# Supplementary material
Source: PubMed Central journal article supplement (PMC7578119)

Rv0001/dnaA

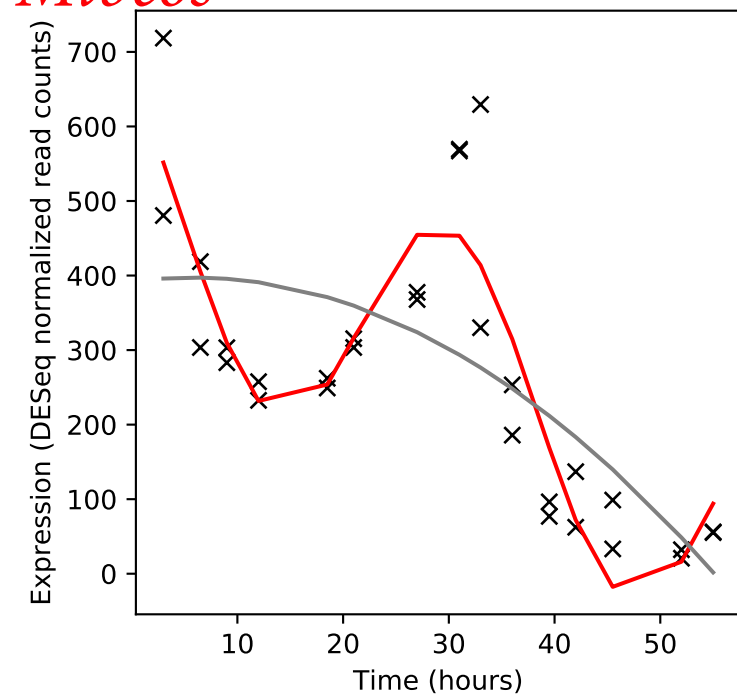

Rv0002/dnaN

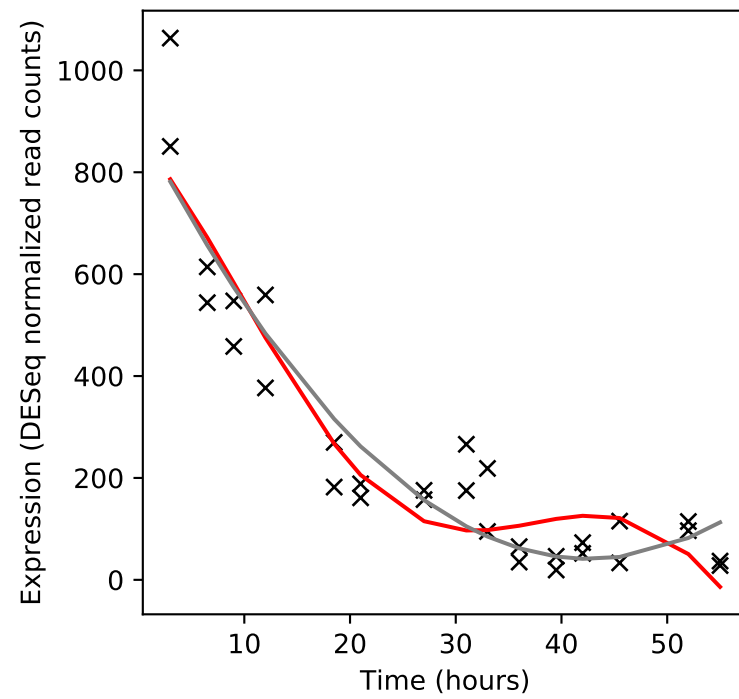

Rv0003/recF

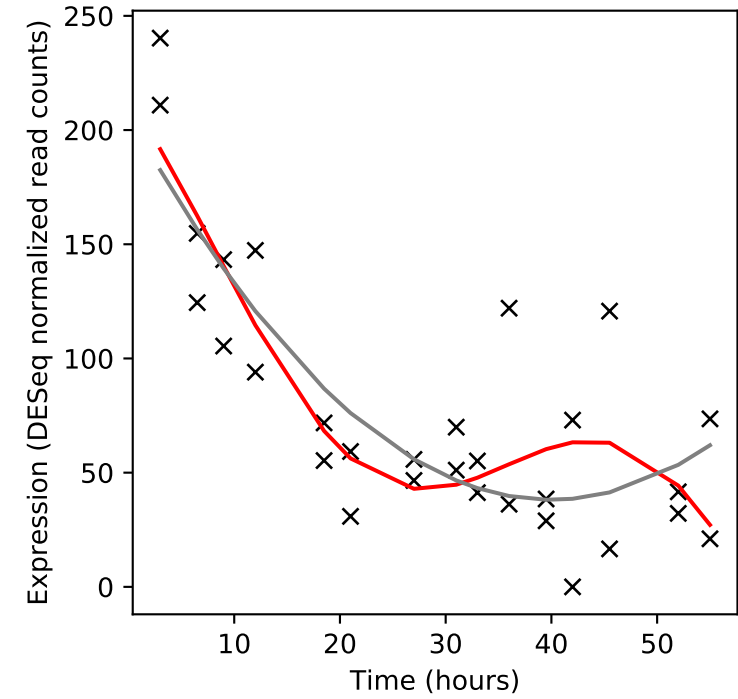

Rv0004/-

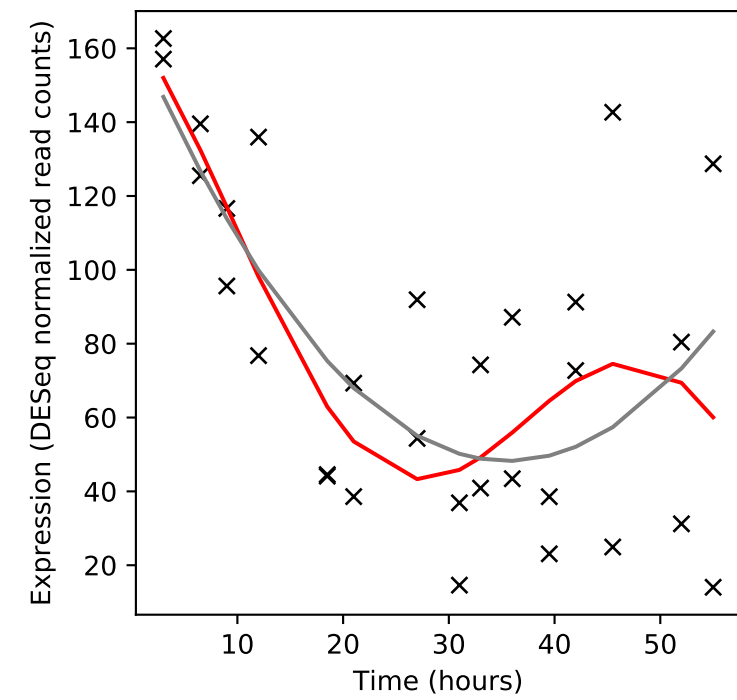

Rv0005/gyrB

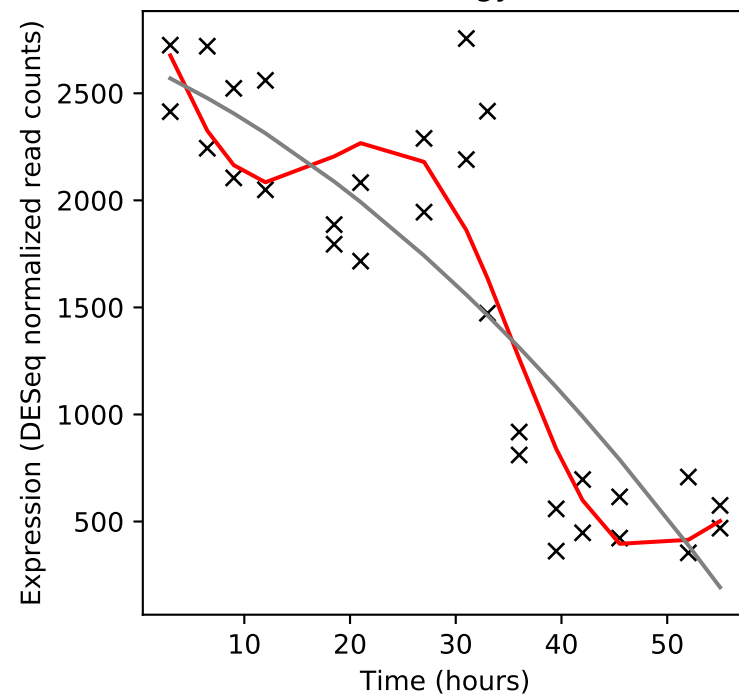

Rv0006/gyrA

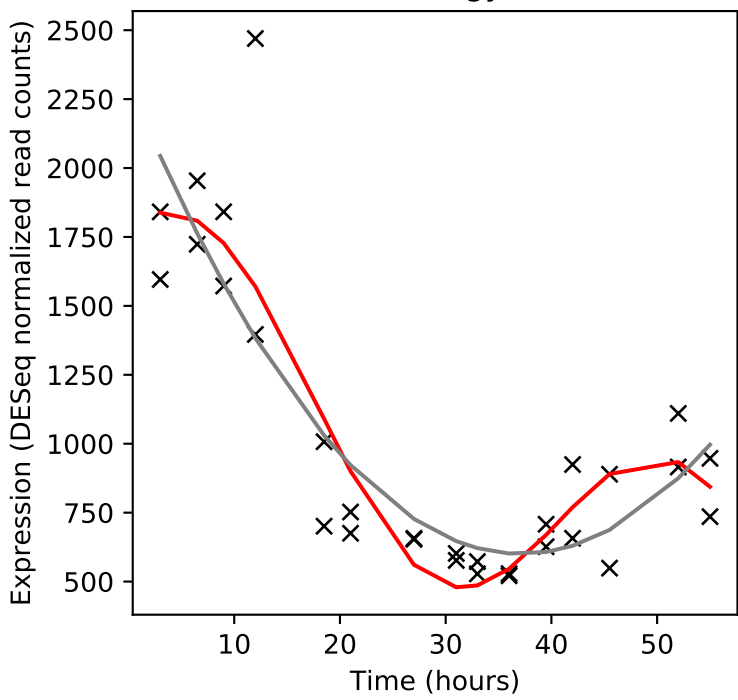

Rv0007/-

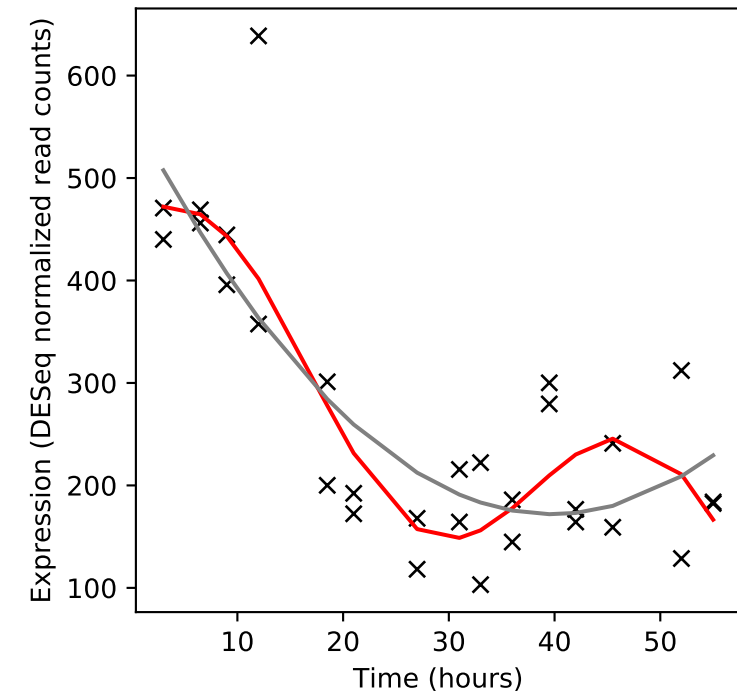

Rv0008c/-

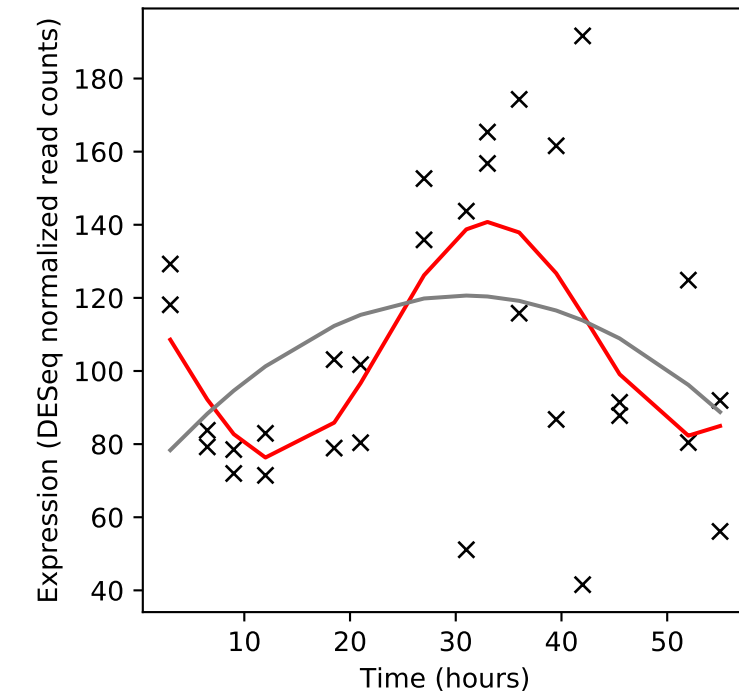

Rv0009/ppiA

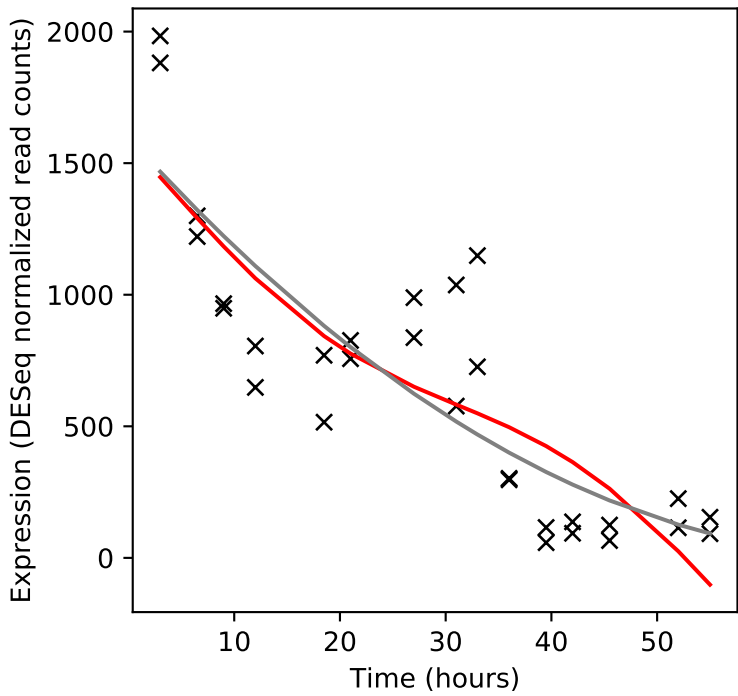

Rv0010c/-

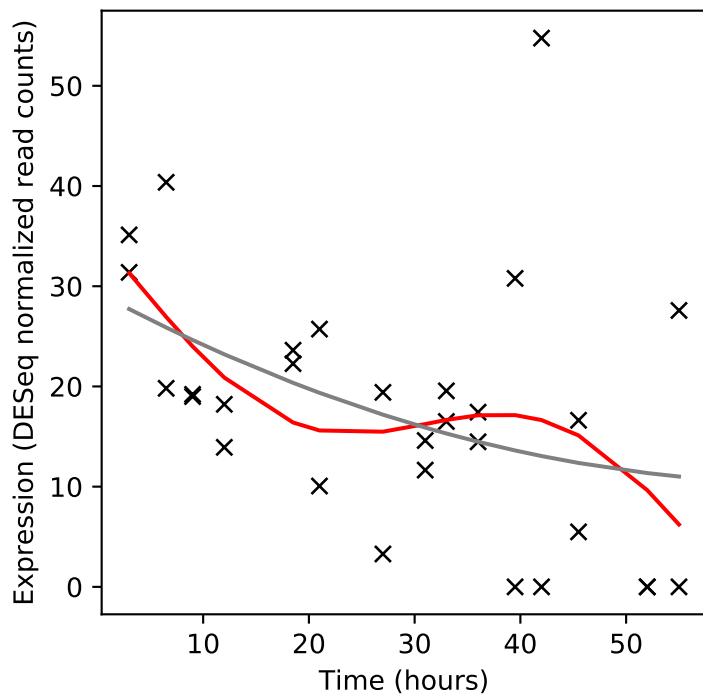

Rv0011c/-

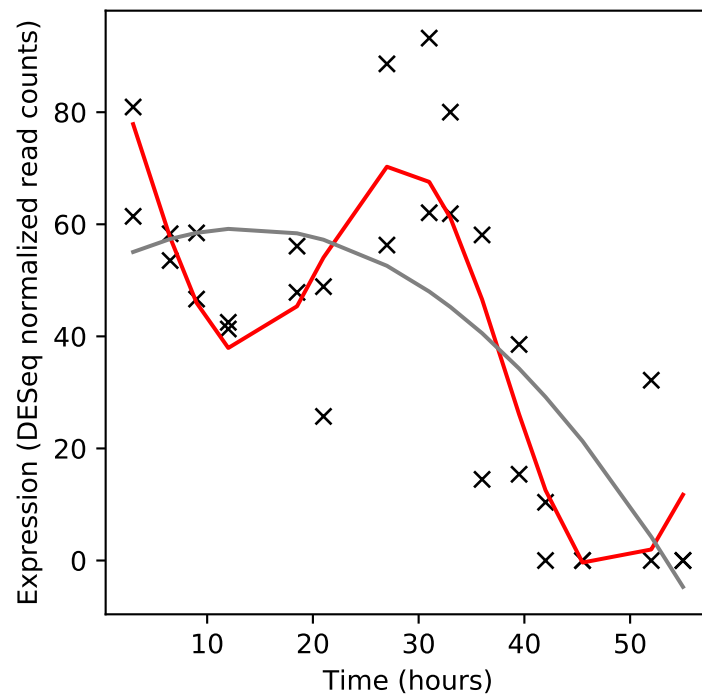

Rv0012c/-

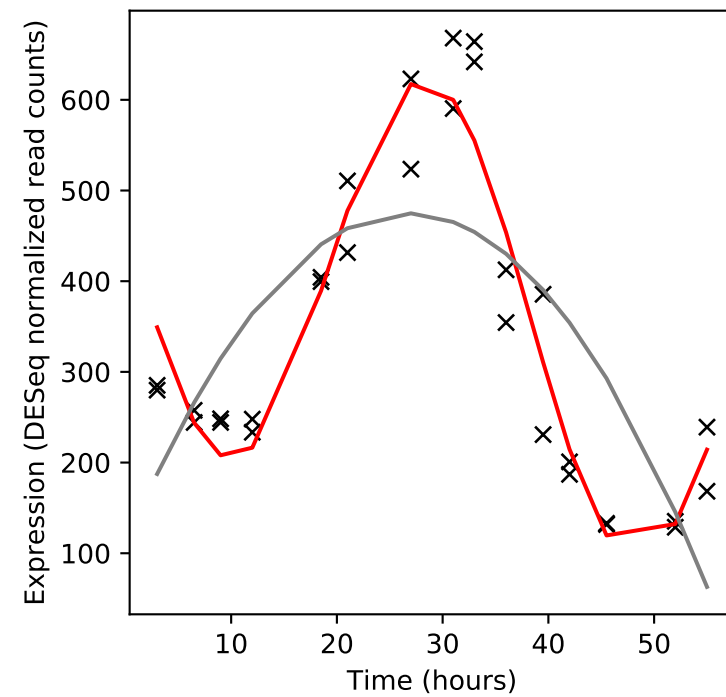

Rv0013/trpG

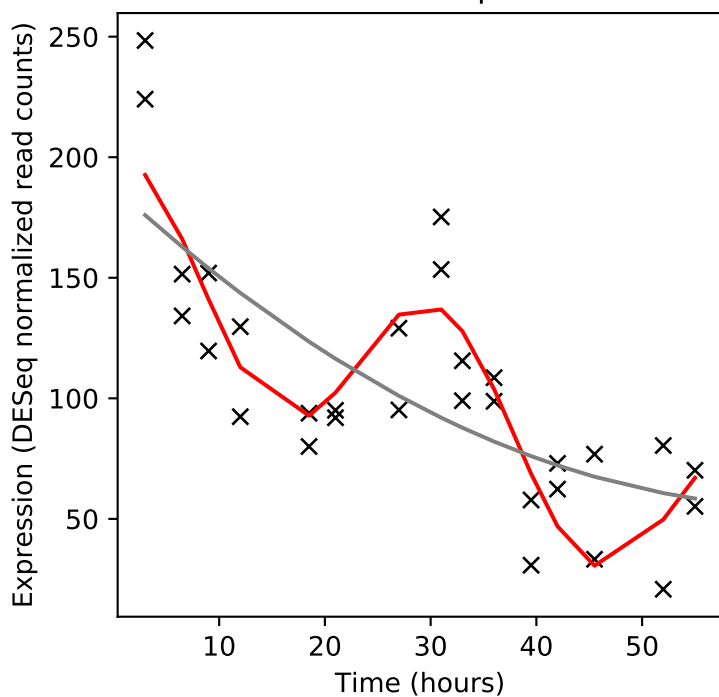

Rv0014c/pknB

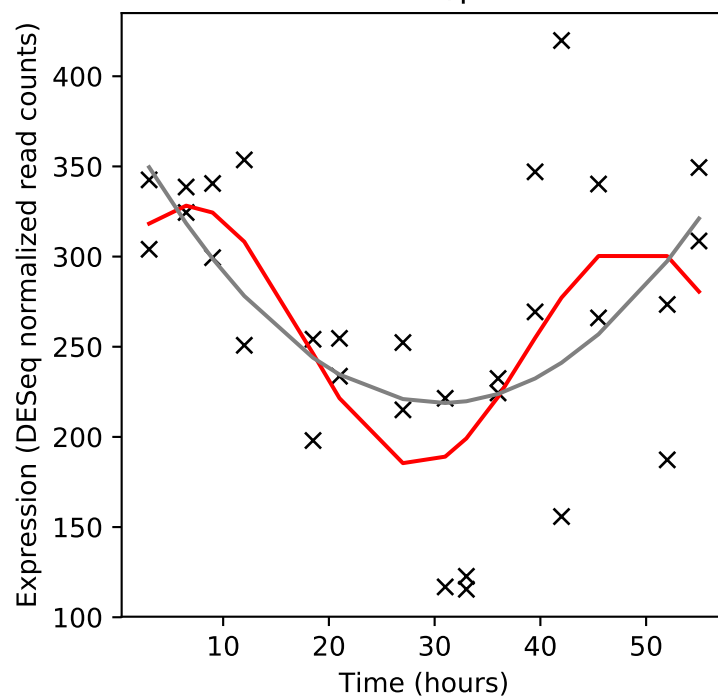

Rv0015c/pknA

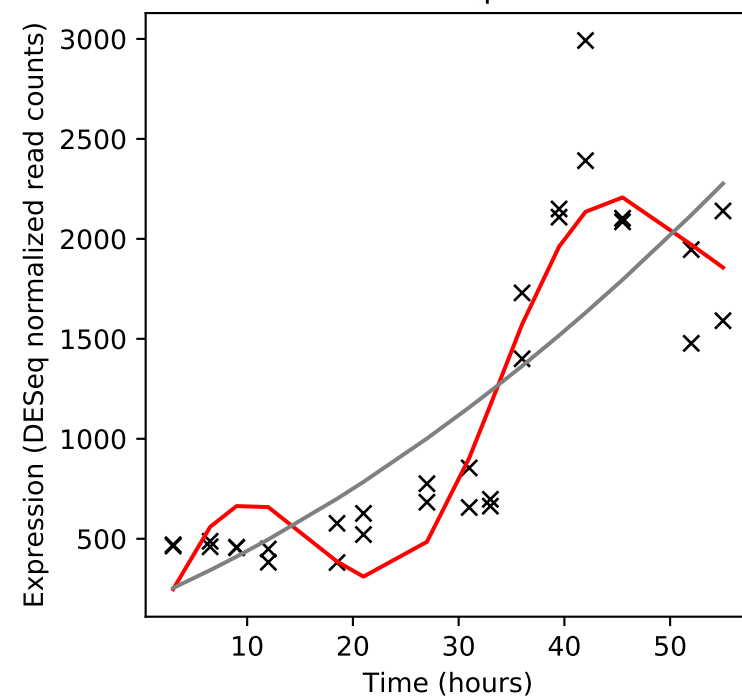

Rv0016c/pbpA

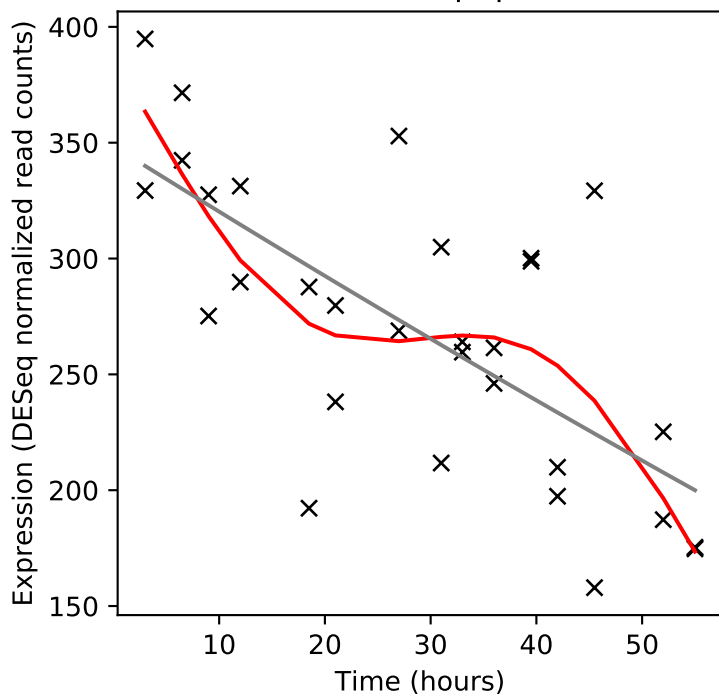

Rv0017c/rodA

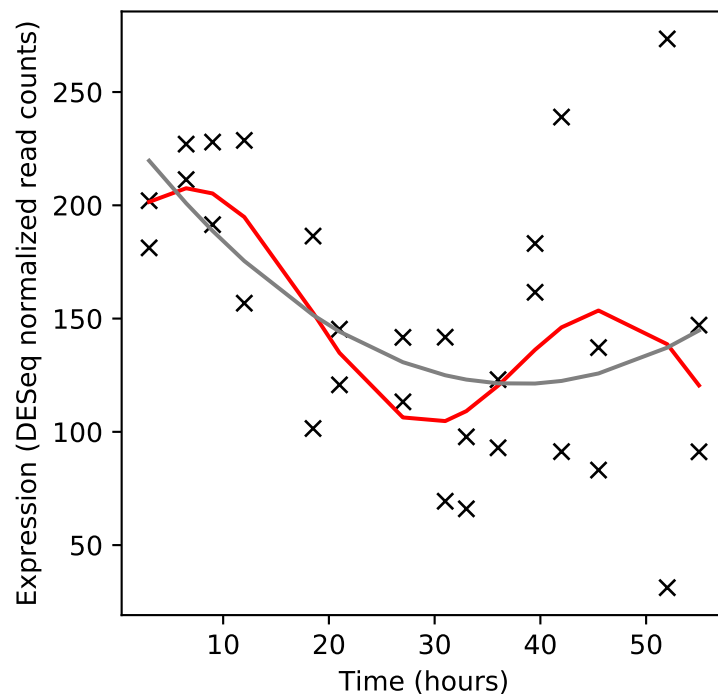

Rv0018c/pstP

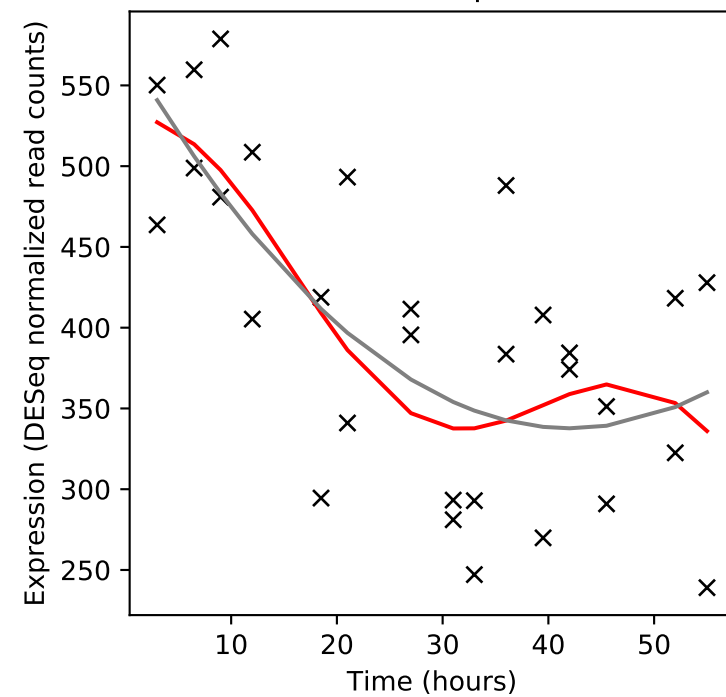

Rv0019c/fhaB

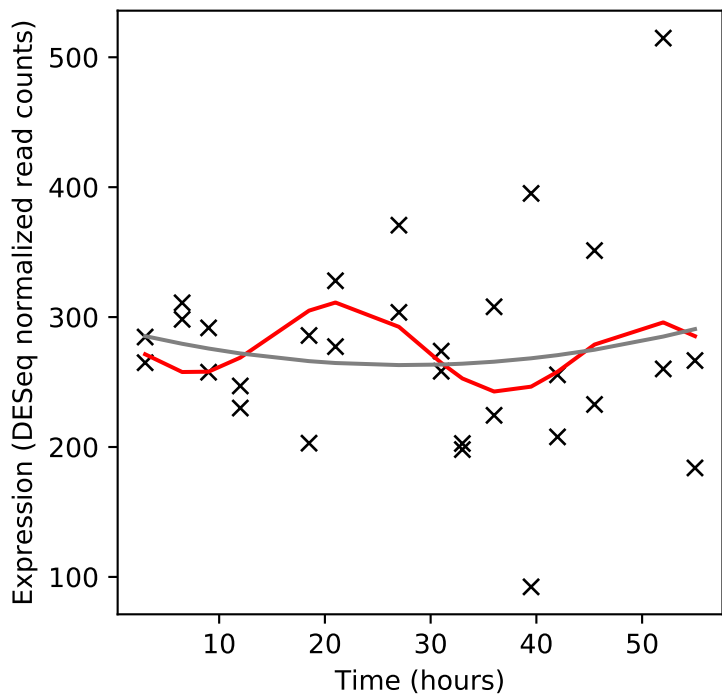

Rv0020c/fhaA

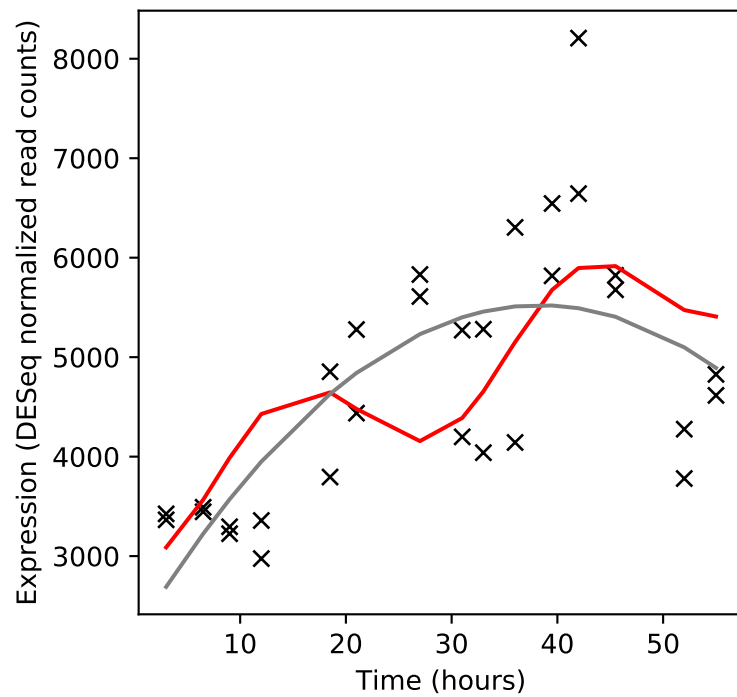

Rv0021c/-

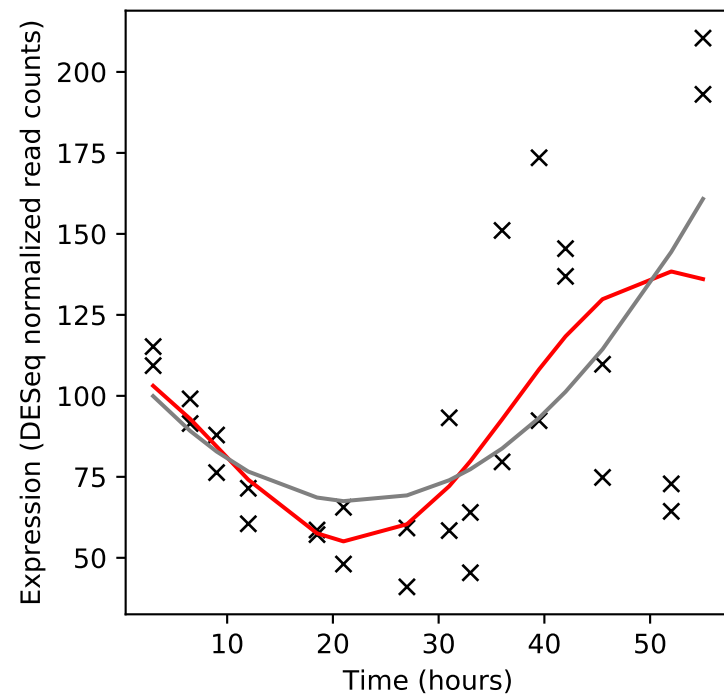

Rv0022c/whiB5

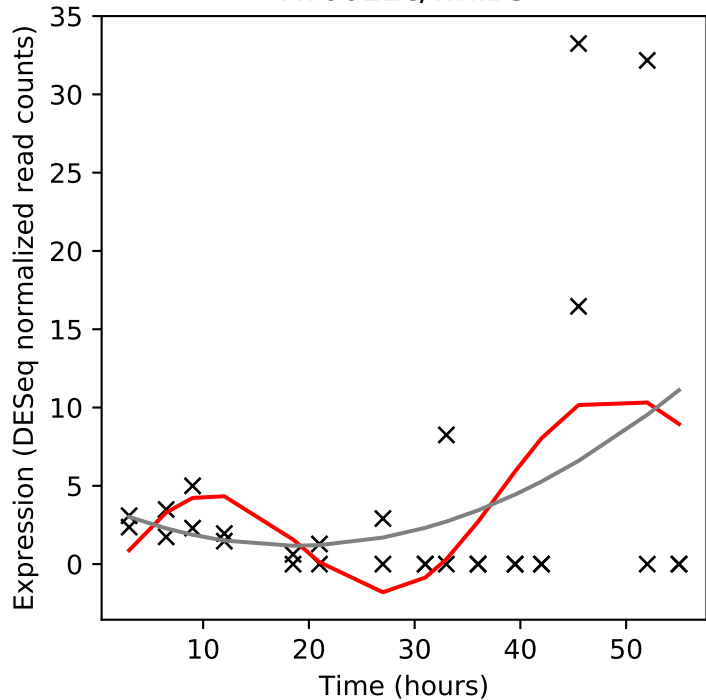

Rv0023/-

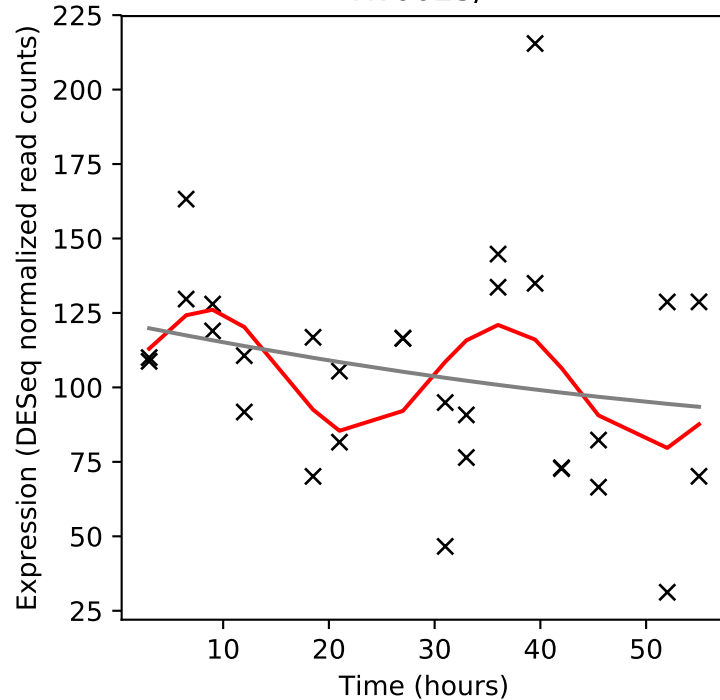

Rv0024/-

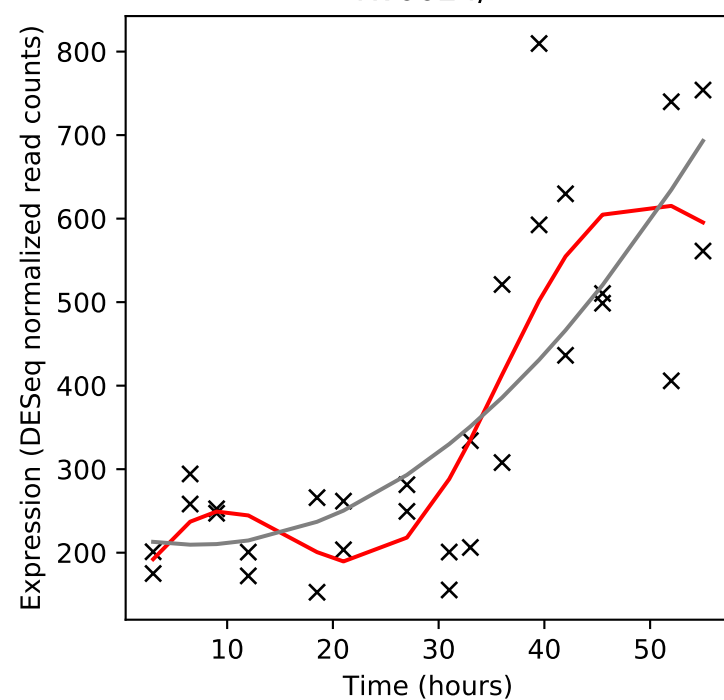

Rv0025/-

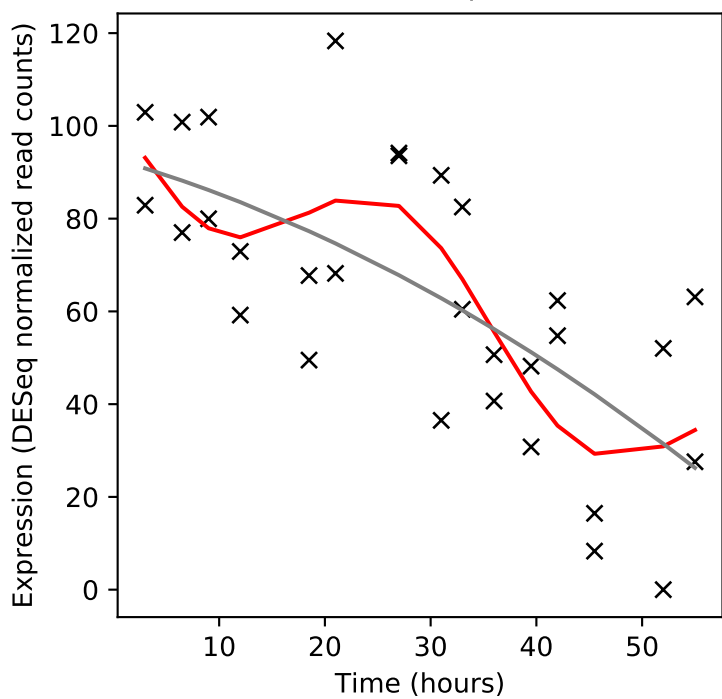

Rv0026/-

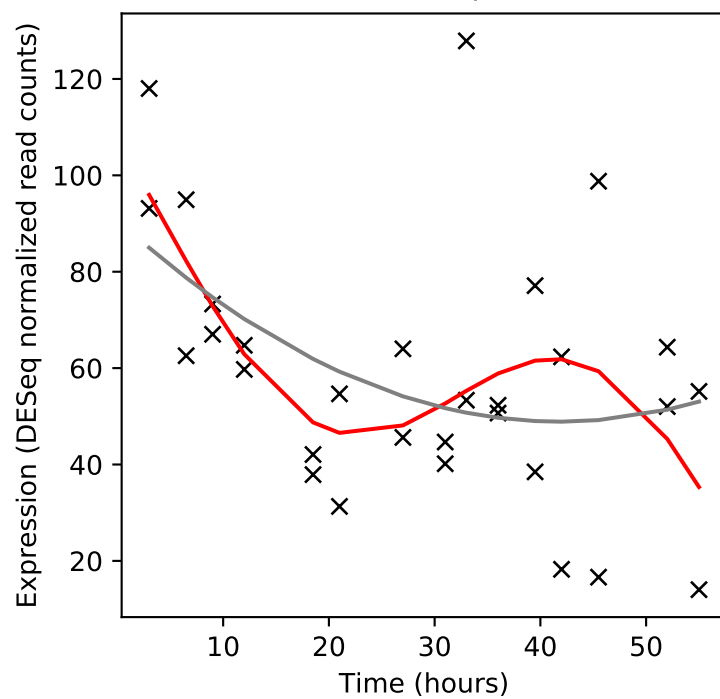

Rv0027/-

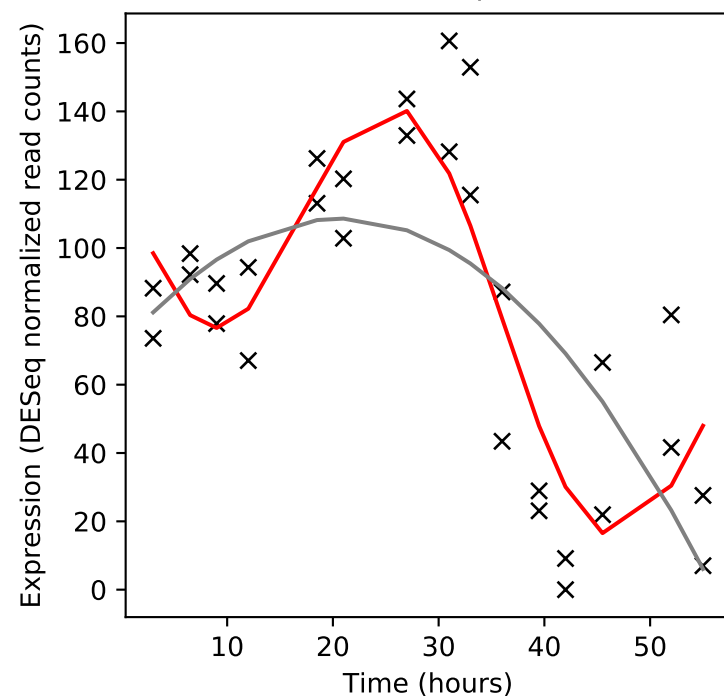

Rv0028/-

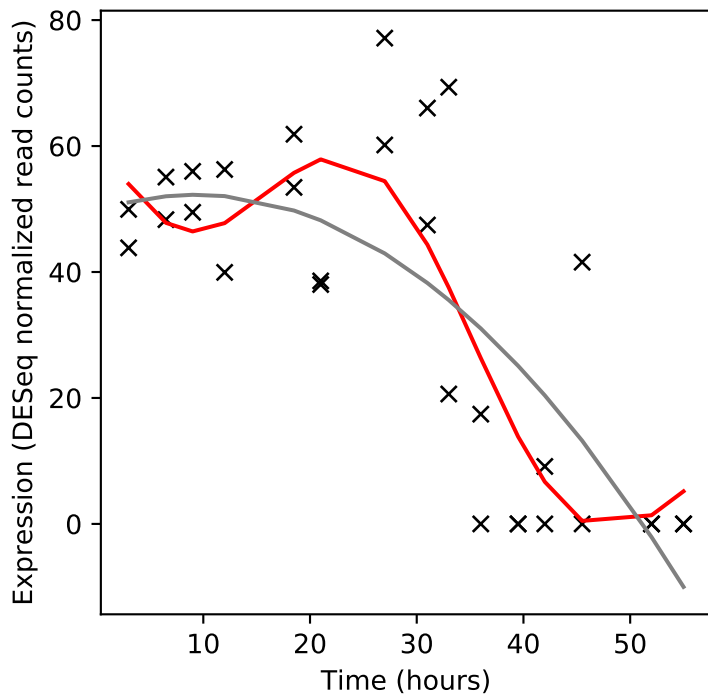

Rv0029/-

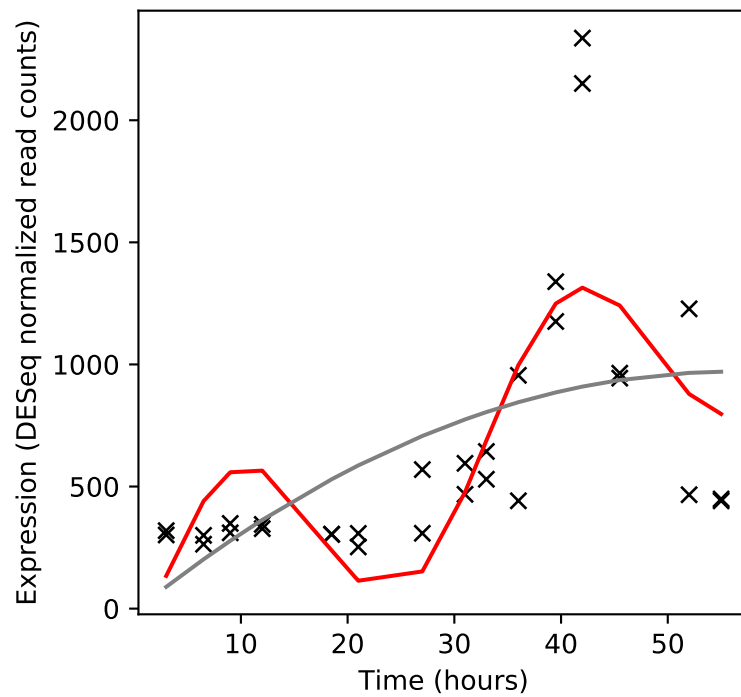

Rv0030/-

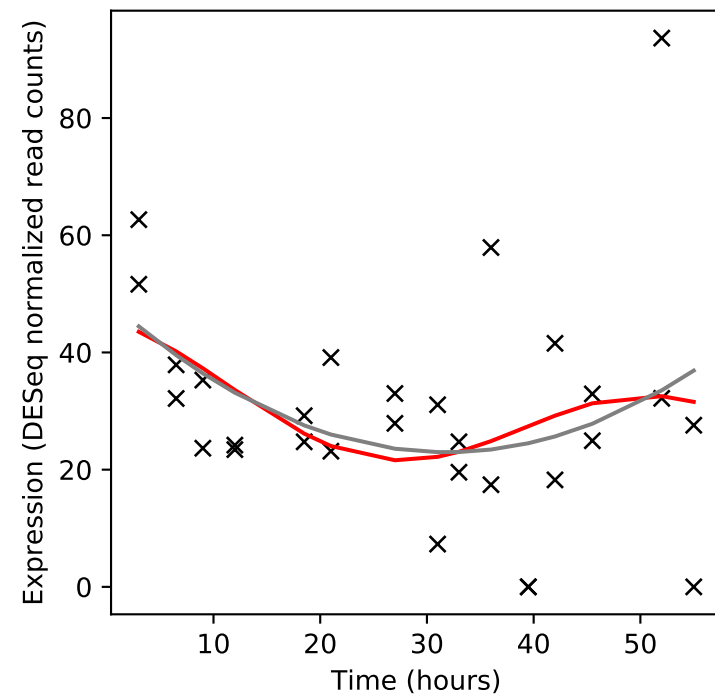

Rv0031/-

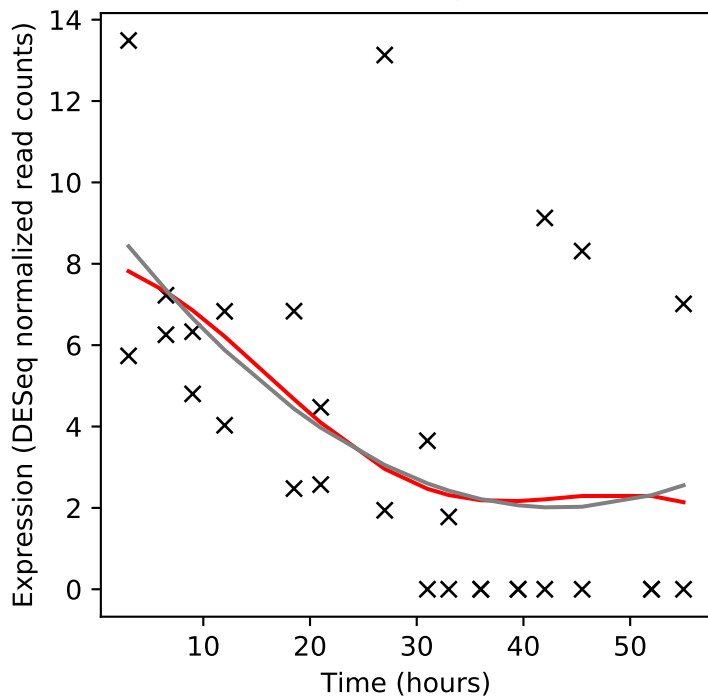

Rv0032/bioF2

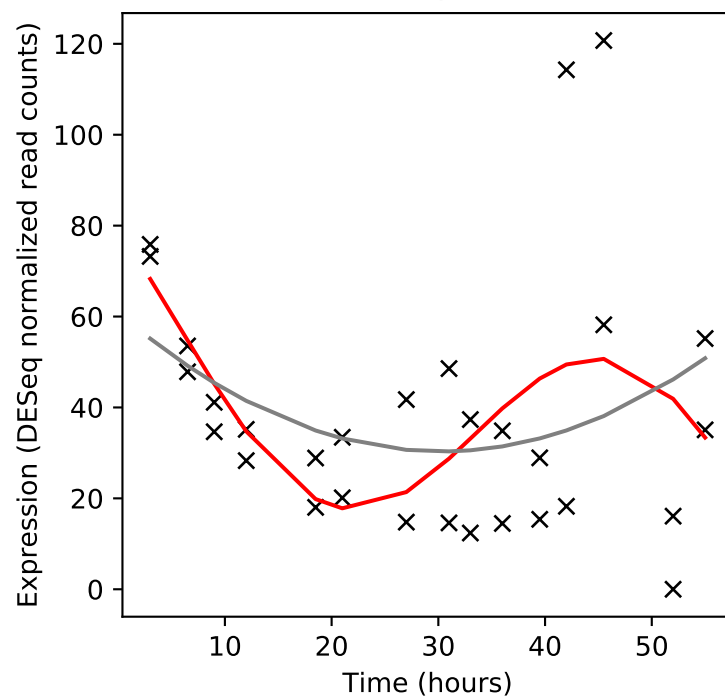

Rv0033/acpA

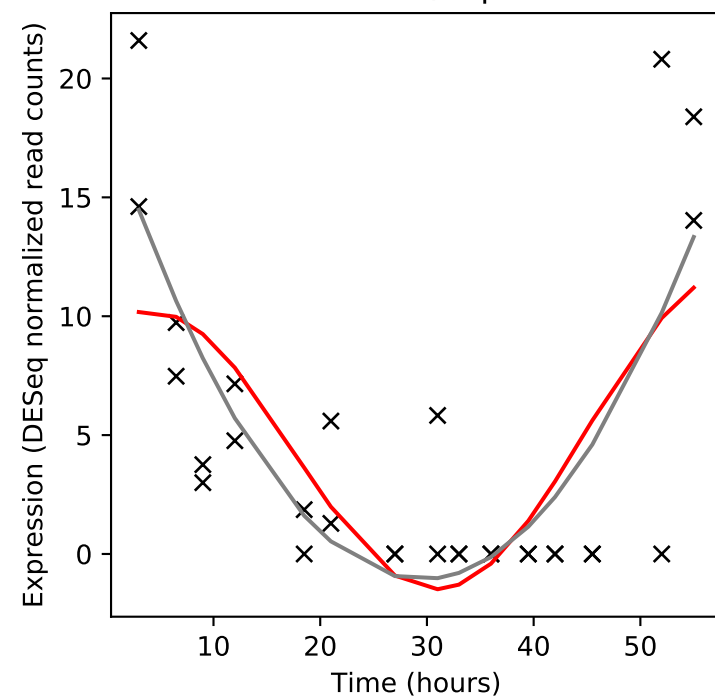

Rv0034/-

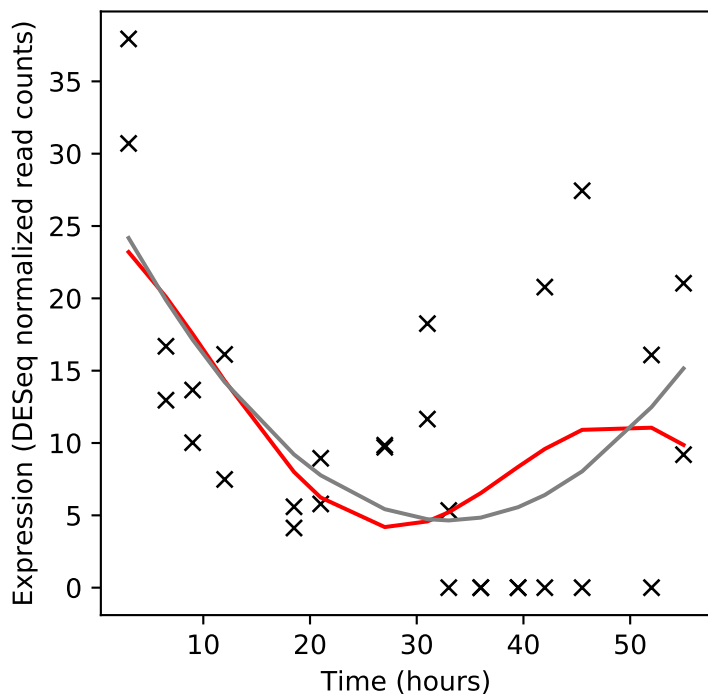

Rv0035/fadD34

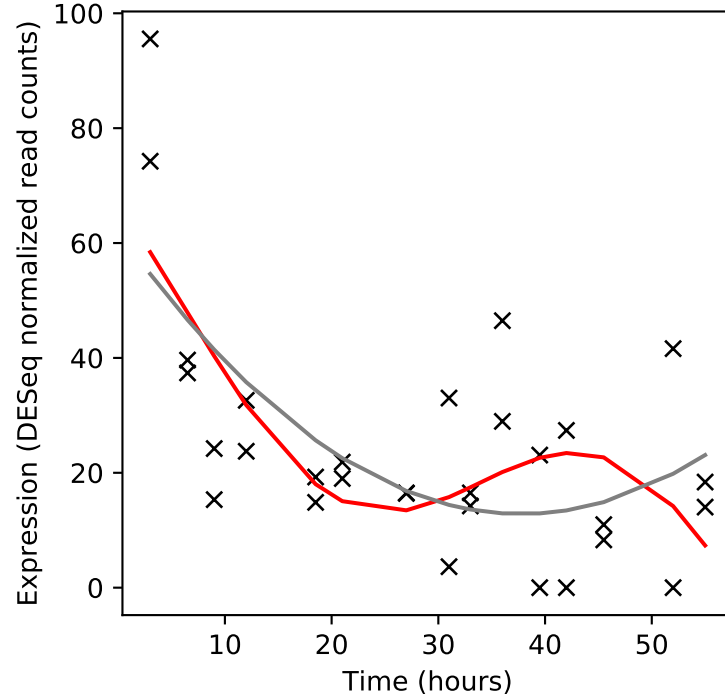

Rv0036c/-

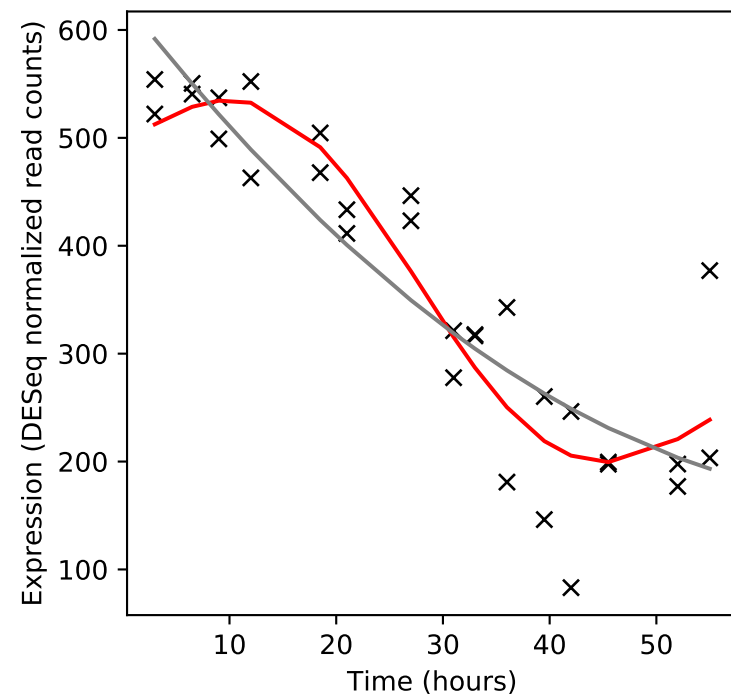

Rv0037c/-

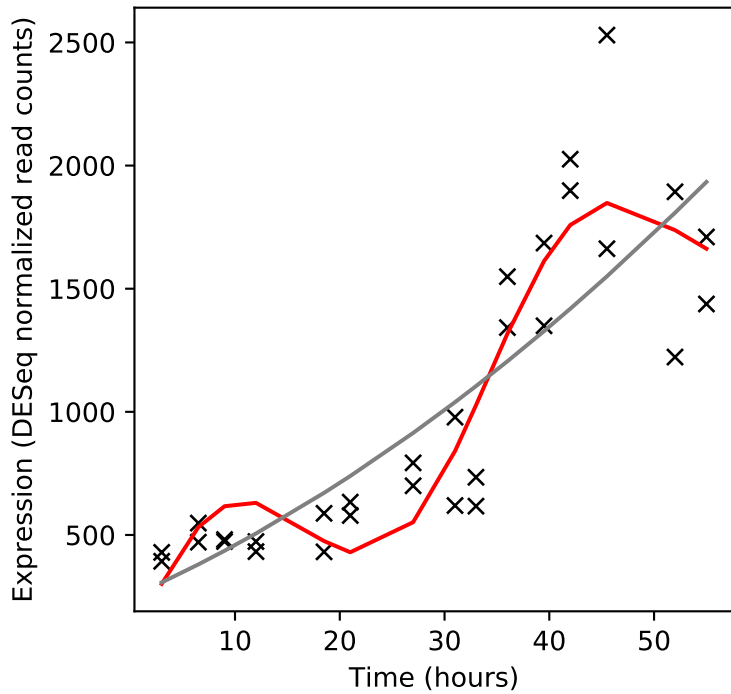

Rv0038/-

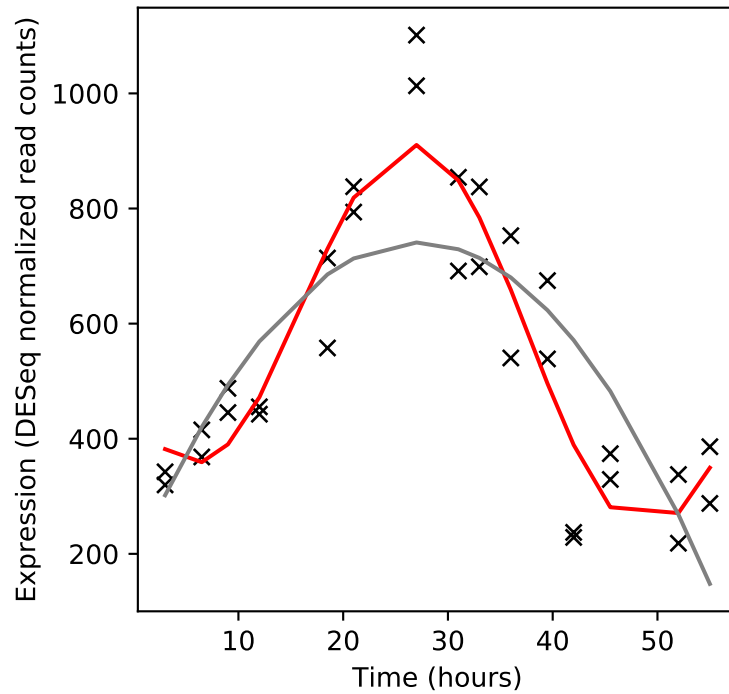

Rv0039c/-

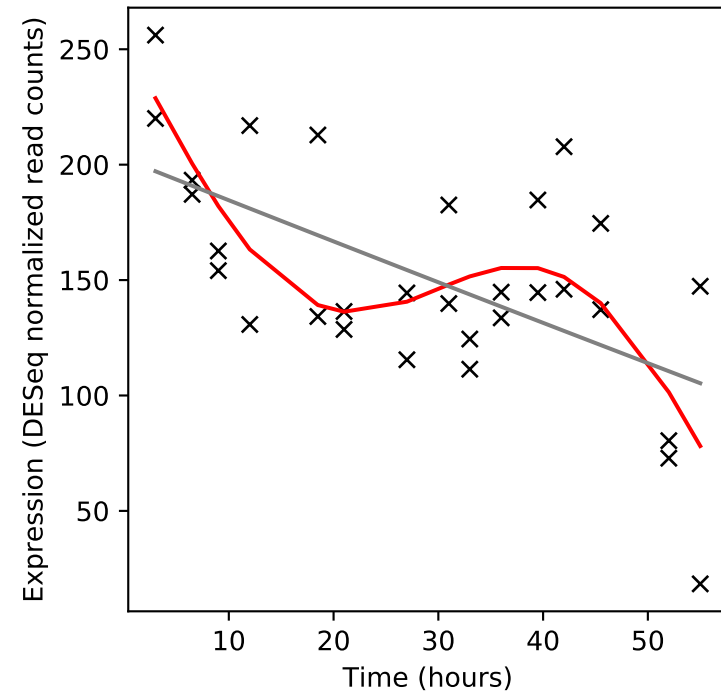

Rv0040c/mtc28

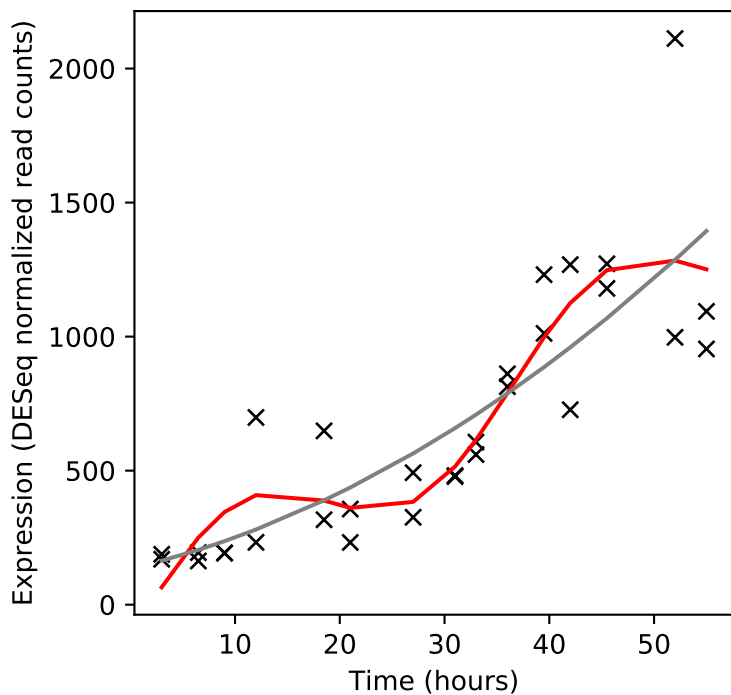

Rv0041/leuS

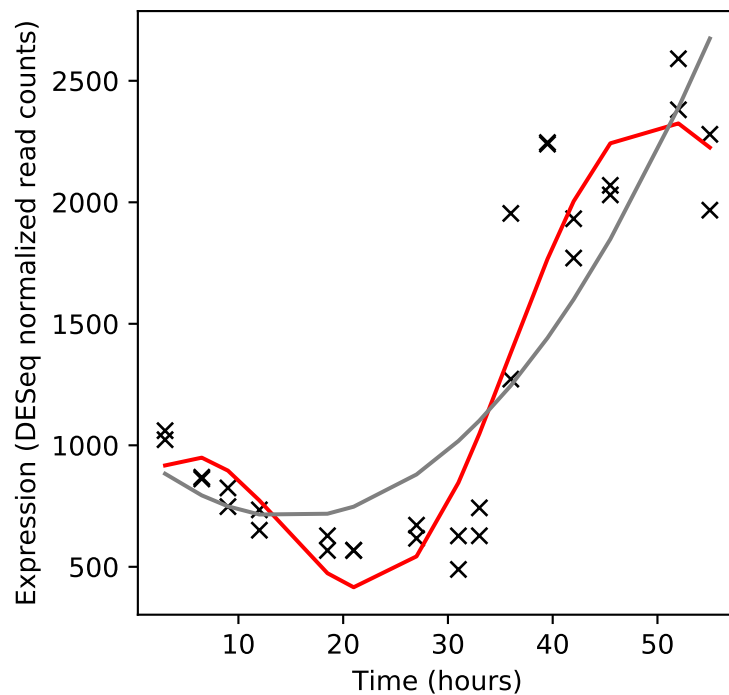

Rv0042c/-

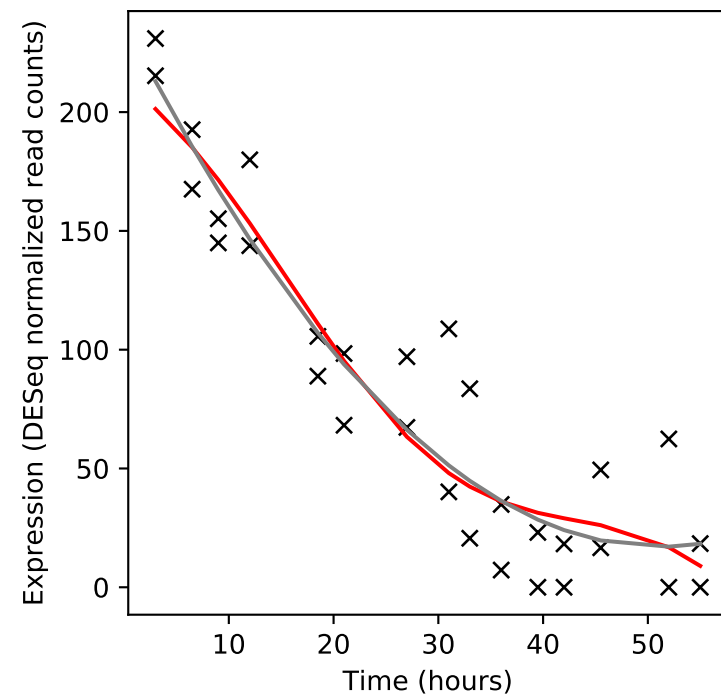

Rv0043c/-

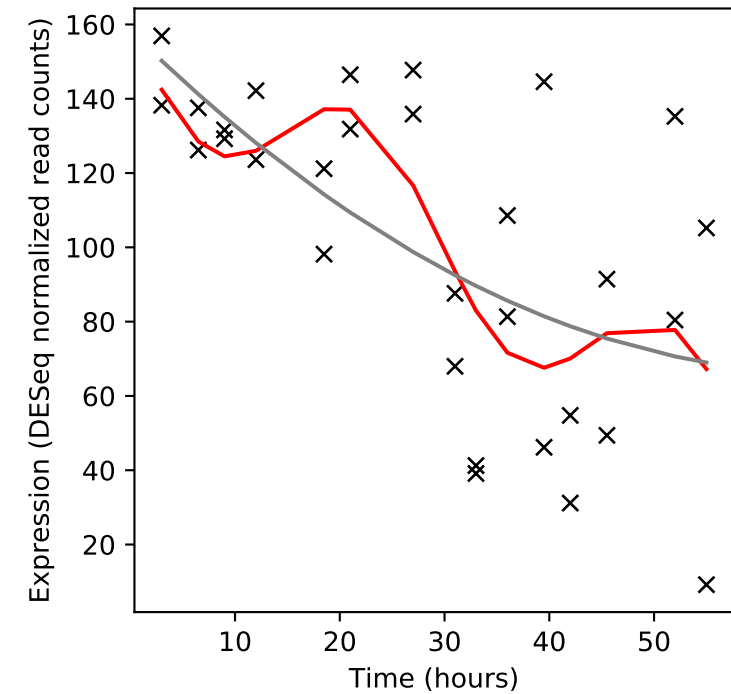

Rv0044c/-

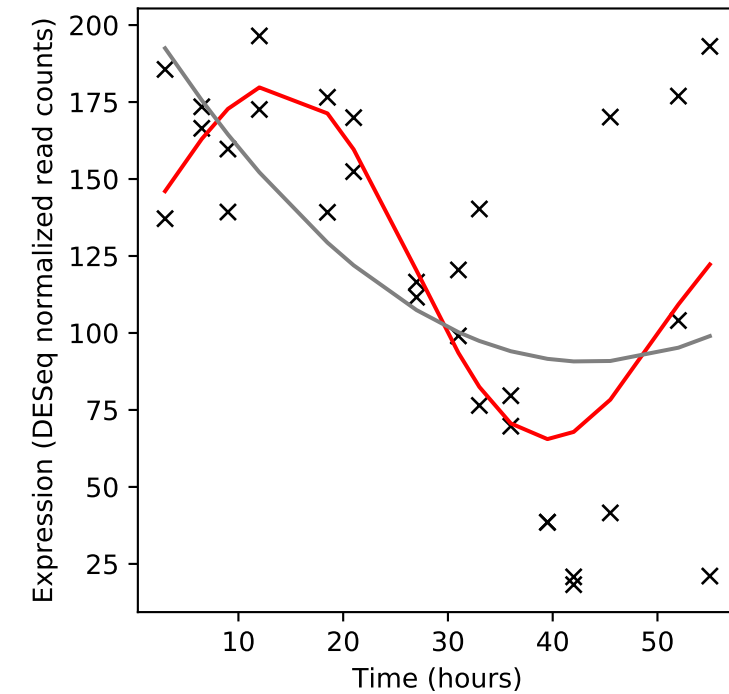

Rv0045c/-

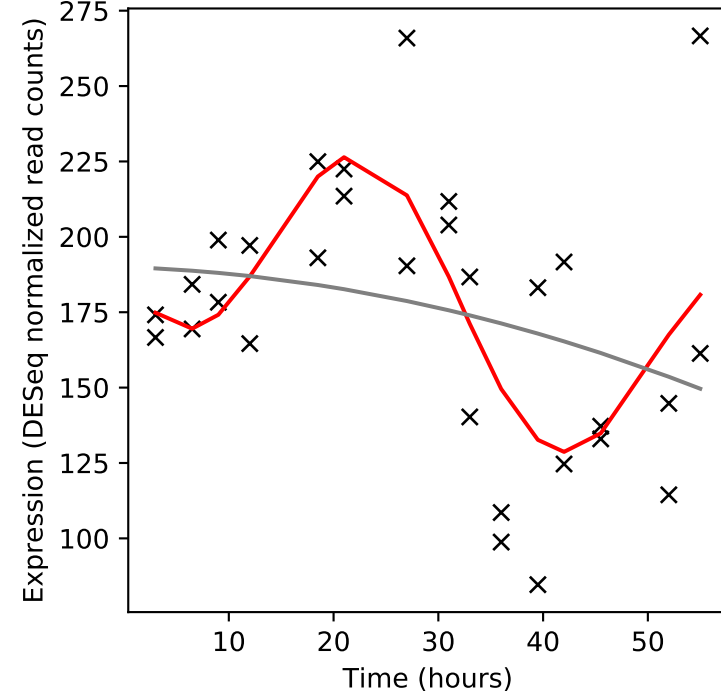

Rv0046c/ino1

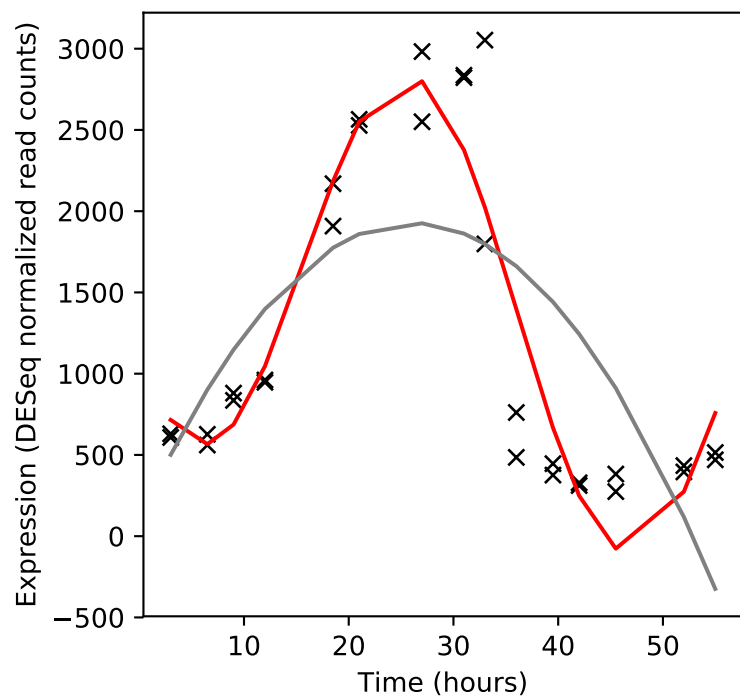

Rv0047c/-

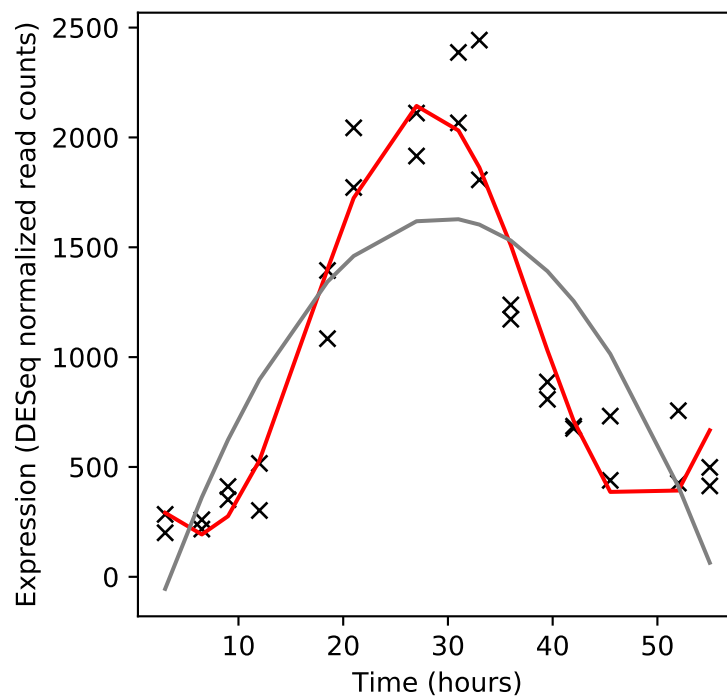

Rv0048c/-

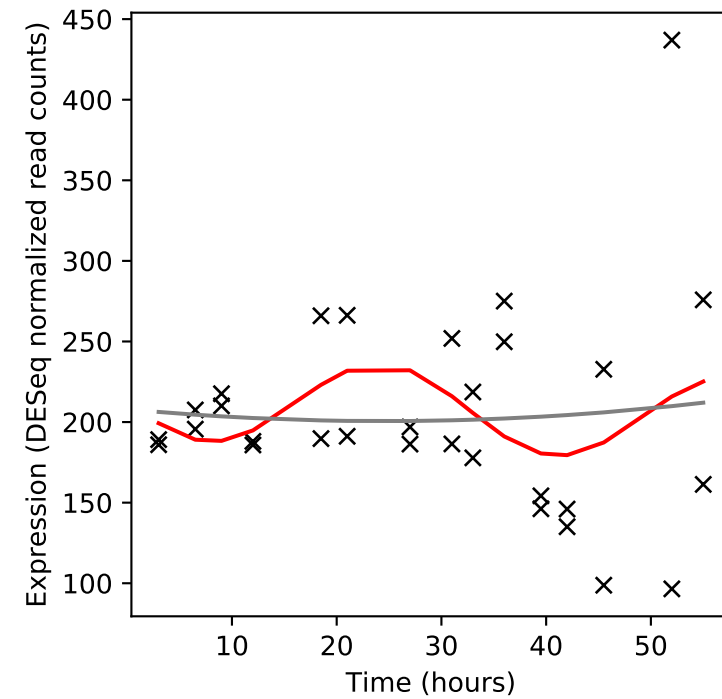

Rv0049/-

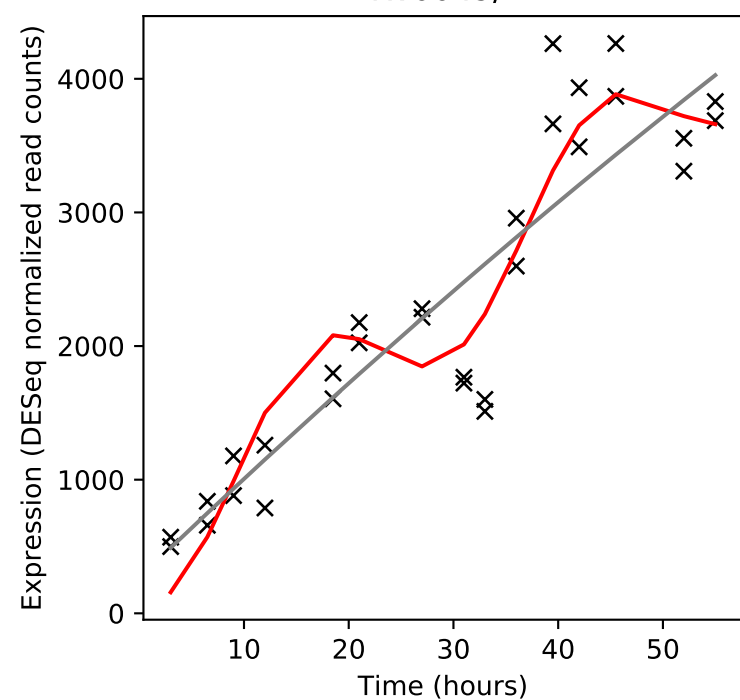

Rv0050/ponA1

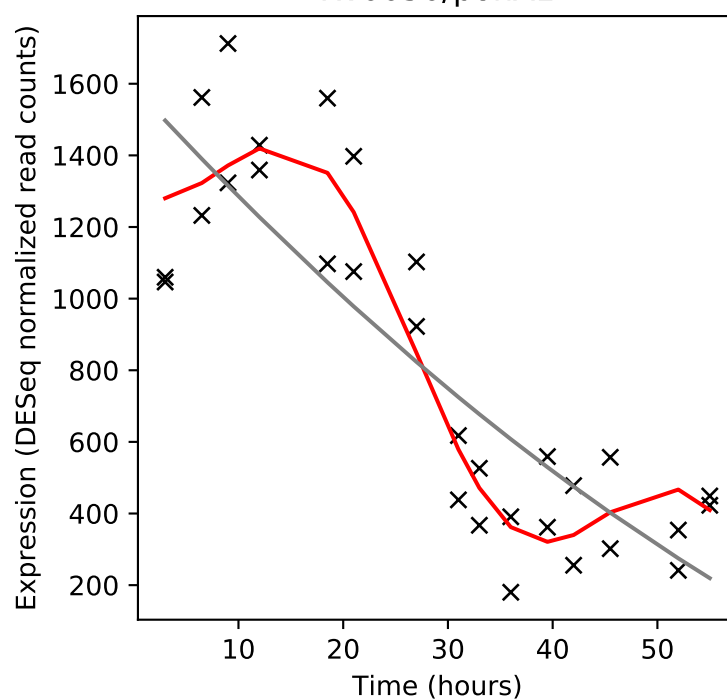

Rv0051/-

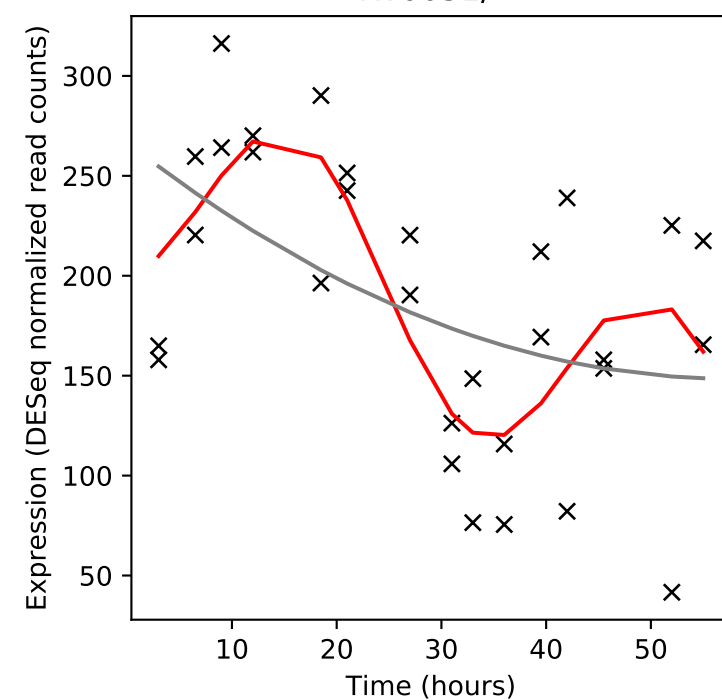

Rv0052/-

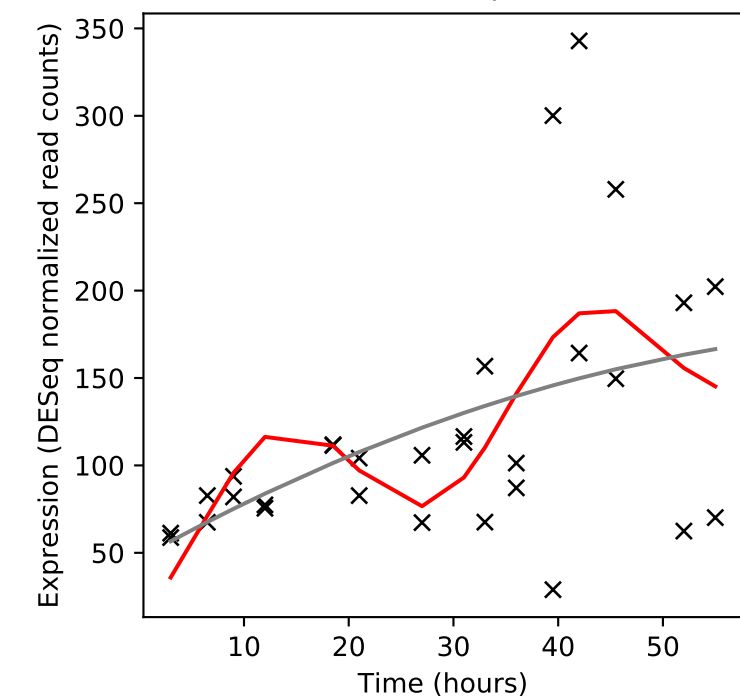

Rv0053/rpsF

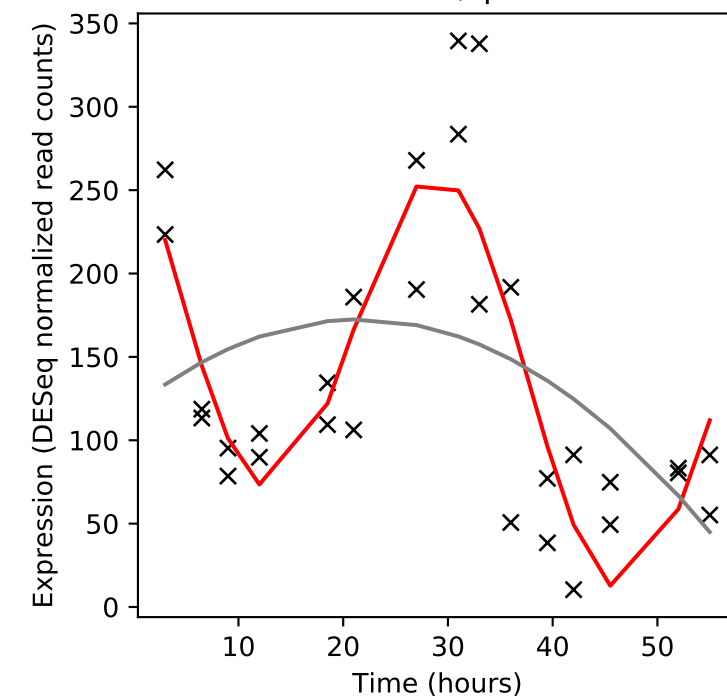

Rv0054/ssb

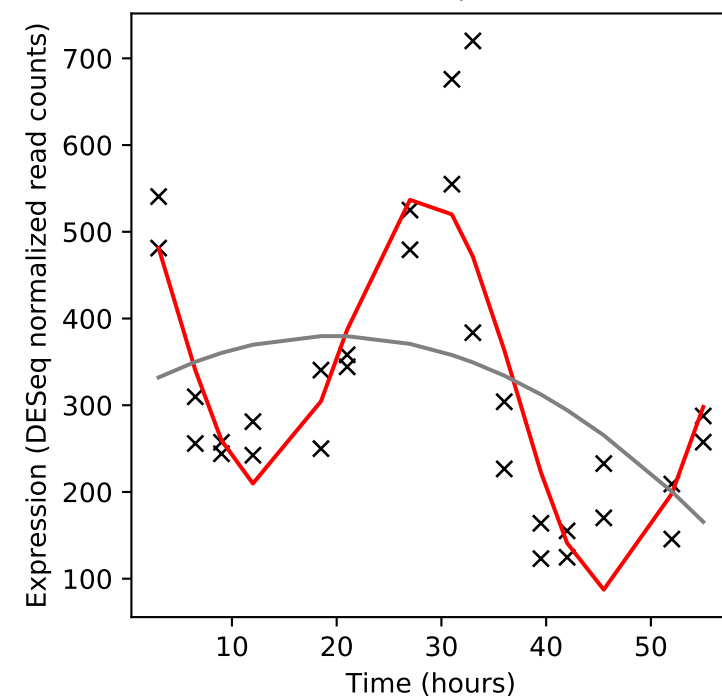

Rv0055/rpsR1

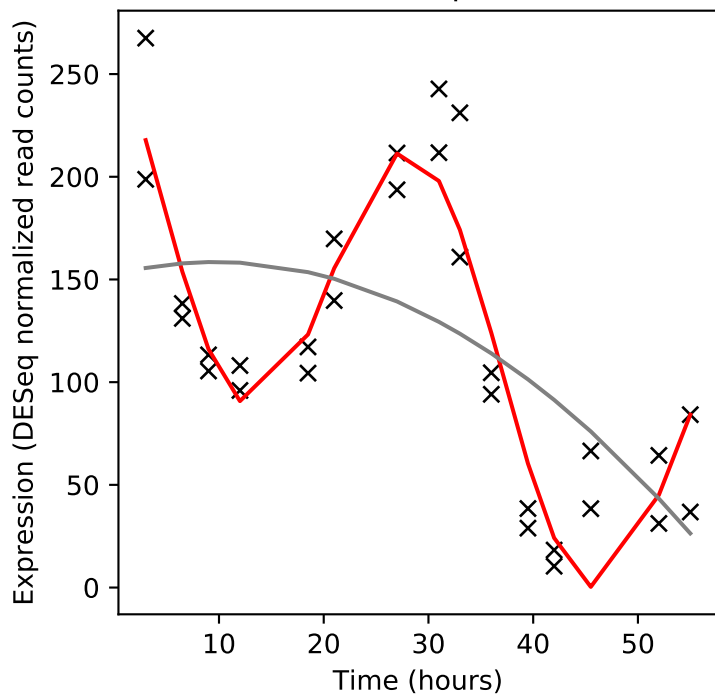

Rv0056/rplI

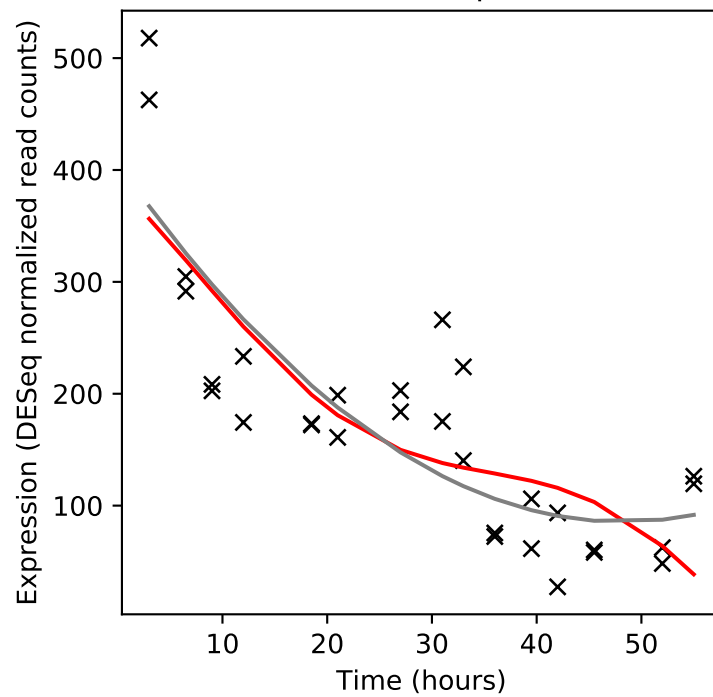

Rv0057/-

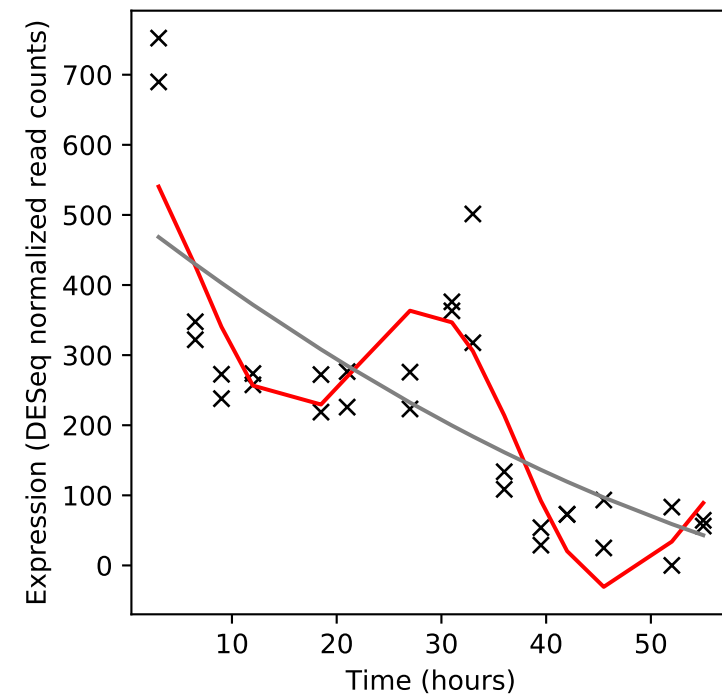

Rv0058/dnaB

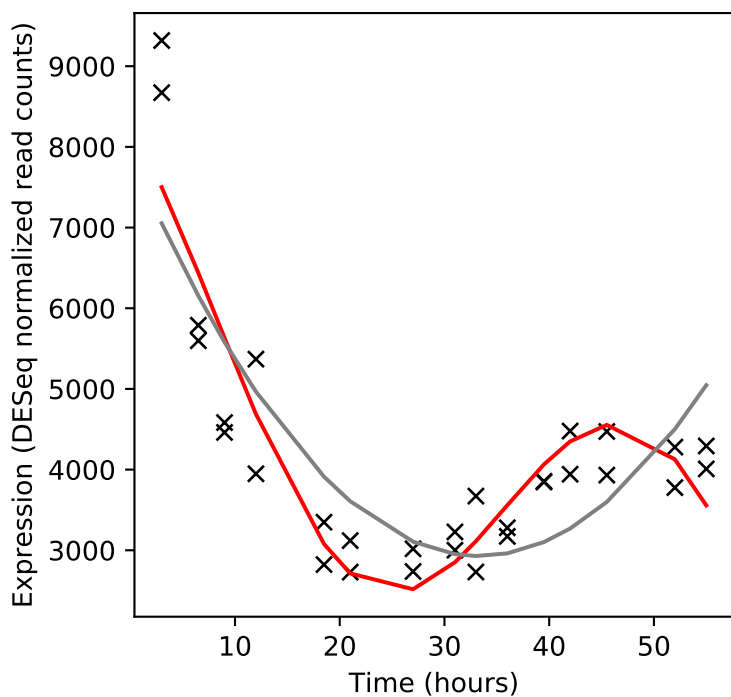

Rv0059/-

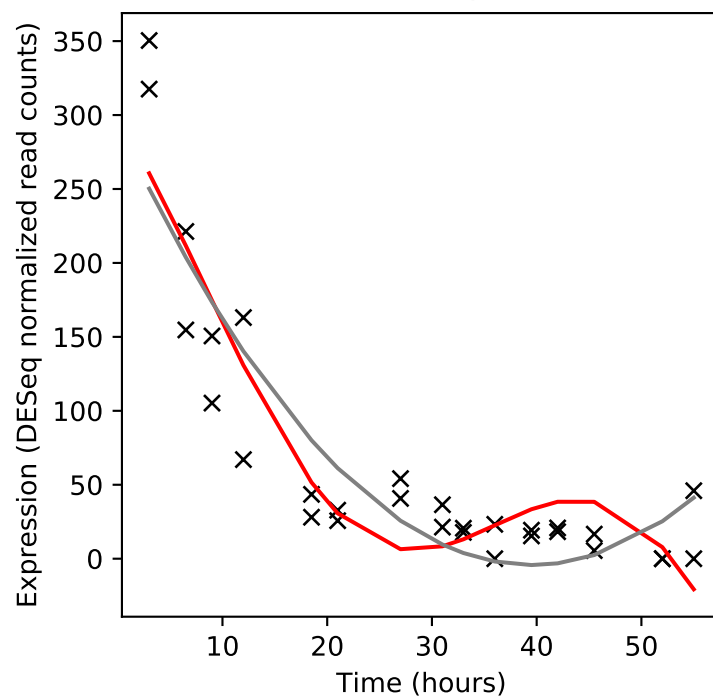

Rv0060/-

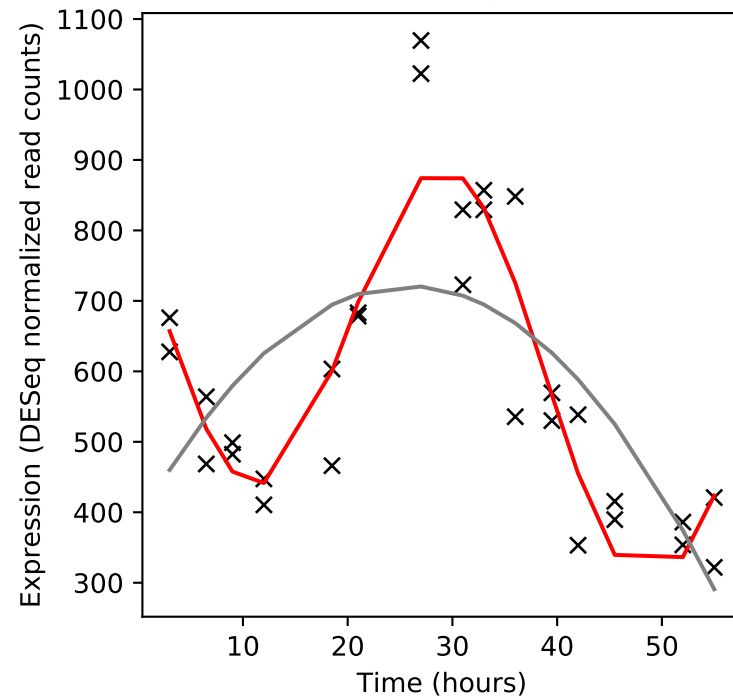

Rv0061c/-

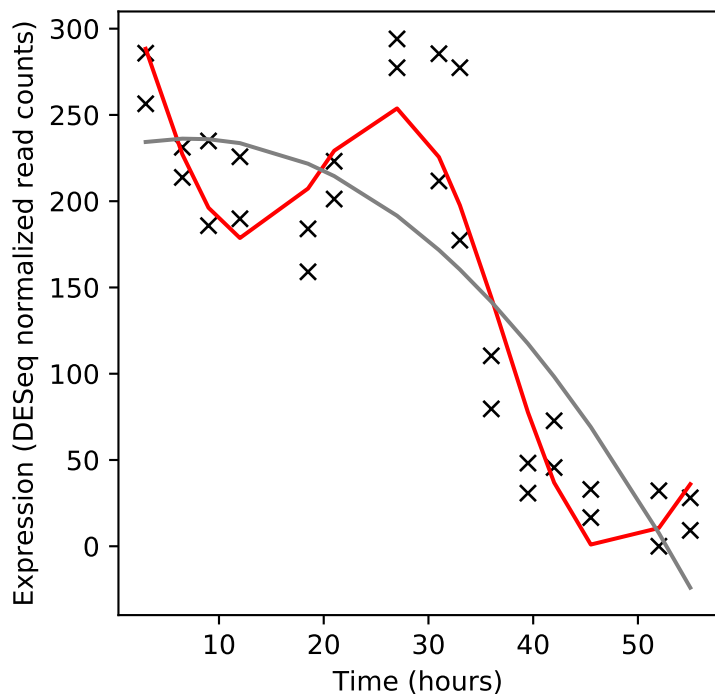

Rv0062/celA1

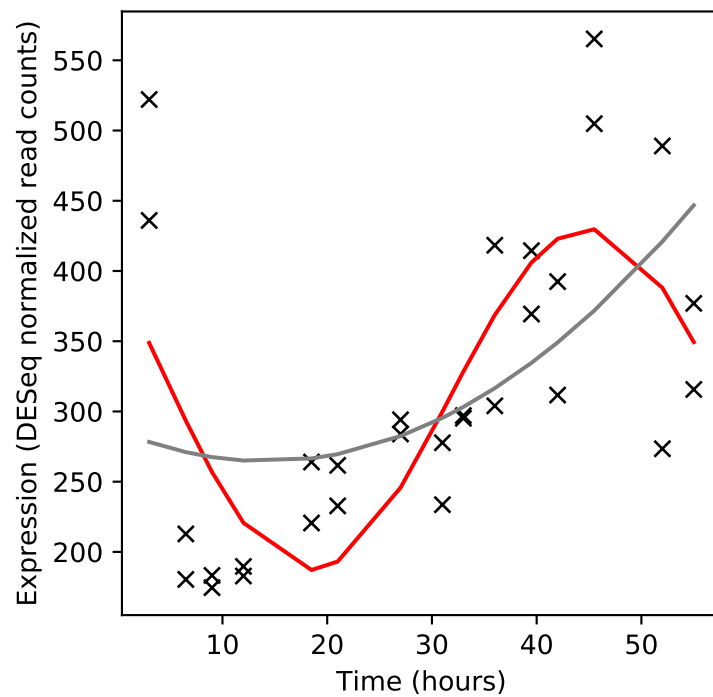

Rv0063/-

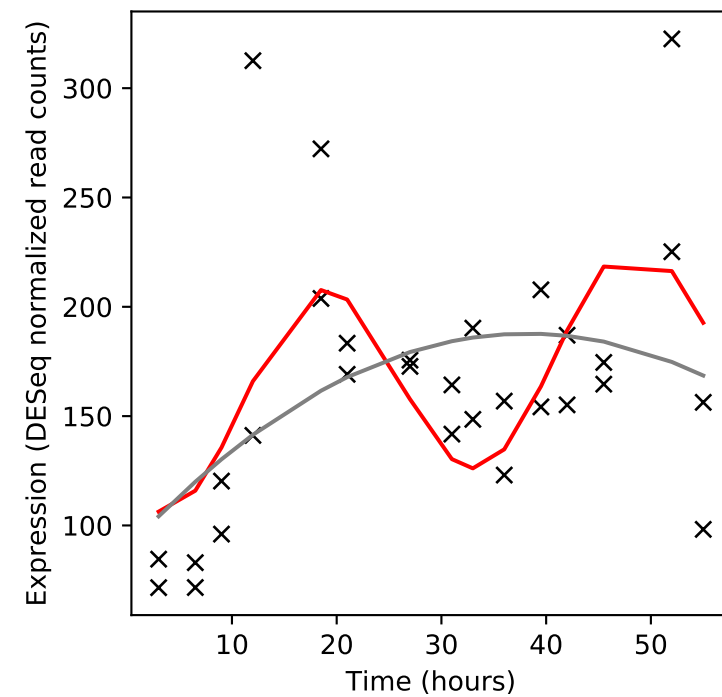



Rv0064/-

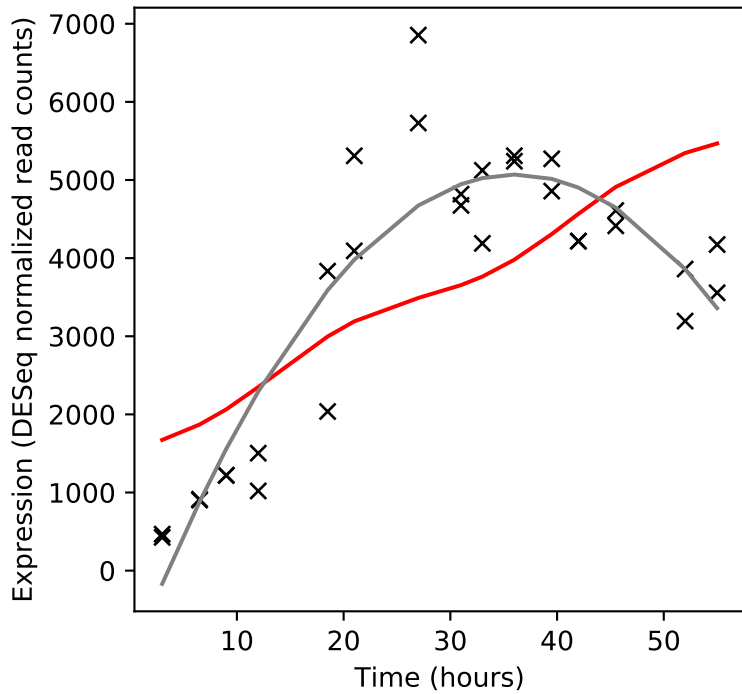

Rv0064A/vapB1

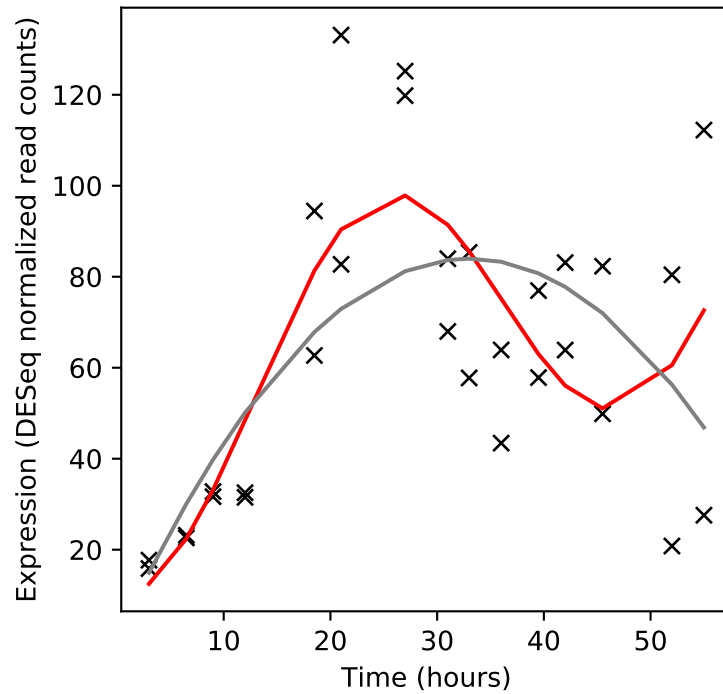

Rv0065/vapC1

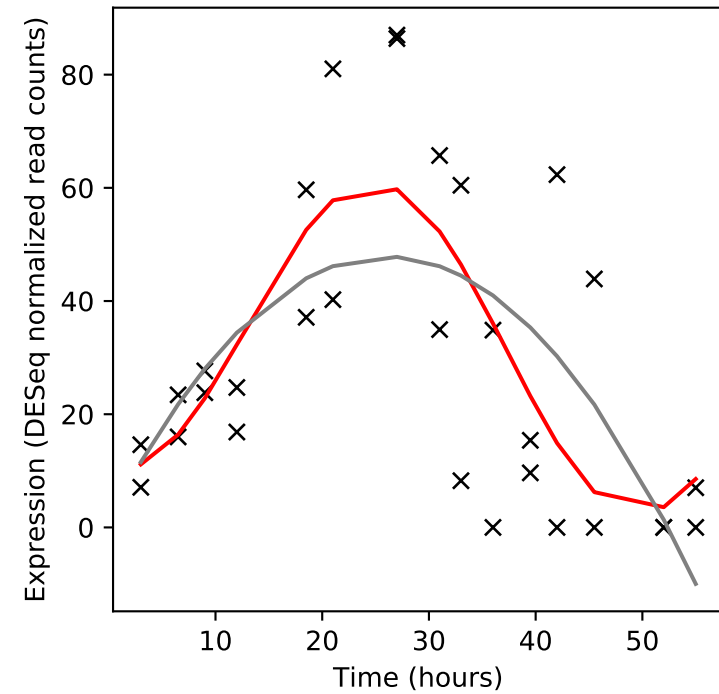

Rv0066c/icd2

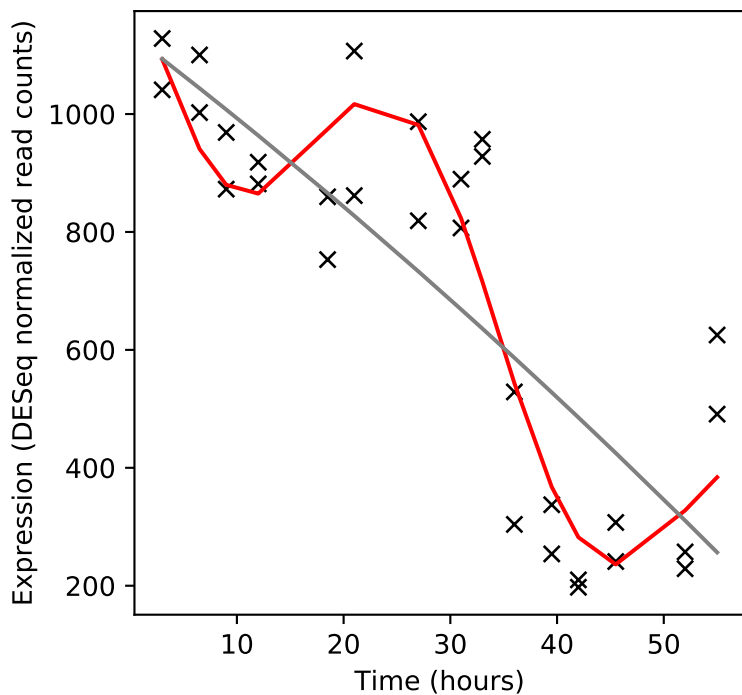

Rv0067c/-

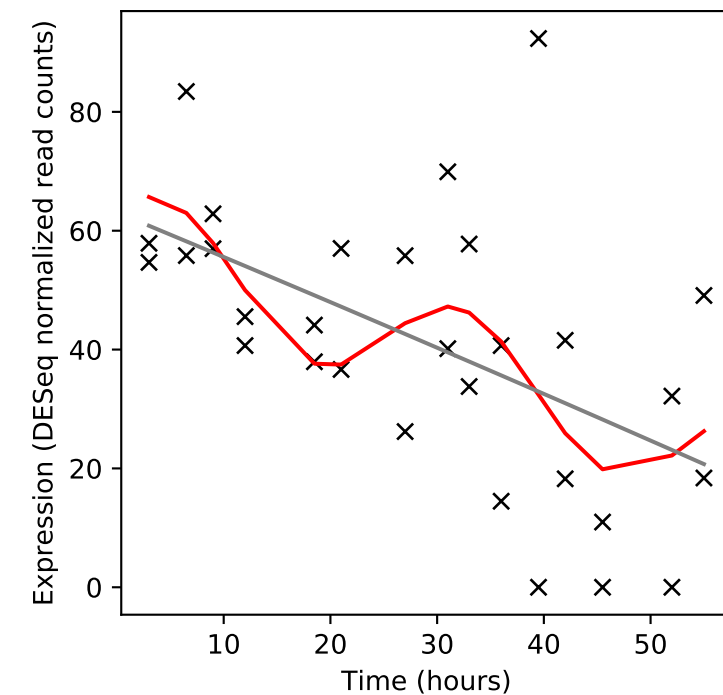

Rv0068/-

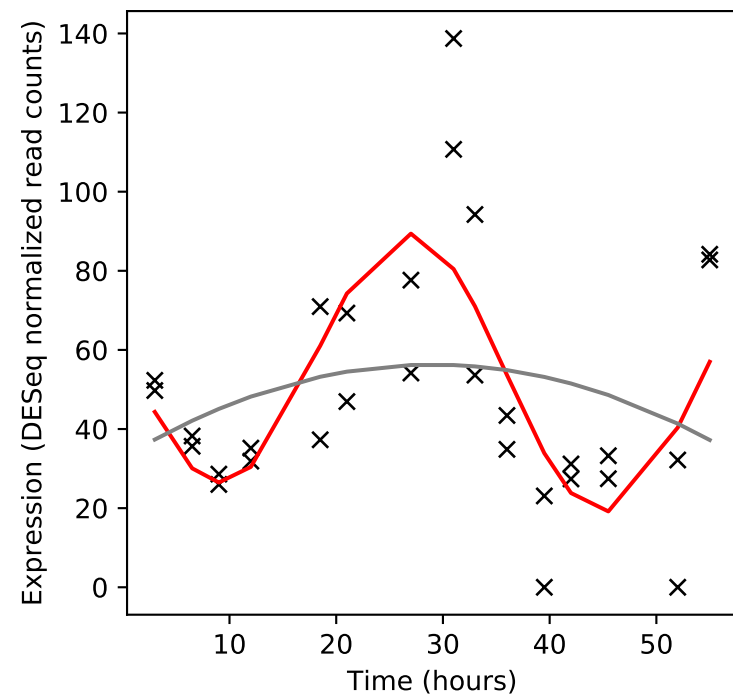

Rv0069c/sdaA

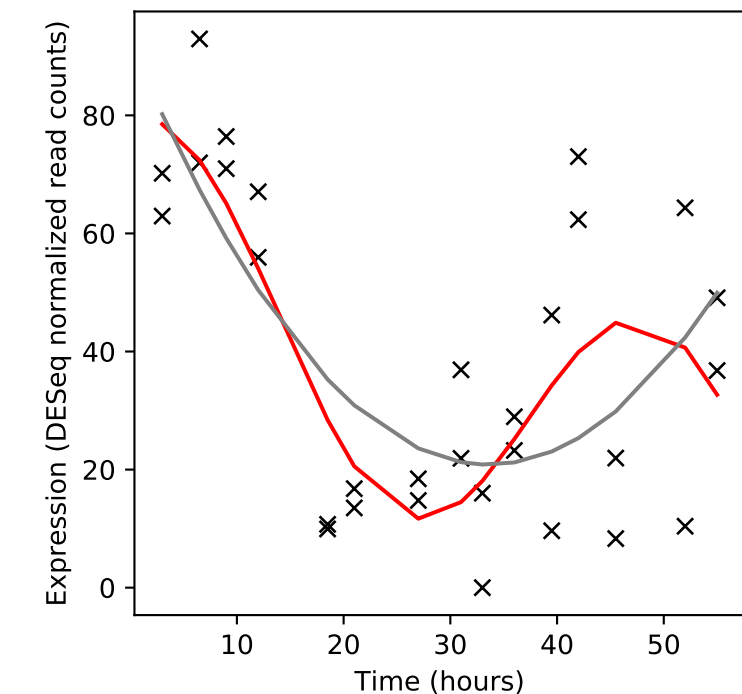

Rv0070c/glyA2

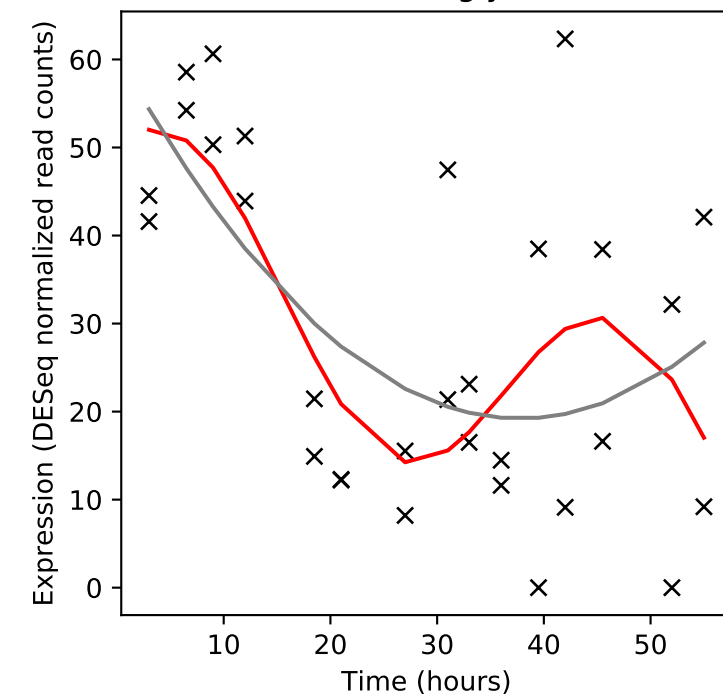

Rv0071/-

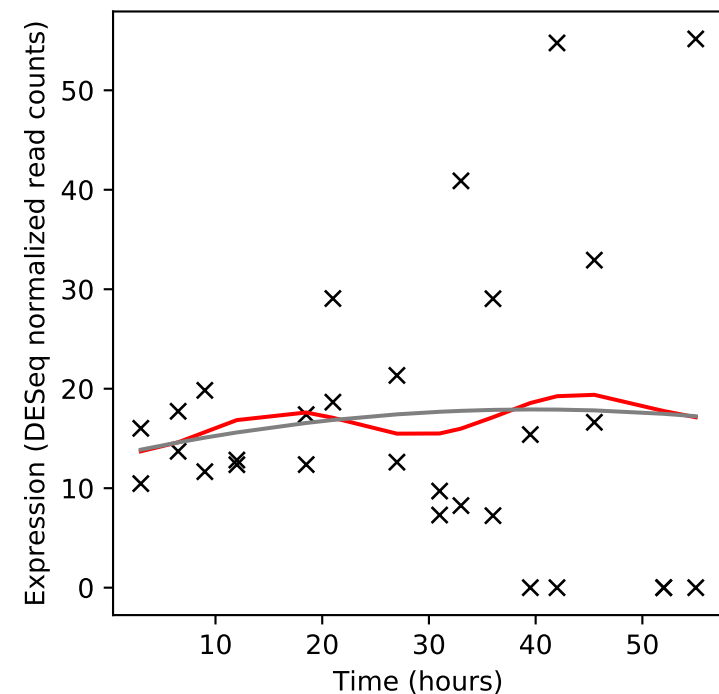



Rv0072/-

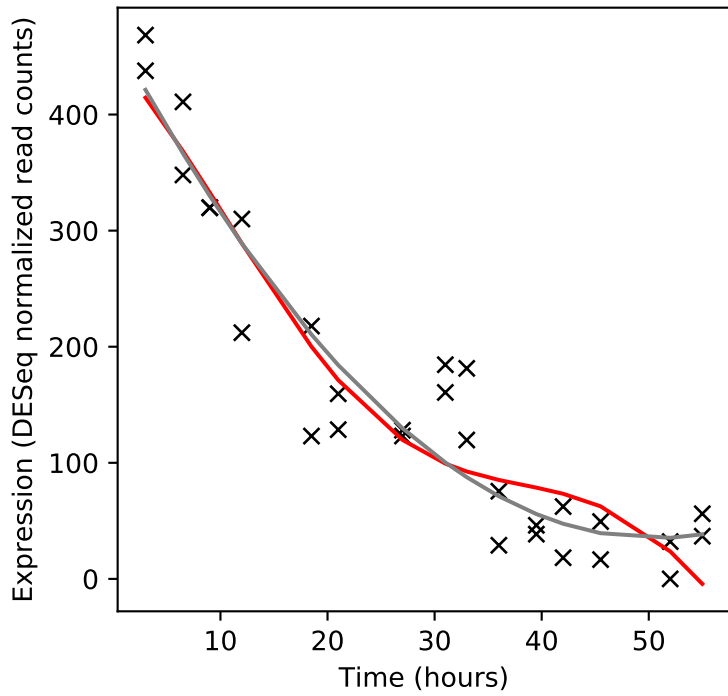

Rv0073/-

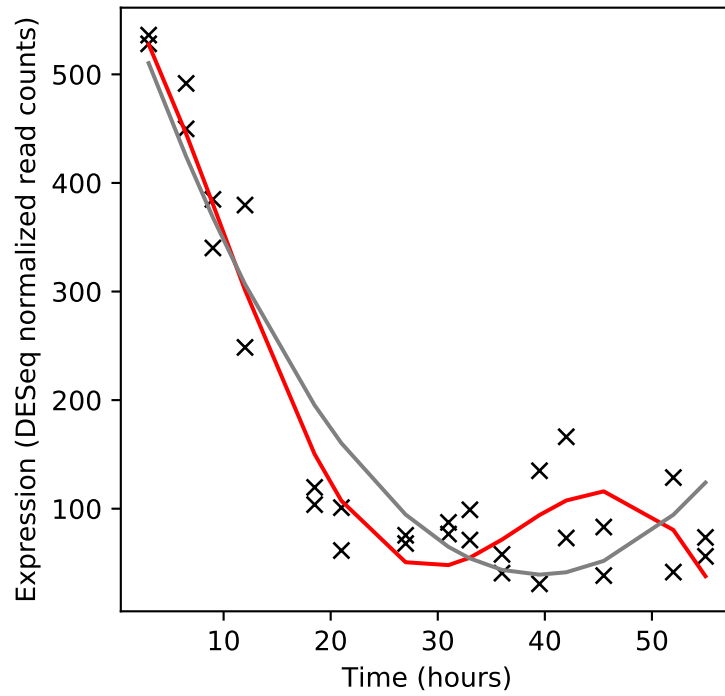

Rv0074/-

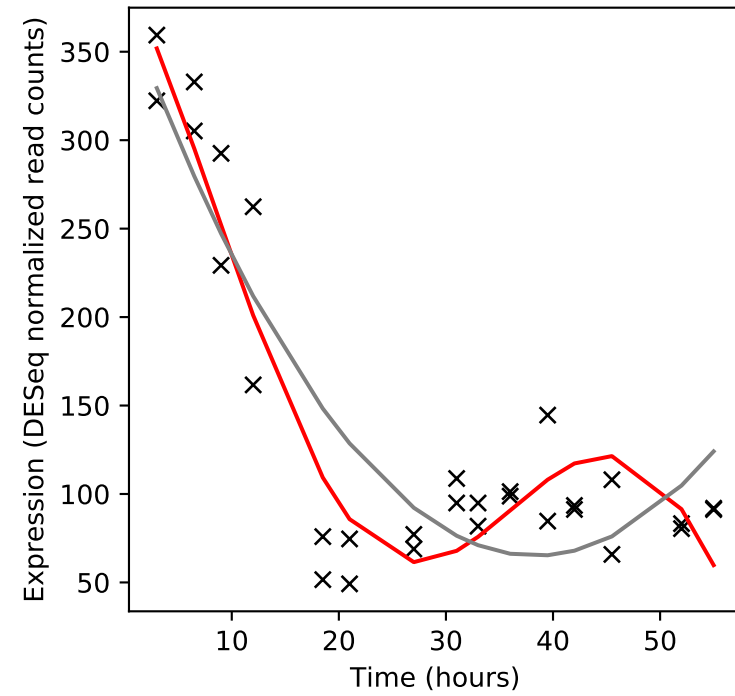

Rv0075/-

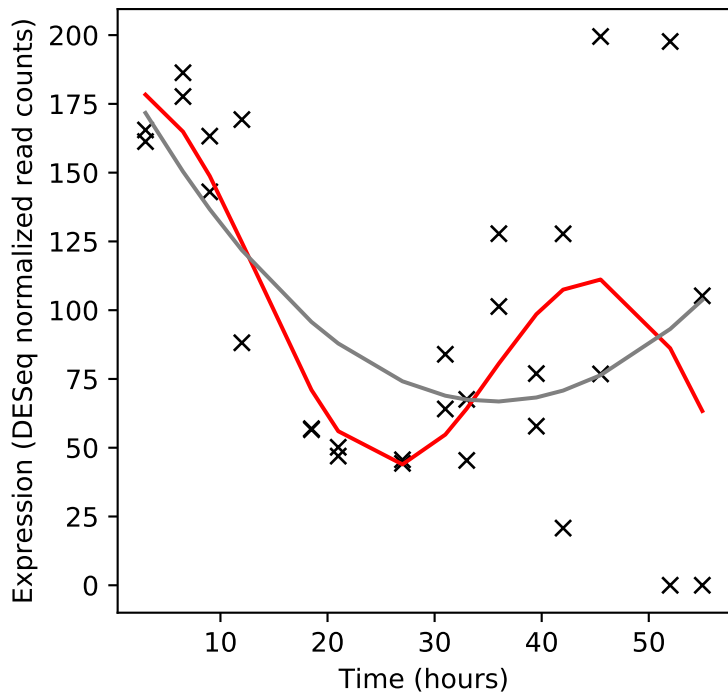

Rv0076c/-

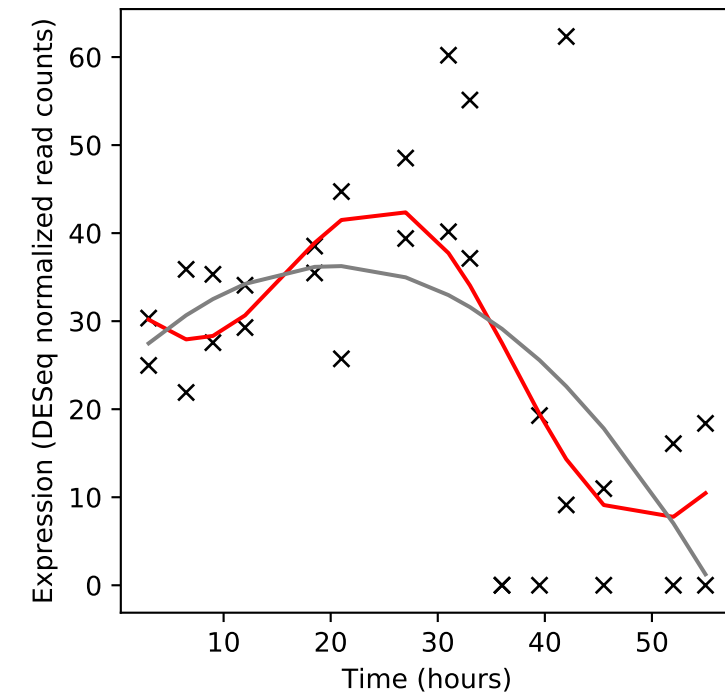

Rv0077c/-

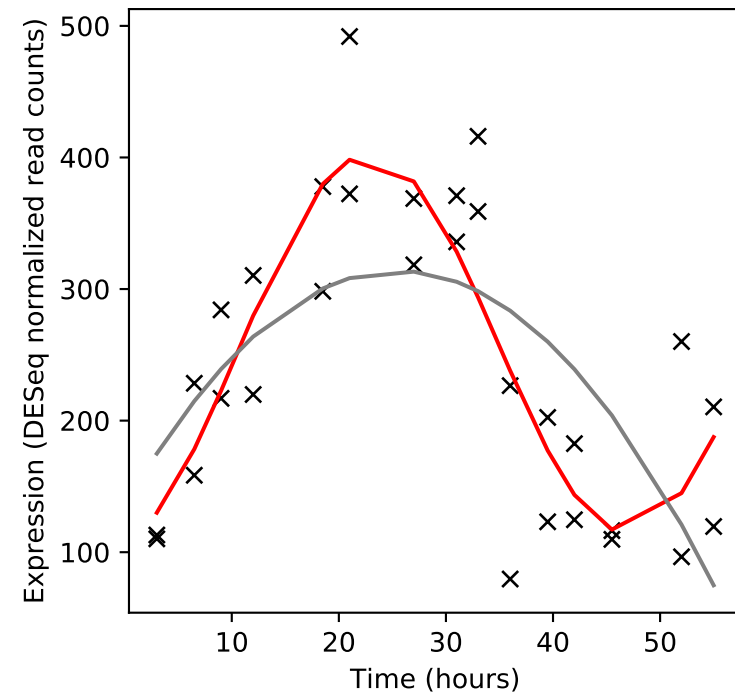

Rv0078/-

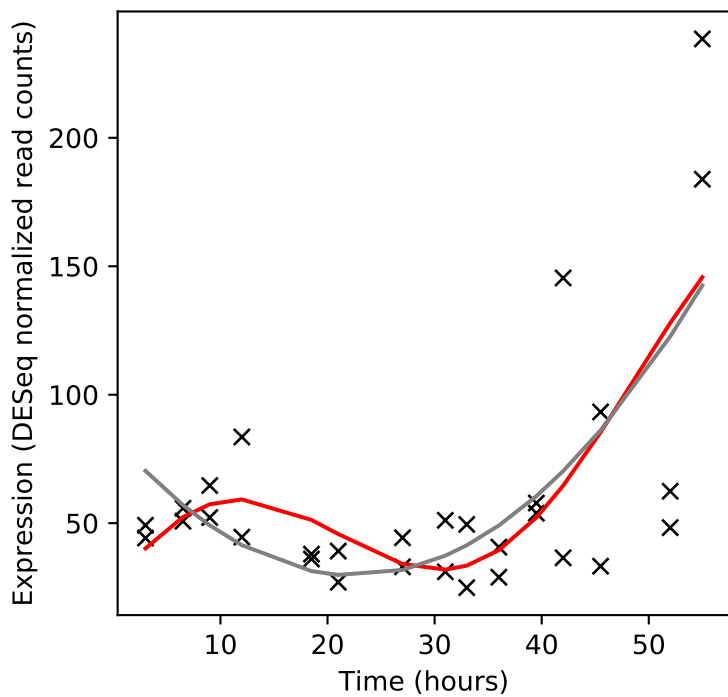

Rv0078A/-

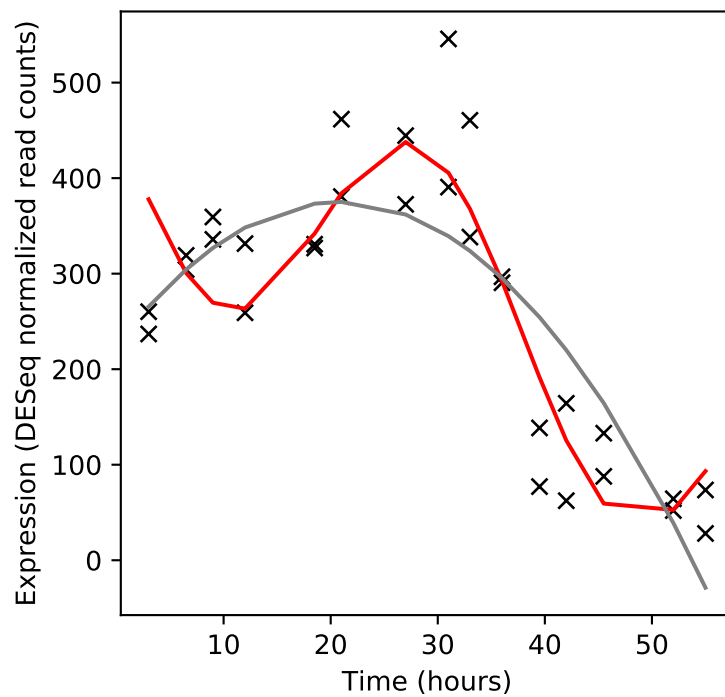

Rv0078B/-

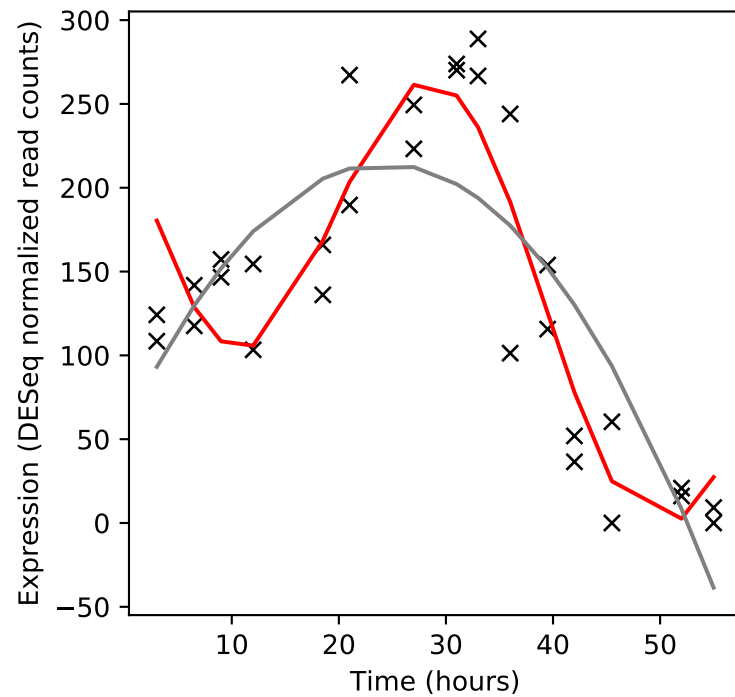

Rv0079/-

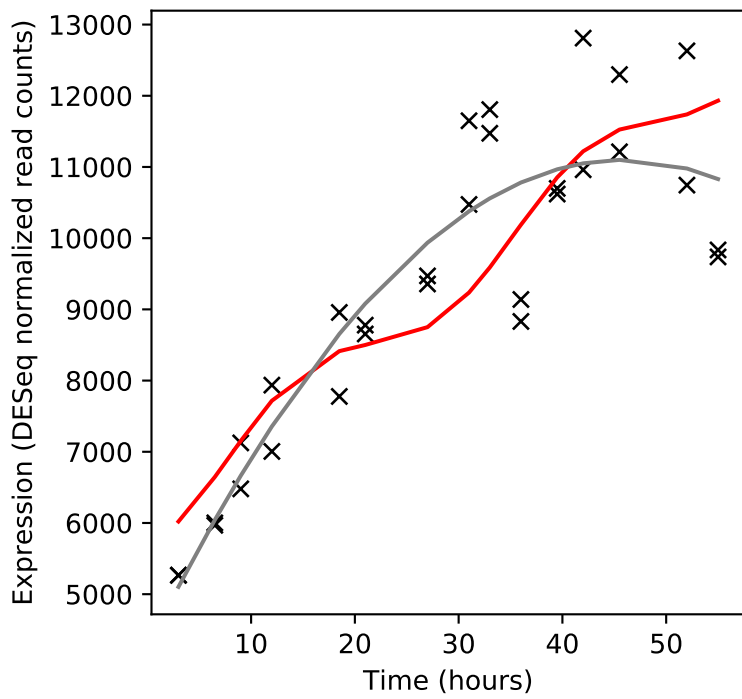

Rv0080/-

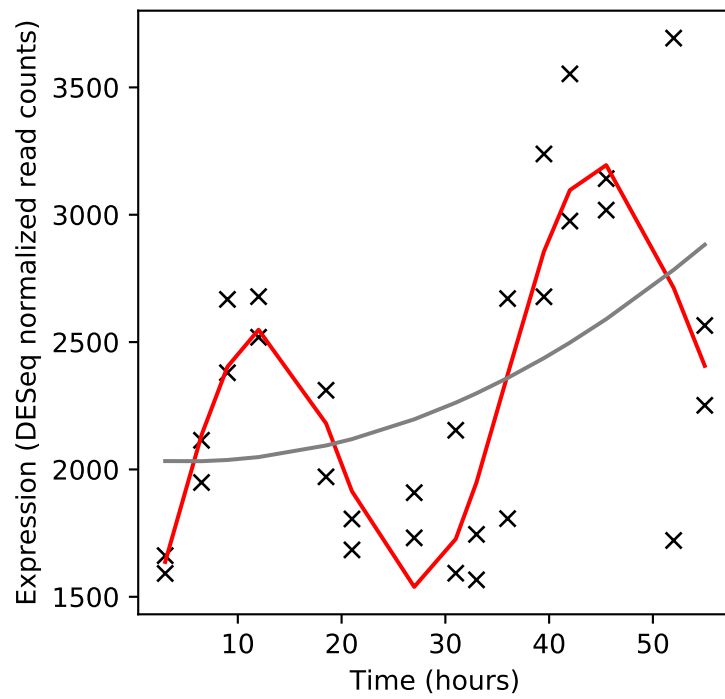

Rv0081/-

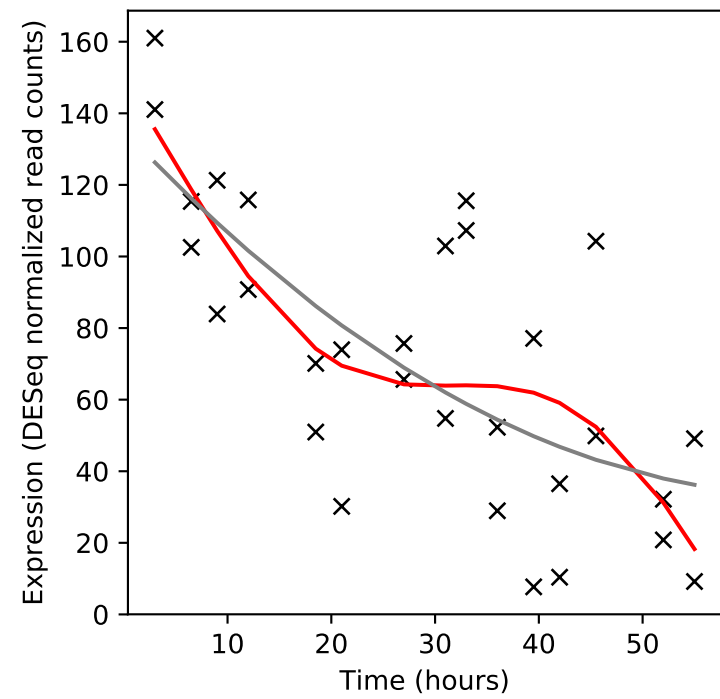

Rv0082/-

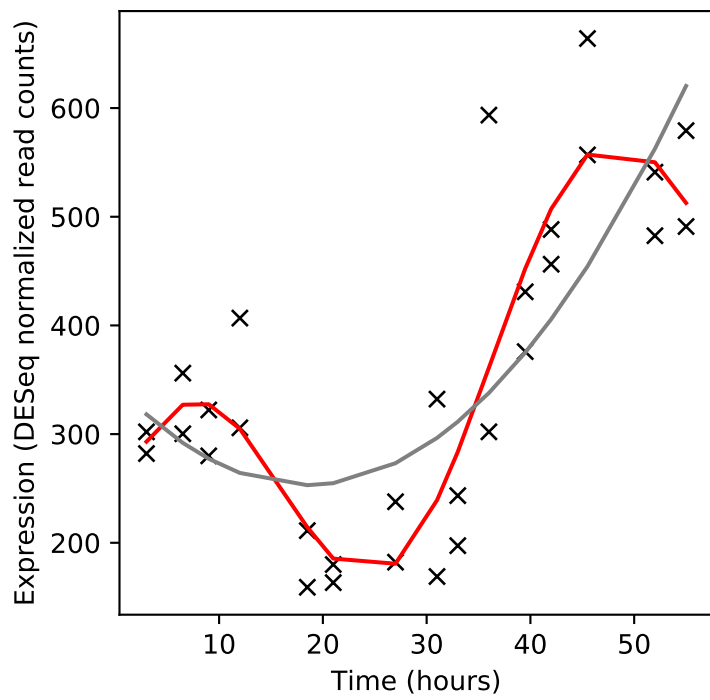

Rv0083/-

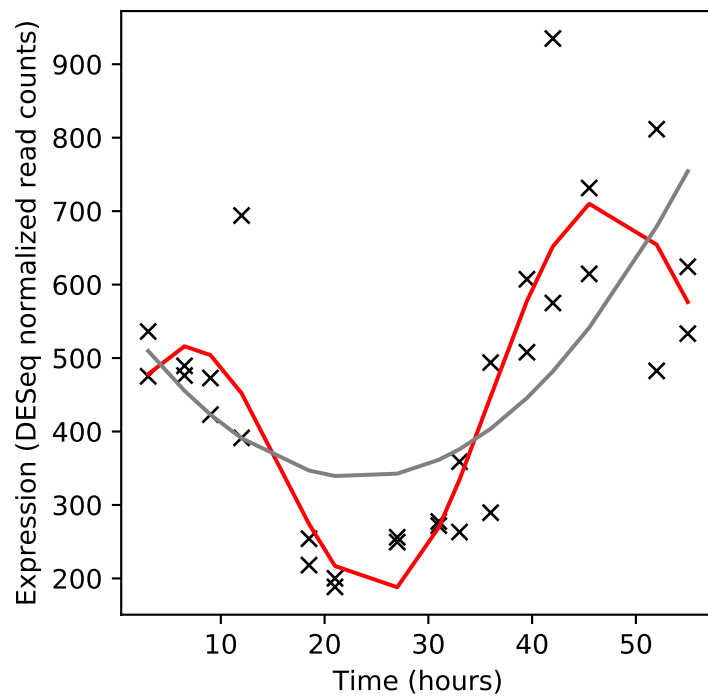

Rv0084/hycD

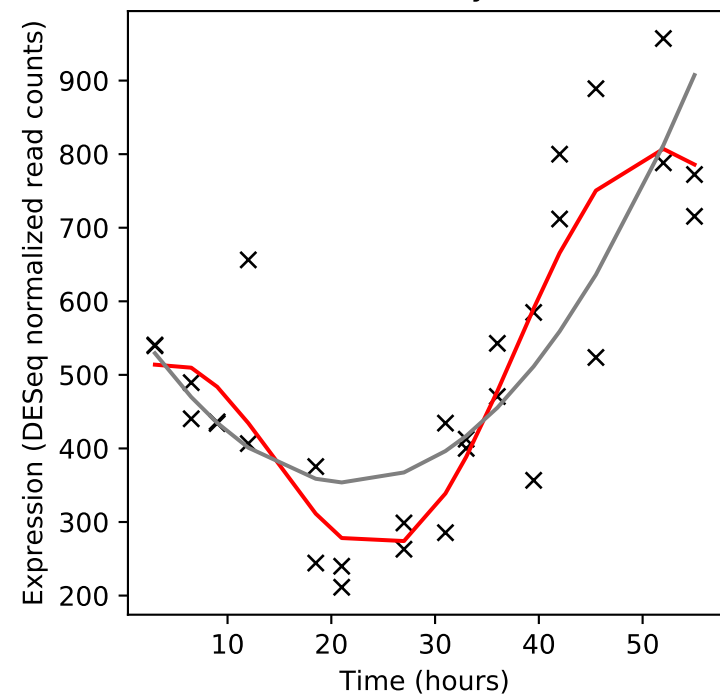

Rv0085/hycP

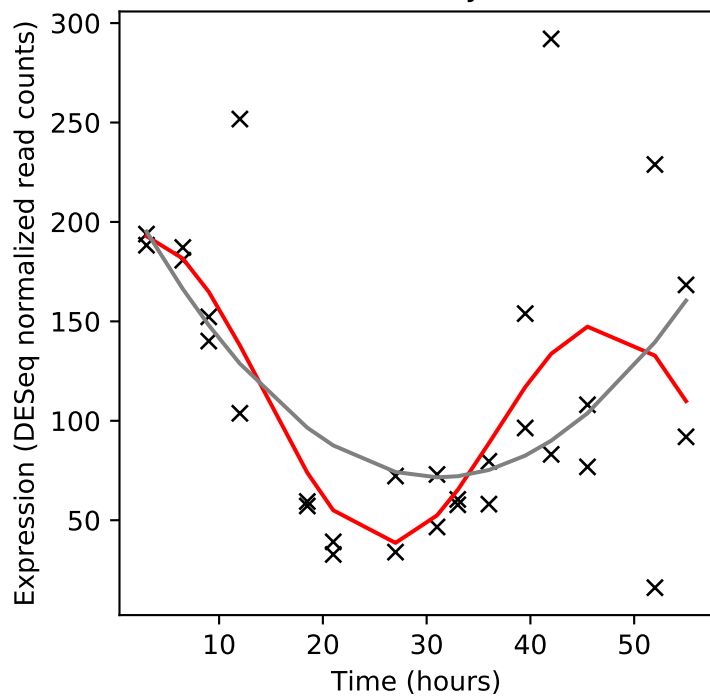

Rv0086/hycQ

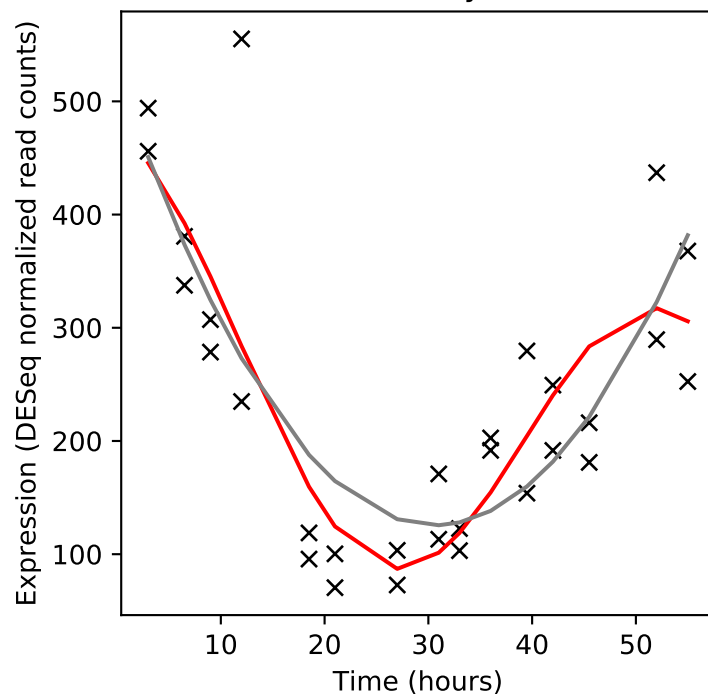

Rv0087/hycE

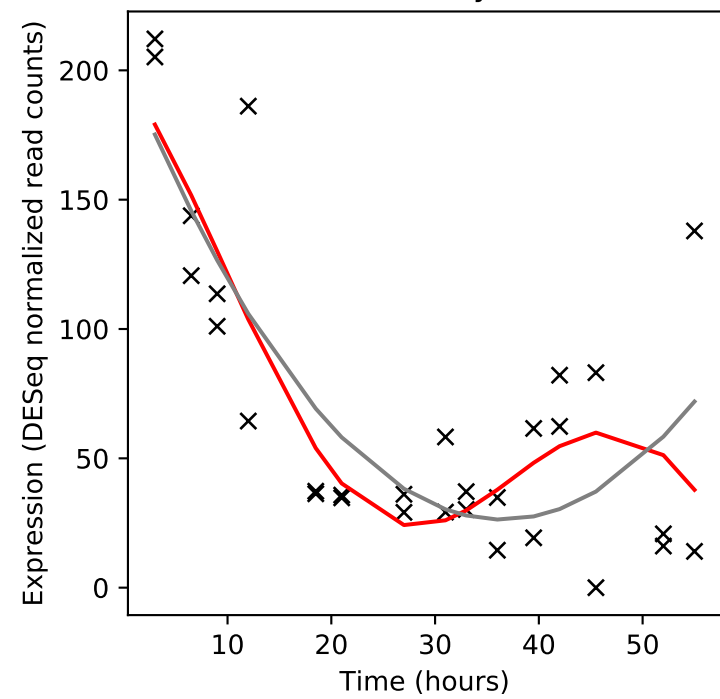

Rv0088/-

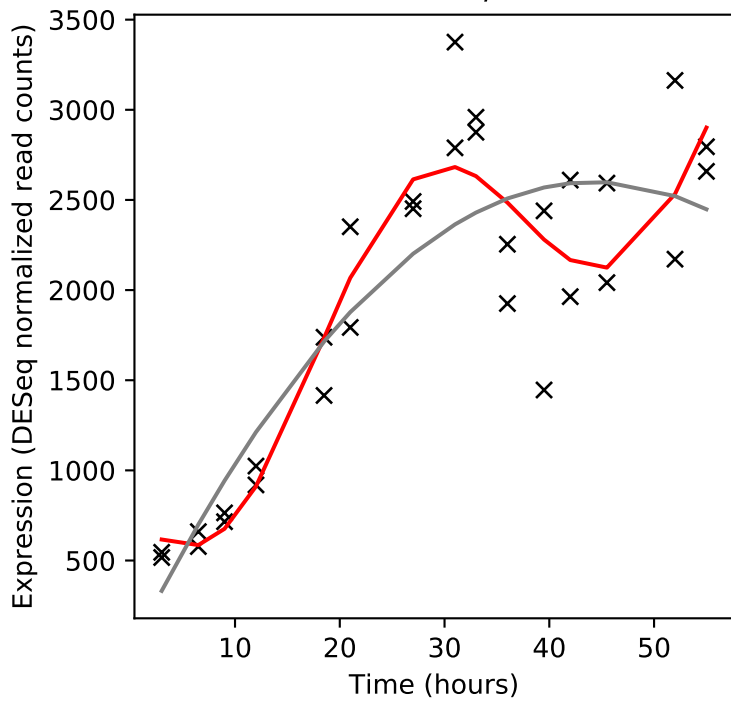

Rv0089/-

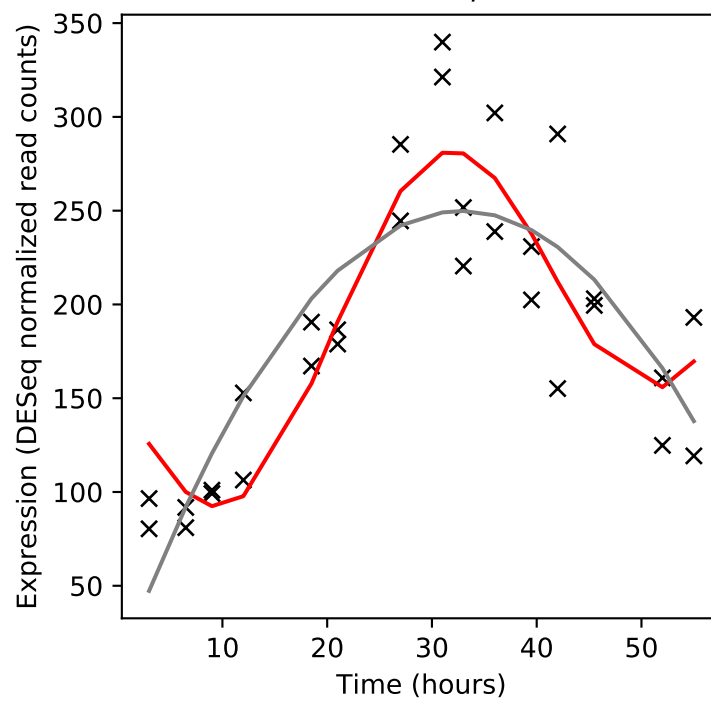

Rv0090/-

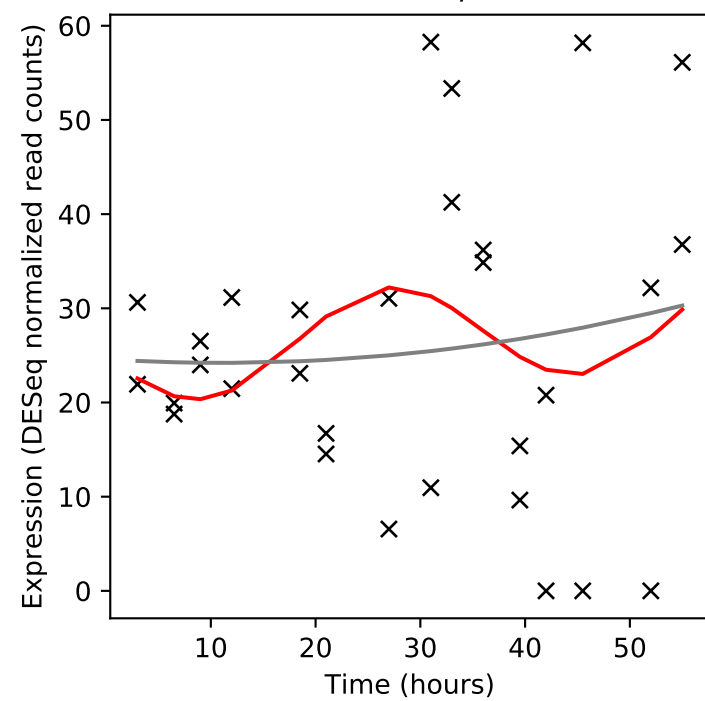

Rv0091/mtn

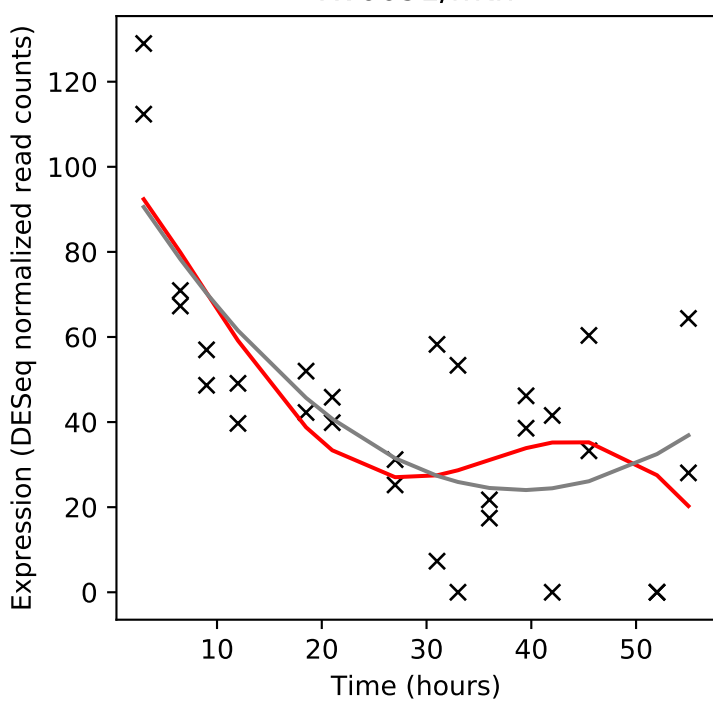

Rv0092/ctpA

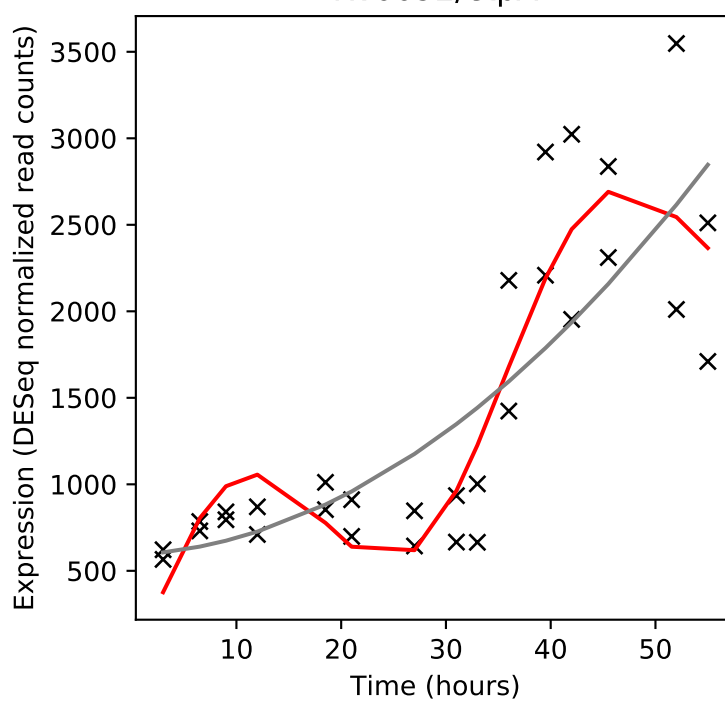

Rv0093c/-

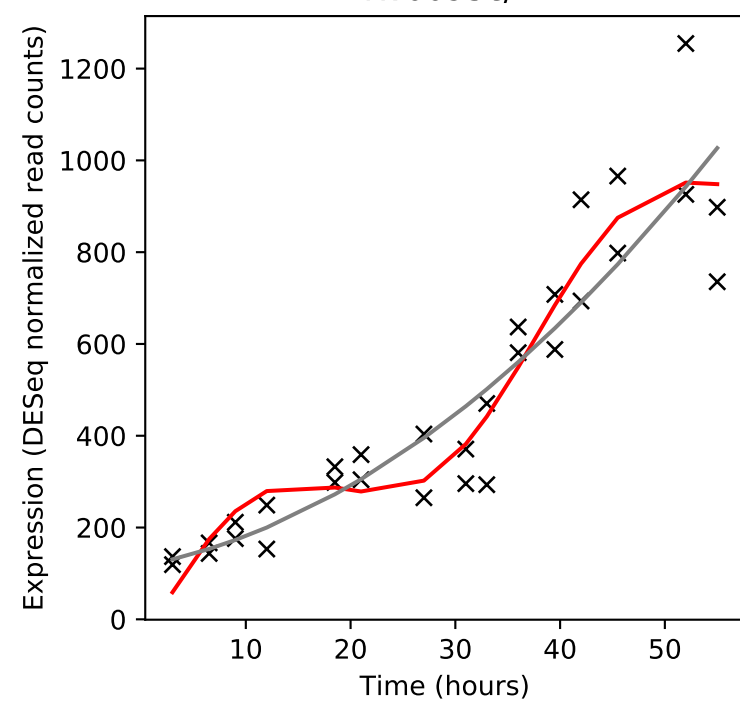

Rv0094c/-

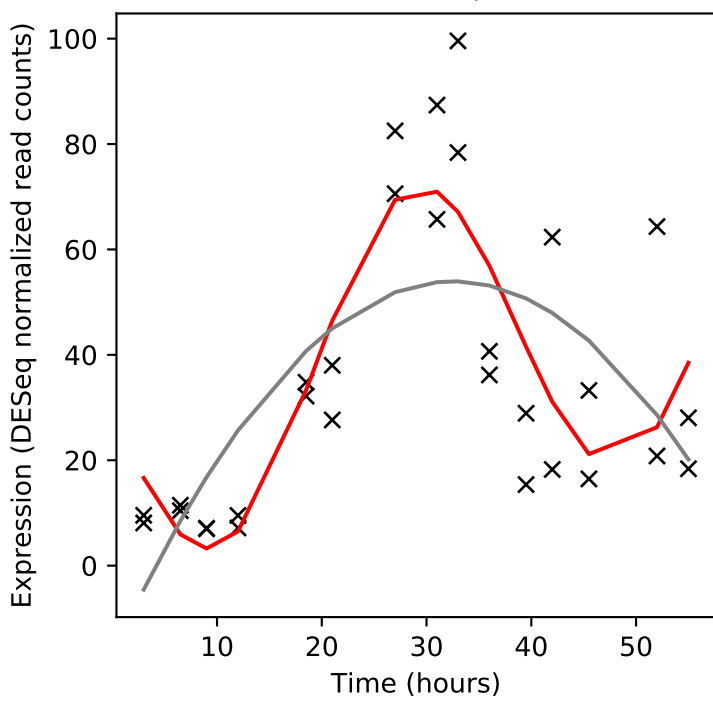

Rv0095c/-

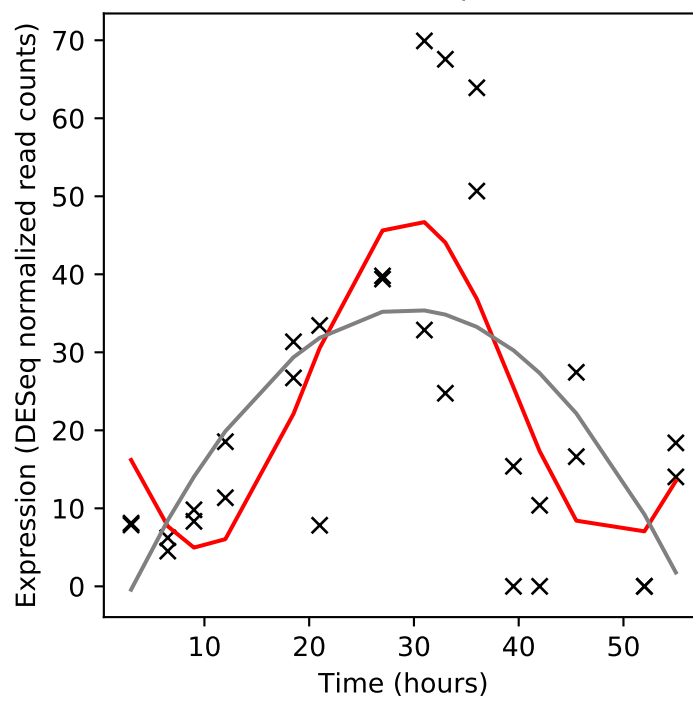

Rv0096/PPE1

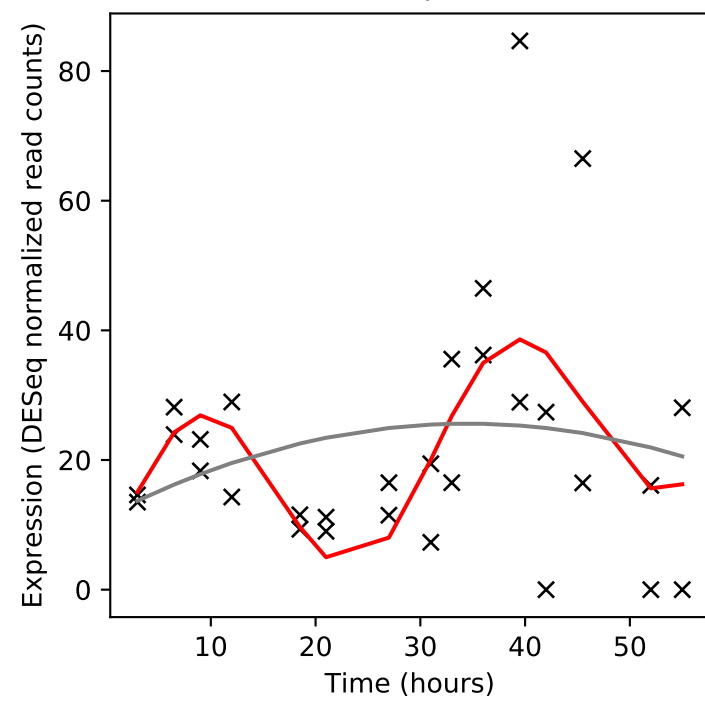

Rv0097/-

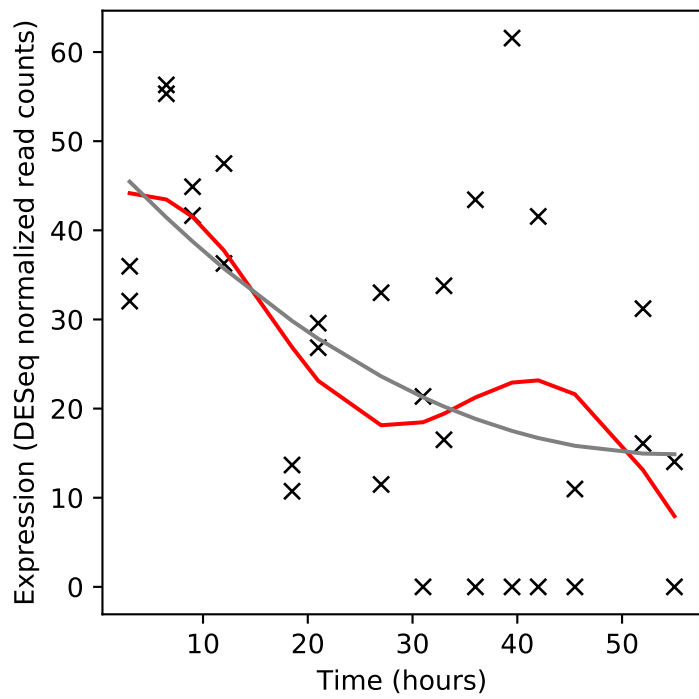

Rv0098/fcoT

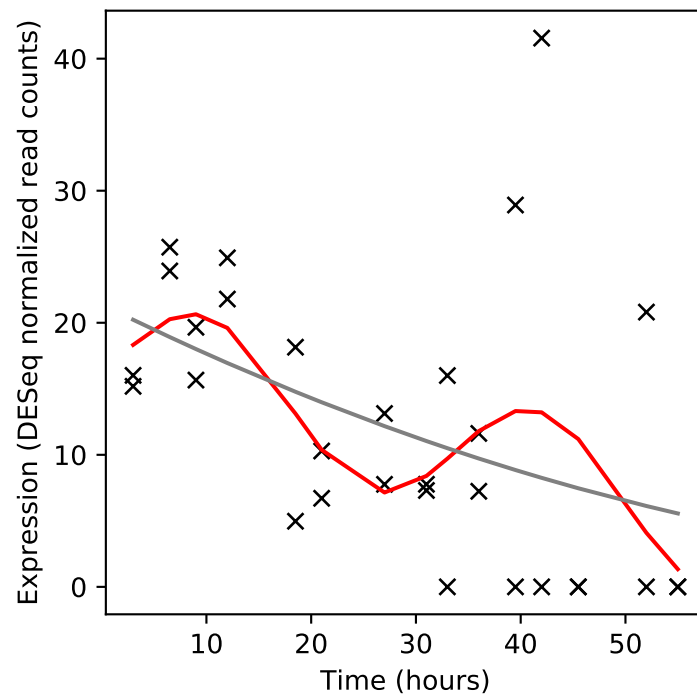

Rv0099/fadD10

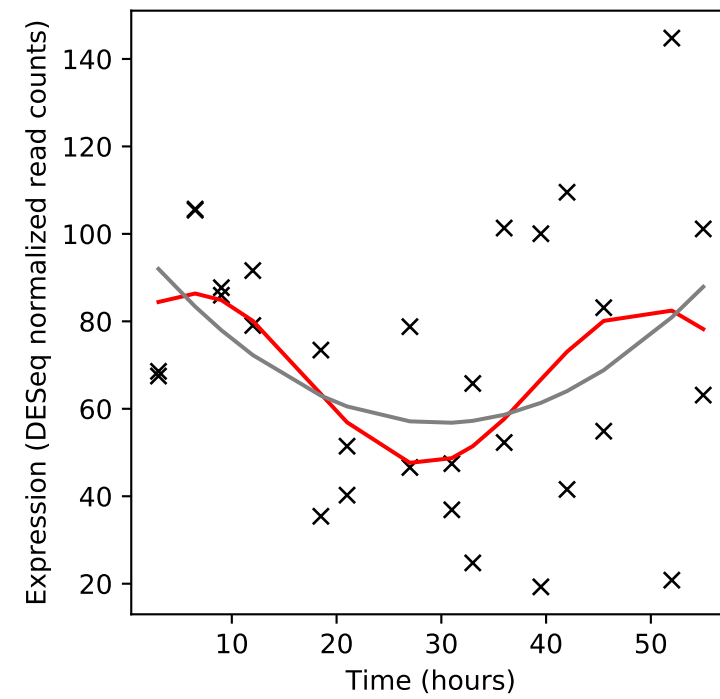

Rv0100/-

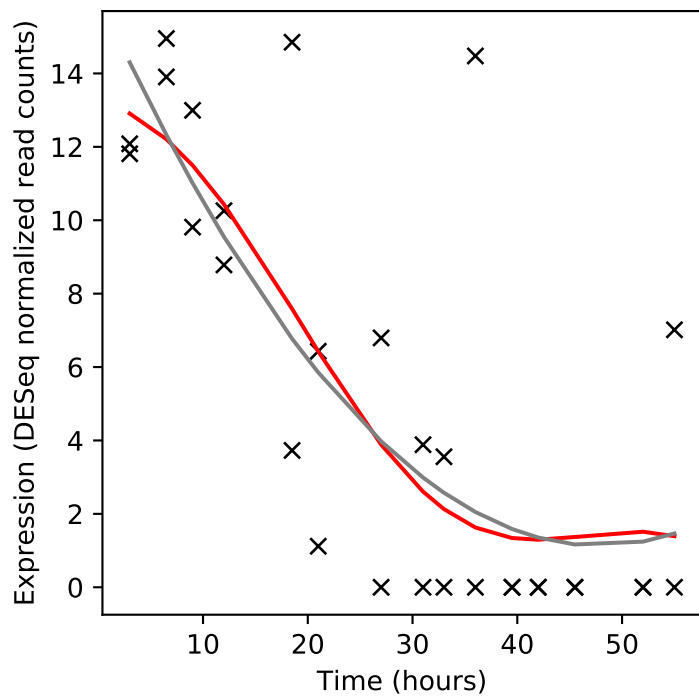

Rv0101/nrp

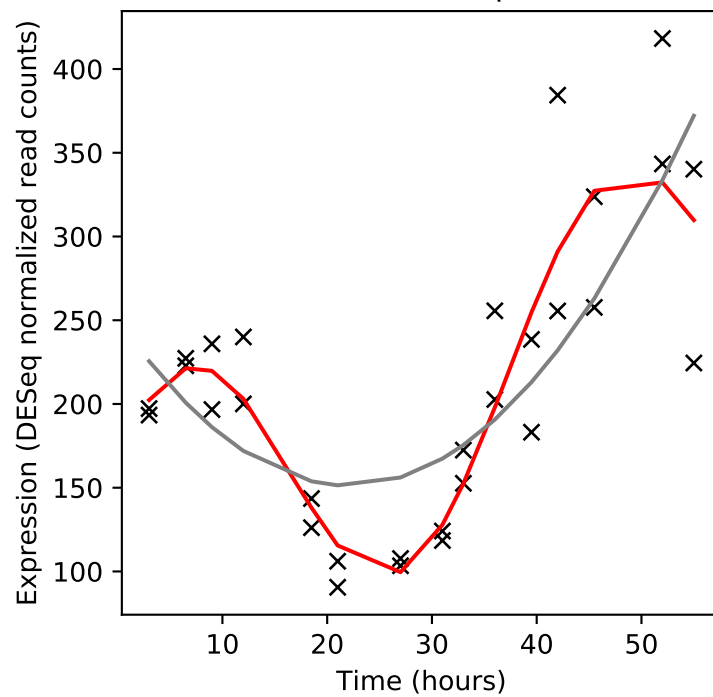

Rv0102/-

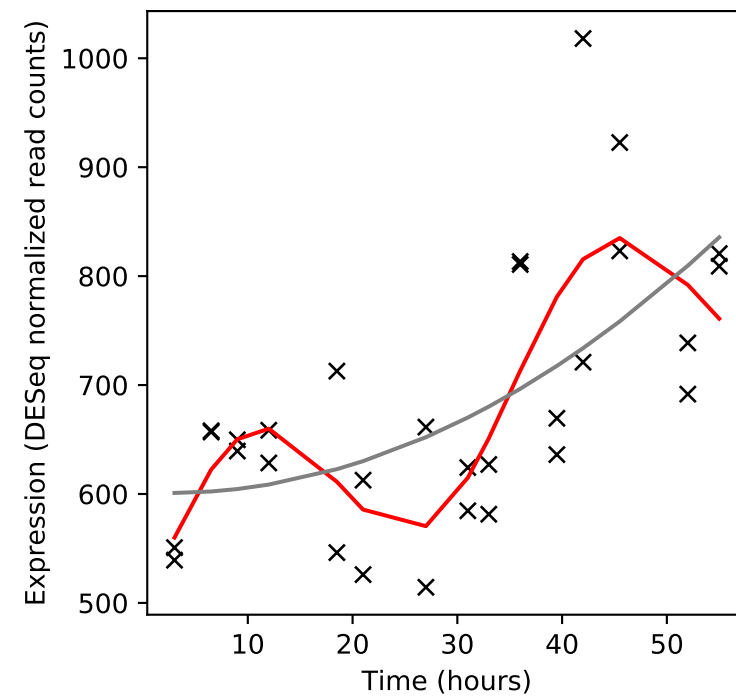

Rv0103c/ctpB

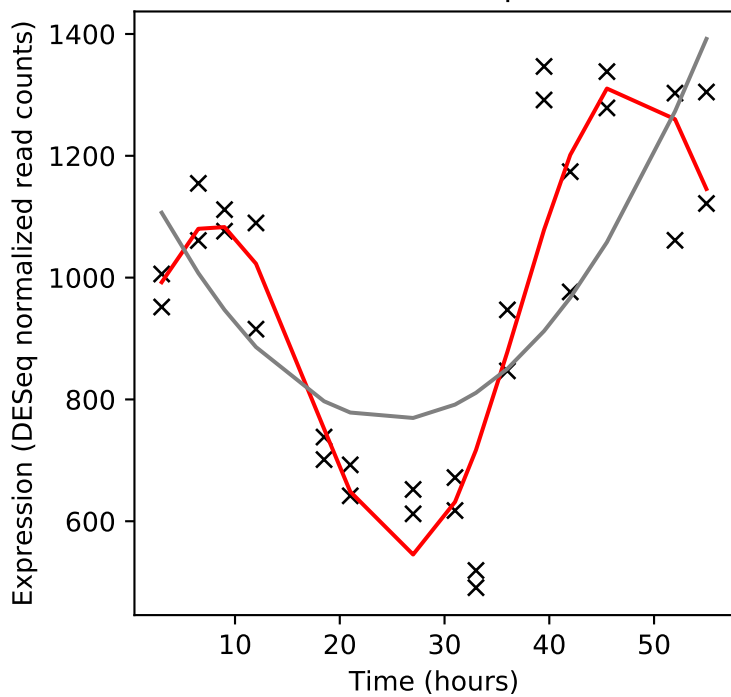

Rv0104/-

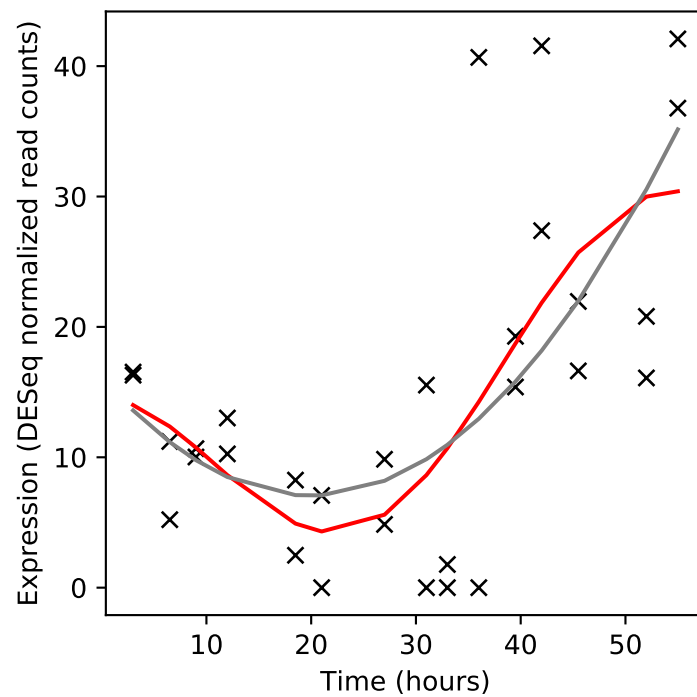

Rv0105c/rpmB1

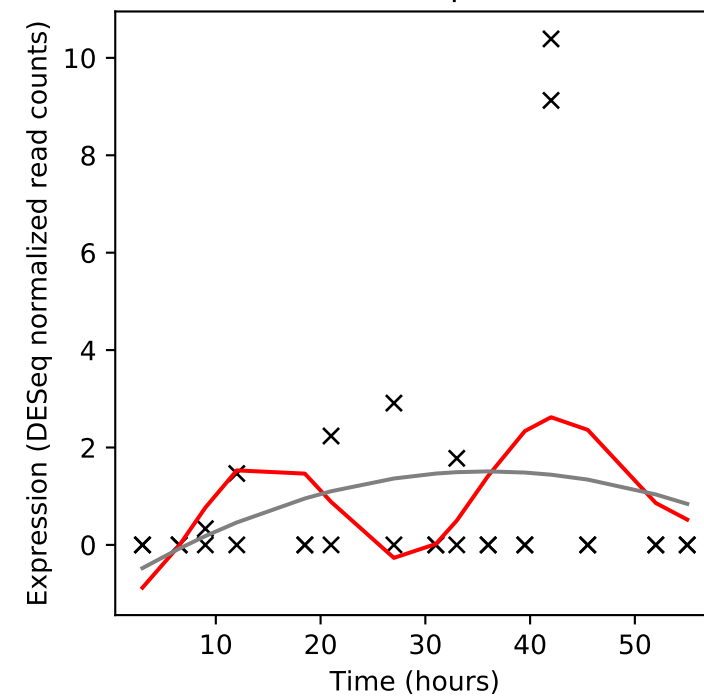

Rv0106/-

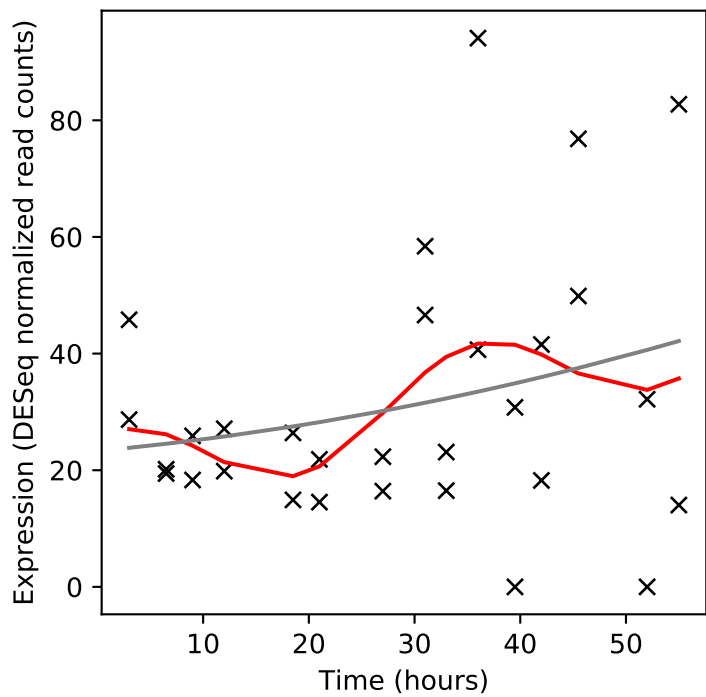

Rv0107c/ctpl

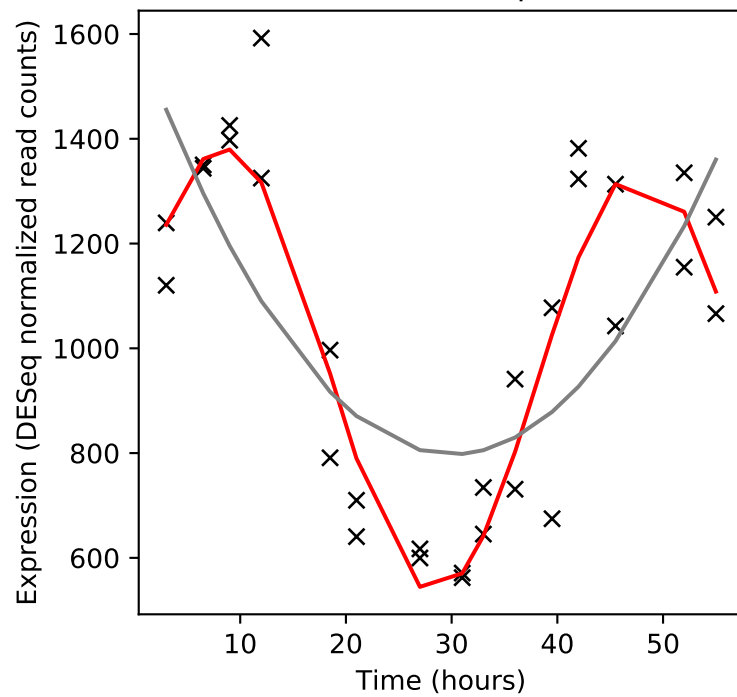

Rv0108c/-

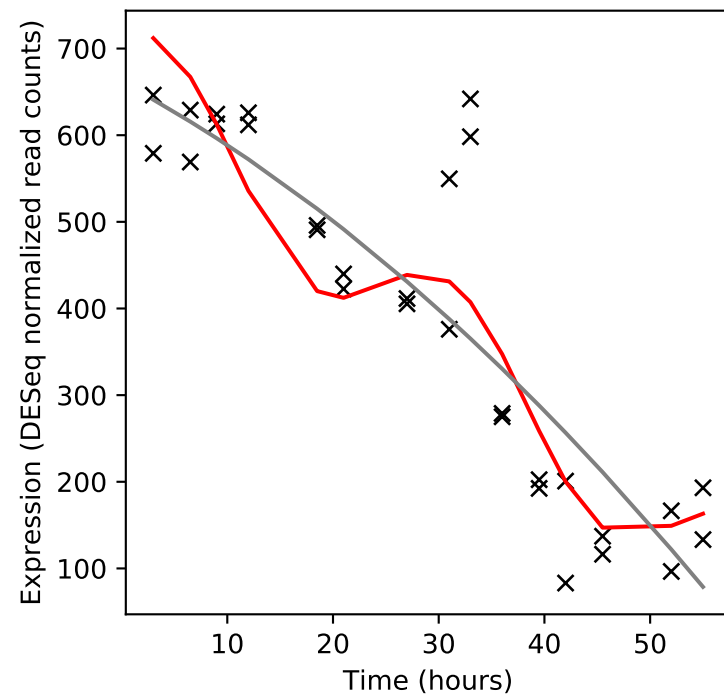

Rv0109/PE\_PGRS1

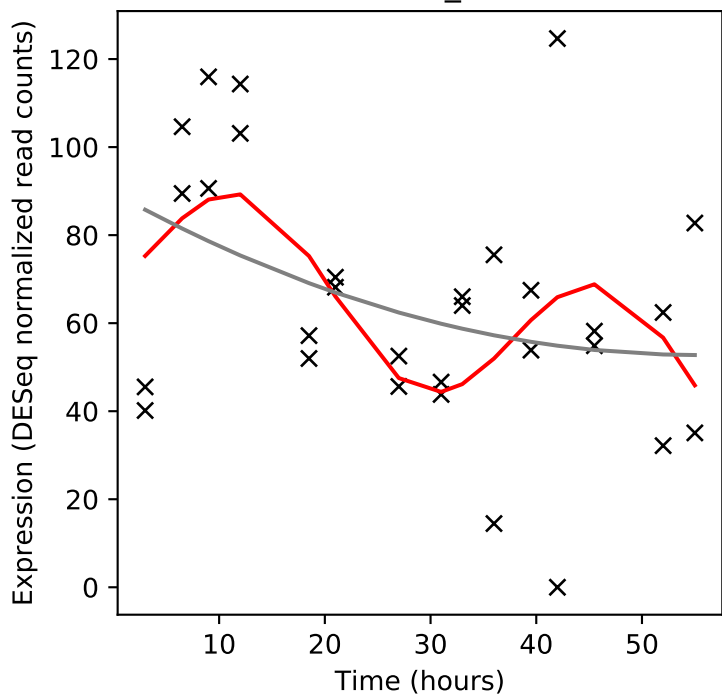

Rv0110/-

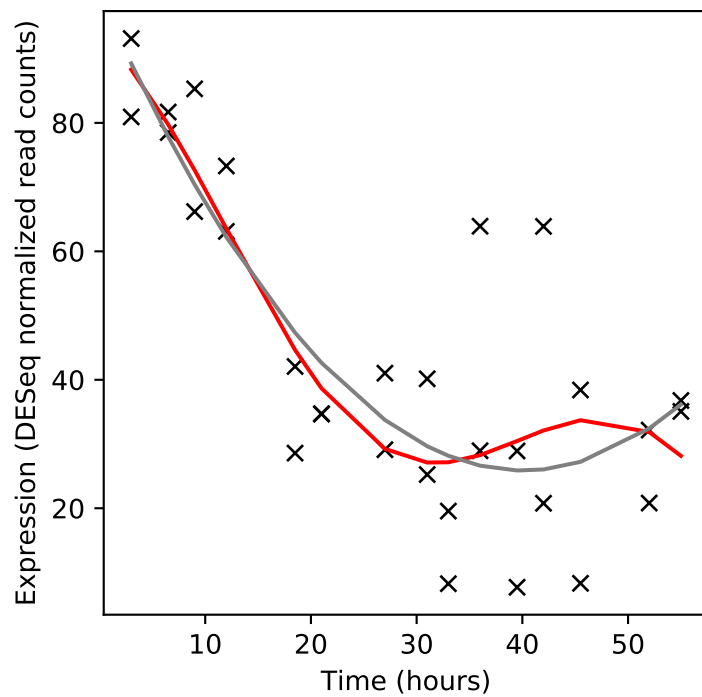

Rv0111/-

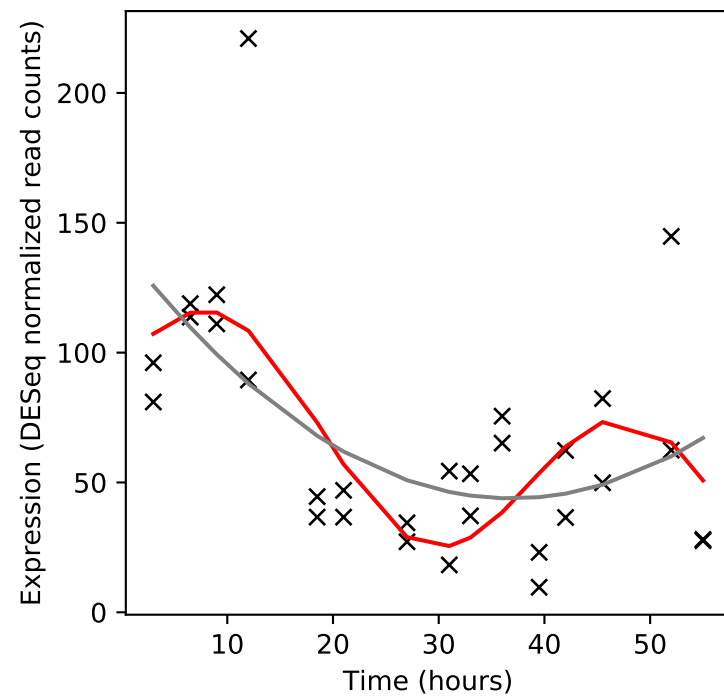

Rv0112/gca

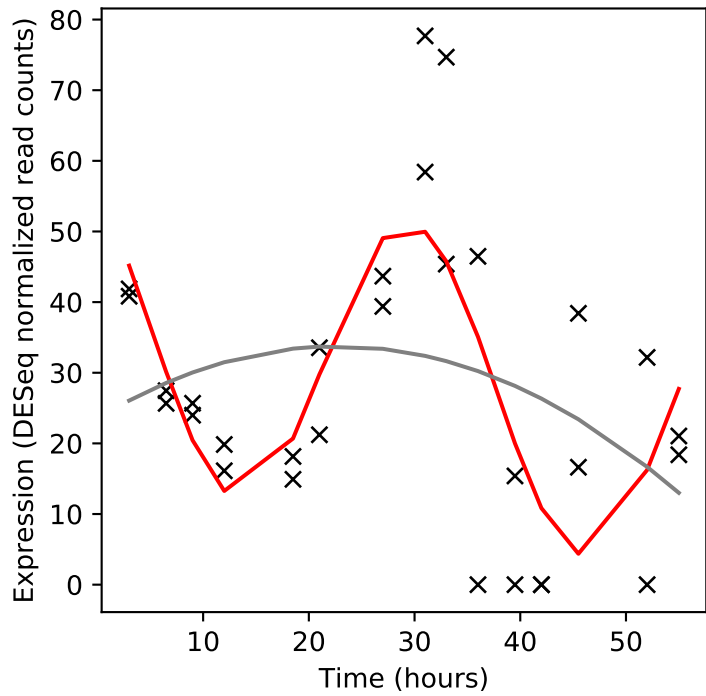

Rv0113/gmhA

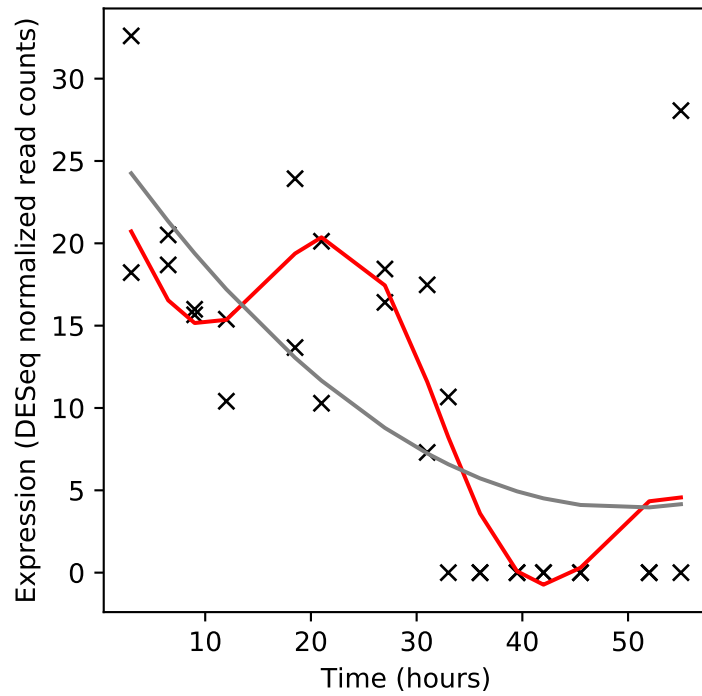

Rv0114/gmhB

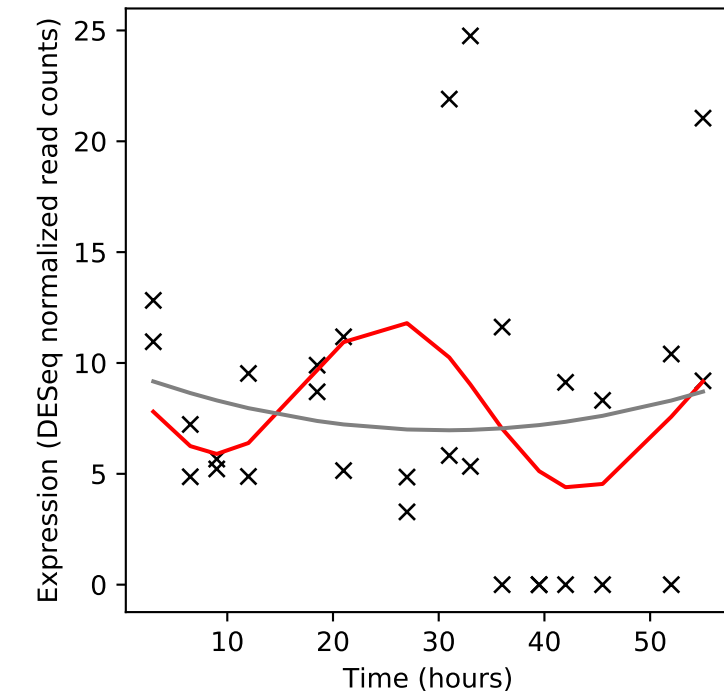

Rv0115/hddA

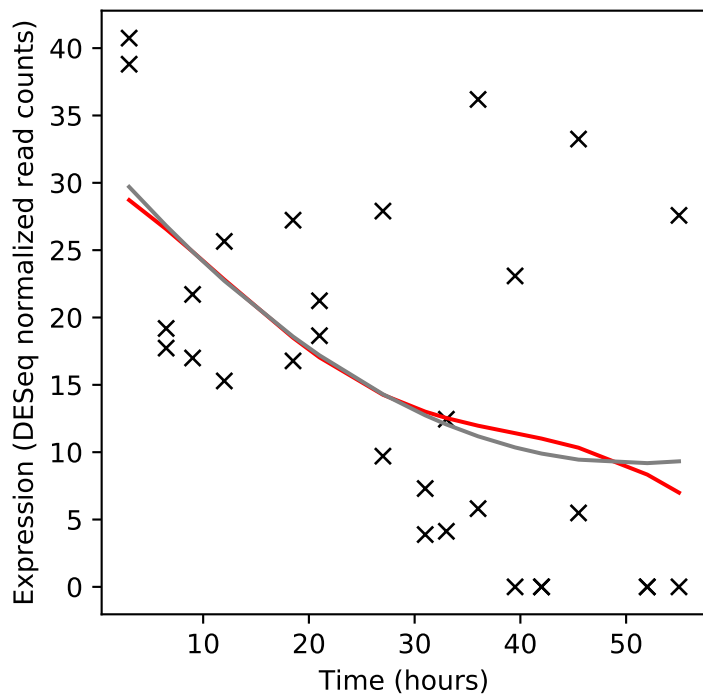

Rv0116c/ldtA

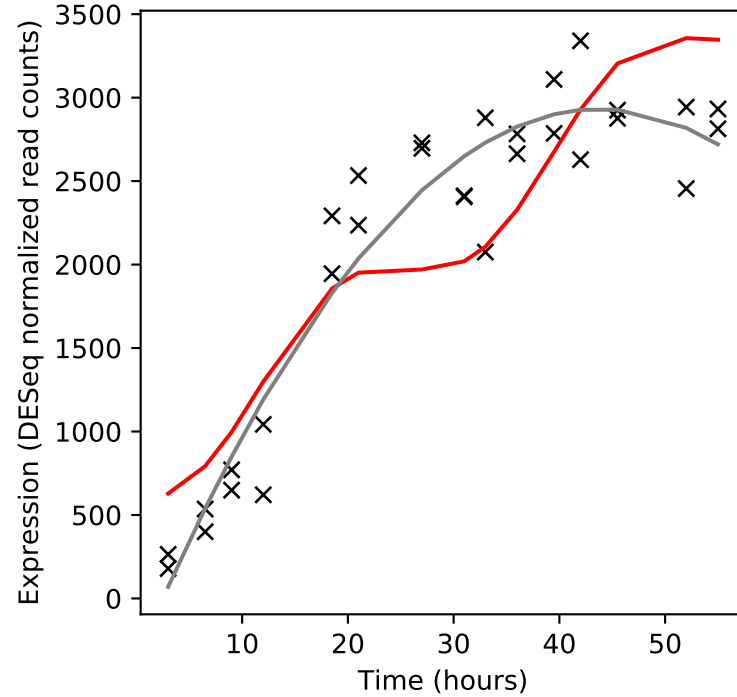

Rv0117/oxyS

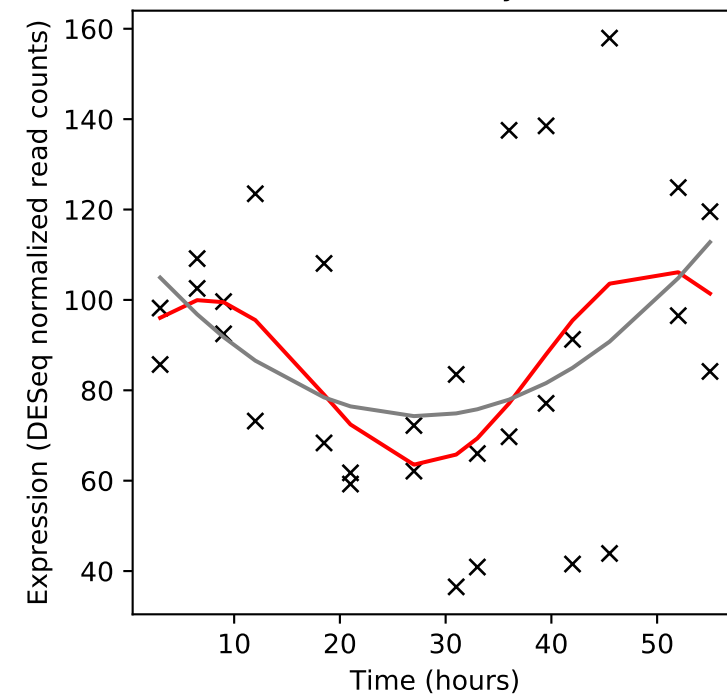

Rv0118c/oxcA

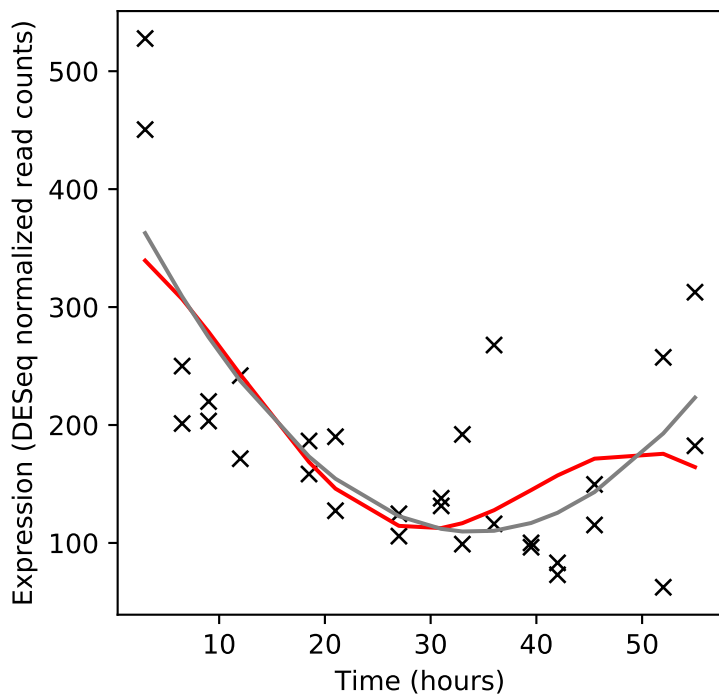

Rv0119/fadD7

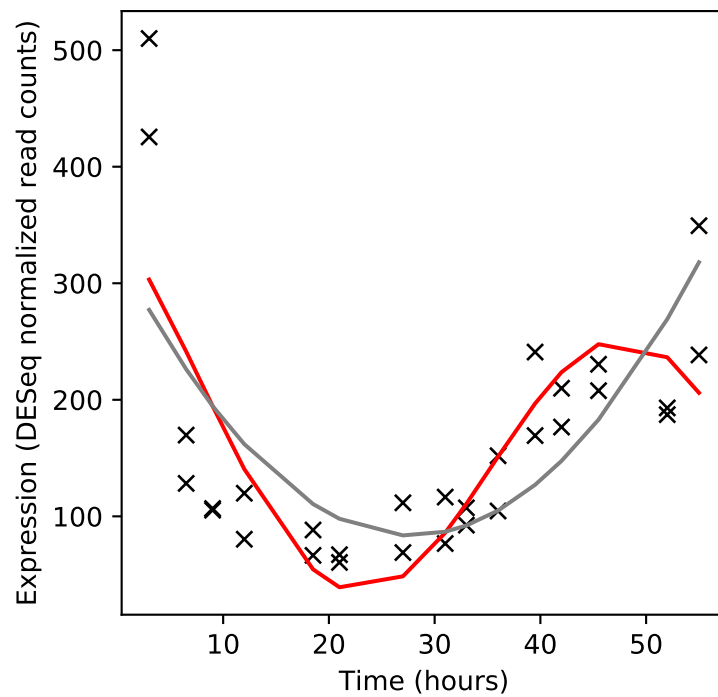

Rv0120c/fusA2

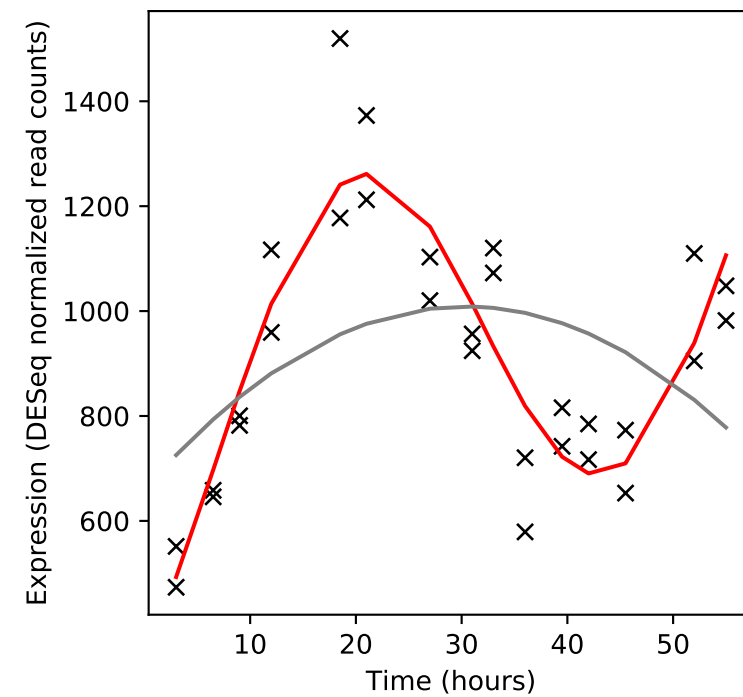

Rv0121c/-

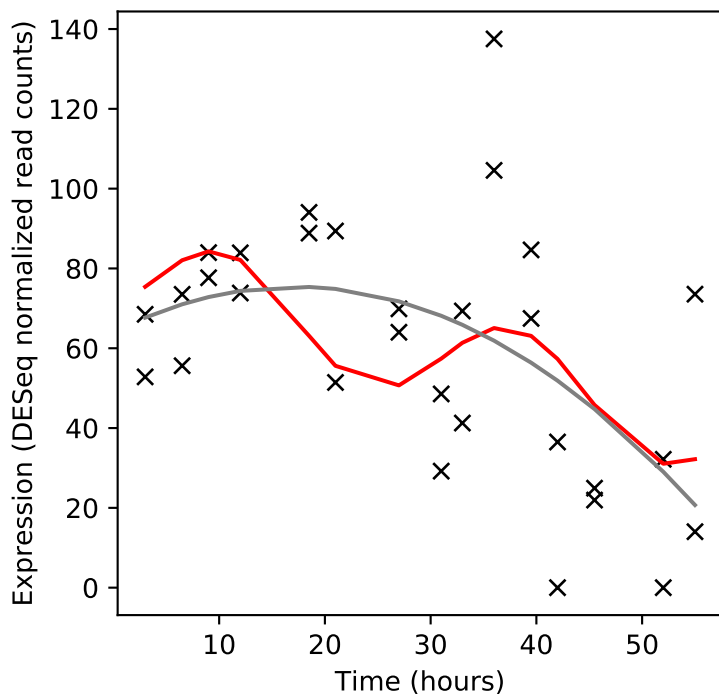

Rv0122/-

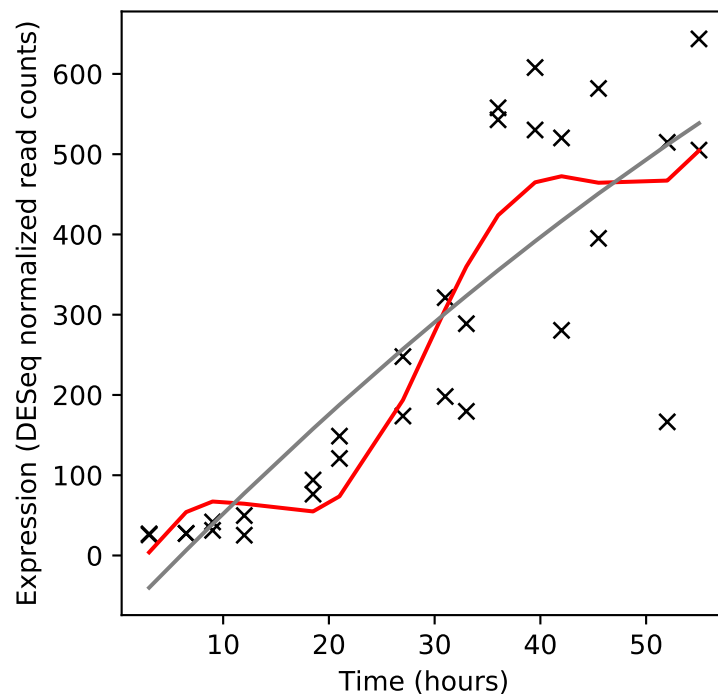

Rv0123/-

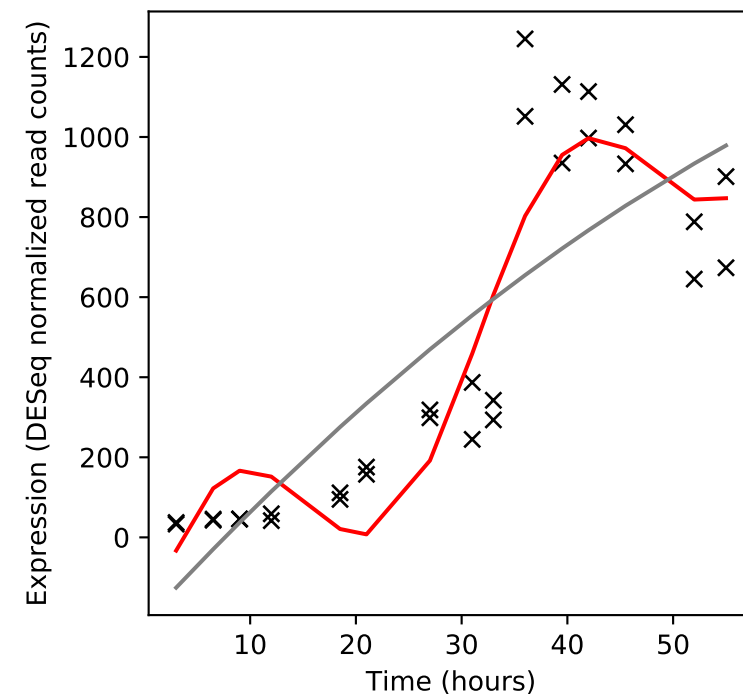

Rv0124/PE\_PGRS2

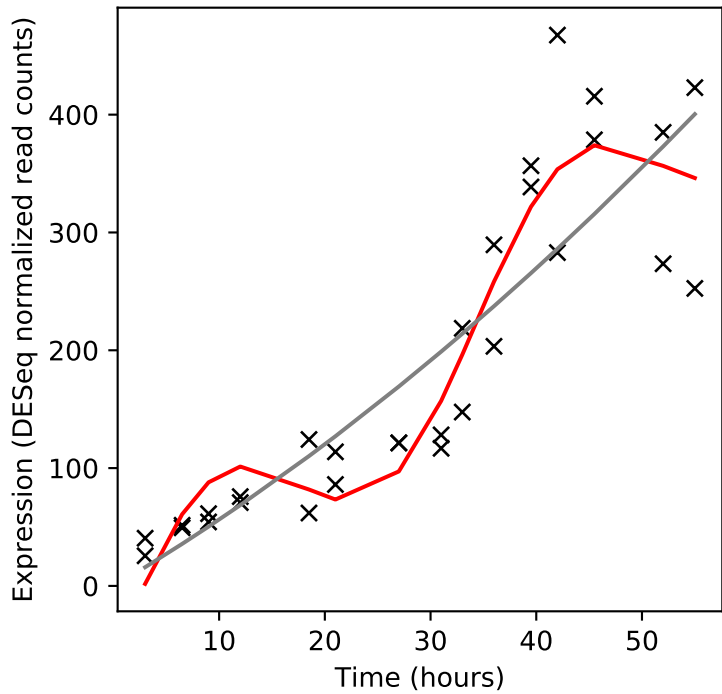

Rv0125/pepA

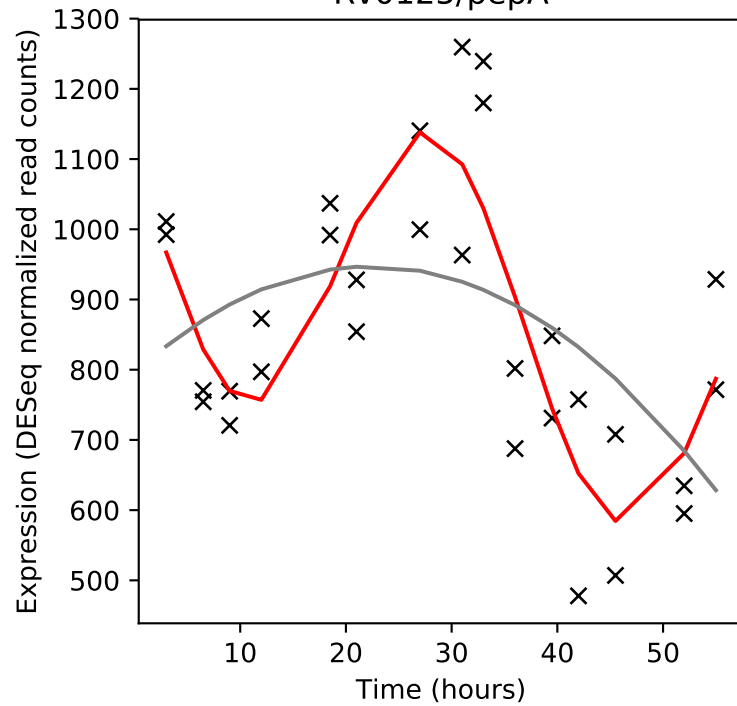

Rv0126/treS

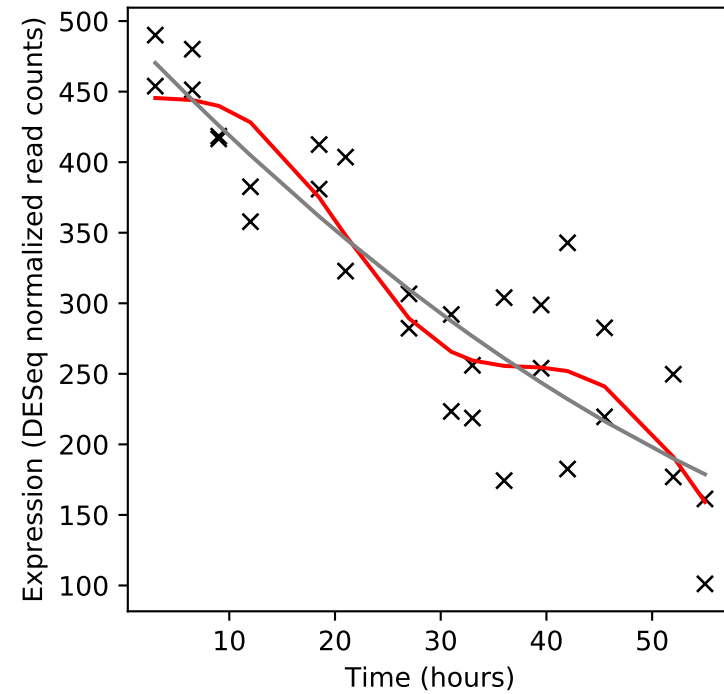

Rv0127/mak

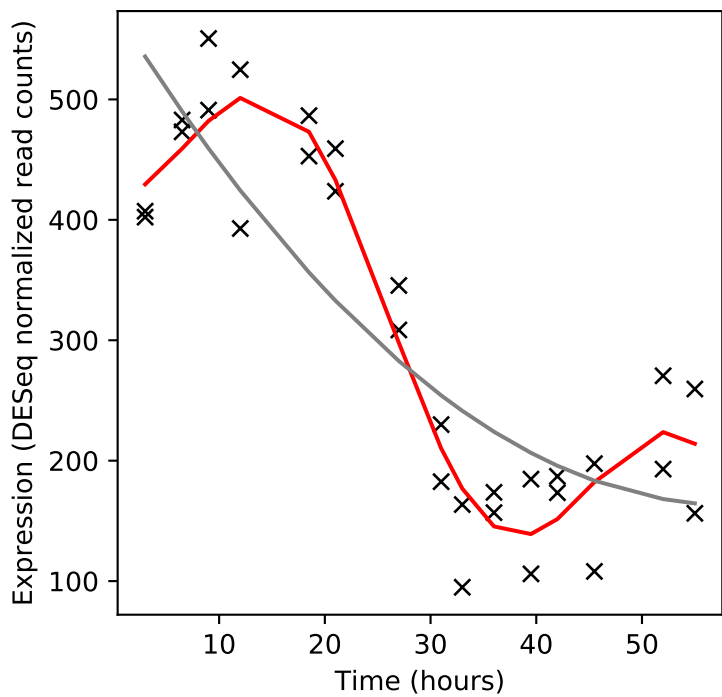

Rv0128/-

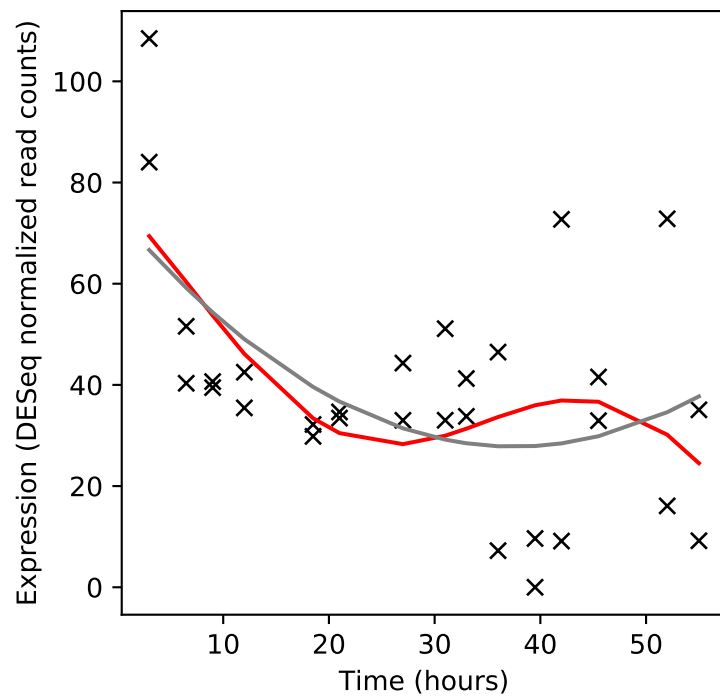

Rv0129c/fbpC

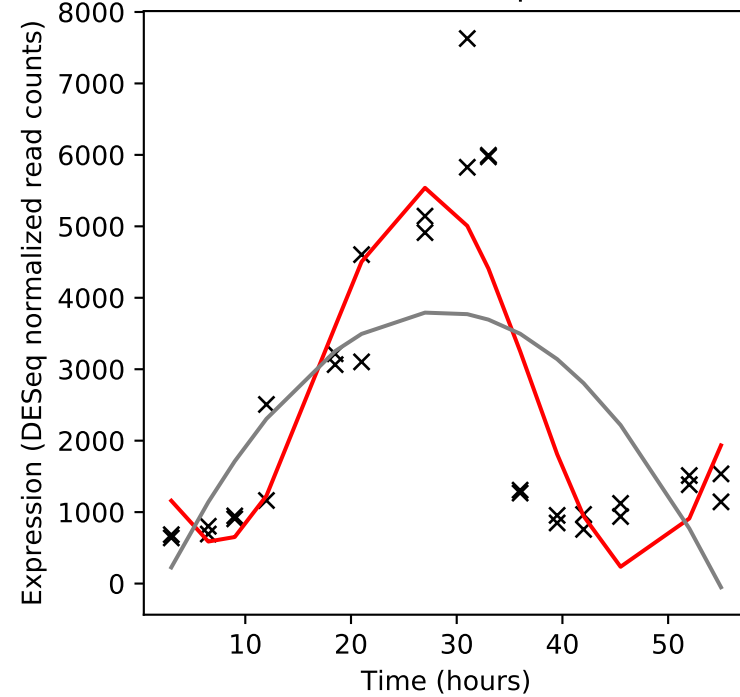

Rv0130/htdZ

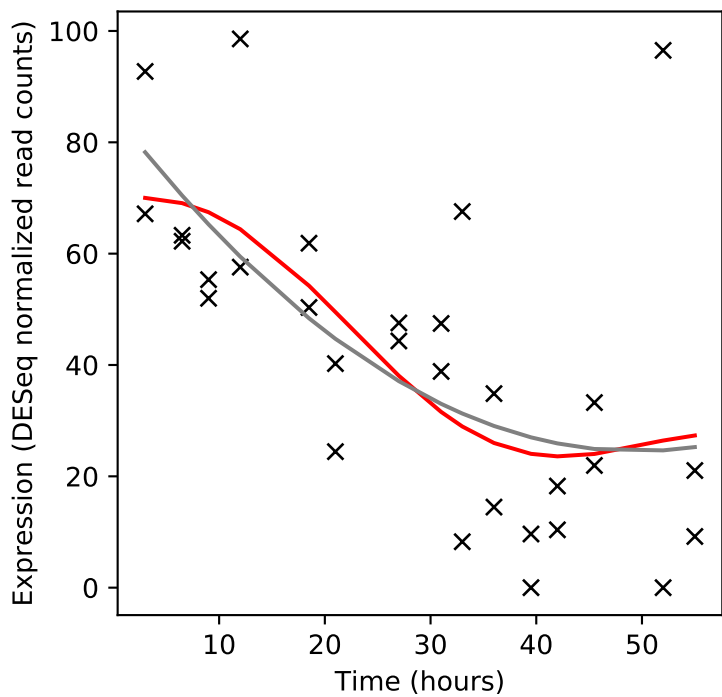

Rv0131c/fadE1

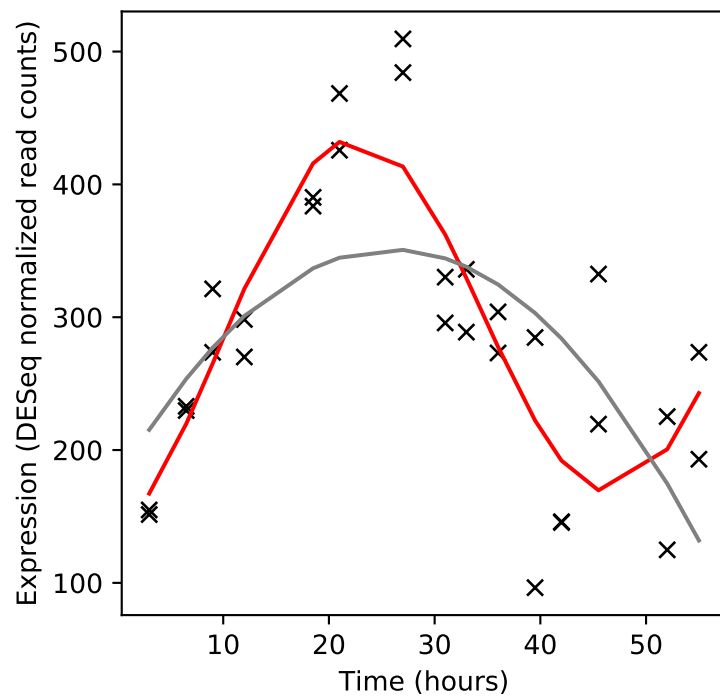

Rv0132c/fgd2

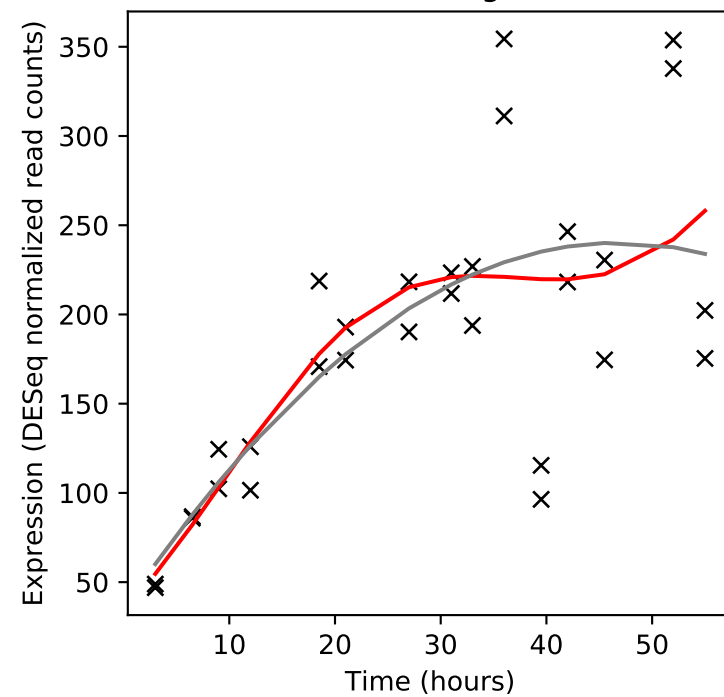



Rv0133/-

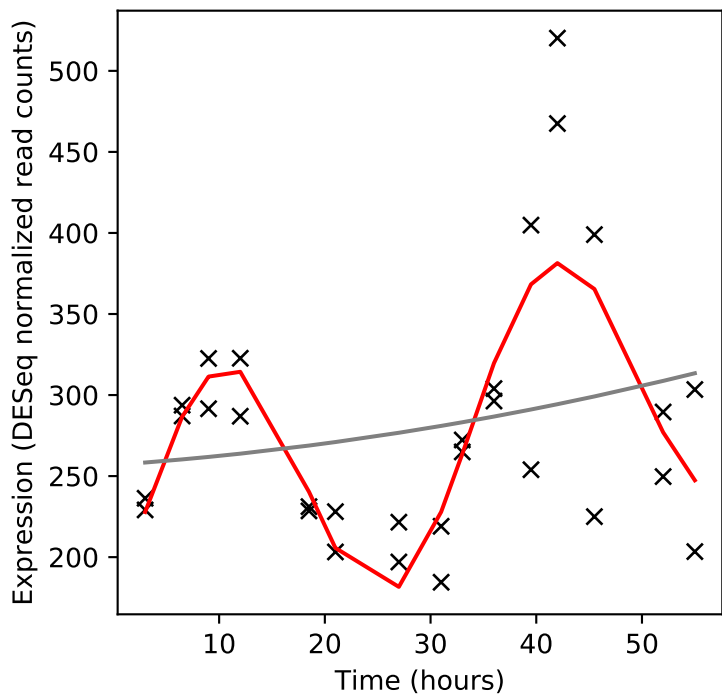

Rv0134/ephF

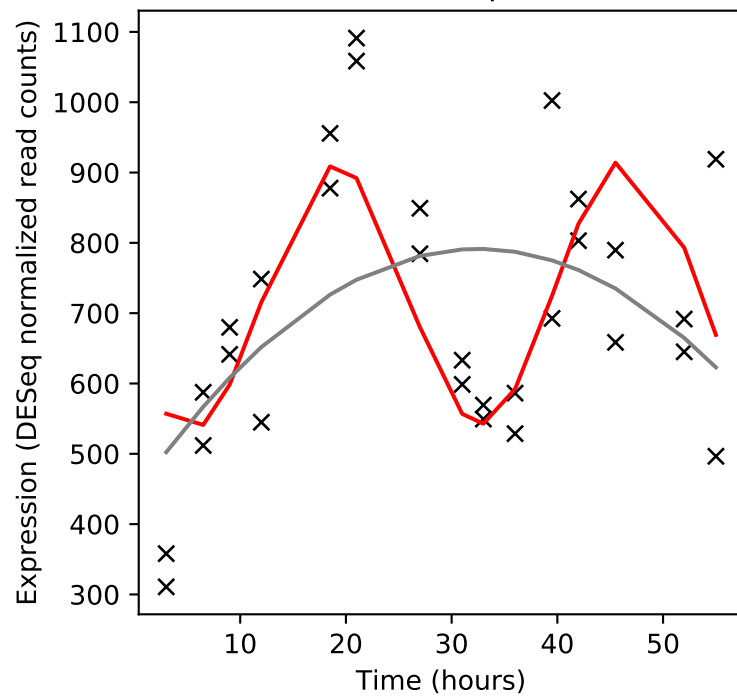

Rv0135c/-

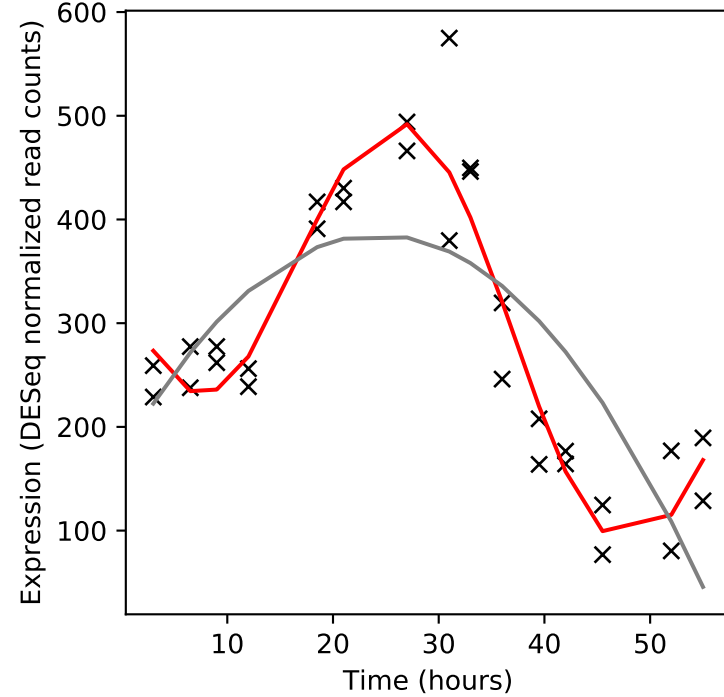

Rv0136/cyp138

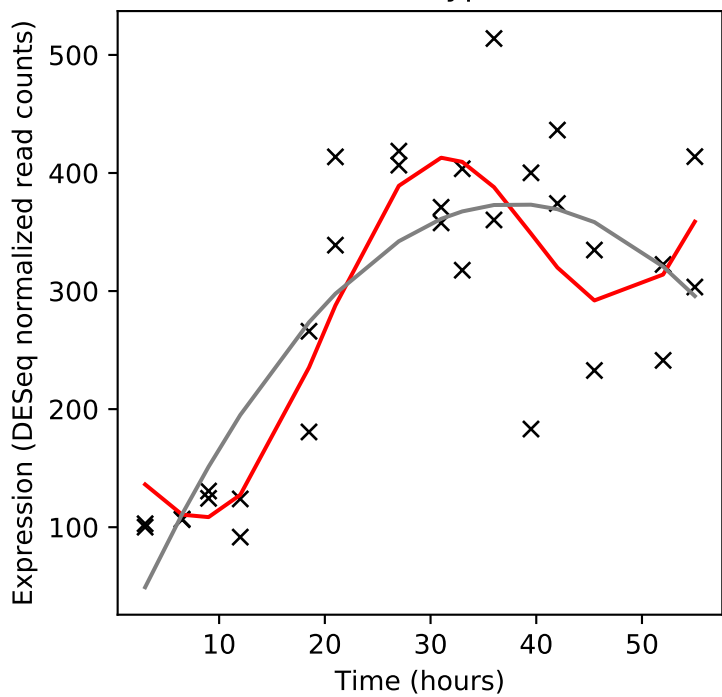

Rv0137c/msrA

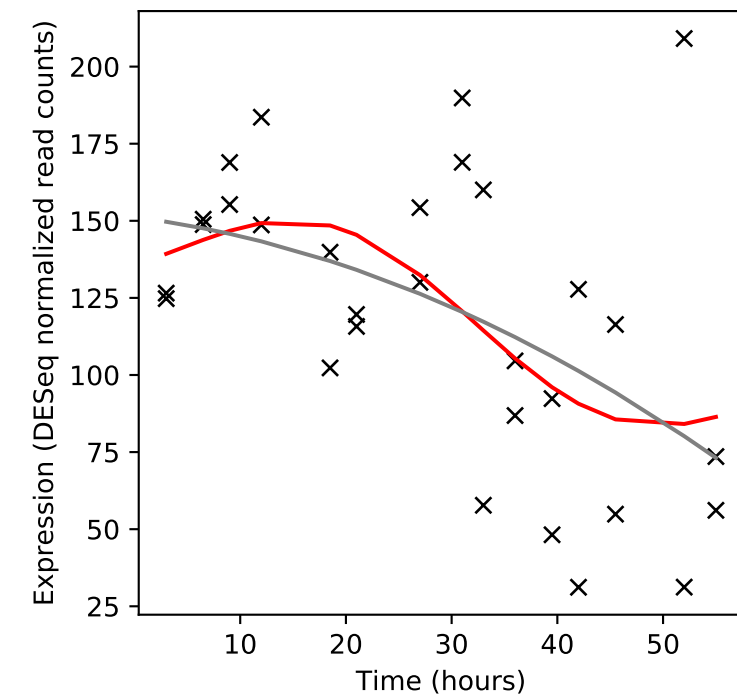

Rv0138/-

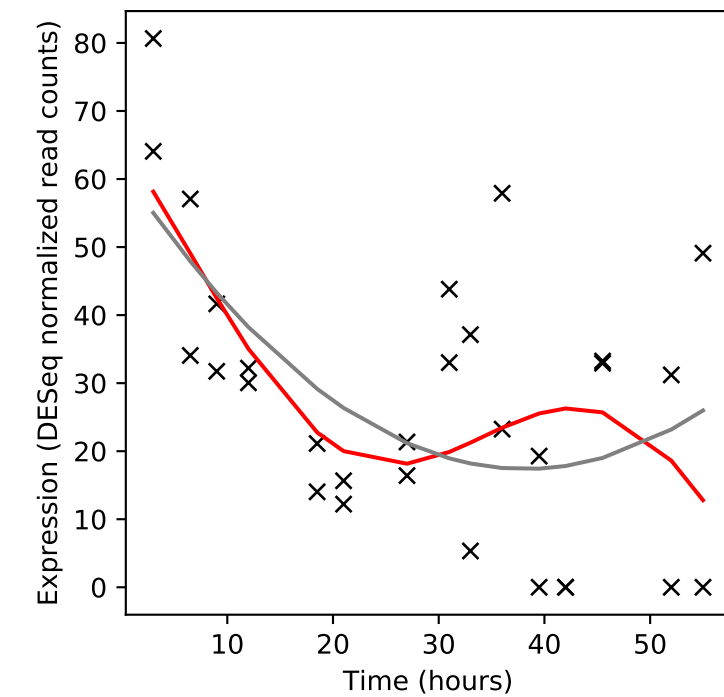

Rv0139/-

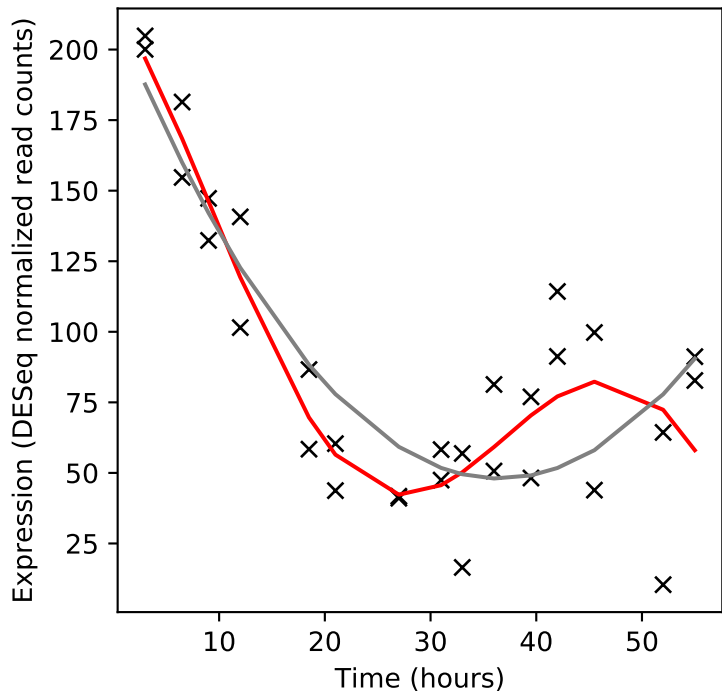

Rv0140/-

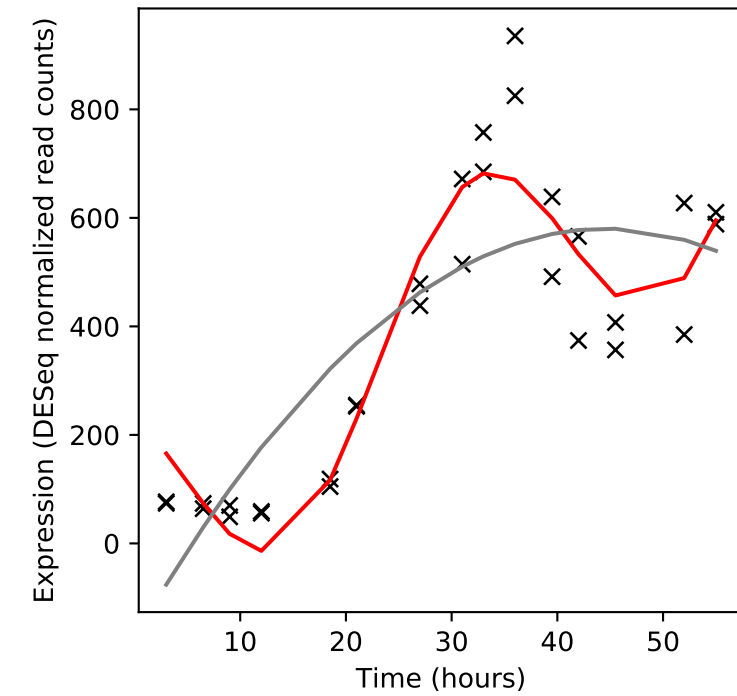

Rv0141c/-

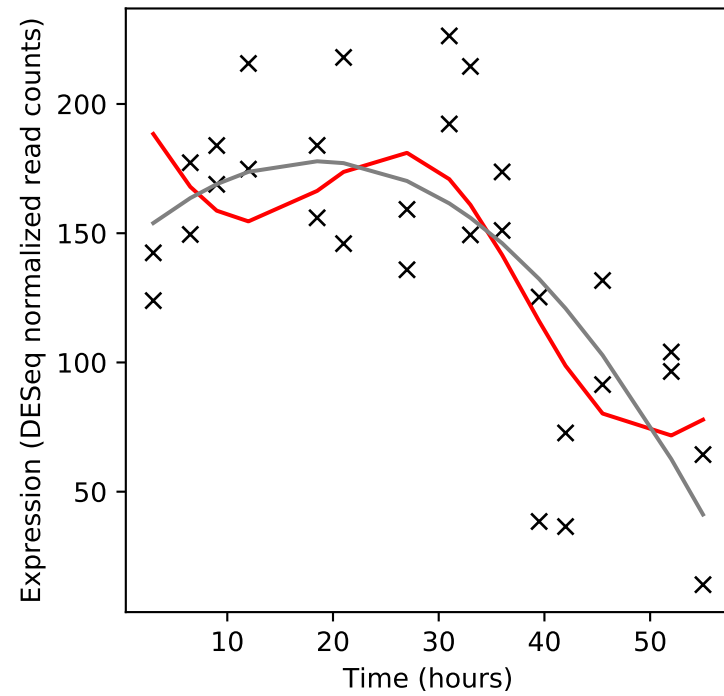

Rv0142/-

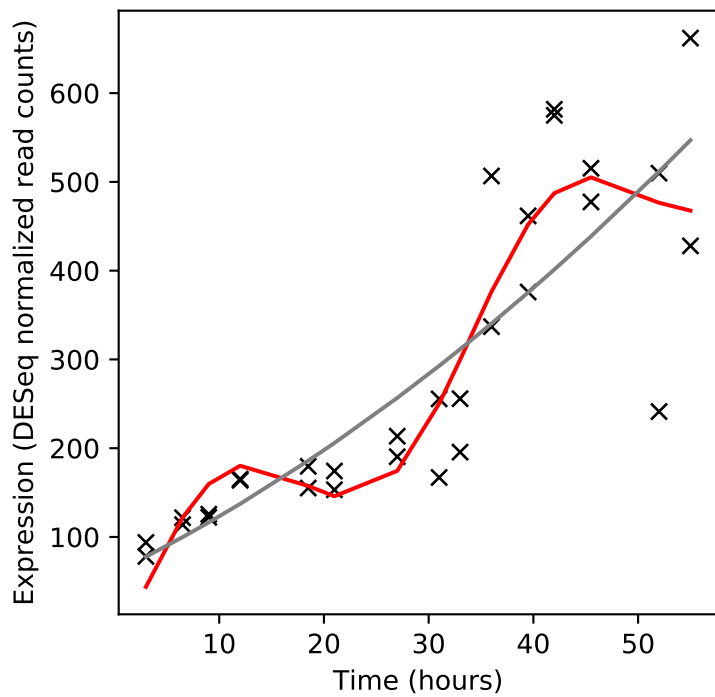

Rv0143c/-

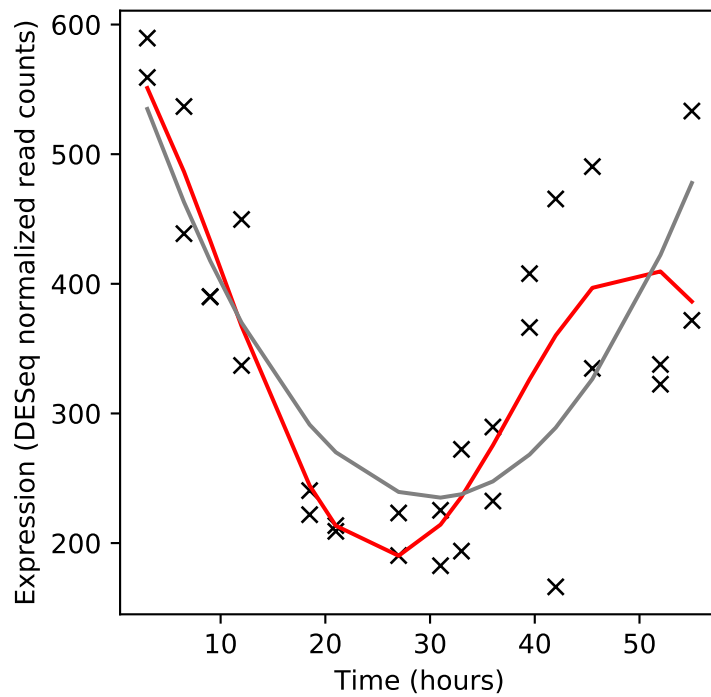

Rv0144/-

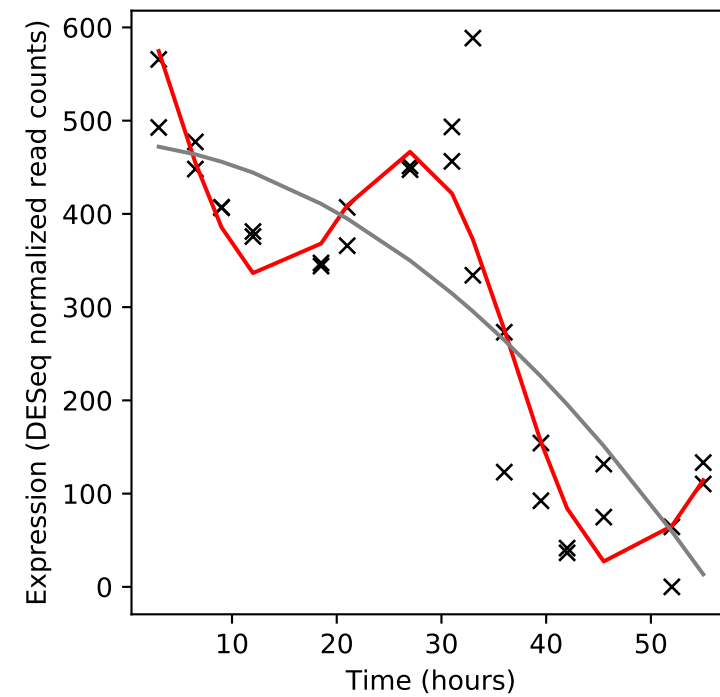

Rv0145/-

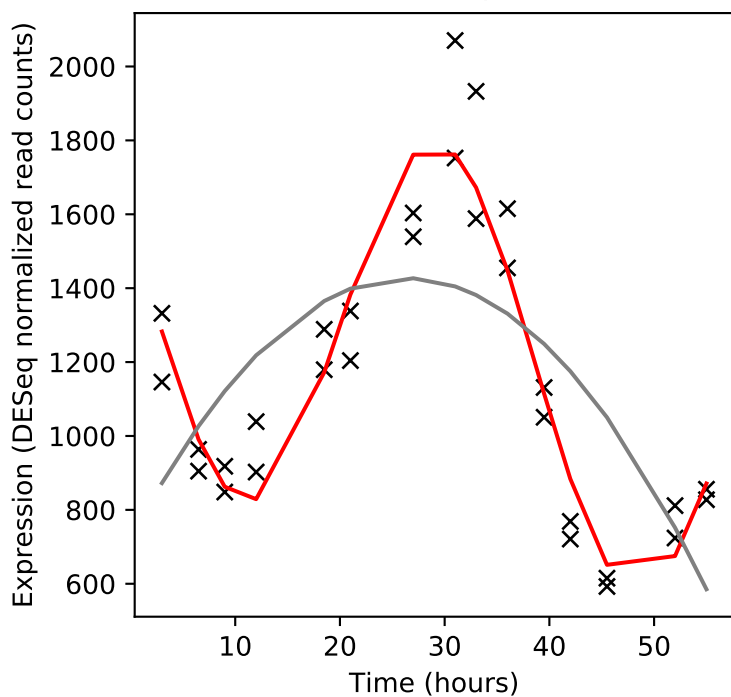

Rv0146/-

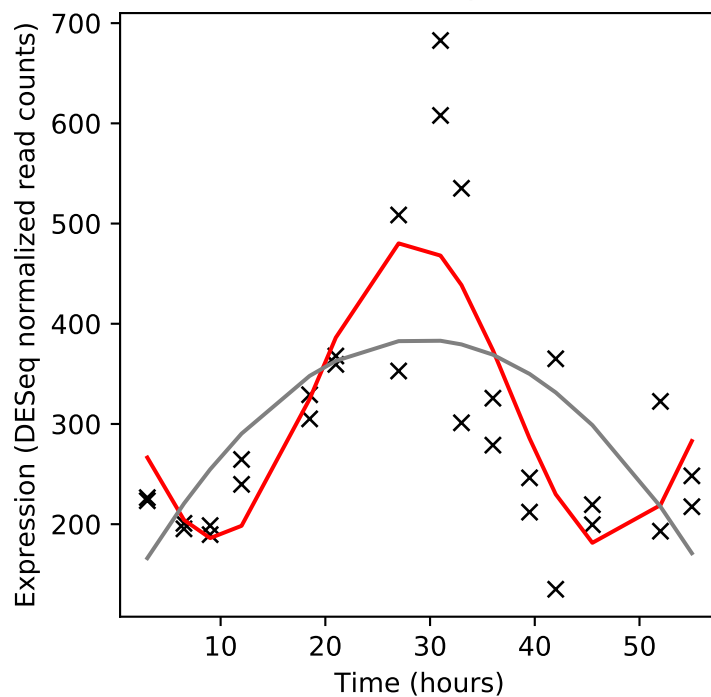

Rv0147/-

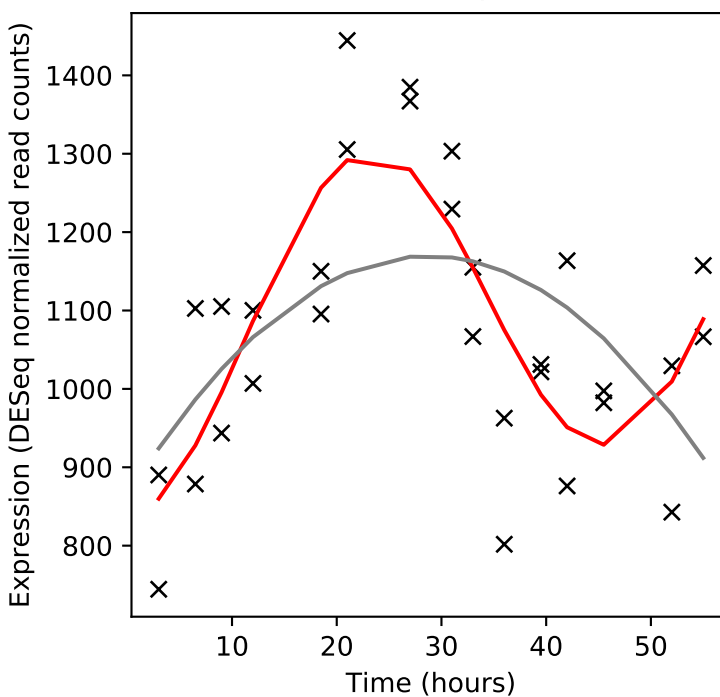

Rv0148/-

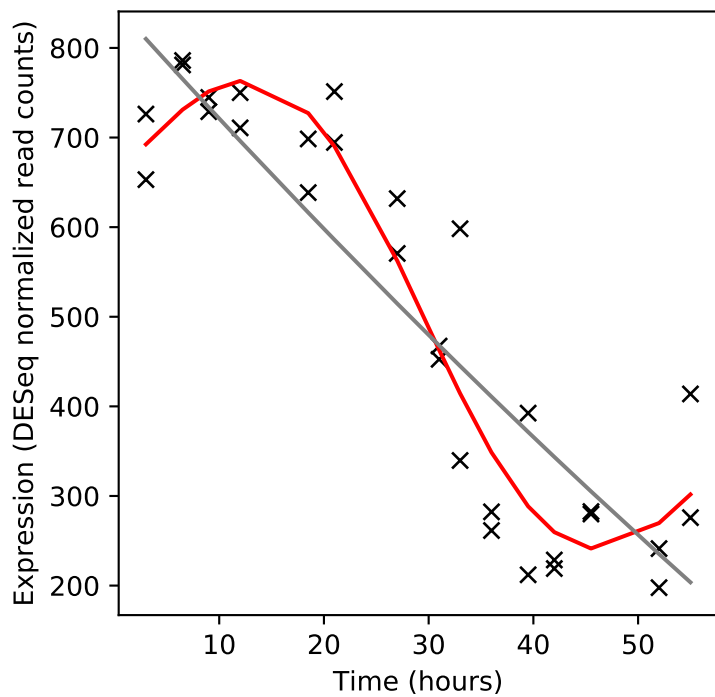

Rv0149/-

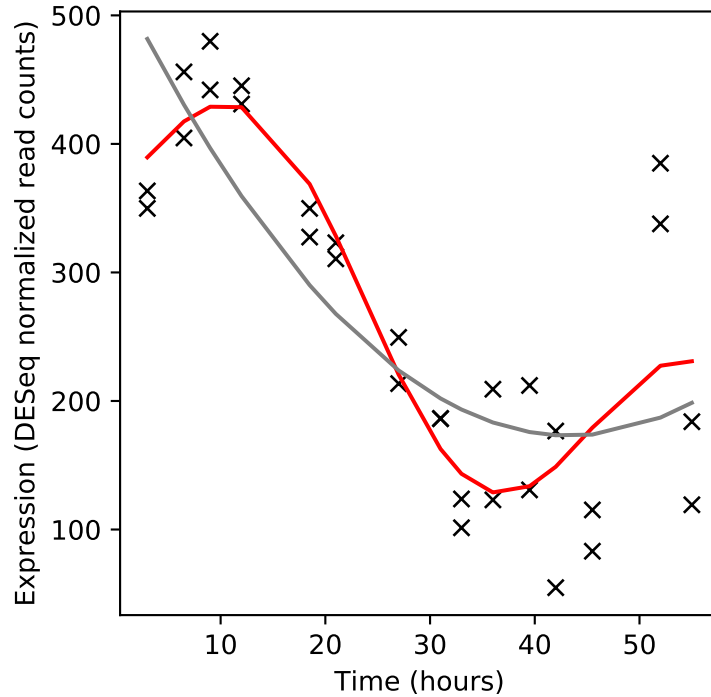

Rv0150c/-

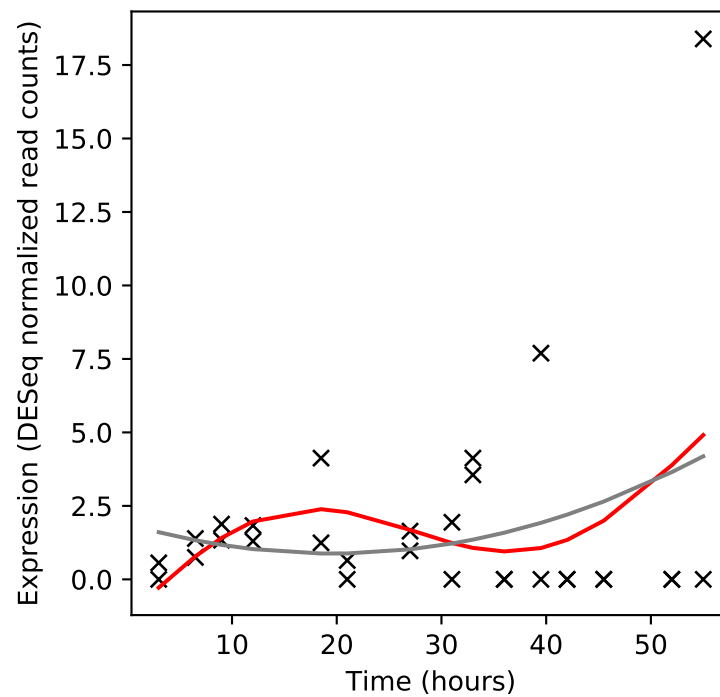

Rv0151c/PE1

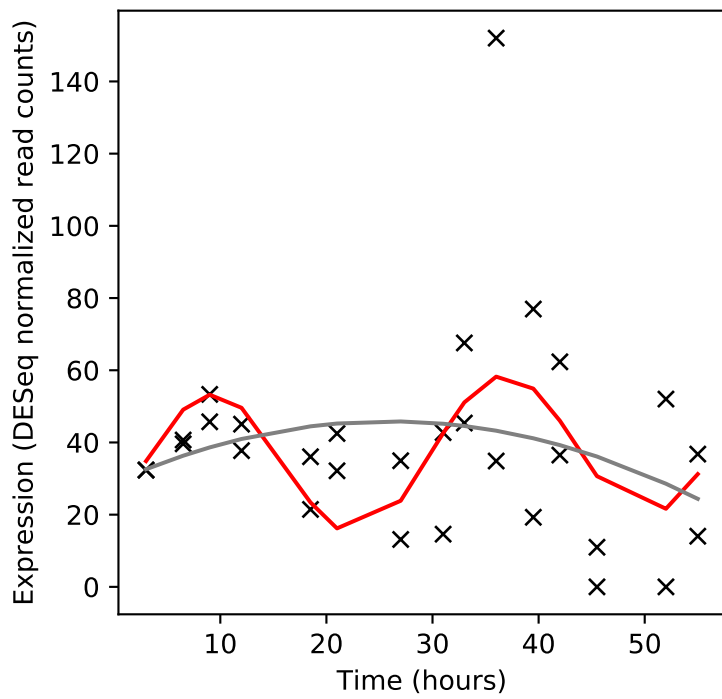

Rv0152c/PE2

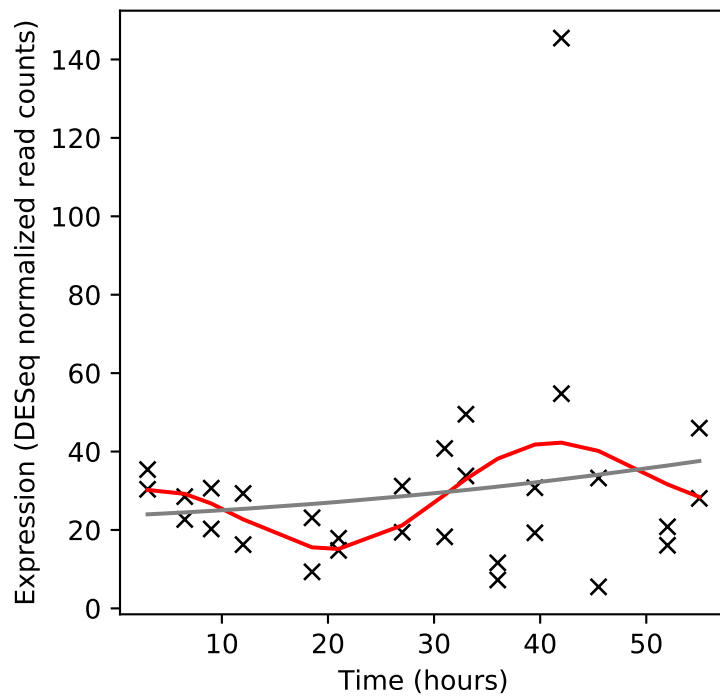

Rv0153c/ptbB

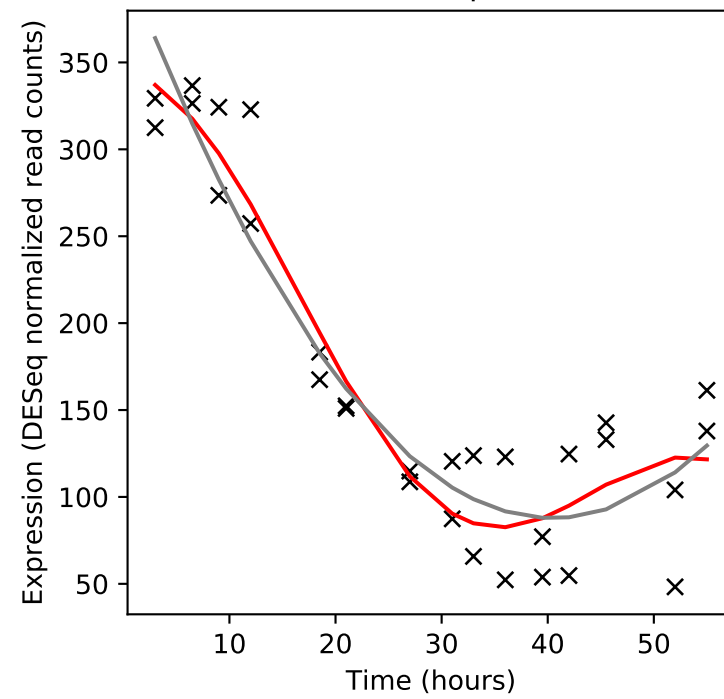

Rv0154c/fadE2

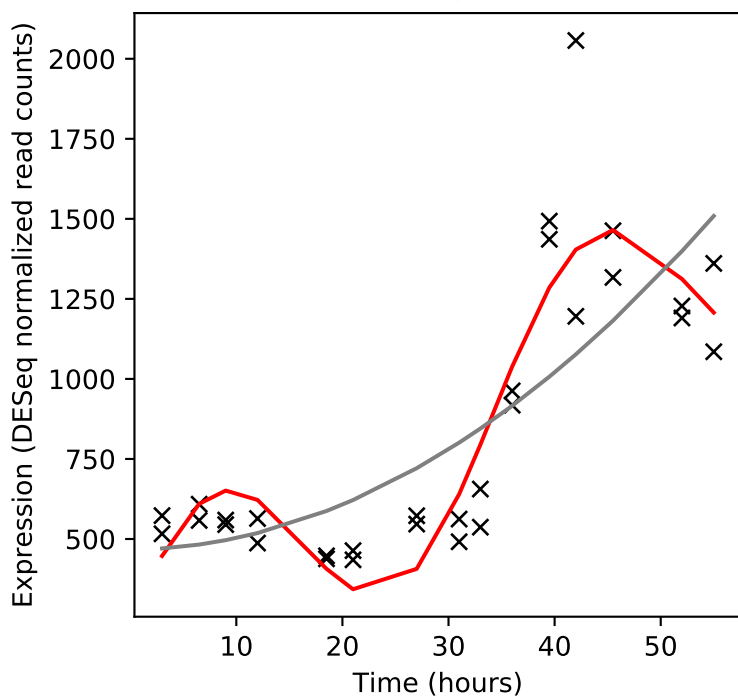

Rv0155/pntAa

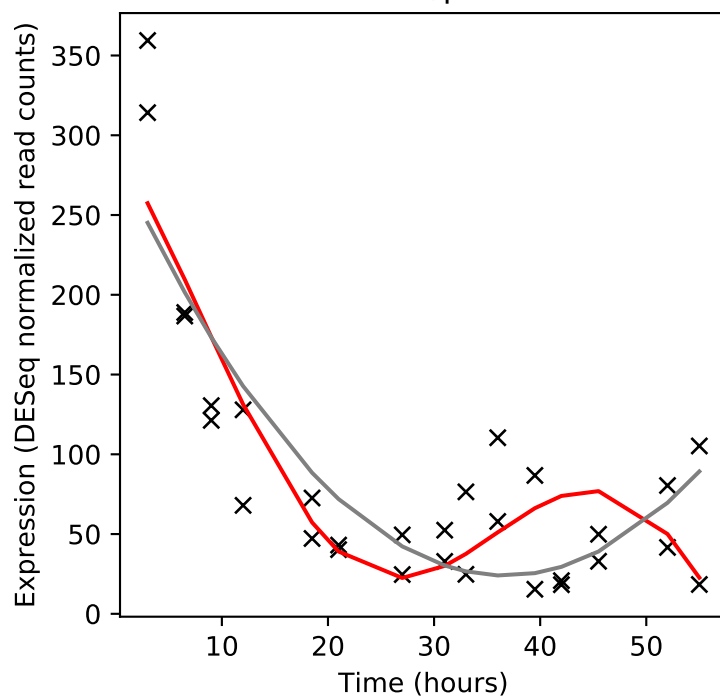

Rv0156/pntAb

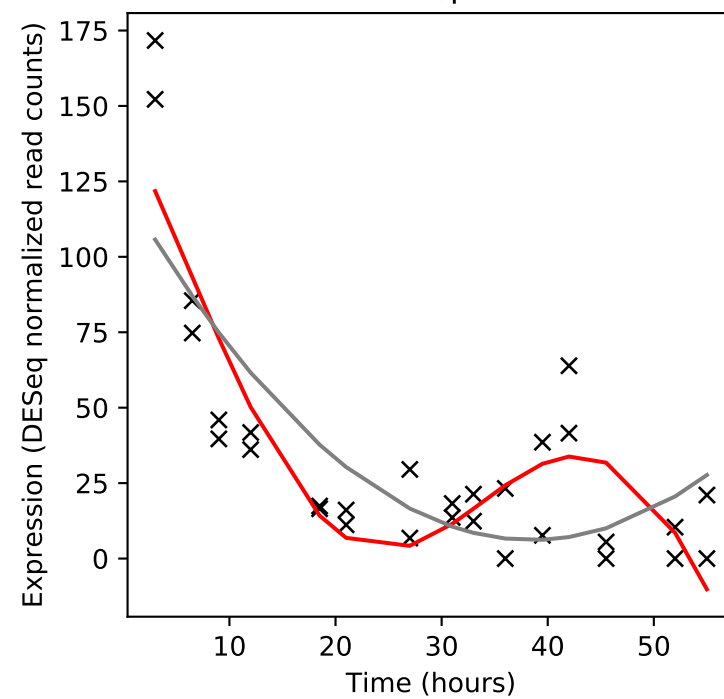

Rv0157/pntB

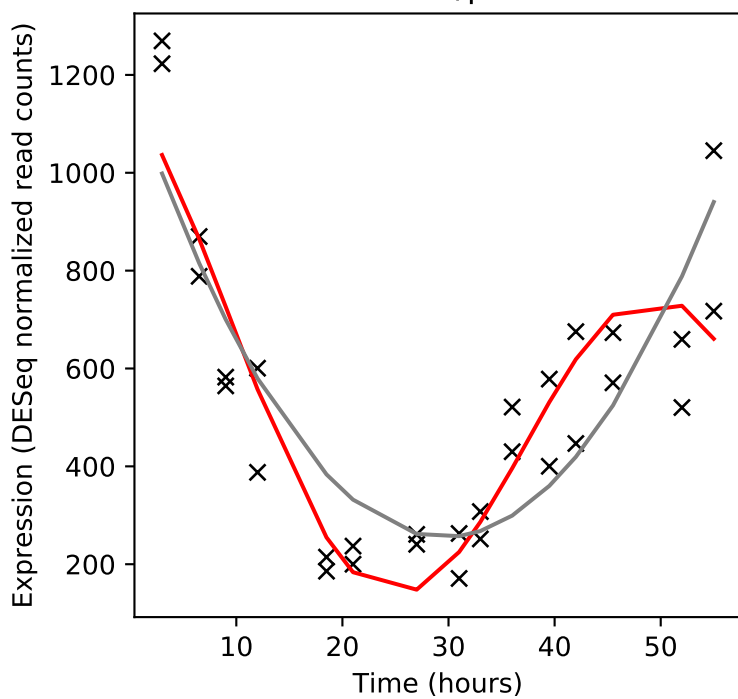

Rv0157A/-

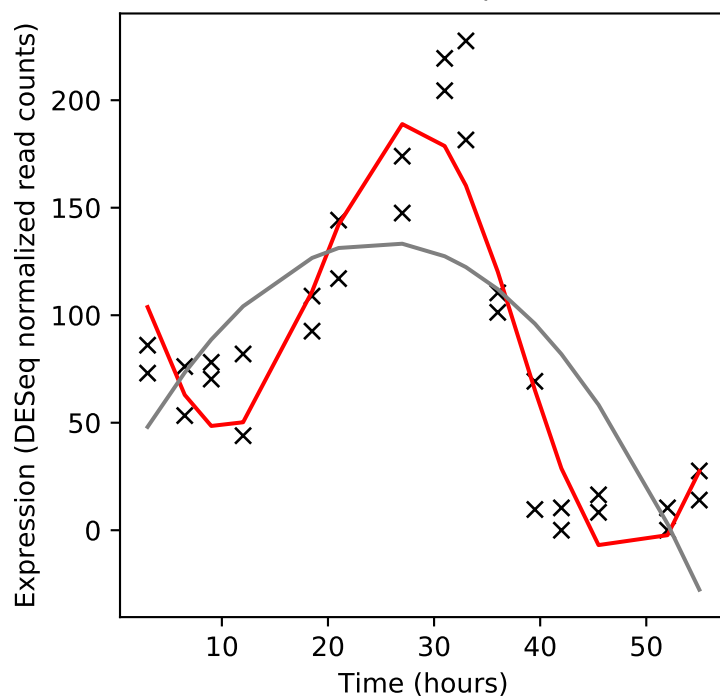

Rv0158/-

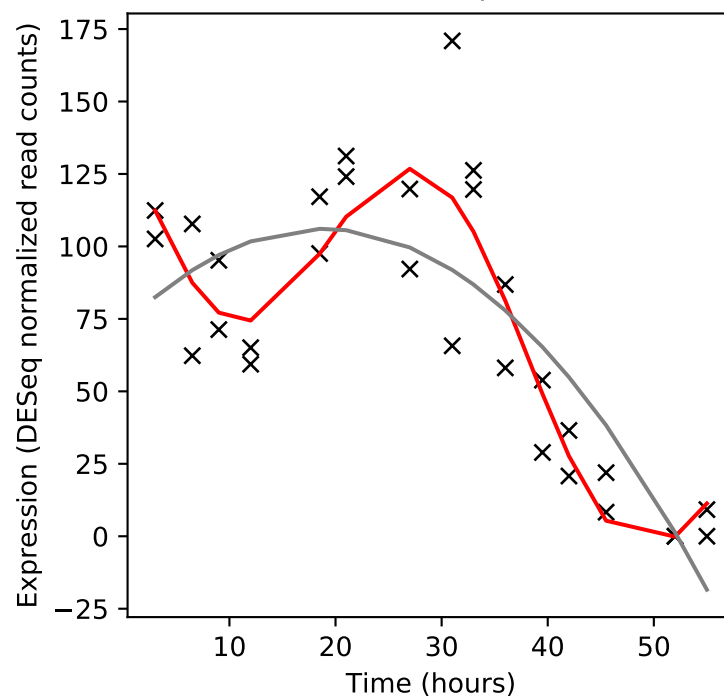

Rv0159c/PE3

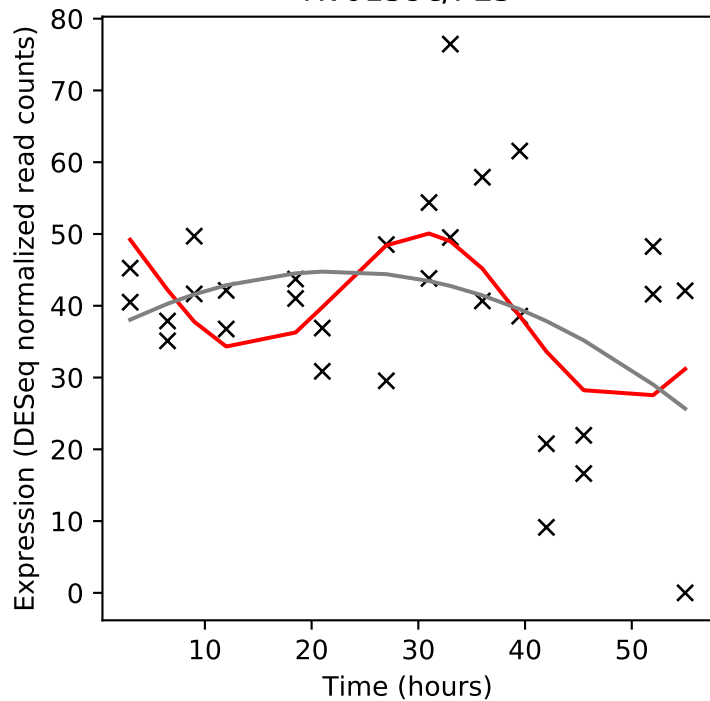

Rv0160c/PE4

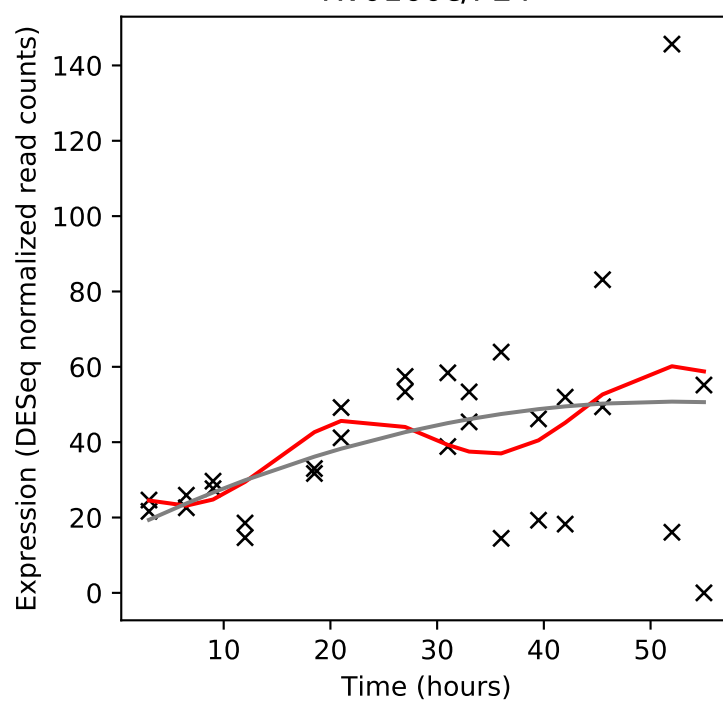

Rv0161/-

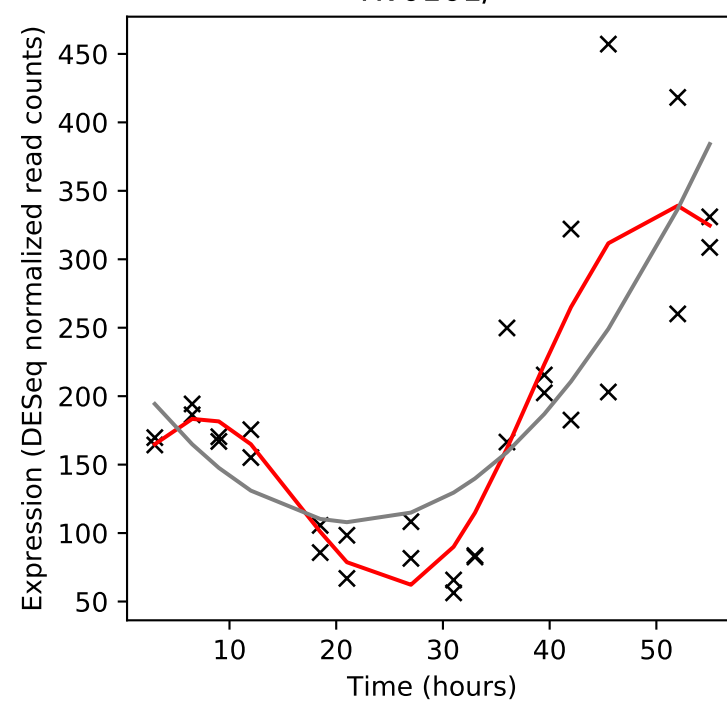

Rv0162c/adhE1

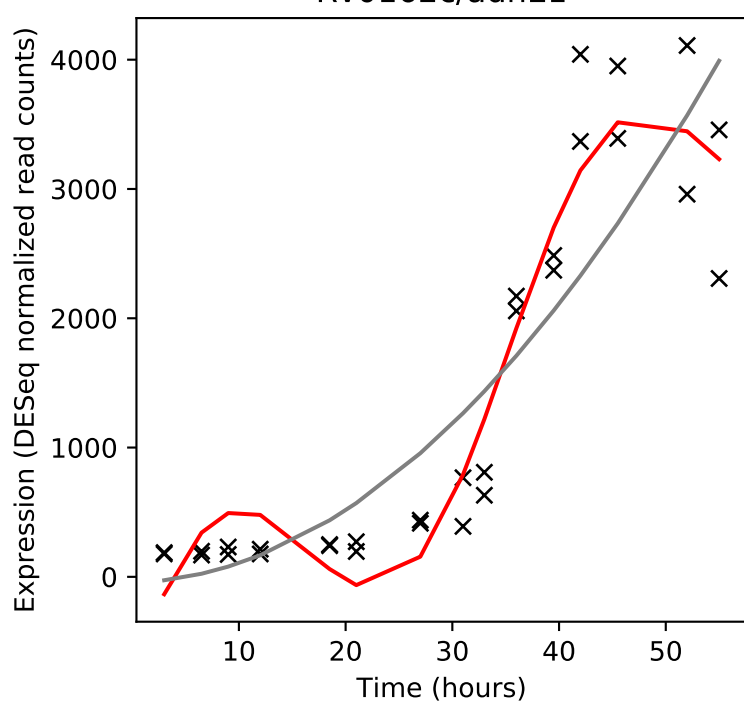

Rv0163/-

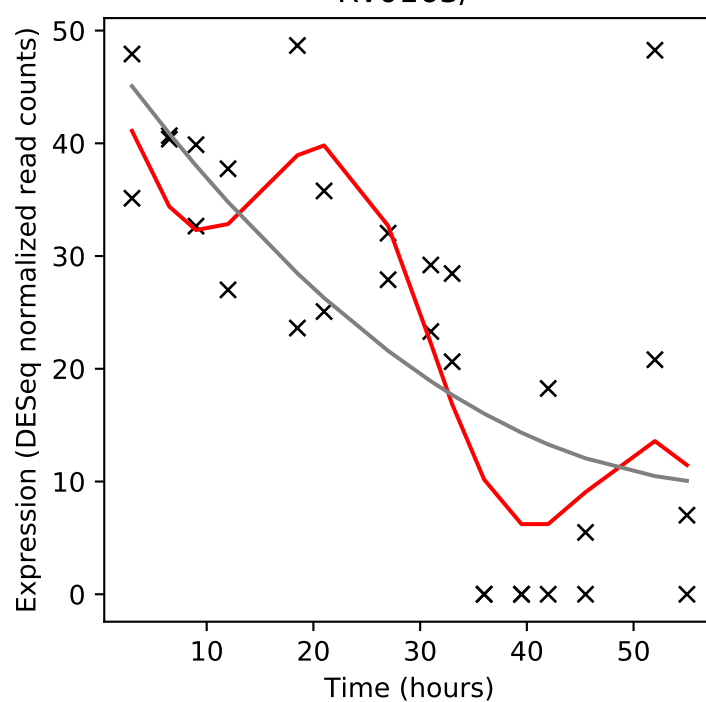

Rv0164/TB18.5

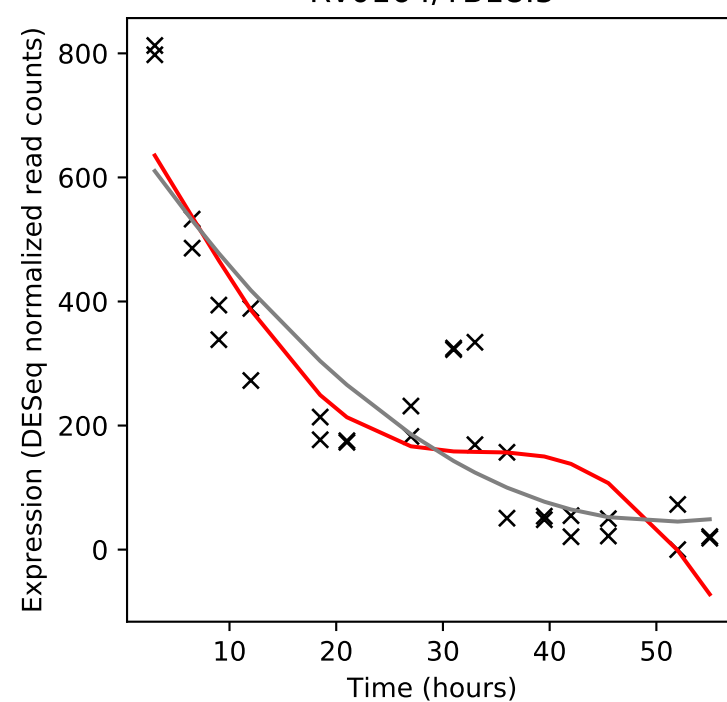

Rv0165c/mce1R

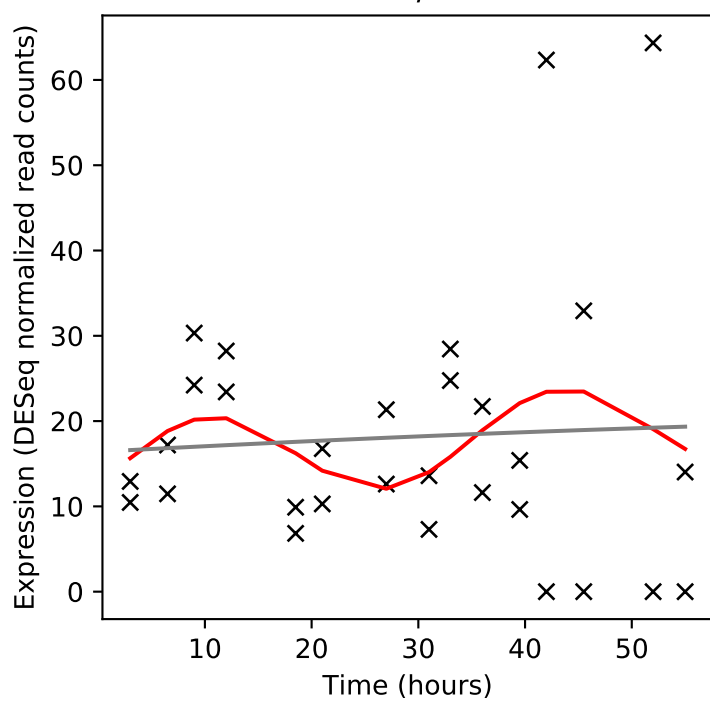

Rv0166/fadD5

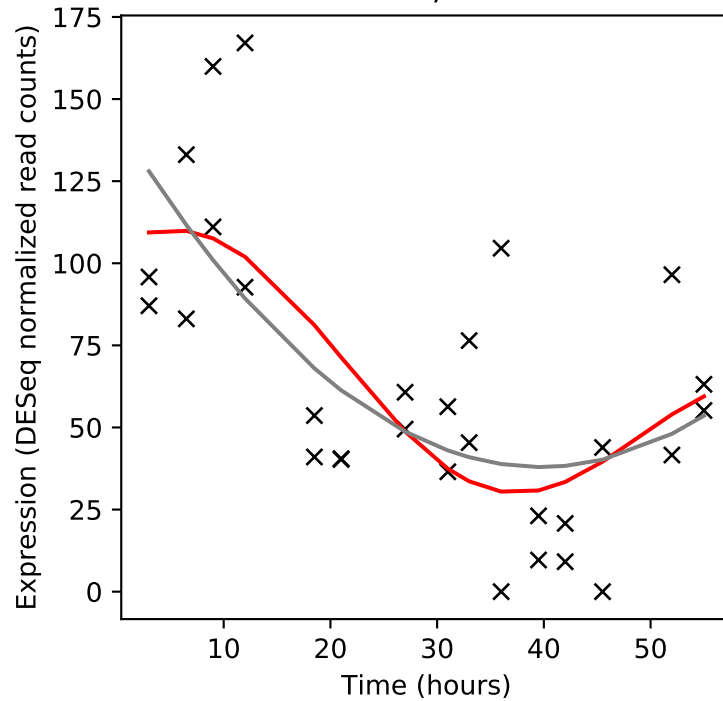

Rv0167/yrbE1A

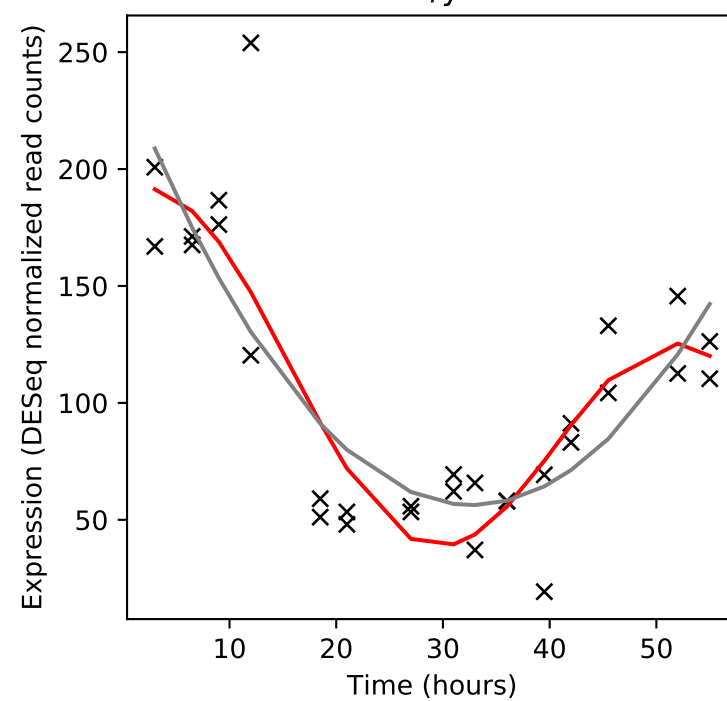

Rv0168/yrbE1B

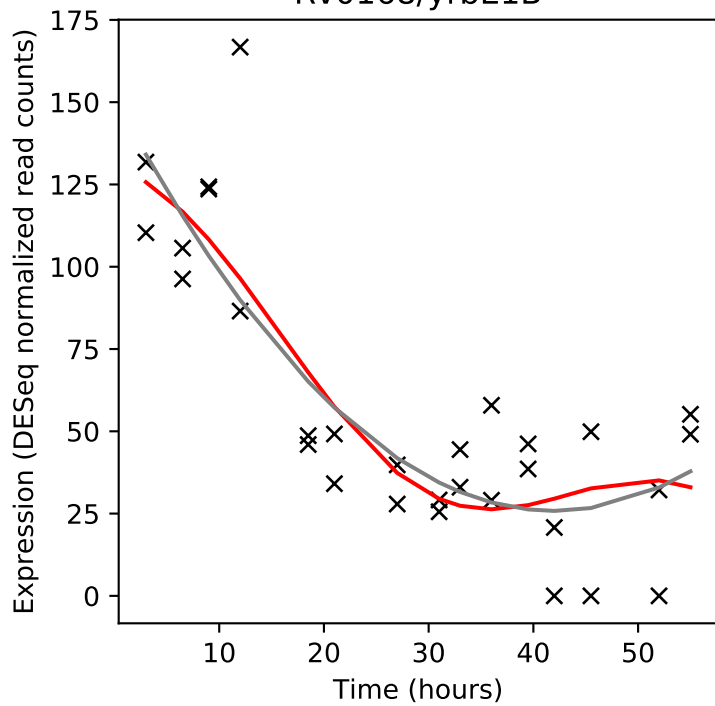

Rv0169/mce1A

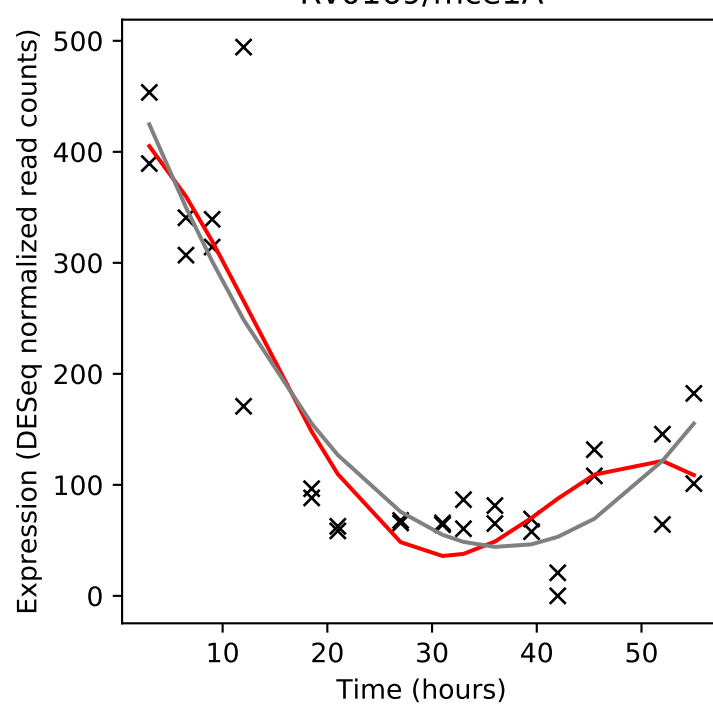

Rv0170/mce1B

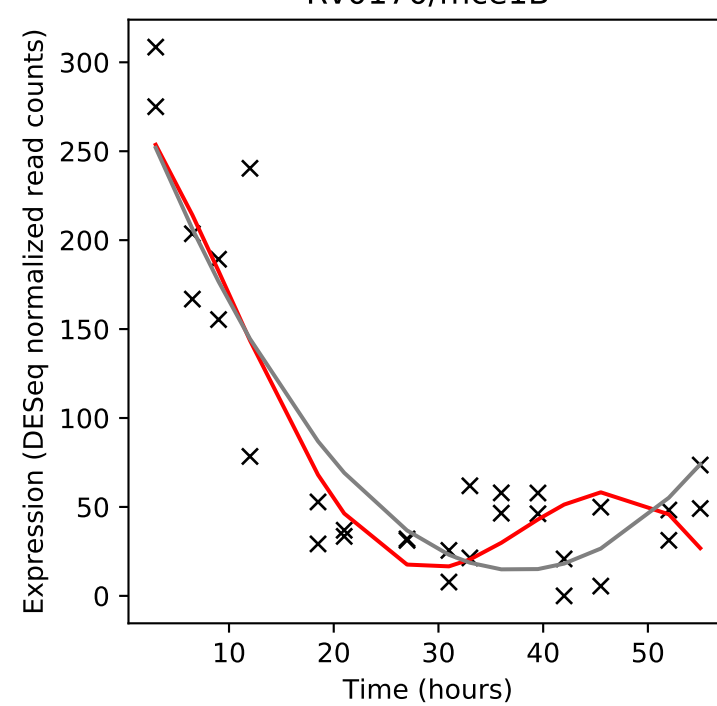

Rv0171/mce1C

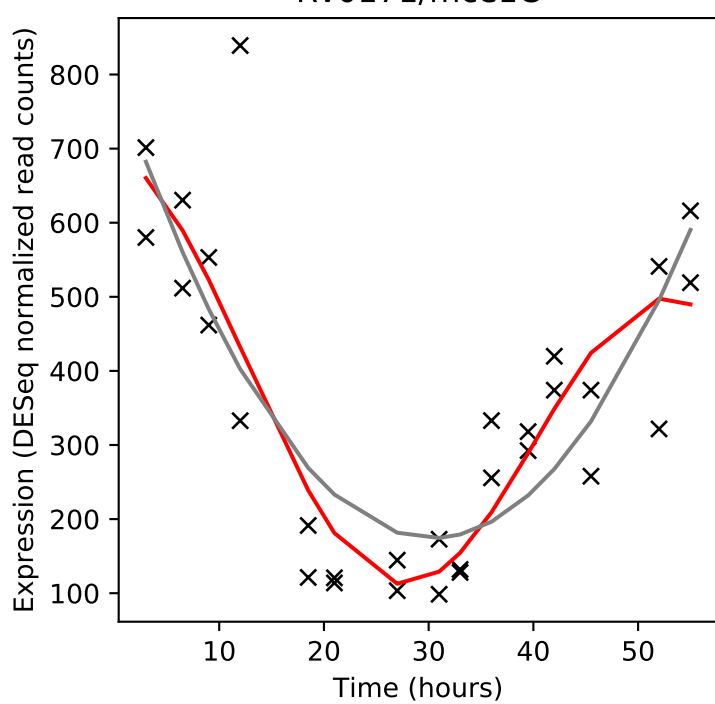

Rv0172/mce1D

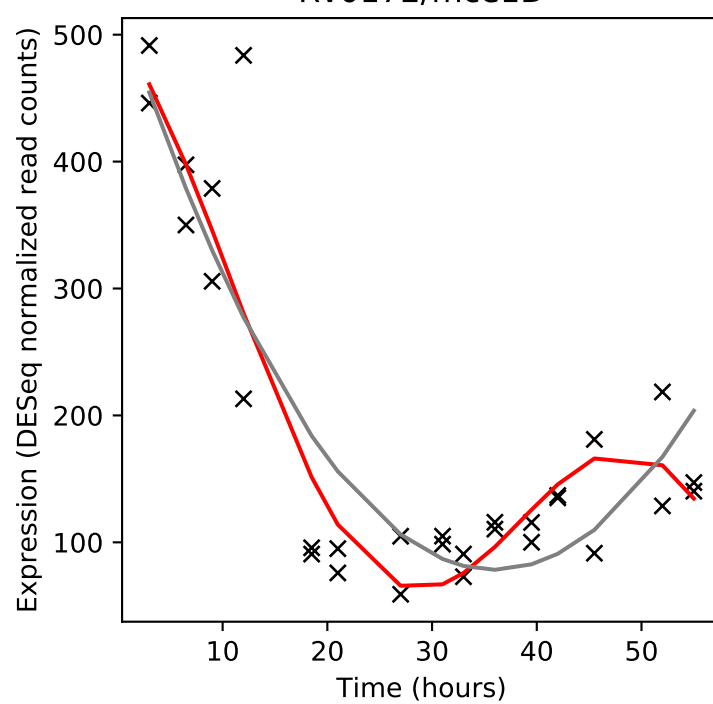

Rv0173/lprK

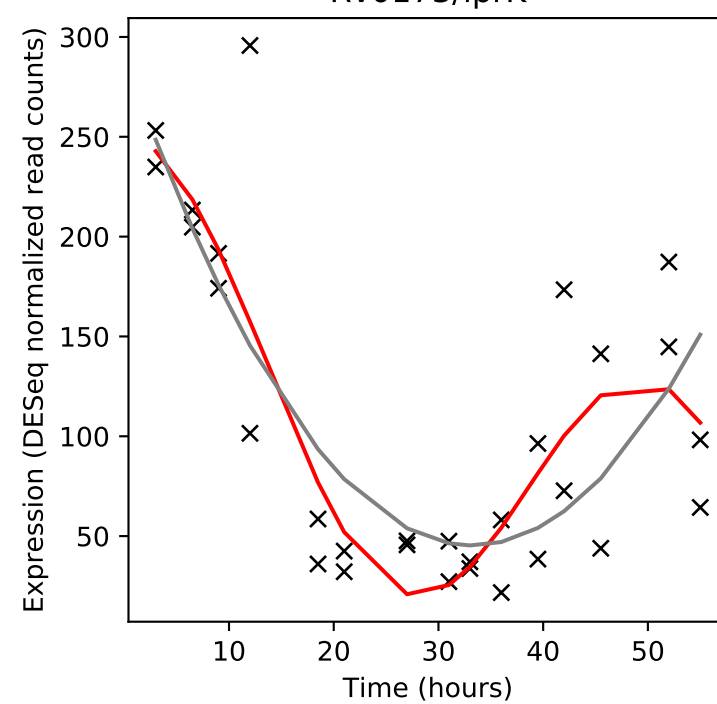

Rv0174/mce1F

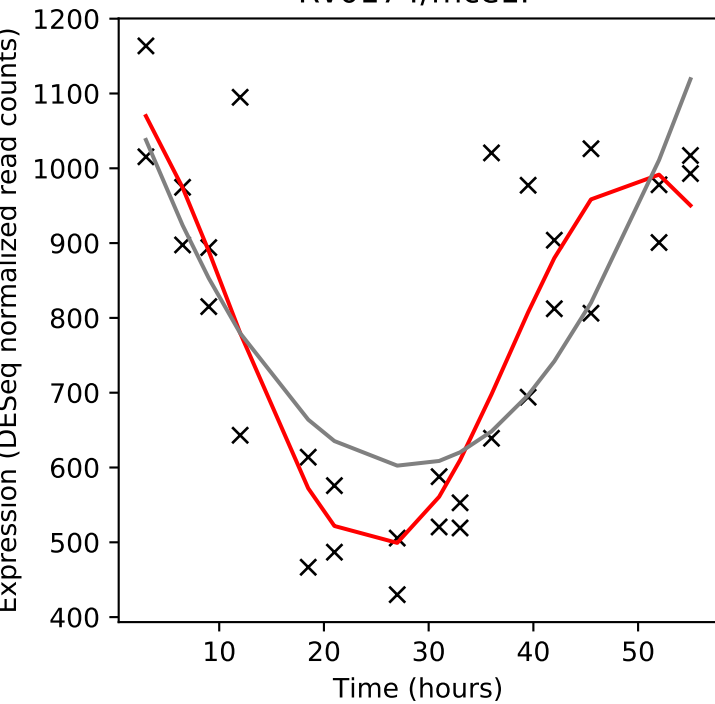

Rv0175/-

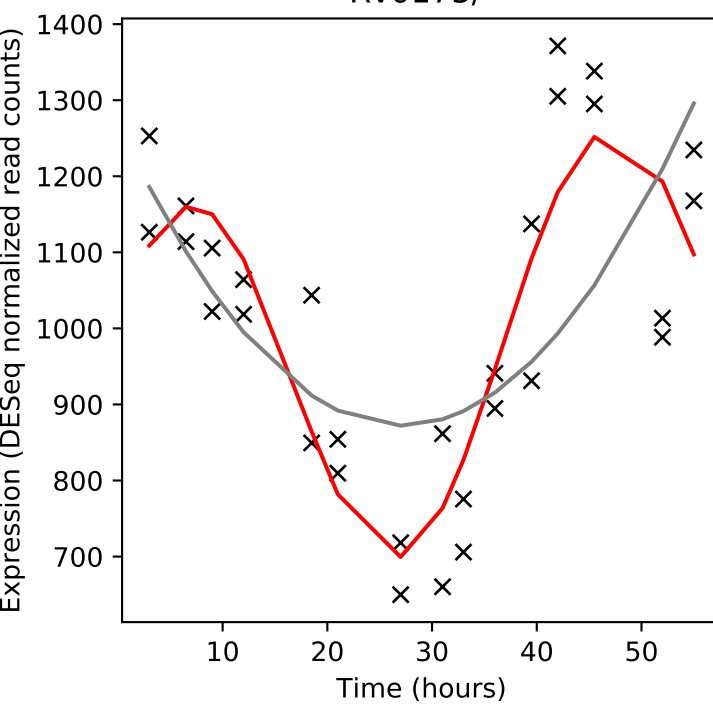

Rv0176/-

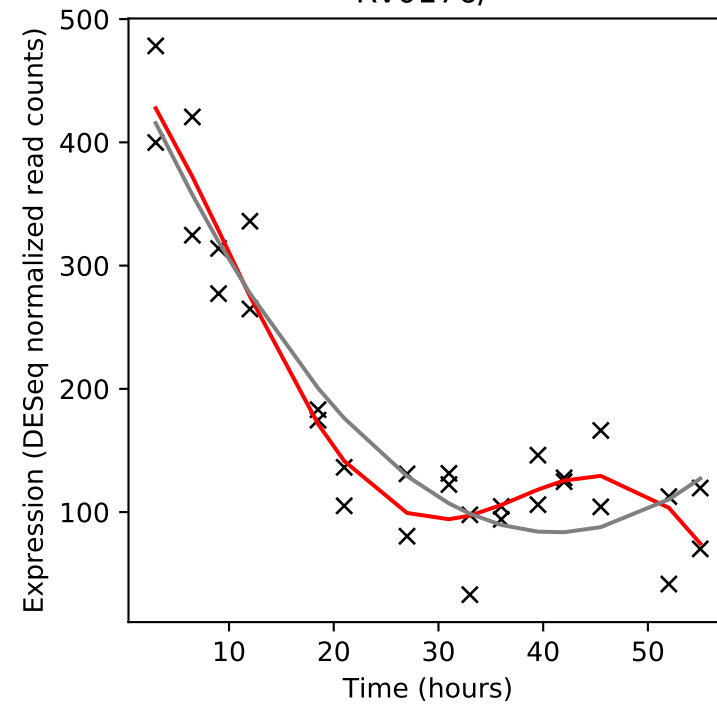

Rv0177/-

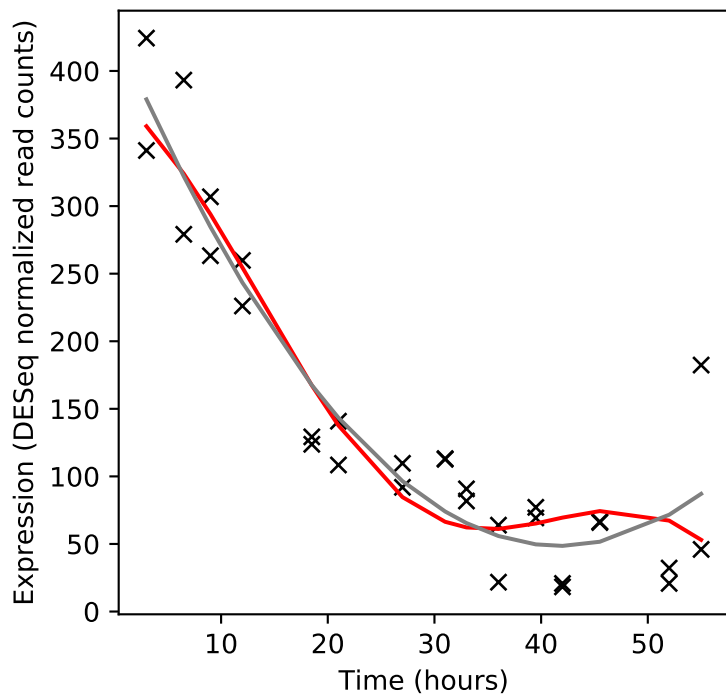

Rv0178/-

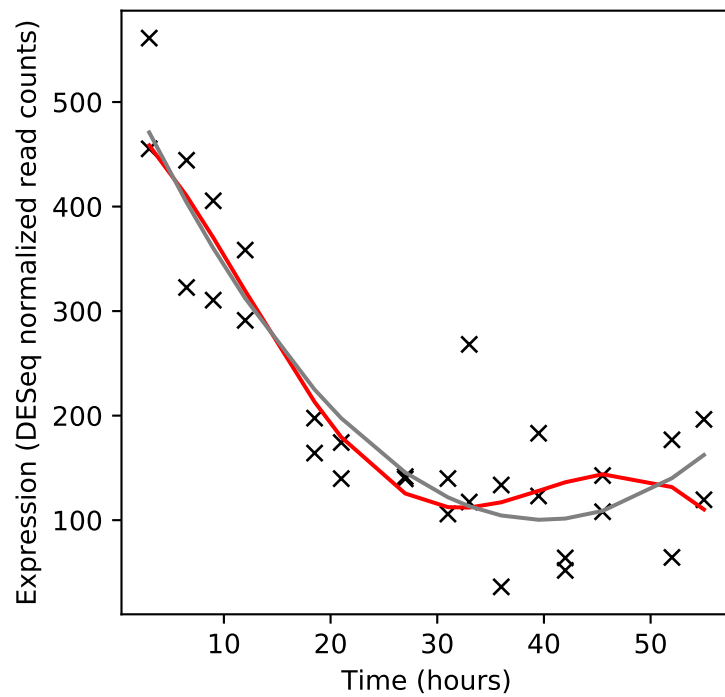

Rv0179c/lprO

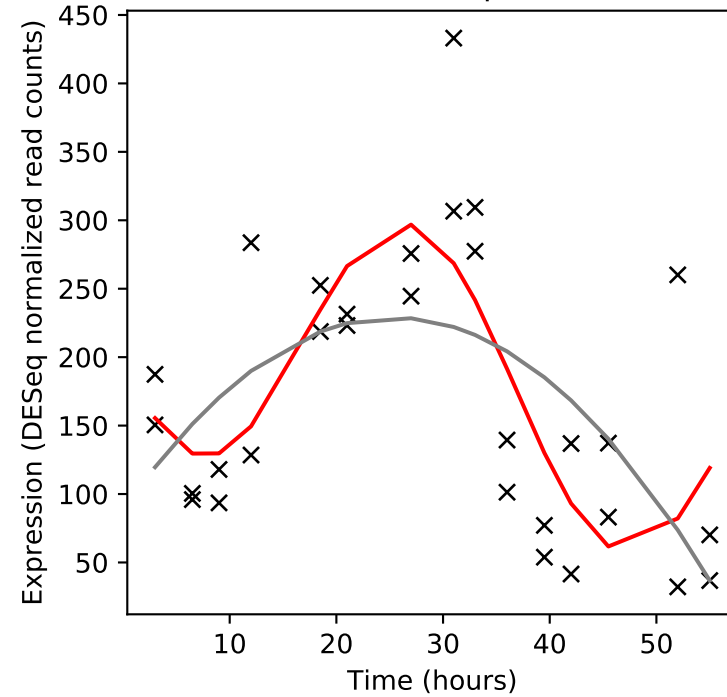

Rv0180c/-

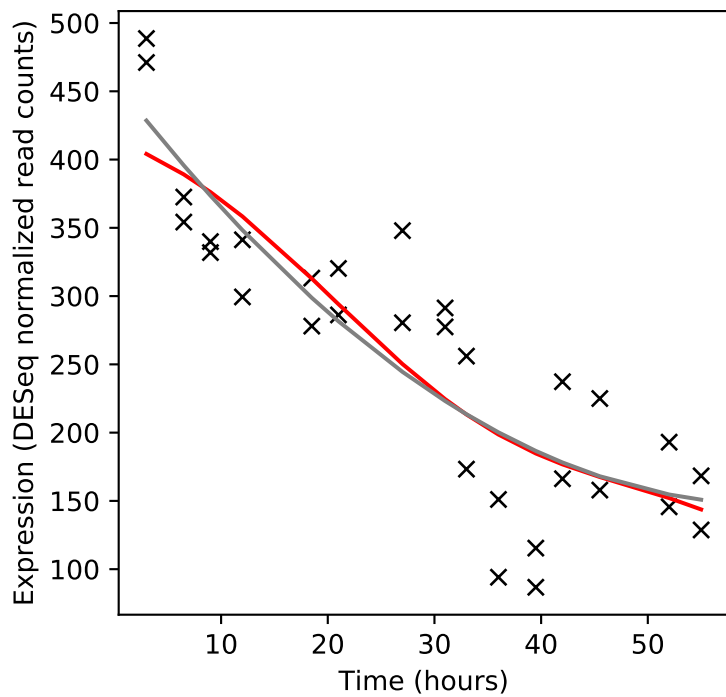

Rv0181c/-

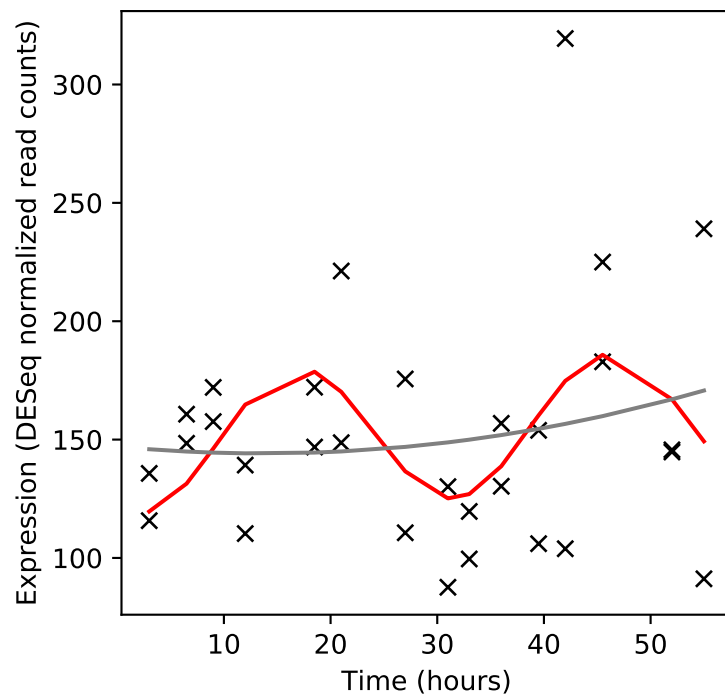

Rv0182c/sigG

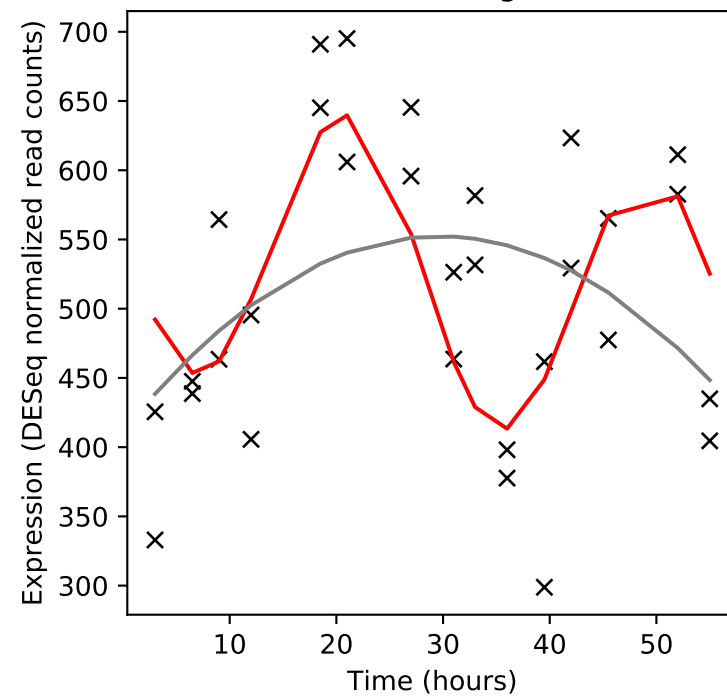

Rv0183/-

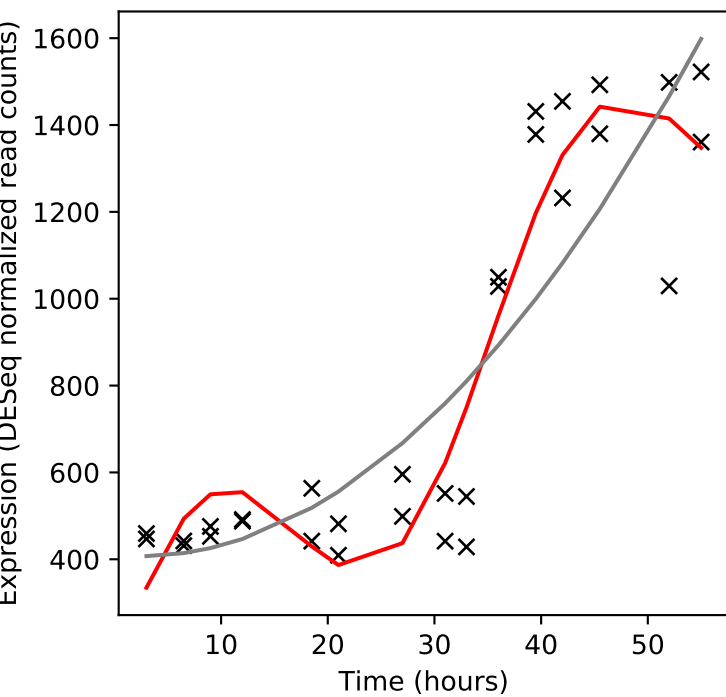

Rv0184/-

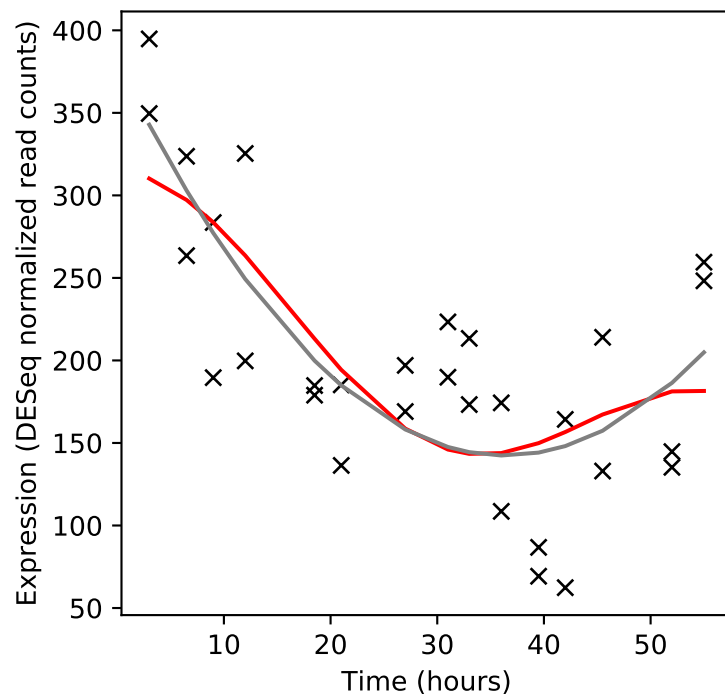

Rv0185/-

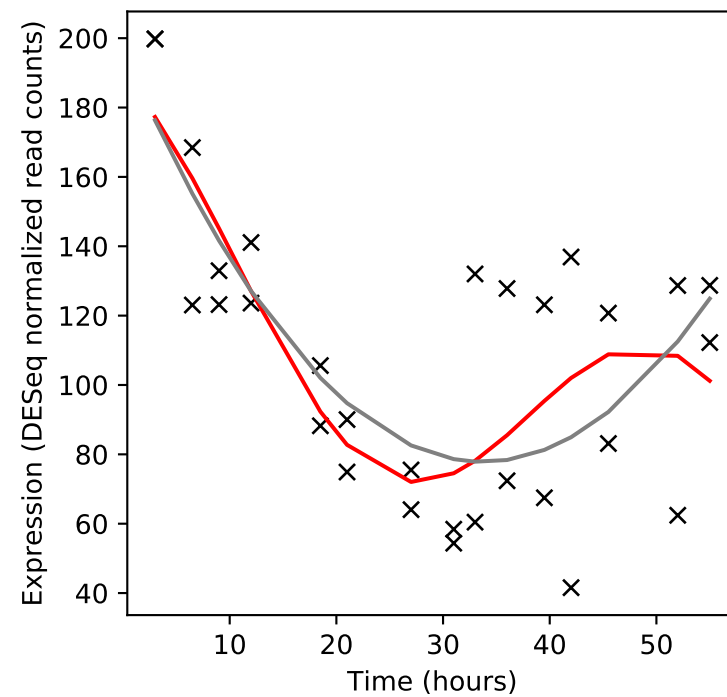

Rv0186/bgIS

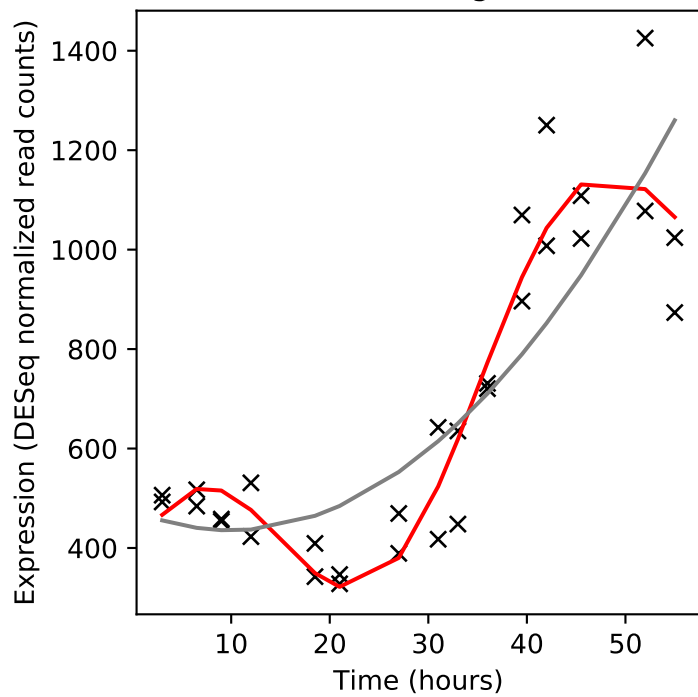

Rv0186A/mymT

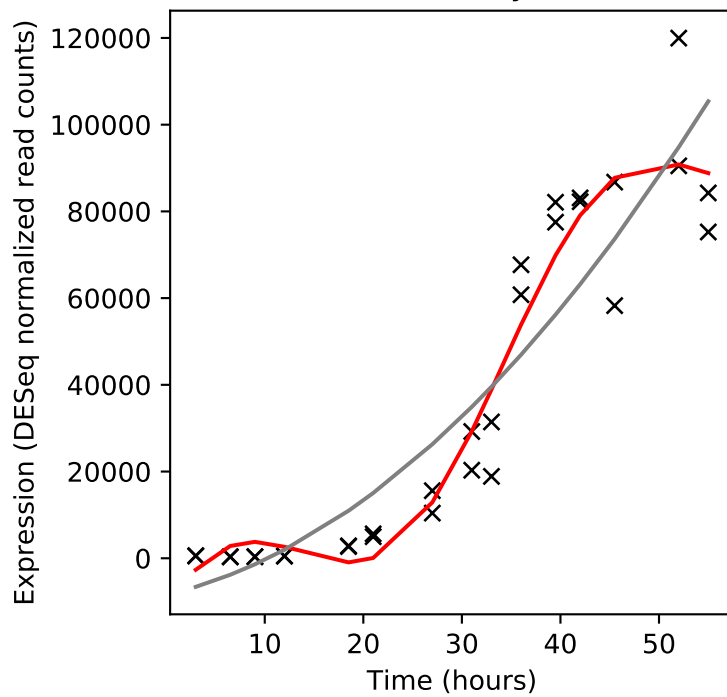

Rv0187/-

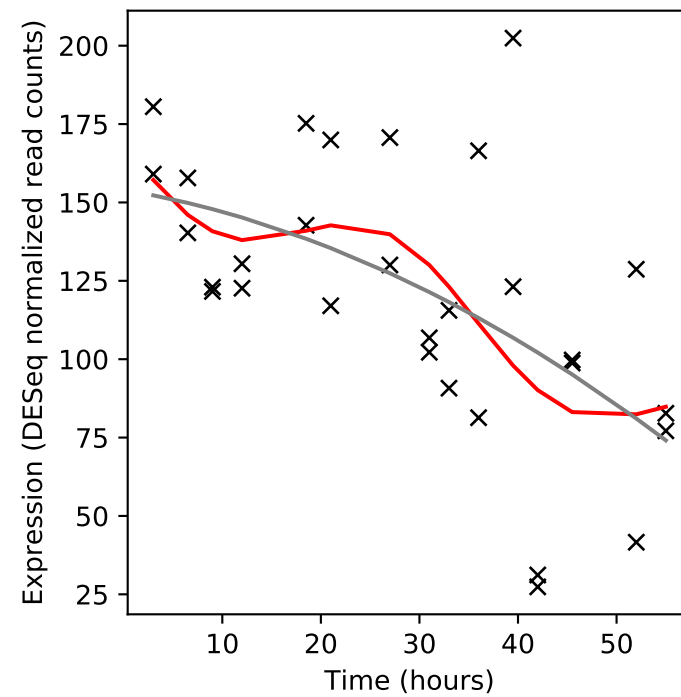

Rv0188/-

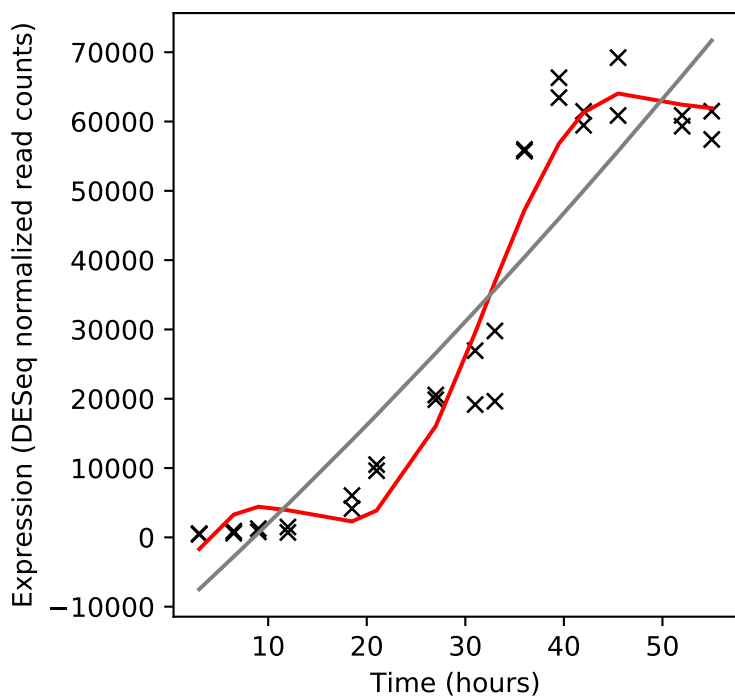

Rv0189c/ilvD

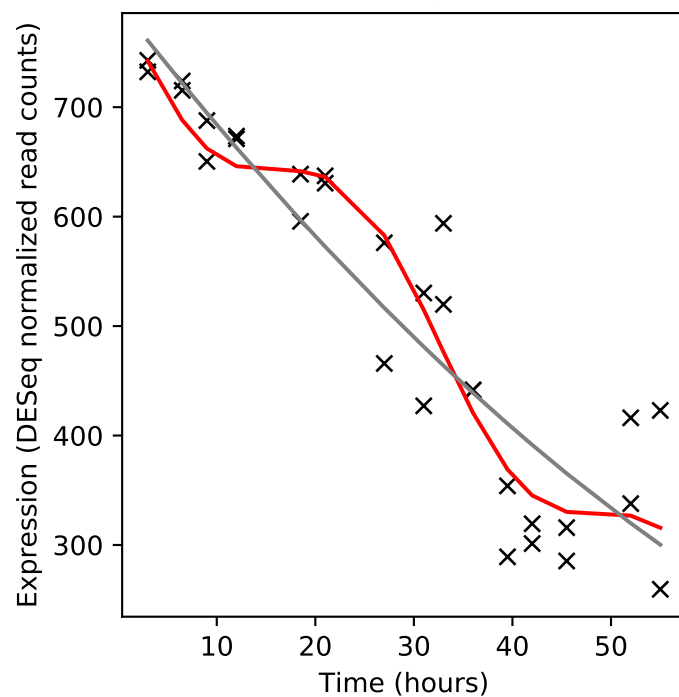

Rv0190/-

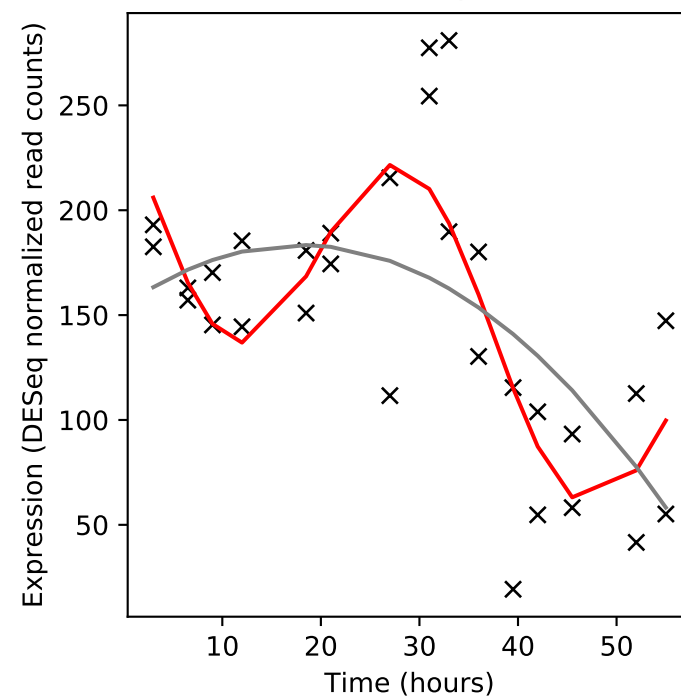

Rv0191/-

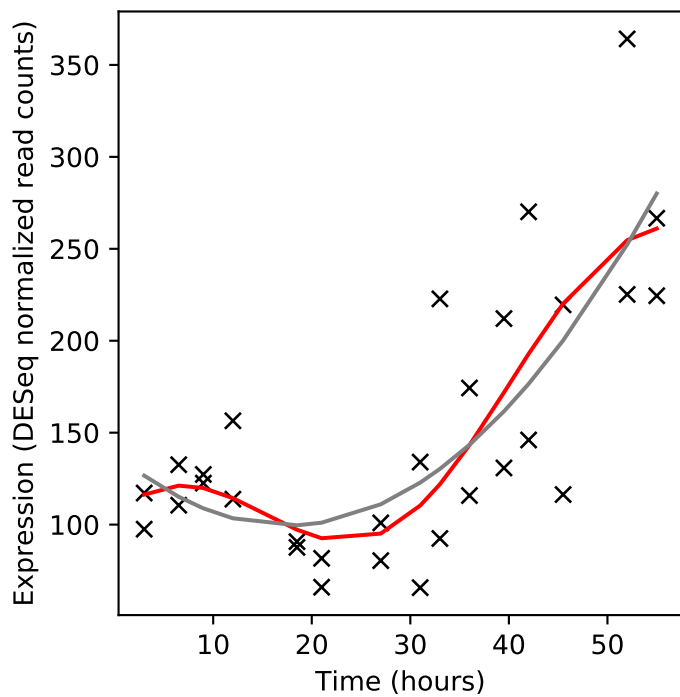

Rv0192/-

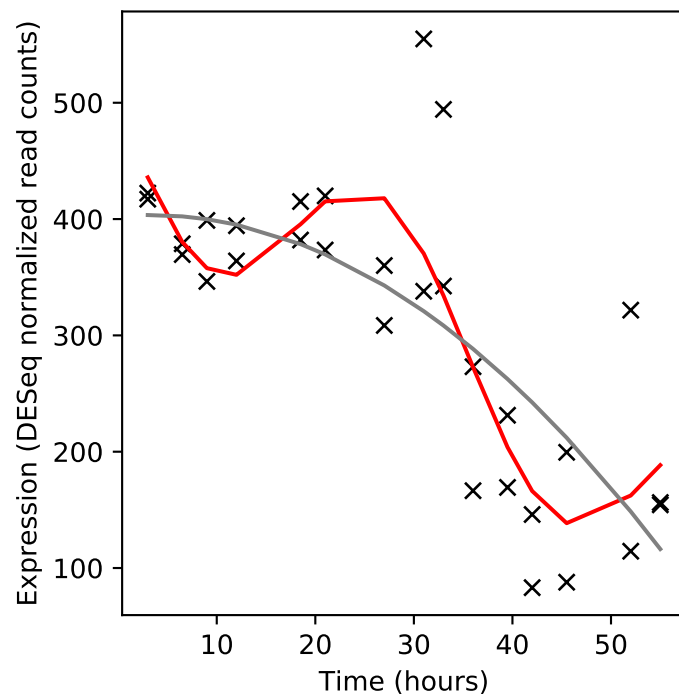

Rv0192A/-

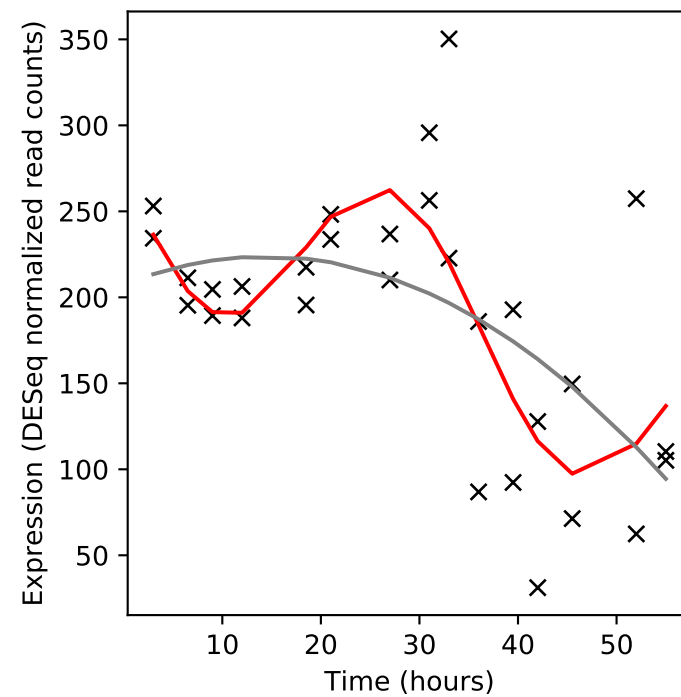



Rv0193c/-

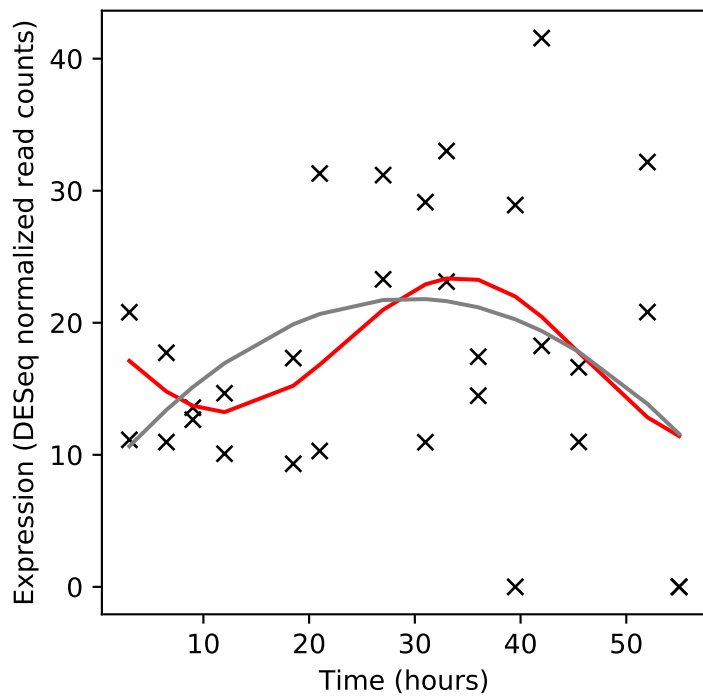

Rv0194/-

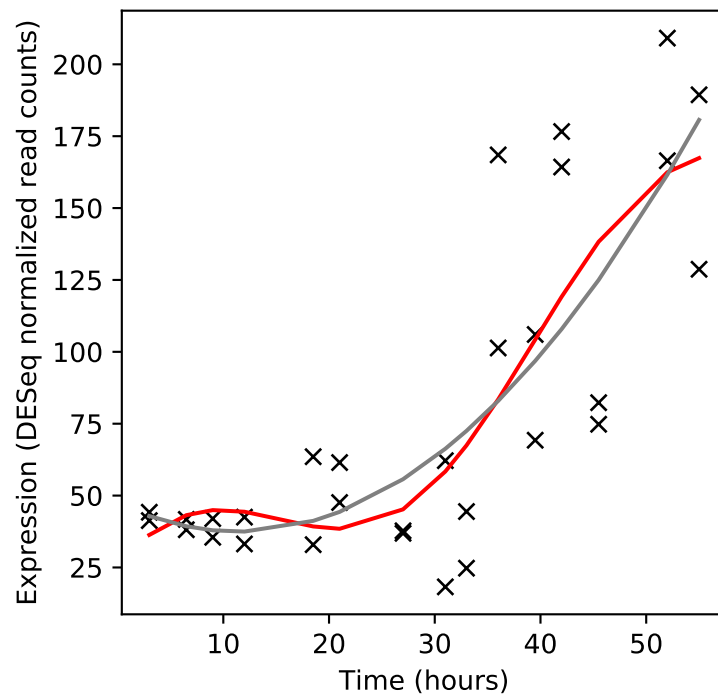

Rv0195/-

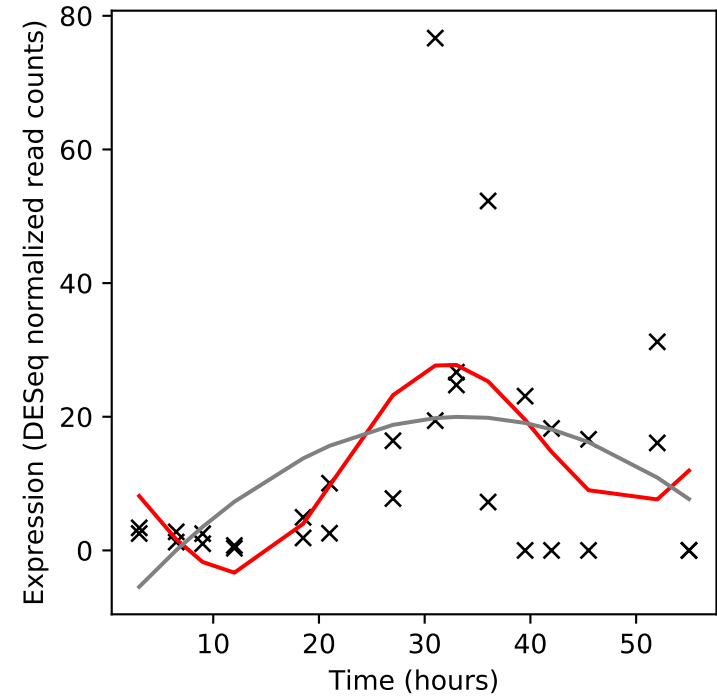

Rv0196/-

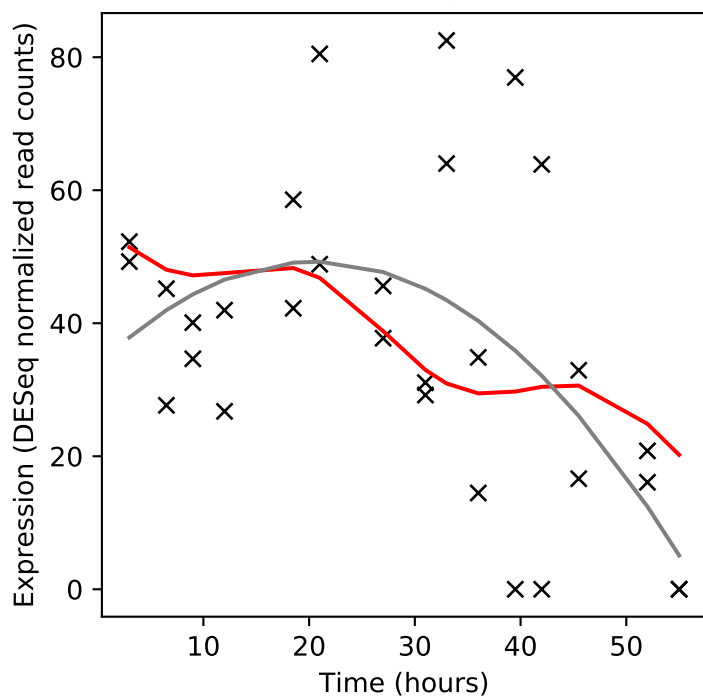

Rv0197/-

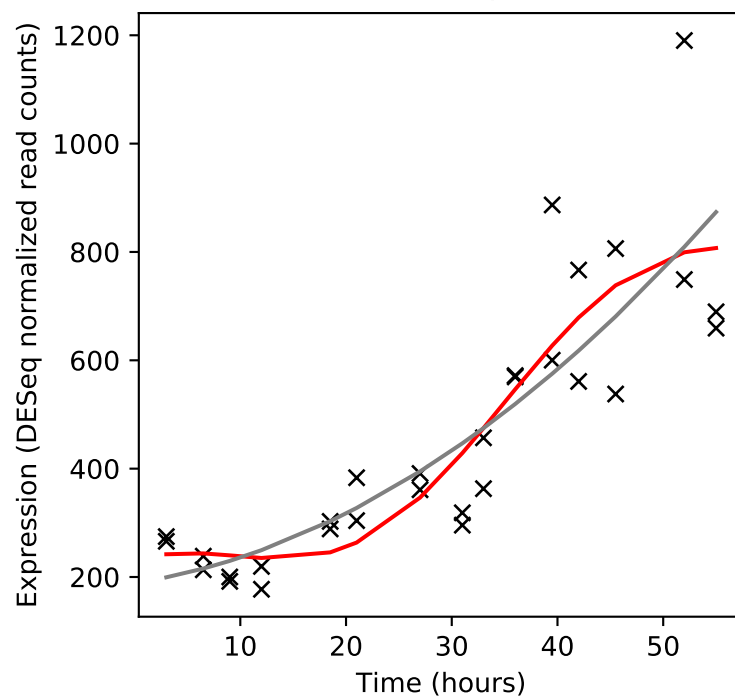

Rv0198c/zmp1

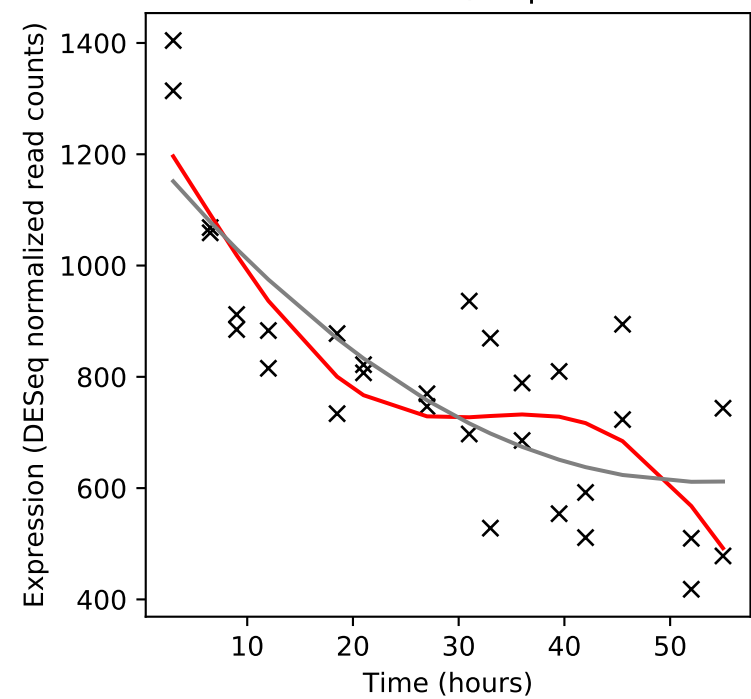

Rv0199/-

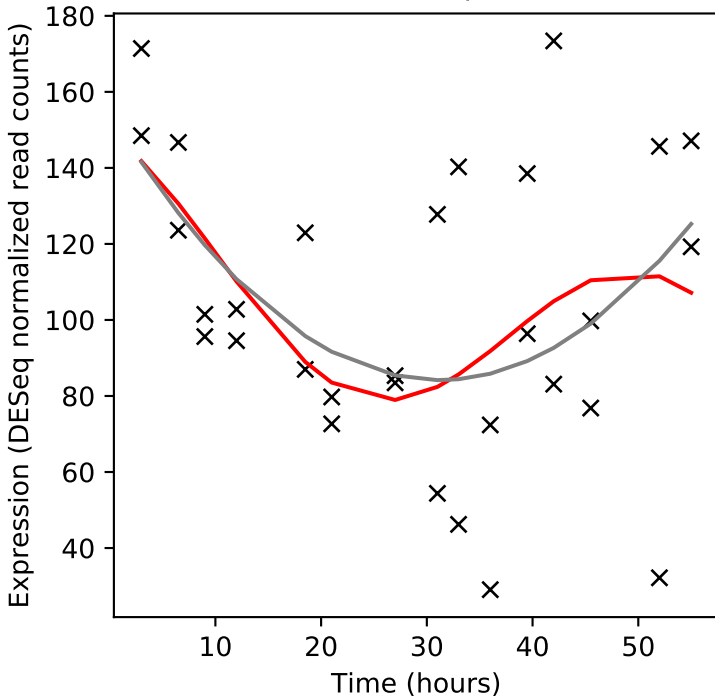

Rv0200/-

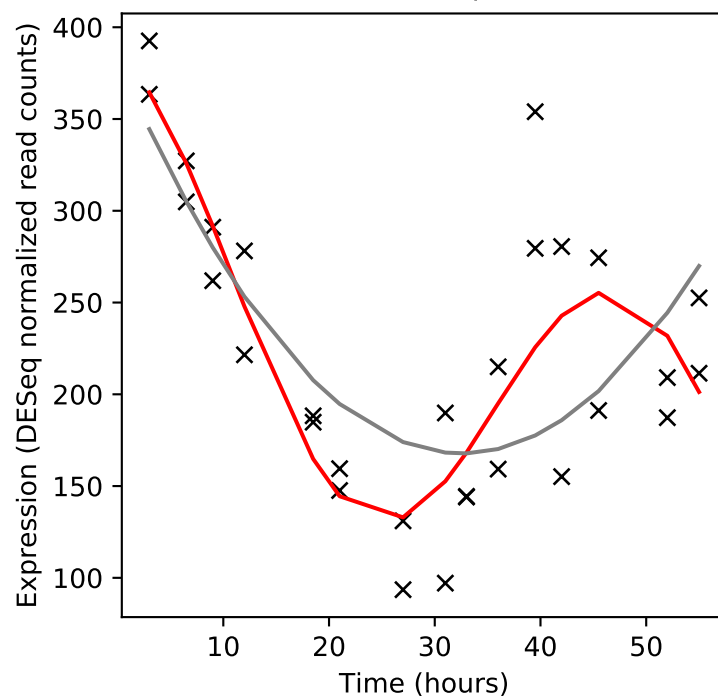

Rv0201c/-

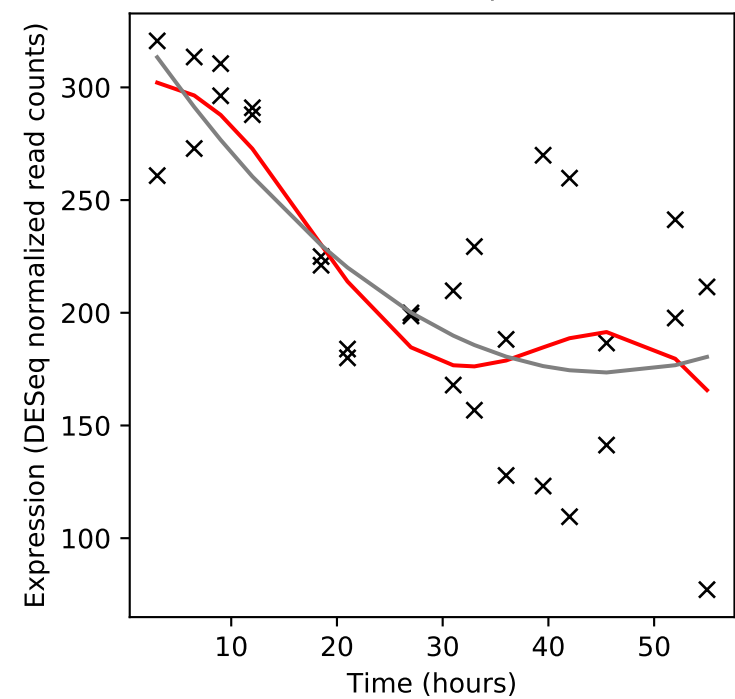

Rv0202c/mmpL11

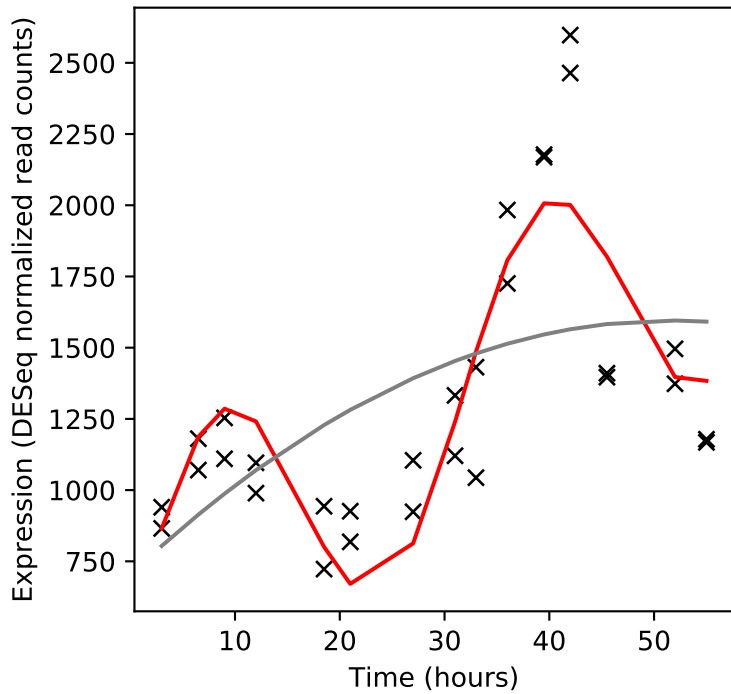

Rv0203/-

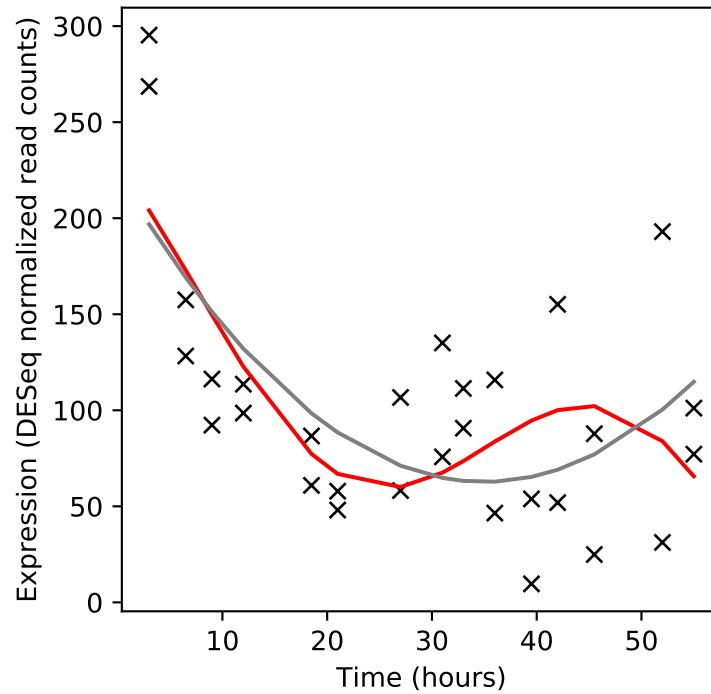

Rv0204c/-

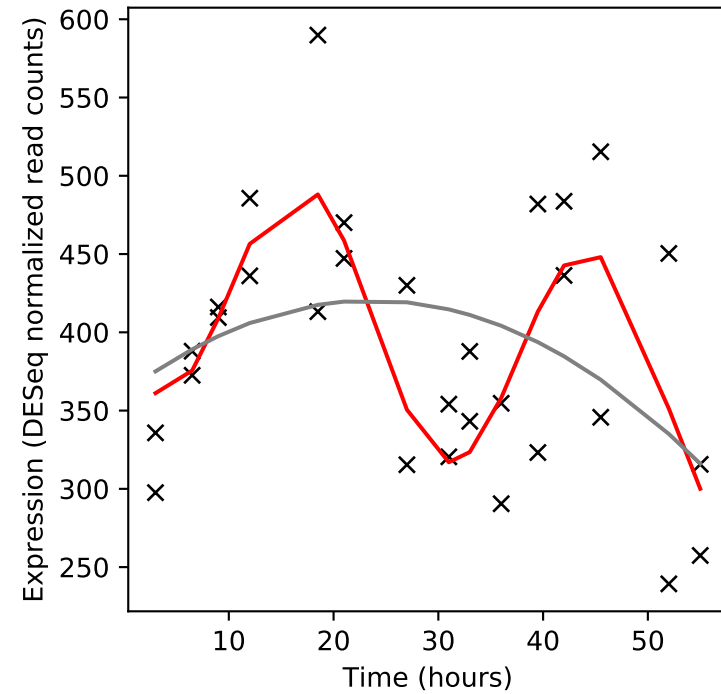

Rv0205/-

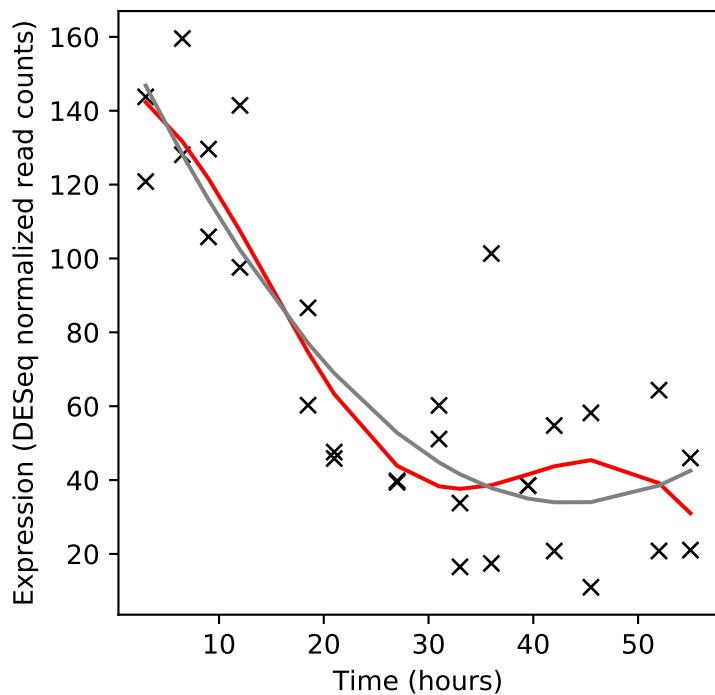

Rv0206c/mmpL3

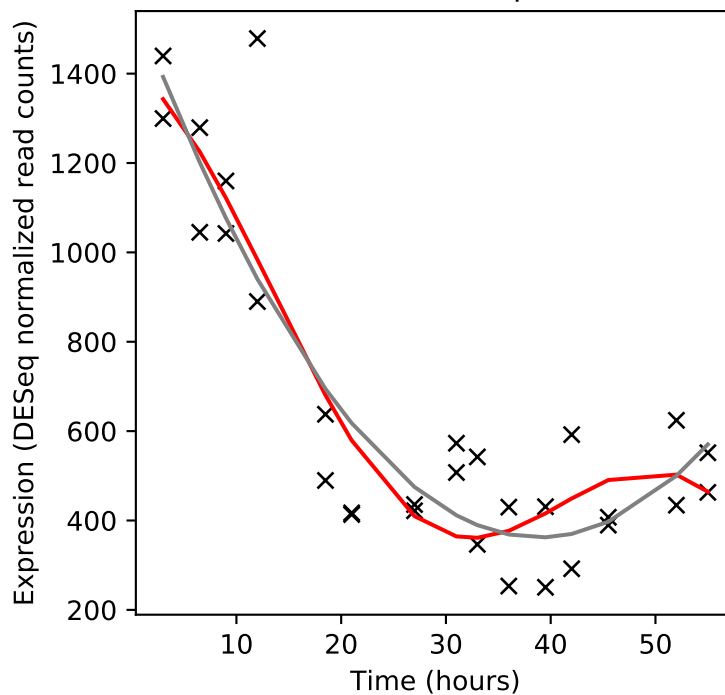

Rv0207c/-

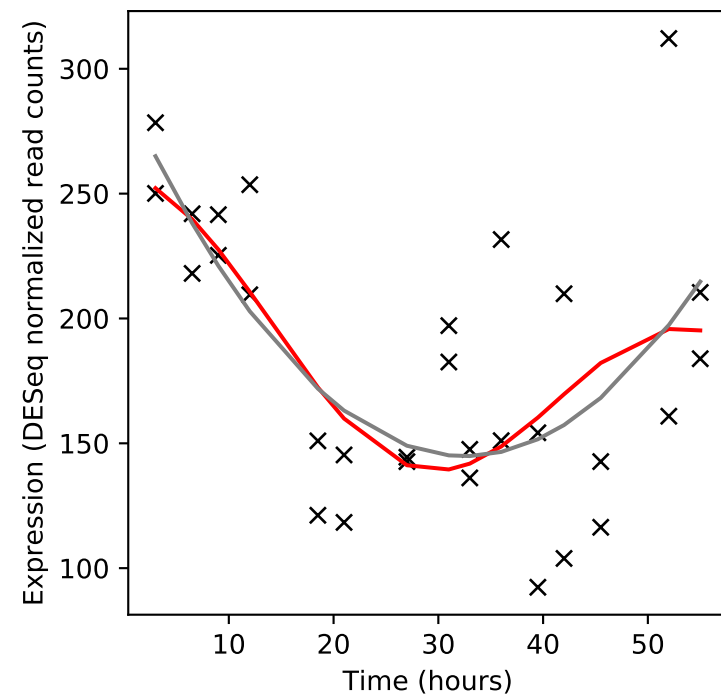

Rv0208c/-

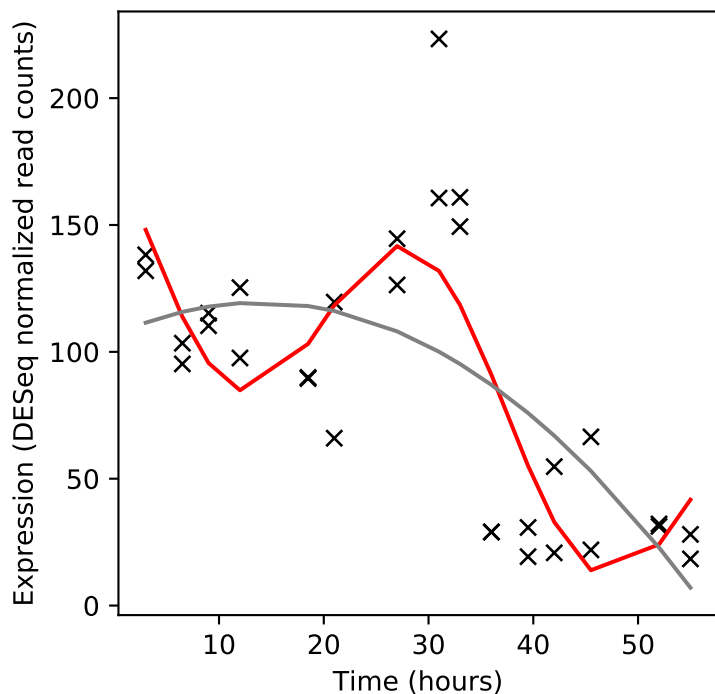

Rv0209/-

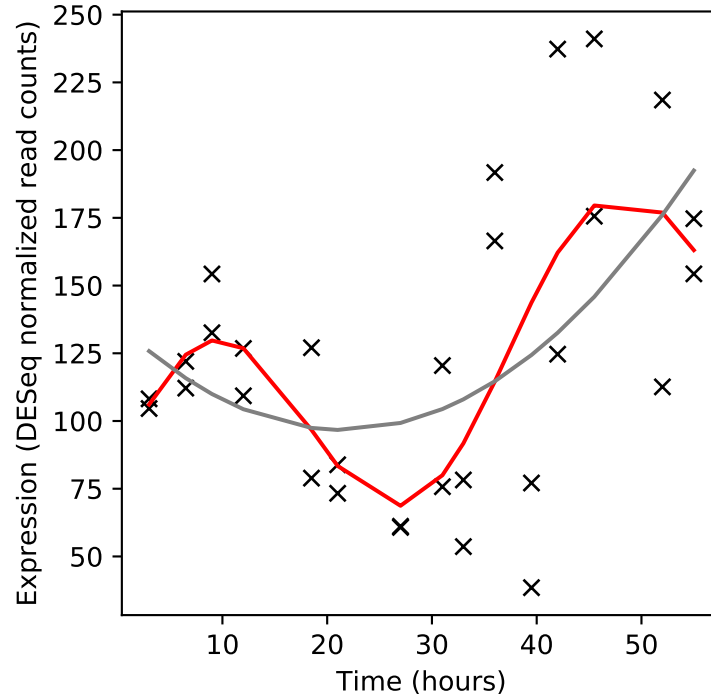

Rv0210/-

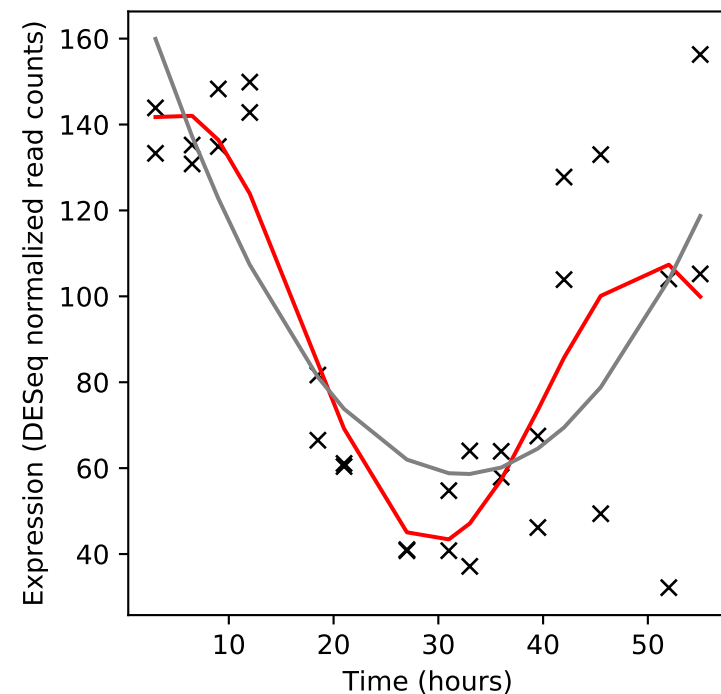

Rv0211/pckA

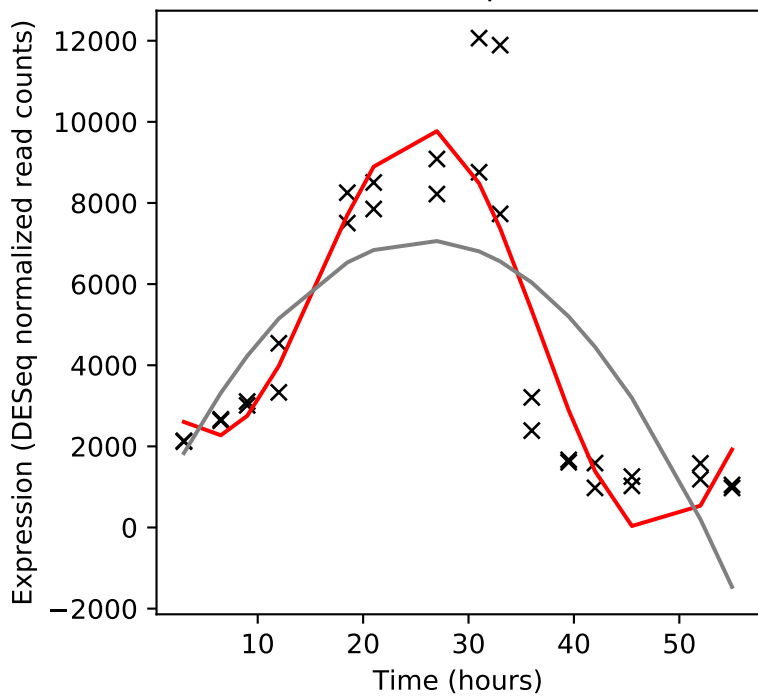

Rv0212c/nadR

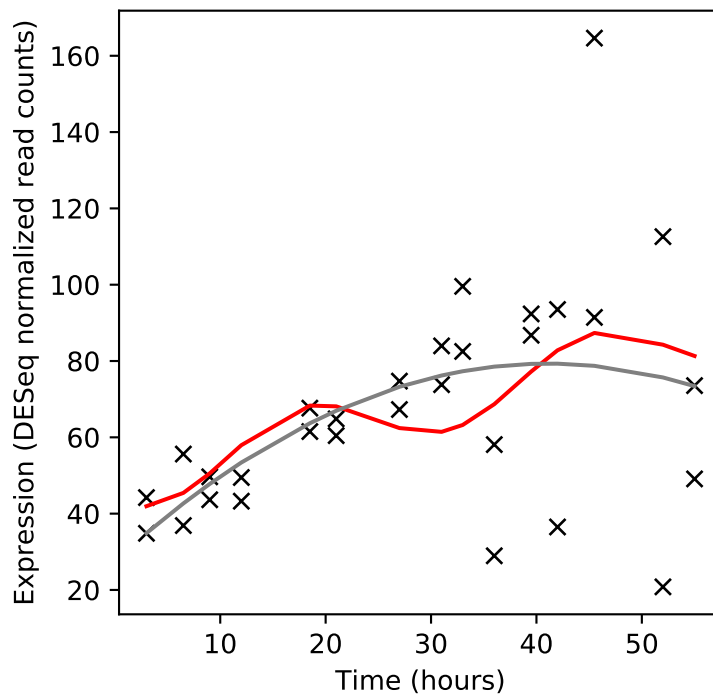

Rv0213c/-

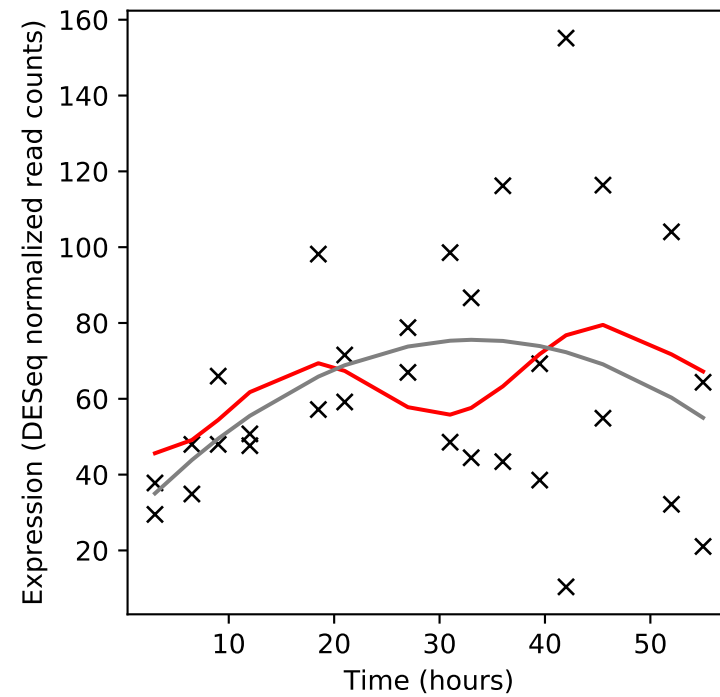

Rv0214/fadD4

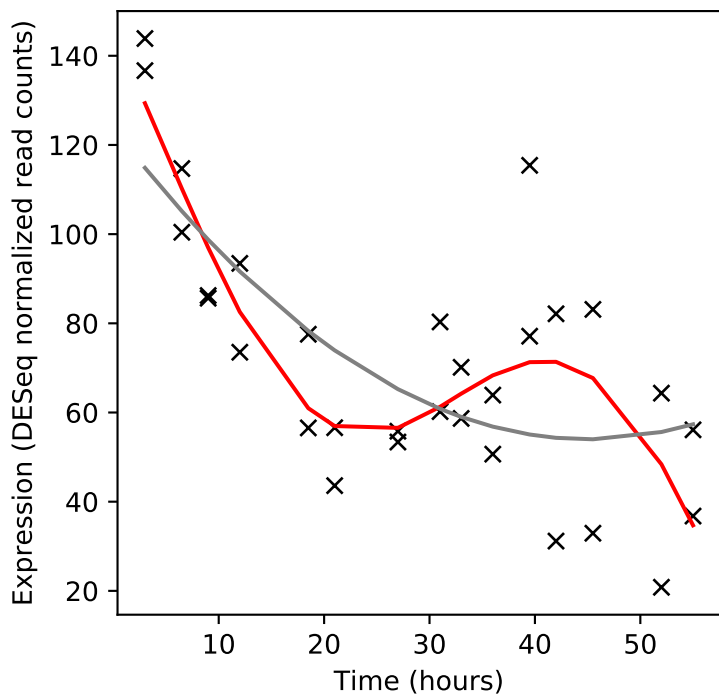

Rv0215c/fadE3

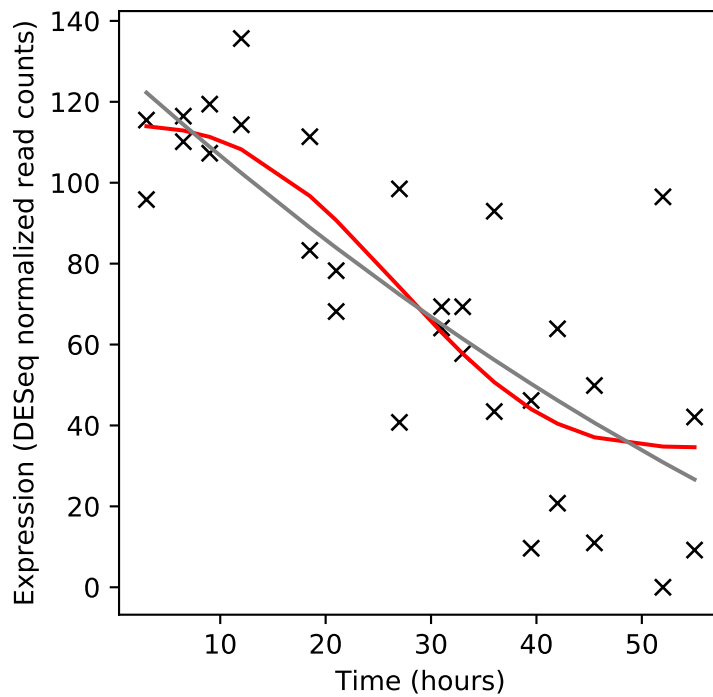

Rv0216/-

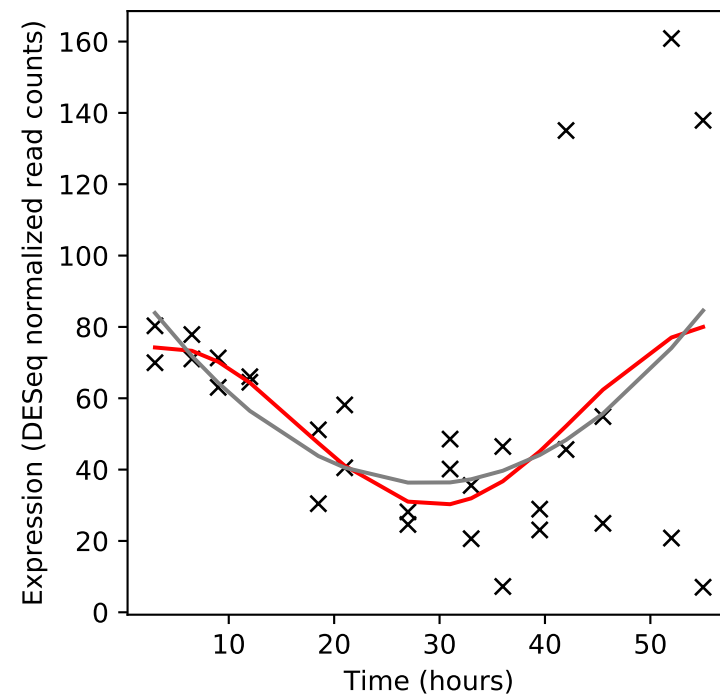

Rv0217c/lipW

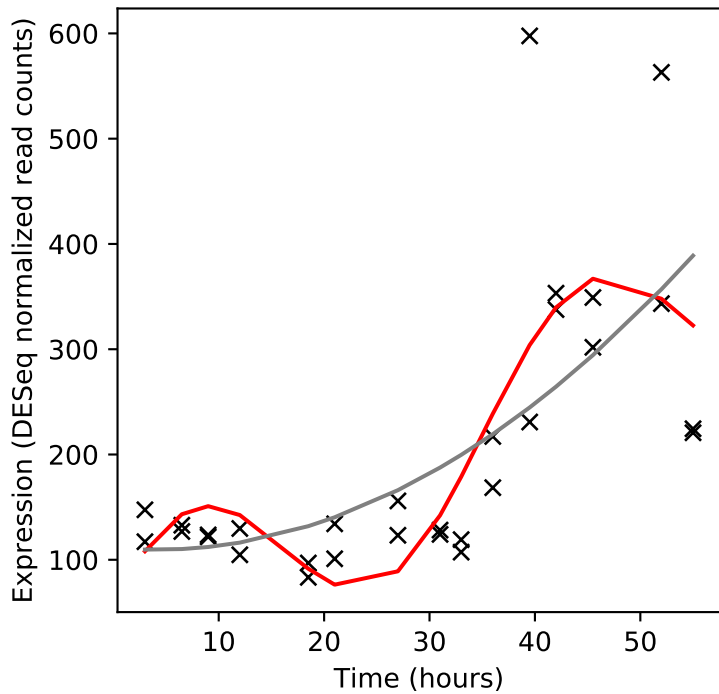

Rv0218/-

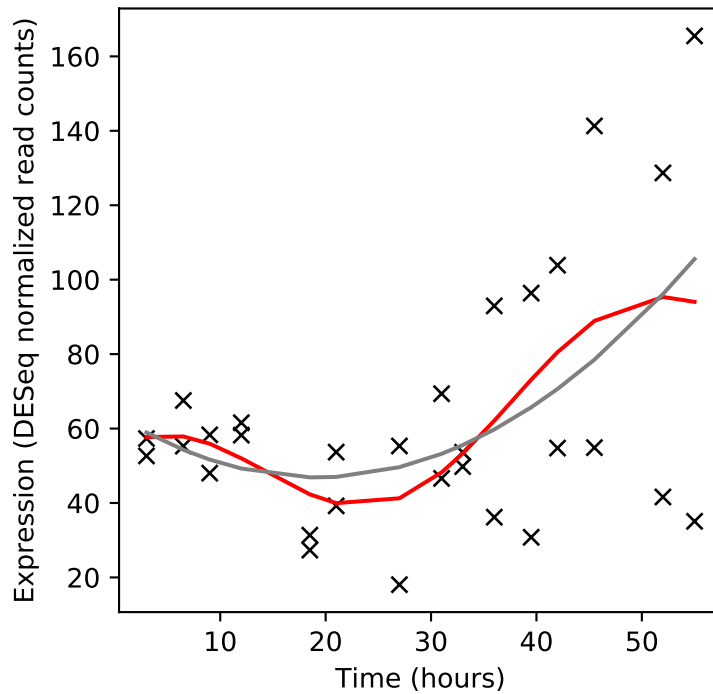

Rv0219/-

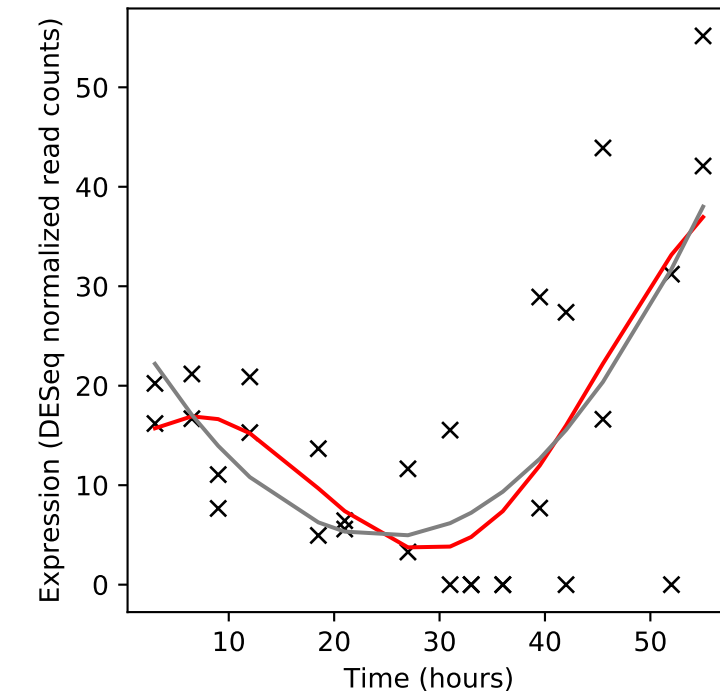

Rv0220/lipC

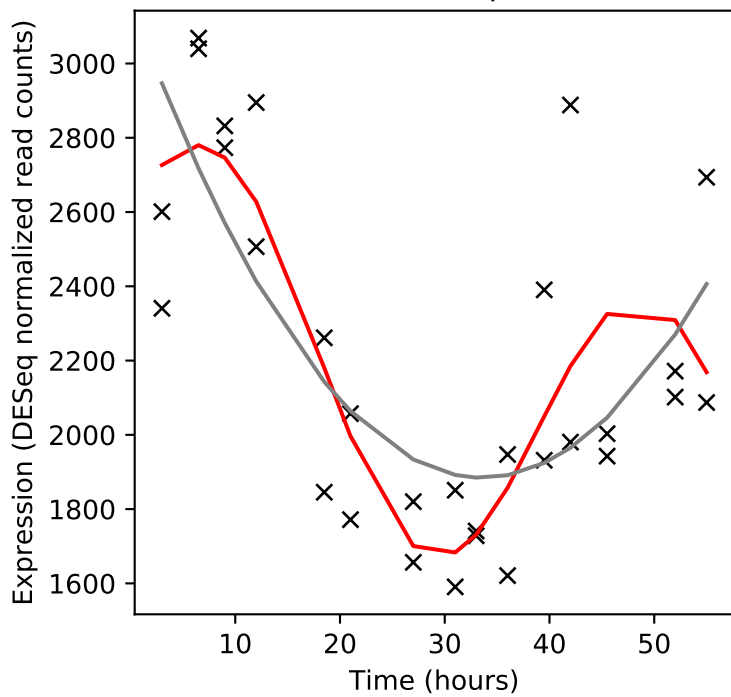

Rv0221/-

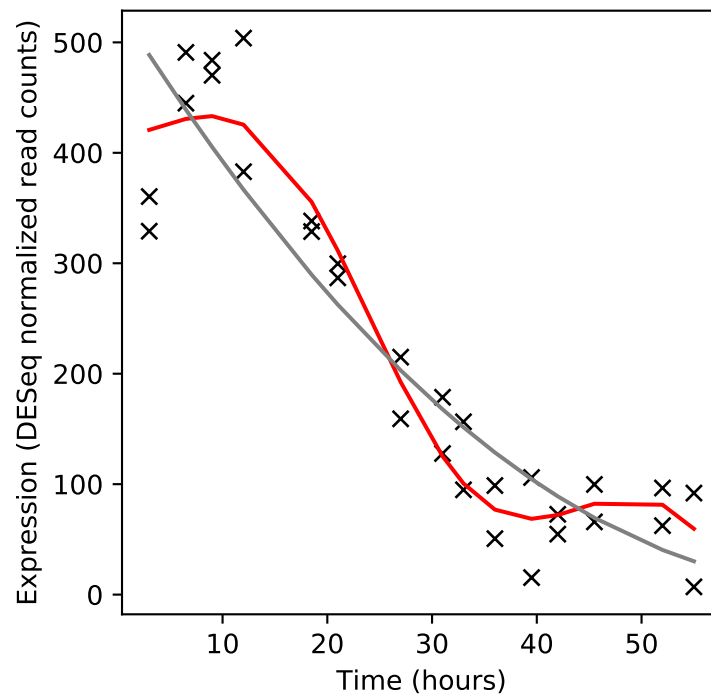

Rv0222/echA1

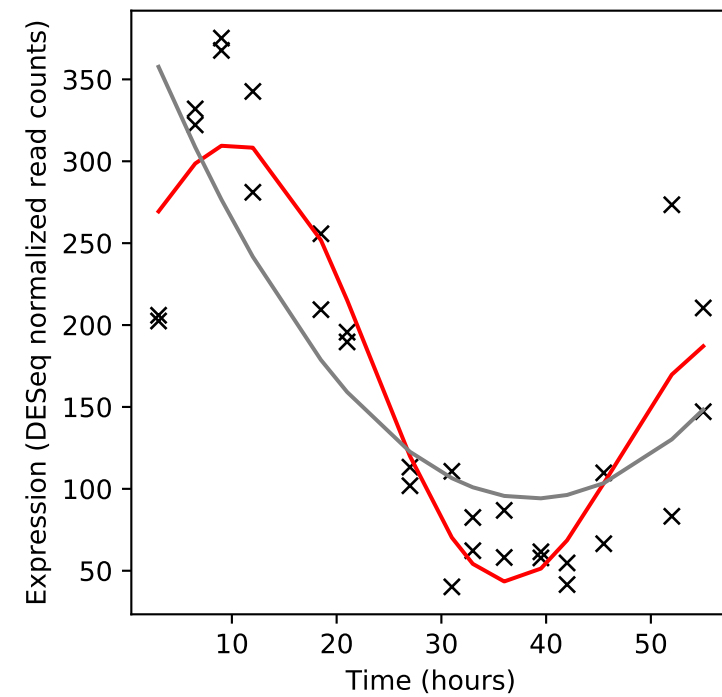

Rv0223c/-

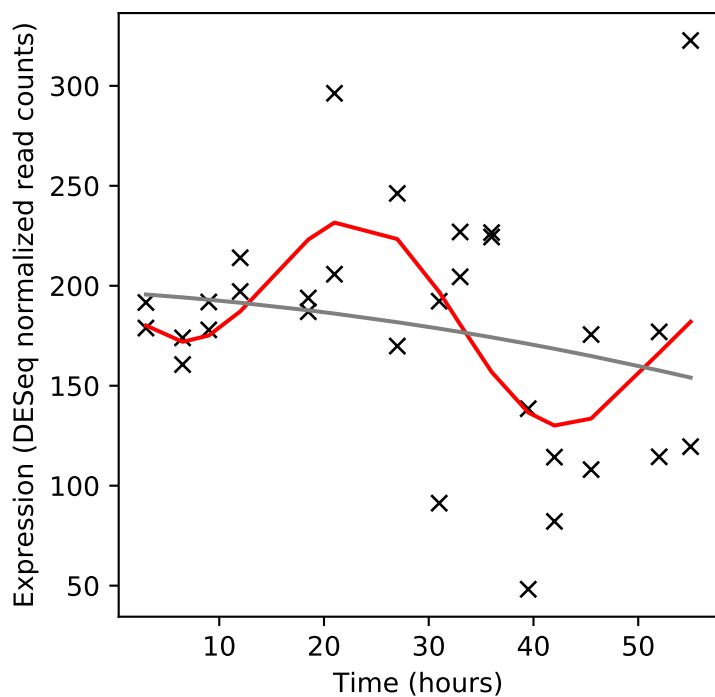

Rv0224c/-

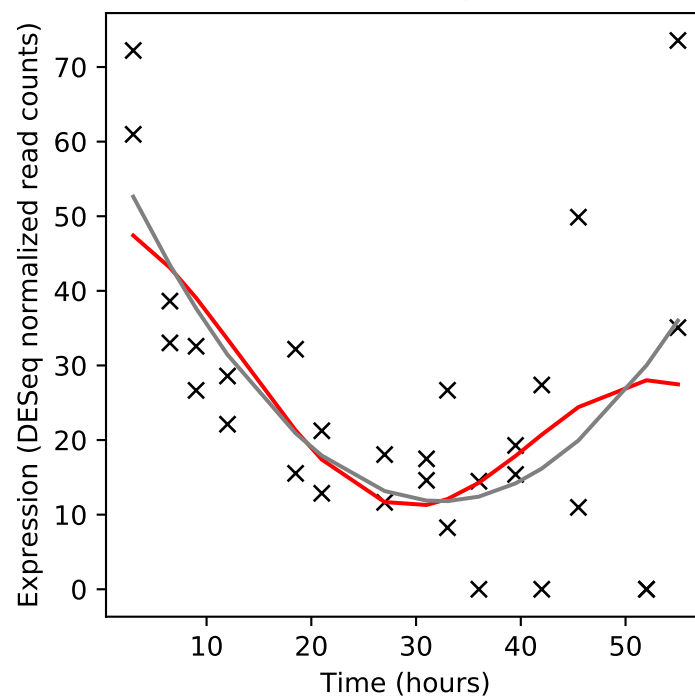

Rv0225/-

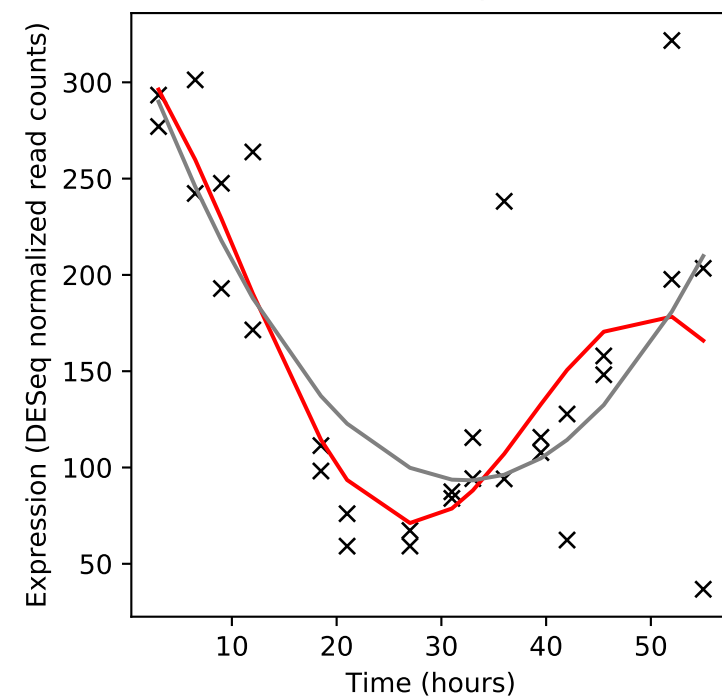

Rv0226c/-

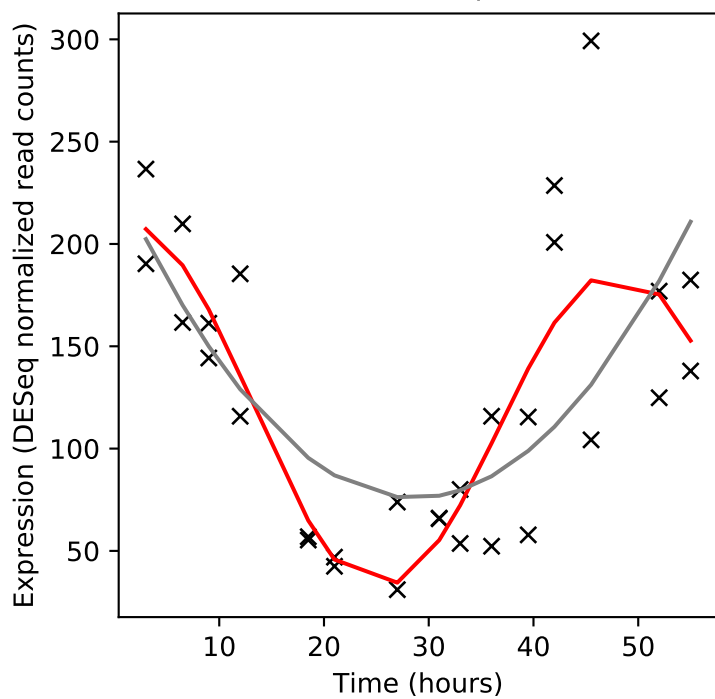

Rv0227c/-

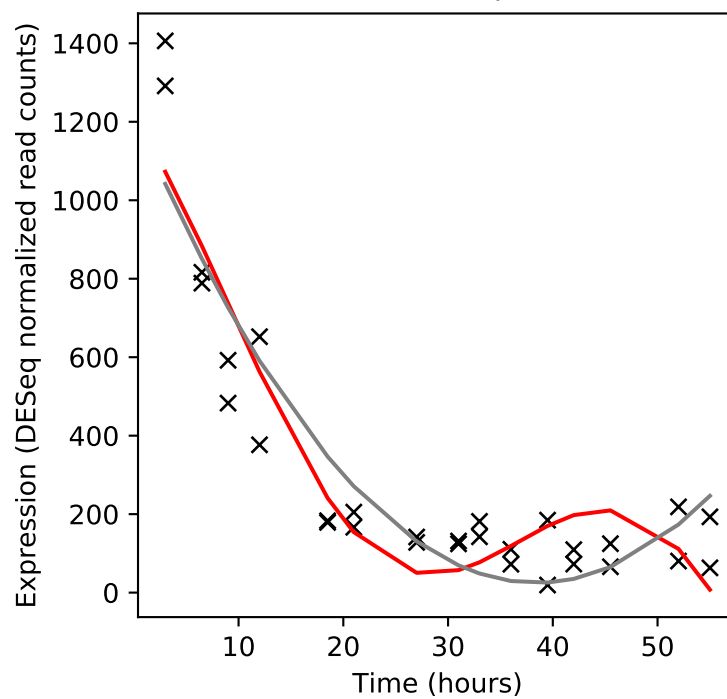

Rv0228/-

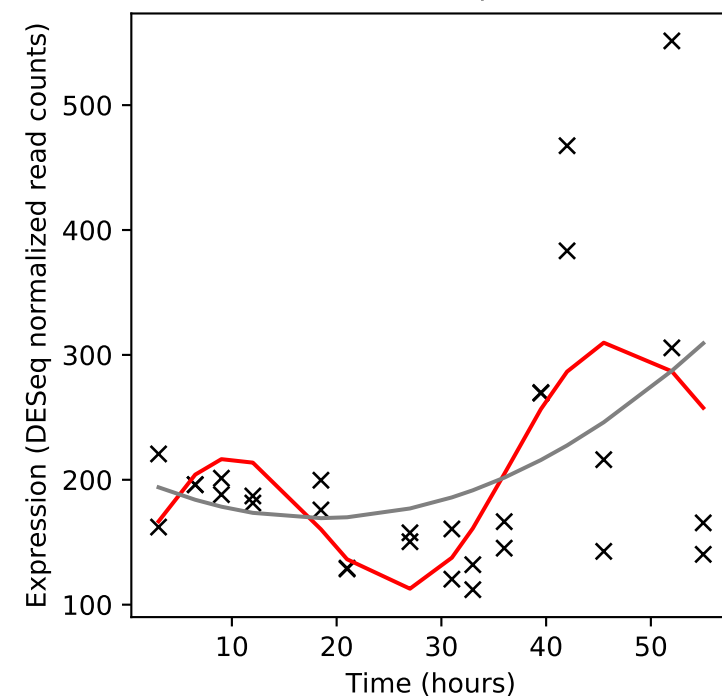

Rv0229c/-

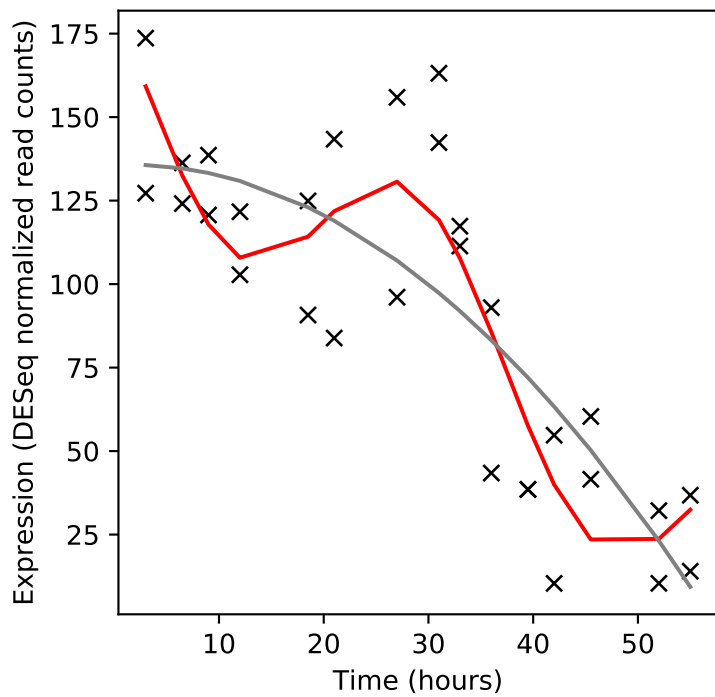

Rv0230c/php

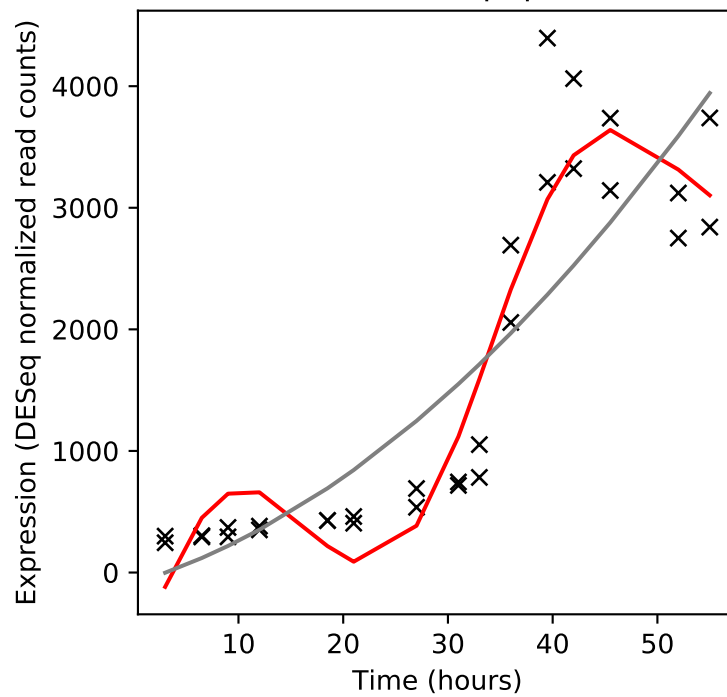

Rv0231/fadE4

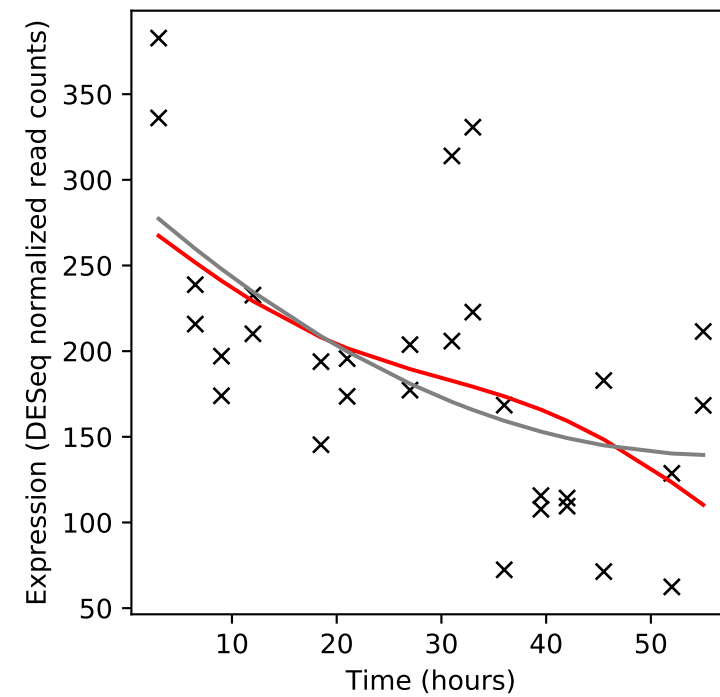

Rv0232/-

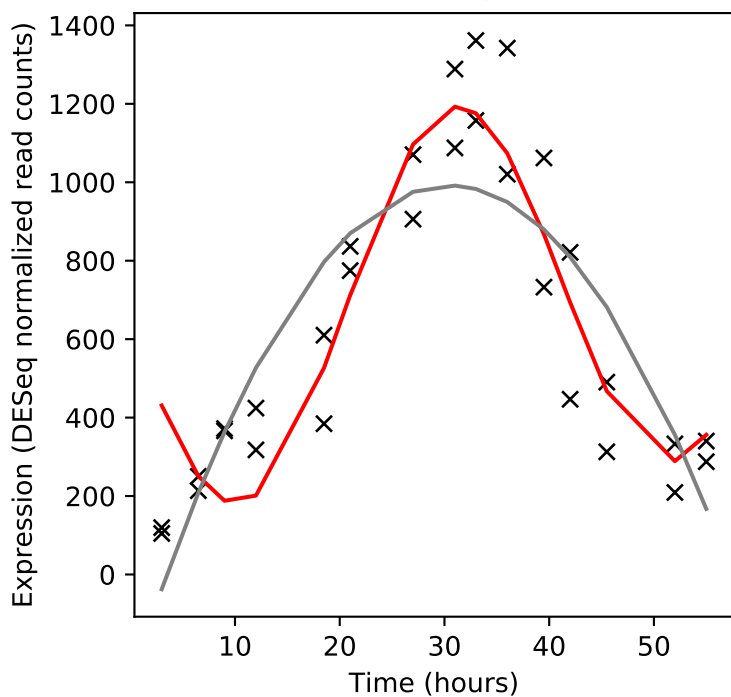

Rv0233/nrdB

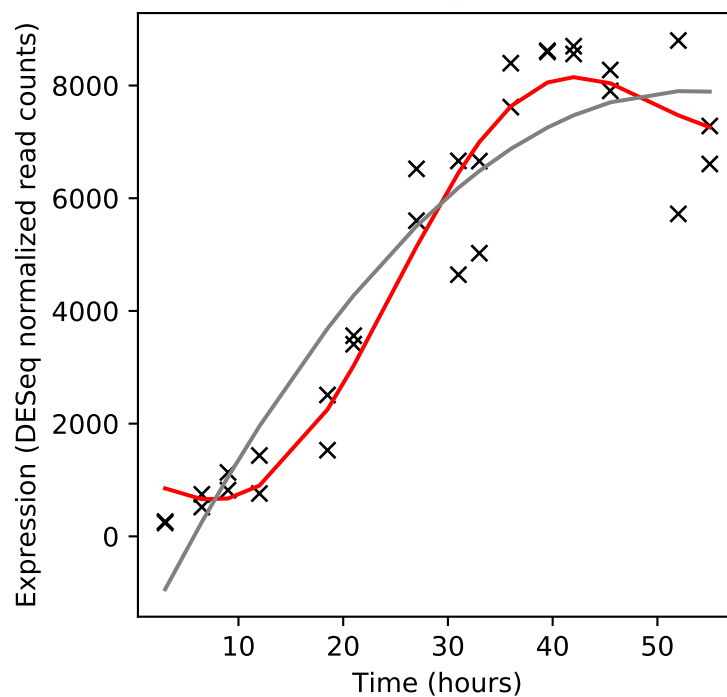

Rv0234c/gabD1

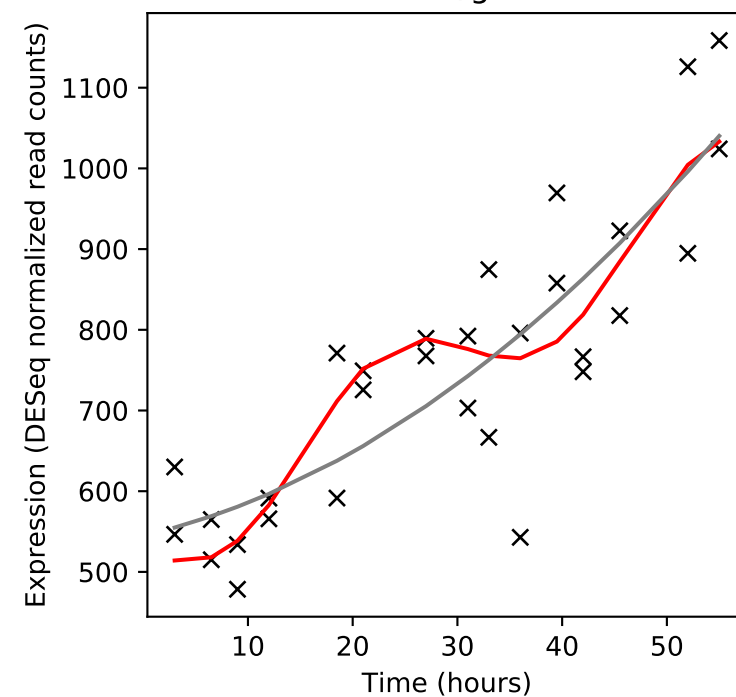

Rv0235c/-

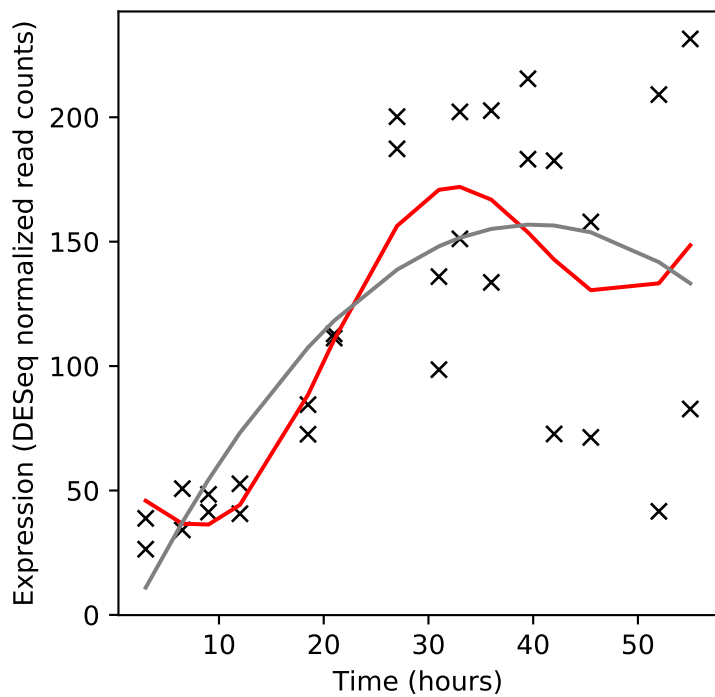

Rv0236c/aftD

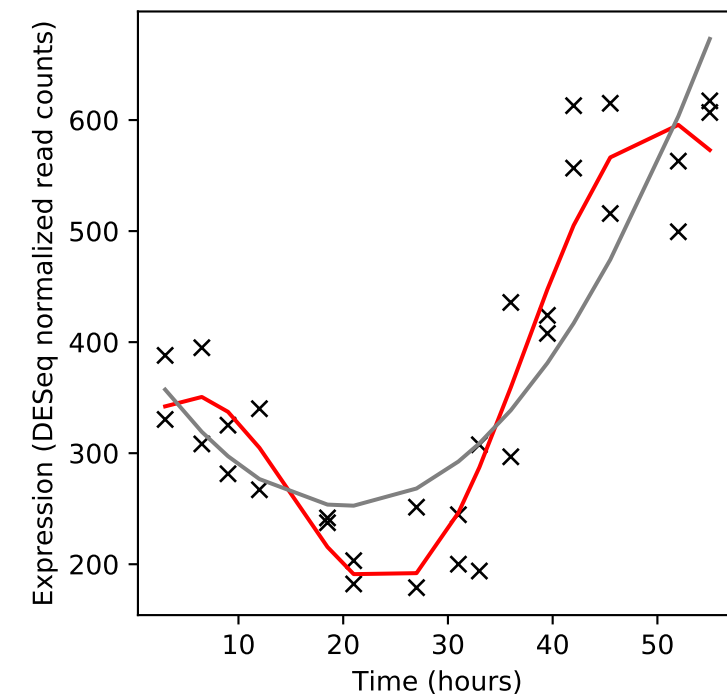

Rv0236A/-

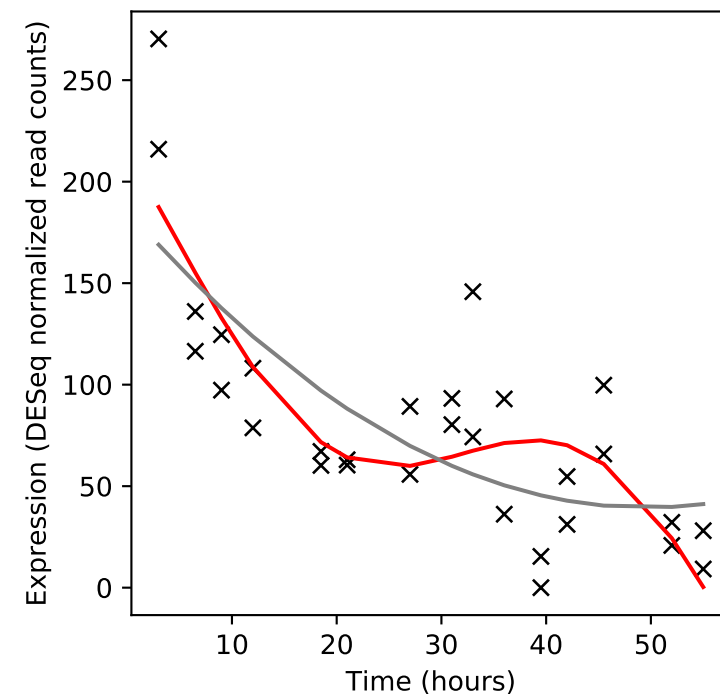

Rv0237/lpqI

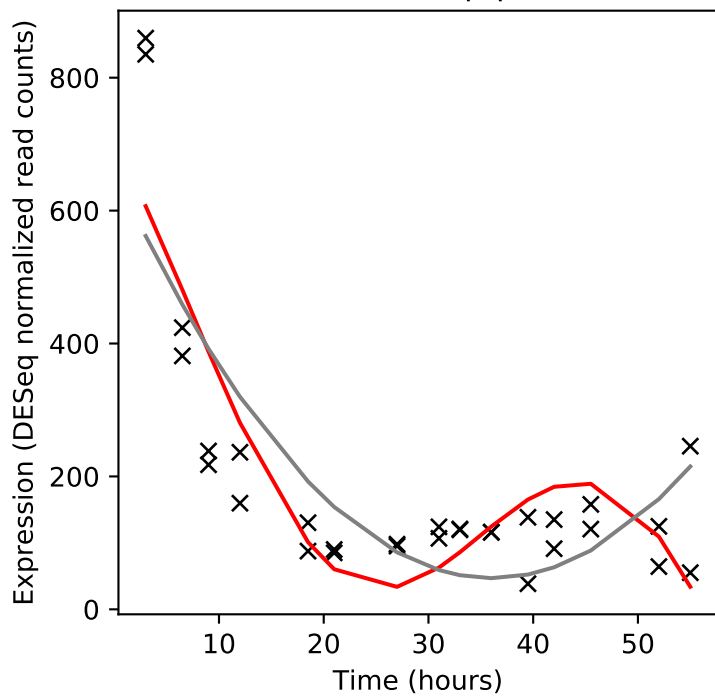

Rv0238/-

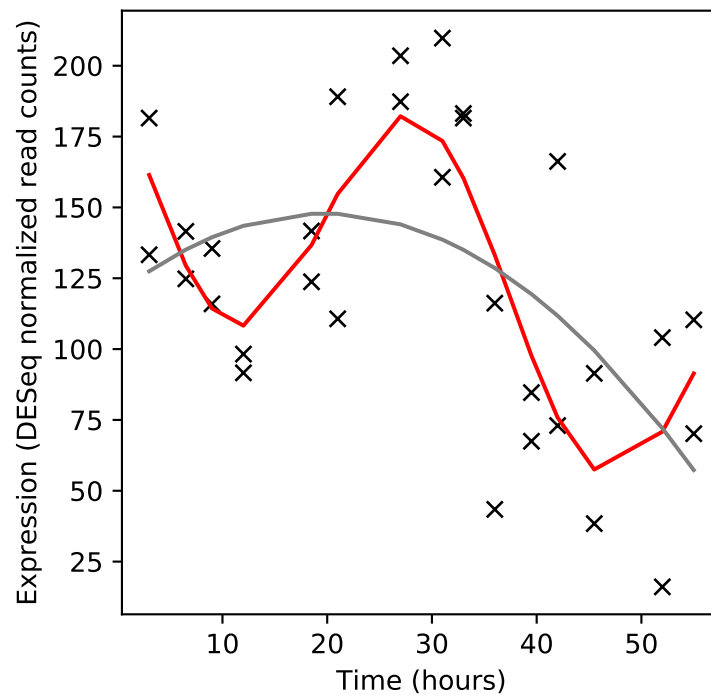

Rv0239/vapB24

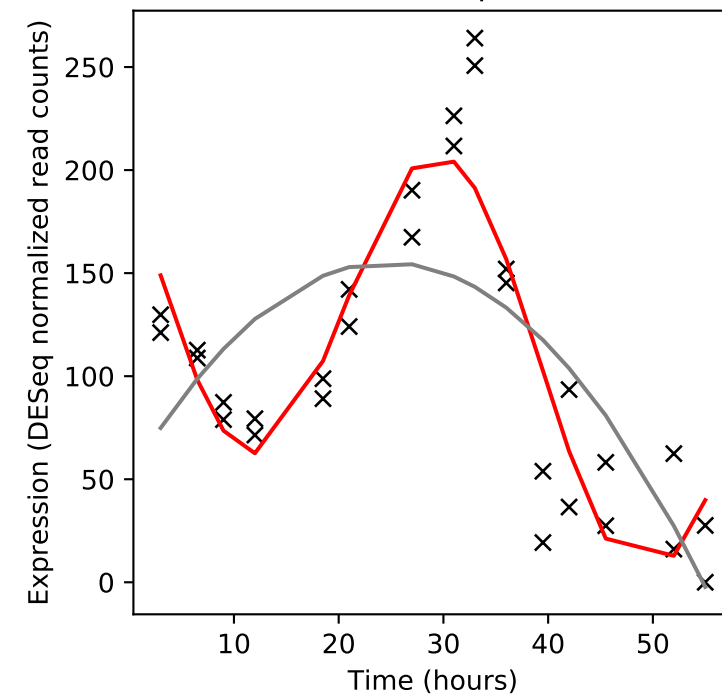

Rv0240/vapC24

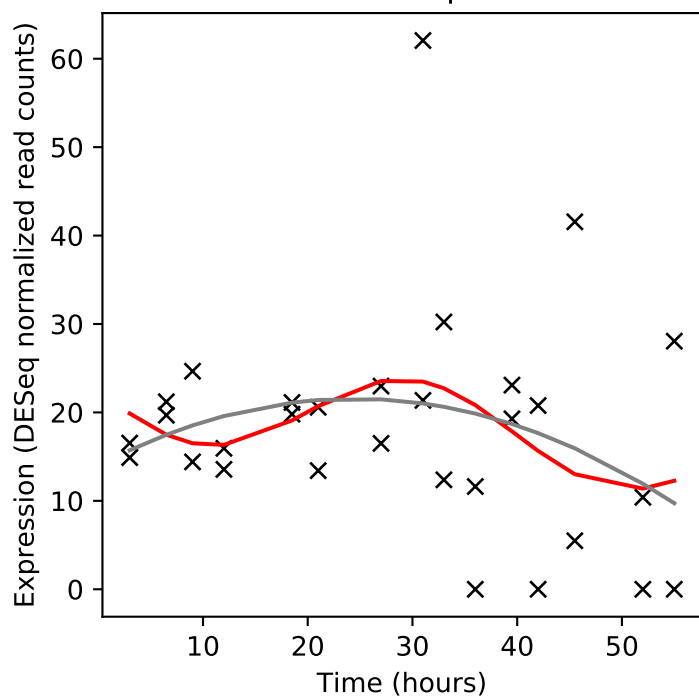

Rv0241c/htdX

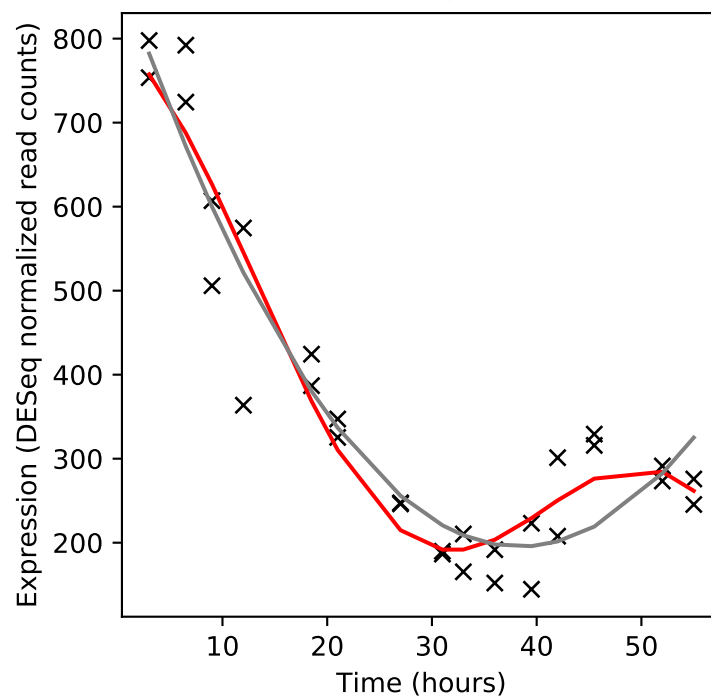

Rv0242c/fabG4

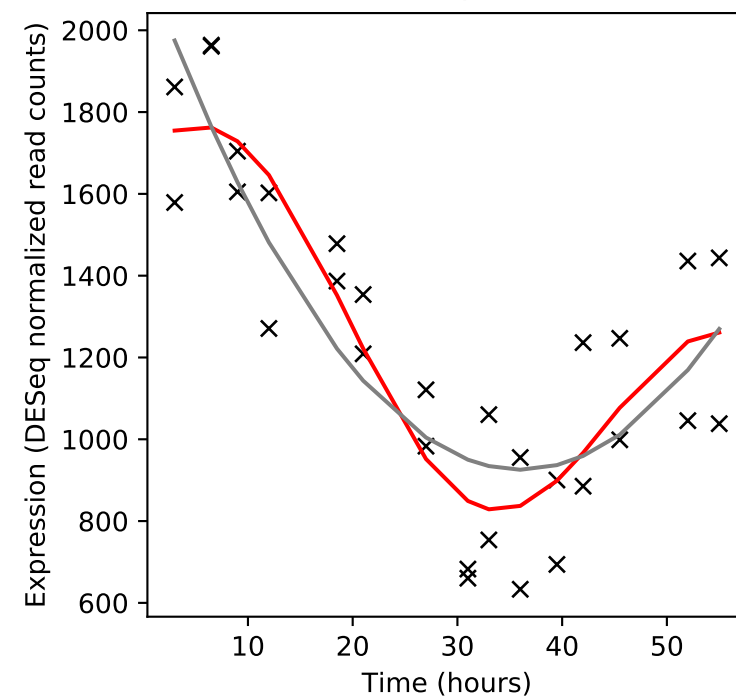

Rv0243/fadA2

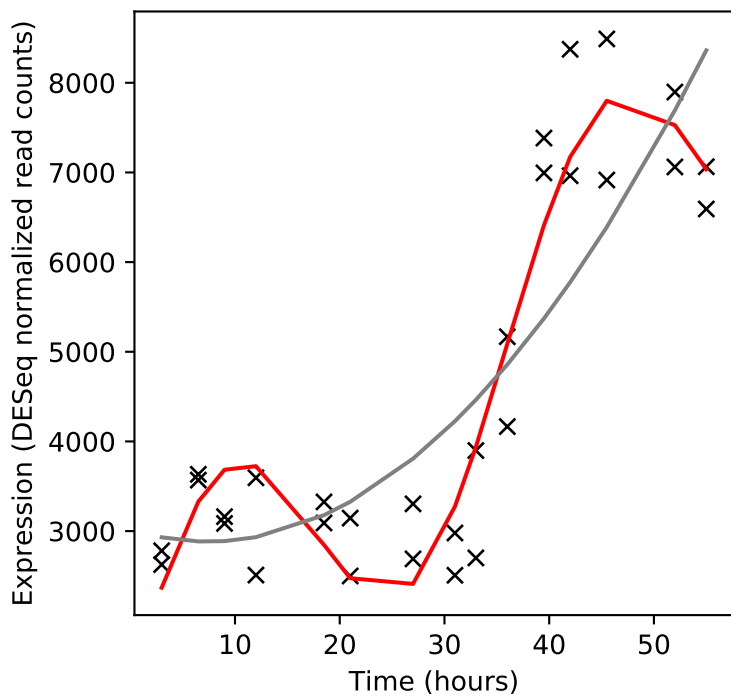

Rv0244c/fadE5

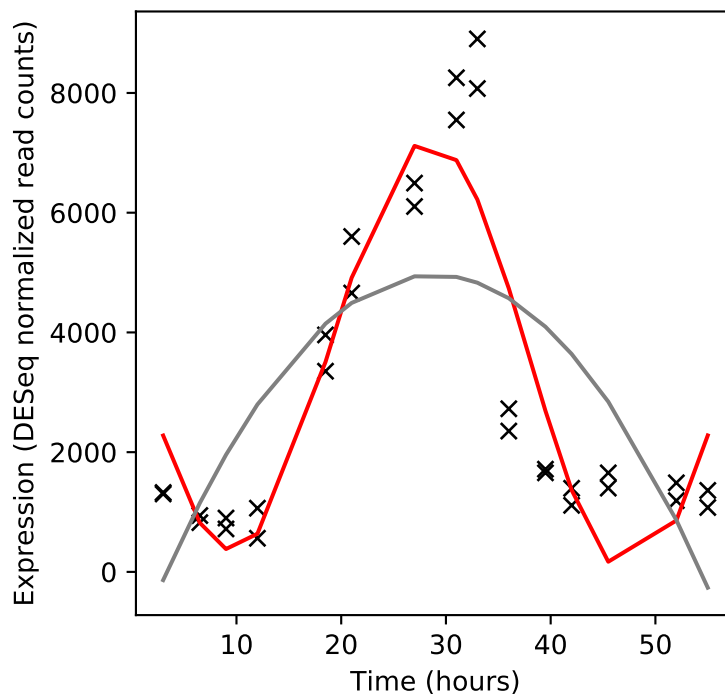

Rv0245/-

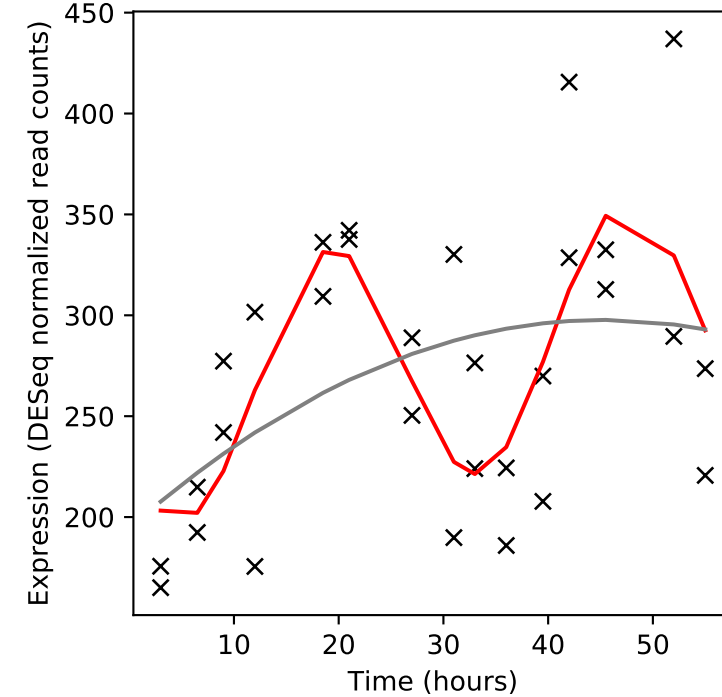

Rv0246/-

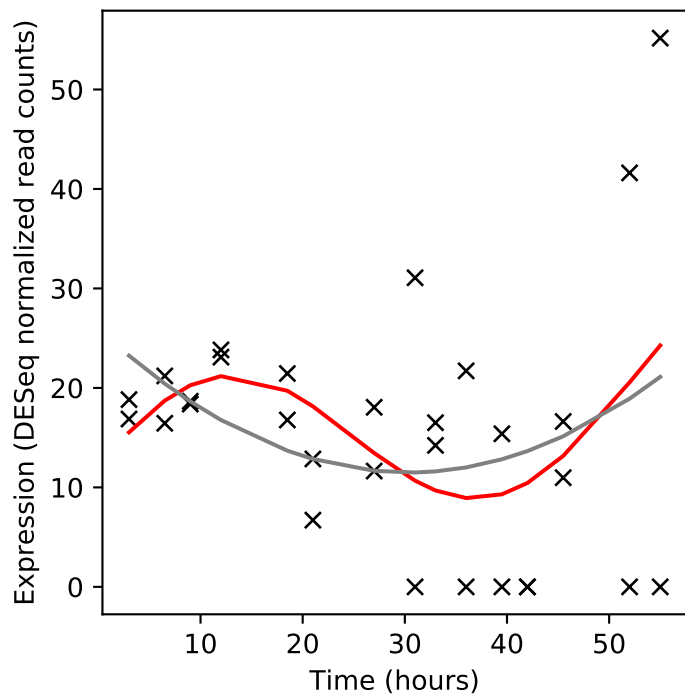

Rv0247c/-

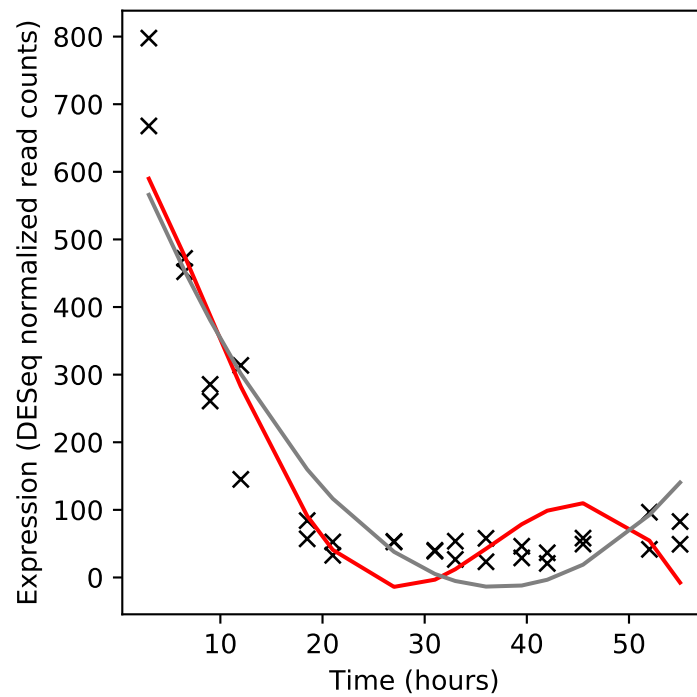

Rv0248c/-

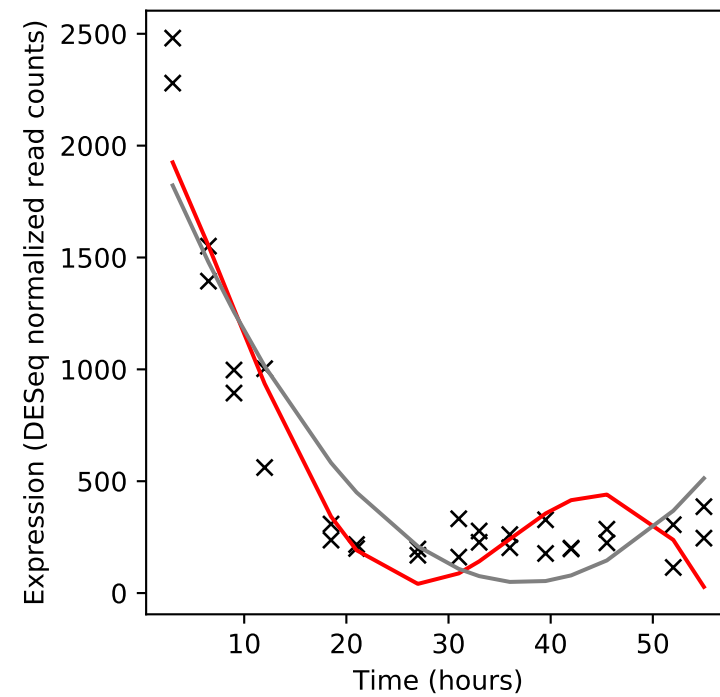

Rv0249c/-

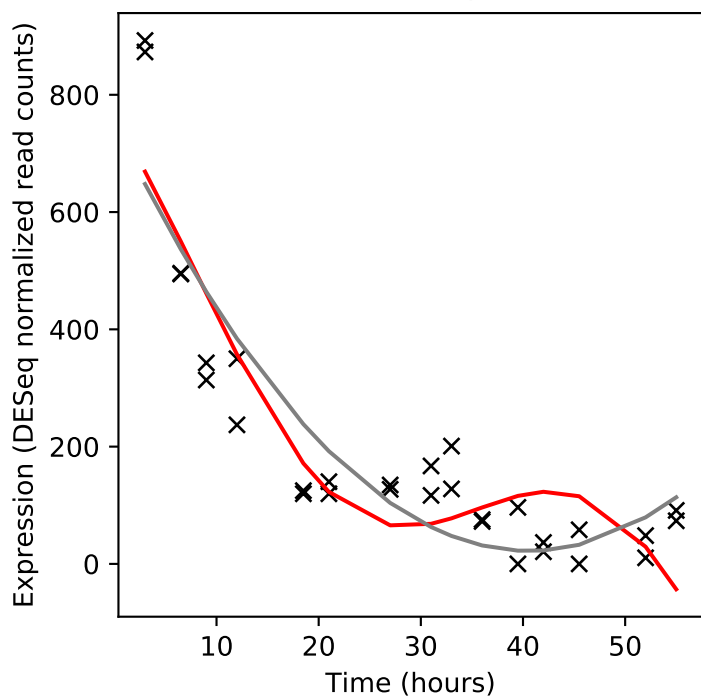

Rv0250c/-

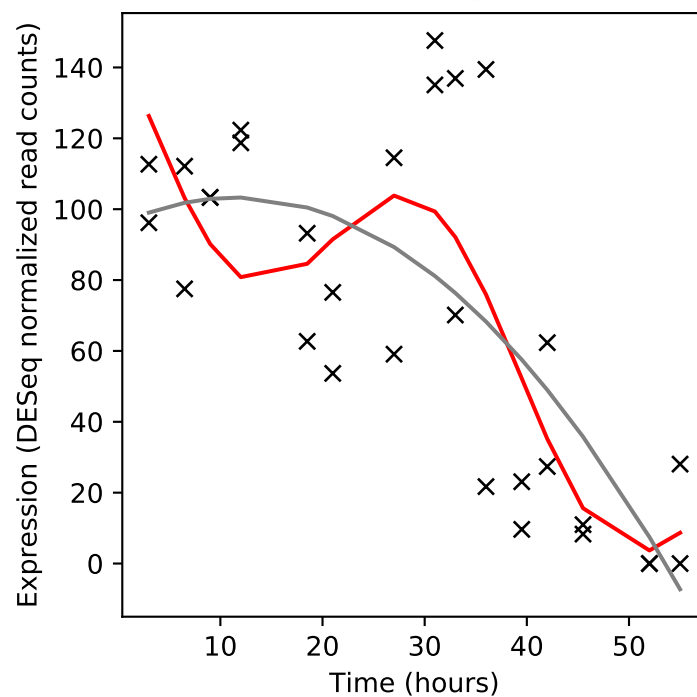

Rv0251c/hsp

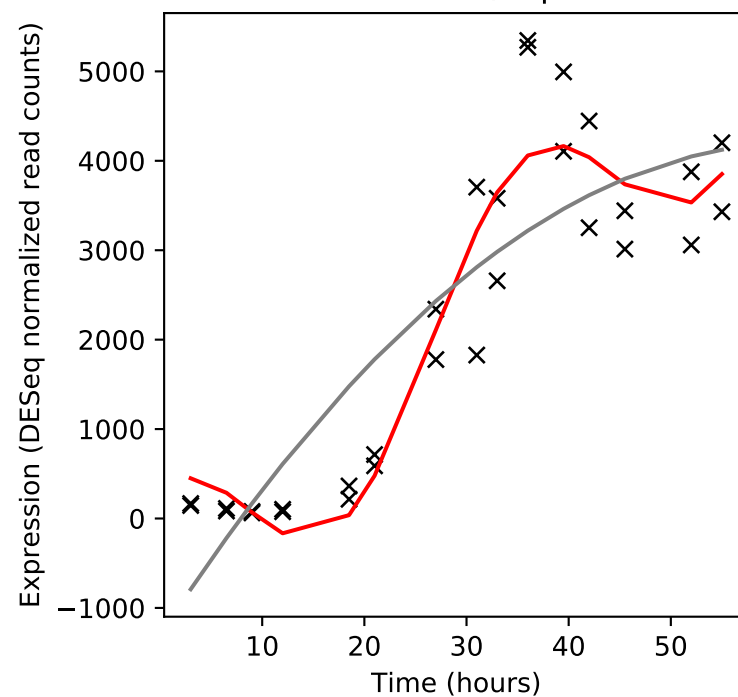

Rv0252/nirB

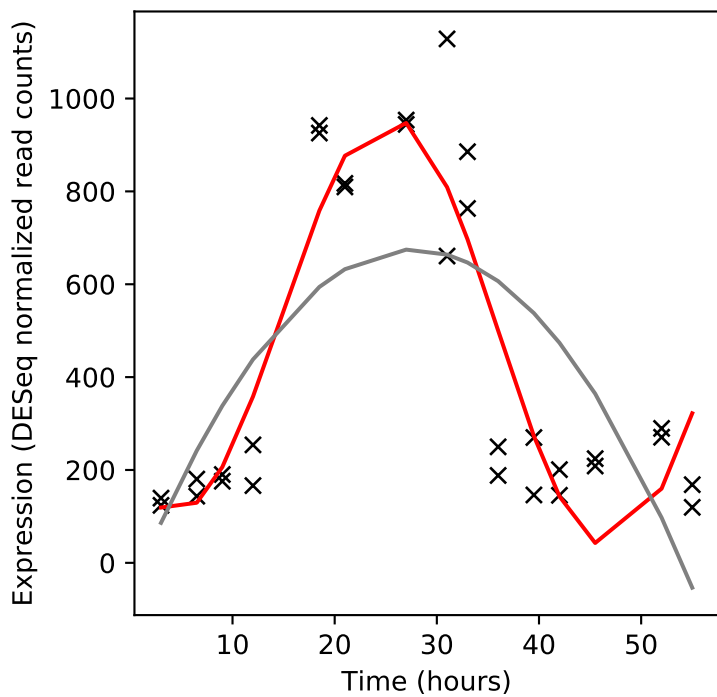

Rv0253/nirD

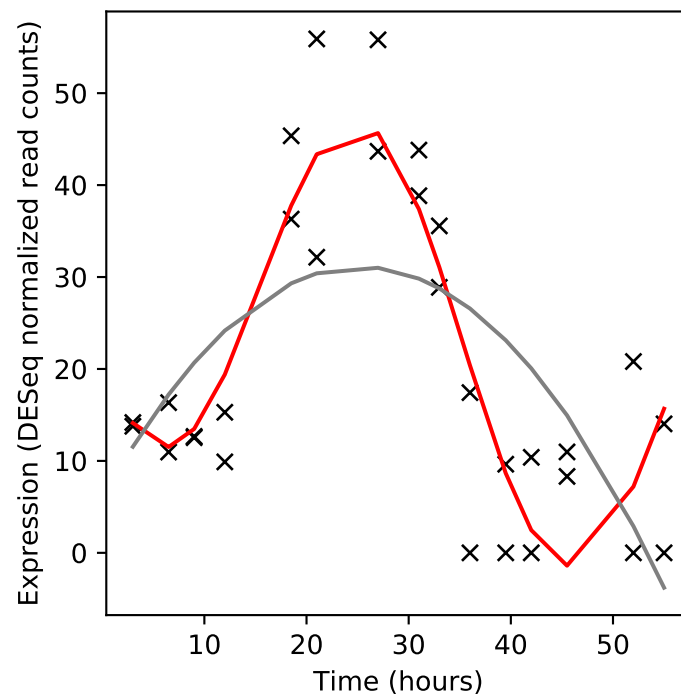

Rv0254c/cobU

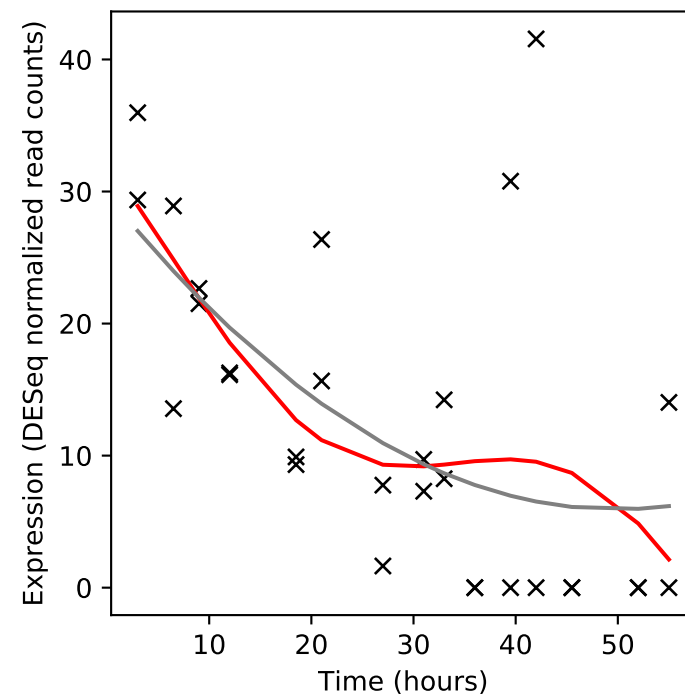



Rv0255c/cobQ1

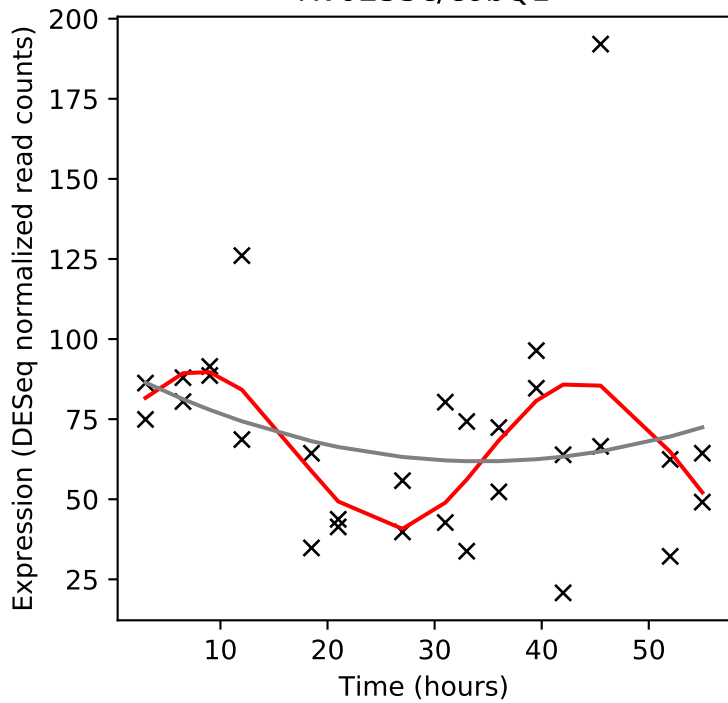

Rv0256c/PPE2

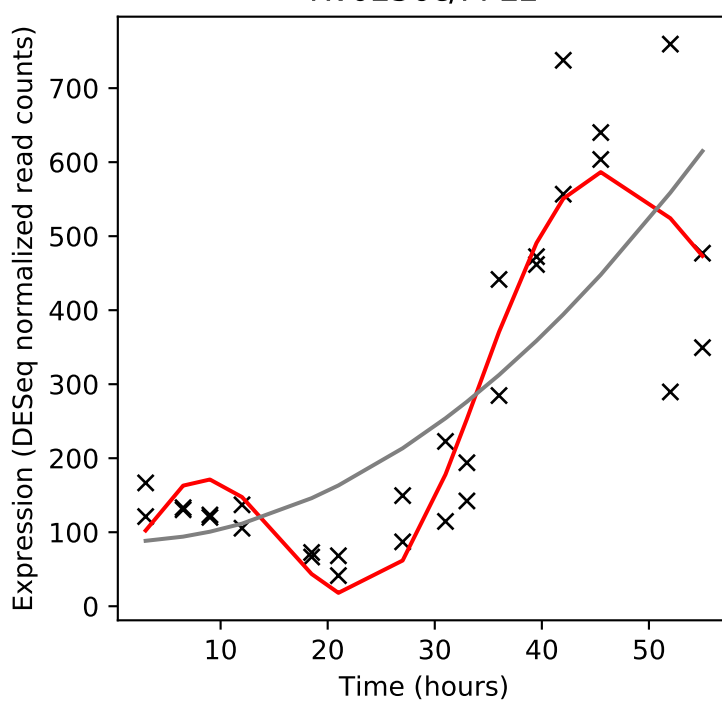

Rv0257c/-

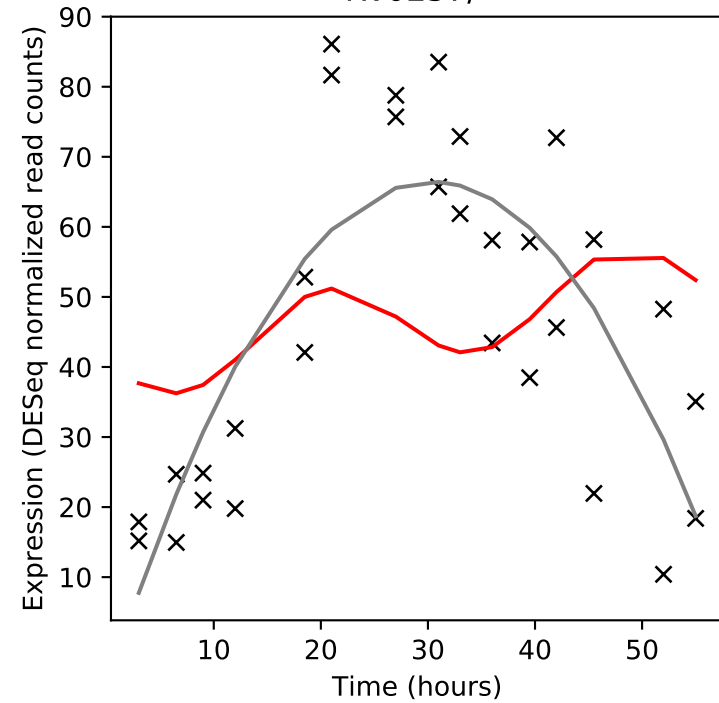

Rv0258c/-

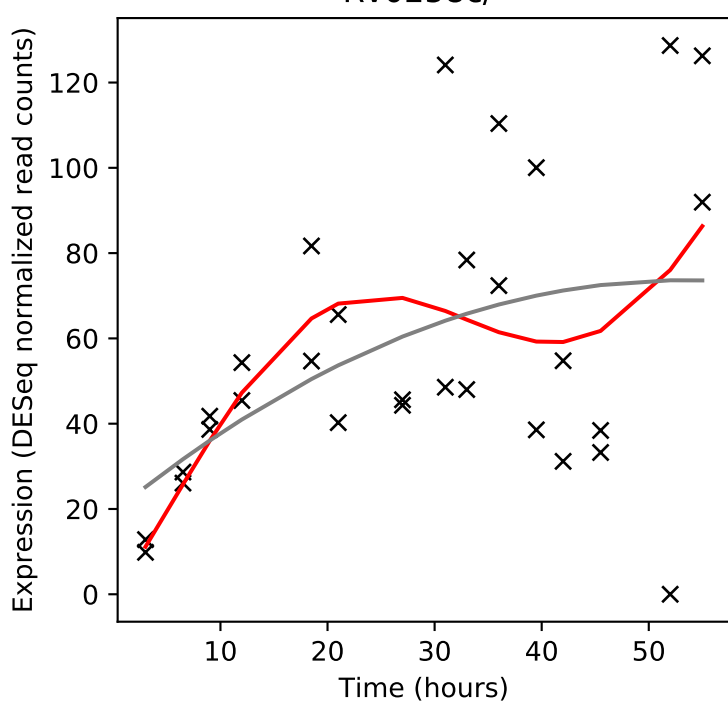

Rv0259c/-

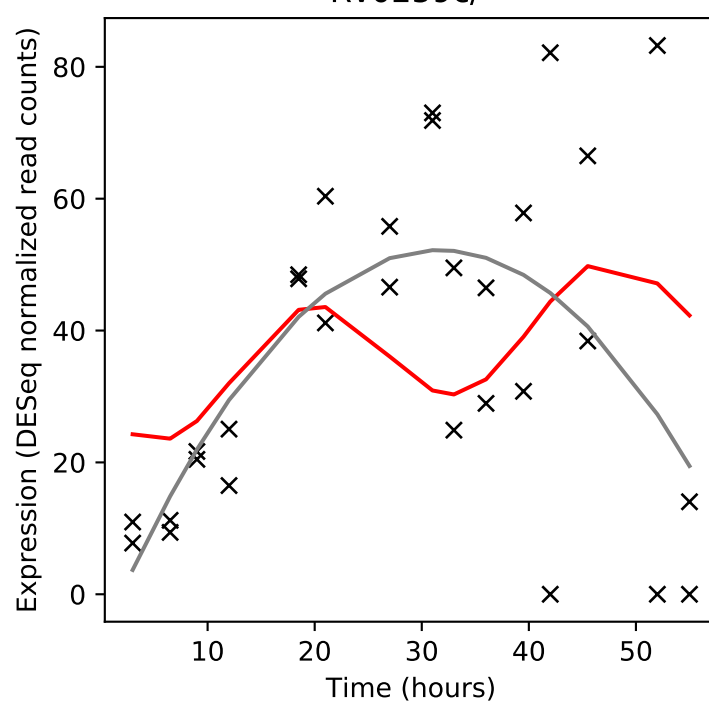

Rv0260c/-

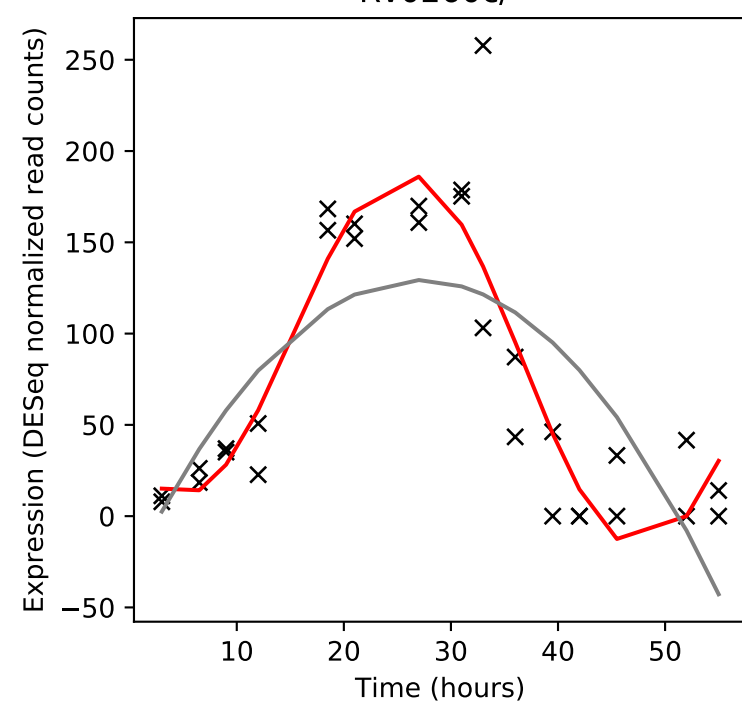

Rv0261c/narK3

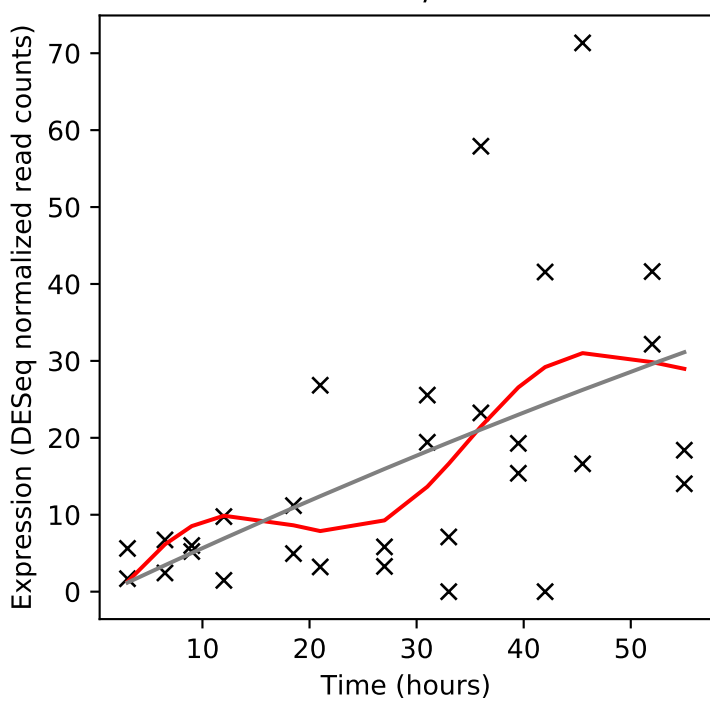

Rv0262c/aac

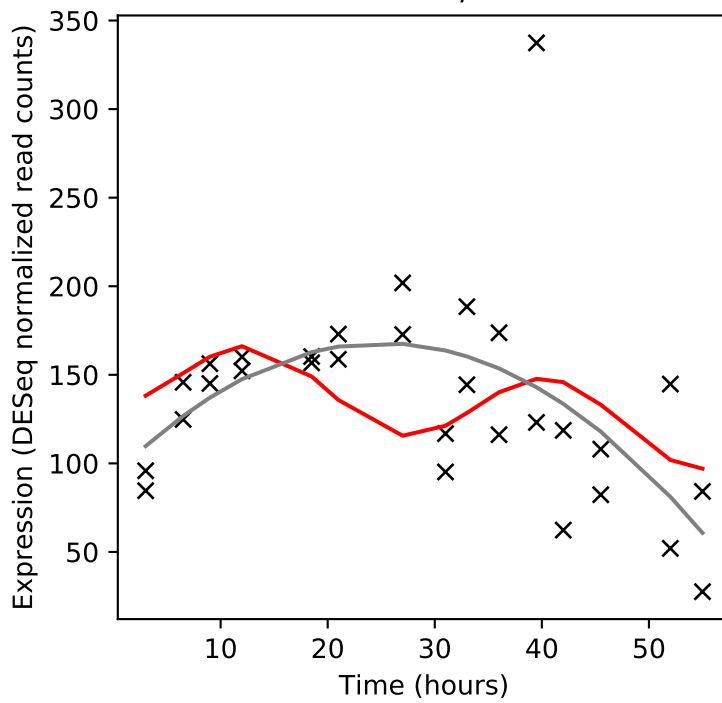

Rv0263c/-

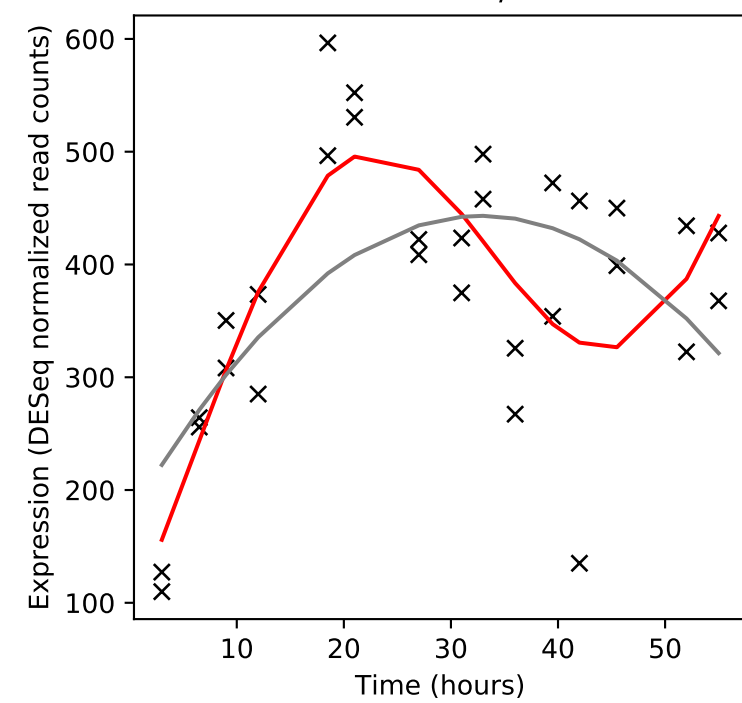

Rv0264c/-

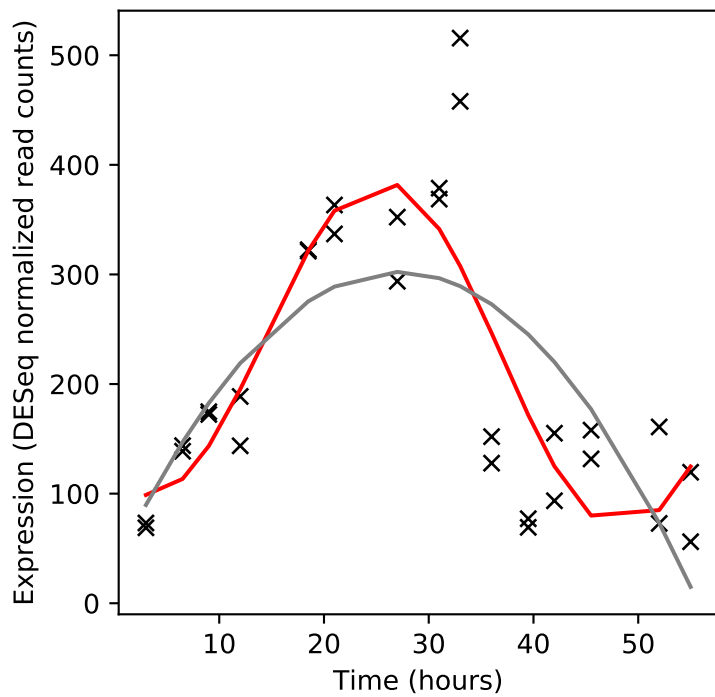

Rv0265c/-

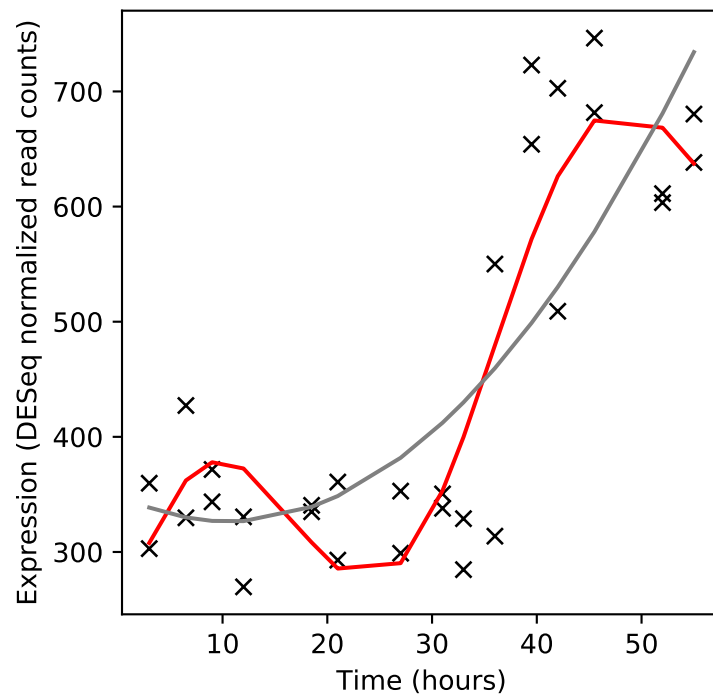

Rv0266c/oplA

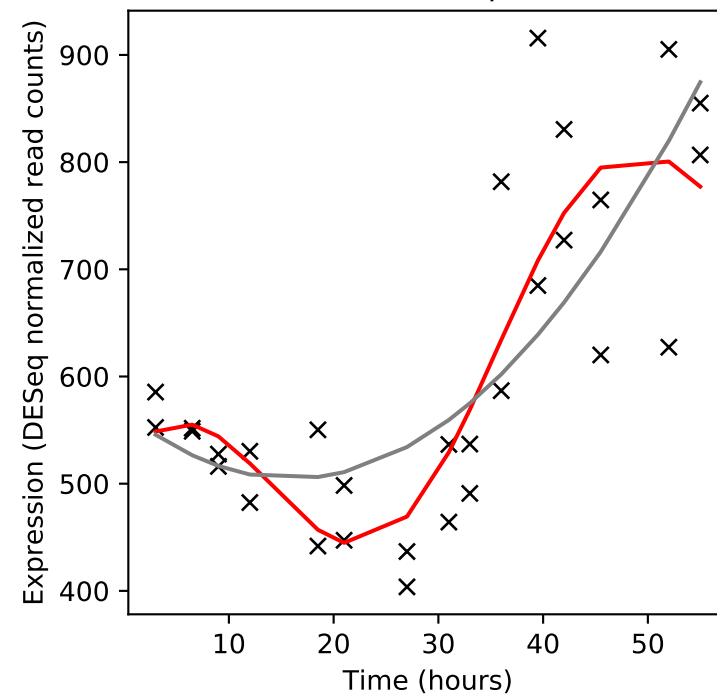

Rv0267/narU

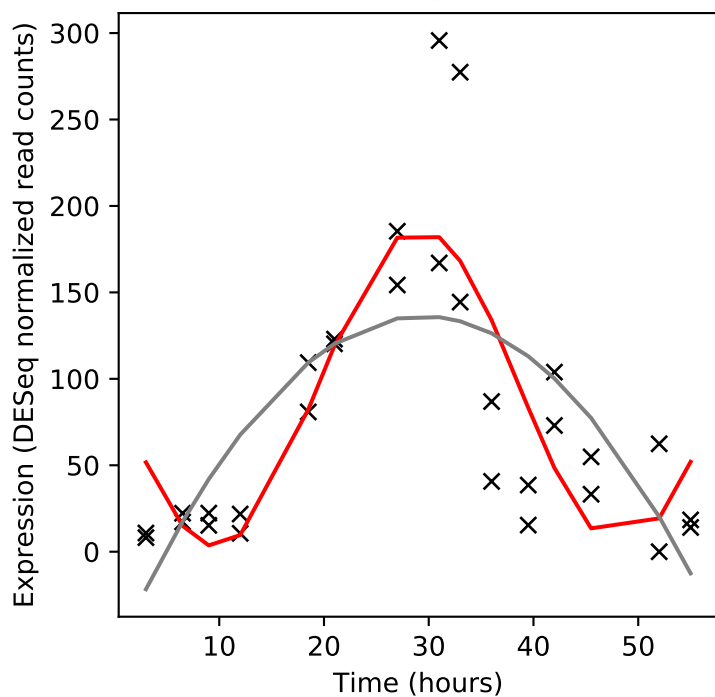

Rv0268c/-

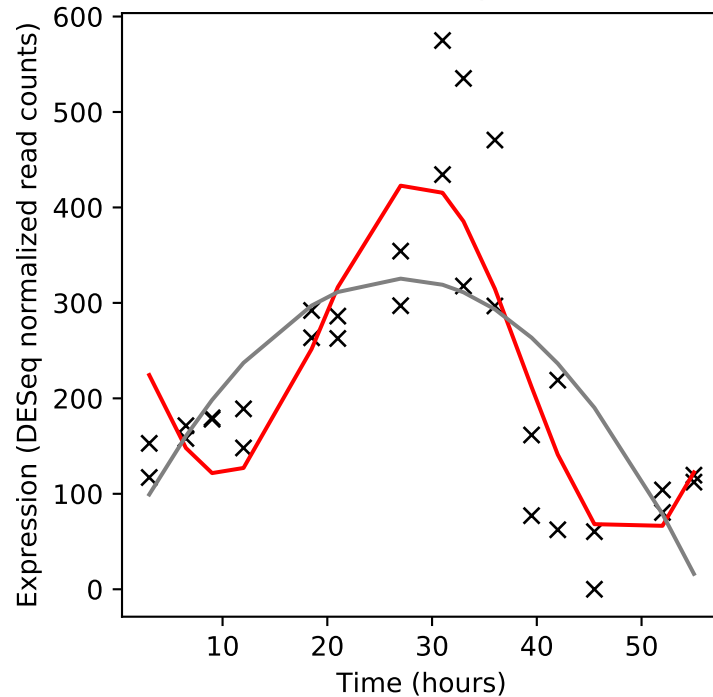

Rv0269c/-

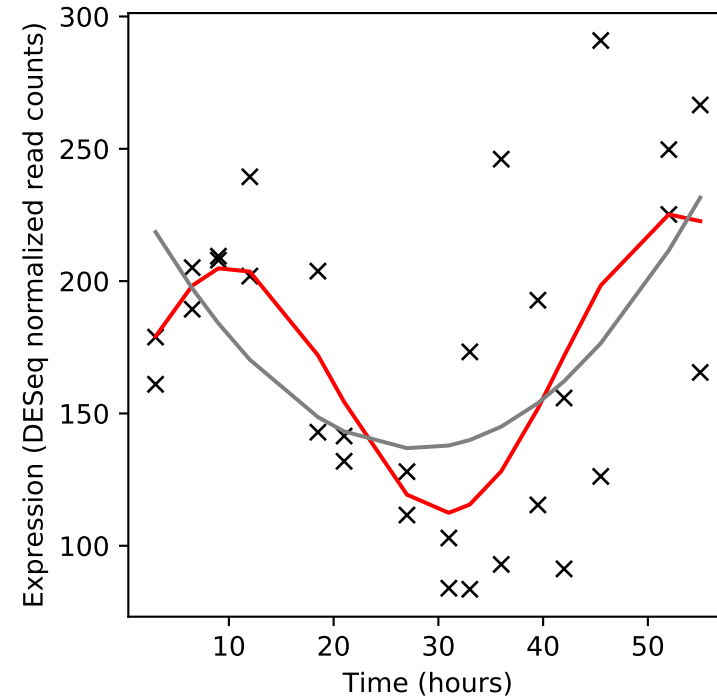

Rv0270/fadD2

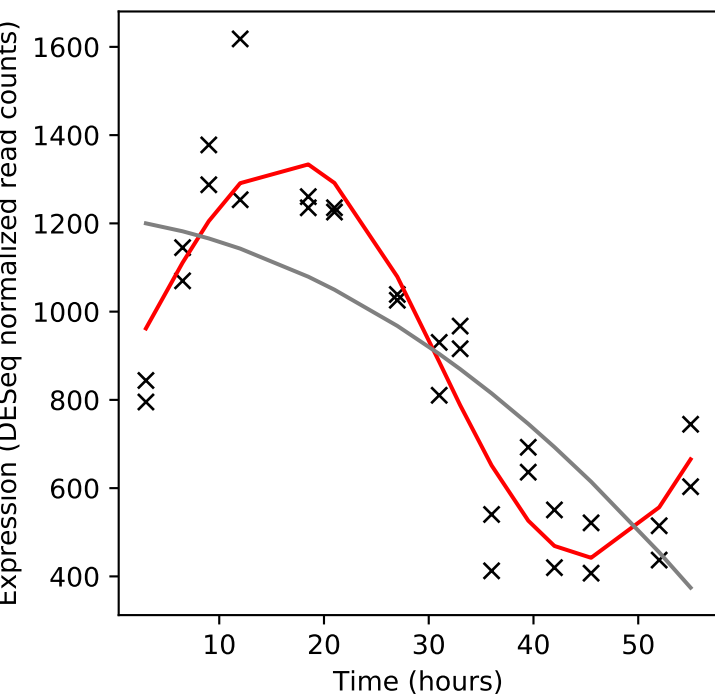

Rv0271c/fadE6

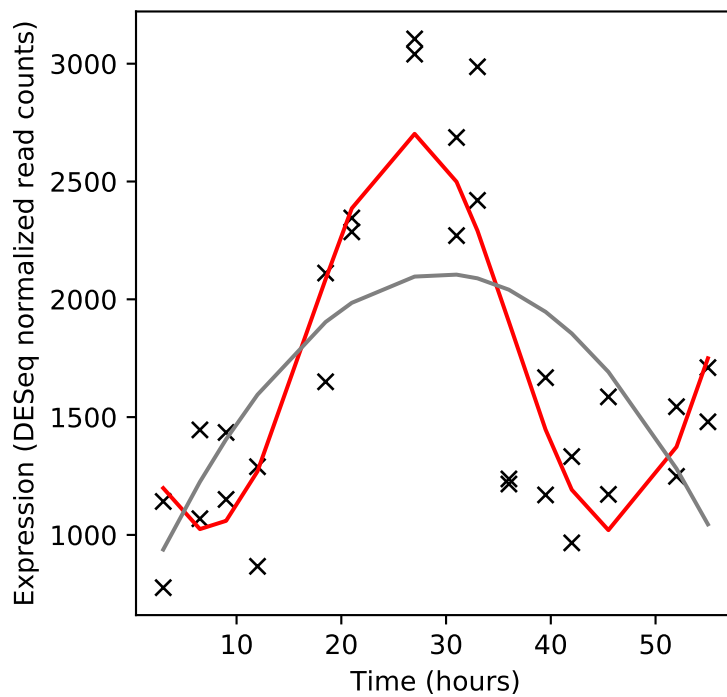

Rv0272c/-

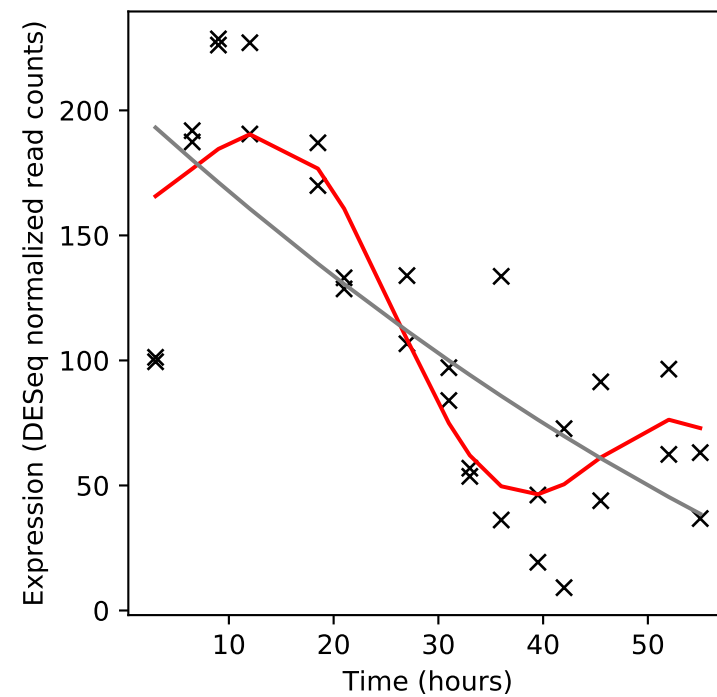

Rv0273c/-

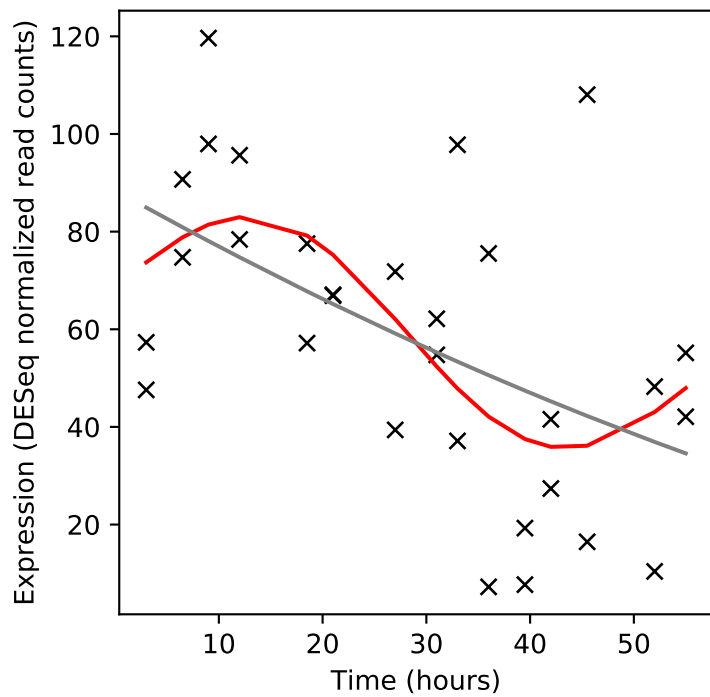

Rv0274/-

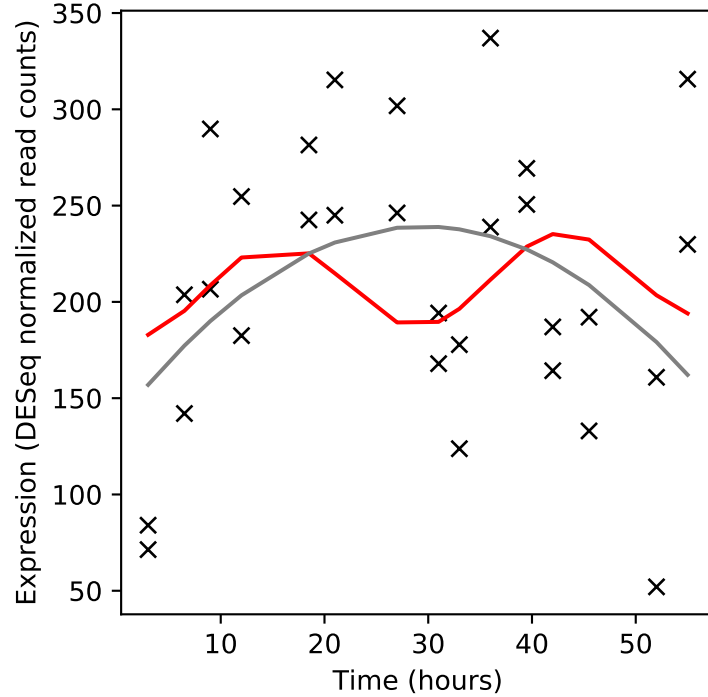

Rv0275c/-

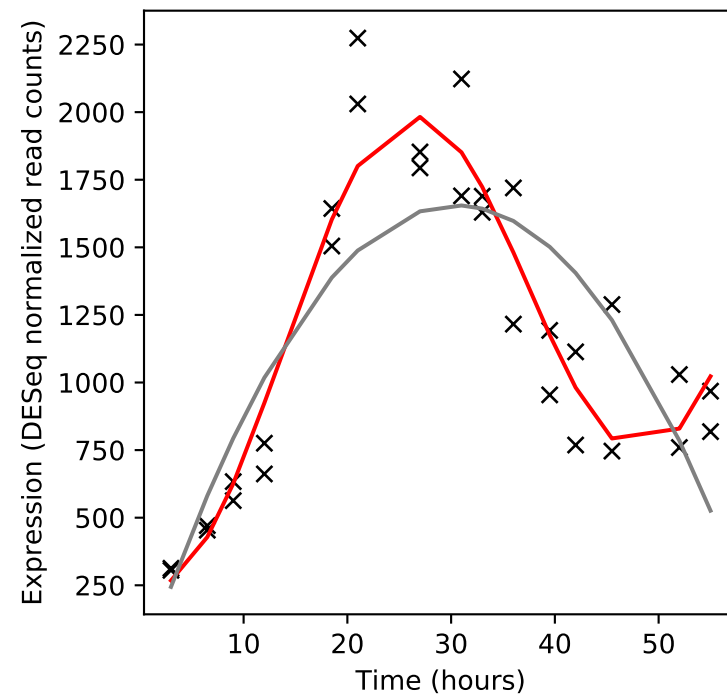

Rv0276/-

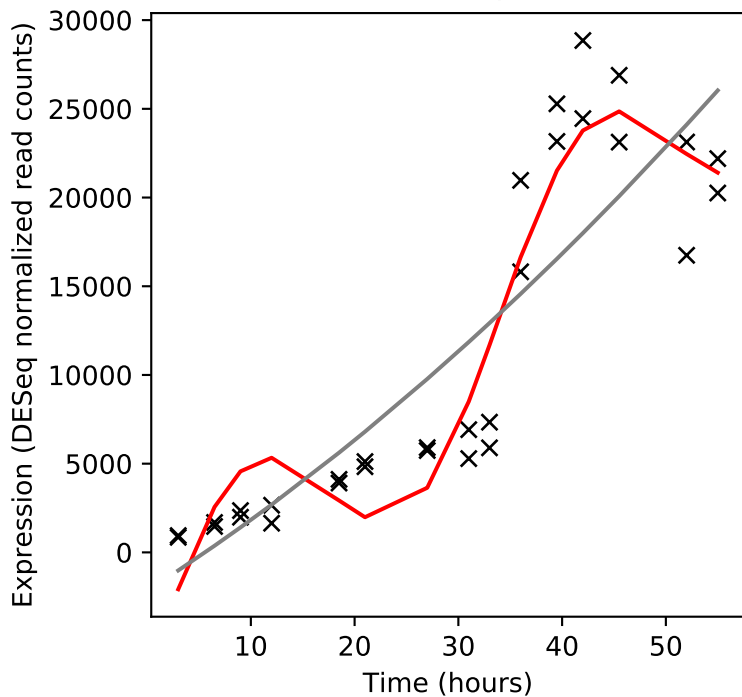

Rv0277c/vapC25

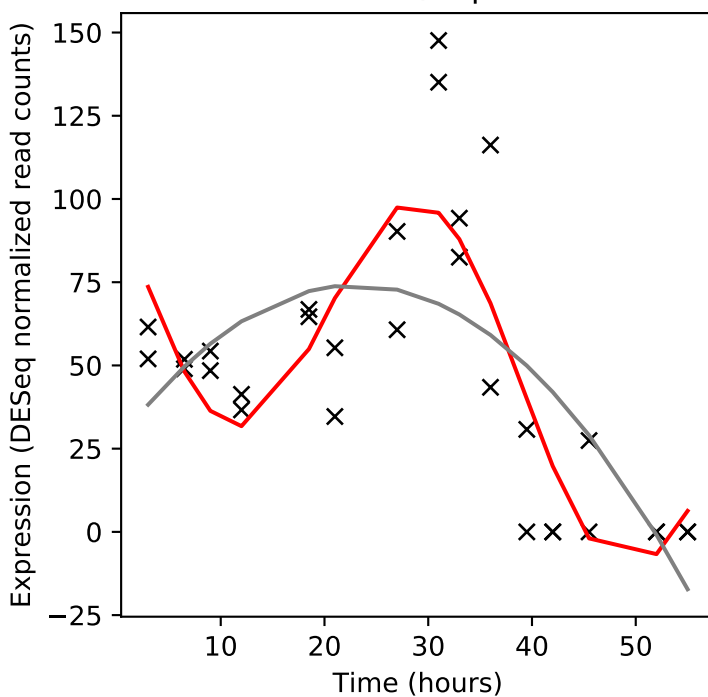

Rv0278c/PE\_PGRS3

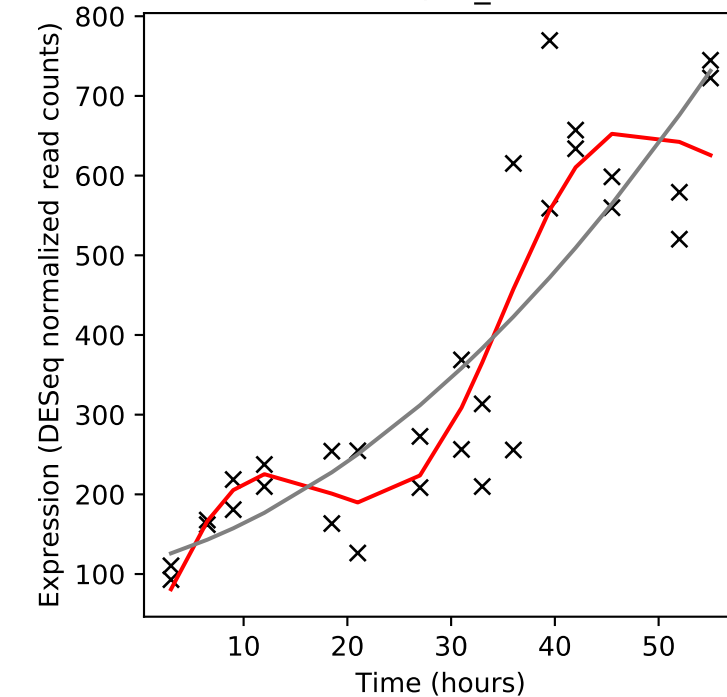

Rv0279c/PE\_PGRS4

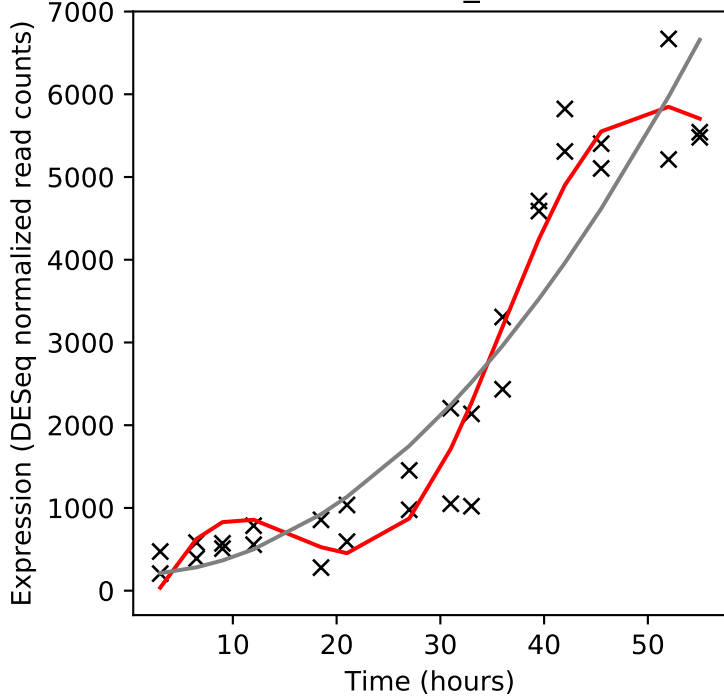

Rv0280/PPE3

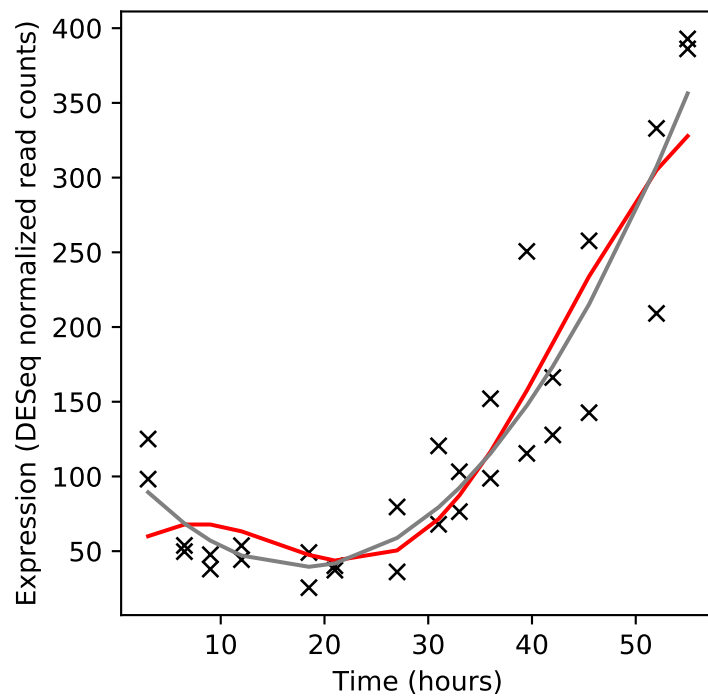

Rv0281/-

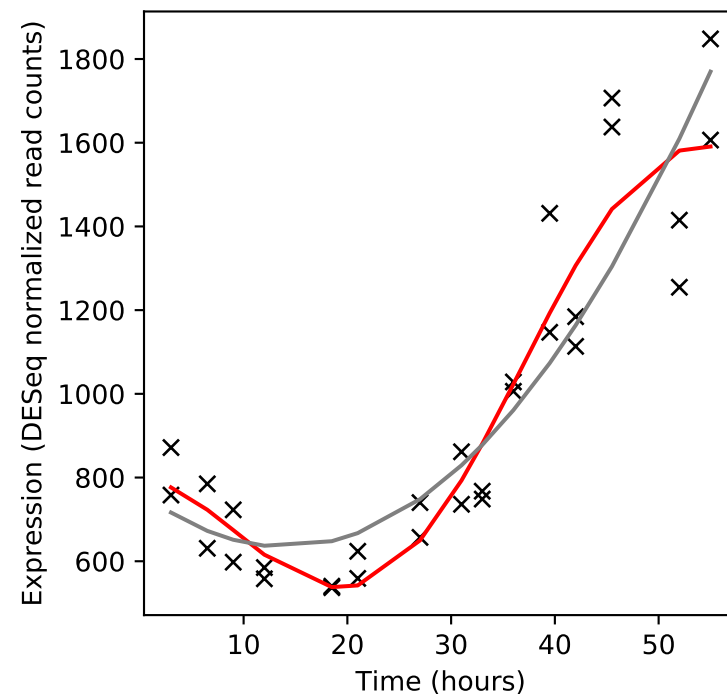

Rv0282/eccA3

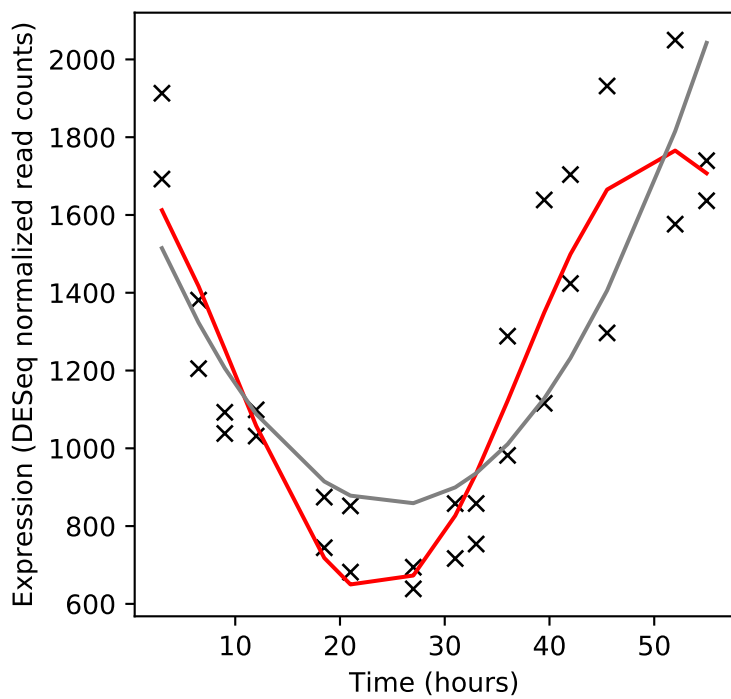

Rv0283/eccB3

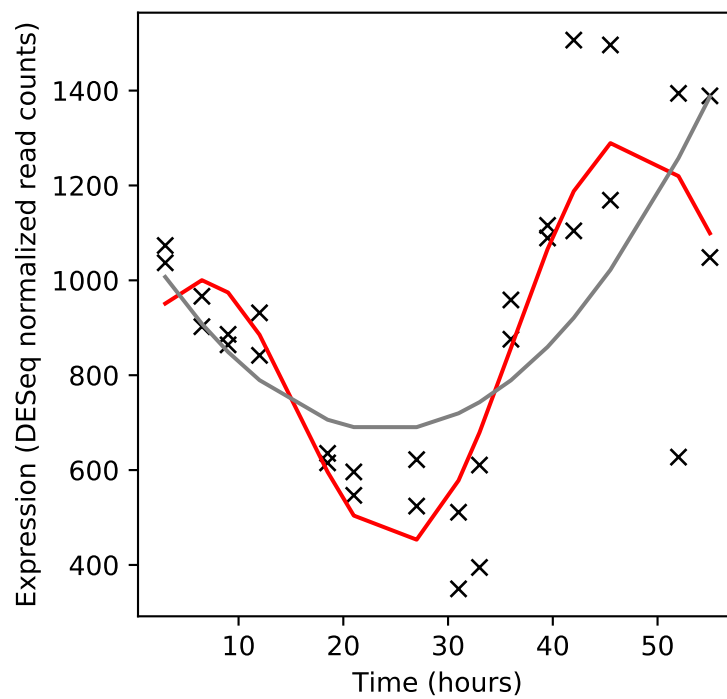

Rv0284/eccC3

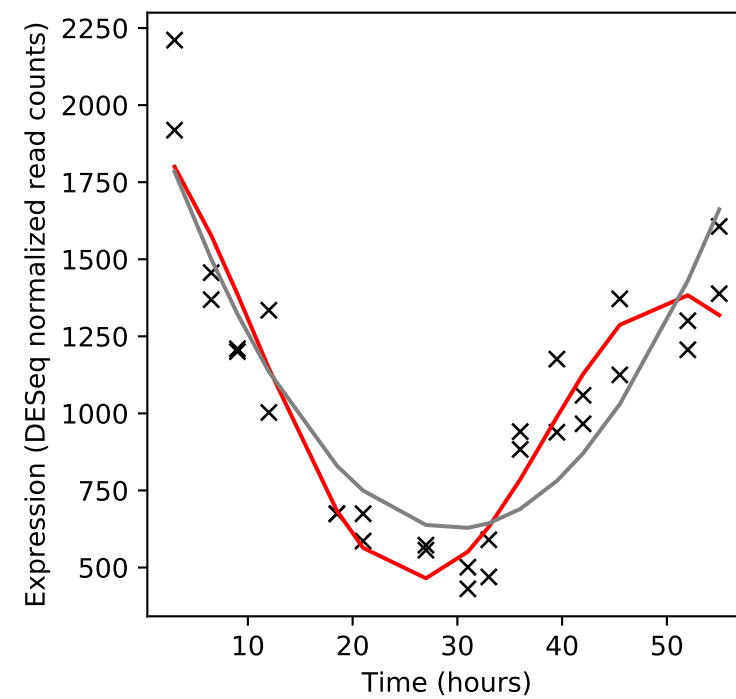

Rv0285/PE5

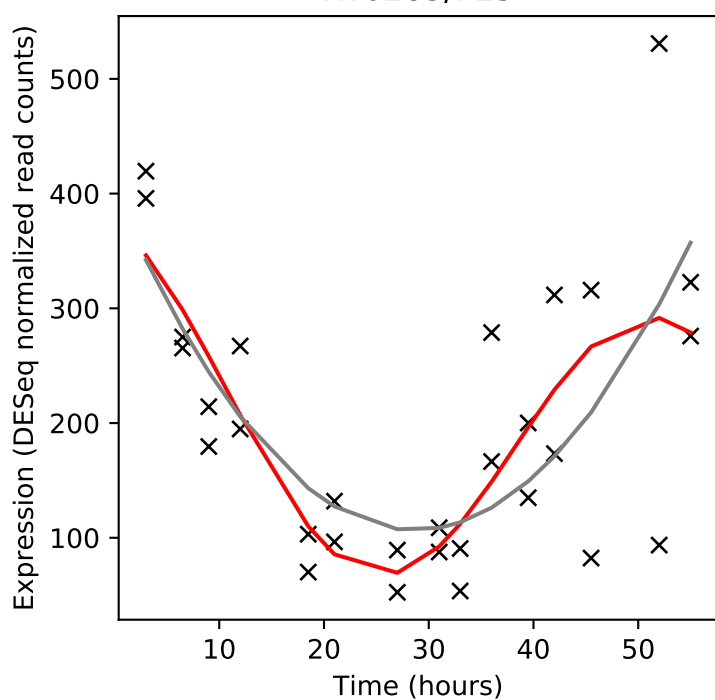

Rv0286/PPE4

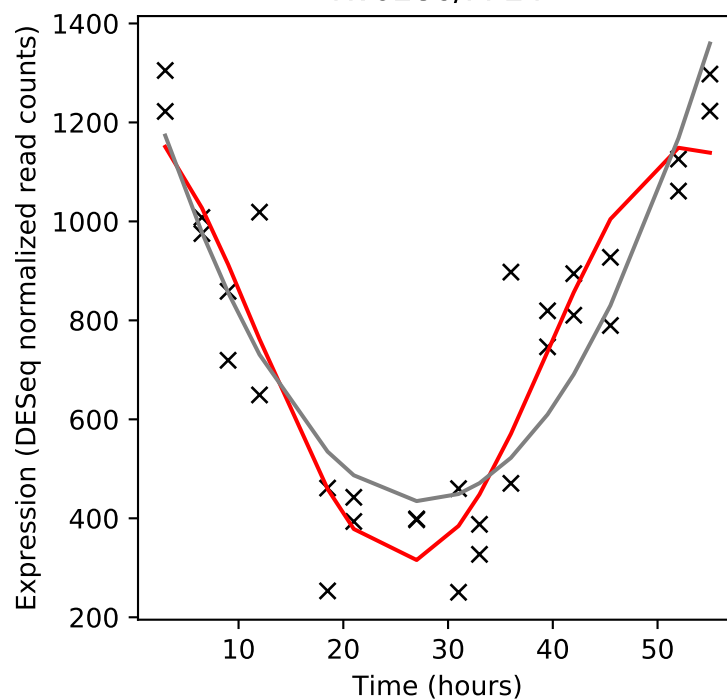

Rv0287/esxG

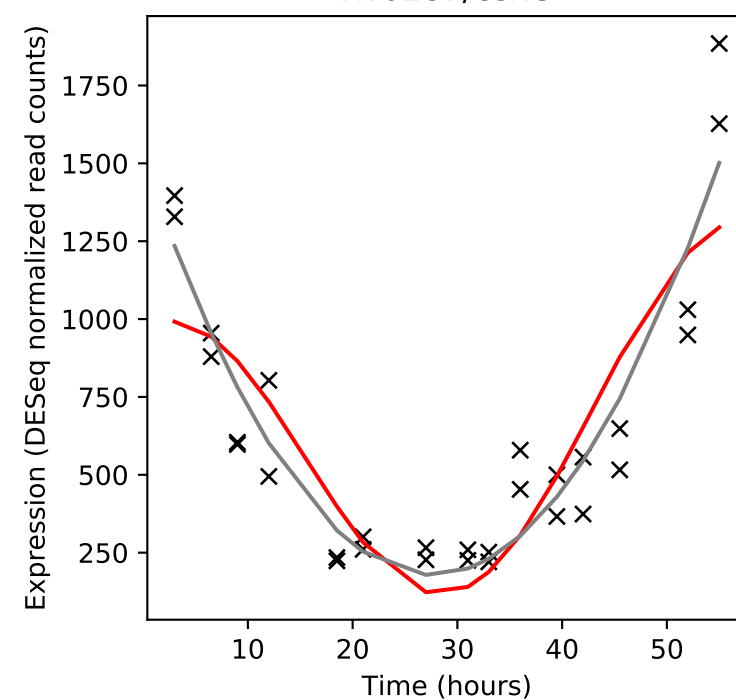

Rv0288/esxH

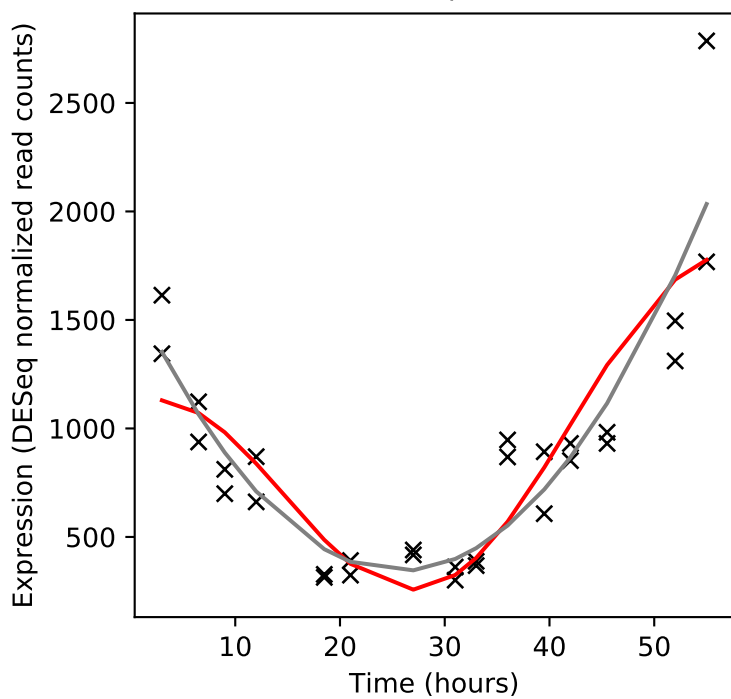

Rv0289/espG3

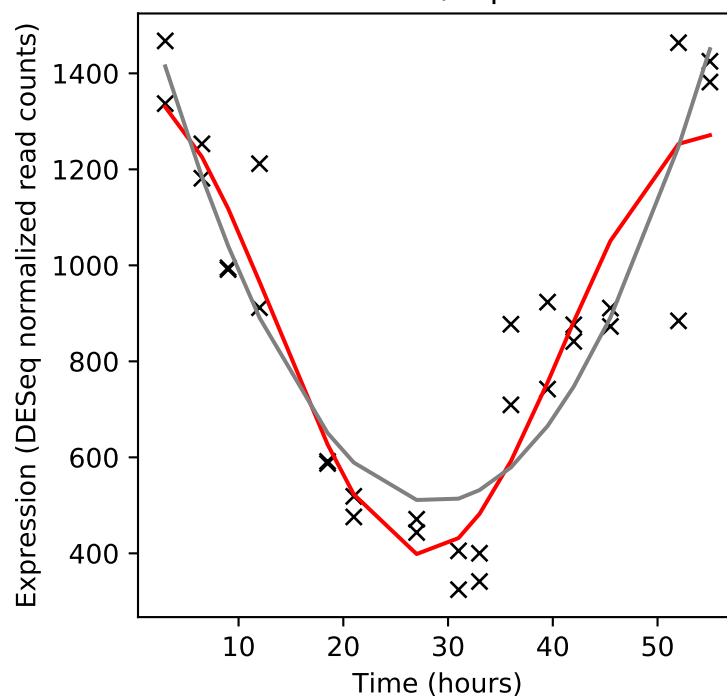

Rv0290/eccD3

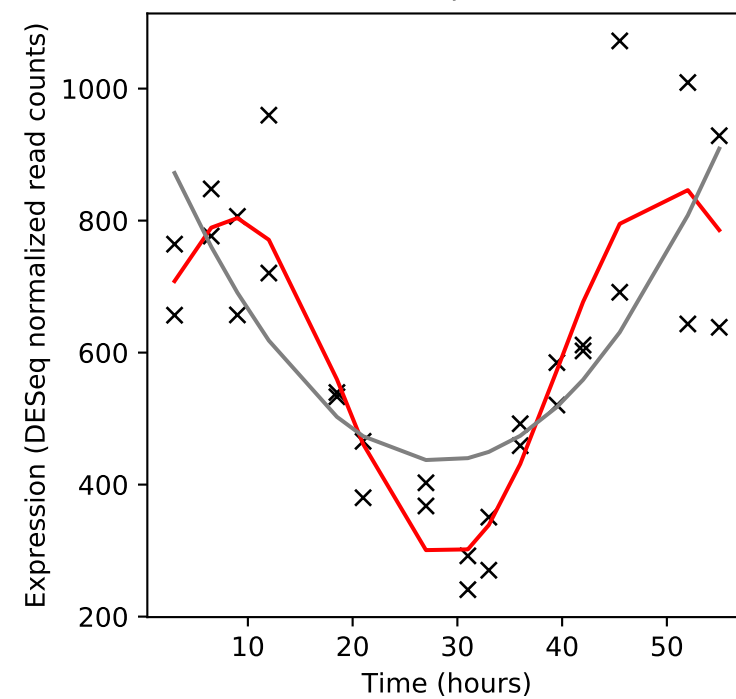

Rv0291/mycP3

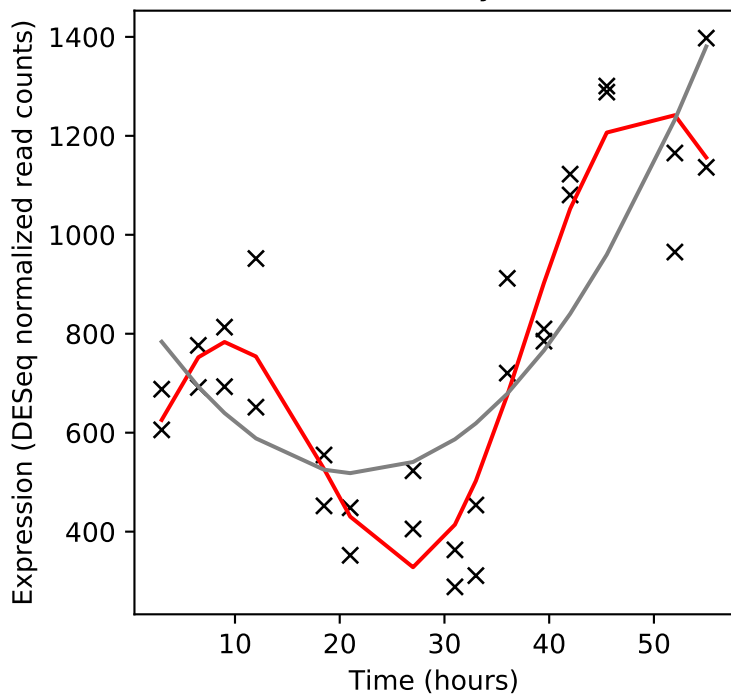

Rv0292/eccE3

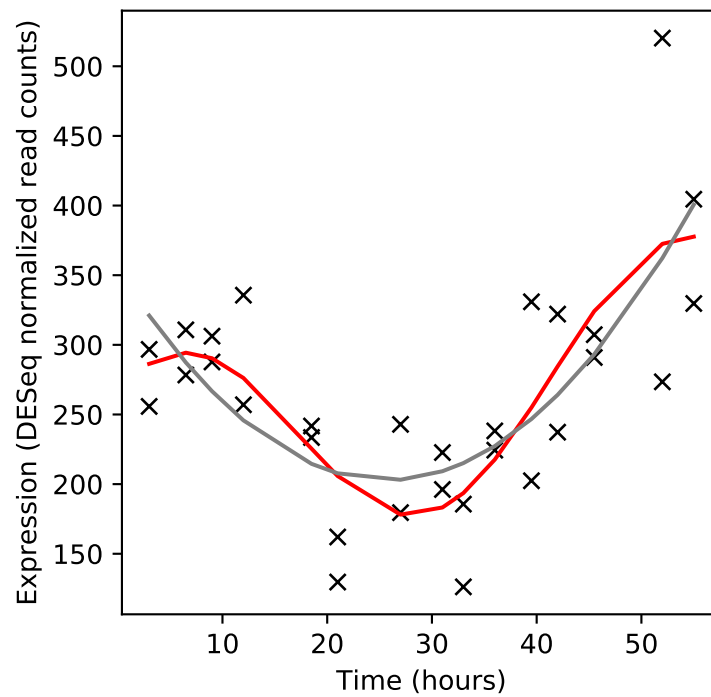

Rv0293c/-

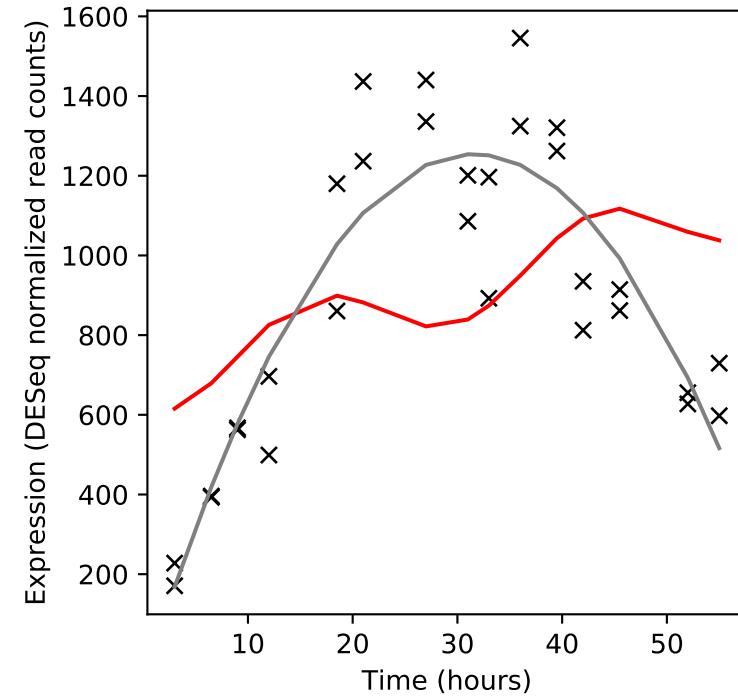

Rv0294/tam

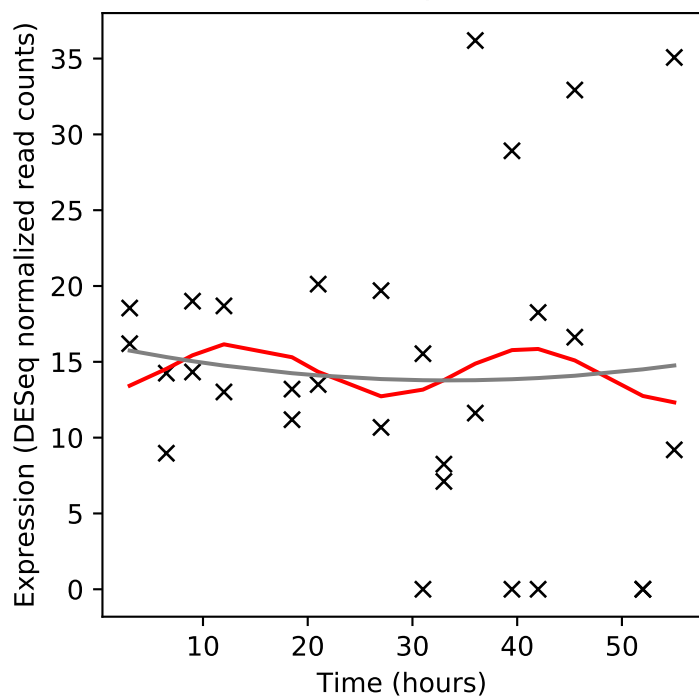

Rv0295c/-

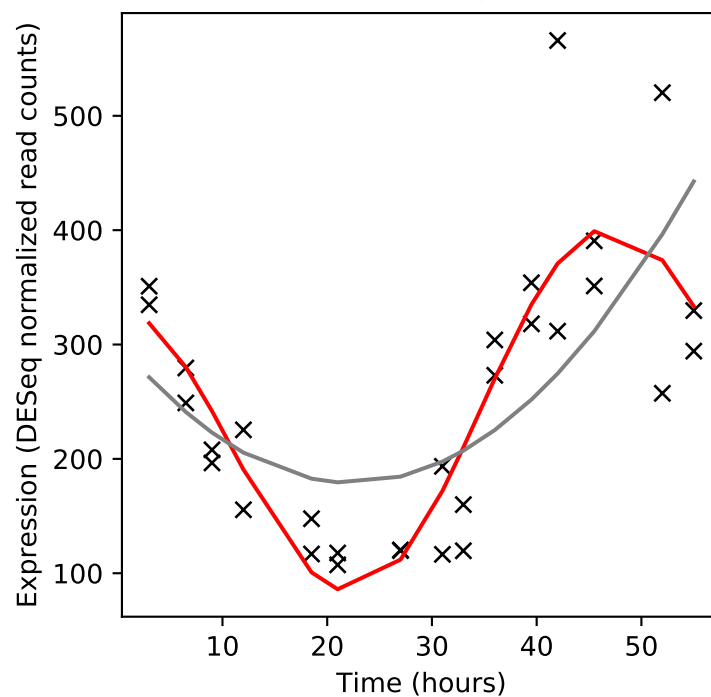

Rv0296c/-

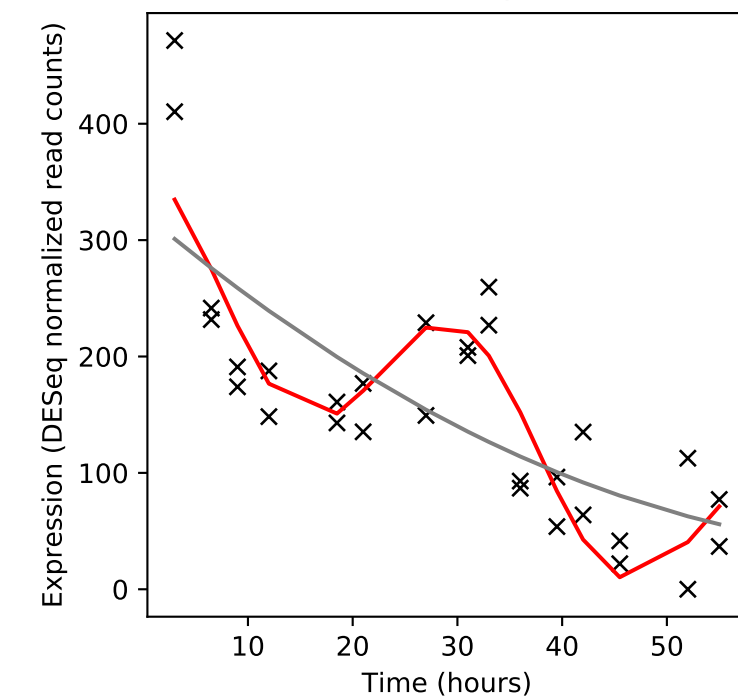

Rv0297/PE\_PGRS5

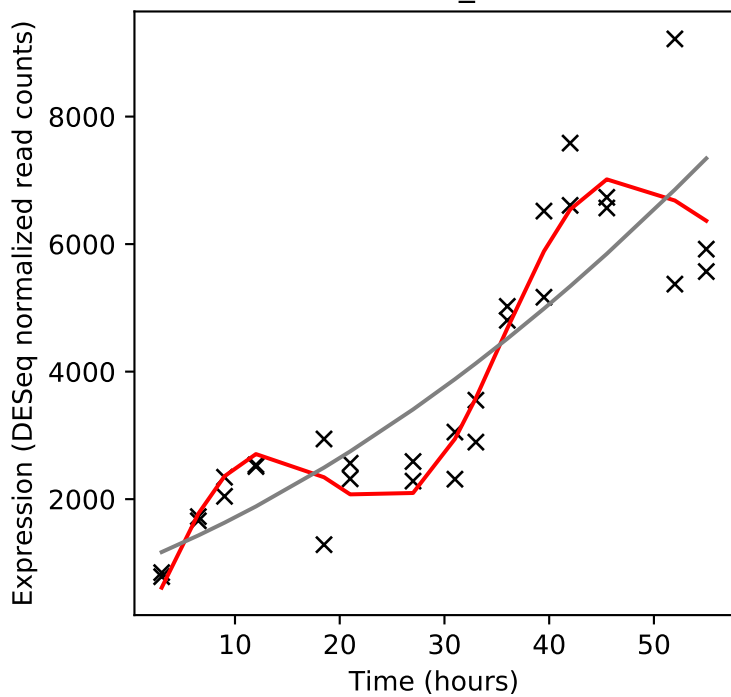

Rv0298/-

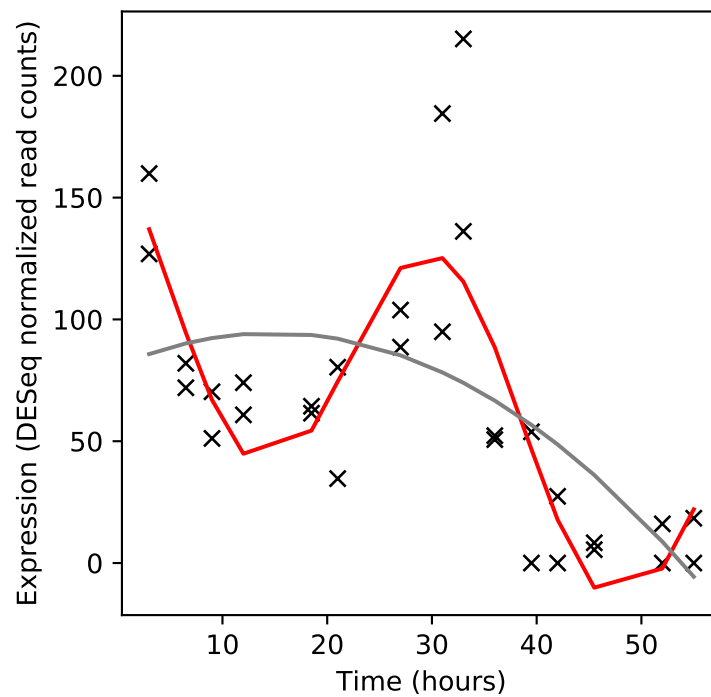

Rv0299/-

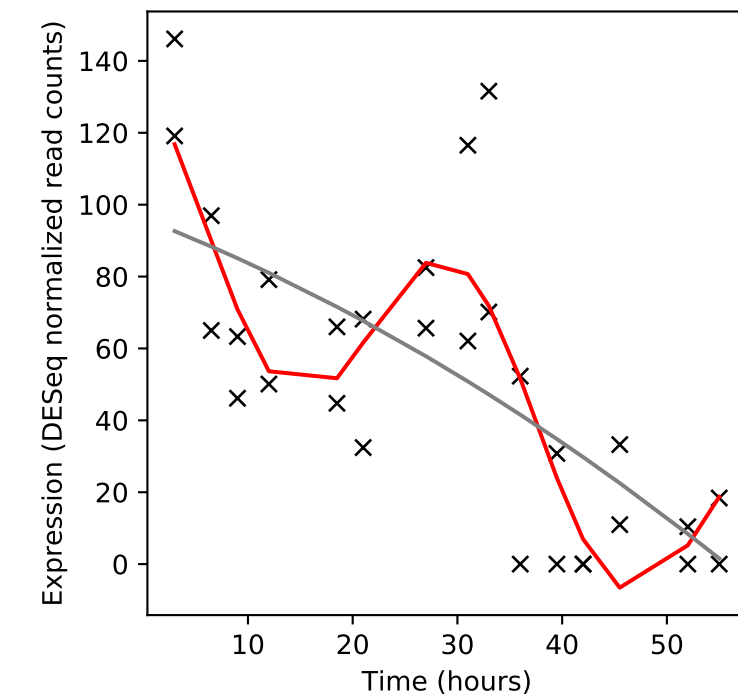

Rv0300/vapB2

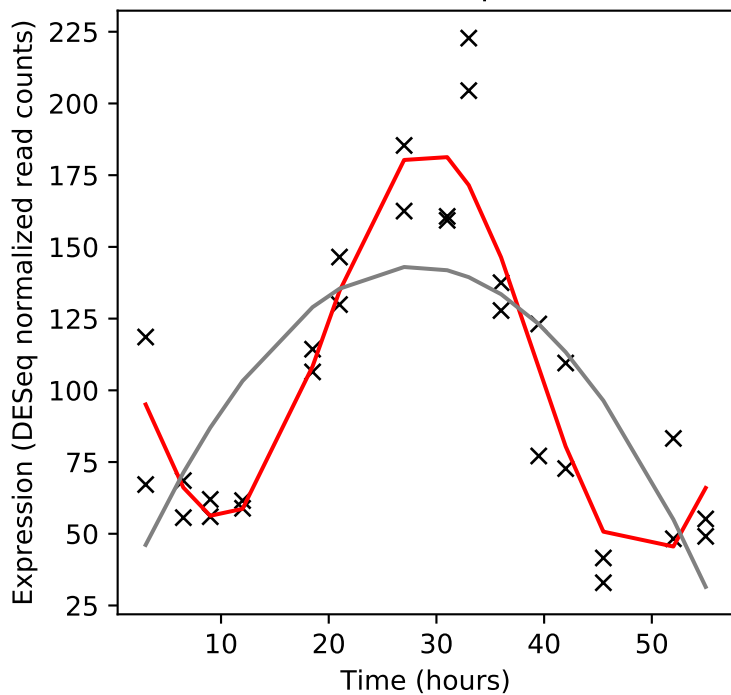

Rv0301/vapC2

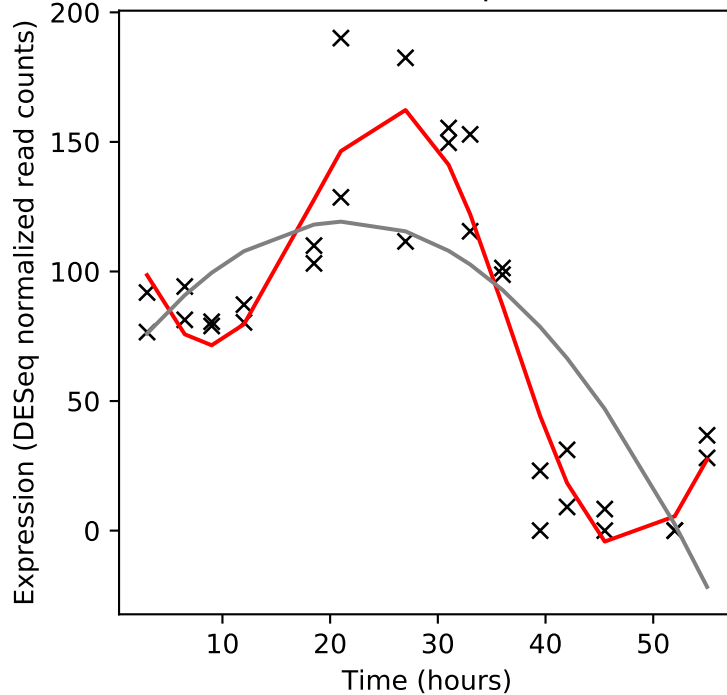

Rv0302/-

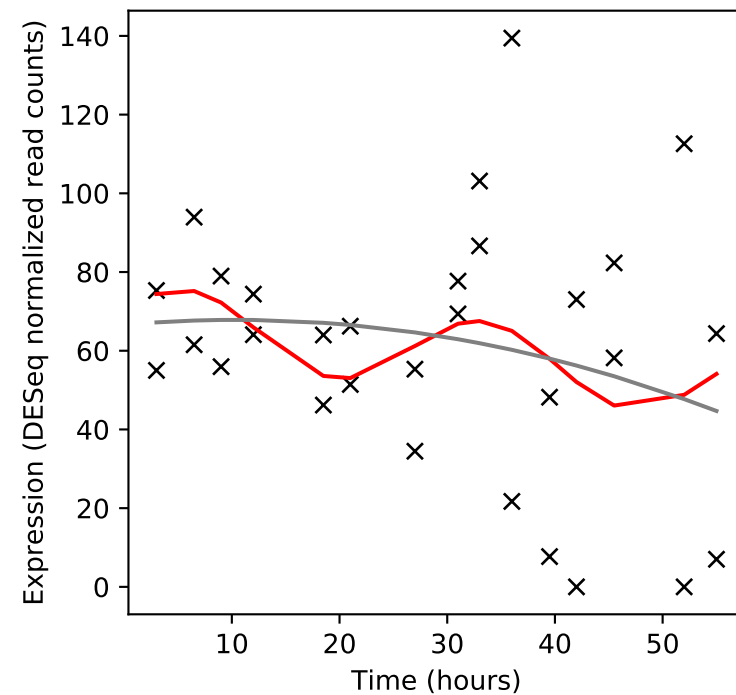

Rv0303/-

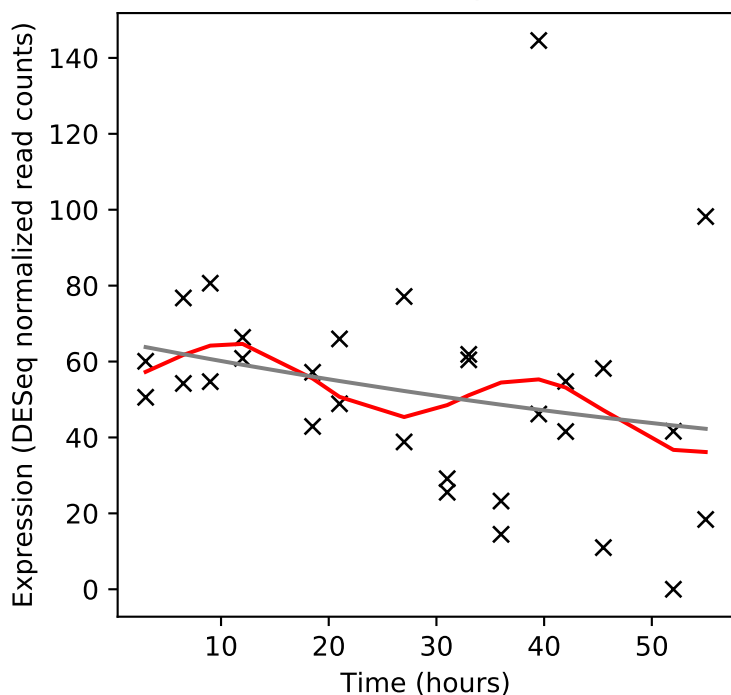

Rv0304c/PPE5

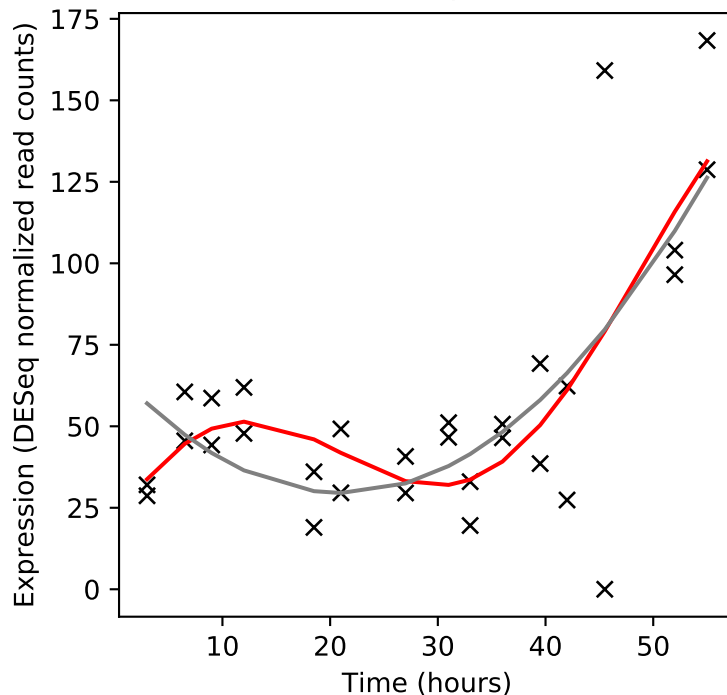

Rv0305c/PPE6

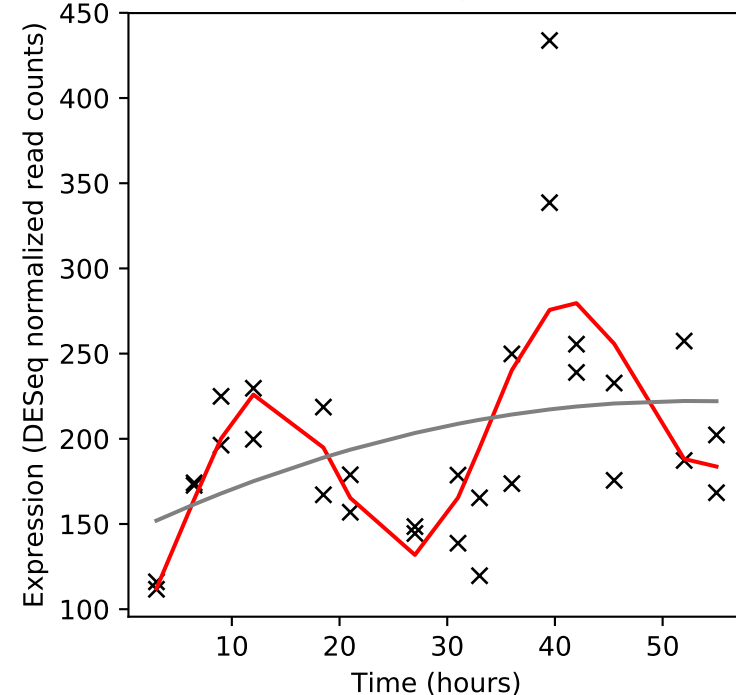

Rv0306/-

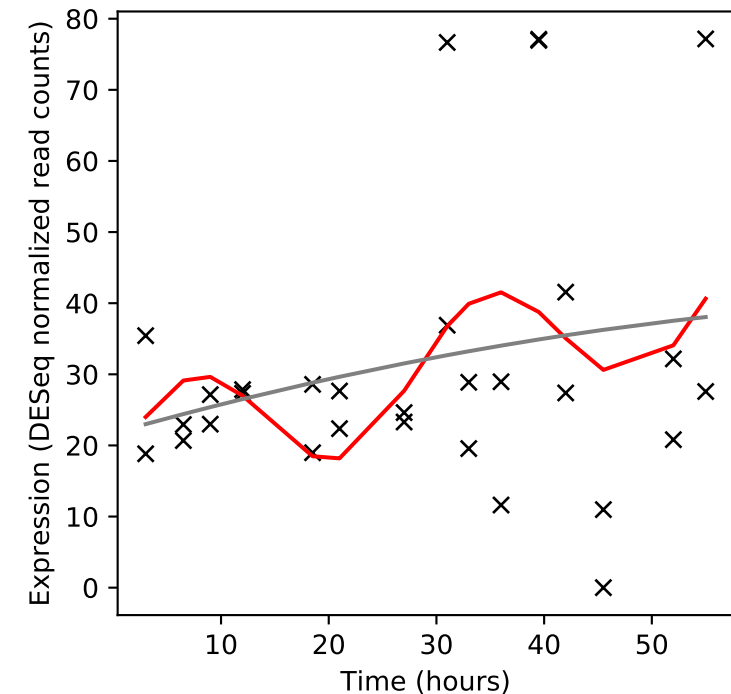

Rv0307c/-

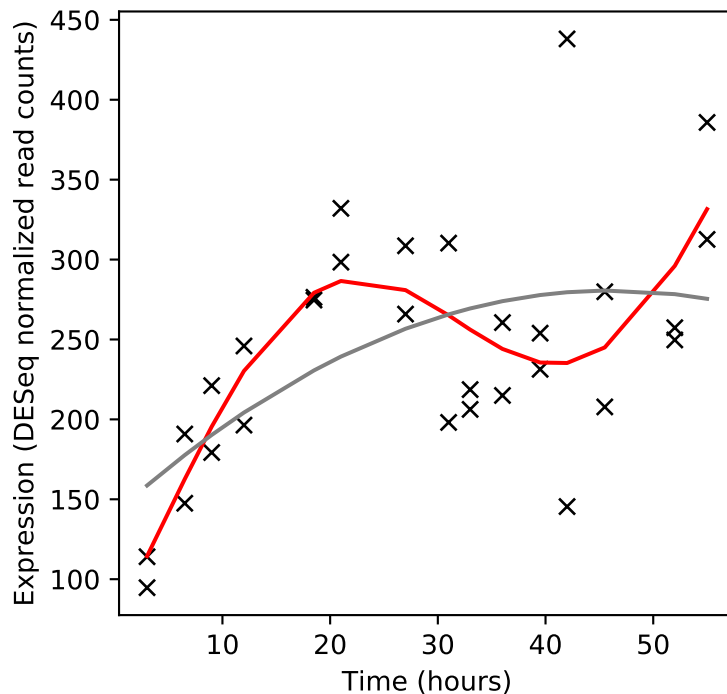

Rv0308/-

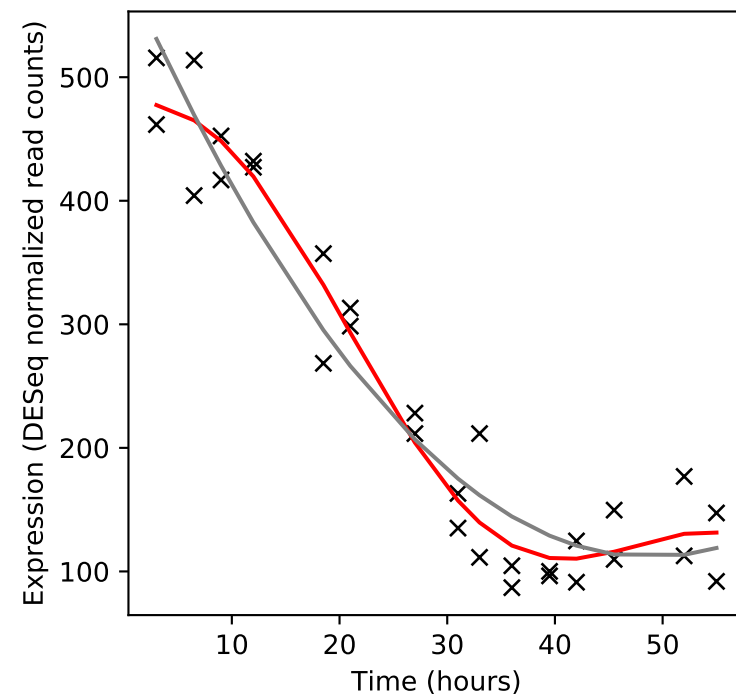

Rv0309/-

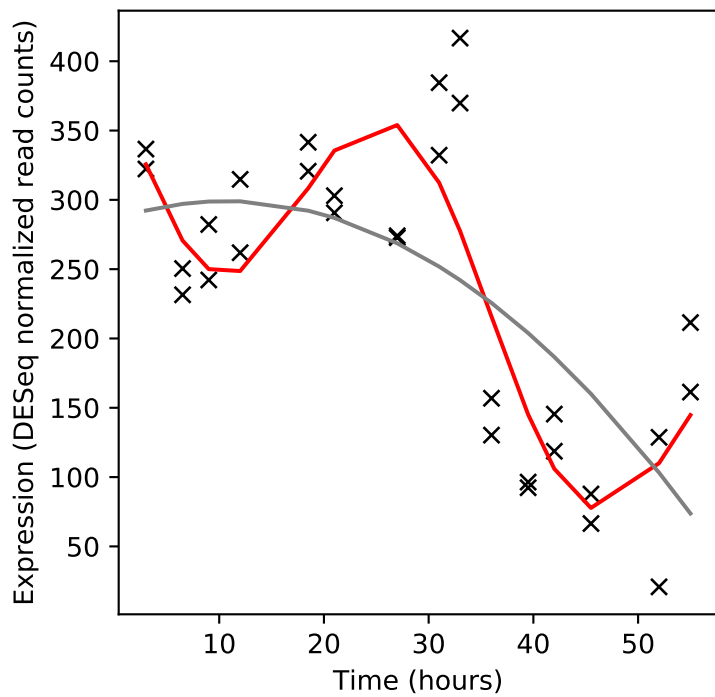

Rv0310c/-

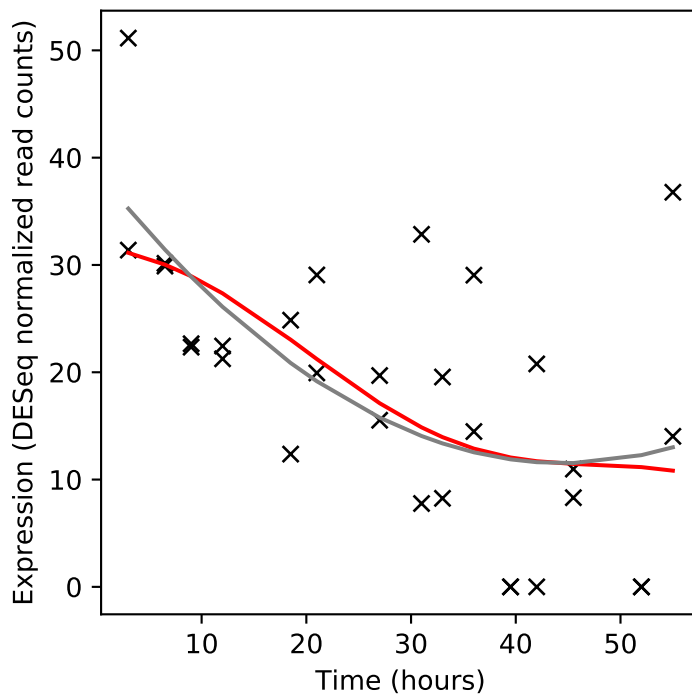

Rv0311/-

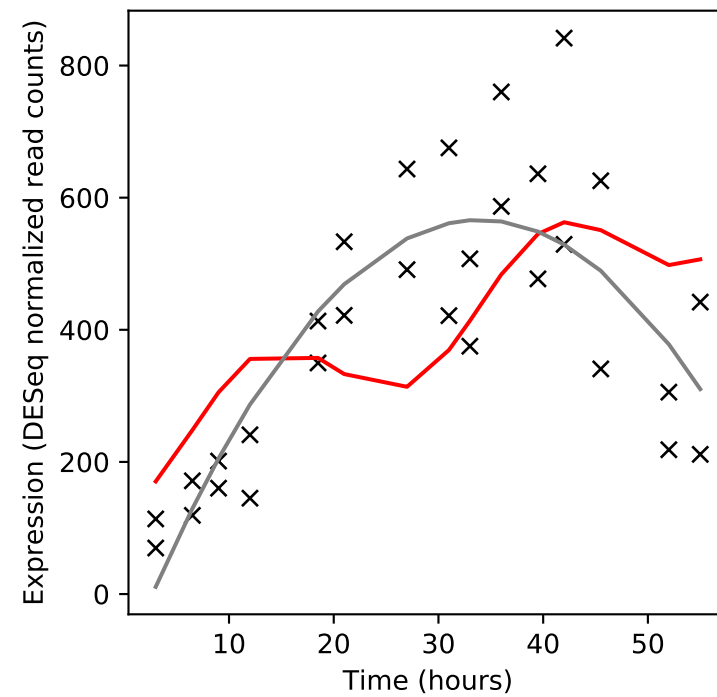

Rv0312/-

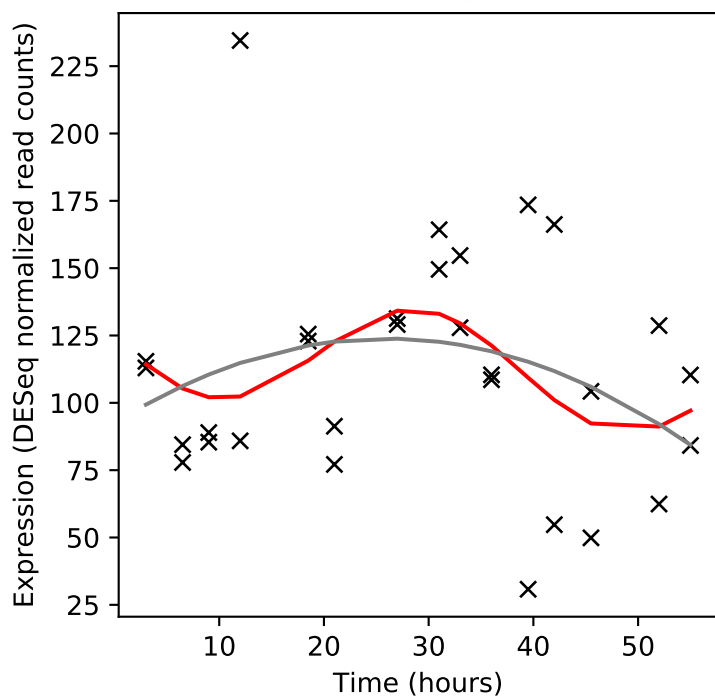

Rv0313/-

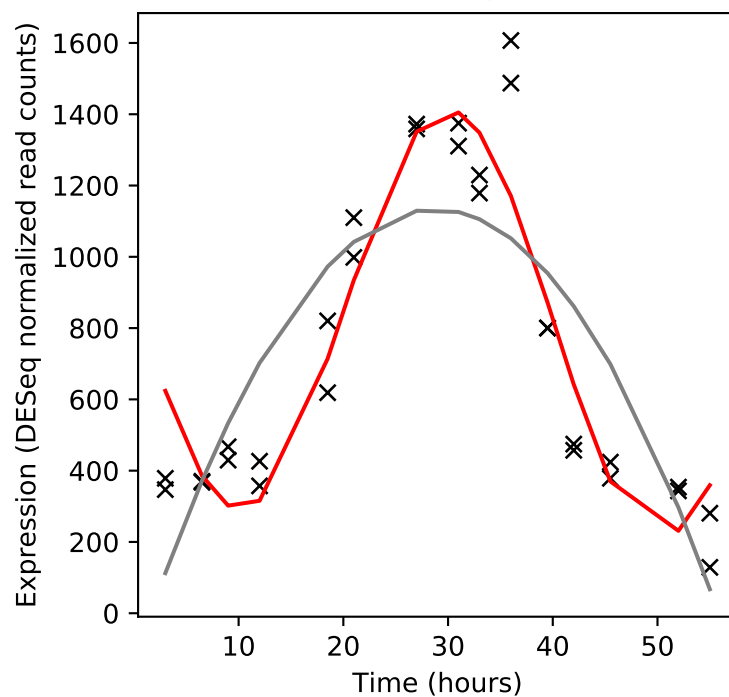

Rv0314c/-

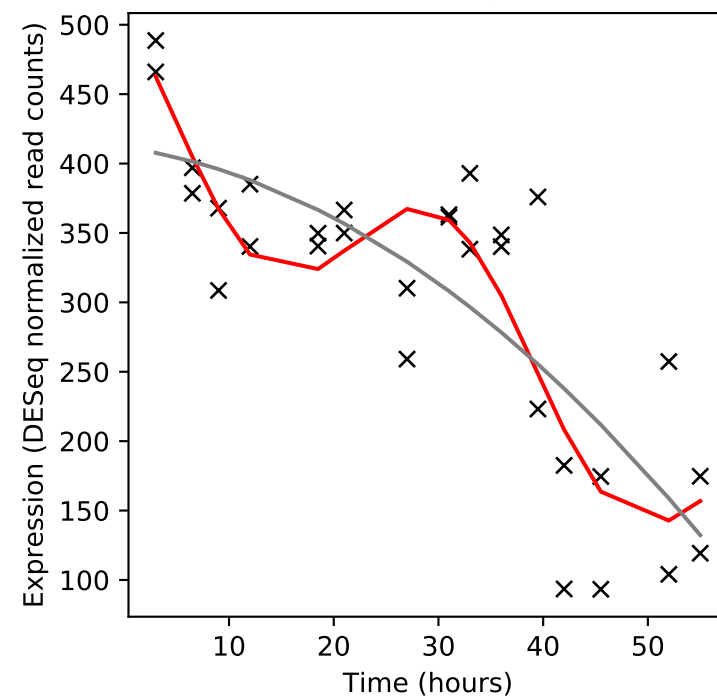

Rv0315/-

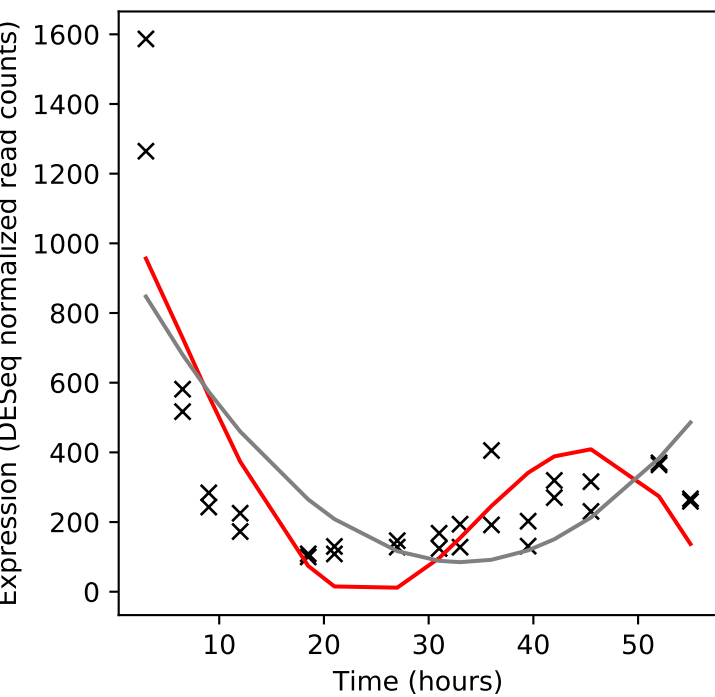

Rv0316/-

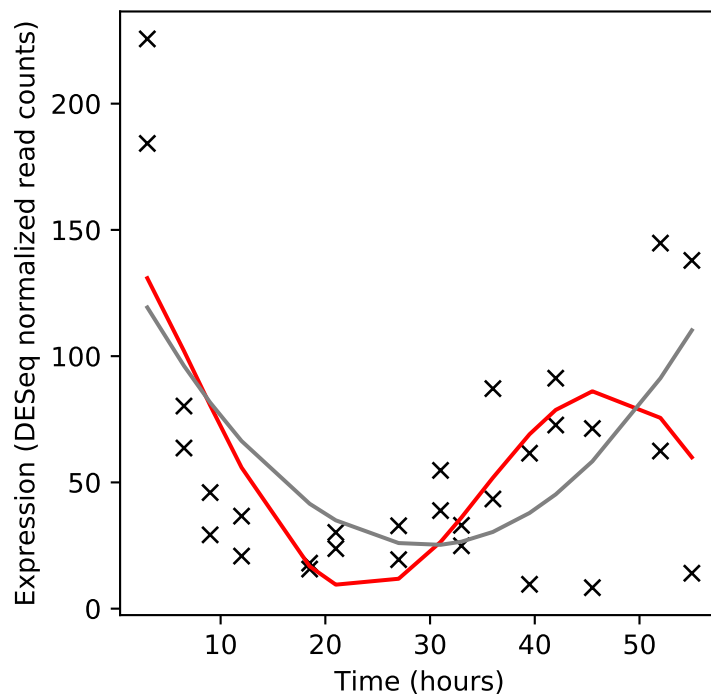

Rv0317c/glpQ2

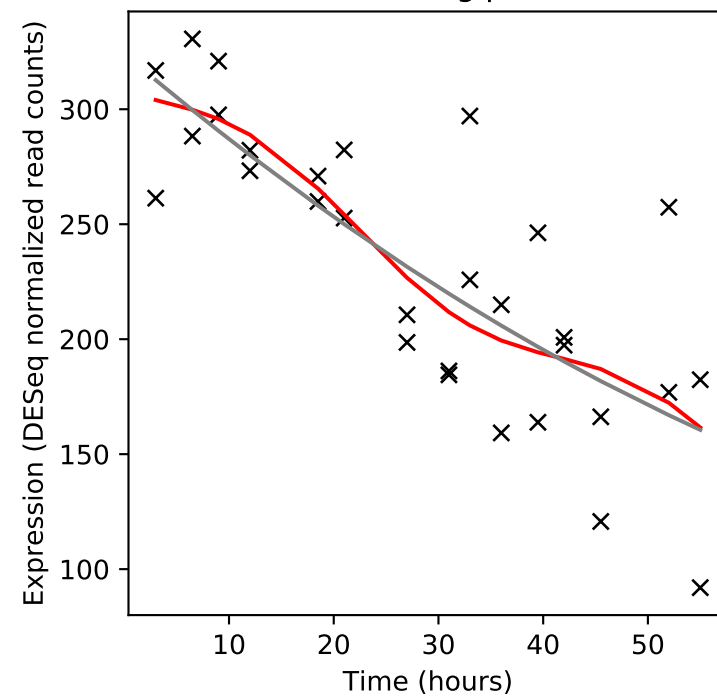



Rv0318c/-

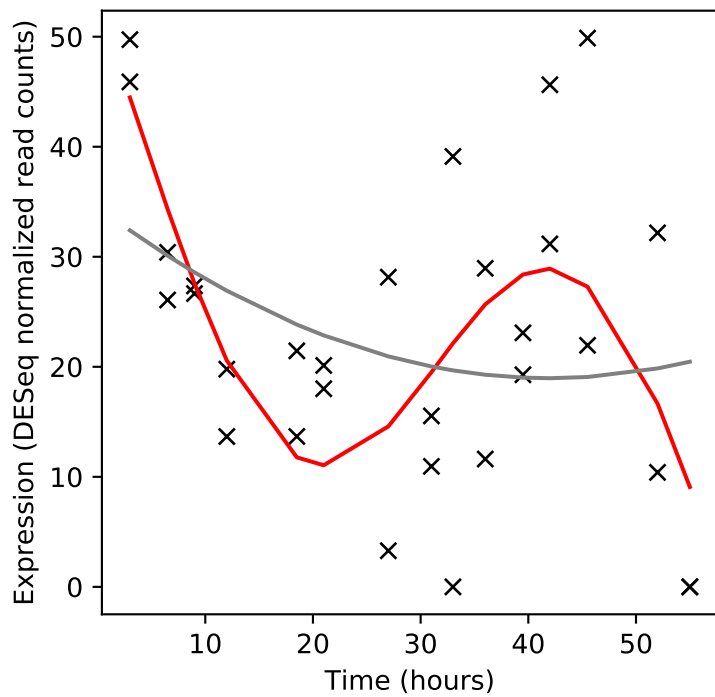

Rv0319/pcp

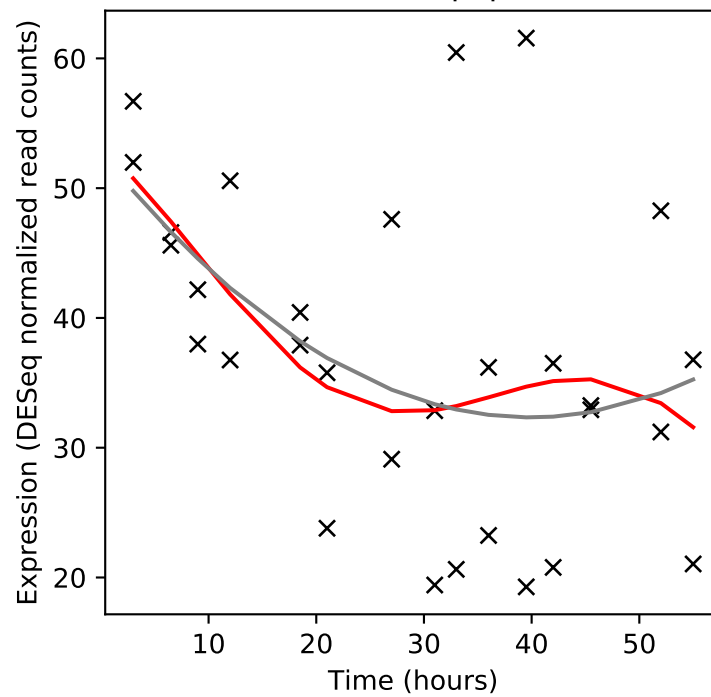

Rv0320/-

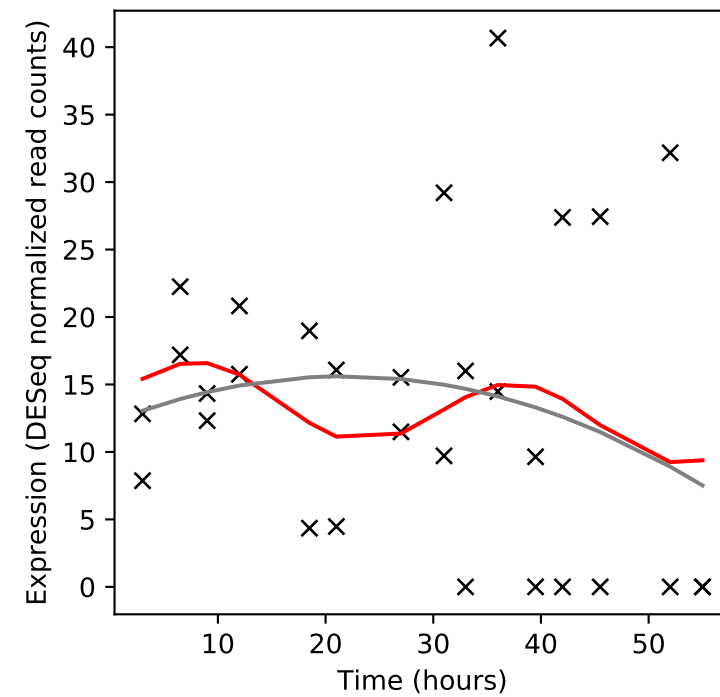

Rv0321/dcd

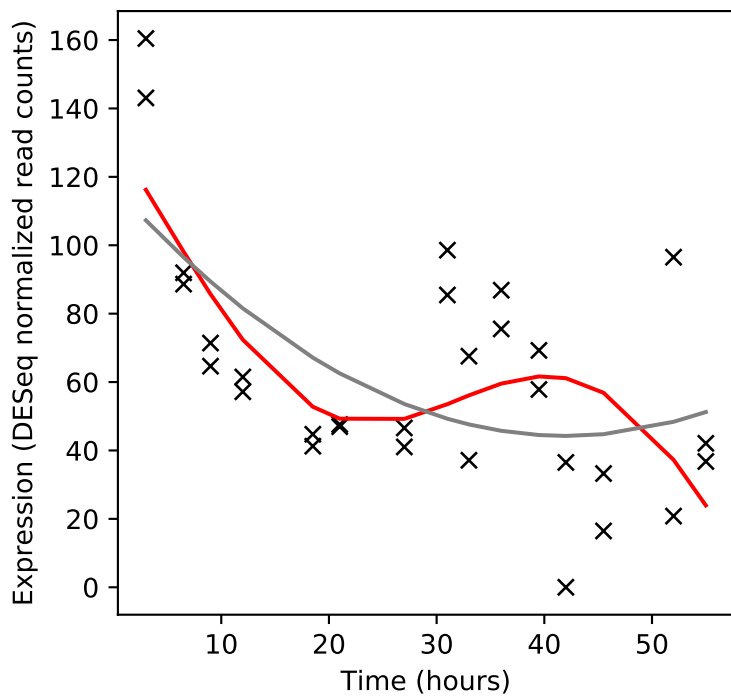

Rv0322/udgA

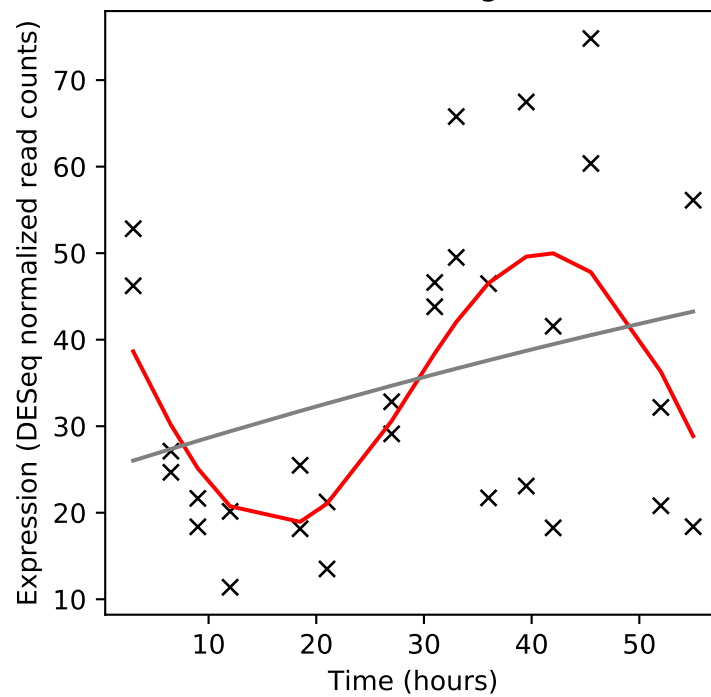

Rv0323c/-

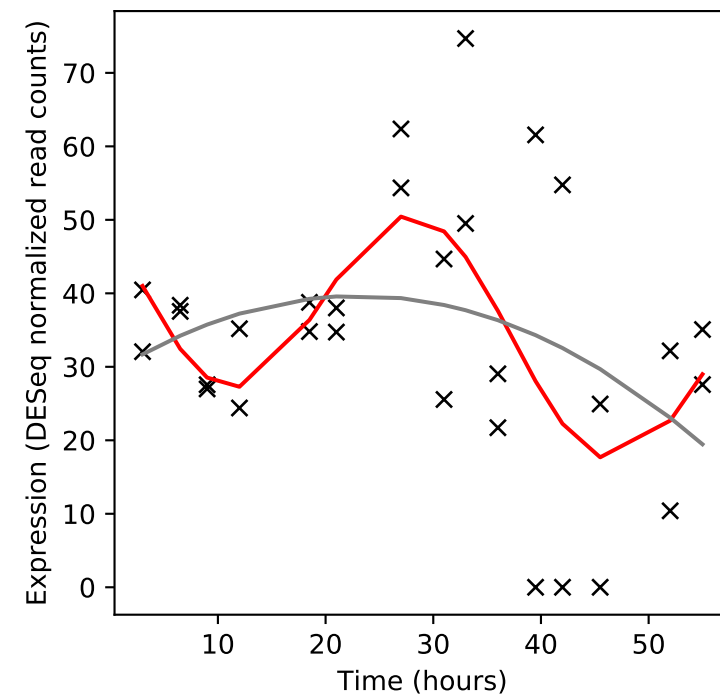

Rv0324/-

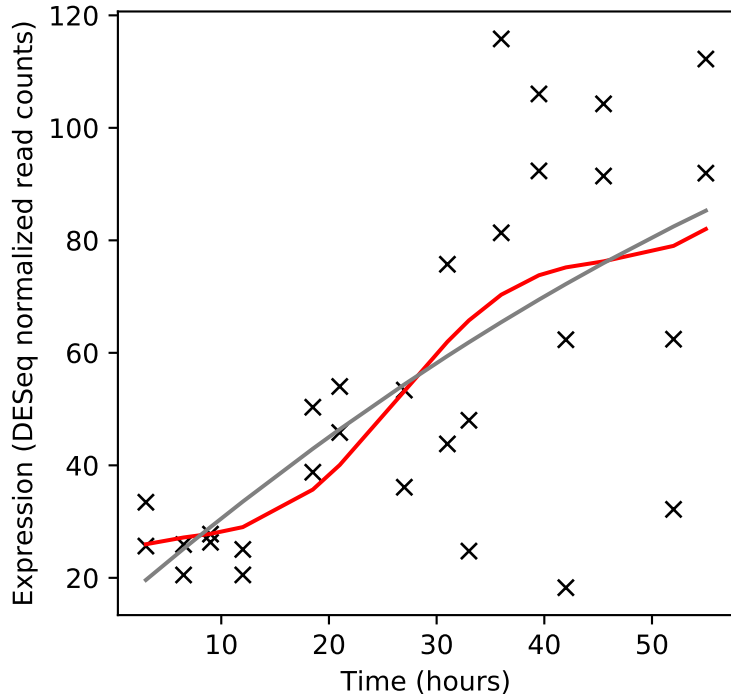

Rv0325/-

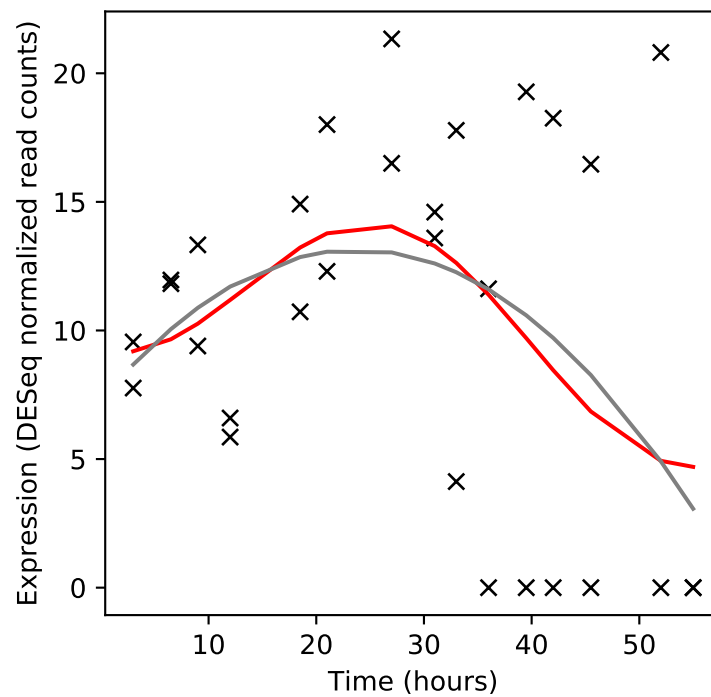

Rv0326/-

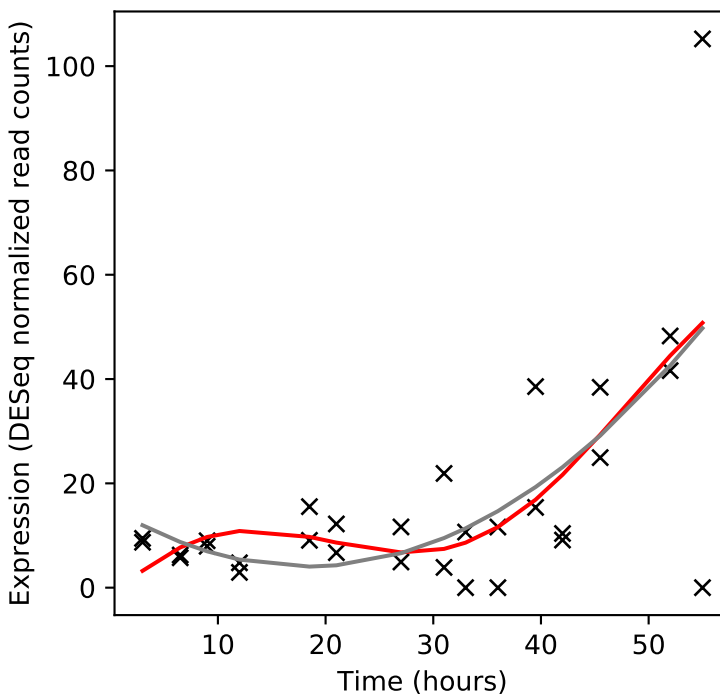

Rv0327c/cyp135A1

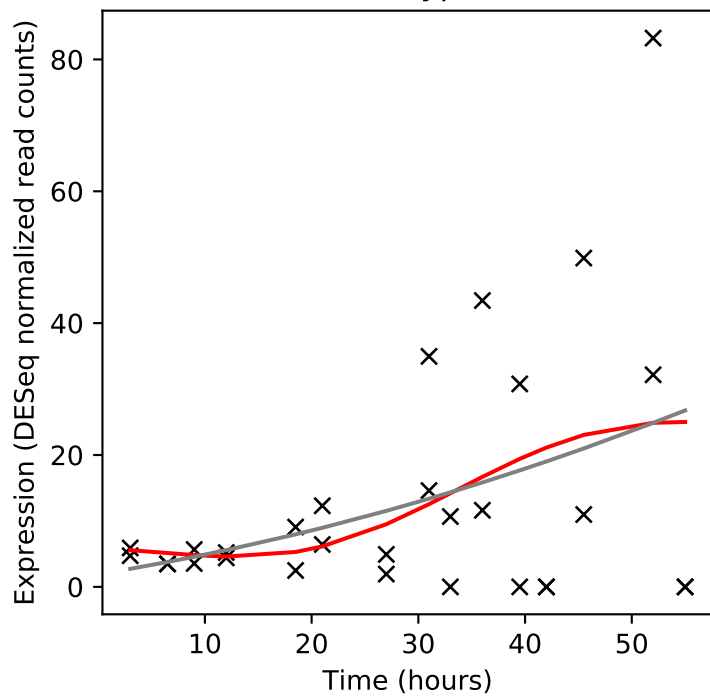

Rv0328/-

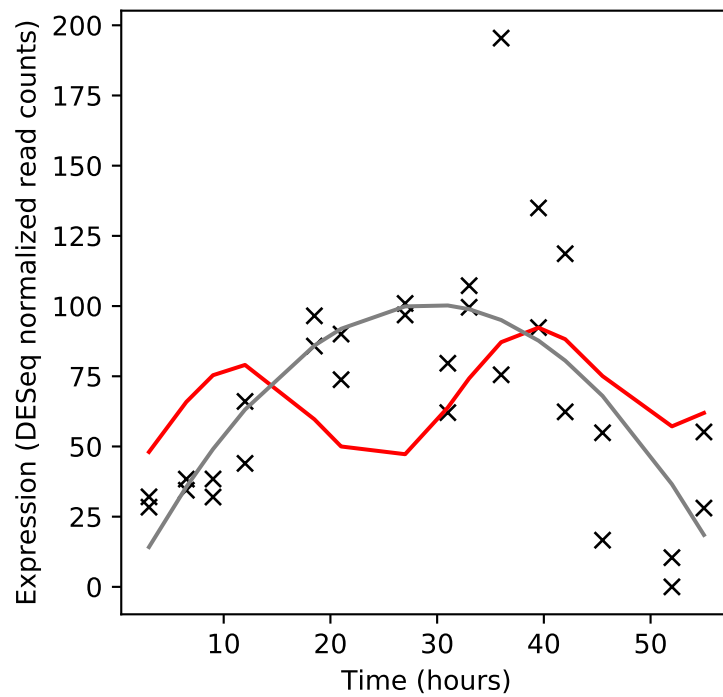

Rv0329c/-

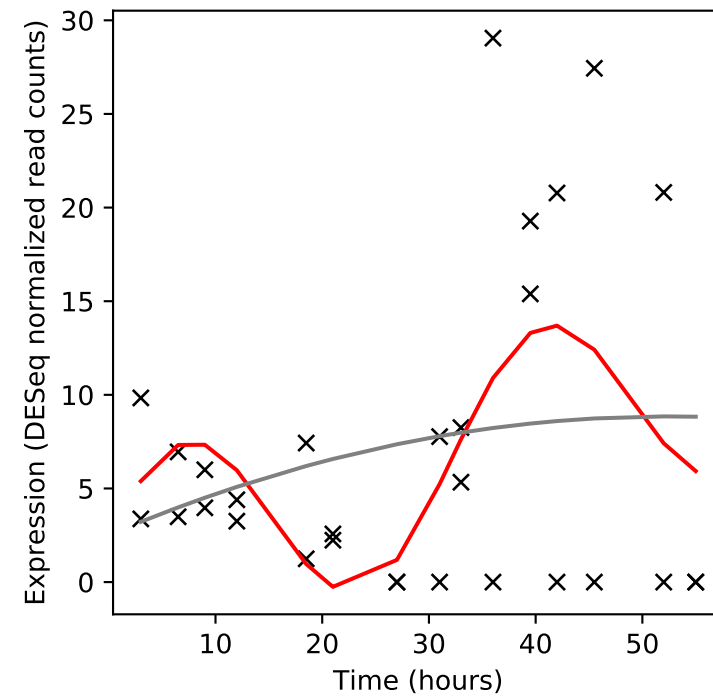

Rv0330c/-

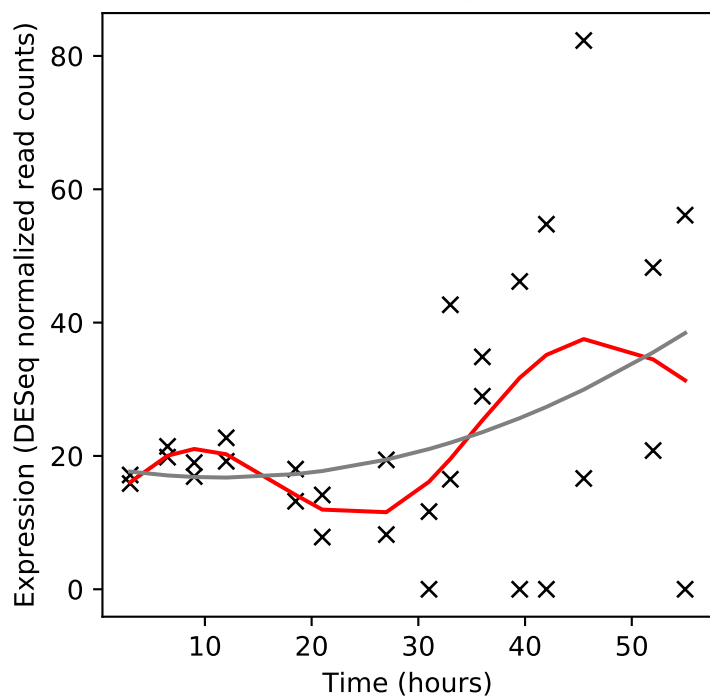

Rv0331/-

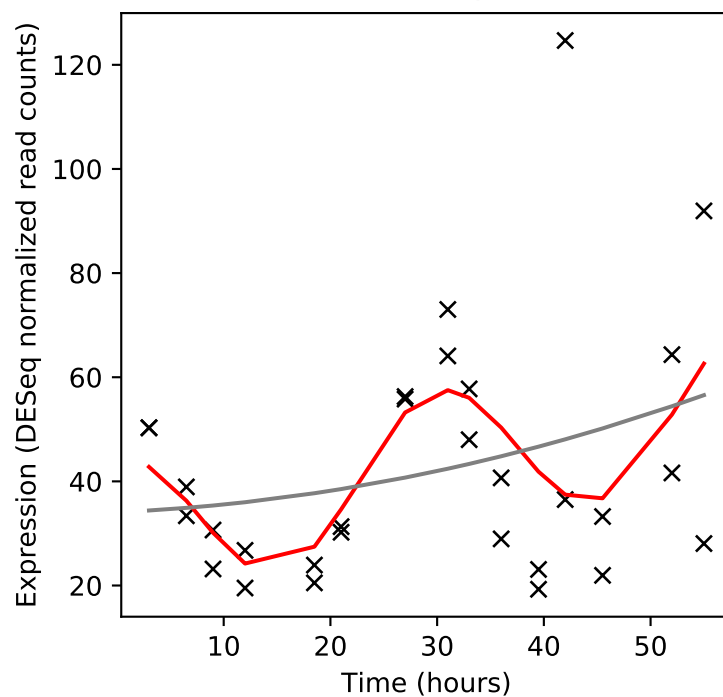

Rv0332/-

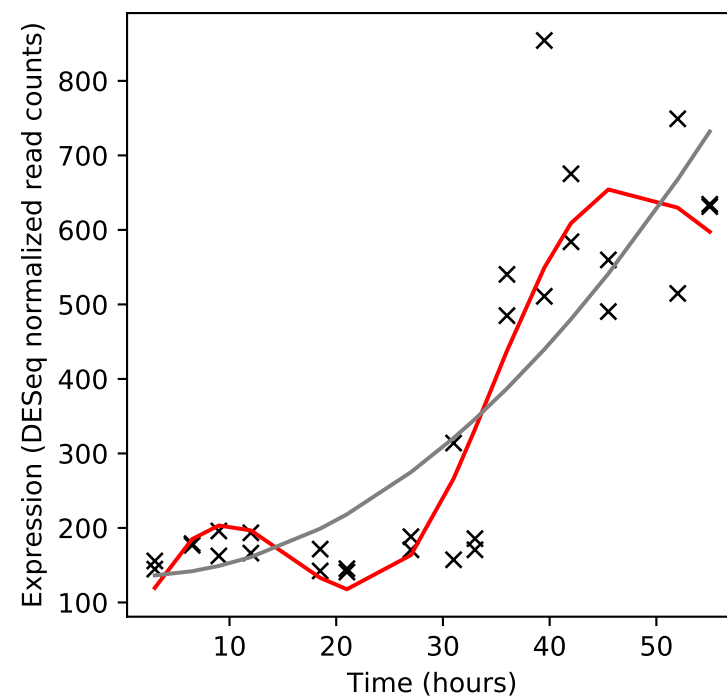

Rv0333/-

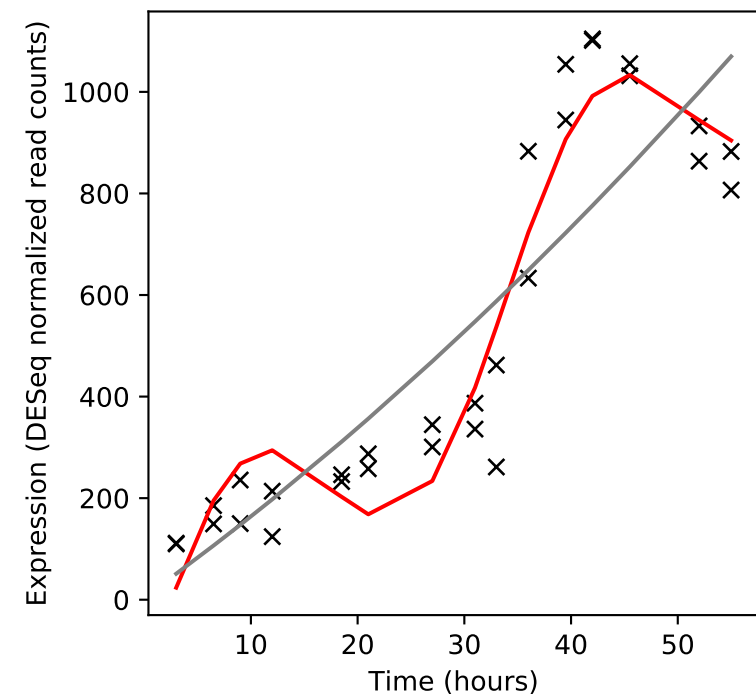

Rv0334/rmlA

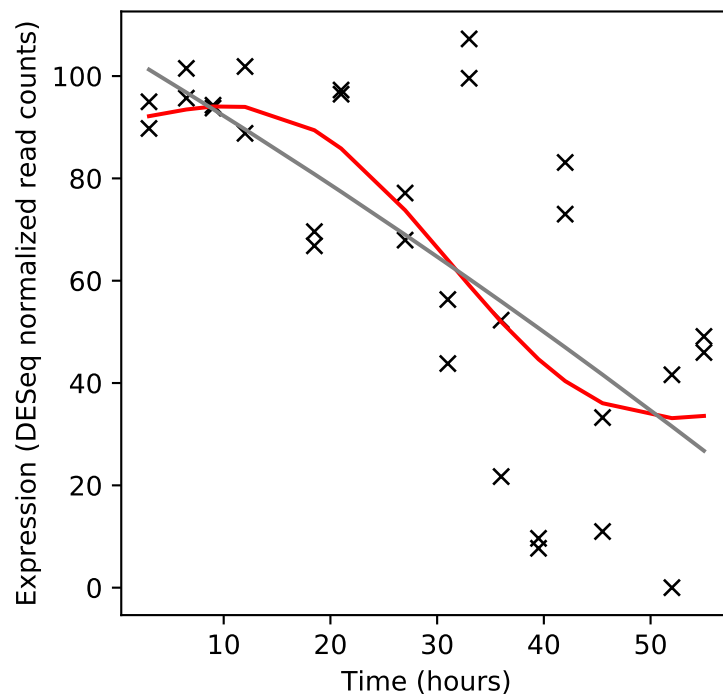

Rv0335c/PE6

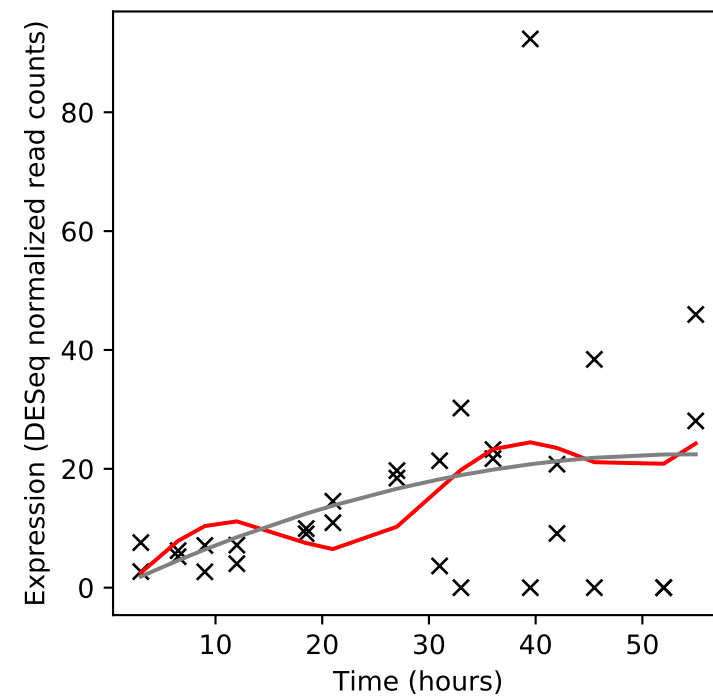

Rv0336/-

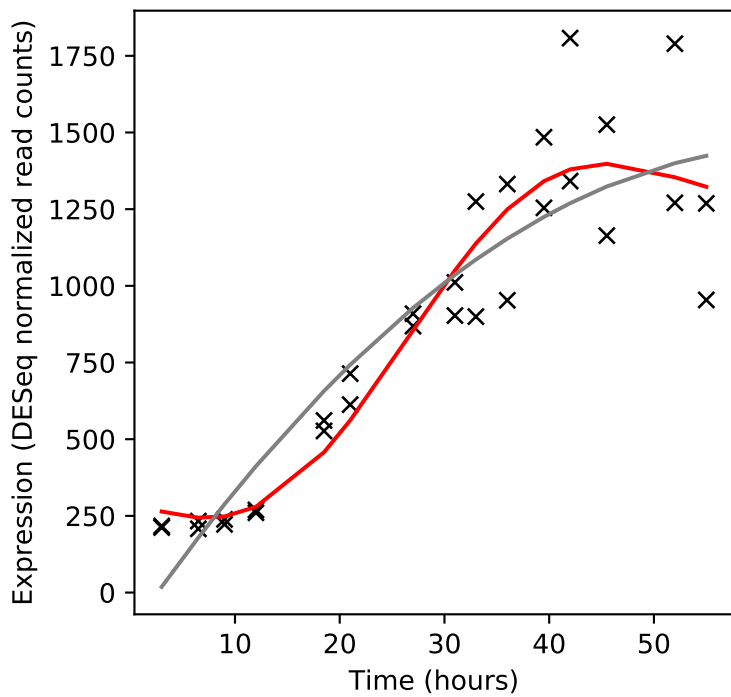

Rv0337c/aspC

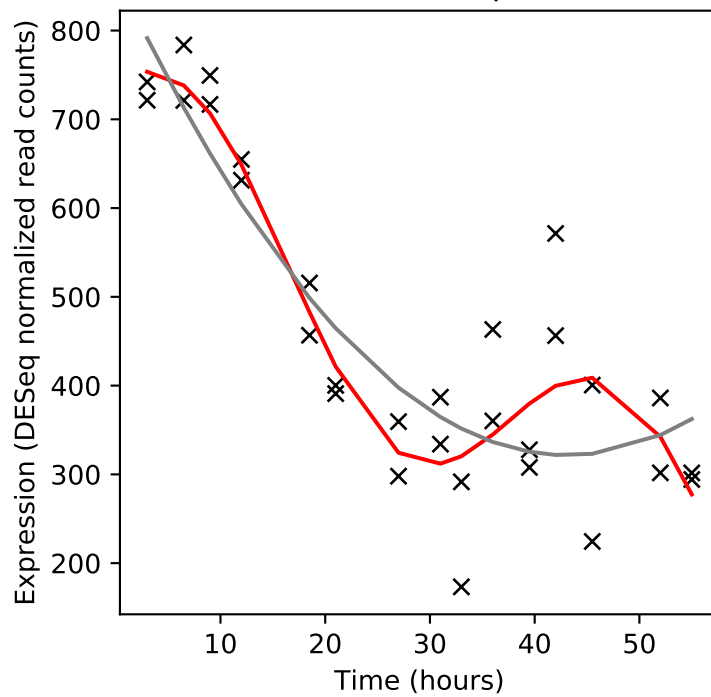

Rv0338c/-

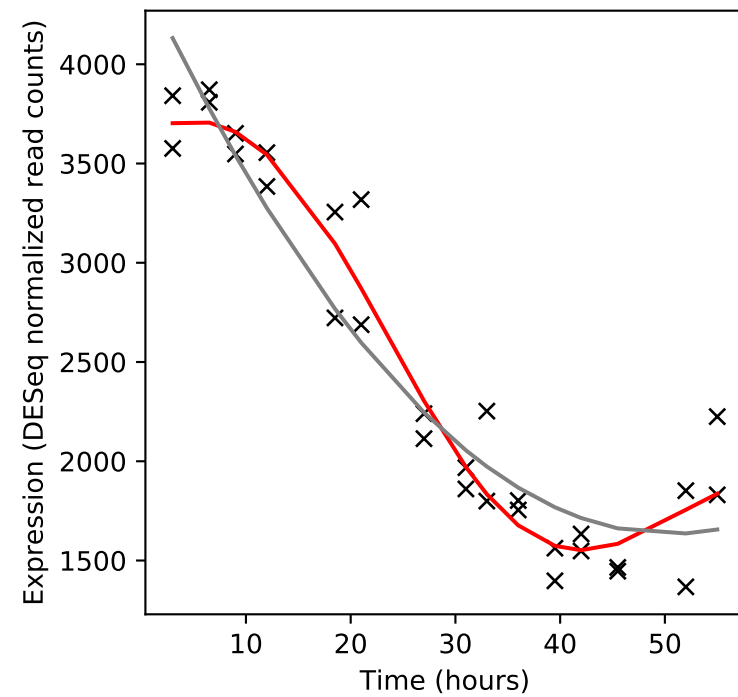

Rv0339c/-

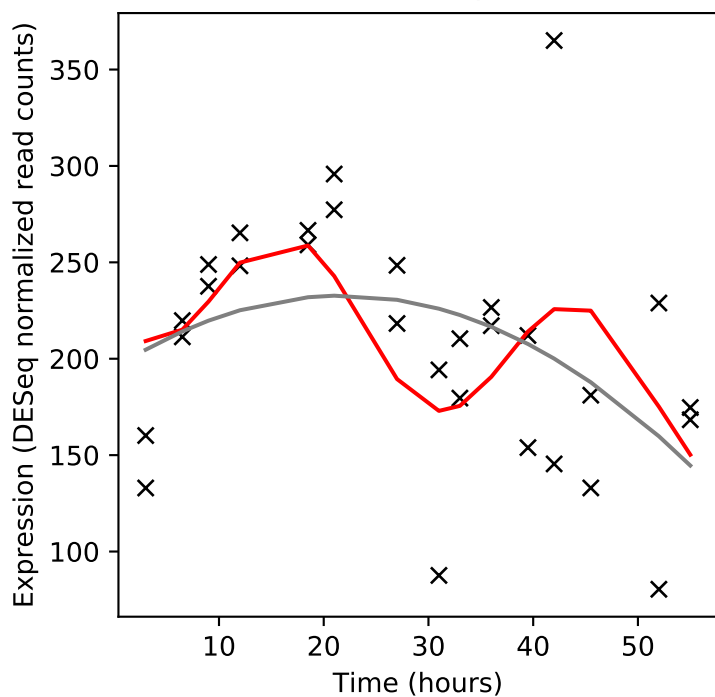

Rv0340/-

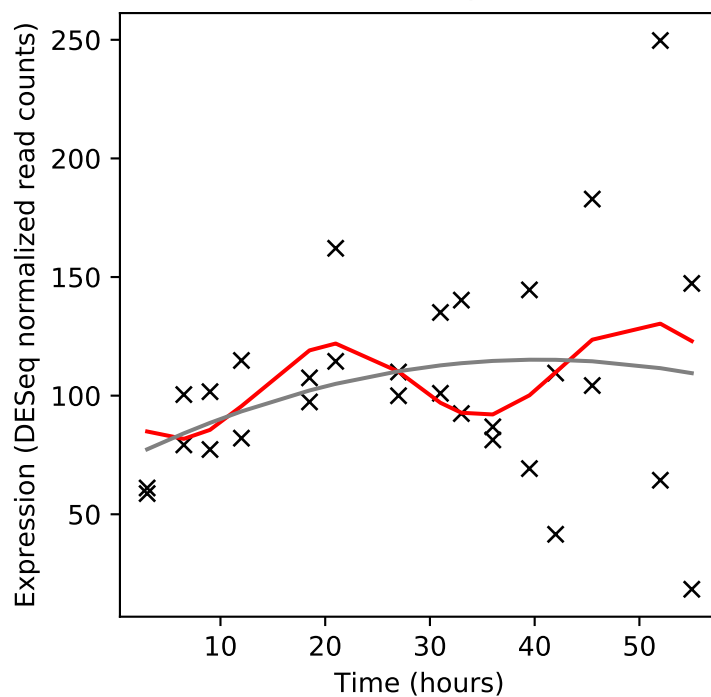

Rv0341/iniB

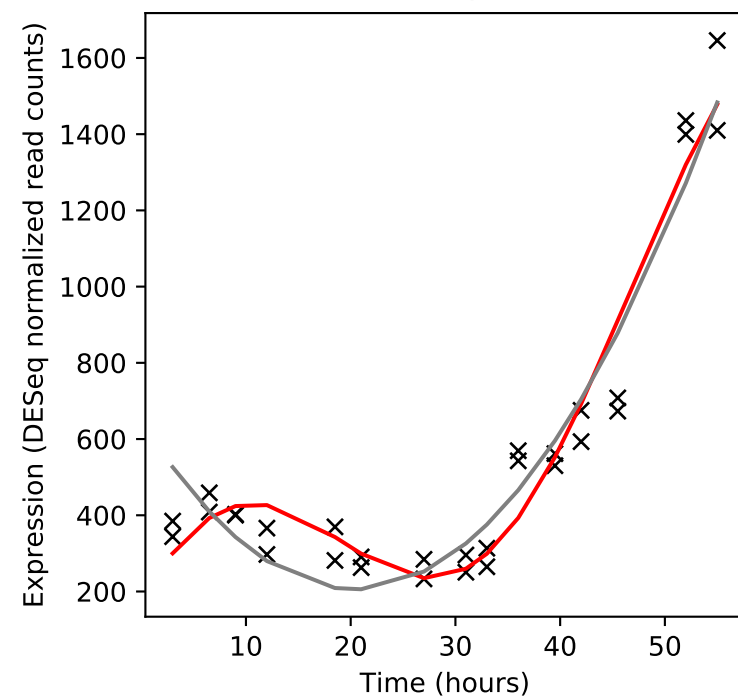

Rv0342/iniA

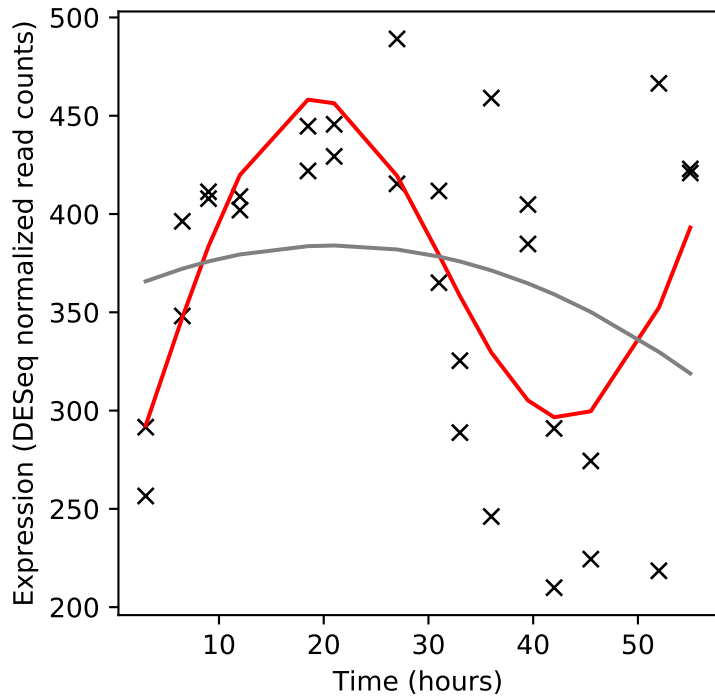

Rv0343/iniC

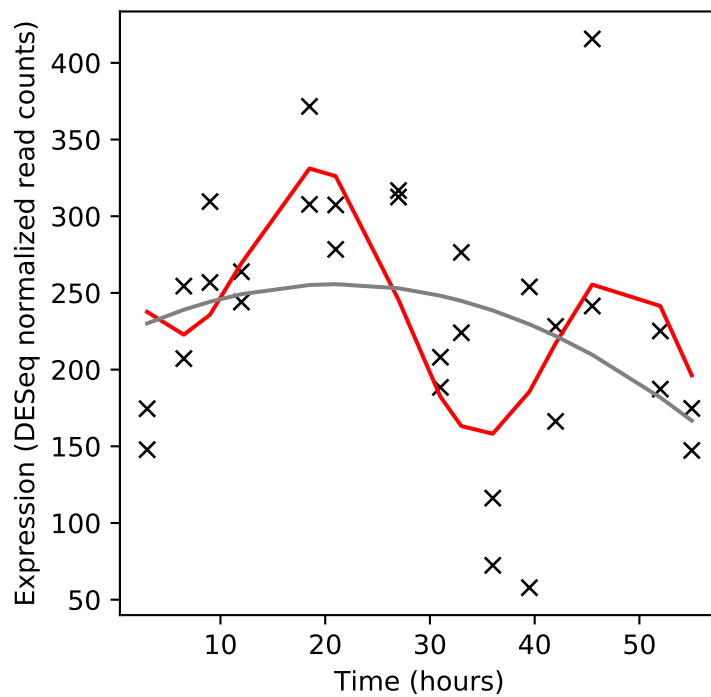

Rv0344c/lpqj

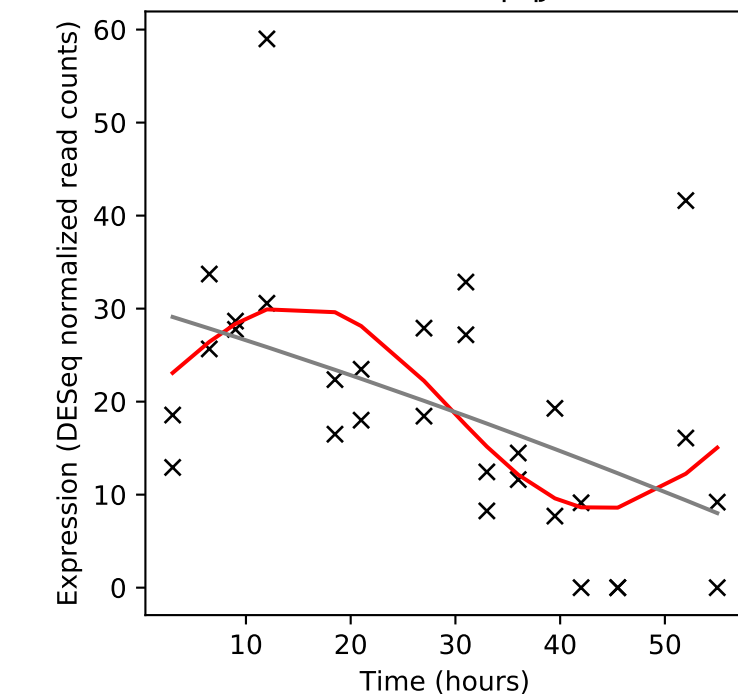

Rv0345/-

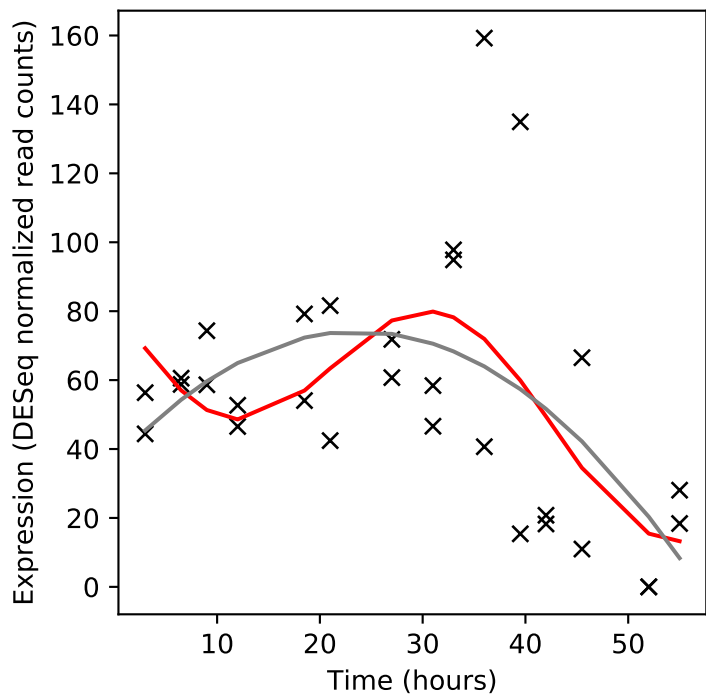

Rv0346c/ansP2

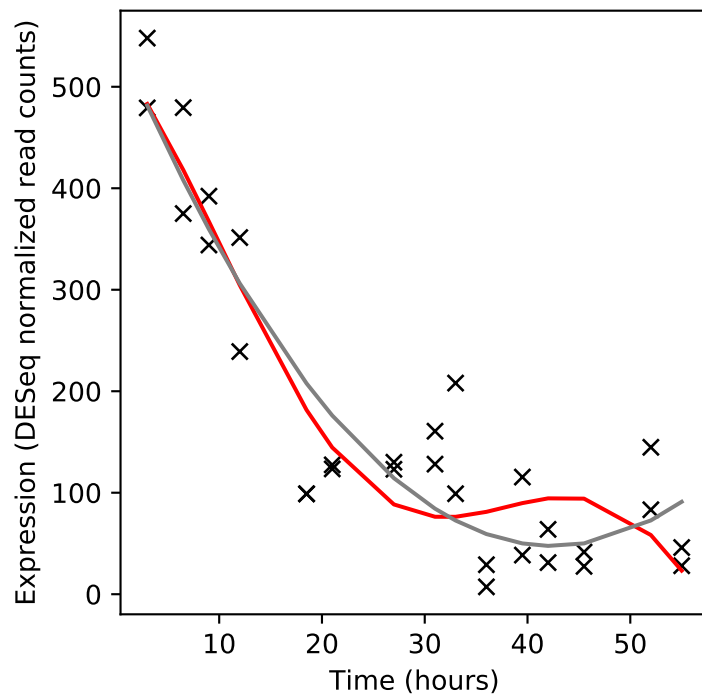

Rv0347/-

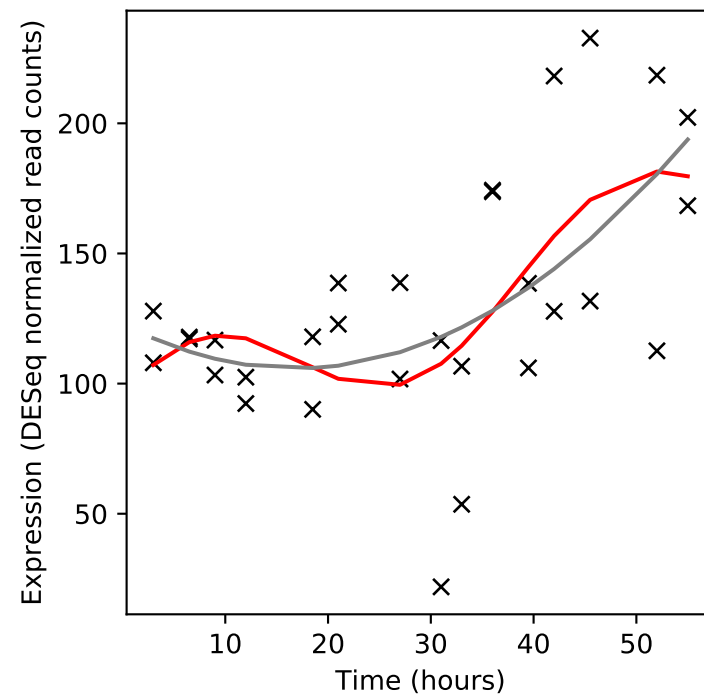

Rv0348/-

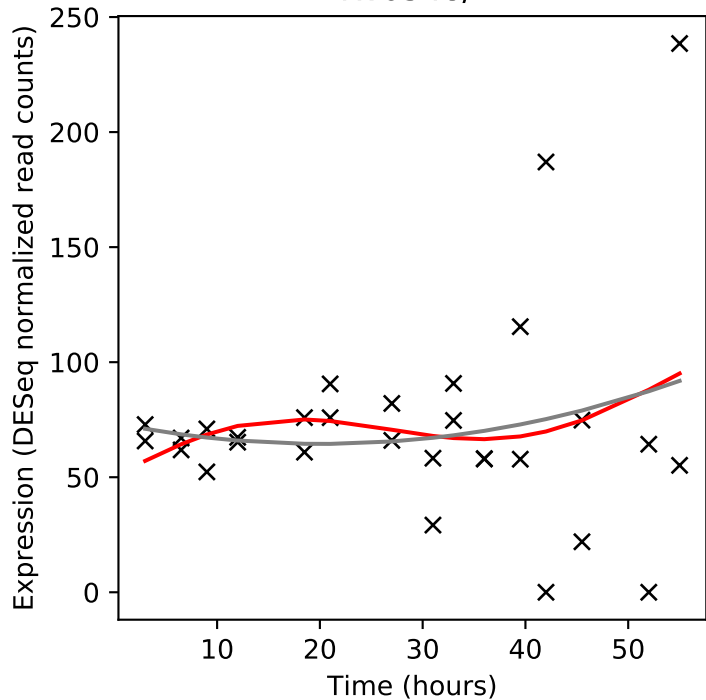

Rv0349/-

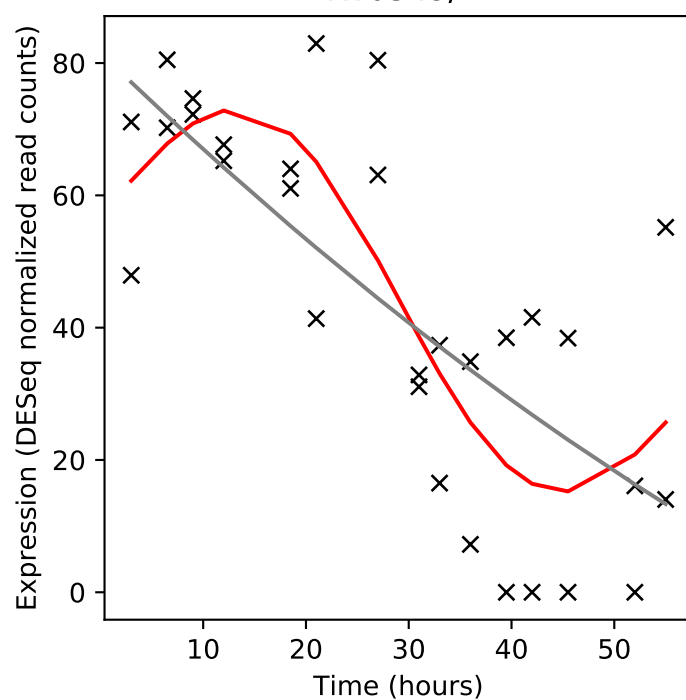

Rv0350/dnaK

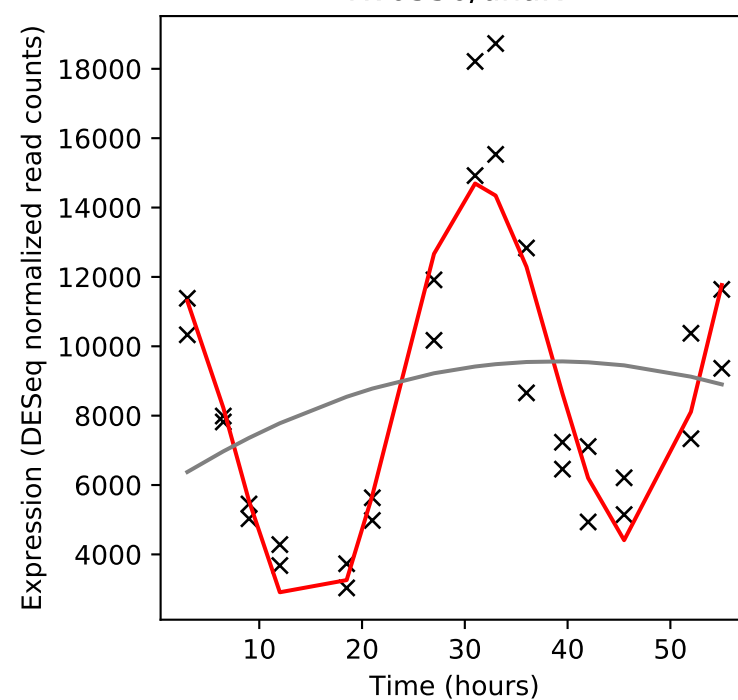

Rv0351/grpE

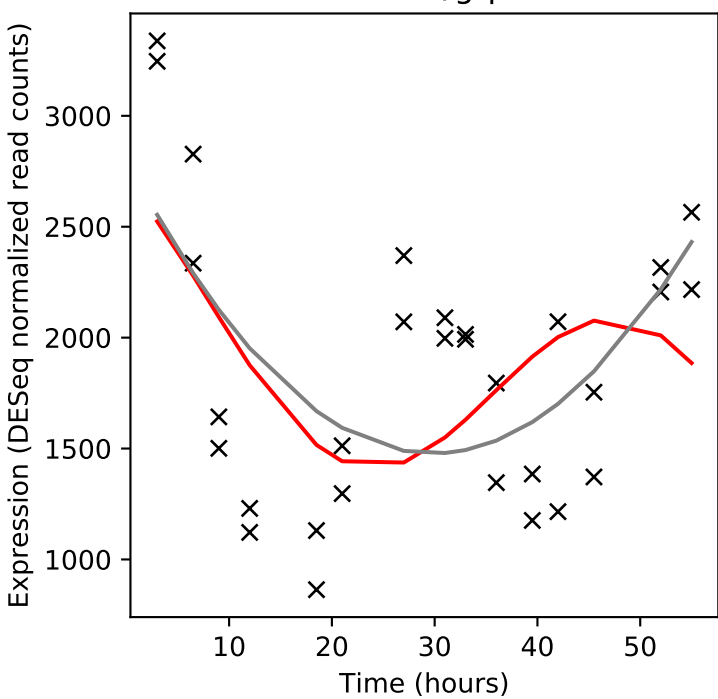

Rv0352/dnaJ1

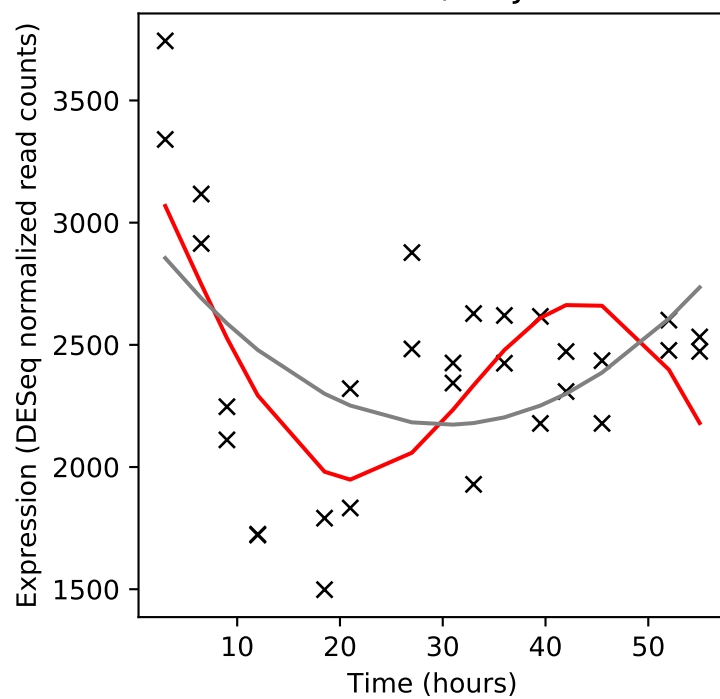

Rv0353/hspR

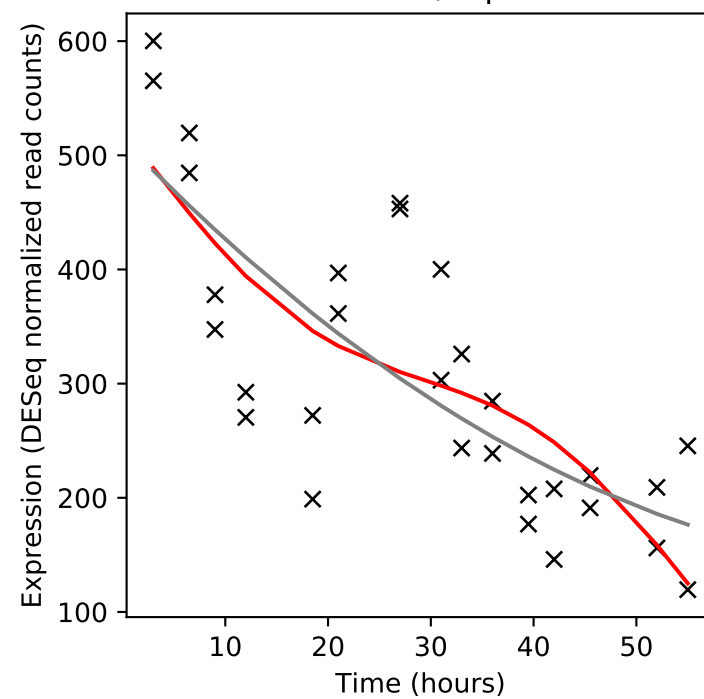

Rv0354c/PPE7

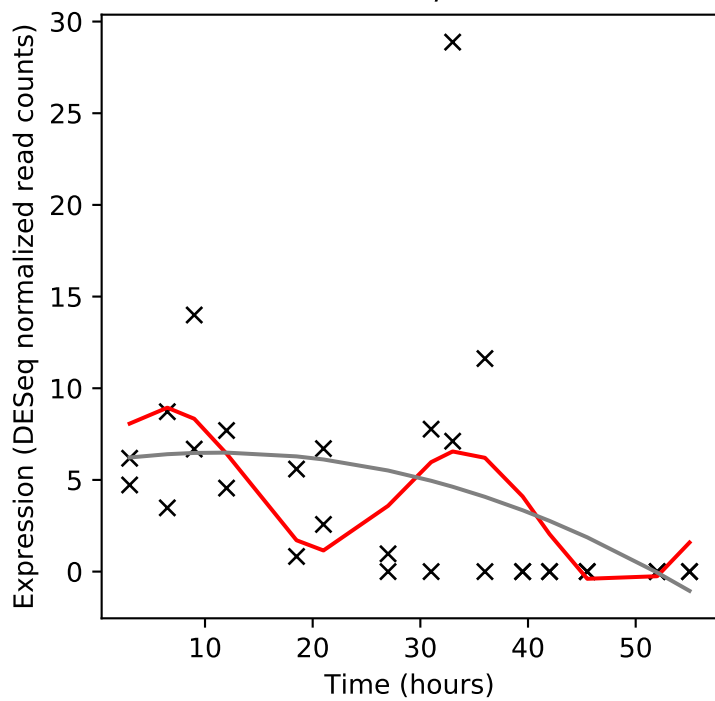

Rv0355c/PPE8

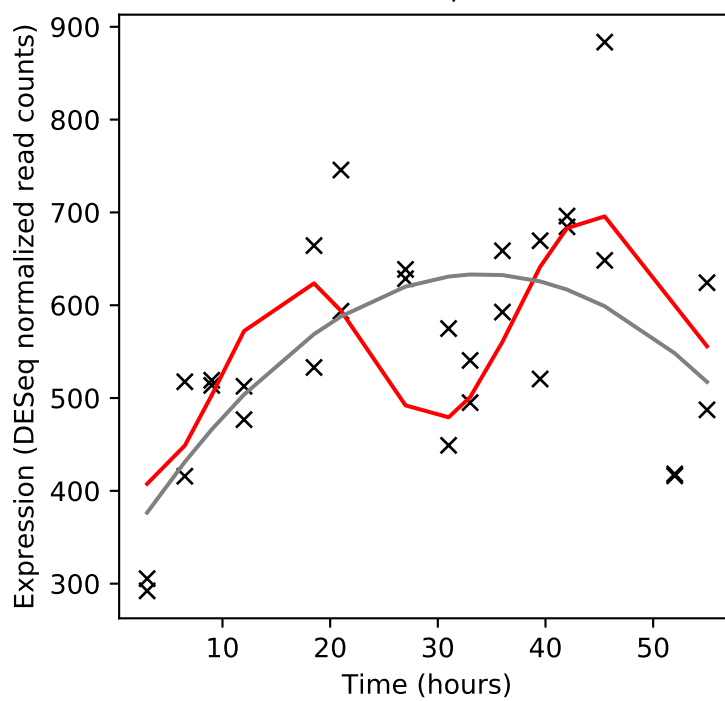

Rv0356c/-

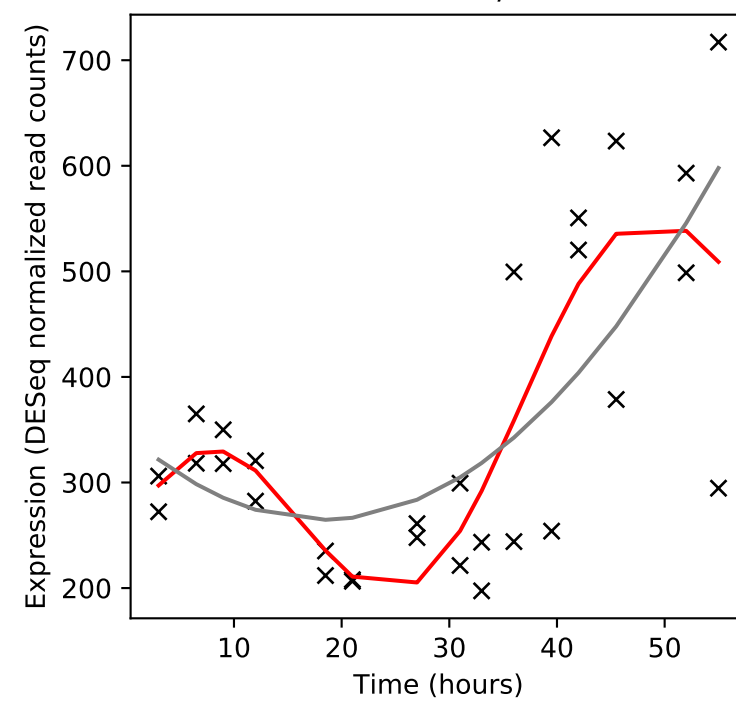

Rv0357c/purA

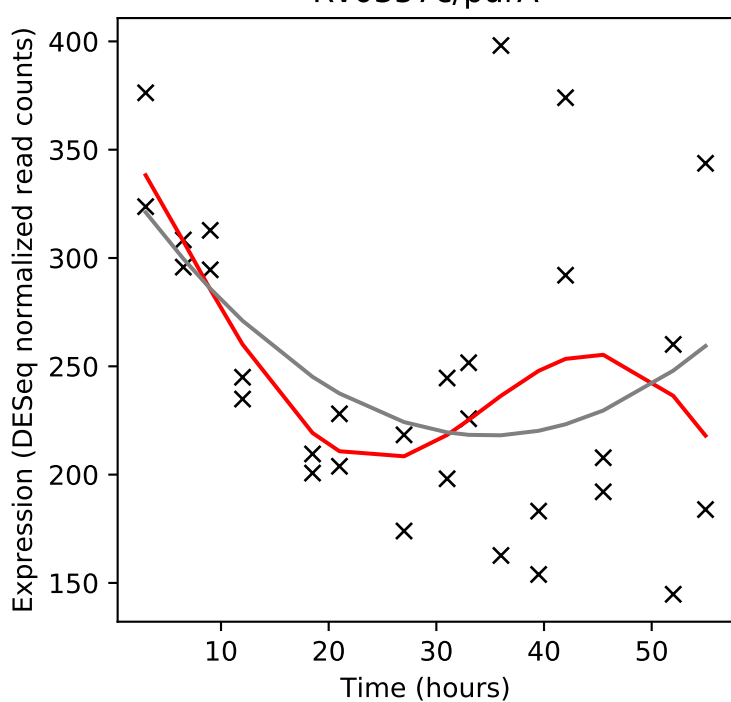

Rv0358/-

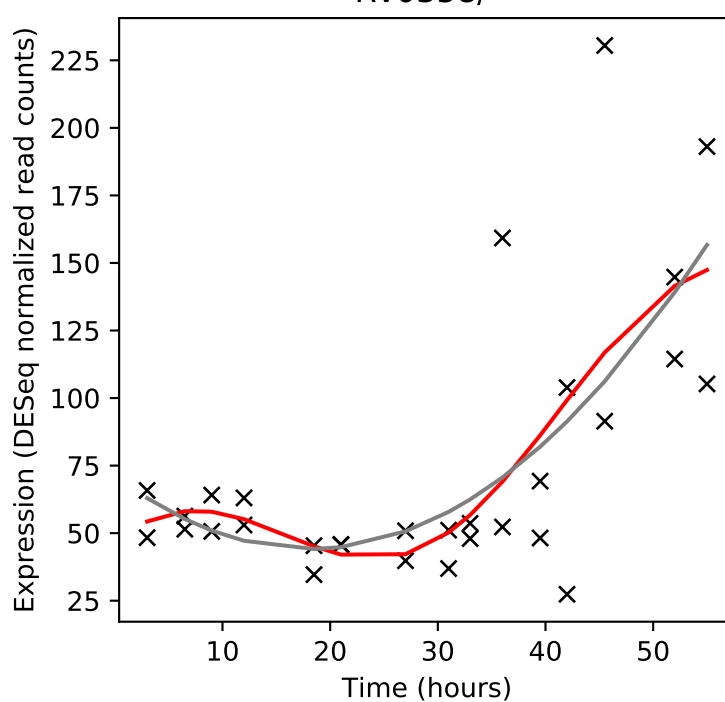

Rv0359/-

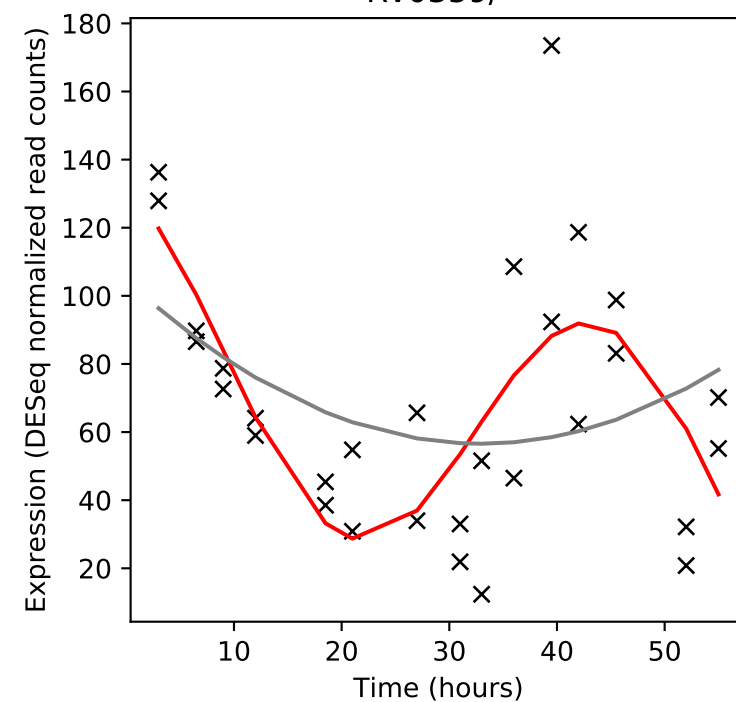

Rv0360c/-

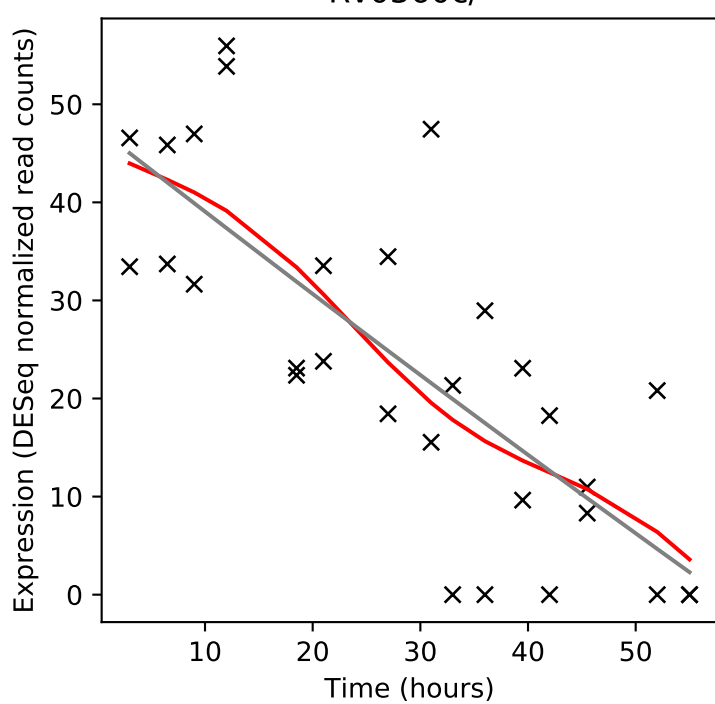

Rv0361/-

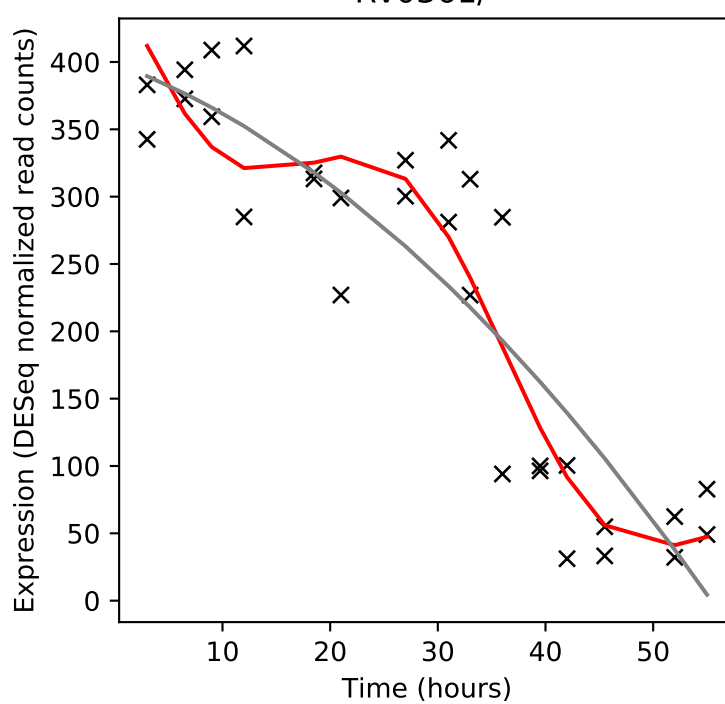

Rv0362/mgtE

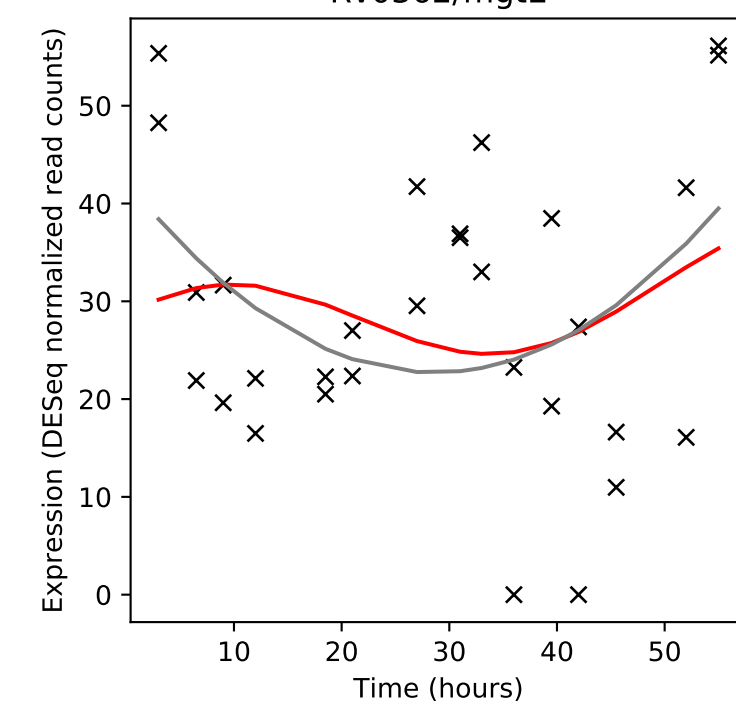

Rv0363c/fba

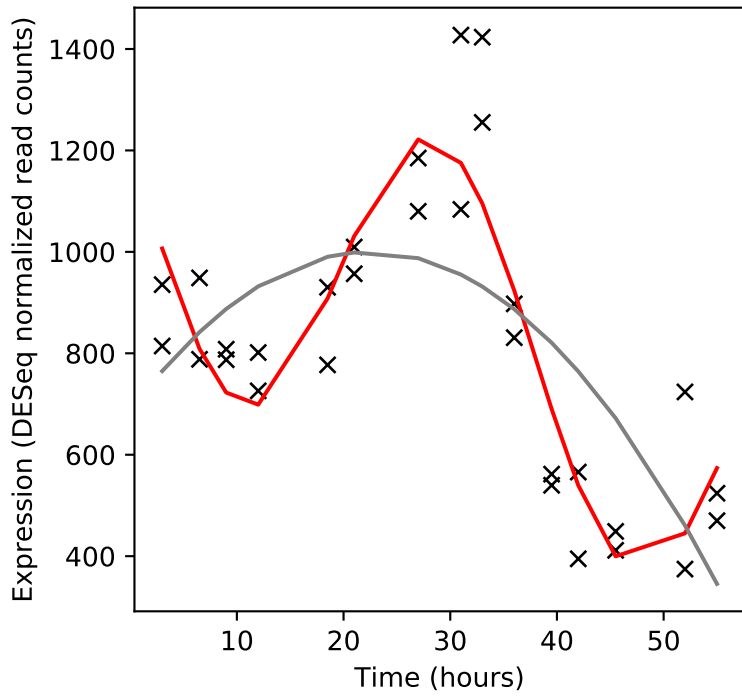

Rv0364/-

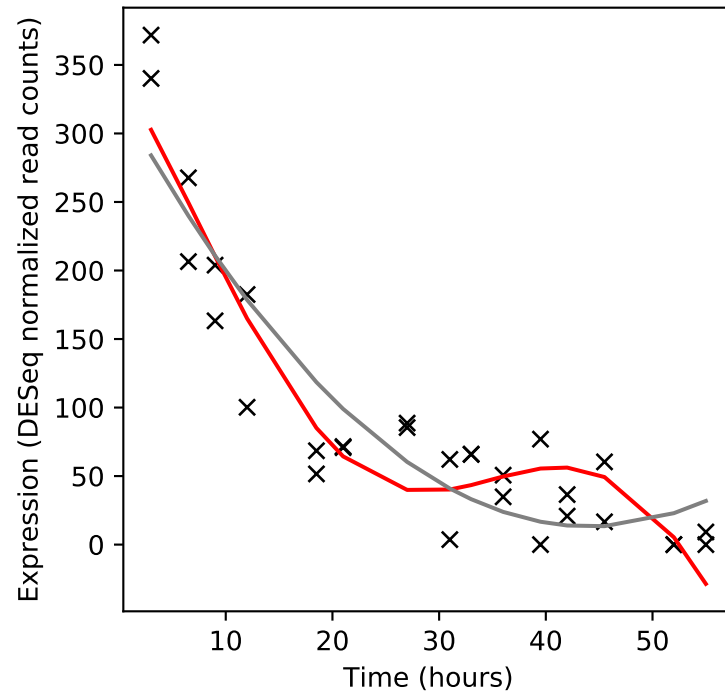

Rv0365c/-

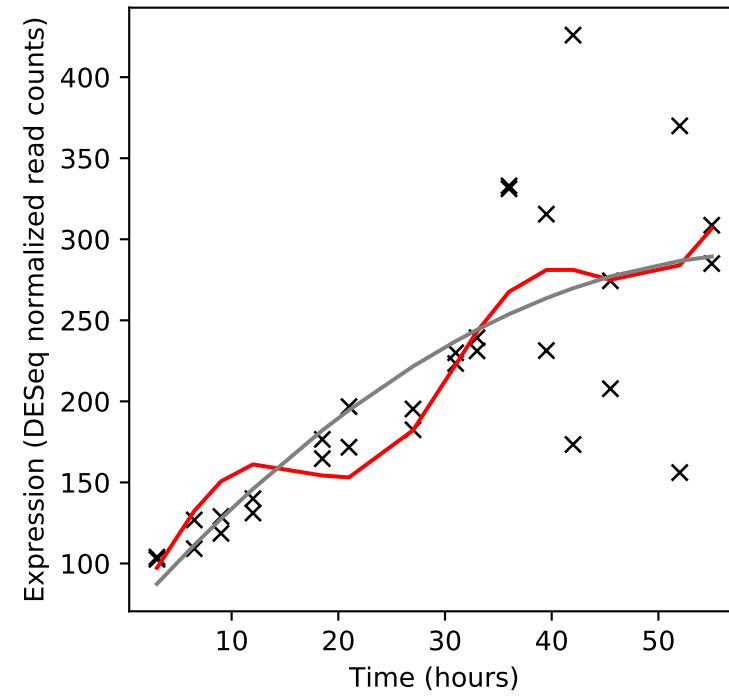

Rv0366c/-

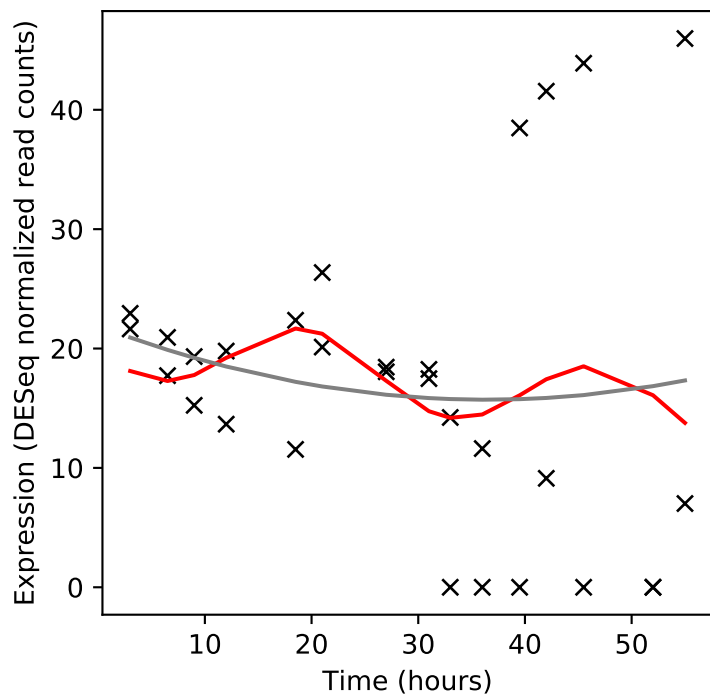

Rv0367c/-

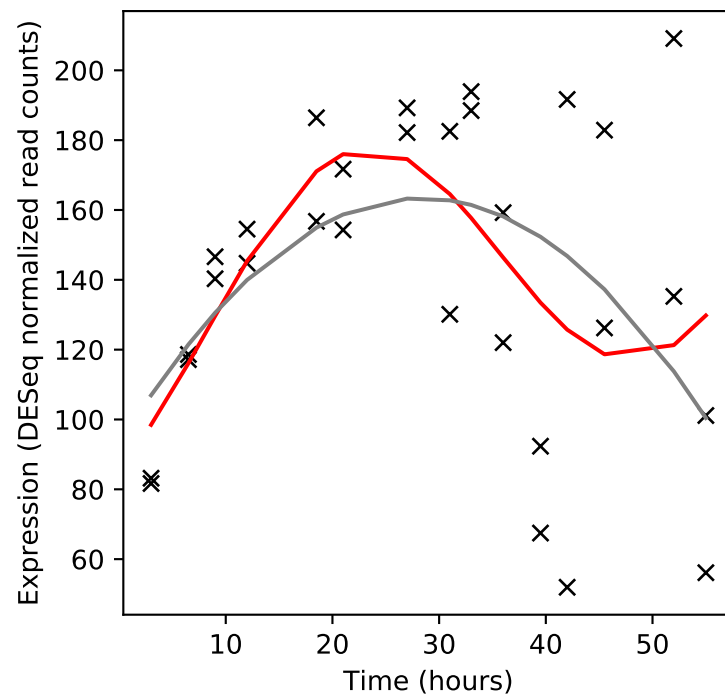

Rv0368c/-

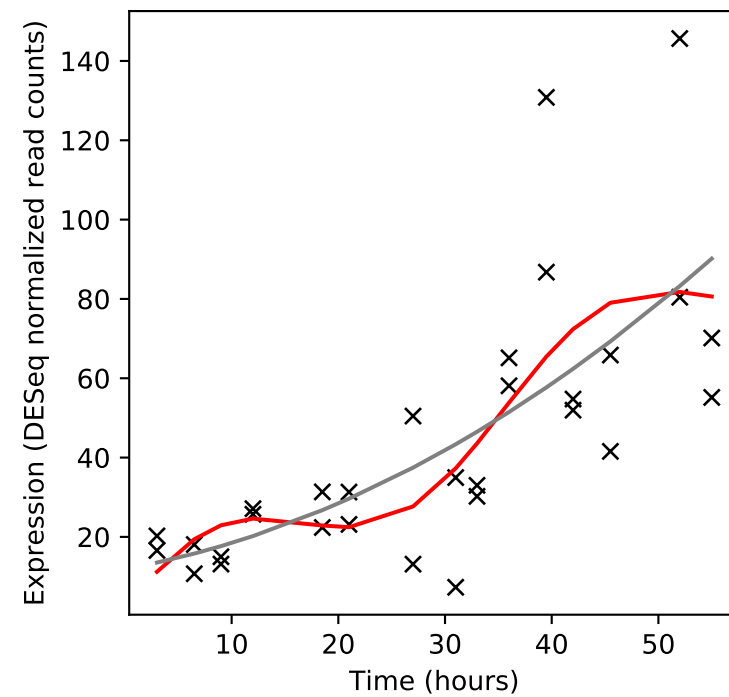

Rv0369c/-

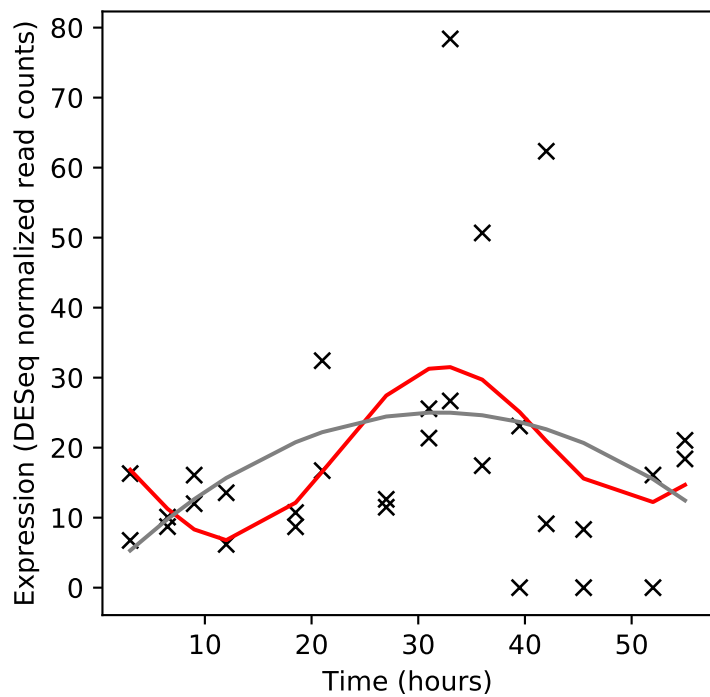

Rv0370c/-

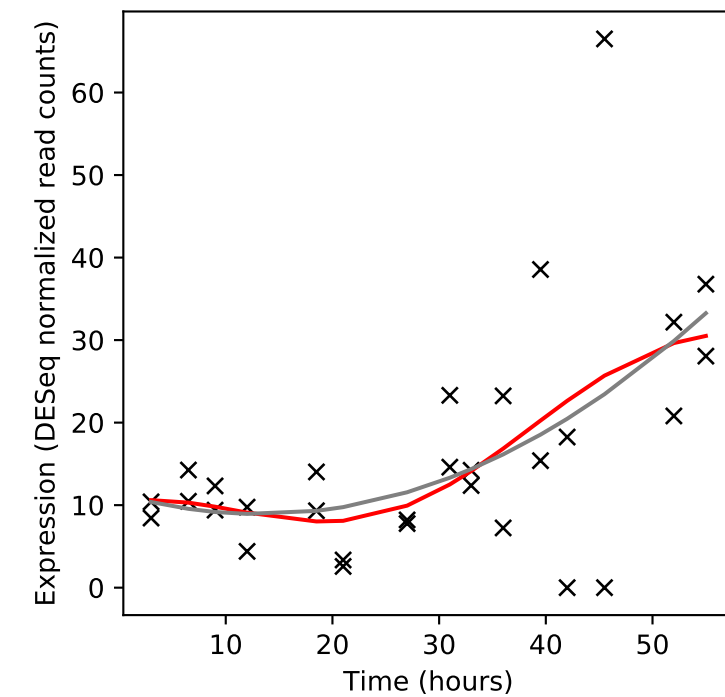

Rv0371c/-

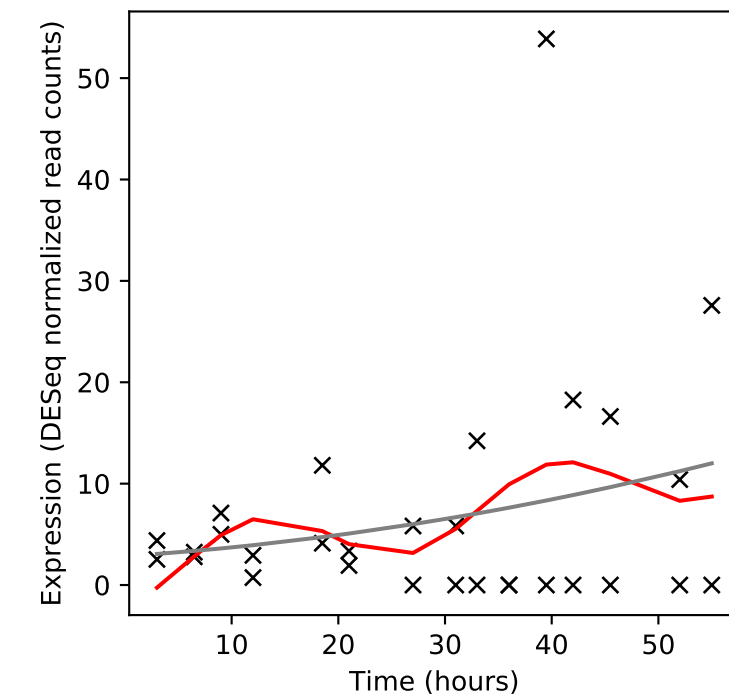

Rv0372c/-

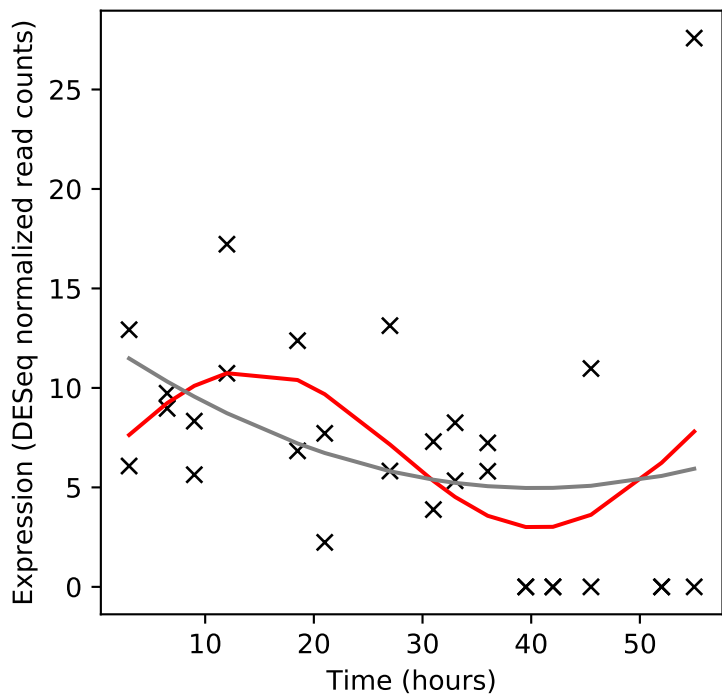

Rv0373c/-

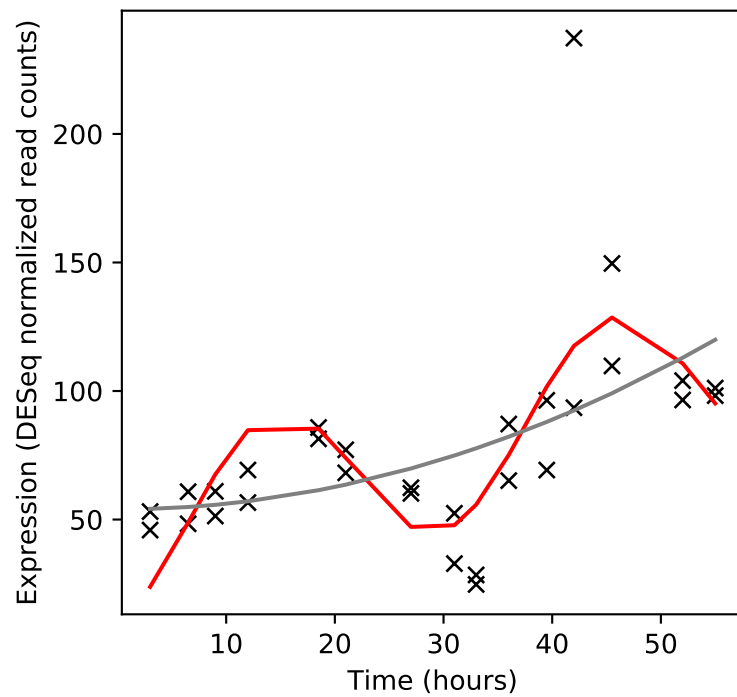

Rv0374c/-

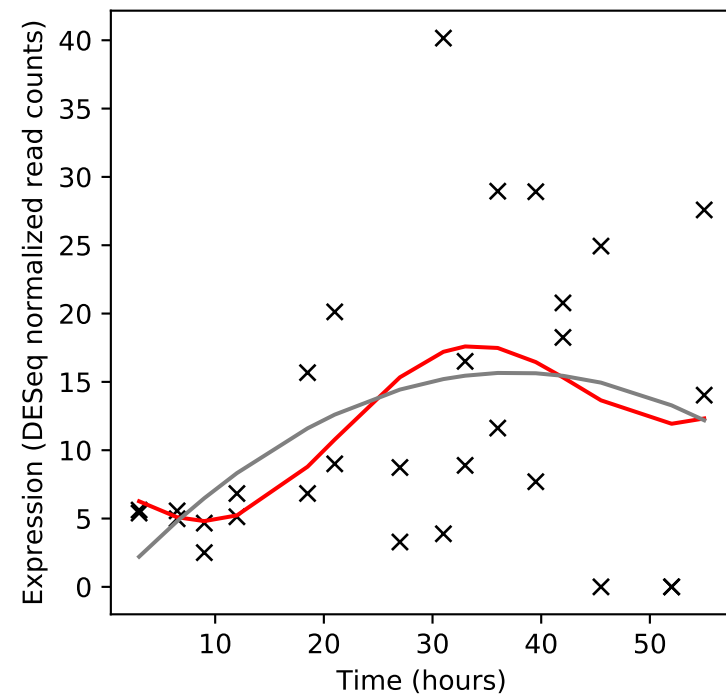

Rv0375c/-

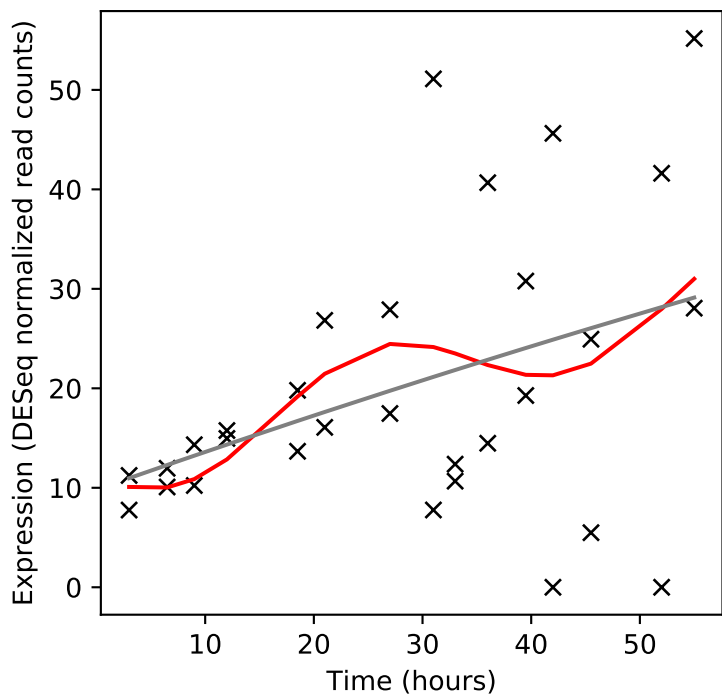

Rv0376c/-

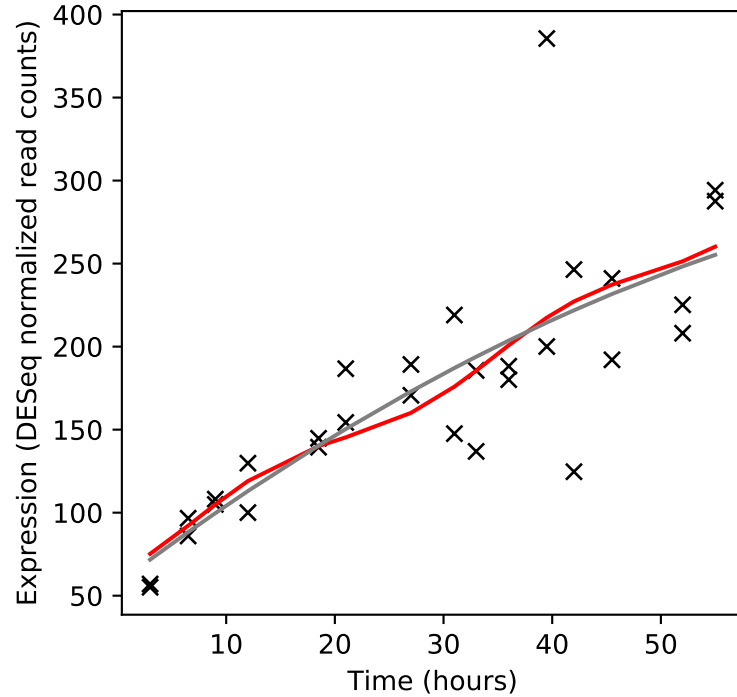

Rv0377/-

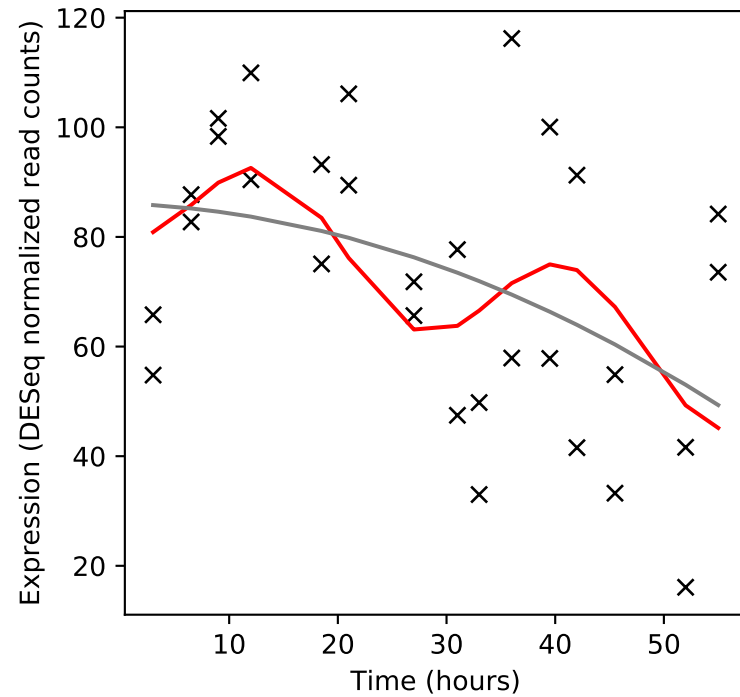

Rv0378/-

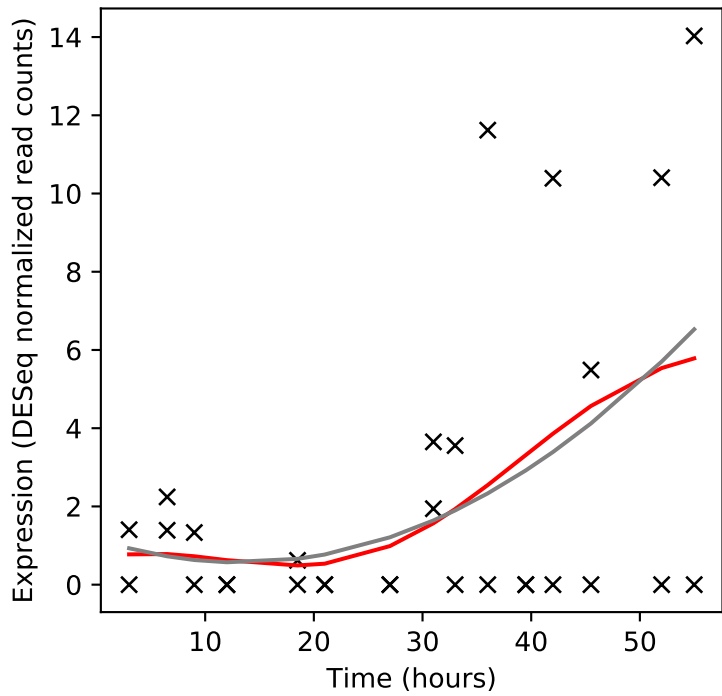

Rv0379/secE2

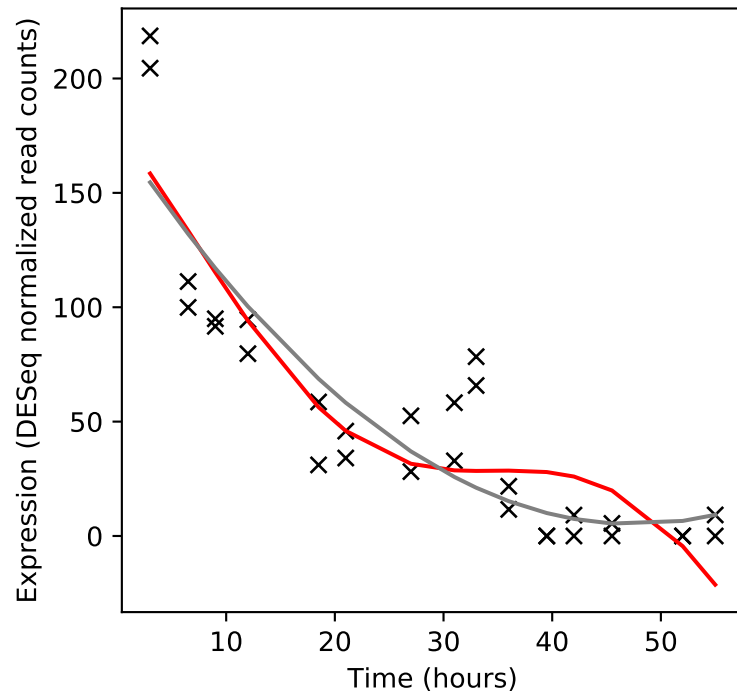

Rv0380c/-

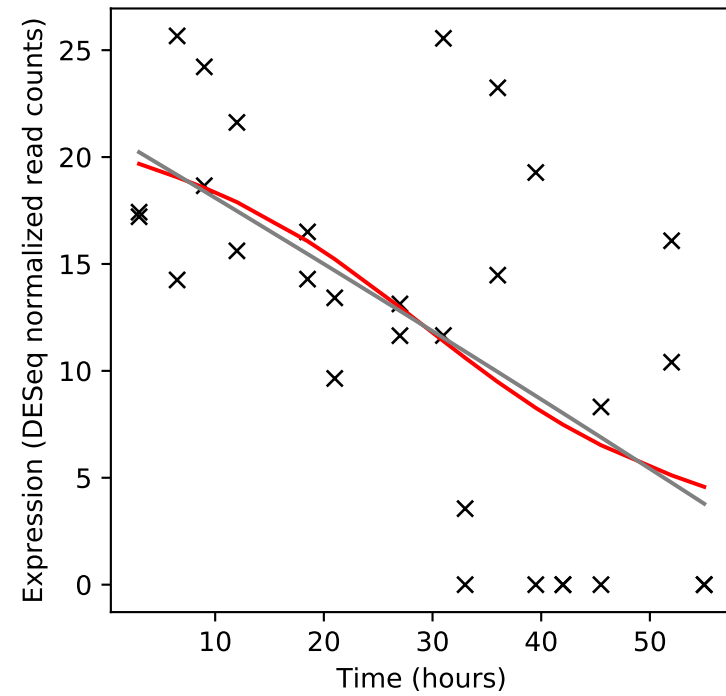



Rv0381c/-

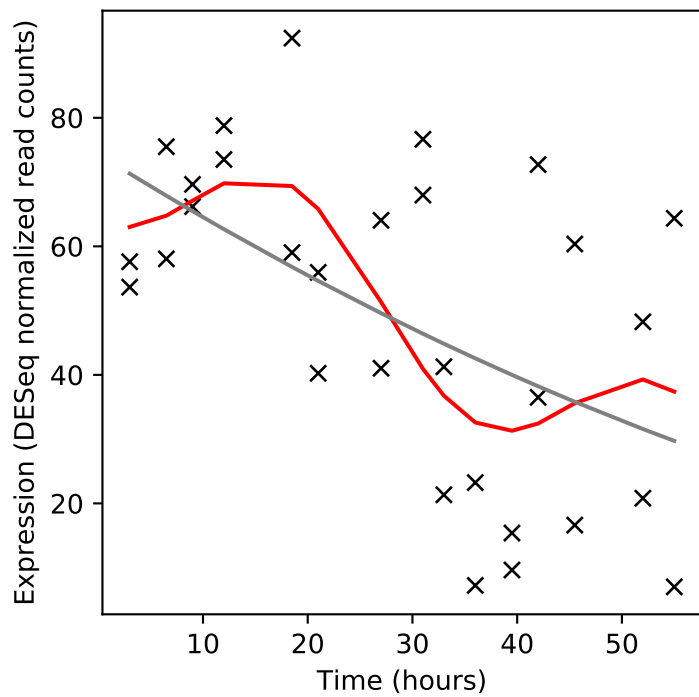

Rv0382c/pyrE

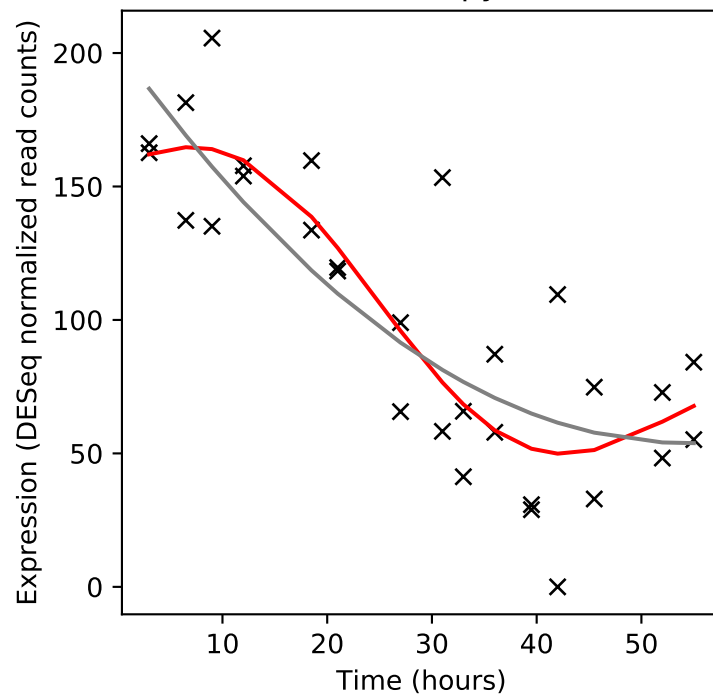

Rv0383c/-

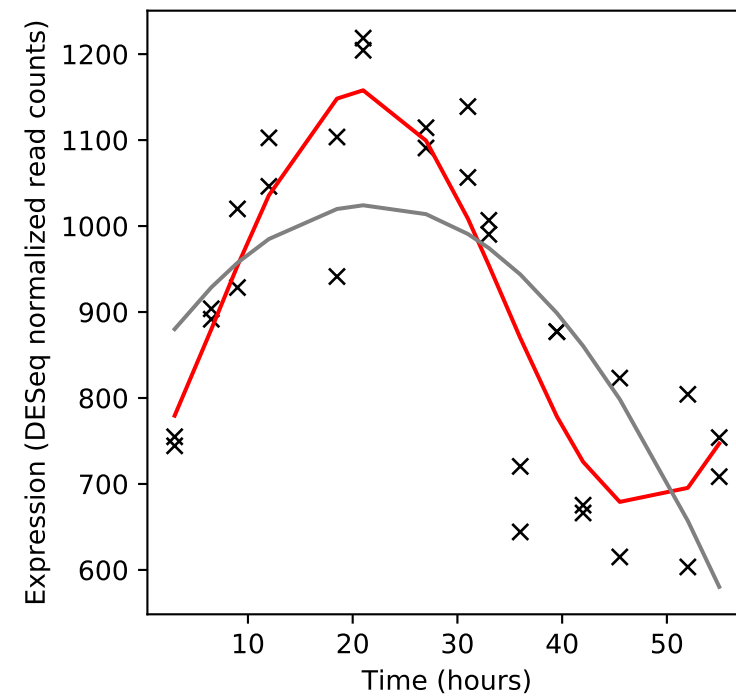

Rv0384c/clpB

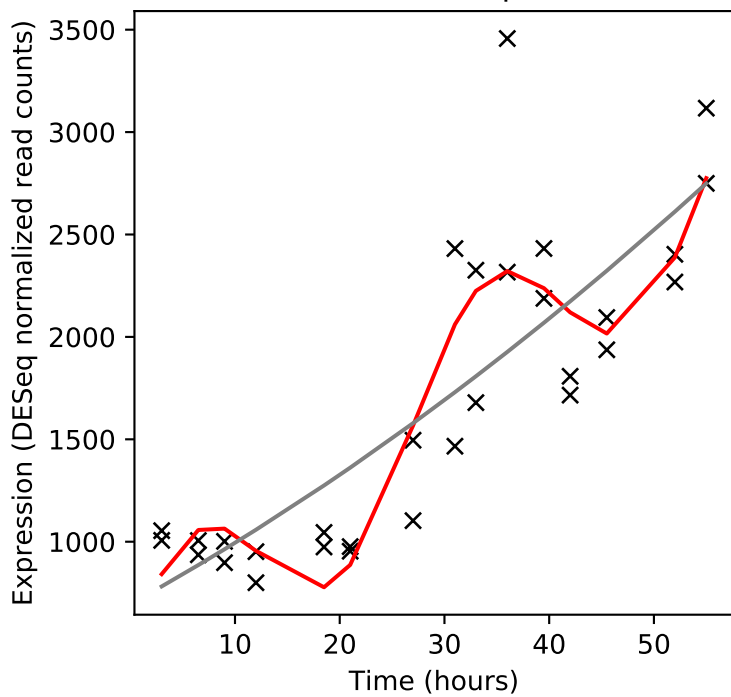

Rv0385/-

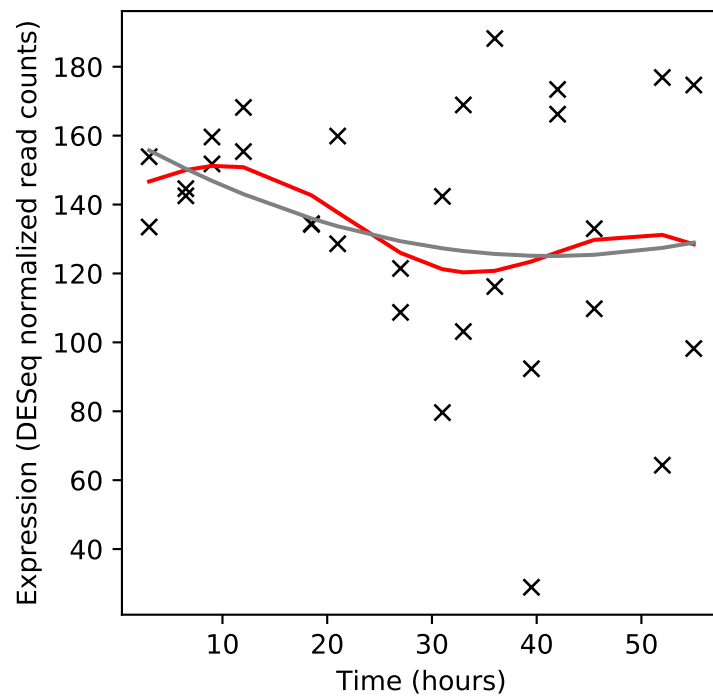

Rv0386/-

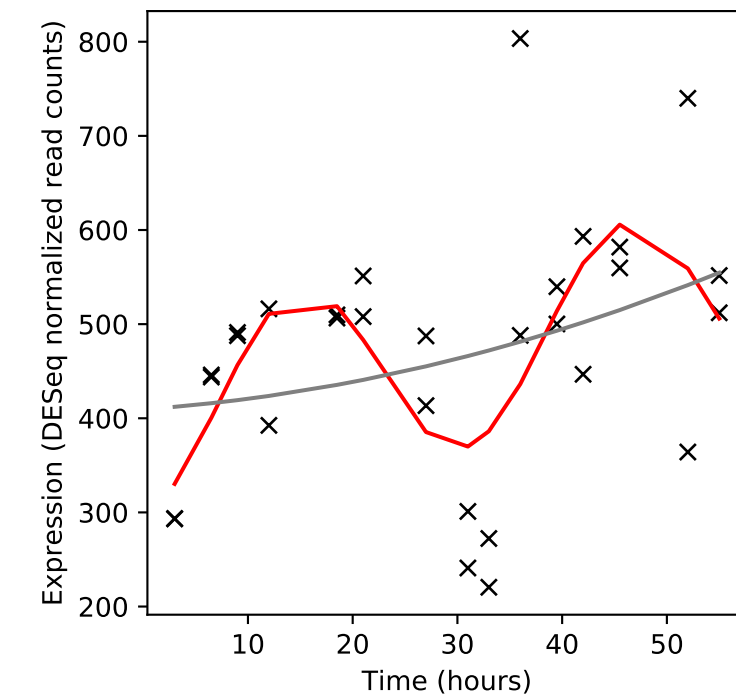

Rv0387c/-

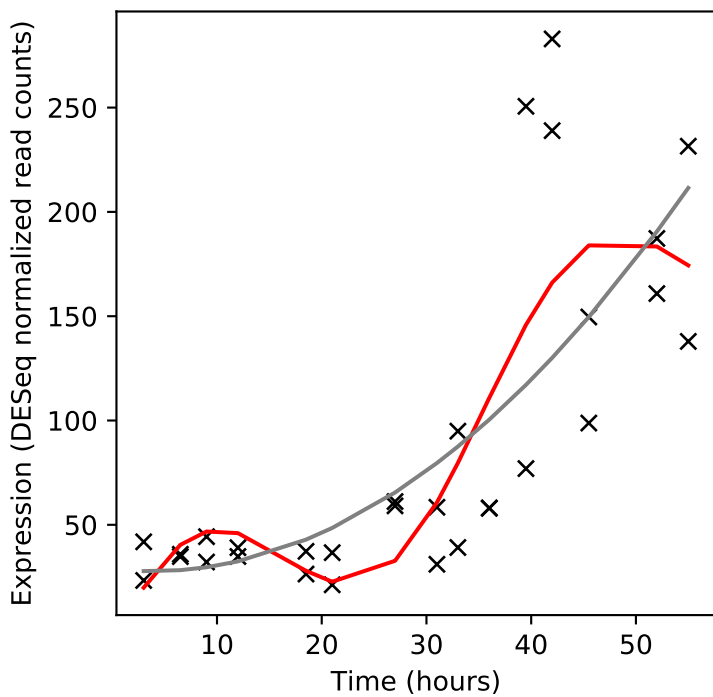

Rv0388c/PPE9

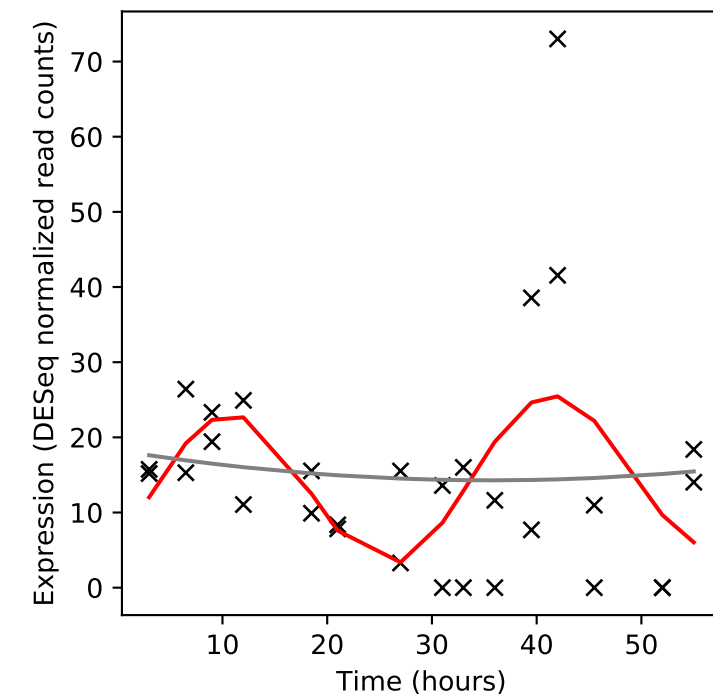

Rv0389/purT

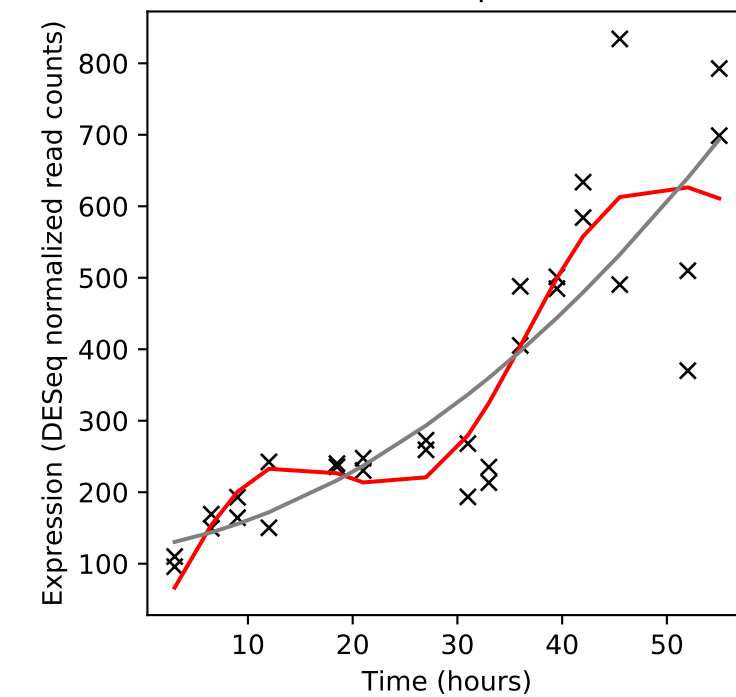

Rv0390/-

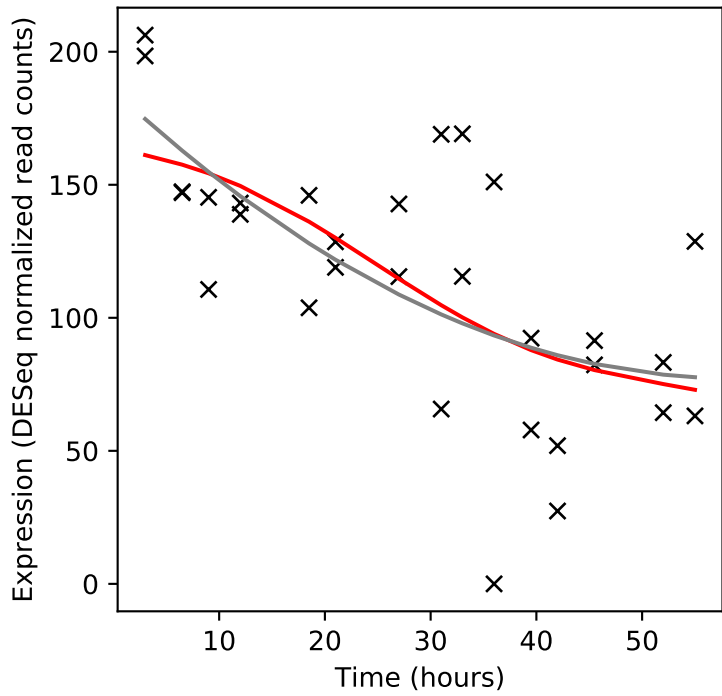

Rv0391/metZ

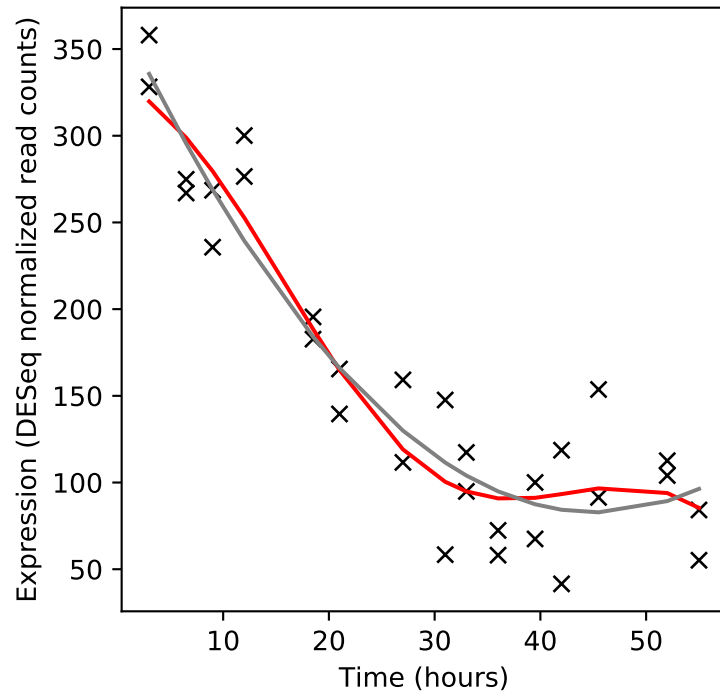

Rv0392c/ndhA

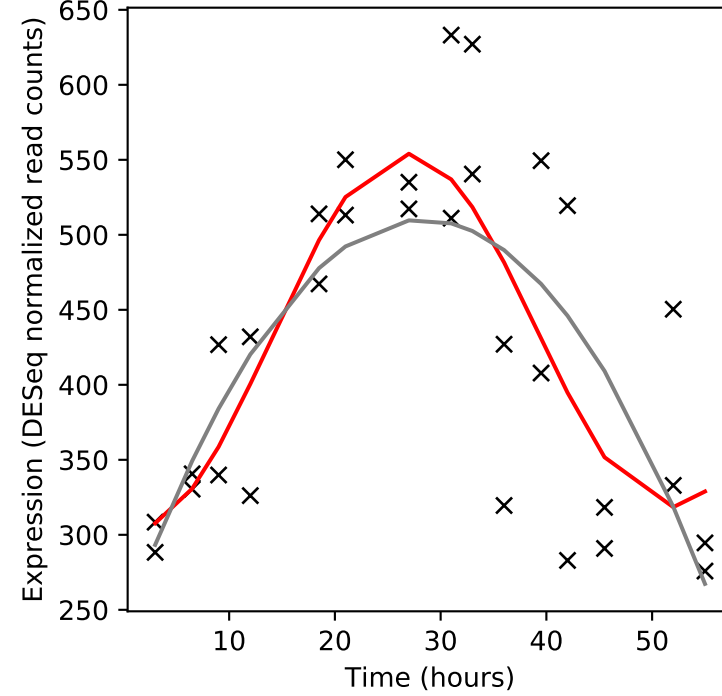

Rv0393/-

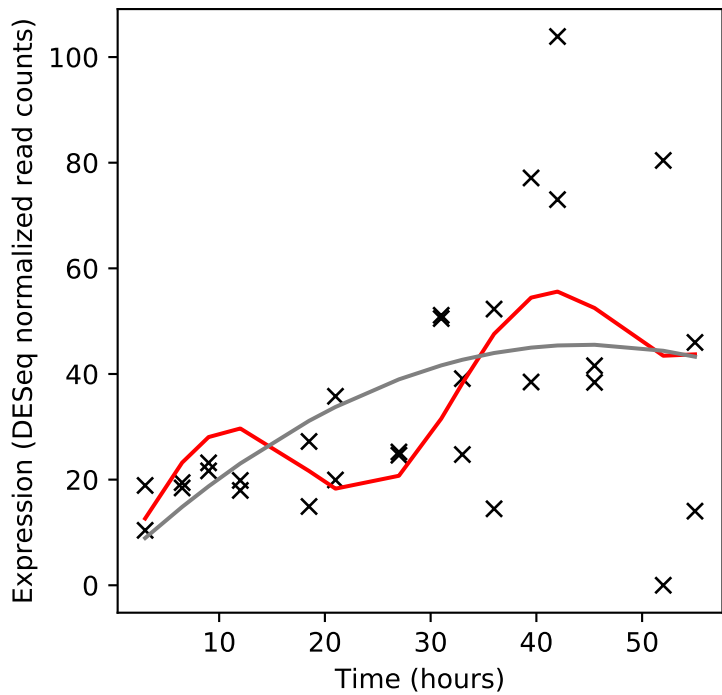

Rv0394c/-

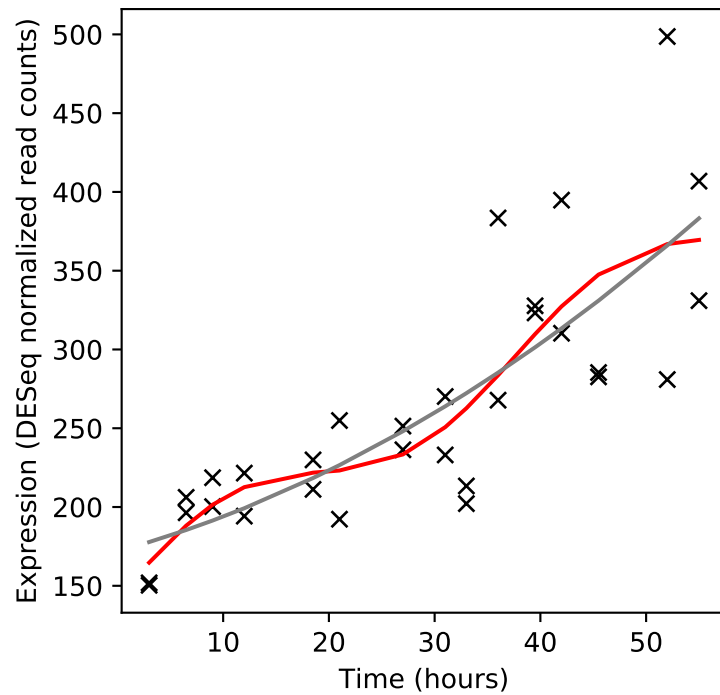

Rv0395/-

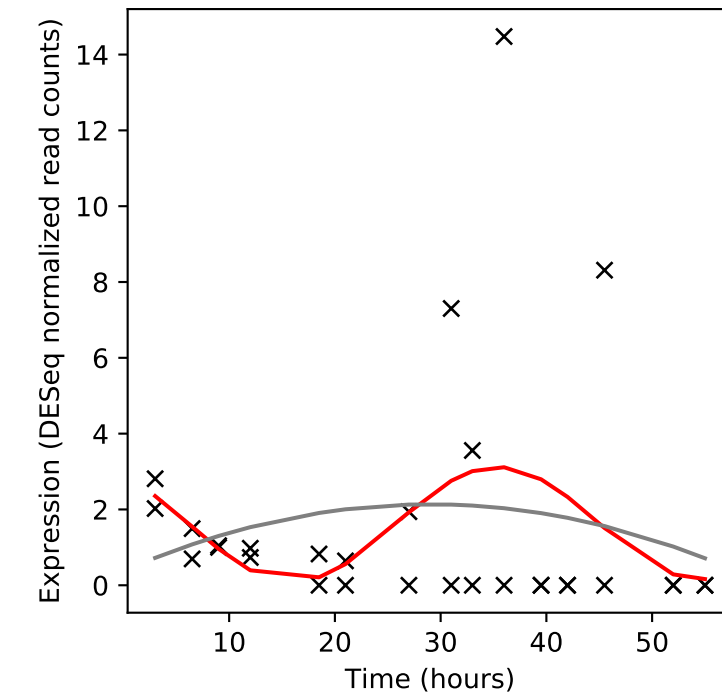

Rv0396/-

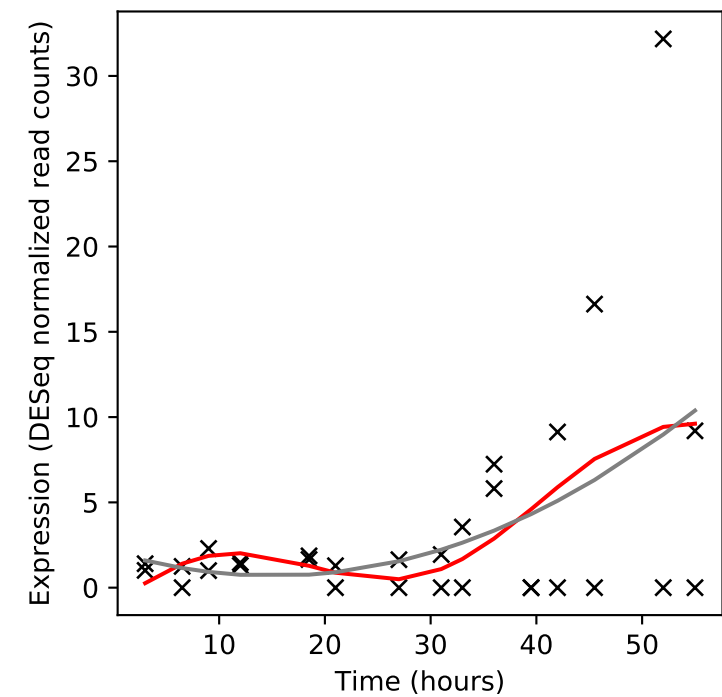

Rv0397/-

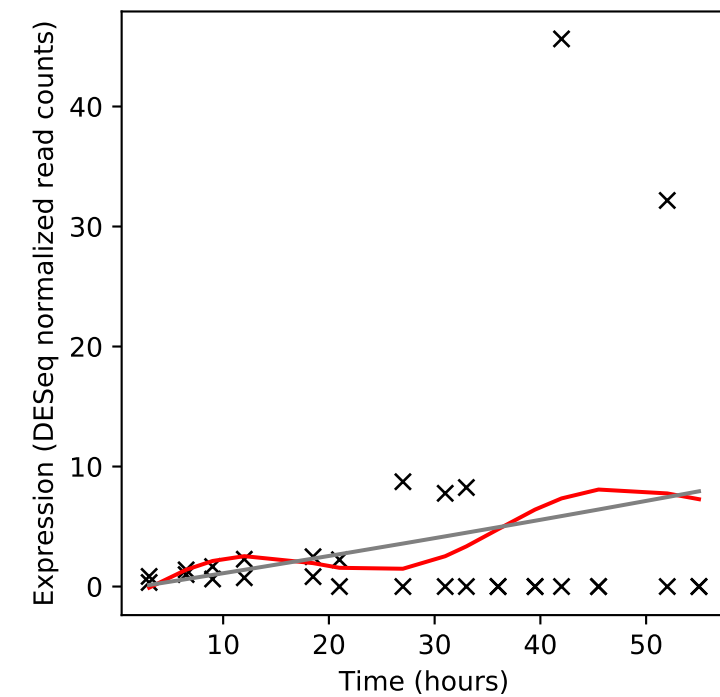

Rv0397A/-

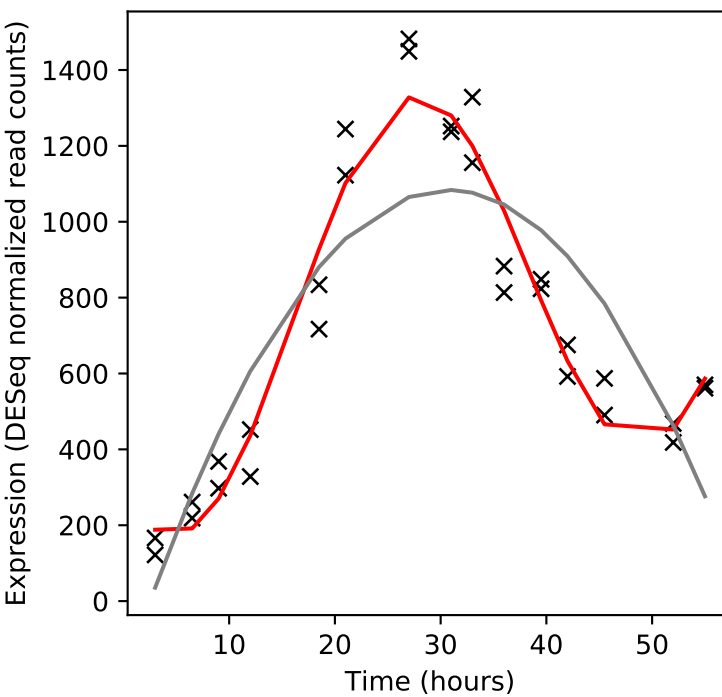

Rv0398c/-

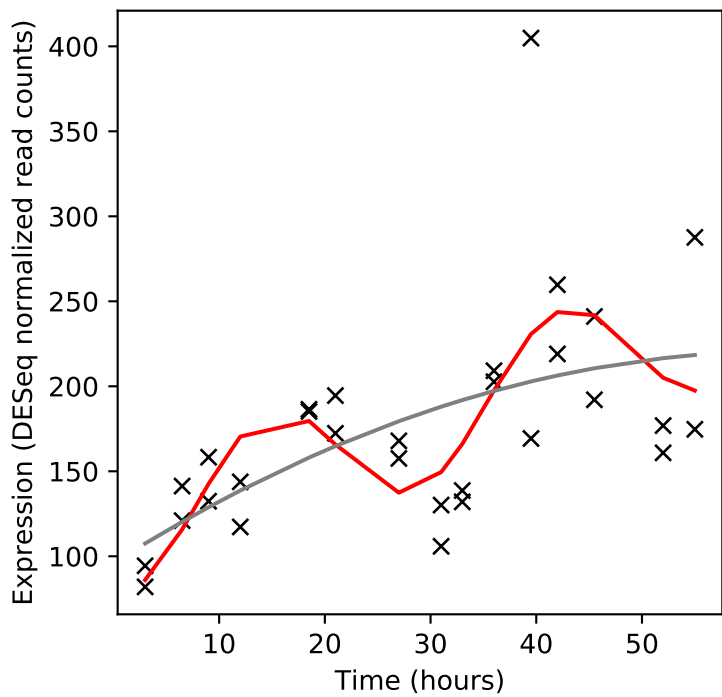

Rv0399c/lpqK

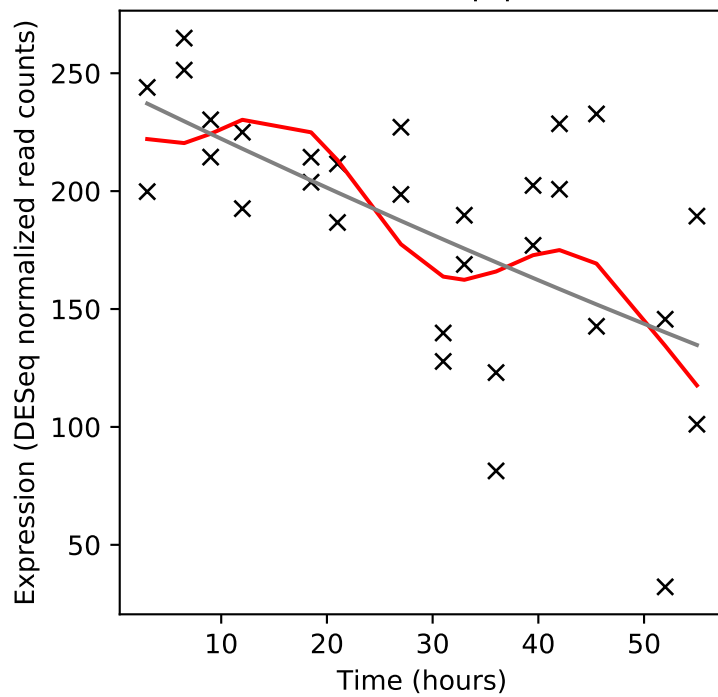

Rv0400c/fadE7

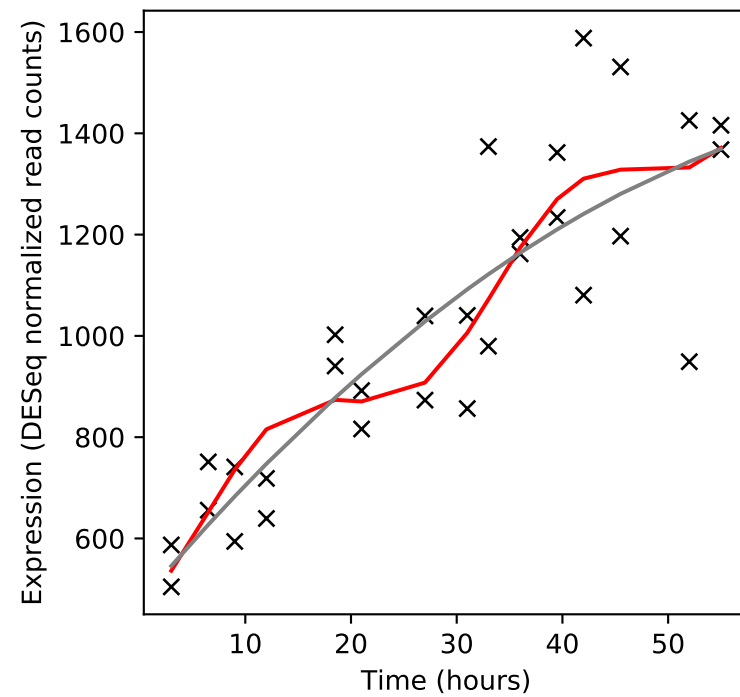

Rv0401c/-

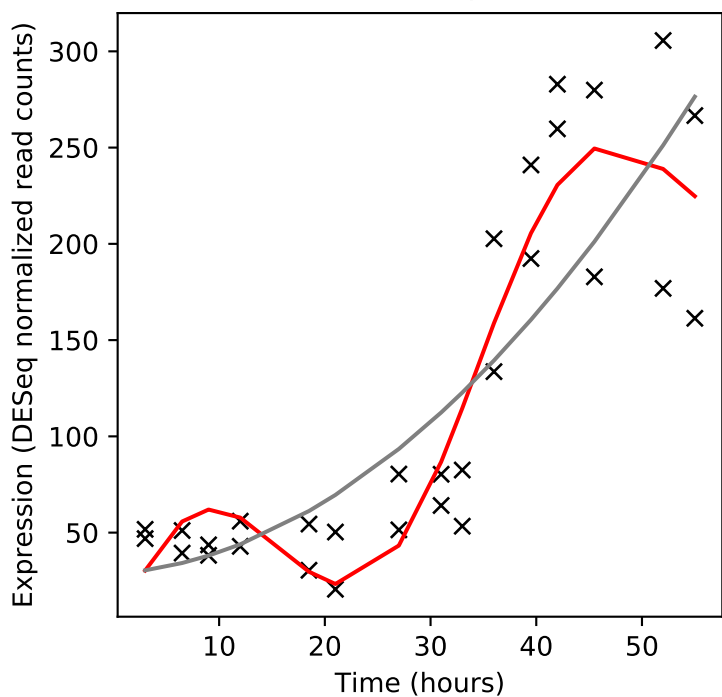

Rv0402c/mmpL1

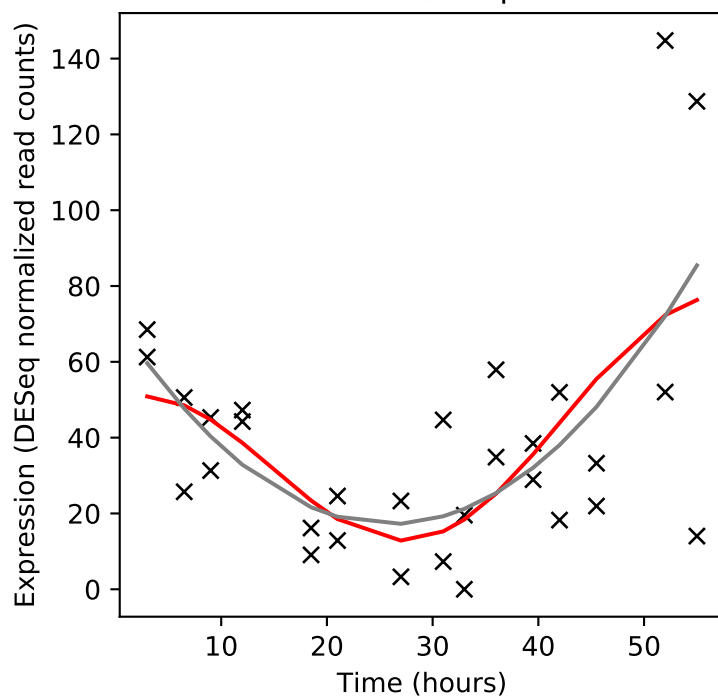

Rv0403c/mmpS1

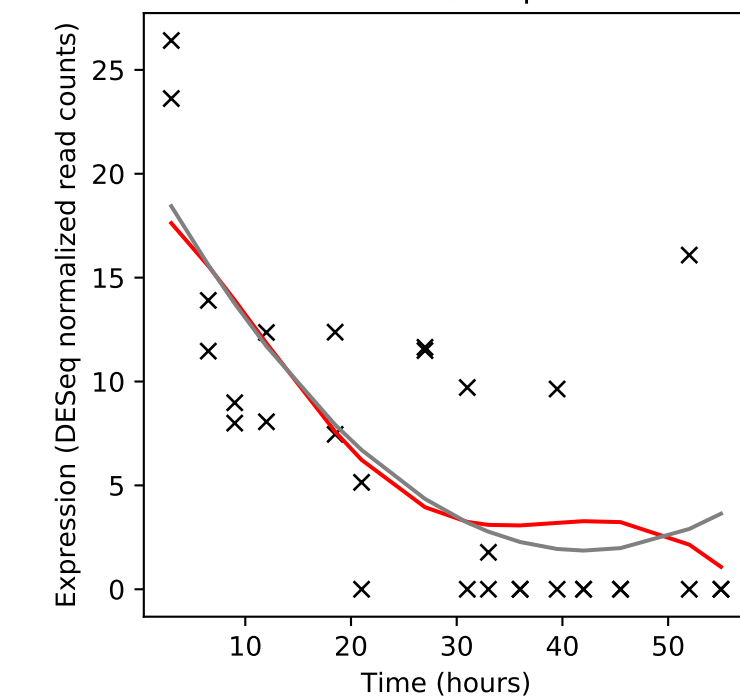

Rv0404c/fadD30

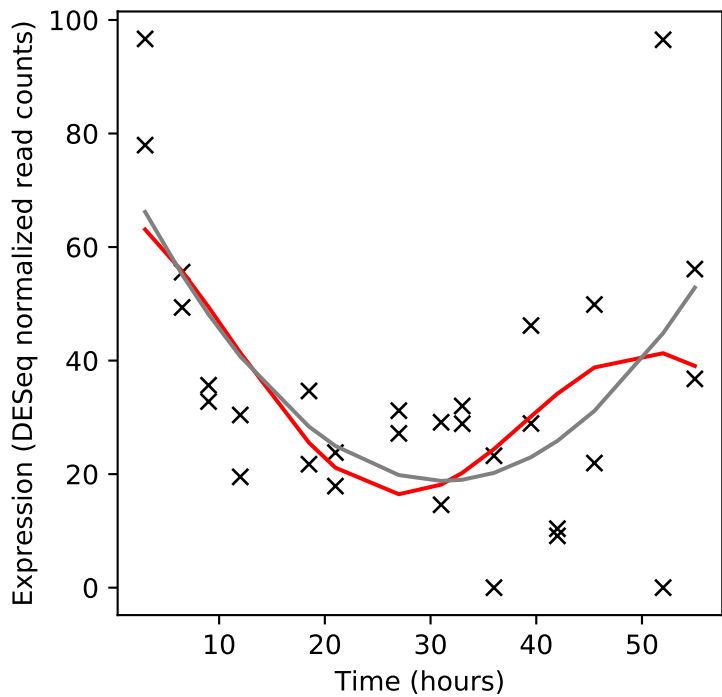

Rv0405c/pks6

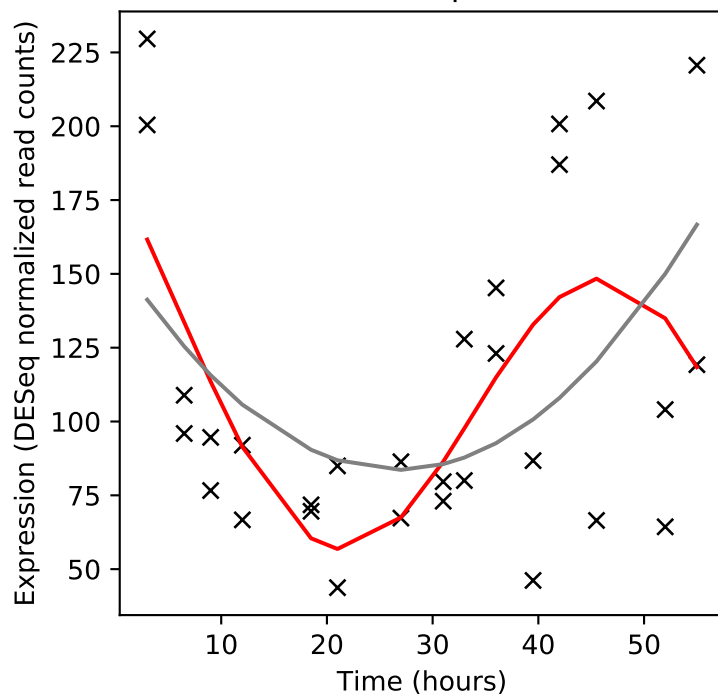

Rv0406c/-

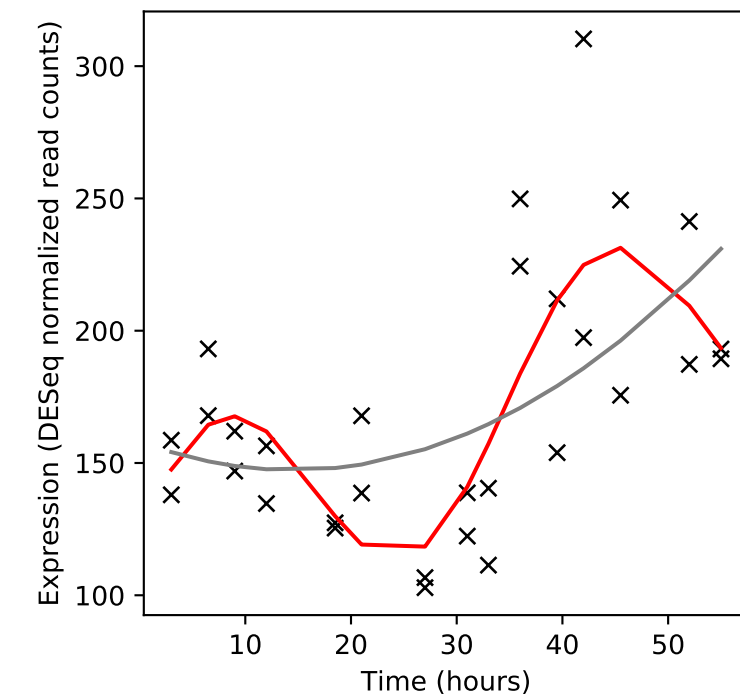

Rv0407/fgd1

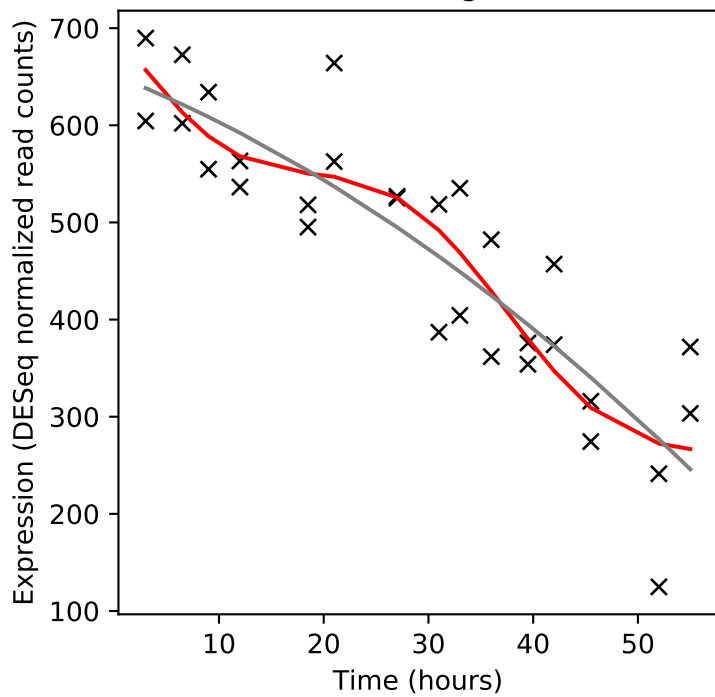

Rv0408/pta

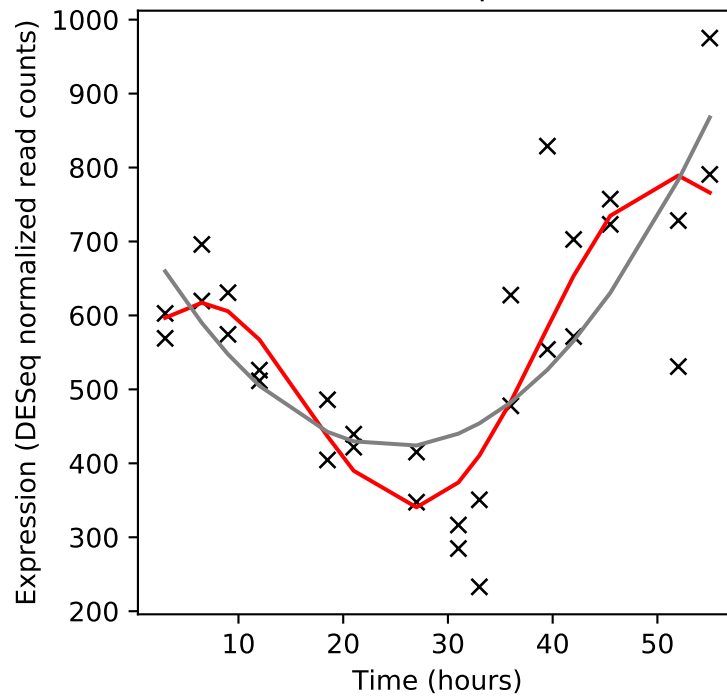

Rv0409/ackA

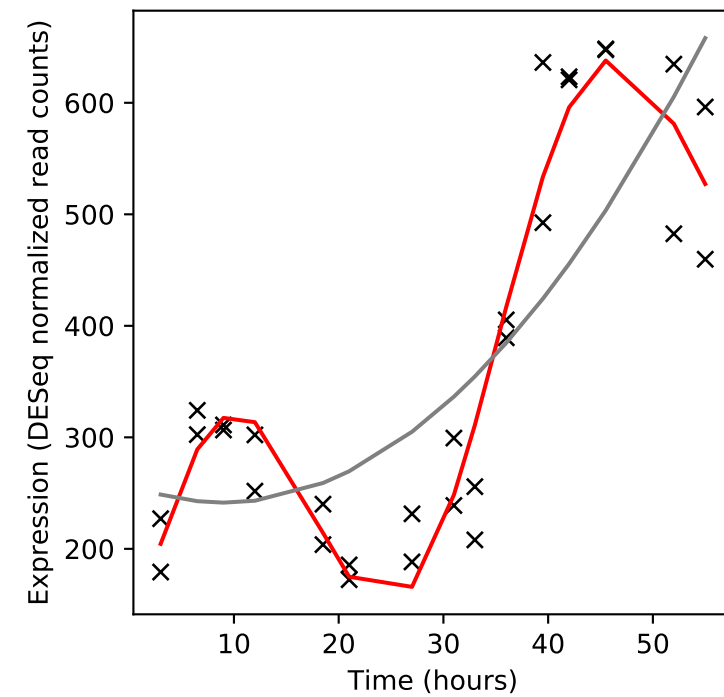

Rv0410c/pknG

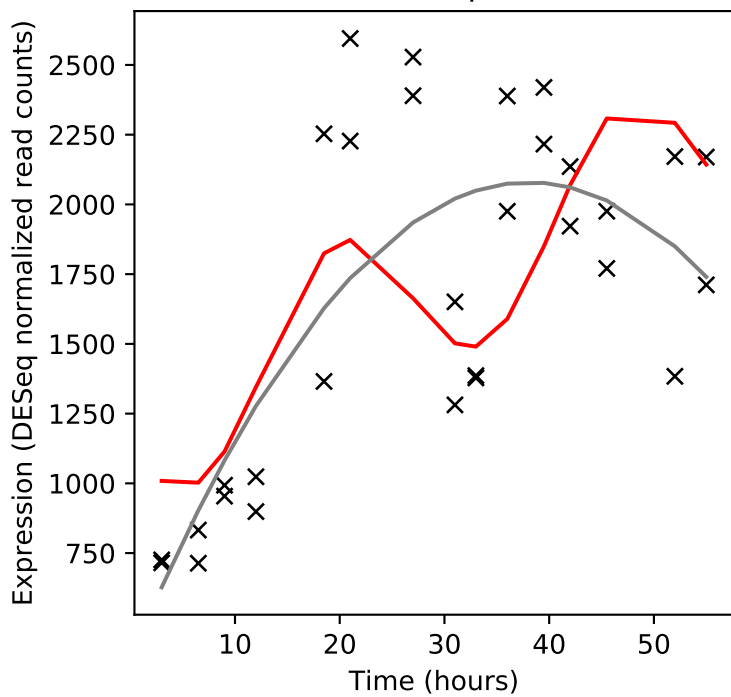

Rv0411c/glnH

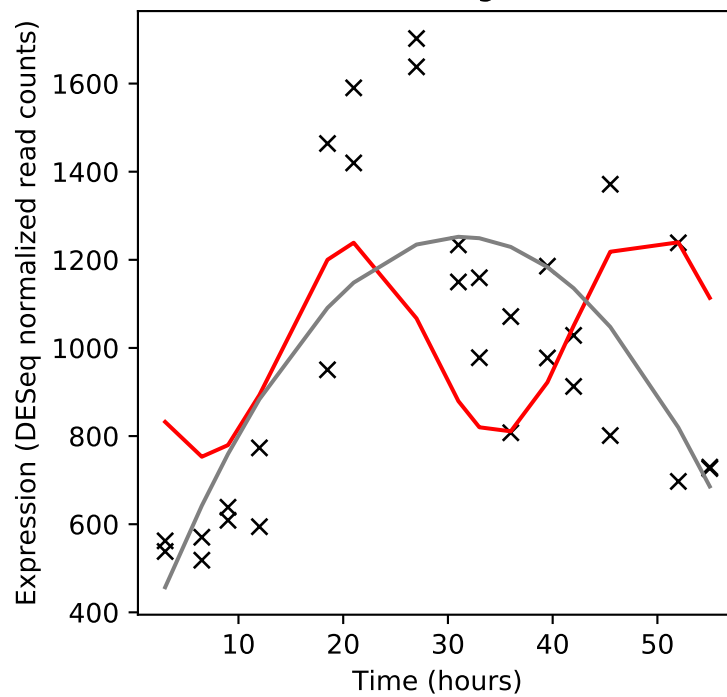

Rv0412c/-

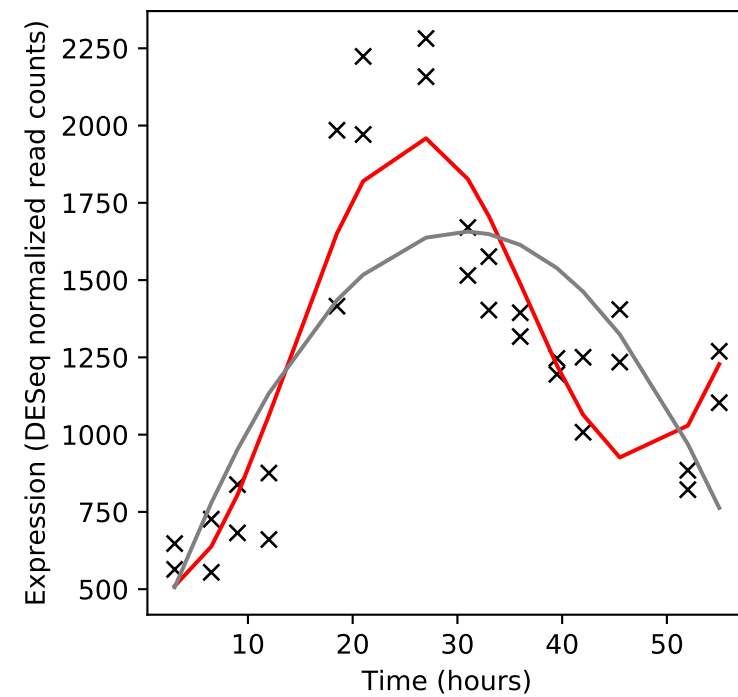

Rv0413/mutT3

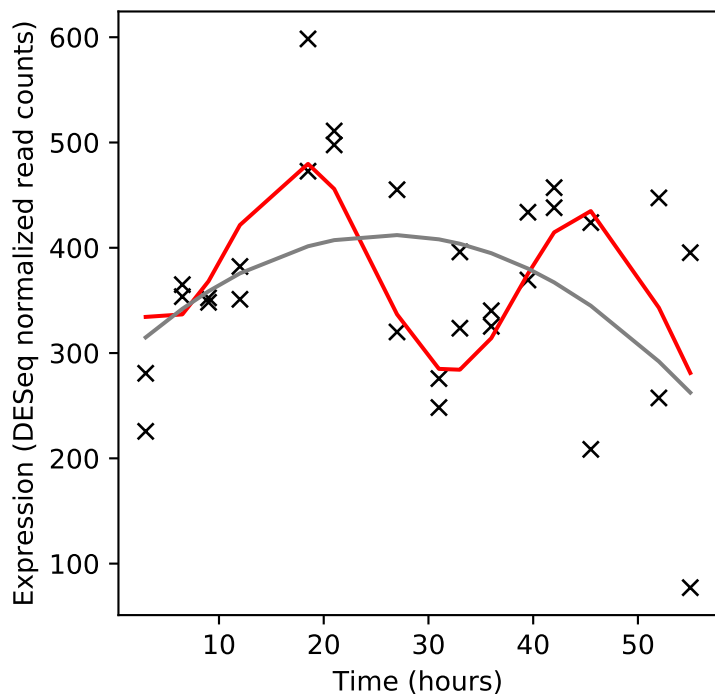

Rv0414c/thiE

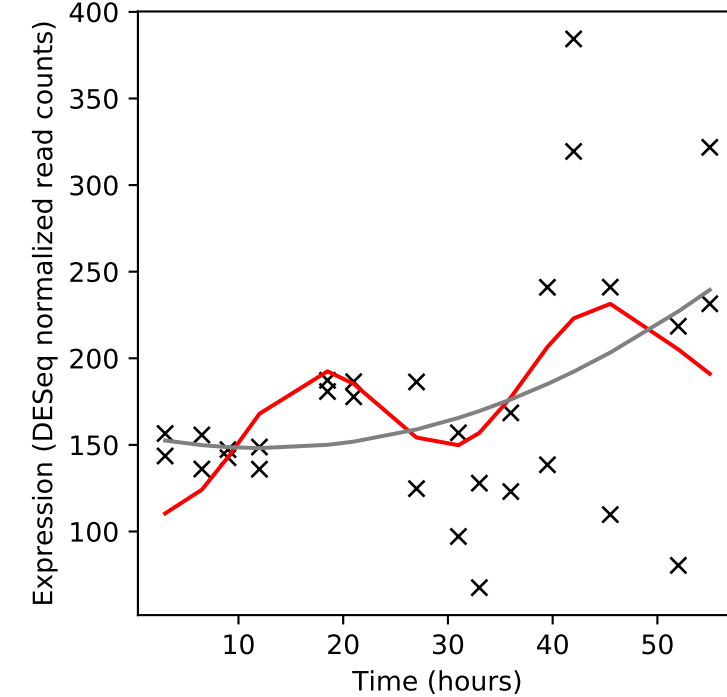

Rv0415/thiO

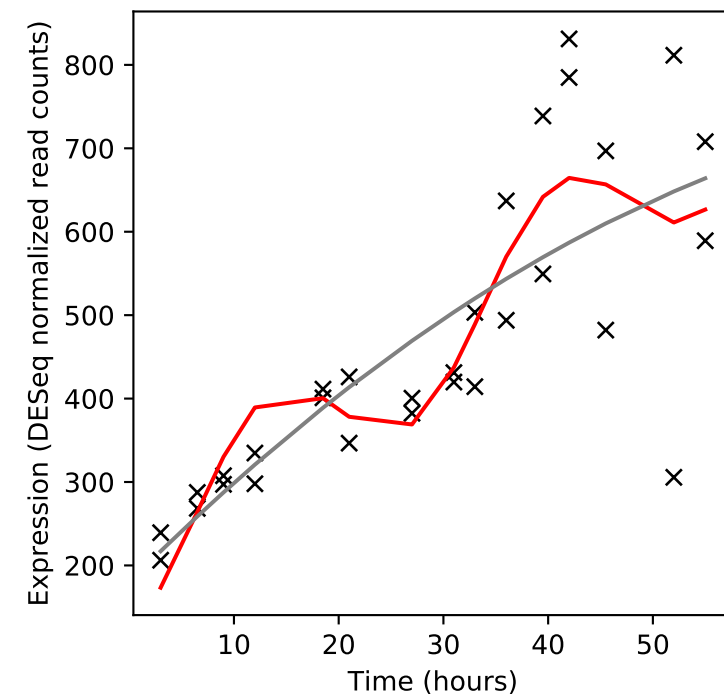

Rv0416/thiS

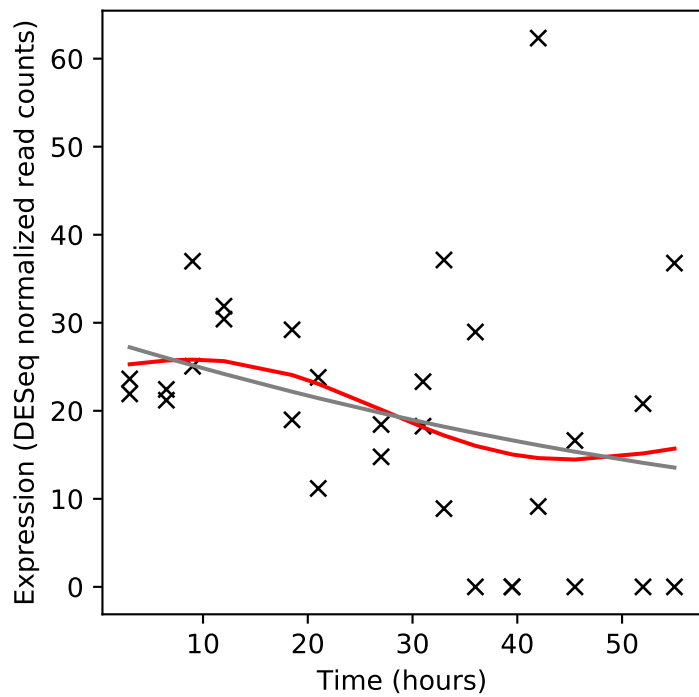

Rv0417/thiG

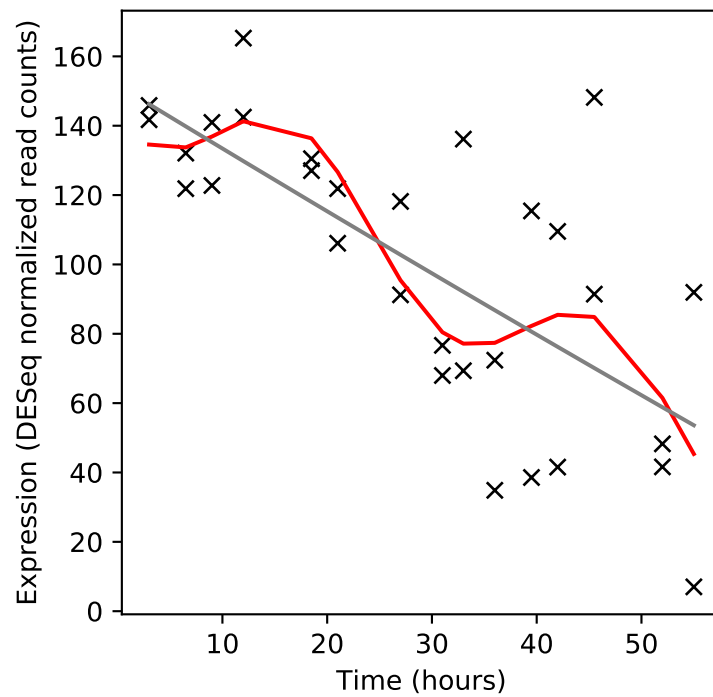

Rv0418/lpqL

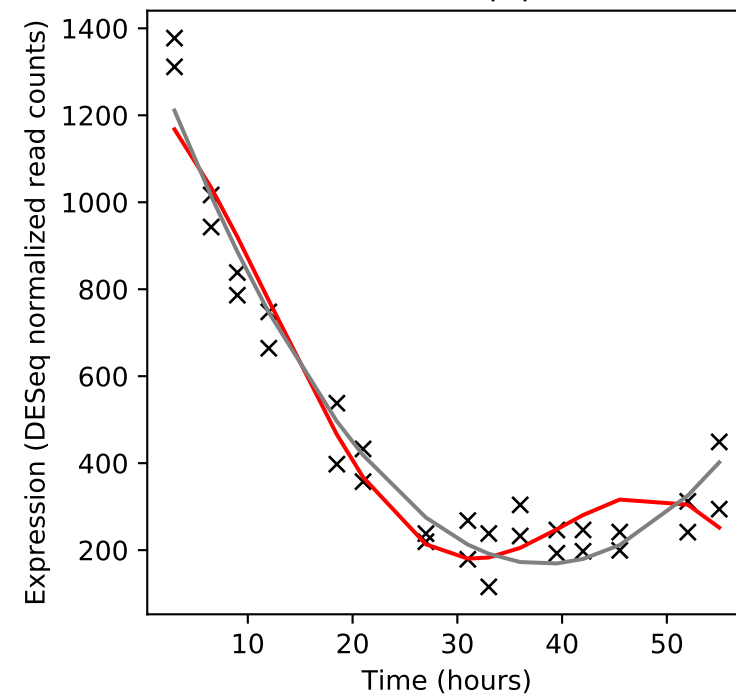

Rv0419/lpqM

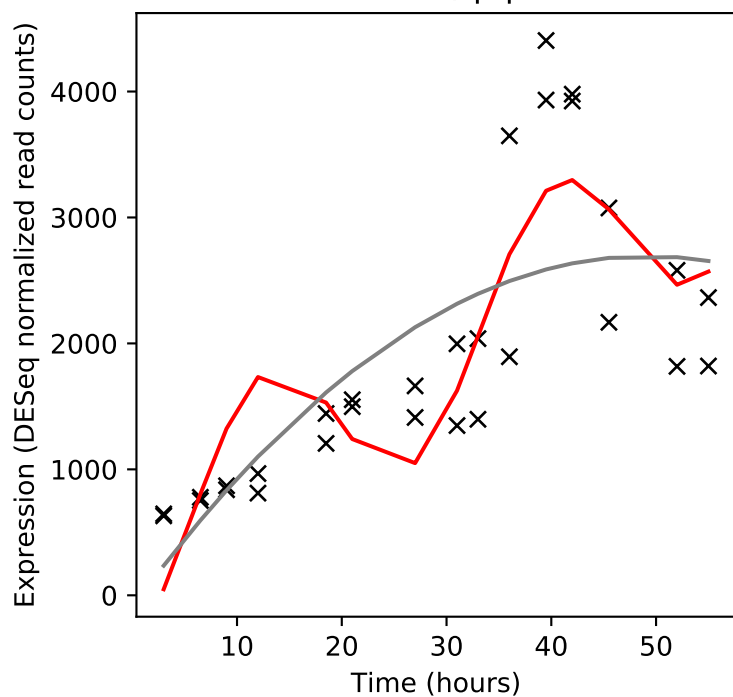

Rv0420c/-

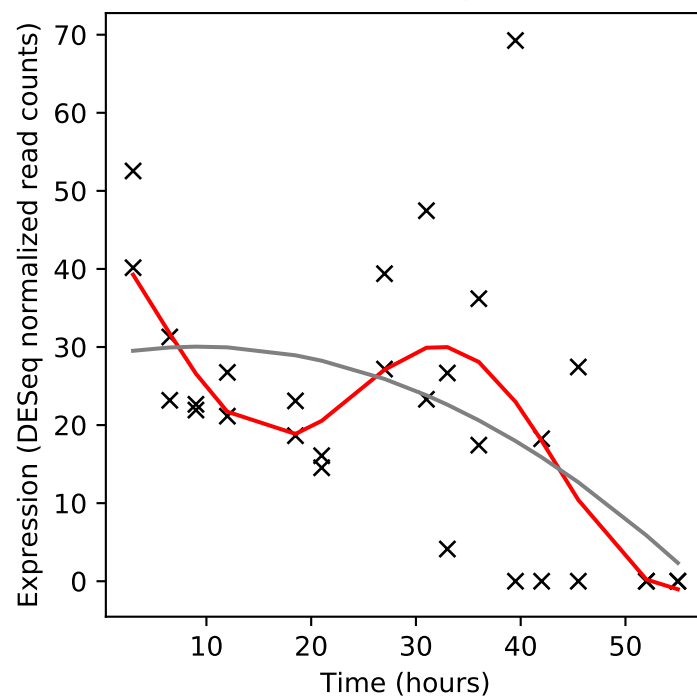

Rv0421c/-

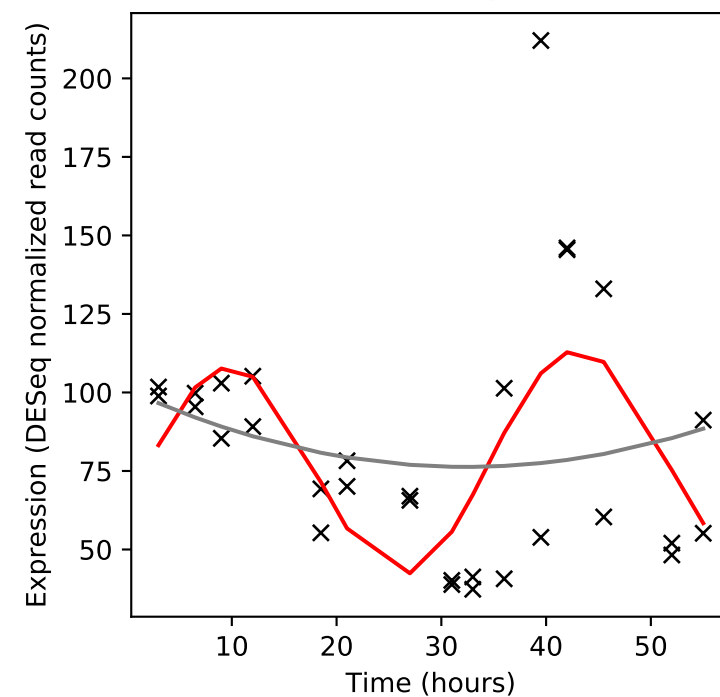

Rv0422c/thiD

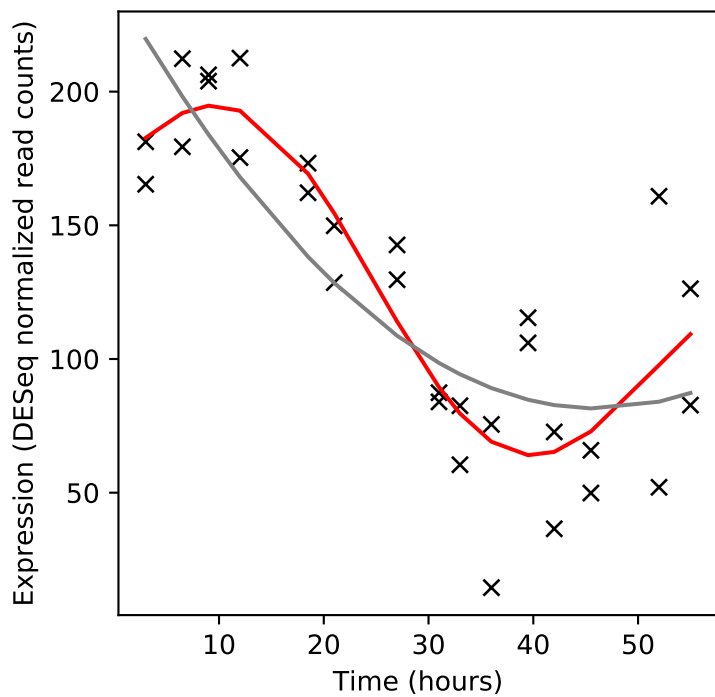

Rv0423c/thiC

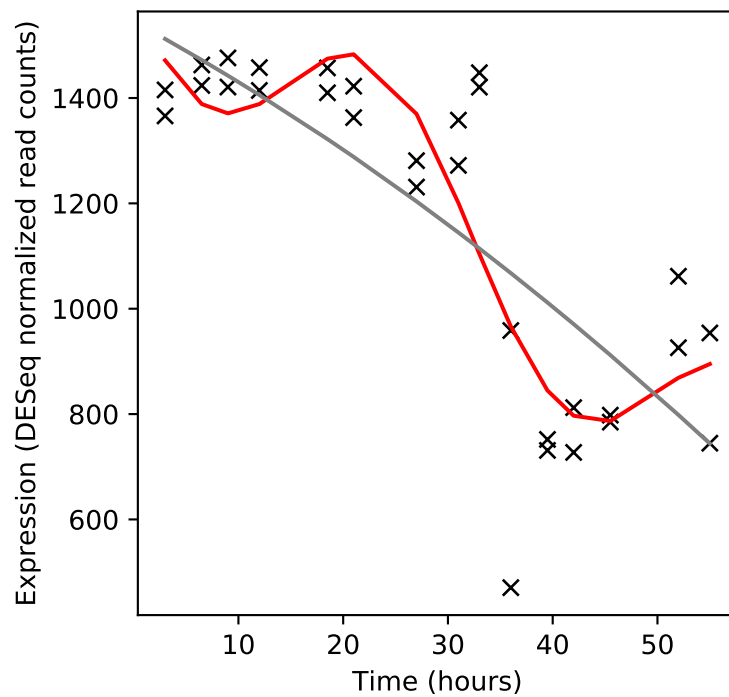

Rv0424c/-

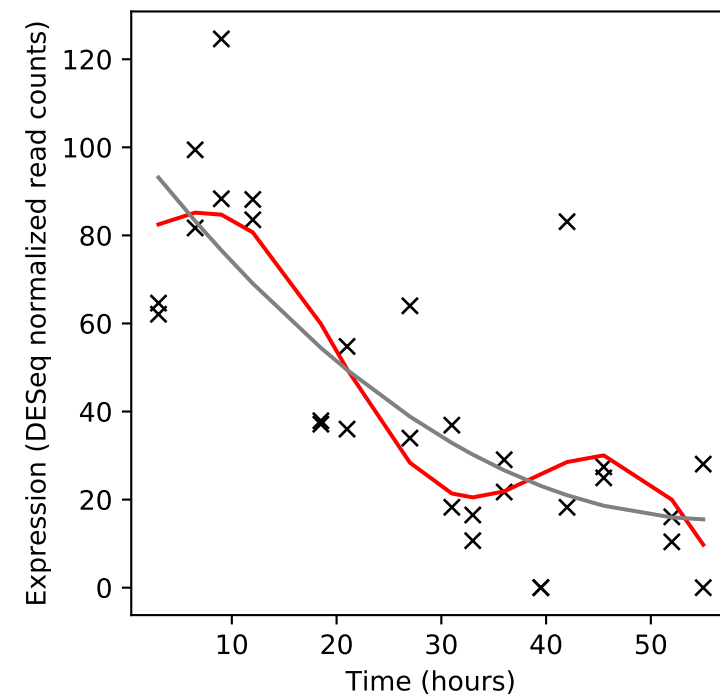

Rv0425c/ctpH

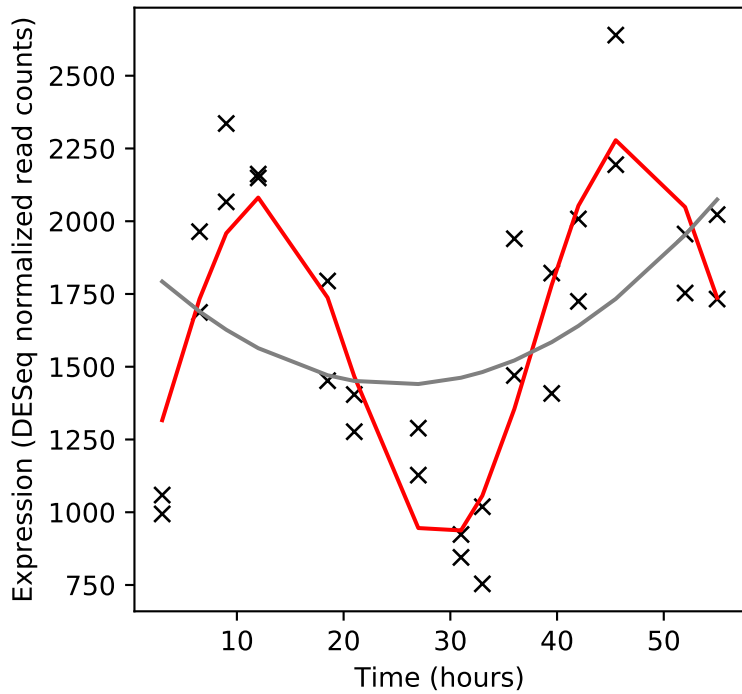

Rv0426c/-

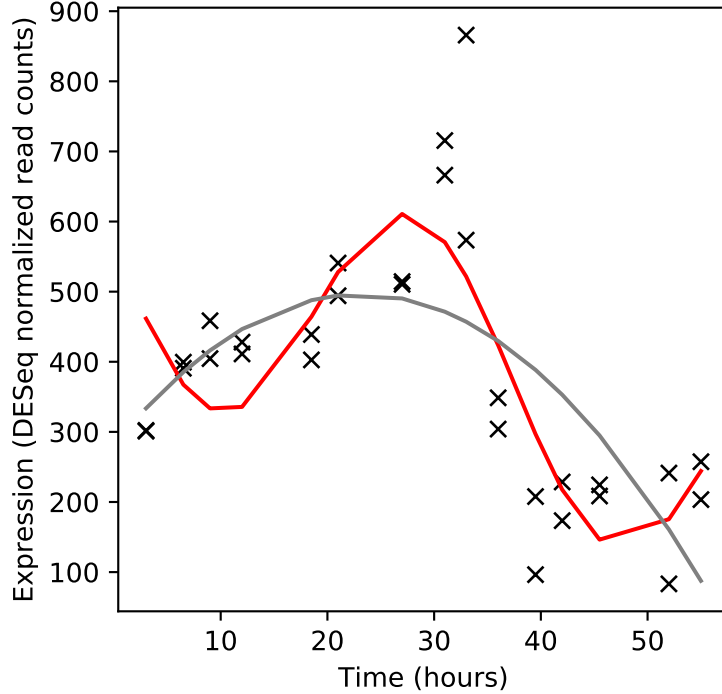

Rv0427c/xthA

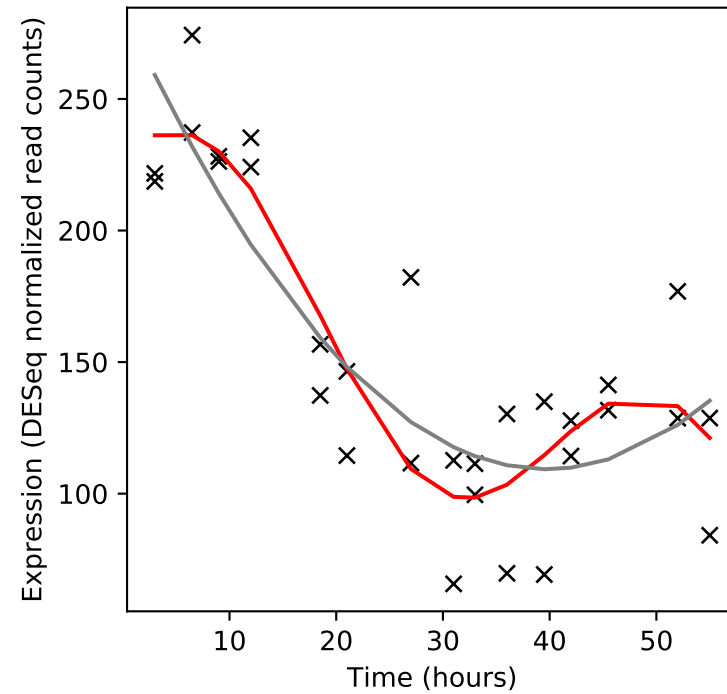

Rv0428c/-

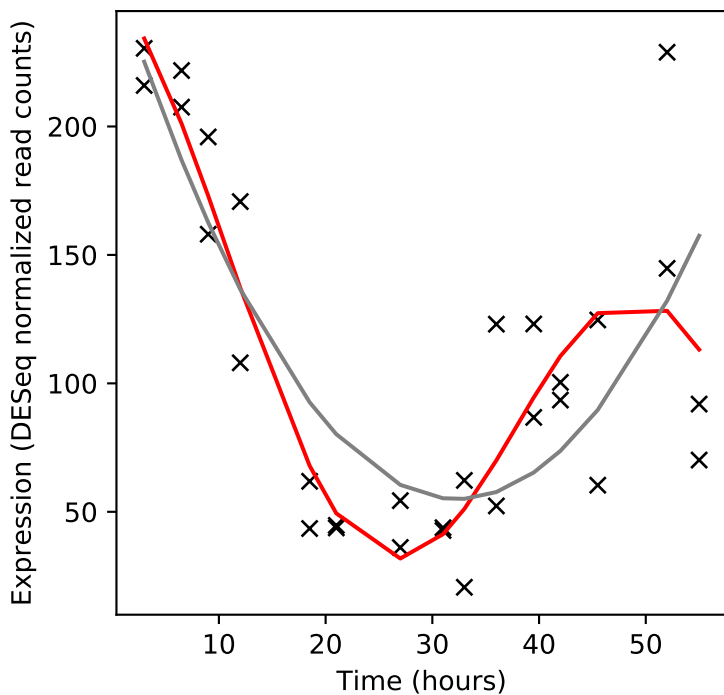

Rv0429c/def

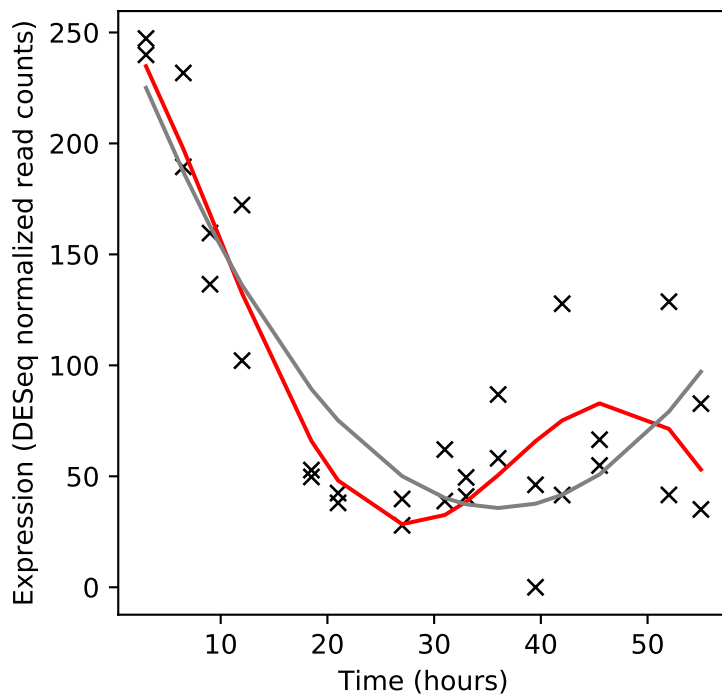

Rv0430/-

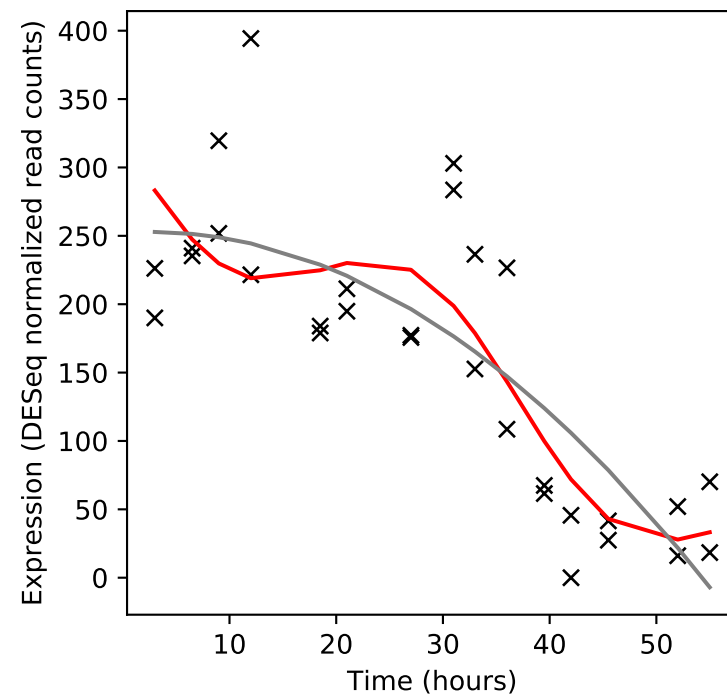

Rv0431/-

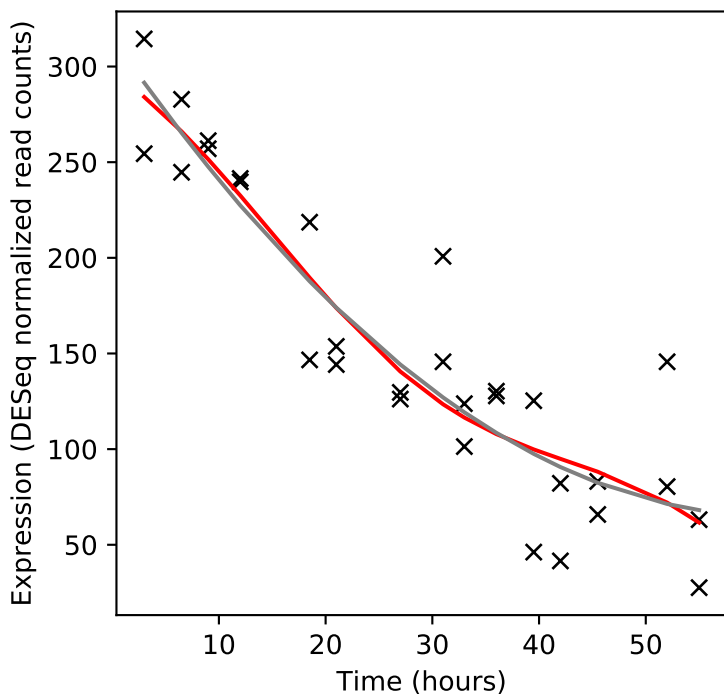

Rv0432/sodC

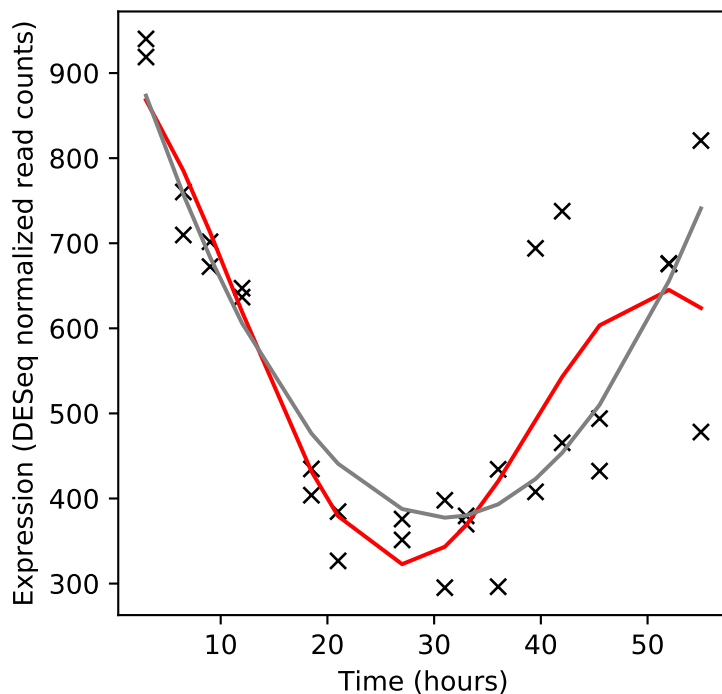

Rv0433/-

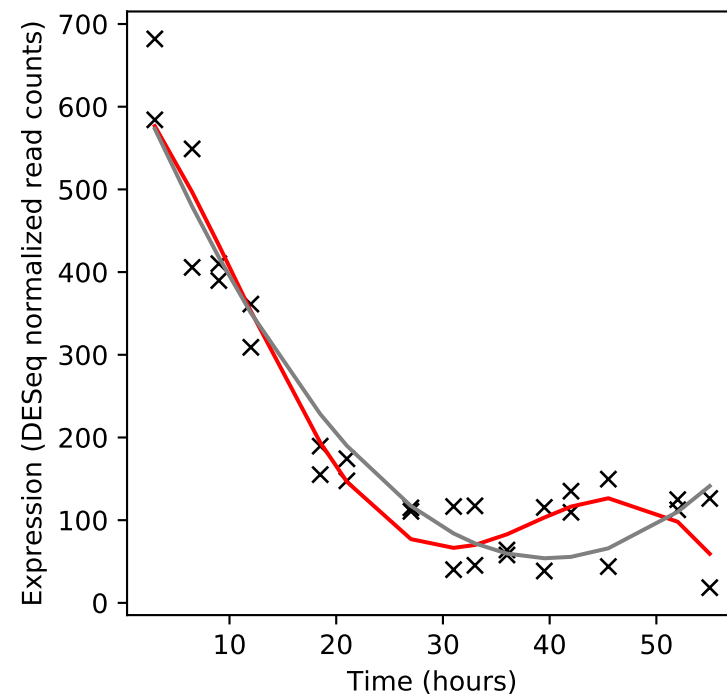

Rv0434/-

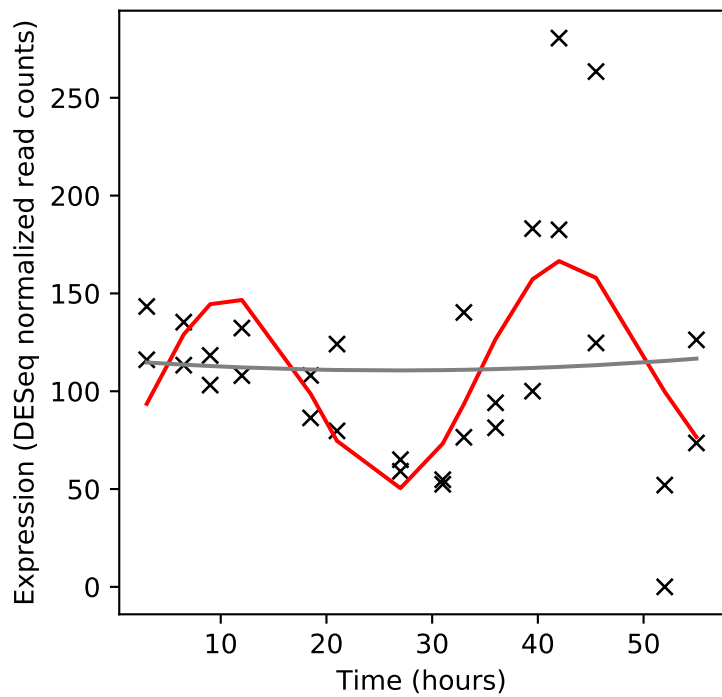

Rv0435c/-

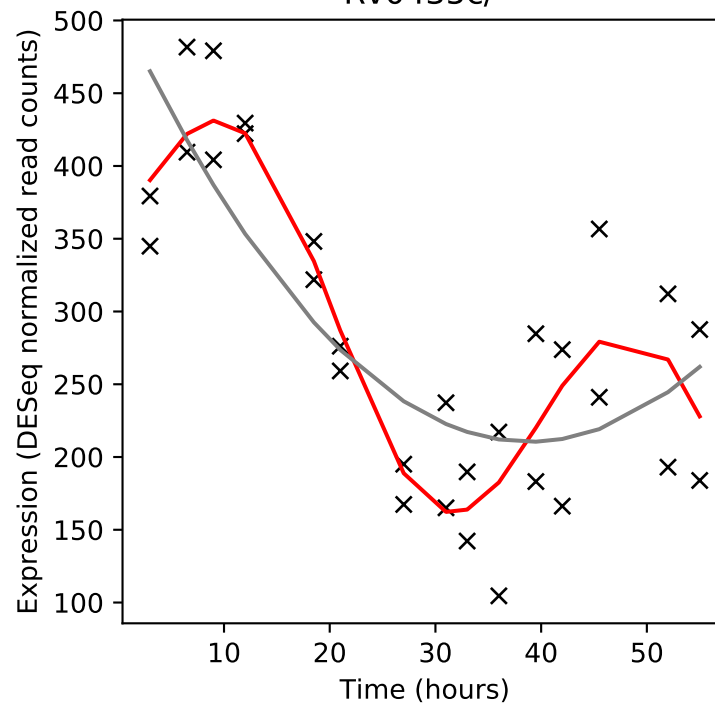

Rv0436c/pssA

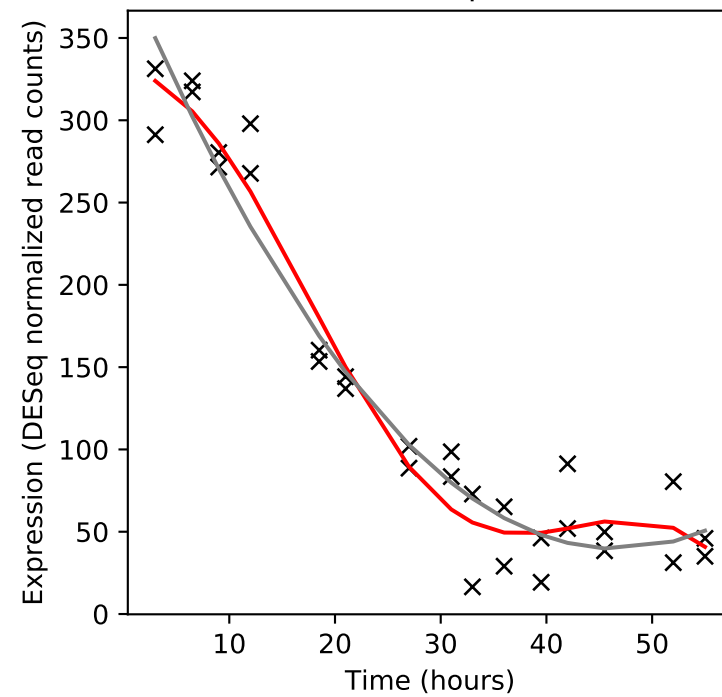

Rv0437c/psd

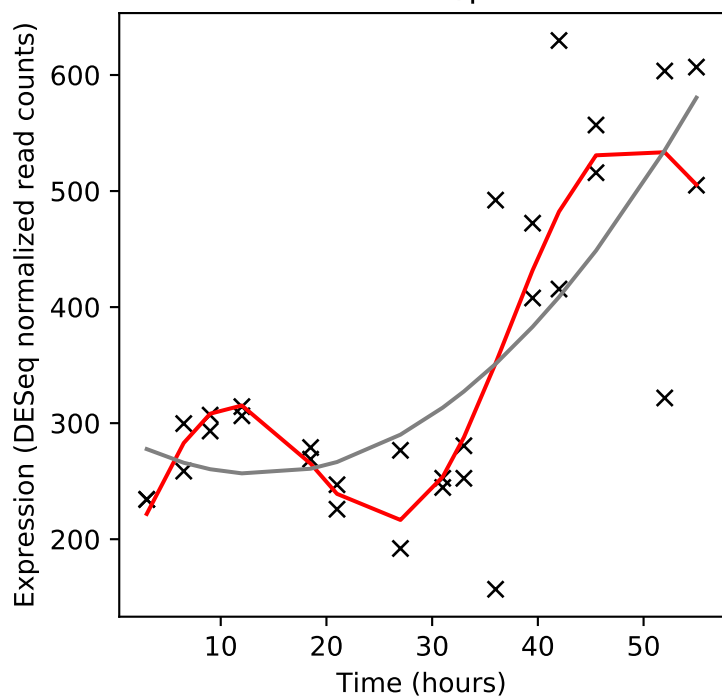

Rv0438c/moeA2

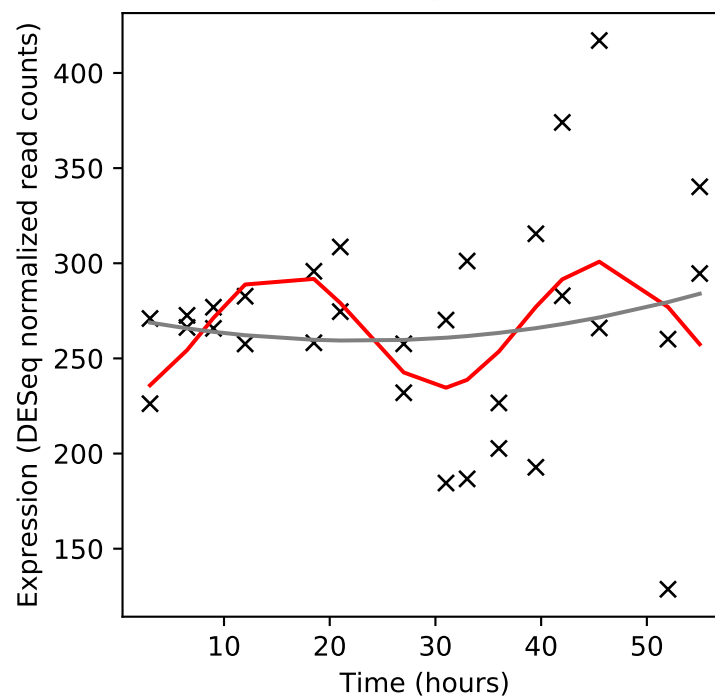

Rv0439c/-

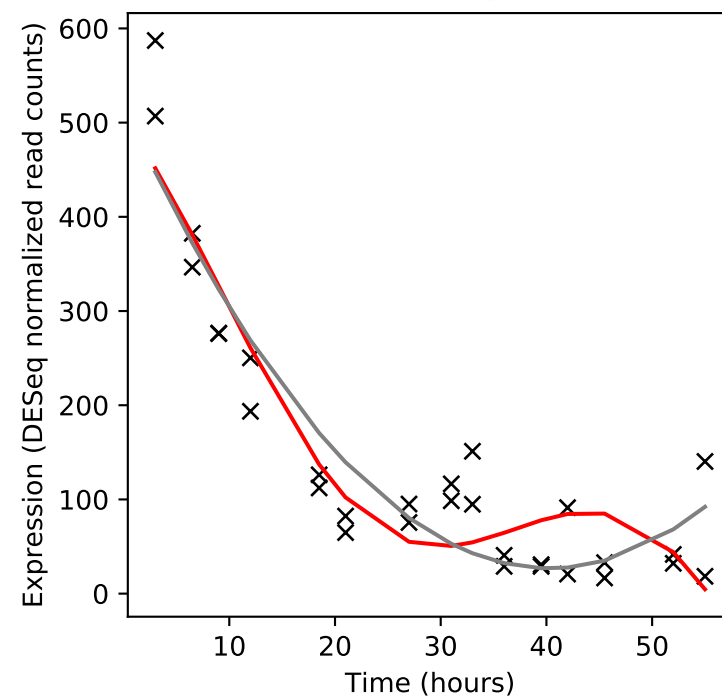

Rv0440/groEL2

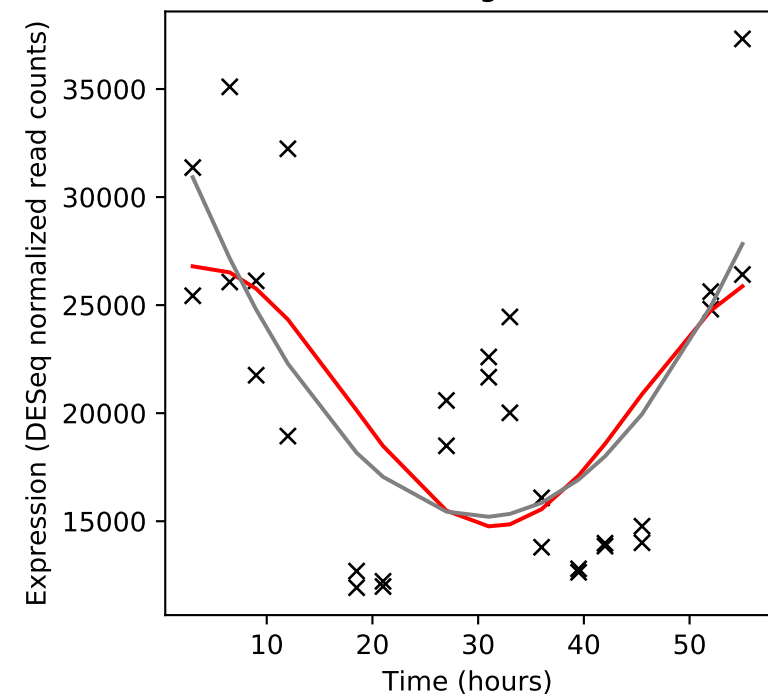

Rv0441c/-

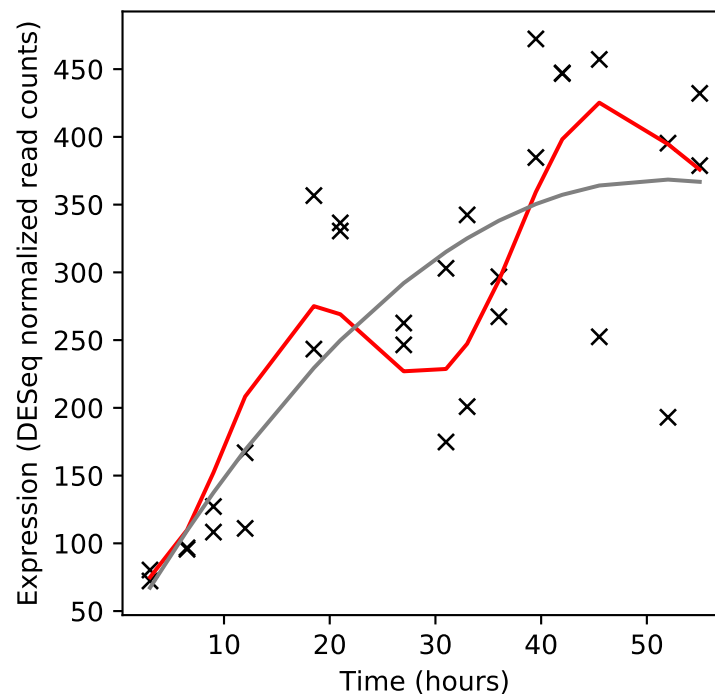

Rv0442c/PPE10

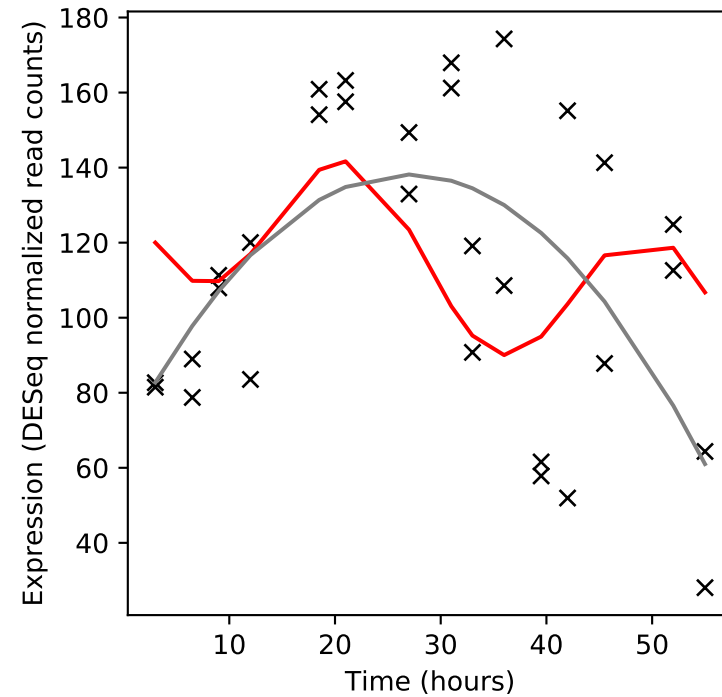



Rv0443/-

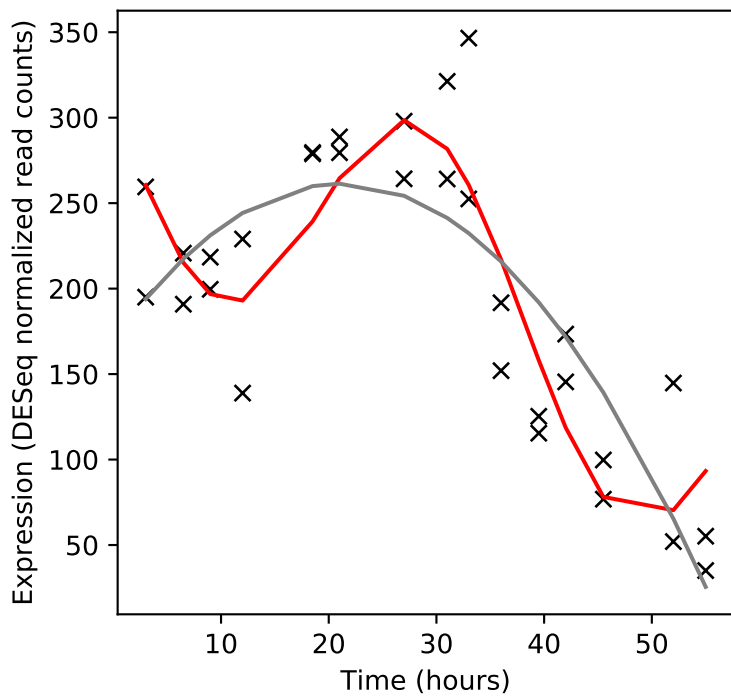

Rv0444c/rskA

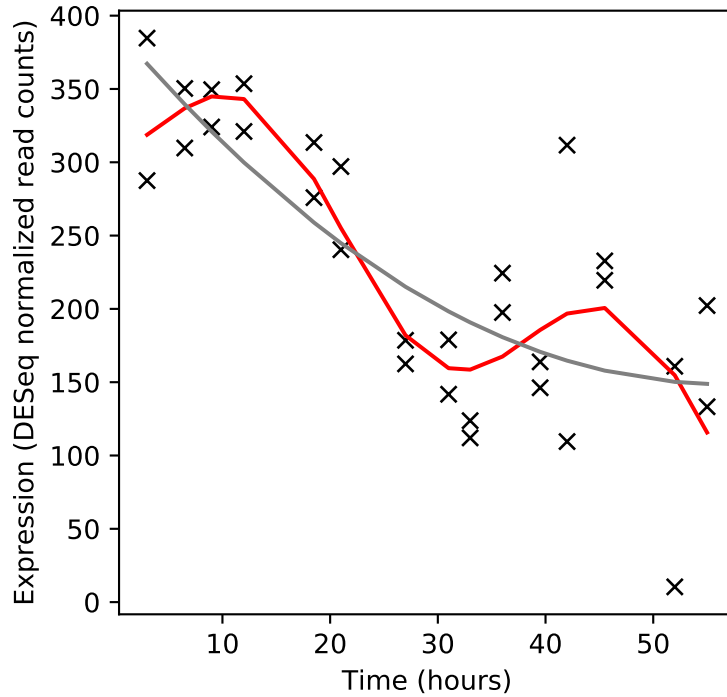

Rv0445c/sigK

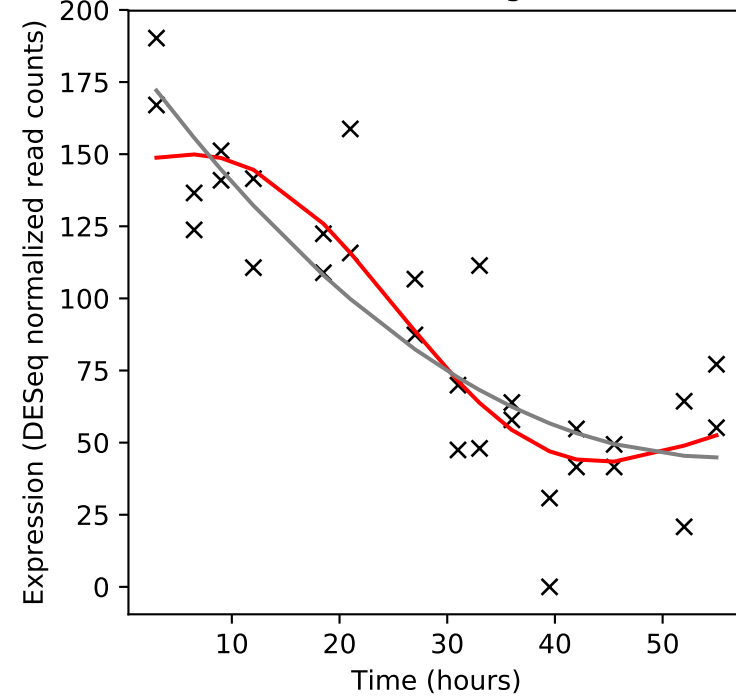

Rv0446c/-

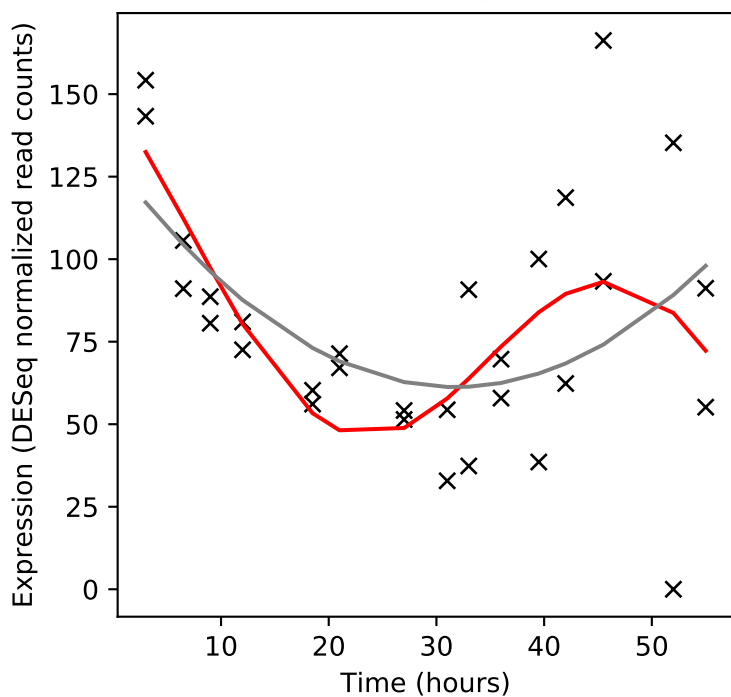

Rv0447c/ufaA1

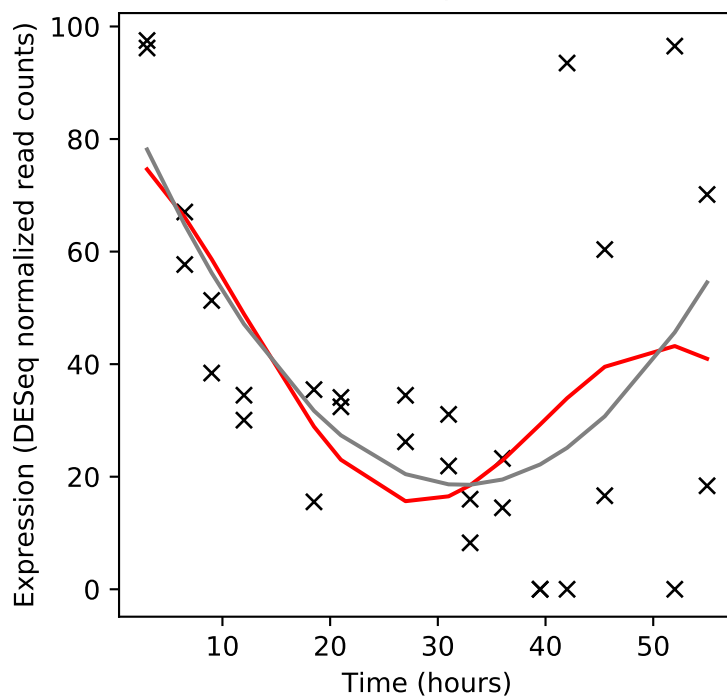

Rv0448c/-

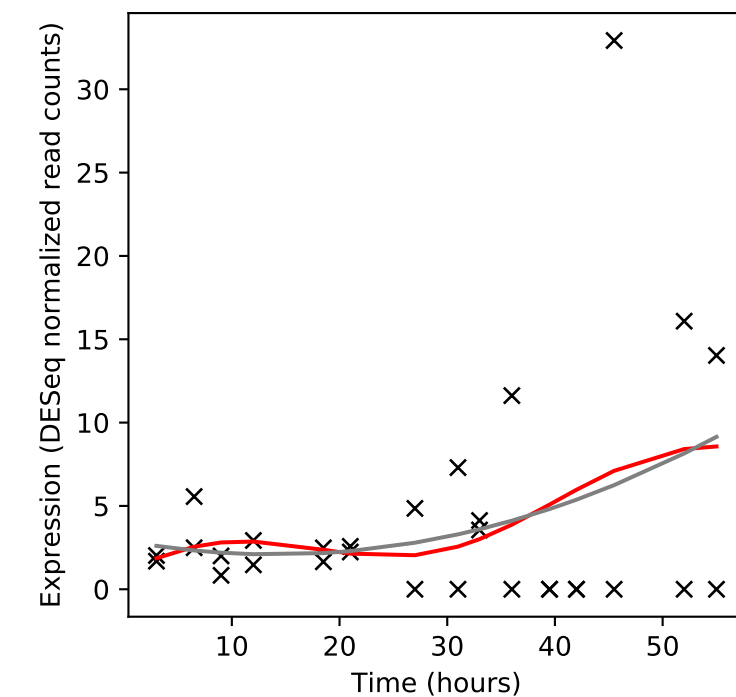

Rv0449c/-

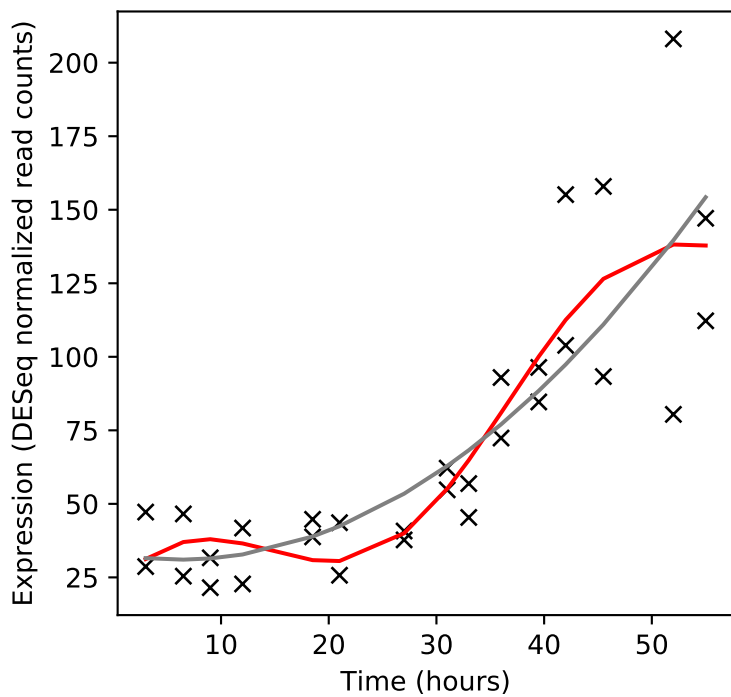

Rv0450c/mmpL4

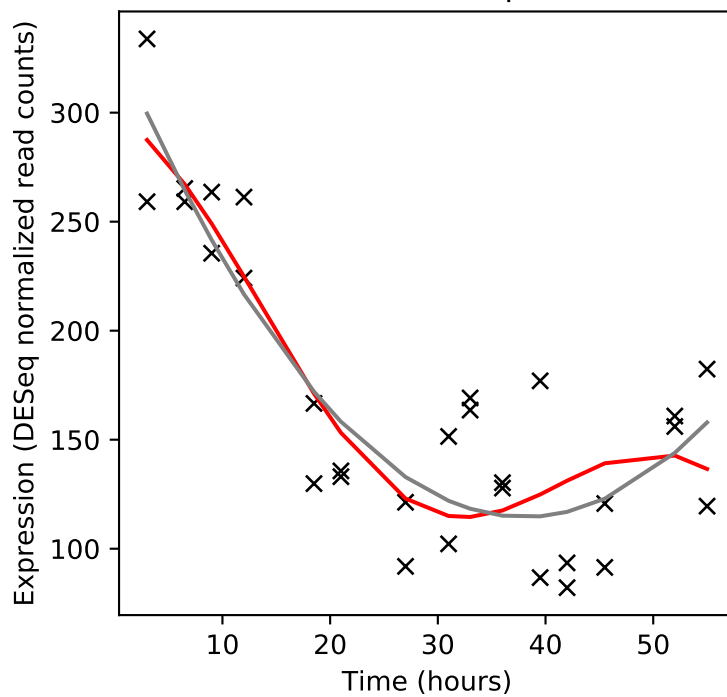

Rv0451c/mmpS4

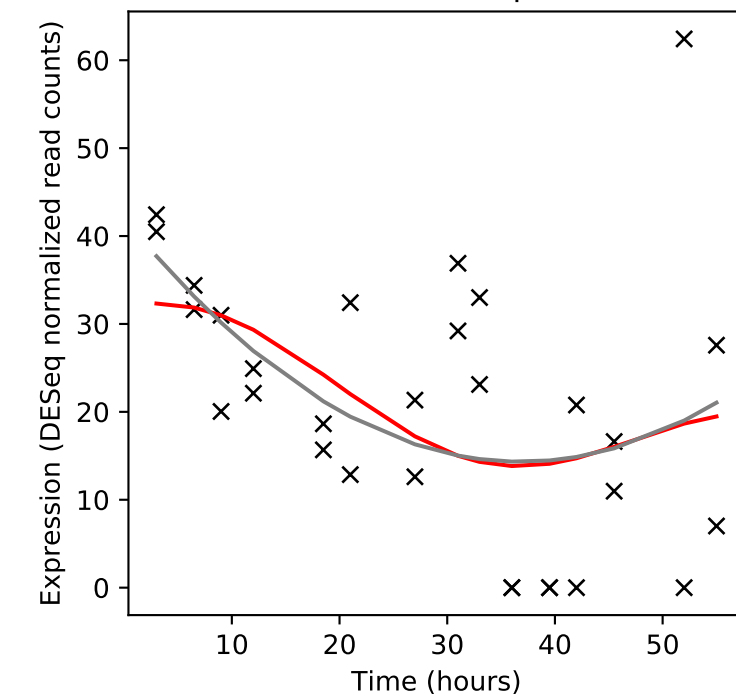

Rv0452/-

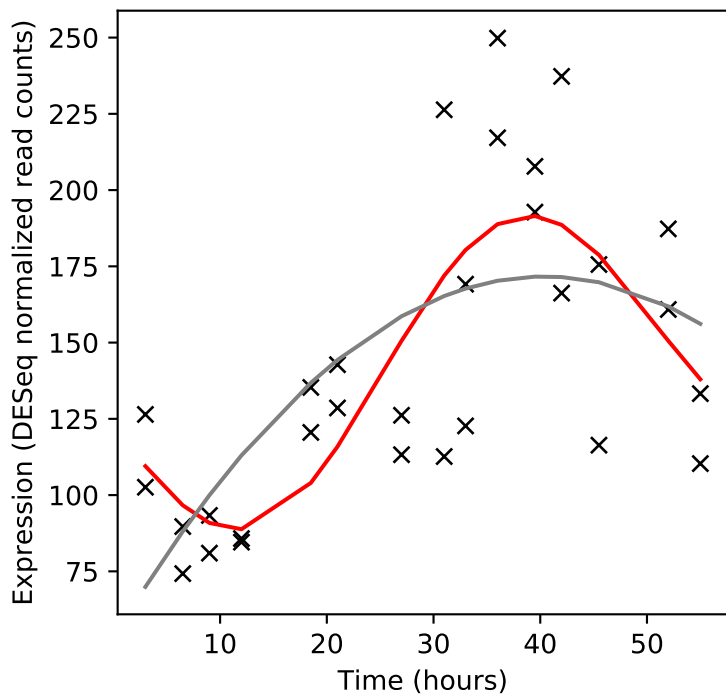

Rv0453/PPE11

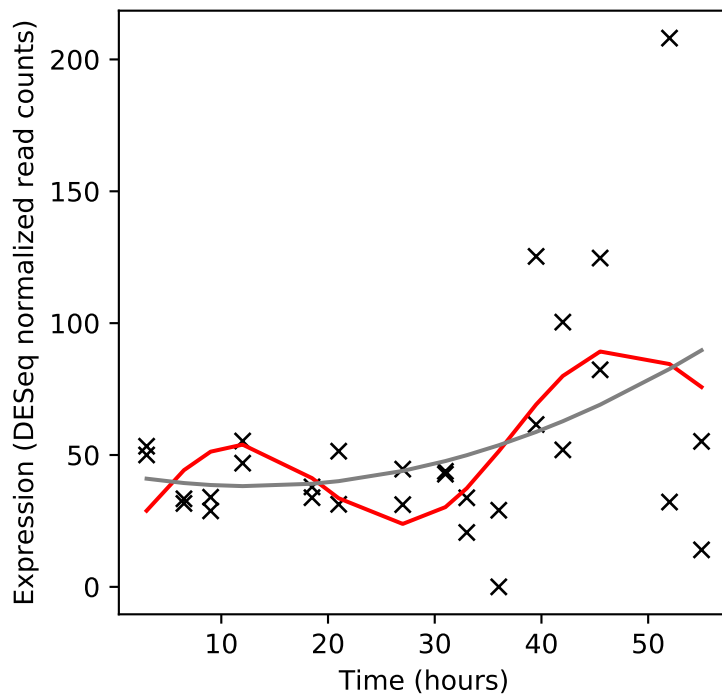

Rv0454/-

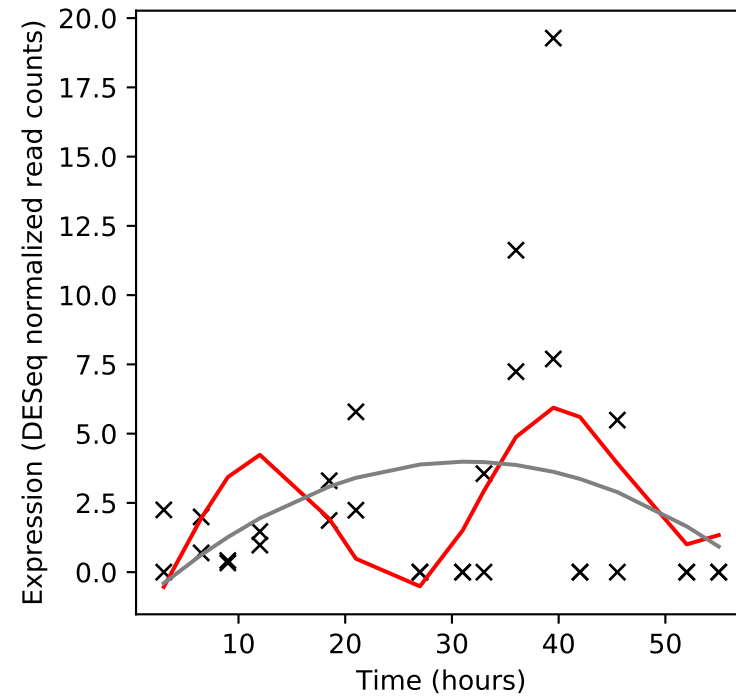

Rv0455c/-

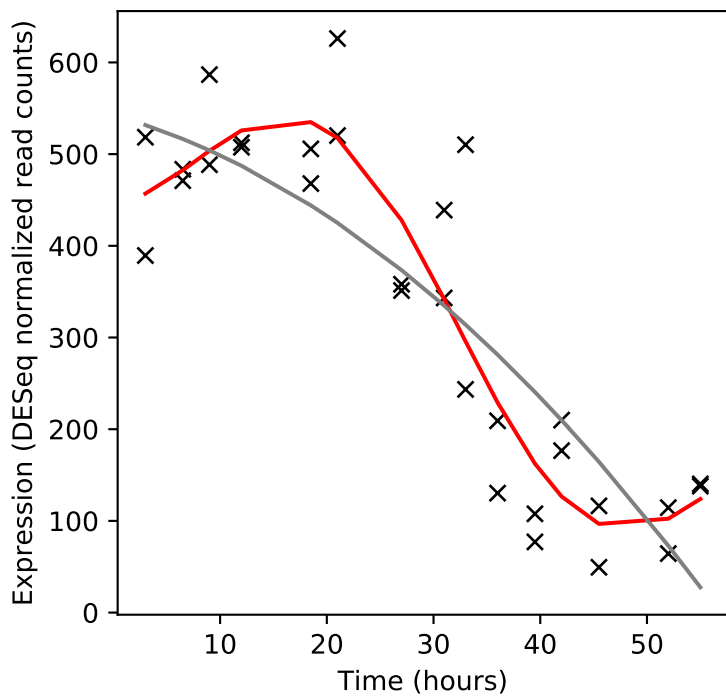

Rv0456c/echA2

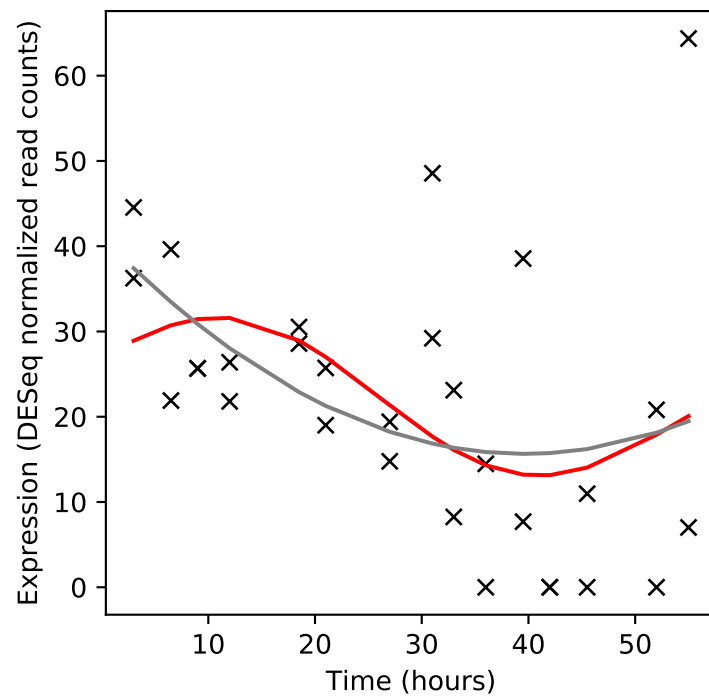

Rv0456A/mazF1

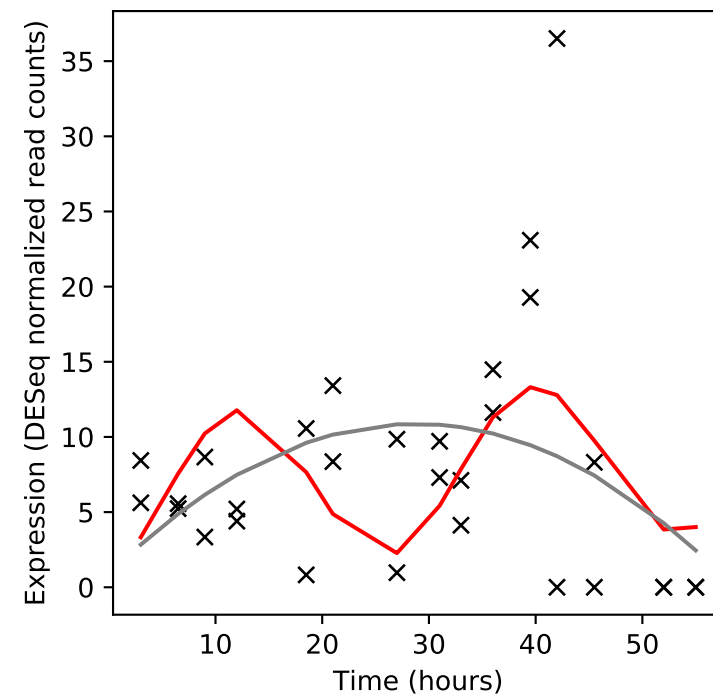

Rv0456B/mazE1

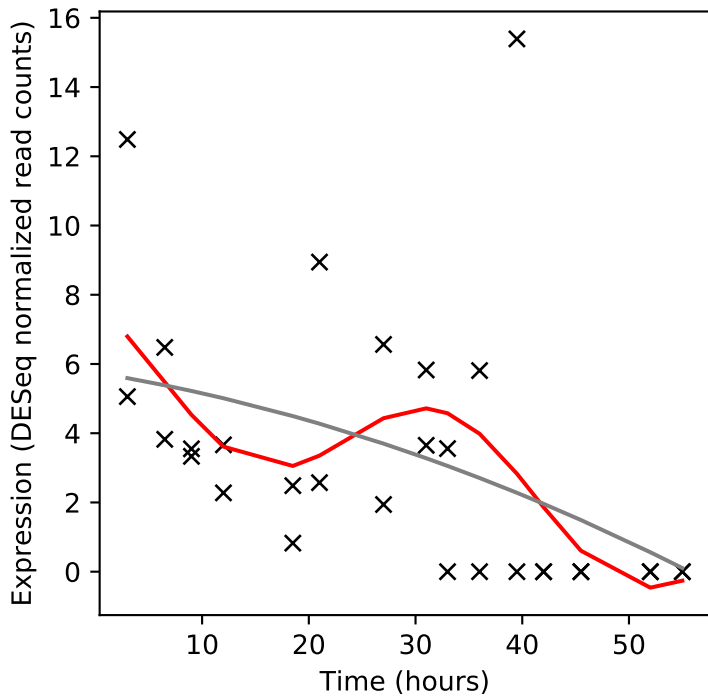

Rv0457c/-

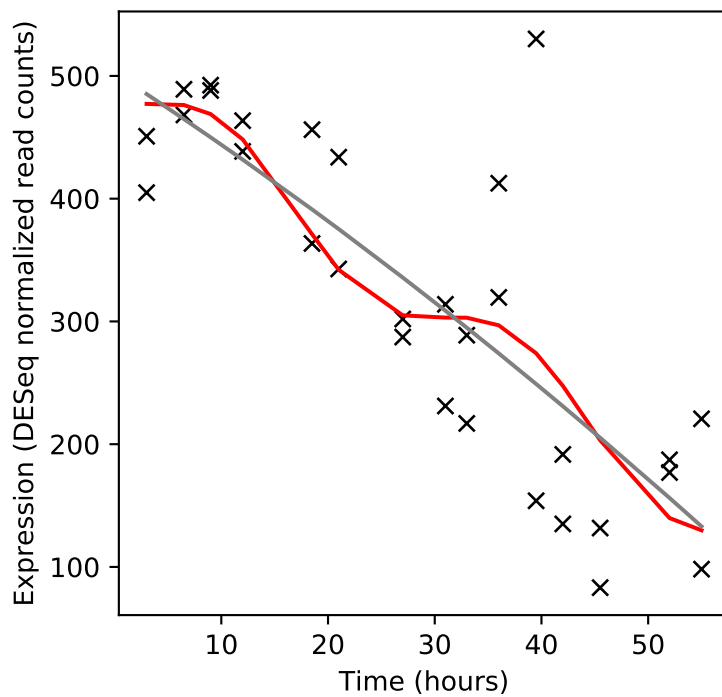

Rv0458/-

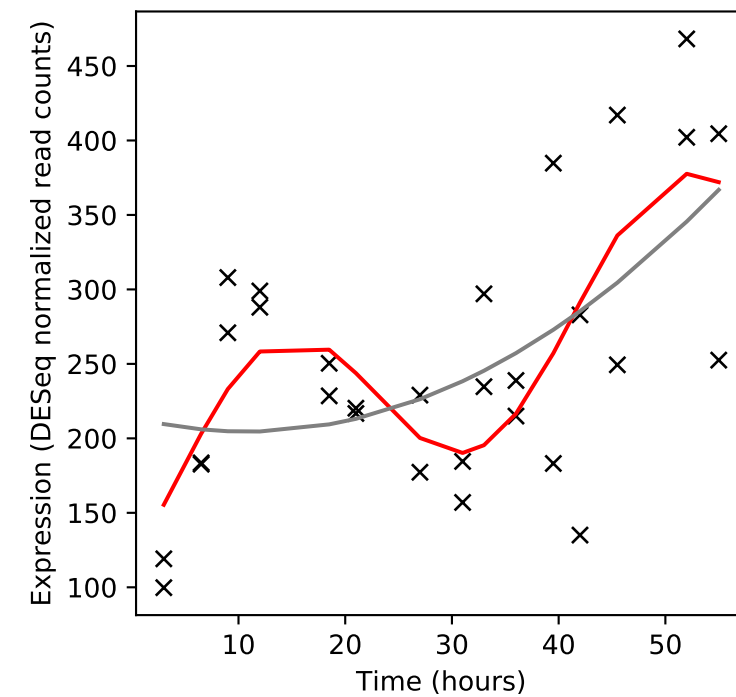

Rv0459/-

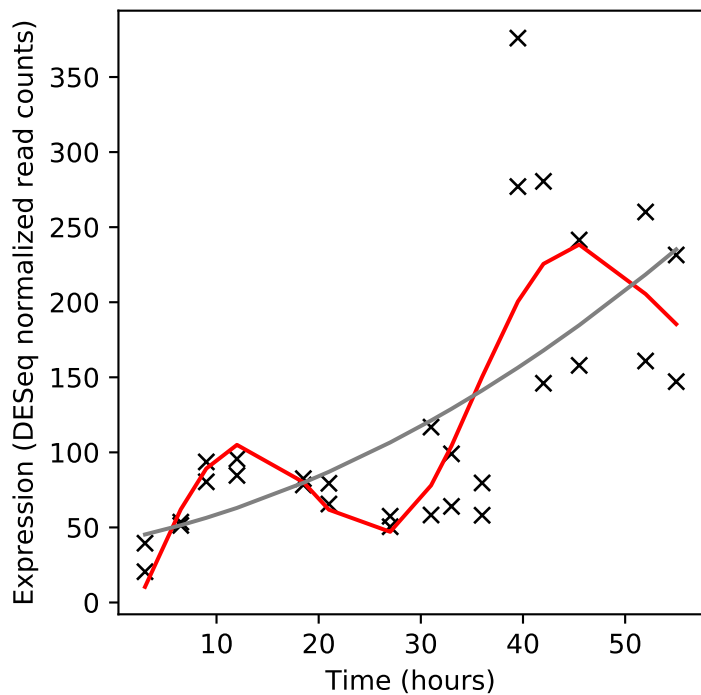

Rv0460/-

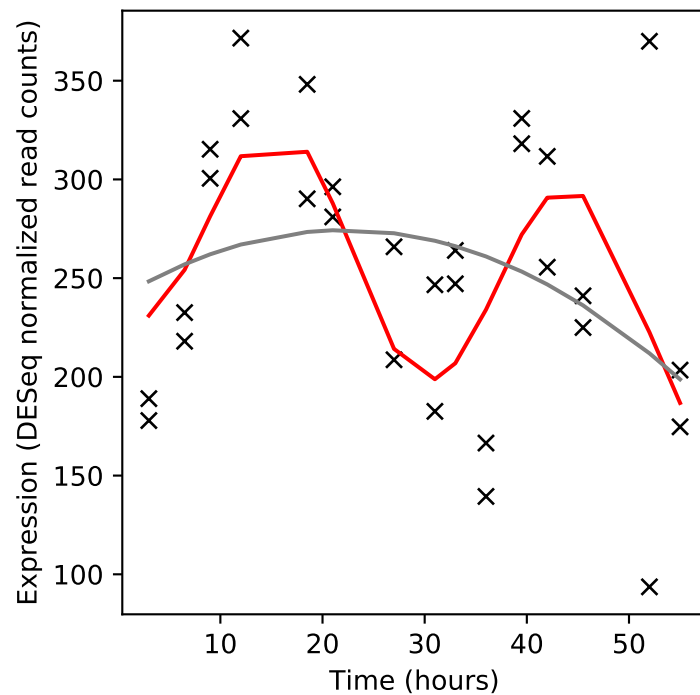

Rv0461/-

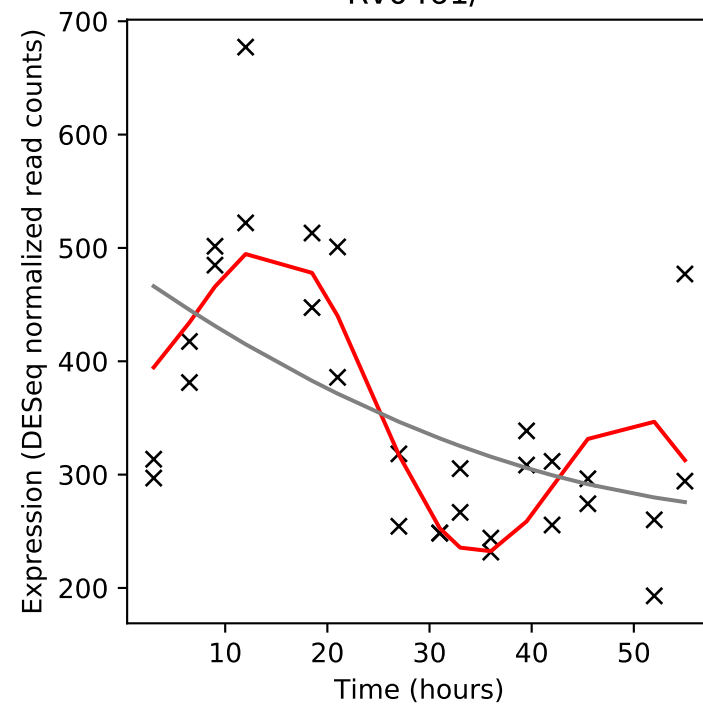

Rv0462/lpdC

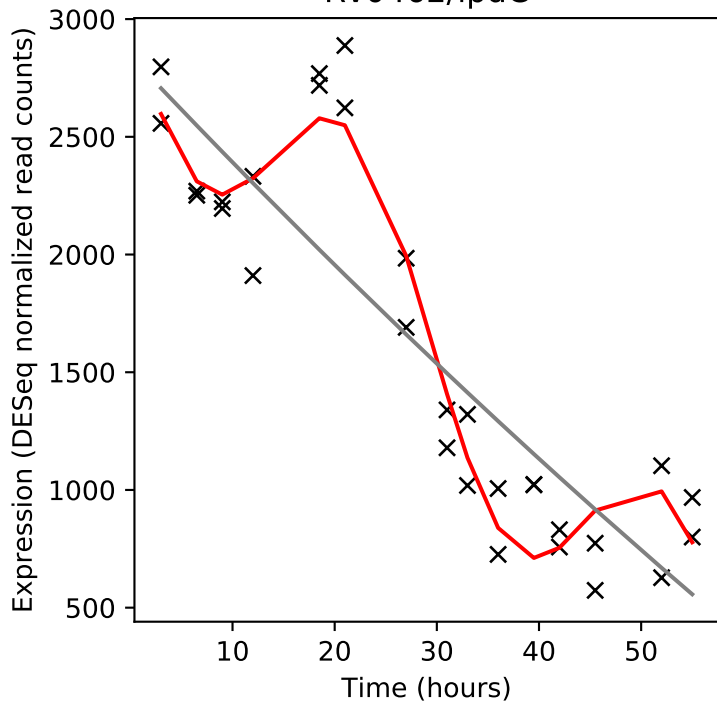

Rv0463/-

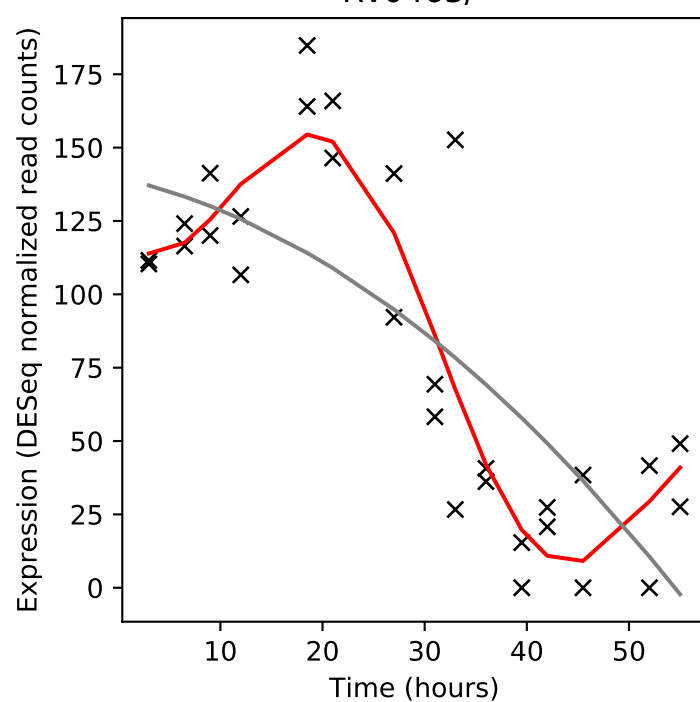

Rv0464c/-

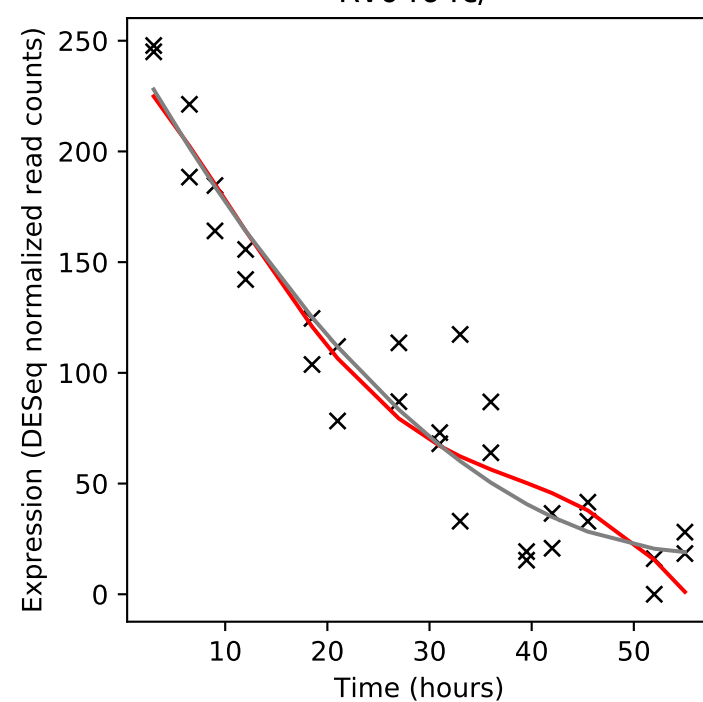

Rv0465c/-

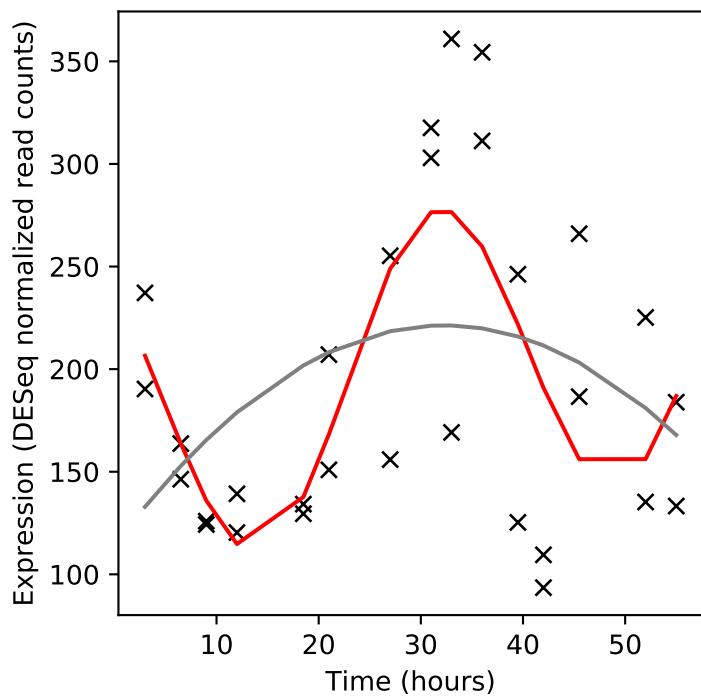

Rv0466/-

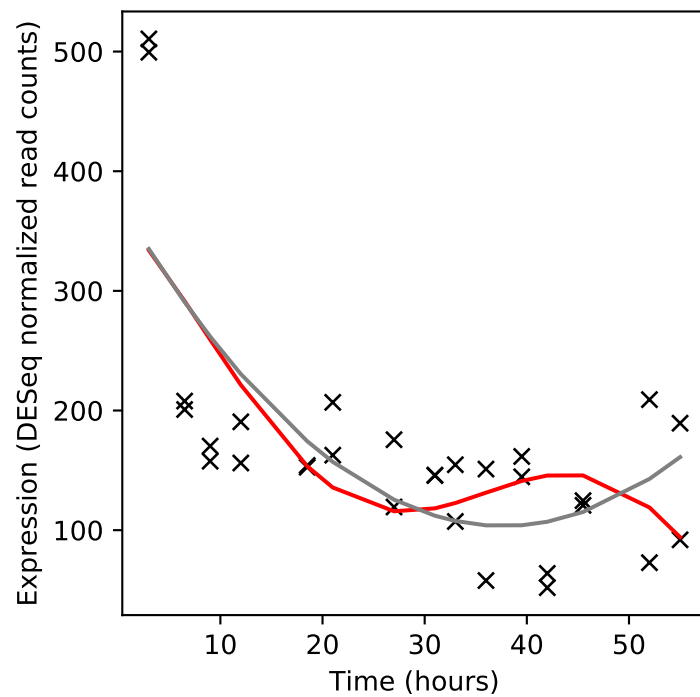

Rv0467/icl1

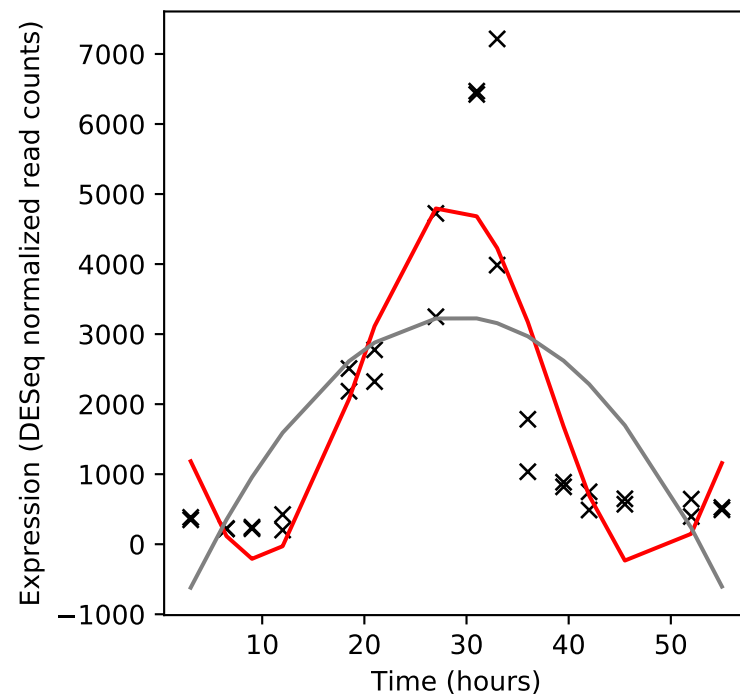

Rv0468/fadB2

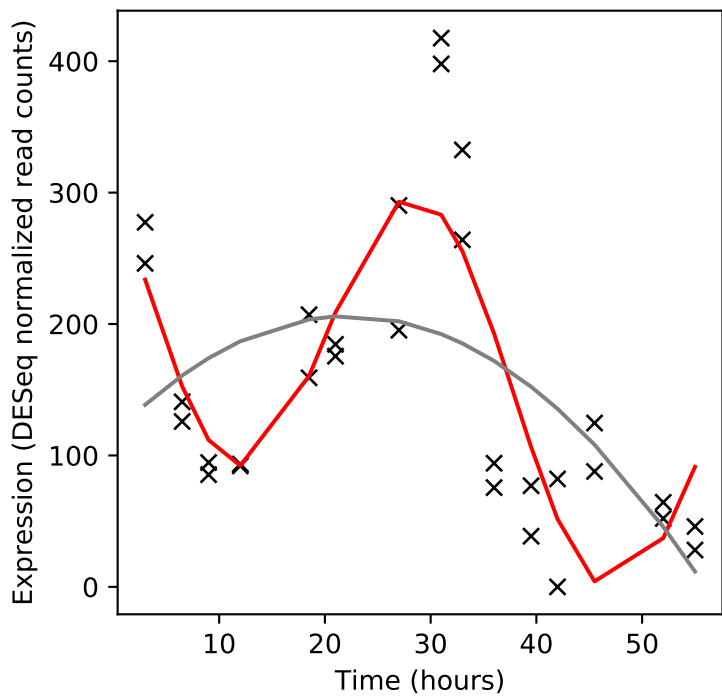

Rv0469/umaA

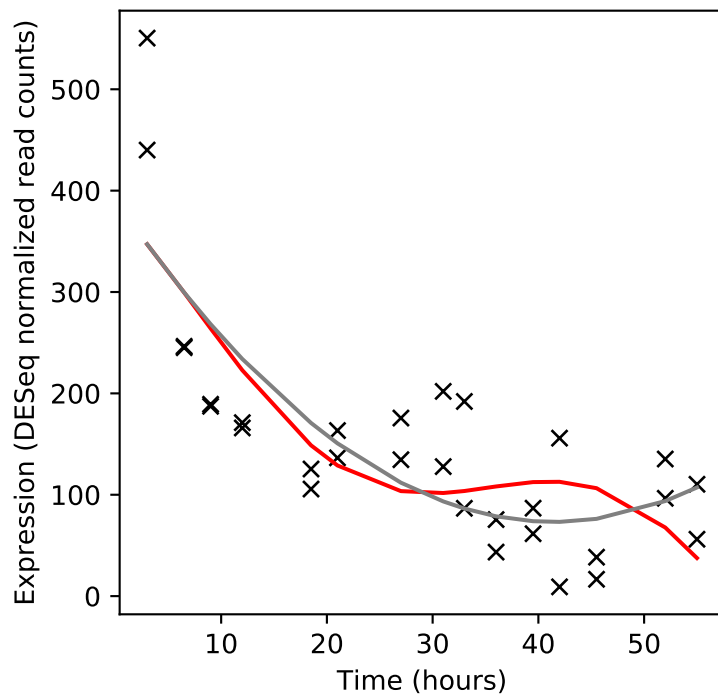

Rv0470c/pcaA

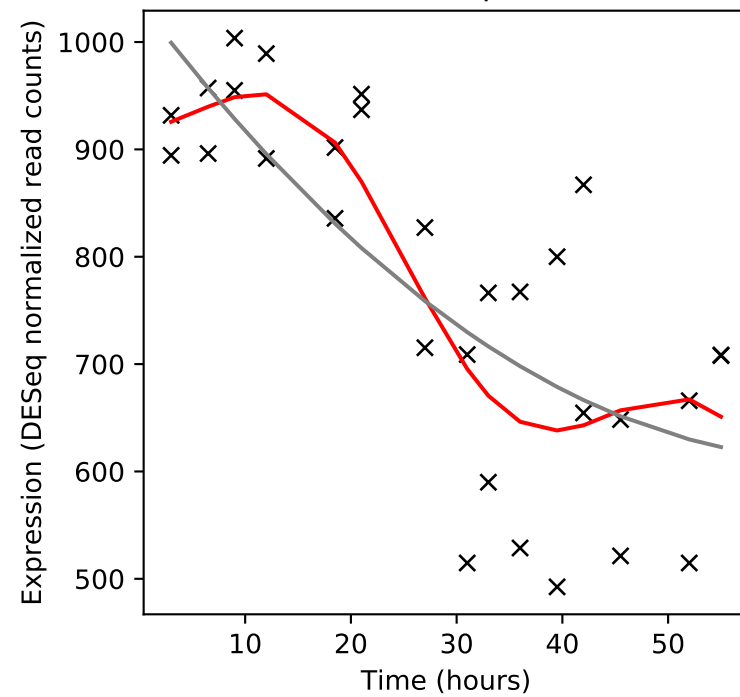

Rv0470A/-

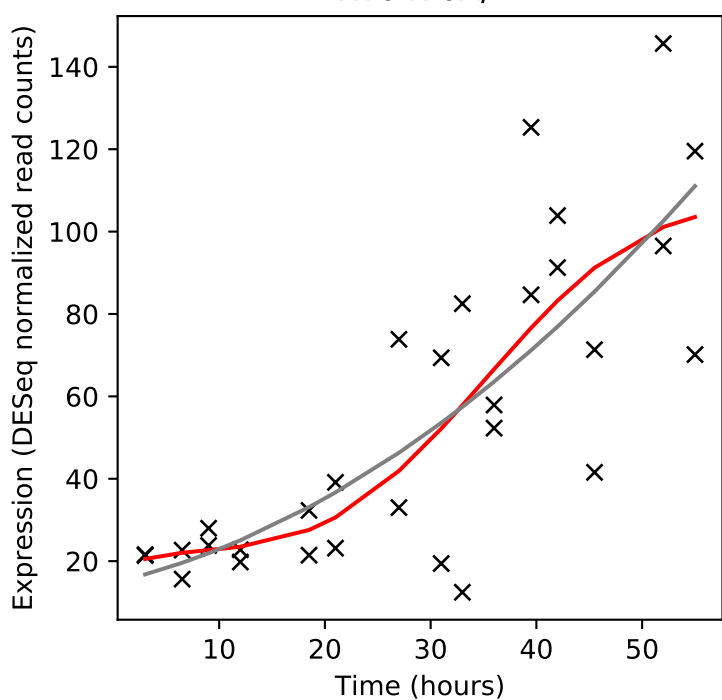

Rv0471c/-

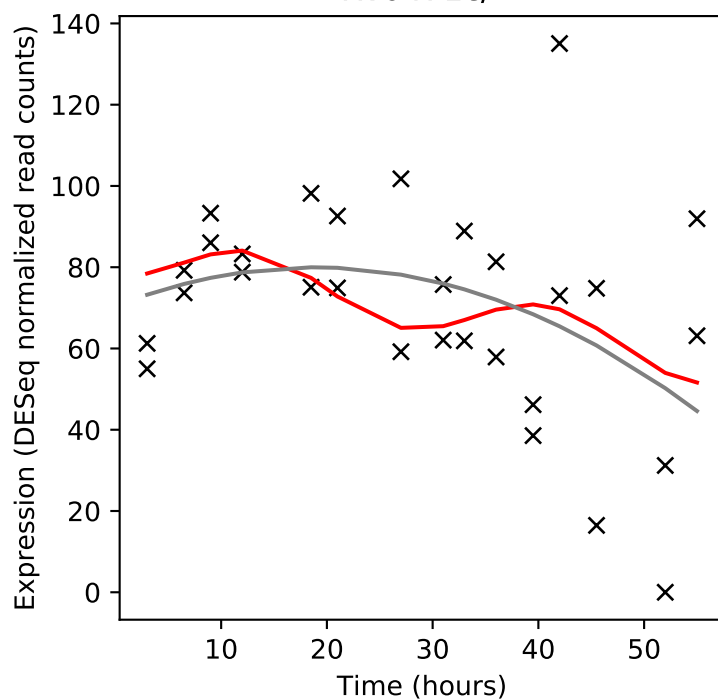

Rv0472c/-

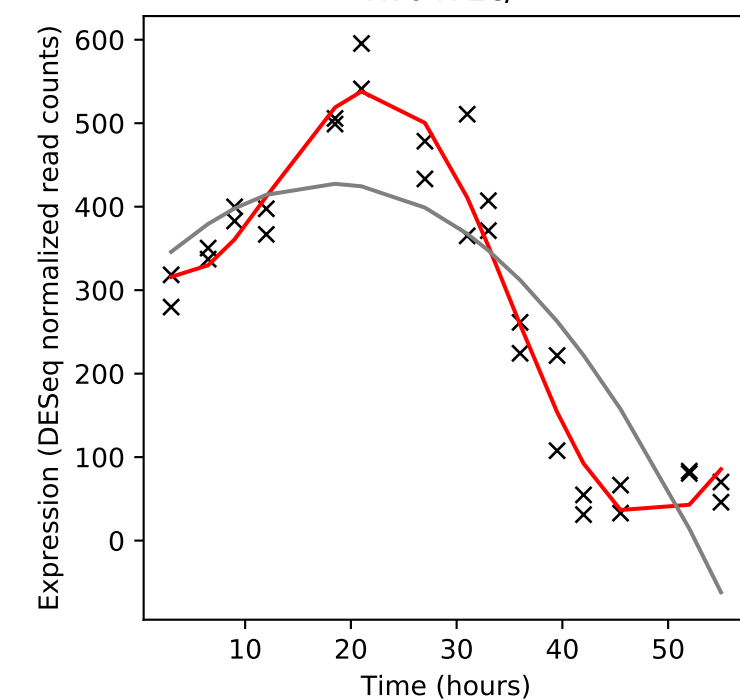

Rv0473/-

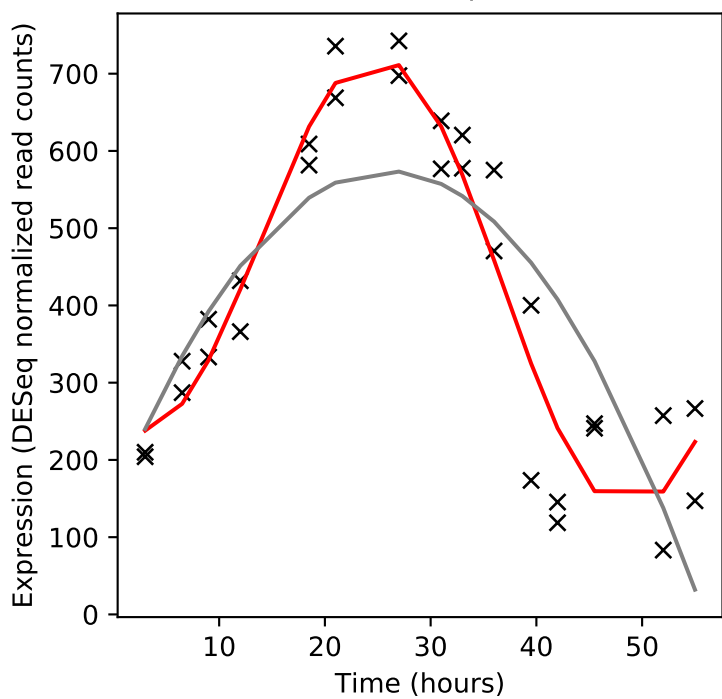

Rv0474/-

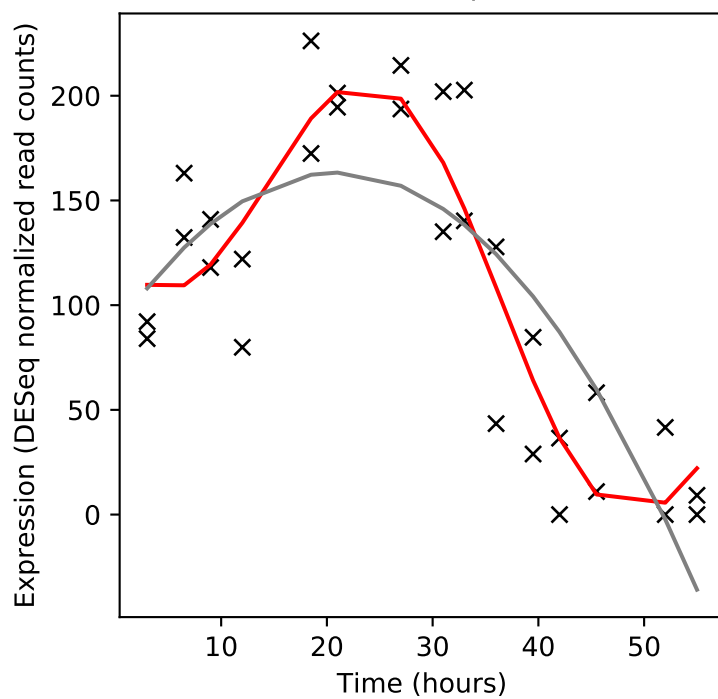

Rv0475/hbhA

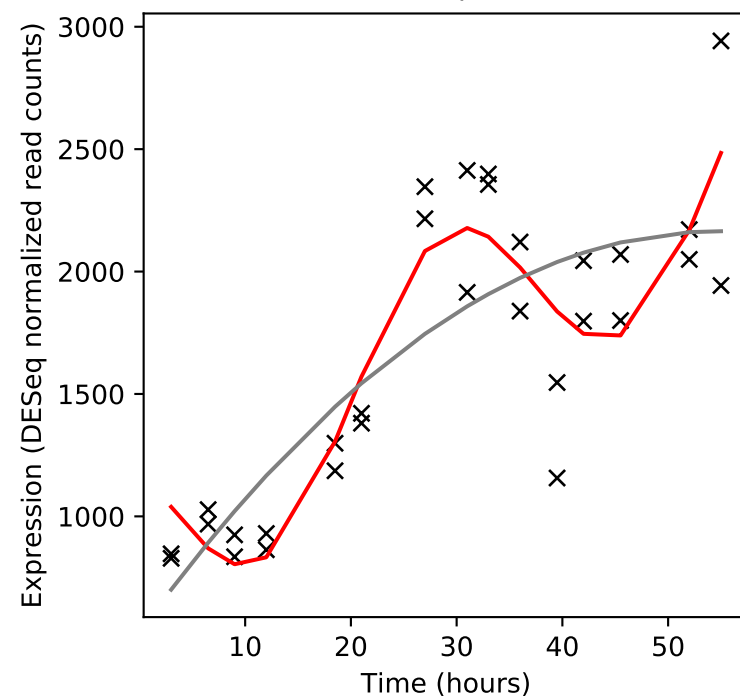

Rv0476/-

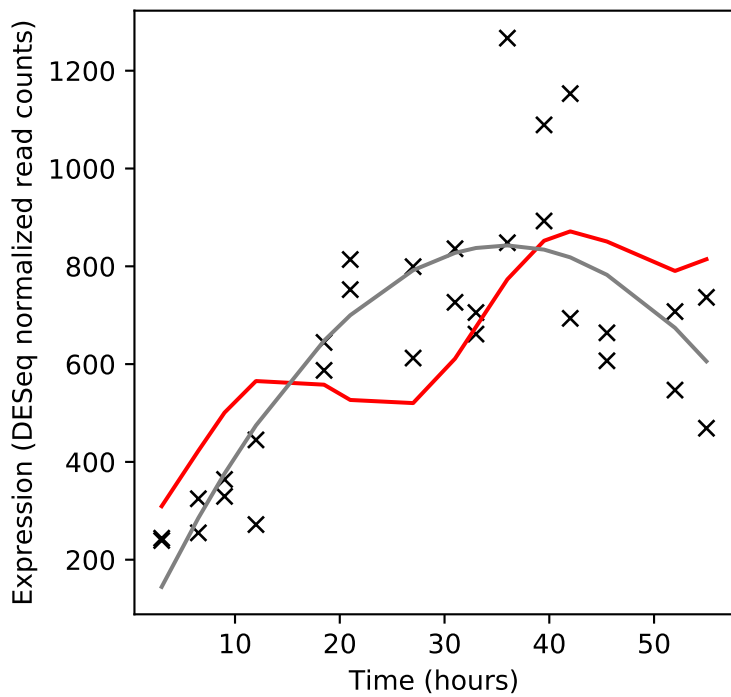

Rv0477/-

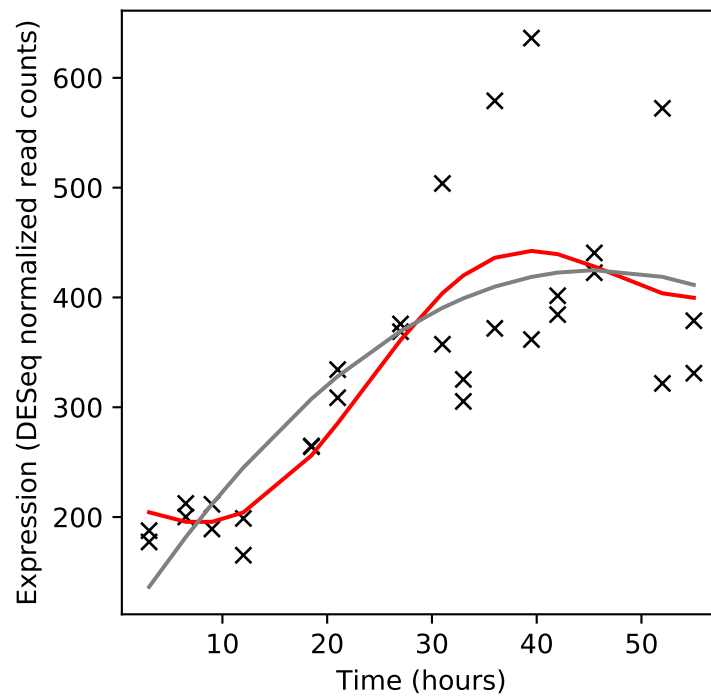

Rv0478/deoC

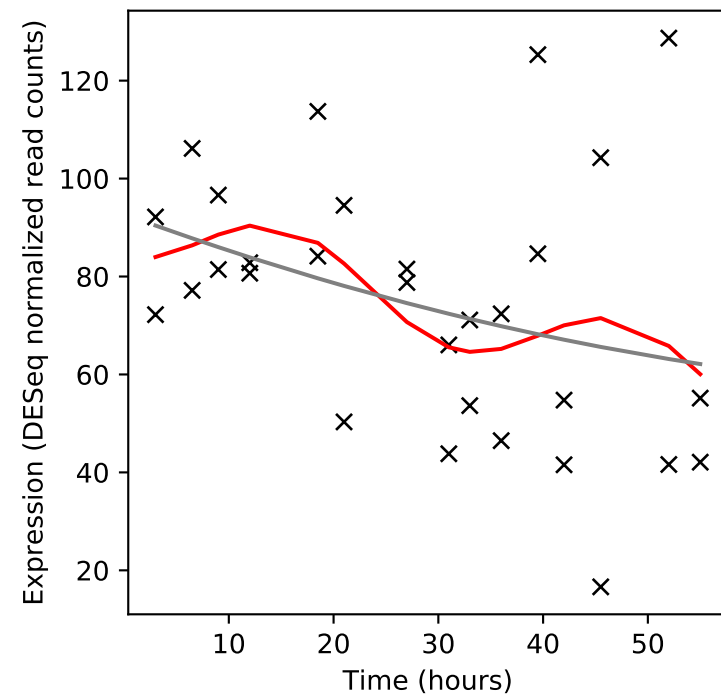

Rv0479c/-

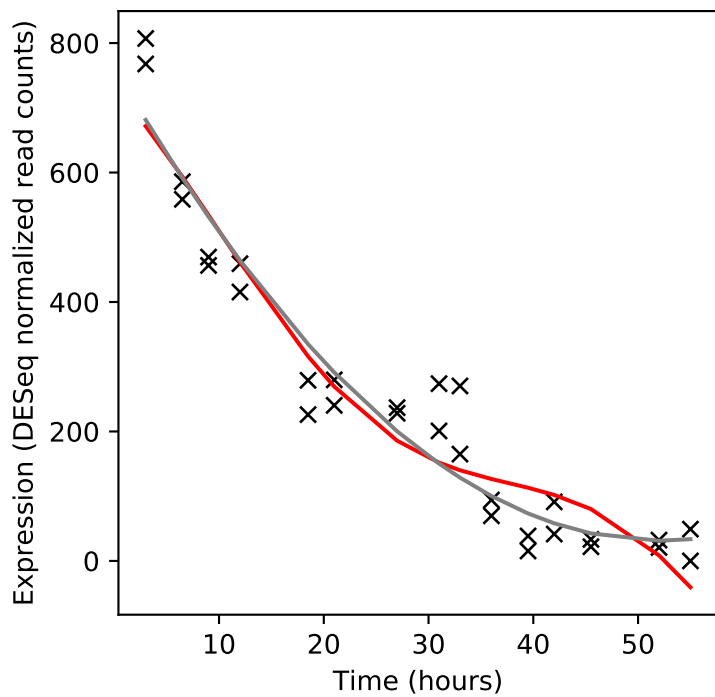

Rv0480c/-

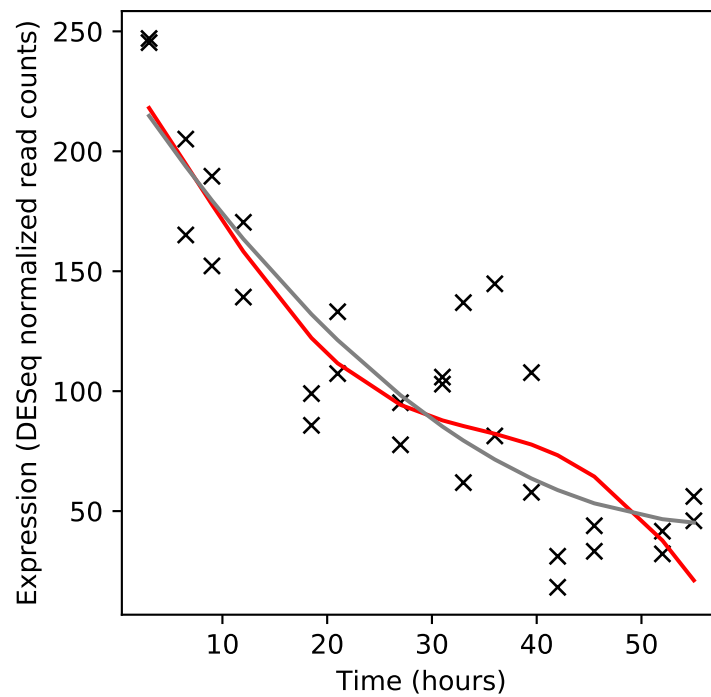

Rv0481c/-

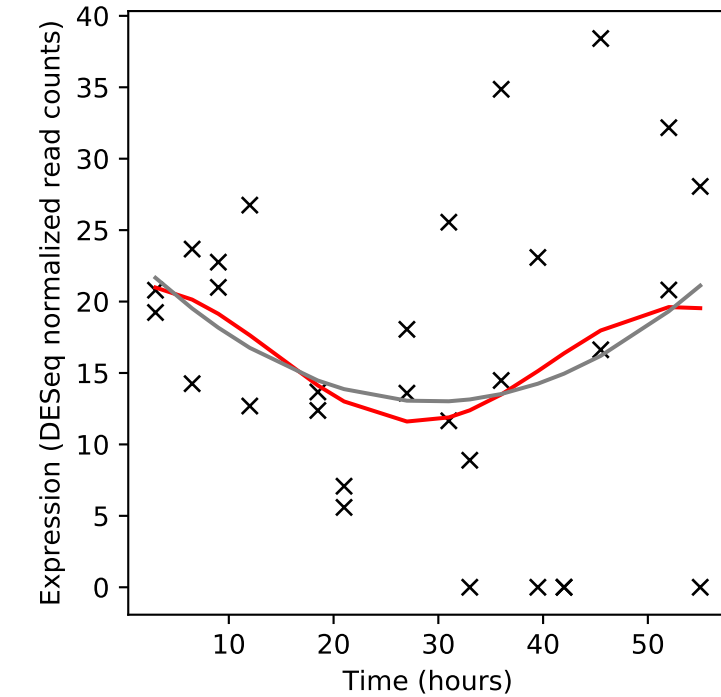

Rv0482/murB

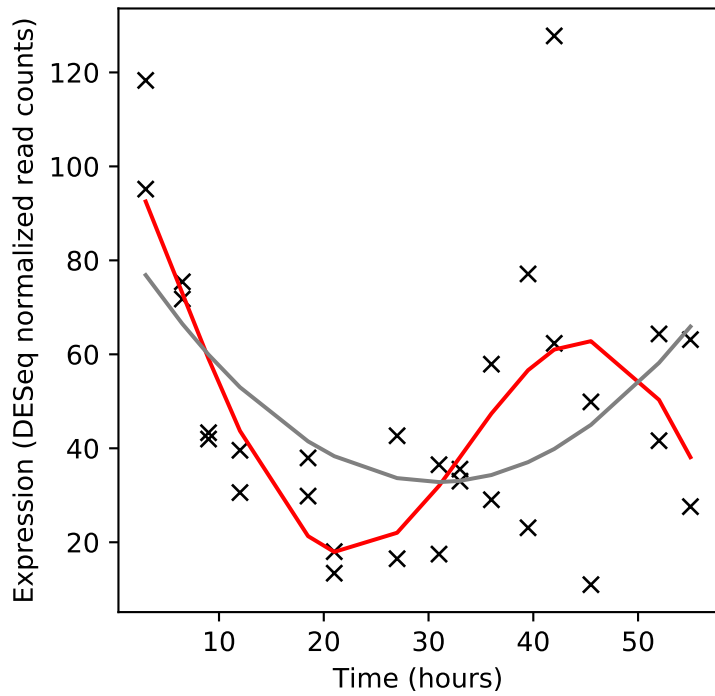

Rv0483/lprQ

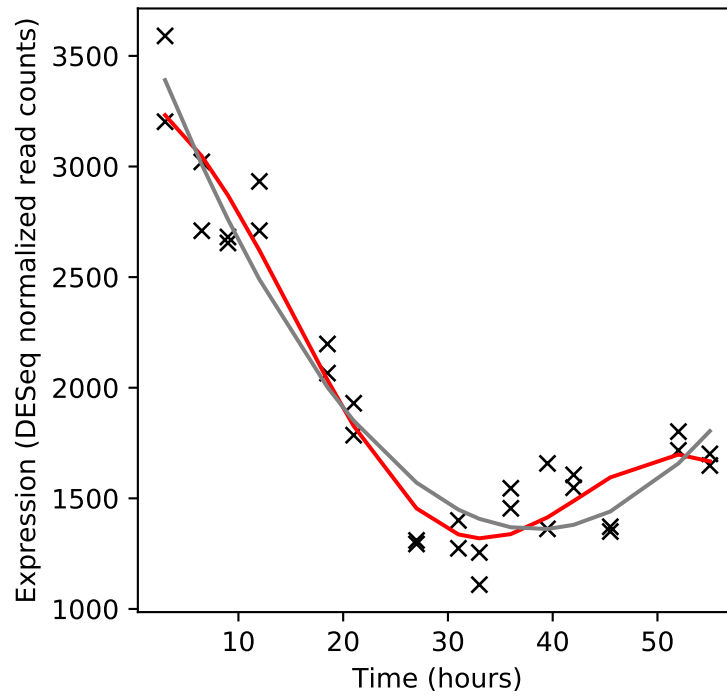

Rv0484c/-

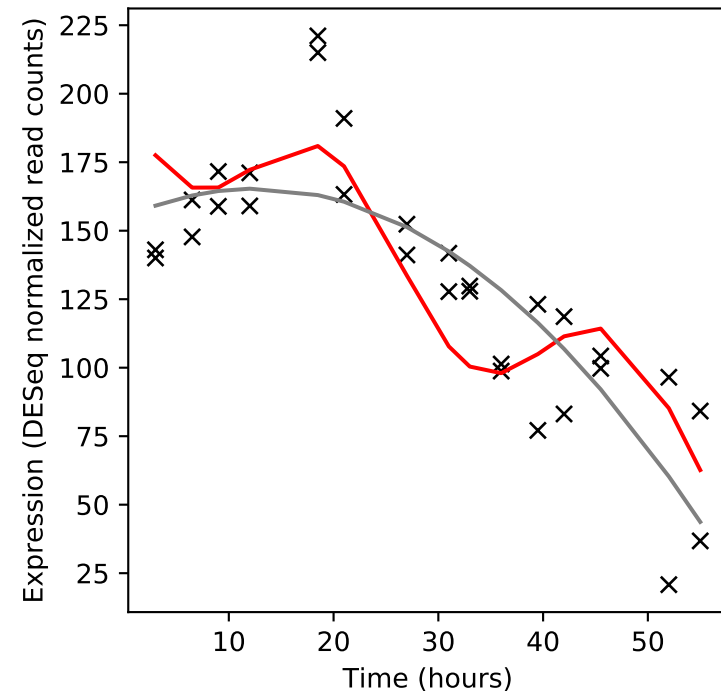

Rv0485/-

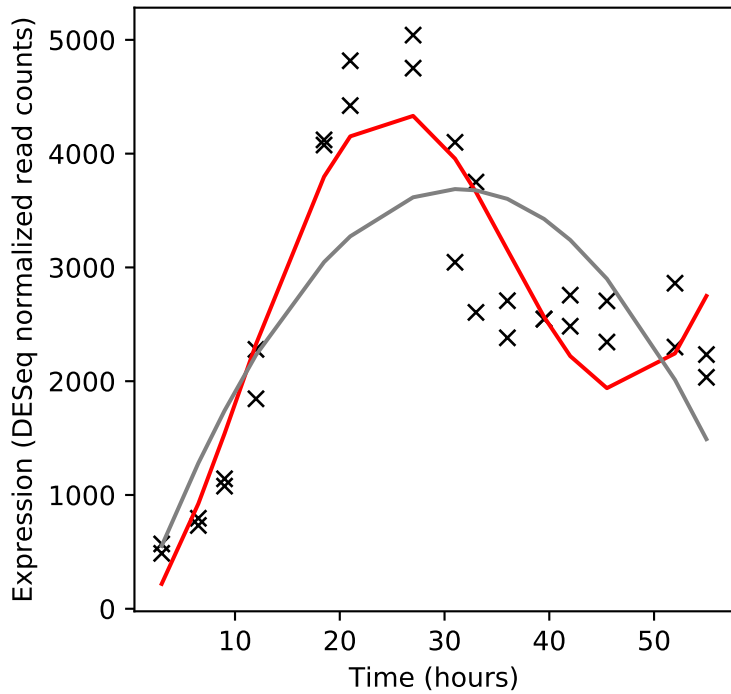

Rv0486/mshA

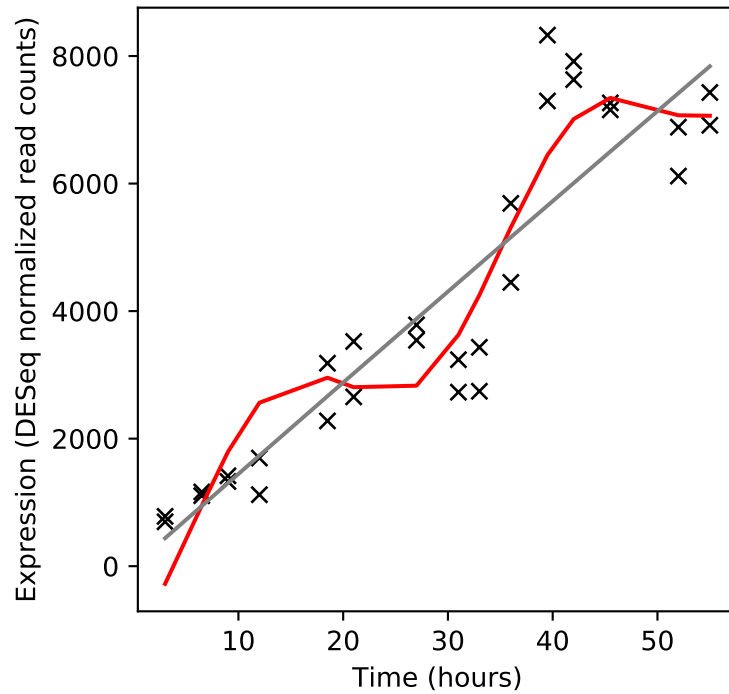

Rv0487/-

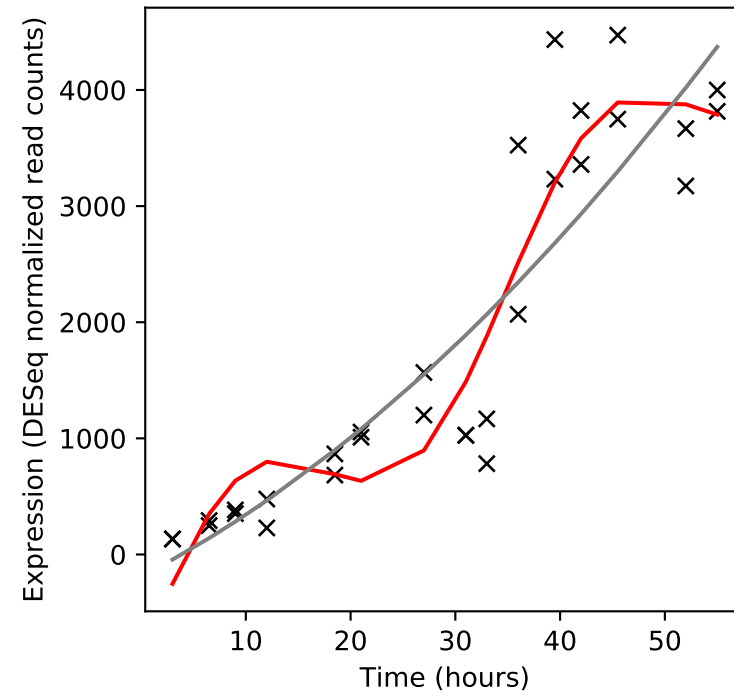

Rv0488/-

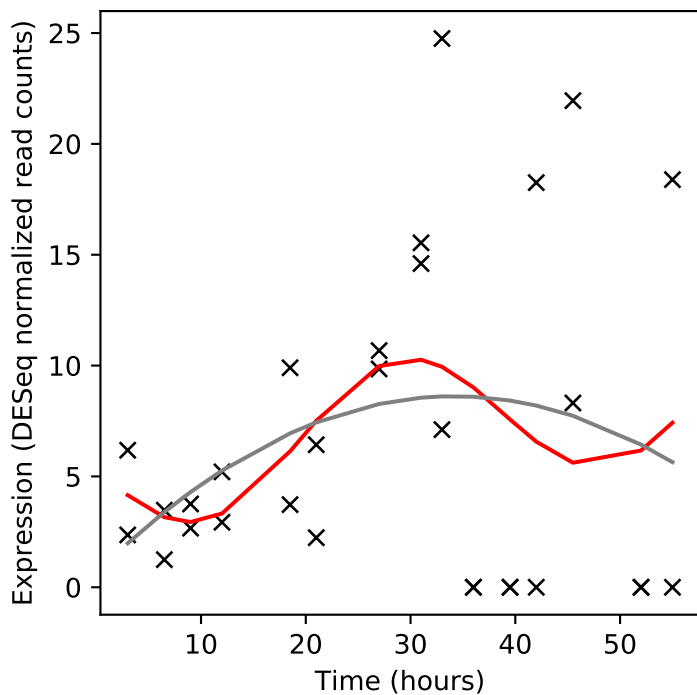

Rv0489/gpm1

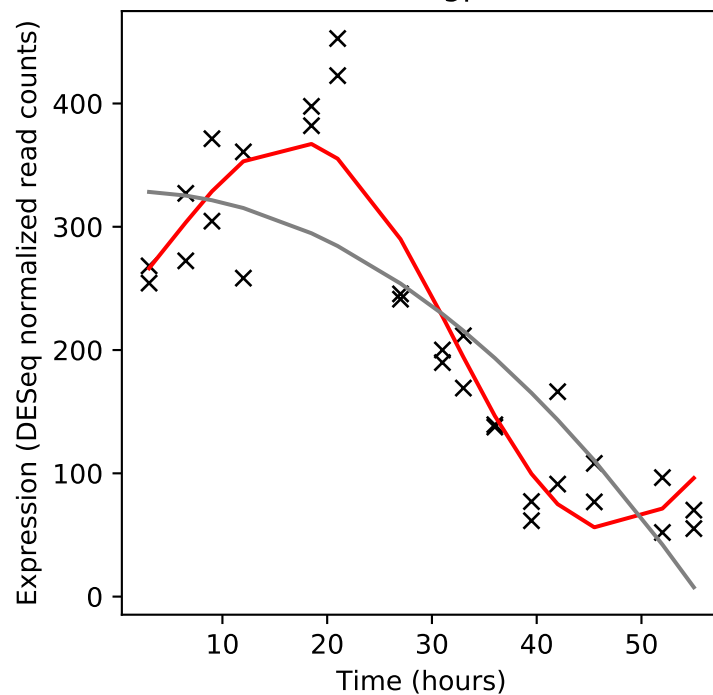

Rv0490/senX3

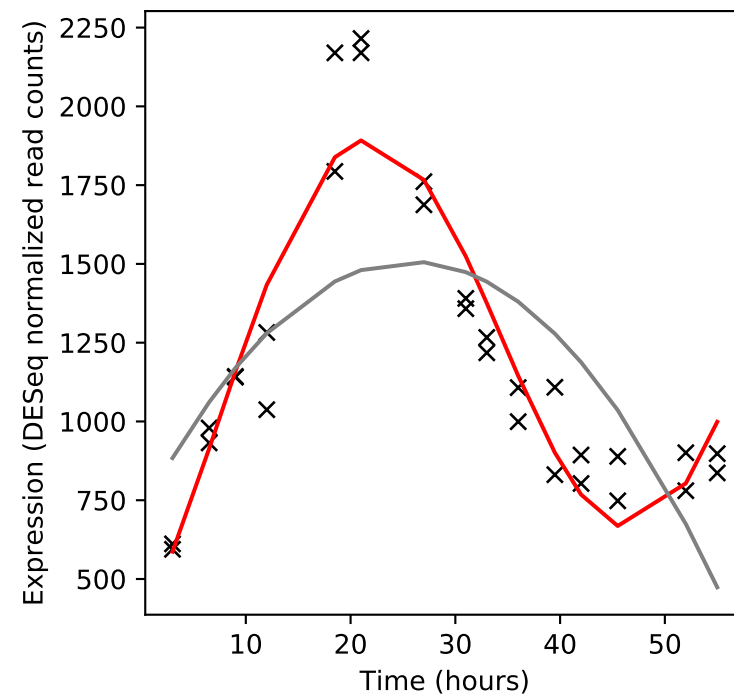

Rv0491/regX3

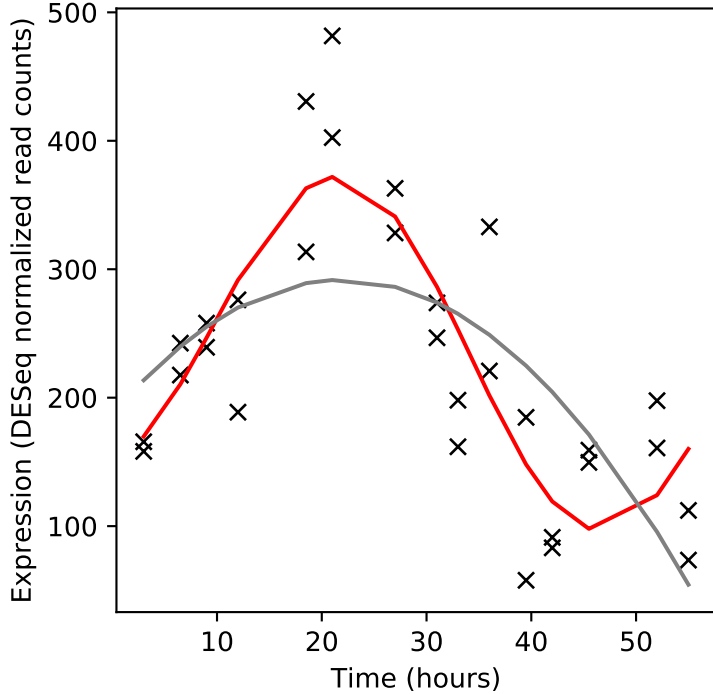

Rv0492c/-

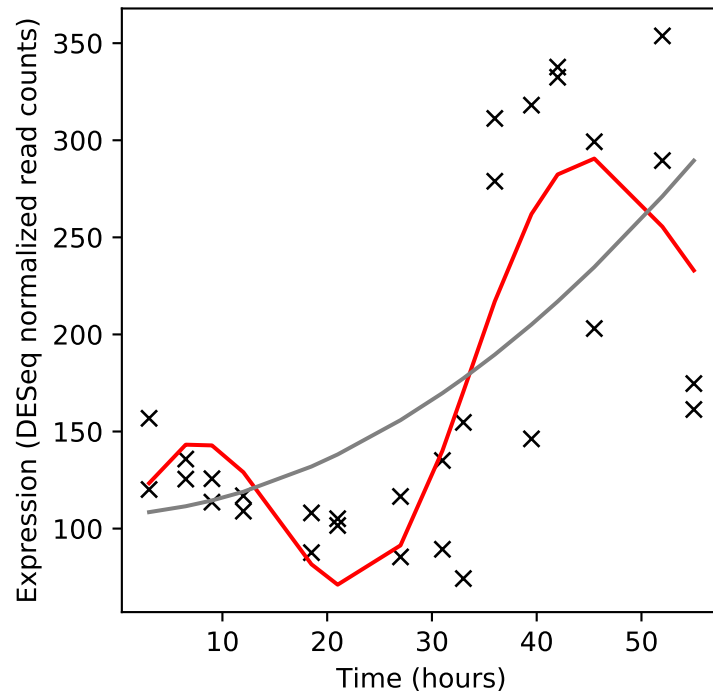

Rv0492A/-

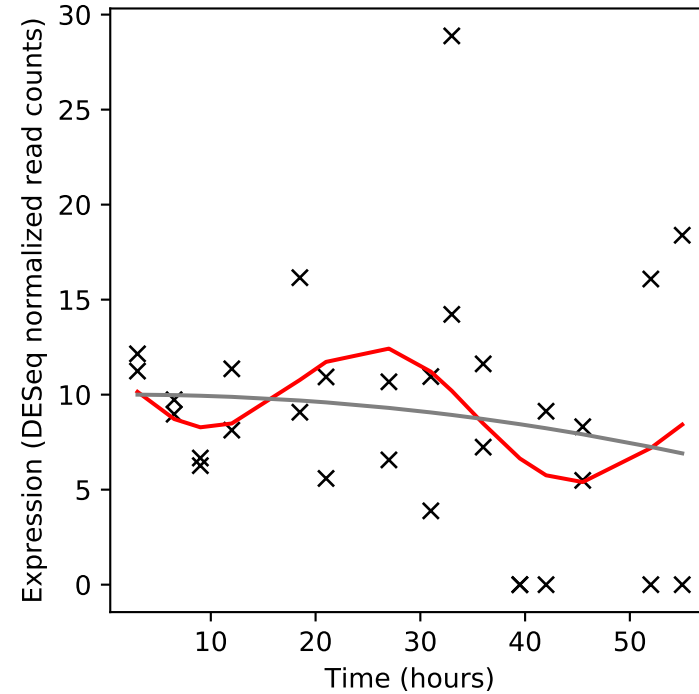

Rv0493c/-

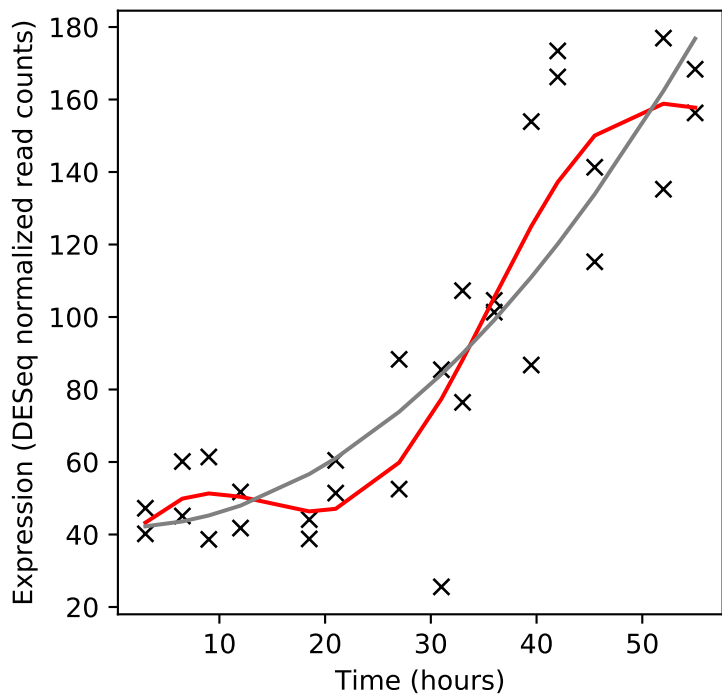

Rv0494/-

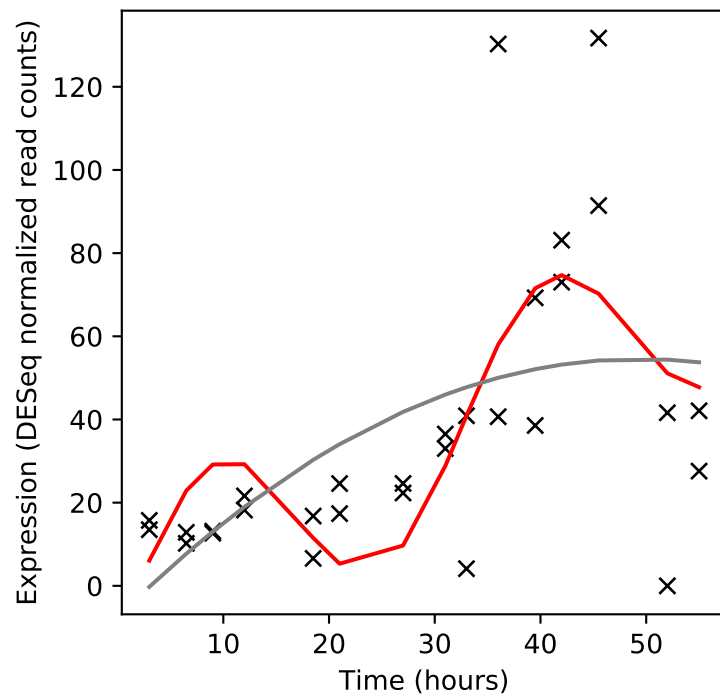

Rv0495c/-

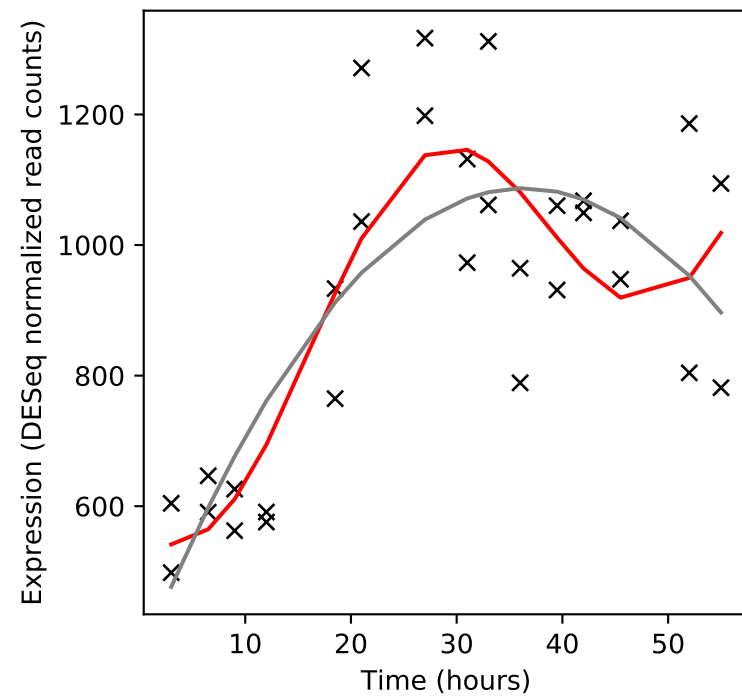

Rv0496/-

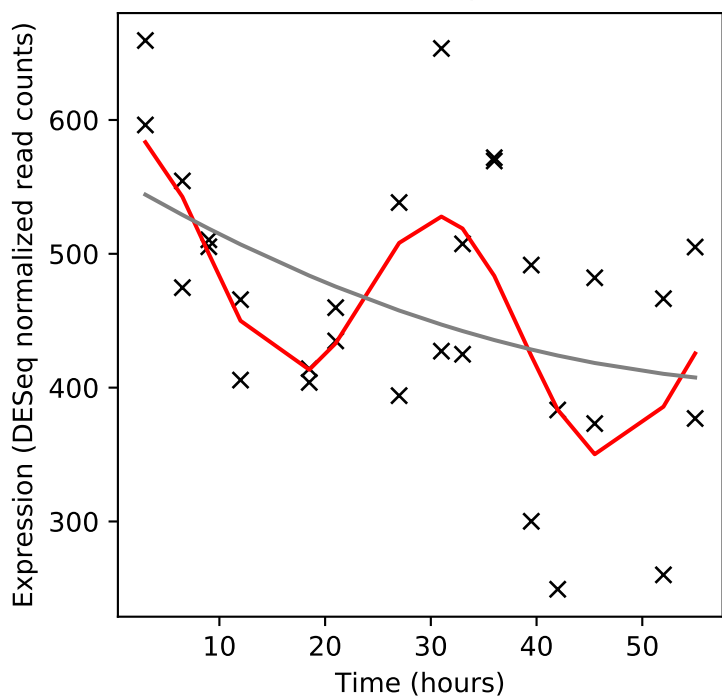

Rv0497/-

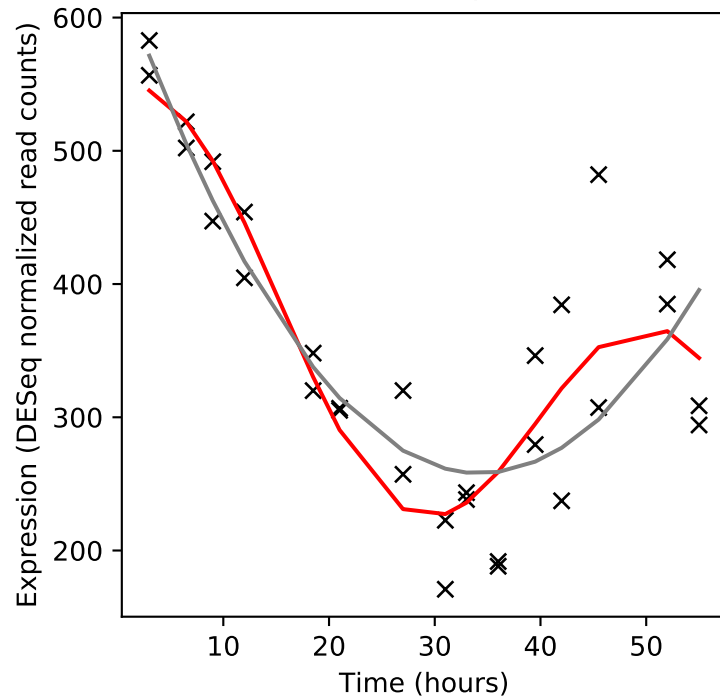

Rv0498/-

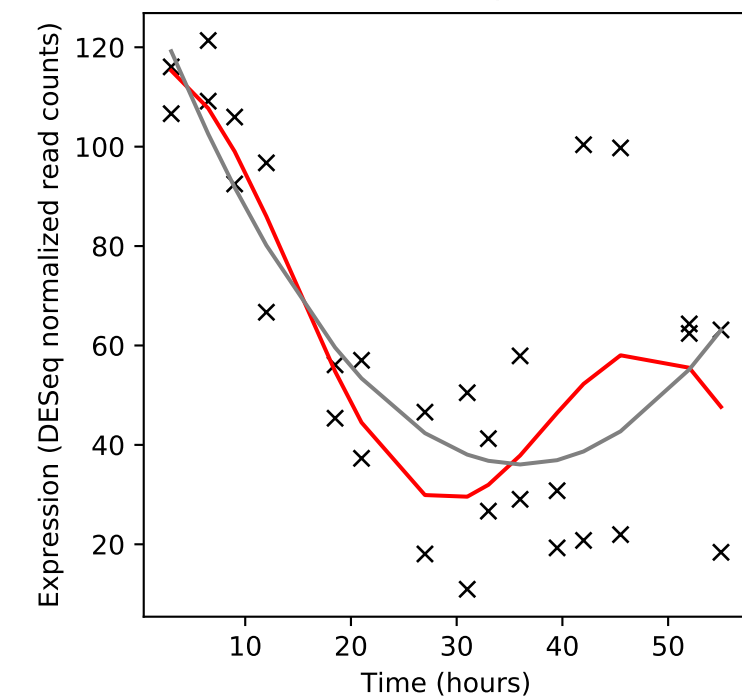

Rv0499/-

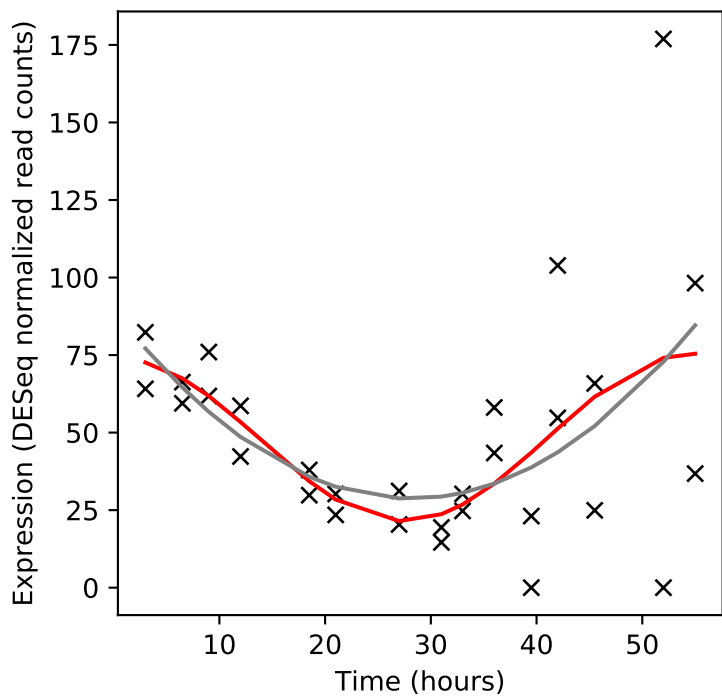

Rv0500/proC

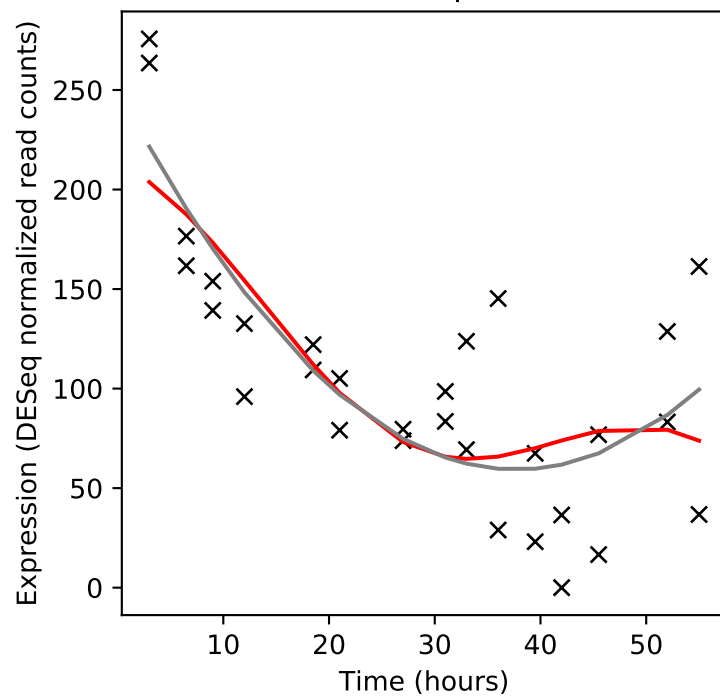

Rv0500A/-

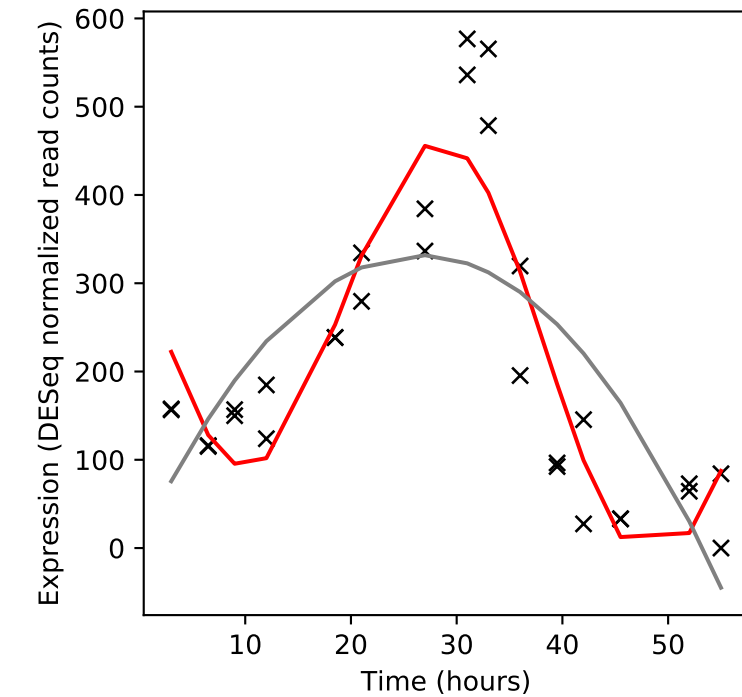



Rv0500B/-

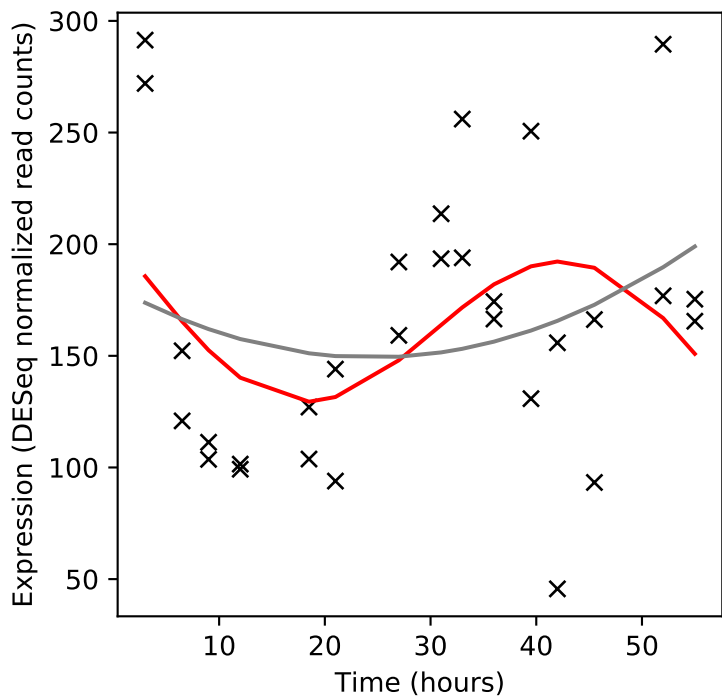

Rv0501/galE2

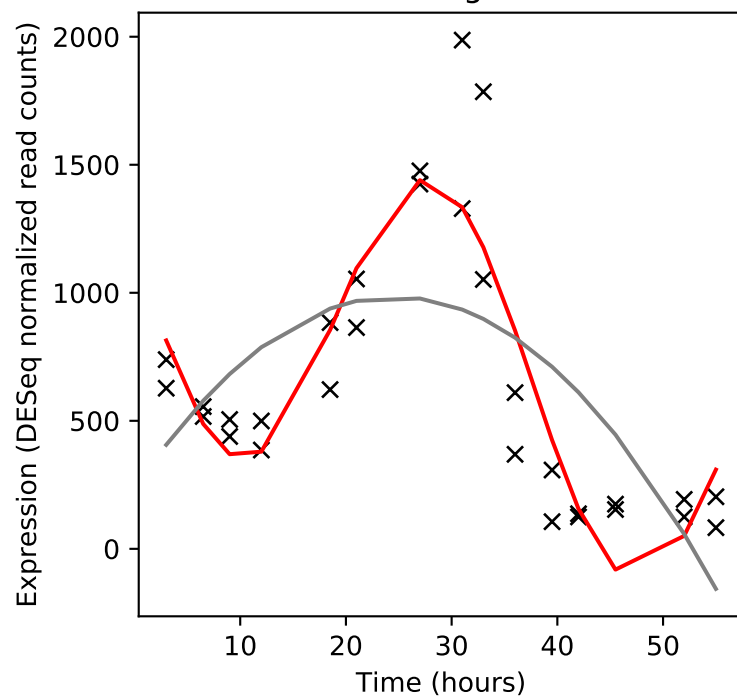

Rv0502/-

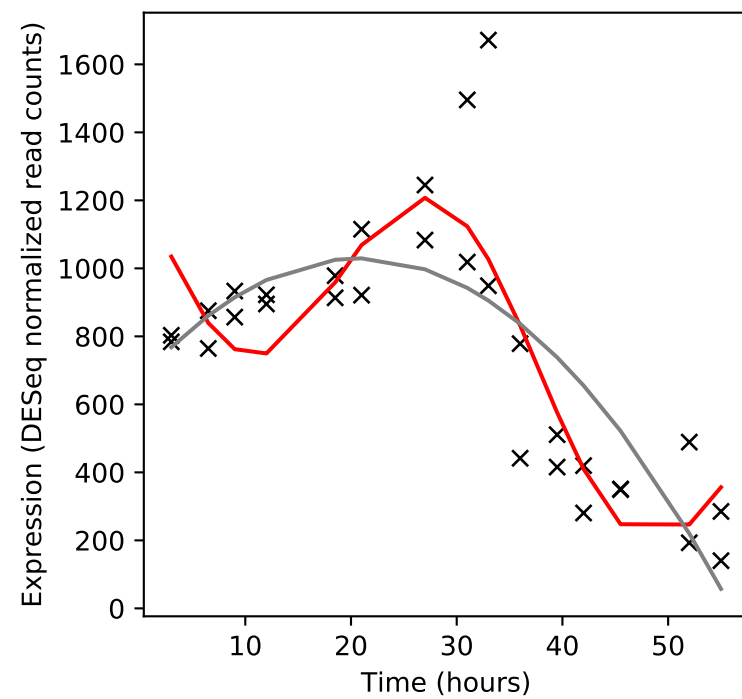

Rv0503c/cmaA2

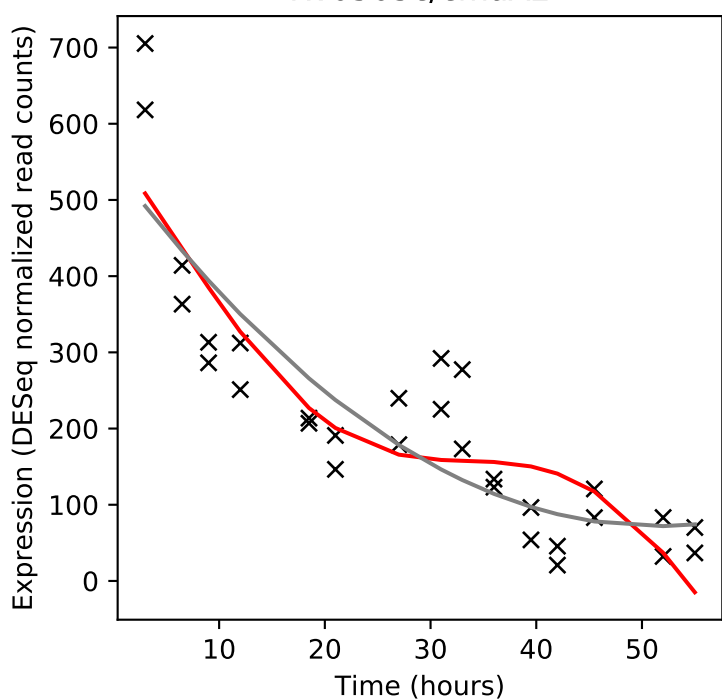

Rv0504c/-

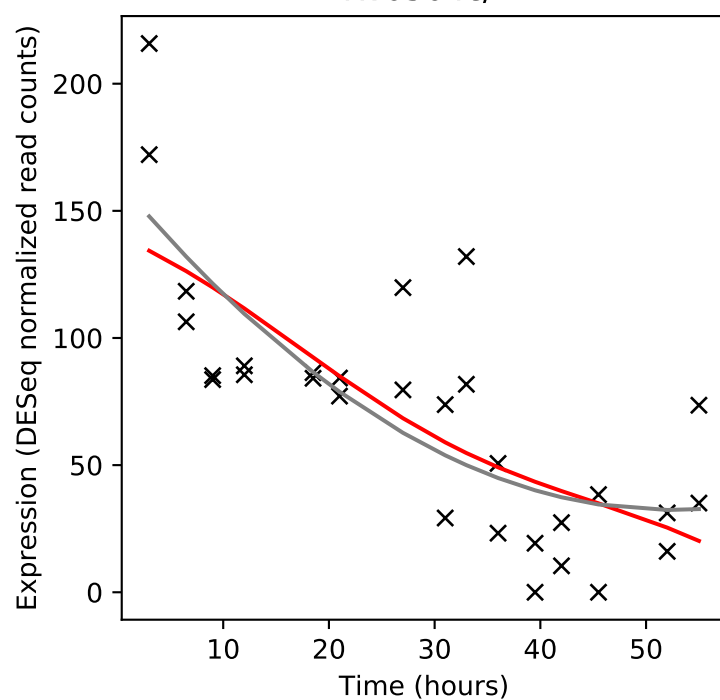

Rv0505c/serB1

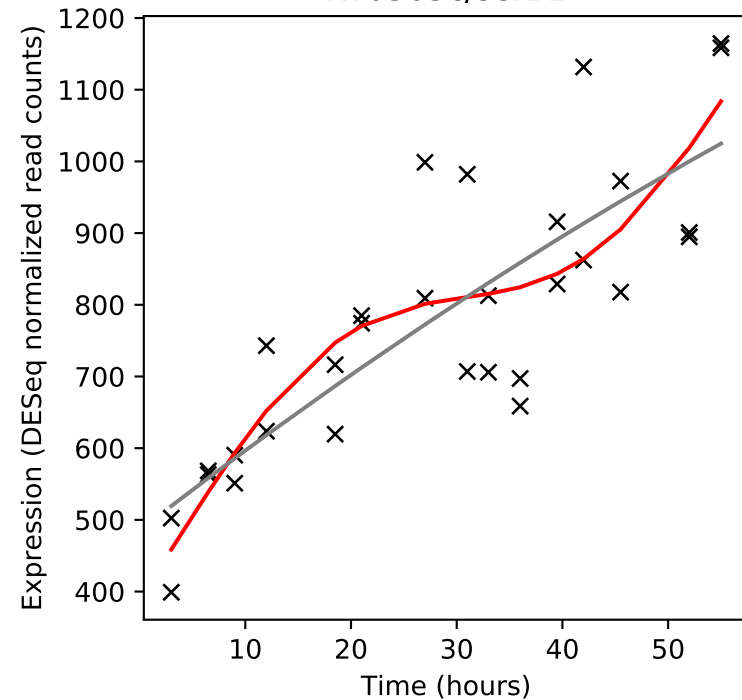

Rv0506/mmpS2

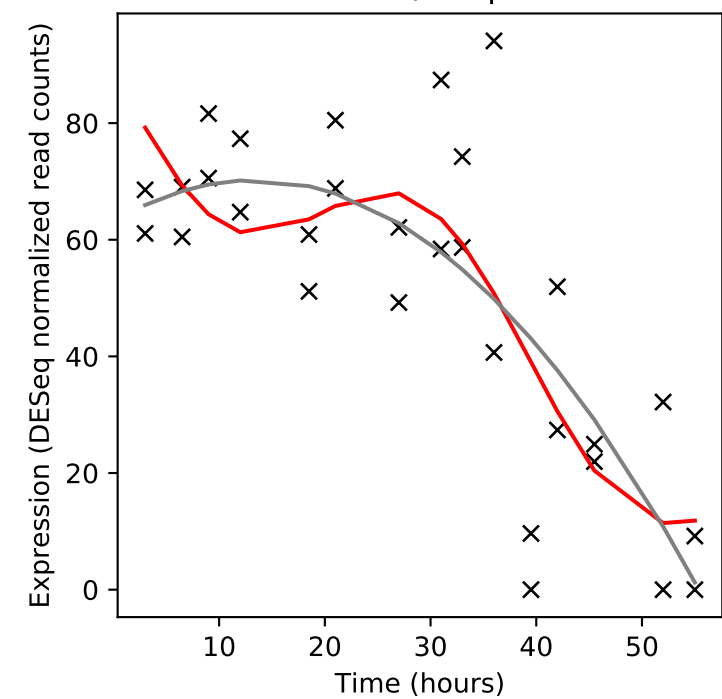

Rv0507/mmpL2

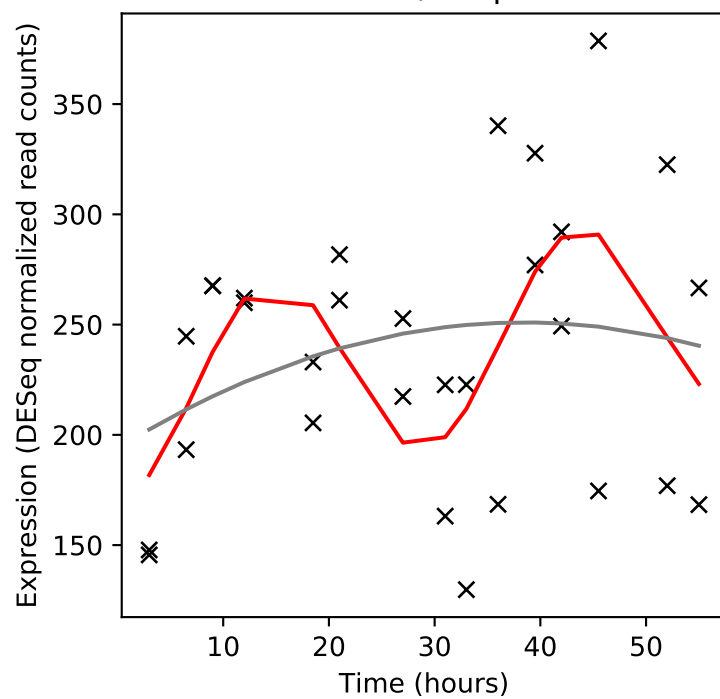

Rv0508/-

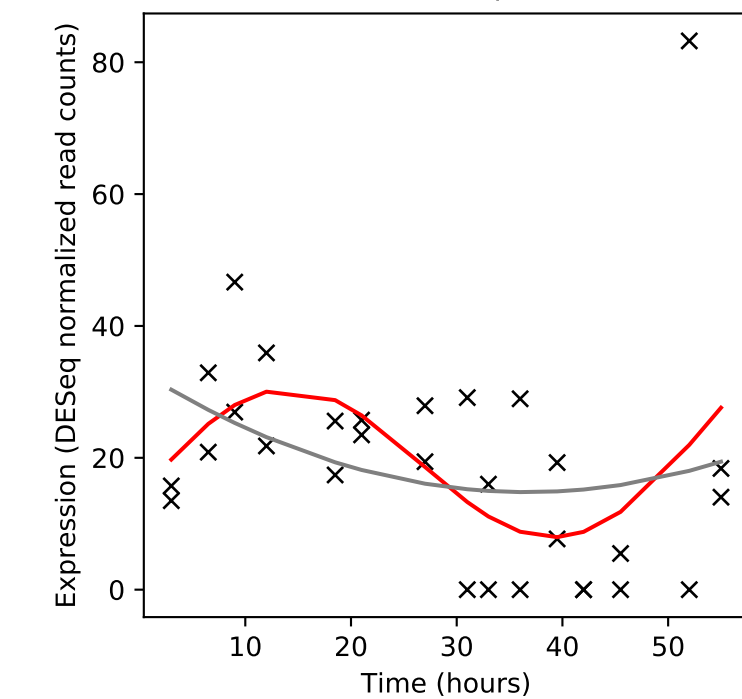

Rv0509/hemA

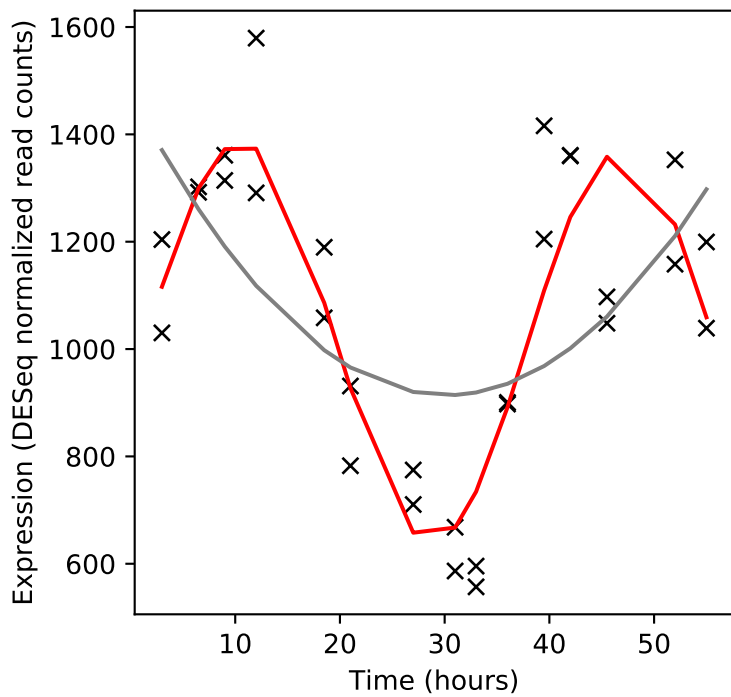

Rv0510/hemC

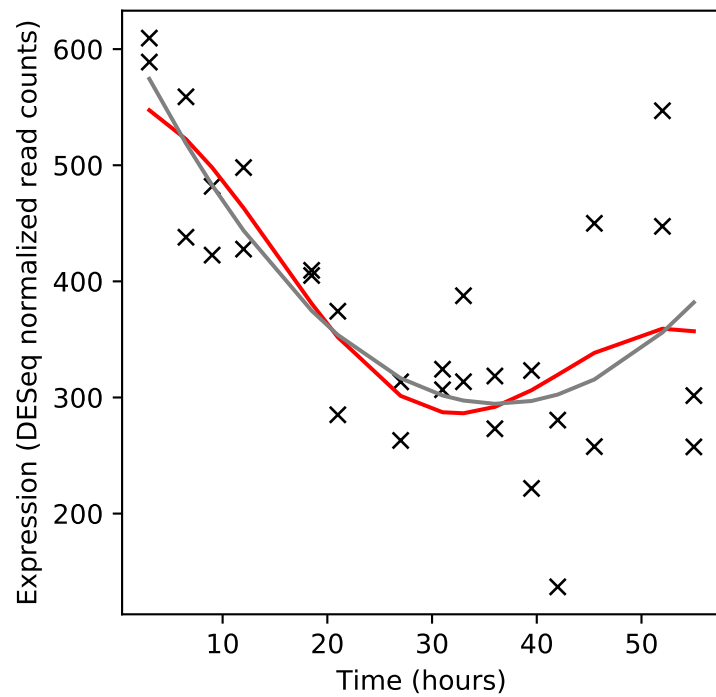

Rv0511/hemD

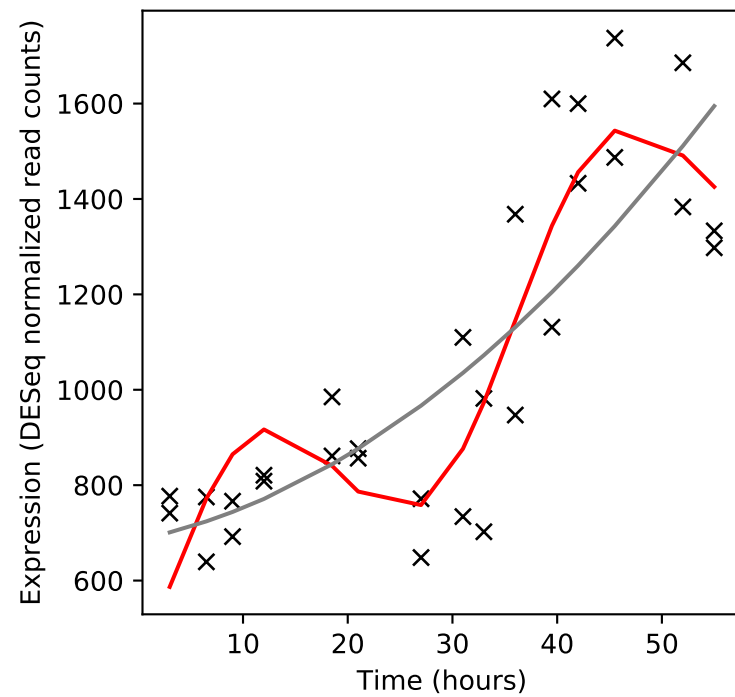

Rv0512/hemB

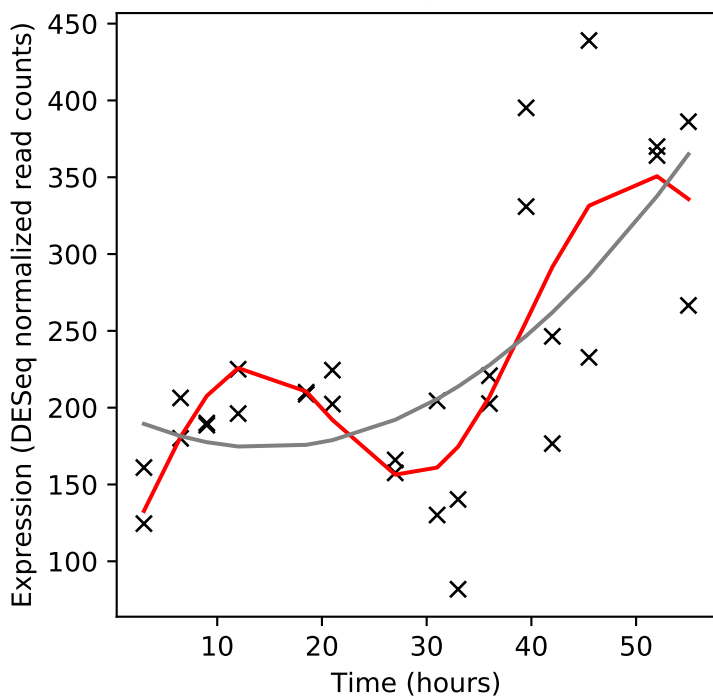

Rv0513/-

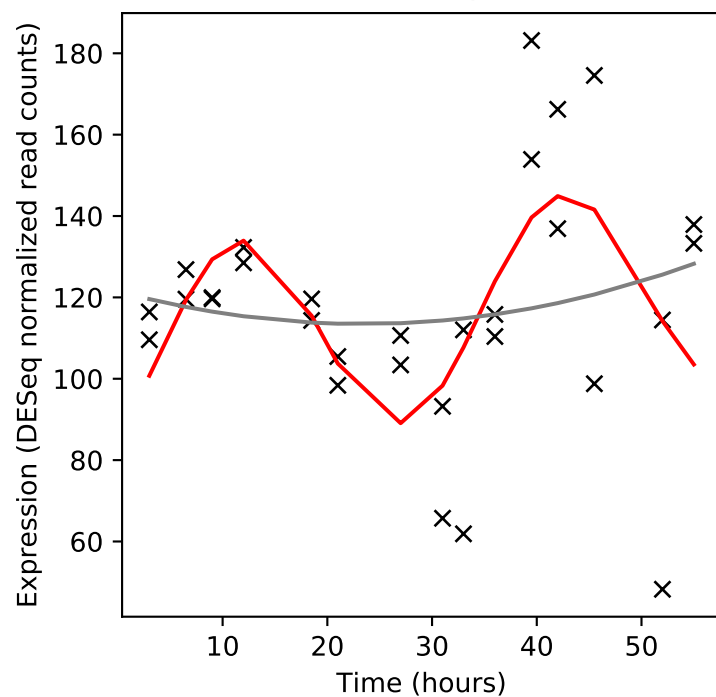

Rv0514/-

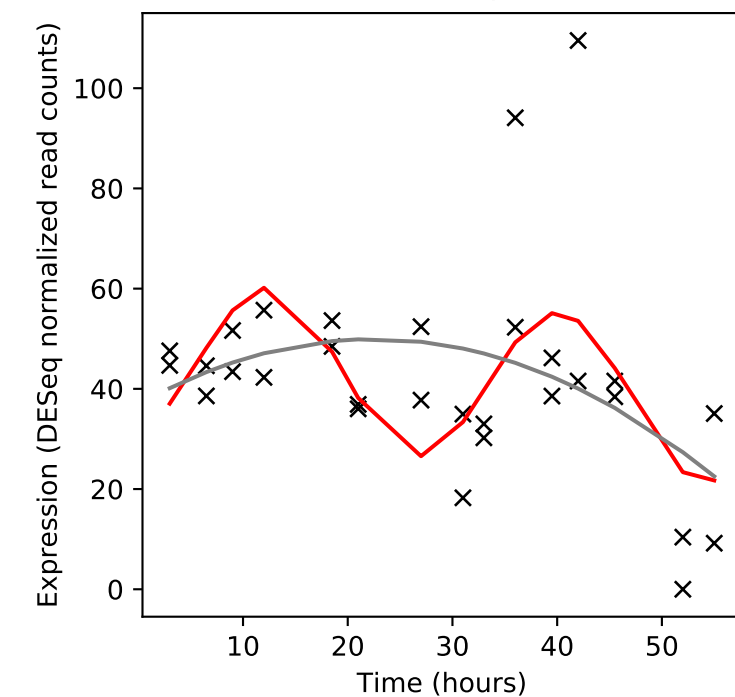

Rv0515/-

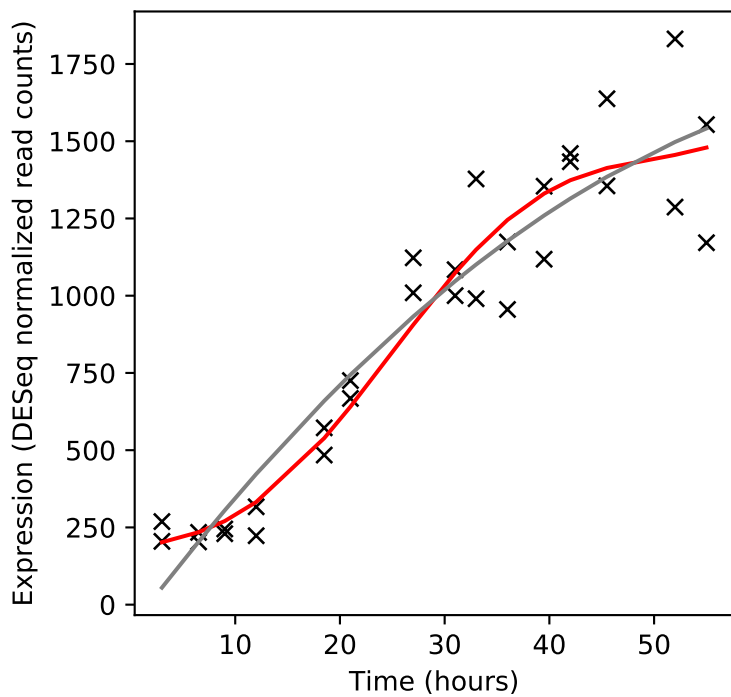

Rv0516c/-

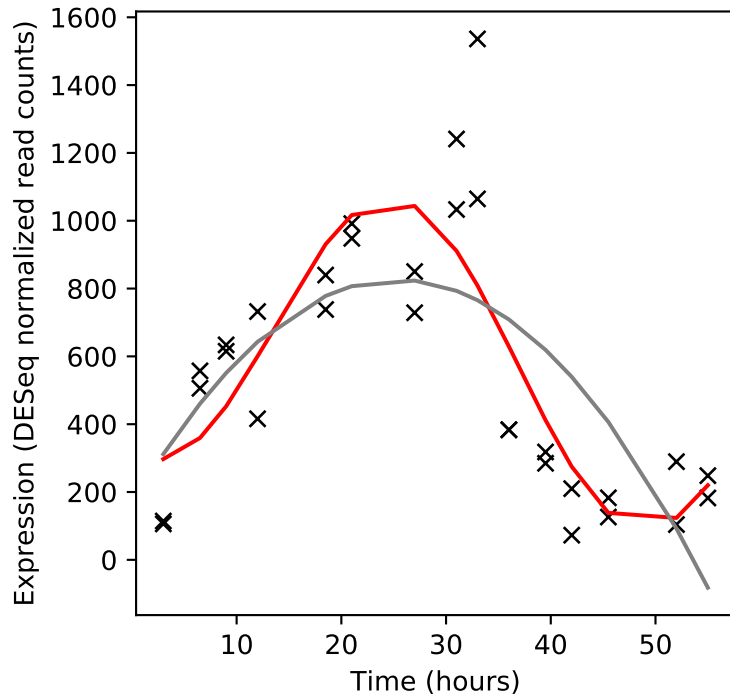

Rv0517/-

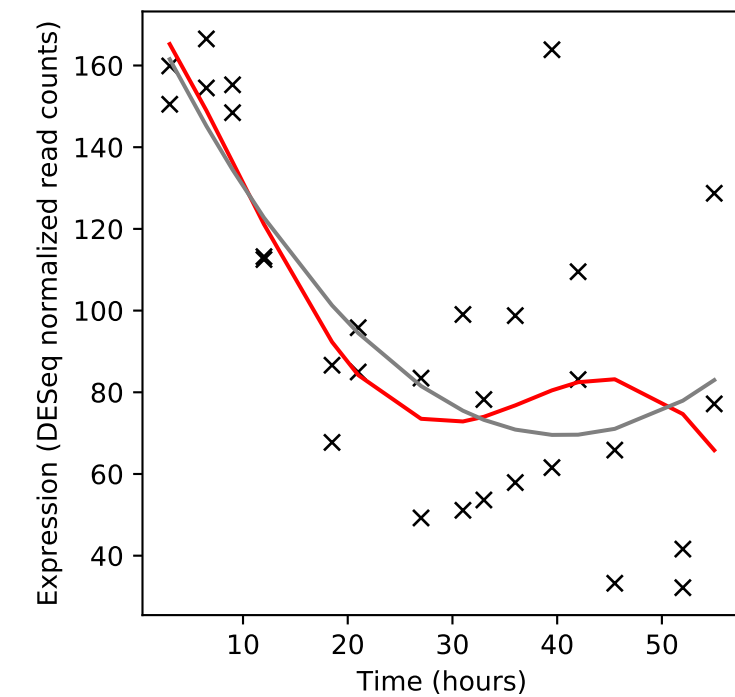

Rv0518/-

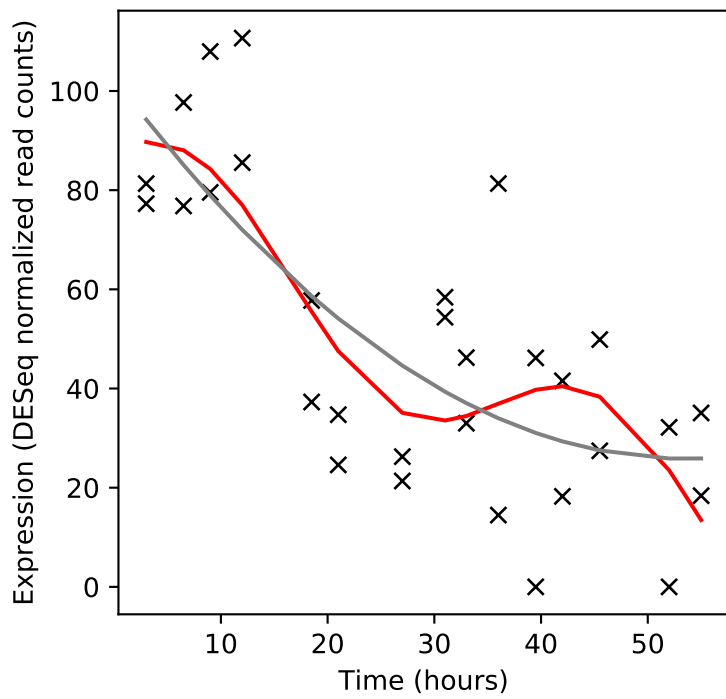

Rv0519c/-

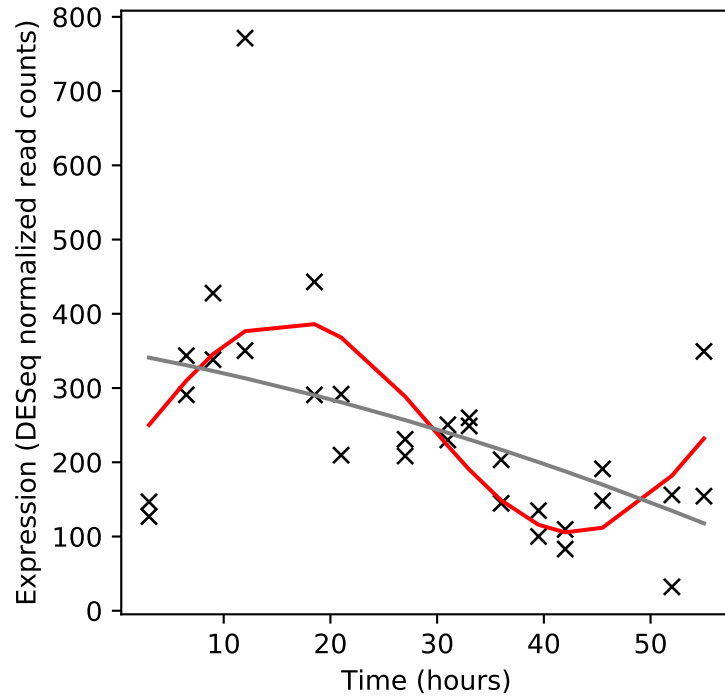

Rv0520/-

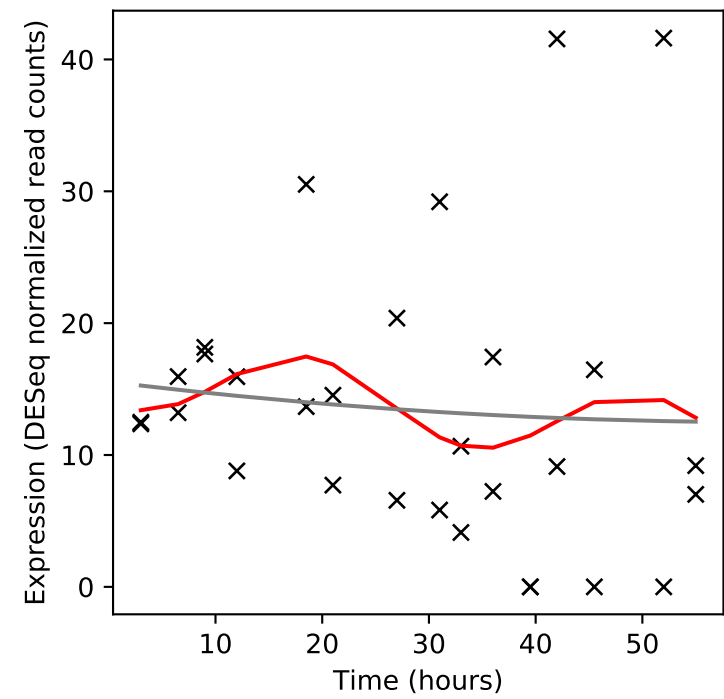

Rv0521/-

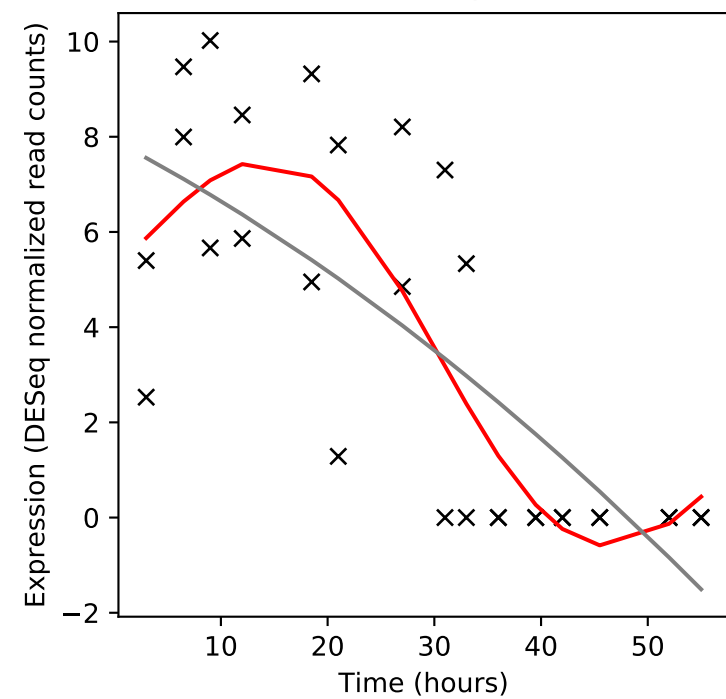

Rv0522/gabP

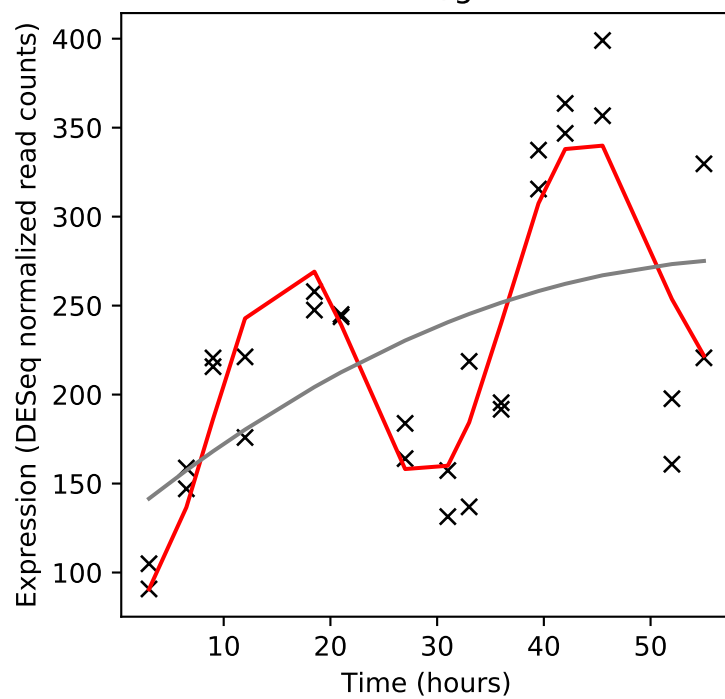

Rv0523c/-

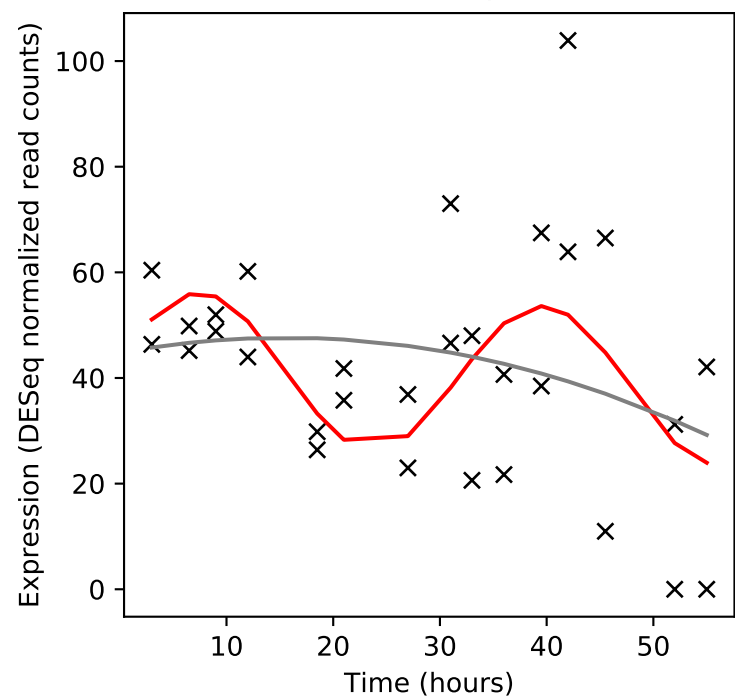

Rv0524/hemL

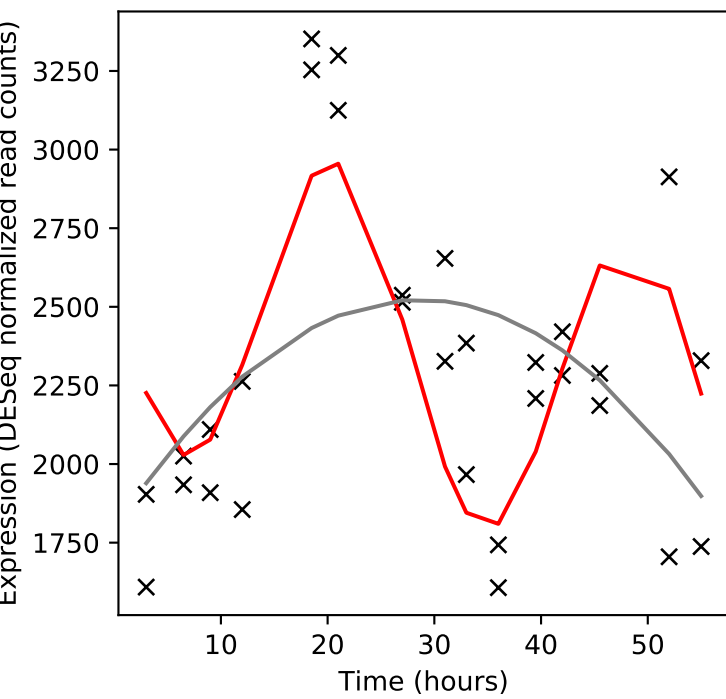

Rv0525/-

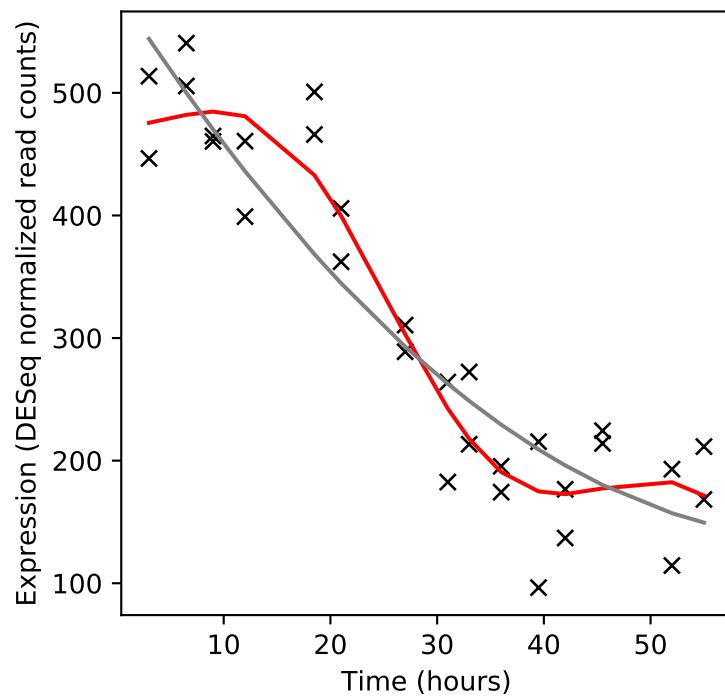

Rv0526/-

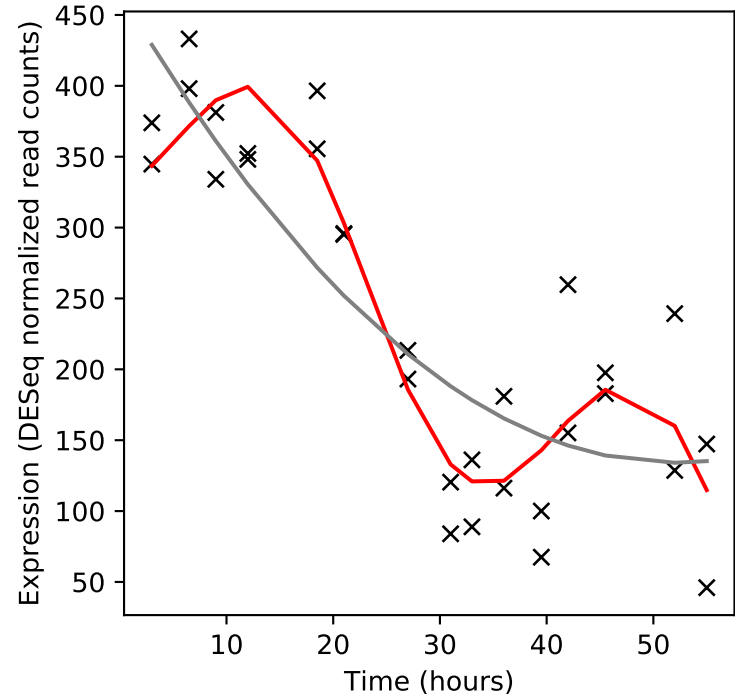

Rv0527/ccdA

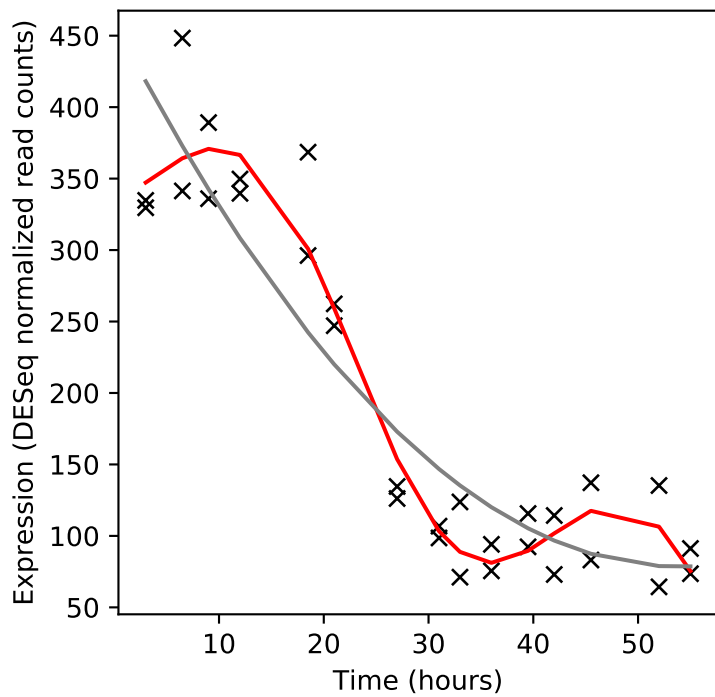

Rv0528/-

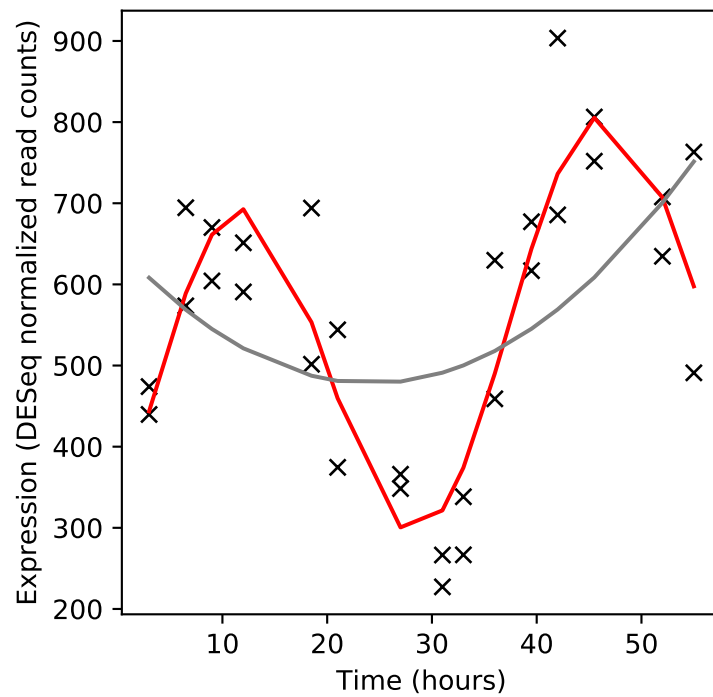

Rv0529/ccsA

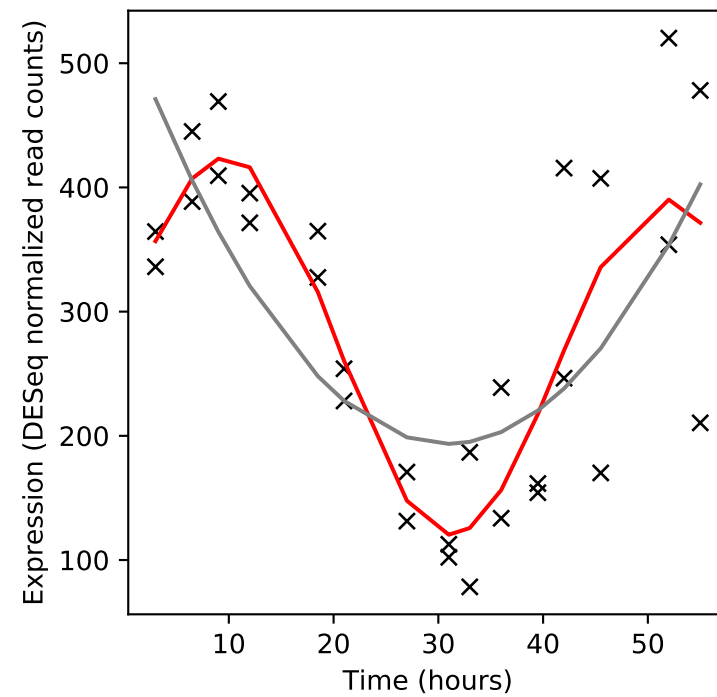

Rv0530/-

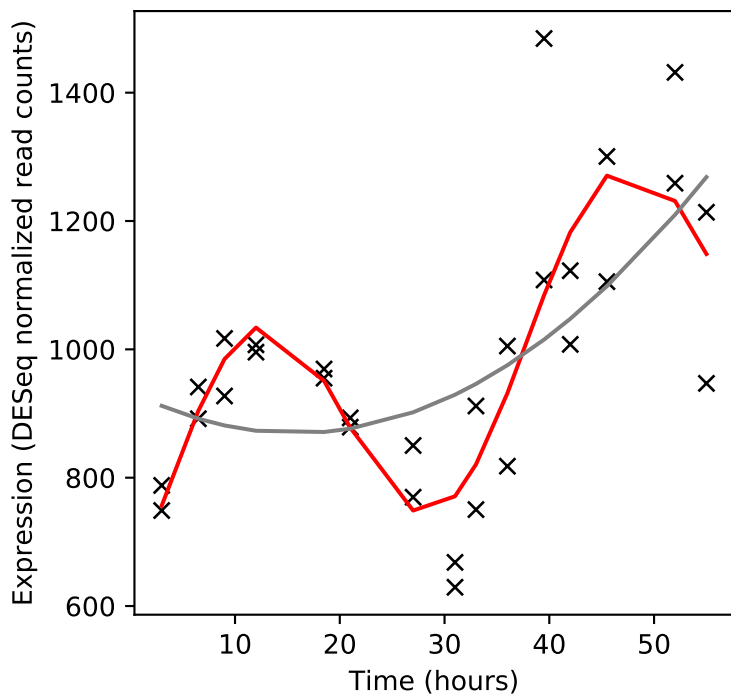

Rv0530A/-

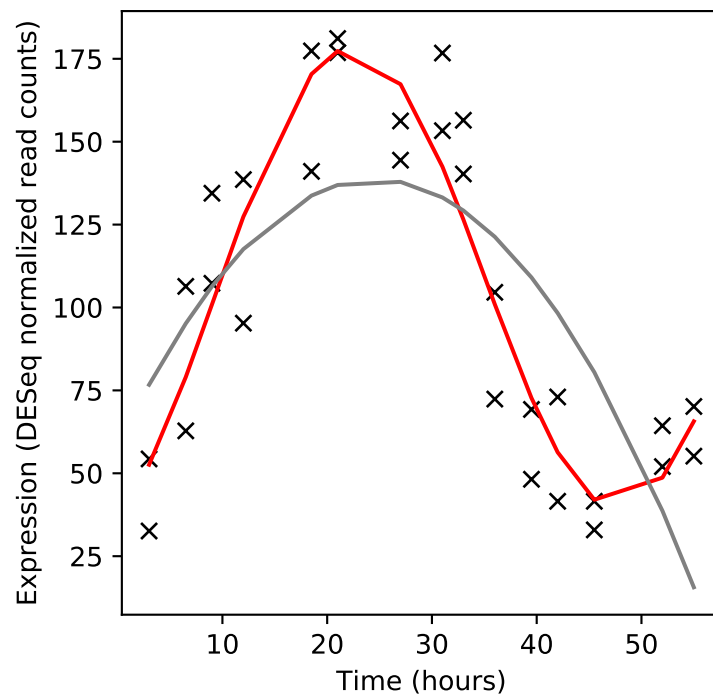

Rv0531/-

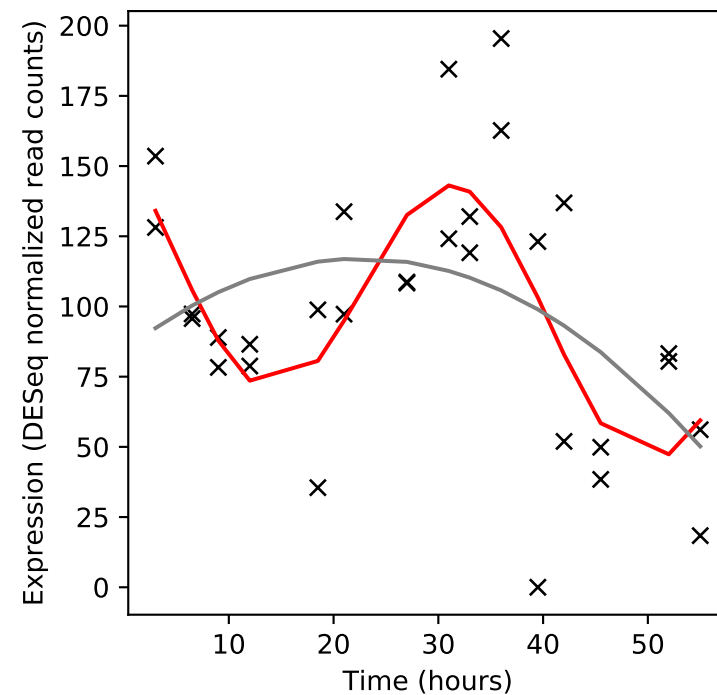

Rv0532/PE\_PGRS6

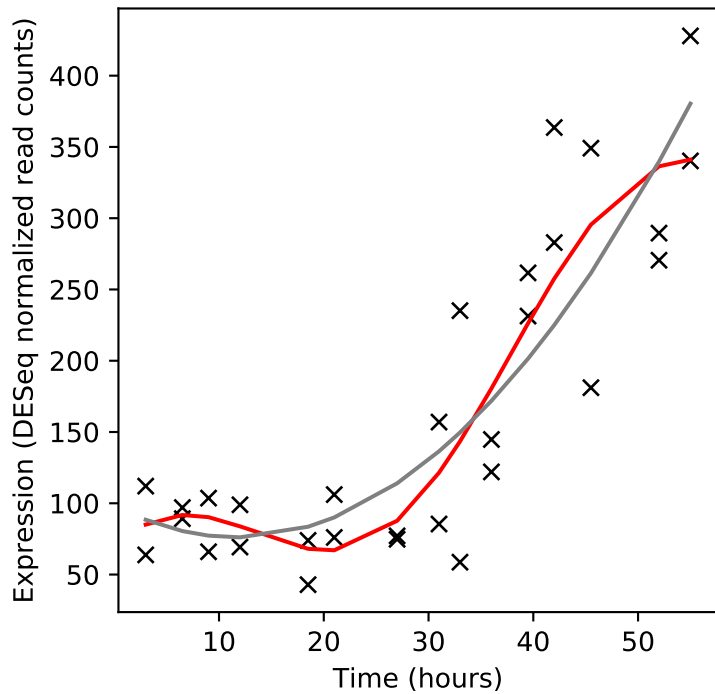

Rv0533c/fabH

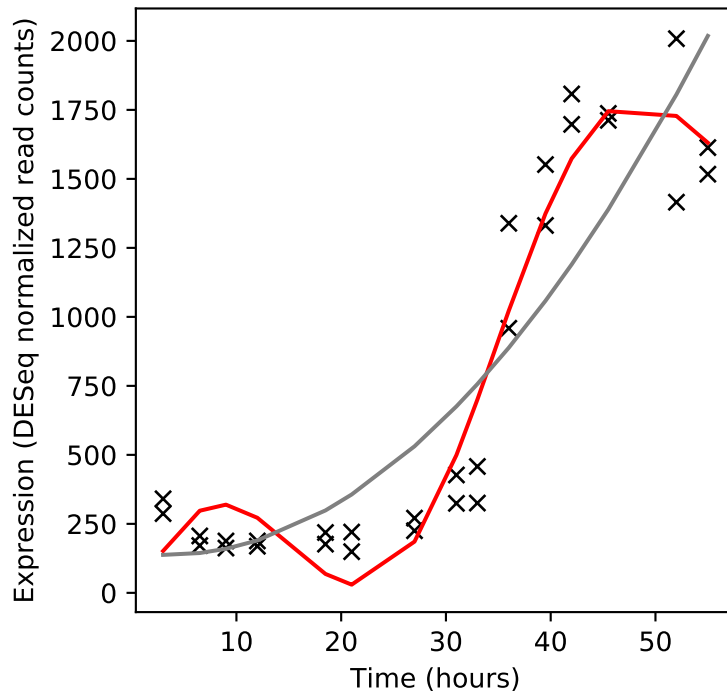

Rv0534c/menA

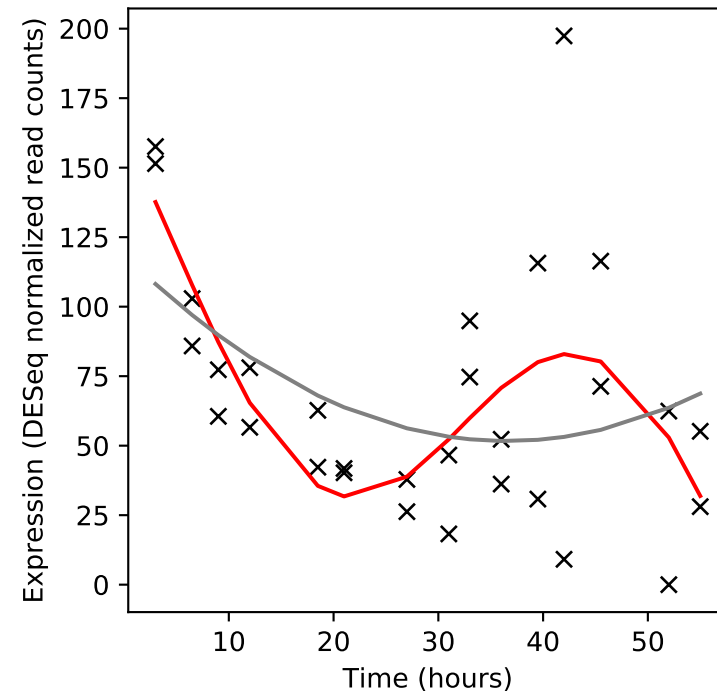

Rv0535/pnp

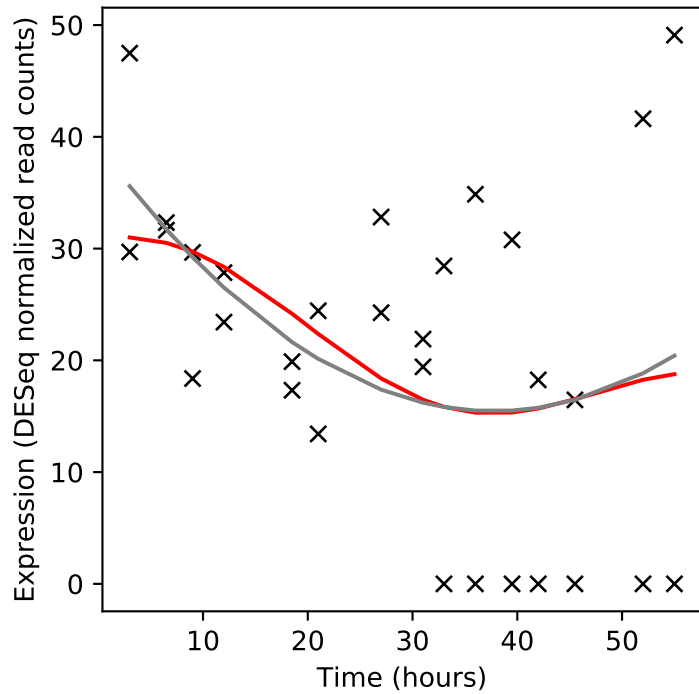

Rv0536/galE3

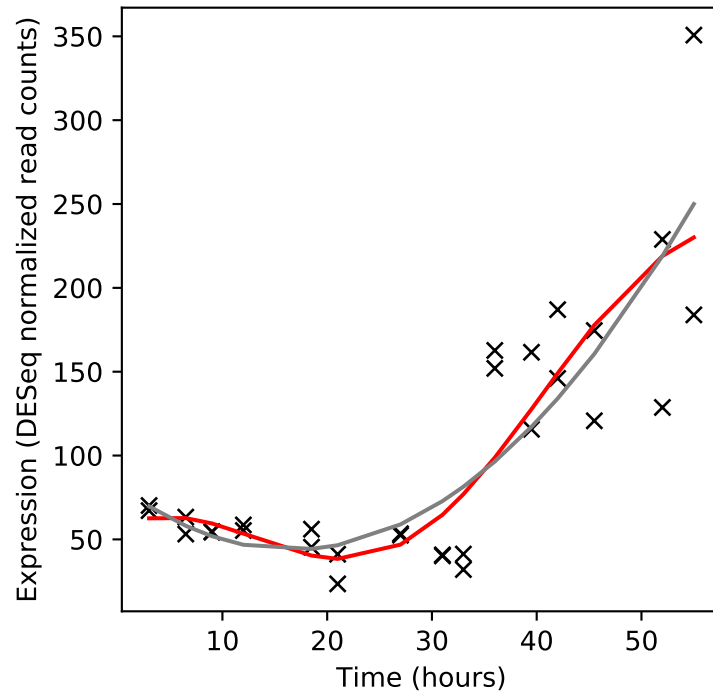

Rv0537c/-

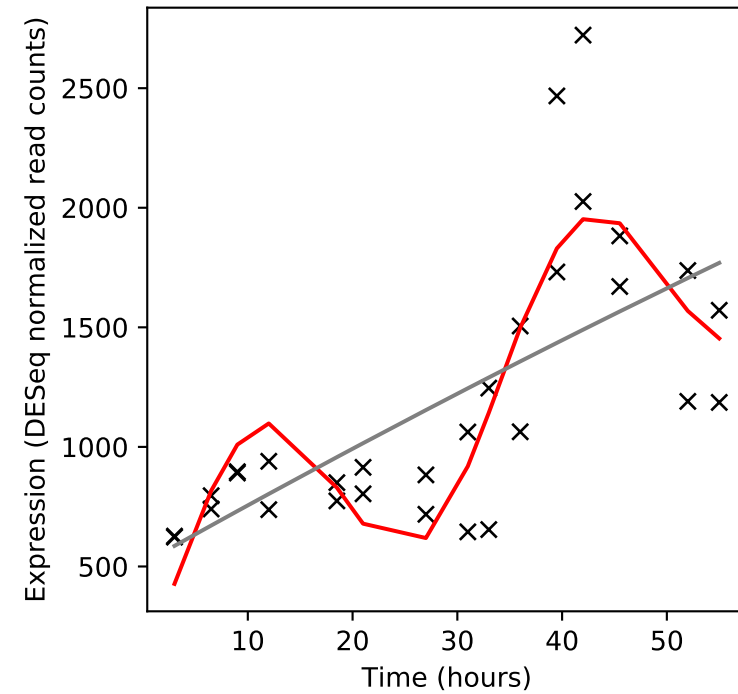

Rv0538/-

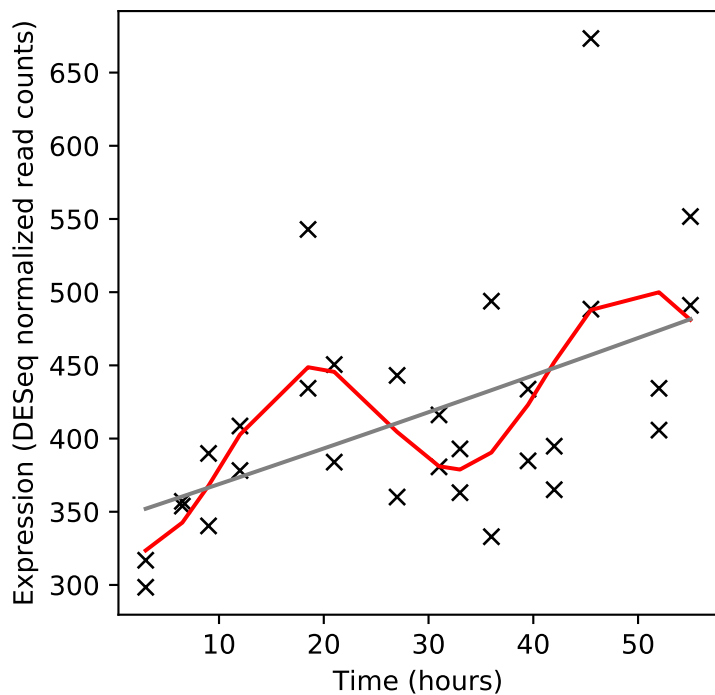

Rv0539/-

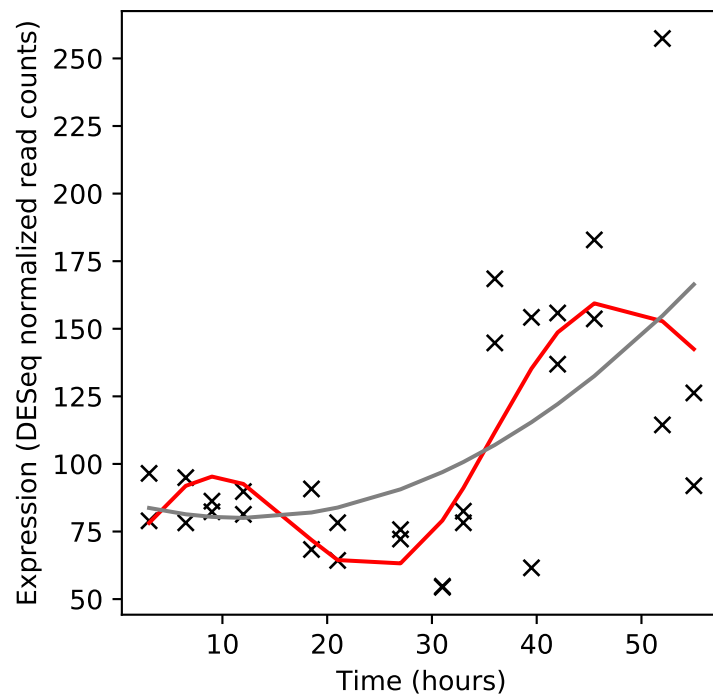

Rv0540/-

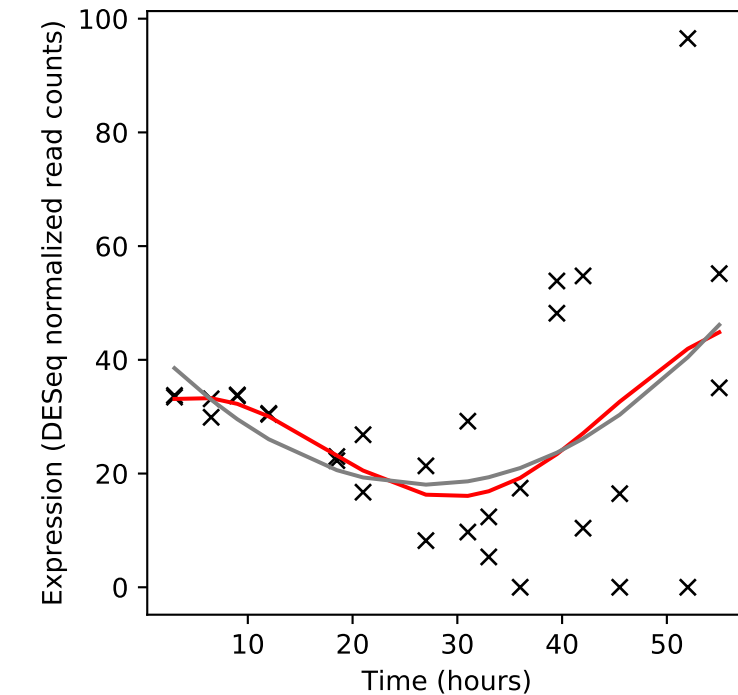

Rv0541c/-

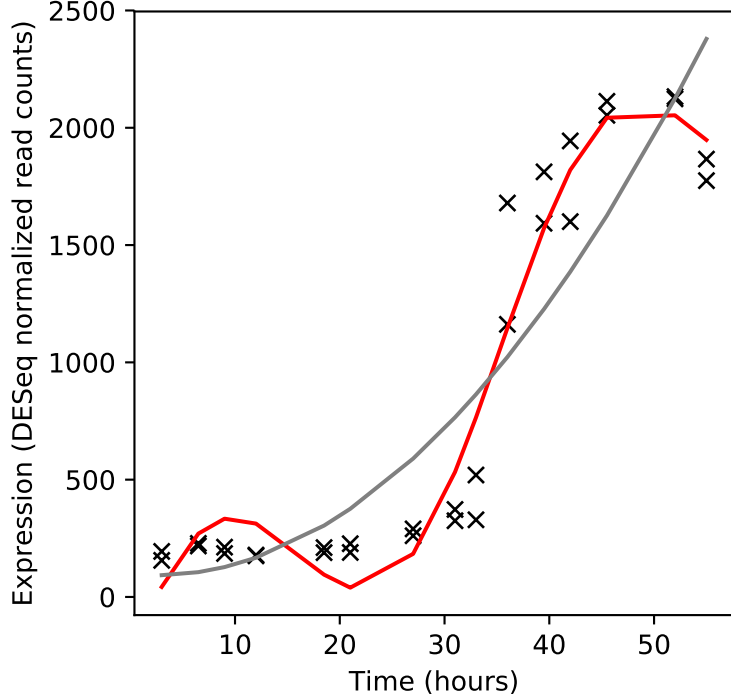

Rv0542c/menE

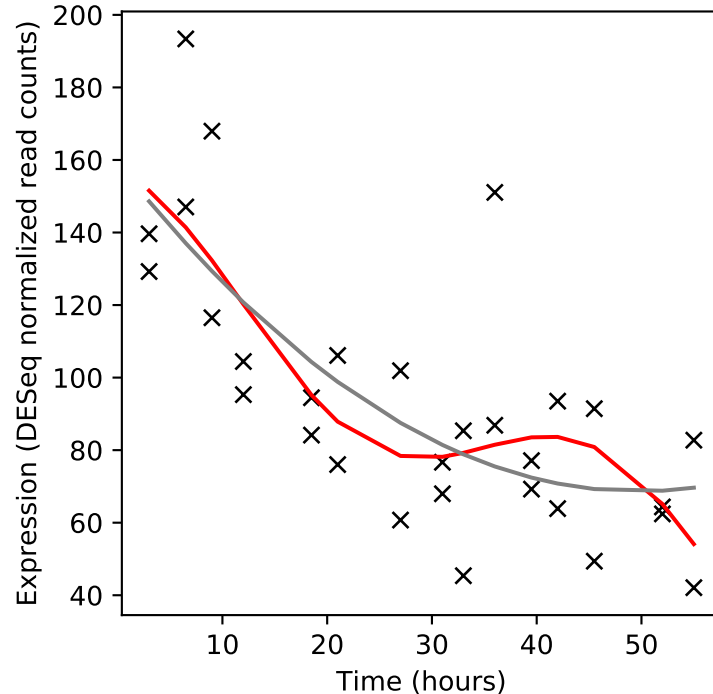

Rv0543c/-

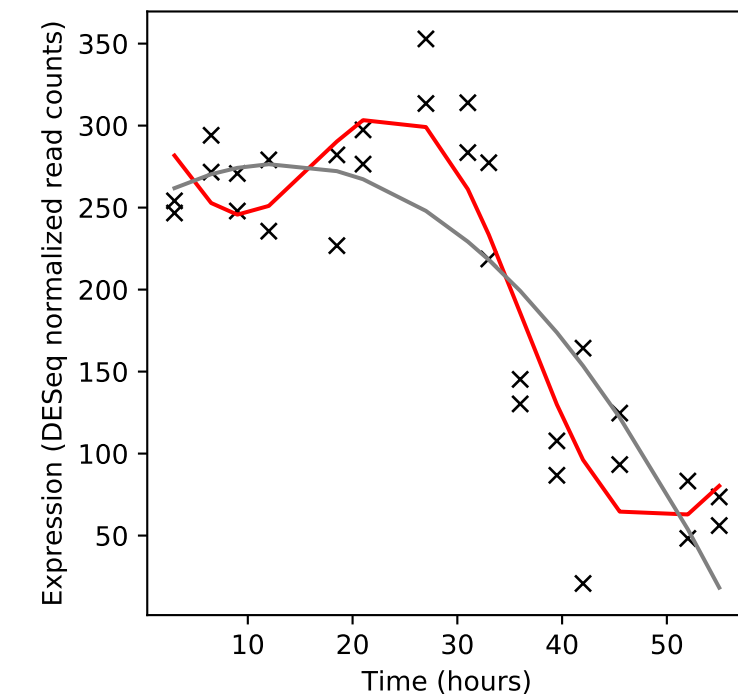

Rv0544c/-

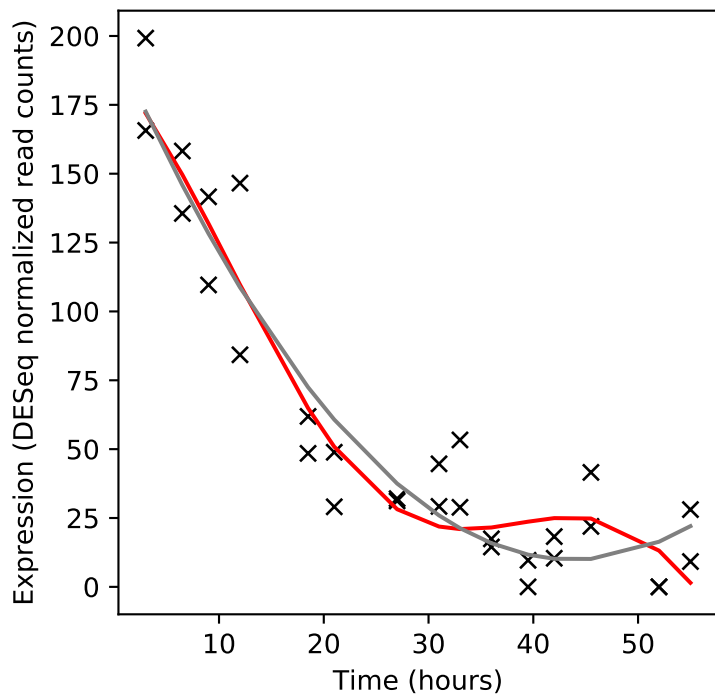

Rv0545c/pitA

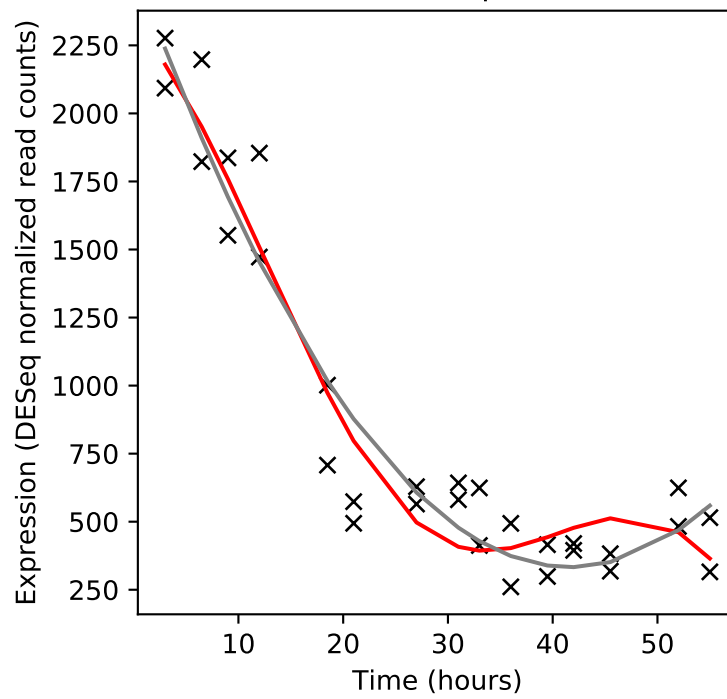

Rv0546c/-

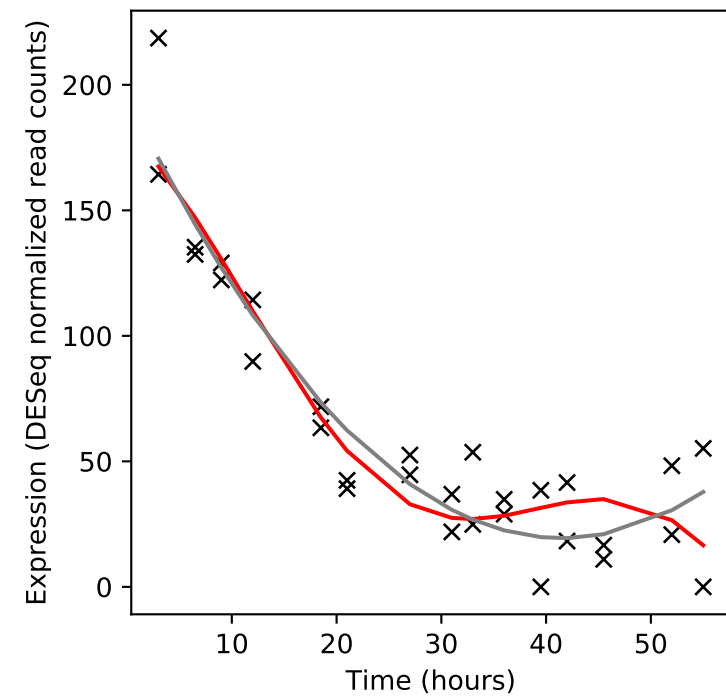

Rv0547c/-

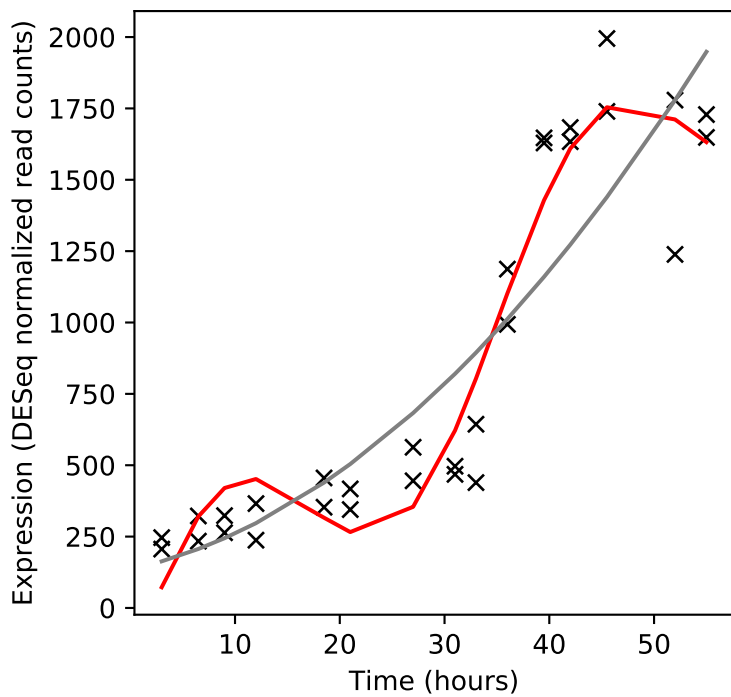

Rv0548c/menB

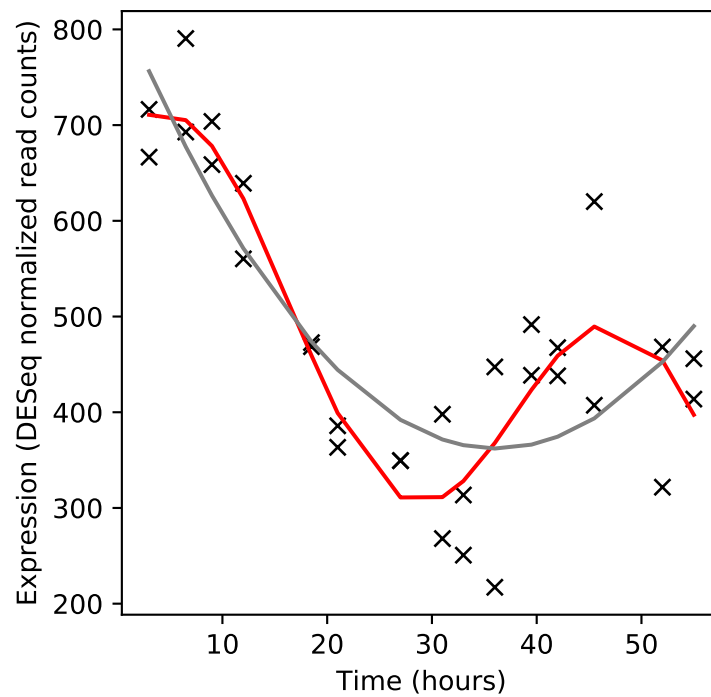

Rv0549c/vapC3

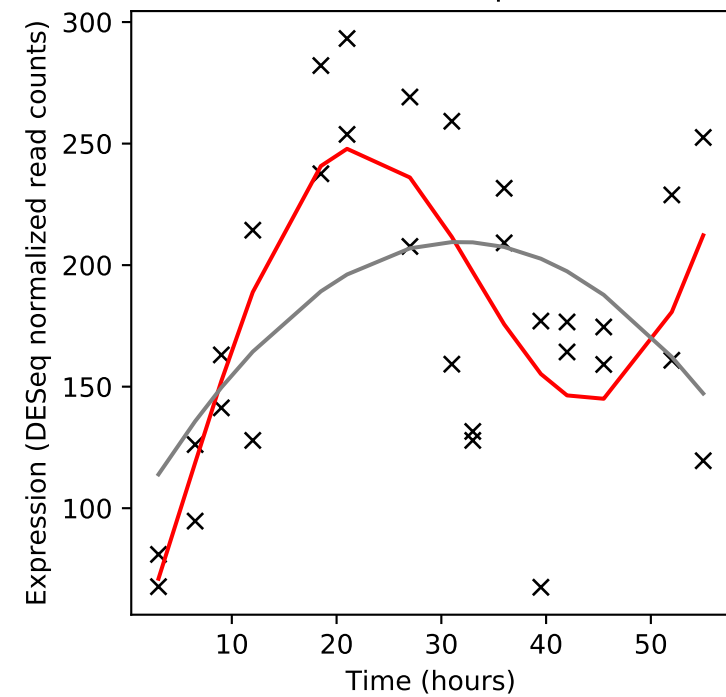

Rv0550c/vapB3

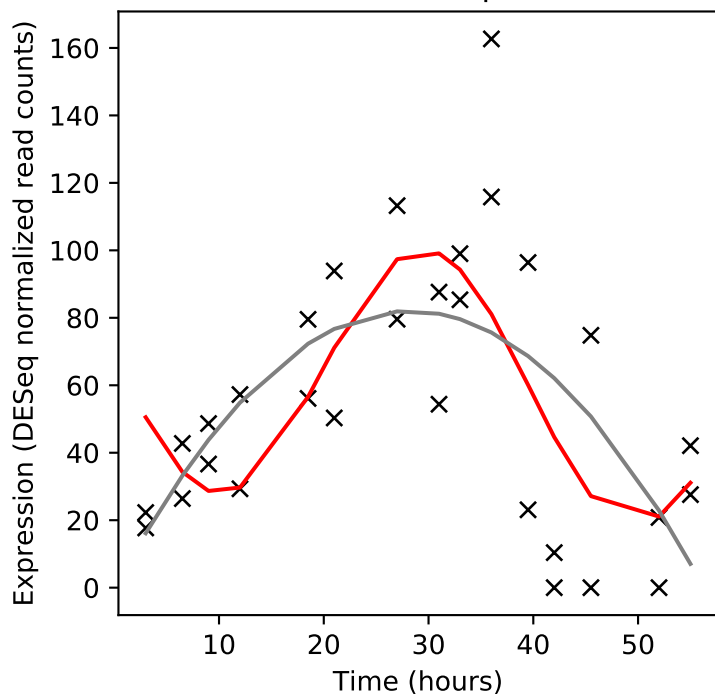

Rv0551c/fadD8

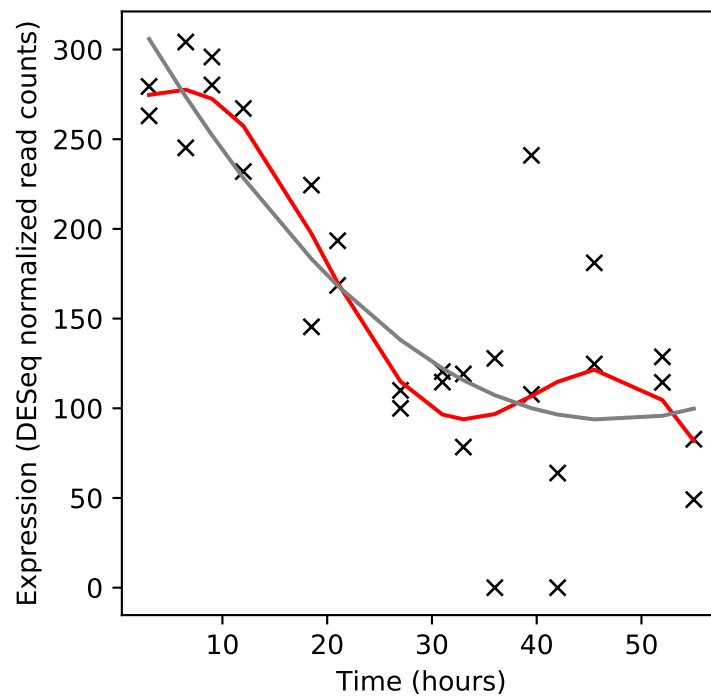

Rv0552c/-

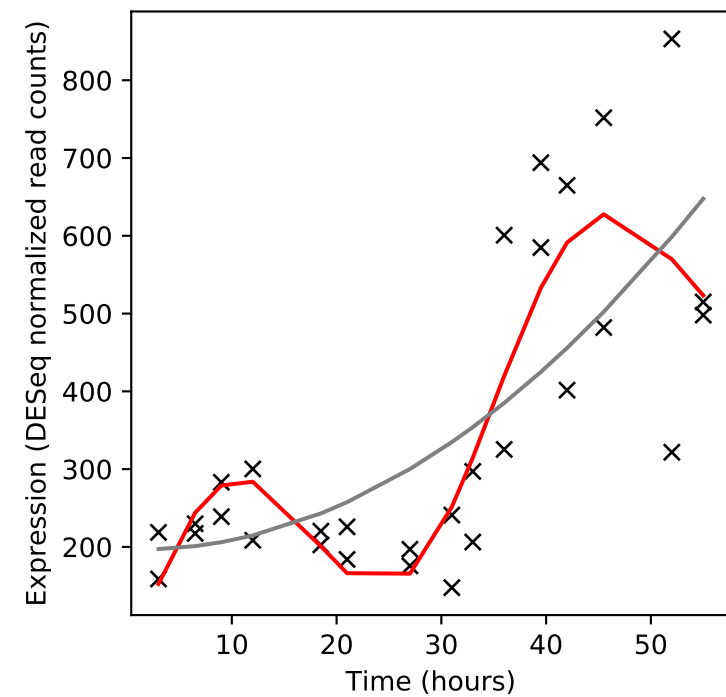

Rv0553/menC

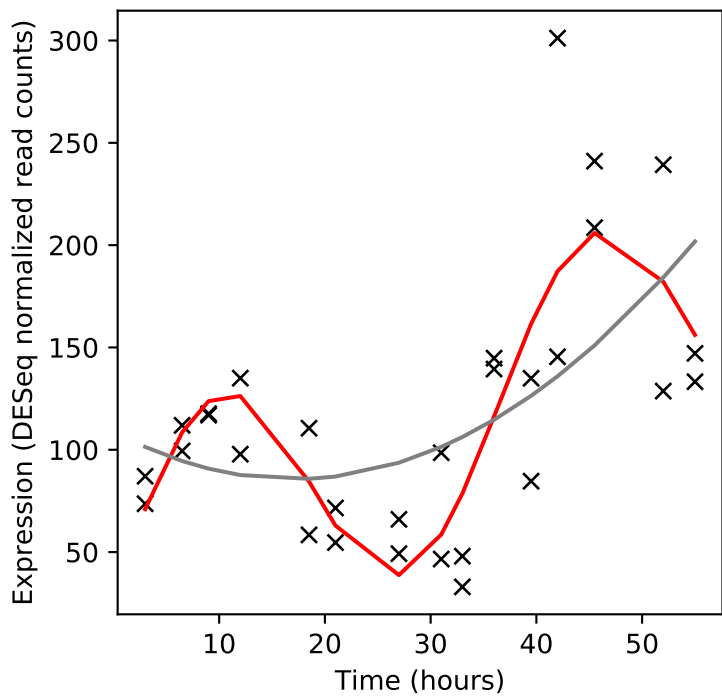

Rv0554/bpoC

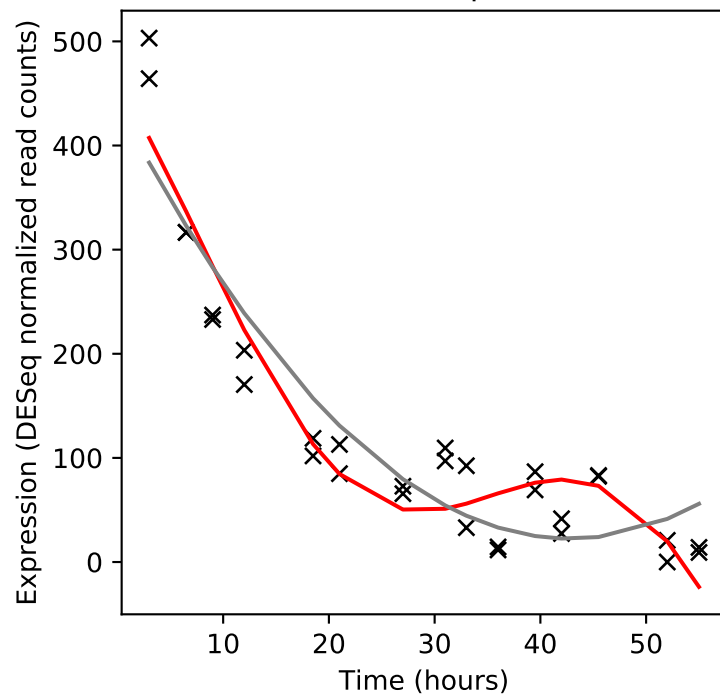

Rv0555/menD

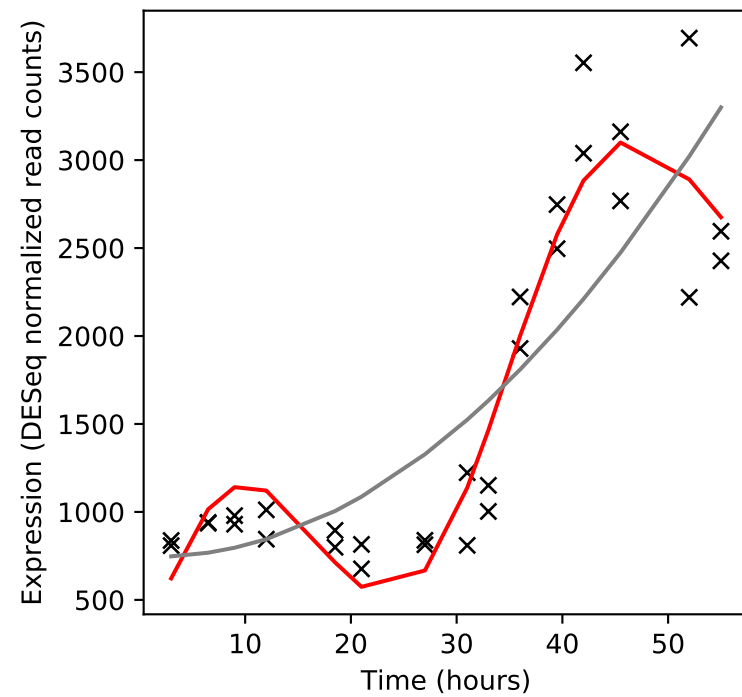

Rv0556/-

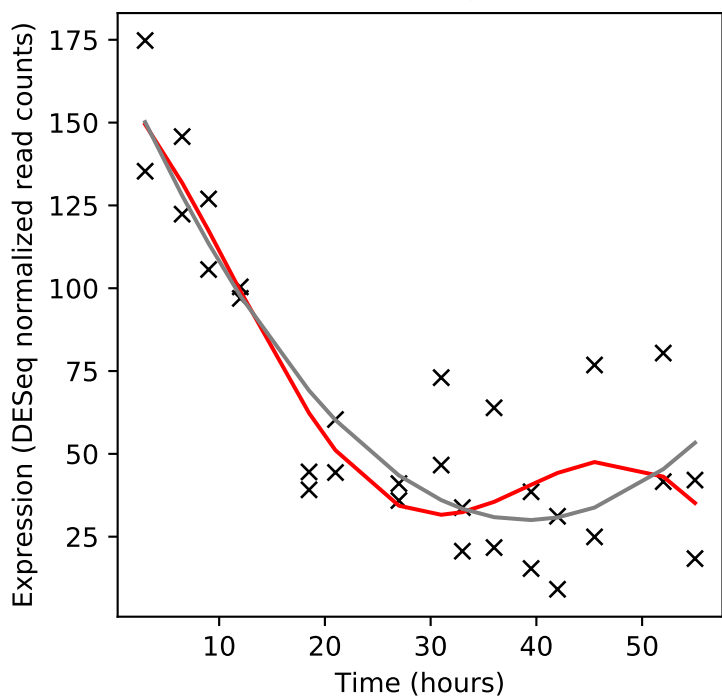

Rv0557/mgtA

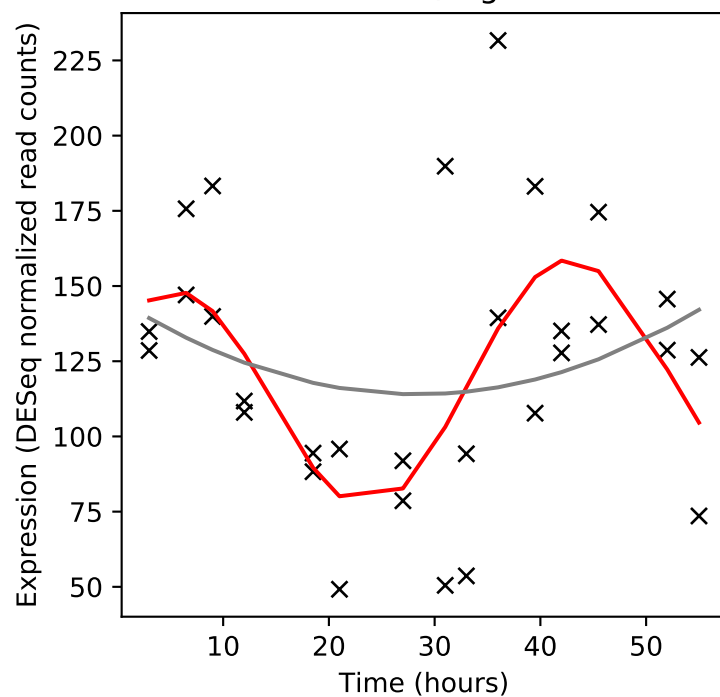

Rv0558/menH

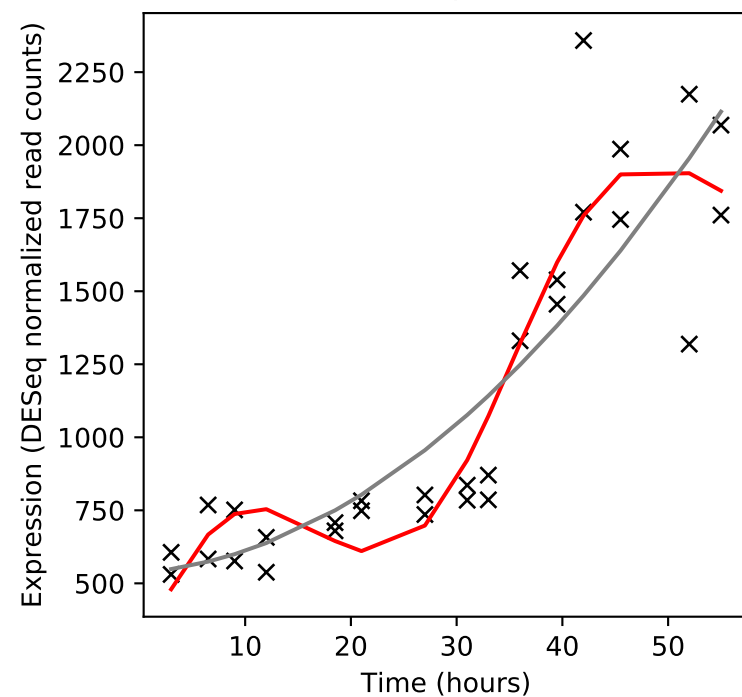

Rv0559c/-

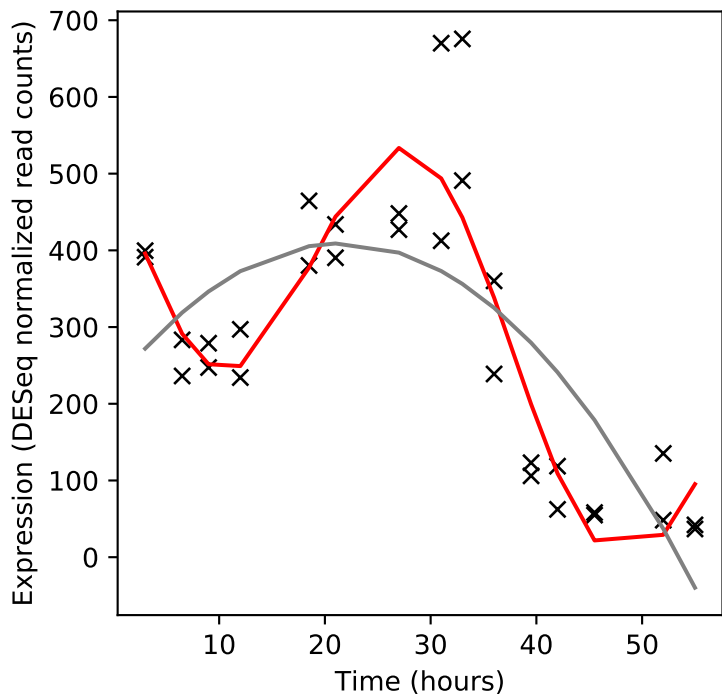

Rv0560c/-

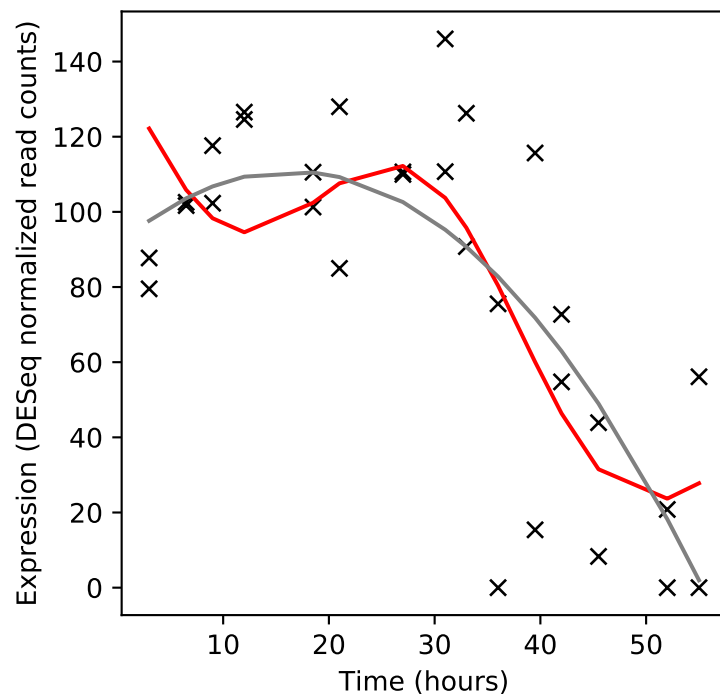

Rv0561c/-

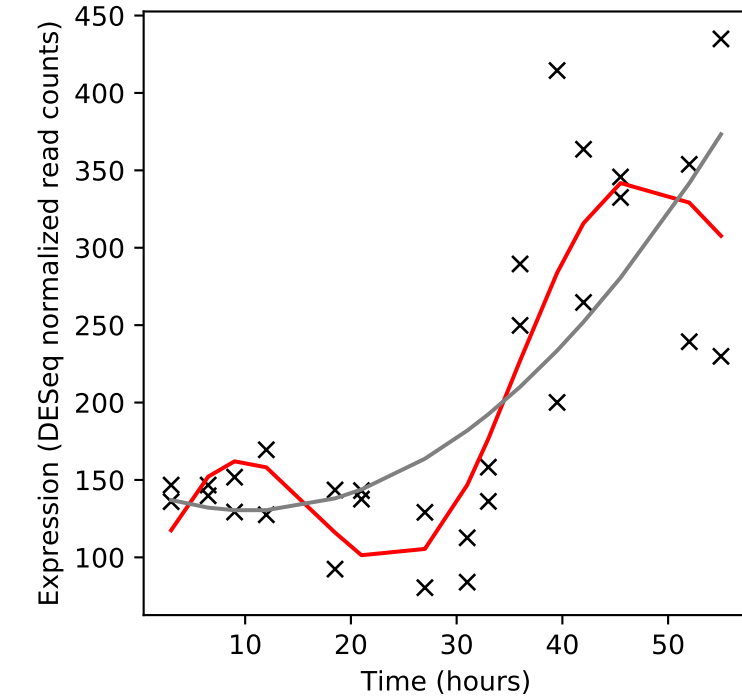



Rv0562/grcC1

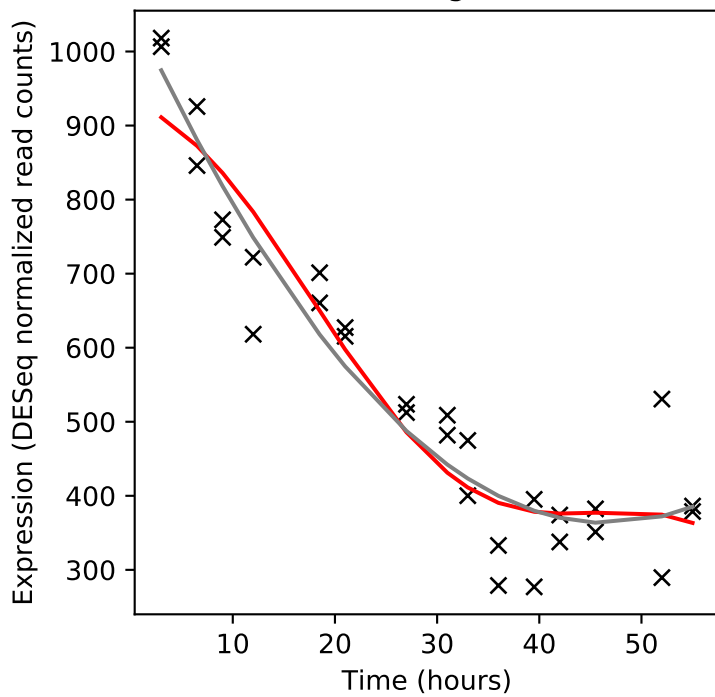

Rv0563/htpX

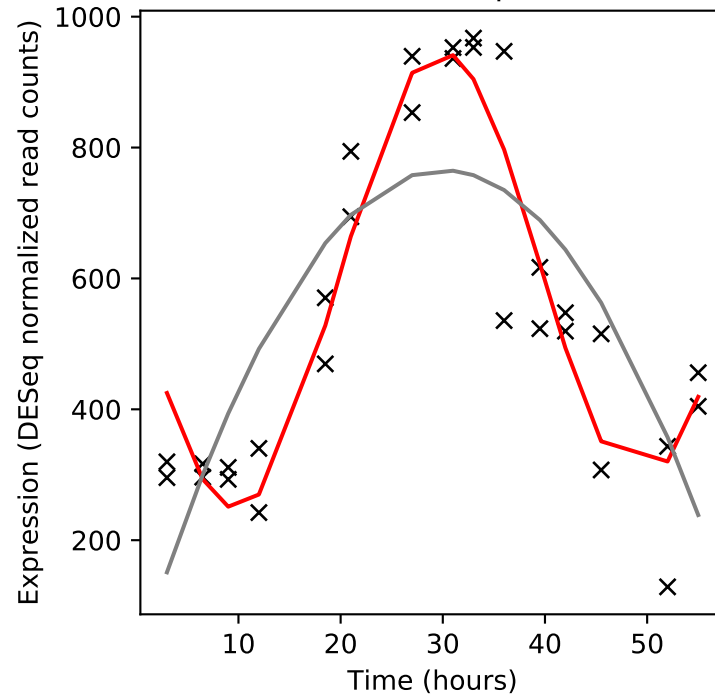

Rv0564c/gpdA1

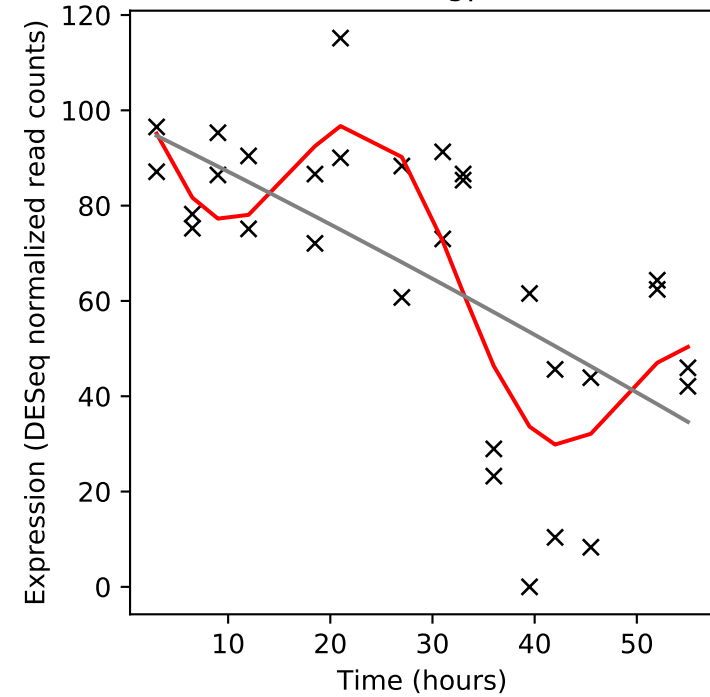

Rv0565c/-

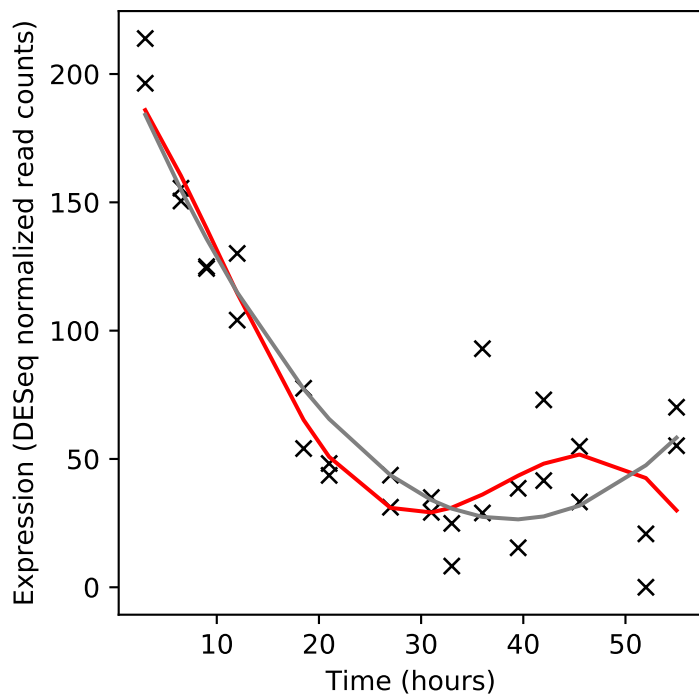

Rv0566c/-

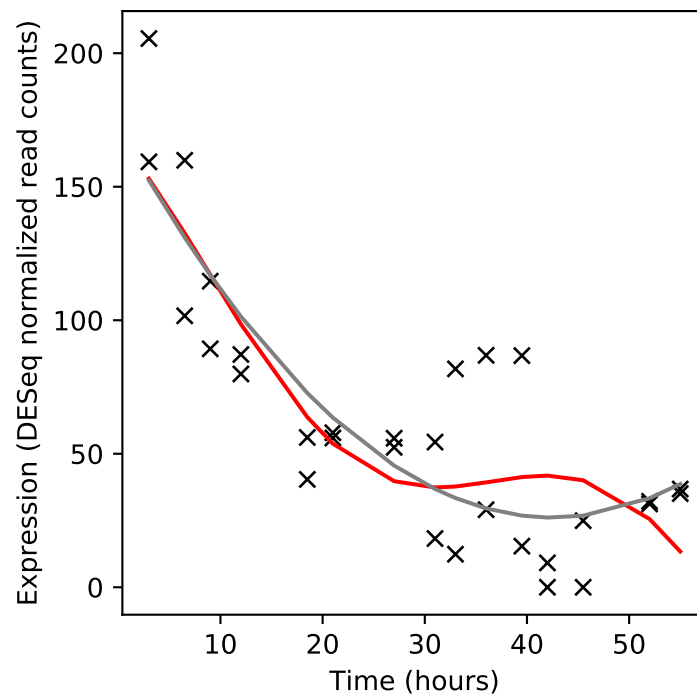

Rv0567/-

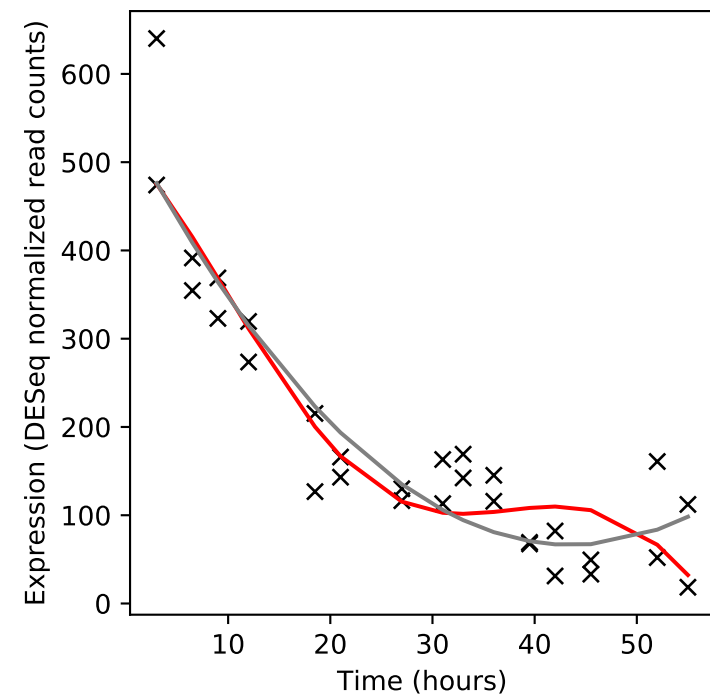

Rv0568/cyp135B1

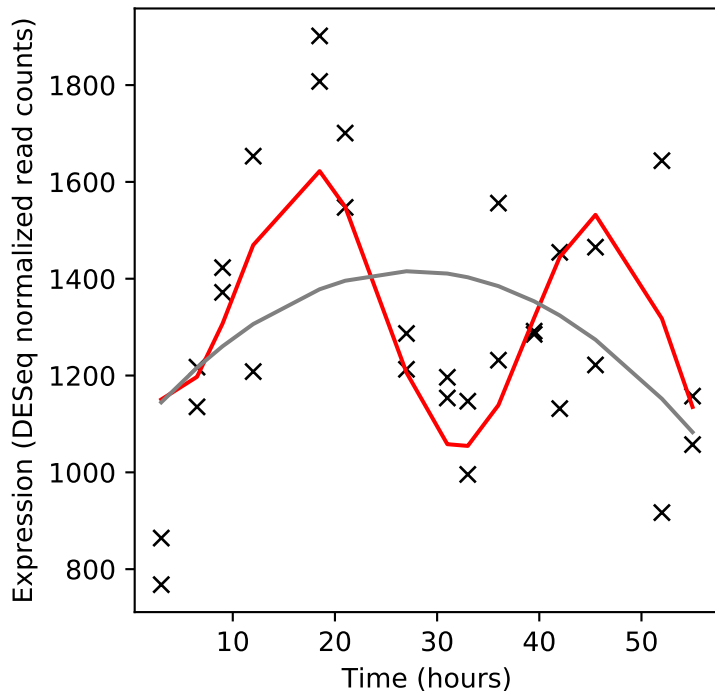

Rv0569/-

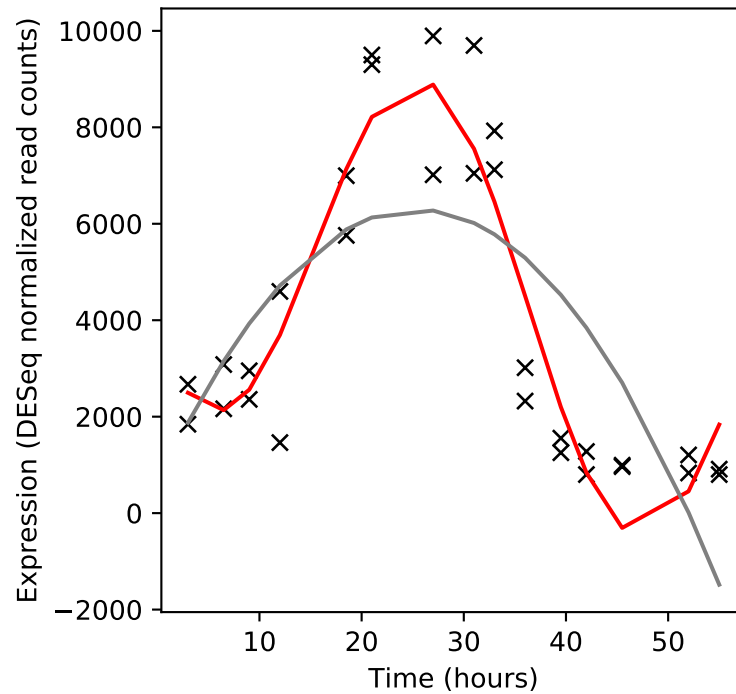

Rv0570/nrdZ

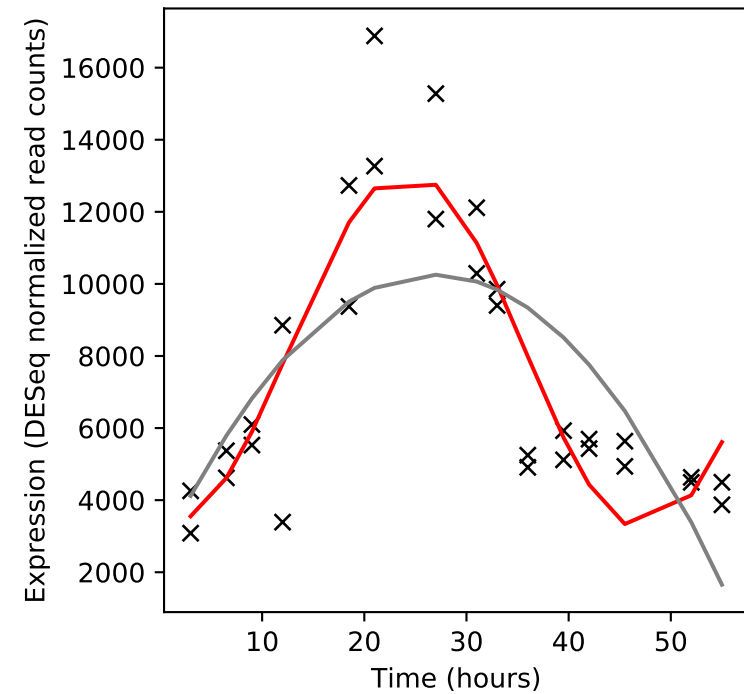

Rv0571c/-

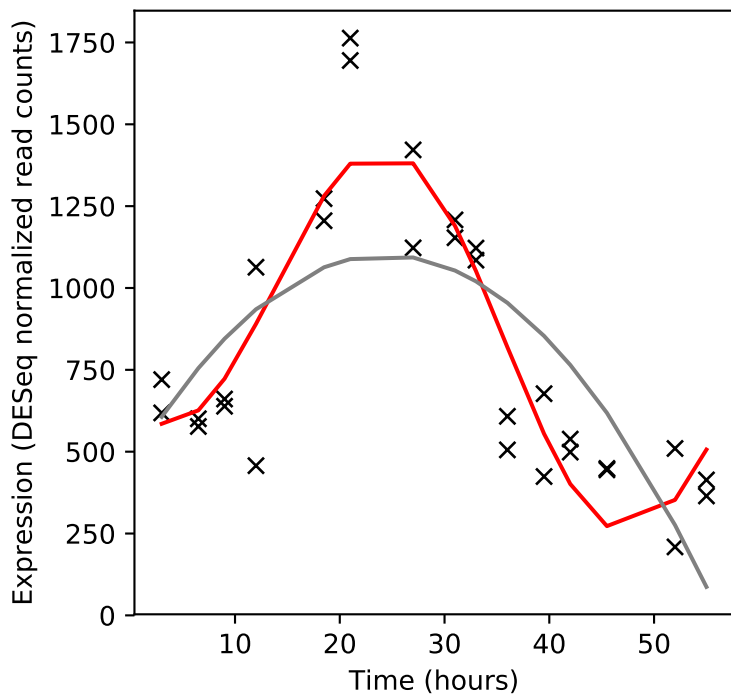

Rv0572c/-

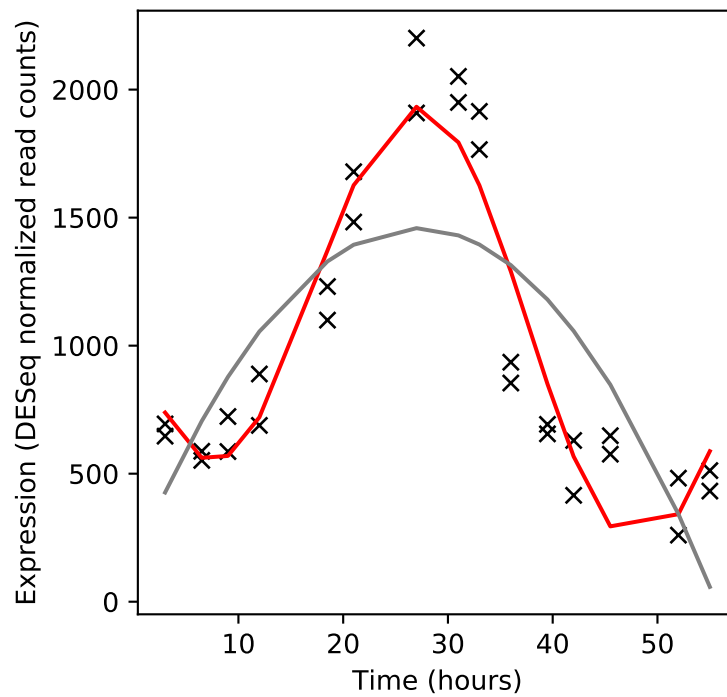

Rv0573c/pncB2

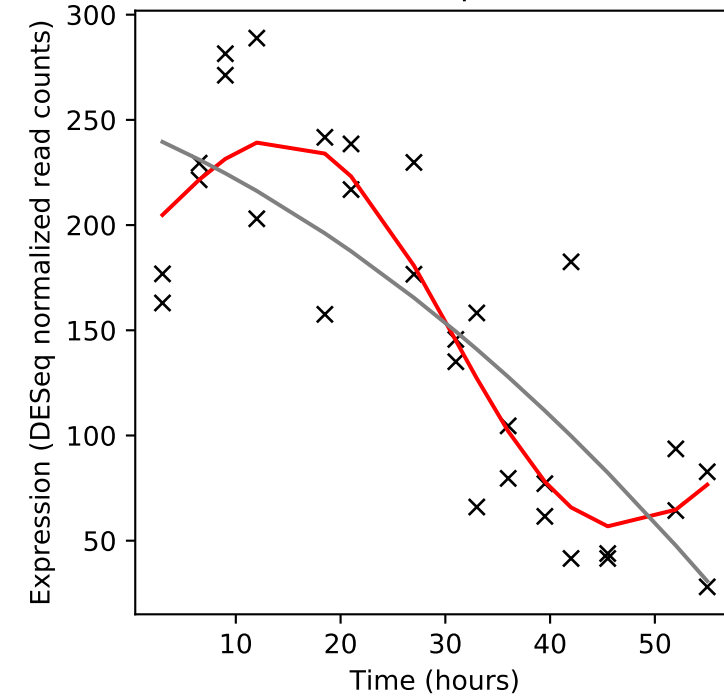

Rv0574c/-

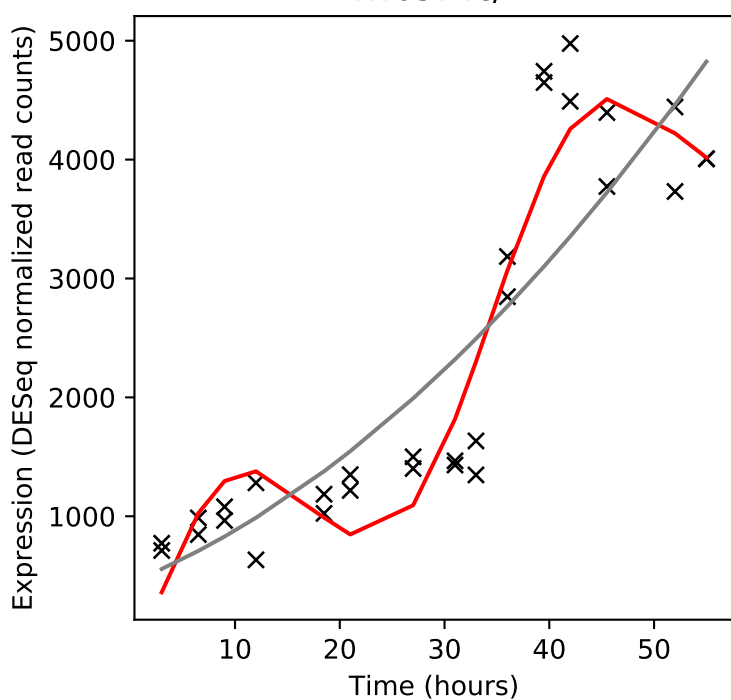

Rv0575c/-

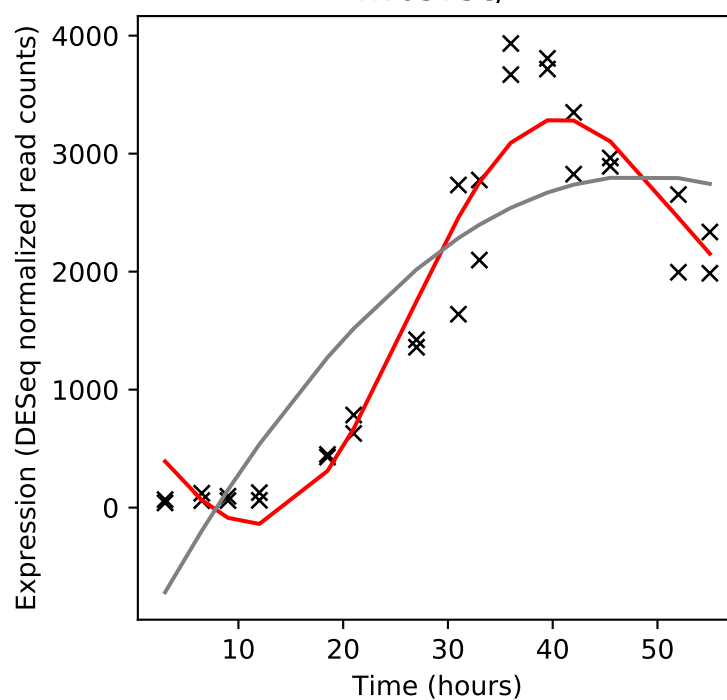

Rv0576/-

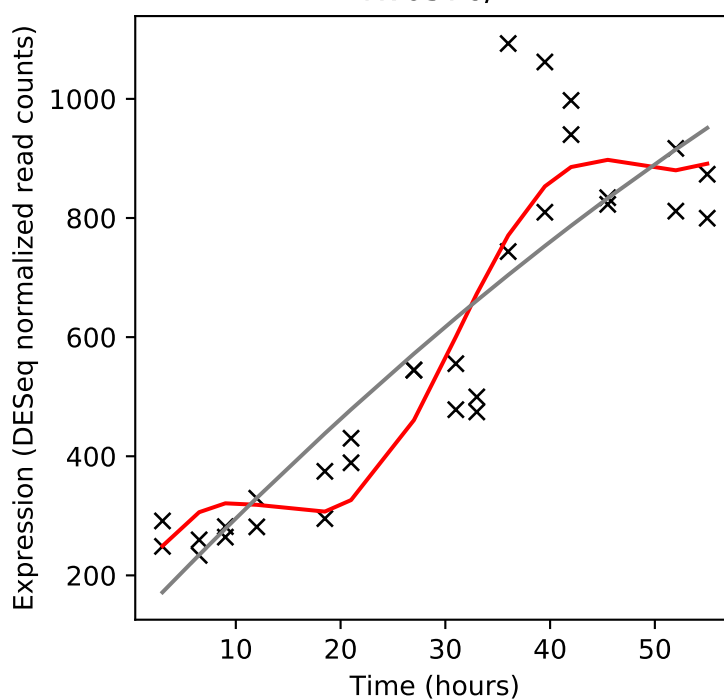

Rv0577/TB27.3

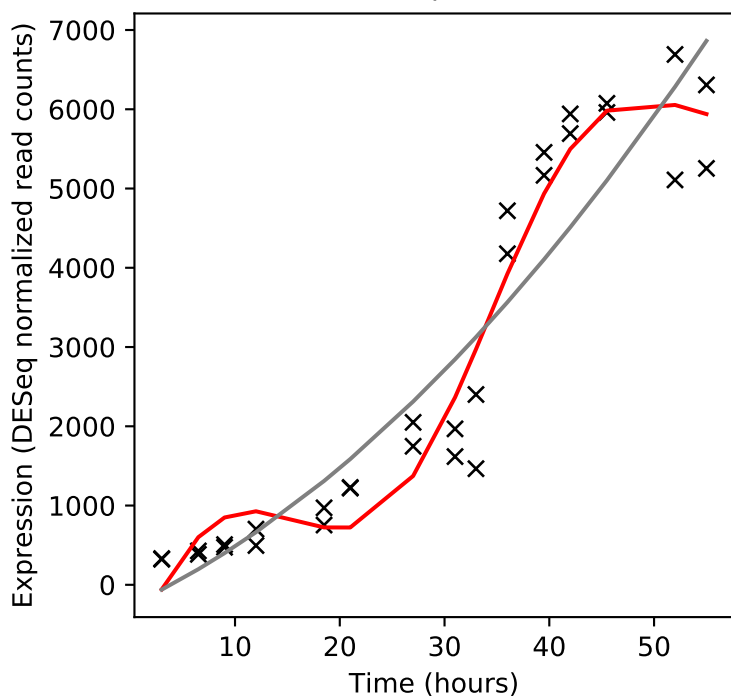

Rv0578c/PE\_PGRS7

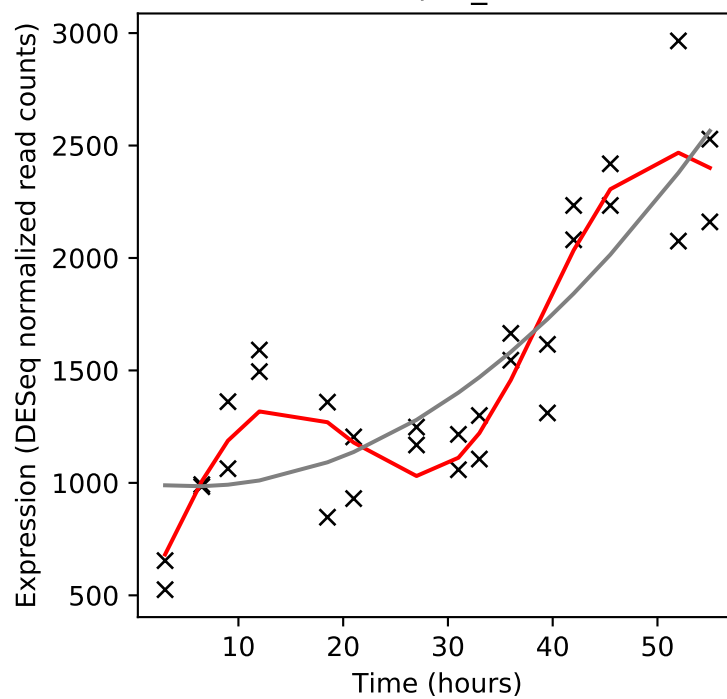

Rv0579/-

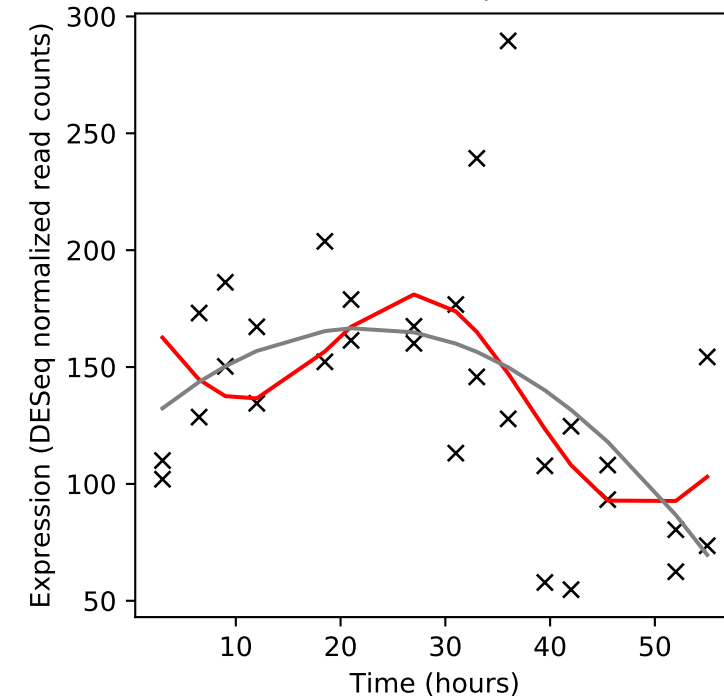

Rv0580c/-

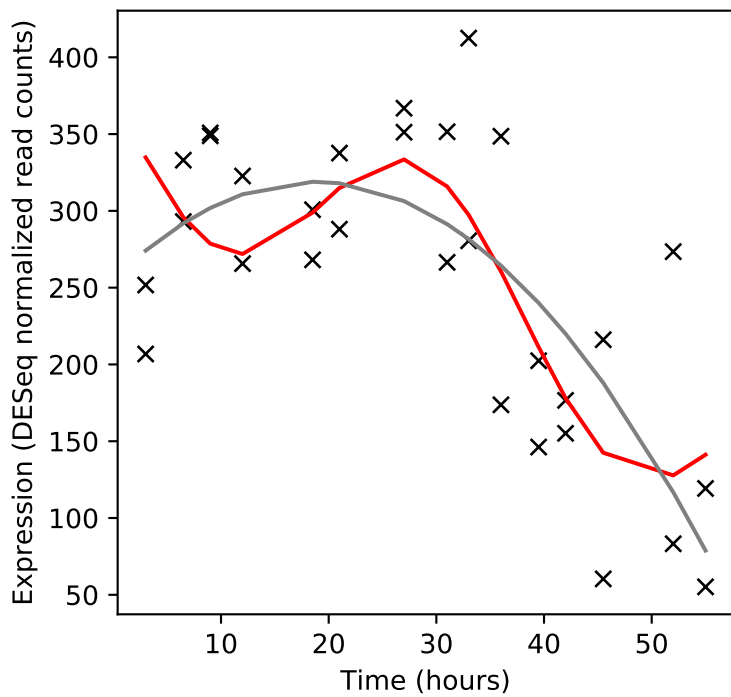

Rv0581/vapB26

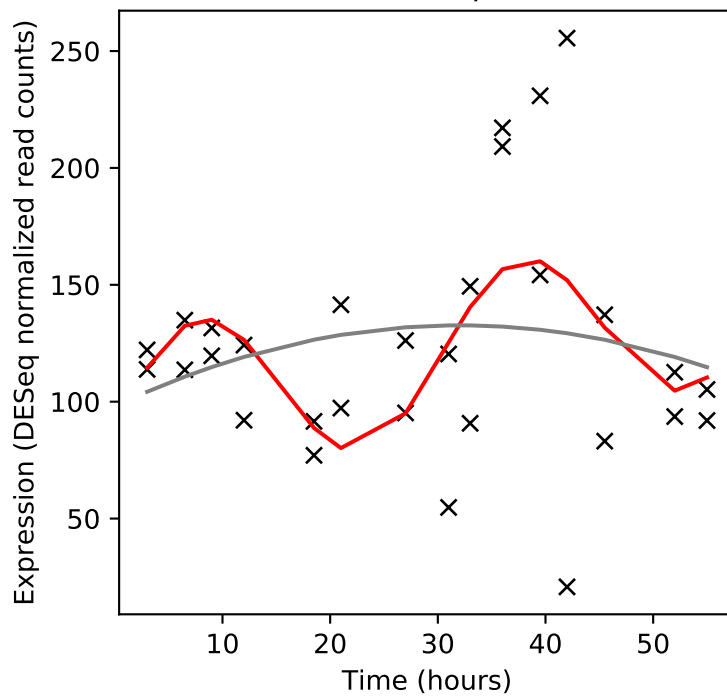

Rv0582/vapC26

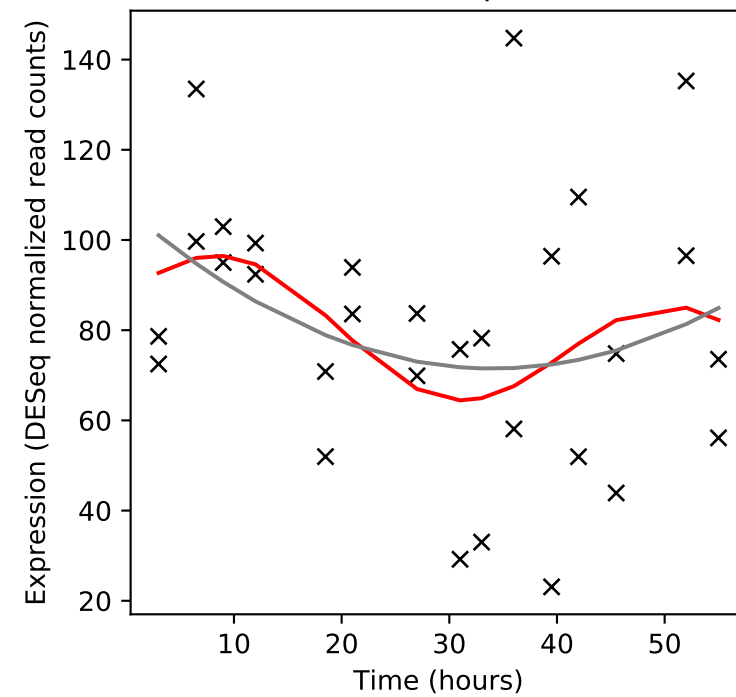

Rv0583c/lpqN

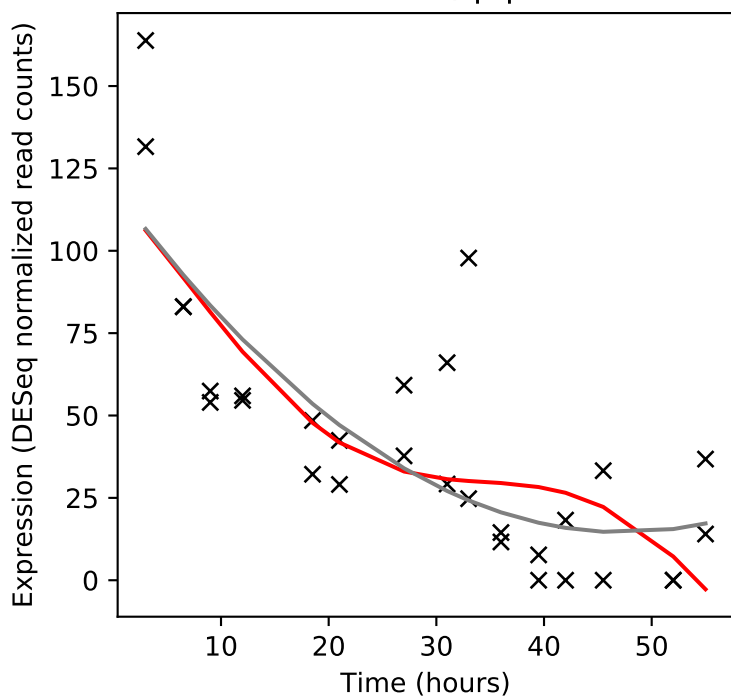

Rv0584/-

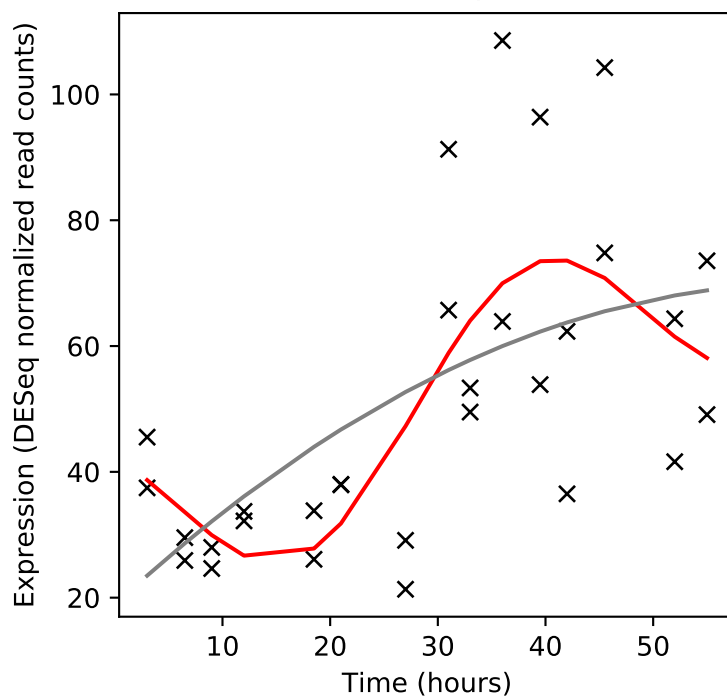

Rv0585c/-

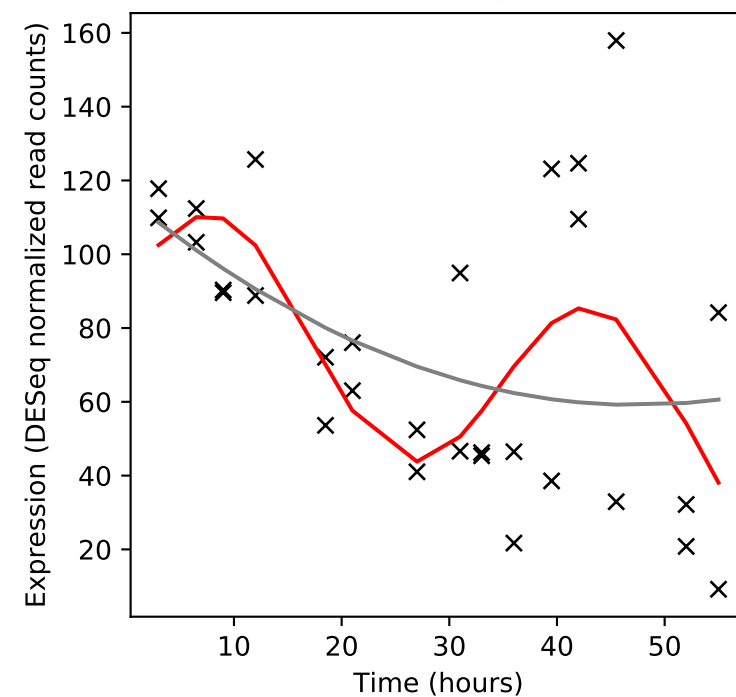

Rv0586/mce2R

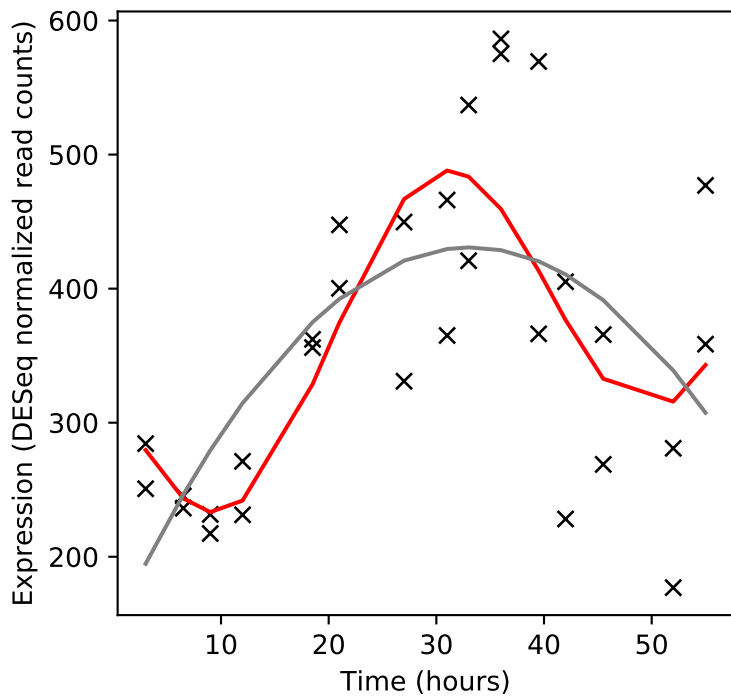

Rv0587/yrbE2A

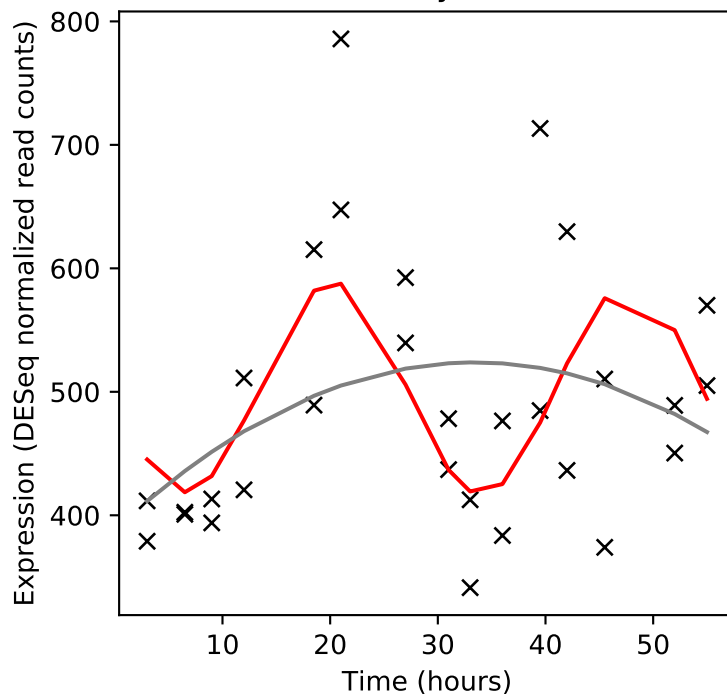

Rv0588/yrbE2B

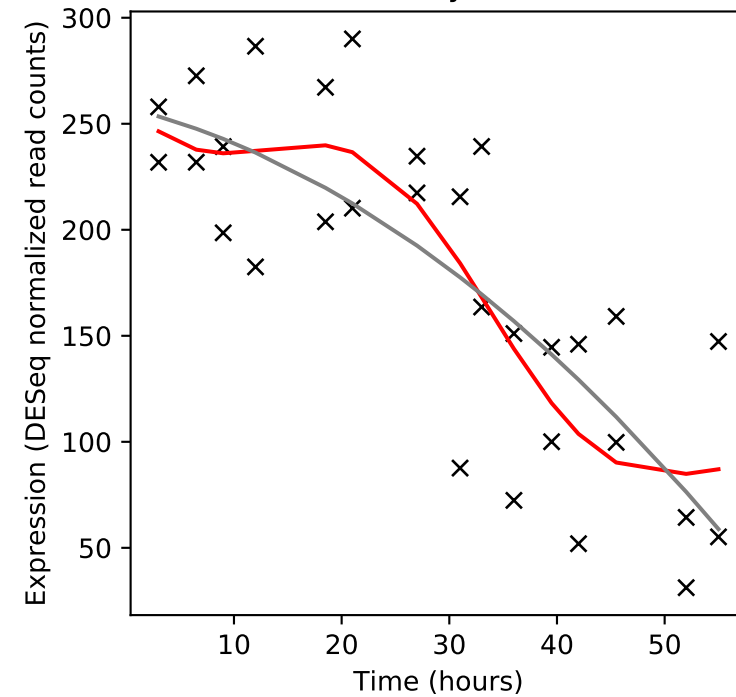

Rv0589/mce2A

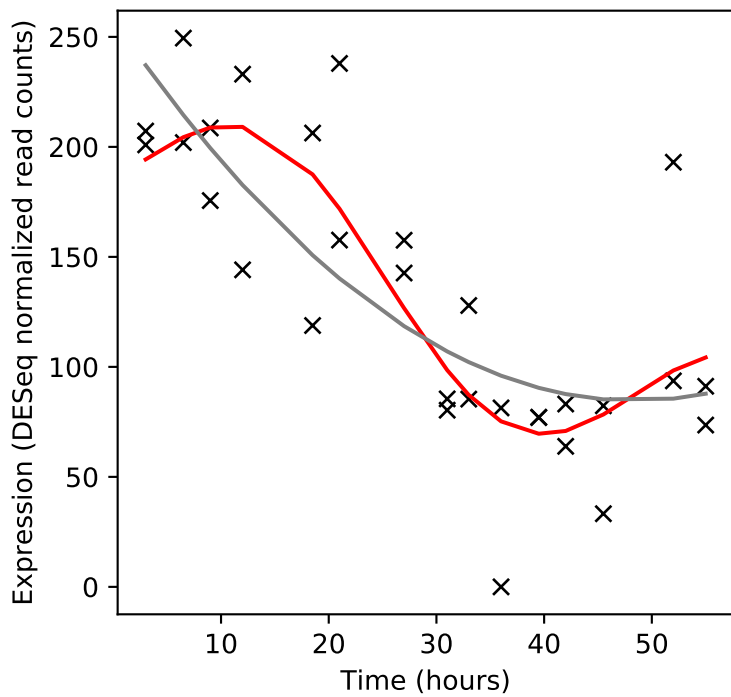

Rv0590/mce2B

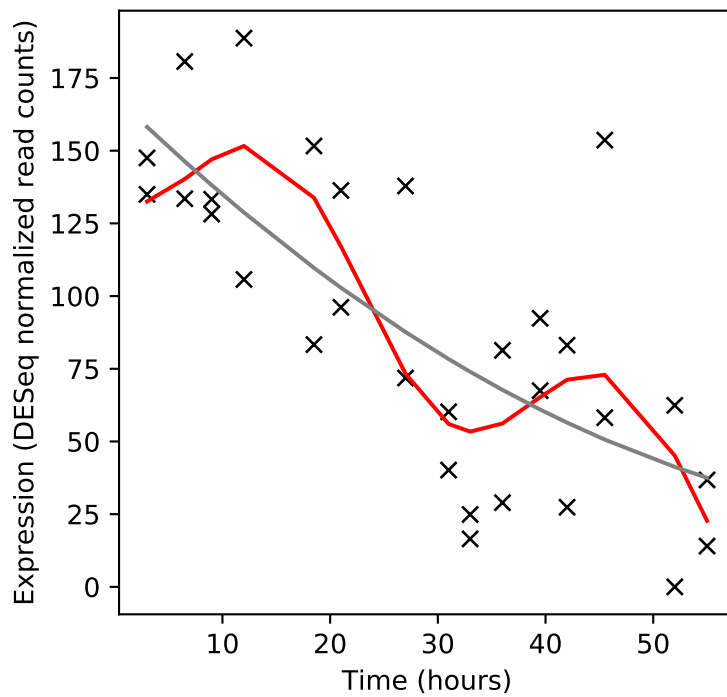

Rv0590A/-

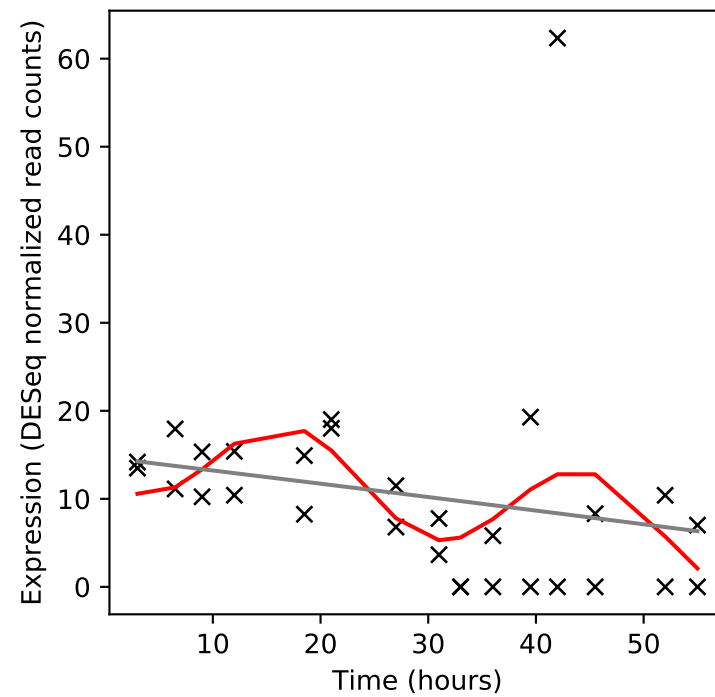

Rv0591/mce2C

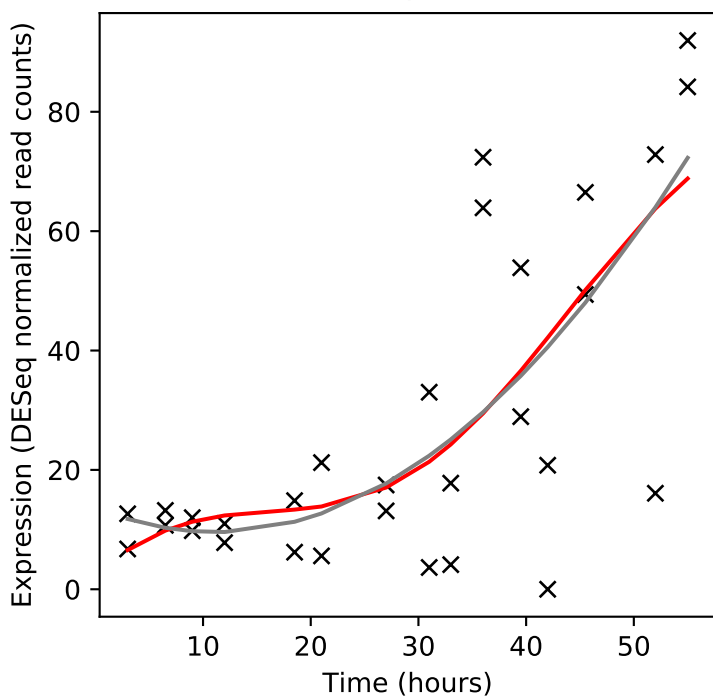

Rv0592/mce2D

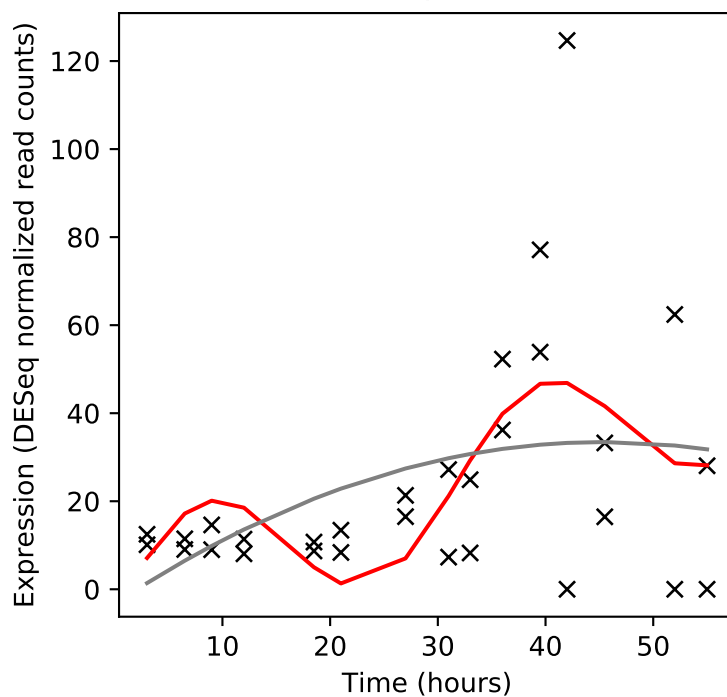

Rv0593/lprL

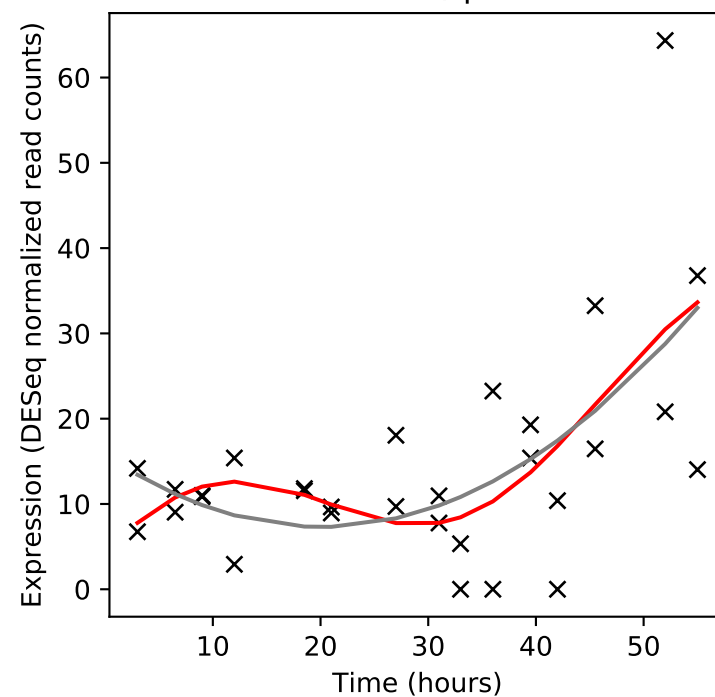

Rv0594/mce2F

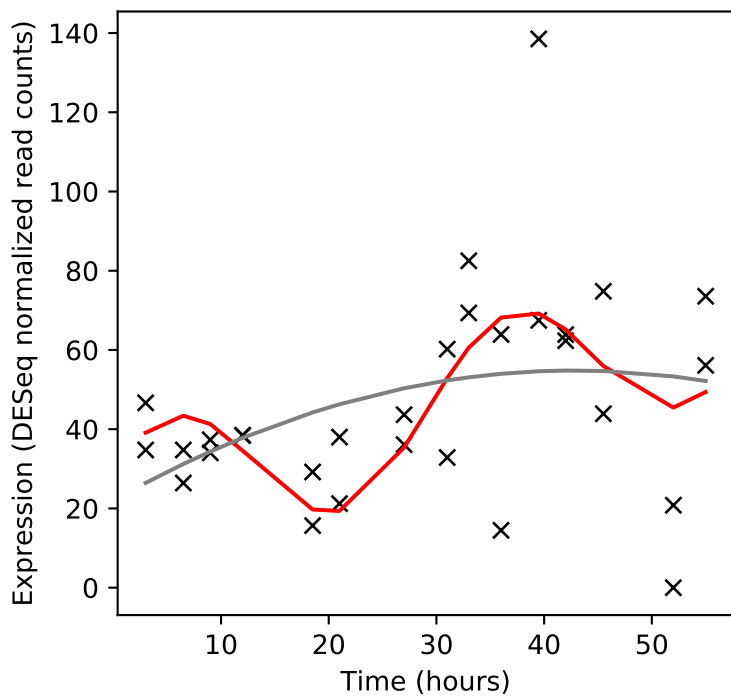

Rv0595c/vapC4

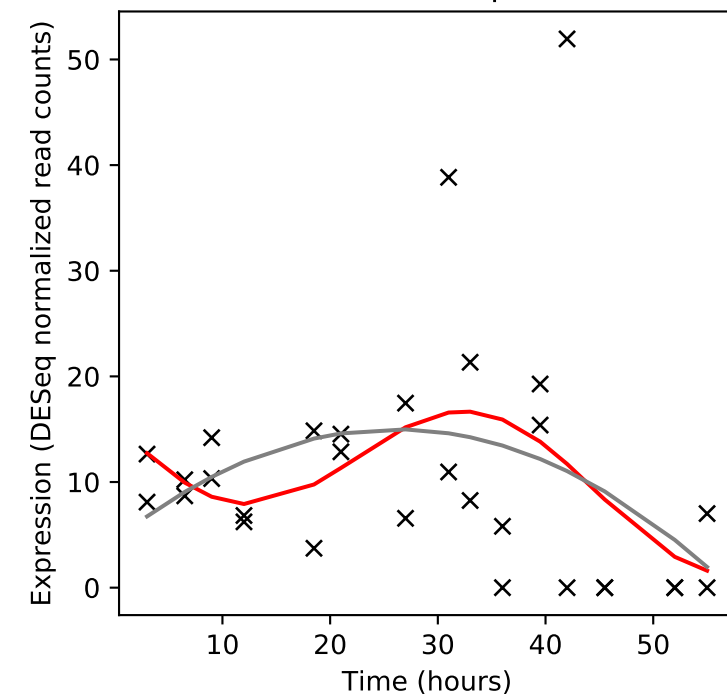

Rv0596c/vapB4

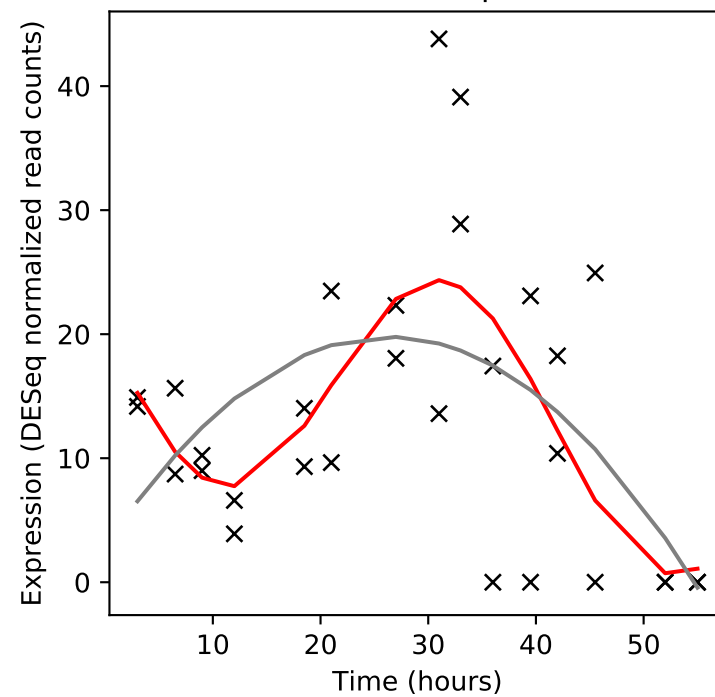

Rv0597c/-

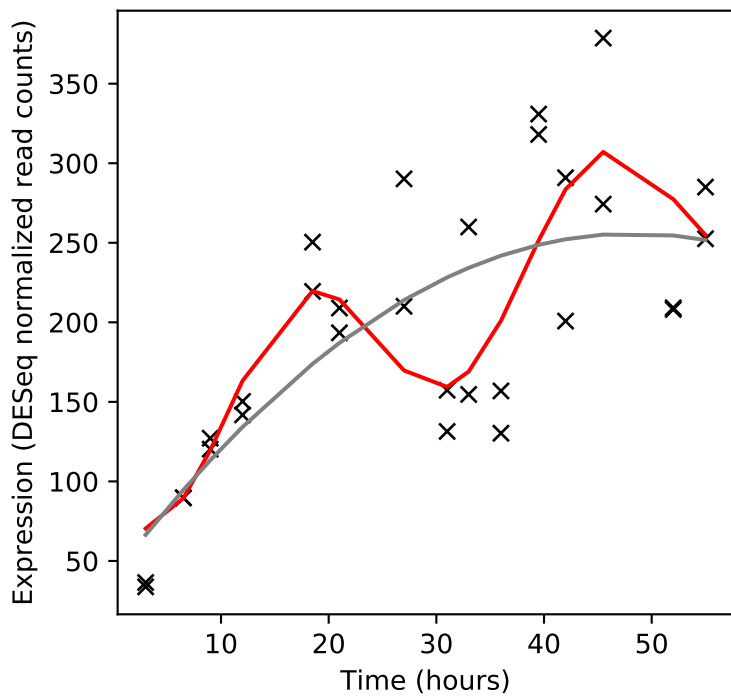

Rv0598c/vapC27

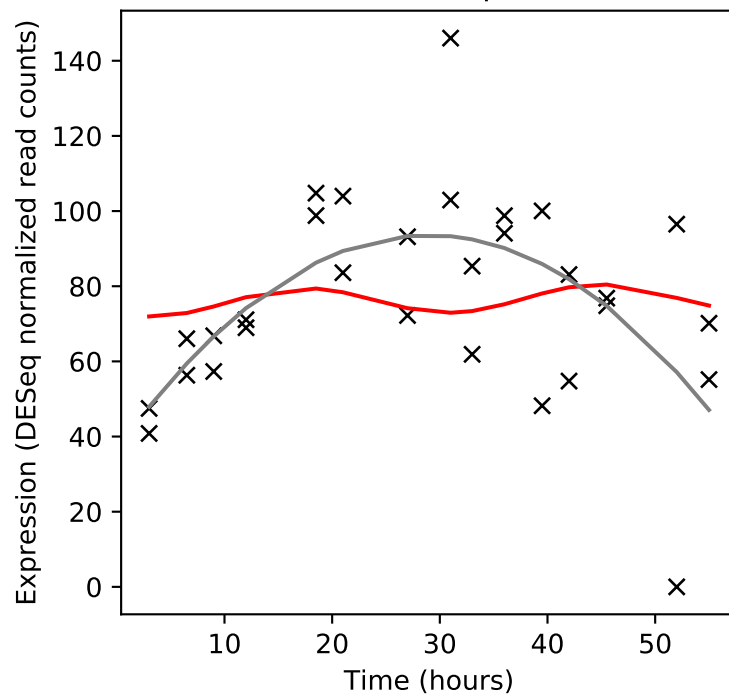

Rv0599c/vapB27

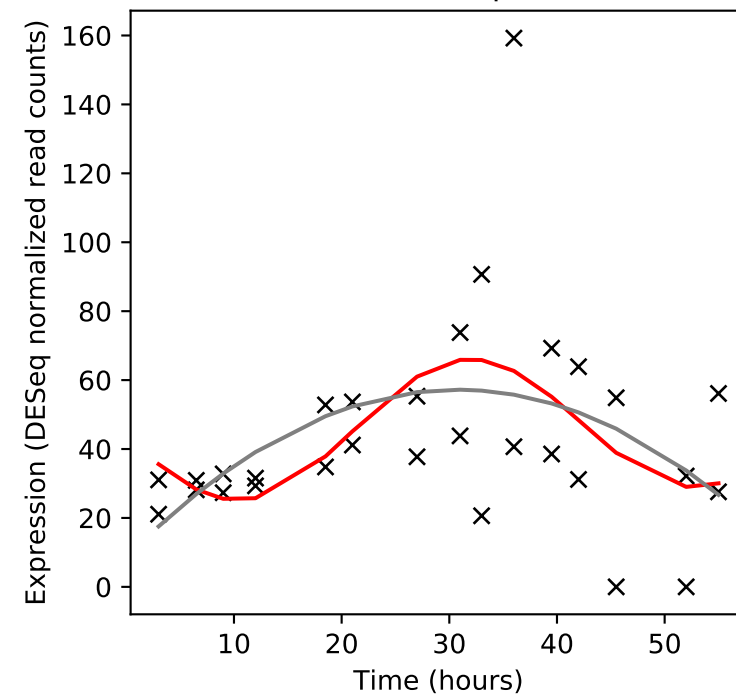

Rv0600c/-

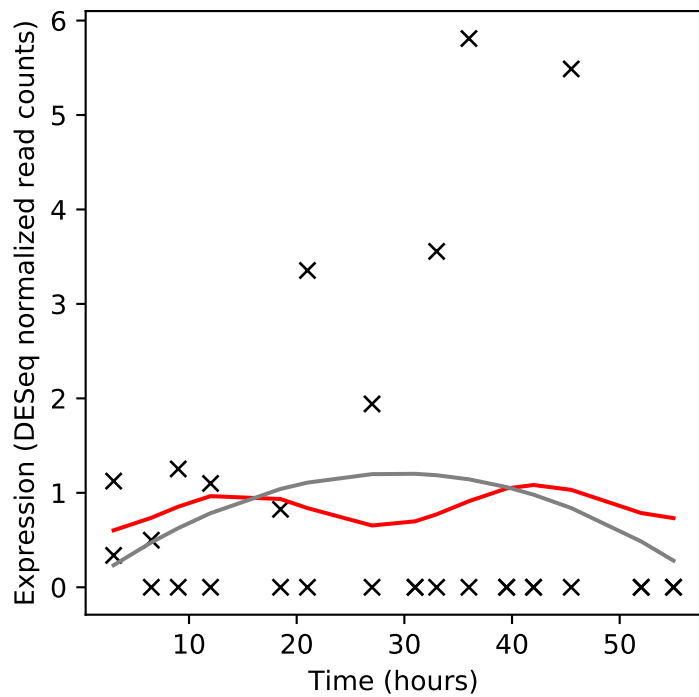

Rv0601c/-

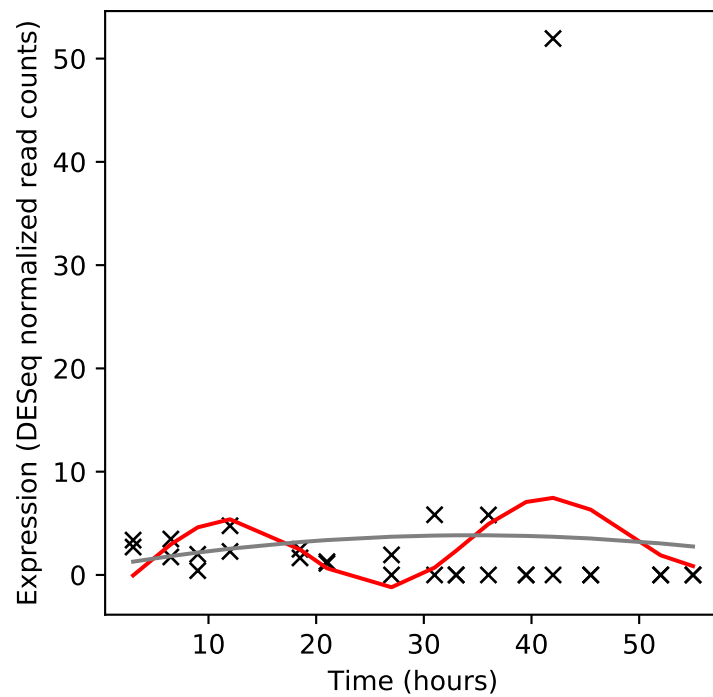

Rv0602c/tcrA

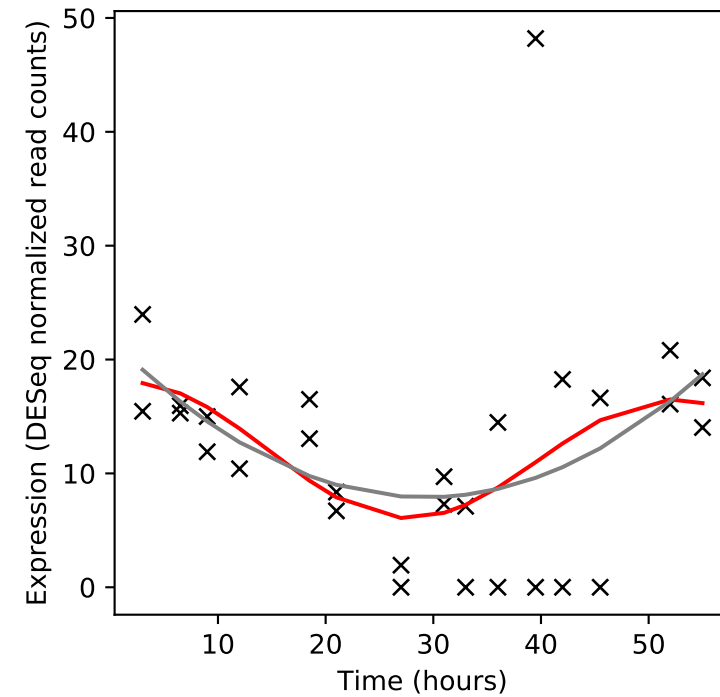

Rv0603c/-

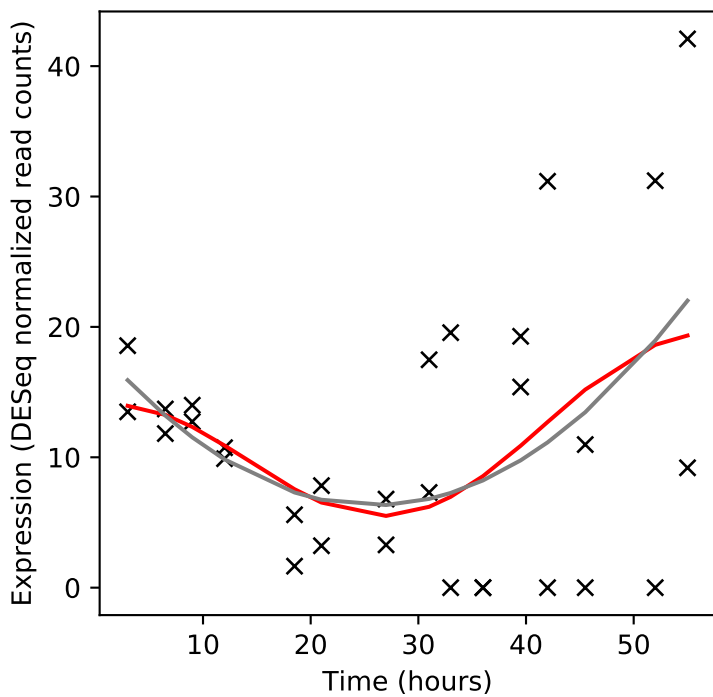

Rv0604/lpqO

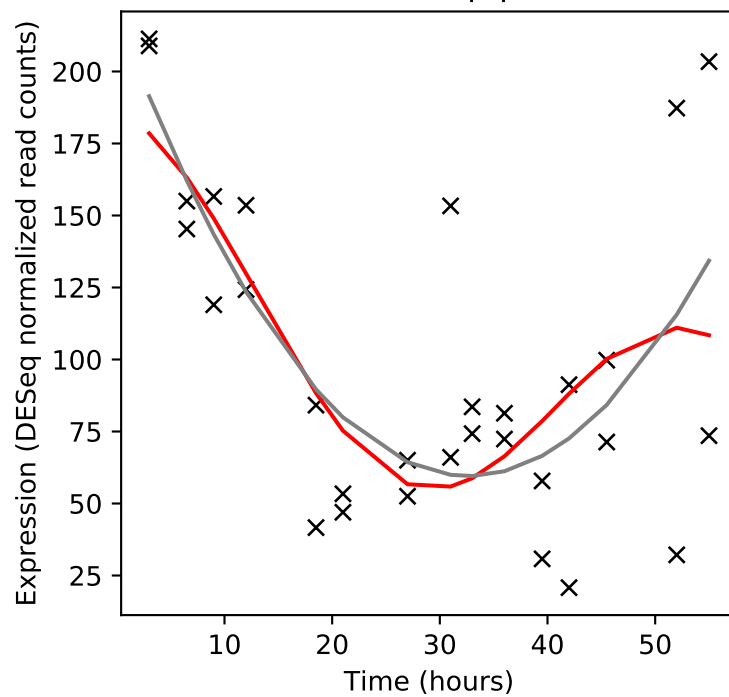

Rv0605c/-

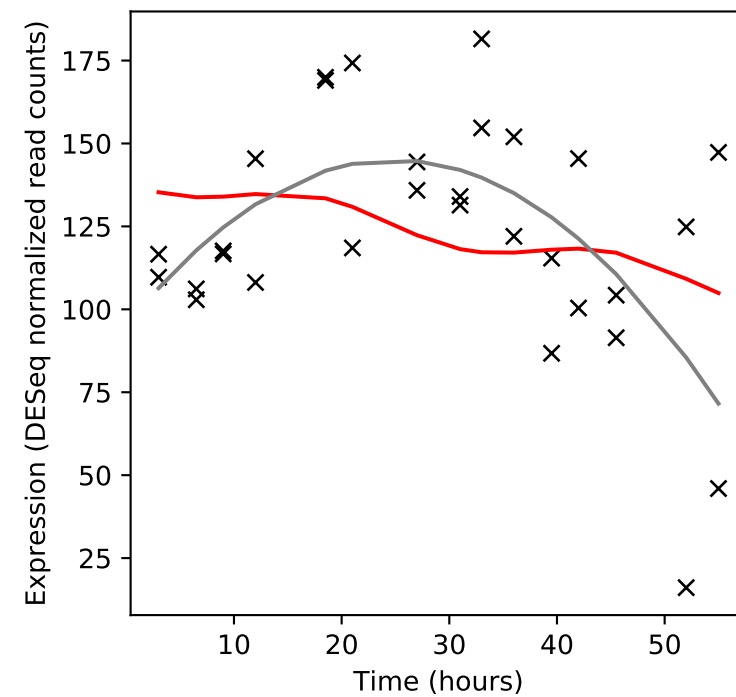

Rv0606/-

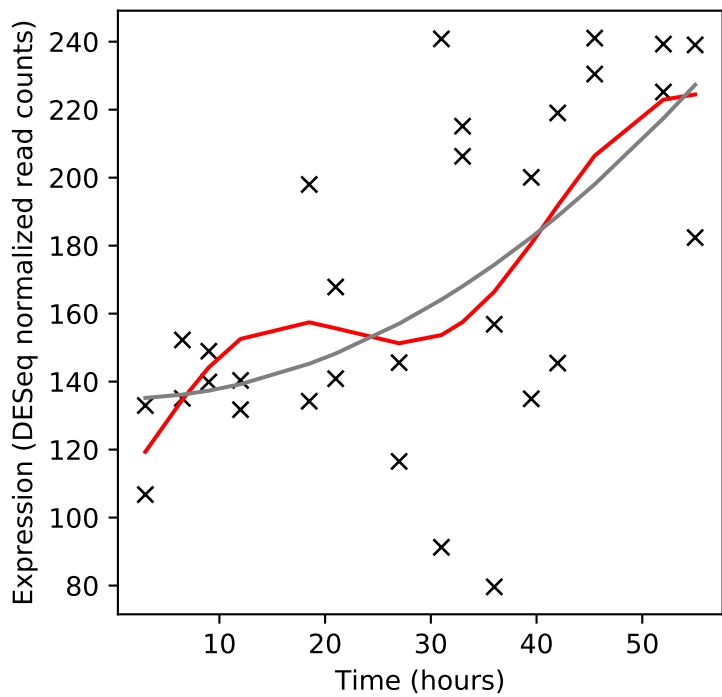

Rv0607/-

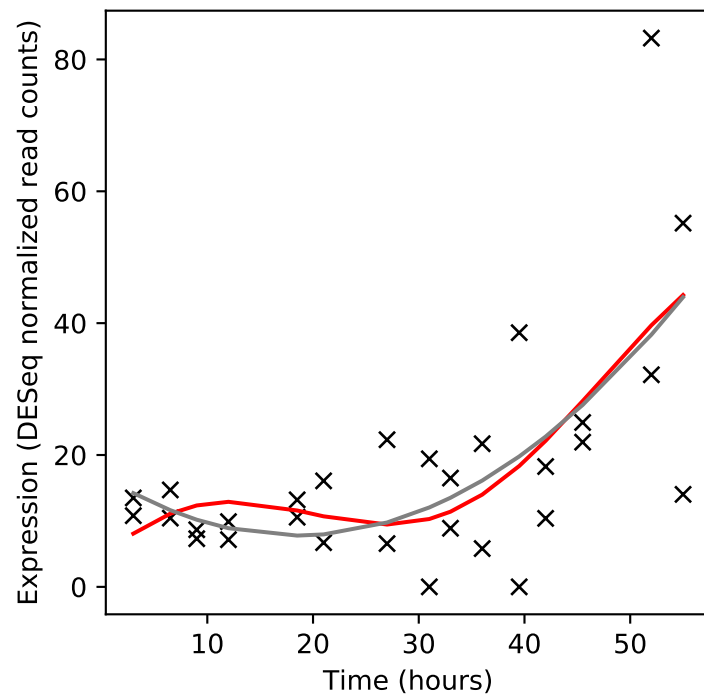

Rv0608/vapB28

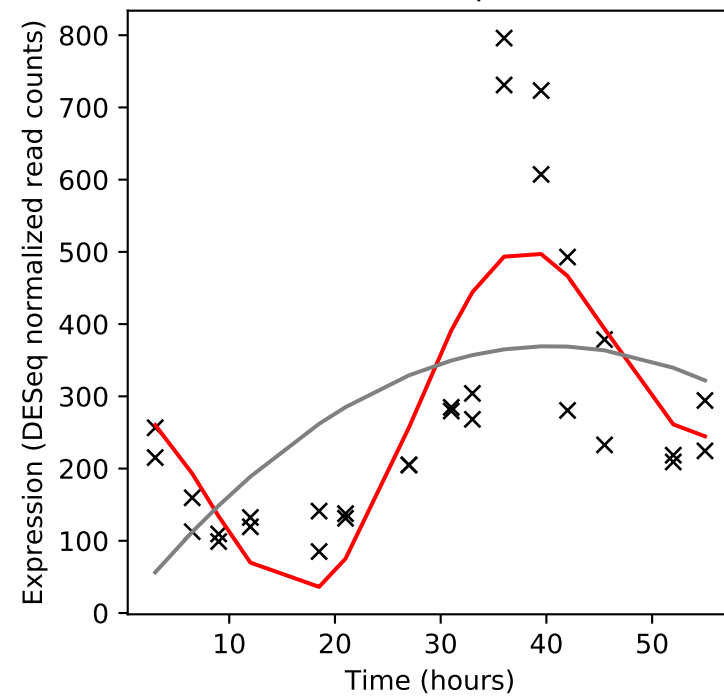

Rv0609/vapC28

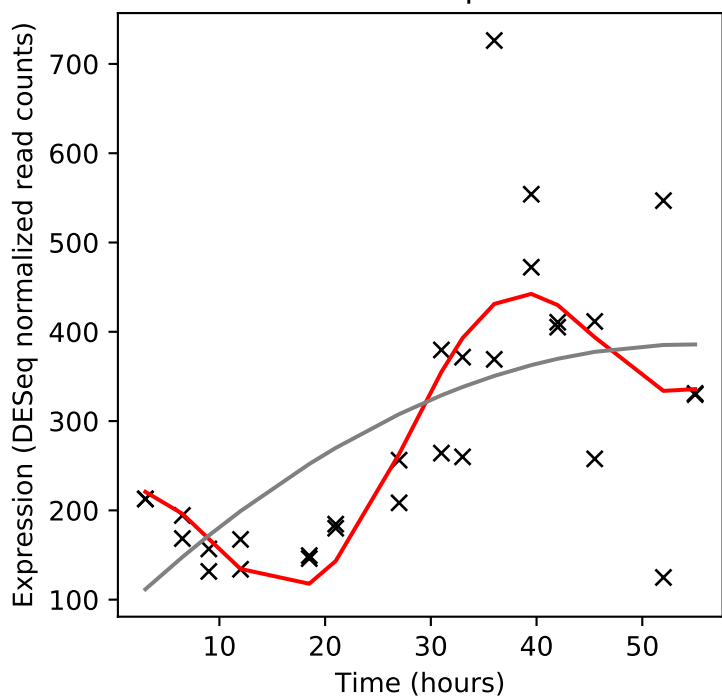

Rv0609A/-

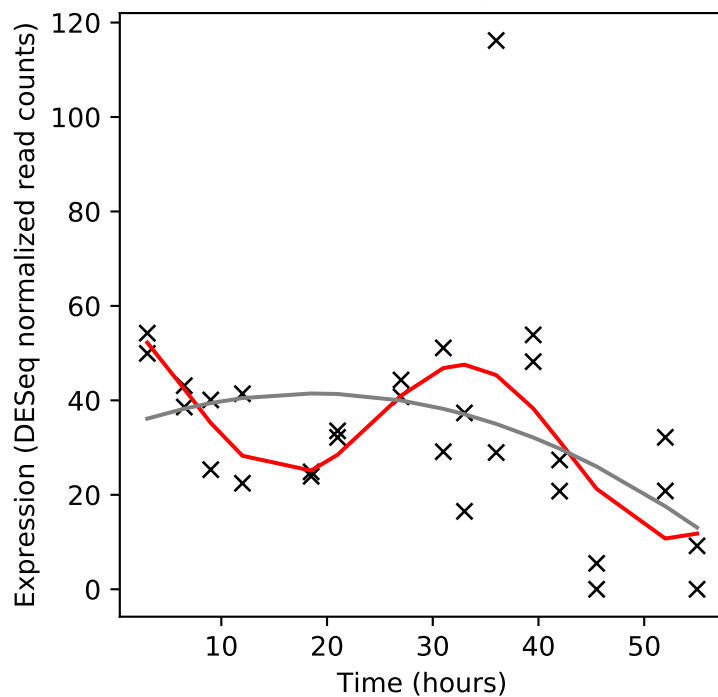

Rv0610c/-

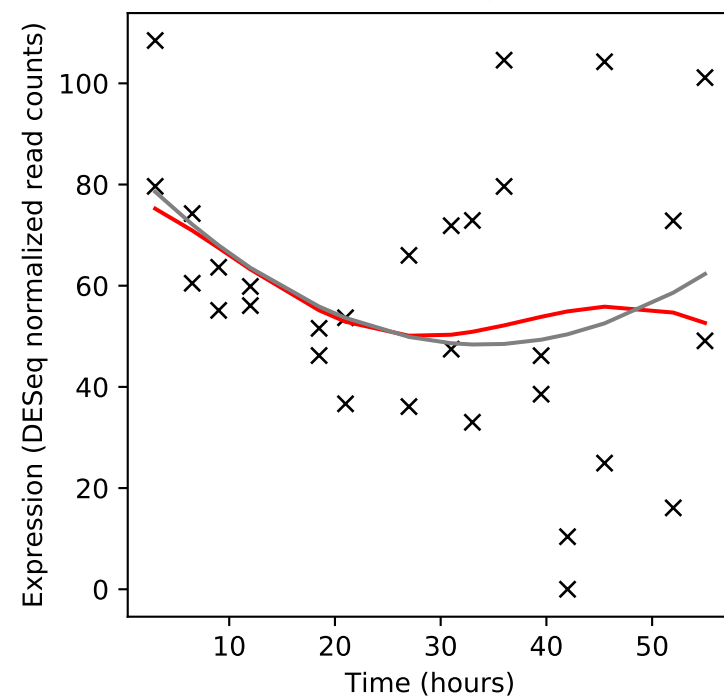

Rv0611c/-

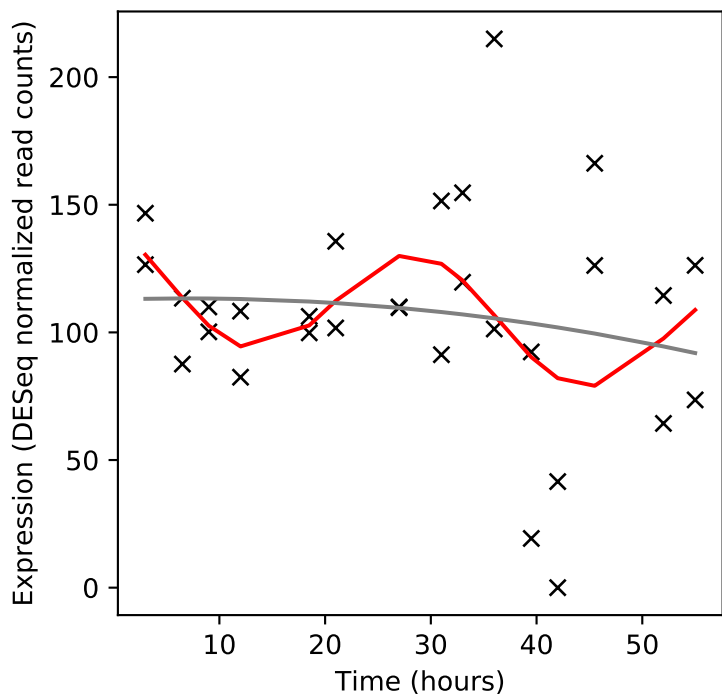

Rv0612/-

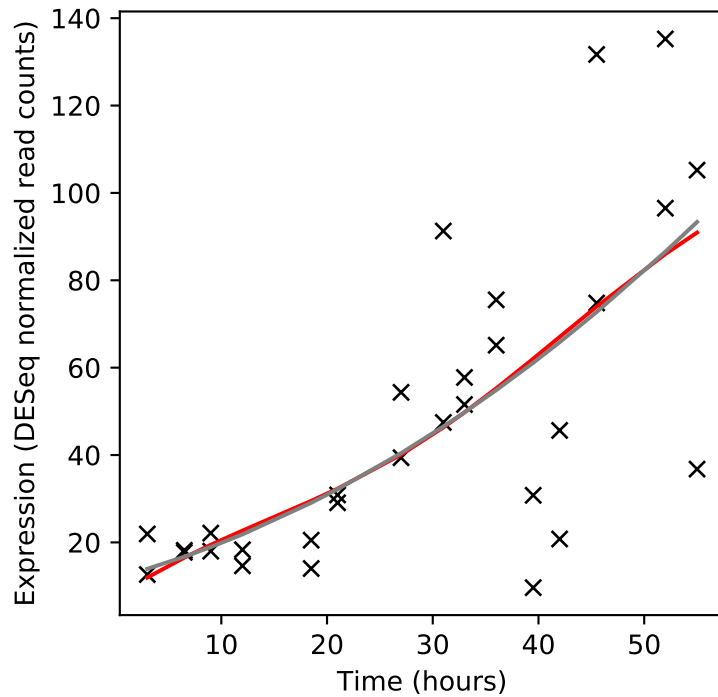

Rv0613c/-

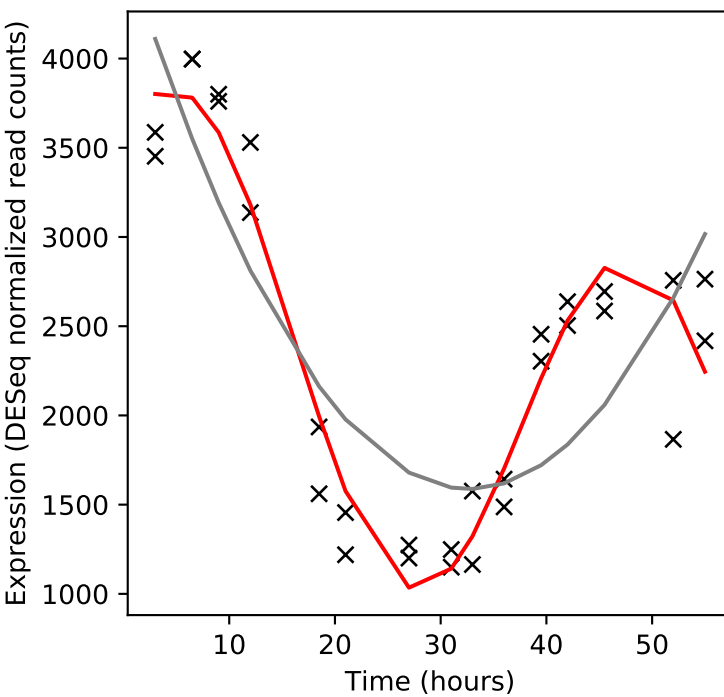

Rv0614/-

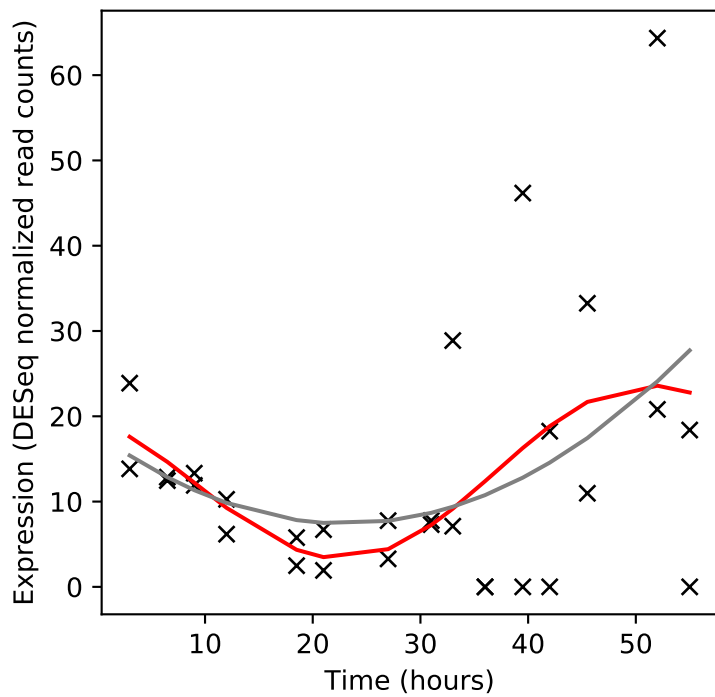

Rv0615/-

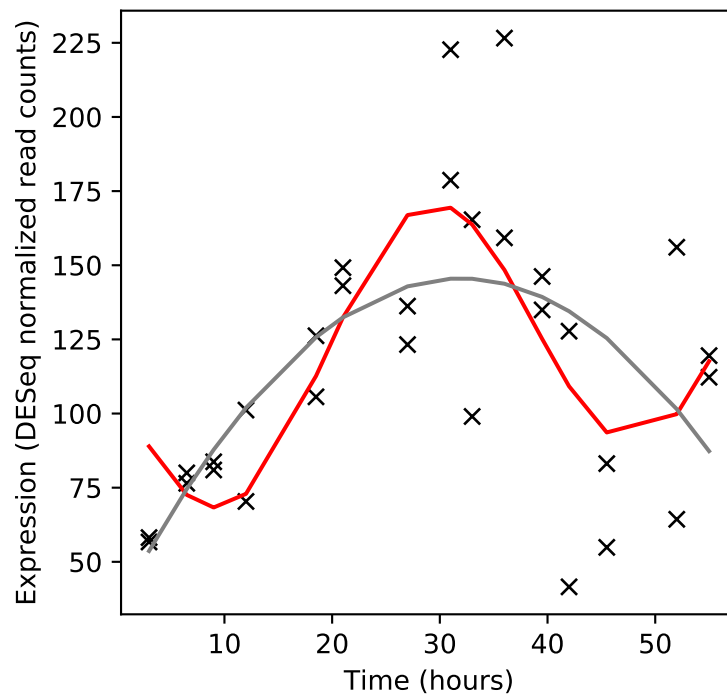

Rv0616c/-

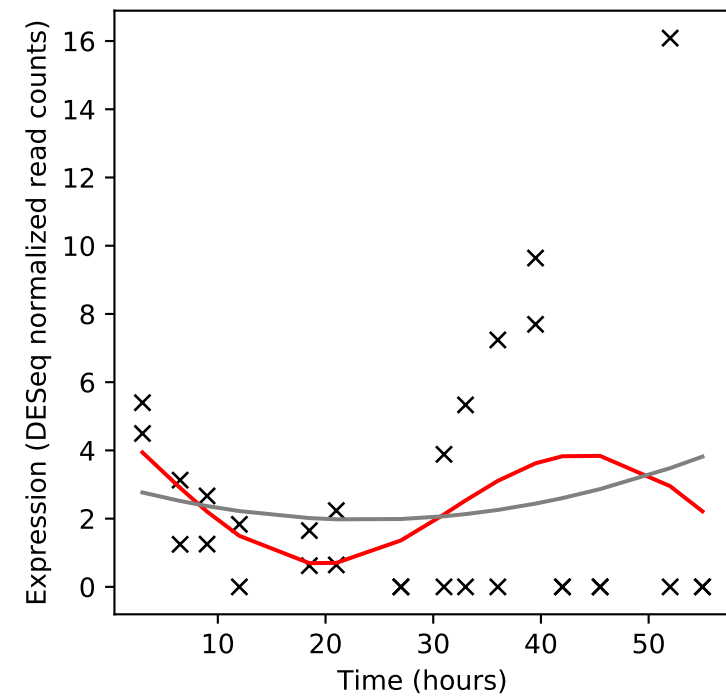

Rv0616A/vapB29

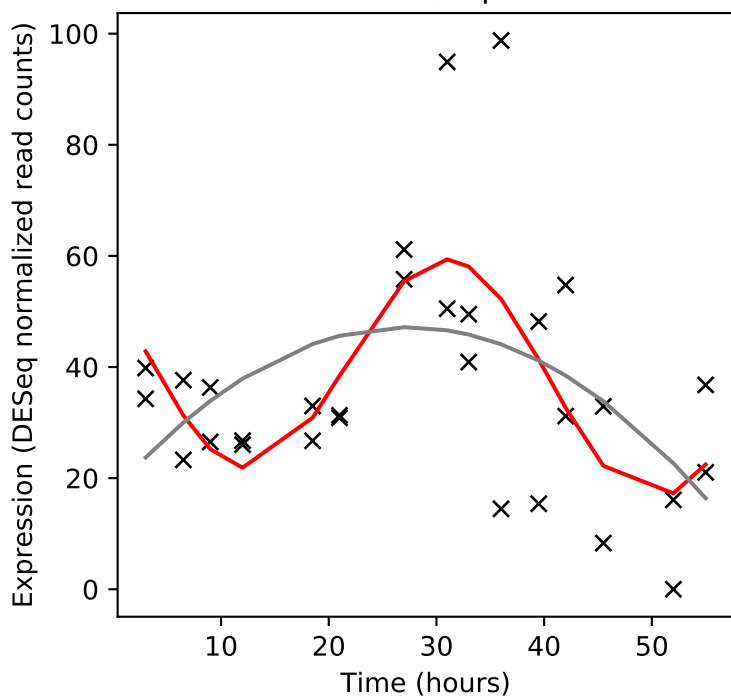

Rv0617/vapC29

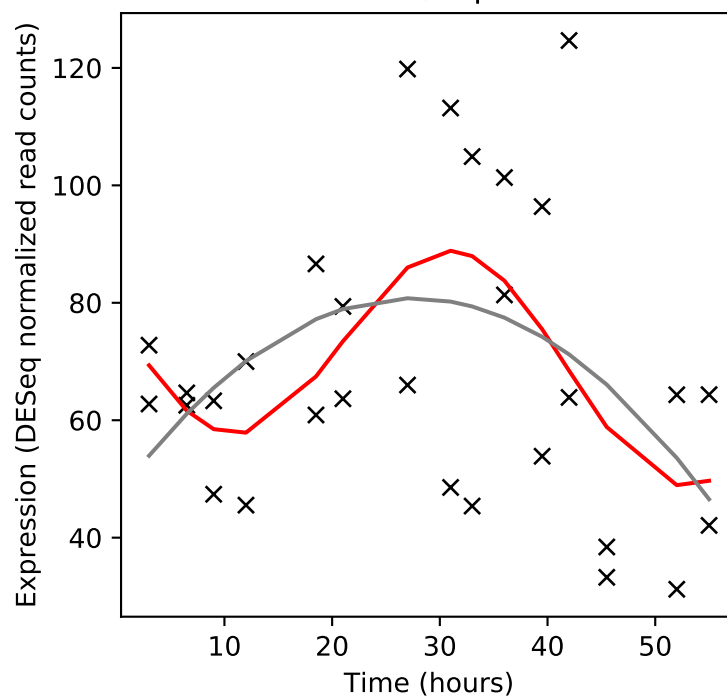

Rv0618/galTa

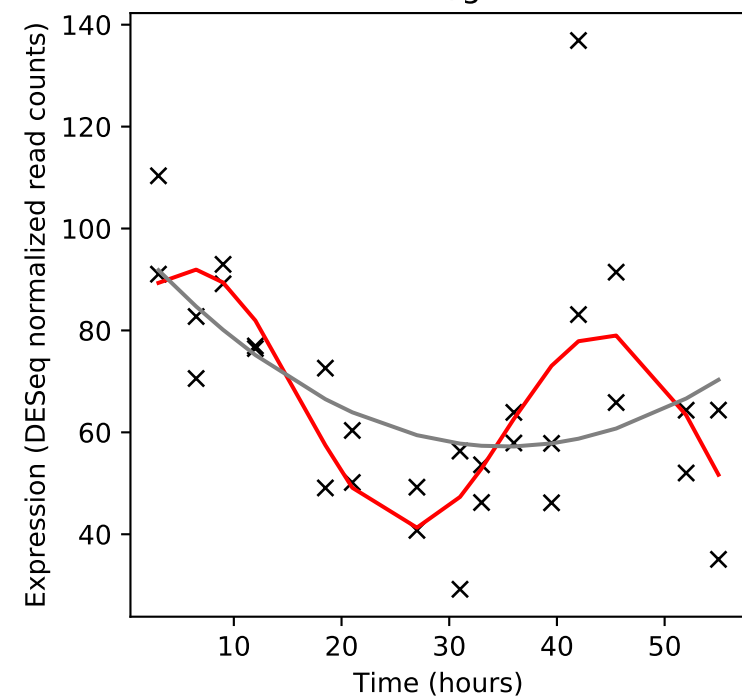

Rv0619/galTb

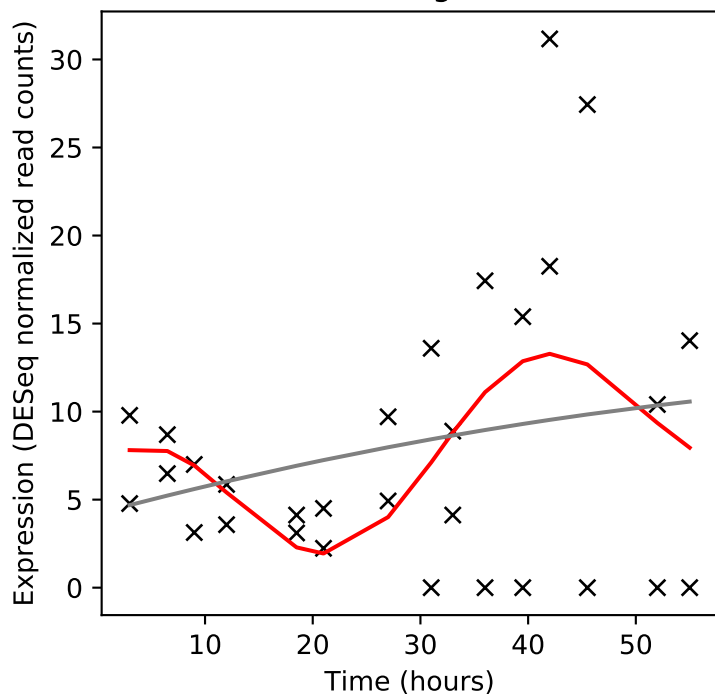

Rv0620/galK

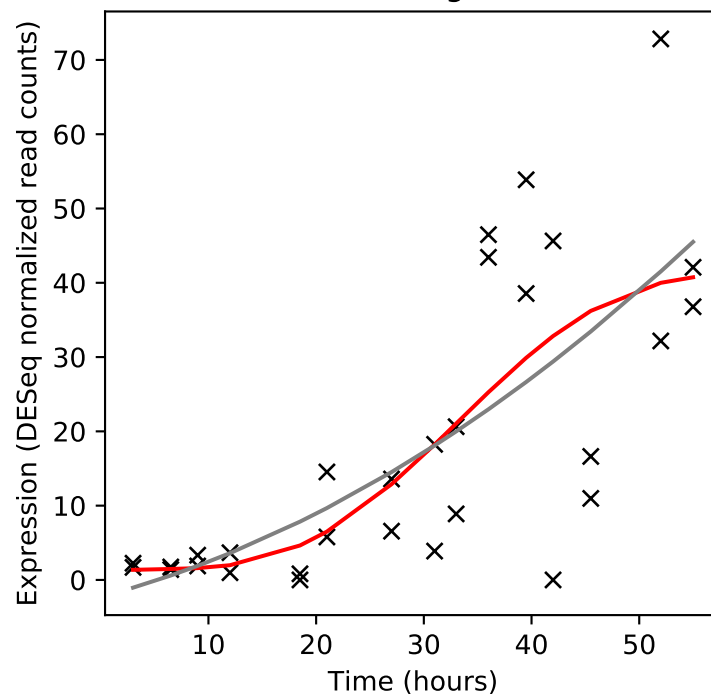

Rv0621/-

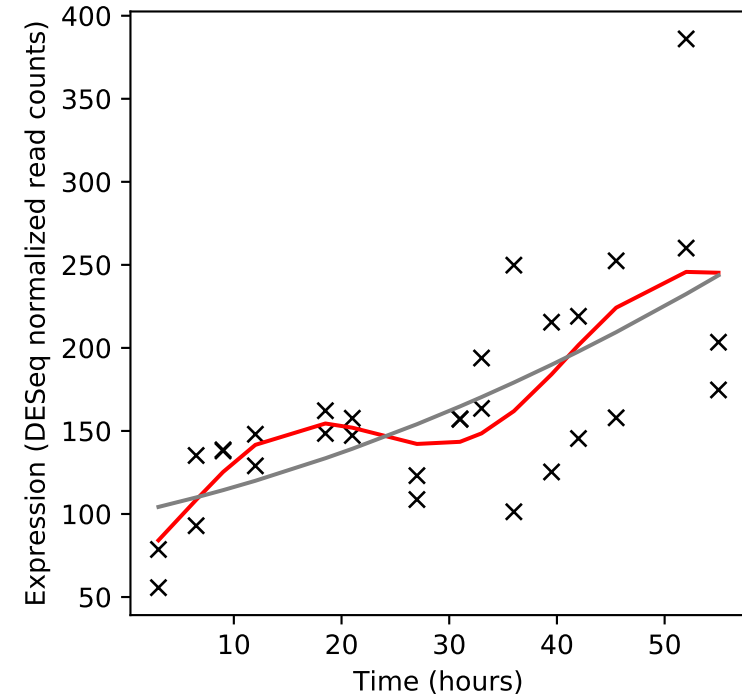



Rv0622/-

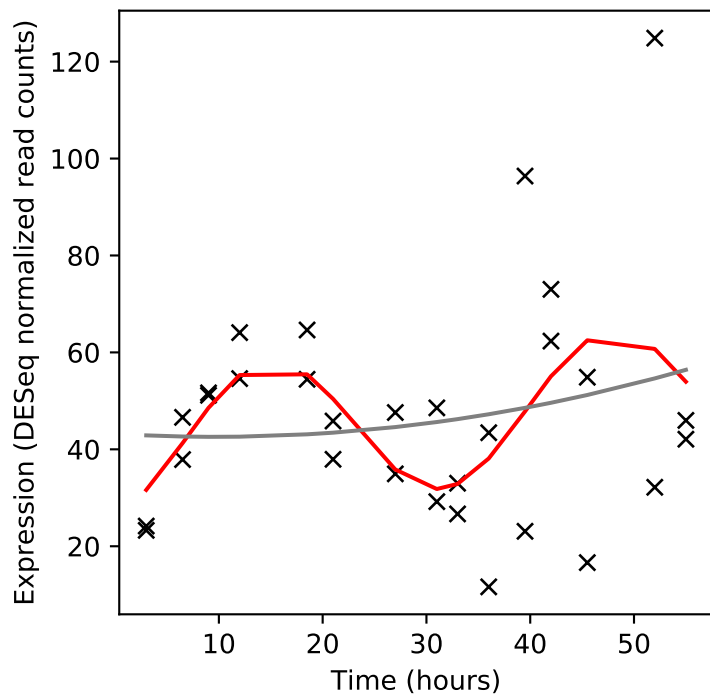

Rv0623/vapB30

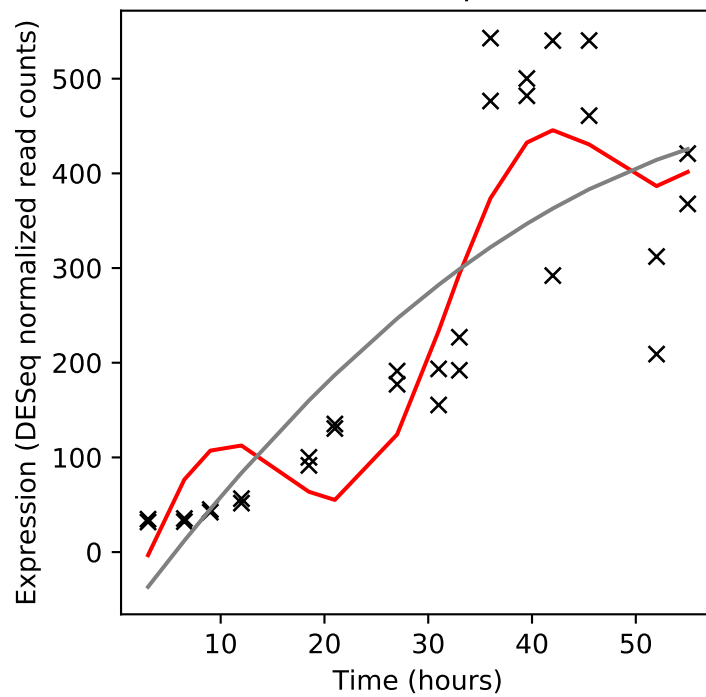

Rv0624/vapC30

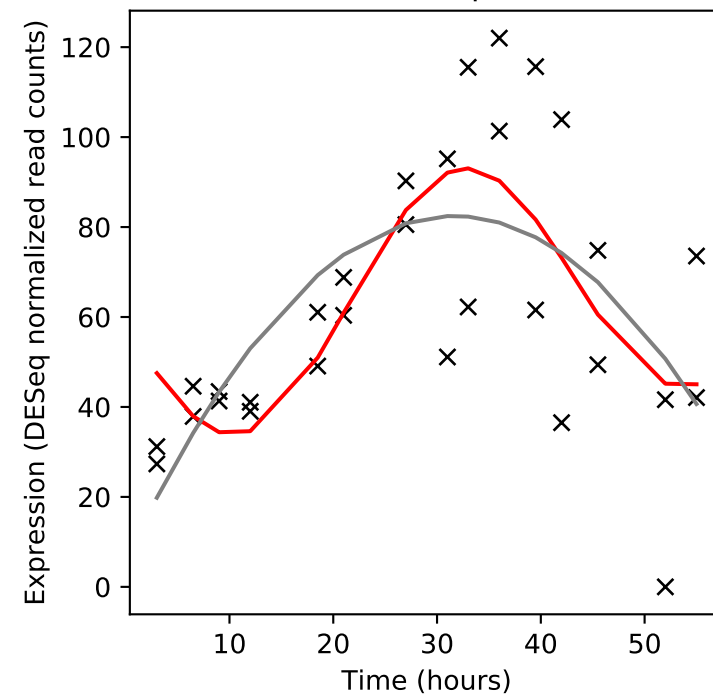

Rv0625c/-

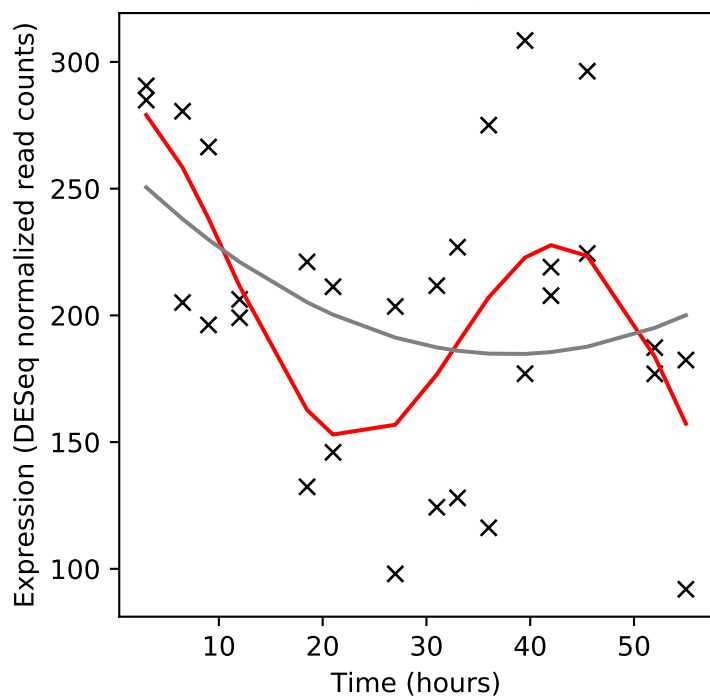

Rv0626/vapB5

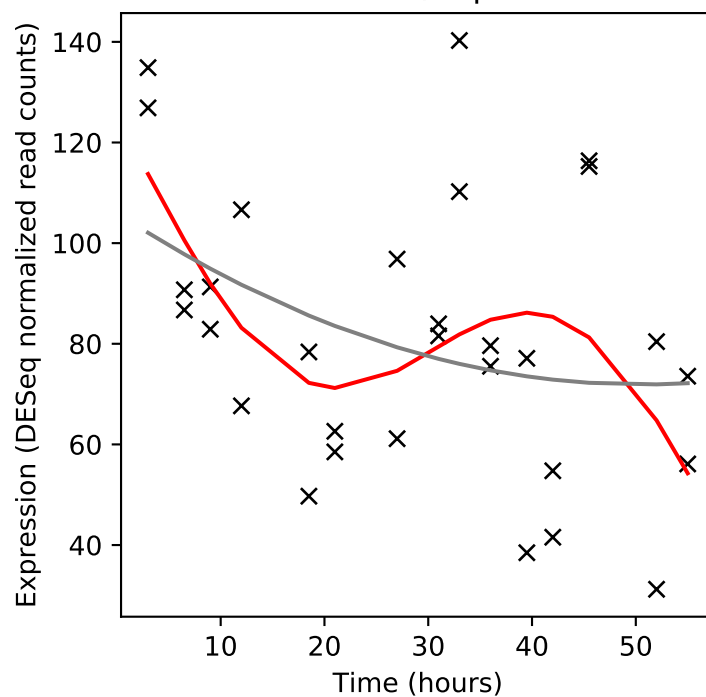

Rv0627/vapC5

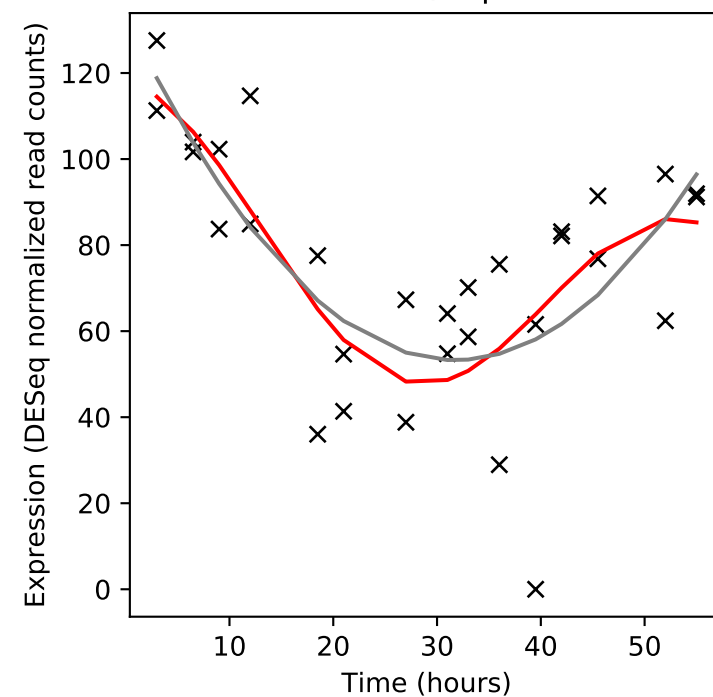

Rv0628c/-

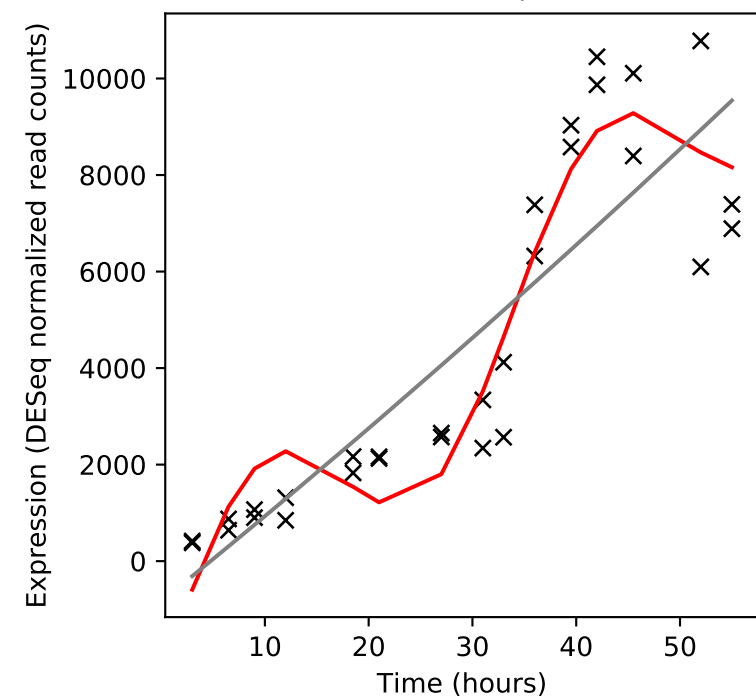

Rv0629c/recD

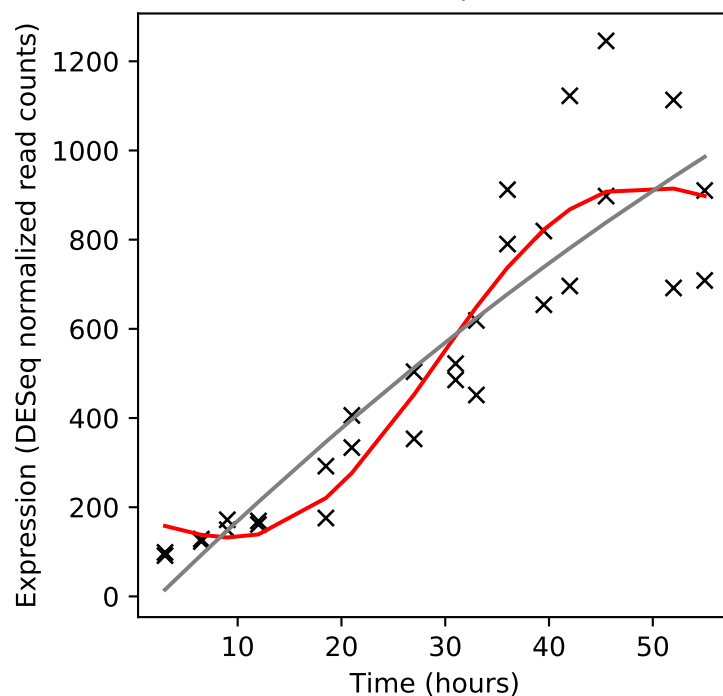

Rv0630c/recB

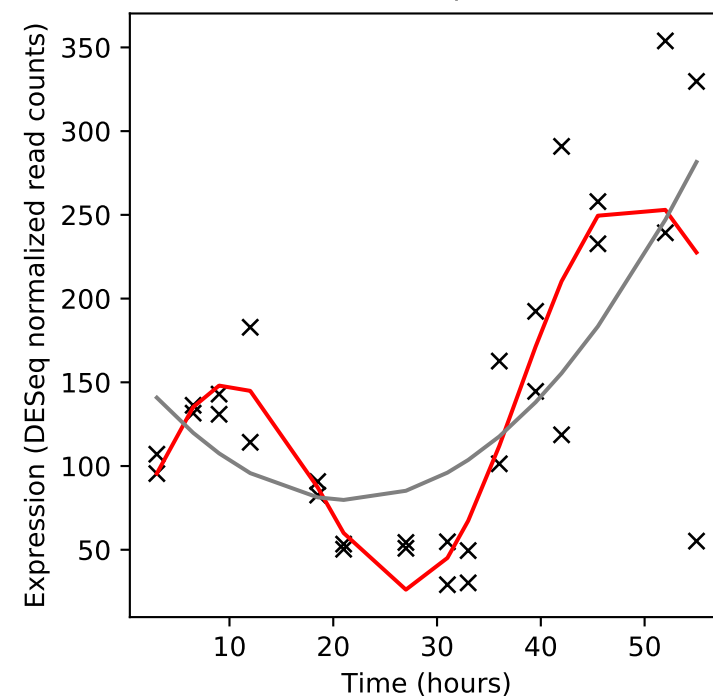

Rv0631c/recC

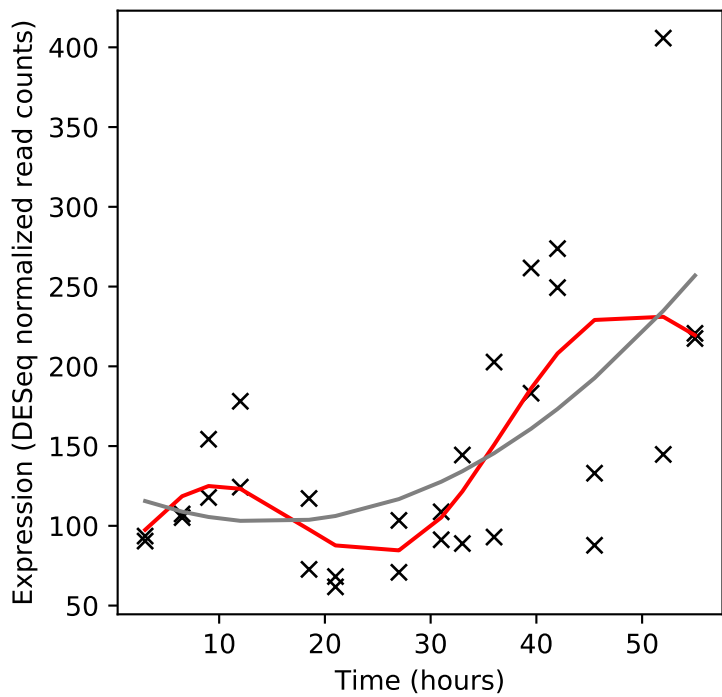

Rv0632c/echA3

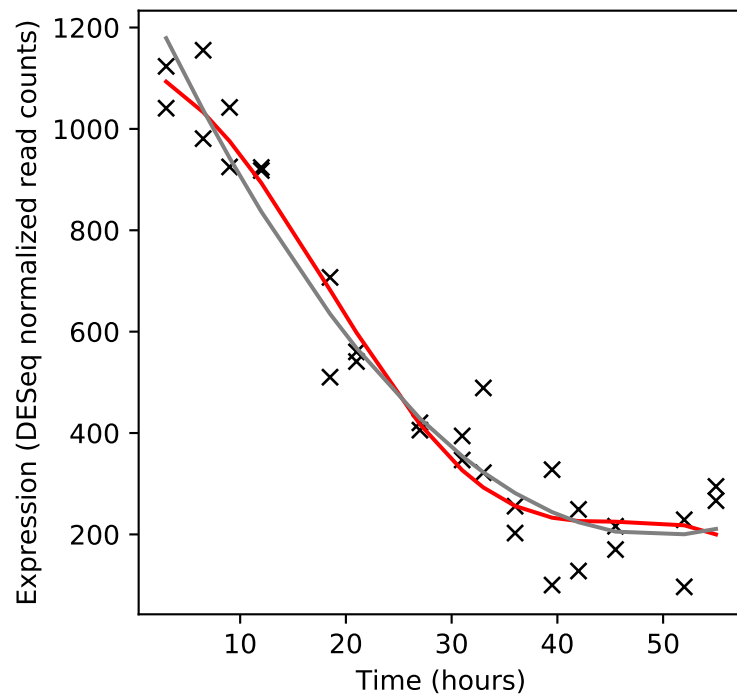

Rv0633c/-

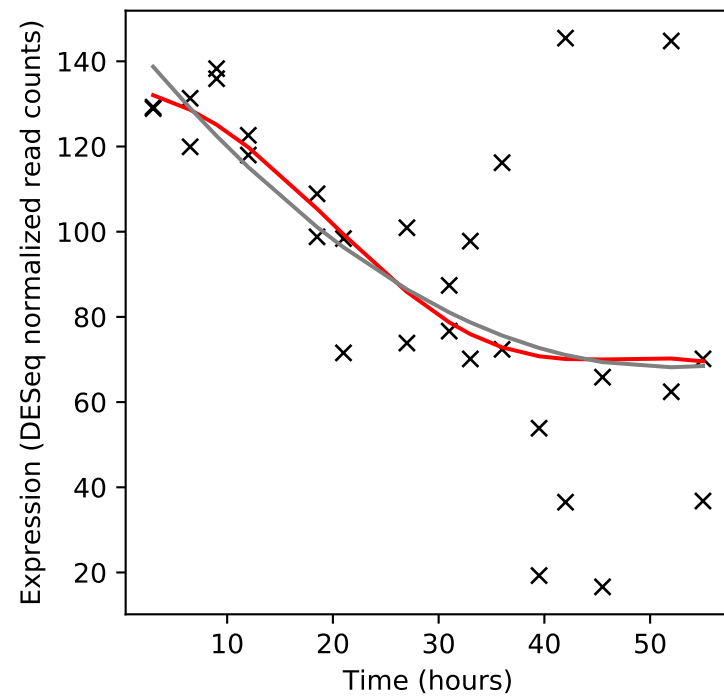

Rv0634c/-

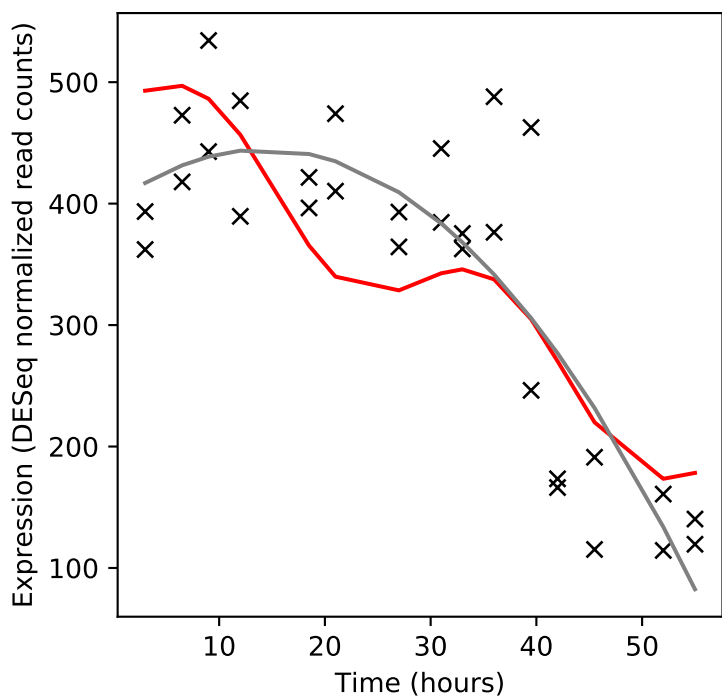

Rv0634A/-

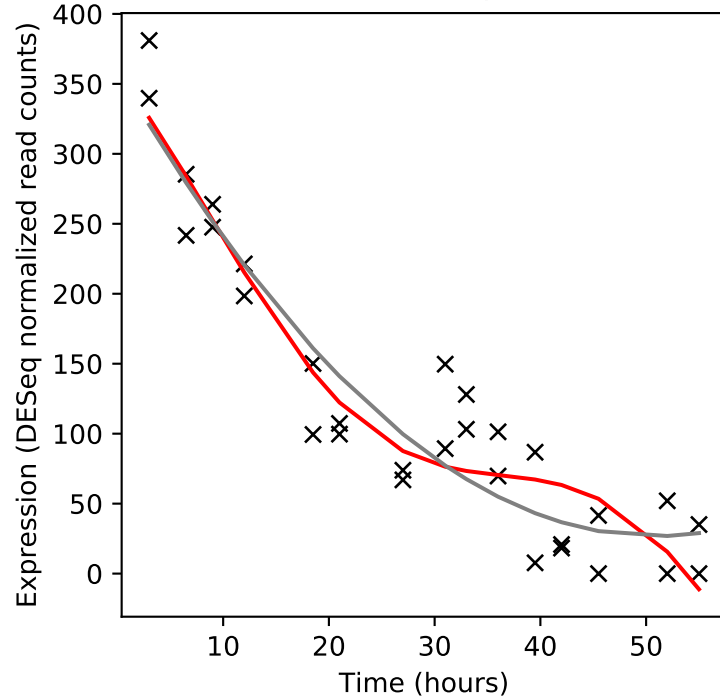

Rv0634B/rpmG2

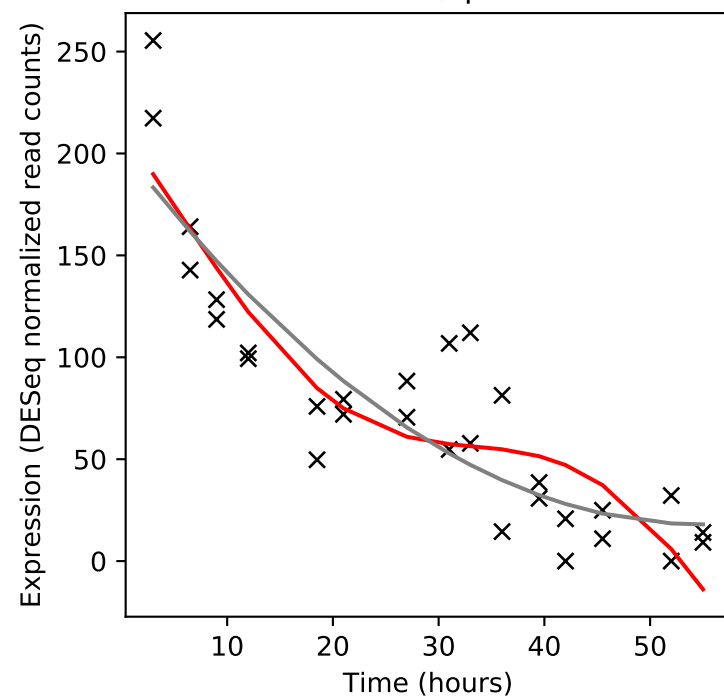

Rv0635/hadA

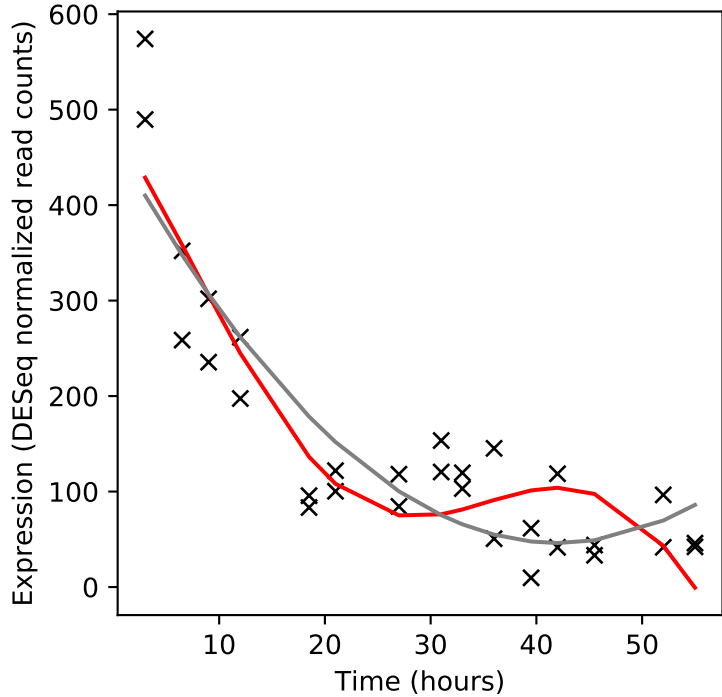

Rv0636/hadB

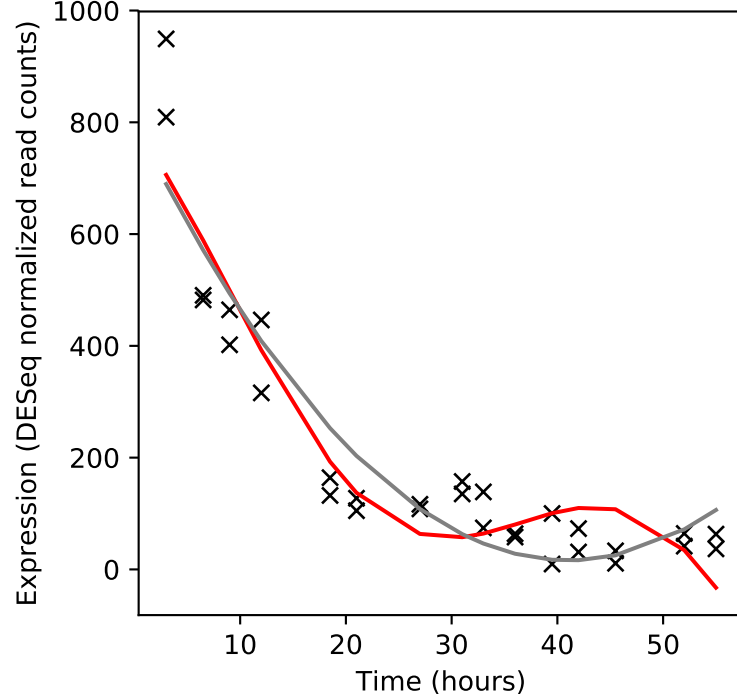

Rv0637/hadC

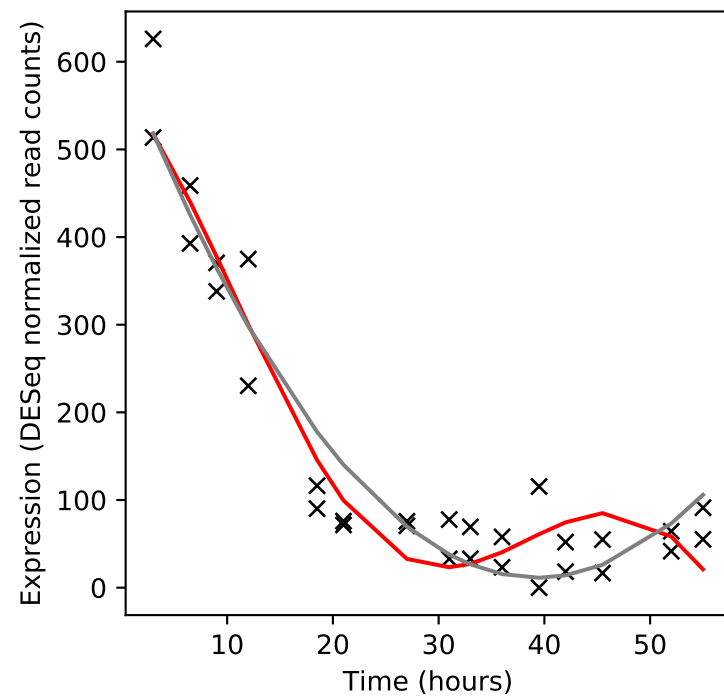

Rv0638/secE1

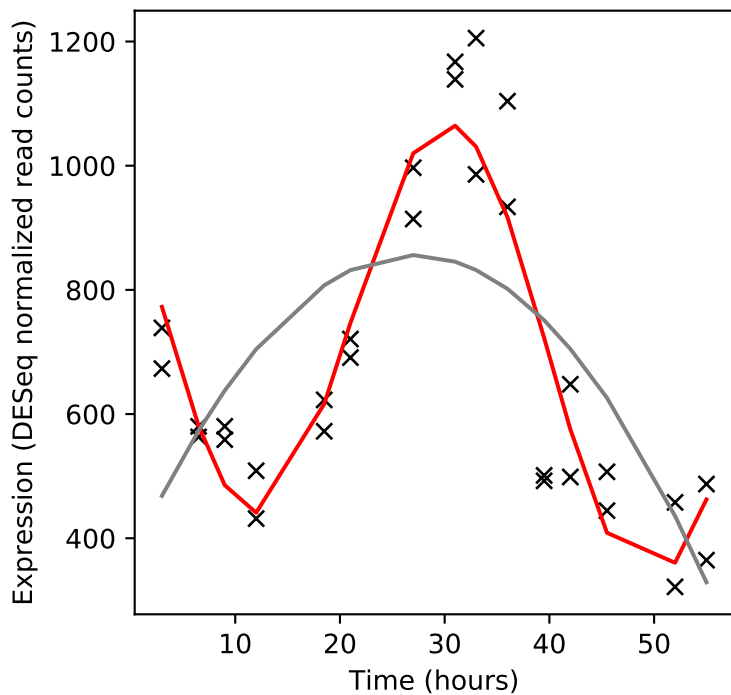

Rv0639/nusG

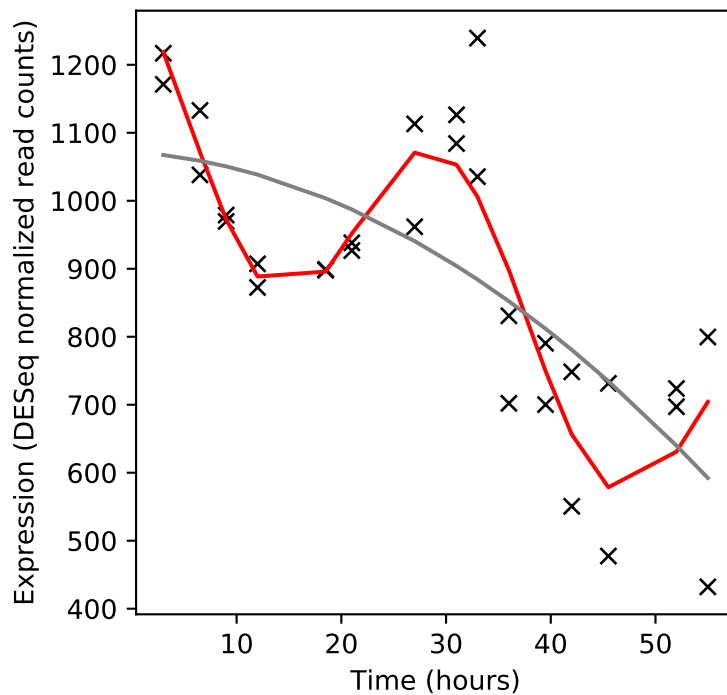

Rv0640/rplK

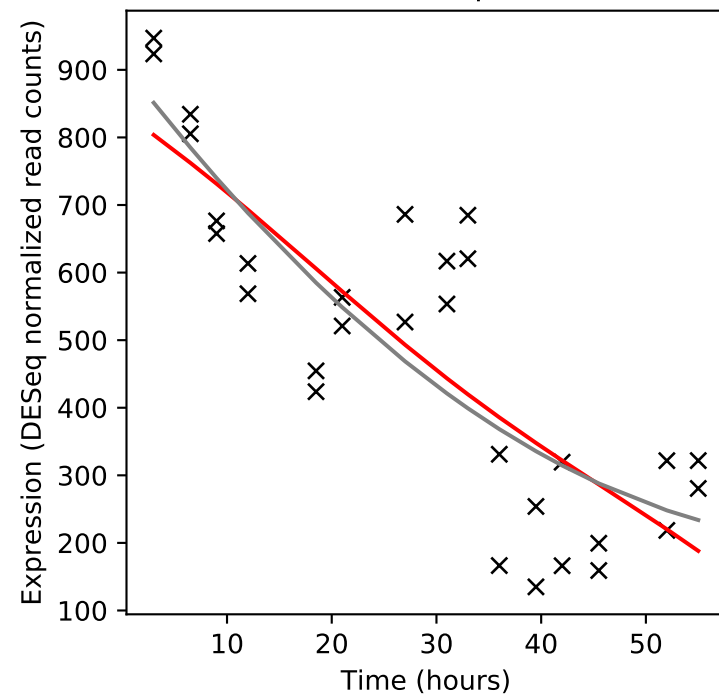

Rv0641/rplA

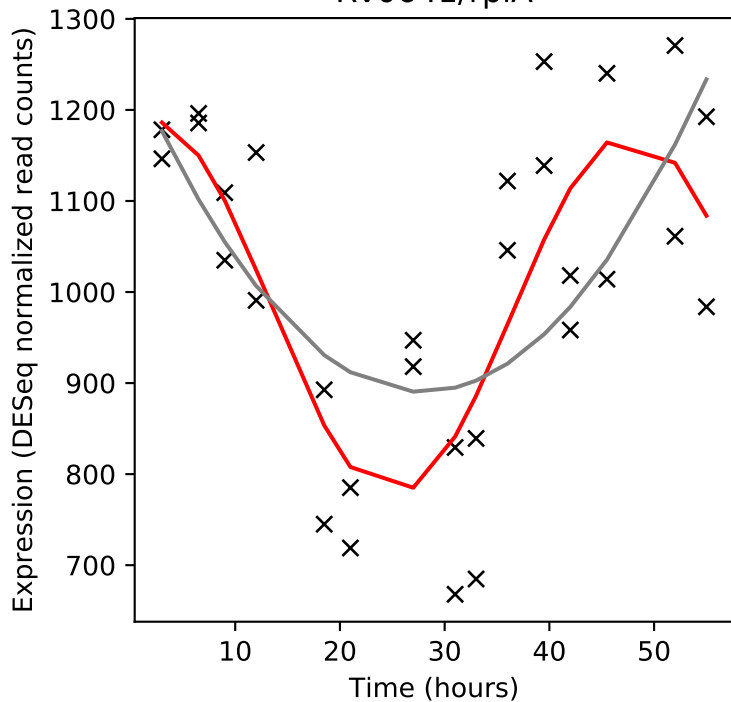

Rv0642c/mmaA4

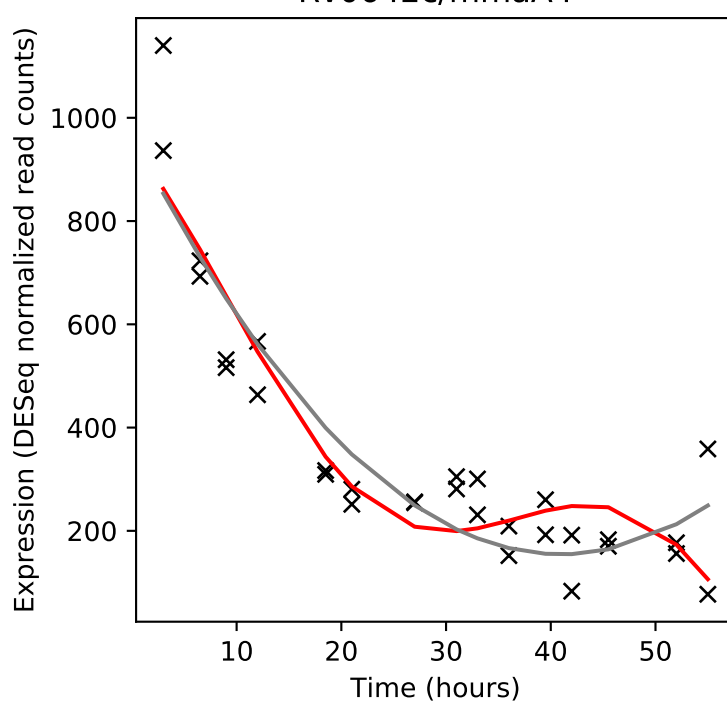

Rv0643c/mmaA3

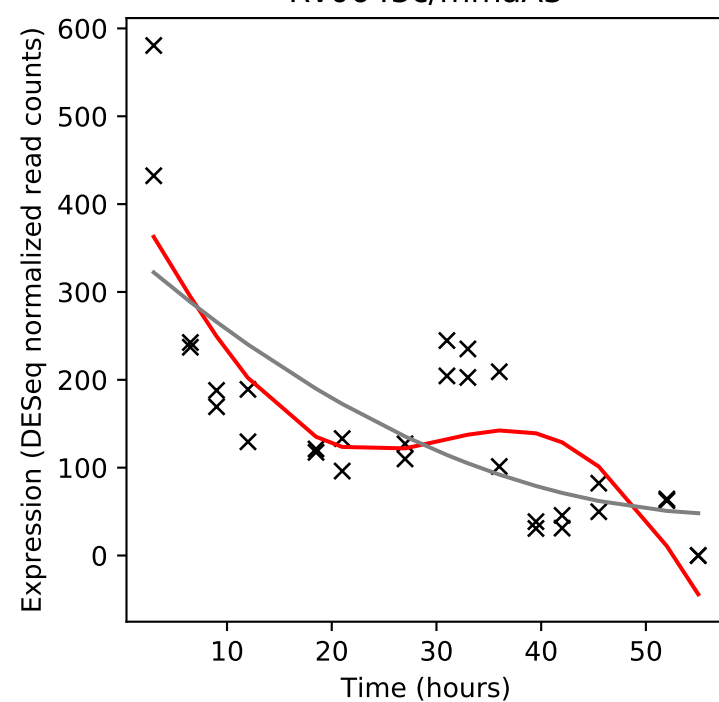

Rv0644c/mmaA2

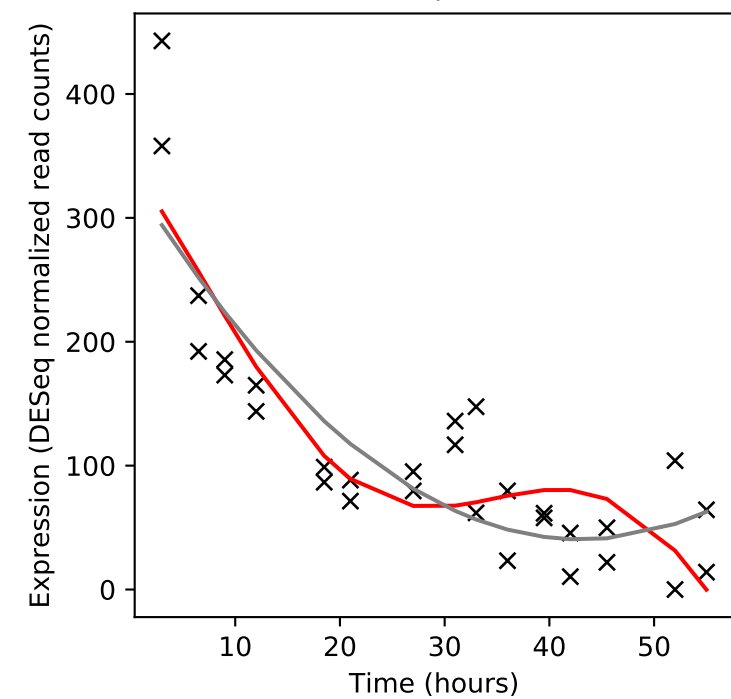

Rv0645c/mmaA1

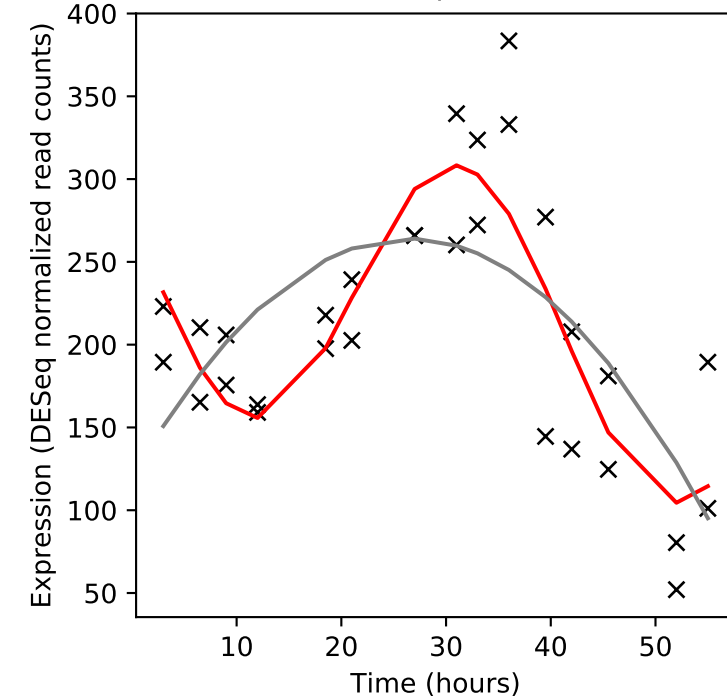

Rv0646c/lipG

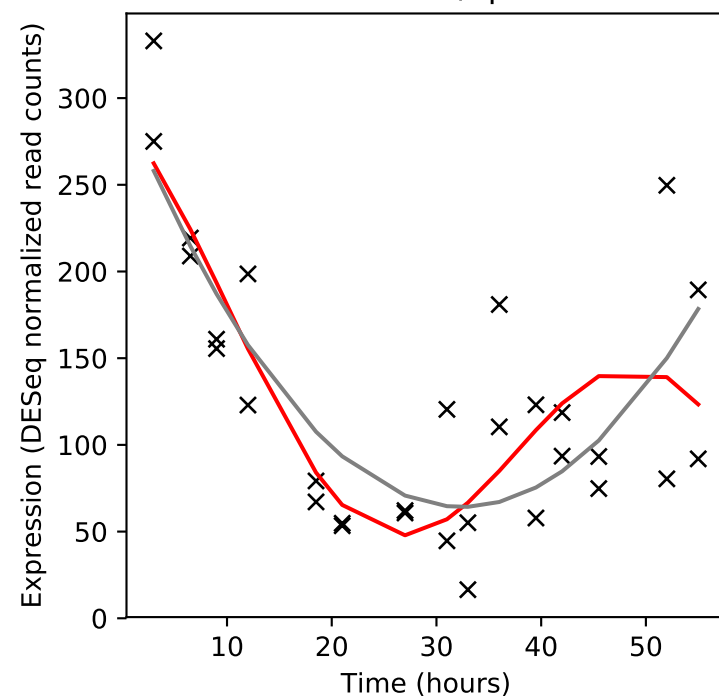

Rv0647c/-

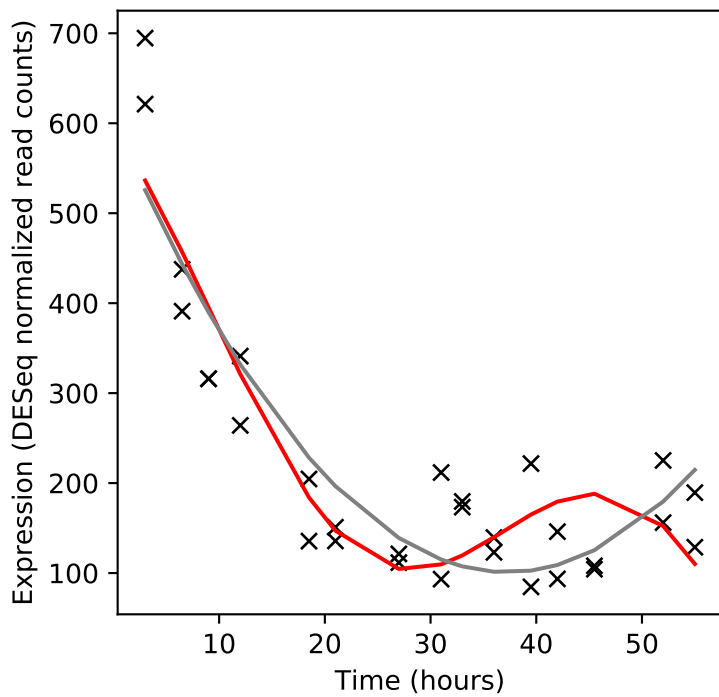

Rv0648/-

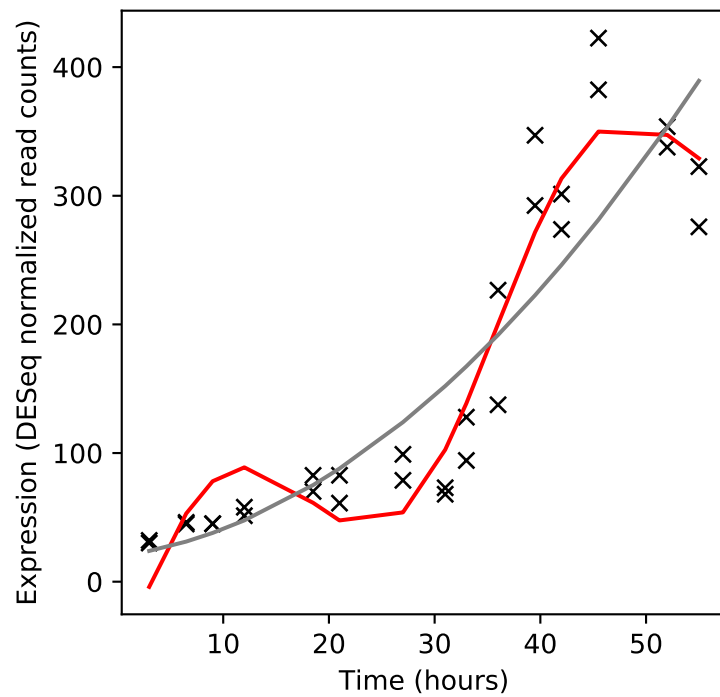

Rv0649/fabD2

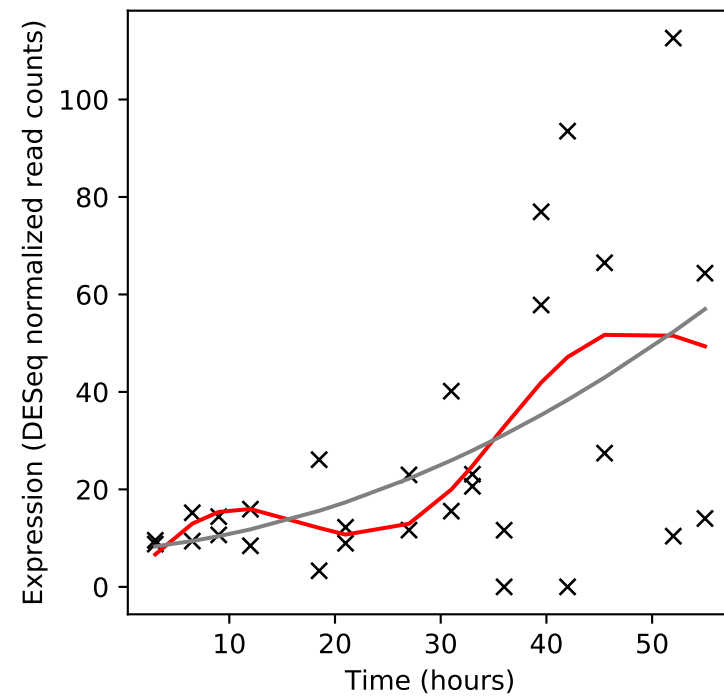

Rv0650/-

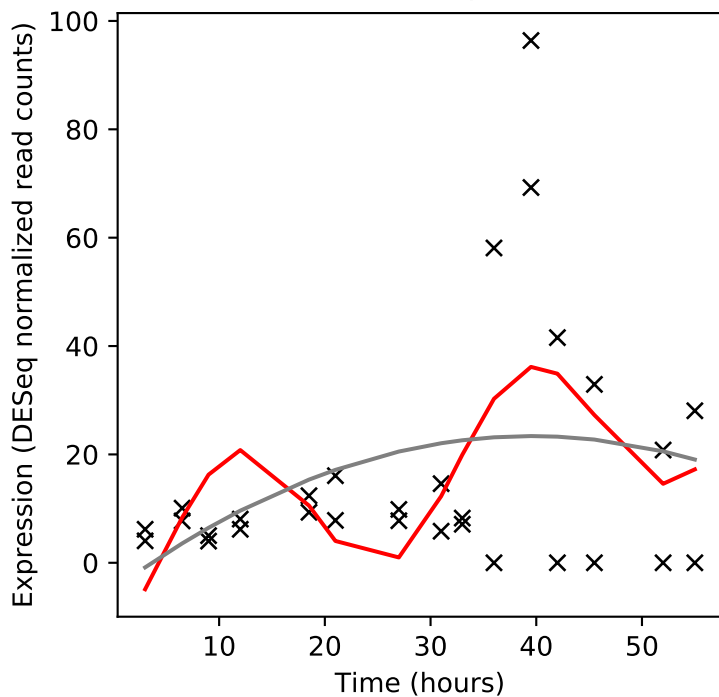

Rv0651/rplJ

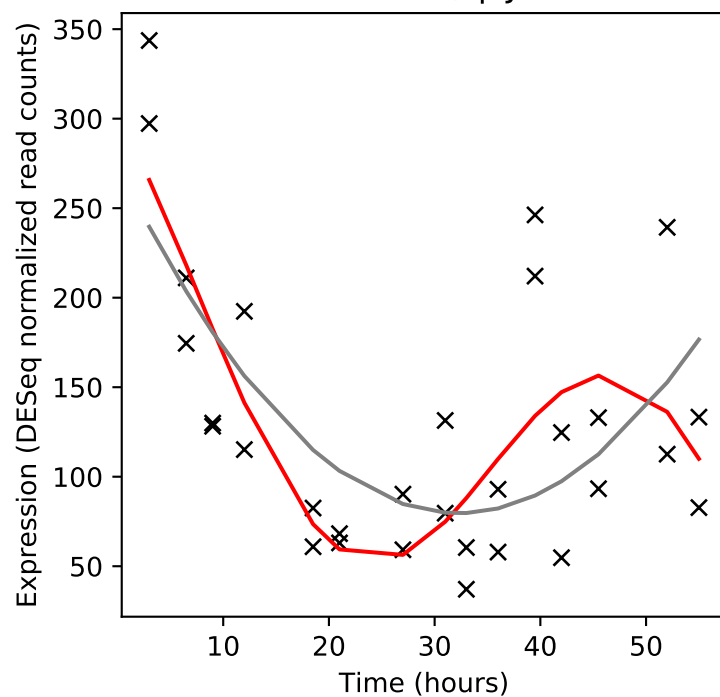

Rv0652/rplL

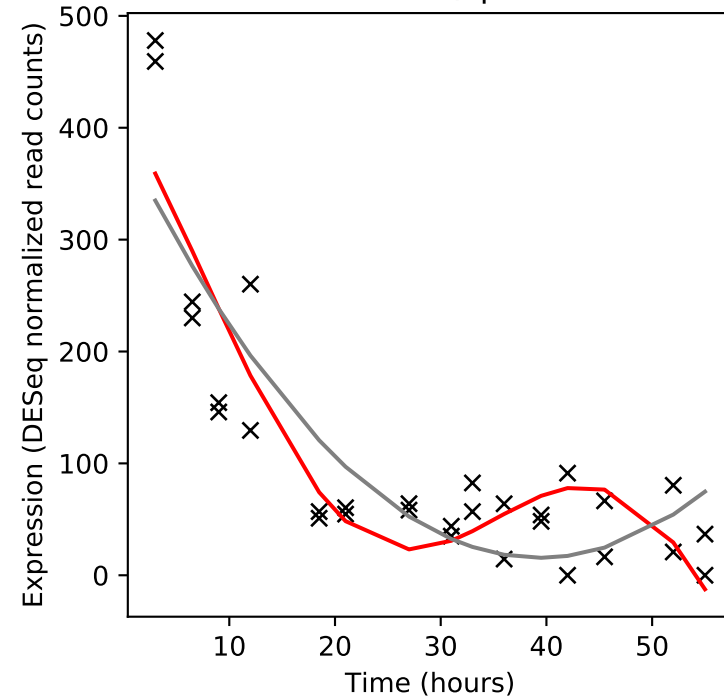

Rv0653c/-

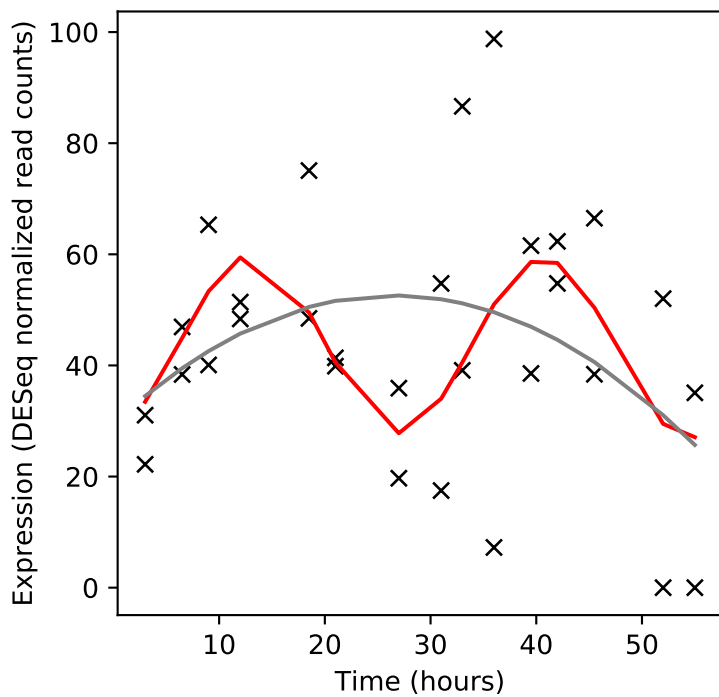

Rv0654/-

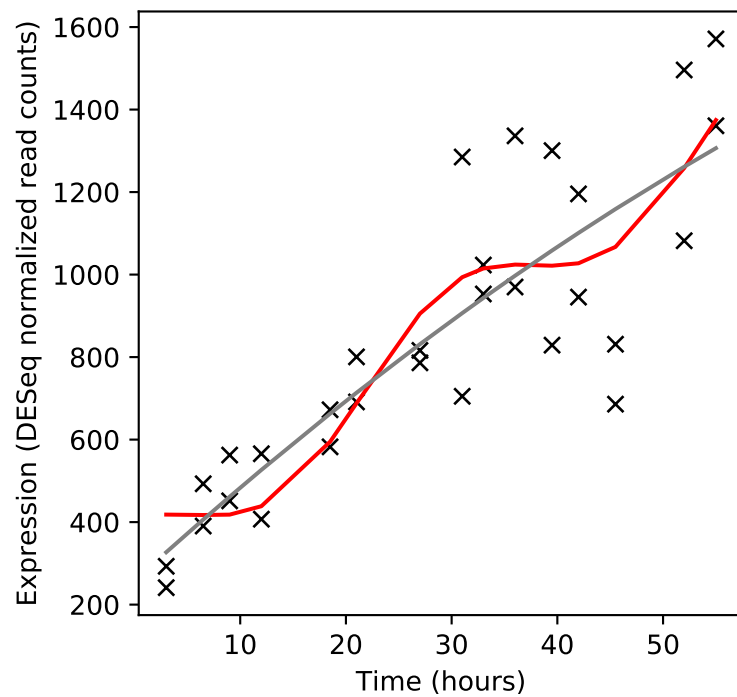

Rv0655/mkl

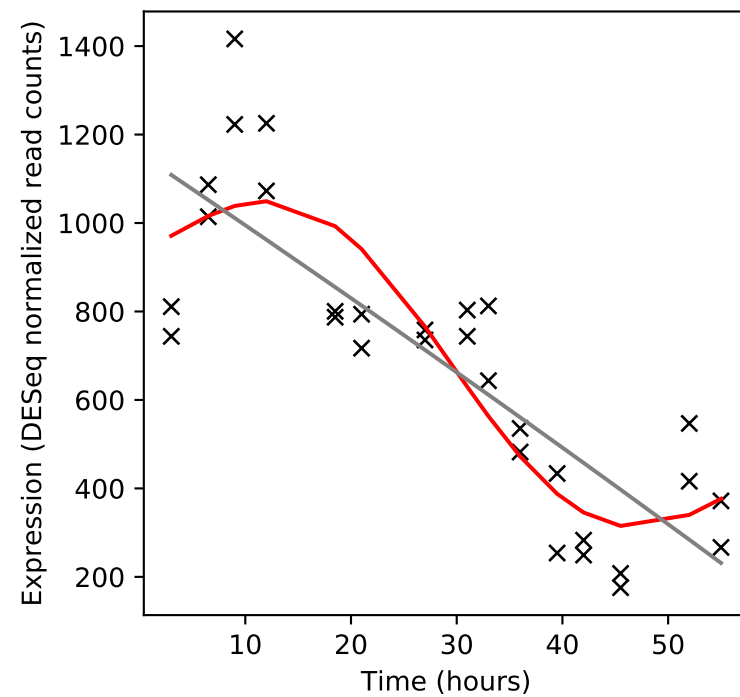

Rv0656c/vapC6

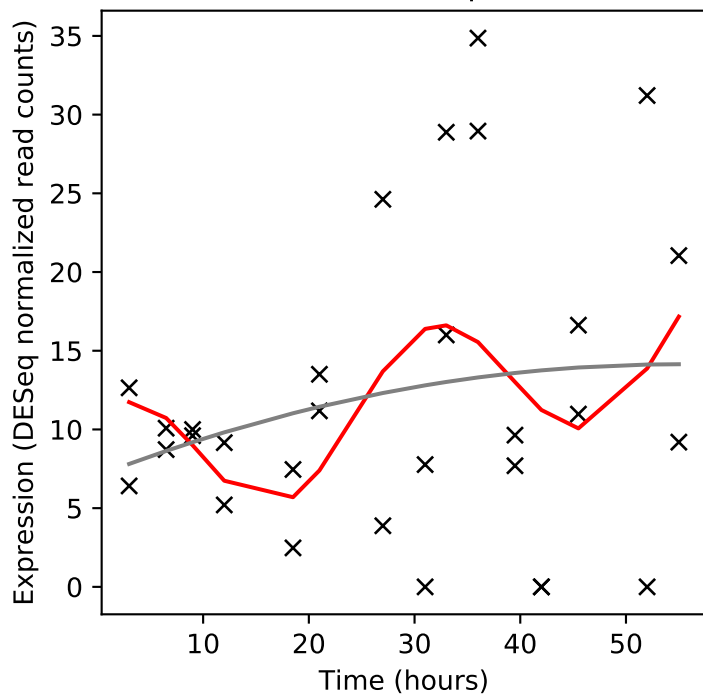

Rv0657c/vapB6

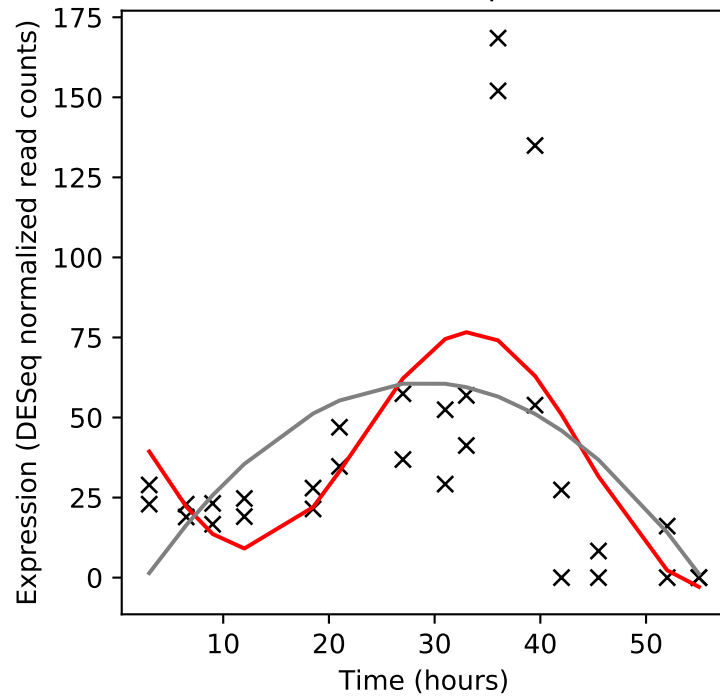

Rv0658c/-

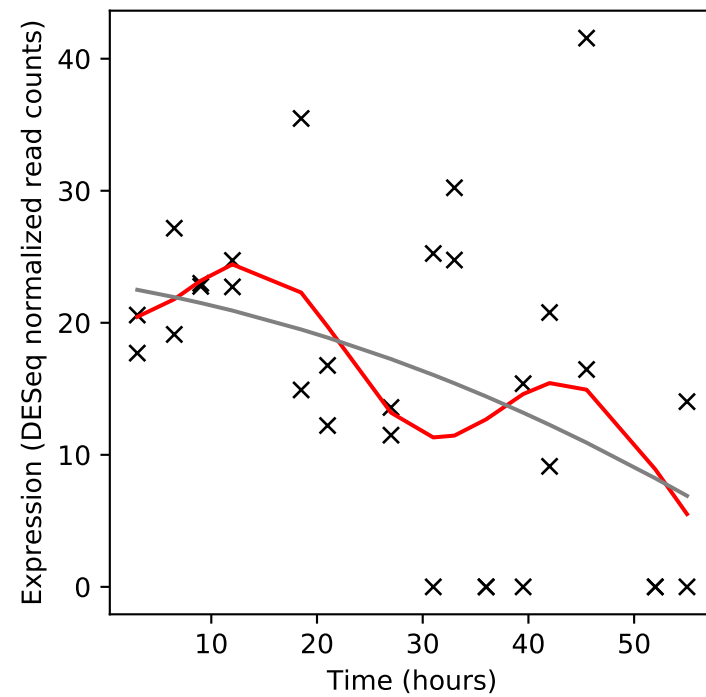

Rv0659c/mazF2

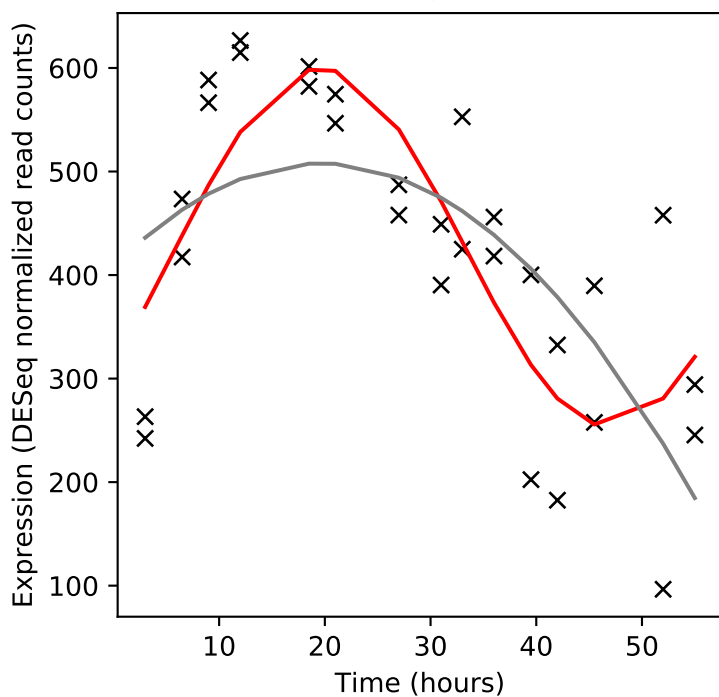

Rv0660c/mazE2

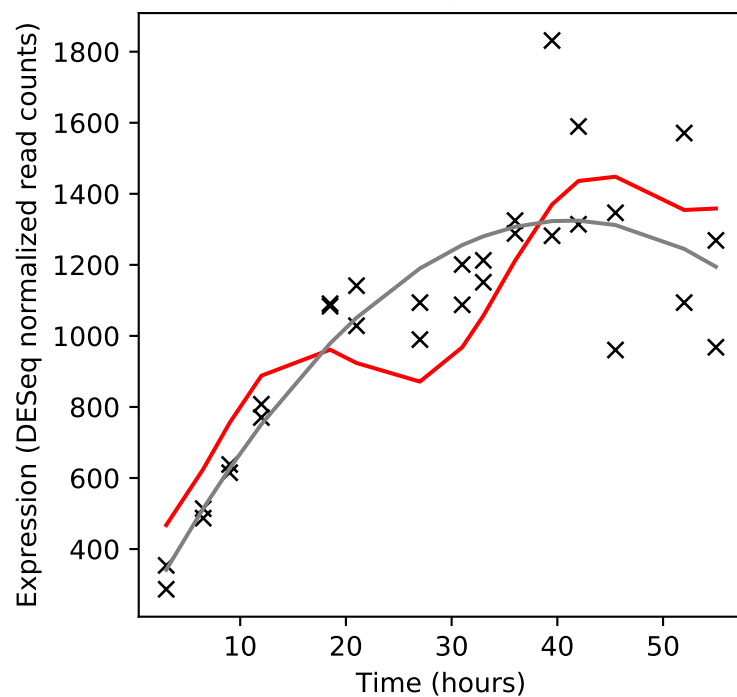

Rv0661c/vapC7

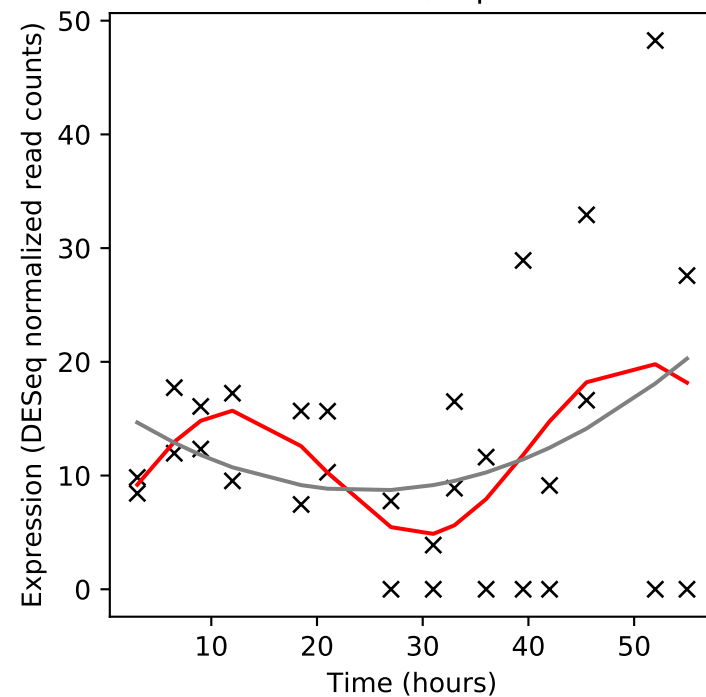

Rv0662c/vapB7

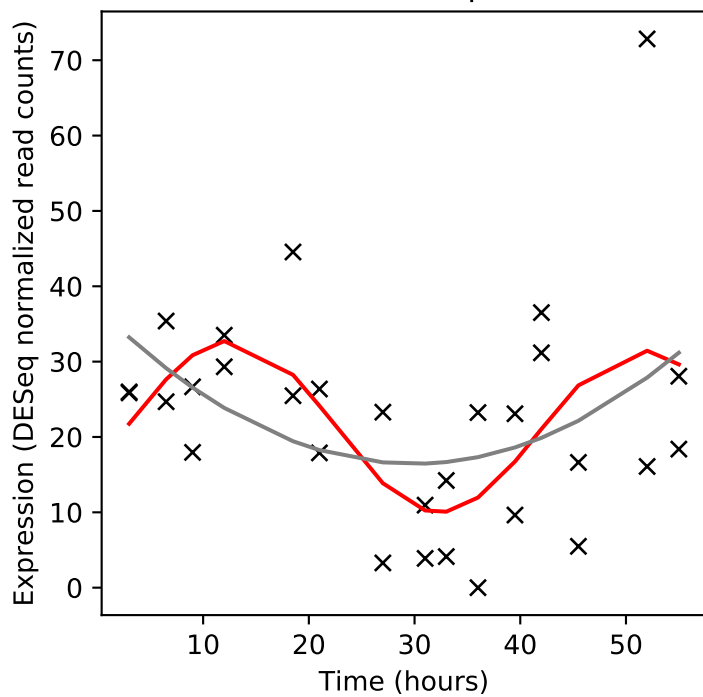

Rv0663/atsD

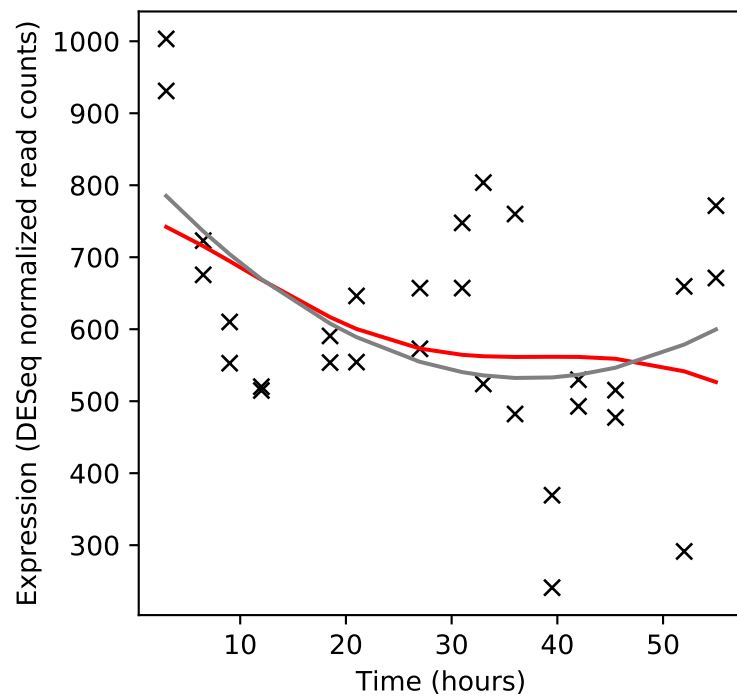

Rv0664/vapB8

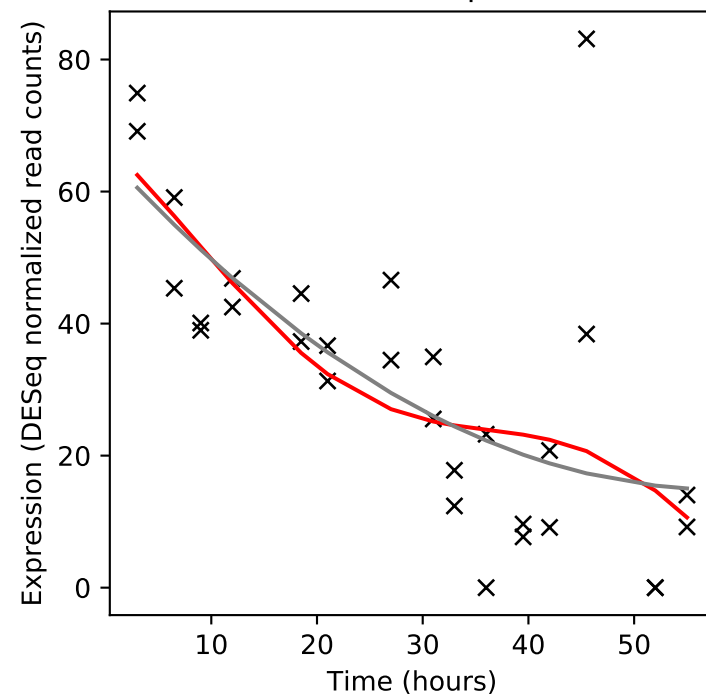

Rv0665/vapC8

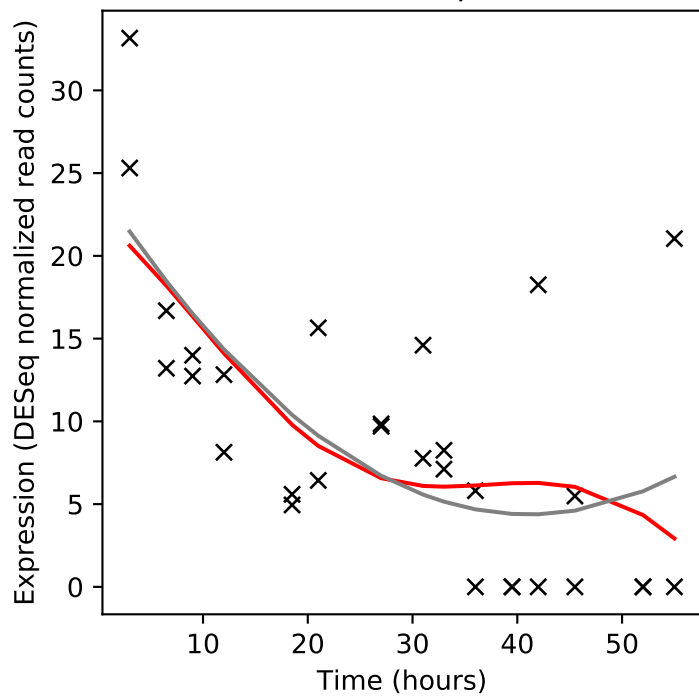

Rv0666/-

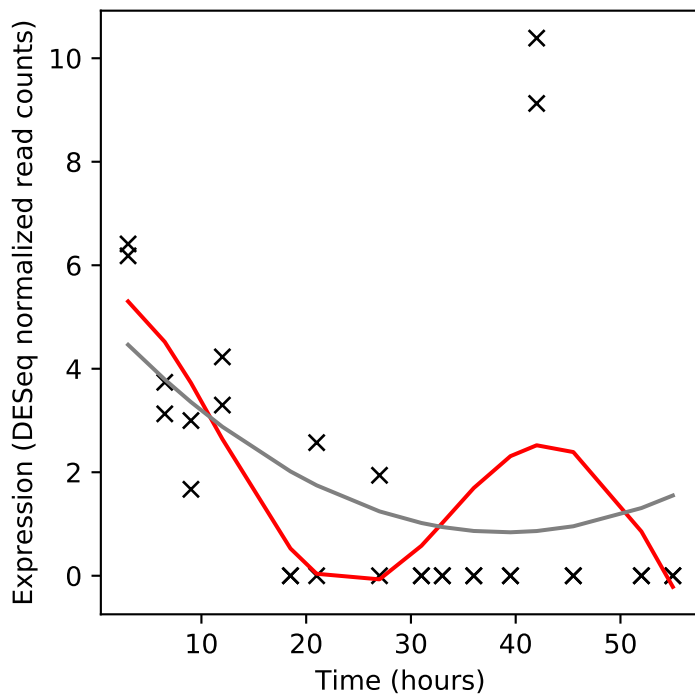

Rv0667/rpoB

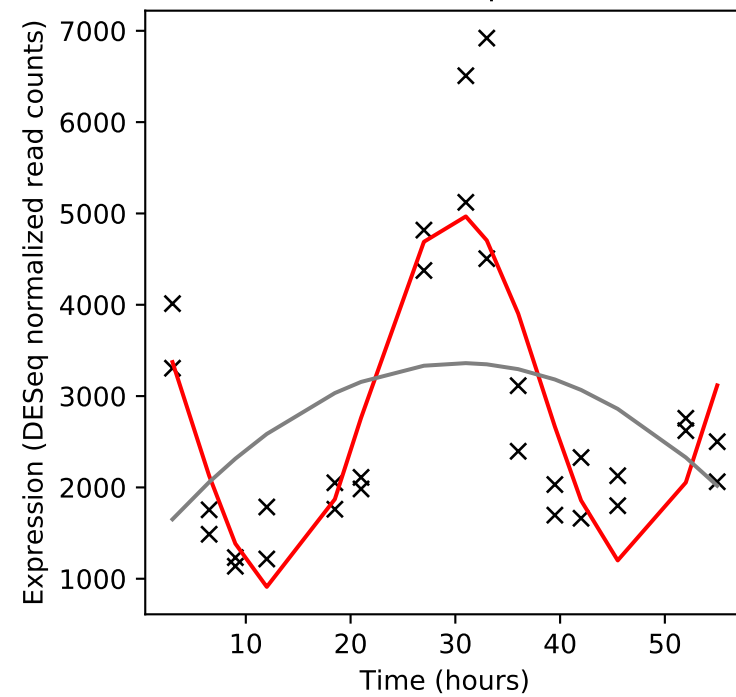

Rv0668/rpoC

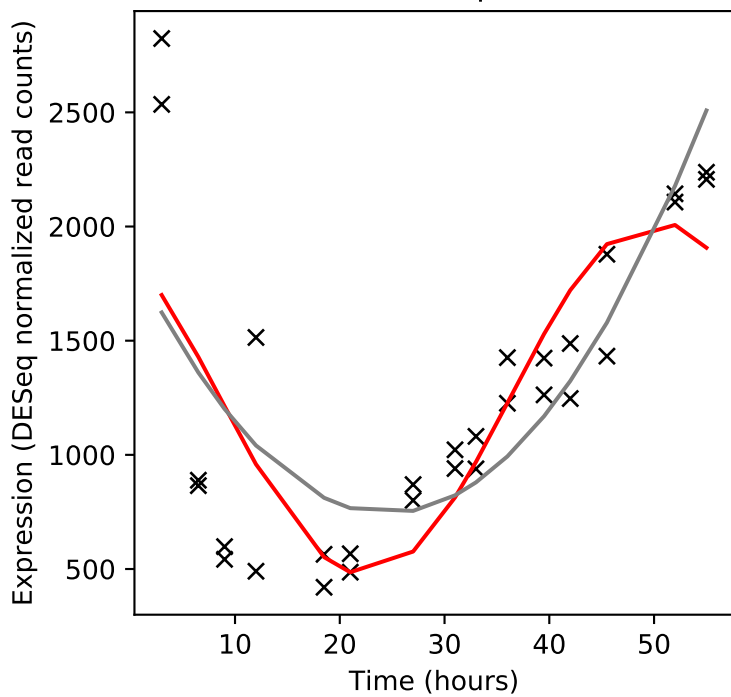

Rv0669c/-

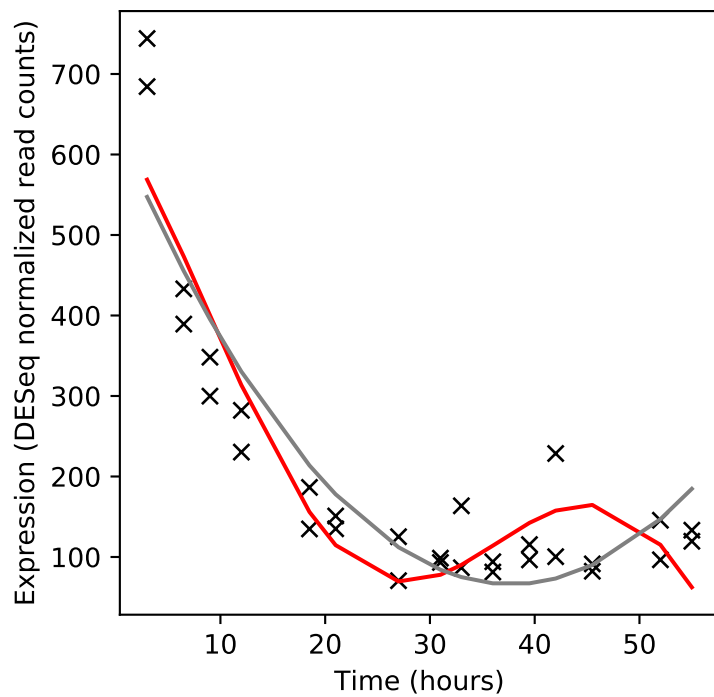

Rv0670/end

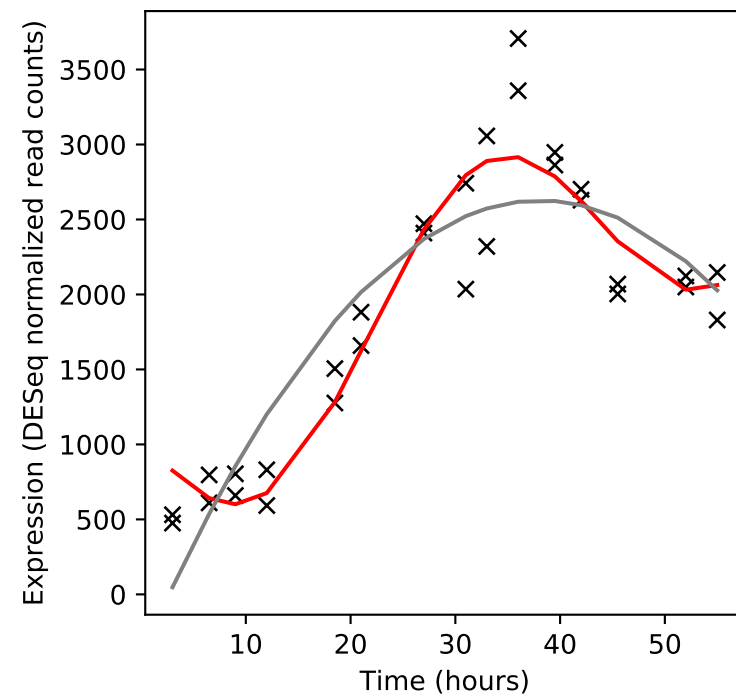

Rv0671/lpqP

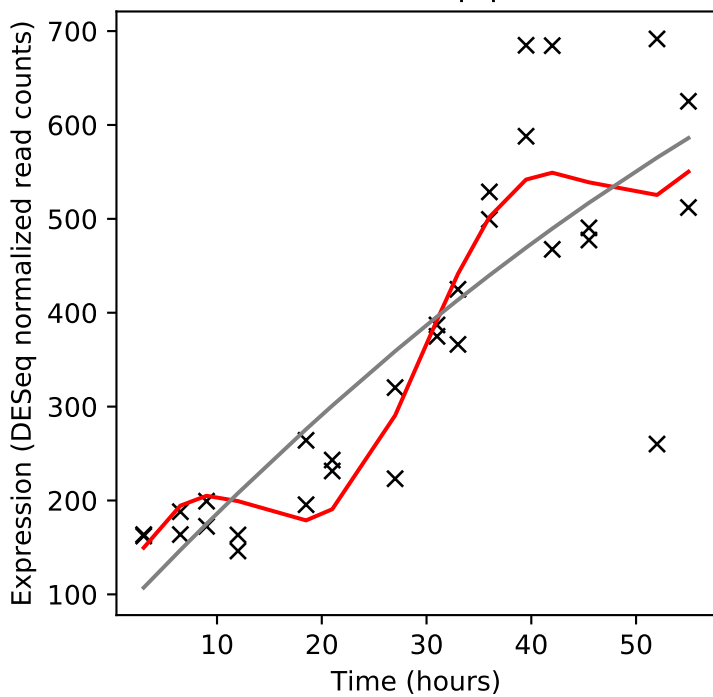

Rv0672/fadE8

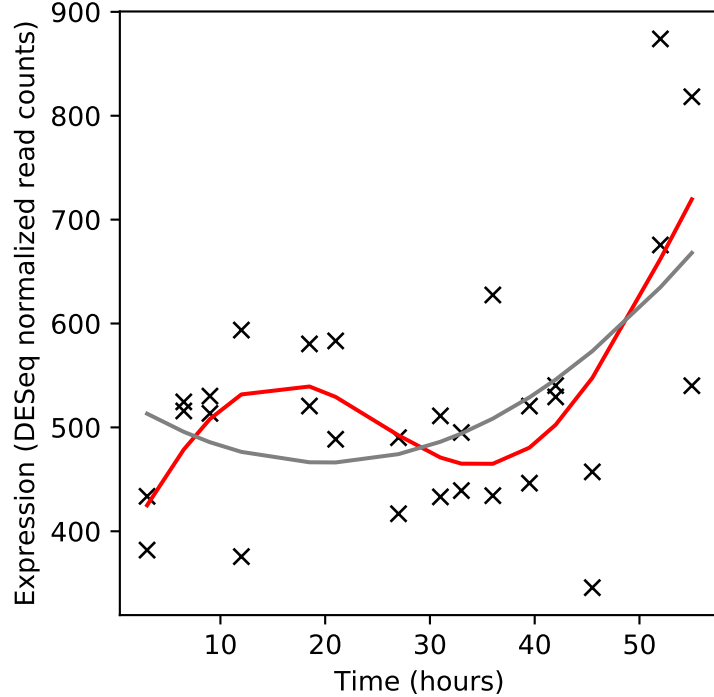

Rv0673/echA4

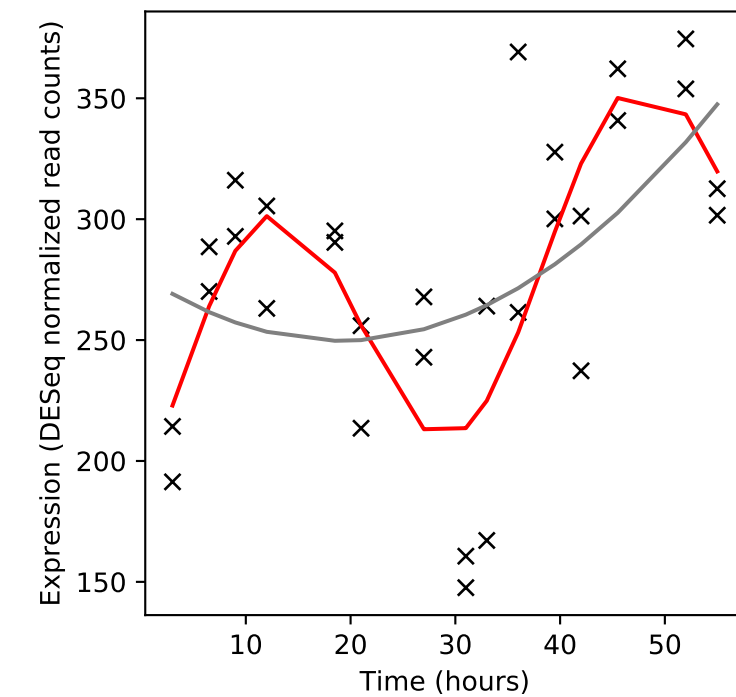

Rv0674/-

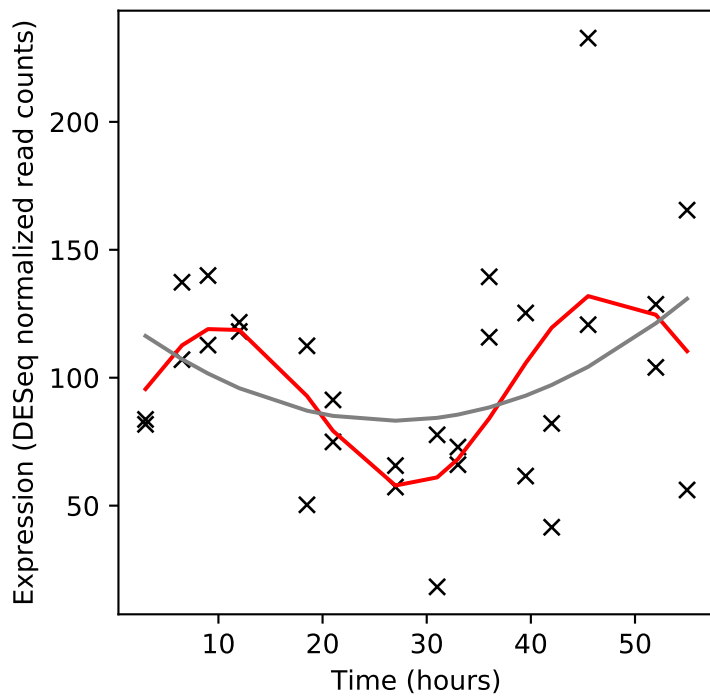

Rv0675/echA5

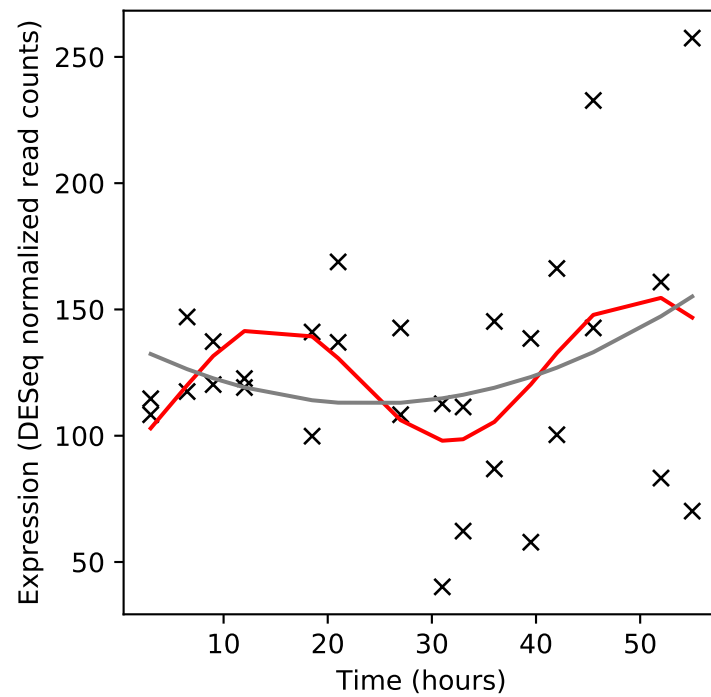

Rv0676c/mmpL5

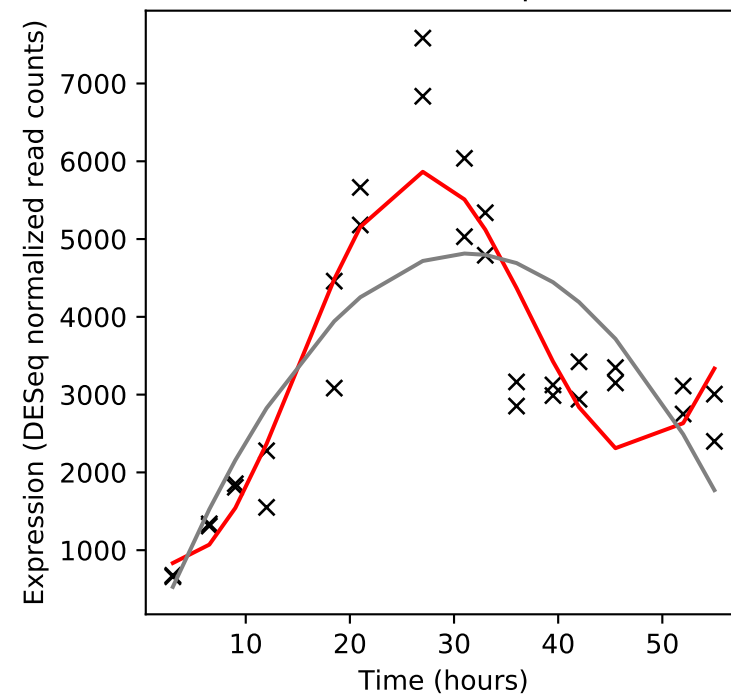

Rv0677c/mmpS5

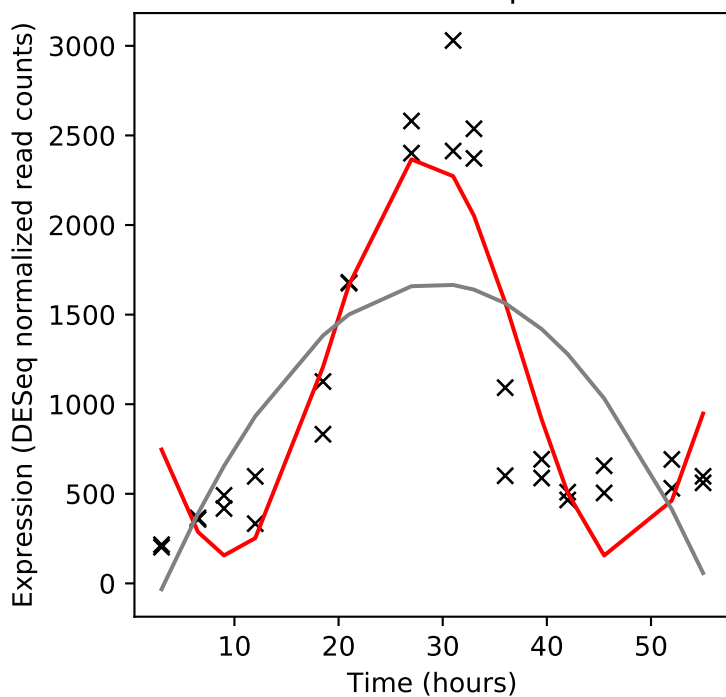

Rv0678/-

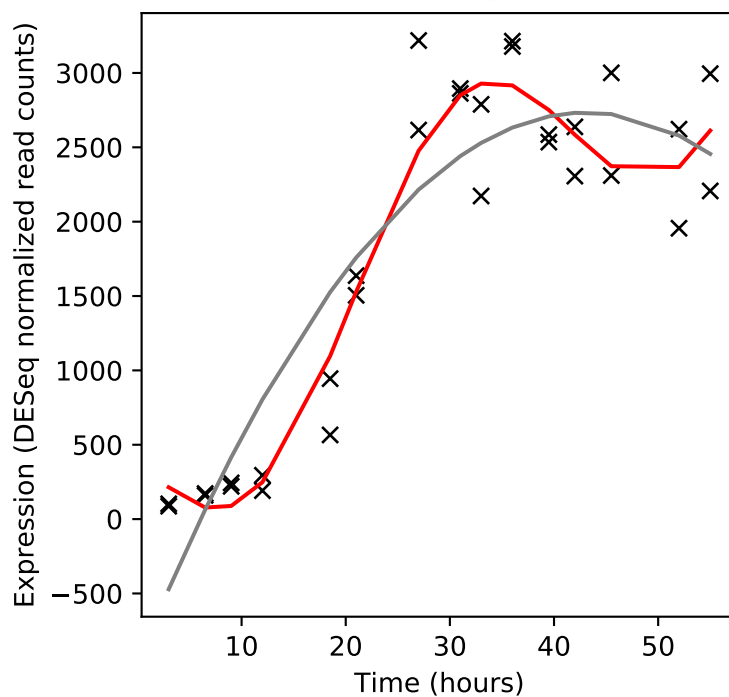

Rv0679c/-

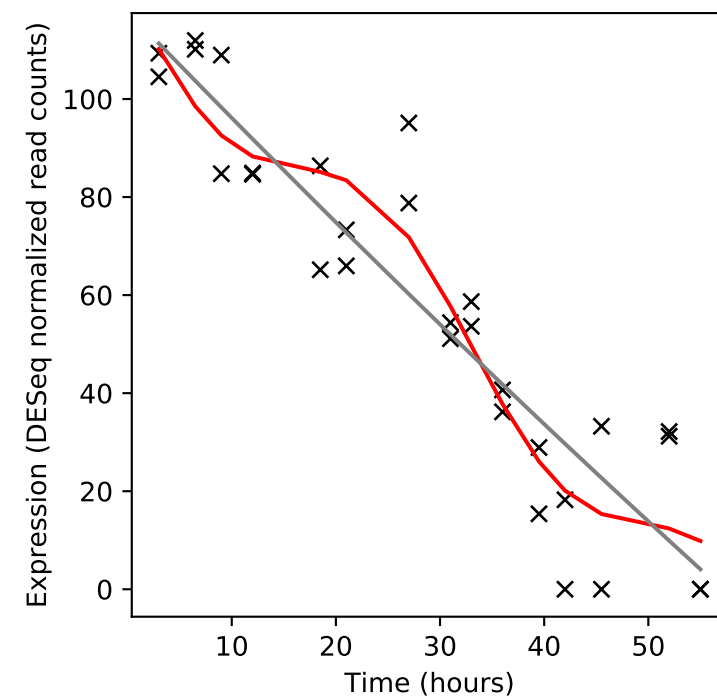

Rv0680c/-

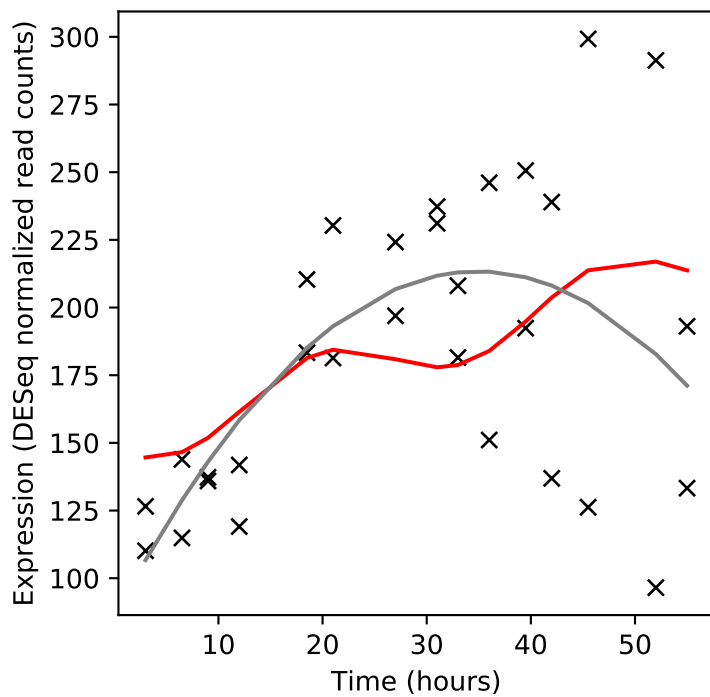

Rv0681/-

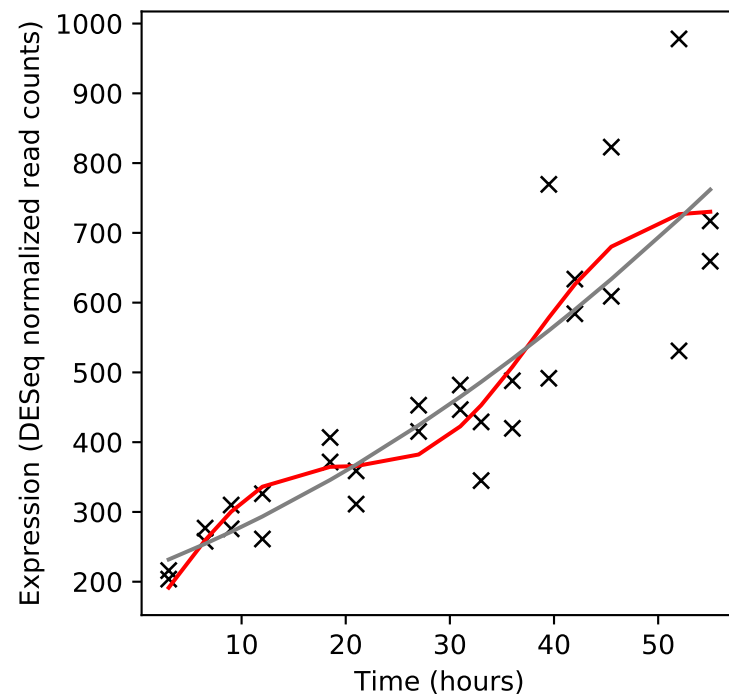

Rv0682/rpsL

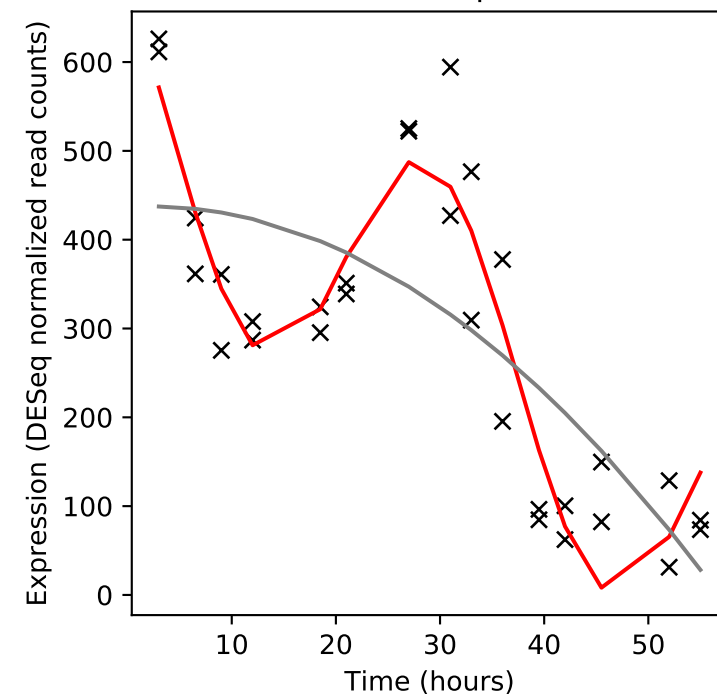



Rv0683/rpsG

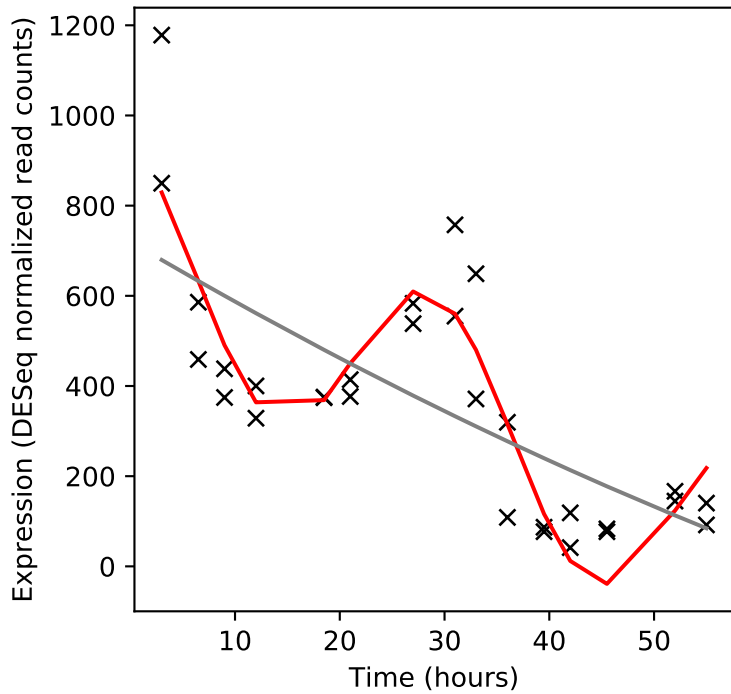

Rv0684/fusA1

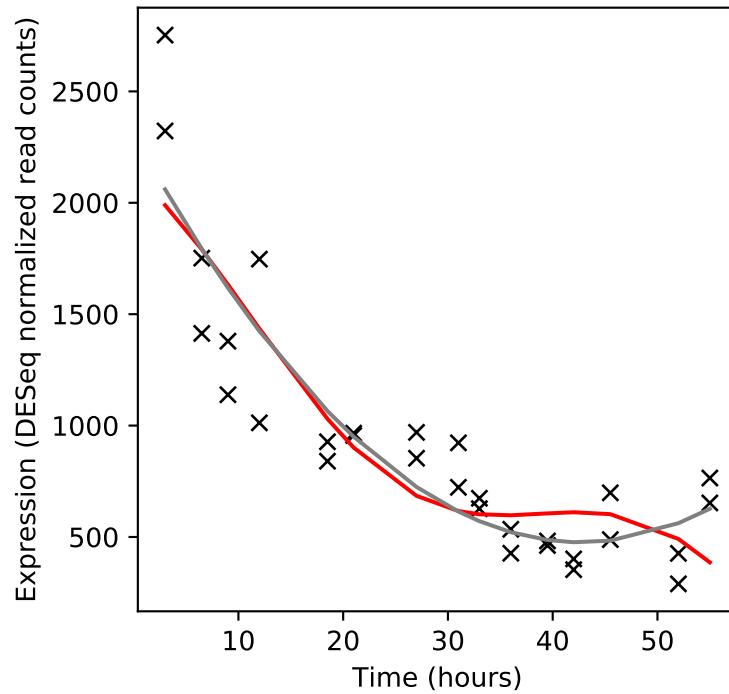

Rv0685/tuf

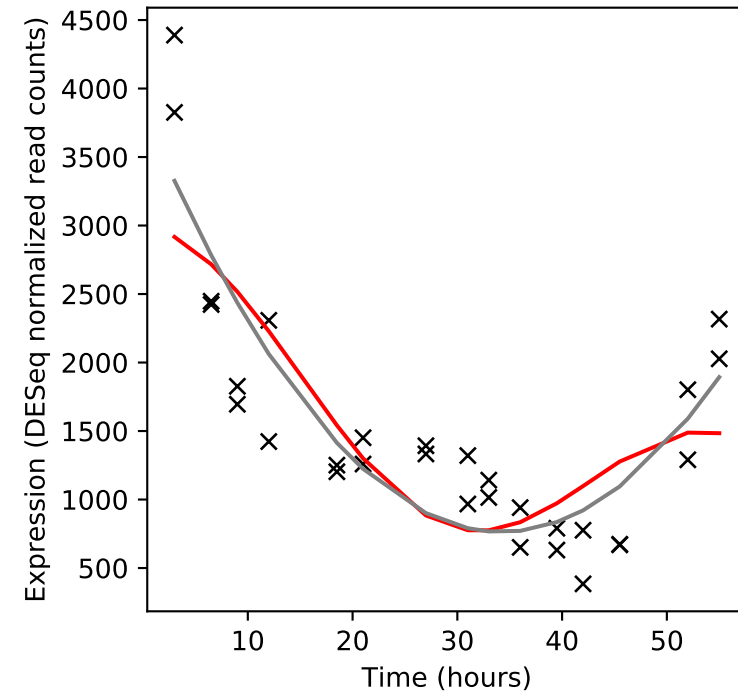

Rv0686/-

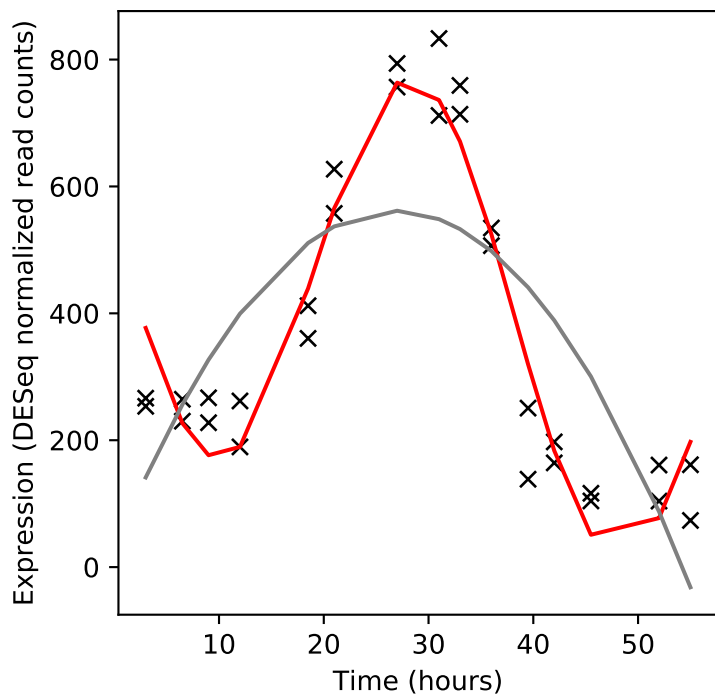

Rv0687/-

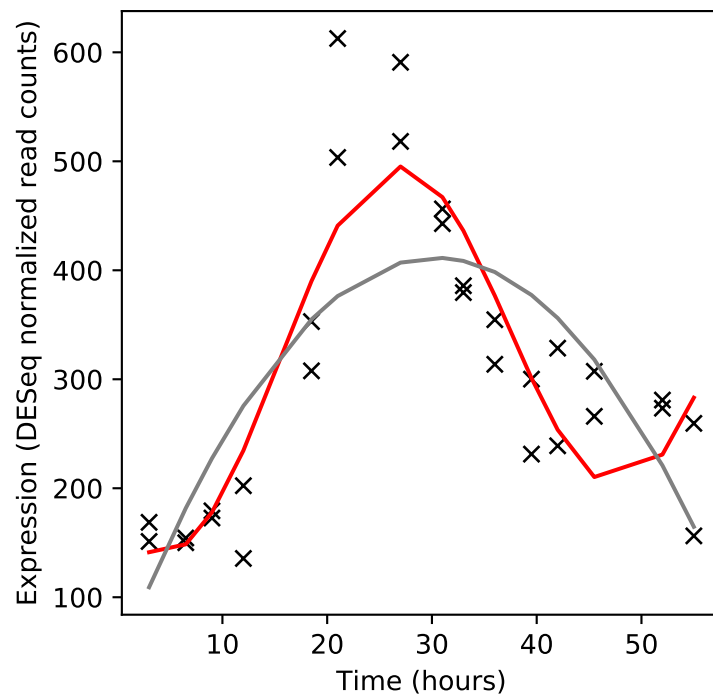

Rv0688/-

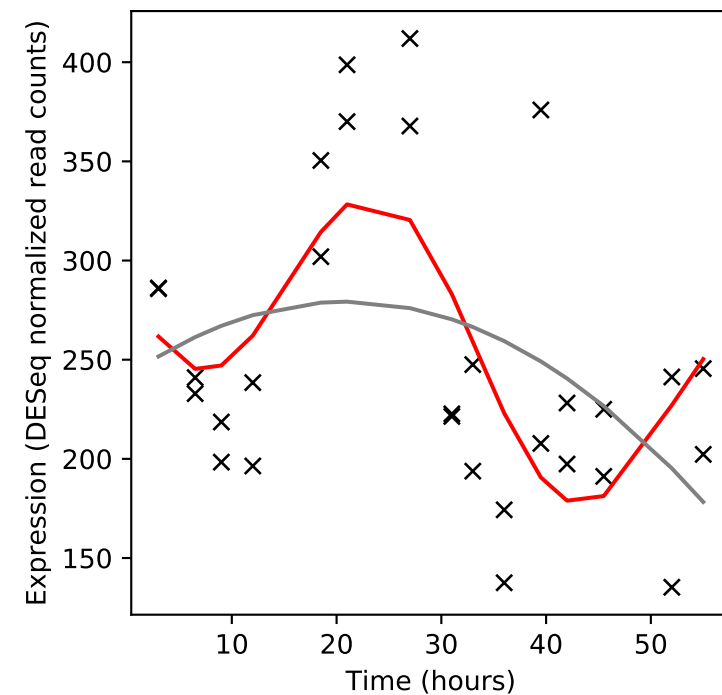

Rv0689c/-

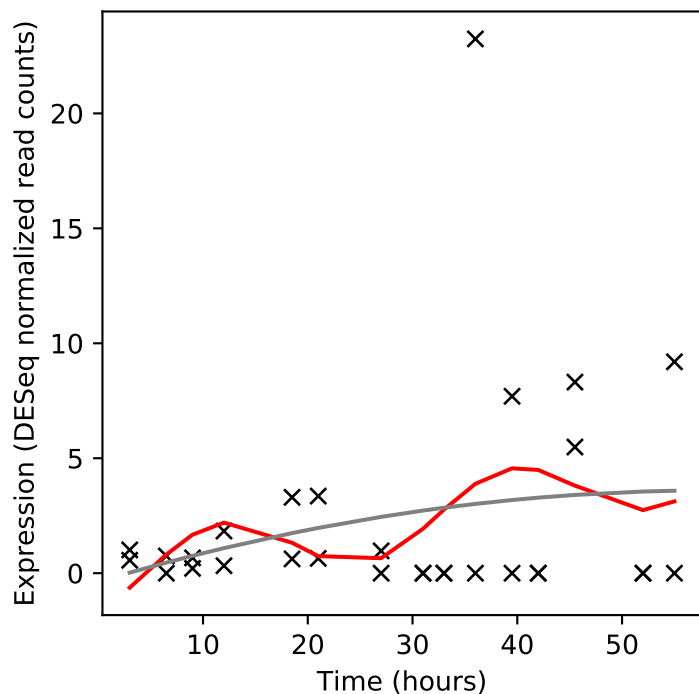

Rv0690c/-

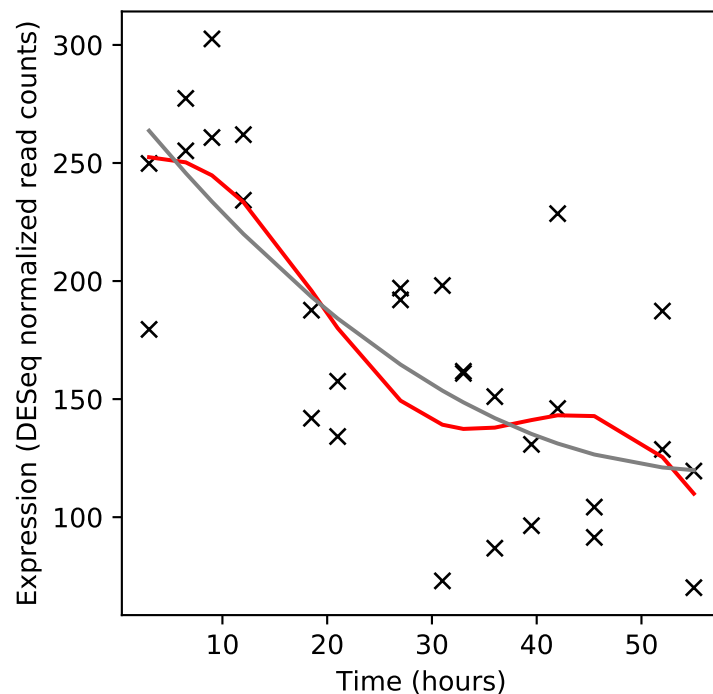

Rv0691c/-

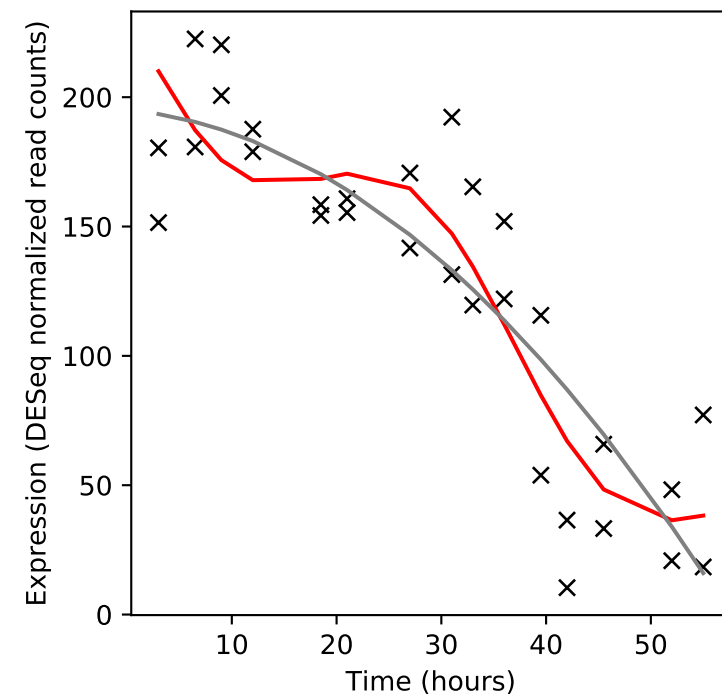

Rv0691A/-

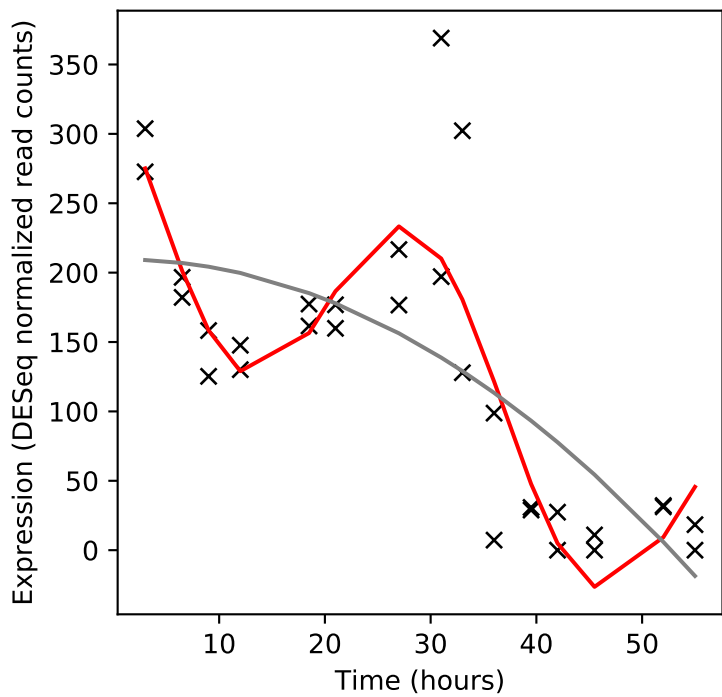

Rv0692/-

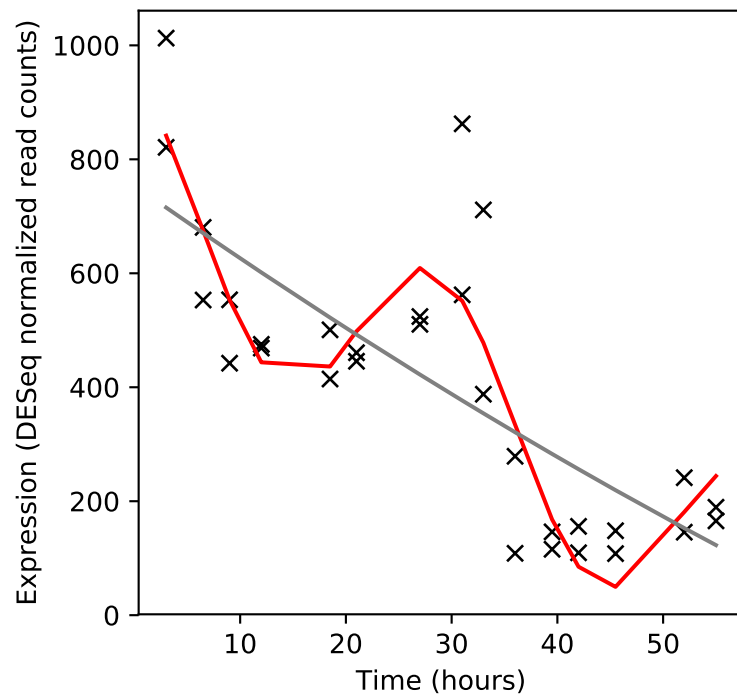

Rv0693/pqqE

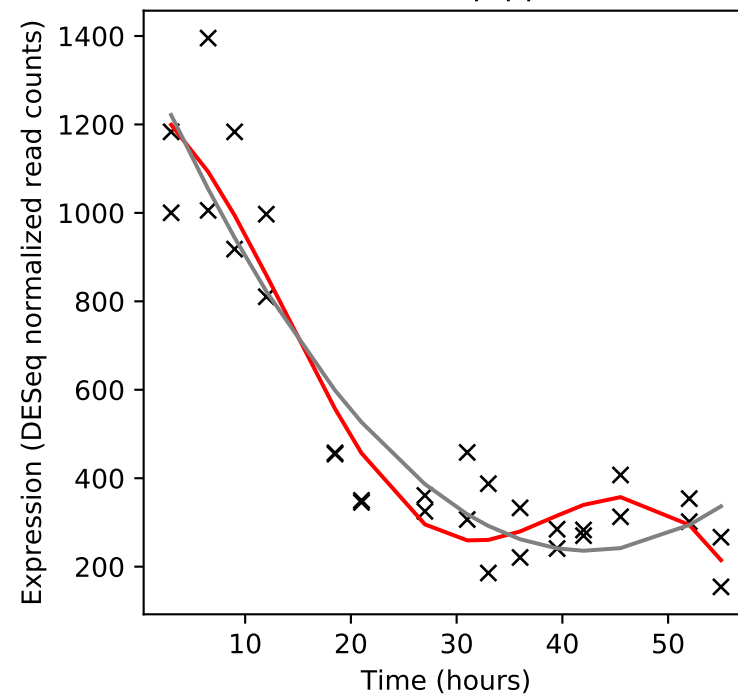

Rv0694/lllD1

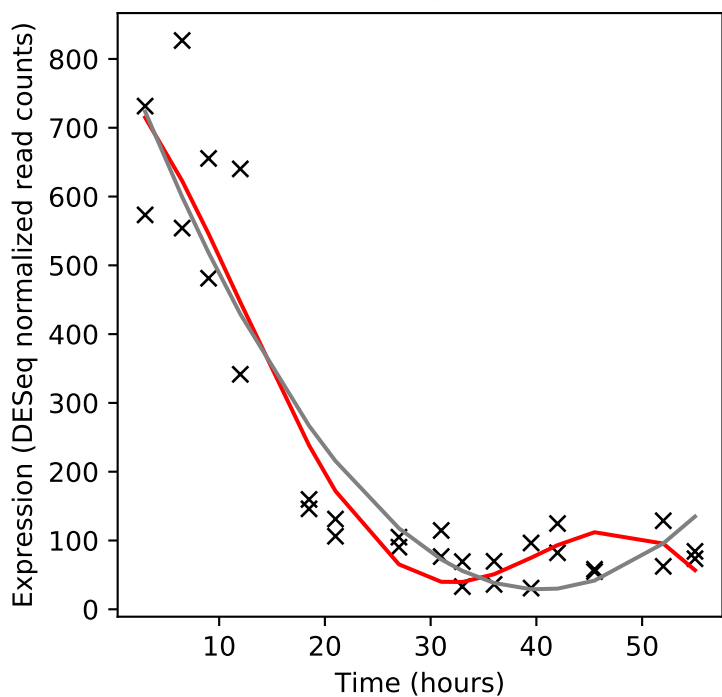

Rv0695/-

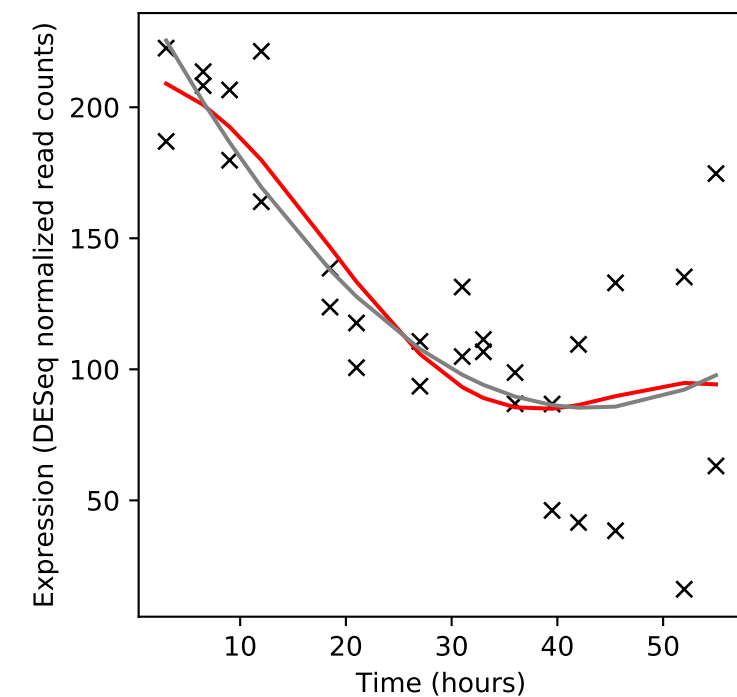

Rv0696/-

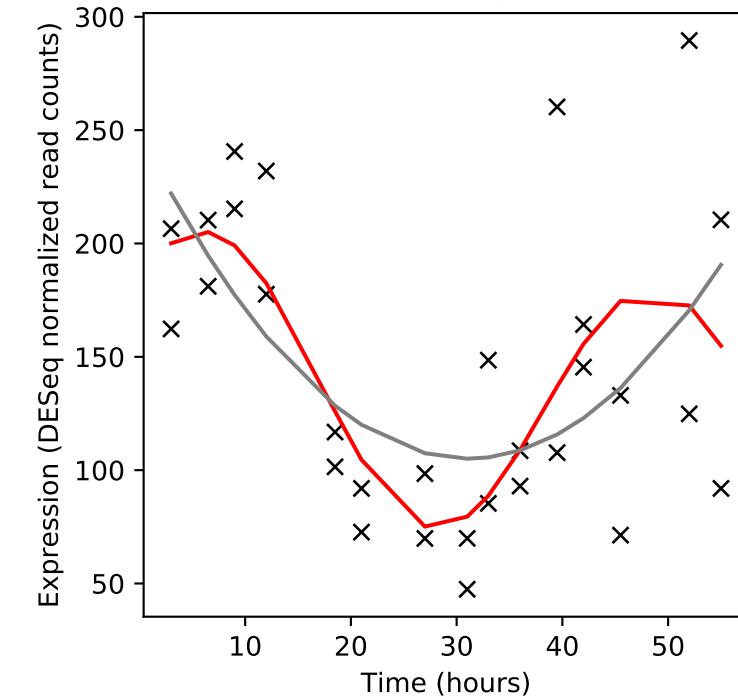

Rv0697/-

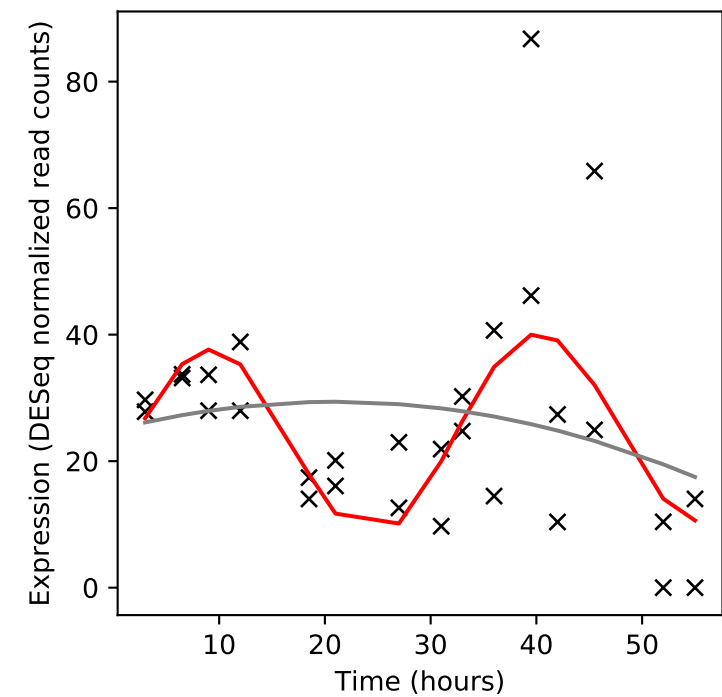

Rv0698/-

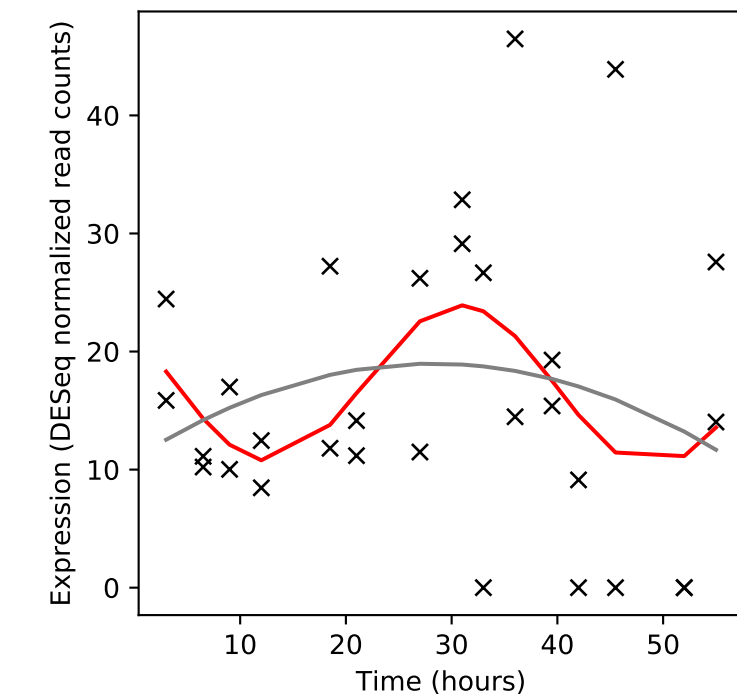

Rv0699/-

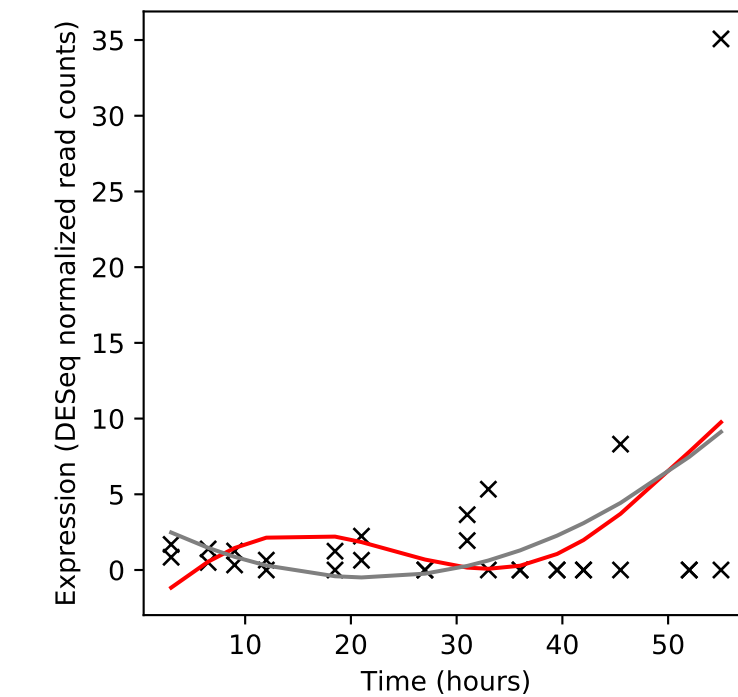

Rv0700/rpsJ

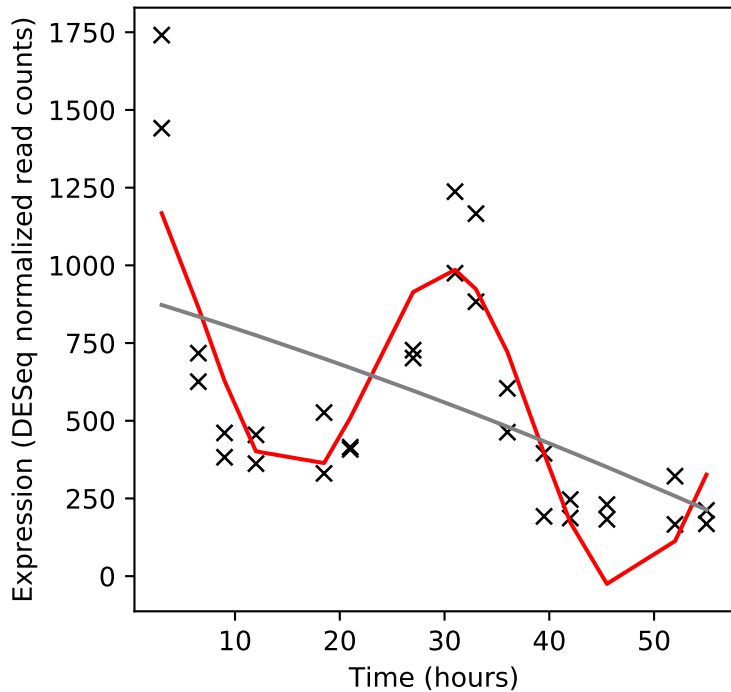

Rv0701/rplC

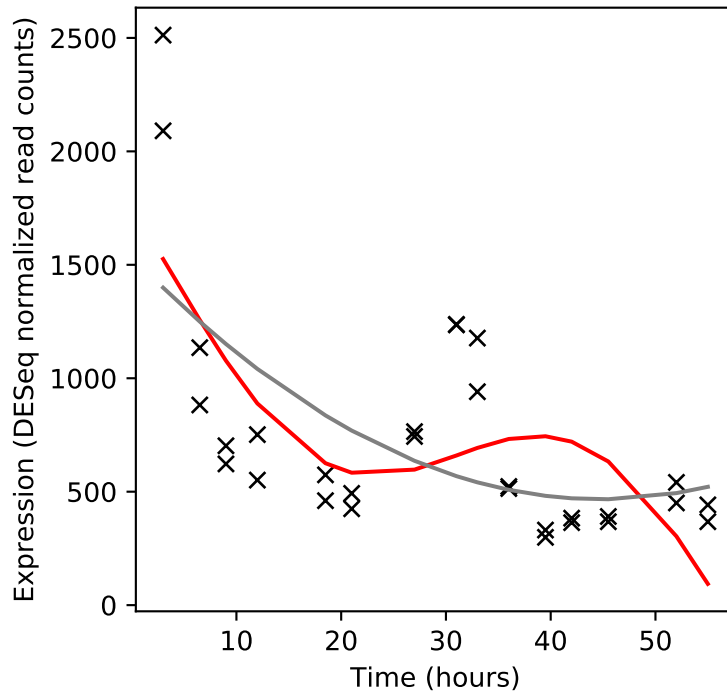

Rv0702/rplD

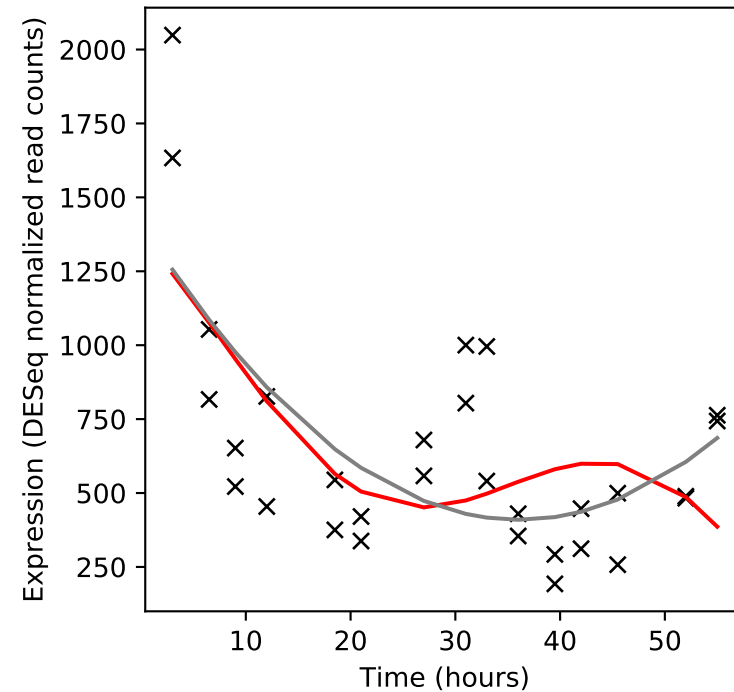

Rv0703/rplW

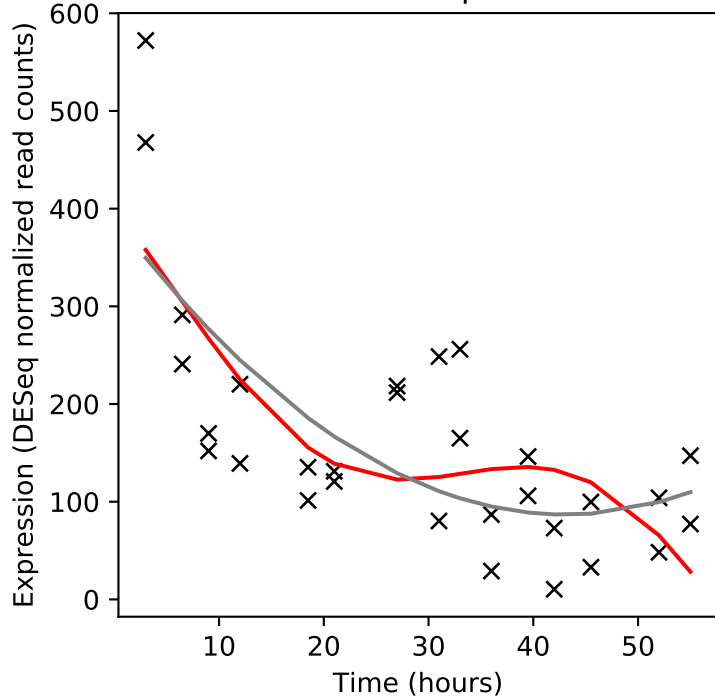

Rv0704/rplB

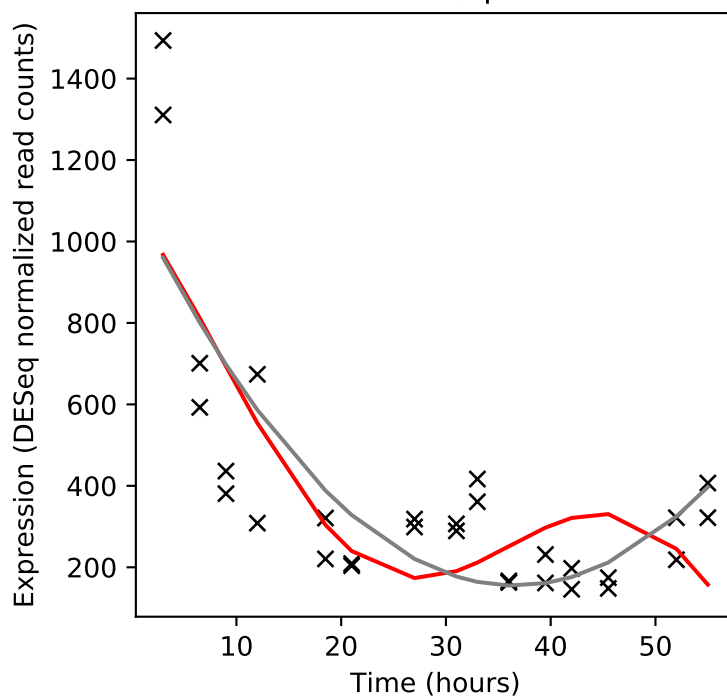

Rv0705/rpsS

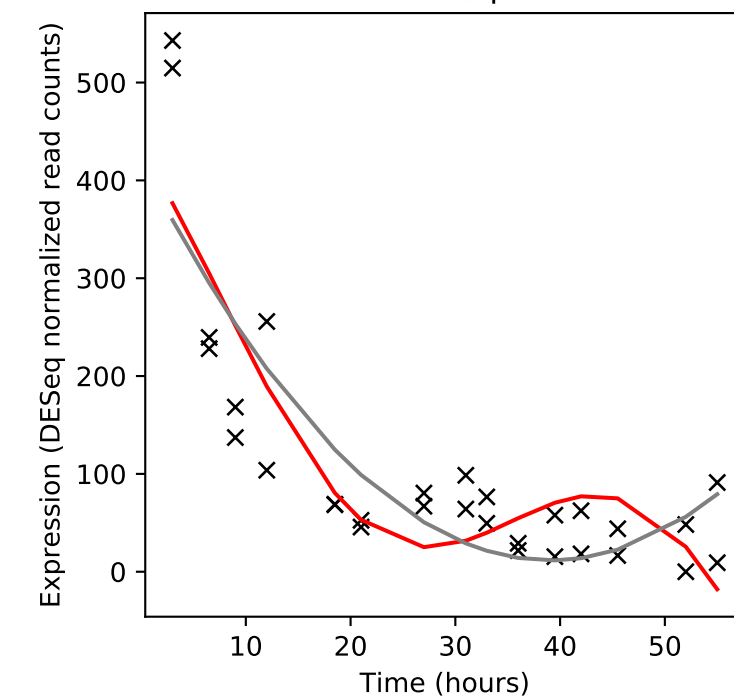

Rv0706/rplV

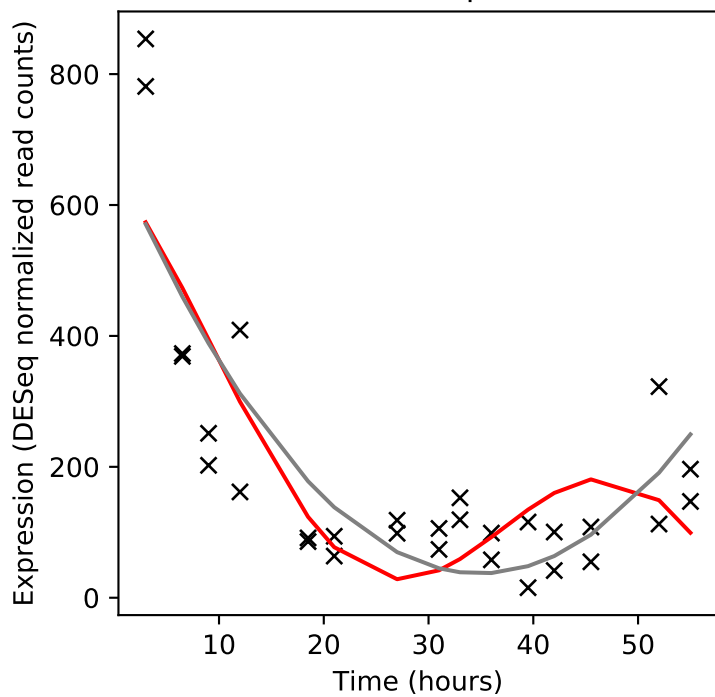

Rv0707/rpsC

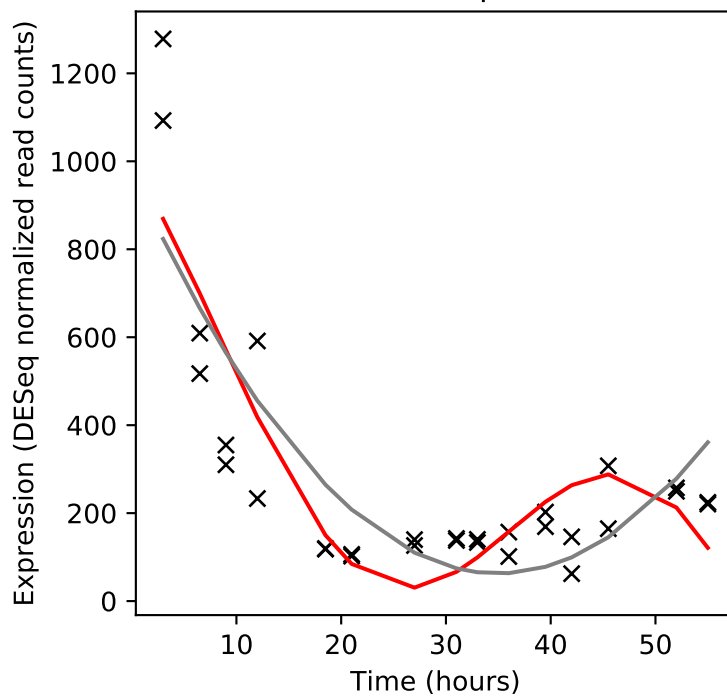

Rv0708/rplP

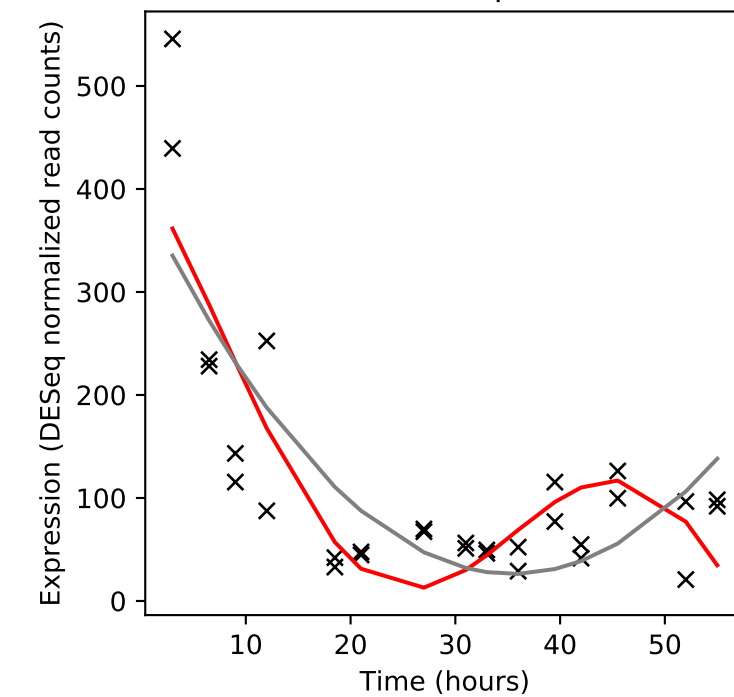

Rv0709/rpmC

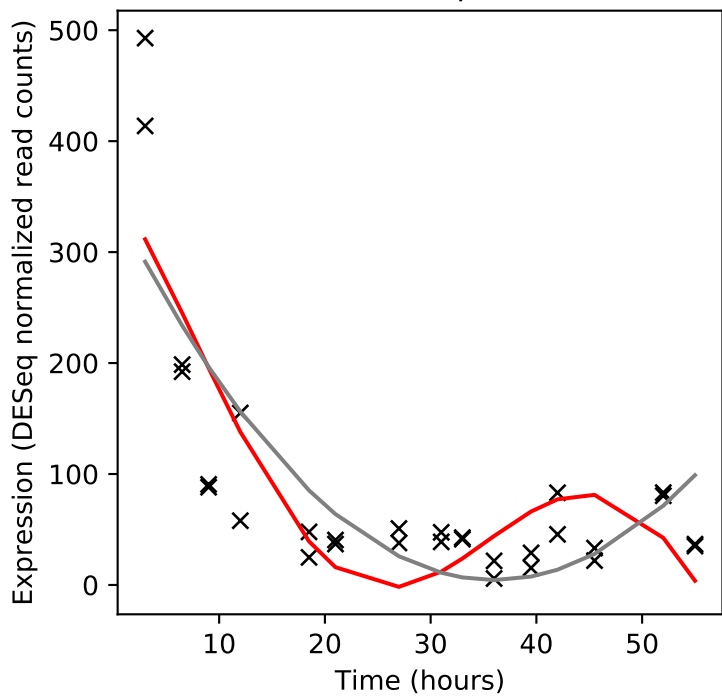

Rv0710/rpsQ

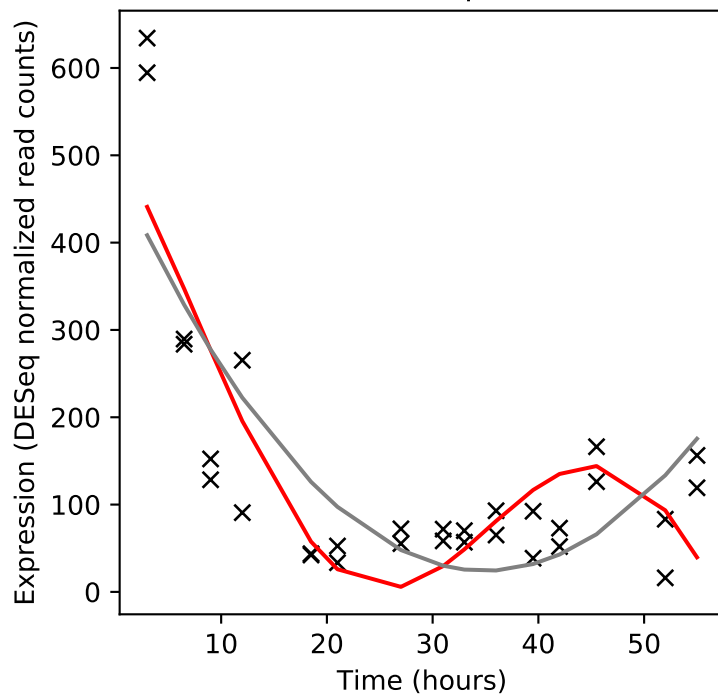

Rv0711/atsA

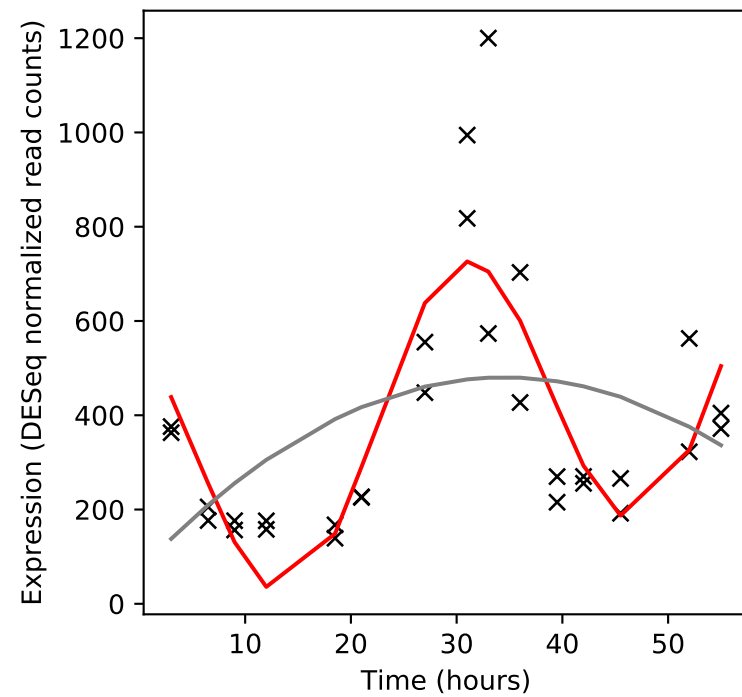

Rv0712/-

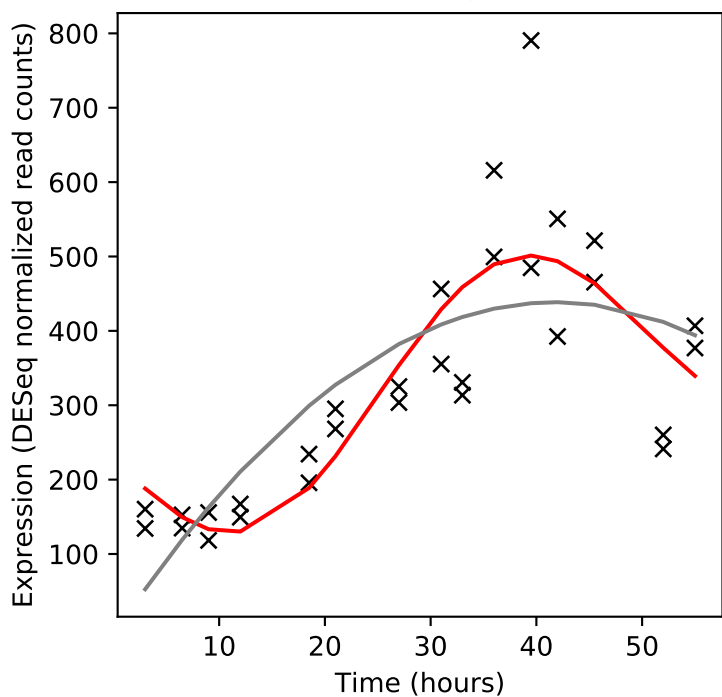

Rv0713/-

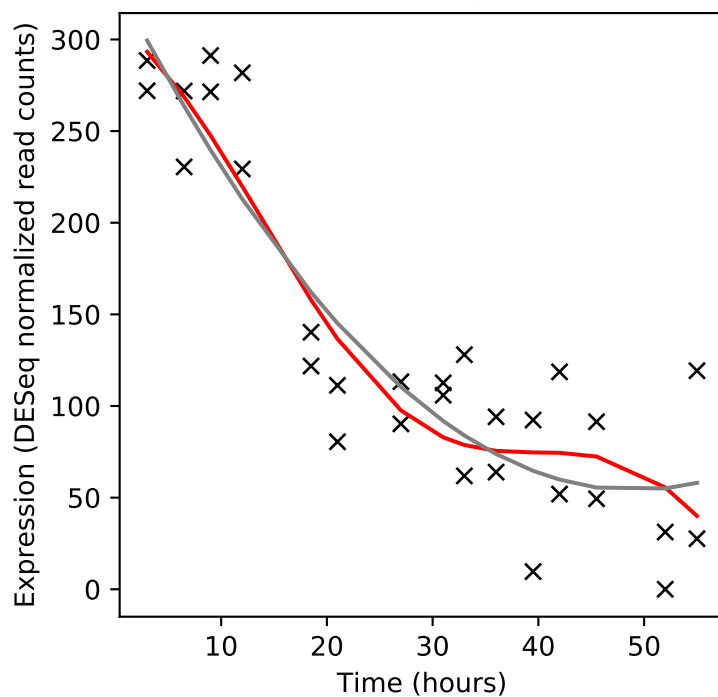

Rv0714/rplN

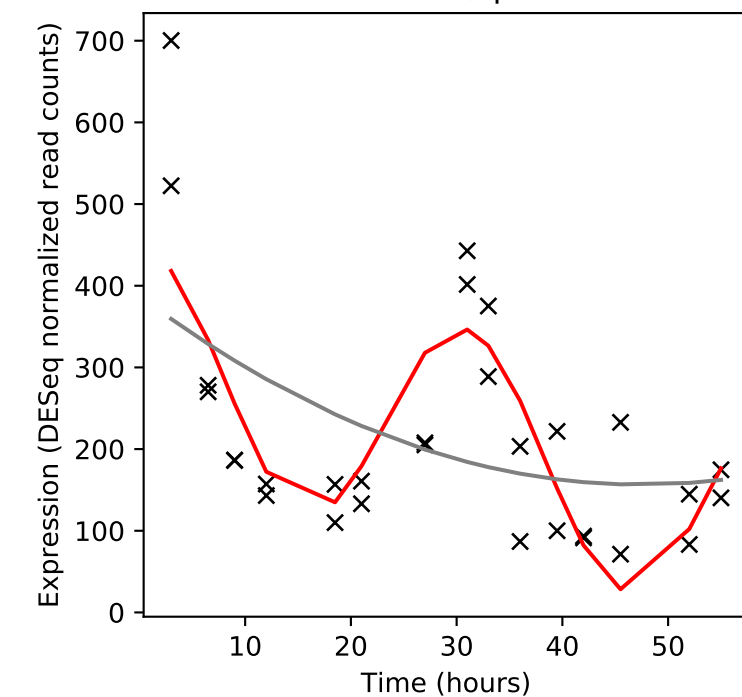

Rv0715/rplX

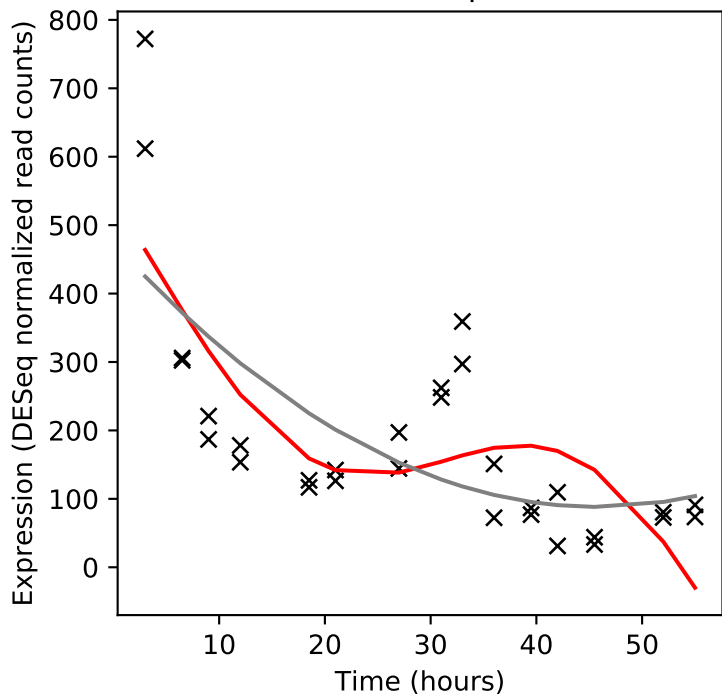

Rv0716/rplE

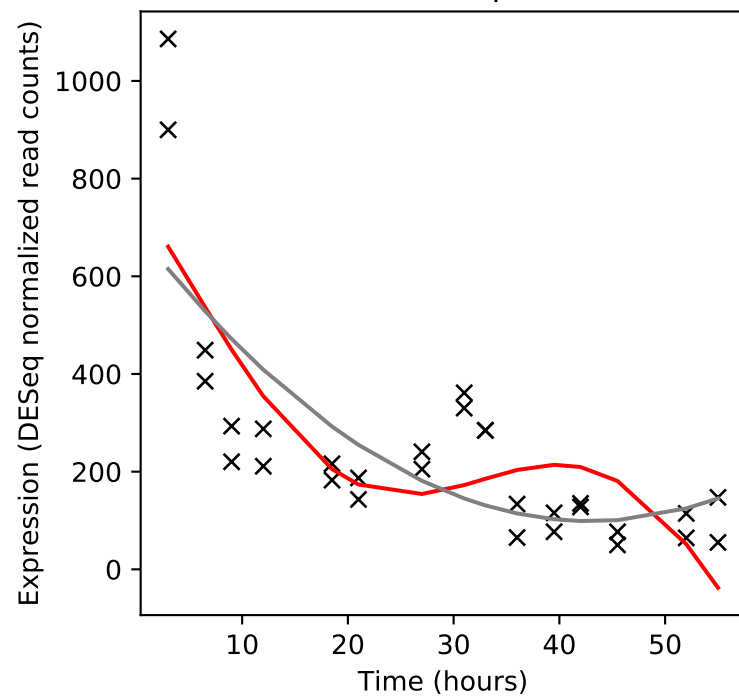

Rv0717/rpsN1

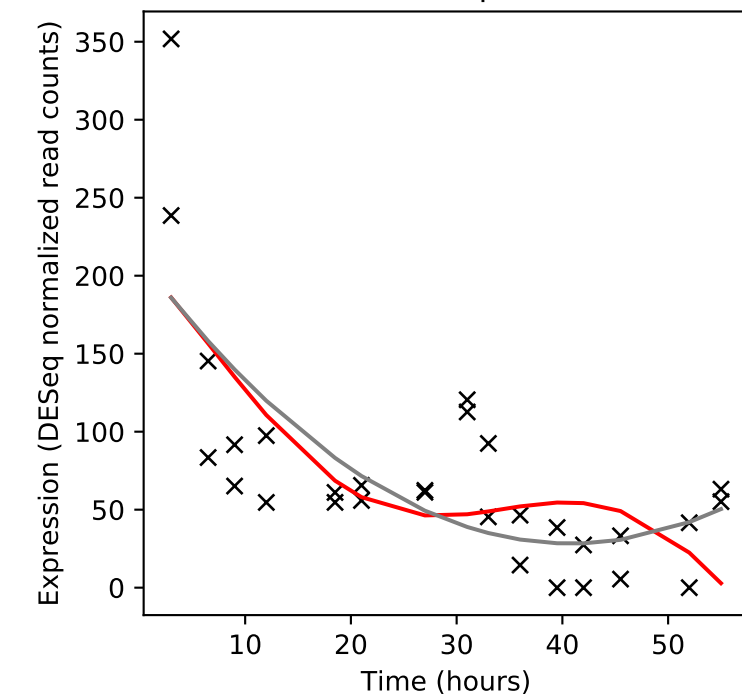

Rv0718/rpsH

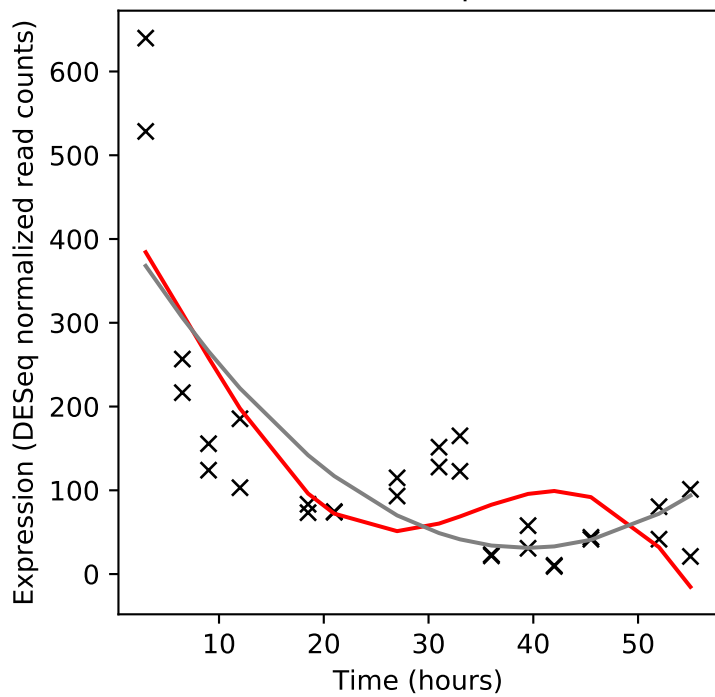

Rv0719/rplF

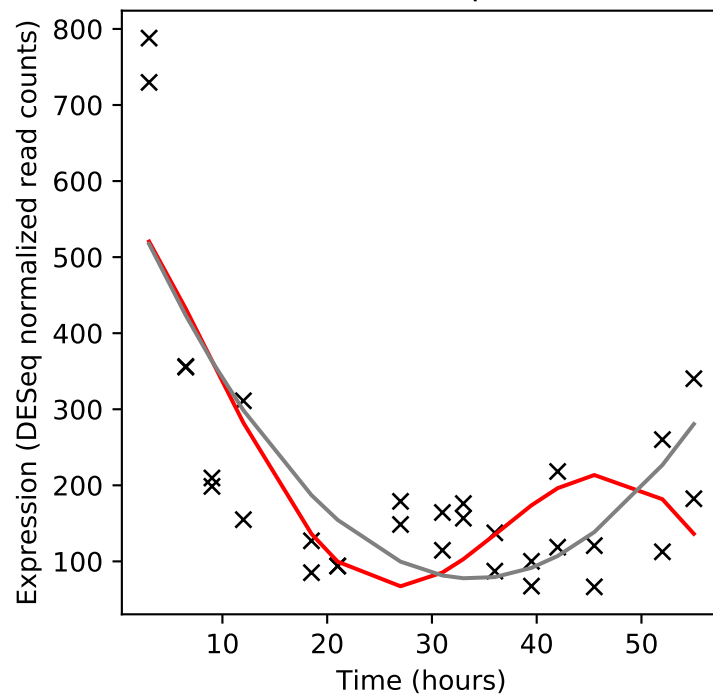

Rv0720/rplR

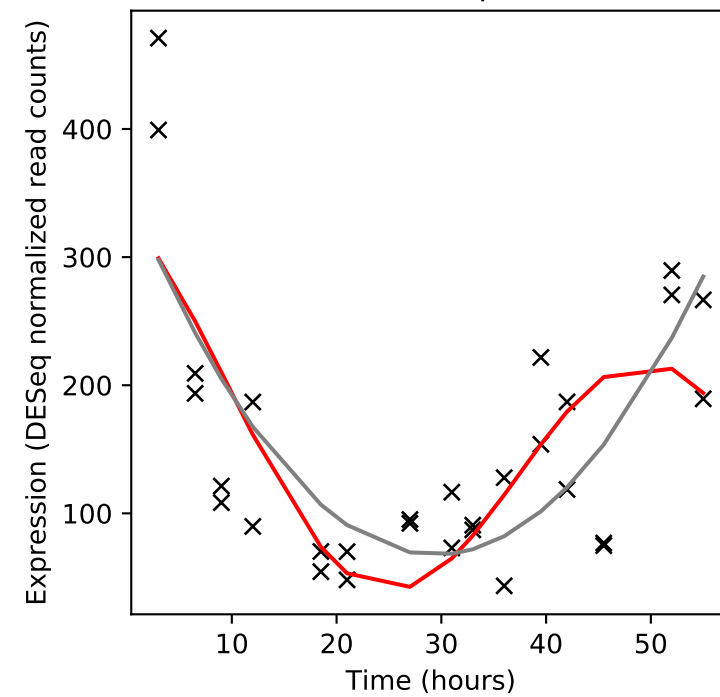

Rv0721/rpsE

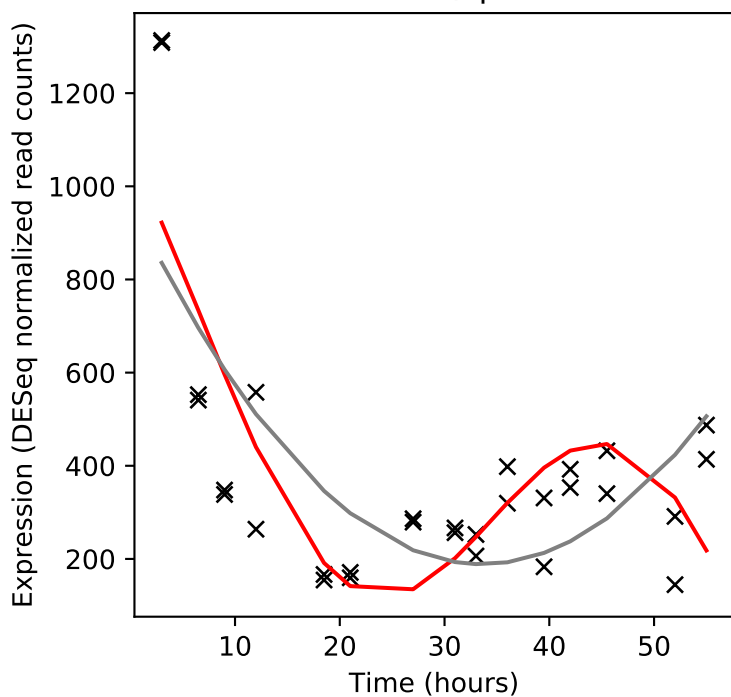

Rv0722/rpmD

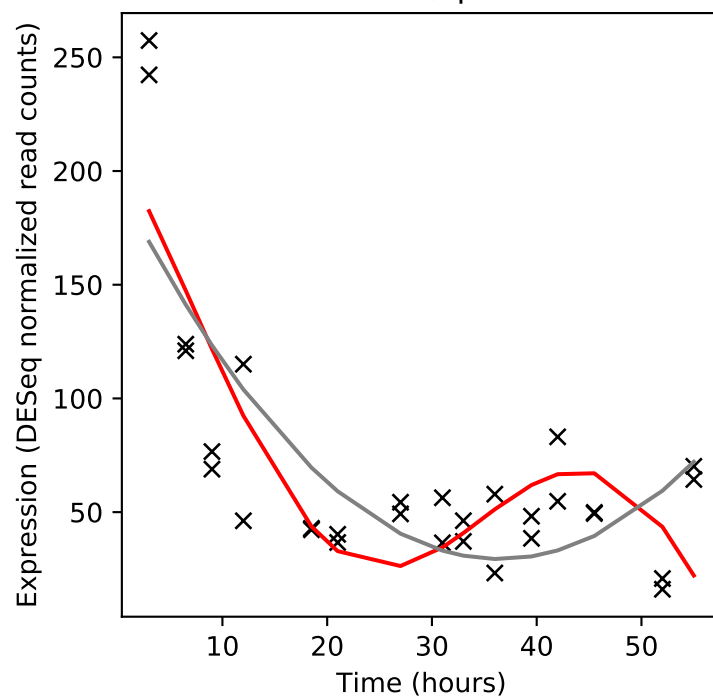

Rv0723/rplO

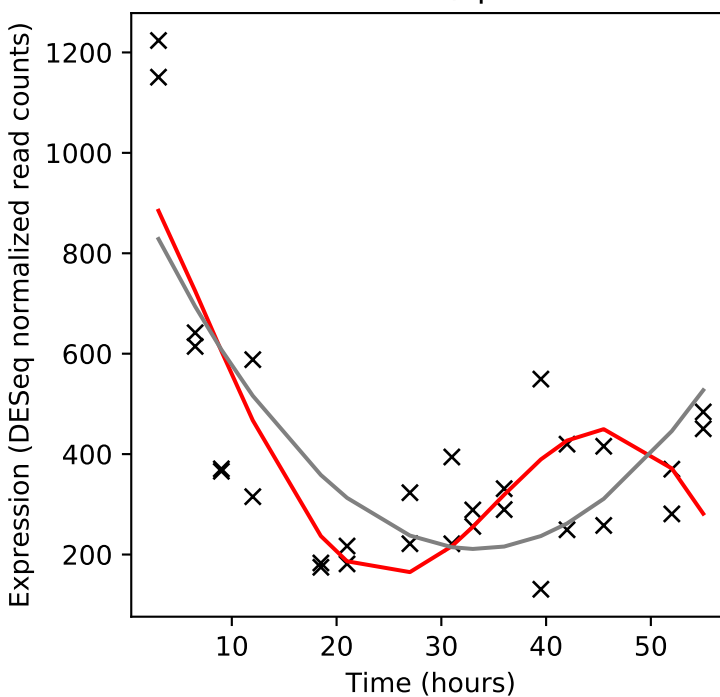

Rv0724/sppA

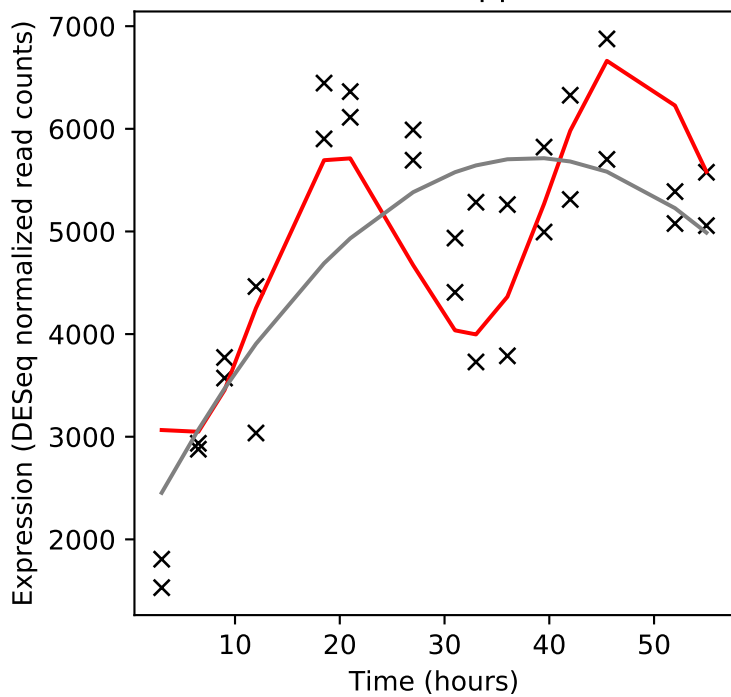

Rv0724A/-

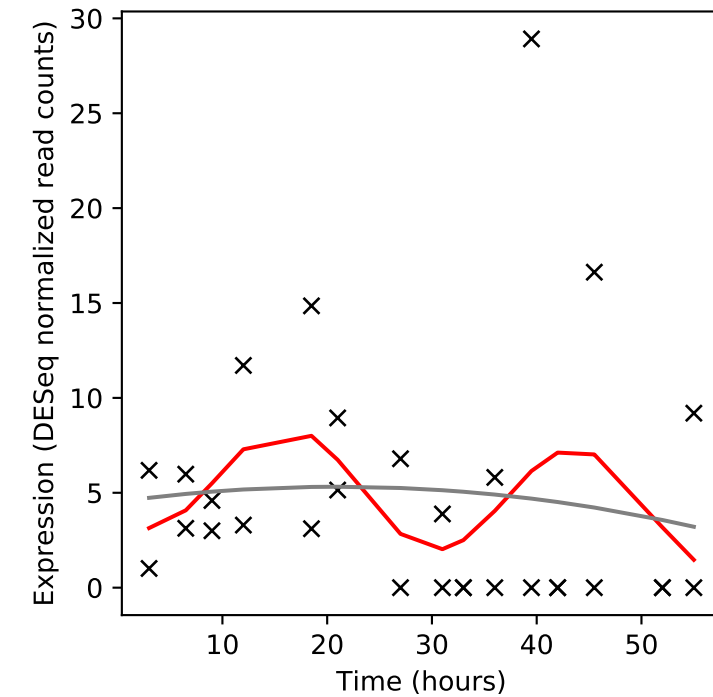

Rv0725c/-

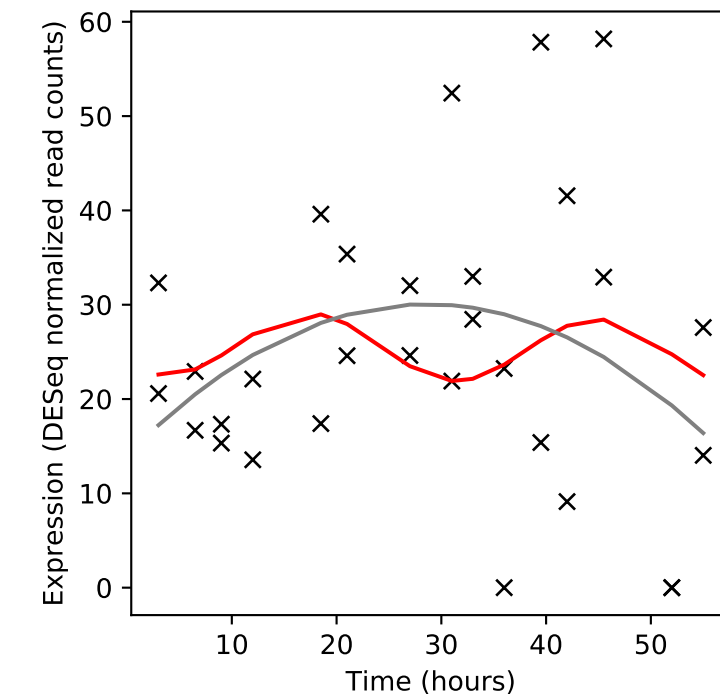

Rv0726c/-

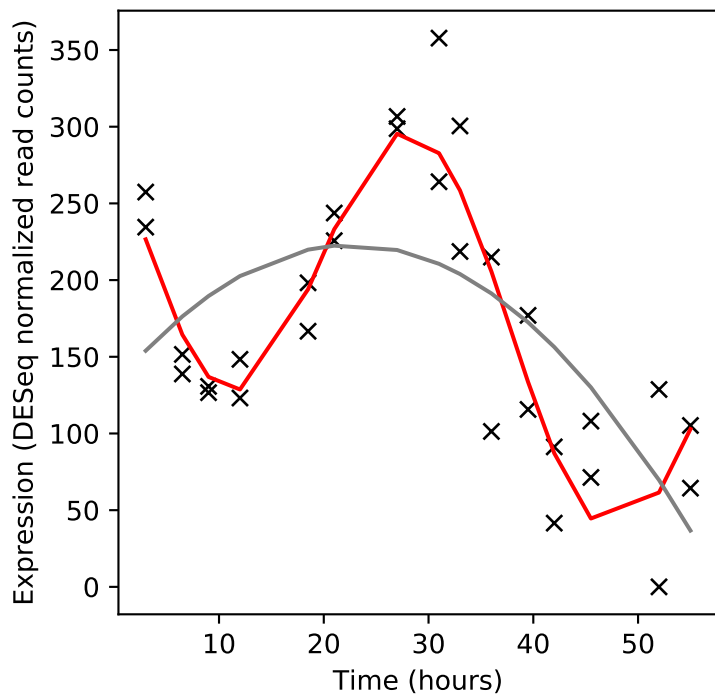

Rv0727c/fucA

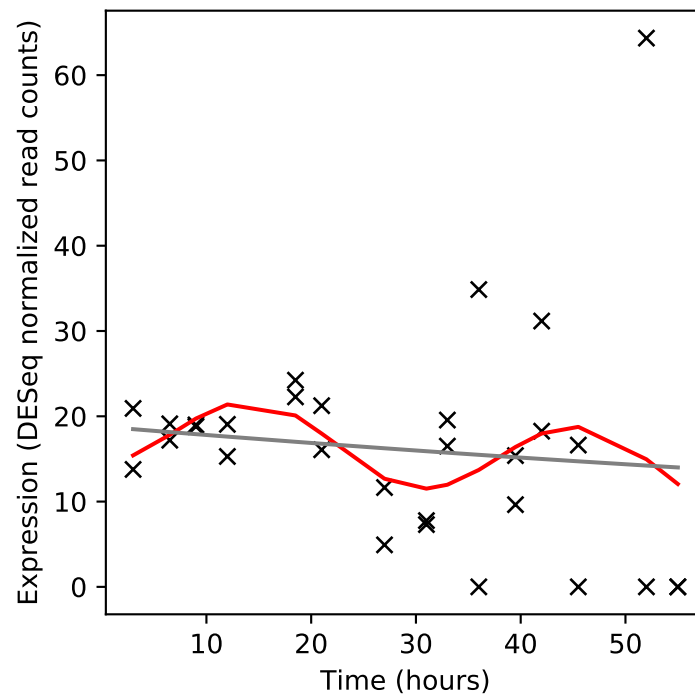

Rv0728c/serA2

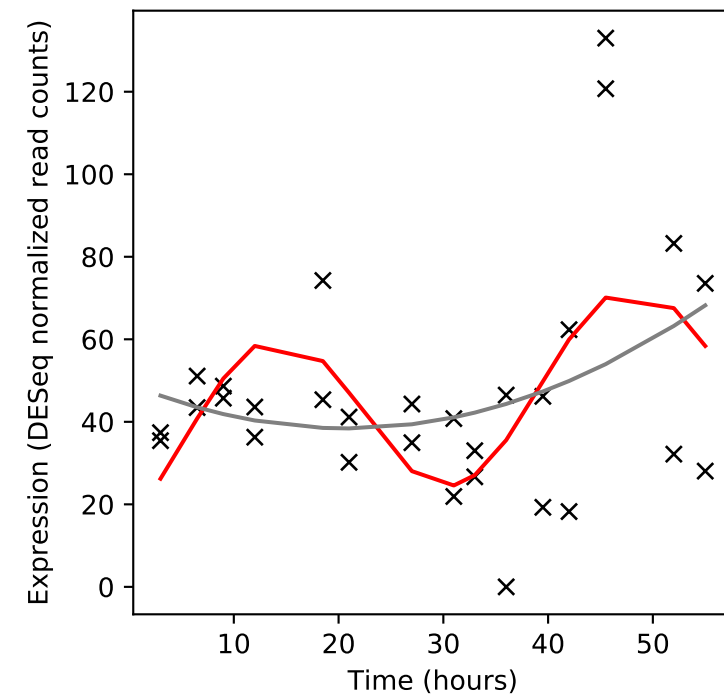

Rv0729/xyIB

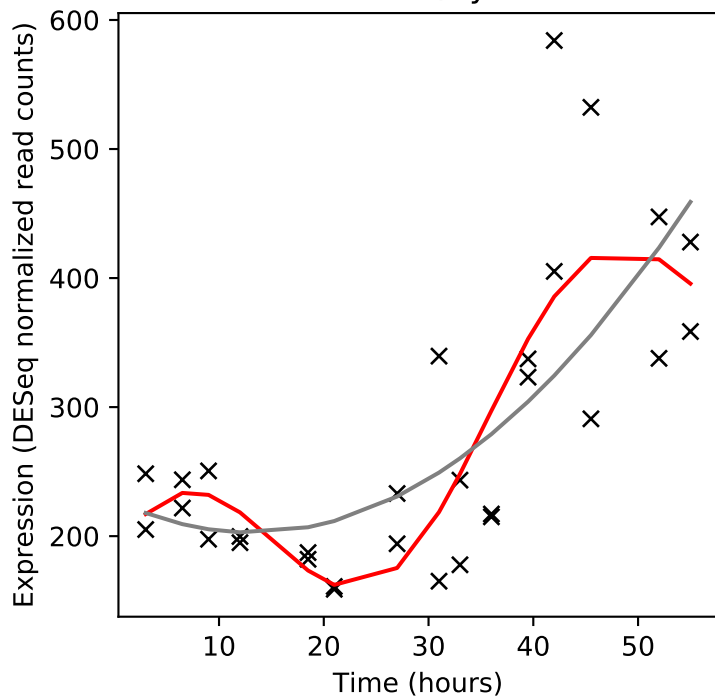

Rv0730/-

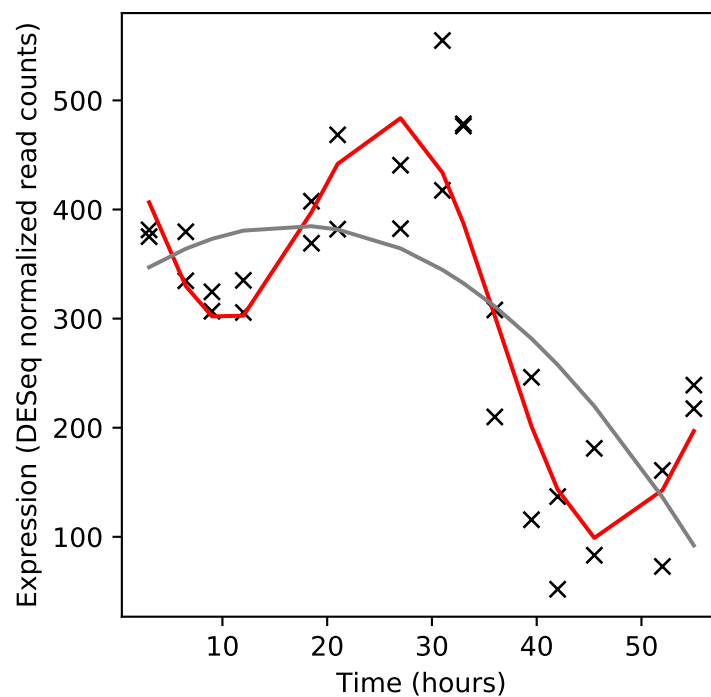

Rv0731c/-

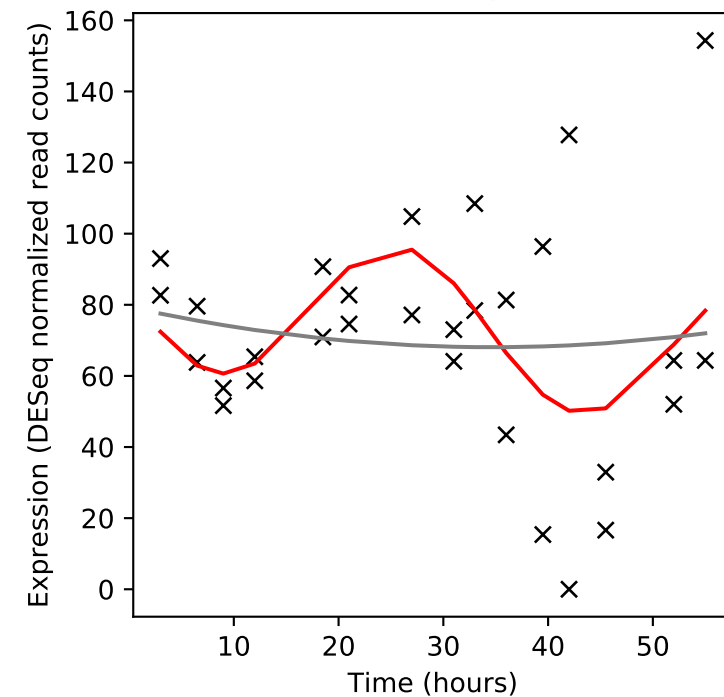

Rv0732/secY

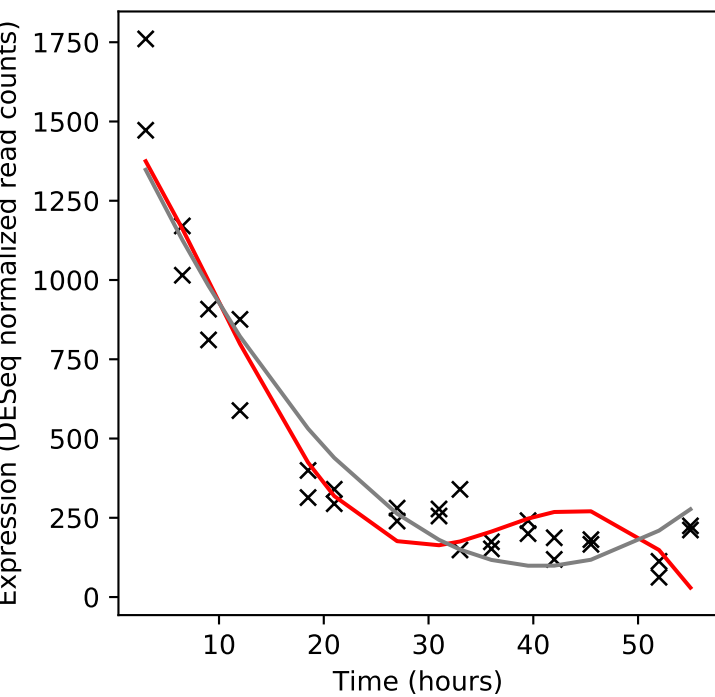

Rv0733/adk

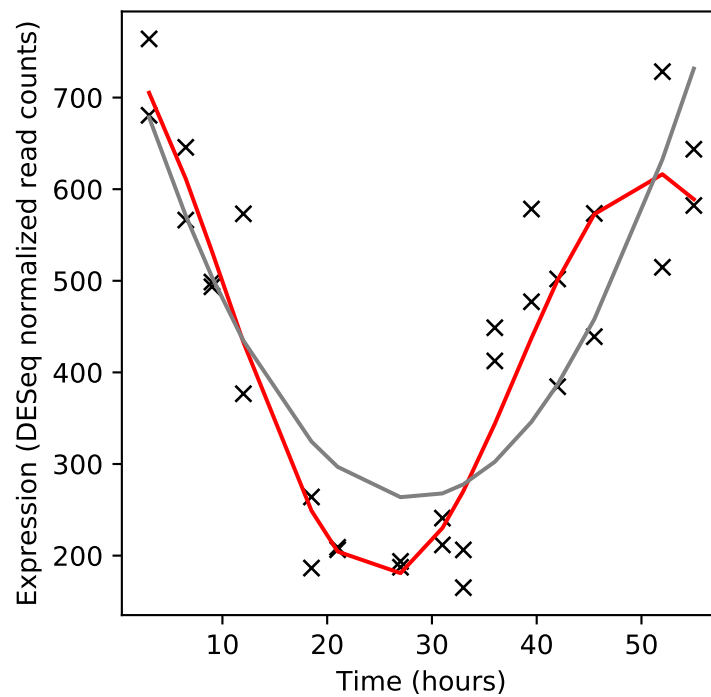

Rv0734/mapA

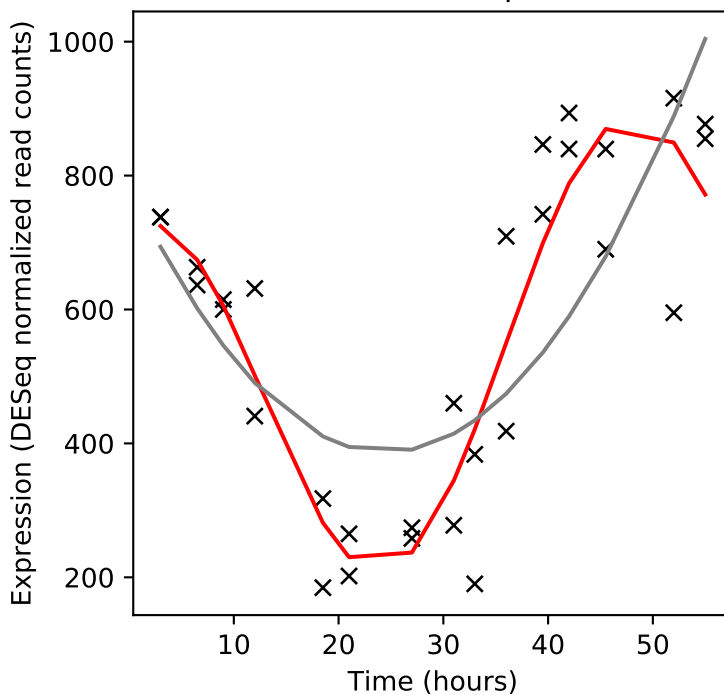

Rv0735/sigL

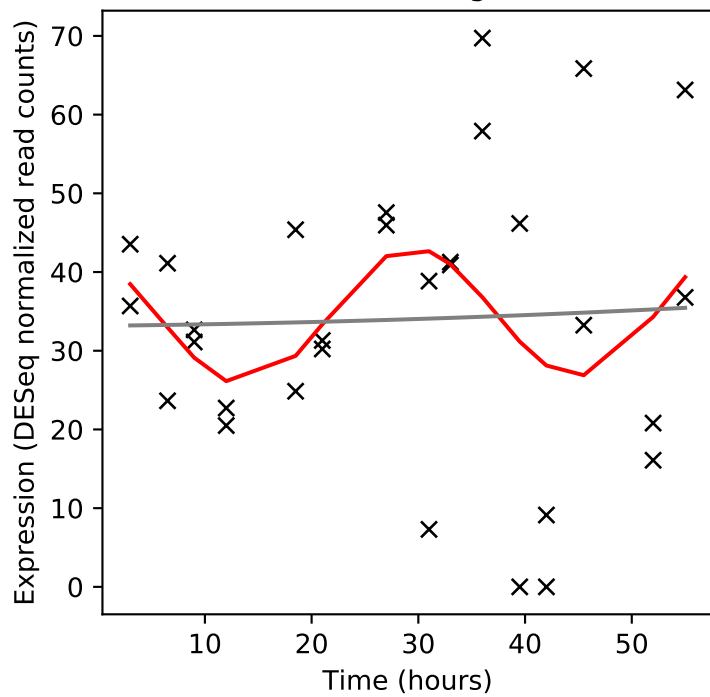

Rv0736/rsIA

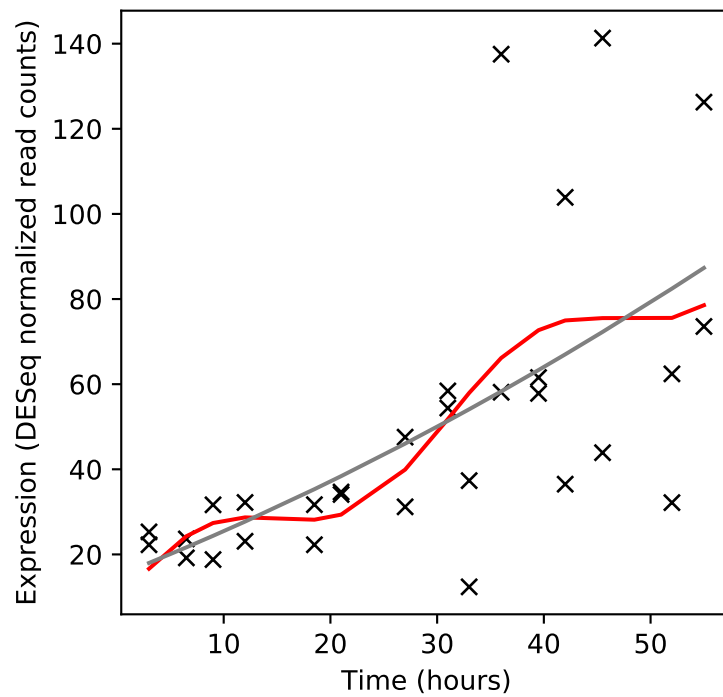

Rv0737/-

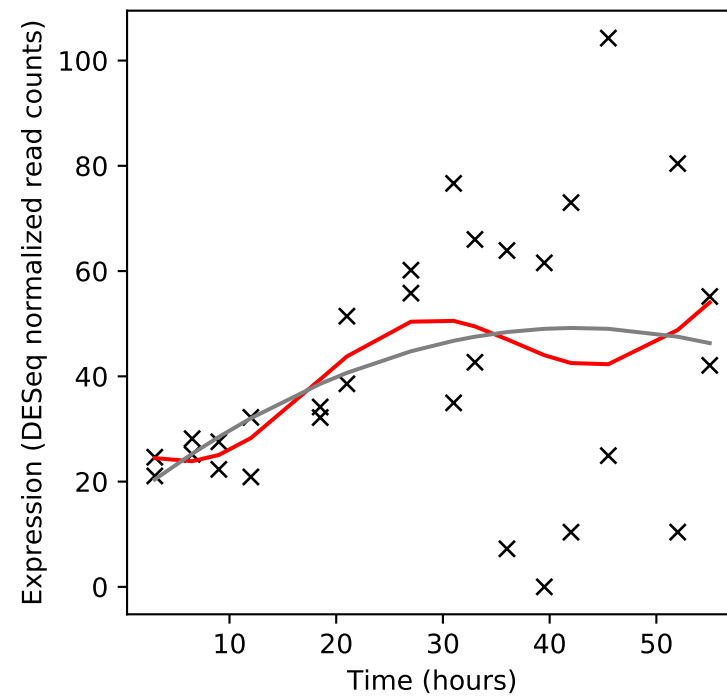

Rv0738/-

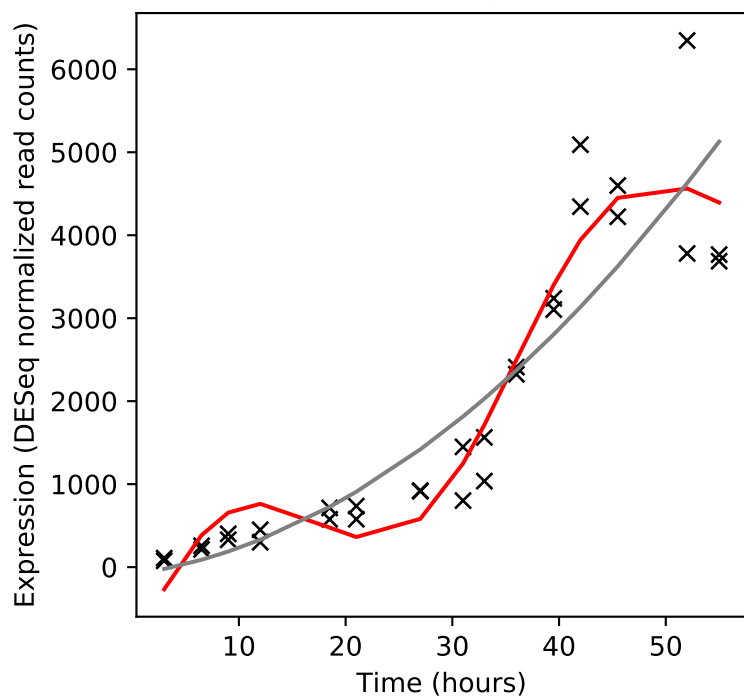

Rv0739/-

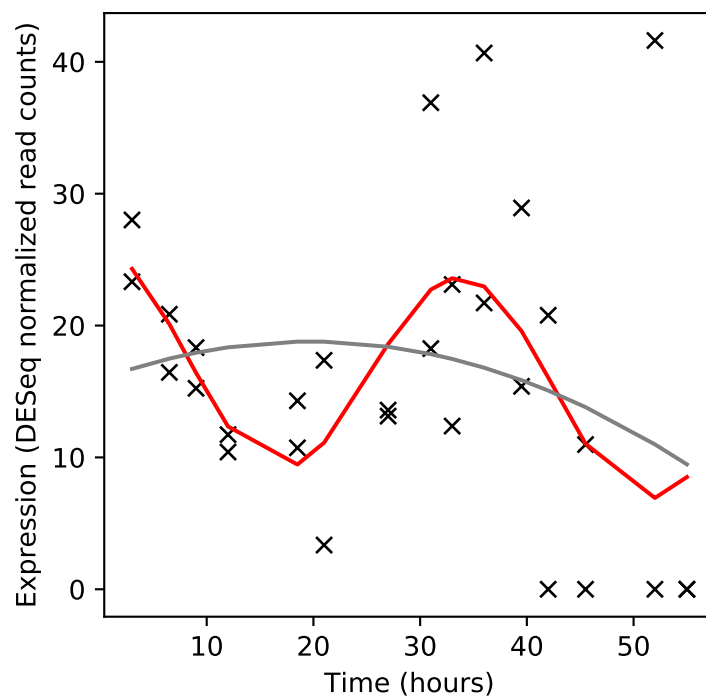

Rv0740/-

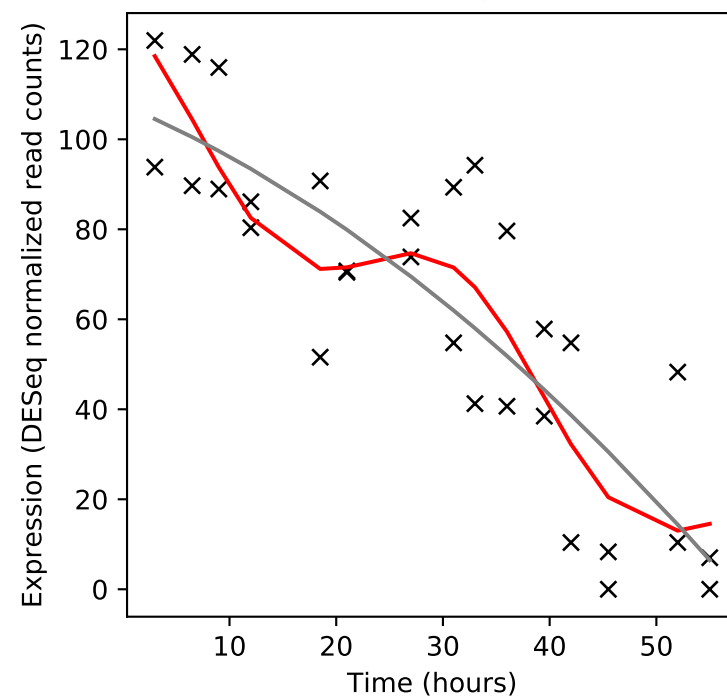

Rv0741/-

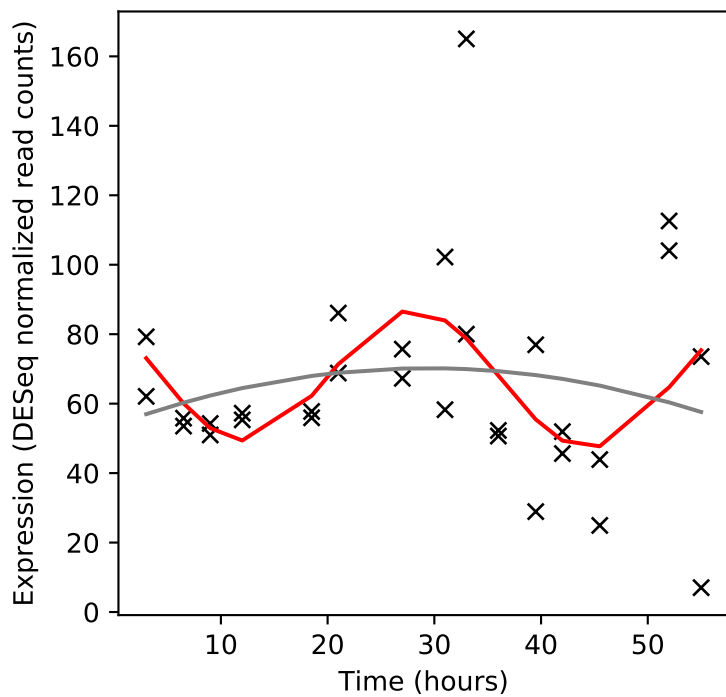

Rv0742/PE\_PGRS8

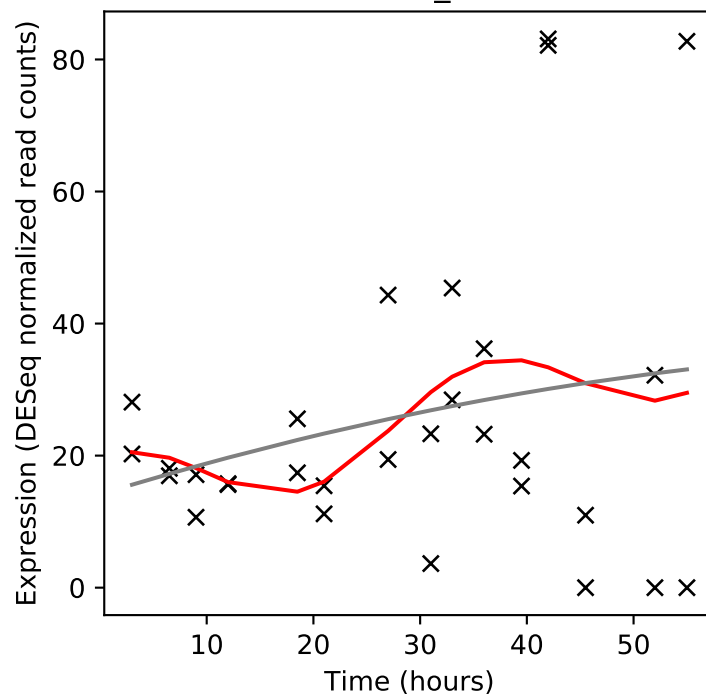

Rv0743c/-

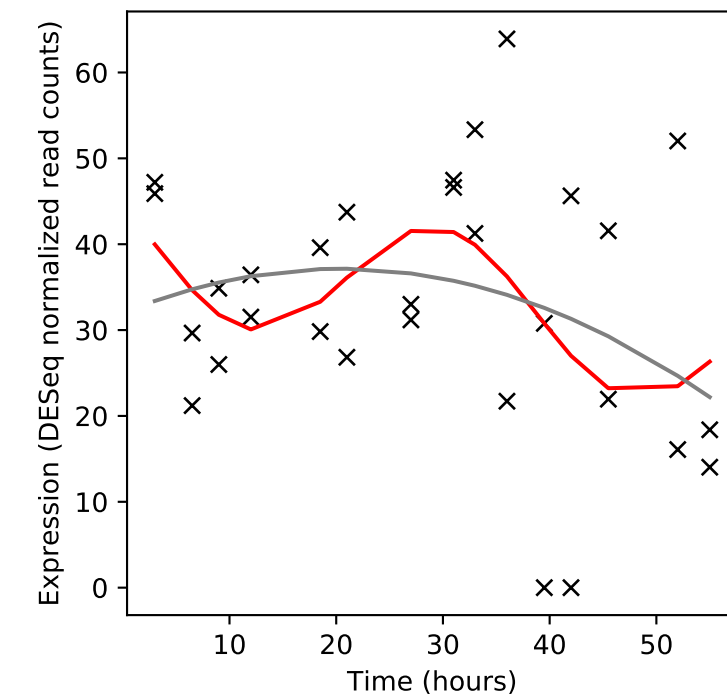



Rv0744c/-

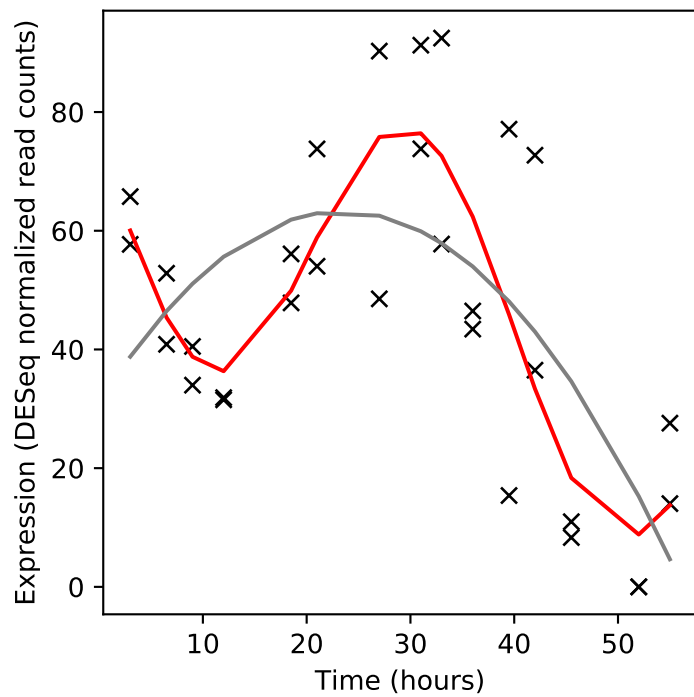

Rv0745/-

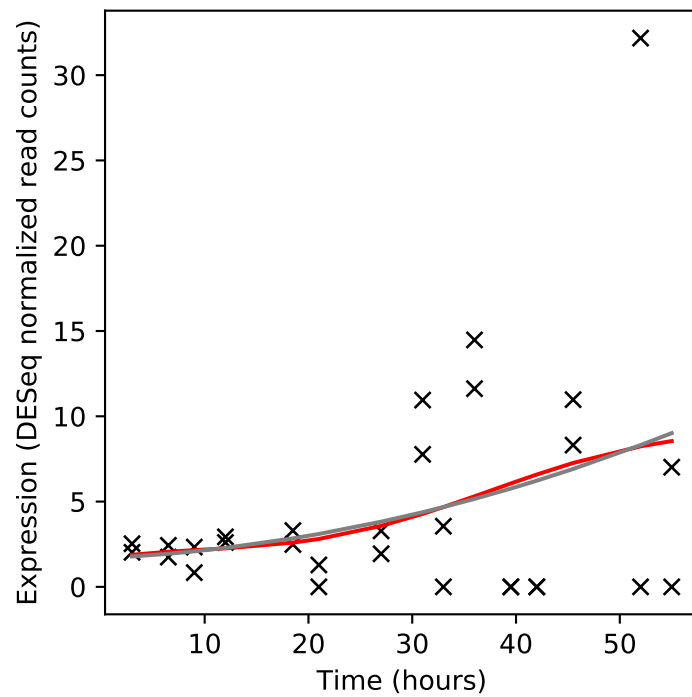

Rv0746/PE\_PGRS9

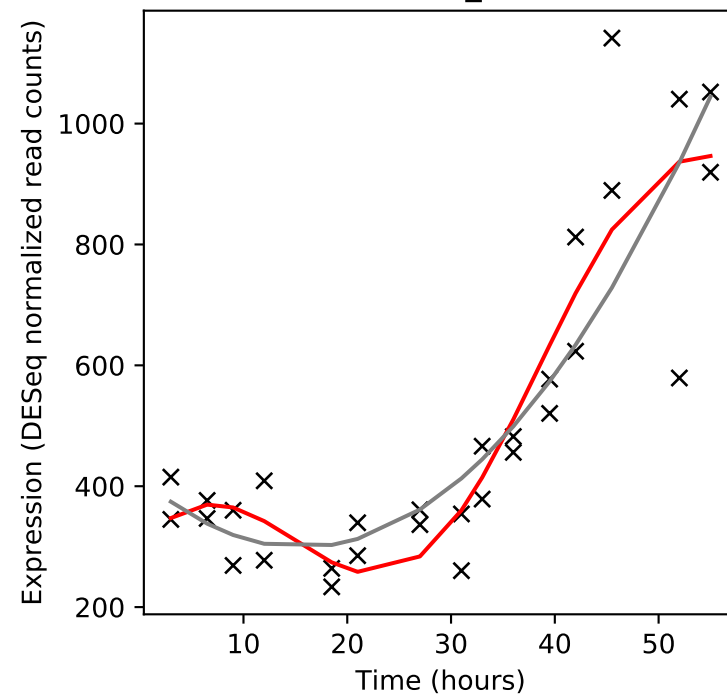

Rv0747/PE\_PGRS10

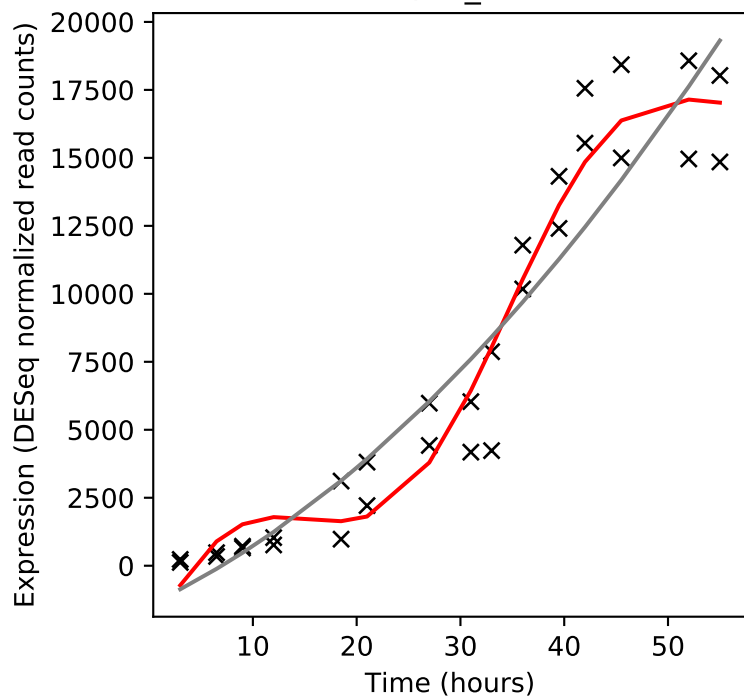

Rv0748/vapB31

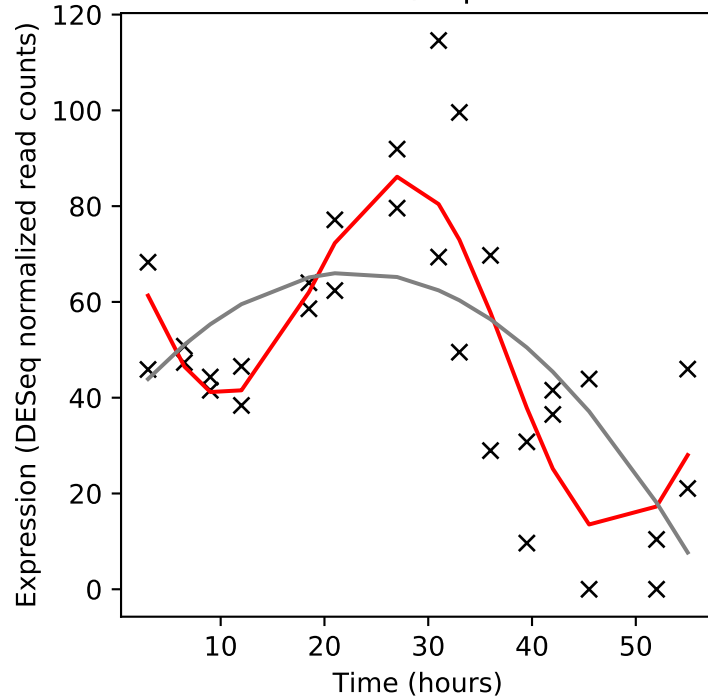

Rv0749/vapC31

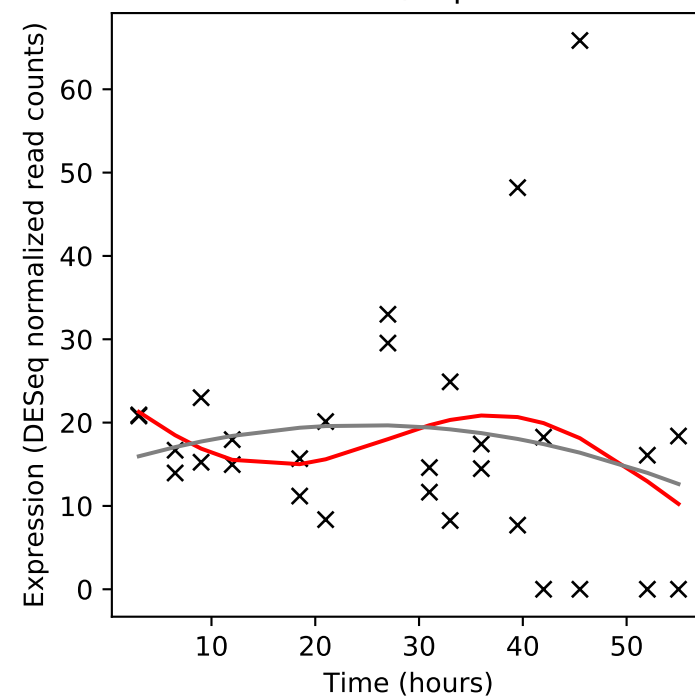

Rv0749A/-

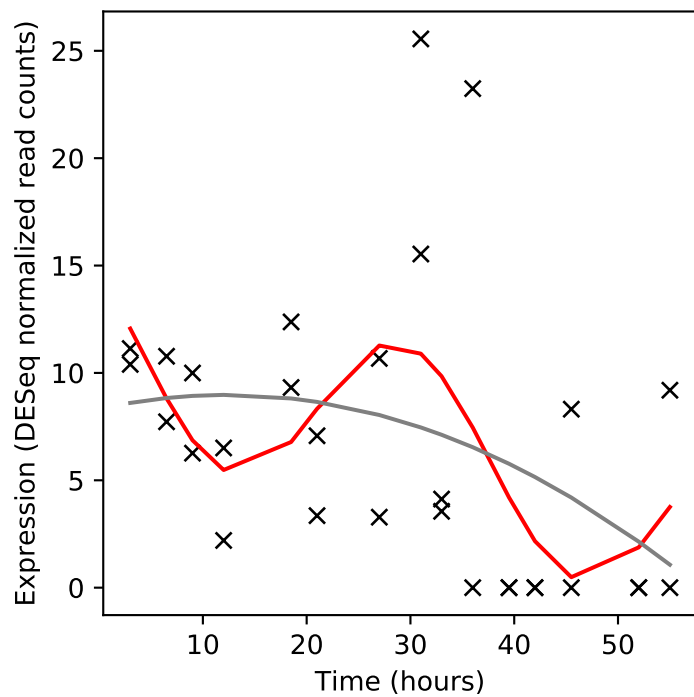

Rv0750/-

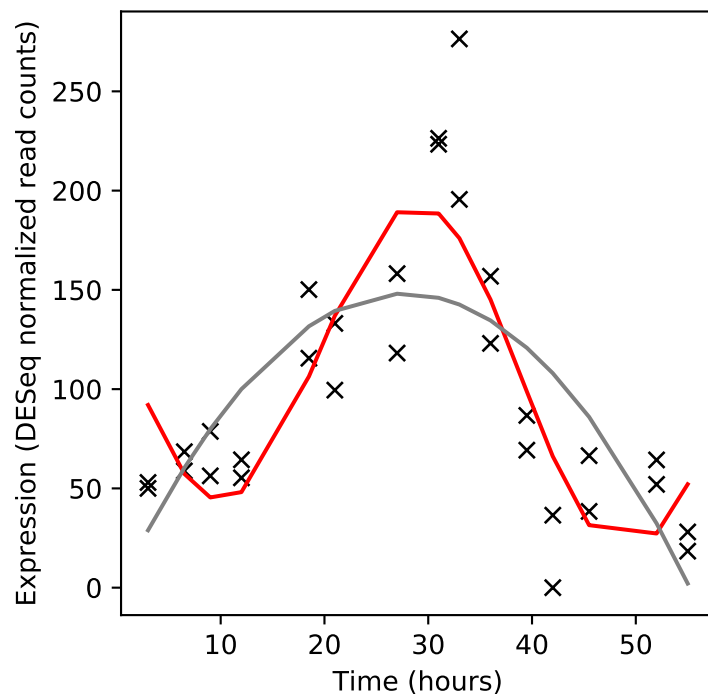

Rv0751c/mmsB

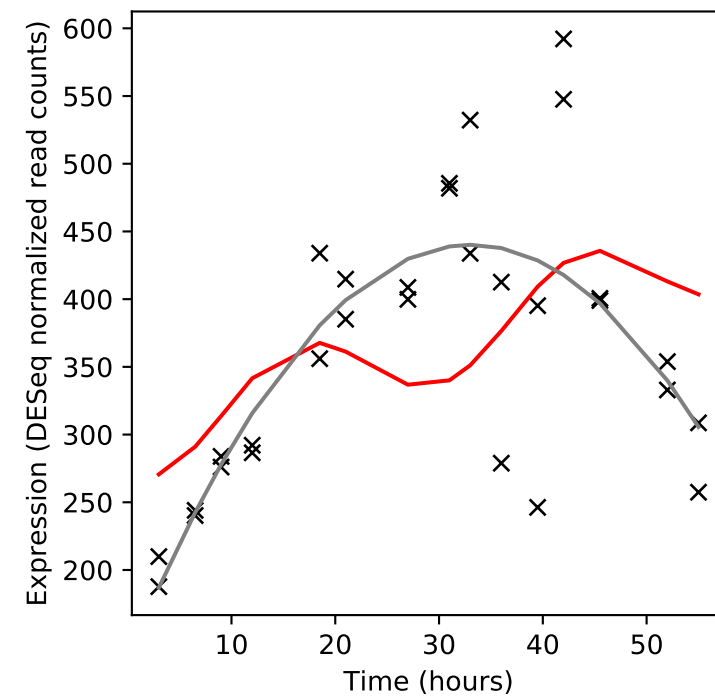

Rv0752c/fadE9

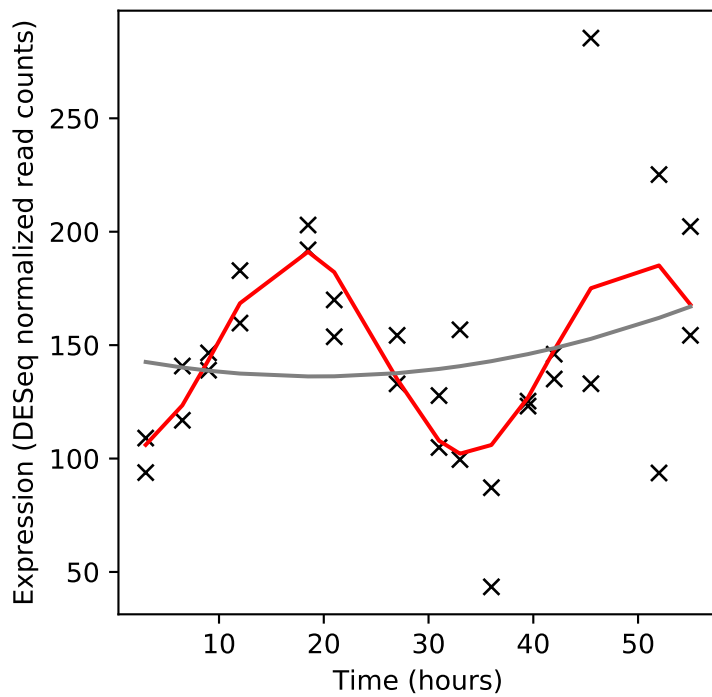

Rv0753c/mmsA

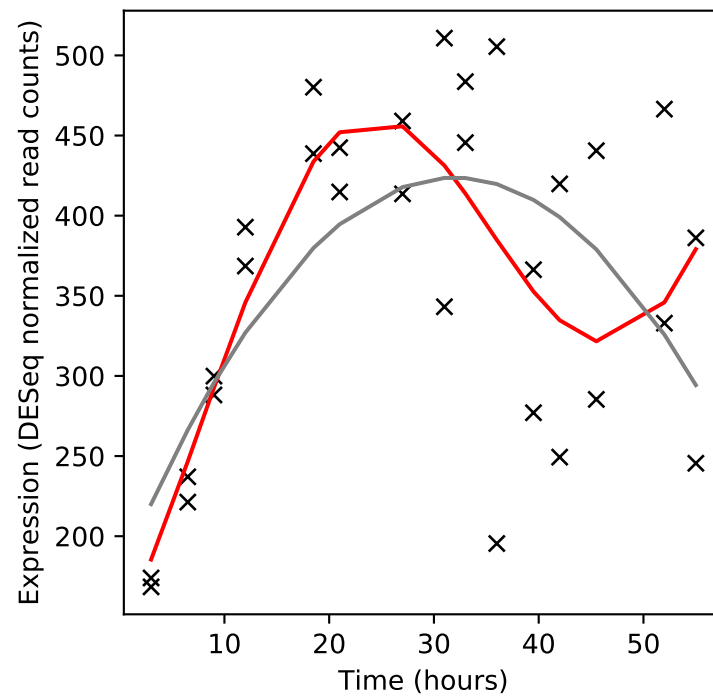

Rv0754/PE\_PGRS11

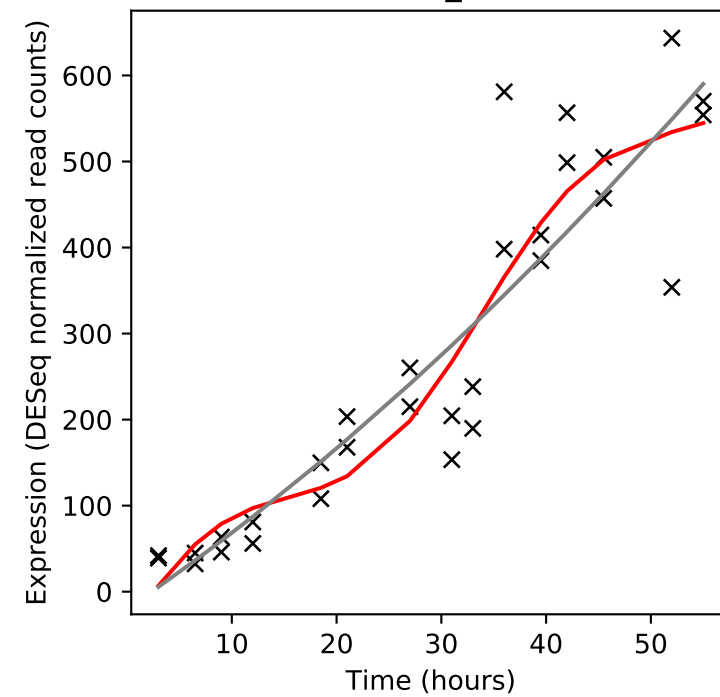

Rv0755c/PPE12

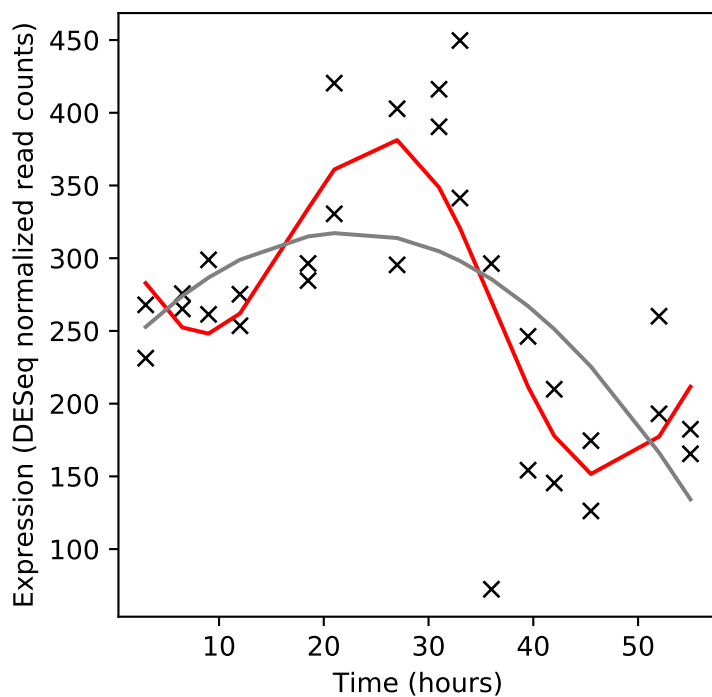

Rv0755A/-

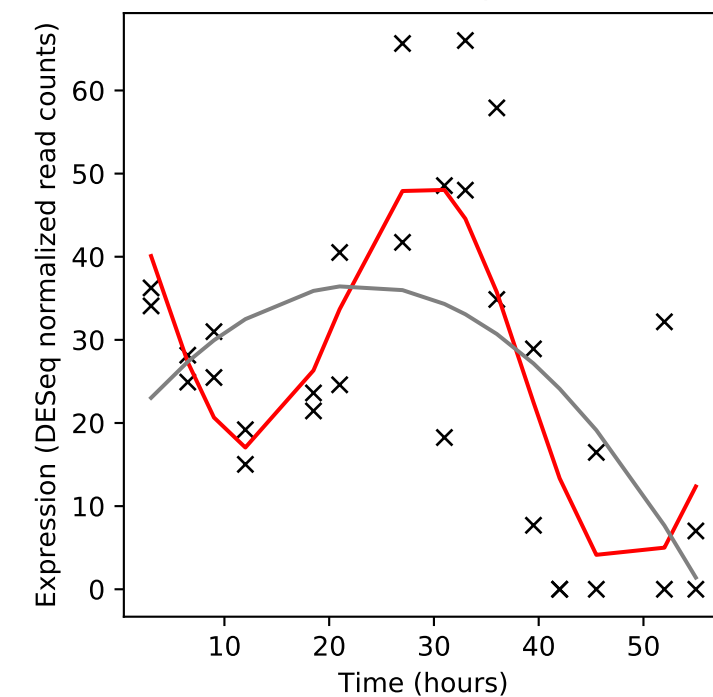

Rv0756c/-

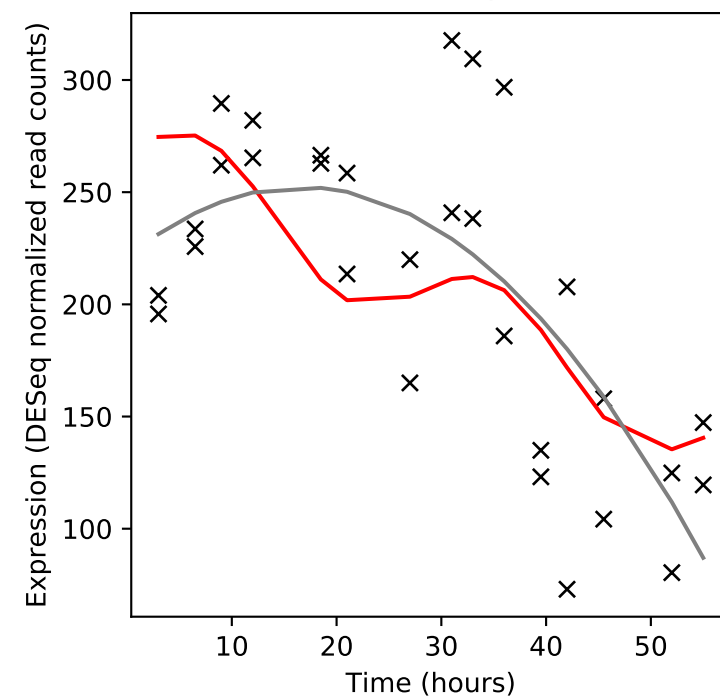

Rv0757/phoP

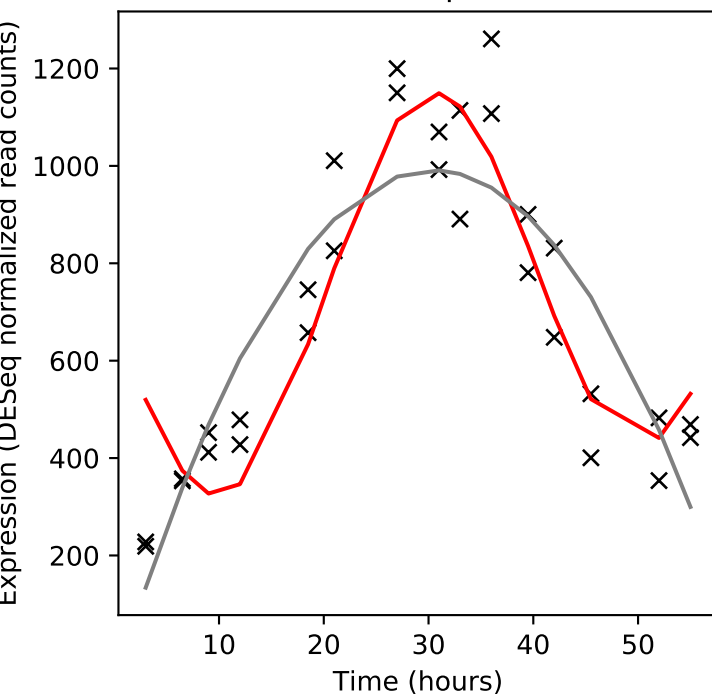

Rv0758/phoR

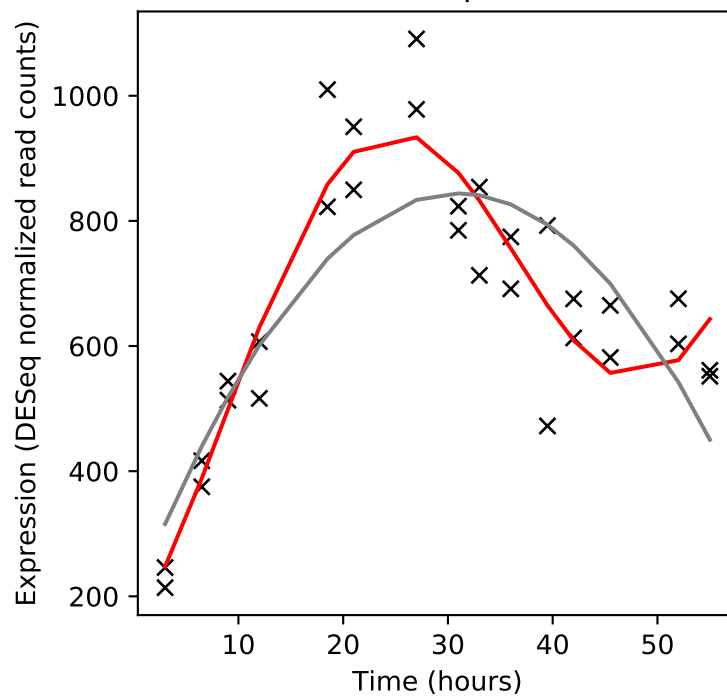

Rv0759c/-

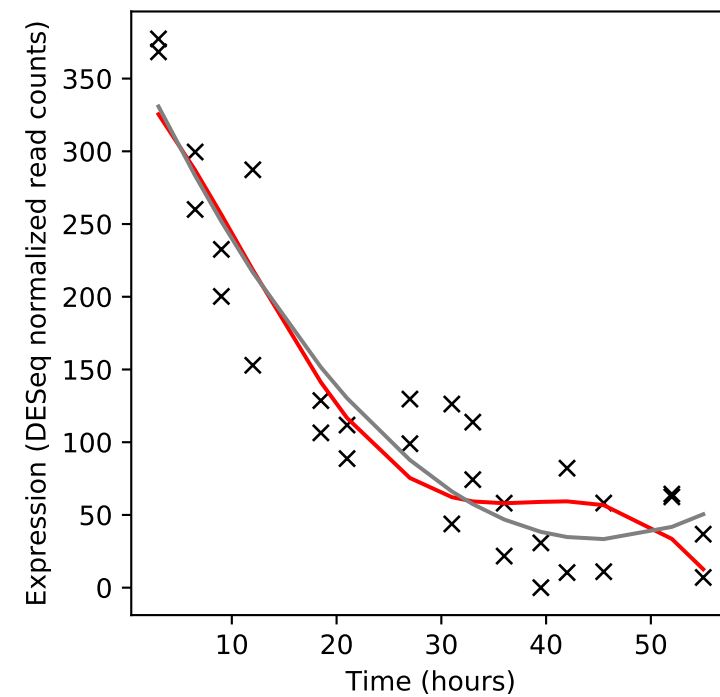

Rv0760c/-

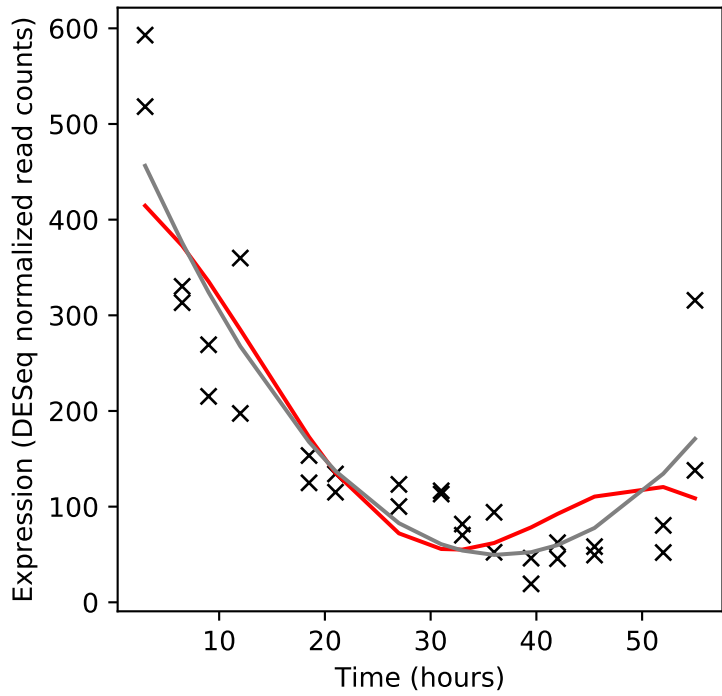

Rv0761c/adhB

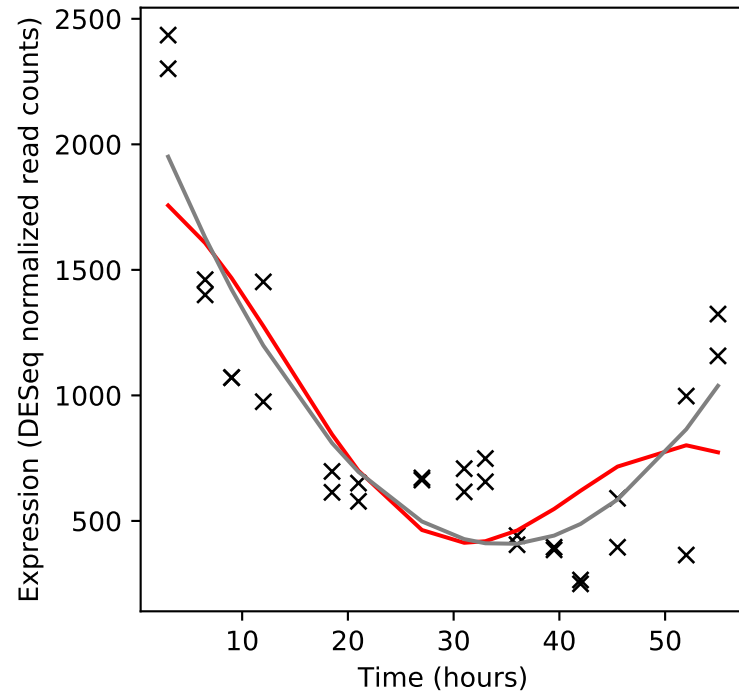

Rv0762c/-

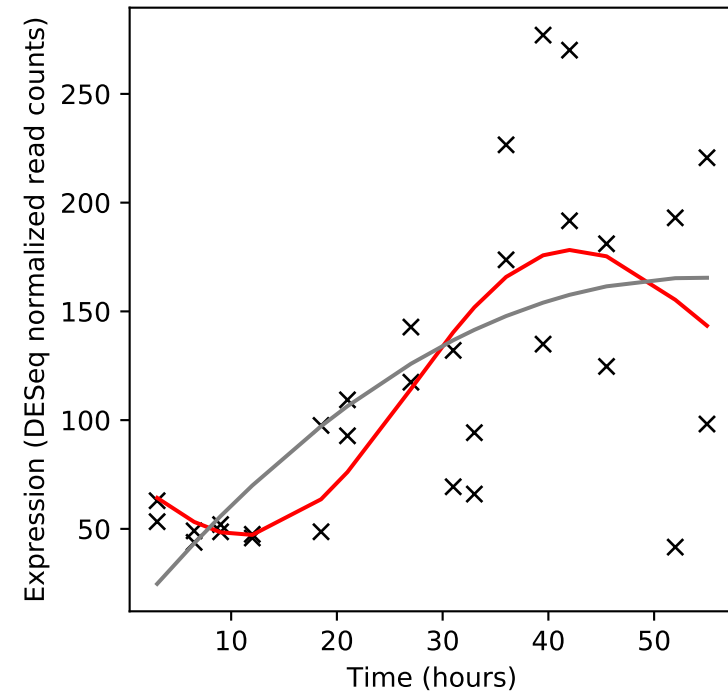

Rv0763c/-

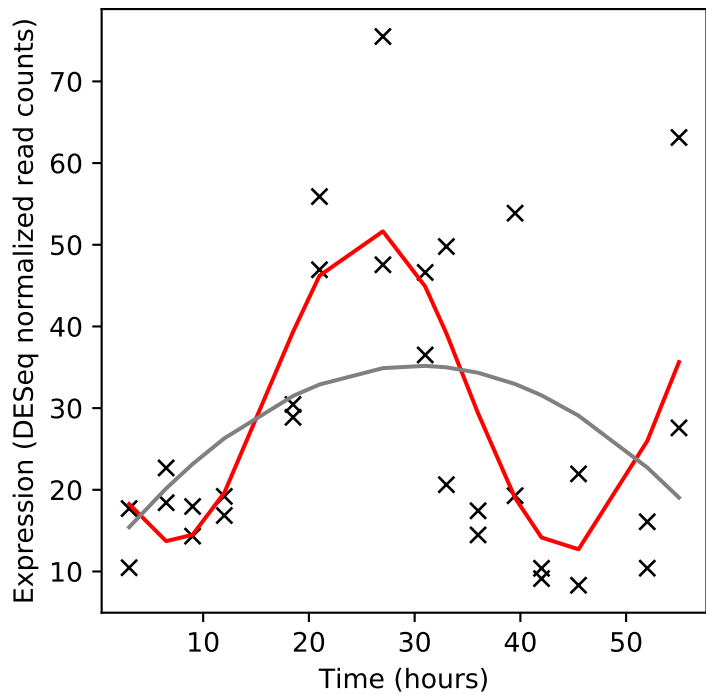

Rv0764c/cyp51

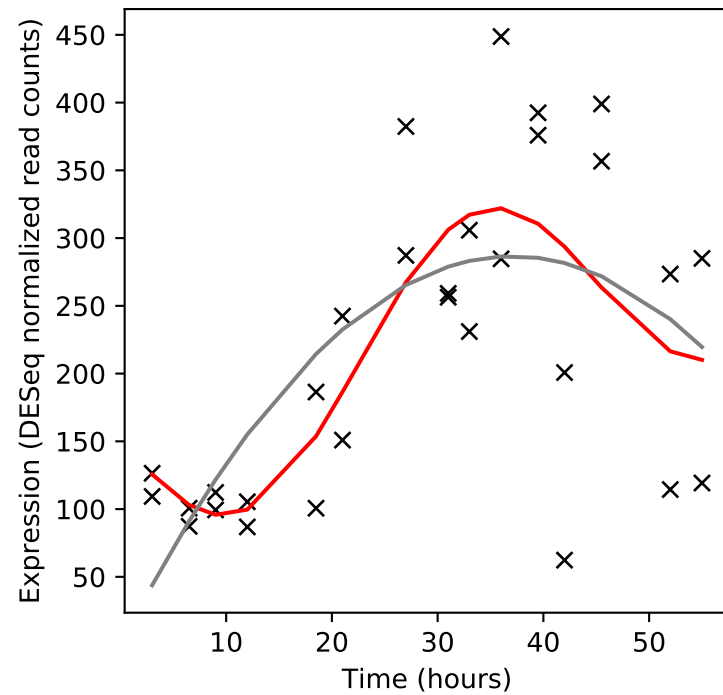

Rv0765c/-

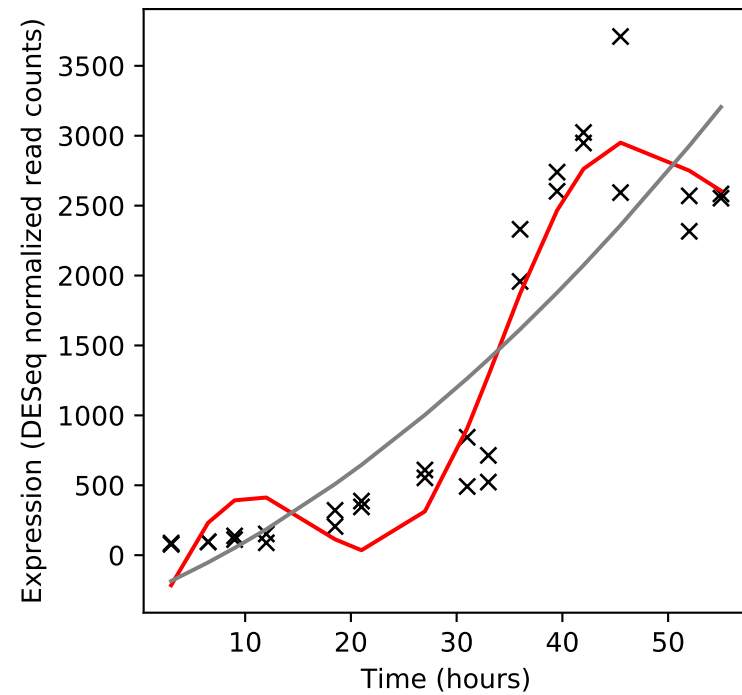

Rv0766c/cyp123

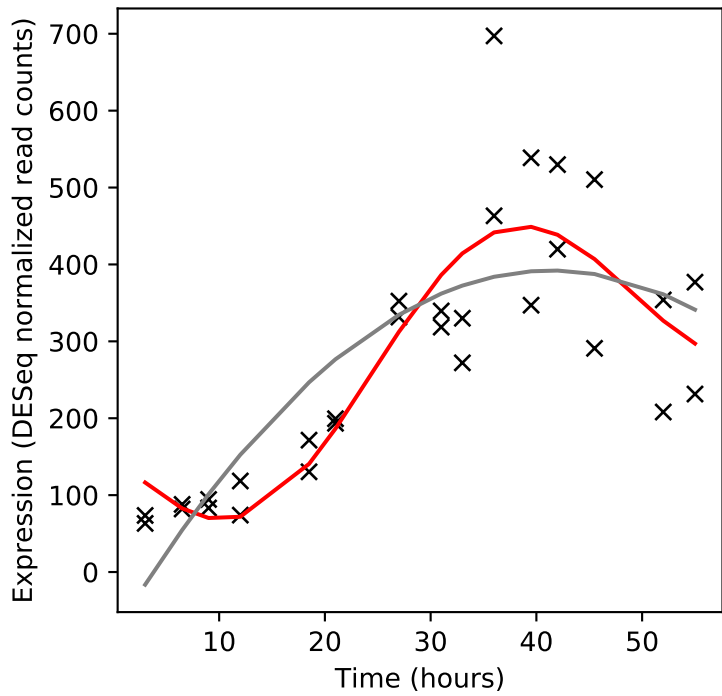

Rv0767c/-

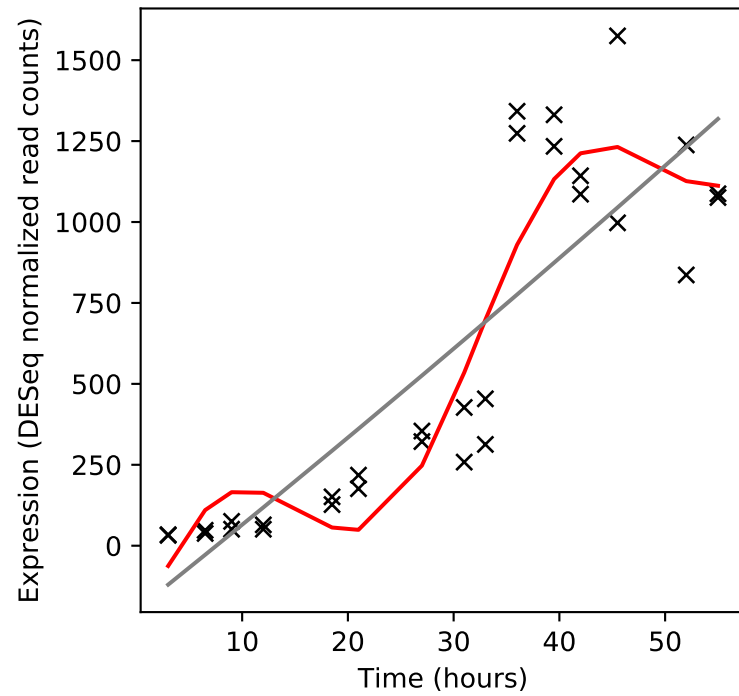

Rv0768/aldA

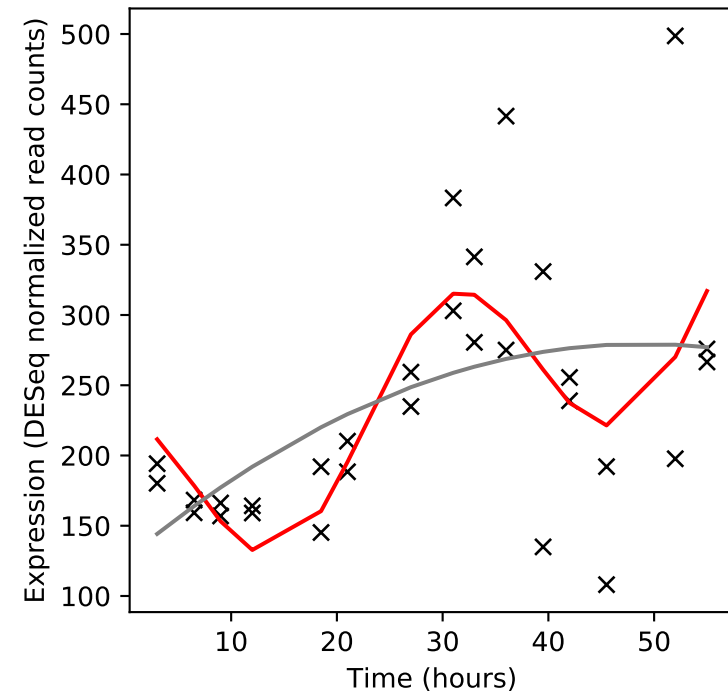

Rv0769/-

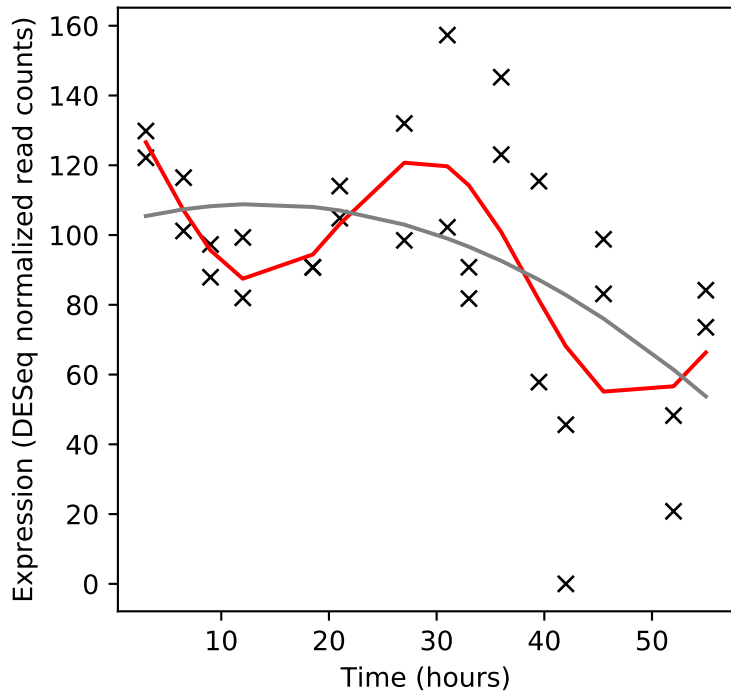

Rv0770/-

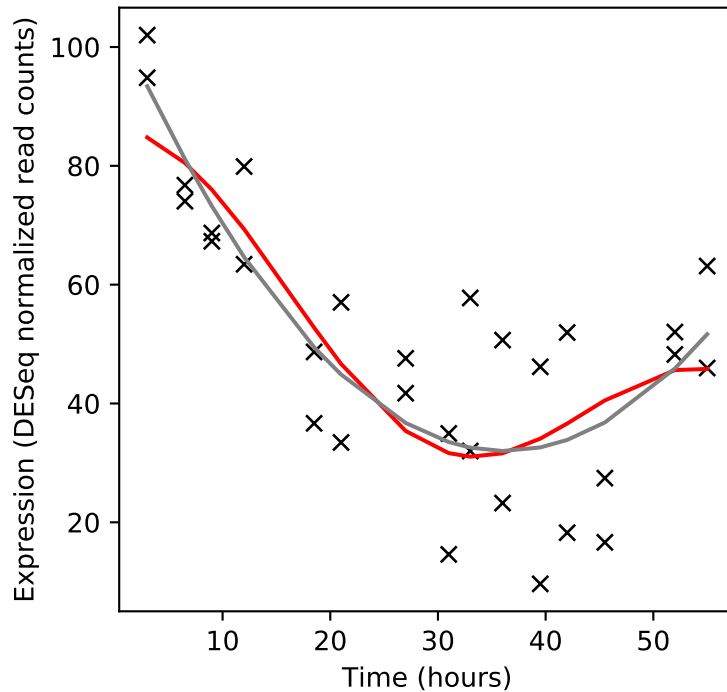

Rv0771/-

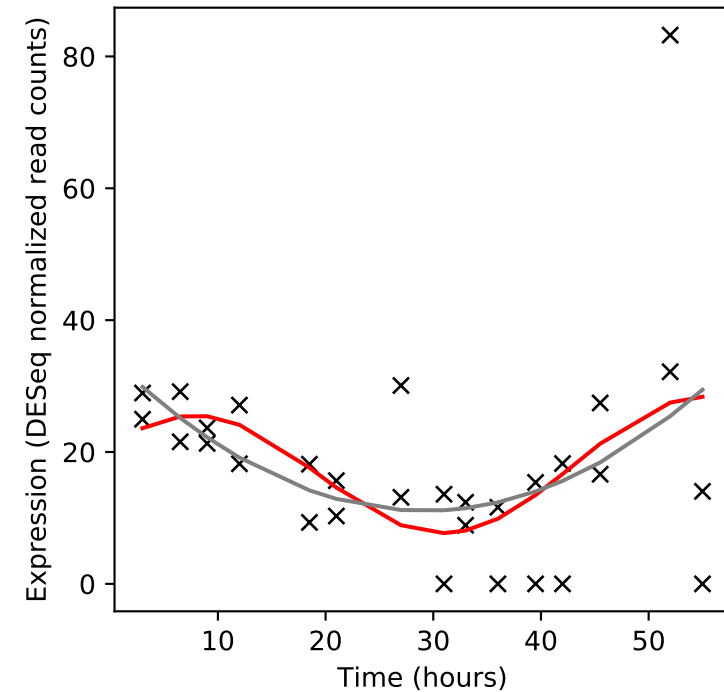

Rv0772/purD

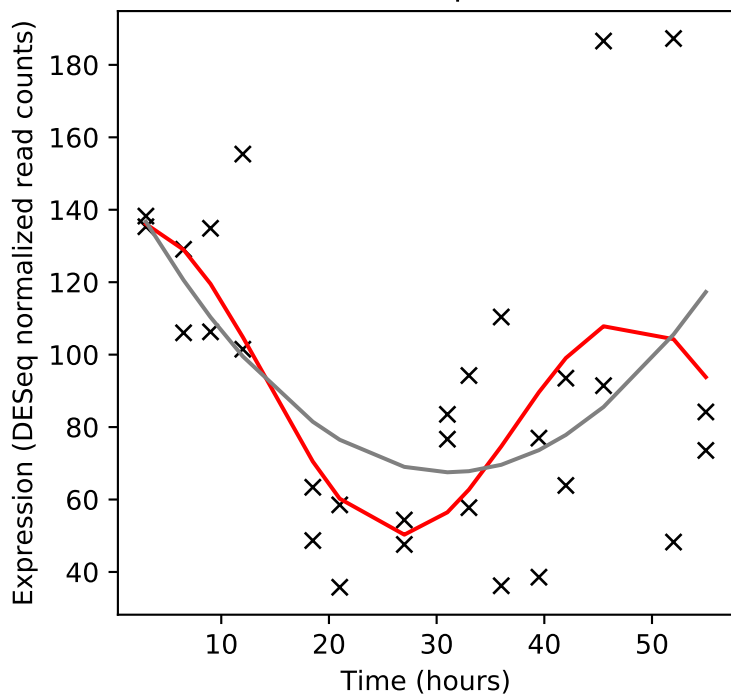

Rv0773c/ggtA

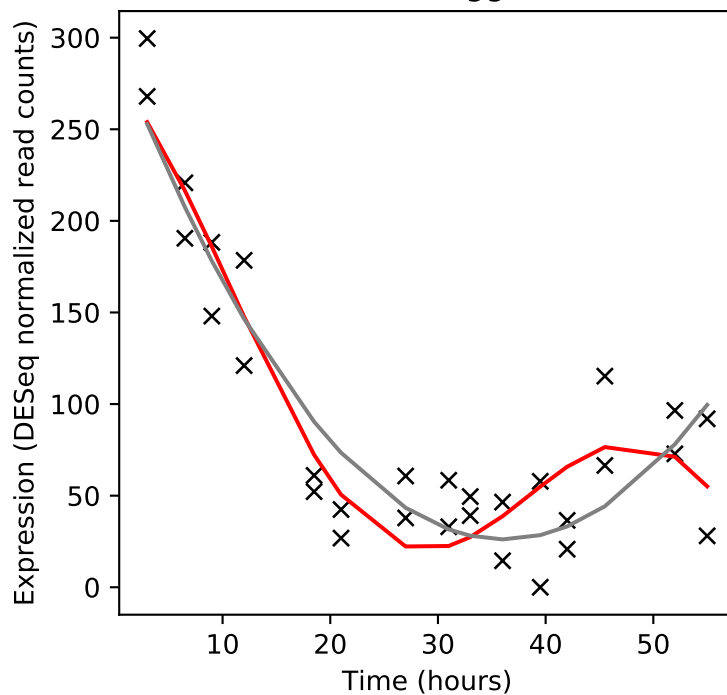

Rv0774c/-

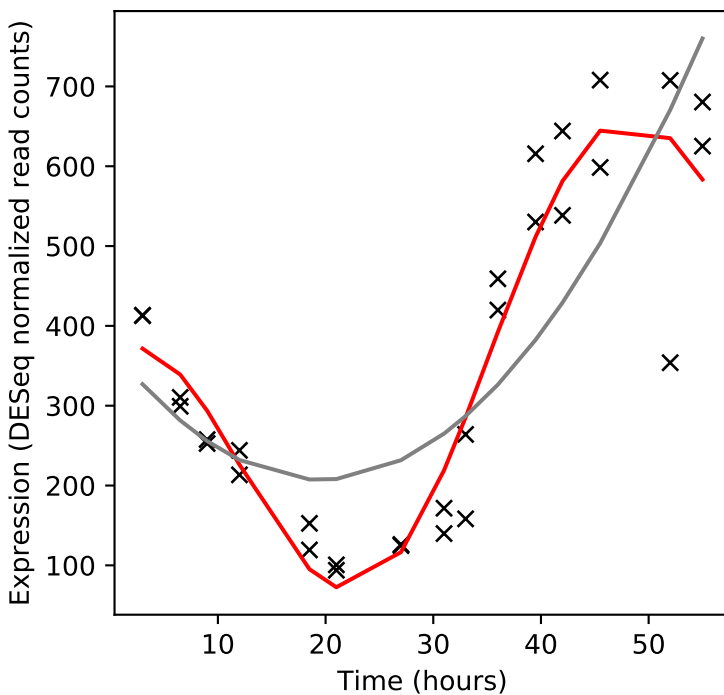

Rv0775/-

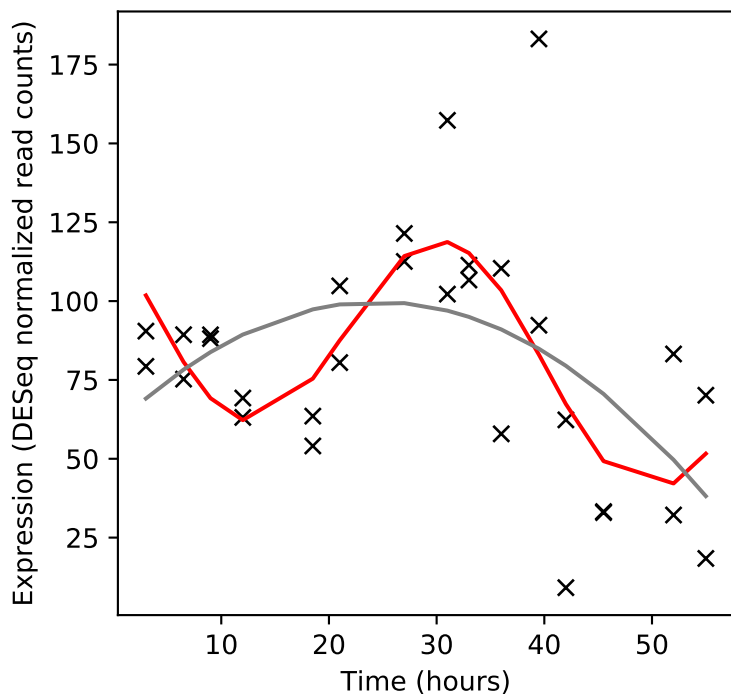

Rv0776c/-

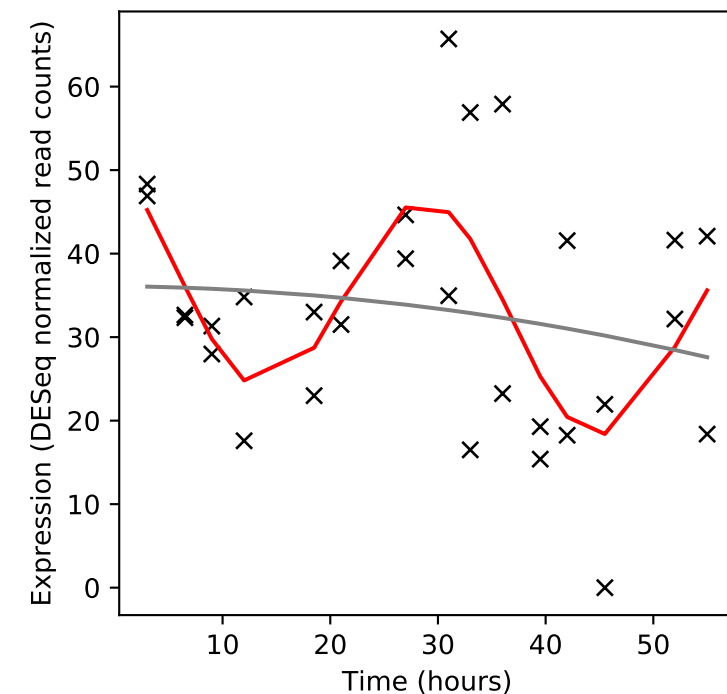

Rv0777/purB

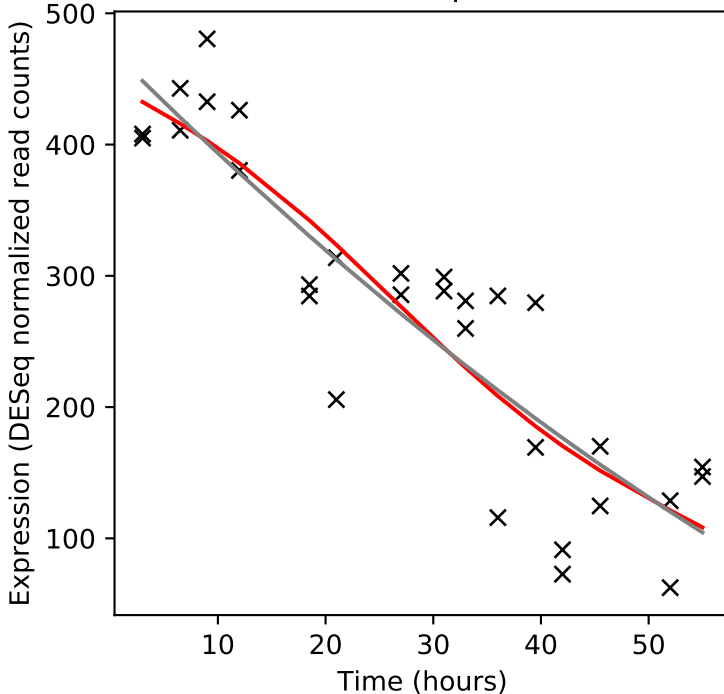

Rv0778/cyp126

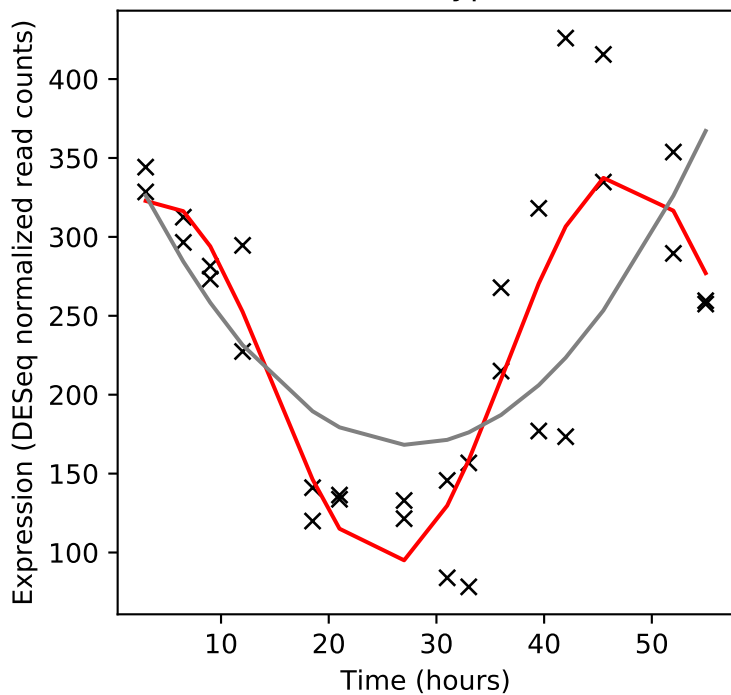

Rv0779c/-

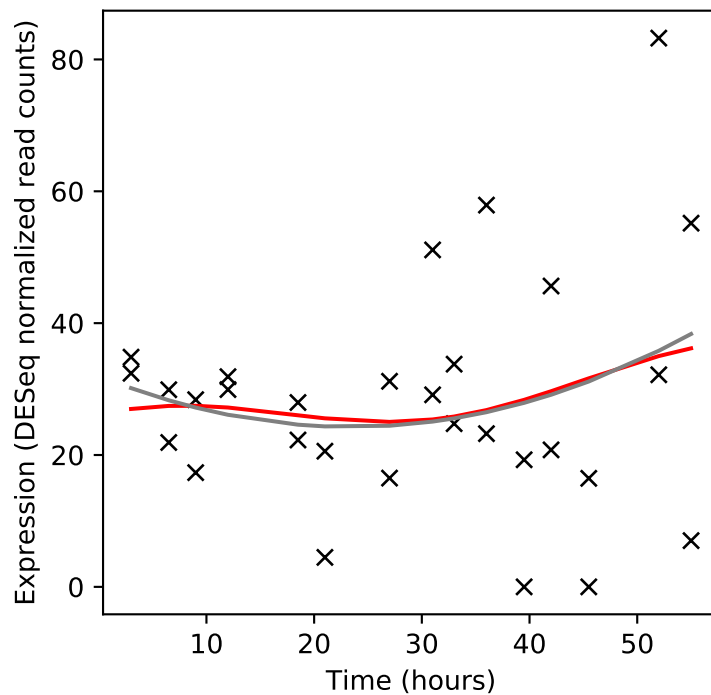

Rv0780/purC

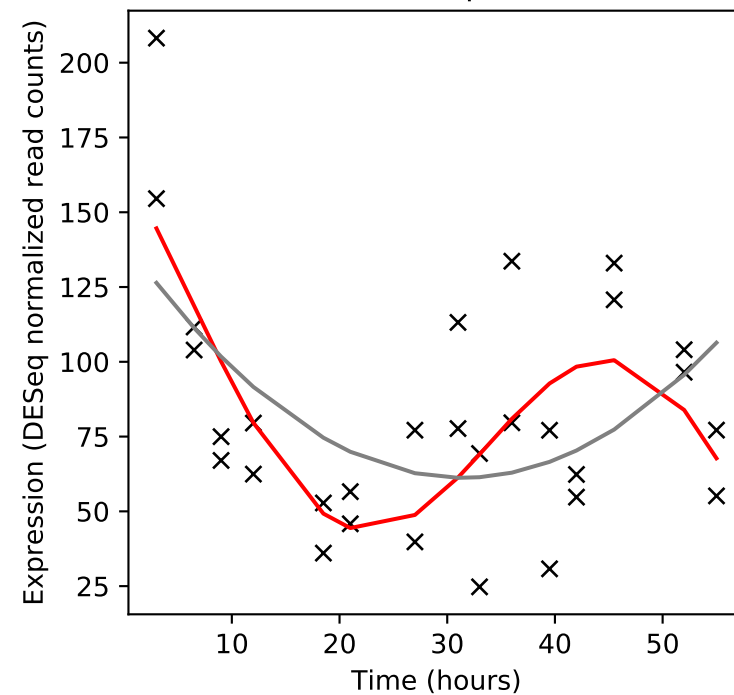

Rv0781/ptrBa

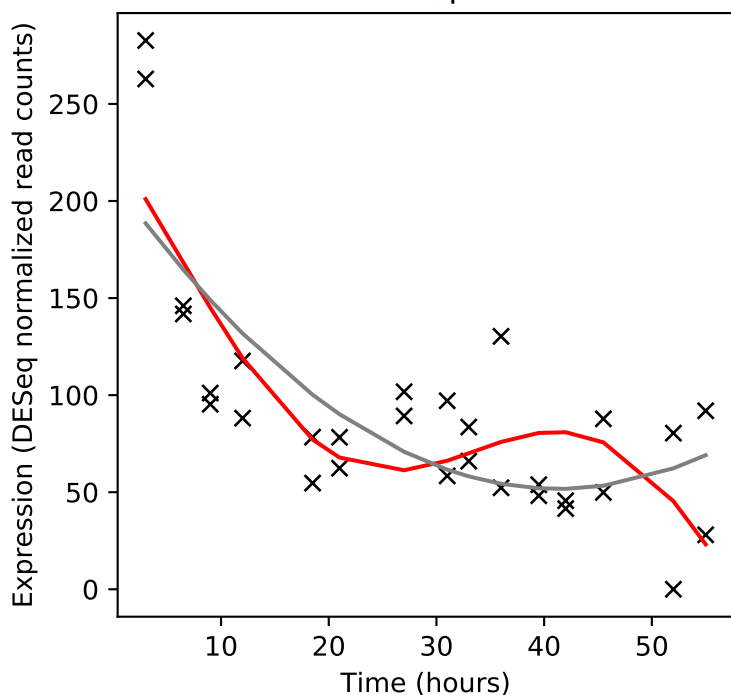

Rv0782/ptrBb

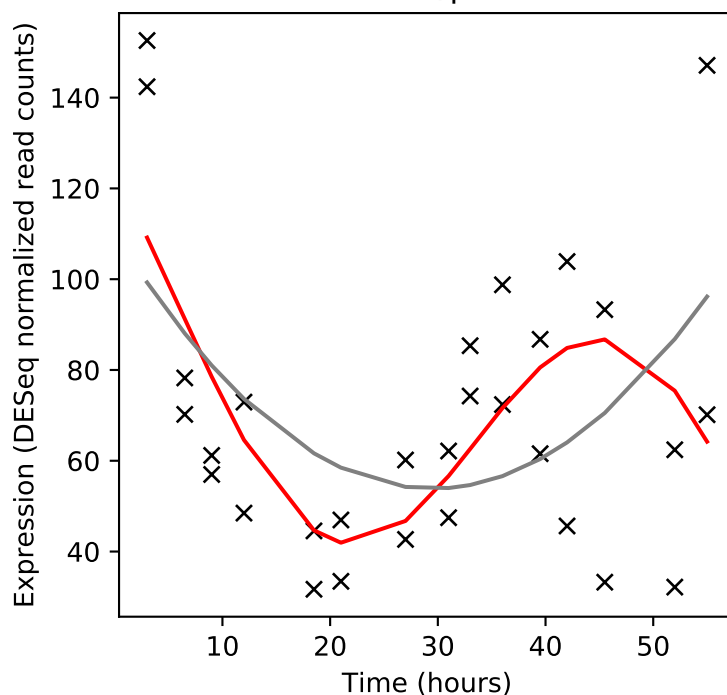

Rv0783c/emrB

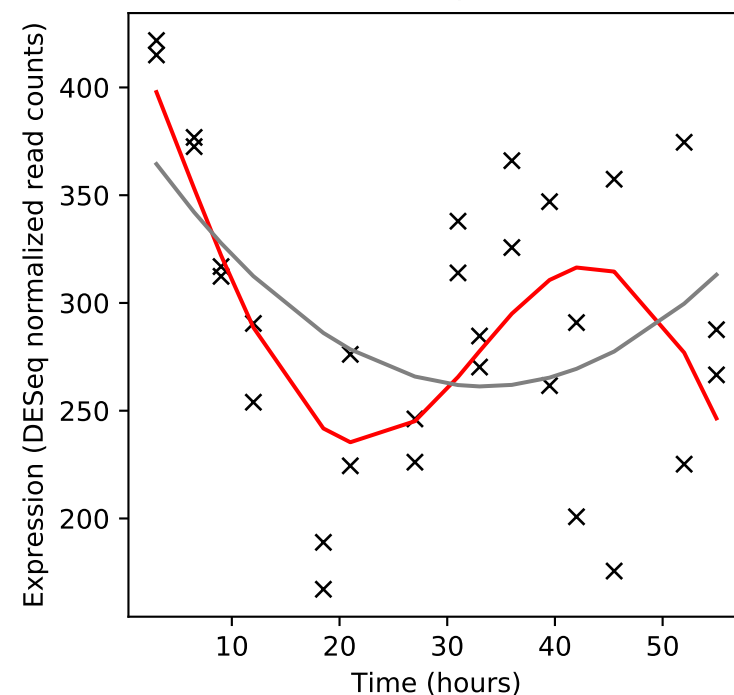

Rv0784/-

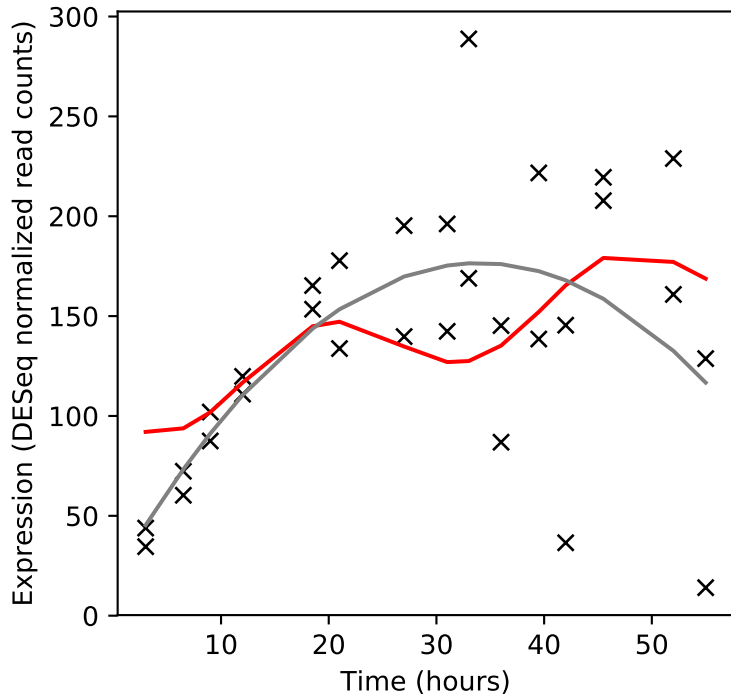

Rv0785/-

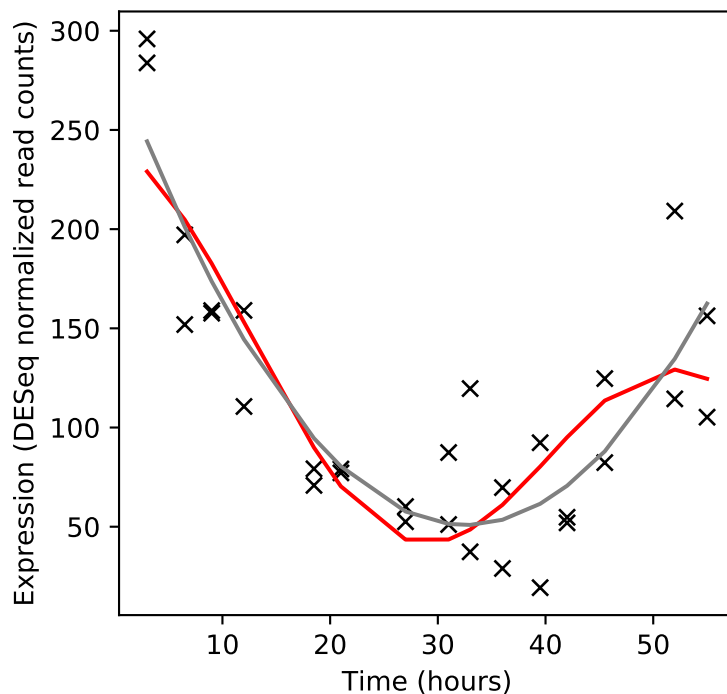

Rv0786c/-

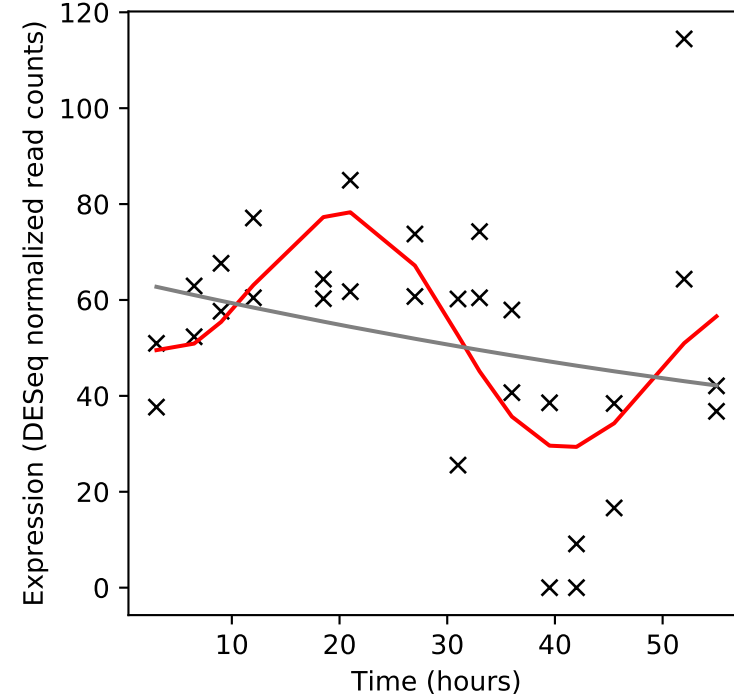

Rv0787/-

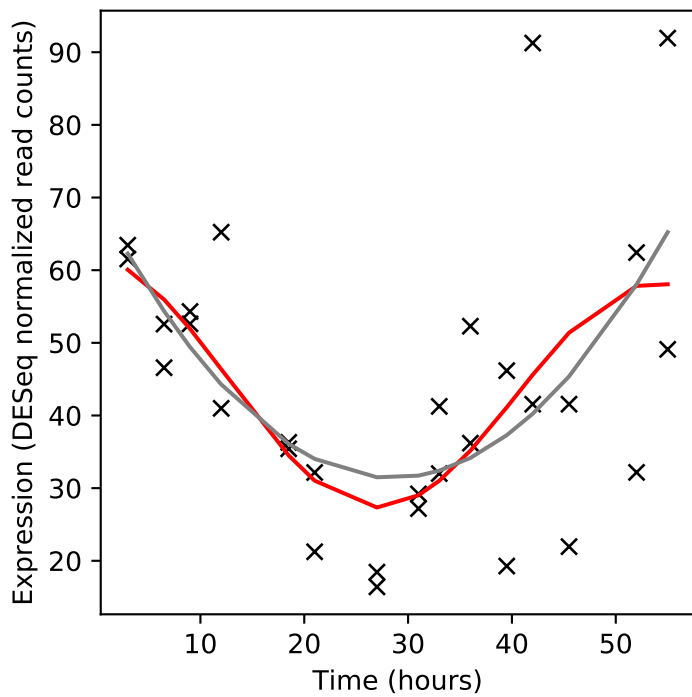

Rv0787A/-

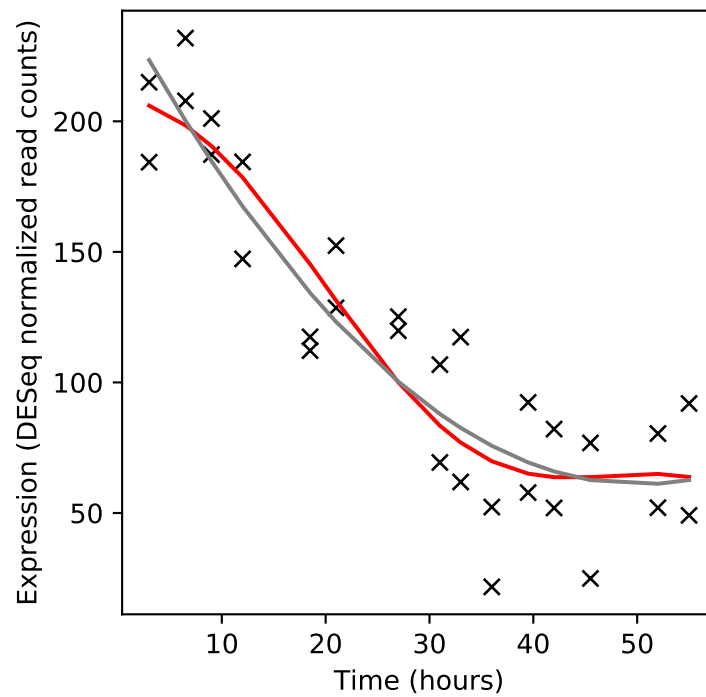

Rv0788/purQ

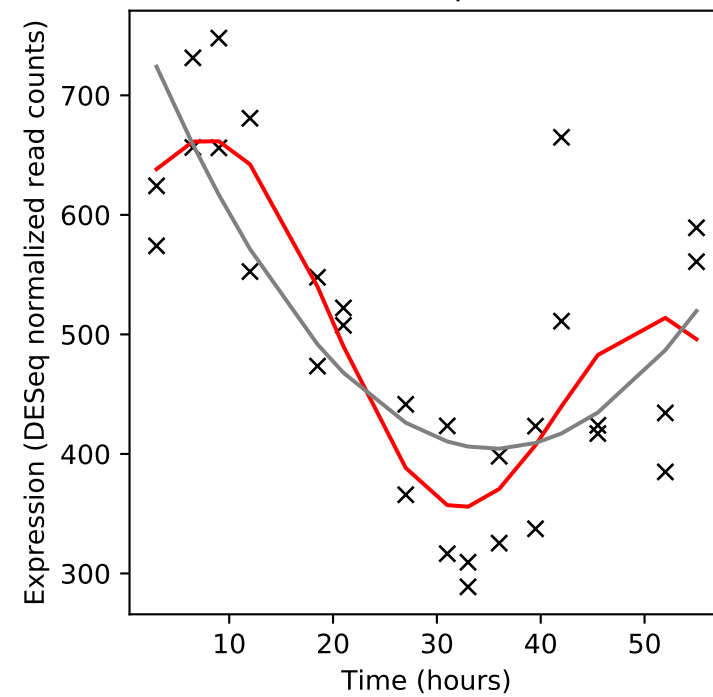

Rv0789c/-

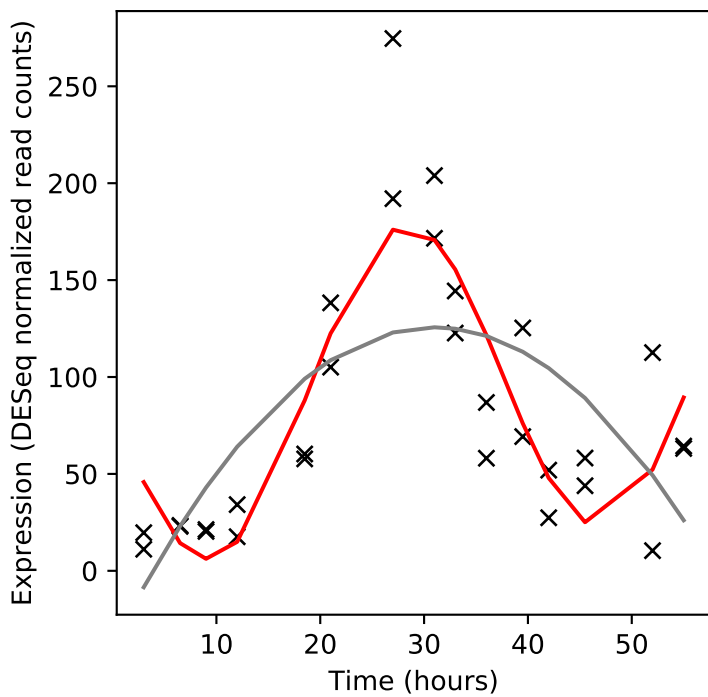

Rv0790c/-

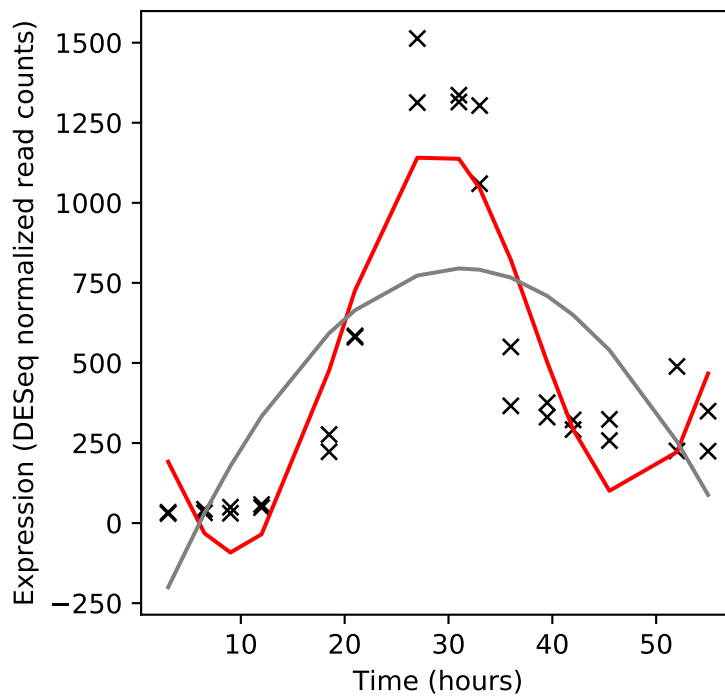

Rv0791c/-

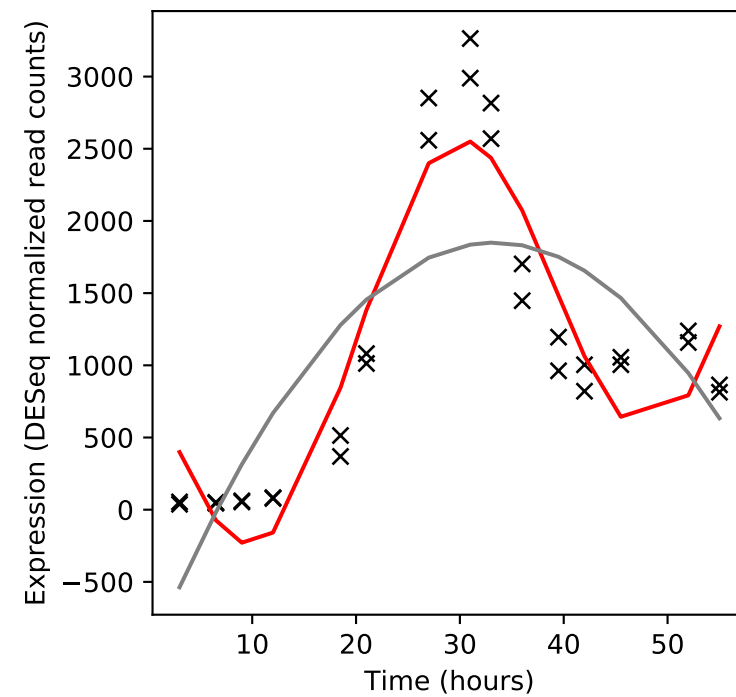

Rv0792c/-

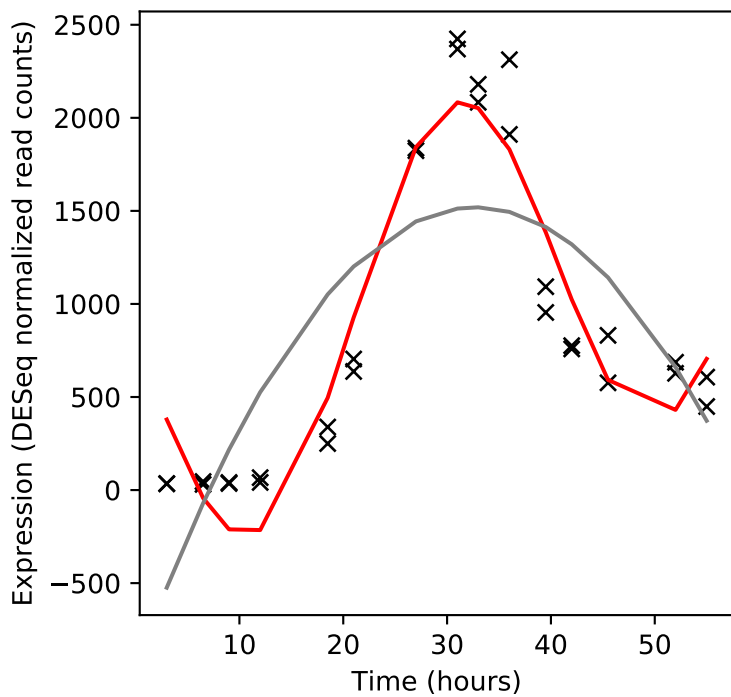

Rv0793/-

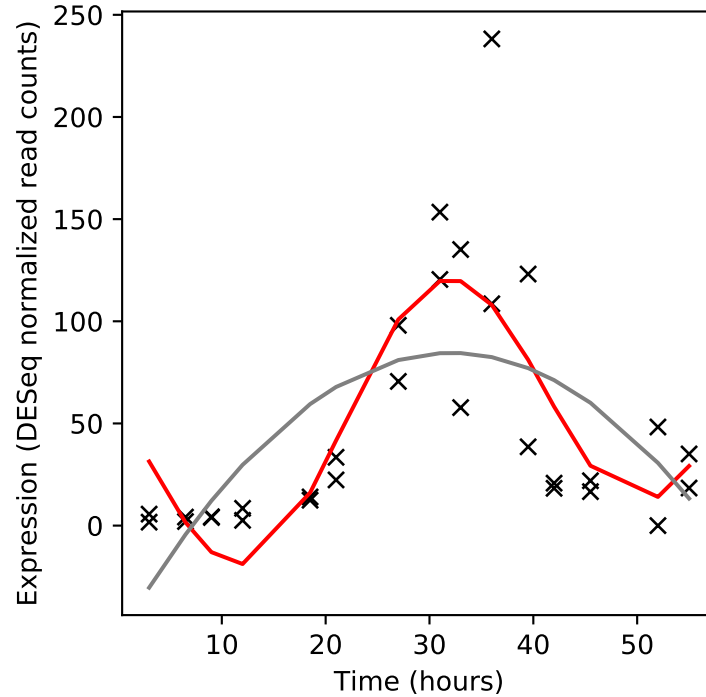

Rv0794c/-

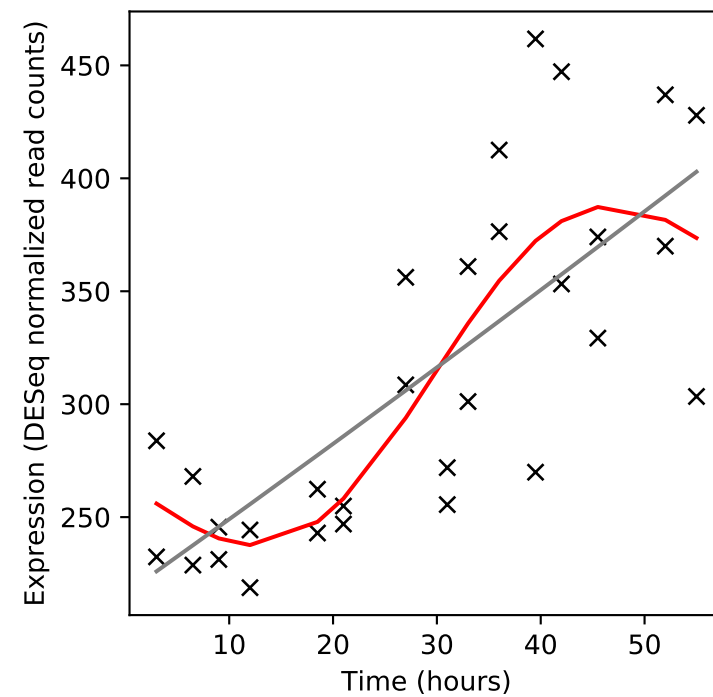

Rv0795/-

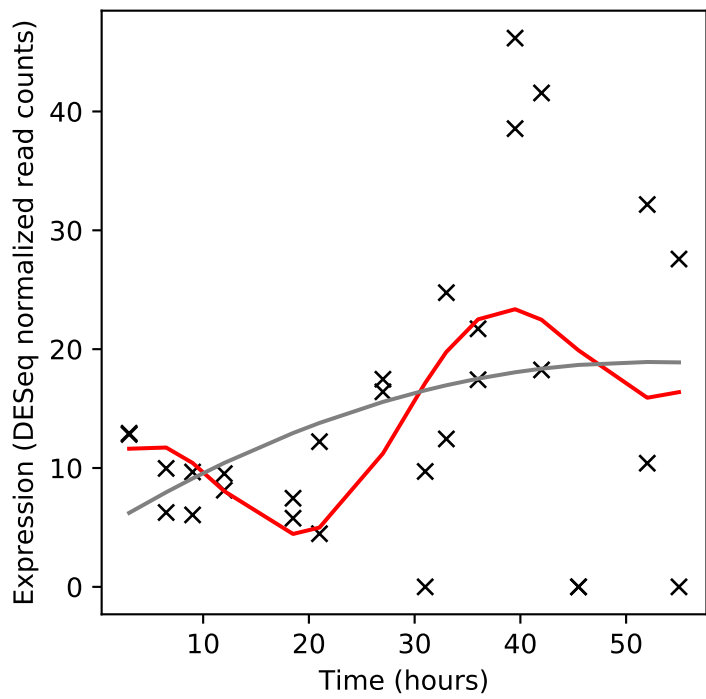

Rv0796/-

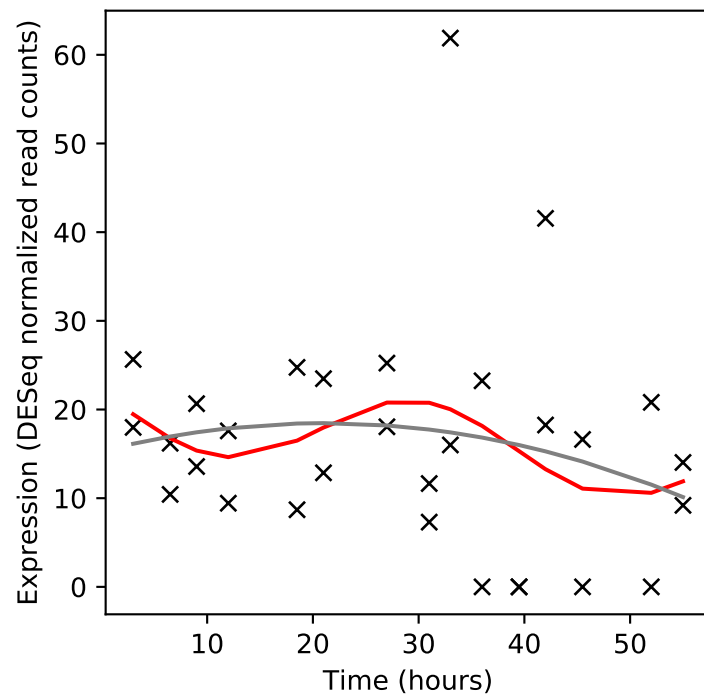

Rv0797/-

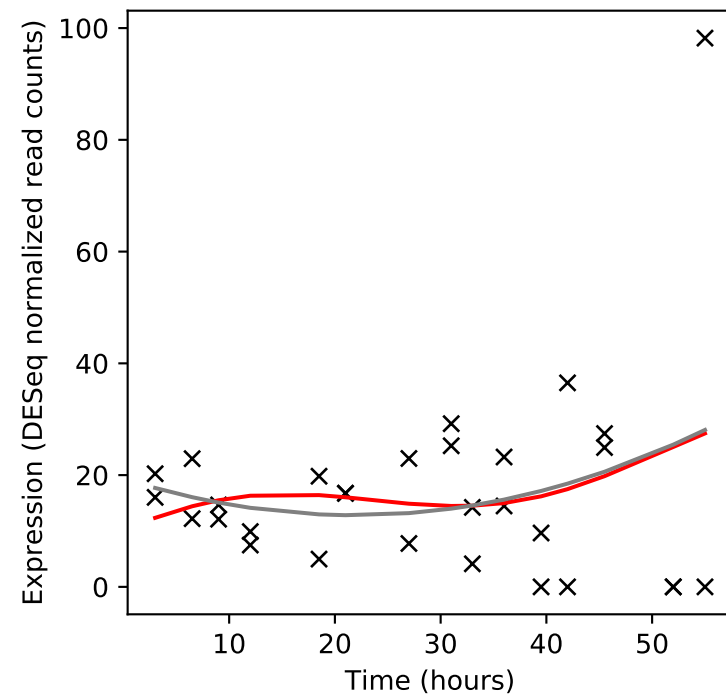

Rv0798c/cfp29

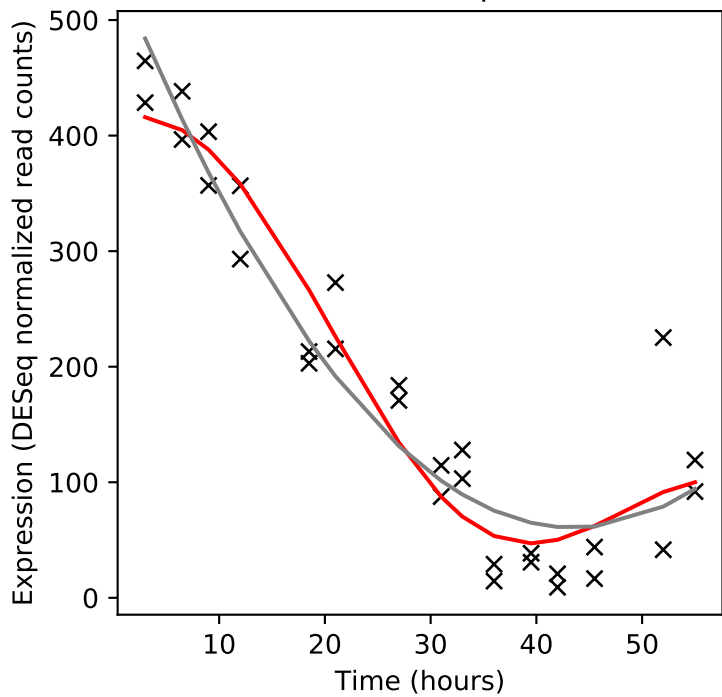

Rv0799c/-

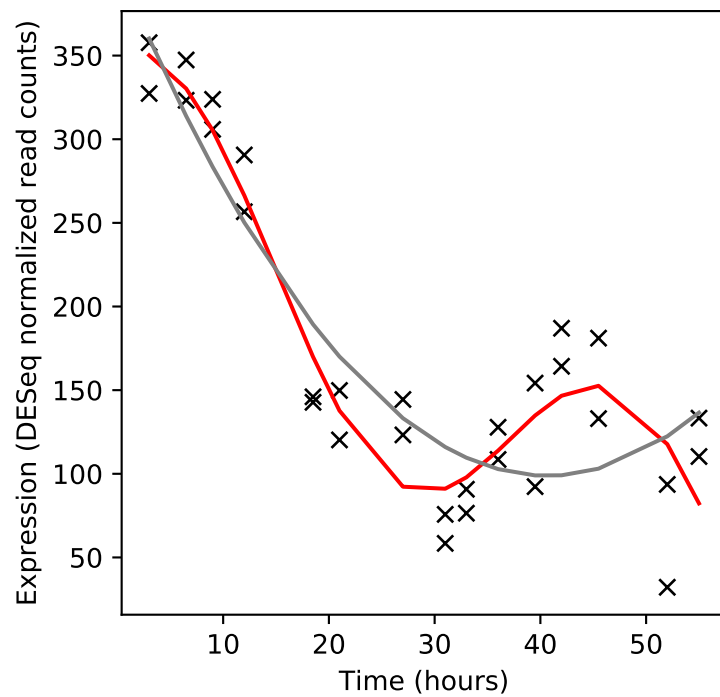

Rv0800/pepC

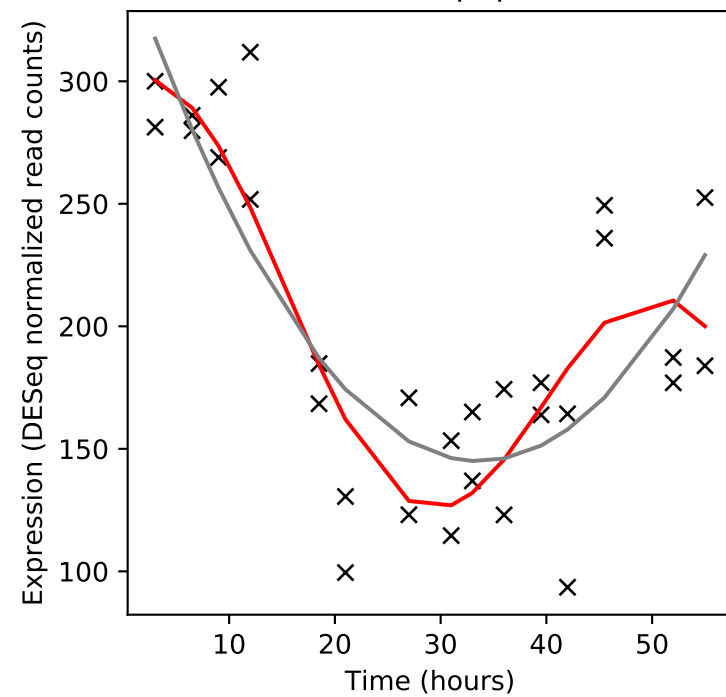

Rv0801/-

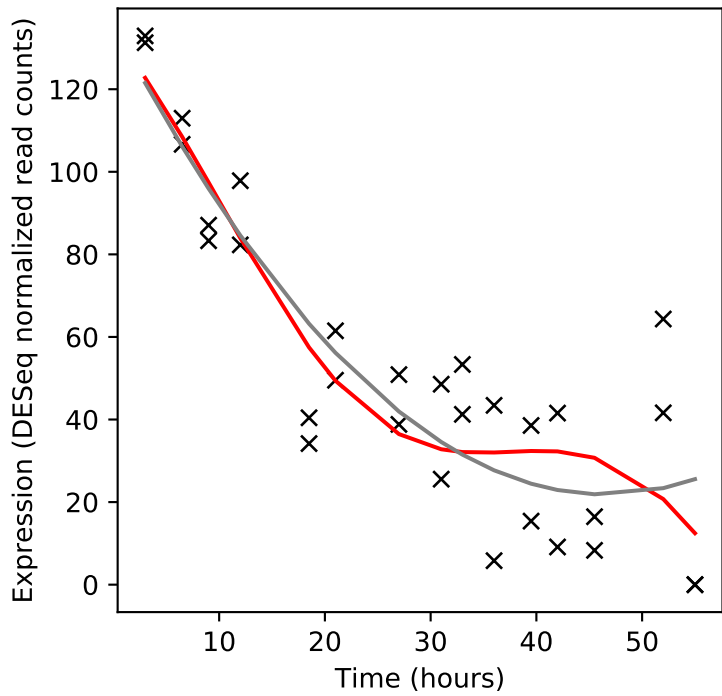

Rv0802c/-

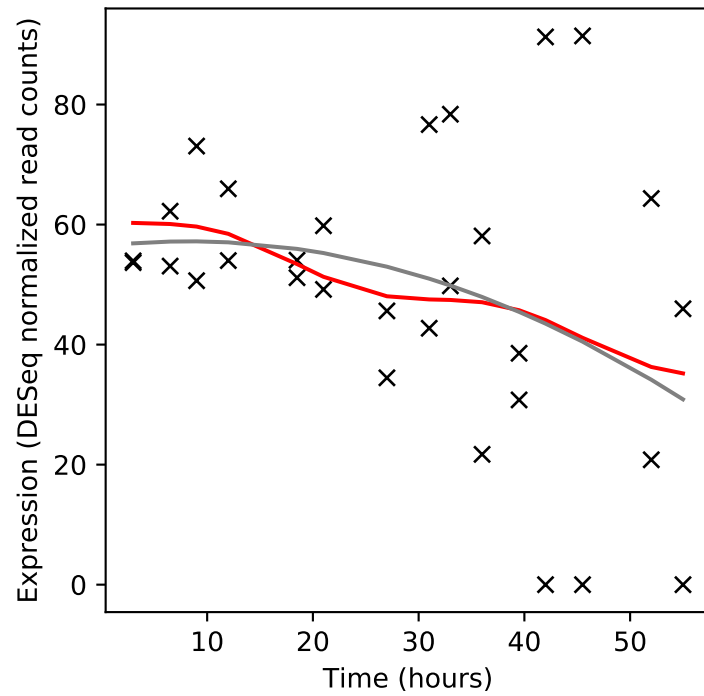

Rv0803/purL

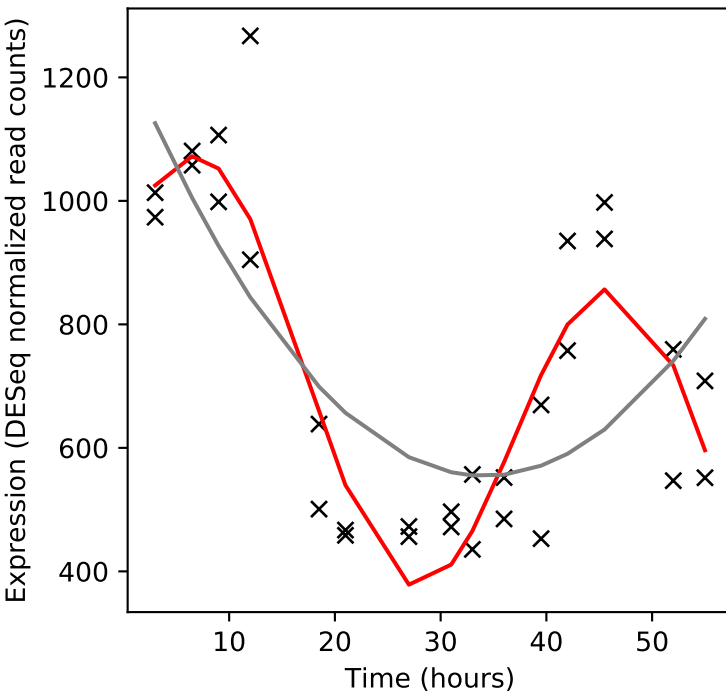



Rv0804/-

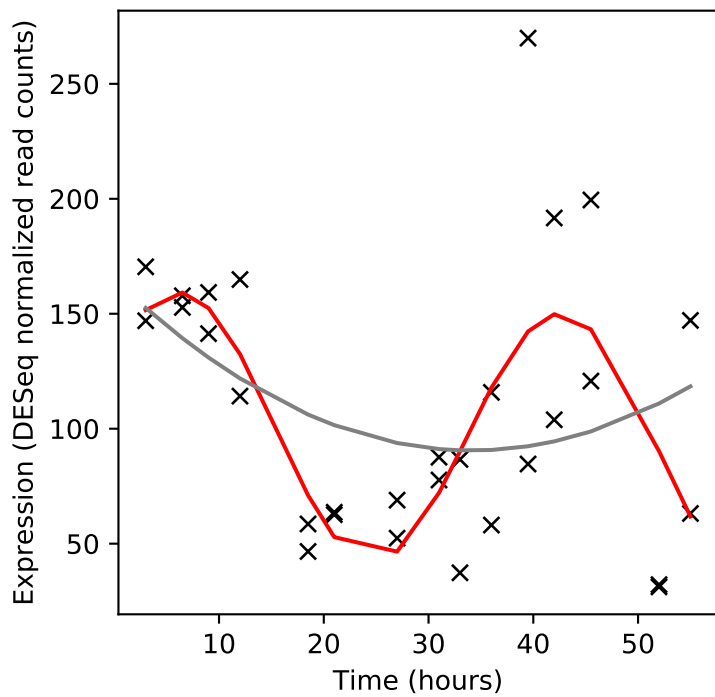

Rv0805/-

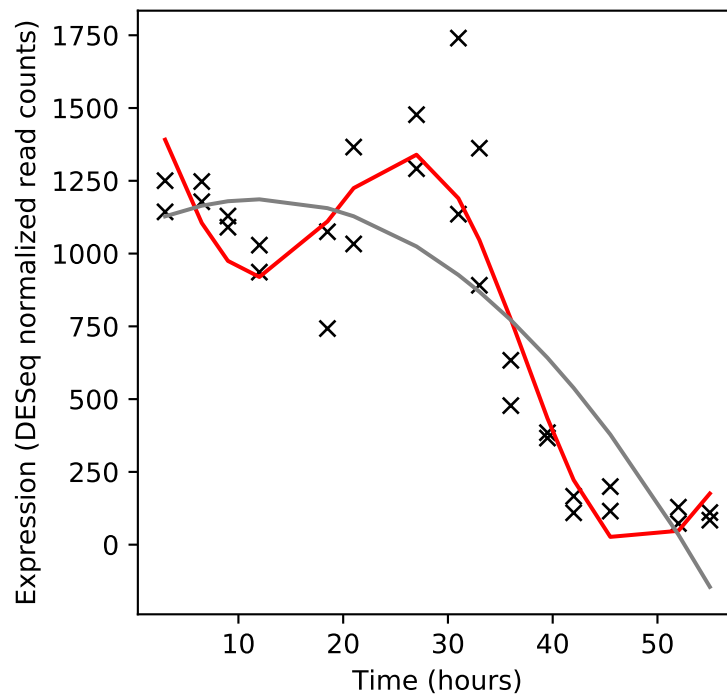

Rv0806c/cpsY

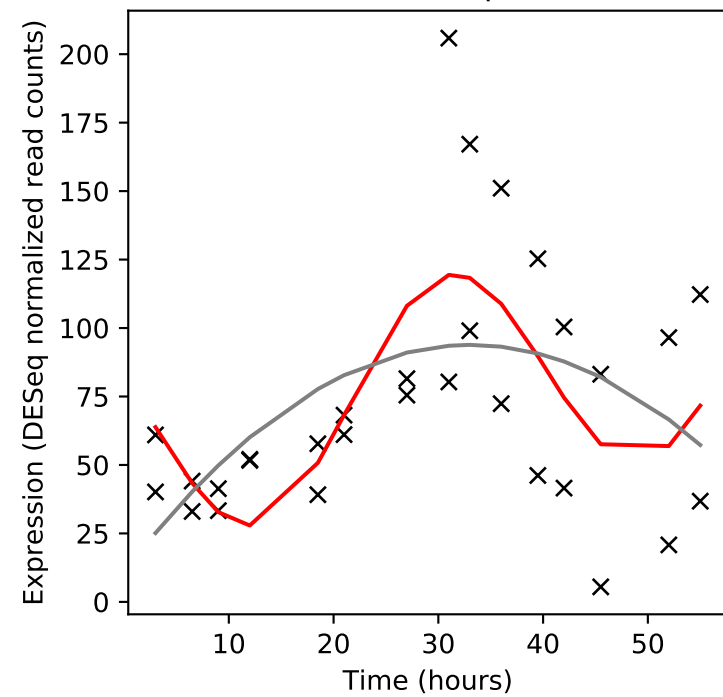

Rv0807/-

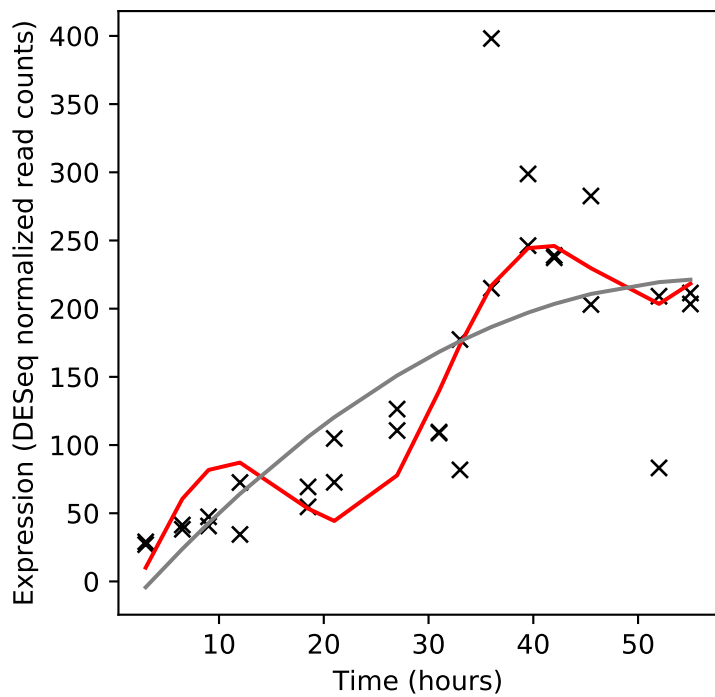

Rv0808/purF

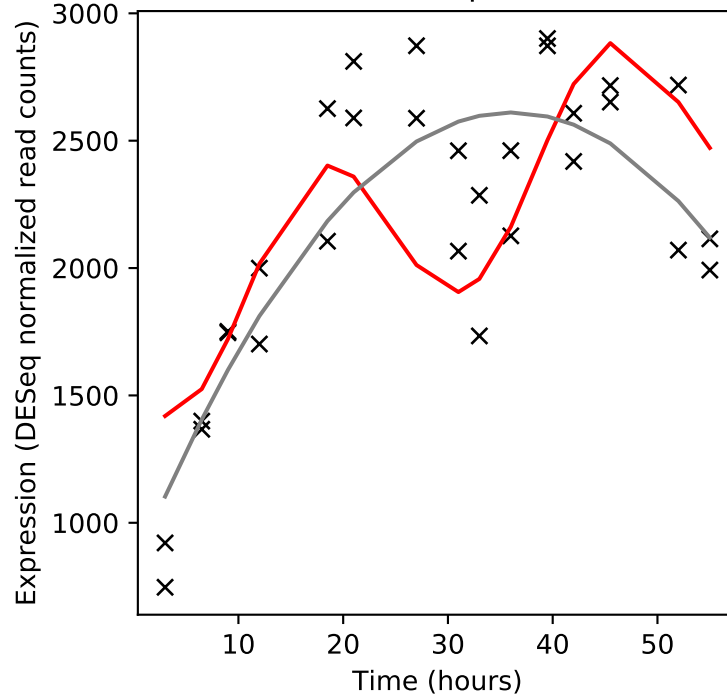

Rv0809/purM

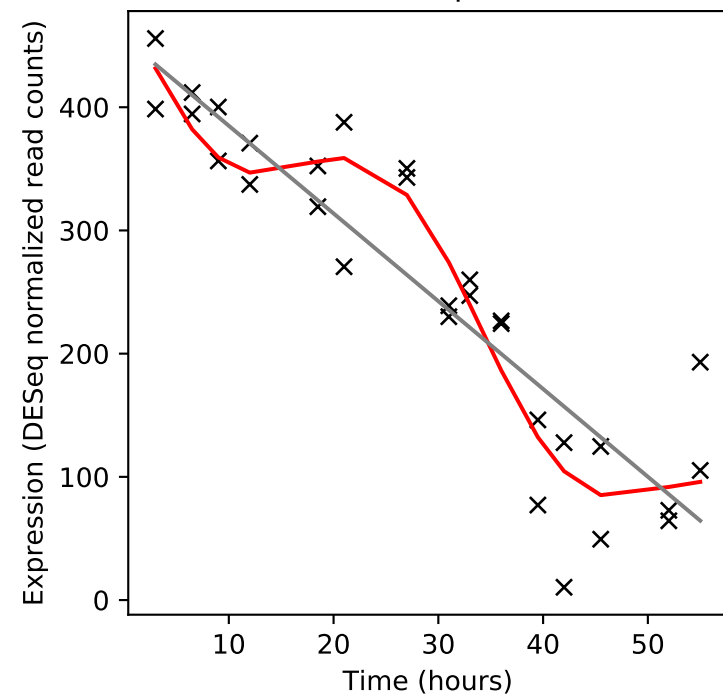

Rv0810c/-

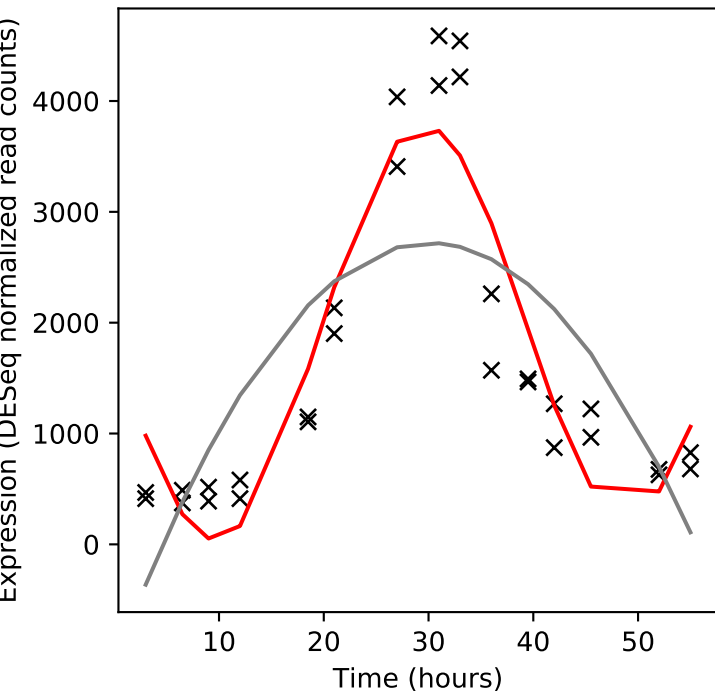

Rv0811c/-

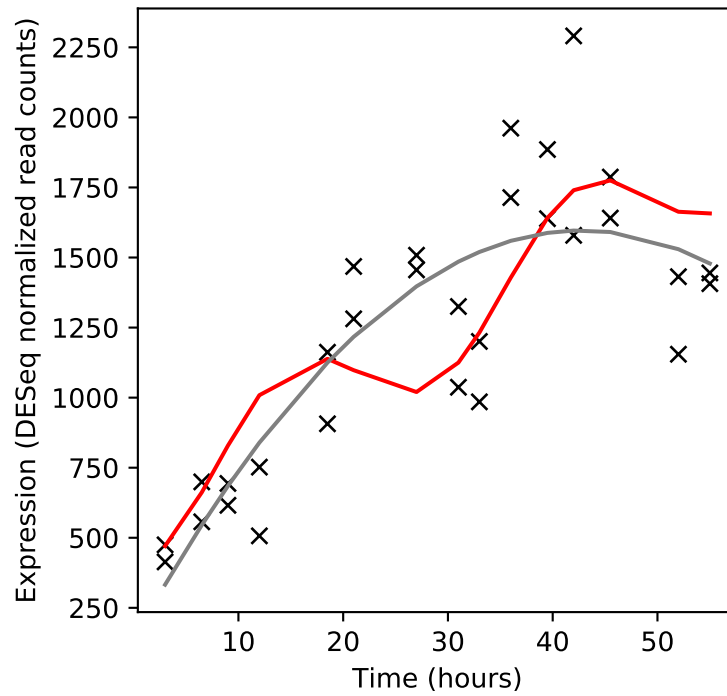

Rv0812/-

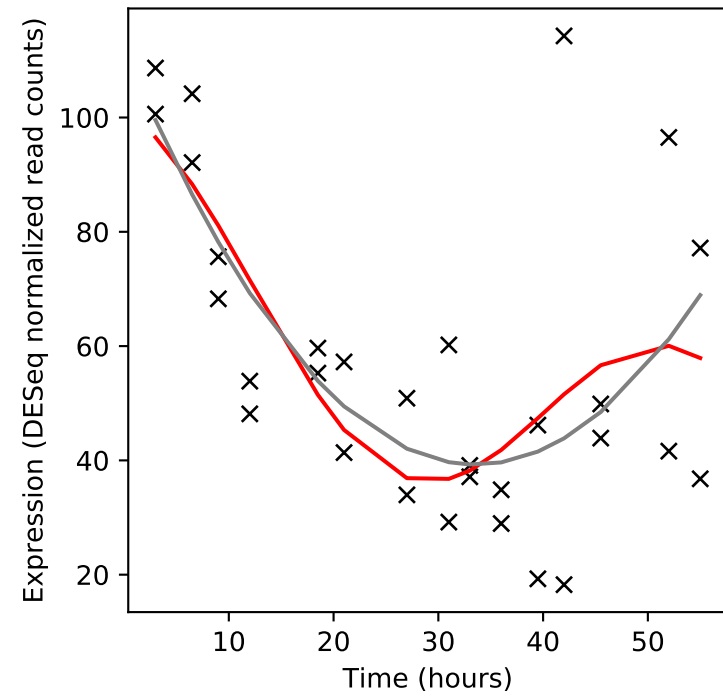

Rv0813c/-

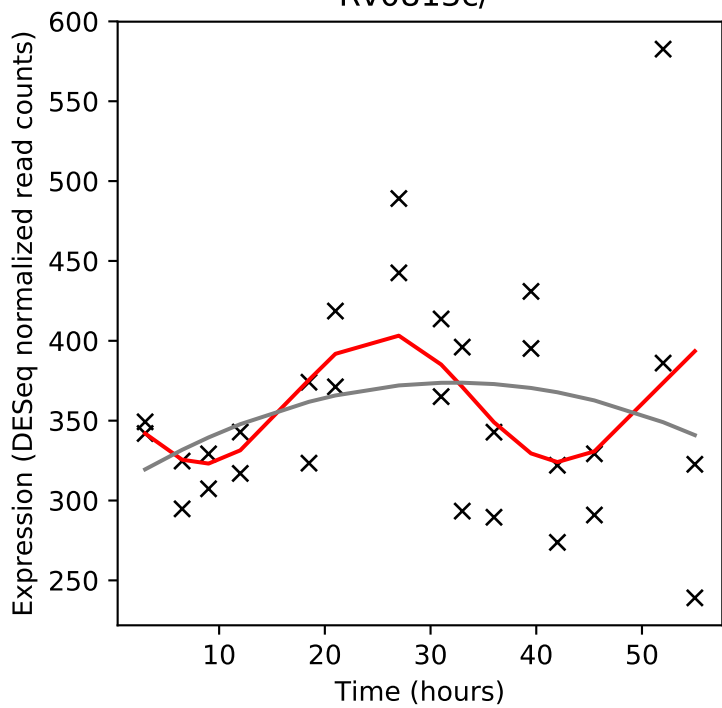

Rv0814c/sseC2

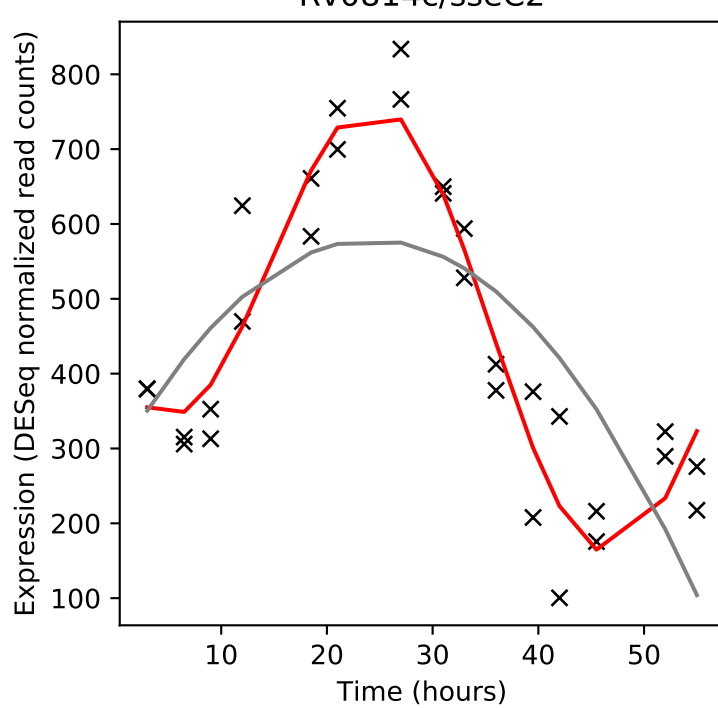

Rv0815c/cysA2

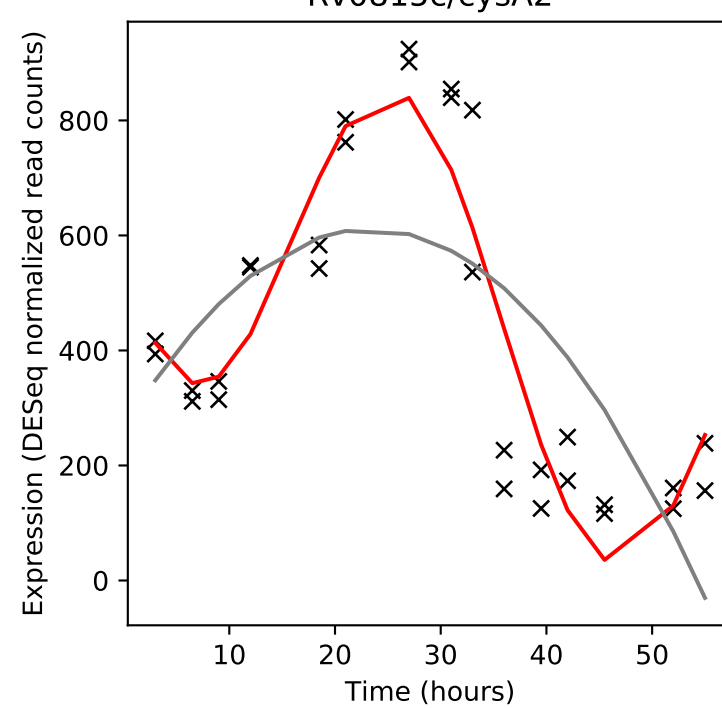

Rv0816c/thiX

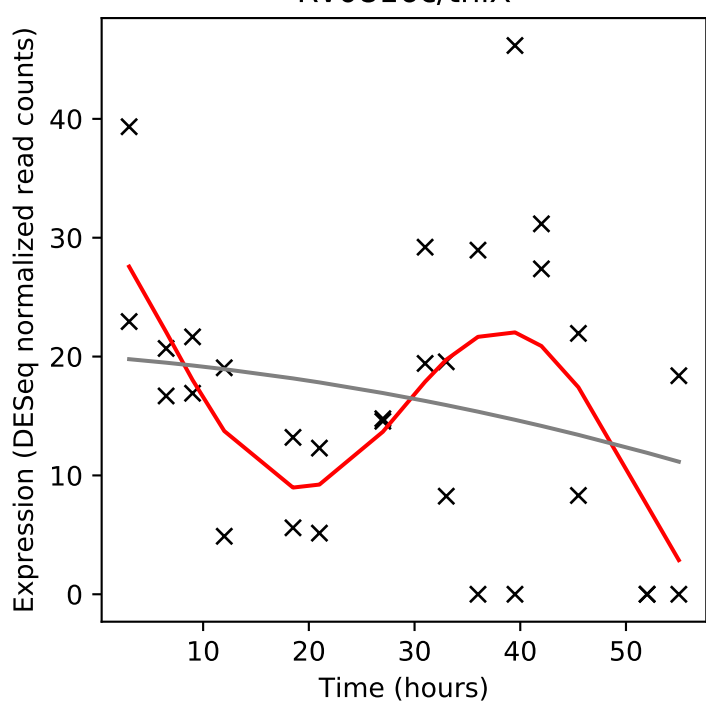

Rv0817c/-

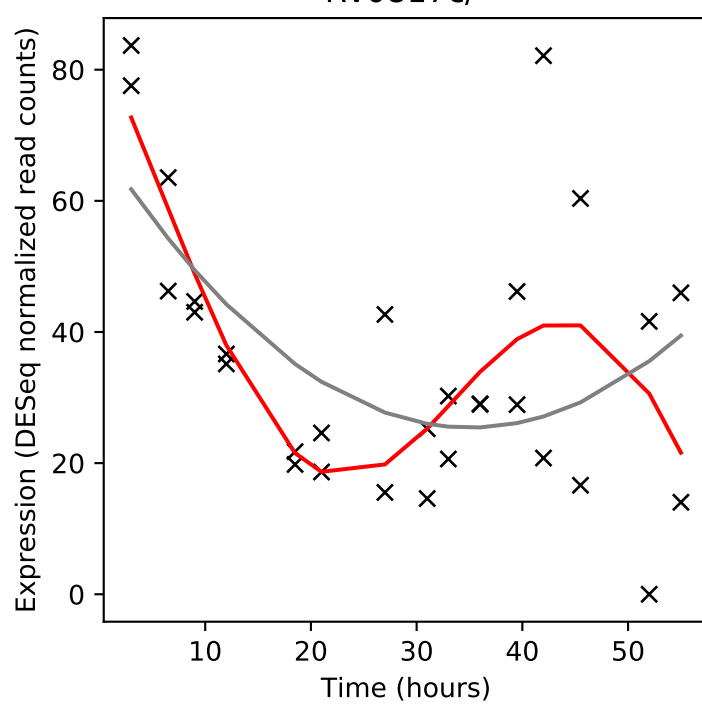

Rv0818/-

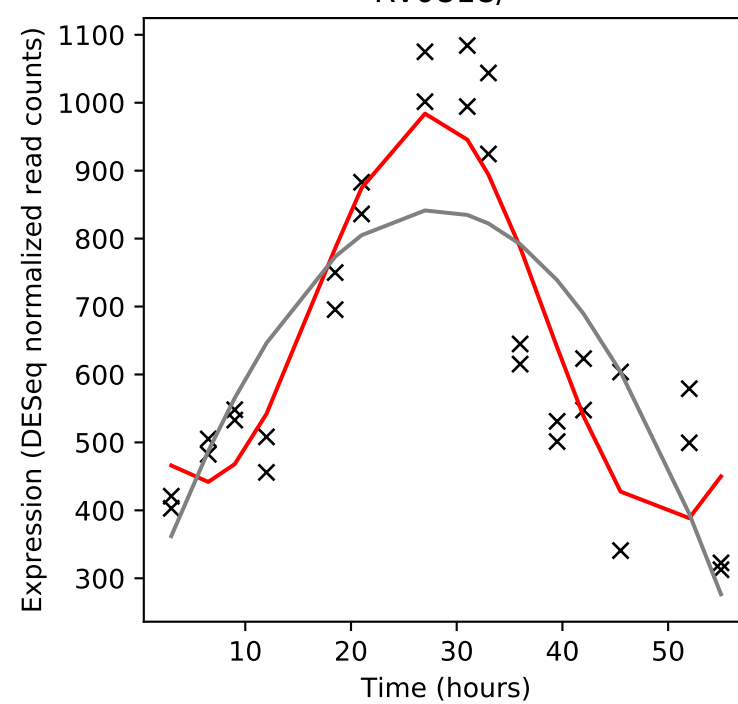

Rv0819/mshD

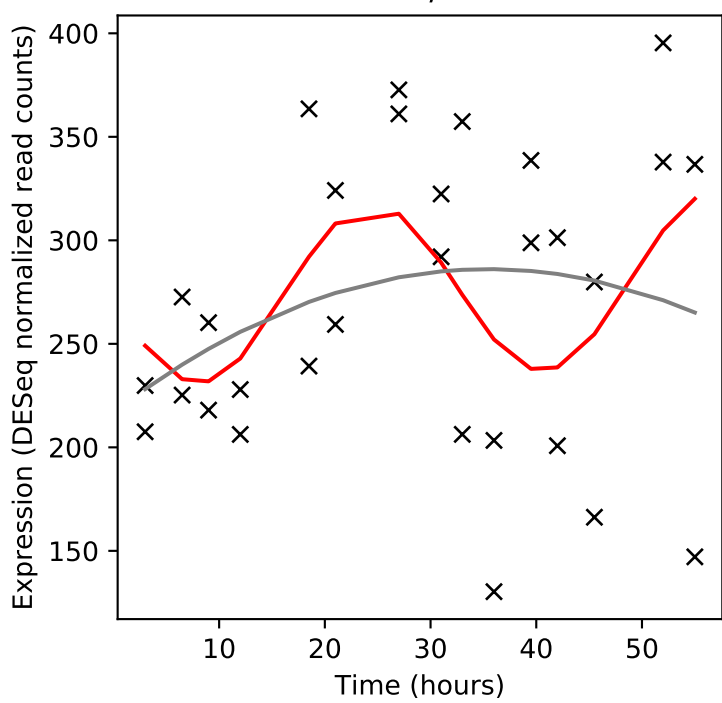

Rv0820/phoT

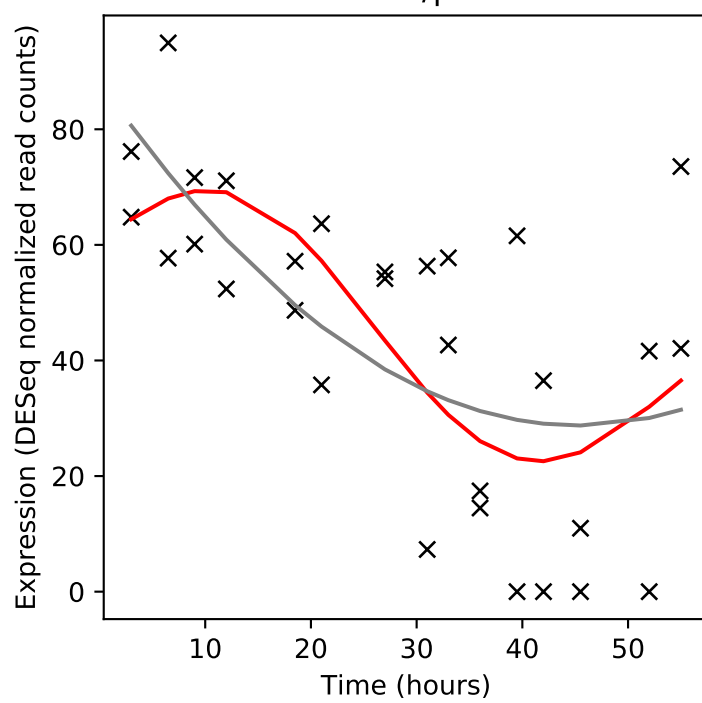

Rv0821c/phoY2

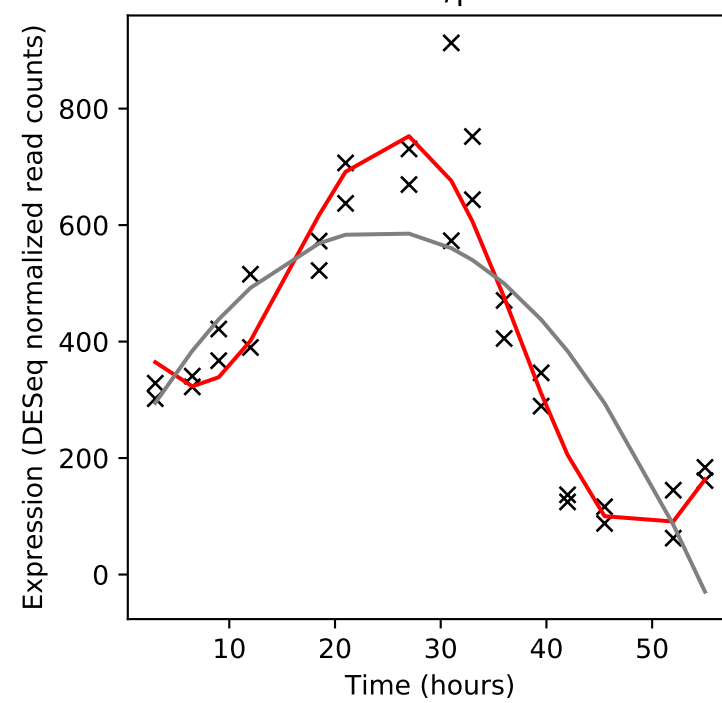

Rv0822c/-

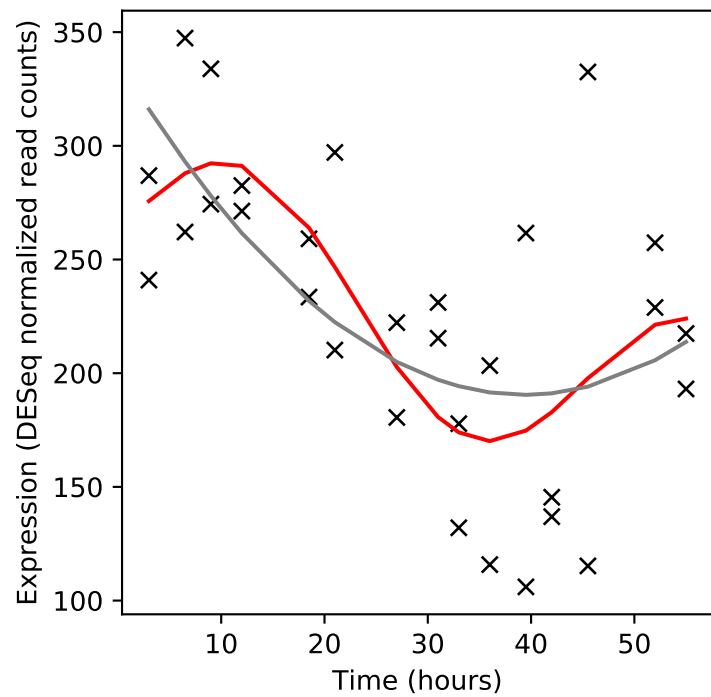

Rv0823c/-

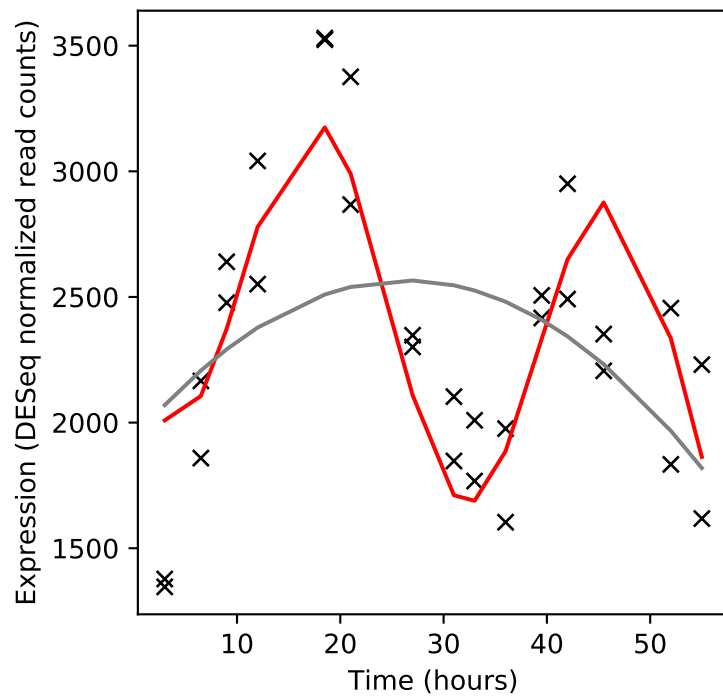

Rv0824c/desA1

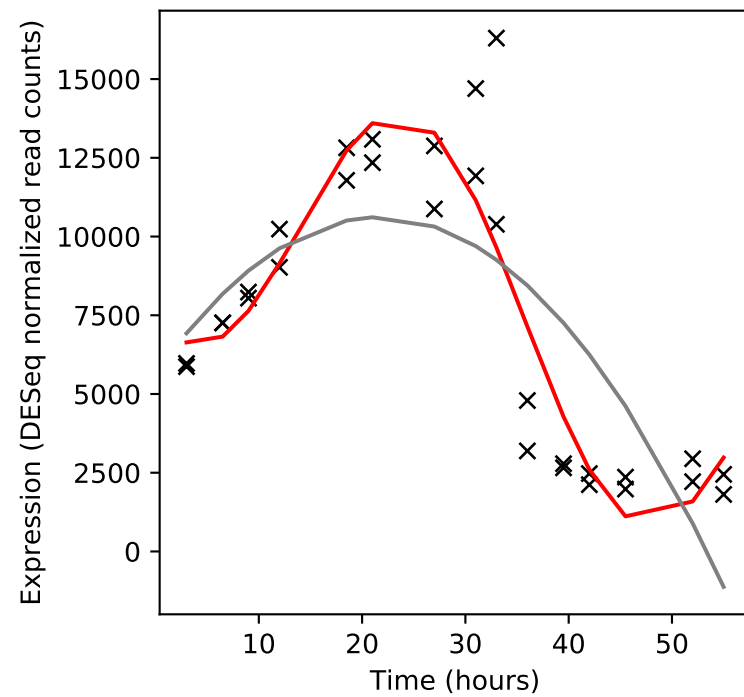

Rv0825c/-

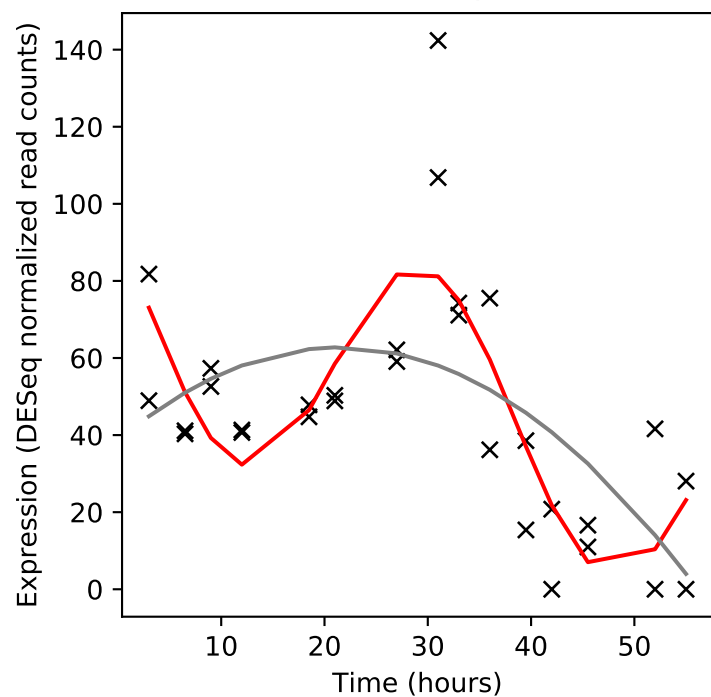

Rv0826/-

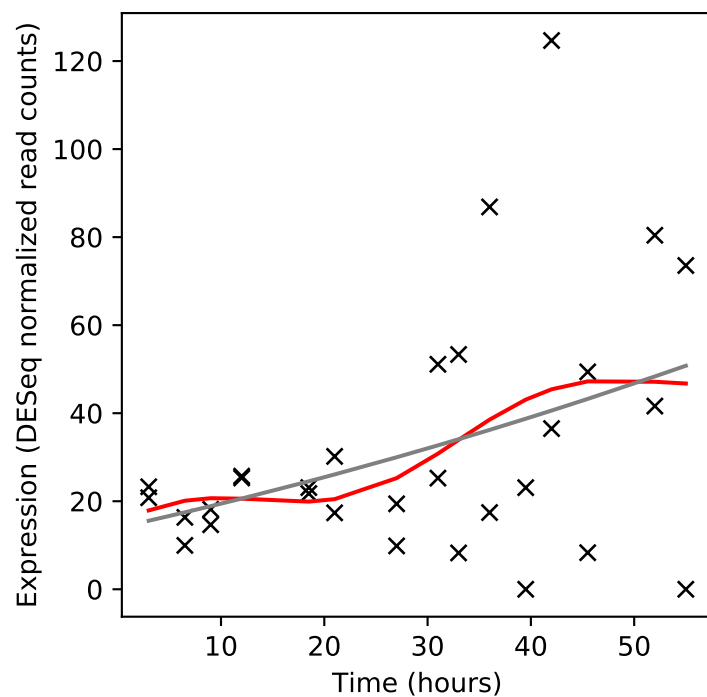

Rv0827c/kmtR

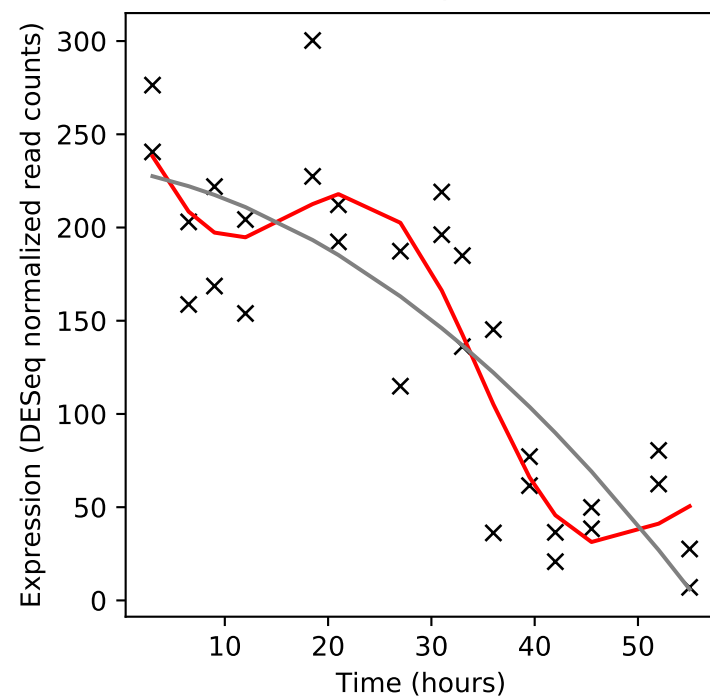

Rv0828c/-

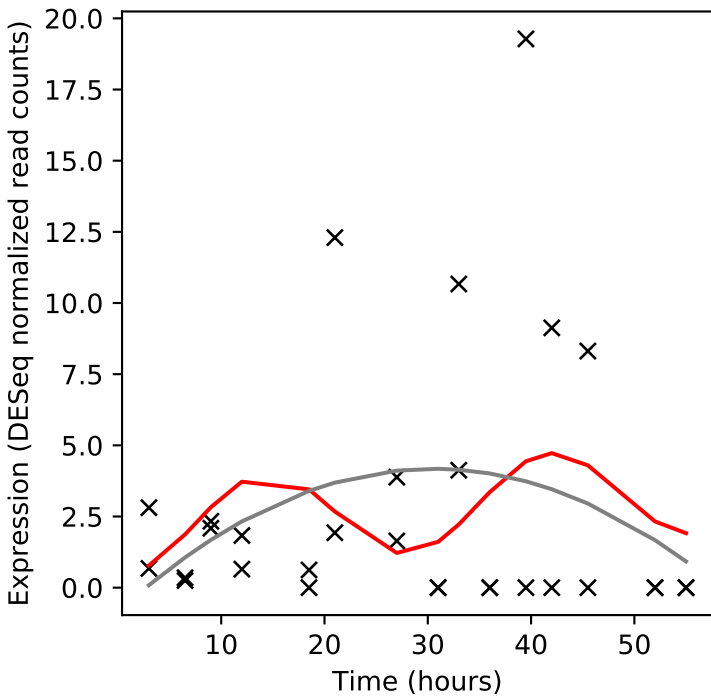

Rv0829/-

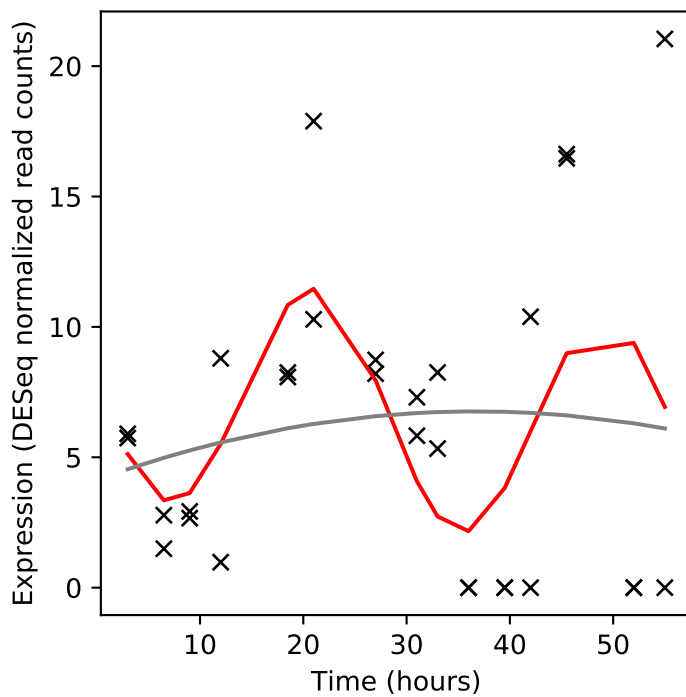

Rv0830/-

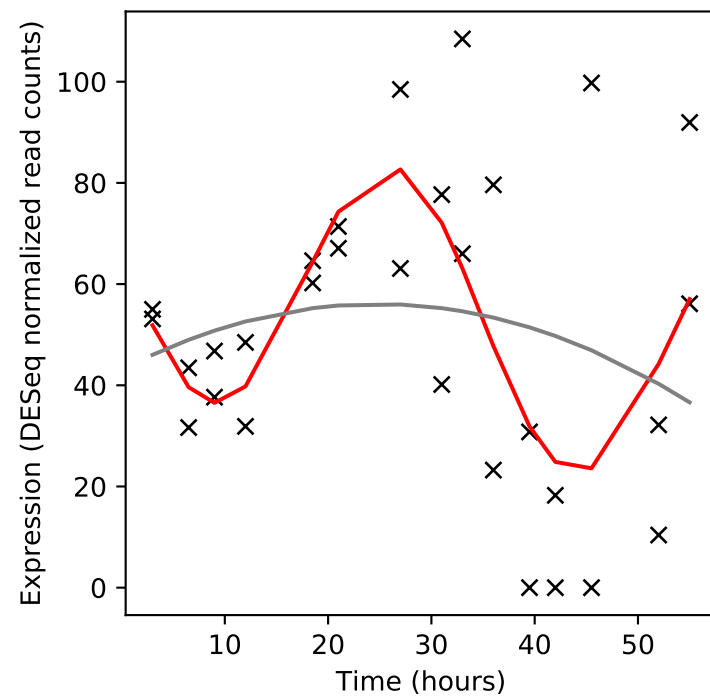

Rv0831c/-

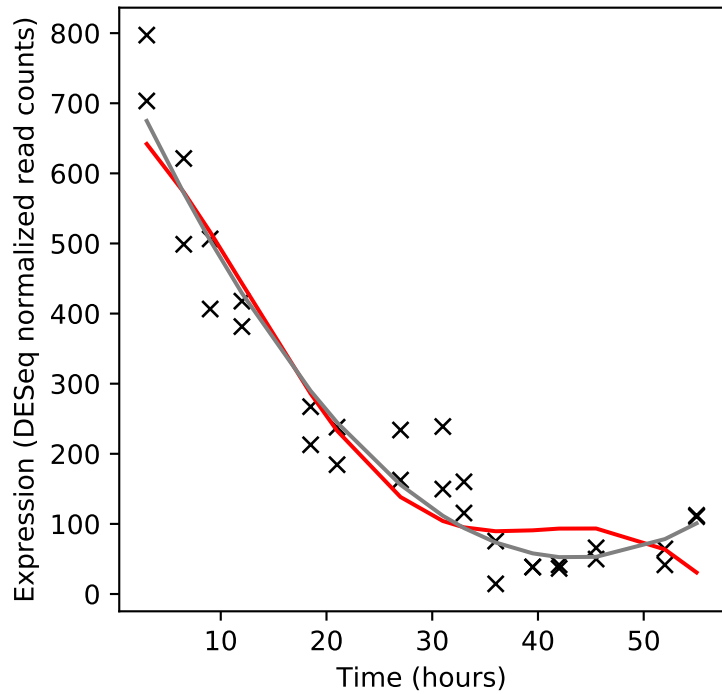

Rv0832/PE\_PGRS12

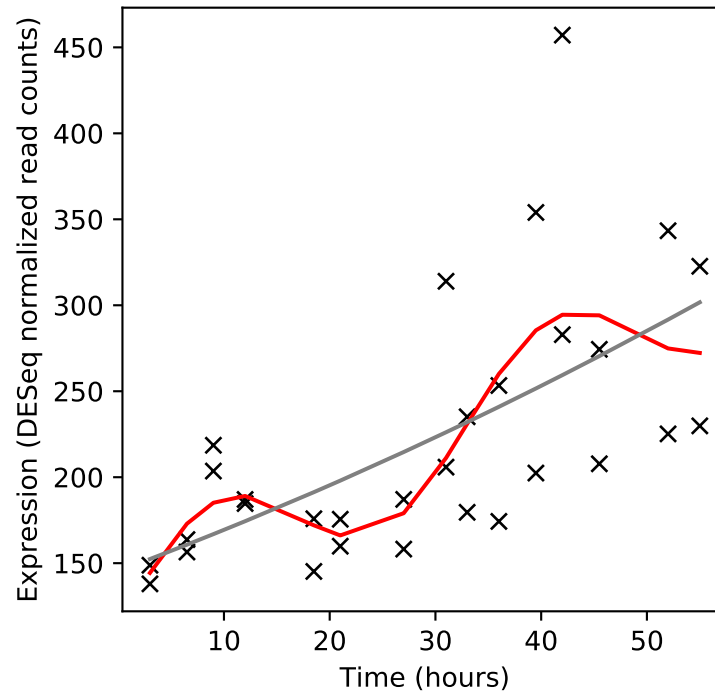

Rv0833/PE\_PGRS13

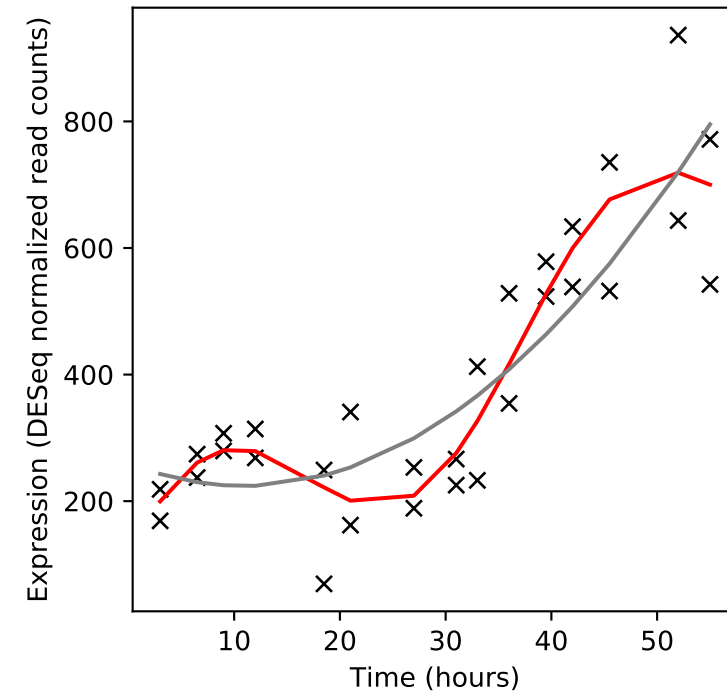

Rv0834c/PE\_PGRS14

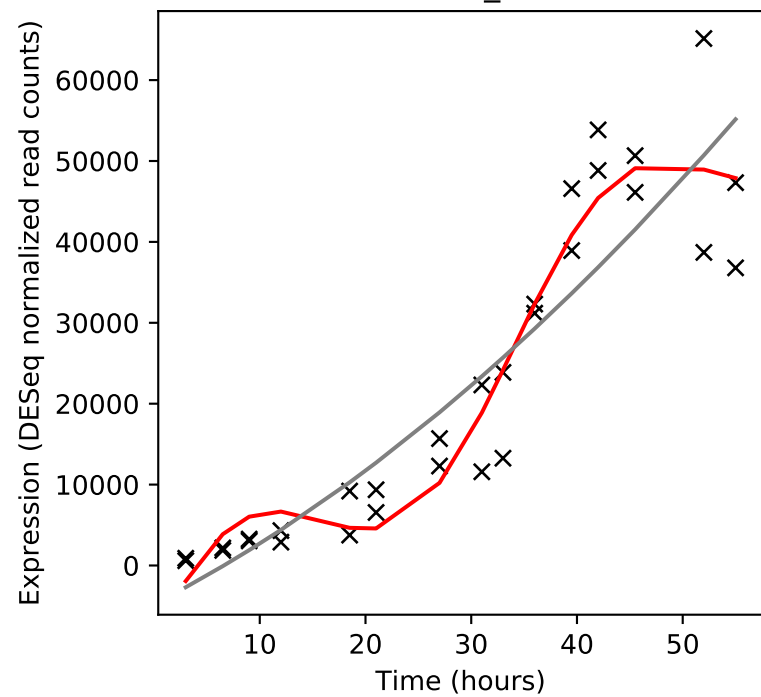

Rv0835/lpqQ

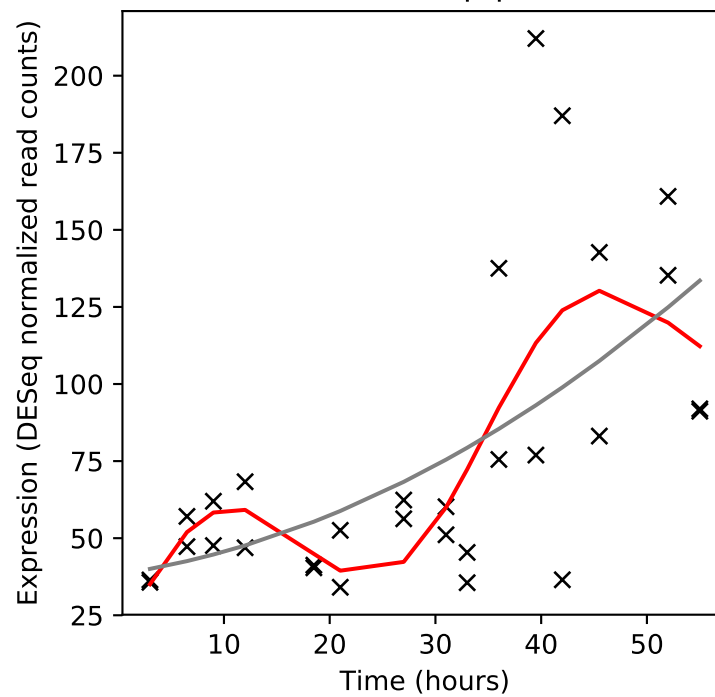

Rv0836c/-

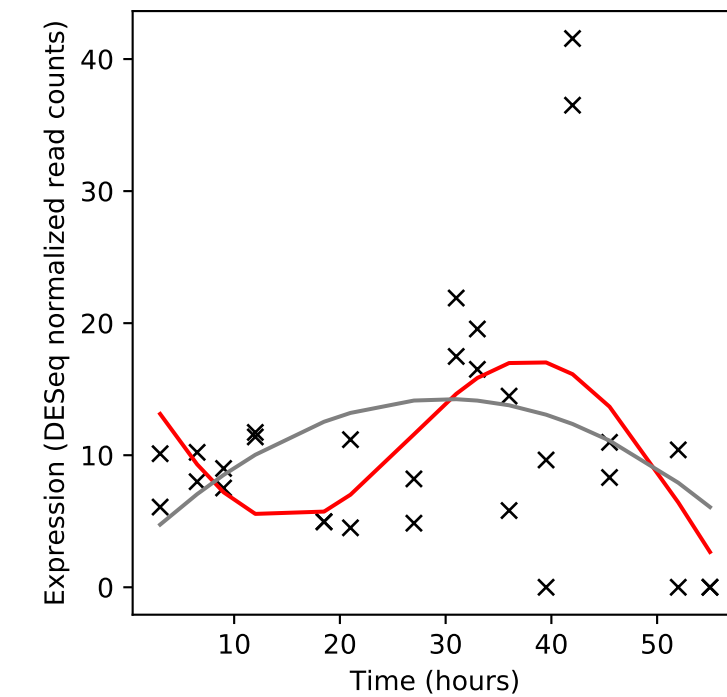

Rv0837c/-

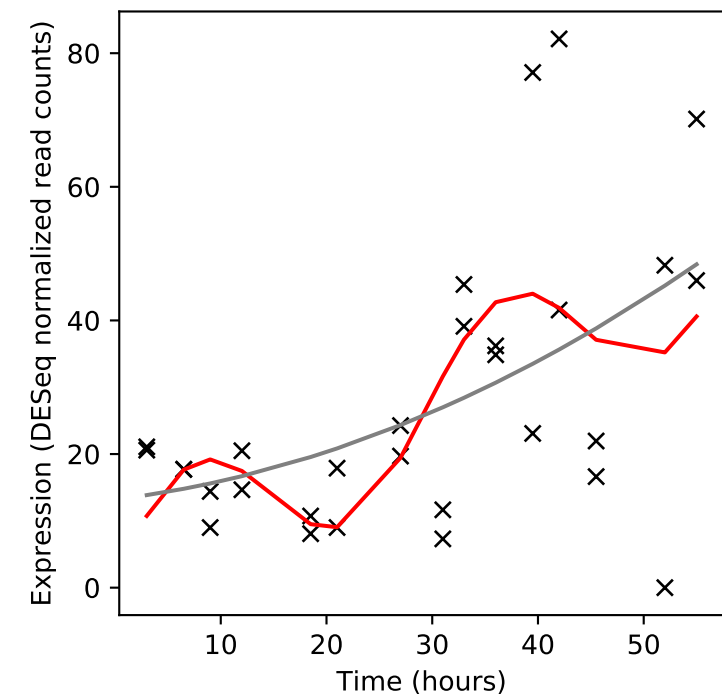

Rv0838/lpqR

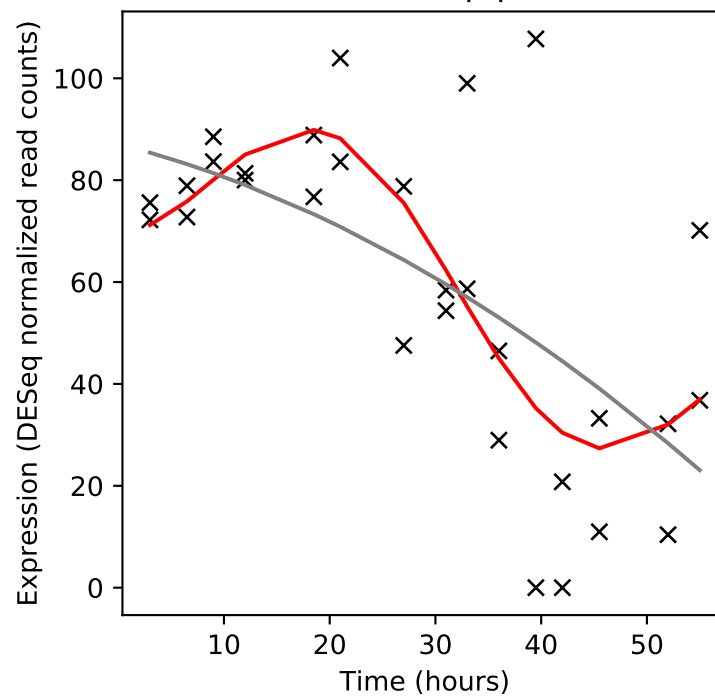

Rv0839/-

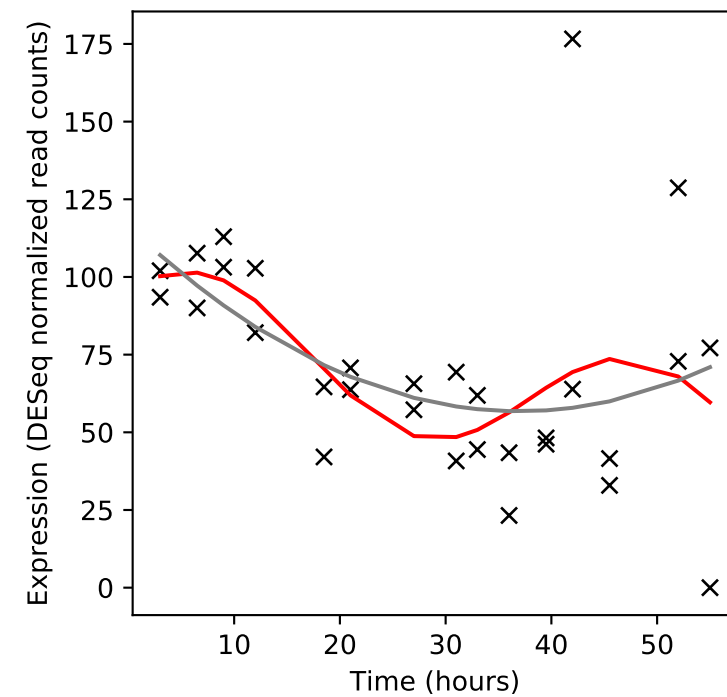

Rv0840c/pip

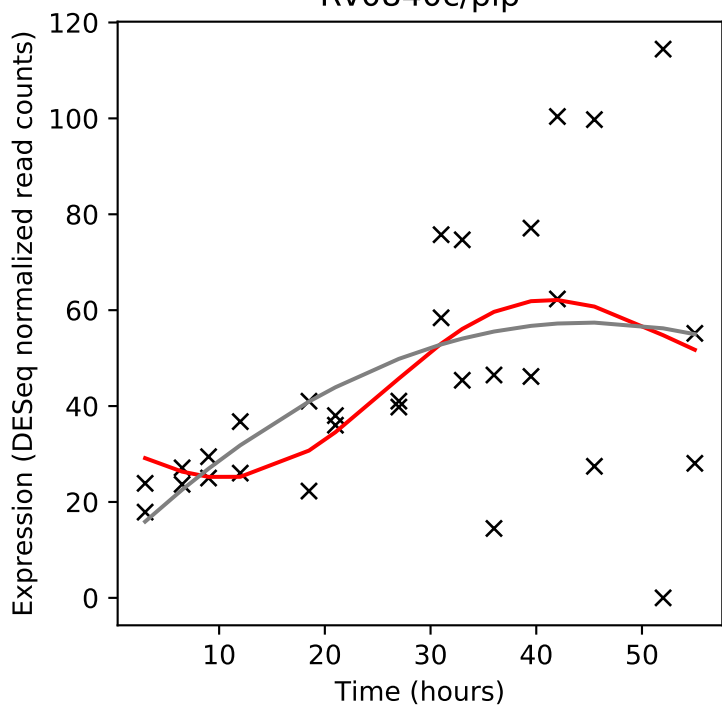

Rv0841/-

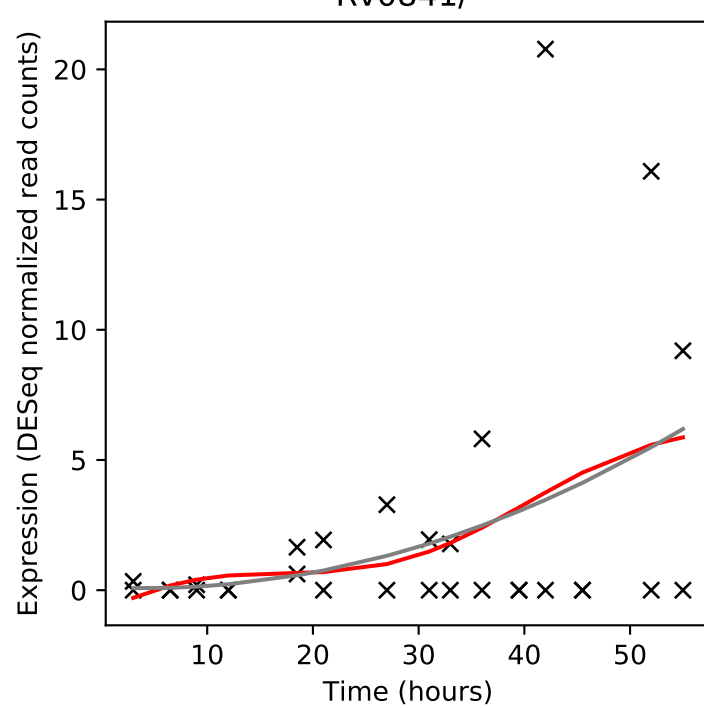

Rv0842/-

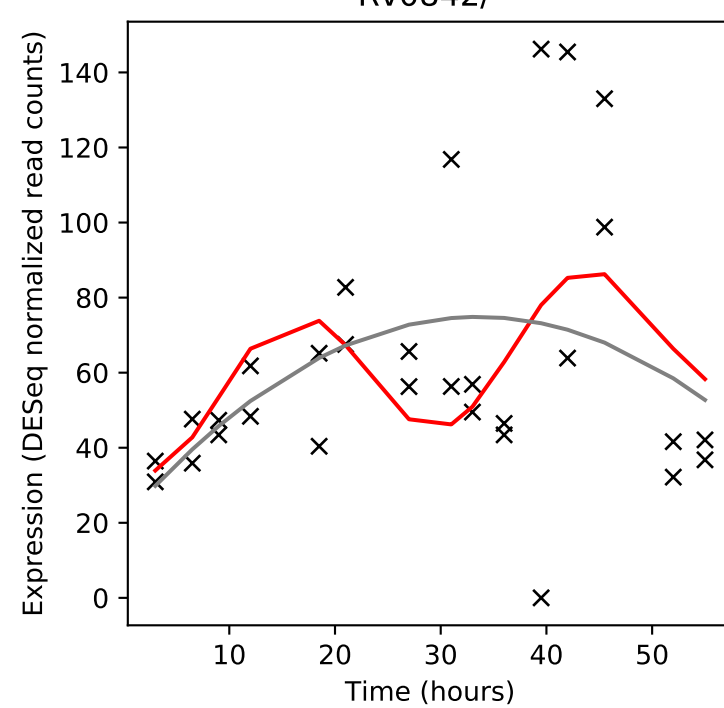

Rv0843/-

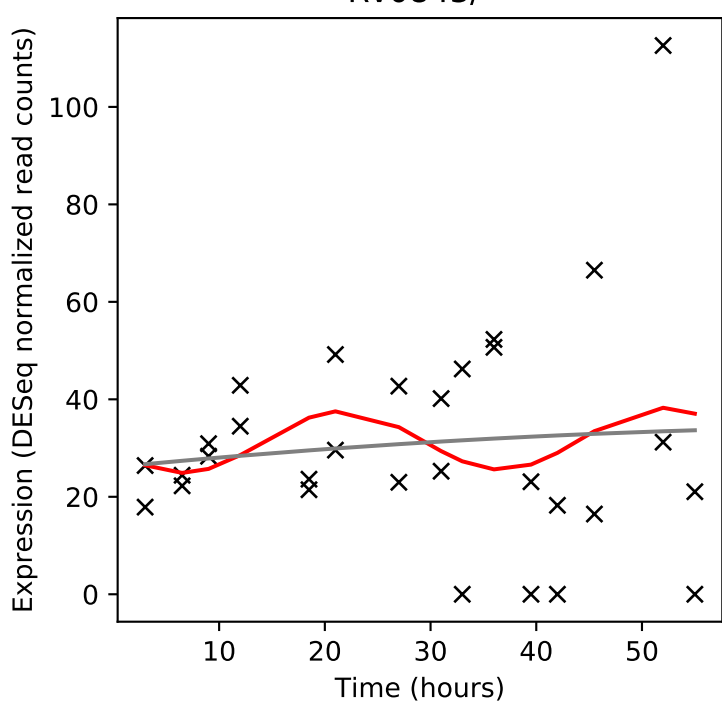

Rv0844c/narL

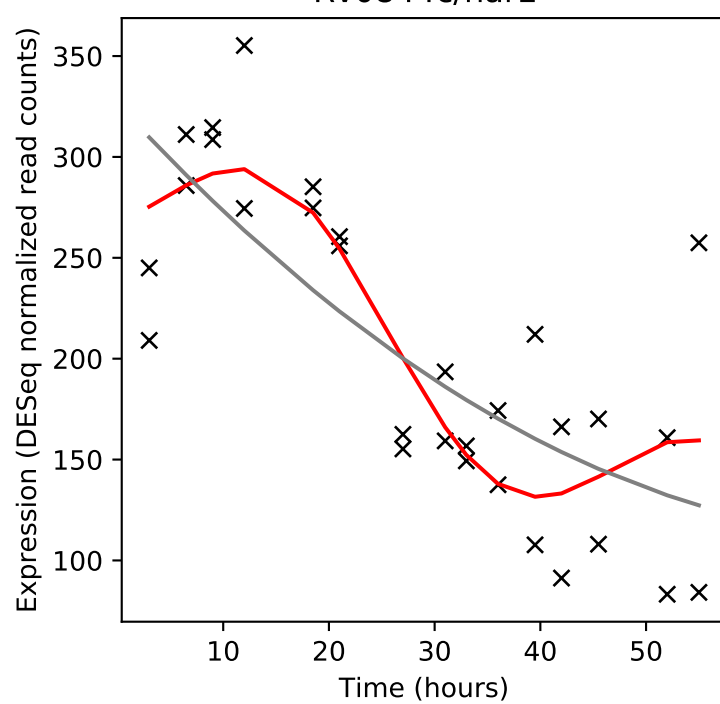

Rv0845/-

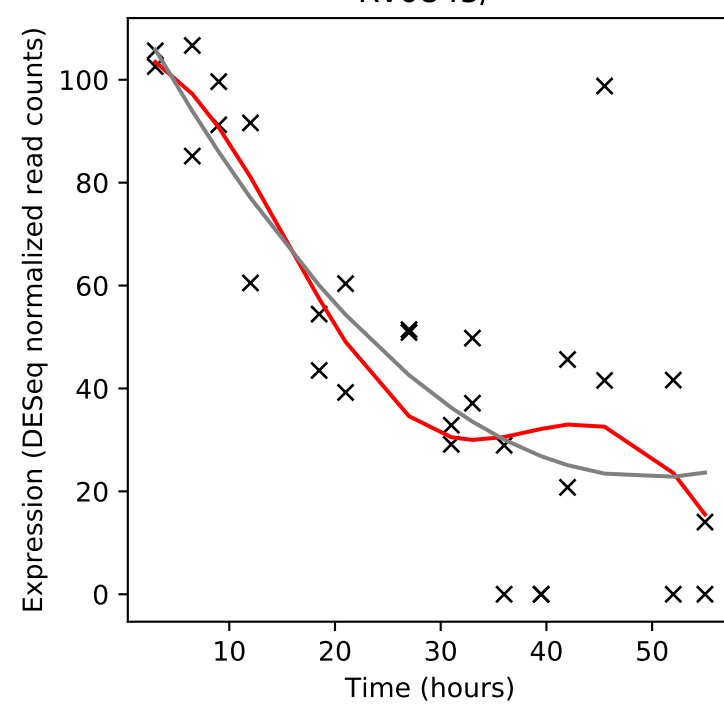

Rv0846c/-

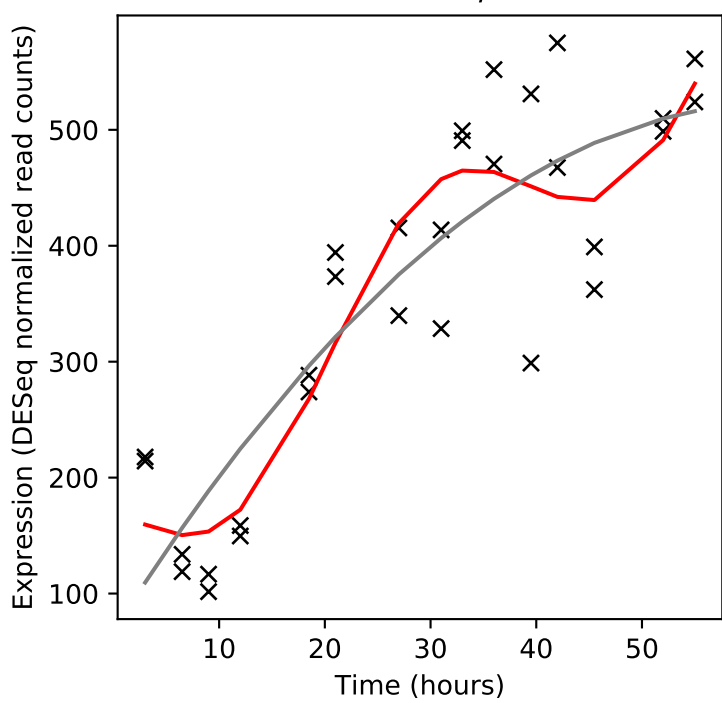

Rv0847/lpqS

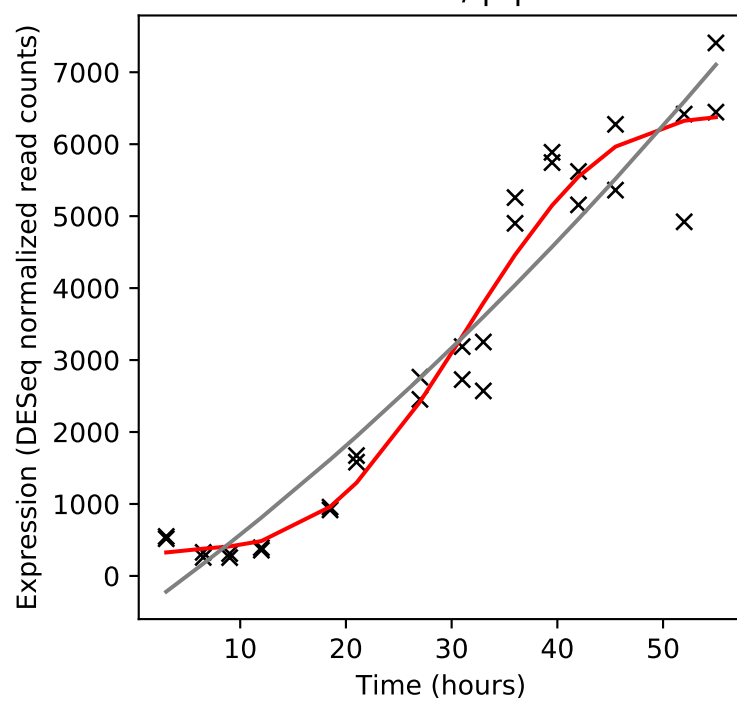

Rv0848/cysK2

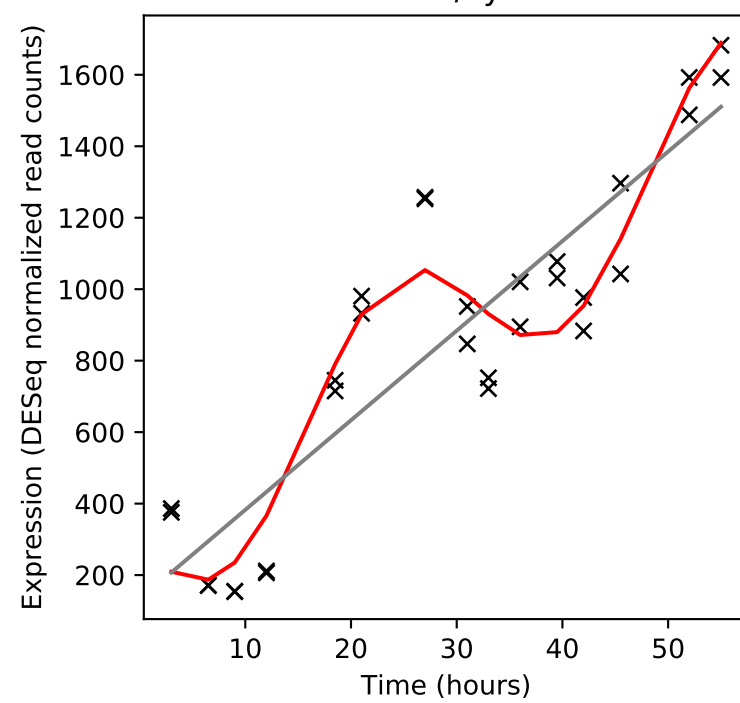

Rv0849/-

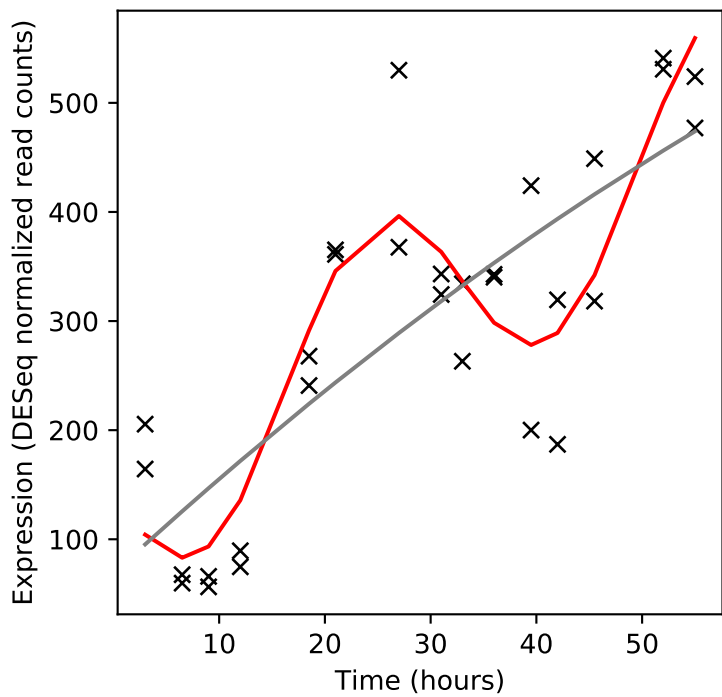

Rv0850/-

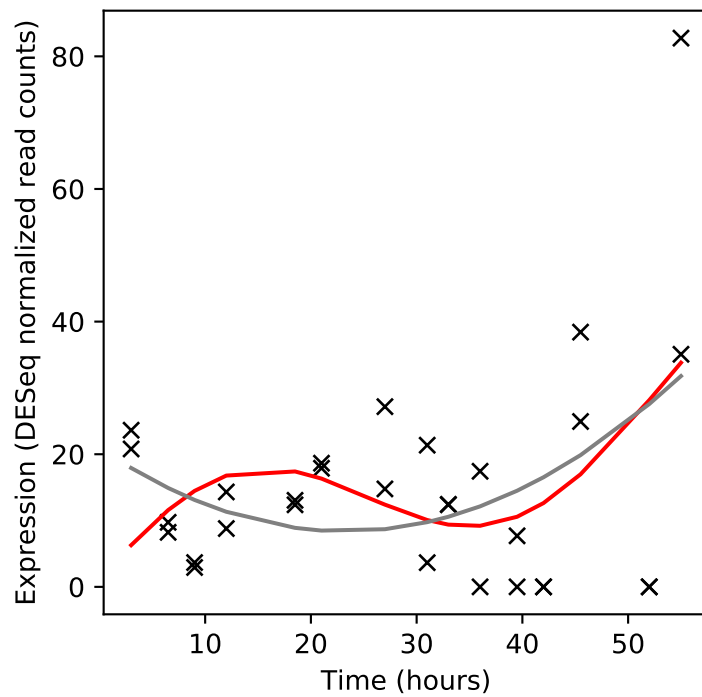

Rv0851c/-

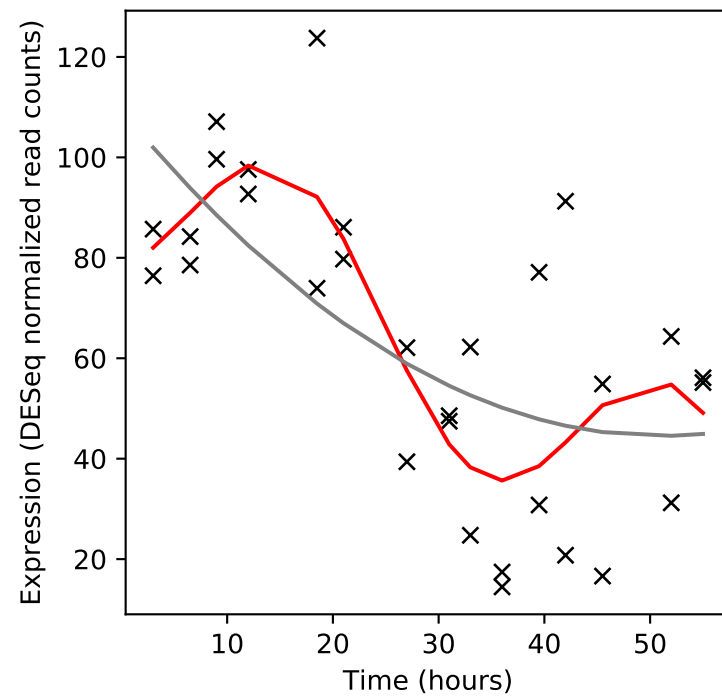

Rv0852/fadD16

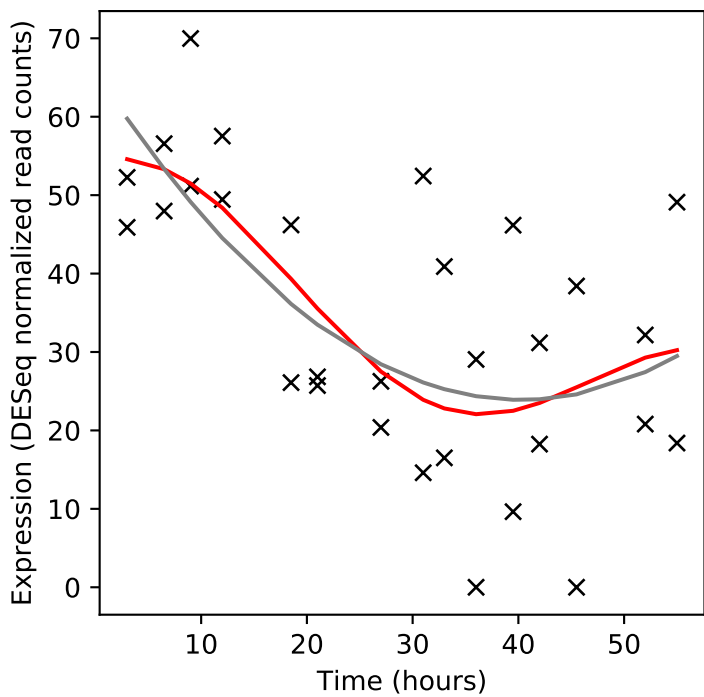

Rv0853c/pdc

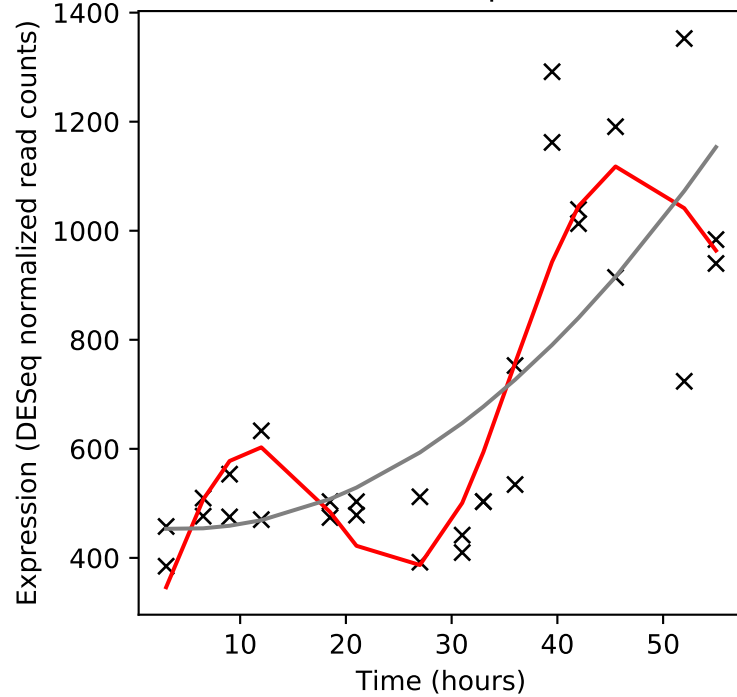

Rv0854/-

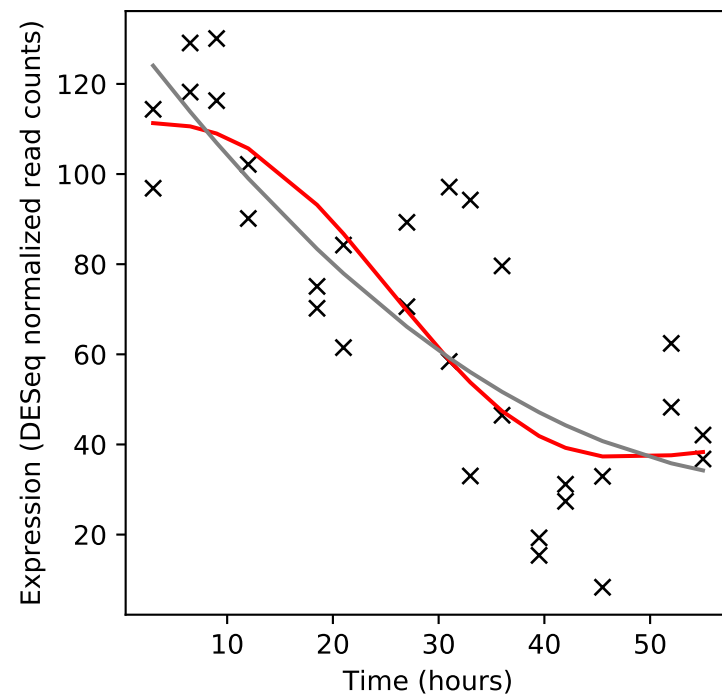

Rv0855/far

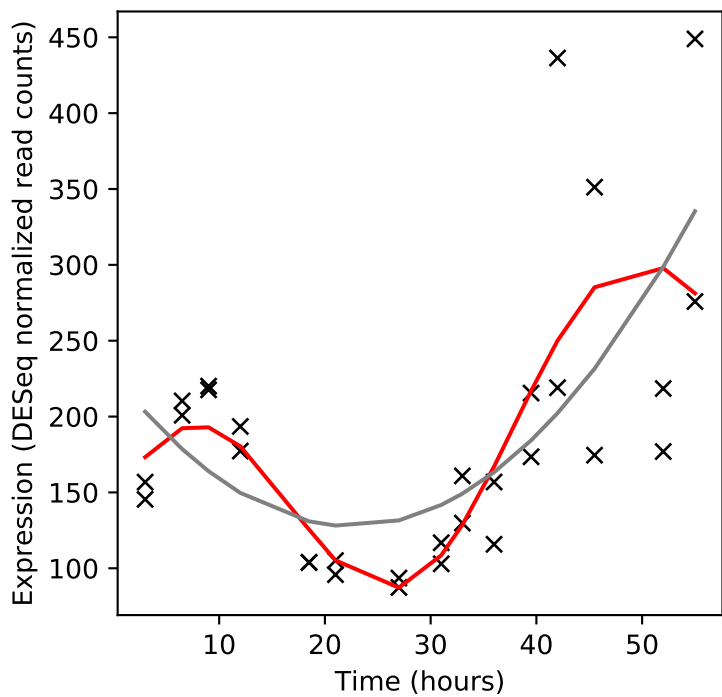

Rv0856/-

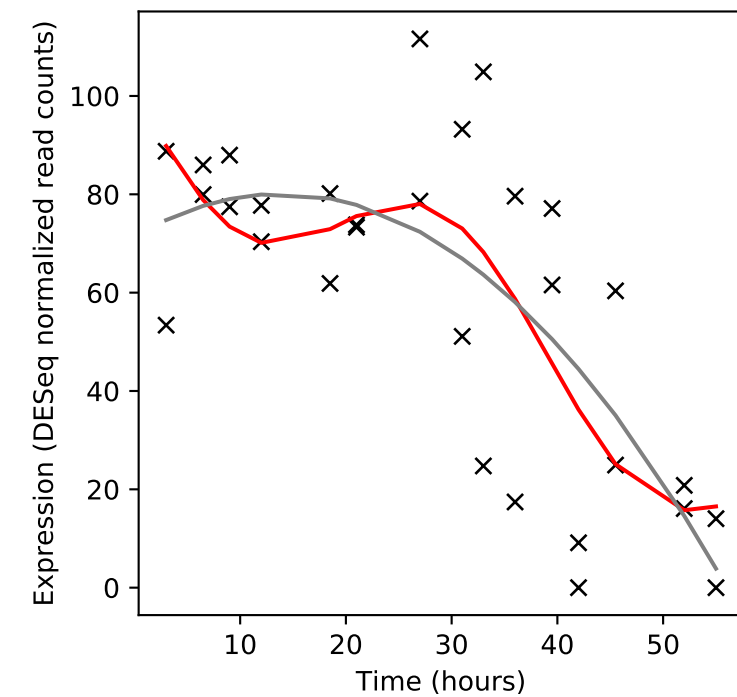

Rv0857/-

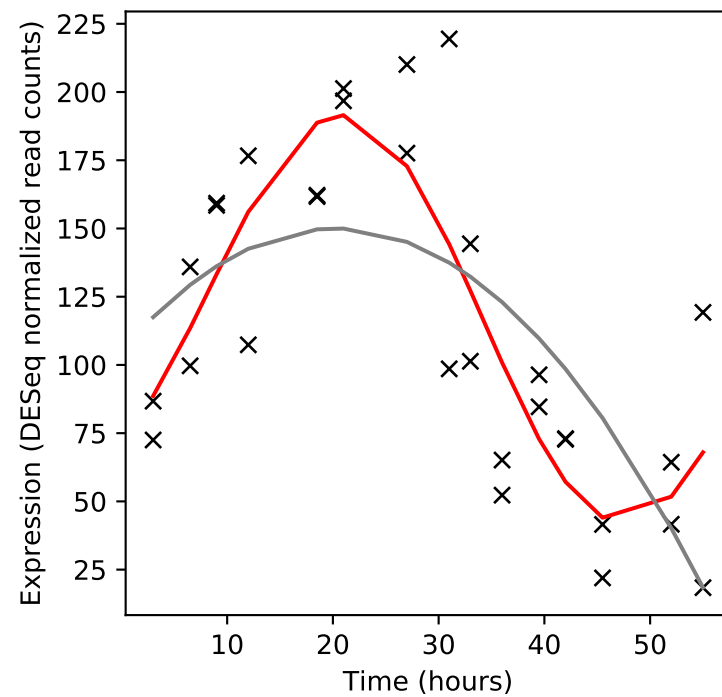

Rv0858c/dapC

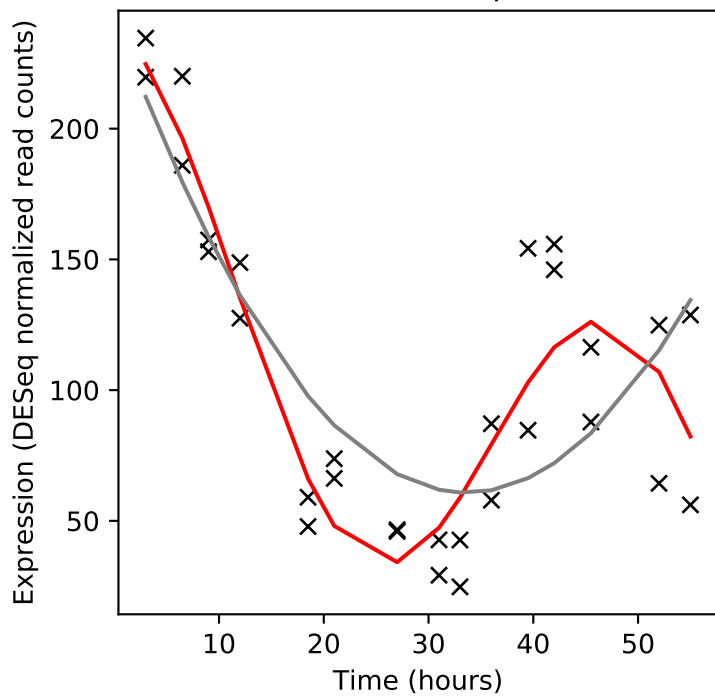

Rv0859/fadA

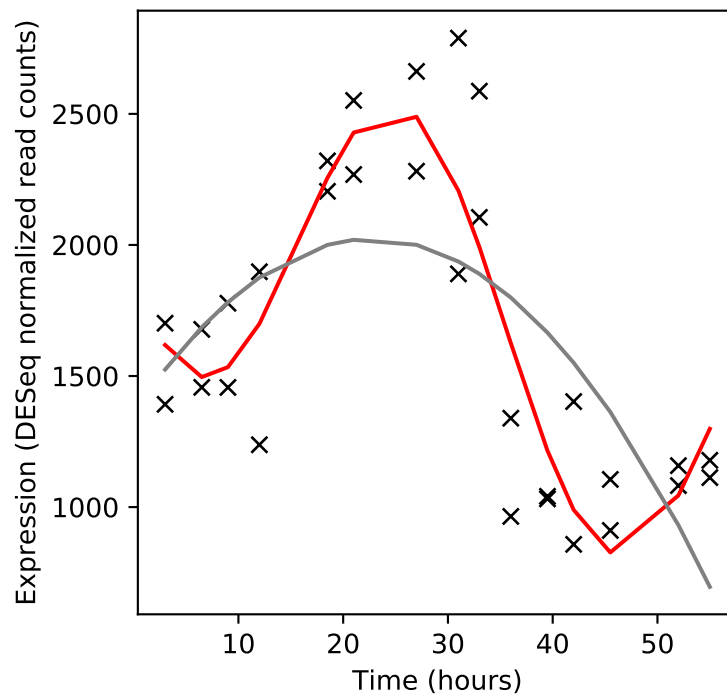

Rv0860/fadB

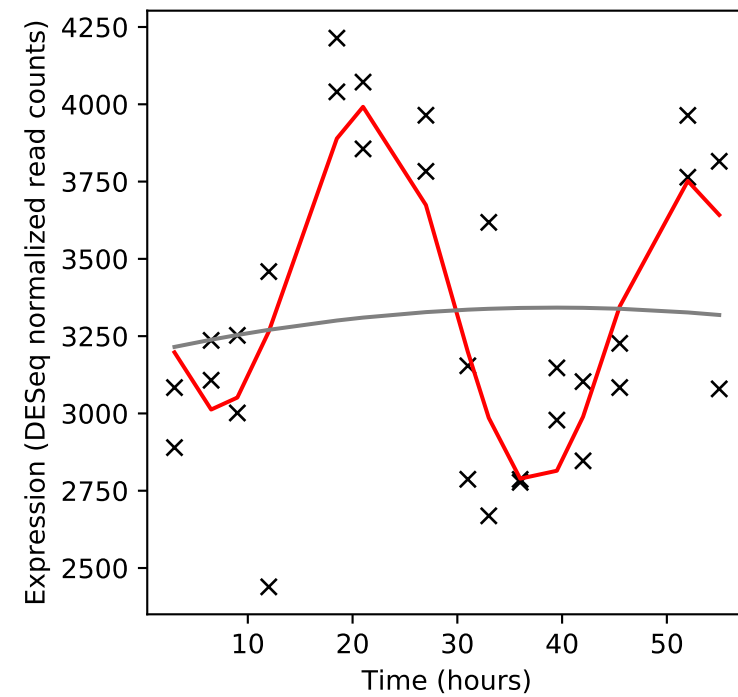

Rv0861c/ercc3

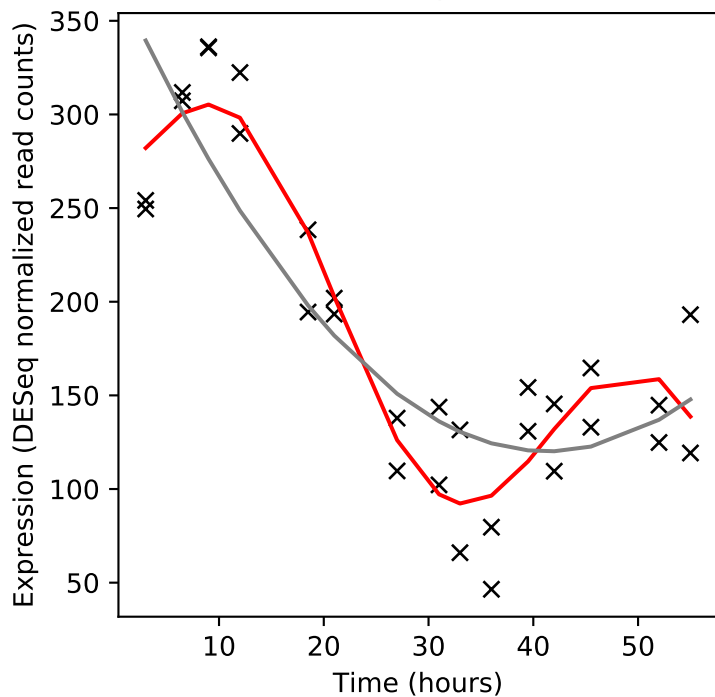

Rv0862c/-

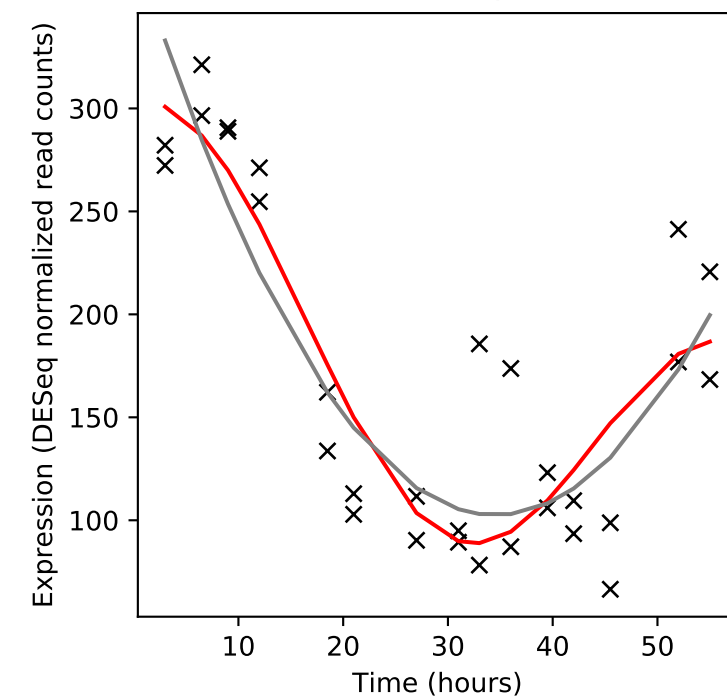

Rv0863/-

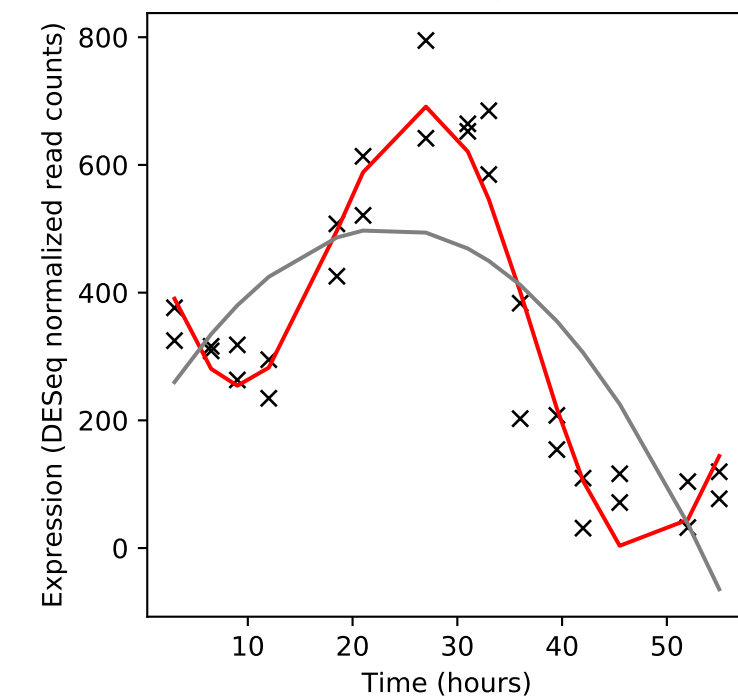

Rv0864/moaC2

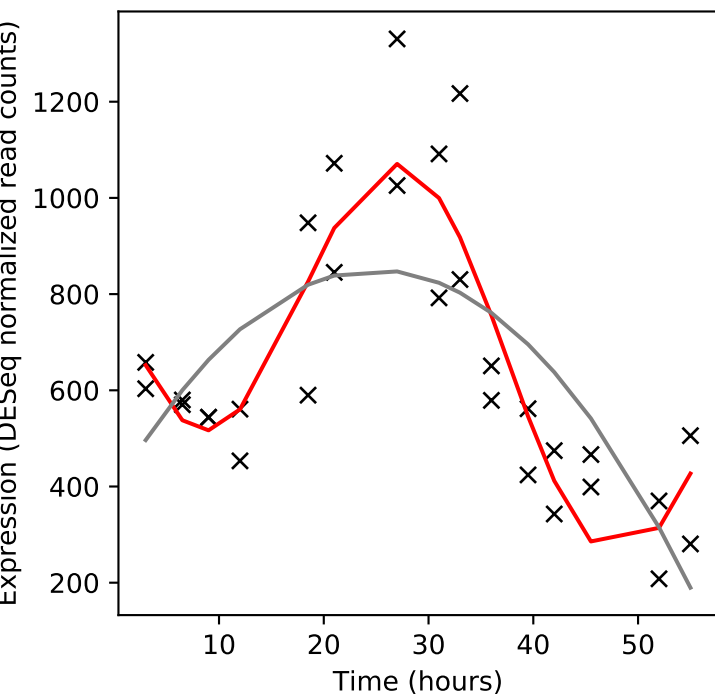

Rv0865/mog

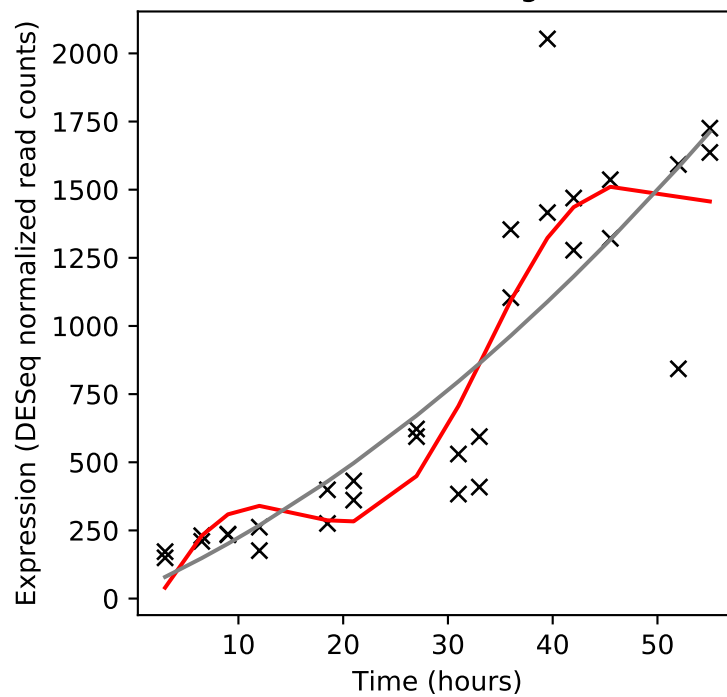

Rv0866/moaE2

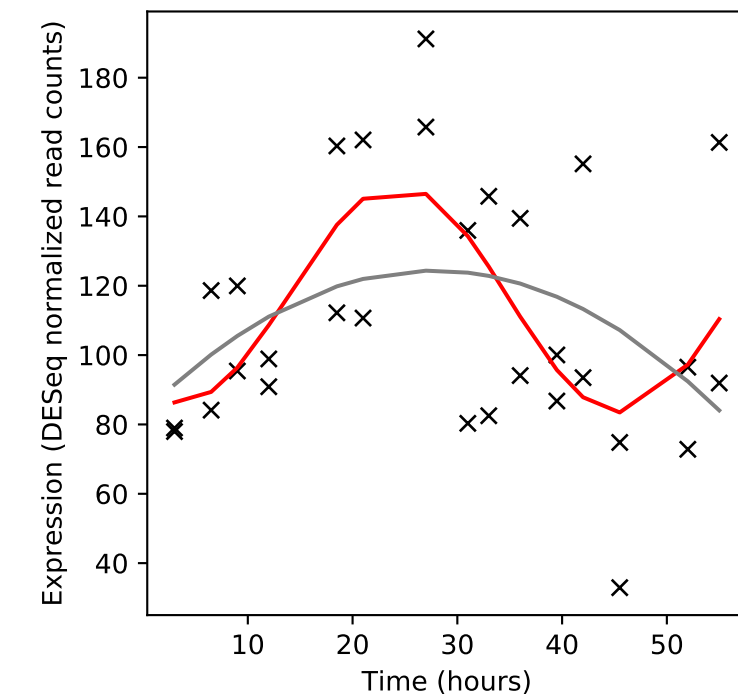



Rv0867c/rpfA

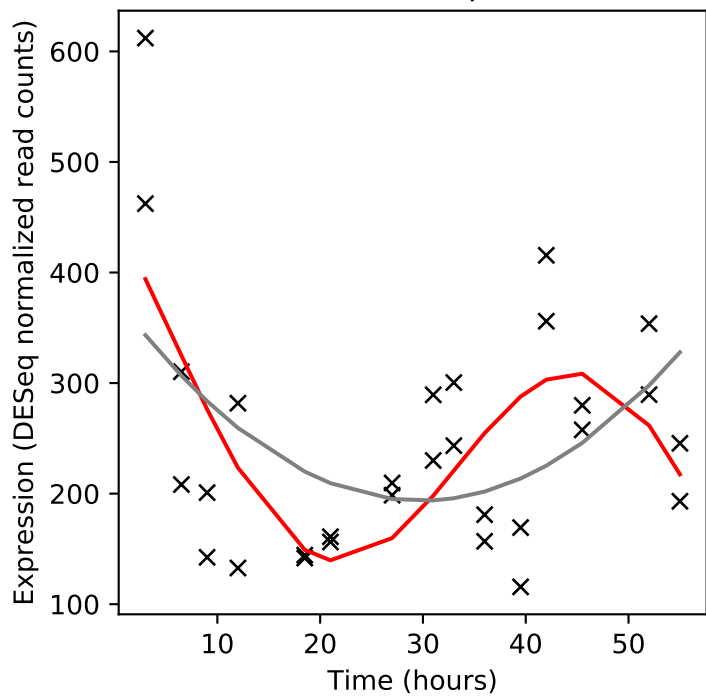

Rv0868c/moaD2

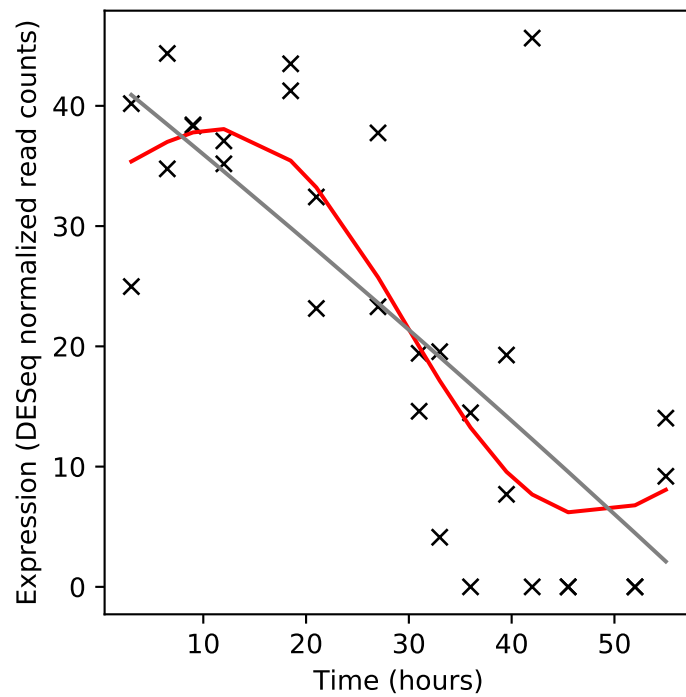

Rv0869c/moaA2

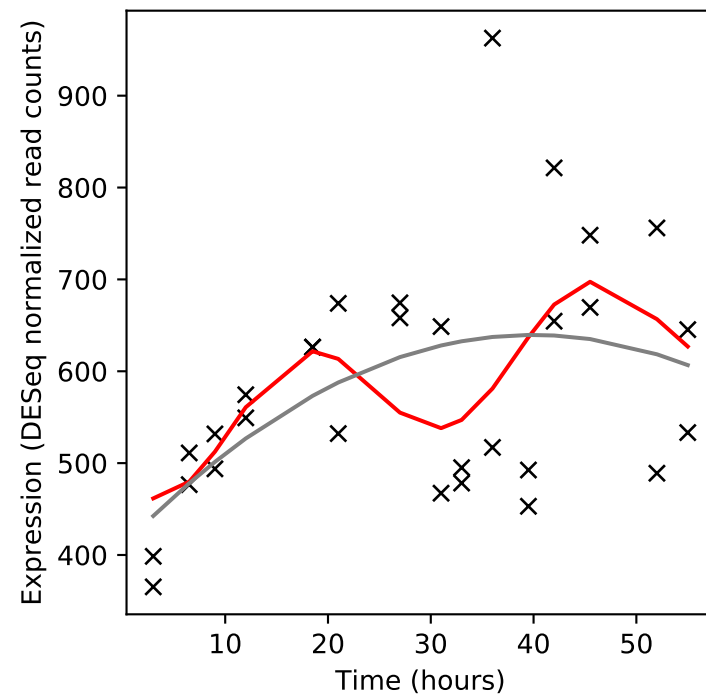

Rv0870c/-

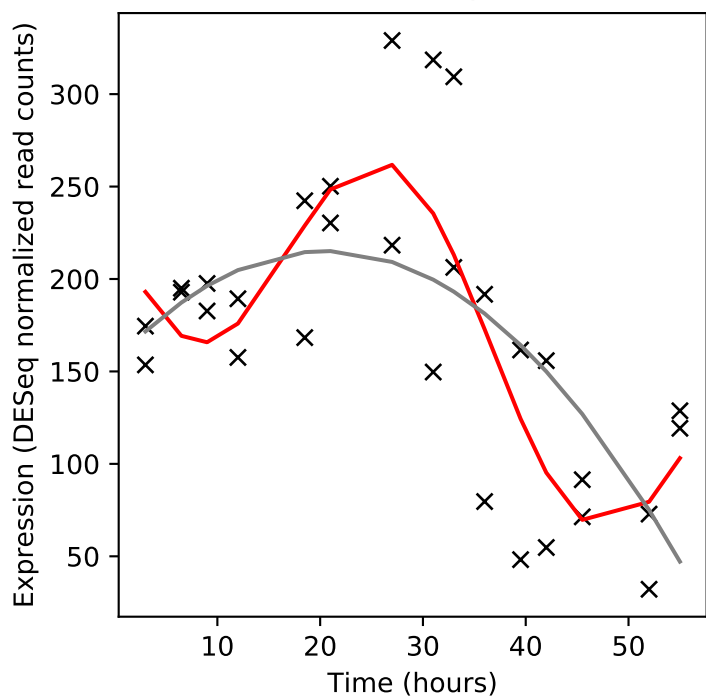

Rv0871c/cspB

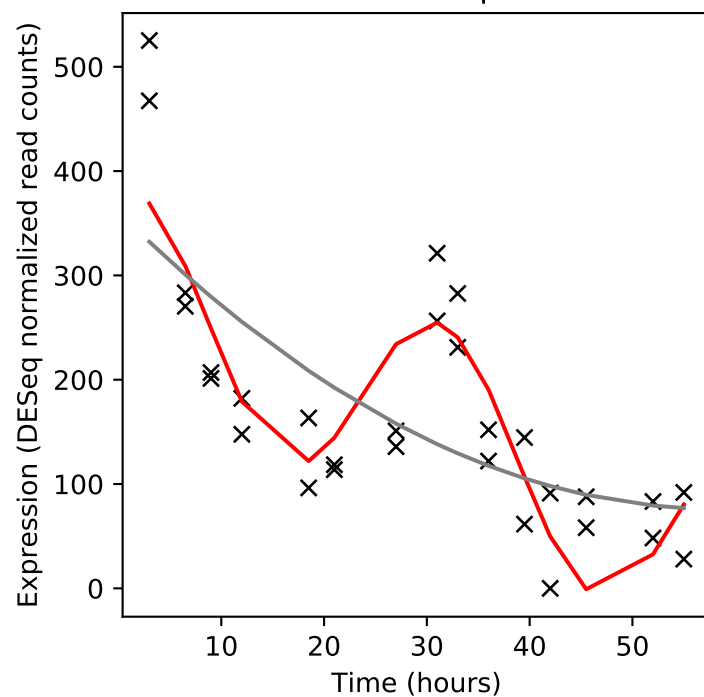

Rv0872c/PE\_PGRS15

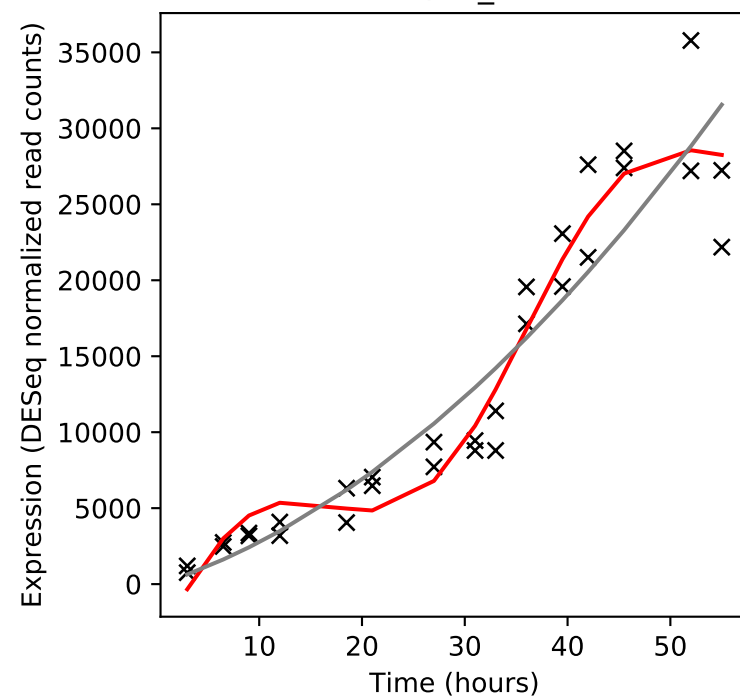

Rv0873c/fadE10

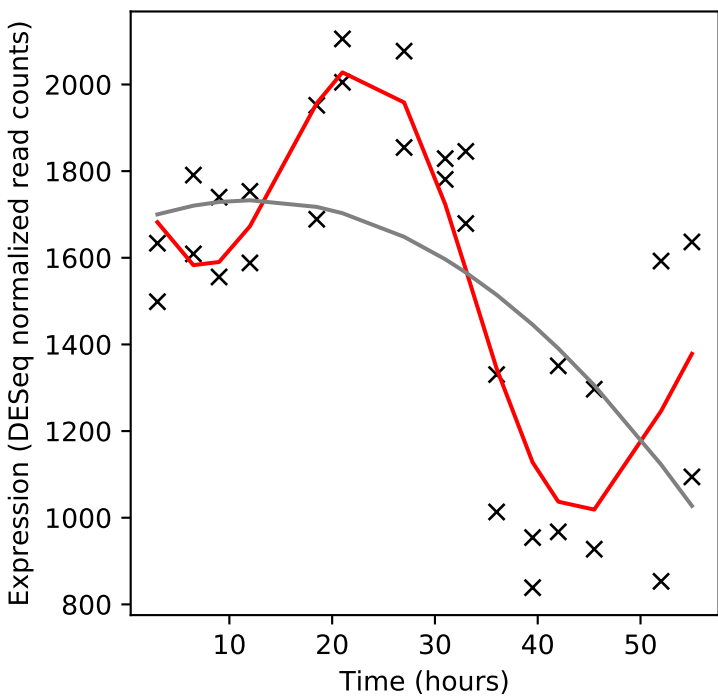

Rv0874c/-

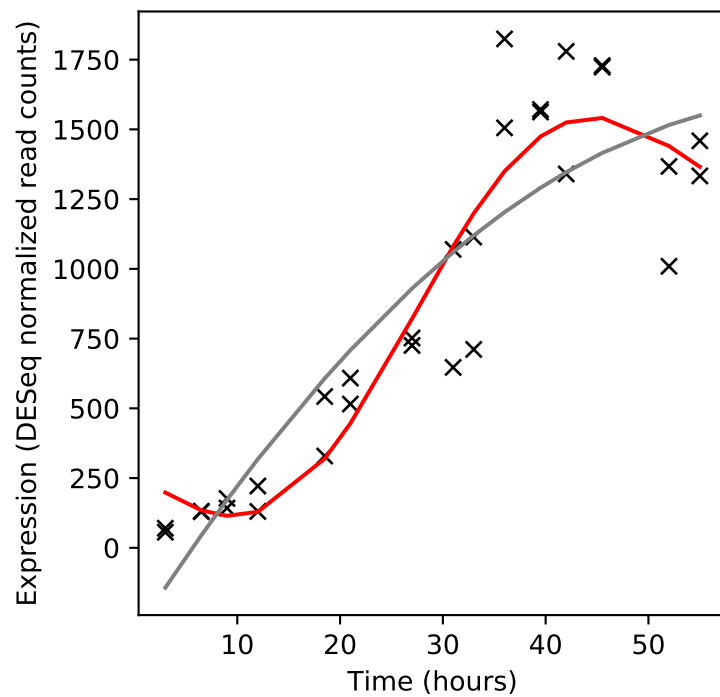

Rv0875c/-

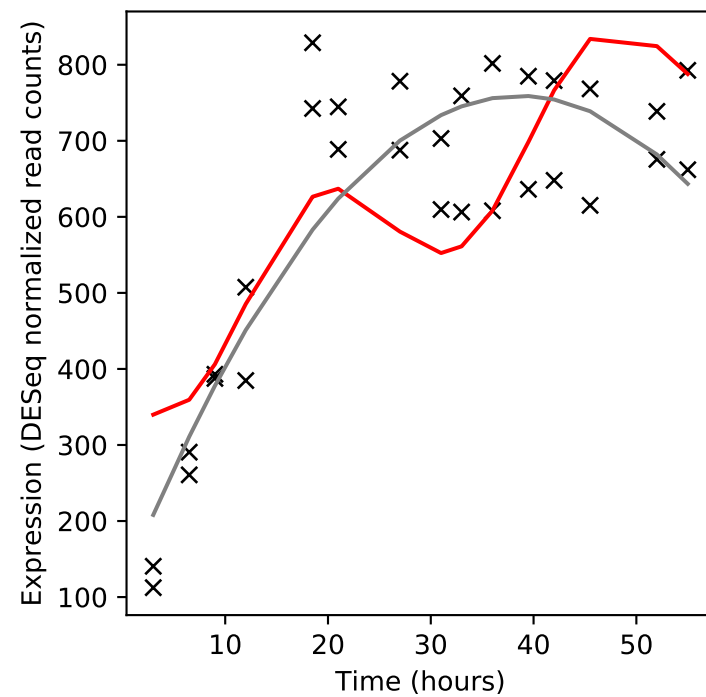

Rv0876c/-

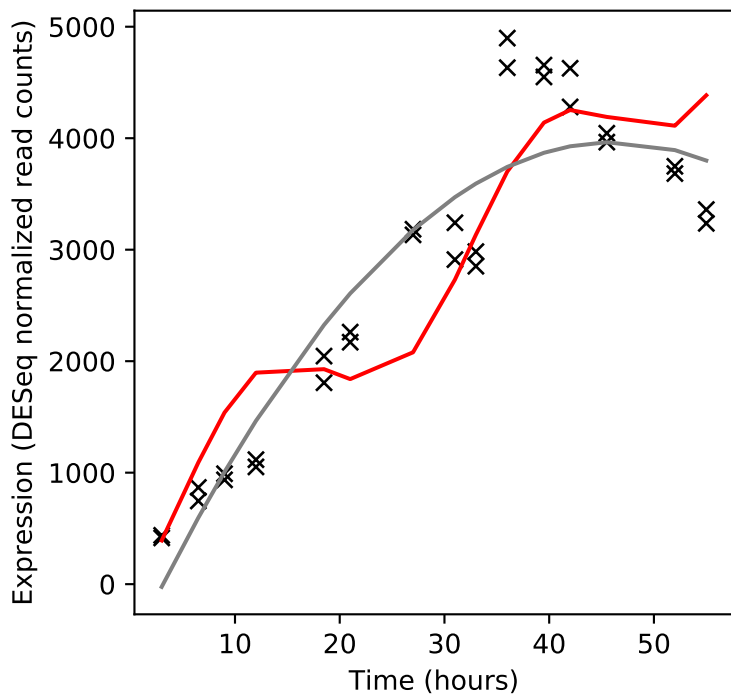

Rv0877/-

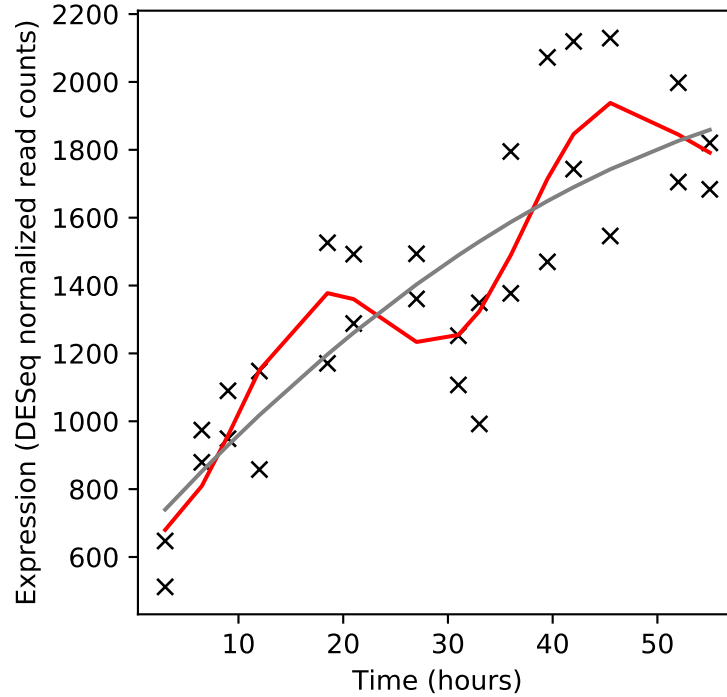

Rv0878c/PPE13

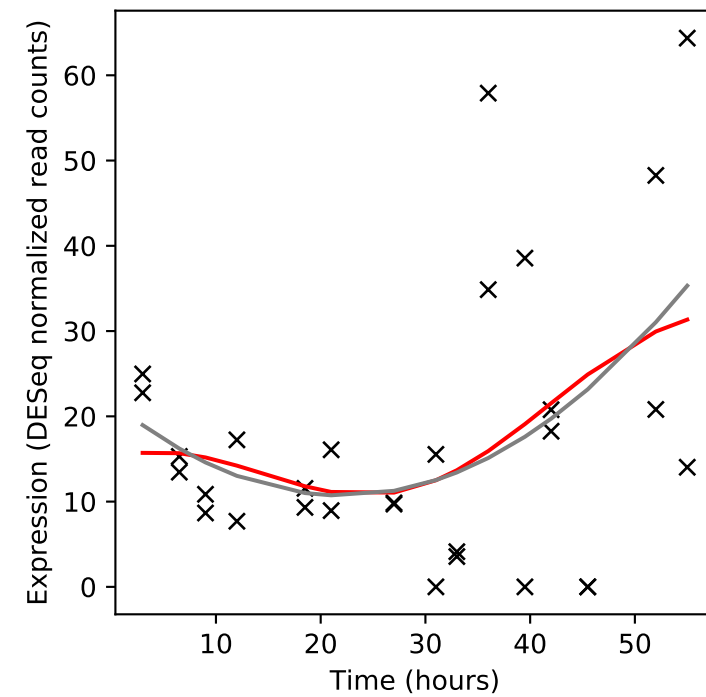

Rv0879c/-

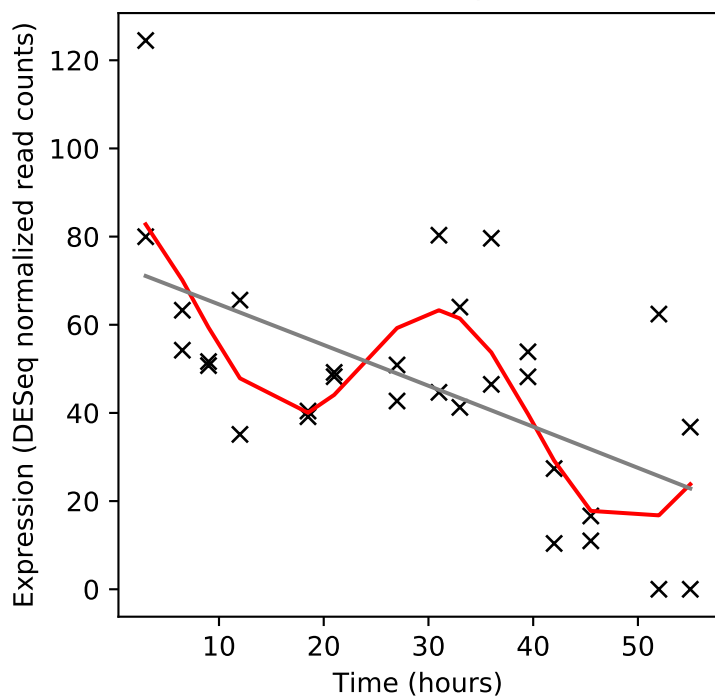

Rv0880/-

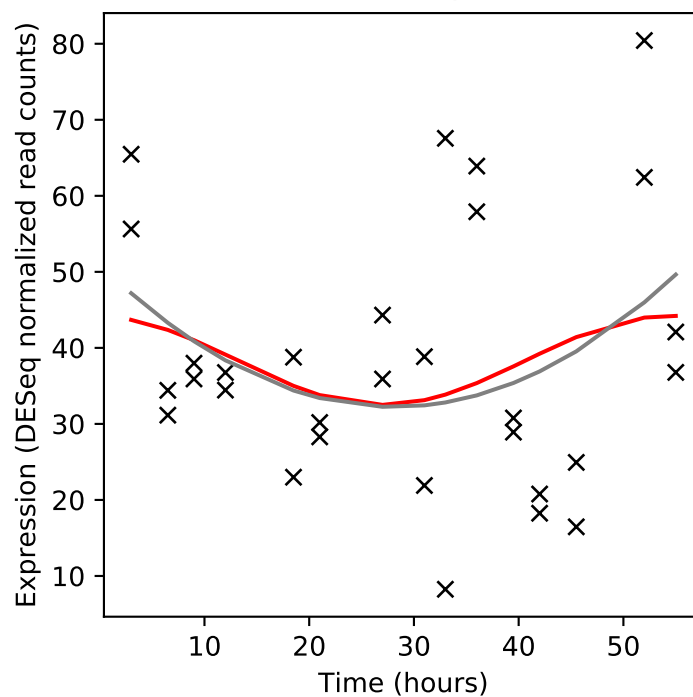

Rv0881/-

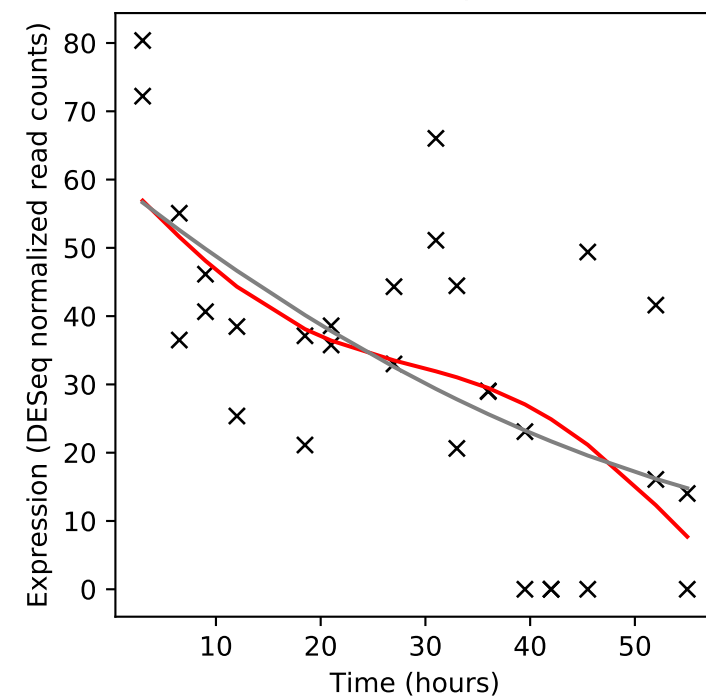

Rv0882/-

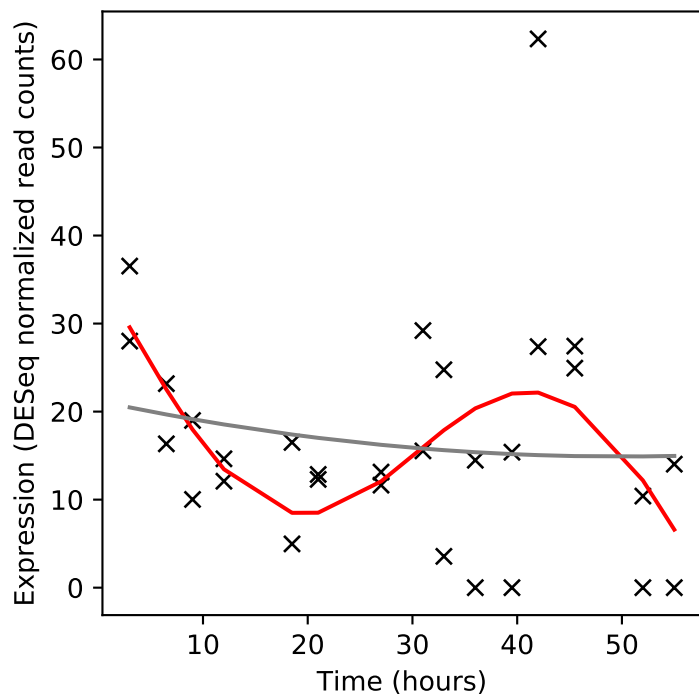

Rv0883c/-

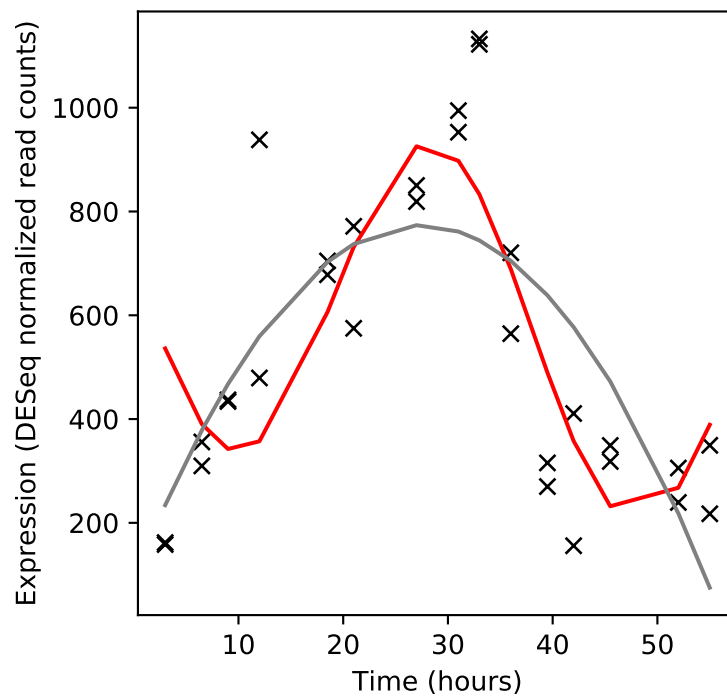

Rv0884c/serC

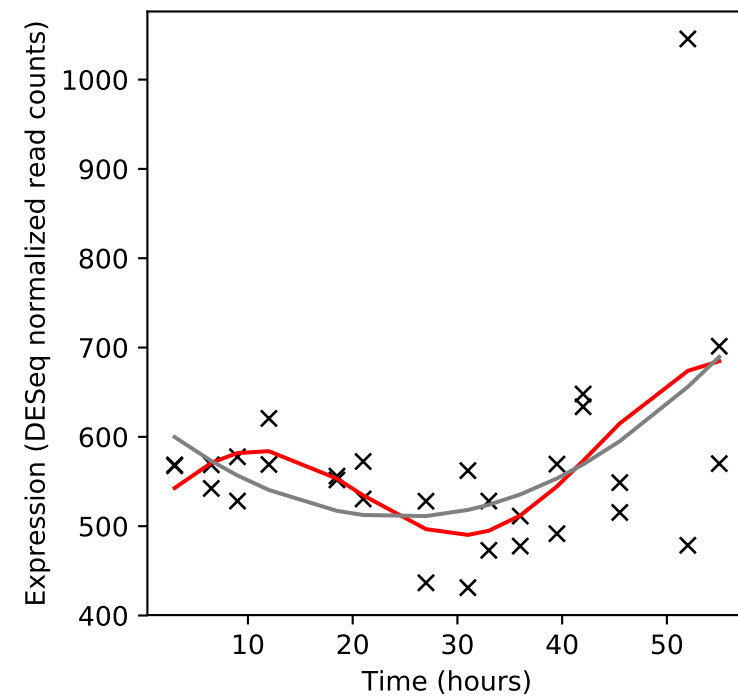

Rv0885/-

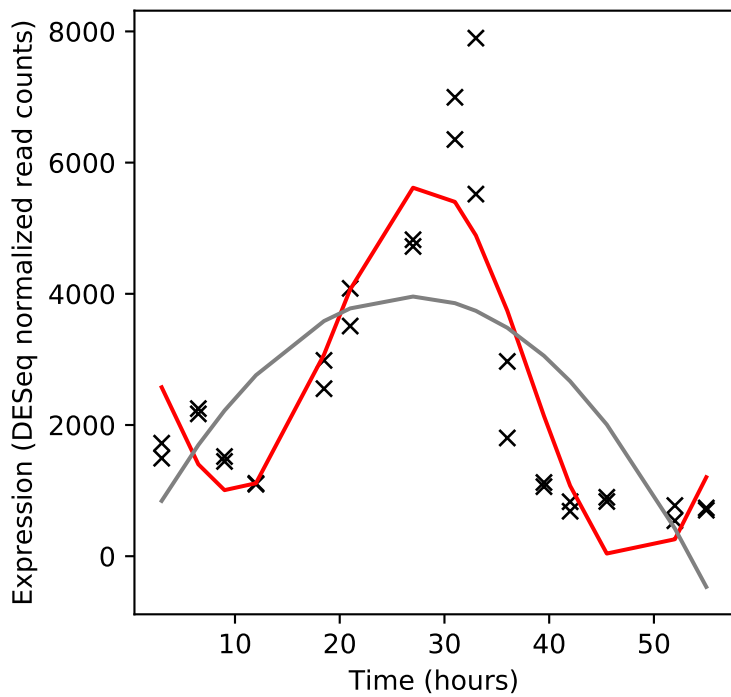

Rv0886/fprB

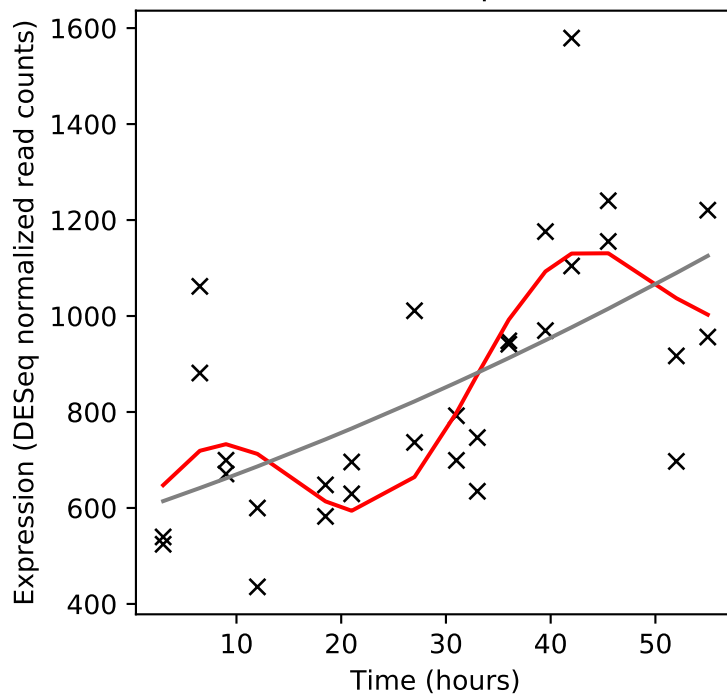

Rv0887c/-

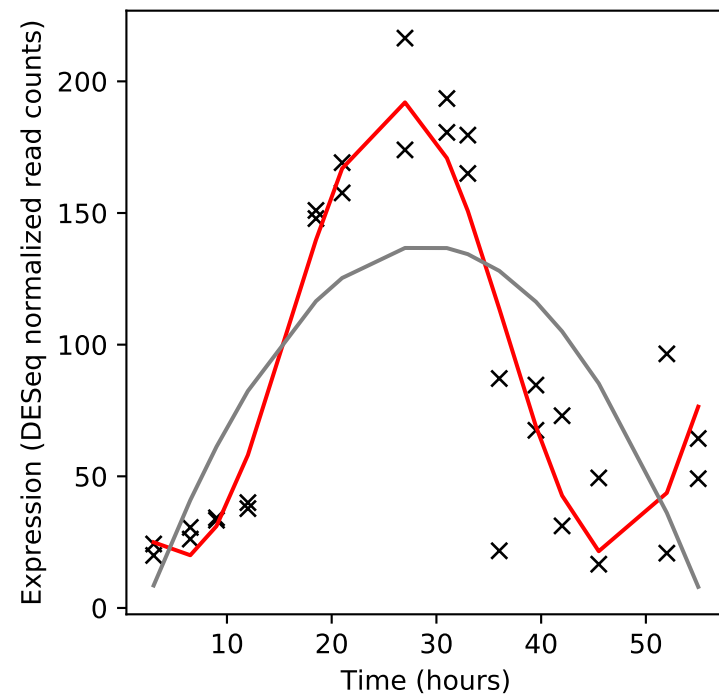

Rv0888/-

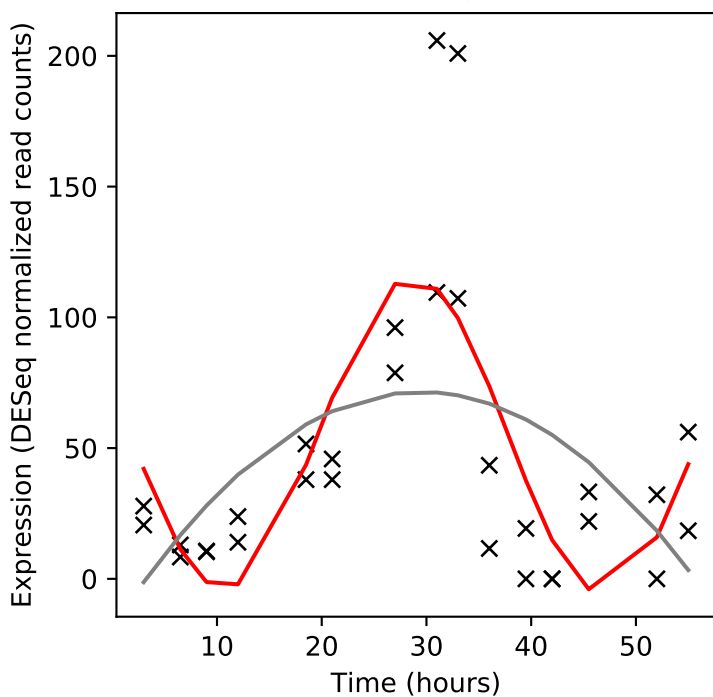

Rv0889c/citA

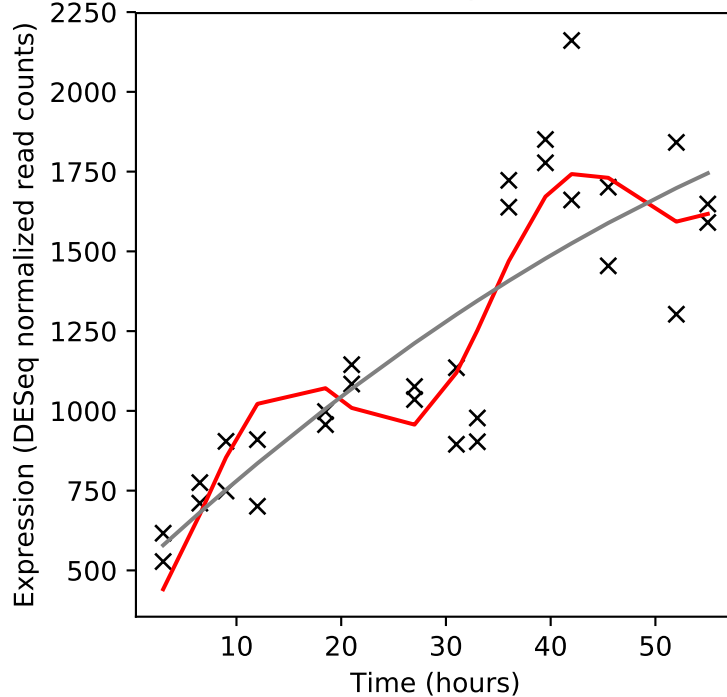

Rv0890c/-

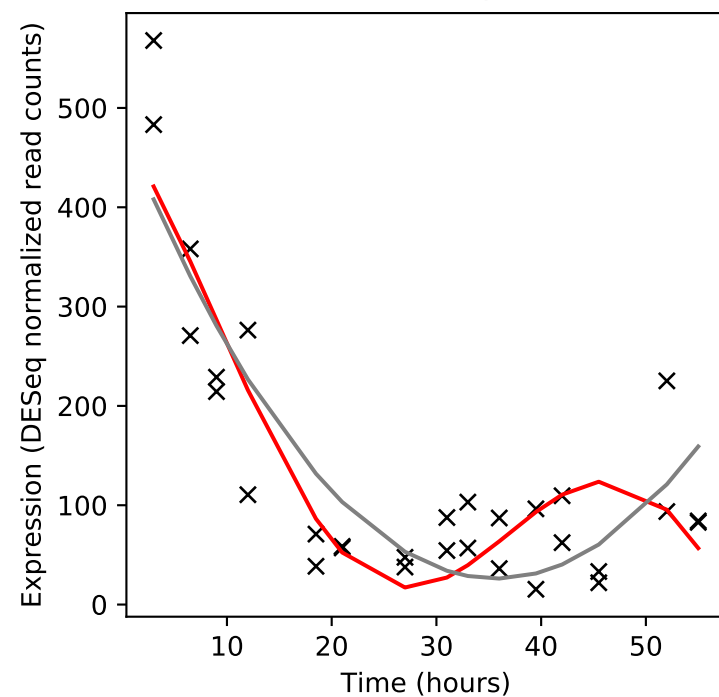

Rv0891c/-

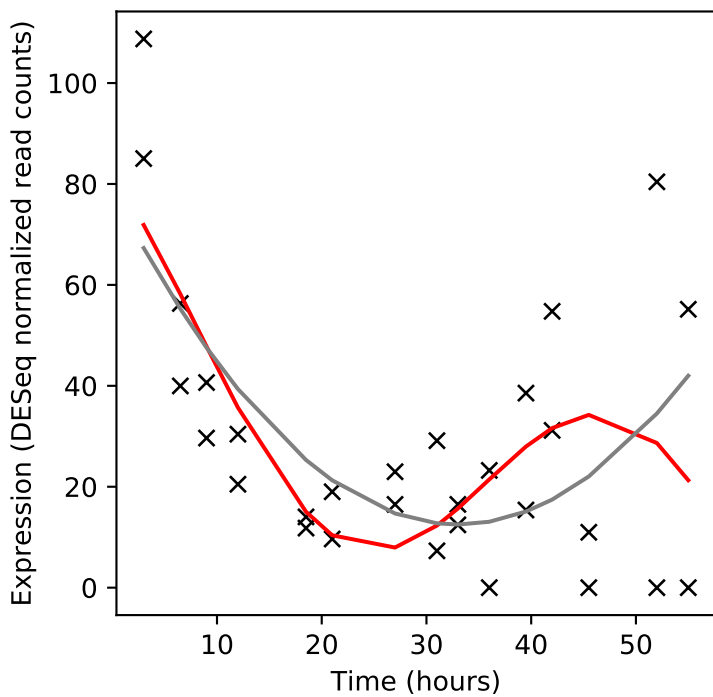

Rv0892/-

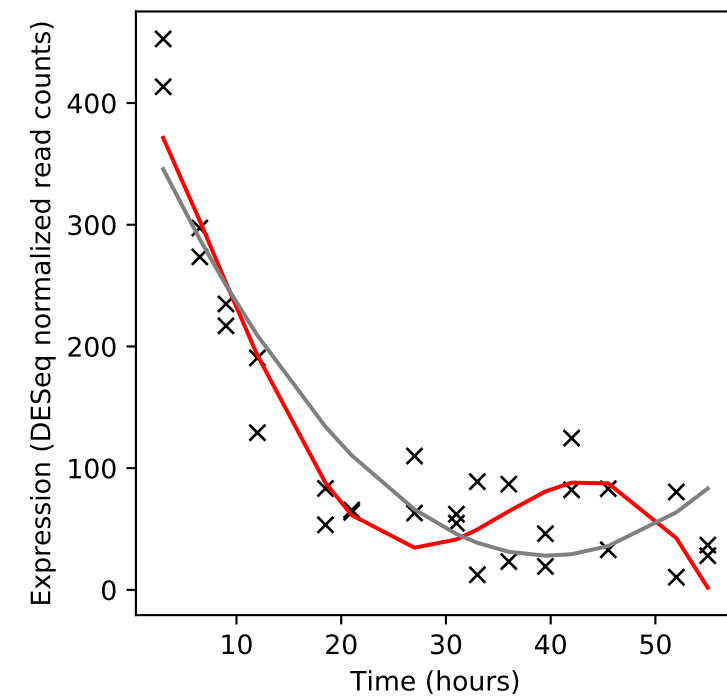

Rv0893c/-

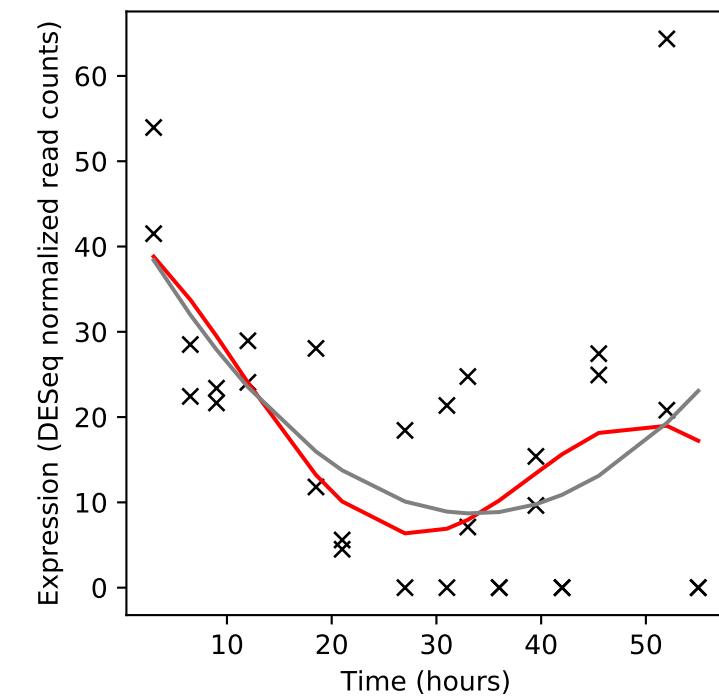

Rv0894/-

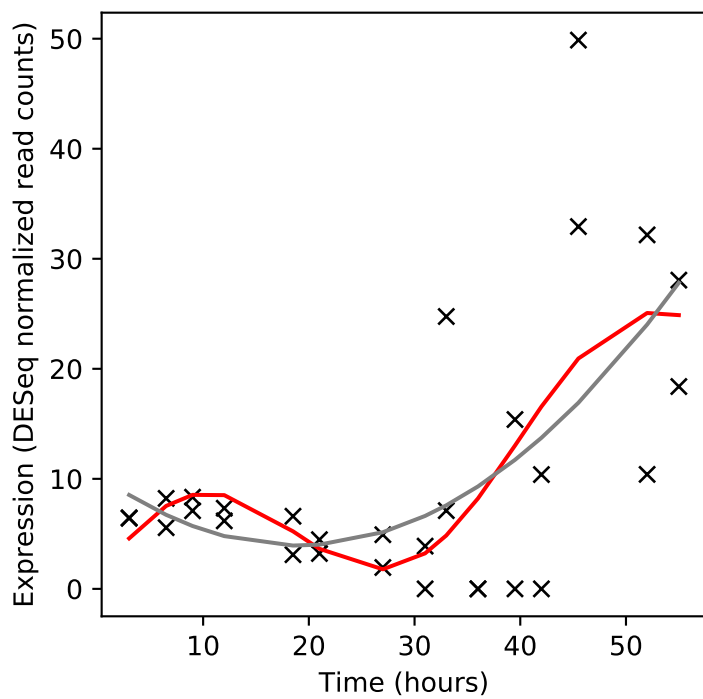

Rv0895/-

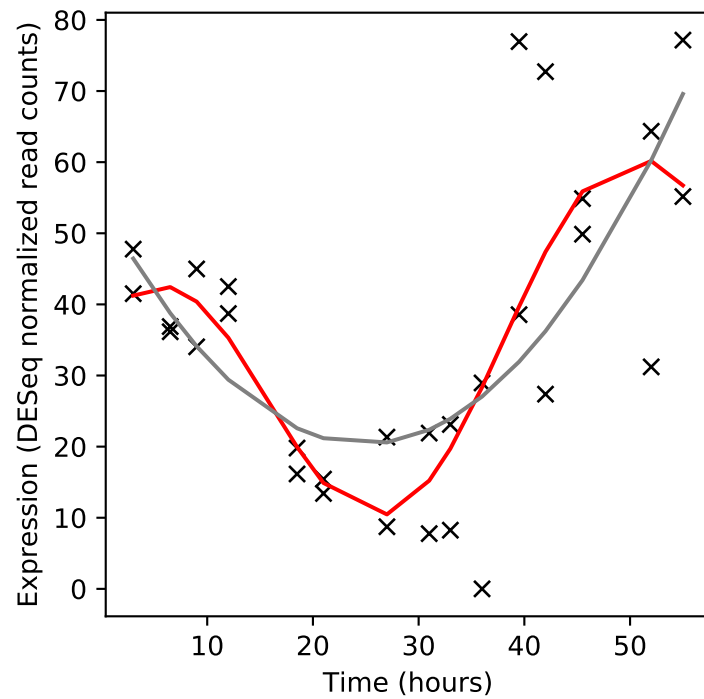

Rv0896/gltA2

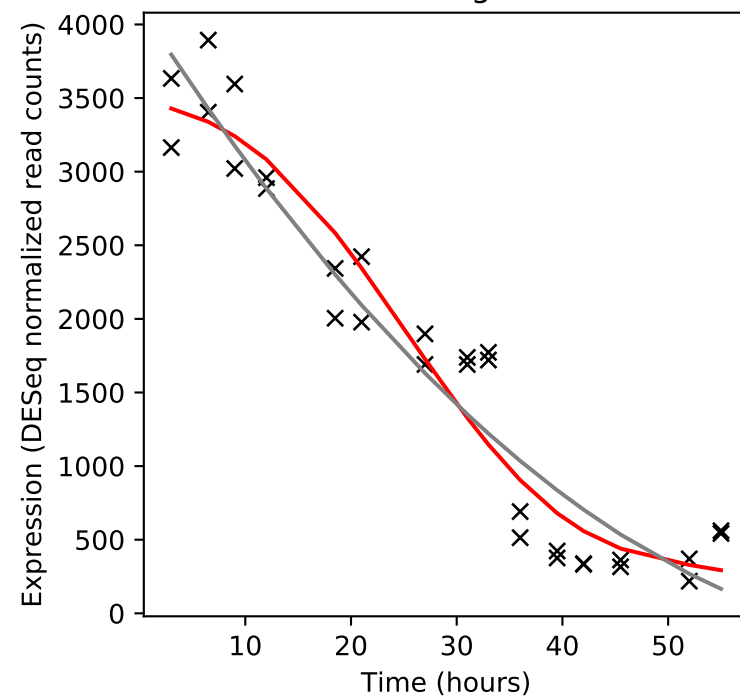

Rv0897c/-

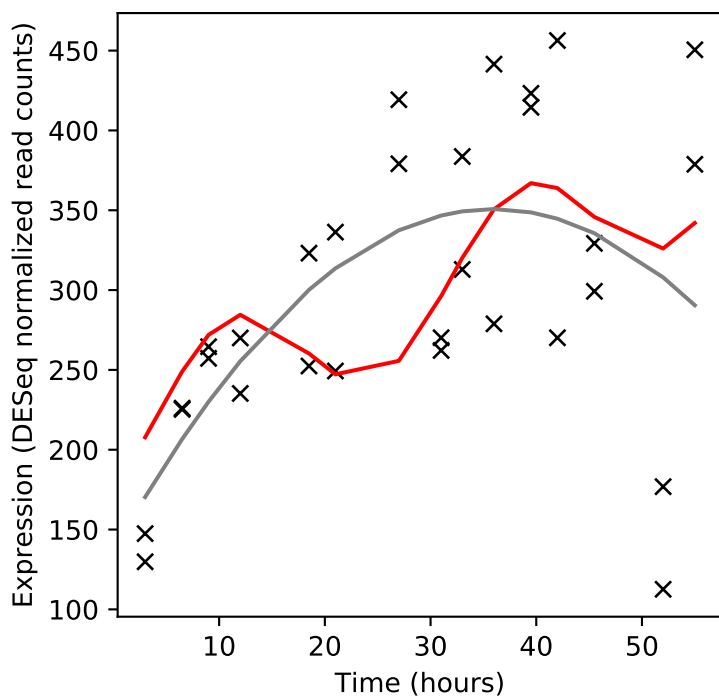

Rv0898c/-

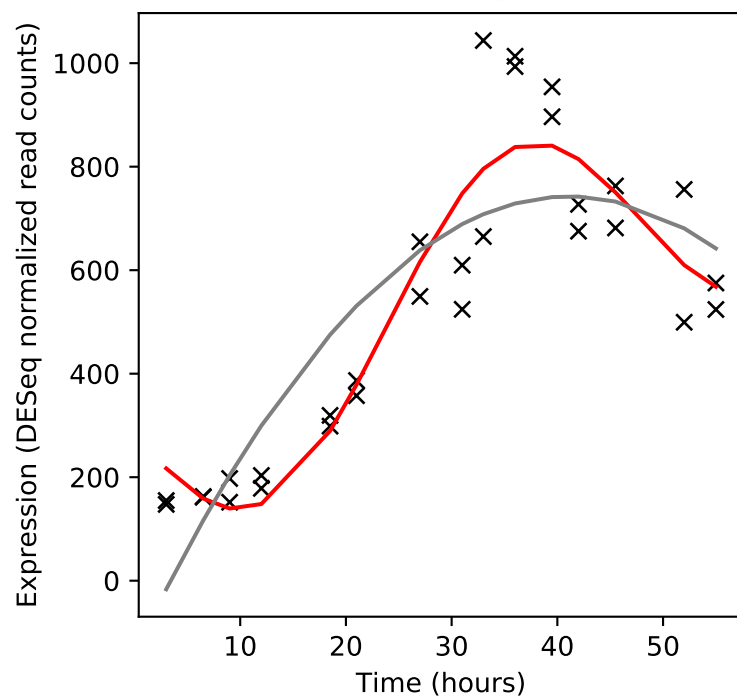

Rv0899/ompA

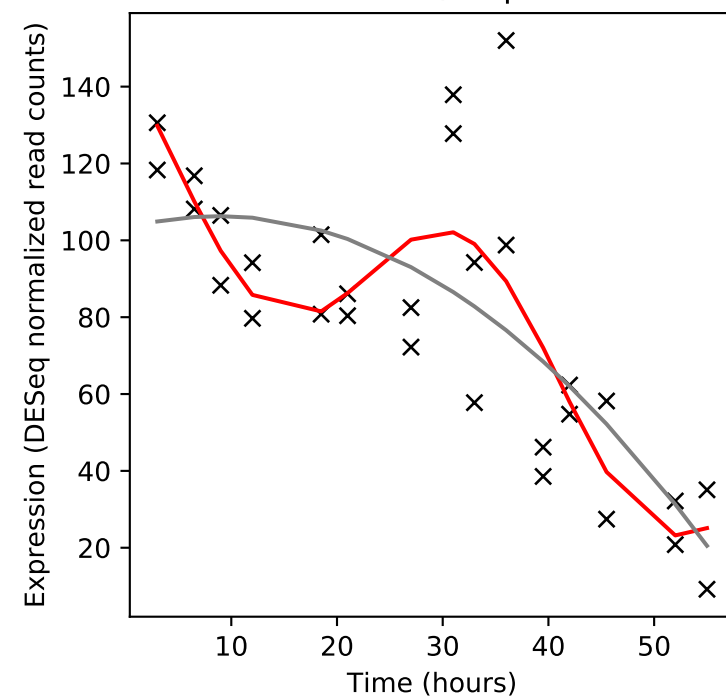

Rv0900/-

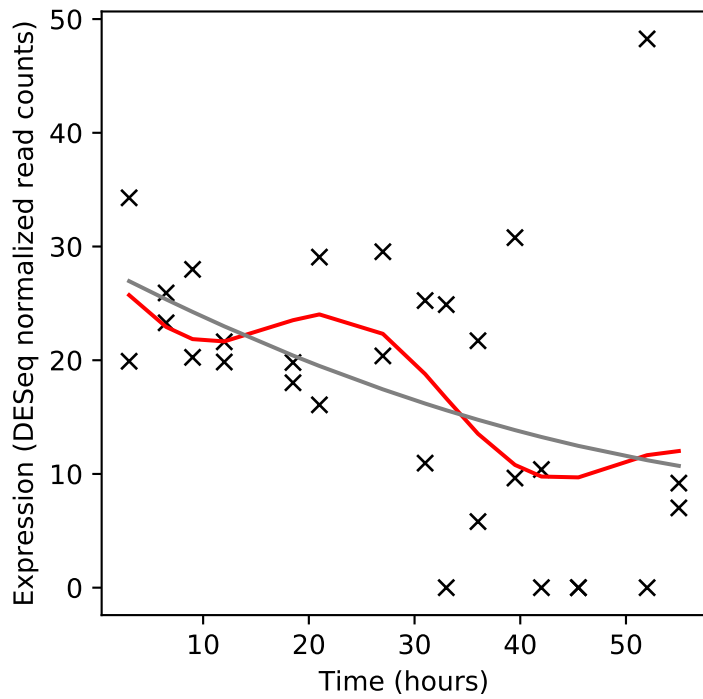

Rv0901/-

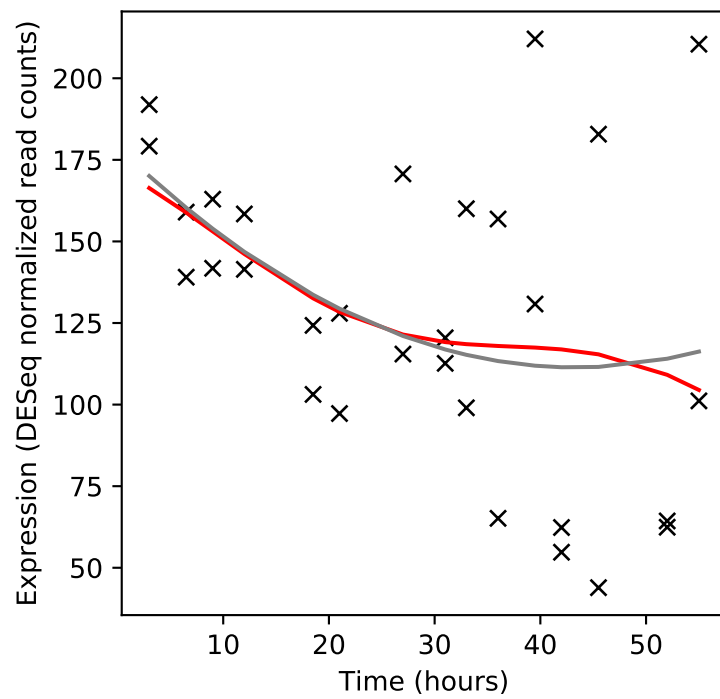

Rv0902c/prrB

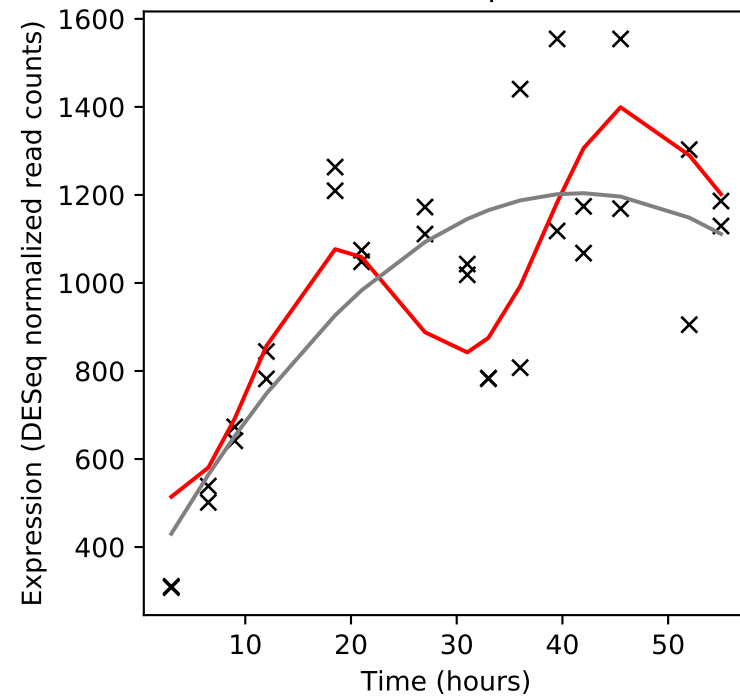

Rv0903c/prrA

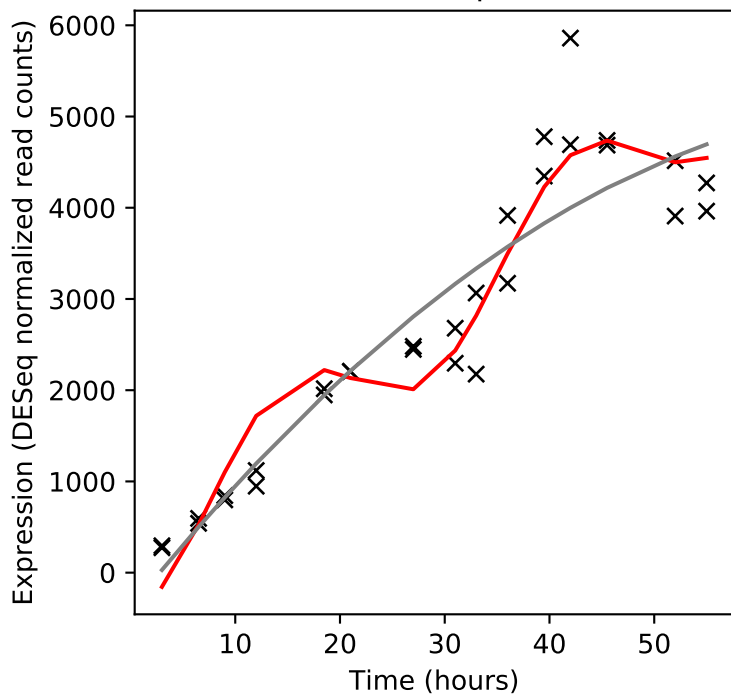

Rv0904c/accD3

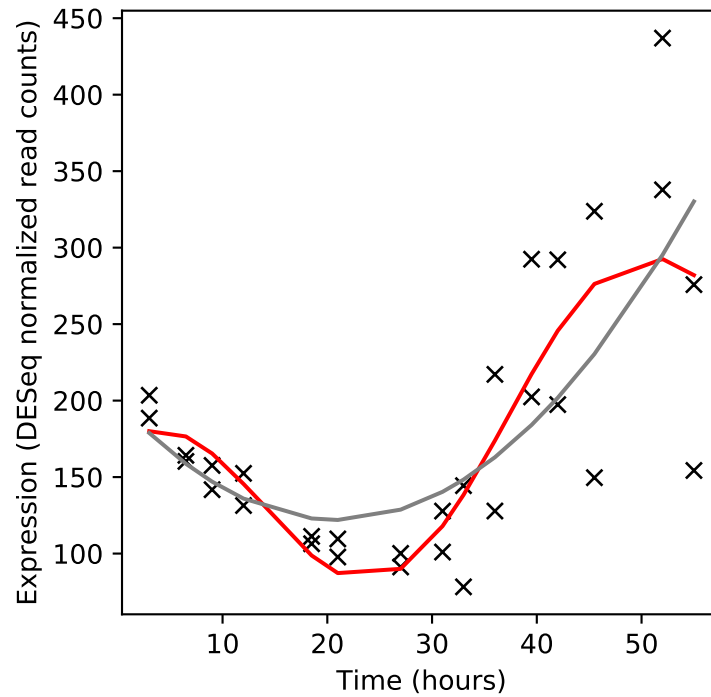

Rv0905/echA6

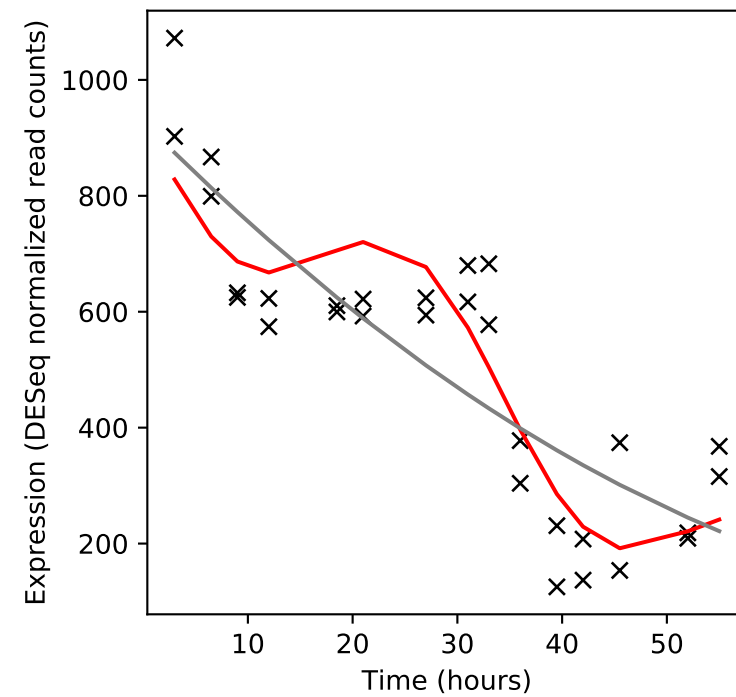

Rv0906/-

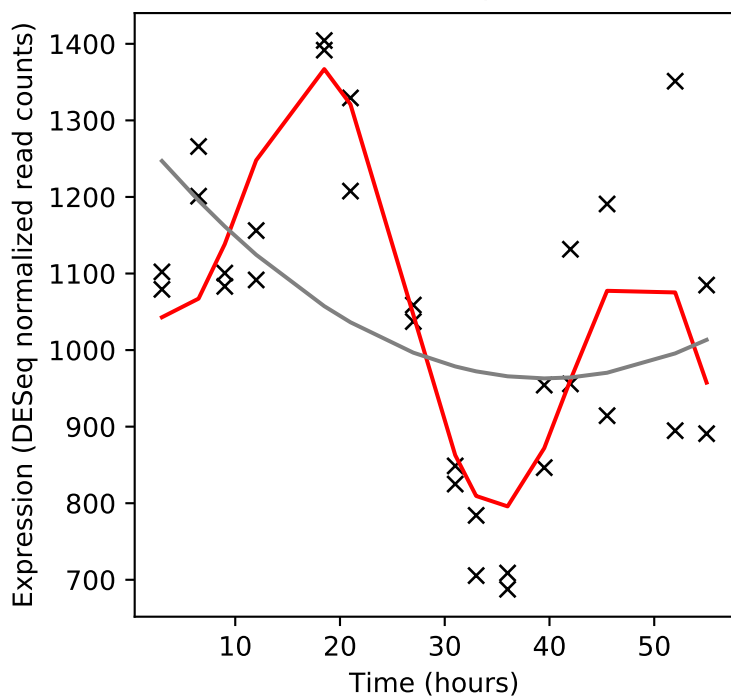

Rv0907/-

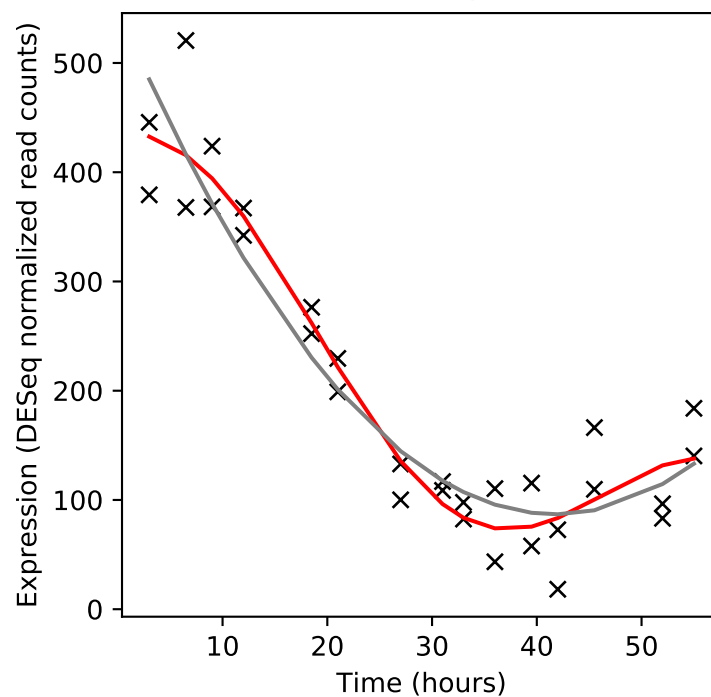

Rv0908/ctpE

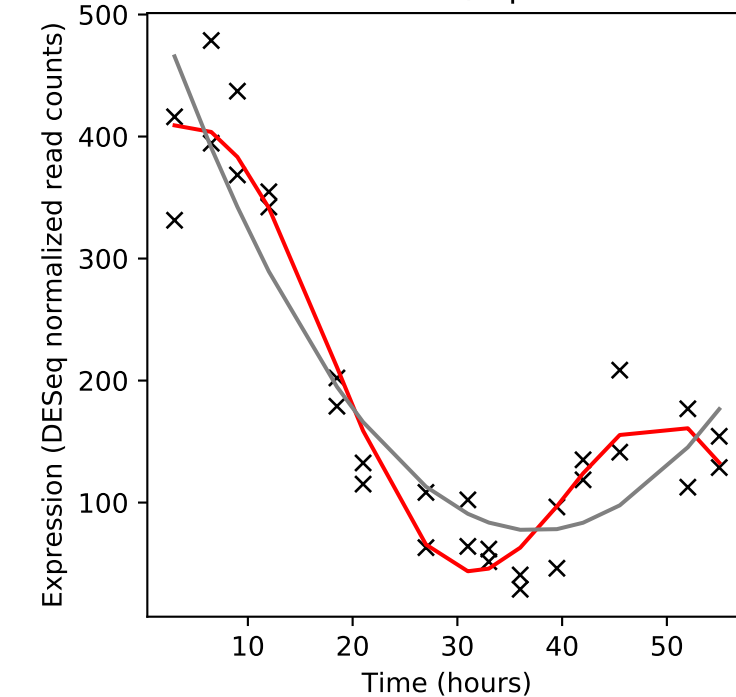

Rv0909/-

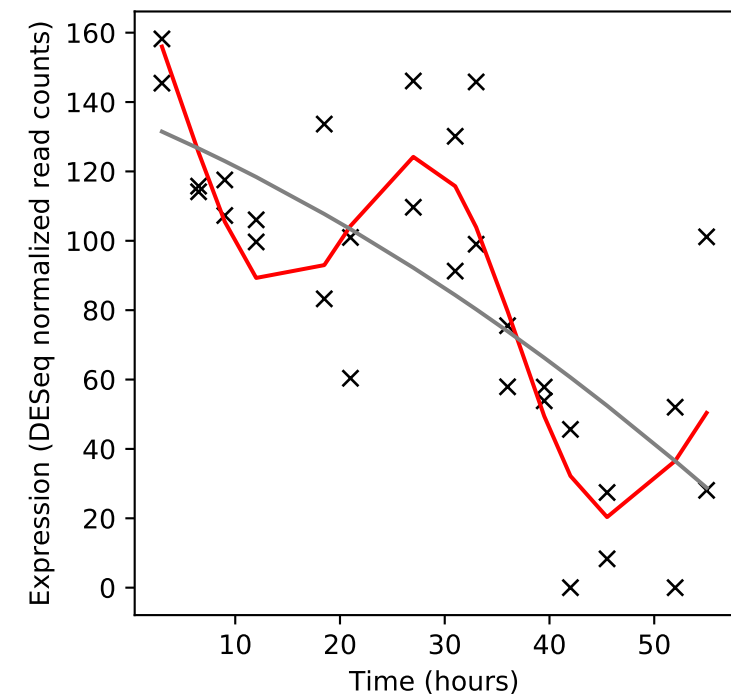

Rv0910/-

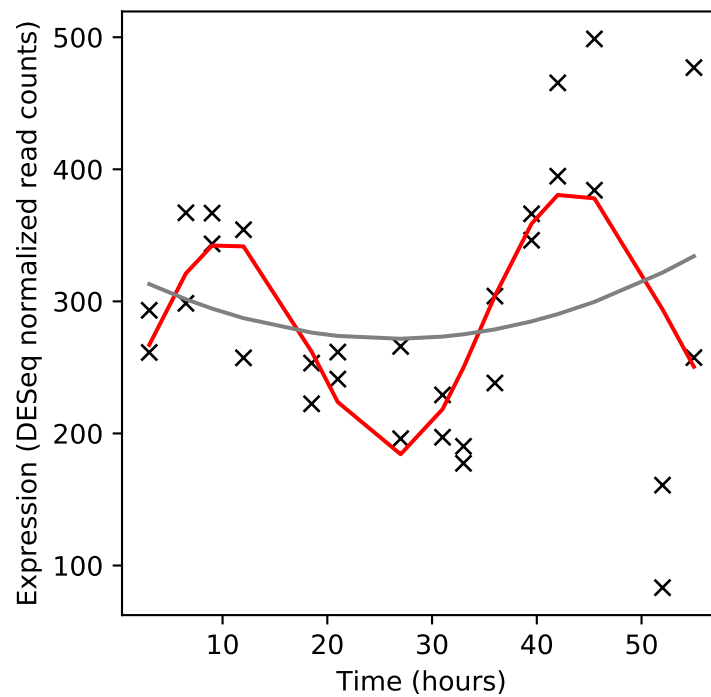

Rv0911/-

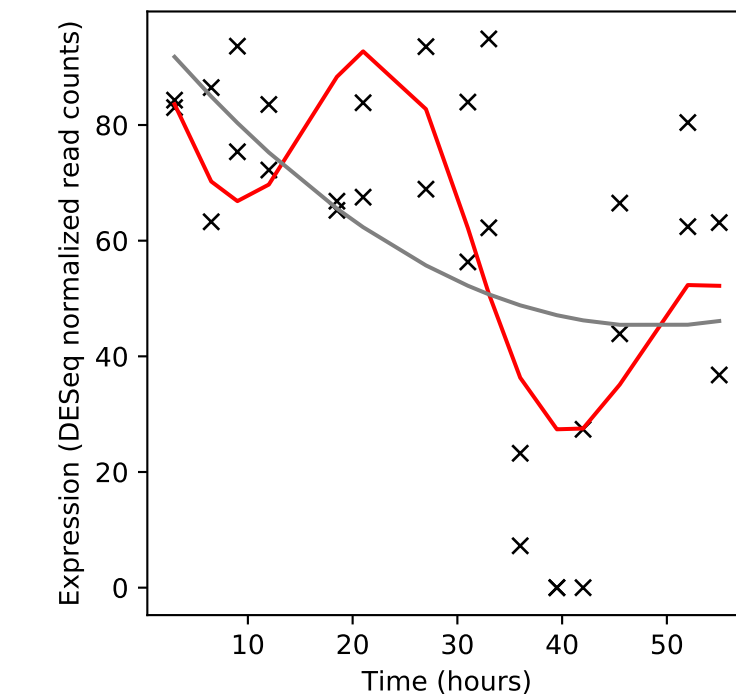

Rv0912/-

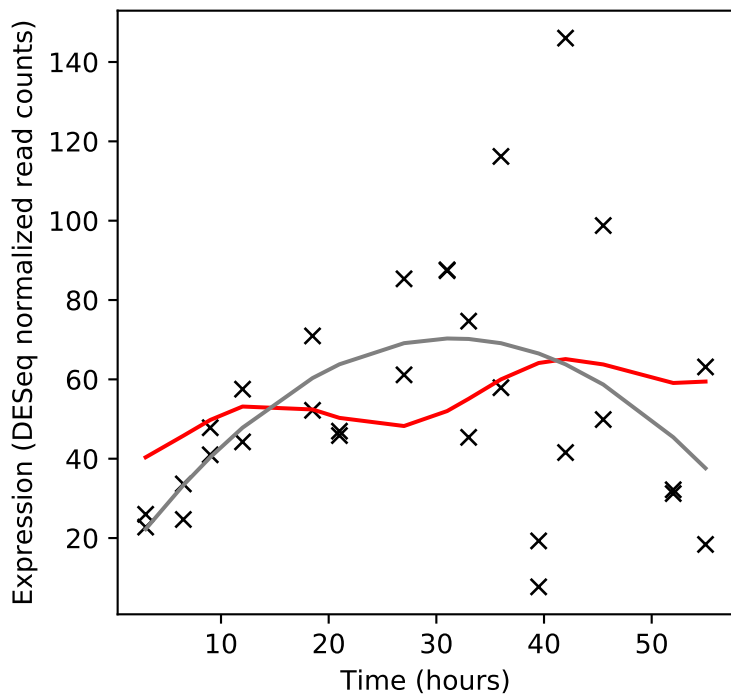

Rv0913c/-

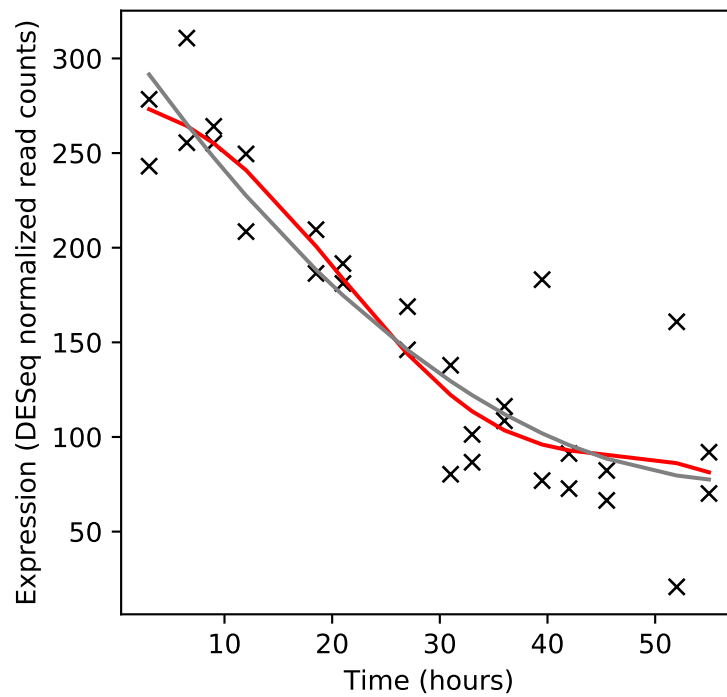

Rv0914c/-

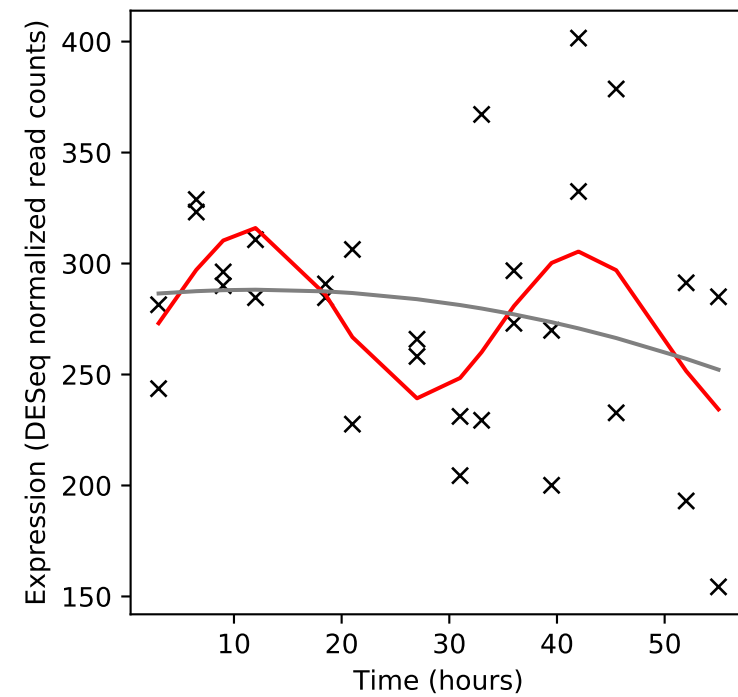

Rv0915c/PPE14

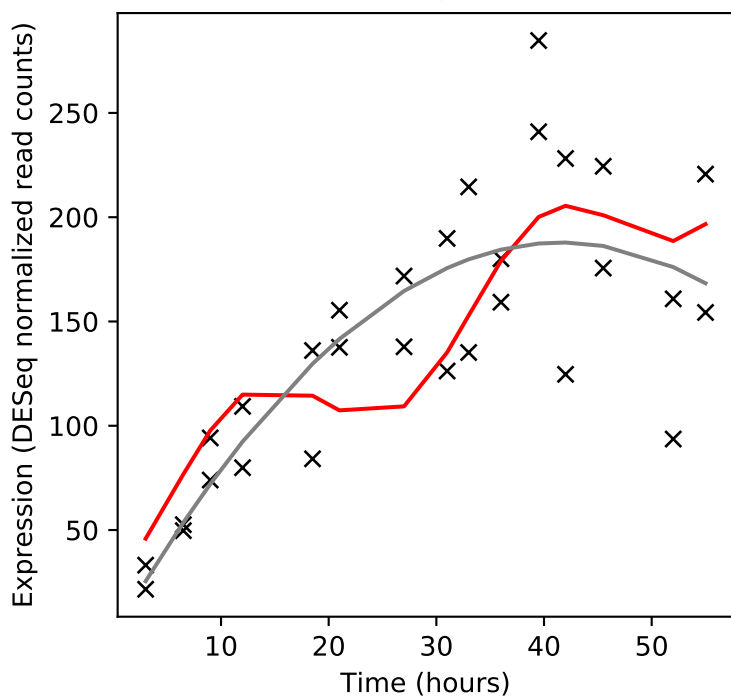

Rv0916c/PE7

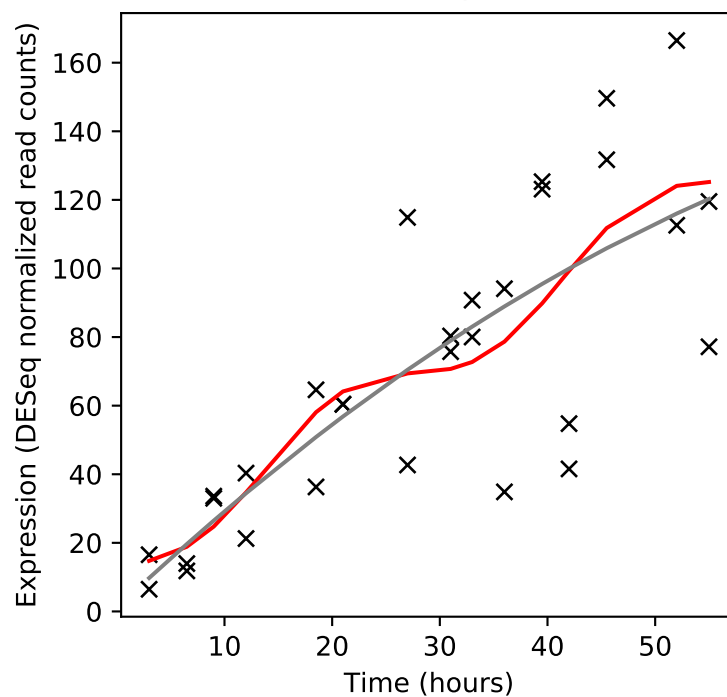

Rv0917/betP

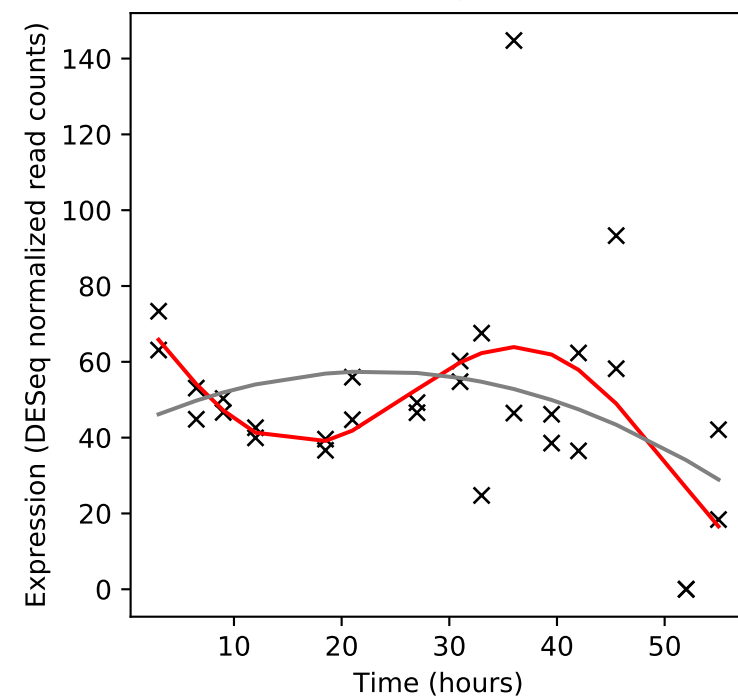

Rv0918/-

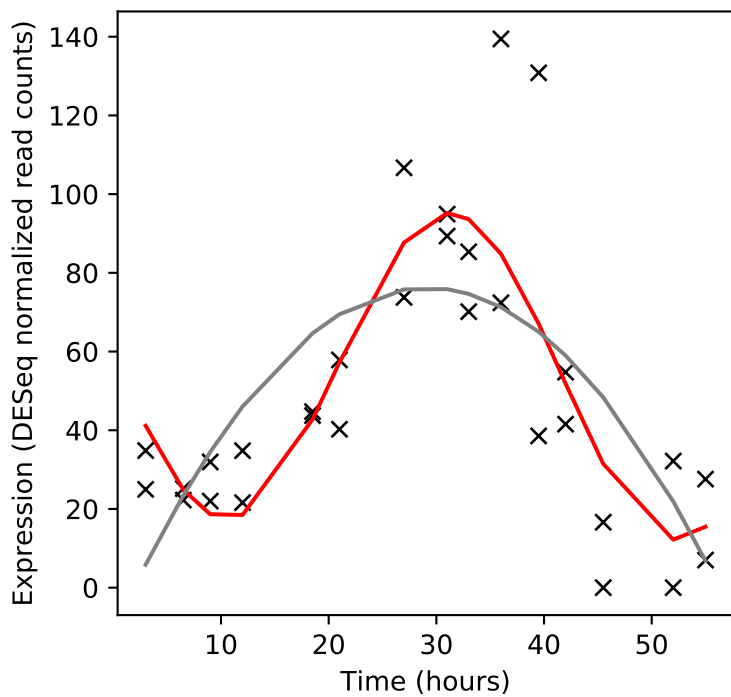

Rv0919/-

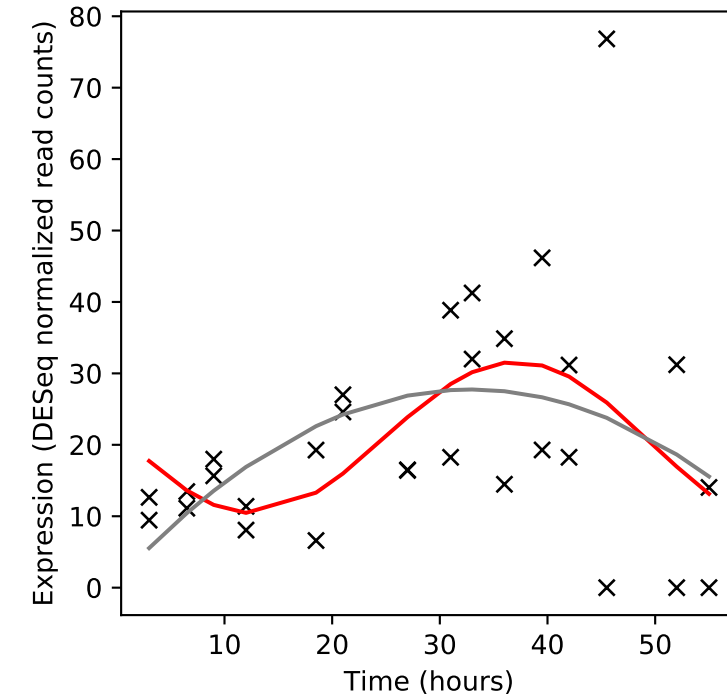

Rv0920c/-

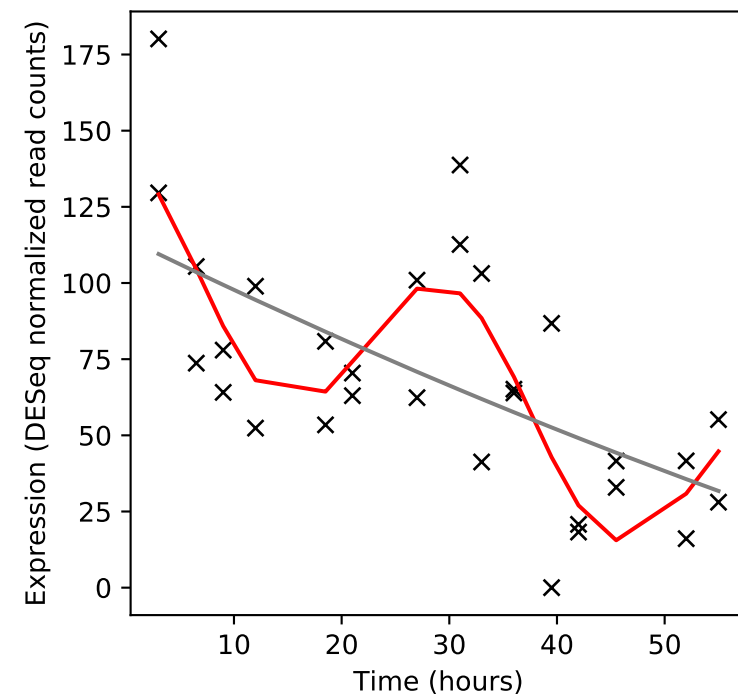

Rv0921/-

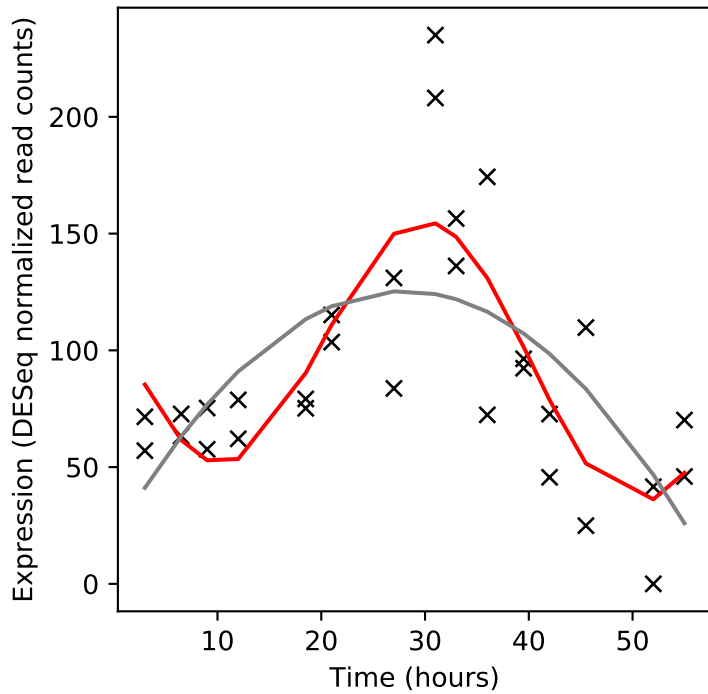

Rv0922/-

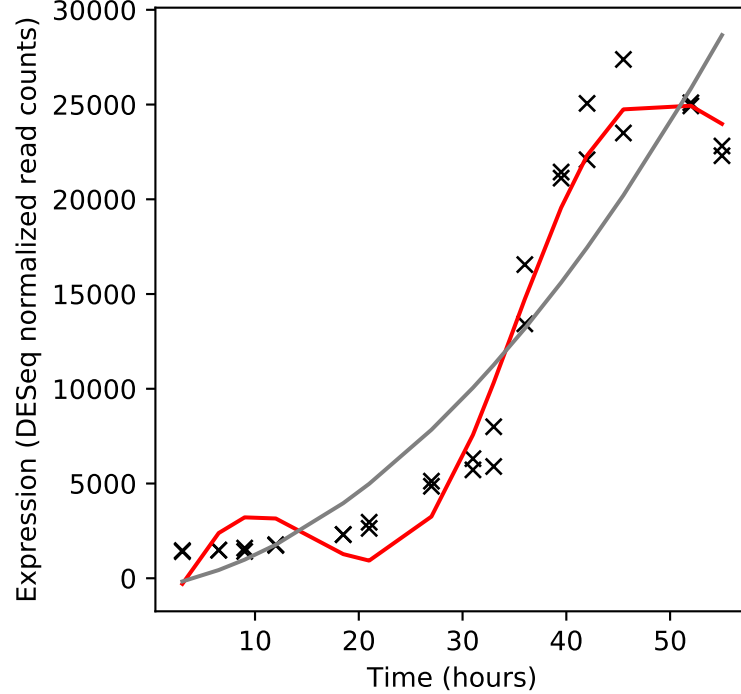

Rv0923c/-

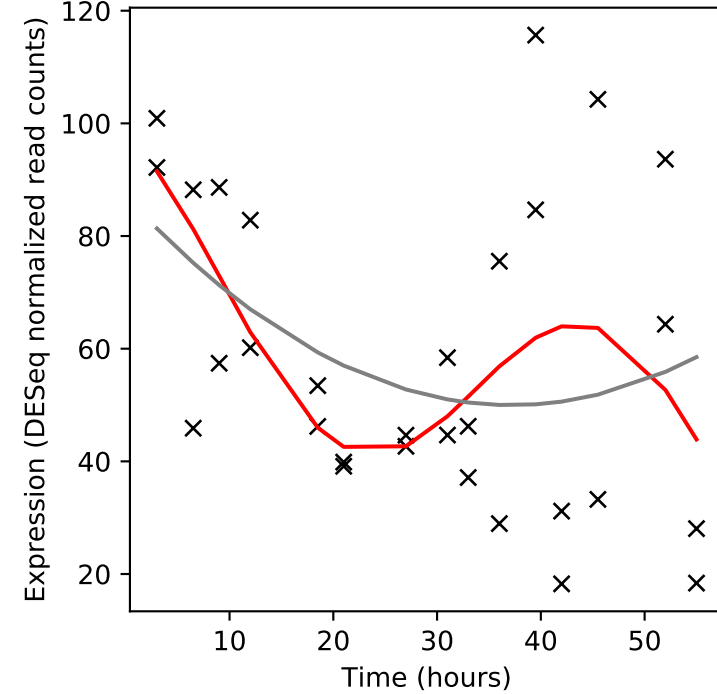

Rv0924c/mntH

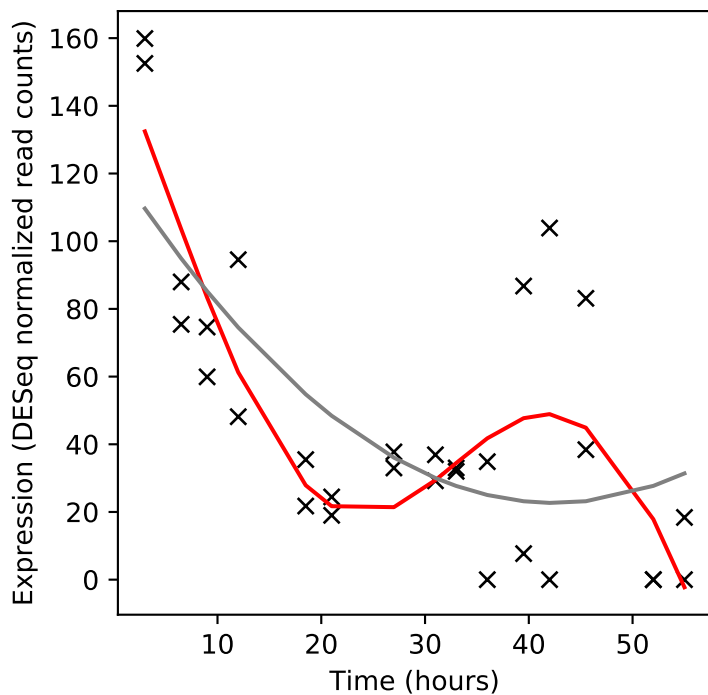

Rv0925c/-

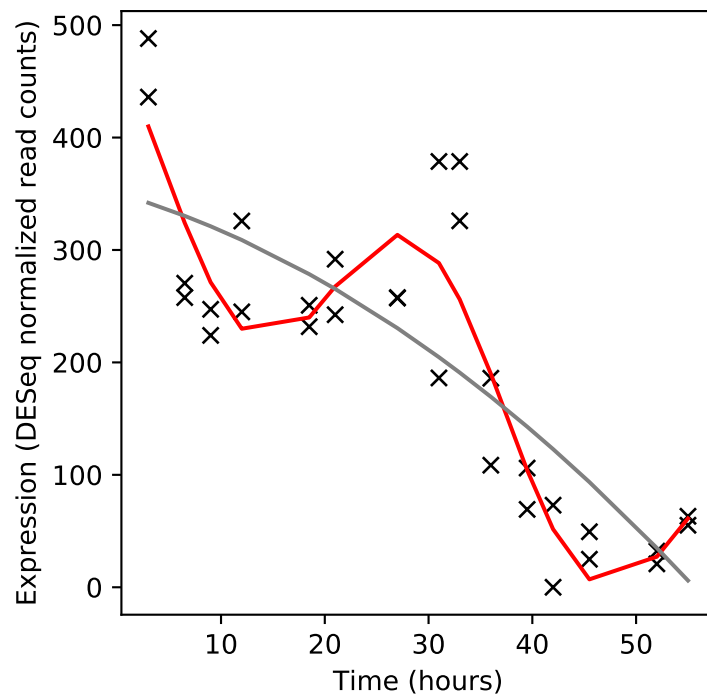

Rv0926c/-

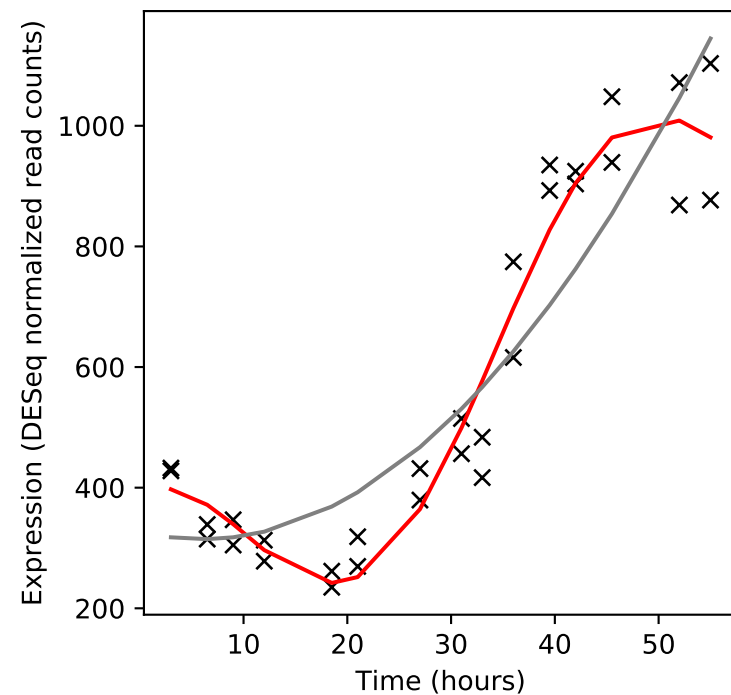

Rv0927c/-

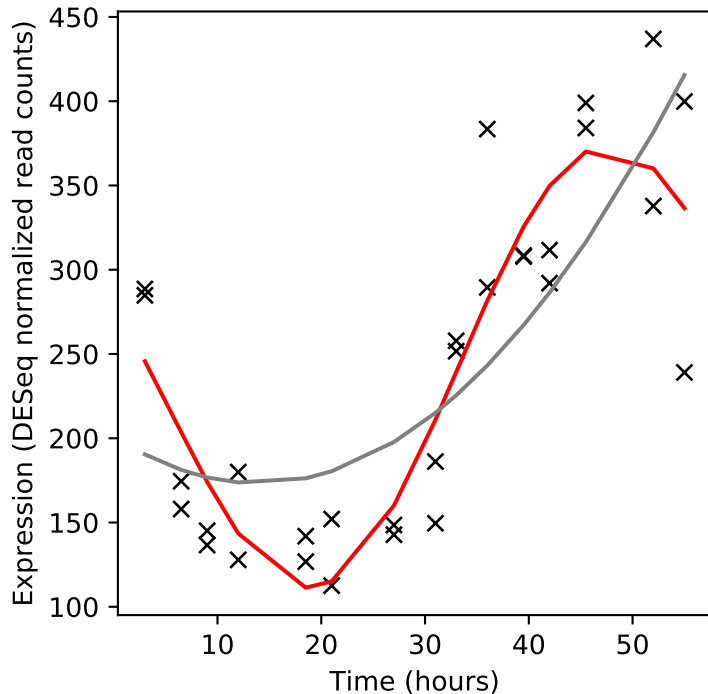

Rv0928/pstS3

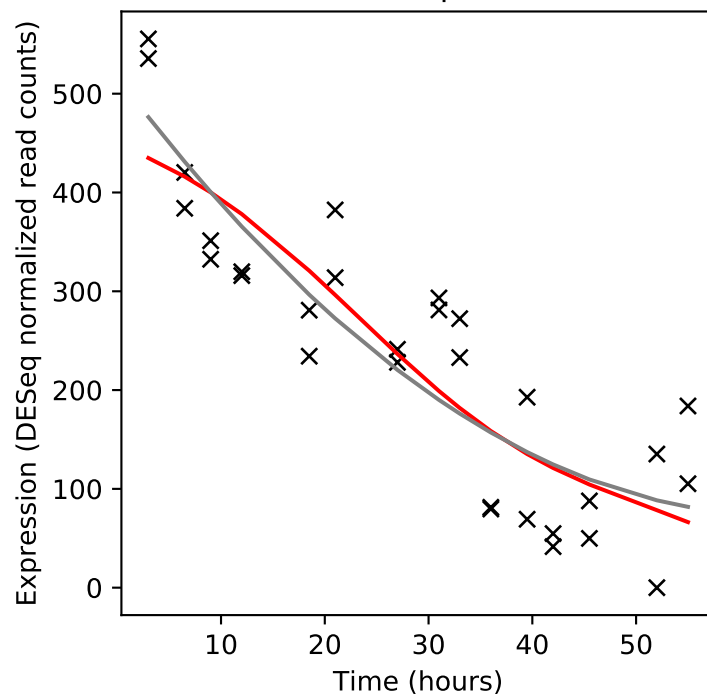

Rv0929/pstC2

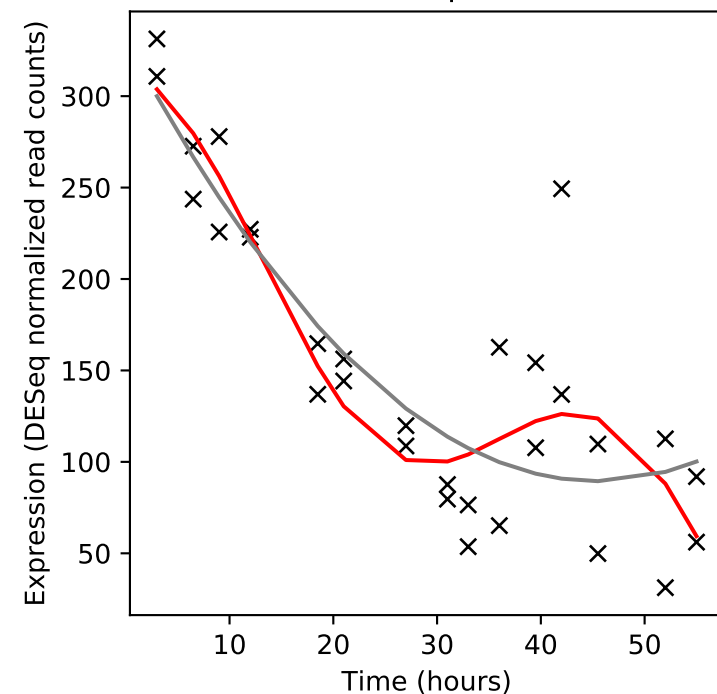



Rv0930/pstA1

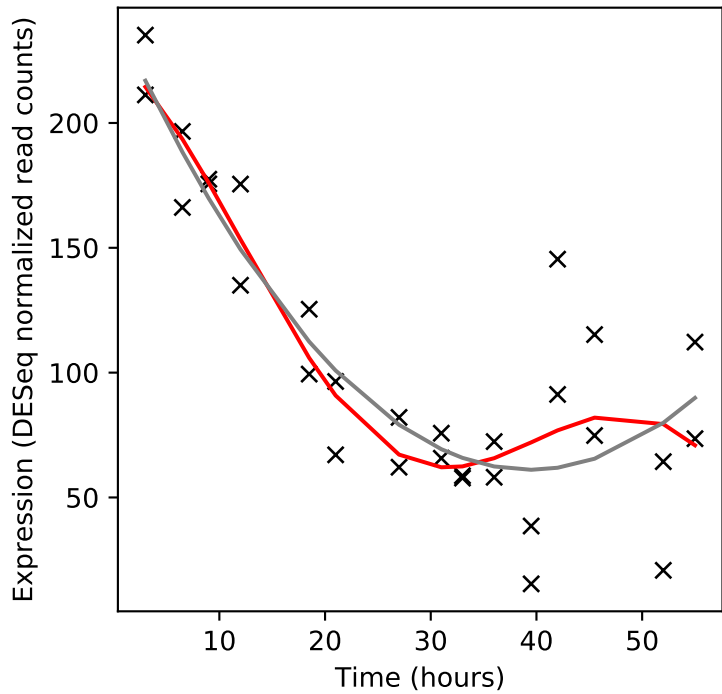

Rv0931c/pknD

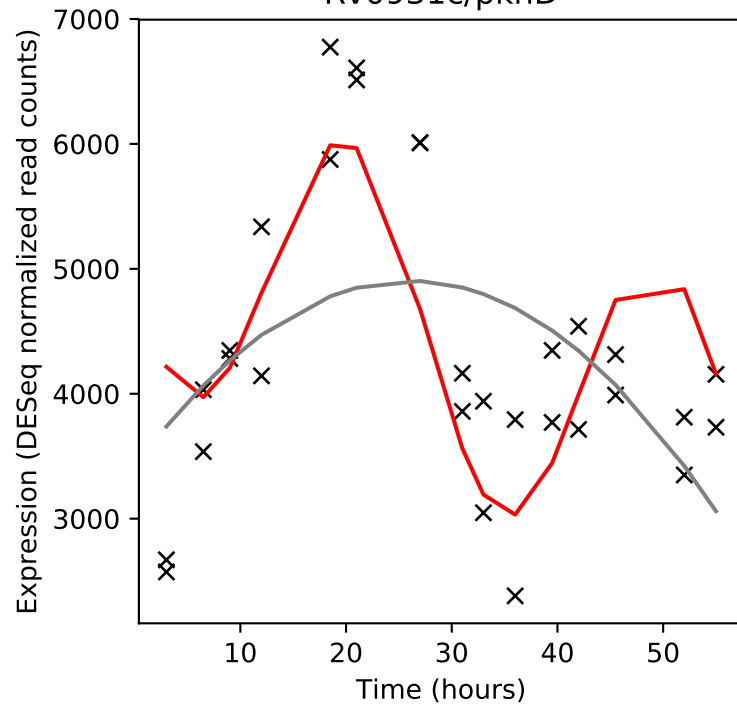

Rv0932c/pstS2

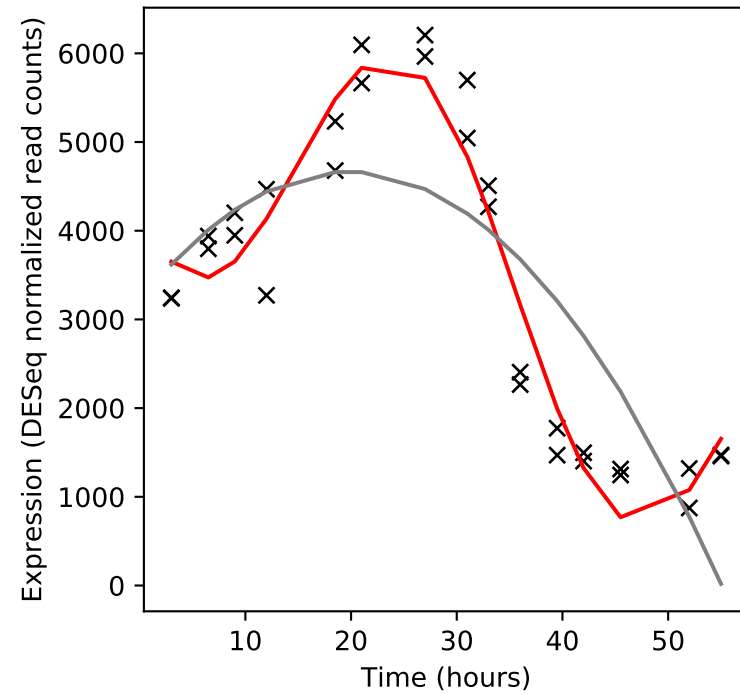

Rv0933/pstB

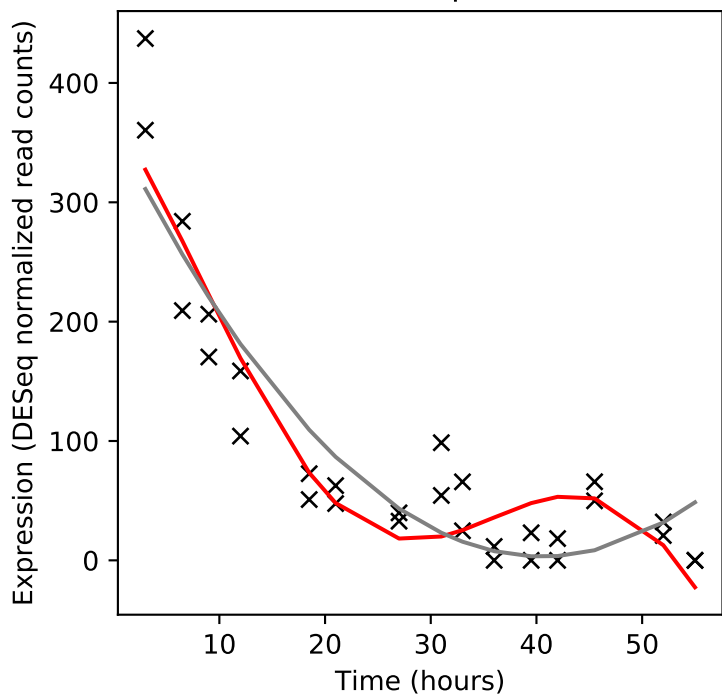

Rv0934/pstS1

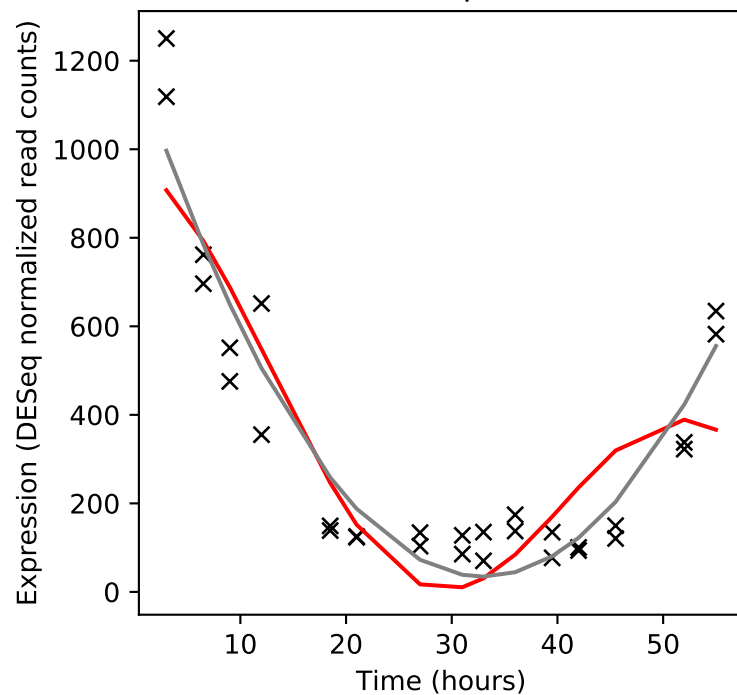

Rv0935/pstC1

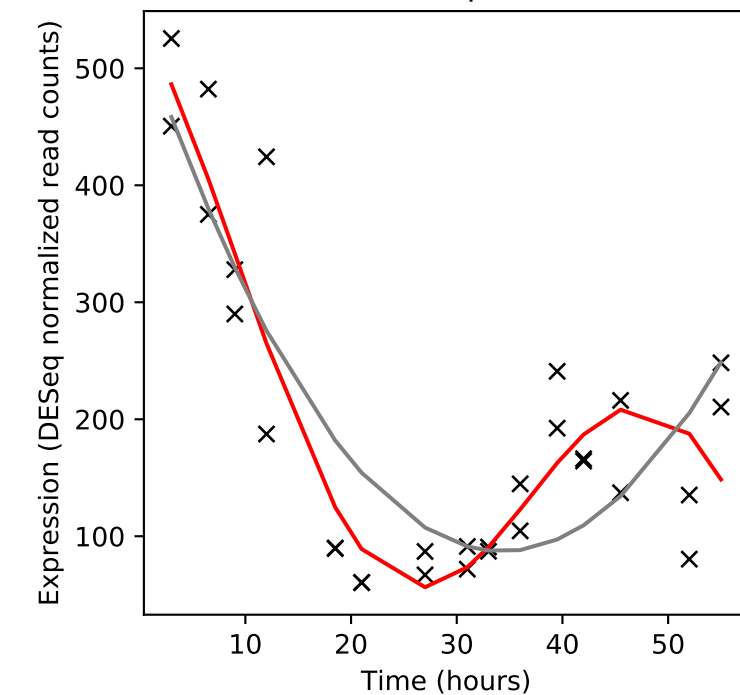

Rv0936/pstA2

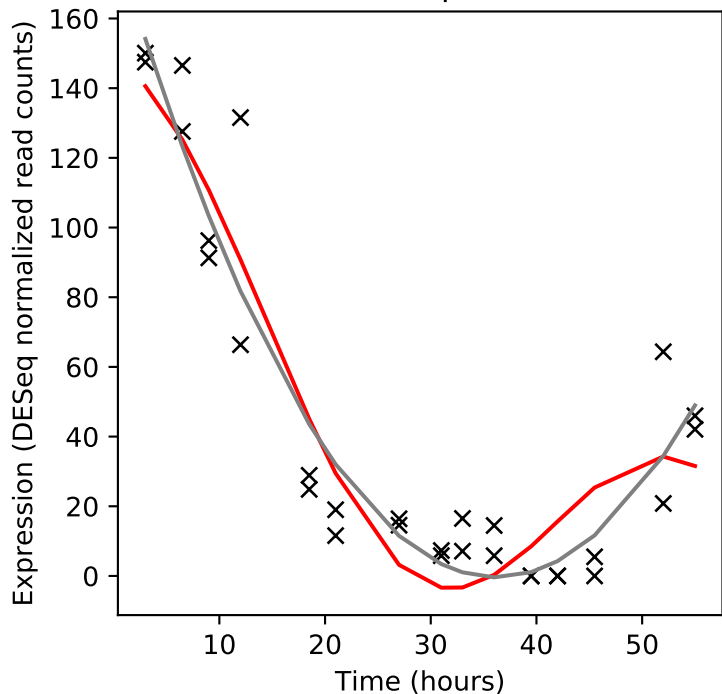

Rv0937c/mku

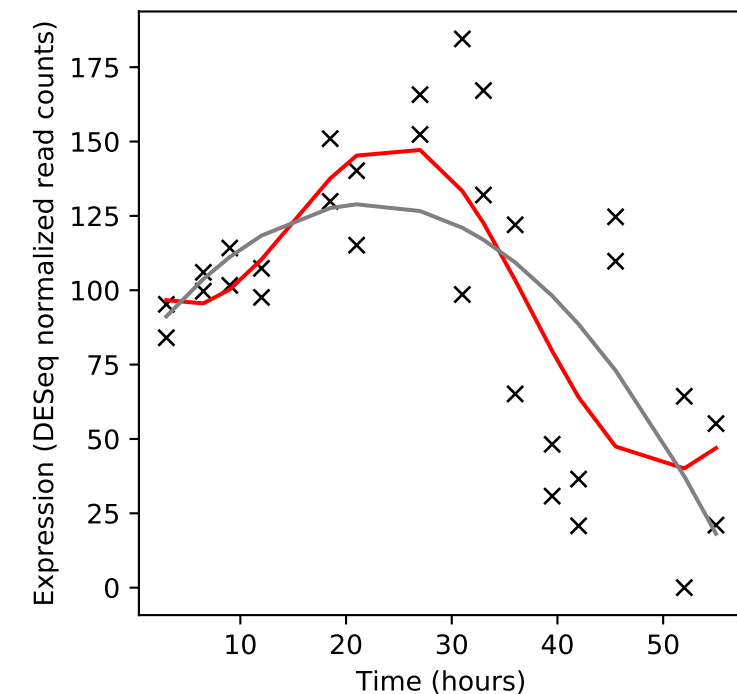

Rv0938/ligD

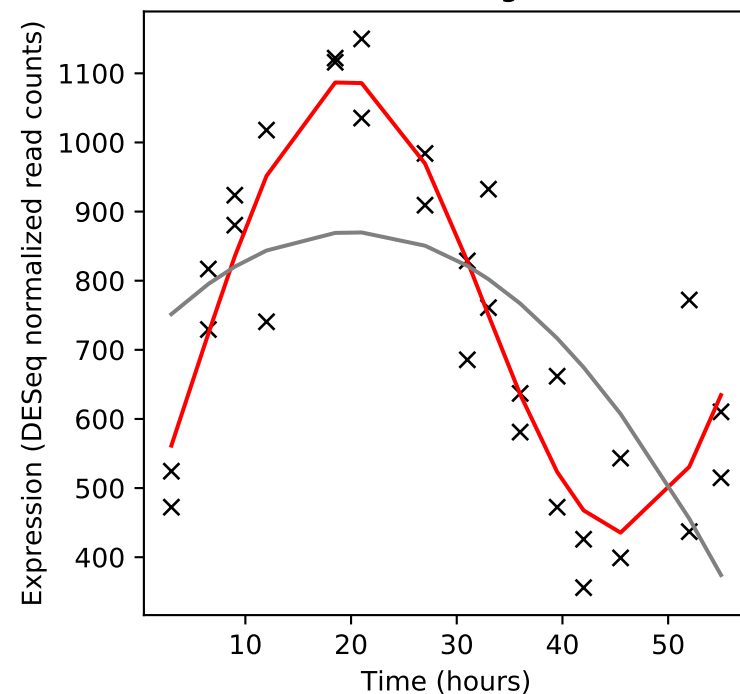

Rv0939/-

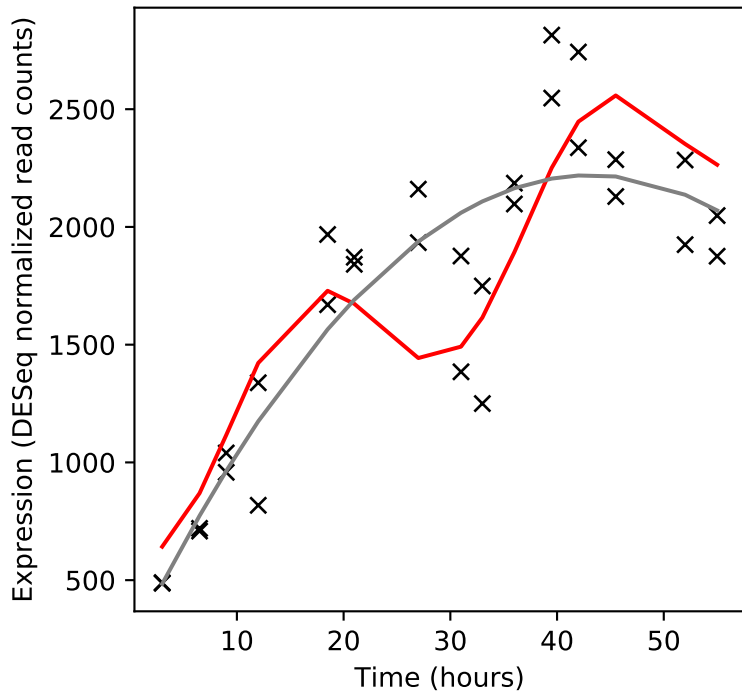

Rv0940c/-

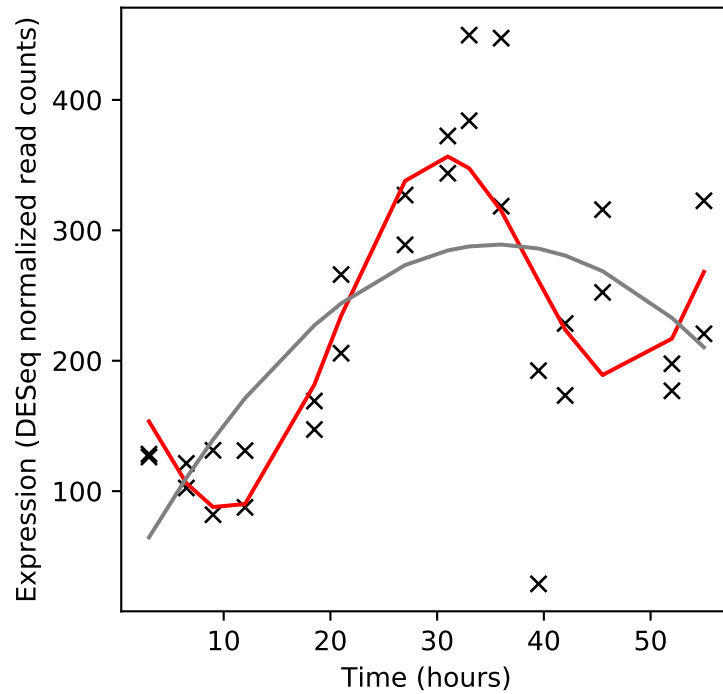

Rv0941c/-

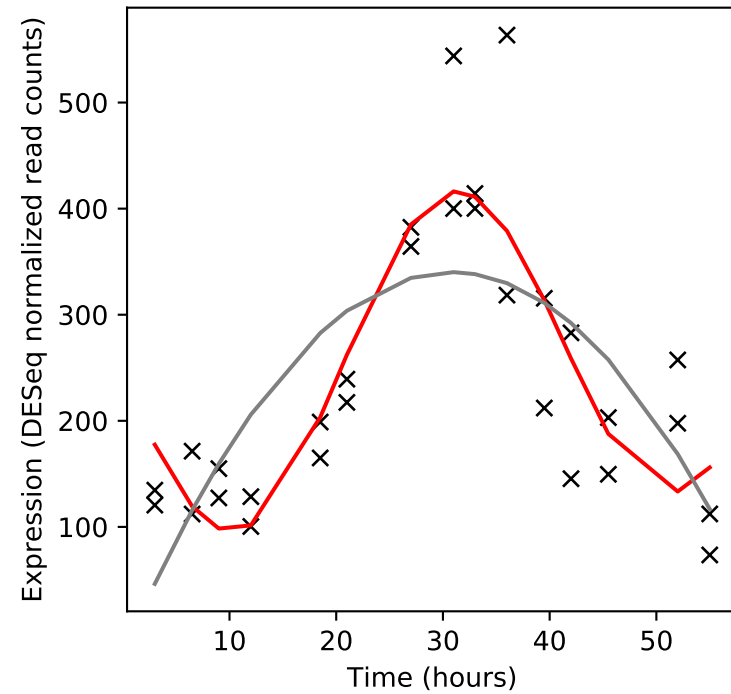

Rv0942/-

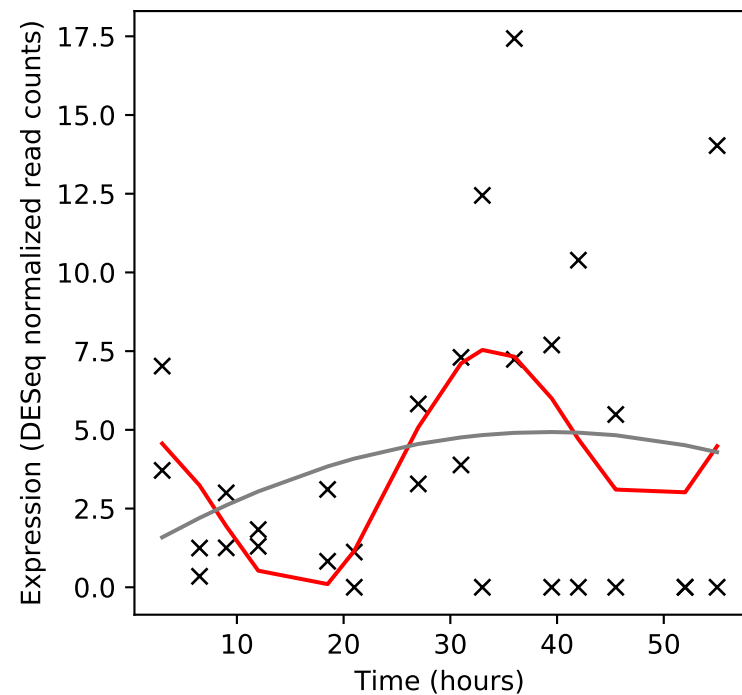

Rv0943c/-

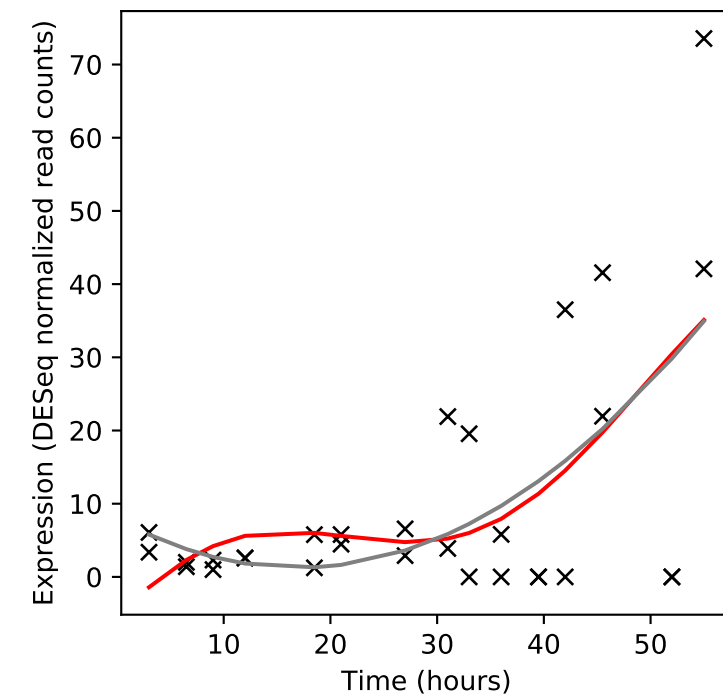

Rv0944/-

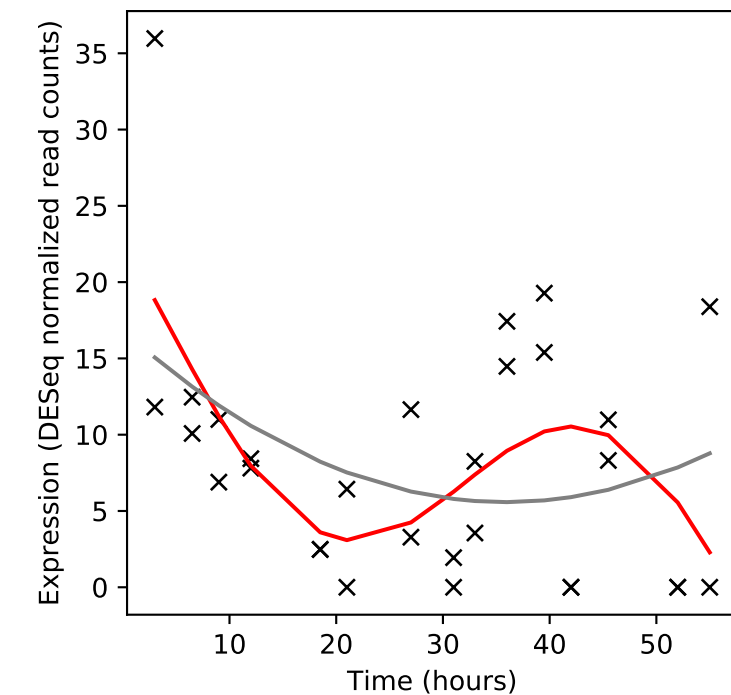

Rv0945/-

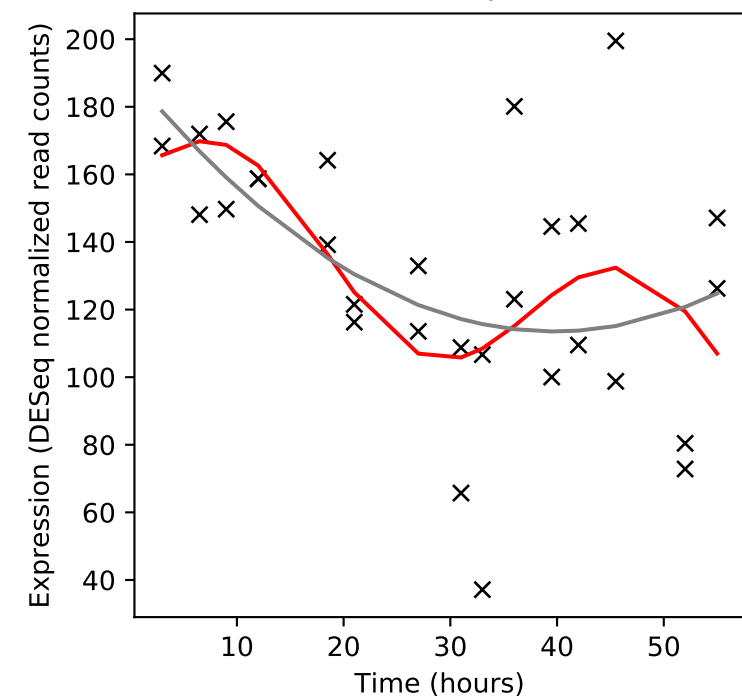

Rv0946c/pgi

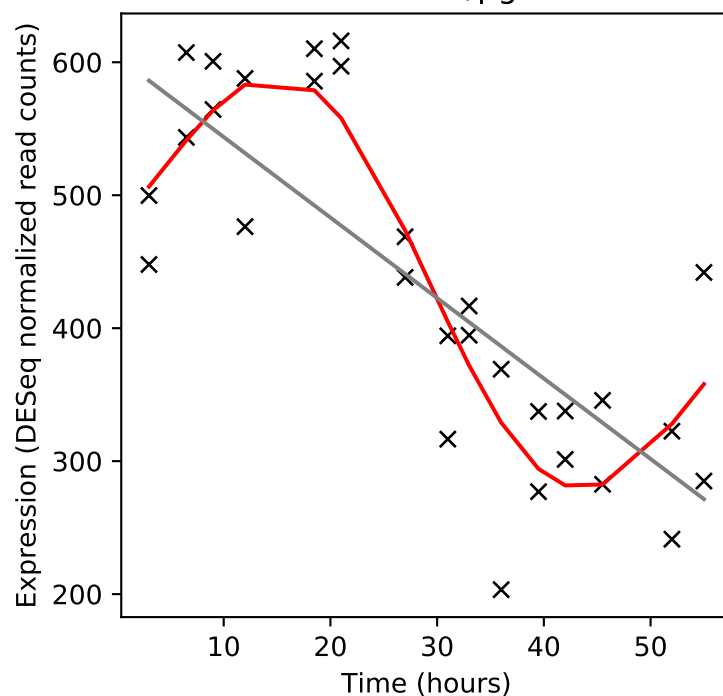

Rv0948c/-

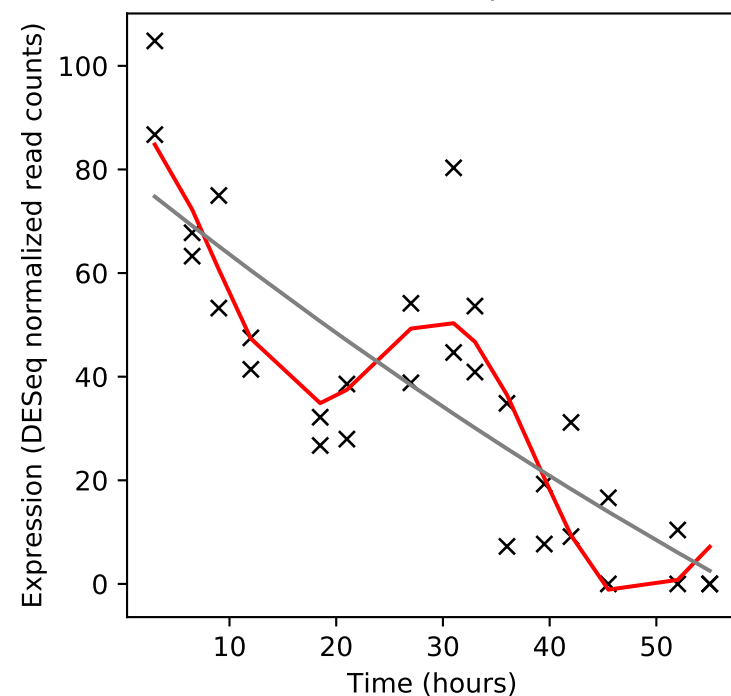

Rv0949/uvrD1

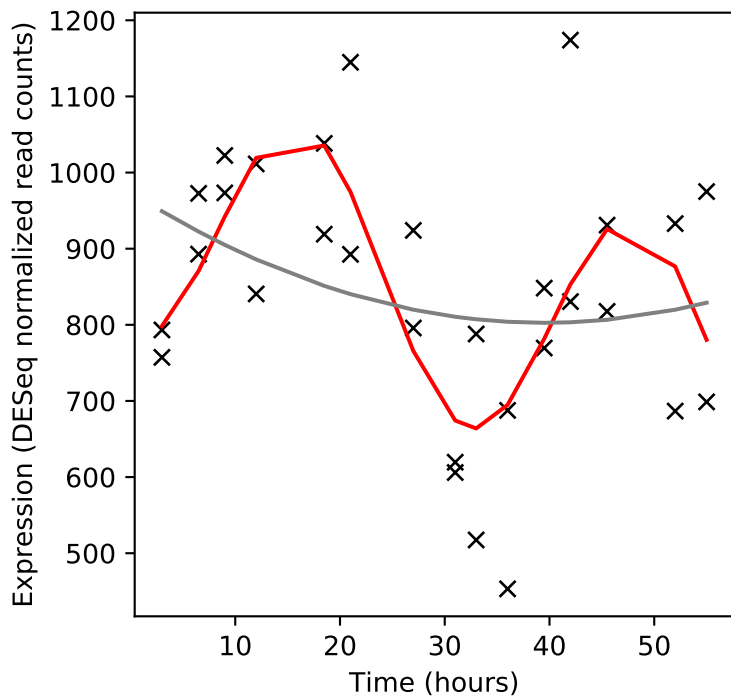

Rv0950c/-

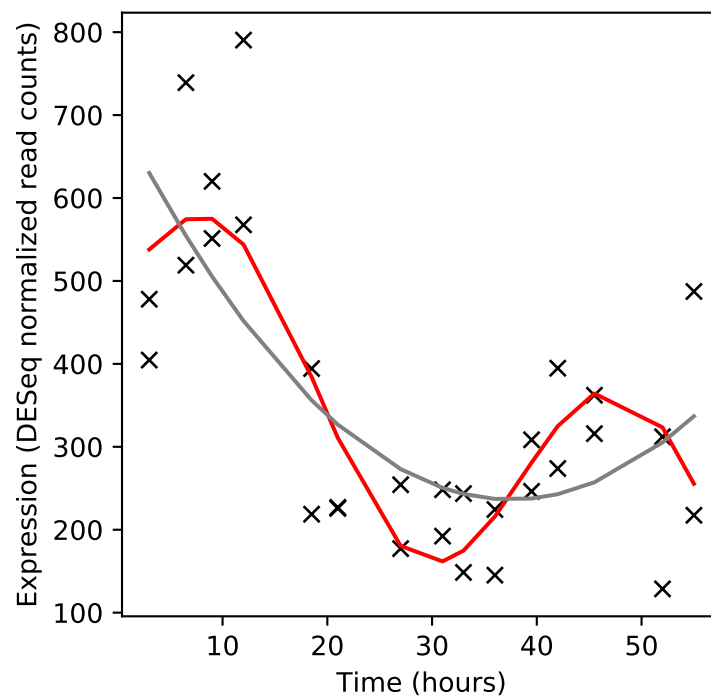

Rv0951/sucC

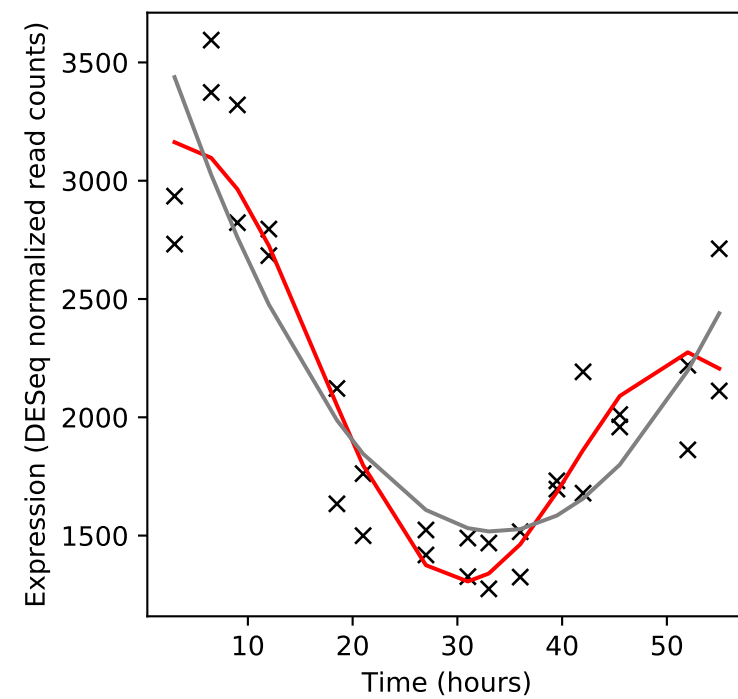

Rv0952/sucD

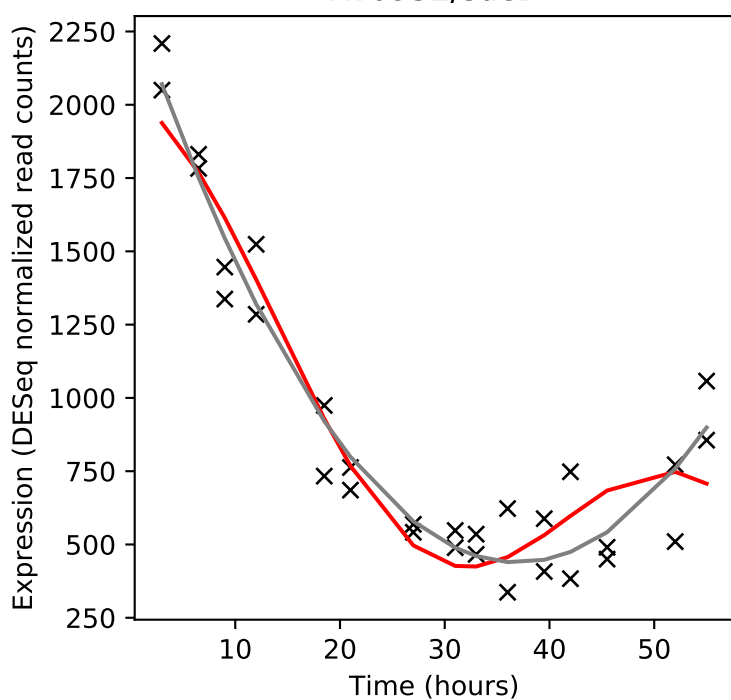

Rv0953c/-

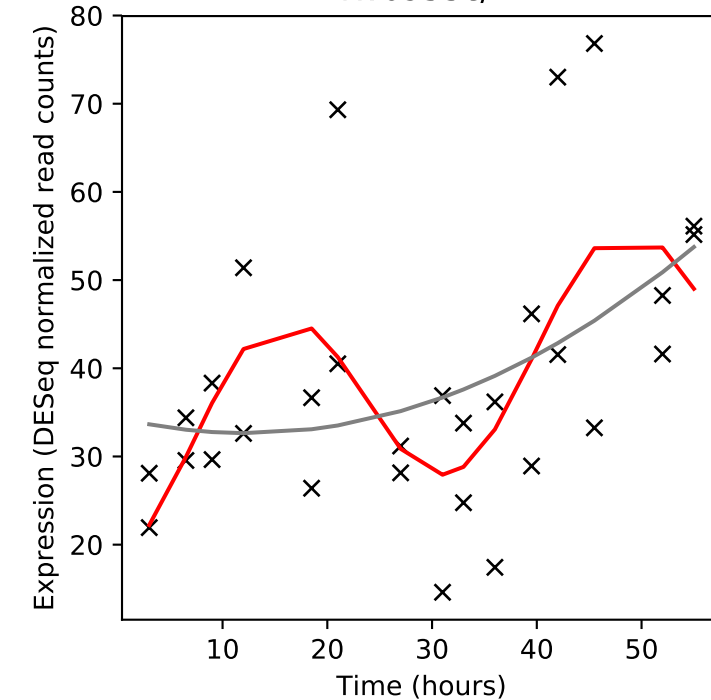

Rv0954/-

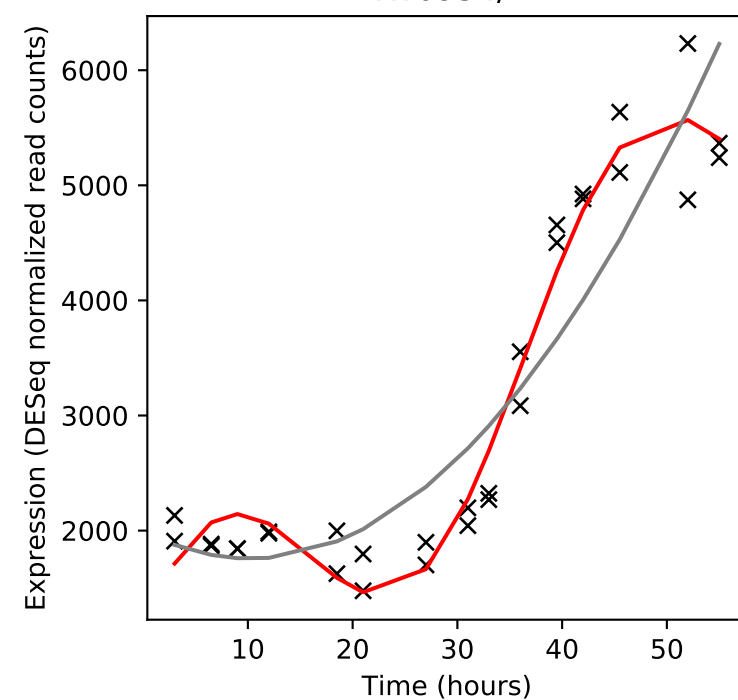

Rv0955/-

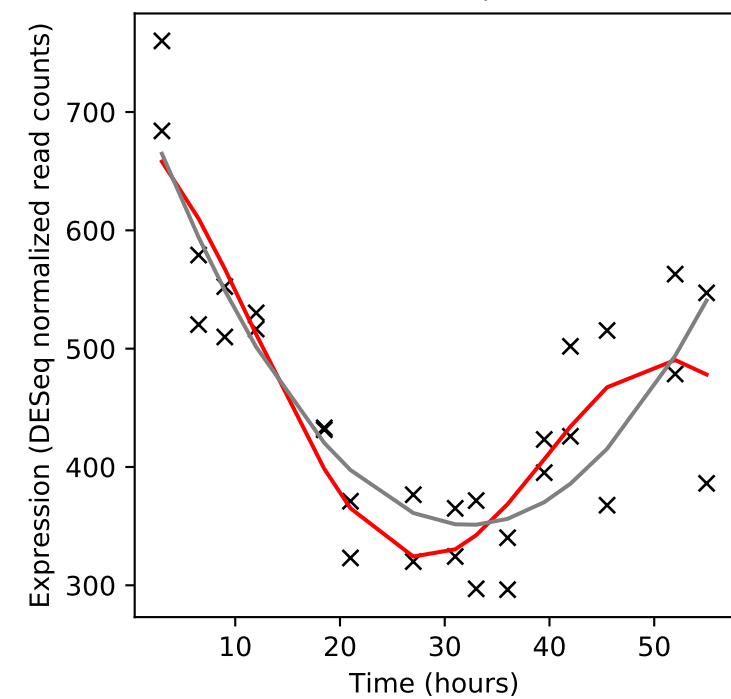

Rv0956/purN

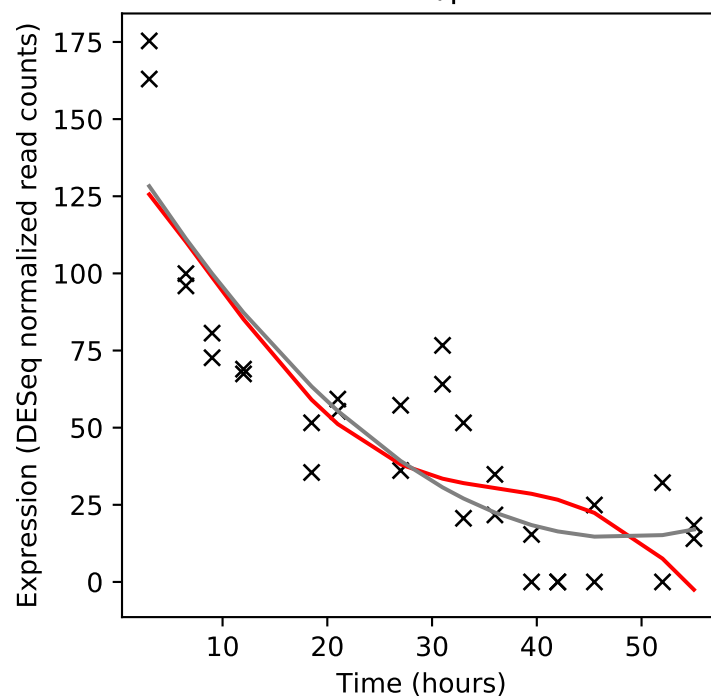

Rv0957/purH

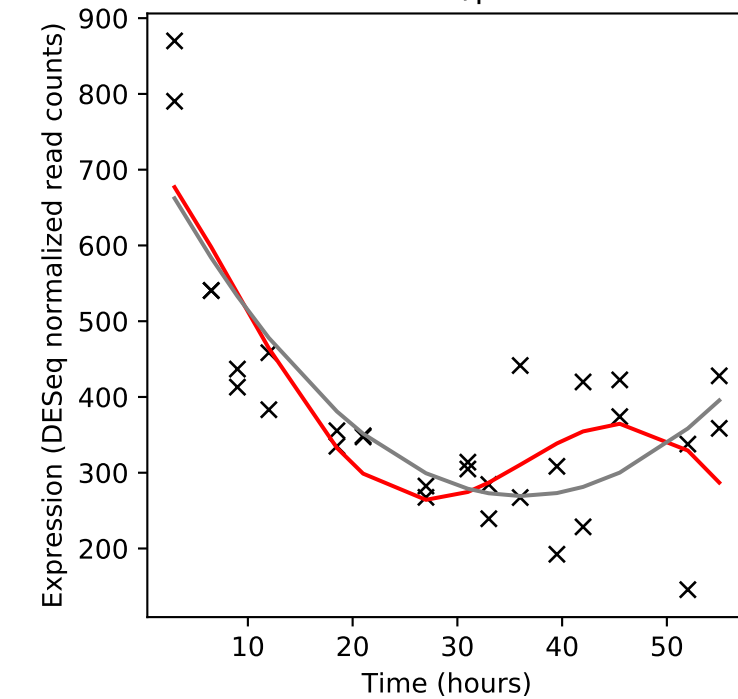

Rv0958/-

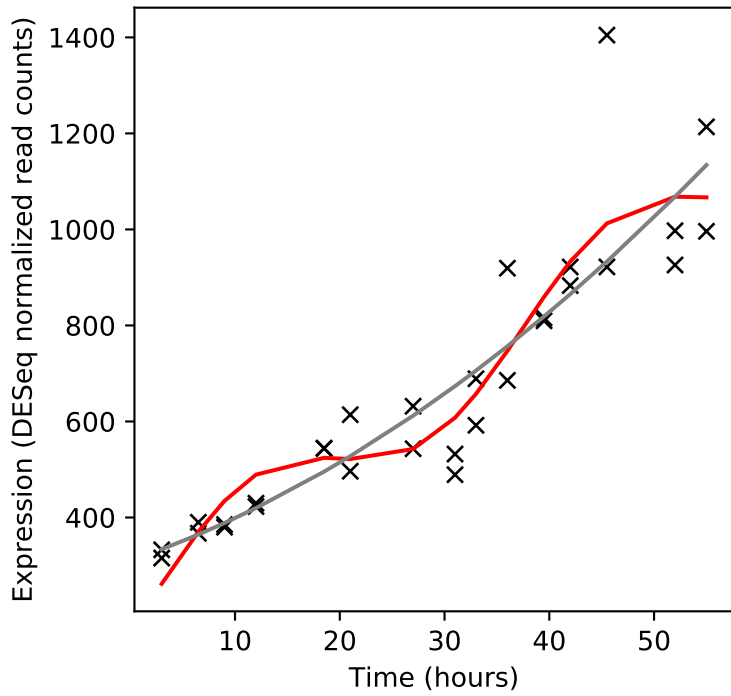

Rv0959/-

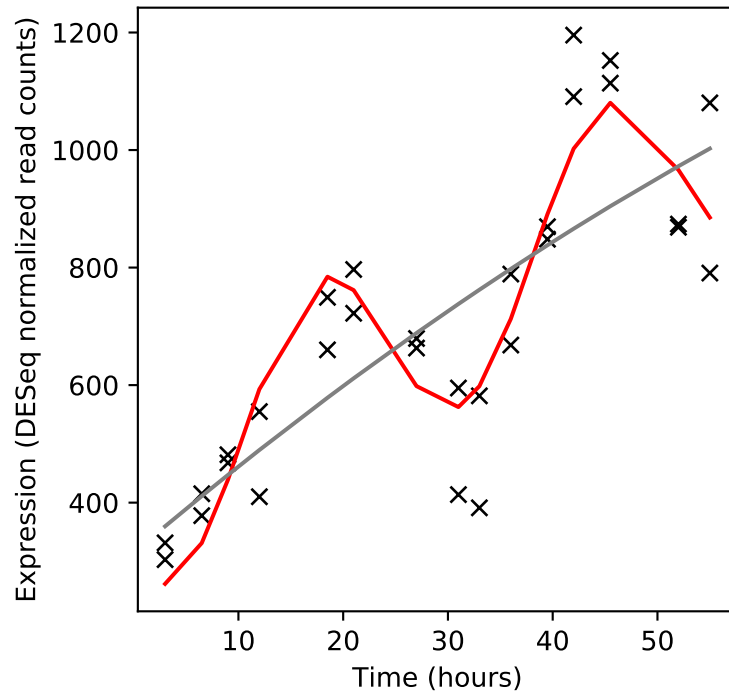

Rv0959A/vapB9

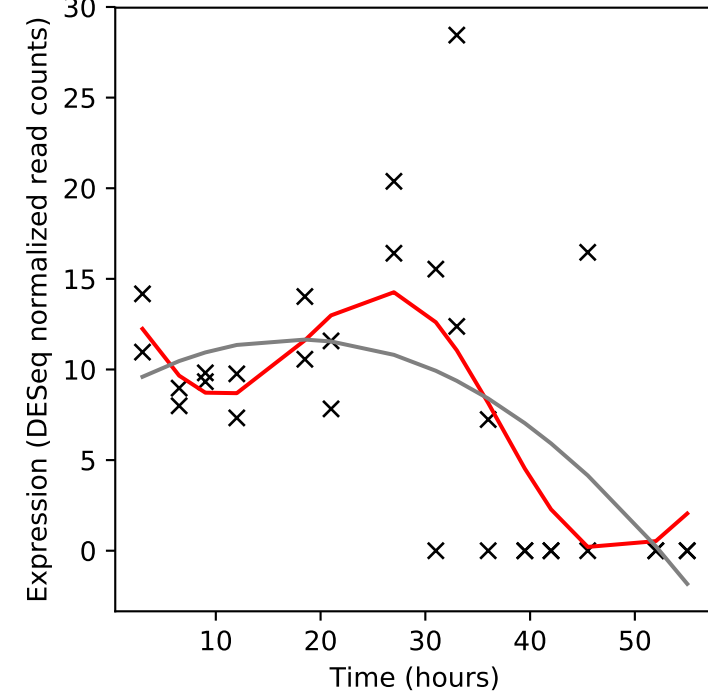

Rv0960/vapC9

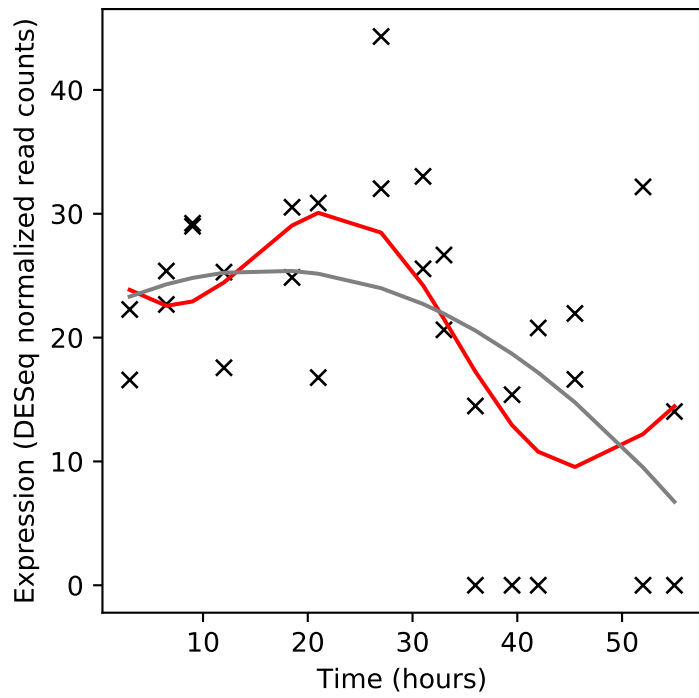

Rv0961/-

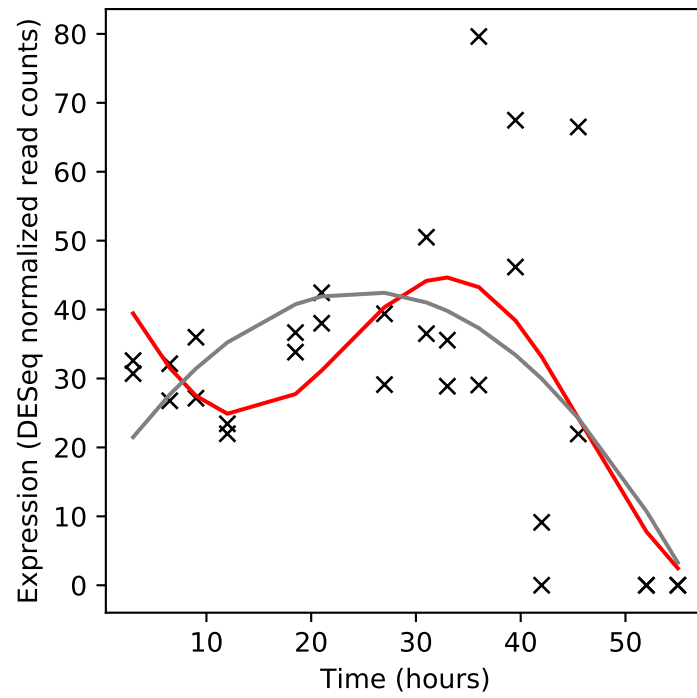

Rv0962c/lprP

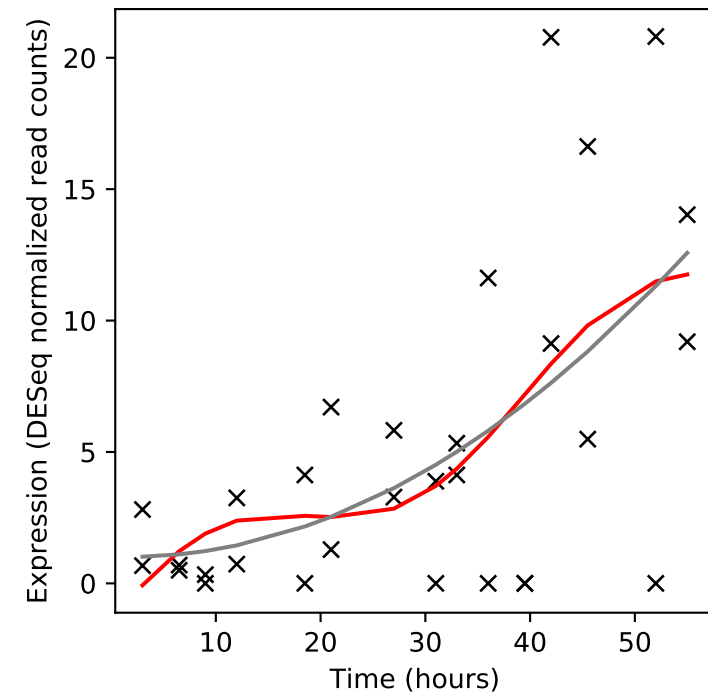

Rv0963c/-

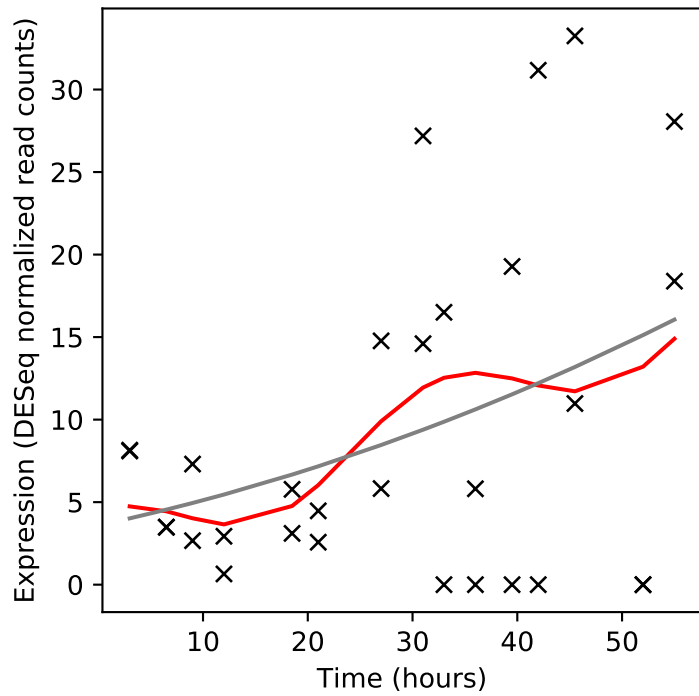

Rv0964c/-

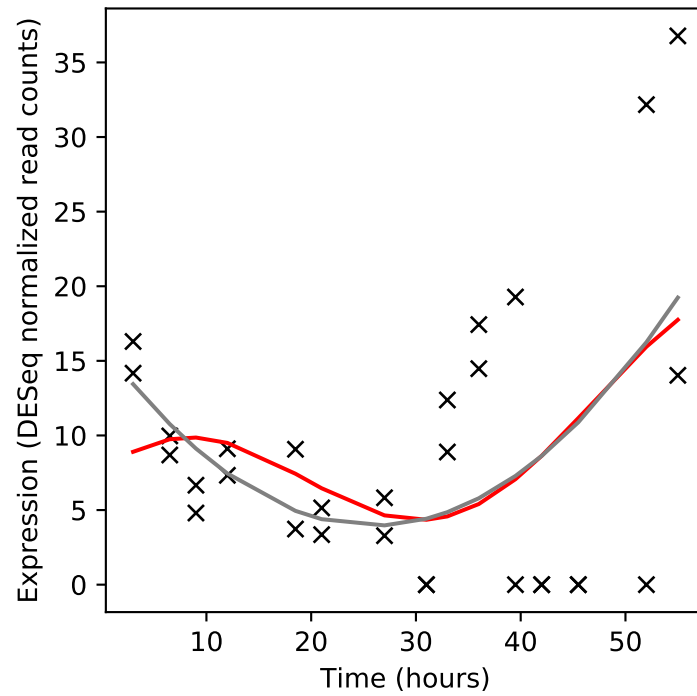

Rv0965c/-

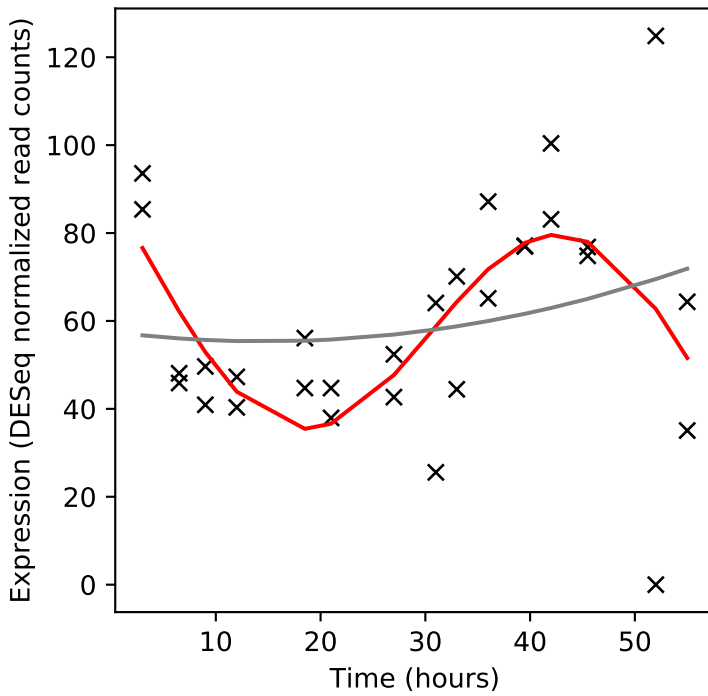

Rv0966c/-

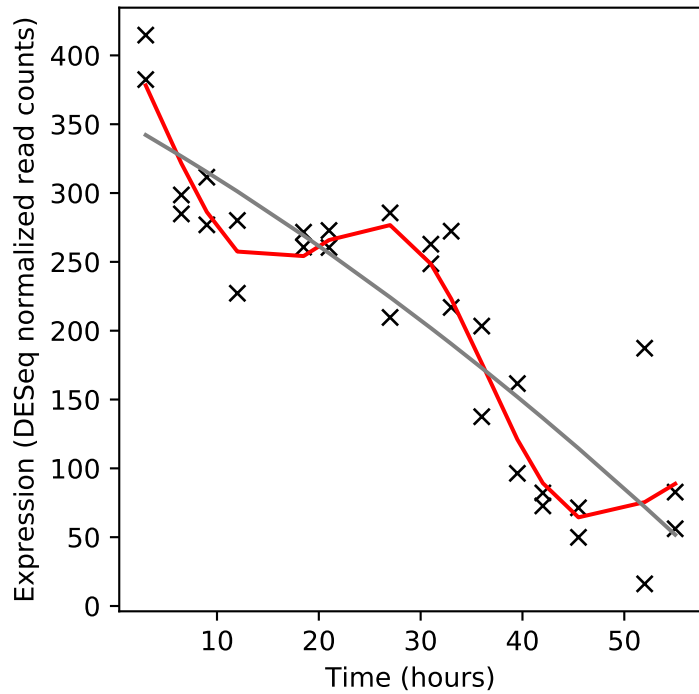

Rv0967/csoR

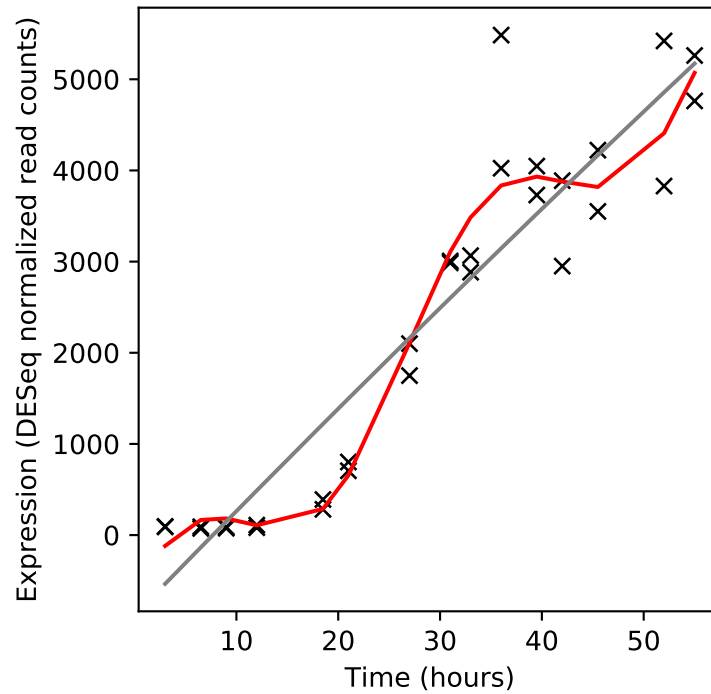

Rv0968/-

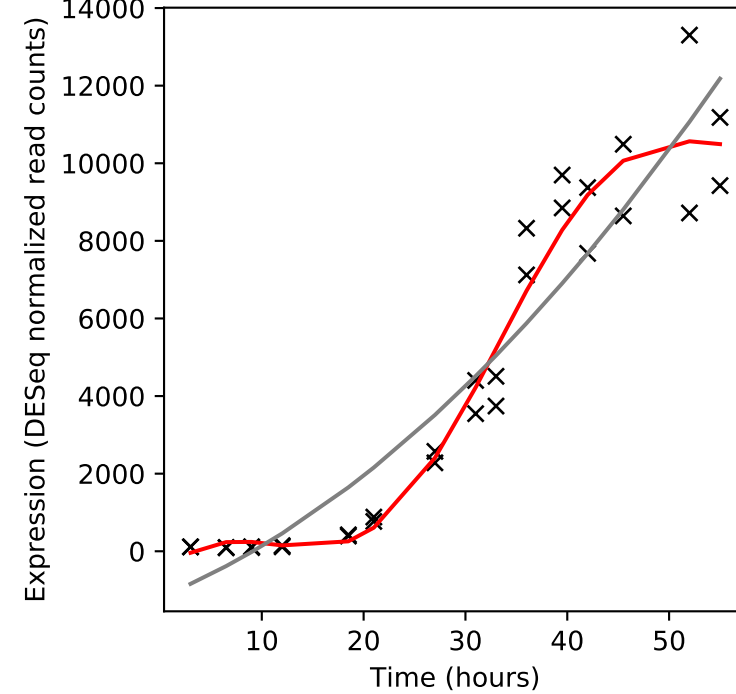

Rv0969/ctpV

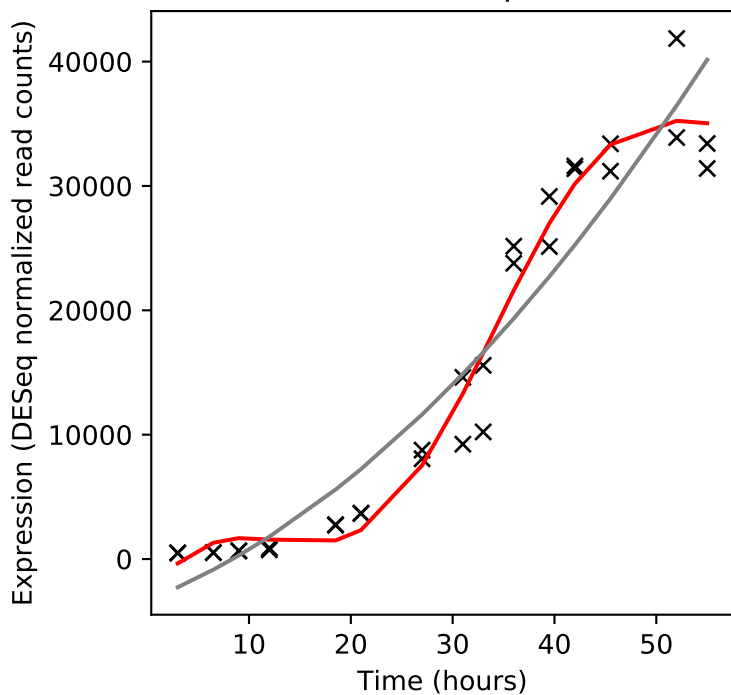

Rv0970/-

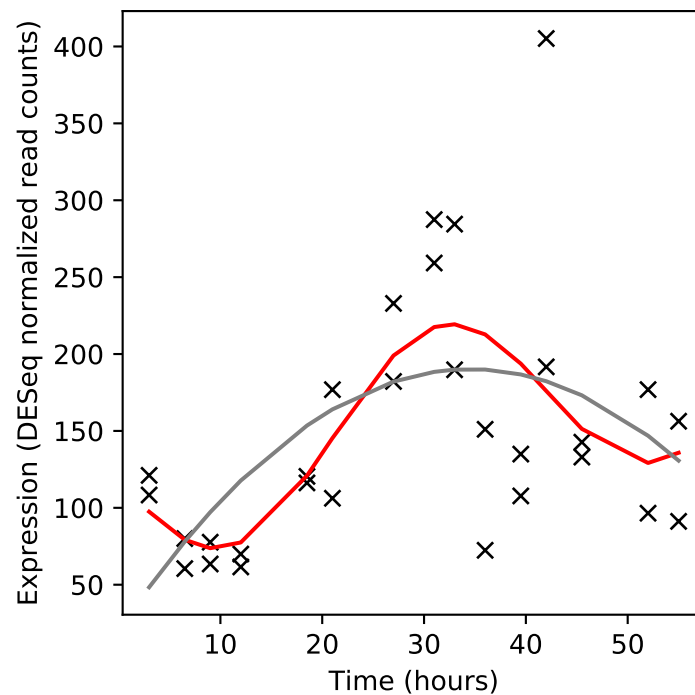

Rv0971c/echA7

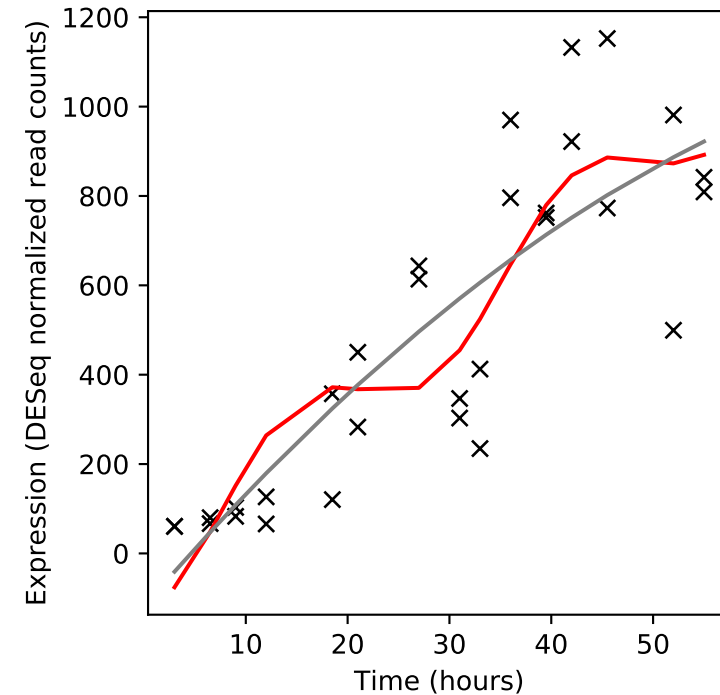

Rv0972c/fadE12

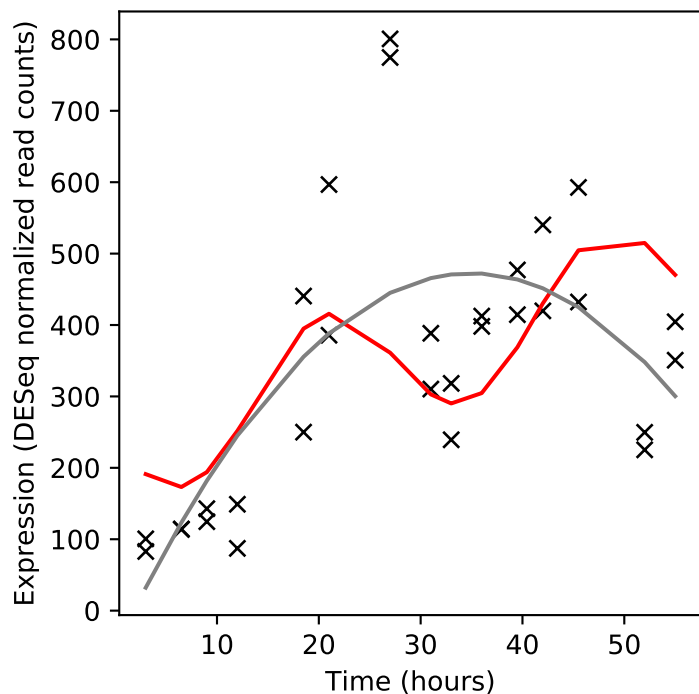

Rv0973c/accA2

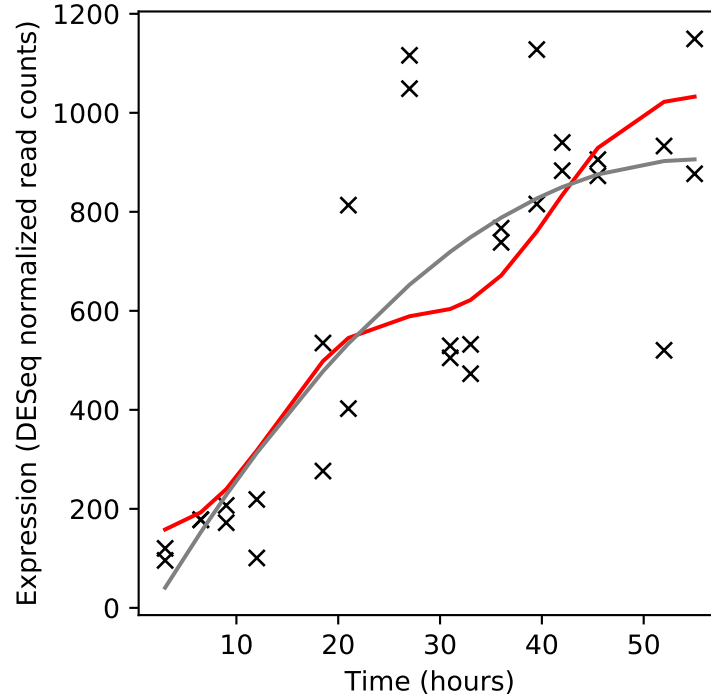

Rv0974c/accD2

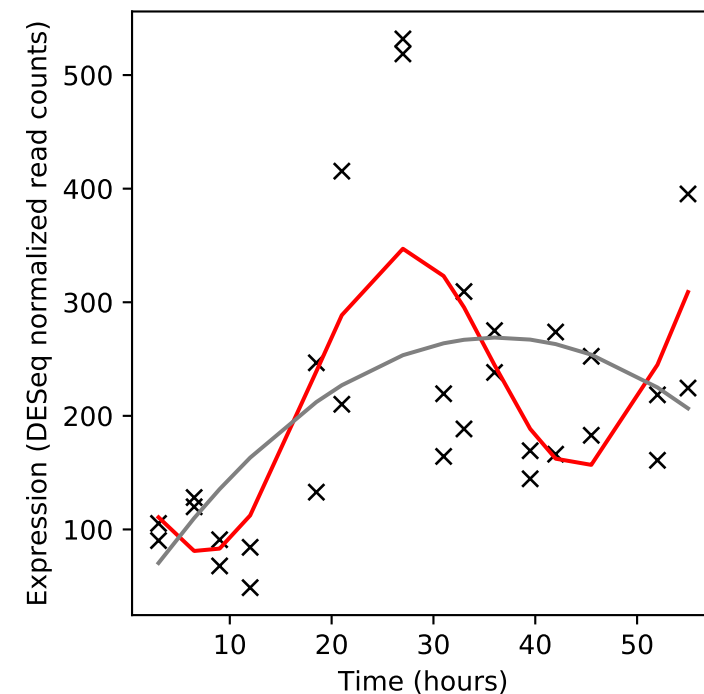

Rv0975c/fadE13

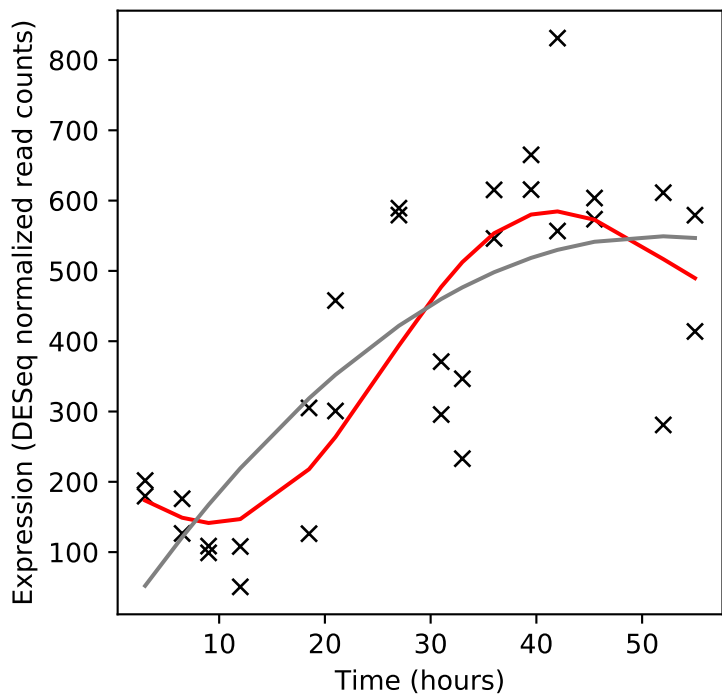

Rv0976c/-

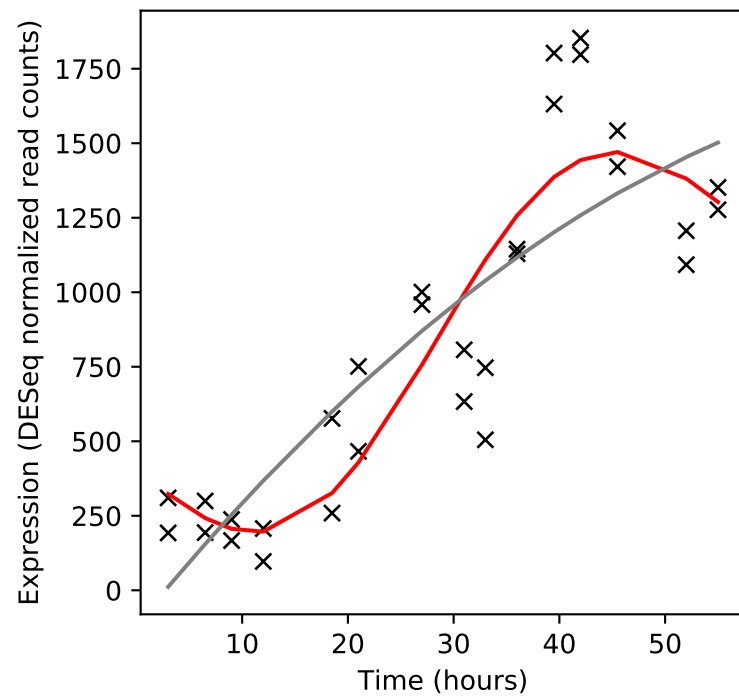

Rv0977/PE\_PGRS16

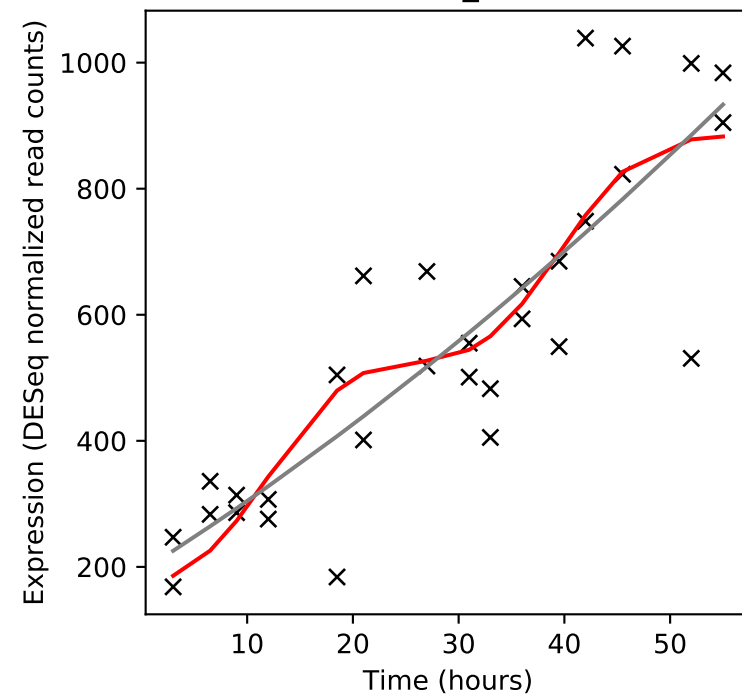

Rv0978c/PE\_PGRS17

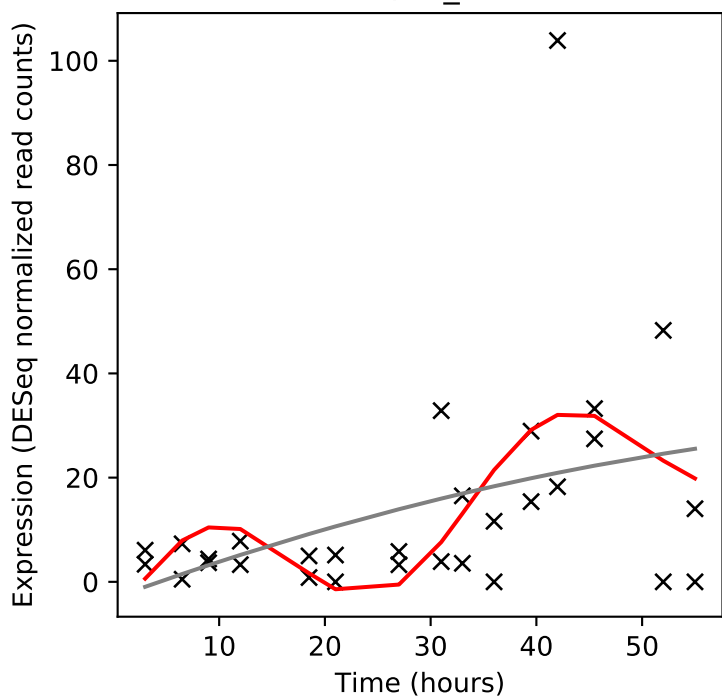

Rv0979c/-

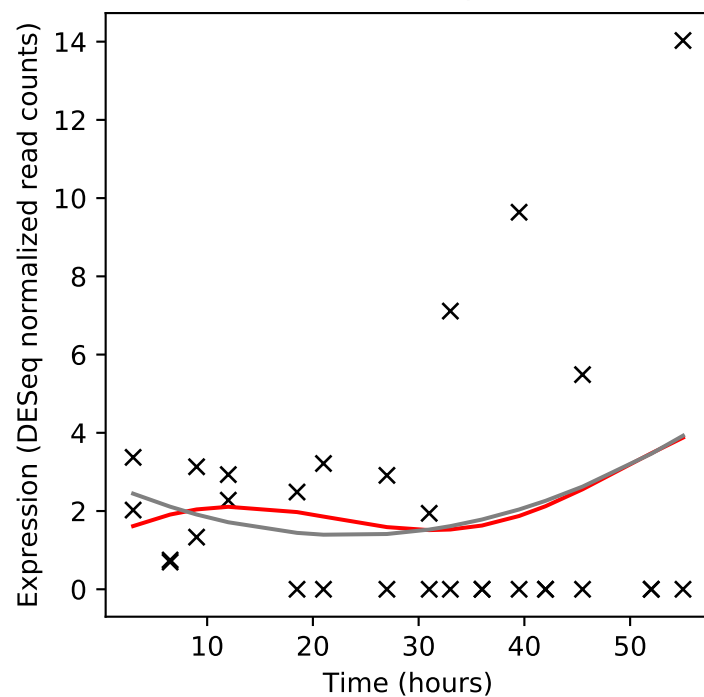

Rv0979A/rpmF

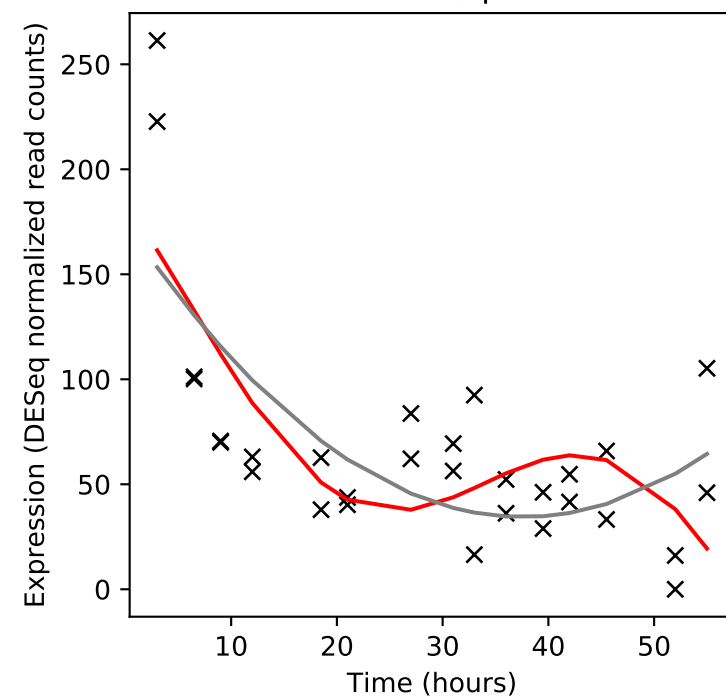

Rv0980c/PE\_PGRS18

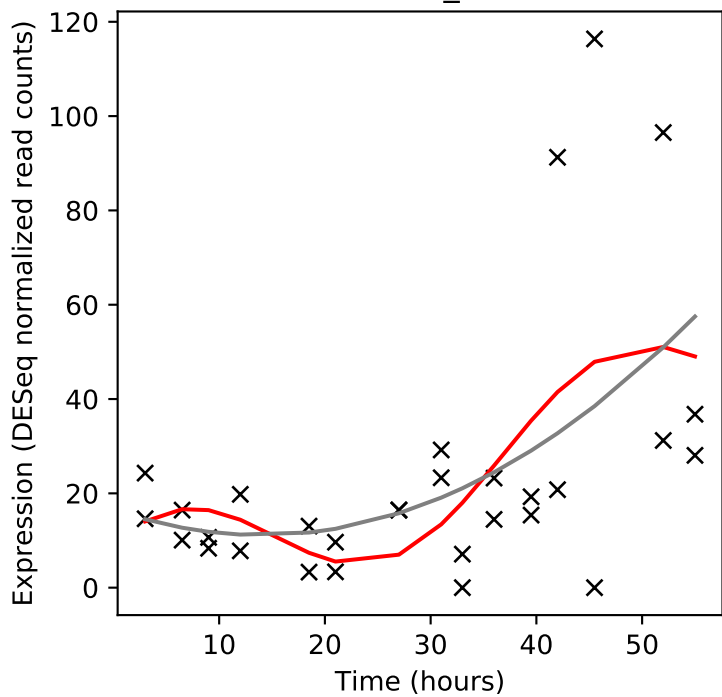

Rv0981/mprA

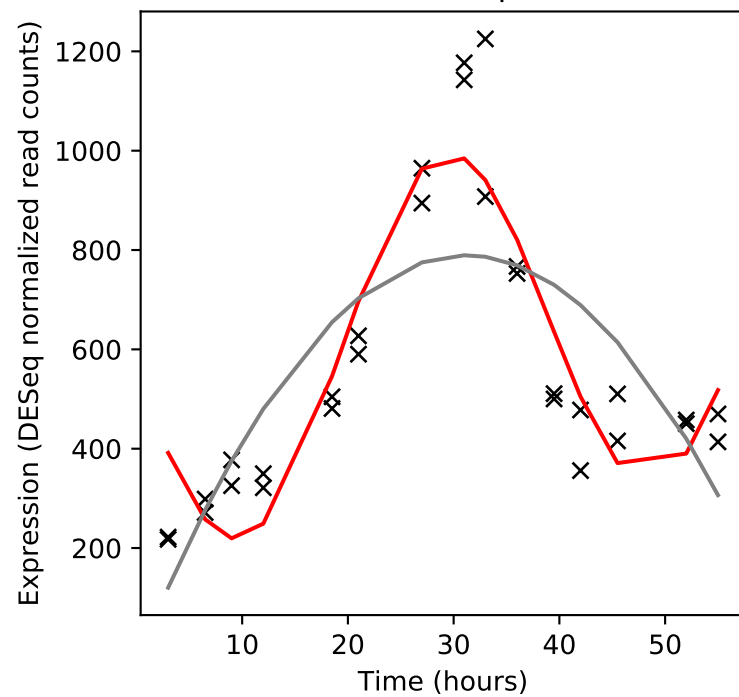

Rv0982/mprB

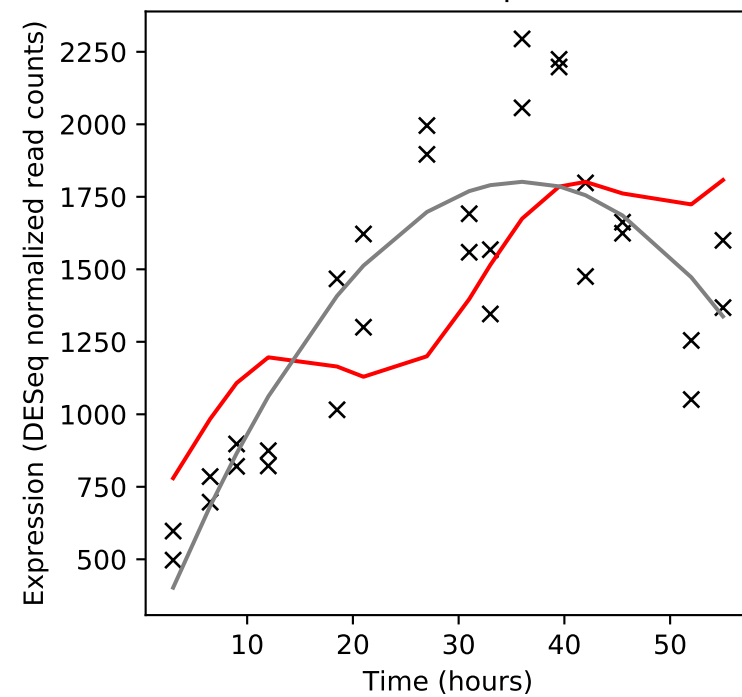

Rv0983/pepD

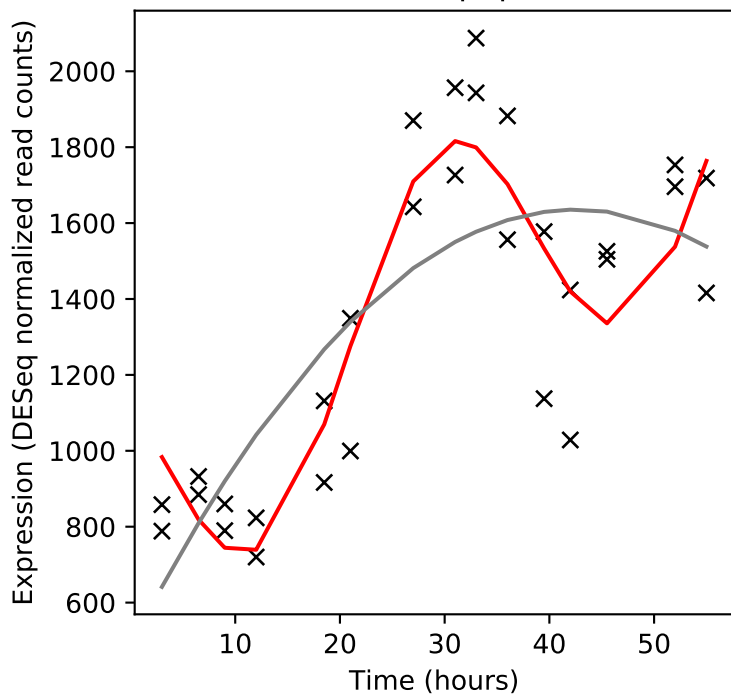

Rv0984/moaB2

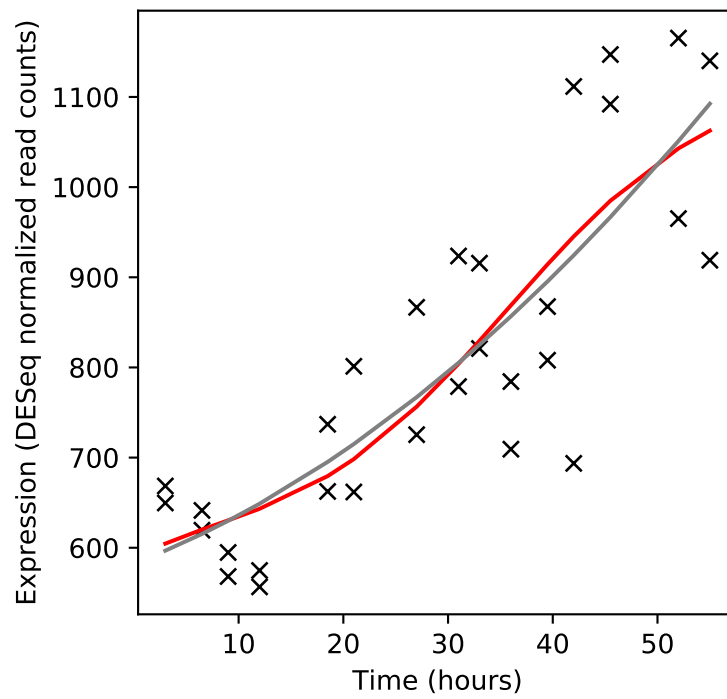

Rv0985c/mscL

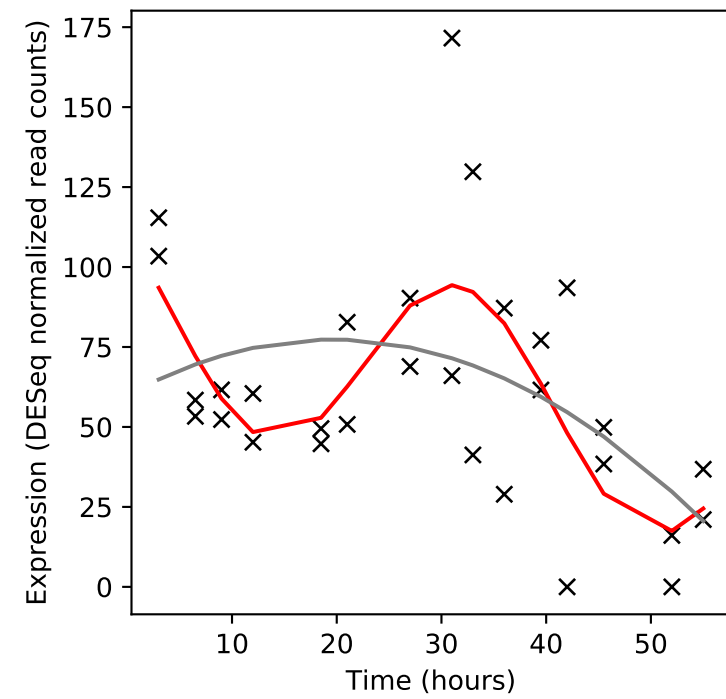

Rv0986/-

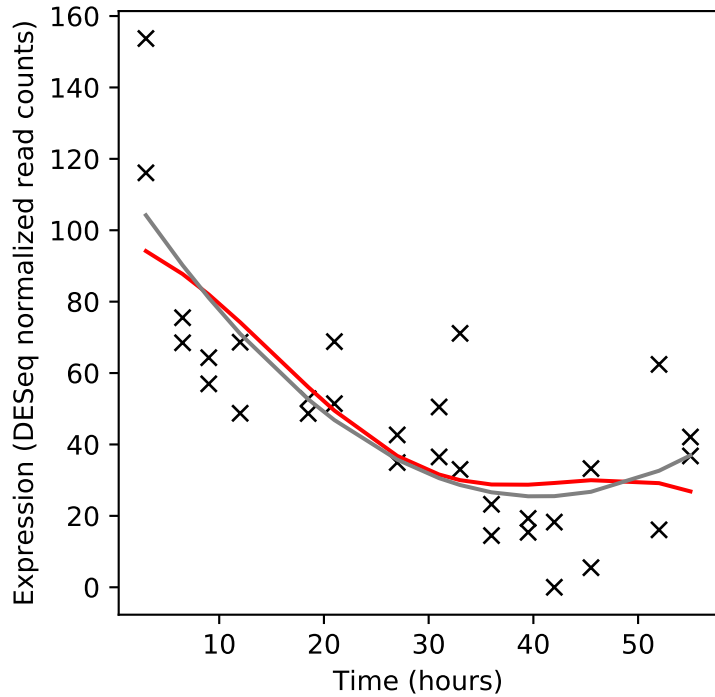

Rv0987/-

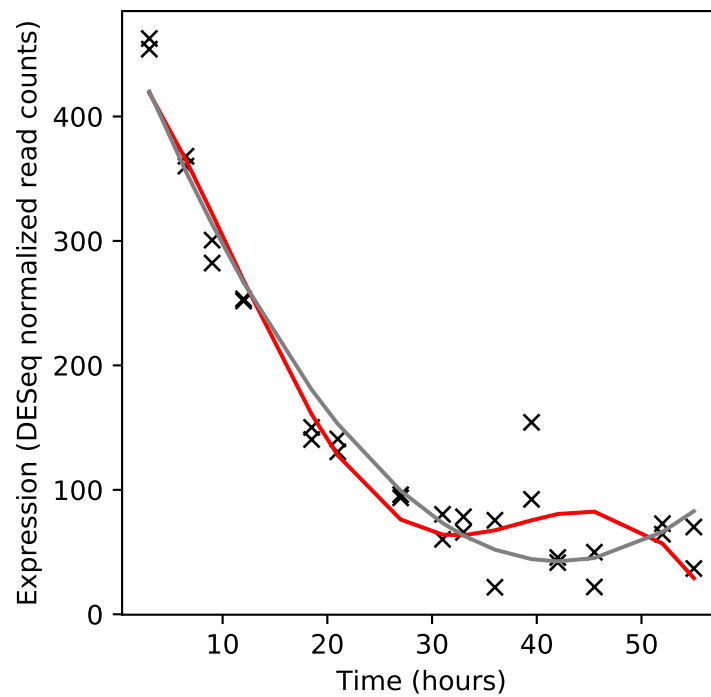

Rv0988/-

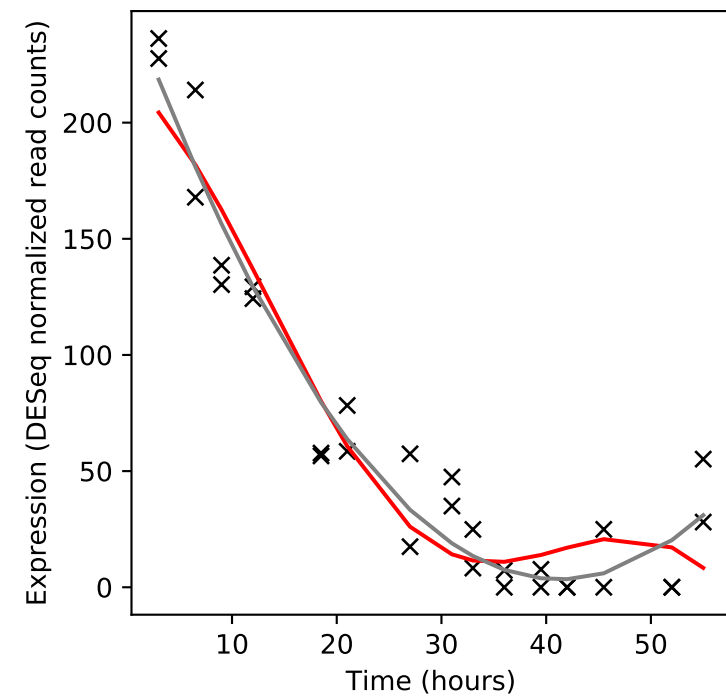

Rv0989c/grcC2

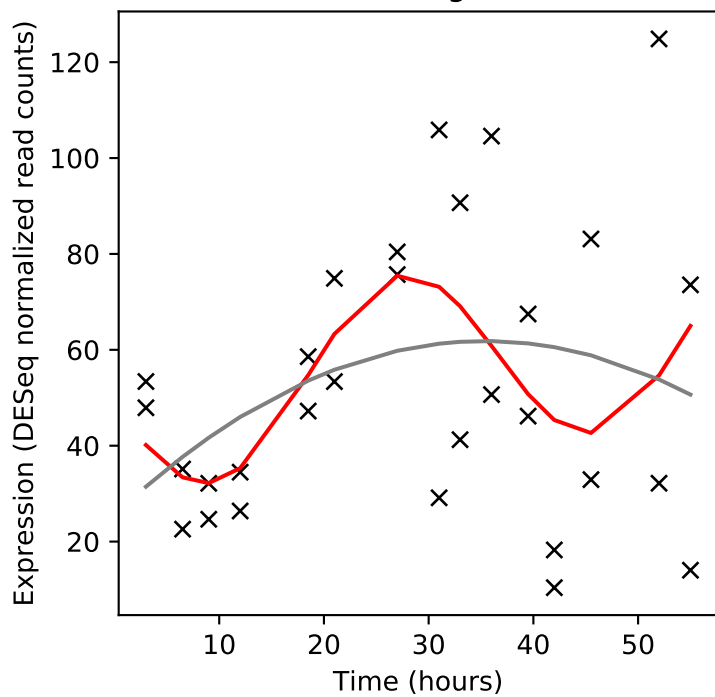

Rv0990c/-

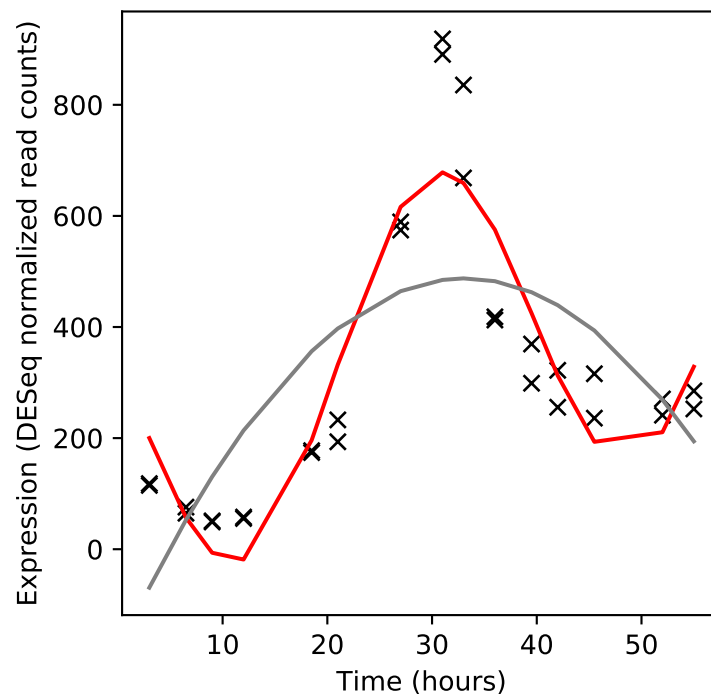

Rv0991c/-

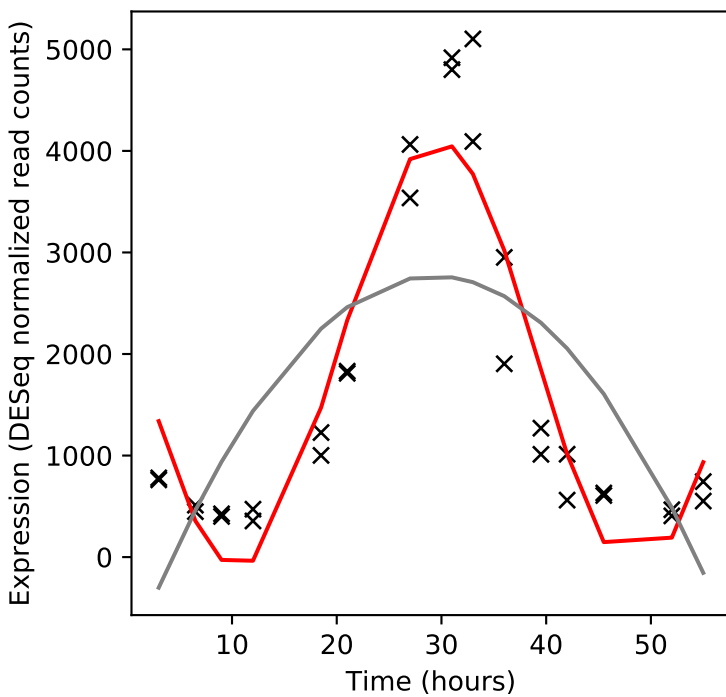



Rv0992c/-

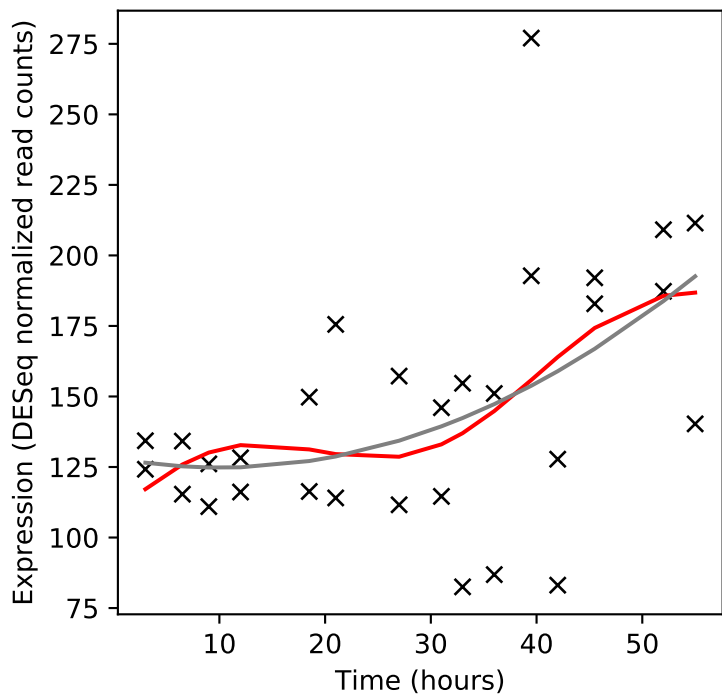

Rv0993/galU

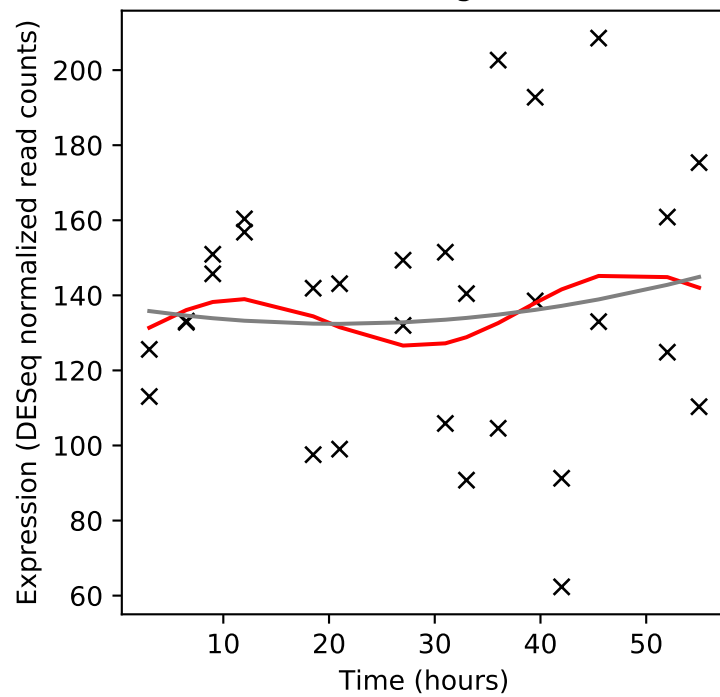

Rv0994/moeA1

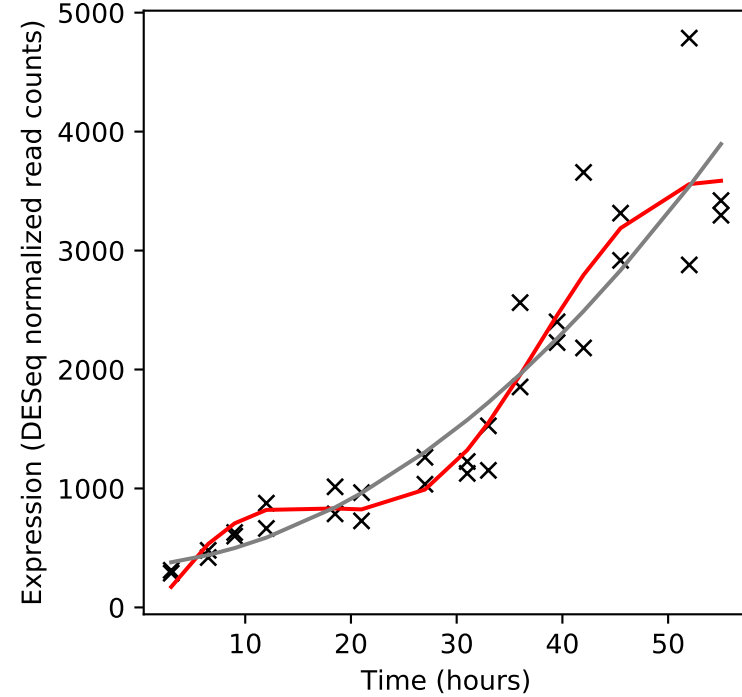

Rv0995/rimJ

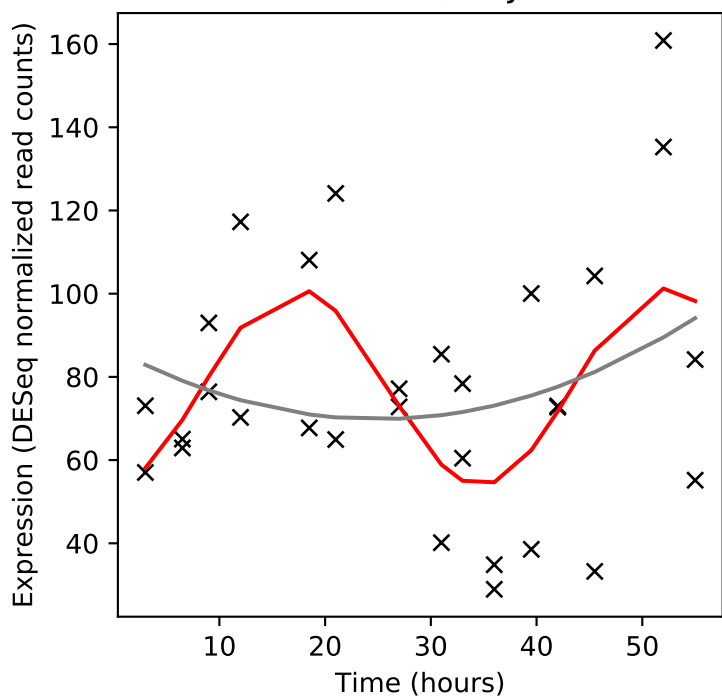

Rv0996/-

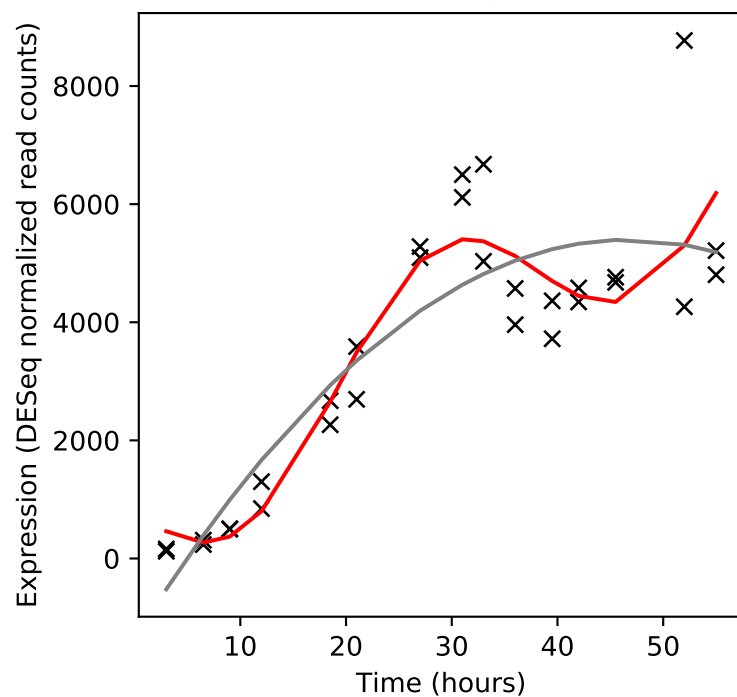

Rv0997/-

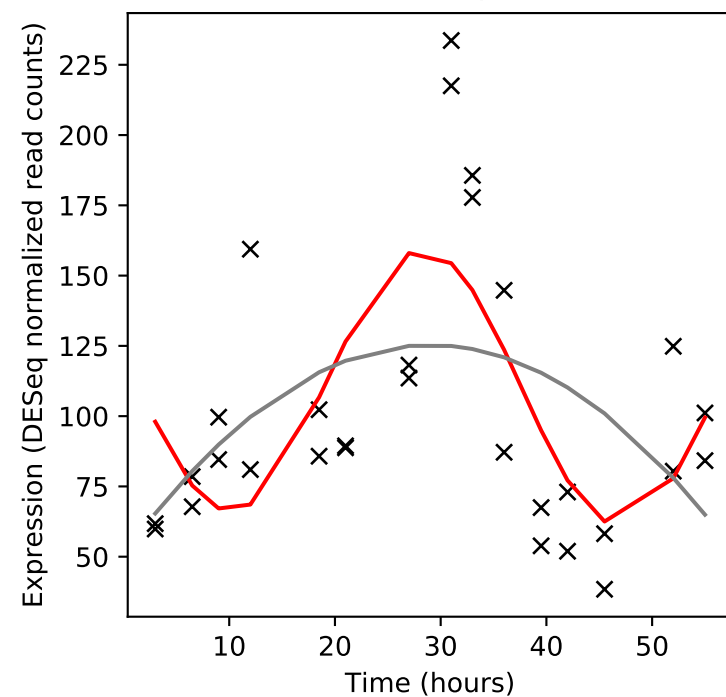

Rv0998/-

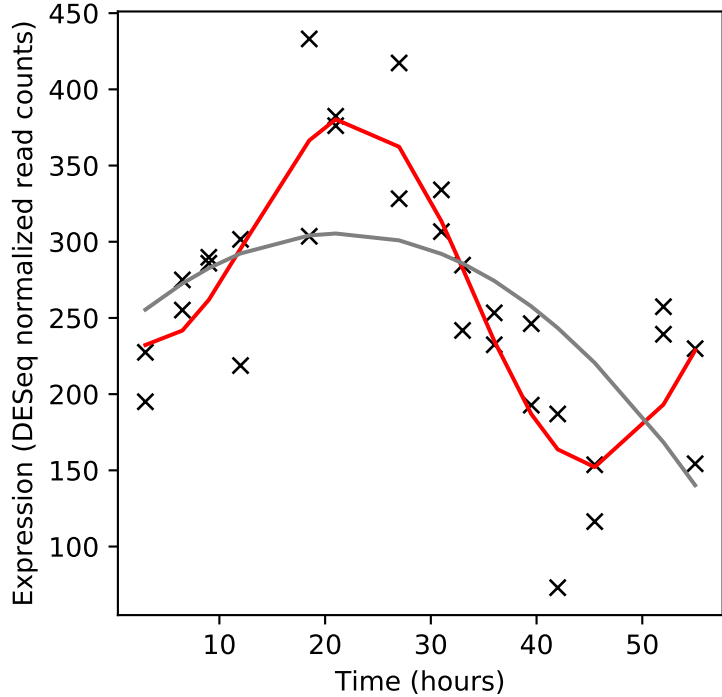

Rv0999/-

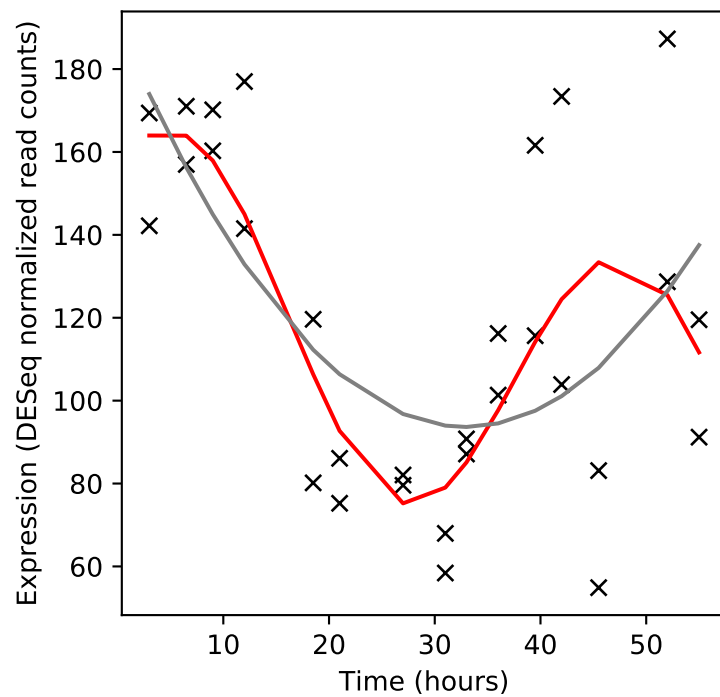

Rv1000c/-

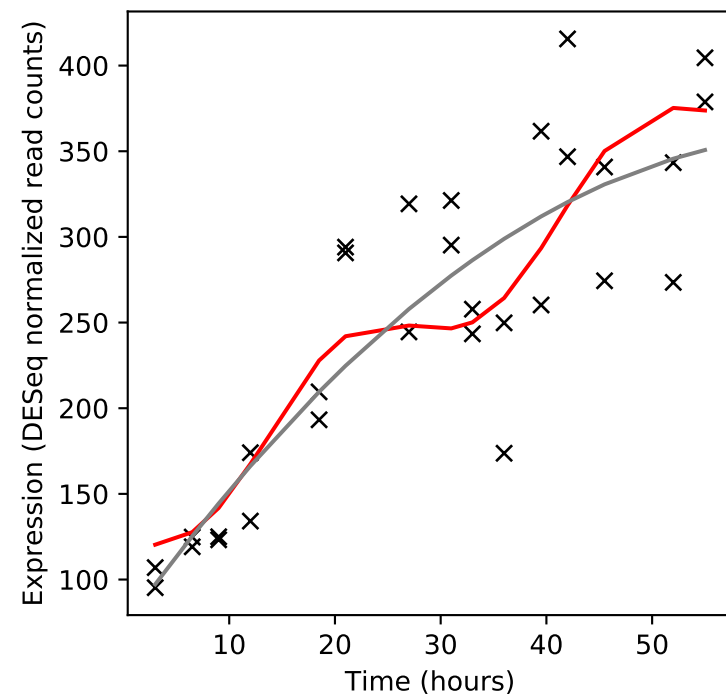

Rv1001/arcA

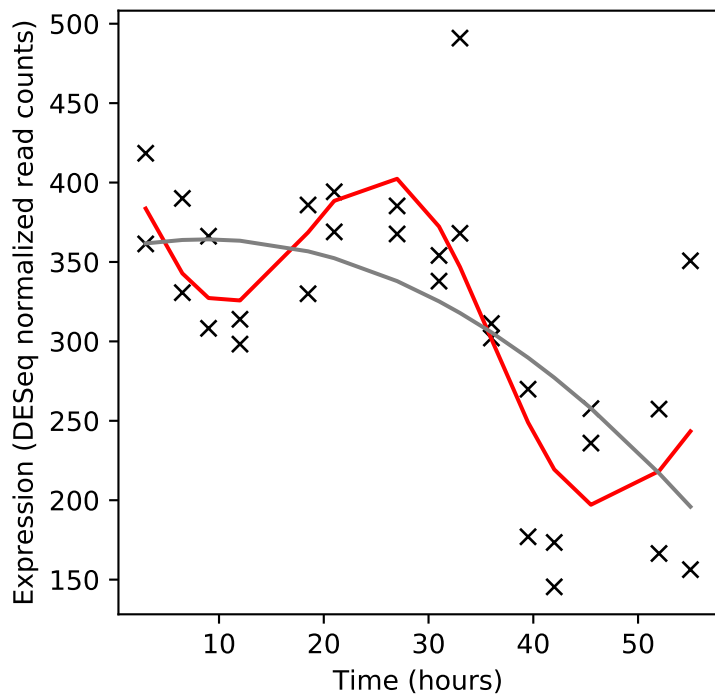

Rv1002c/-

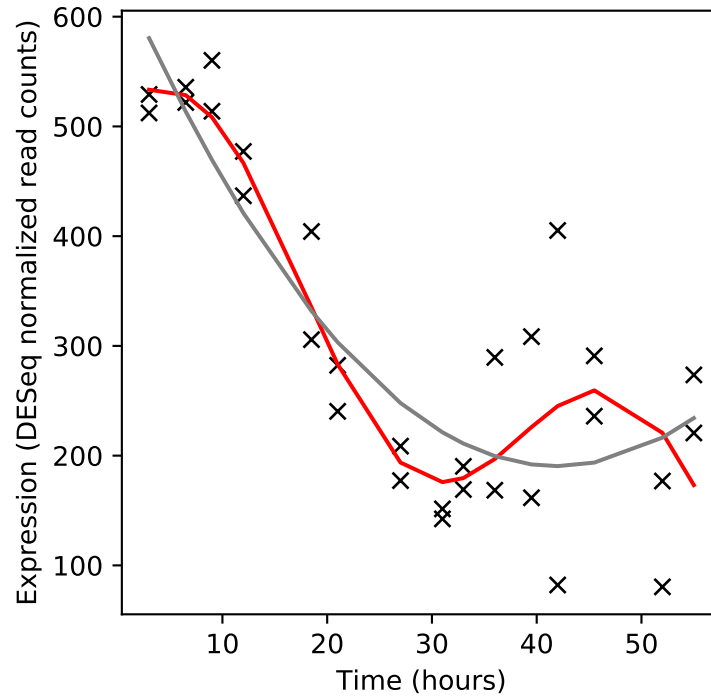

Rv1003/-

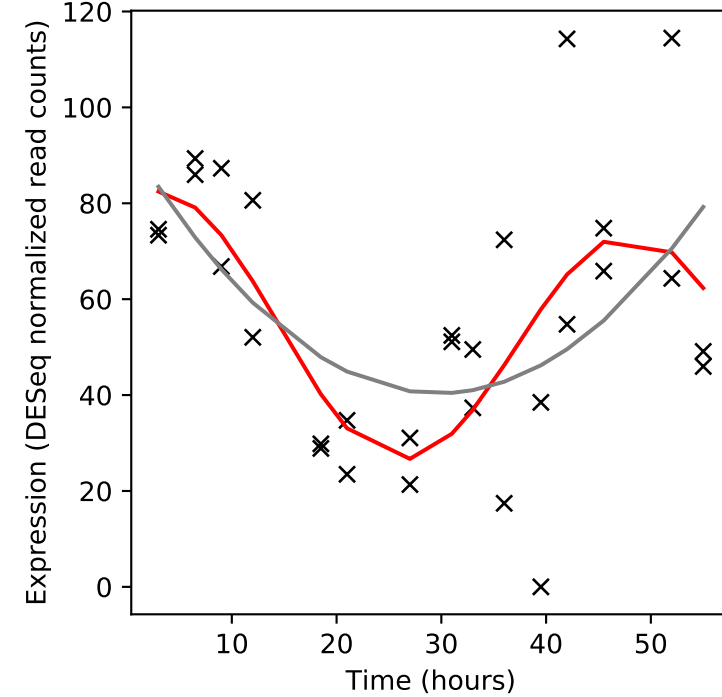

Rv1004c/-

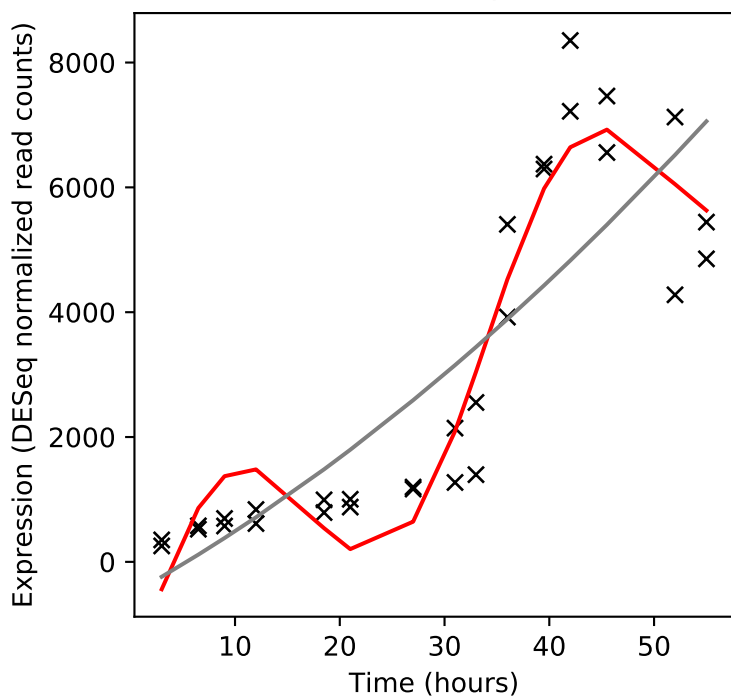

Rv1005c/pabB

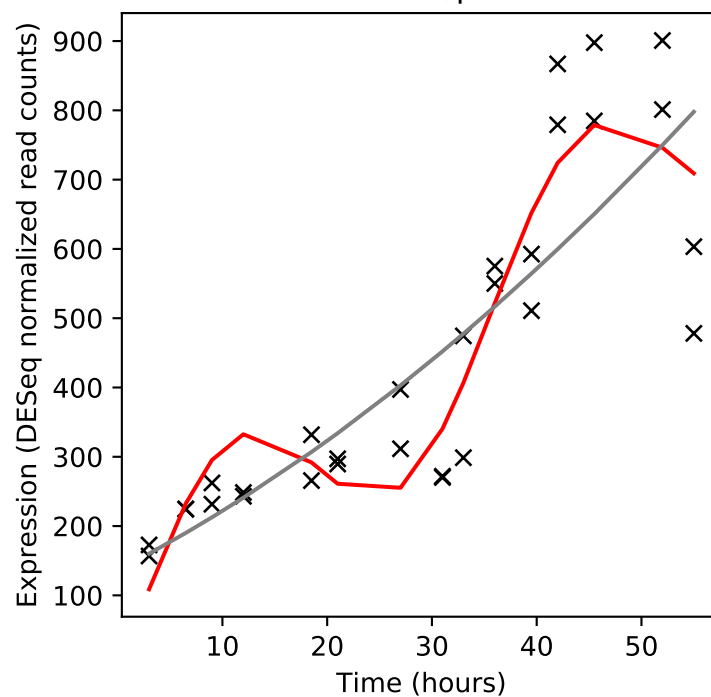

Rv1006/-

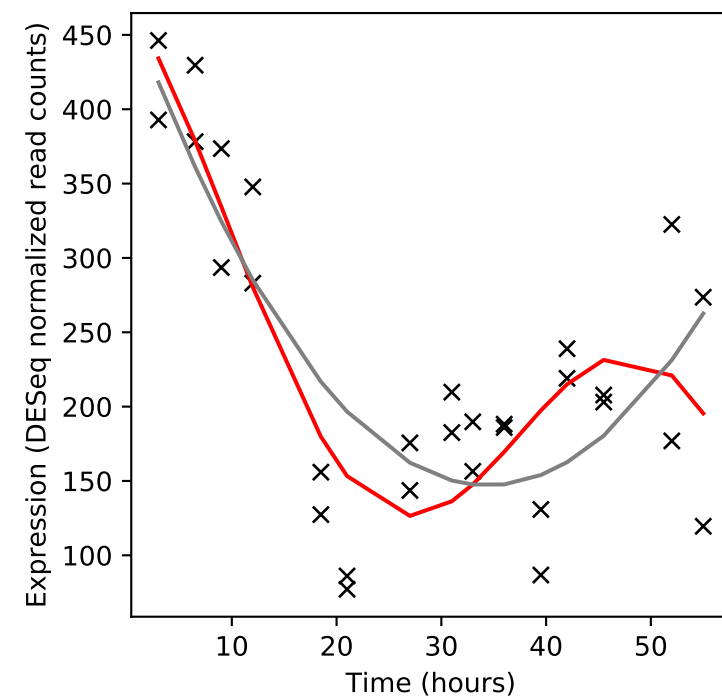

Rv1007c/metS

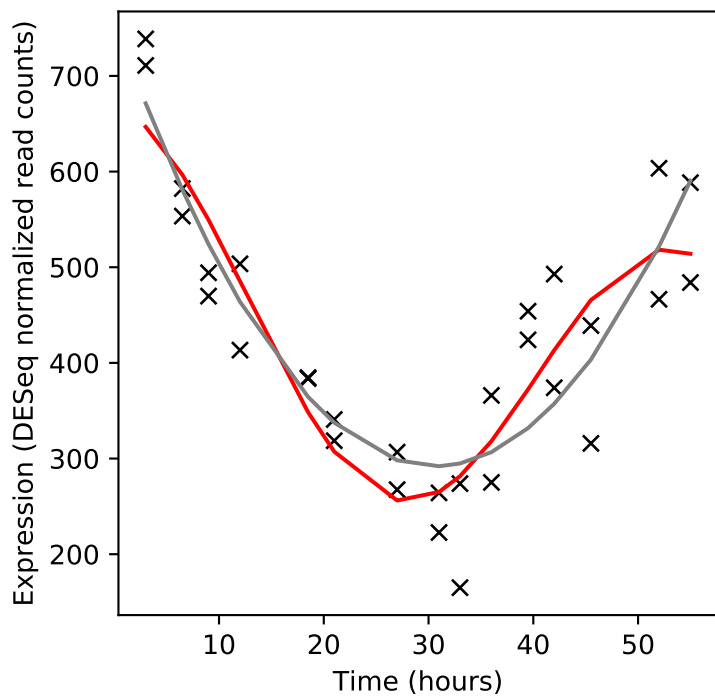

Rv1008/tatD

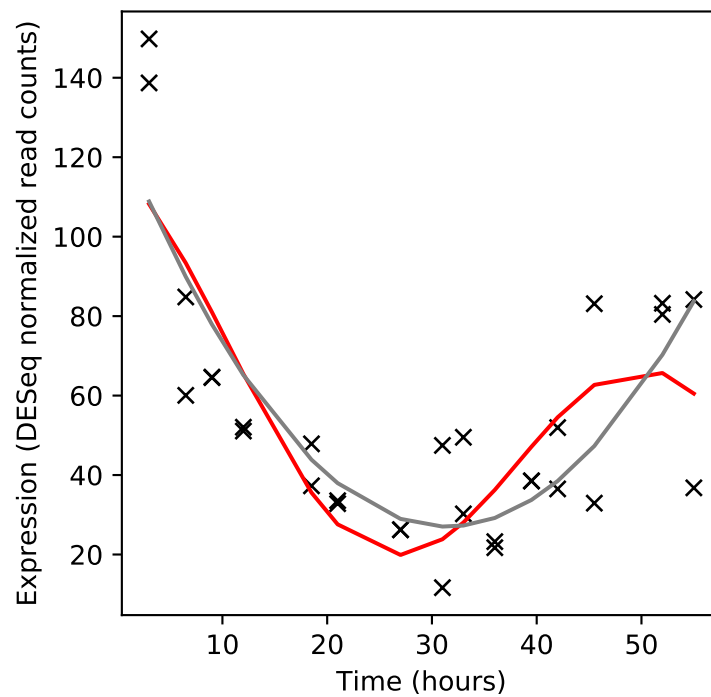

Rv1009/rpfB

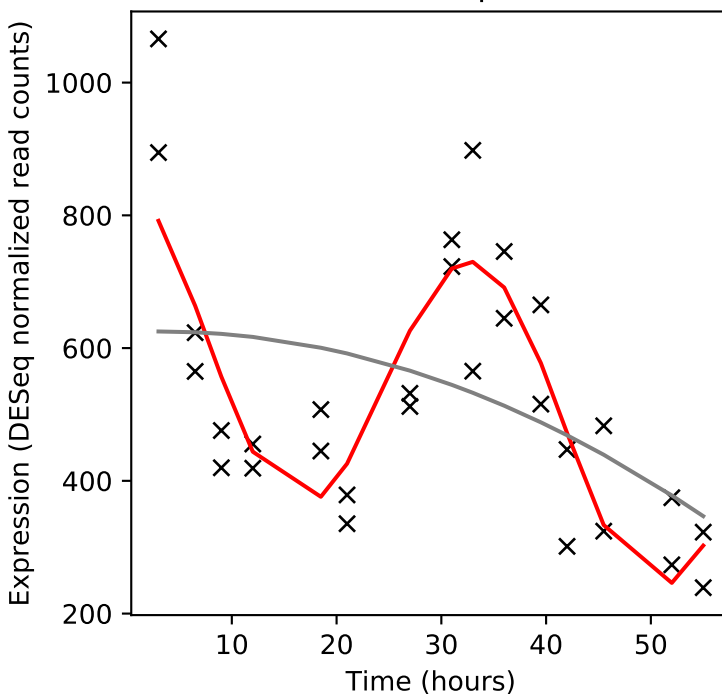

Rv1010/ksgA

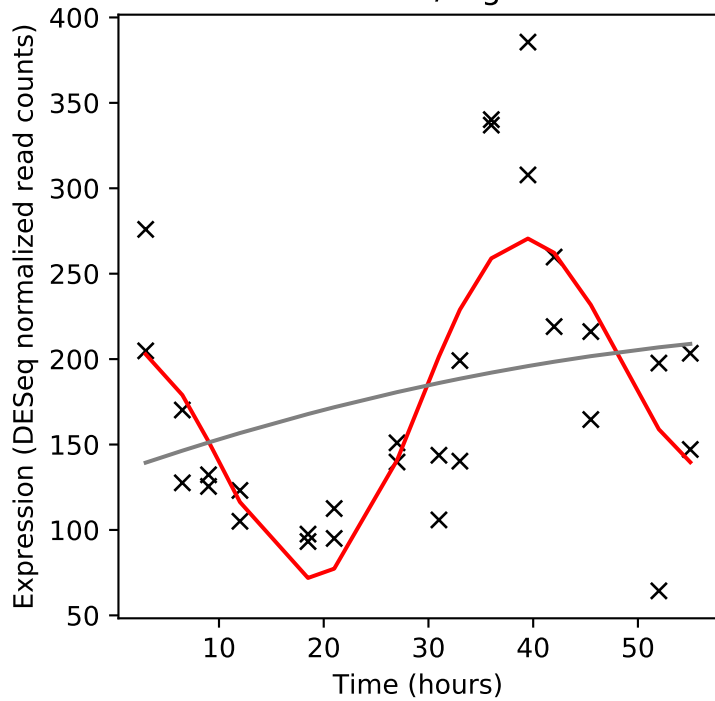

Rv1011/ispE

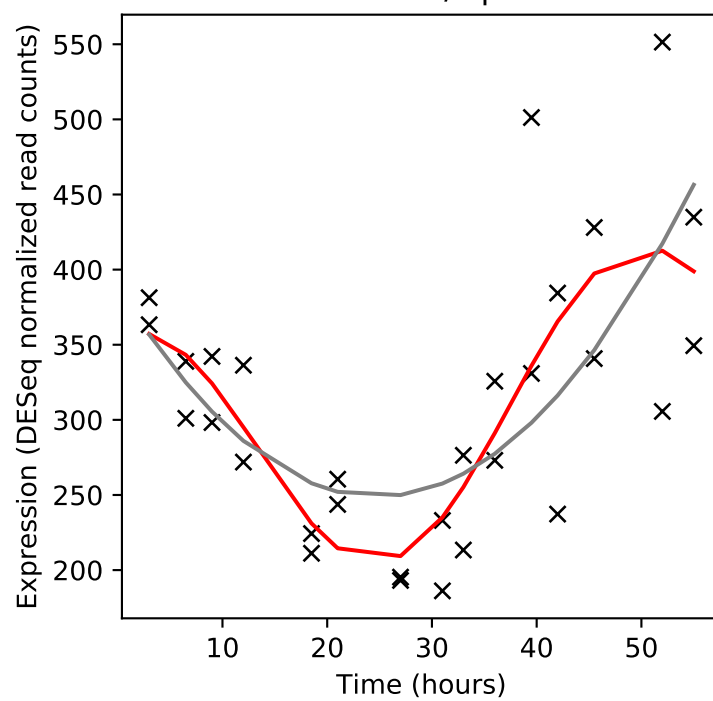

Rv1012/-

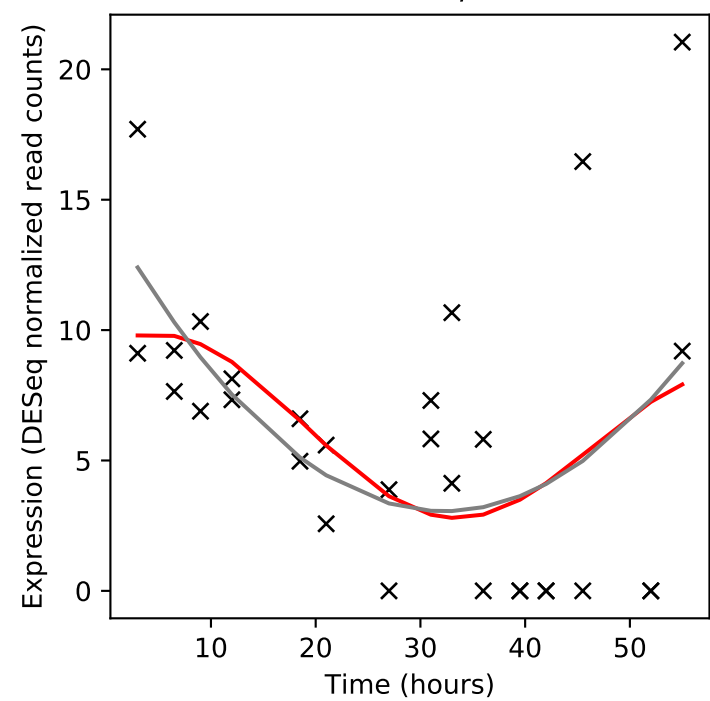

Rv1013/pks16

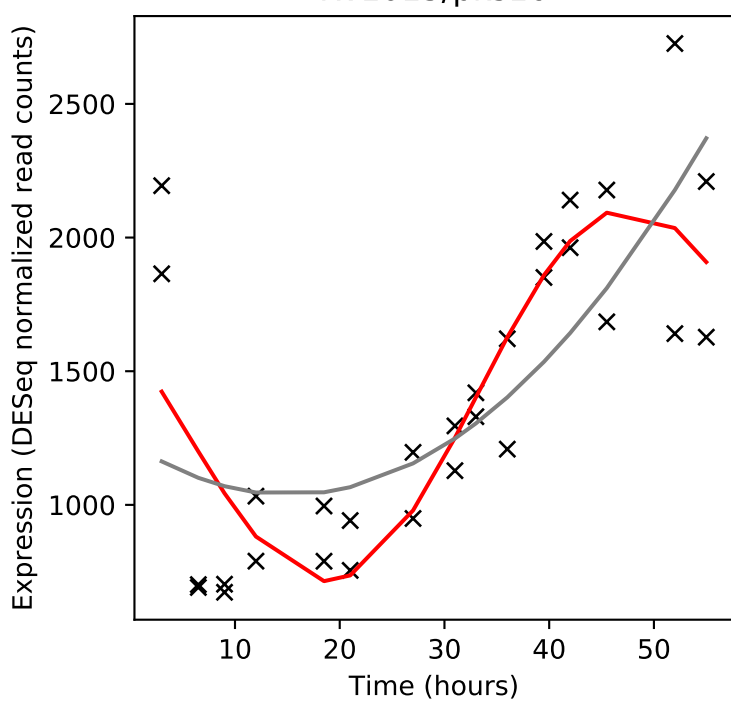

Rv1014c/pth

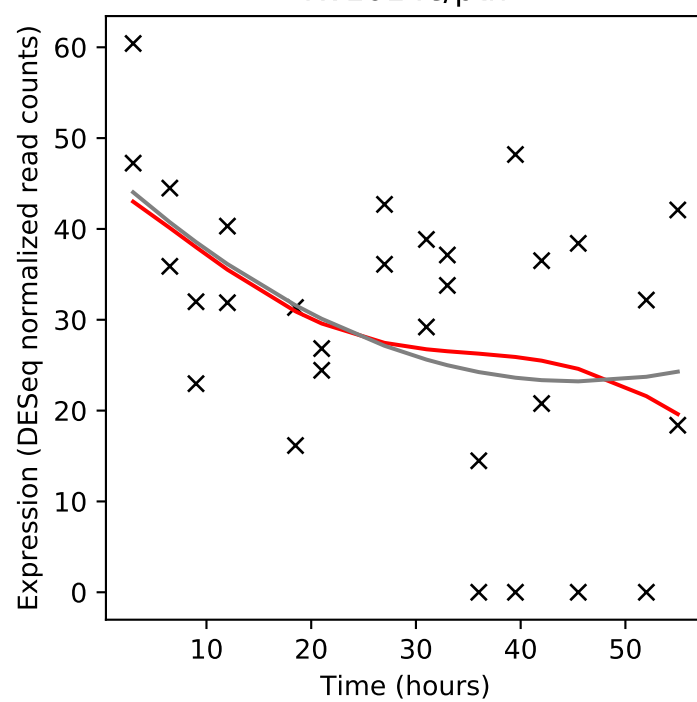

Rv1015c/rpIY

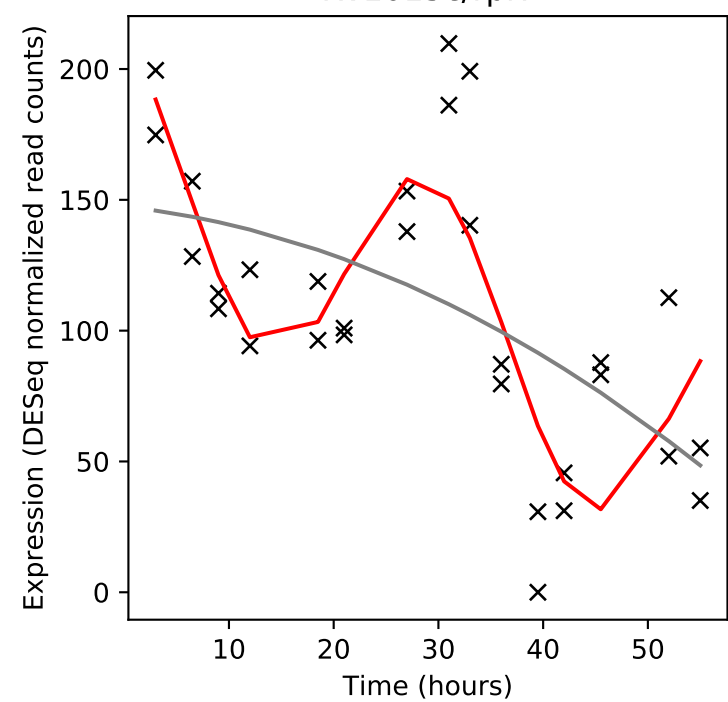

Rv1016c/lpqT

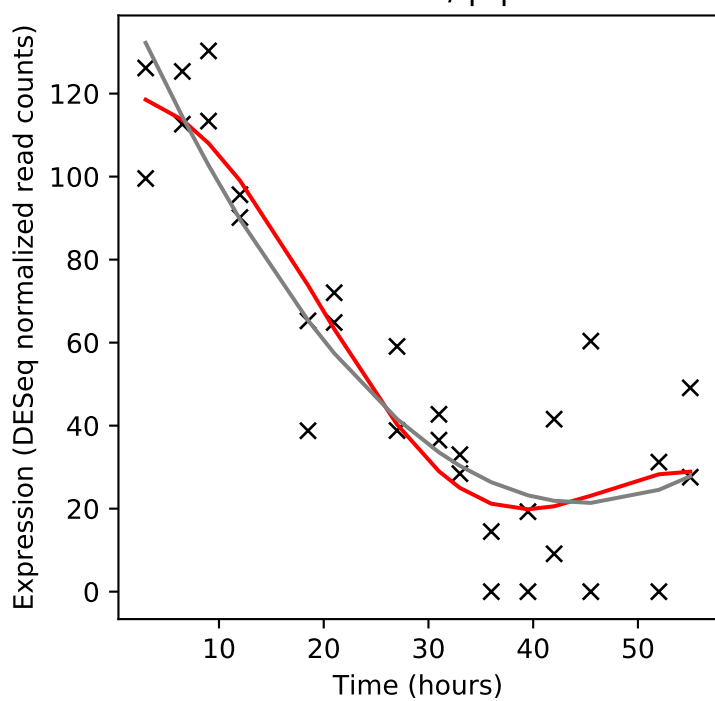

Rv1017c/prsA

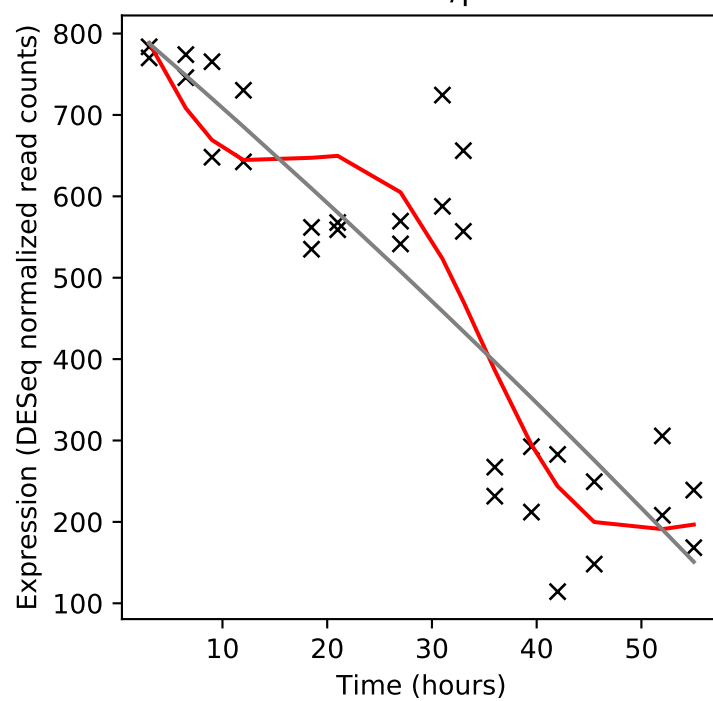

Rv1018c/glmU

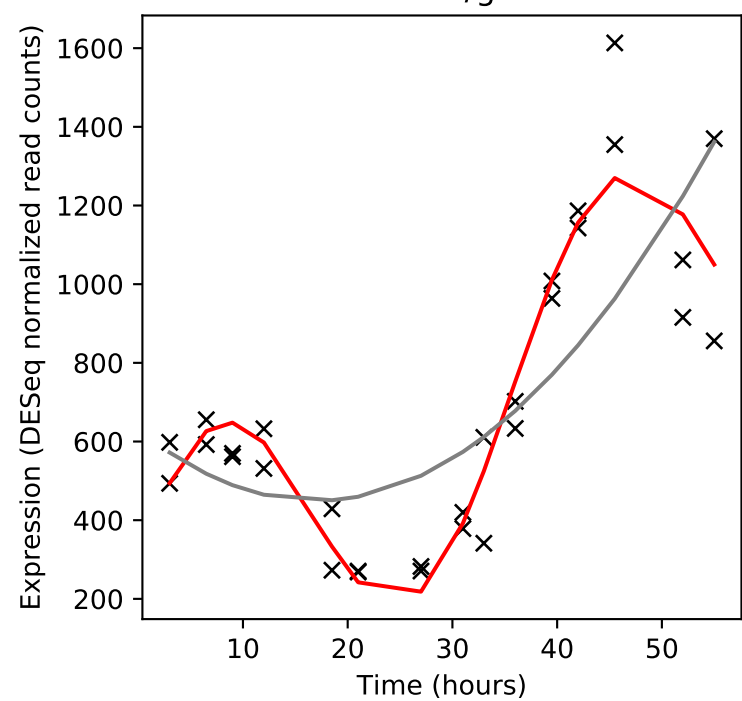

Rv1019/-

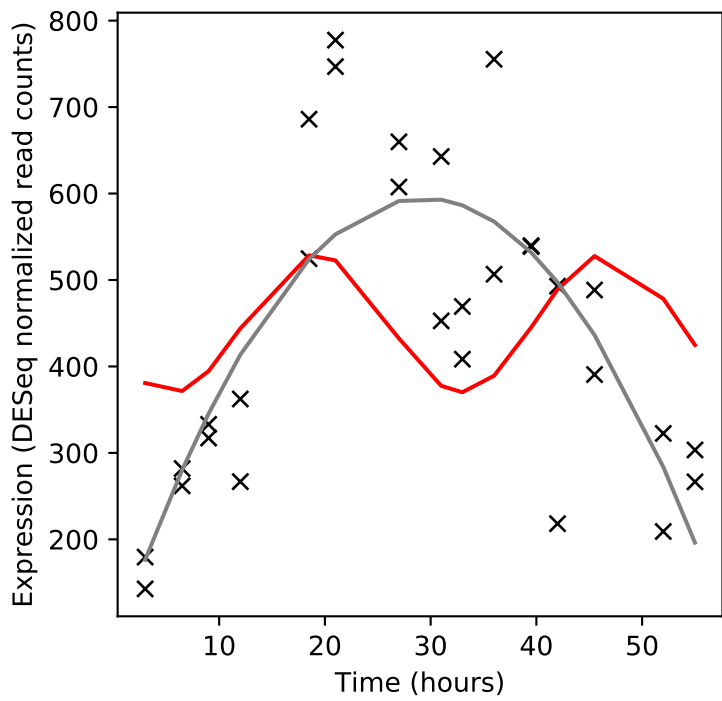

Rv1020/mfd

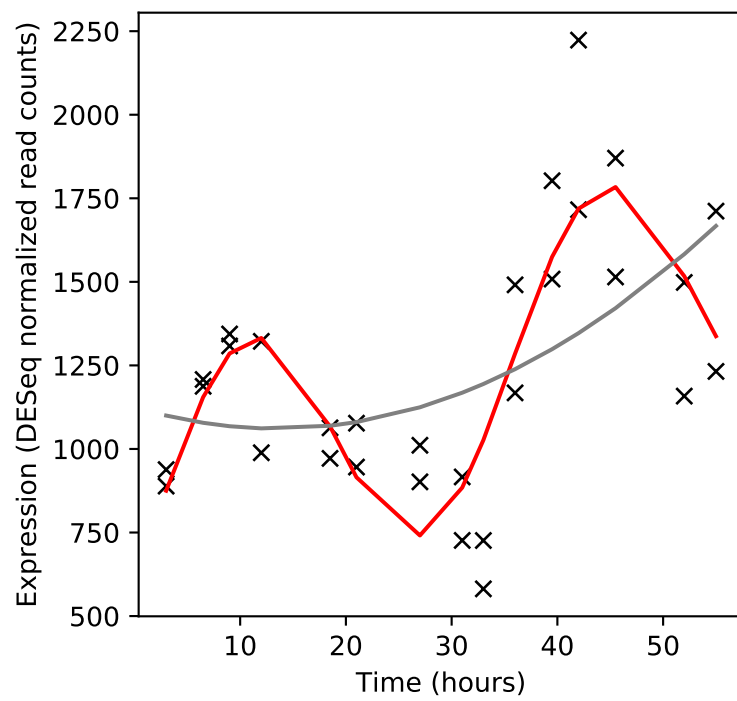

Rv1021/-

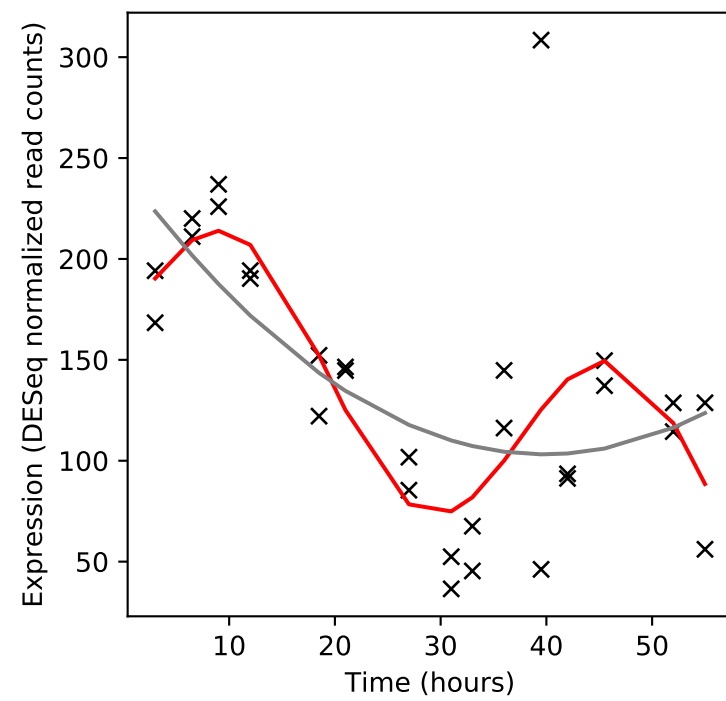

Rv1022/lpqU

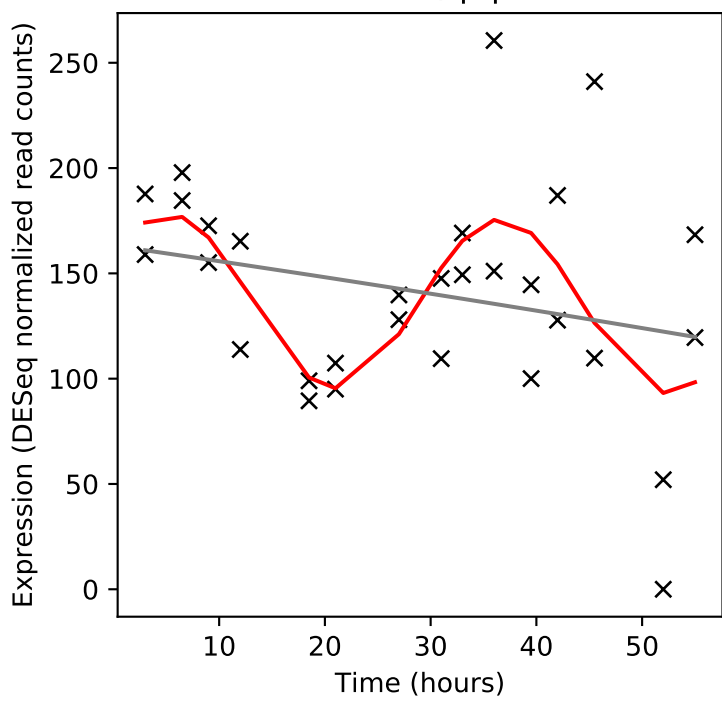

Rv1023/eno

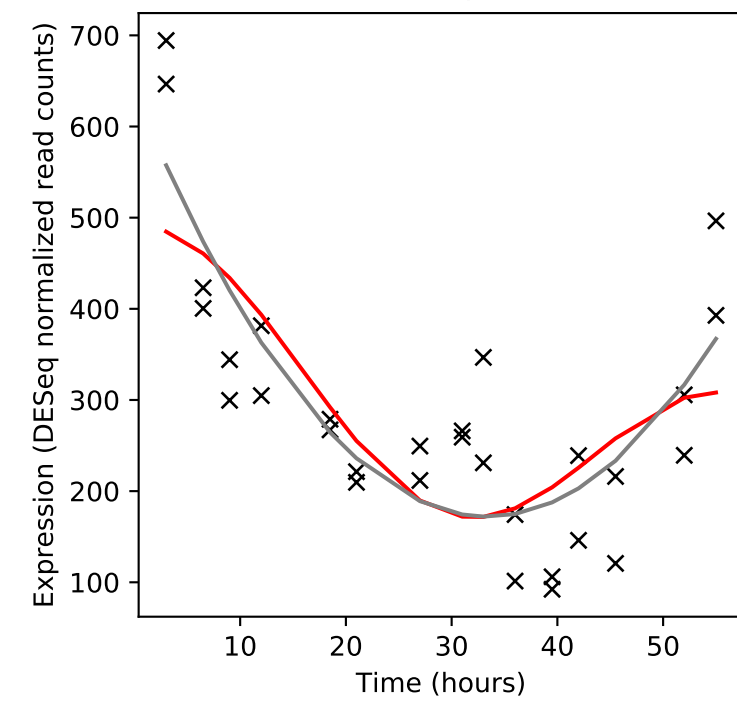

Rv1024/-

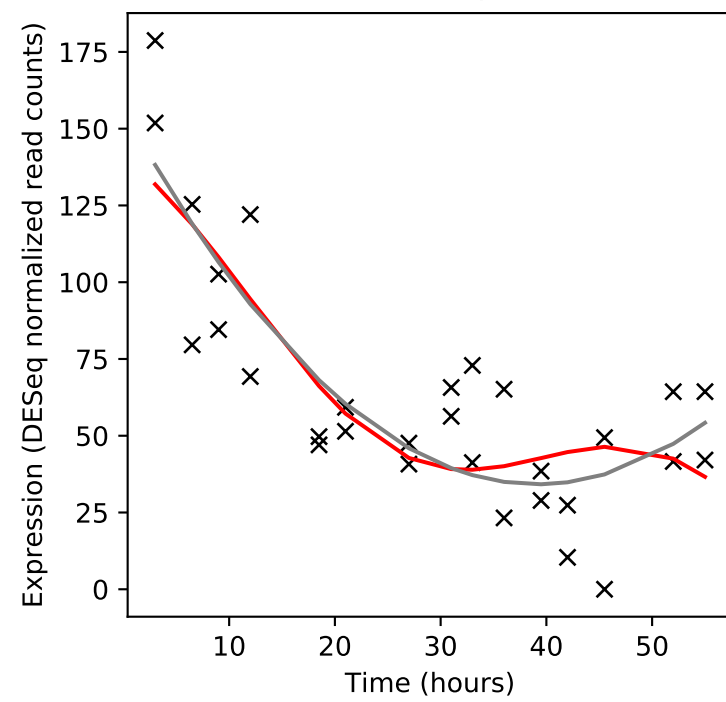

Rv1025/-

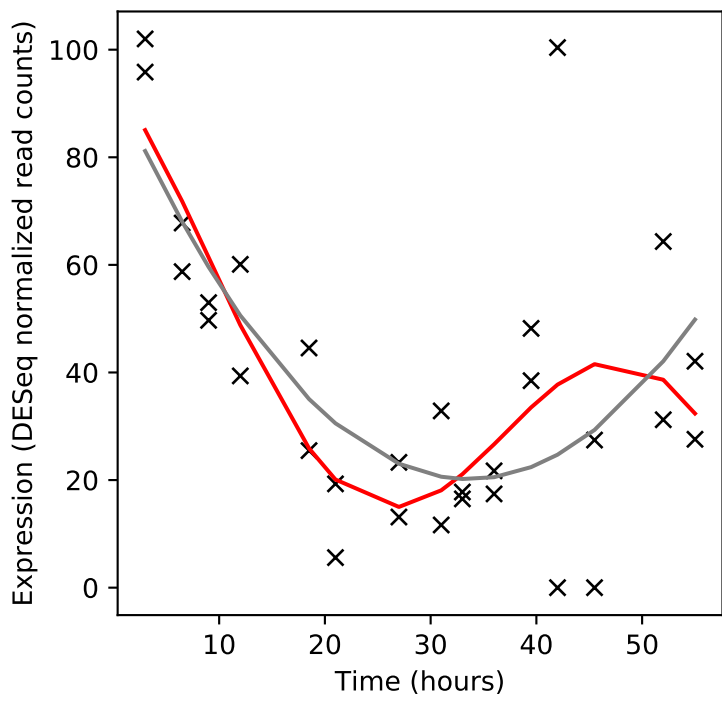

Rv1026/-

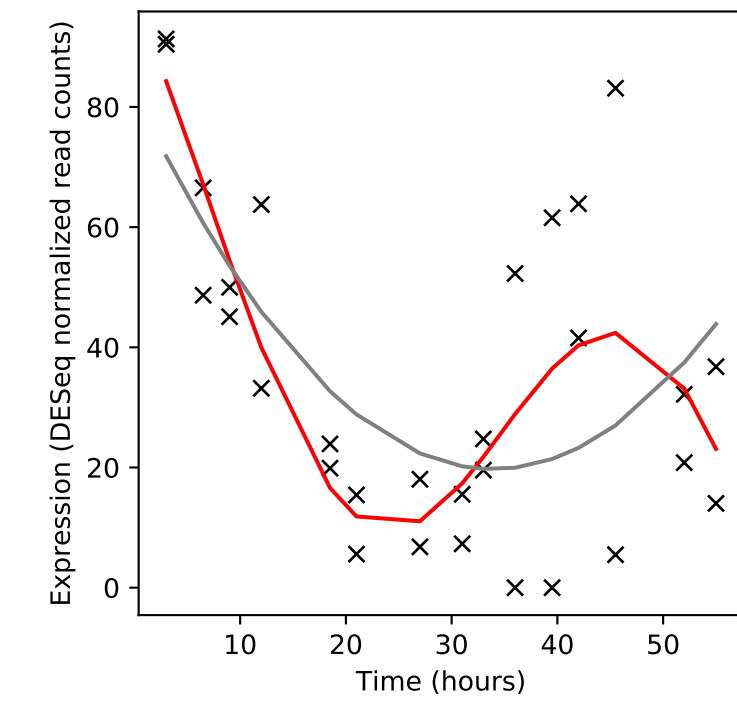

Rv1027c/kdpE

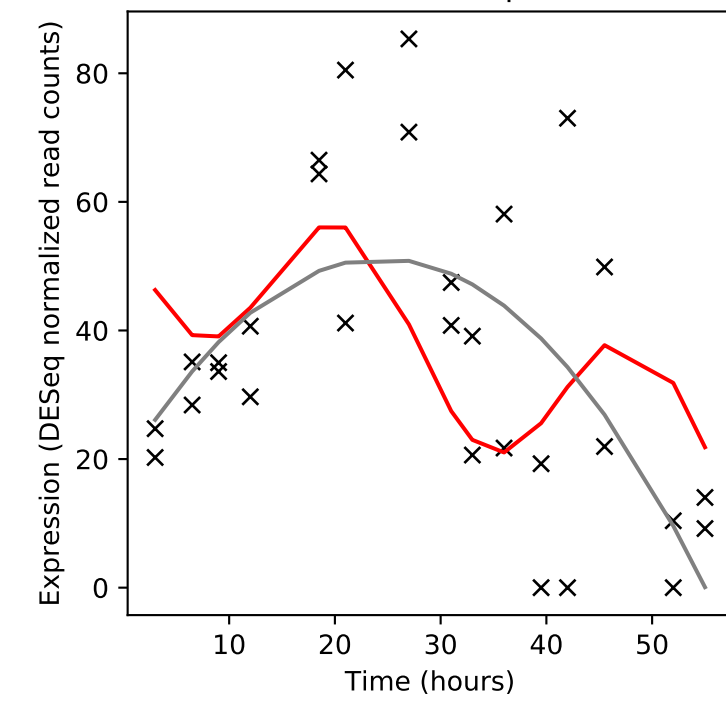

Rv1028c/kdpD

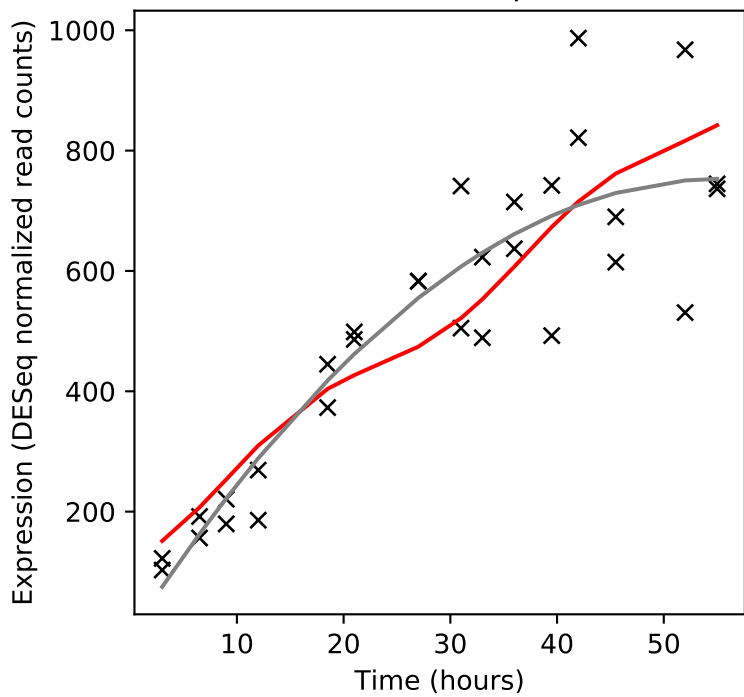

Rv1028A/kdpF

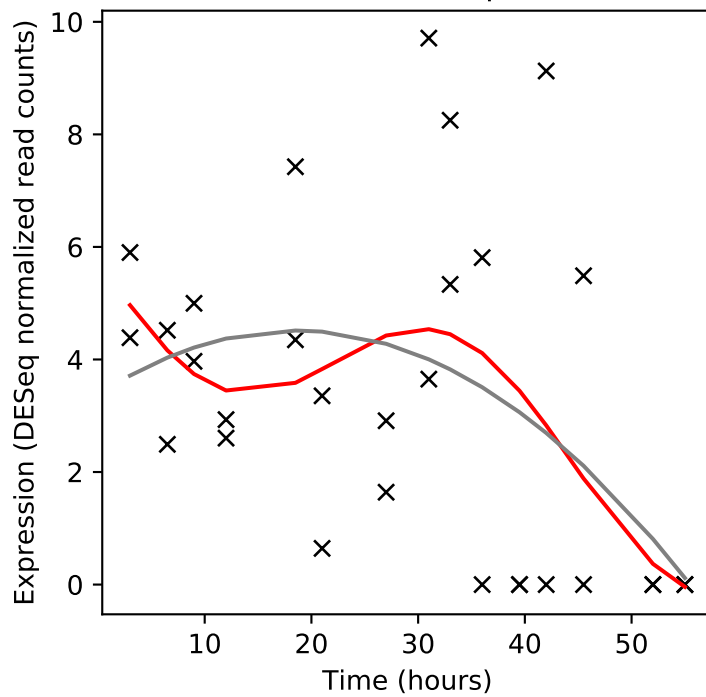

Rv1029/kdpA

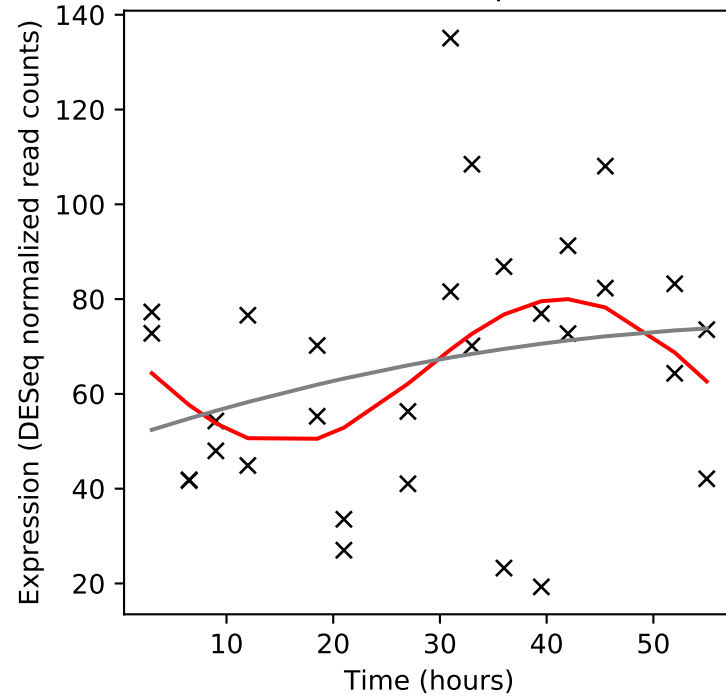

Rv1030/kdpB

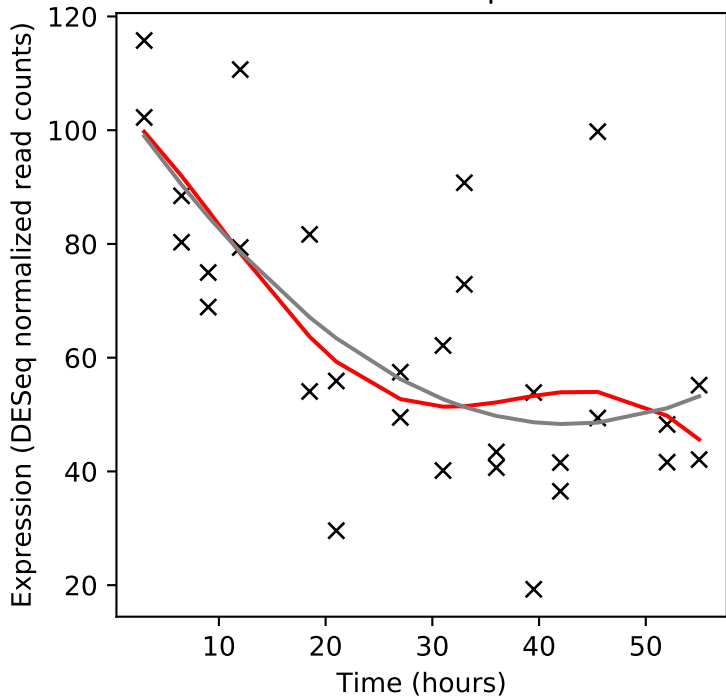

Rv1031/kdpC

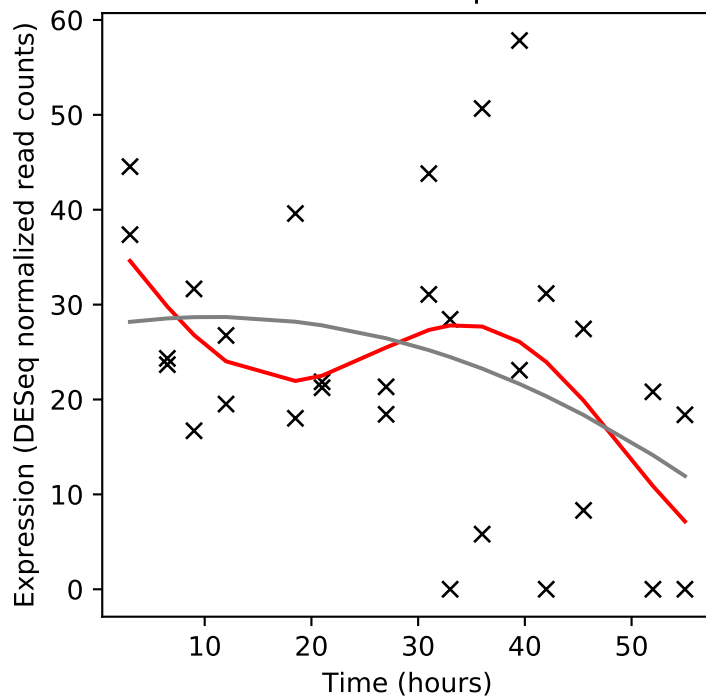

Rv1032c/trcS

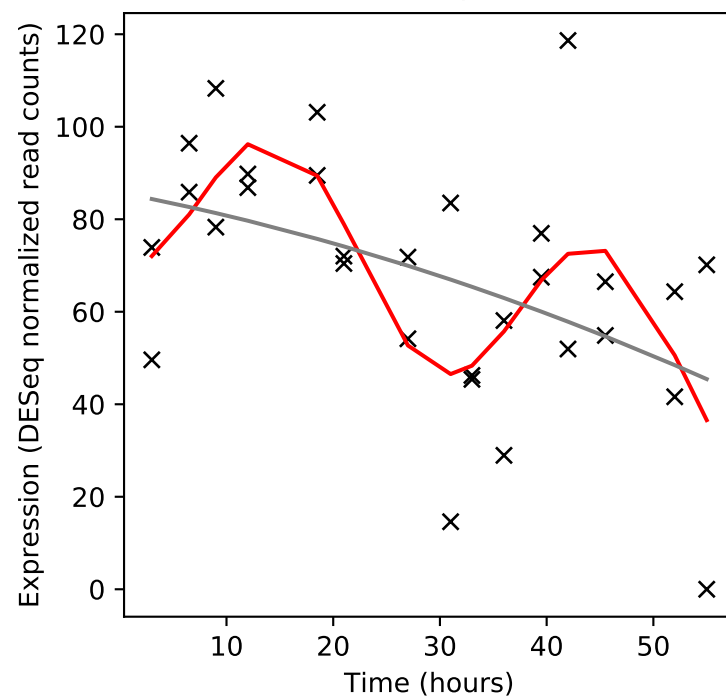

Rv1033c/trcR

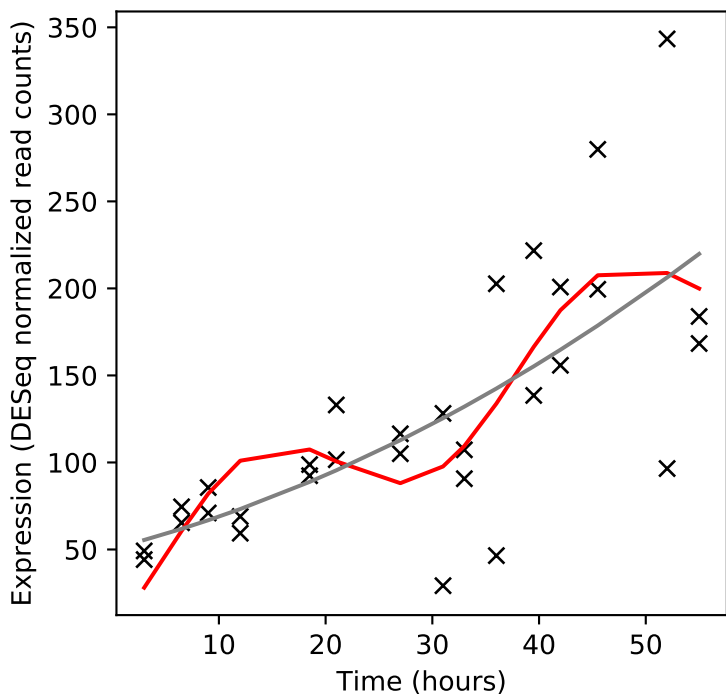

Rv1034c/-

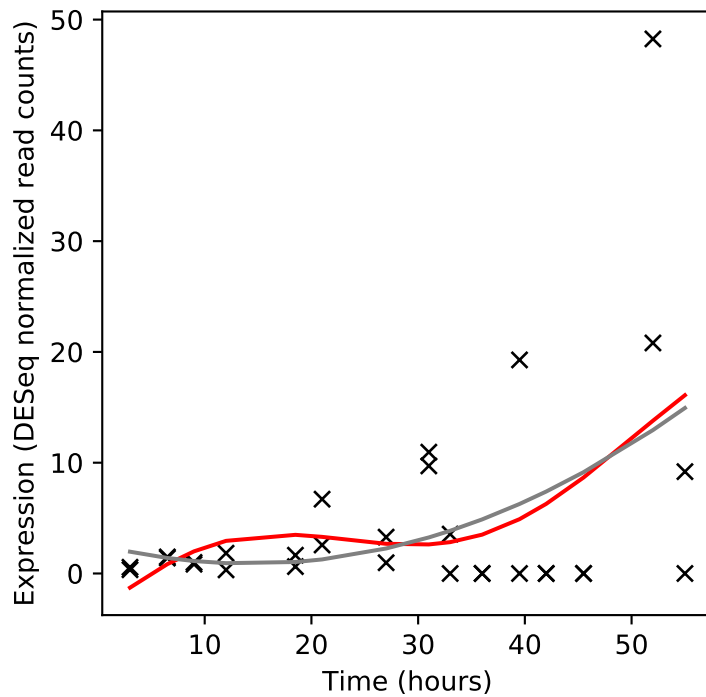

Rv1035c/-

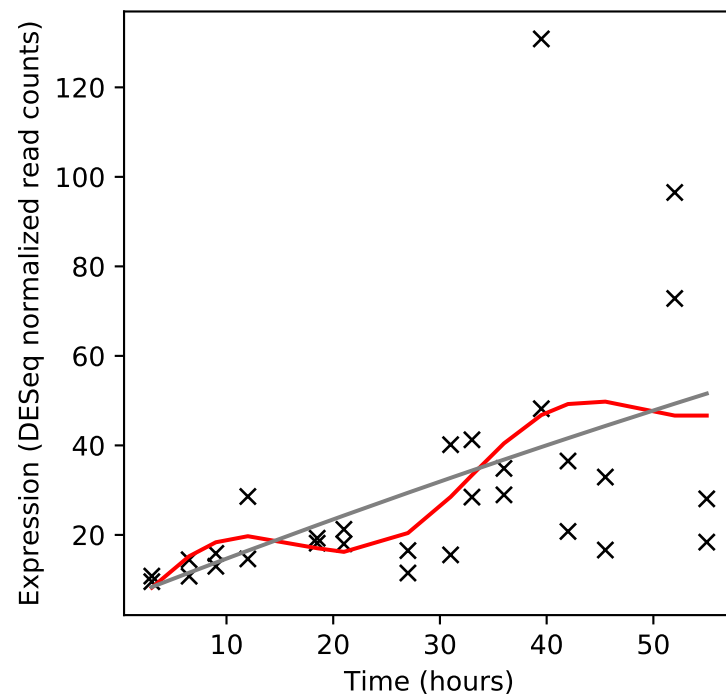

Rv1036c/-

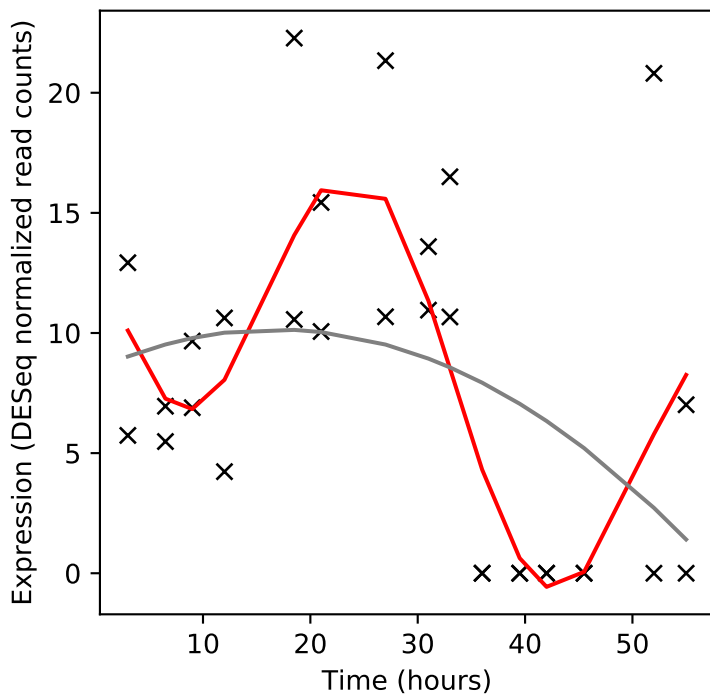

Rv1037c/esxl

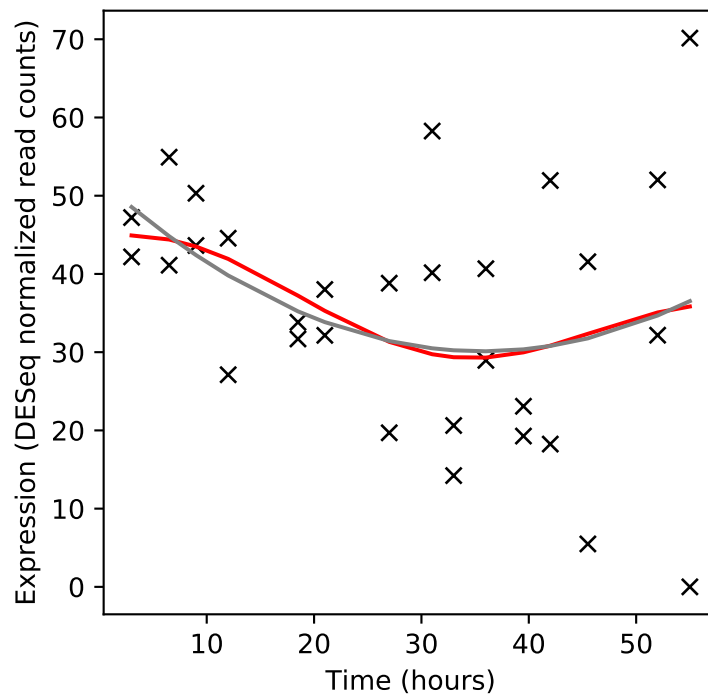

Rv1038c/esxl

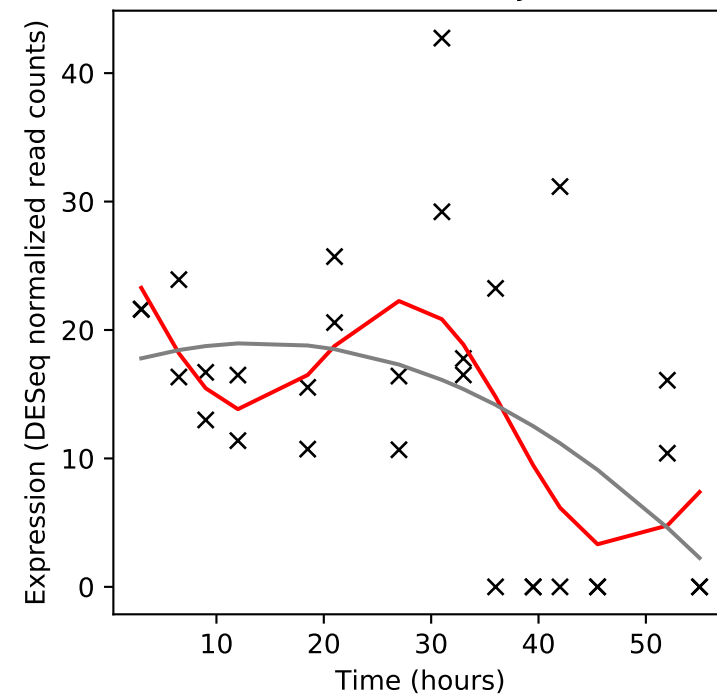

Rv1039c/PPE15

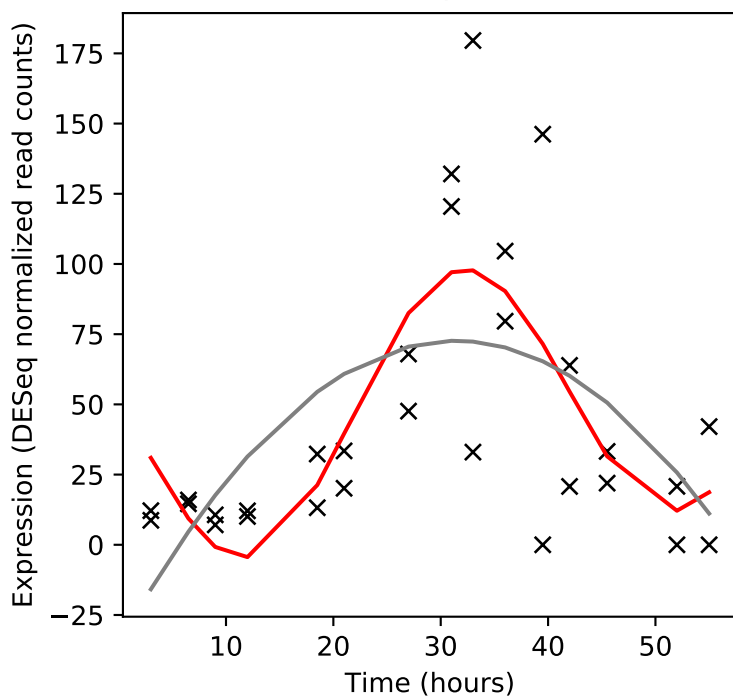

Rv1040c/PE8

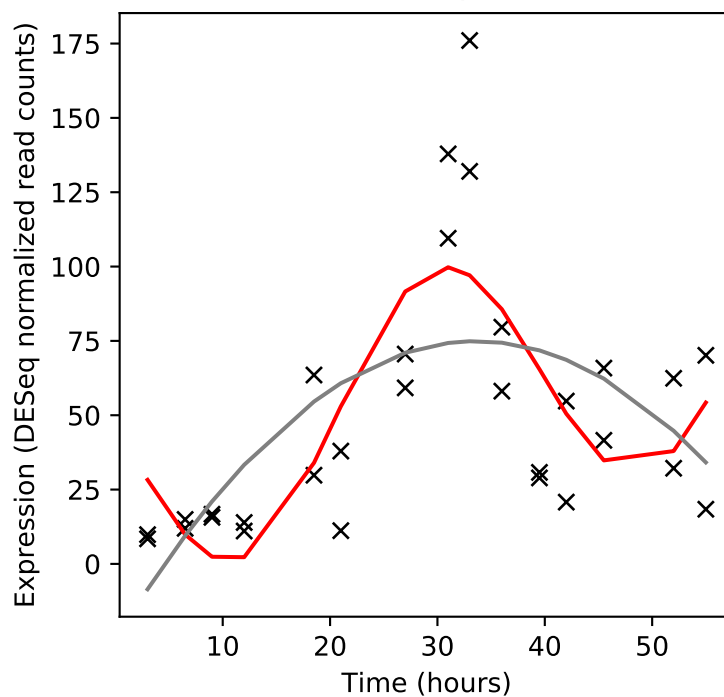

Rv1041c/-

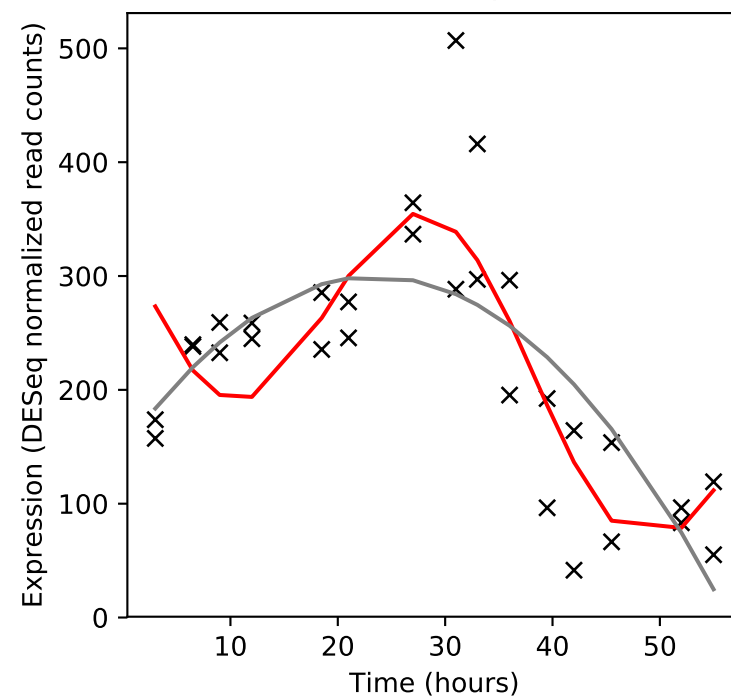

Rv1042c/-

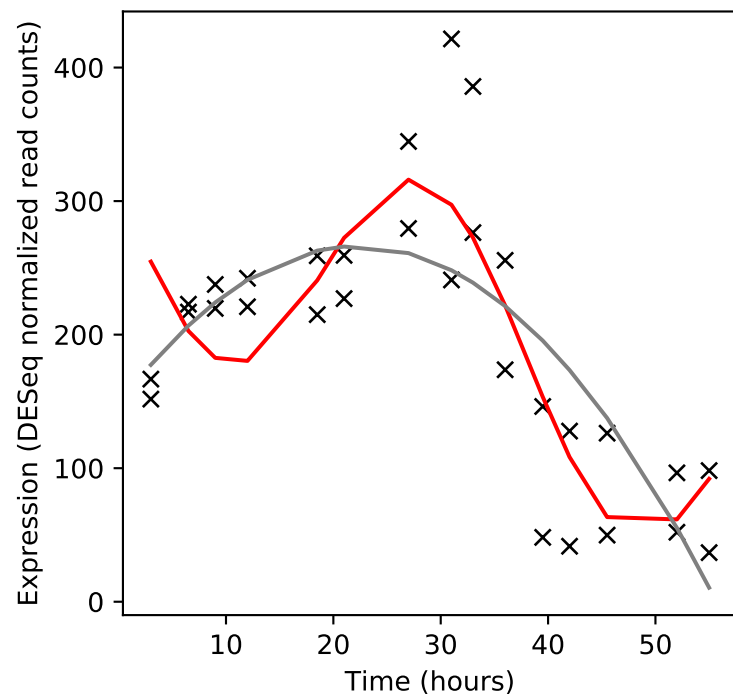

Rv1043c/-

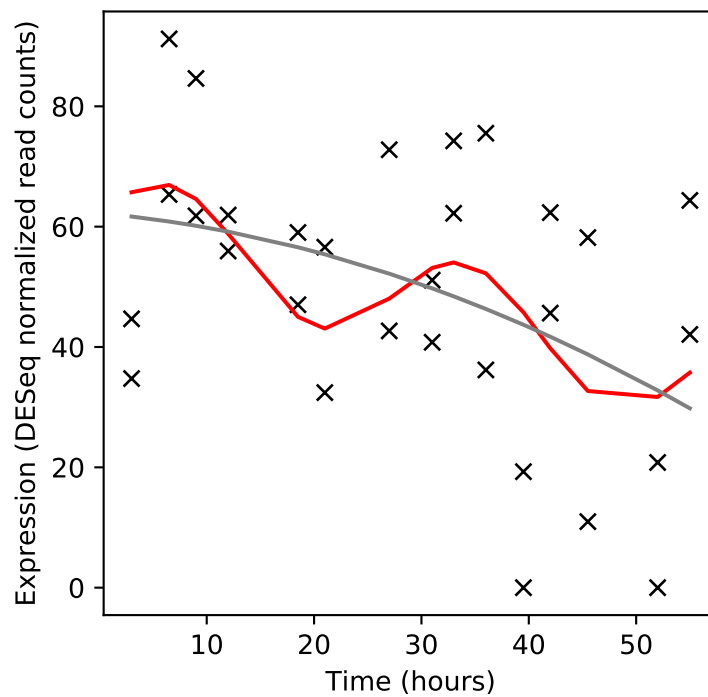

Rv1044c/-

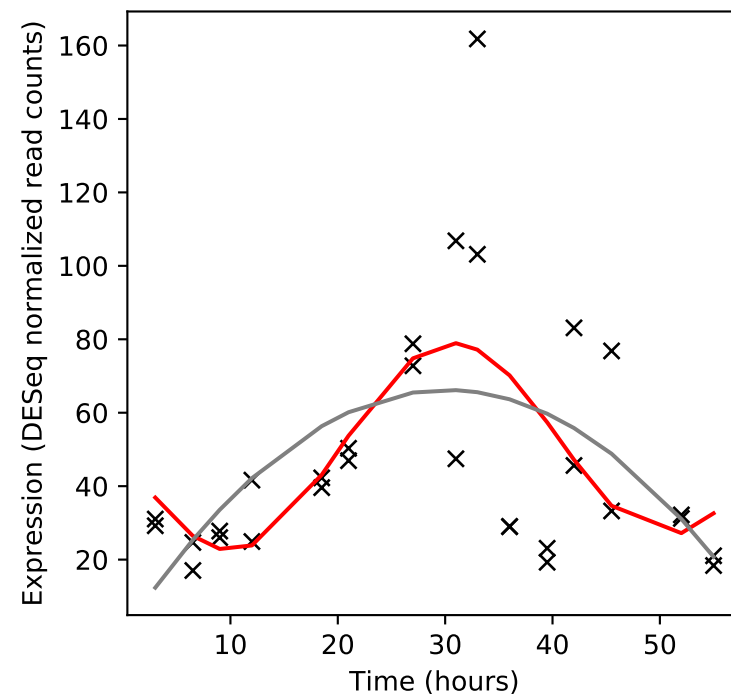

Rv1045/-

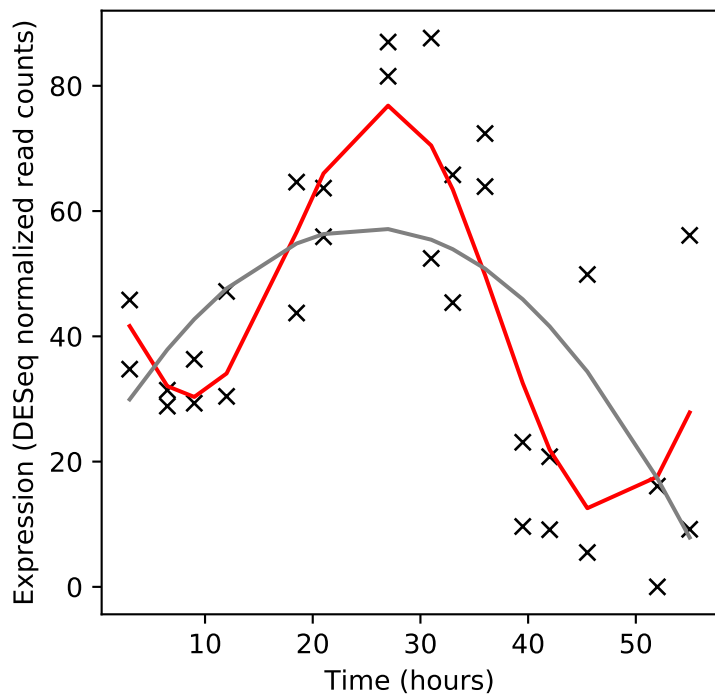

Rv1046c/-

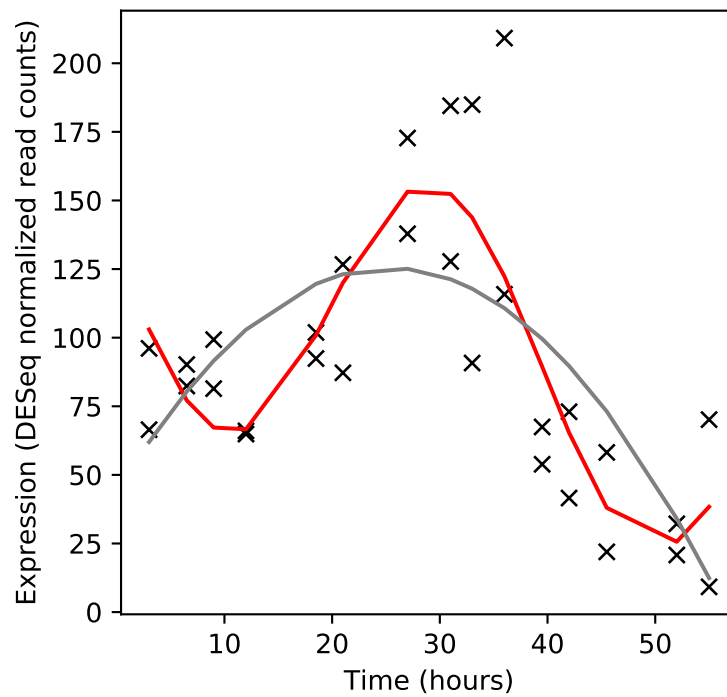

Rv1047/-

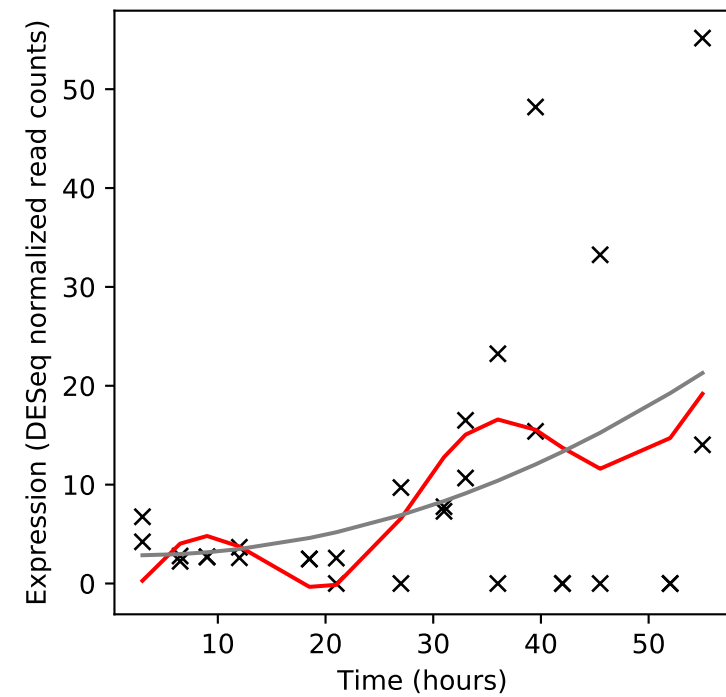

Rv1048c/-

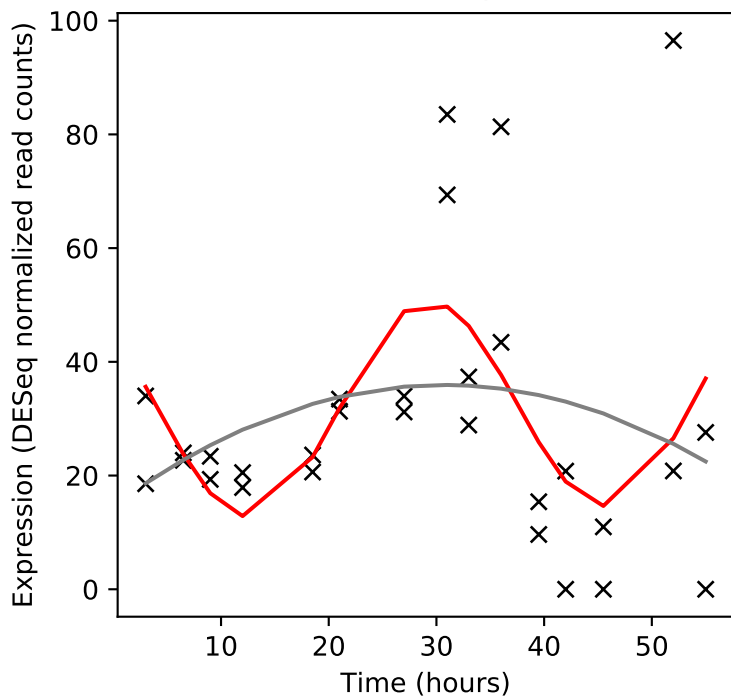

Rv1049/-

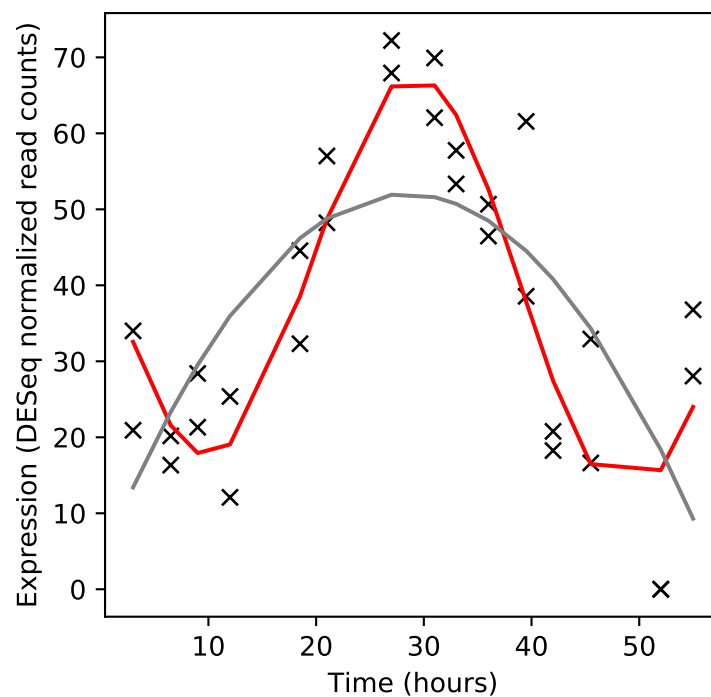

Rv1050/-

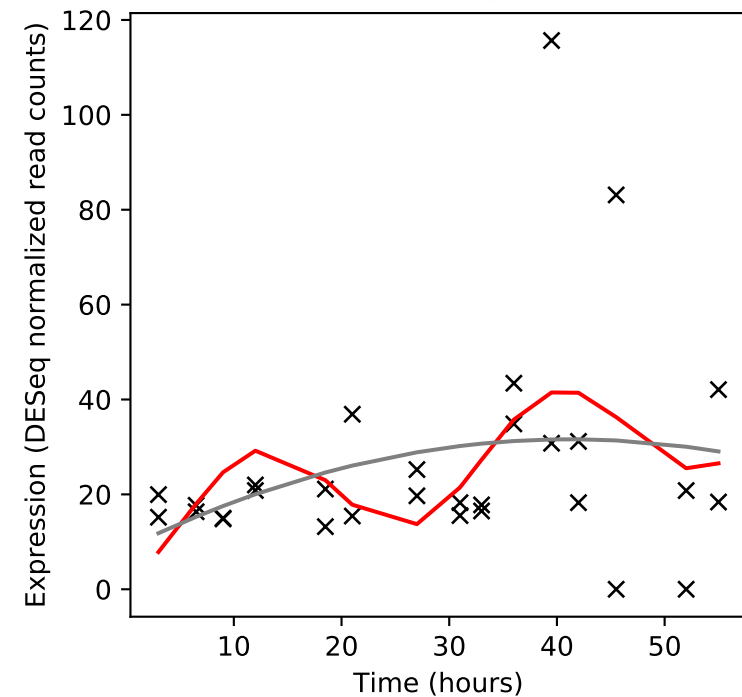

Rv1051c/-

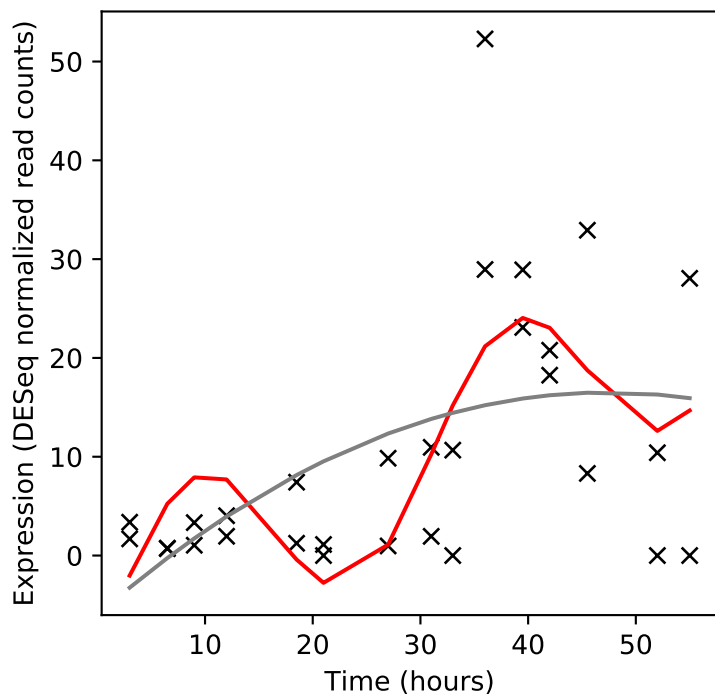

Rv1052/-

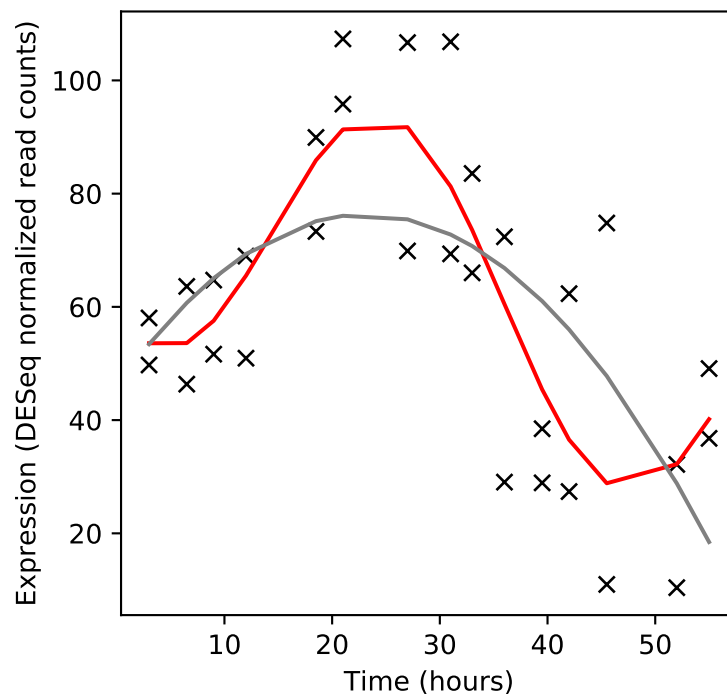

Rv1053c/-

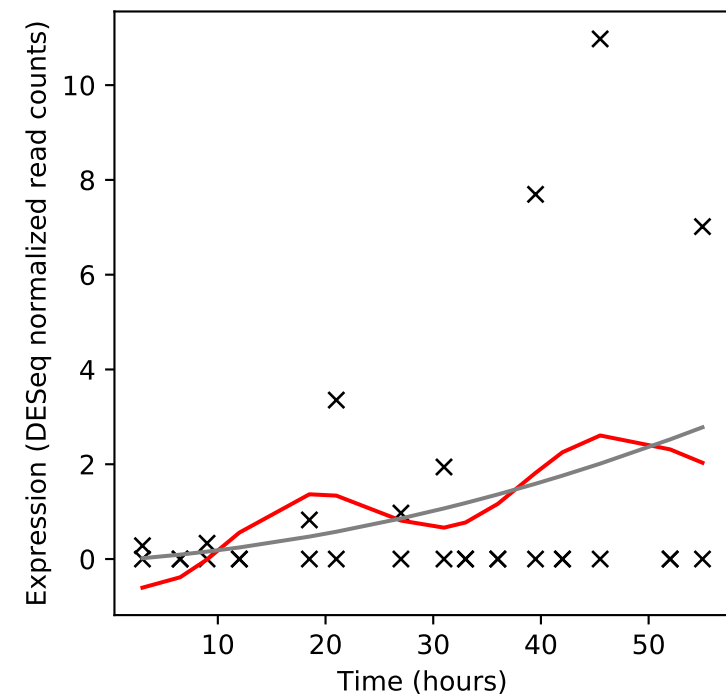



Rv1054/-

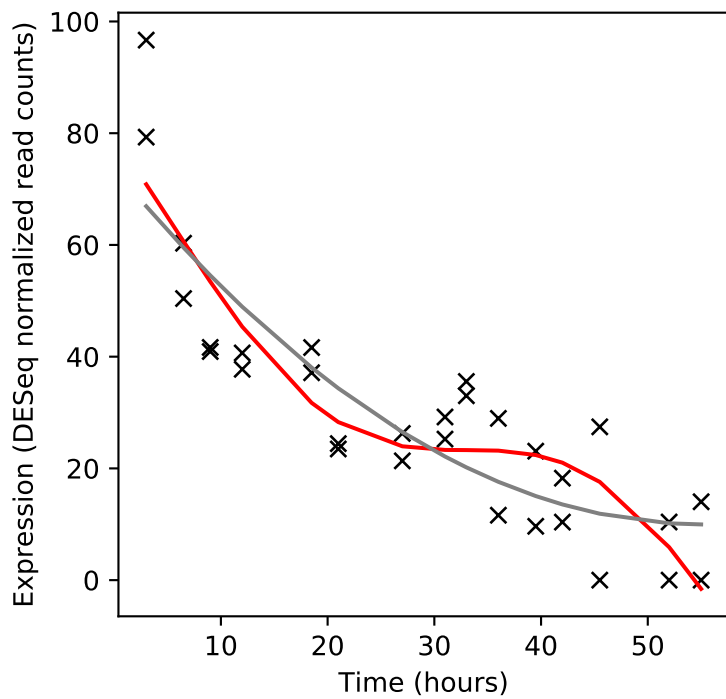

Rv1055/-

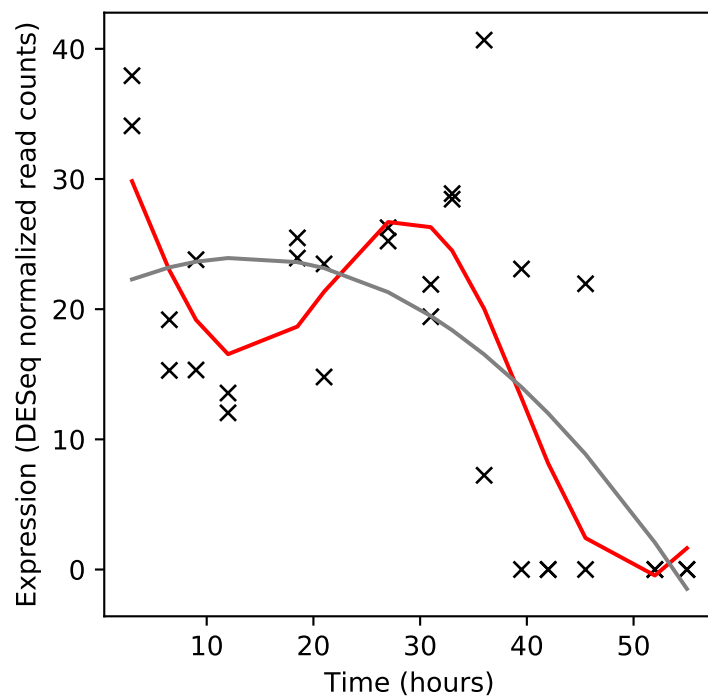

Rv1056/-

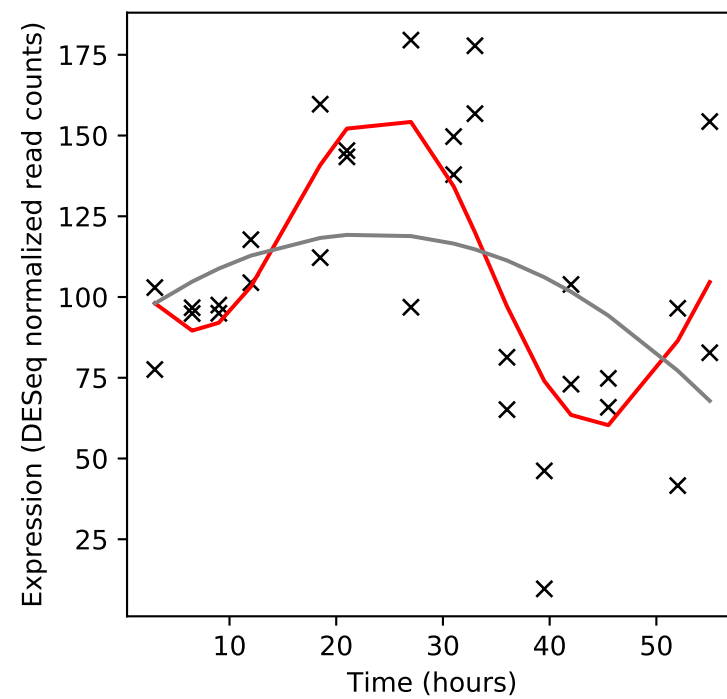

Rv1057/-

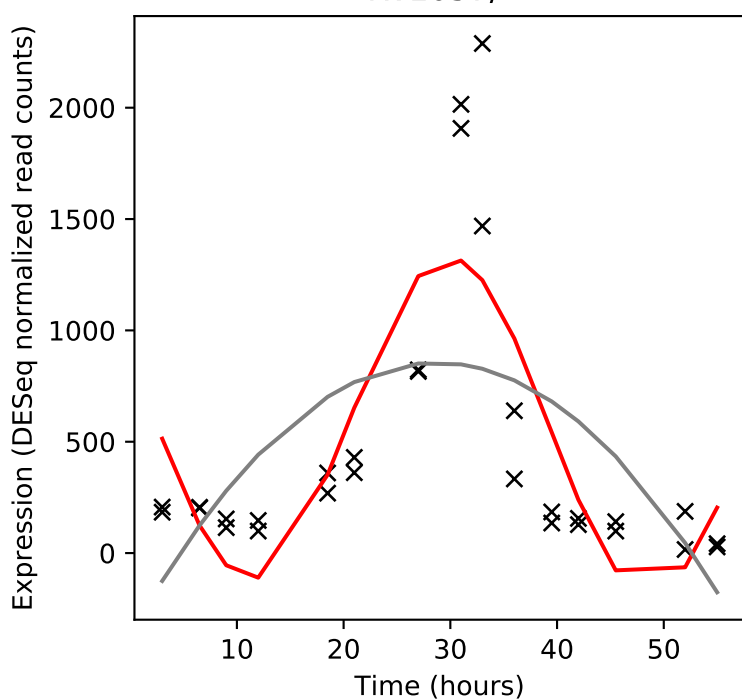

Rv1058/fadD14

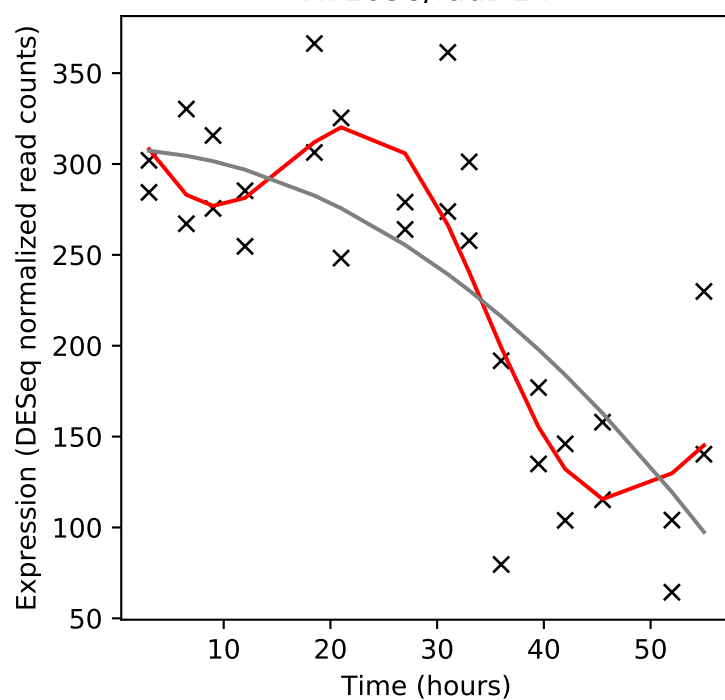

Rv1059/-

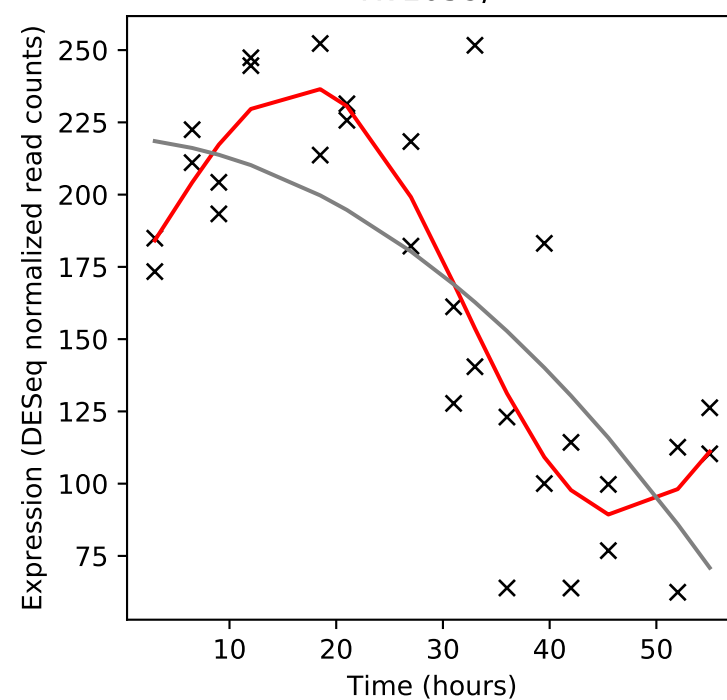

Rv1060/-

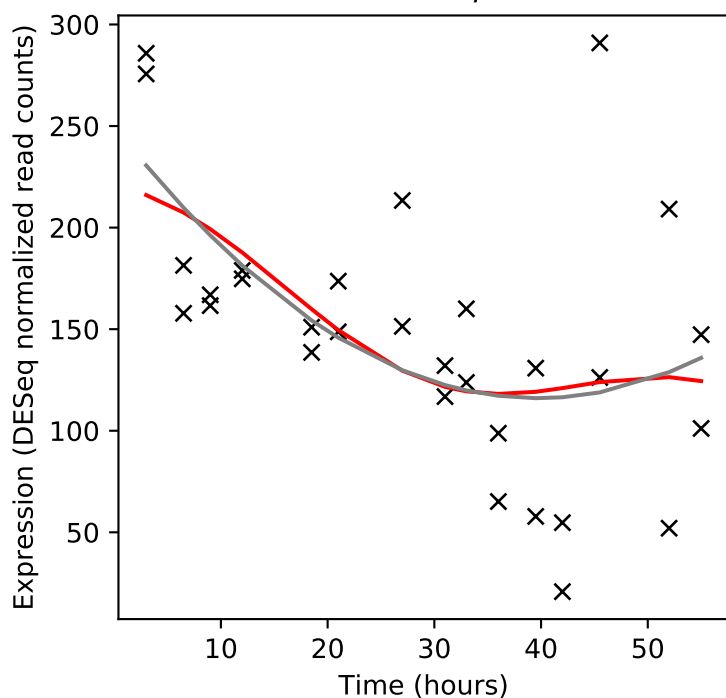

Rv1061/-

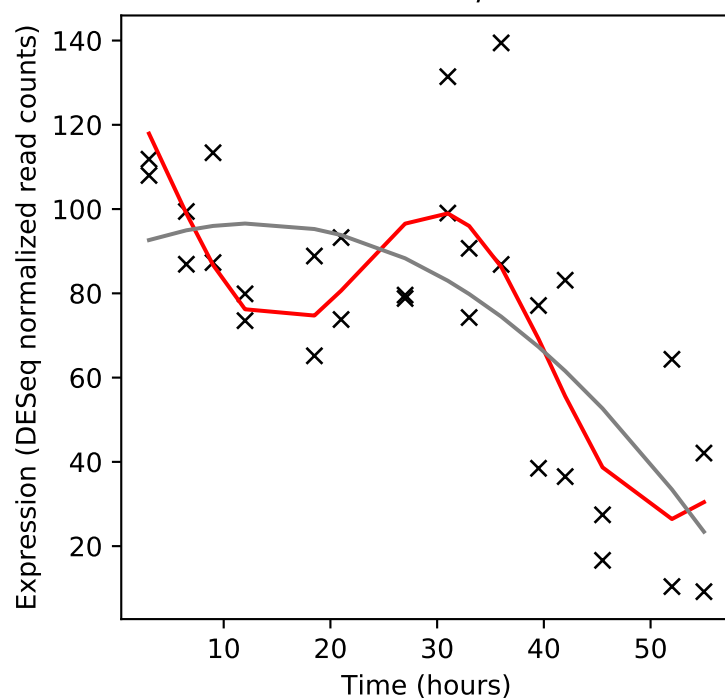

Rv1062/-

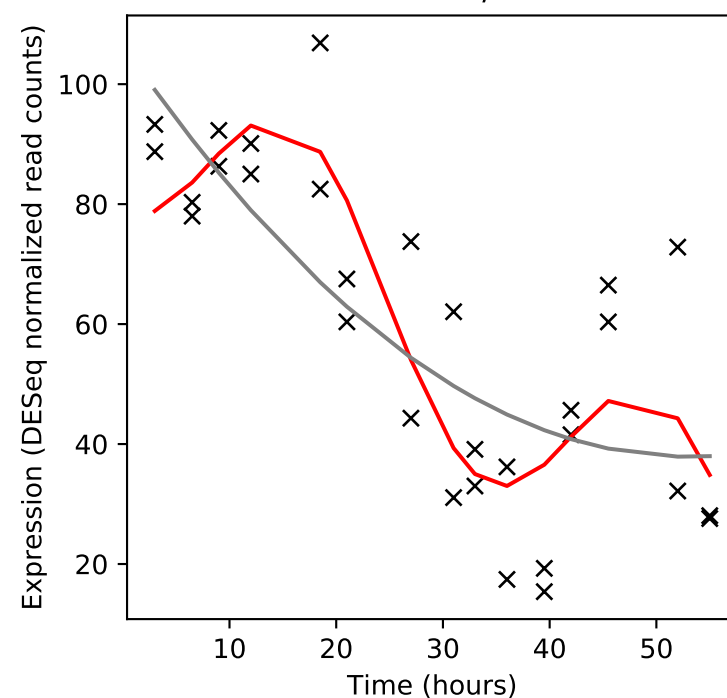

Rv1063c/-

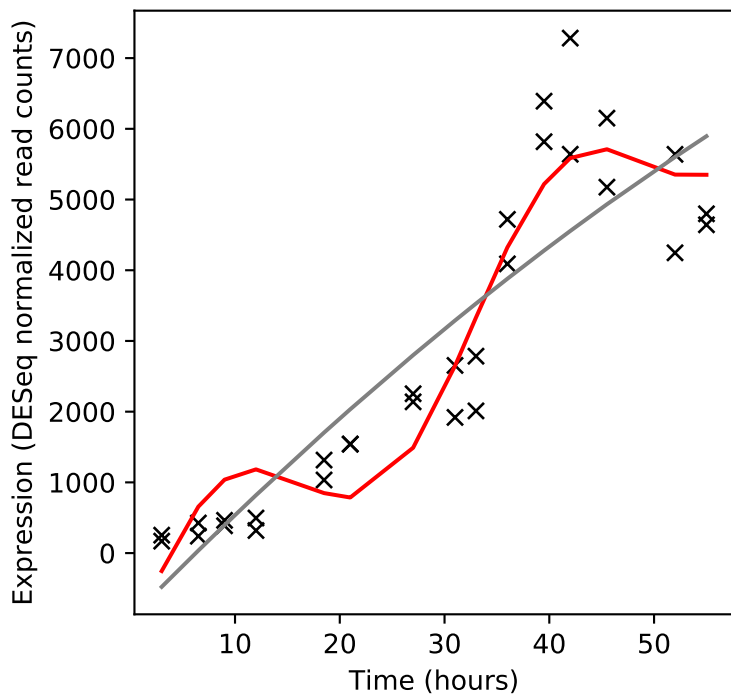

Rv1064c/lpqV

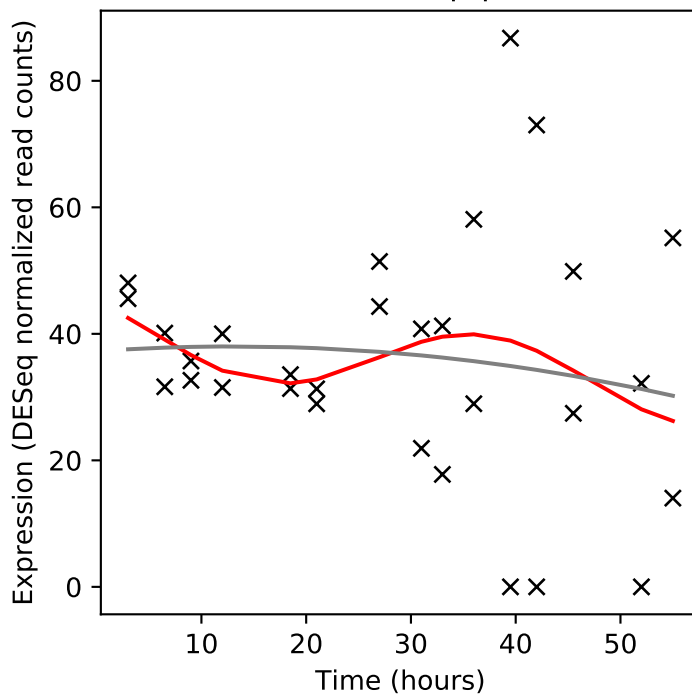

Rv1065/-

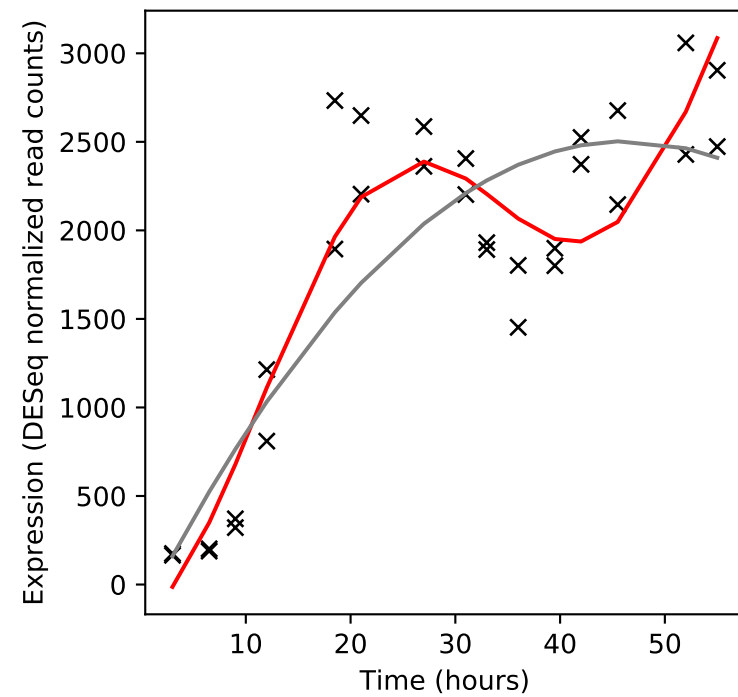

Rv1066/-

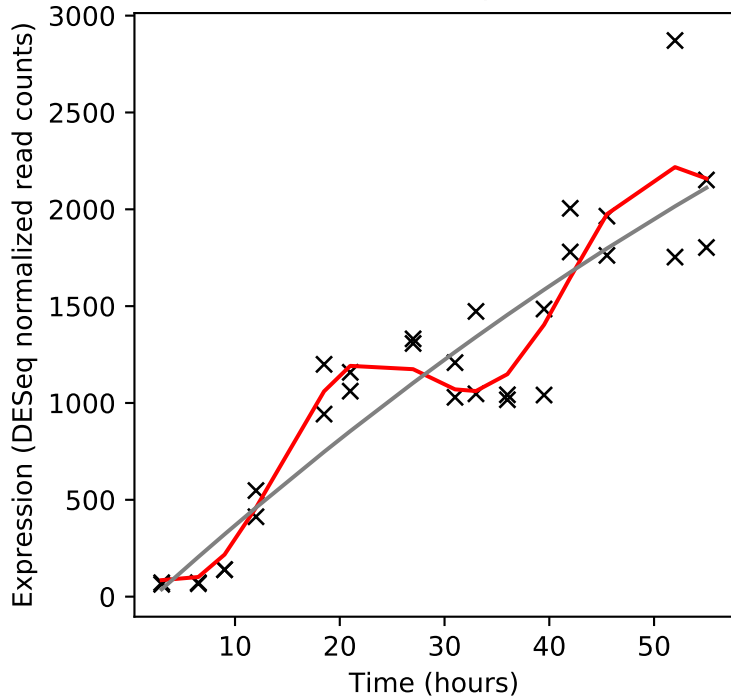

Rv1067c/PE\_PGRS19

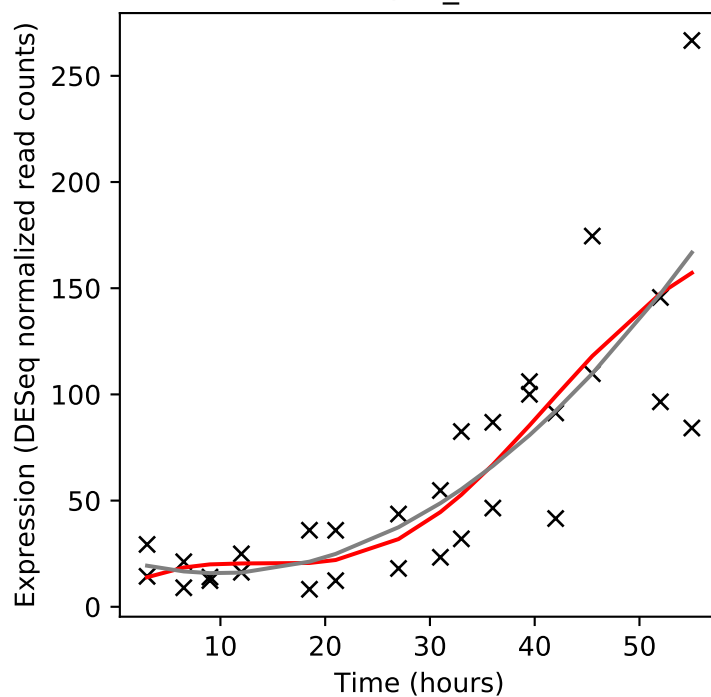

Rv1068c/PE\_PGRS20

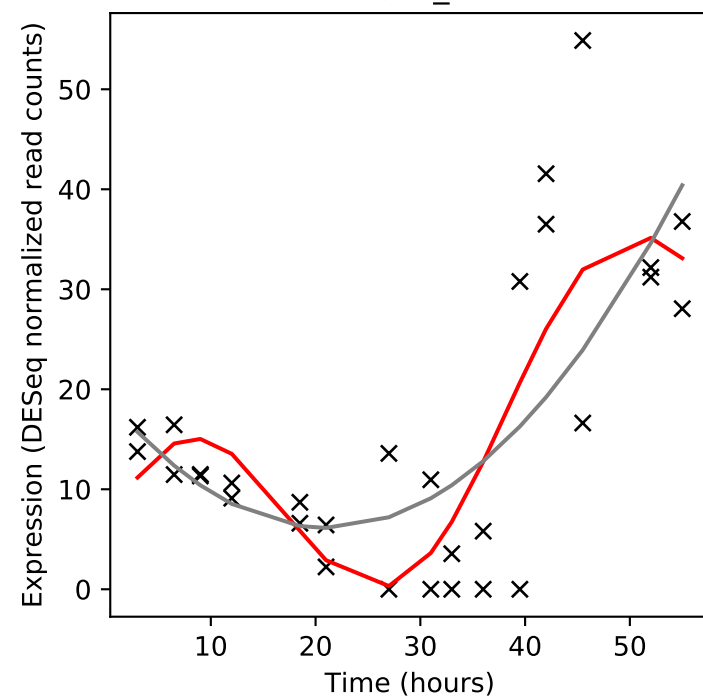

Rv1069c/-

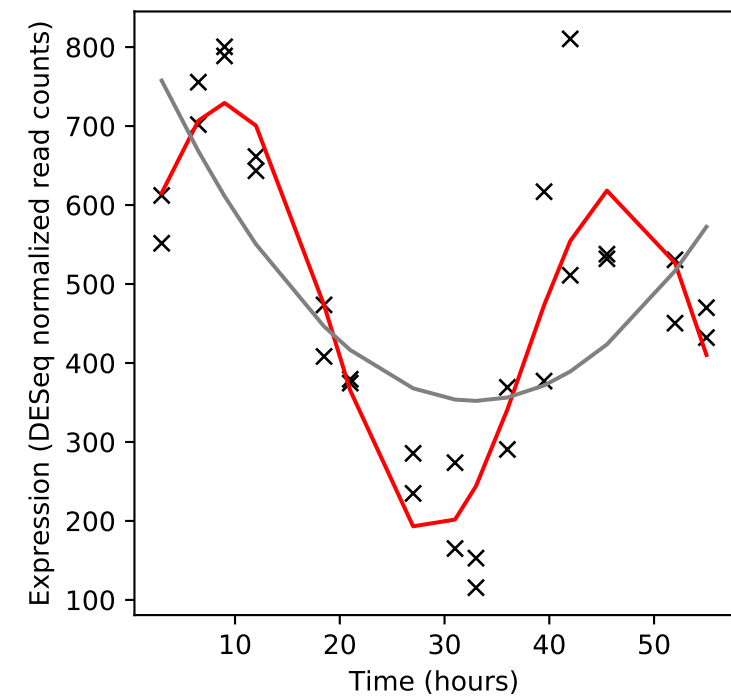

Rv1070c/echA8

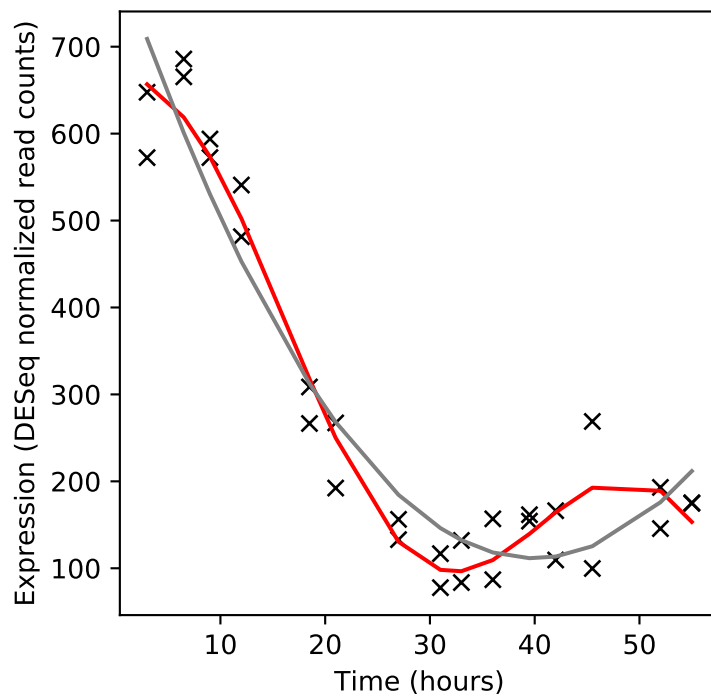

Rv1071c/echA9

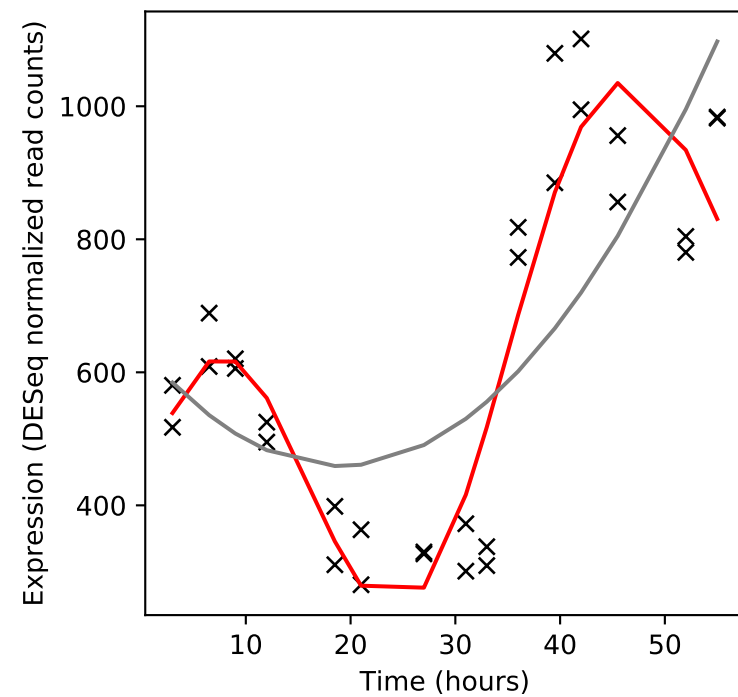

Rv1072/-

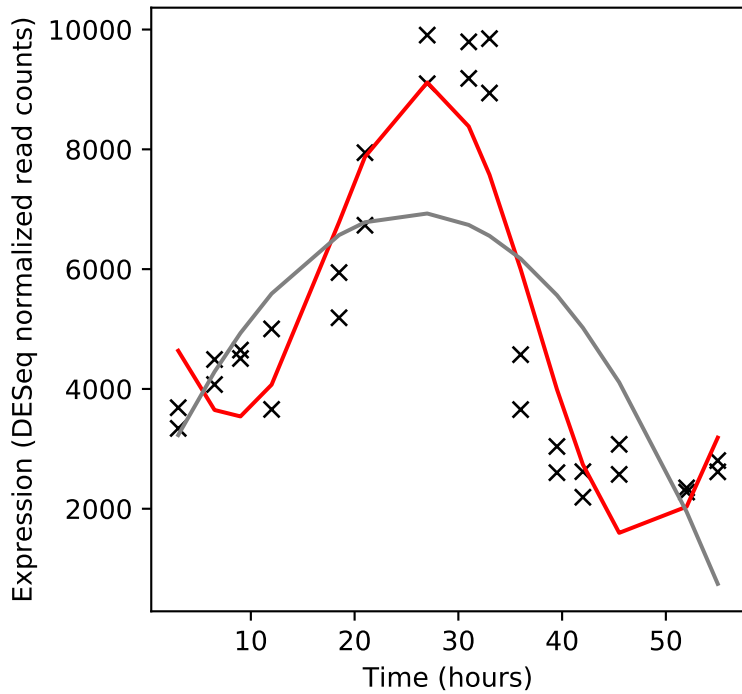

Rv1073/-

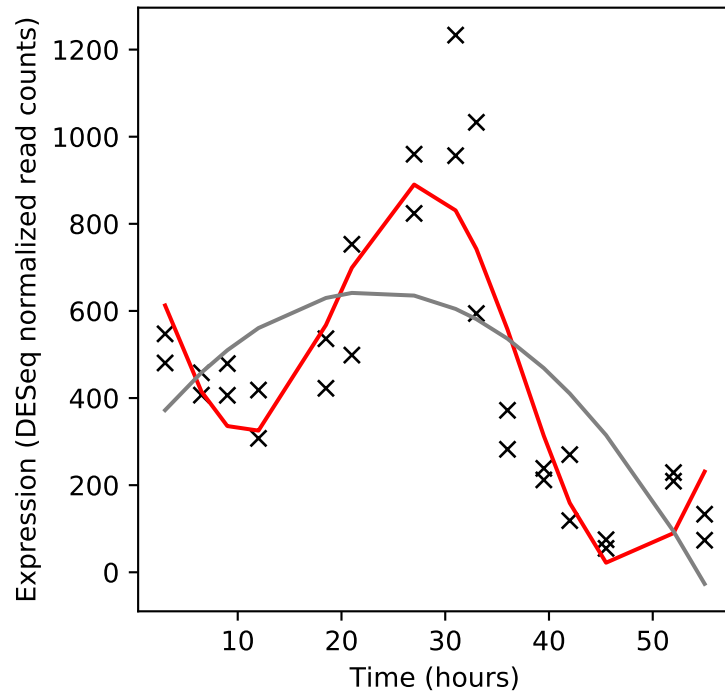

Rv1074c/fadA3

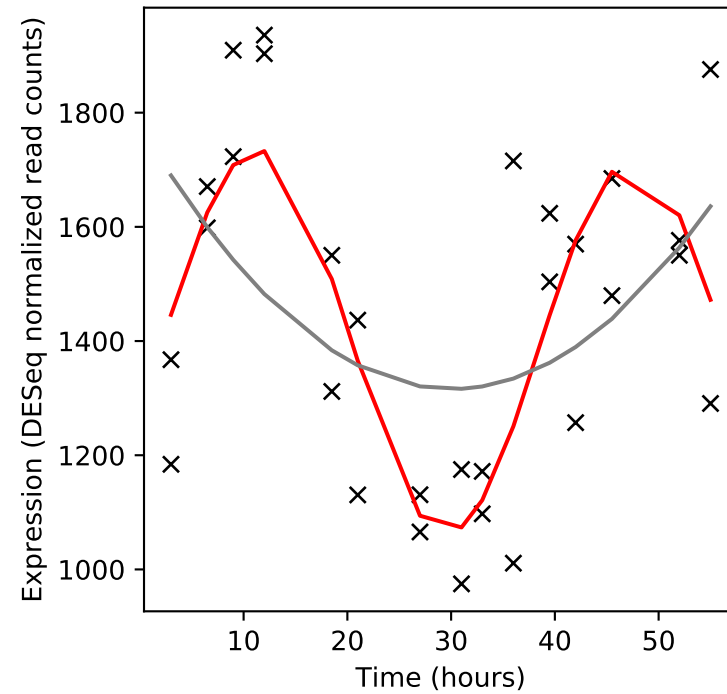

Rv1075c/-

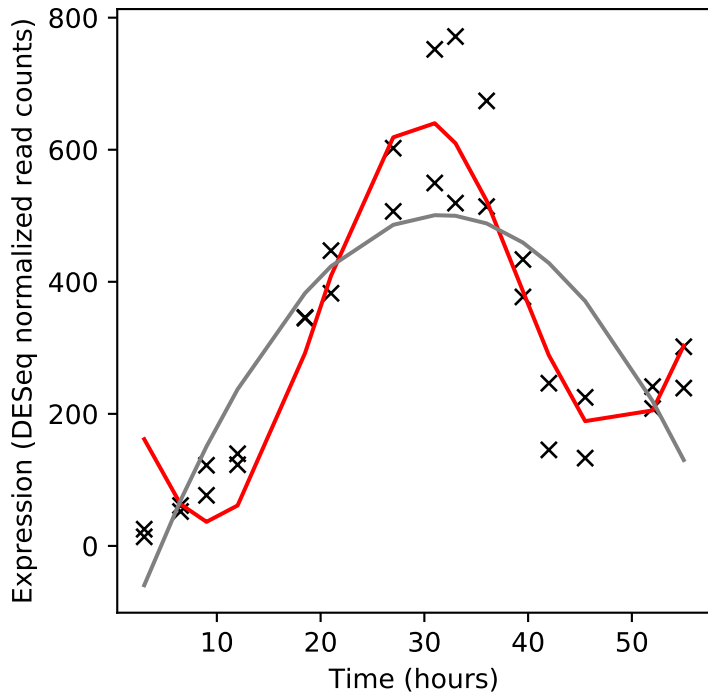

Rv1076/lipU

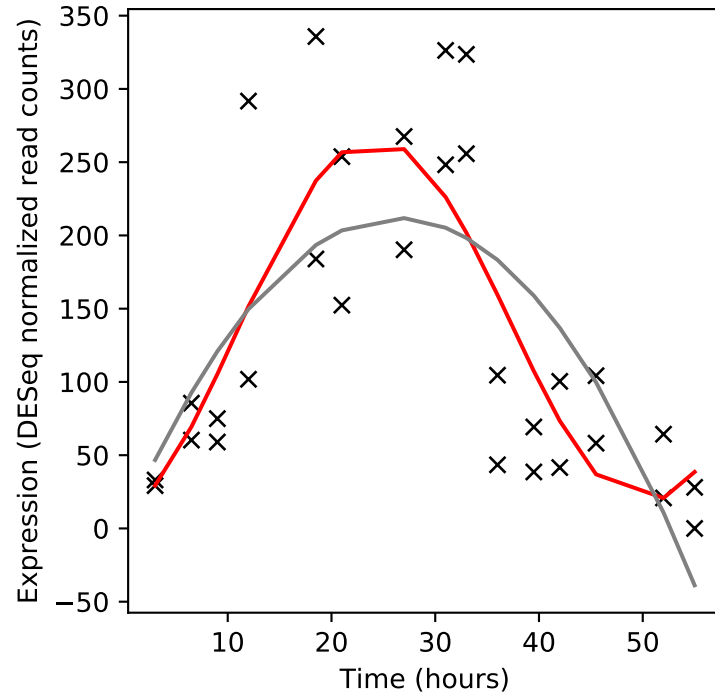

Rv1077/cbs

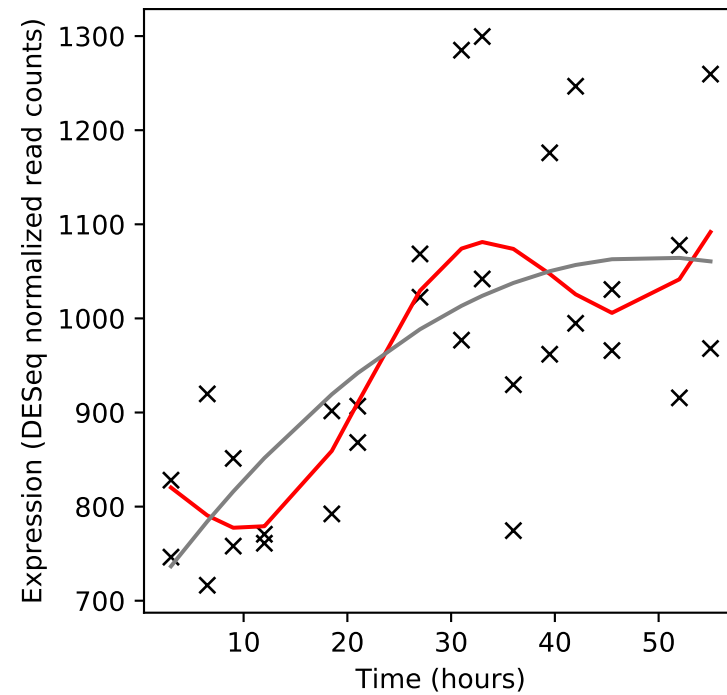

Rv1078/pra

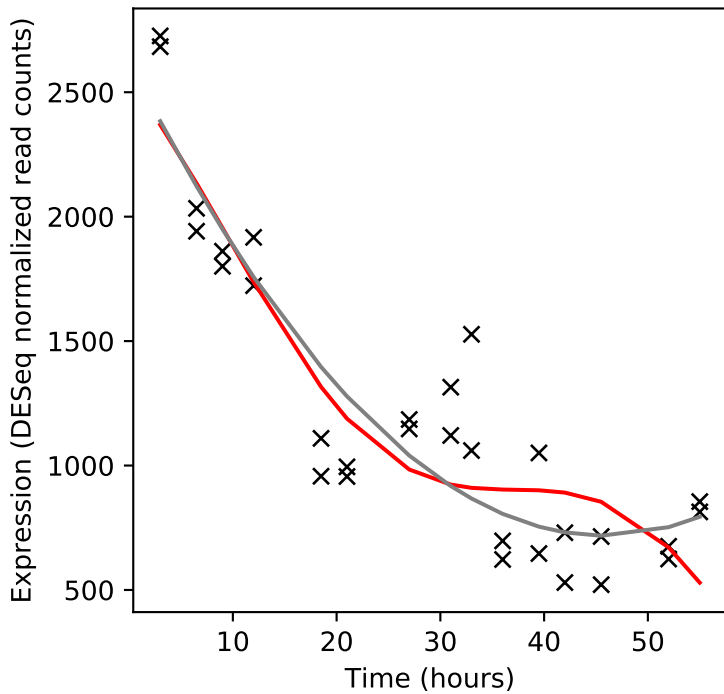

Rv1079/metB

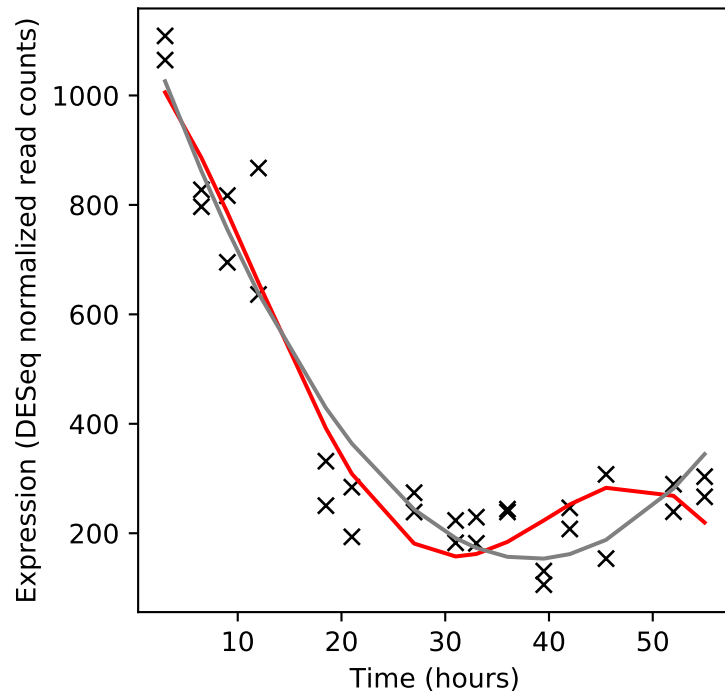

Rv1080c/greA

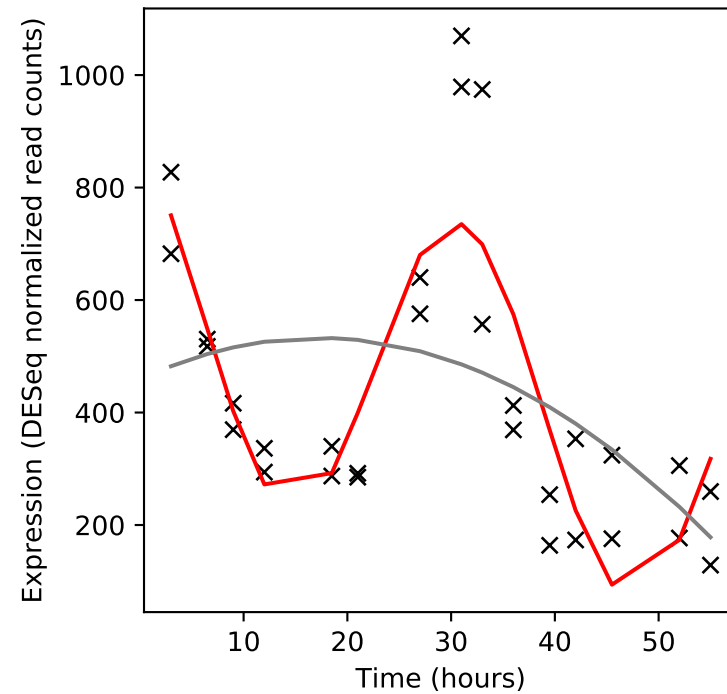

Rv1081c/-

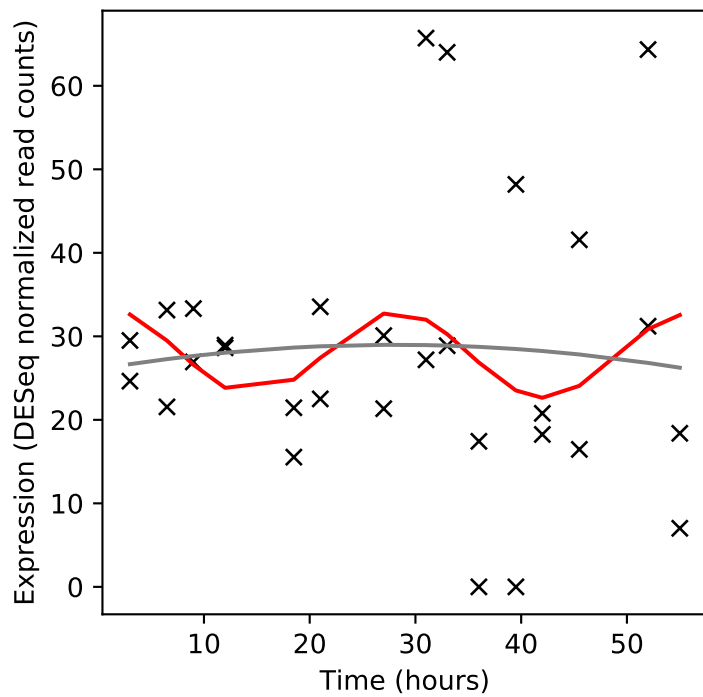

Rv1082/mca

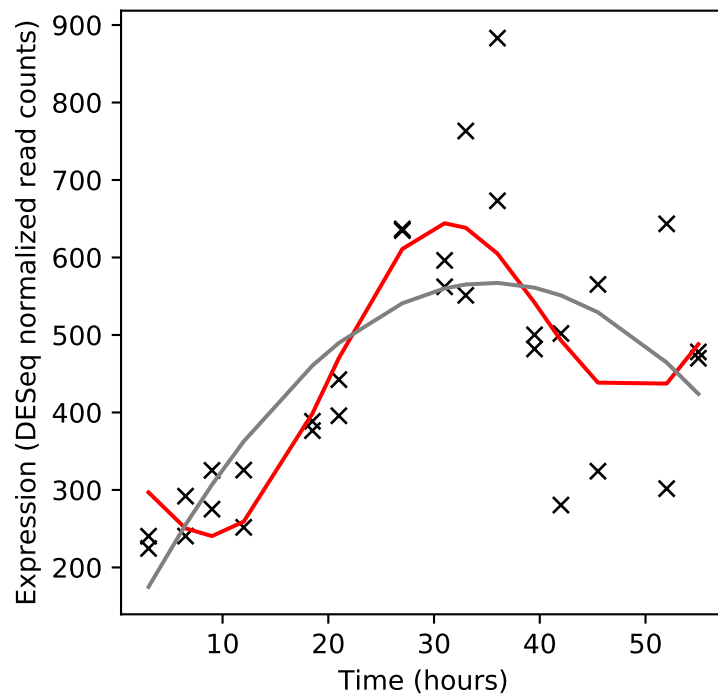

Rv1083/-

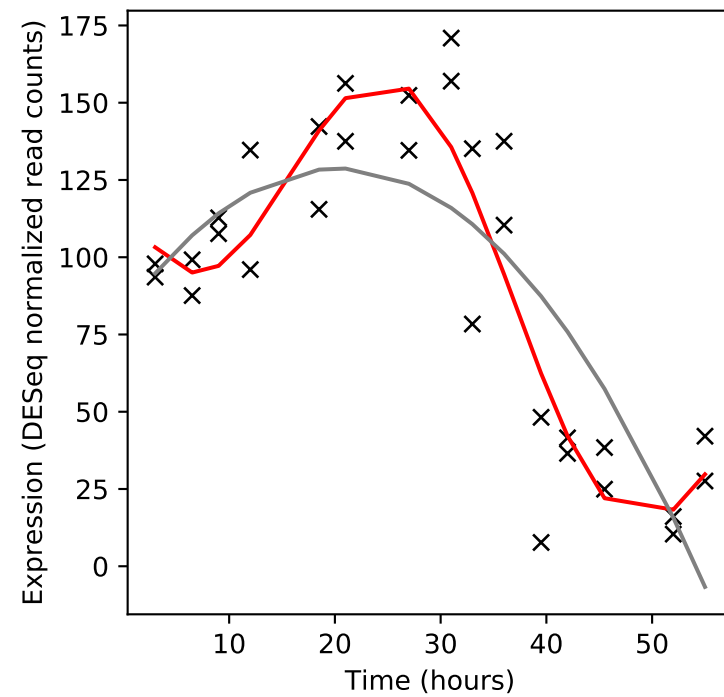

Rv1084/-

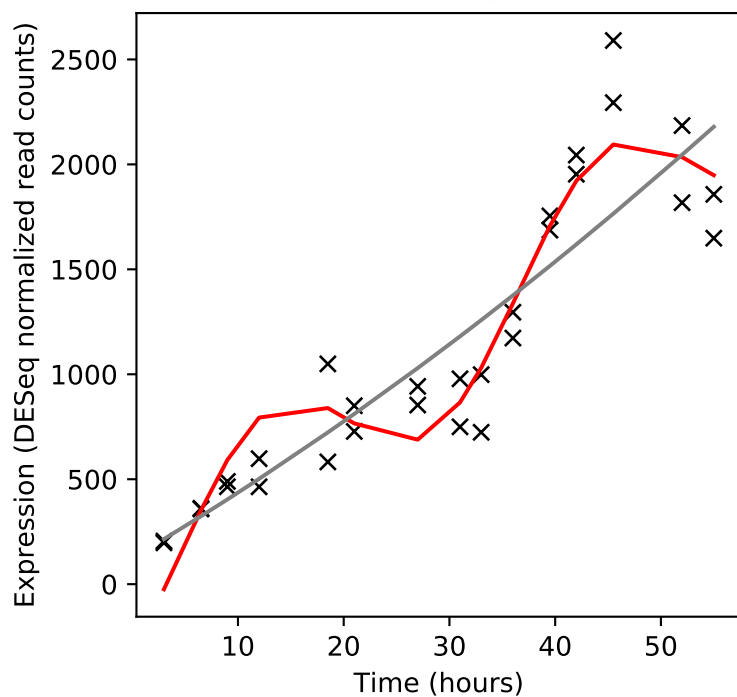

Rv1085c/-

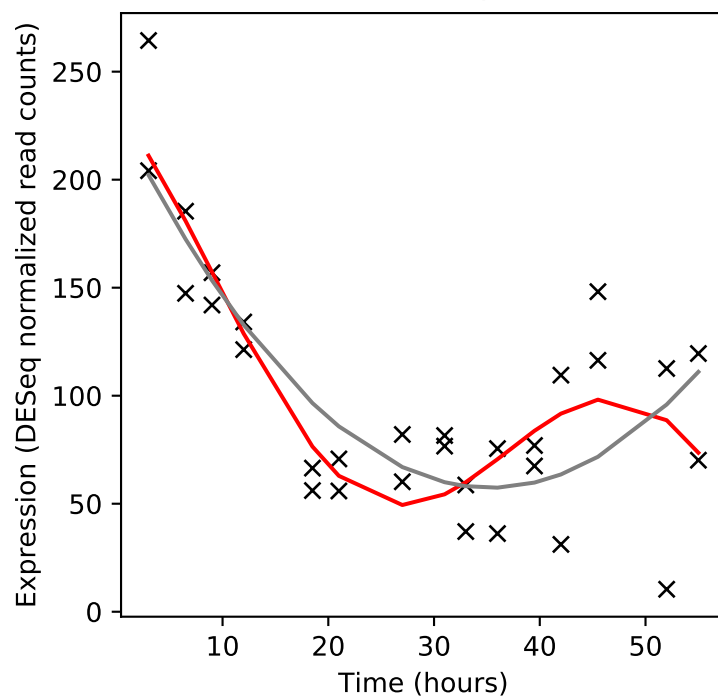

Rv1086/-

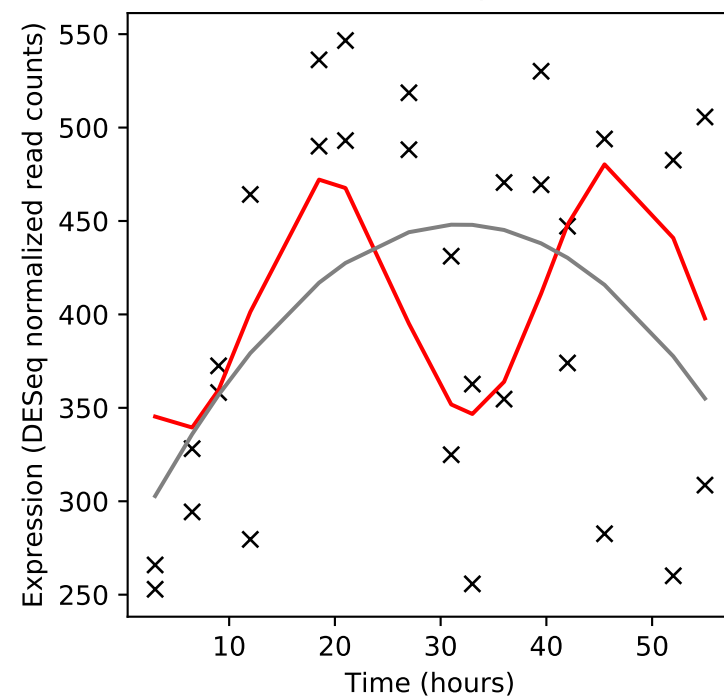

Rv1087/PE\_PGRS21

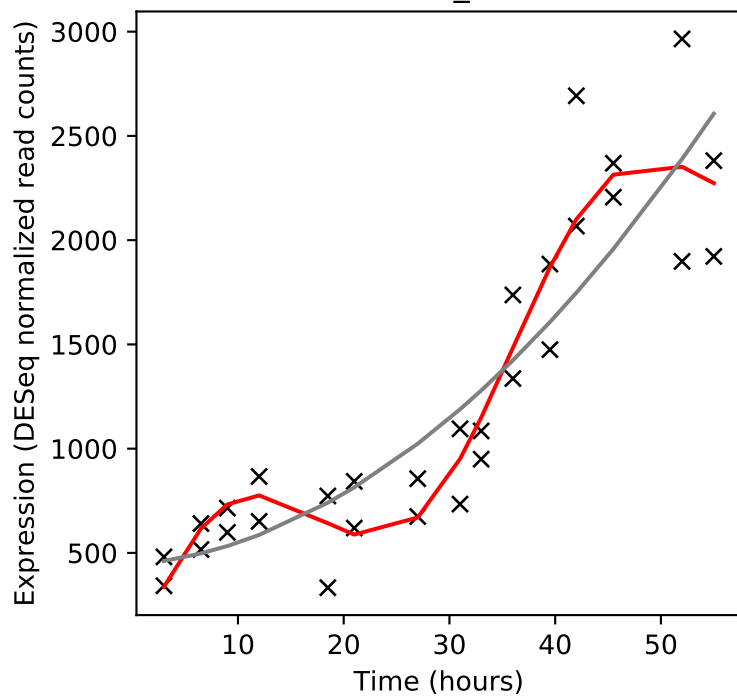

Rv1087A/-

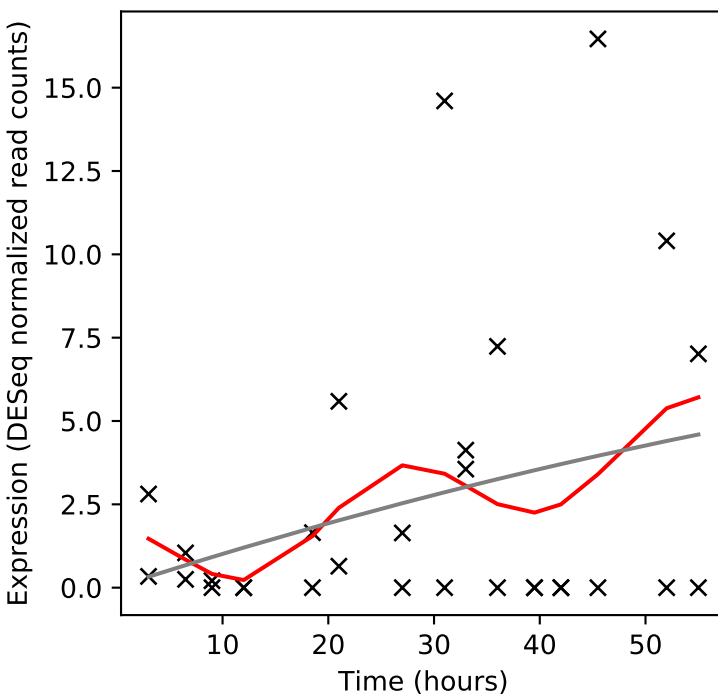

Rv1088/PE9

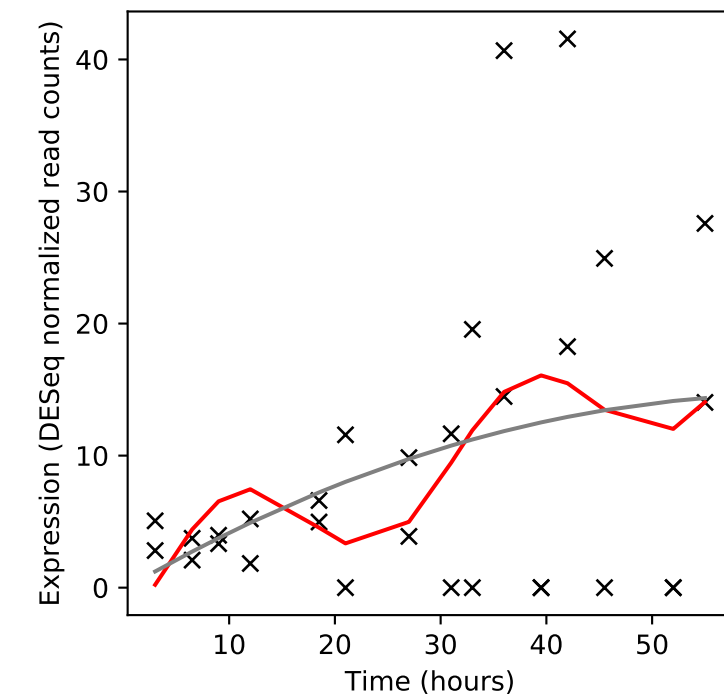

Rv1089/PE10

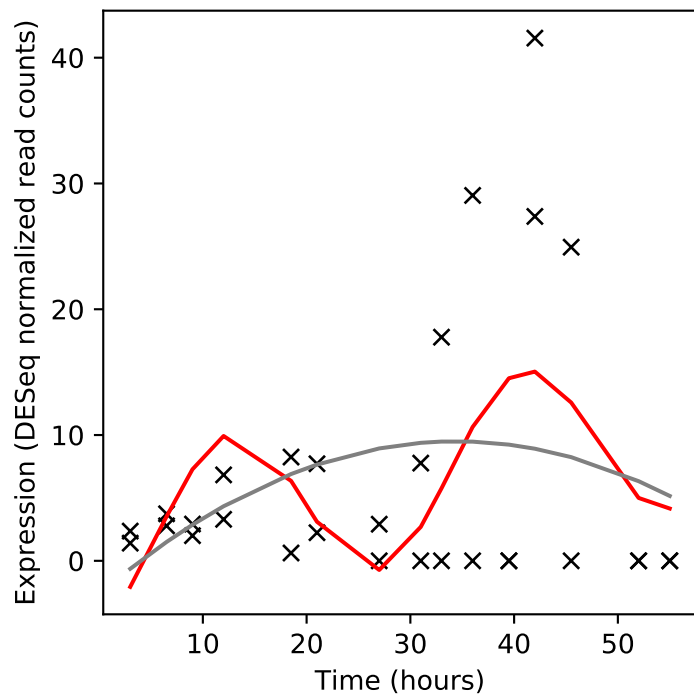

Rv1089A/celA2a

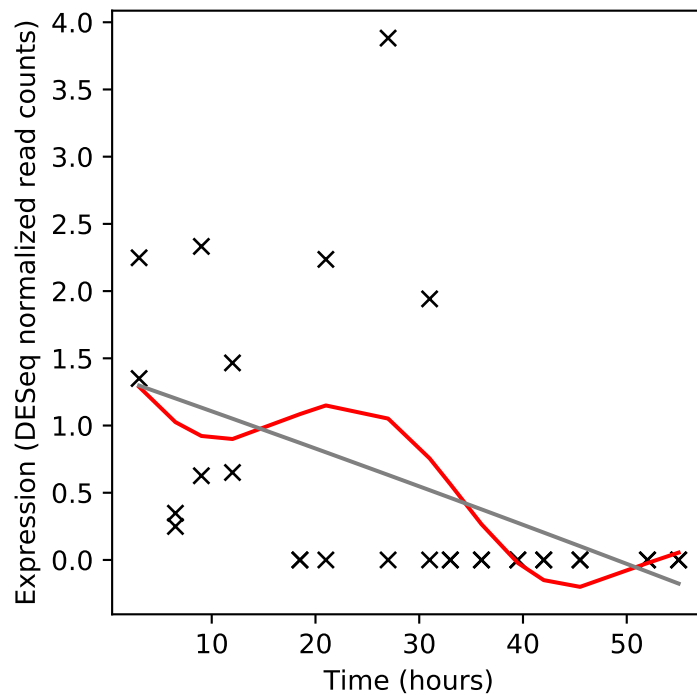

Rv1090/celA2b

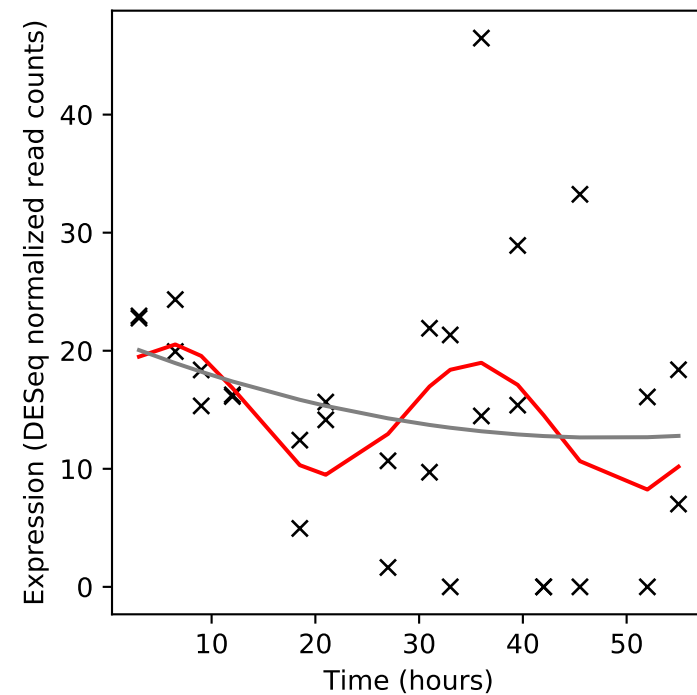

Rv1091/PE\_PGRS22

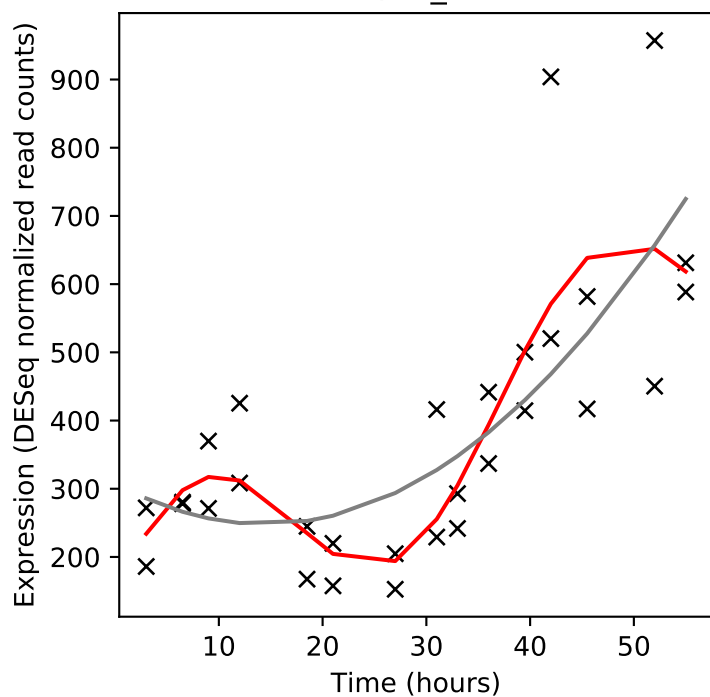

Rv1092c/coaA

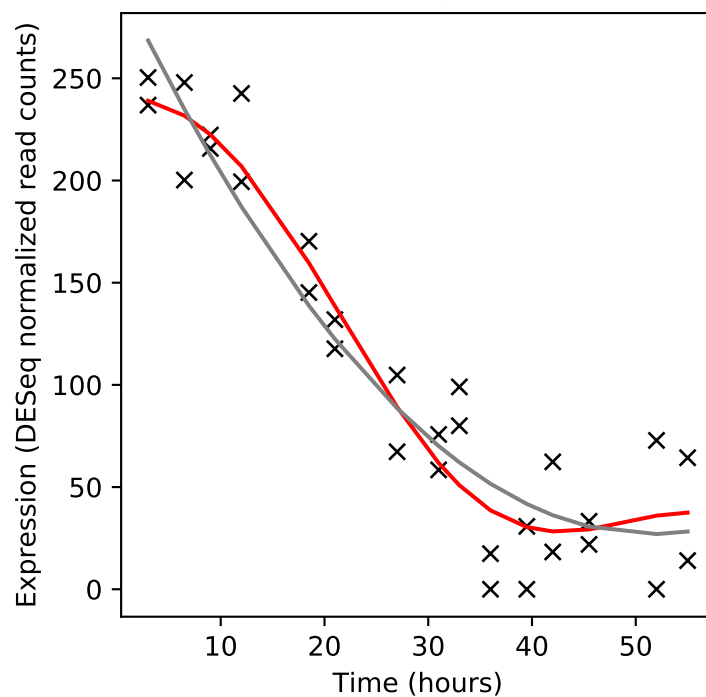

Rv1093/glyA1

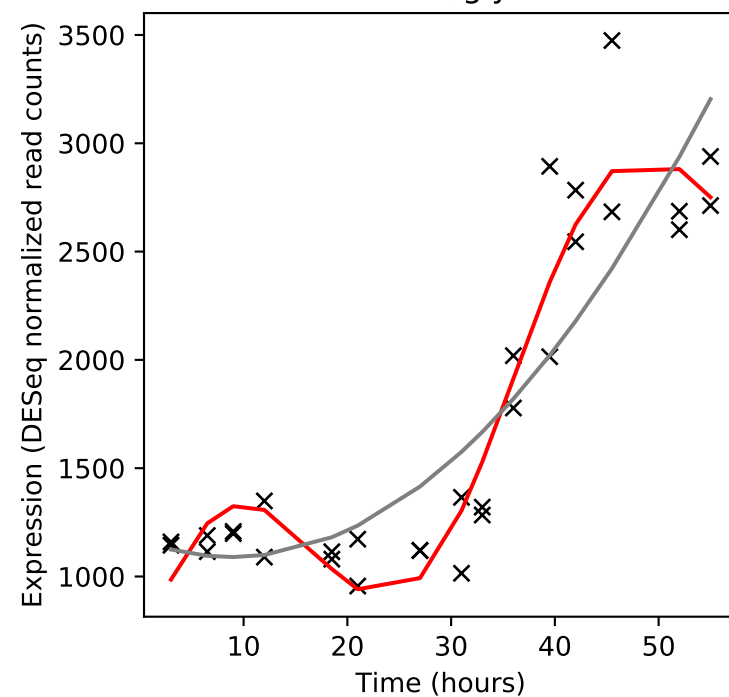

Rv1094/desA2

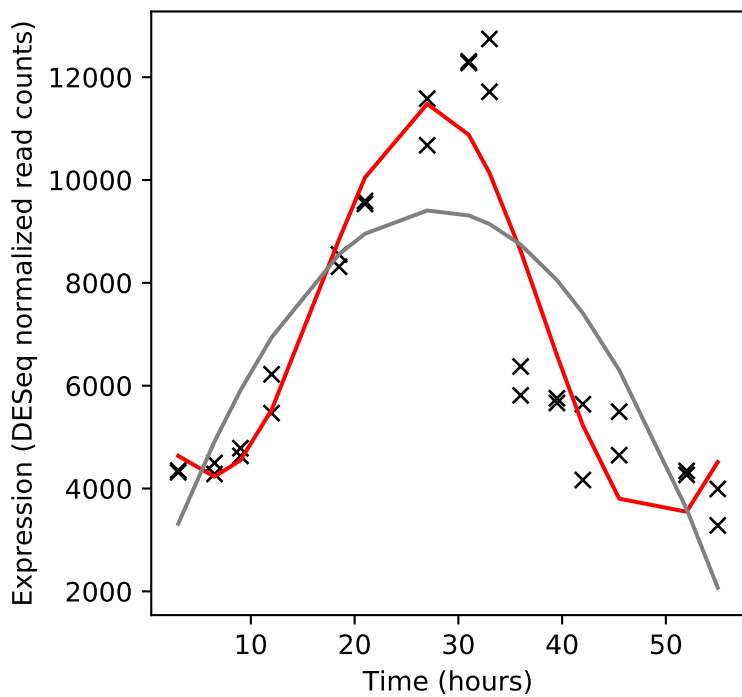

Rv1095/phoH2

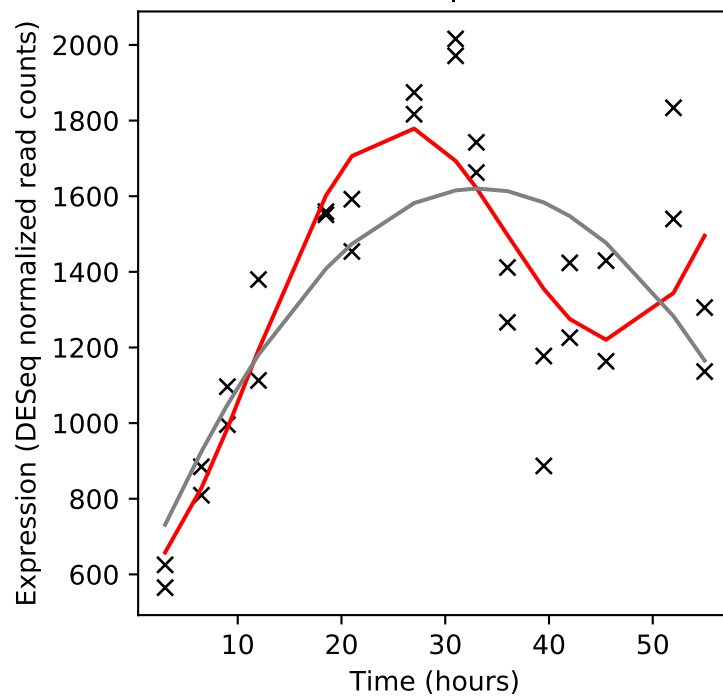

Rv1096/-

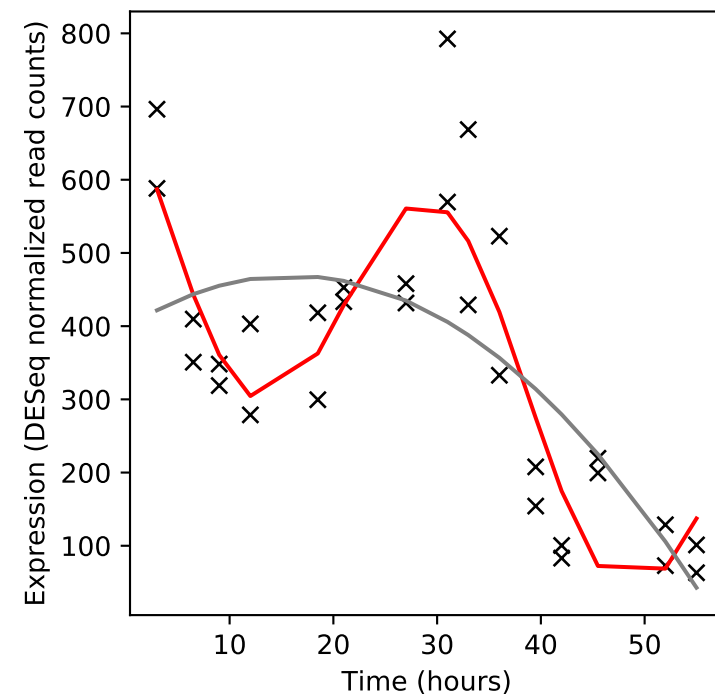

Rv1097c/-

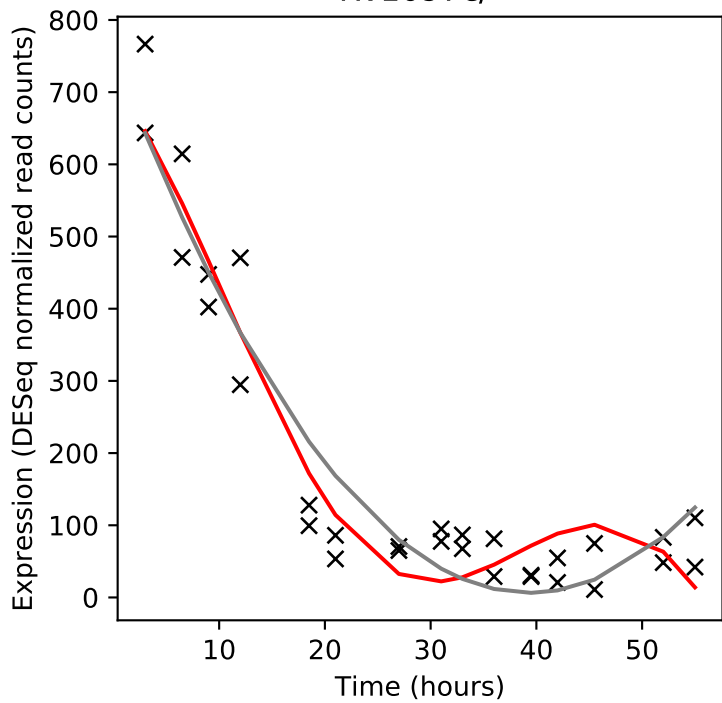

Rv1098c/fum

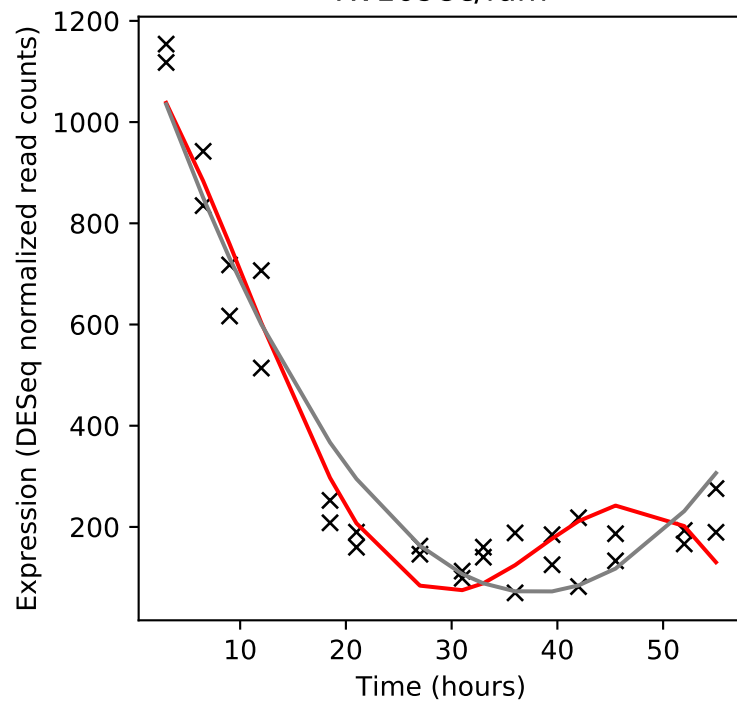

Rv1099c/glpX

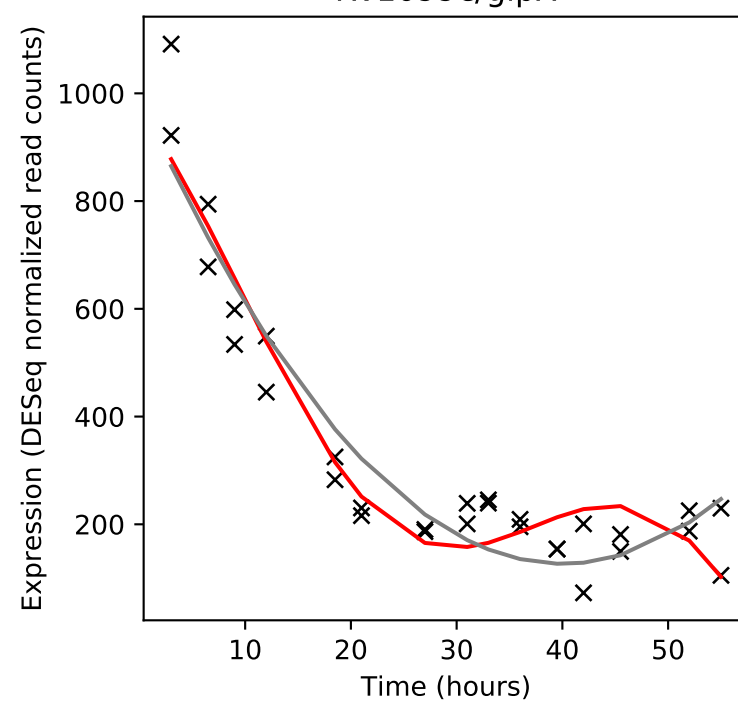

Rv1100/-

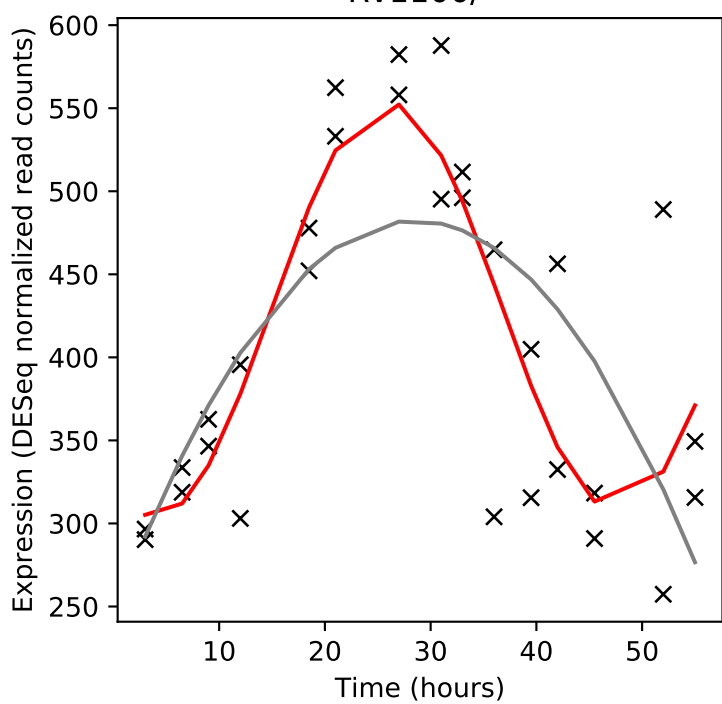

Rv1101c/-

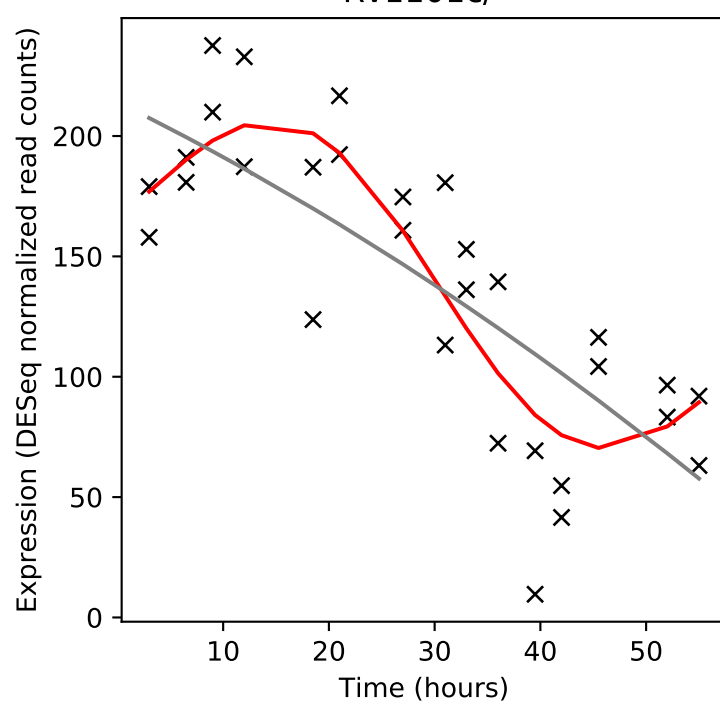

Rv1102c/mazF3

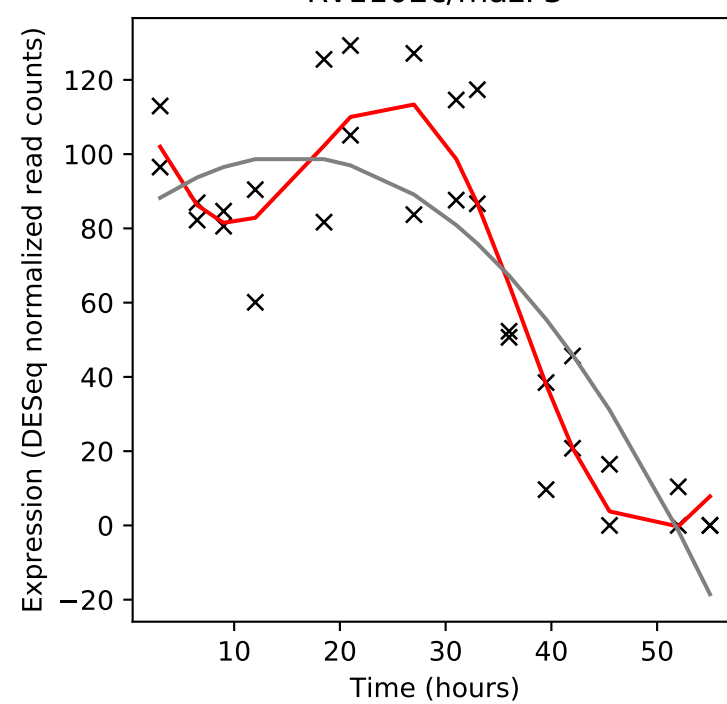

Rv1103c/mazE3

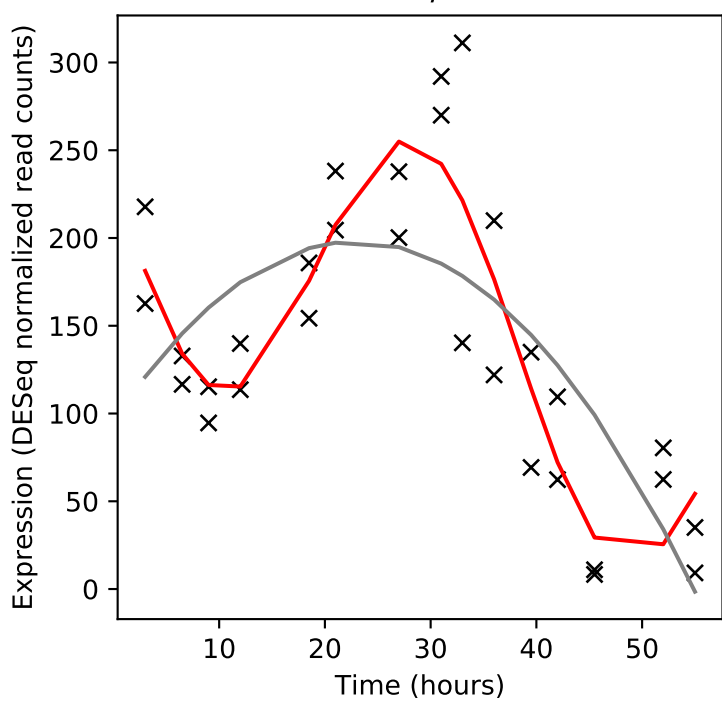

Rv1104/-

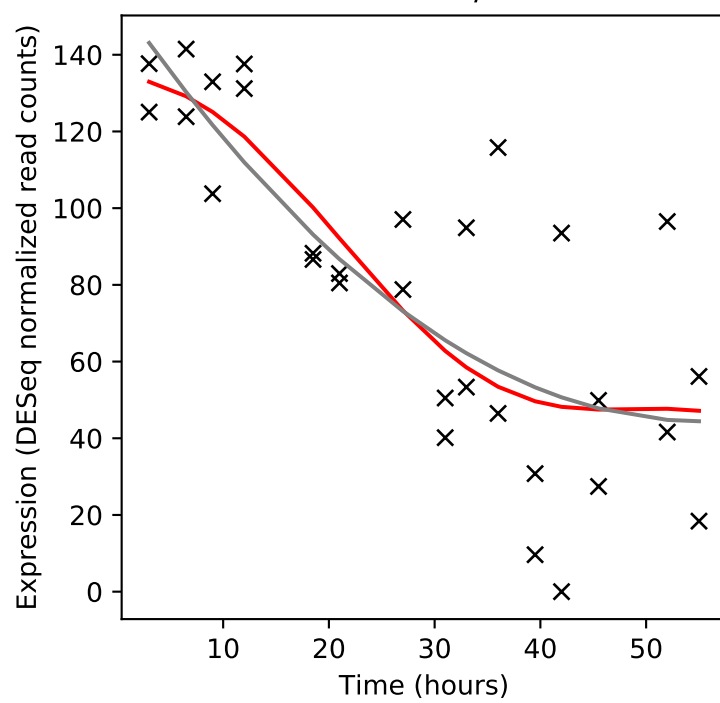

Rv1105/-

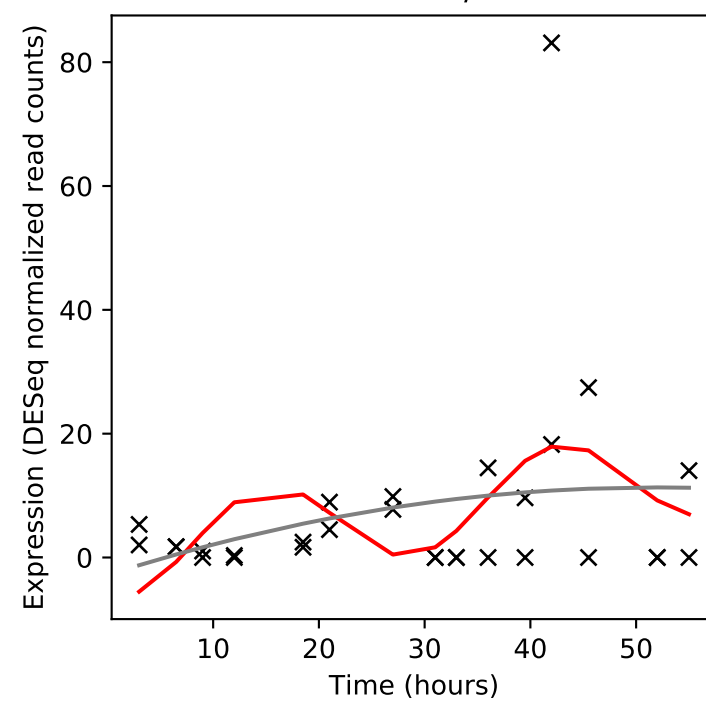

Rv1106c/-

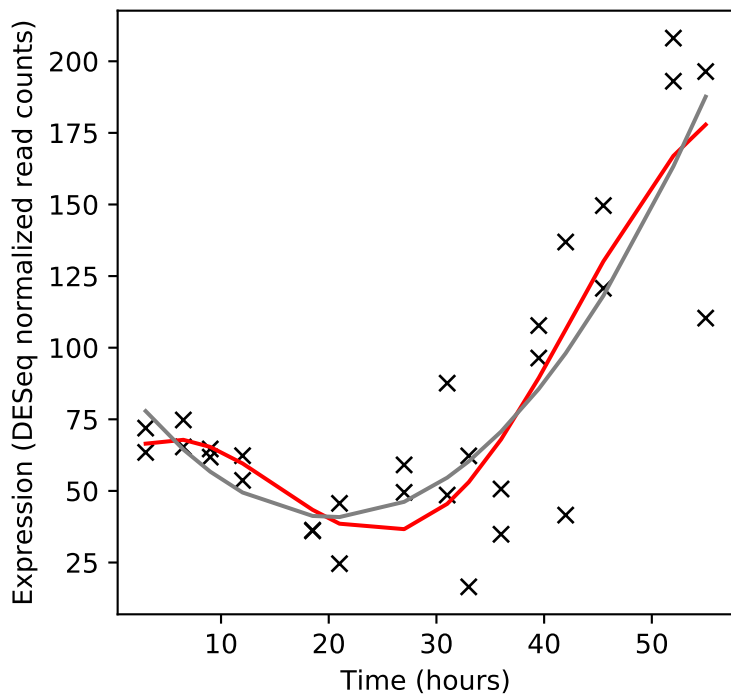

Rv1107c/xseB

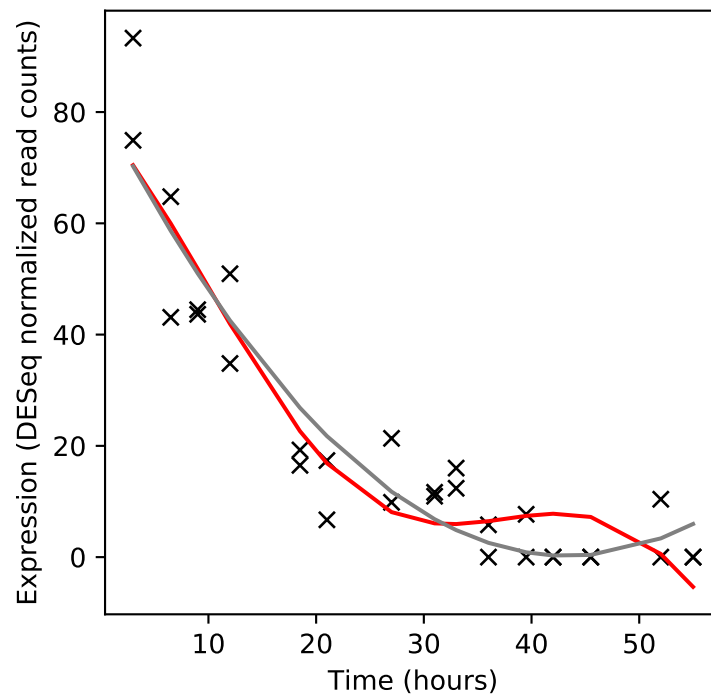

Rv1108c/xseA

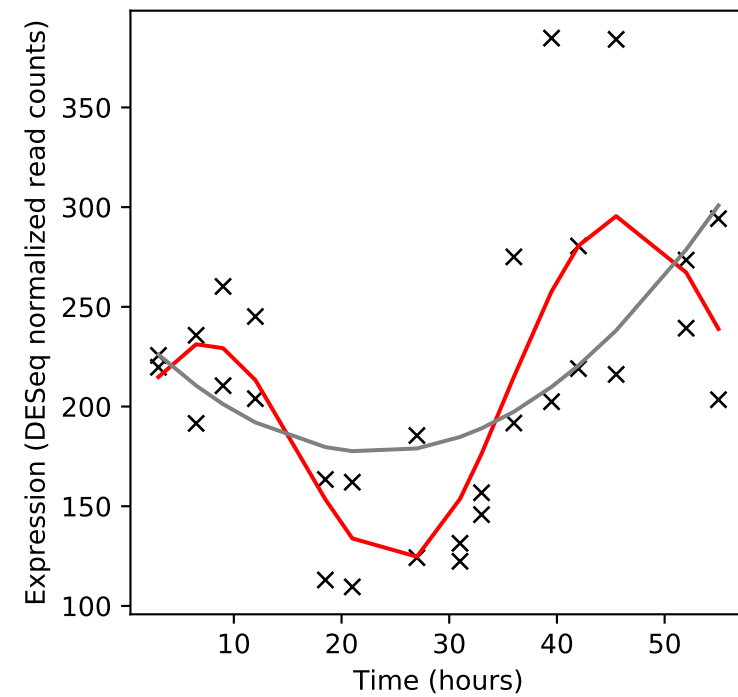

Rv1109c/-

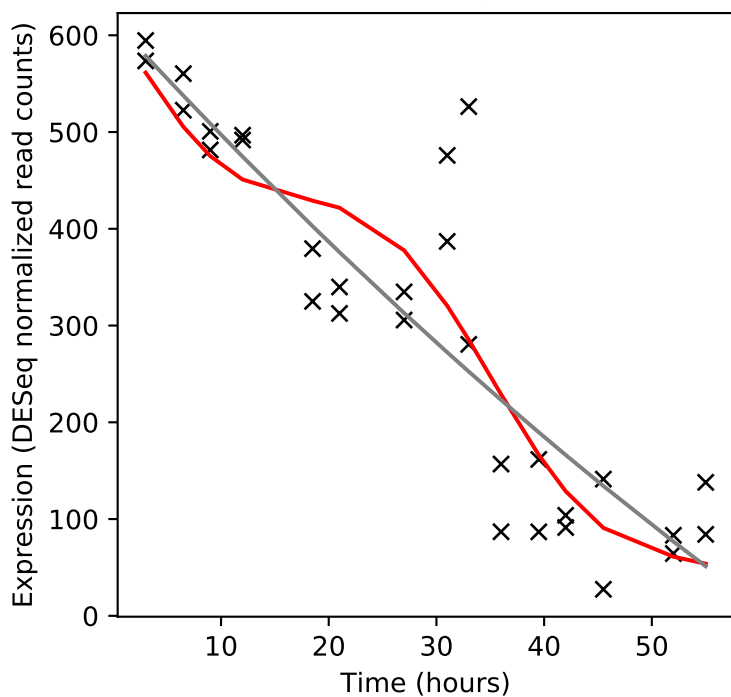

Rv1110/lytB2

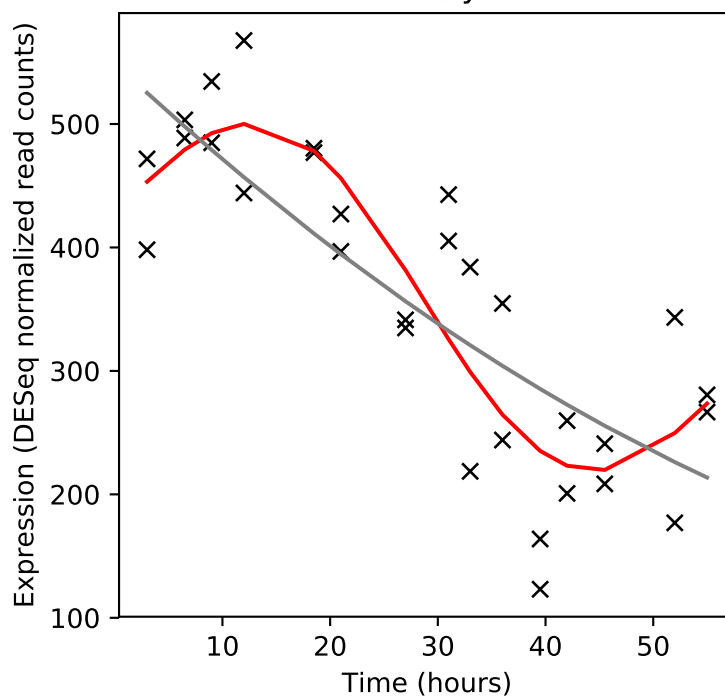

Rv1111c/-

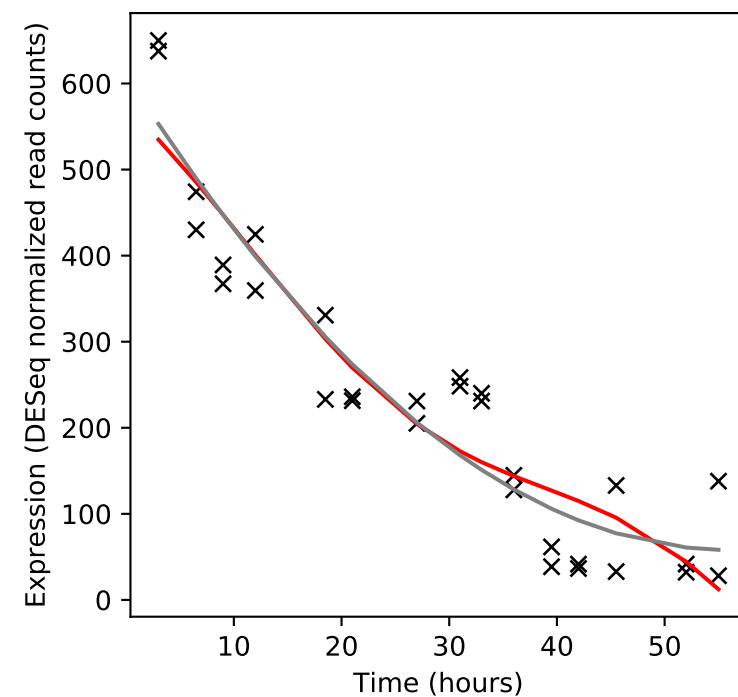

Rv1112/-

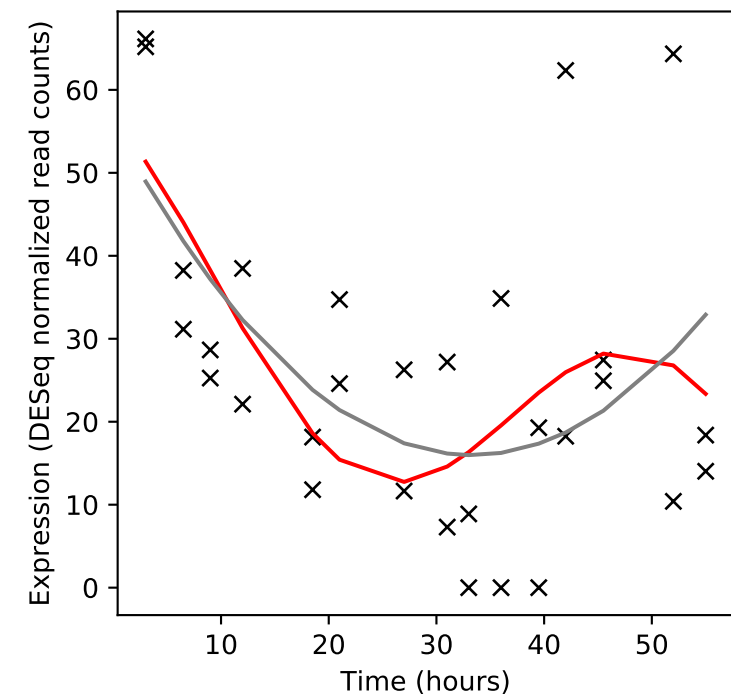

Rv1113/vapB32

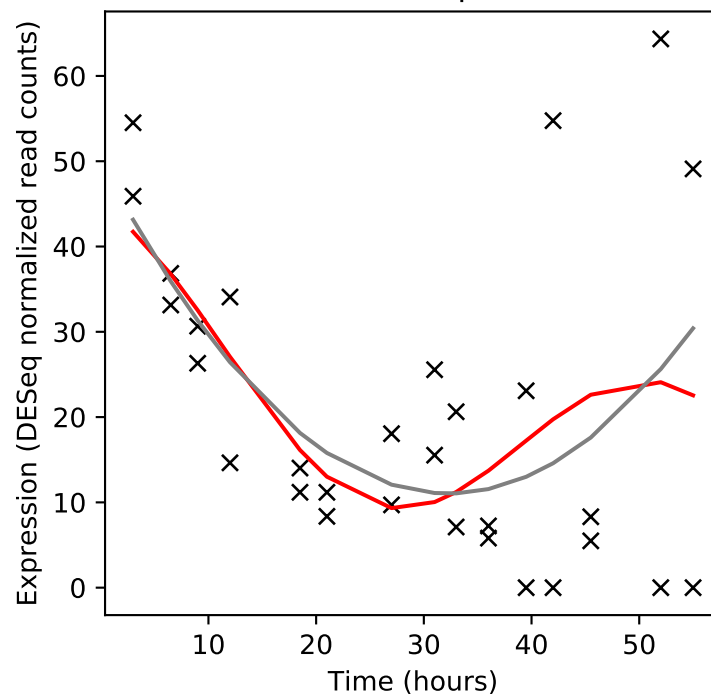

Rv1114/vapC32

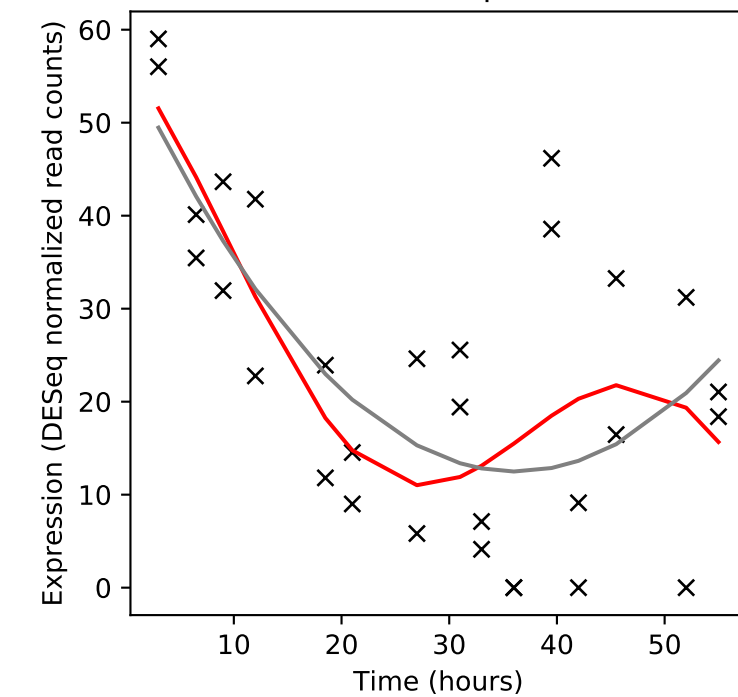



Rv1115/-

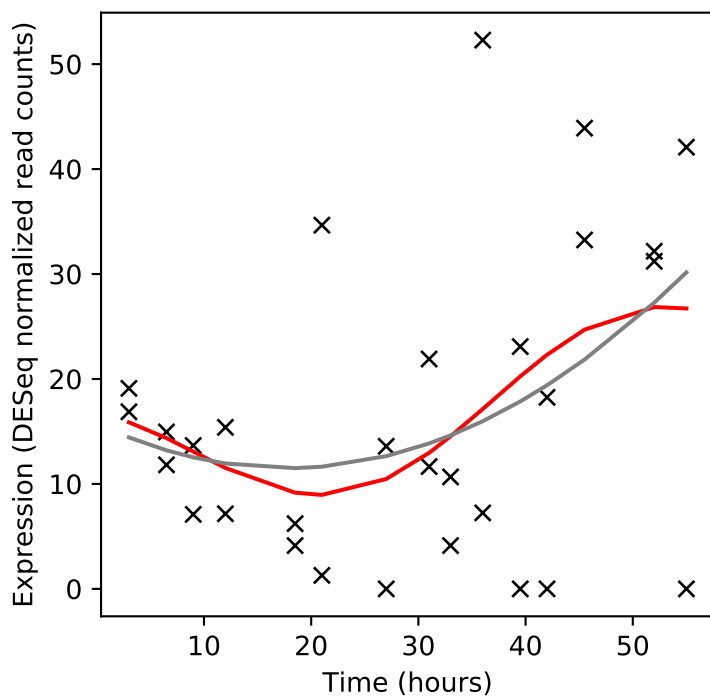

Rv1116/-

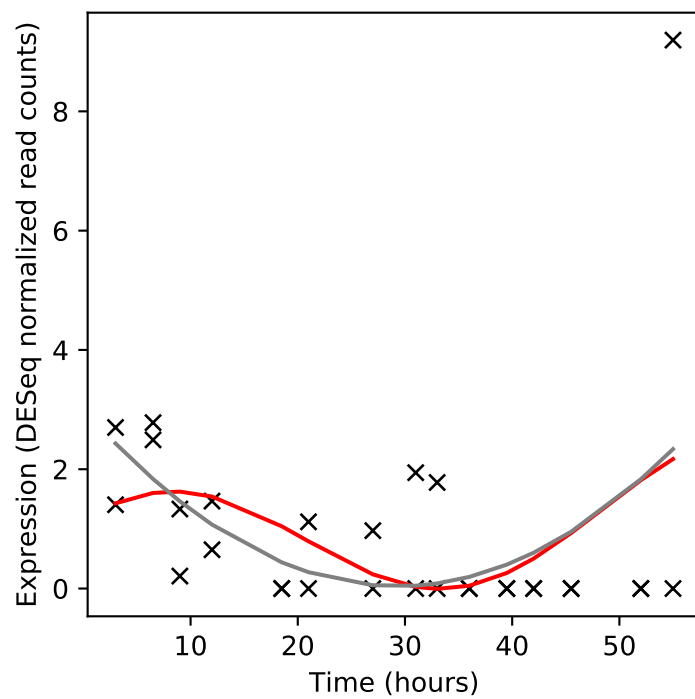

Rv1116A/-

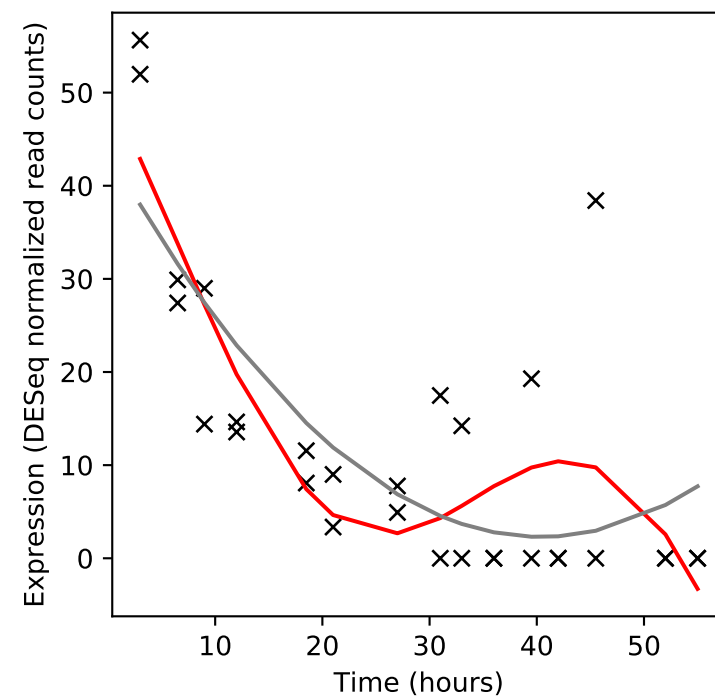

Rv1117/-

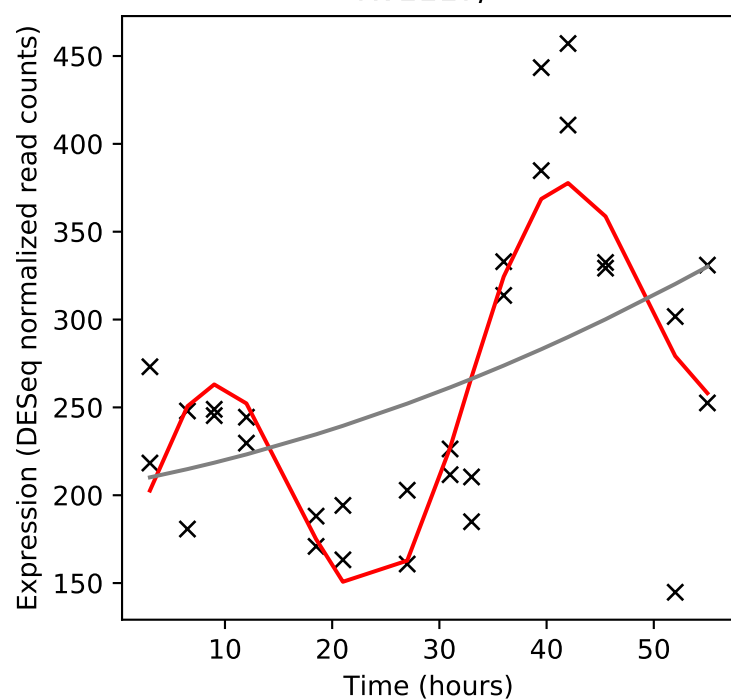

Rv1118c/-

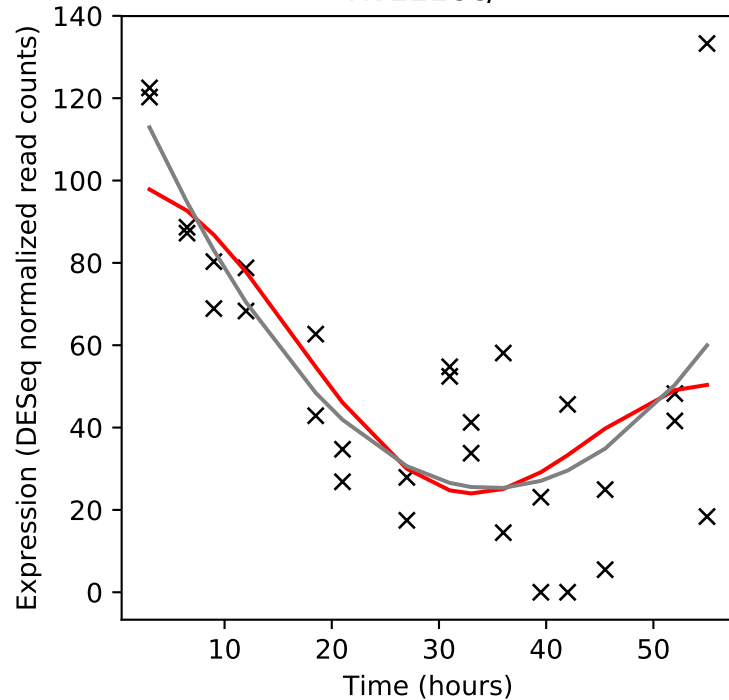

Rv1119c/-

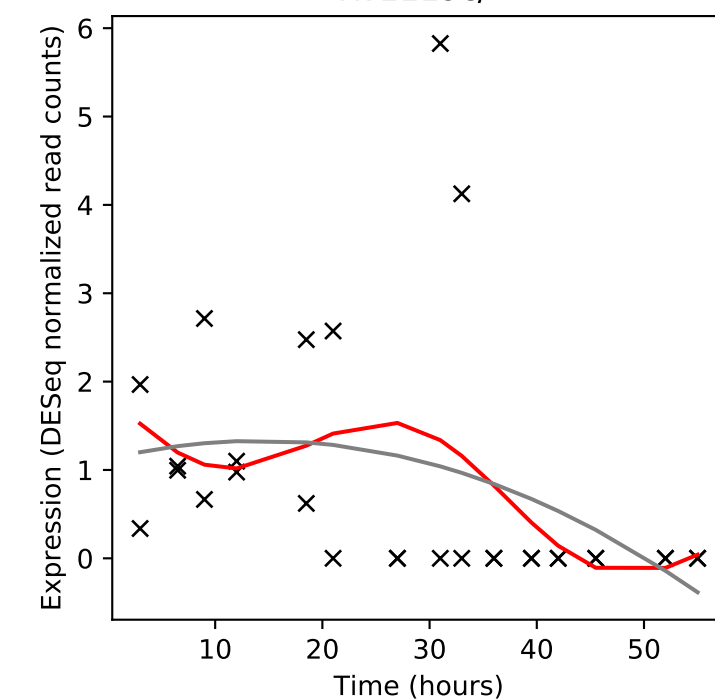

Rv1120c/-

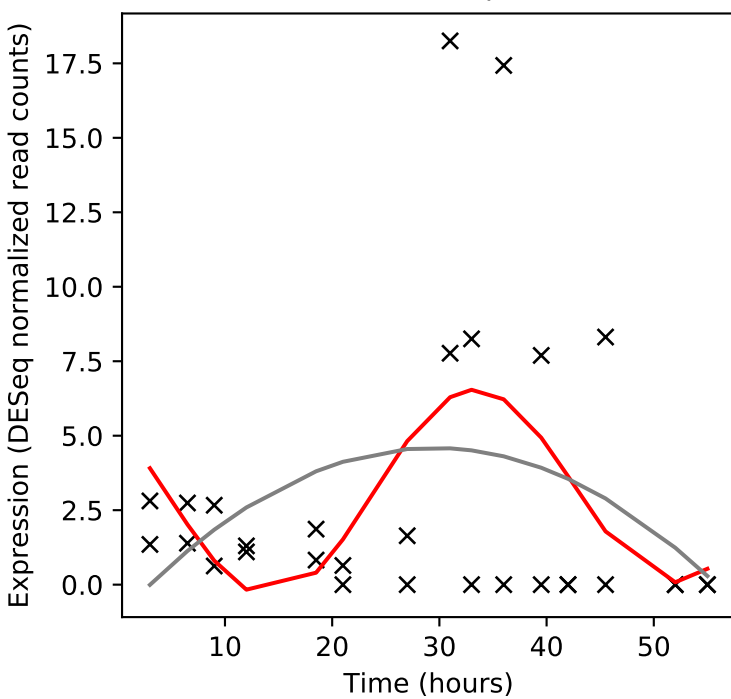

Rv1121/zwf1

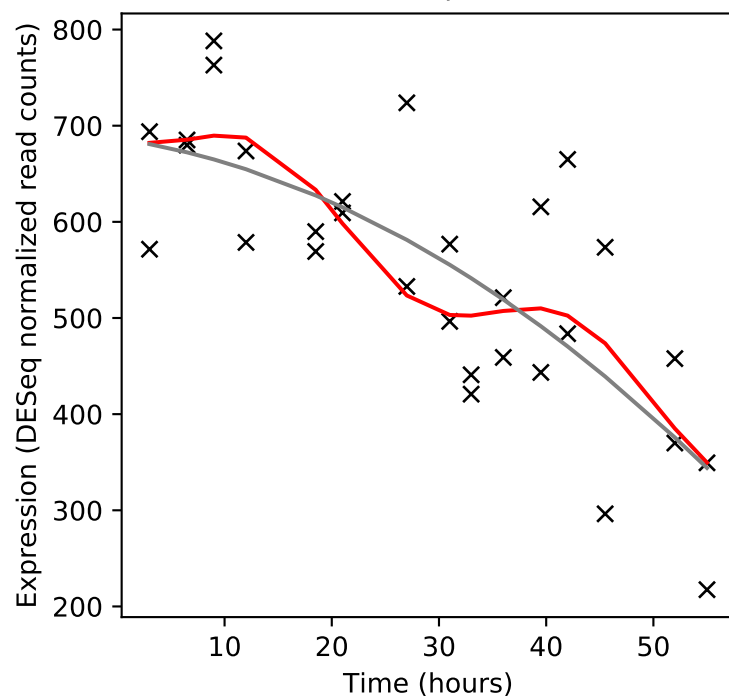

Rv1122/gnd2

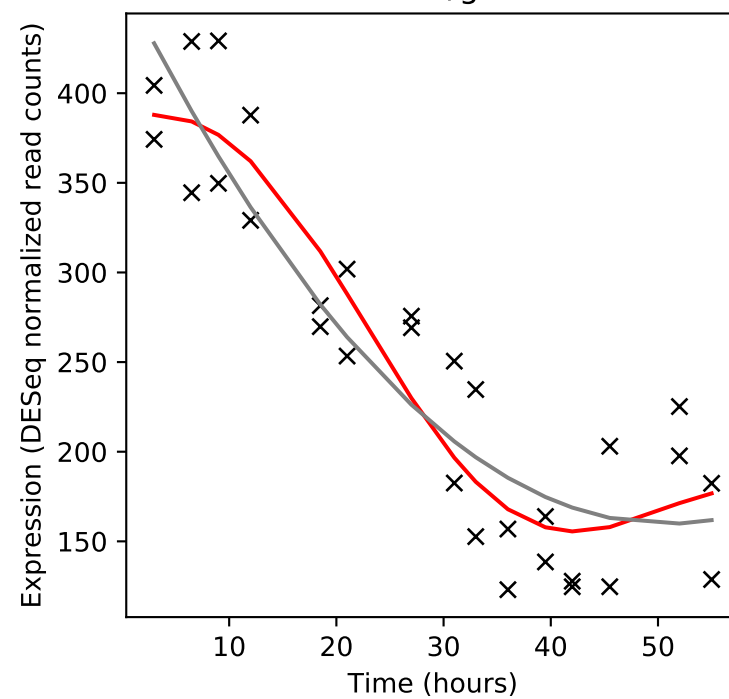

Rv1123c/bpoB

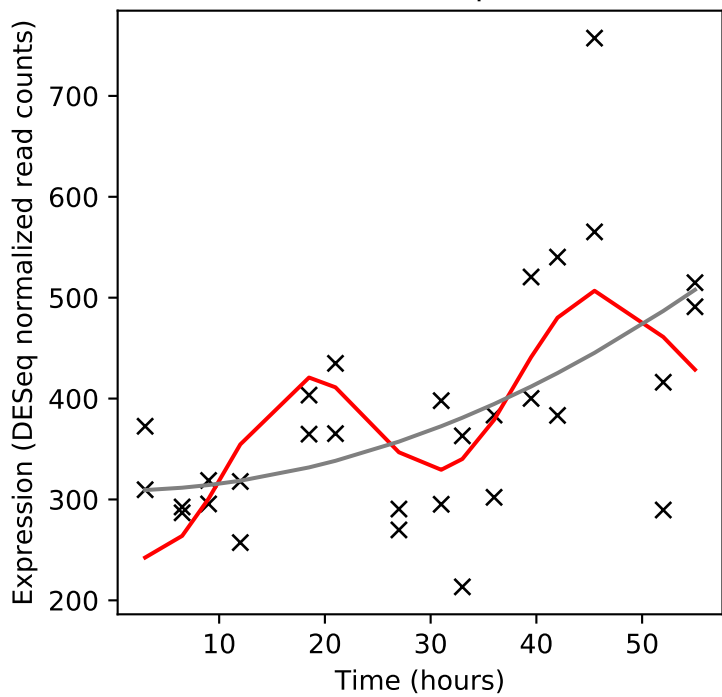

Rv1124/ephC

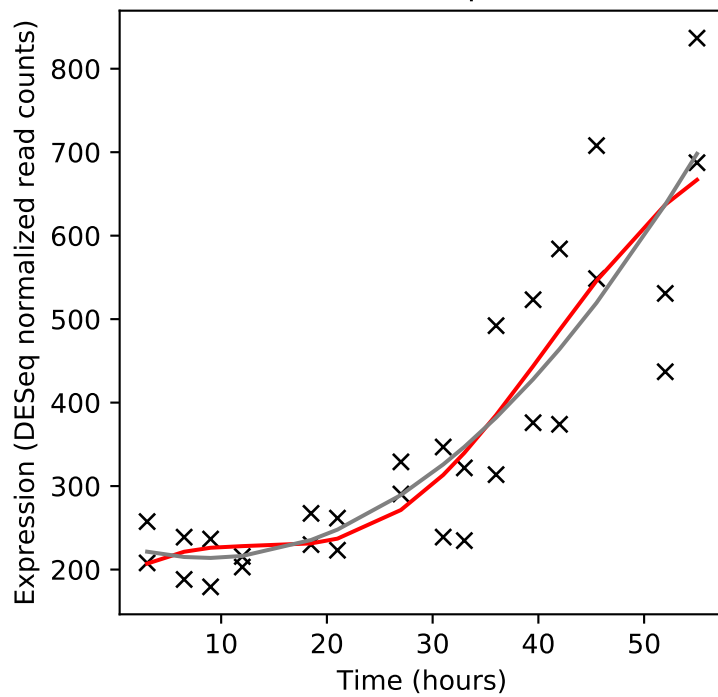

Rv1125/-

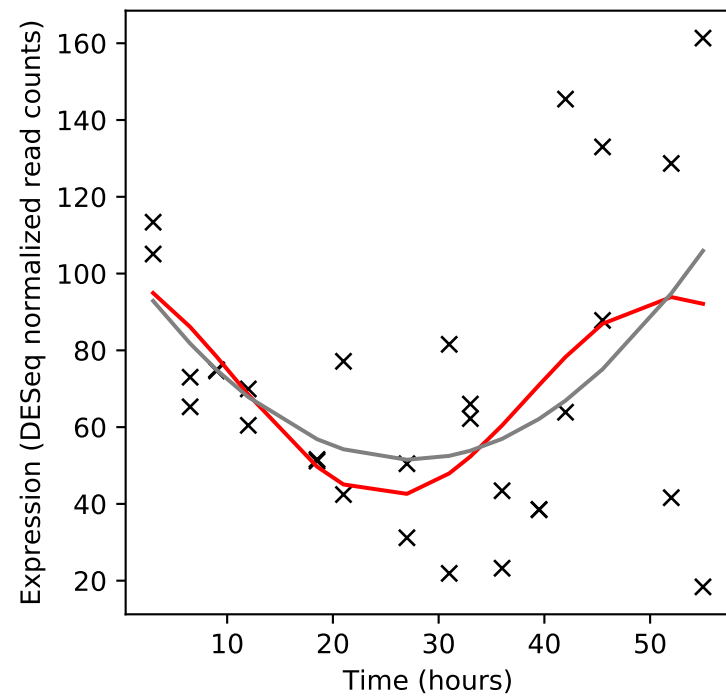

Rv1126c/-

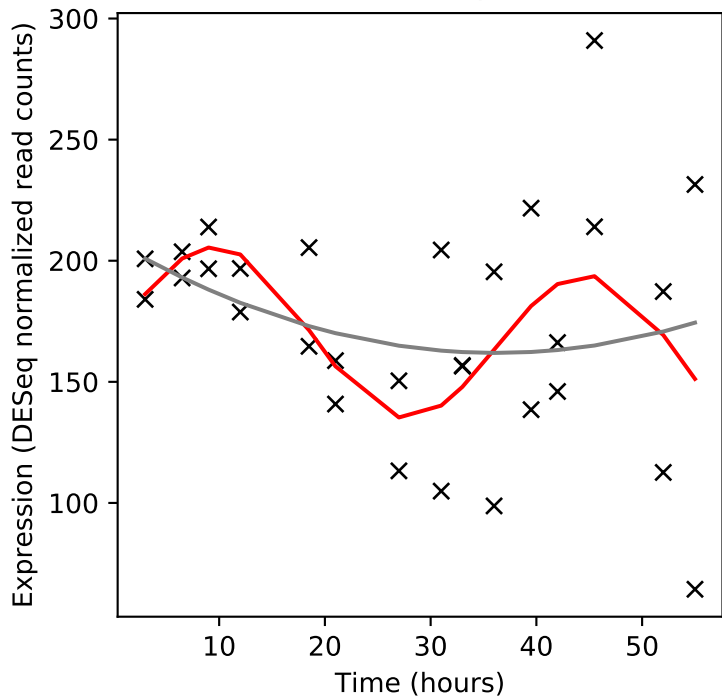

Rv1127c/ppdK

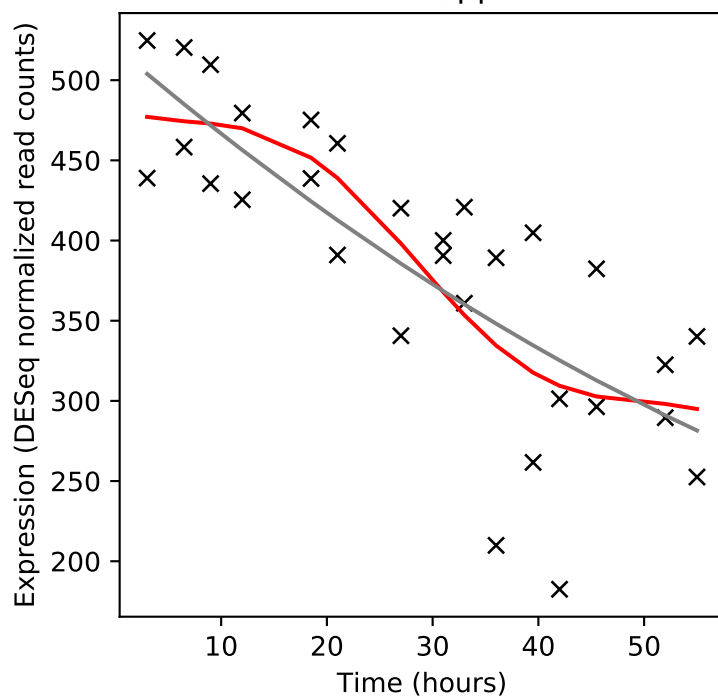

Rv1128c/-

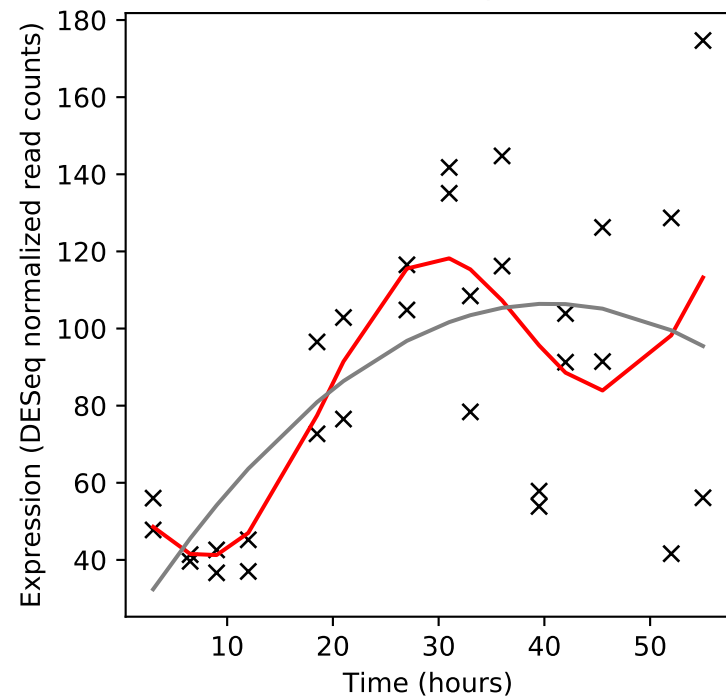

Rv1129c/-

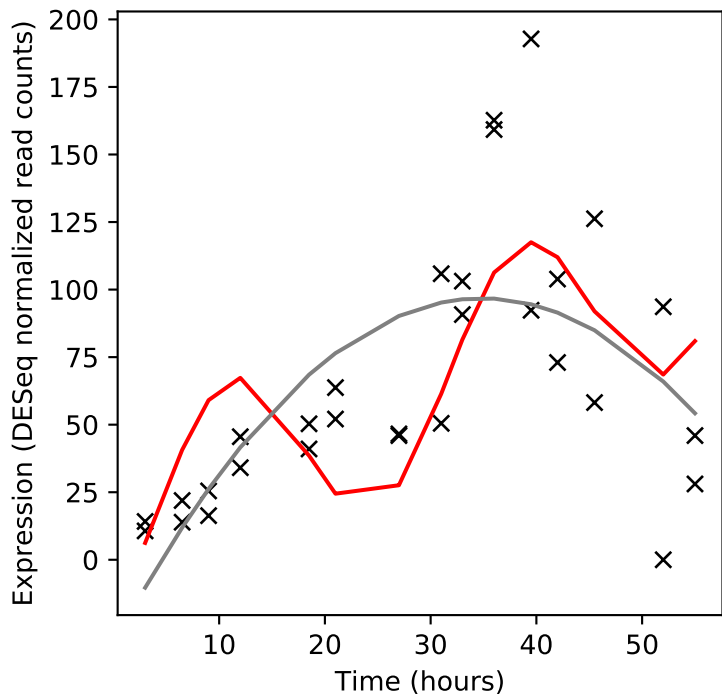

Rv1130/prpD

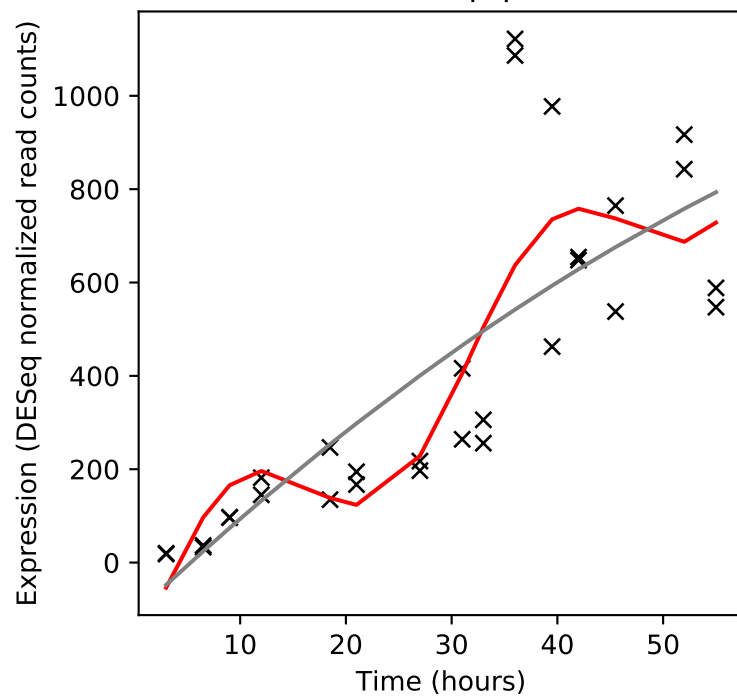

Rv1131/prpC

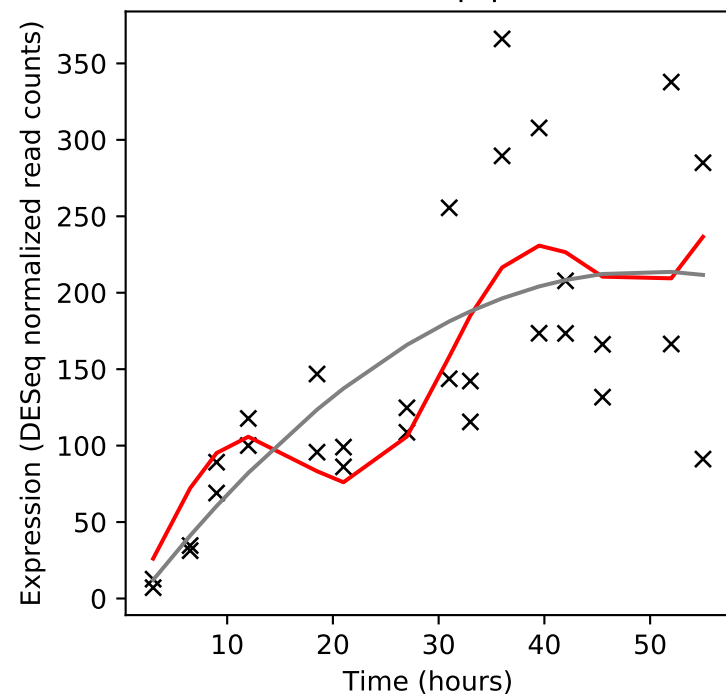

Rv1132/-

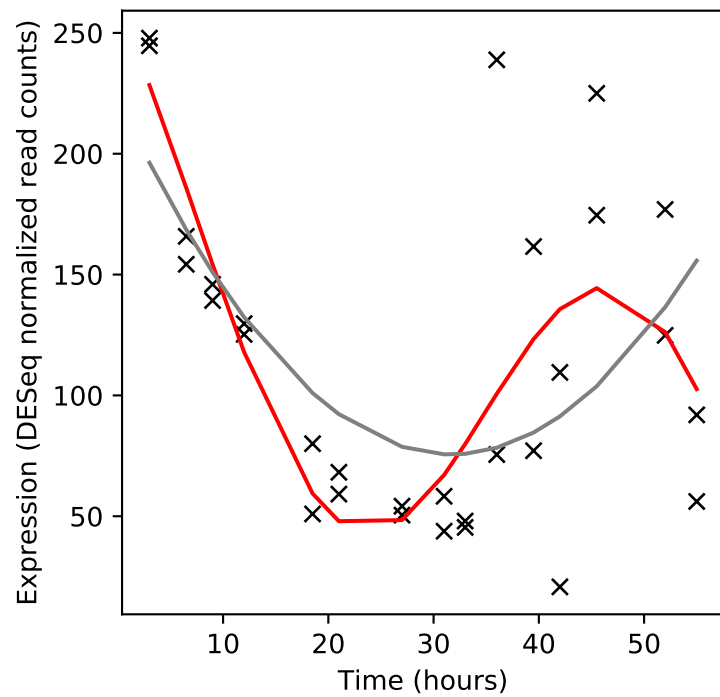

Rv1133c/metE

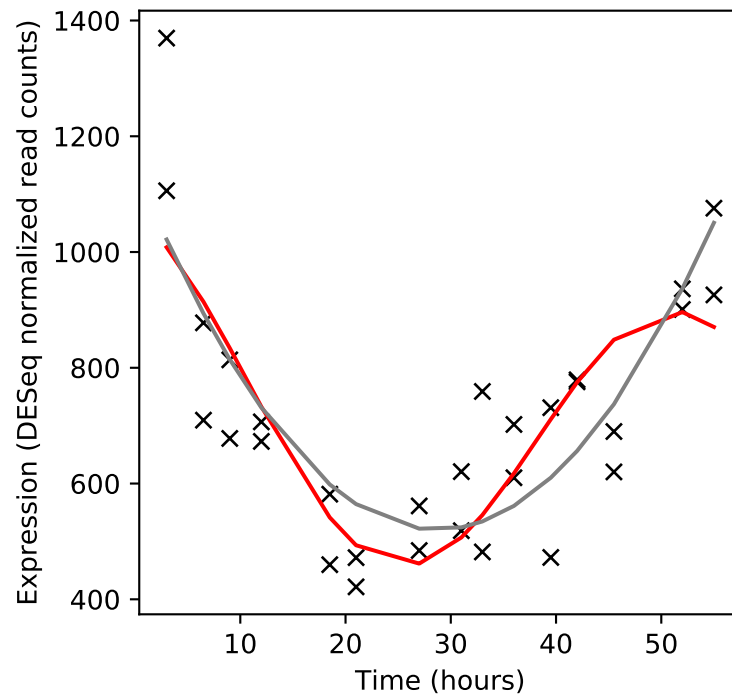

Rv1134/-

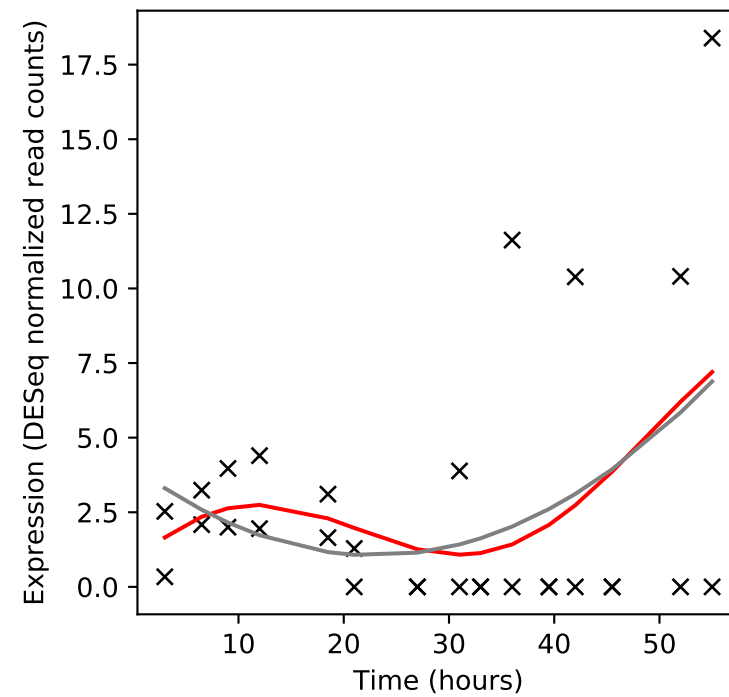

Rv1135c/PPE16

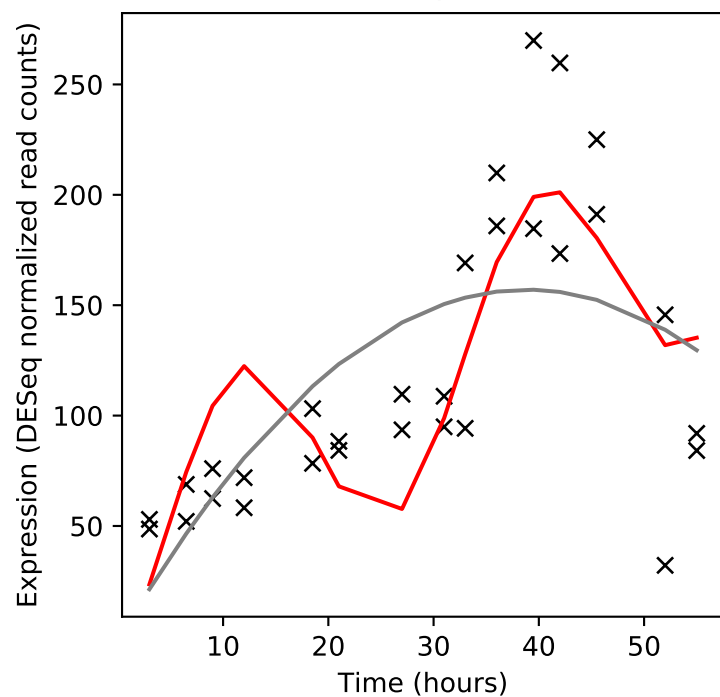

Rv1135A/-

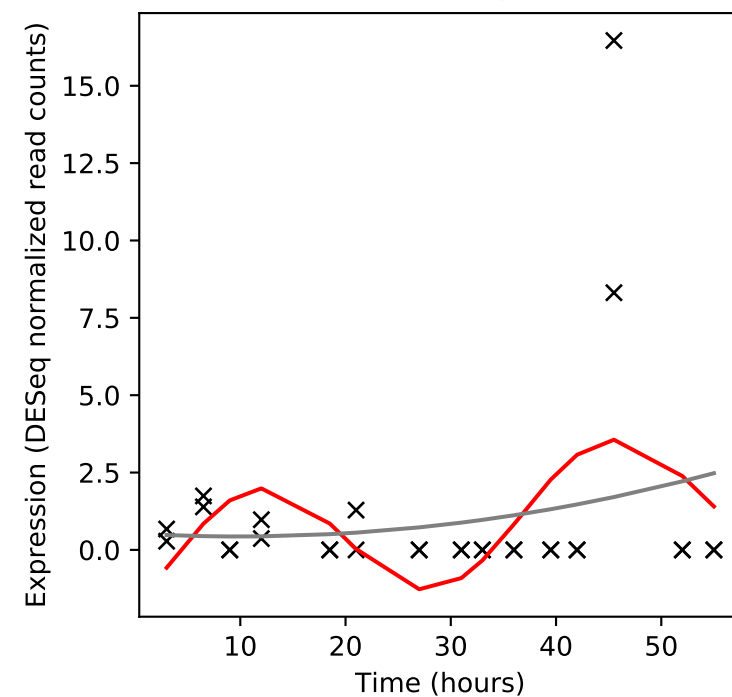

Rv1136/-

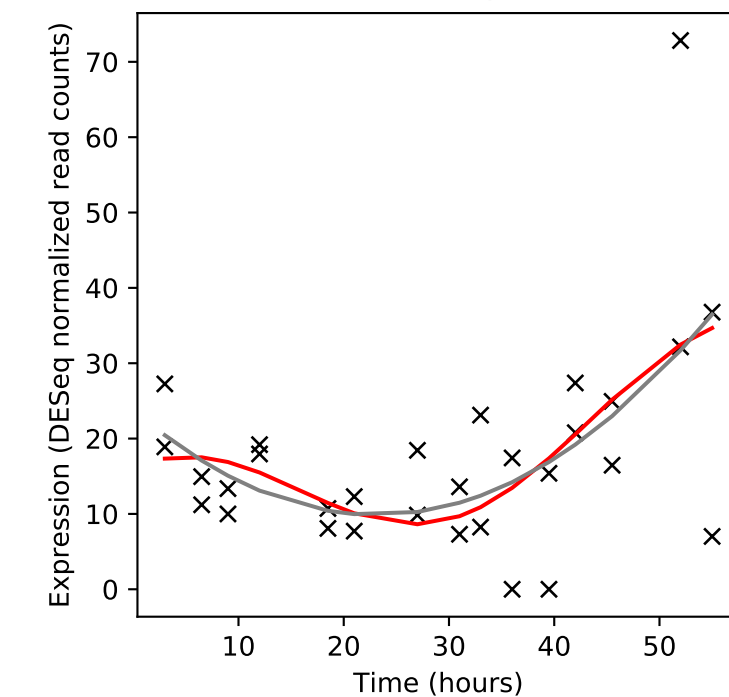

Rv1137c/-

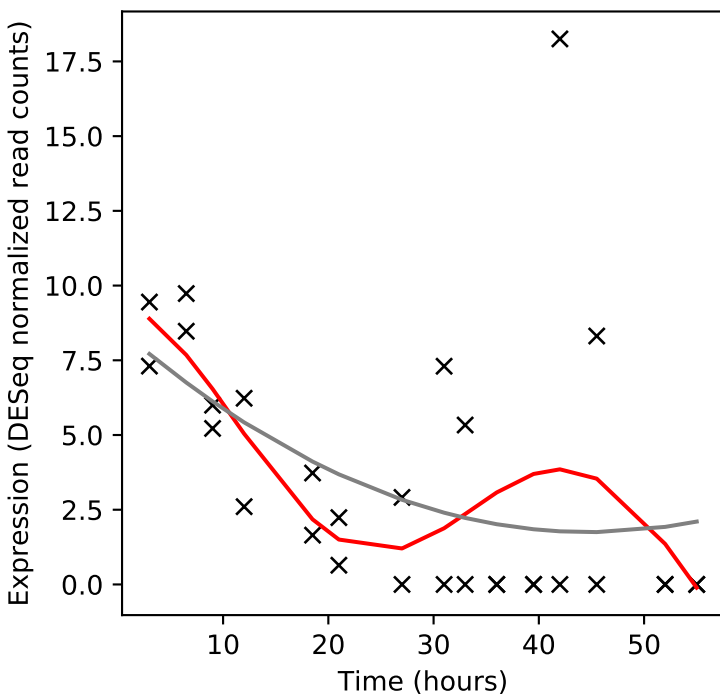

Rv1138c/-

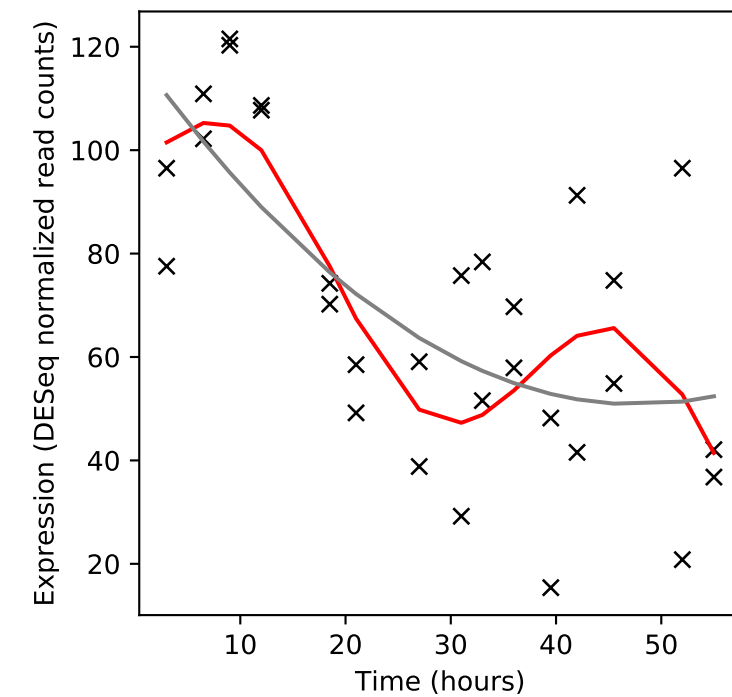

Rv1139c/-

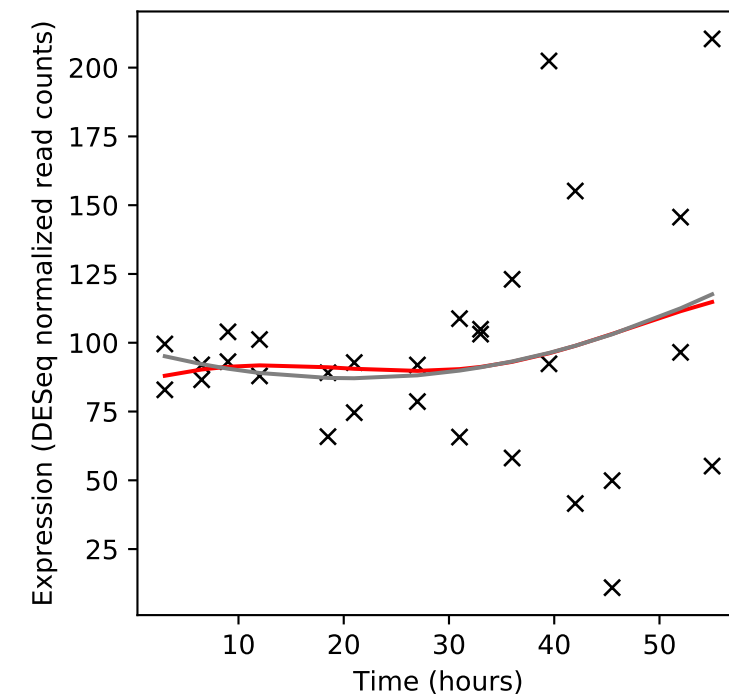

Rv1140/-

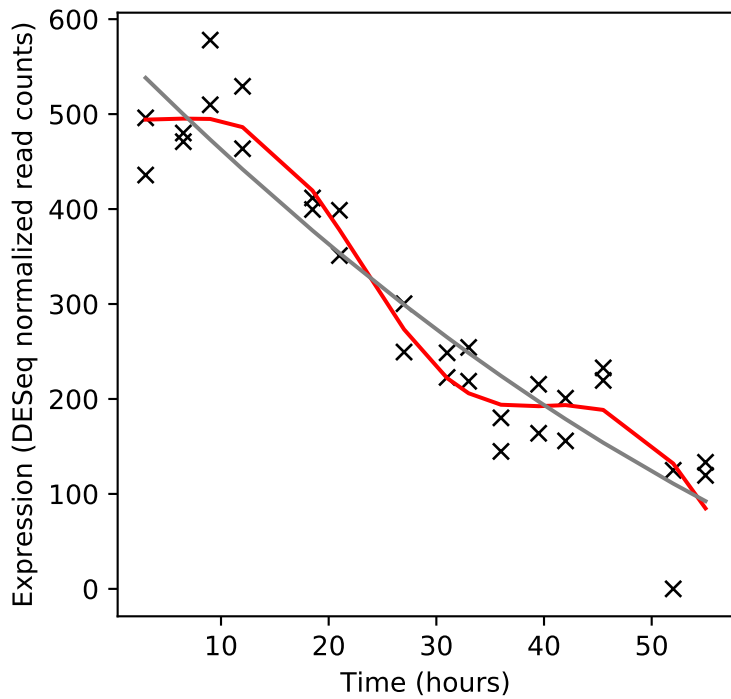

Rv1141c/echA11

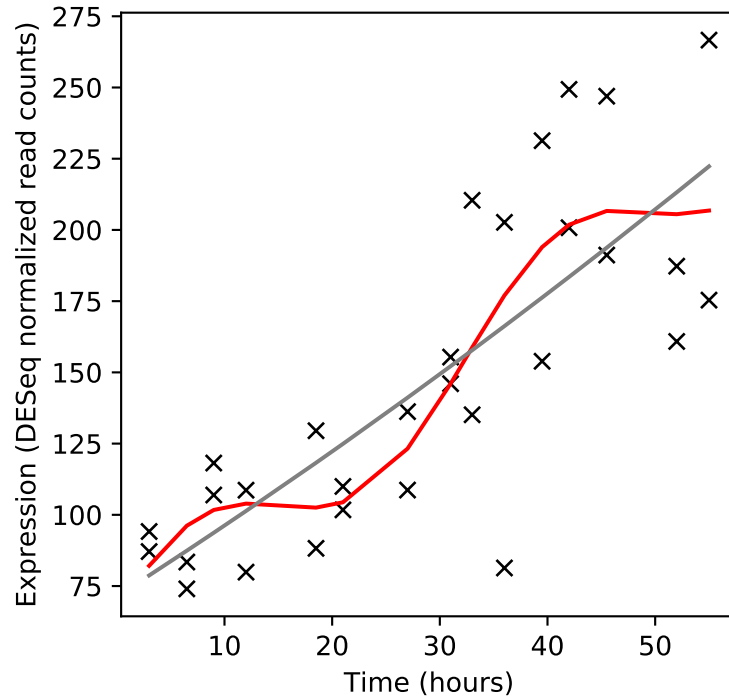

Rv1142c/echA10

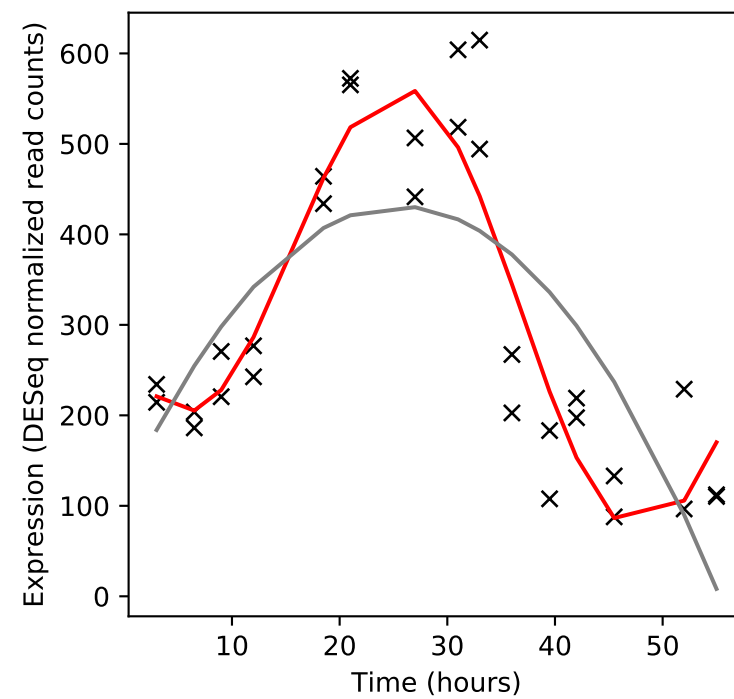

Rv1143/mcr

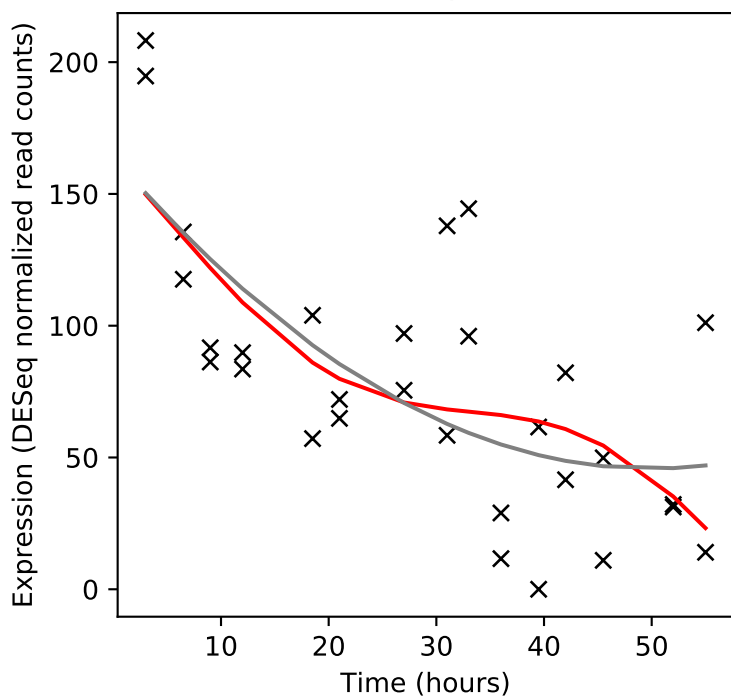

Rv1144/-

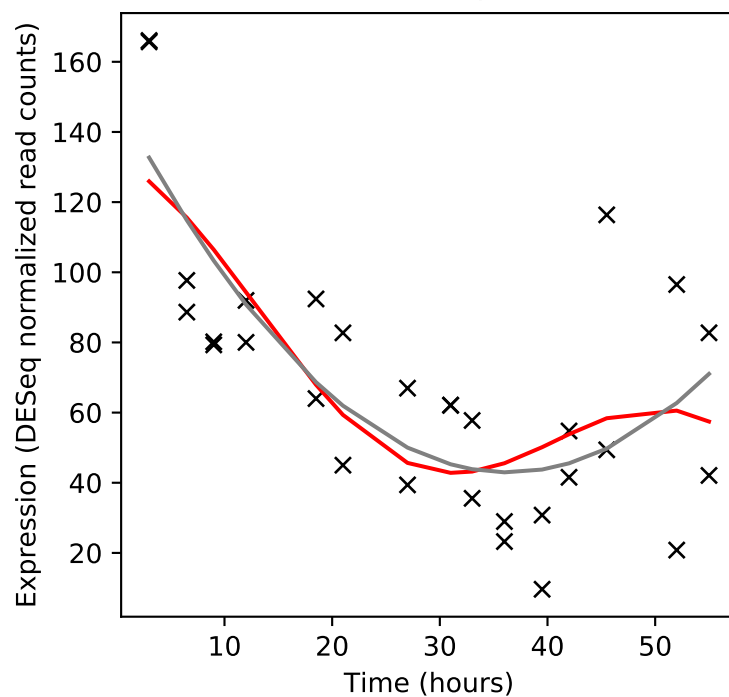

Rv1145/mmpL13a

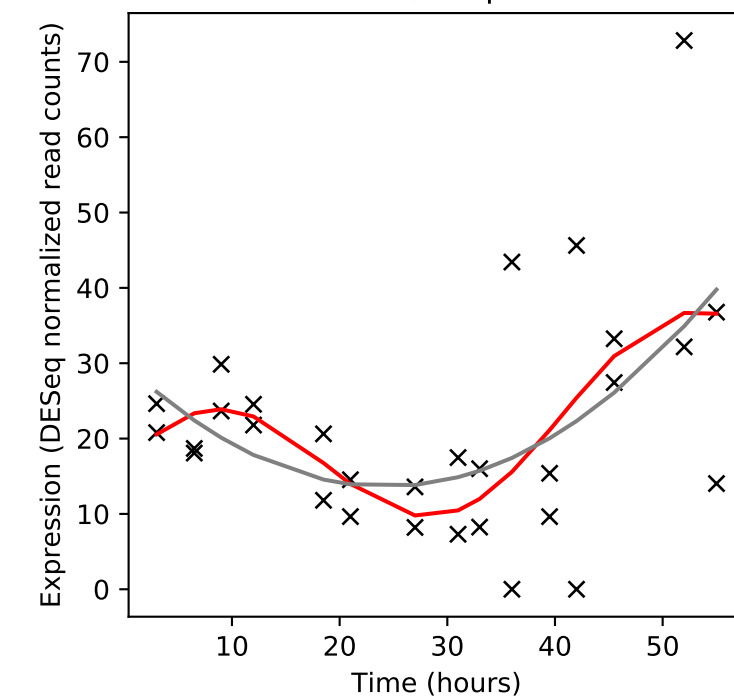

Rv1146/mmpL13b

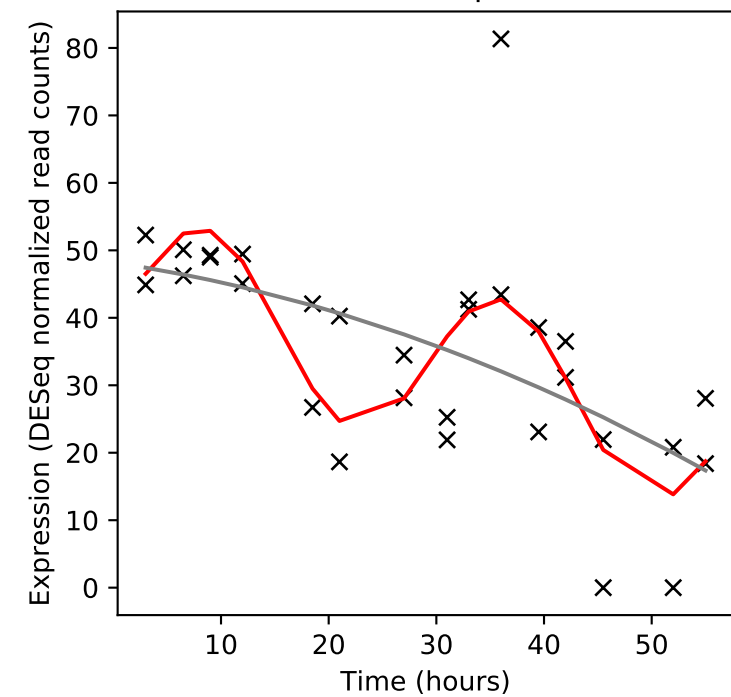

Rv1147/-

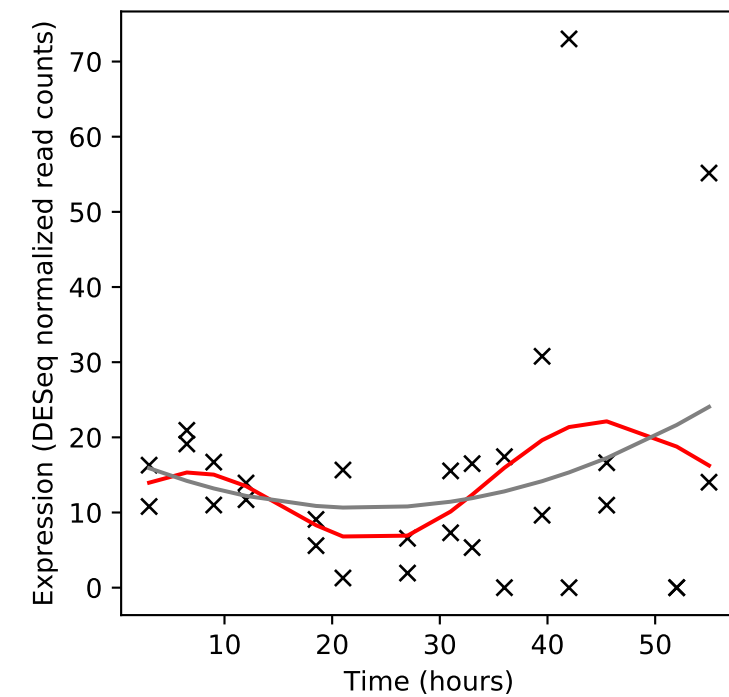

Rv1148c/-

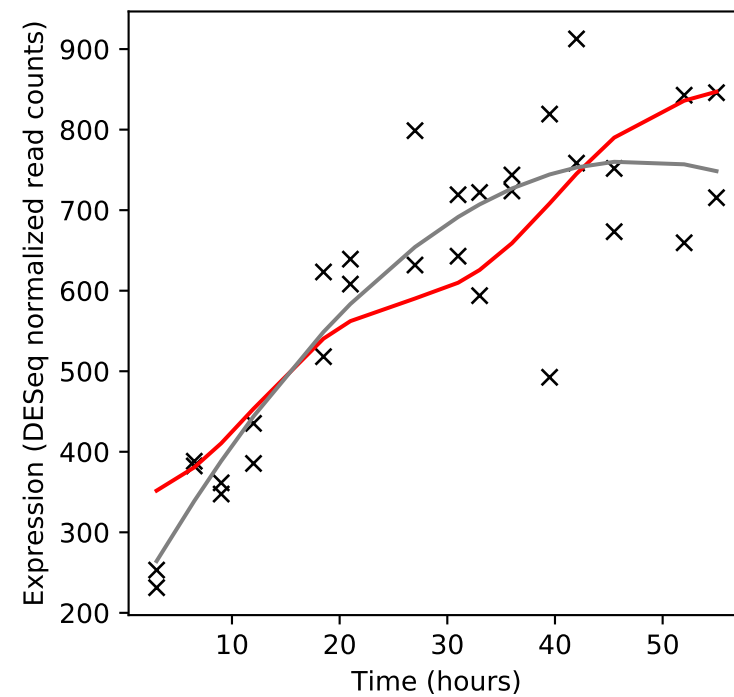

Rv1149/-

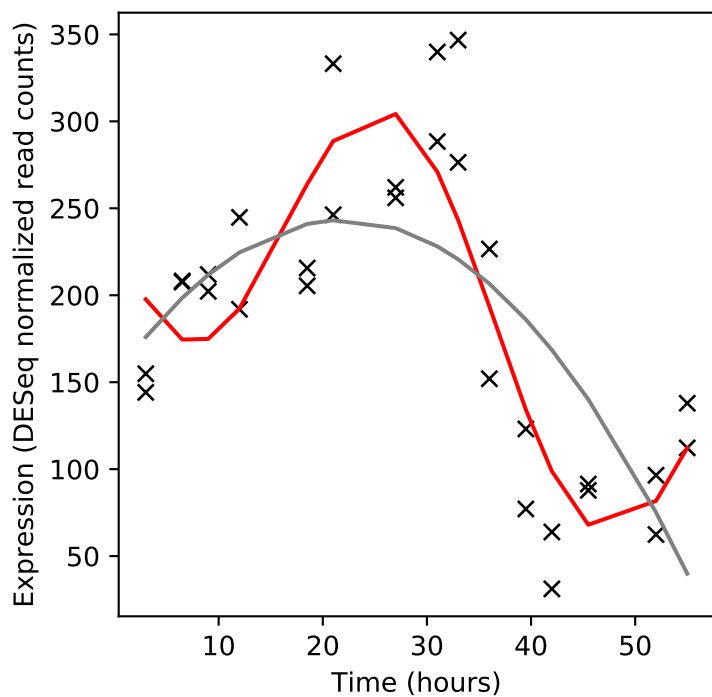

Rv1151c/-

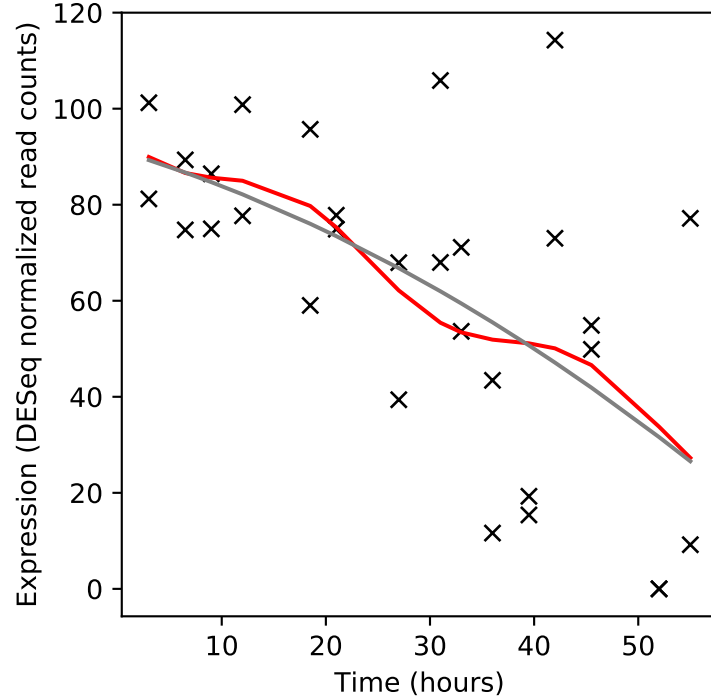

Rv1152/-

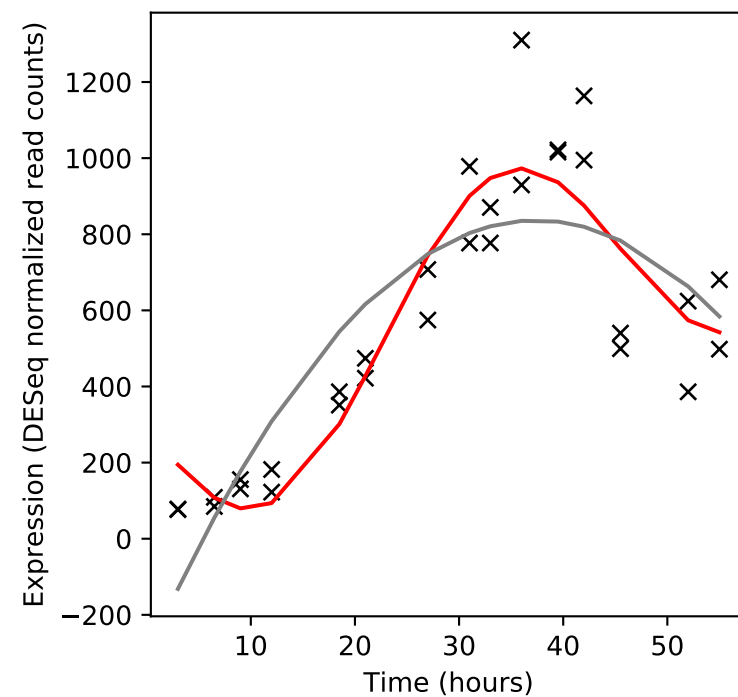

Rv1153c/omt

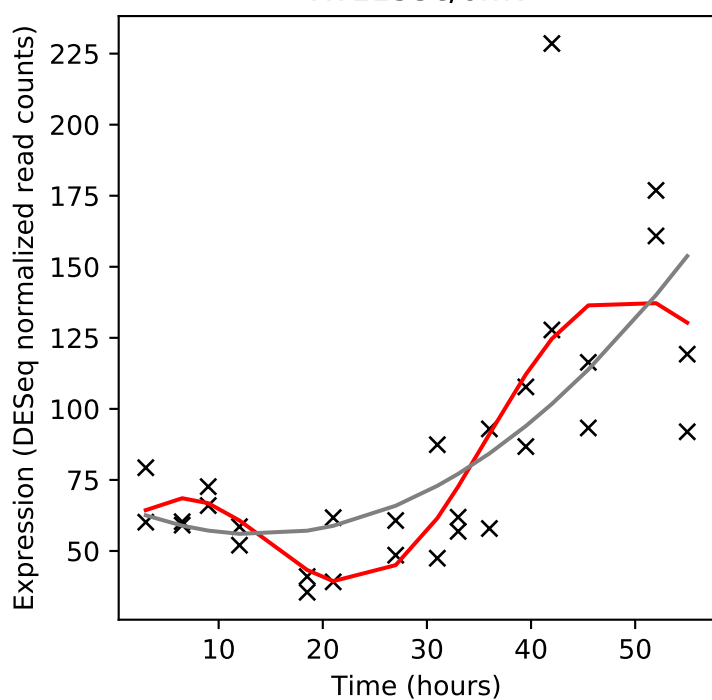

Rv1154c/-

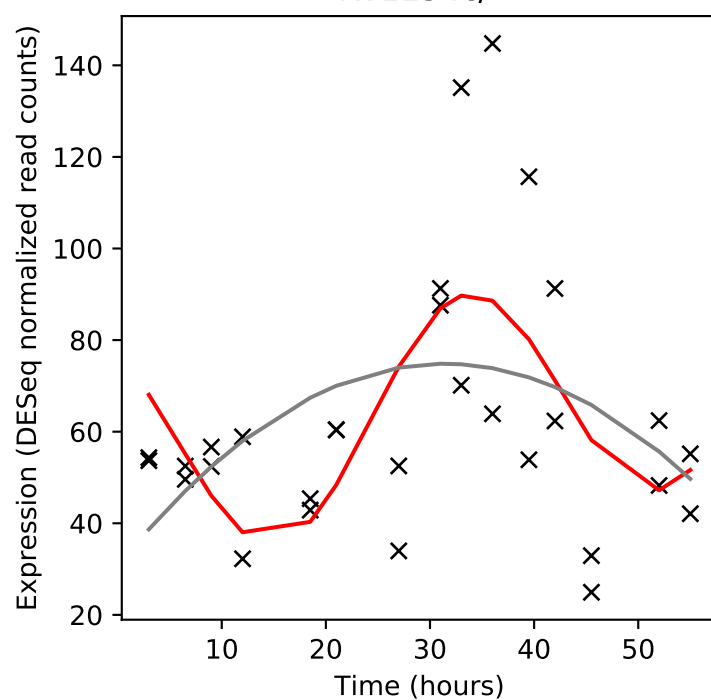

Rv1155/-

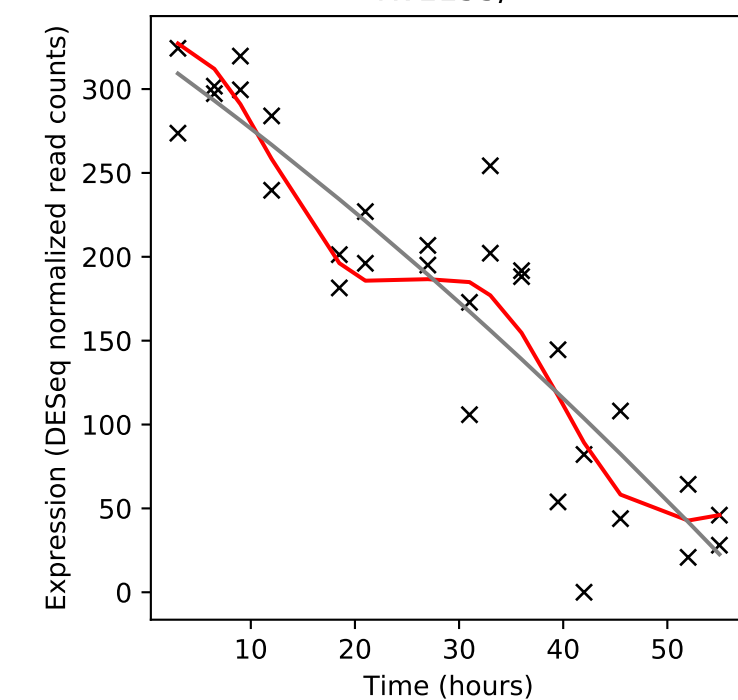

Rv1156/-

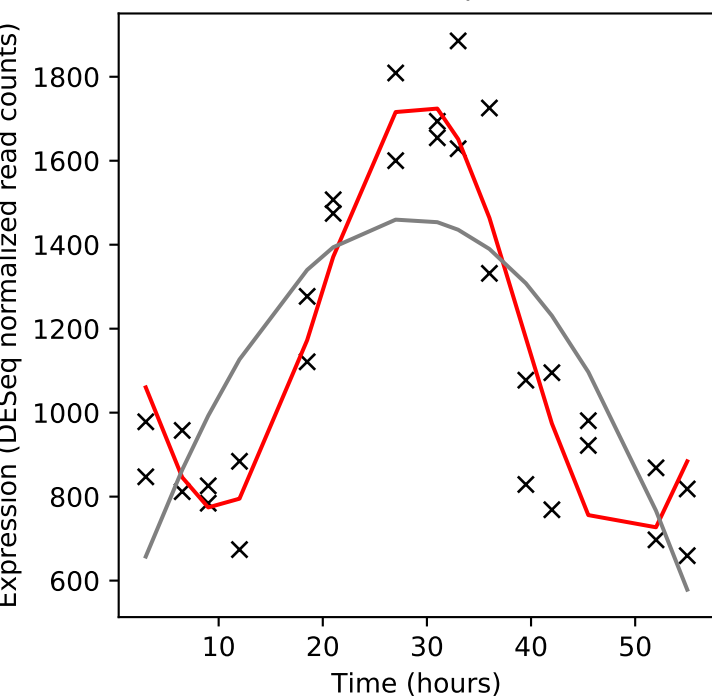

Rv1157c/-

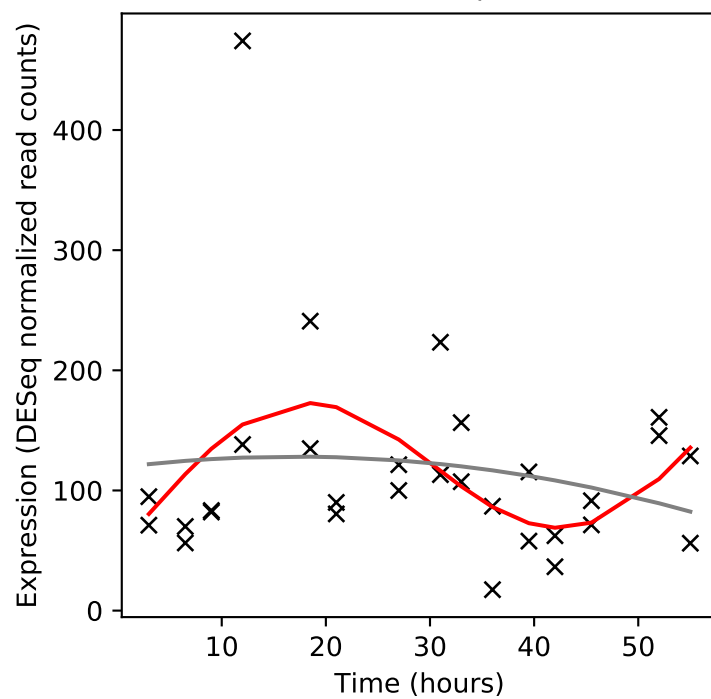

Rv1158c/-

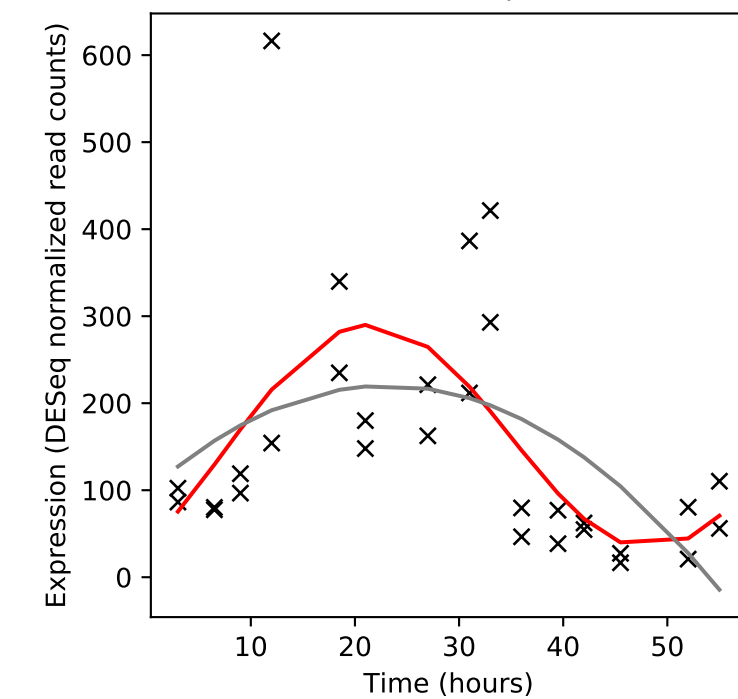

Rv1159/pimE

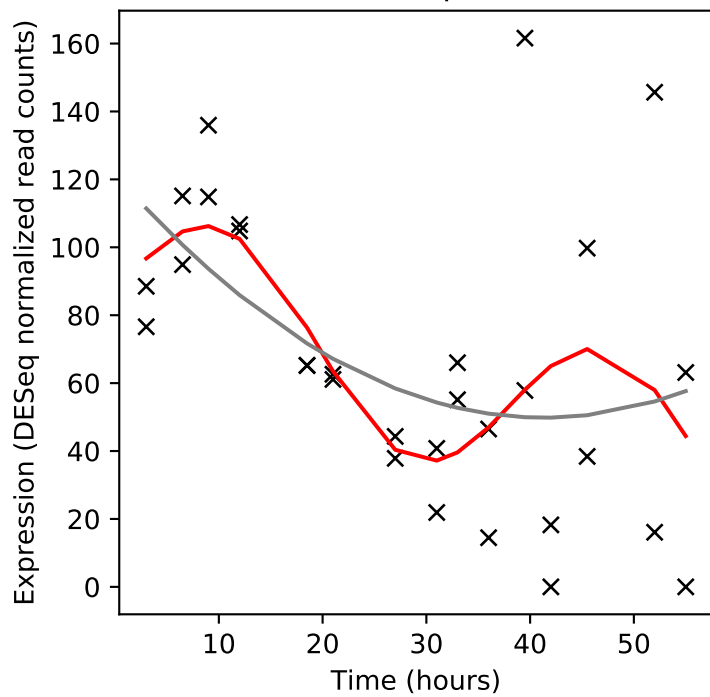

Rv1159A/-

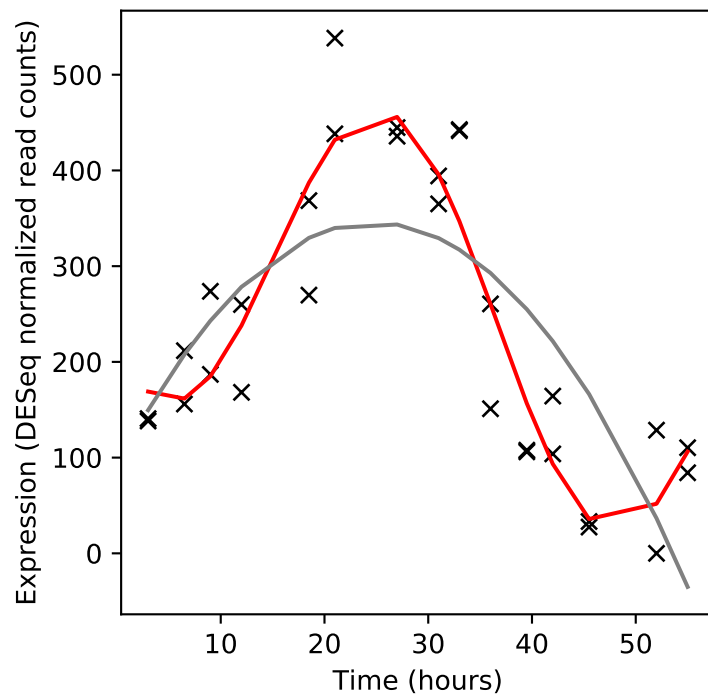

Rv1160/mutT2

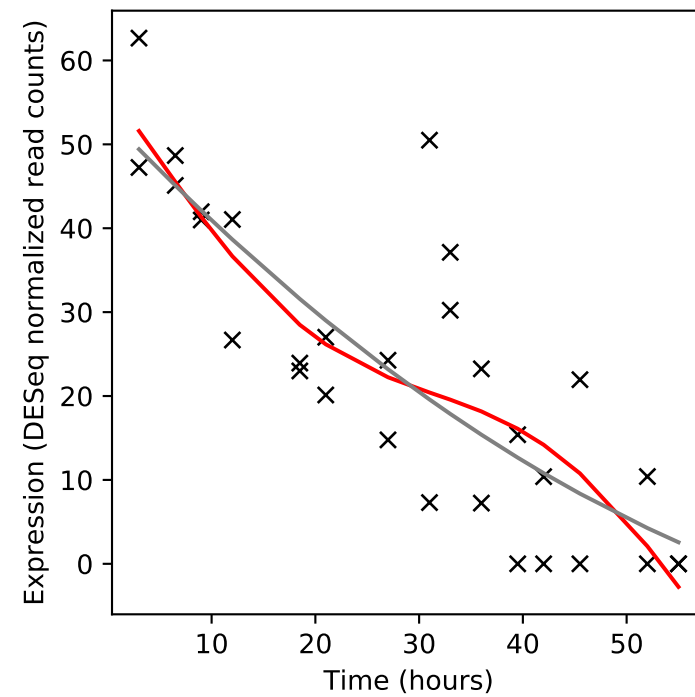

Rv1161/narG

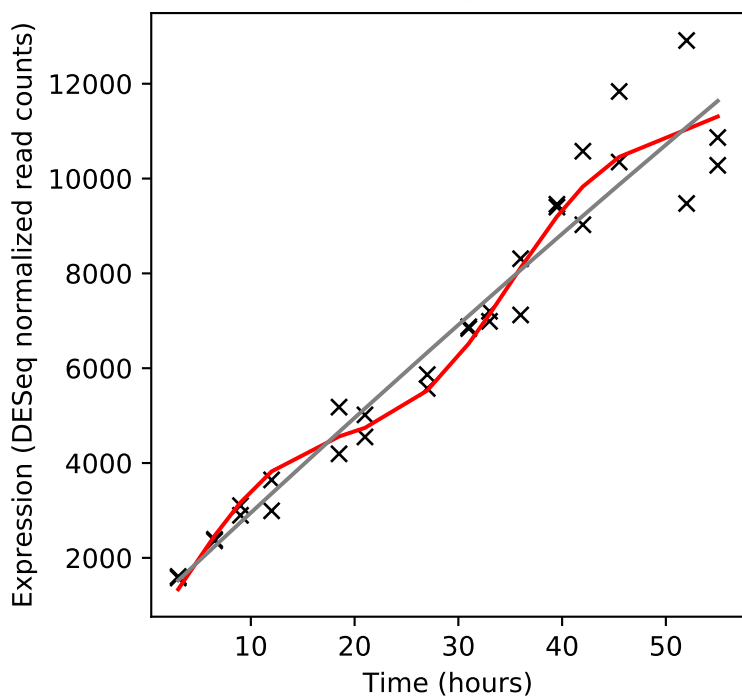

Rv1162/narH

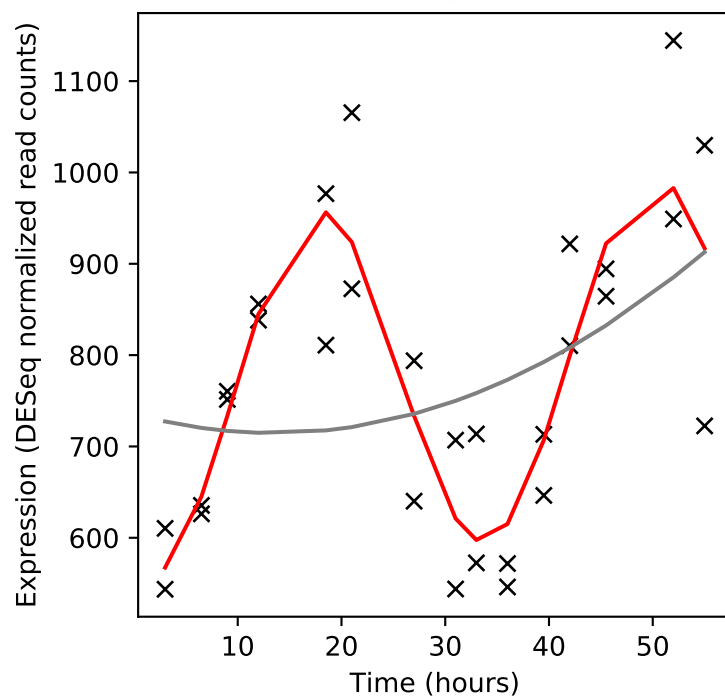

Rv1163/narJ

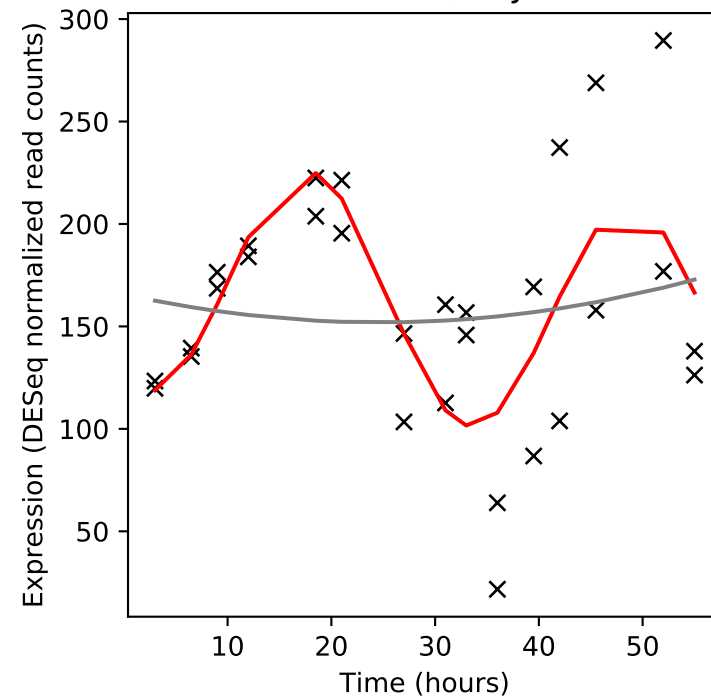

Rv1164/narI

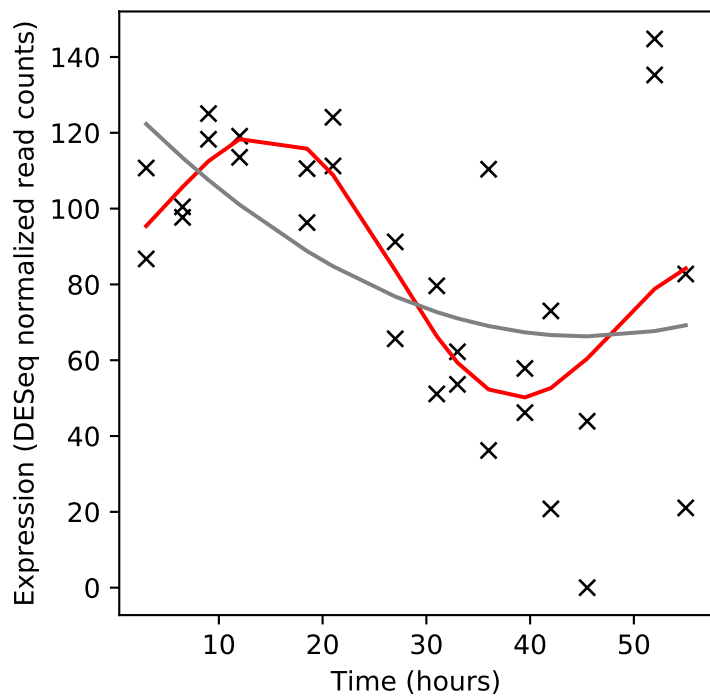

Rv1165/typA

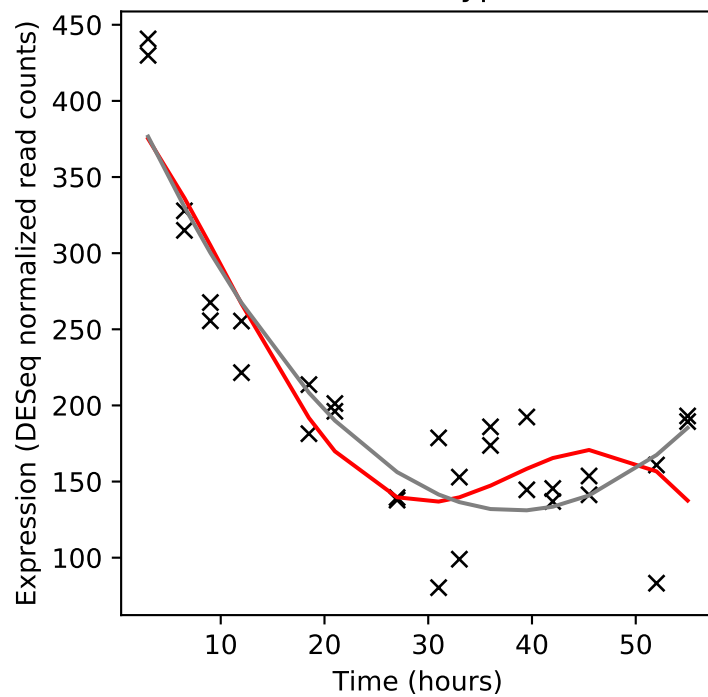

Rv1166/lpqW

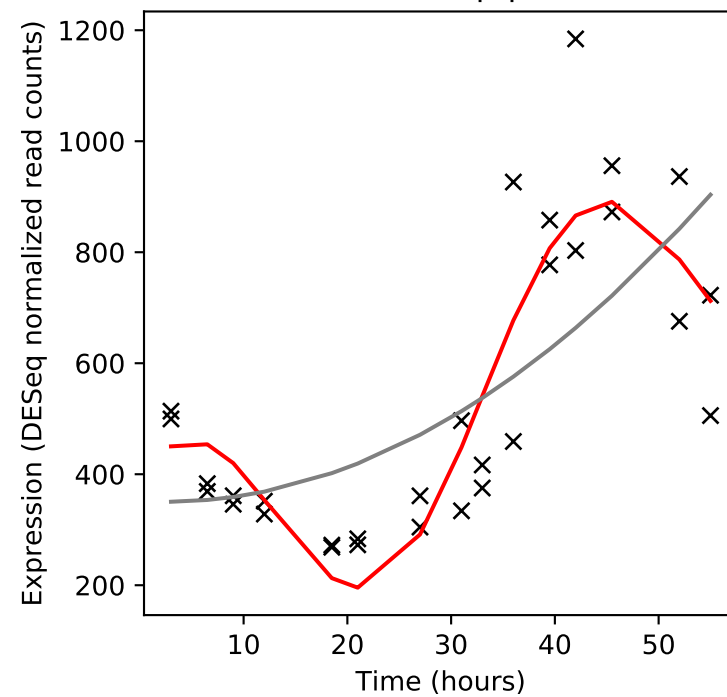

Rv1167c/-

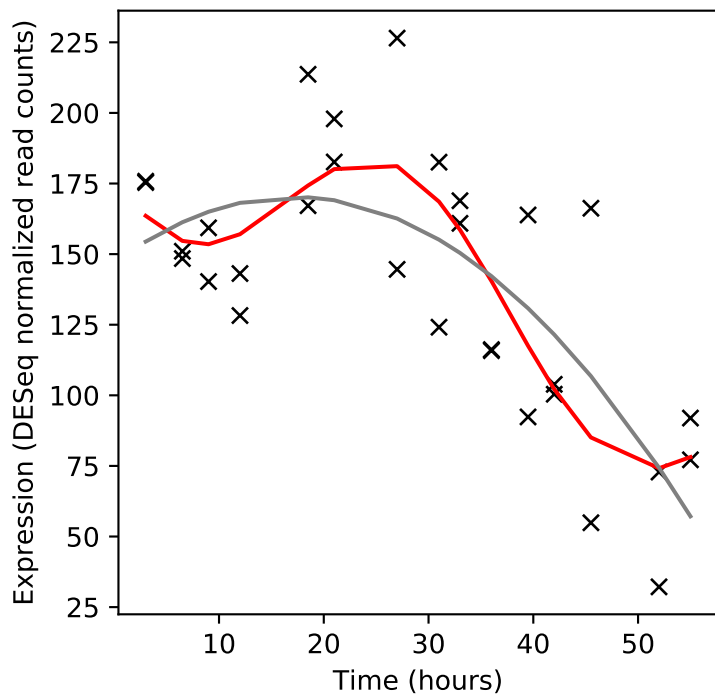

Rv1168c/PPE17

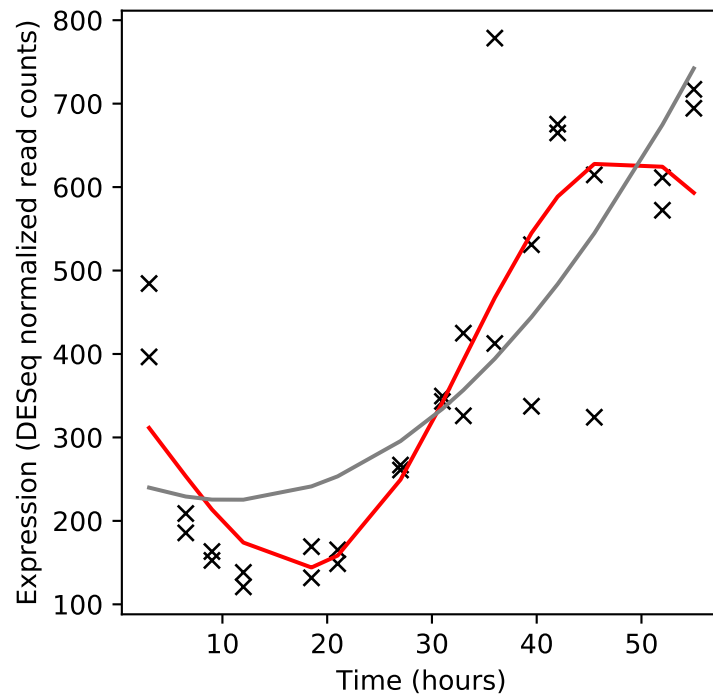

Rv1169c/lipX

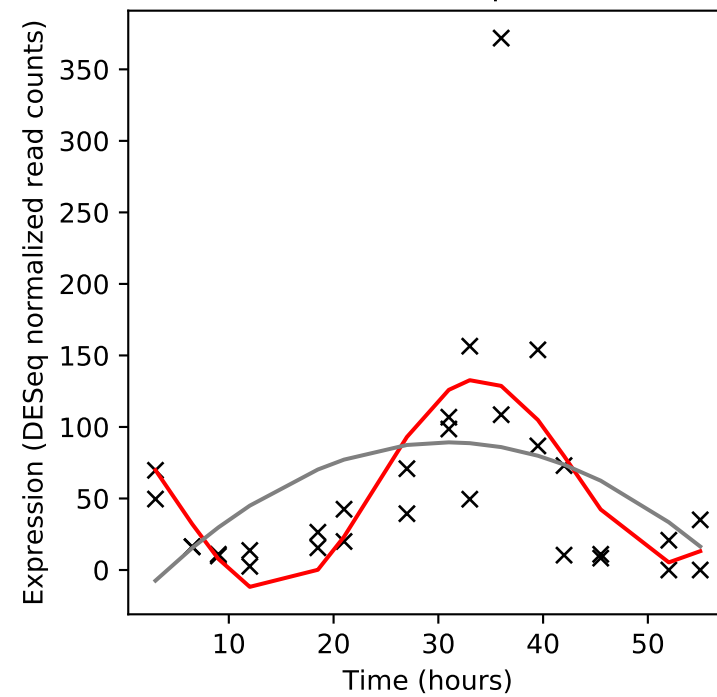

Rv1170/mshB

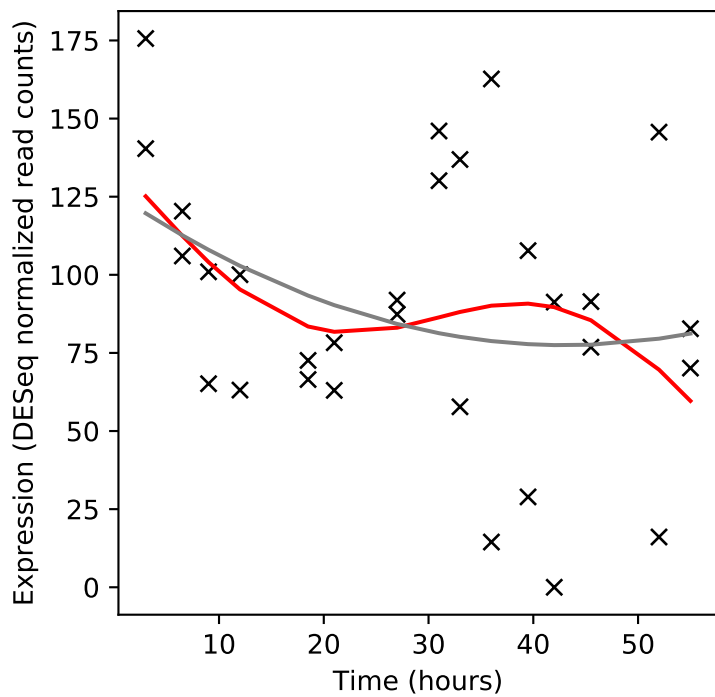

Rv1171/-

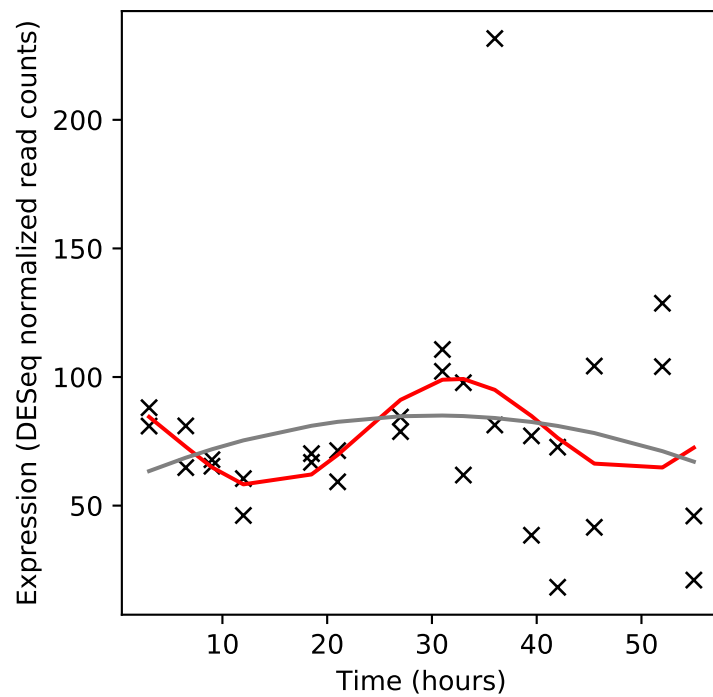

Rv1172c/PE12

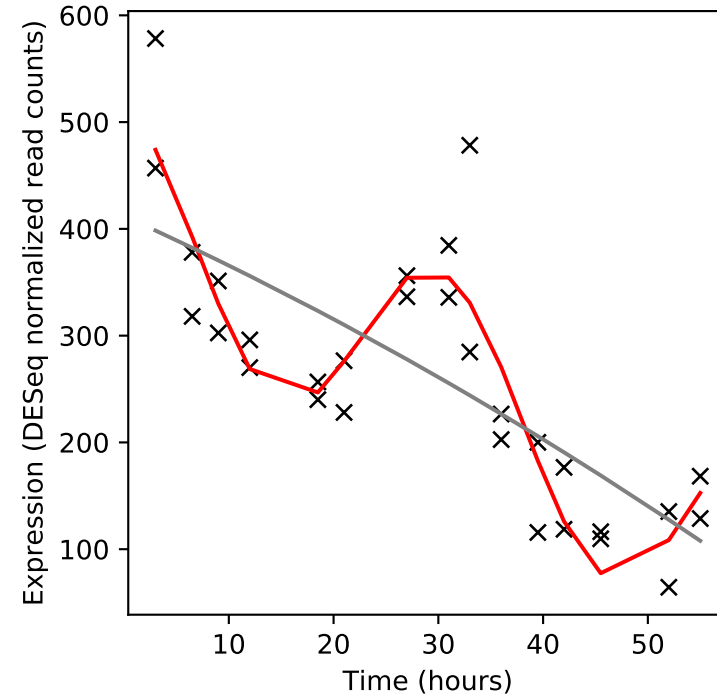

Rv1173/fbiC

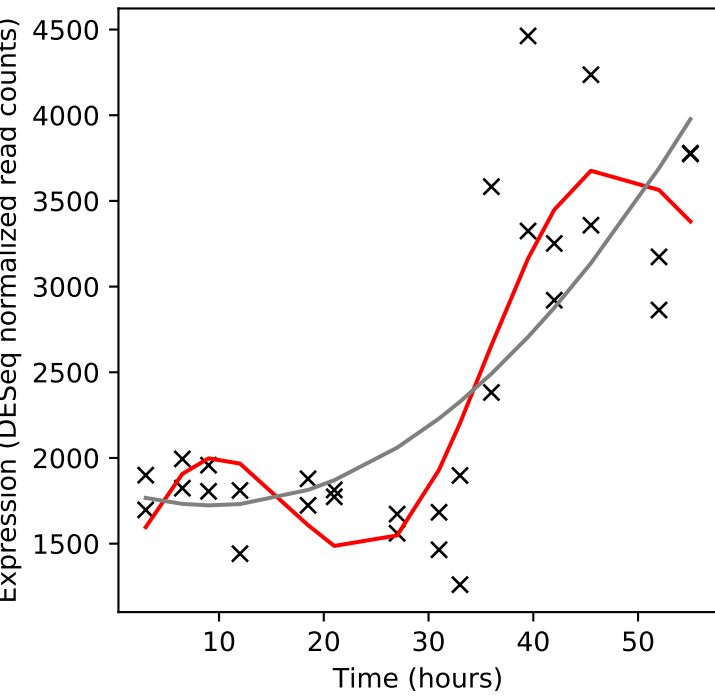

Rv1174c/TB8.4

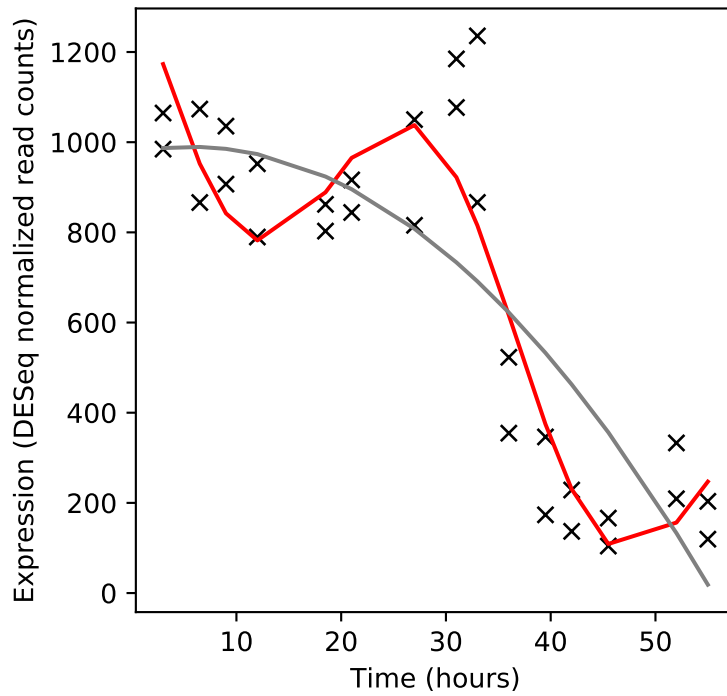

Rv1175c/fadH

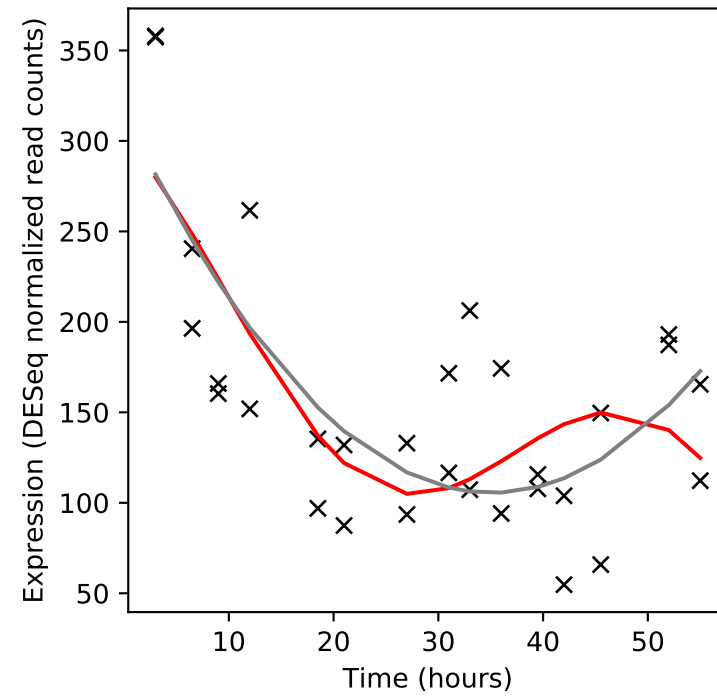



Rv1176c/-

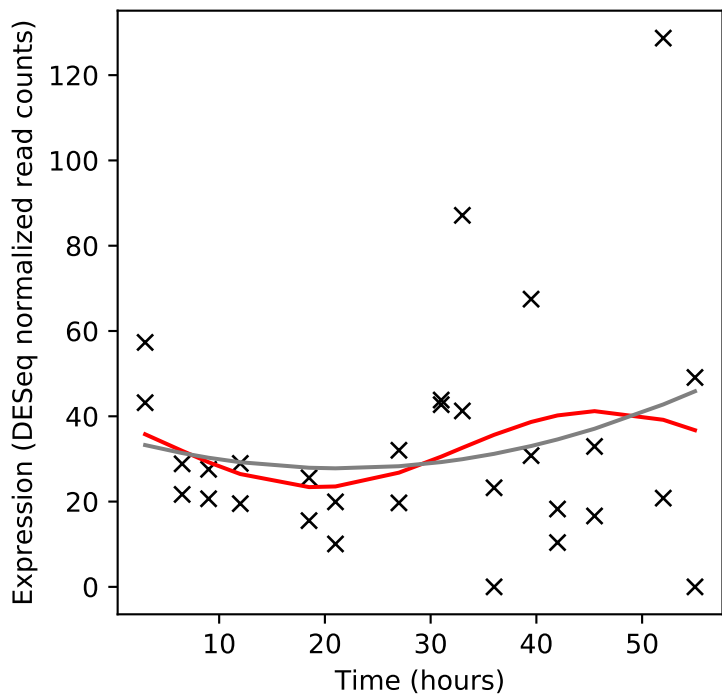

Rv1177/fdxC

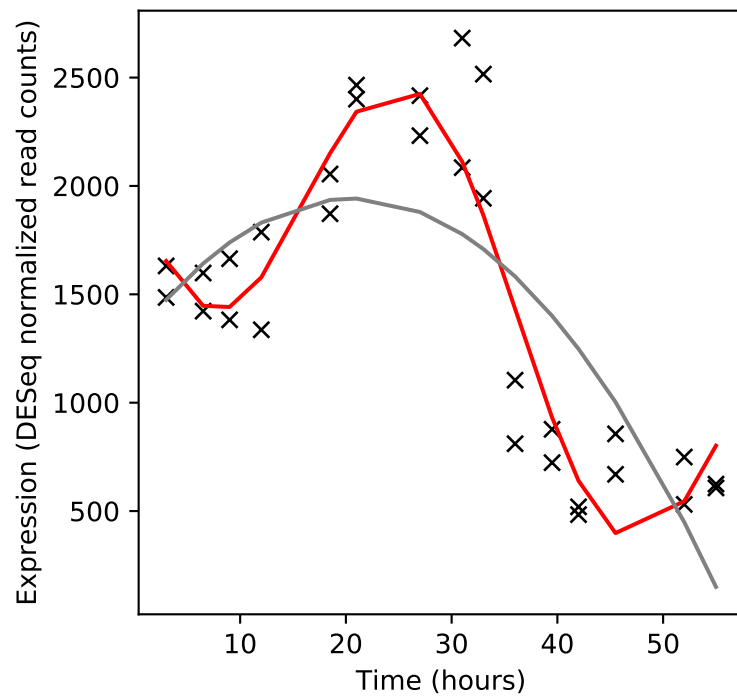

Rv1178/-

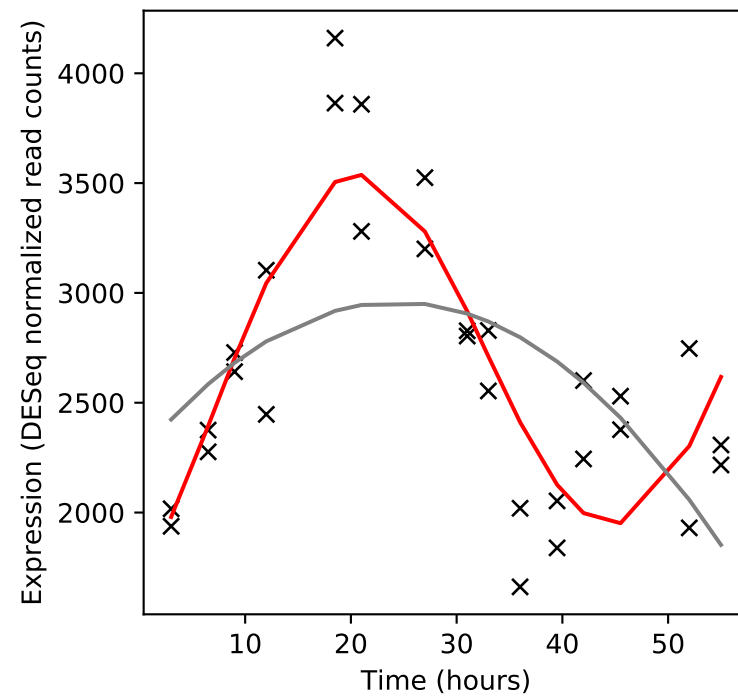

Rv1179c/-

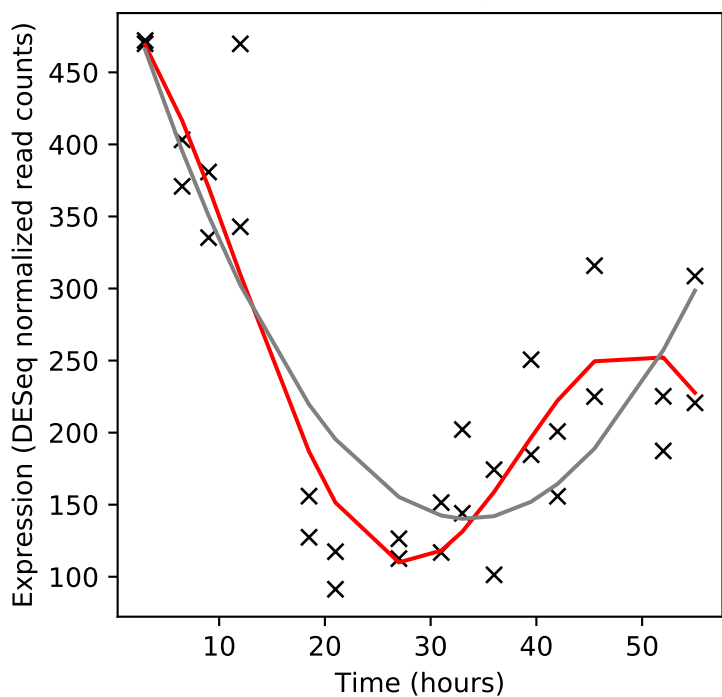

Rv1180/pks3

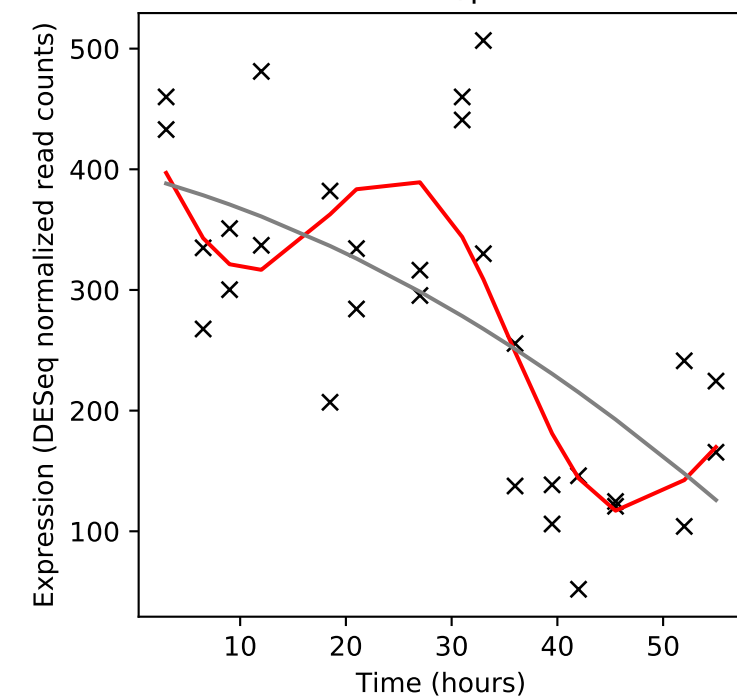

Rv1181/pks4

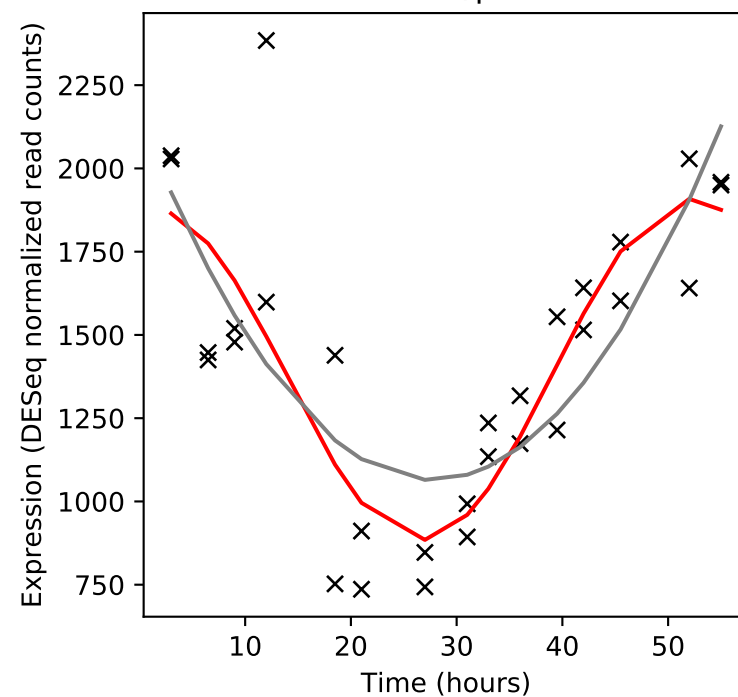

Rv1182/papA3

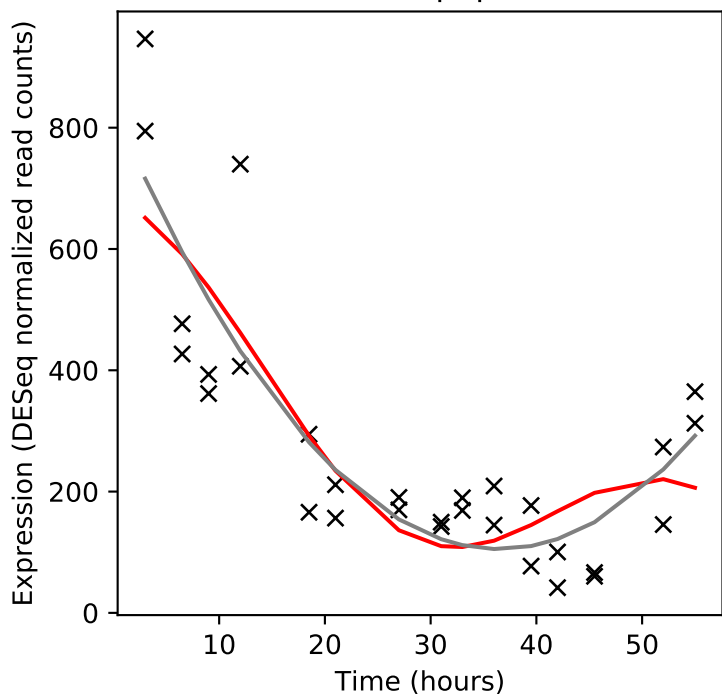

Rv1183/mmpL10

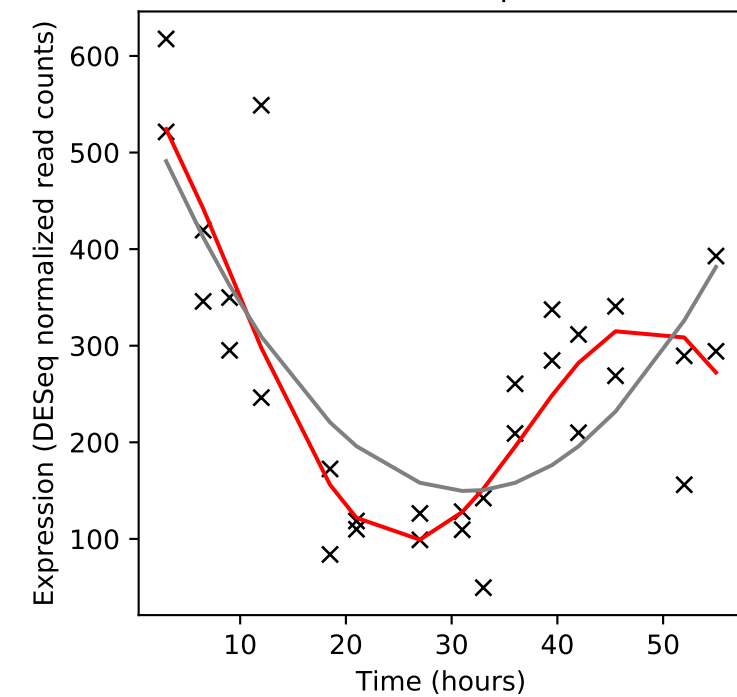

Rv1184c/-

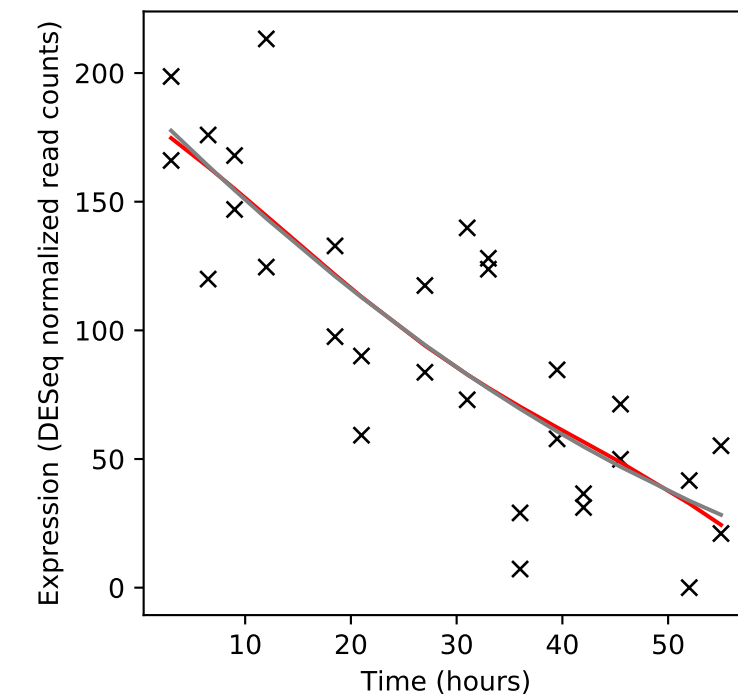

Rv1185c/fadD21

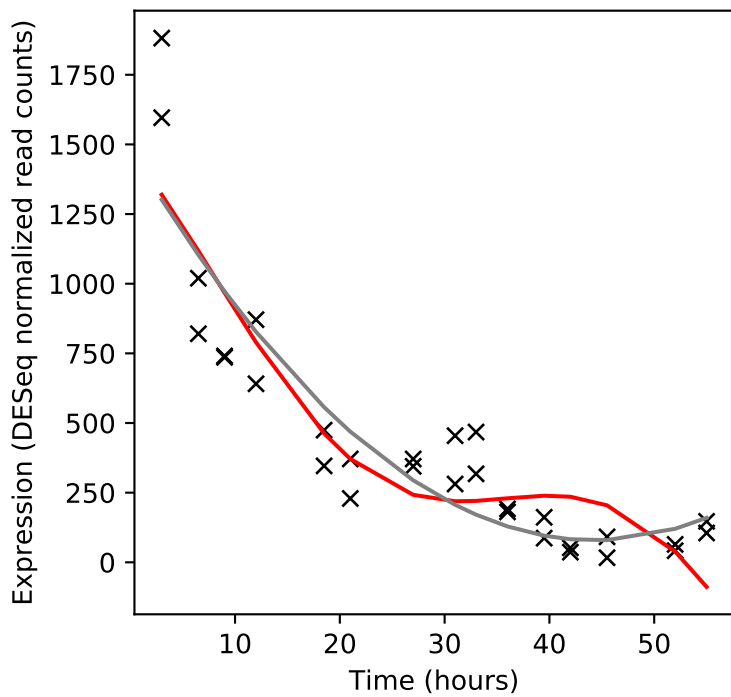

Rv1186c/-

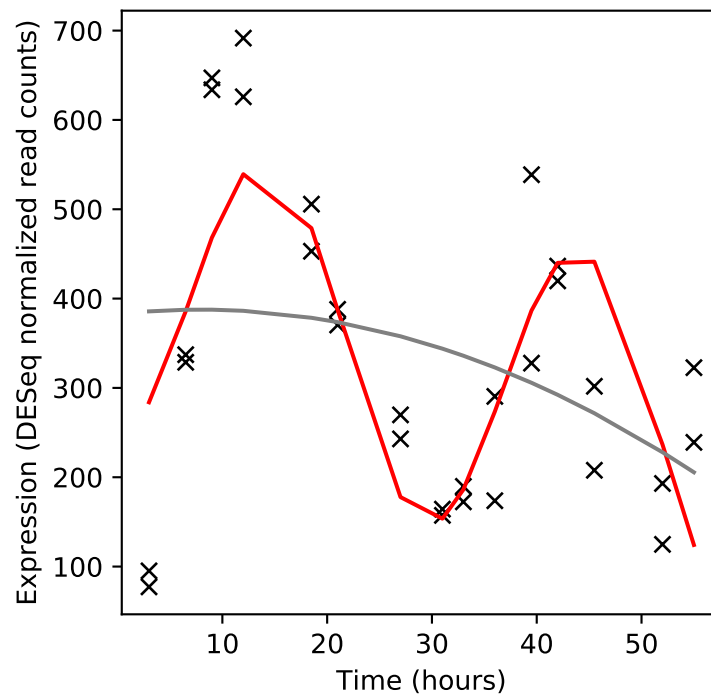

Rv1187/rocA

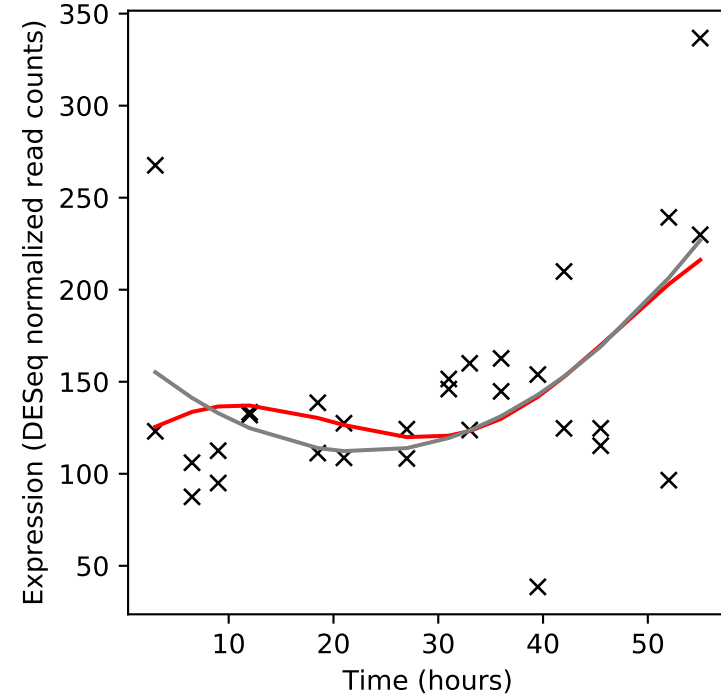

Rv1188/-

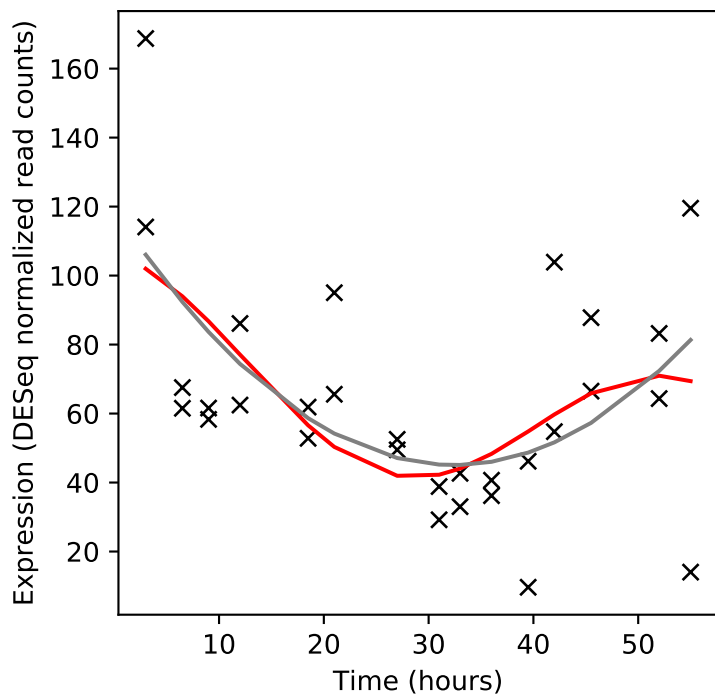

Rv1189/sigl

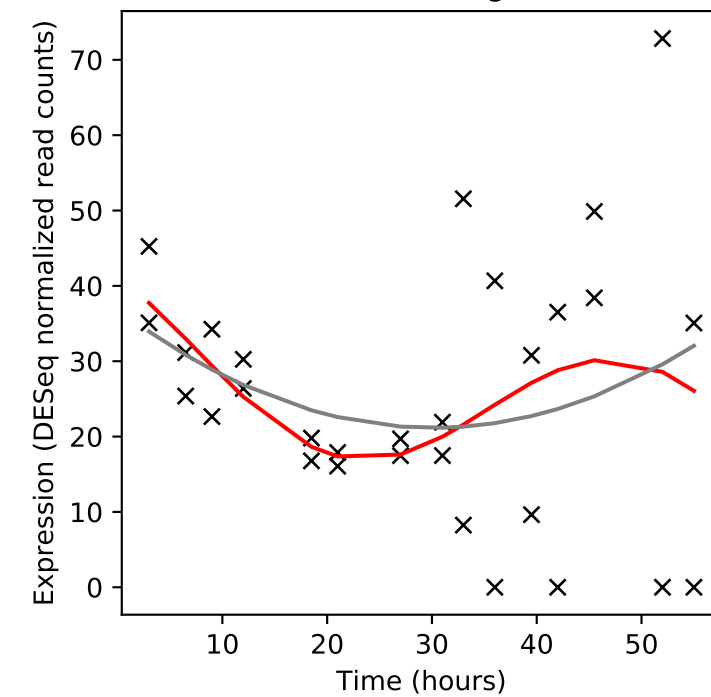

Rv1190/-

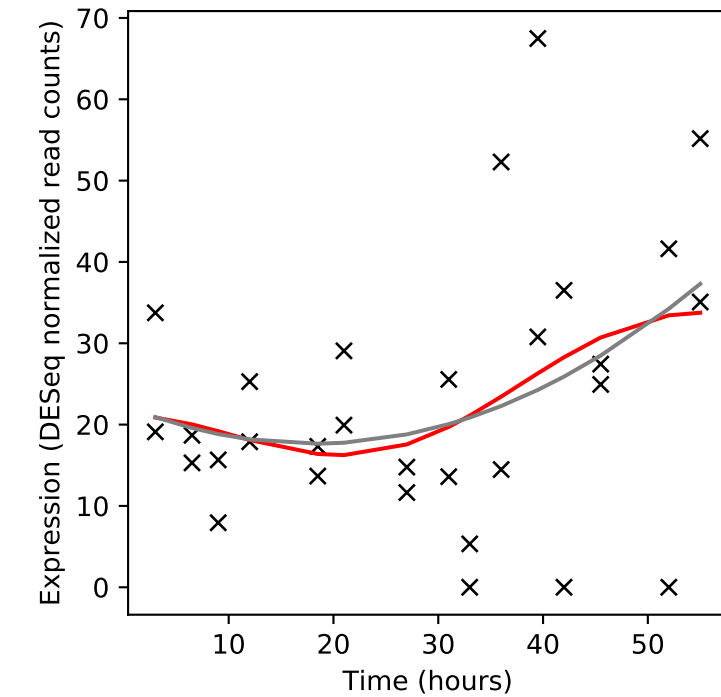

Rv1191/-

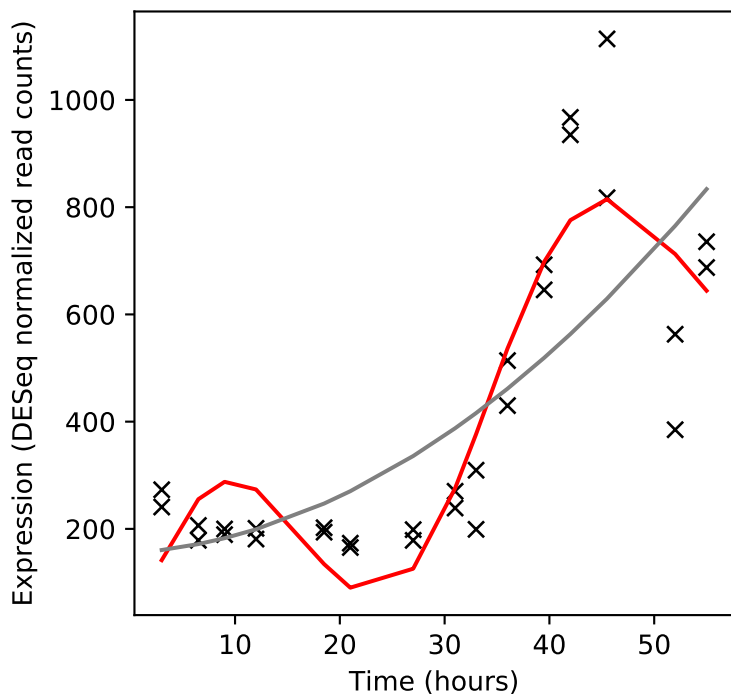

Rv1192/-

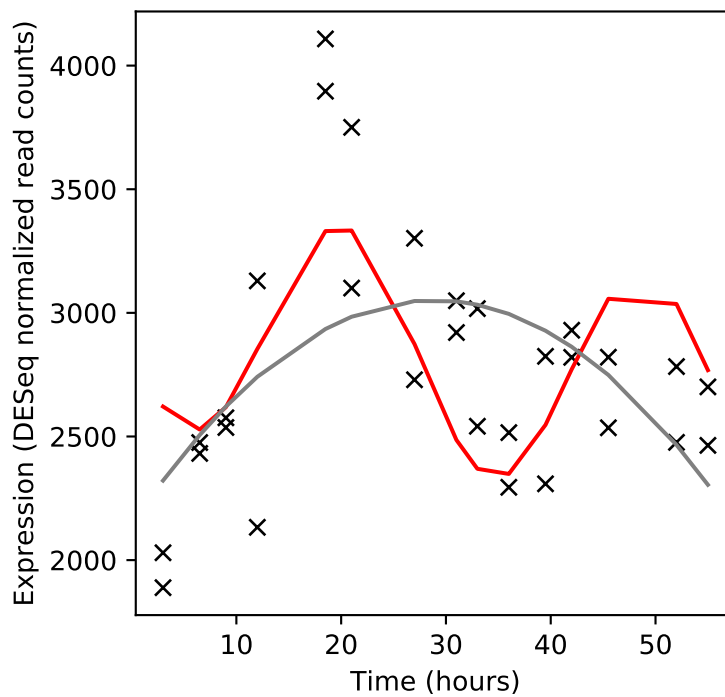

Rv1193/fadD36

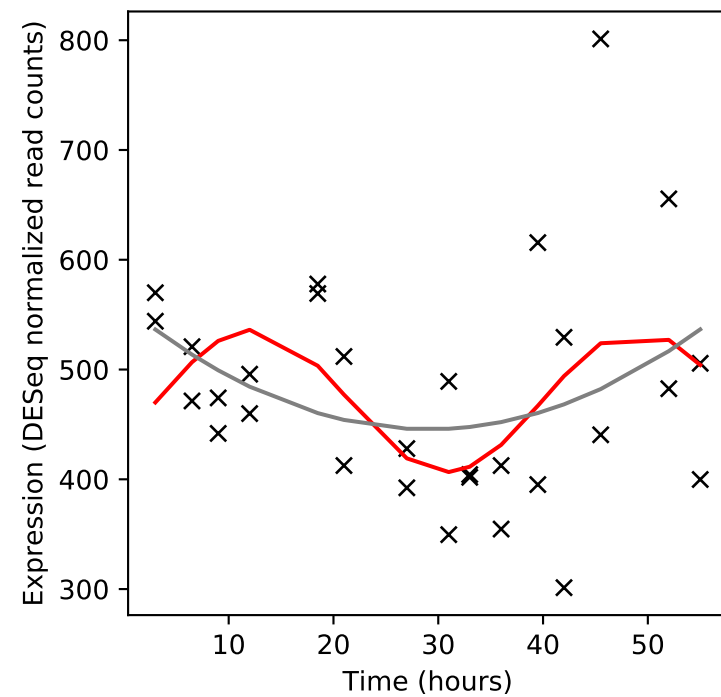

Rv1194c/-

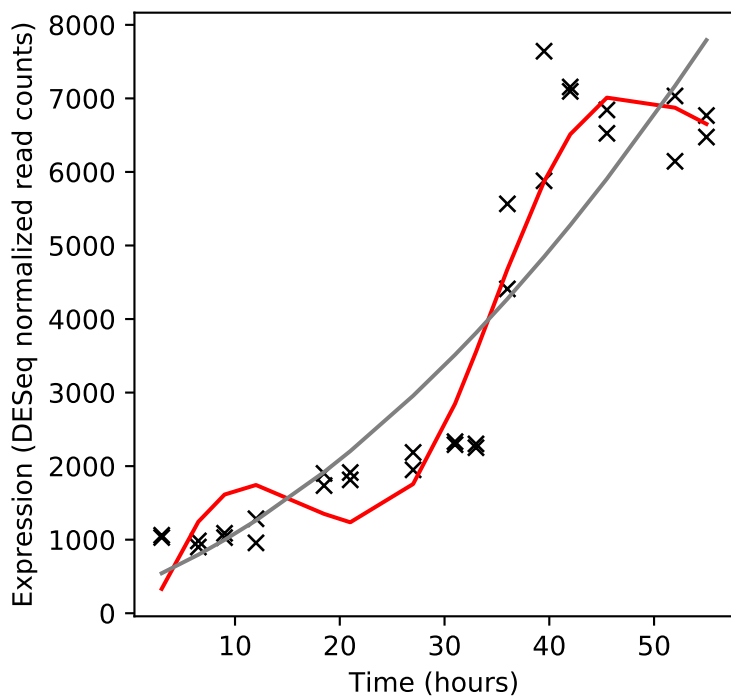

Rv1195/PE13

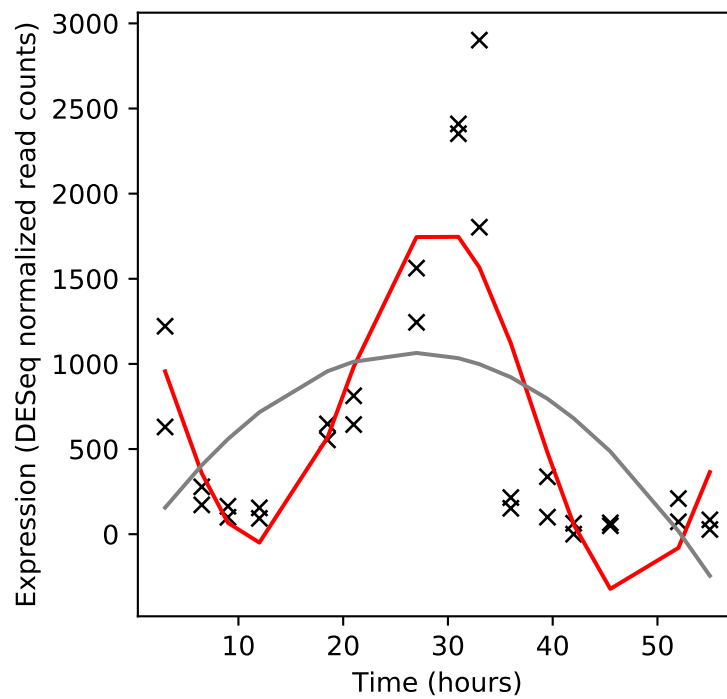

Rv1196/PPE18

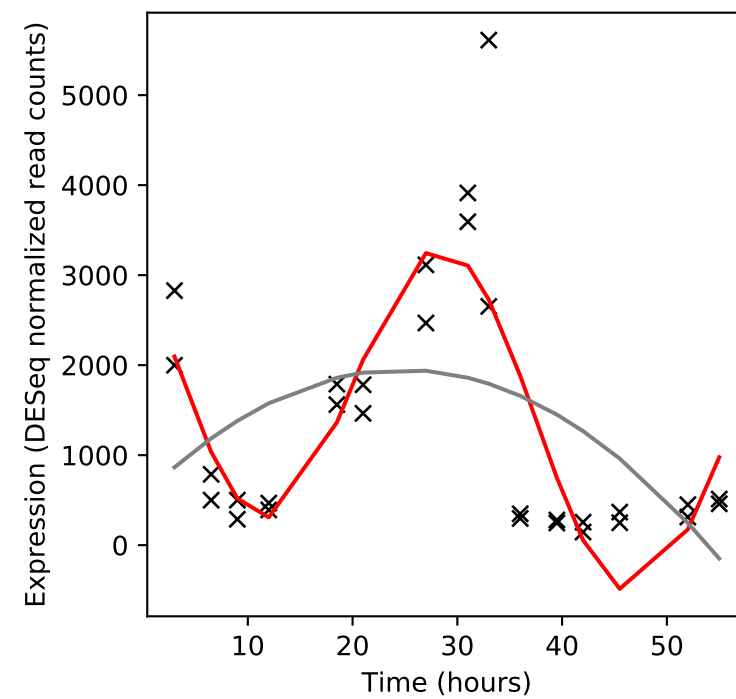

Rv1197/esxK

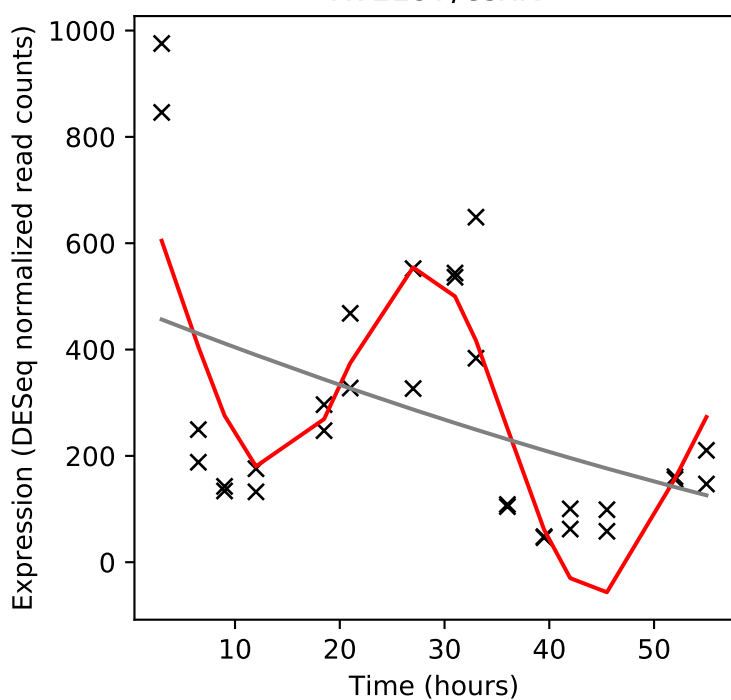

Rv1198/esxL

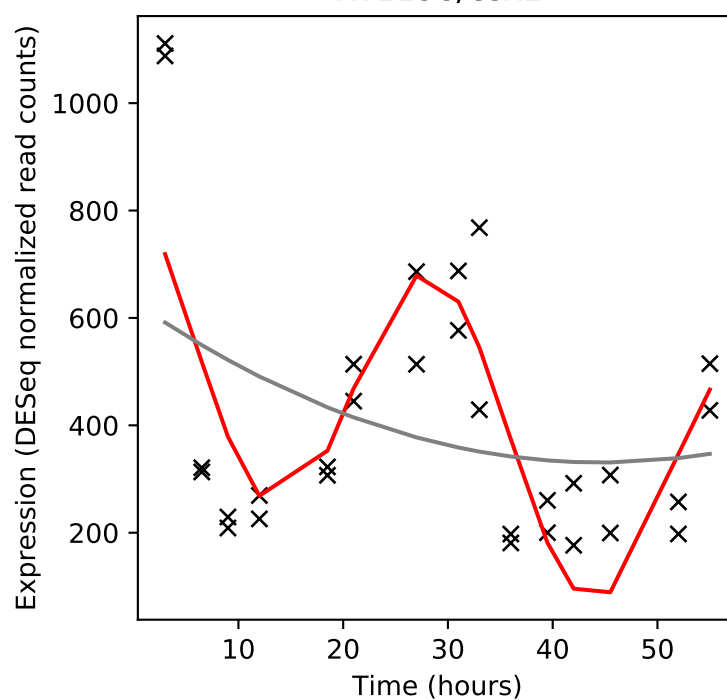

Rv1199c/-

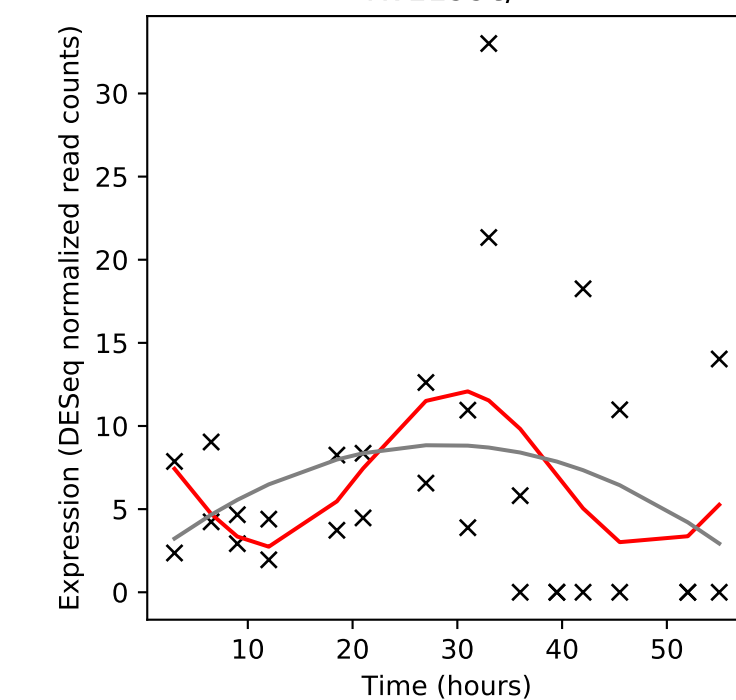

Rv1200/-

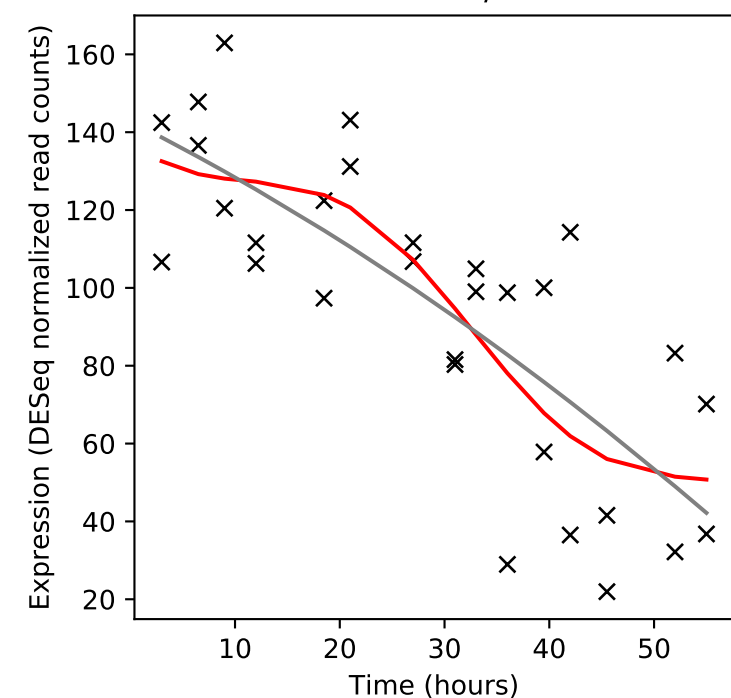

Rv1201c/dapD

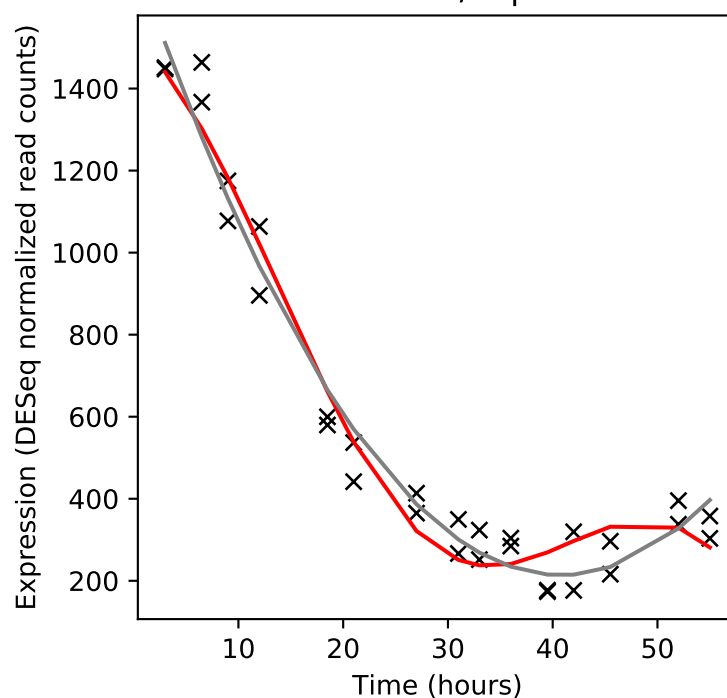

Rv1202/dapE

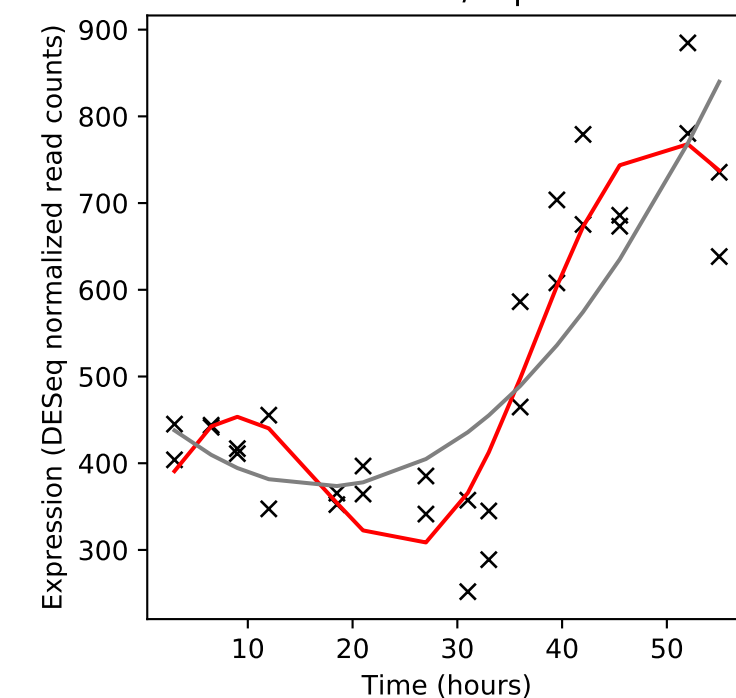

Rv1203c/-

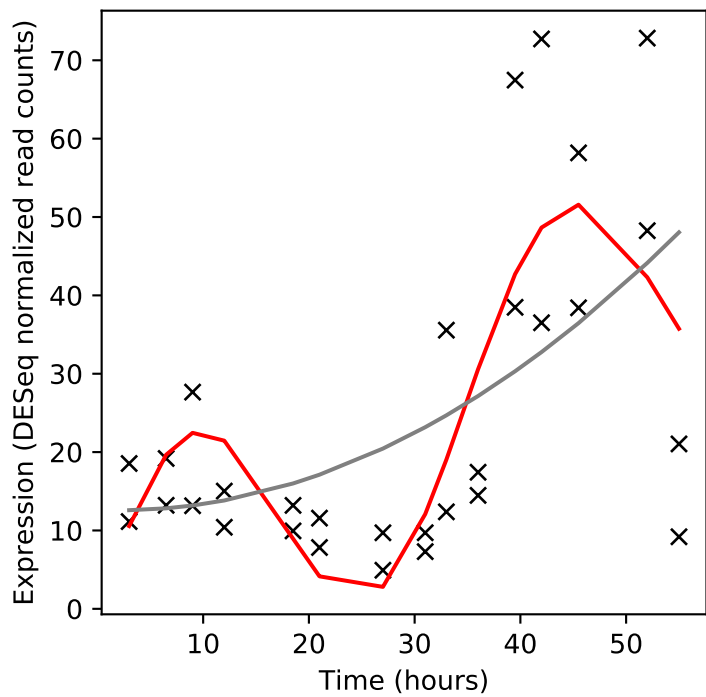

Rv1204c/-

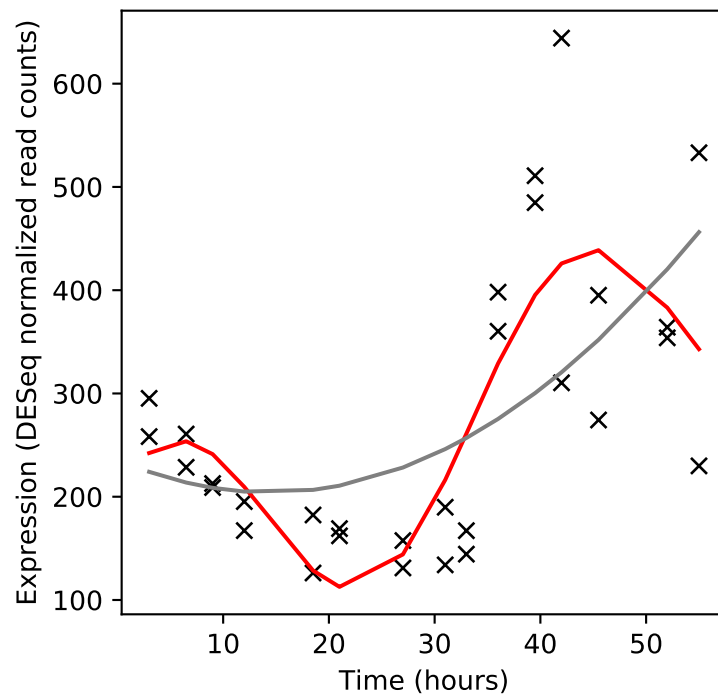

Rv1205/-

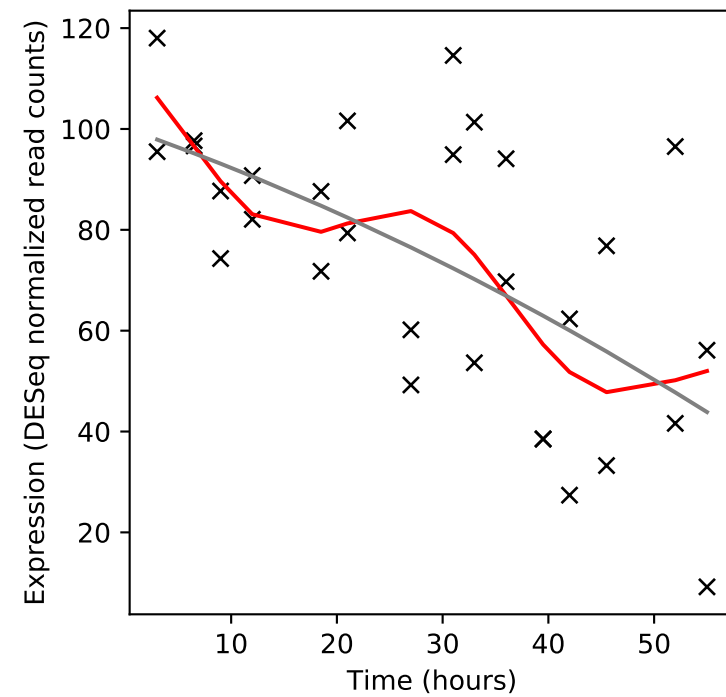

Rv1206/fadD6

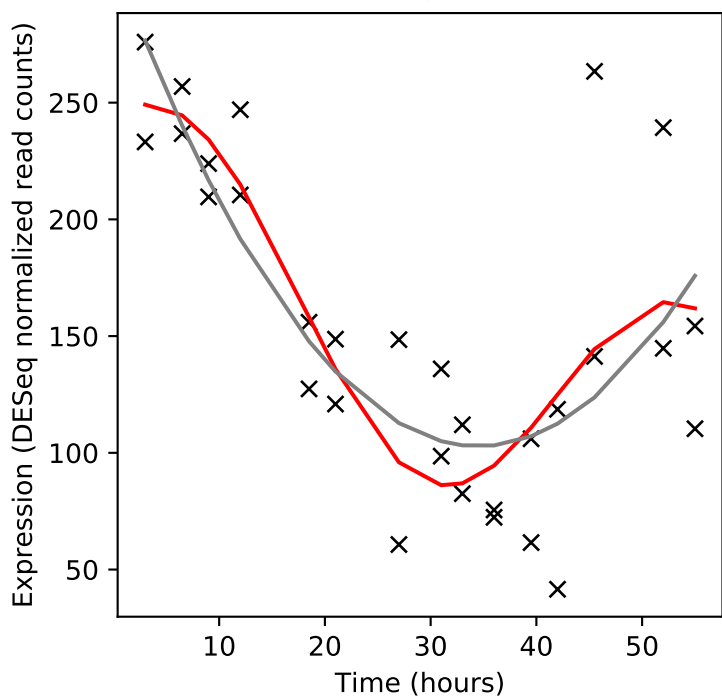

Rv1207/foIP2

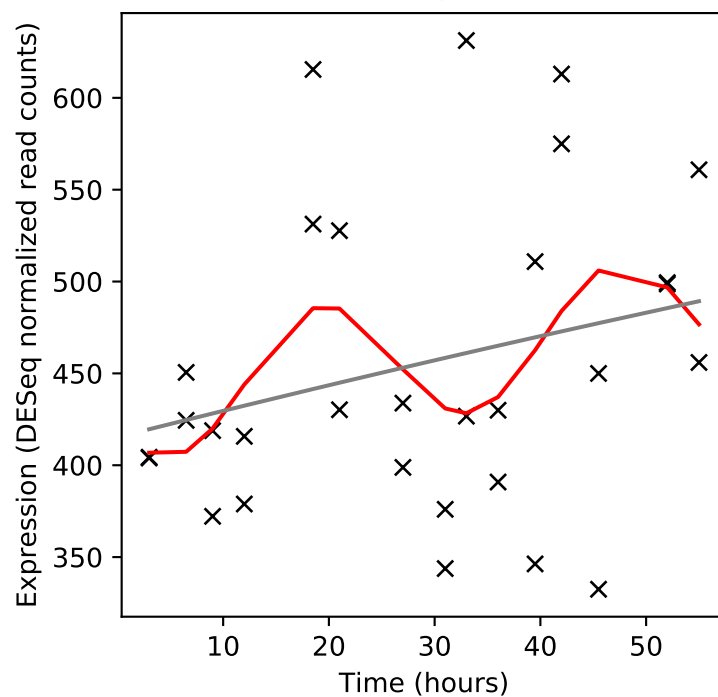

Rv1208/gpgS

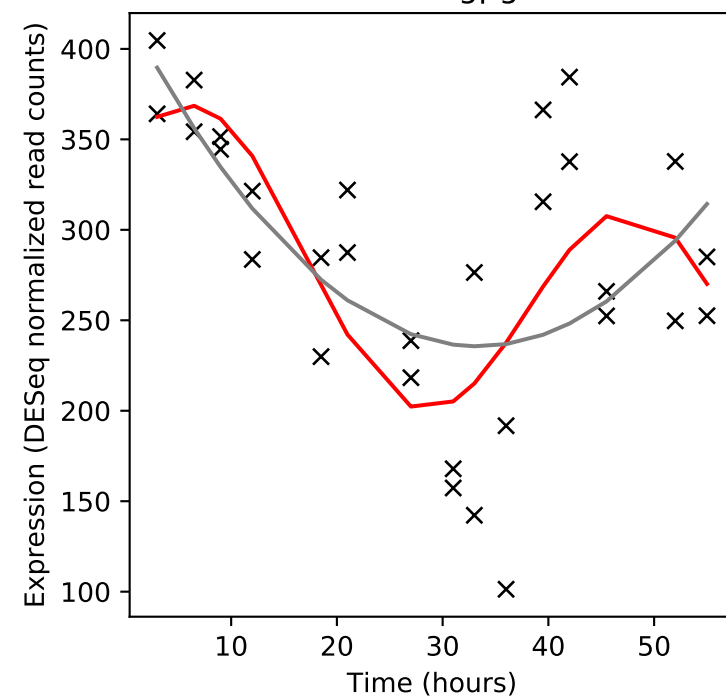

Rv1209/-

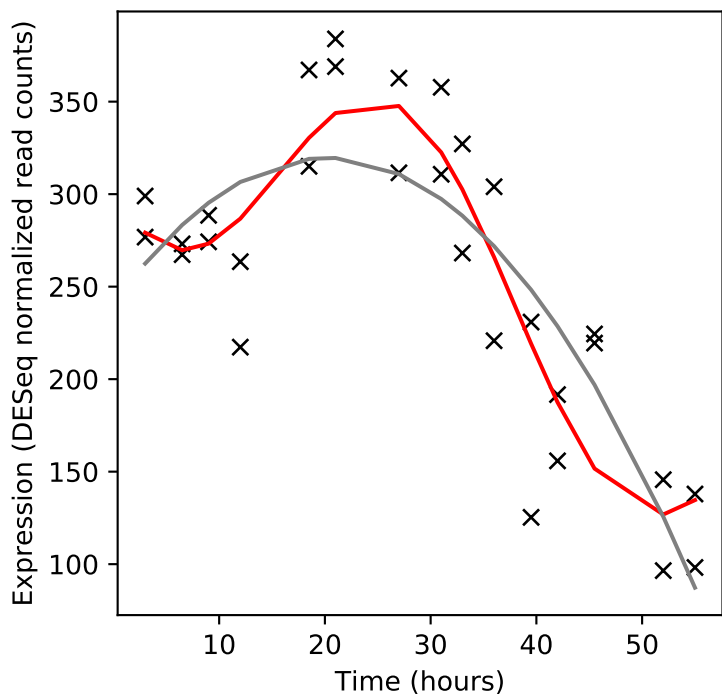

Rv1210/tagA

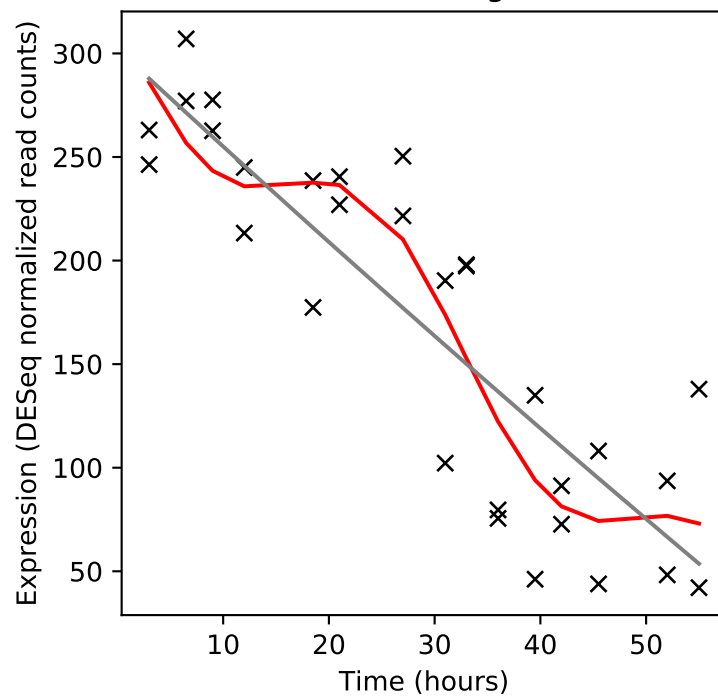

Rv1211/-

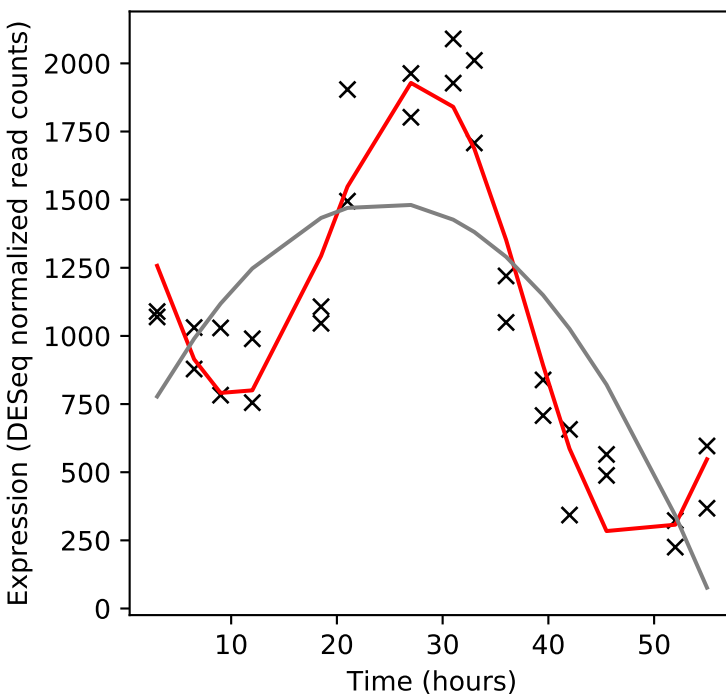

Rv1212c/glgA

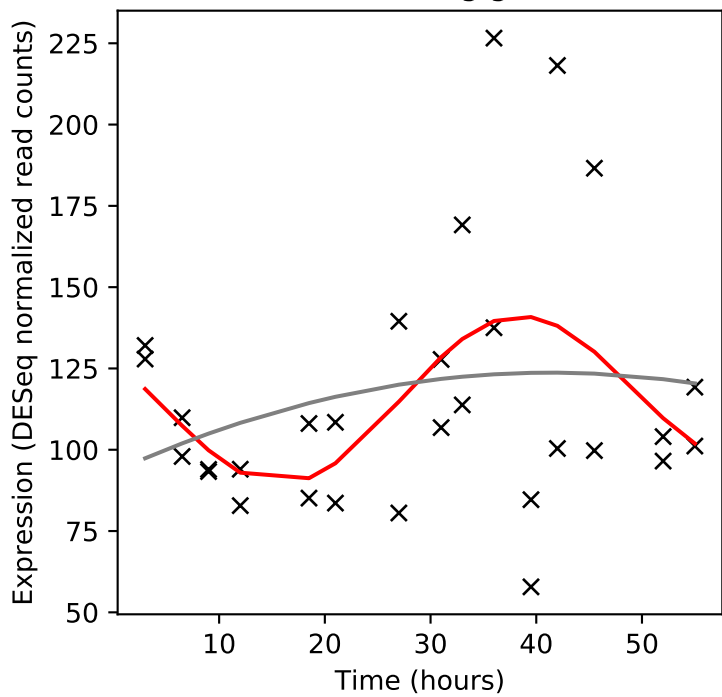

Rv1213/glgC

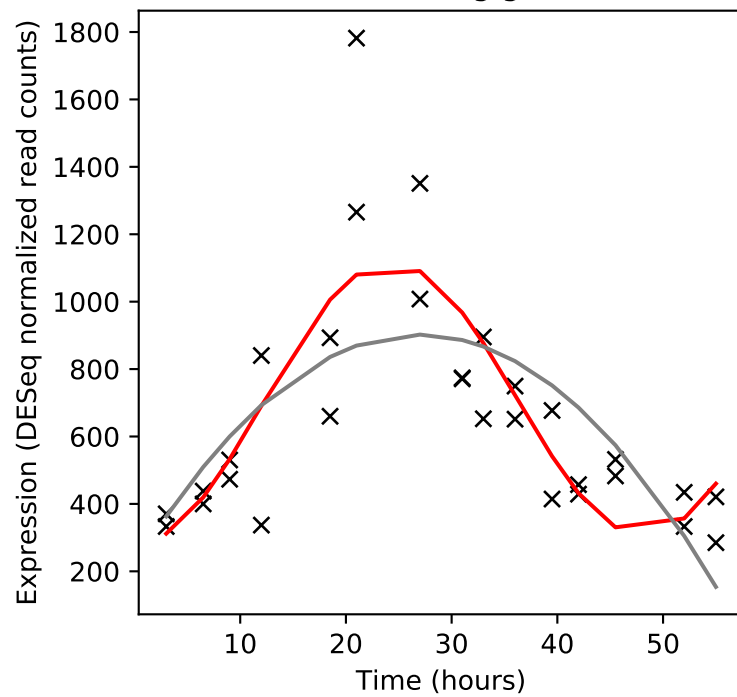

Rv1214c/PE14

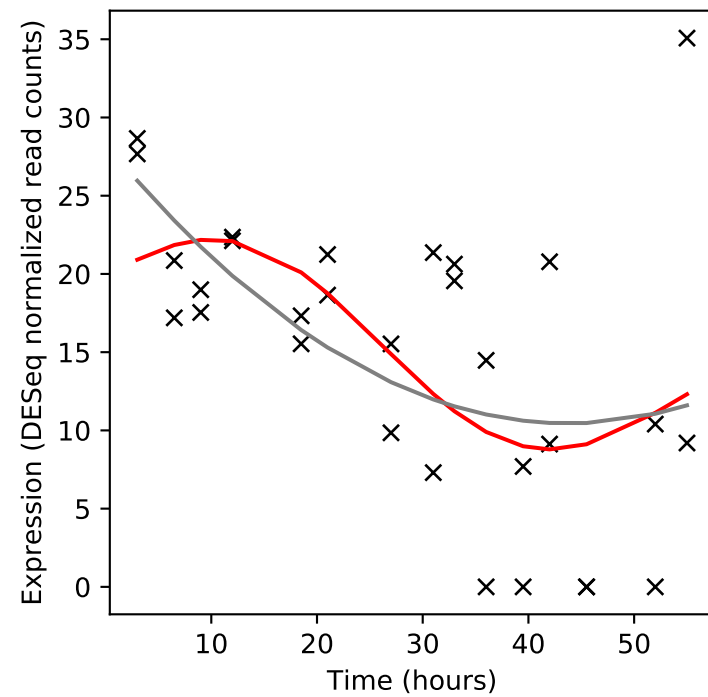

Rv1215c/-

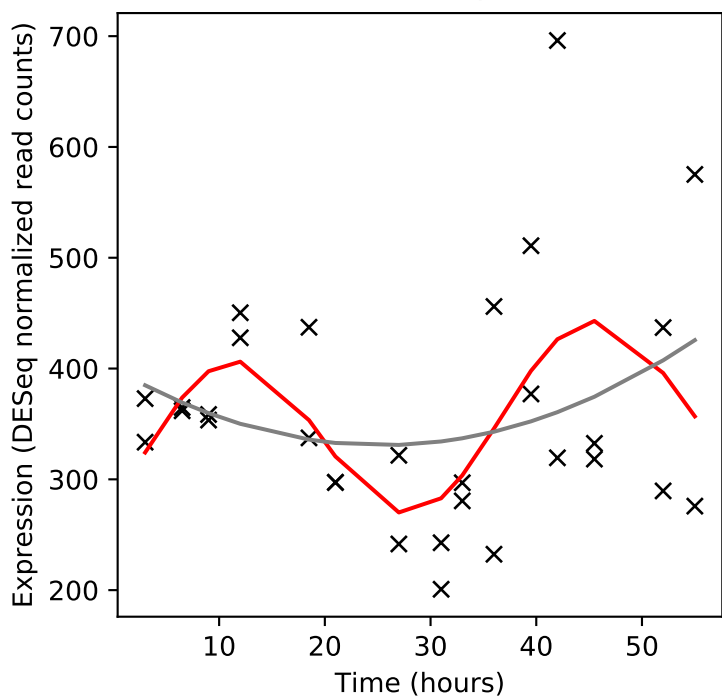

Rv1216c/-

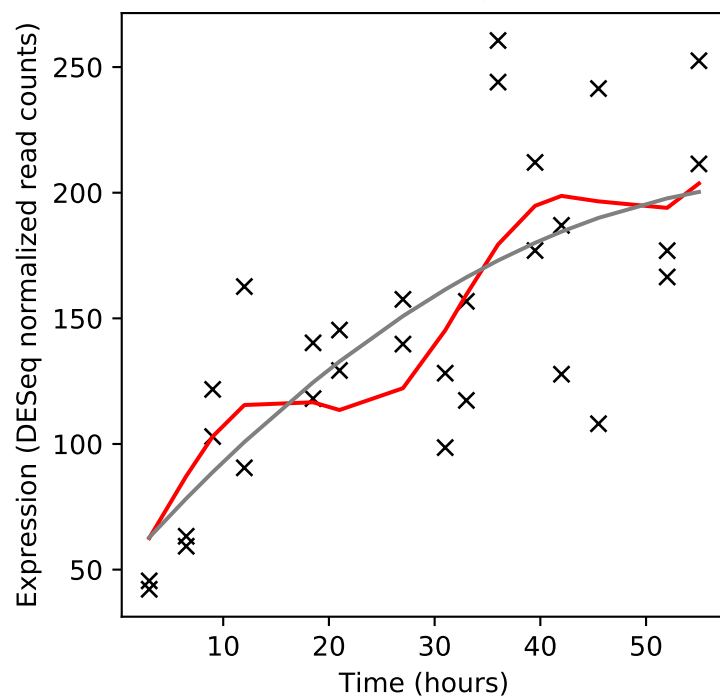

Rv1217c/-

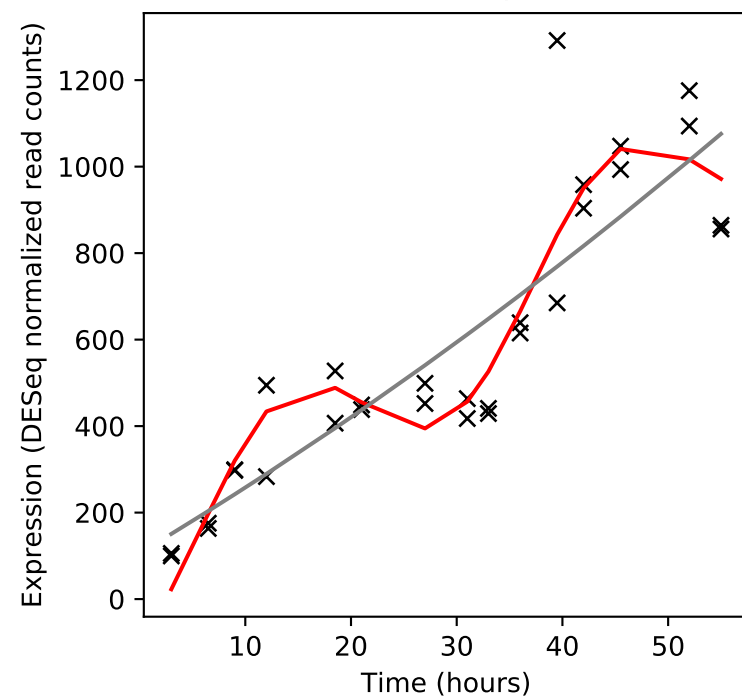

Rv1218c/-

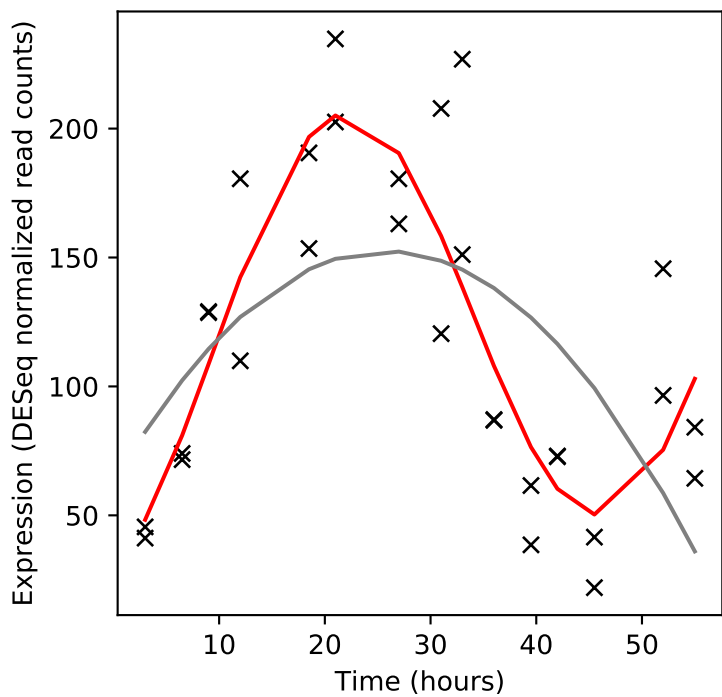

Rv1219c/-

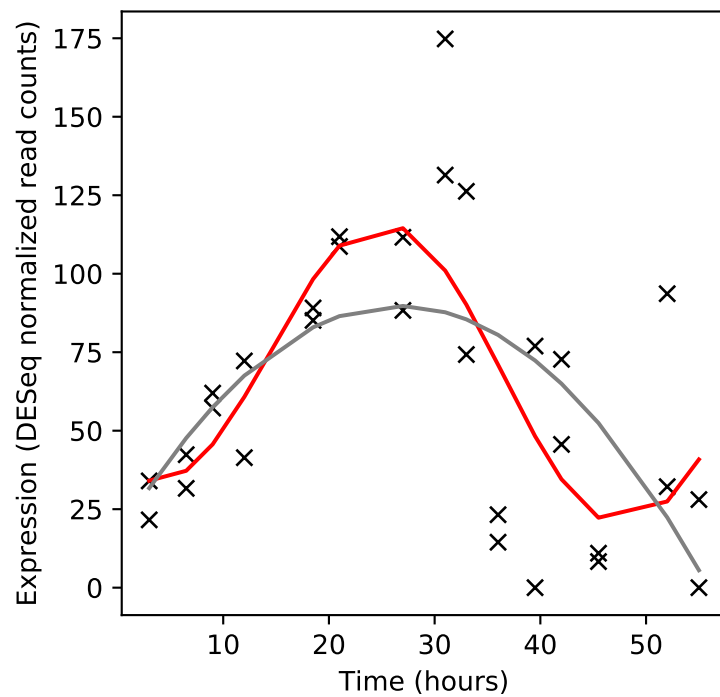

Rv1220c/-

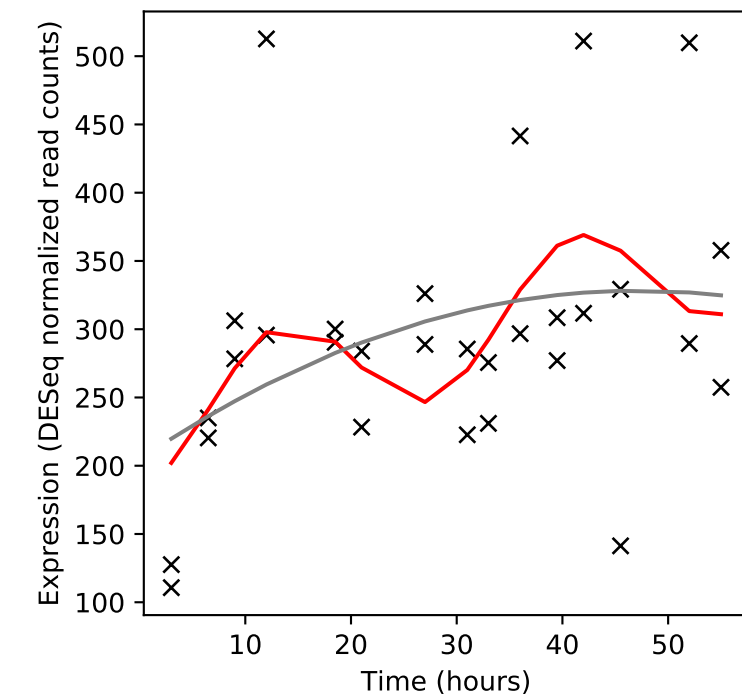

Rv1221/sigE

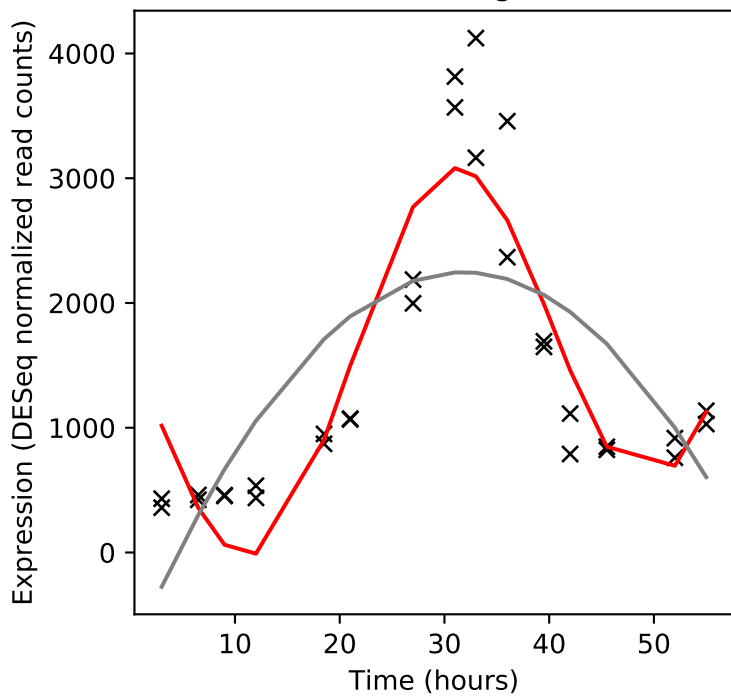

Rv1222/rseA

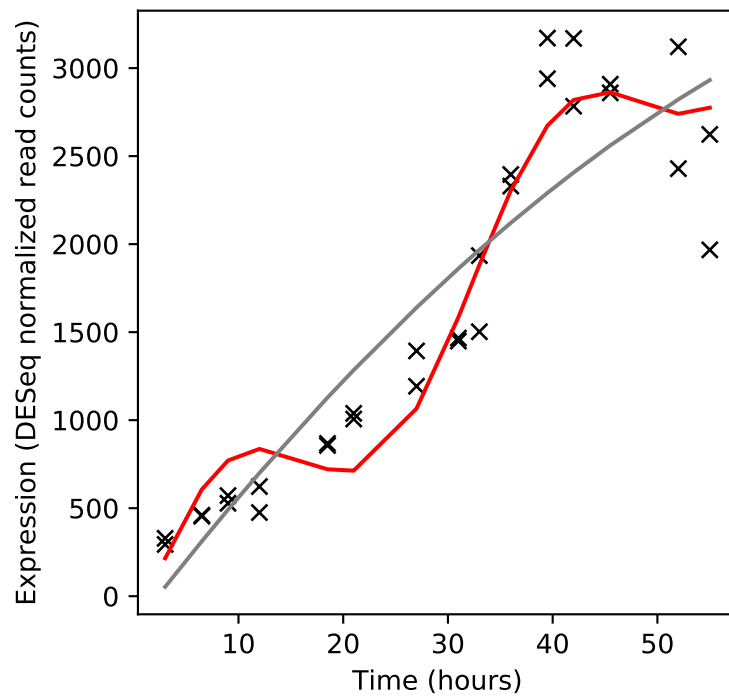

Rv1223/htrA

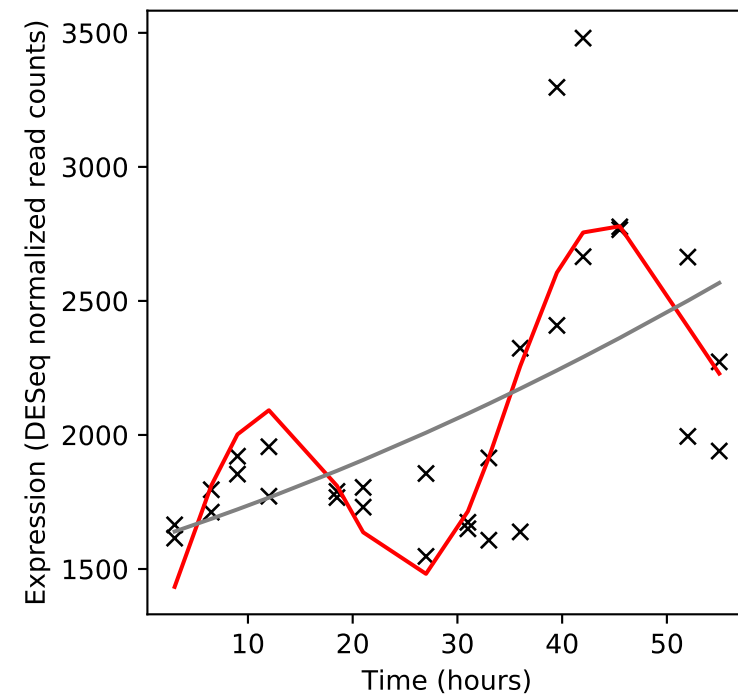

Rv1224/tatB

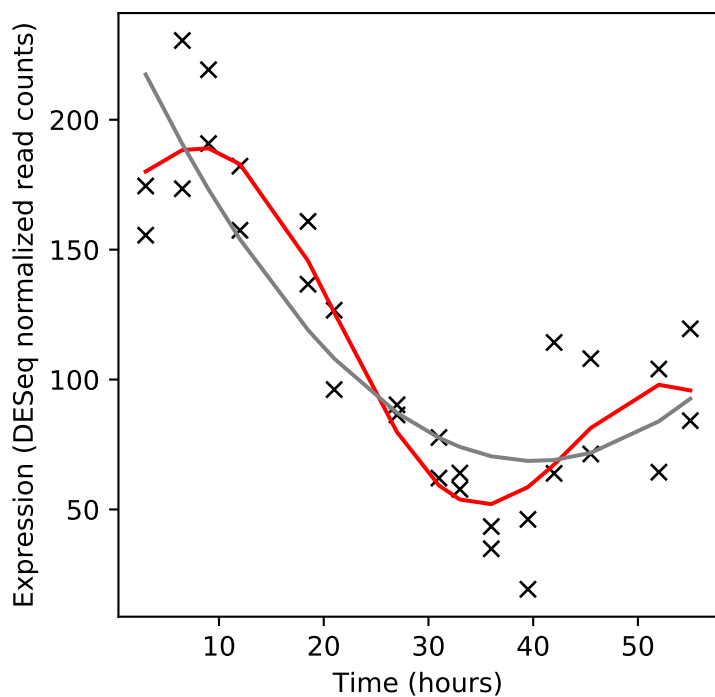

Rv1225c/-

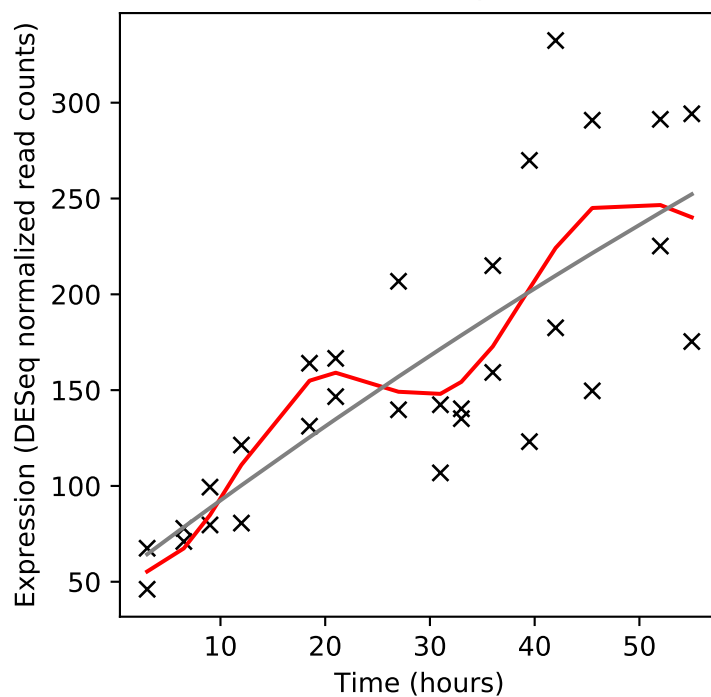

Rv1226c/-

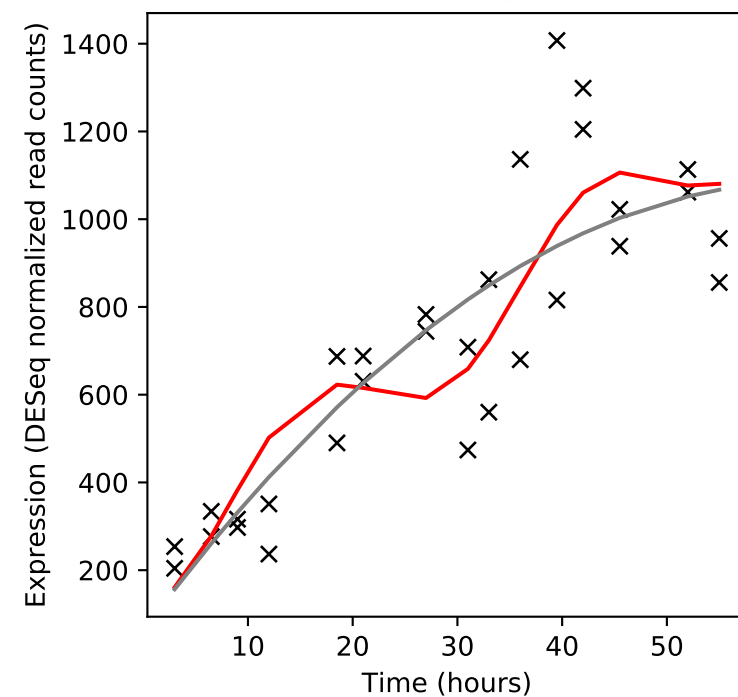

Rv1227c/-

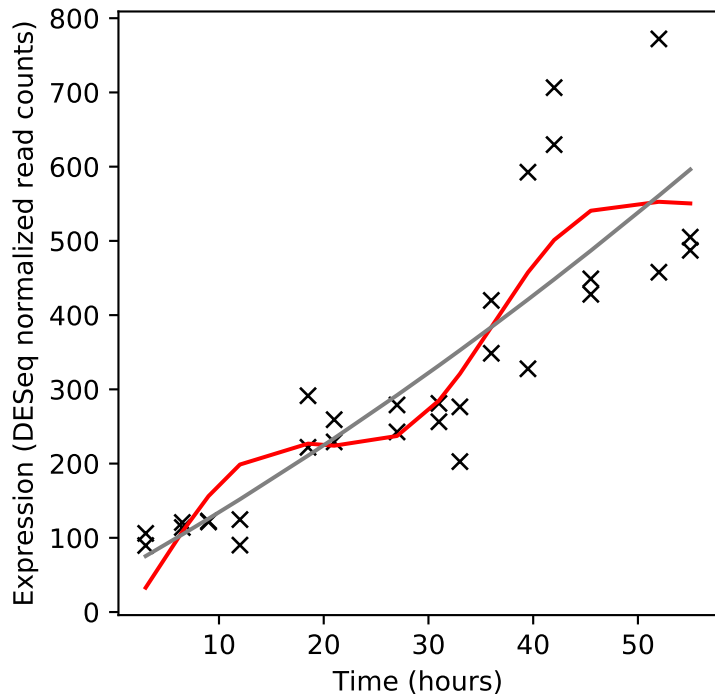

Rv1228/lpqX

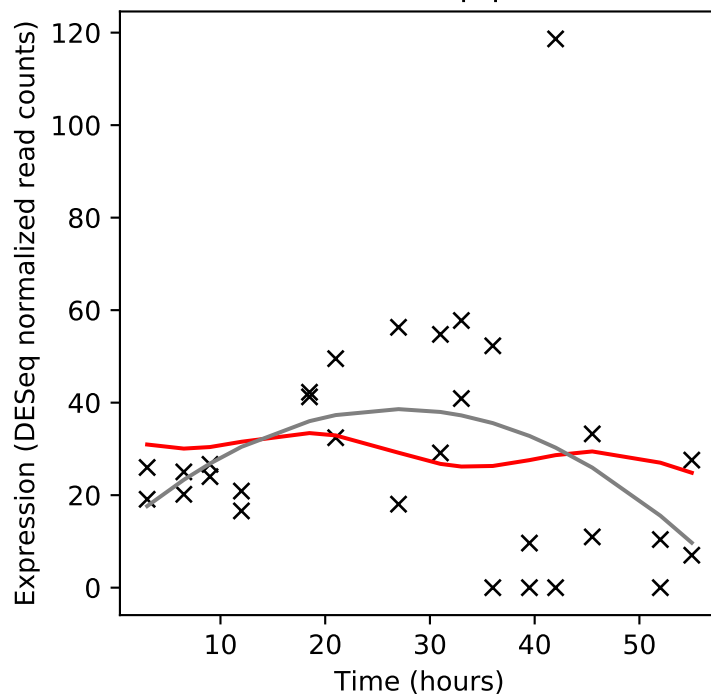

Rv1229c/mrp

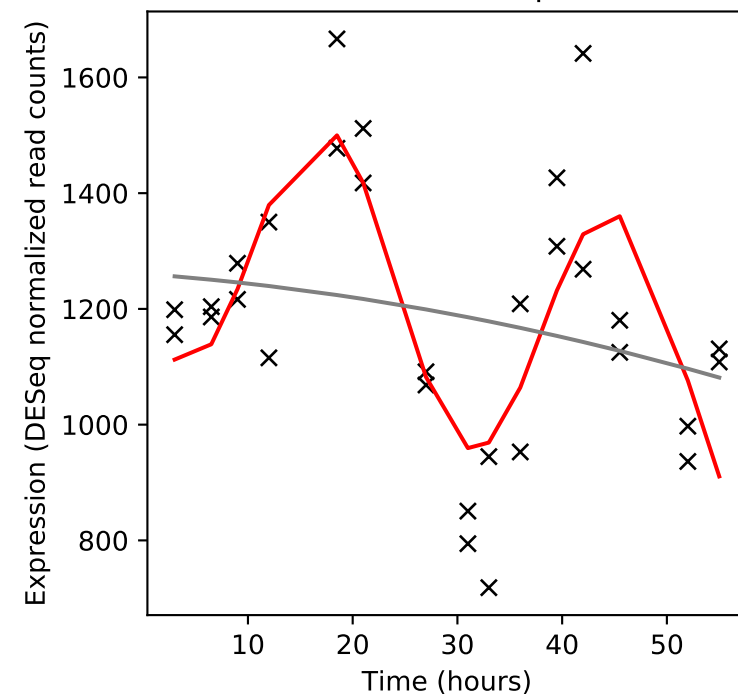

Rv1230c/-

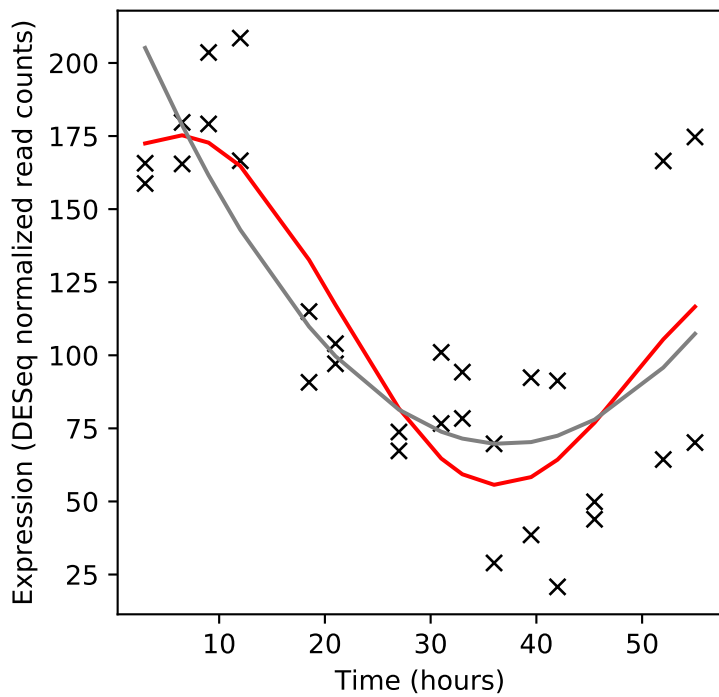

Rv1231c/-

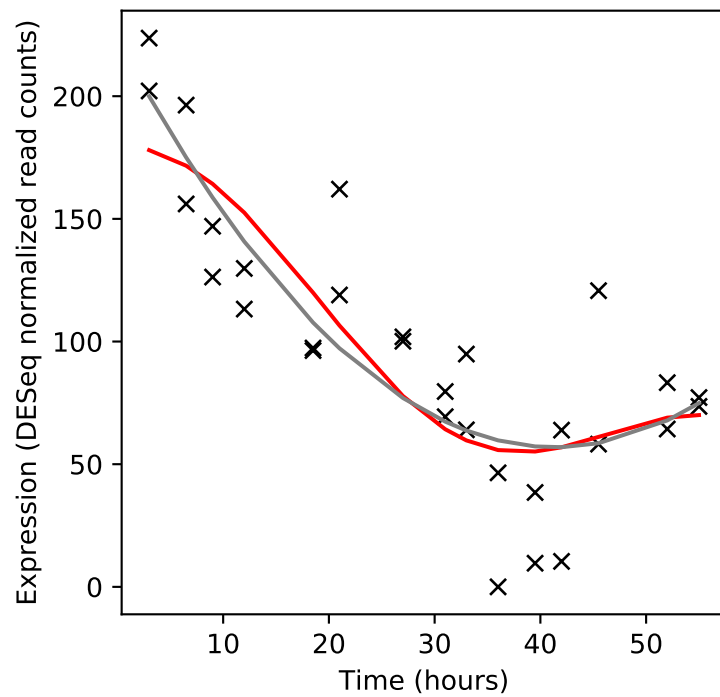

Rv1232c/-

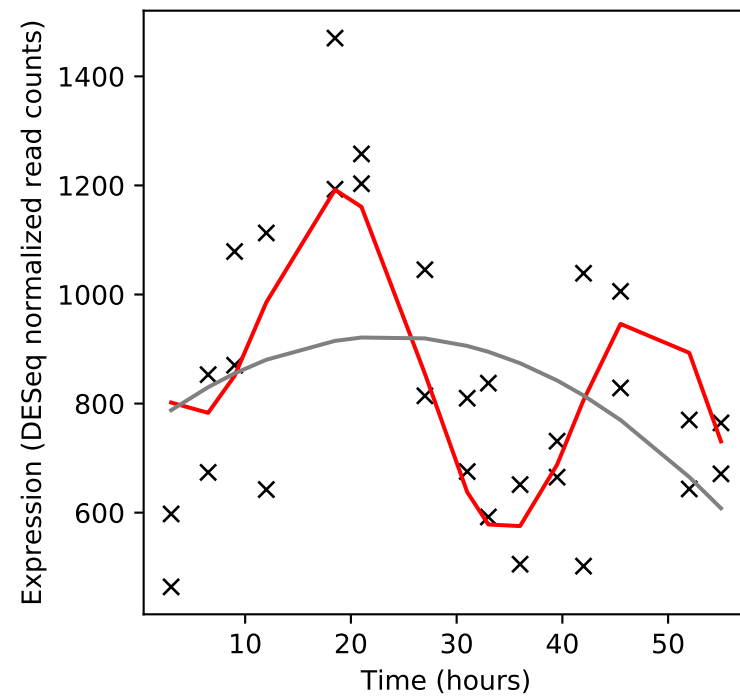

Rv1233c/-

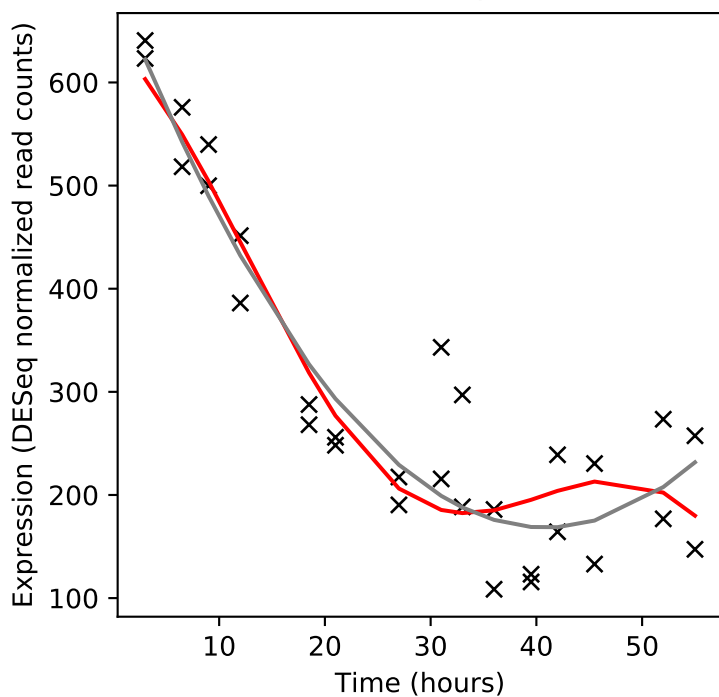

Rv1234/-

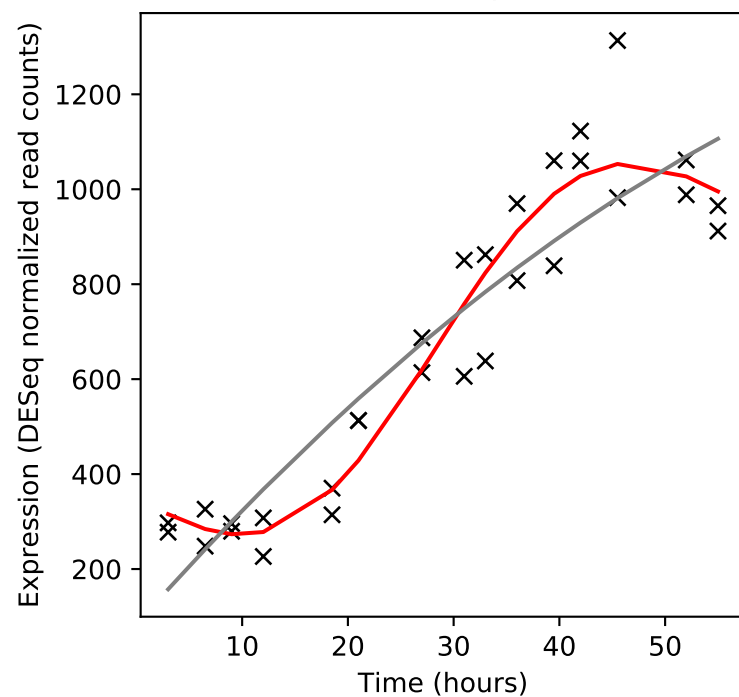

Rv1235/lpqY

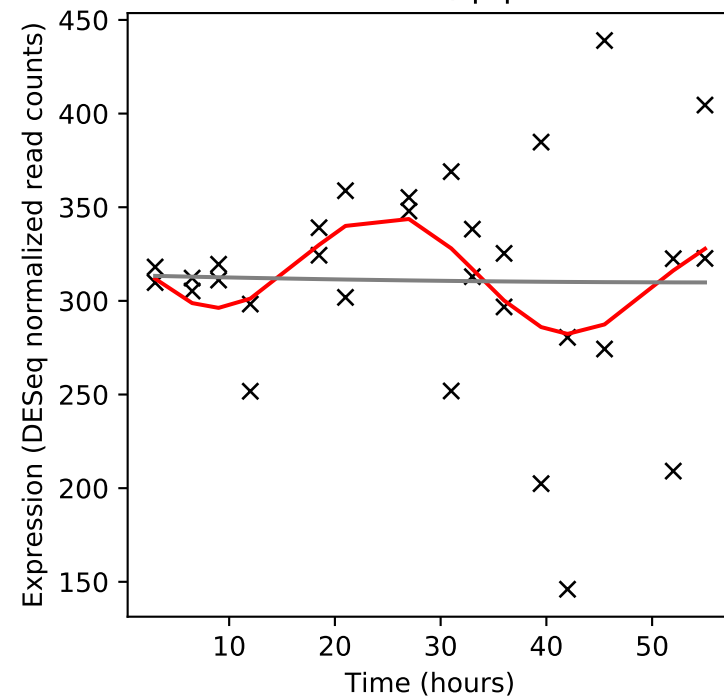

Rv1236/sugA

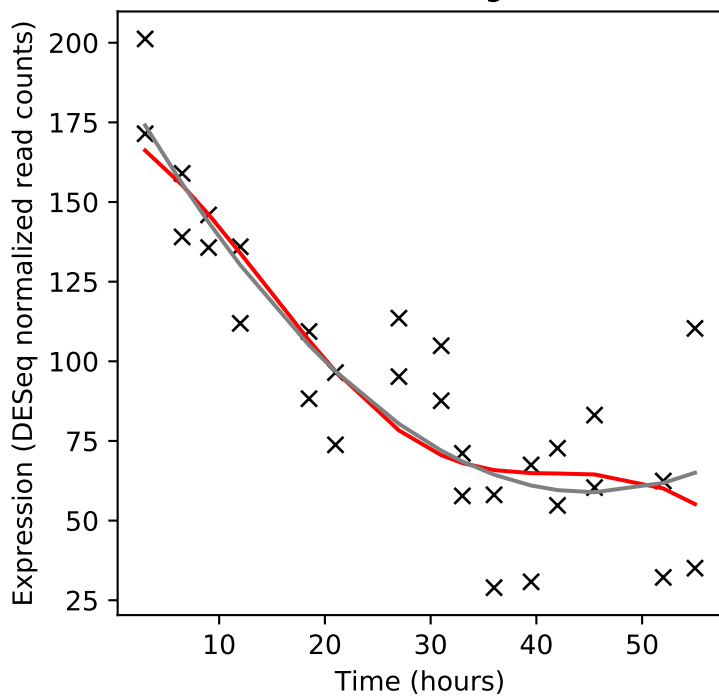

Rv1237/sugB

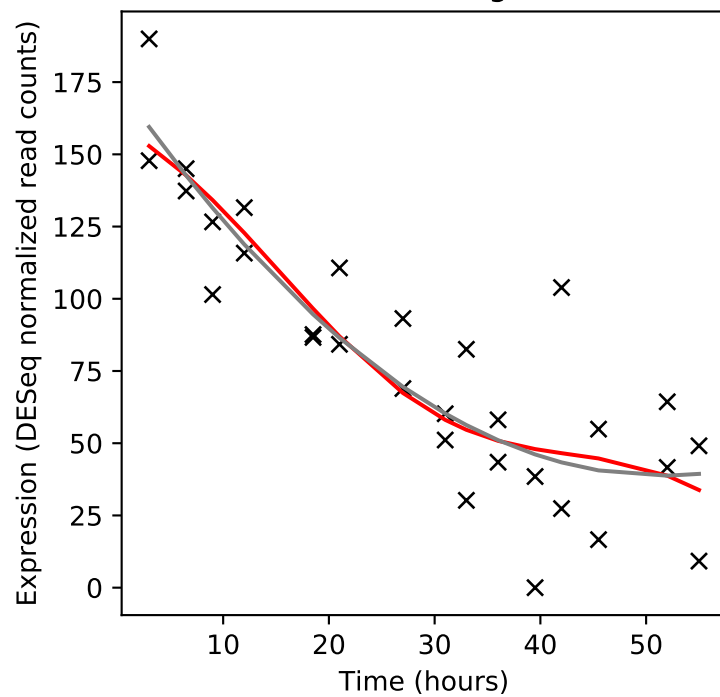

Rv1238/sugC

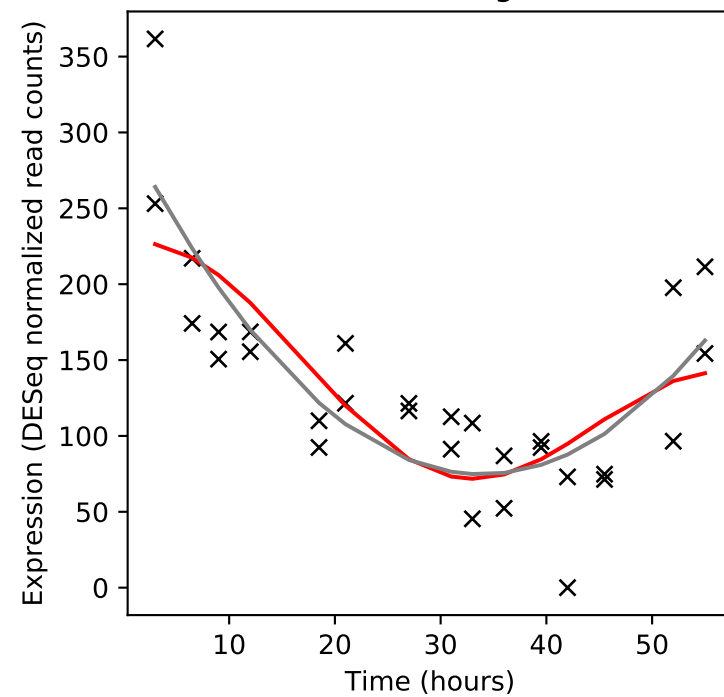



Rv1239c/corA

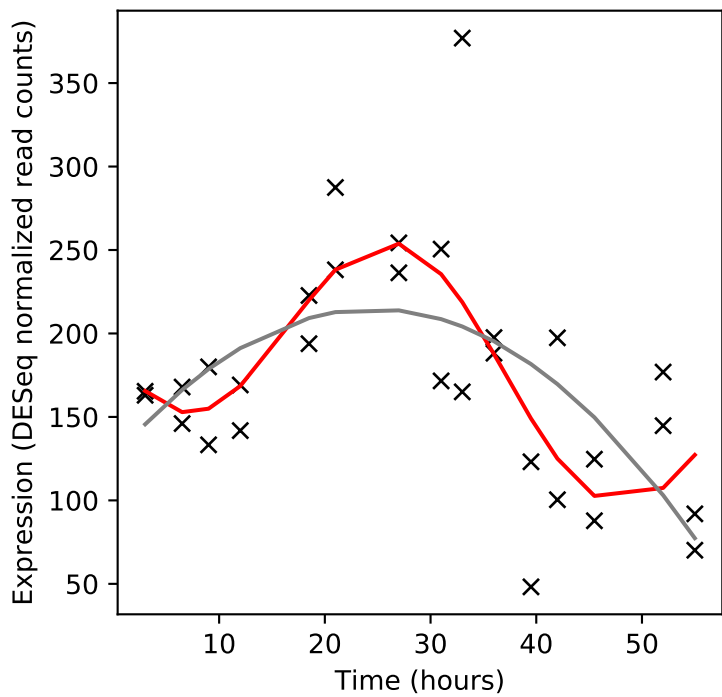

Rv1240/mdh

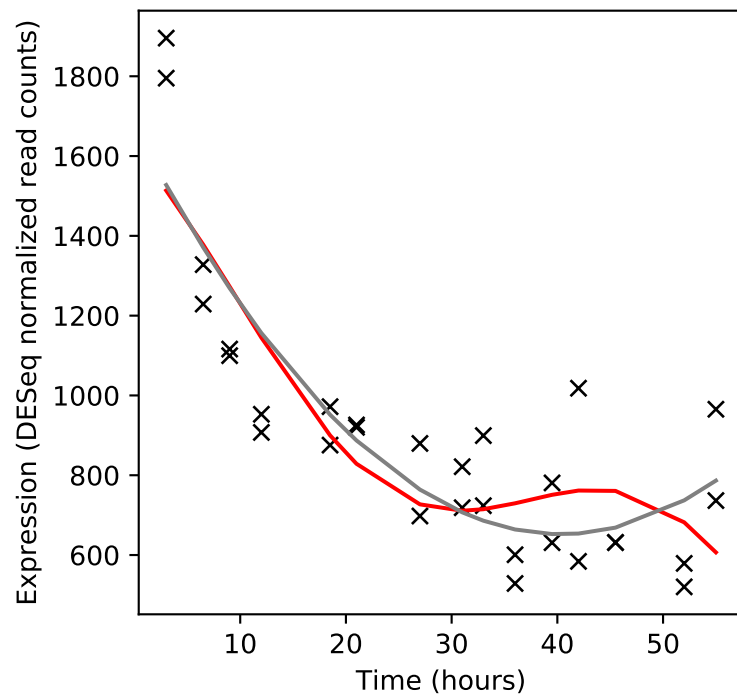

Rv1241/vapB33

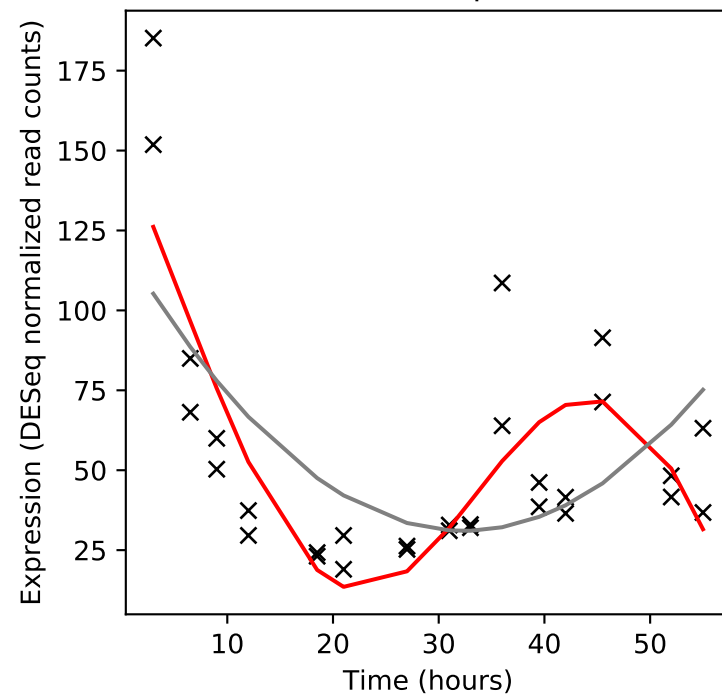

Rv1242/vapC33

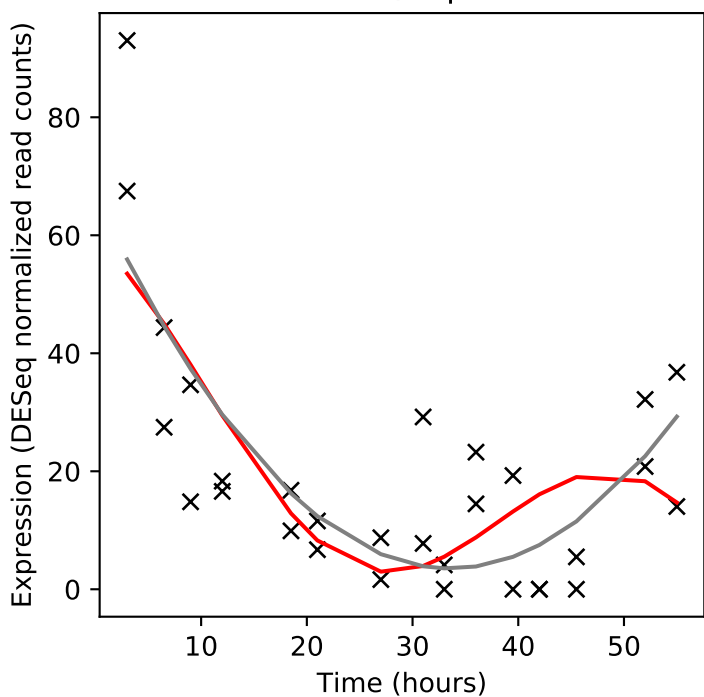

Rv1243c/PE\_PGRS23

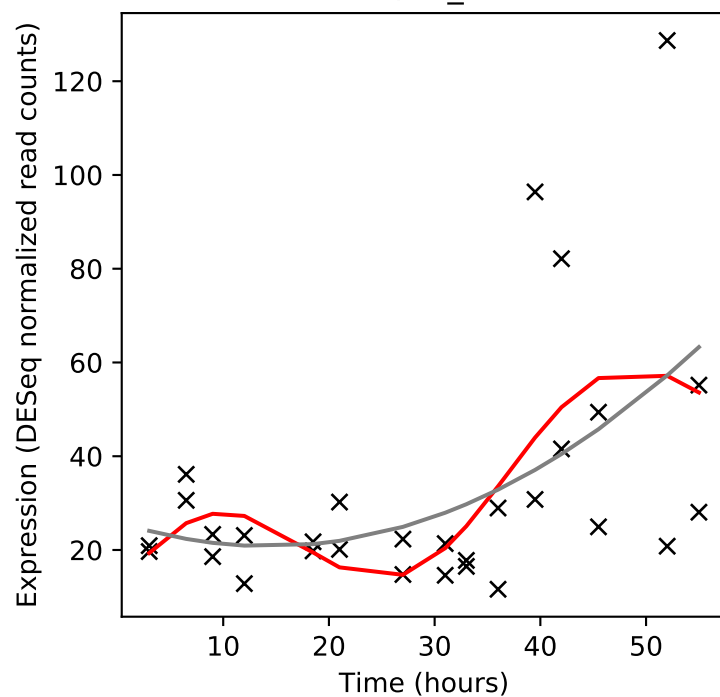

Rv1244/lpqZ

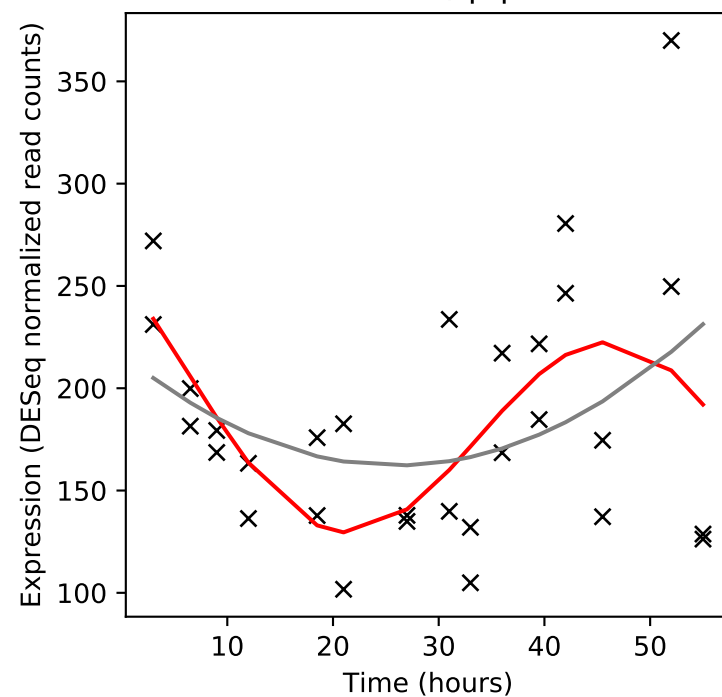

Rv1245c/-

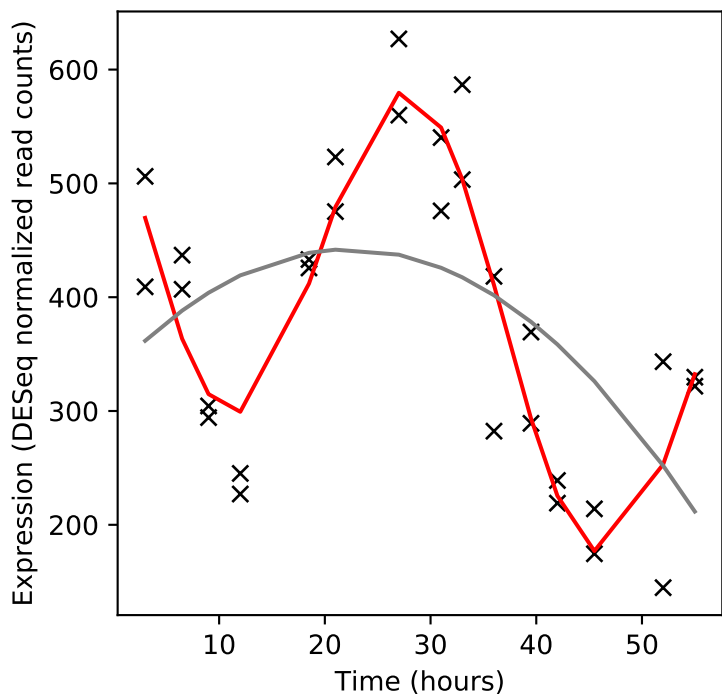

Rv1246c/reIE

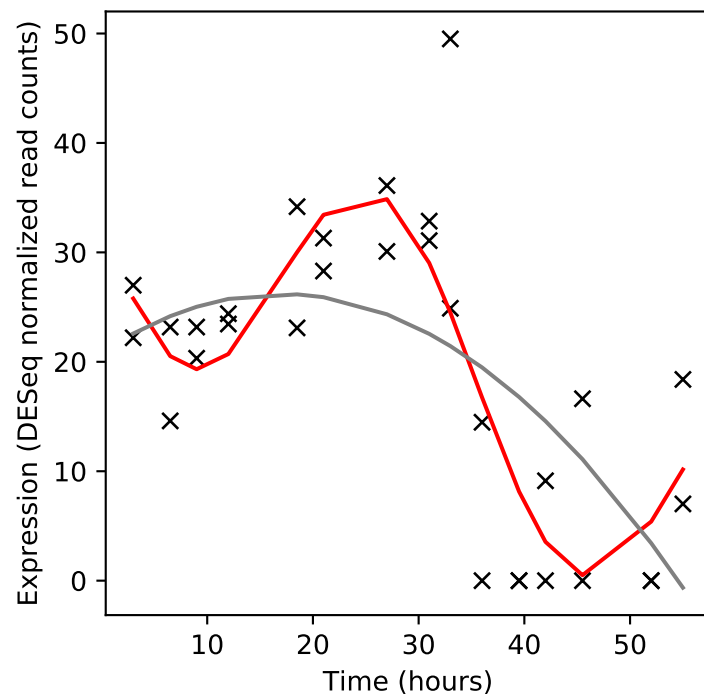

Rv1247c/reIB

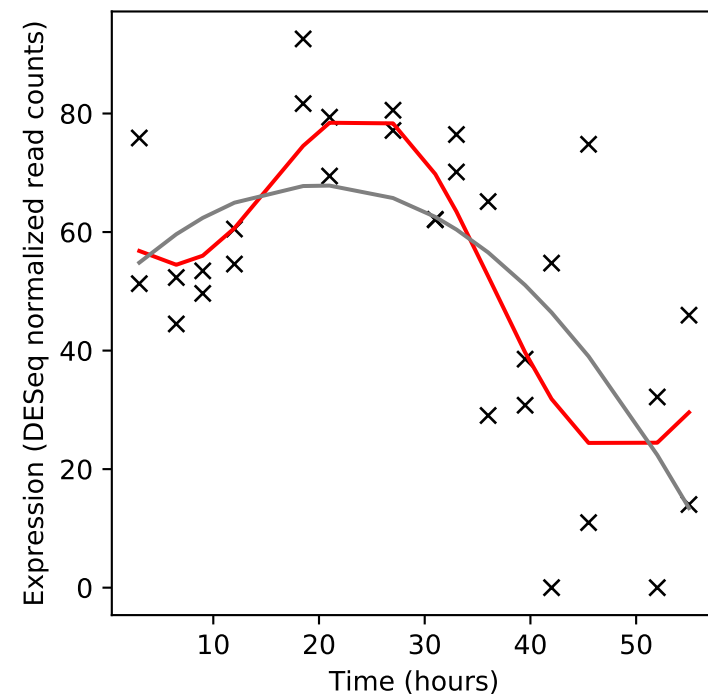

Rv1248c/-

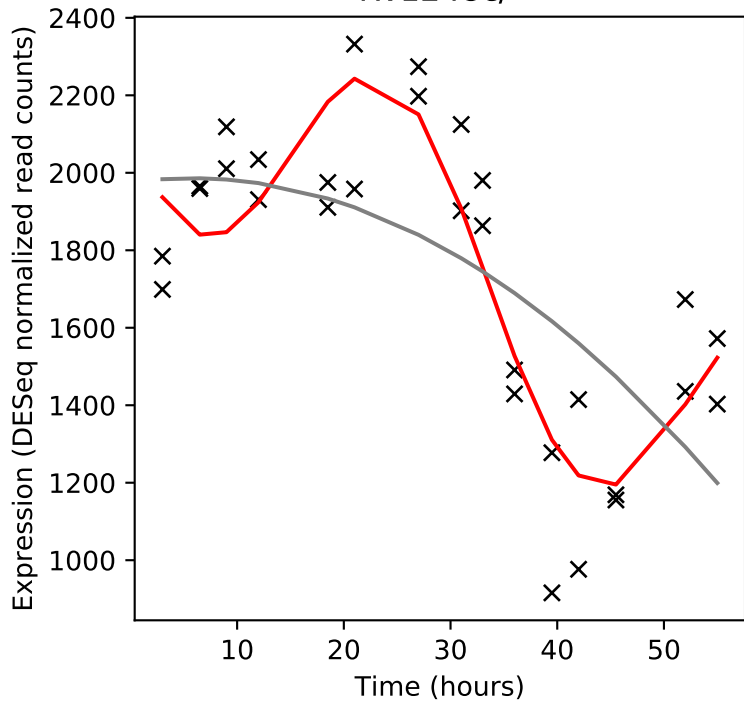

Rv1249c/-

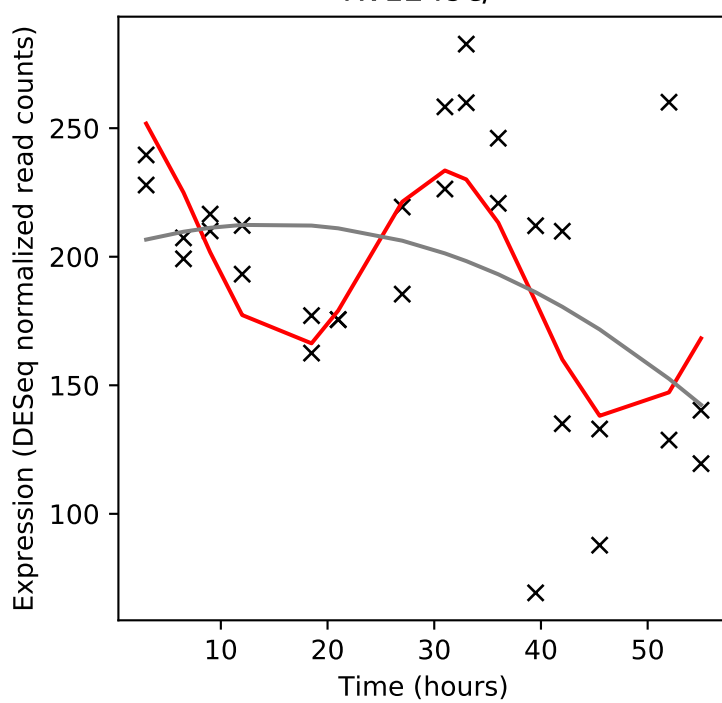

Rv1250/-

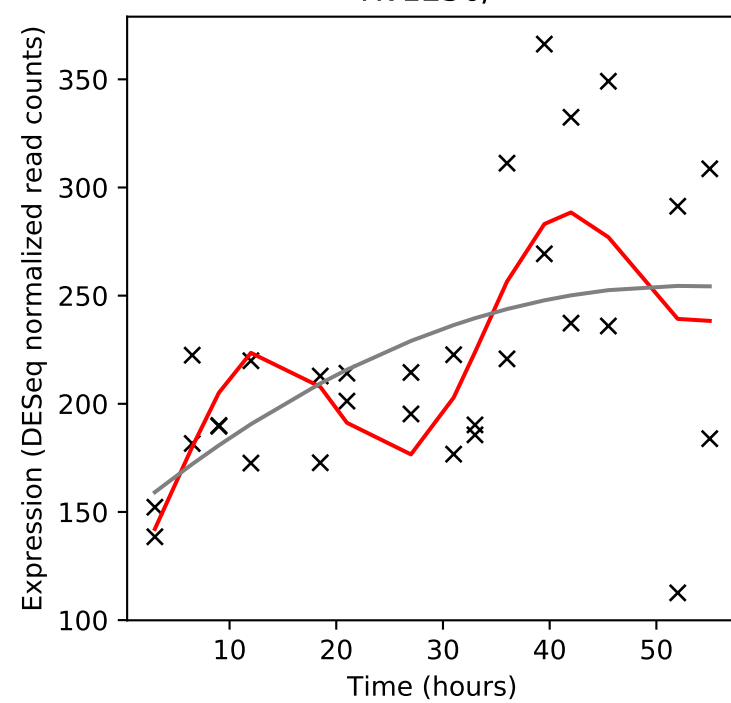

Rv1251c/-

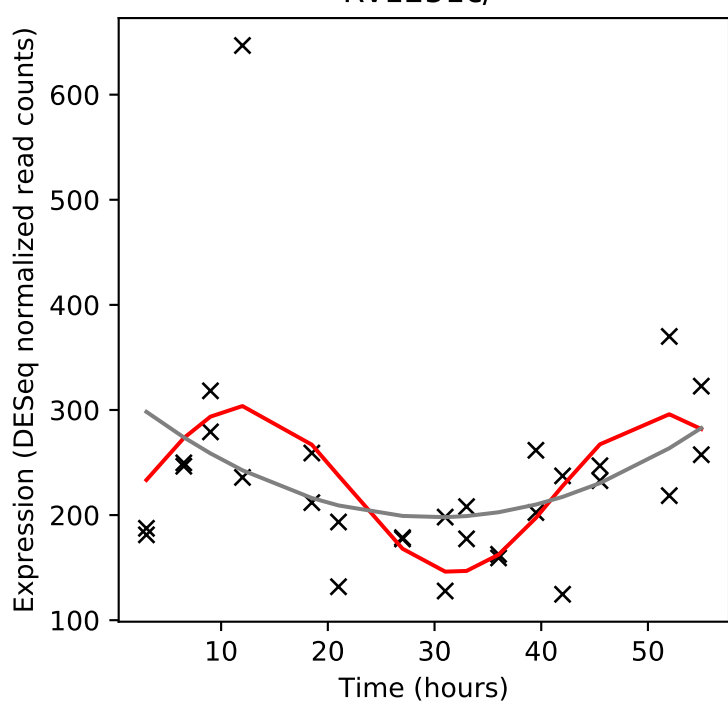

Rv1252c/lprE

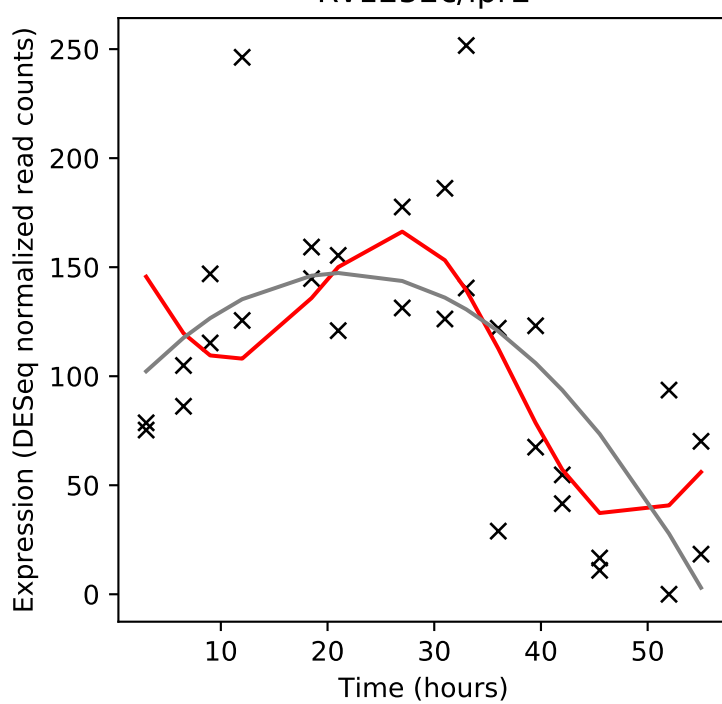

Rv1253/deaD

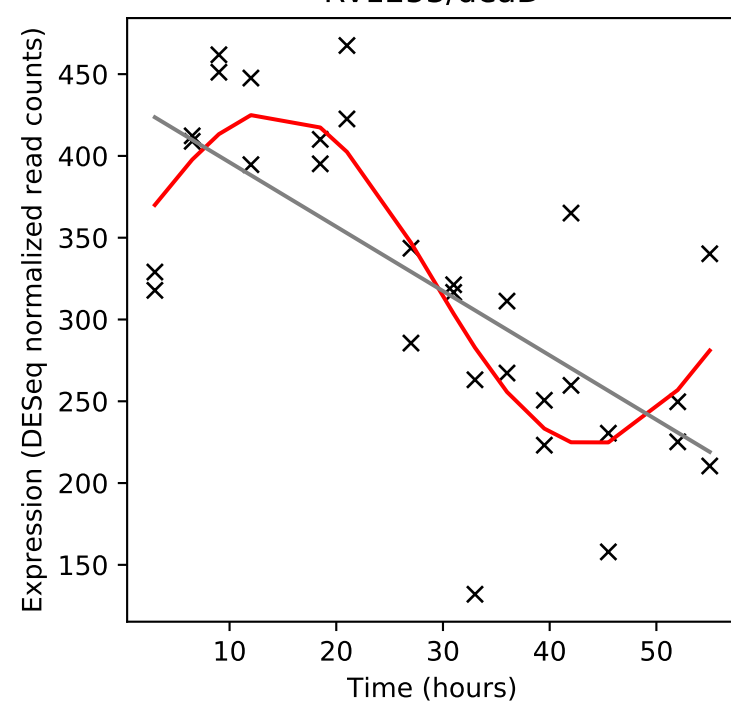

Rv1254/-

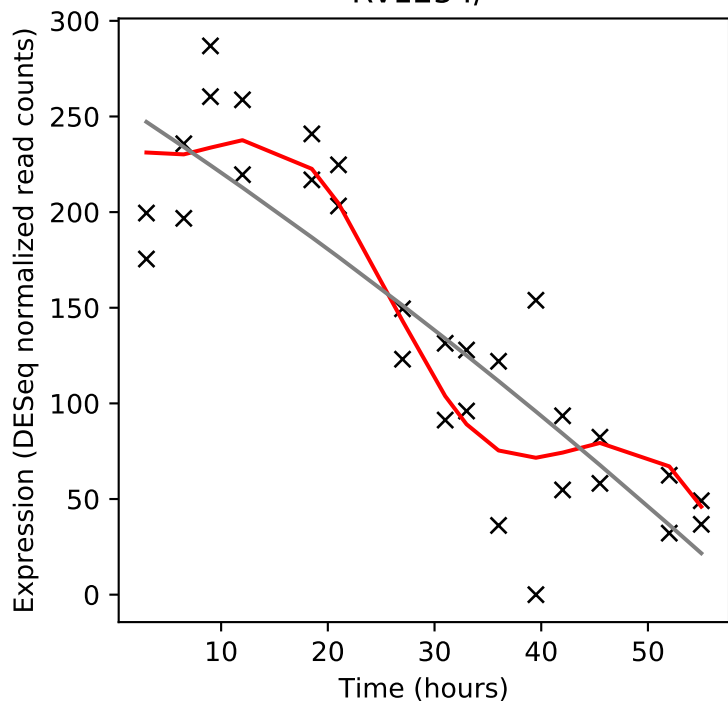

Rv1255c/-

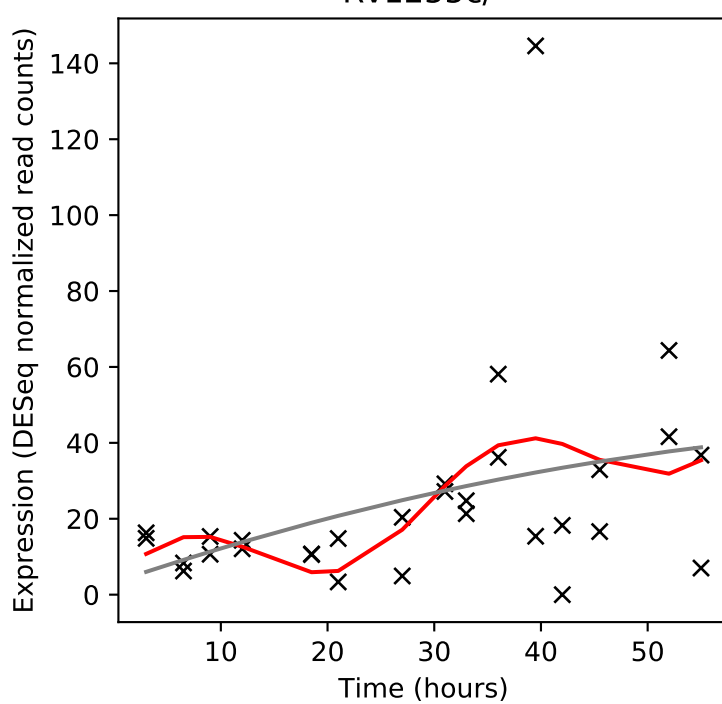

Rv1256c/cyp130

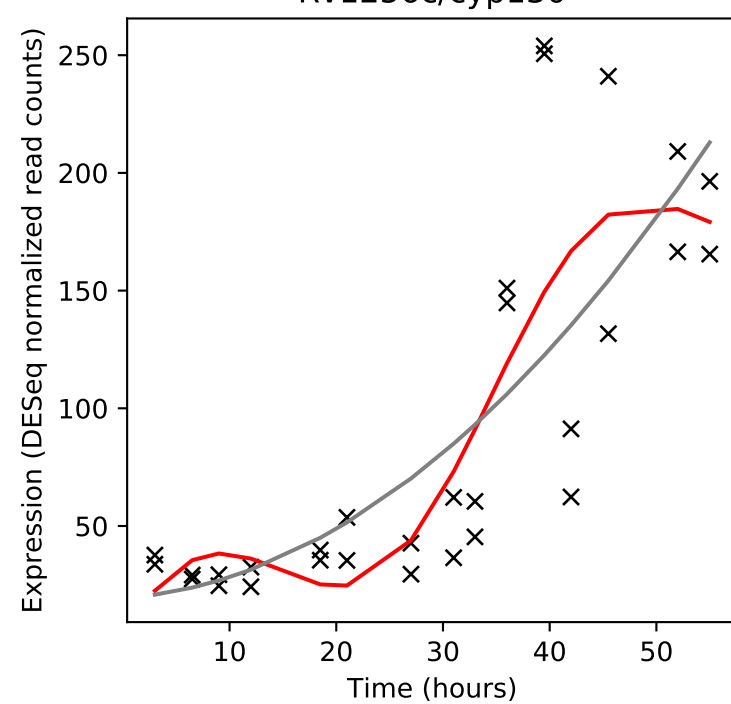

Rv1257c/-

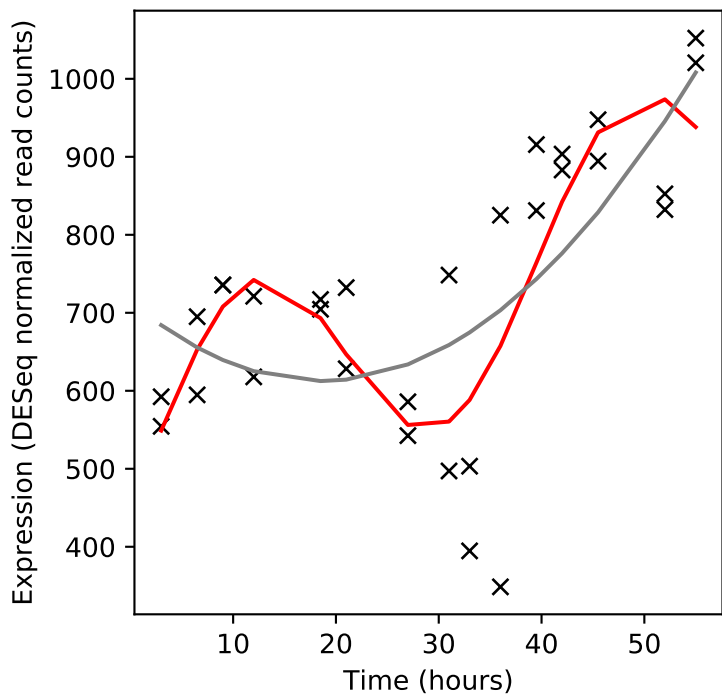

Rv1258c/-

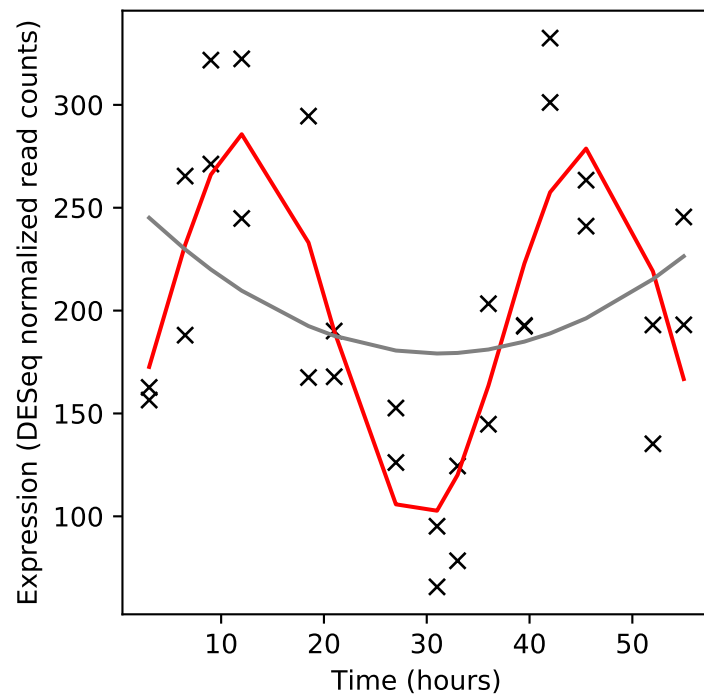

Rv1259/udgB

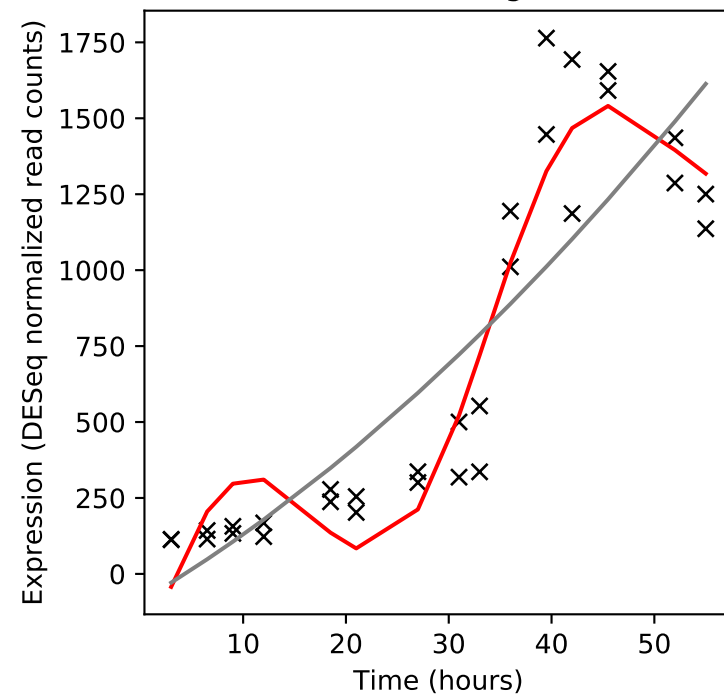

Rv1260/-

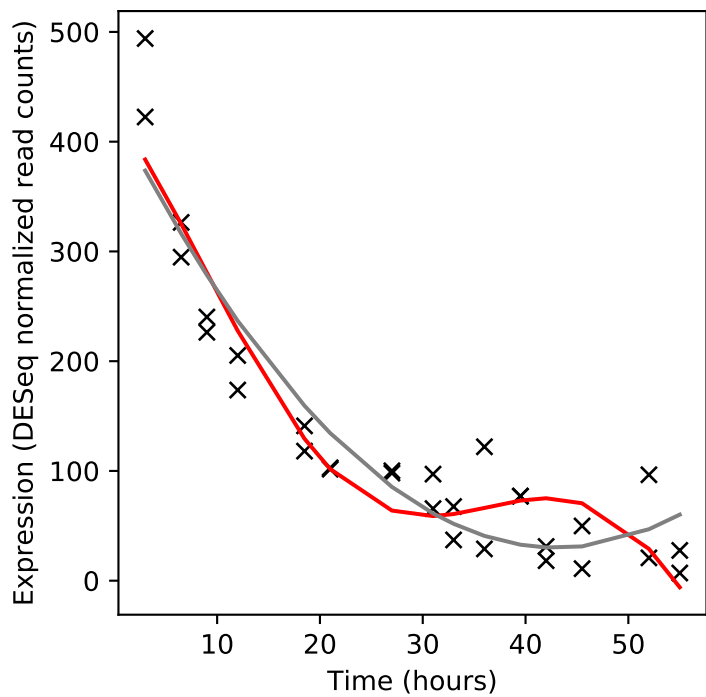

Rv1261c/-

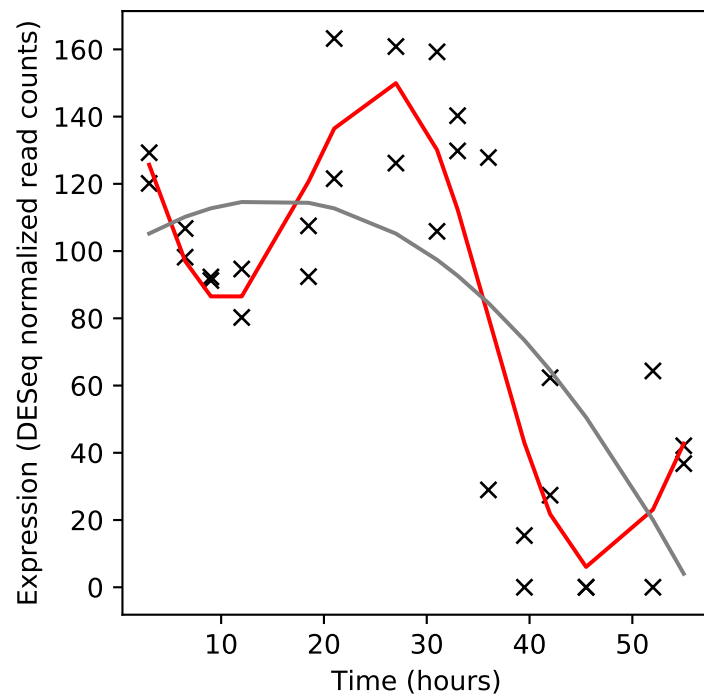

Rv1262c/-

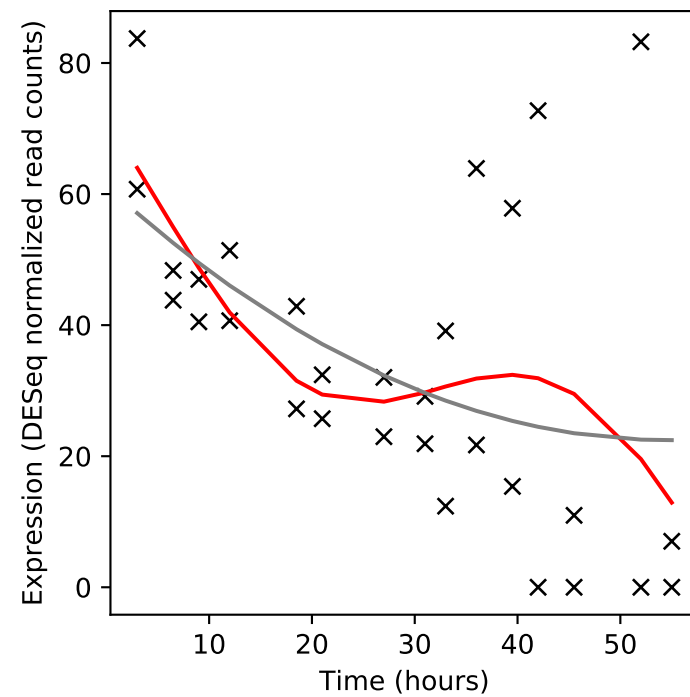

Rv1263/amiB2

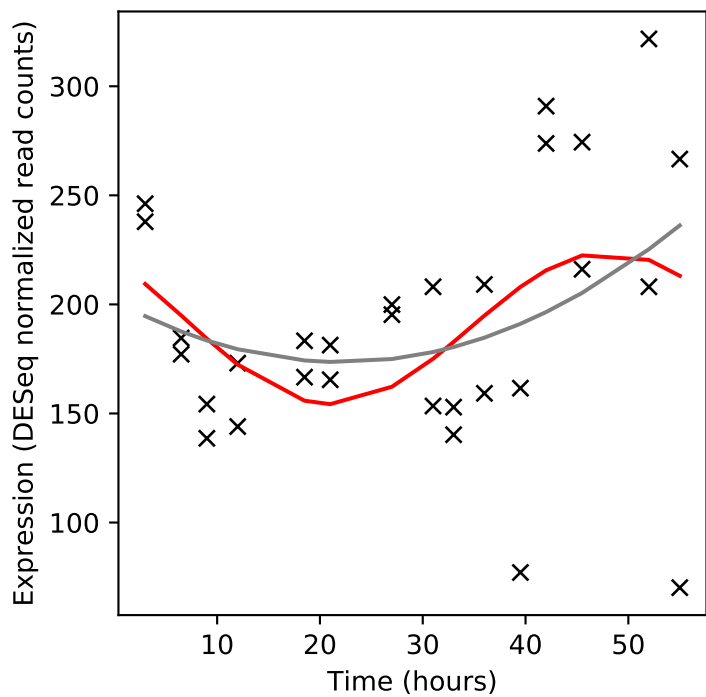

Rv1264/-

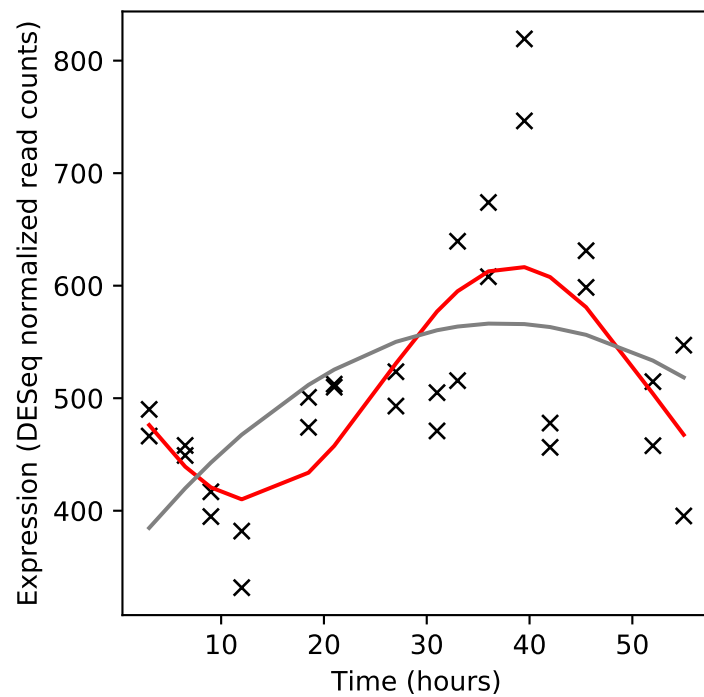

Rv1265/-

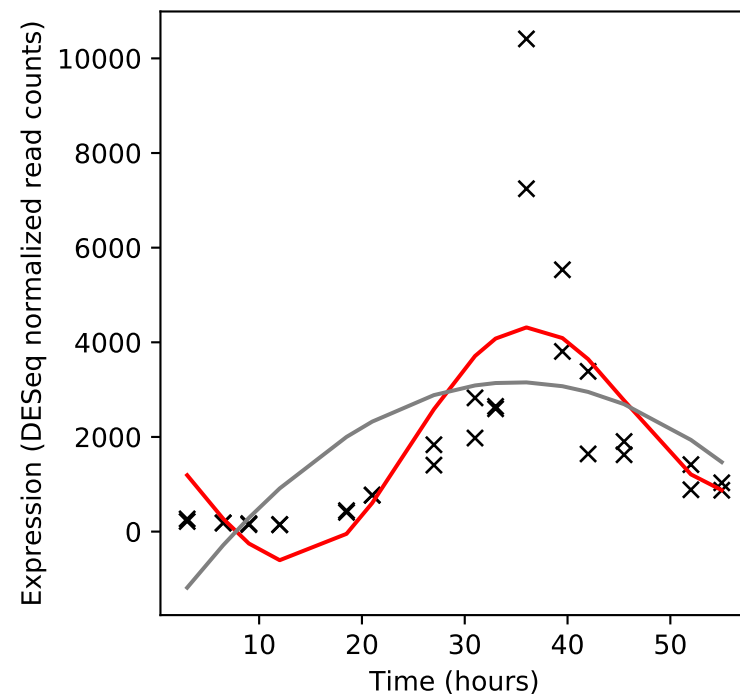

Rv1266c/pknH

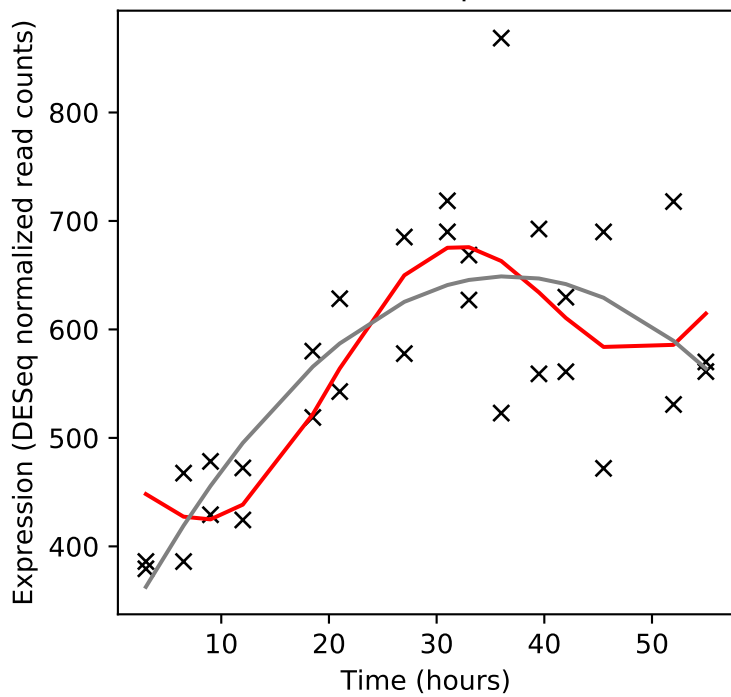

Rv1267c/embR

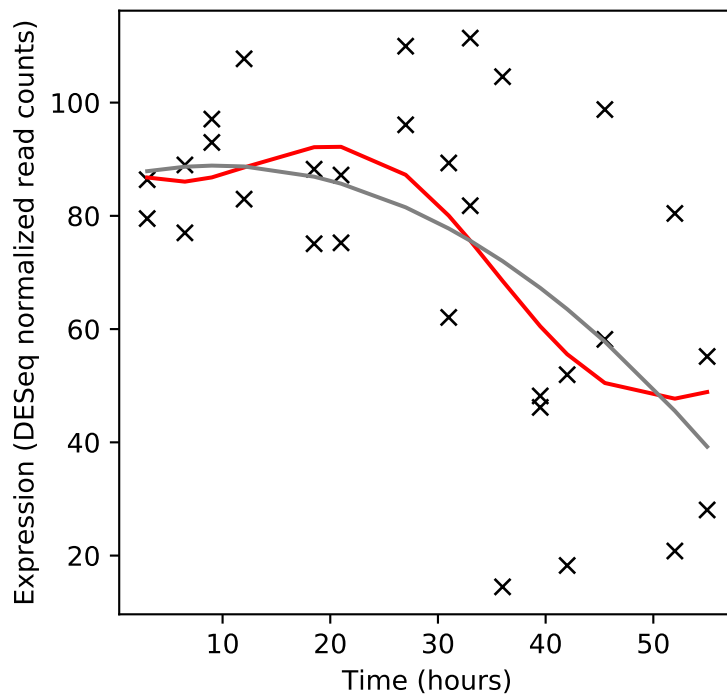

Rv1268c/-

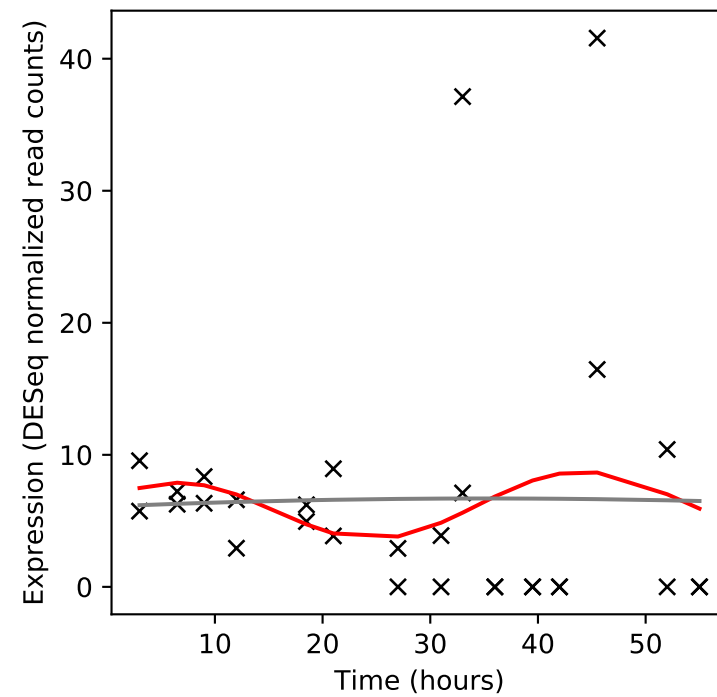

Rv1269c/-

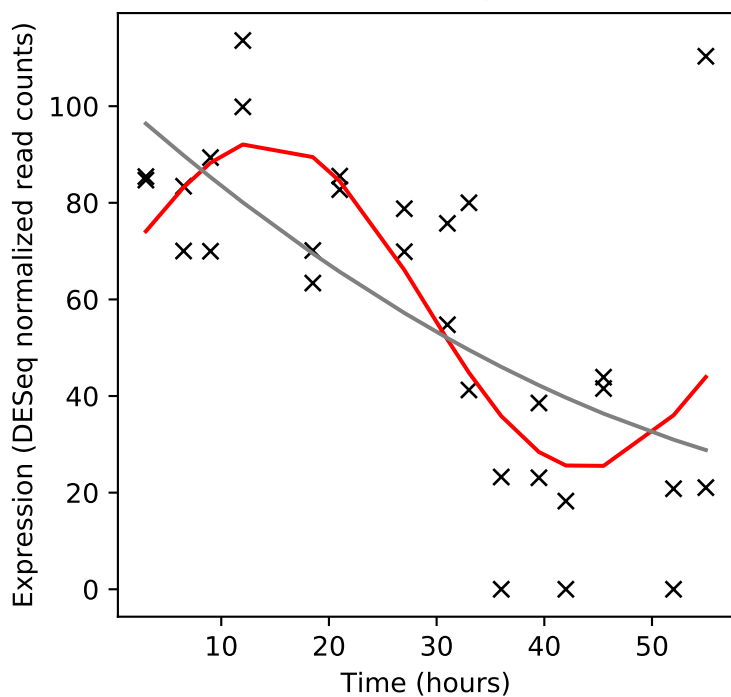

Rv1270c/lprA

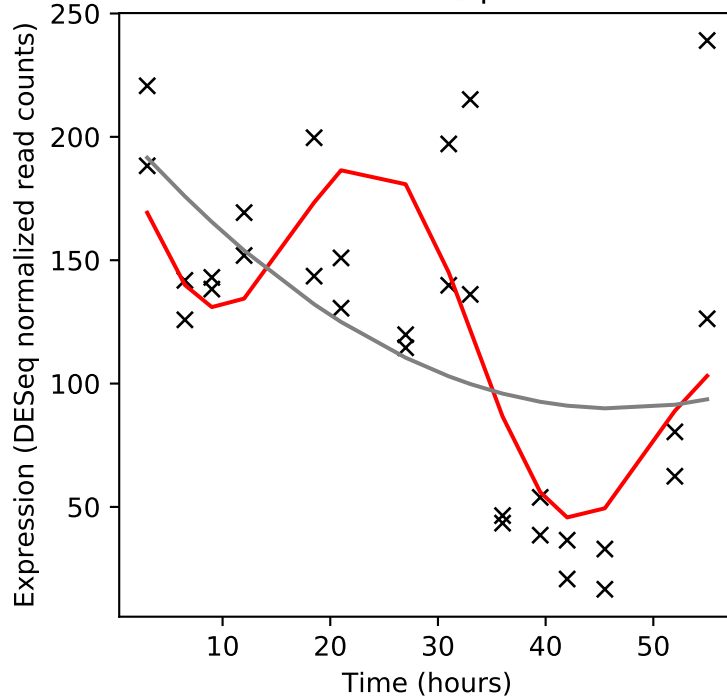

Rv1271c/-

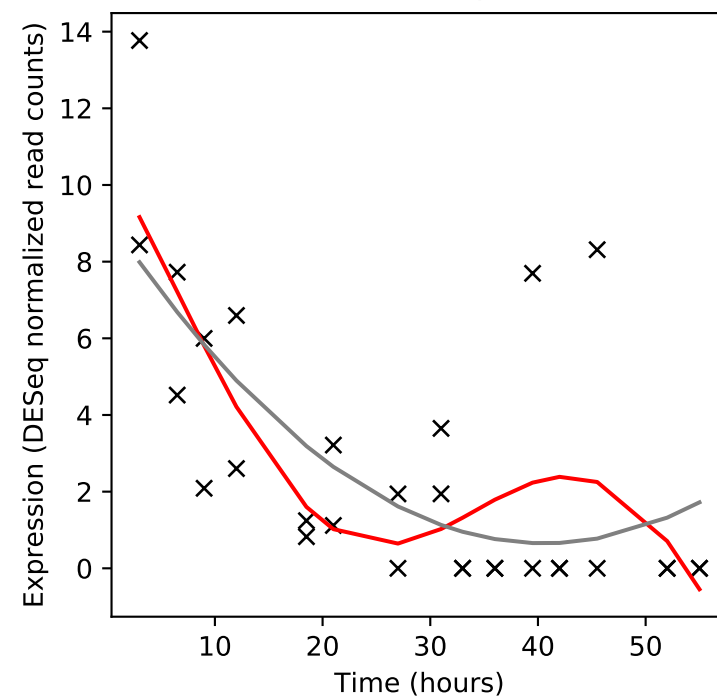

Rv1272c/-

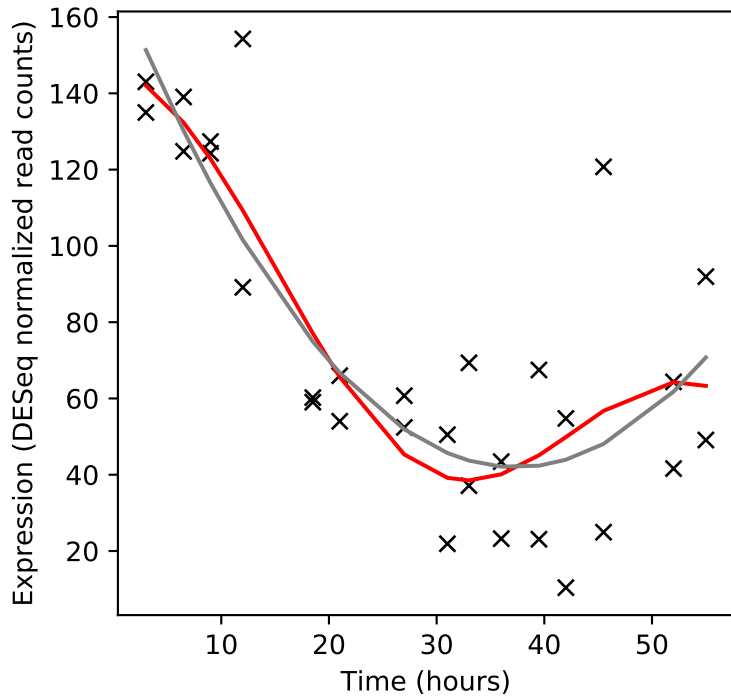

Rv1273c/-

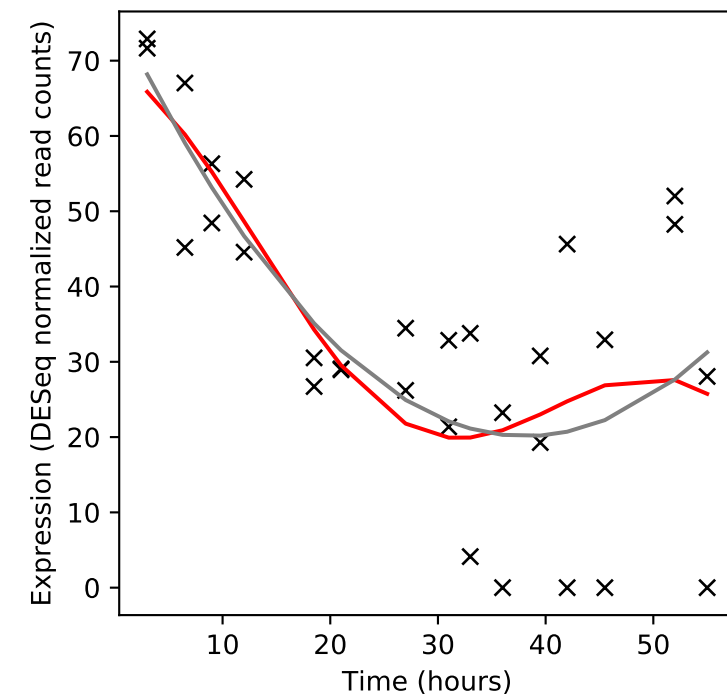

Rv1274/lprB

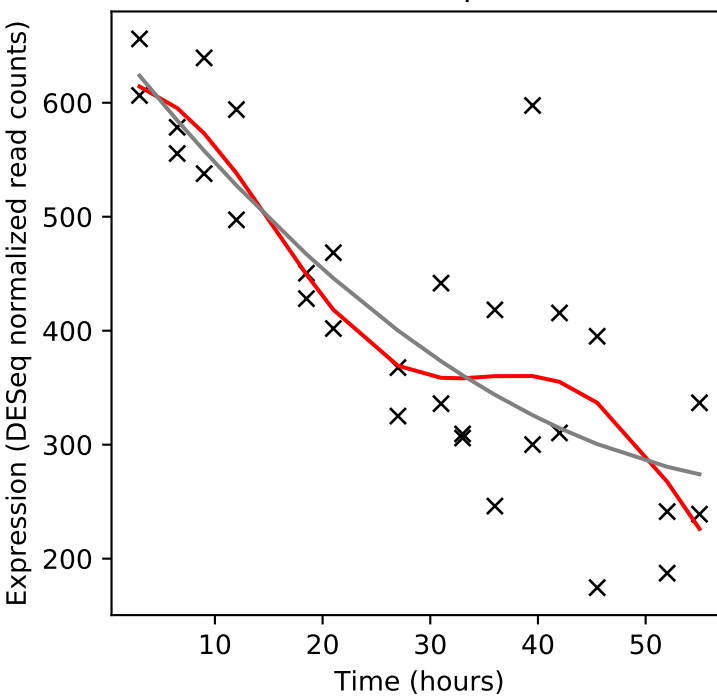

Rv1275/lprC

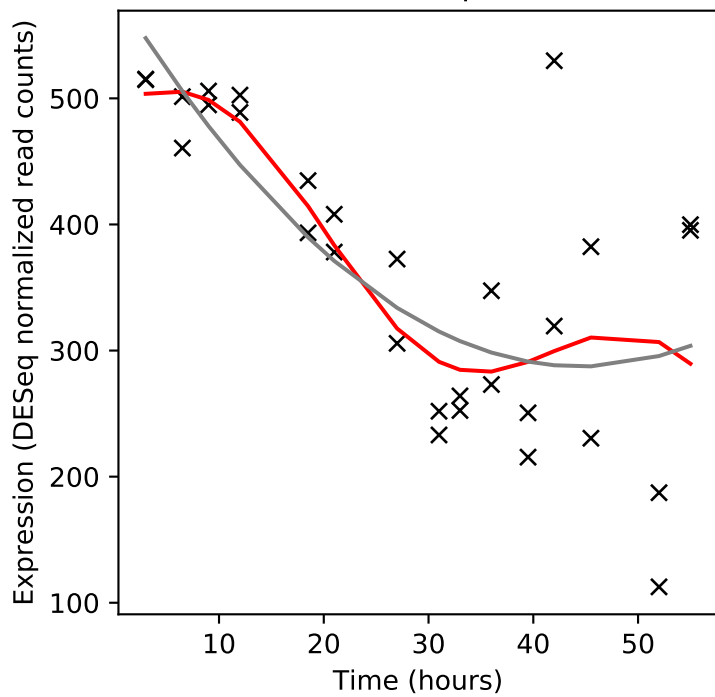

Rv1276c/-

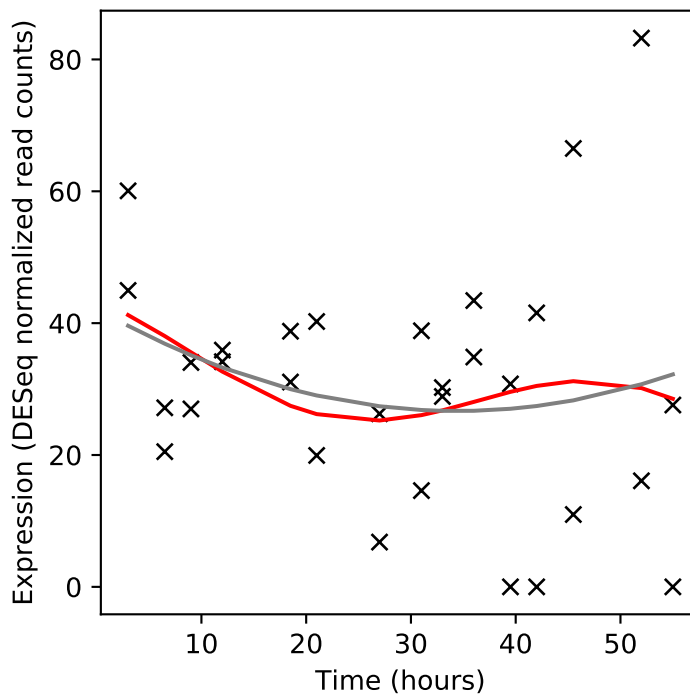

Rv1277/-

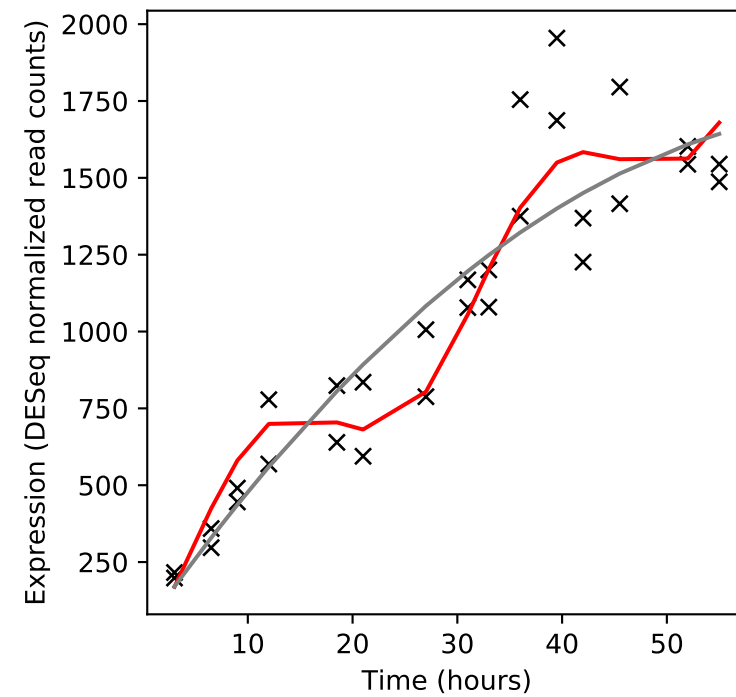

Rv1278/-

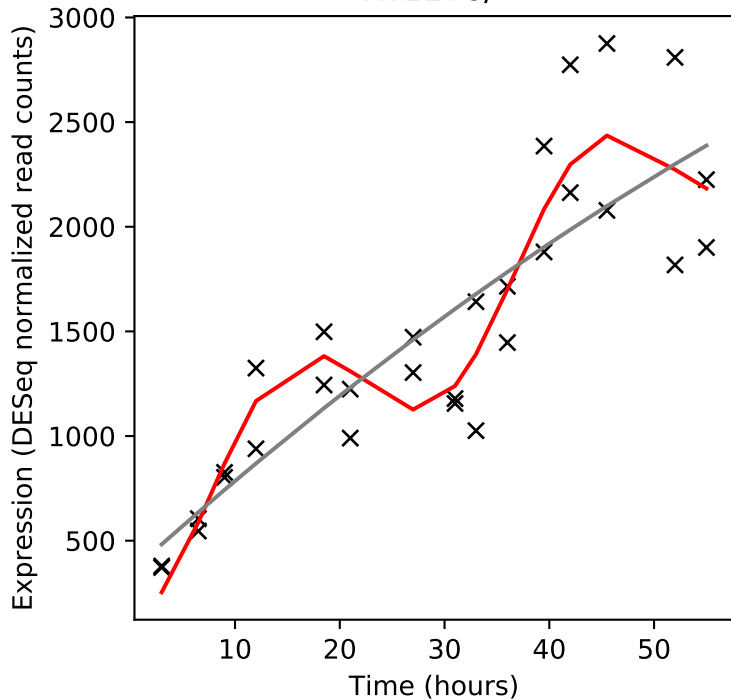

Rv1279/-

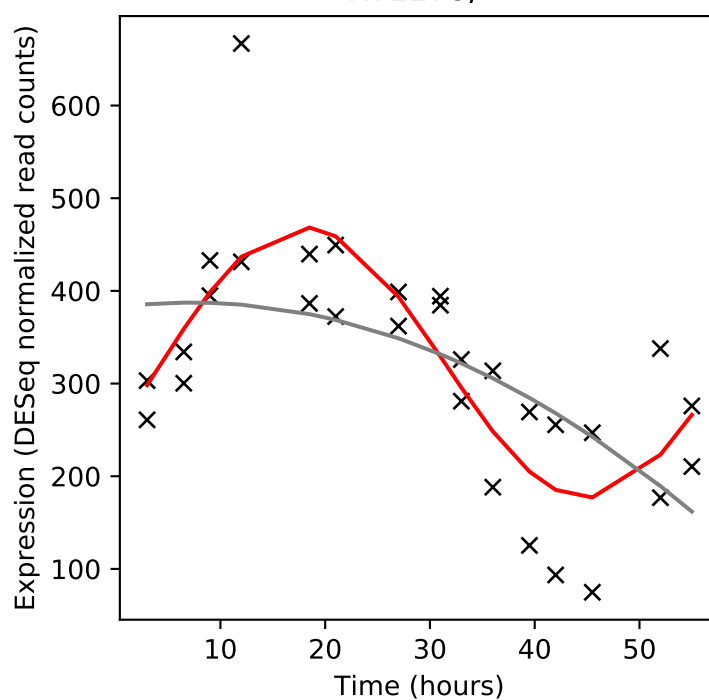

Rv1280c/oppA

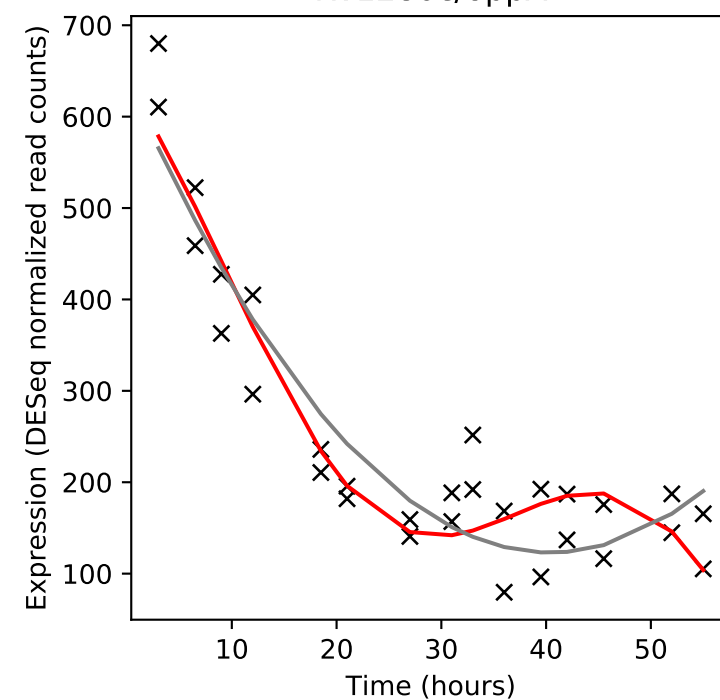

Rv1281c/oppD

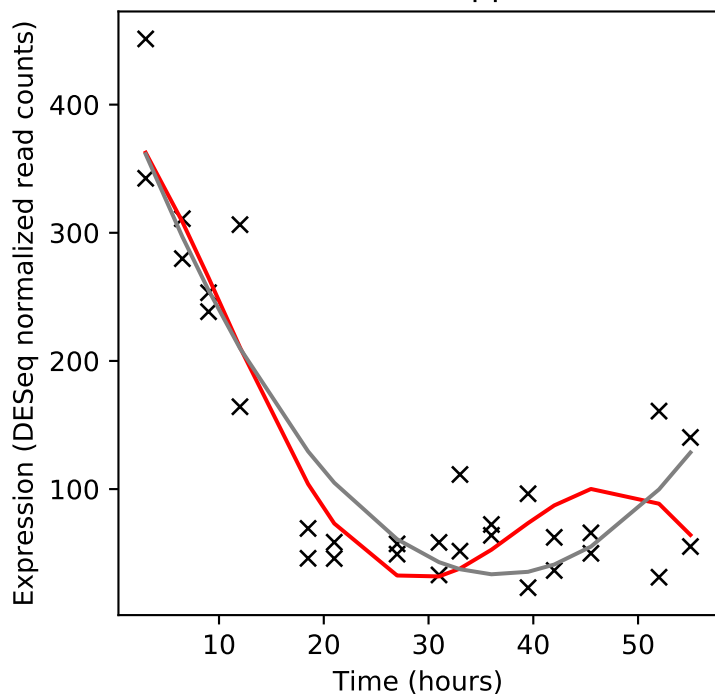

Rv1282c/oppC

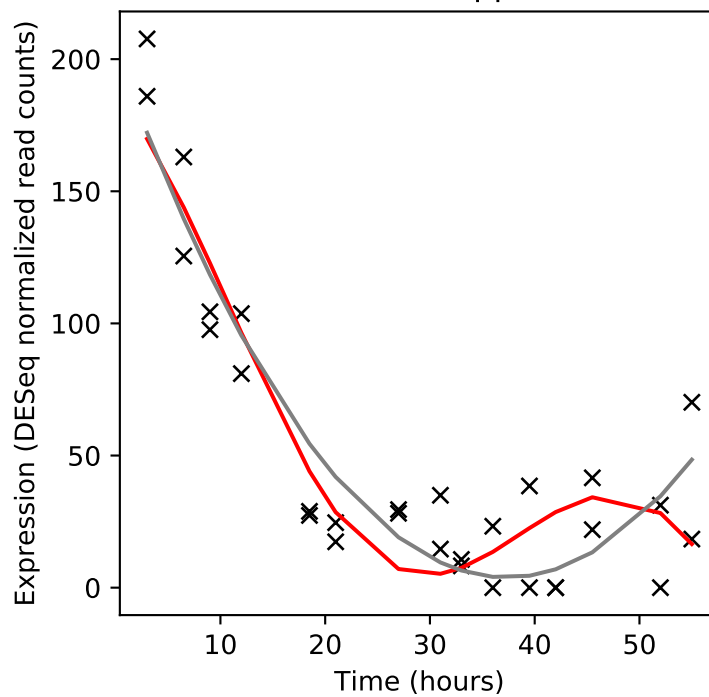

Rv1283c/oppB

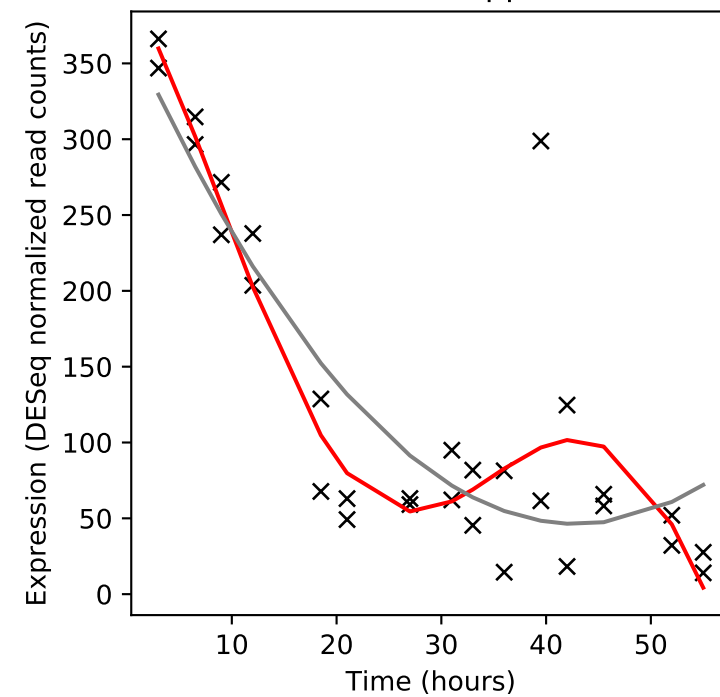

Rv1284/canA

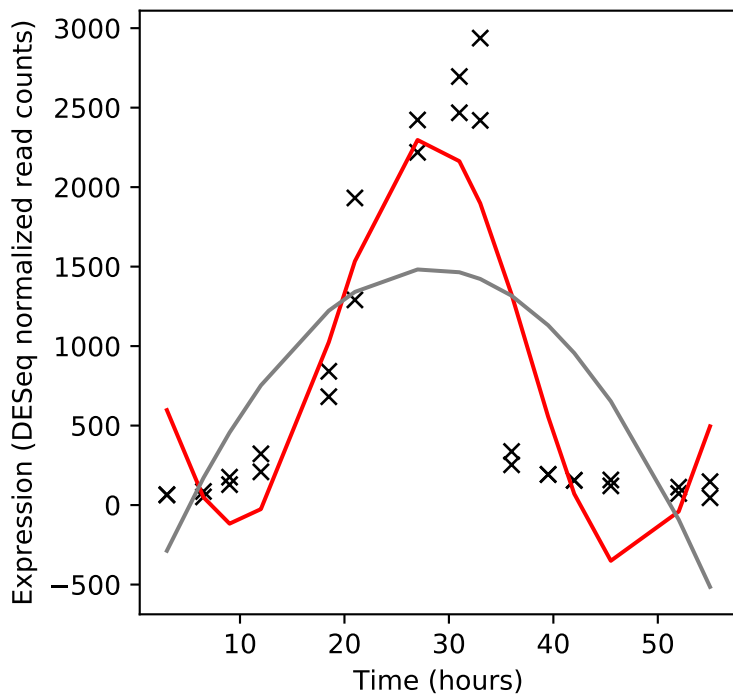

Rv1285/cysD

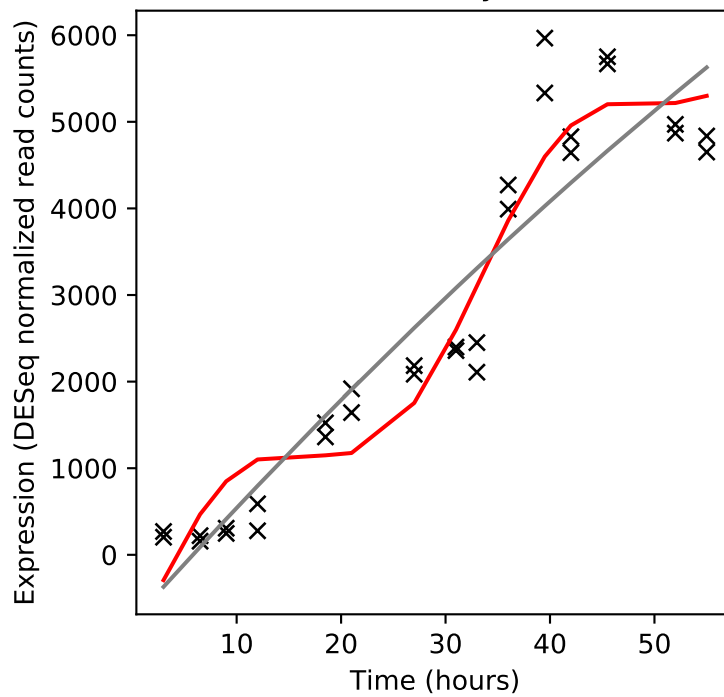

Rv1286/cysN

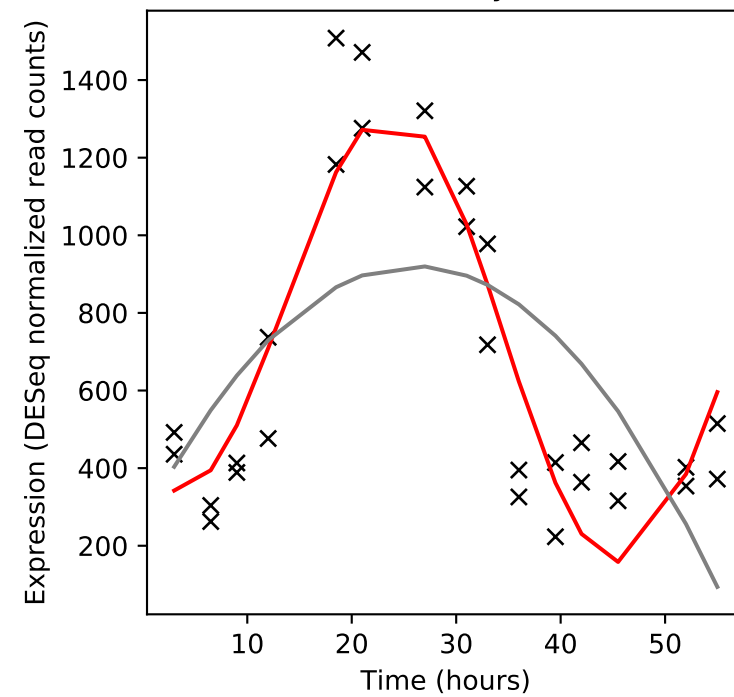

Rv1287/-

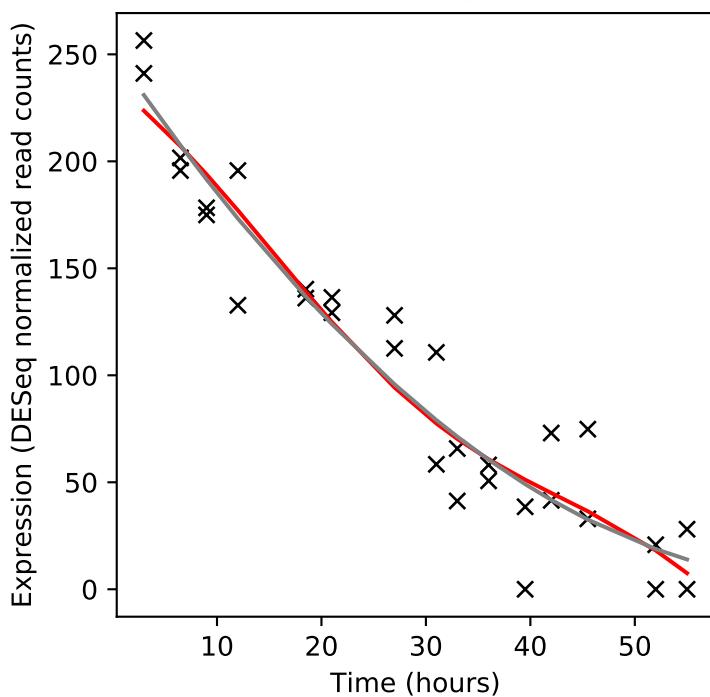

Rv1288/-

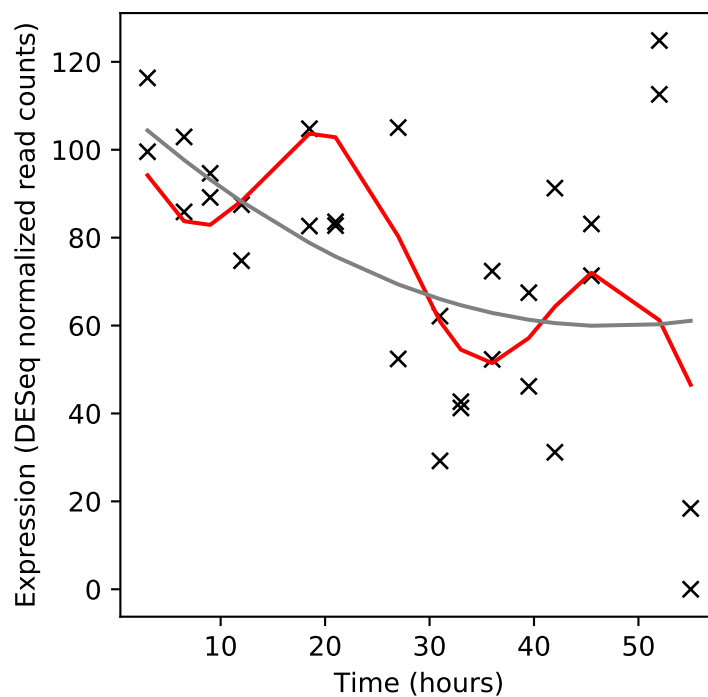

Rv1289/-

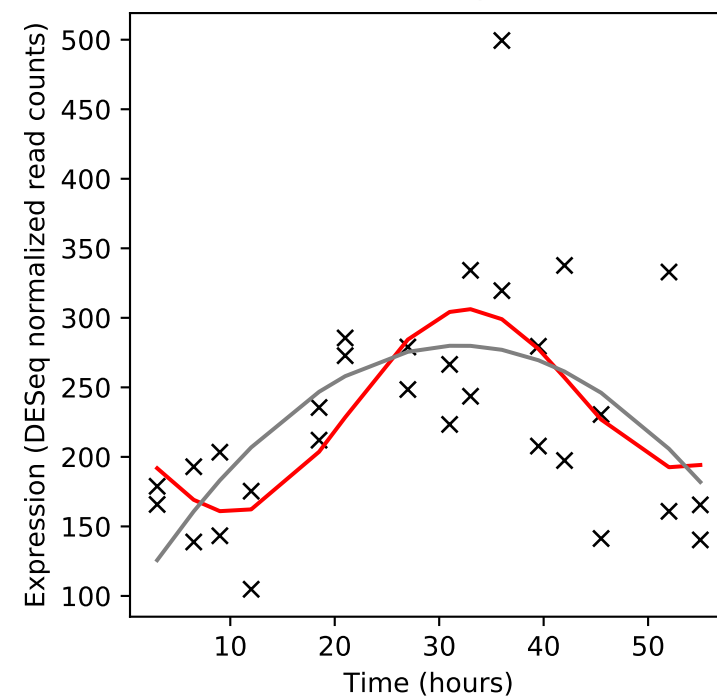

Rv1290c/-

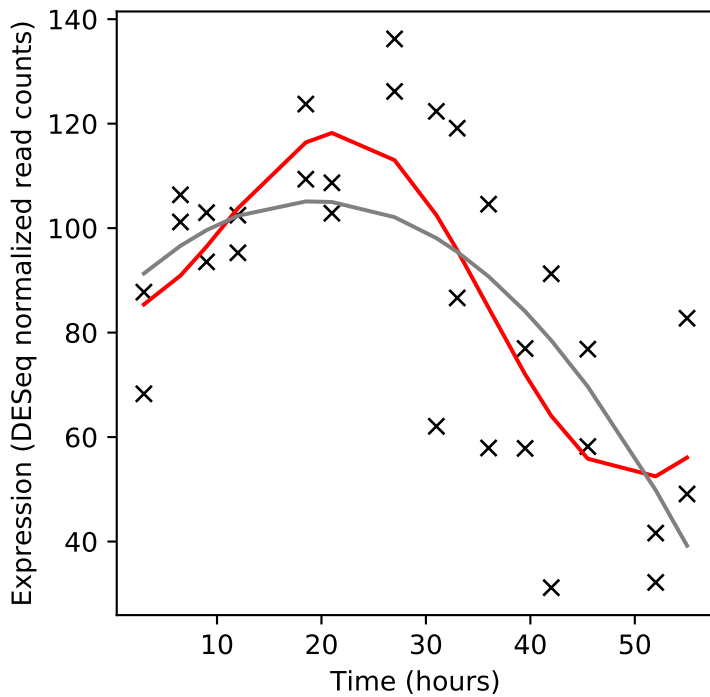

Rv1290A/-

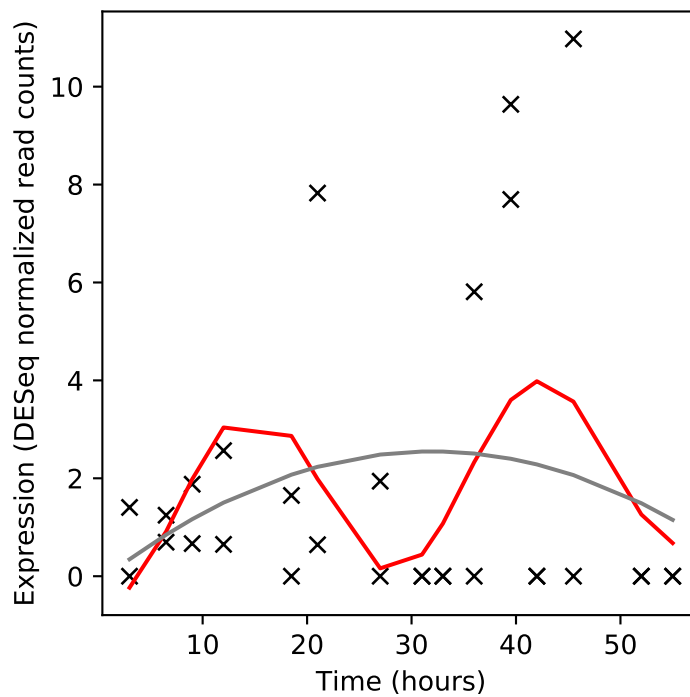

Rv1291c/-

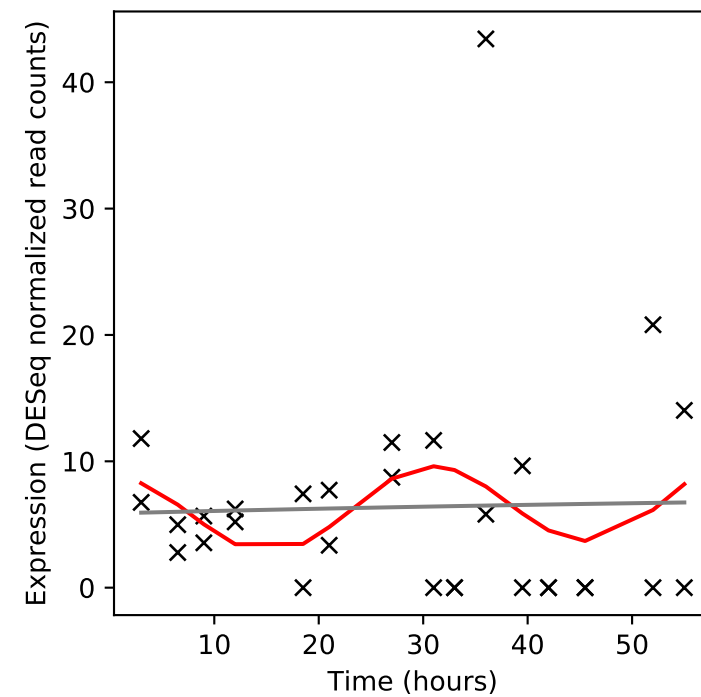

Rv1292/argS

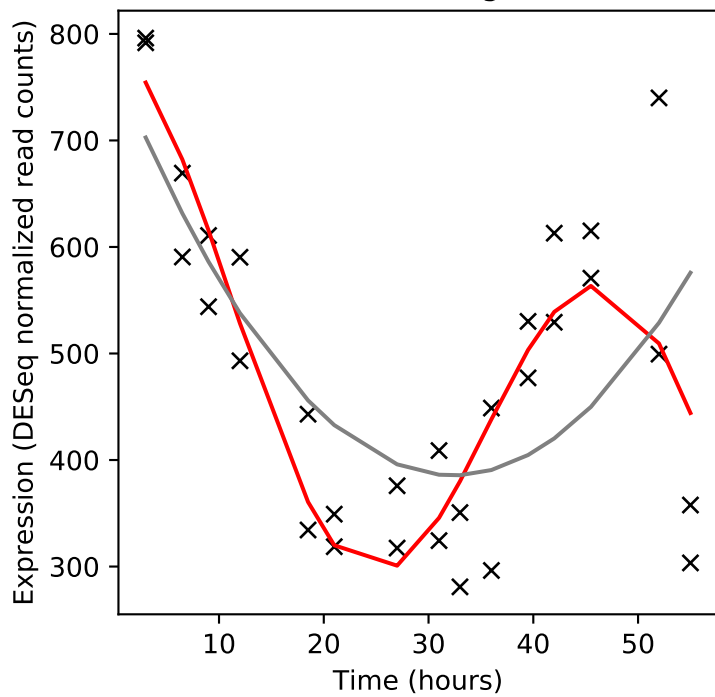

Rv1293/lysA

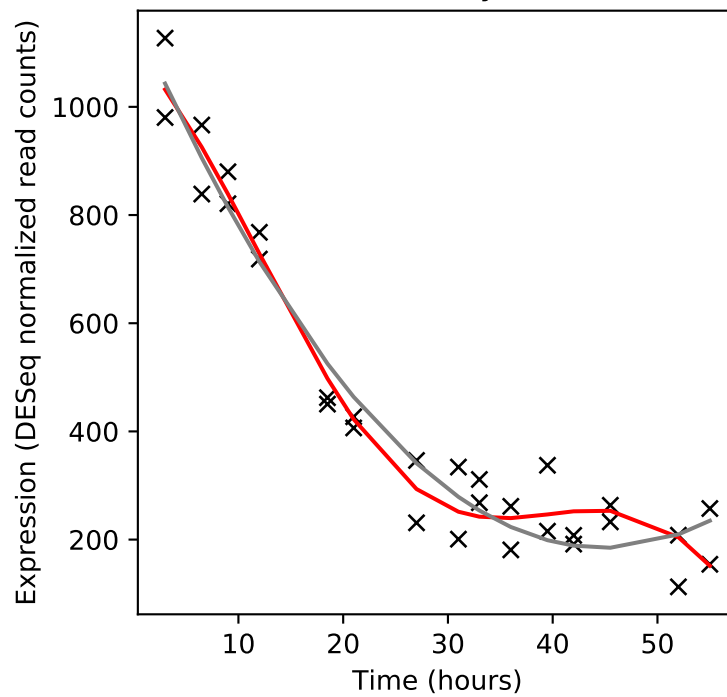

Rv1294/thrA

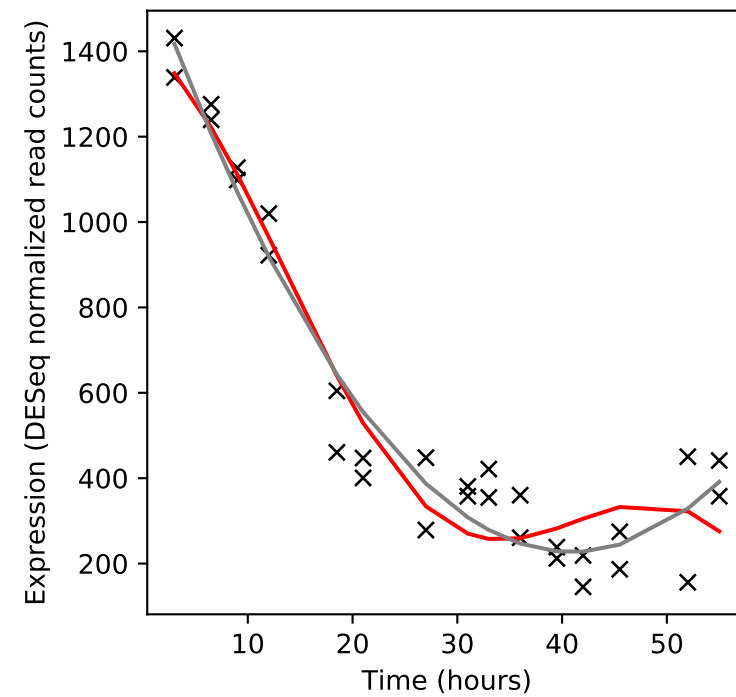

Rv1295/thrC

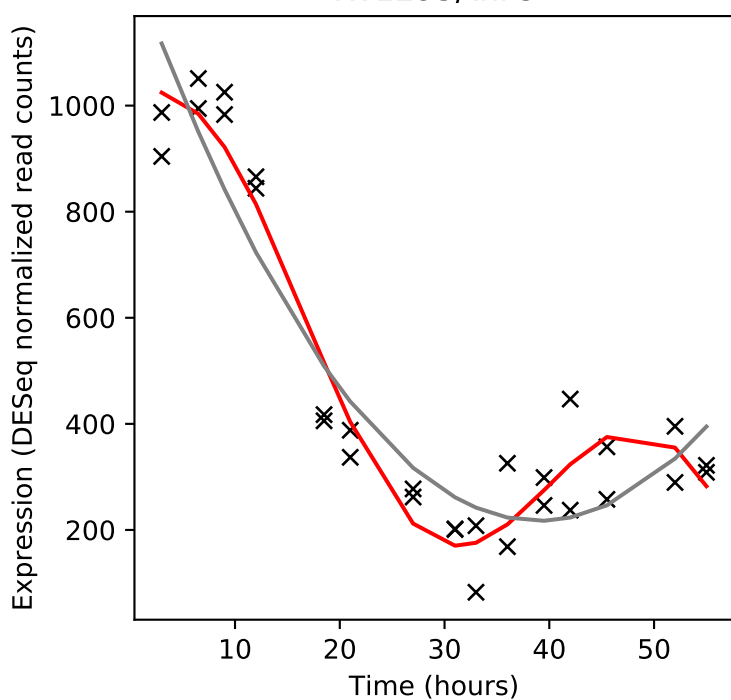

Rv1296/thrB

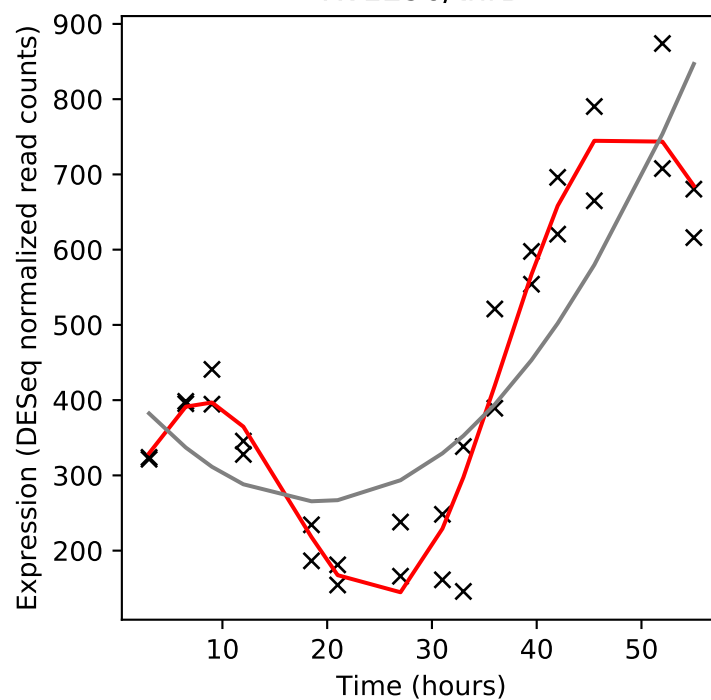

Rv1297/rho

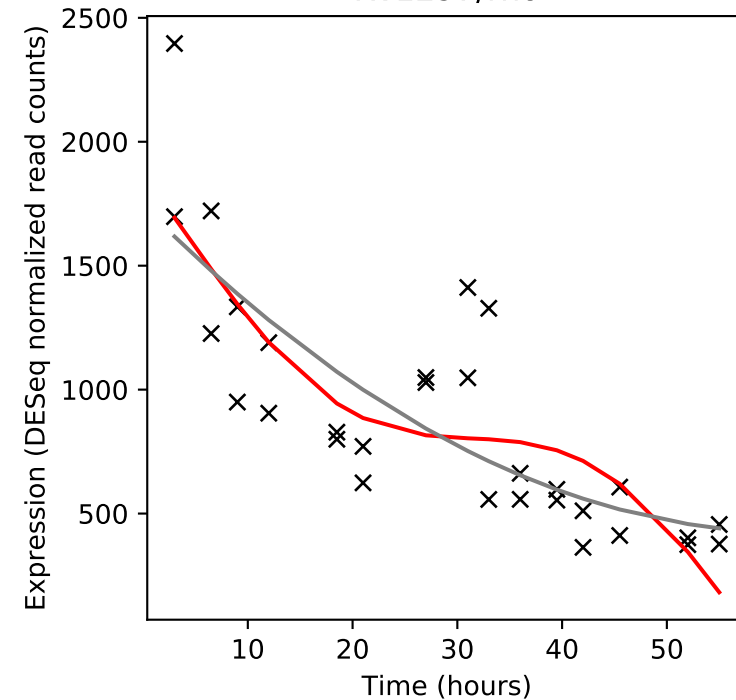

Rv1298/rpmE

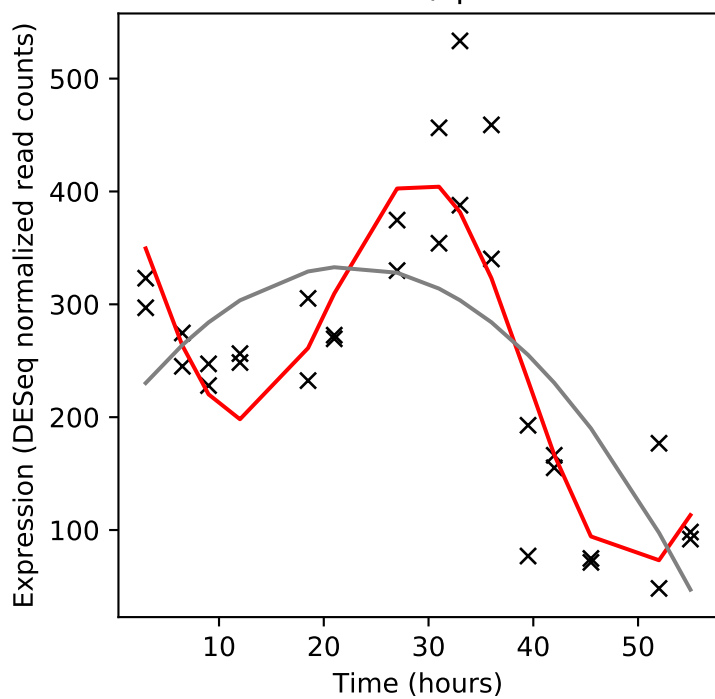

Rv1299/prfA

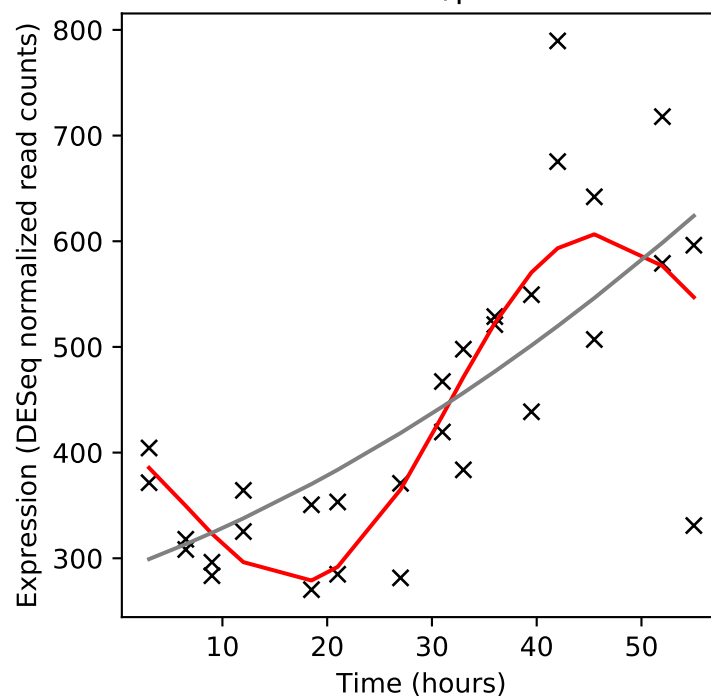

Rv1300/hemK

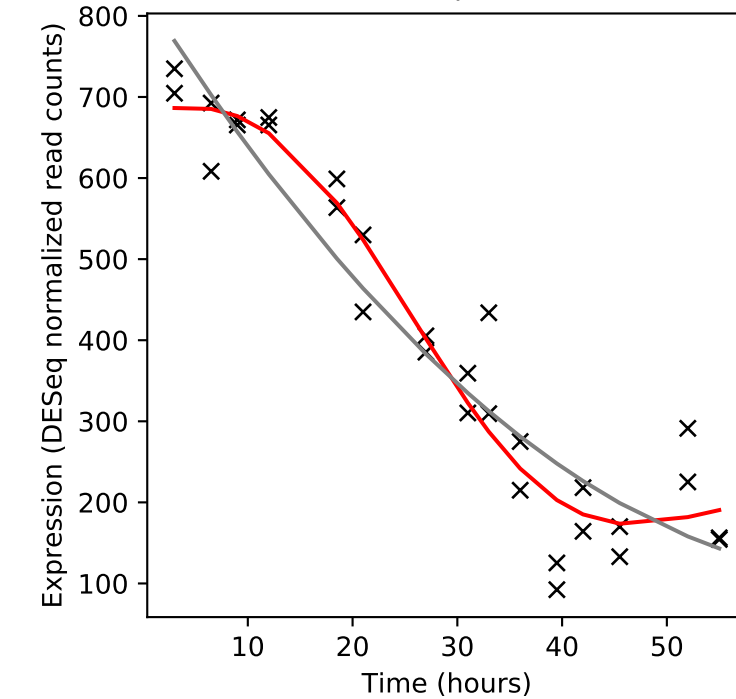



Rv1301/-

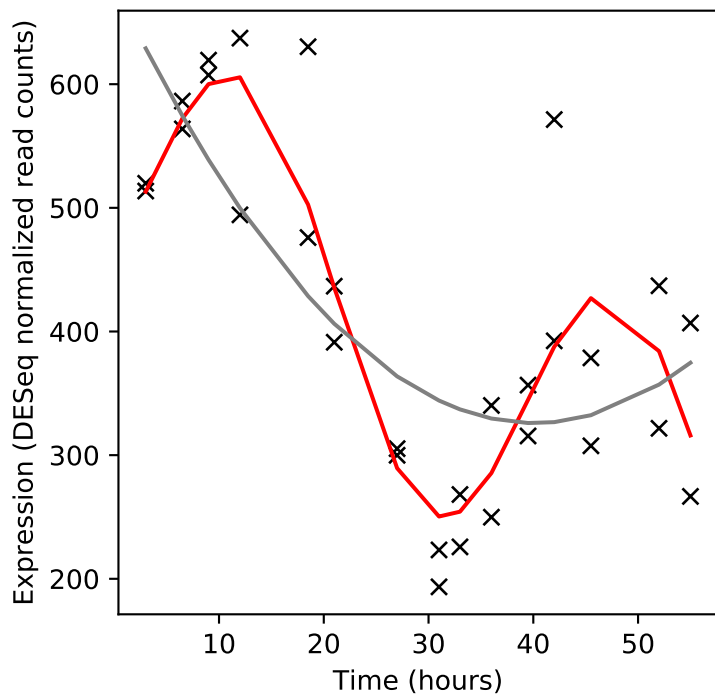

Rv1302/rfe

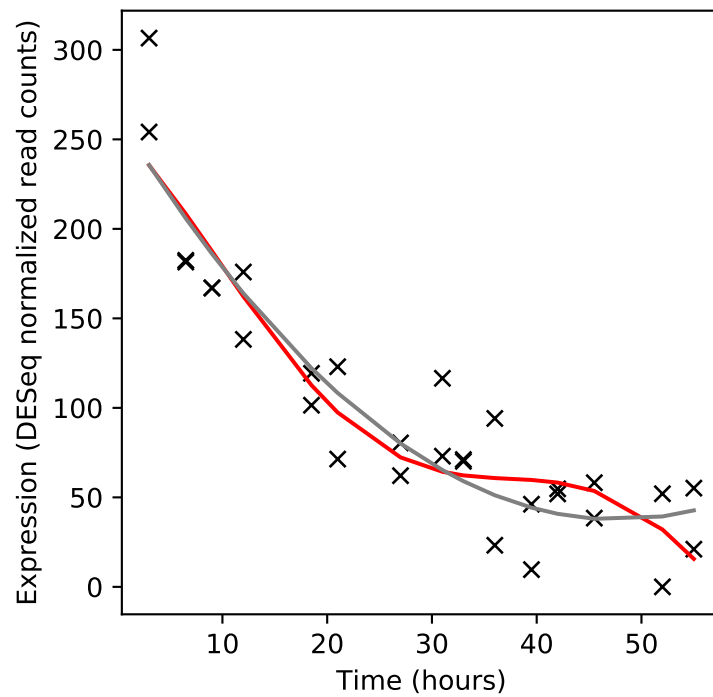

Rv1303/-

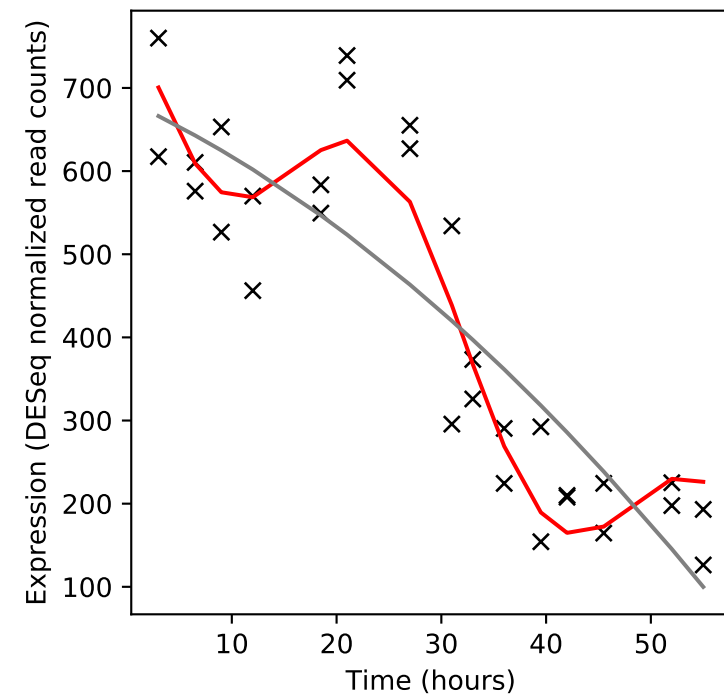

Rv1304/atpB

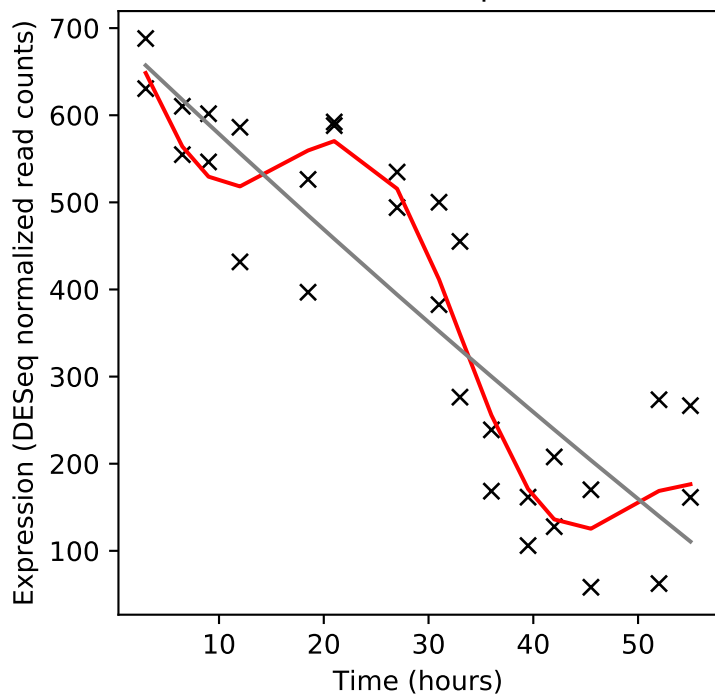

Rv1305/atpE

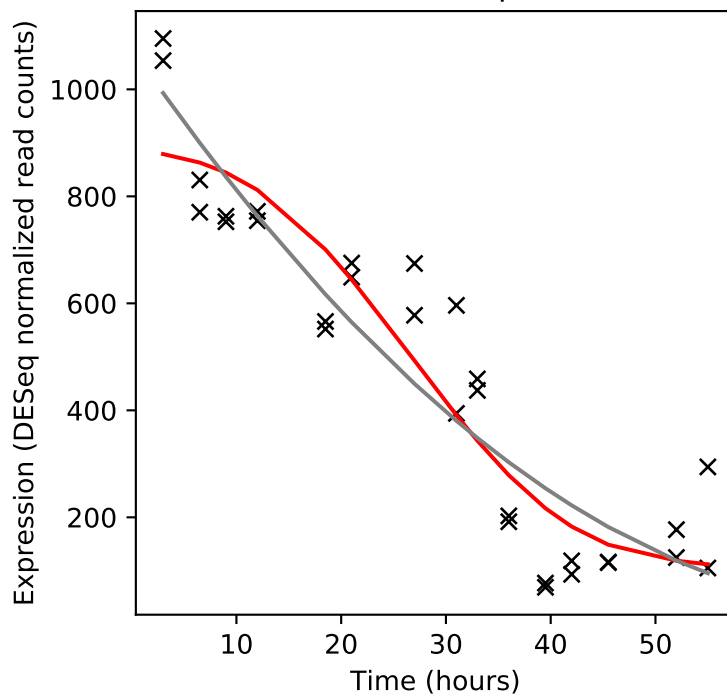

Rv1306/atpF

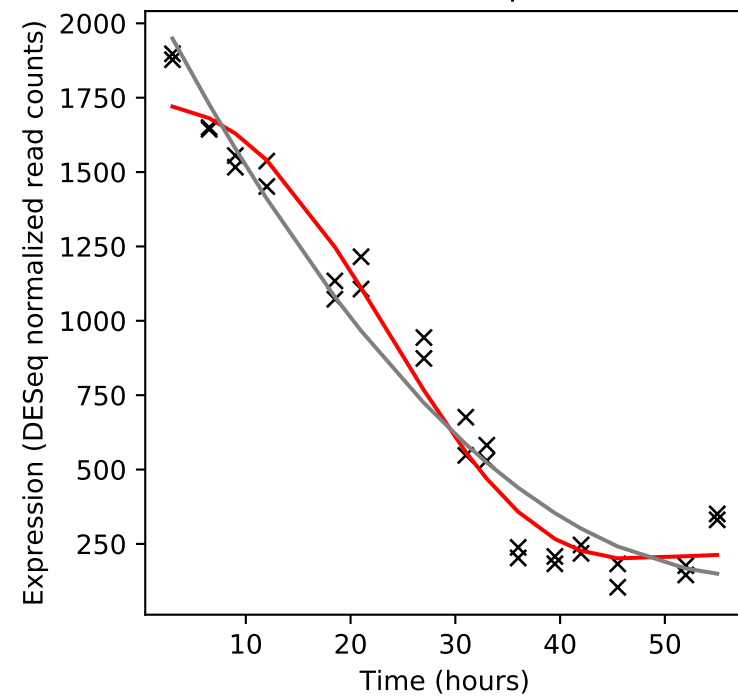

Rv1307/atpH

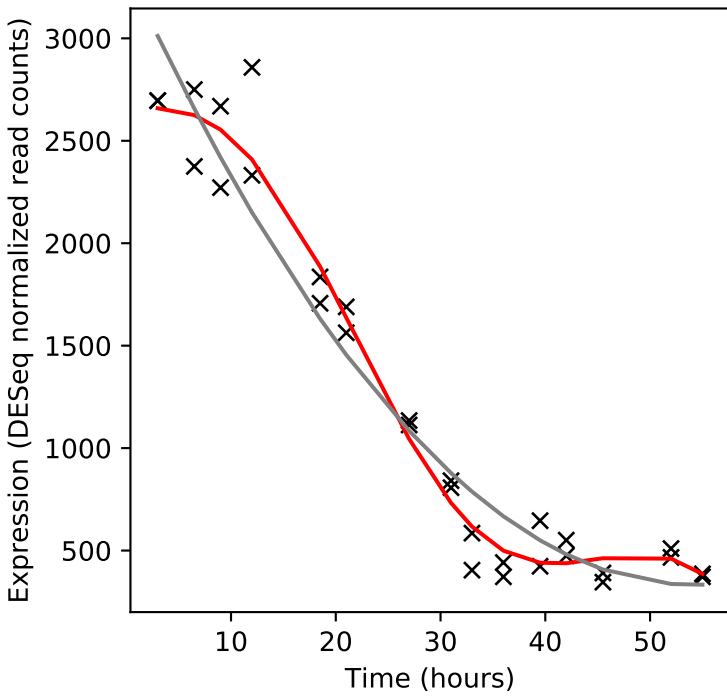

Rv1308/atpA

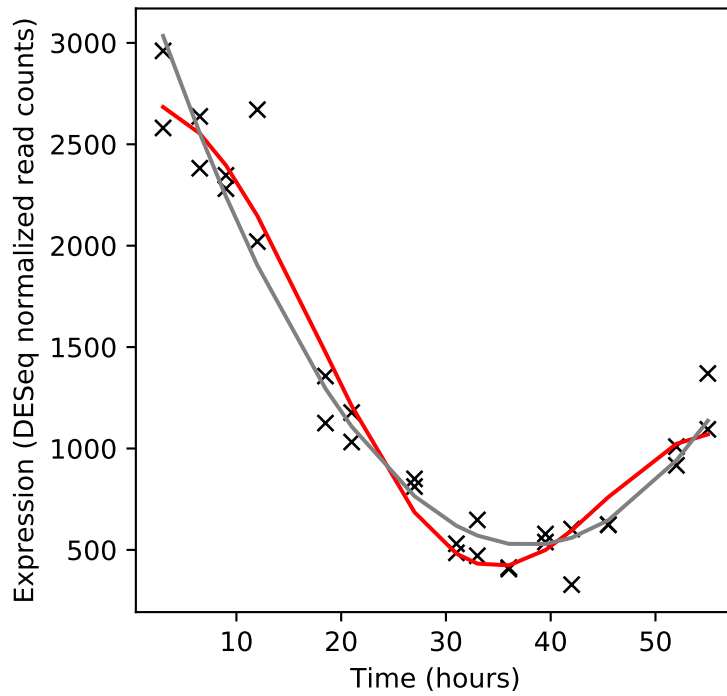

Rv1309/atpG

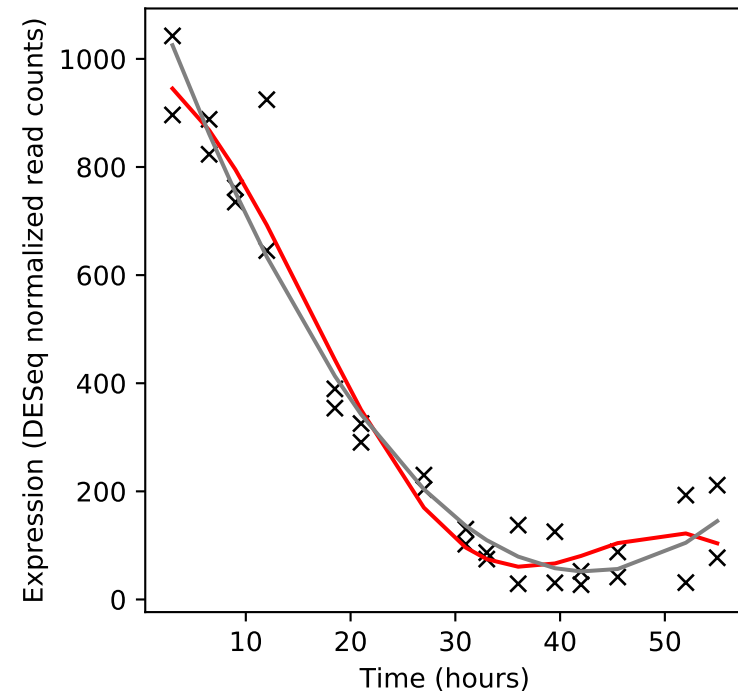

Rv1310/atpD

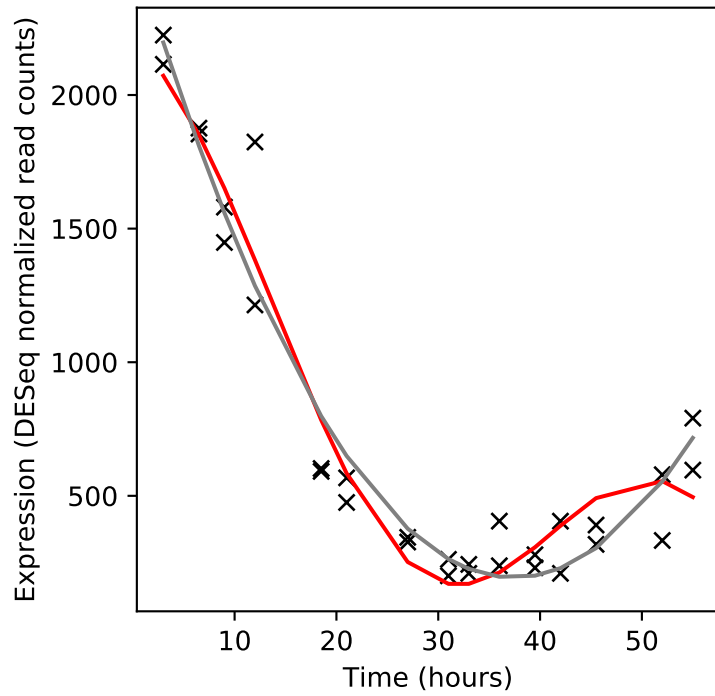

Rv1311/atpC

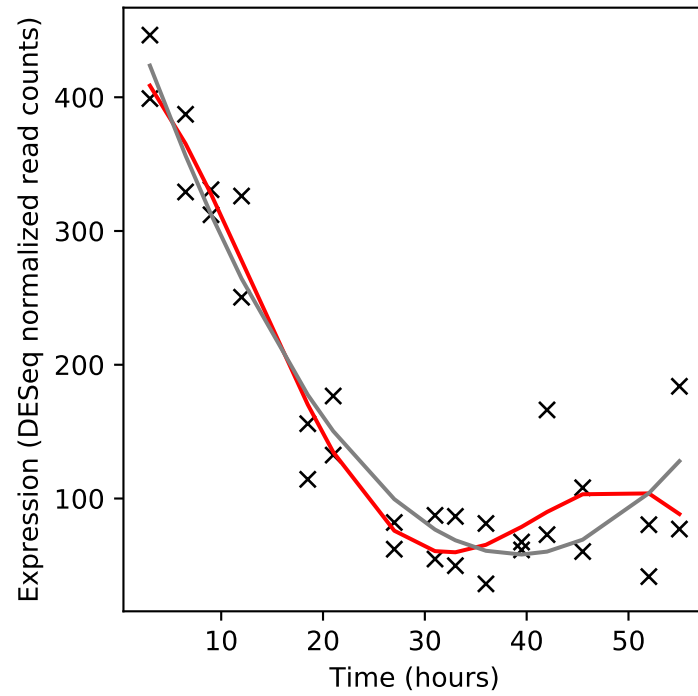

Rv1312/-

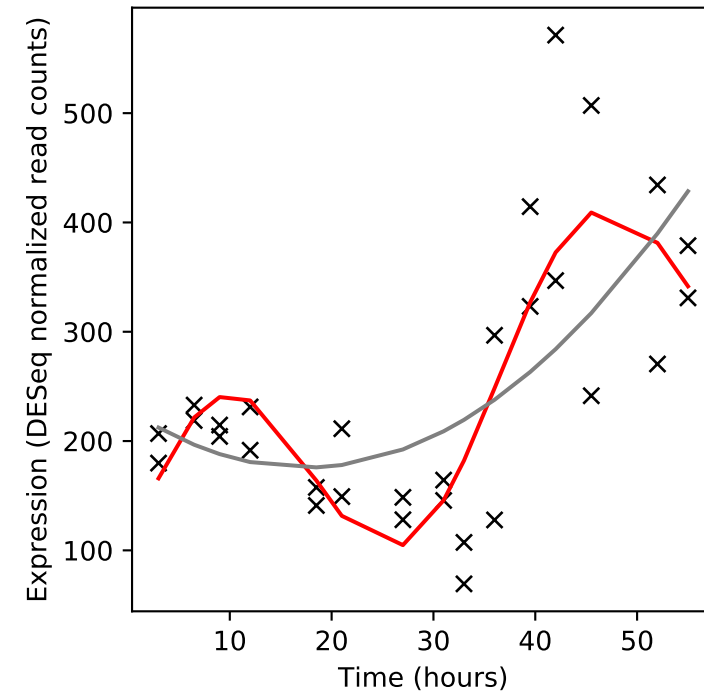

Rv1313c/-

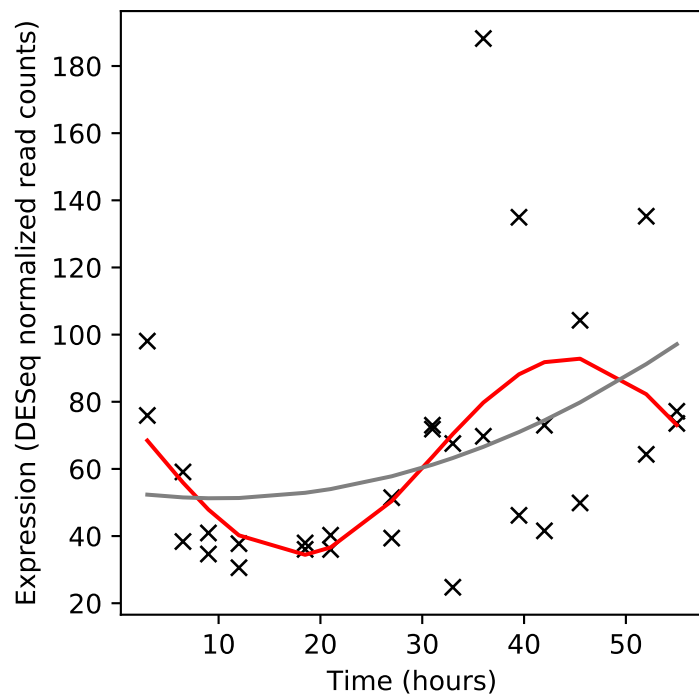

Rv1314c/-

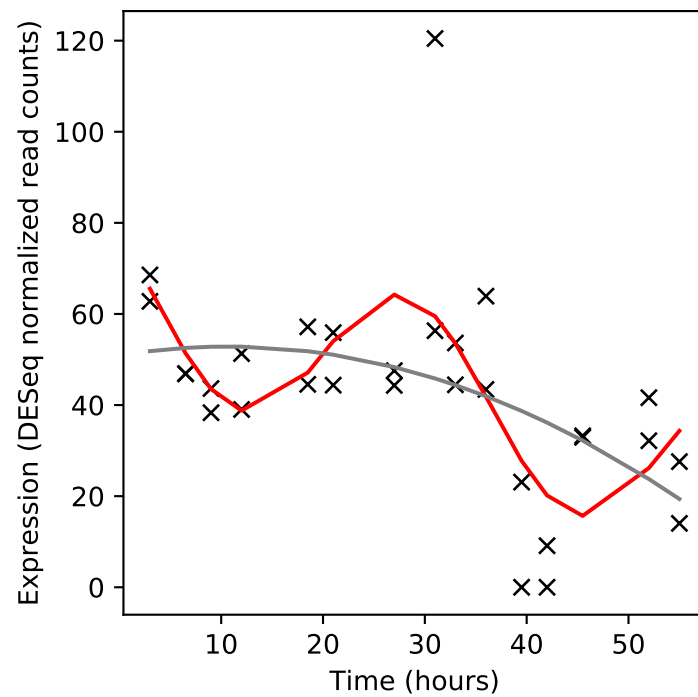

Rv1315/murA

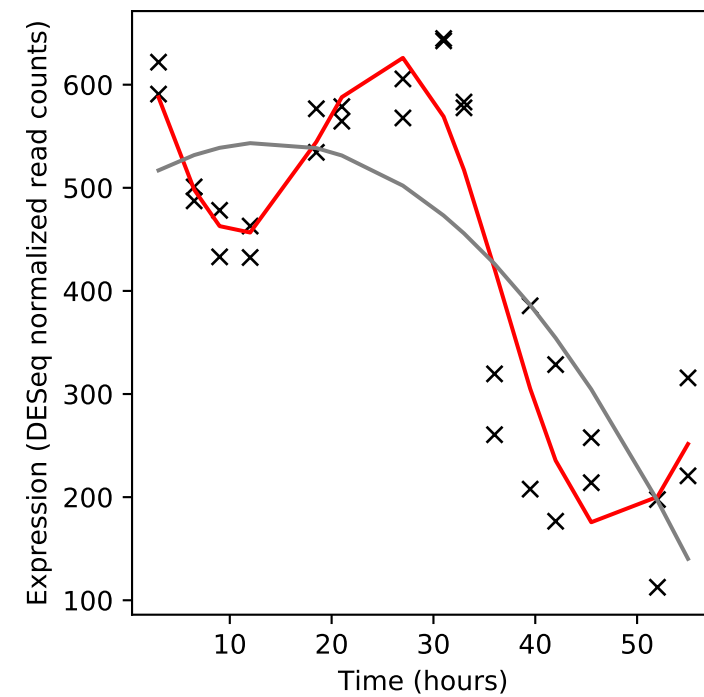

Rvnr01/rrs

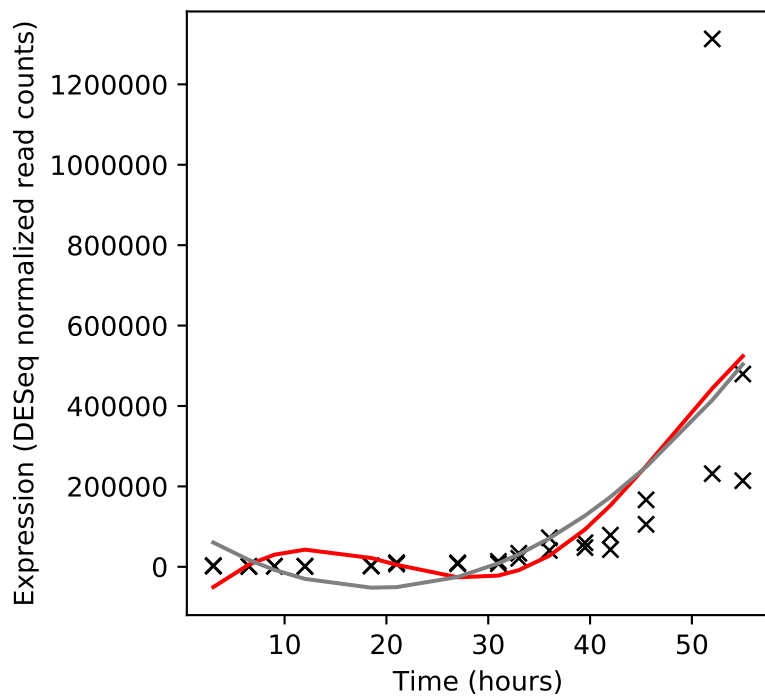

Rv1316c/ogt

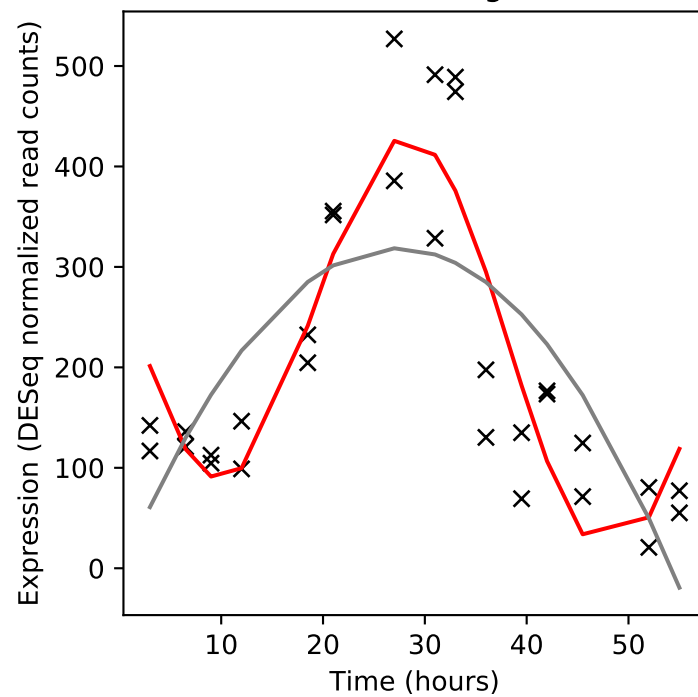

Rv1317c/alkA

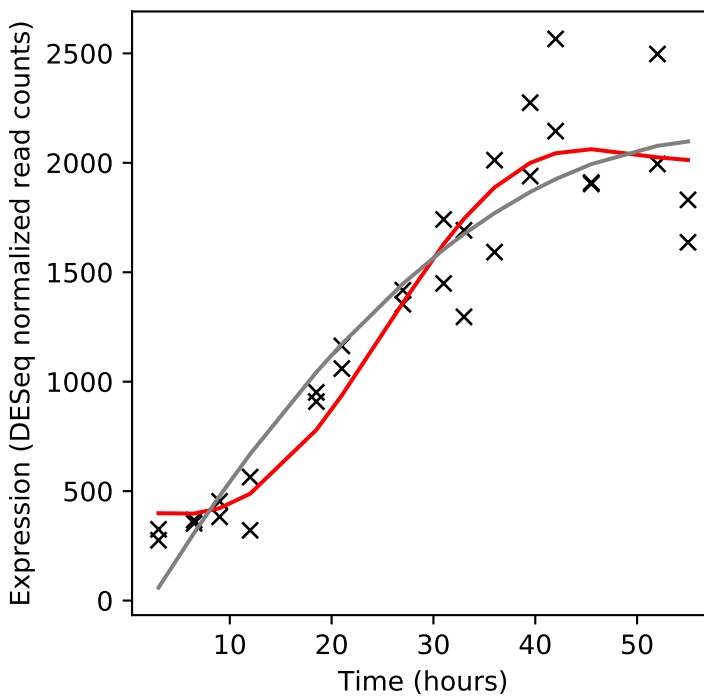

Rv1318c/-

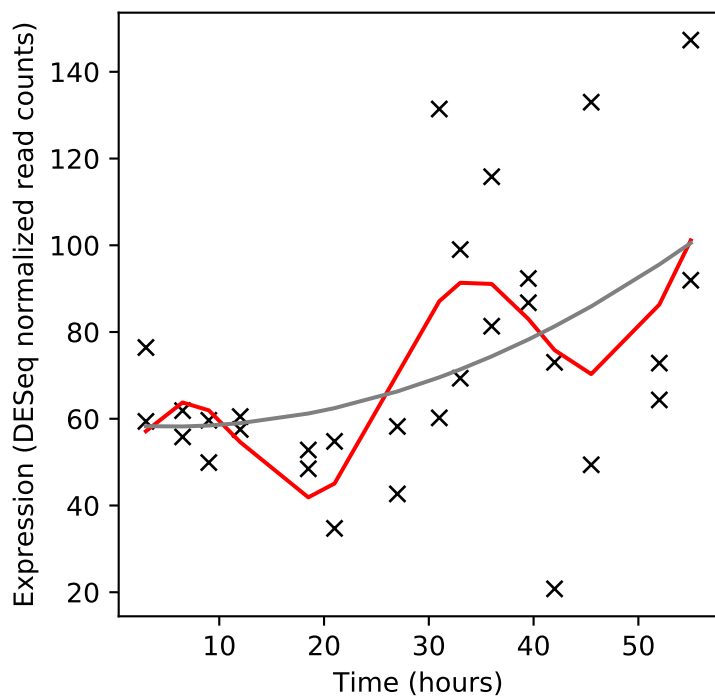

Rv1319c/-

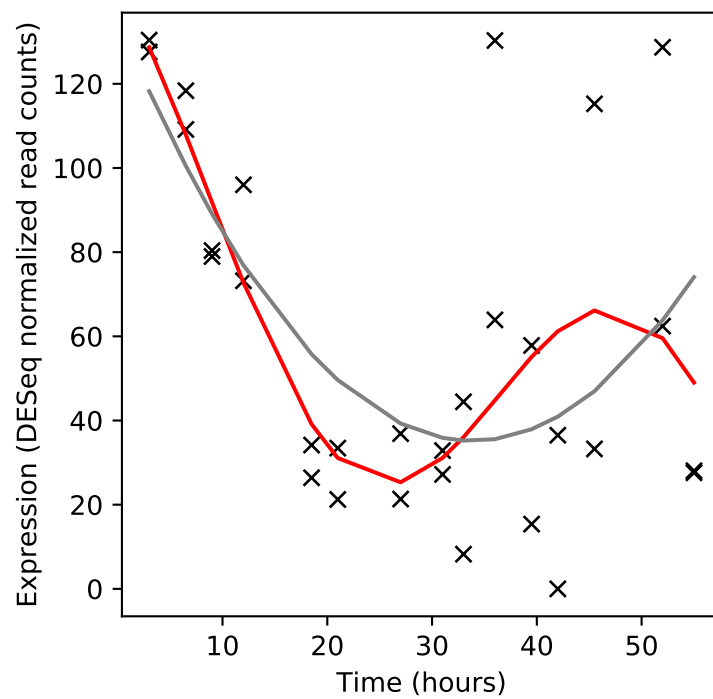

Rv1320c/-

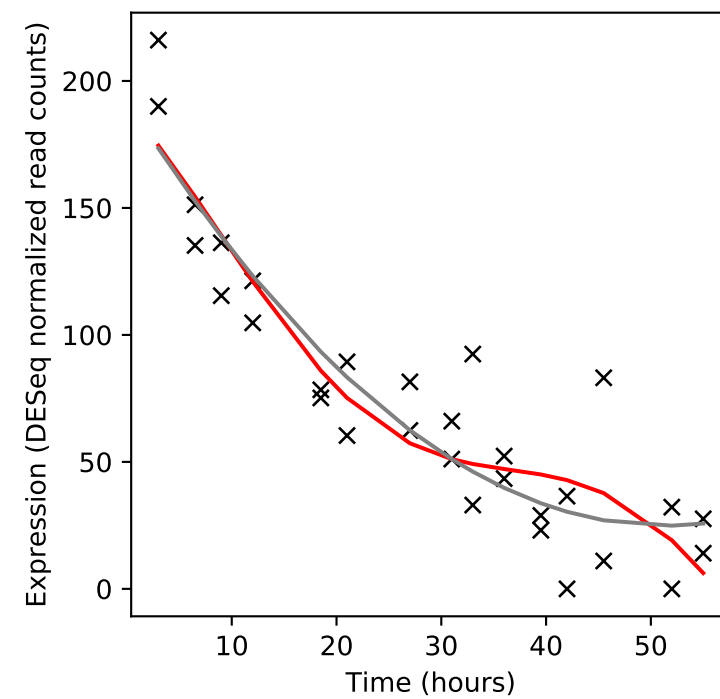

Rv1321/-

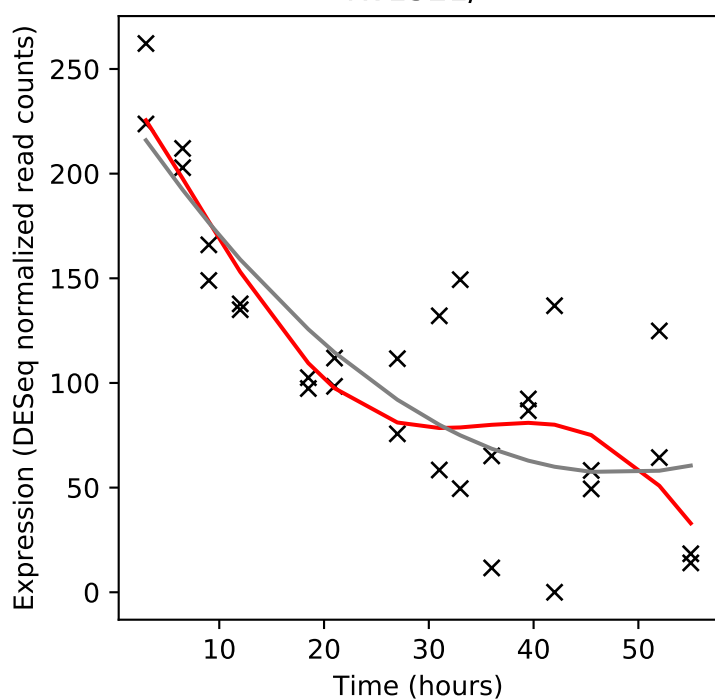

Rv1322/-

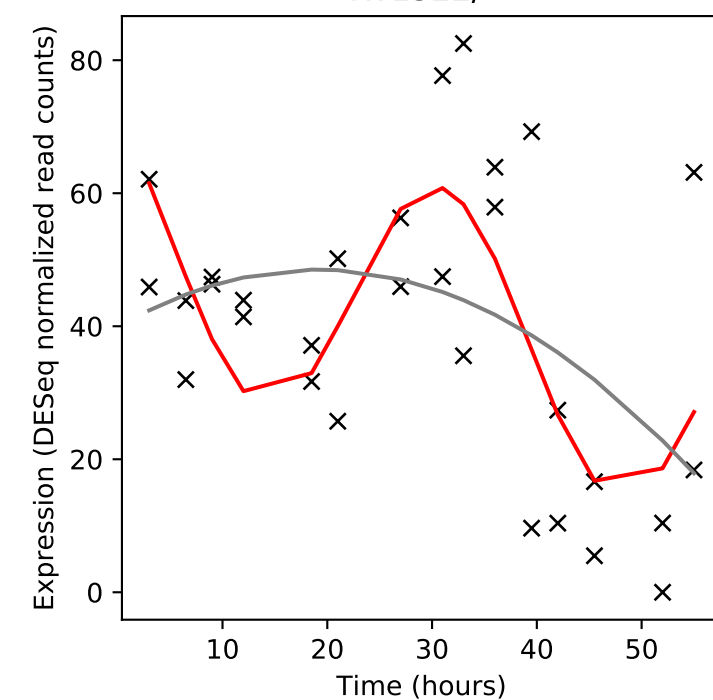

Rv1322A/-

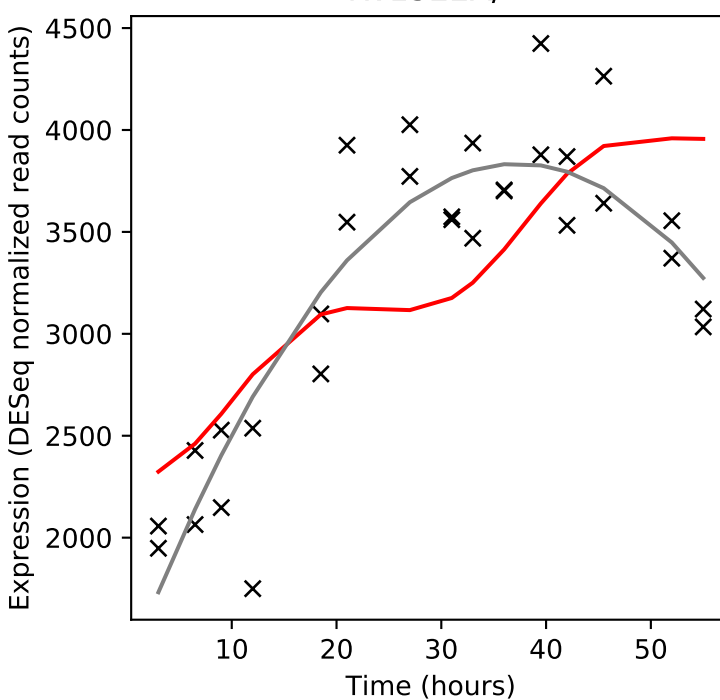

Rv1323/fadA4

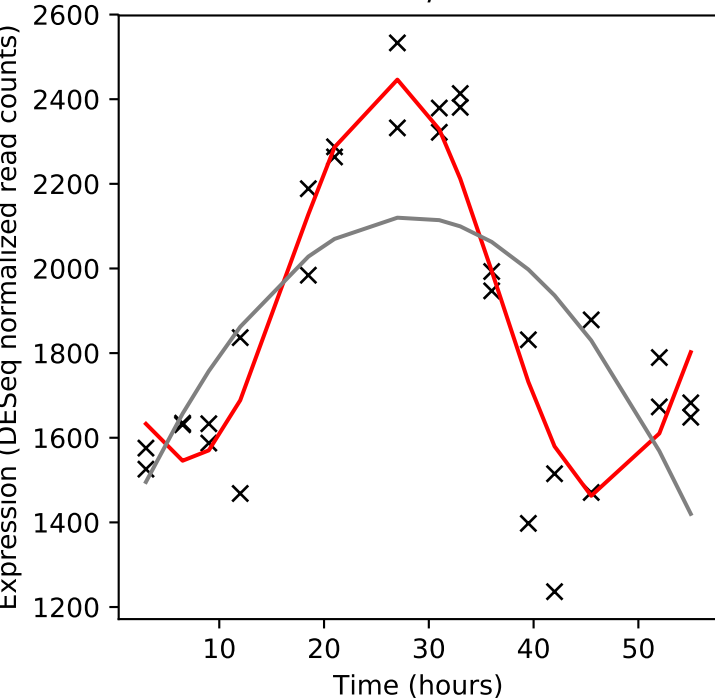

Rv1324/-

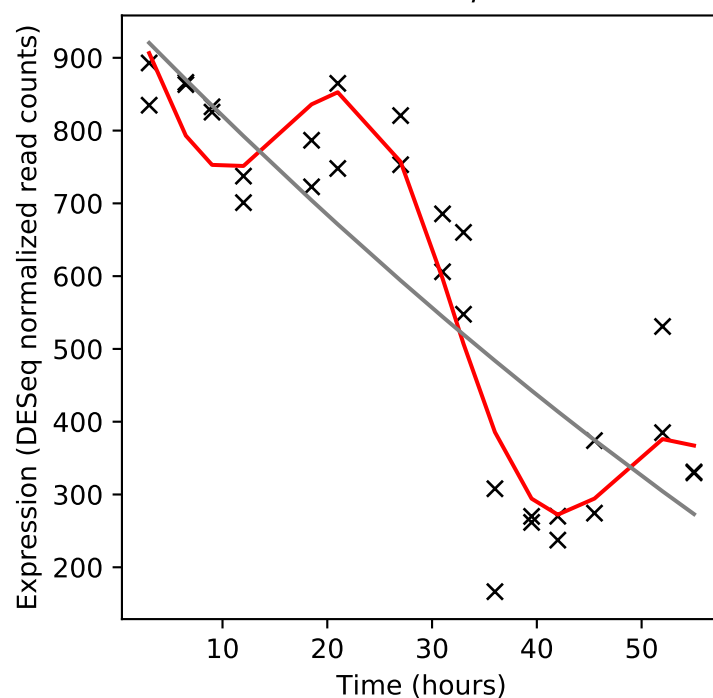

Rv1325c/PE\_PGRS24

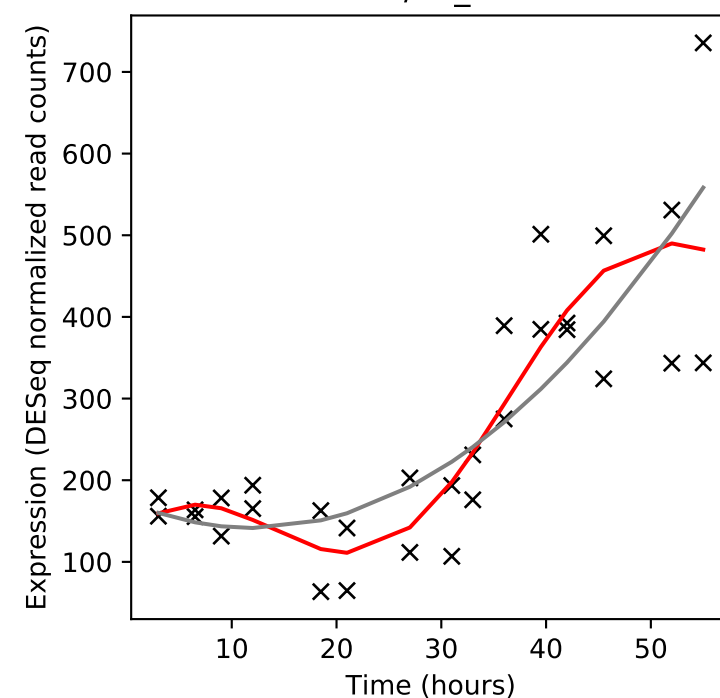

Rv1326c/glgB

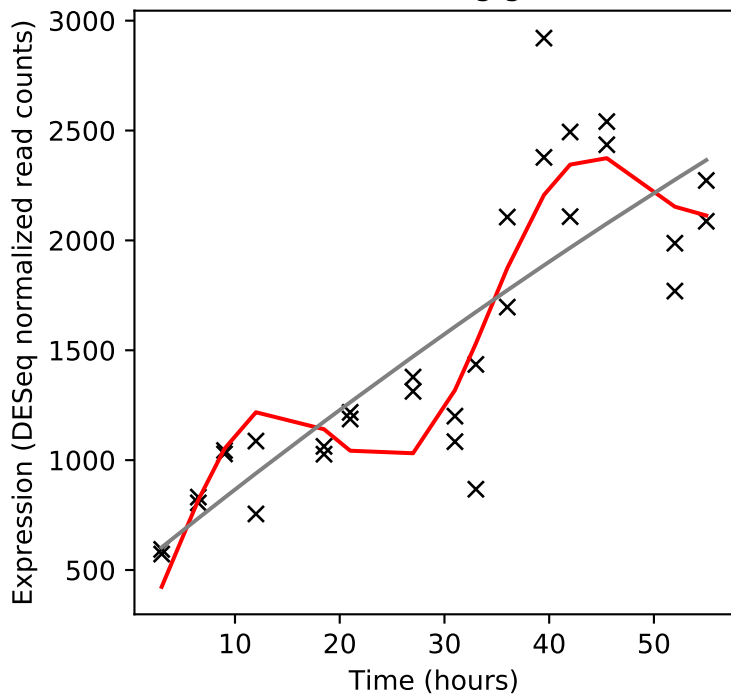

Rv1327c/glgE

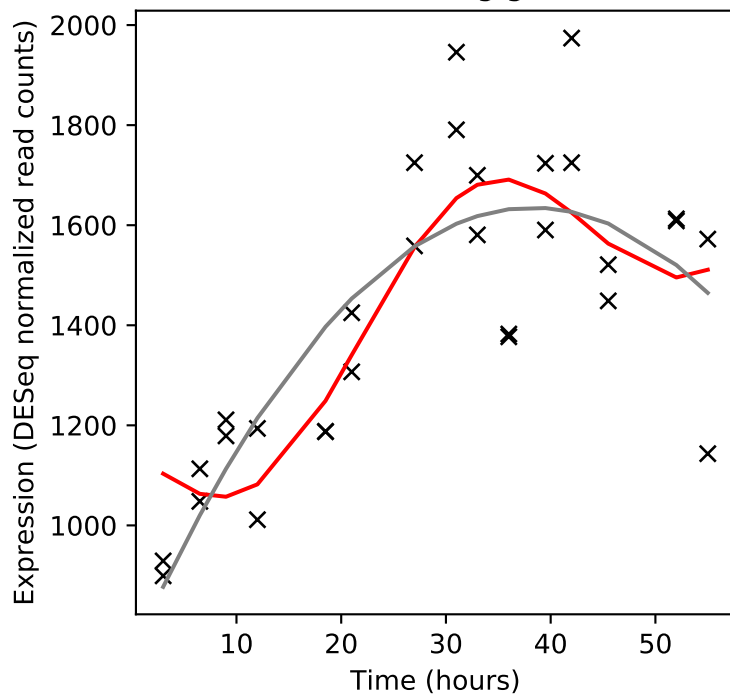

Rv1328c/glgP

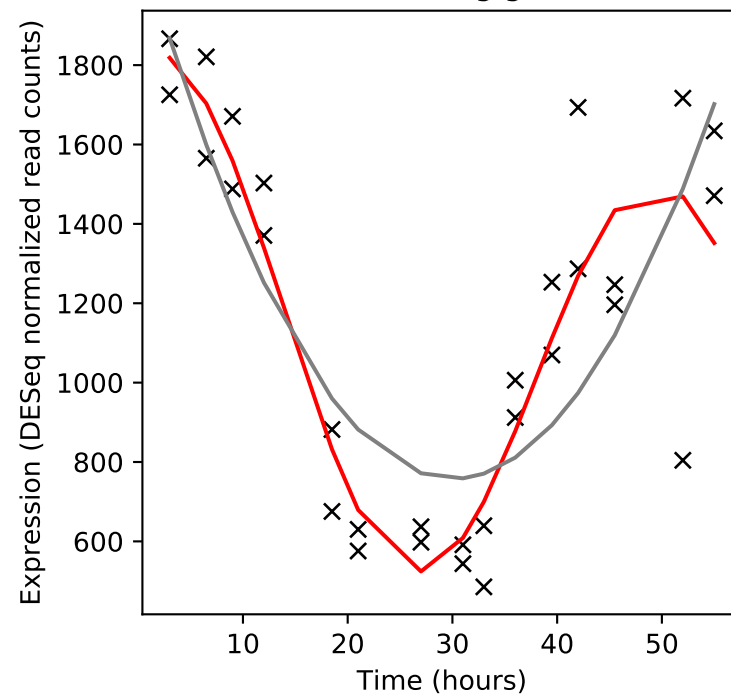

Rv1329c/dinG

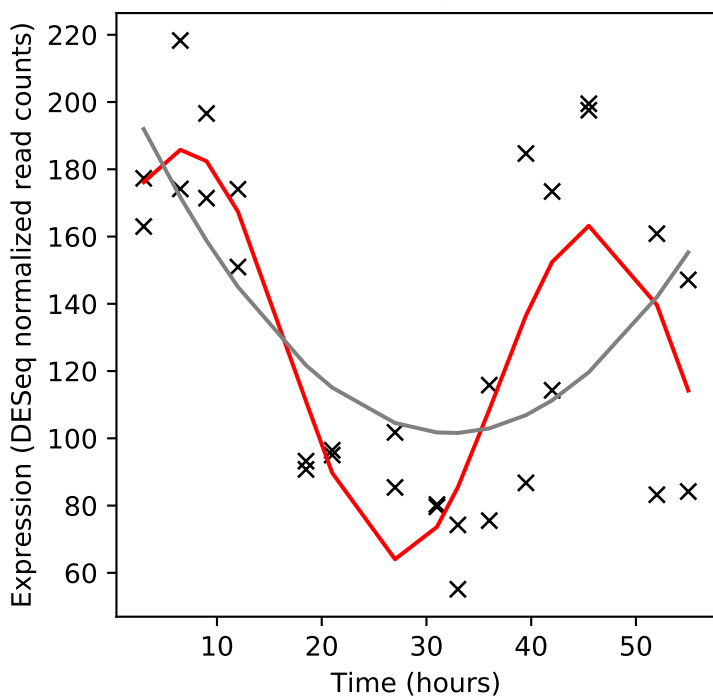

Rv1330c/pncB1

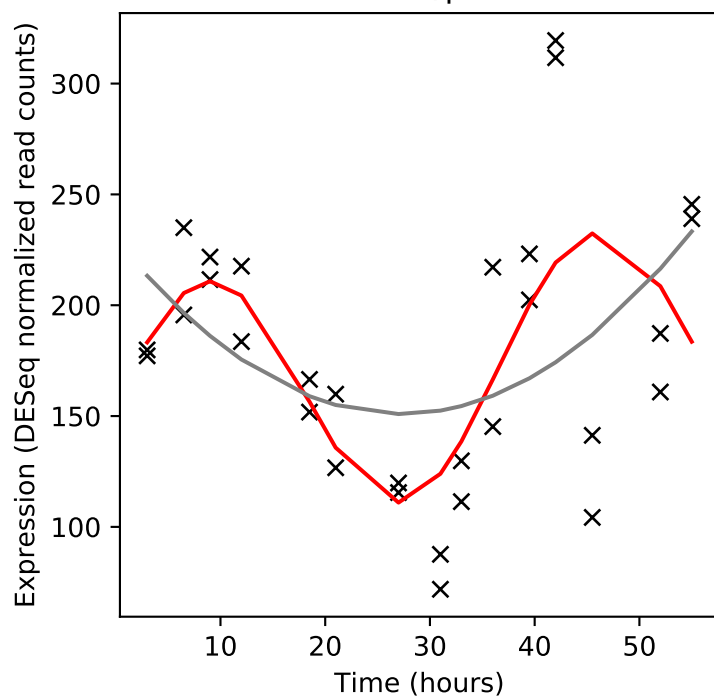

Rv1331/-

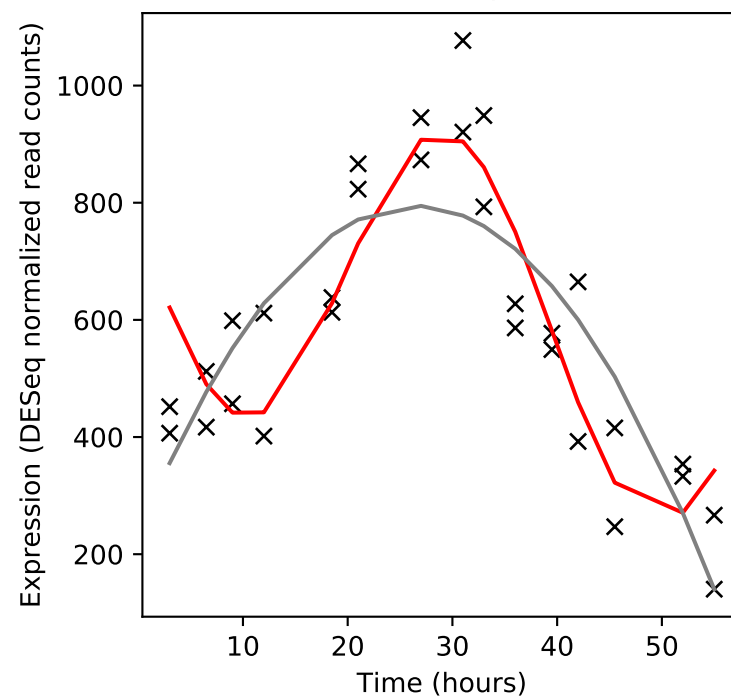

Rv1332/-

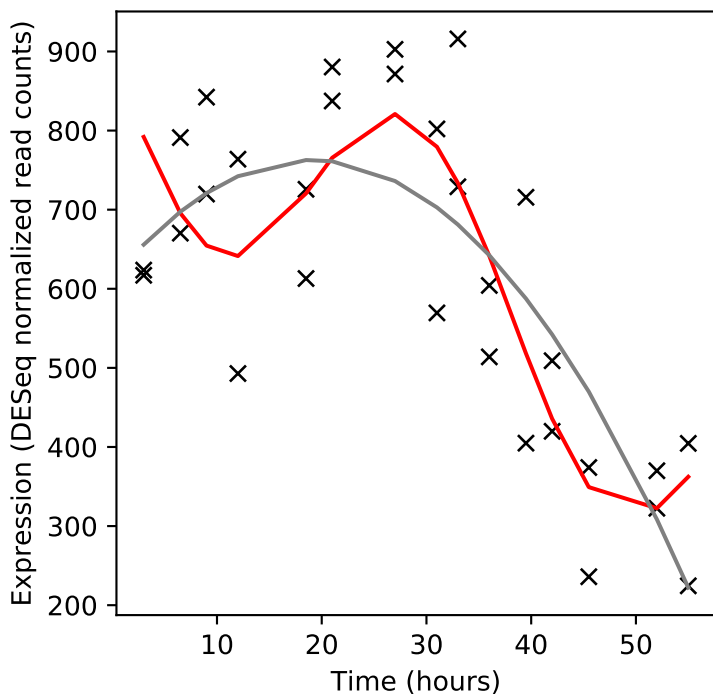

Rv1333/-

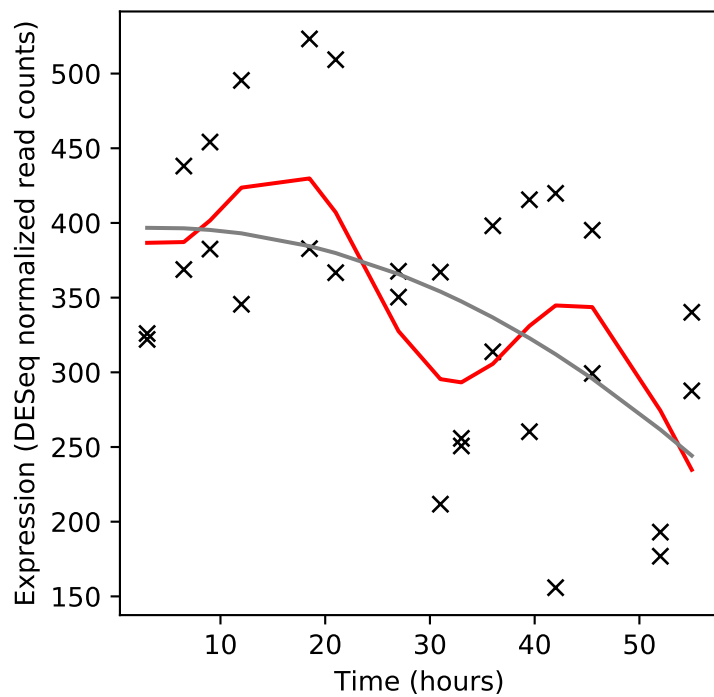

Rv1334/mec

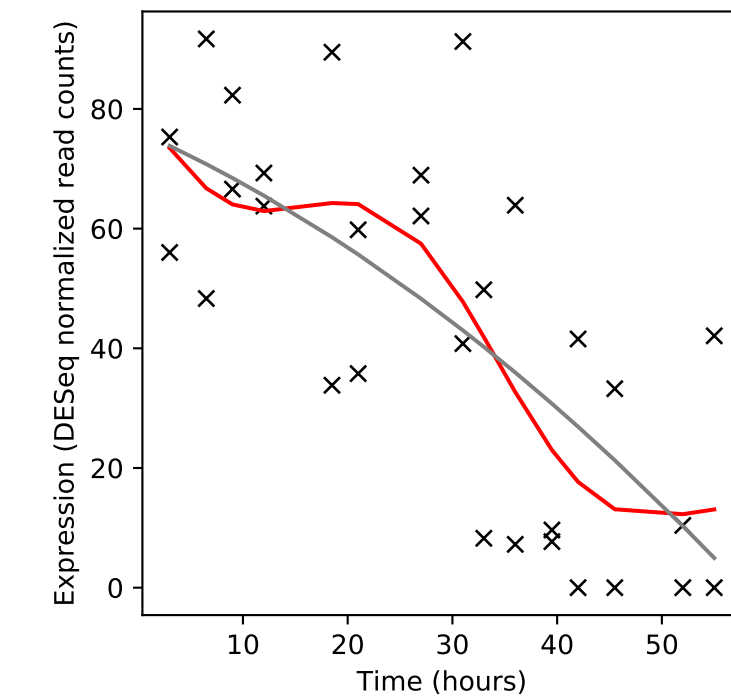

Rv1335/cysO

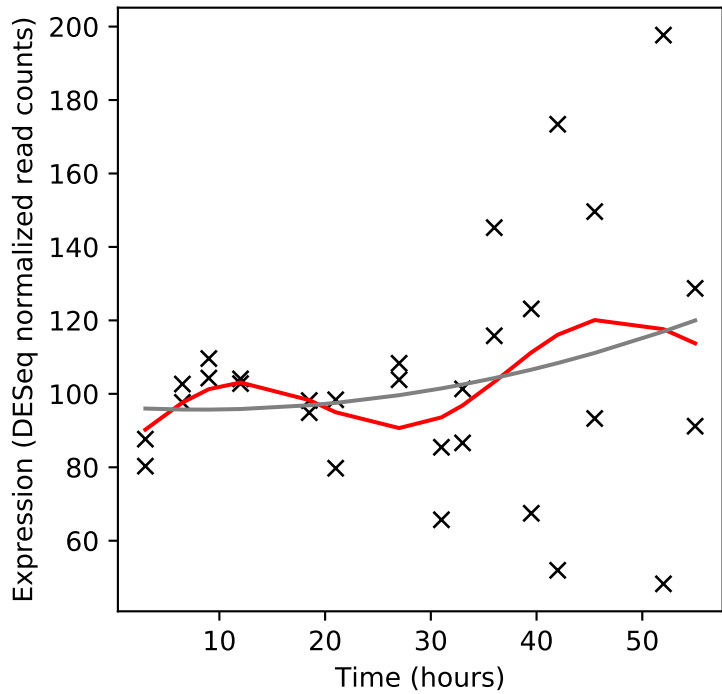

Rv1336/cysM

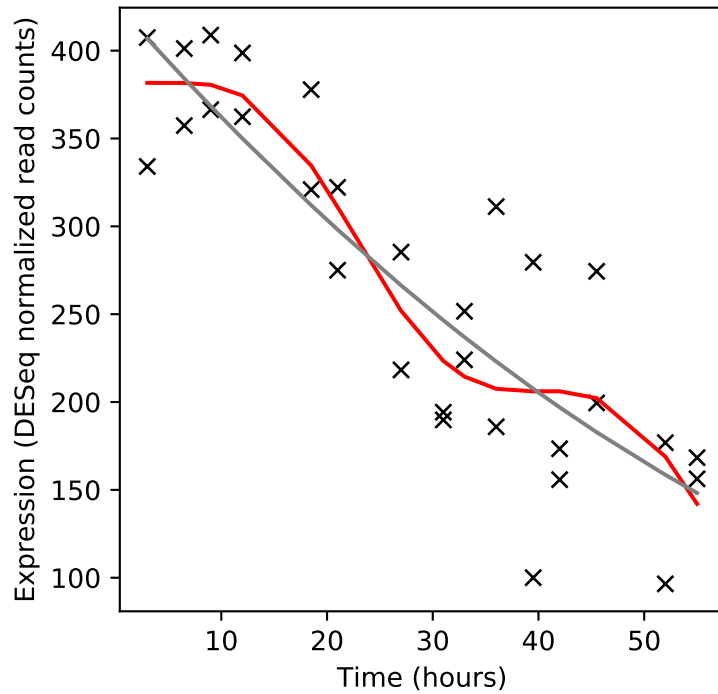

Rv1337/-

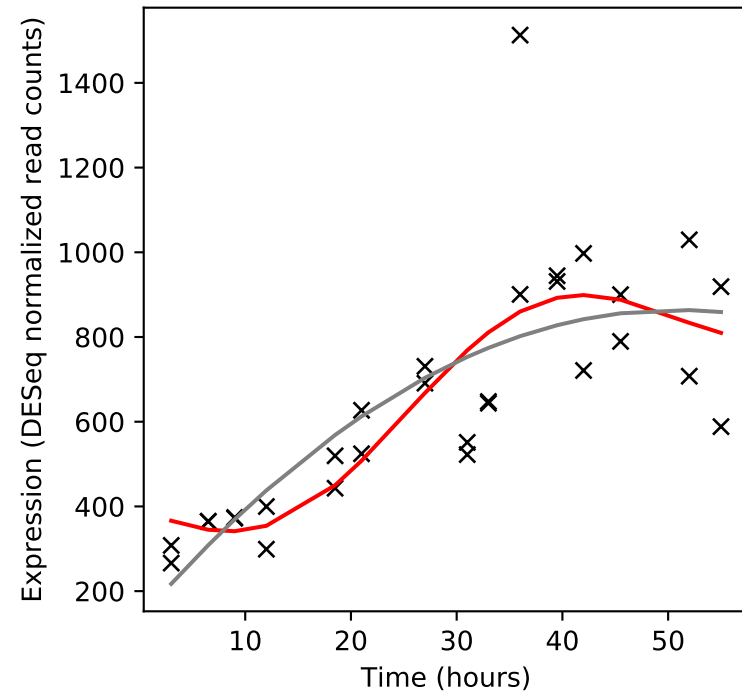

Rv1338/murl

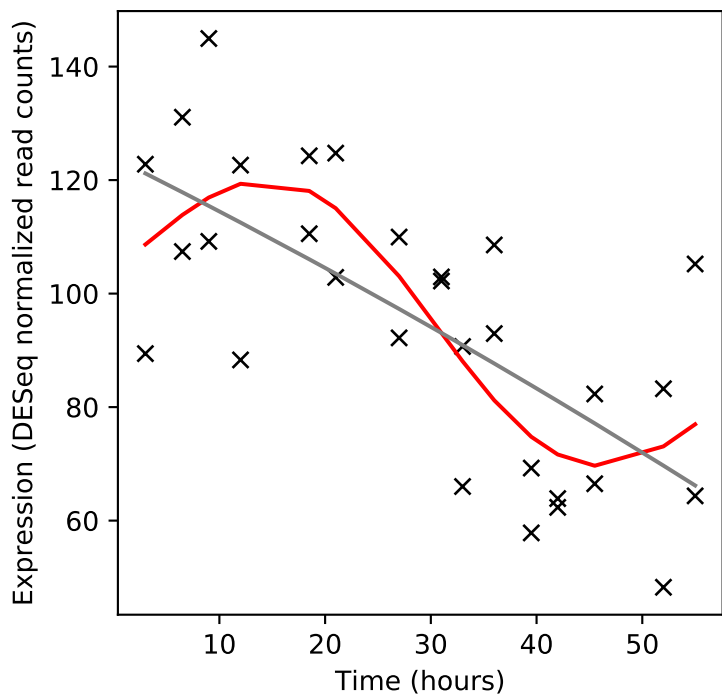

Rv1339/-

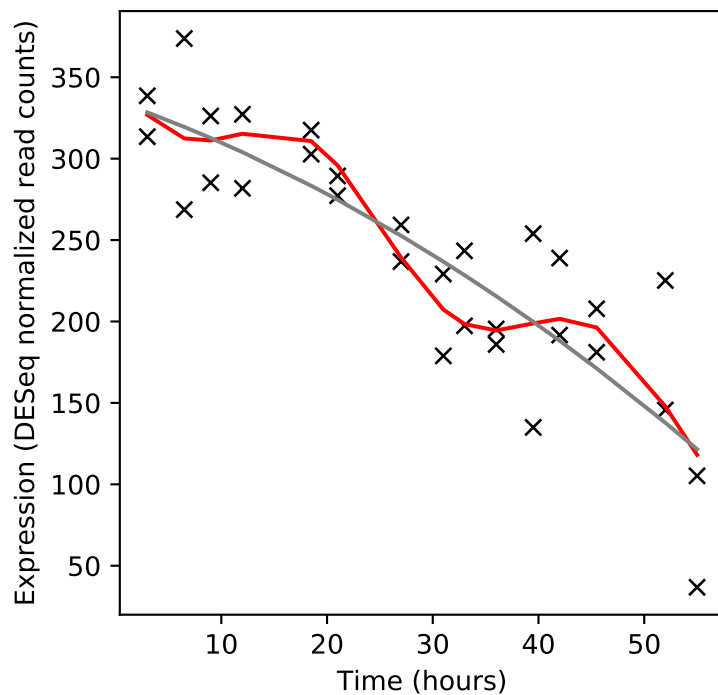

Rv1340/rphA

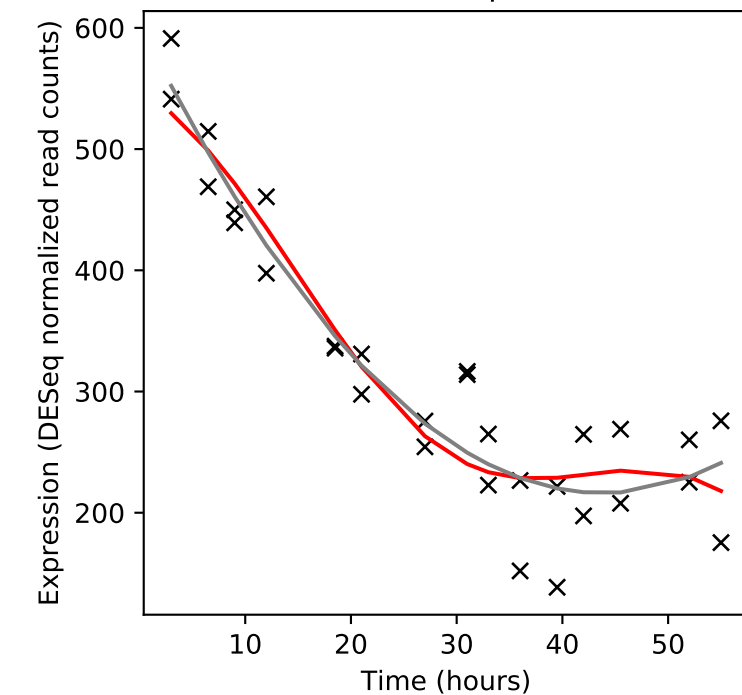

Rv1341/-

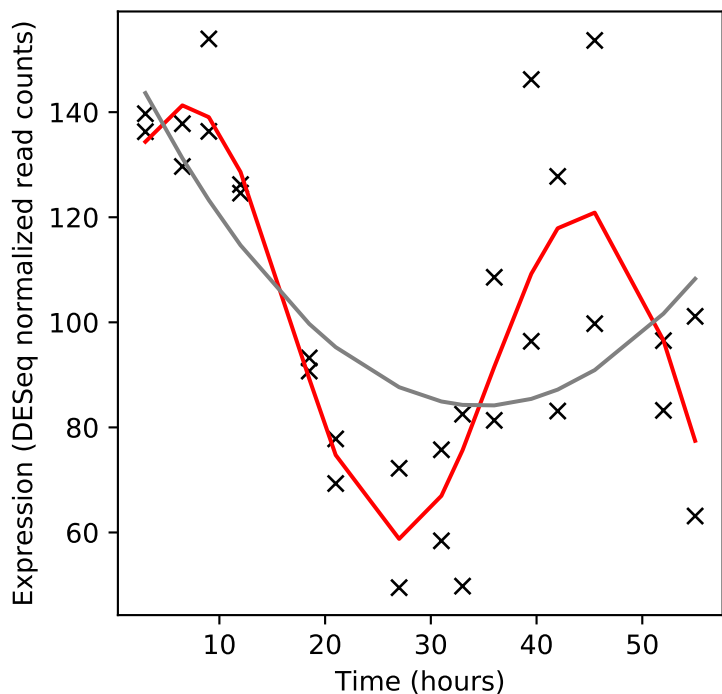

Rv1342c/-

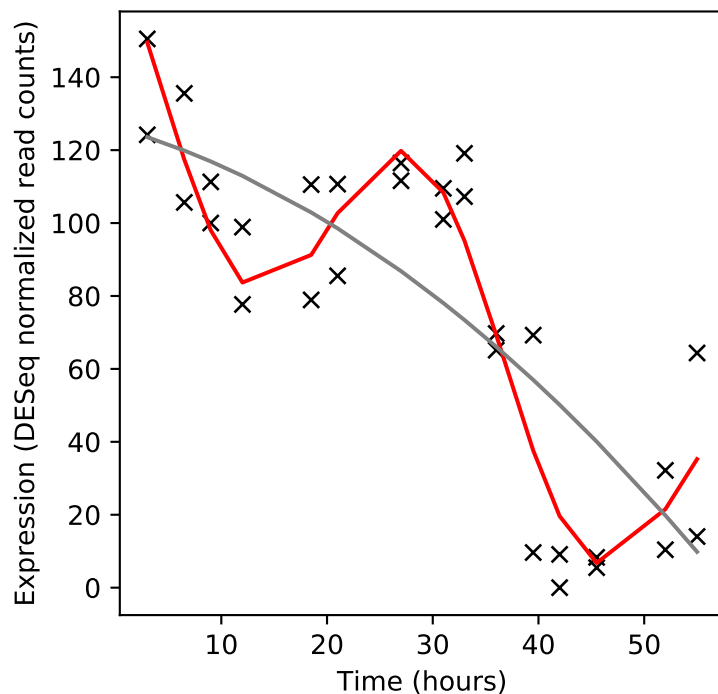

Rv1343c/lprD

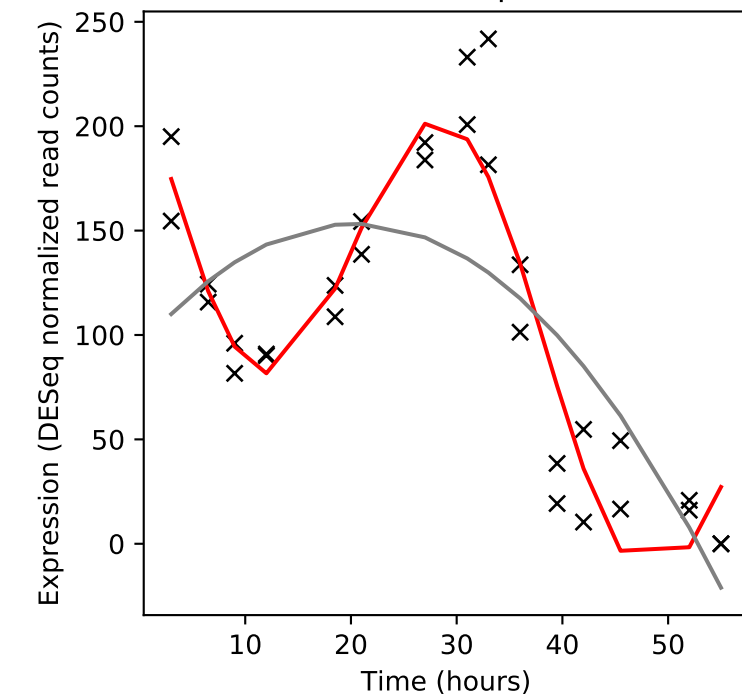

Rv1344/mbtL

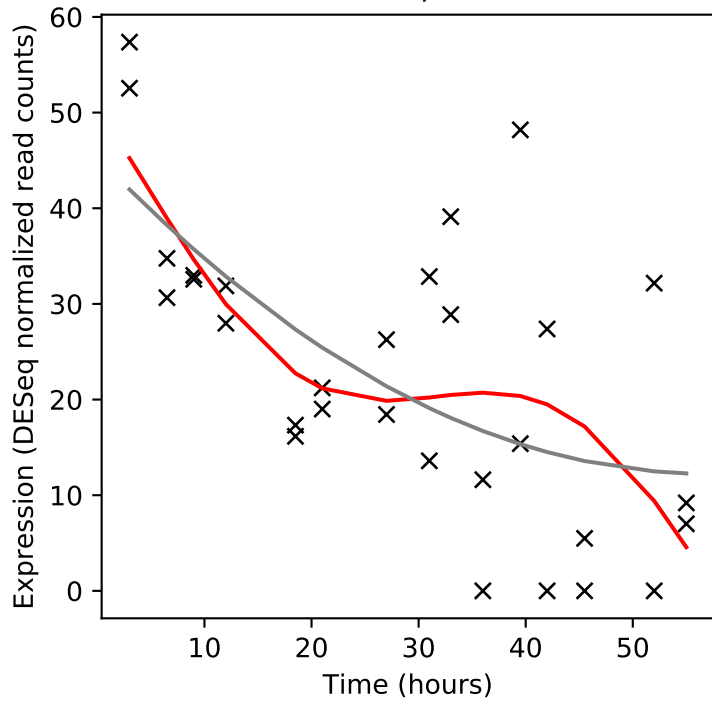

Rv1345/mbtM

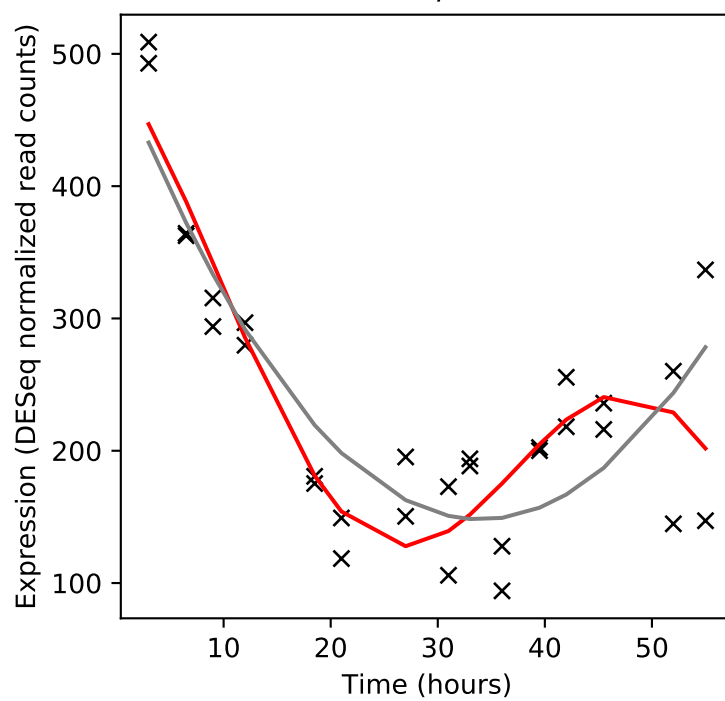

Rv1346/mbtN

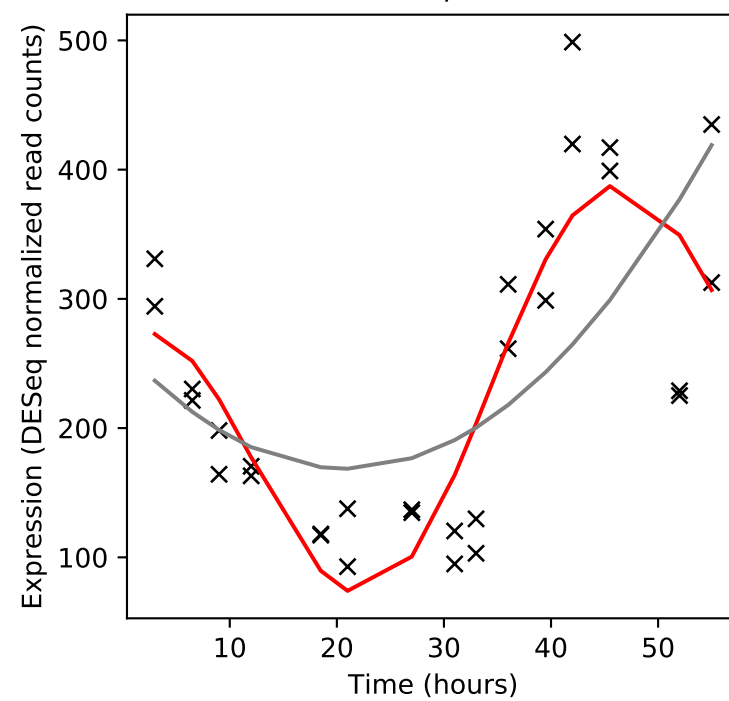

Rv1347c/mbtK

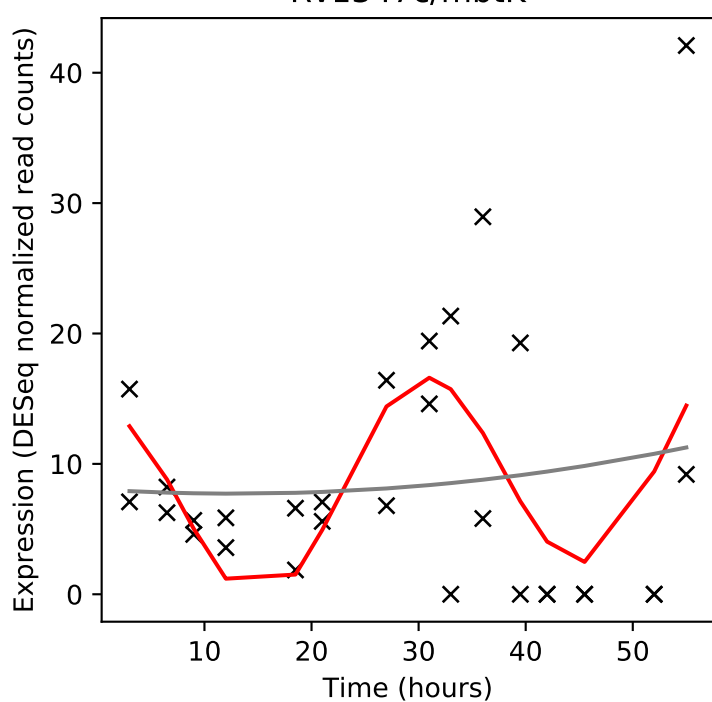

Rv1348/irtA

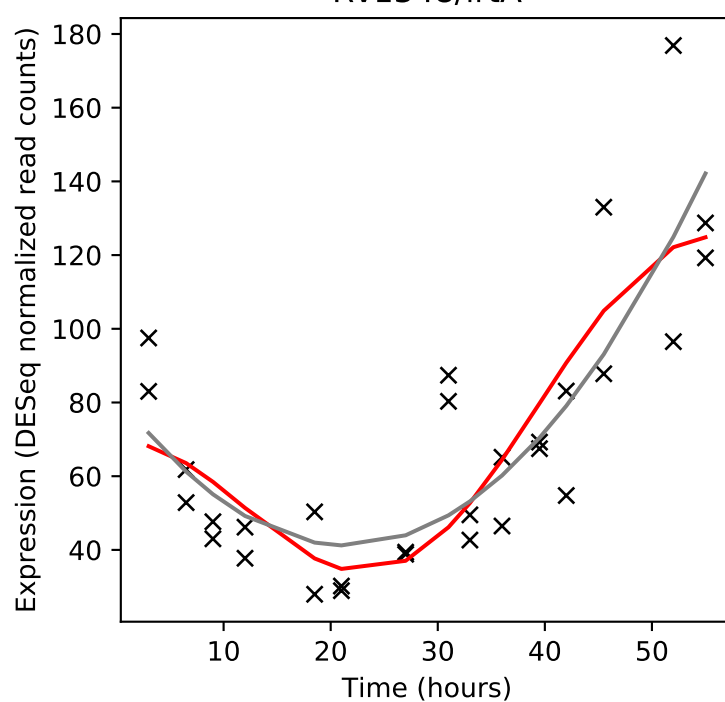

Rv1349/irtB

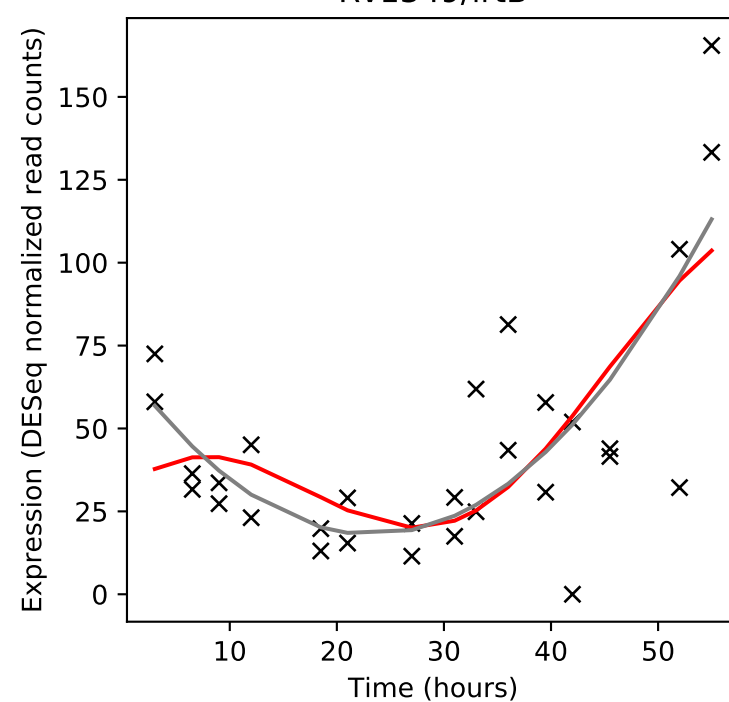

Rv1350/fabG2

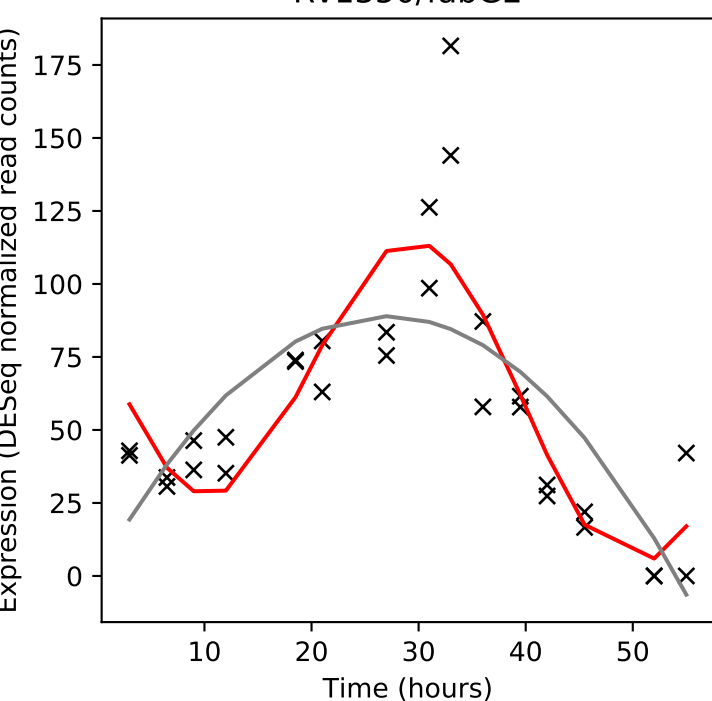

Rv1351/-

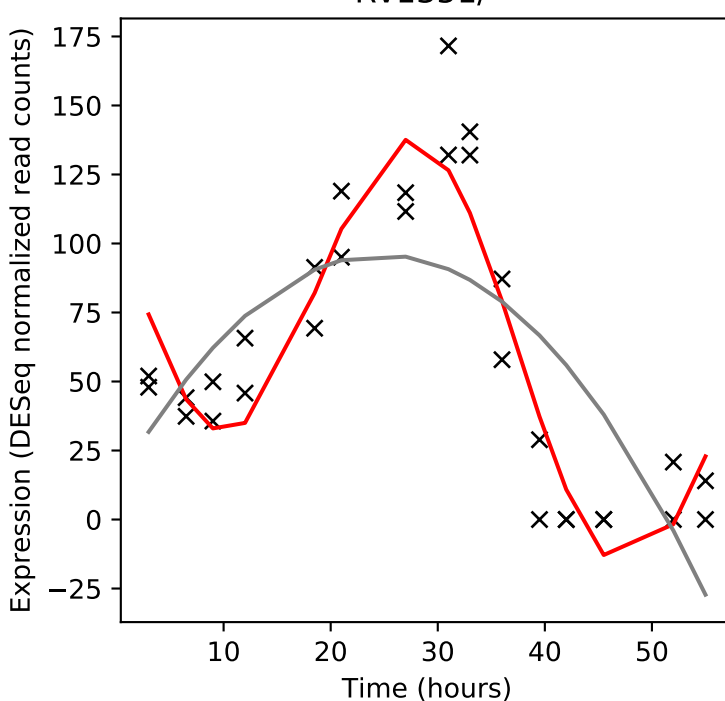

Rv1352/-

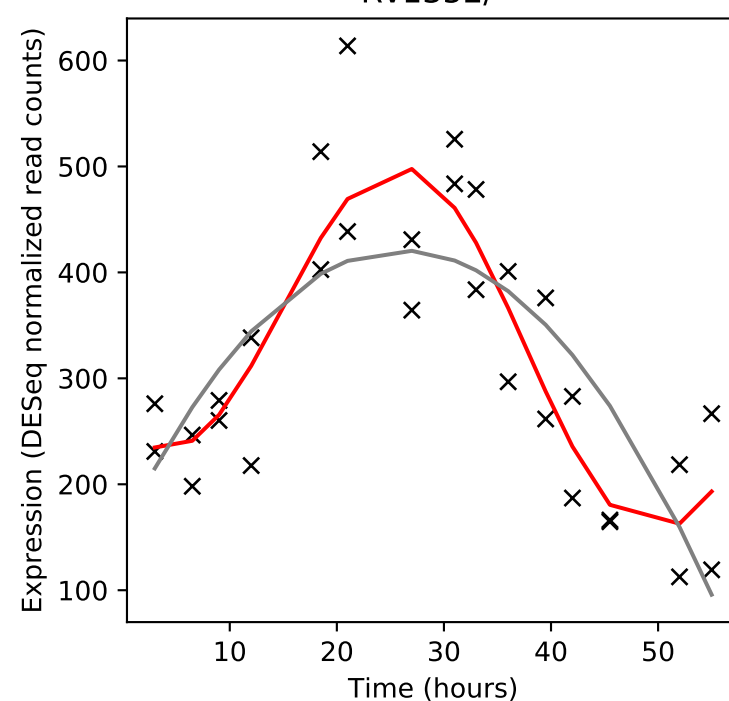

Rv1353c/-

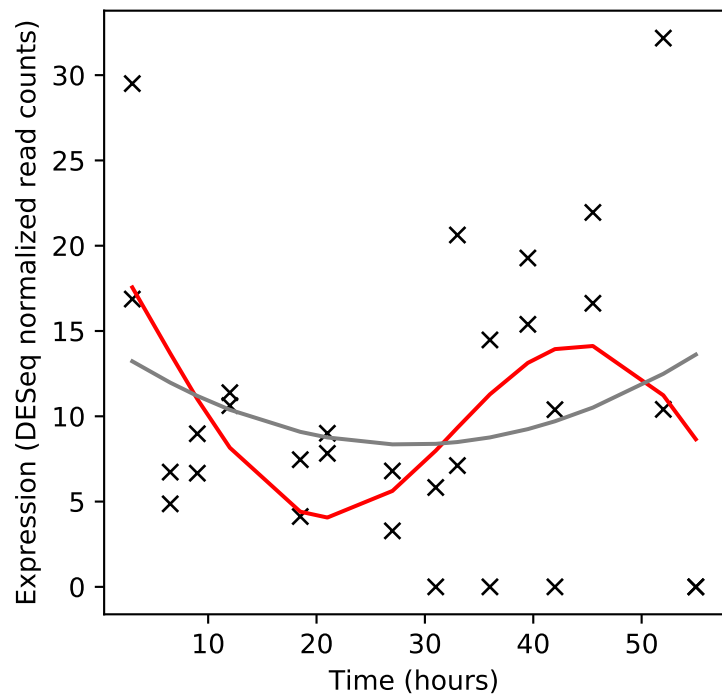

Rv1354c/-

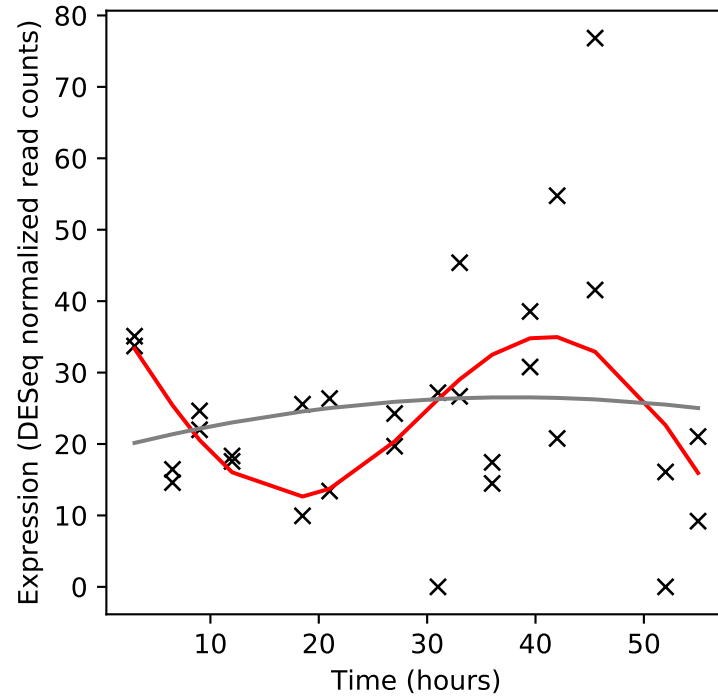

Rv1355c/moeY

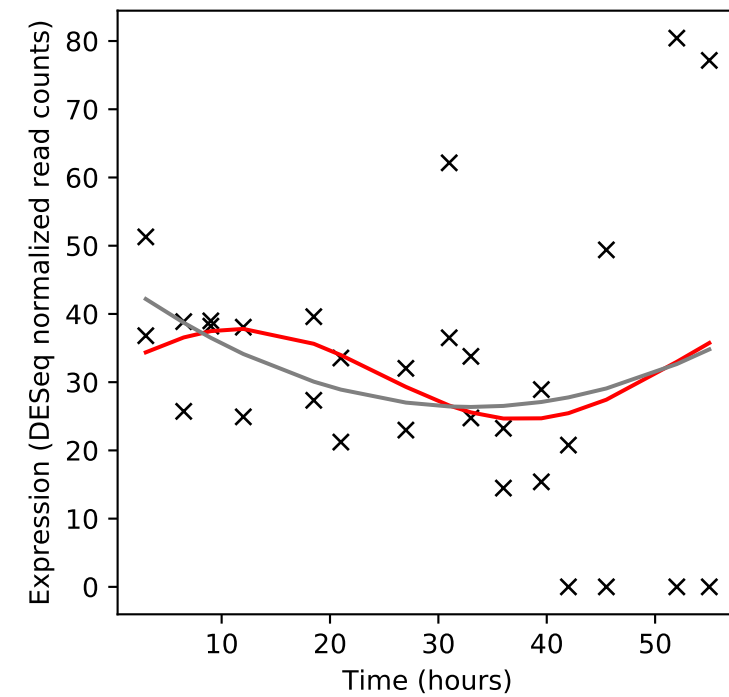

Rv1356c/-

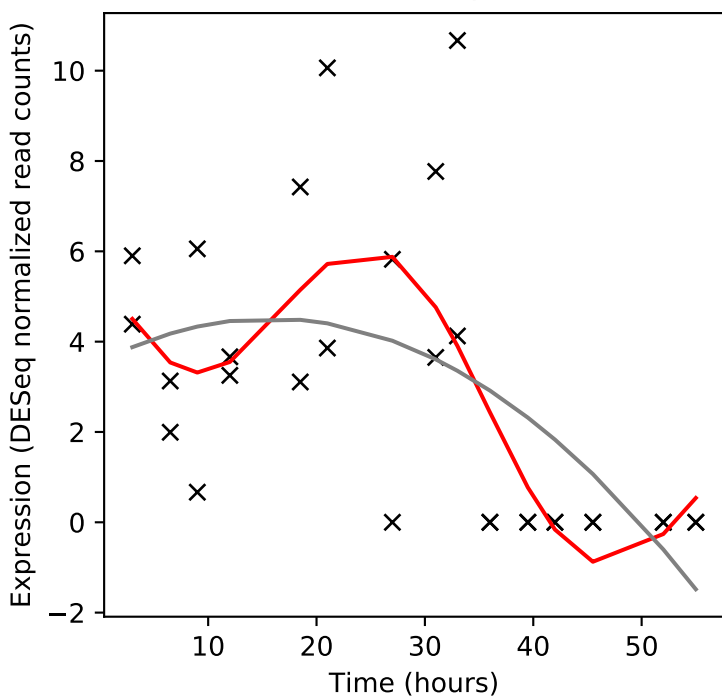

Rv1357c/-

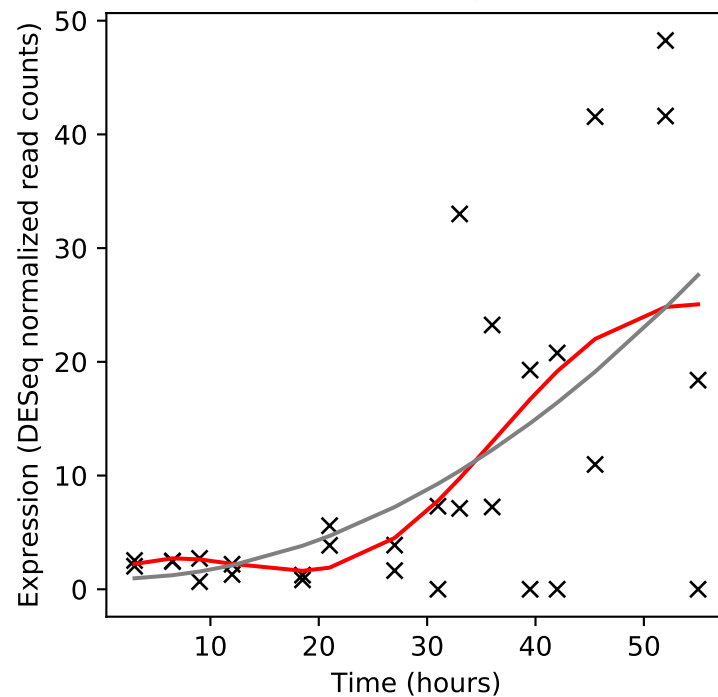

Rv1358/-

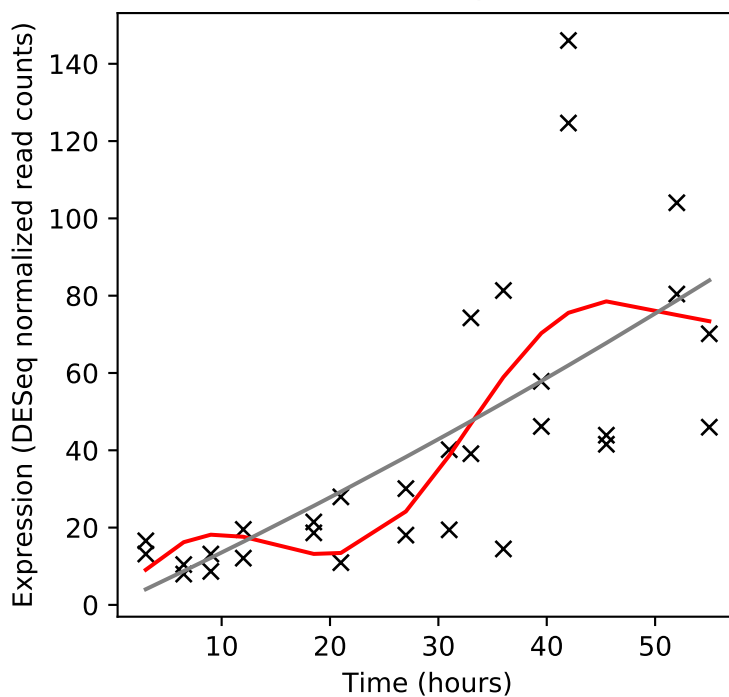

Rv1359/-

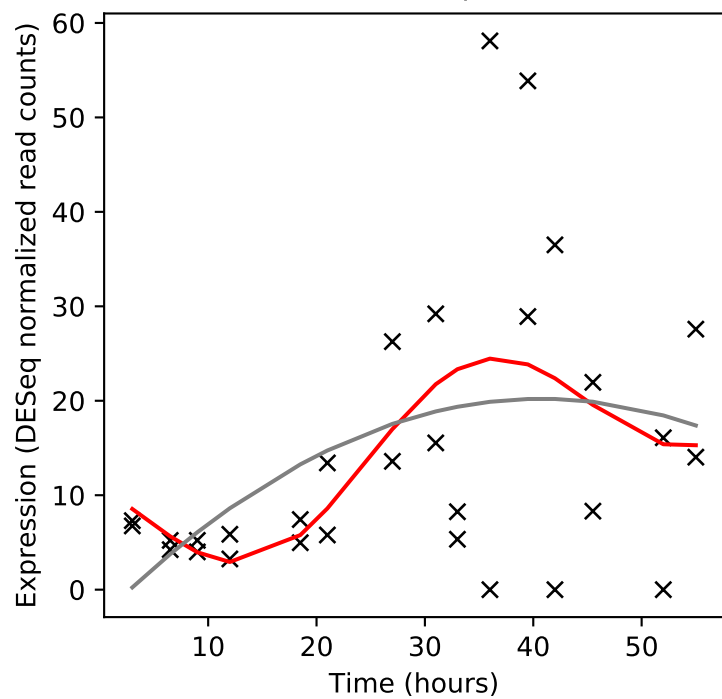

Rv1360/-

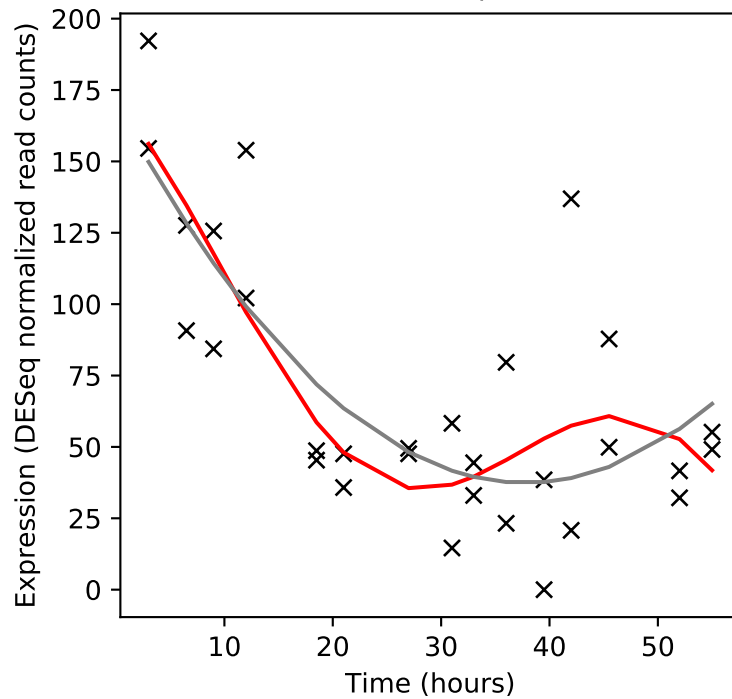

Rv1361c/PPE19

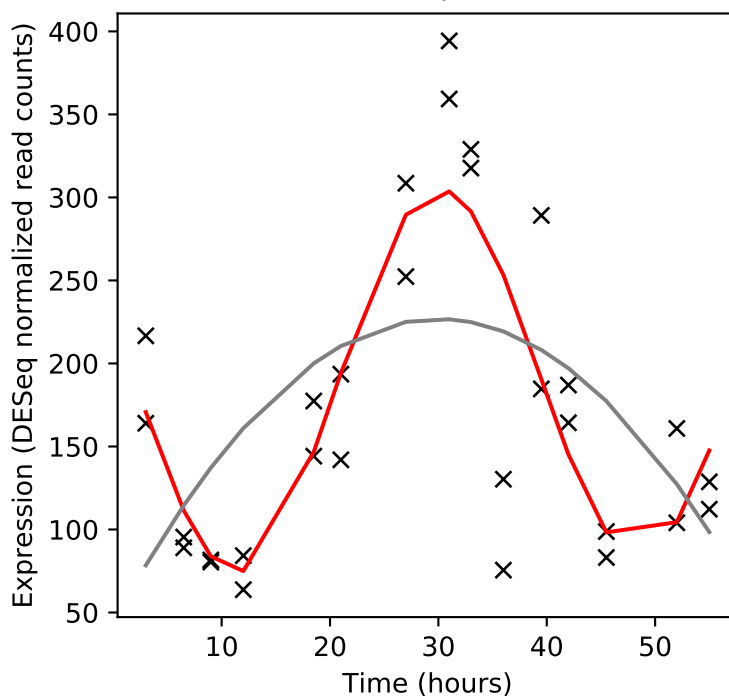



Rv1362c/-

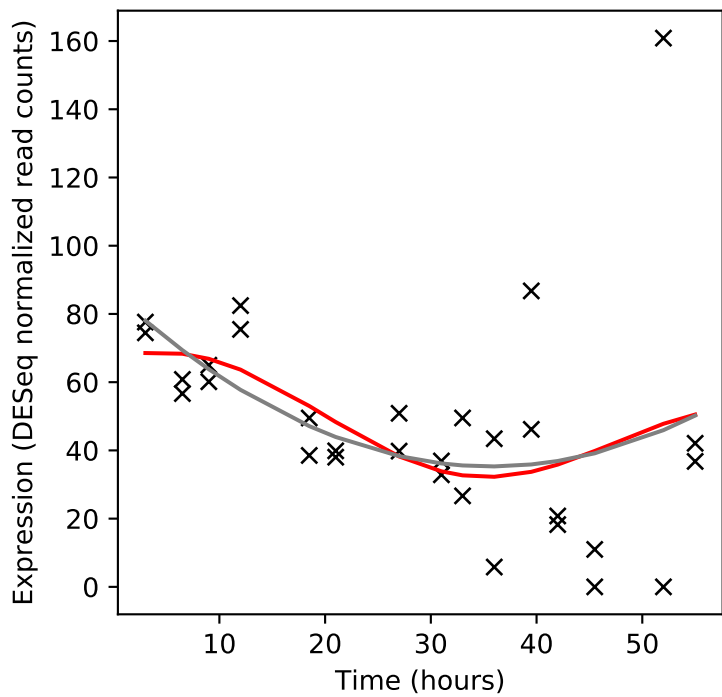

Rv1363c/-

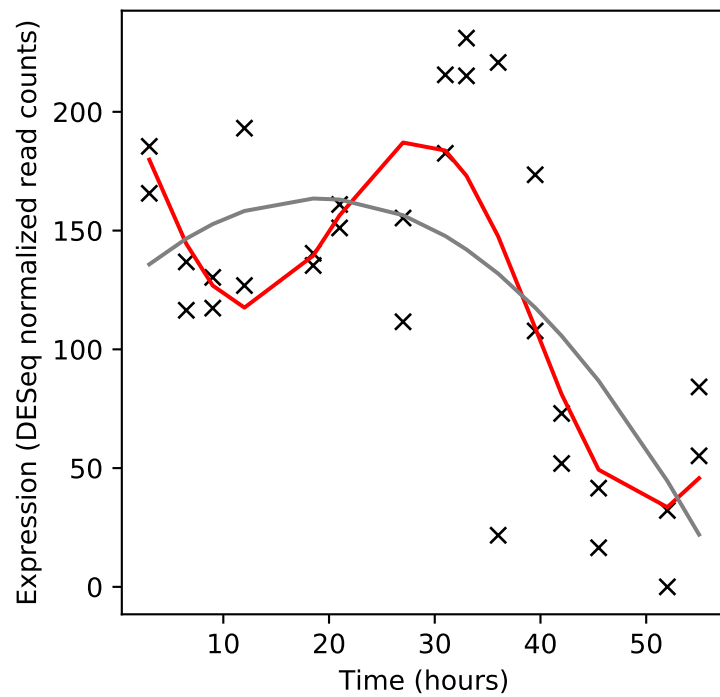

Rv1364c/-

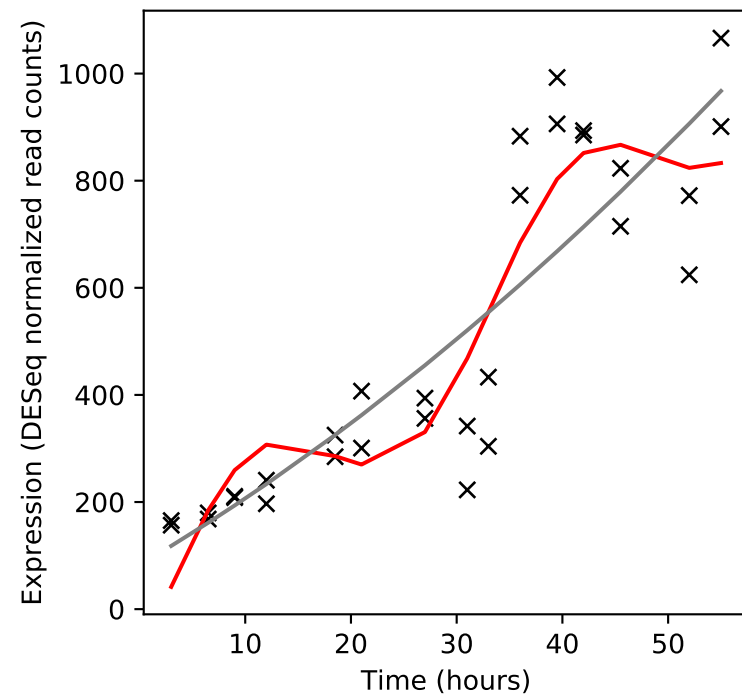

Rv1365c/rsfA

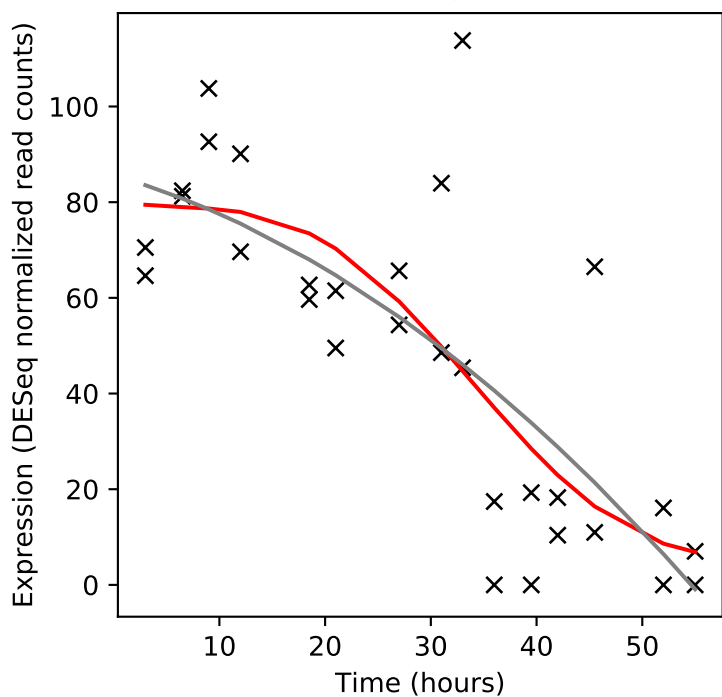

Rv1366/-

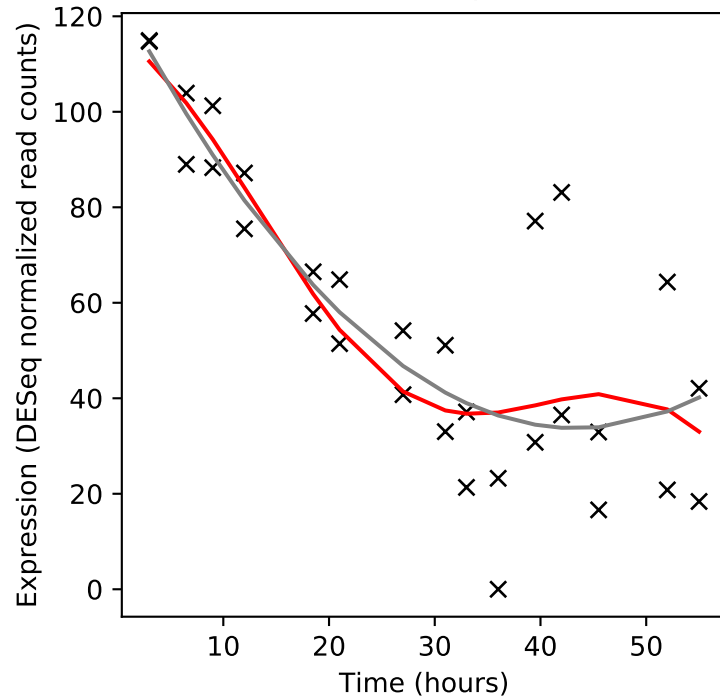

Rv1366A/-

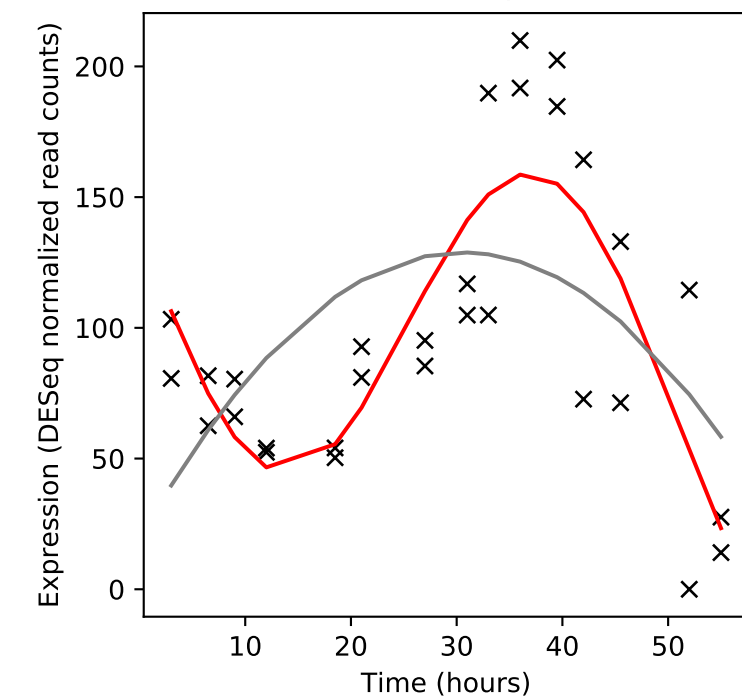

Rv1367c/-

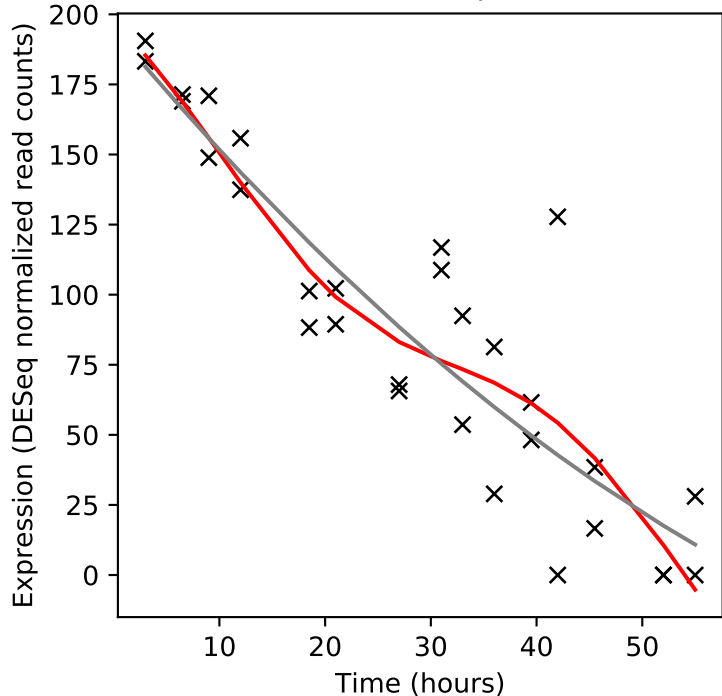

Rv1368/lprF

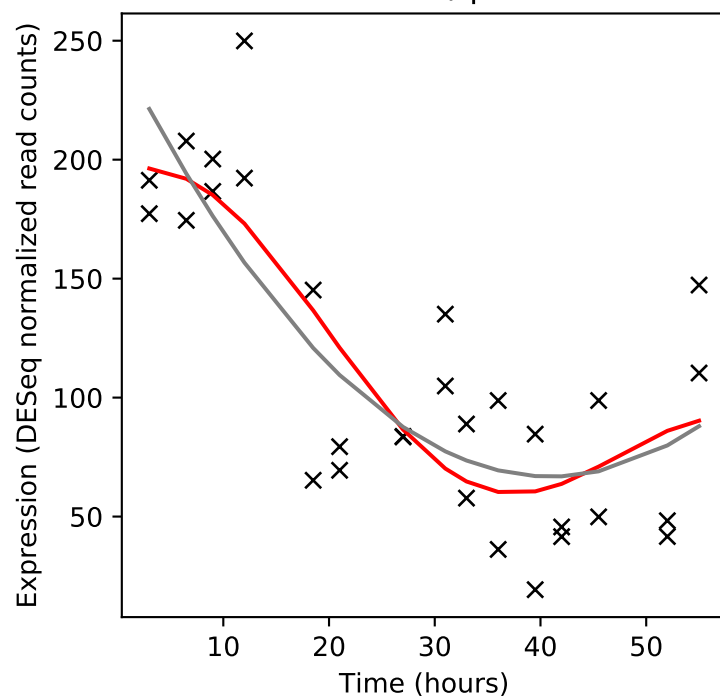

Rv1369c/-

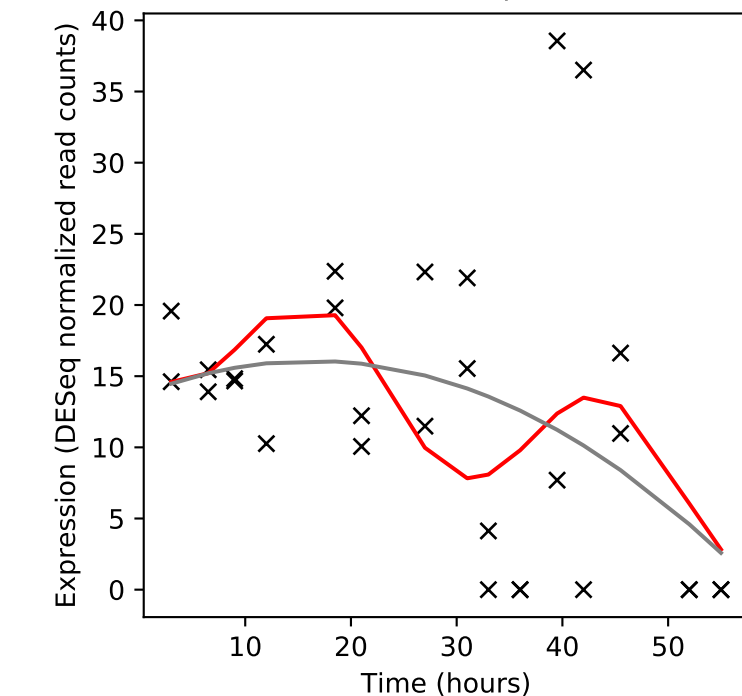

Rv1370c/-

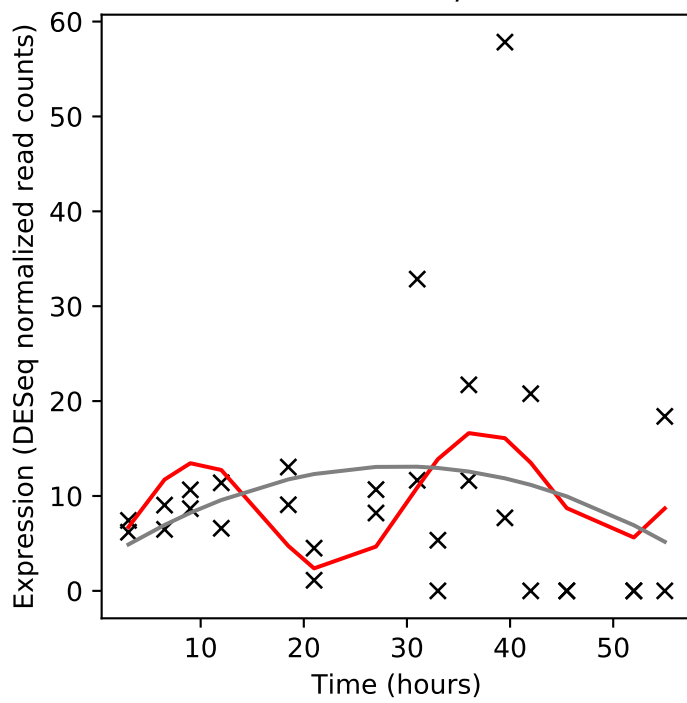

Rv1371/-

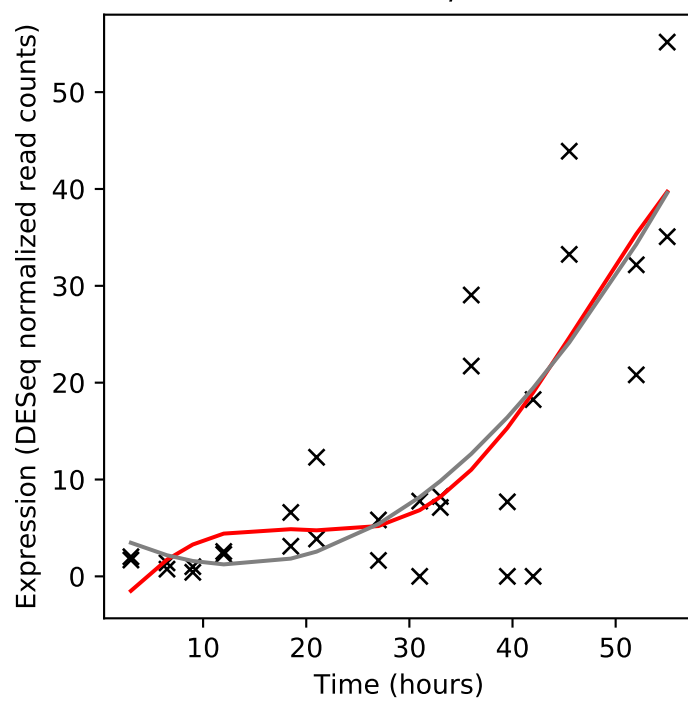

Rv1372/-

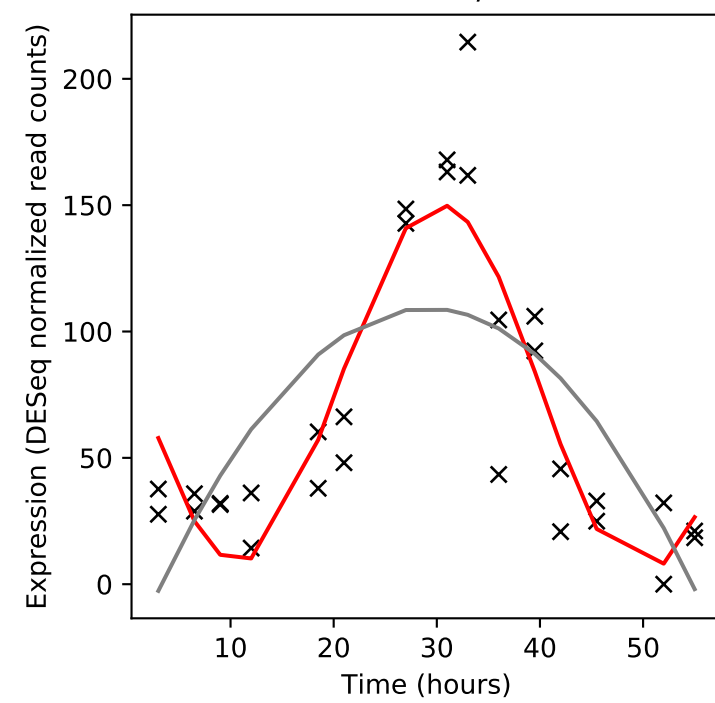

Rv1373/-

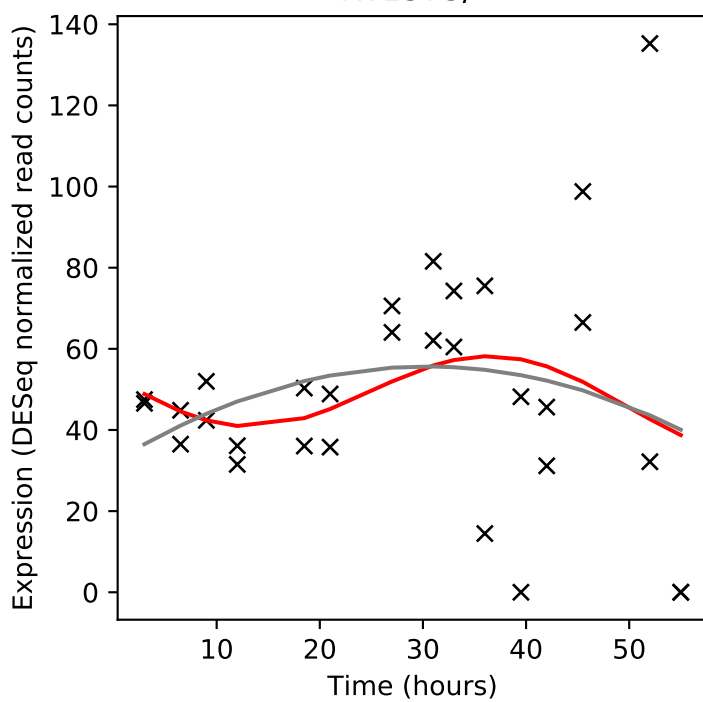

Rv1374c/-

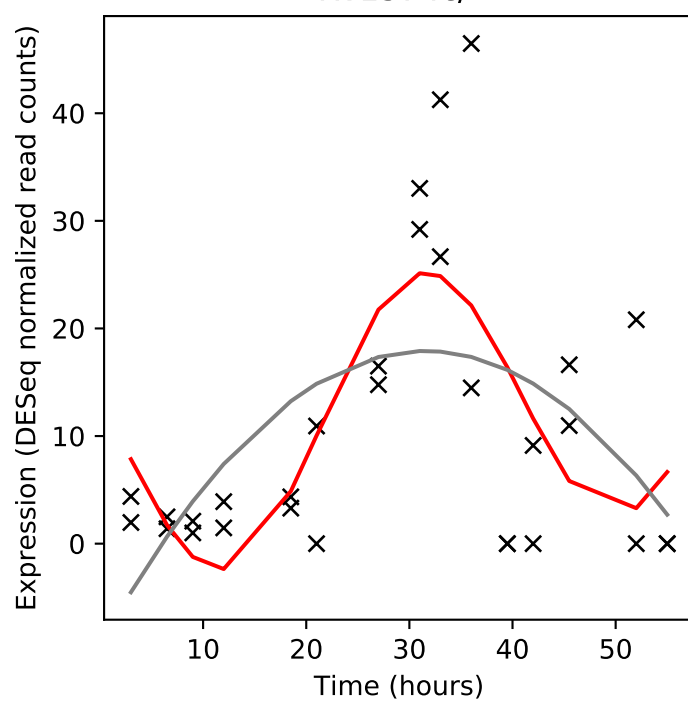

Rv1375/-

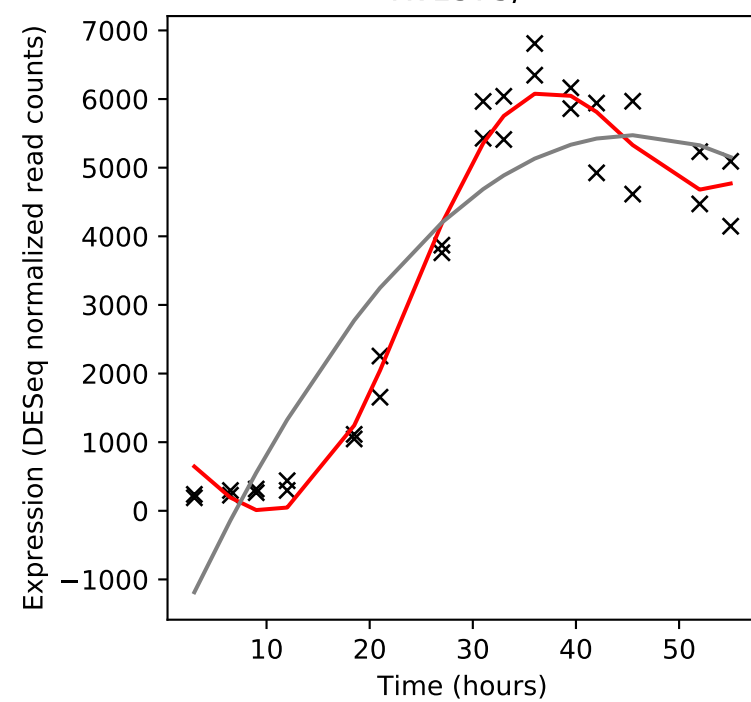

Rv1376/-

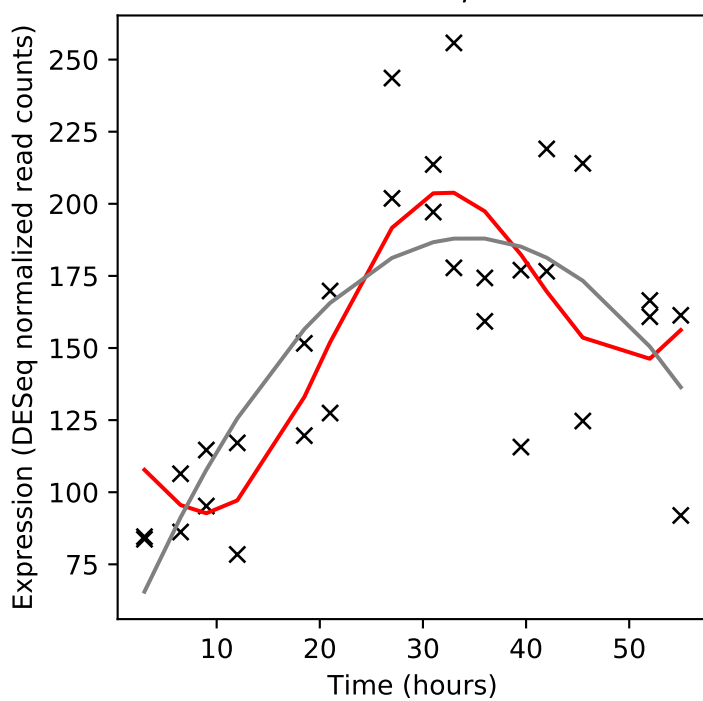

Rv1377c/-

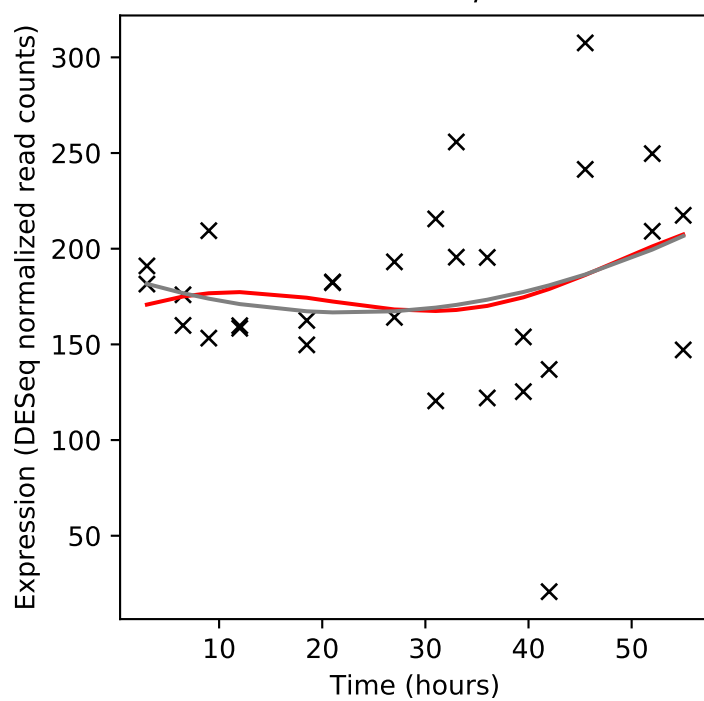

Rv1378c/-

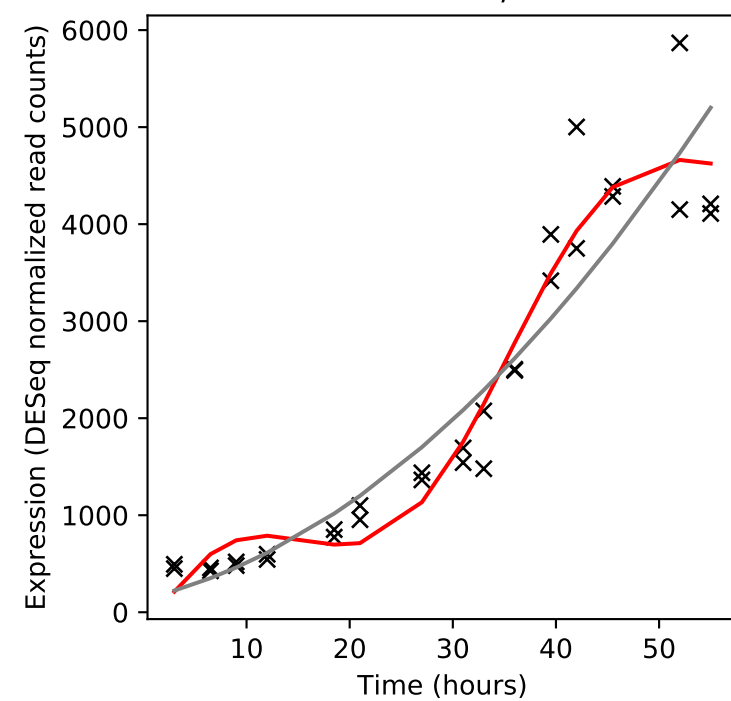

Rv1379/pyrR

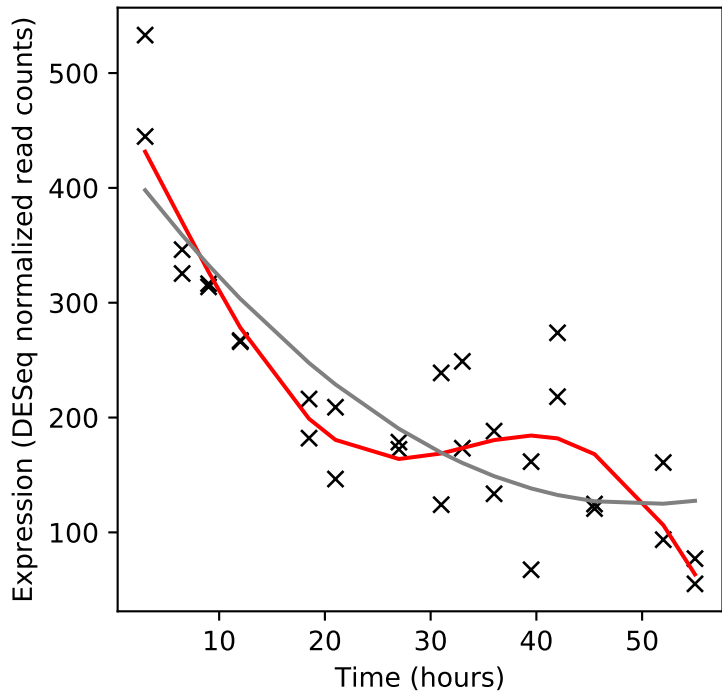

Rv1380/pyrB

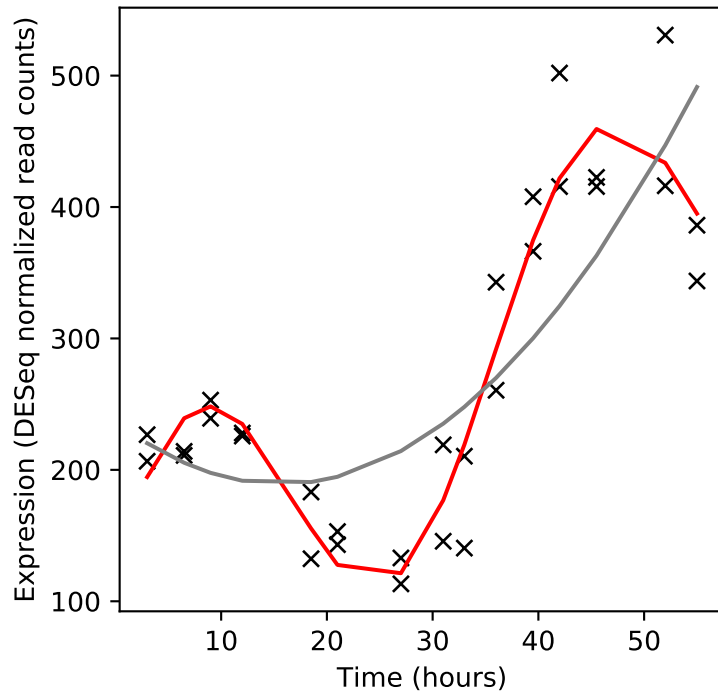

Rv1381/pyrC

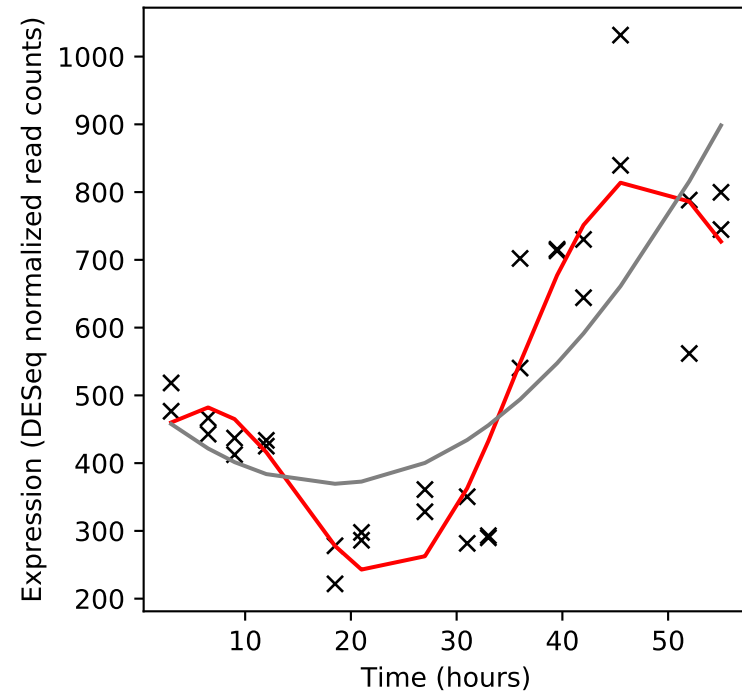

Rv1382/-

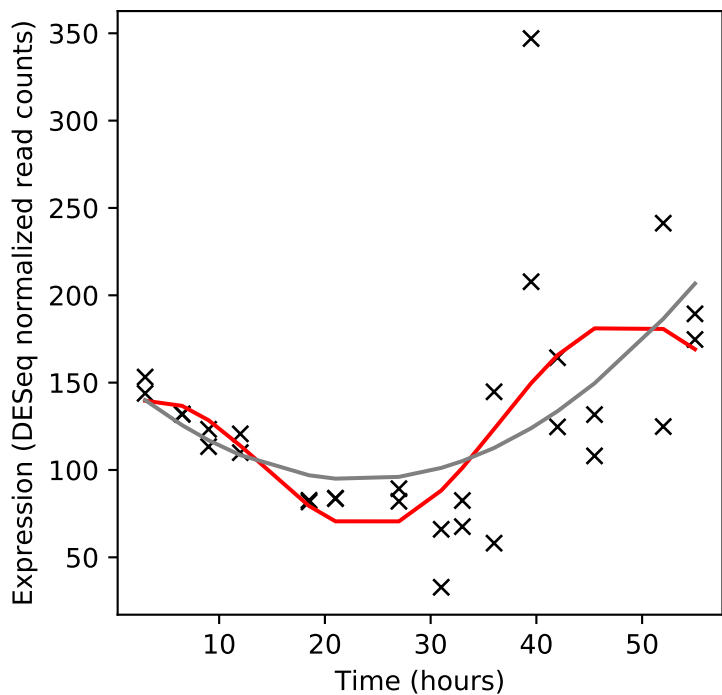

Rv1383/carA

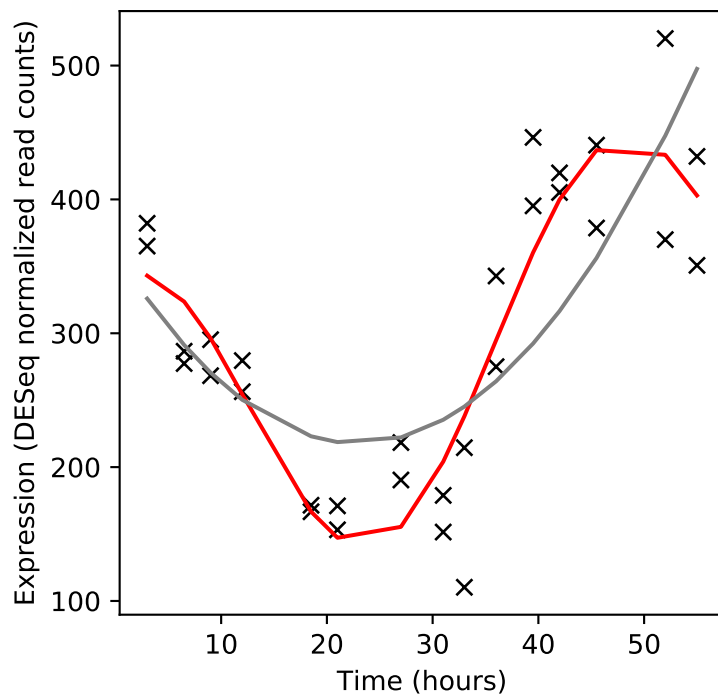

Rv1384/carB

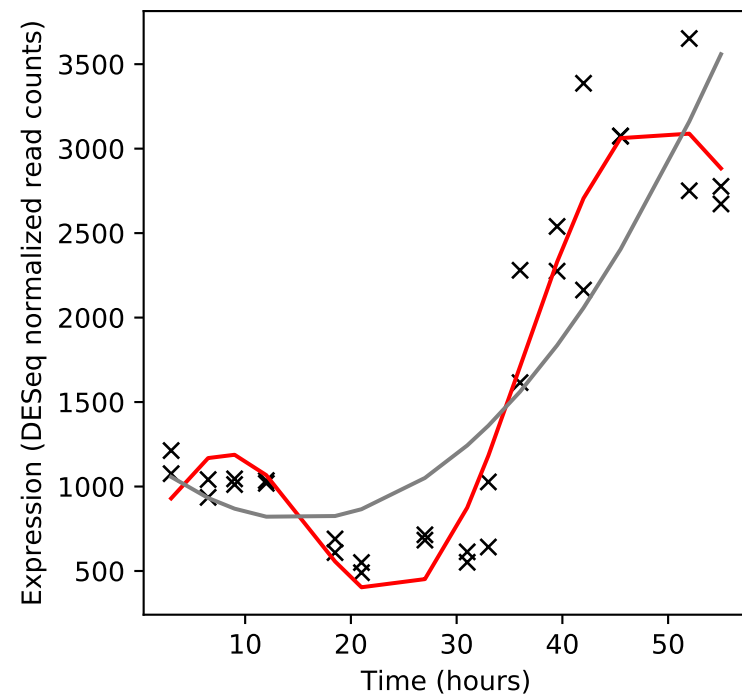

Rv1385/pyrF

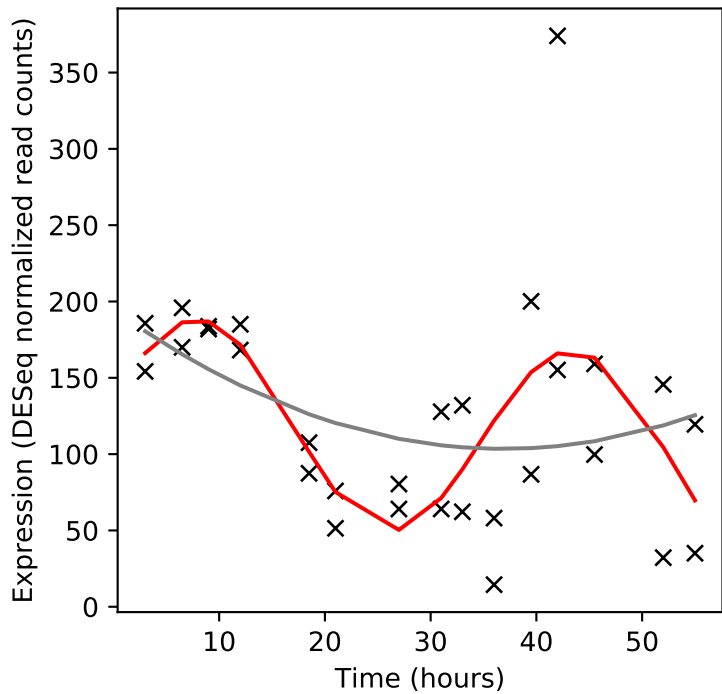

Rv1386/PE15

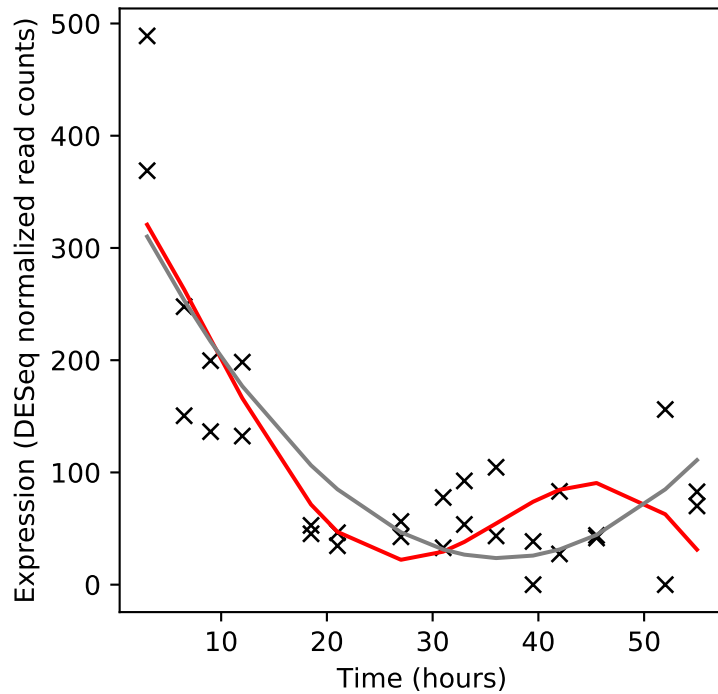

Rv1387/PPE20

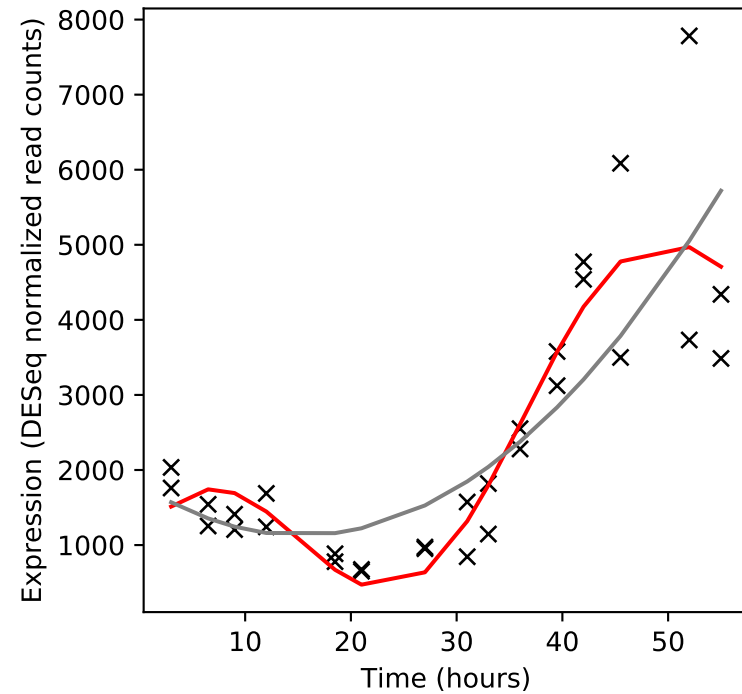

Rv1388/mihF

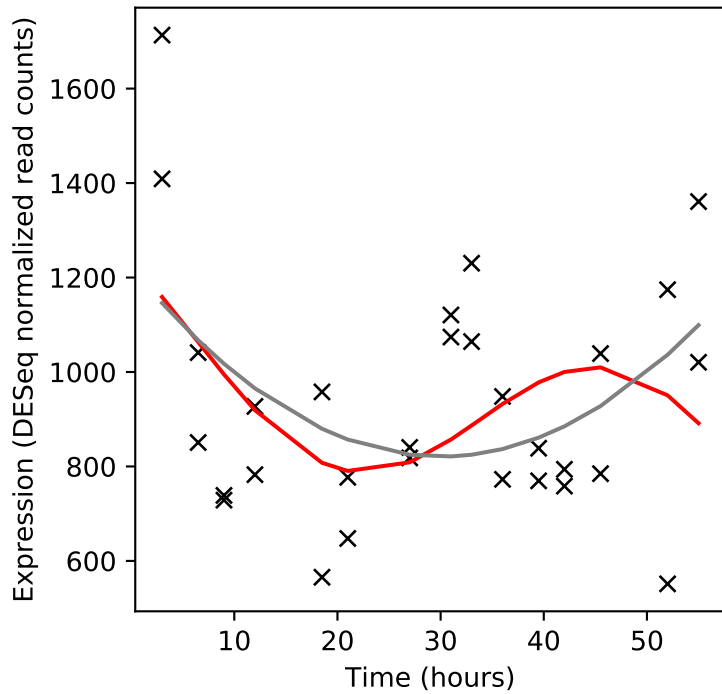

Rv1389/gmk

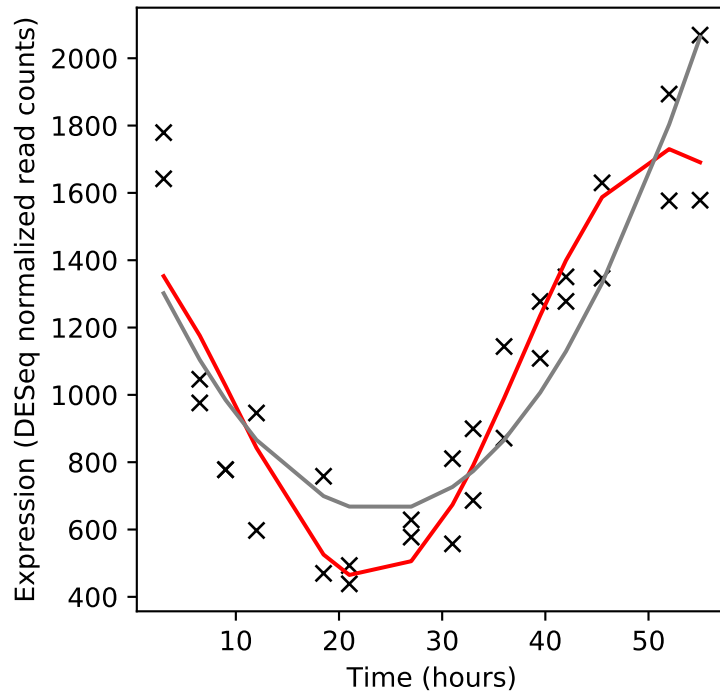

Rv1390/rpoZ

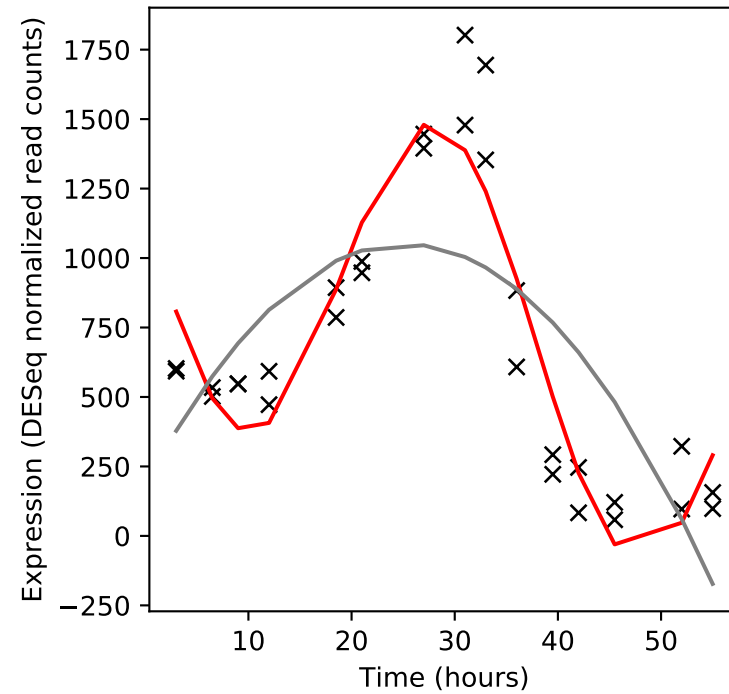

Rv1391/dfp

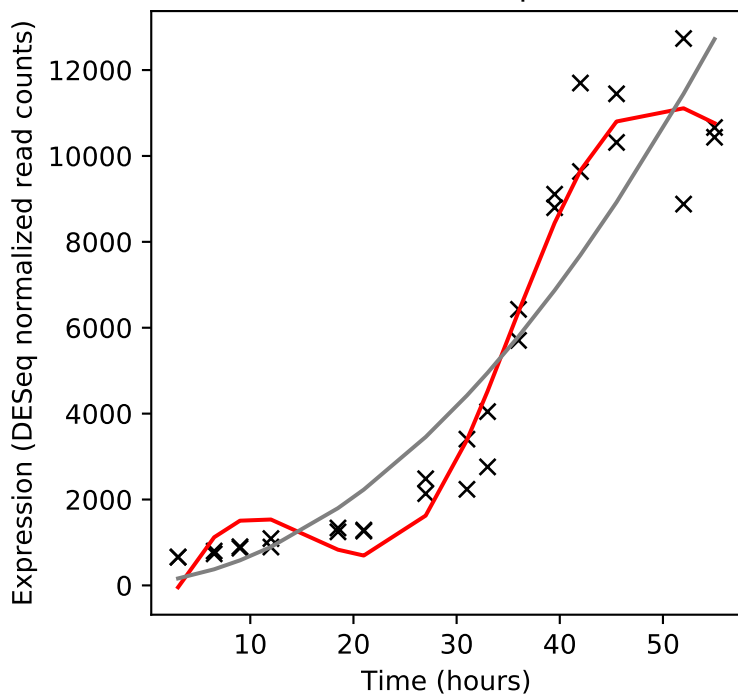

Rv1392/metK

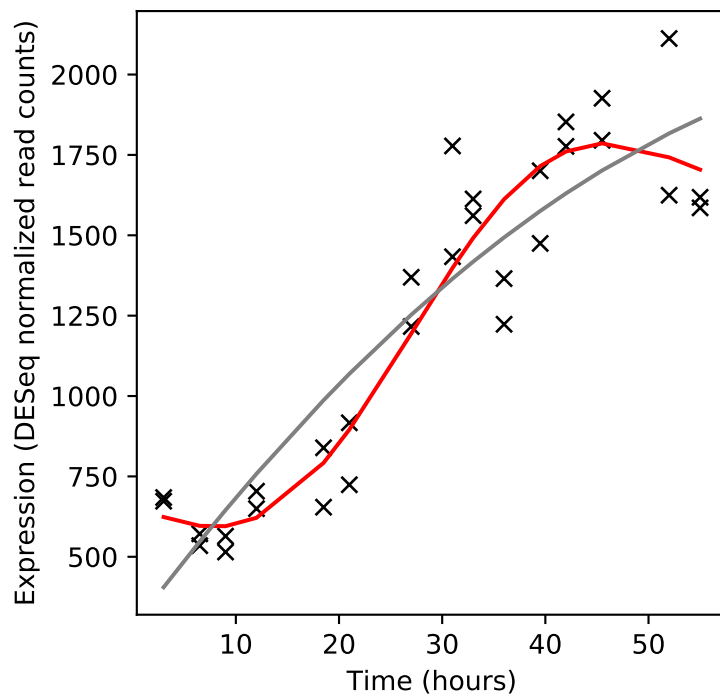

Rv1393c/-

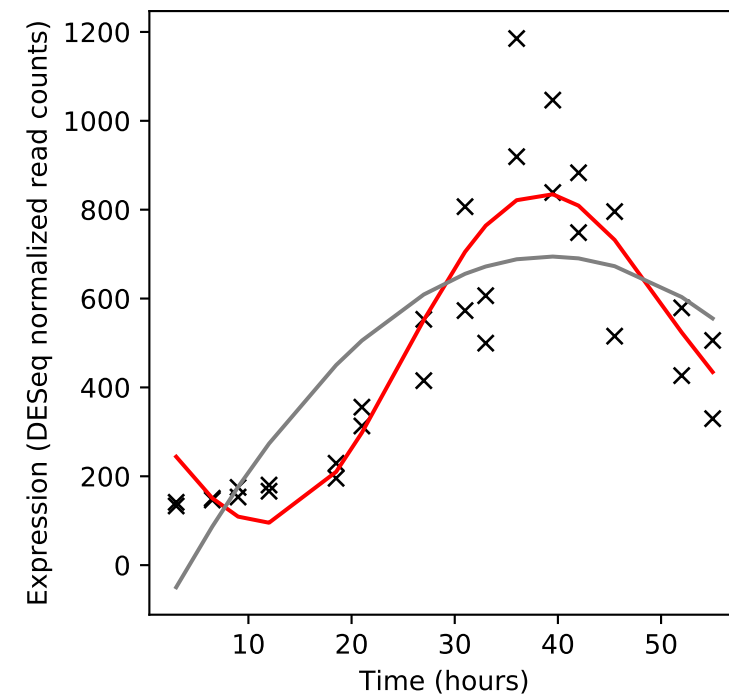

Rv1394c/cyp132

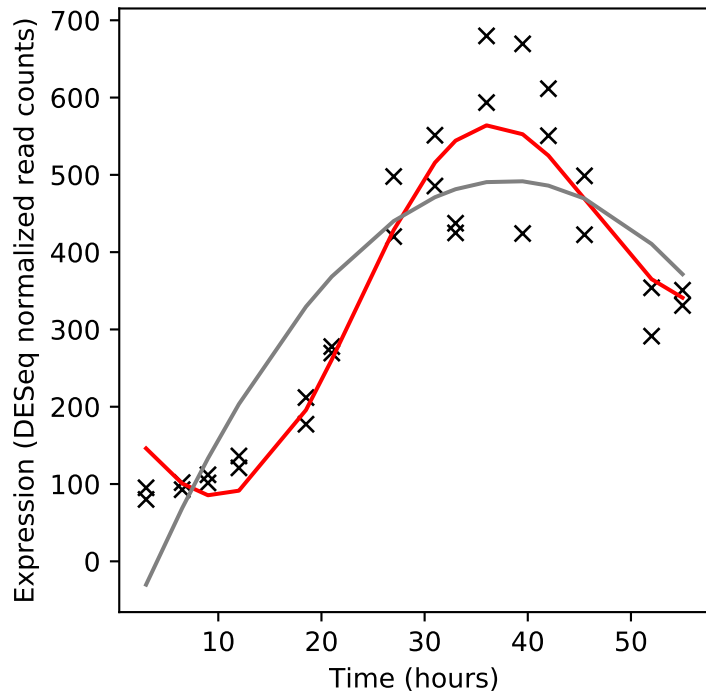

Rv1395/-

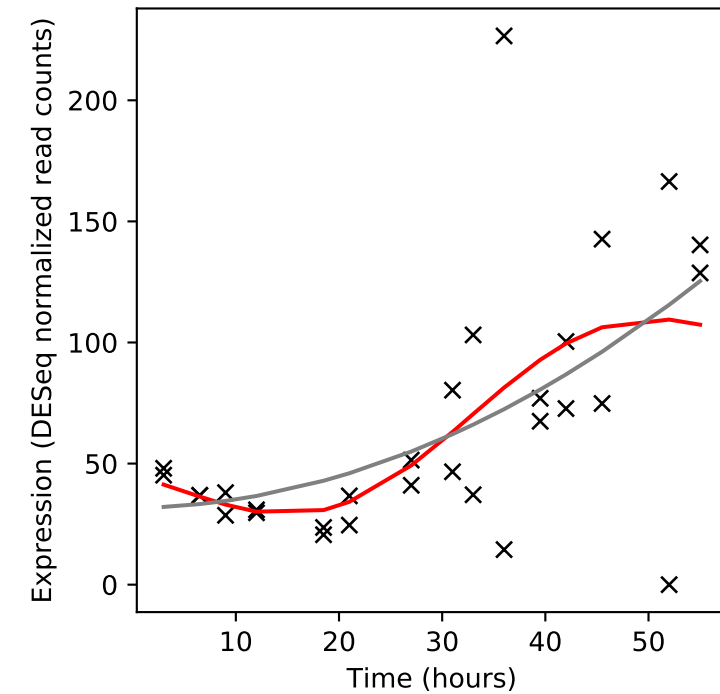

Rv1396c/PE\_PGRS25

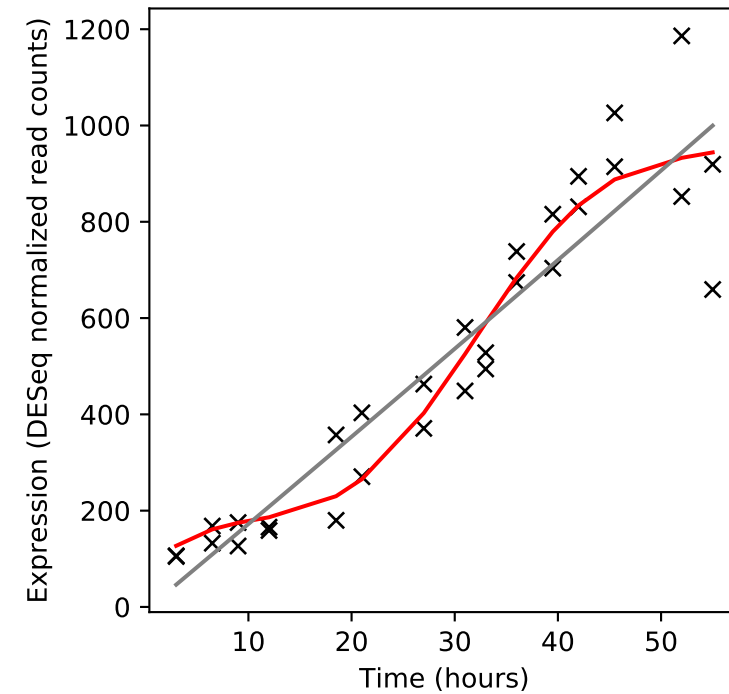

Rv1397c/vapC10

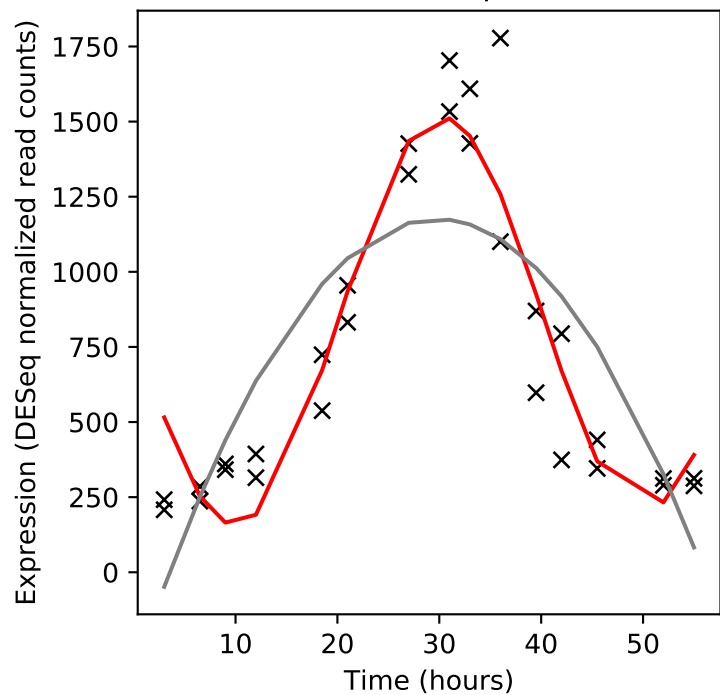

Rv1398c/vapB10

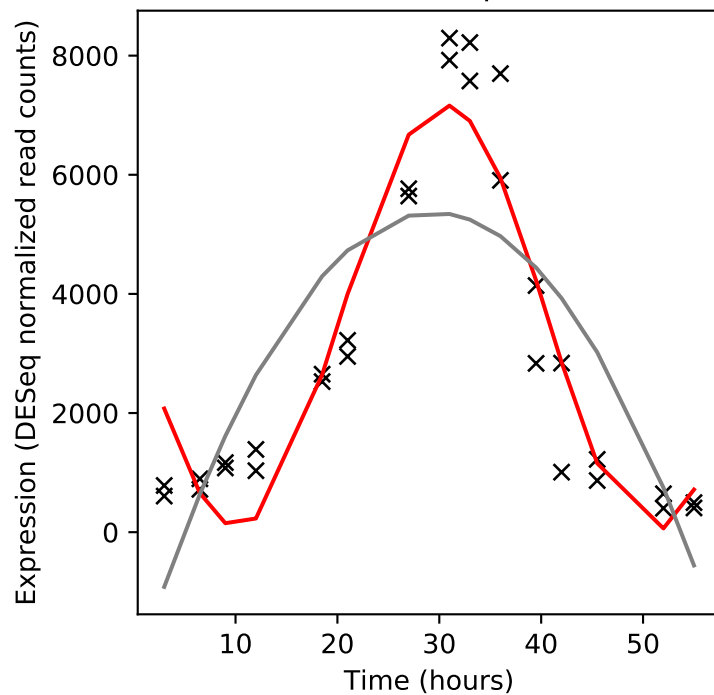

Rv1399c/nlhH

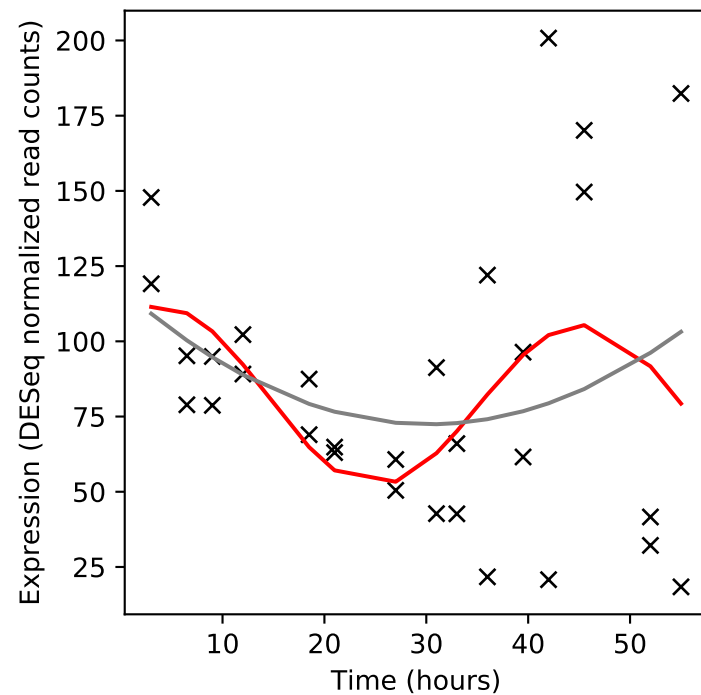

Rv1400c/lipl

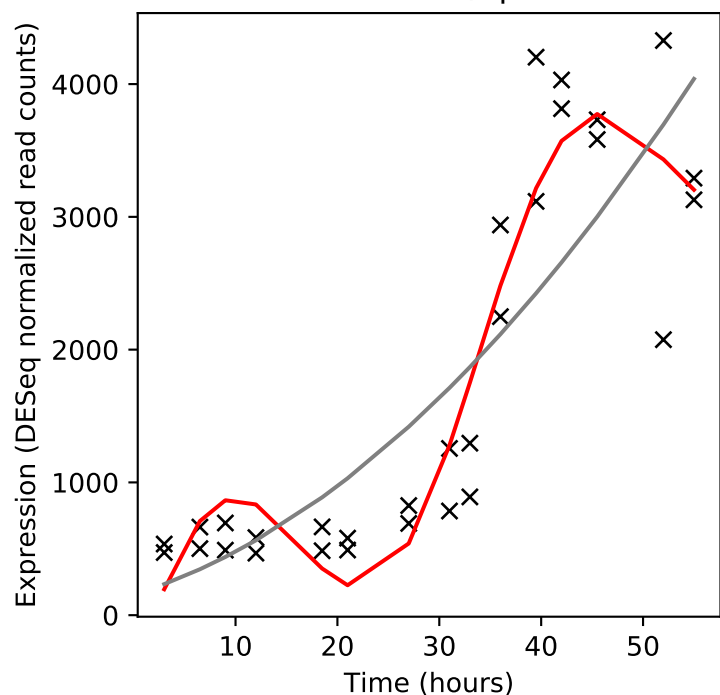

Rv1401/-

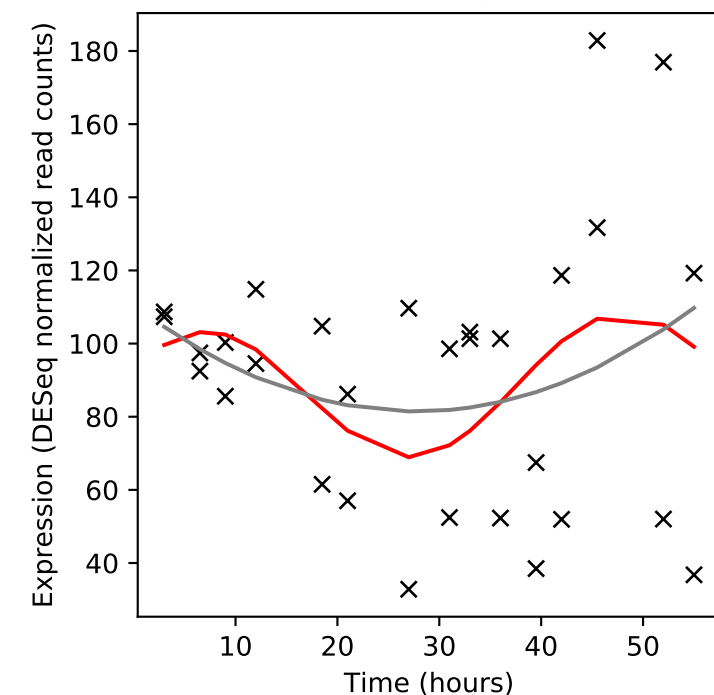

Rv1402/priA

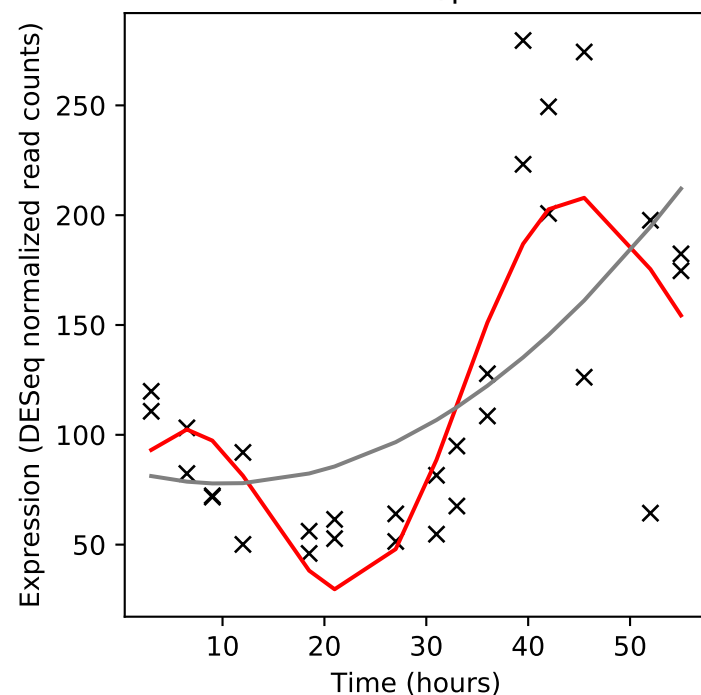

Rv1403c/-

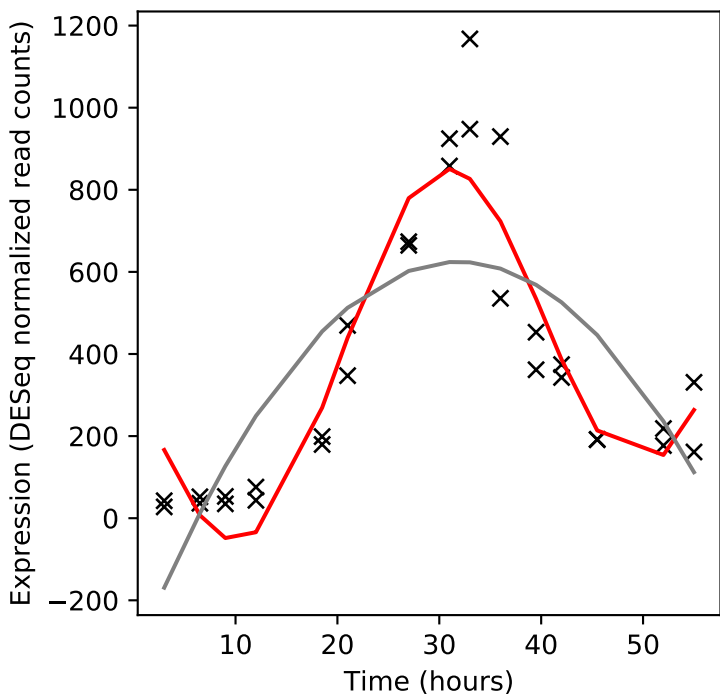

Rv1404/-

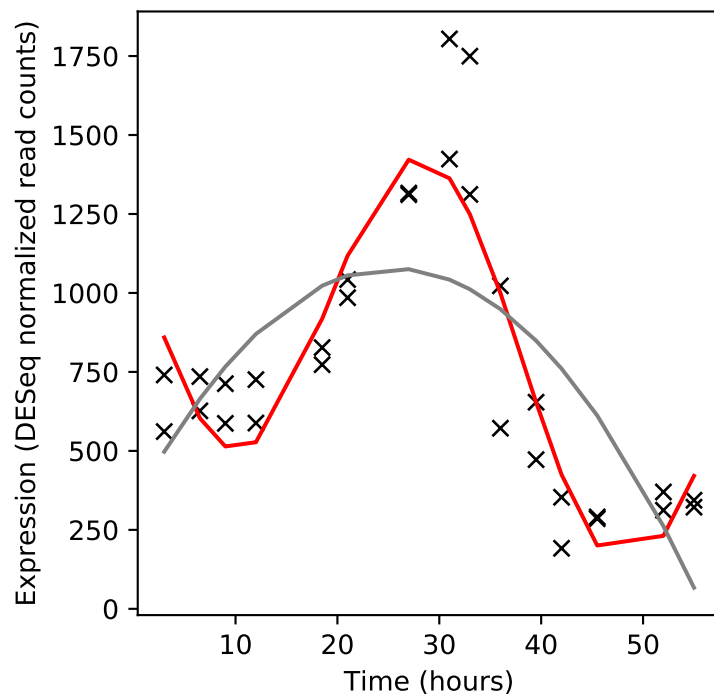

Rv1405c/-

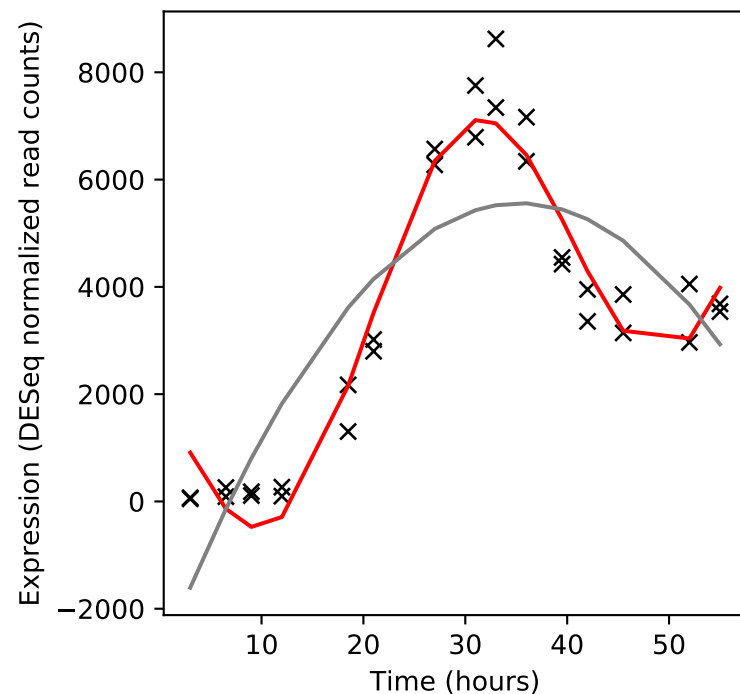

Rv1406/fmt

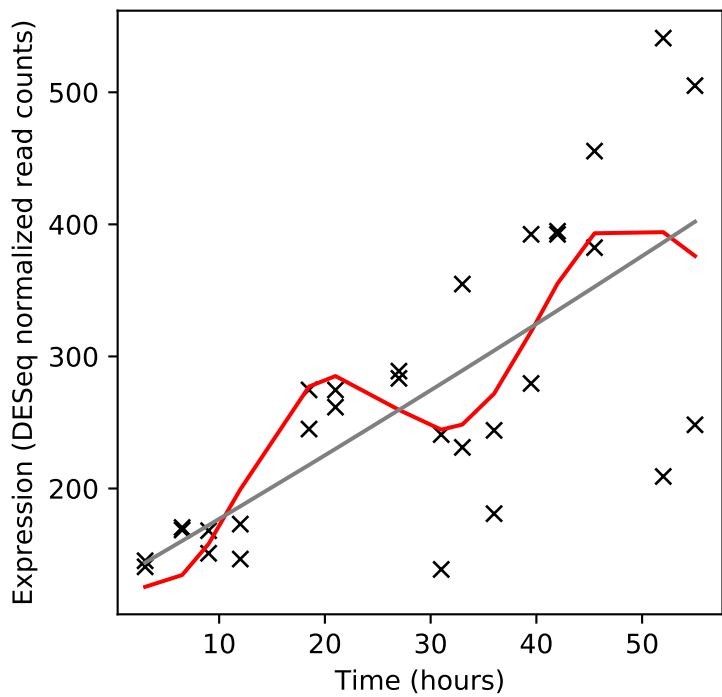

Rv1407/fmu

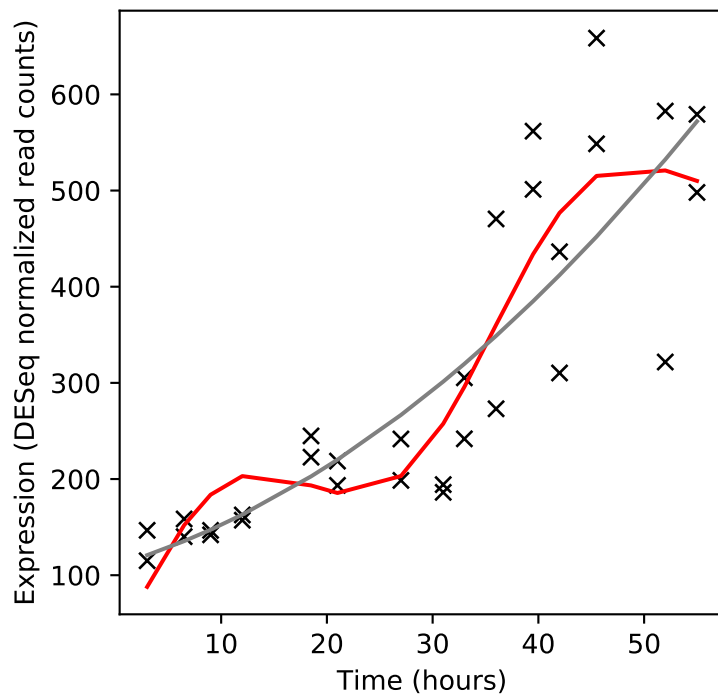

Rv1408/rpe

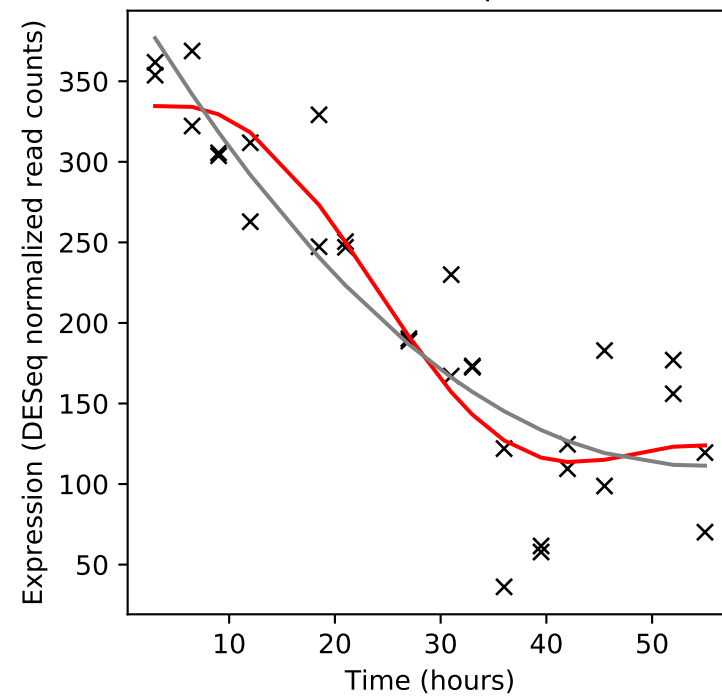

Rv1409/ribG

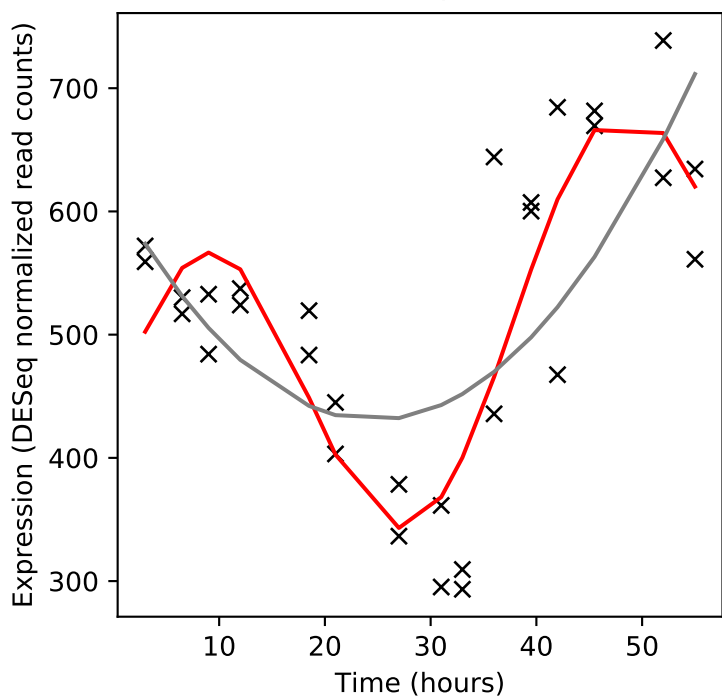

Rv1410c/-

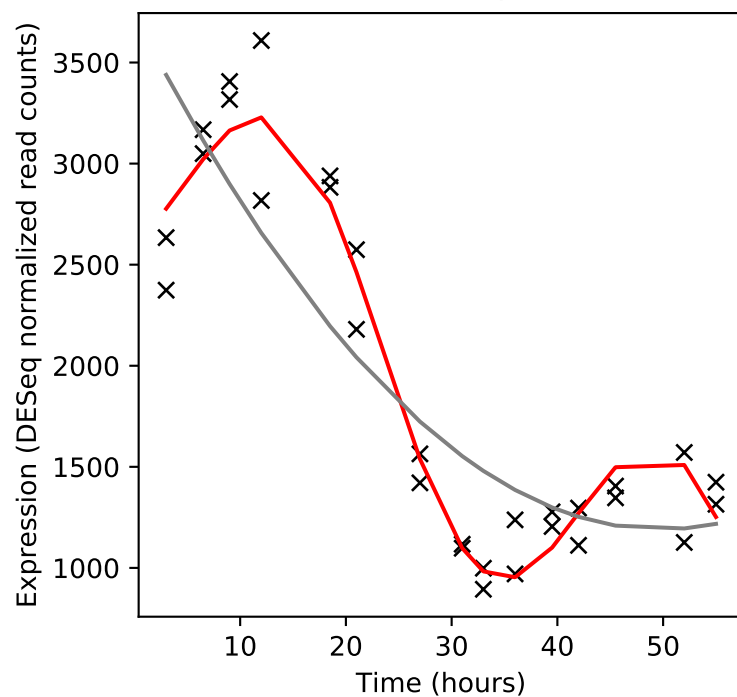

Rv1411c/lprG

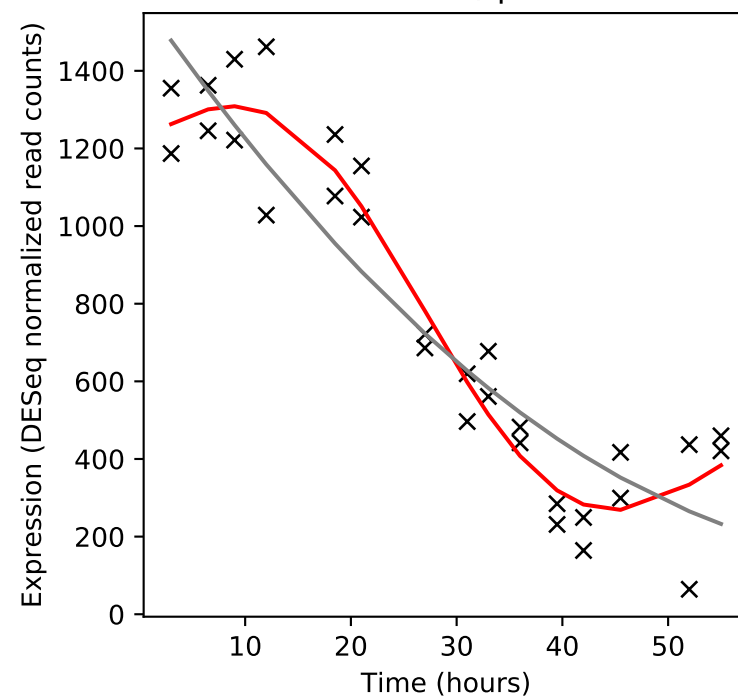

Rv1412/ribC

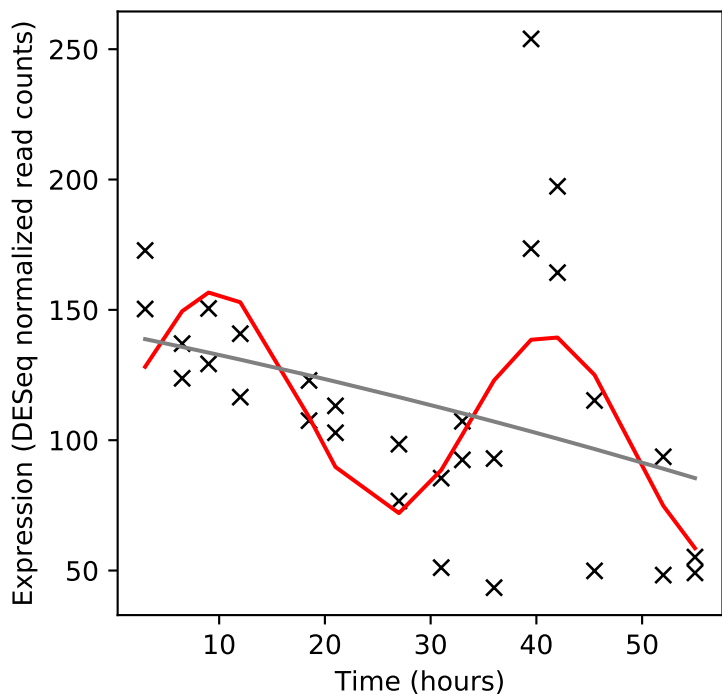

Rv1413/-

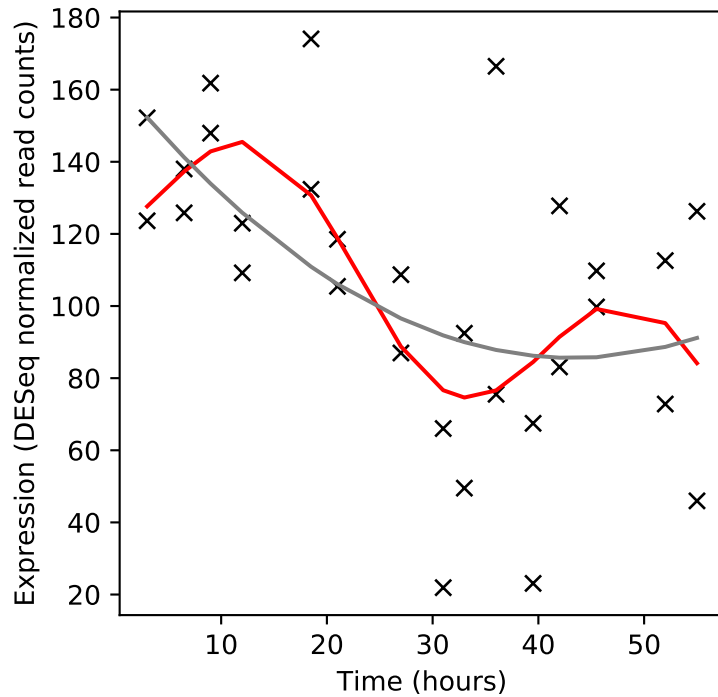

Rv1414/-

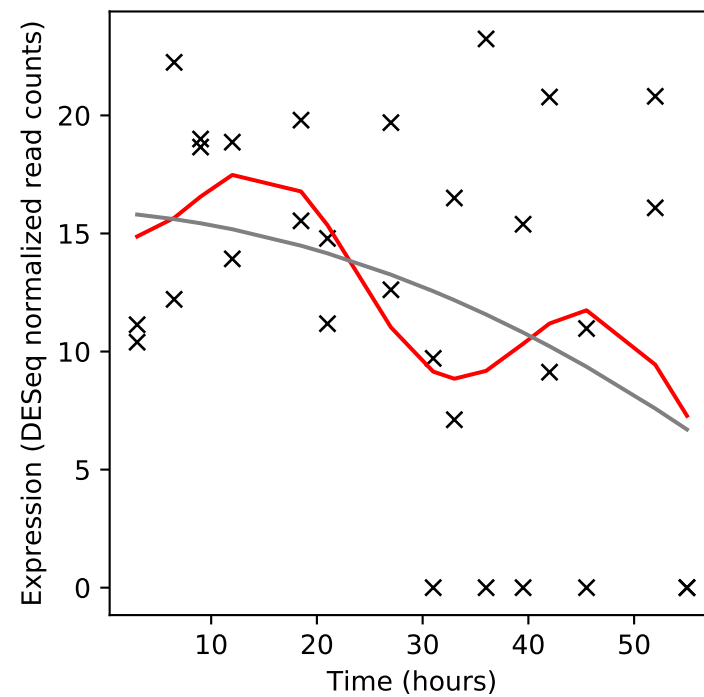

Rv1415/ribA2

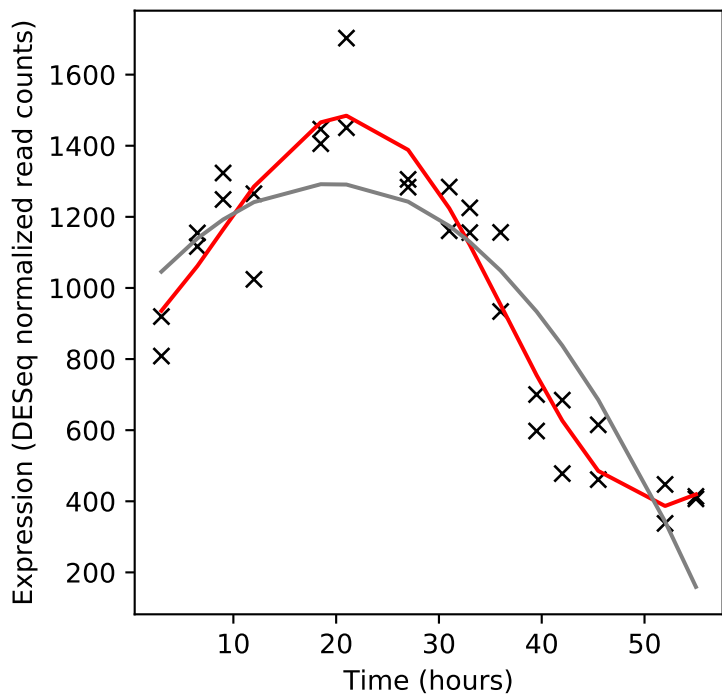

Rv1416/ribH

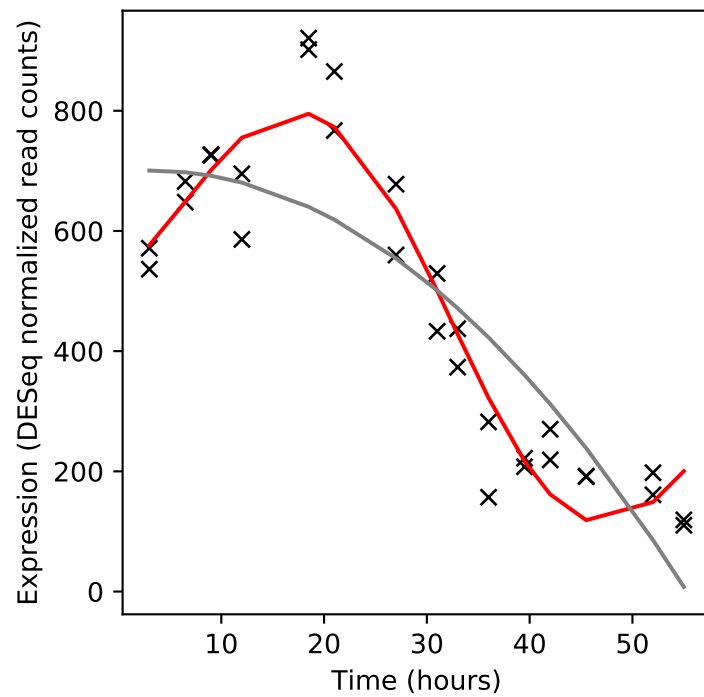

Rv1417/-

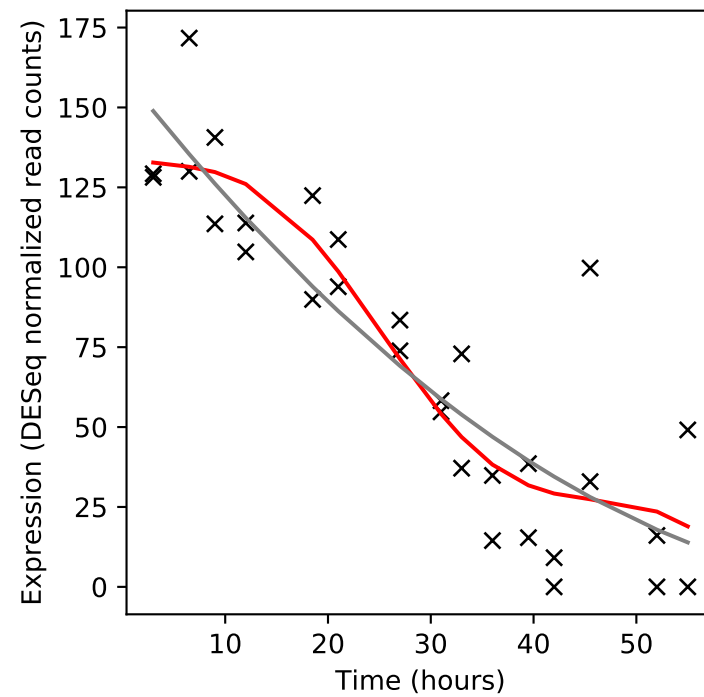

Rv1418/lprH

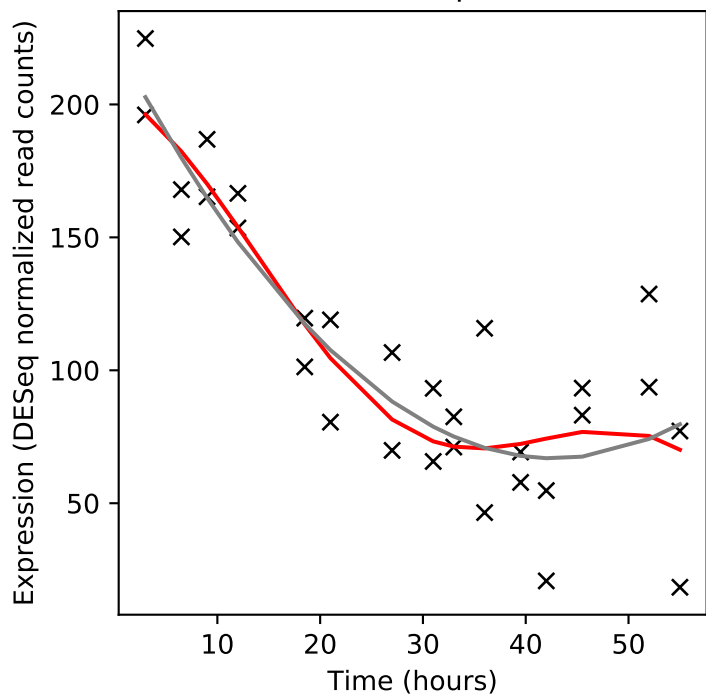

Rv1419/-

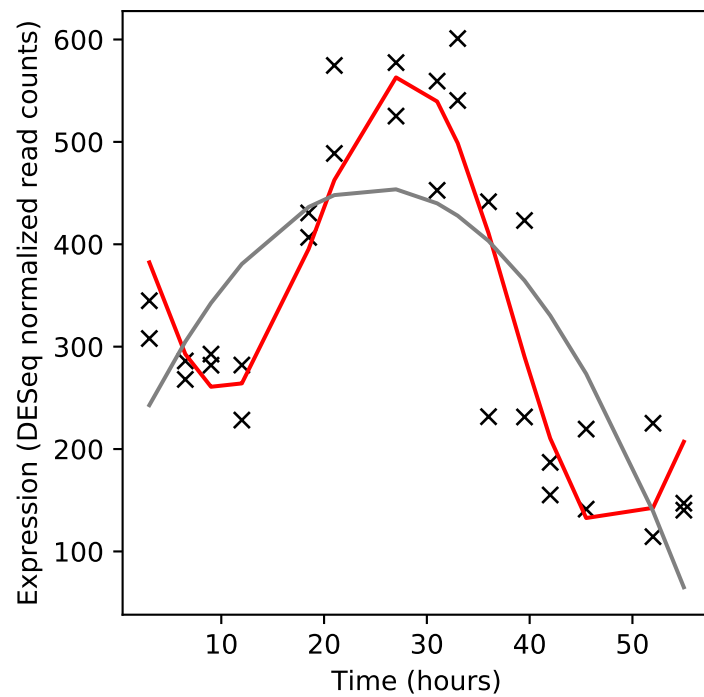

Rv1420/uvrC

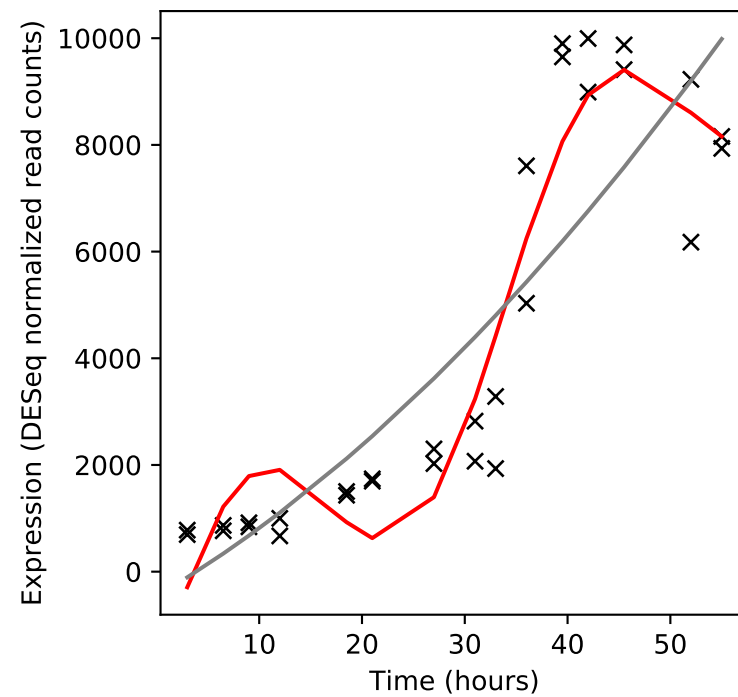

Rv1421/-

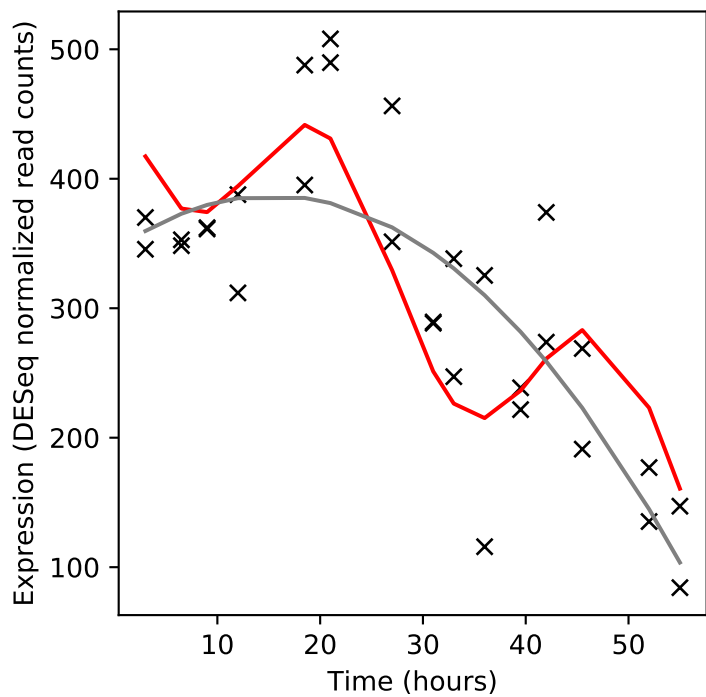

Rv1422/-

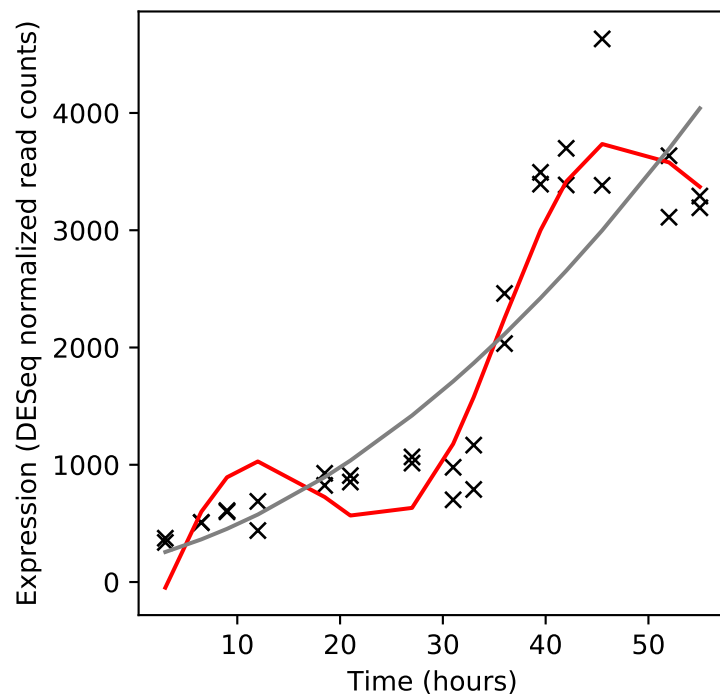

Rv1423/whiA

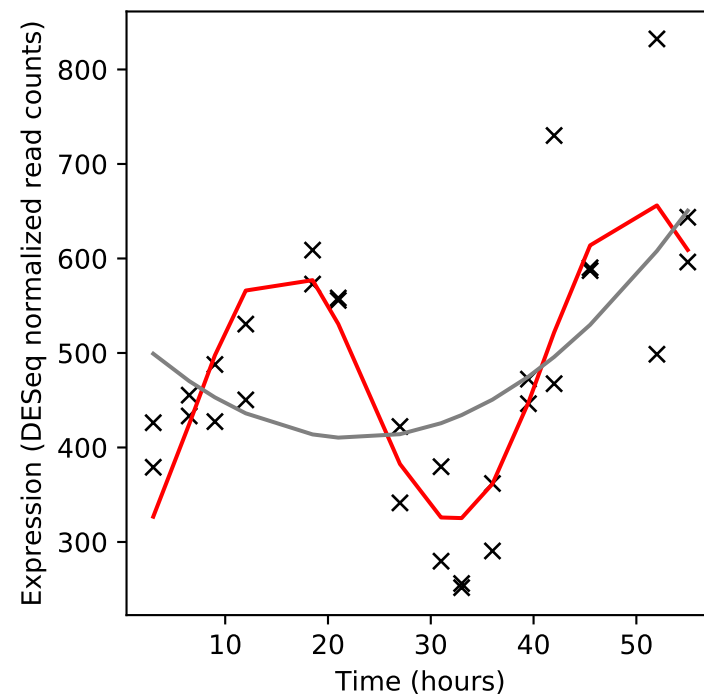



Rv1424c/-

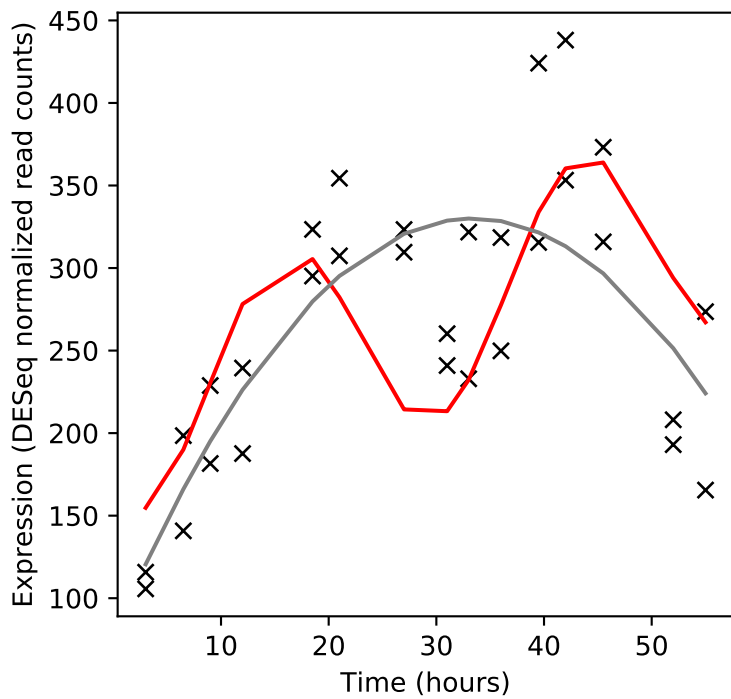

Rv1425/-

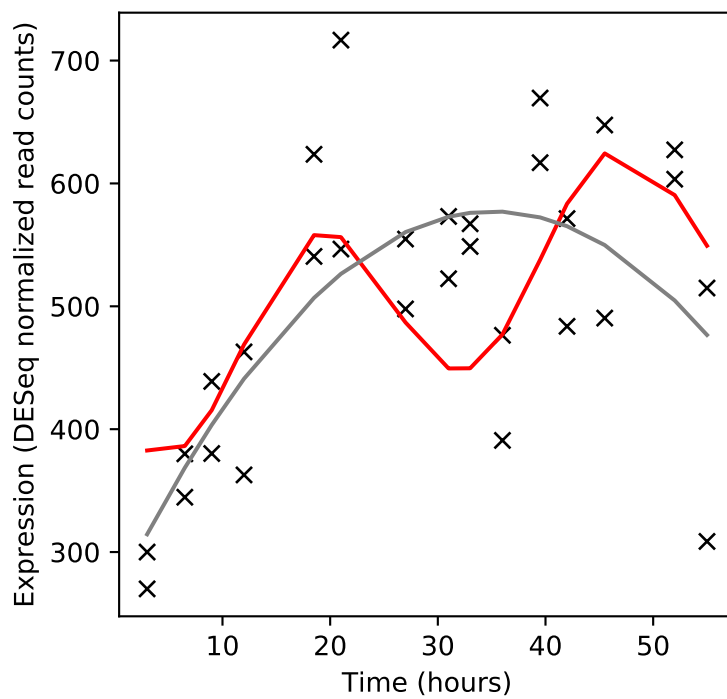

Rv1426c/lipO

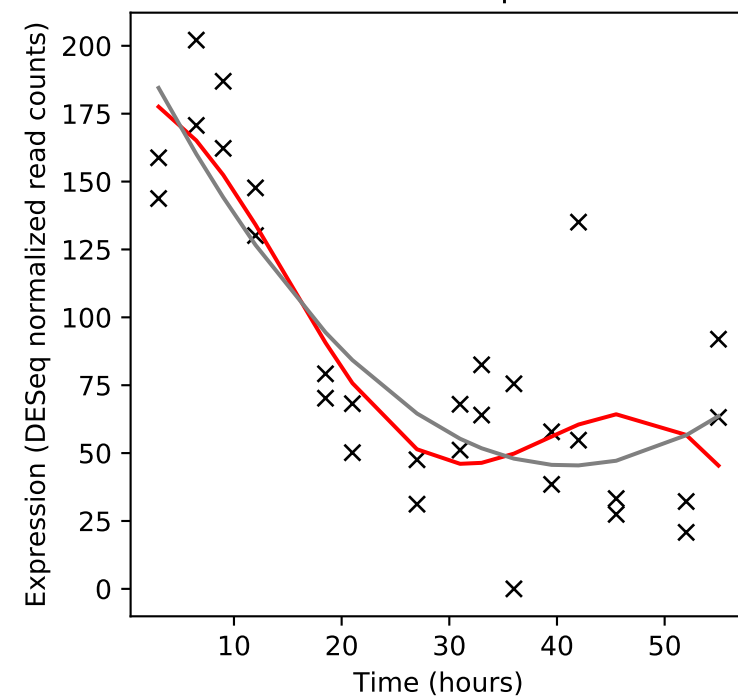

Rv1427c/fadD12

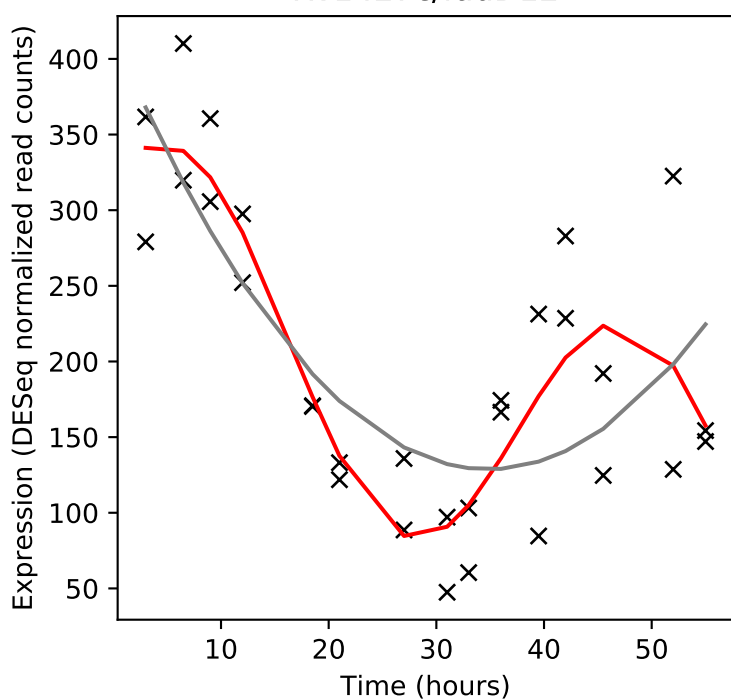

Rv1428c/-

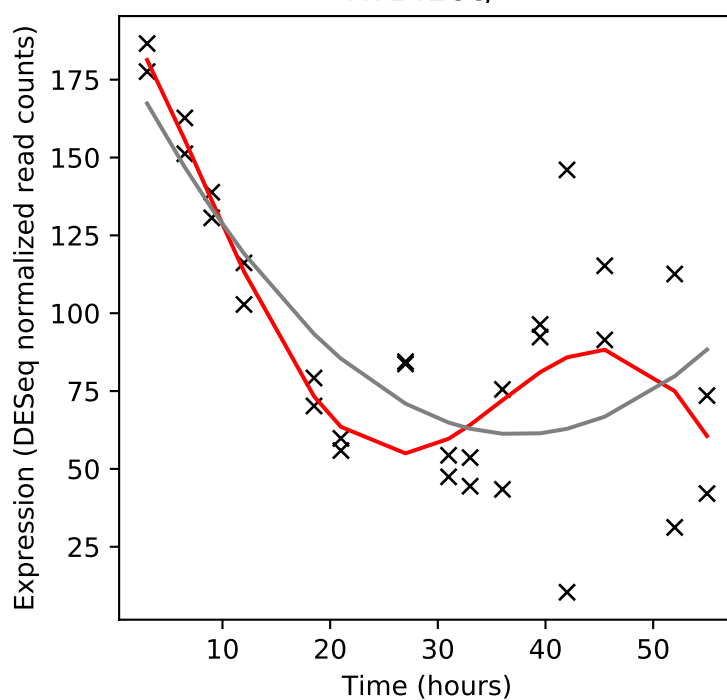

Rv1429/-

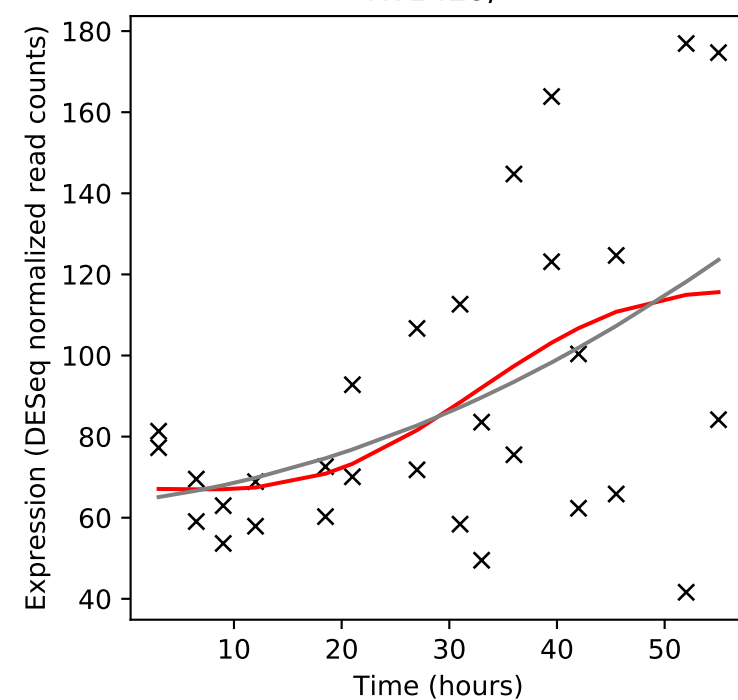

Rv1430/PE16

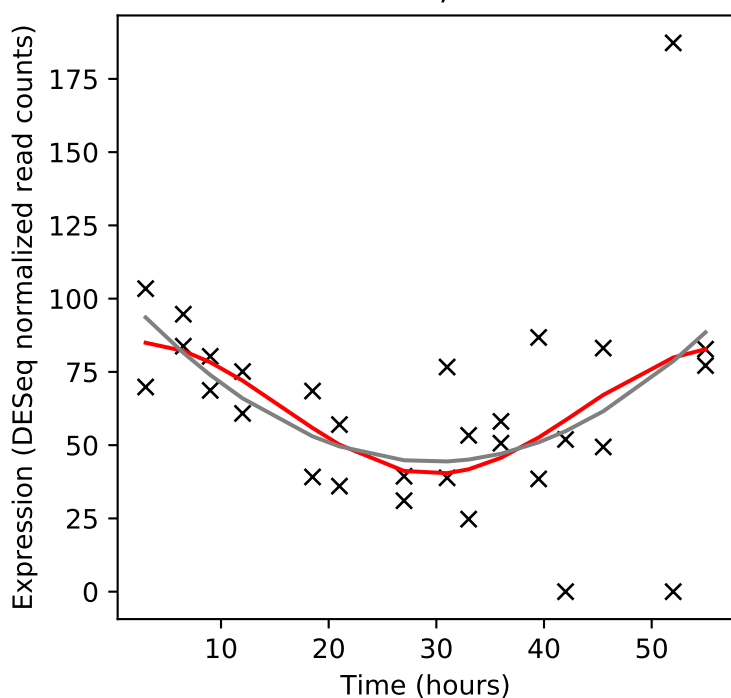

Rv1431/-

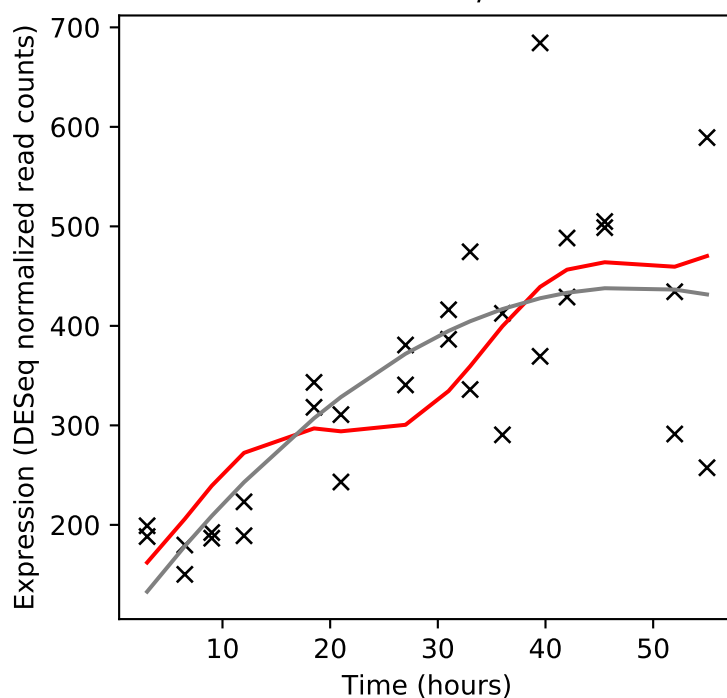

Rv1432/-

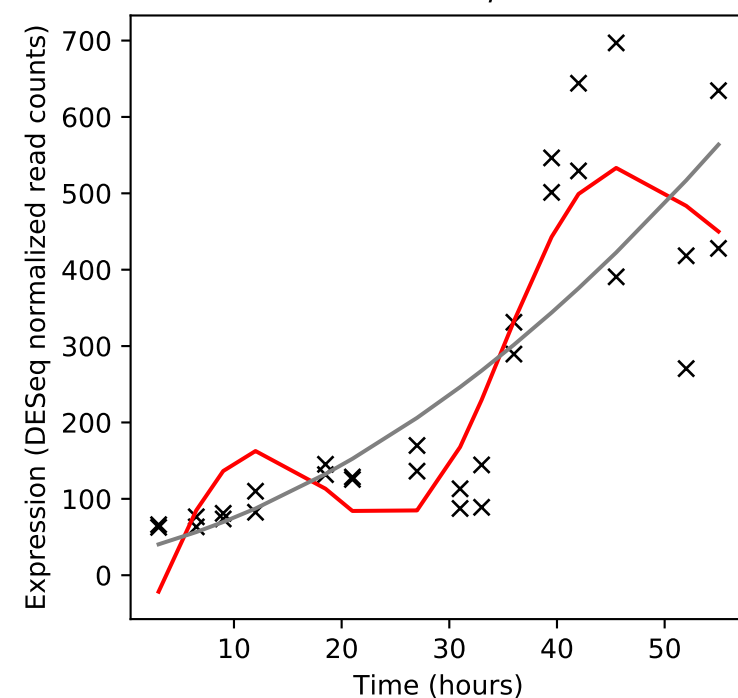

Rv1433/-

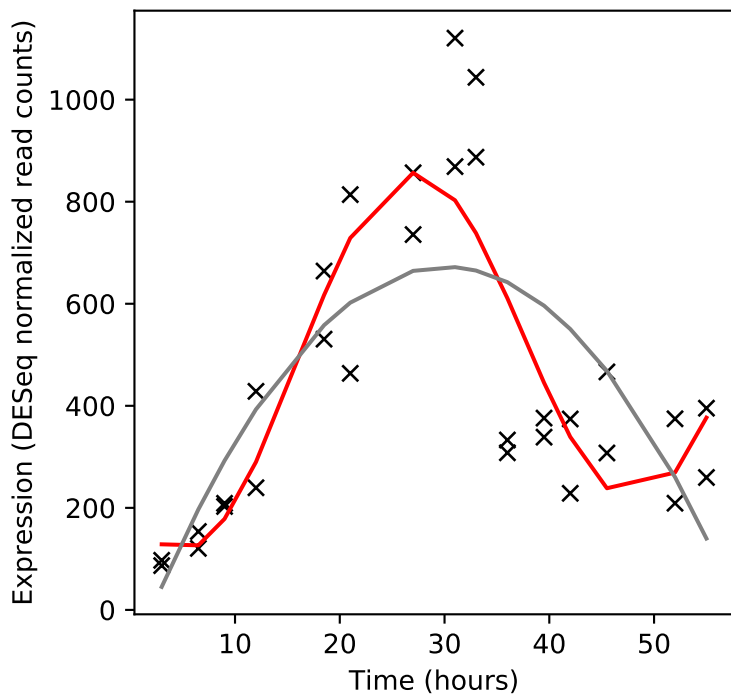

Rv1434/-

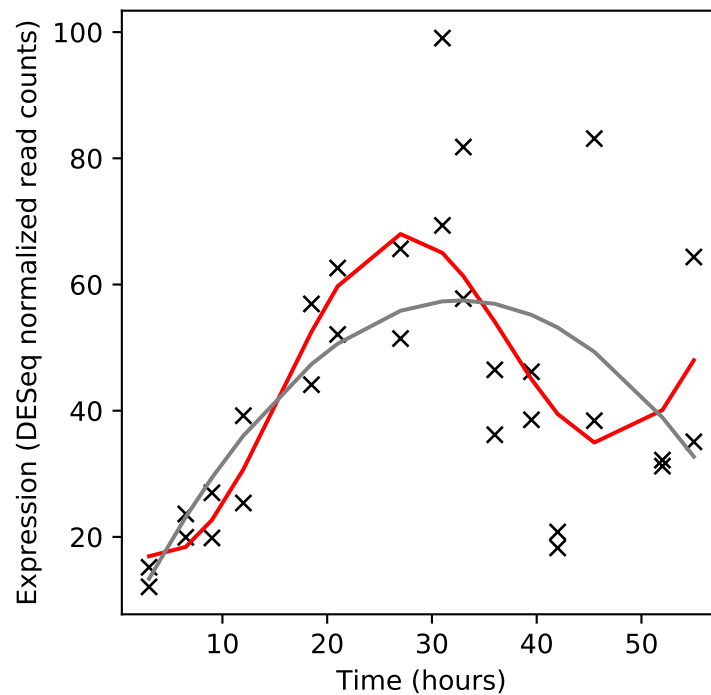

Rv1435c/-

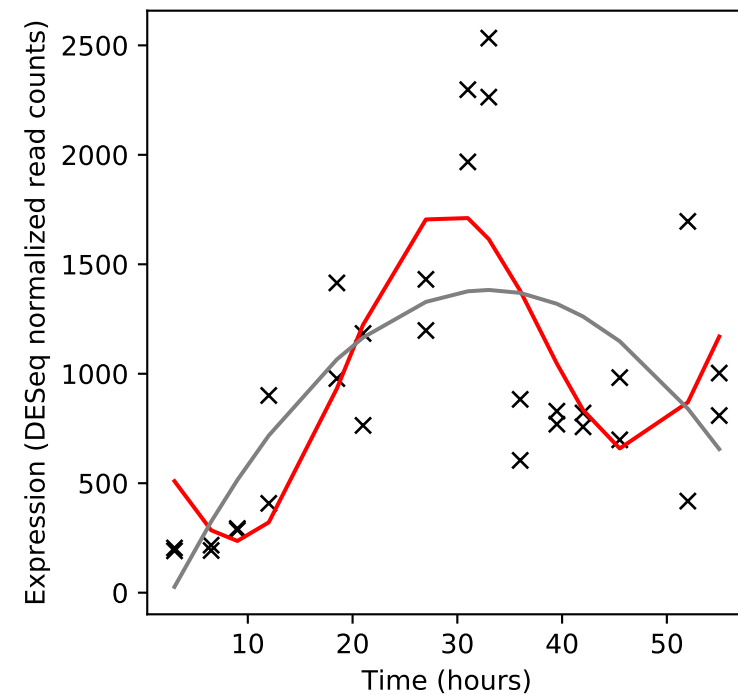

Rv1436/gap

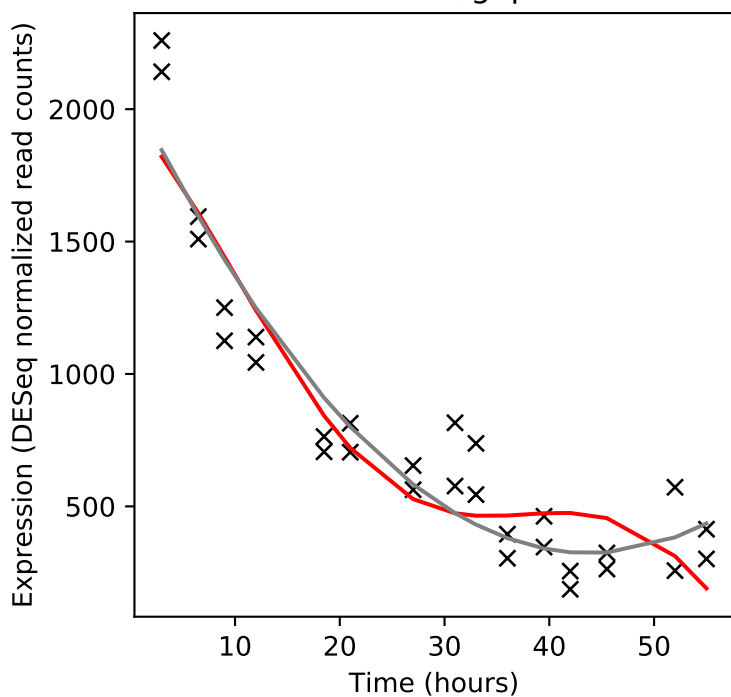

Rv1437/pgk

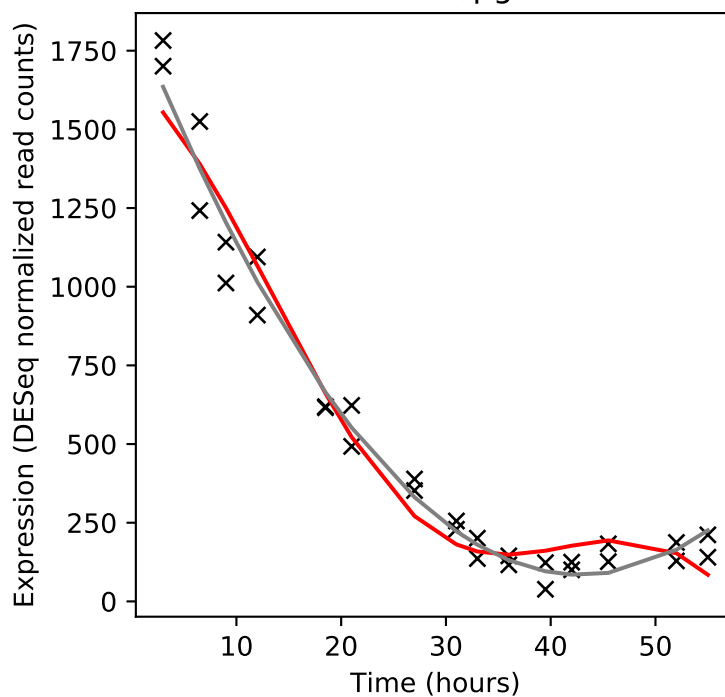

Rv1438/tpi

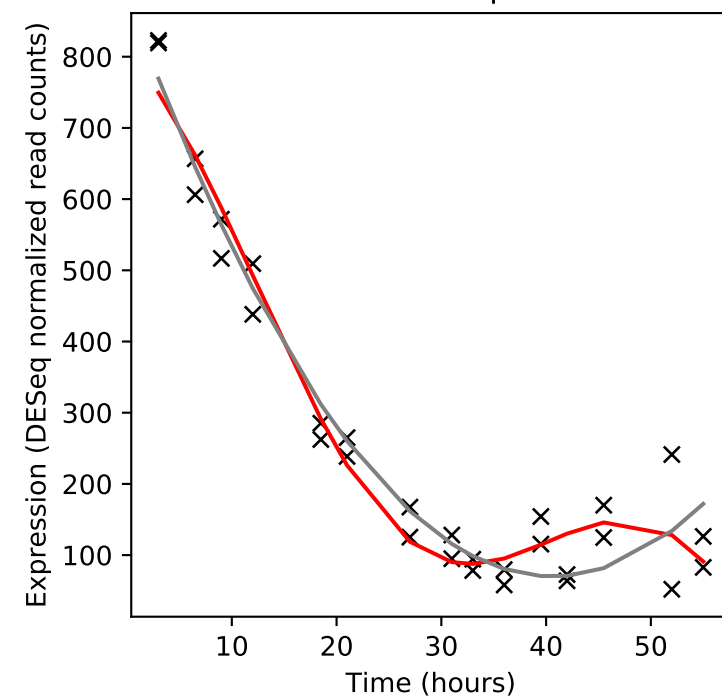

Rv1439c/-

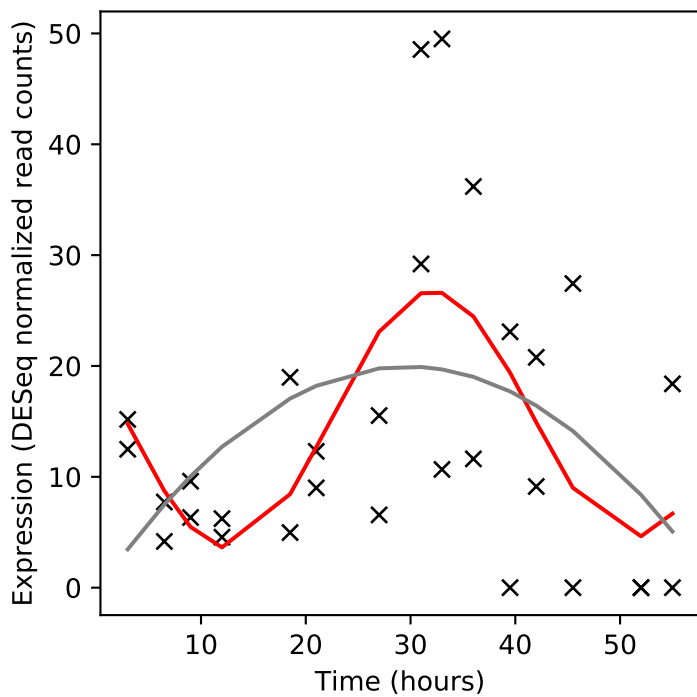

Rv1440/secG

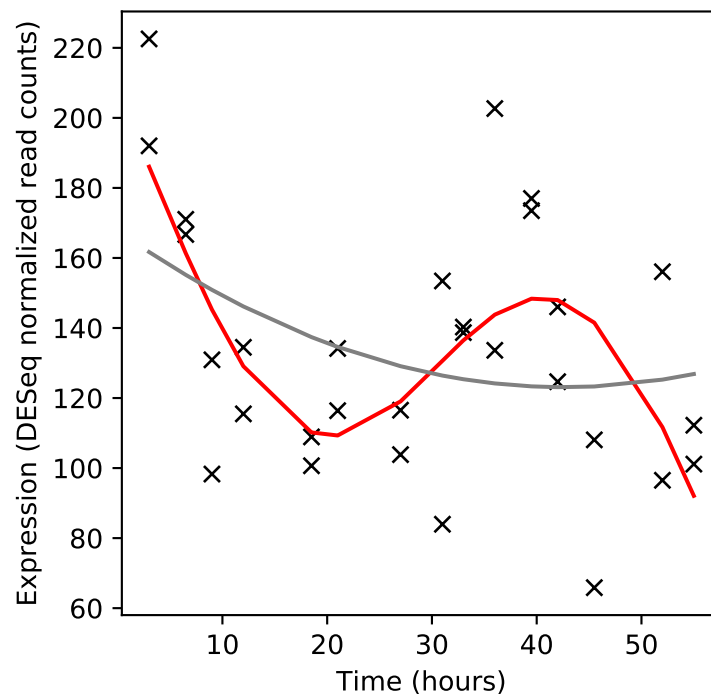

Rv1441c/PE\_PGRS26

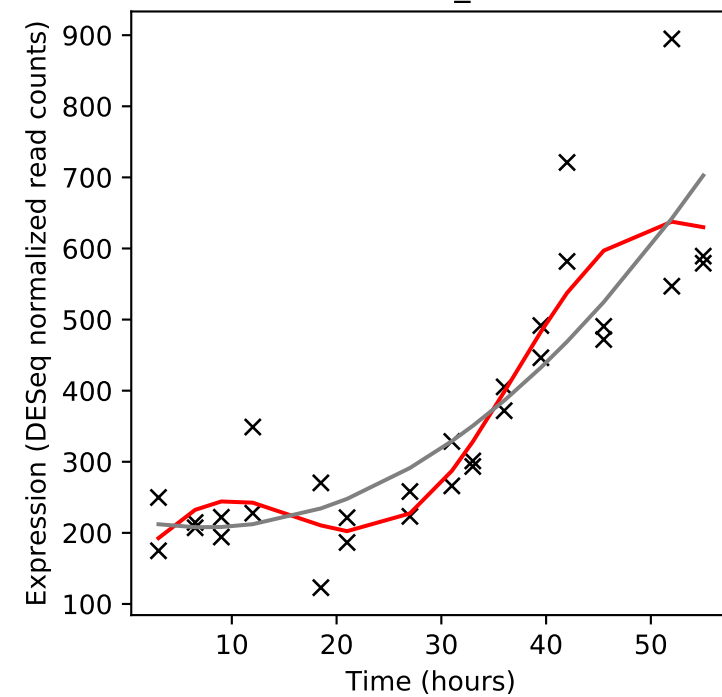

Rv1442/bisC

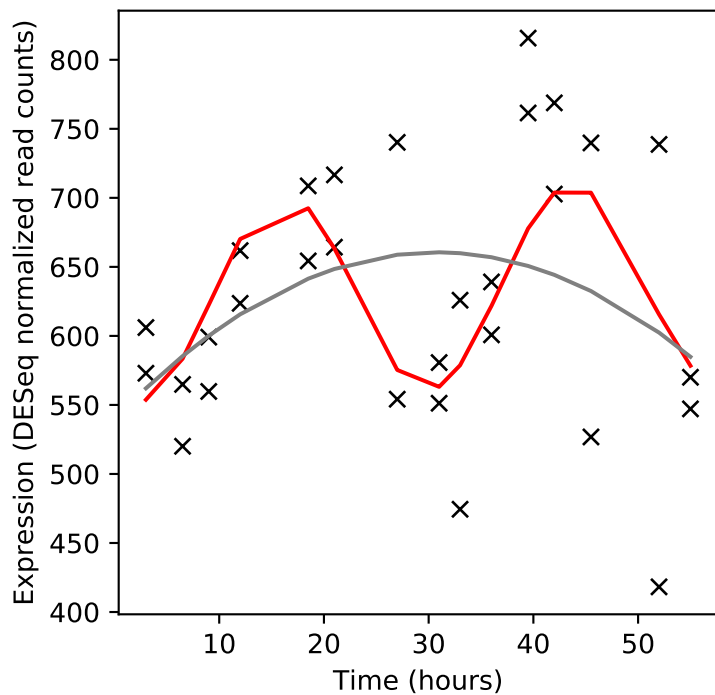

Rv1443c/-

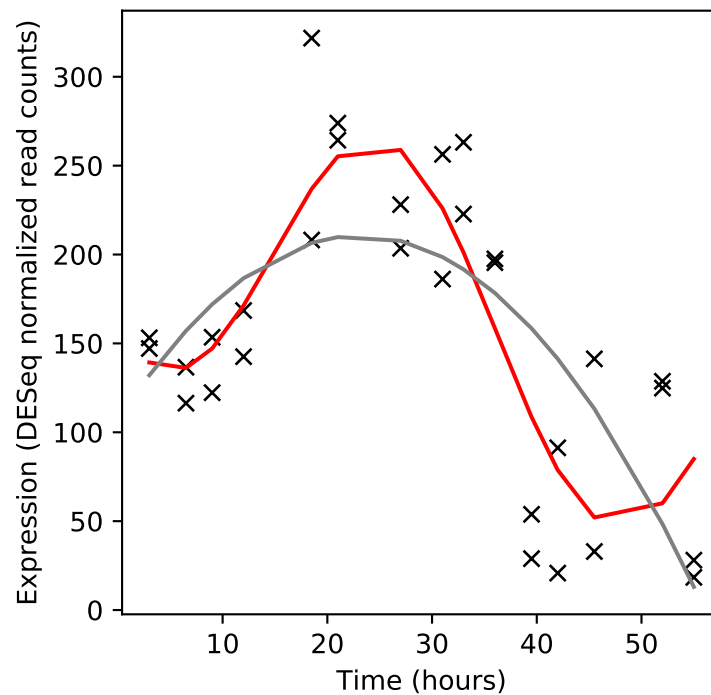

Rv1444c/-

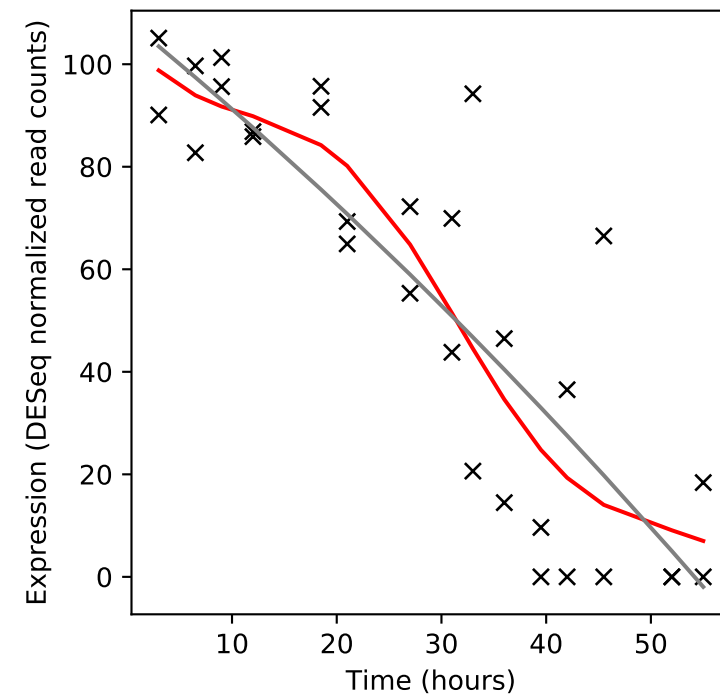

Rv1445c/devB

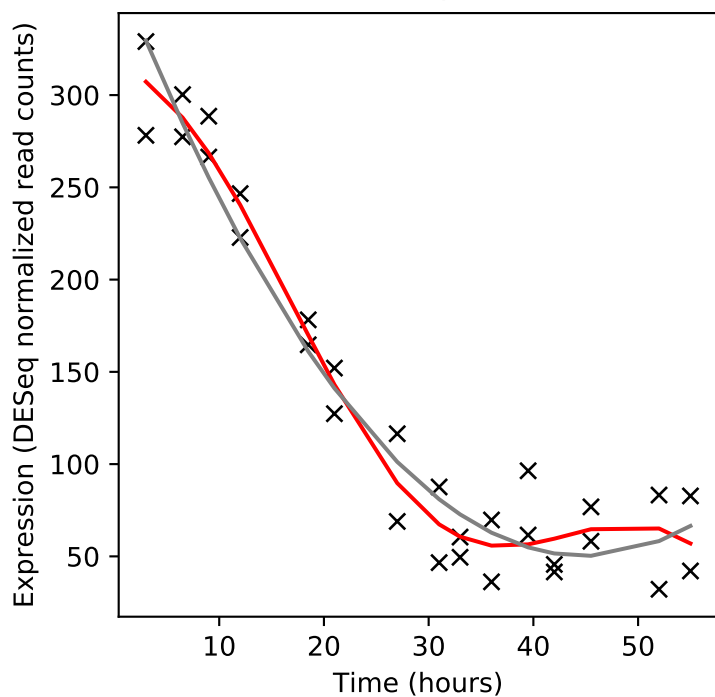

Rv1446c/opcA

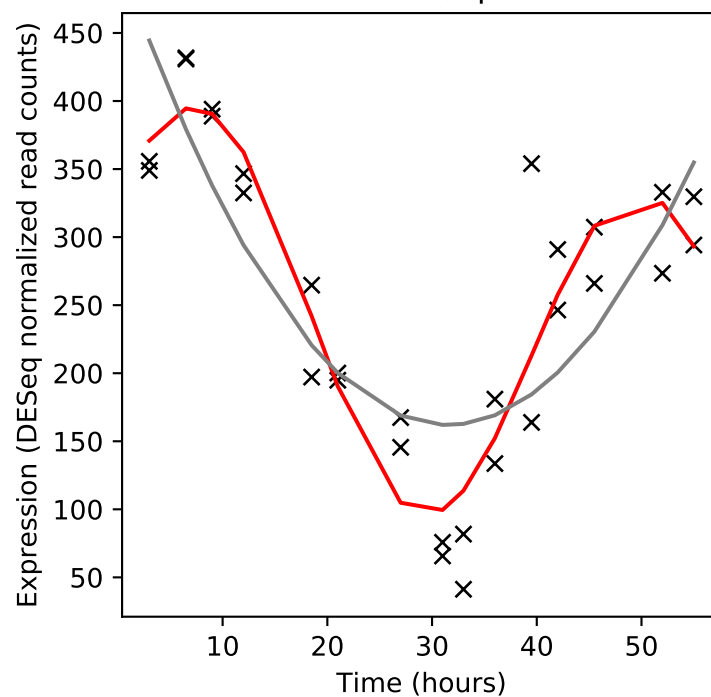

Rv1447c/zwf2

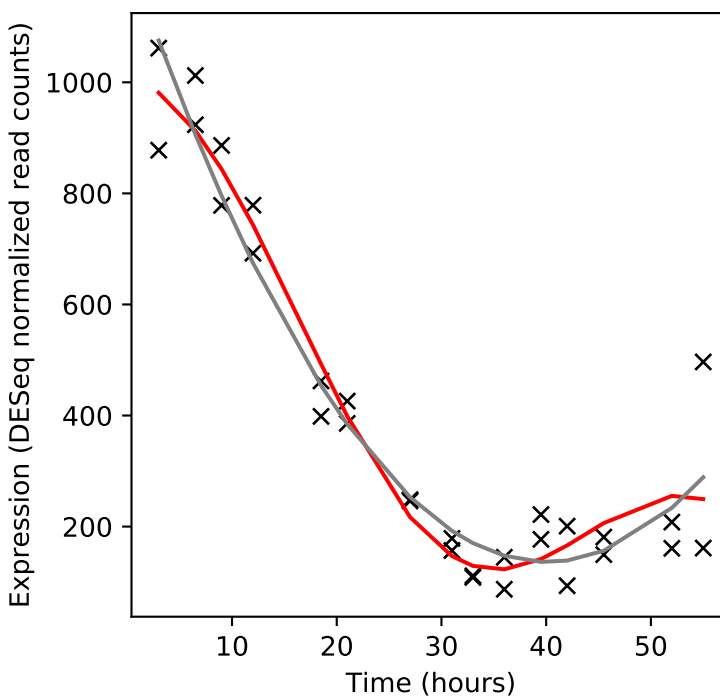

Rv1448c/tal

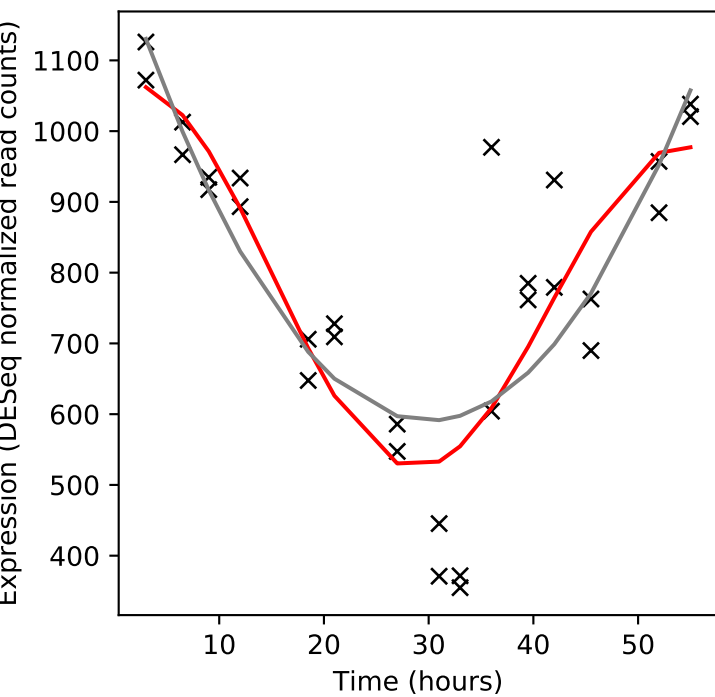

Rv1449c/tkt

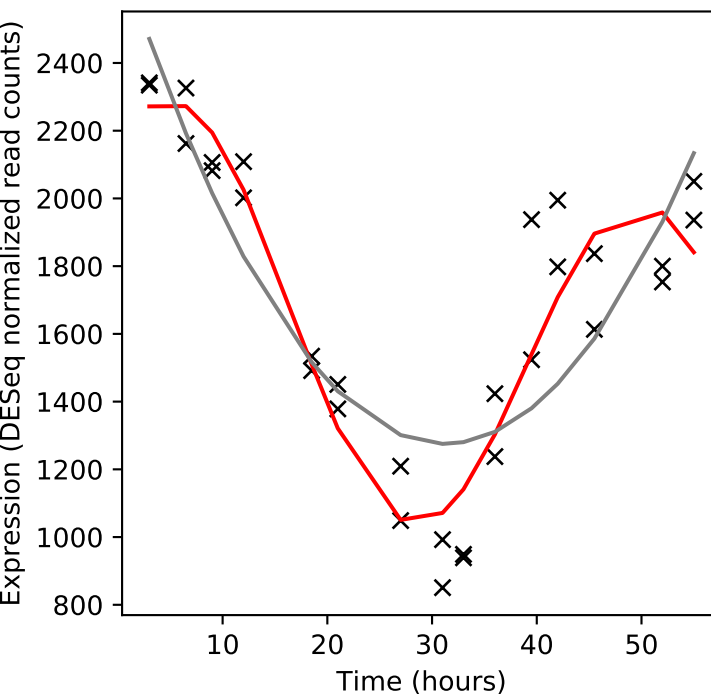

Rv1450c/PE\_PGRS27

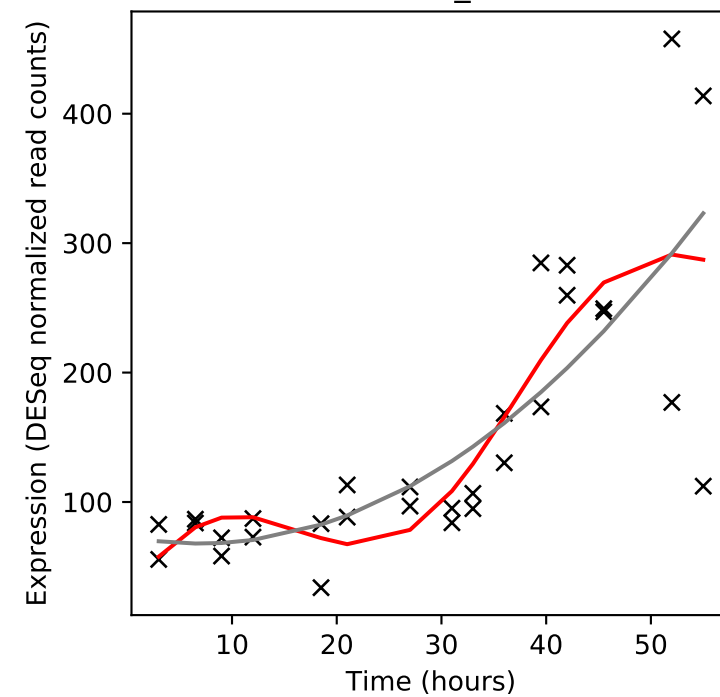

Rv1451/ctaB

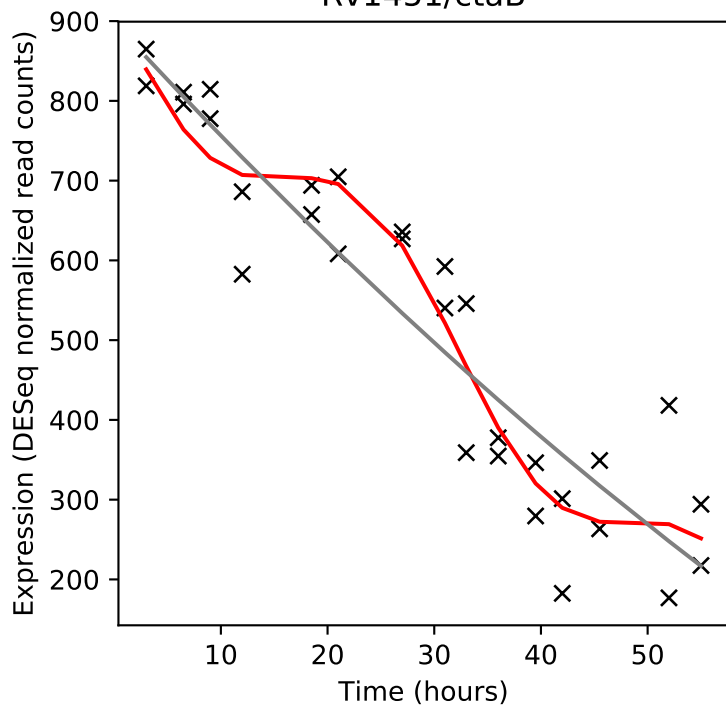

Rv1452c/PE\_PGRS28

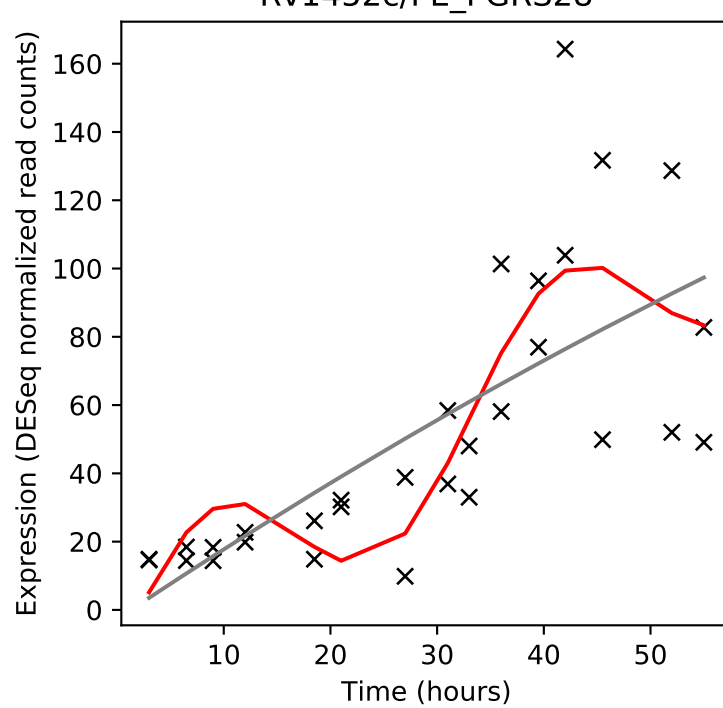

Rv1453/-

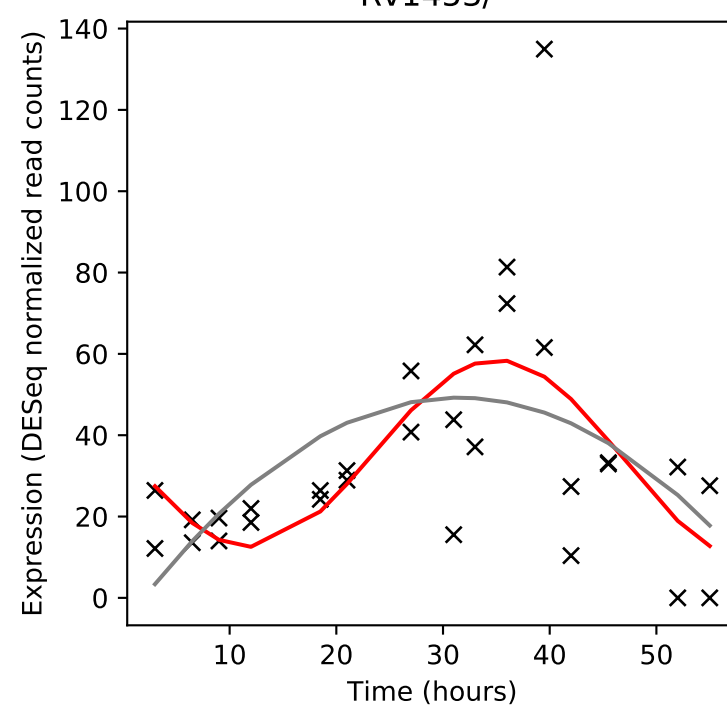

Rv1454c/qor

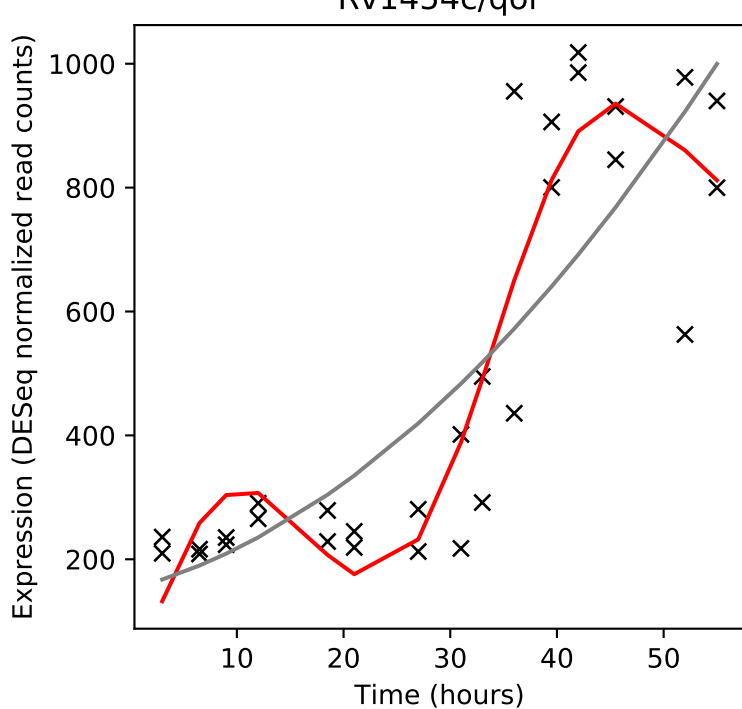

Rv1455/-

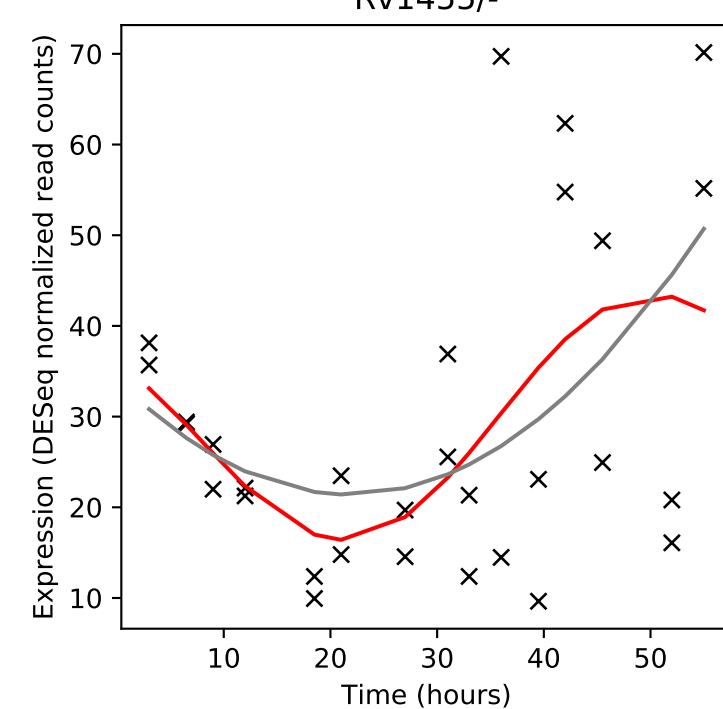

Rv1456c/-

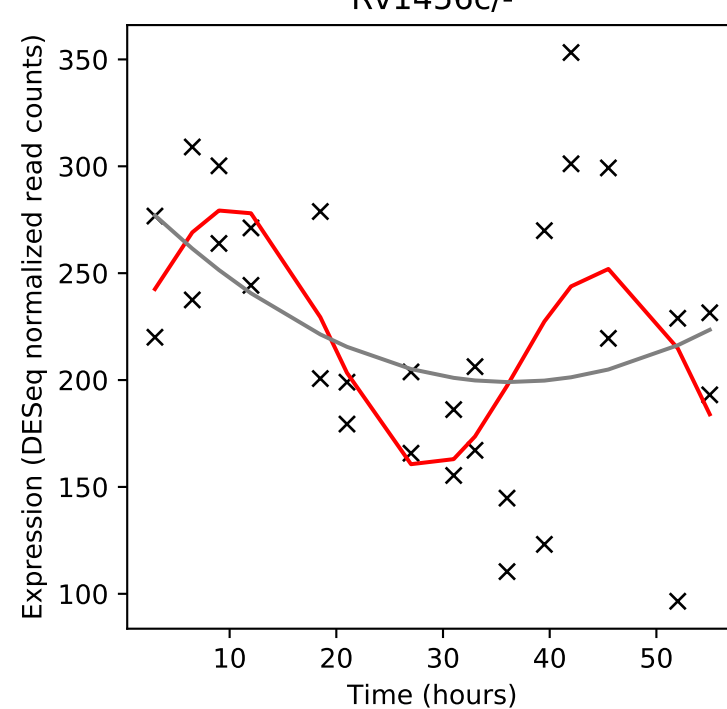

Rv1457c/-

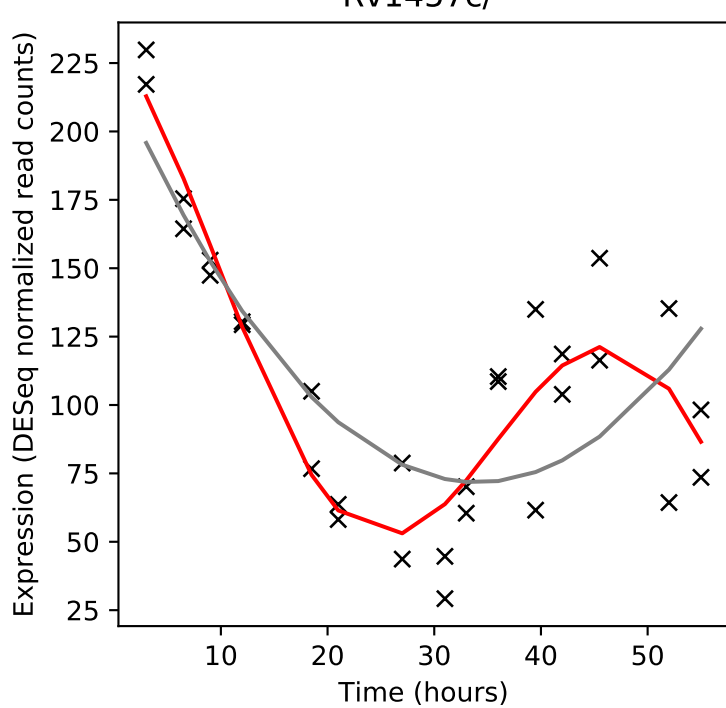

Rv1458c/-

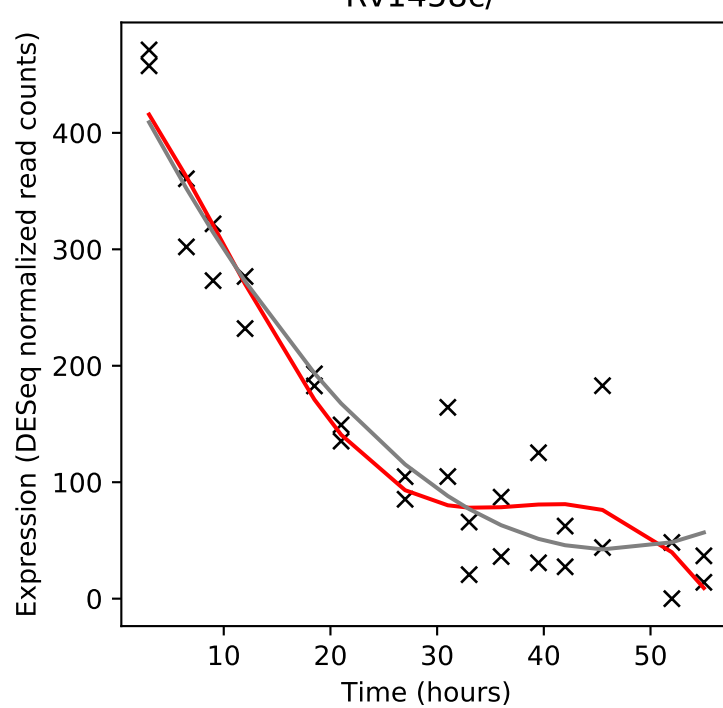

Rv1459c/-

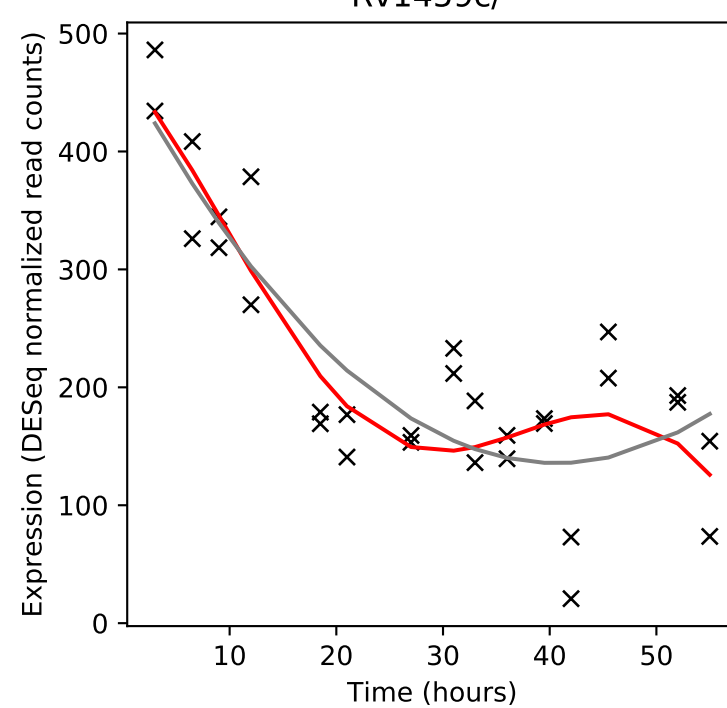

Rv1460/-

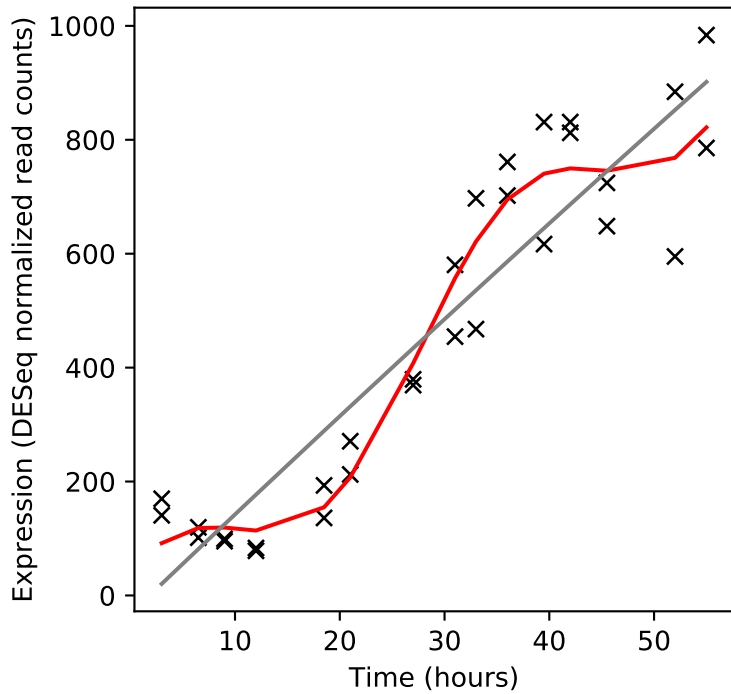

Rv1461/-

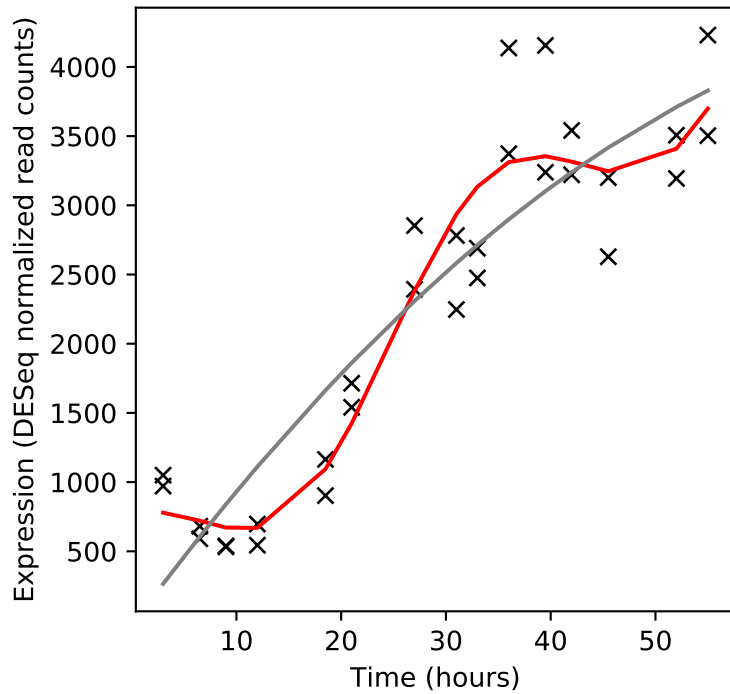

Rv1462/-

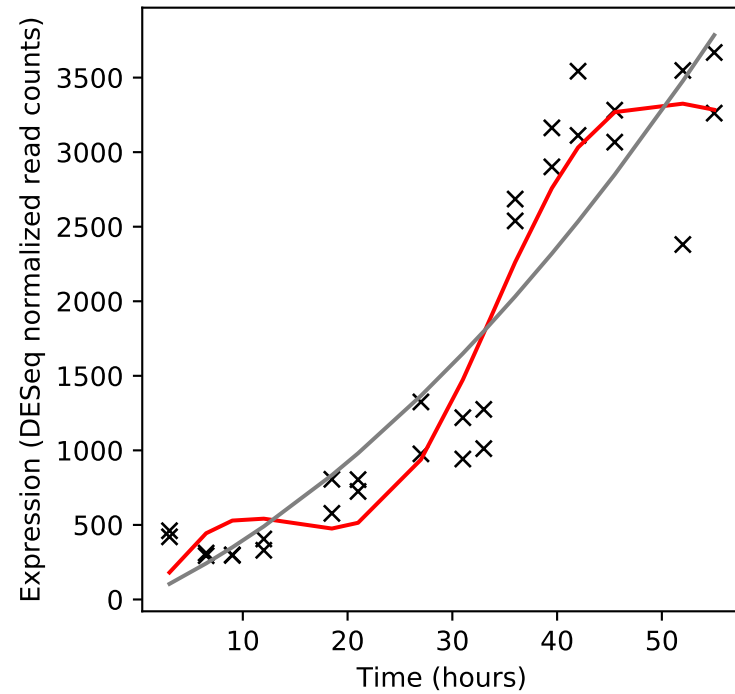

Rv1463/-

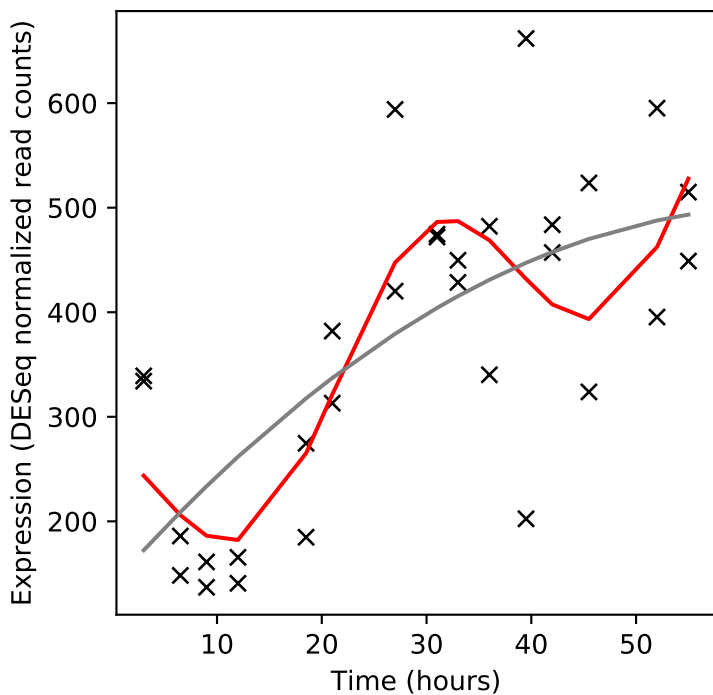

Rv1464/csd

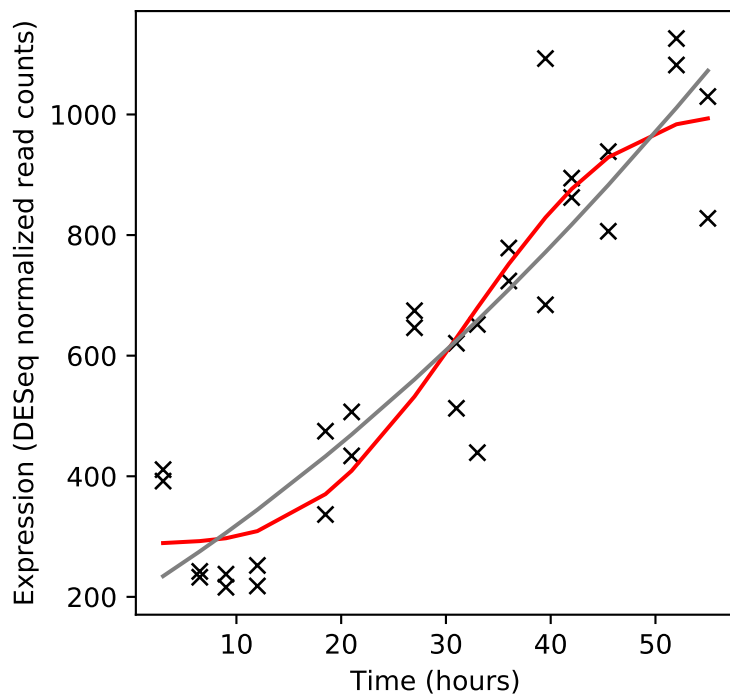

Rv1465/-

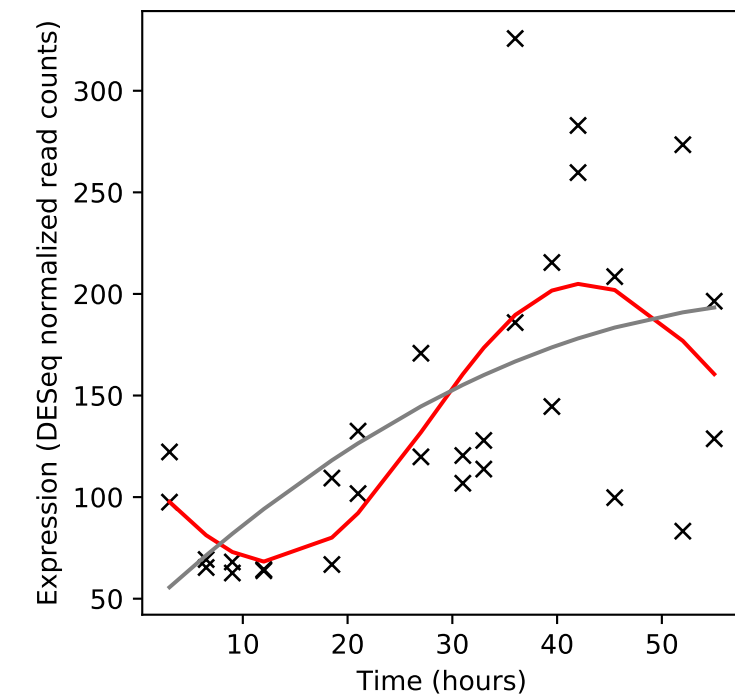

Rv1466/-

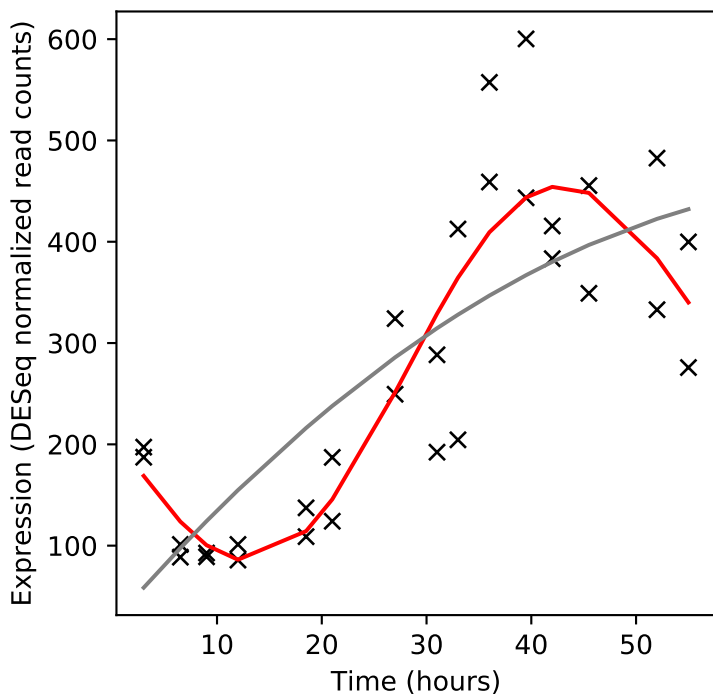

Rv1467c/fadE15

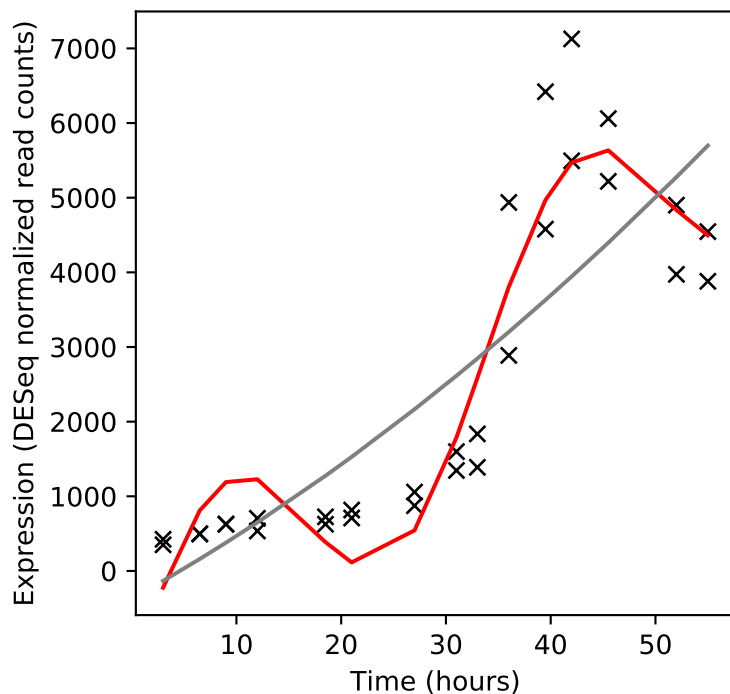

Rv1468c/PE\_PGRS29

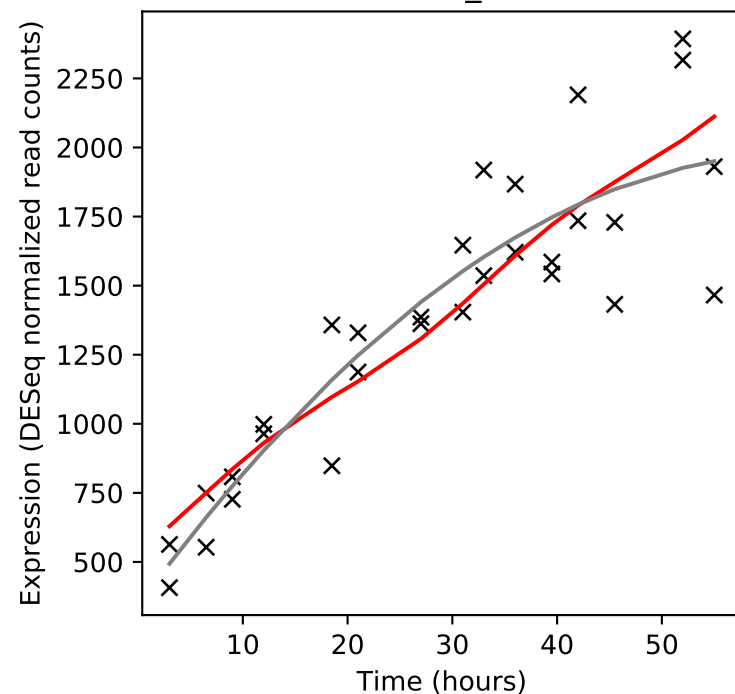

Rv1469/ctpD

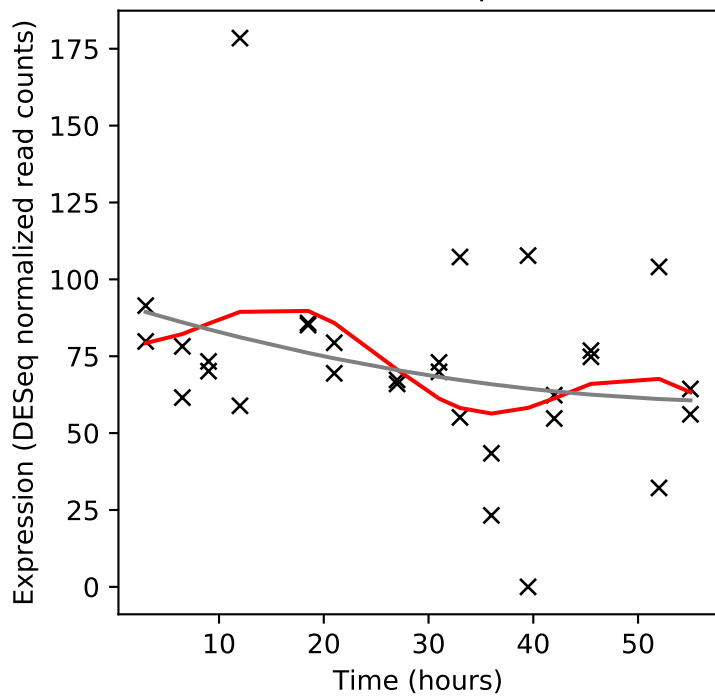

Rv1470/trxA

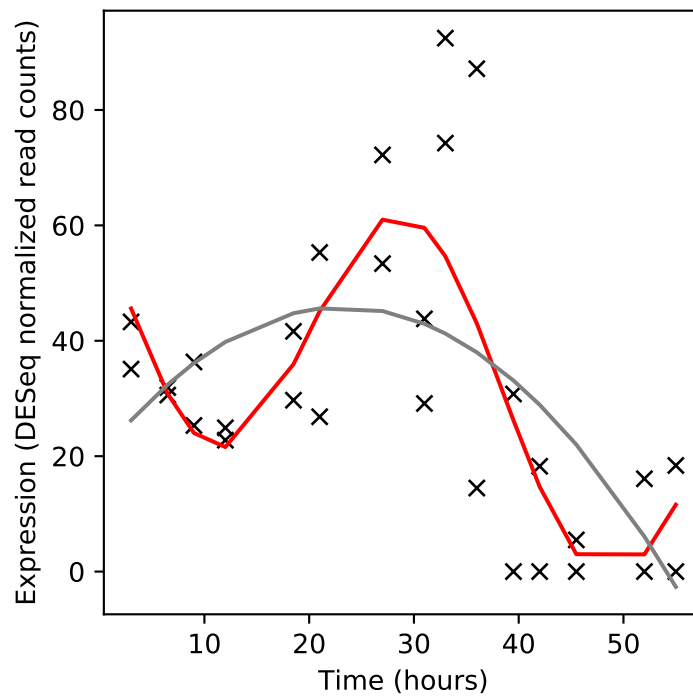

Rv1471/trxB1

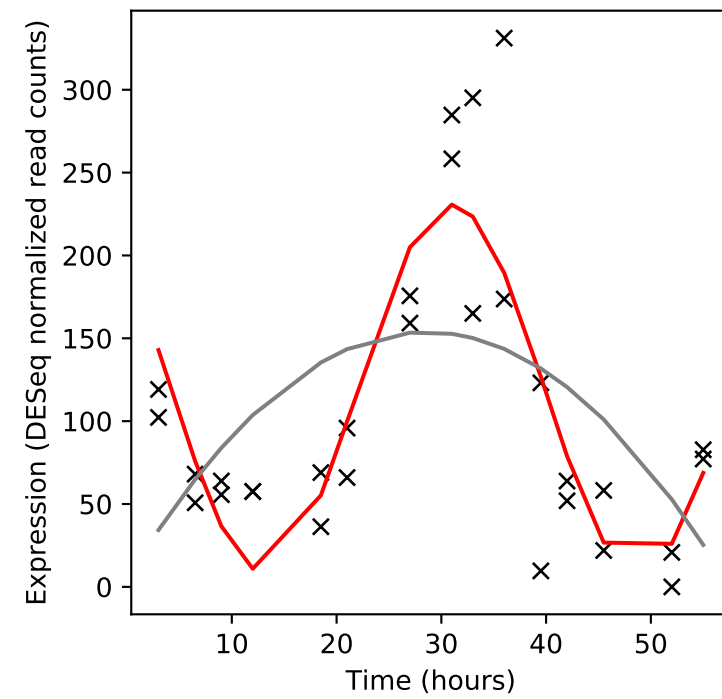

Rv1472/echA12

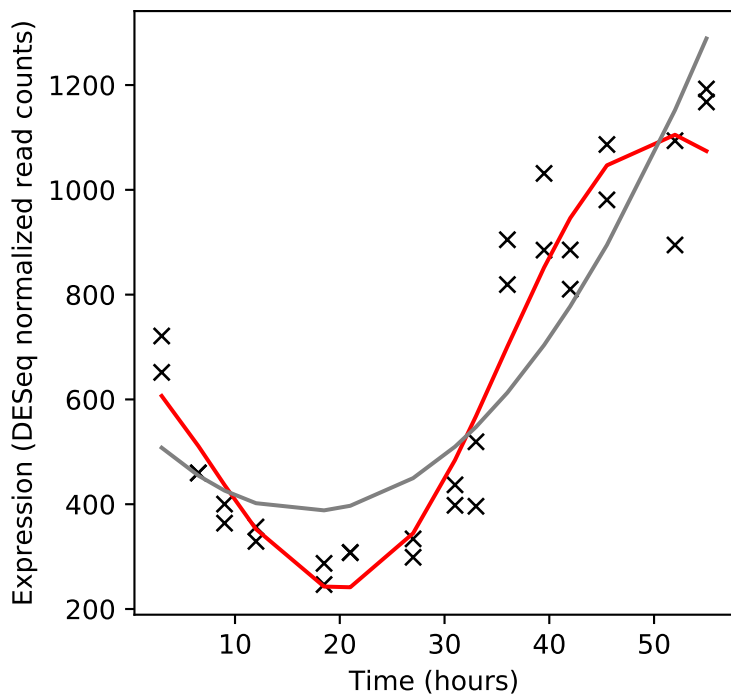

Rv1473/-

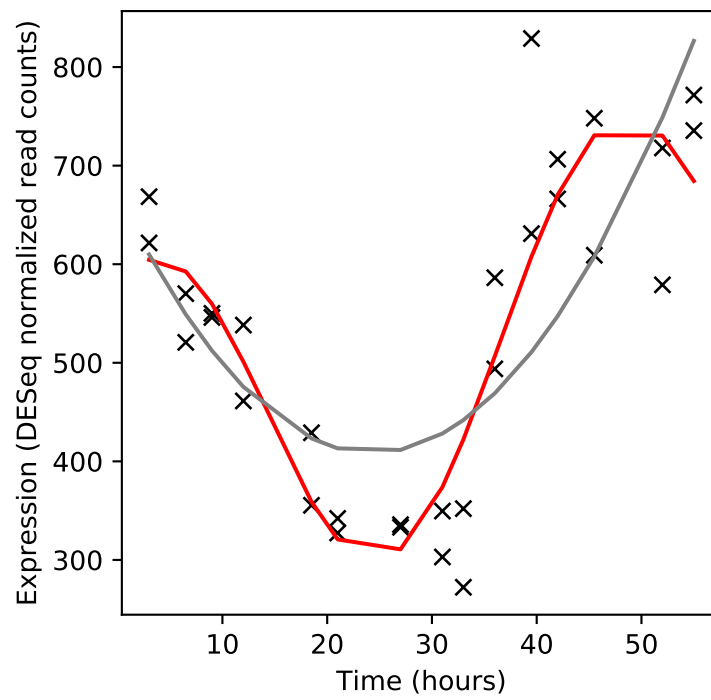

Rv1473A/-

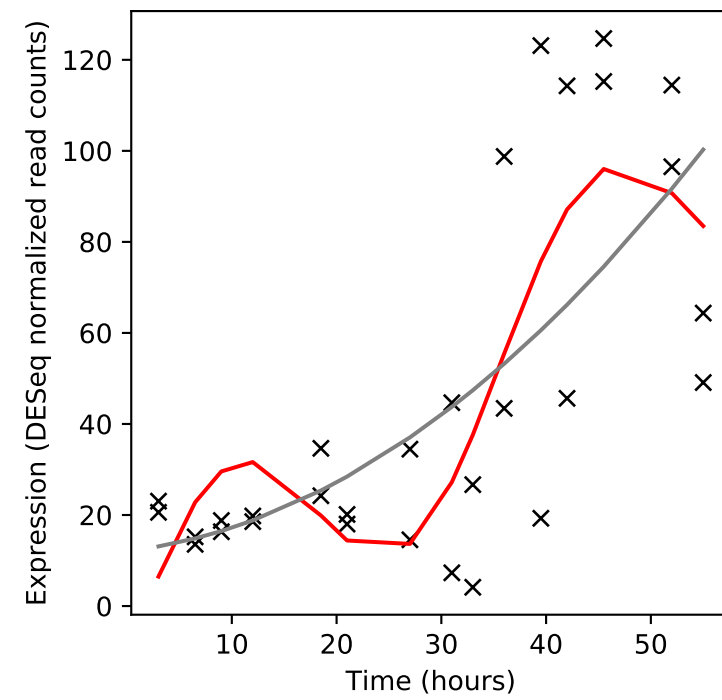

Rv1474c/-

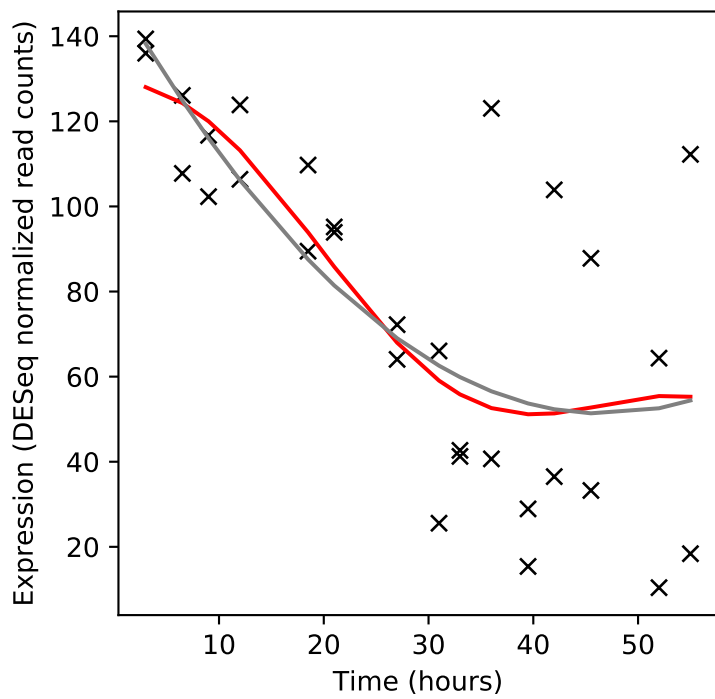

Rv1475c/acn

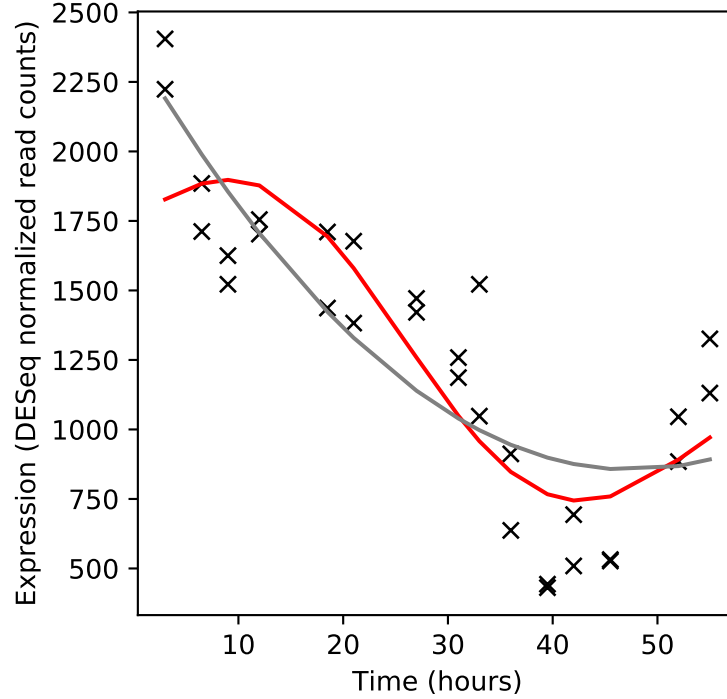

Rv1476/-

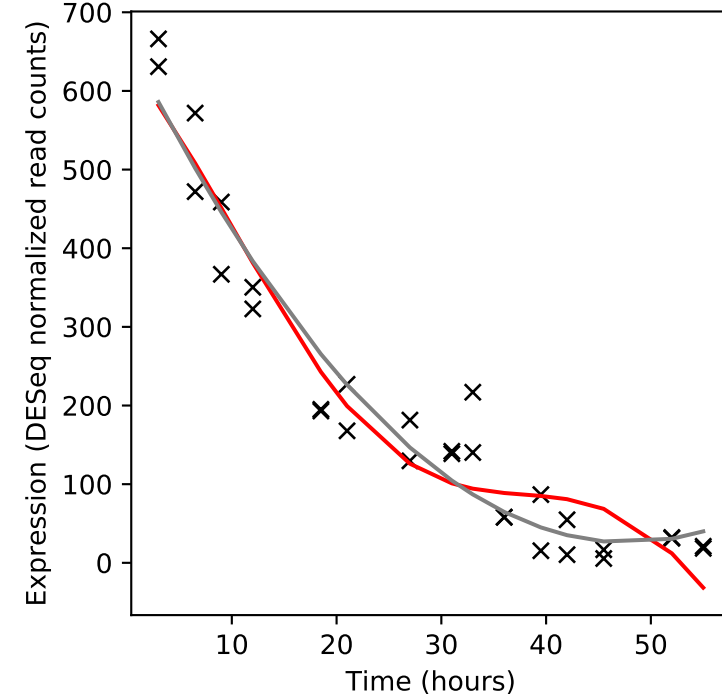

Rv1477/ripA

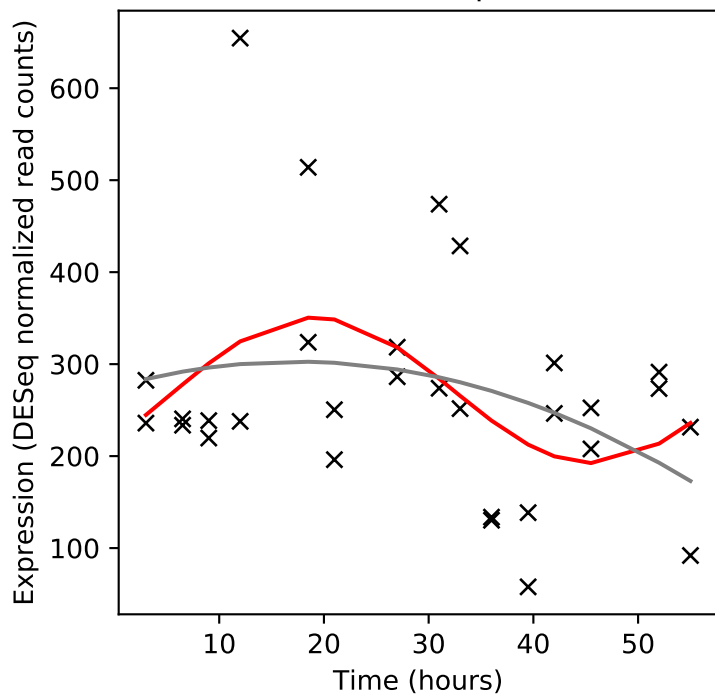

Rv1478/-

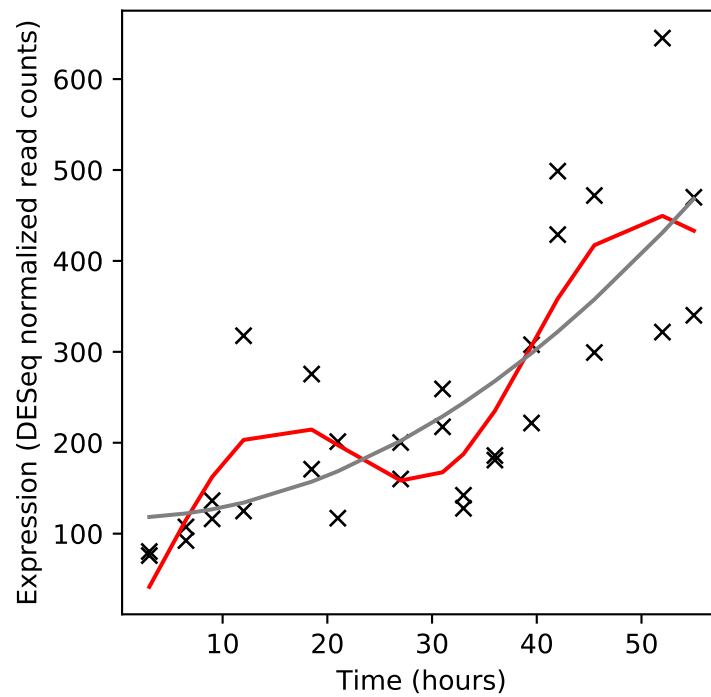

Rv1479/moxR1

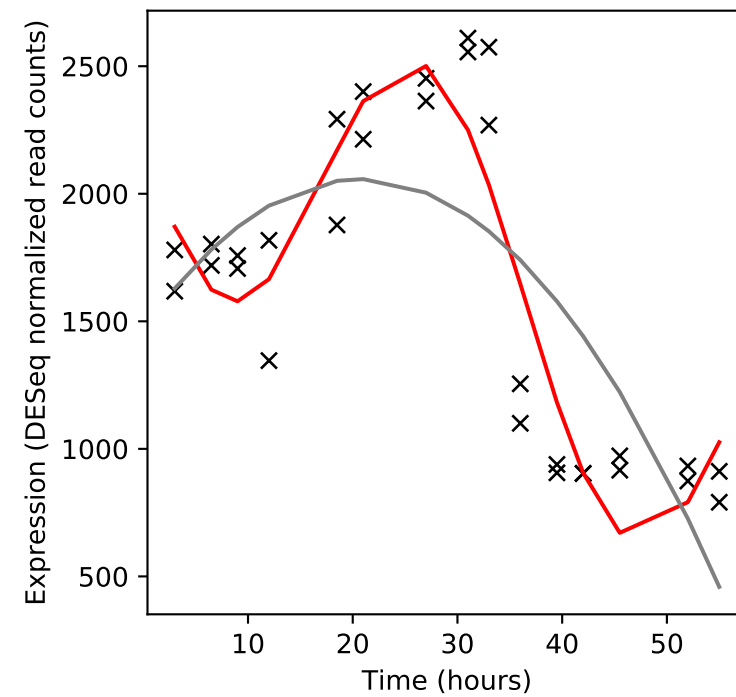

Rv1480/-

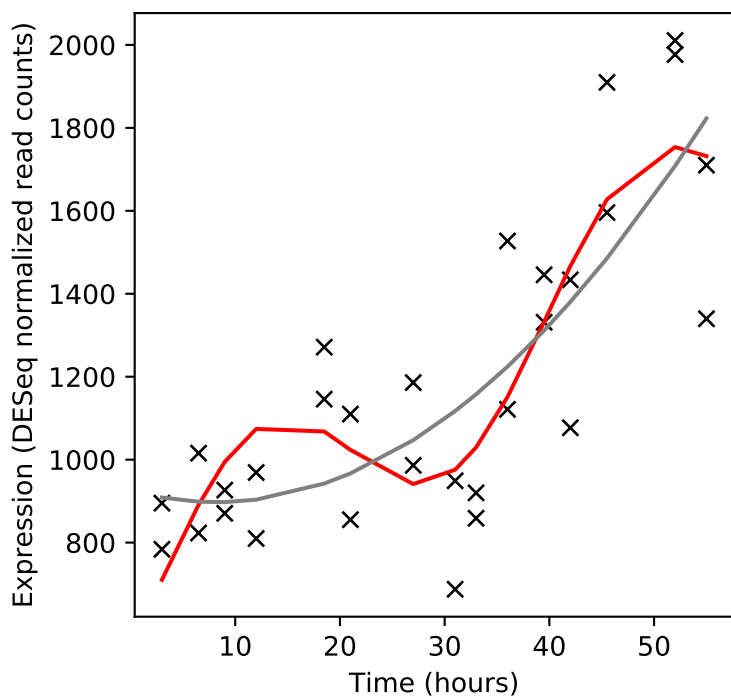

Rv1481/-

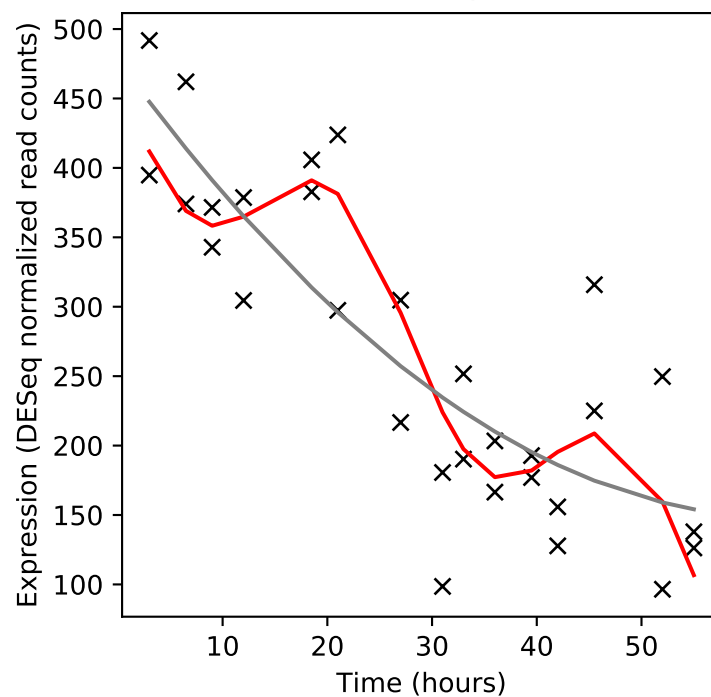

Rv1482c/-

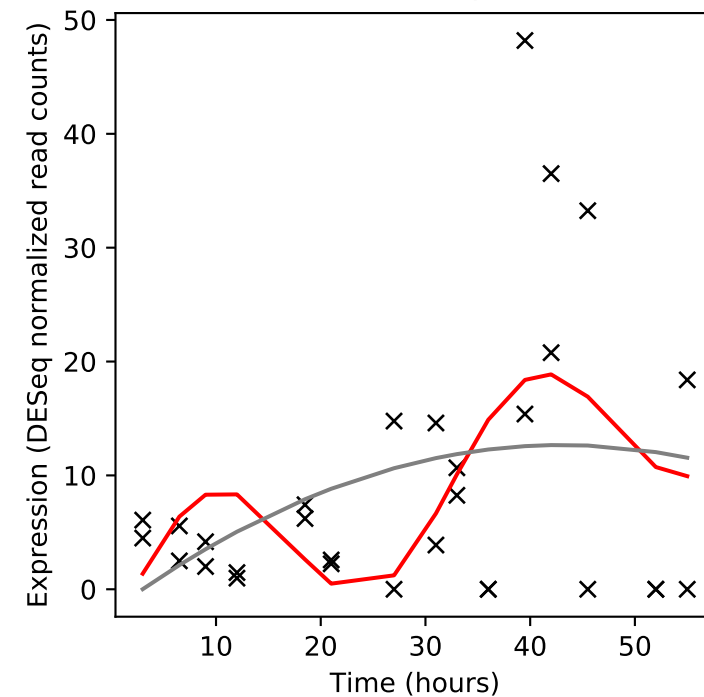

Rv1483/fabG1

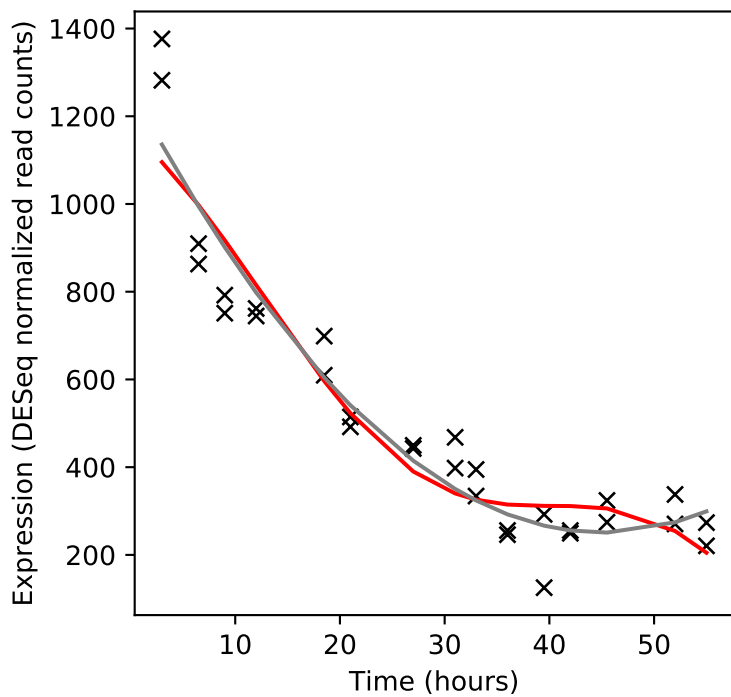

Rv1484/inhA

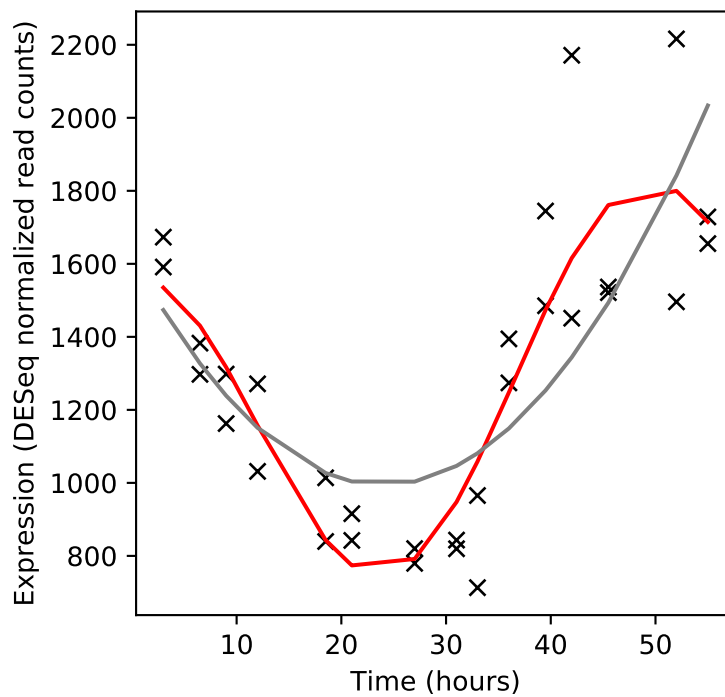

Rv1485/hemZ

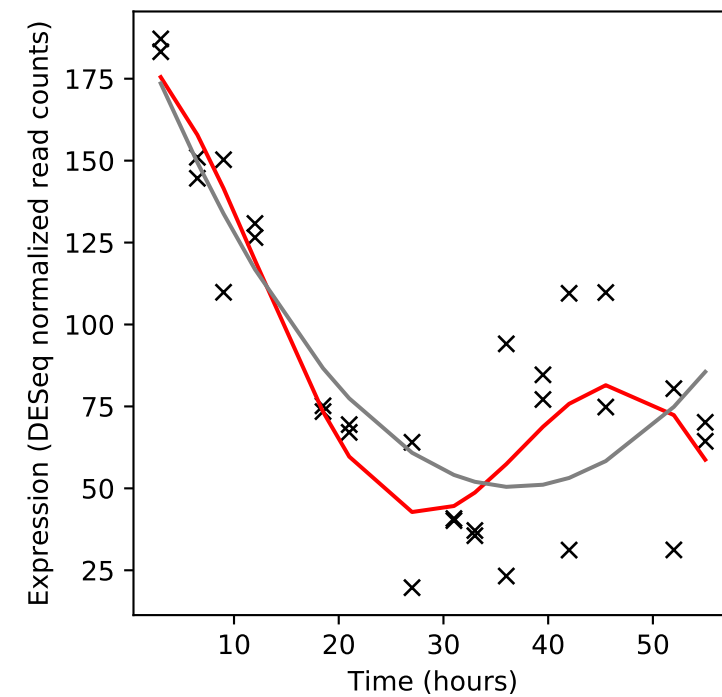



Rv1486c/-

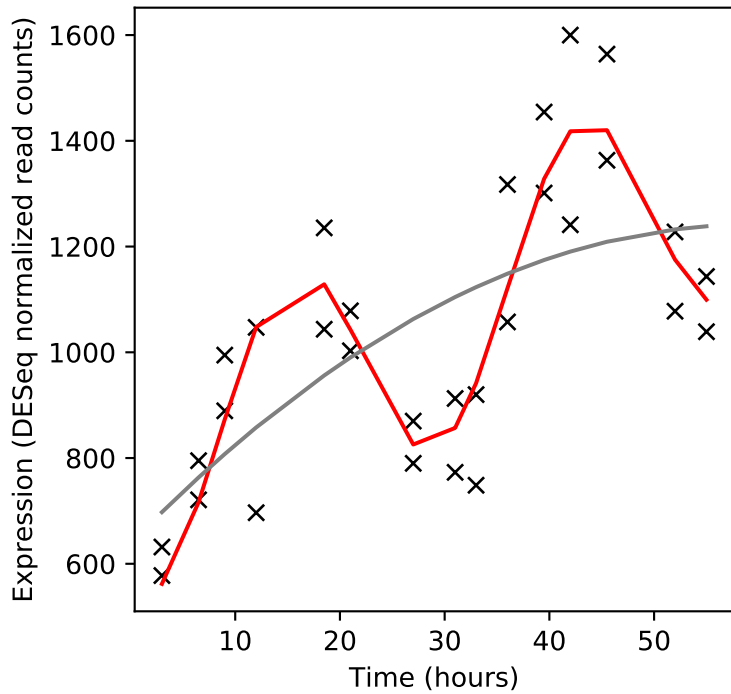

Rv1487/-

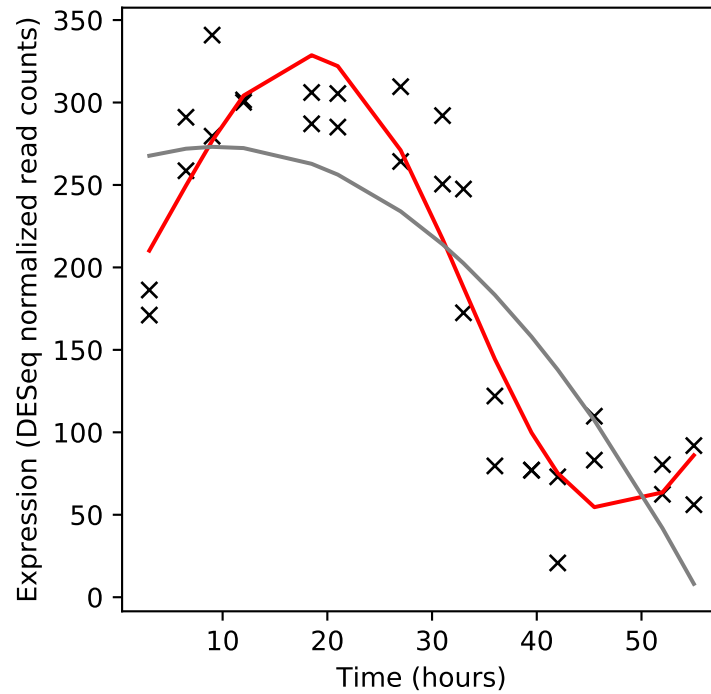

Rv1488/-

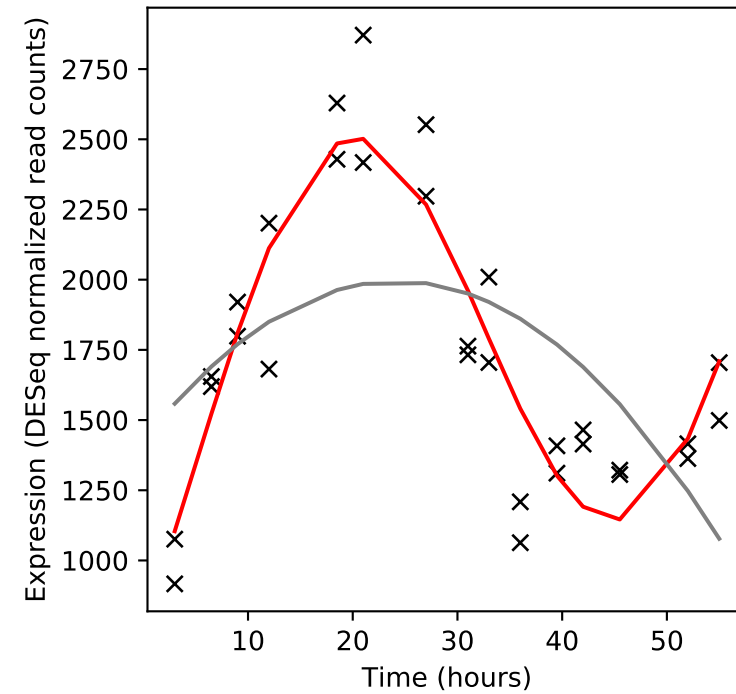

Rv1489/-

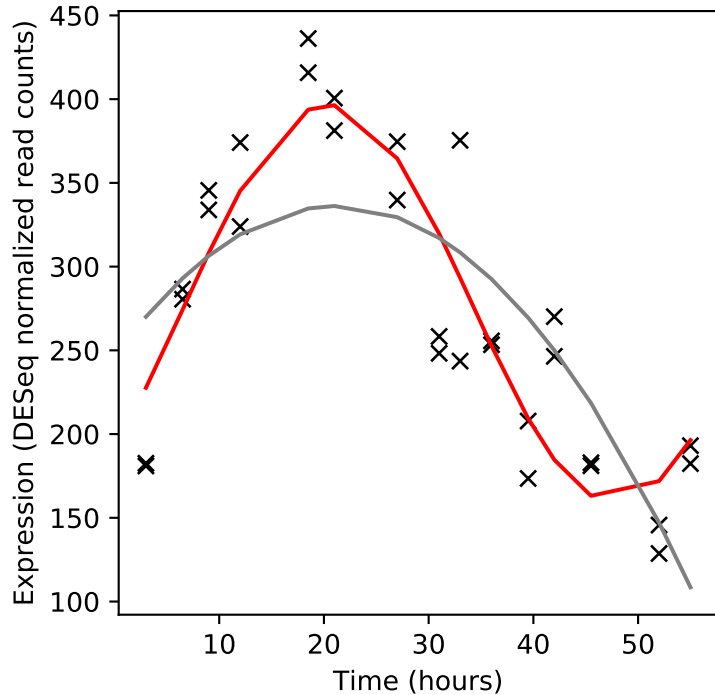

Rv1489A/-

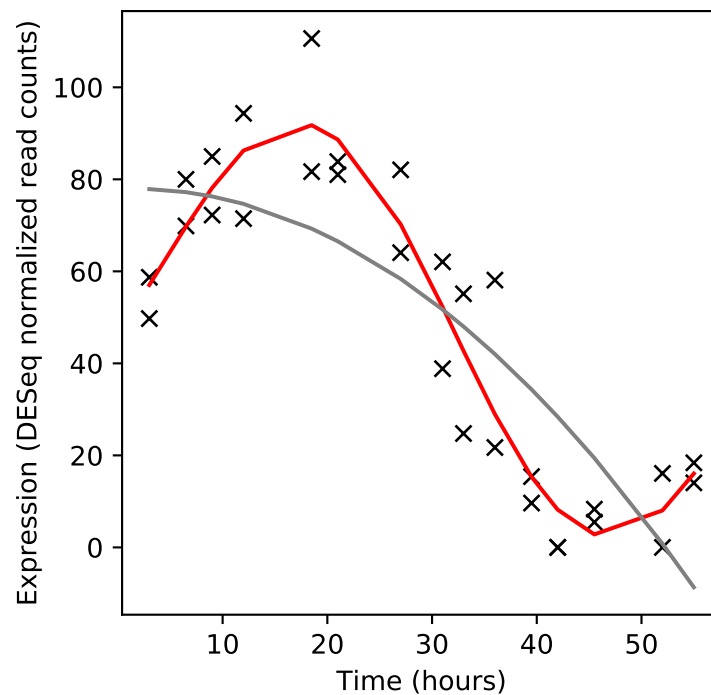

Rv1490/-

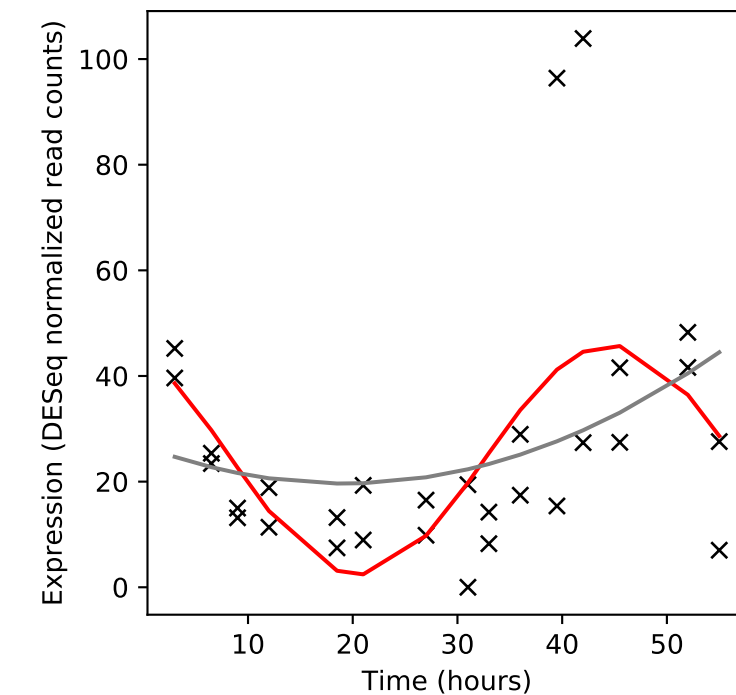

Rv1491c/-

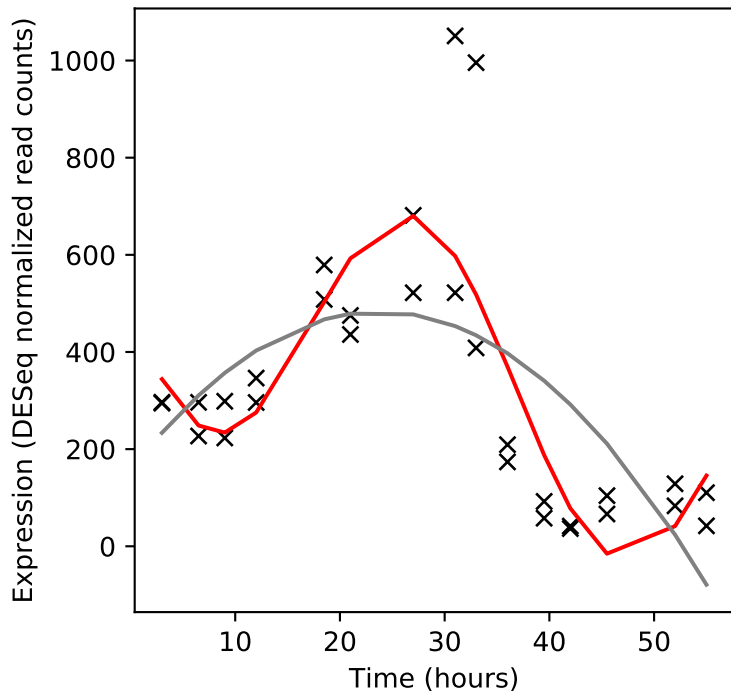

Rv1492/mutA

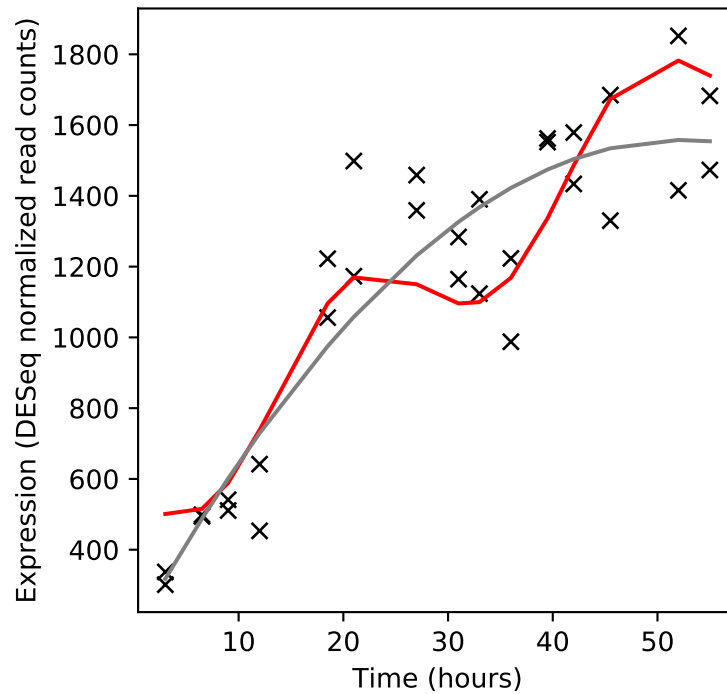

Rv1493/mutB

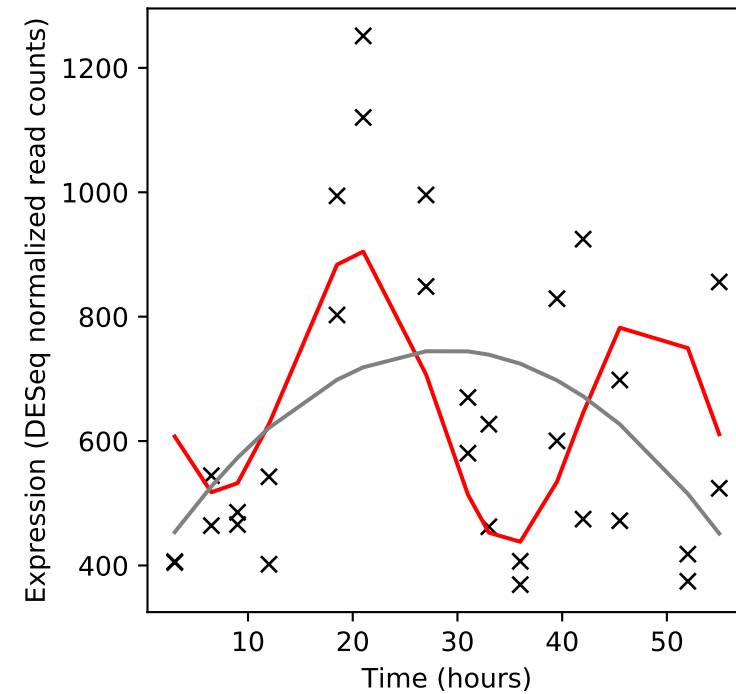

Rv1494/mazE4

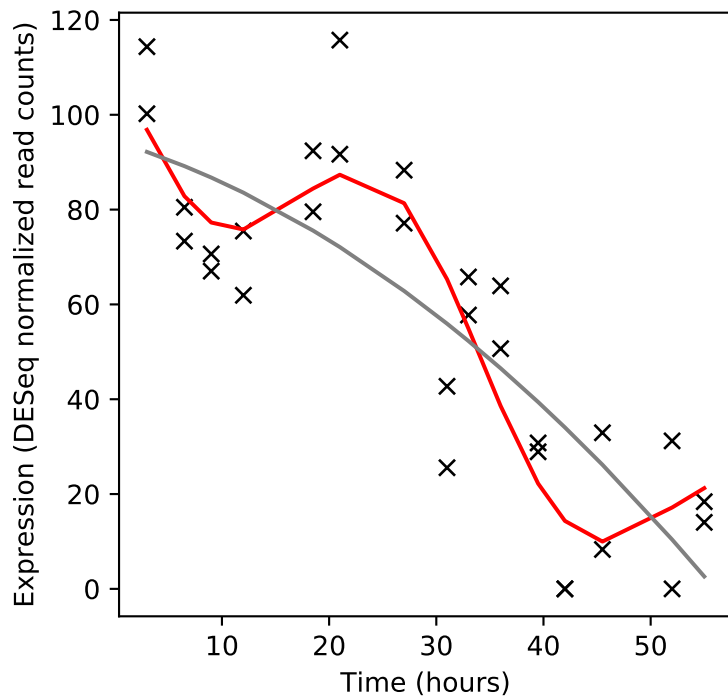

Rv1495/mazF4

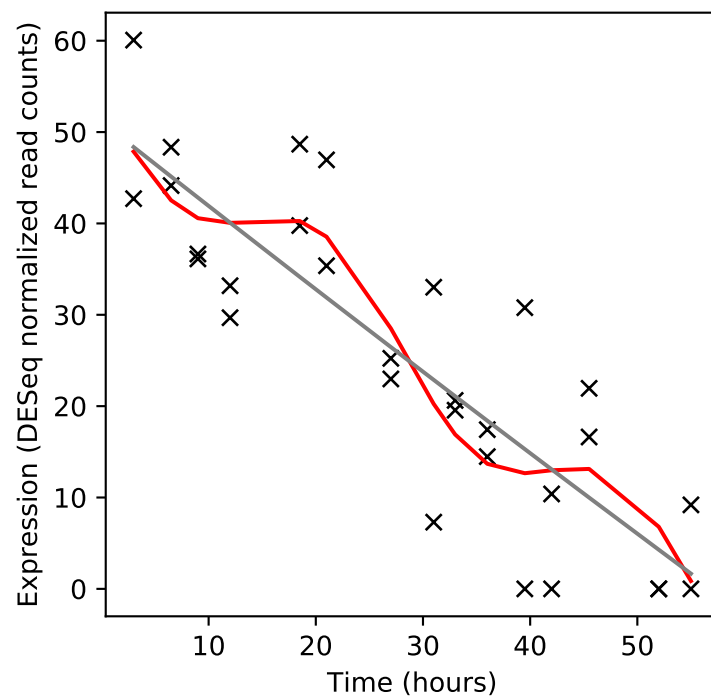

Rv1496/-

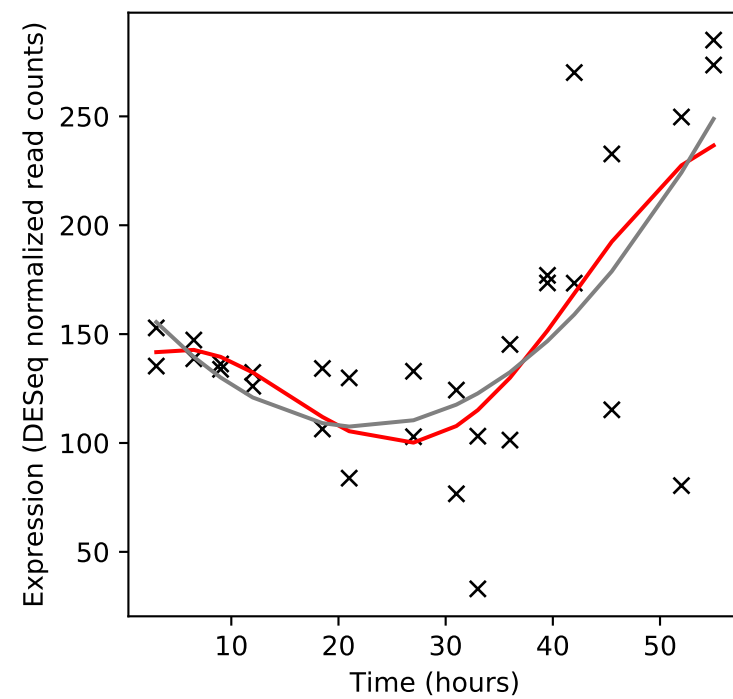

Rv1497/lipL

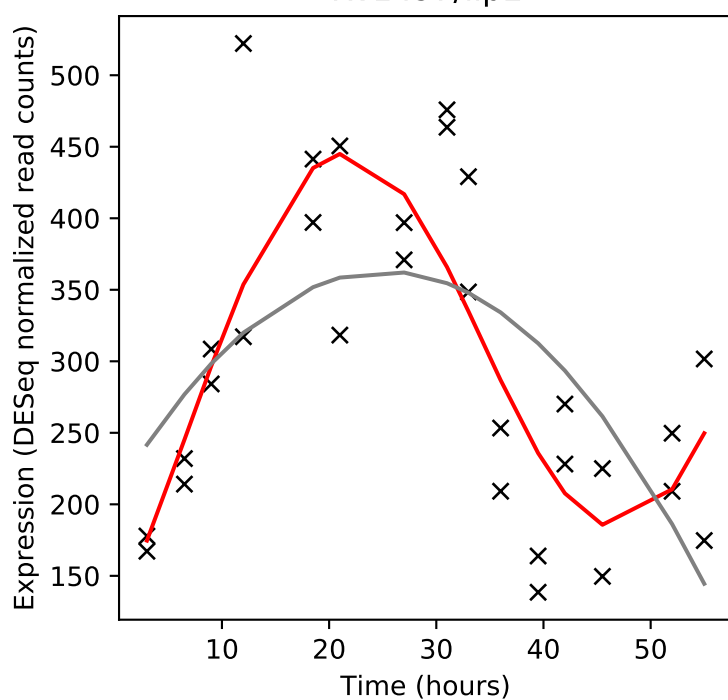

Rv1498c/-

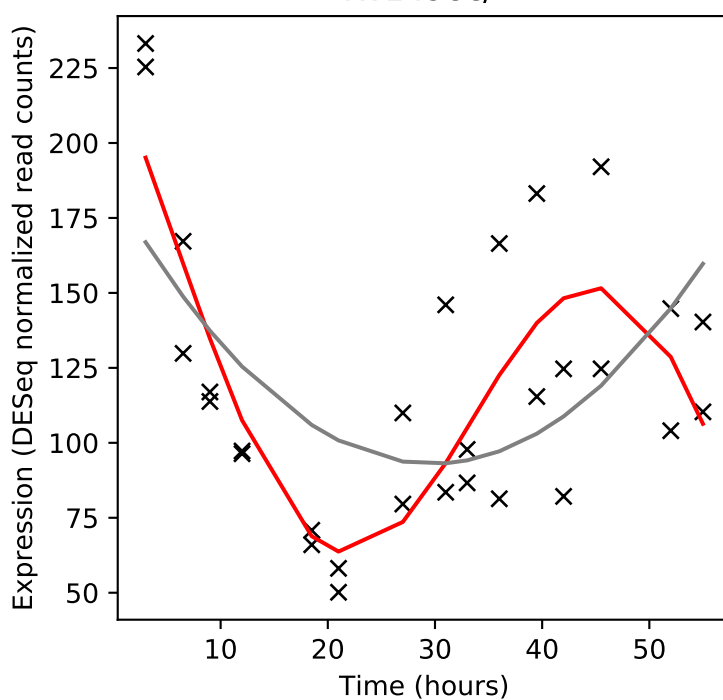

Rv1498A/-

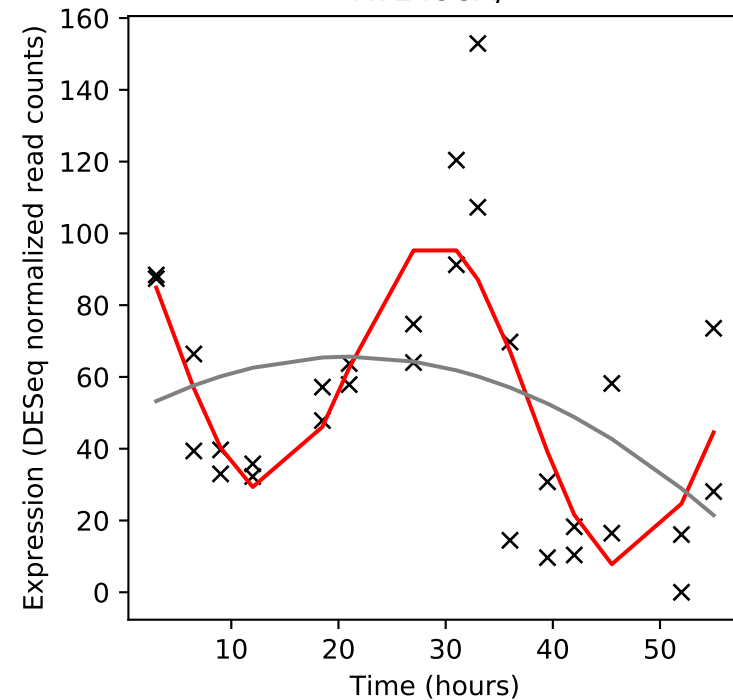

Rv1499/-

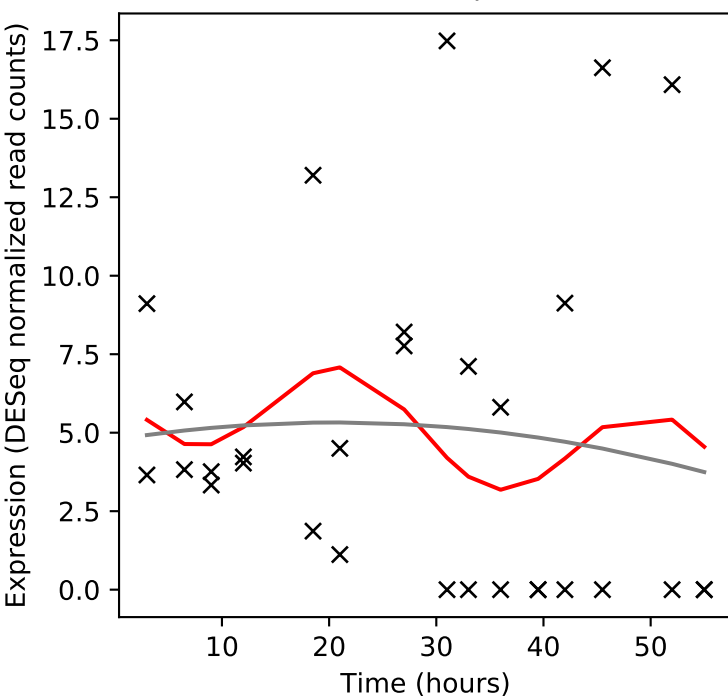

Rv1500/-

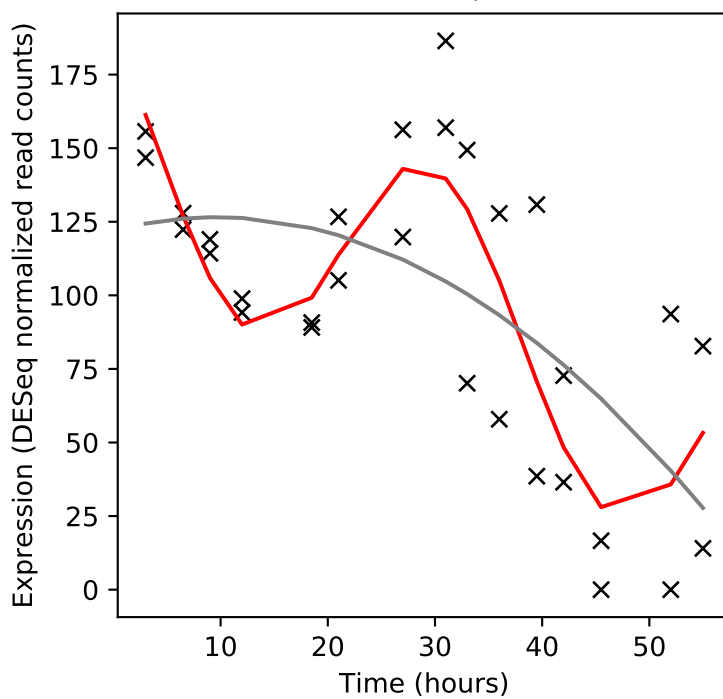

Rv1501/-

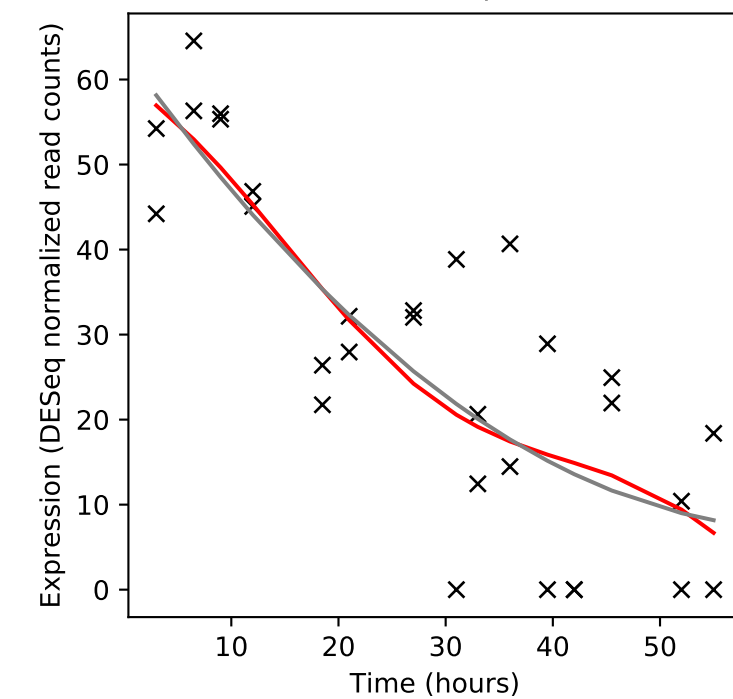

Rv1502/-

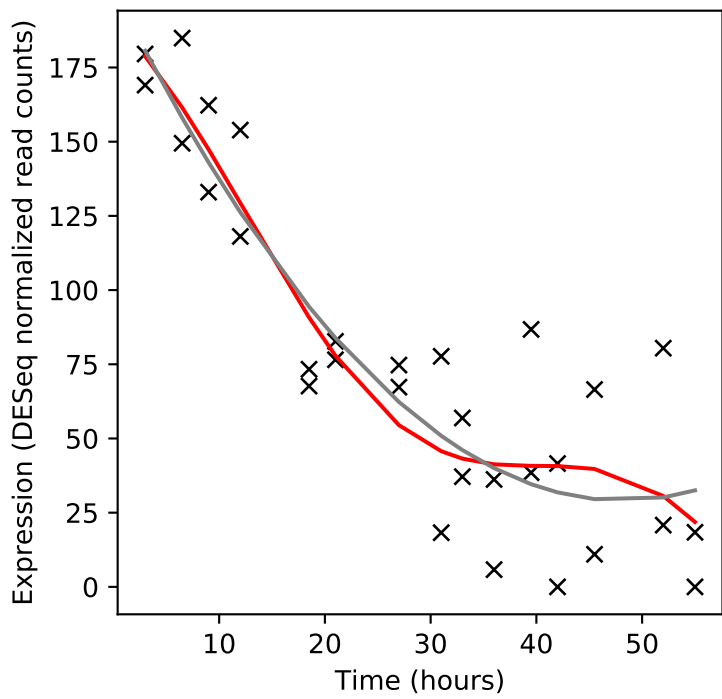

Rv1503c/-

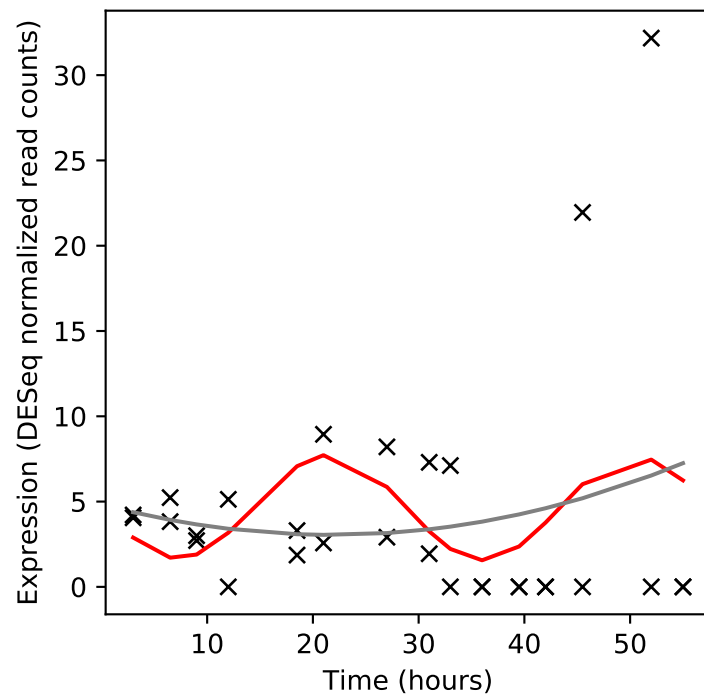

Rv1504c/-

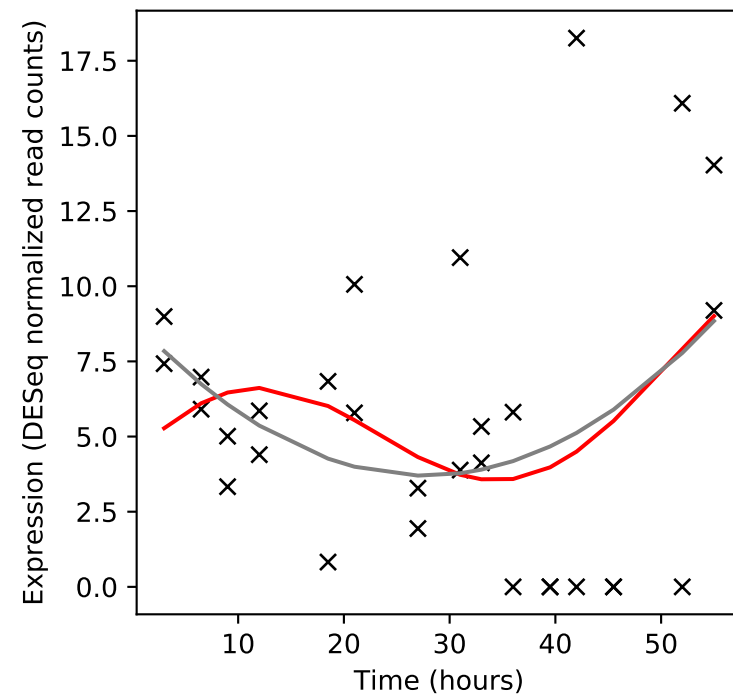

Rv1505c/-

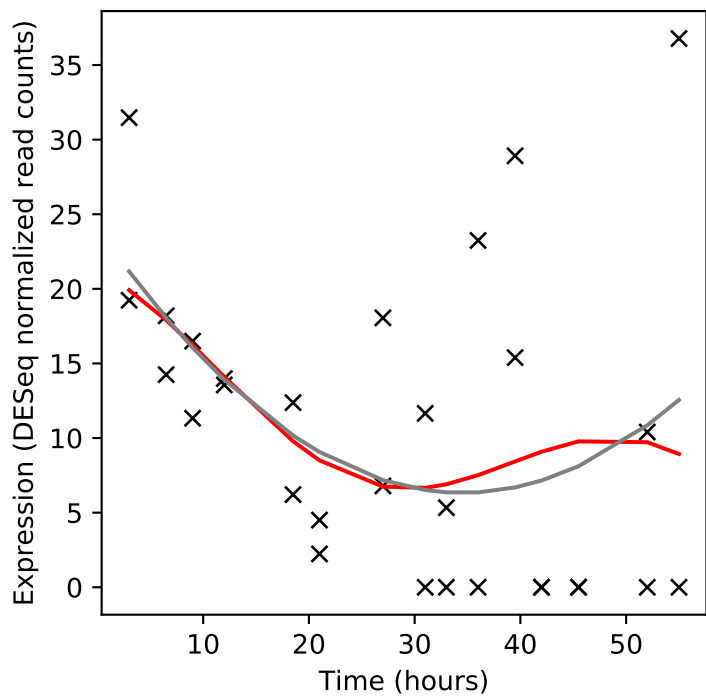

Rv1506c/-

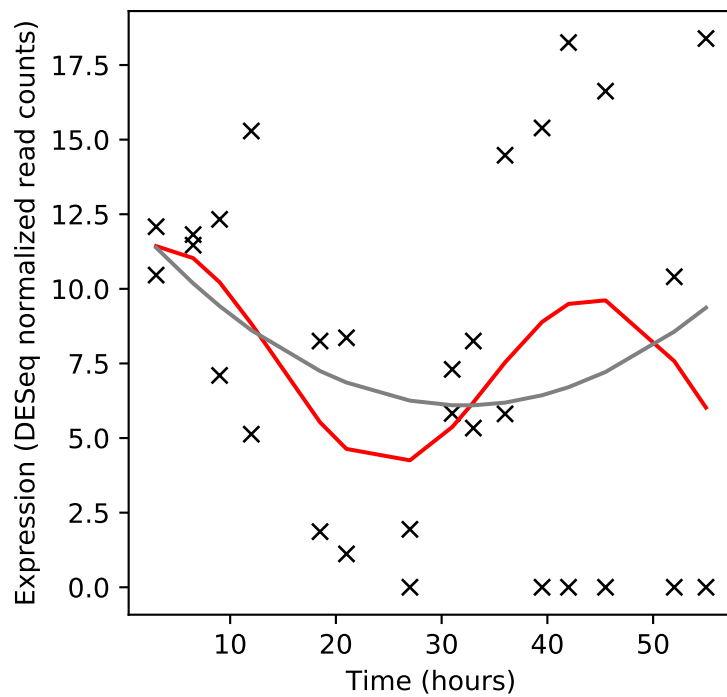

Rv1507c/-

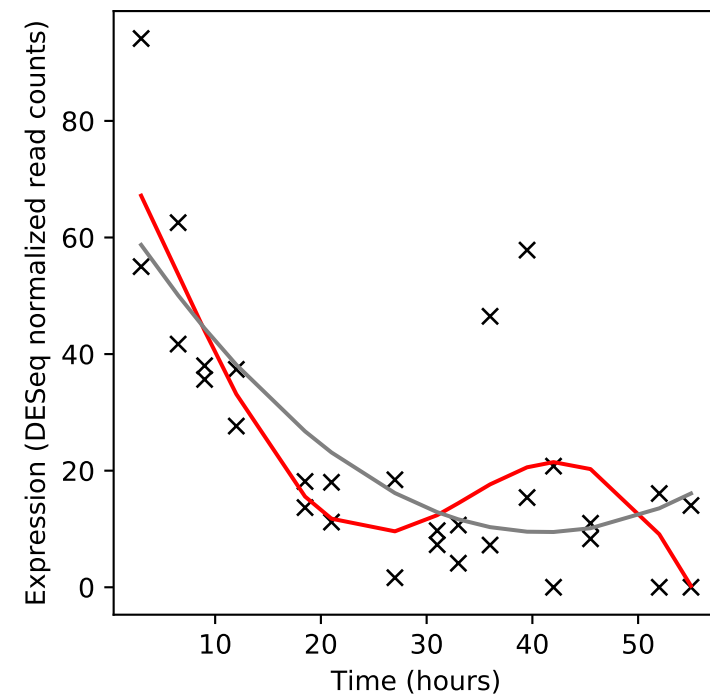

Rv1507A/-

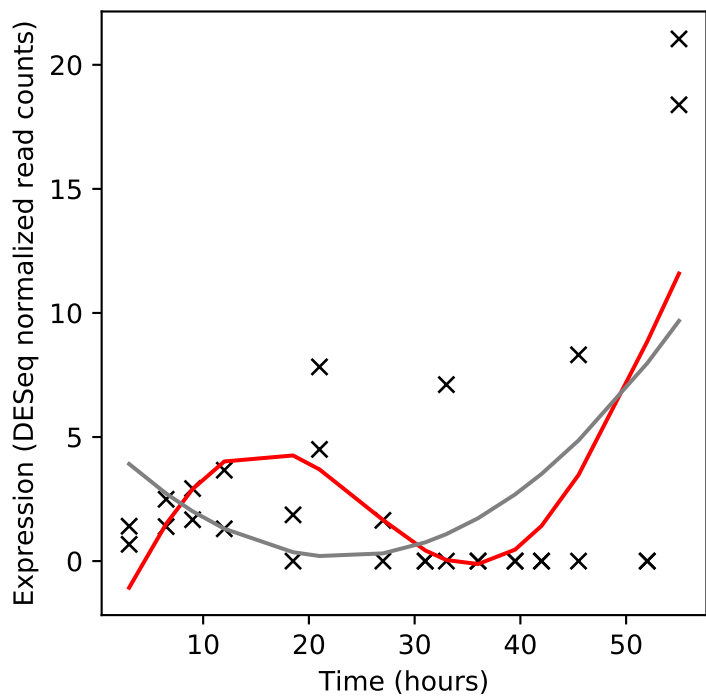

Rv1508c/-

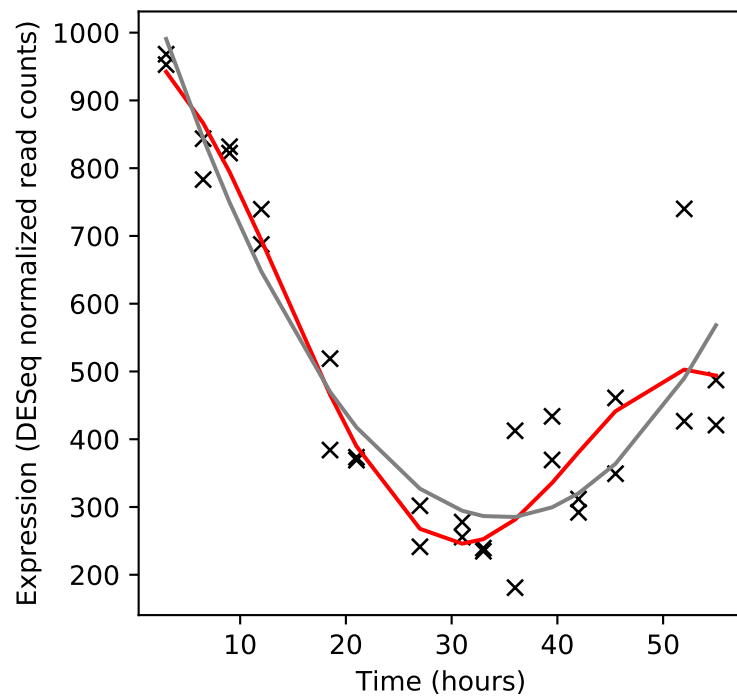

Rv1508A/-

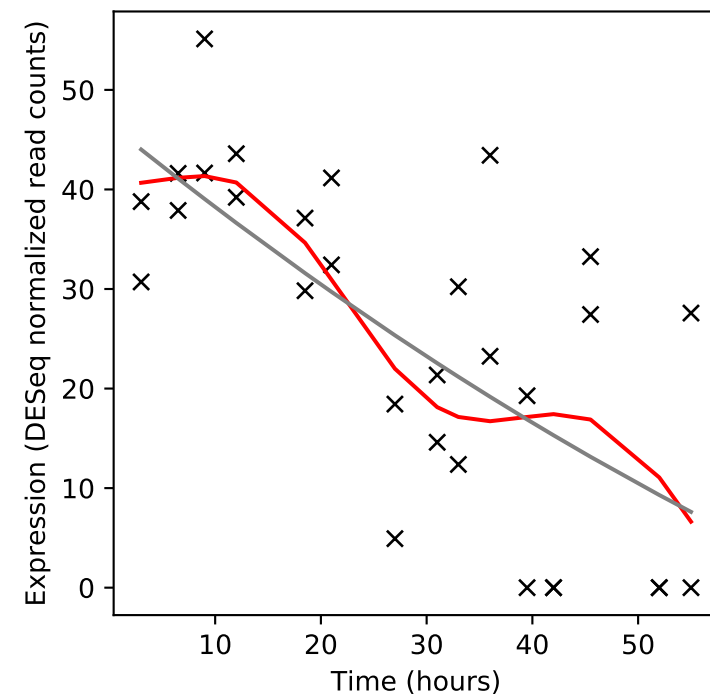

Rv1509/-

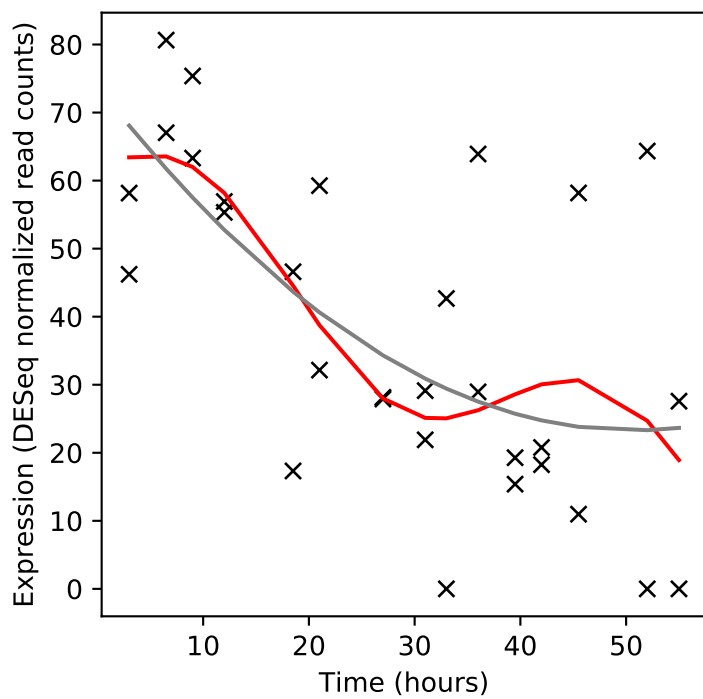

Rv1510/-

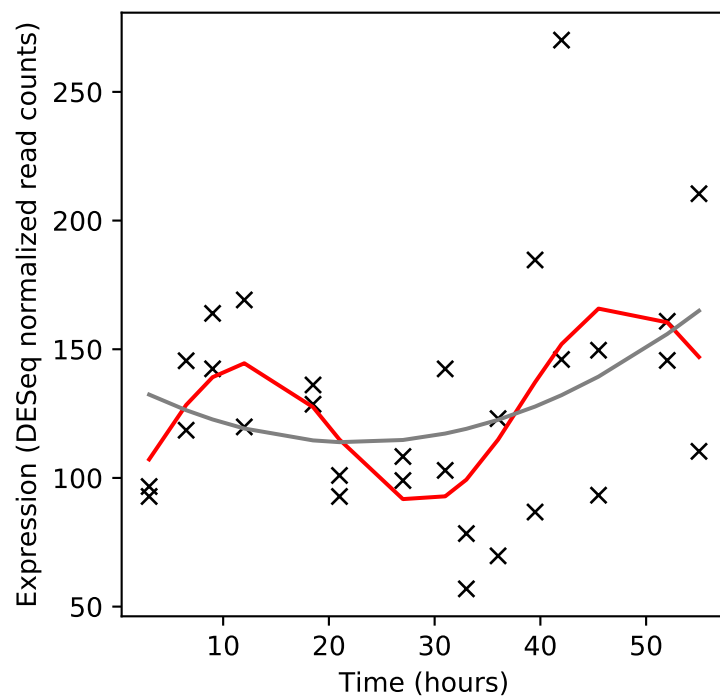

Rv1511/gmdA

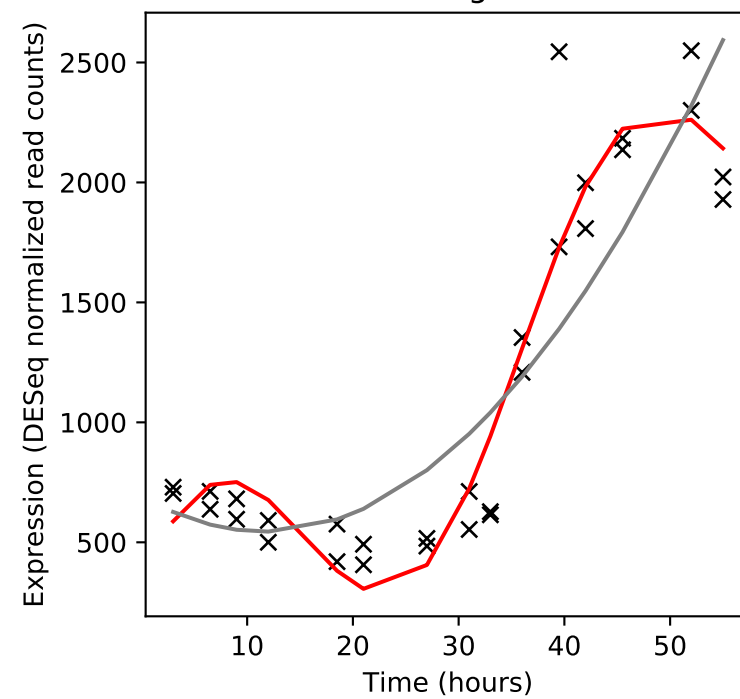

Rv1512/epiA

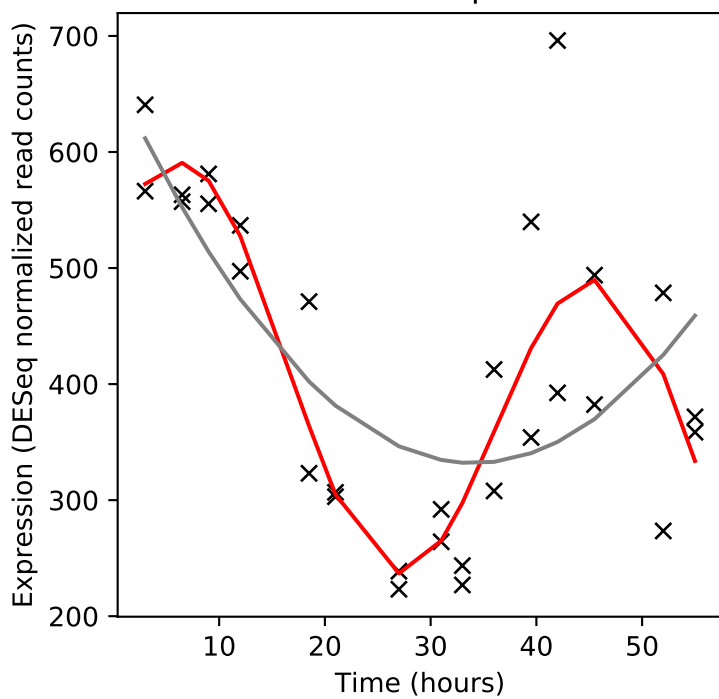

Rv1513/-

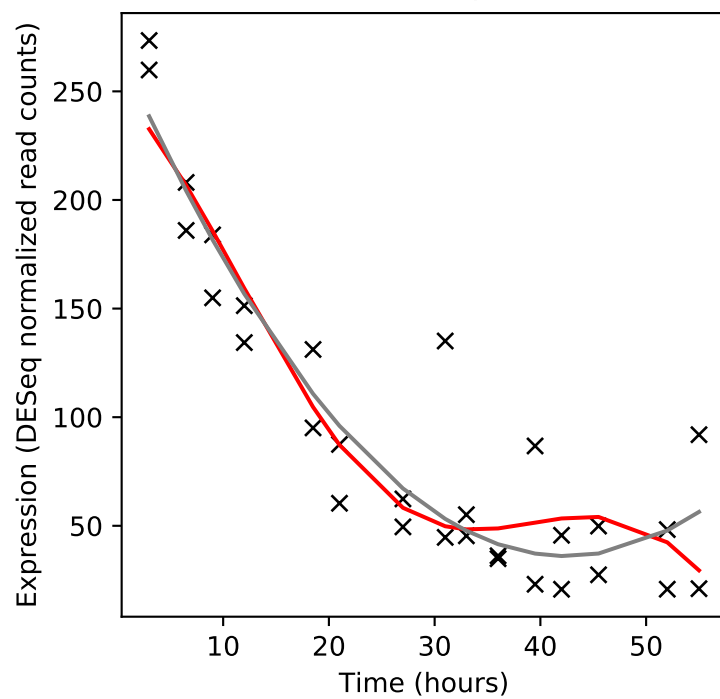

Rv1514c/-

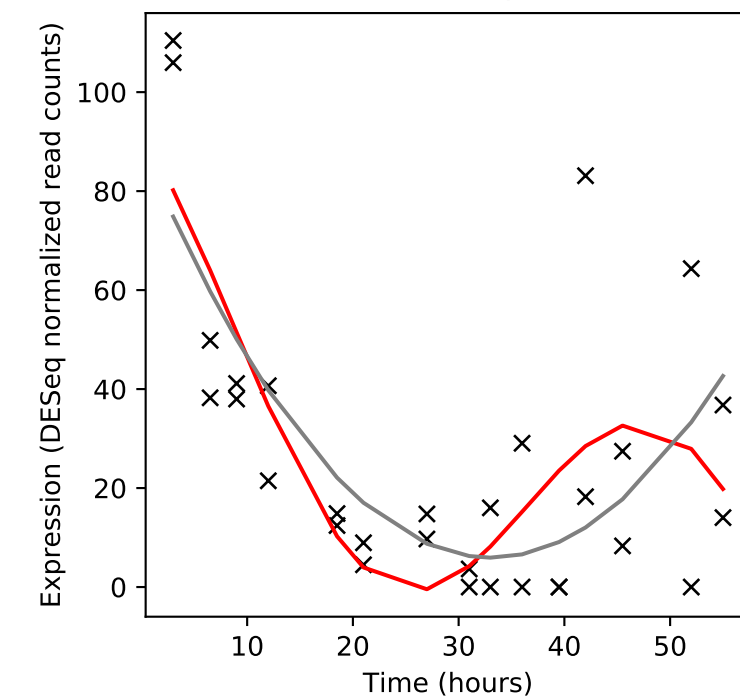

Rv1515c/-

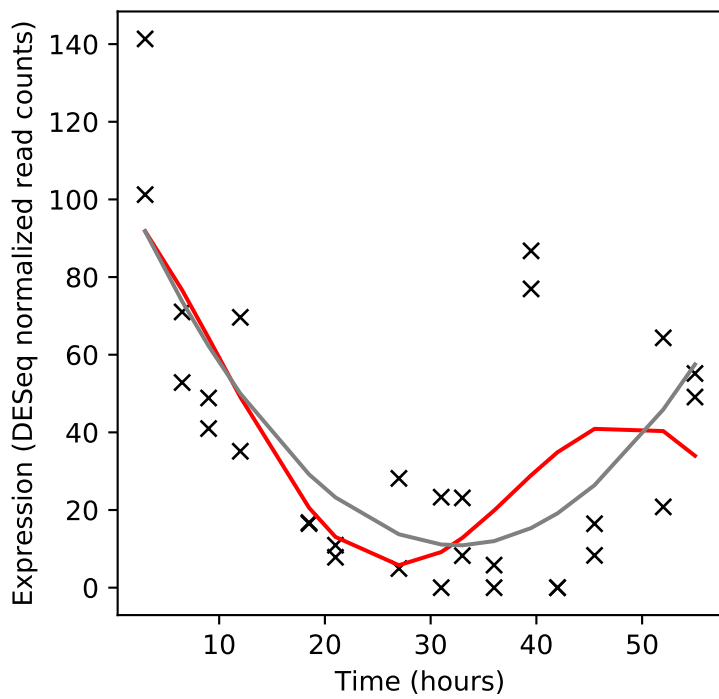

Rv1516c/-

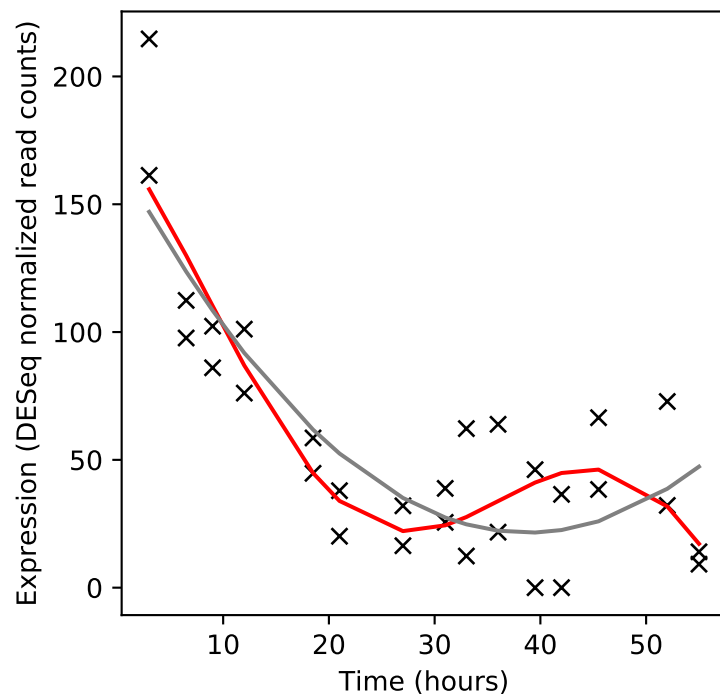

Rv1517/-

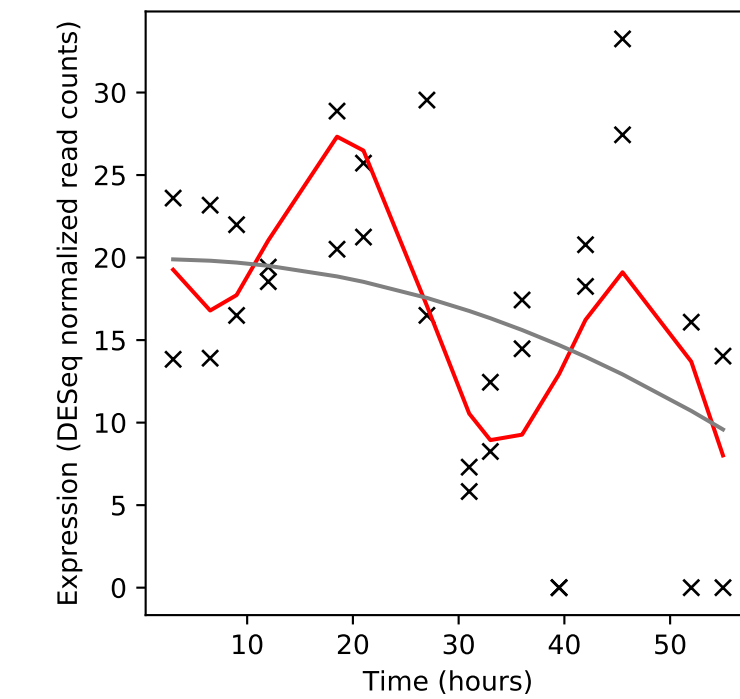

Rv1518/-

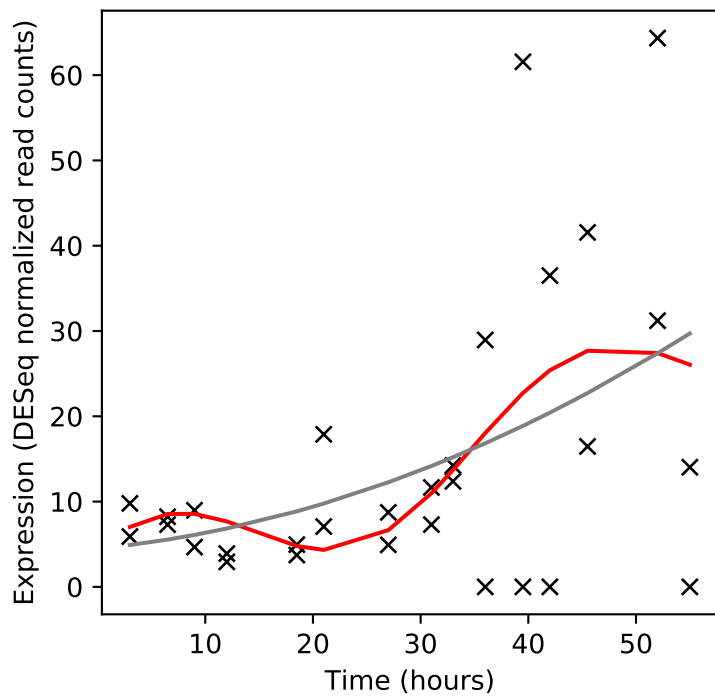

Rv1519/-

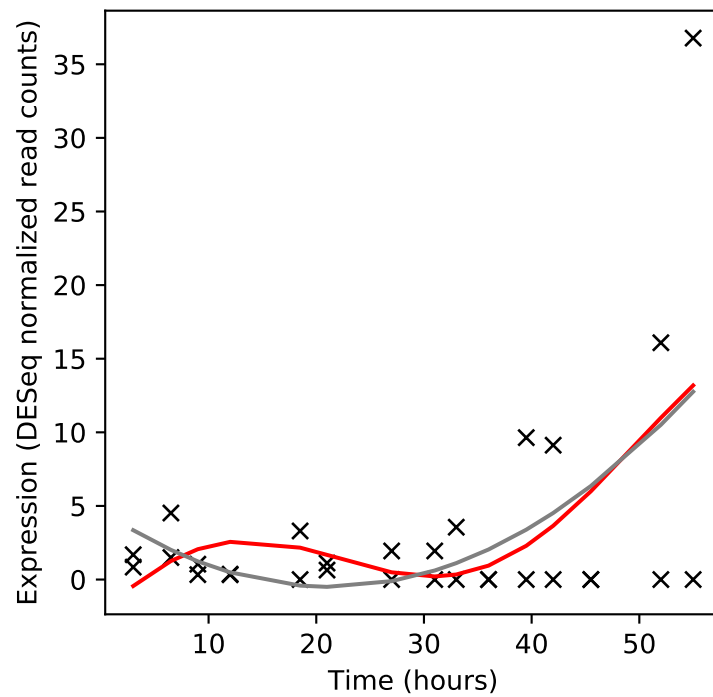

Rv1520/-

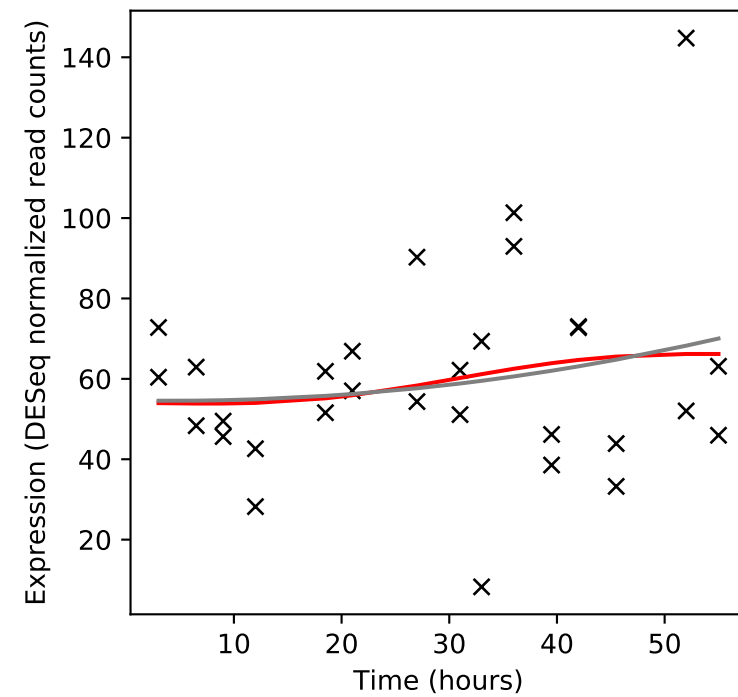

Rv1521/fadD25

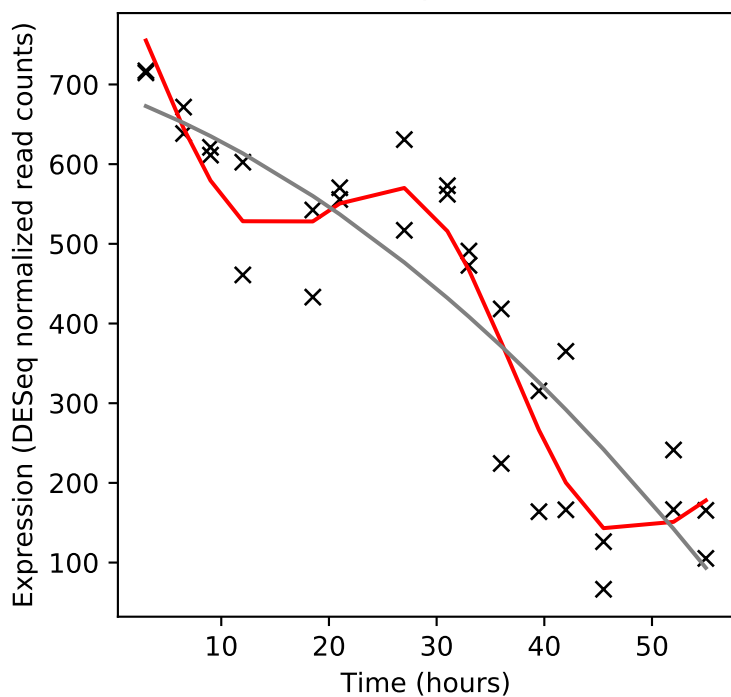

Rv1522c/mmpL12

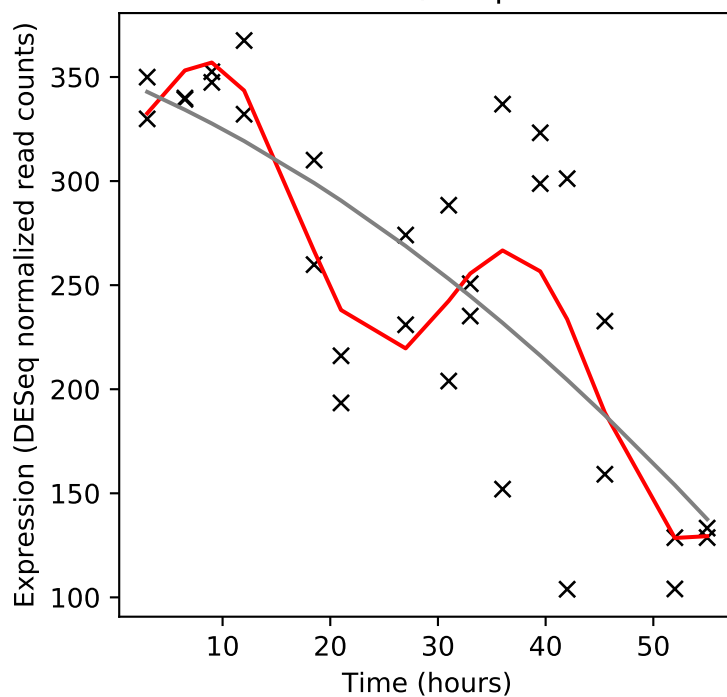

Rv1523/-

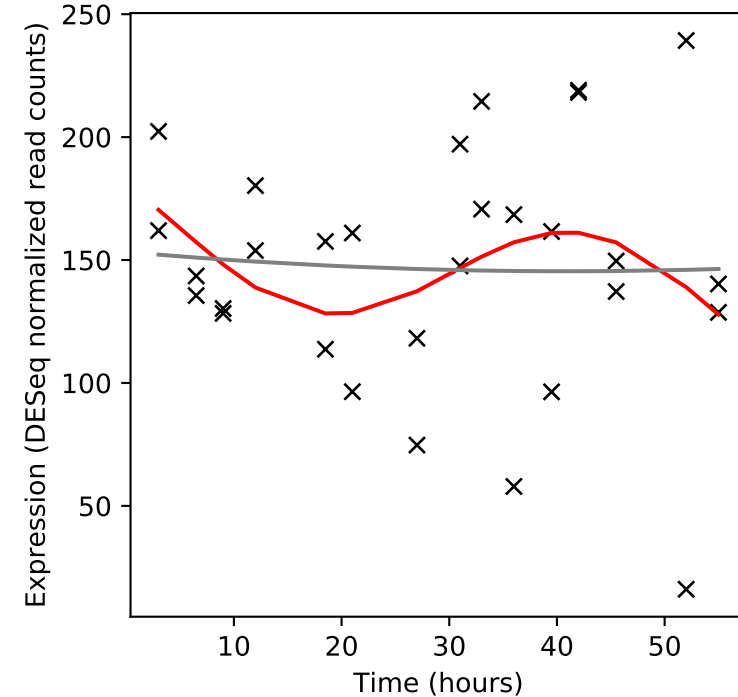

Rv1524/-

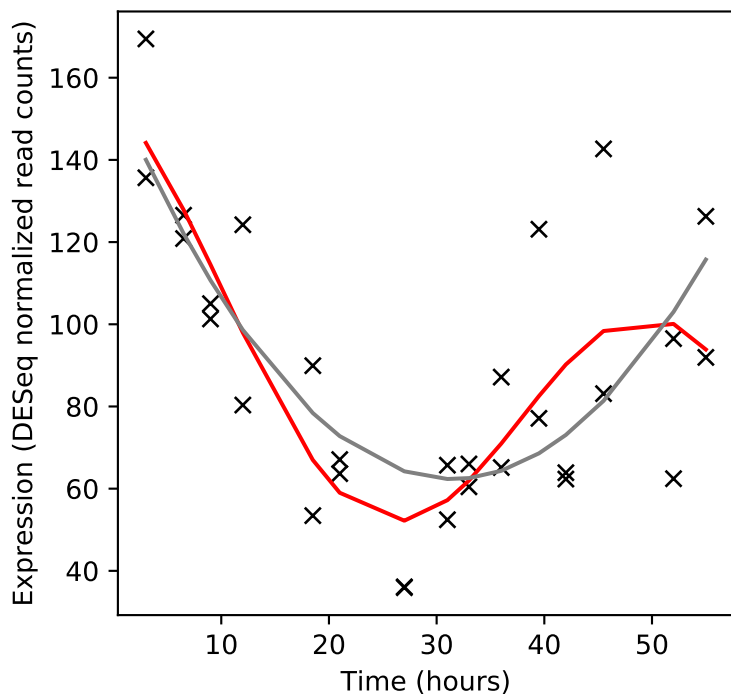

Rv1525/wbbL2

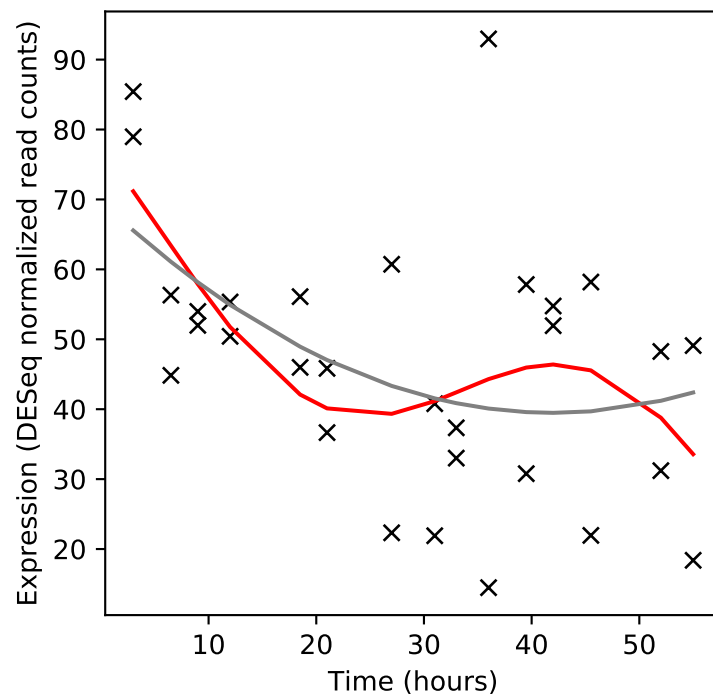

Rv1526c/-

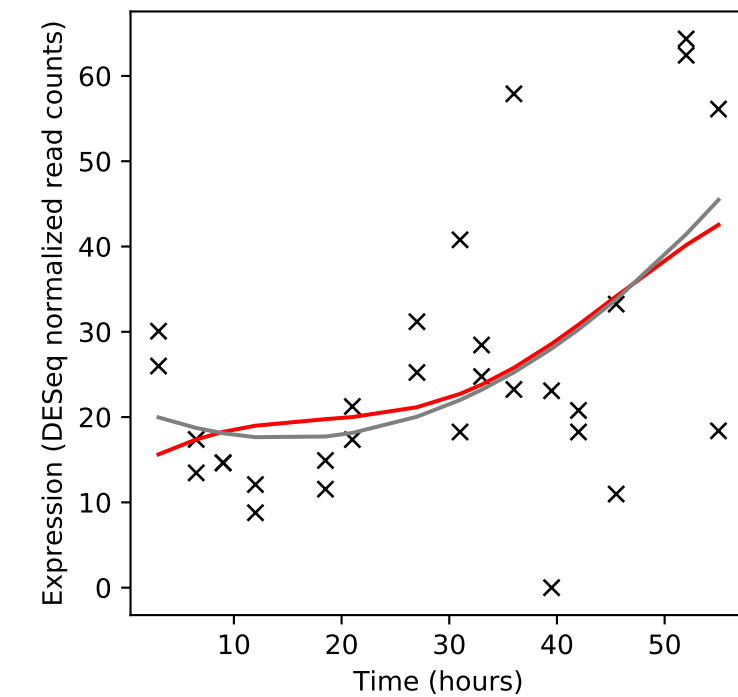

Rv1527c/pks5

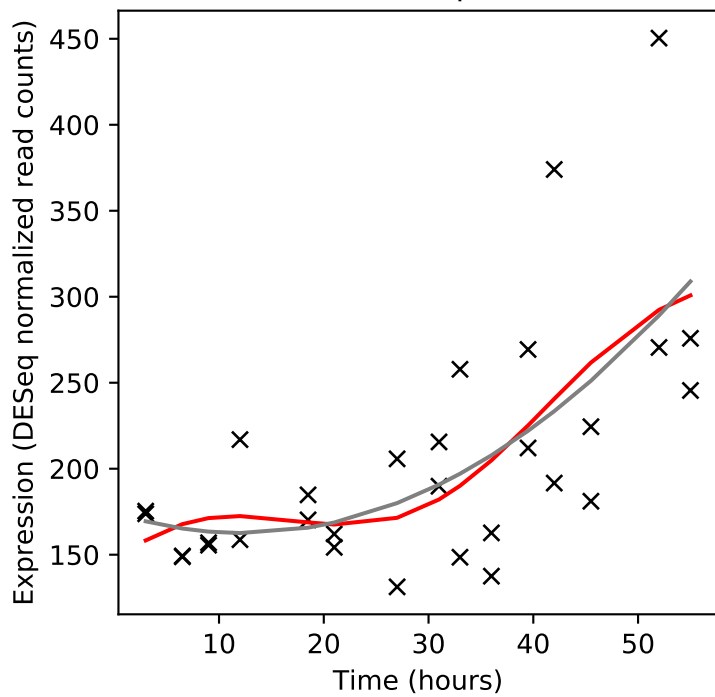

Rv1528c/papA4

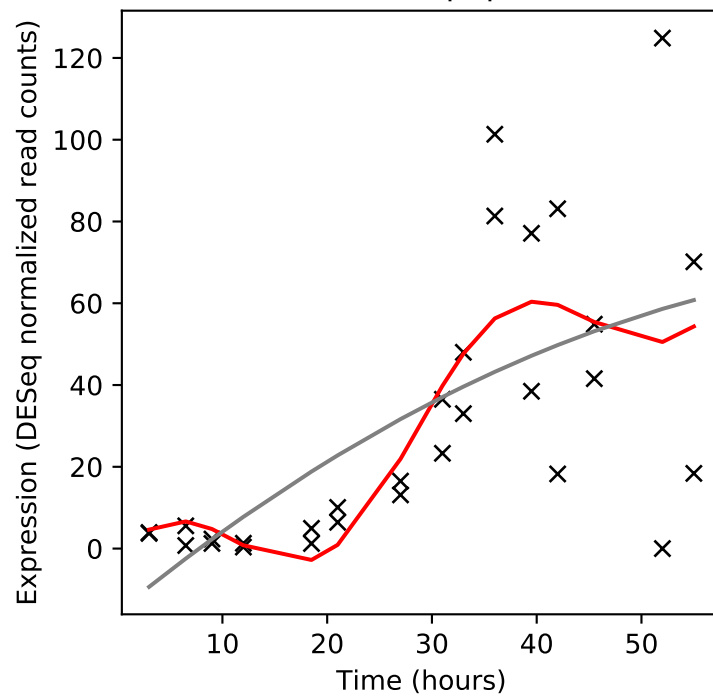

Rv1529/fadD24

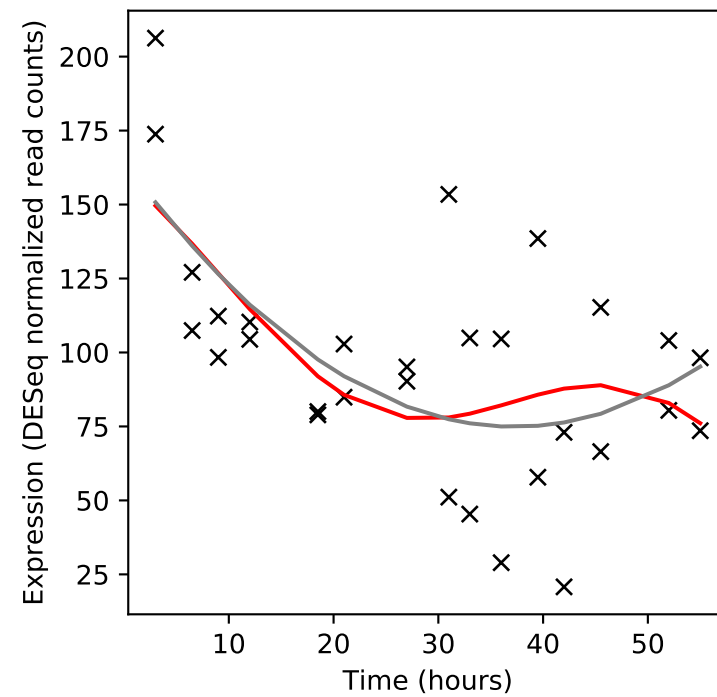

Rv1530/adh

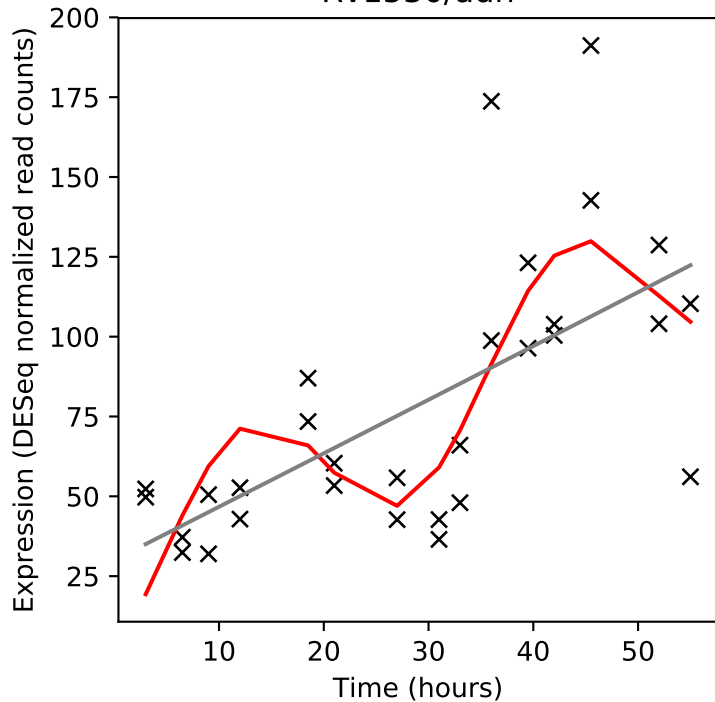

Rv1531/-

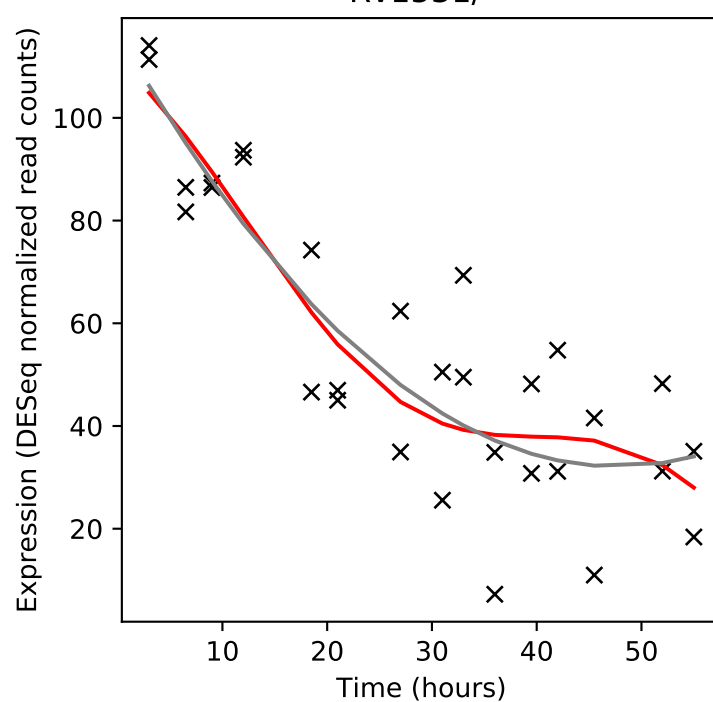

Rv1532c/-

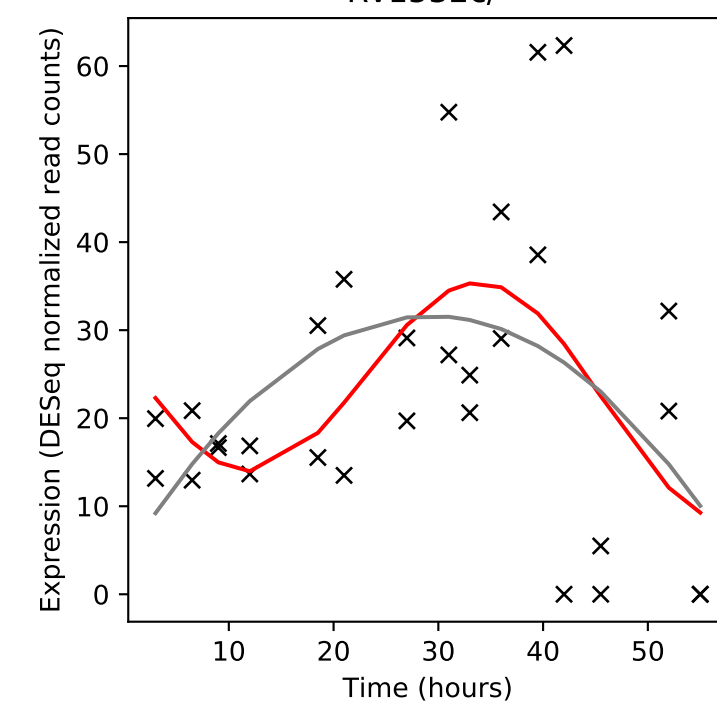

Rv1533/-

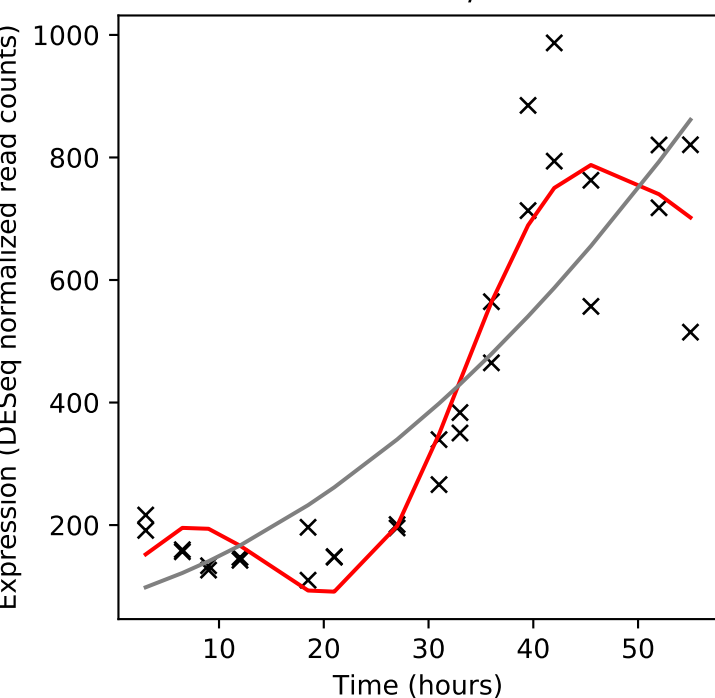

Rv1534/-

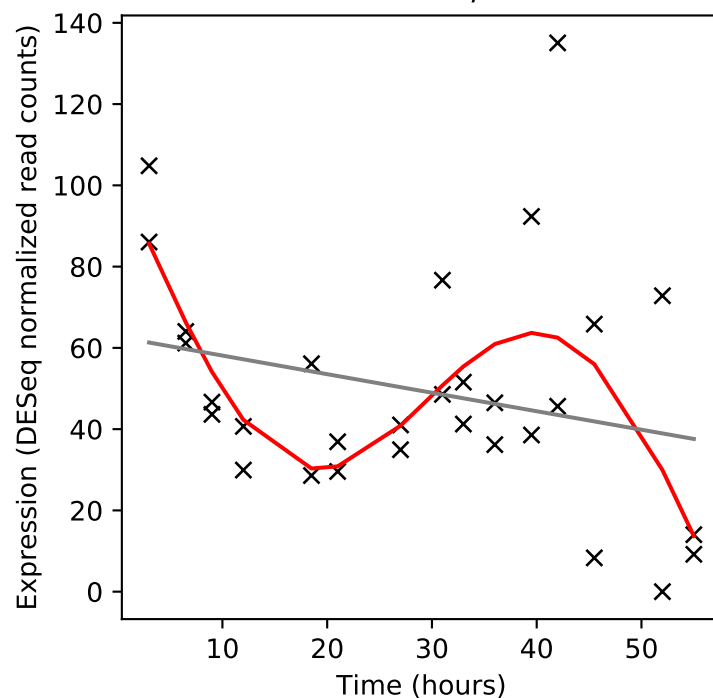

Rv1535/-

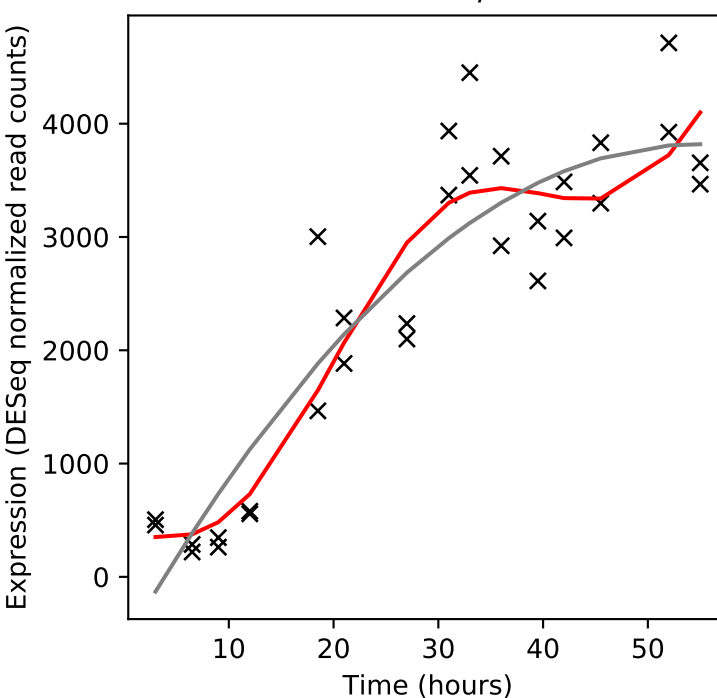

Rv1536/ileS

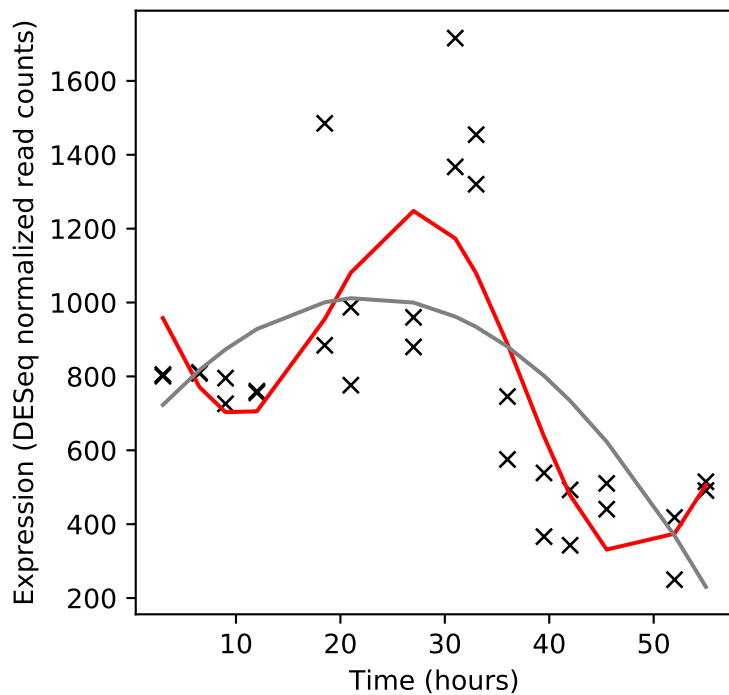

Rv1537/dinX

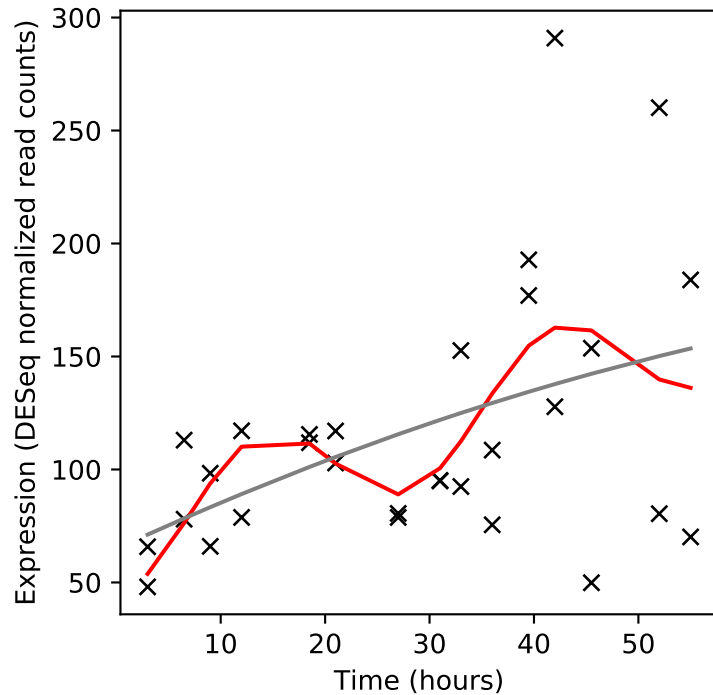

Rv1538c/ansA

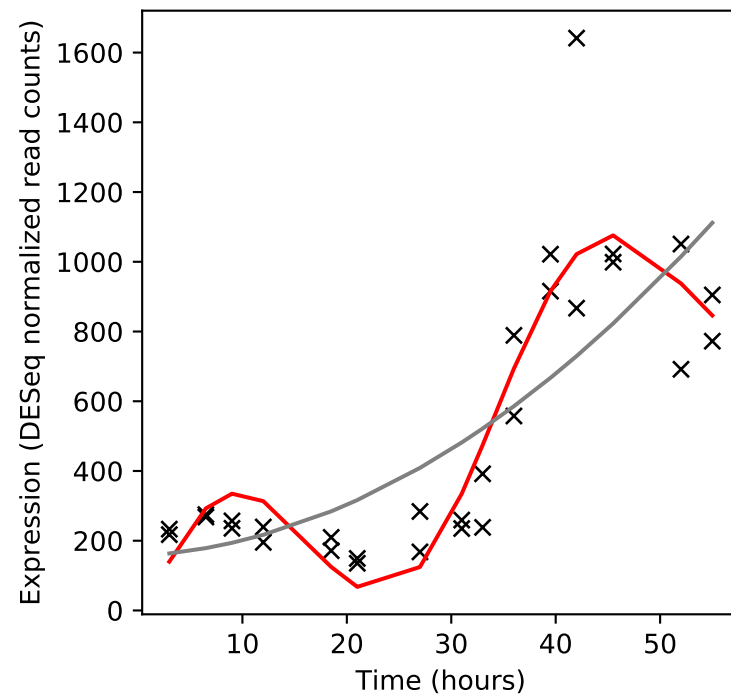

Rv1539/lspA

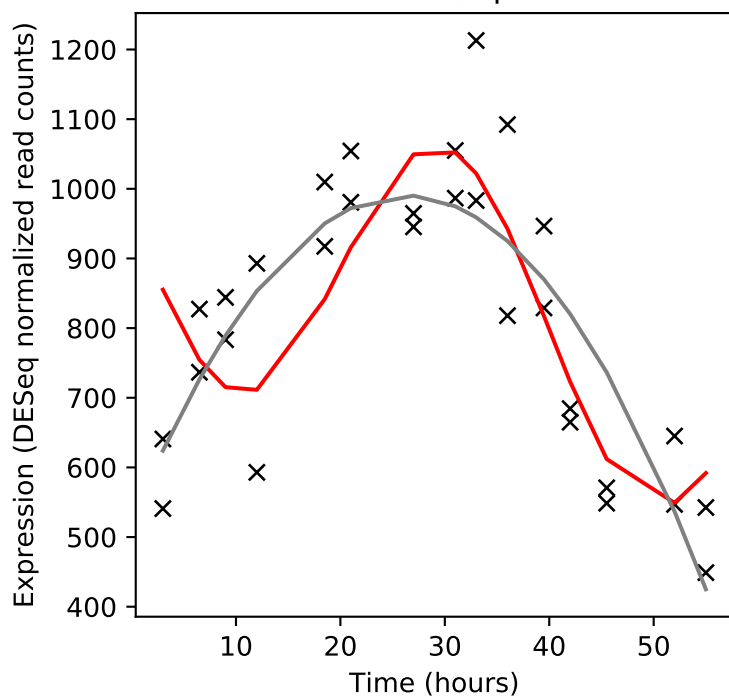

Rv1540/-

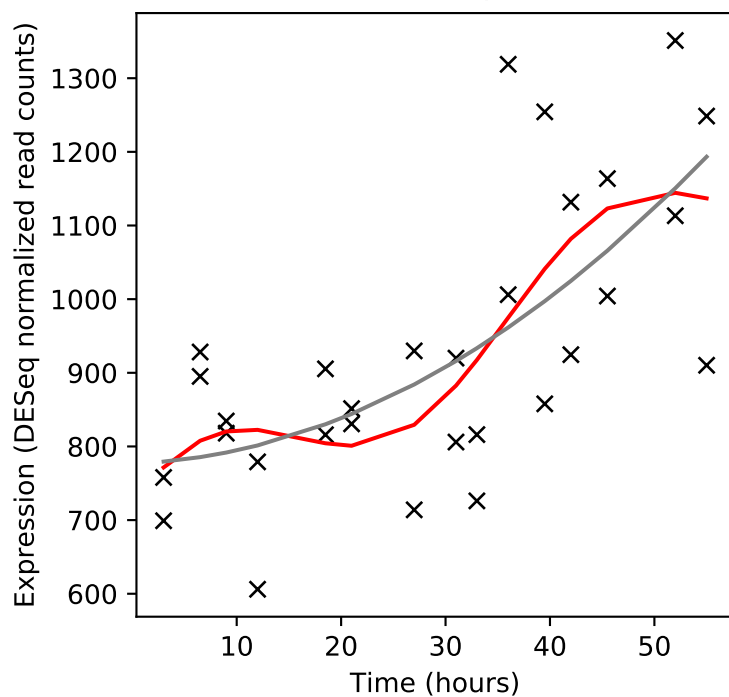

Rv1541c/lprI

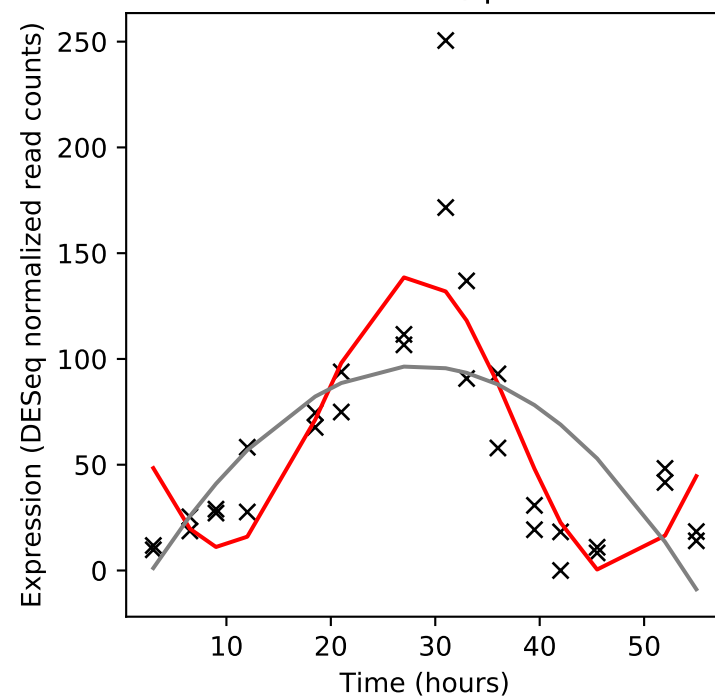

Rv1542c/glbN

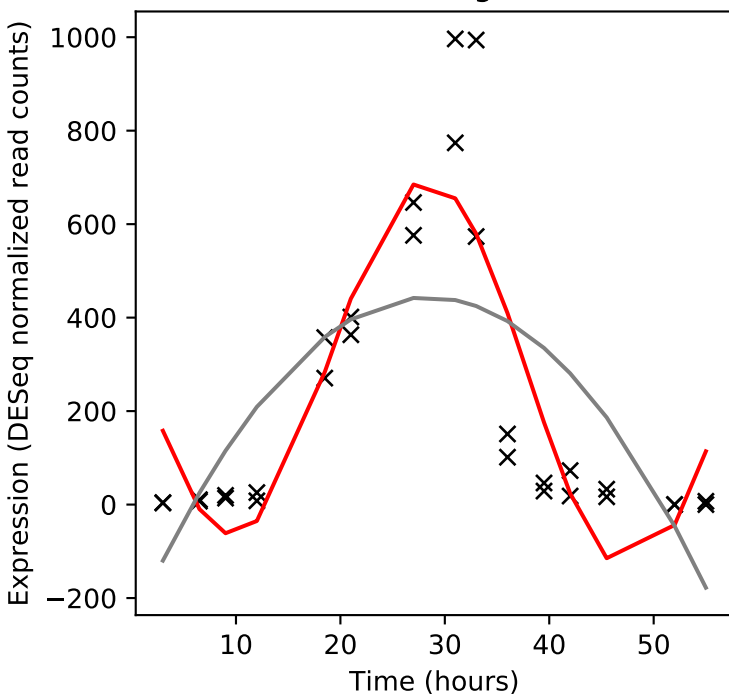

Rv1543/-

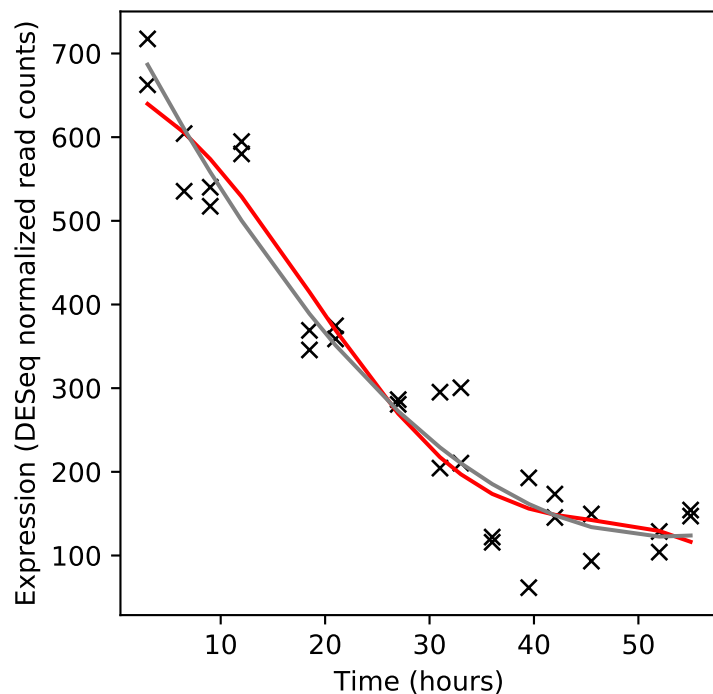

Rv1544/-

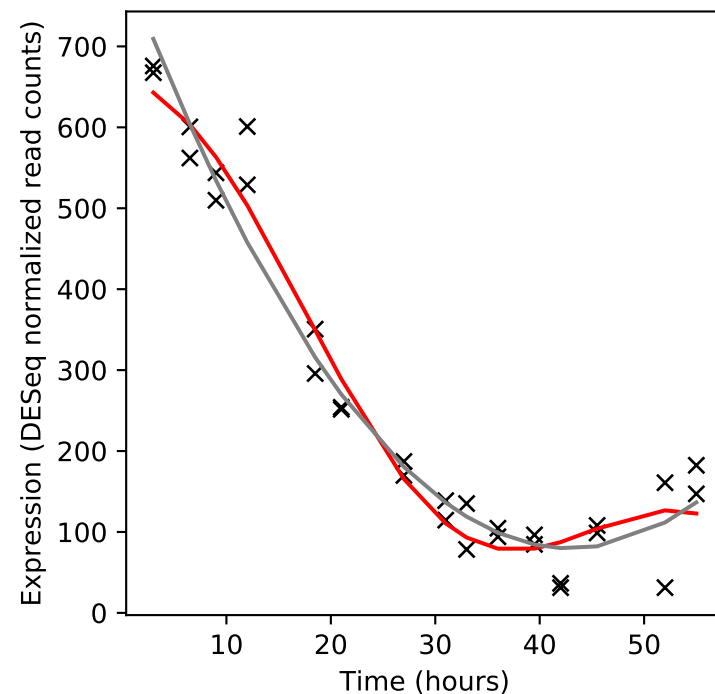



Rv1545/-

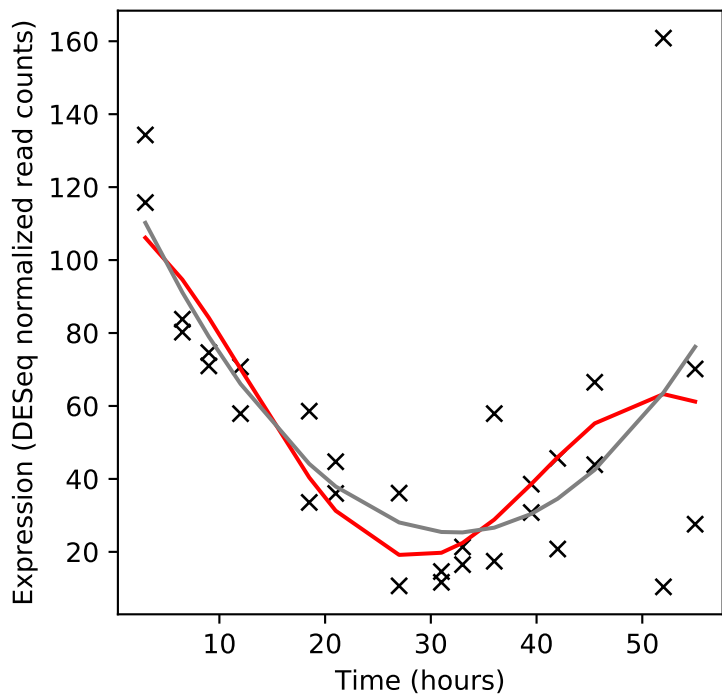

Rv1546/-

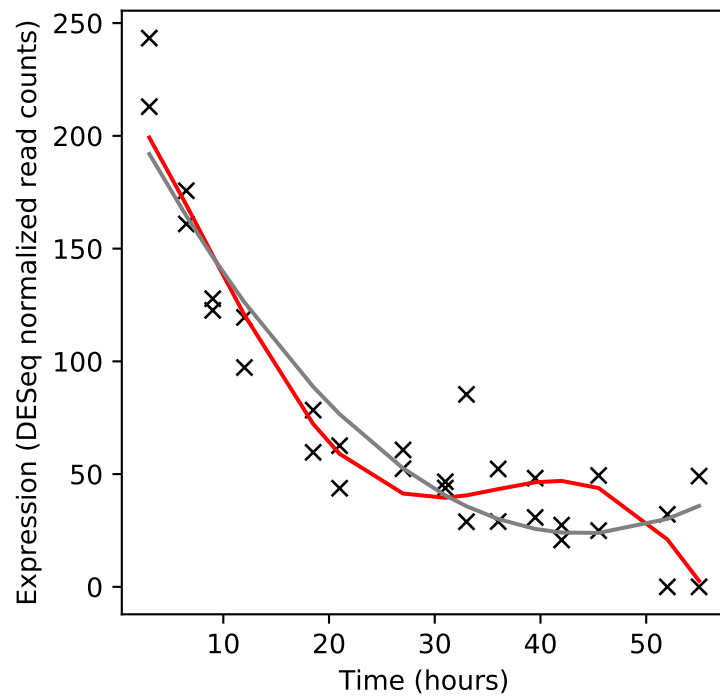

Rv1547/dnaE1

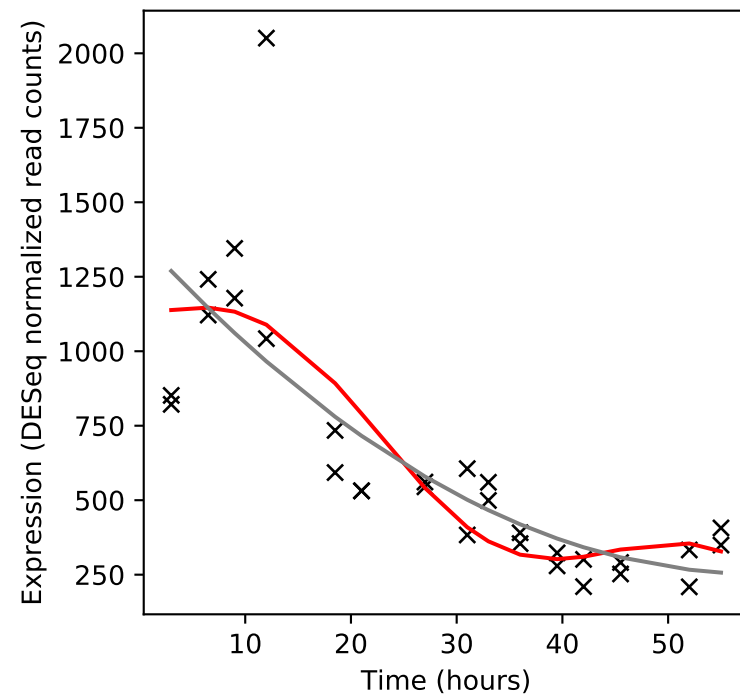

Rv1548c/PPE21

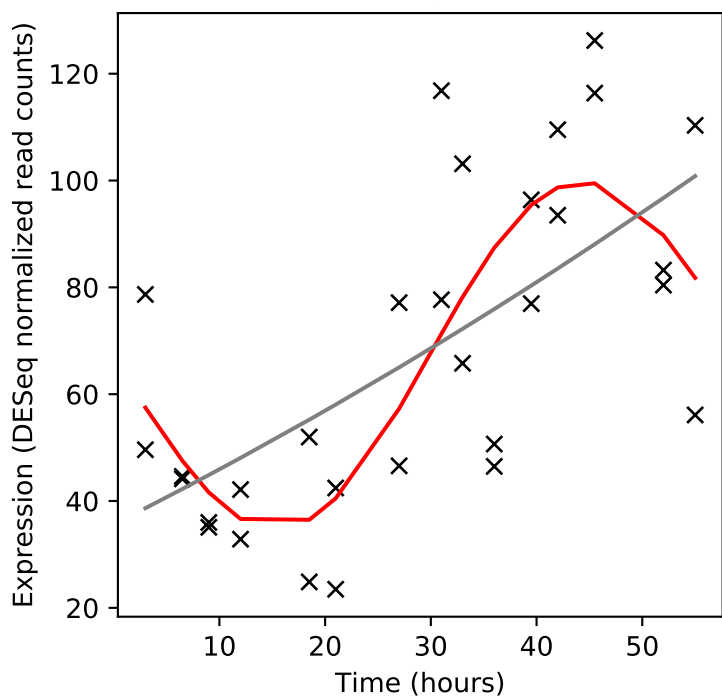

Rv1549/fadD11.1

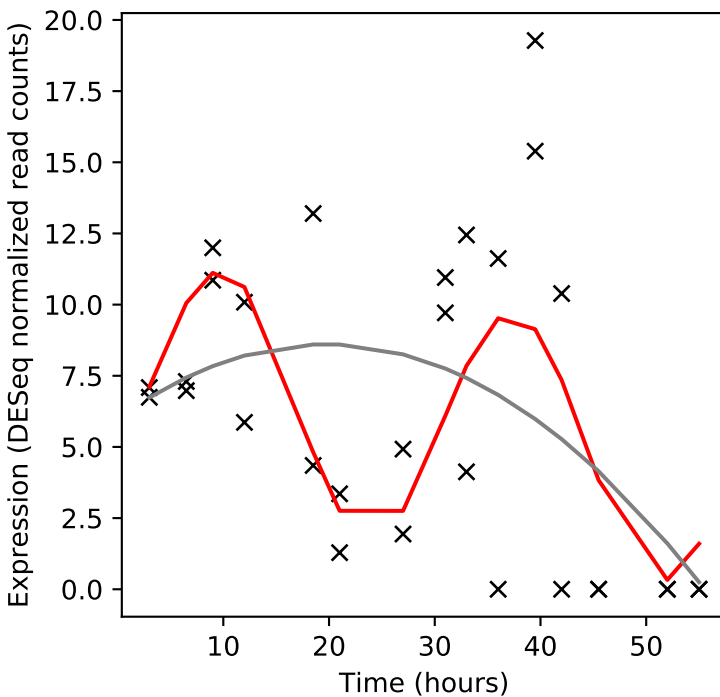

Rv1550/fadD11

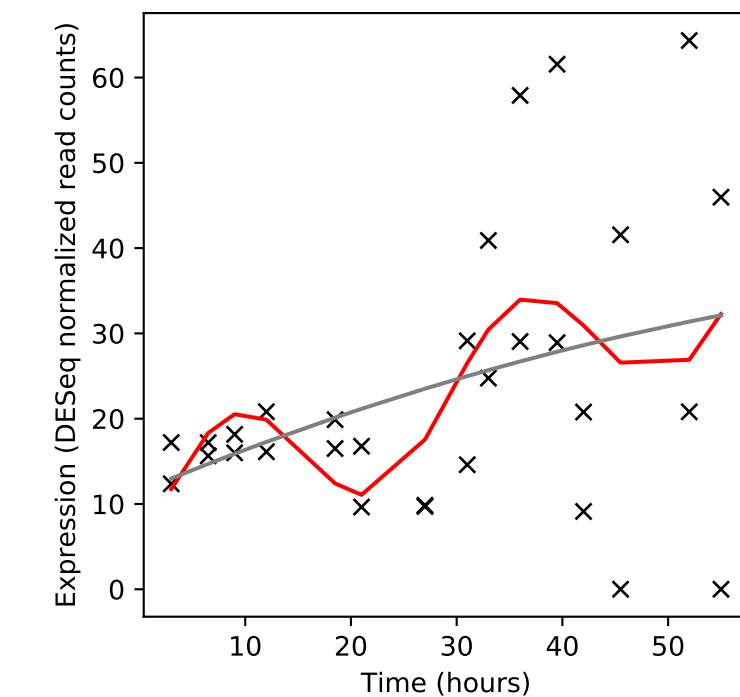

Rv1551/plsB1

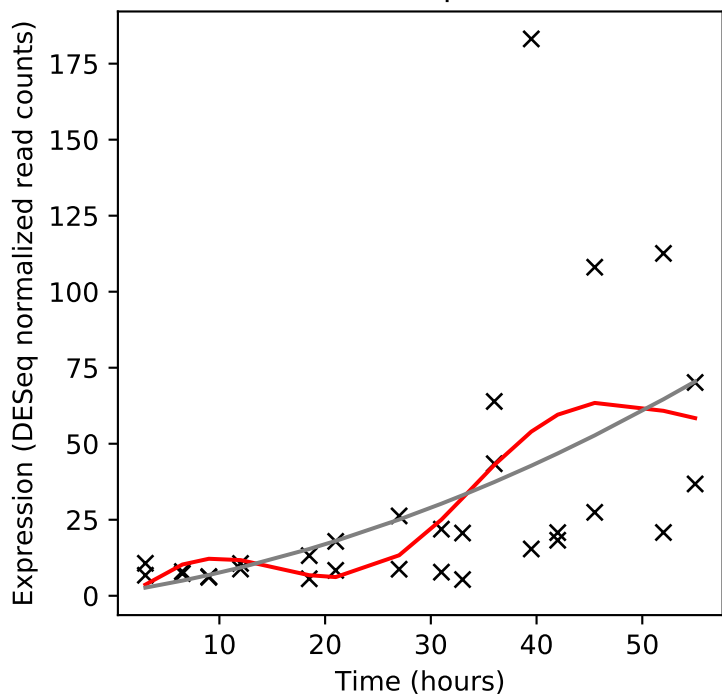

Rv1552/frdA

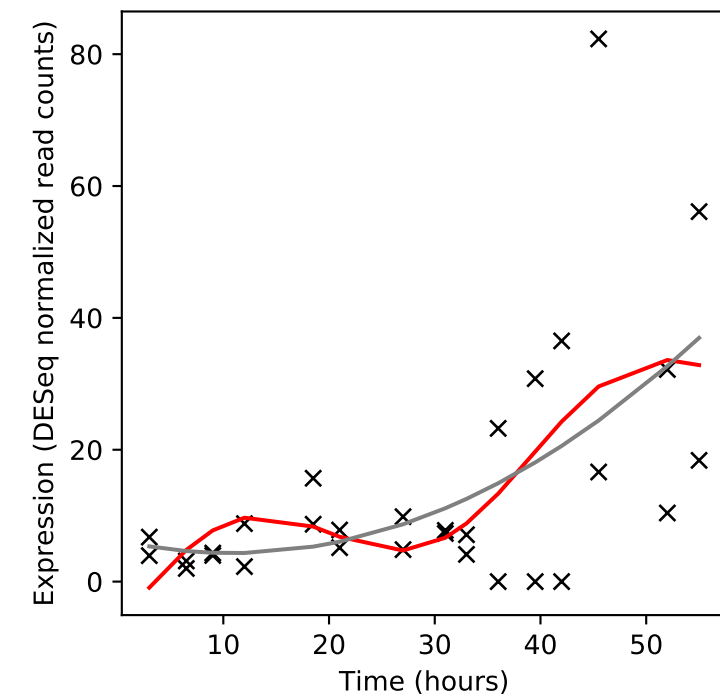

Rv1553/frdB

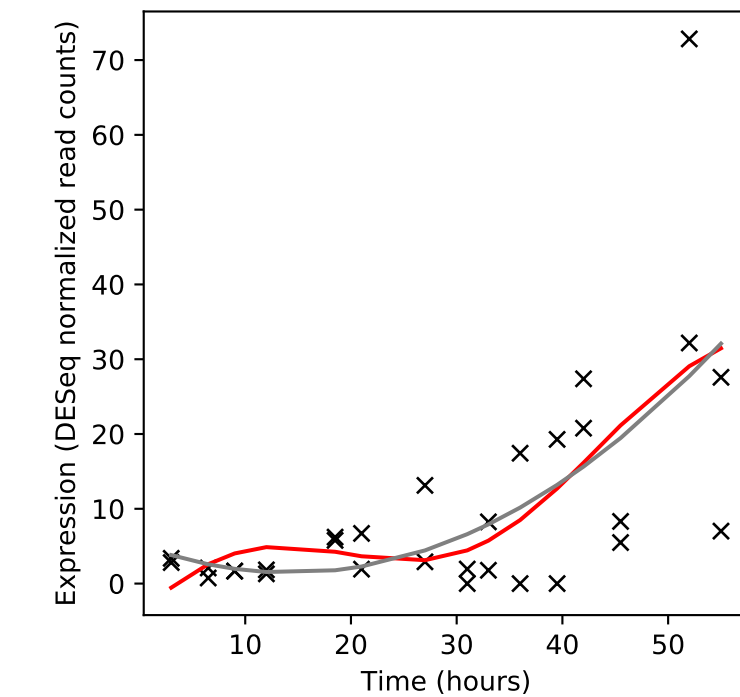

Rv1554/frdC

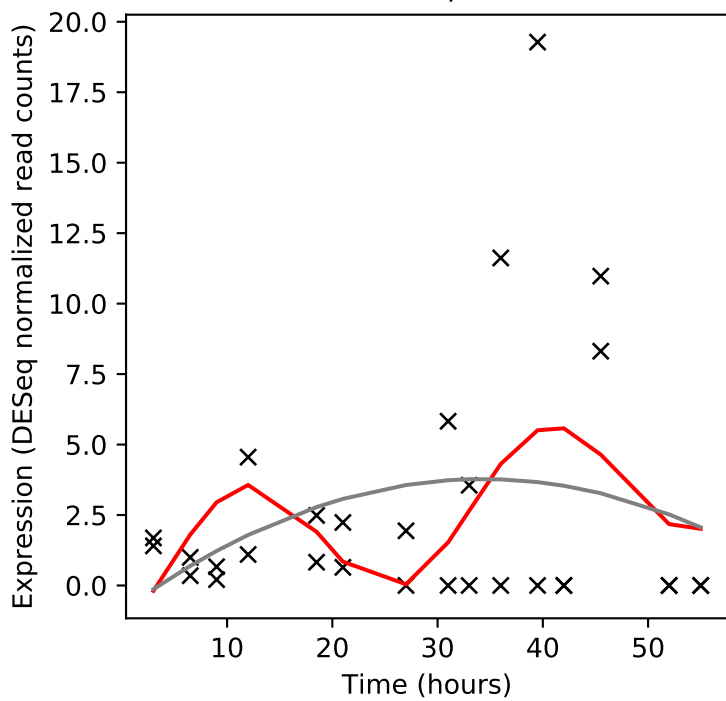

Rv1555/frdD

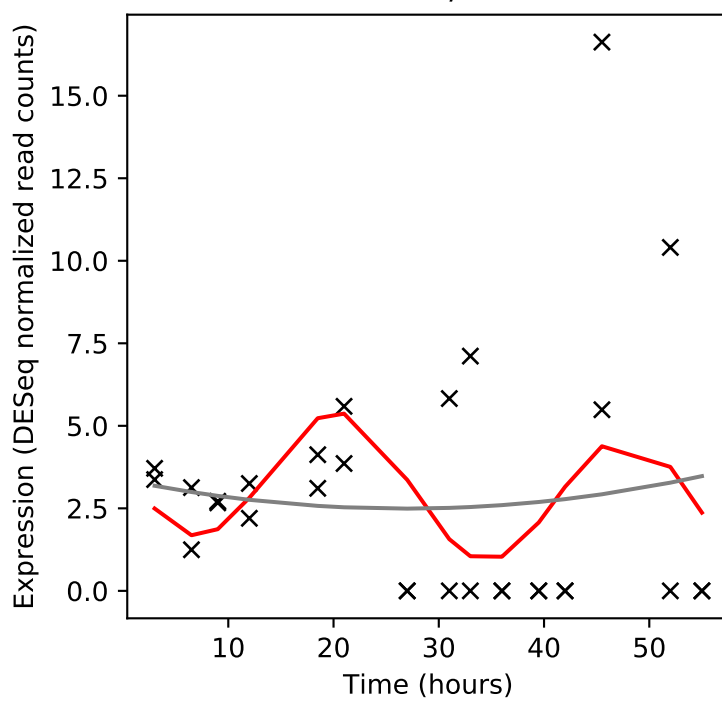

Rv1556/-

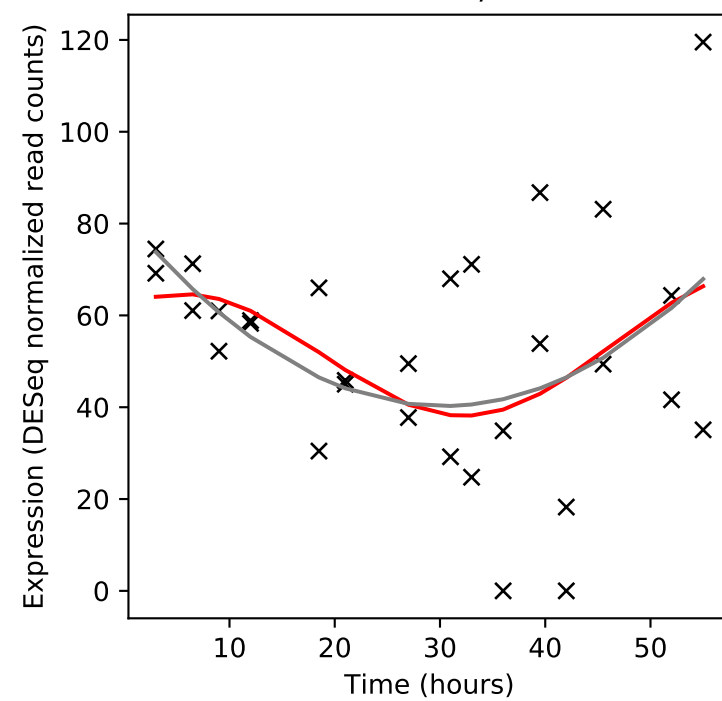

Rv1557/mmpL6

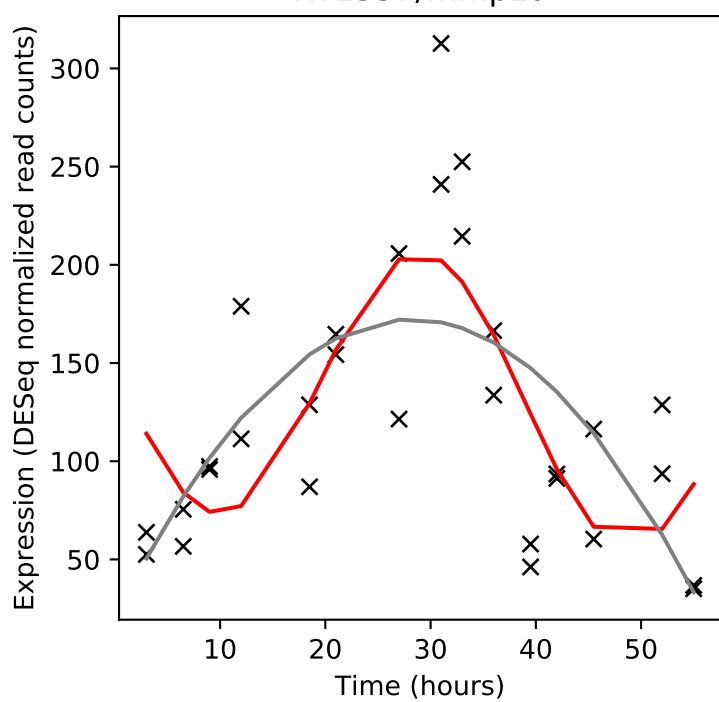

Rv1558/-

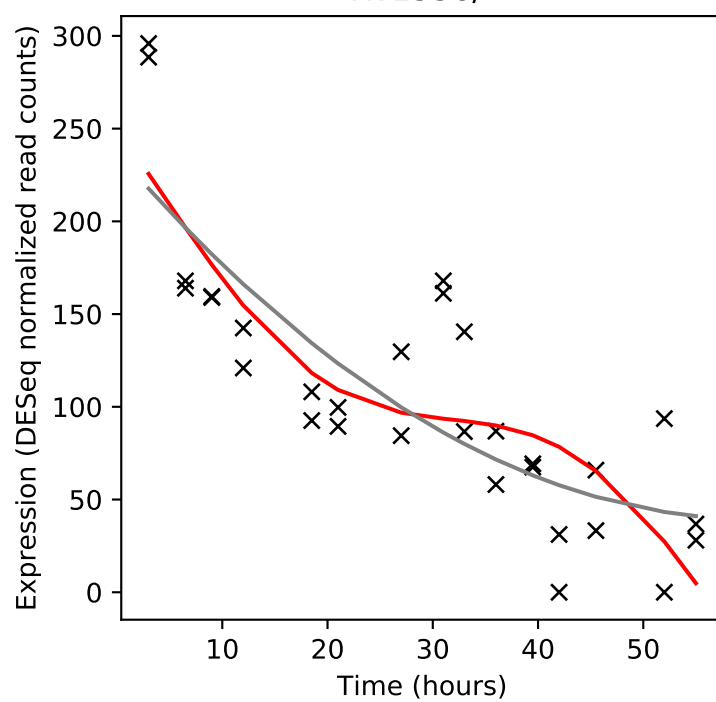

Rv1559/ilvA

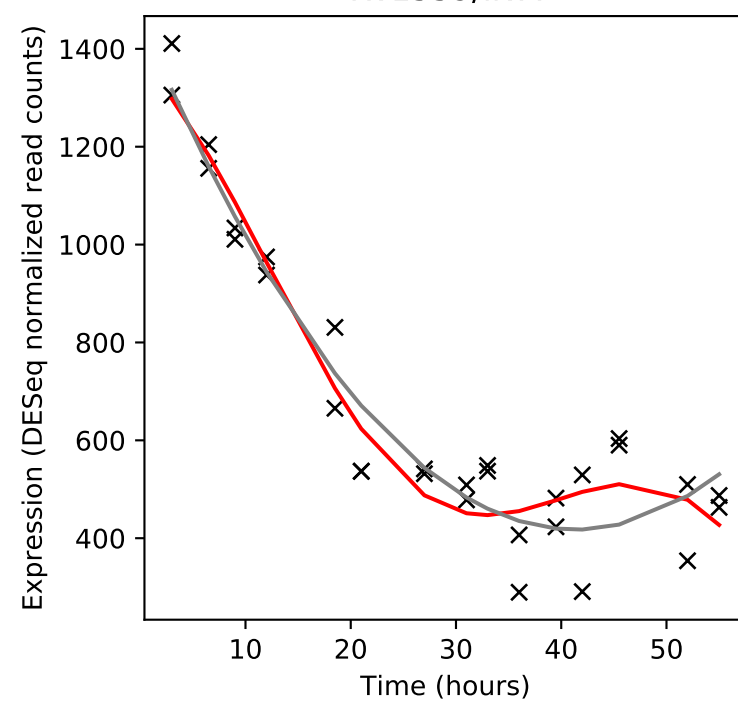

Rv1560/vapB11

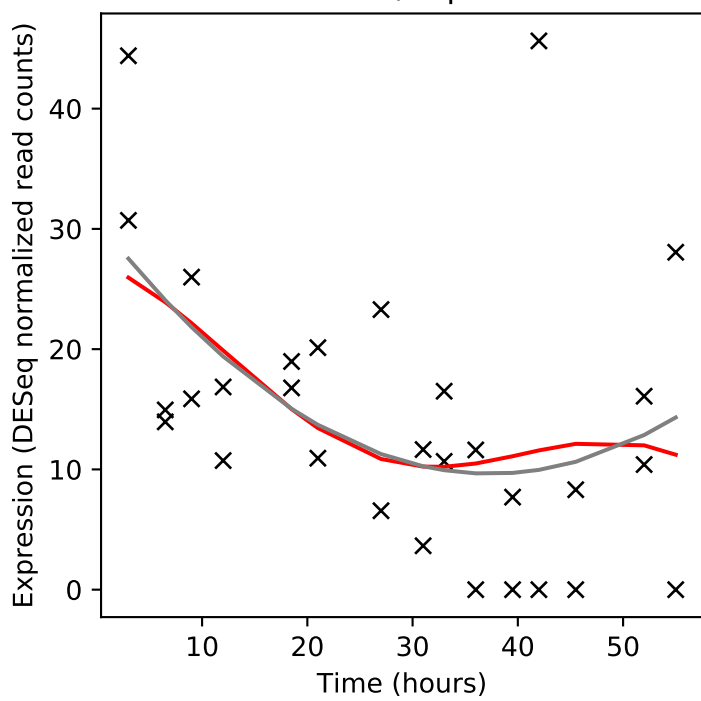

Rv1561/vapC11

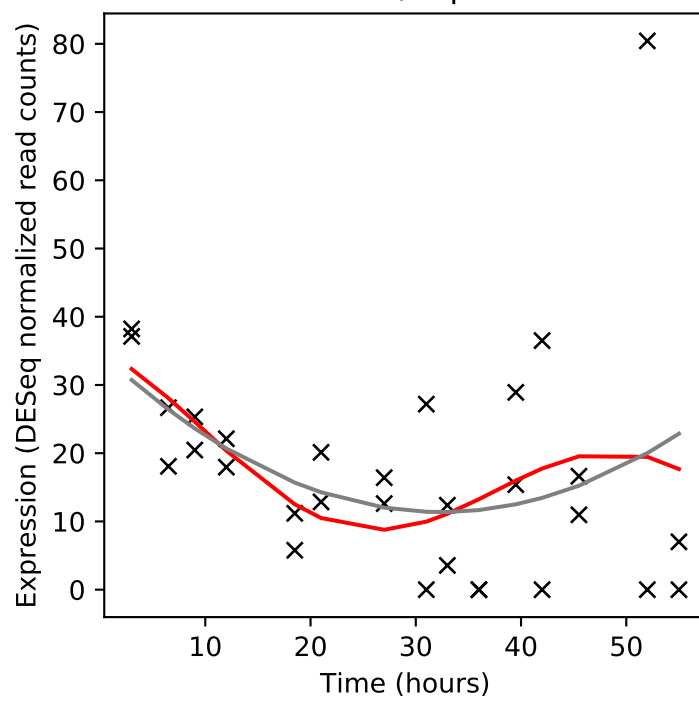

Rv1562c/treZ

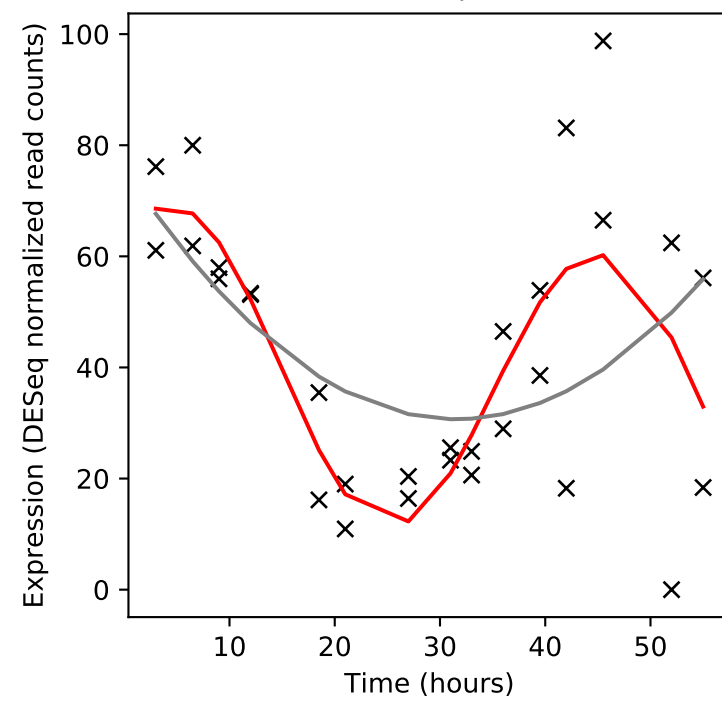

Rv1563c/treY

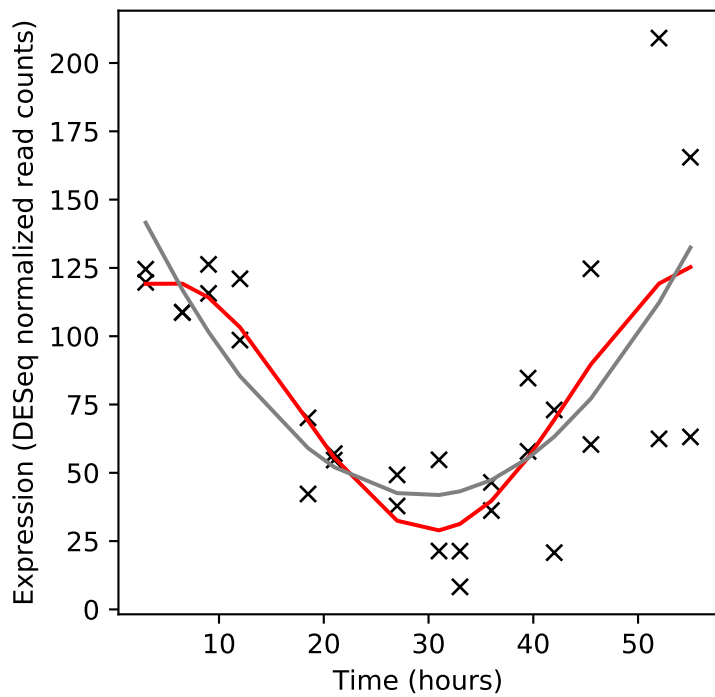

Rv1564c/treX

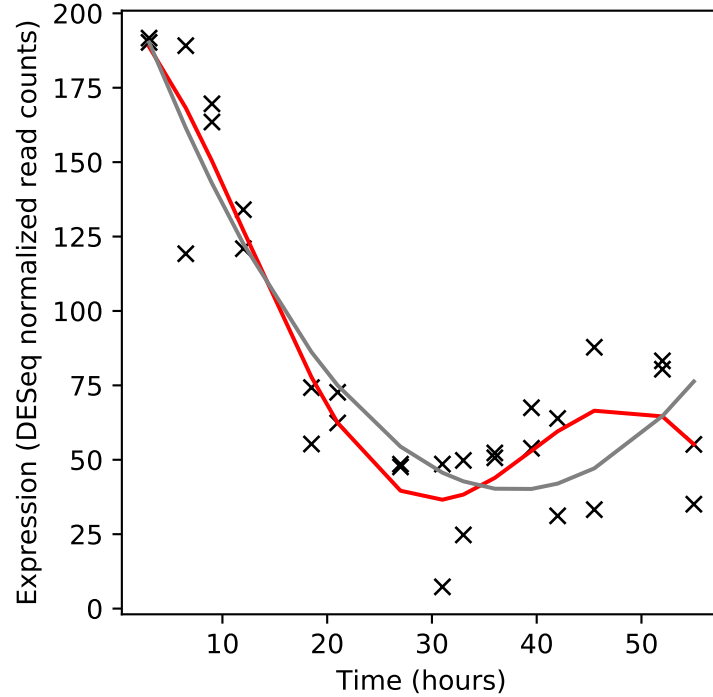

Rv1565c/-

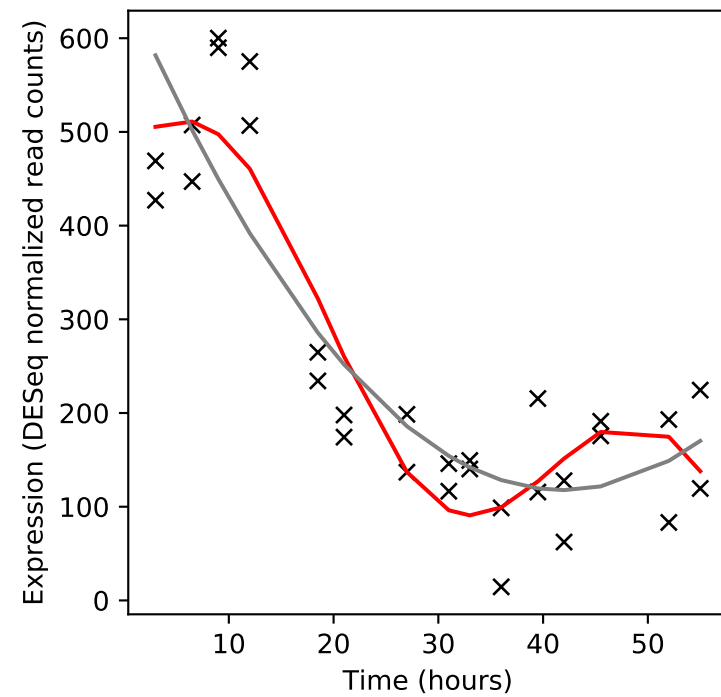

Rv1566c/-

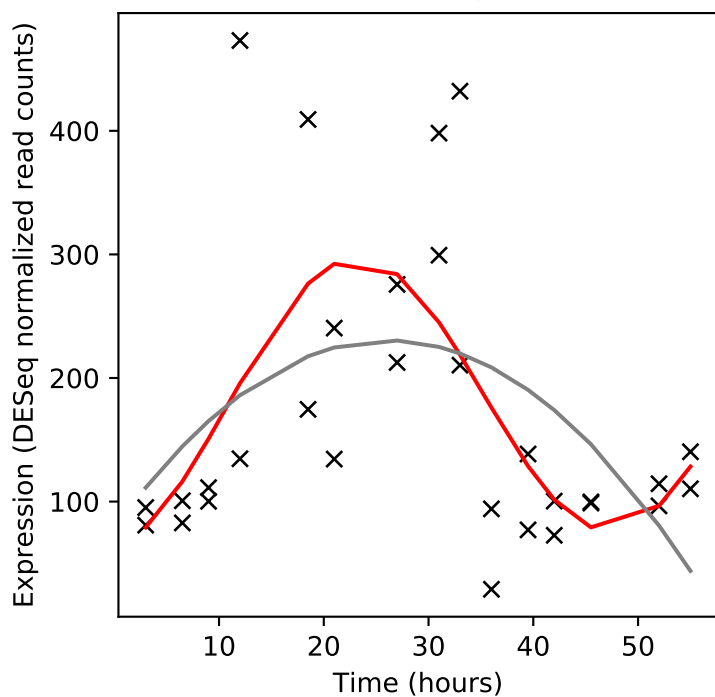

Rv1567c/-

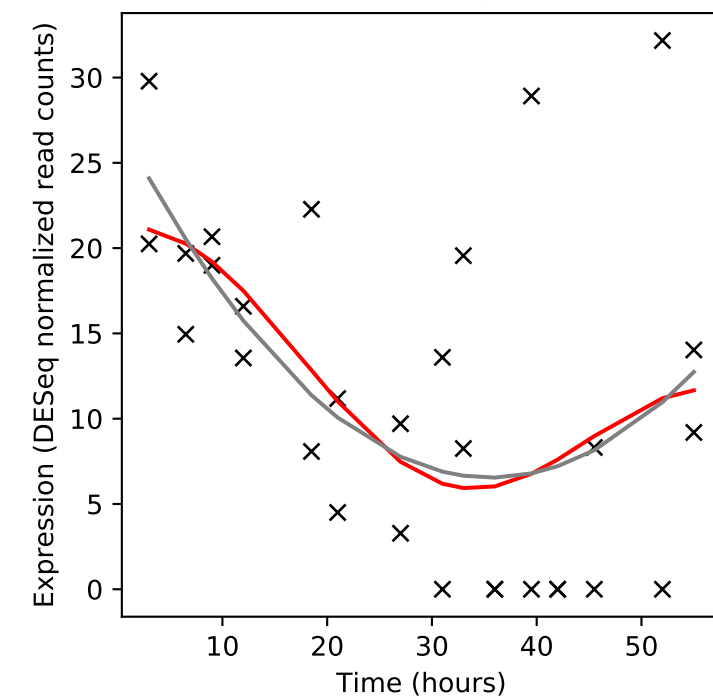

Rv1568/bioA

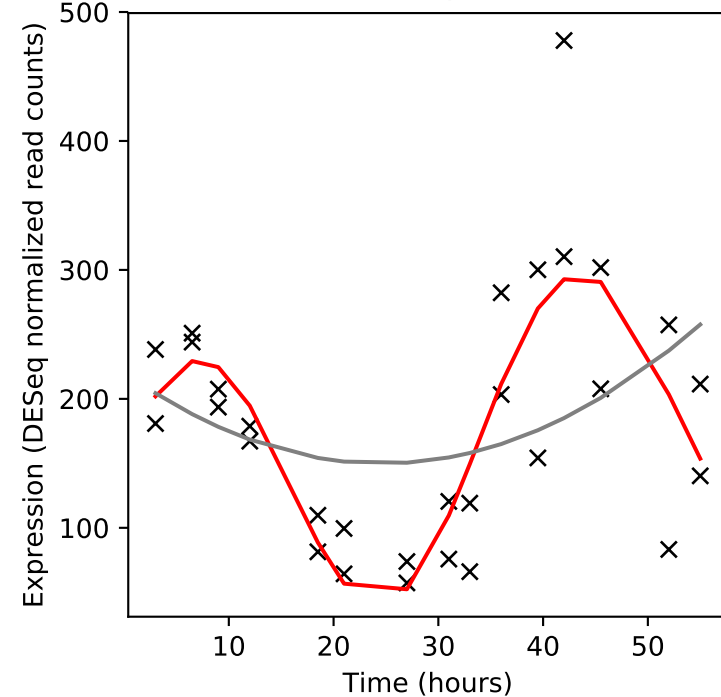

Rv1569/bioF1

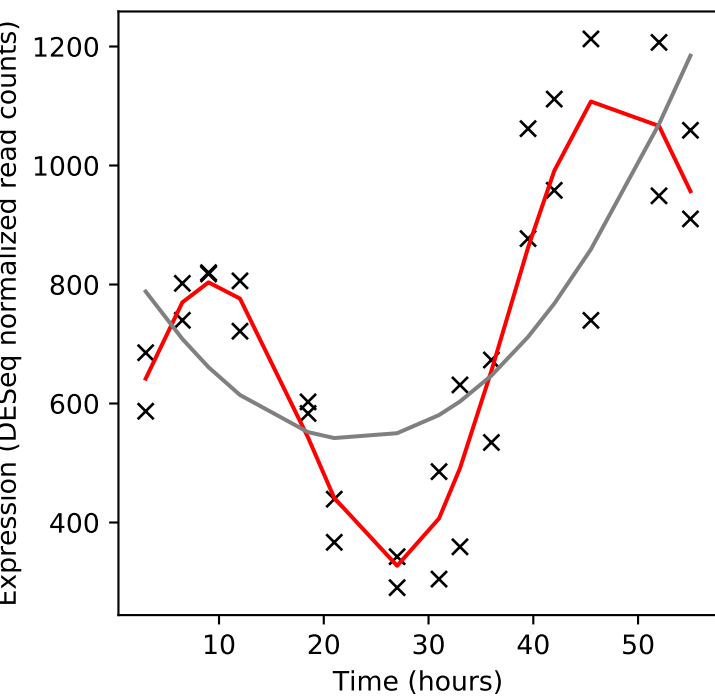

Rv1570/bioD

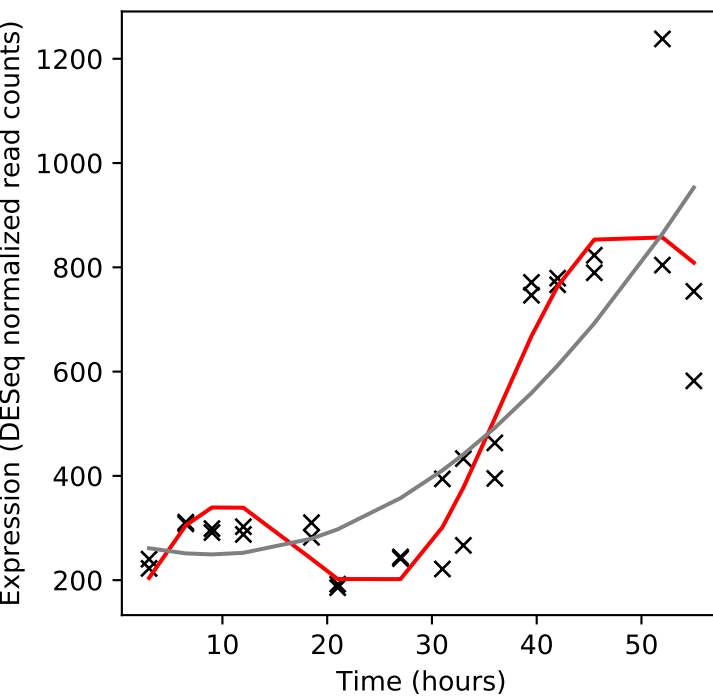

Rv1571/-

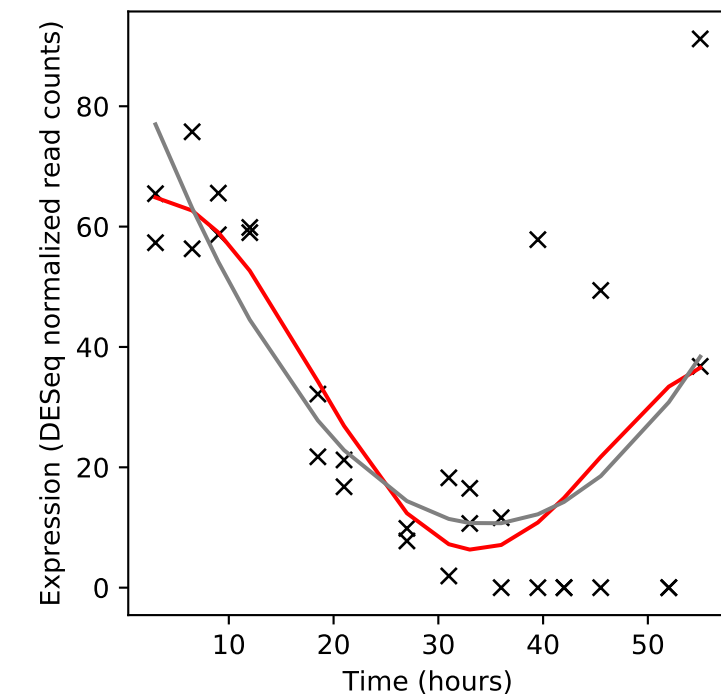

Rv1572c/-

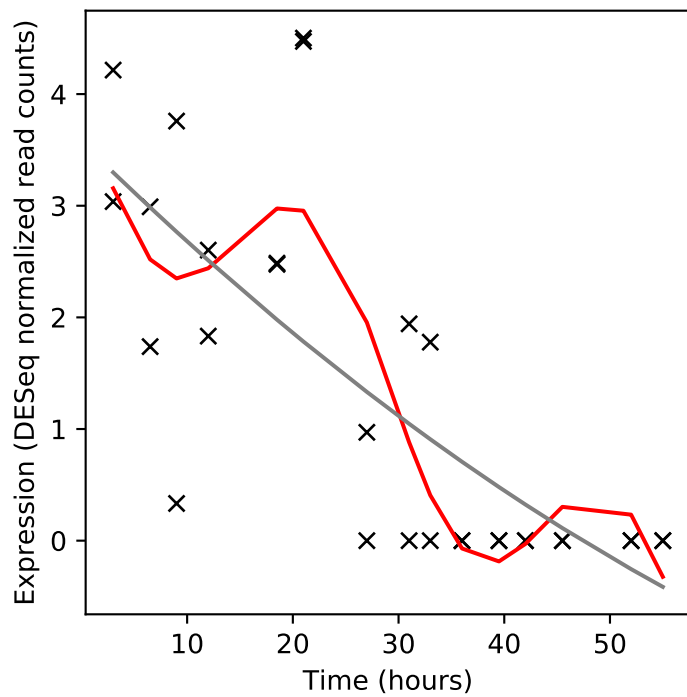

Rv1573/-

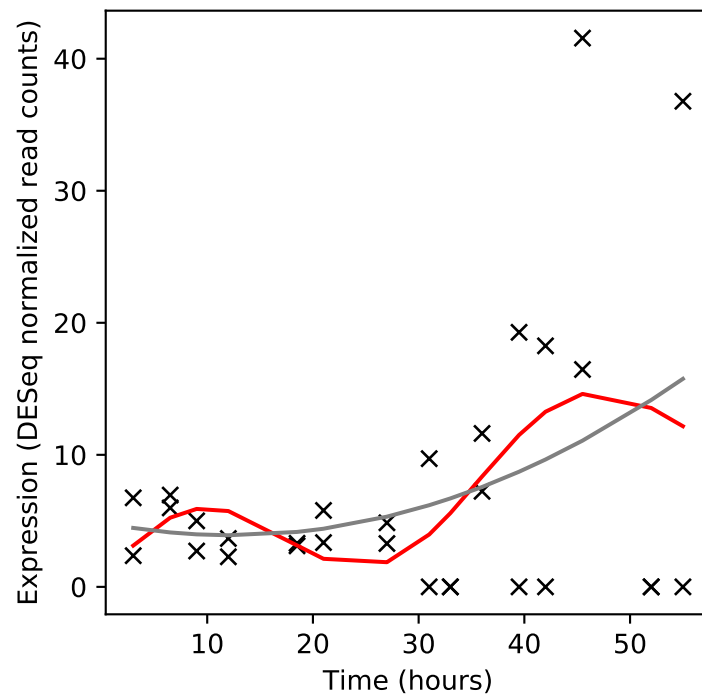

Rv1574/-

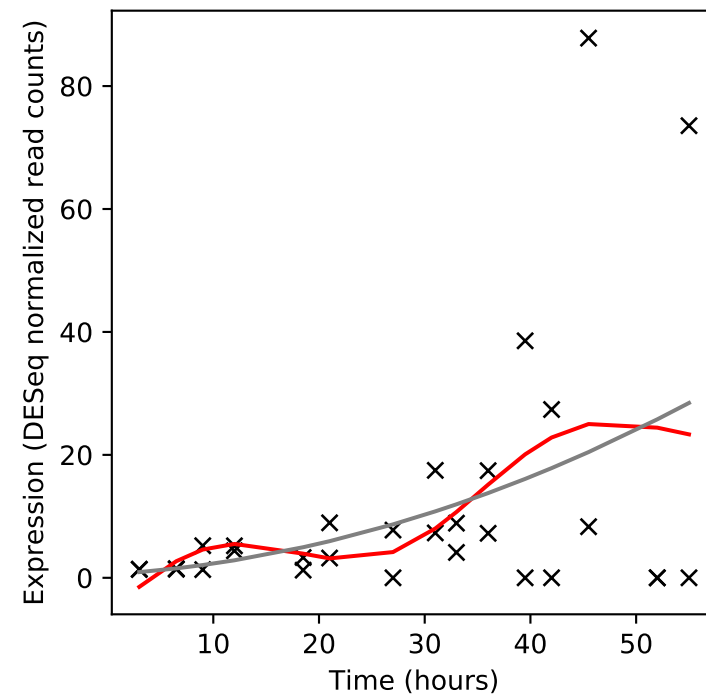

Rv1575/-

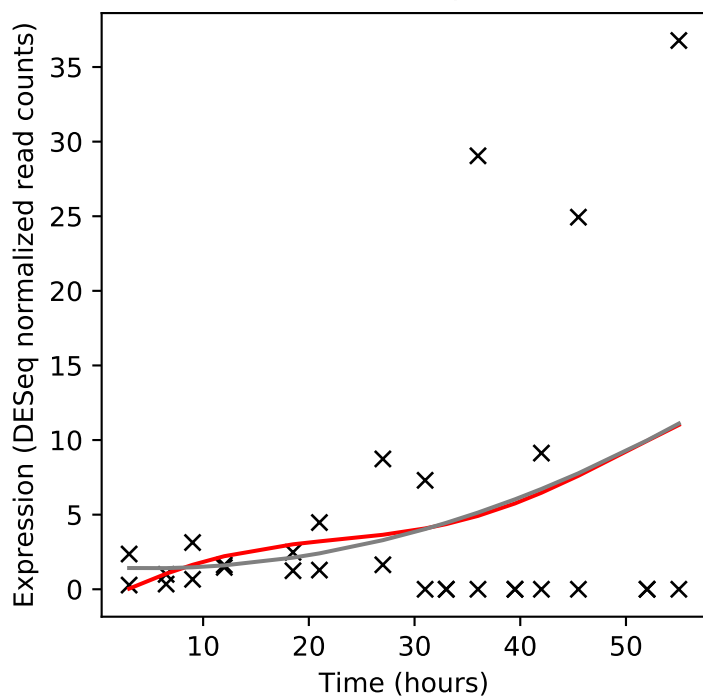

Rv1576c/-

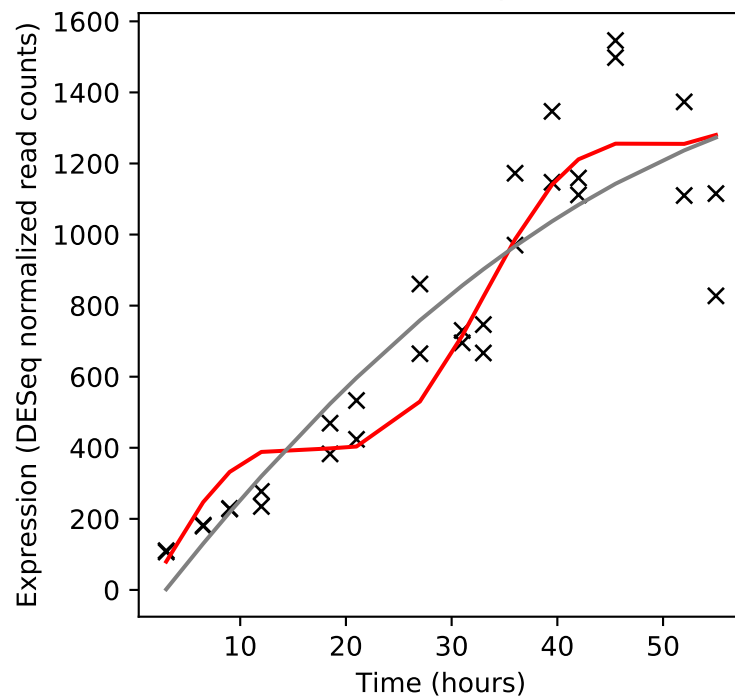

Rv1577c/-

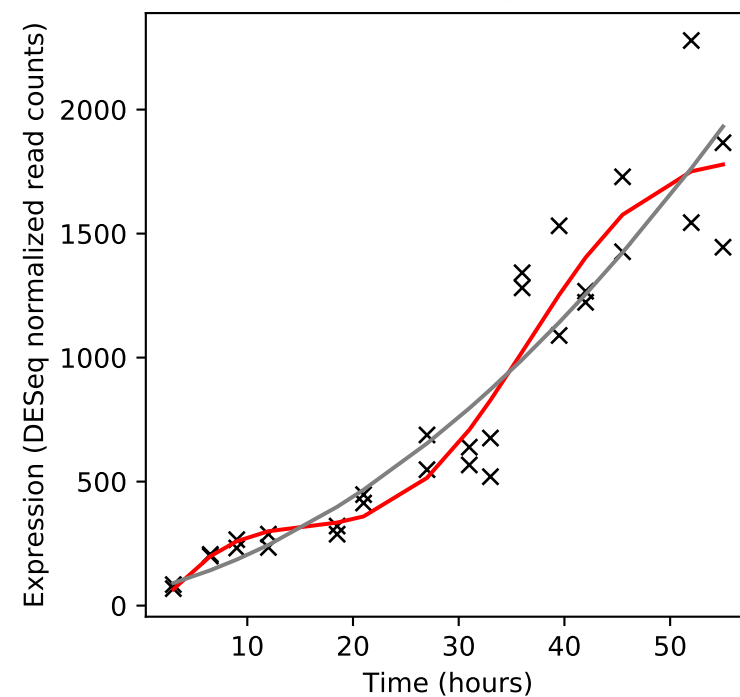

Rv1578c/-

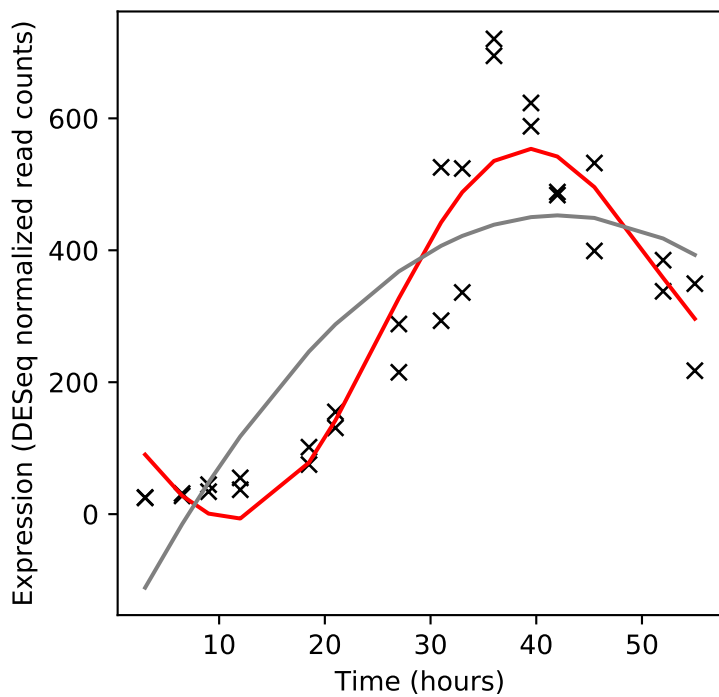

Rv1579c/-

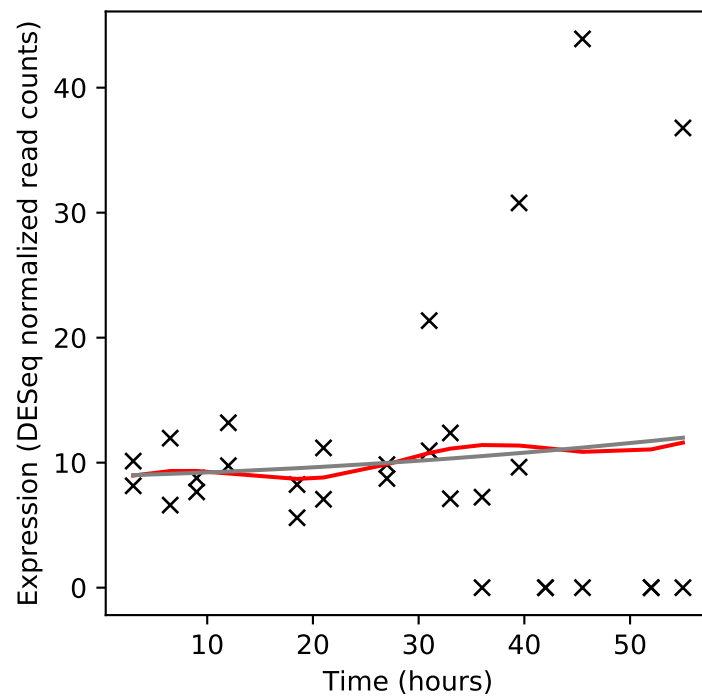

Rv1580c/-

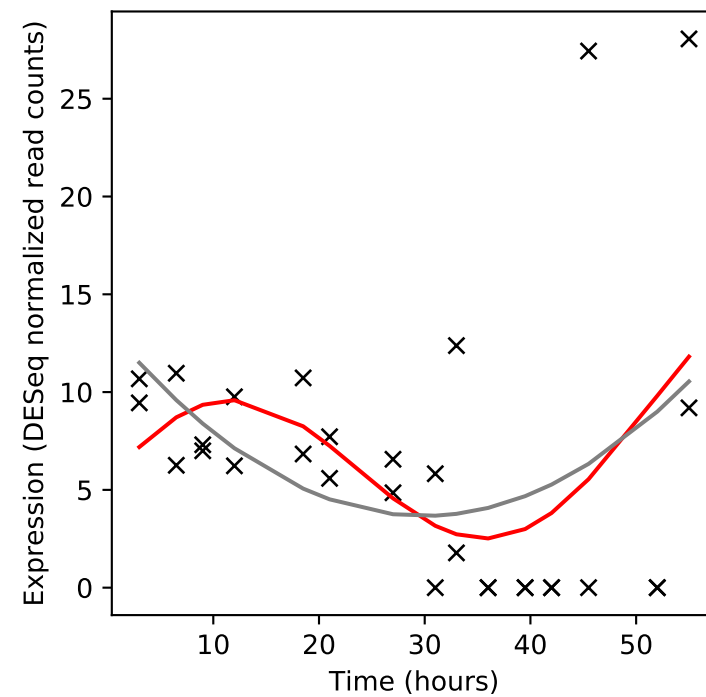

Rv1581c/-

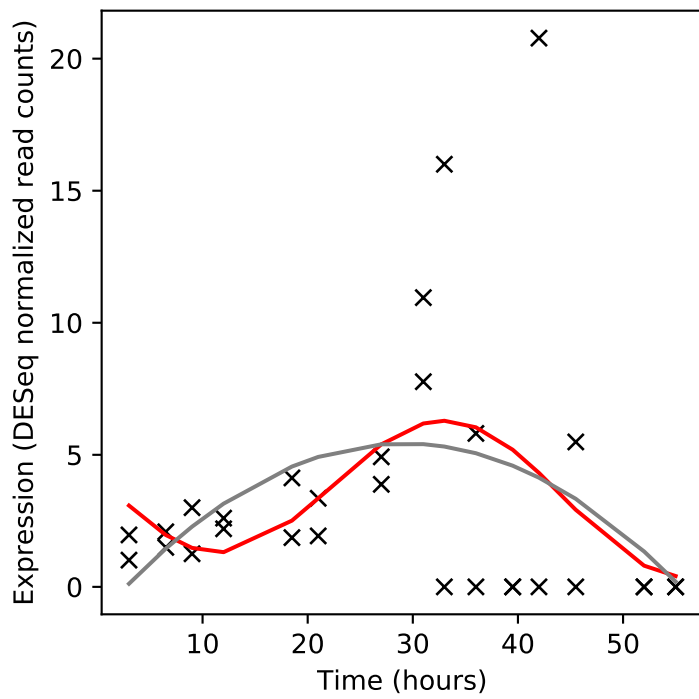

Rv1582c/-

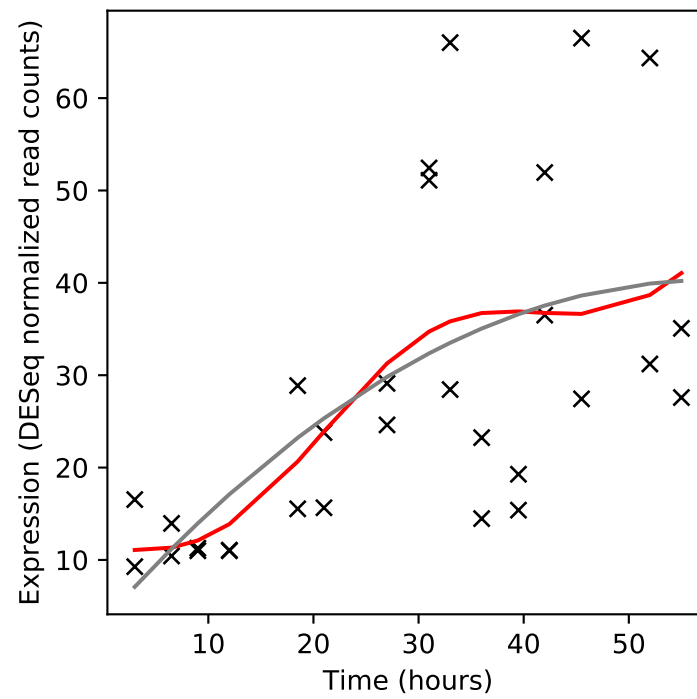

Rv1583c/-

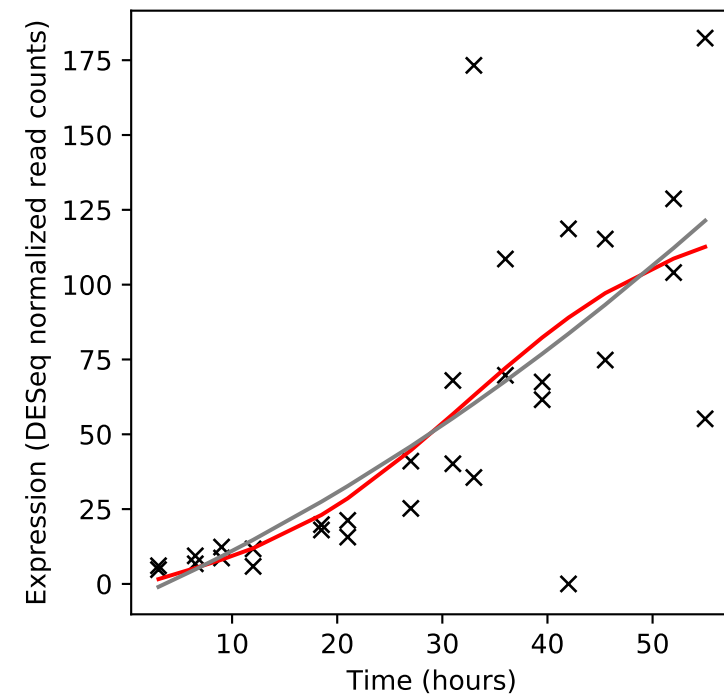

Rv1584c/-

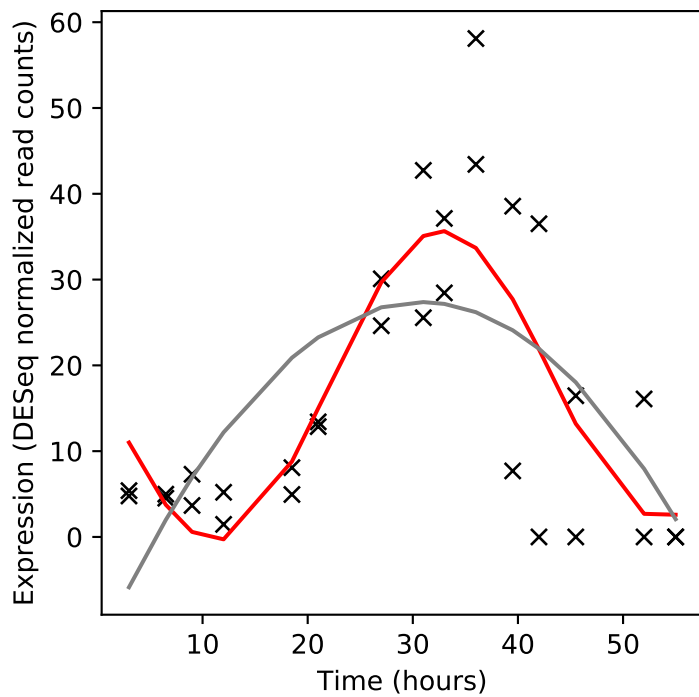

Rv1585c/-

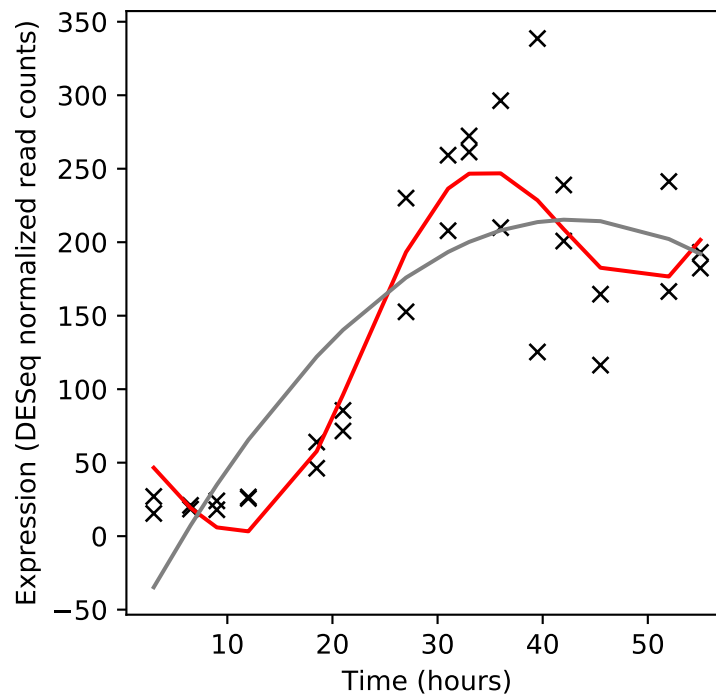

Rv1586c/-

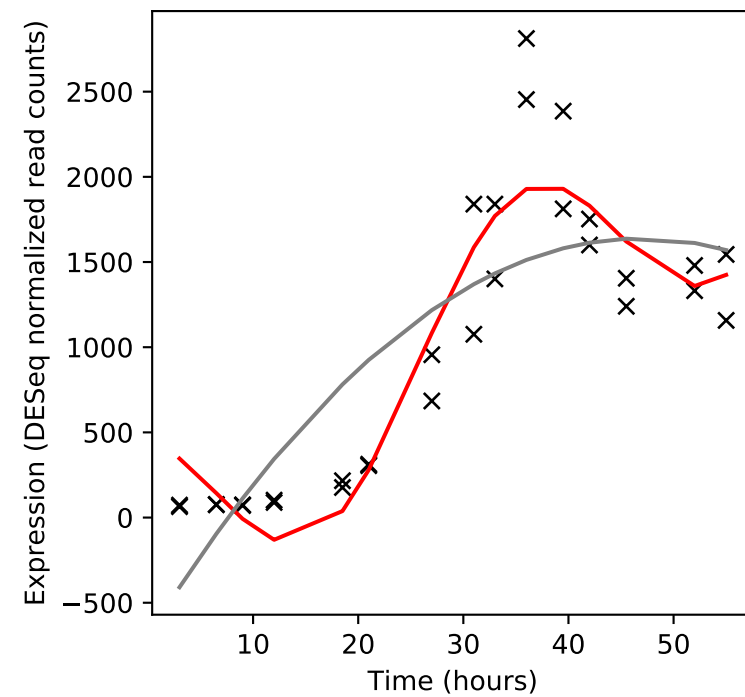

Rv1587c/-

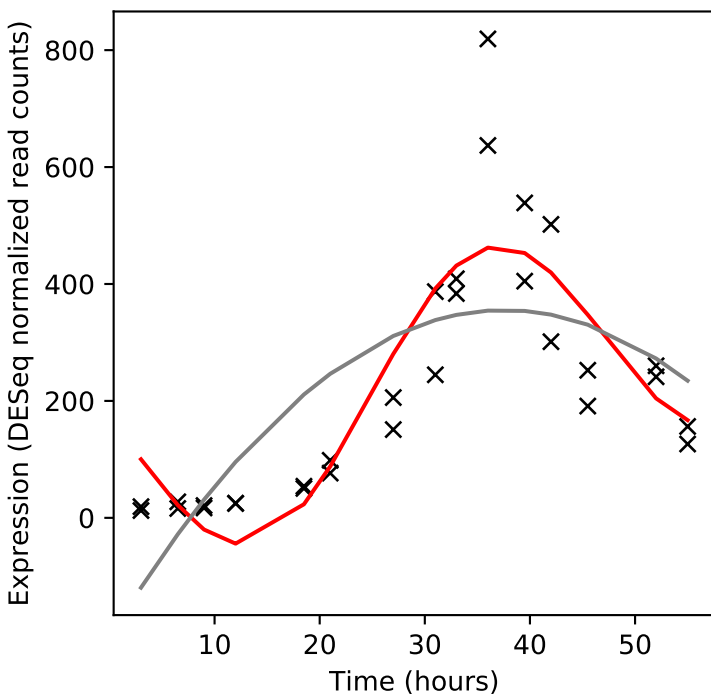

Rv1588c/-

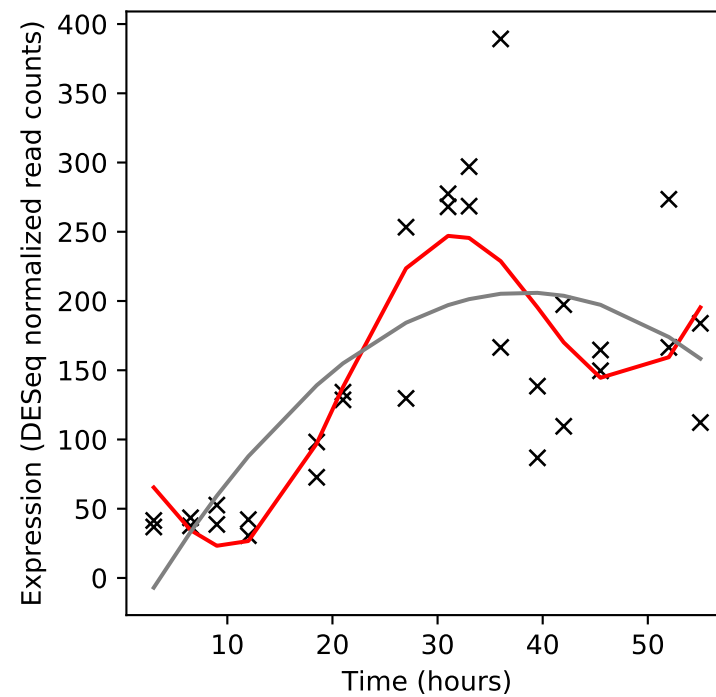

Rv1589/bioB

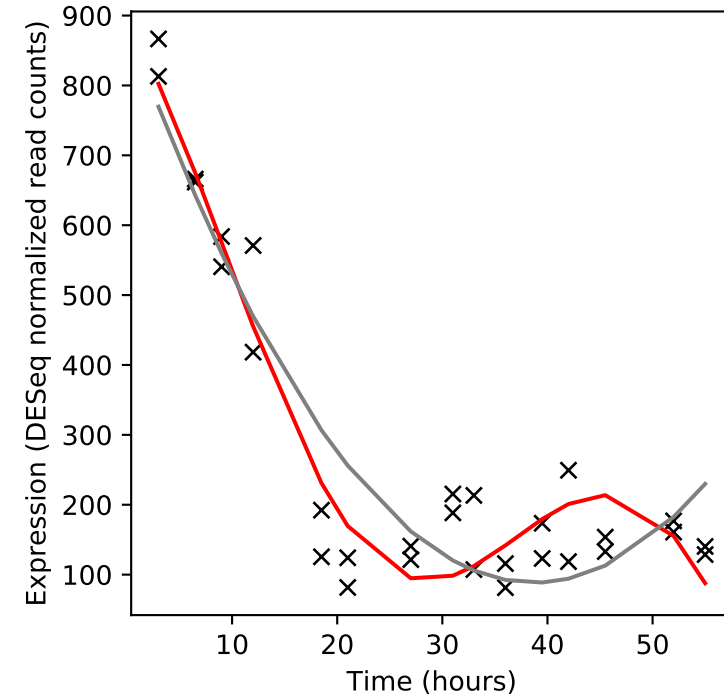

Rv1590/-

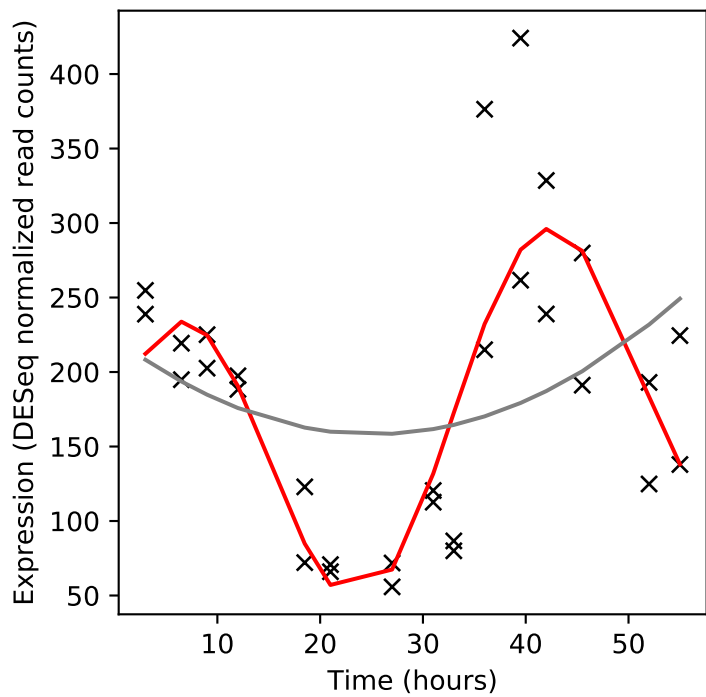

Rv1591/-

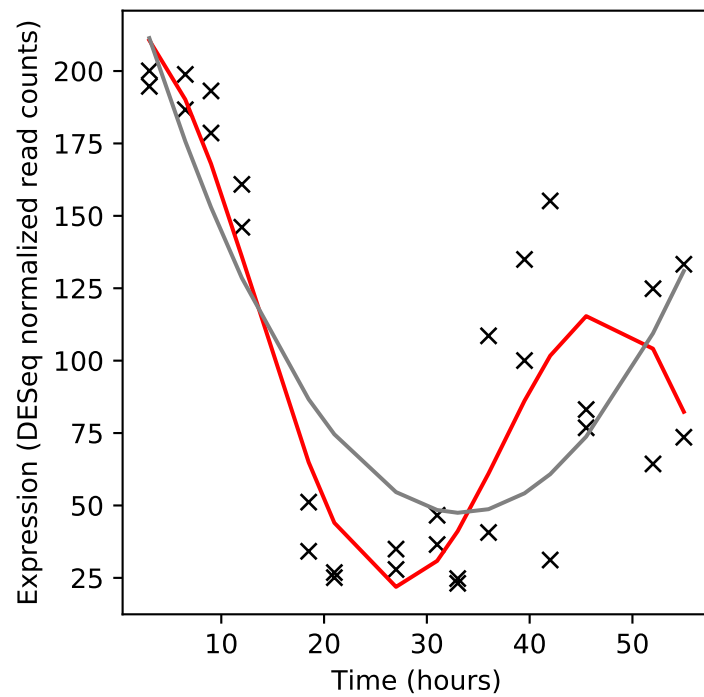

Rv1592c/-

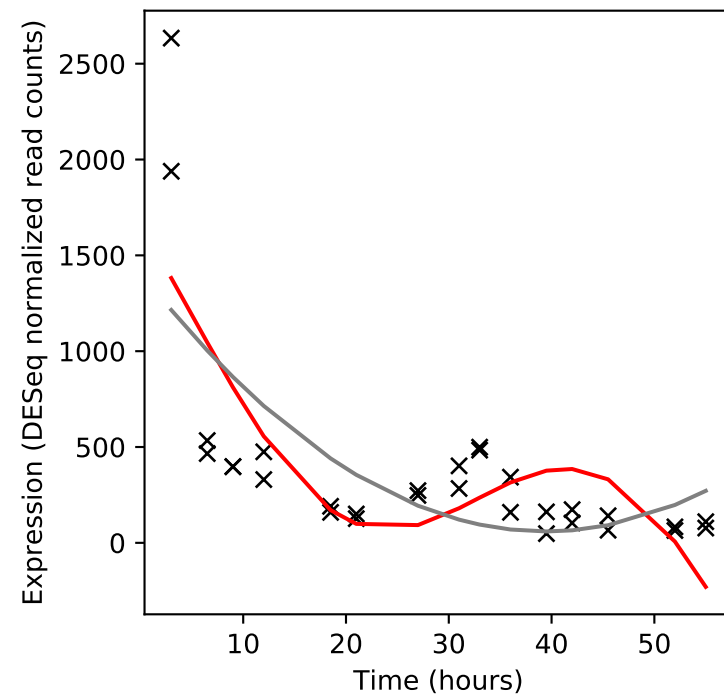

Rv1593c/-

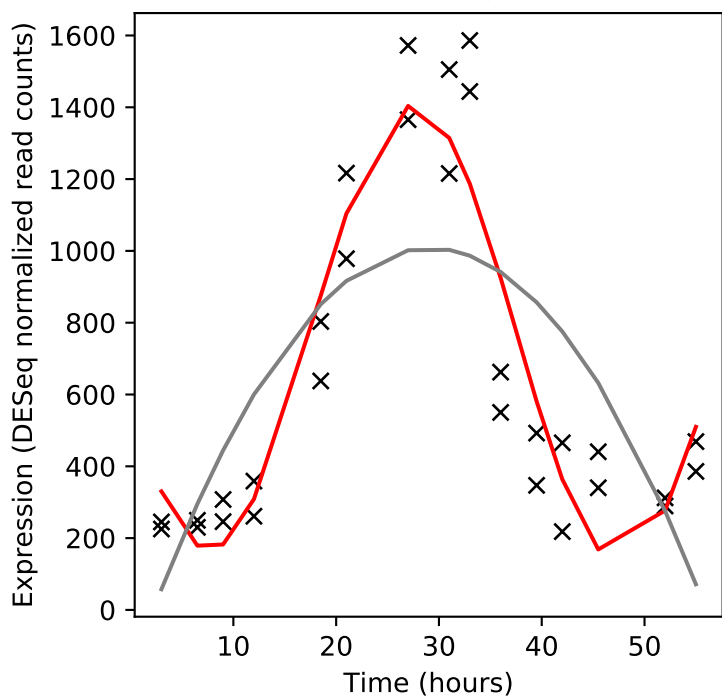

Rv1594/nadA

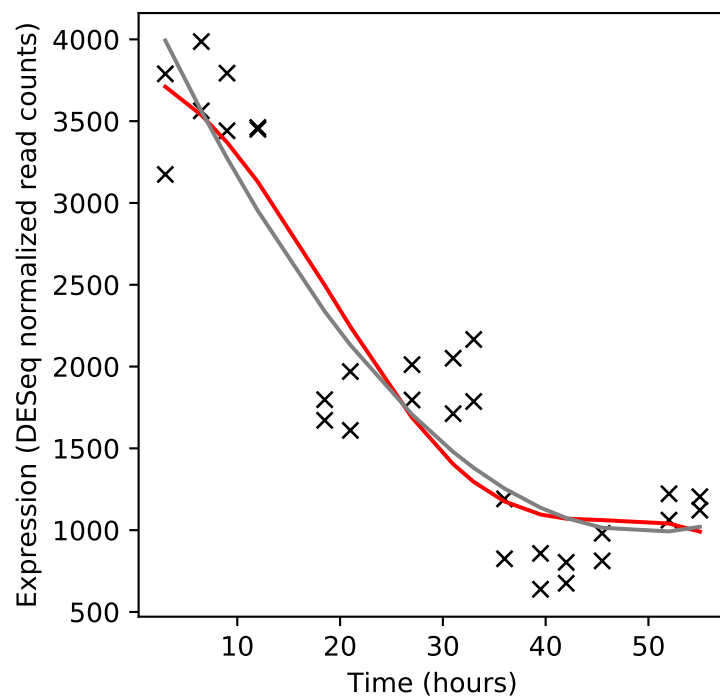

Rv1595/nadB

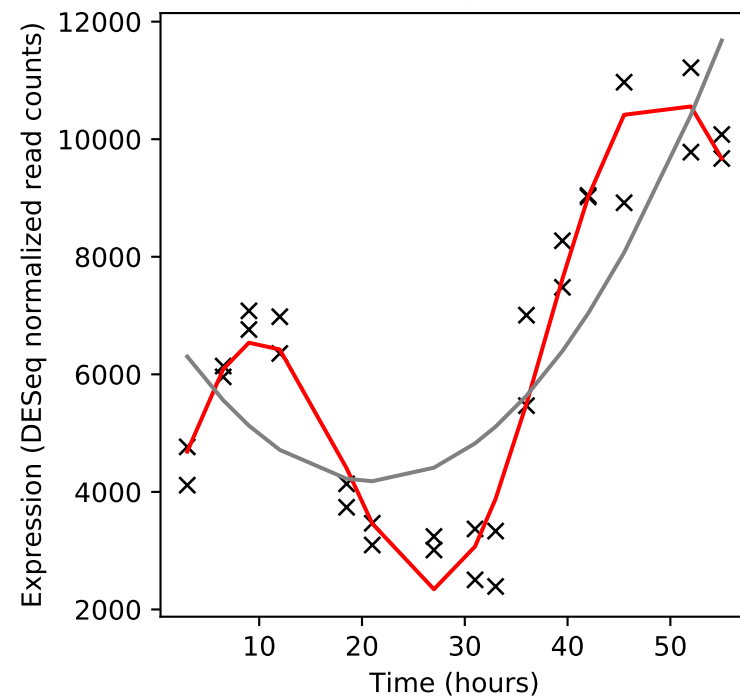

Rv1596/nadC

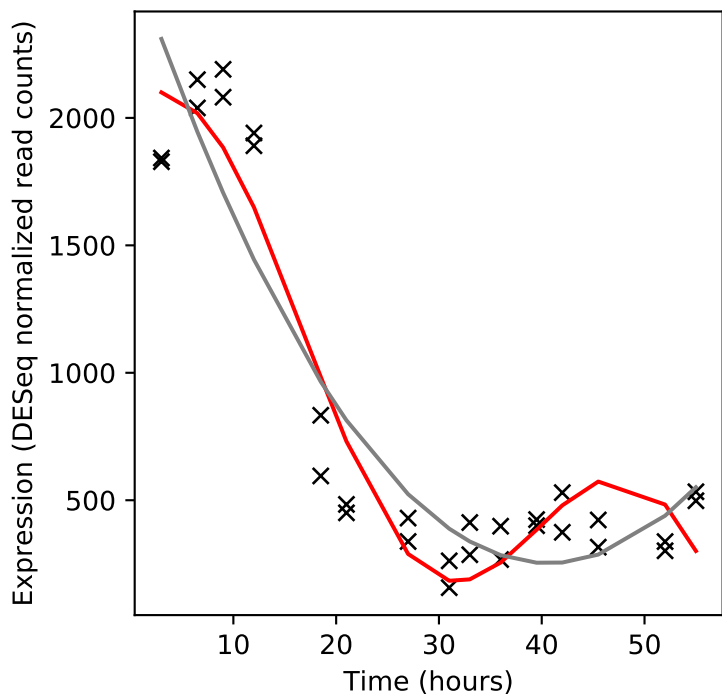

Rv1597/-

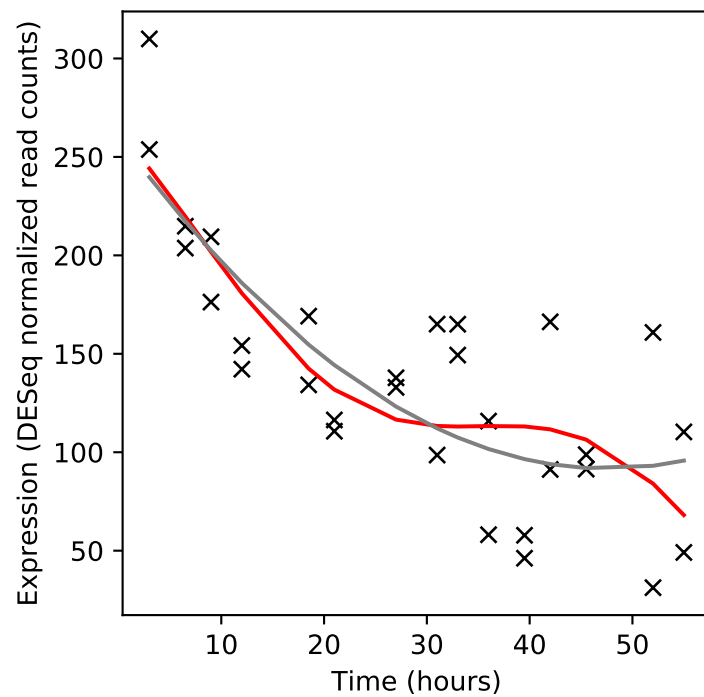

Rv1598c/-

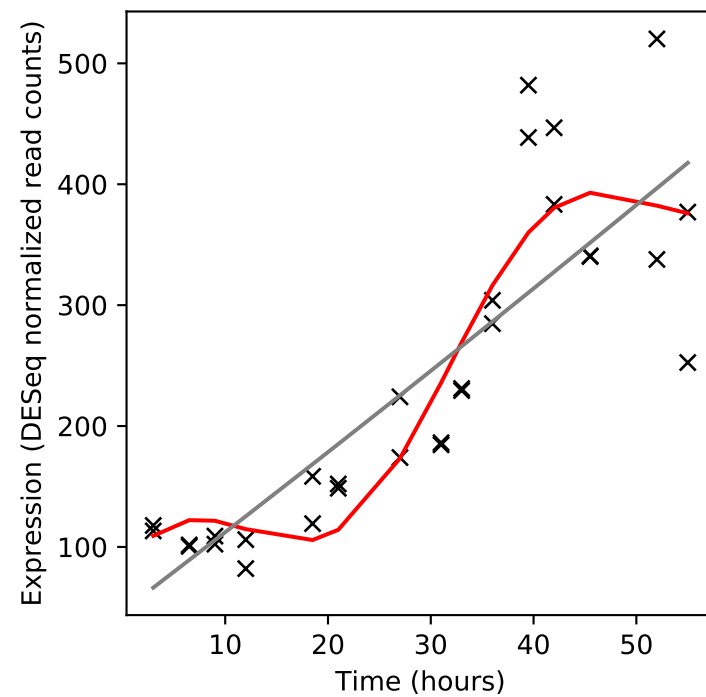

Rv1599/hisD

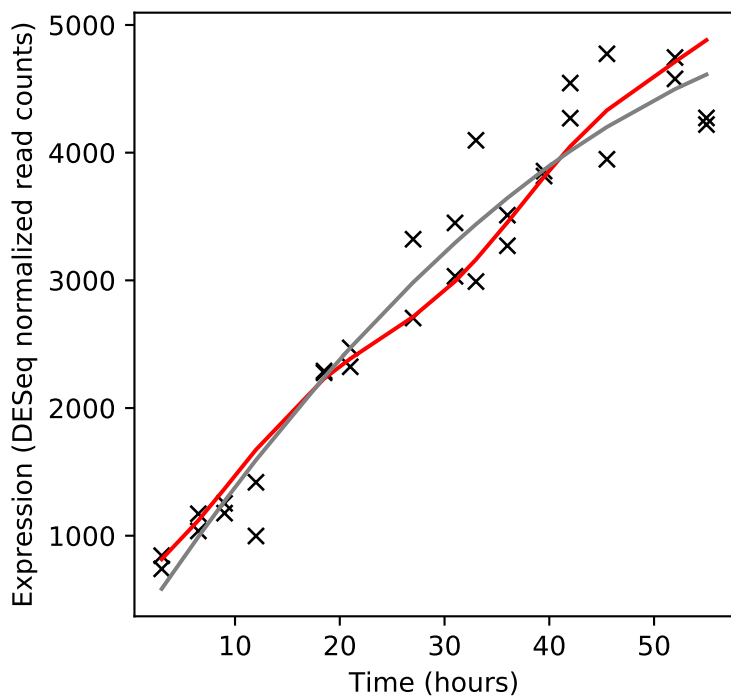

Rv1600/hisC1

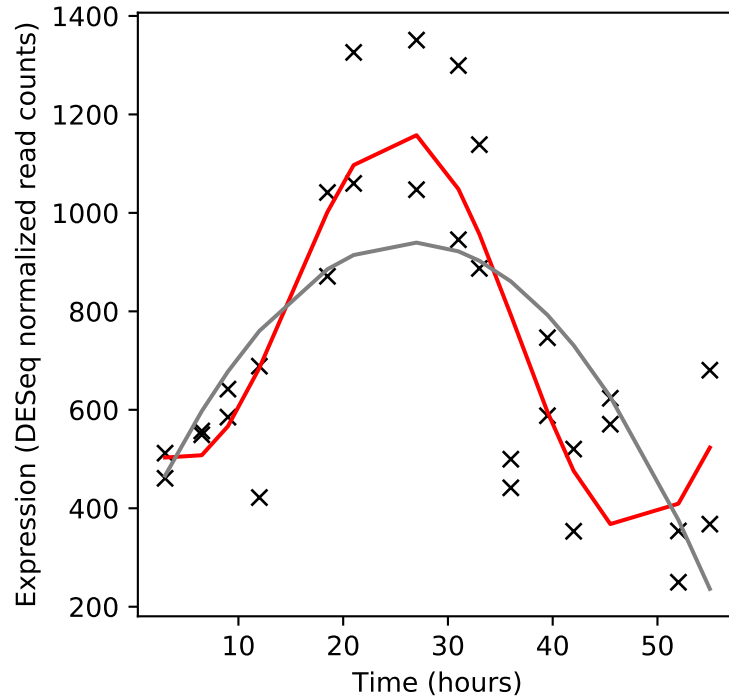

Rv1601/hisB

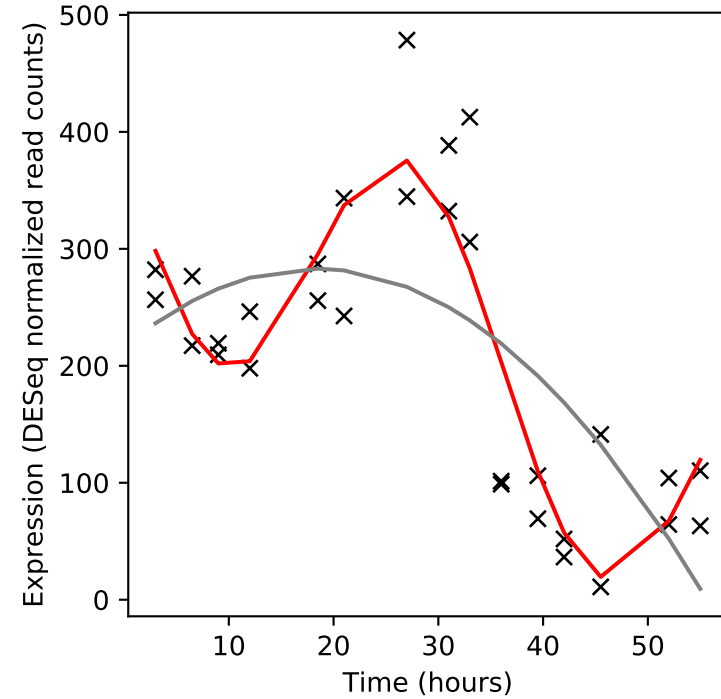

Rv1602/hisH

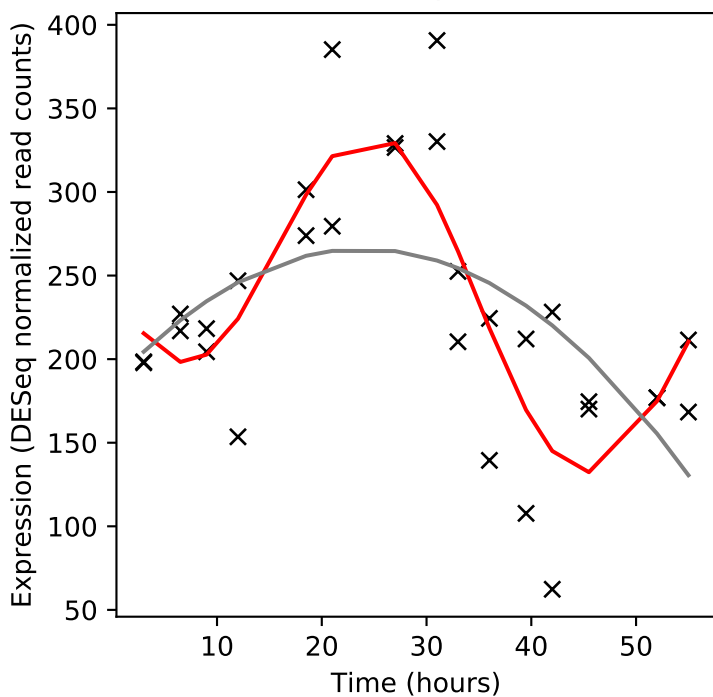

Rv1603/hisA

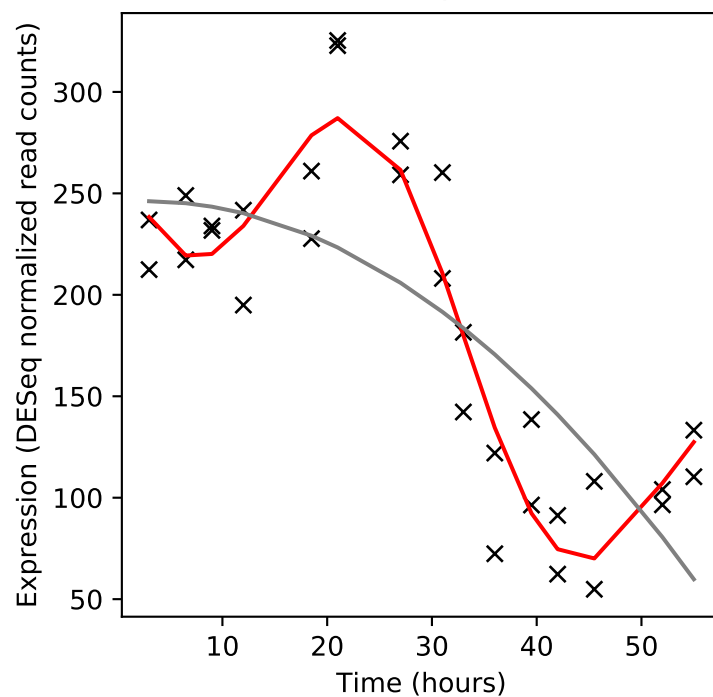

Rv1604/impA

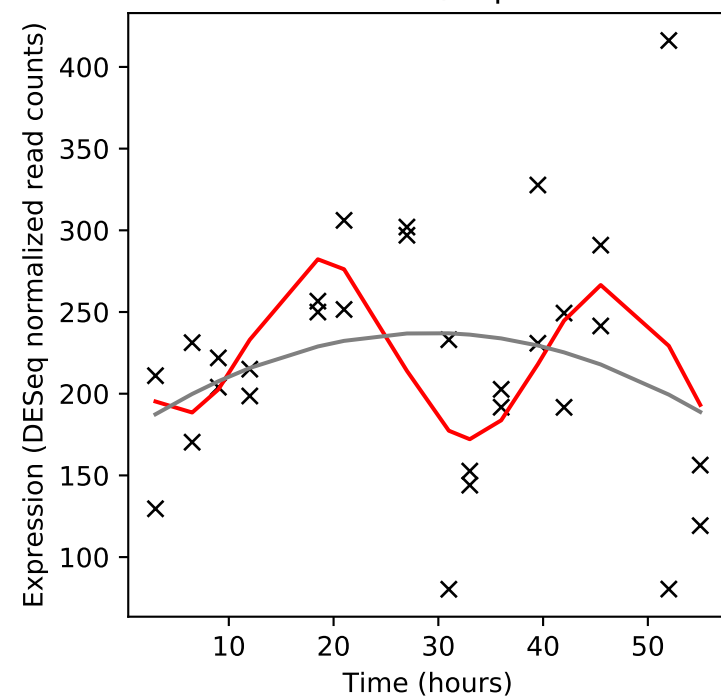

Rv1605/hisF

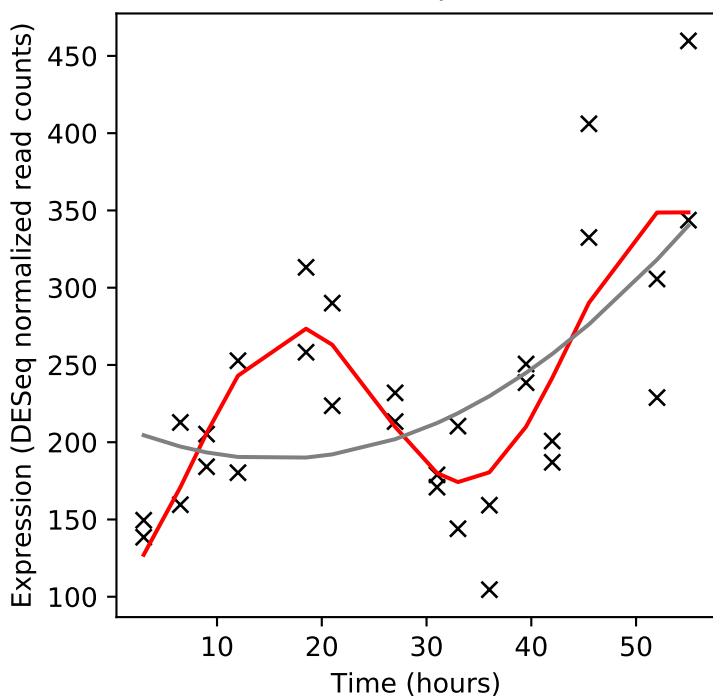

Rv1606/hisI

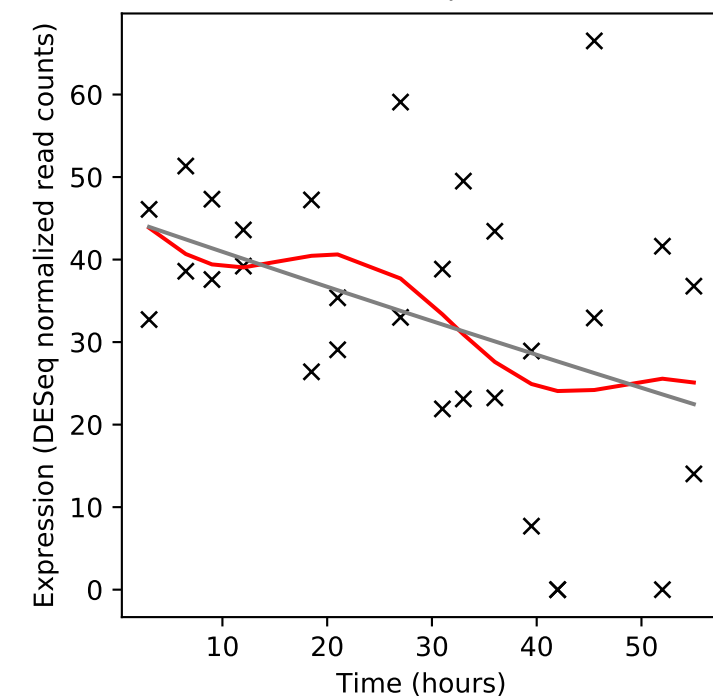

Rv1607/chaA

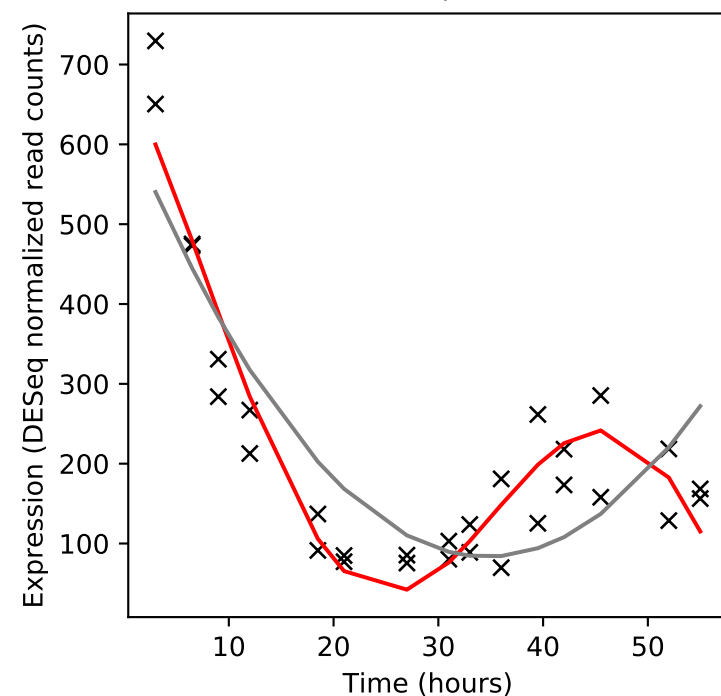



Rv1608c/bcpB

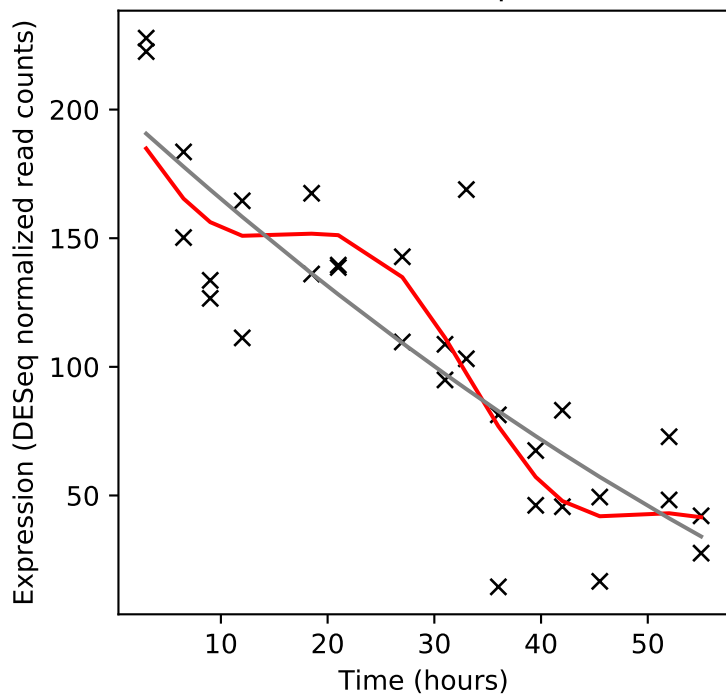

Rv1609/trpE

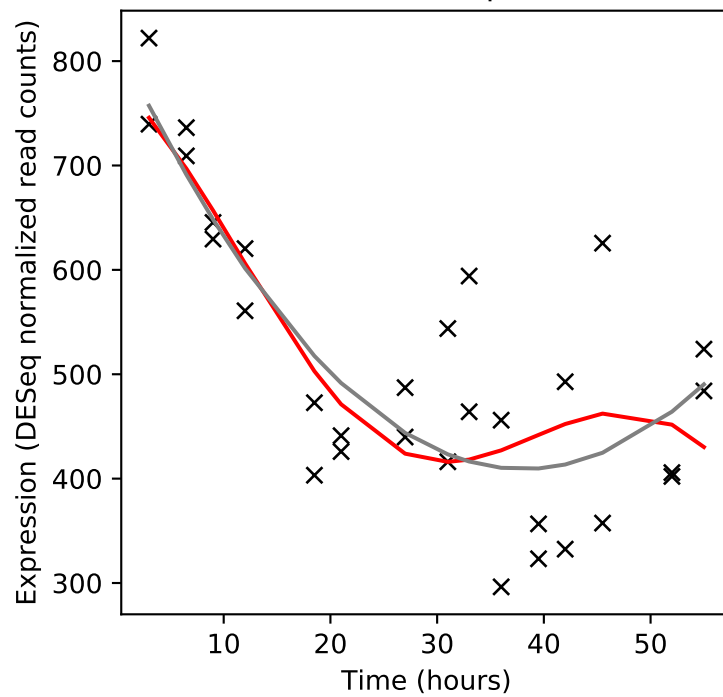

Rv1610/-

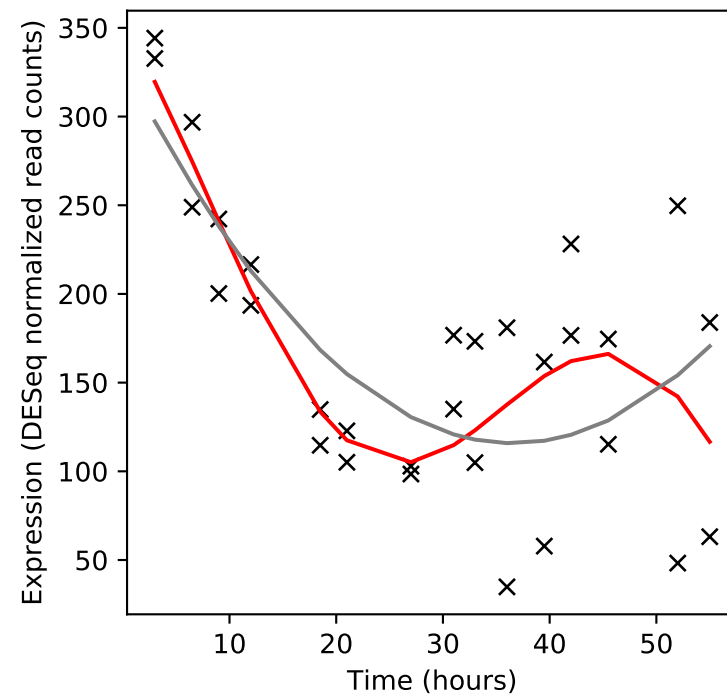

Rv1611/trpC

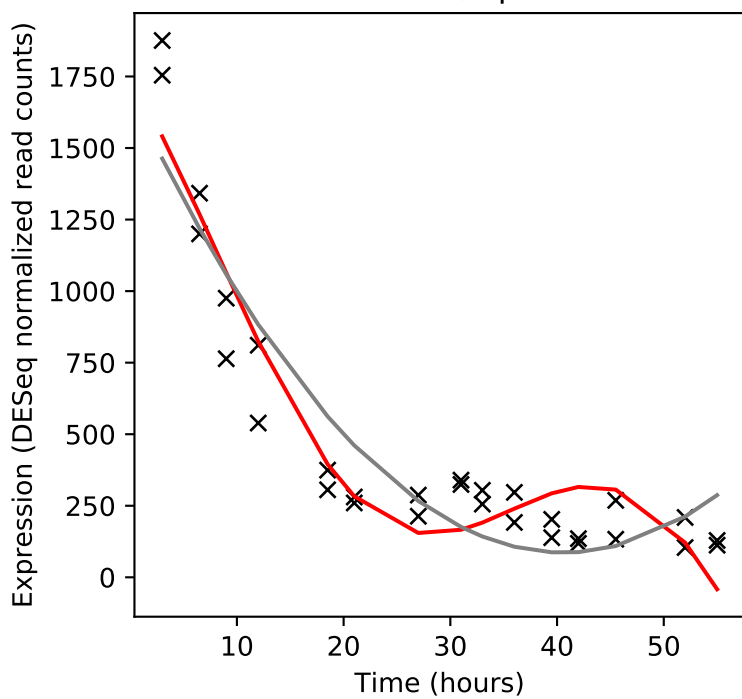

Rv1612/trpB

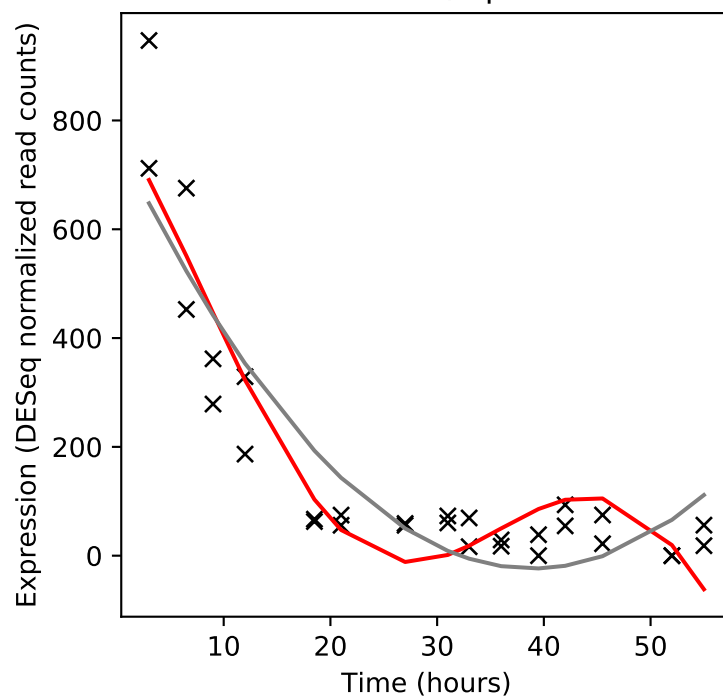

Rv1613/trpA

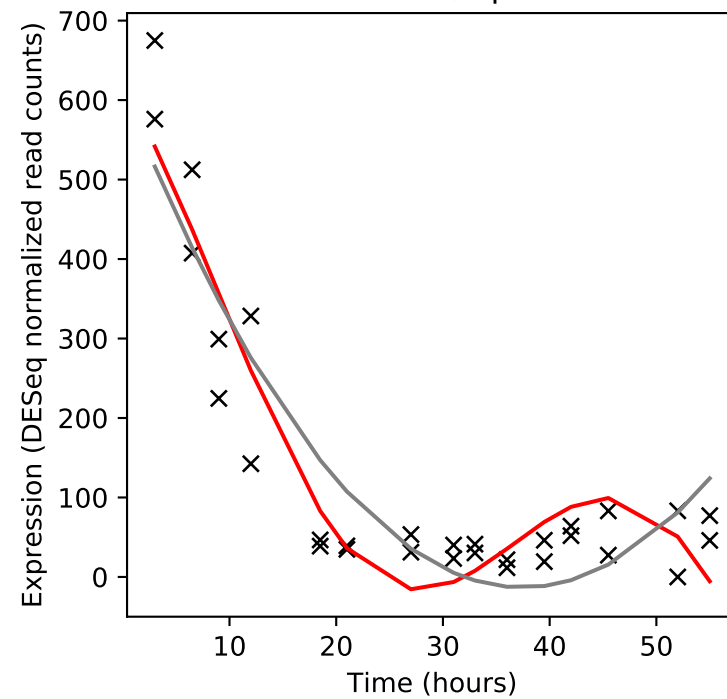

Rv1614/lgt

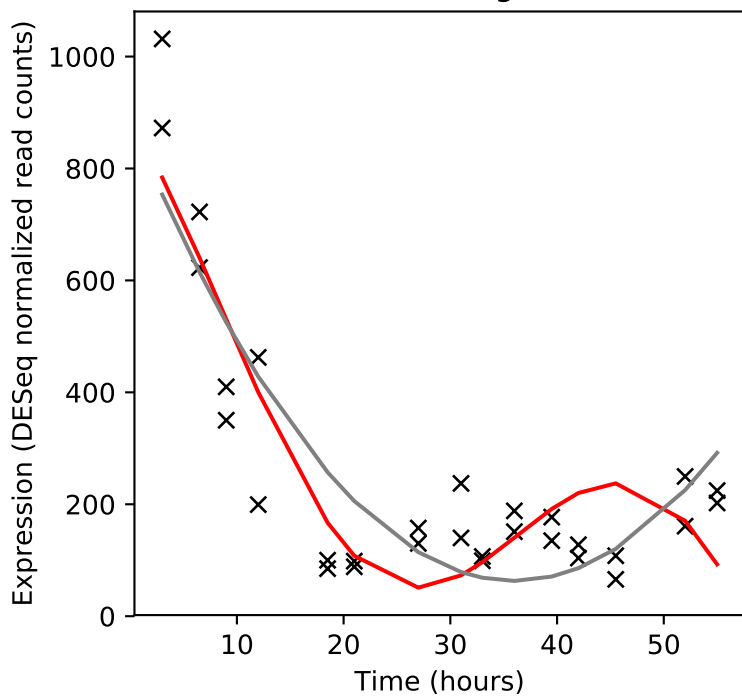

Rv1615/-

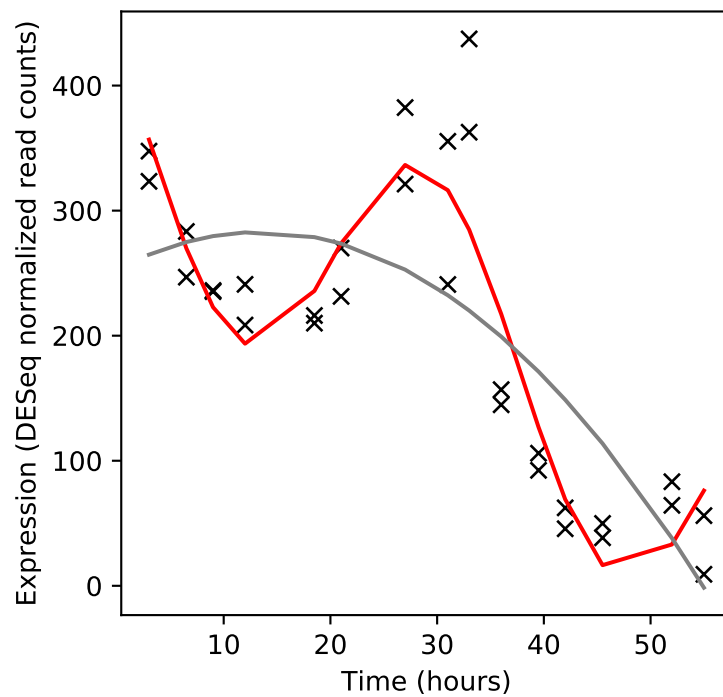

Rv1616/-

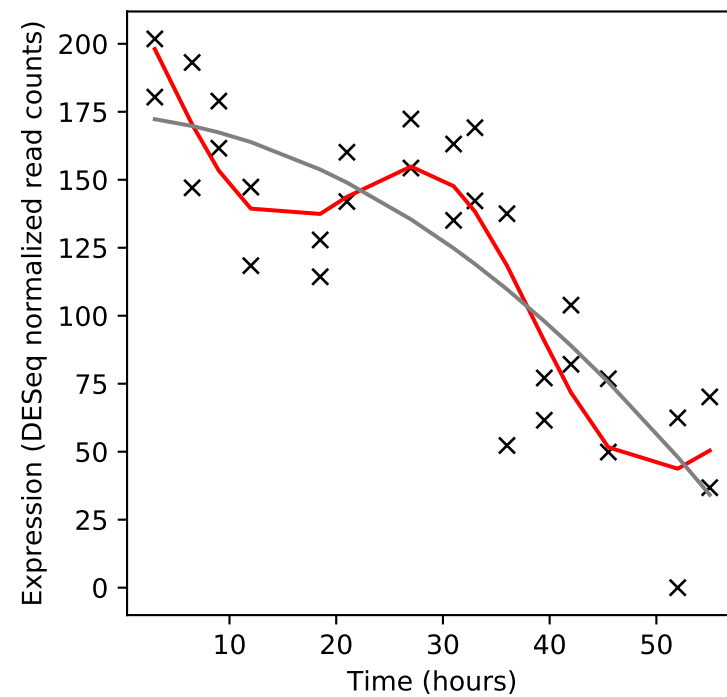

Rv1617/pykA

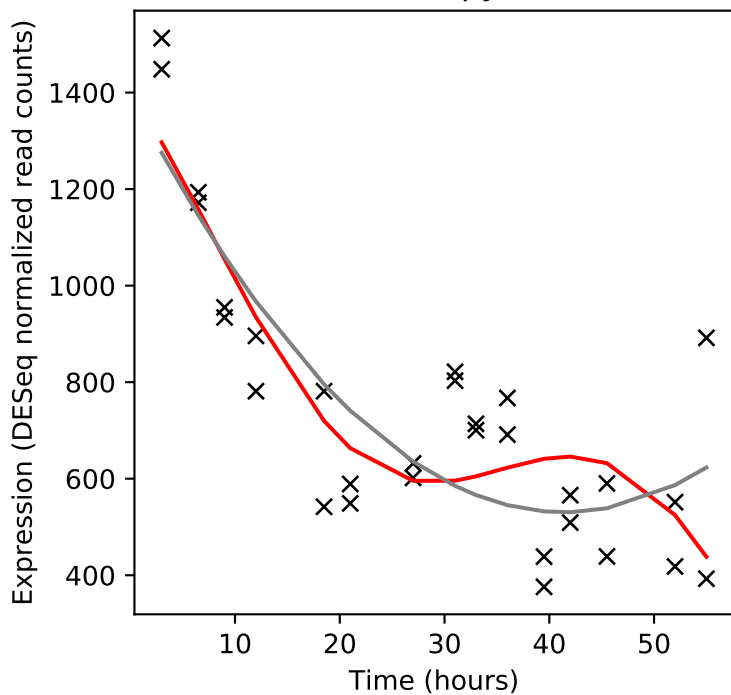

Rv1618/tesB1

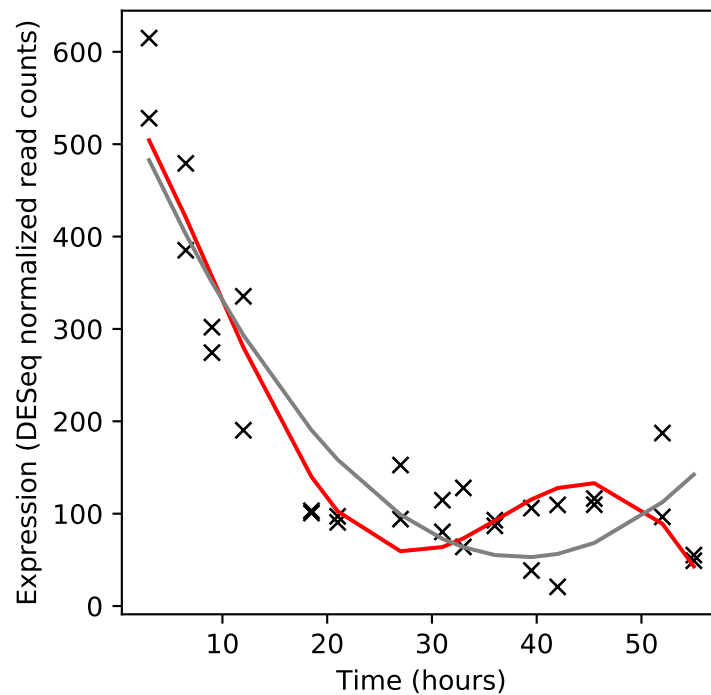

Rv1619/-

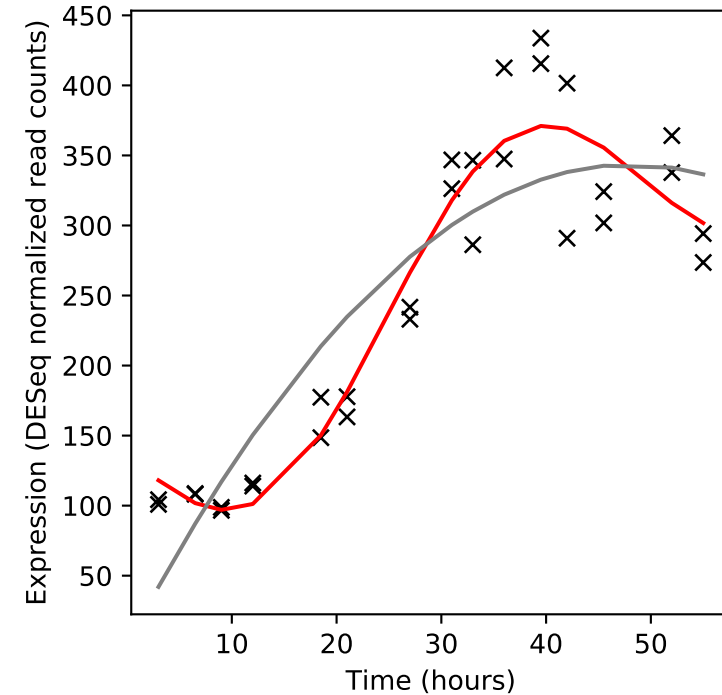

Rv1620c/cydC

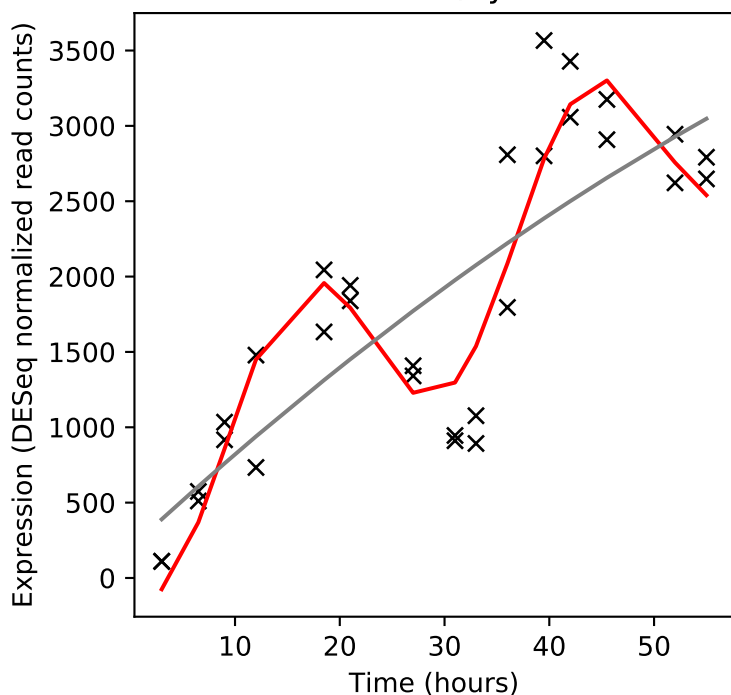

Rv1621c/cydD

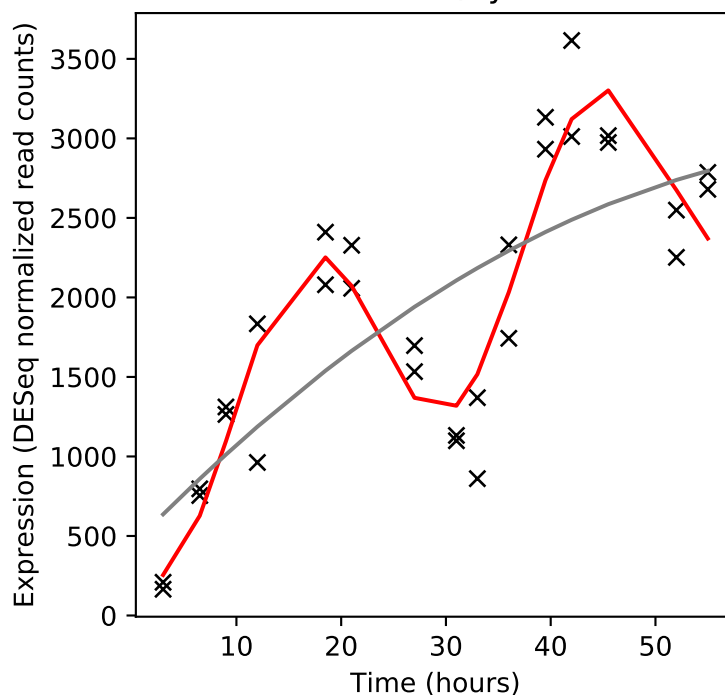

Rv1622c/cydB

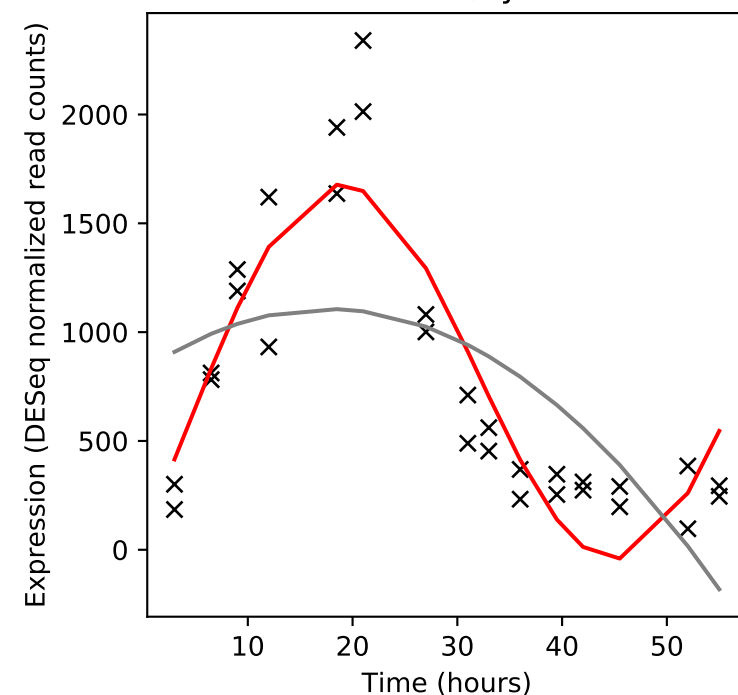

Rv1623c/cydA

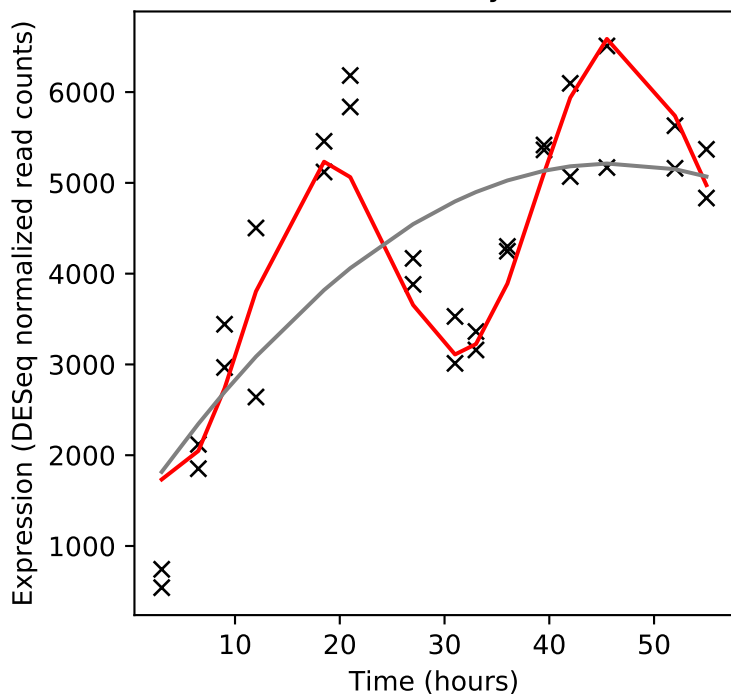

Rv1624c/-

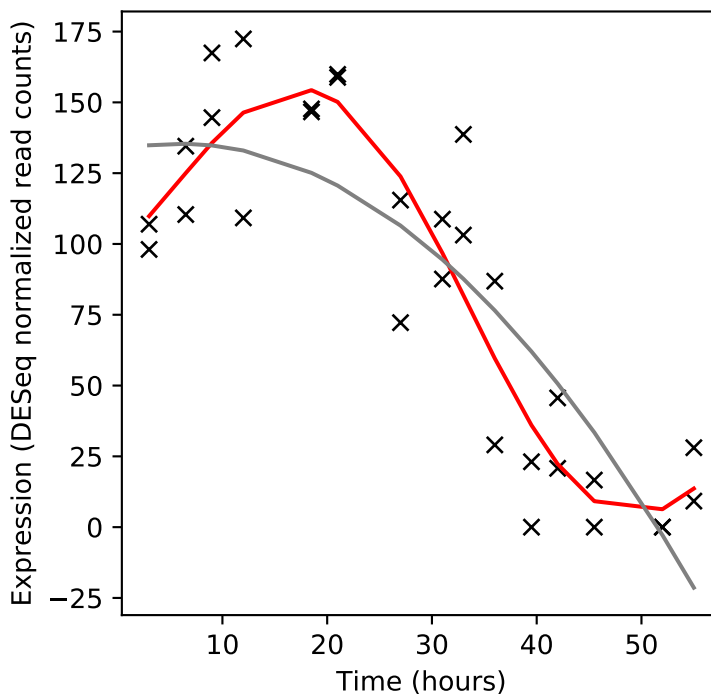

Rv1625c/cya

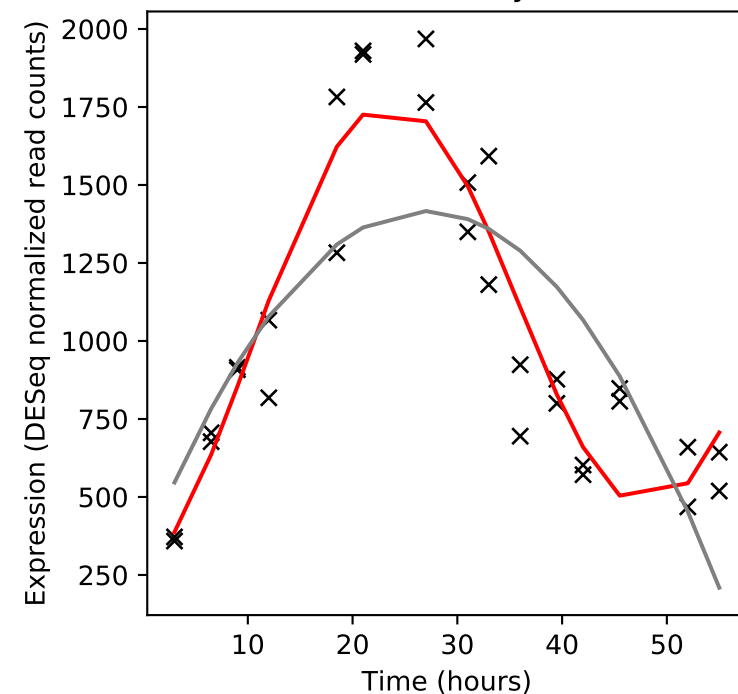

Rv1626/-

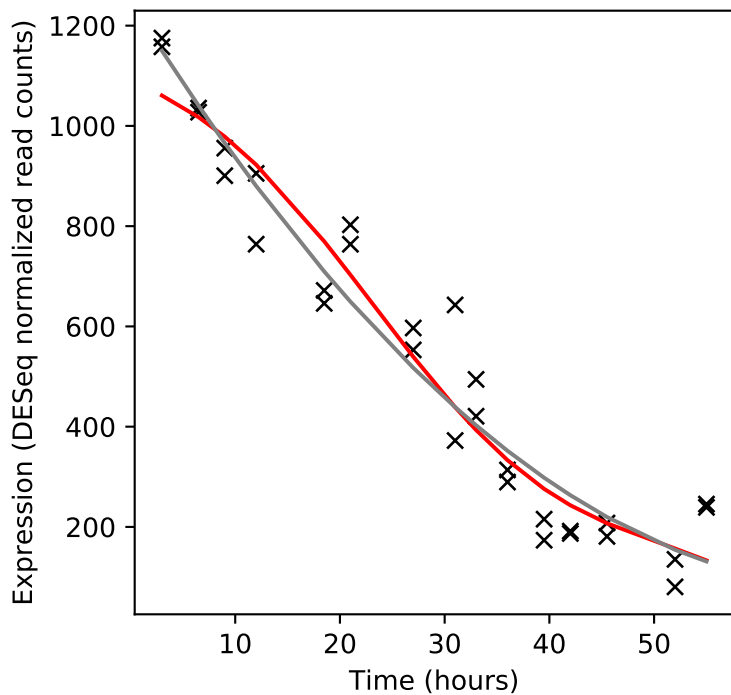

Rv1627c/-

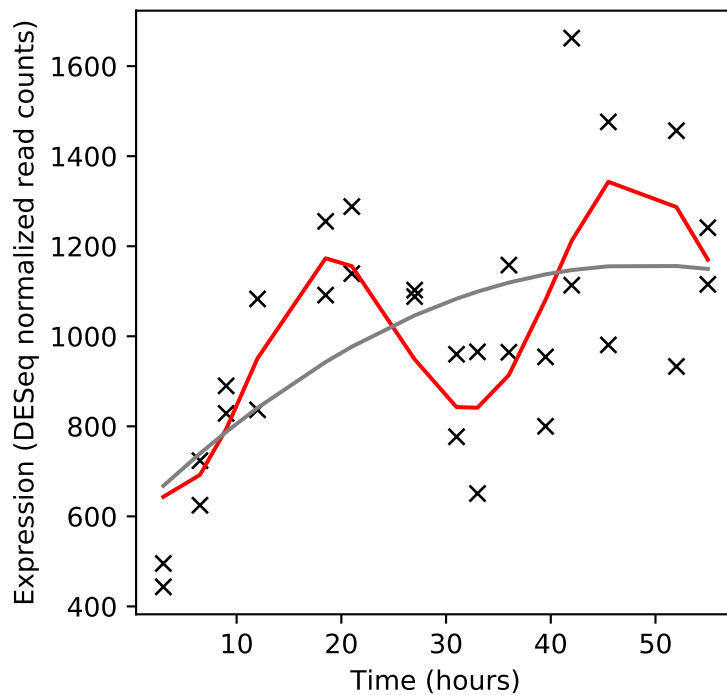

Rv1628c/-

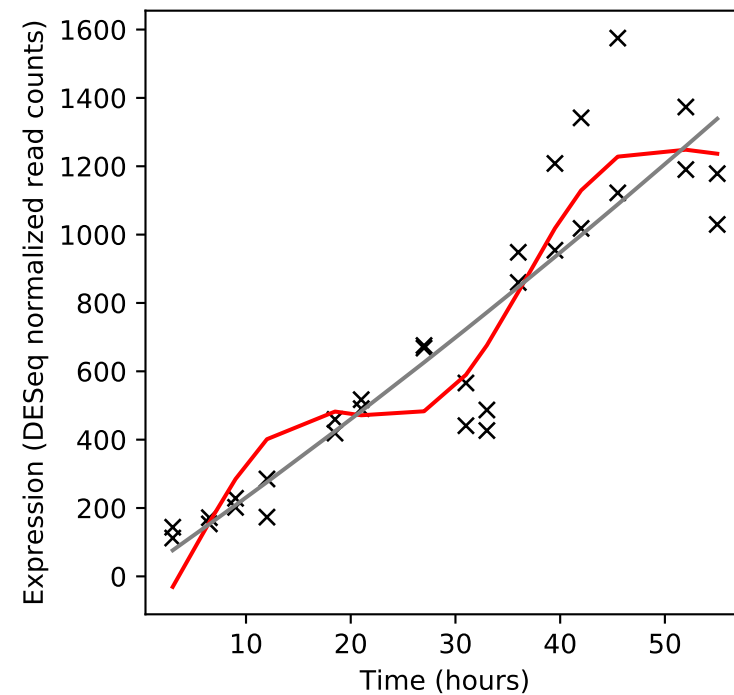

Rv1629/polA

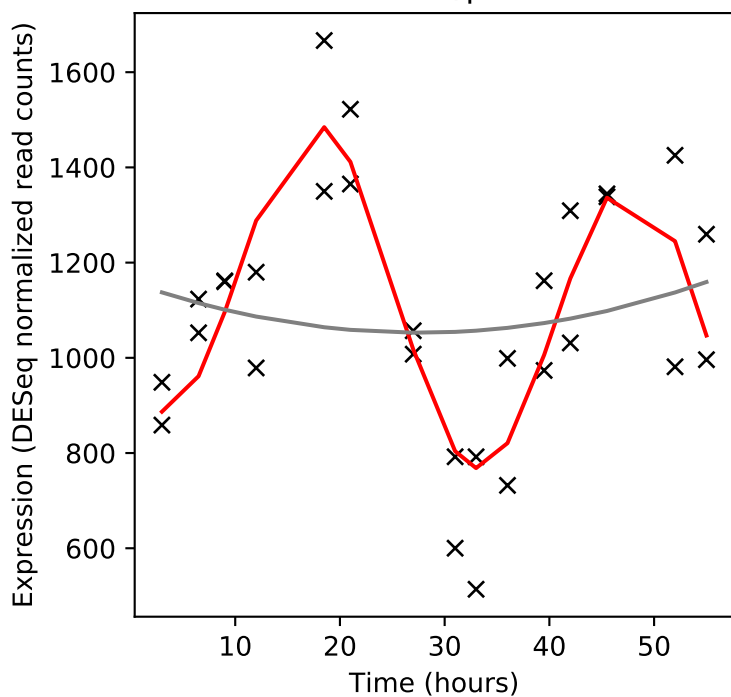

Rv1630/rpsA

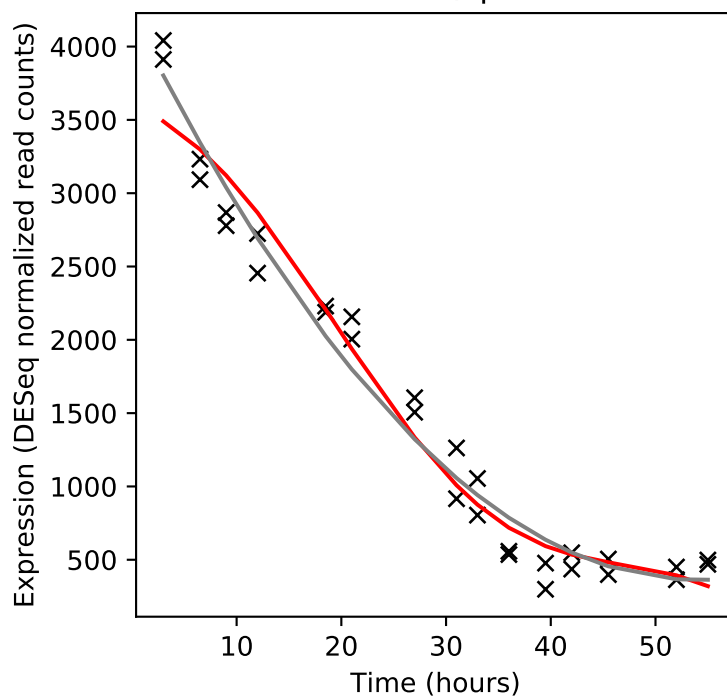

Rv1631/coaE

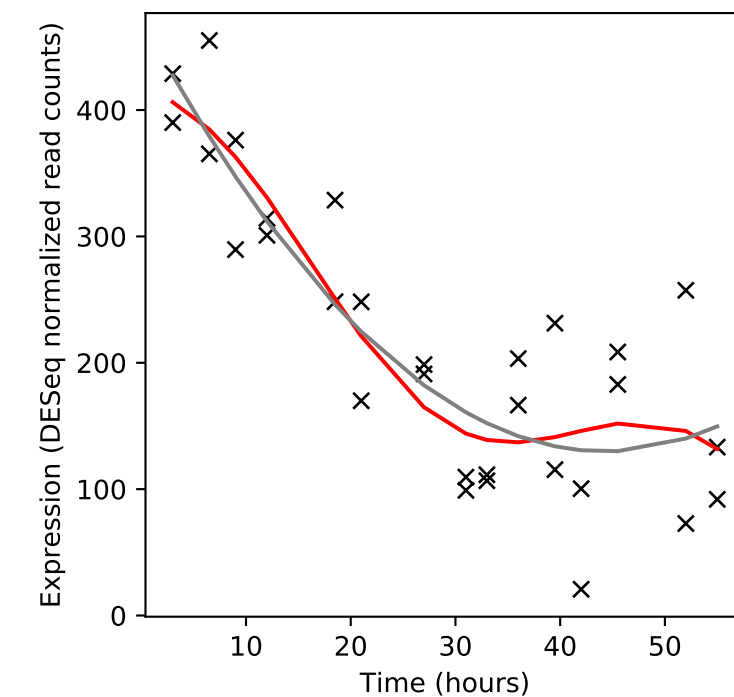

Rv1632c/-

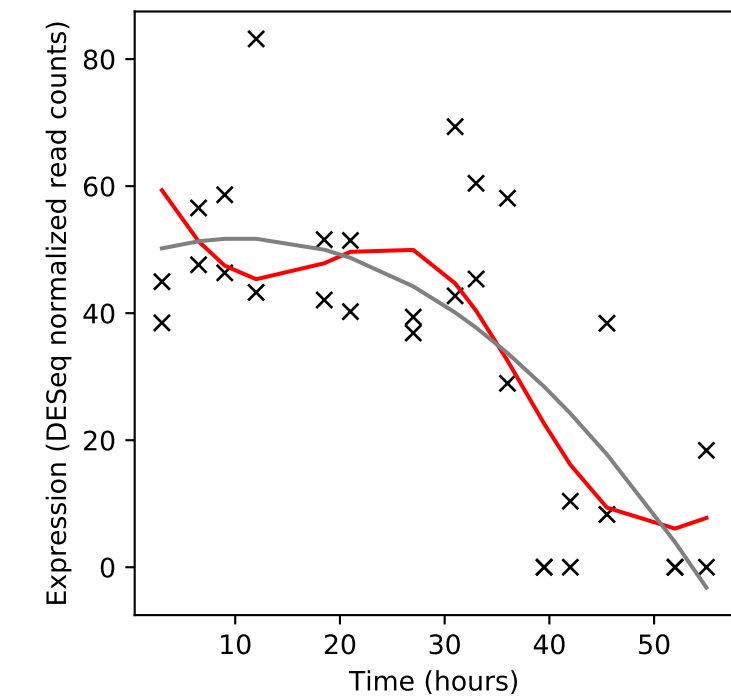

Rv1633/uvrB

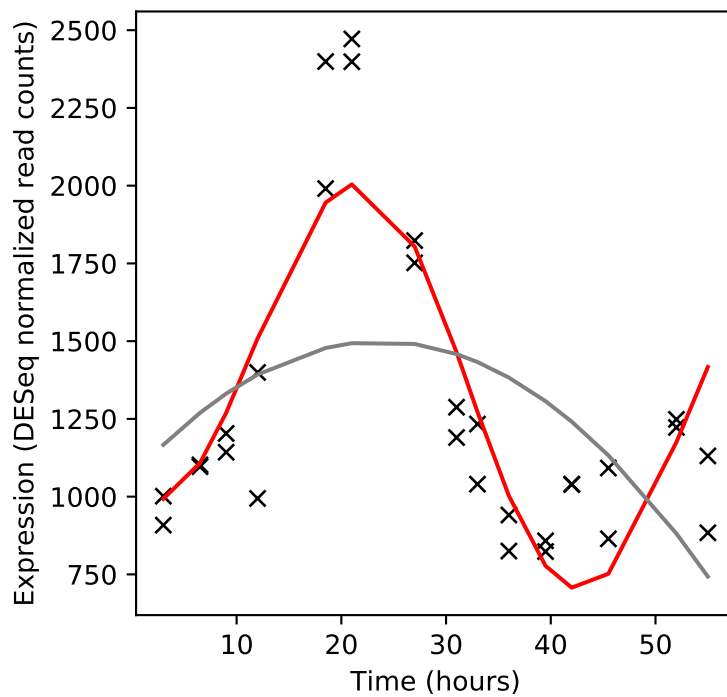

Rv1634/-

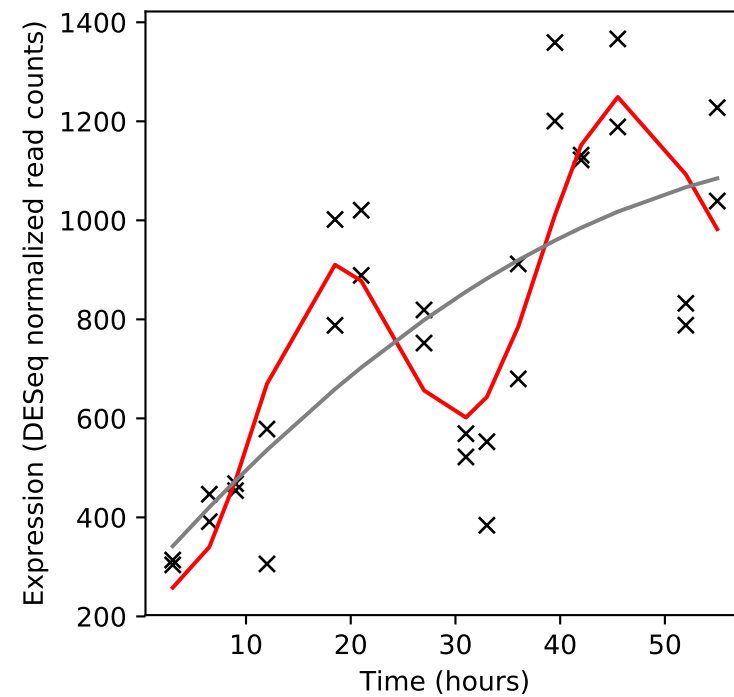

Rv1635c/-

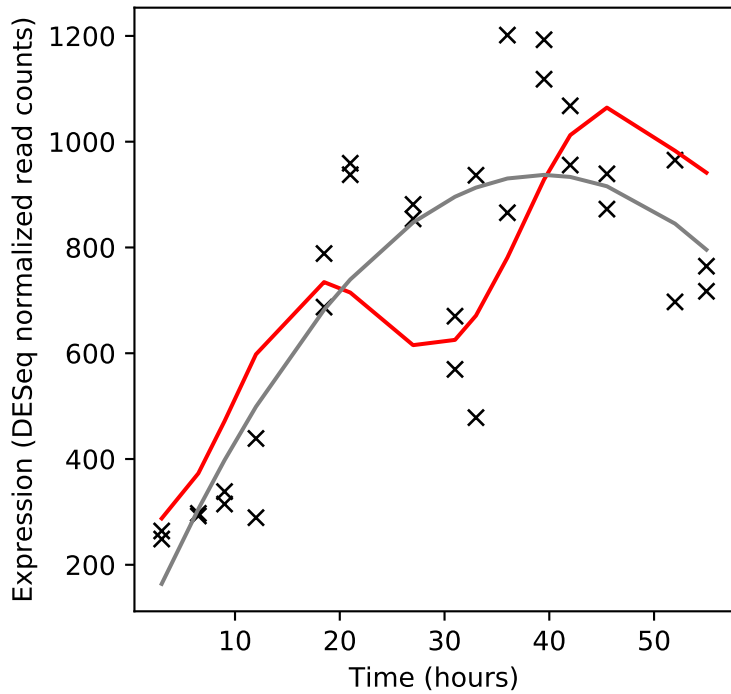

Rv1636/TB15.3

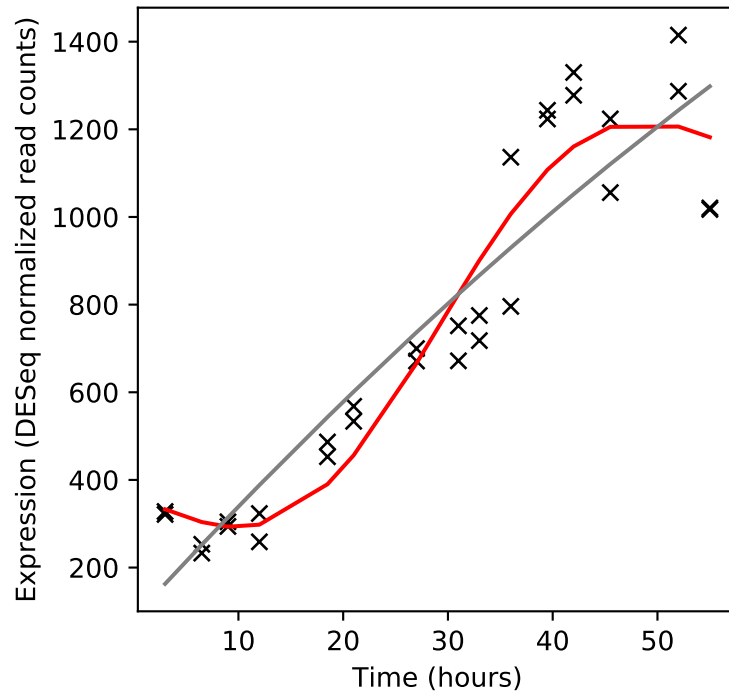

Rv1637c/-

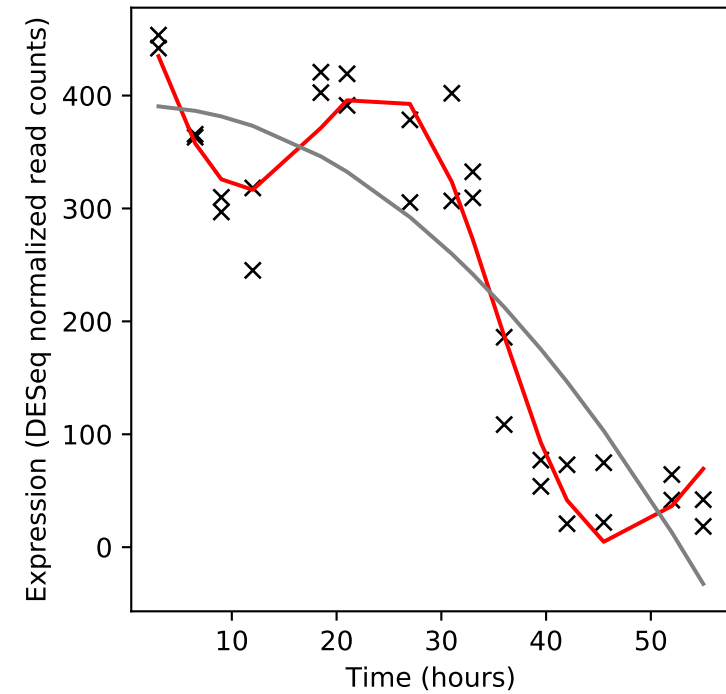

Rv1638/uvrA

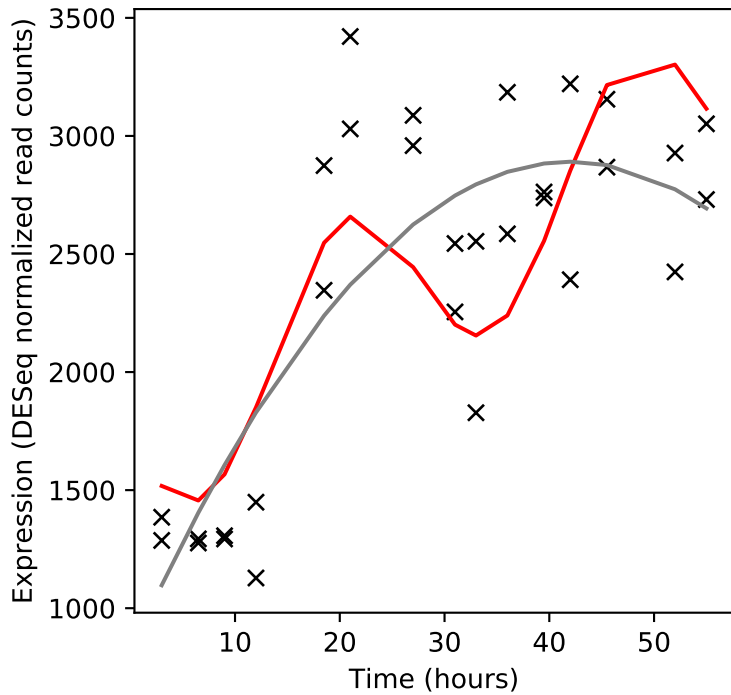

Rv1638A/-

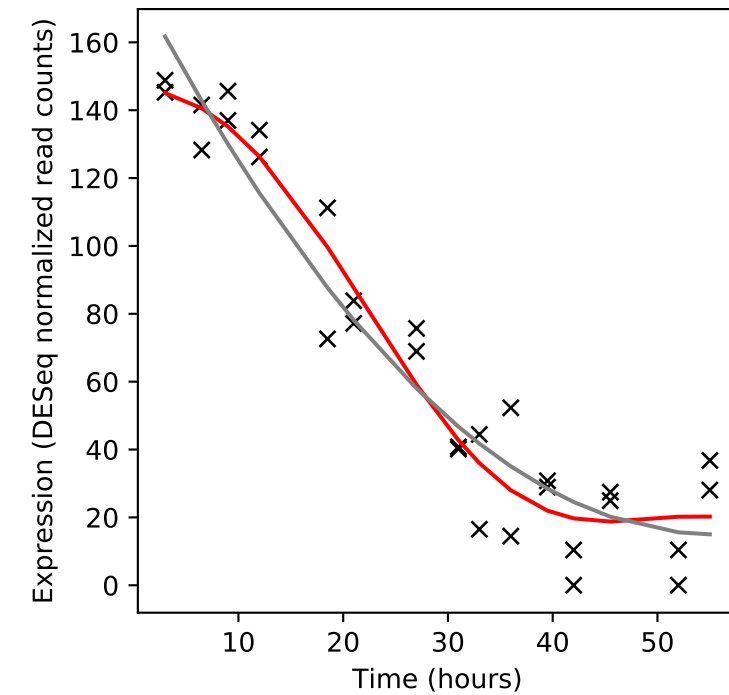

Rv1639c/-

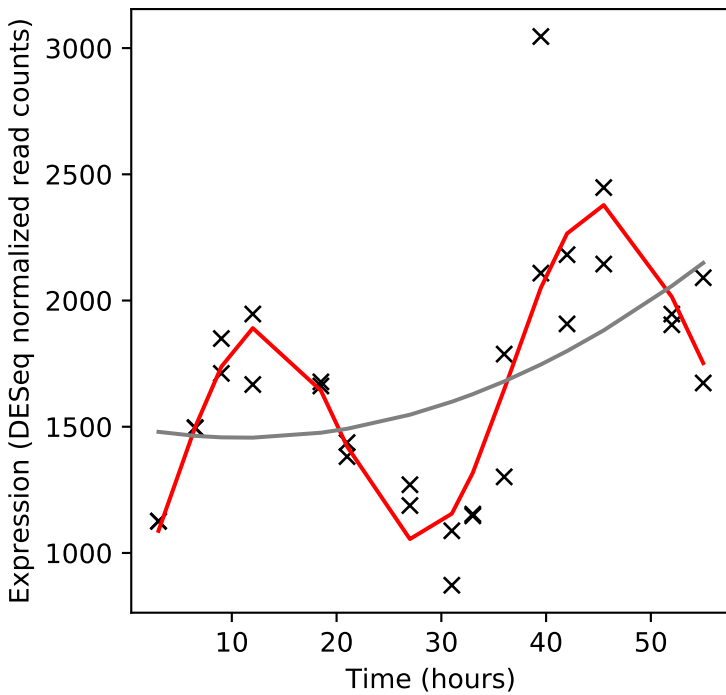

Rv1640c/lysX

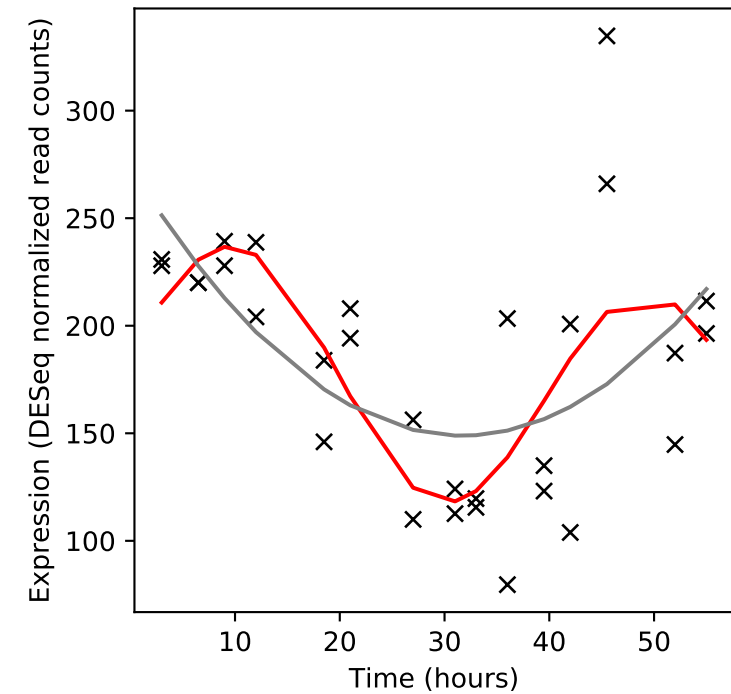

Rv1641/infC

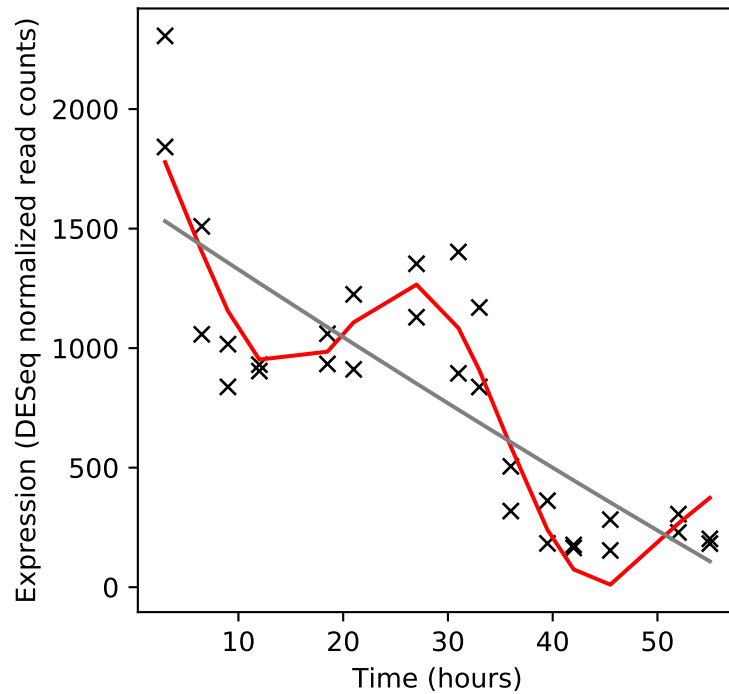

Rv1642/rpmI

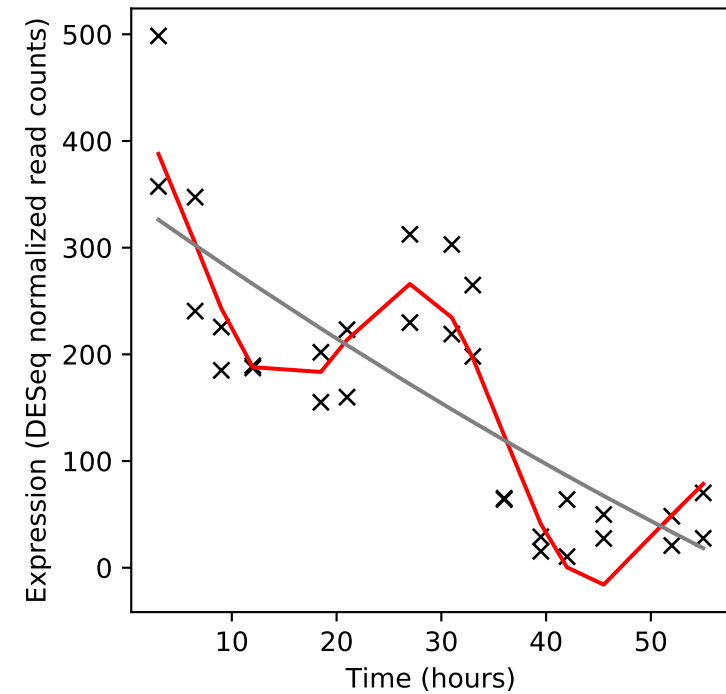

Rv1643/rpIT

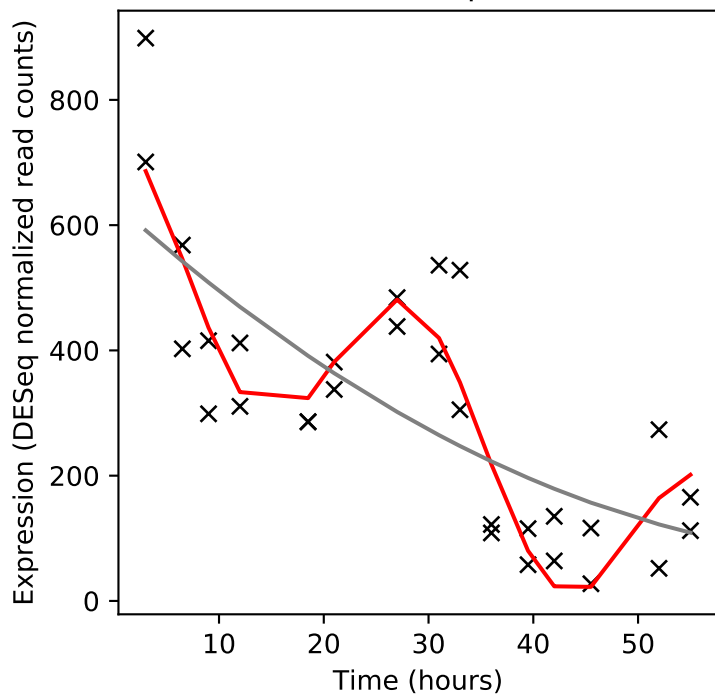

Rv1644/tsnR

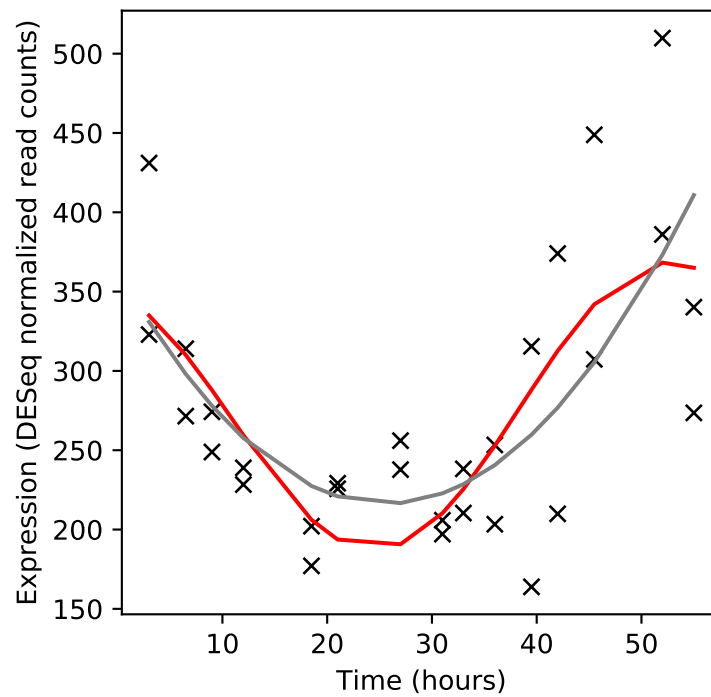

Rv1645c/-

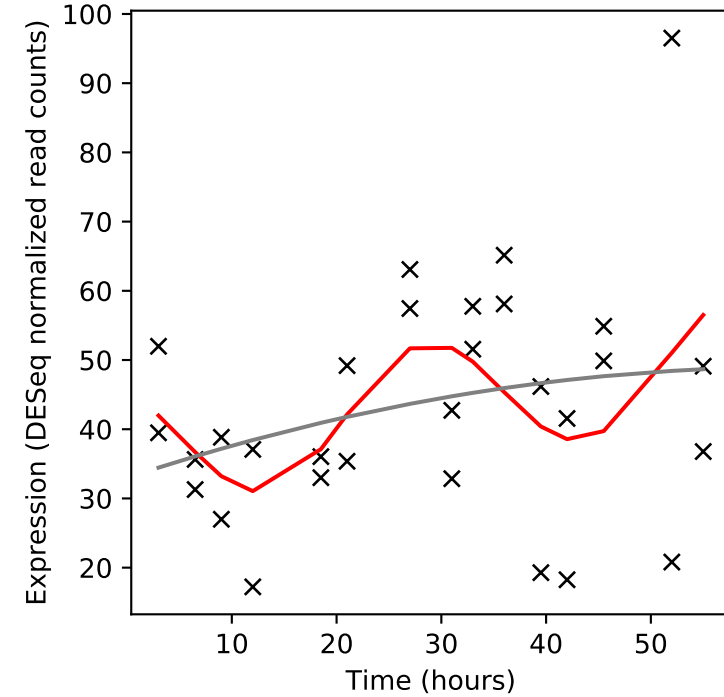

Rv1646/PE17

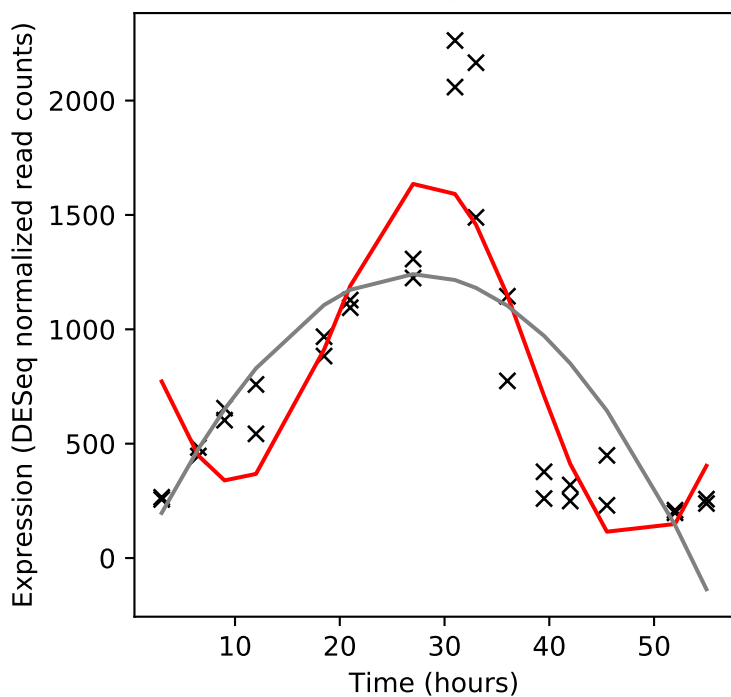

Rv1647/-

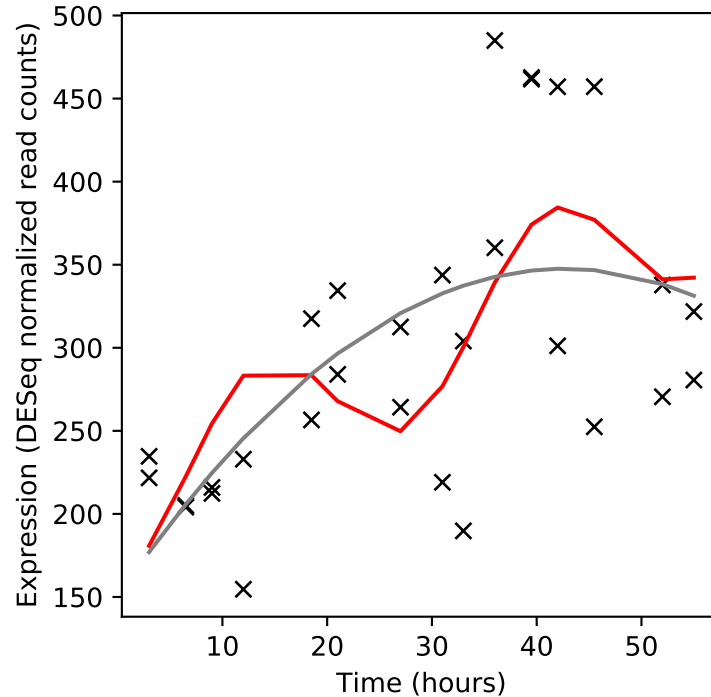

Rv1648/-

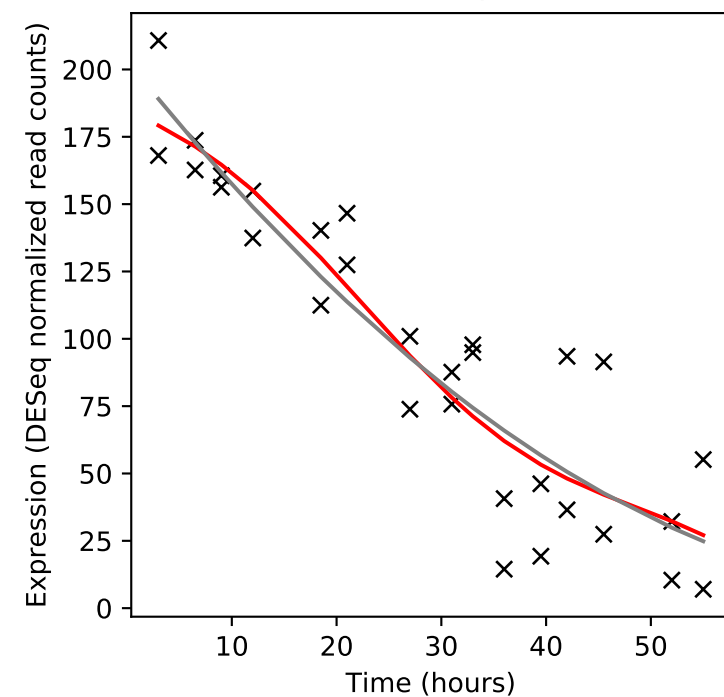

Rv1649/pheS

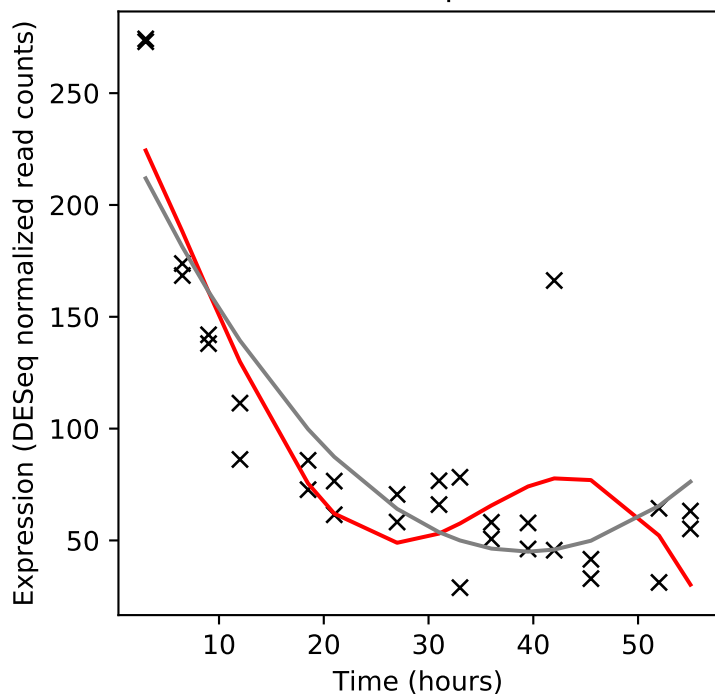

Rv1650/pheT

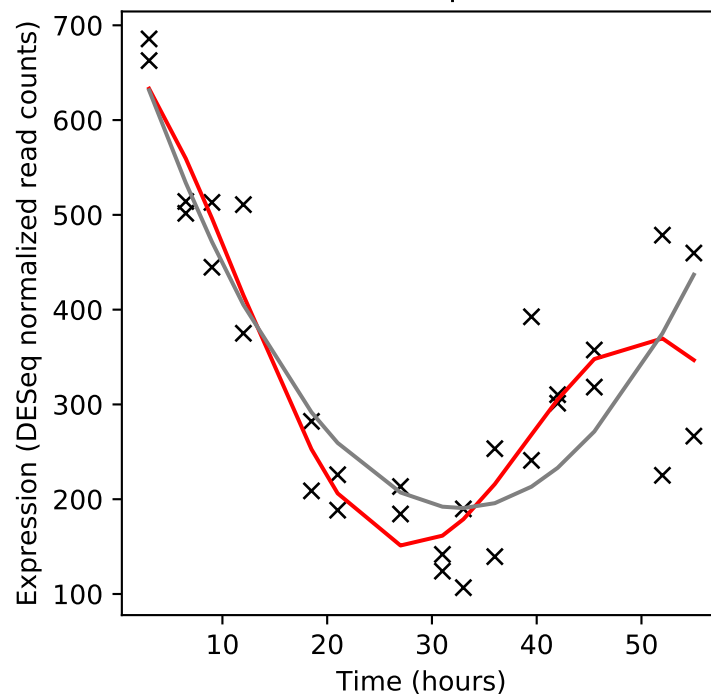

Rv1651c/PE\_PGRS30

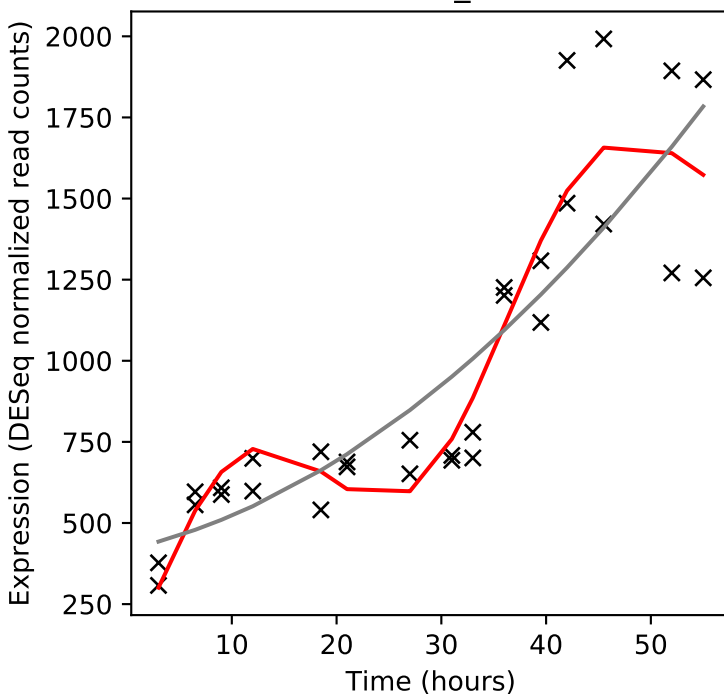

Rv1652/argC

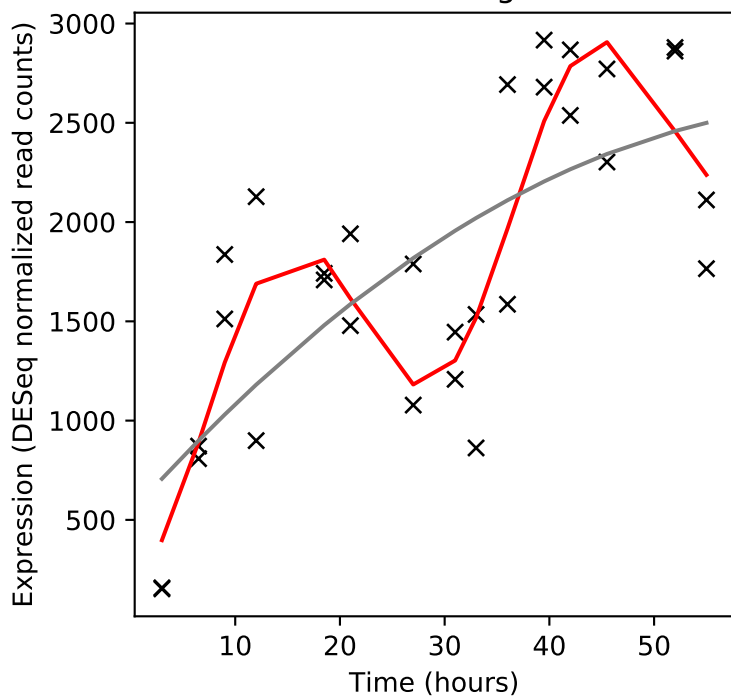

Rv1653/argJ

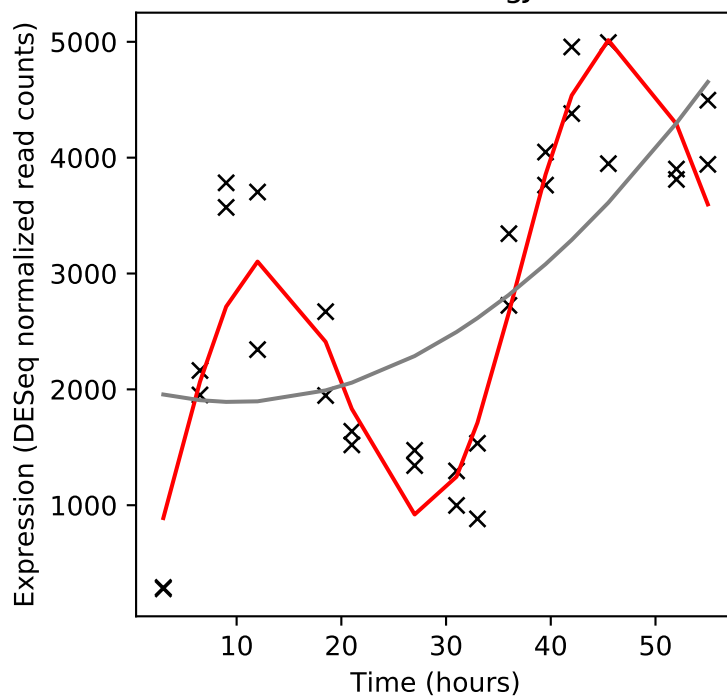

Rv1654/argB

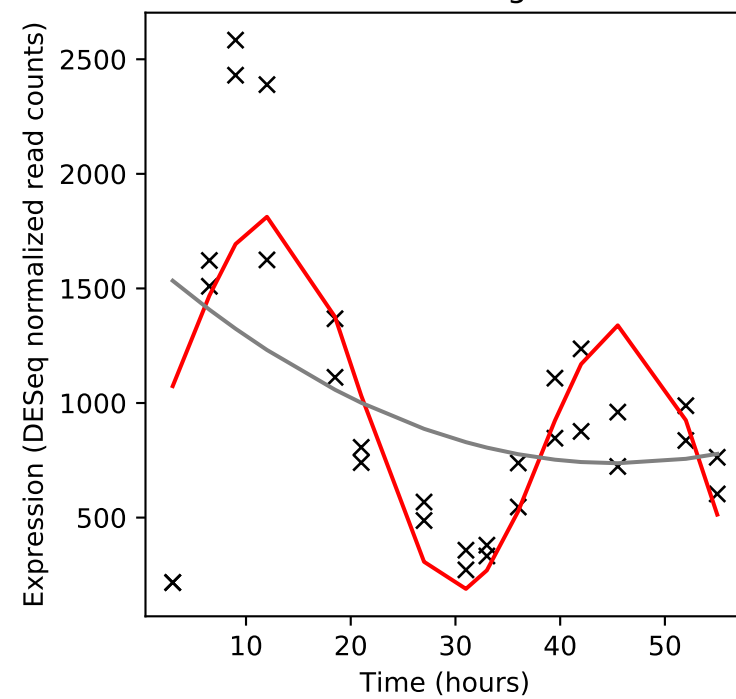

Rv1655/argD

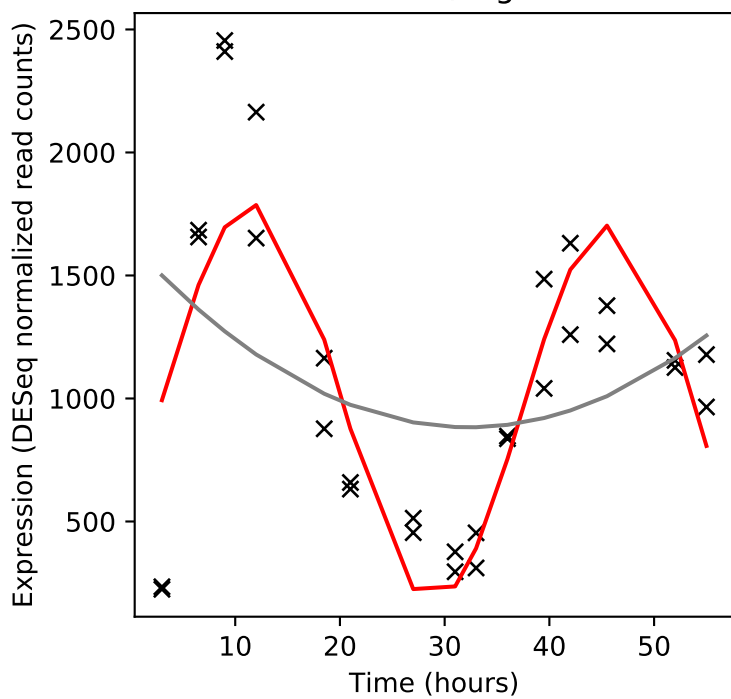

Rv1656/argF

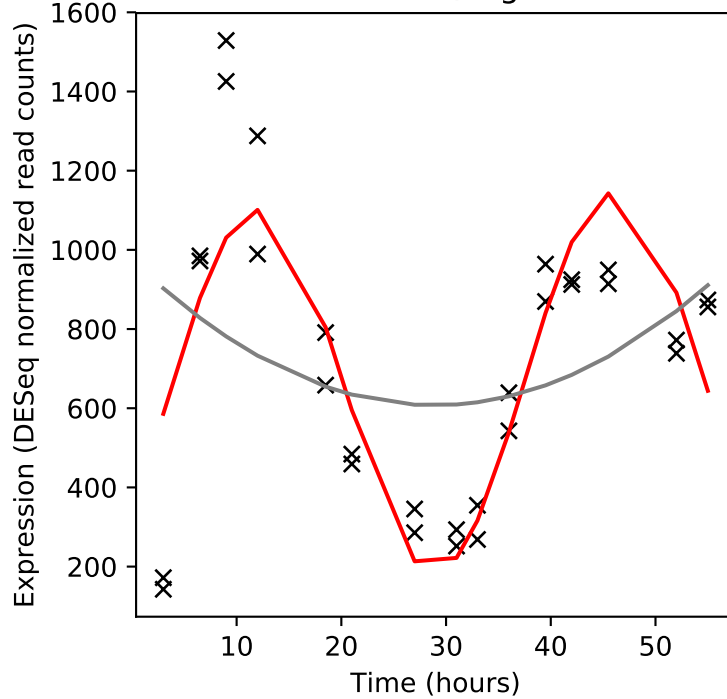

Rv1657/argR

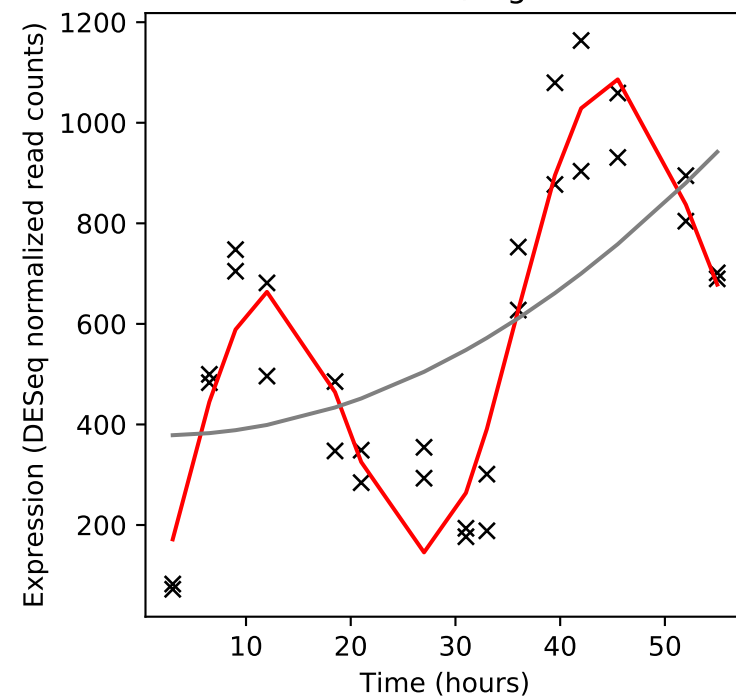

Rv1658/argG

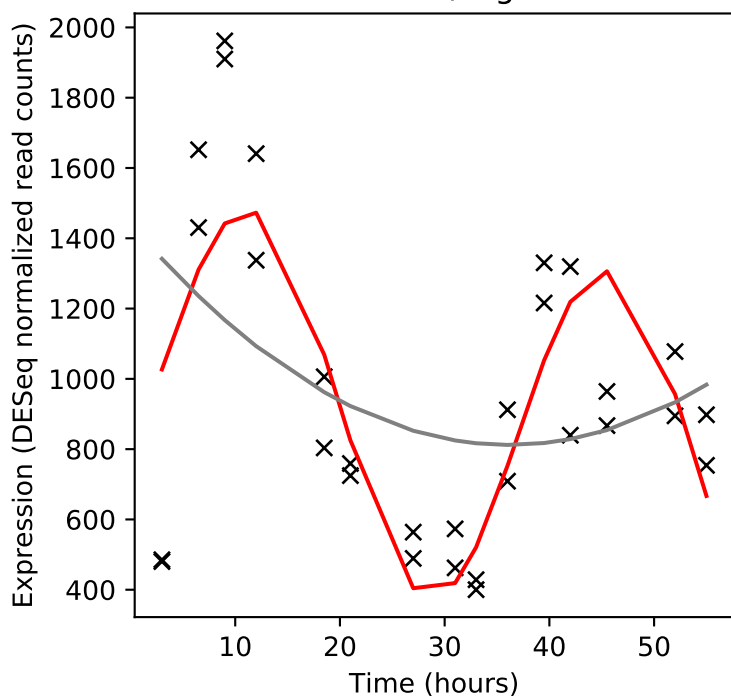

Rv1659/argH

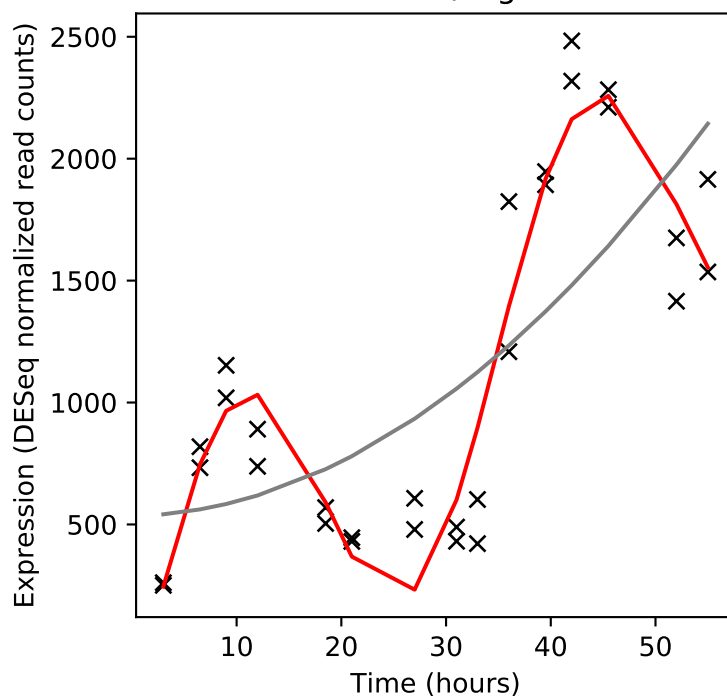

Rv1660/pks10

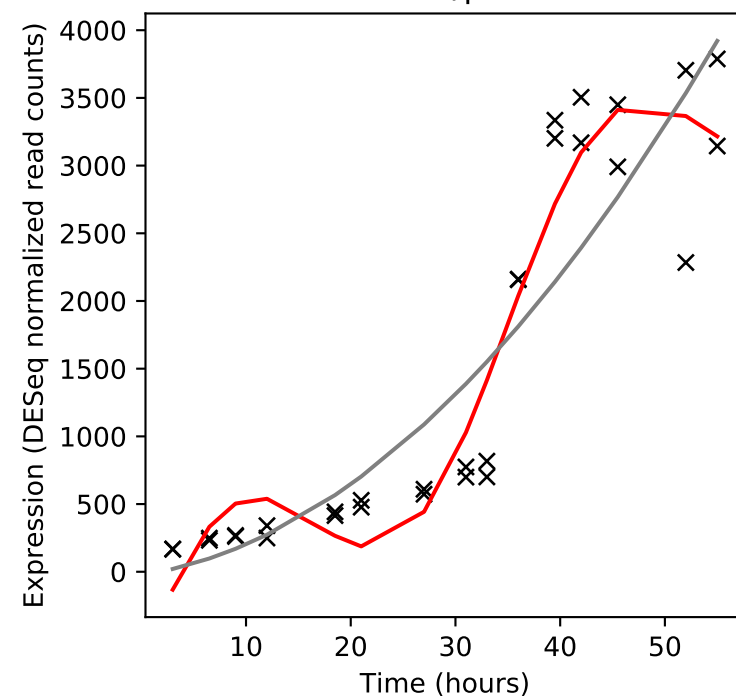



Rv1661/pks7

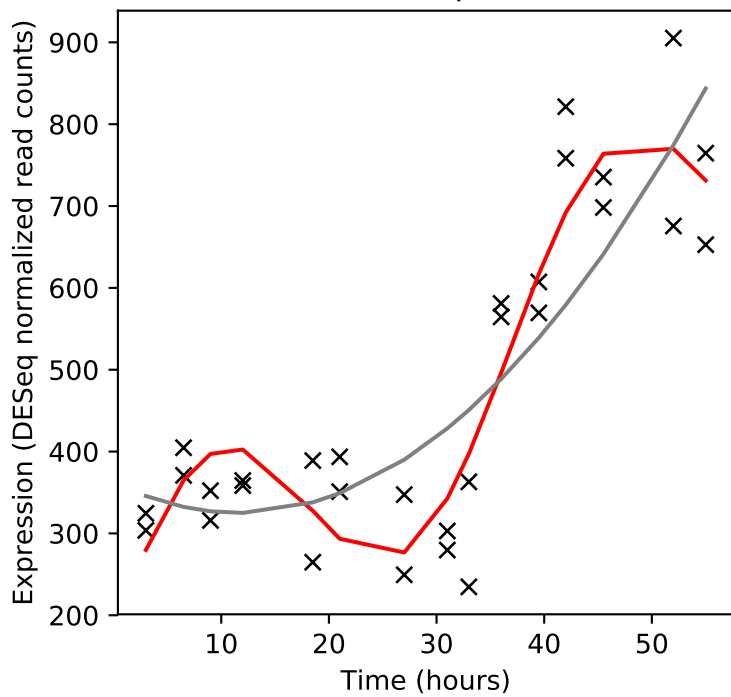

Rv1662/pks8

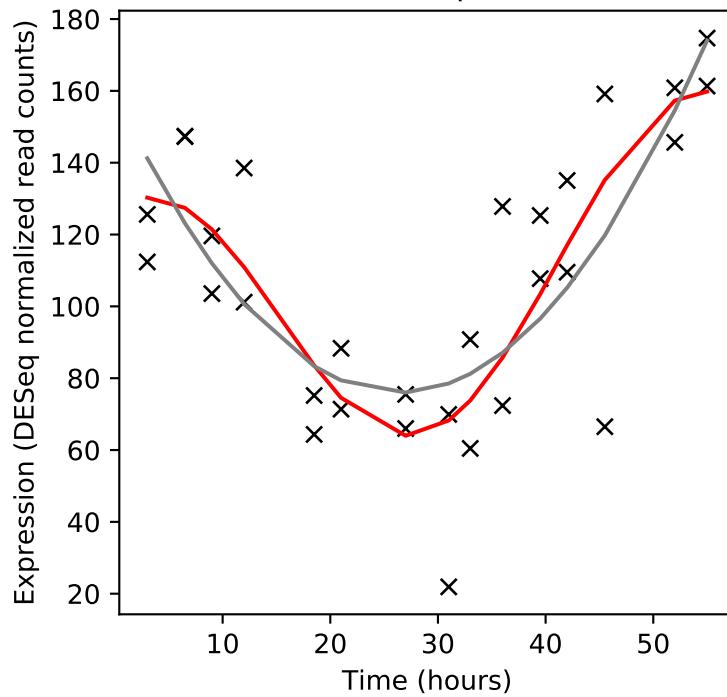

Rv1663/pks17

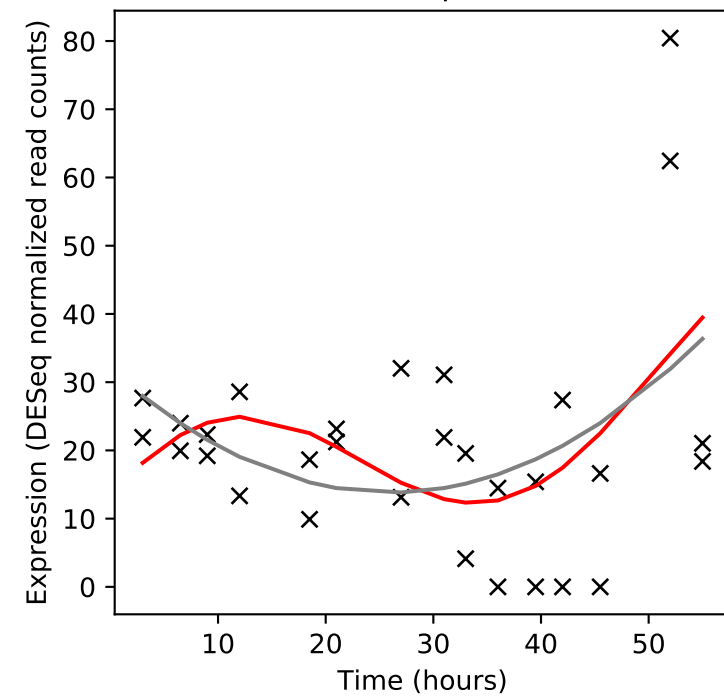

Rv1664/pks9

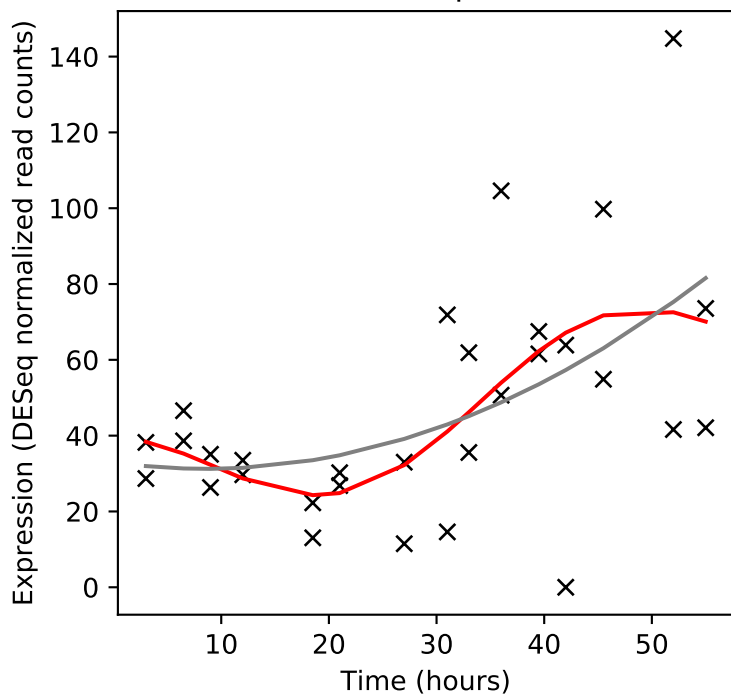

Rv1665/pks11

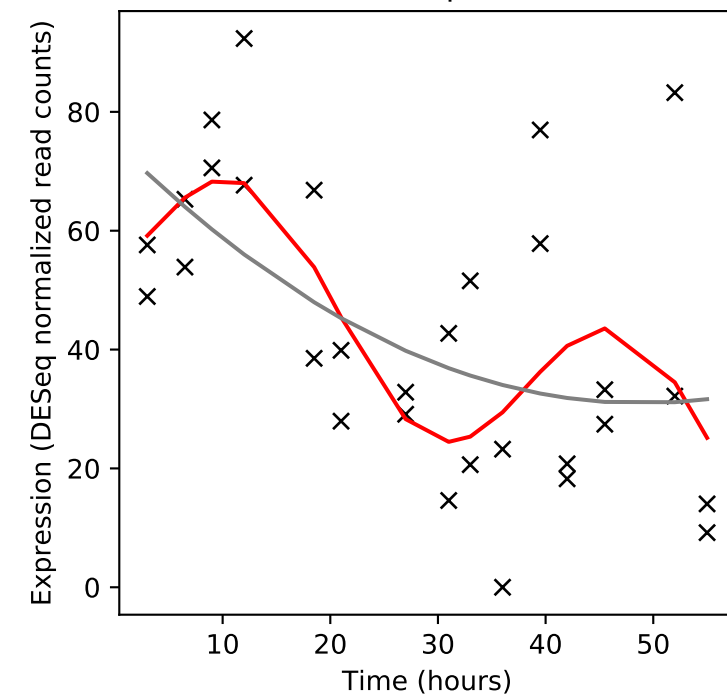

Rv1666c/cyp139

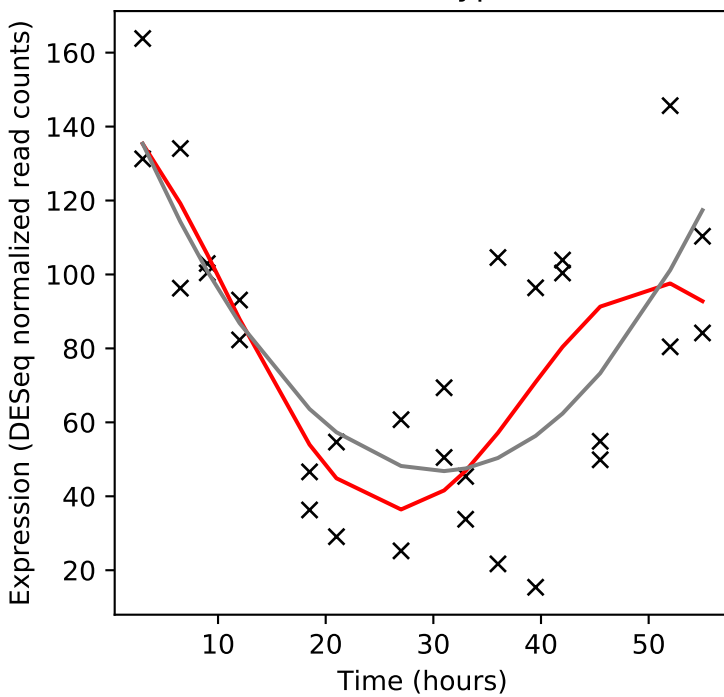

Rv1667c/-

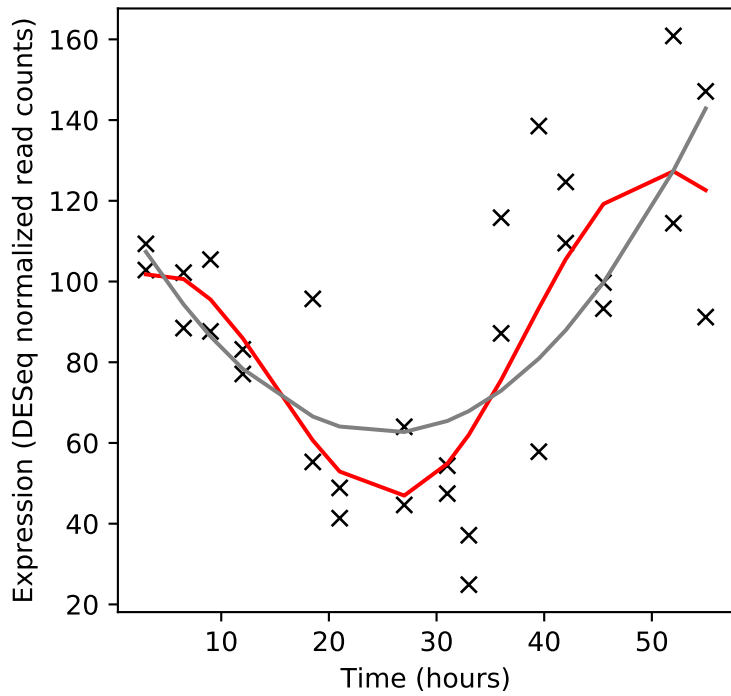

Rv1668c/-

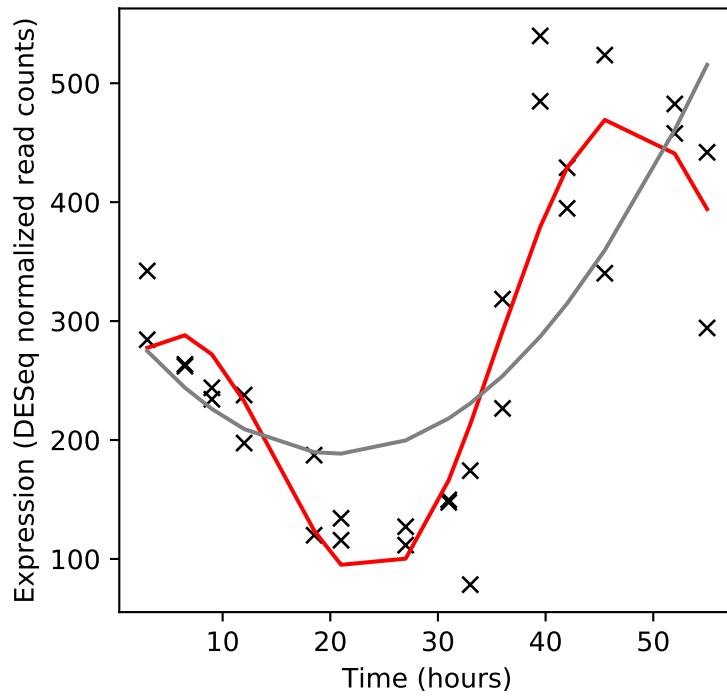

Rv1669/-

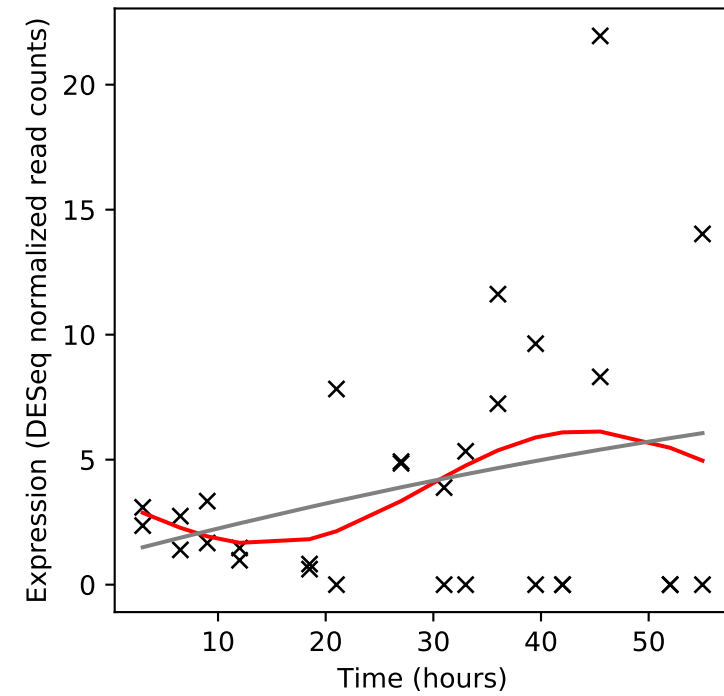



Rv1670/-

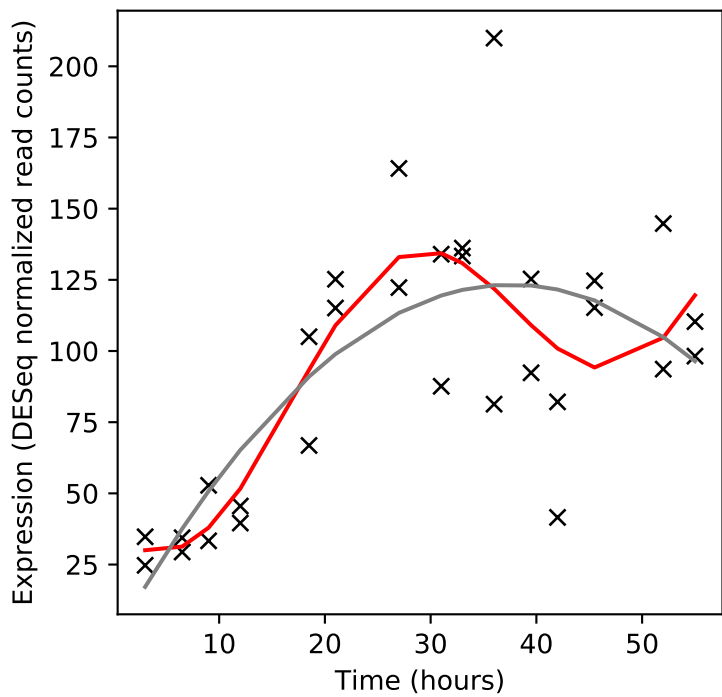

Rv1671/-

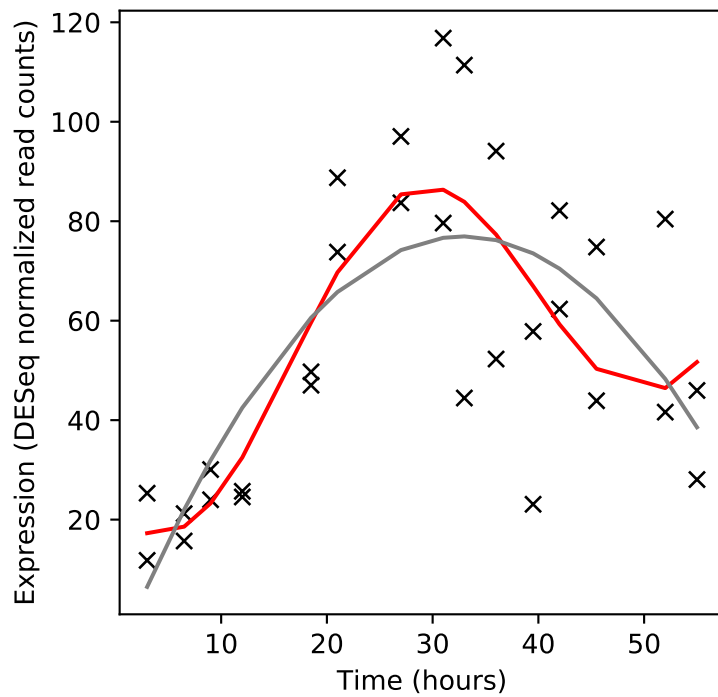

Rv1672c/-

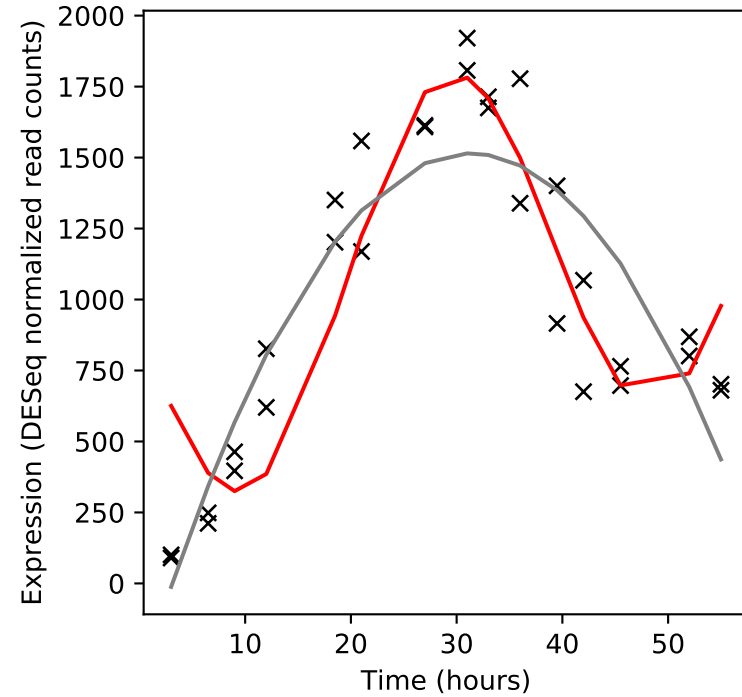

Rv1673c/-

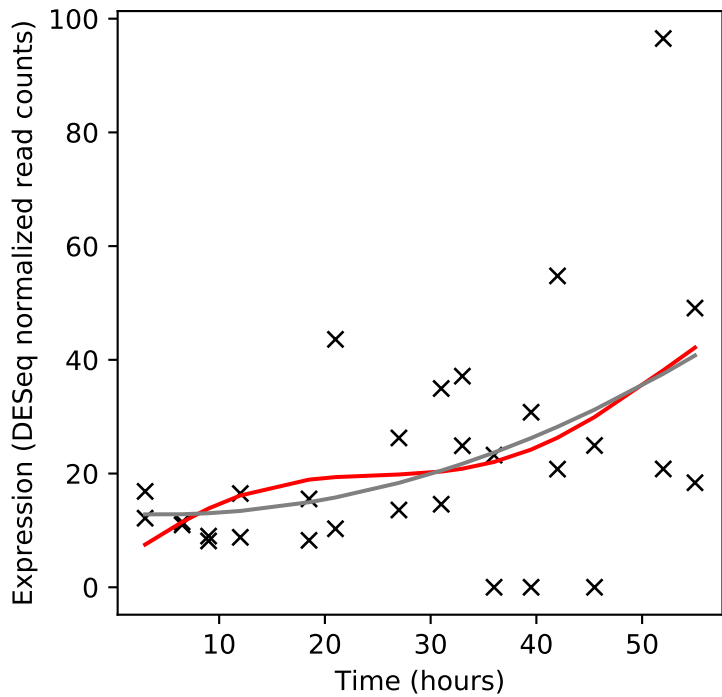

Rv1674c/-

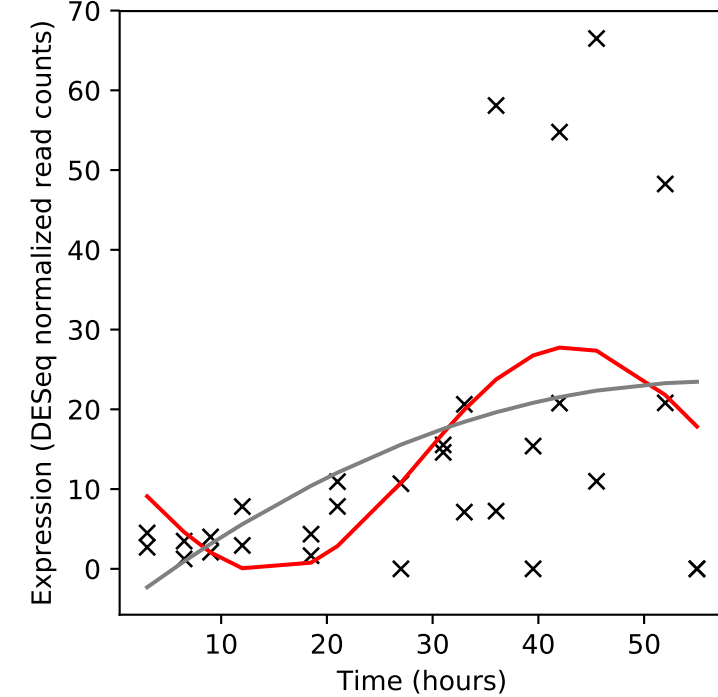

Rv1675c/cmr

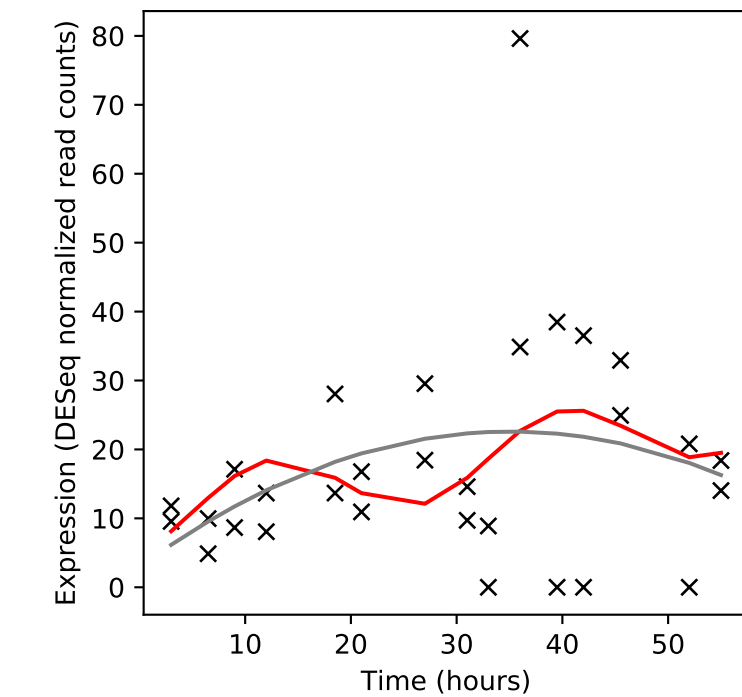

Rv1676/-

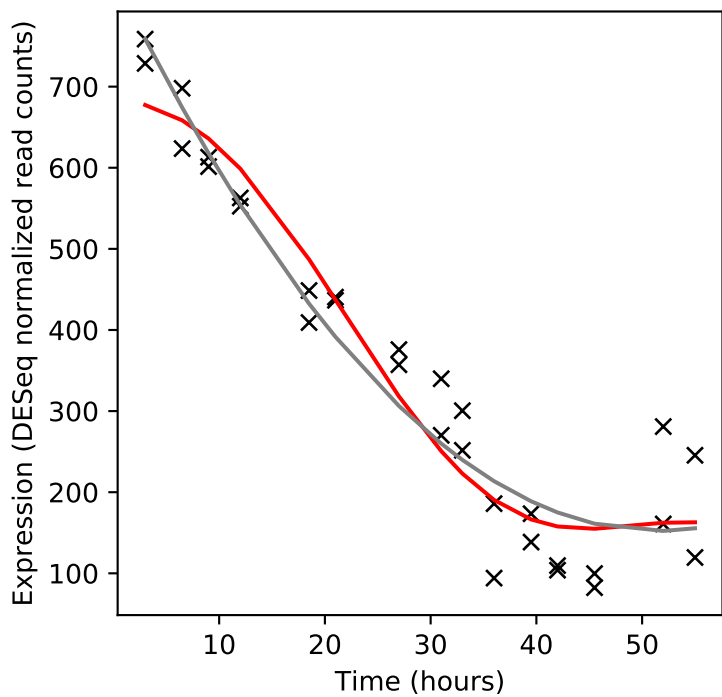

Rv1677/dsbF

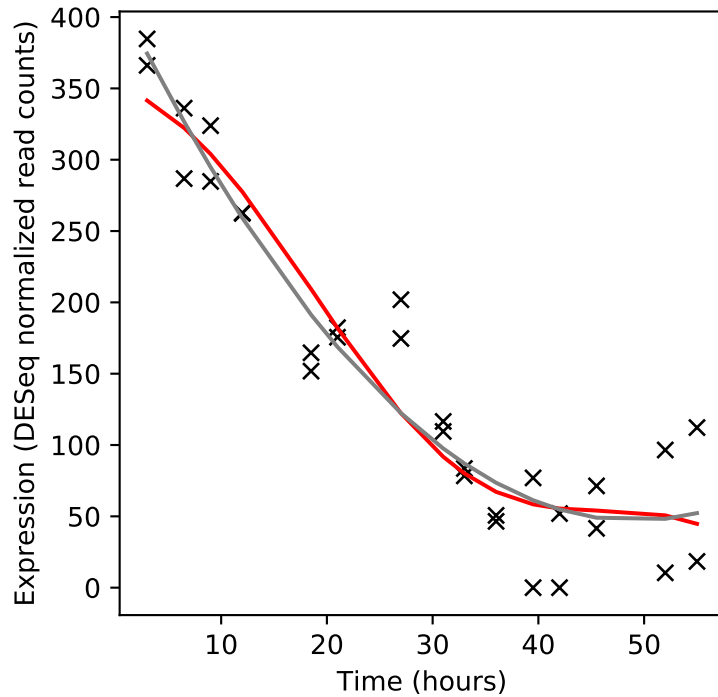

Rv1678/-

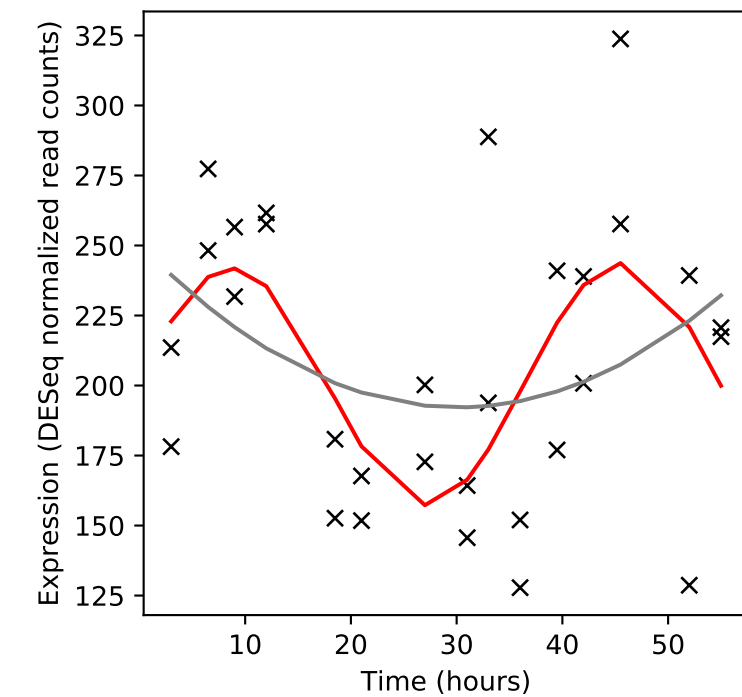

Rv1679/fadE16

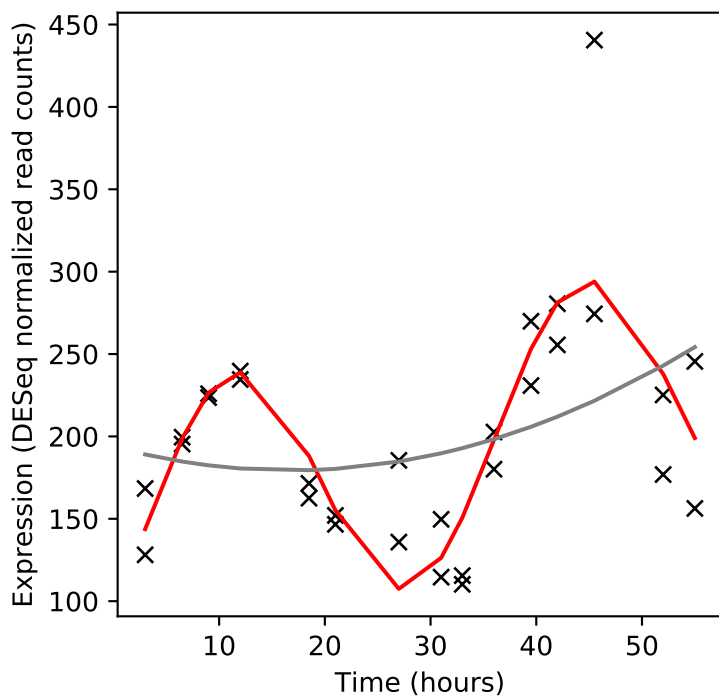

Rv1680/-

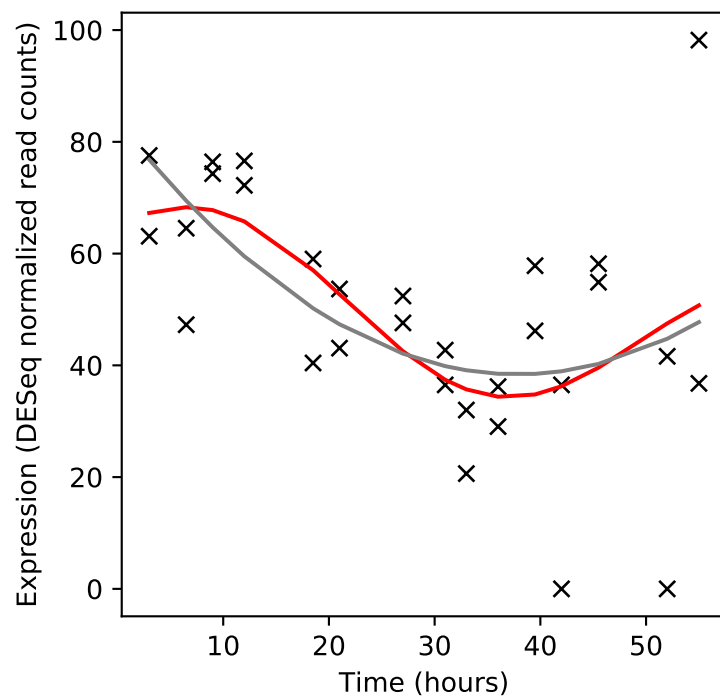

Rv1681/moeX

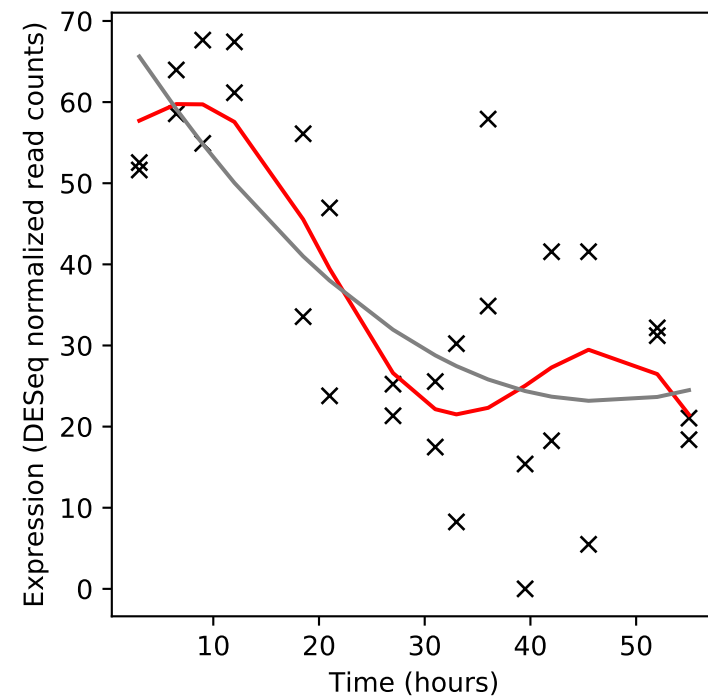

Rv1682/-

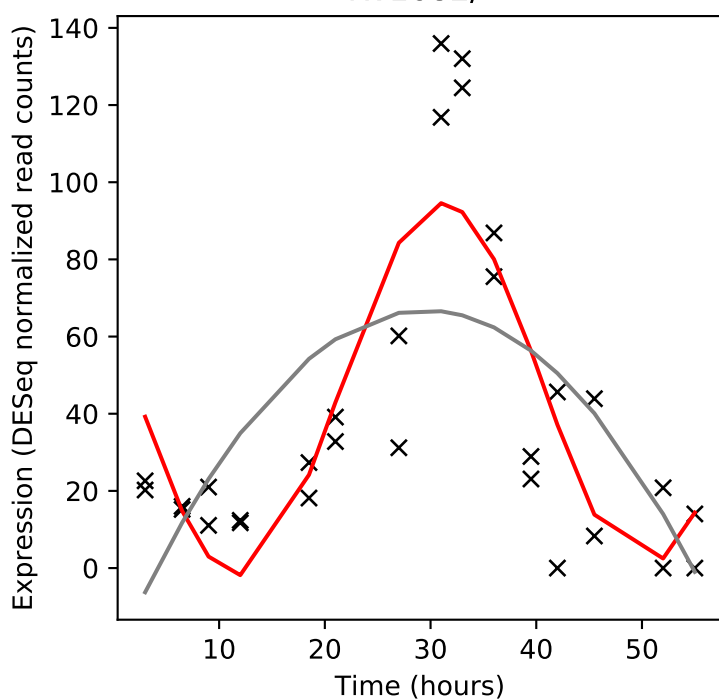

Rv1683/-

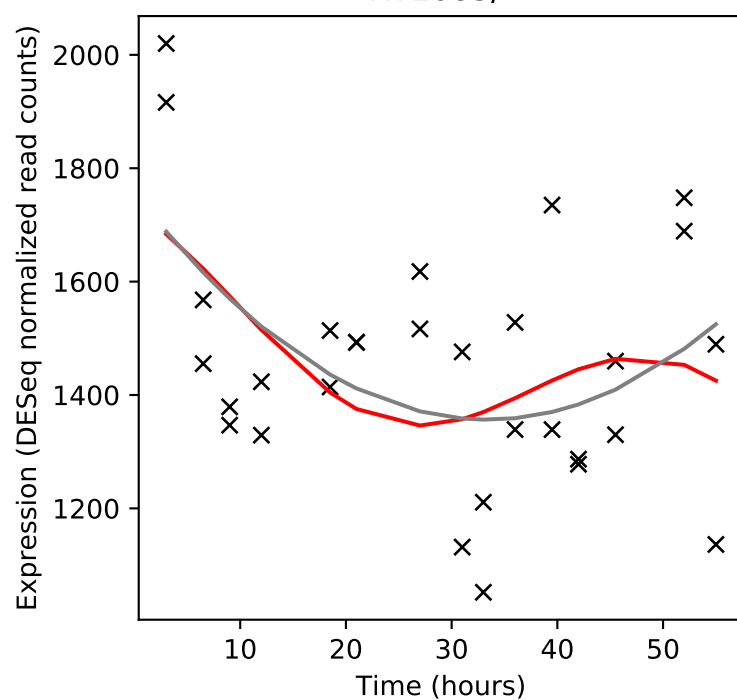

Rv1684/-

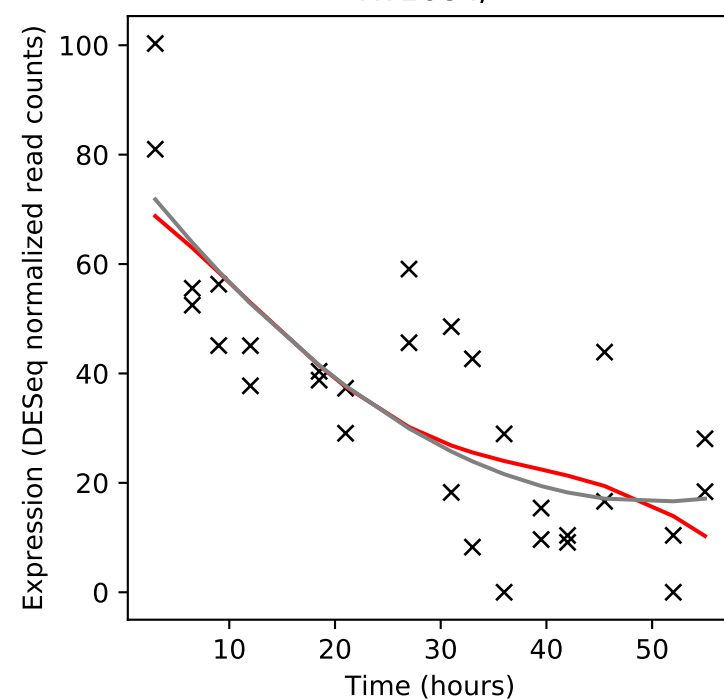

Rv1685c/-

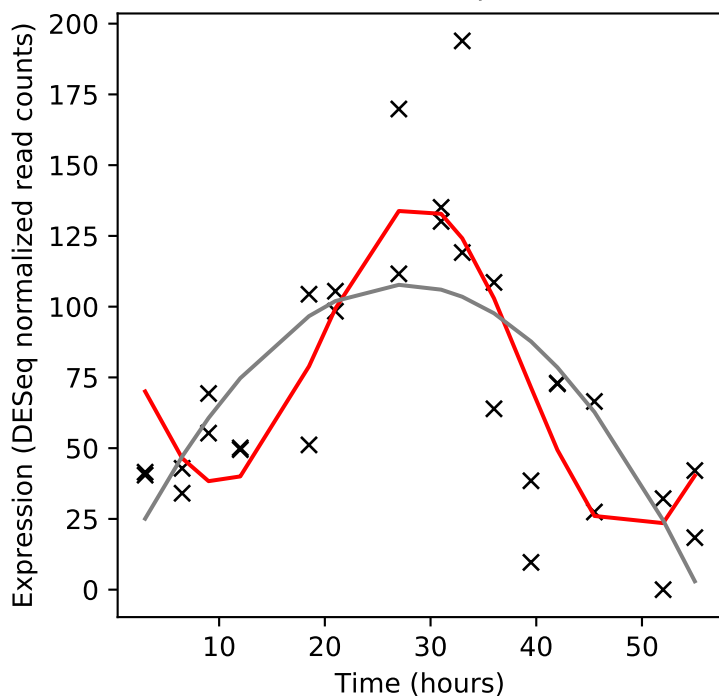

Rv1686c/-

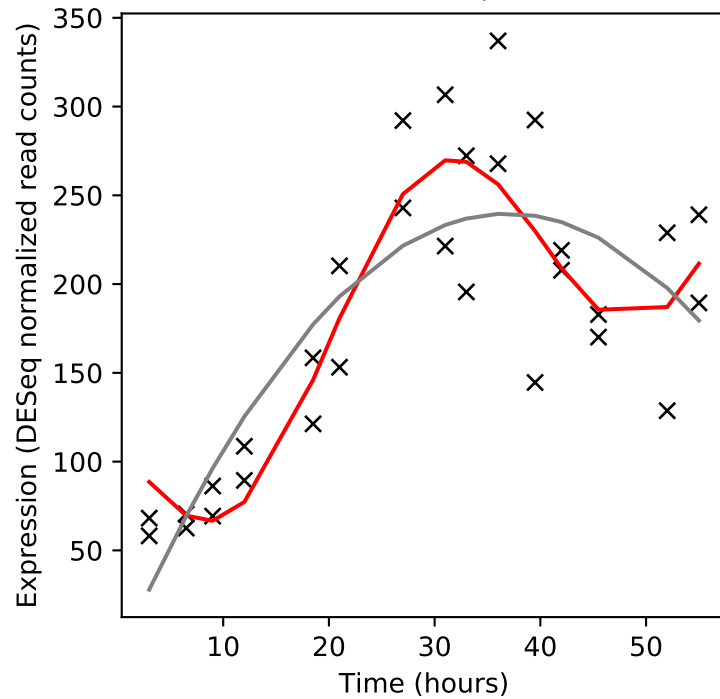

Rv1687c/-

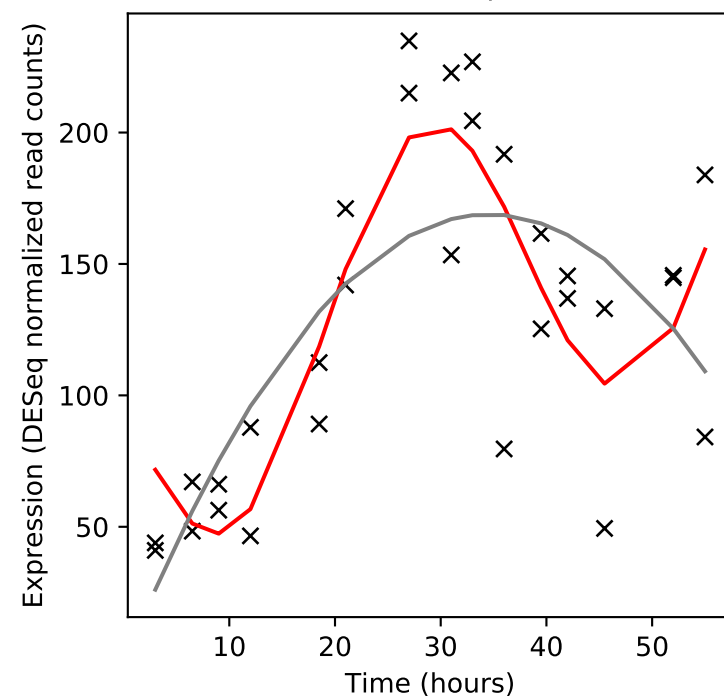

Rv1688/mpg

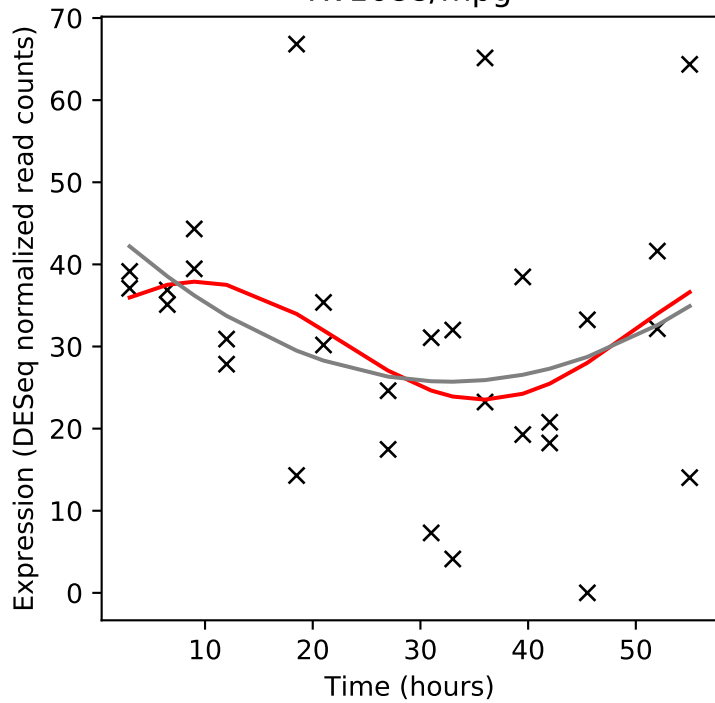

Rv1689/tyrS

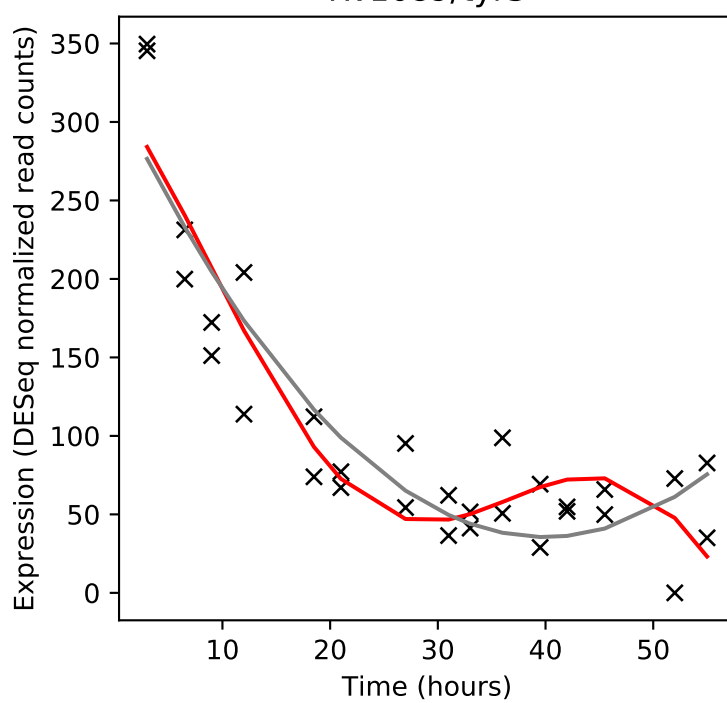

Rv1690/lprJ

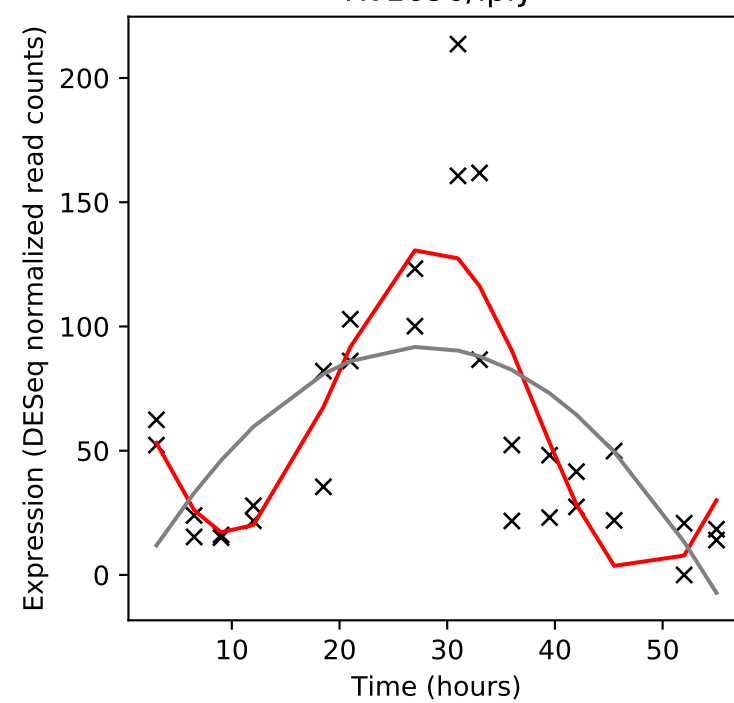

Rv1691/-

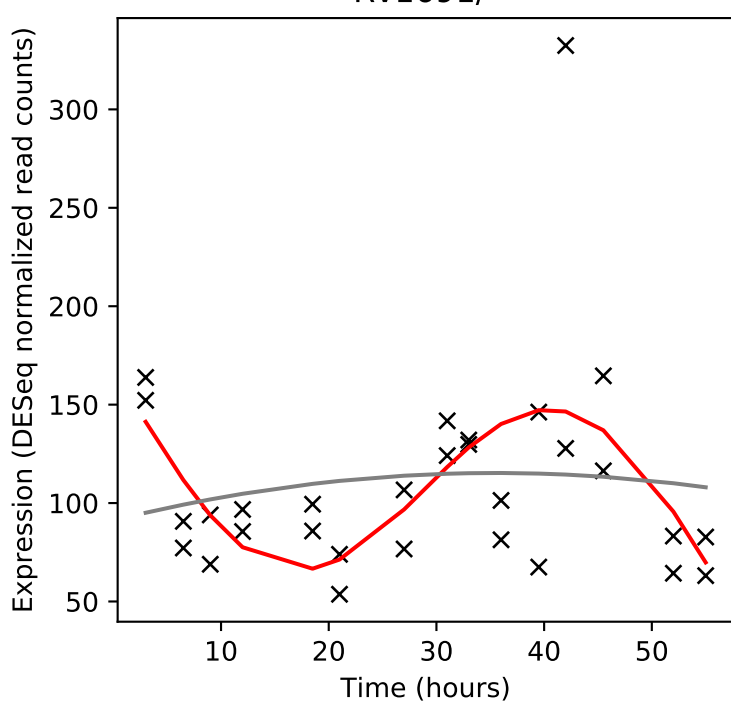

Rv1692/-

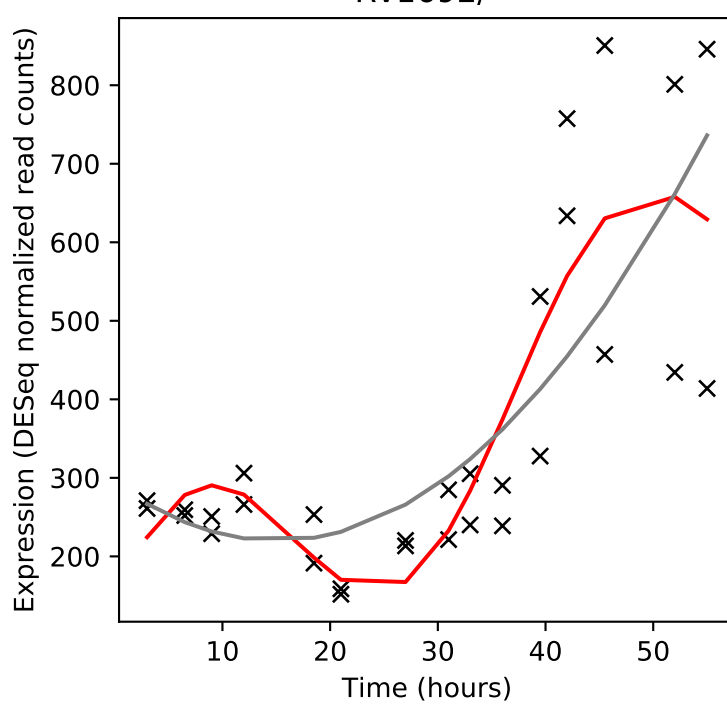

Rv1693/-

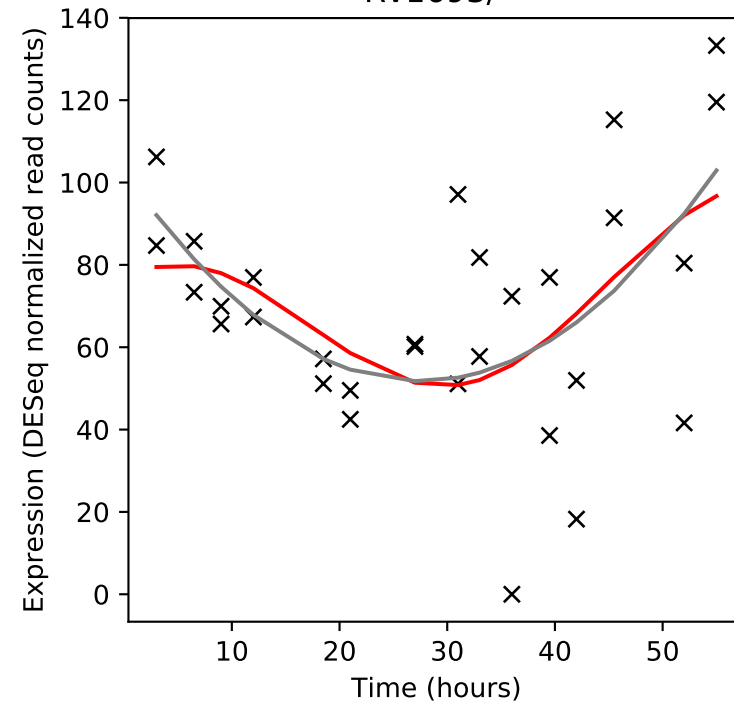

Rv1694/tlyA

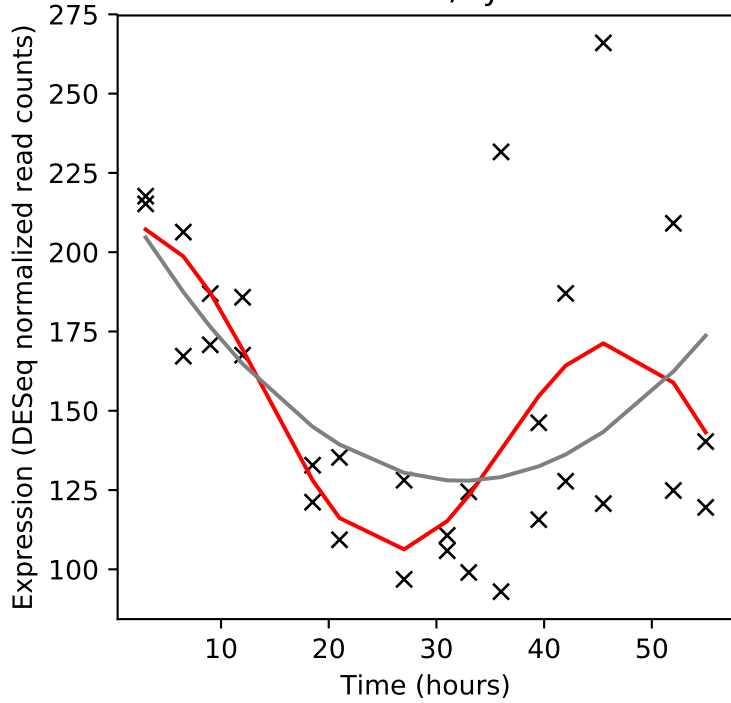

Rv1695/ppnK

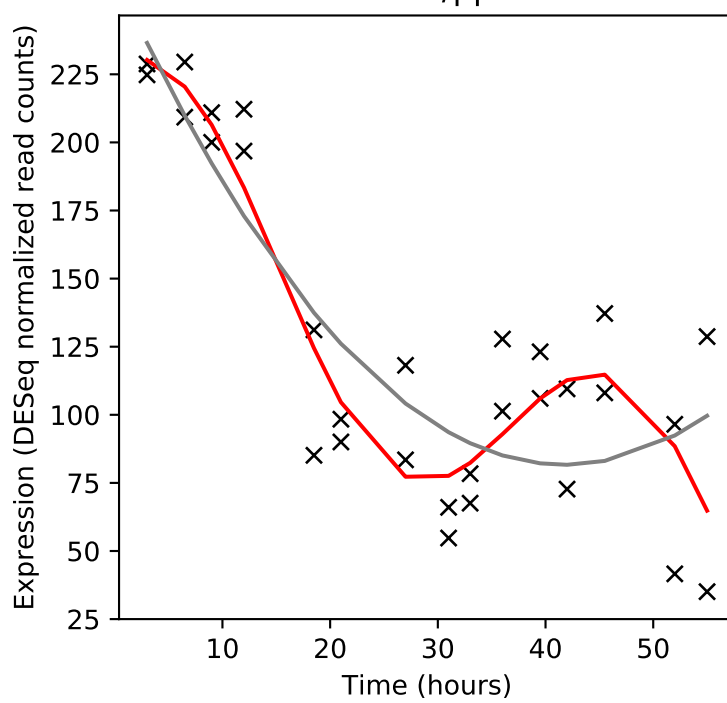

Rv1696/recN

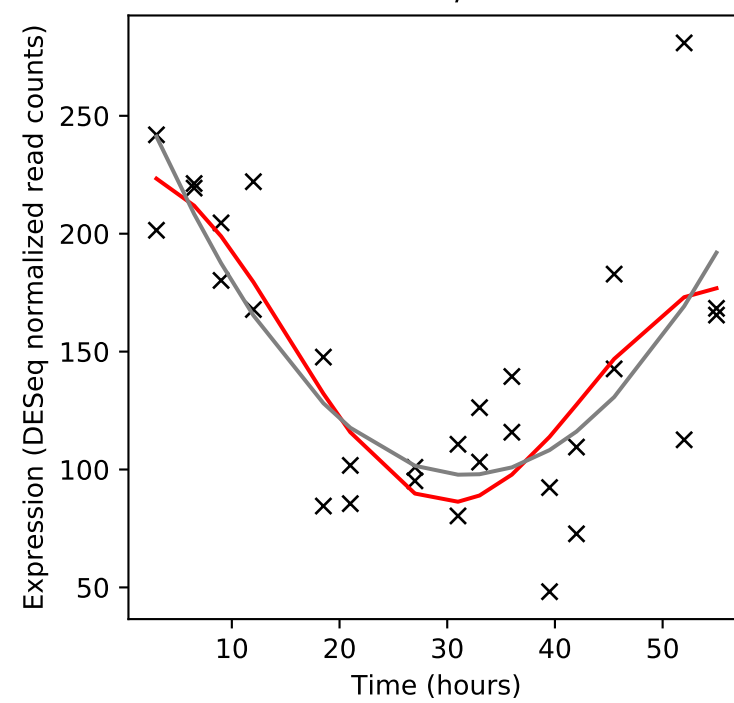

Rv1697/-

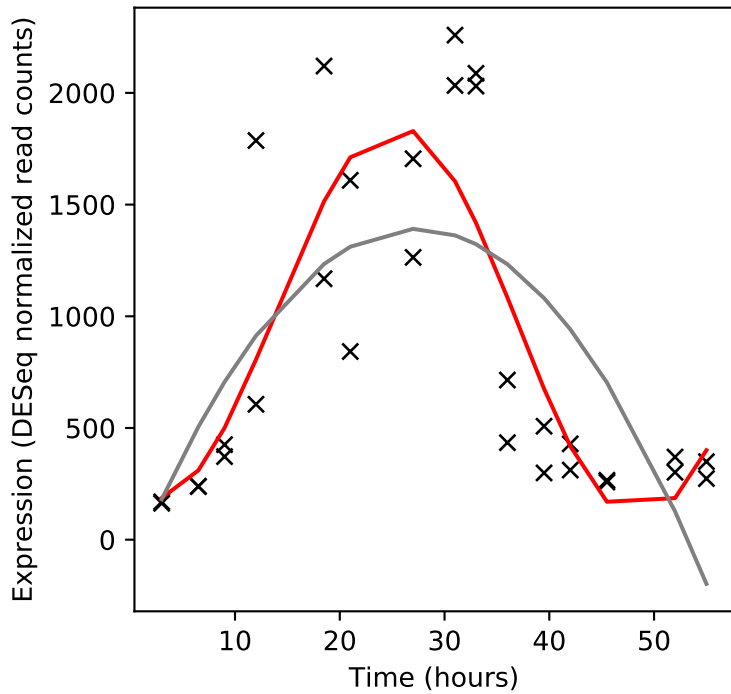

Rv1698/mctB

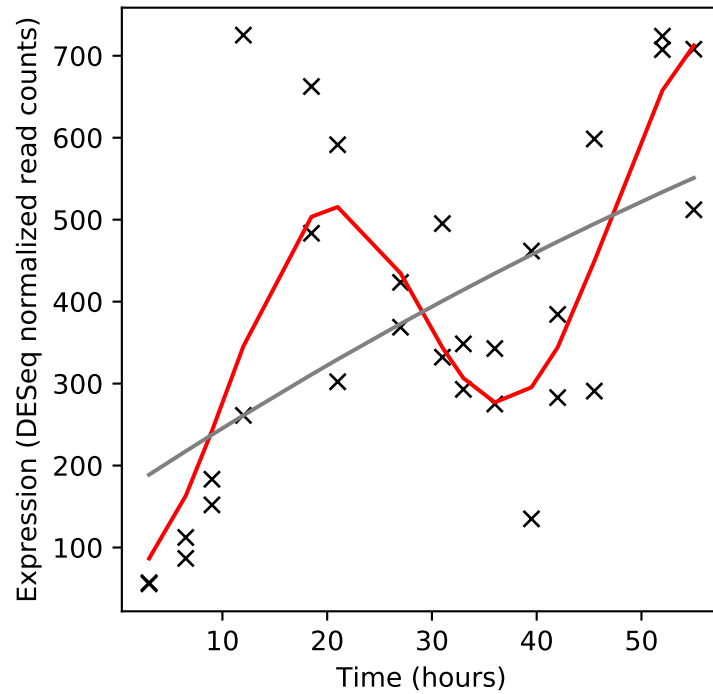

Rv1699/pyrG

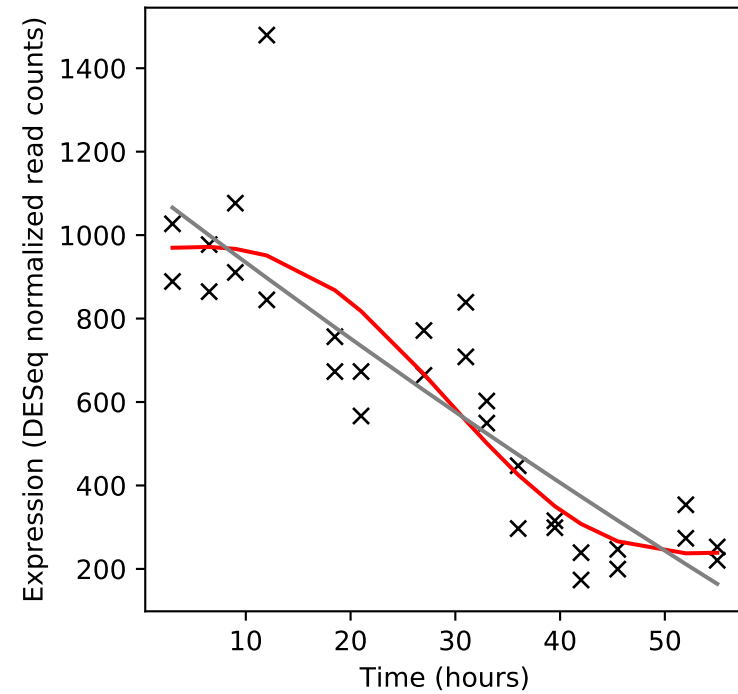

Rv1700/-

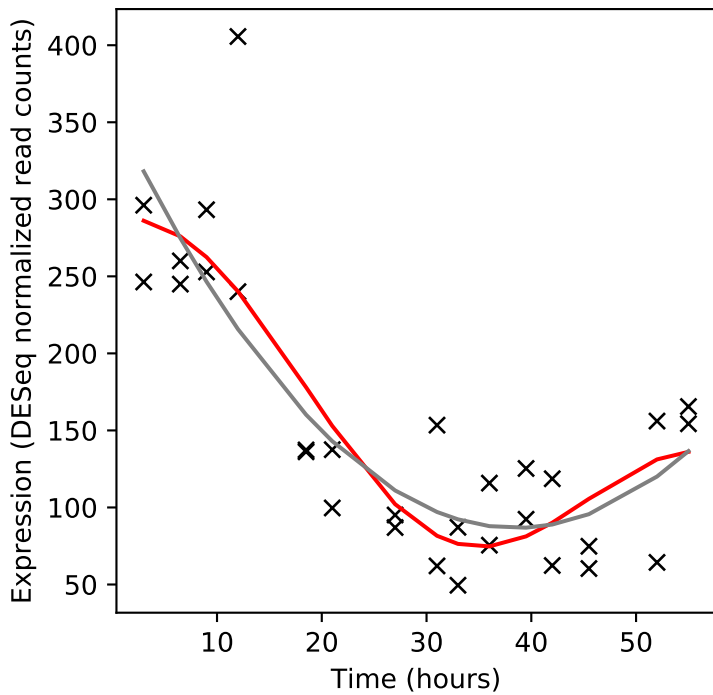

Rv1701/-

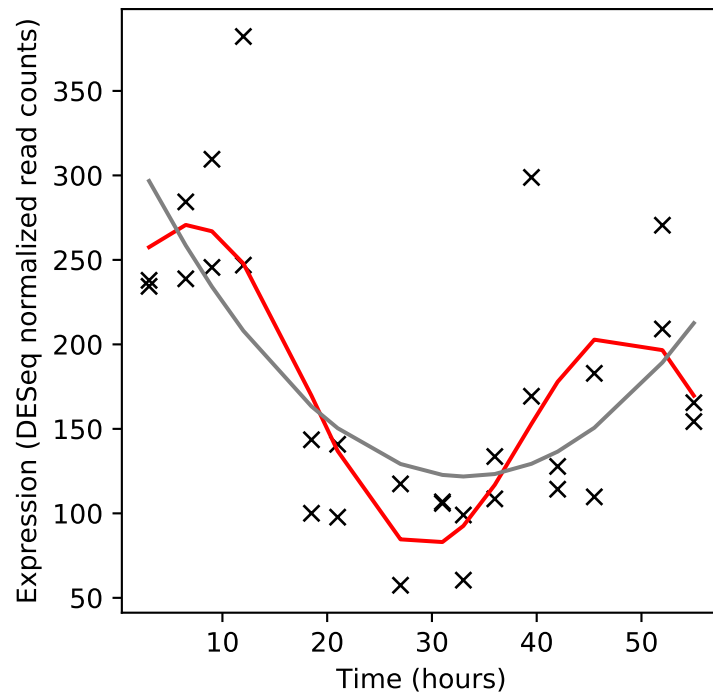

Rv1702c/-

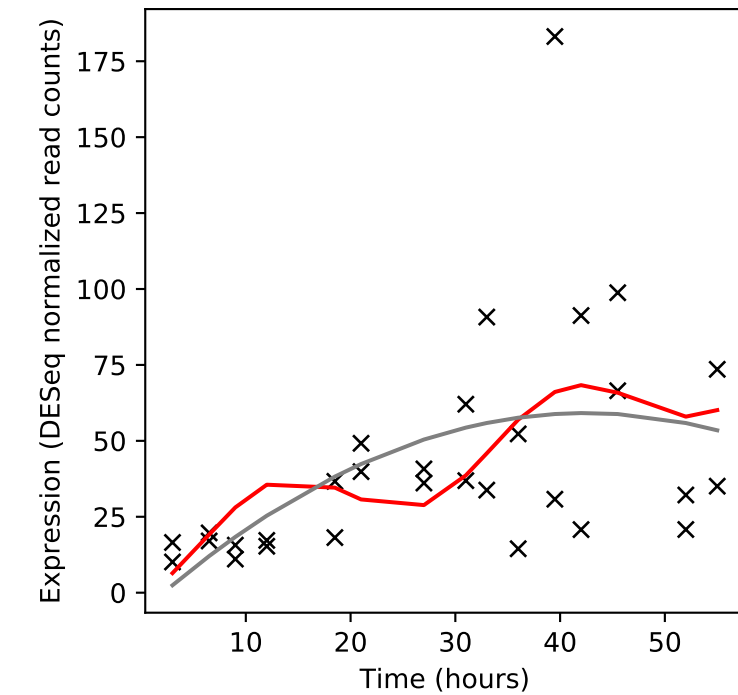

Rv1703c/-

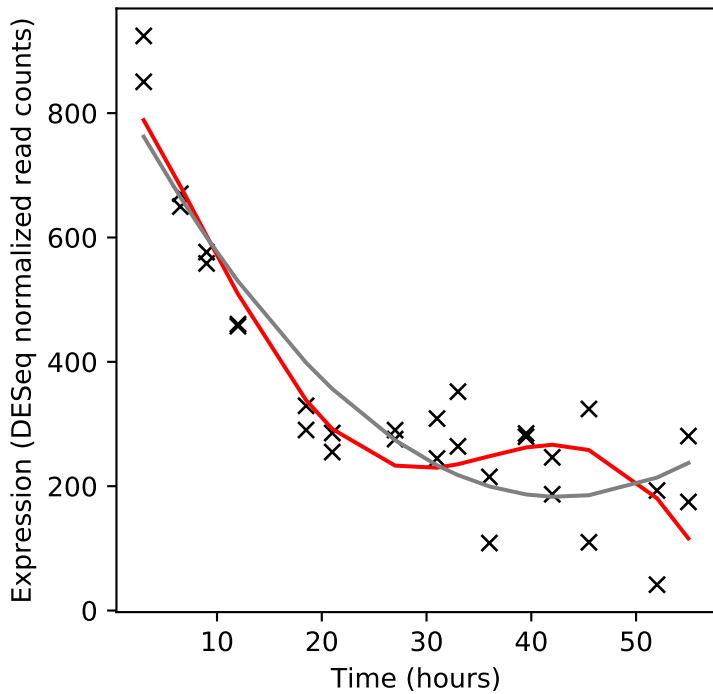

Rv1704c/cycA

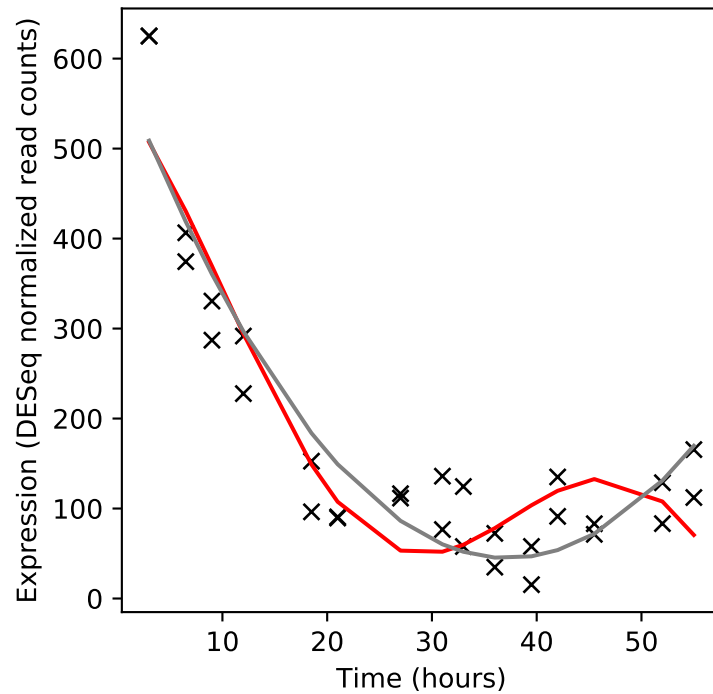

Rv1705c/PPE22

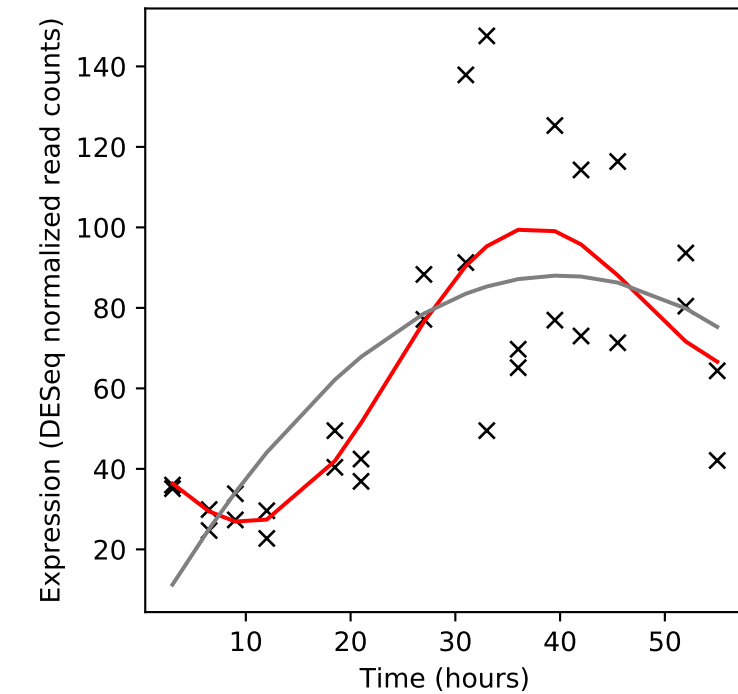

Rv1706c/PPE23

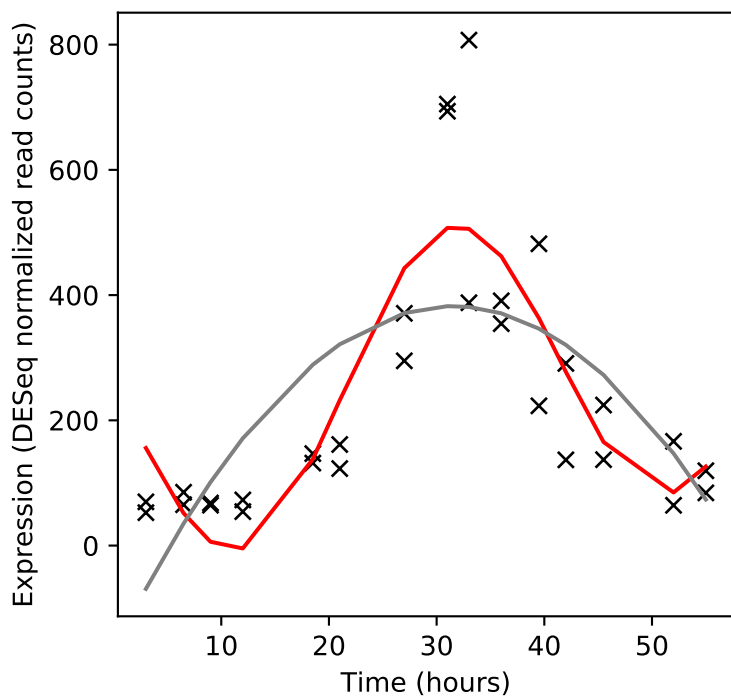

Rv1706A/-

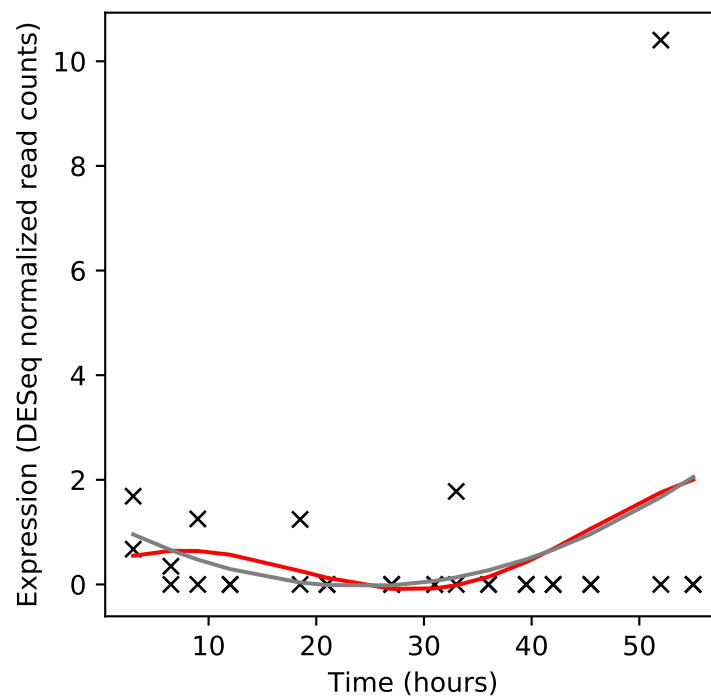

Rv1707/-

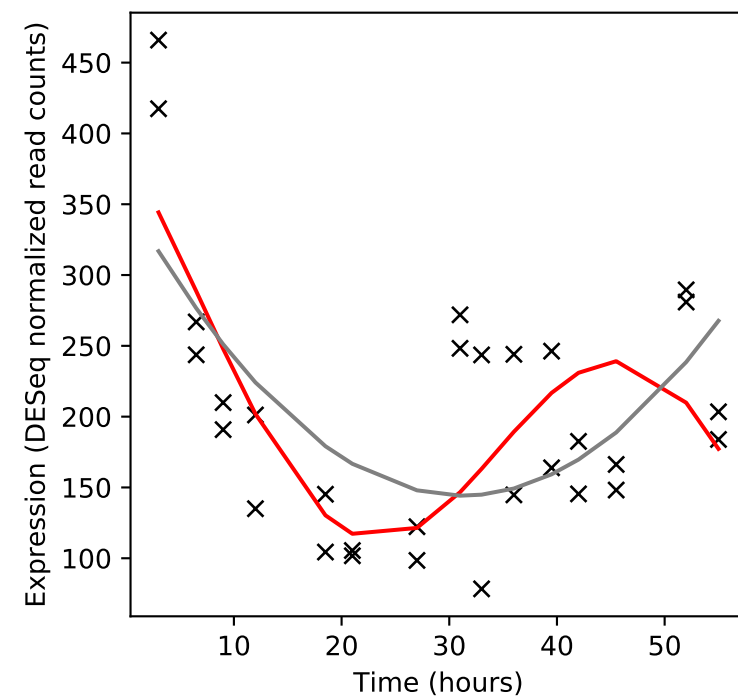

Rv1708/-

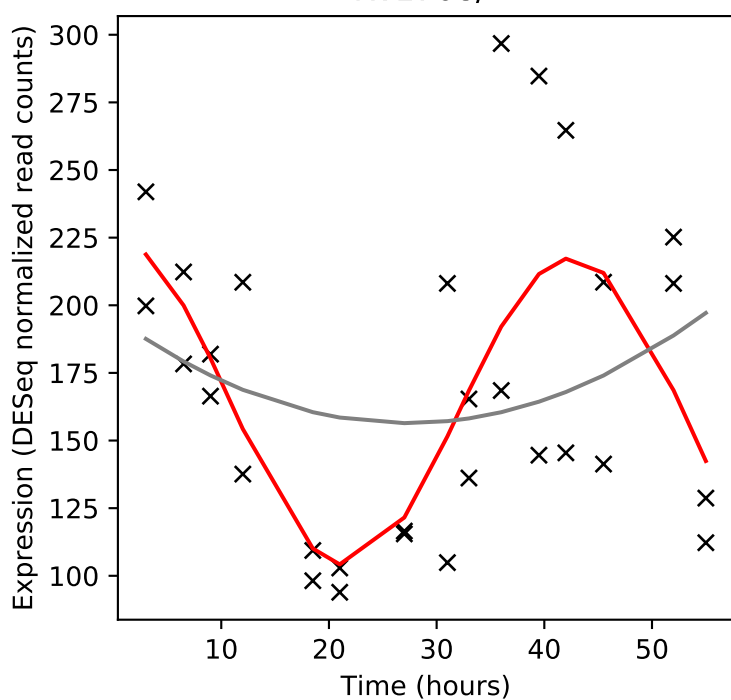

Rv1709/scpA

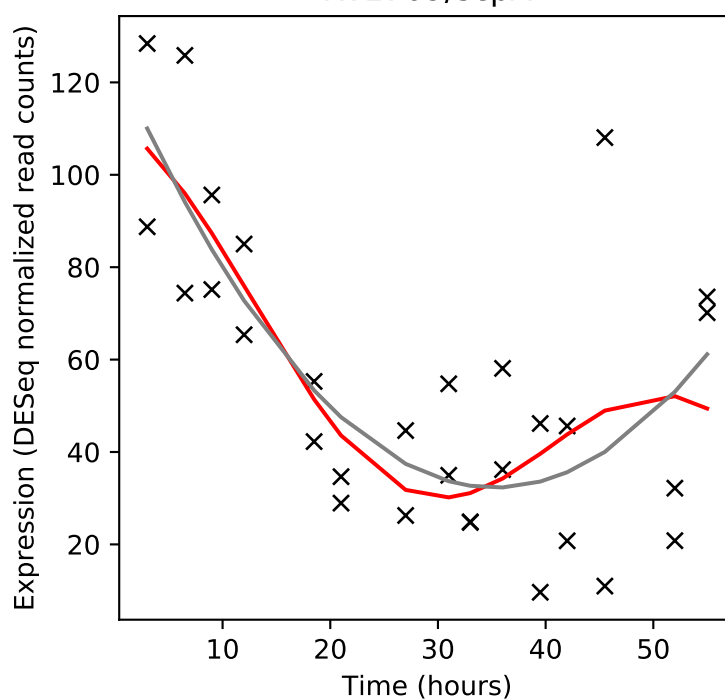

Rv1710/scpB

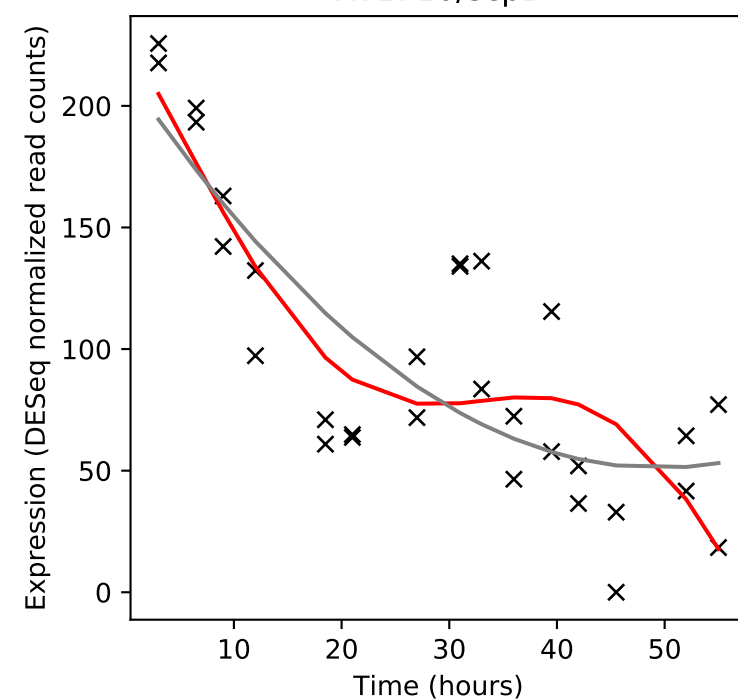

Rv1711/-

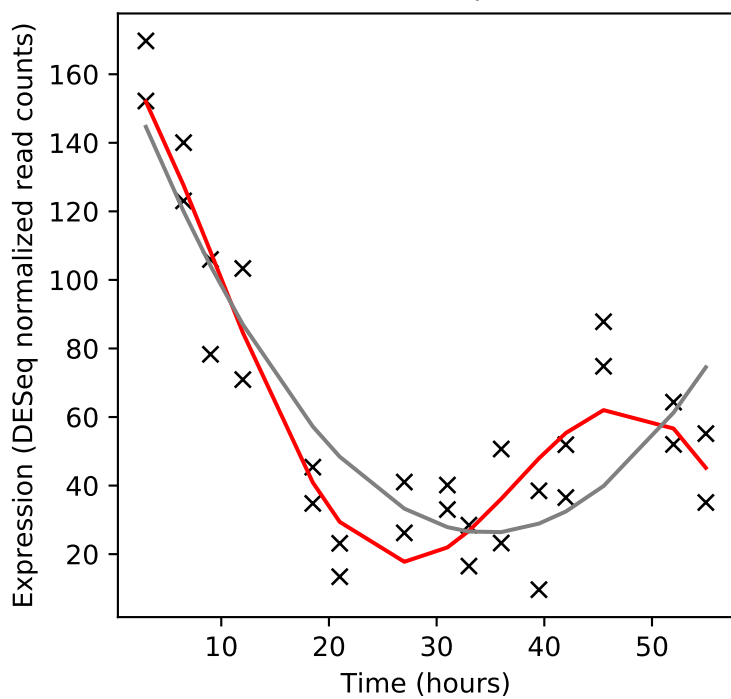

Rv1712/cmK

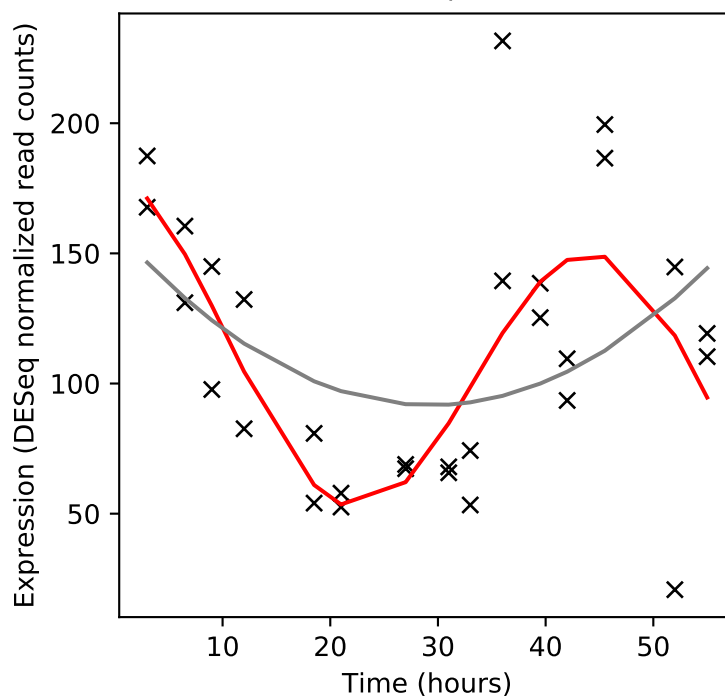

Rv1713/engA

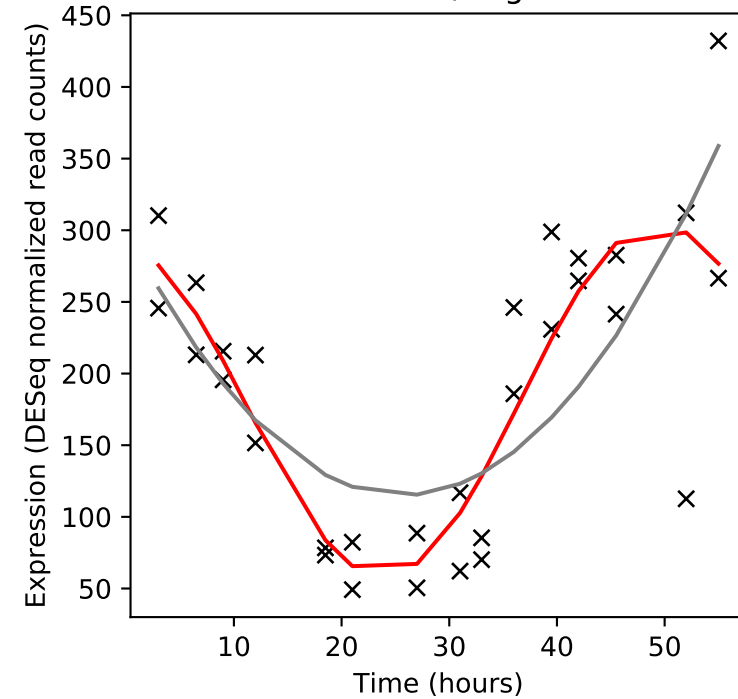

Rv1714/-

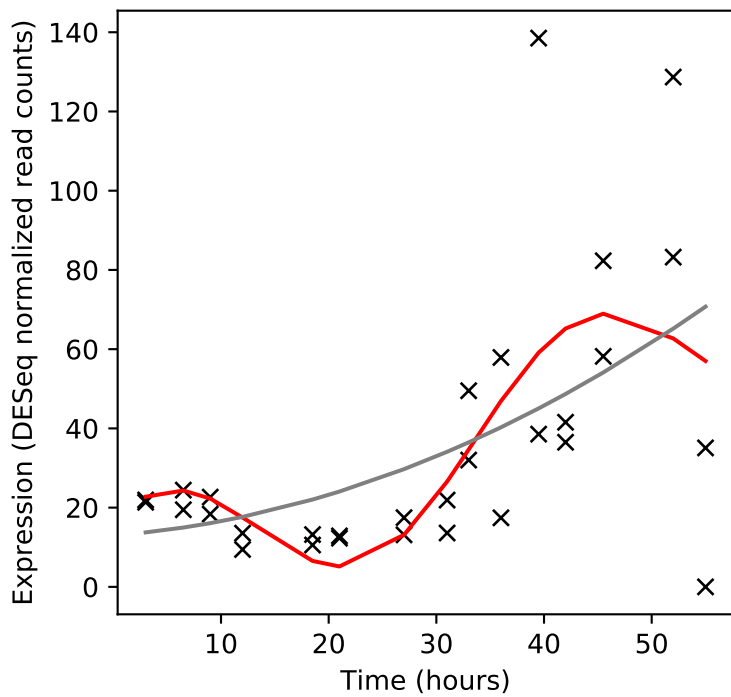

Rv1715/fadB3

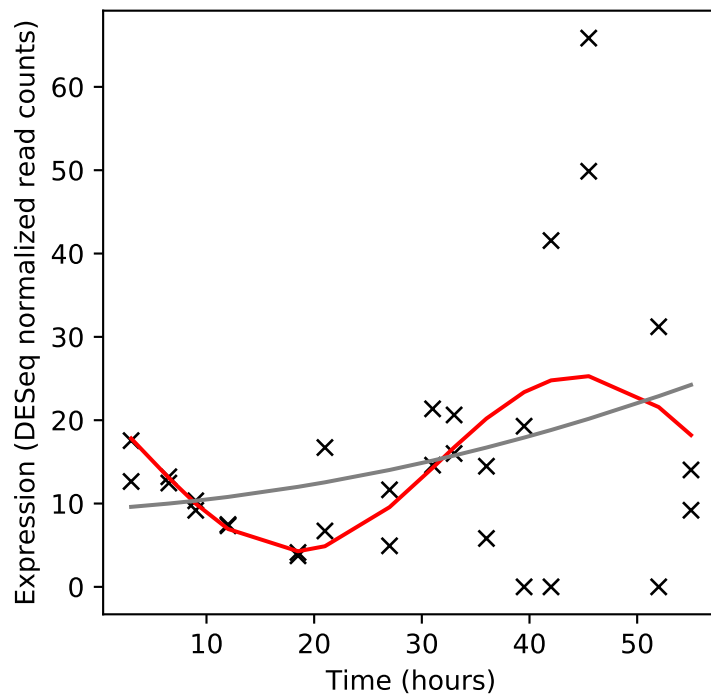

Rv1716/-

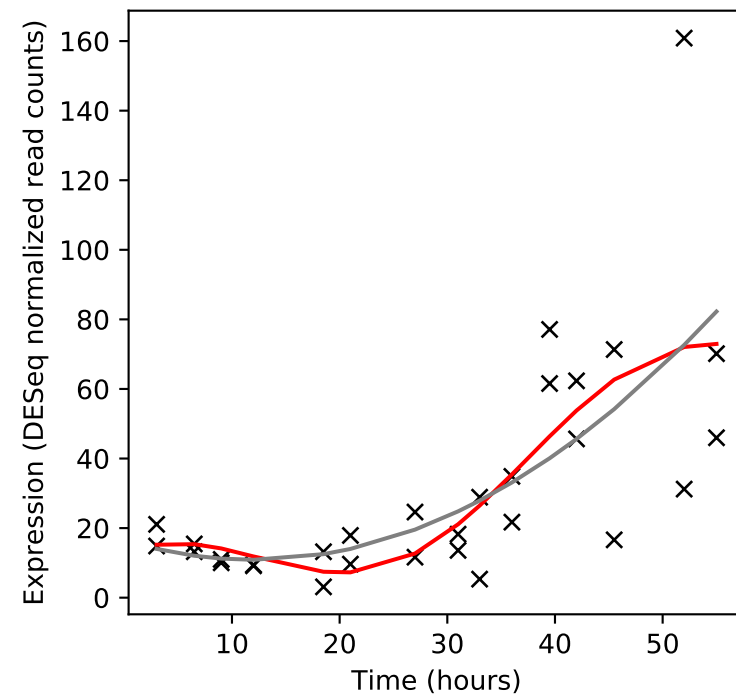

Rv1717/-

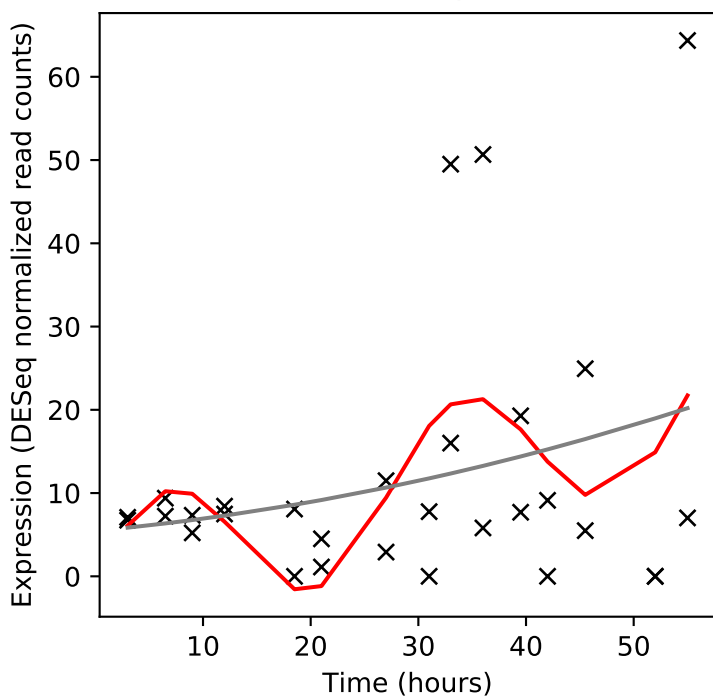

Rv1718/-

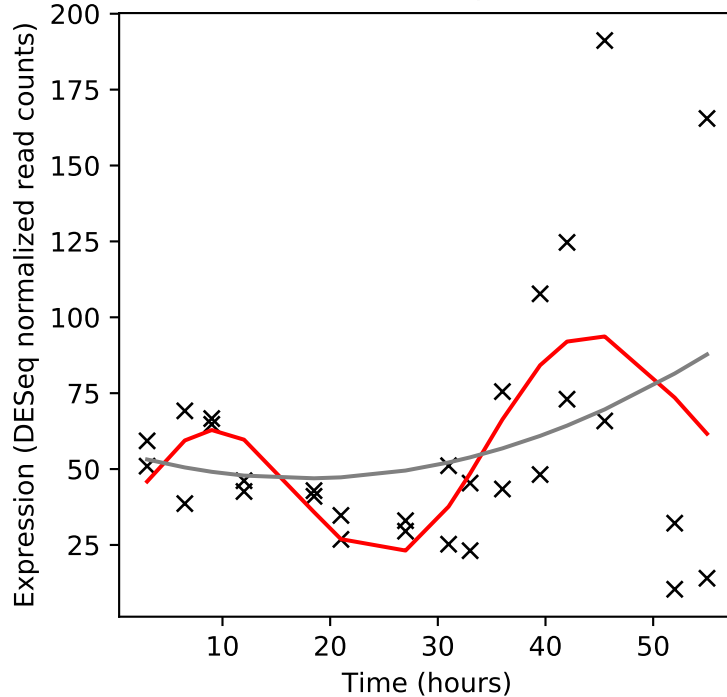

Rv1719/-

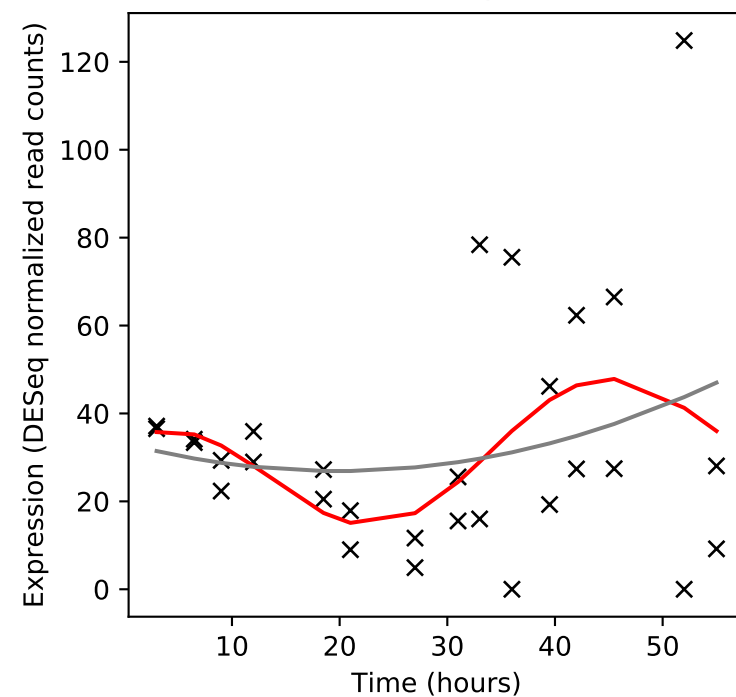

Rv1720c/vapC12

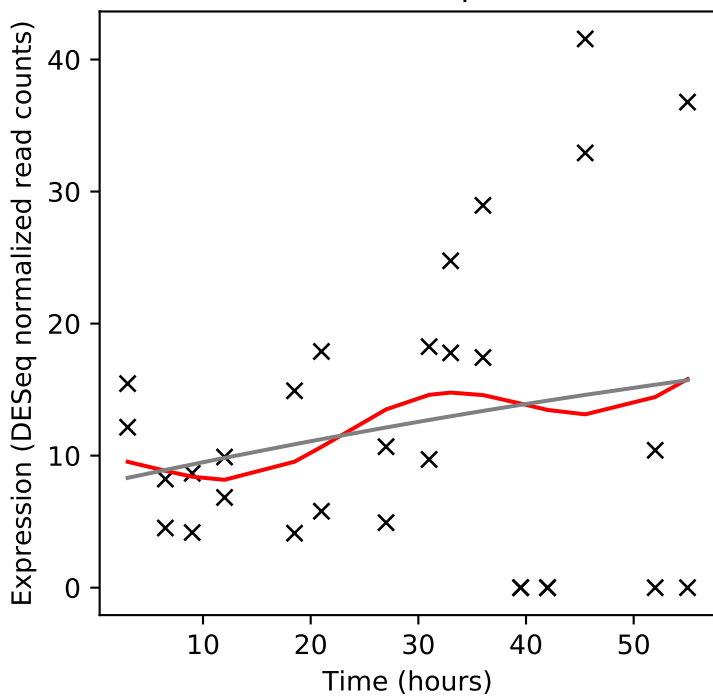

Rv1721c/vapB12

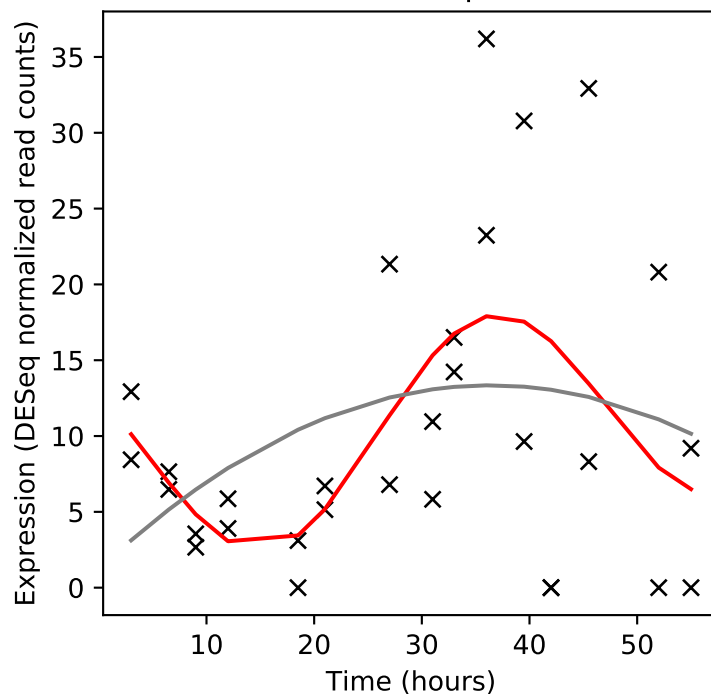

Rv1722/-

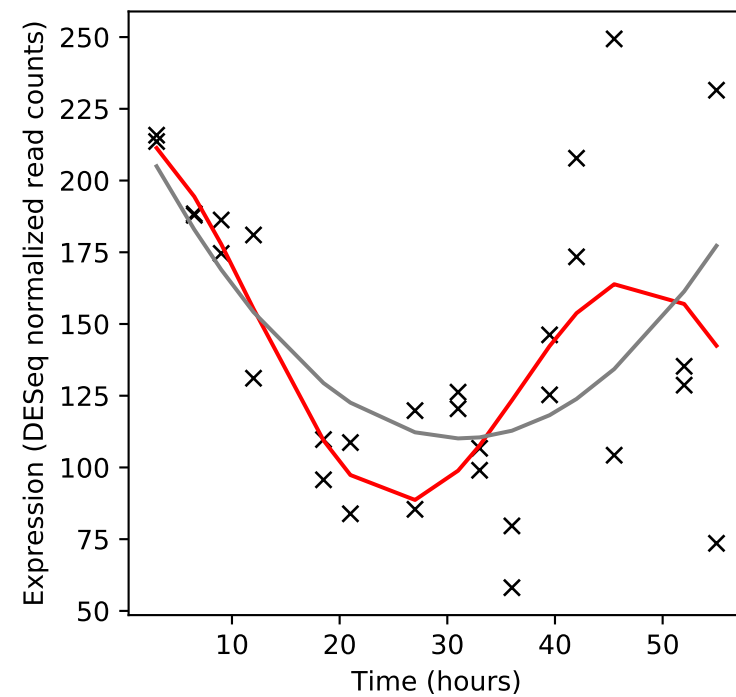

Rv1723/-

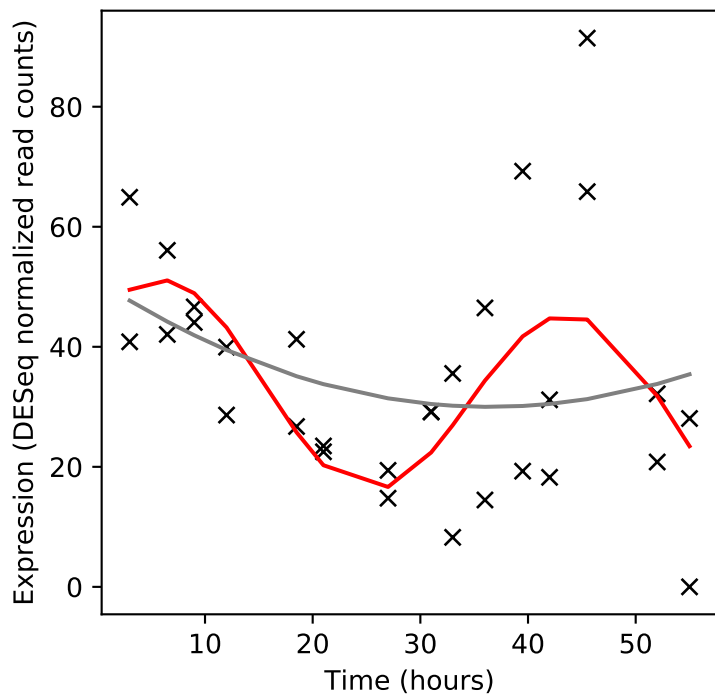

Rv1724c/-

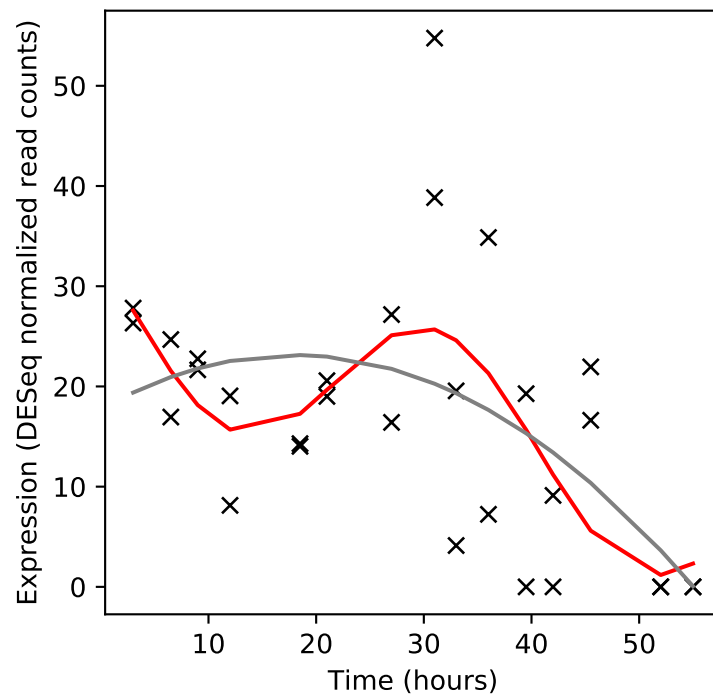

Rv1725c/-

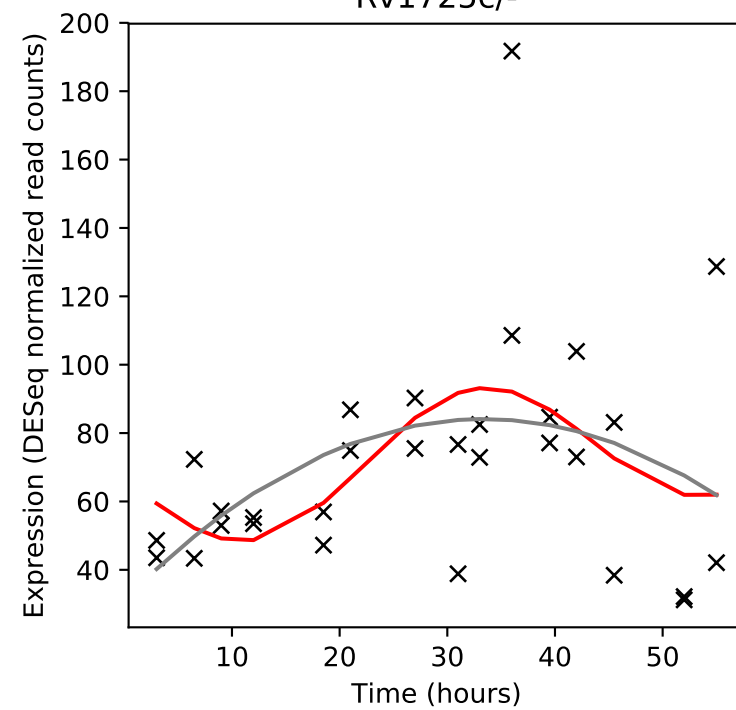

Rv1726/-

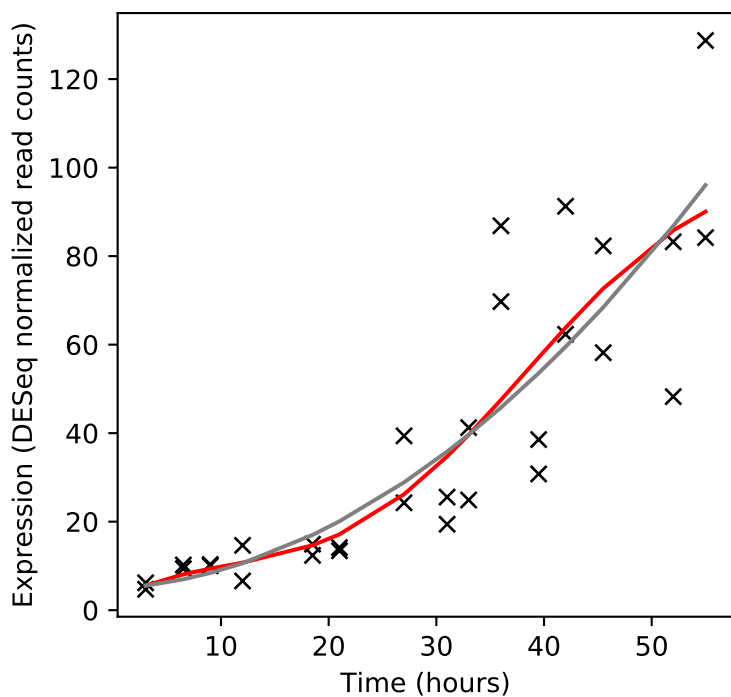

Rv1727/-

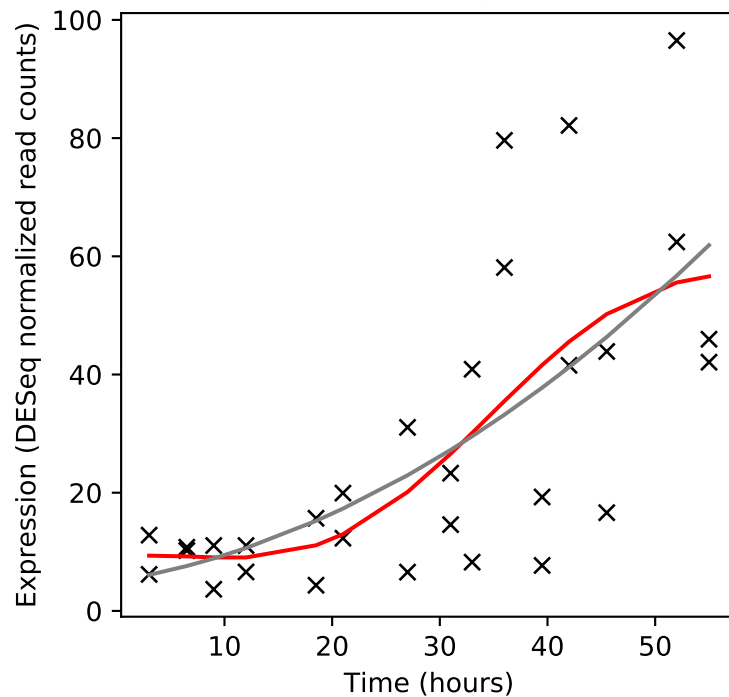

Rv1728c/-

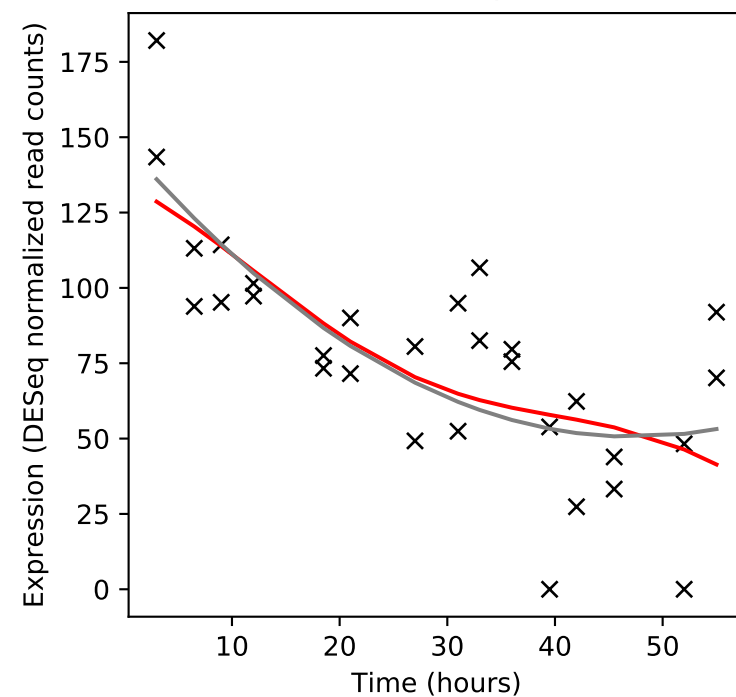

Rv1729c/-

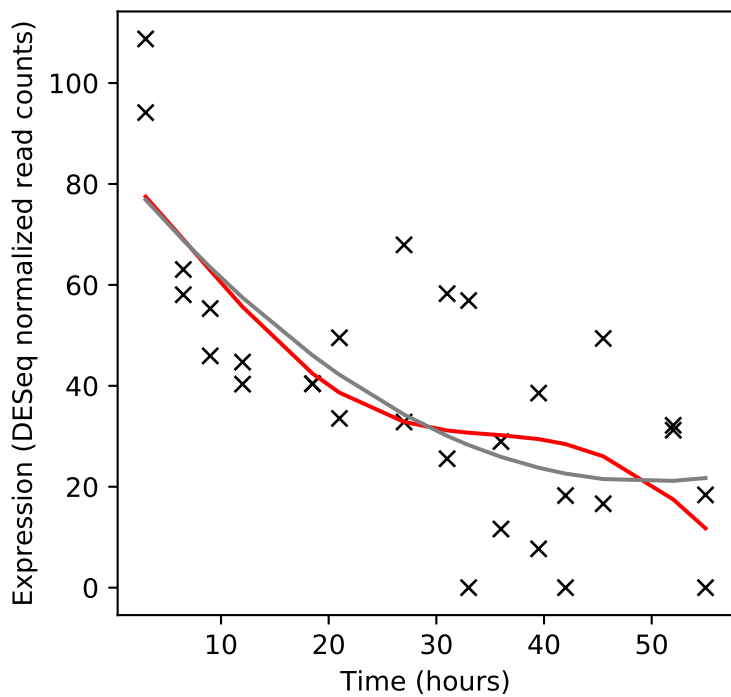

Rv1730c/-

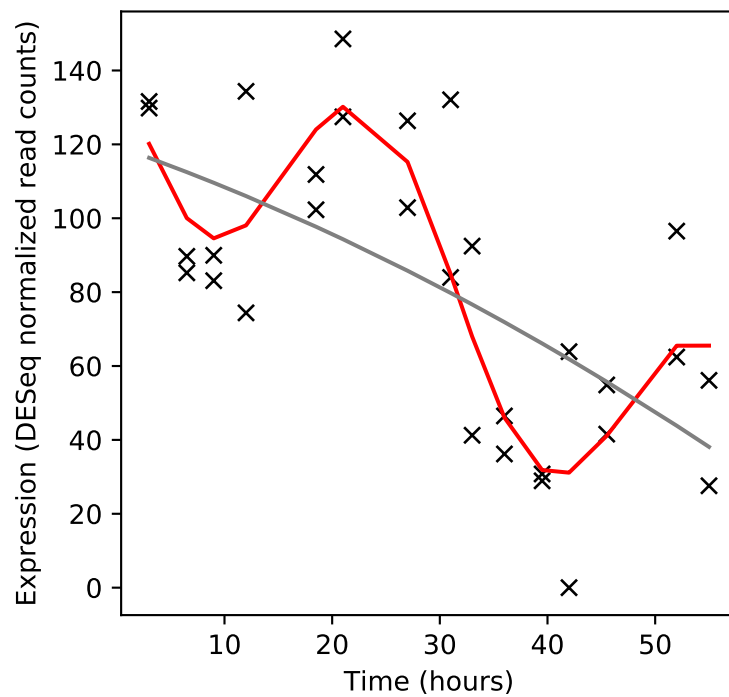

Rv1731/gabD2

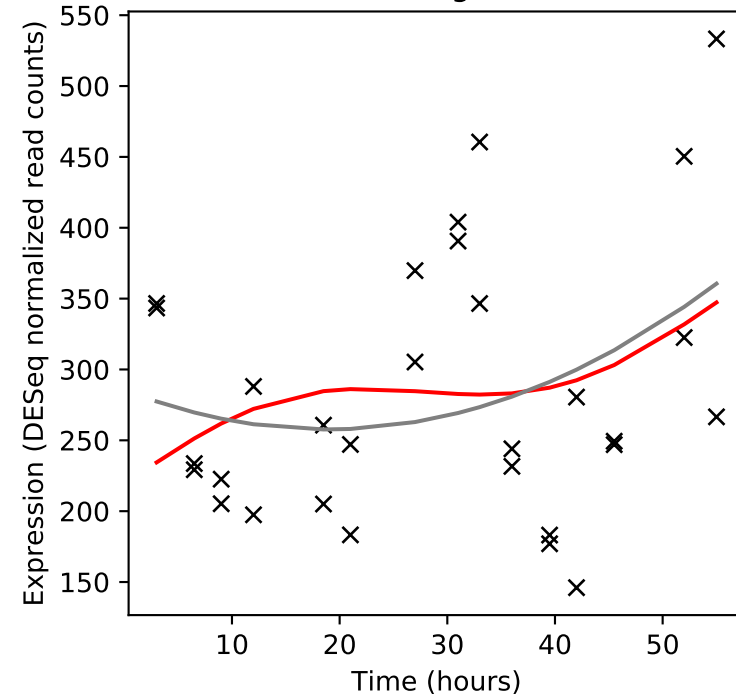



Rv1732c/-

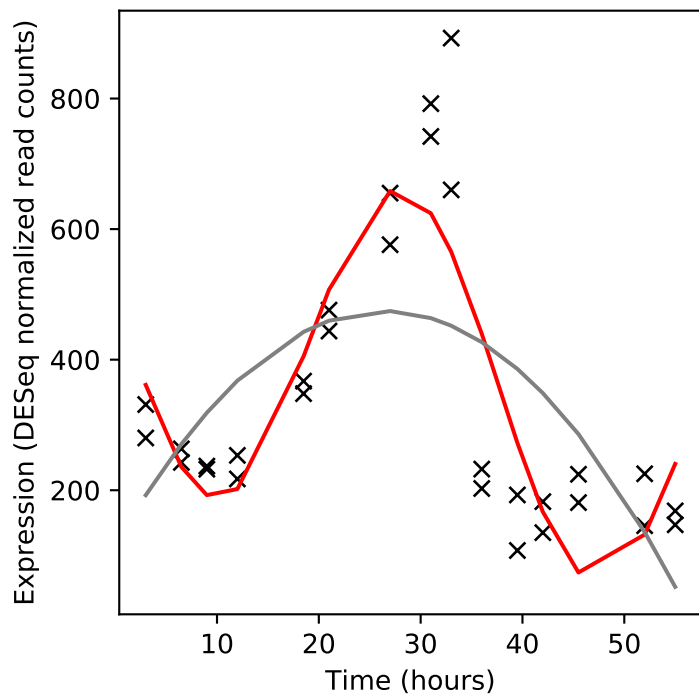

Rv1733c/-

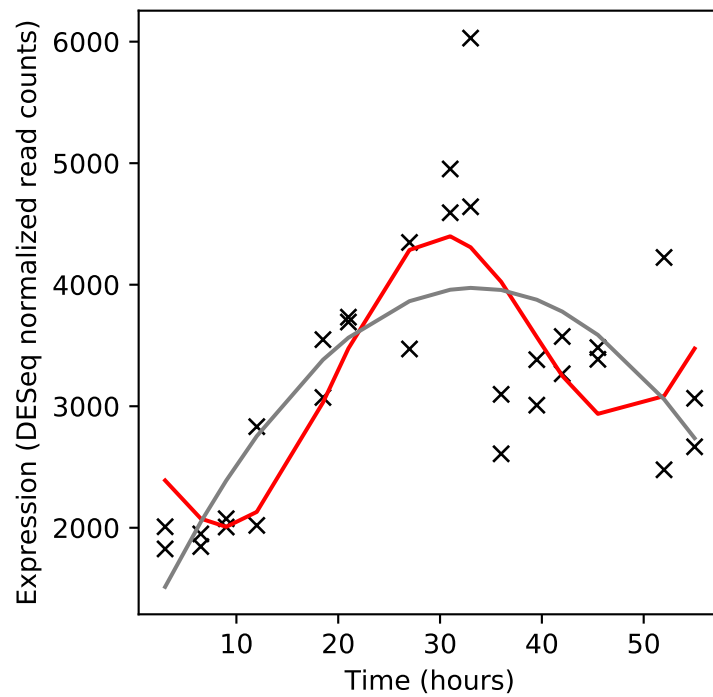

Rv1734c/-

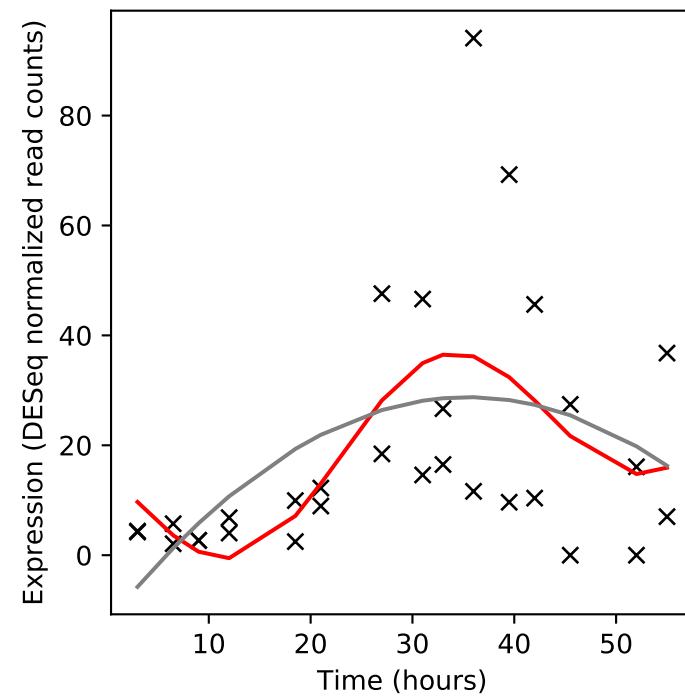

Rv1735c/-

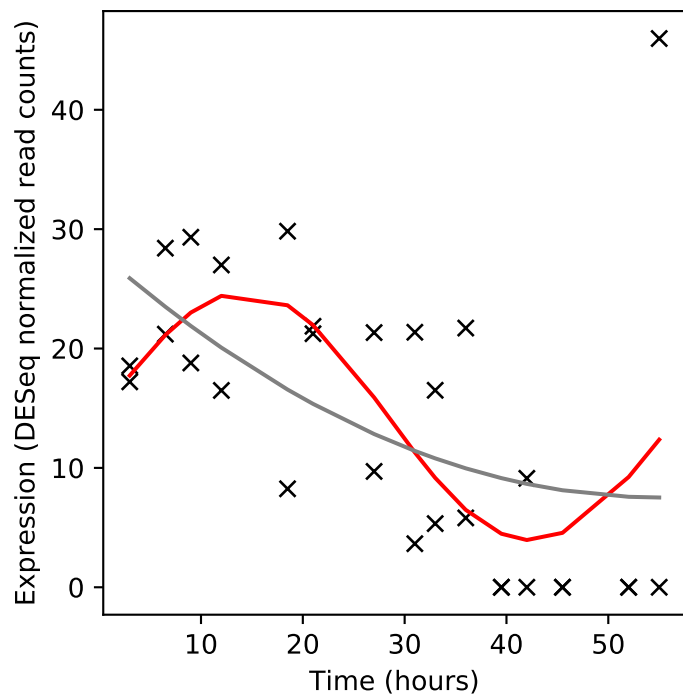

Rv1736c/narX

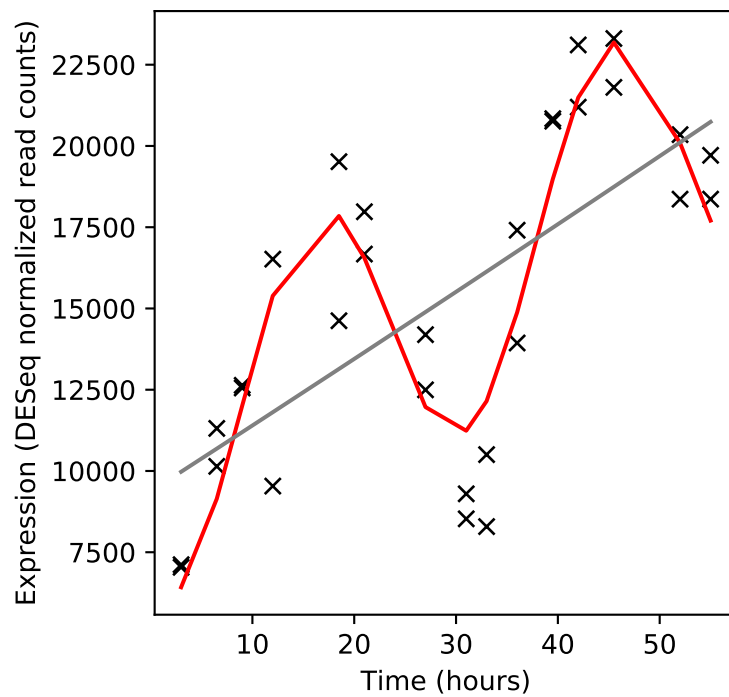

Rv1737c/narK2

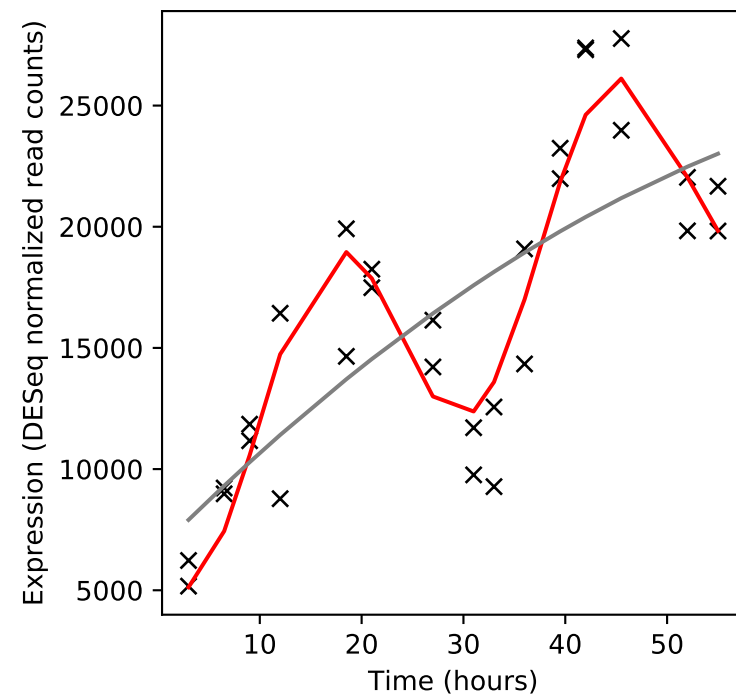

Rv1738/-

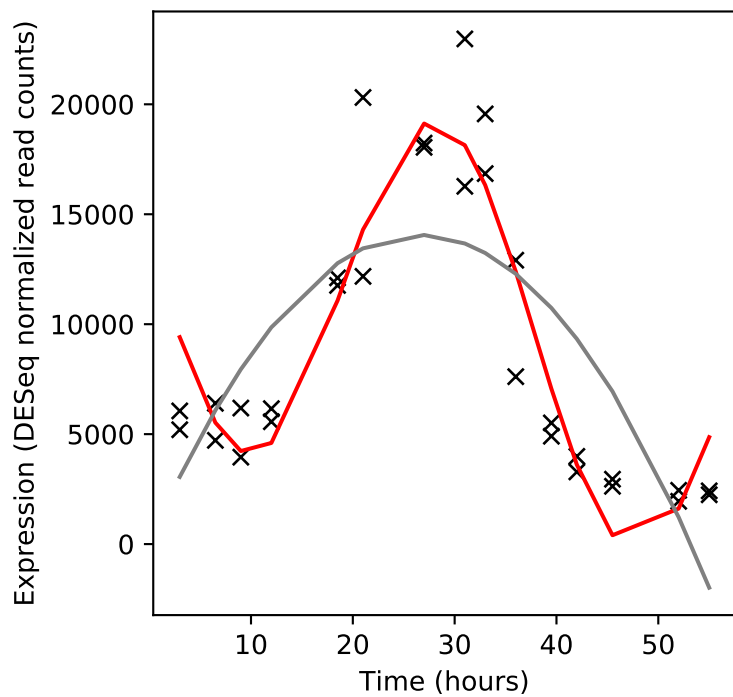

Rv1739c/-

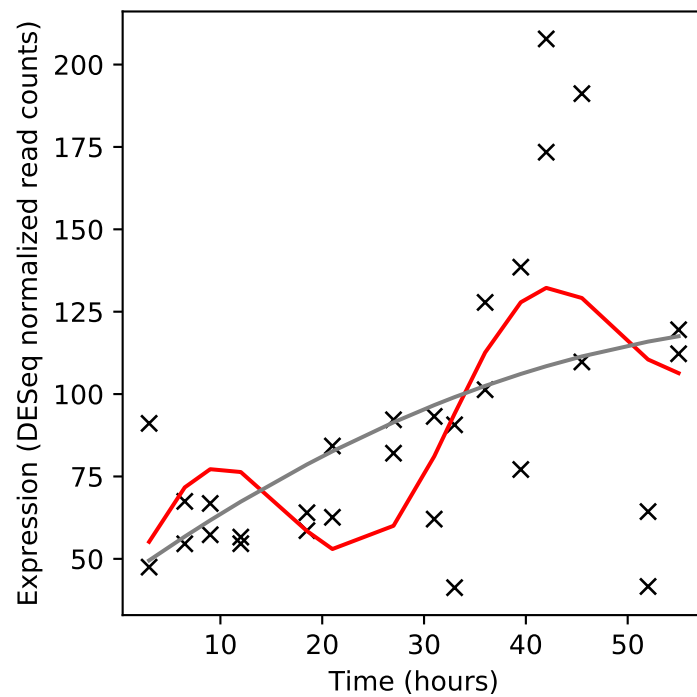

Rv1740/vapB34

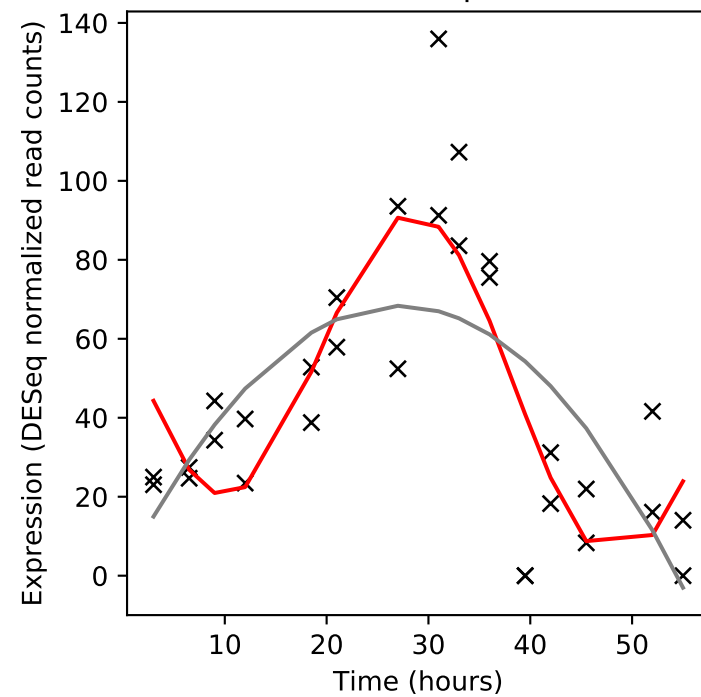

Rv1741/vapC34

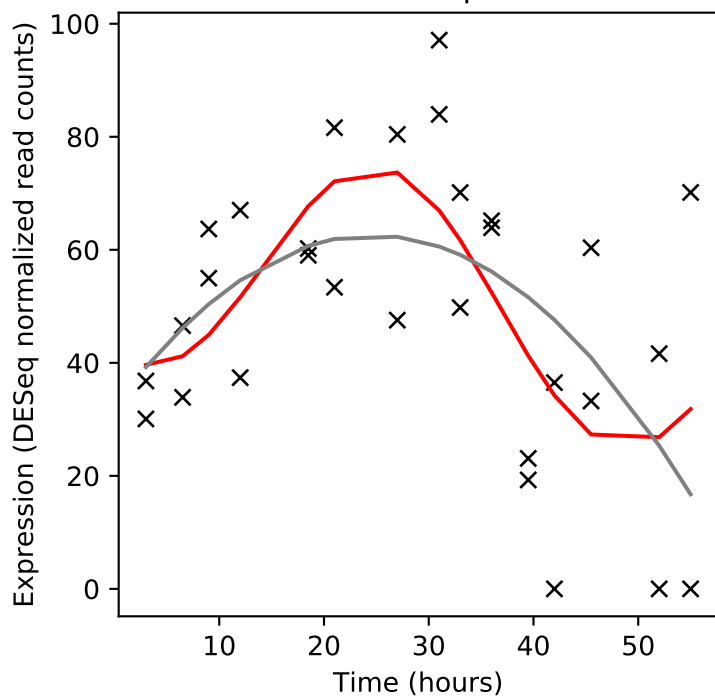

Rv1742/-

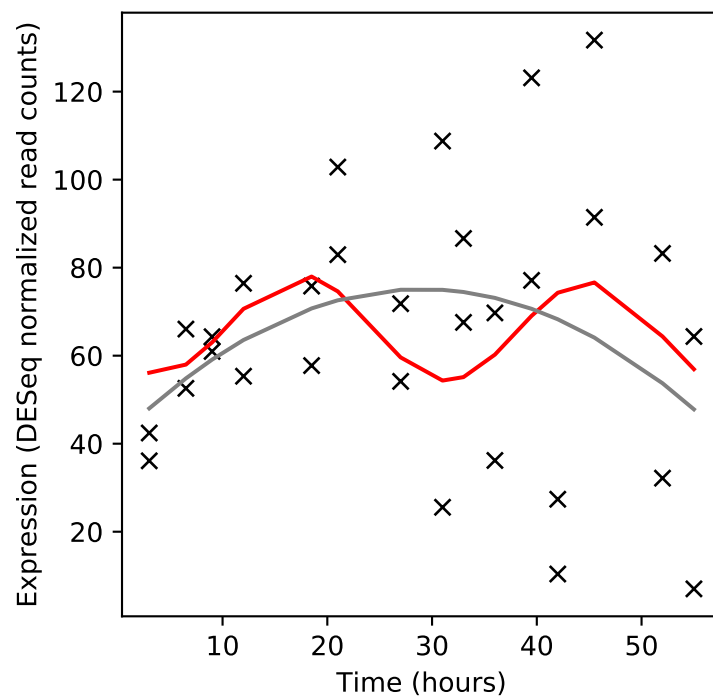

Rv1743/pknE

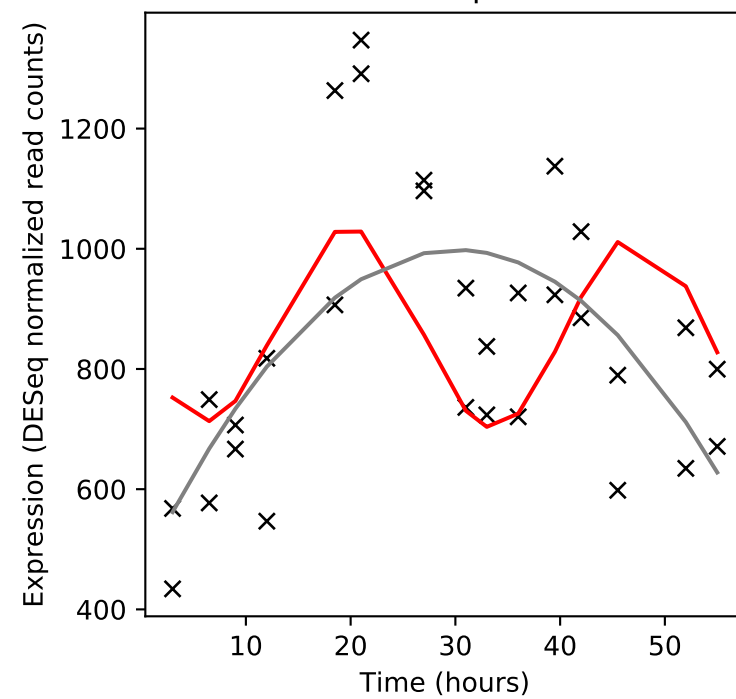

Rv1744c/-

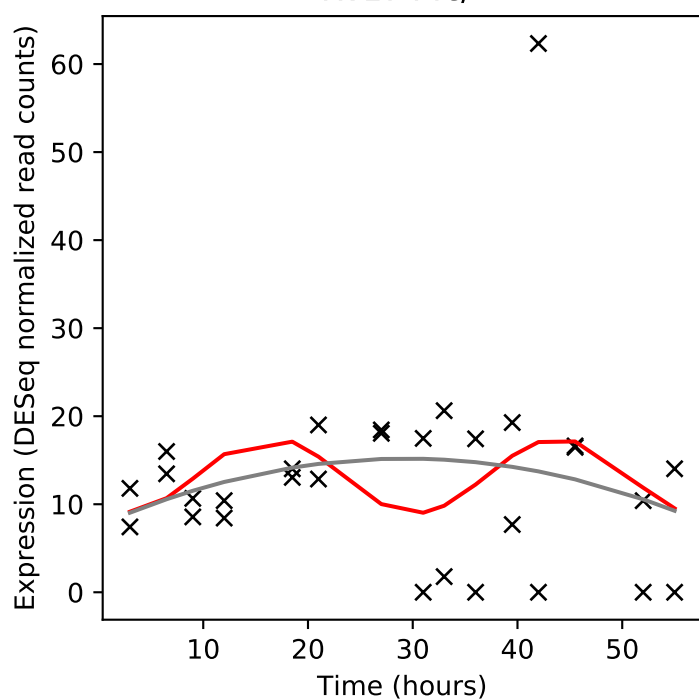

Rv1745c/idi

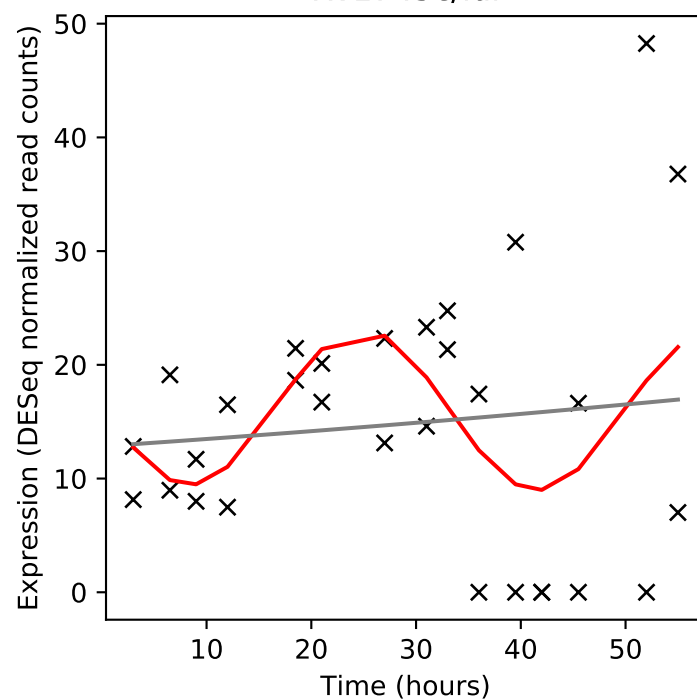

Rv1746/pknF

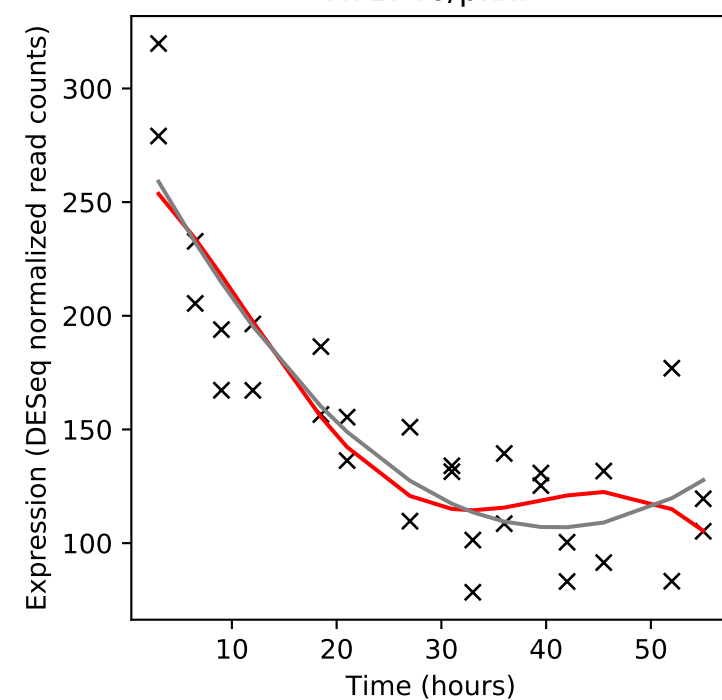

Rv1747/-

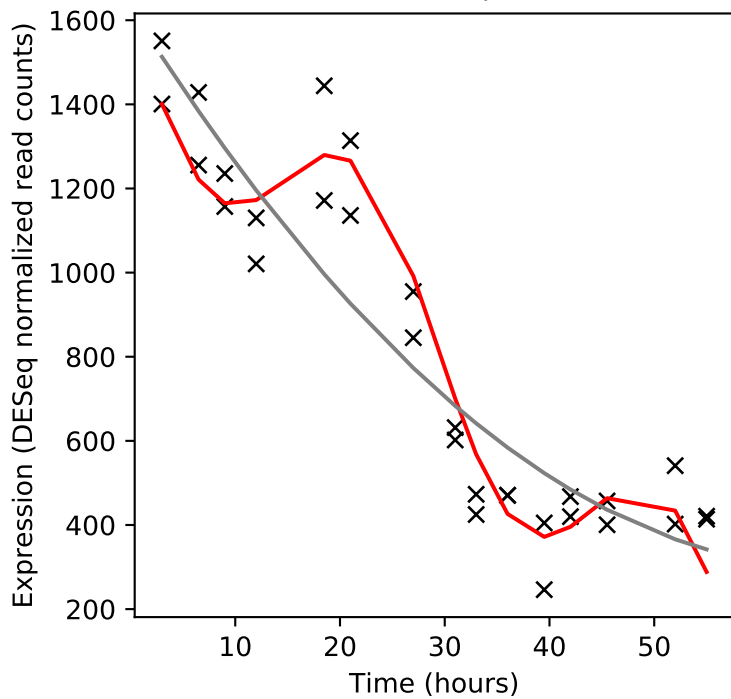

Rv1748/-

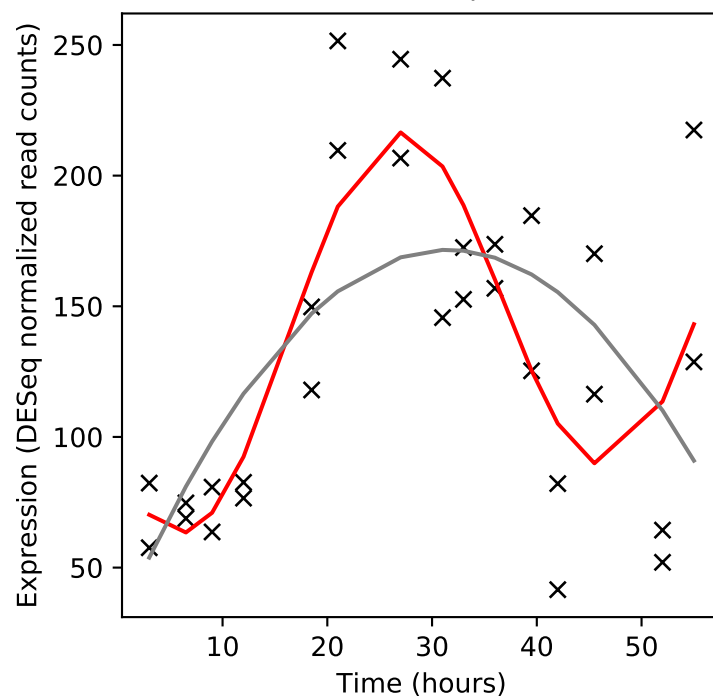

Rv1749c/-

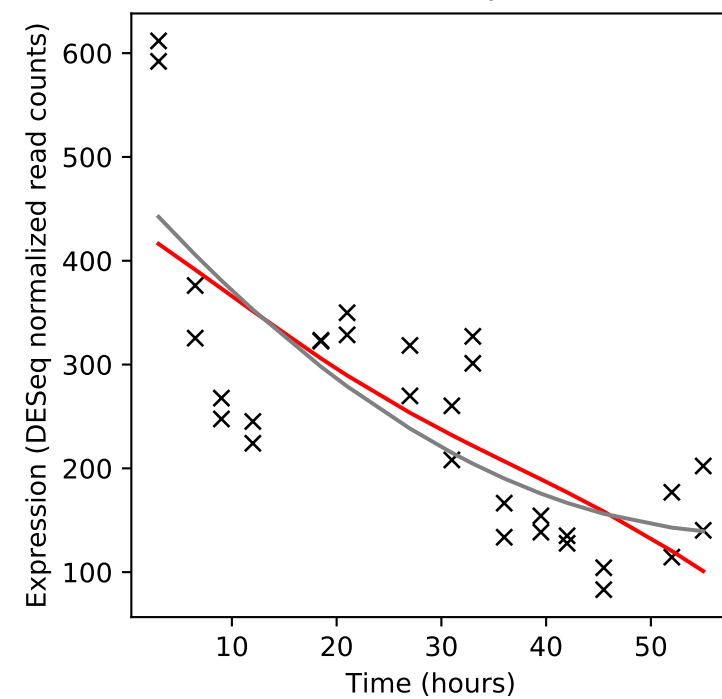

Rv1750c/fadD1

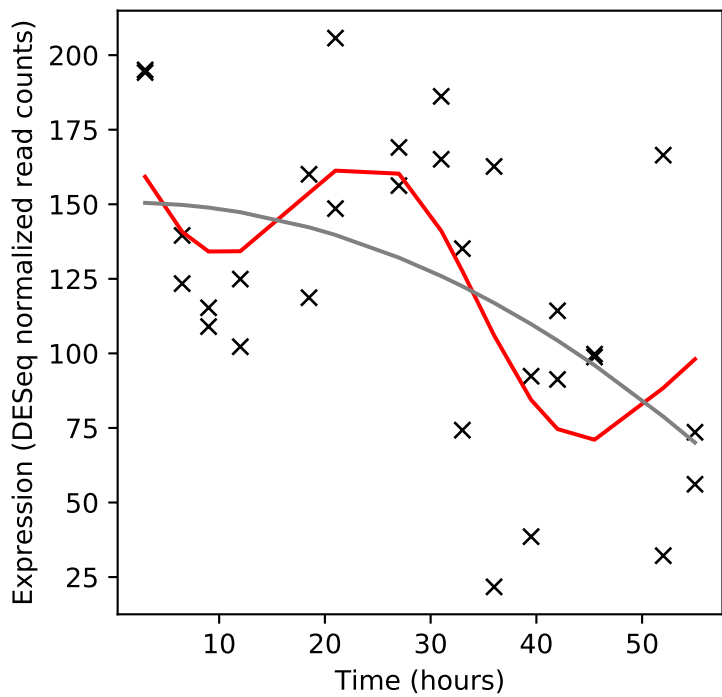

Rv1751/-

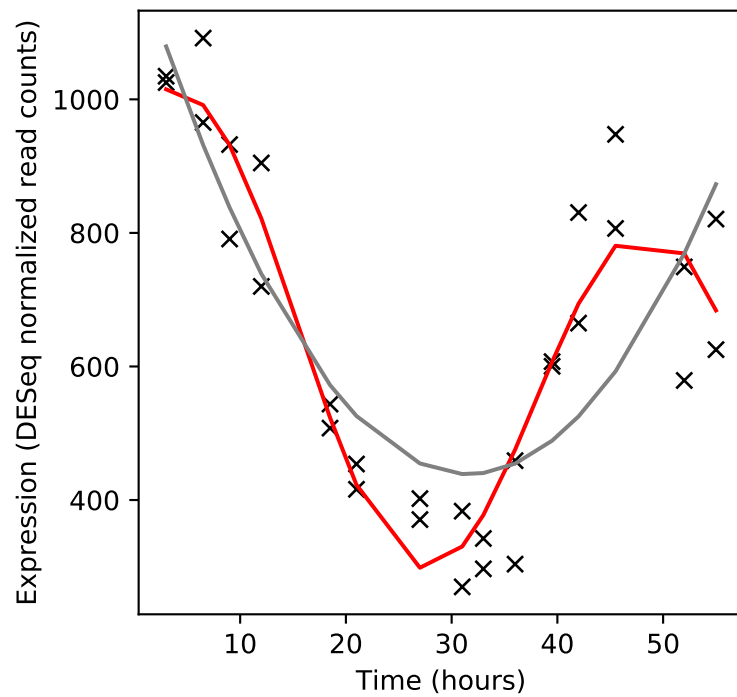

Rv1752/-

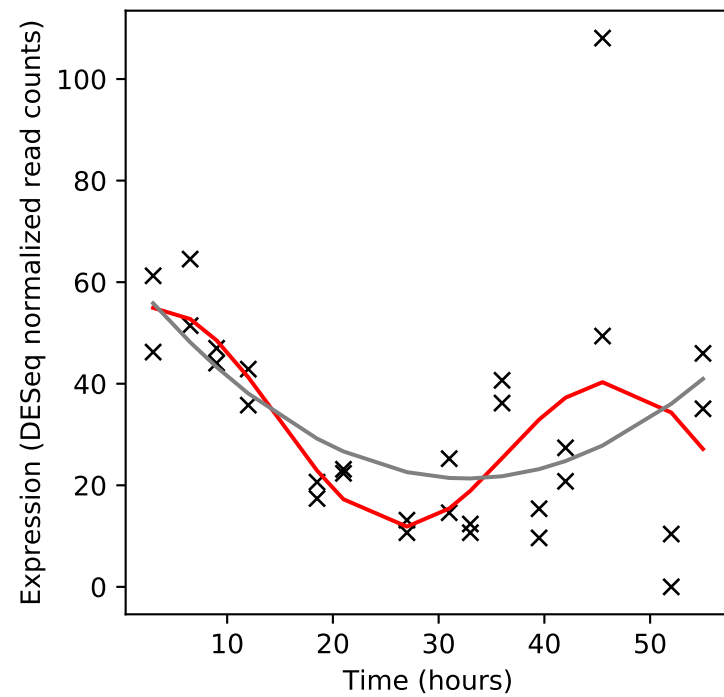

Rv1753c/PPE24

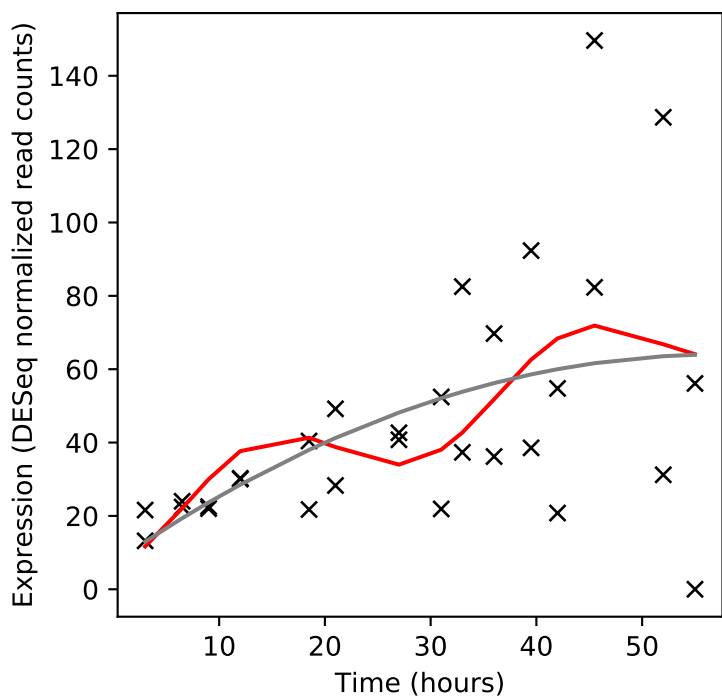

Rv1754c/-

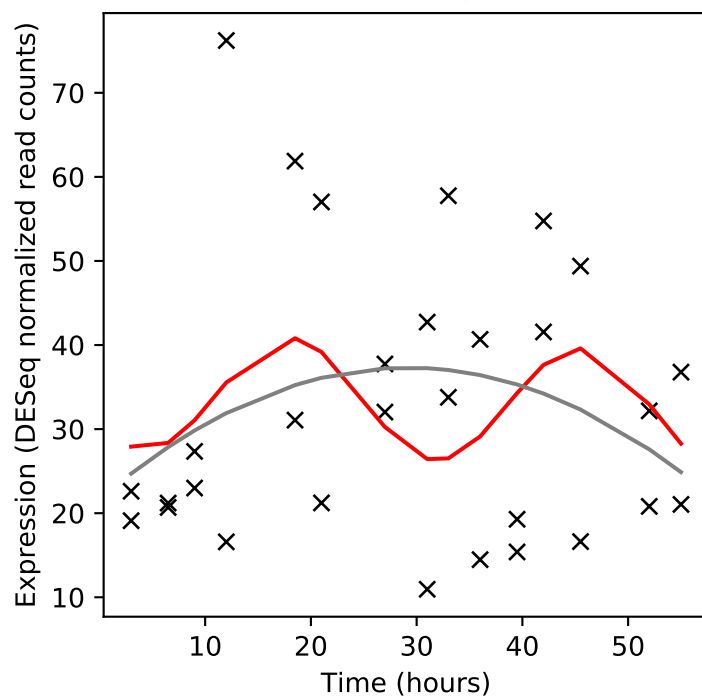

Rv1756c/-

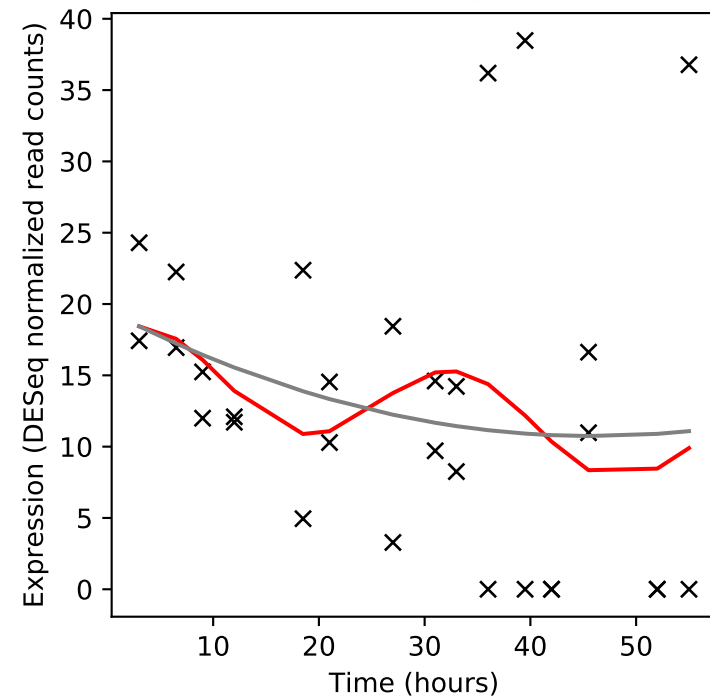

Rv1757c/-

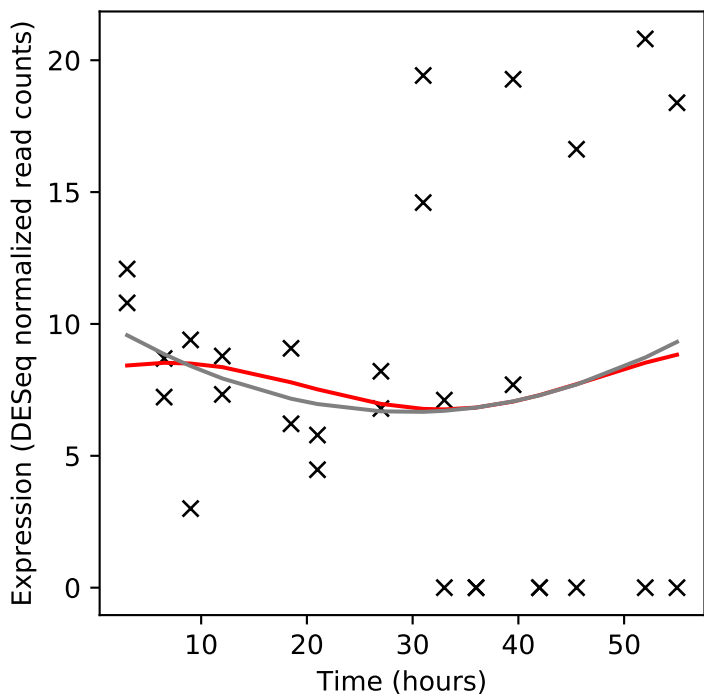

Rv1758/cut1

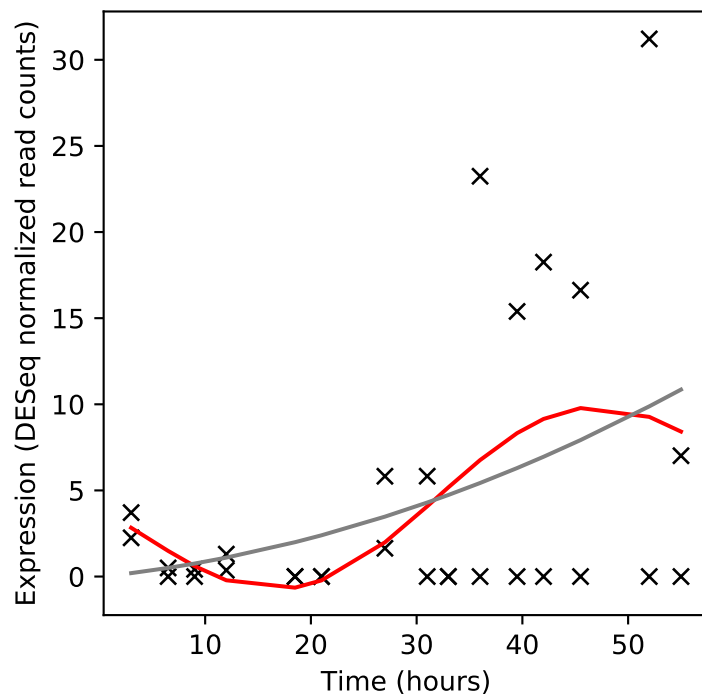

Rv1759c/wag22

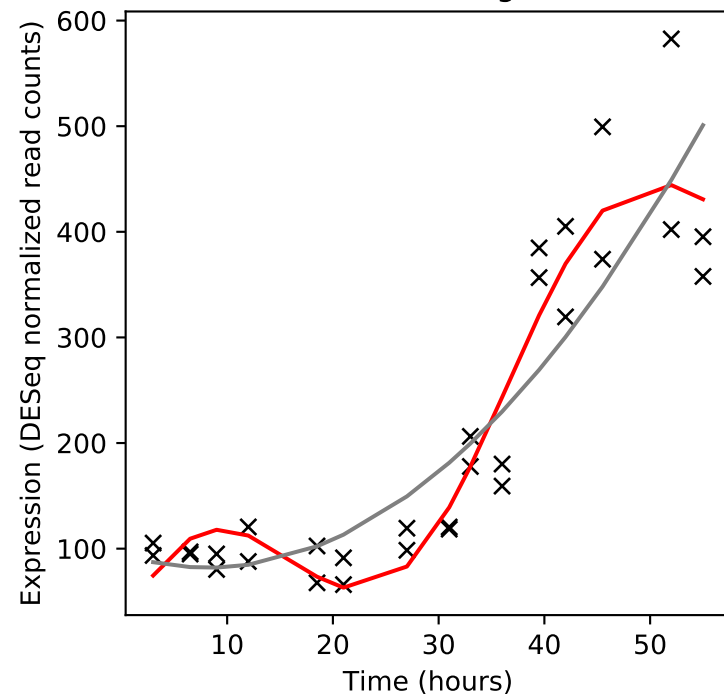

Rv1760/-

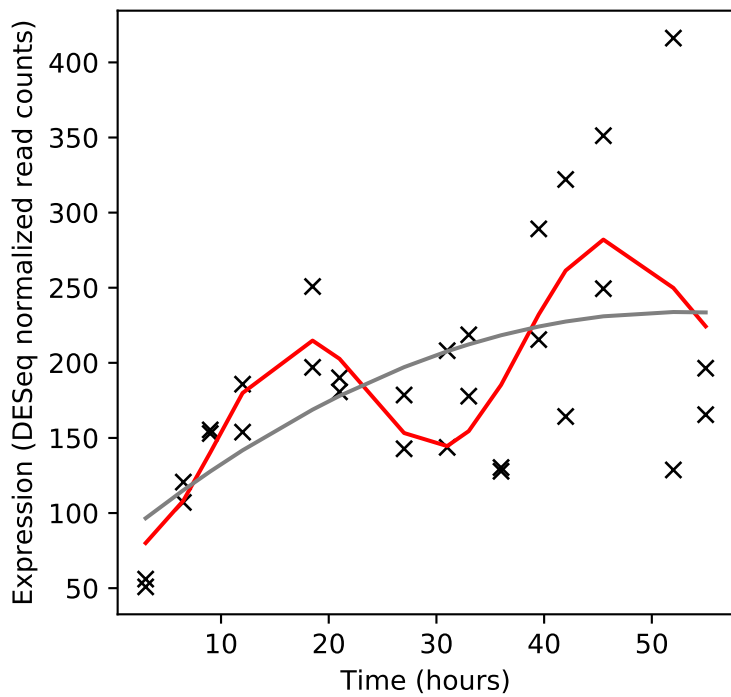

Rv1761c/-

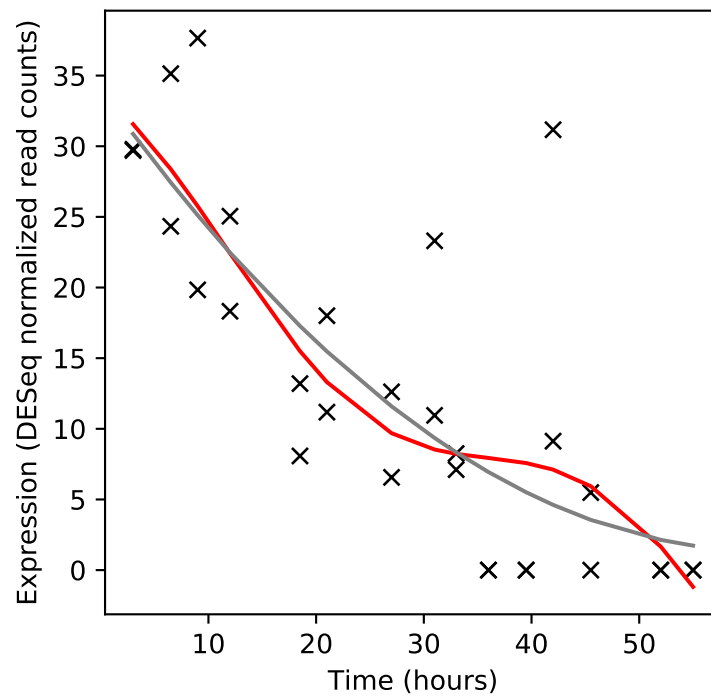

Rv1762c/-

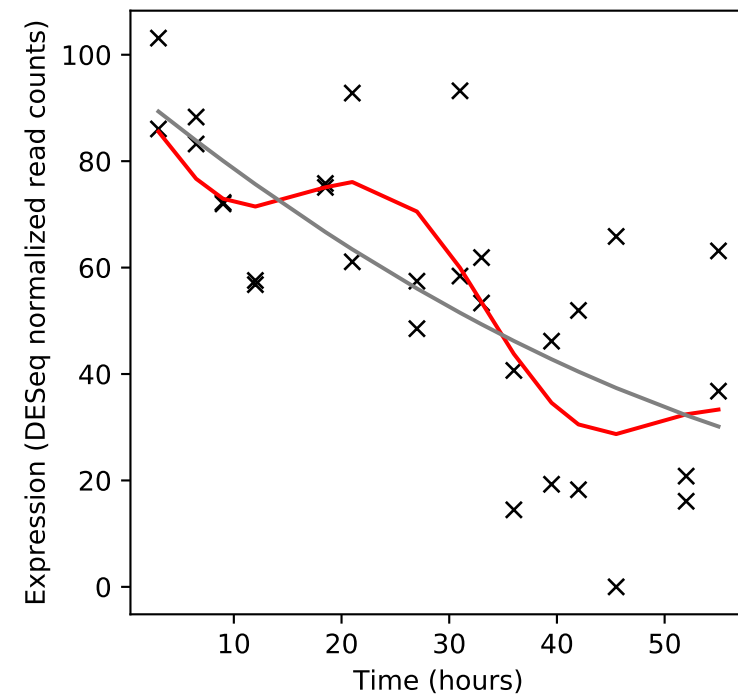

Rv1763/-

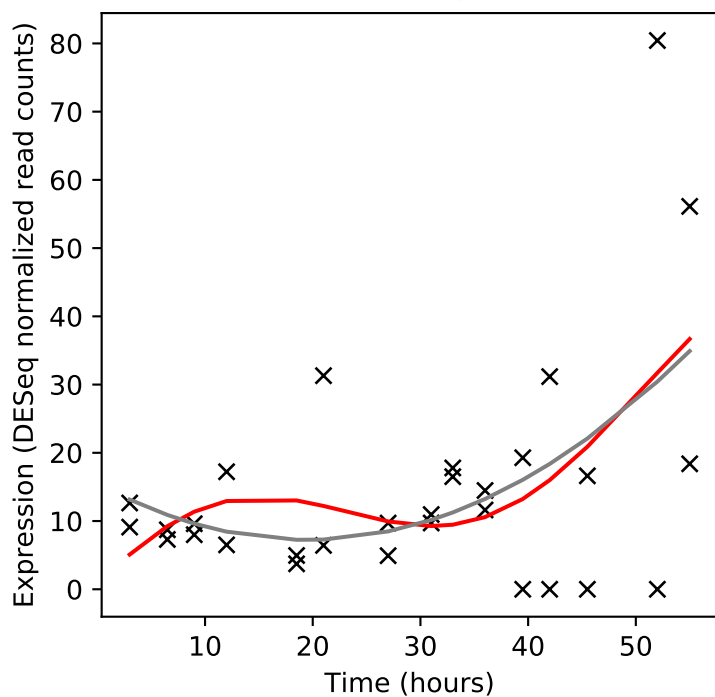

Rv1764/-

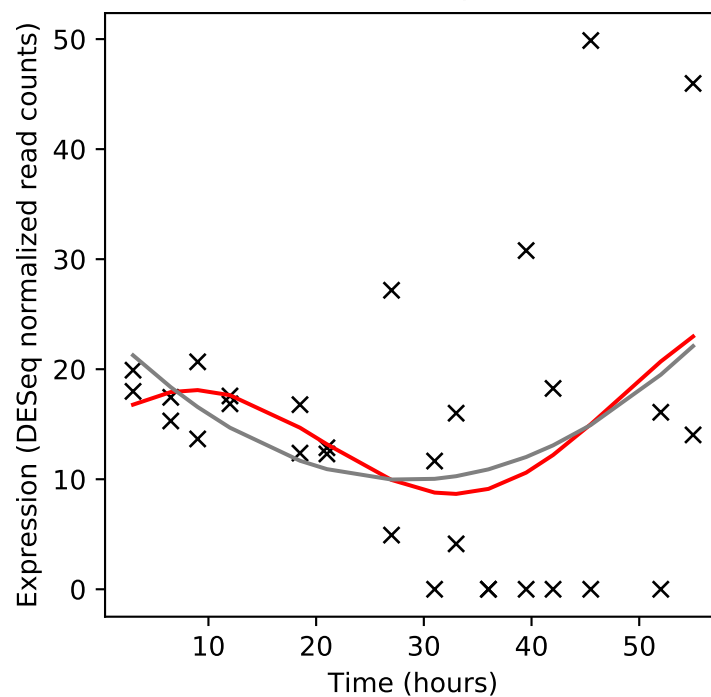

Rv1765c/-

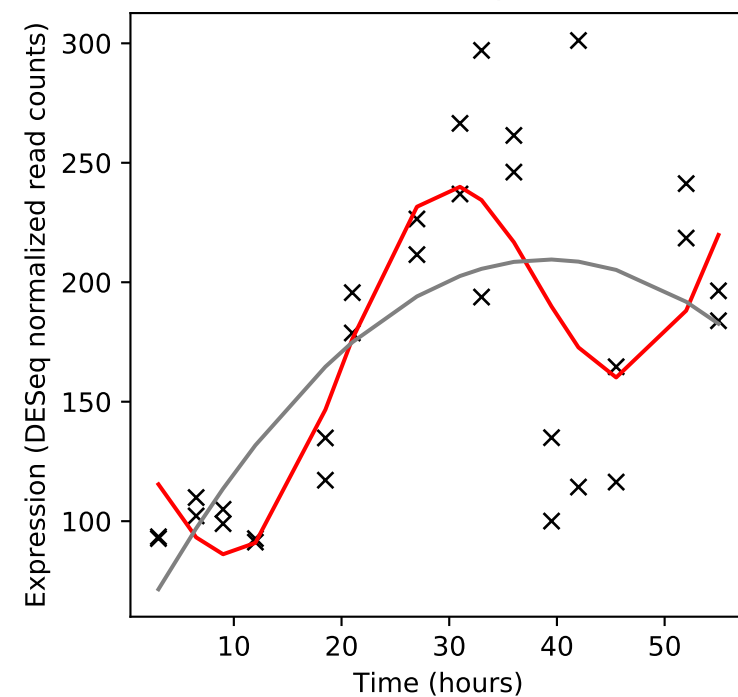

Rv1765A/-

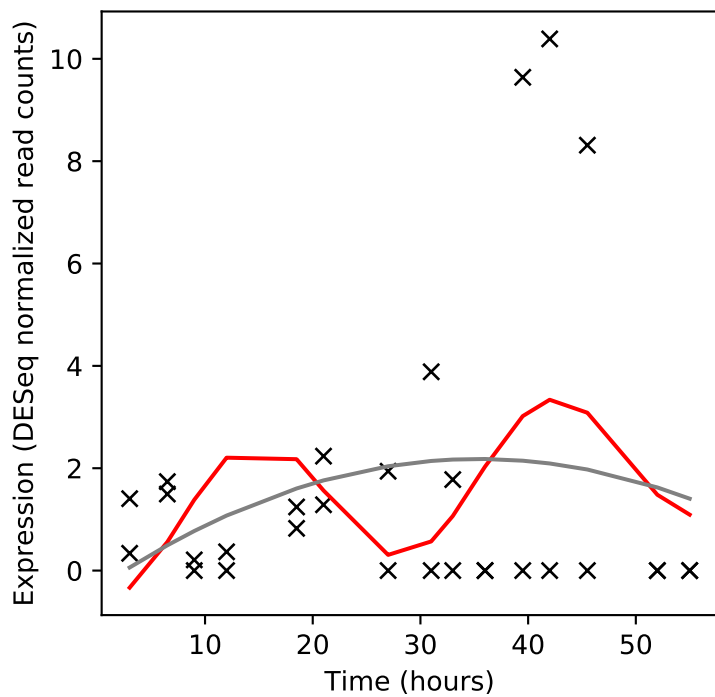

Rv1766/-

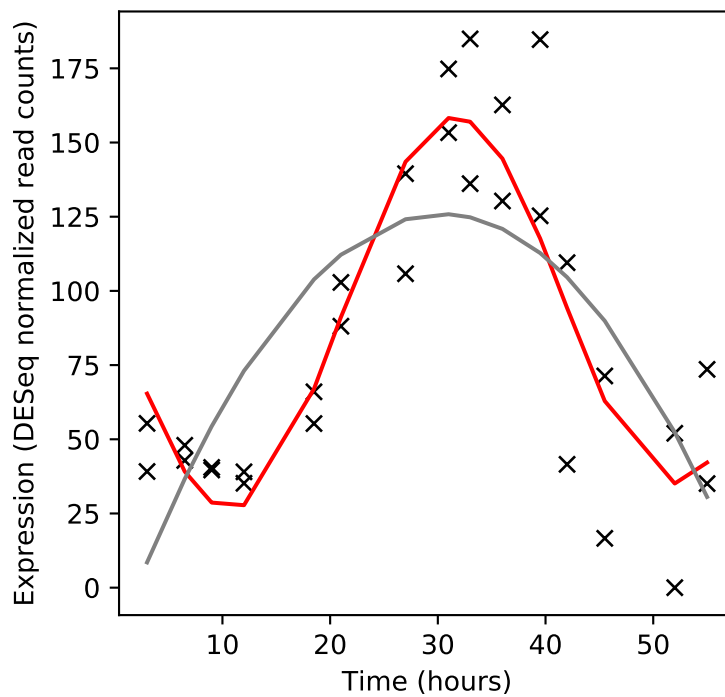

Rv1767/-

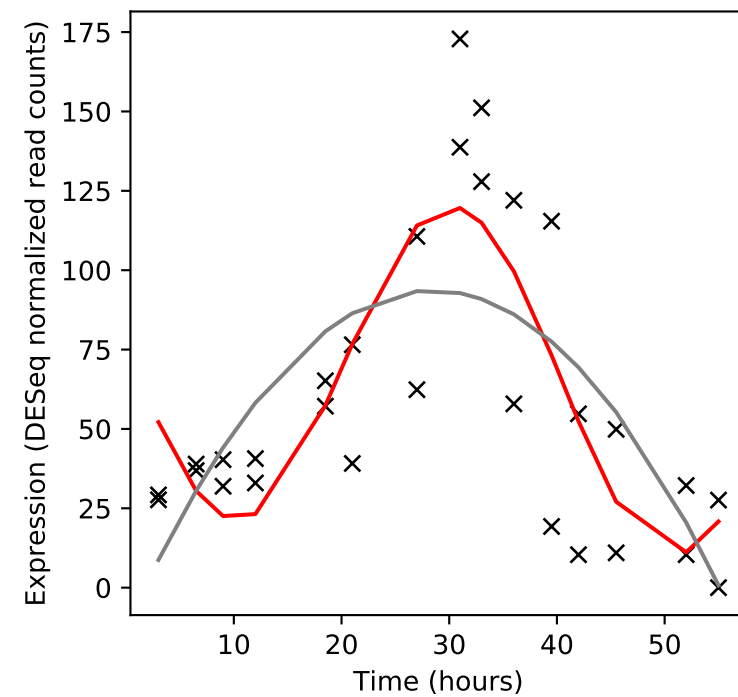

Rv1768/PE\_PGRS31

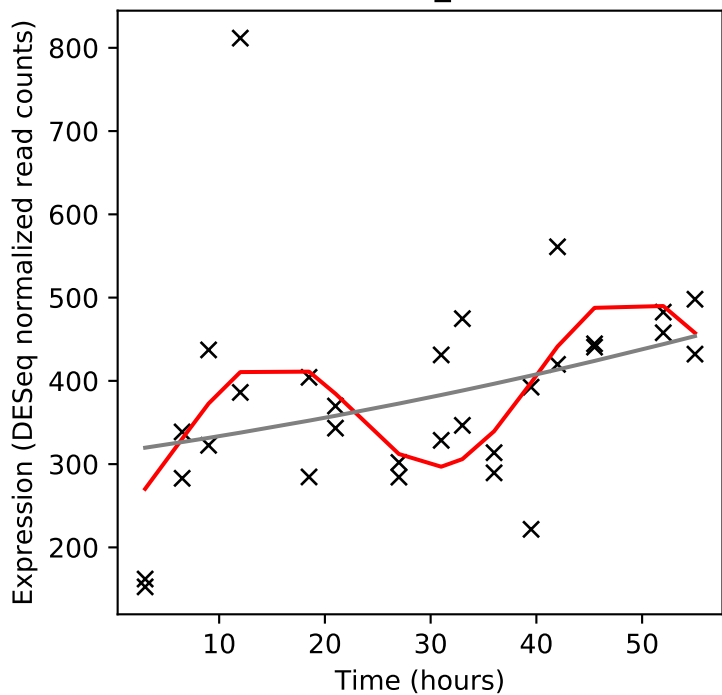

Rv1769/-

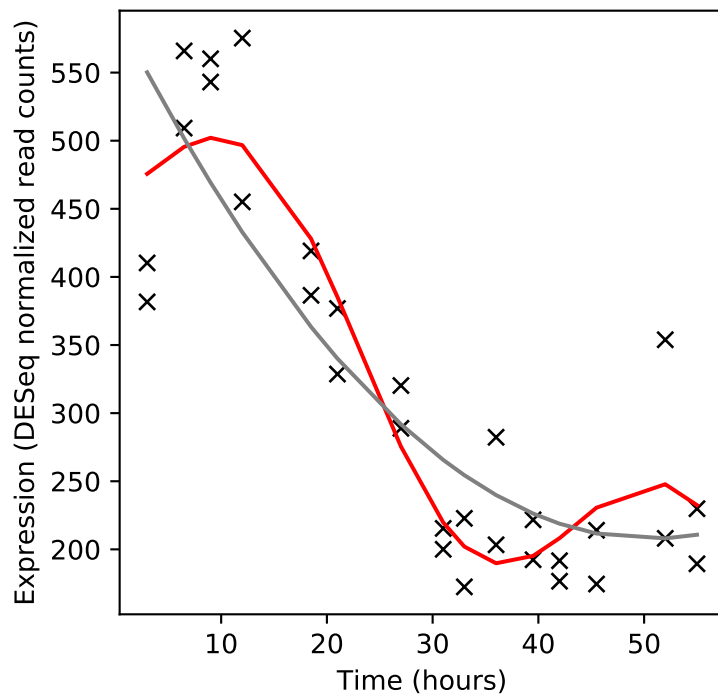

Rv1770/-

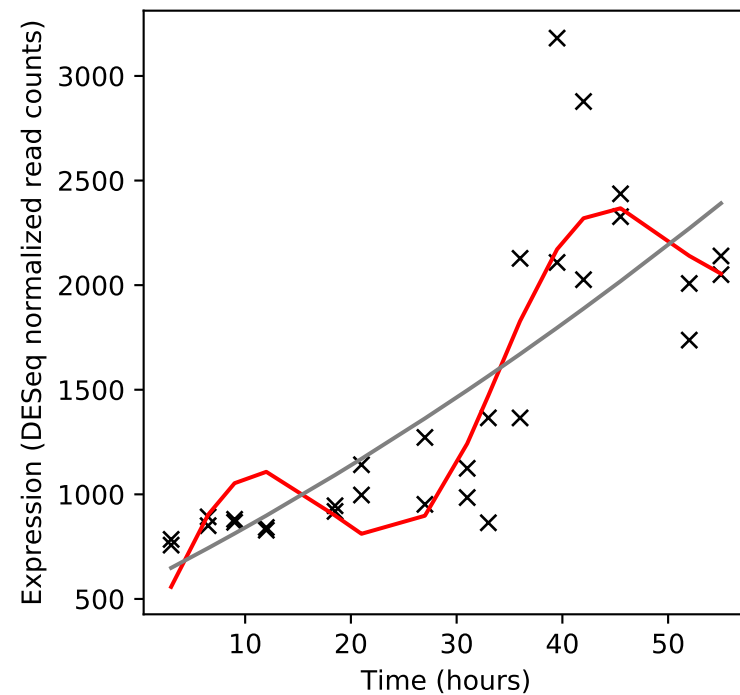

Rv1771/-

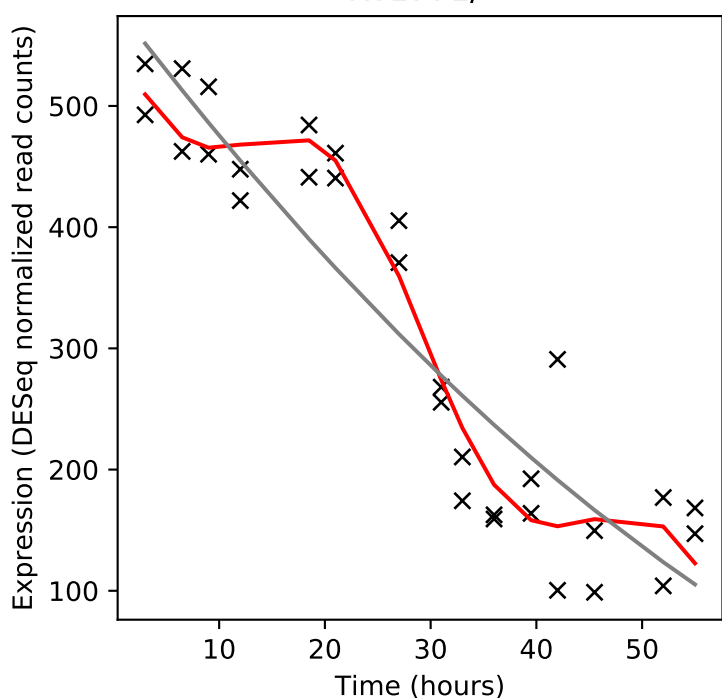

Rv1772/-

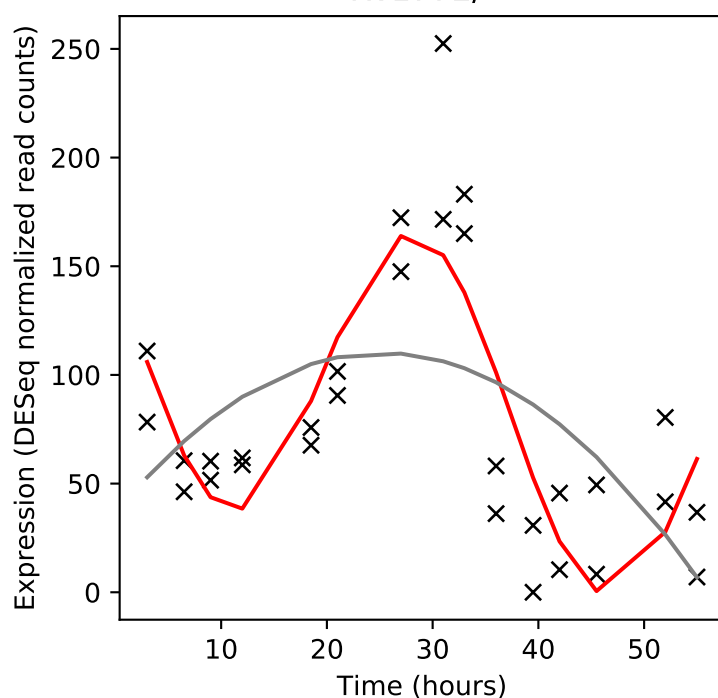

Rv1773c/-

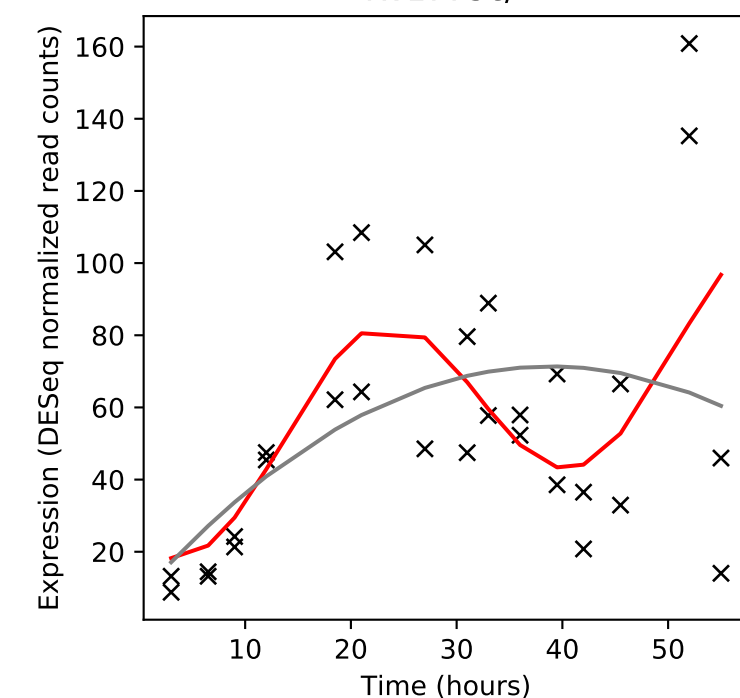

Rv1774/-

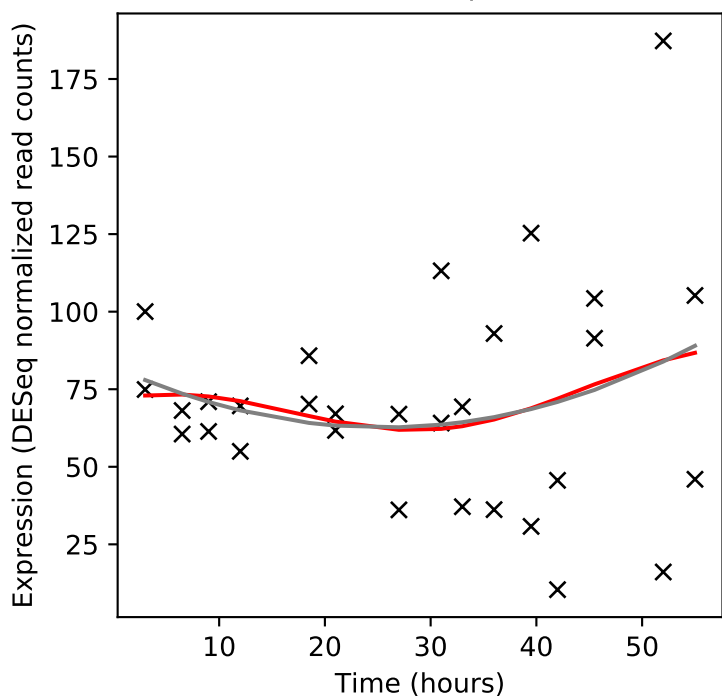

Rv1775/-

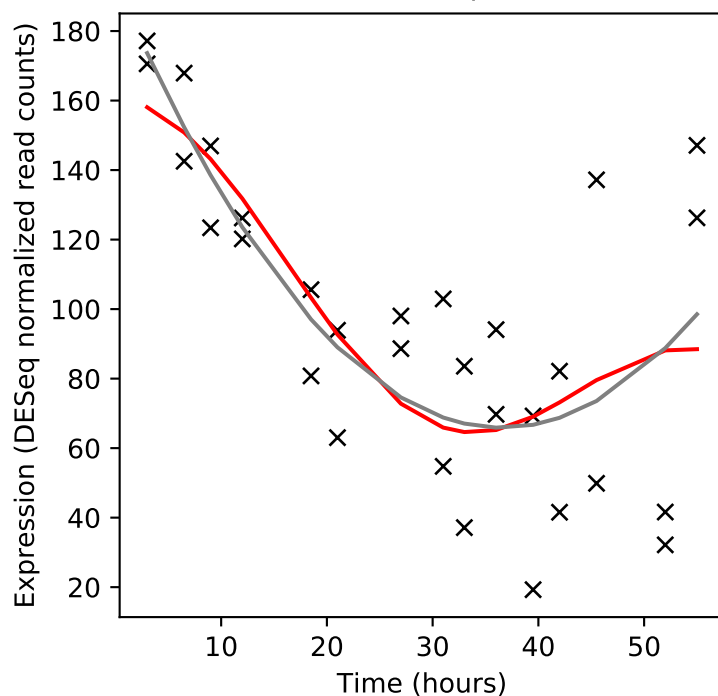

Rv1776c/-

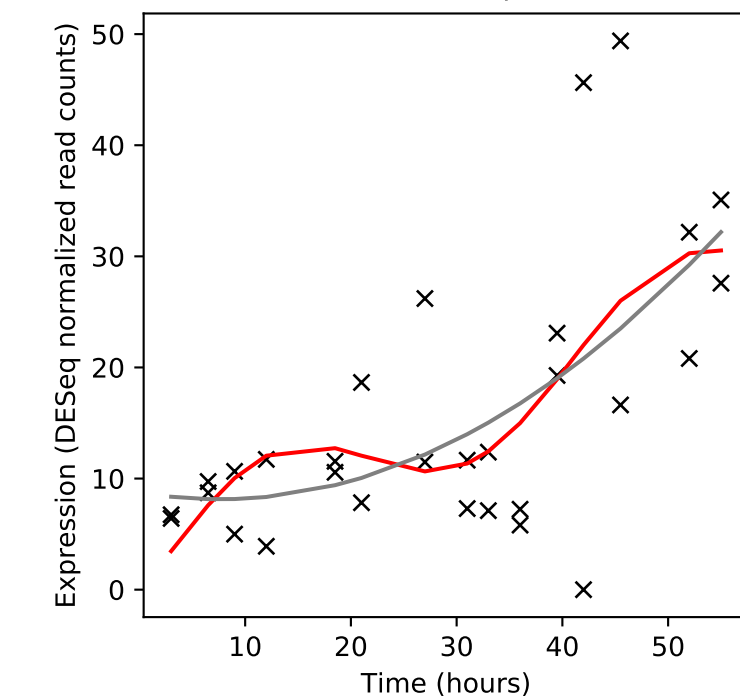

Rv1777/cyp144

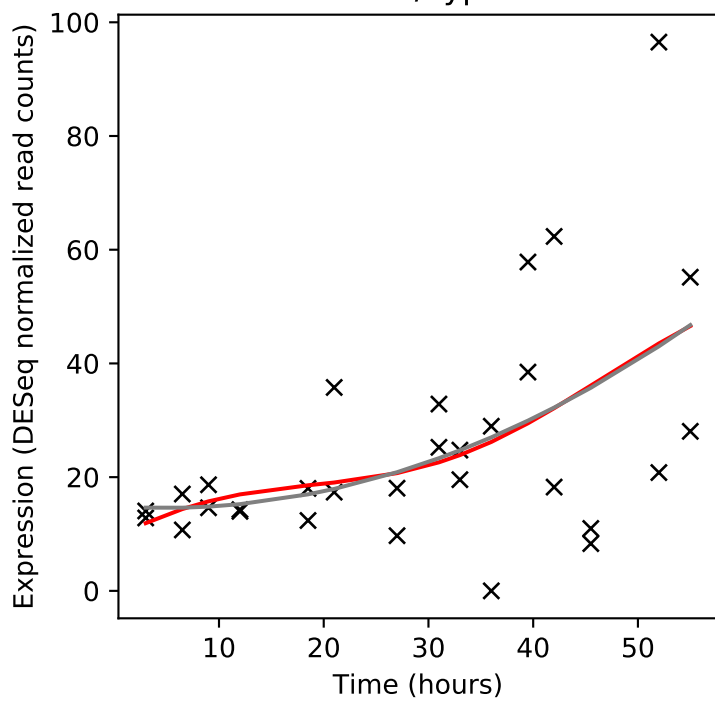

Rv1778c/-

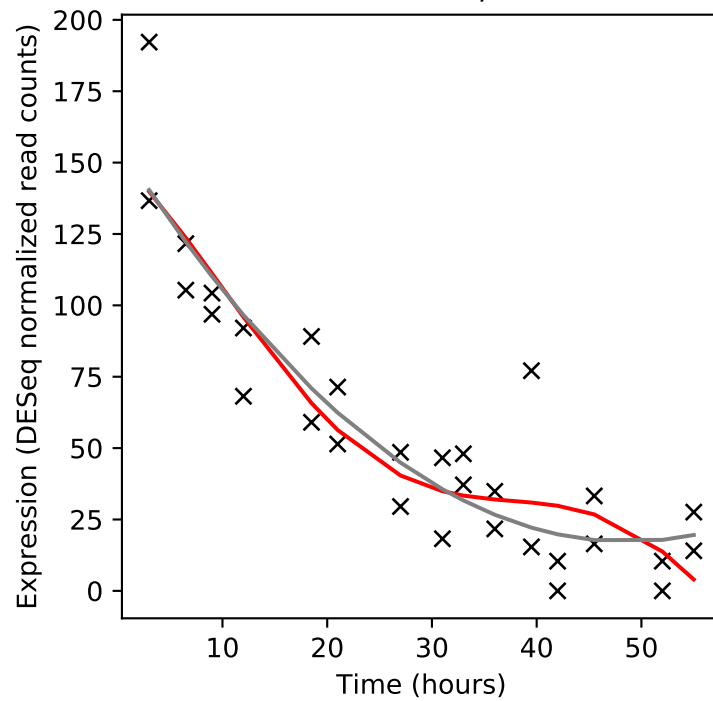

Rv1779c/-

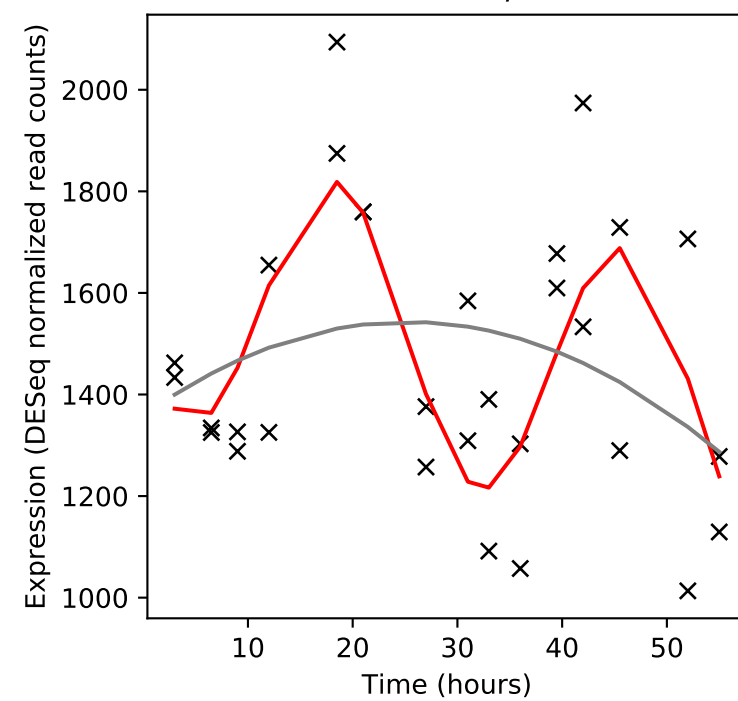

Rv1780/-

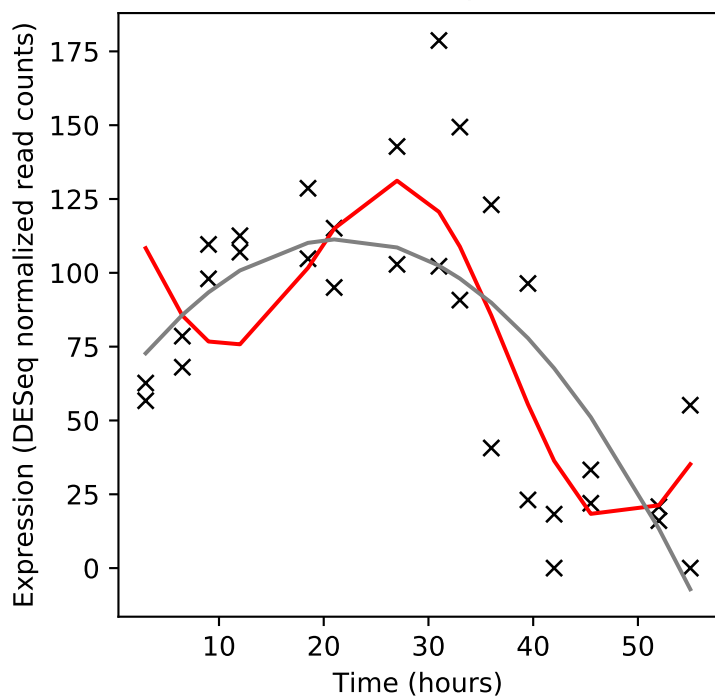

Rv1781c/malQ

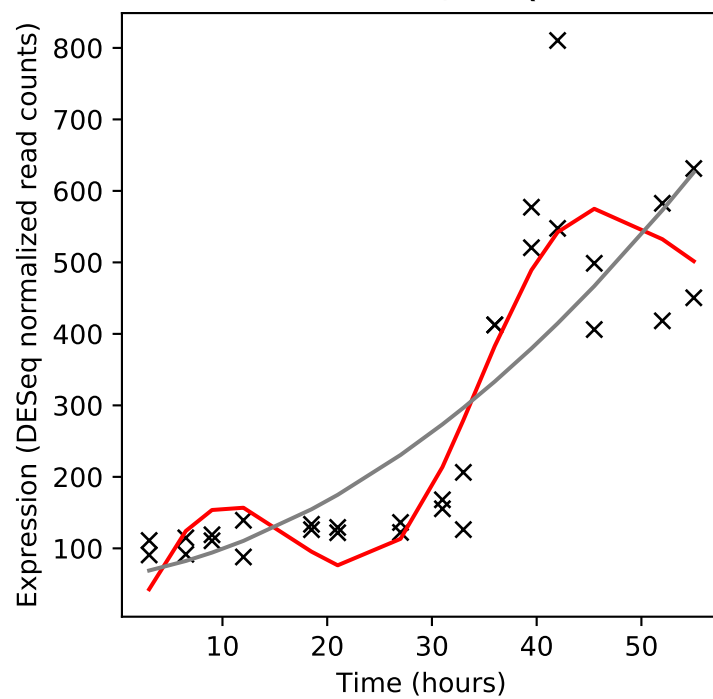

Rv1782/eccB5

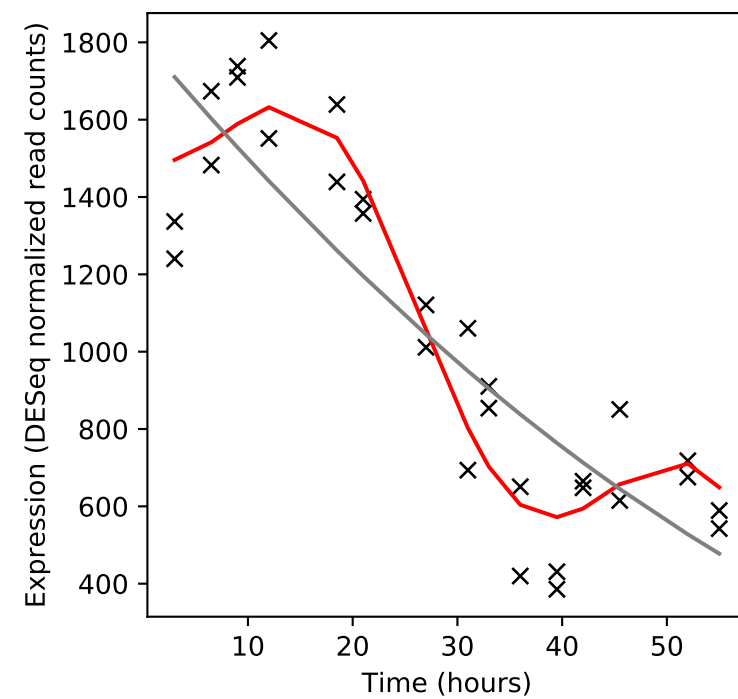

Rv1783/eccC5

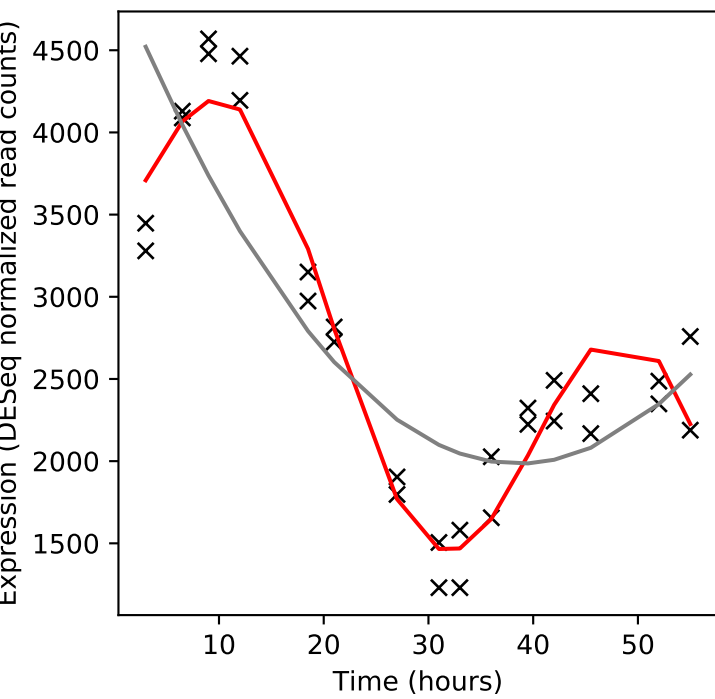

Rv1785c/cyp143

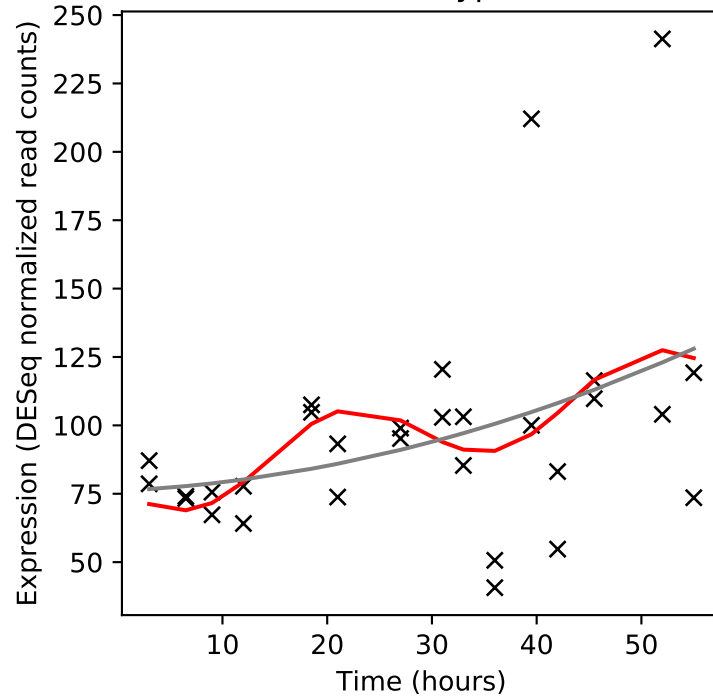

Rv1786/-

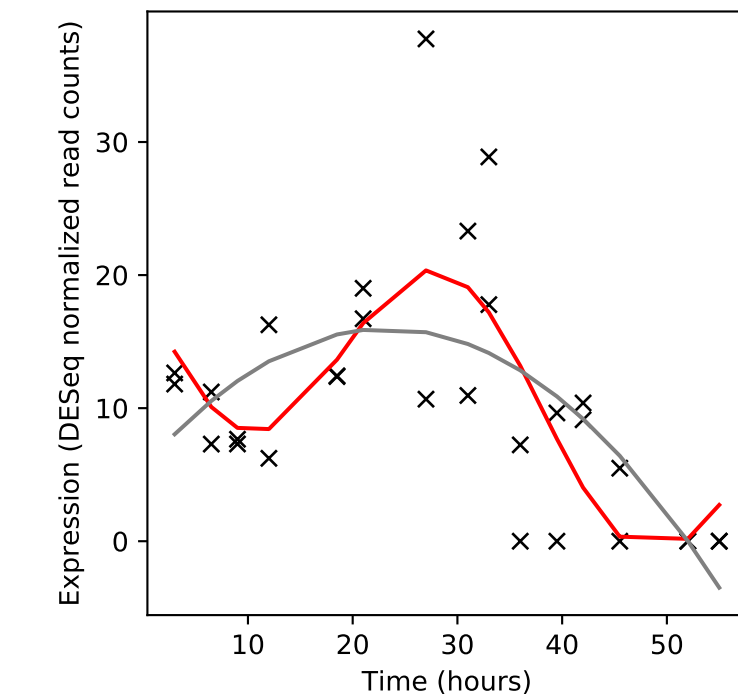

Rv1787/PPE25

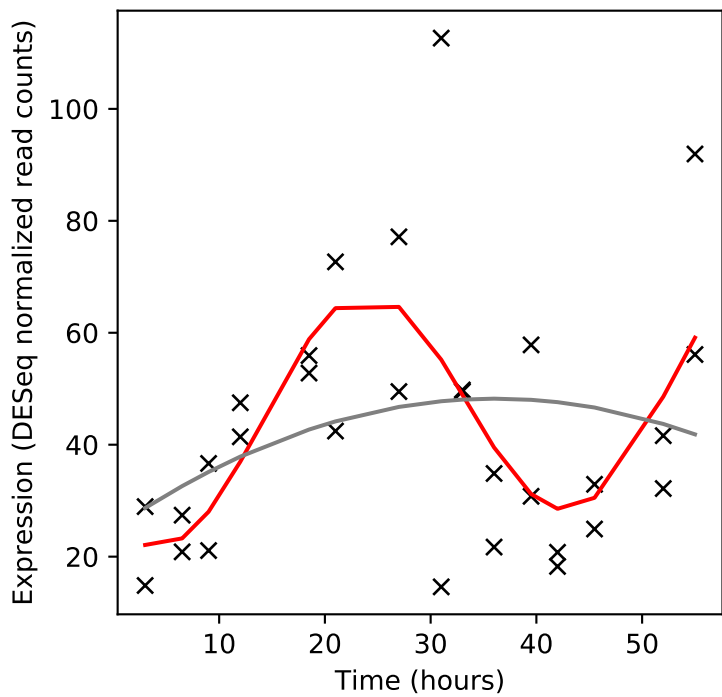

Rv1788/PE18

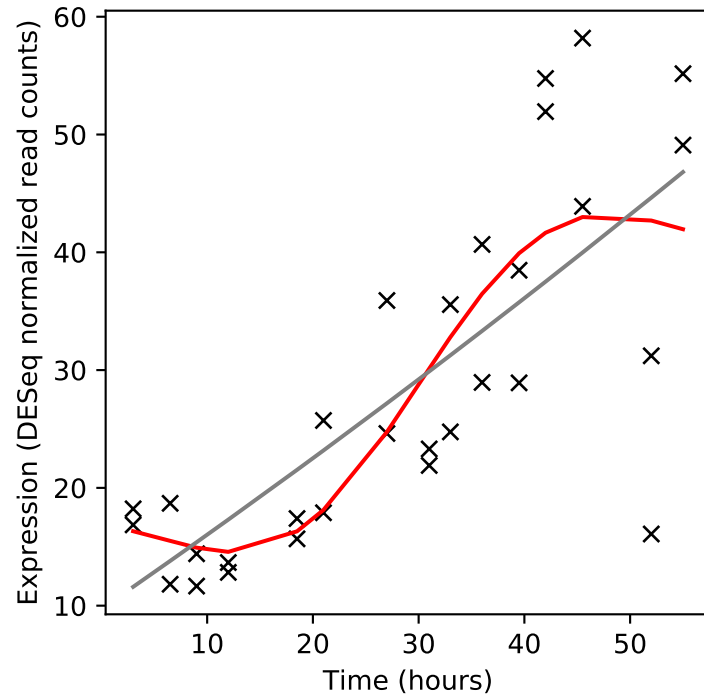

Rv1789/PPE26

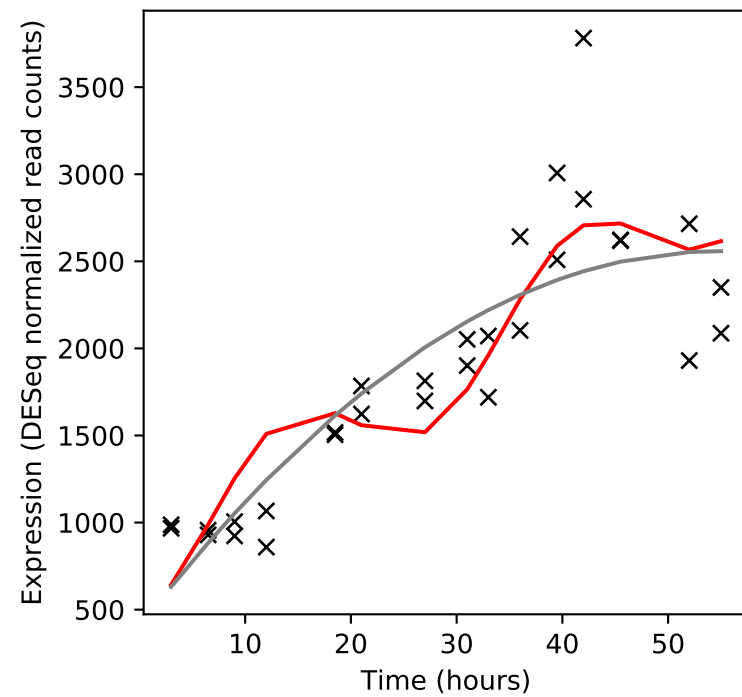

Rv1790/PPE27

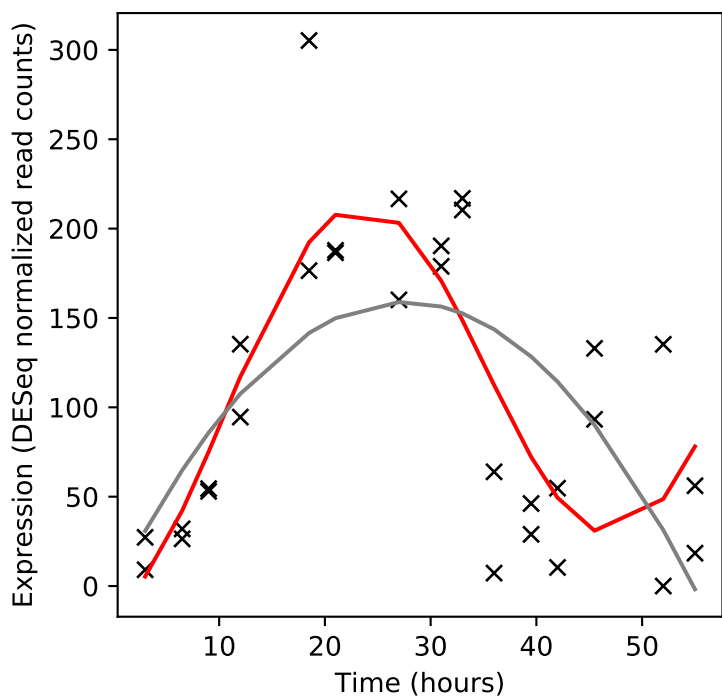

Rv1791/PE19

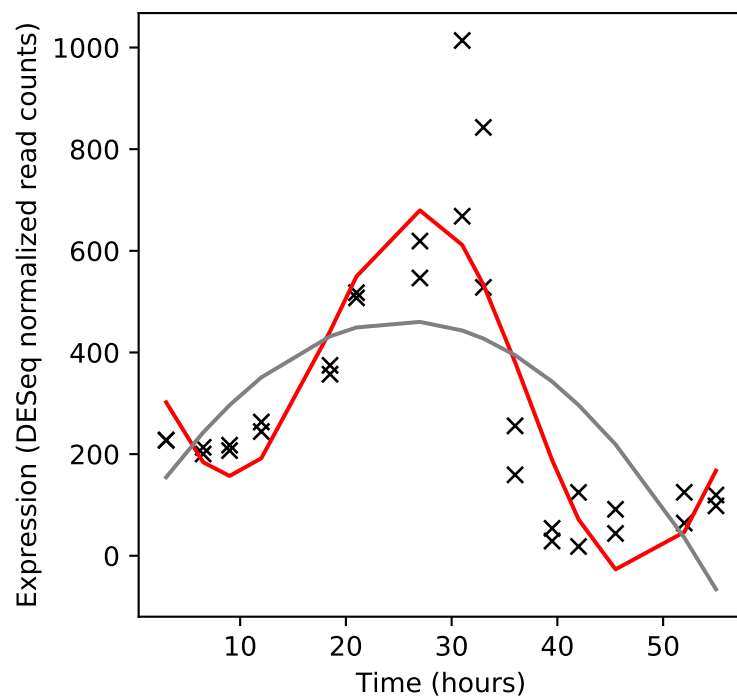

Rv1793/esxN

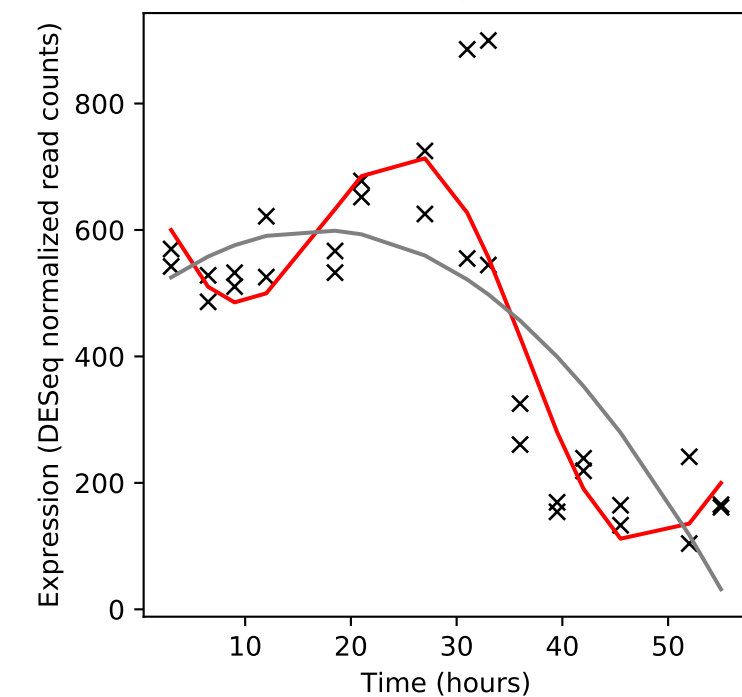

Rv1794/-

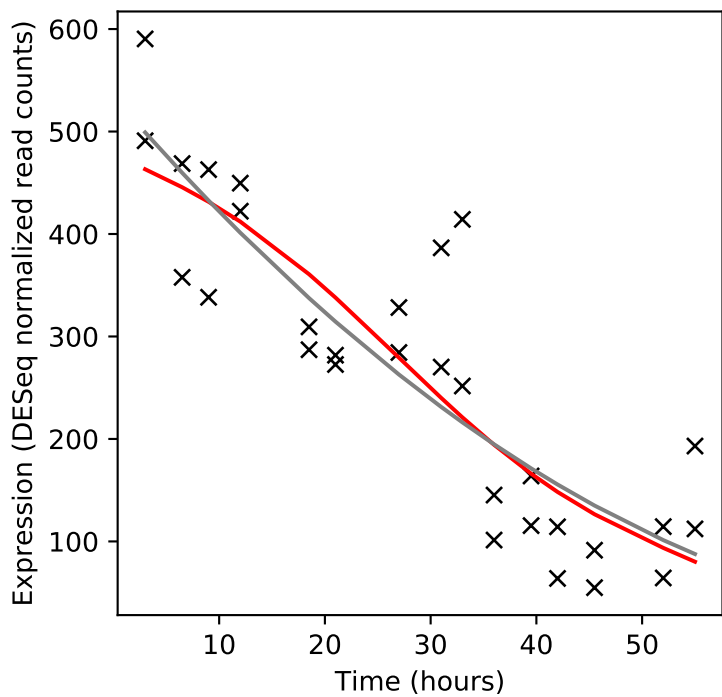

Rv1795/eccD5

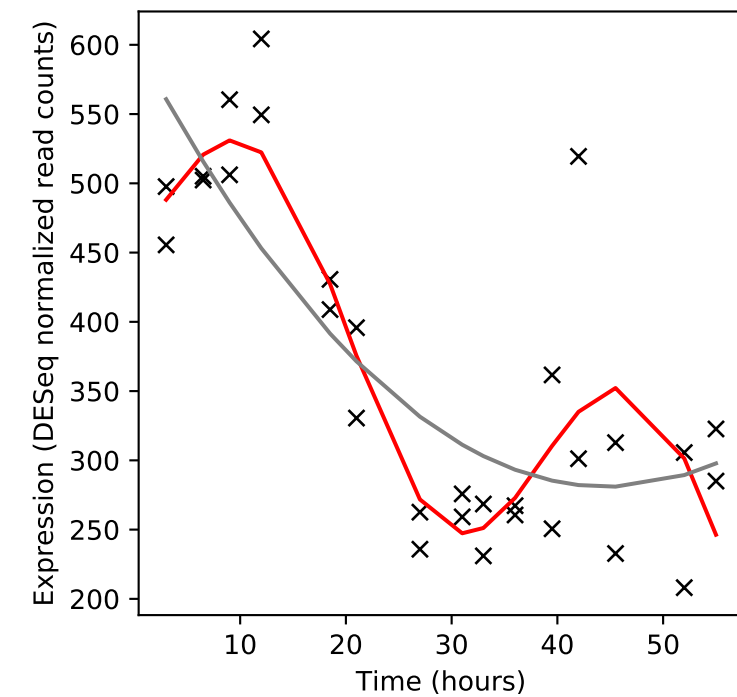

Rv1796/mycP5

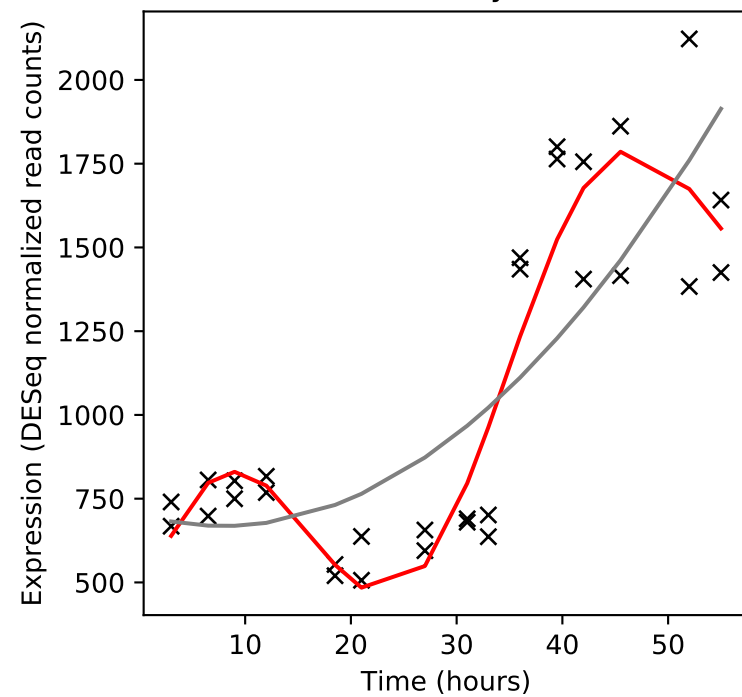



Rv1797/eccE5

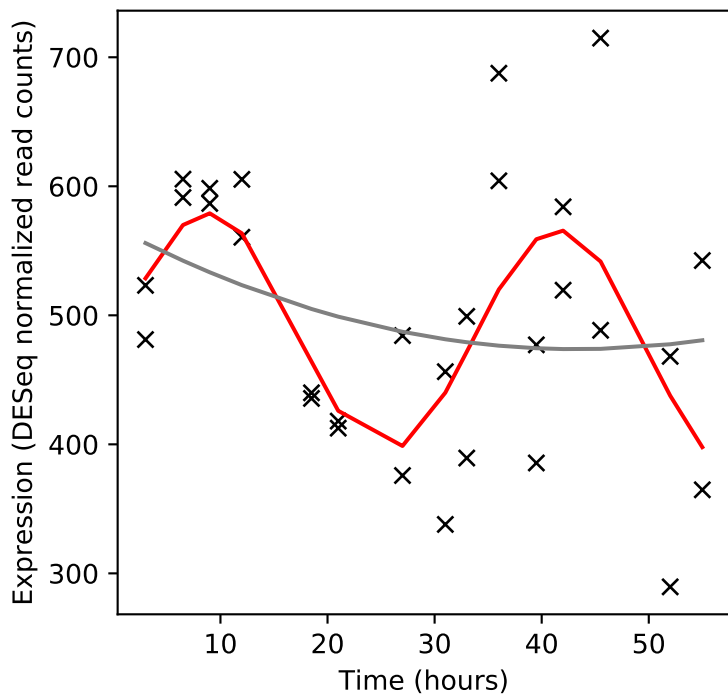

Rv1798/eccA5

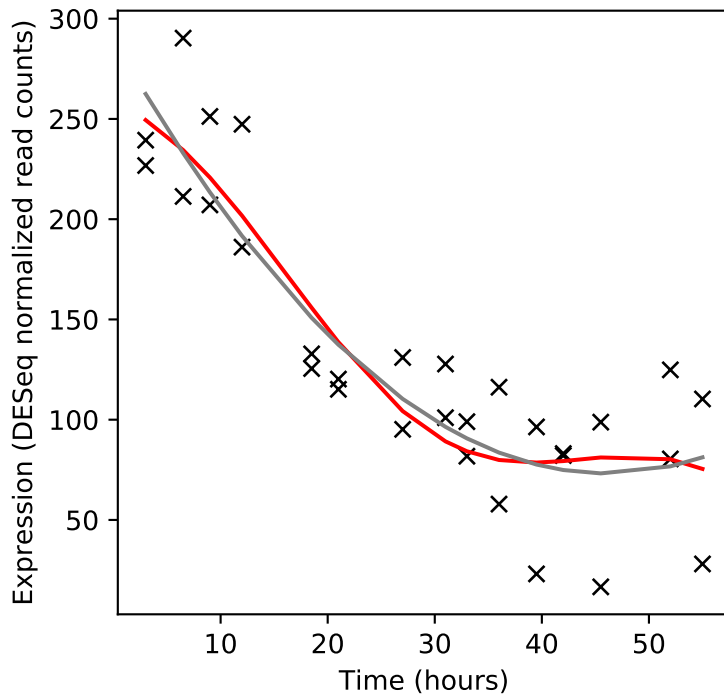

Rv1799/lppT

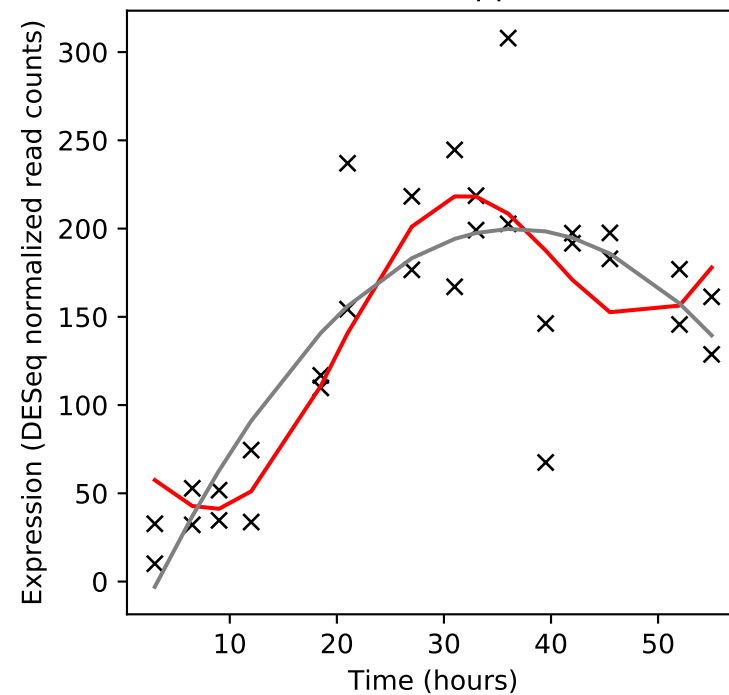

Rv1800/PPE28

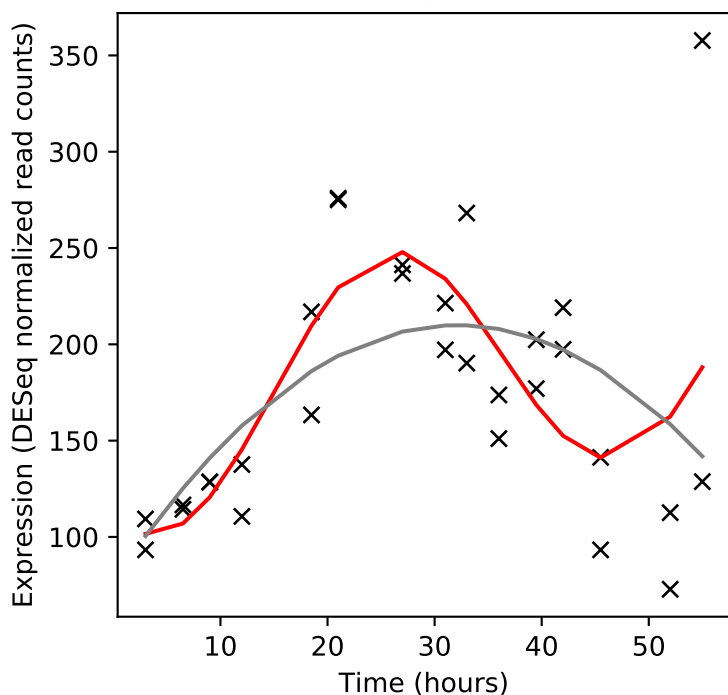

Rv1801/PPE29

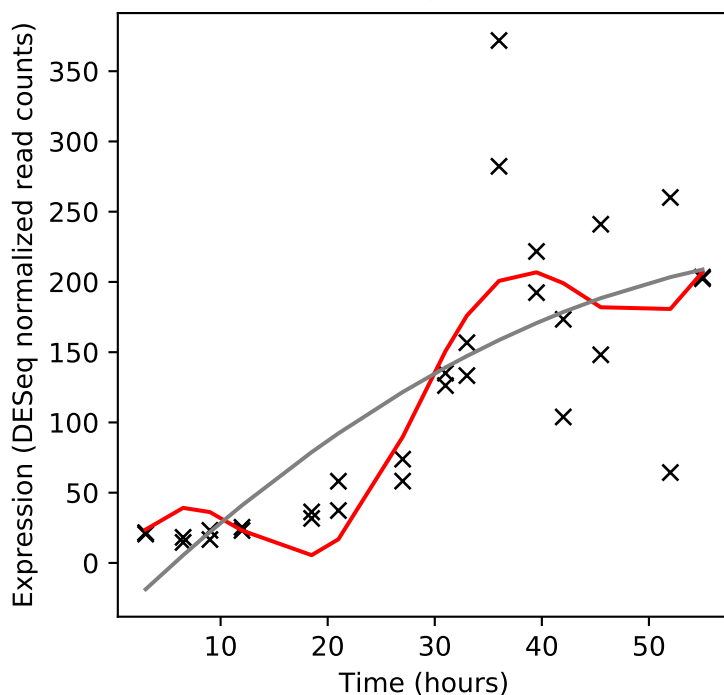

Rv1802/PPE30

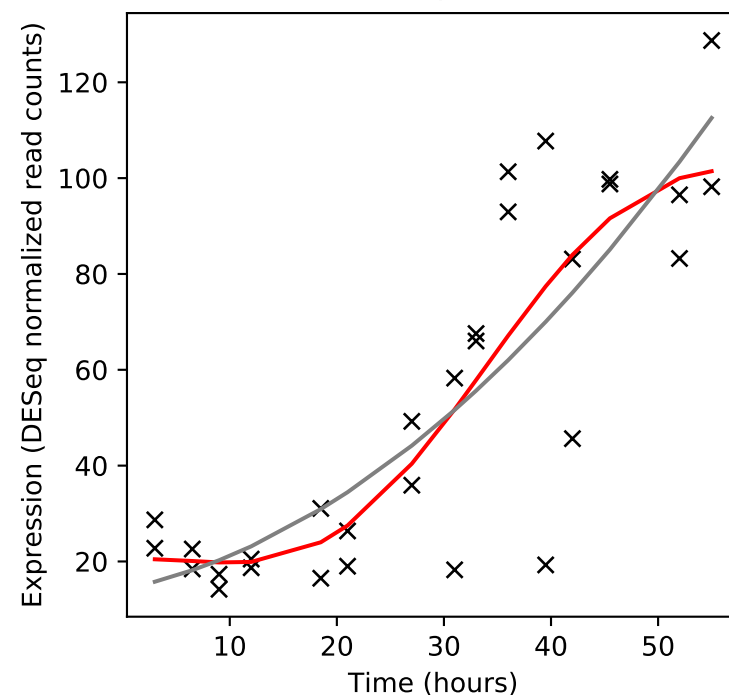

Rv1803c/PE\_PGRS32

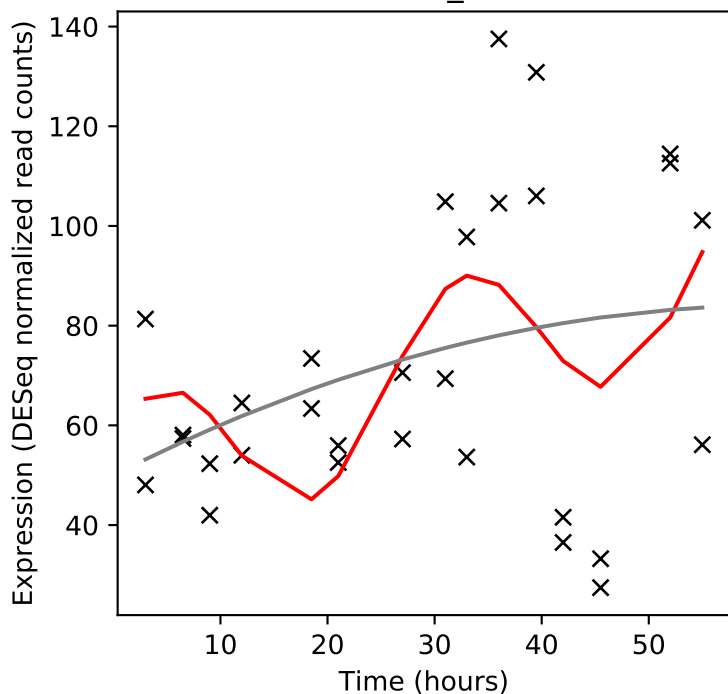

Rv1804c/-

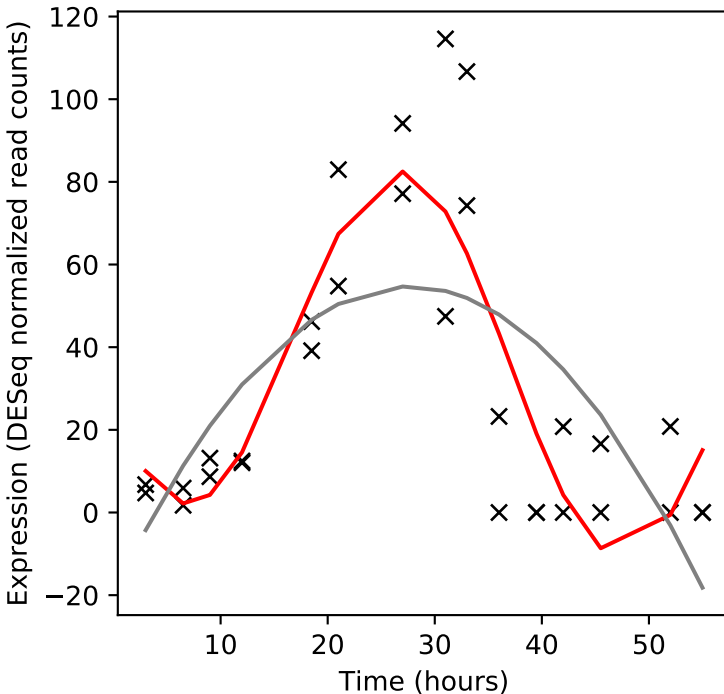

Rv1805c/-

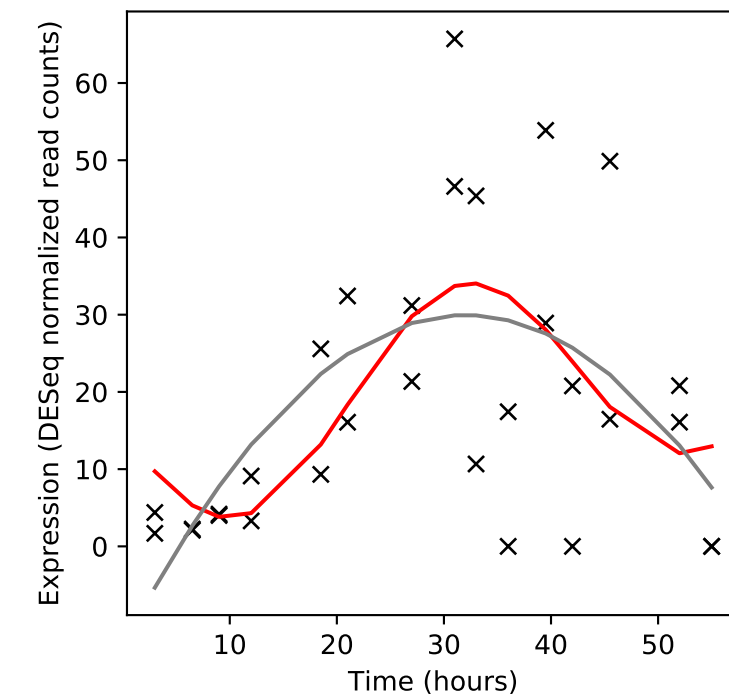

Rv1806/PE20

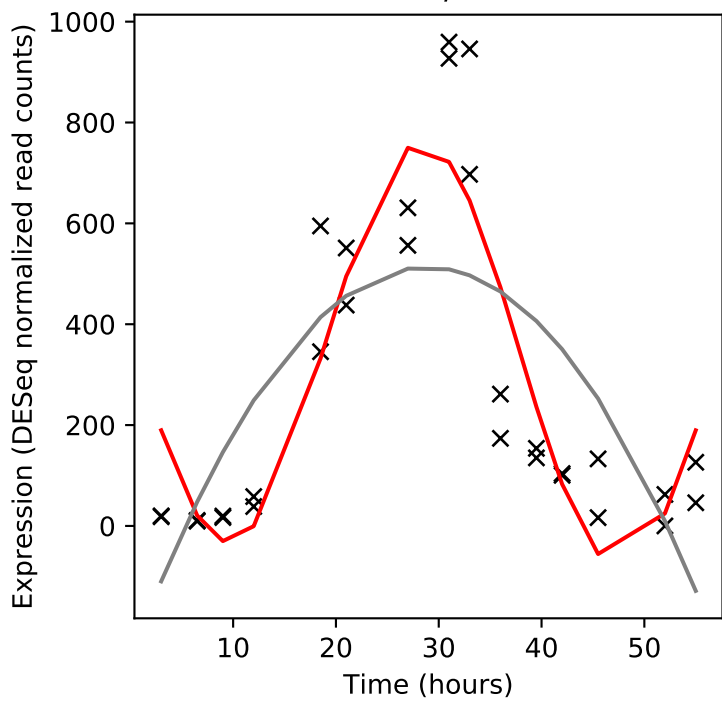

Rv1807/PPE31

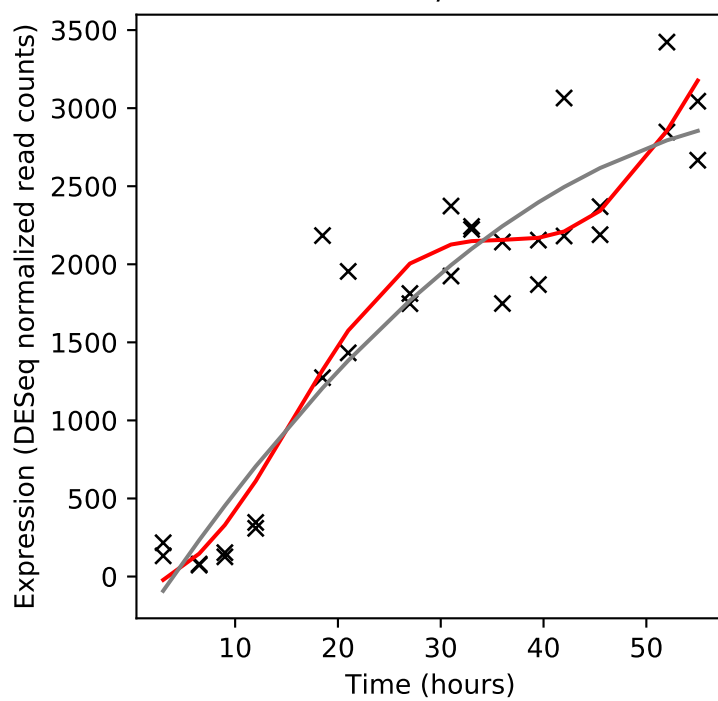

Rv1808/PPE32

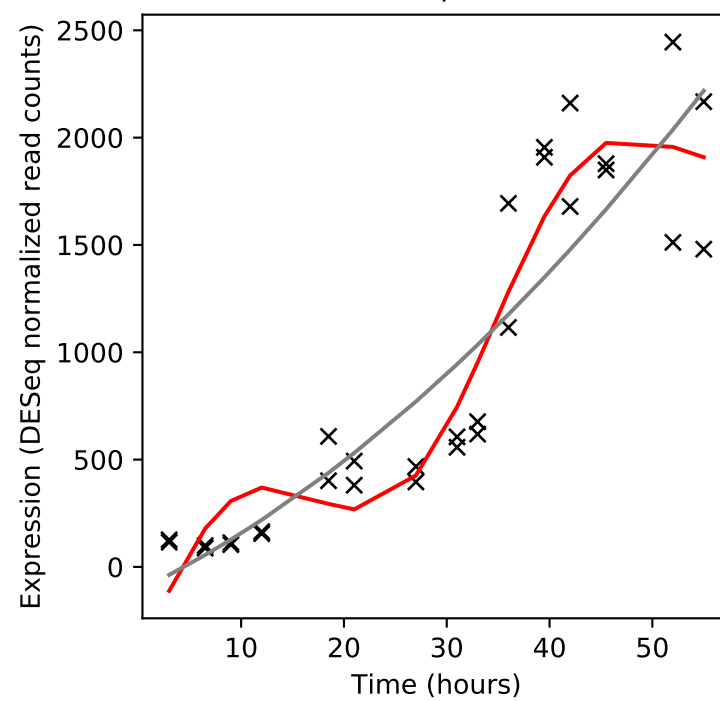

Rv1809/PPE33

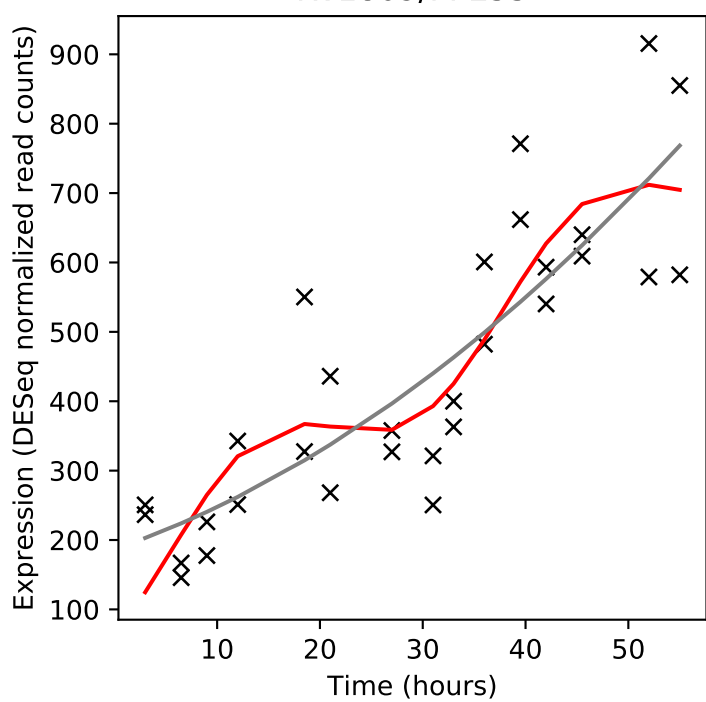

Rv1810/-

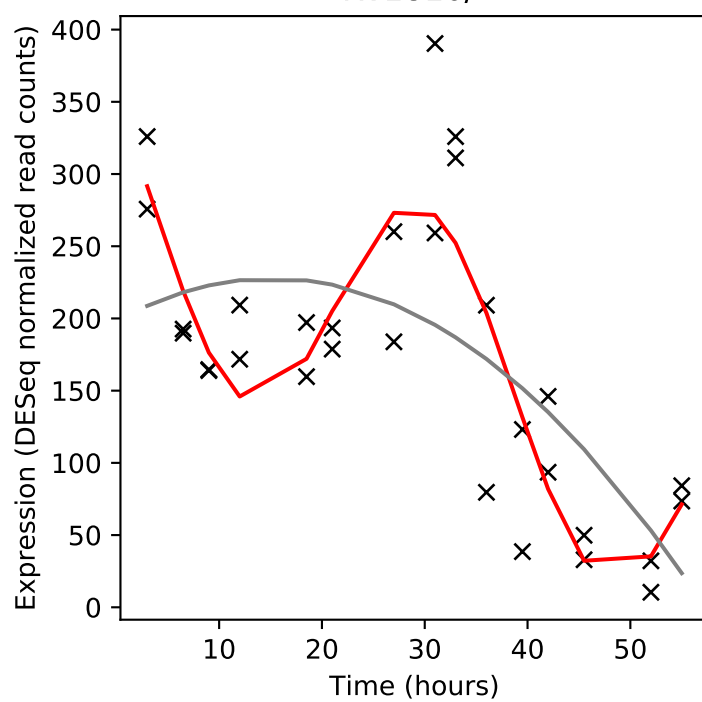

Rv1811/mgtC

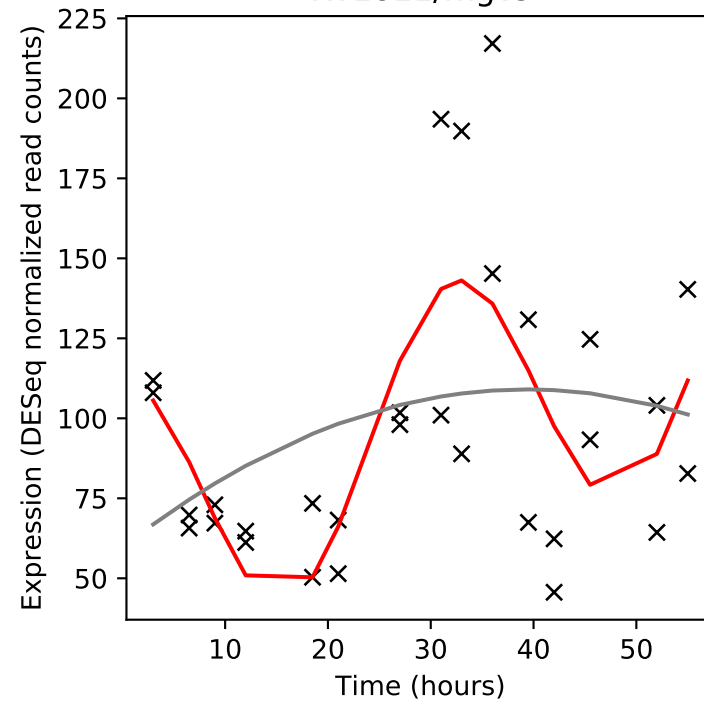

Rv1812c/-

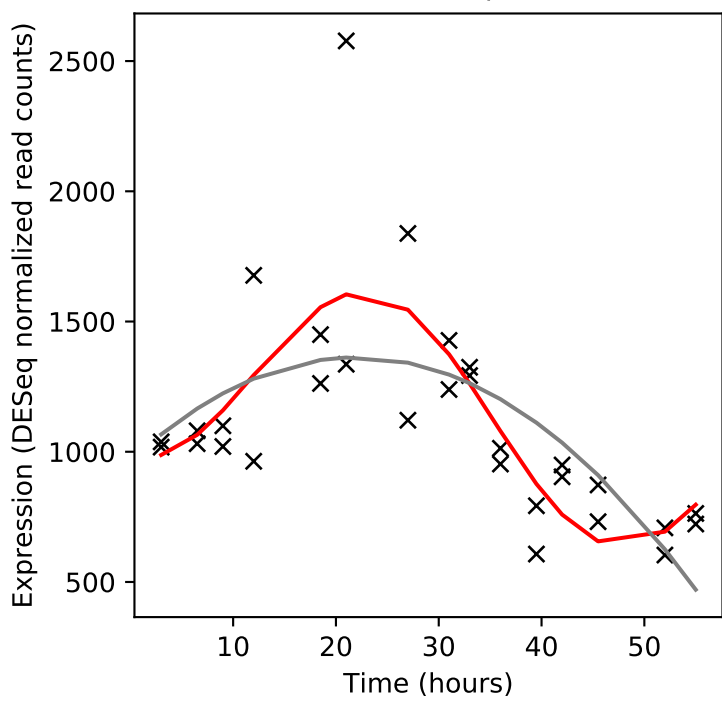

Rv1813c/-

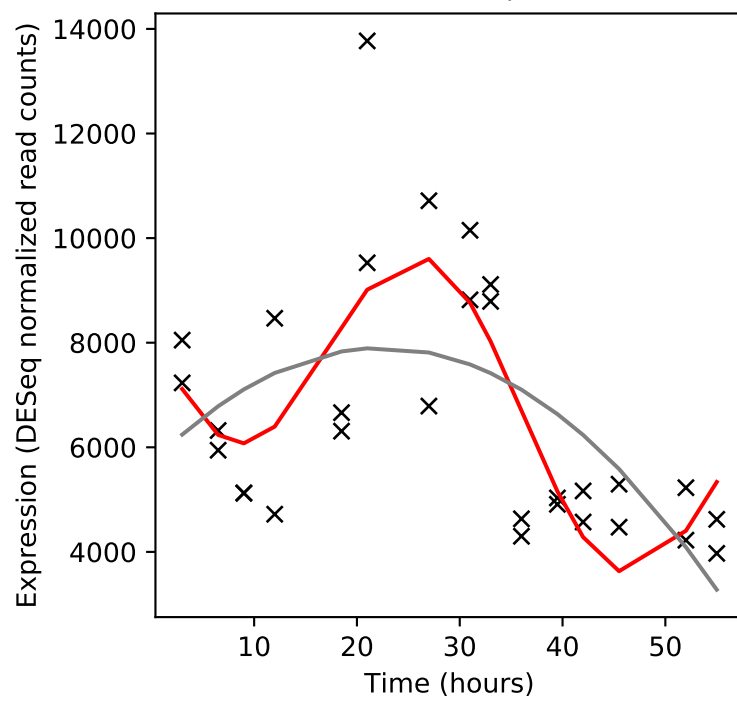

Rv1814/erg3

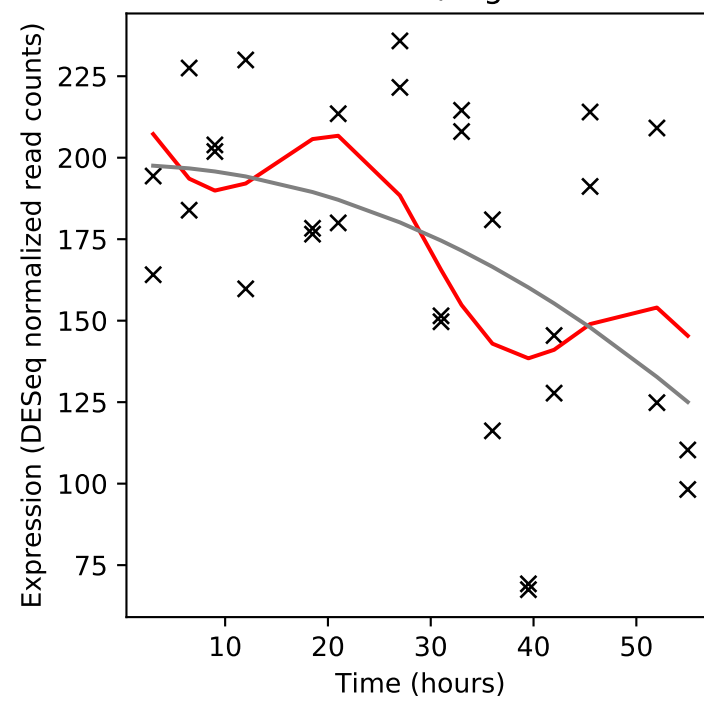

Rv1815/-

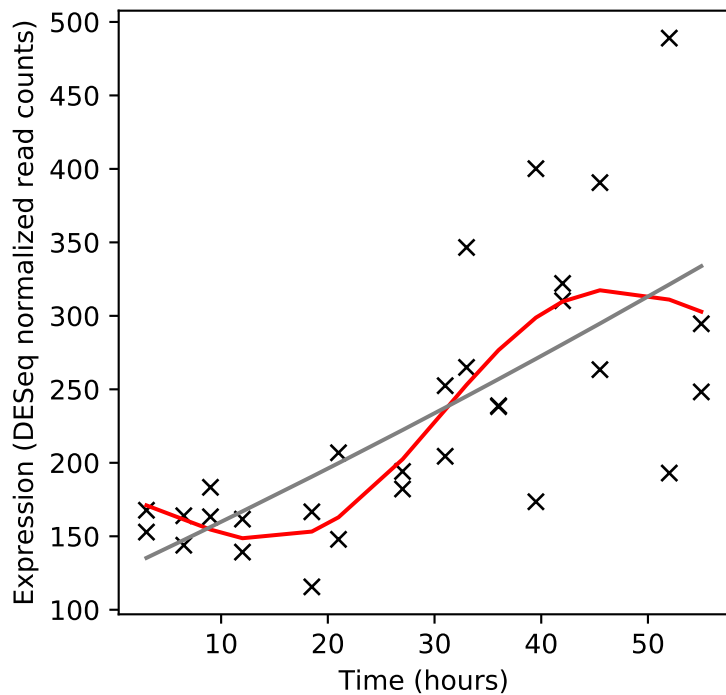

Rv1816/-

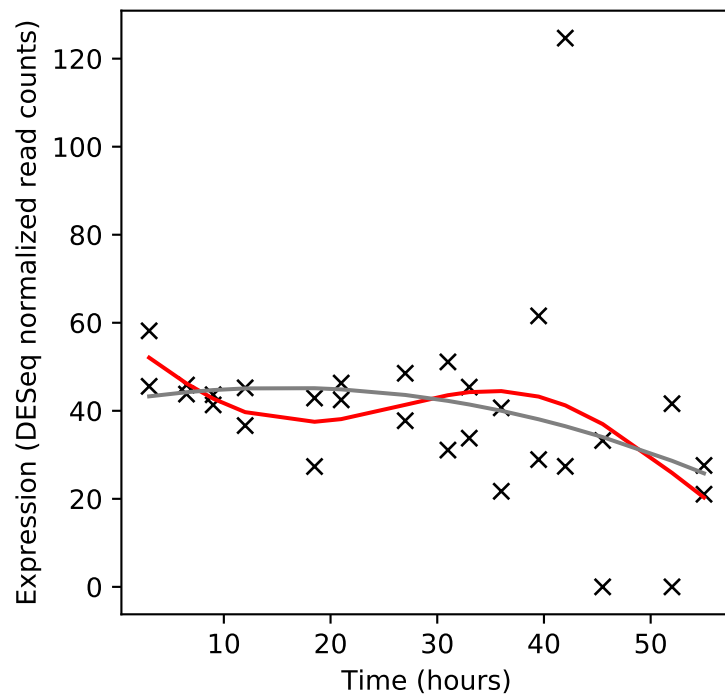

Rv1817/-

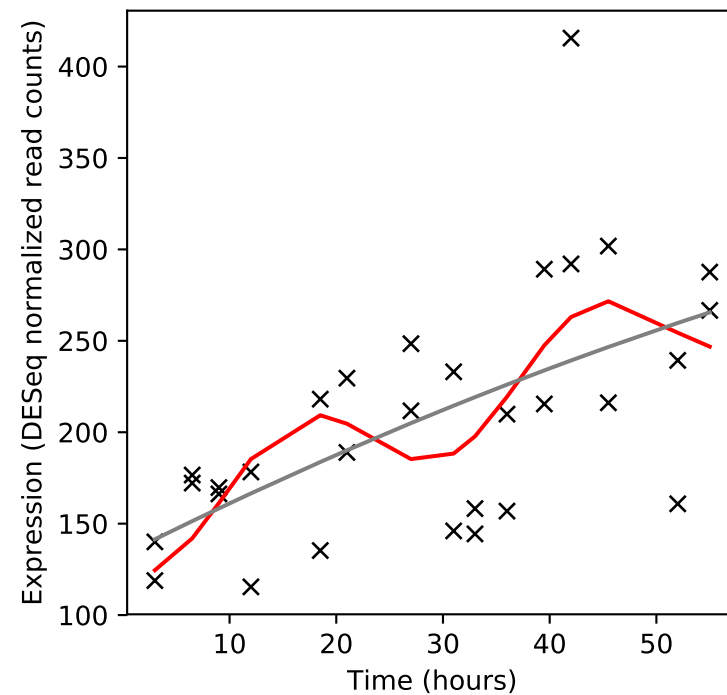

Rv1818c/PE\_PGRS33

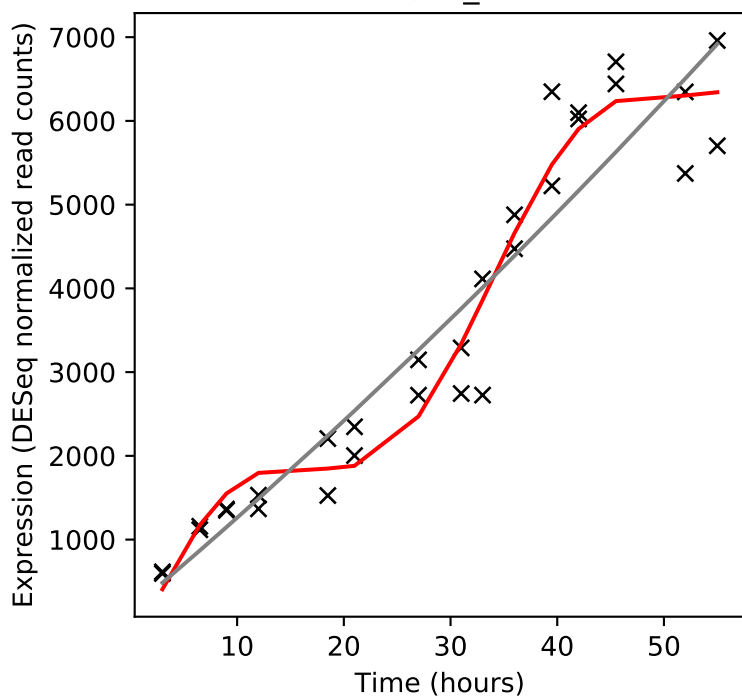

Rv1819c/bacA

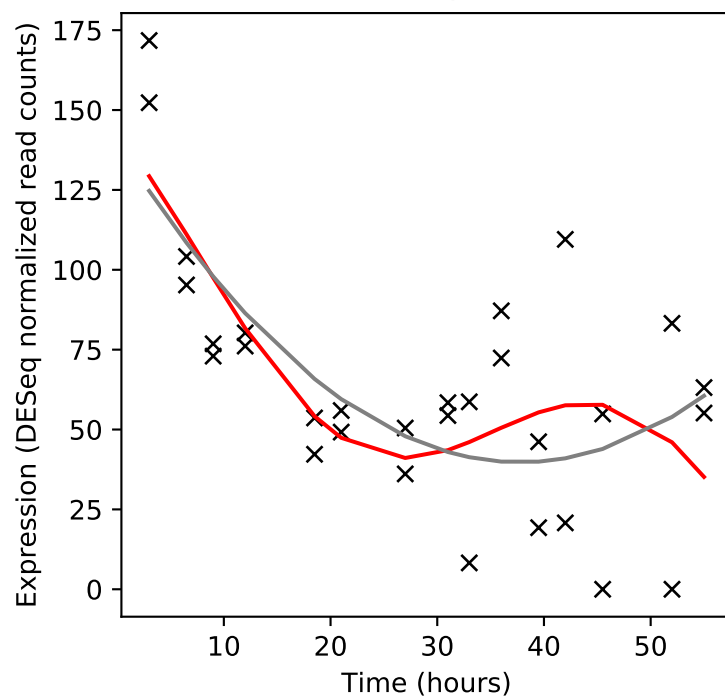

Rv1820/ilvG

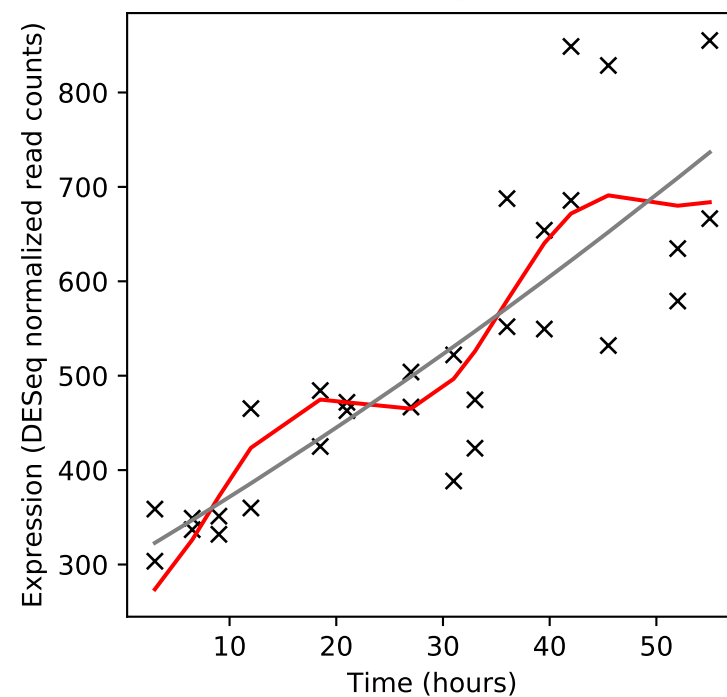

Rv1821/secA2

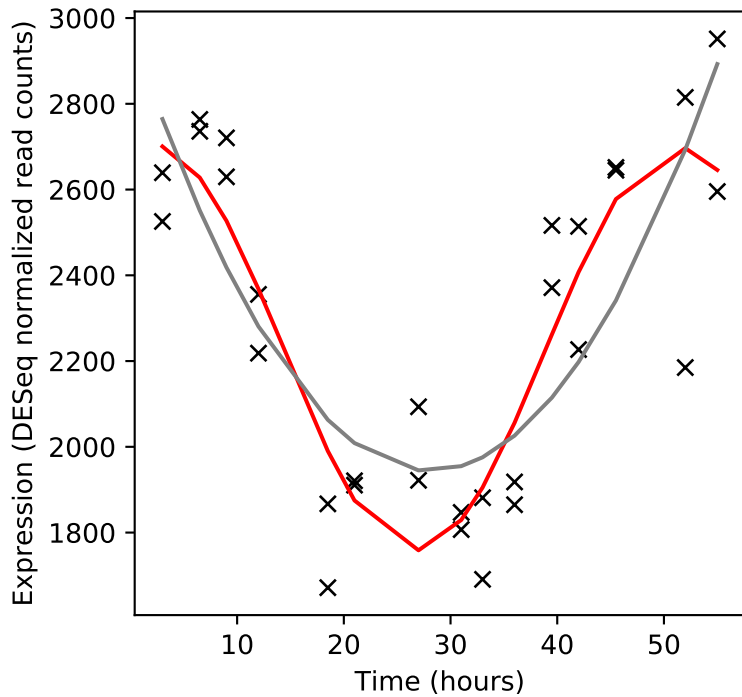

Rv1822/pgsA2

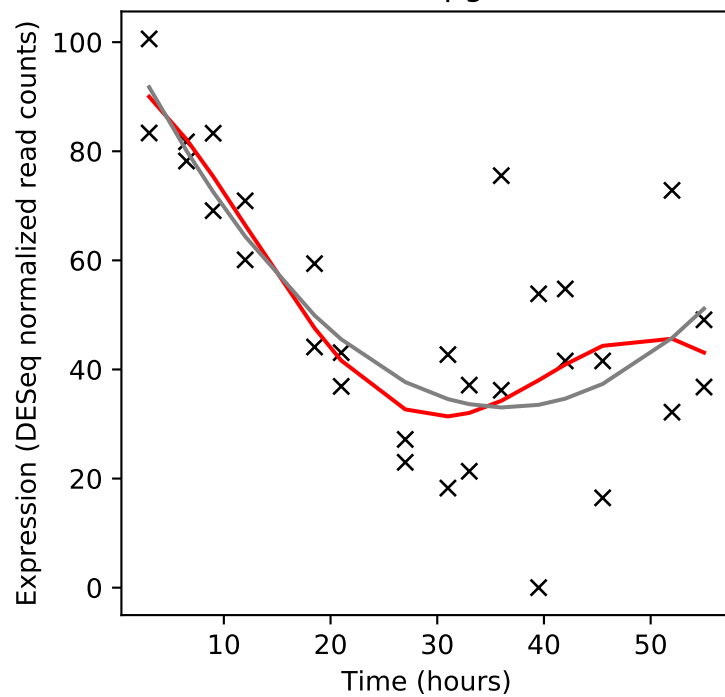

Rv1823/-

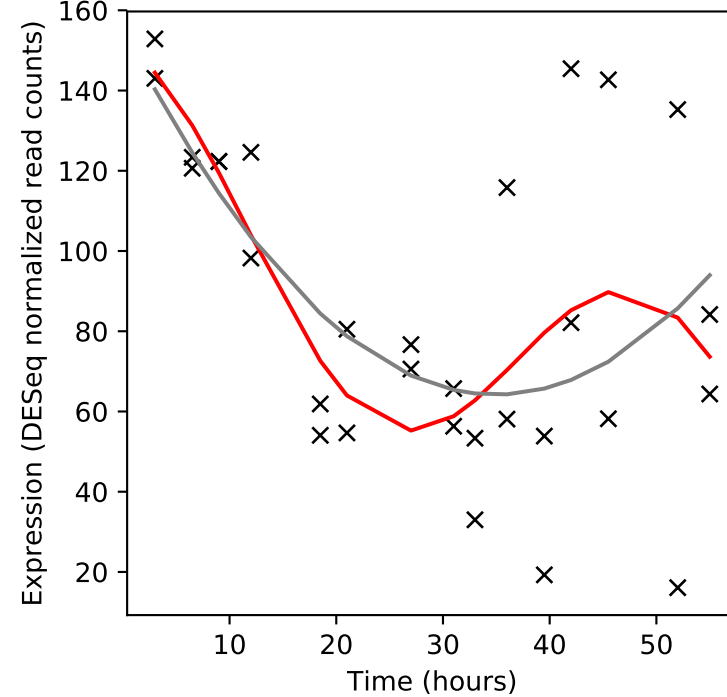

Rv1824/-

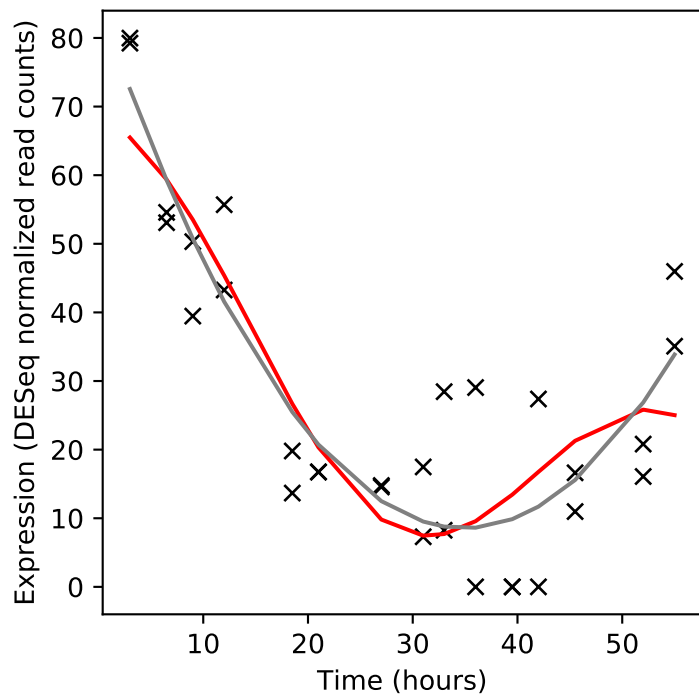

Rv1825/-

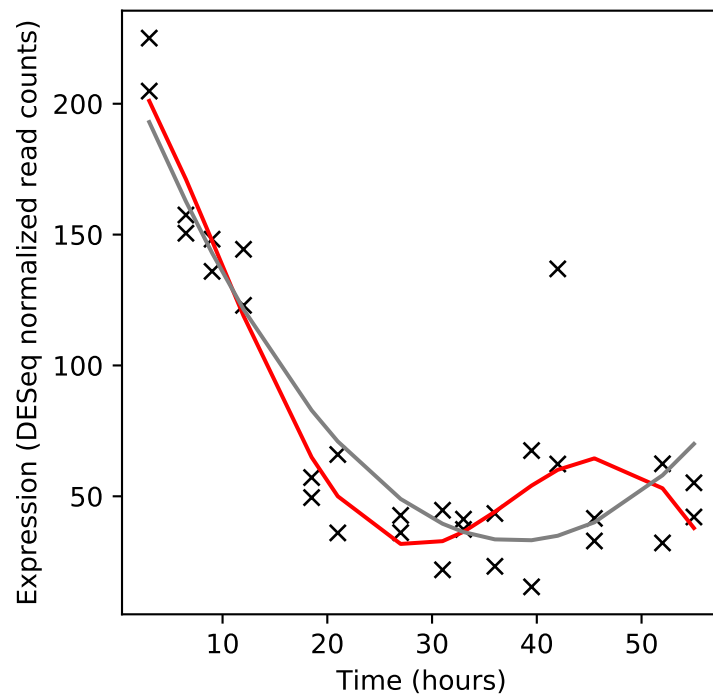

Rv1826/gcvH

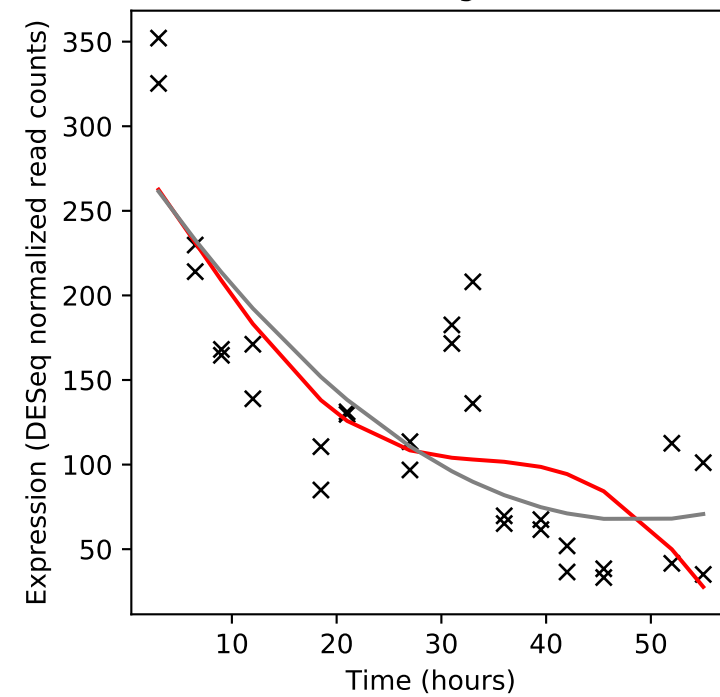

Rv1827/garA

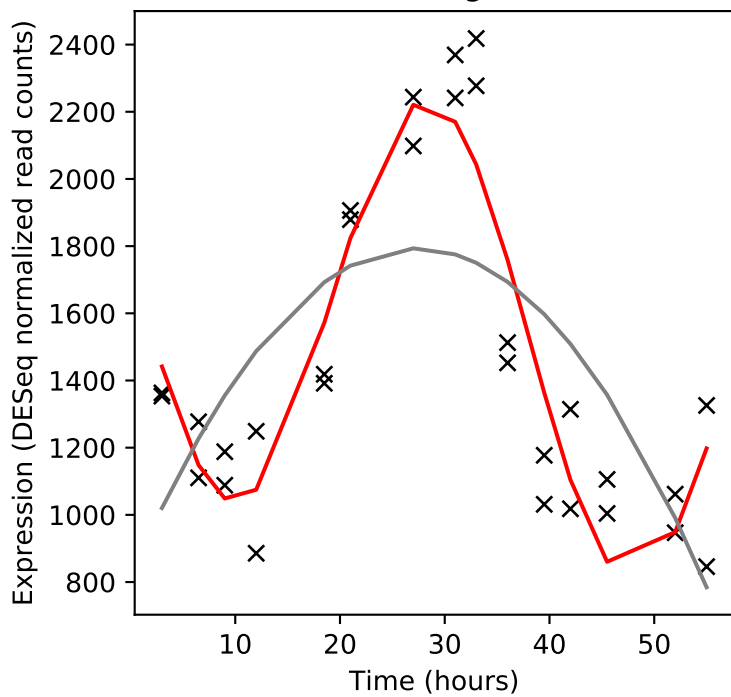

Rv1828/-

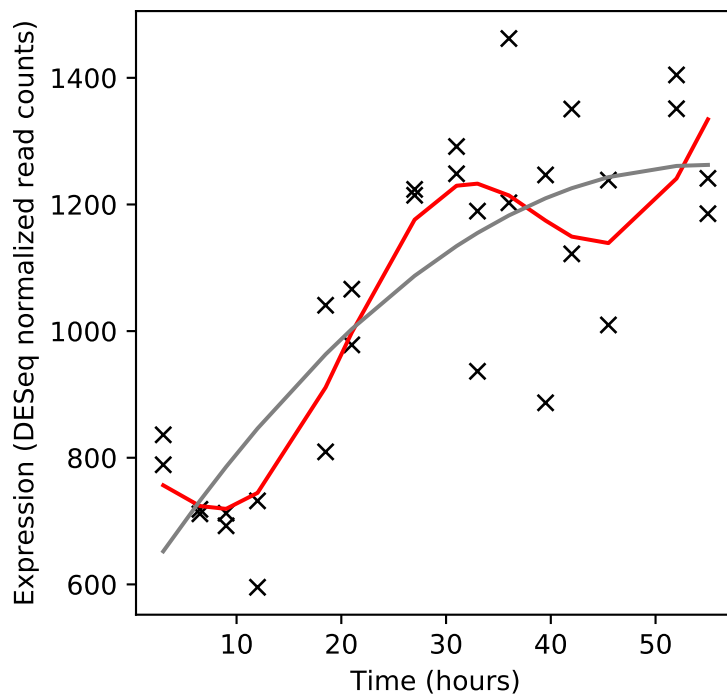

Rv1829/-

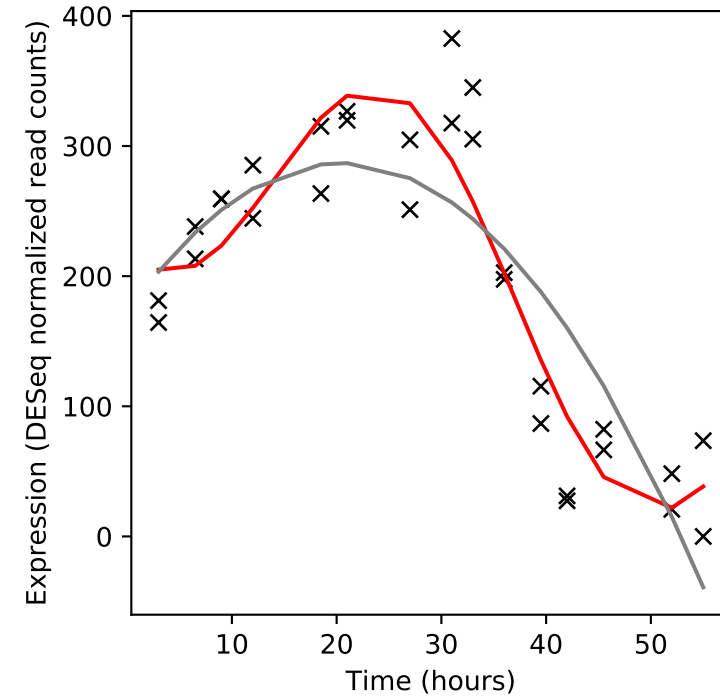

Rv1830/-

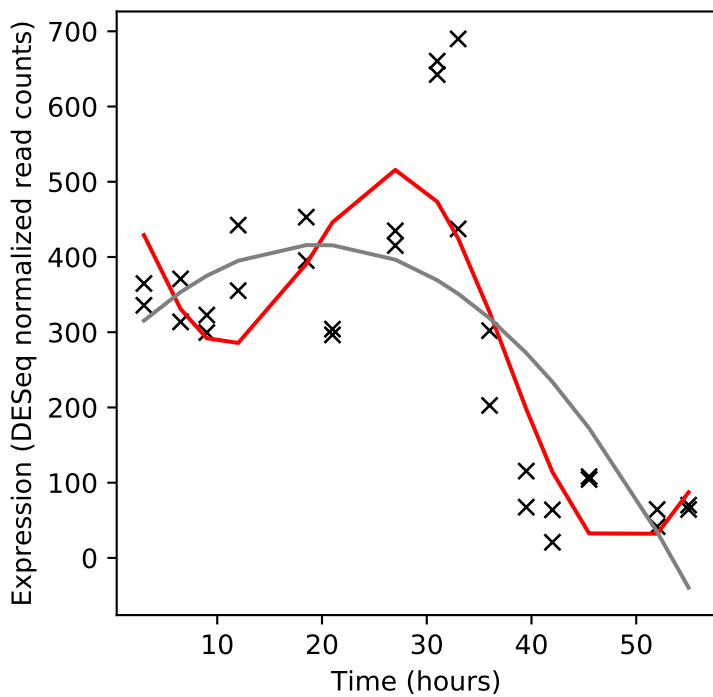

Rv1831/-

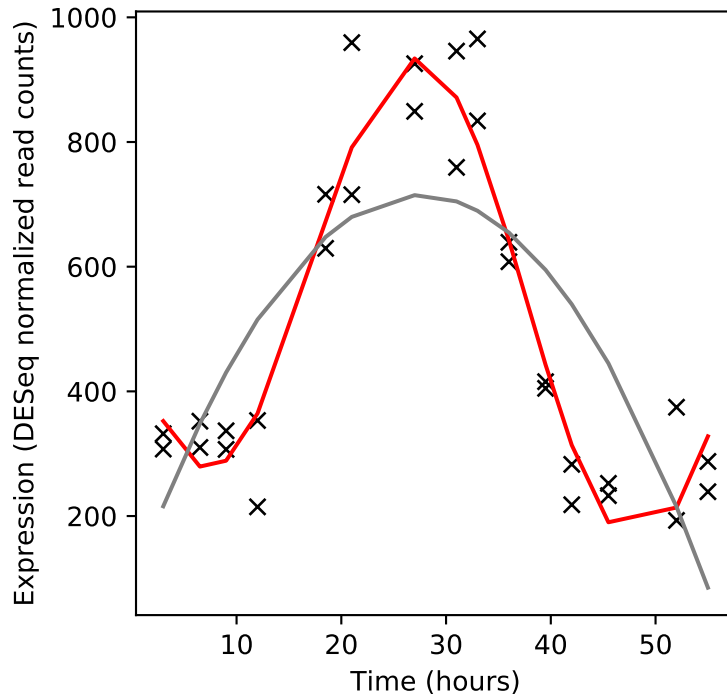

Rv1832/gcvB

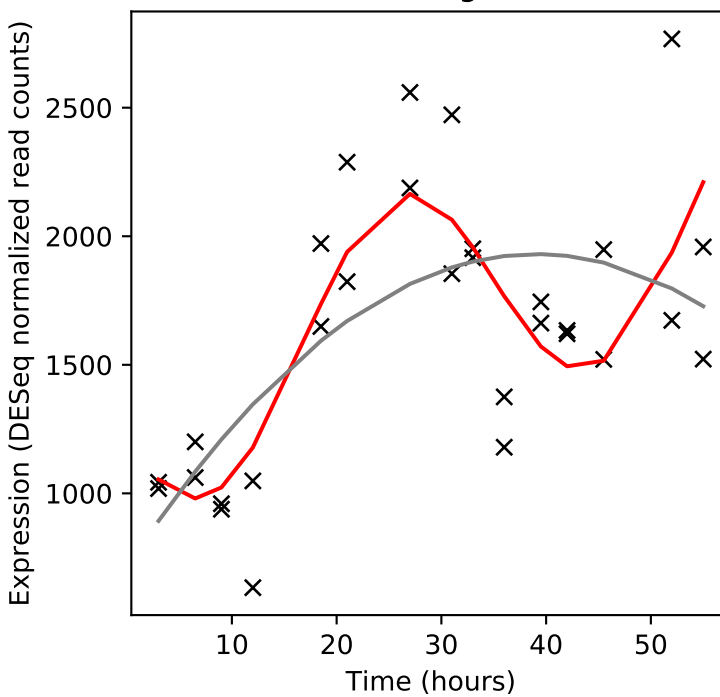

Rv1833c/-

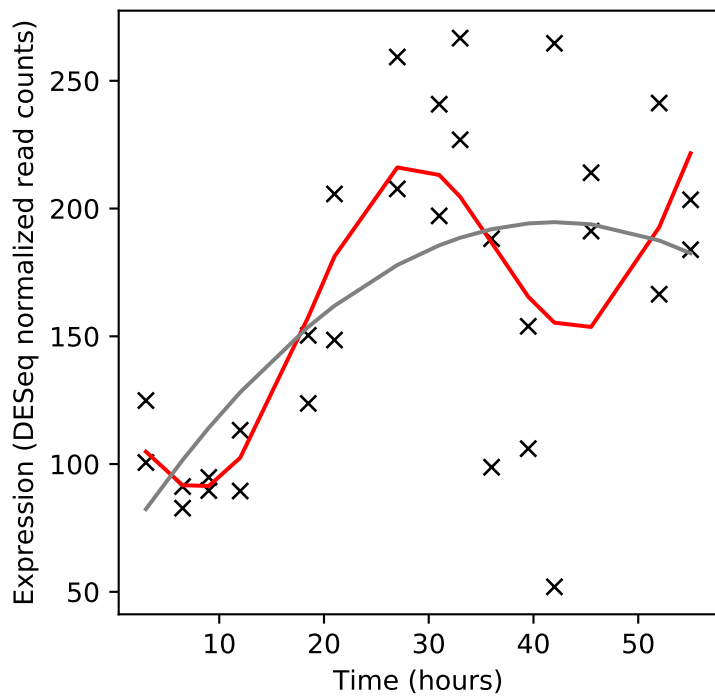

Rv1834/lipZ

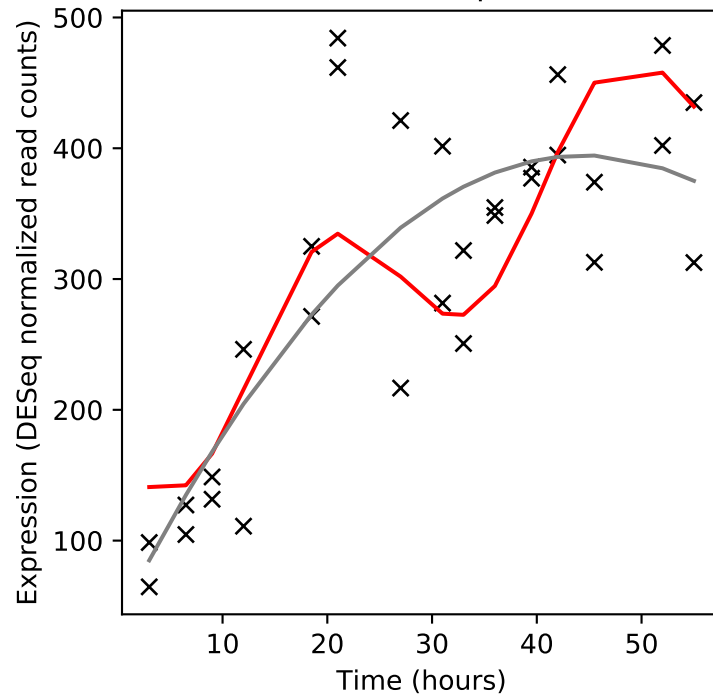

Rv1835c/-

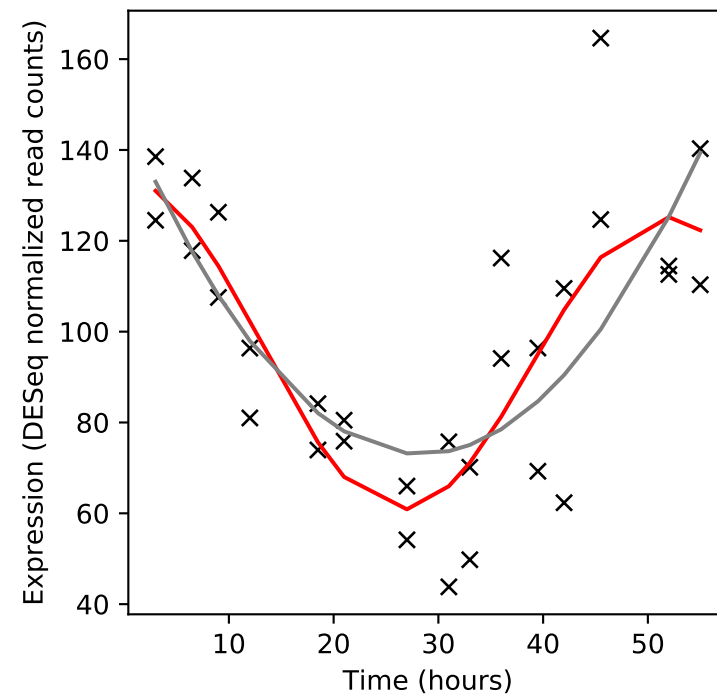

Rv1836c/-

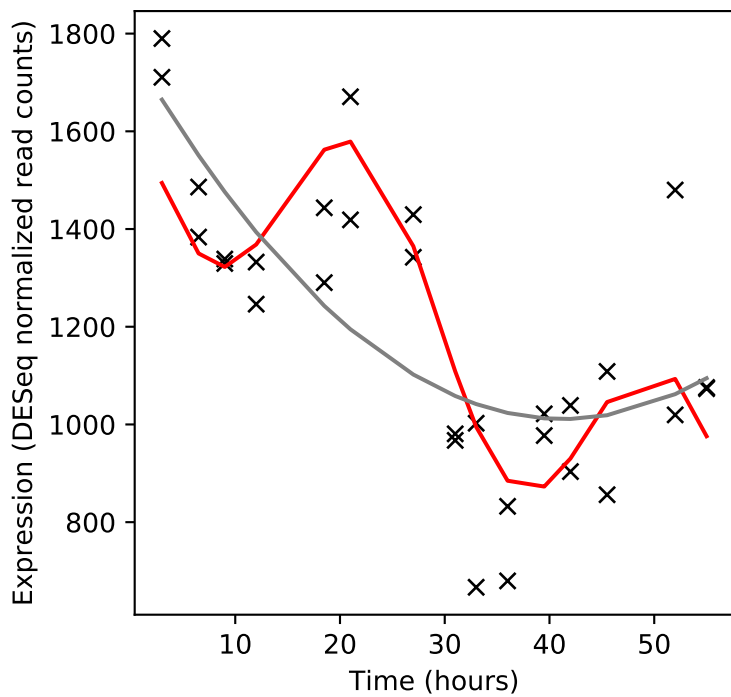

Rv1837c/glcB

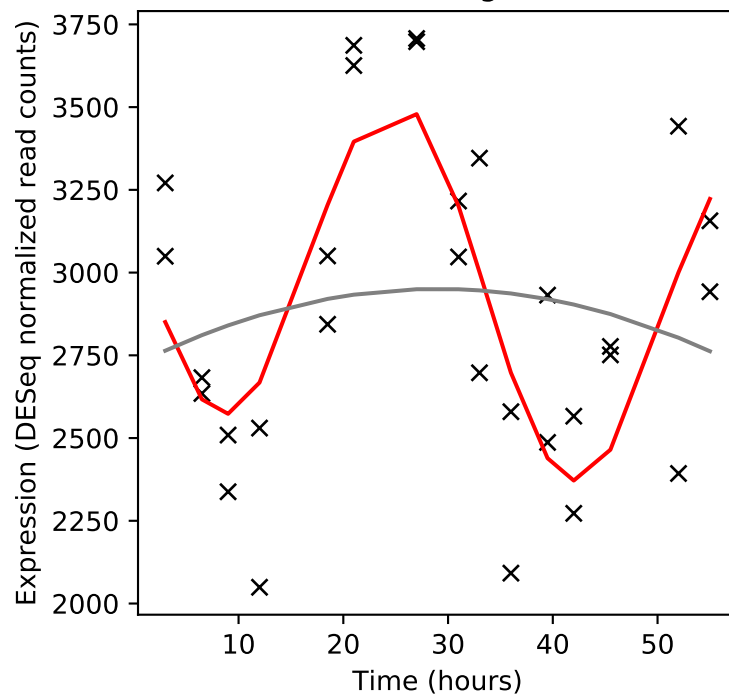

Rv1838c/vapC13

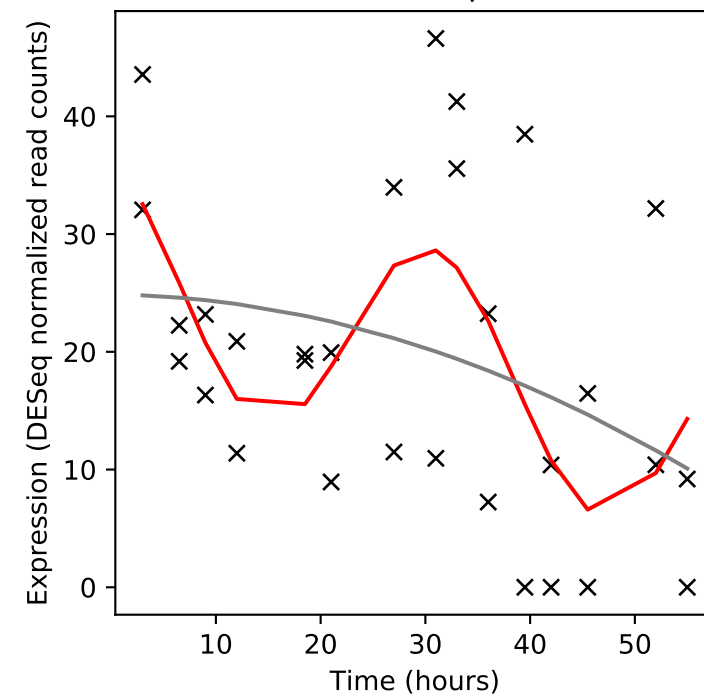

Rv1839c/vapB13

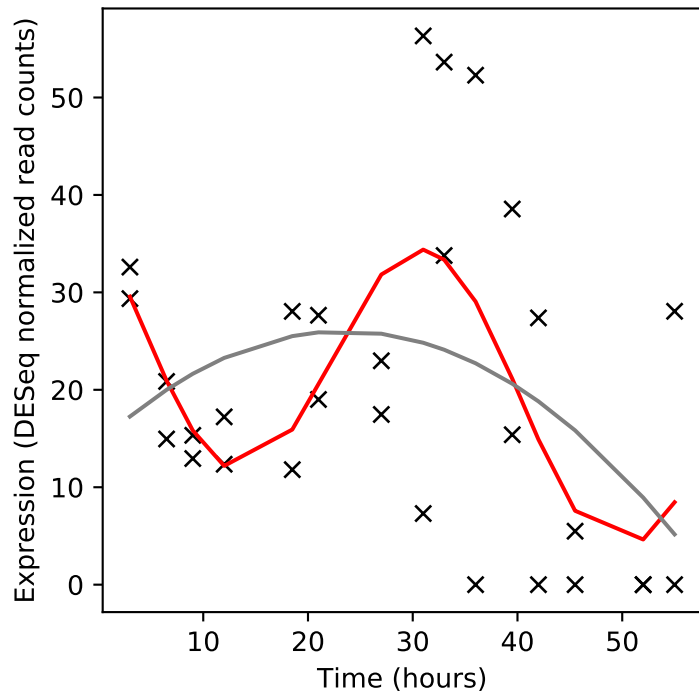

Rv1840c/PE\_PGRS34

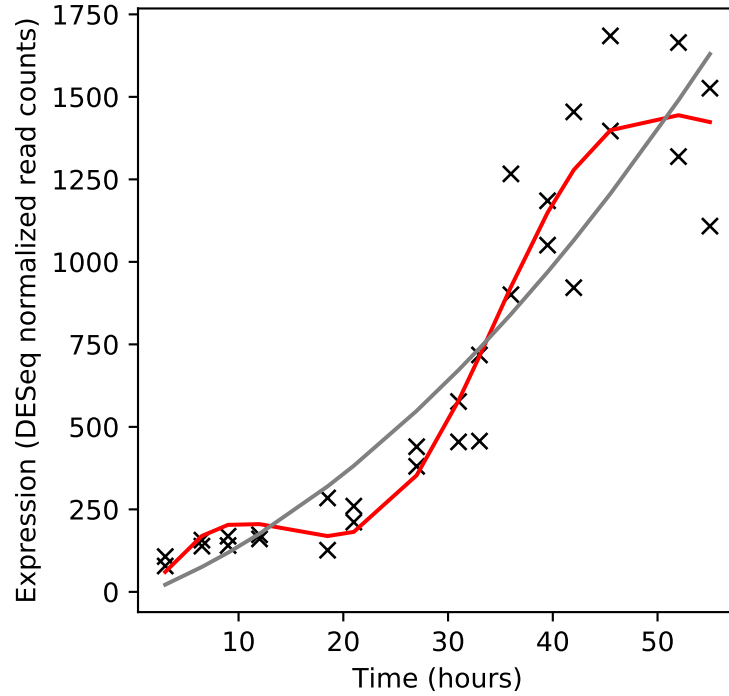

Rv1841c/-

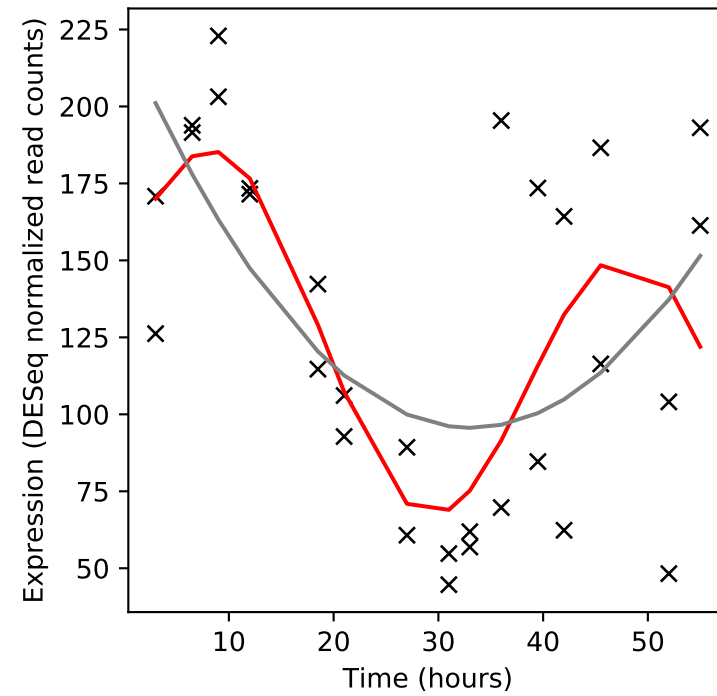

Rv1842c/-

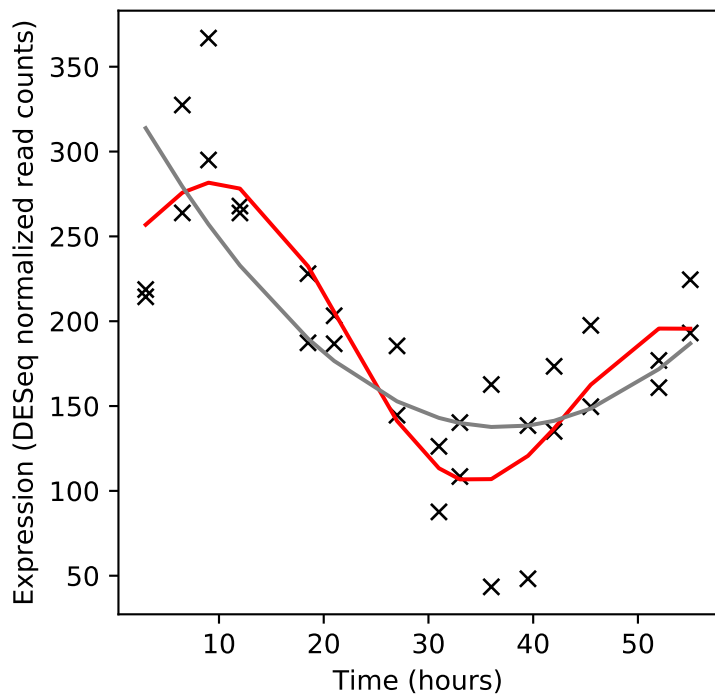

Rv1843c/guaB1

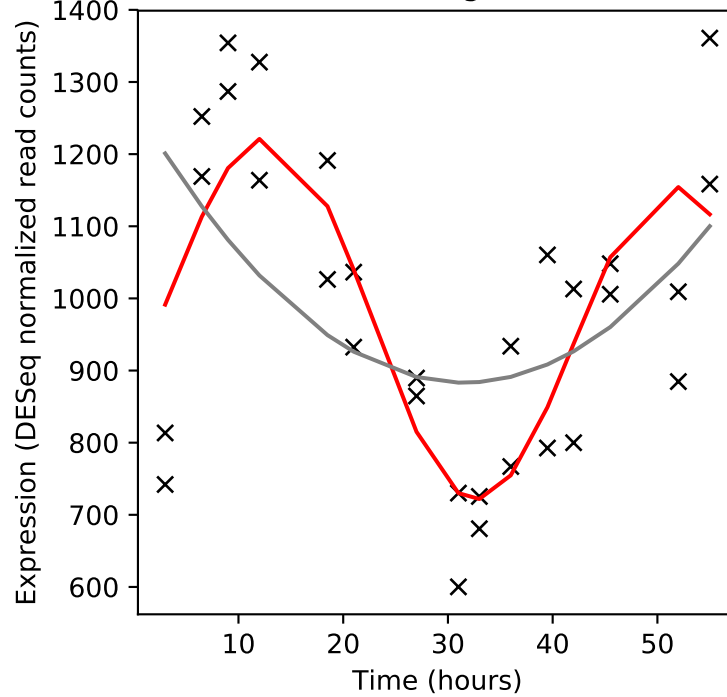

Rv1844c/gnd1

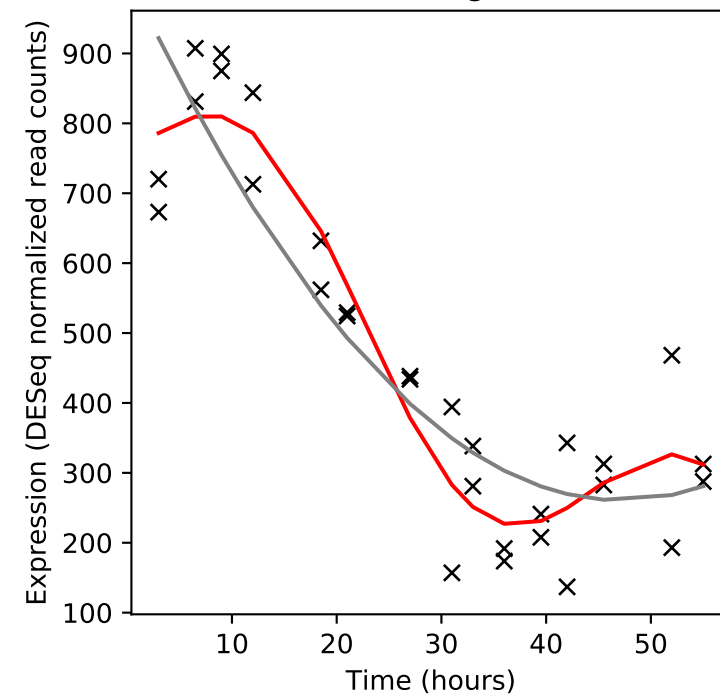

Rv1845c/blaR

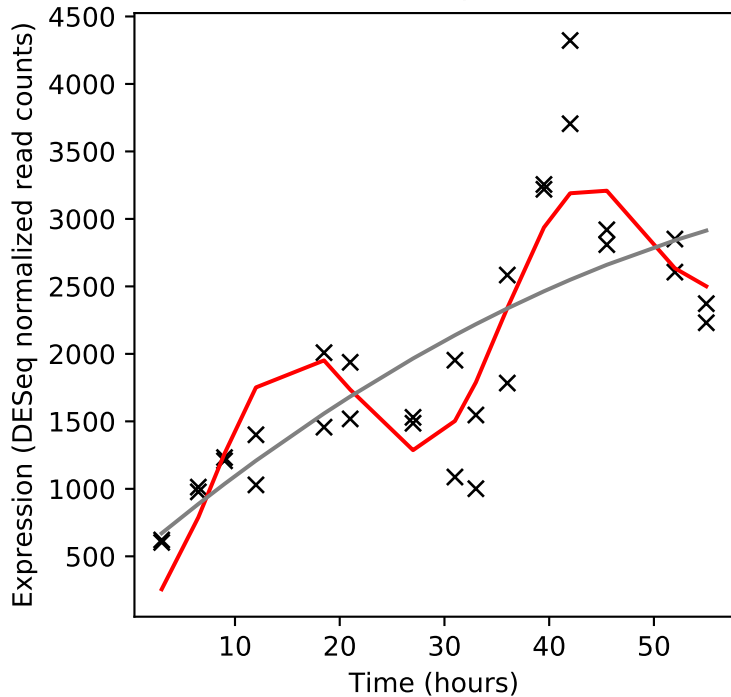

Rv1846c/blal

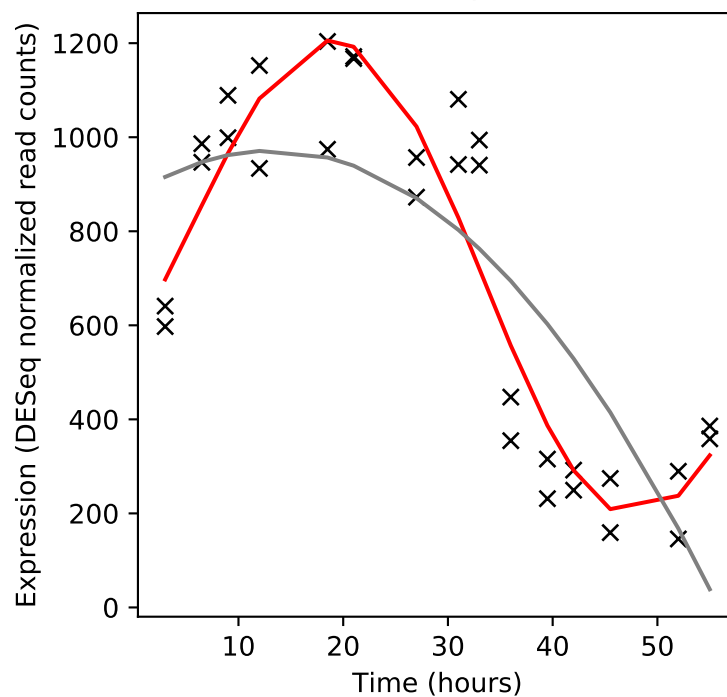

Rv1847/-

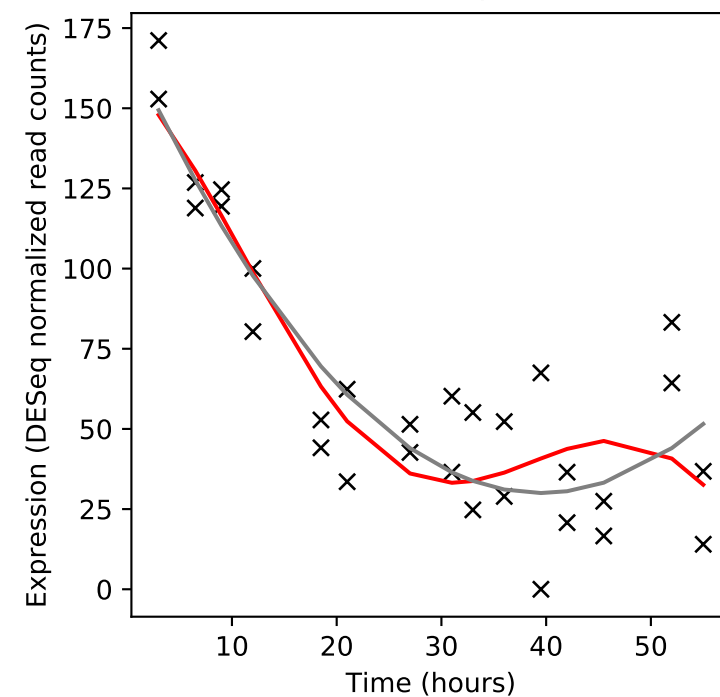

Rv1848/ureA

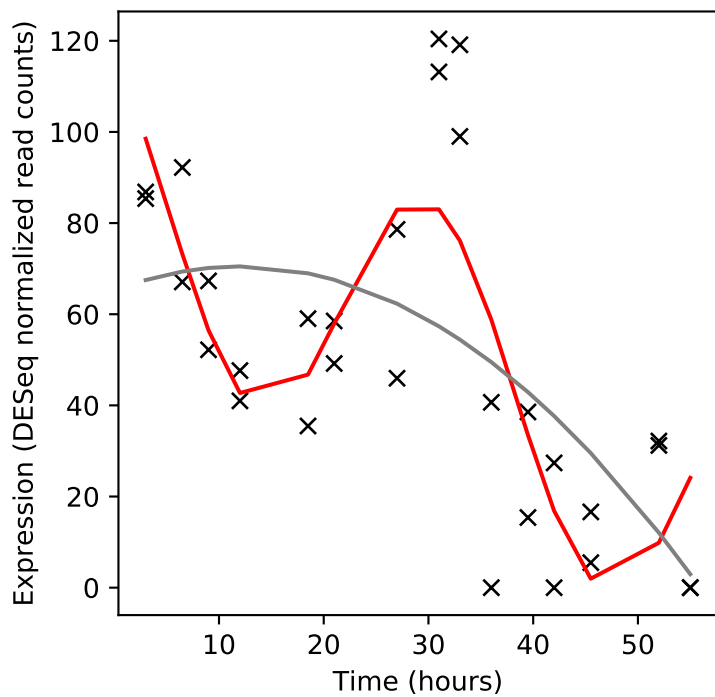

Rv1849/ureB

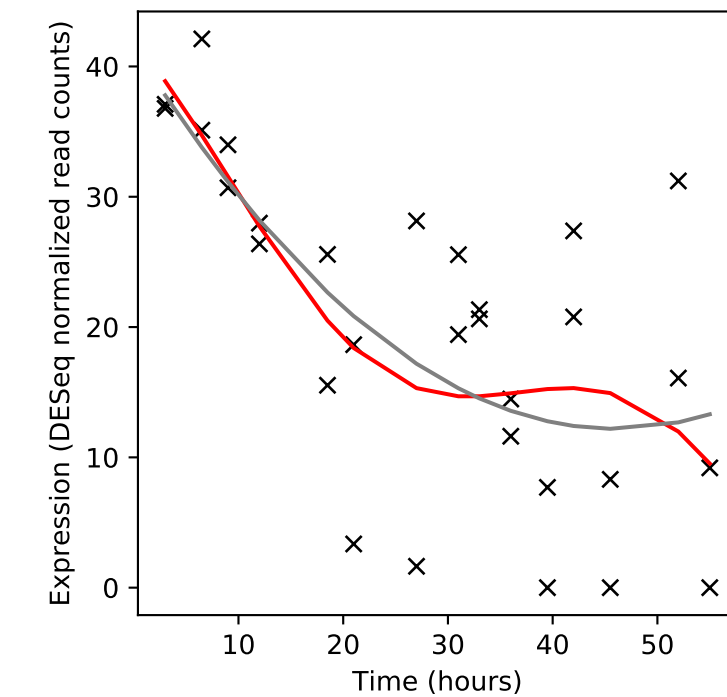

Rv1850/ureC

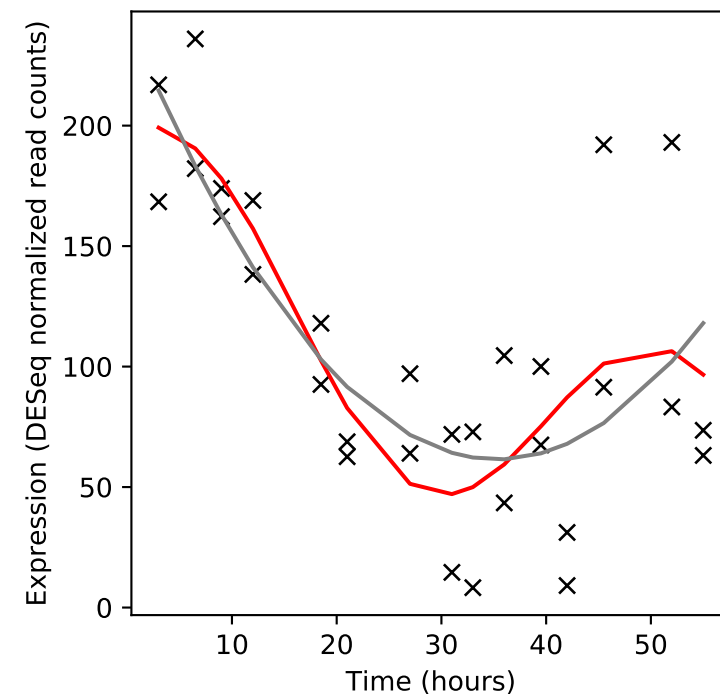

Rv1851/ureF

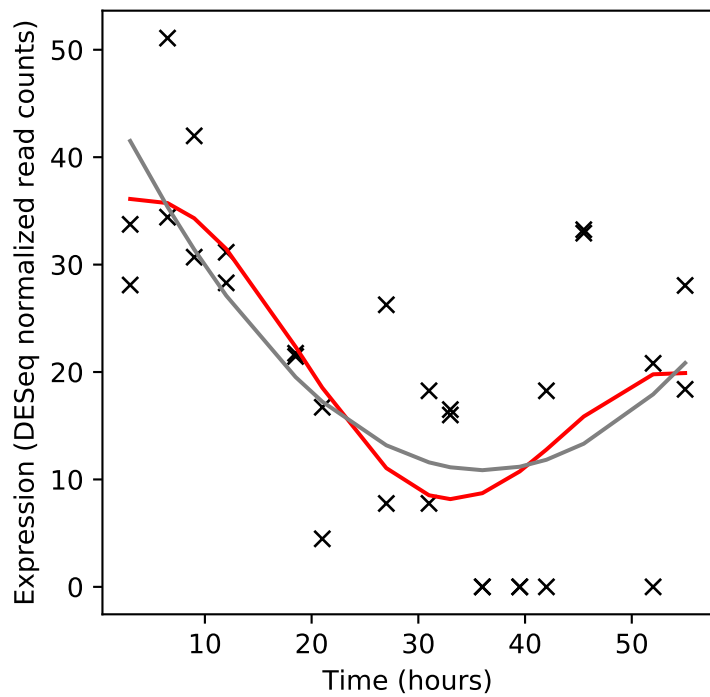

Rv1852/ureG

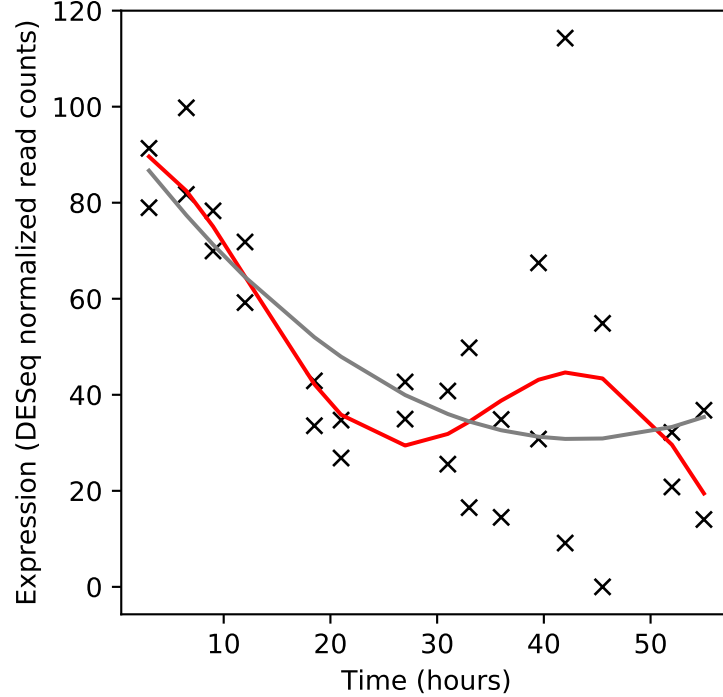

Rv1853/ureD

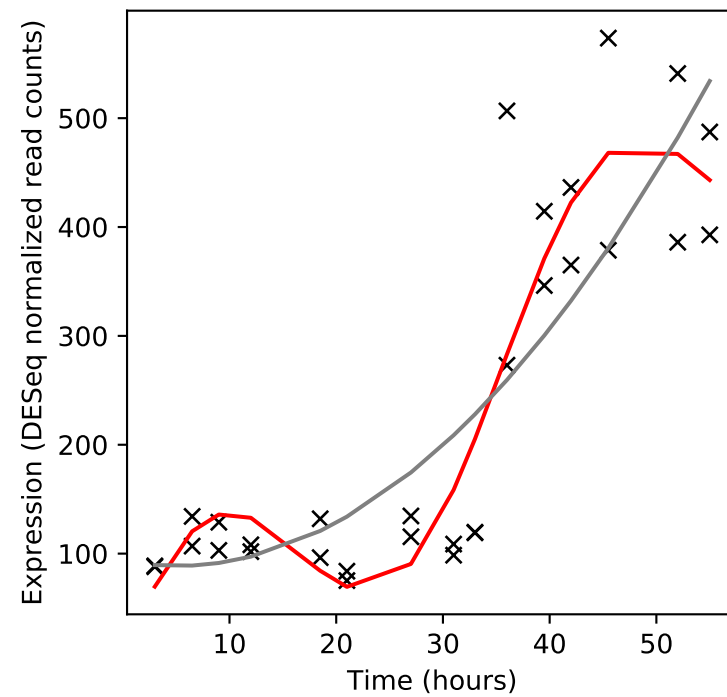

Rv1854c/ndh

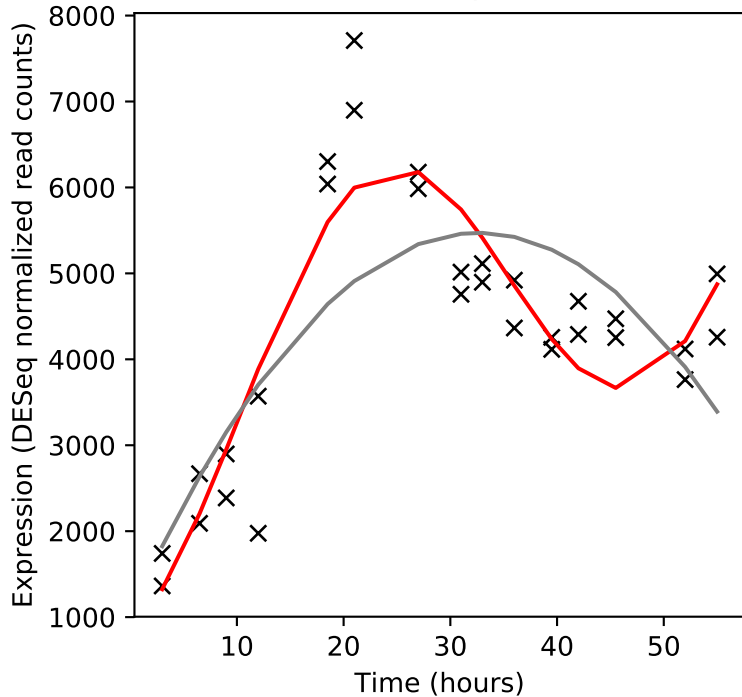

Rv1855c/-

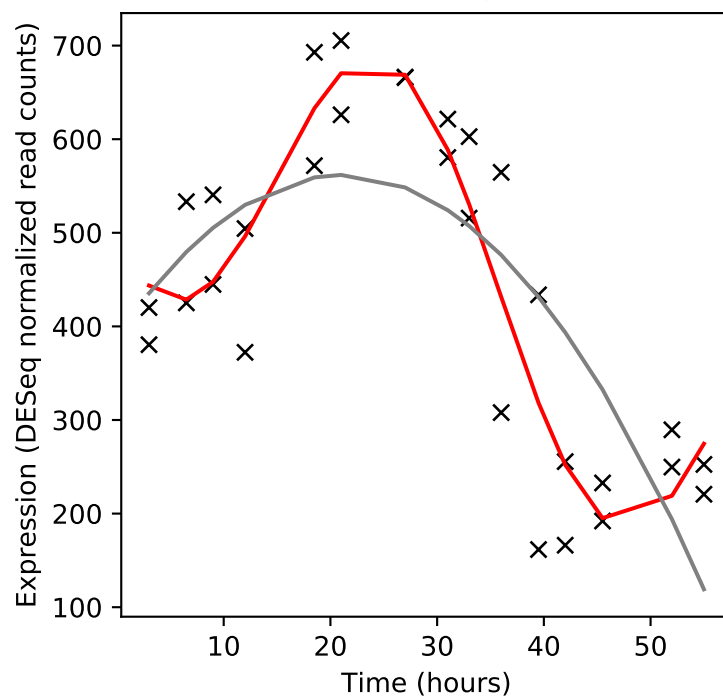

Rv1856c/-

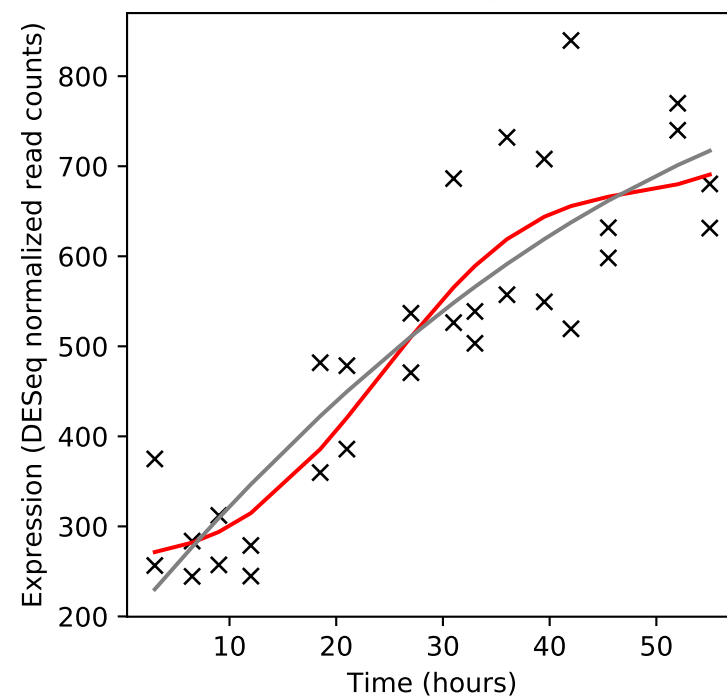

Rv1857/modA

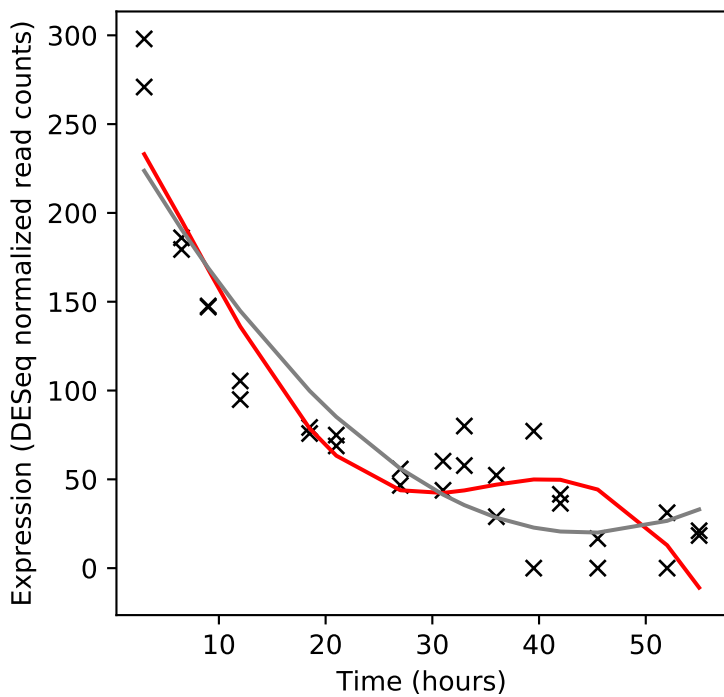

Rv1858/modB

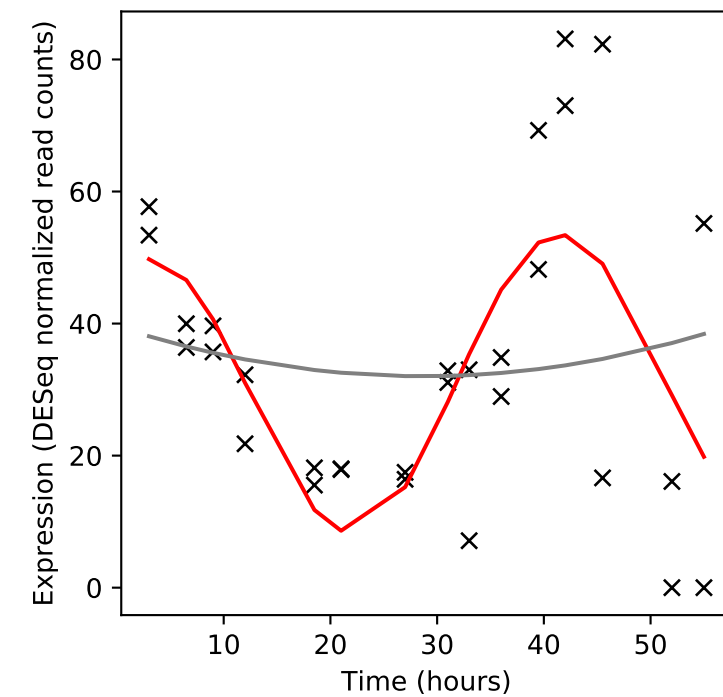

Rv1859/modC

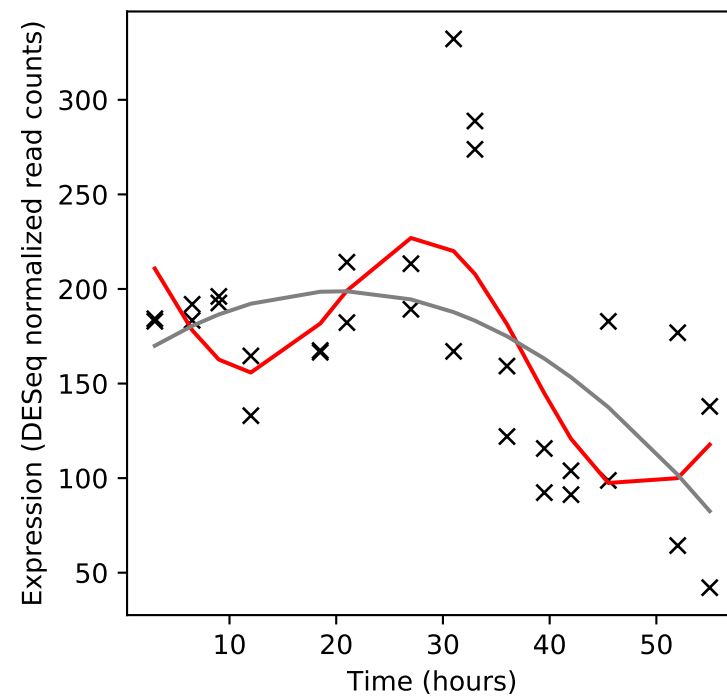



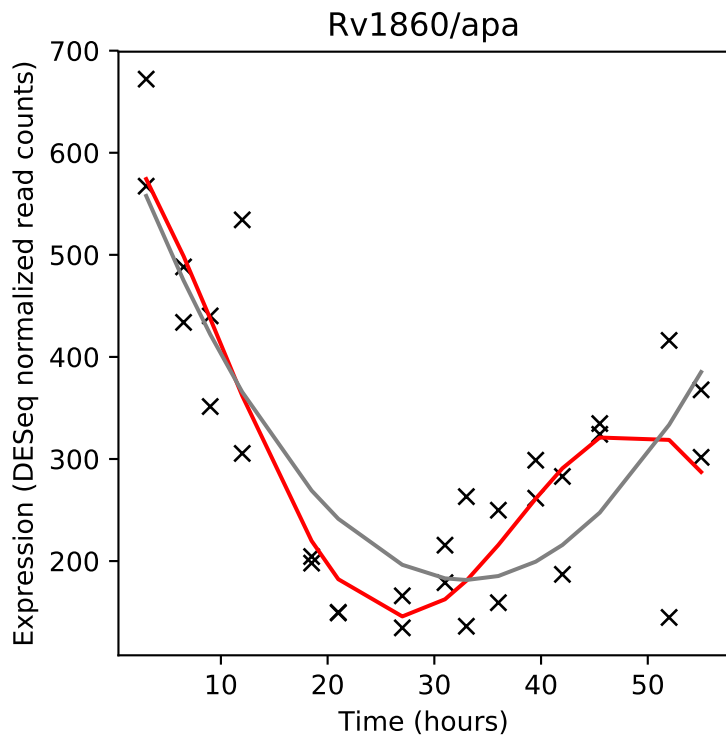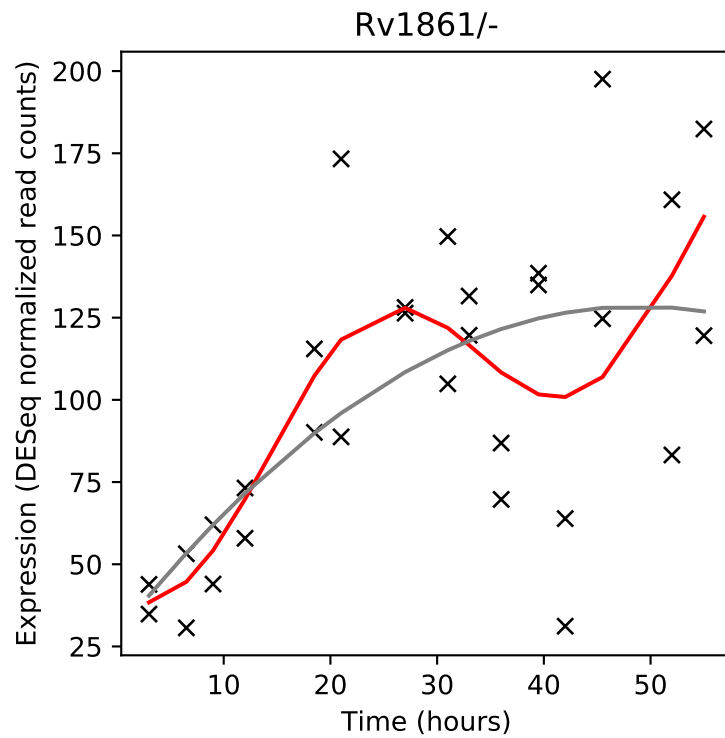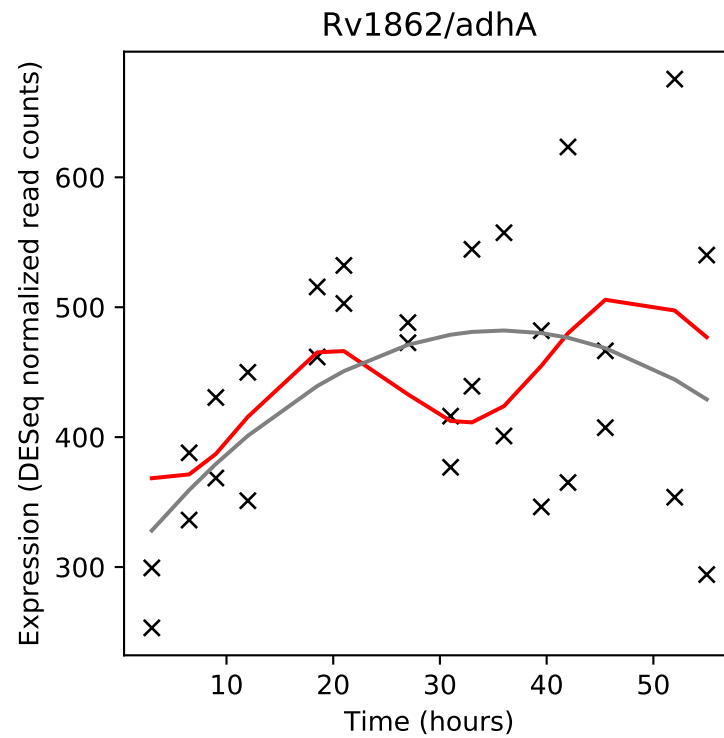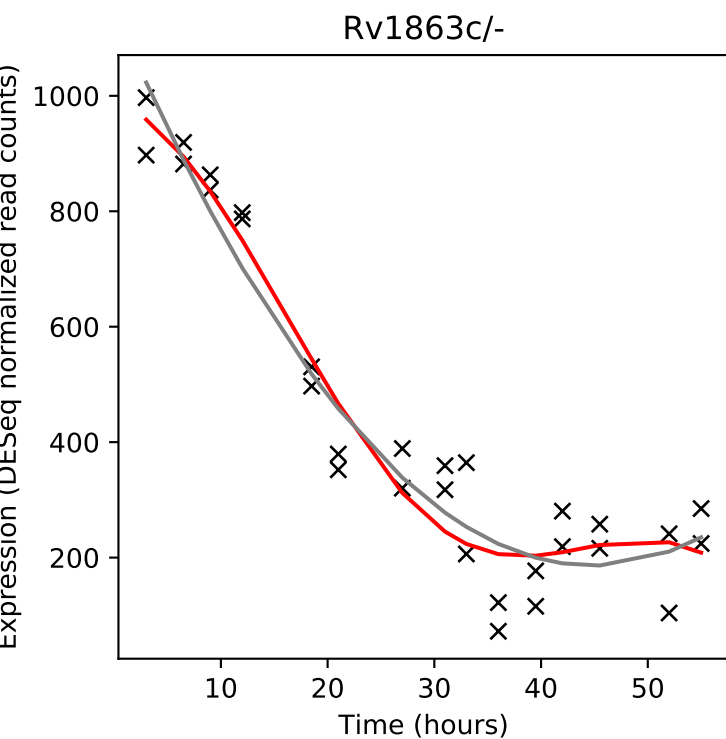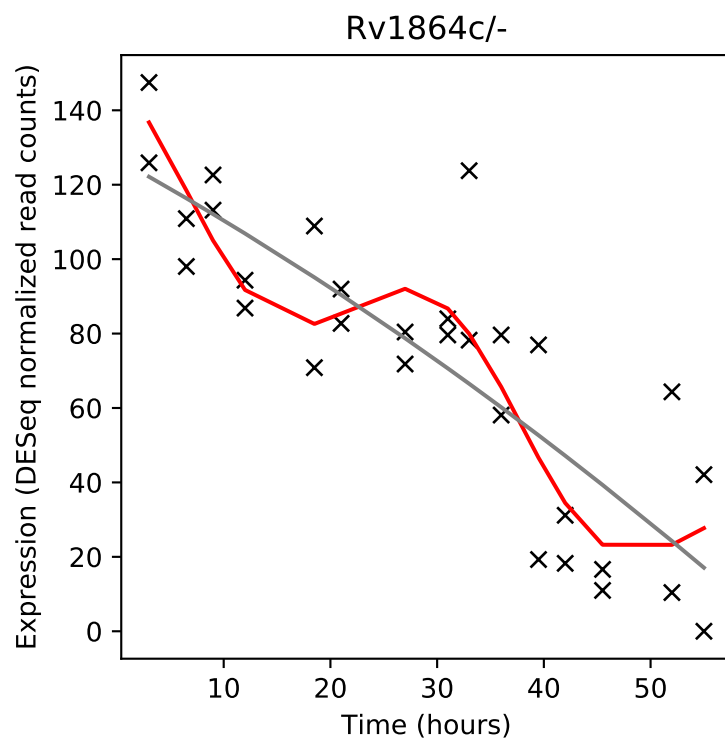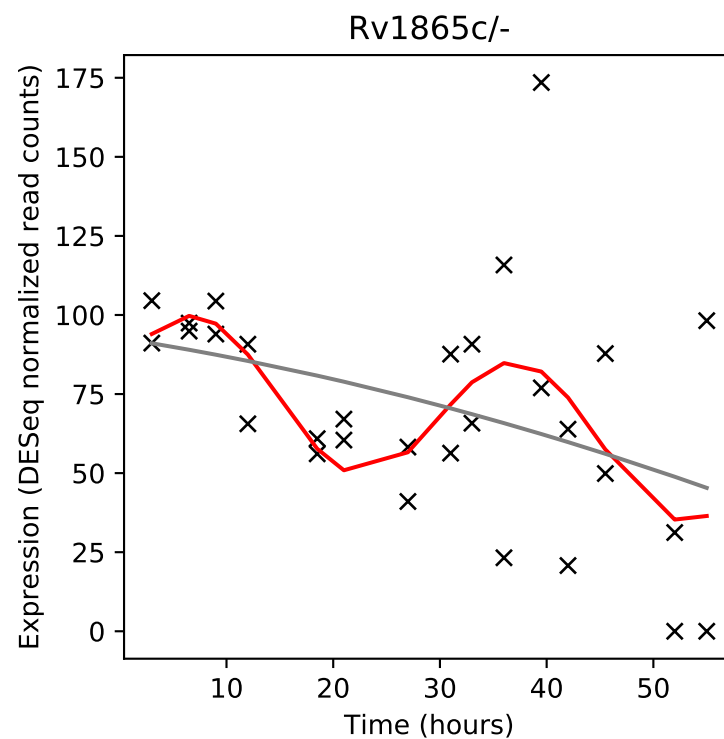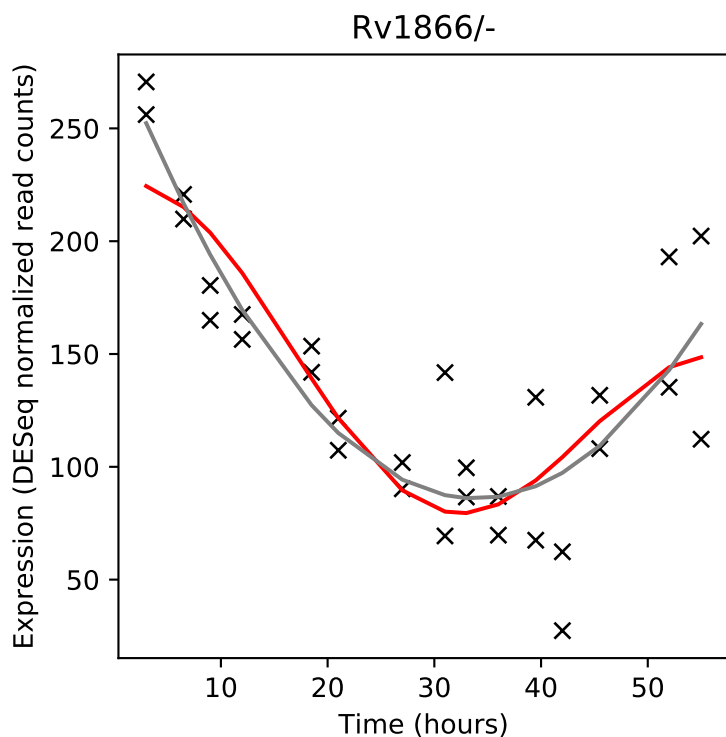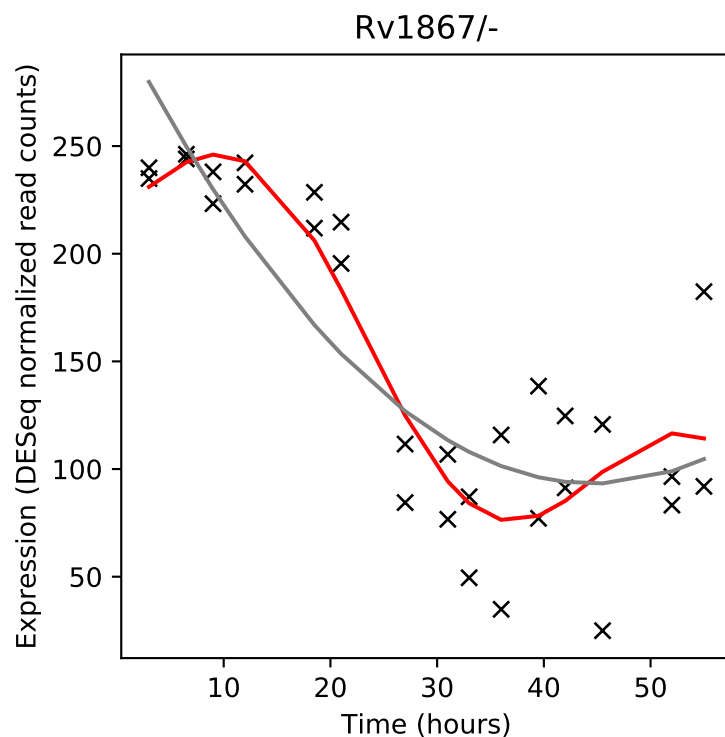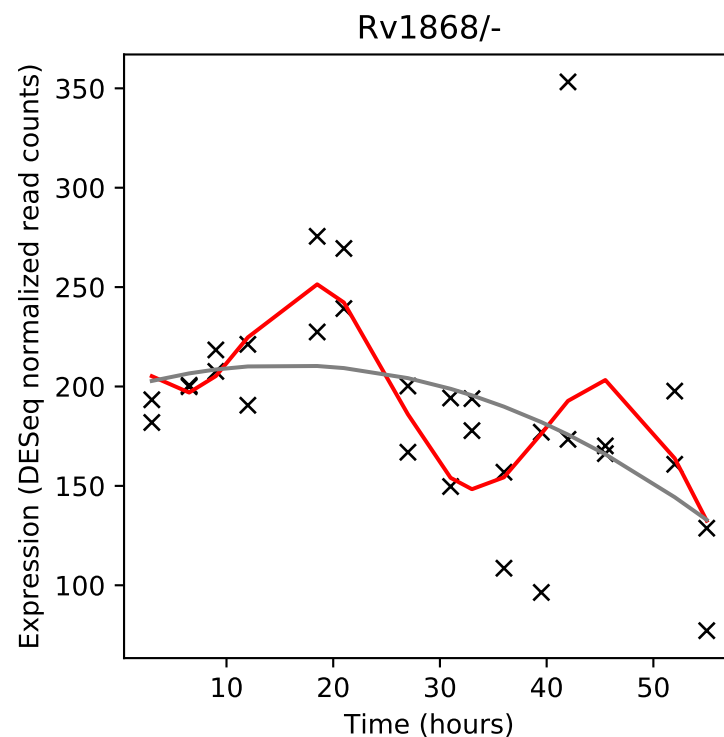

Rv1869c/-

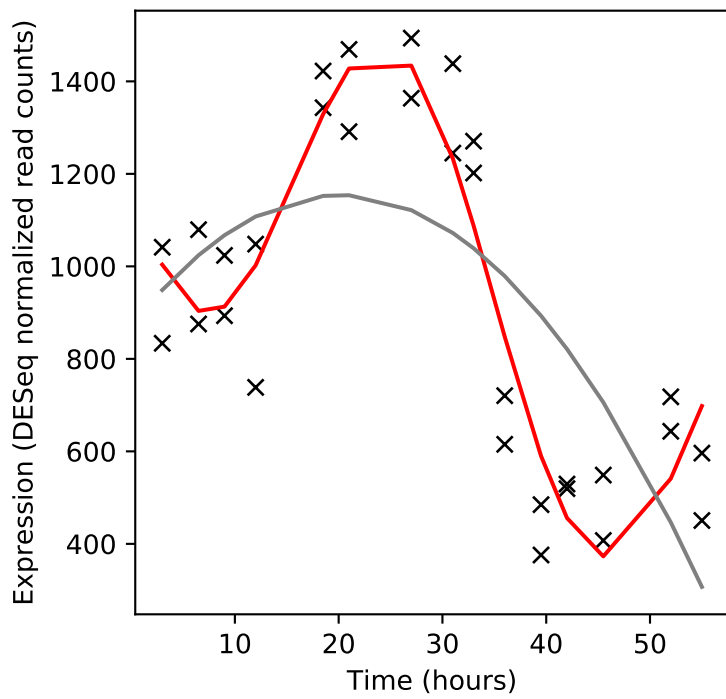

Rv1870c/-

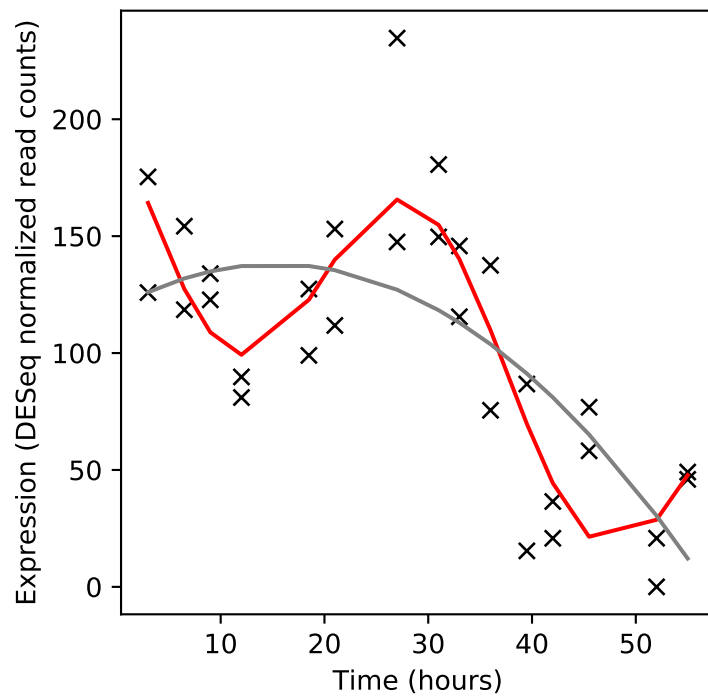

Rv1871c/-

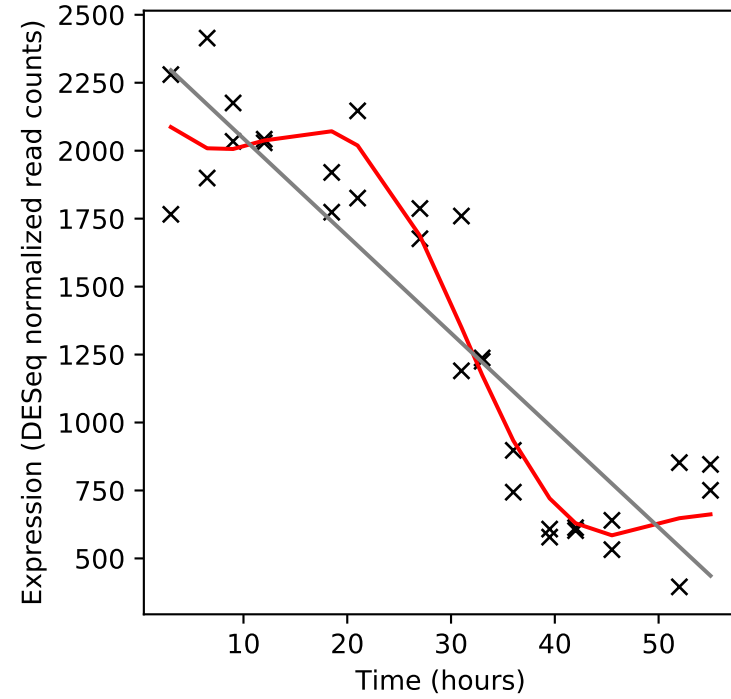

Rv1872c/lldD2

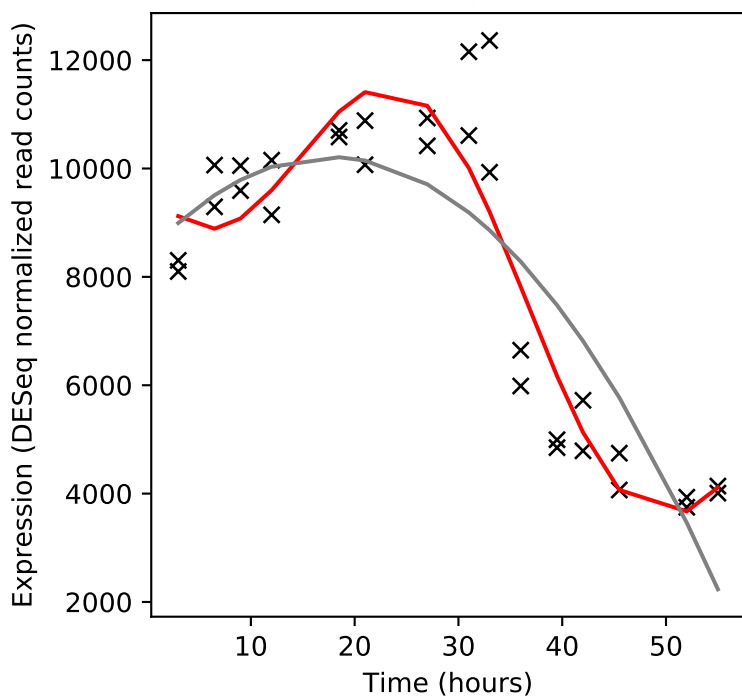

Rv1873/-

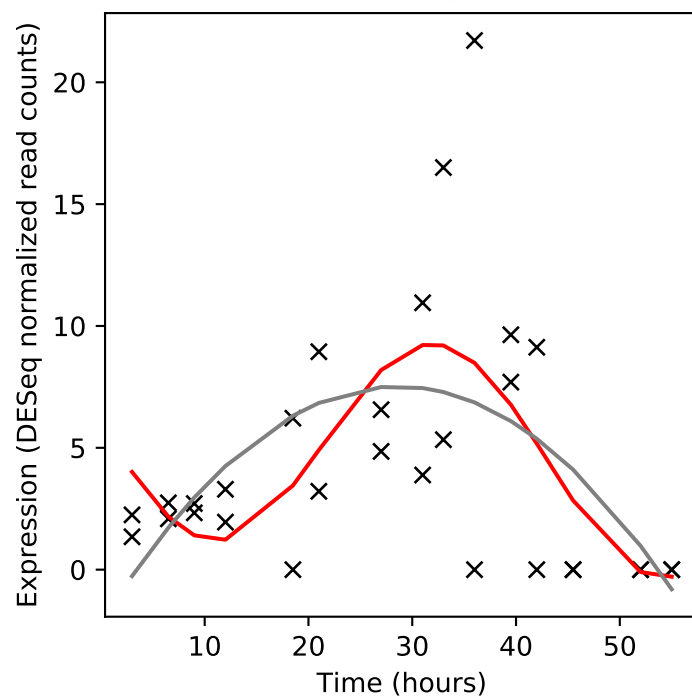

Rv1874/-

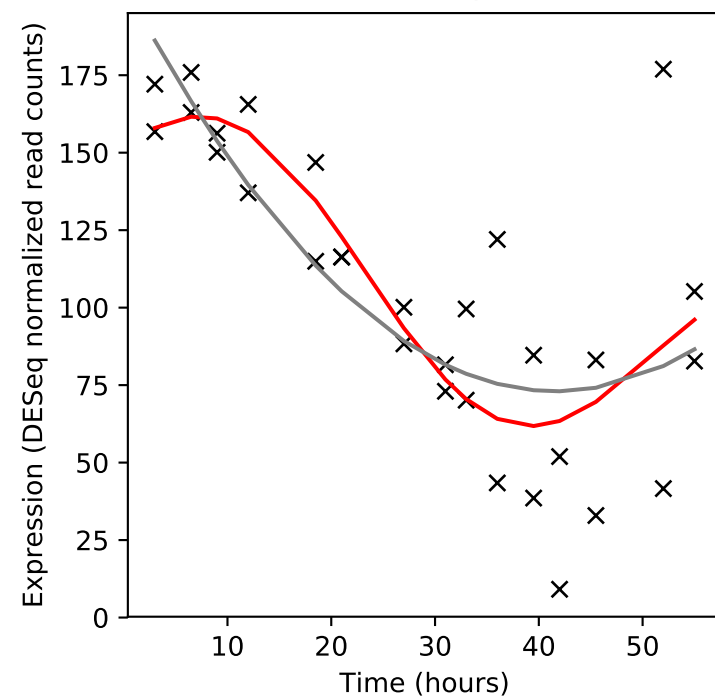

Rv1875/-

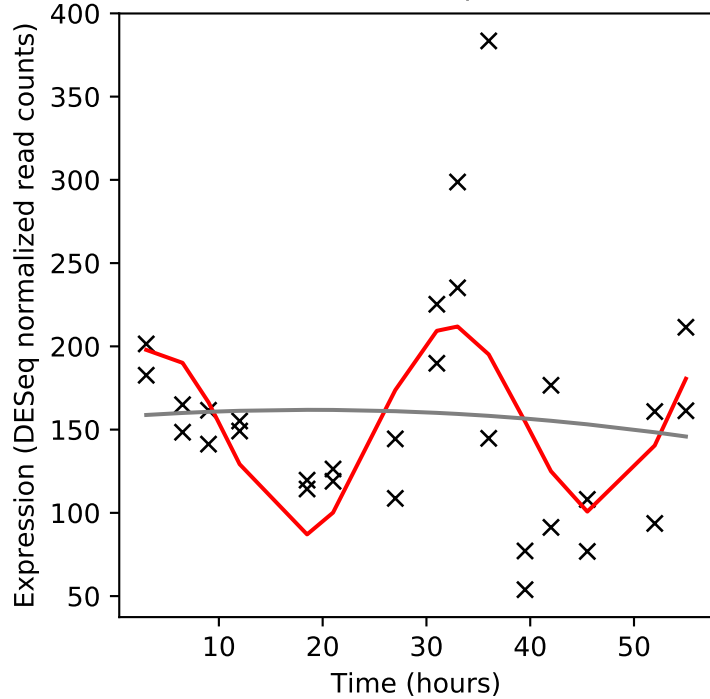

Rv1876/bfrA

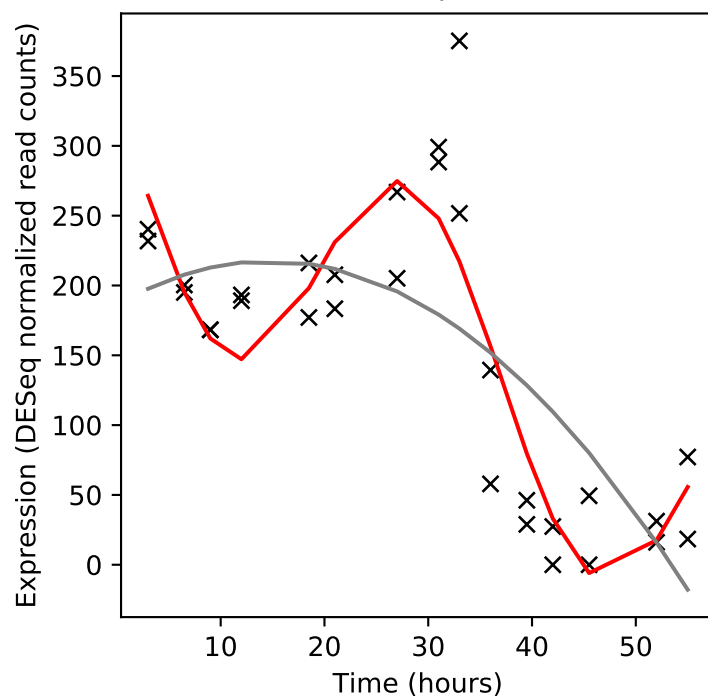

Rv1877/-

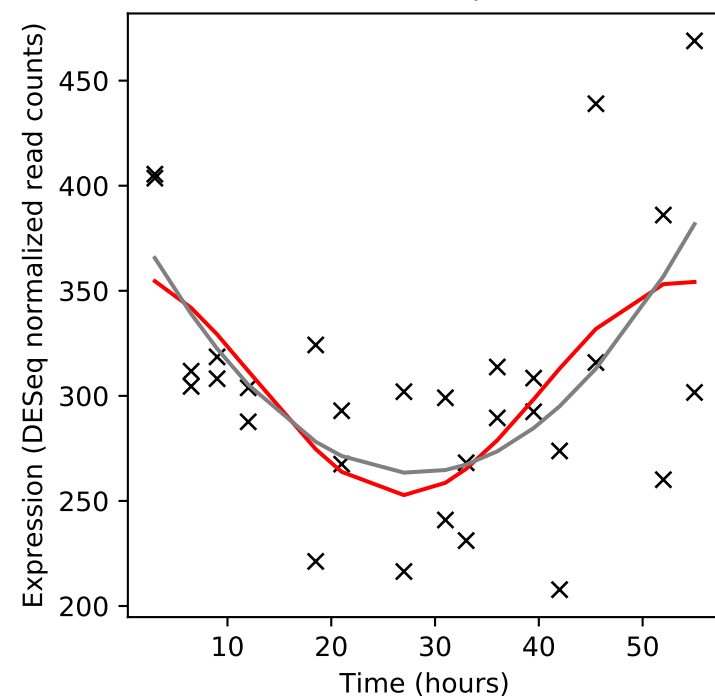

Rv1878/glnA3

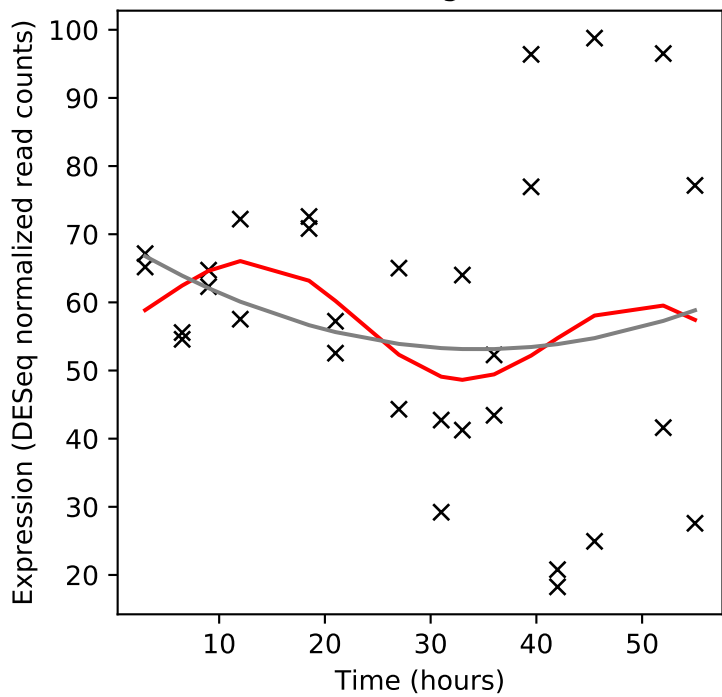

Rv1879/-

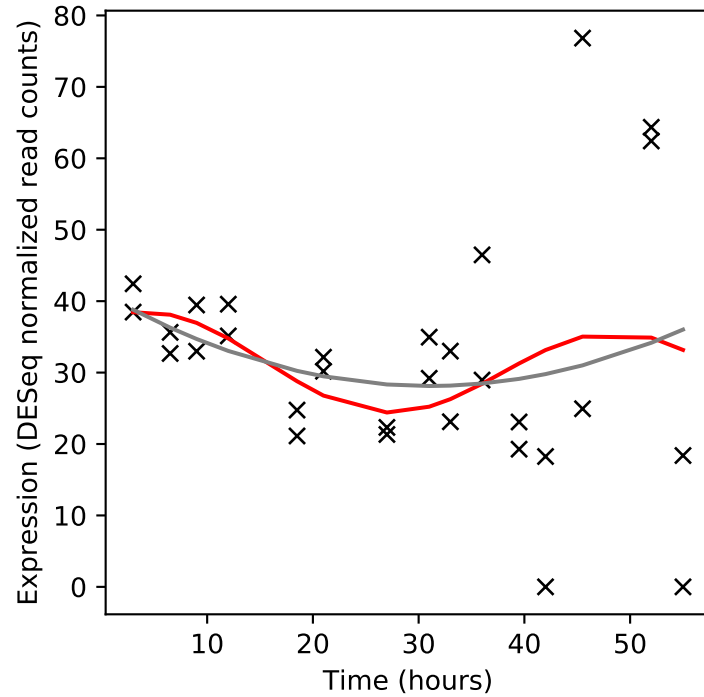

Rv1880c/cyp140

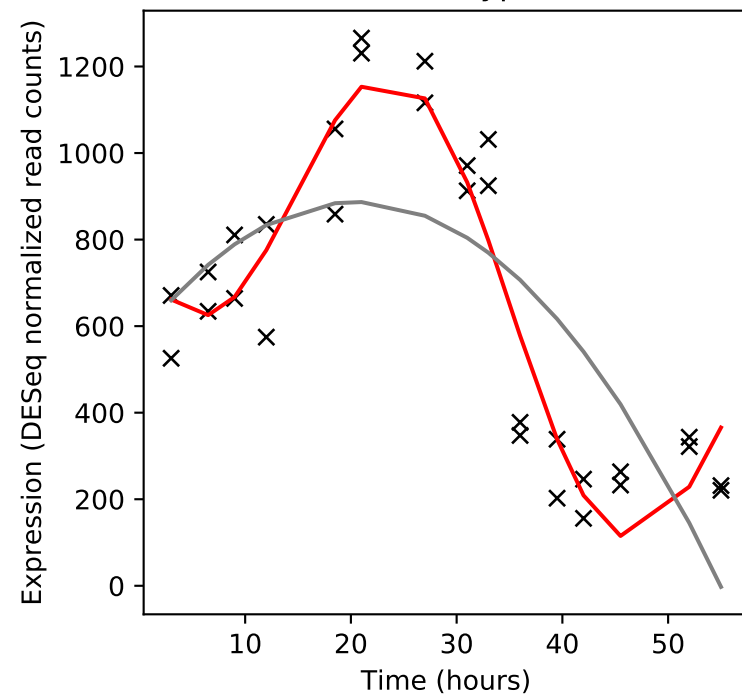

Rv1881c/lppE

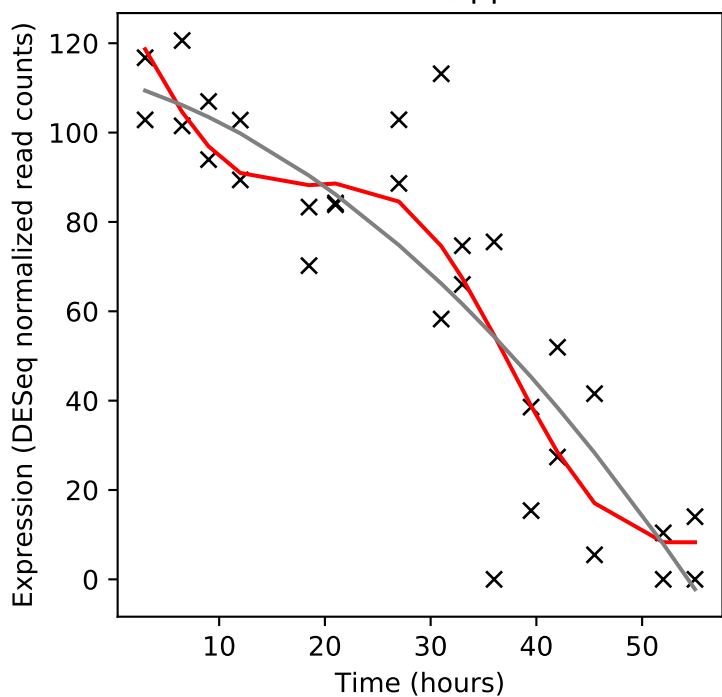

Rv1882c/-

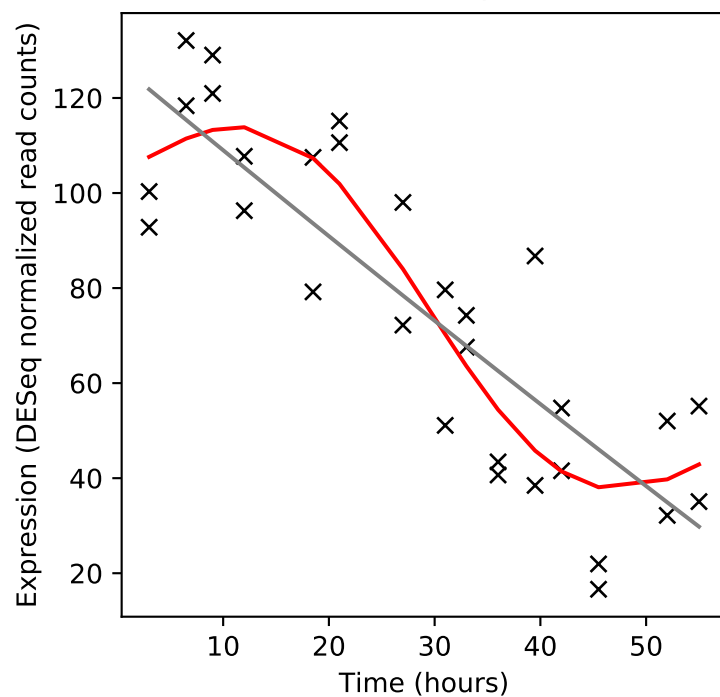

Rv1883c/-

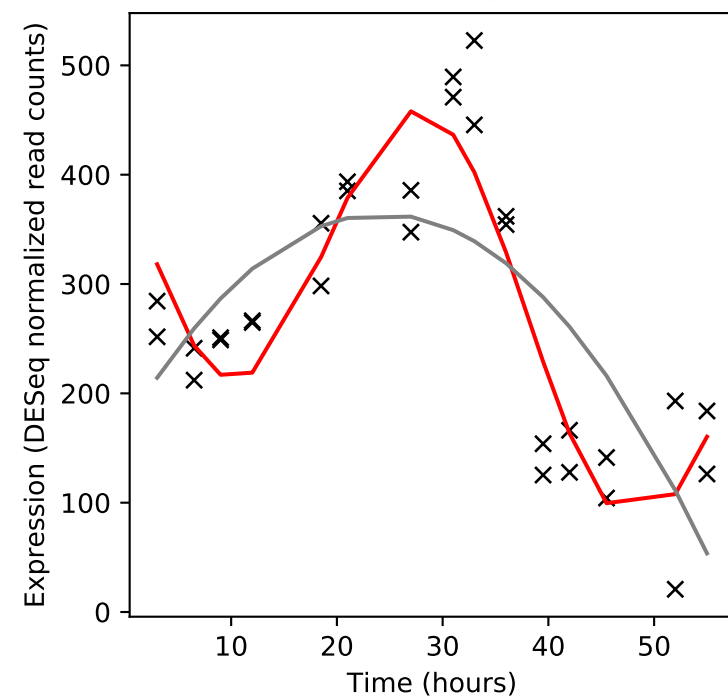

Rv1884c/rpfc

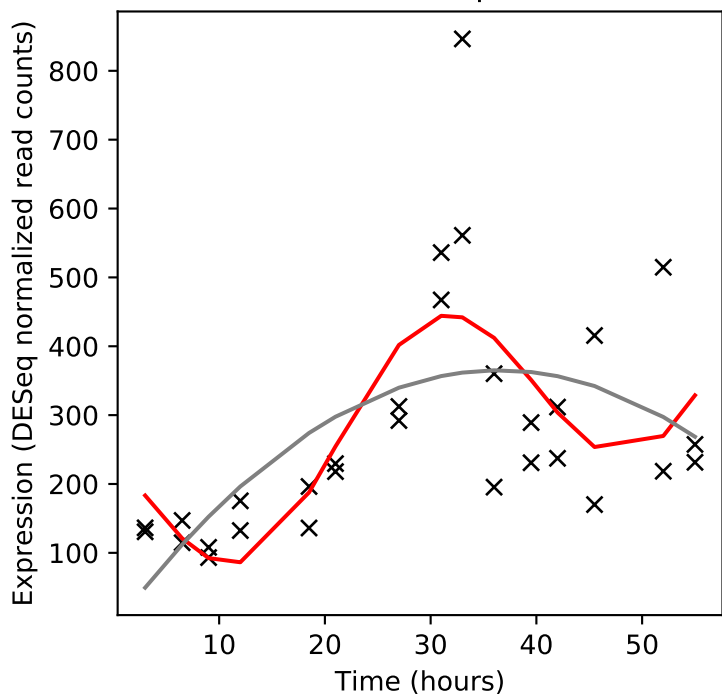

Rv1885c/-

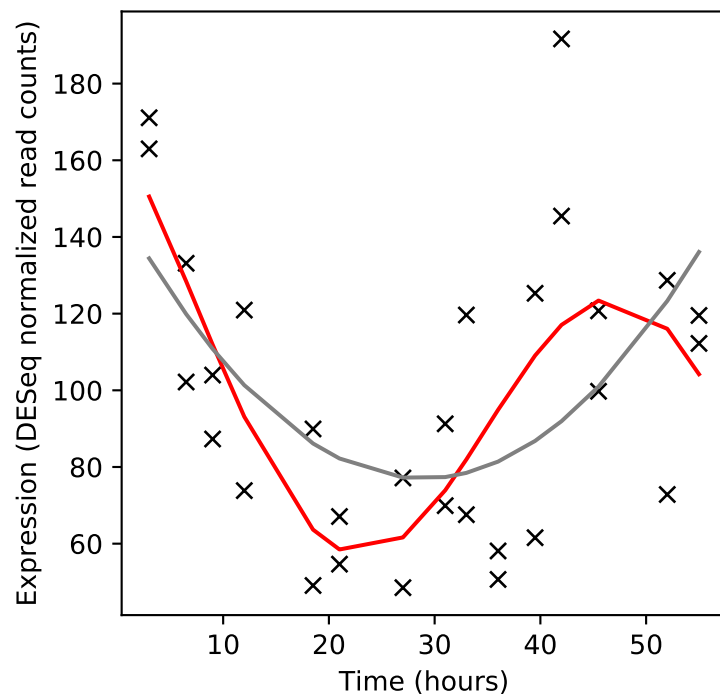

Rv1886c/fbpB

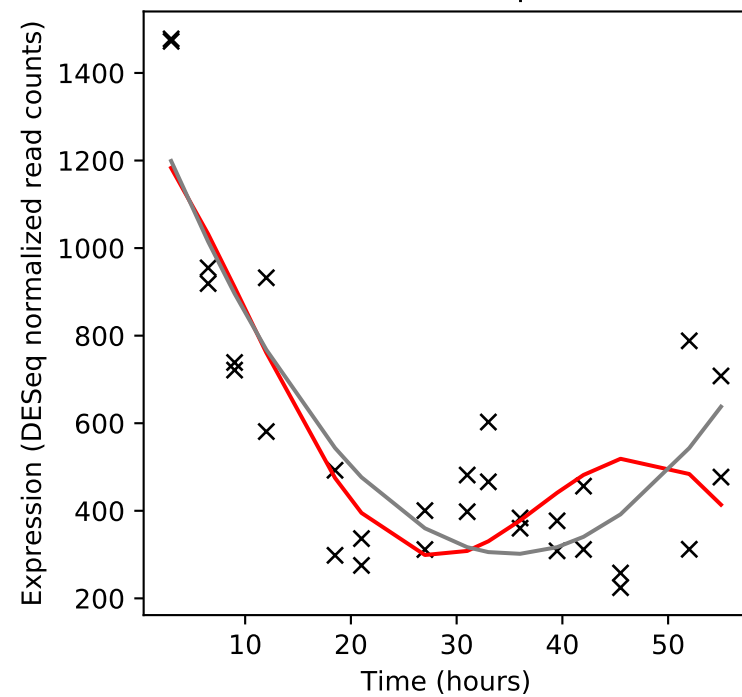

Rv1887/-

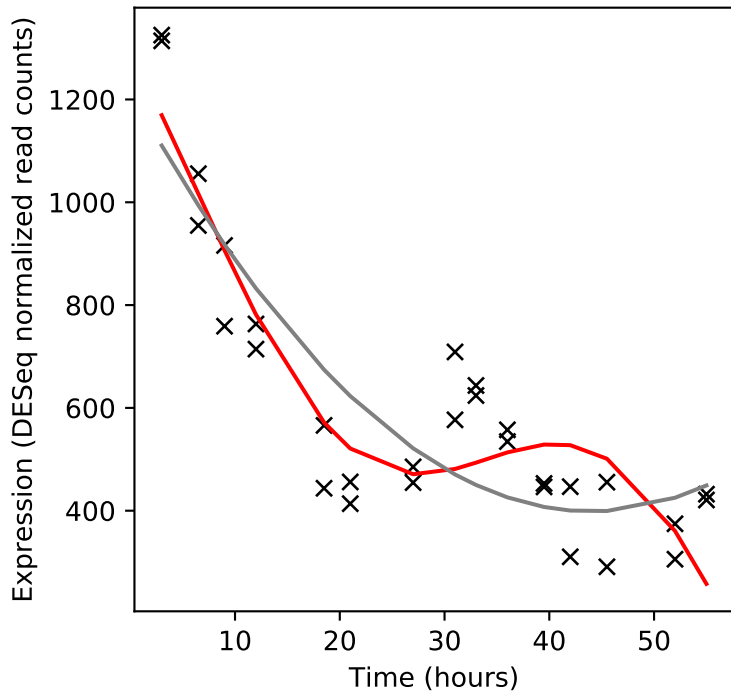

Rv1888c/-

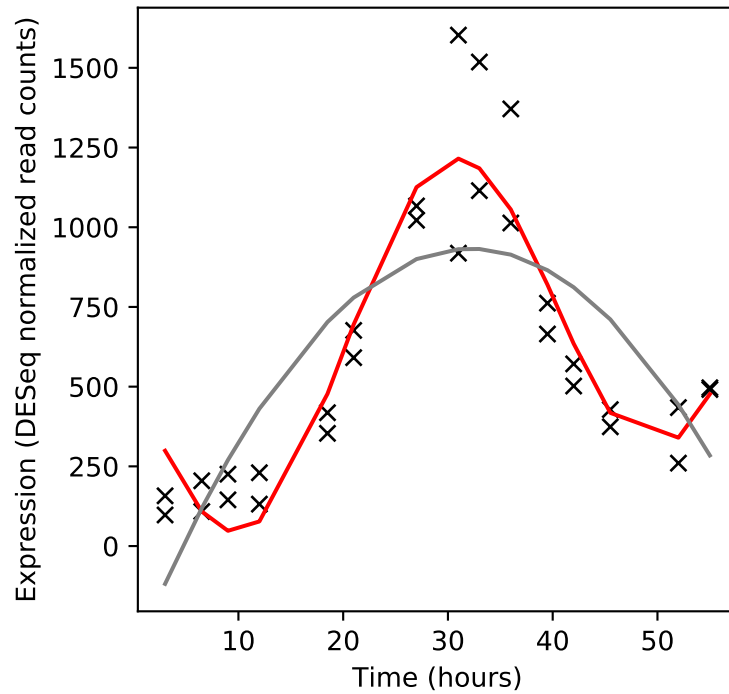

Rv1888A/-

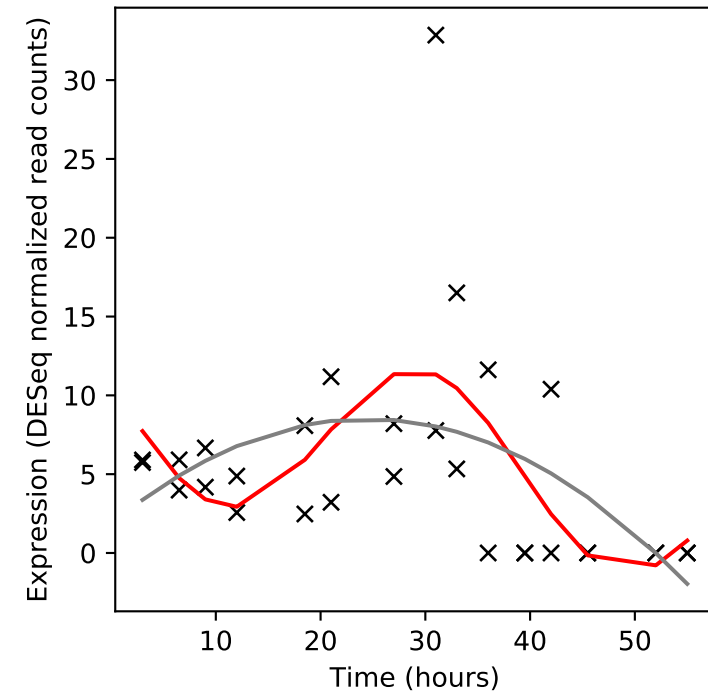

Rv1889c/-

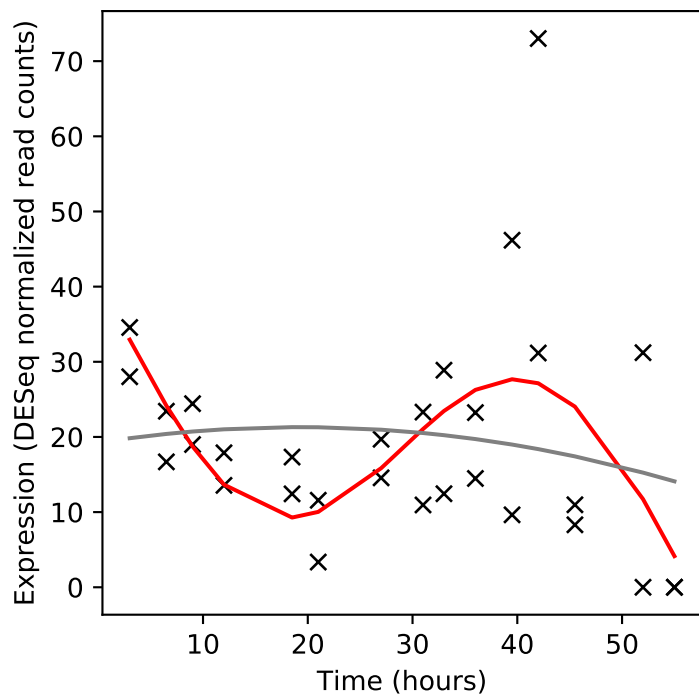

Rv1890c/-

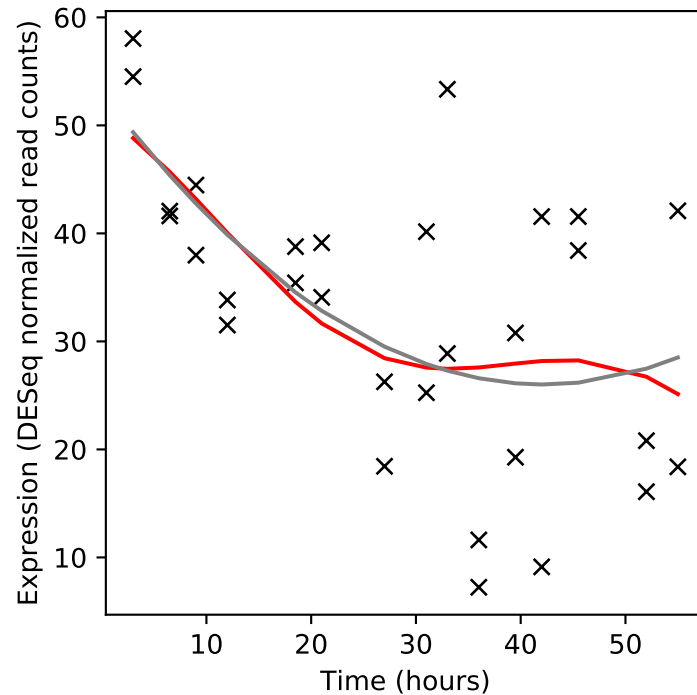

Rv1891/-

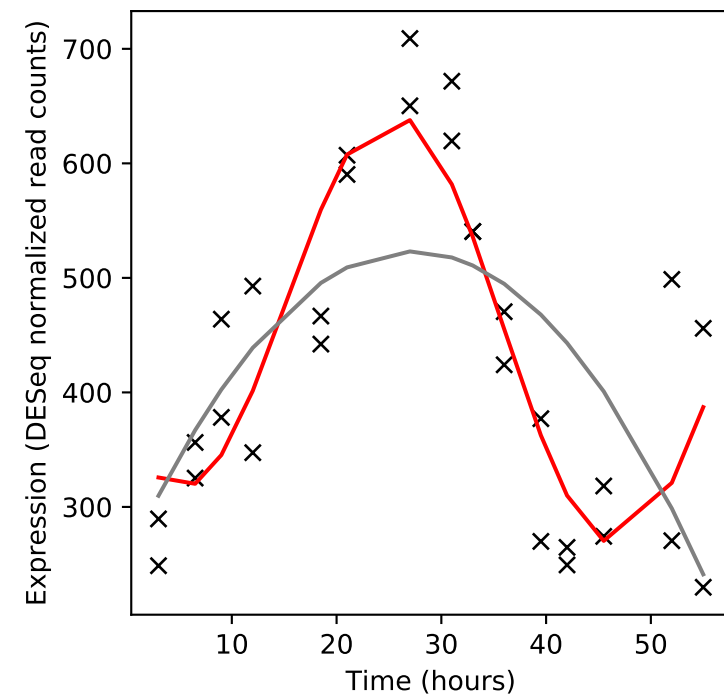

Rv1892/-

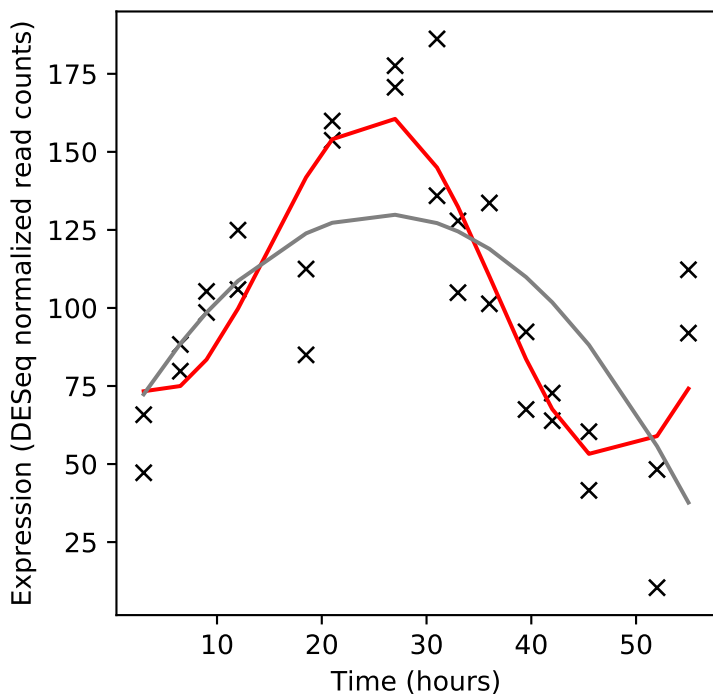

Rv1893/-

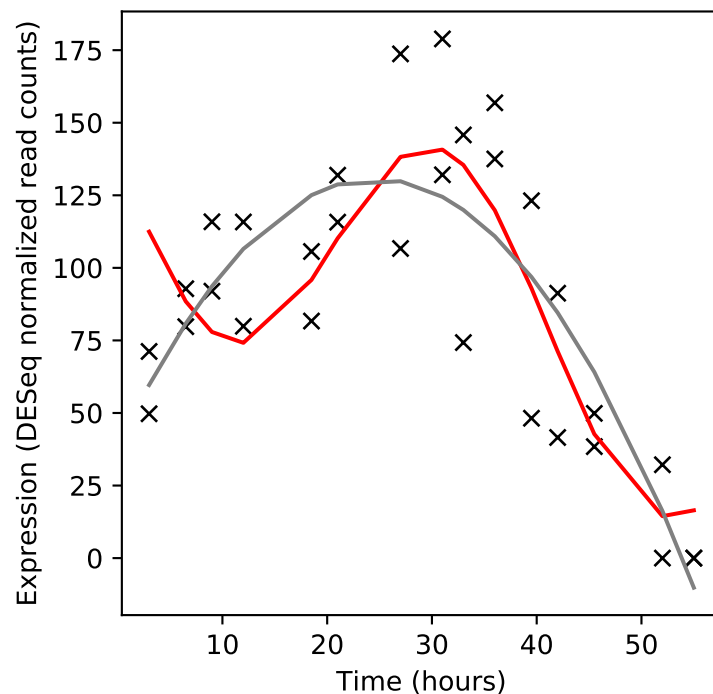

Rv1894c/-

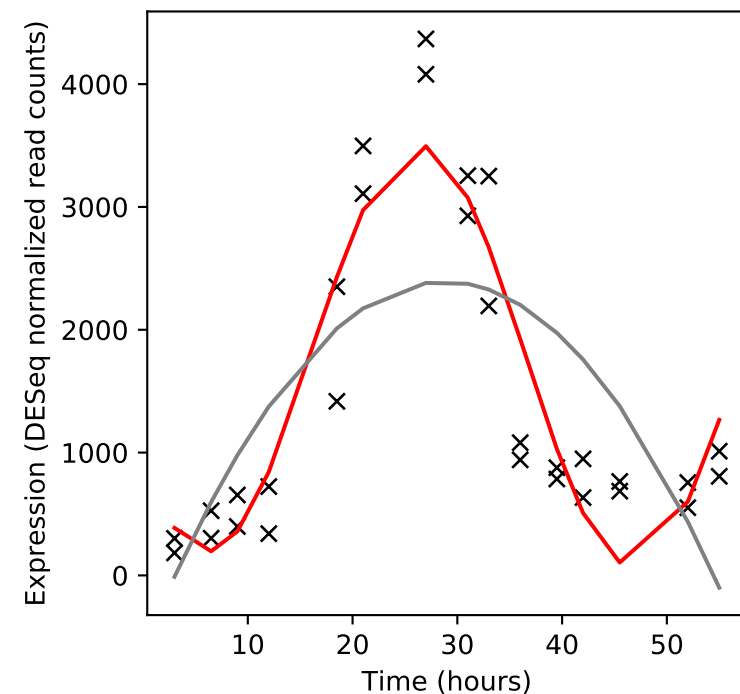

Rv1895/-

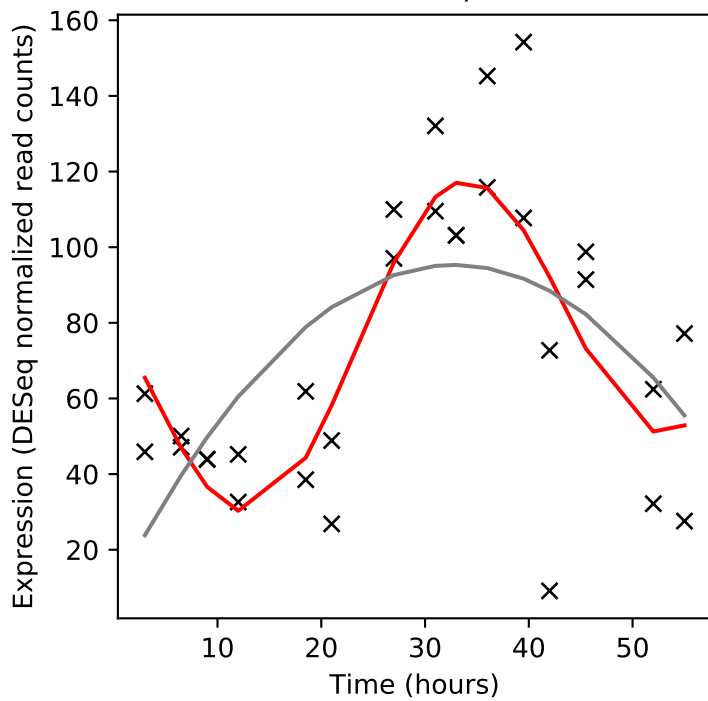

Rv1896c/-

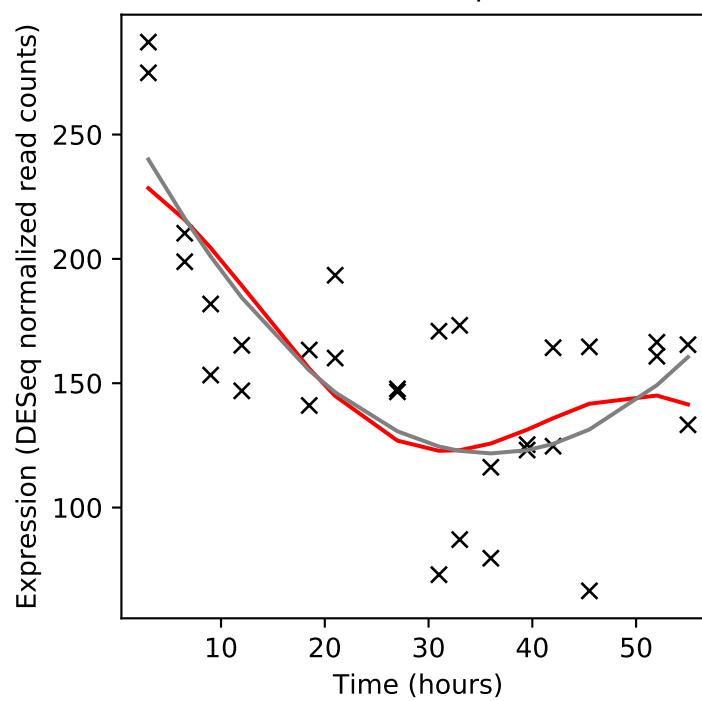

Rv1897c/-

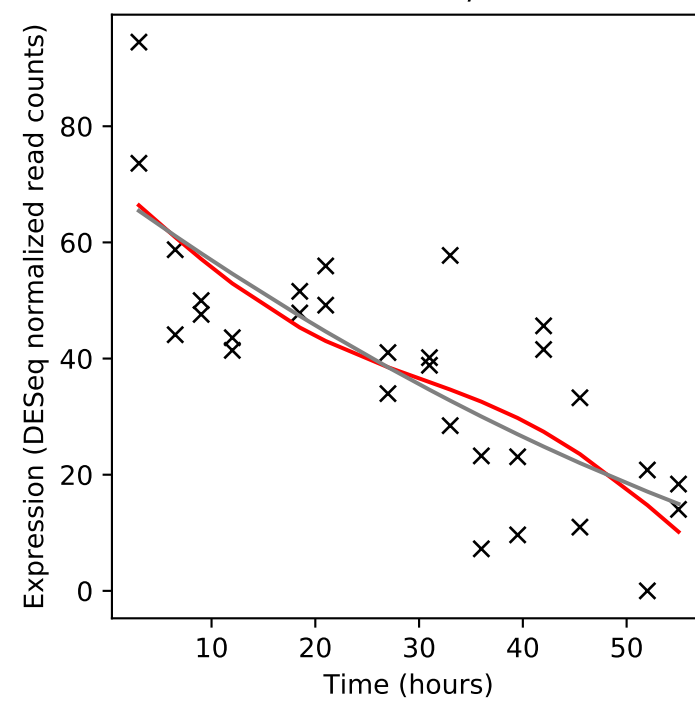

Rv1898/-

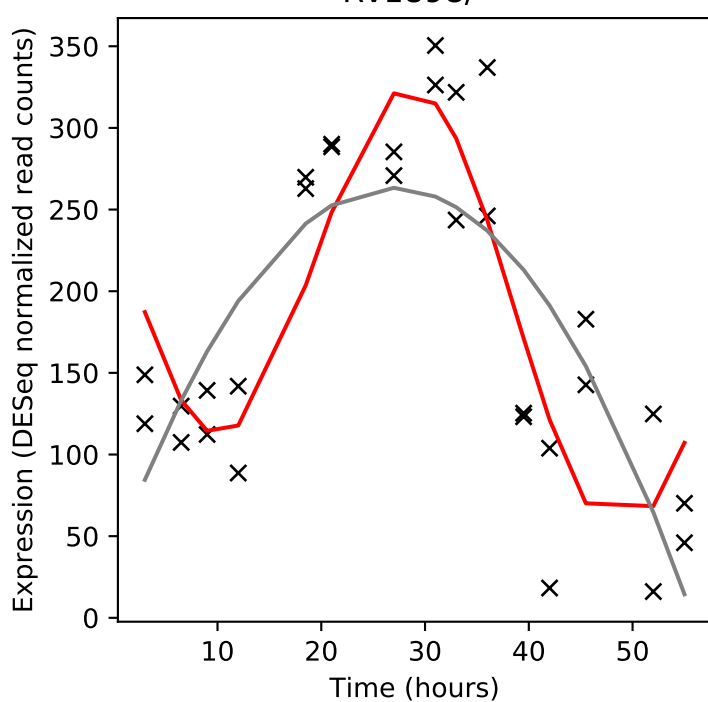

Rv1899c/lppD

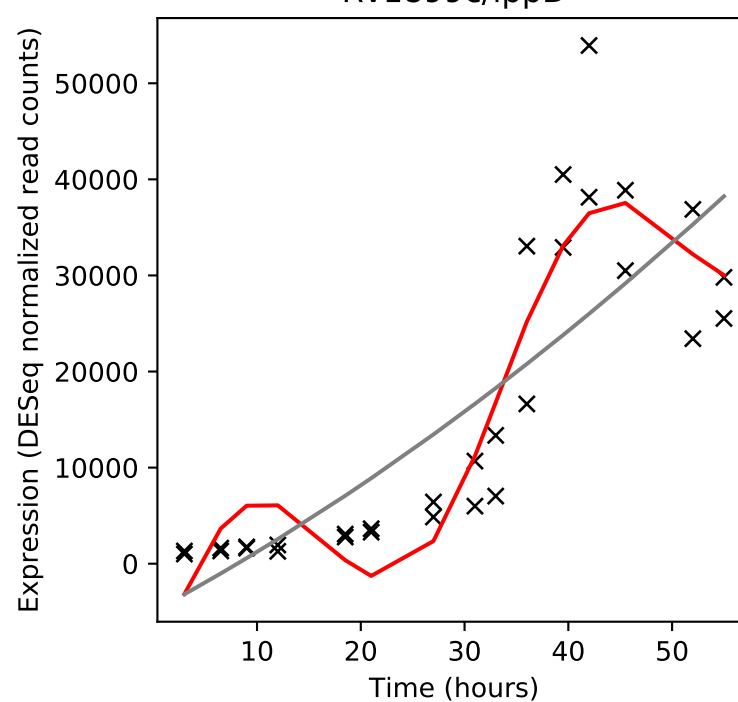

Rv1900c/lipJ

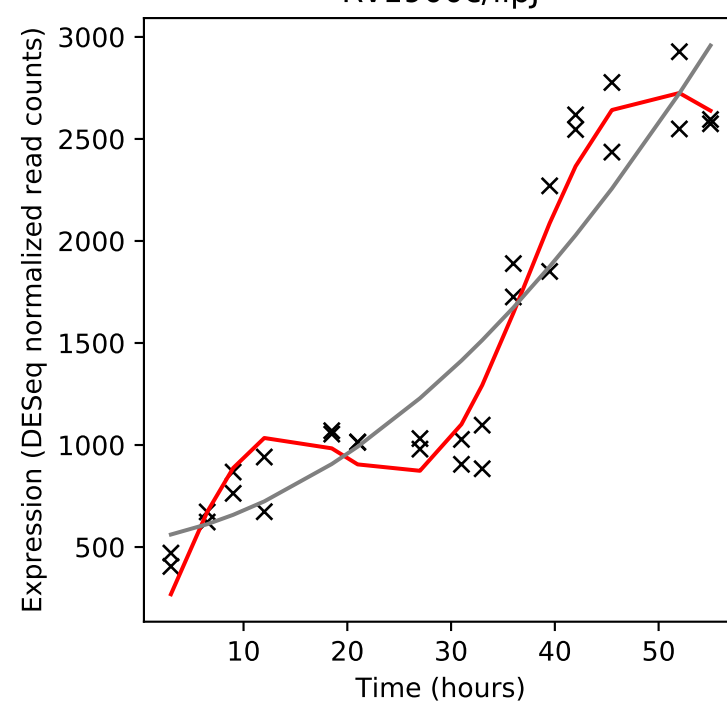

Rv1901/cinA

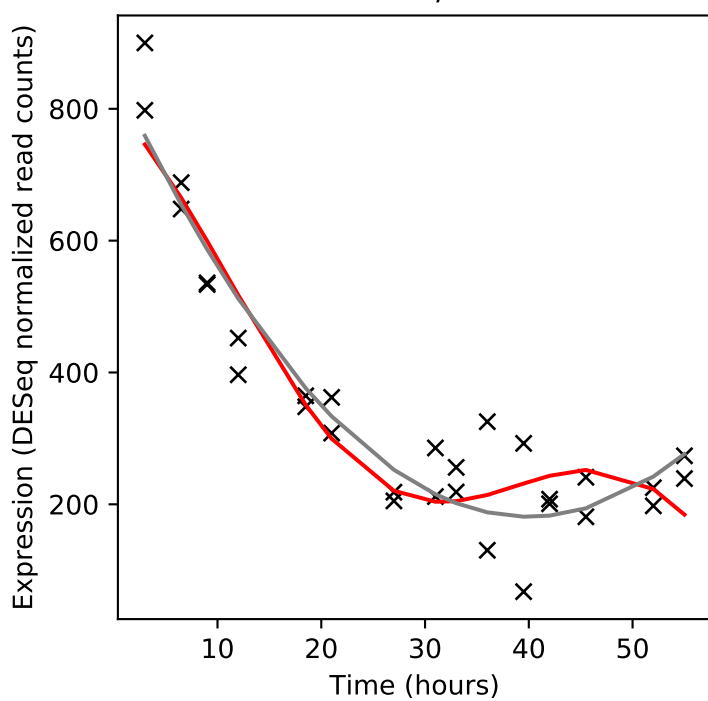

Rv1902c/nanT

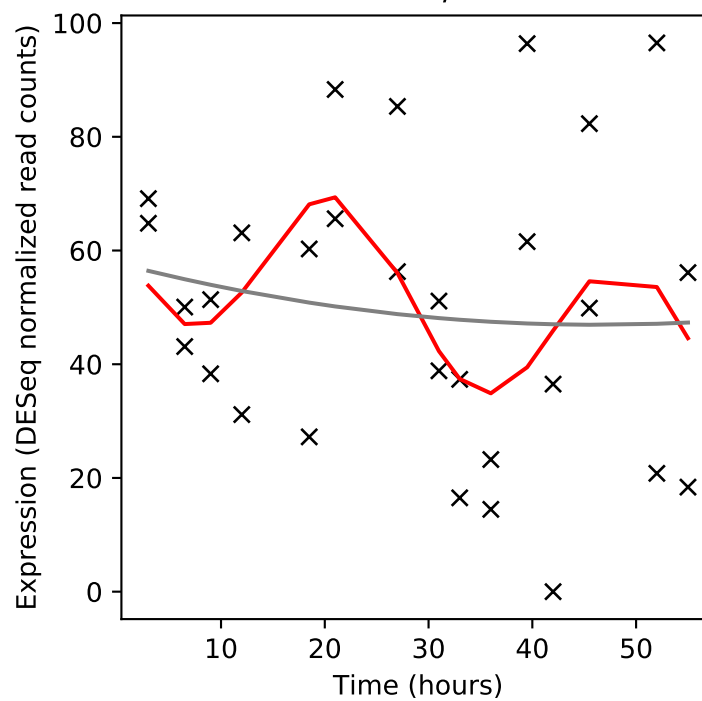

Rv1903/-

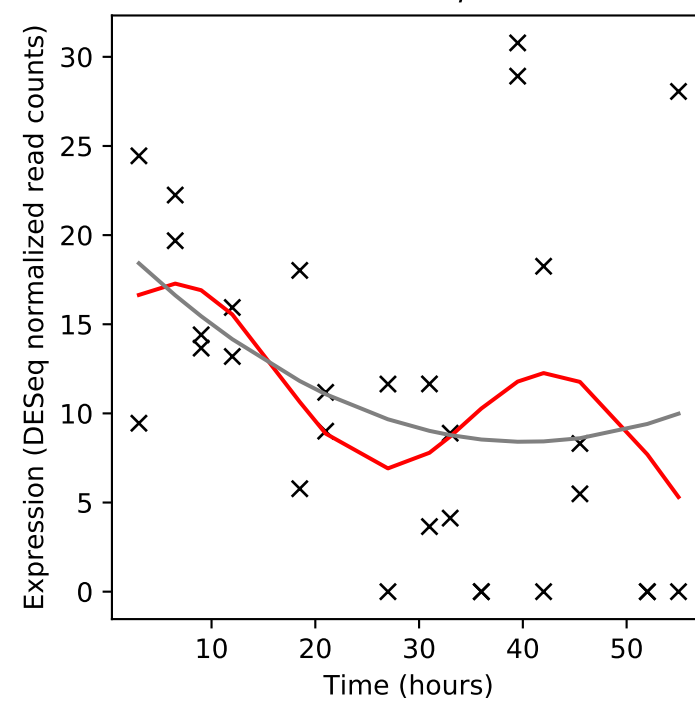

Rv1904/-

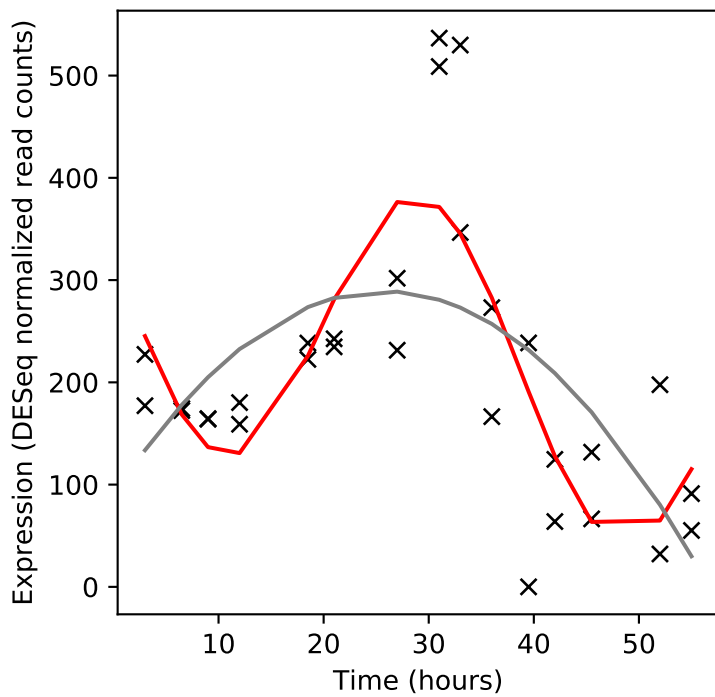

Rv1905c/aao

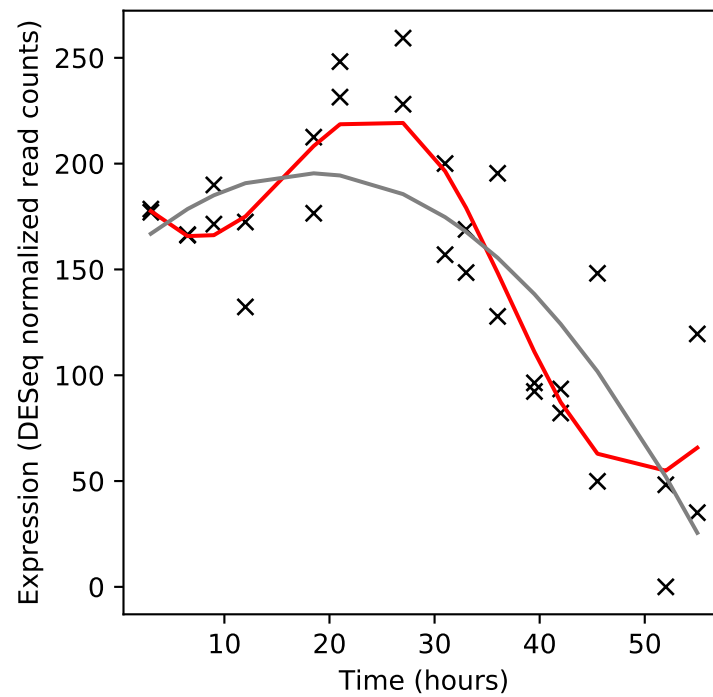

Rv1906c/-

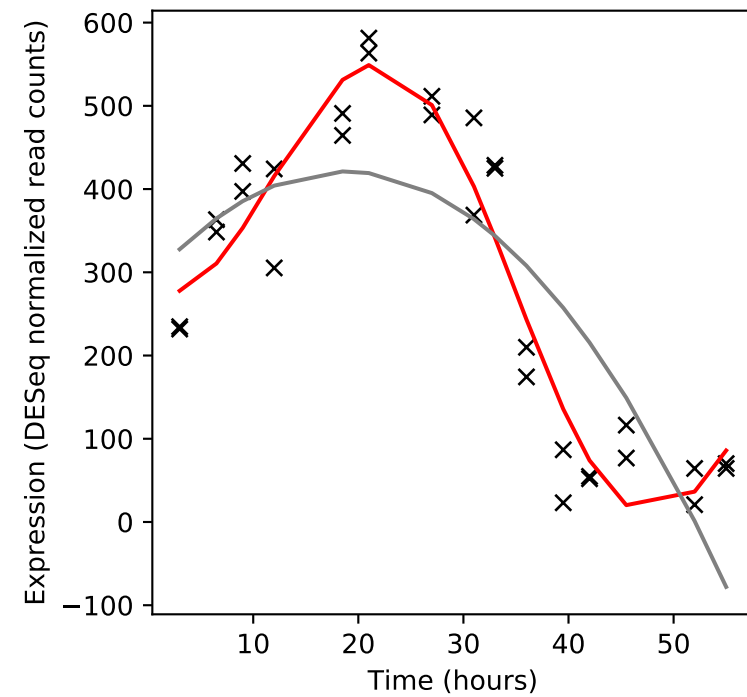

Rv1907c/-

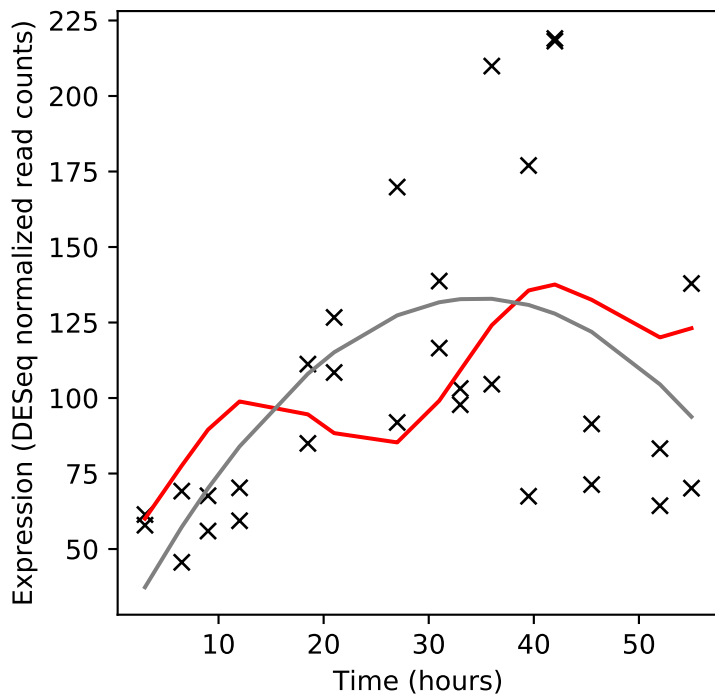

Rv1908c/katG

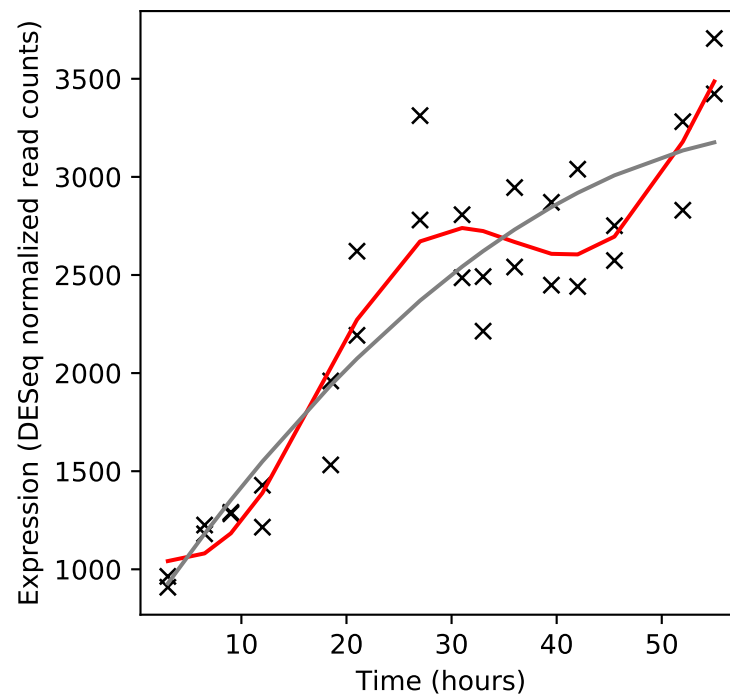

Rv1909c/furA

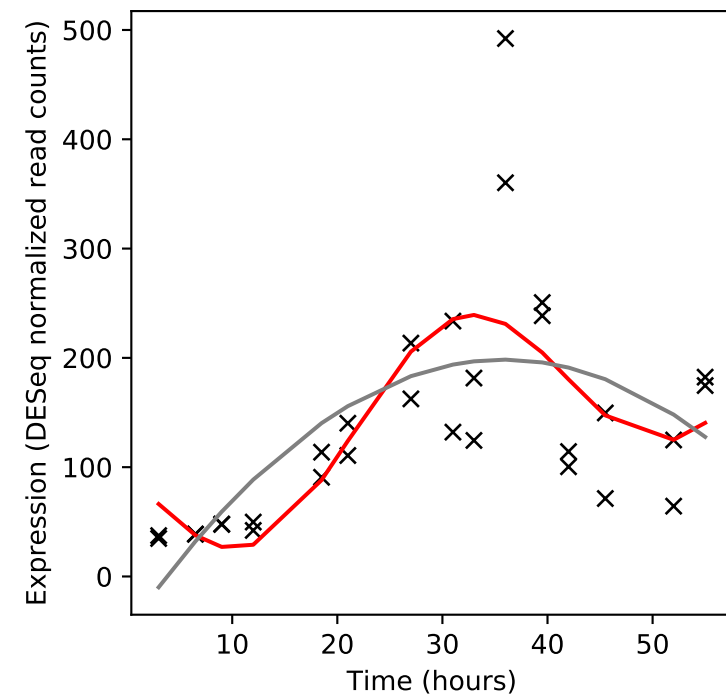

Rv1910c/-

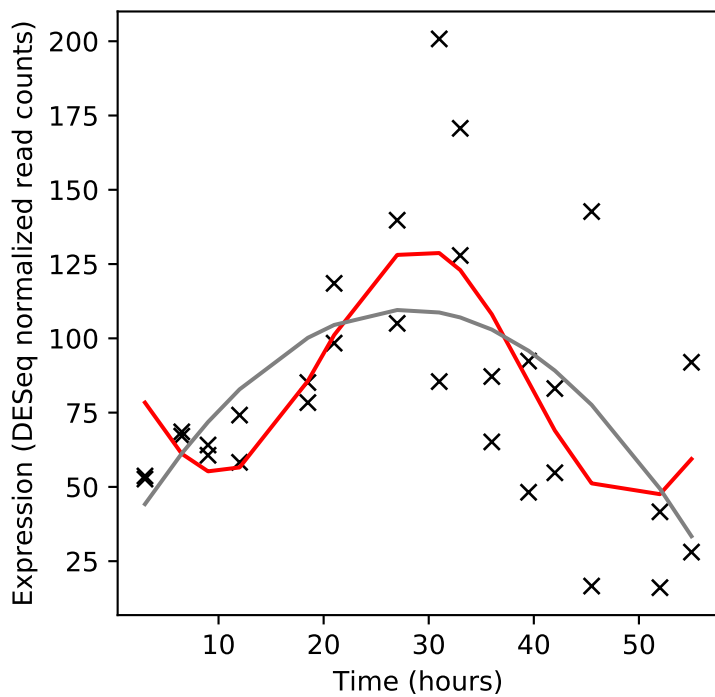

Rv1911c/lppC

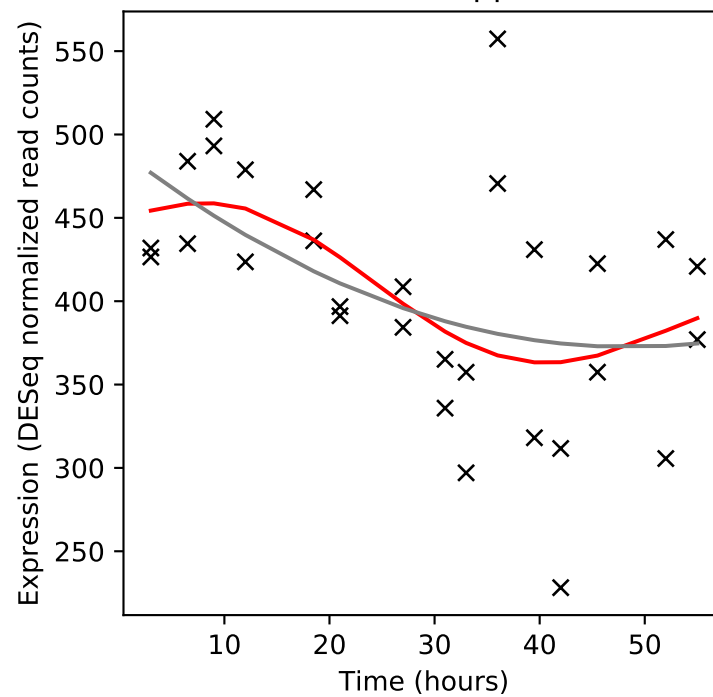

Rv1912c/fadB5

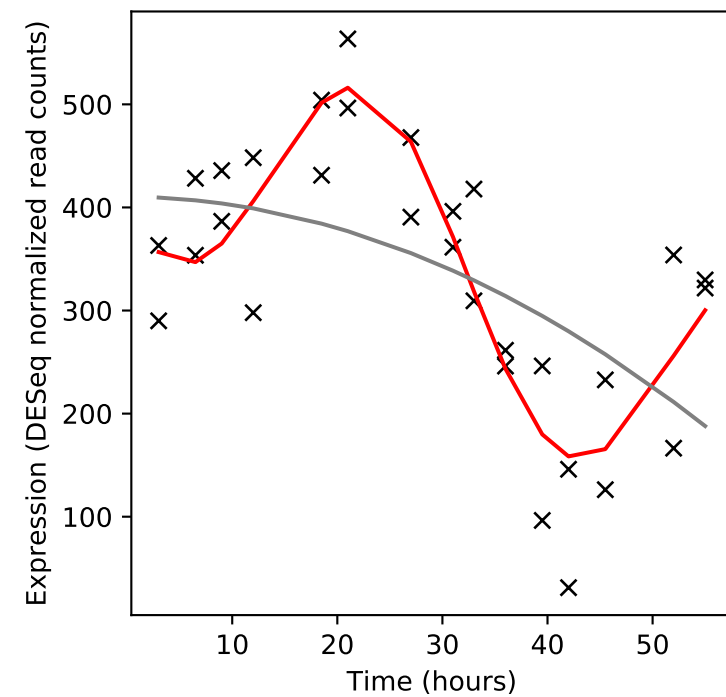

Rv1913/-

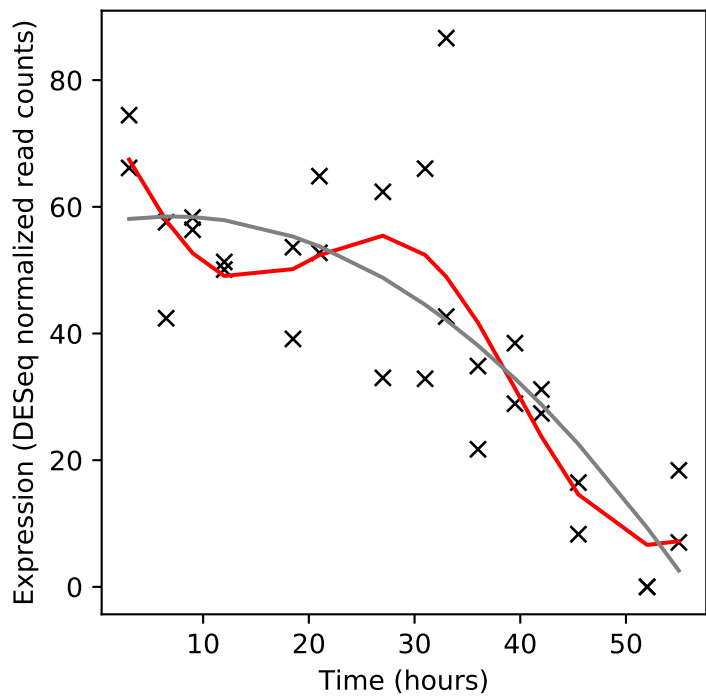

Rv1914c/-

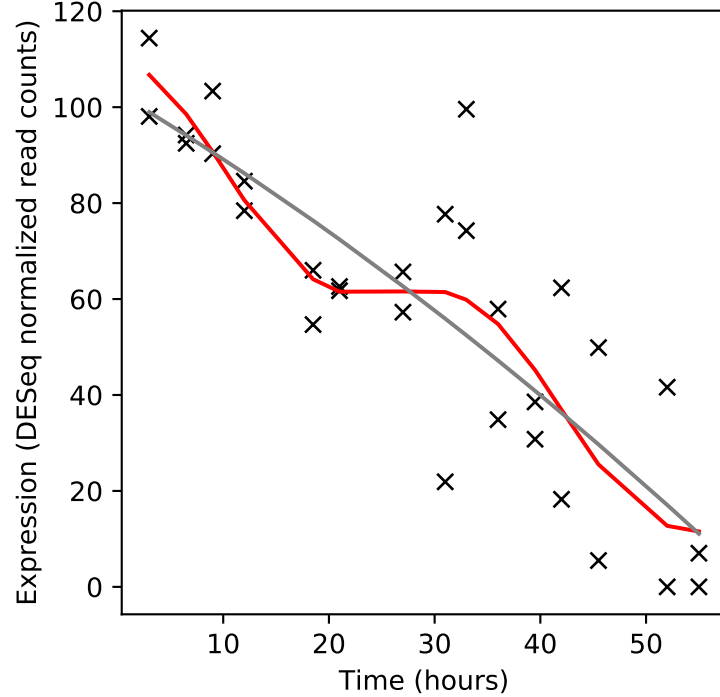

Rv1915/aceAa

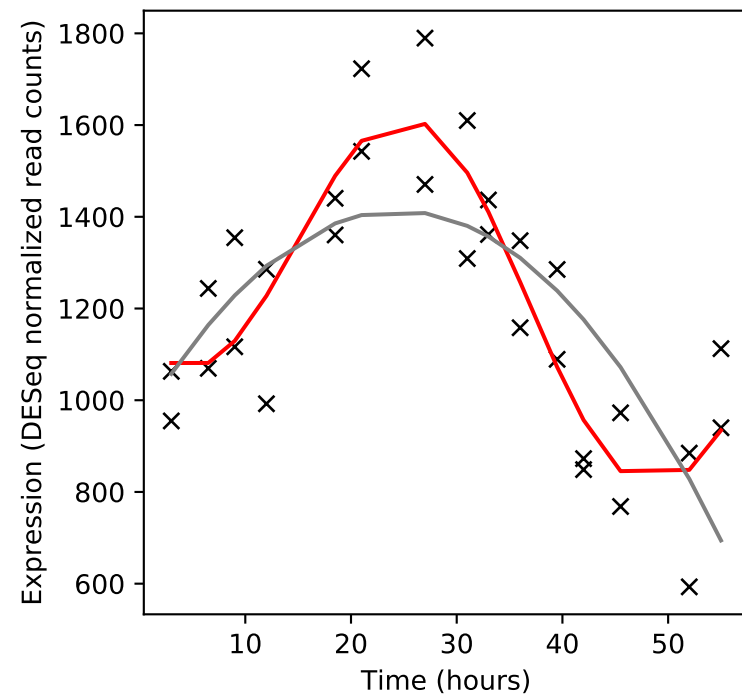

Rv1916/aceAb

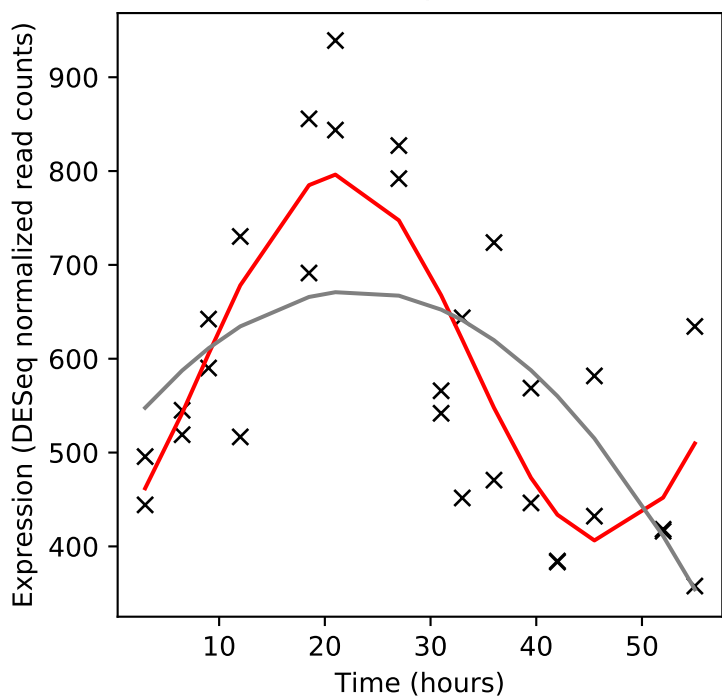

Rv1917c/PPE34

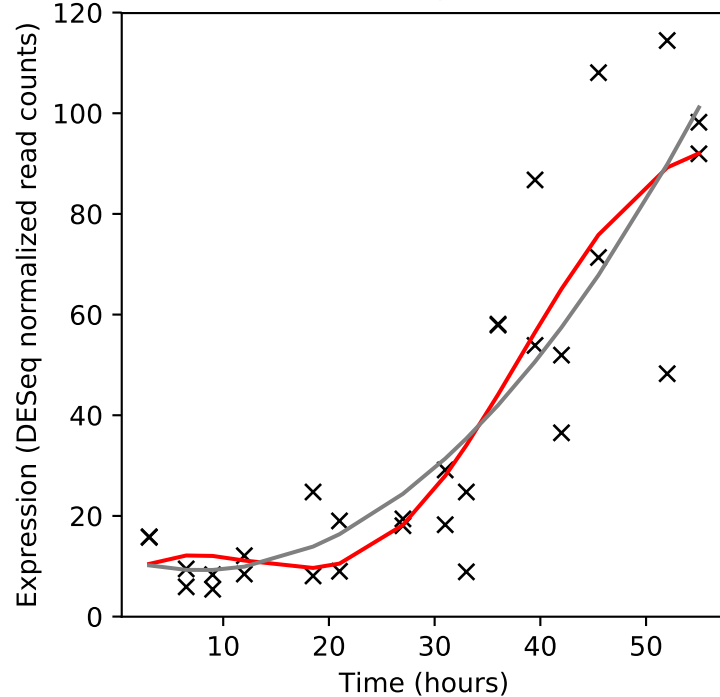

Rv1918c/PPE35

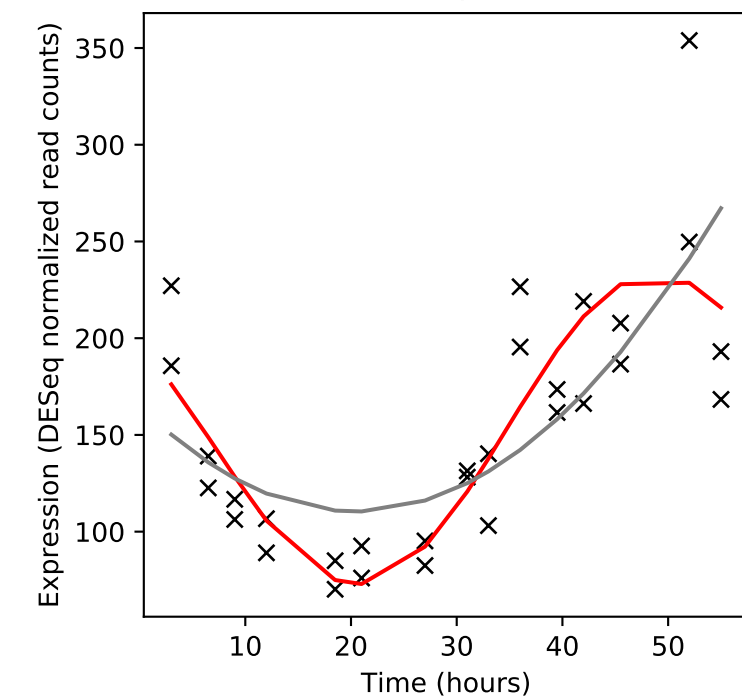

Rv1919c/-

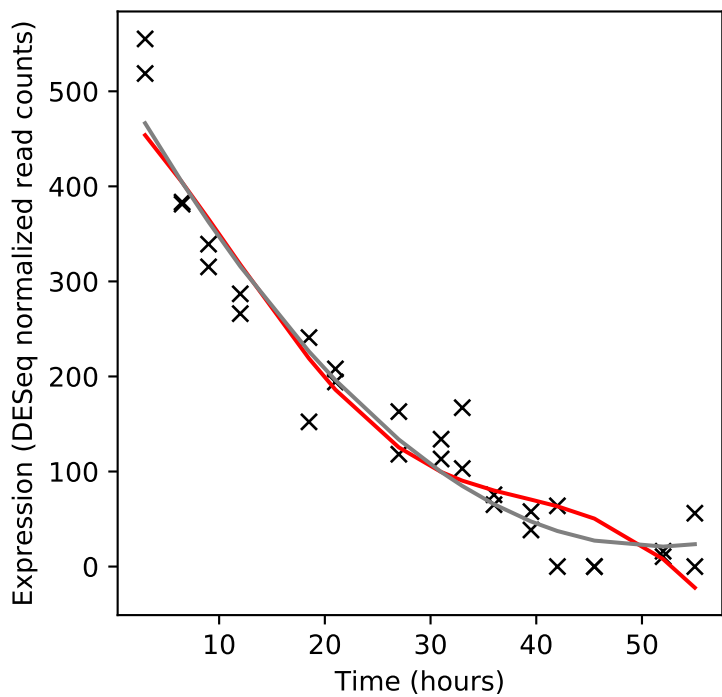

Rv1920/-

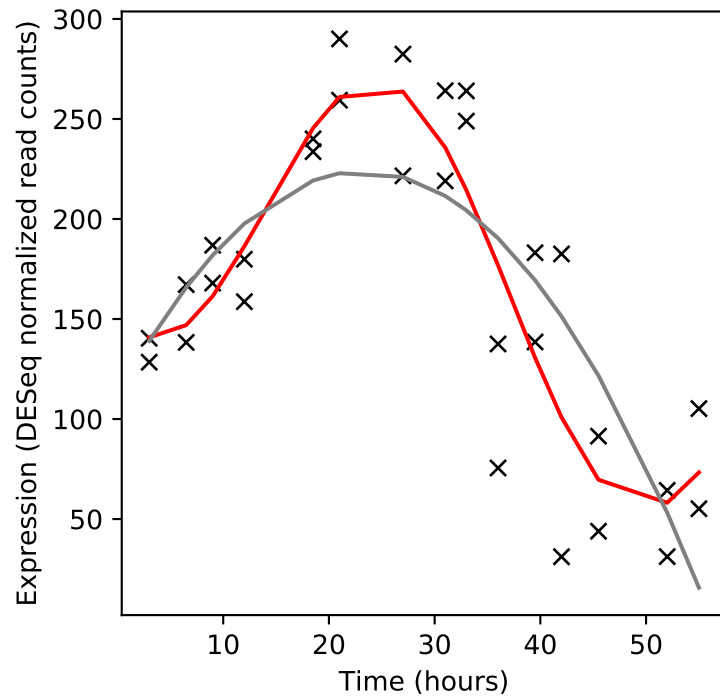

Rv1921c/lppF

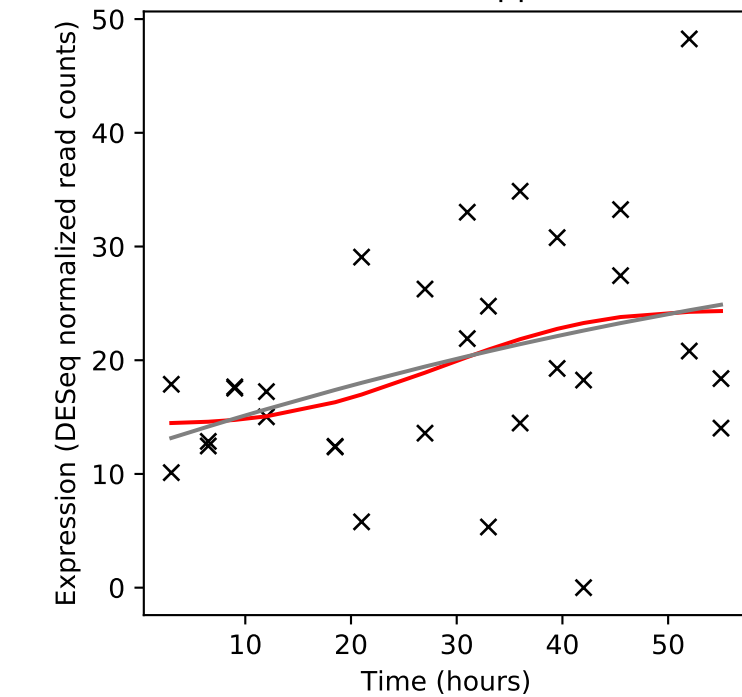



Rv1922/-

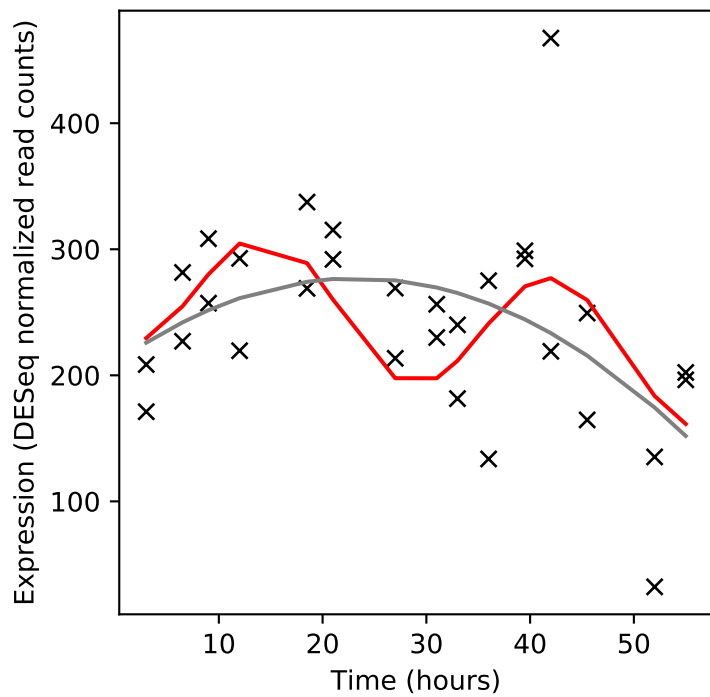

Rv1923/lipD

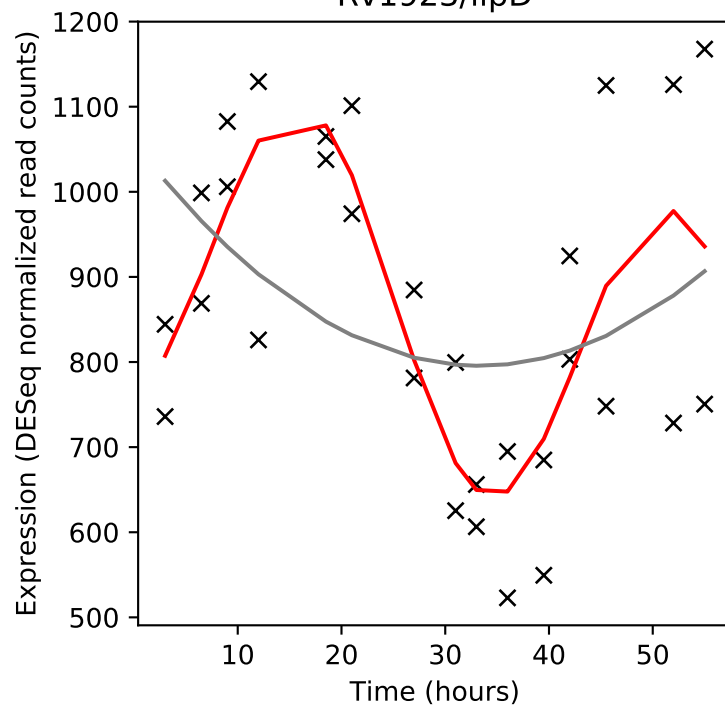

Rv1924c/-

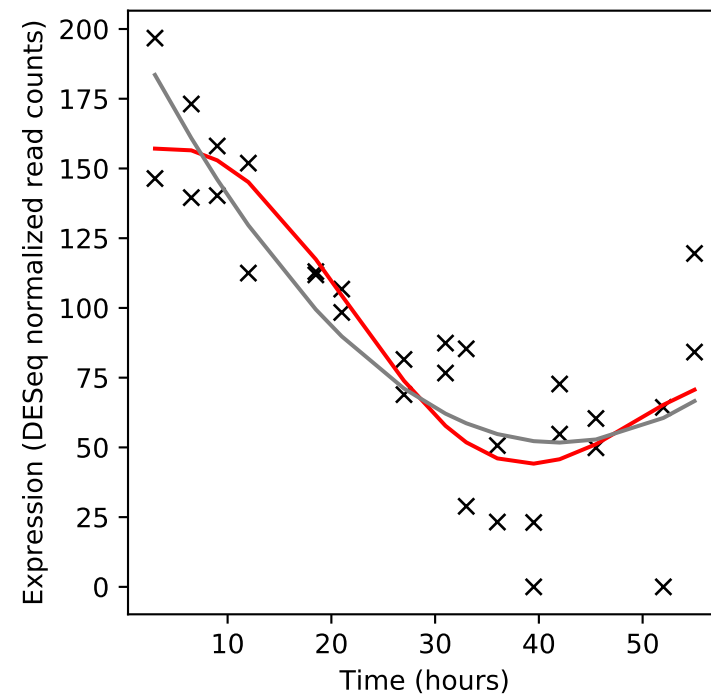

Rv1925/fadD31

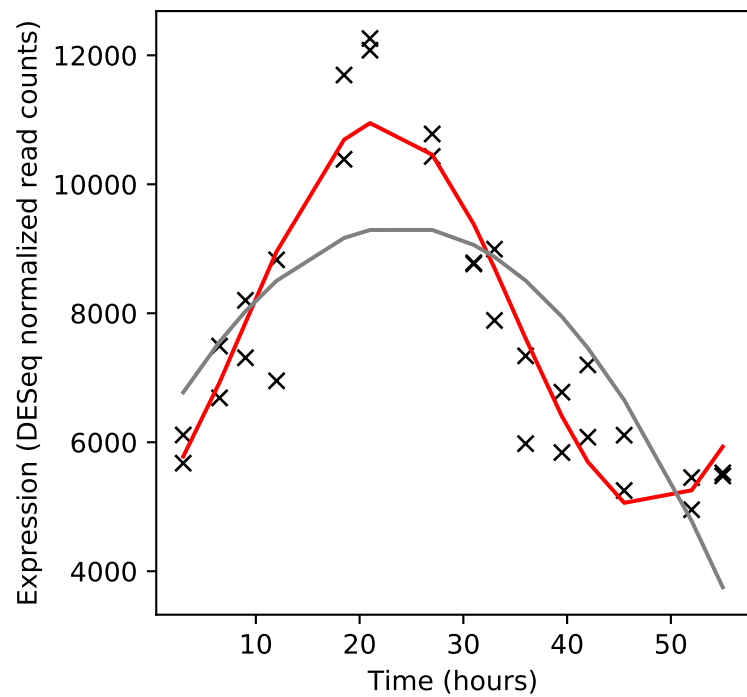

Rv1926c/mpt63

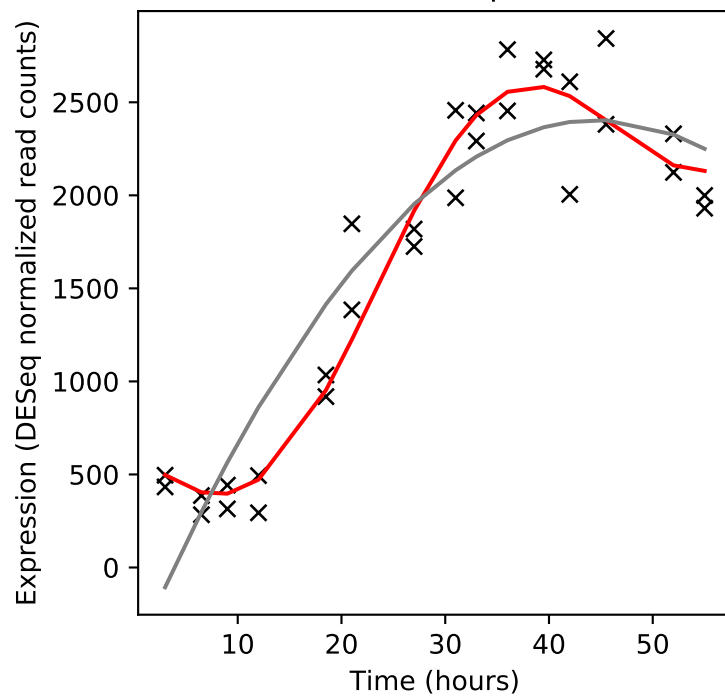

Rv1927/-

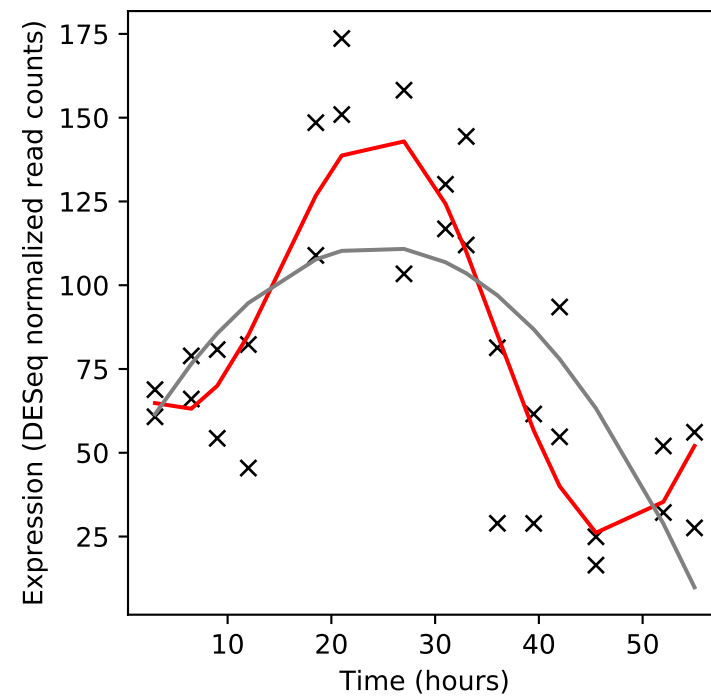

Rv1928c/-

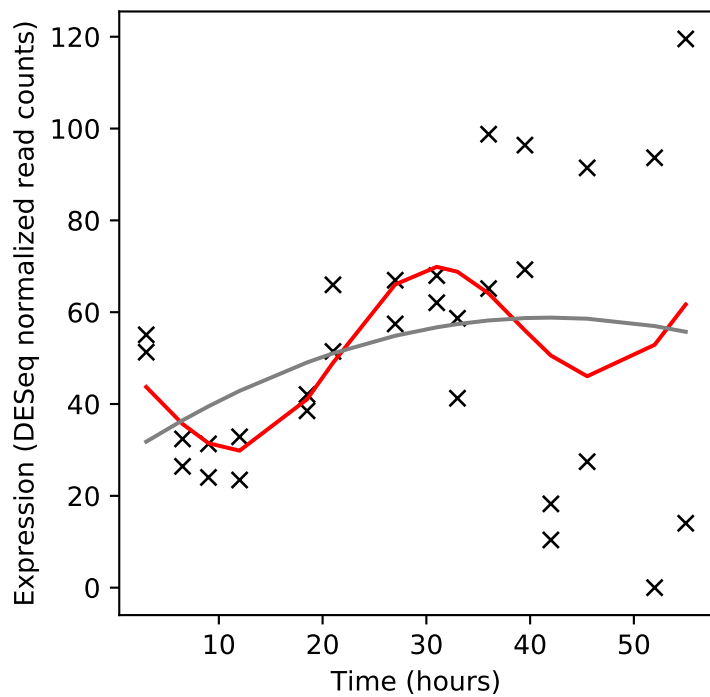

Rv1929c/-

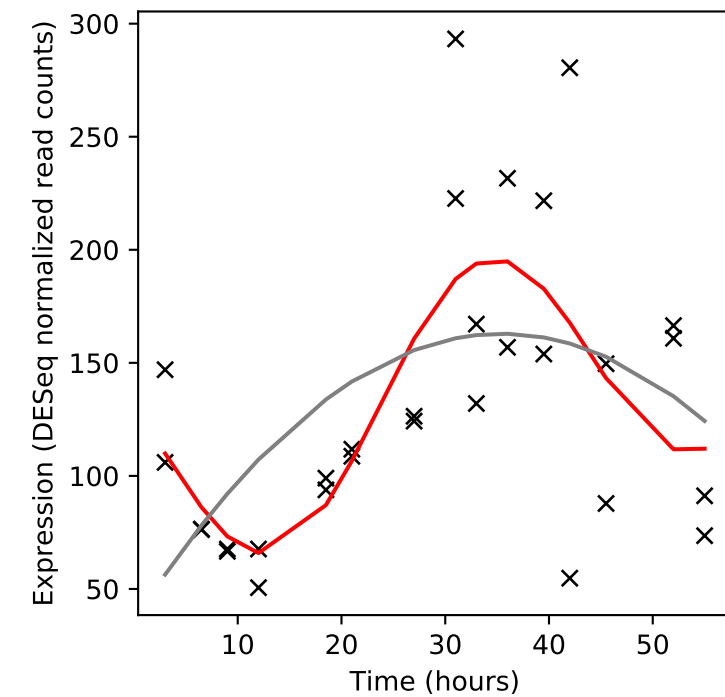

Rv1930c/-

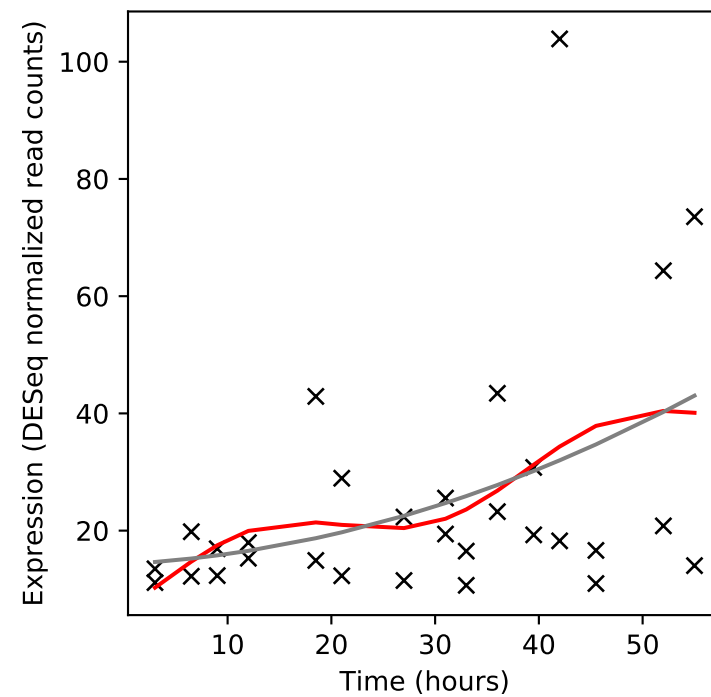

Rv1931c/-

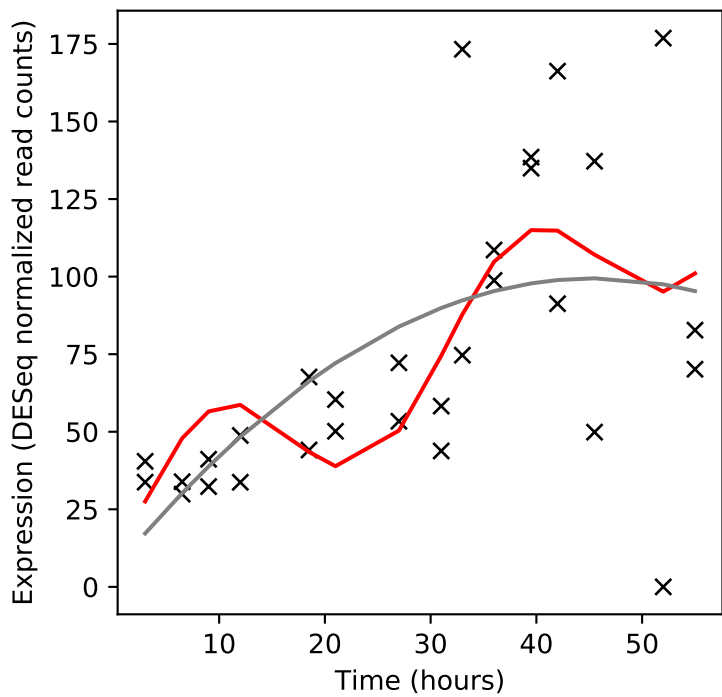

Rv1932/tpx

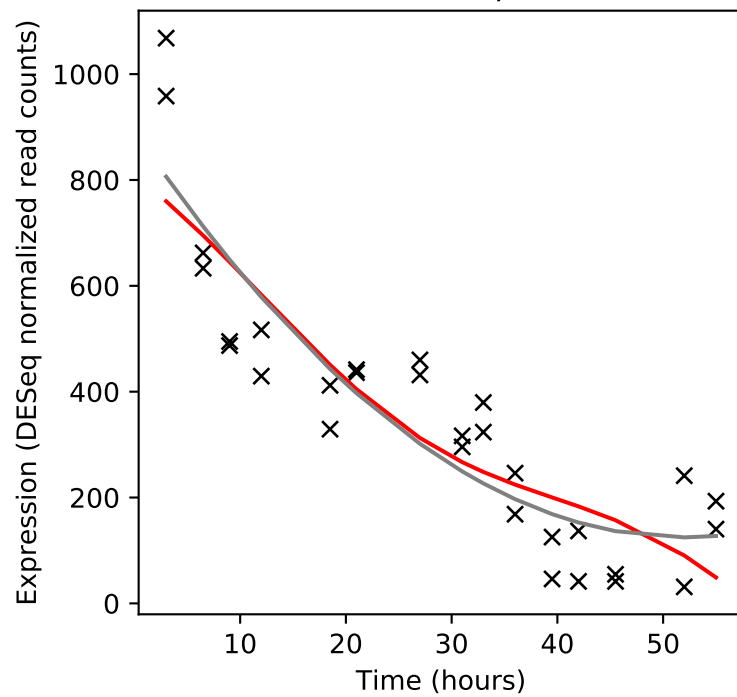

Rv1933c/fadE18

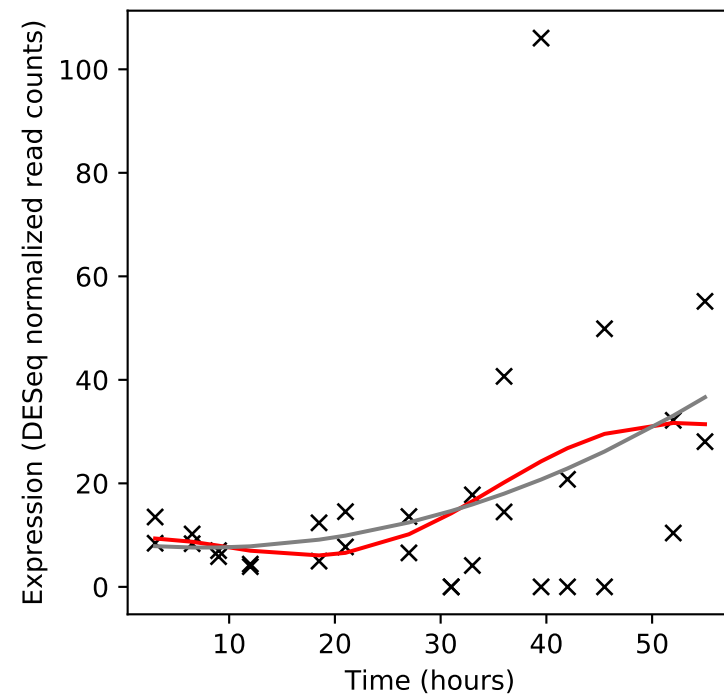

Rv1934c/fadE17

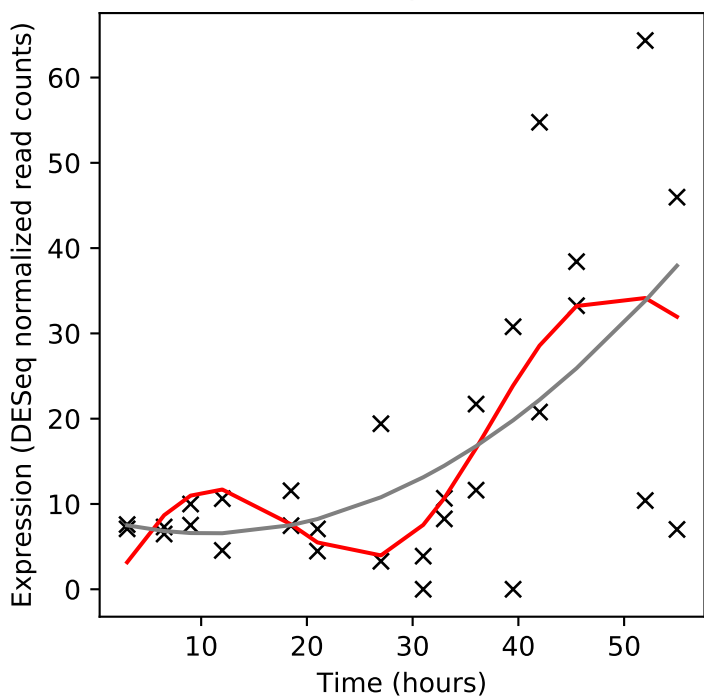

Rv1935c/echA13

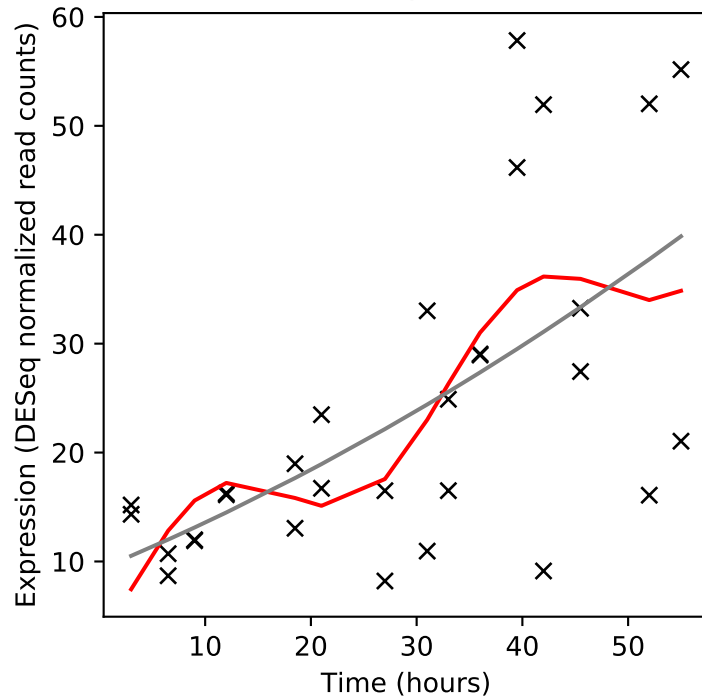

Rv1936/-

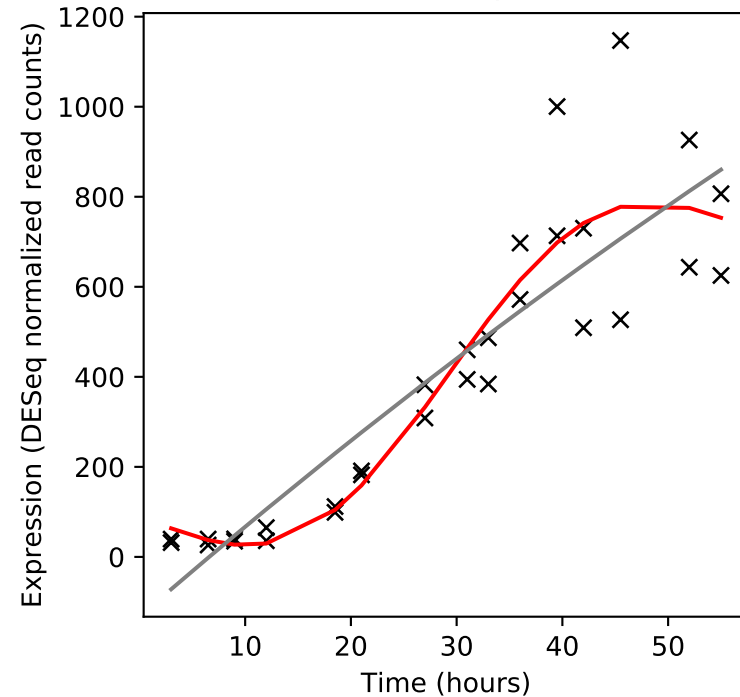

Rv1937/-

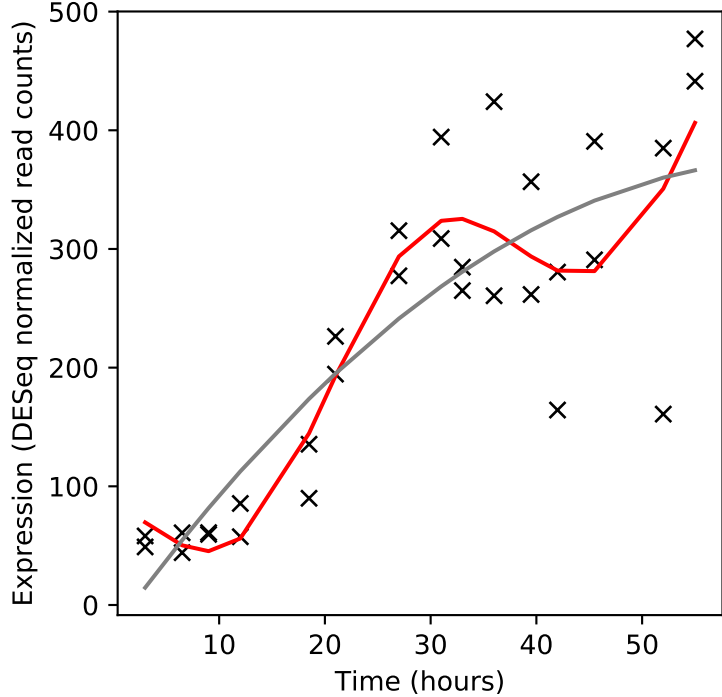

Rv1938/ephB

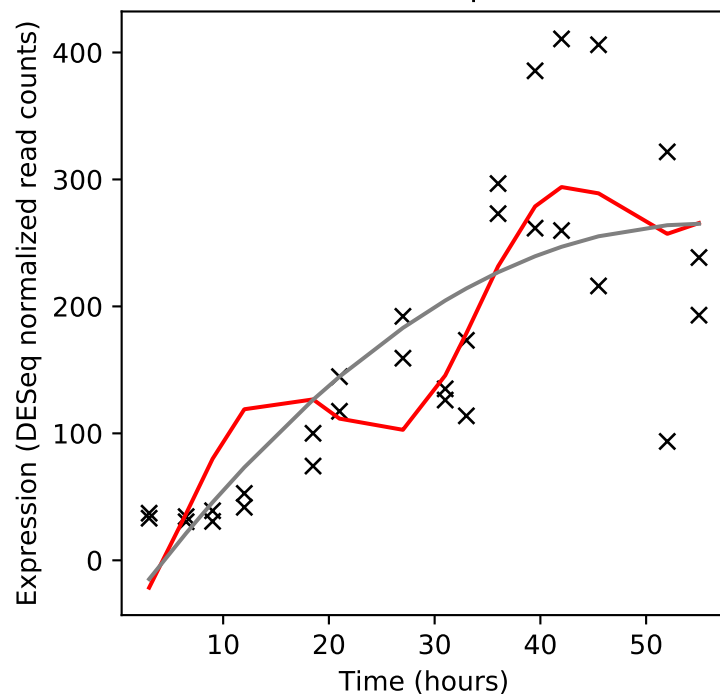

Rv1939/-

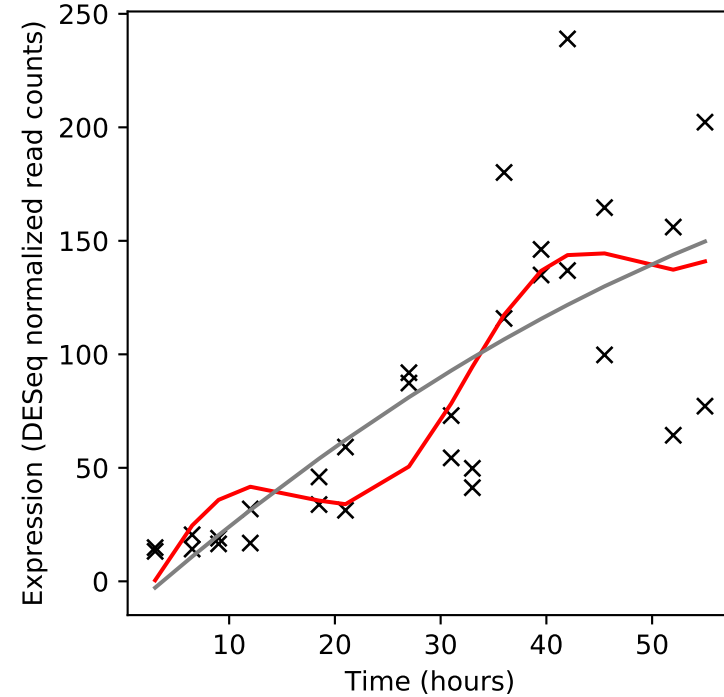

Rv1940/ribA1

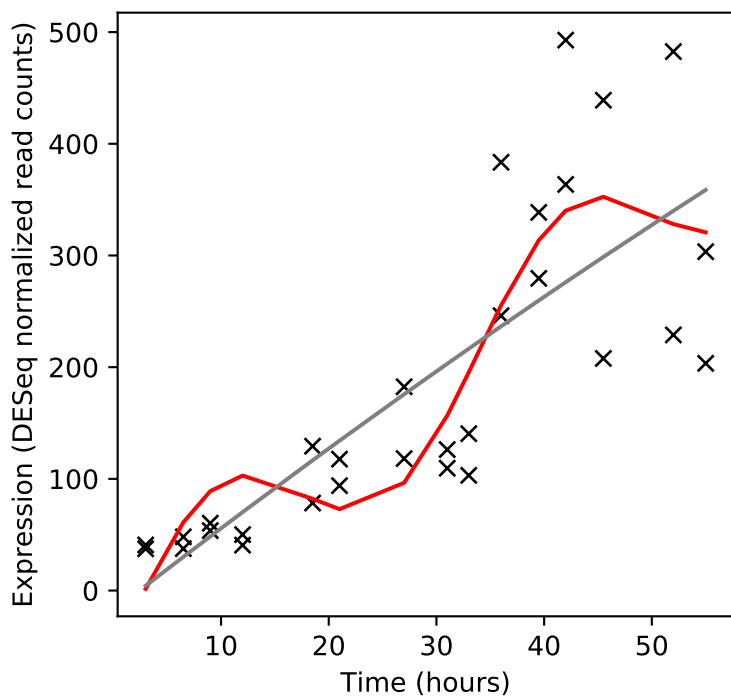

Rv1941/-

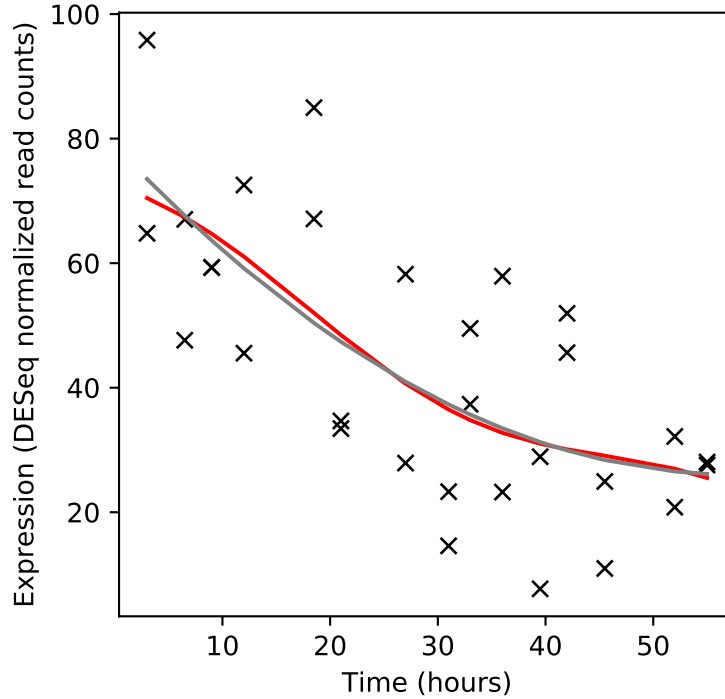

Rv1942c/mazF5

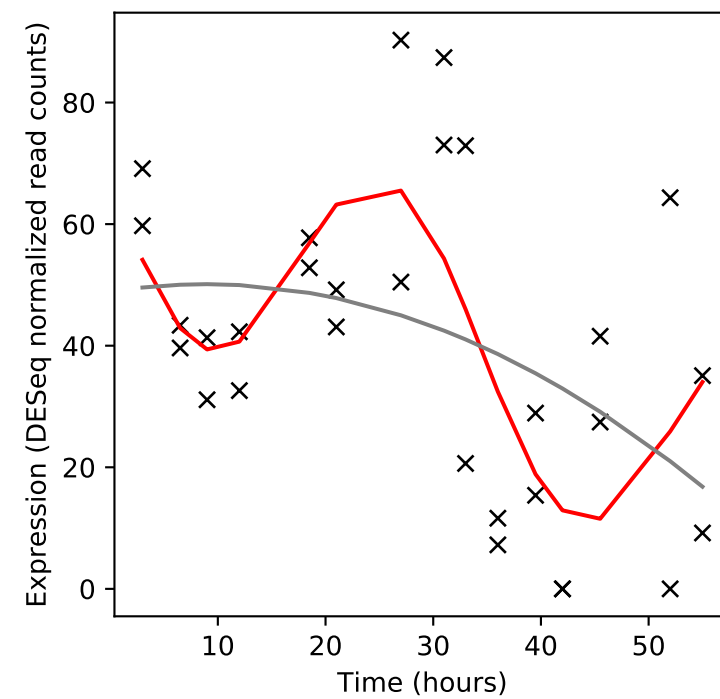

Rv1943c/mazE5

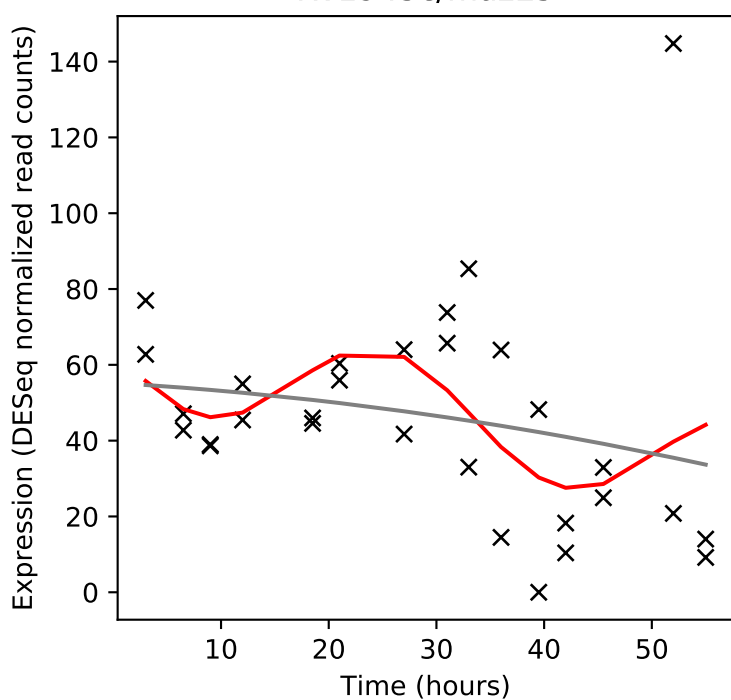

Rv1944c/-

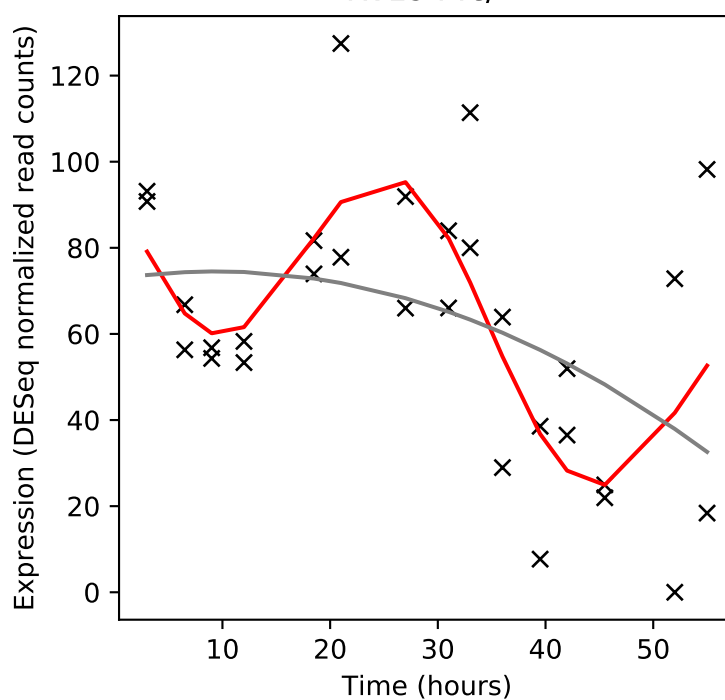

Rv1945/-

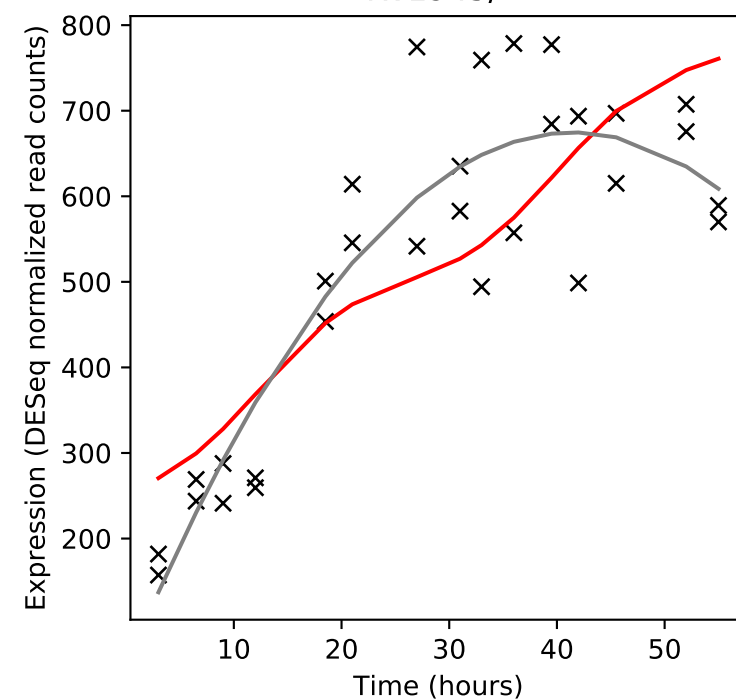

Rv1946c/lppG

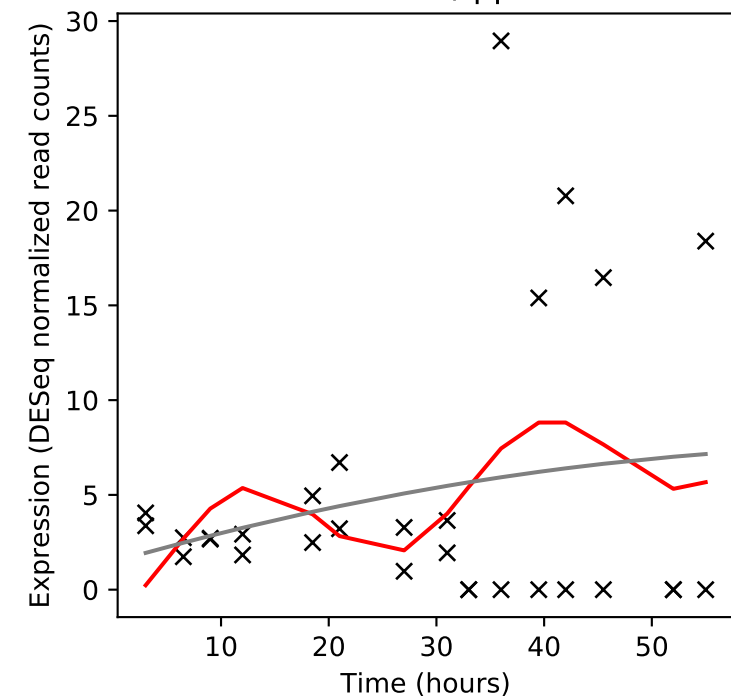

Rv1947/-

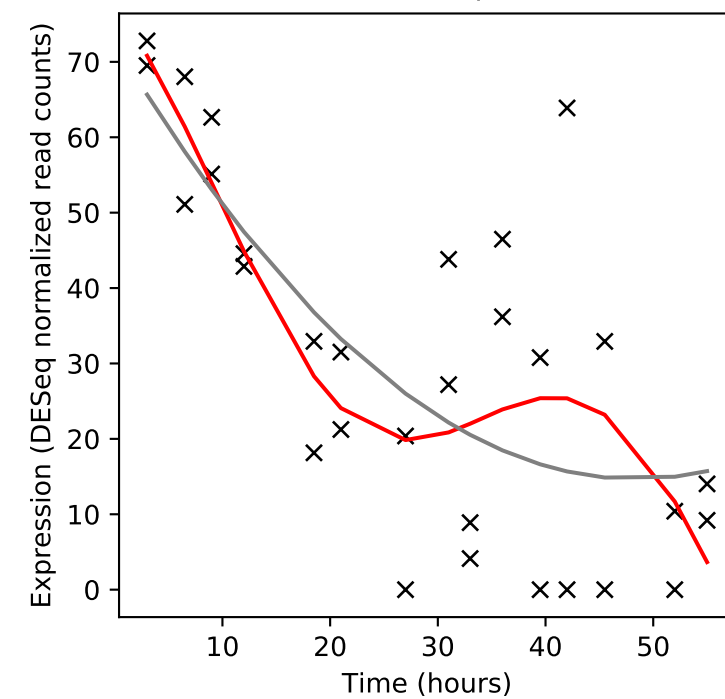

Rv1948c/-

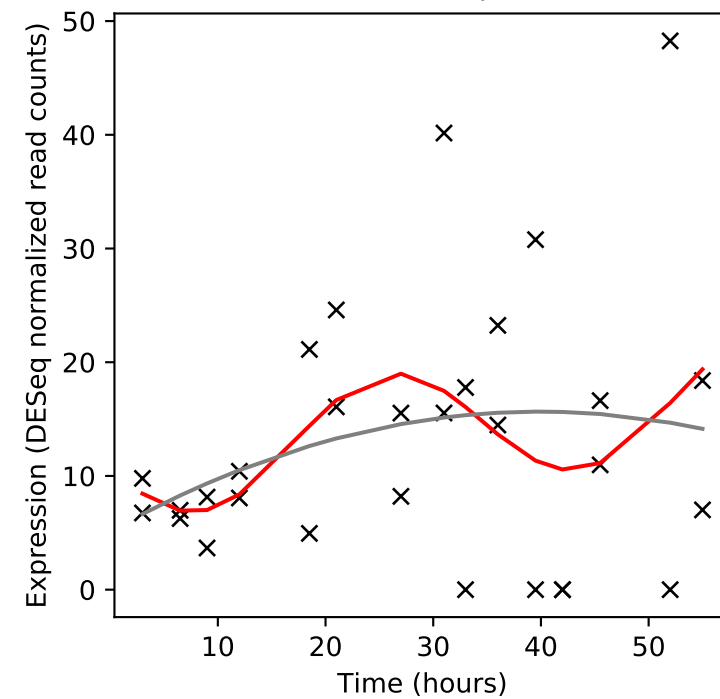

Rv1949c/-

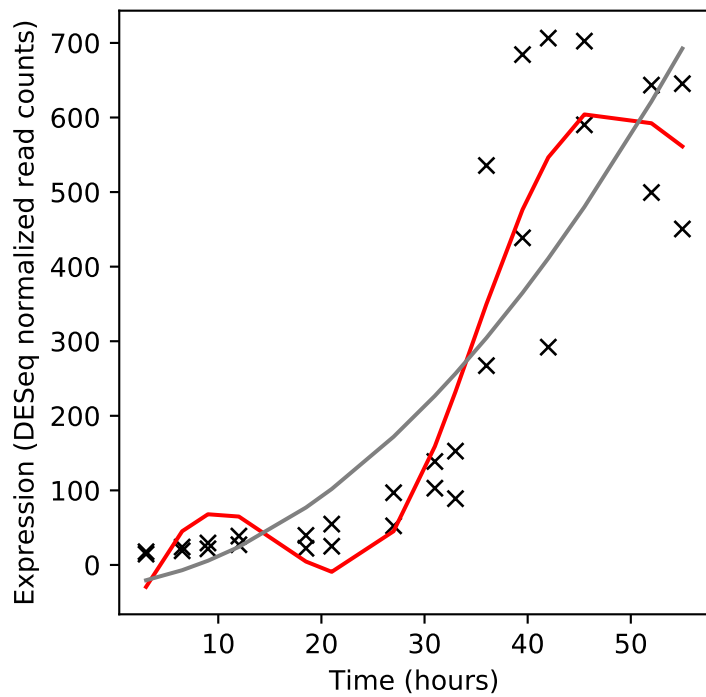

Rv1950c/-

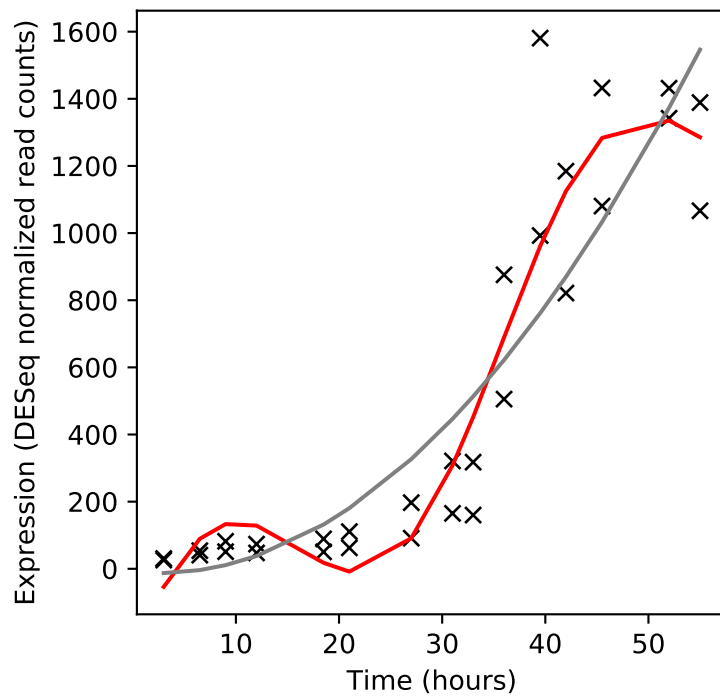

Rv1951c/-

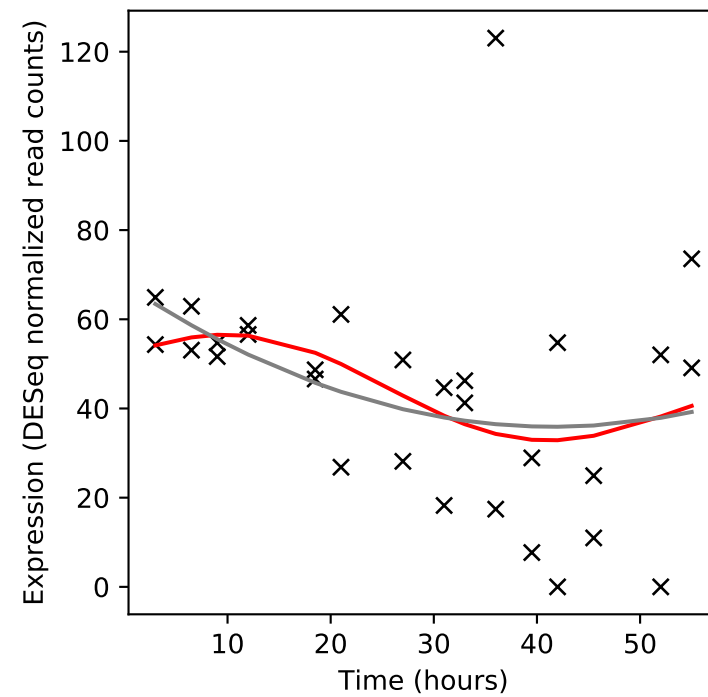

Rv1952/vapB14

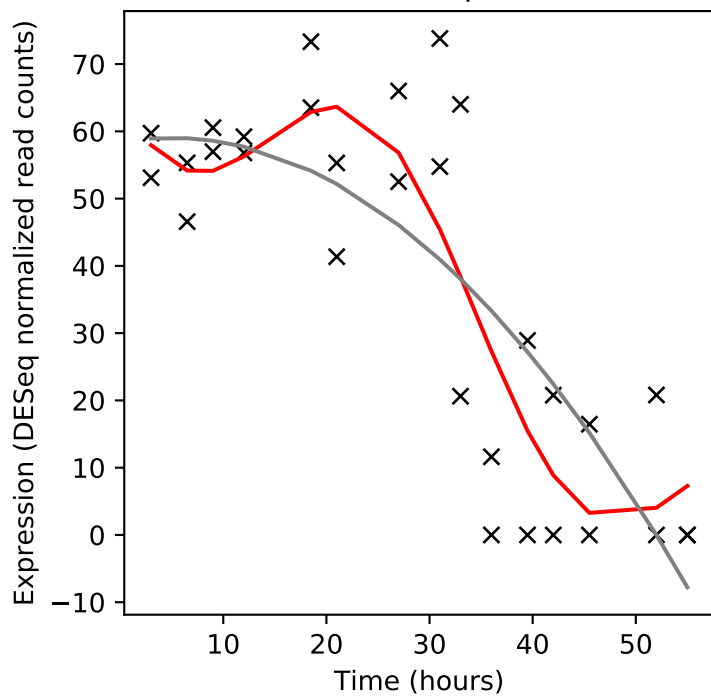

Rv1953/vapC14

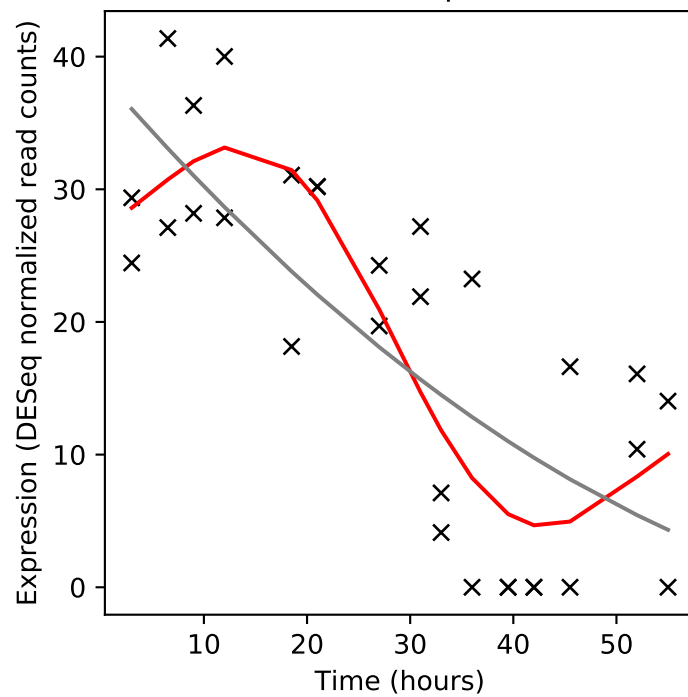

Rv1954c/-

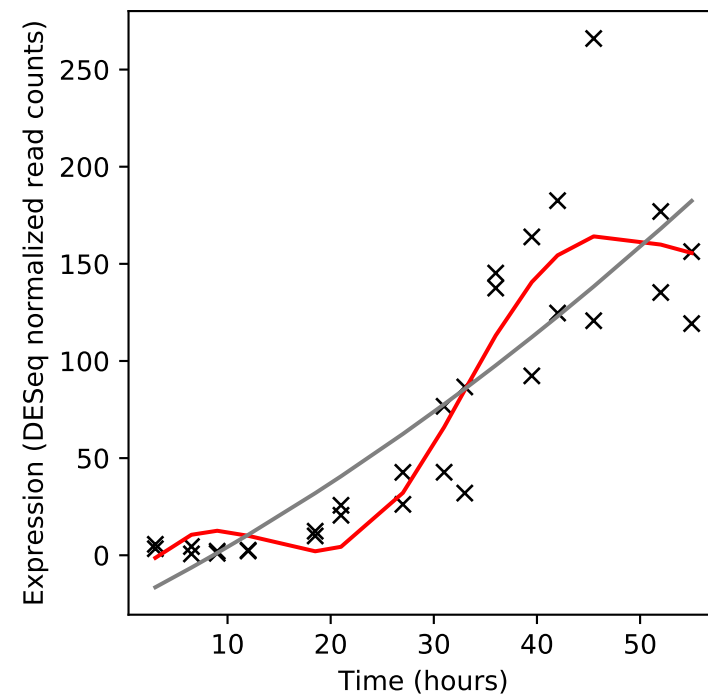

Rv1954A/-

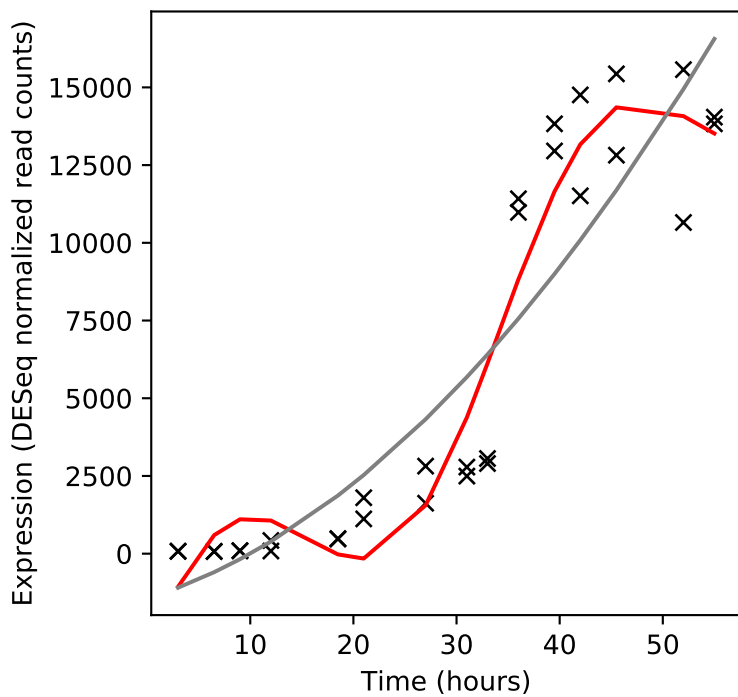

Rv1955/higB

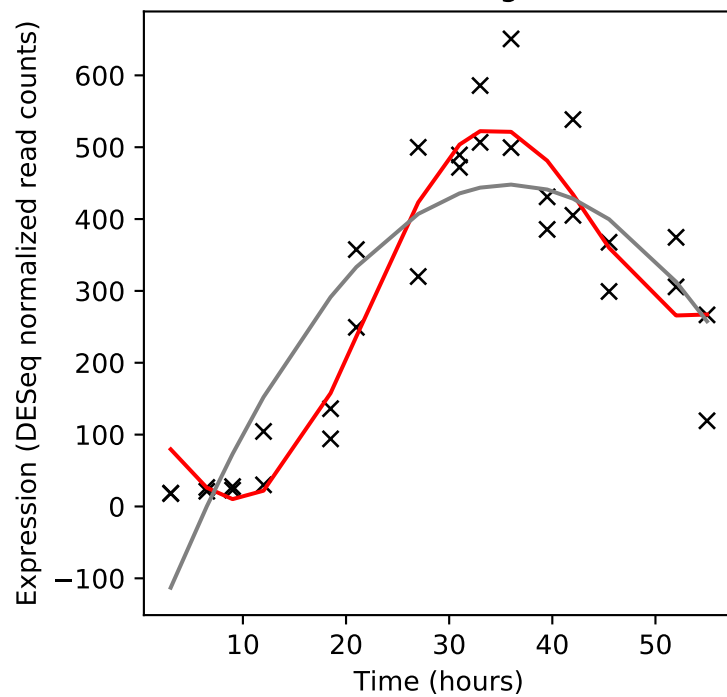

Rv1956/higA

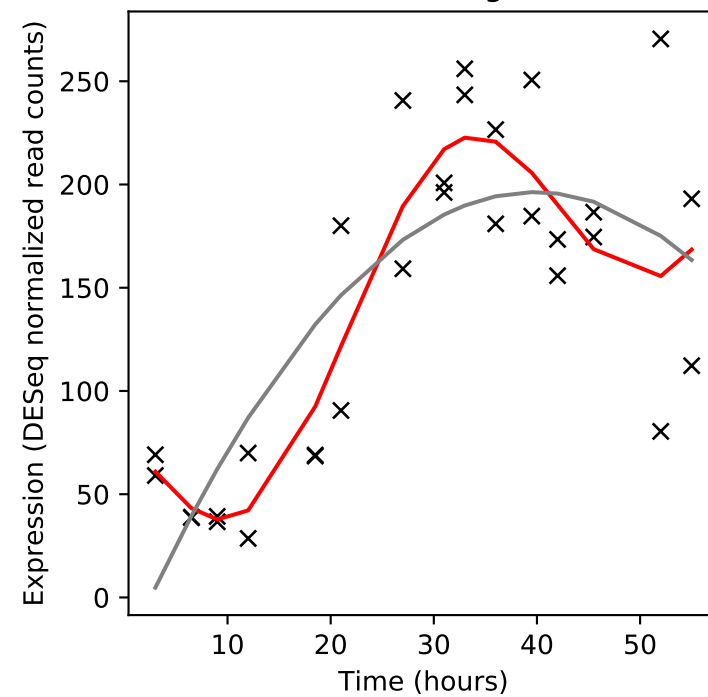

Rv1957/-

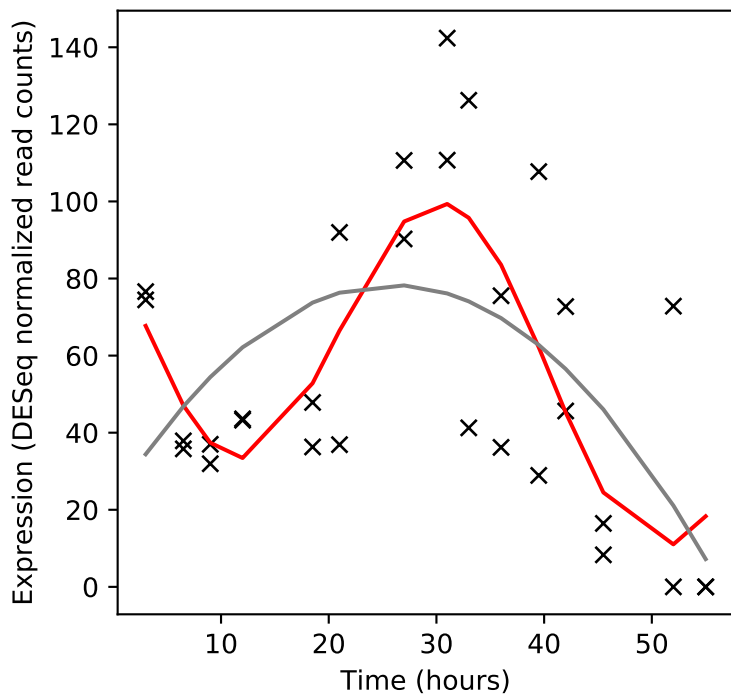

Rv1958c/-

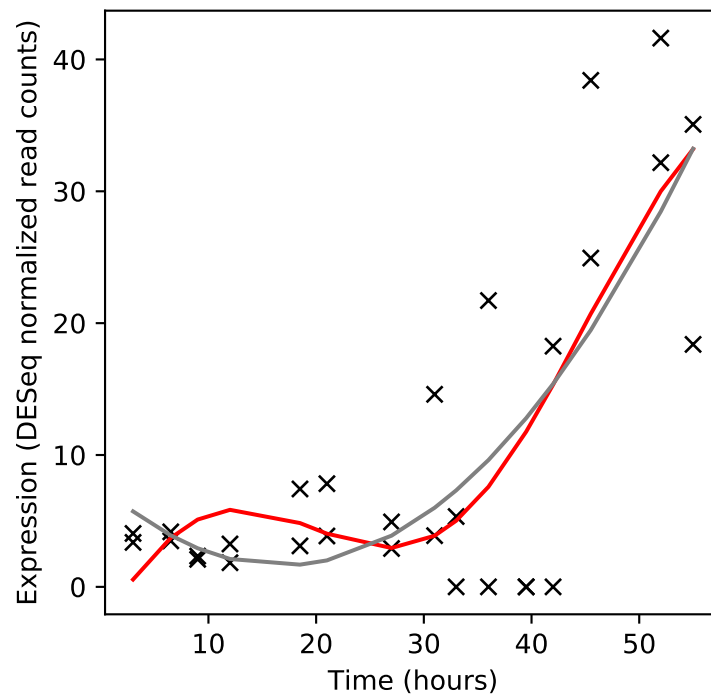

Rv1959c/parE1

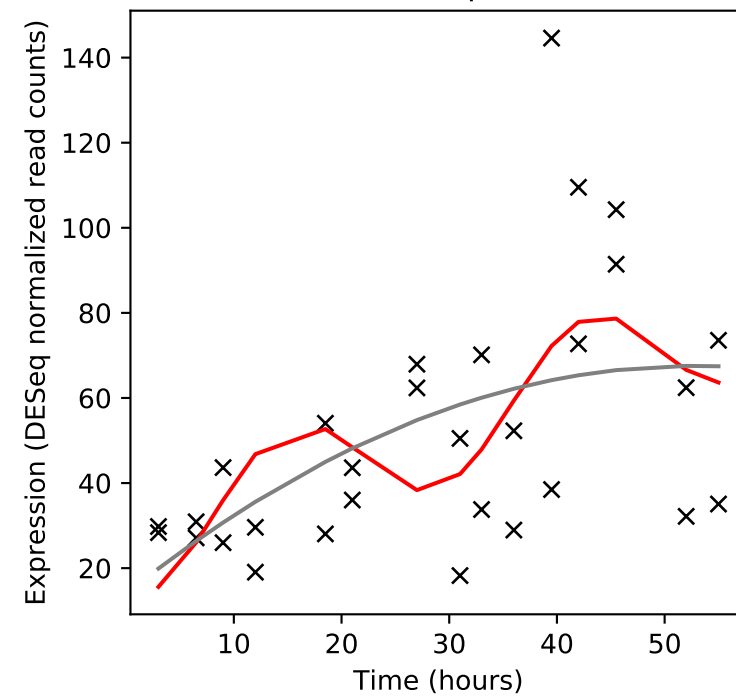

Rv1960c/parD1

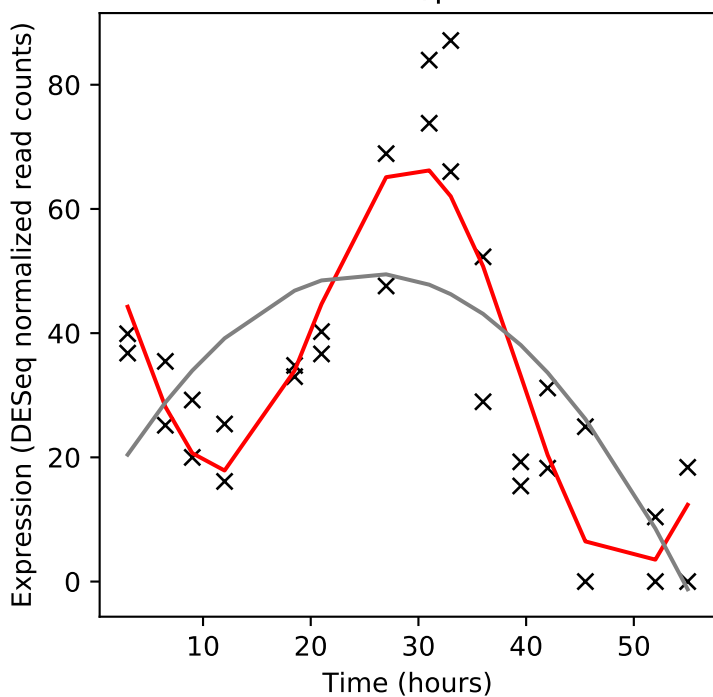

Rv1961/-

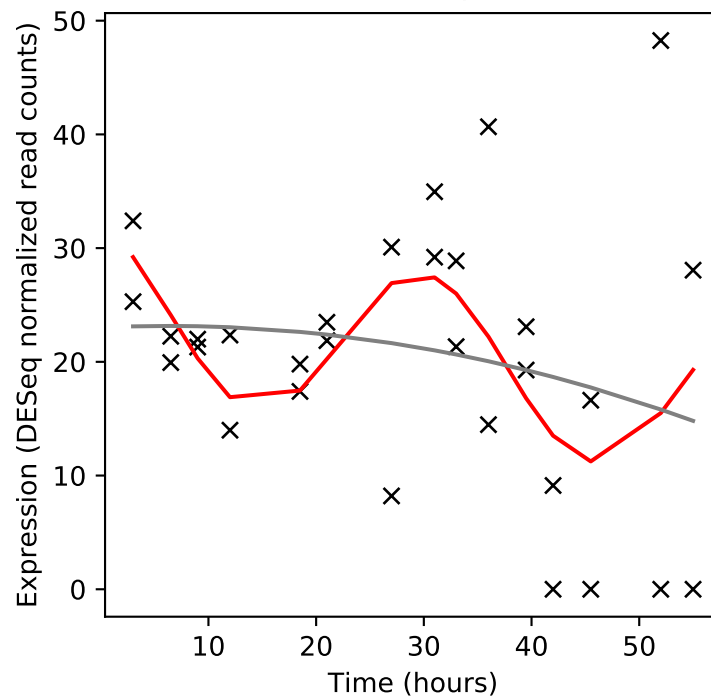

Rv1962c/vapC35

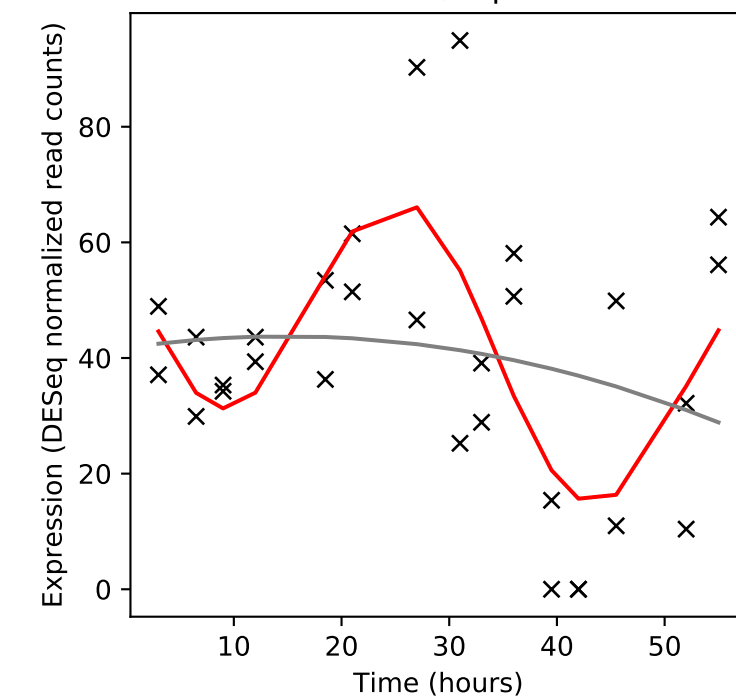

Rv1962A/vapB35

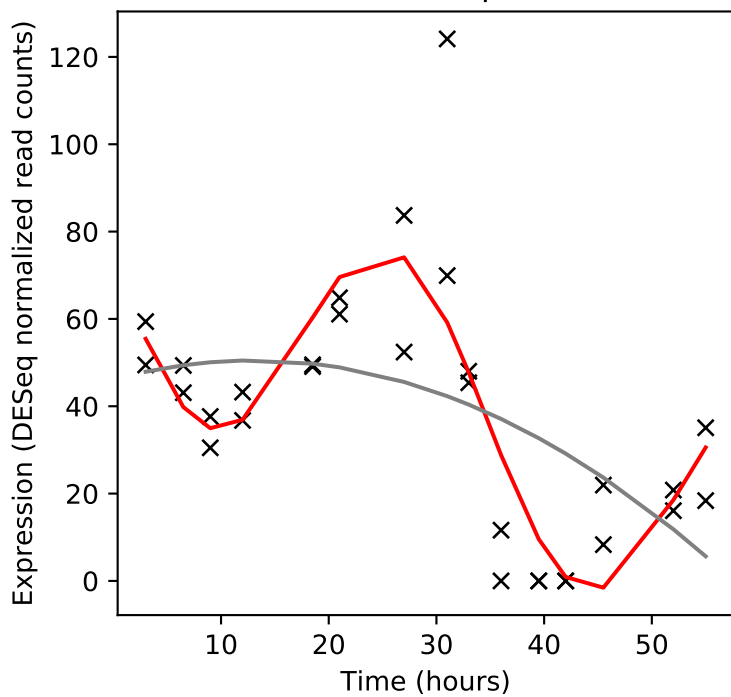

Rv1963c/mce3R

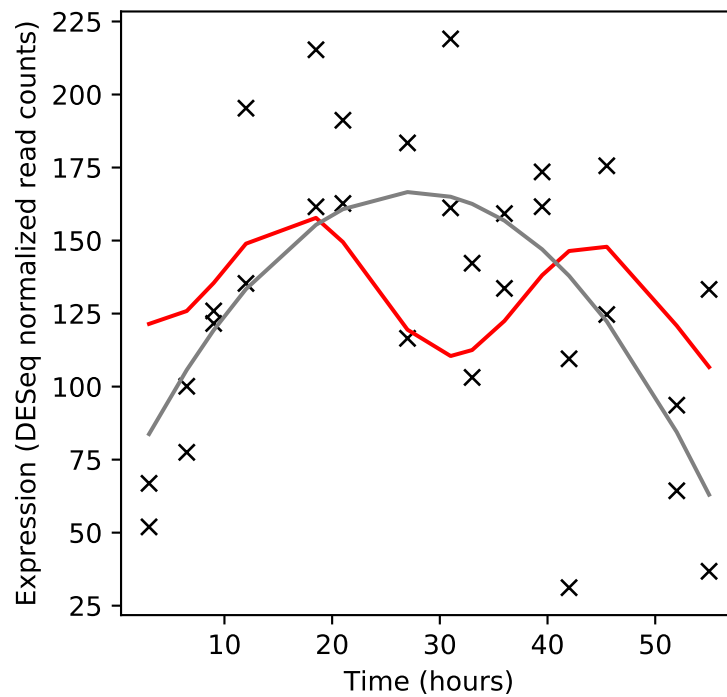

Rv1964/yrbE3A

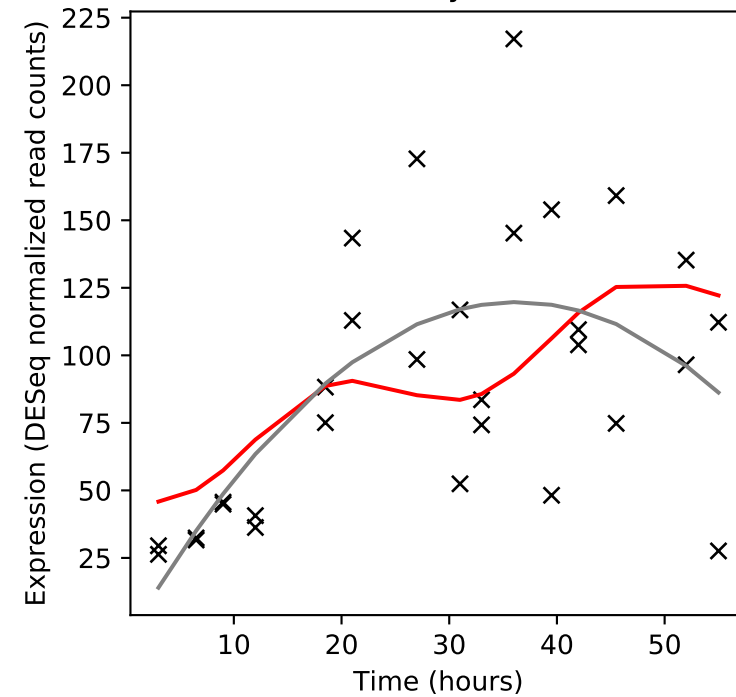

Rv1965/yrbE3B

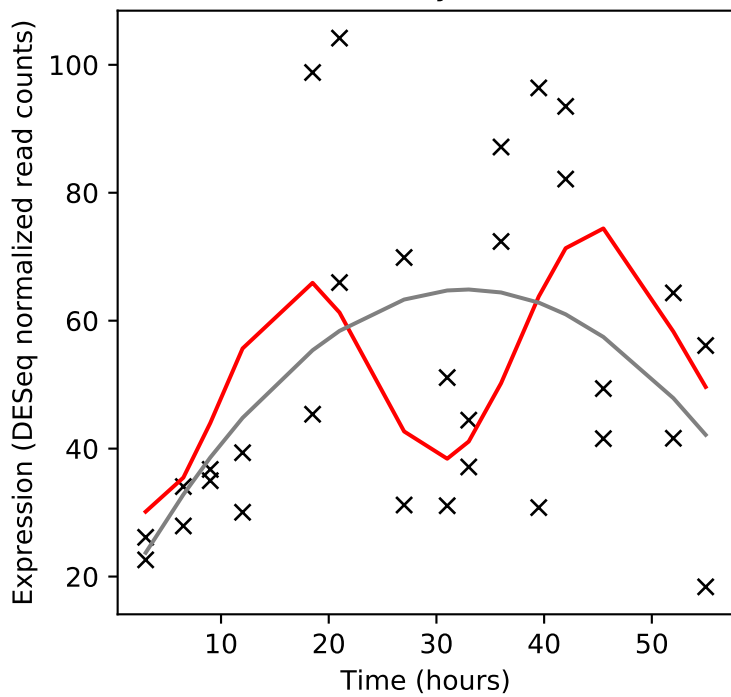

Rv1966/mce3A

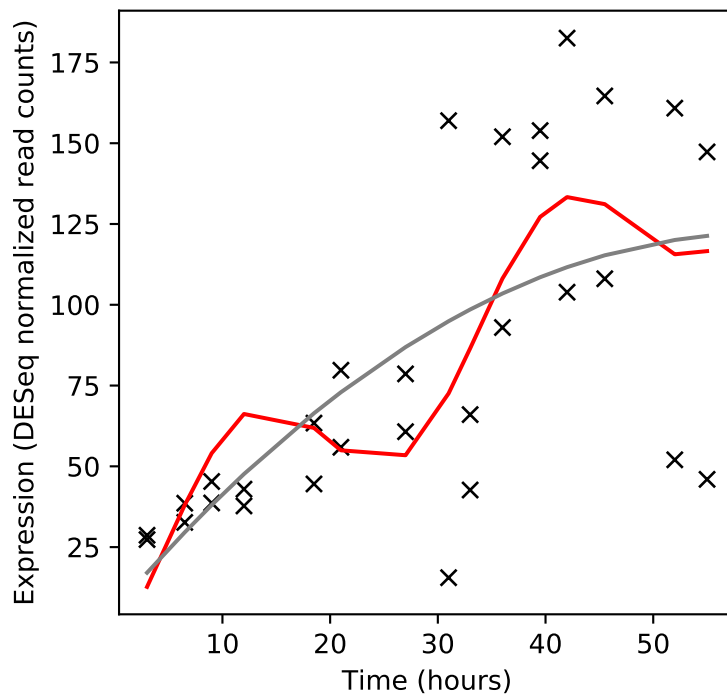

Rv1967/mce3B

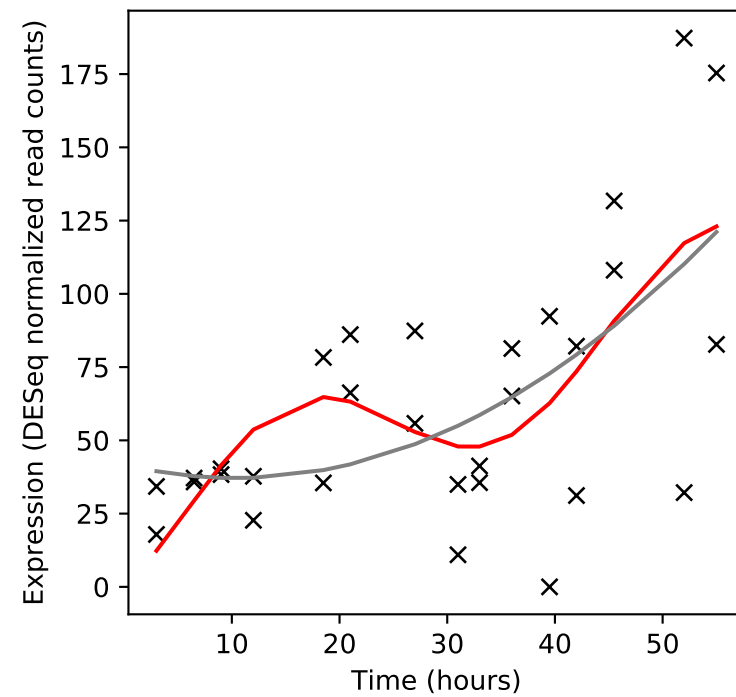

Rv1968/mce3C

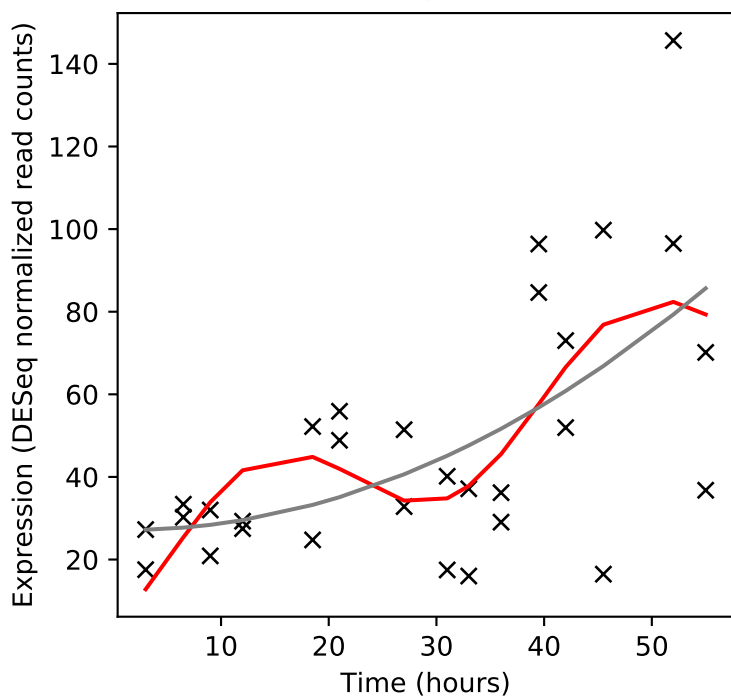

Rv1969/mce3D

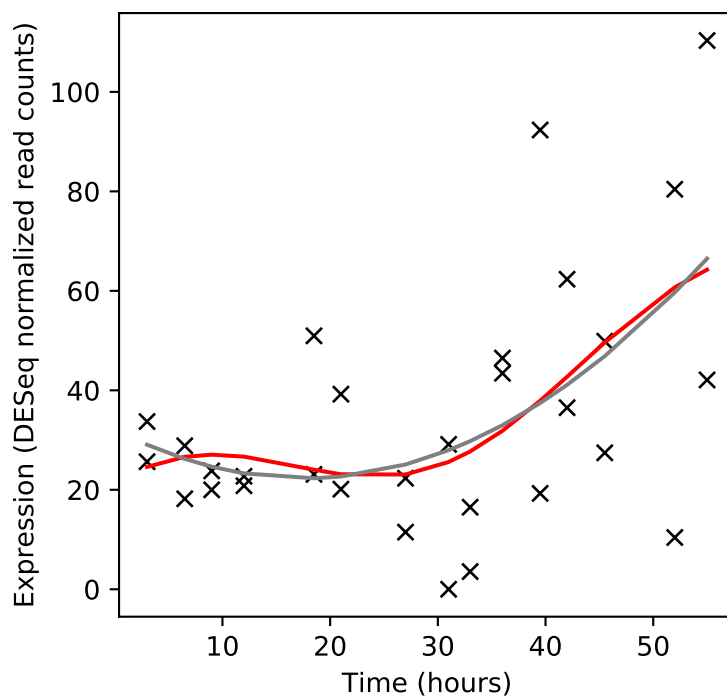

Rv1970/lprM

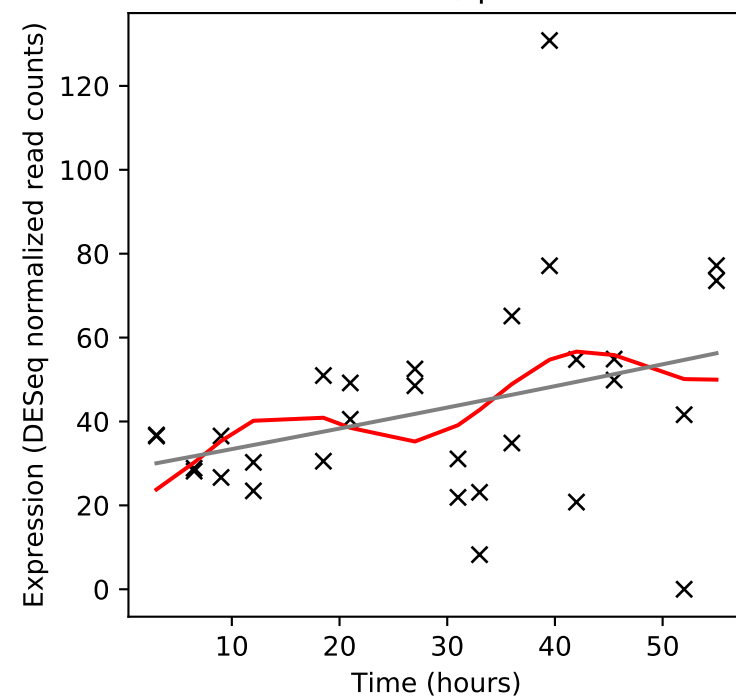

Rv1971/mce3F

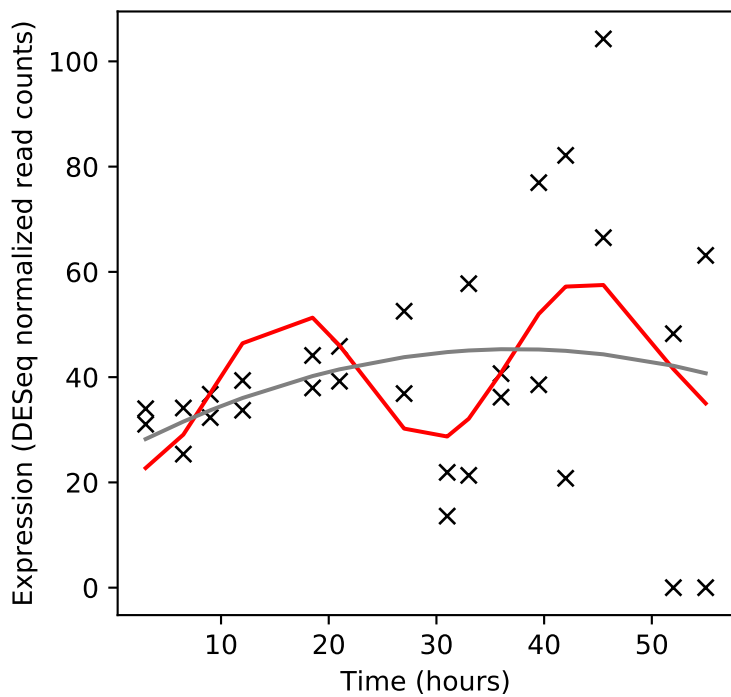

Rv1972/-

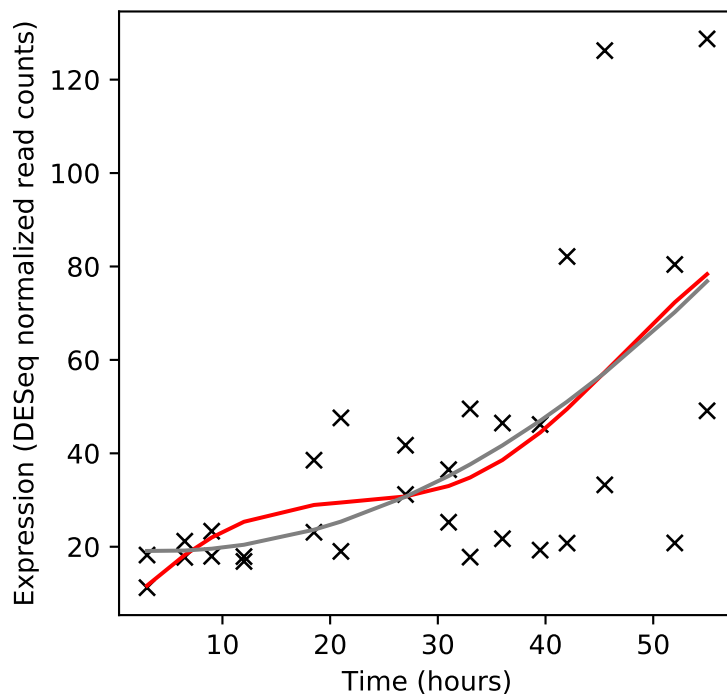

Rv1973/-

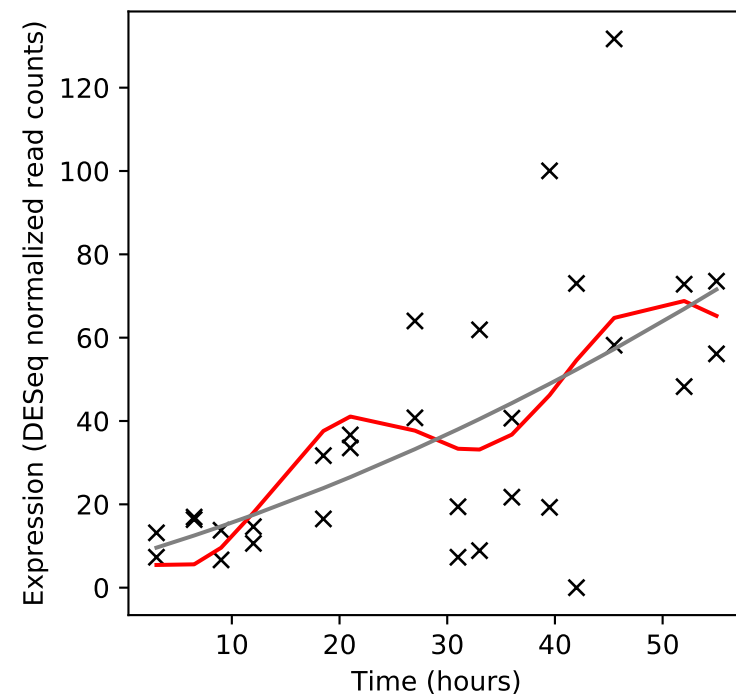

Rv1974/-

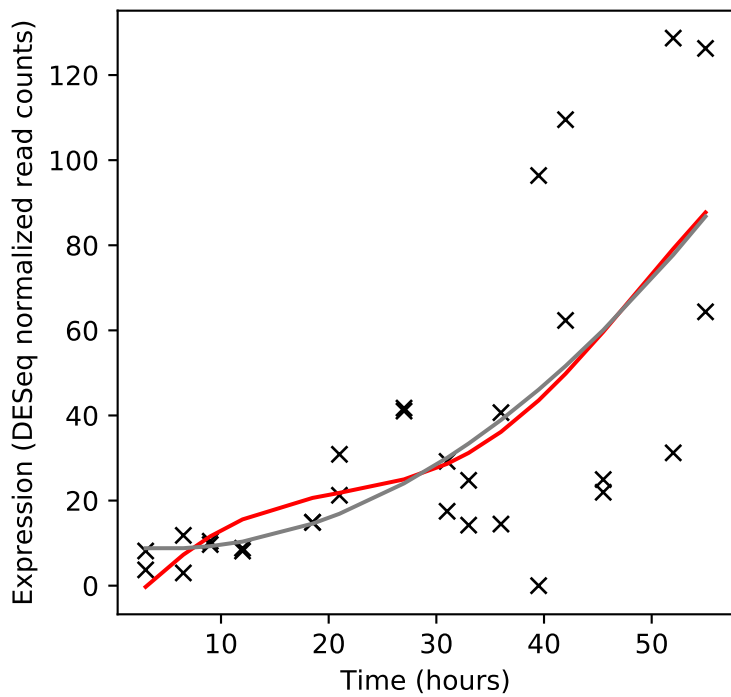

Rv1975/-

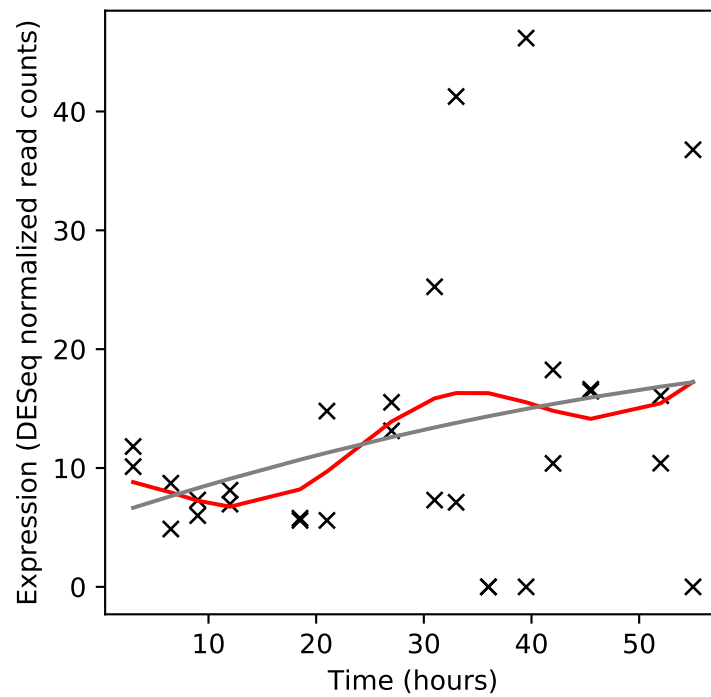

Rv1976c/-

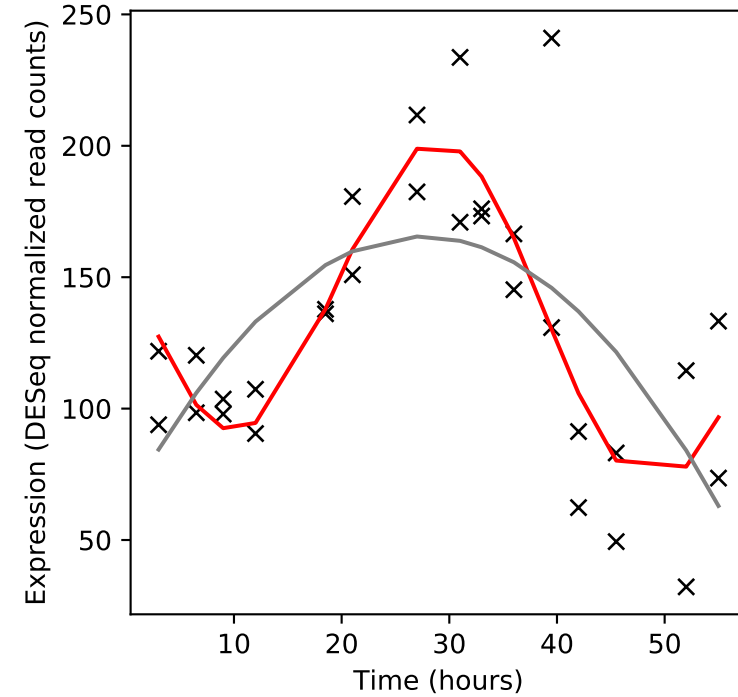

Rv1977/-

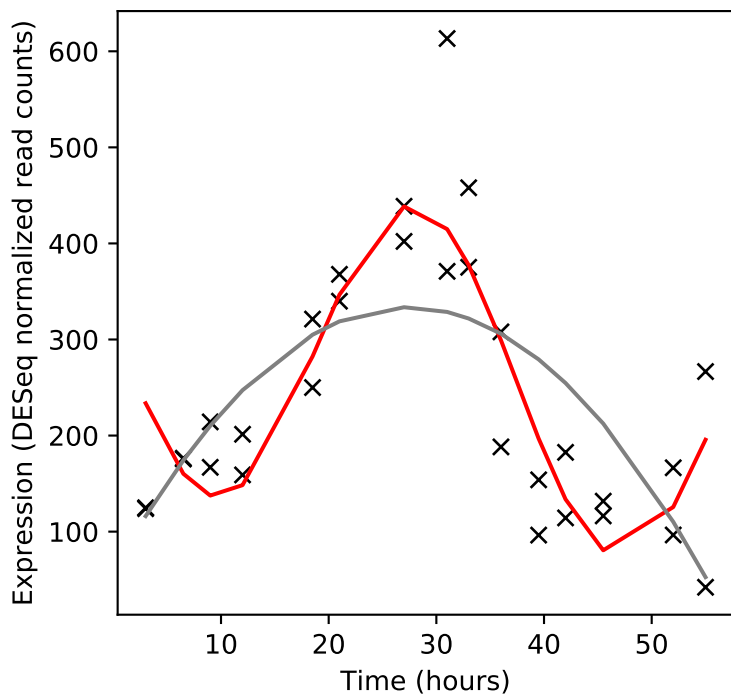

Rv1978/-

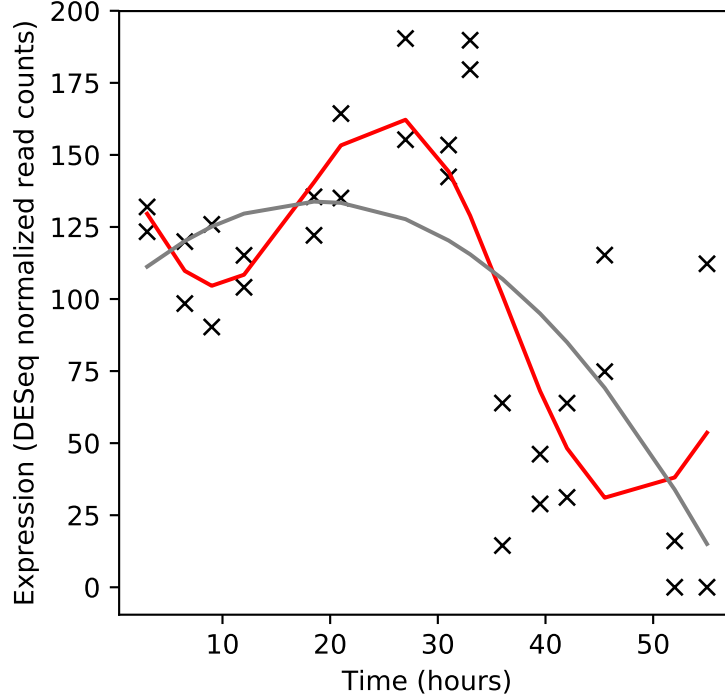

Rv1979c/-

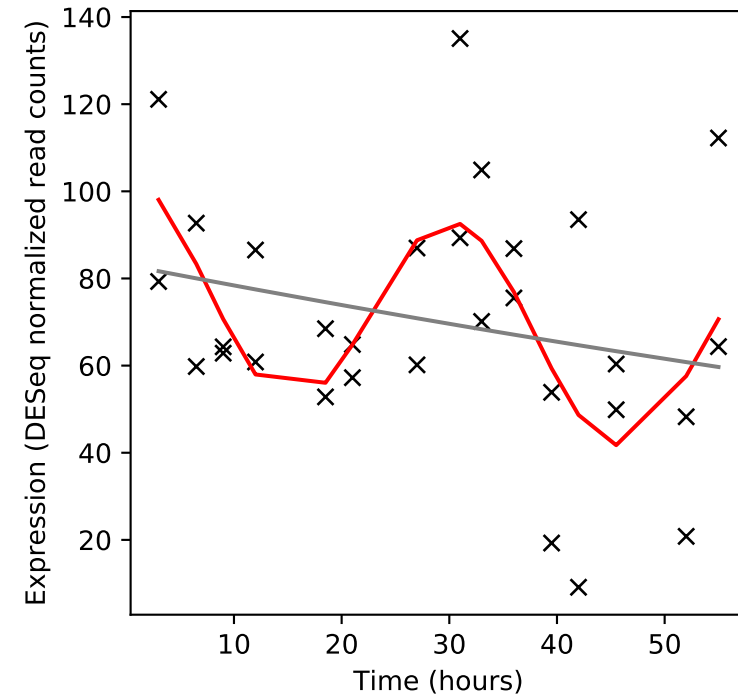

Rv1980c/mpt64

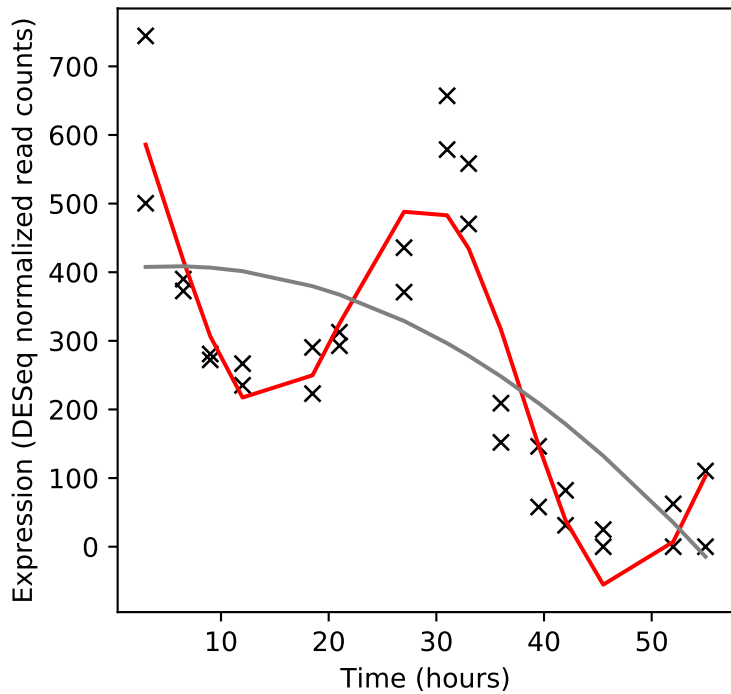

Rv1981c/nrdF1

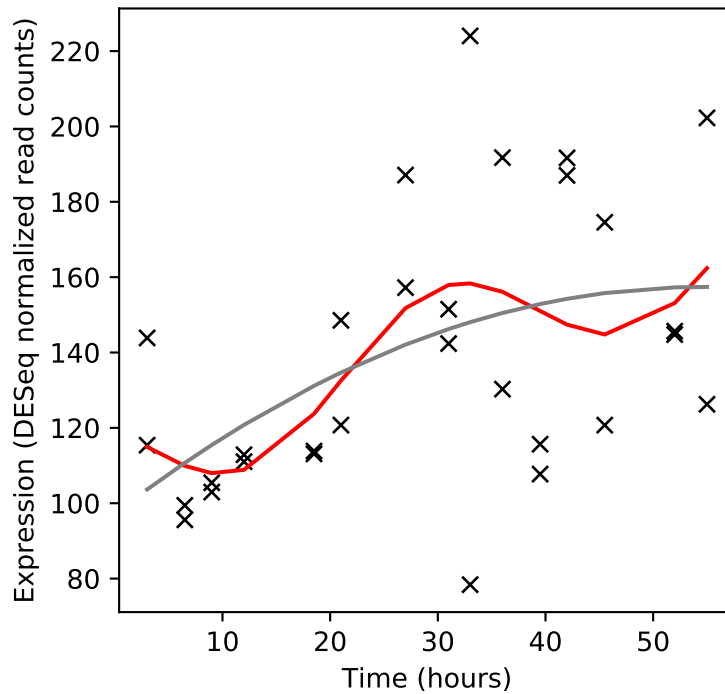

Rv1982c/vapC36

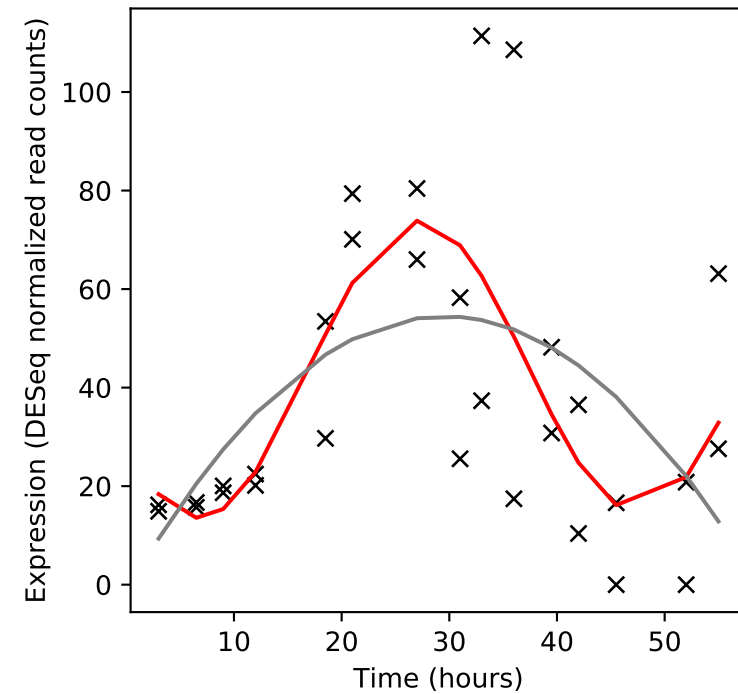



Rv1982A/vapB36

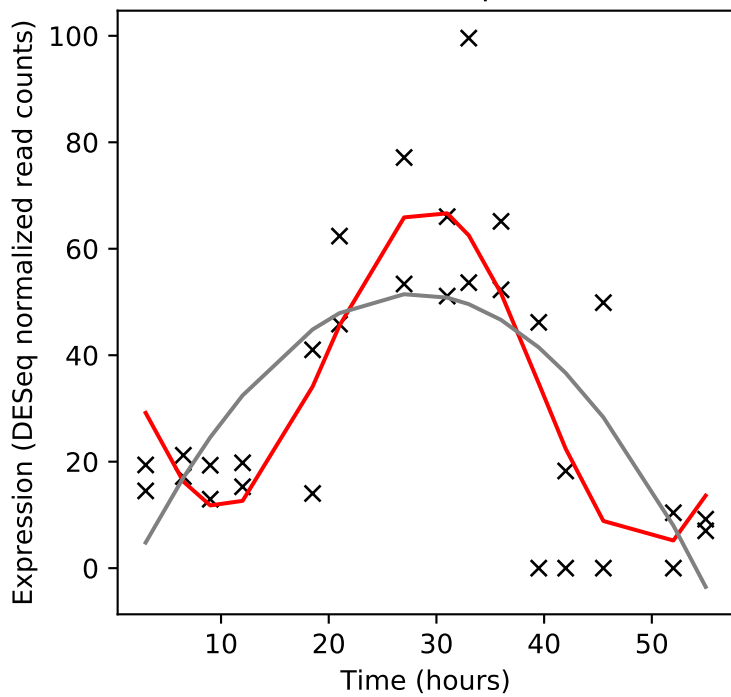

Rv1983/PE\_PGRS35

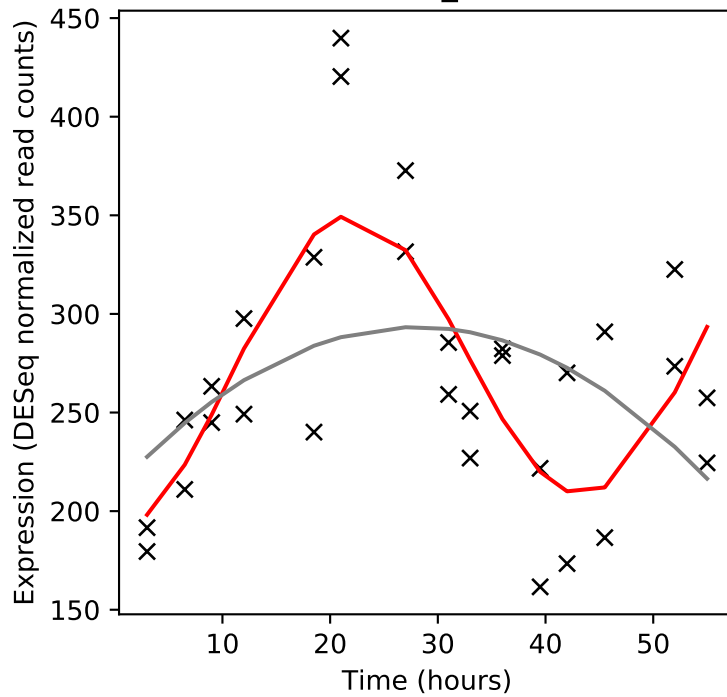

Rv1984c/cfp21

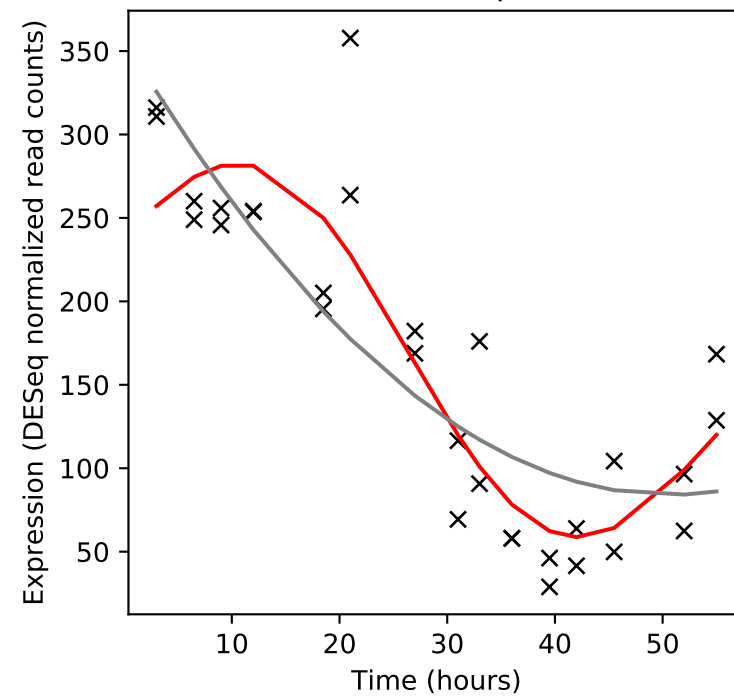

Rv1985c/-

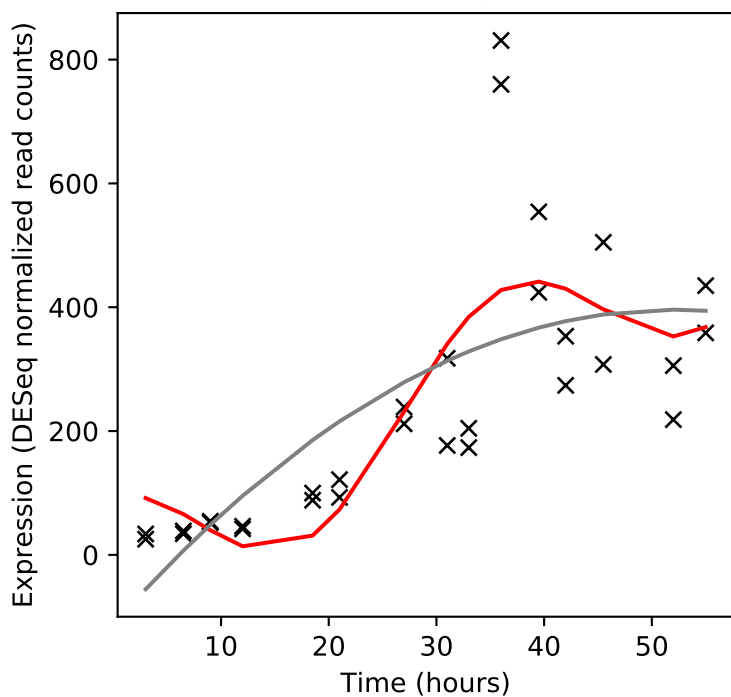

Rv1986/-

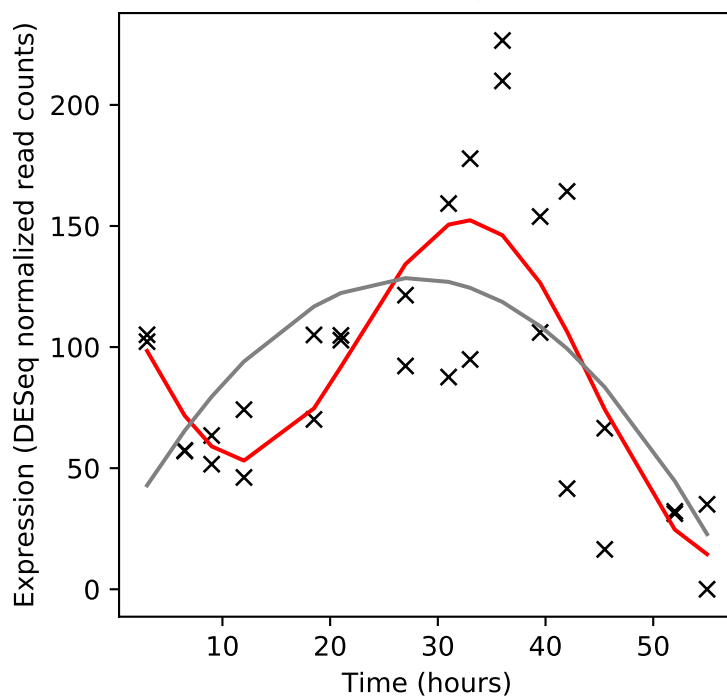

Rv1987/-

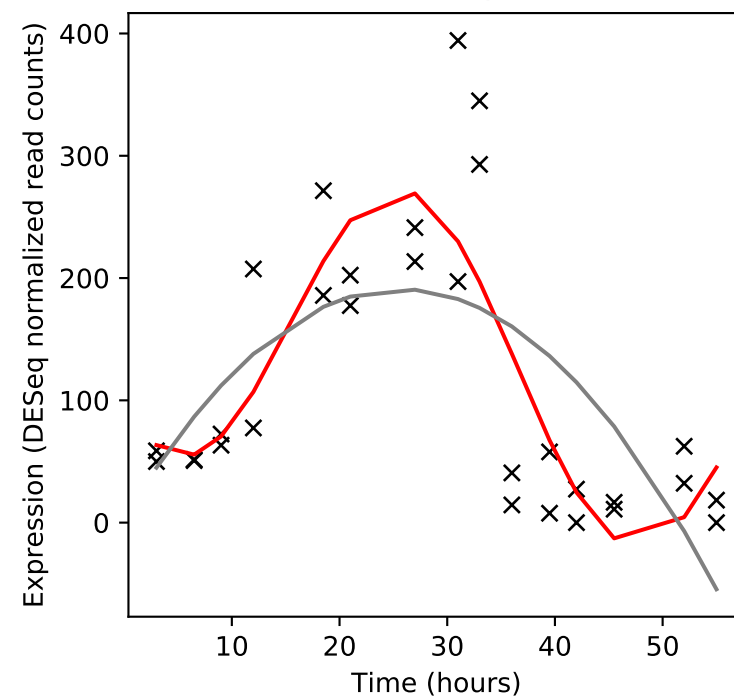

Rv1988/erm(37)

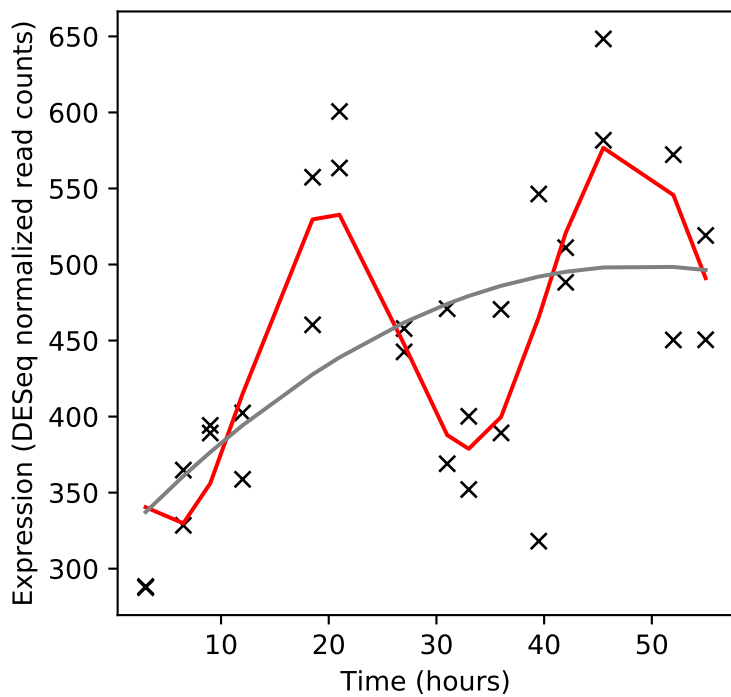

Rv1989c/-

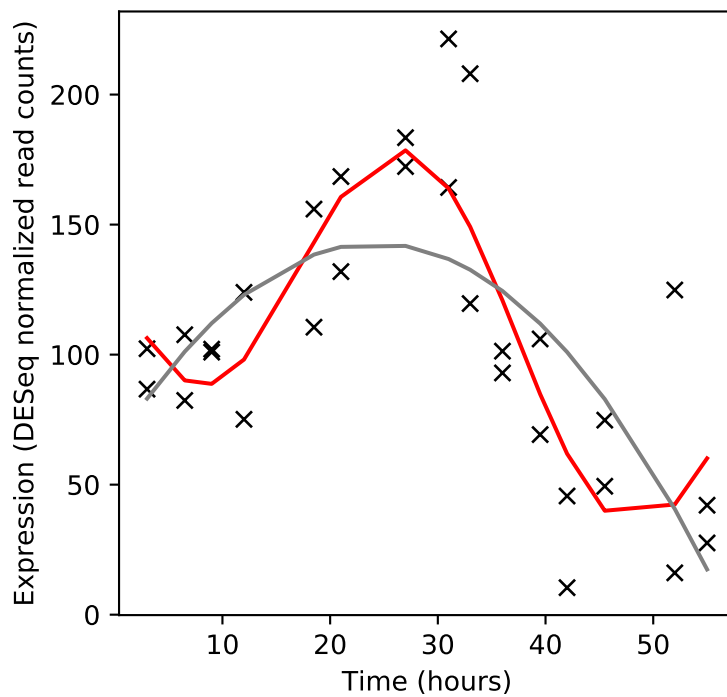

Rv1990c/-

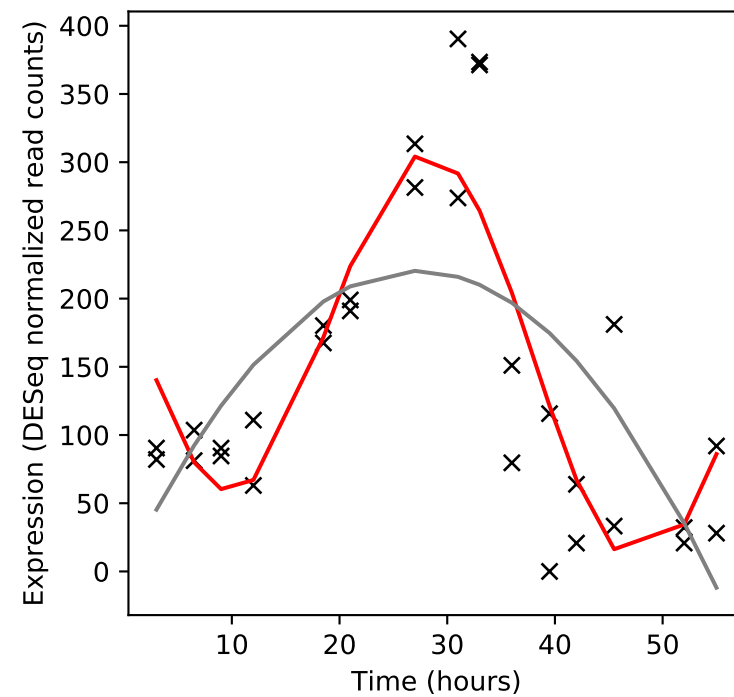

Rv1990A/-

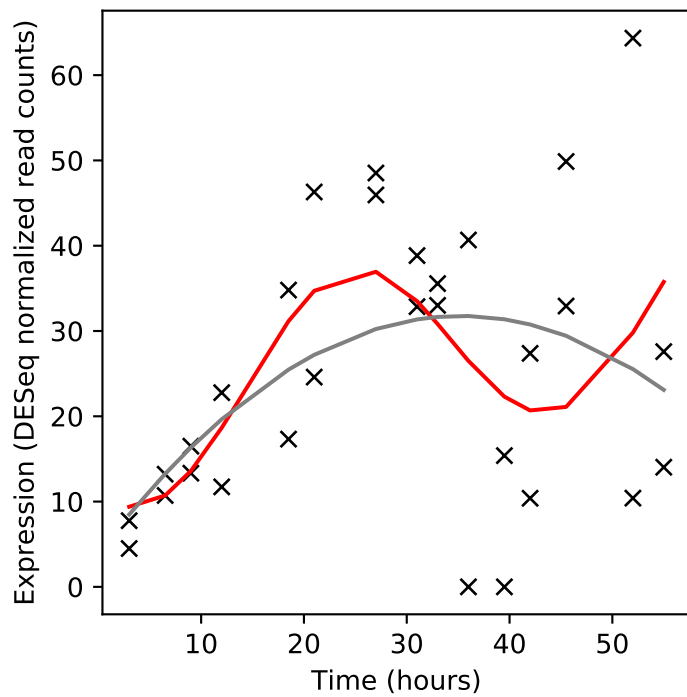

Rv1991c/mazF6

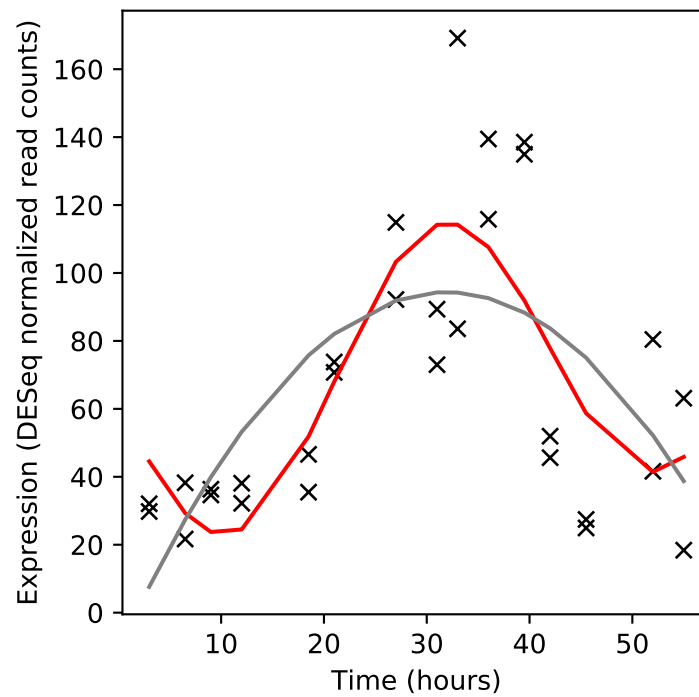

Rv1991A/mazE6

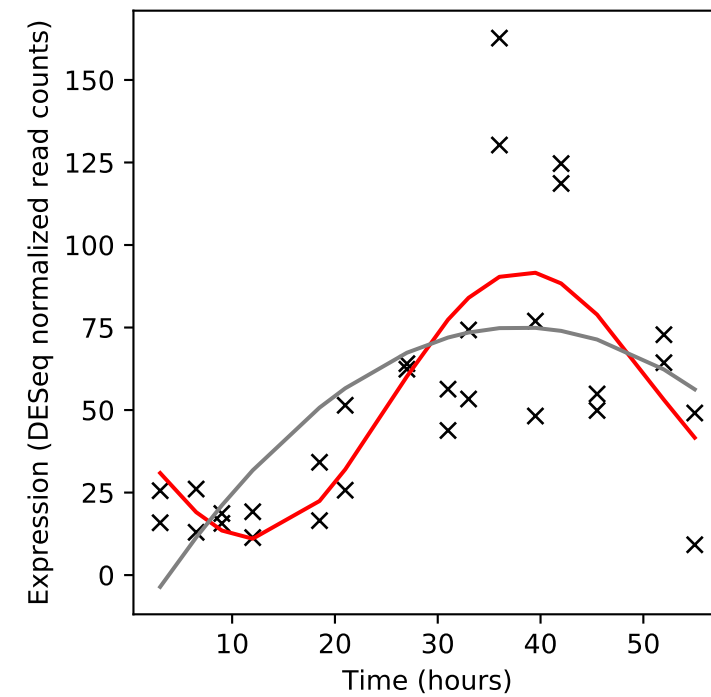

Rv1992c/ctpG

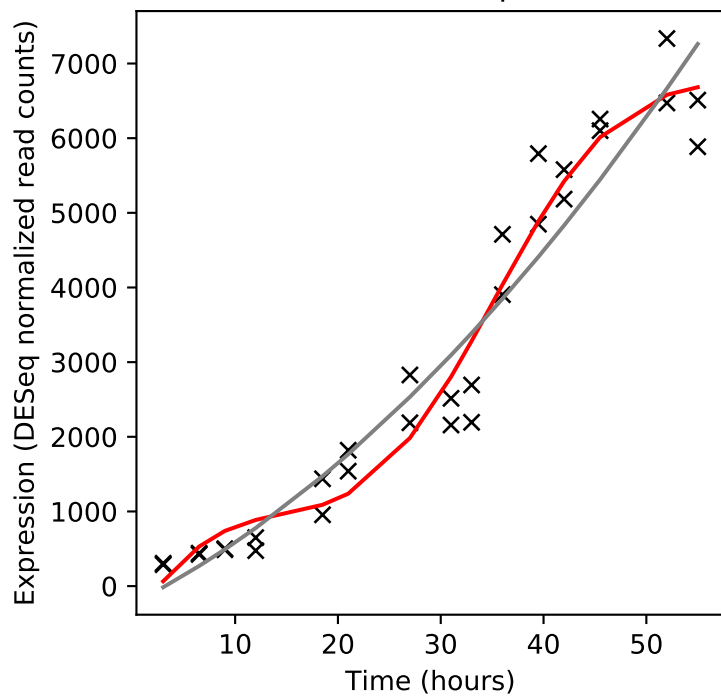

Rv1993c/-

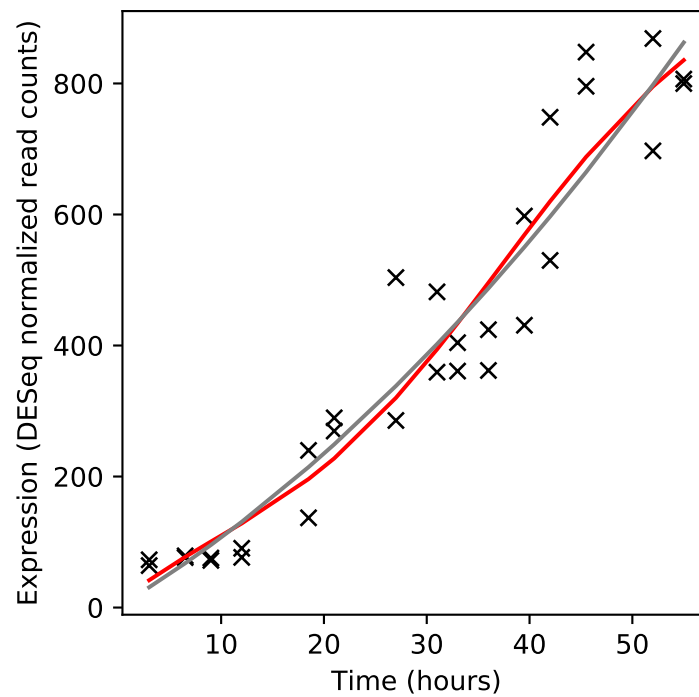

Rv1994c/cmtR

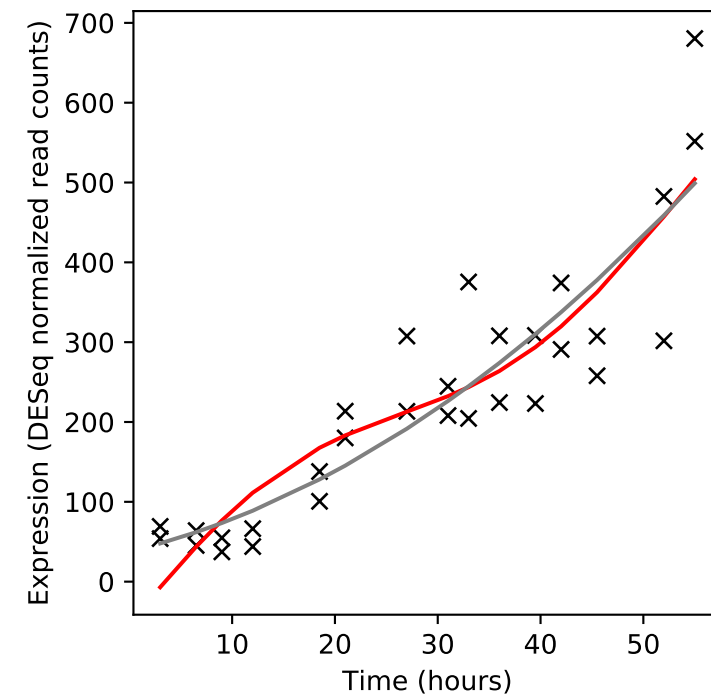

Rv1995/-

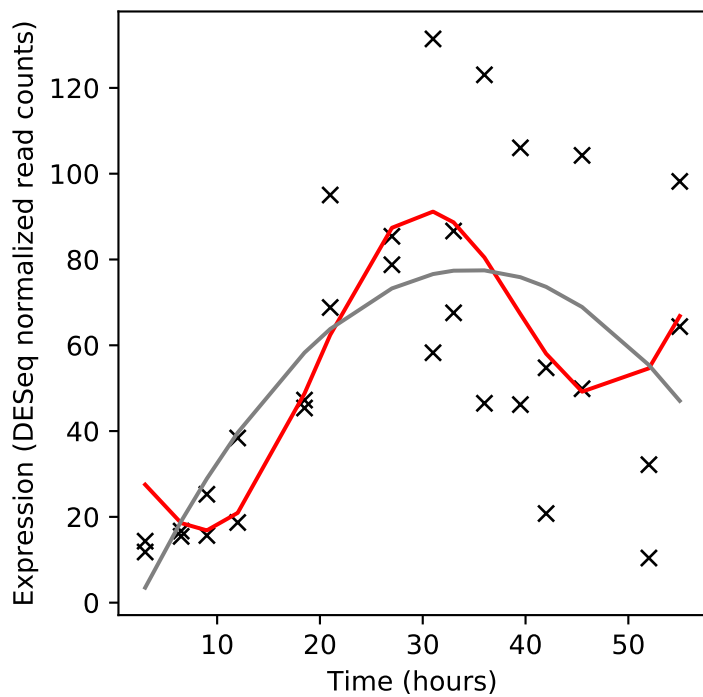

Rv1996/-

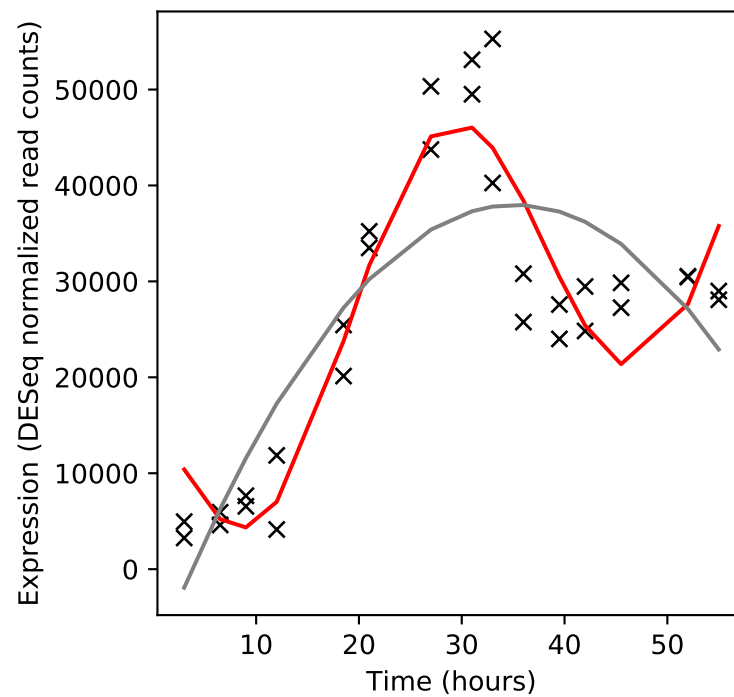

Rv1997/ctpF

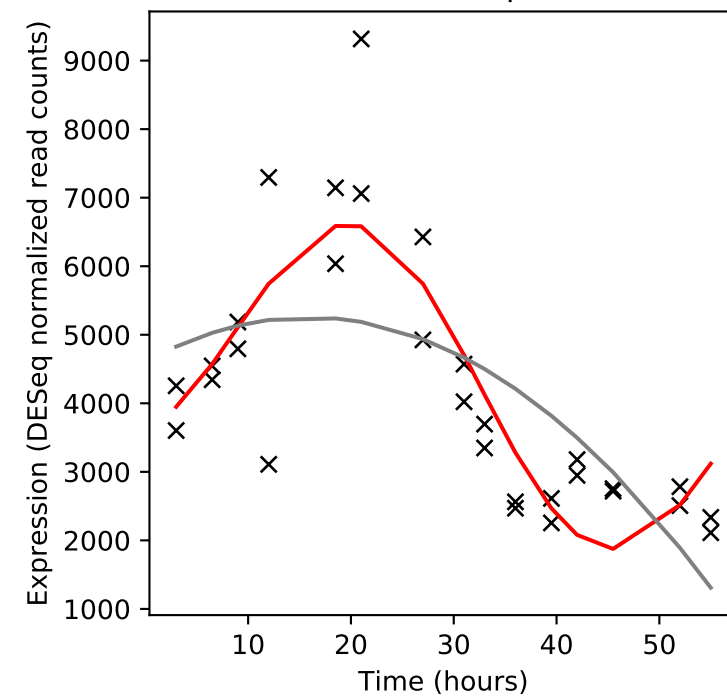

Rv1998c/-

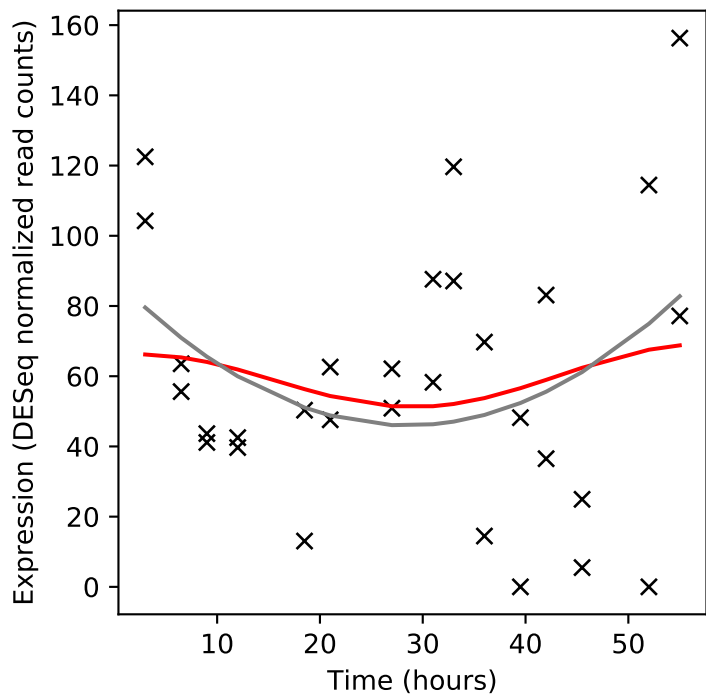

Rv1999c/-

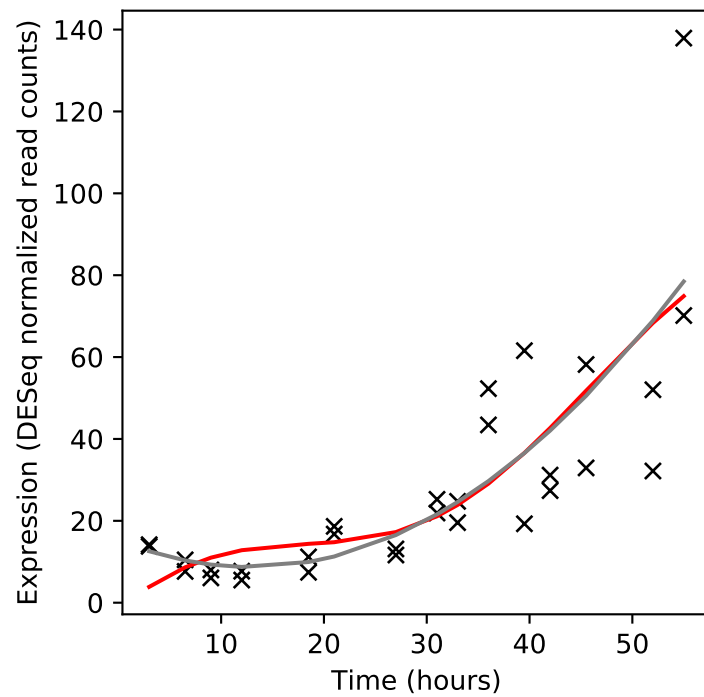

Rv2000/-

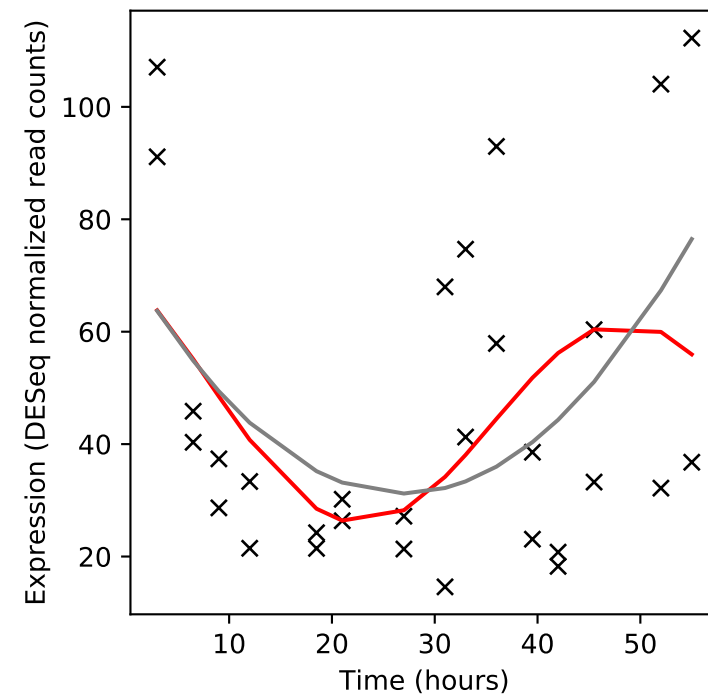

Rv2001/-

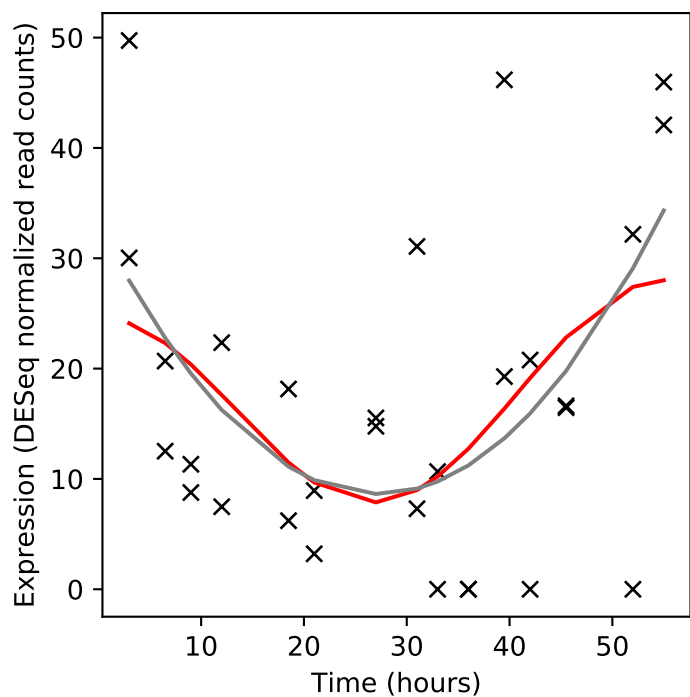

Rv2002/fabG3

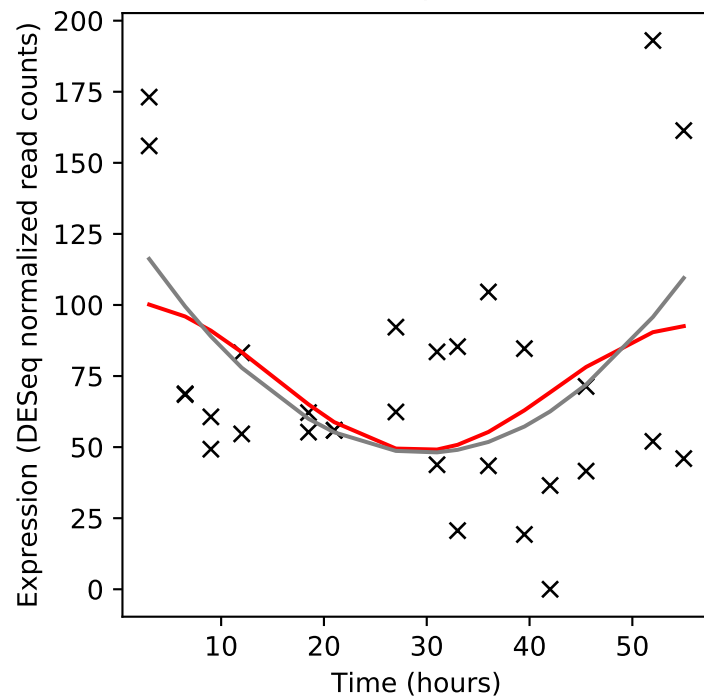

Rv2003c/-

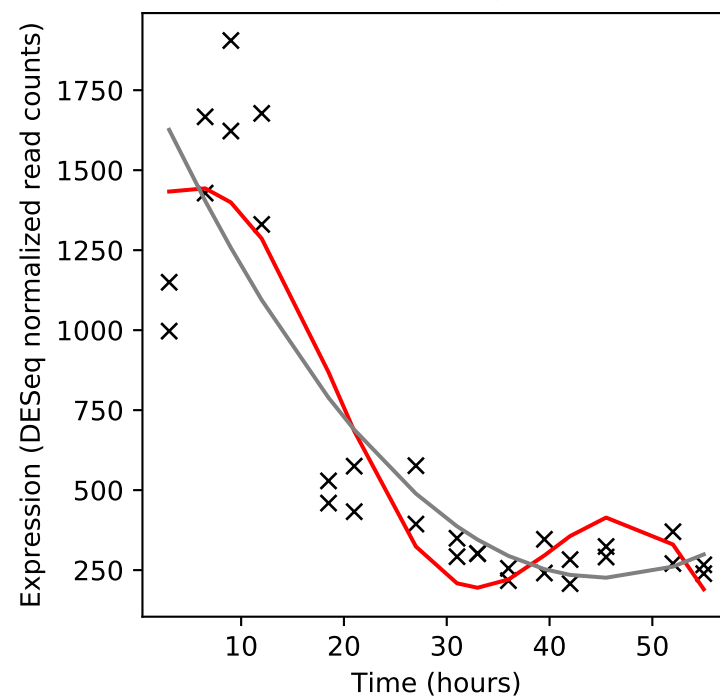

Rv2004c/-

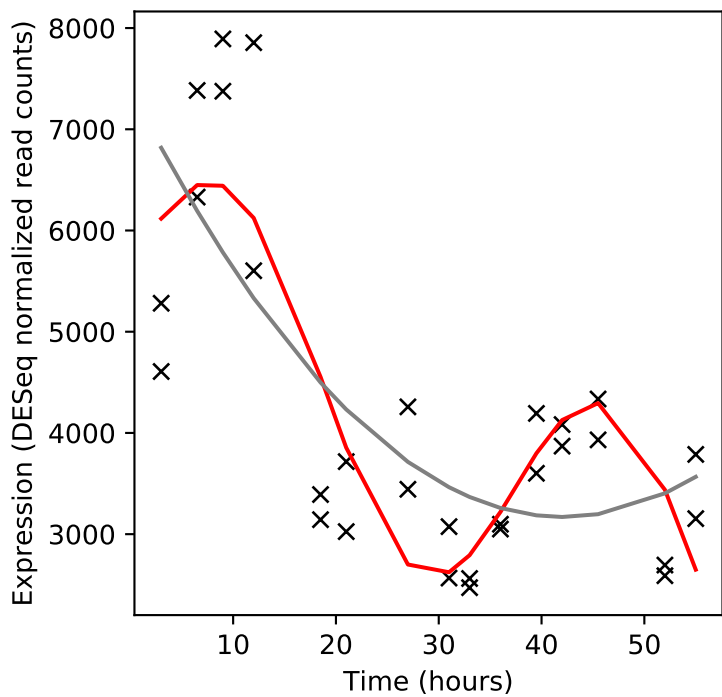

Rv2005c/-

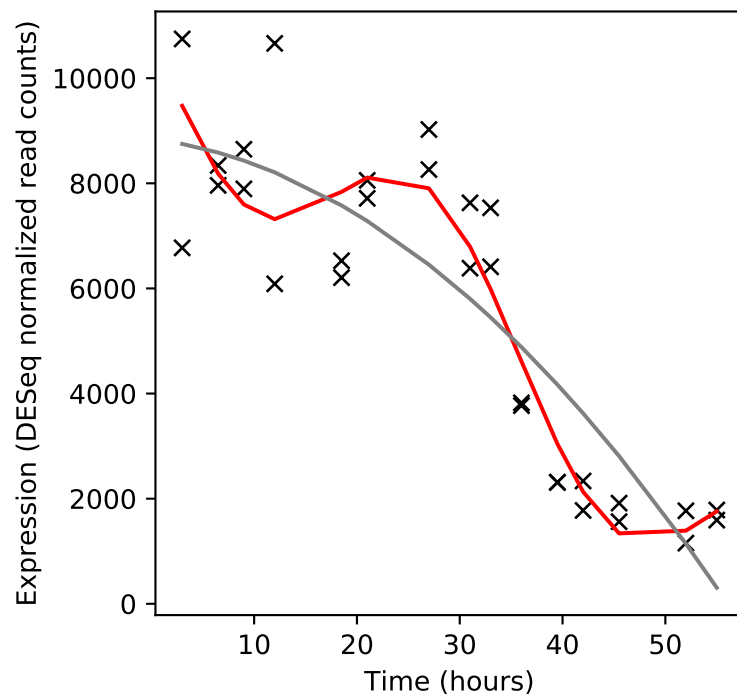

Rv2006/otsB1

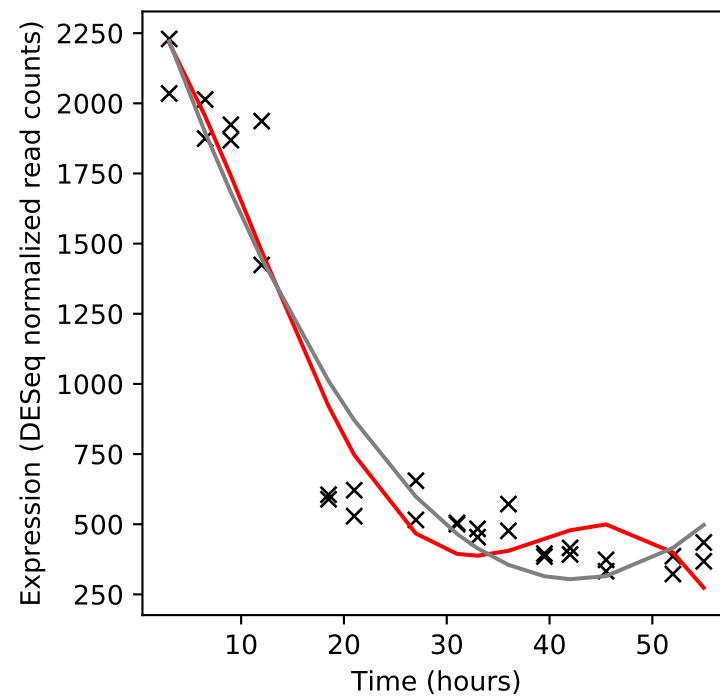

Rv2007c/fdxA

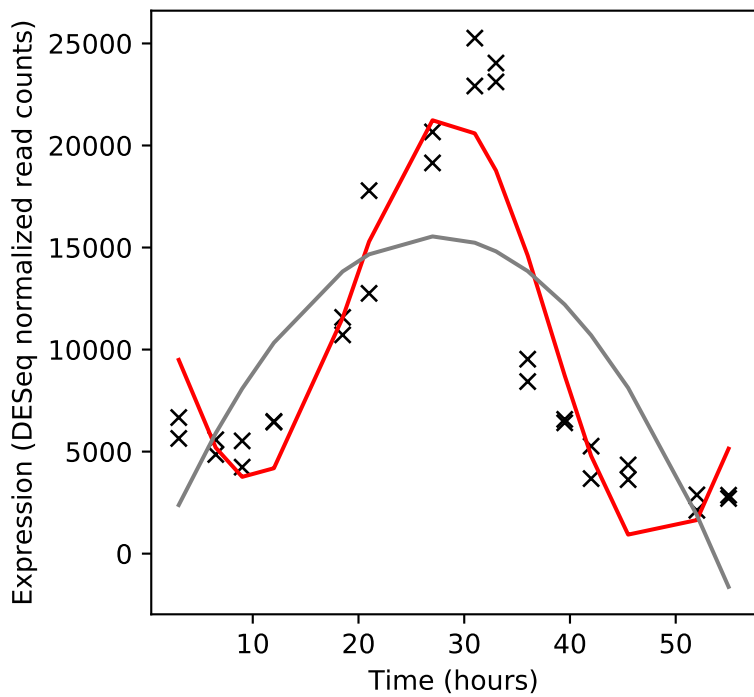

Rv2008c/-

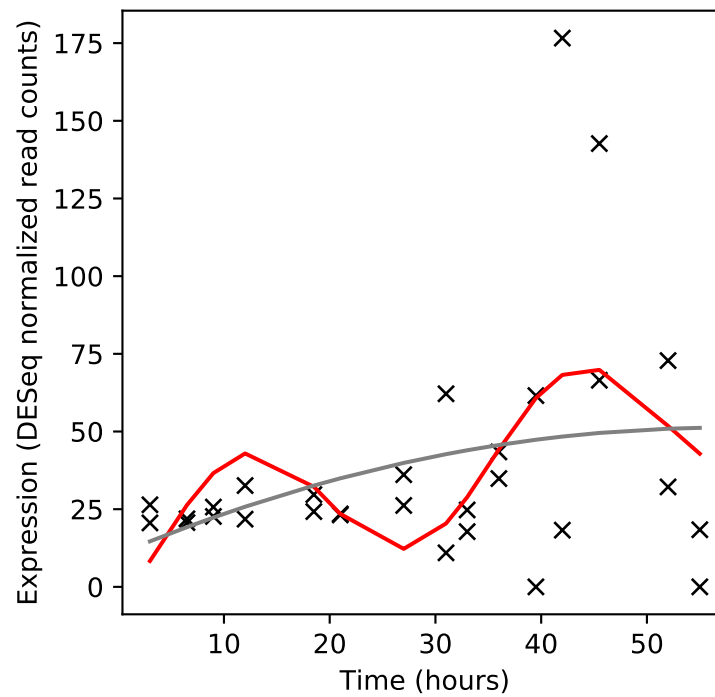

Rv2009/vapB15

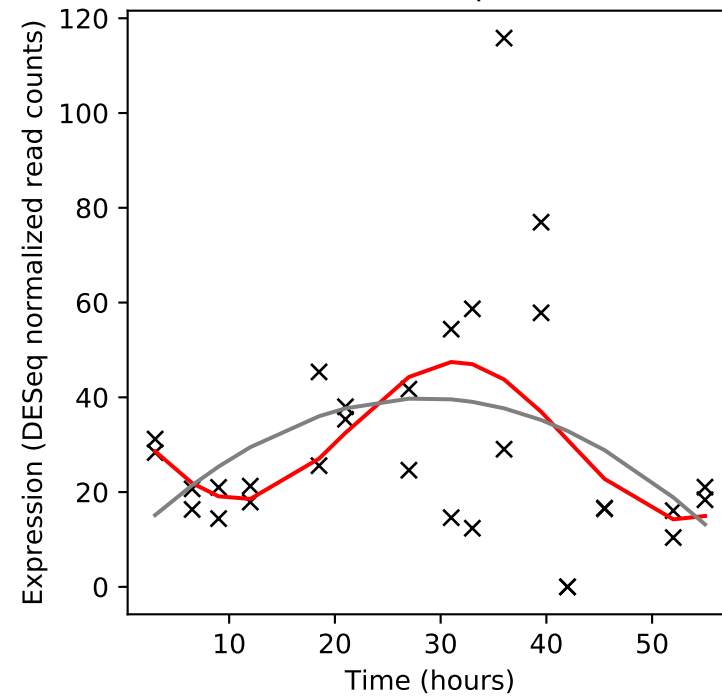

Rv2010/vapC15

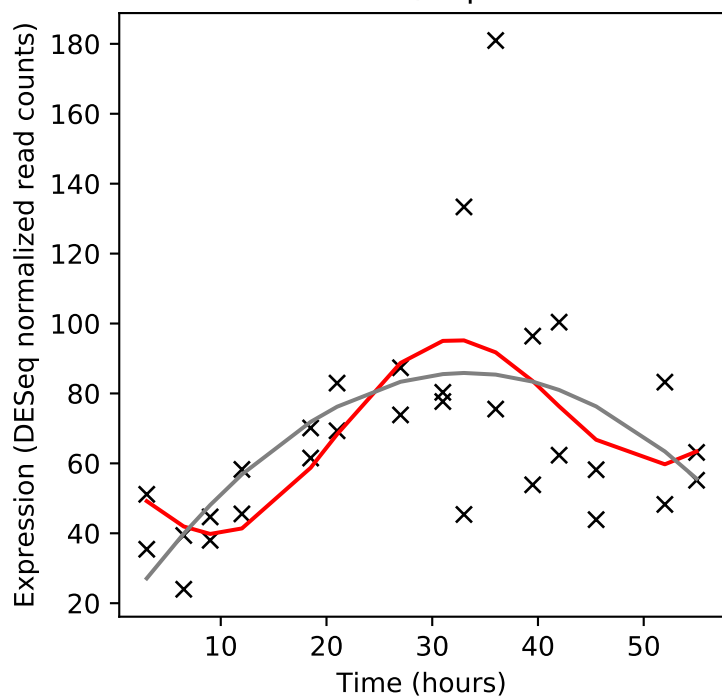

Rv2011c/-

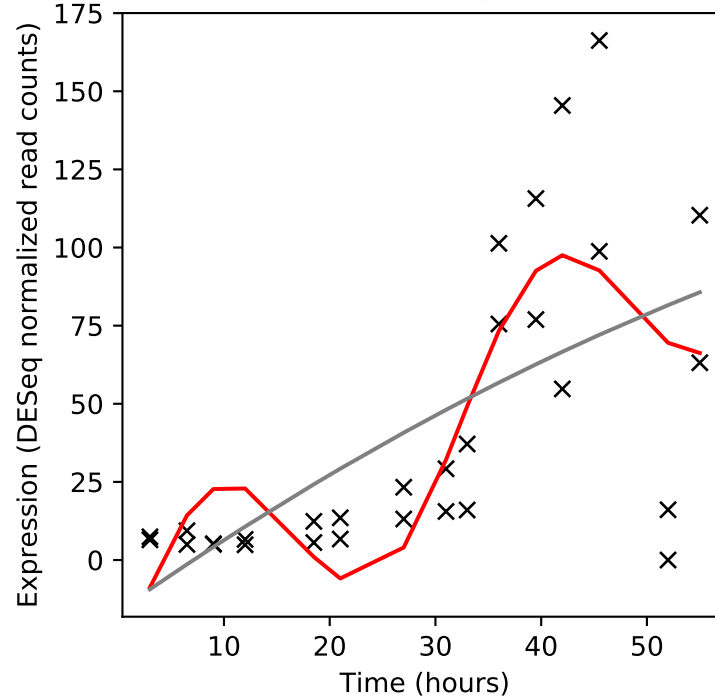

Rv2012/-

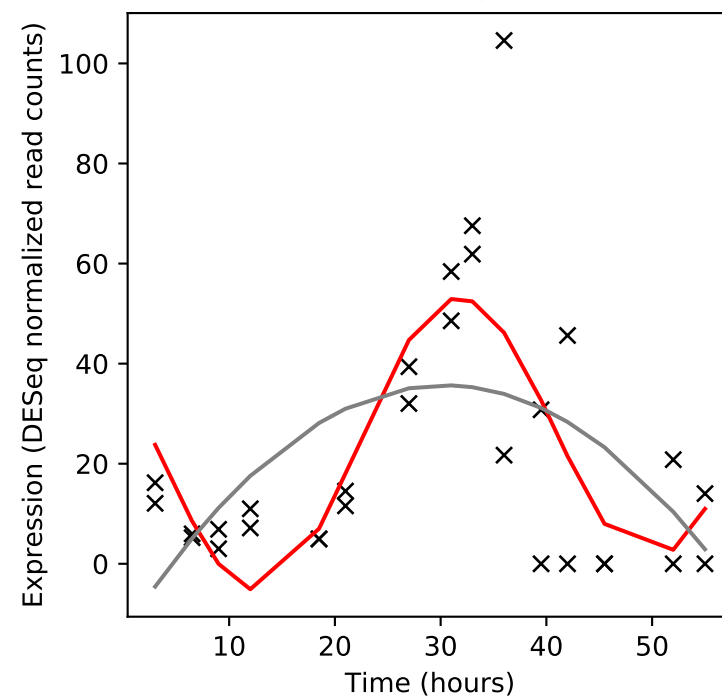

Rv2013/-

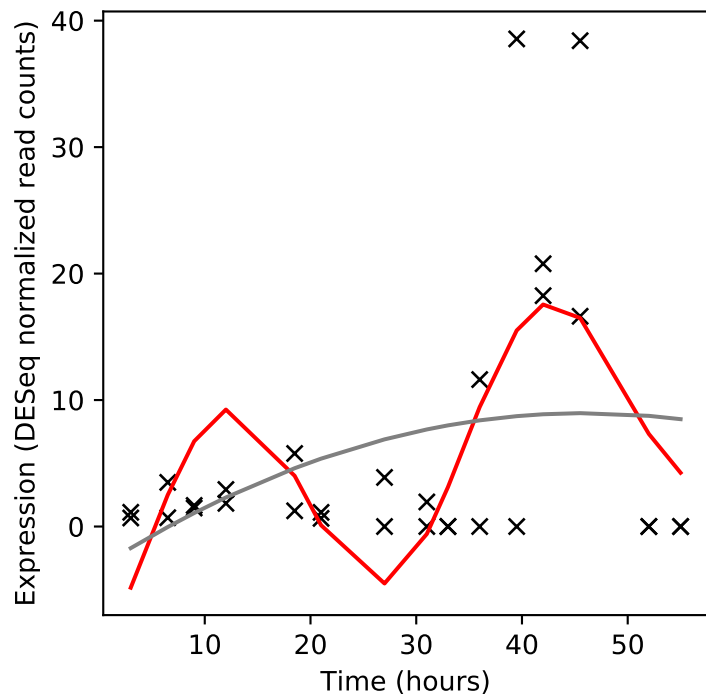

Rv2014/-

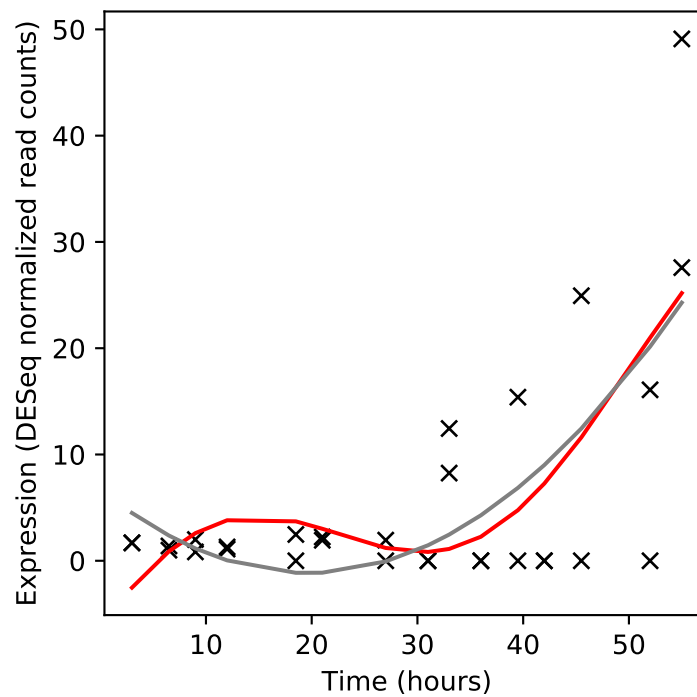

Rv2015c/-

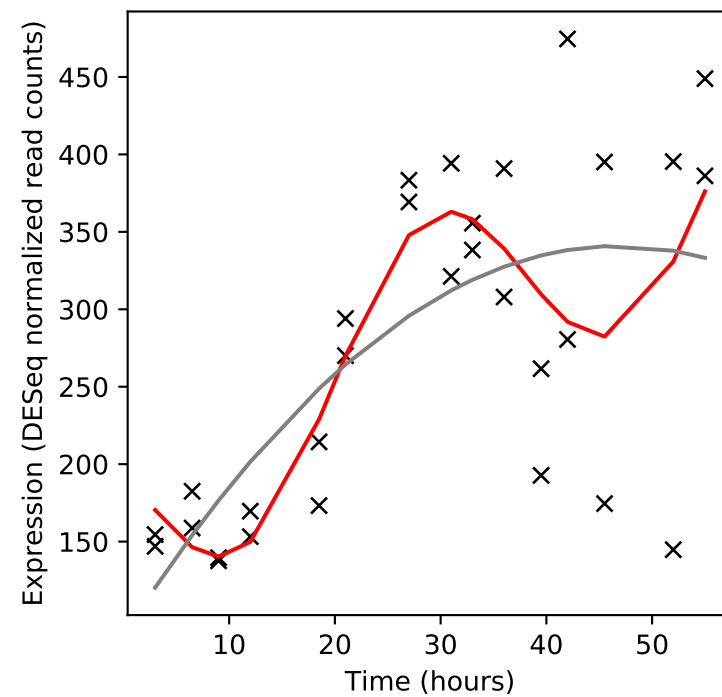

Rv2016/-

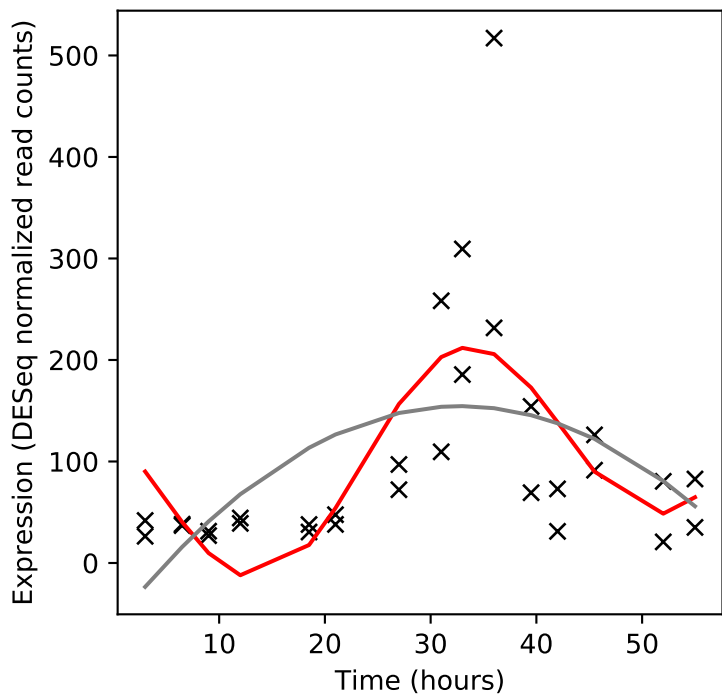

Rv2017/-

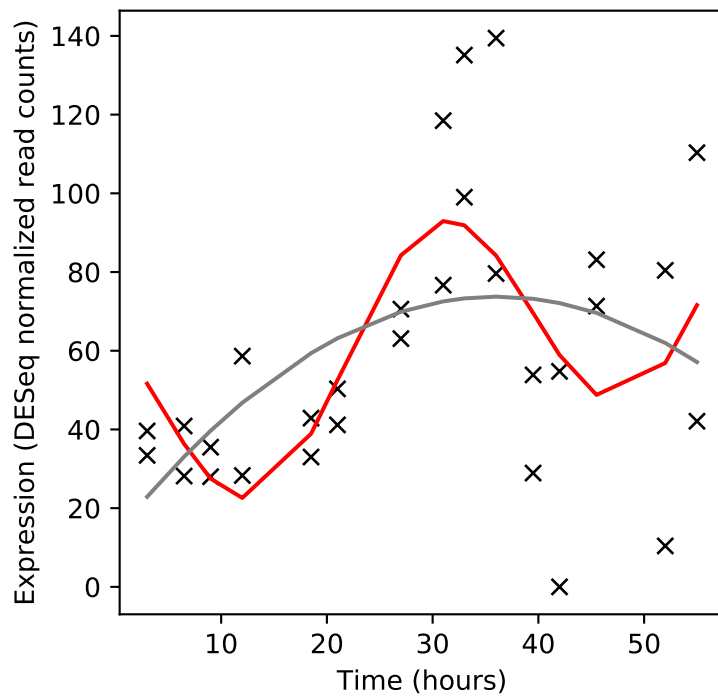

Rv2018/-

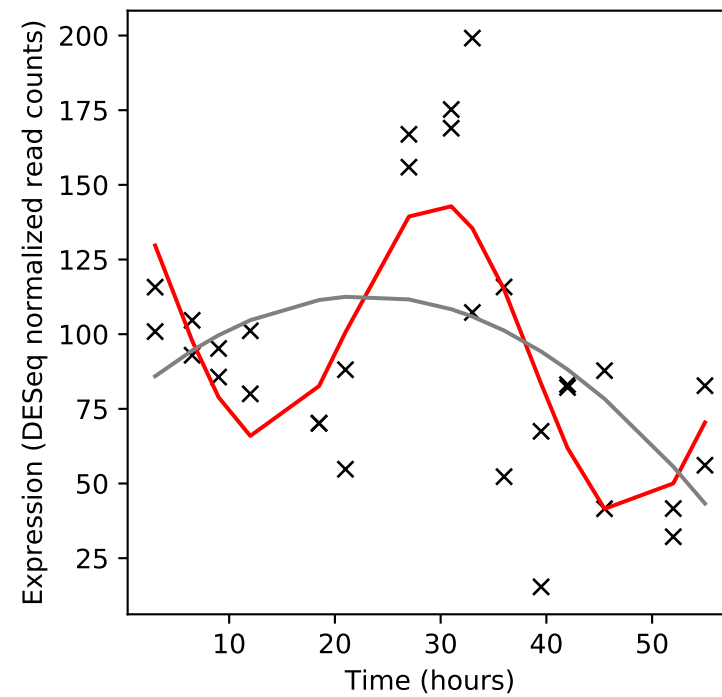

Rv2019/-

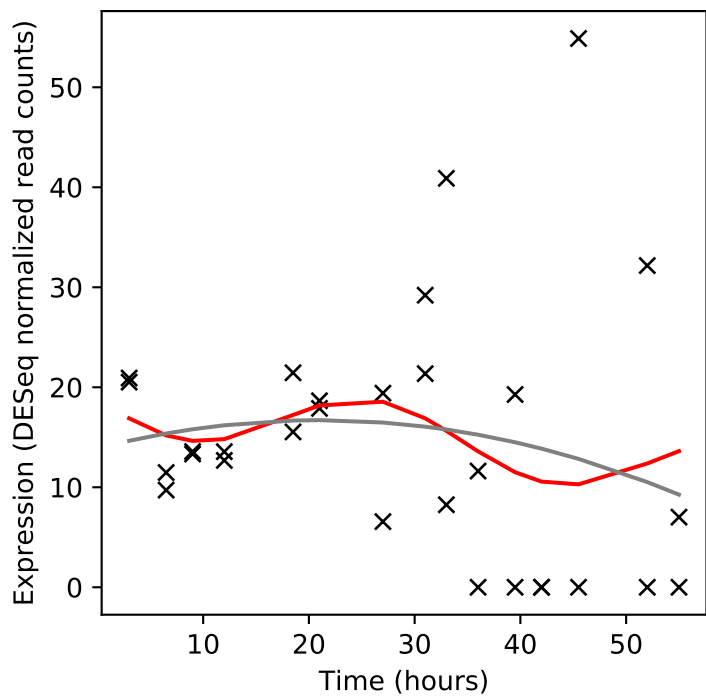

Rv2020c/-

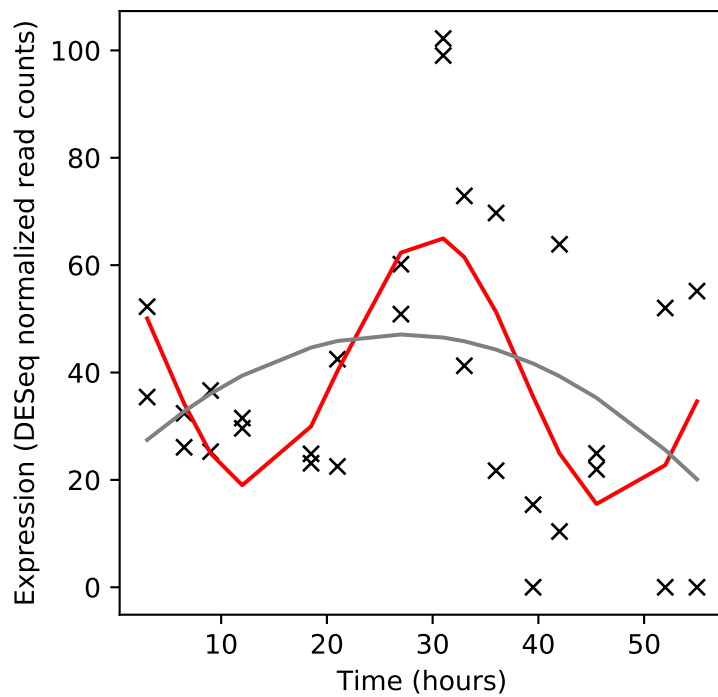

Rv2021c/-

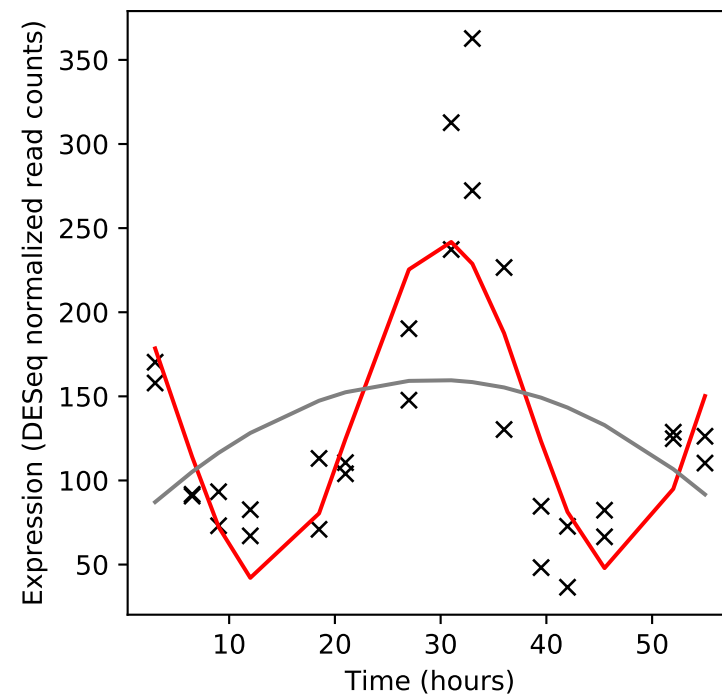

Rv2022c/-

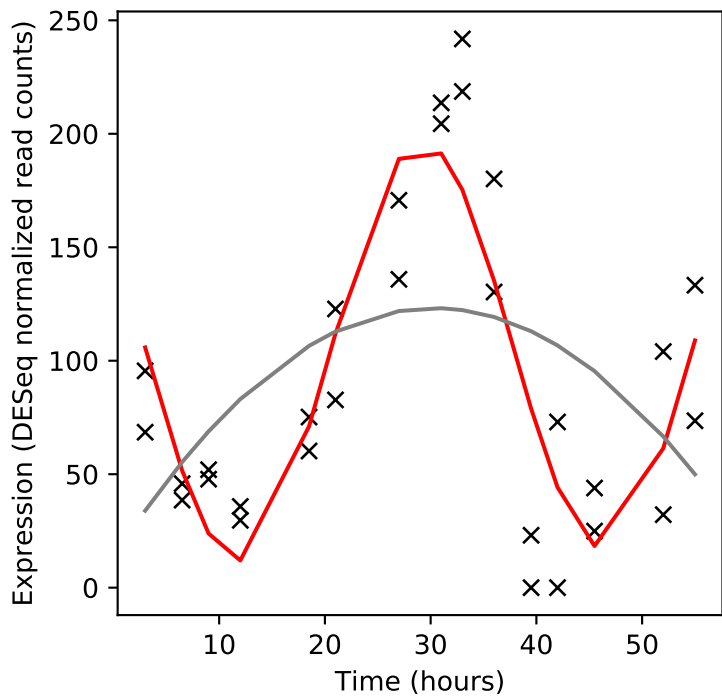

Rv2023c/-

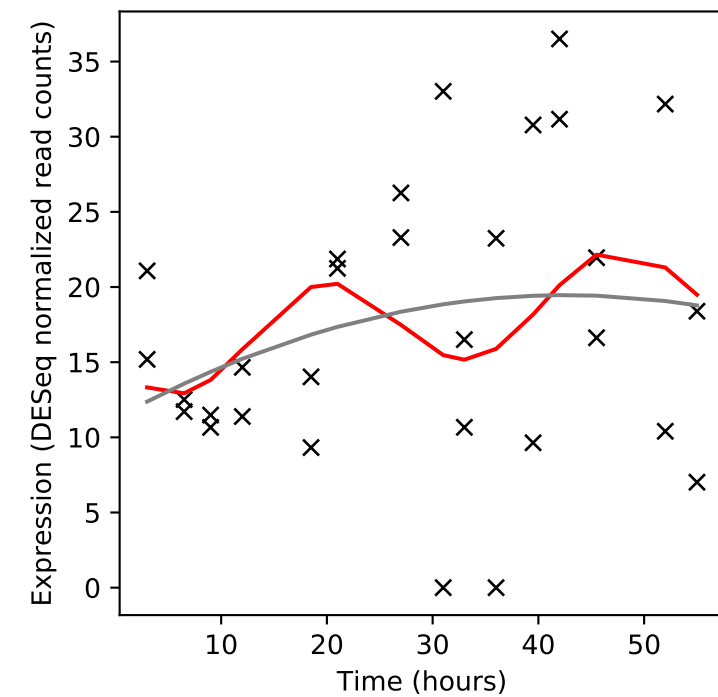

Rv2024c/-

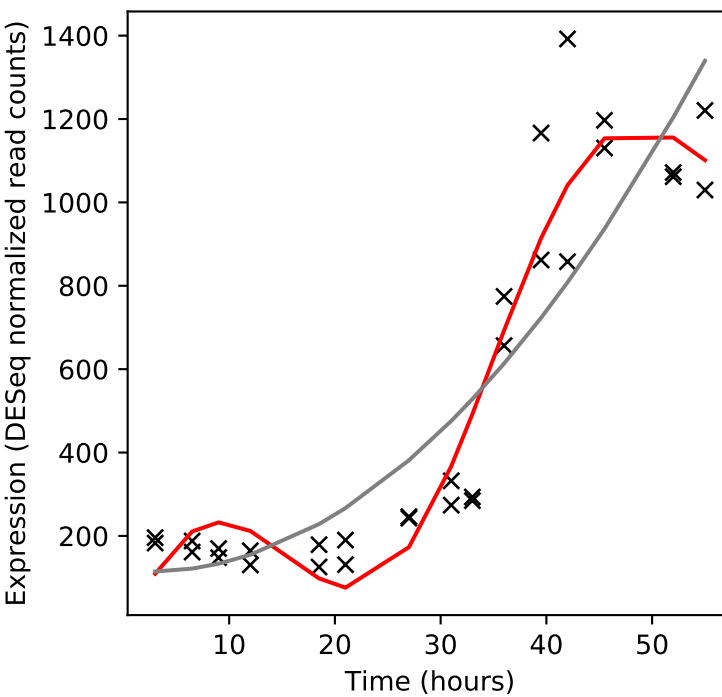

Rv2025c/-

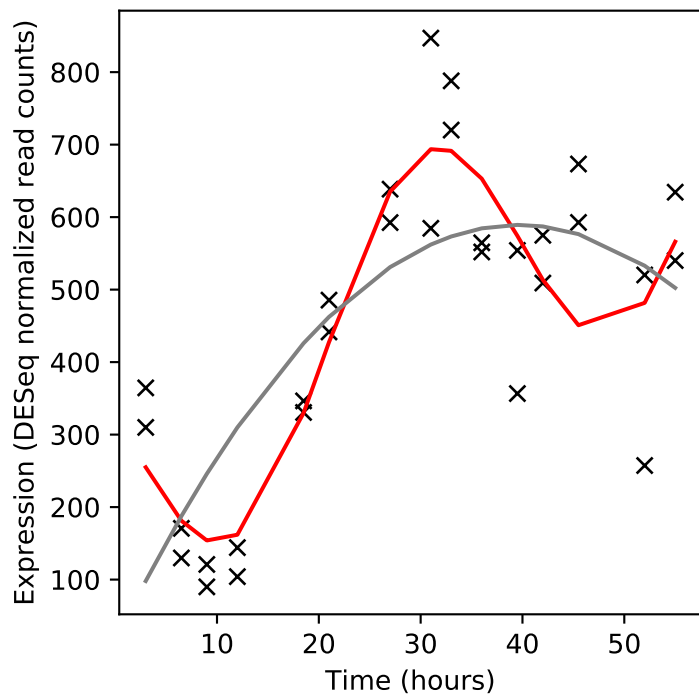

Rv2026c/-

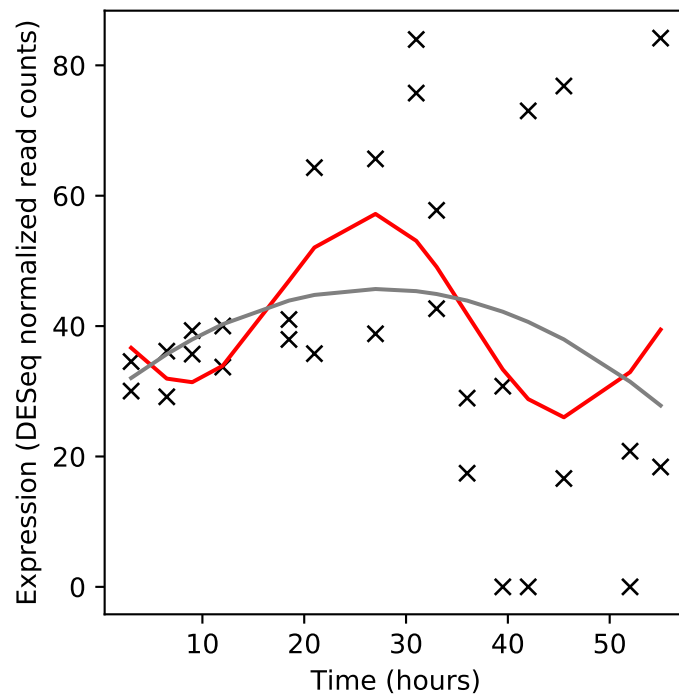

Rv2027c/dosT

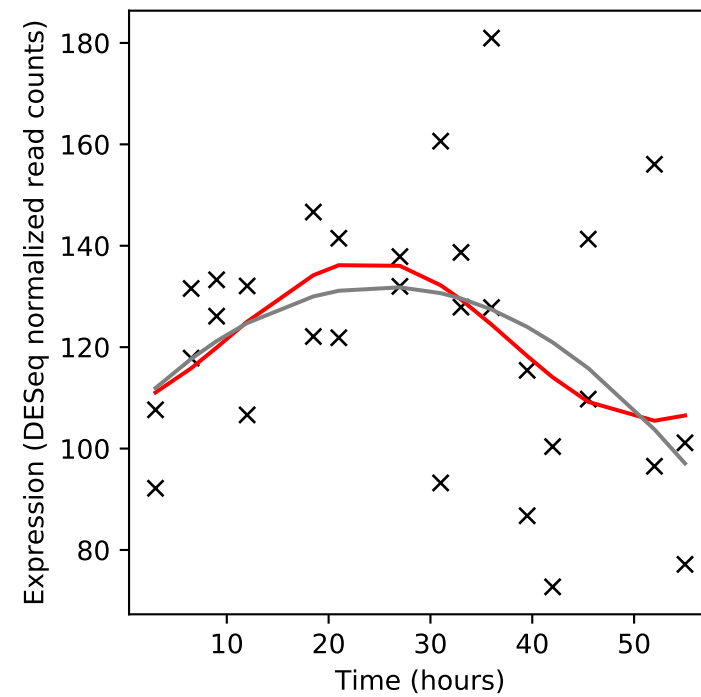

Rv2028c/-

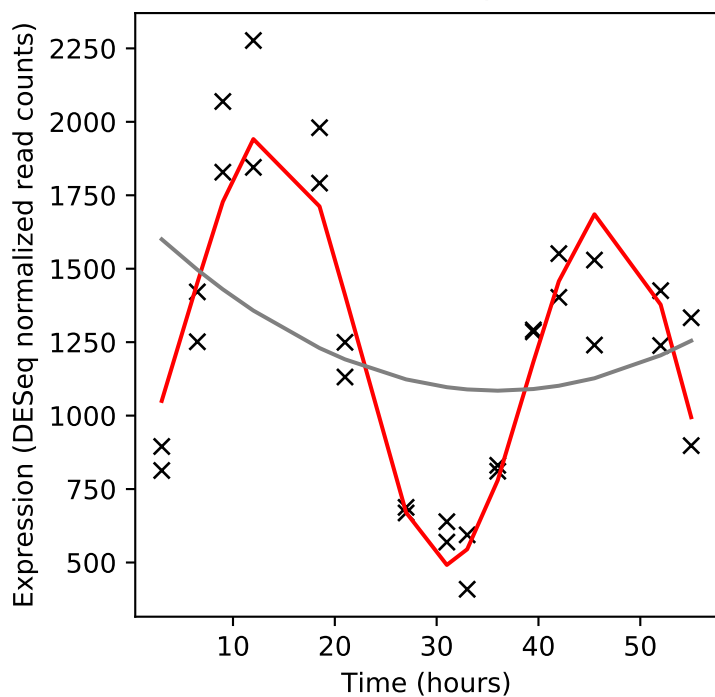

Rv2029c/pfkB

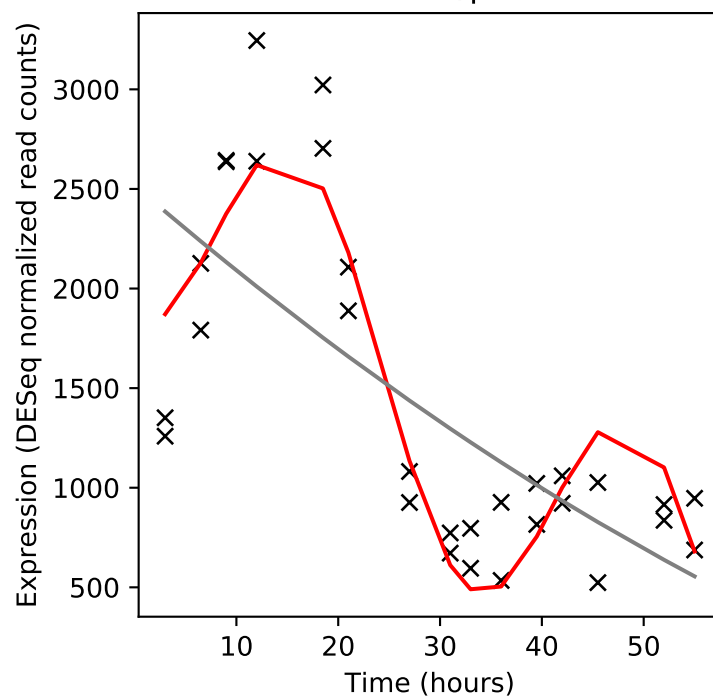

Rv2030c/-

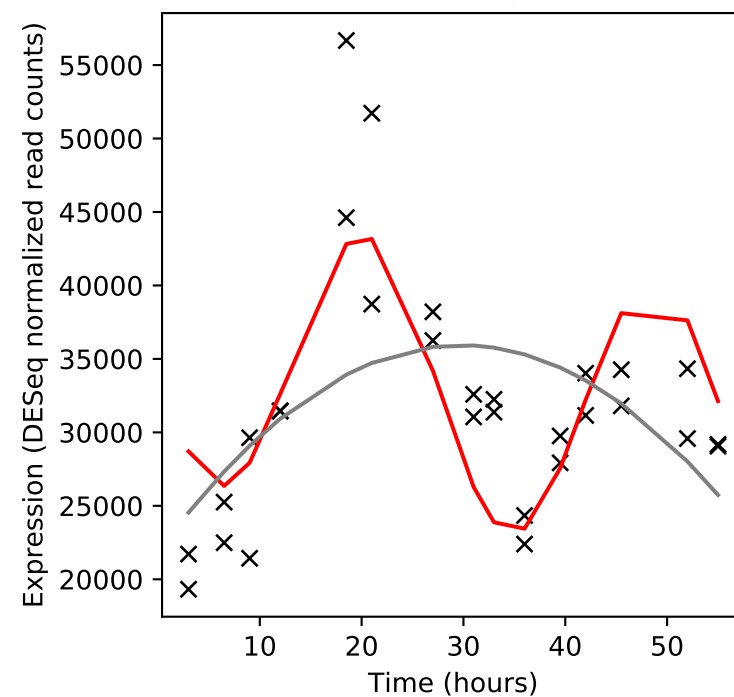

Rv2031c/hspX

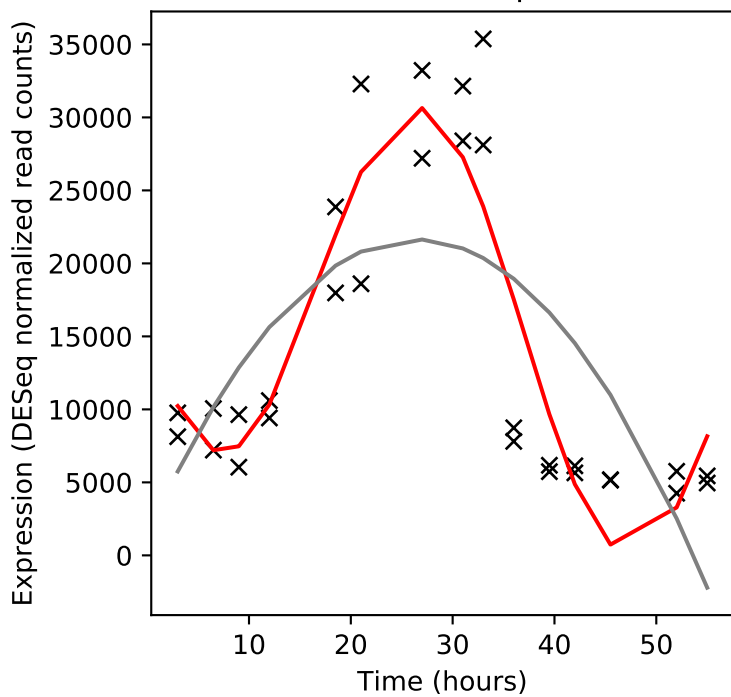

Rv2032/acg

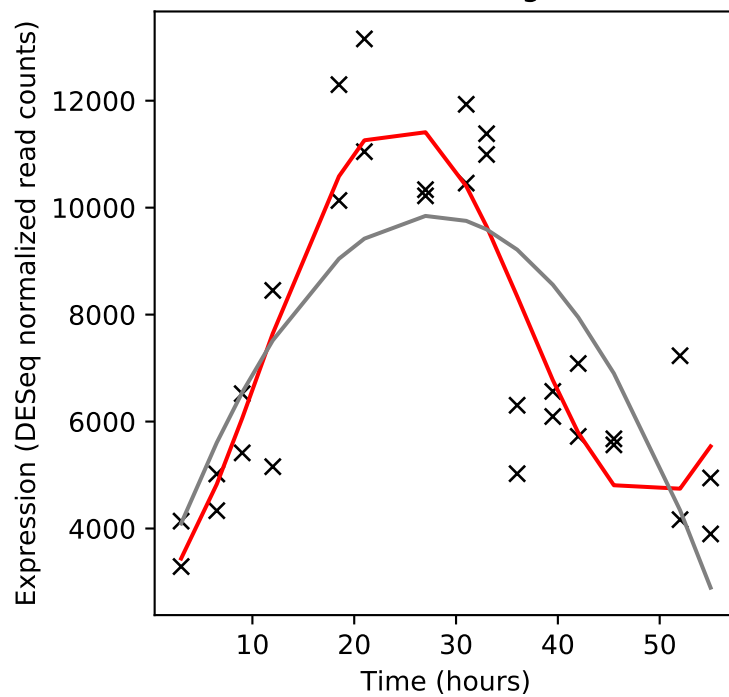

Rv2033c/-

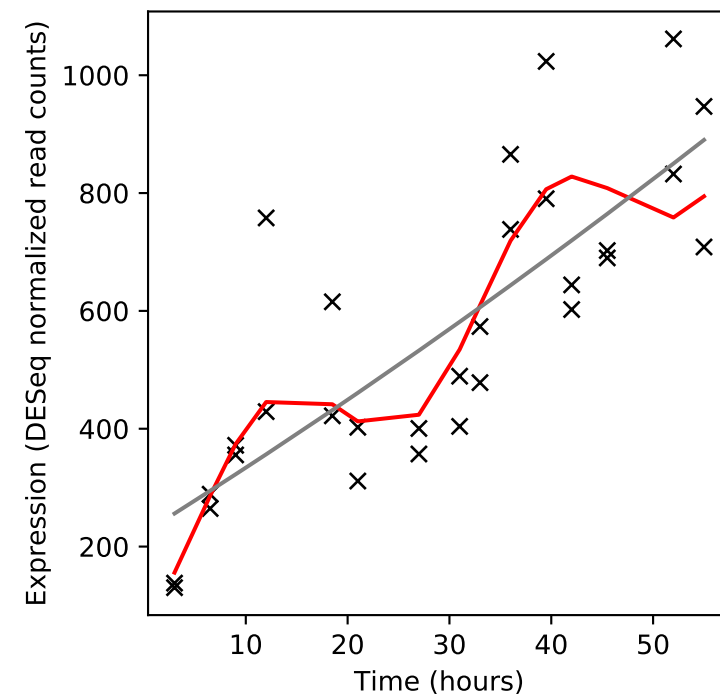

Rv2034/-

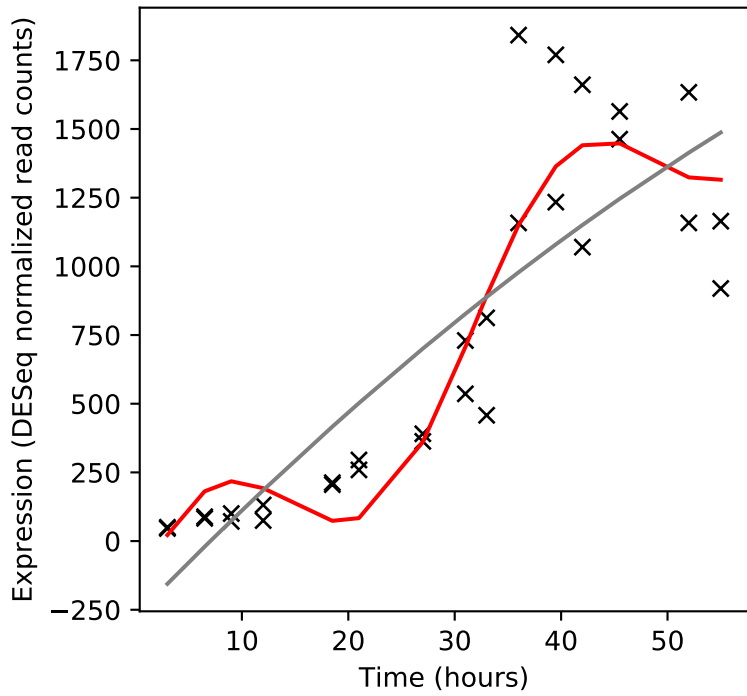

Rv2035/-

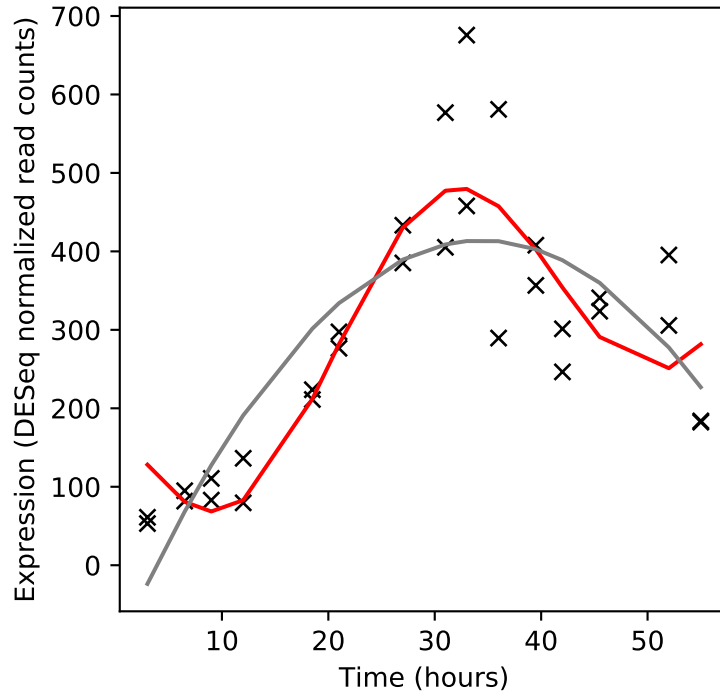

Rv2036/-

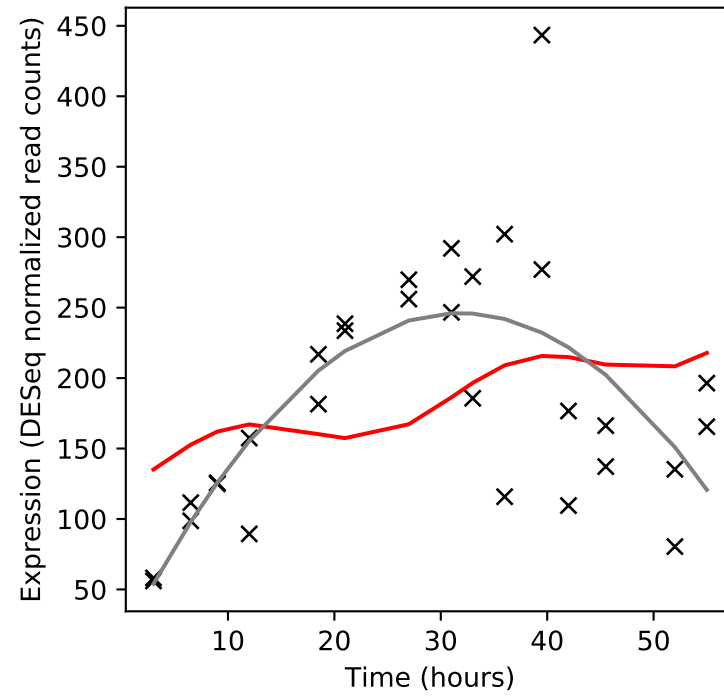

Rv2037c/-

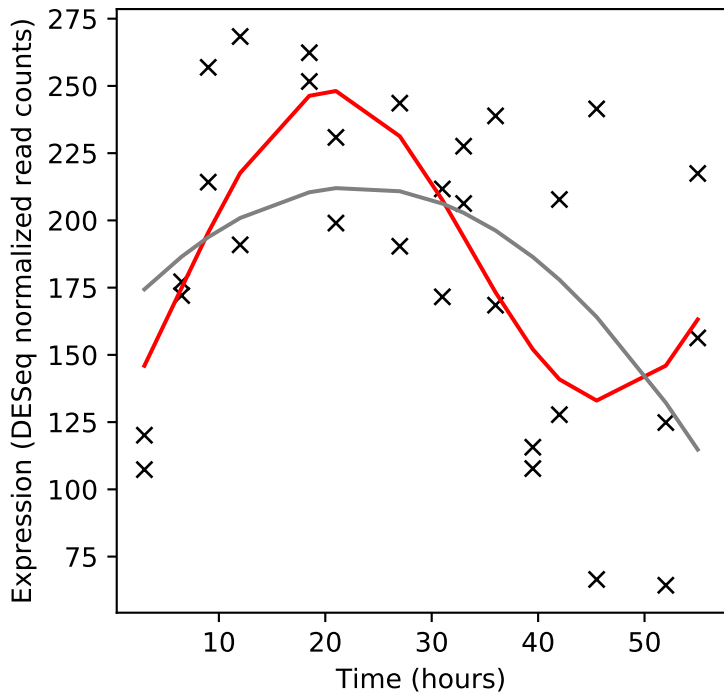

Rv2038c/-

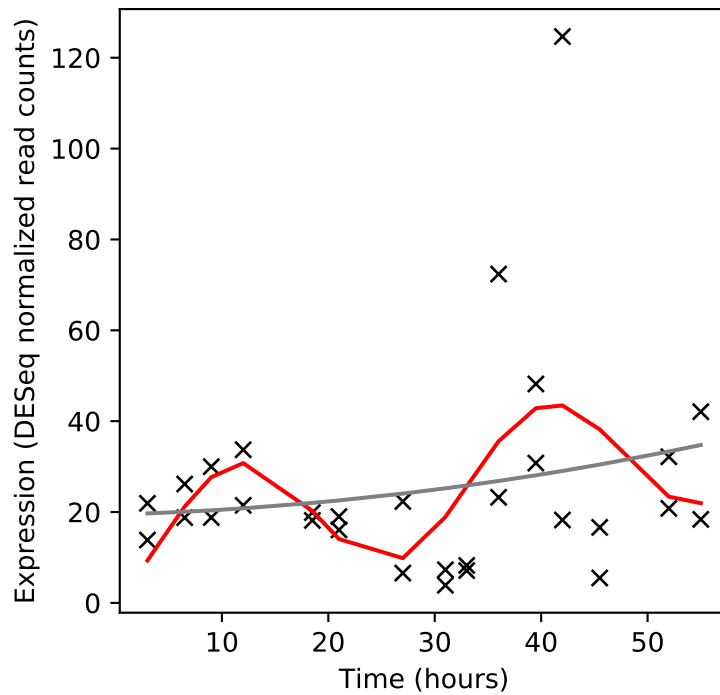

Rv2039c/-

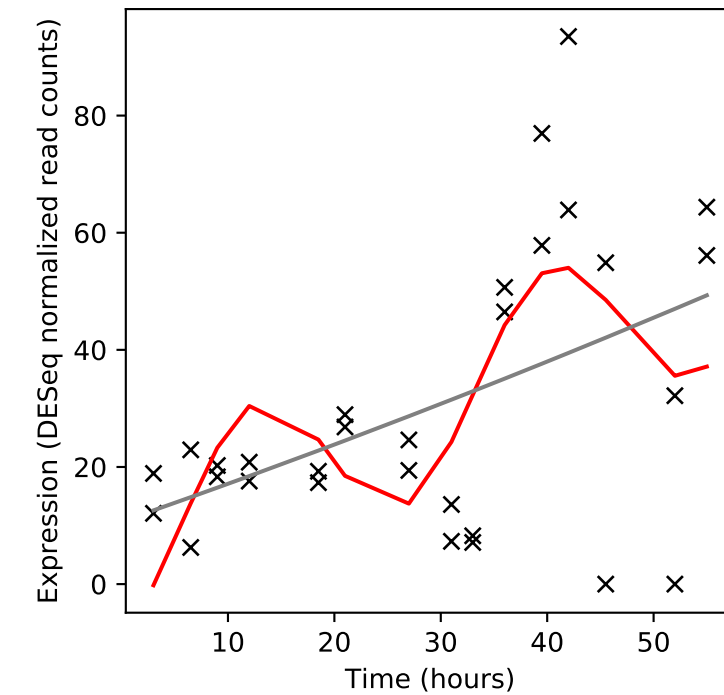

Rv2040c/-

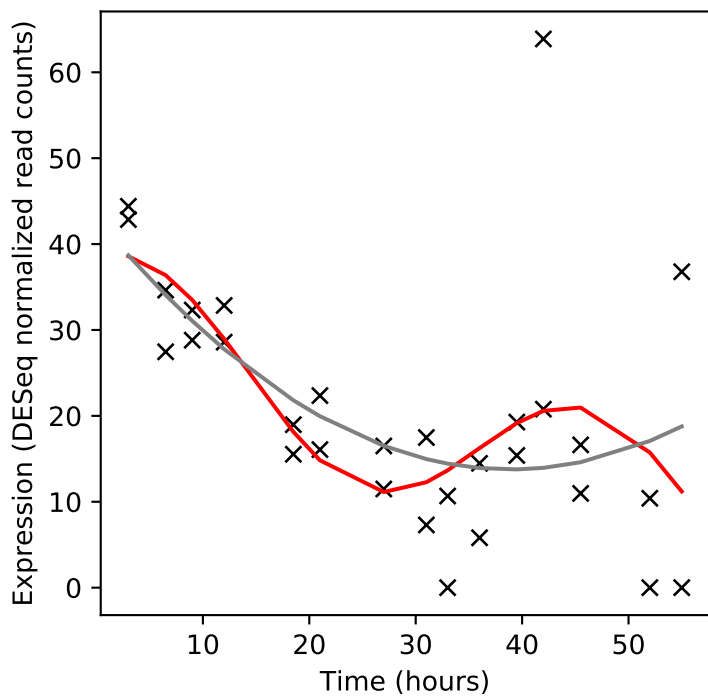

Rv2041c/-

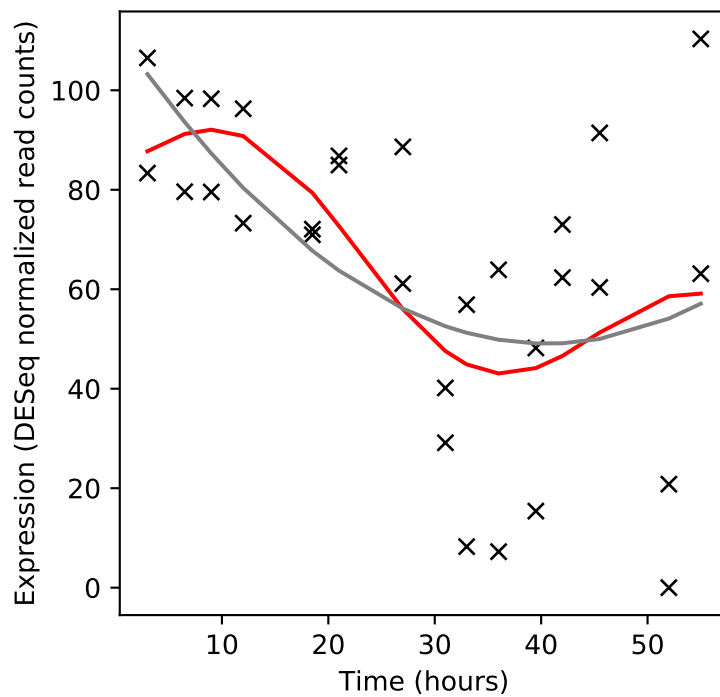

Rv2042c/-

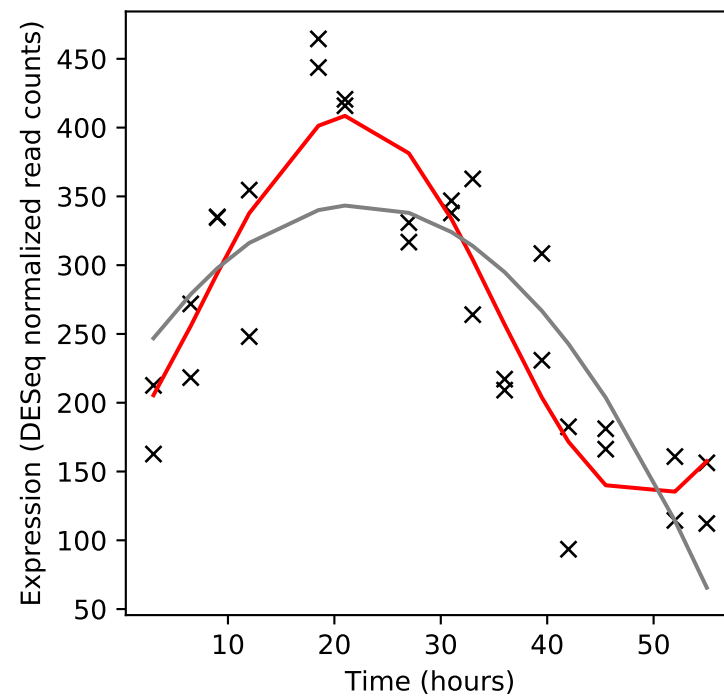



Rv2043c/pncA

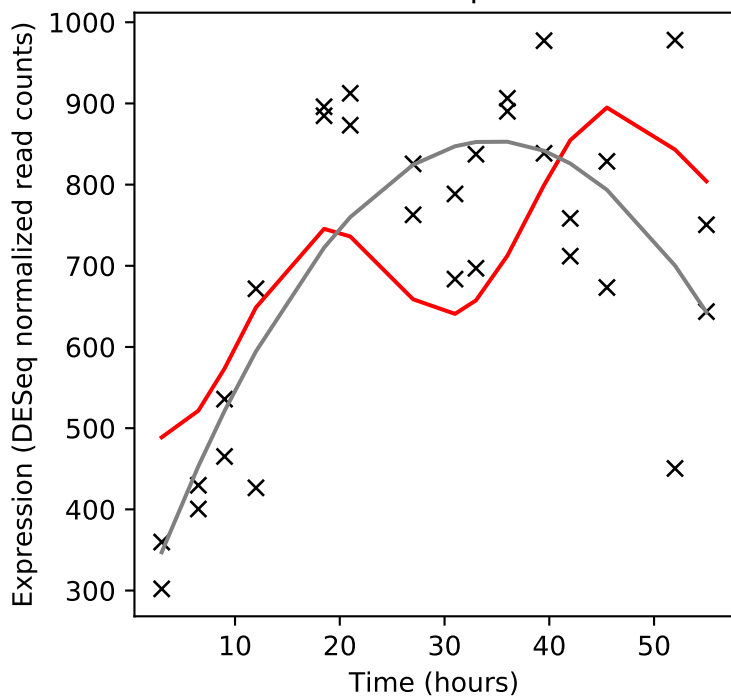

Rv2044c/-

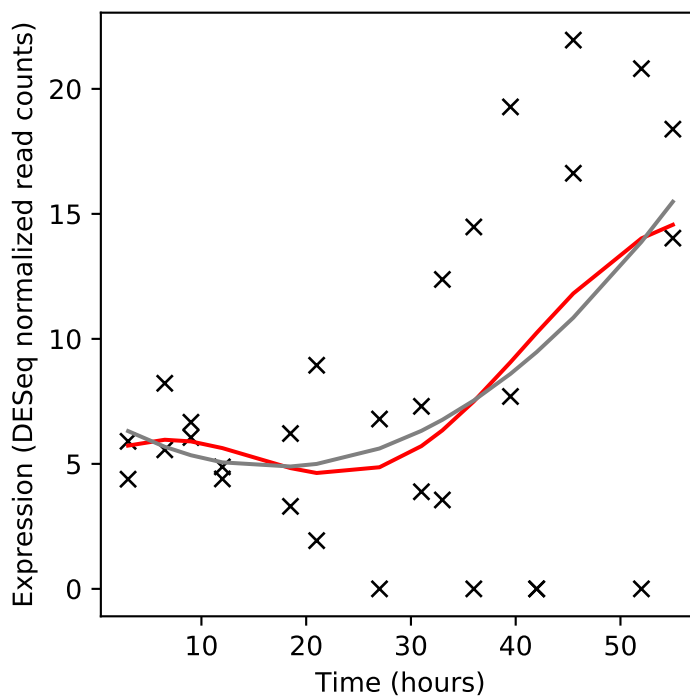

Rv2045c/lipT

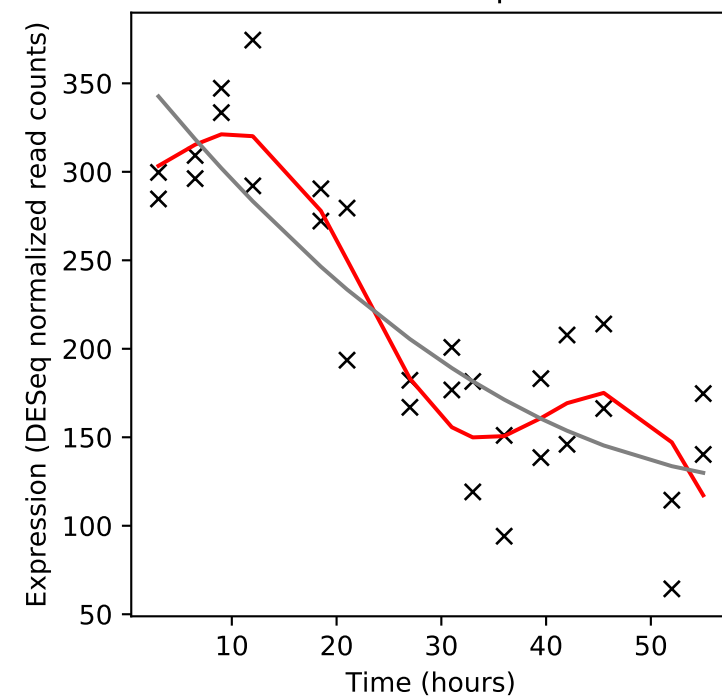

Rv2046/lppl

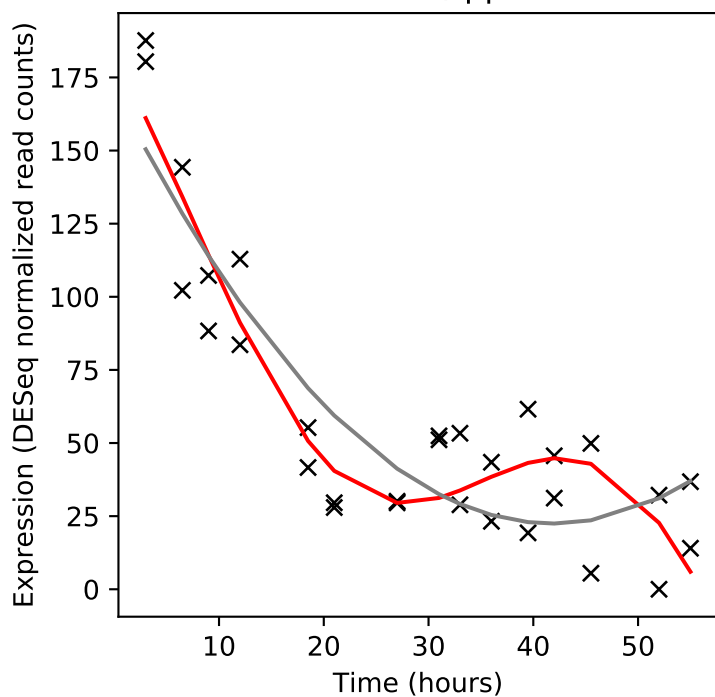

Rv2047c/-

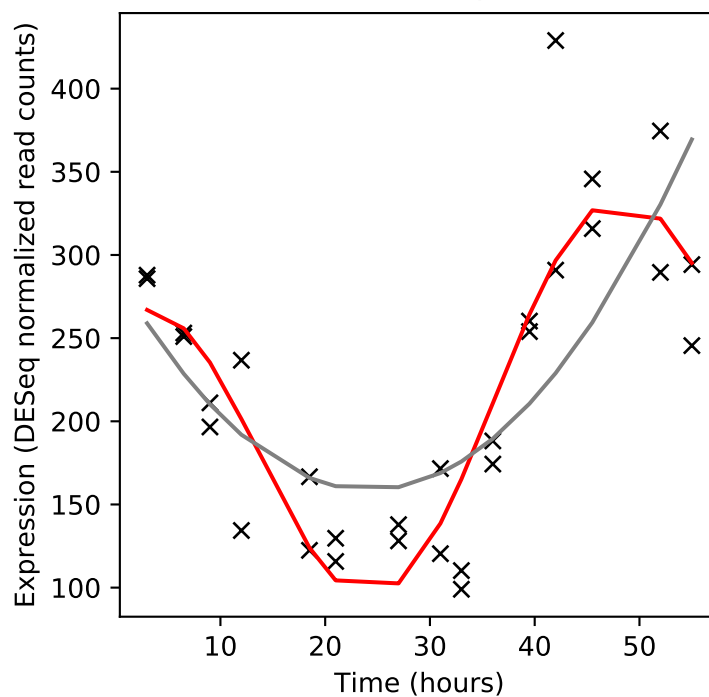

Rv2048c/pks12

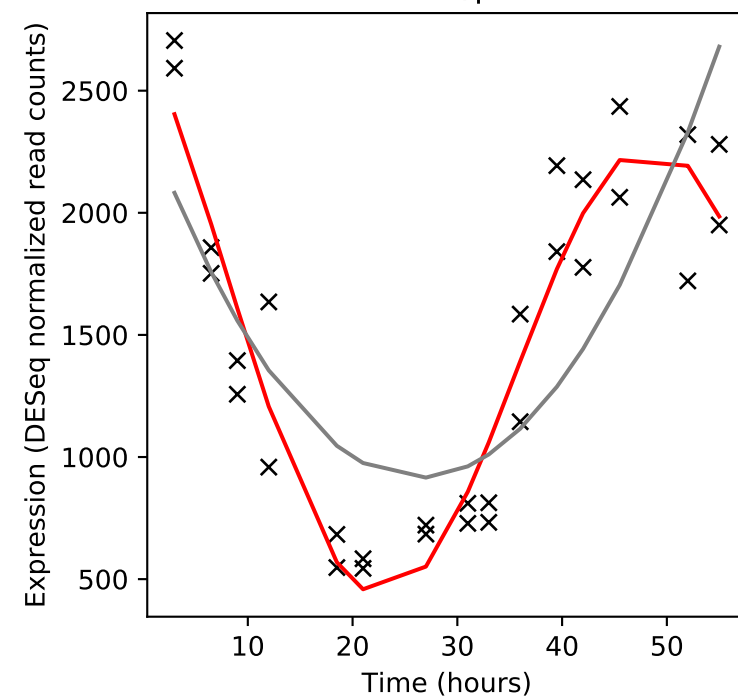

Rv2049c/-

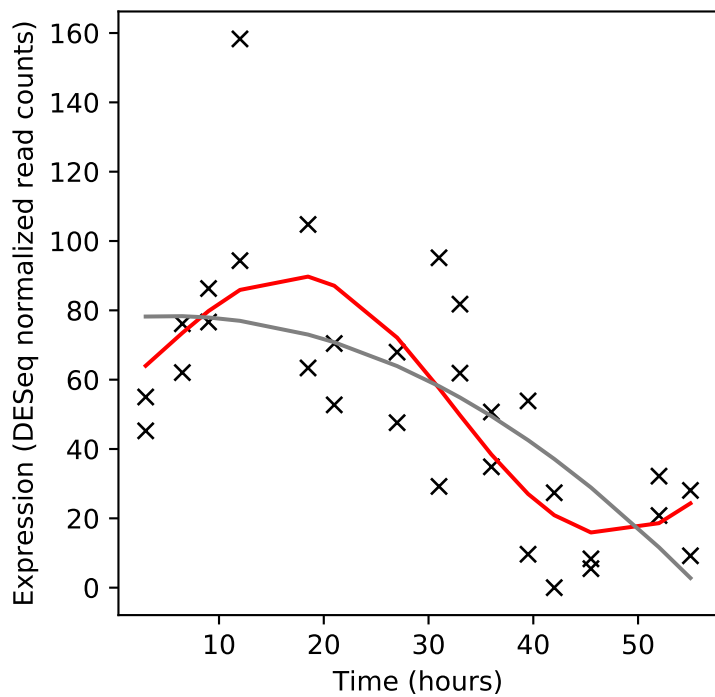

Rv2050/-

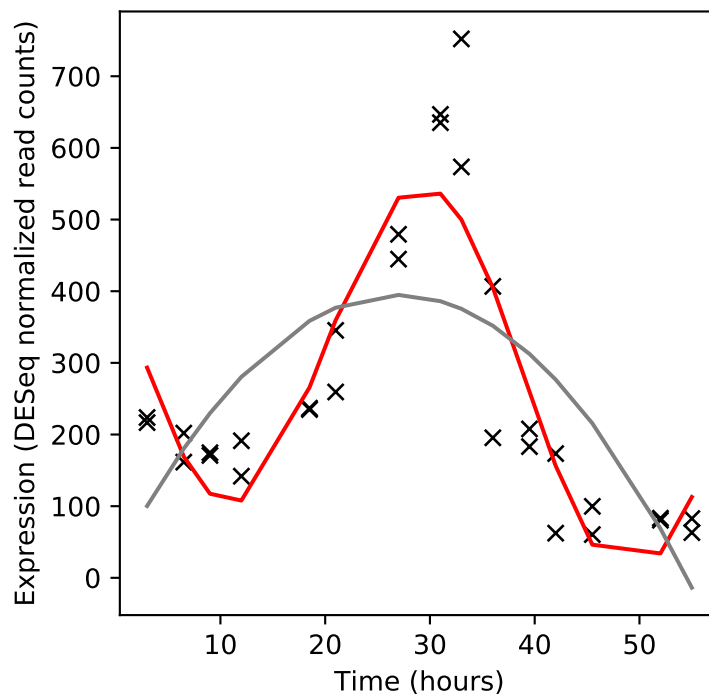

Rv2051c/ppm1

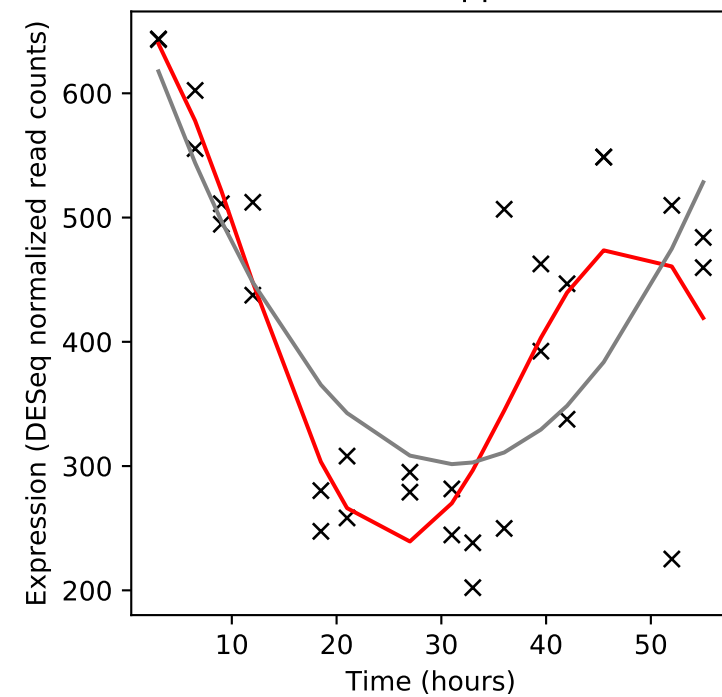

Rv2052c/-

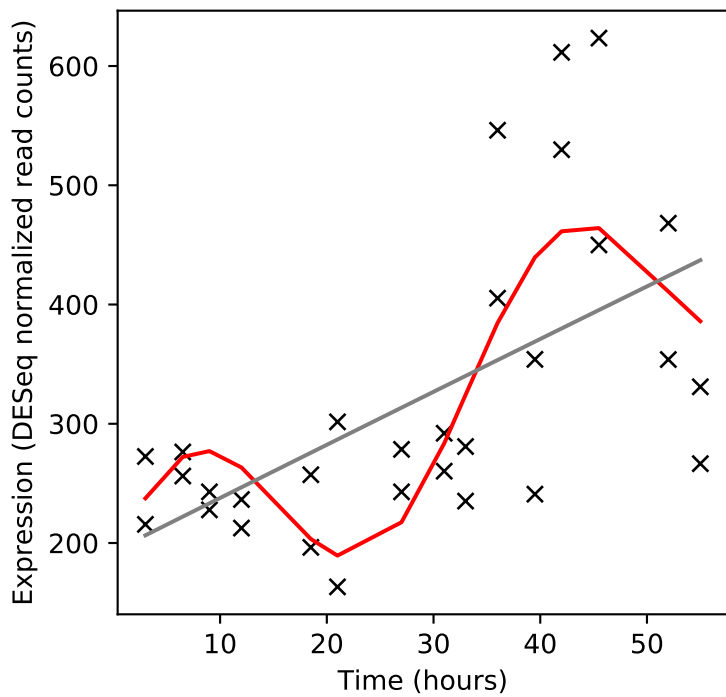

Rv2053c/fxsA

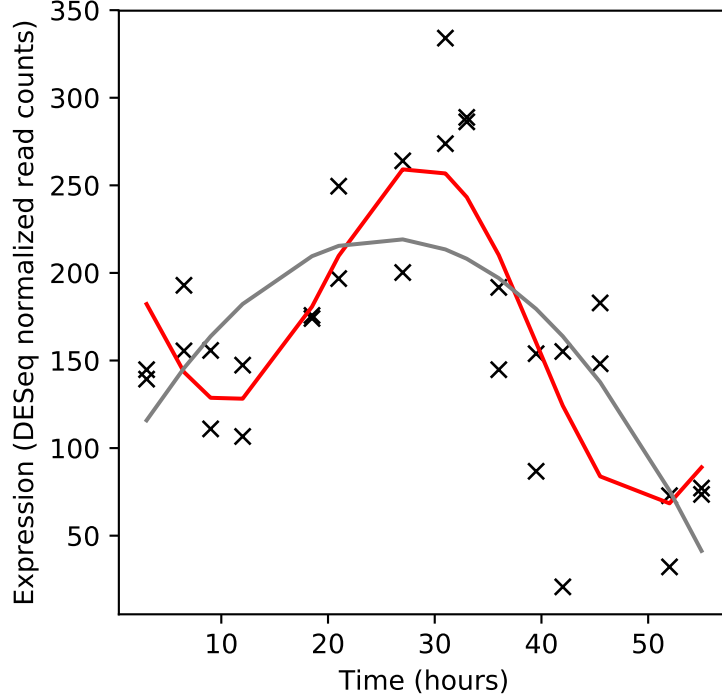

Rv2054/-

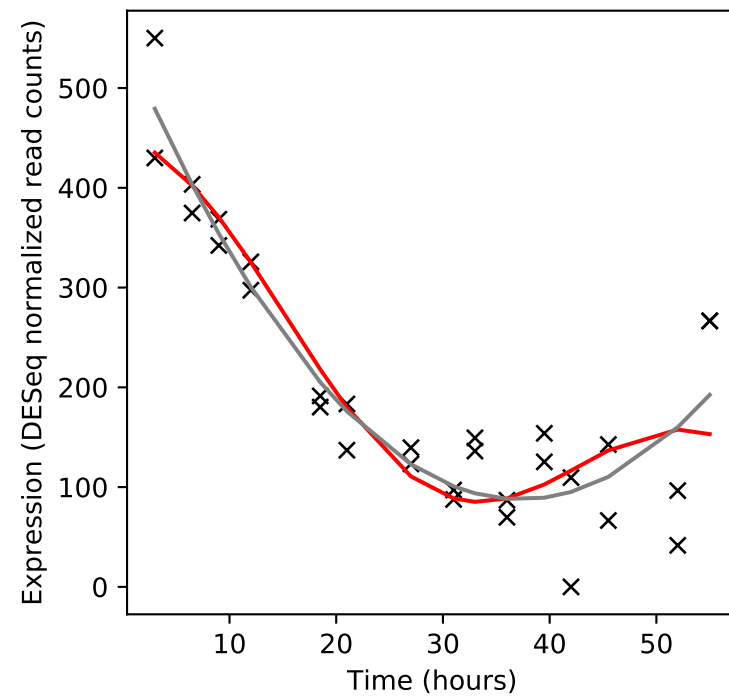

Rv2055c/rpsR2

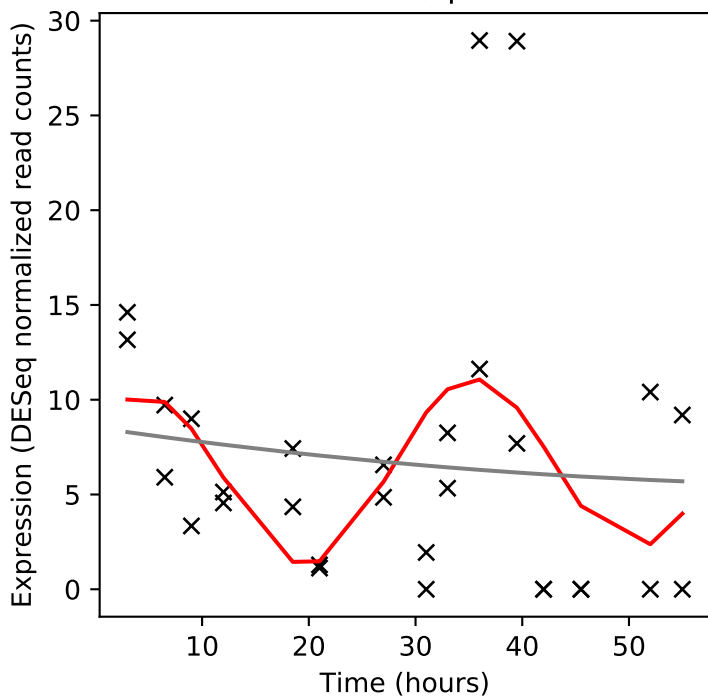

Rv2056c/rpsN2

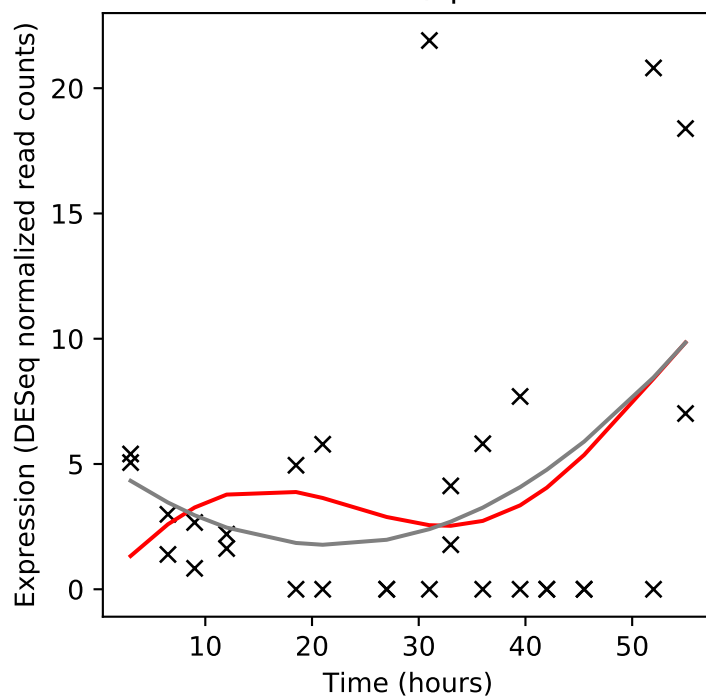

Rv2057c/rpmG1

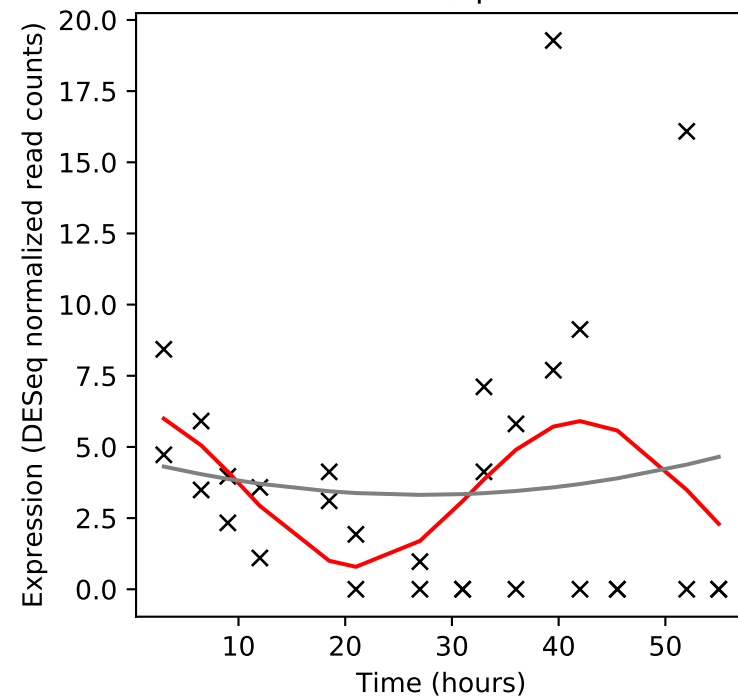

Rv2058c/rpmB2

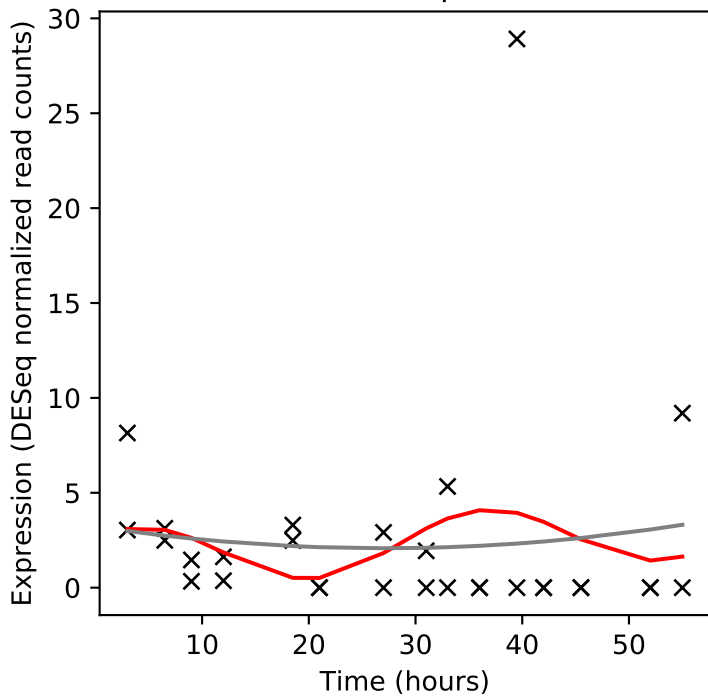

Rv2059/-

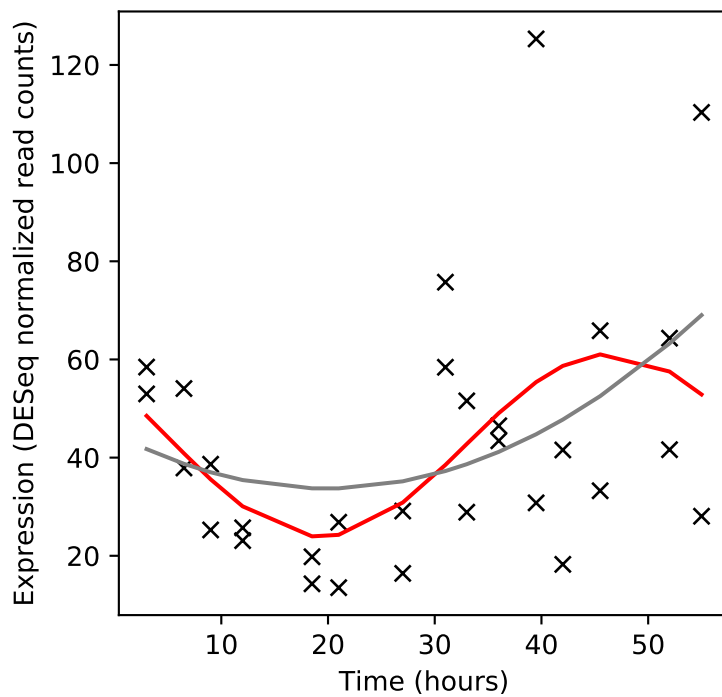

Rv2060/-

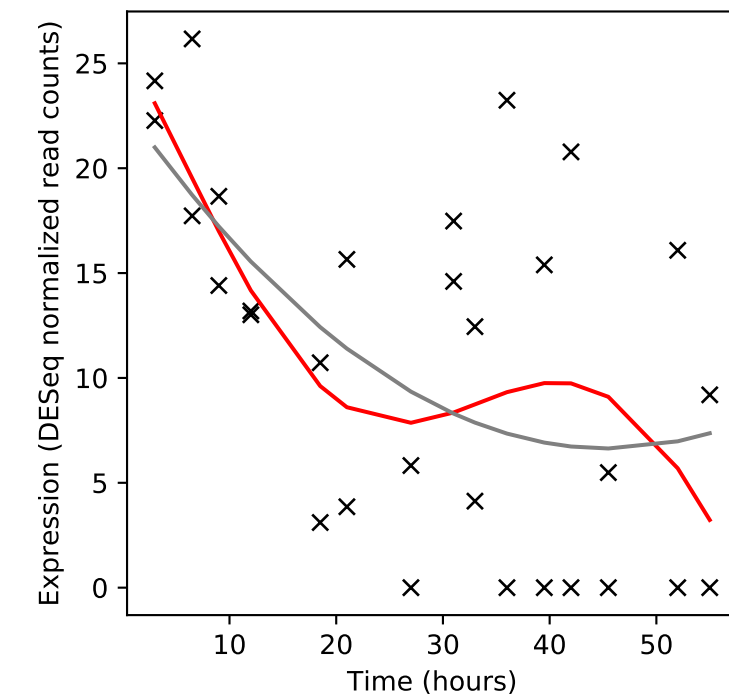

Rv2061c/-

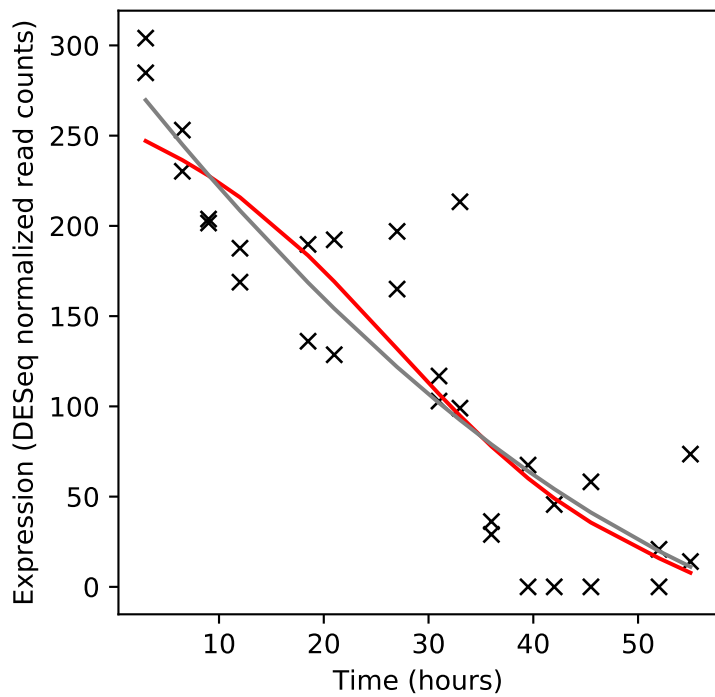

Rv2062c/cobN

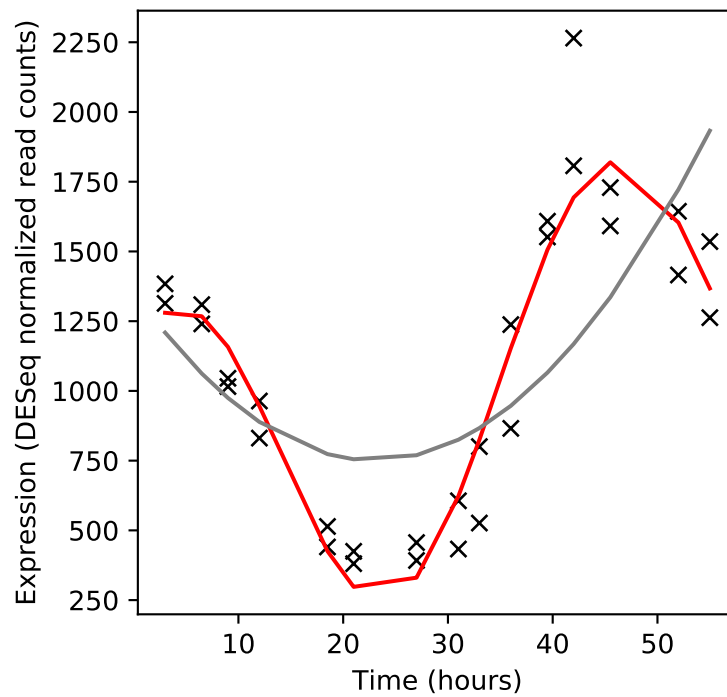

Rv2063/mazE7

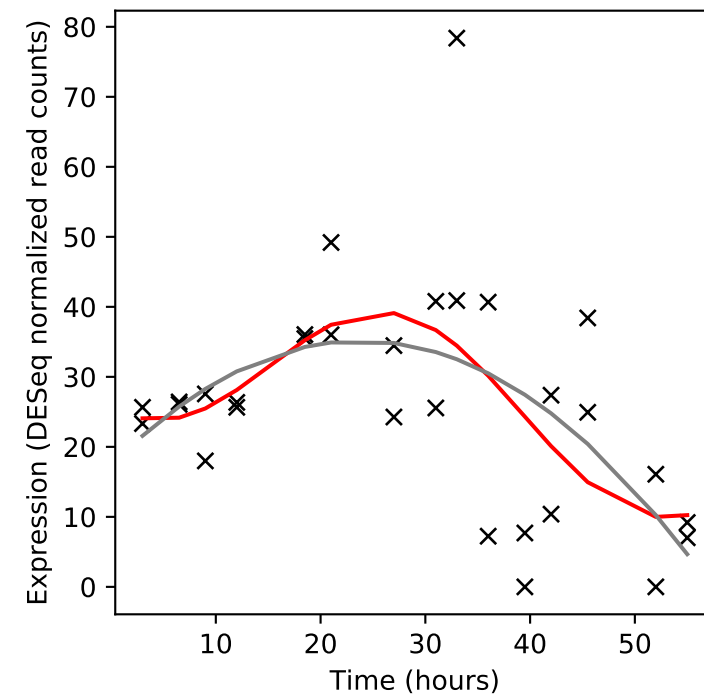

Rv2063A/mazF7

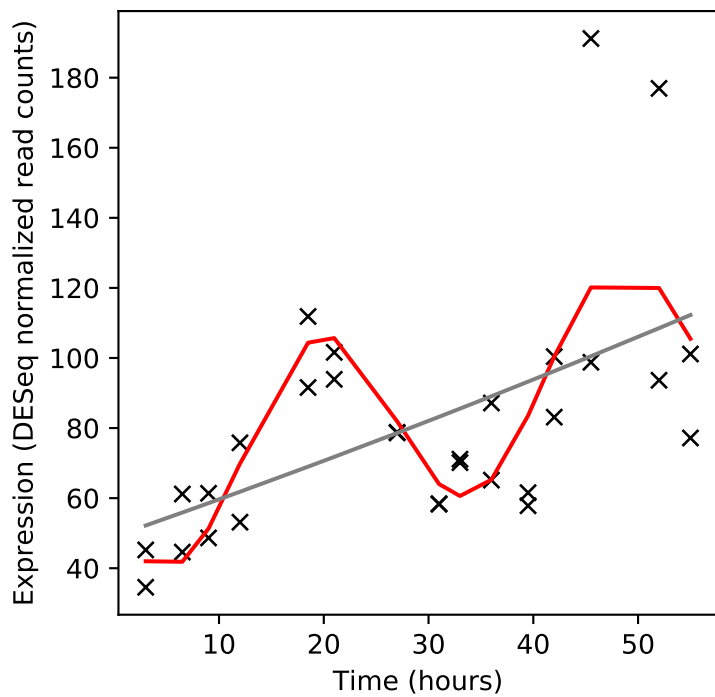

Rv2064/cobG

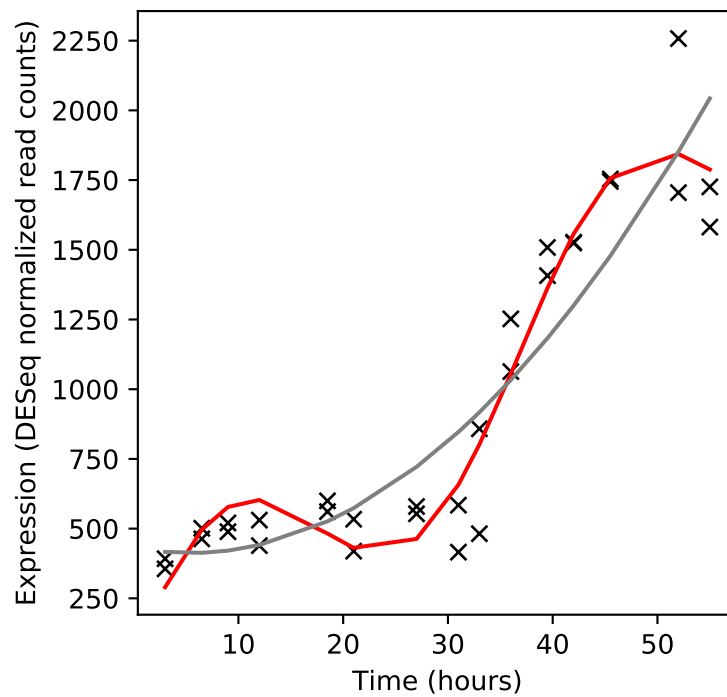

Rv2065/cobH

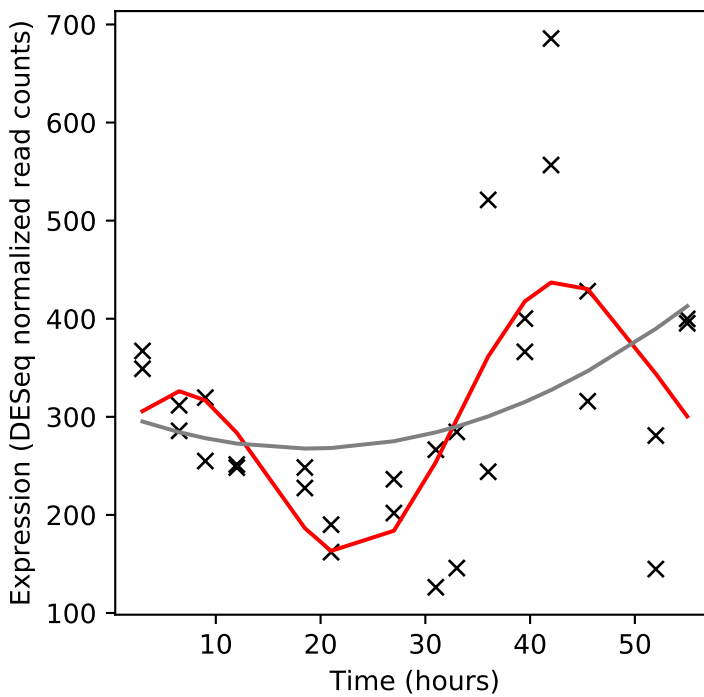

Rv2066/cobI

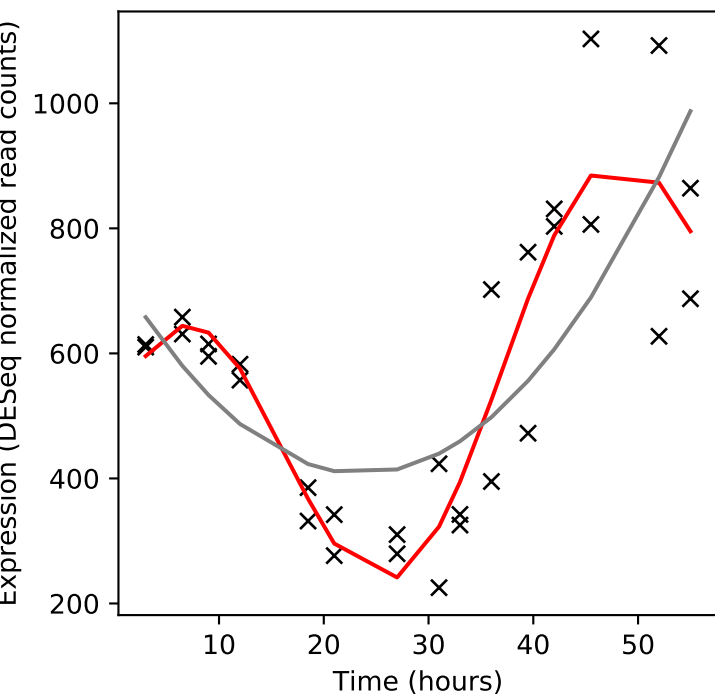

Rv2067c/-

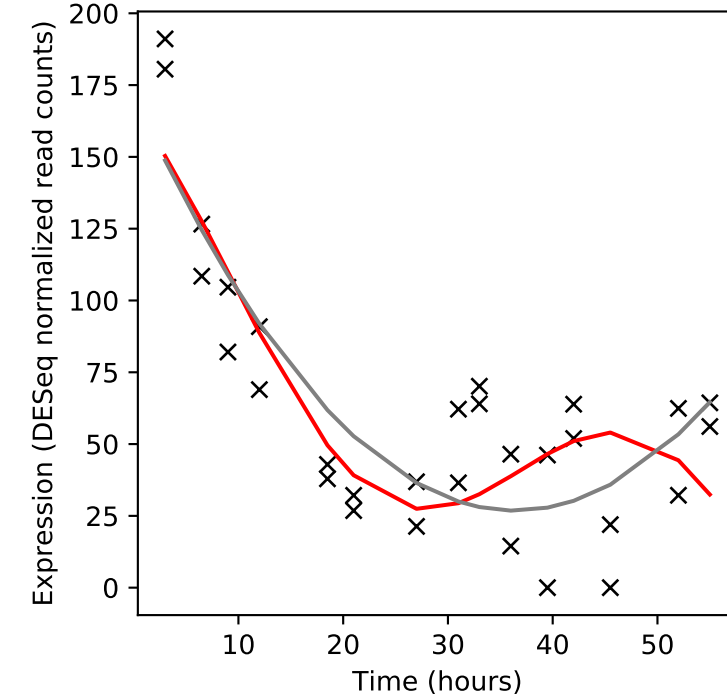

Rv2068c/blaC

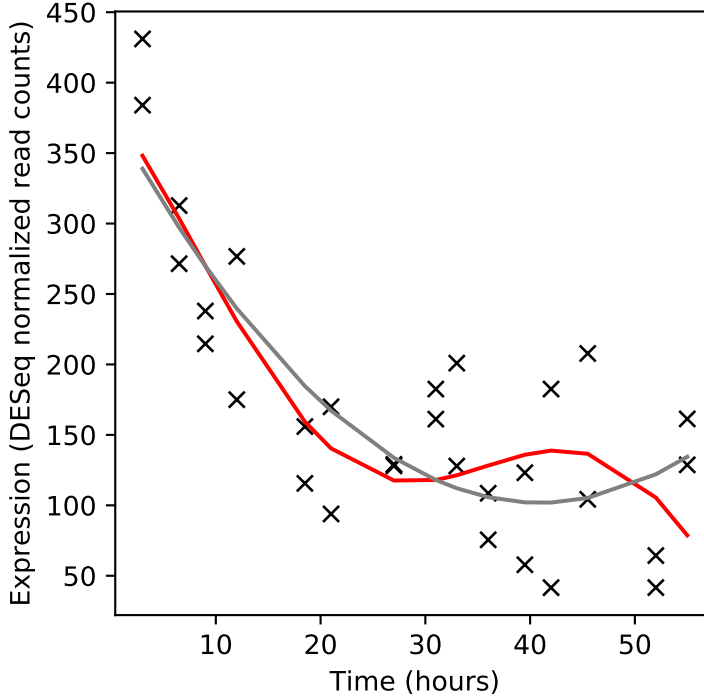

Rv2069/sigC

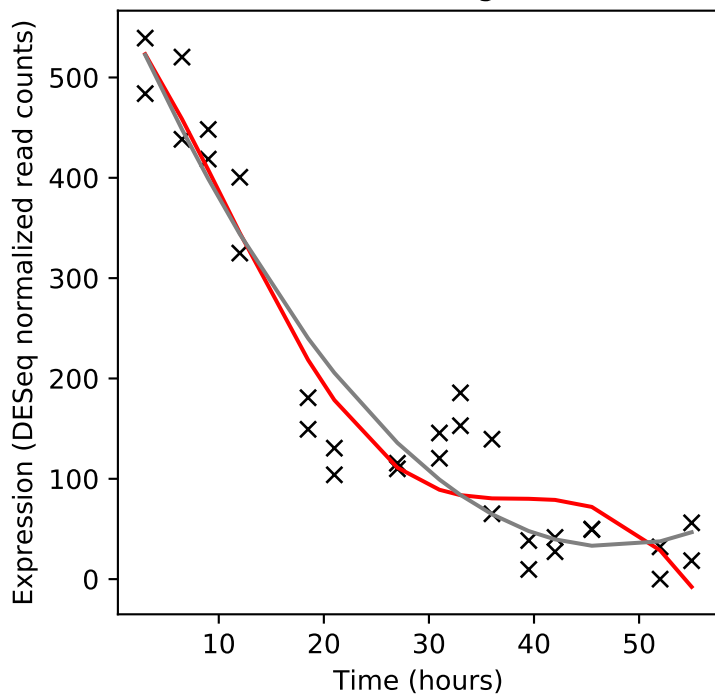

Rv2070c/cobK

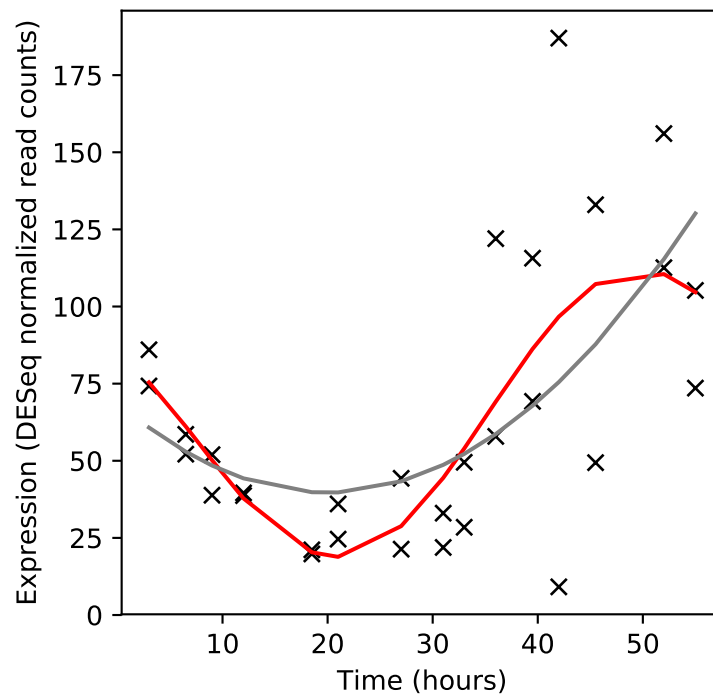

Rv2071c/cobM

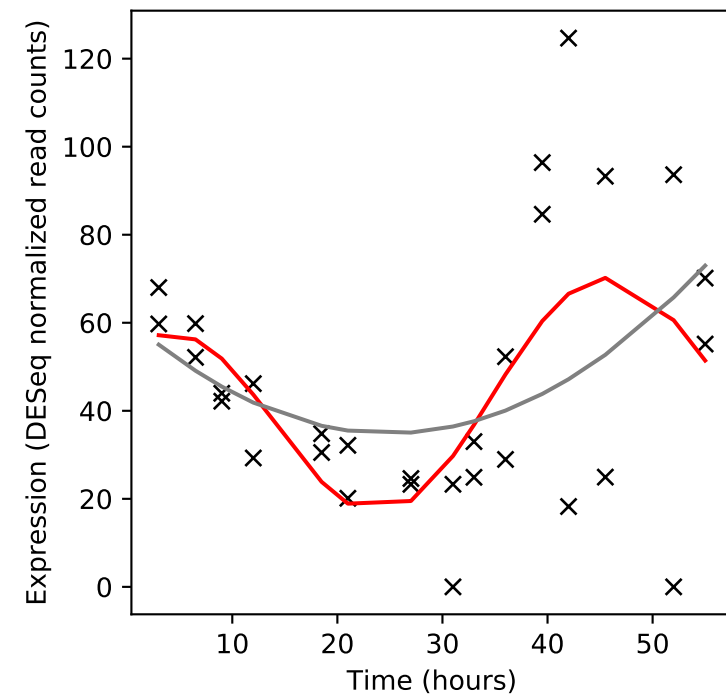

Rv2072c/cobL

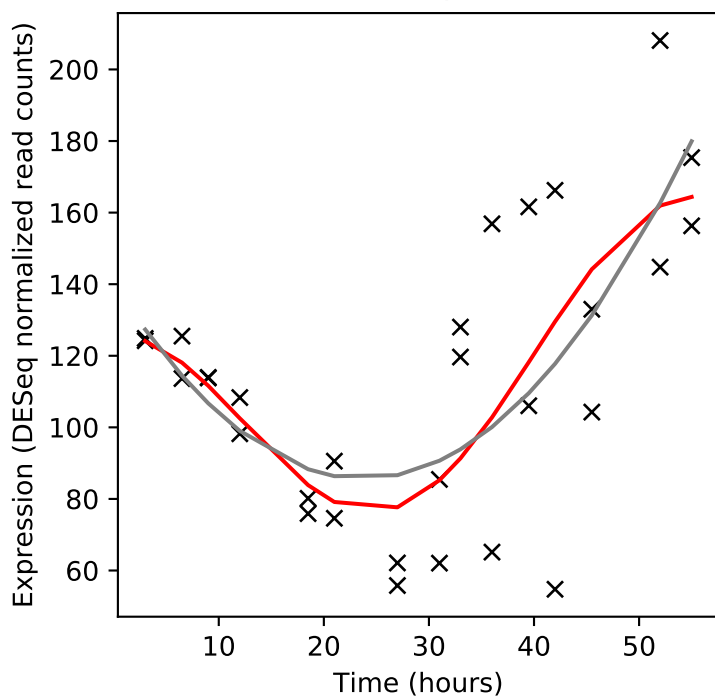

Rv2073c/-

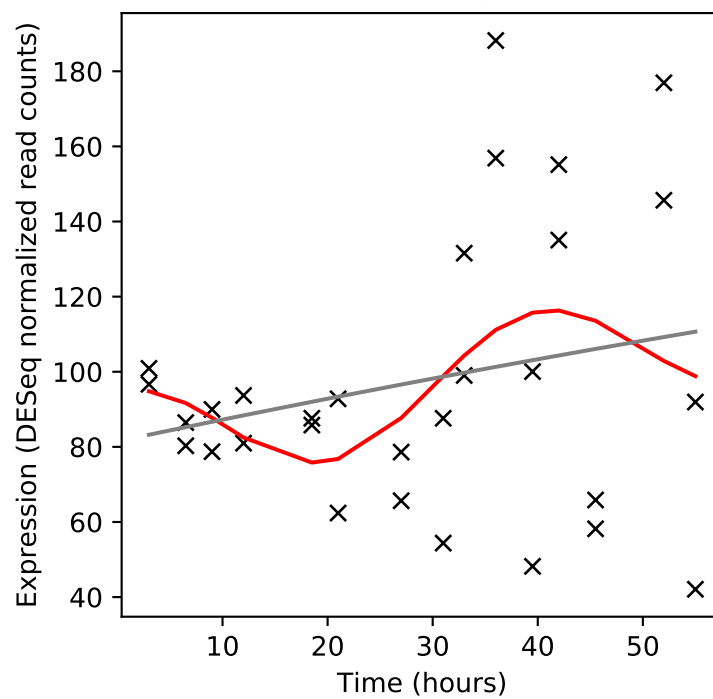

Rv2074/-

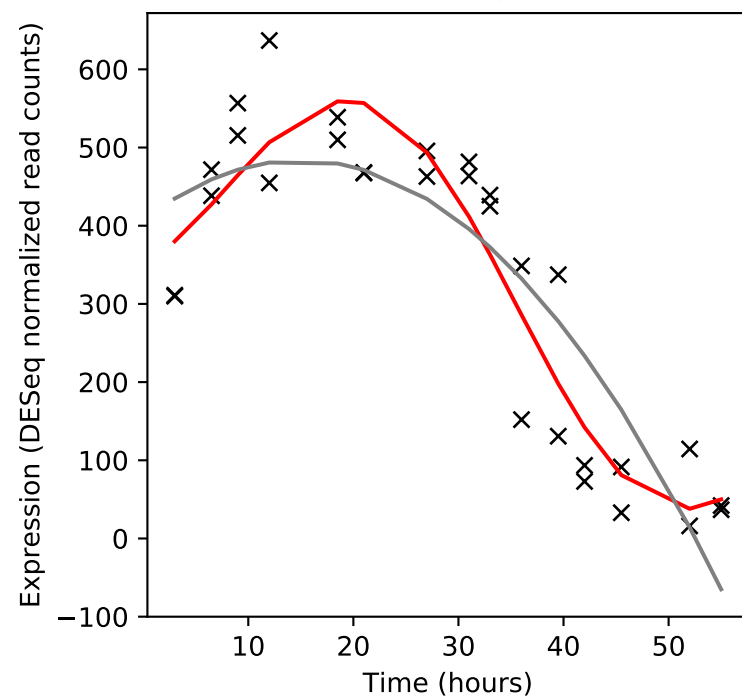

Rv2075c/-

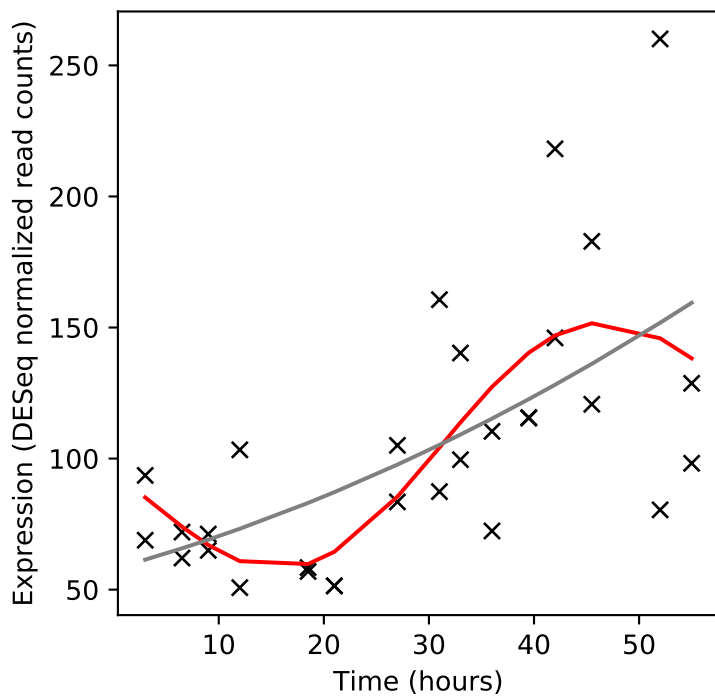

Rv2076c/-

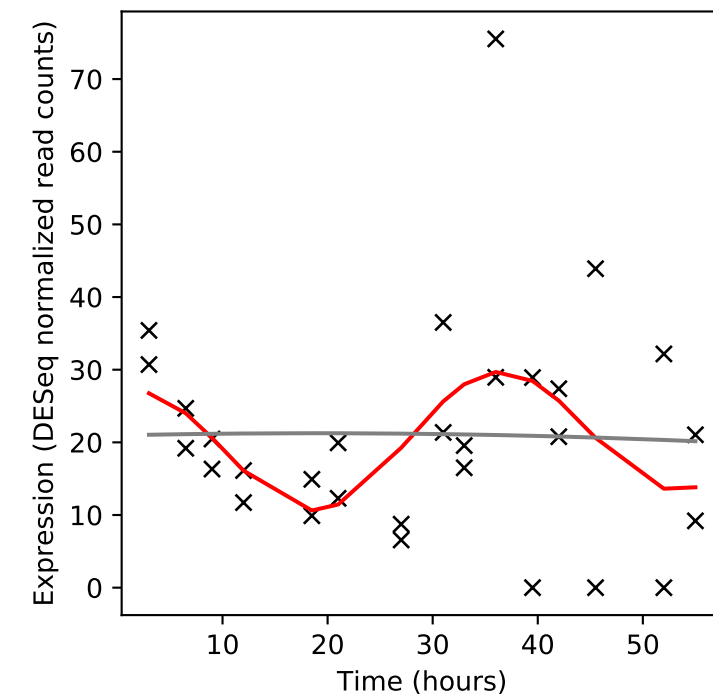

Rv2077c/-

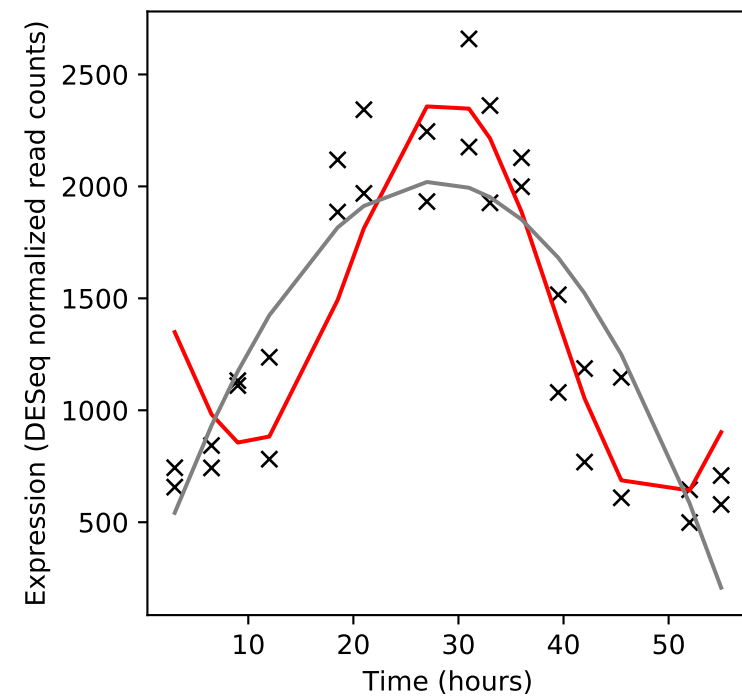

Rv2077A/-

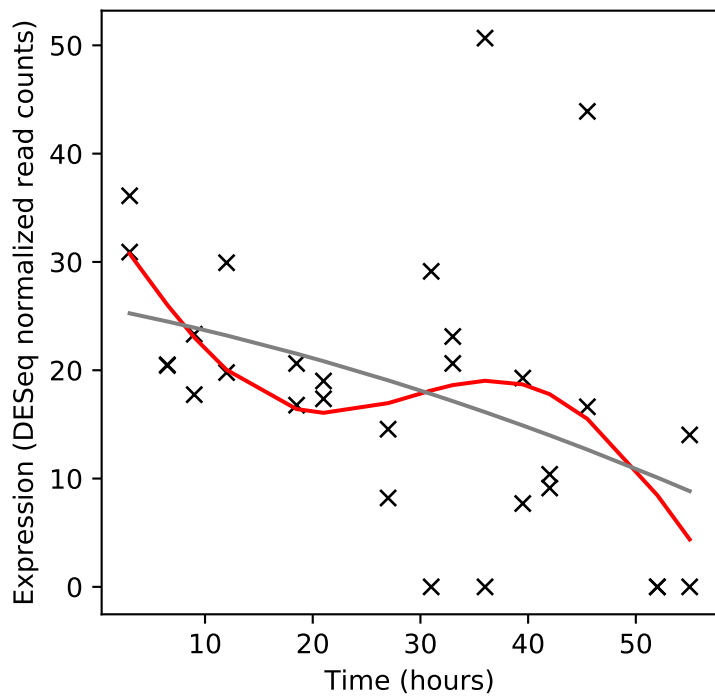

Rv2078/-

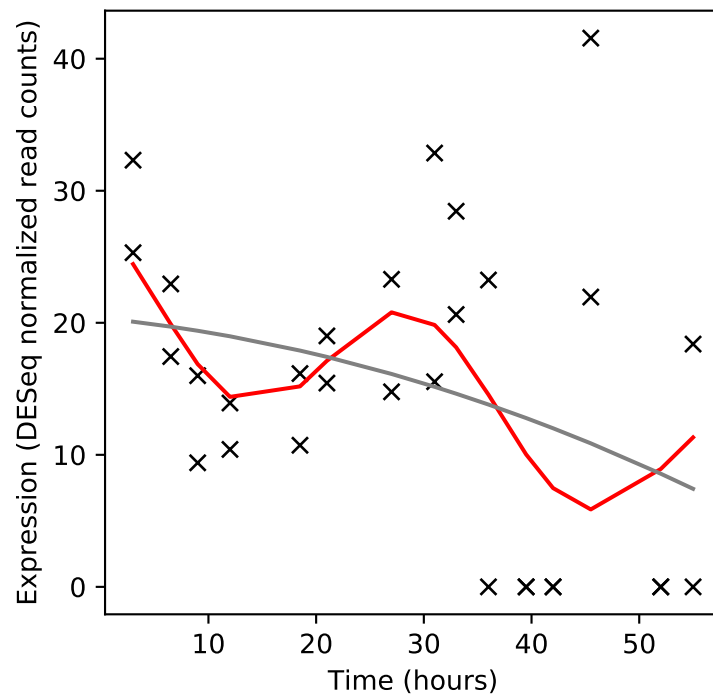

Rv2079/-

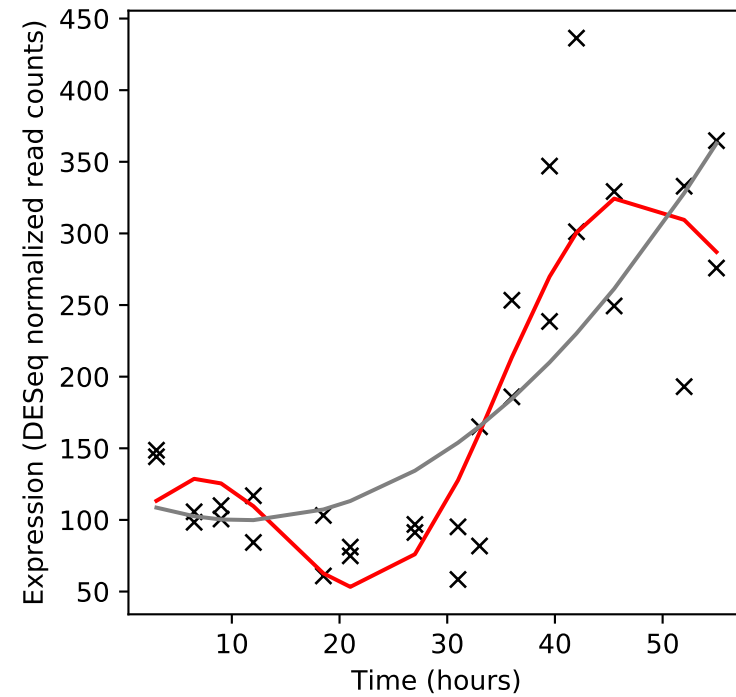

Rv2080/lppJ

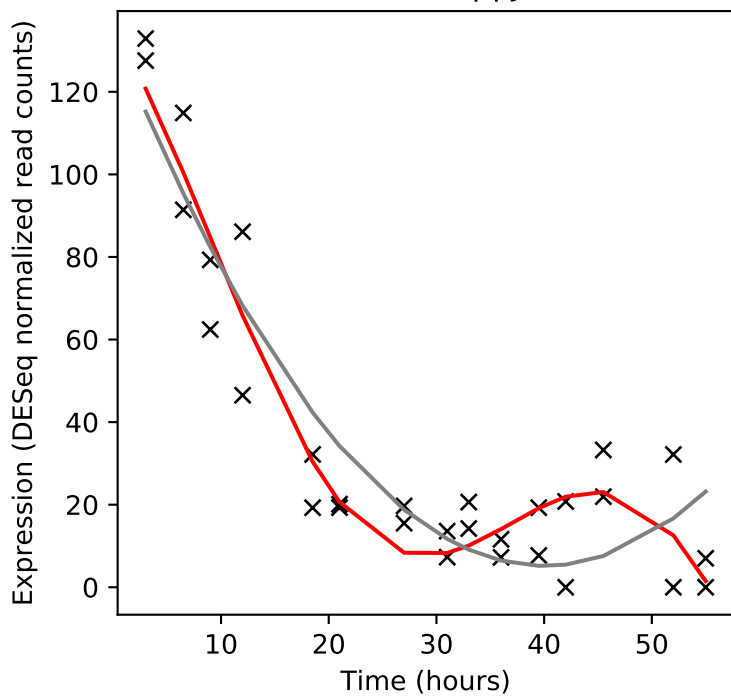

Rv2081c/-

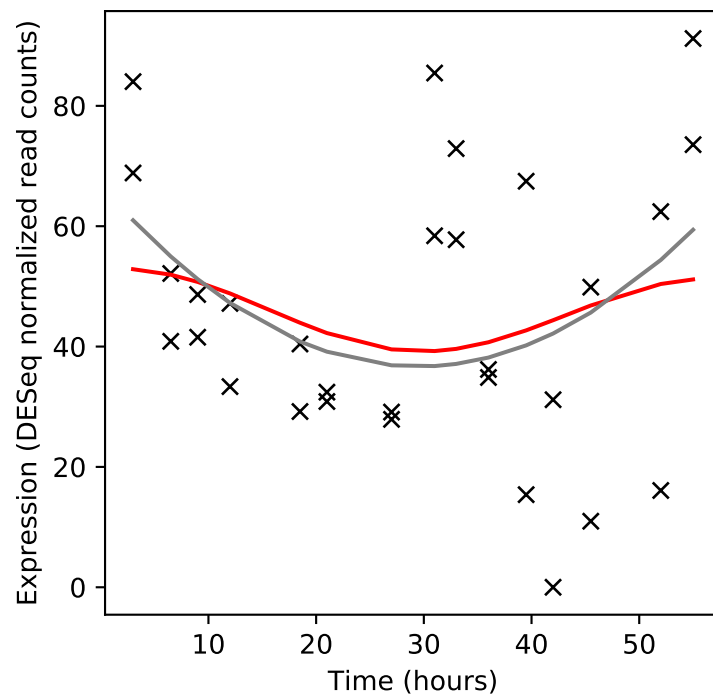

Rv2082/-

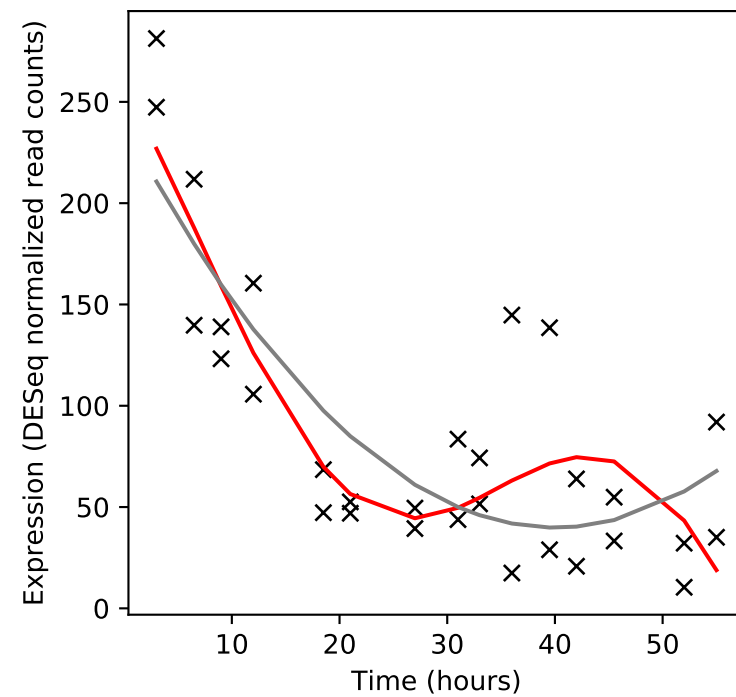

Rv2083/-

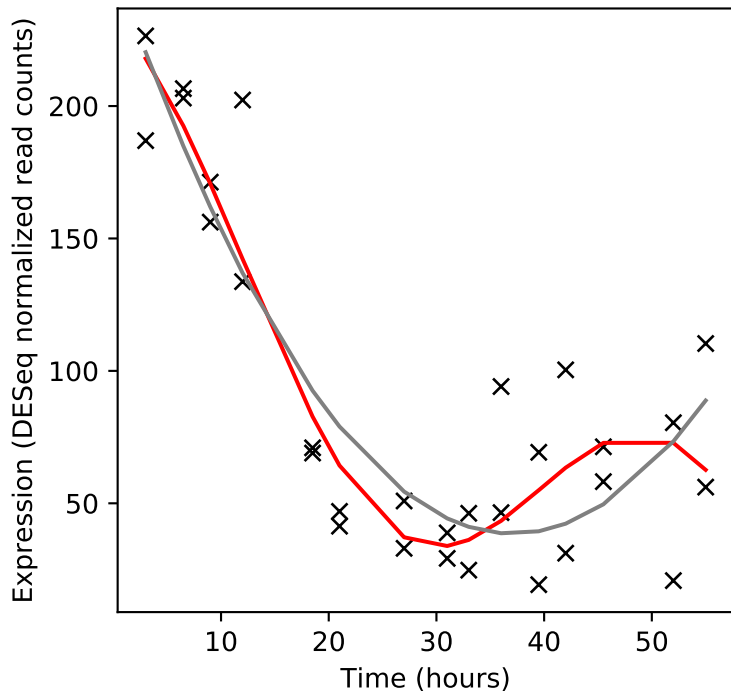

Rv2084/-

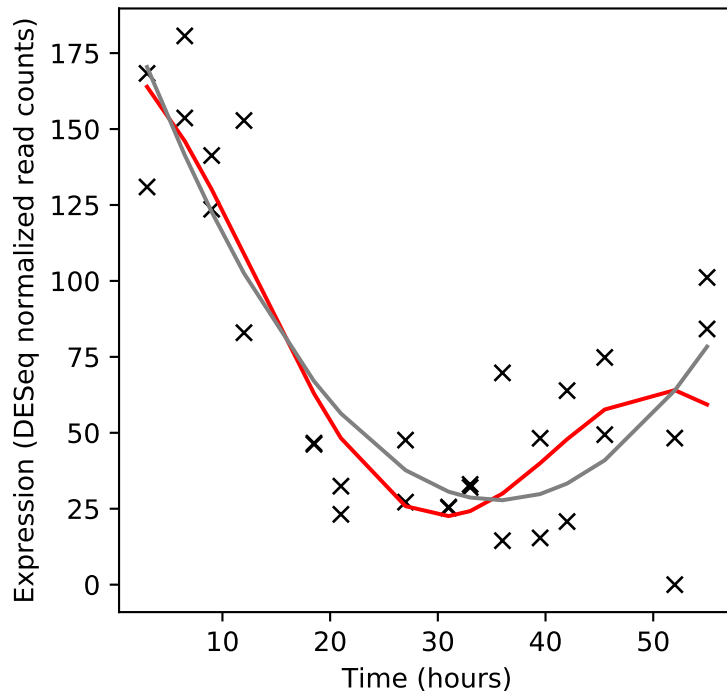

Rv2085/-

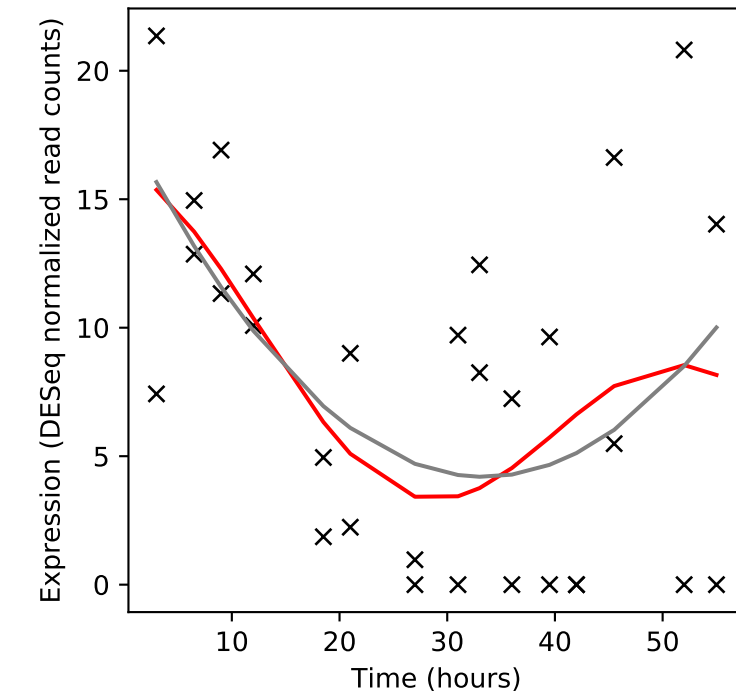

Rv2086/-

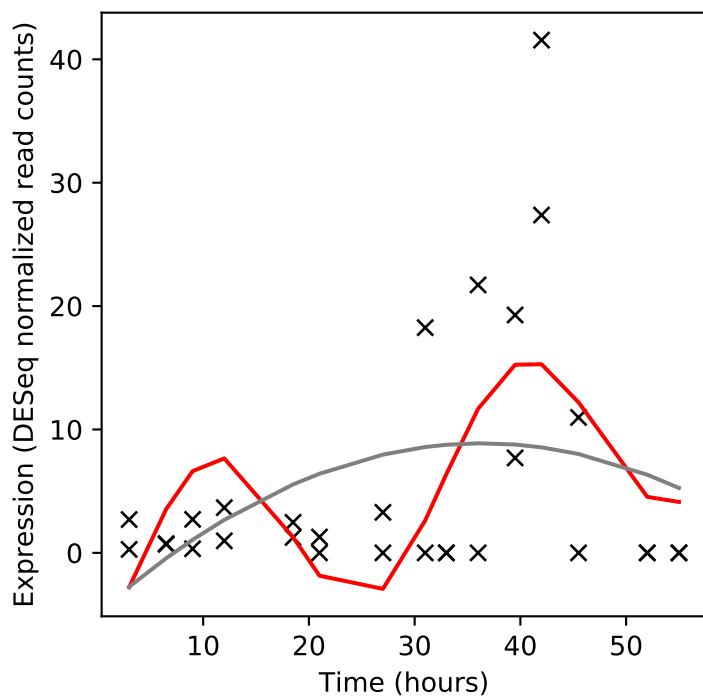

Rv2087/-

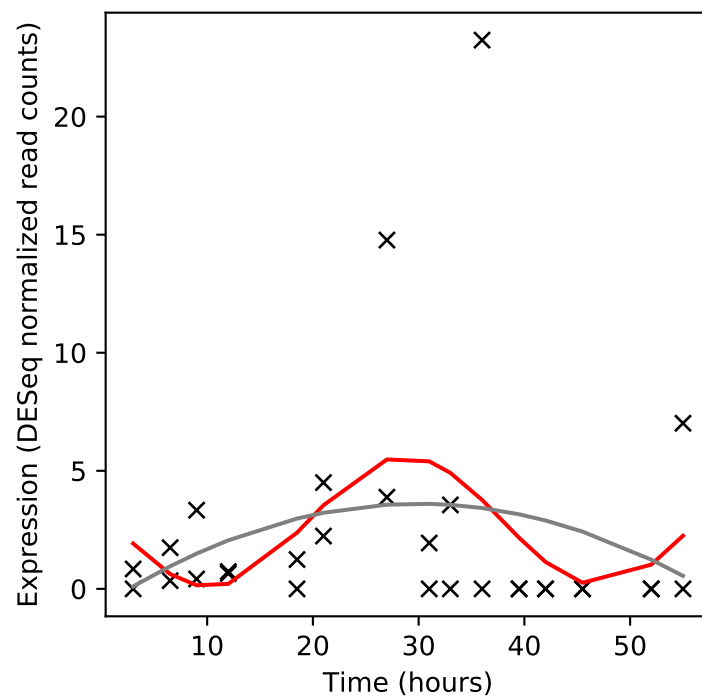

Rv2088/pknJ

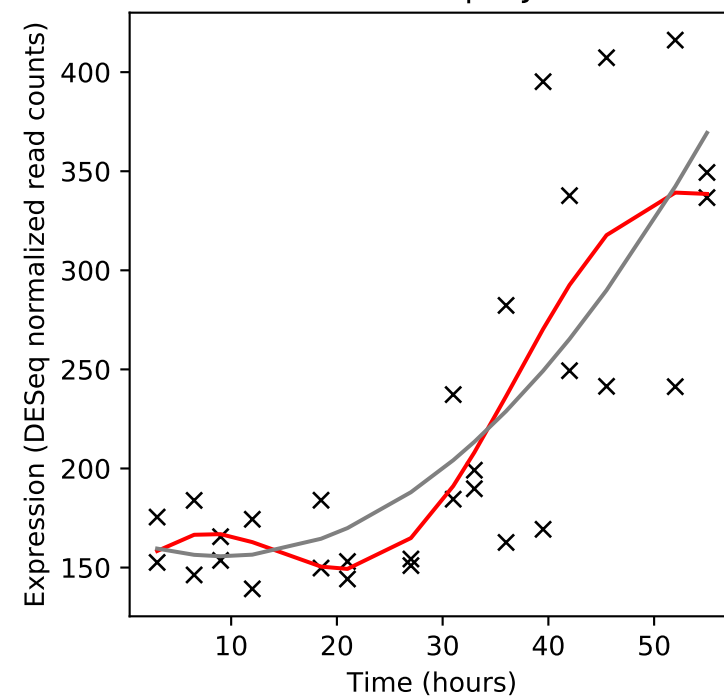

Rv2089c/pepE

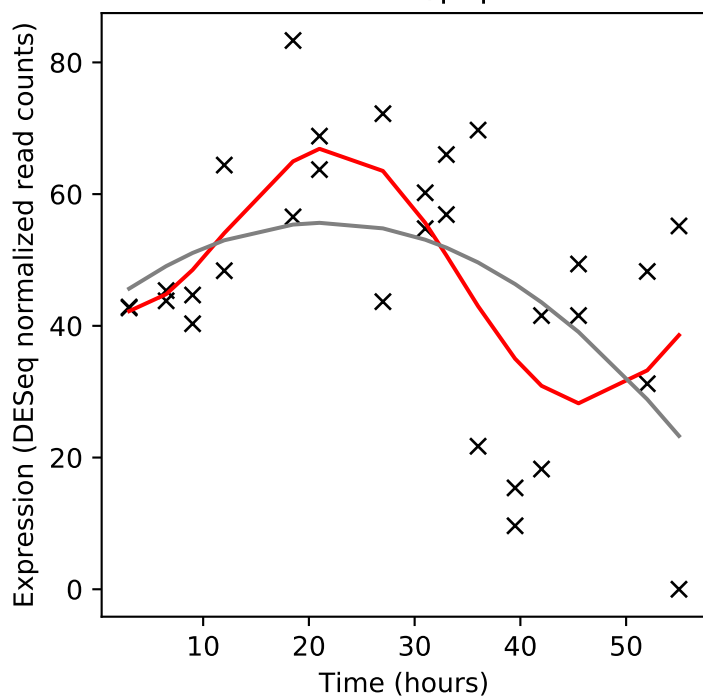

Rv2090/-

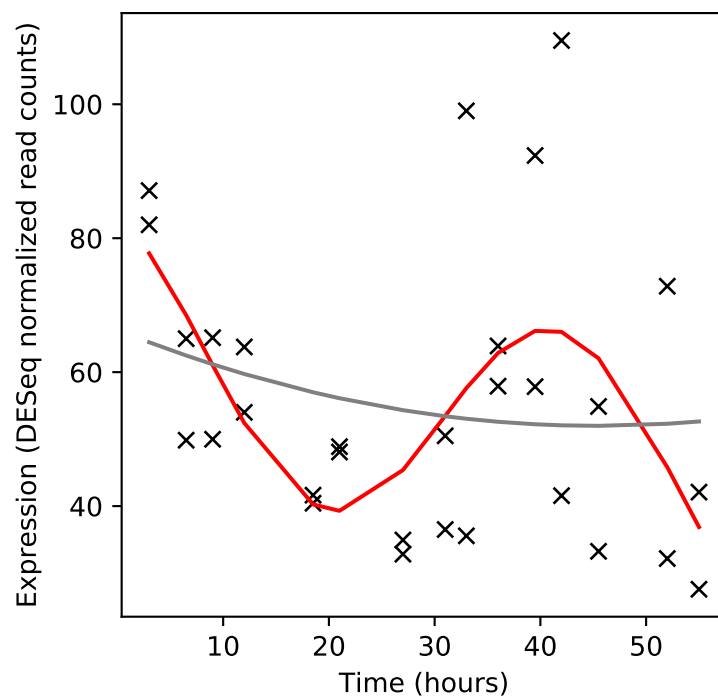

Rv2091c/-

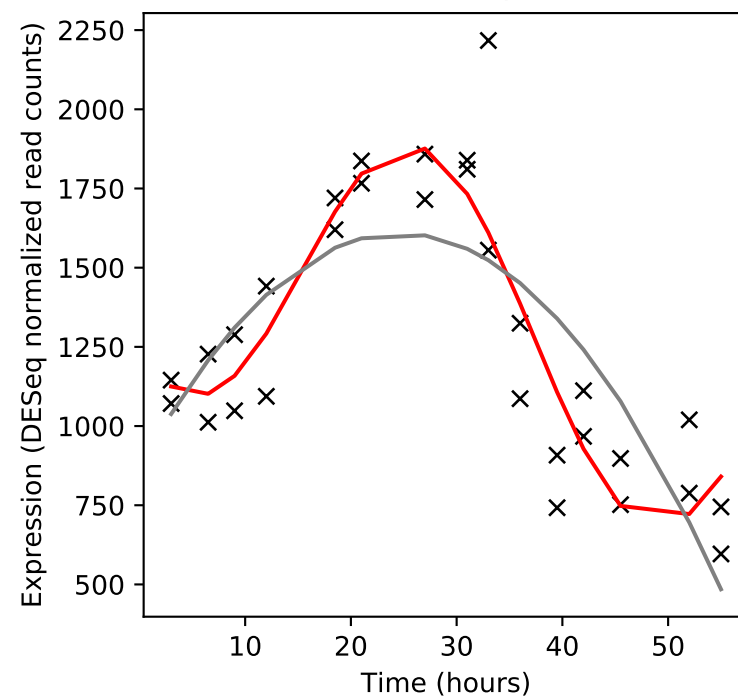

Rv2092c/helY

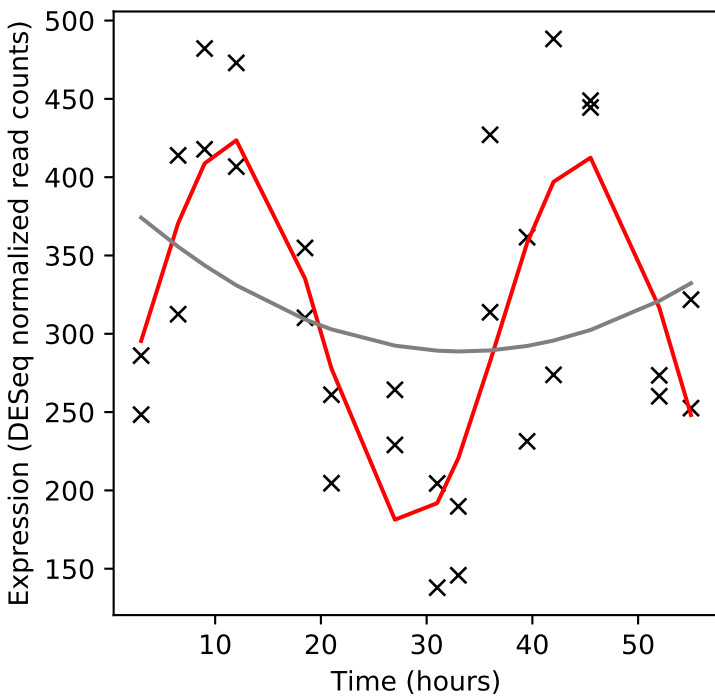

Rv2093c/tatC

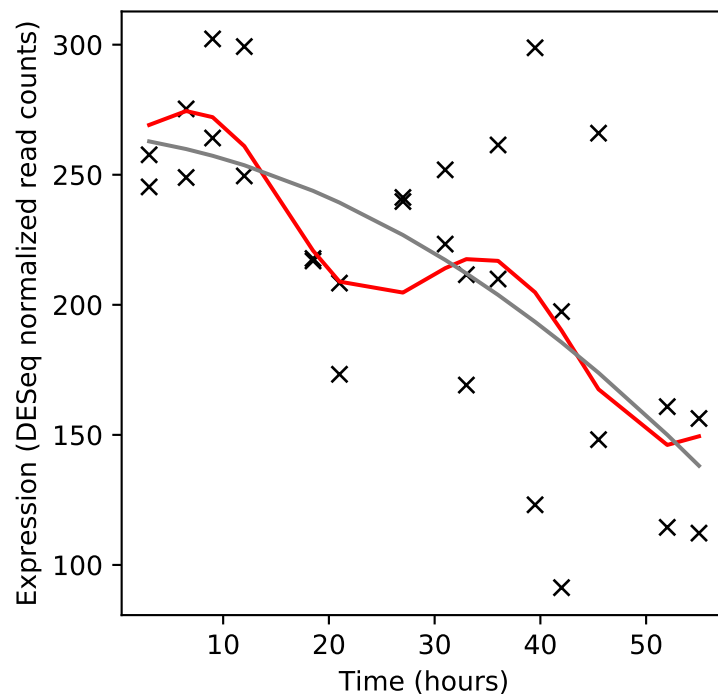

Rv2094c/tatA

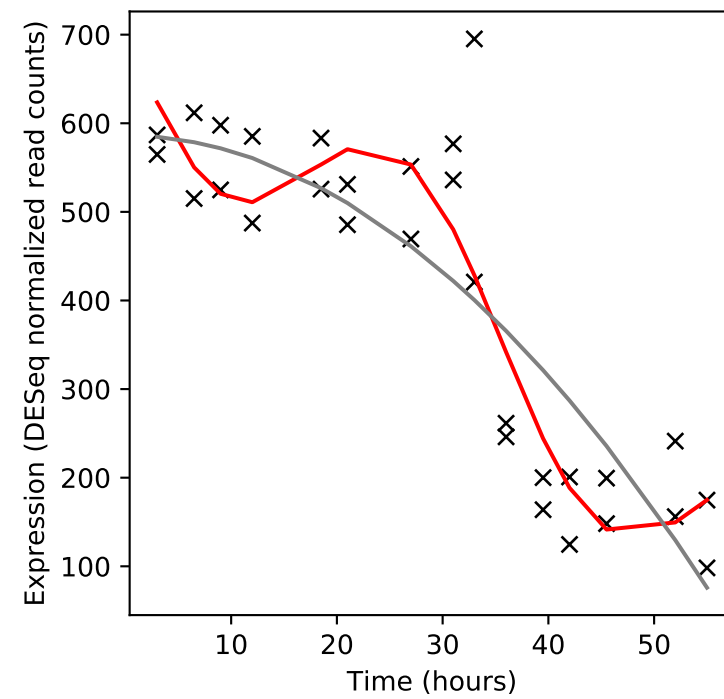

Rv2095c/pafC

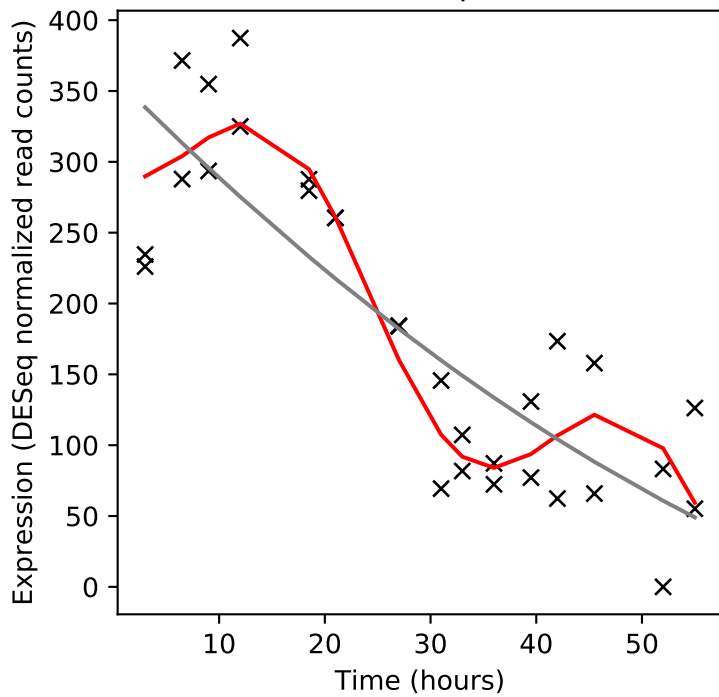

Rv2096c/pafB

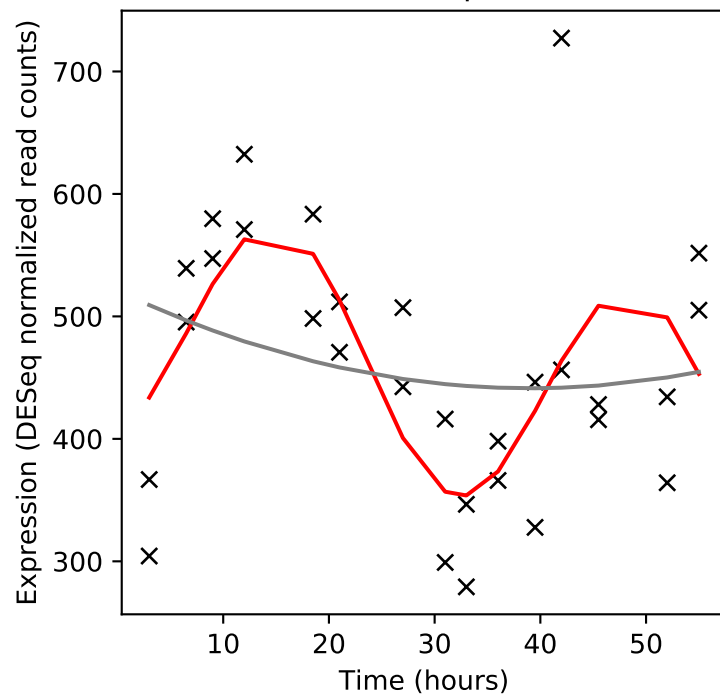

Rv2097c/pafA

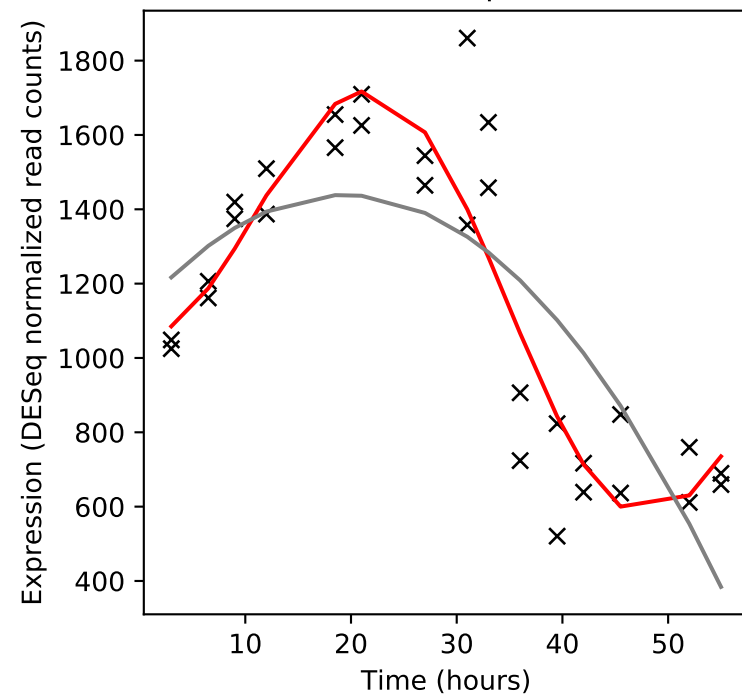

Rv2100/-

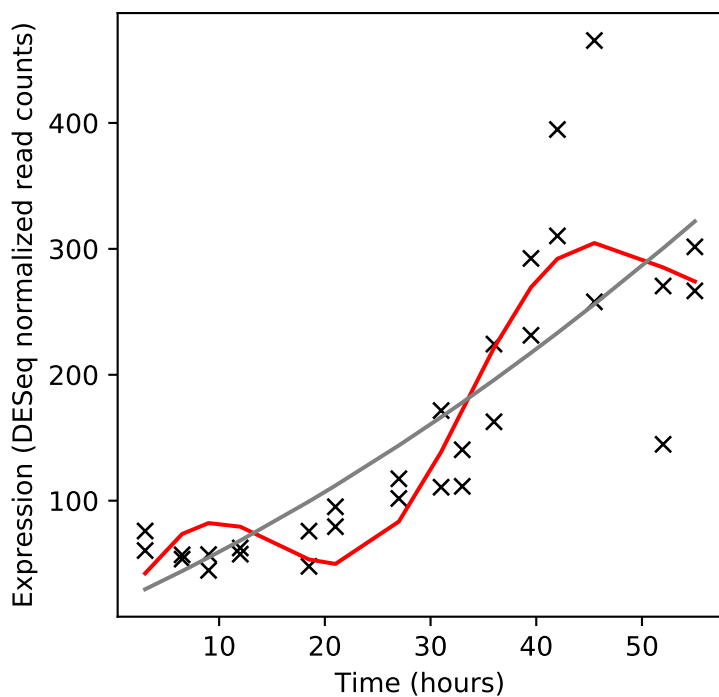

Rv2101/helZ

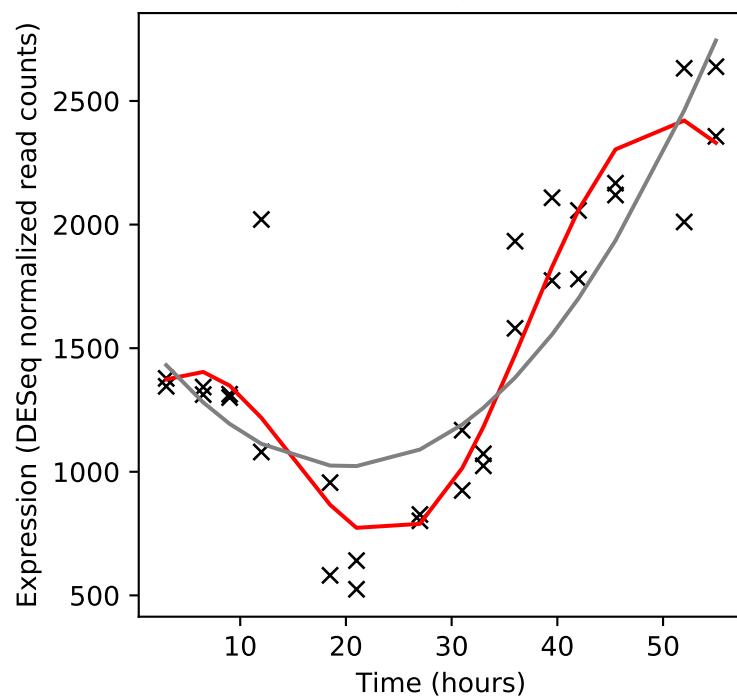

Rv2102/-

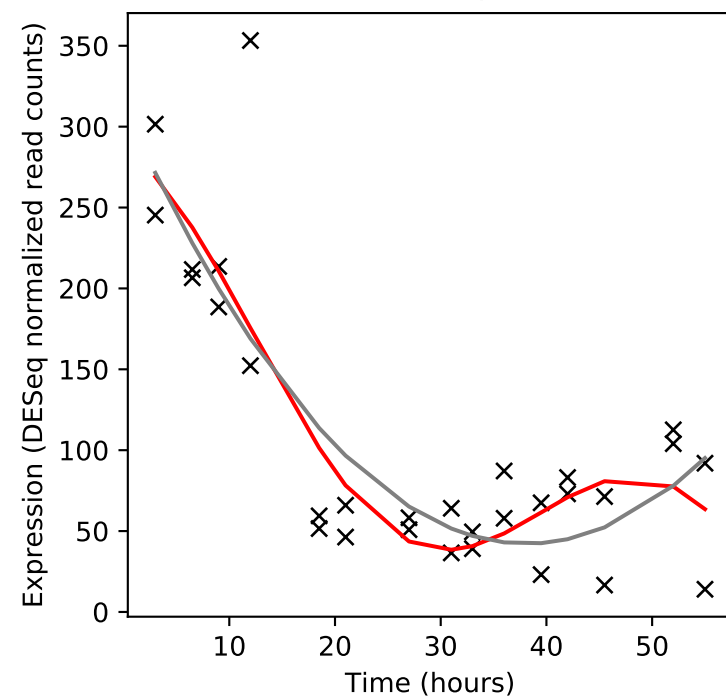

Rv2103c/vapC37

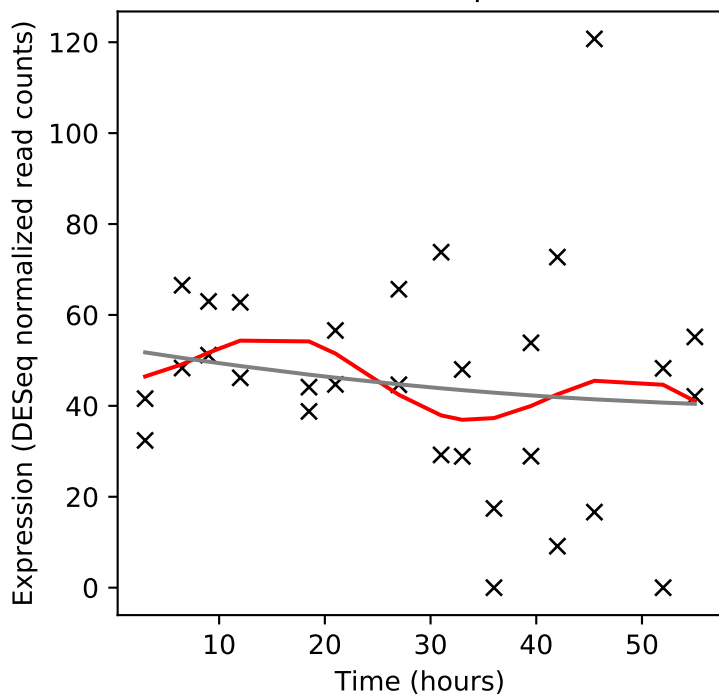

Rv2104c/vapB37

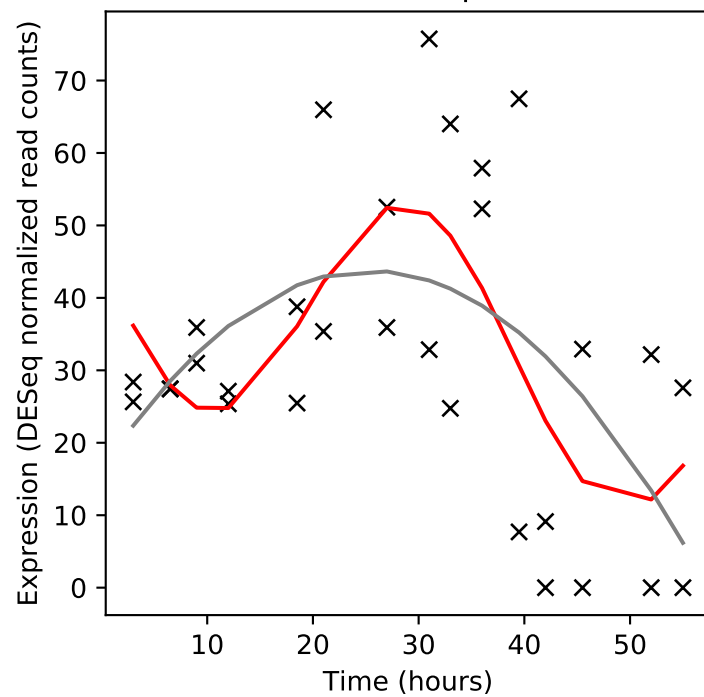

Rv2105/-

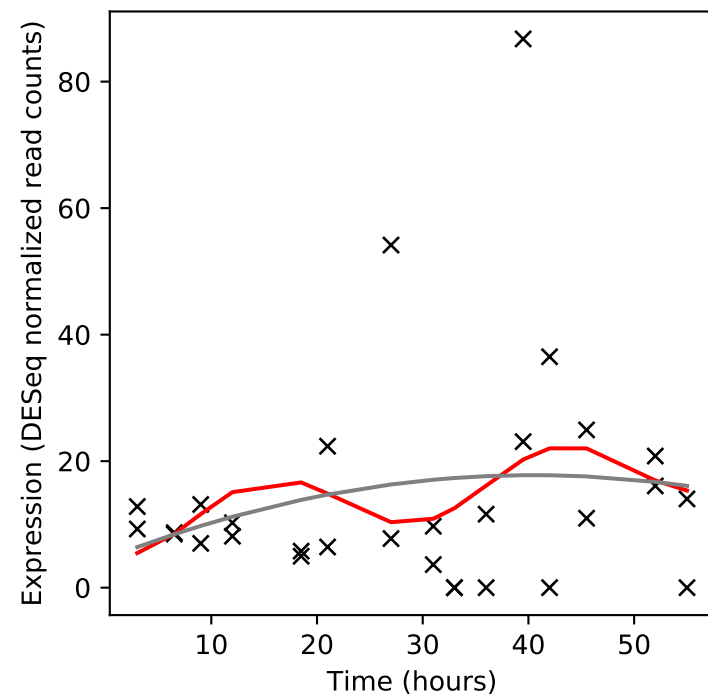



Rv2106/-

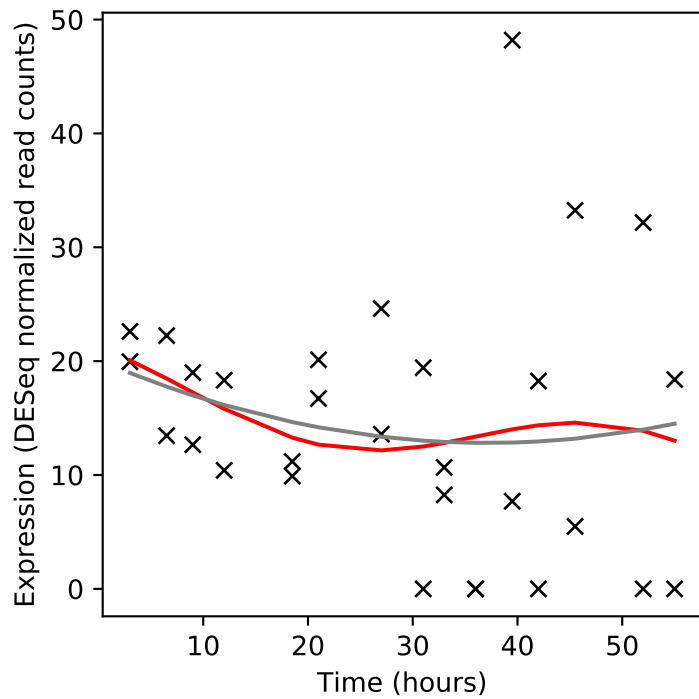

Rv2107/PE22

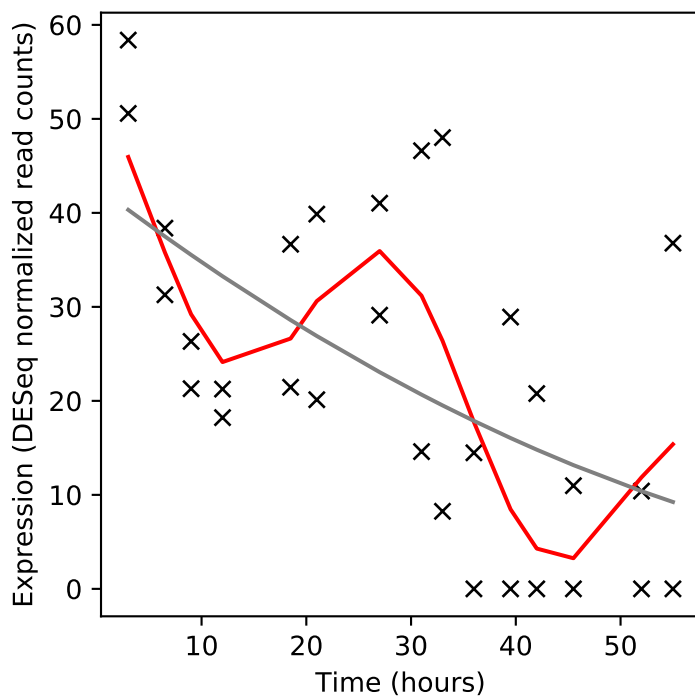

Rv2108/PPE36

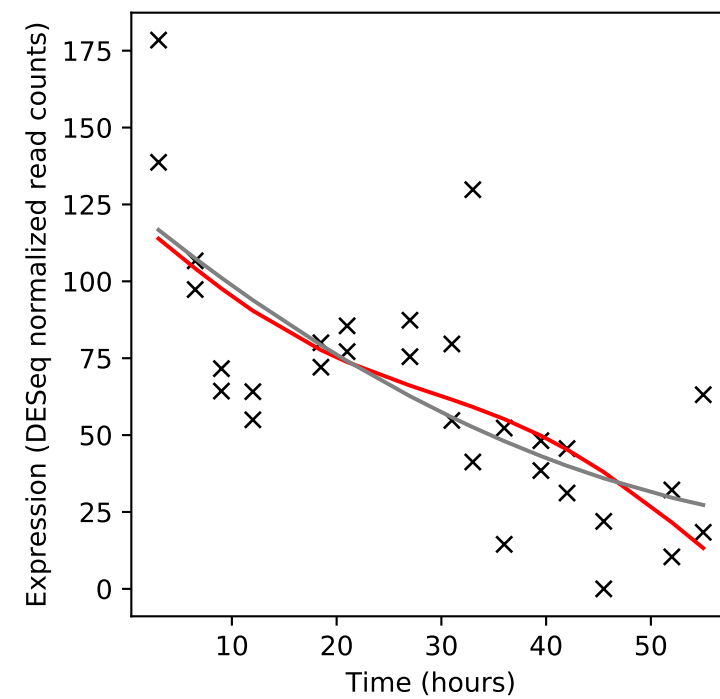

Rv2109c/prcA

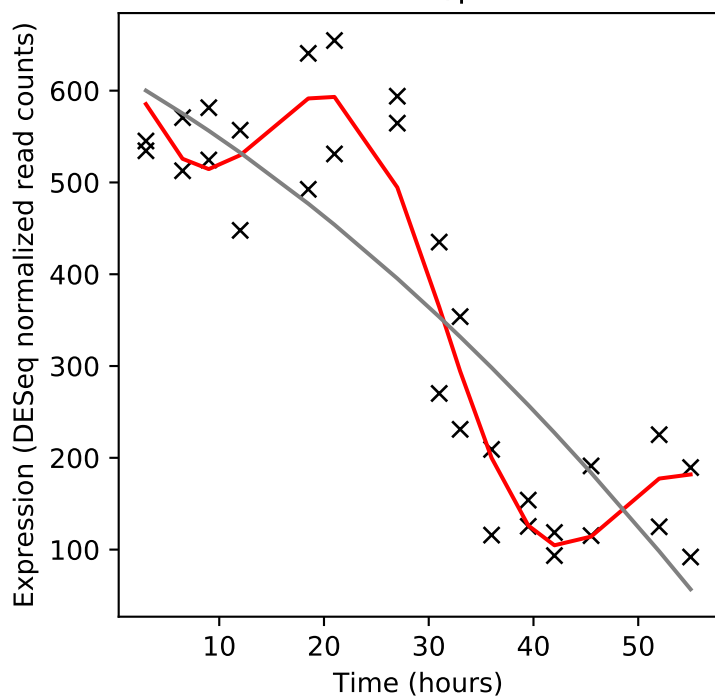

Rv2110c/prcB

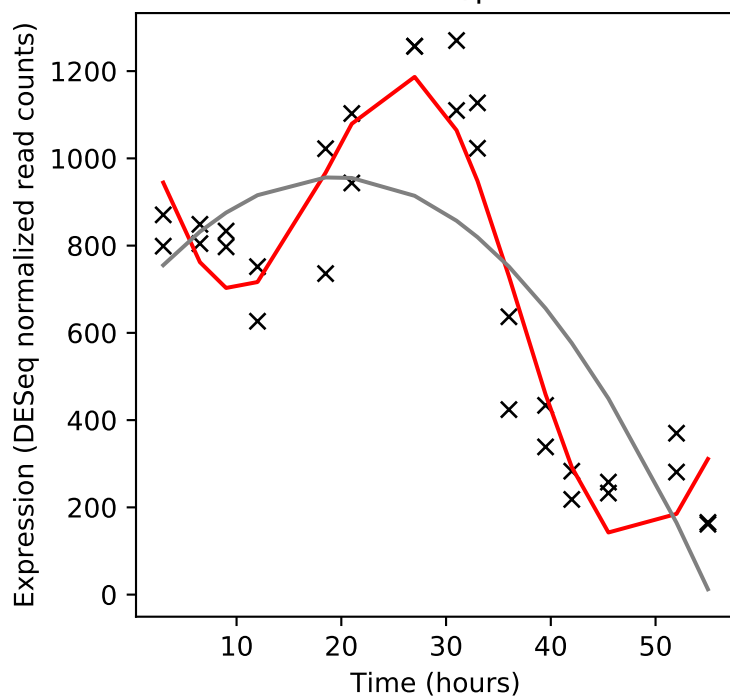

Rv2111c/pup

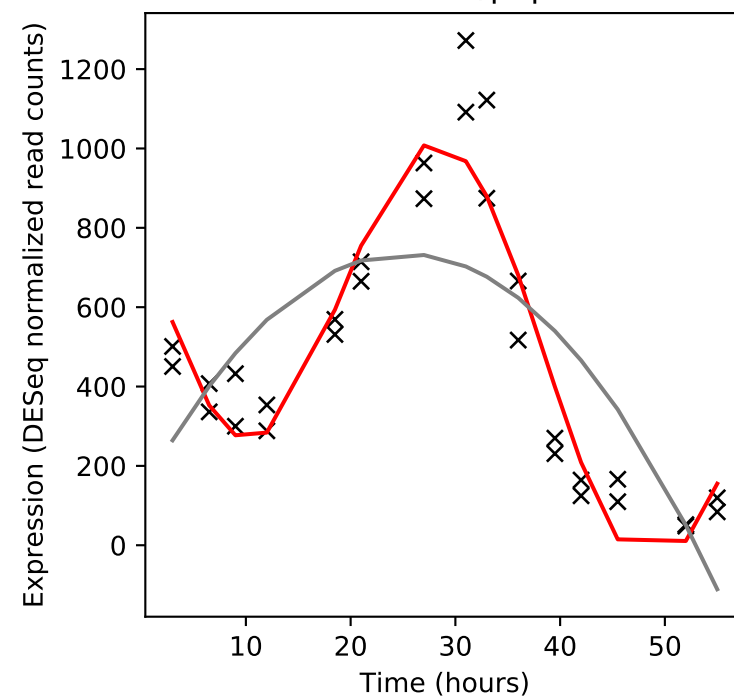

Rv2112c/dop

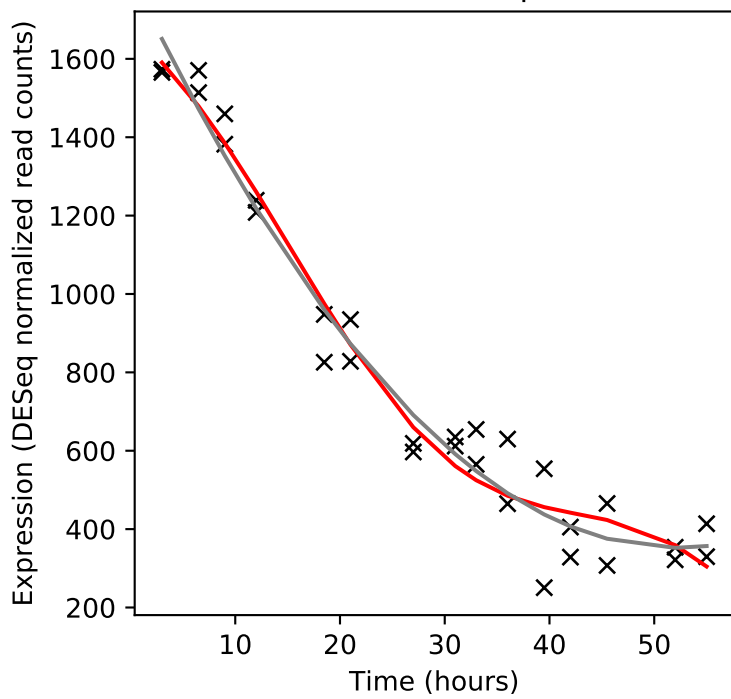

Rv2113/-

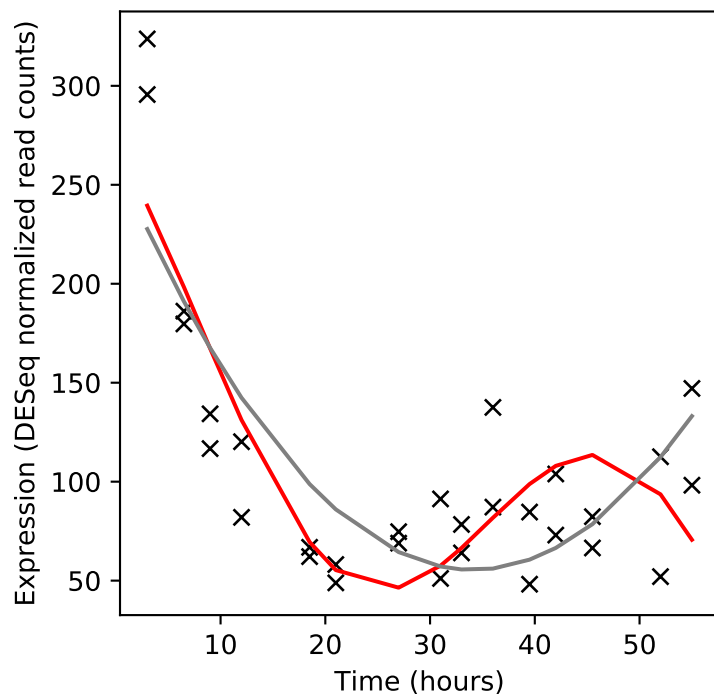

Rv2114/-

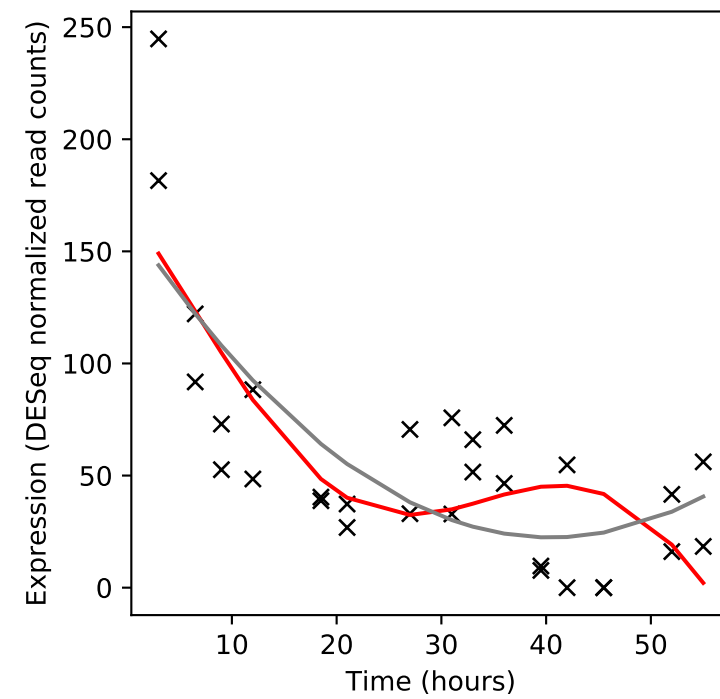

Rv2115c/mpa

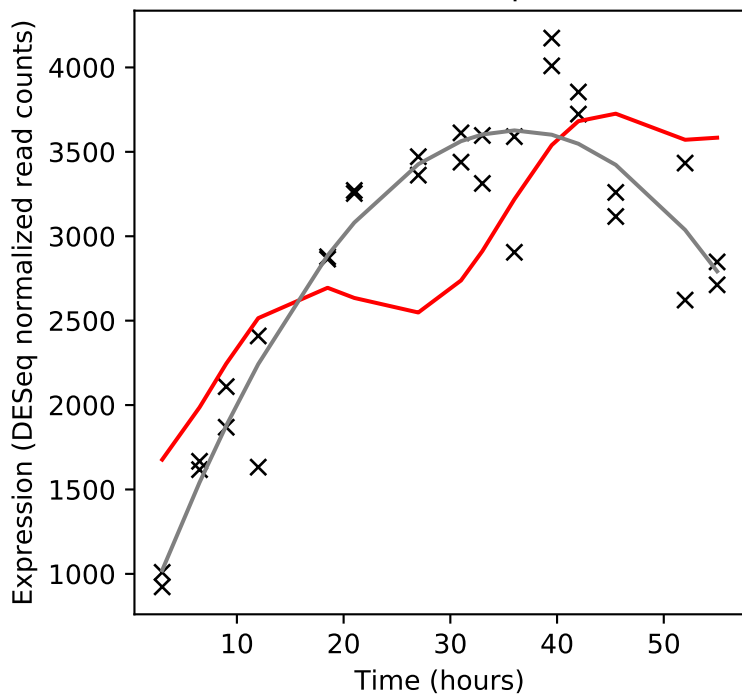

Rv2116/lppK

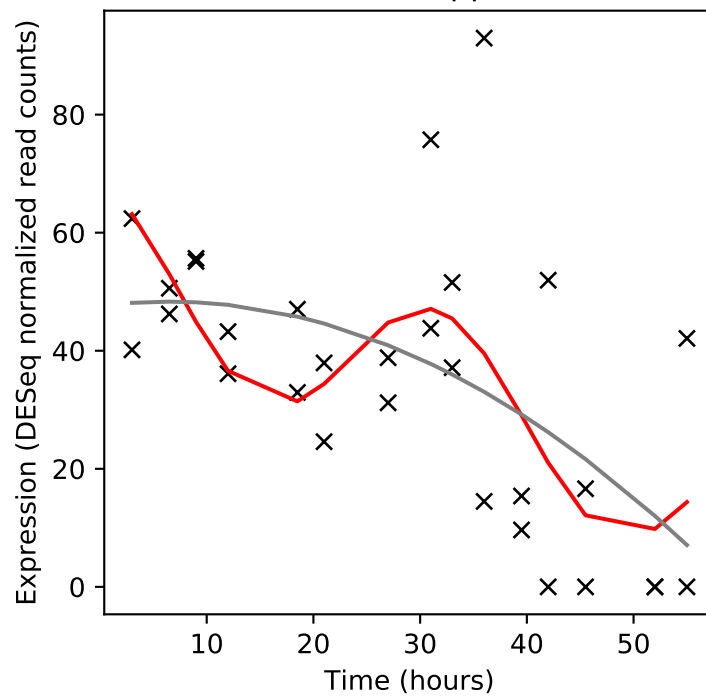

Rv2117/-

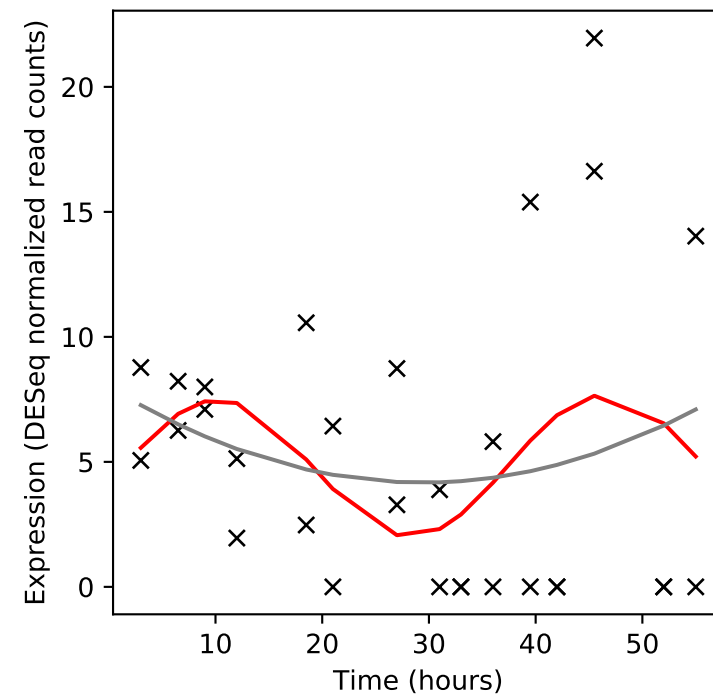

Rv2118c/-

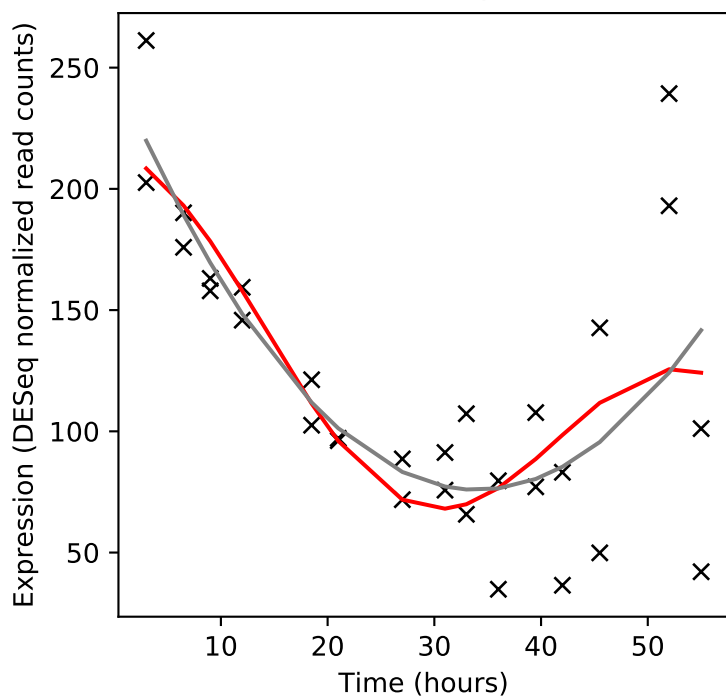

Rv2119/-

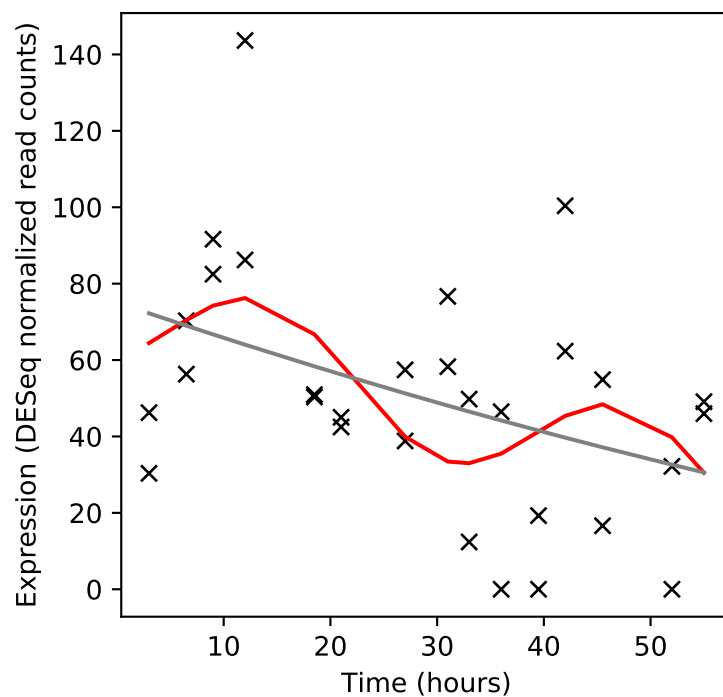

Rv2120c/-

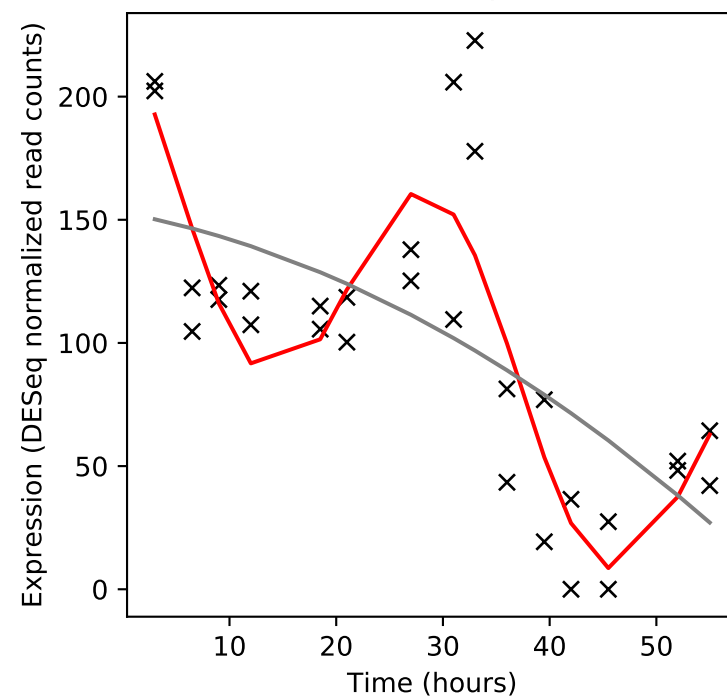

Rv2121c/hisG

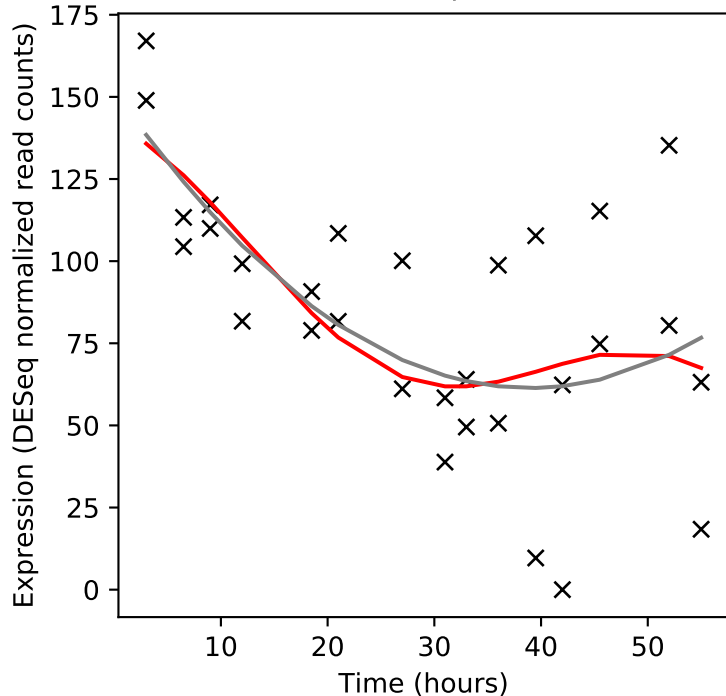

Rv2122c/hisE

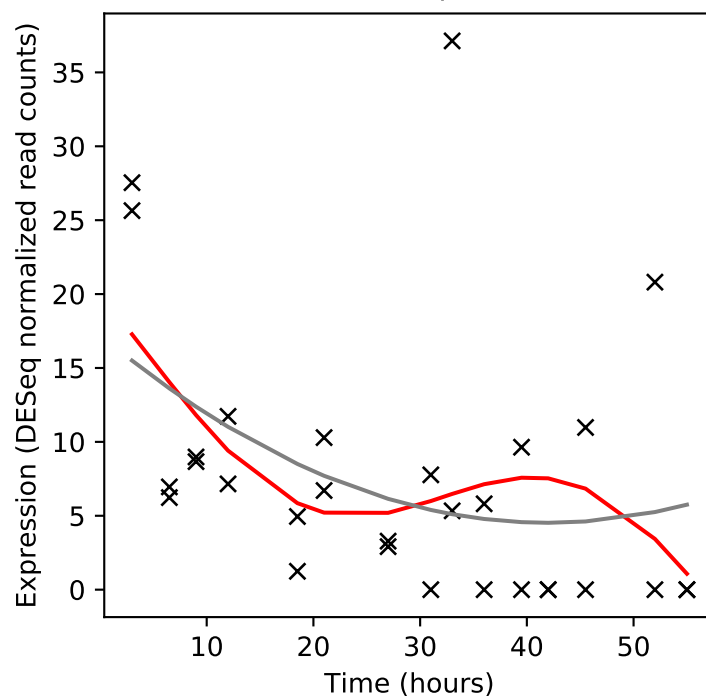

Rv2123/PPE37

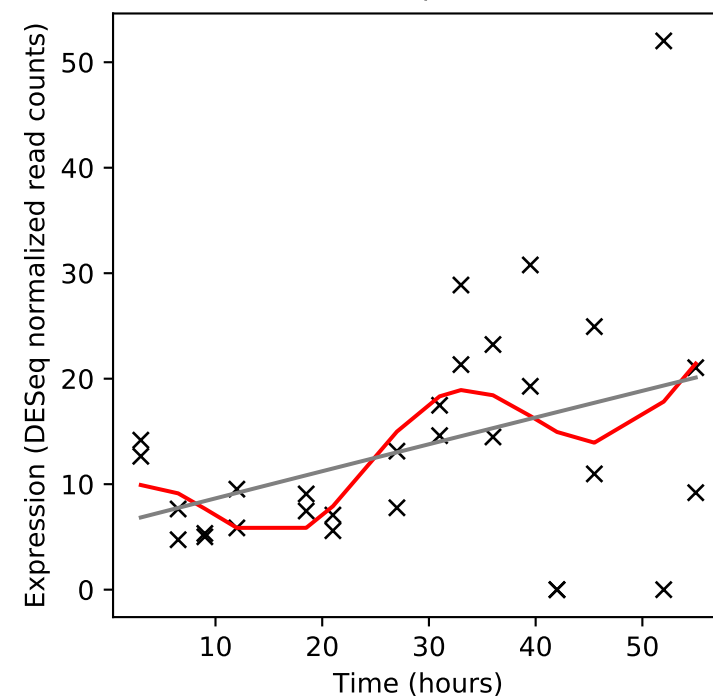

Rv2124c/methH

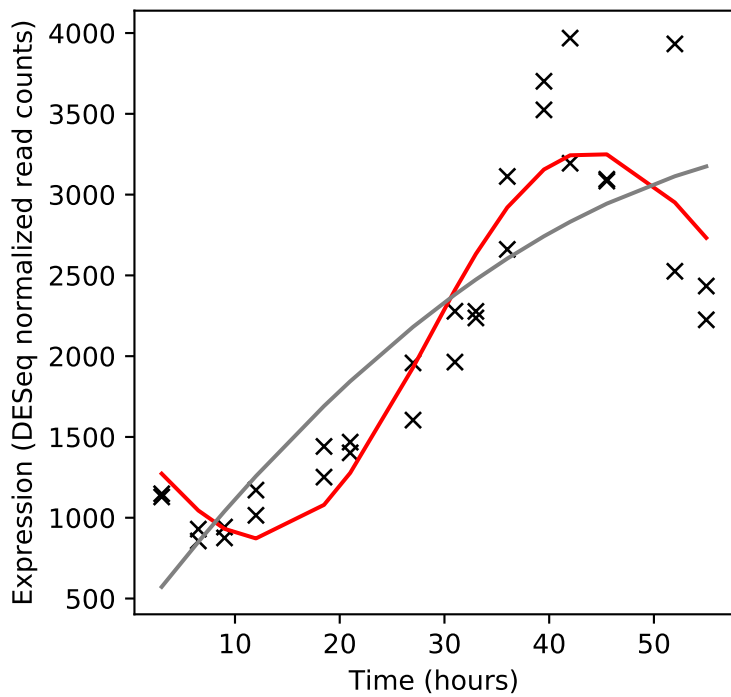

Rv2125/-

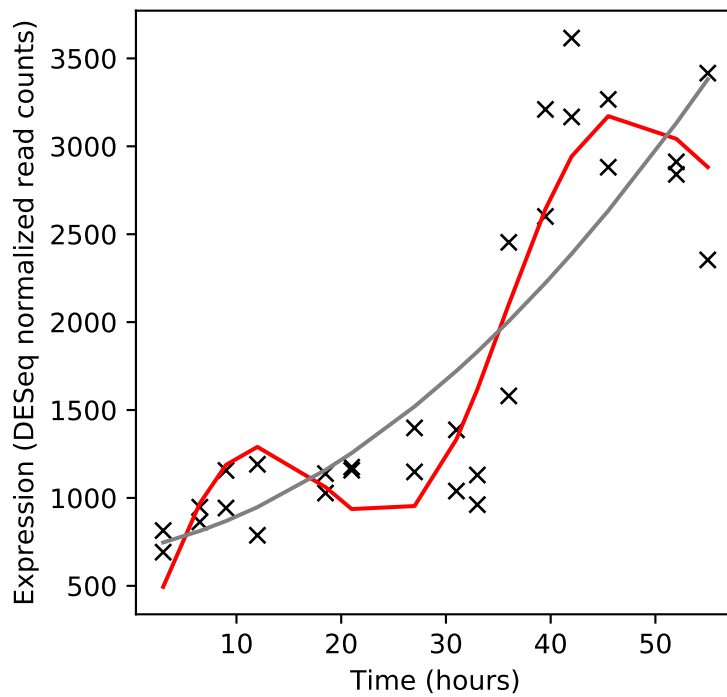

Rv2126c/PE\_PGRS37

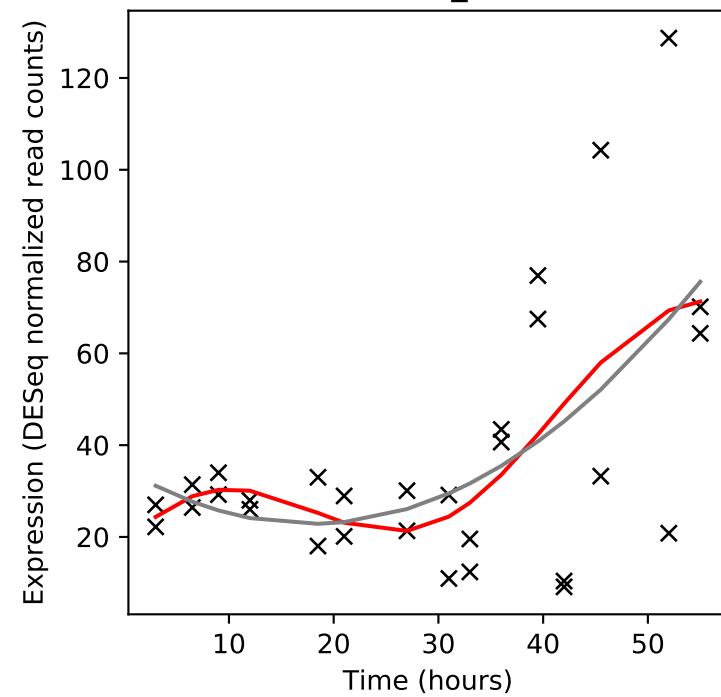

Rv2127/ansP1

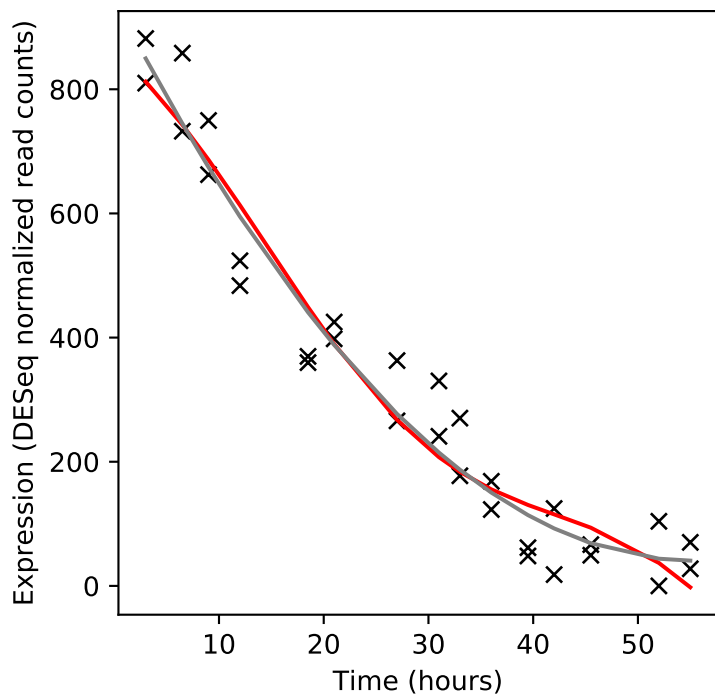

Rv2128/-

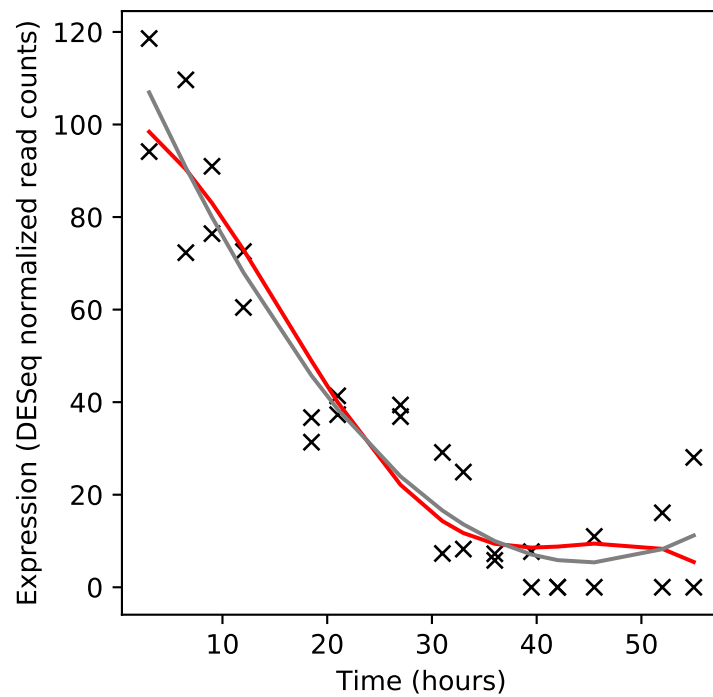

Rv2129c/-

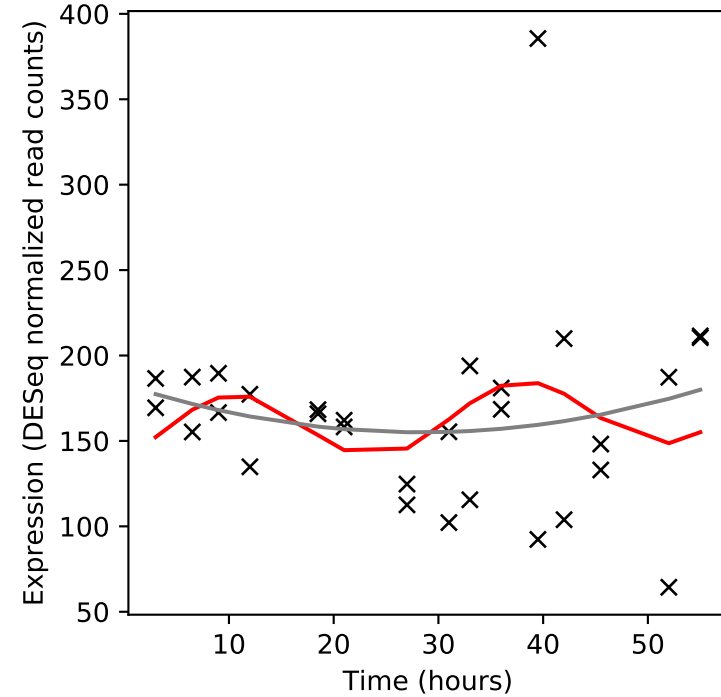

Rv2130c/mshC

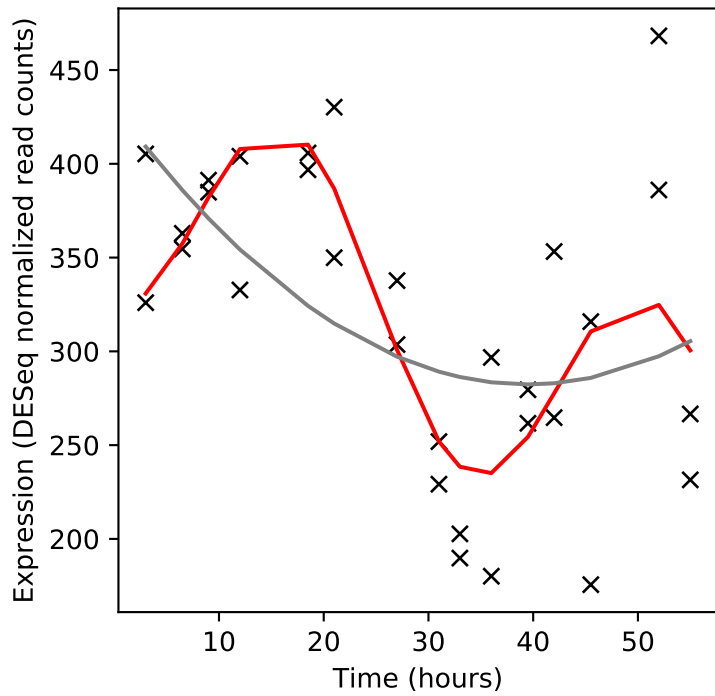

Rv2131c/cysQ

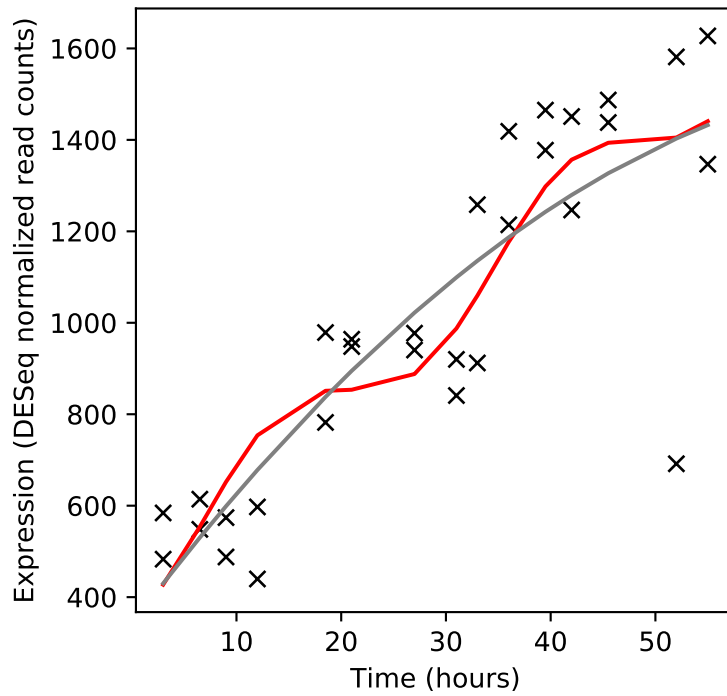

Rv2132/-

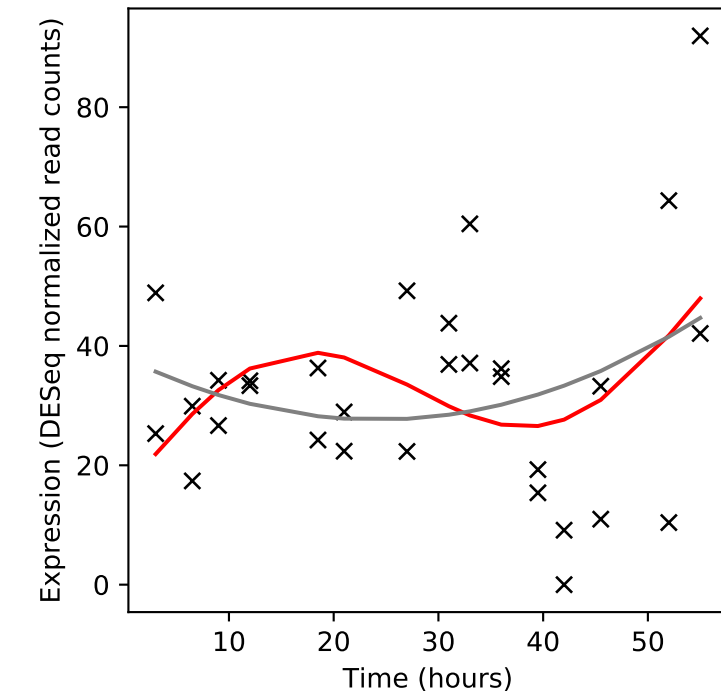

Rv2133c/-

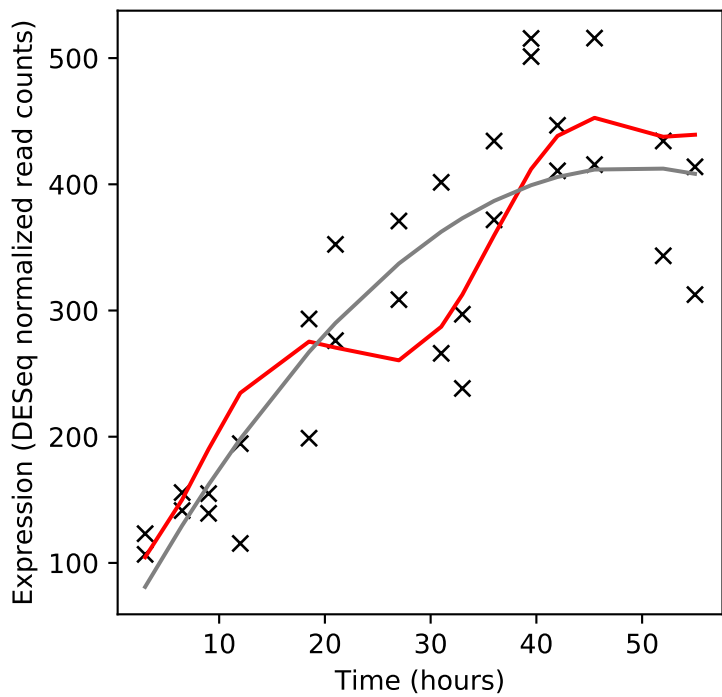

Rv2134c/-

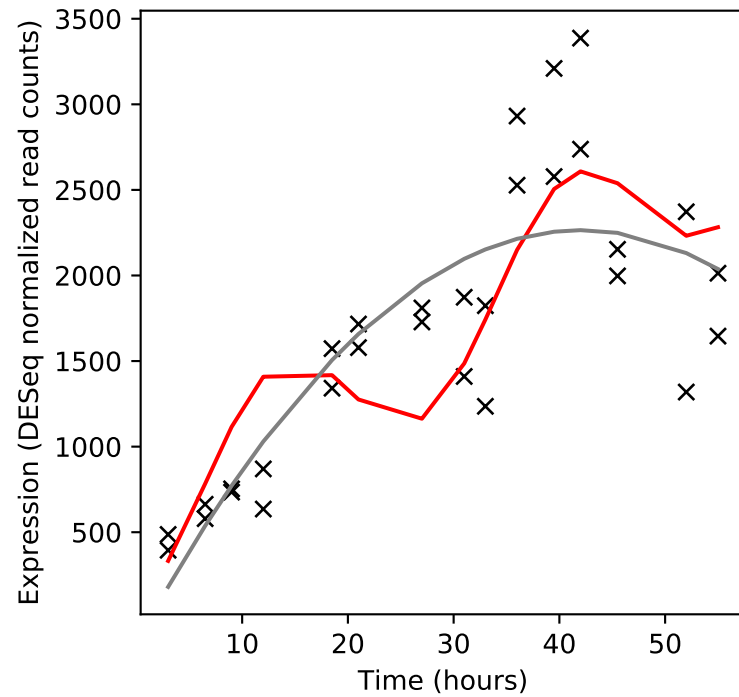

Rv2135c/-

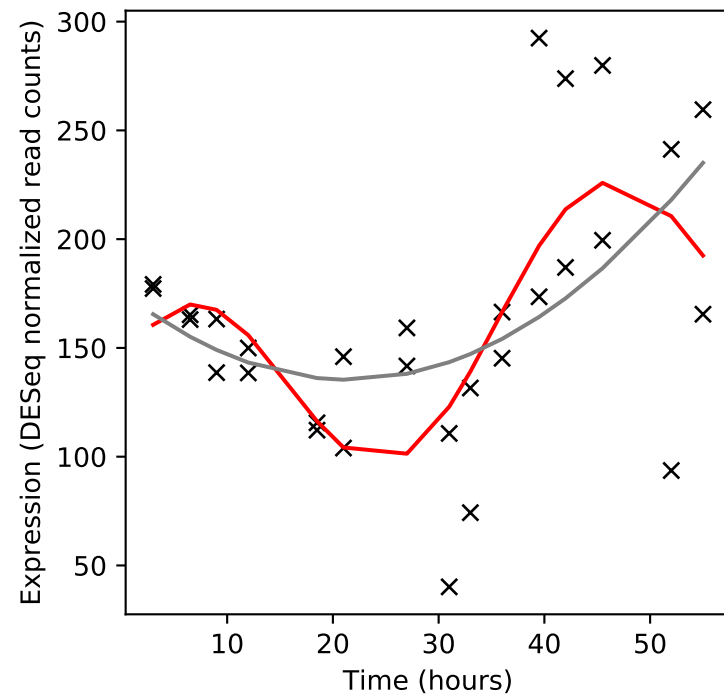

Rv2136c/-

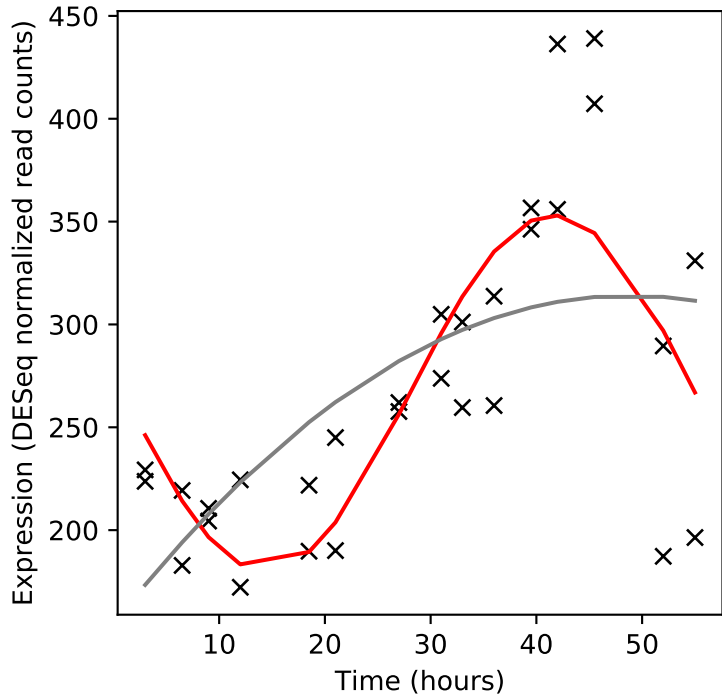

Rv2137c/-

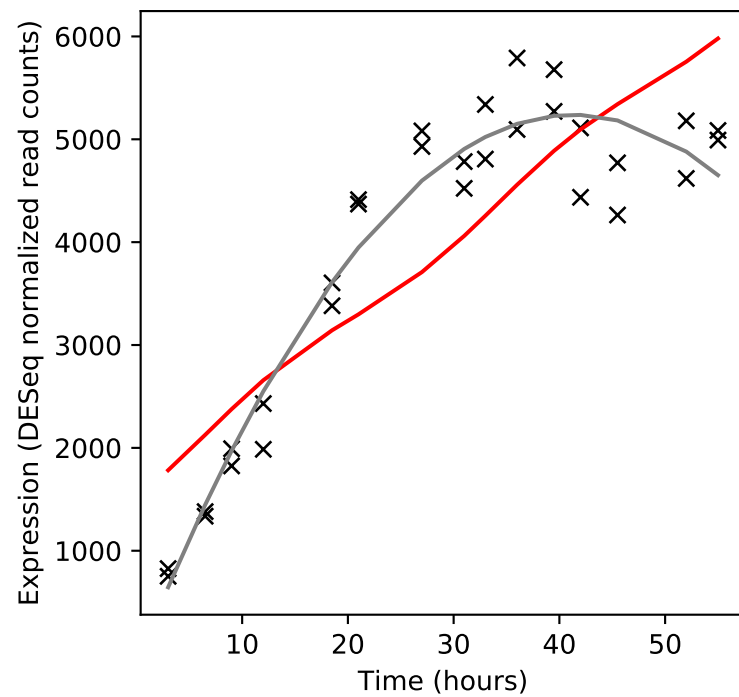

Rv2138/lppL

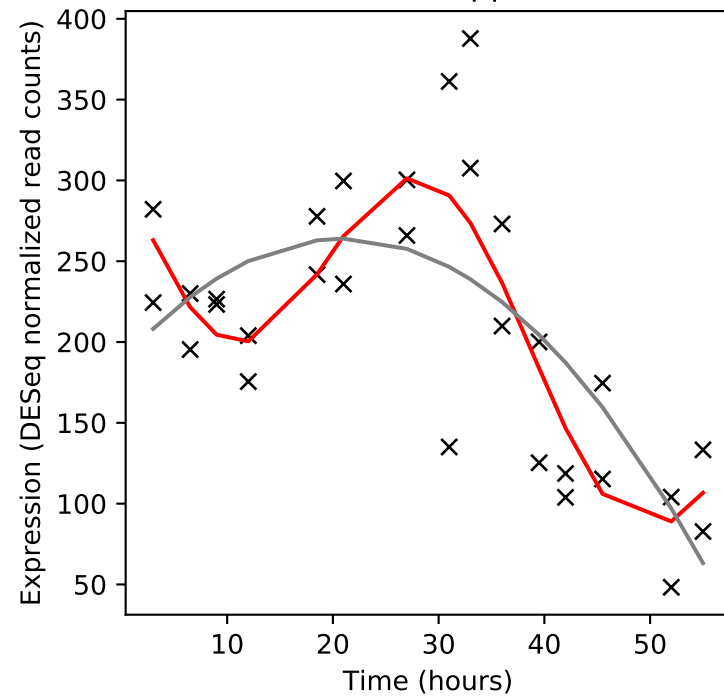

Rv2139/pyrD

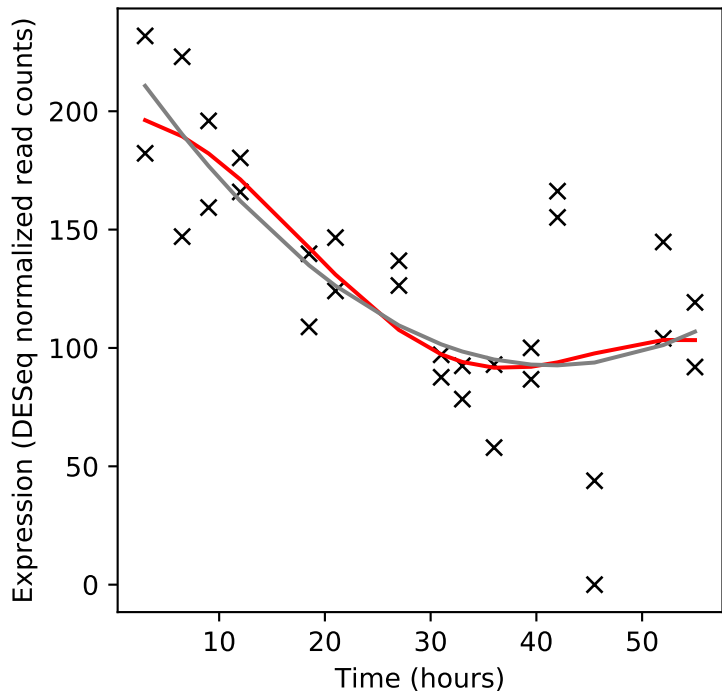

Rv2140c/TB18.6

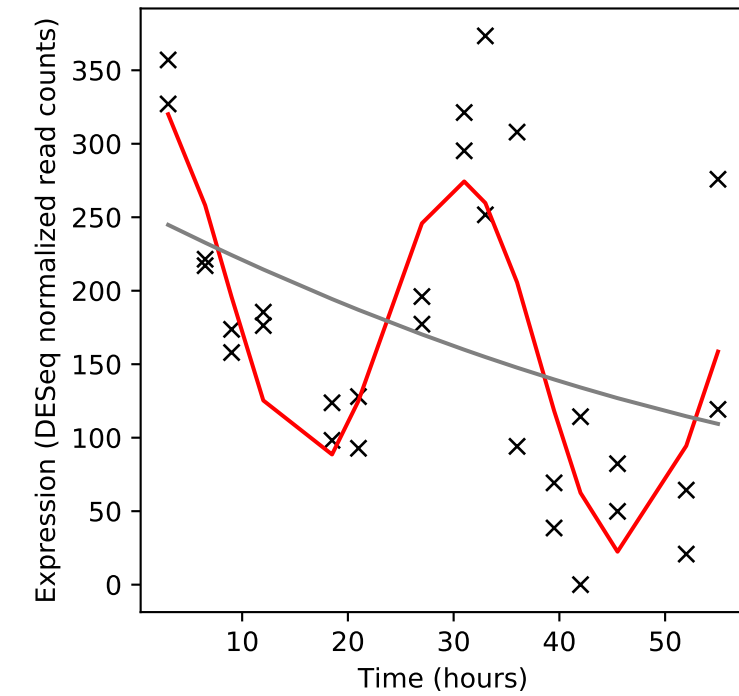

Rv2141c/-

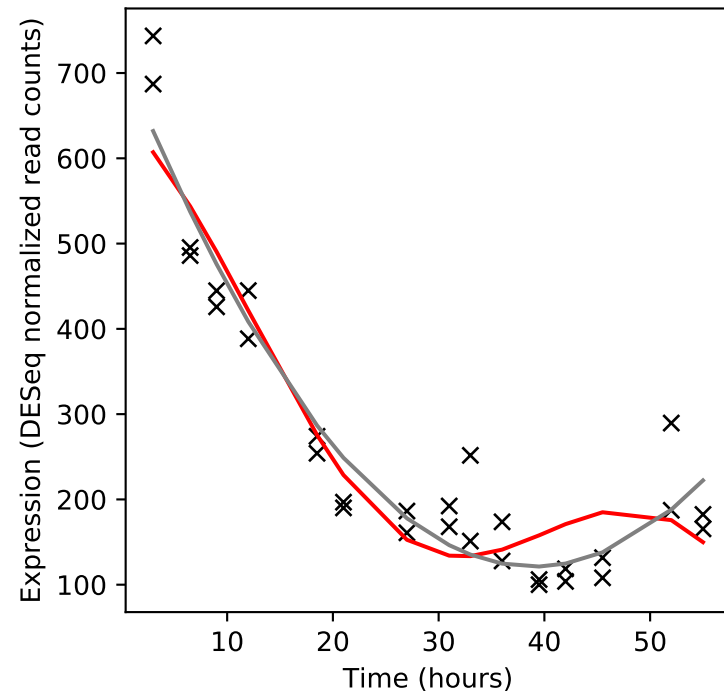

Rv2142c/parE2

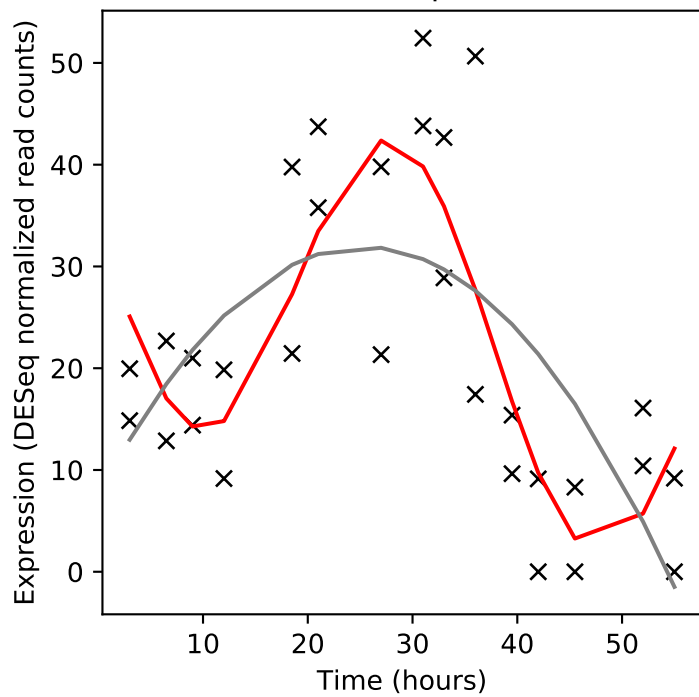

Rv2142A/parD2

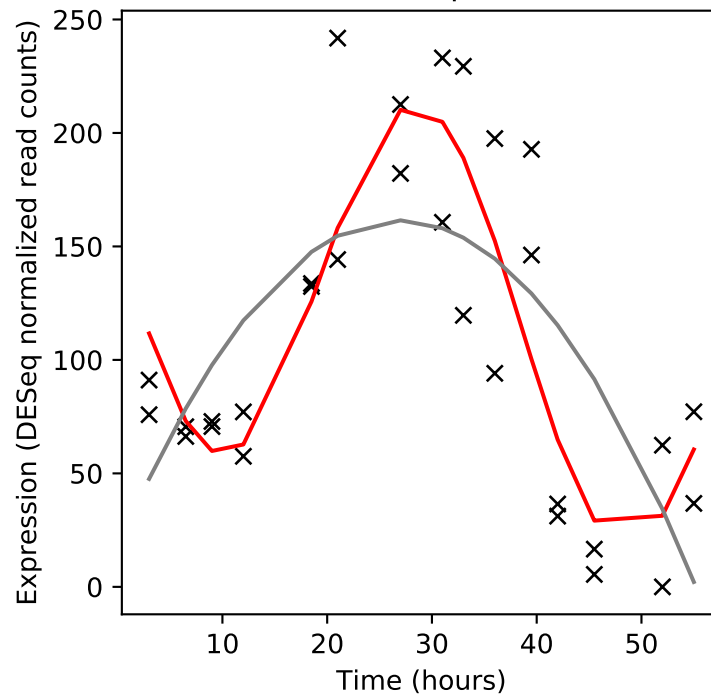

Rv2143/-

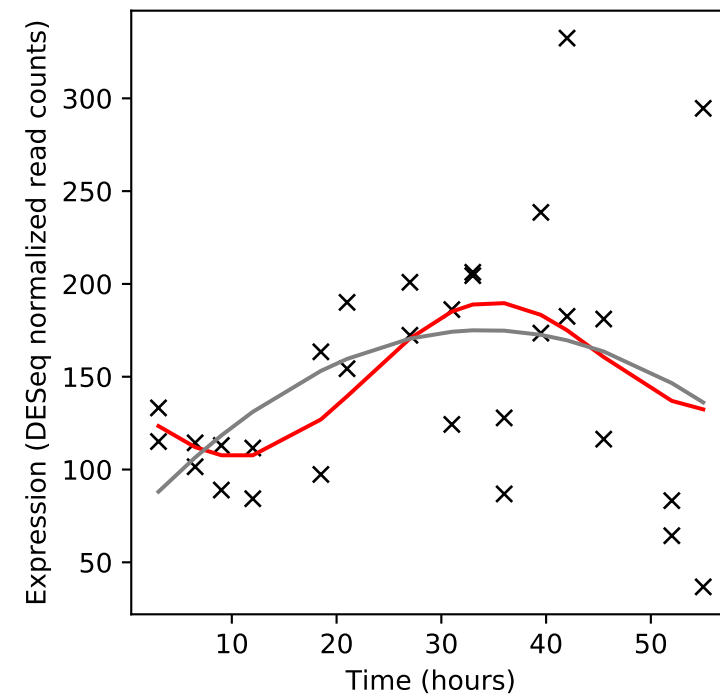

Rv2144c/-

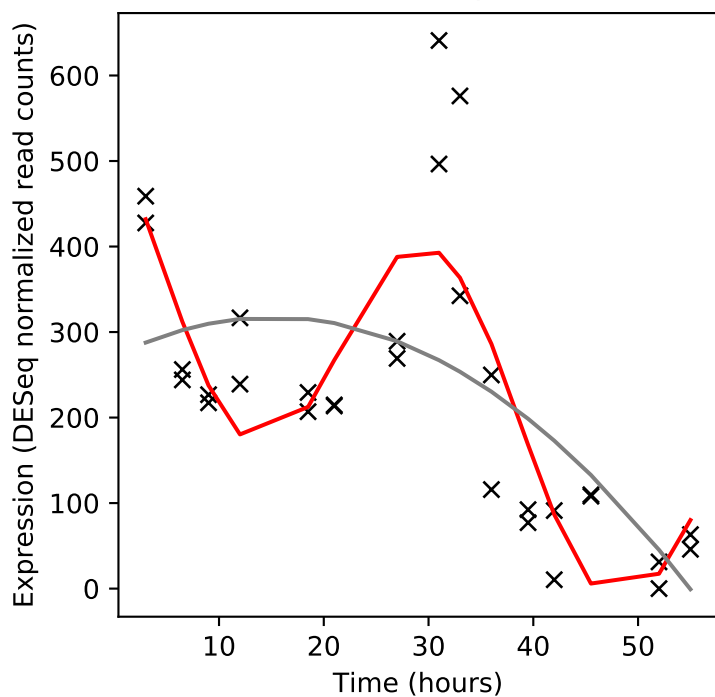

Rv2145c/wag31

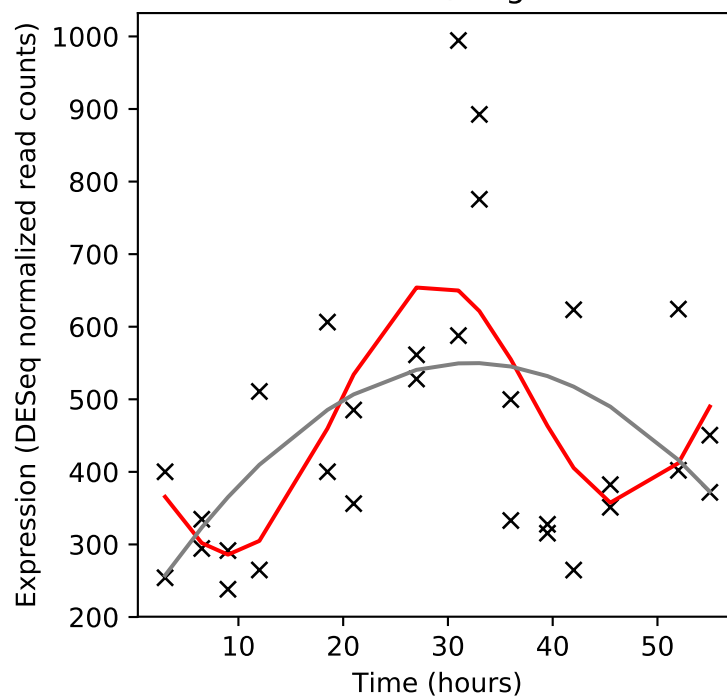

Rv2146c/-

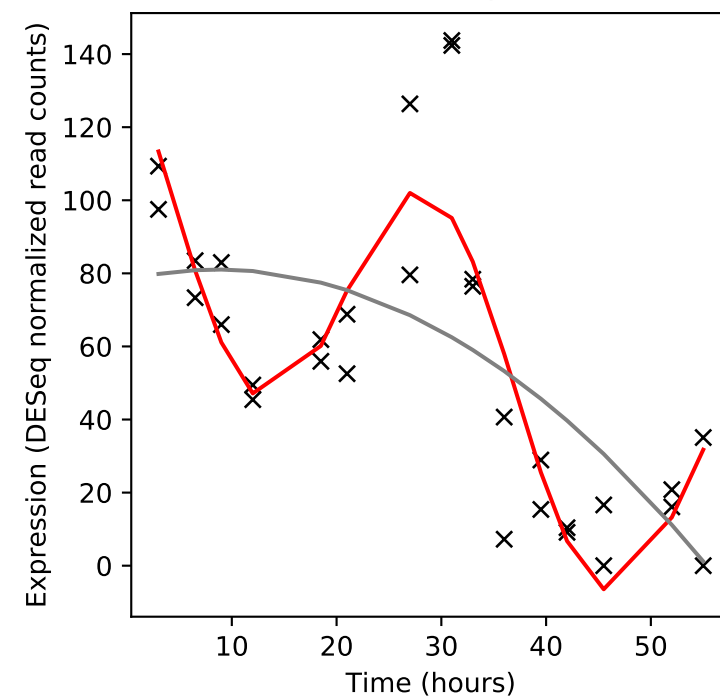

Rv2147c/-

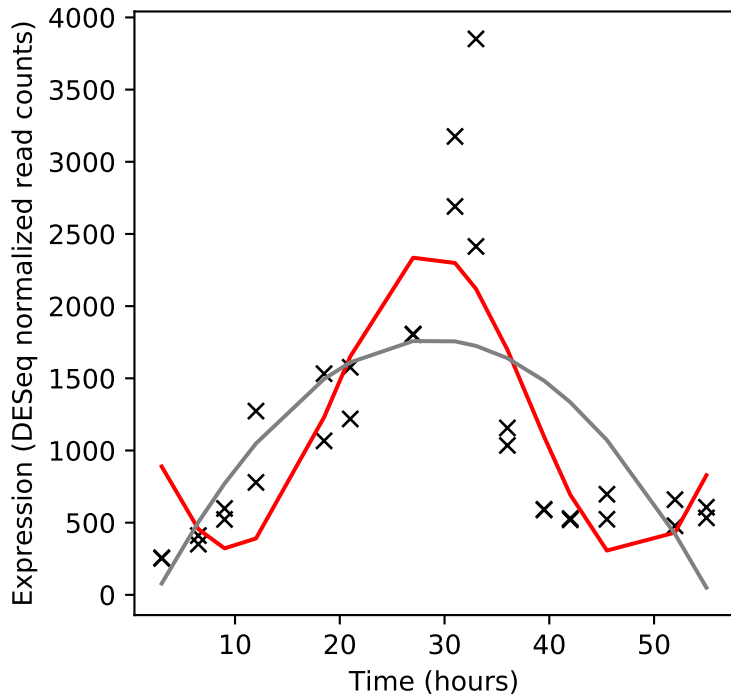

Rv2148c/-

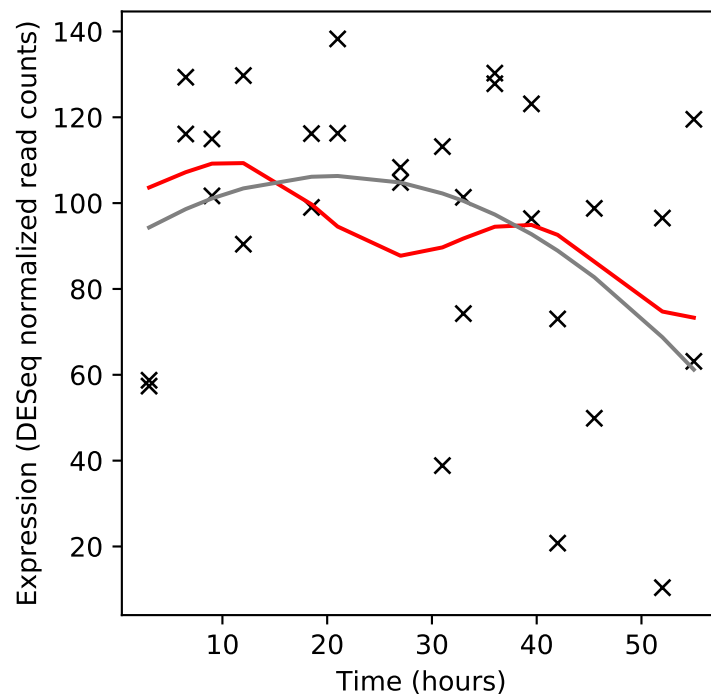

Rv2149c/yfiH

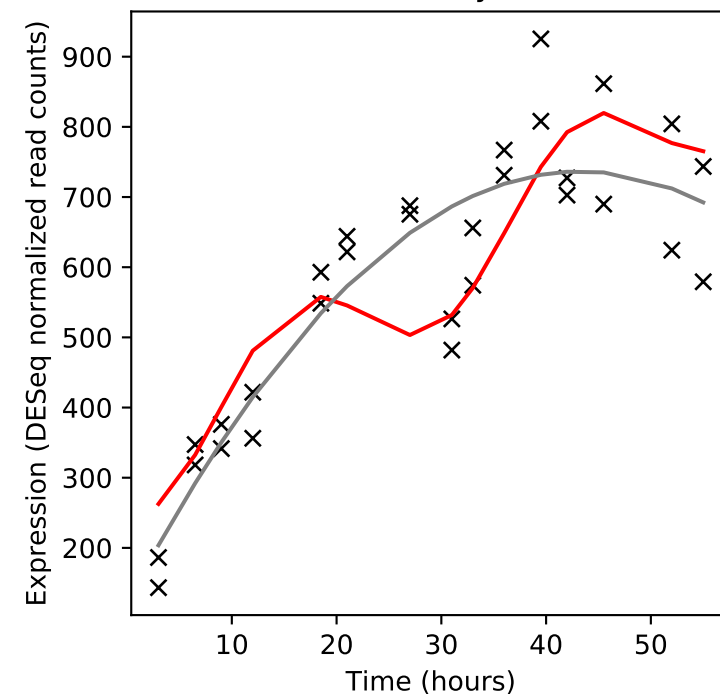

Rv2150c/ftsZ

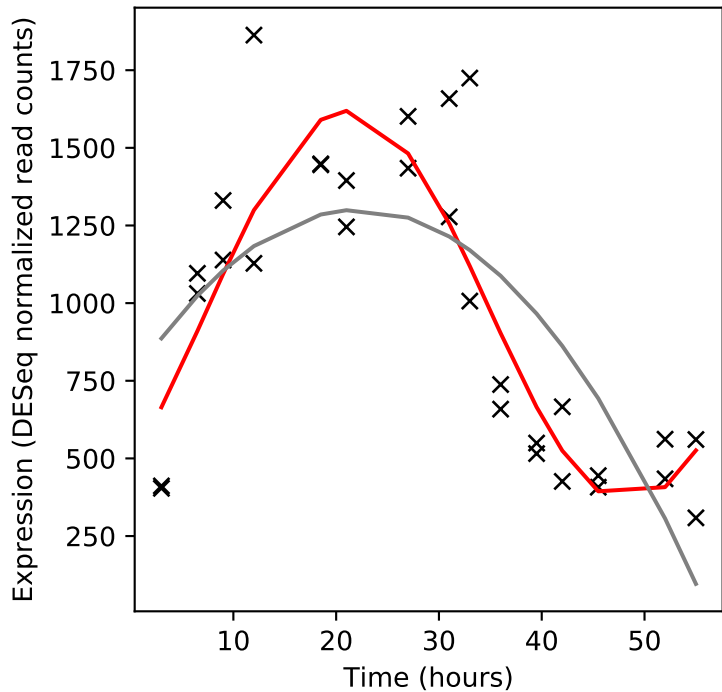

Rv2151c/ftsQ

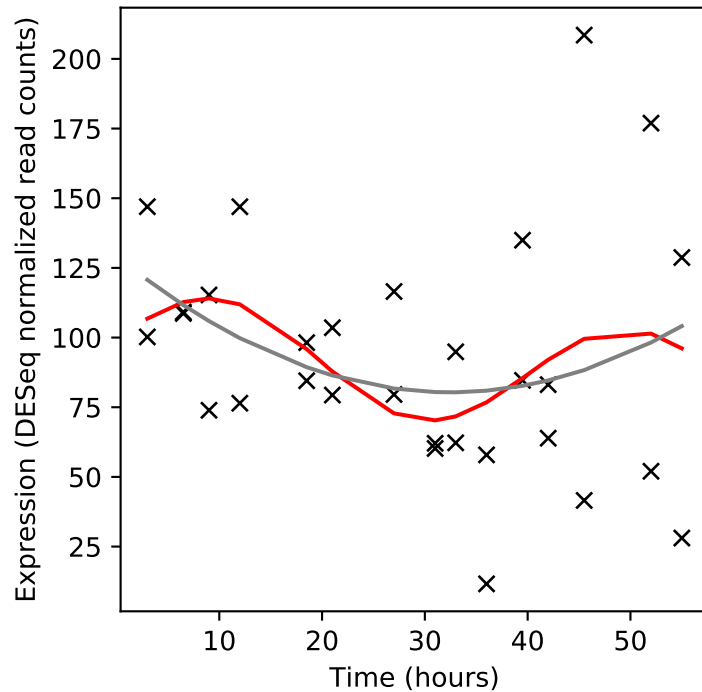

Rv2152c/murC

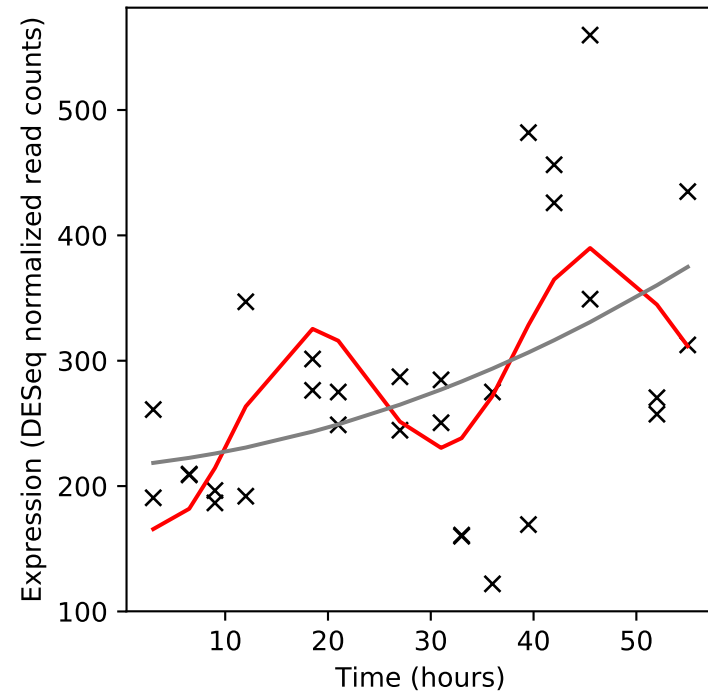

Rv2153c/murG

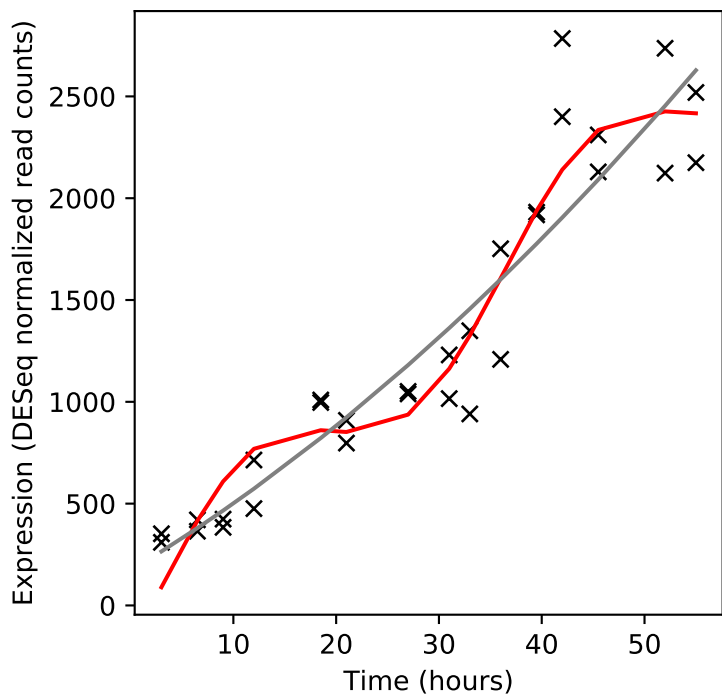

Rv2154c/ftsW

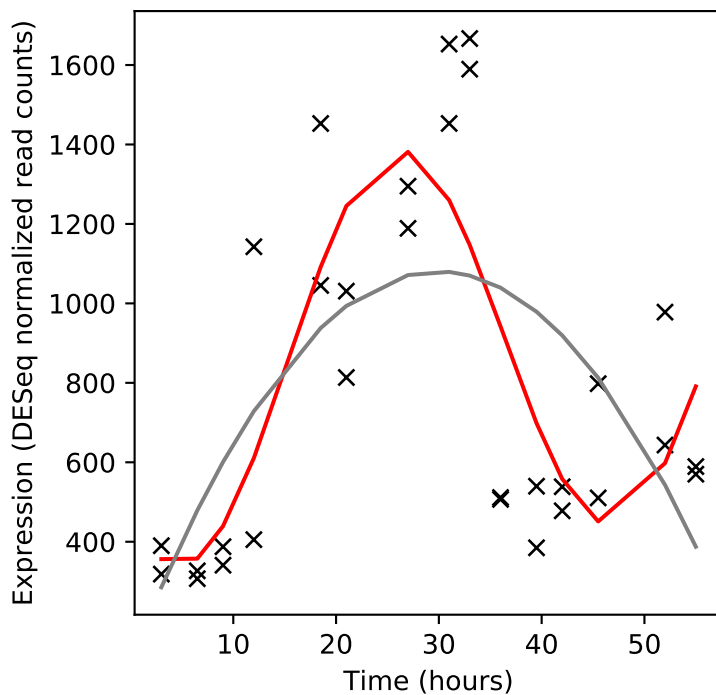

Rv2155c/murD

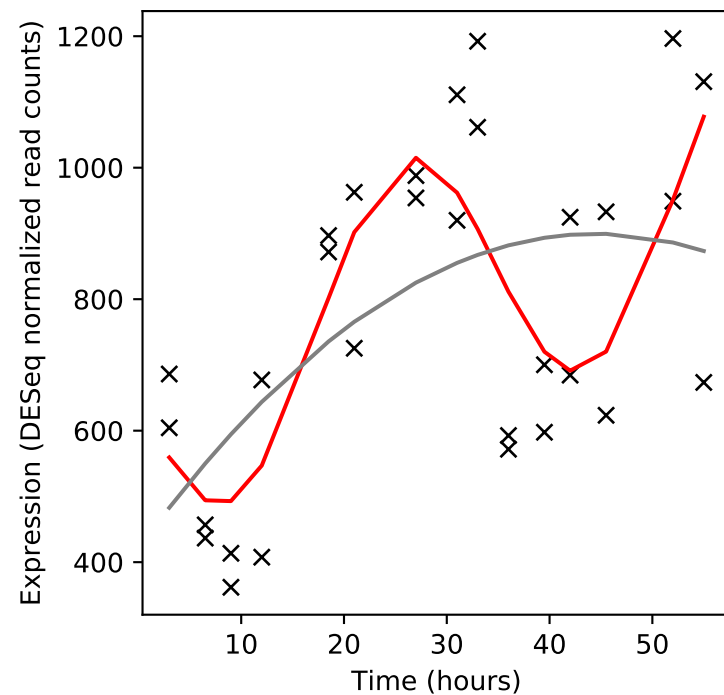

Rv2156c/murX

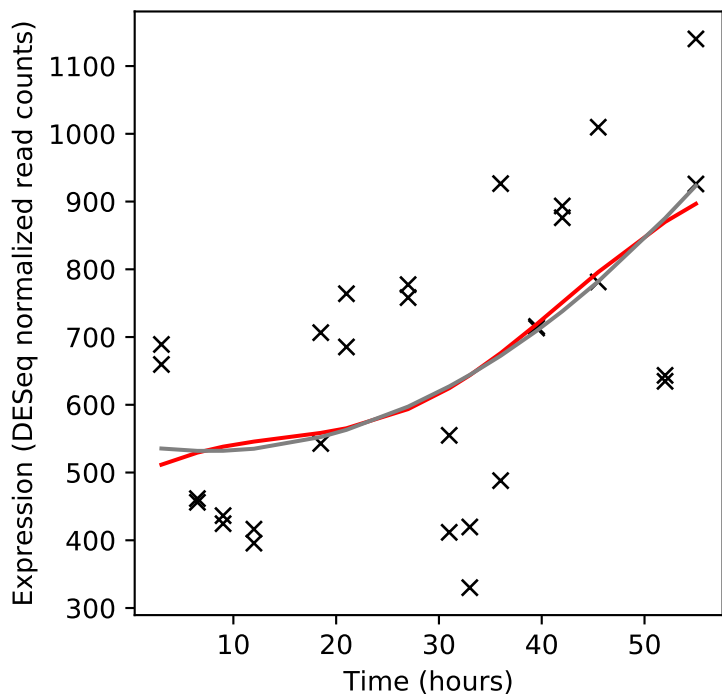

Rv2157c/murF

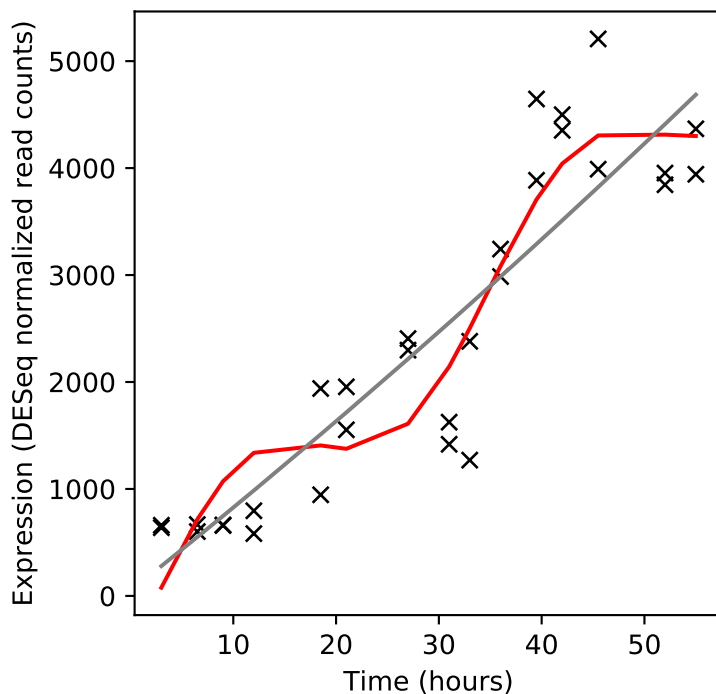

Rv2158c/murE

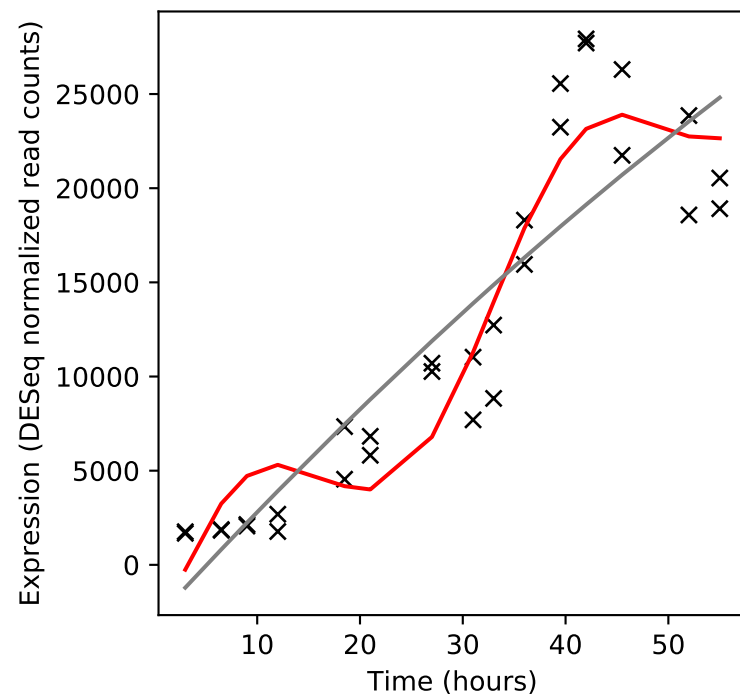

Rv2159c/-

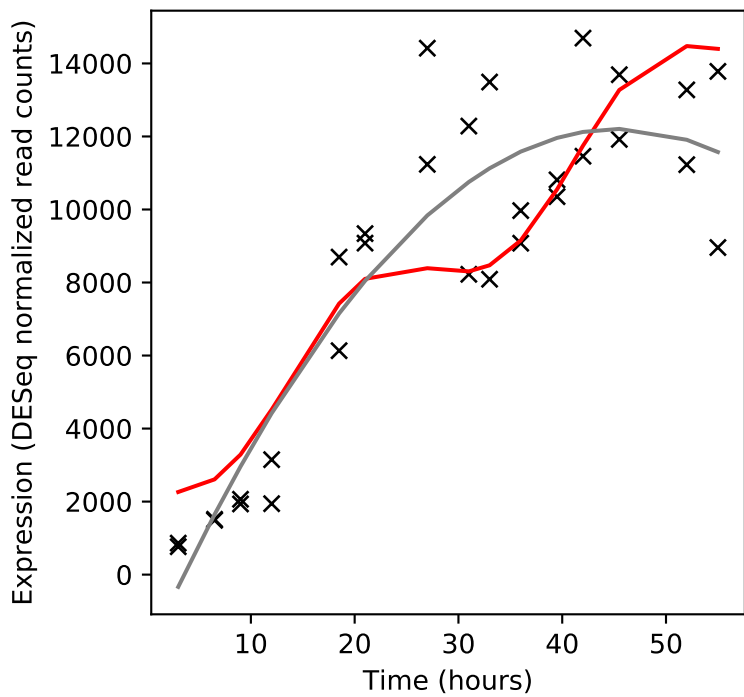

Rv2160A/-

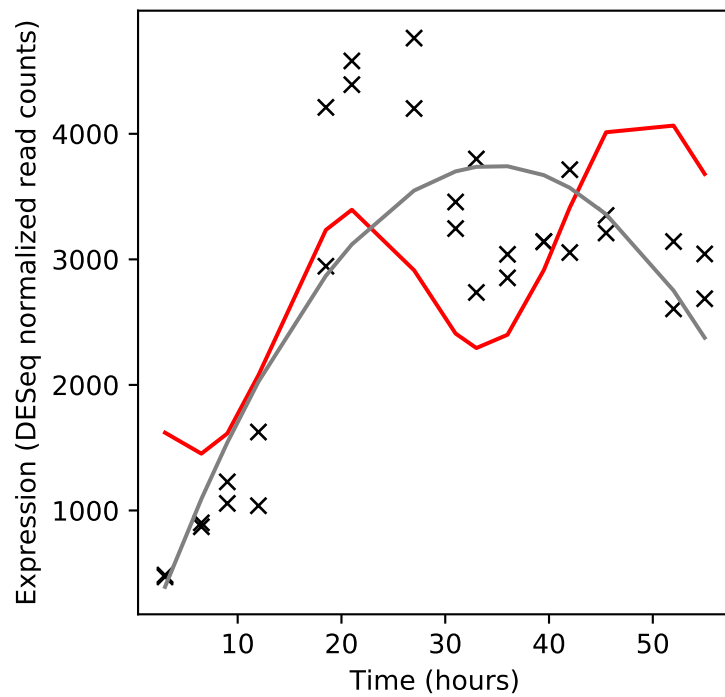

Rv2160c/-

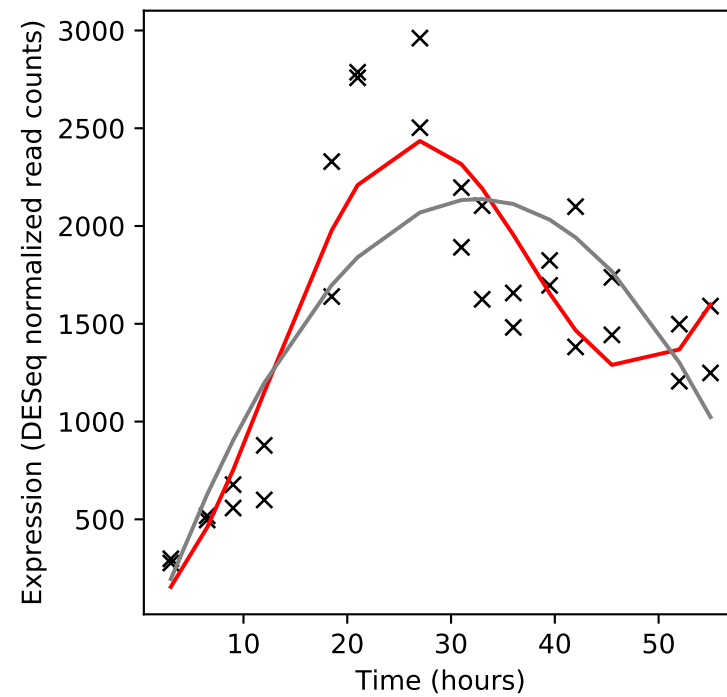

Rv2161c/-

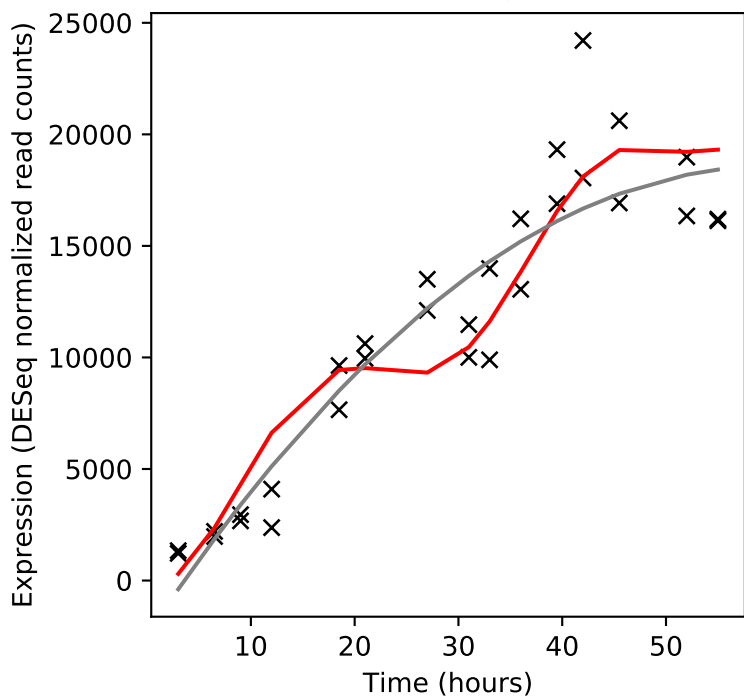

Rv2162c/PE\_PGRS38

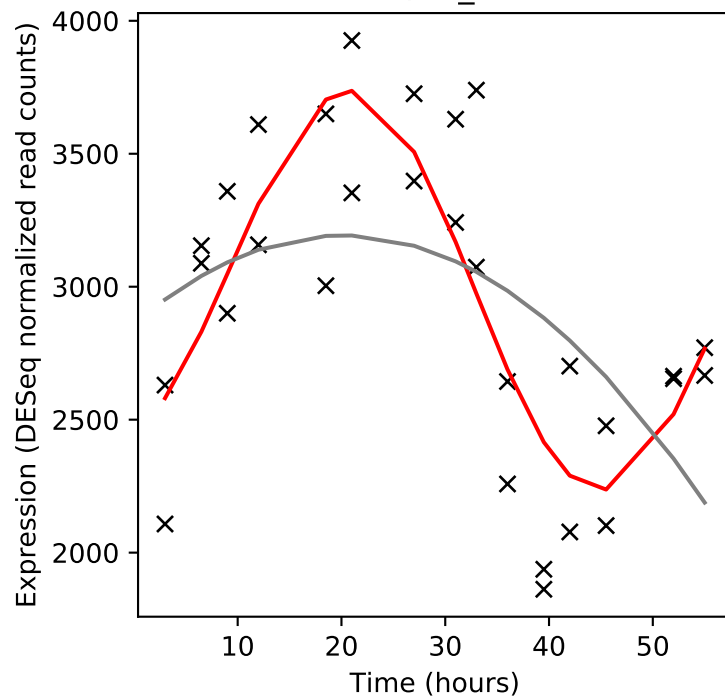

Rv2163c/pbpB

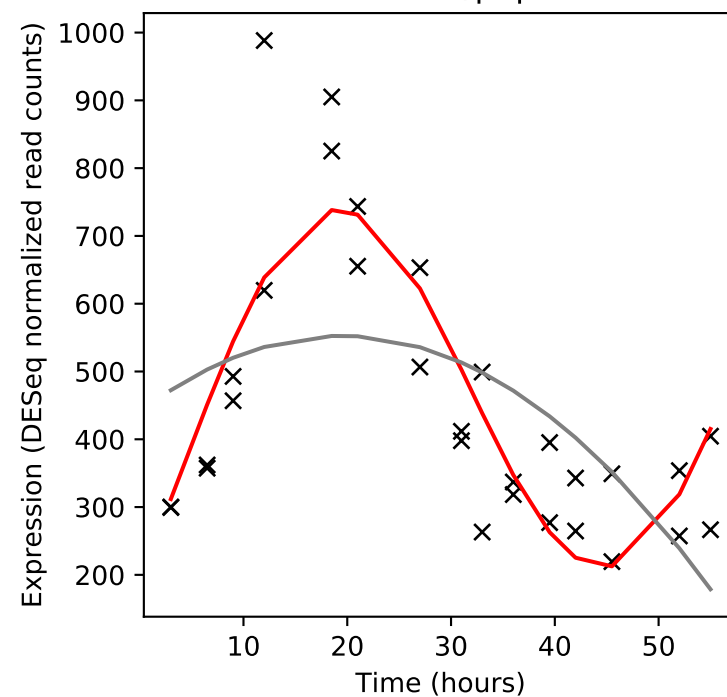

Rv2164c/-

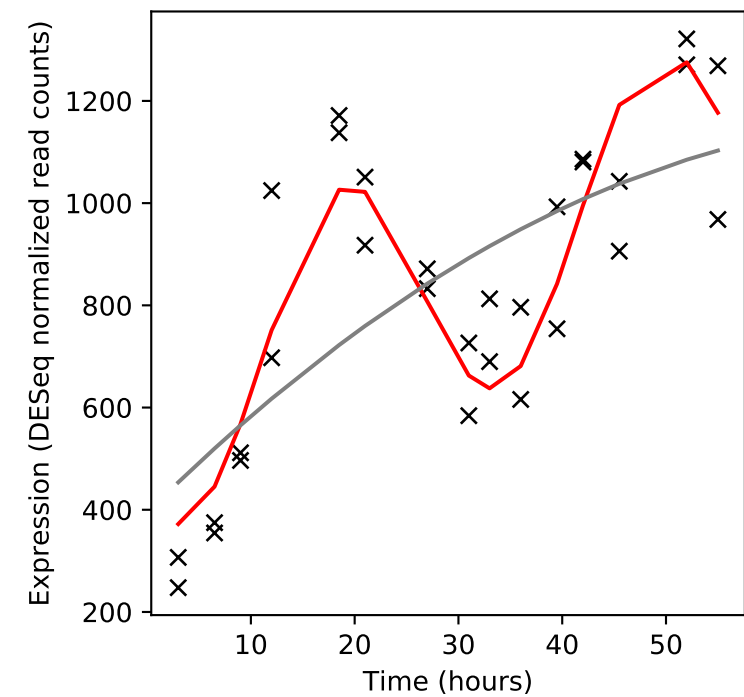

Rv2165c/-

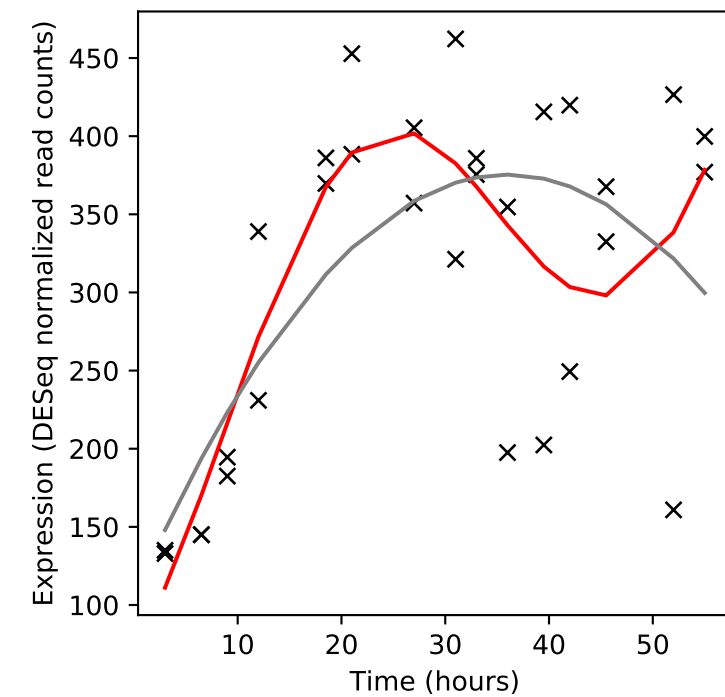

Rv2166c/-

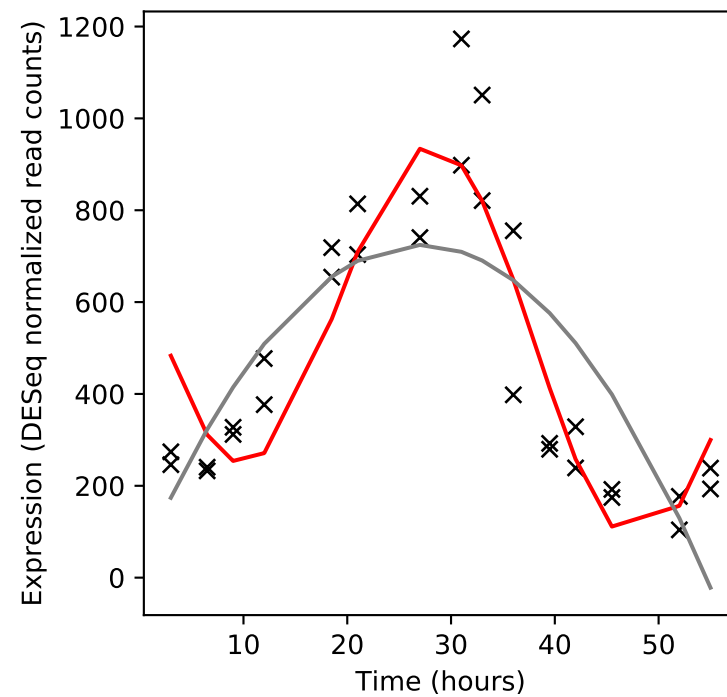



Rv2167c/-

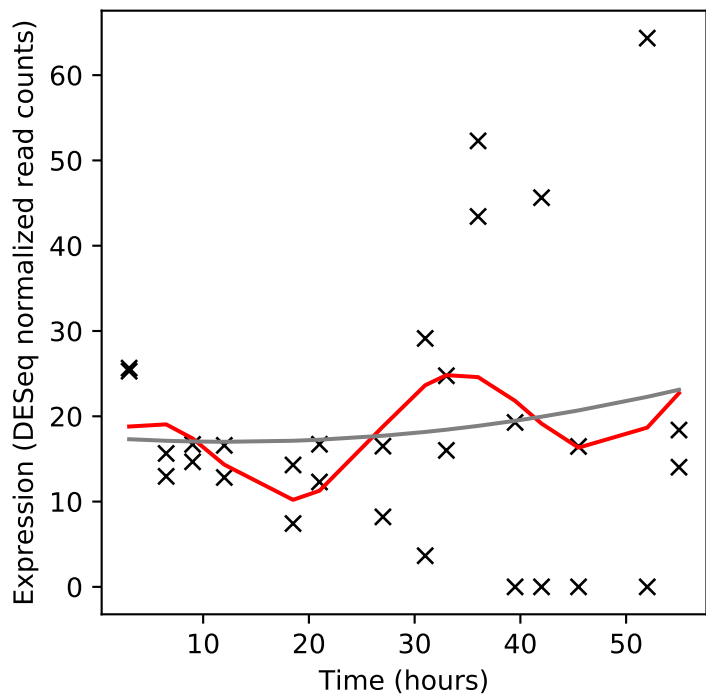

Rv2168c/-

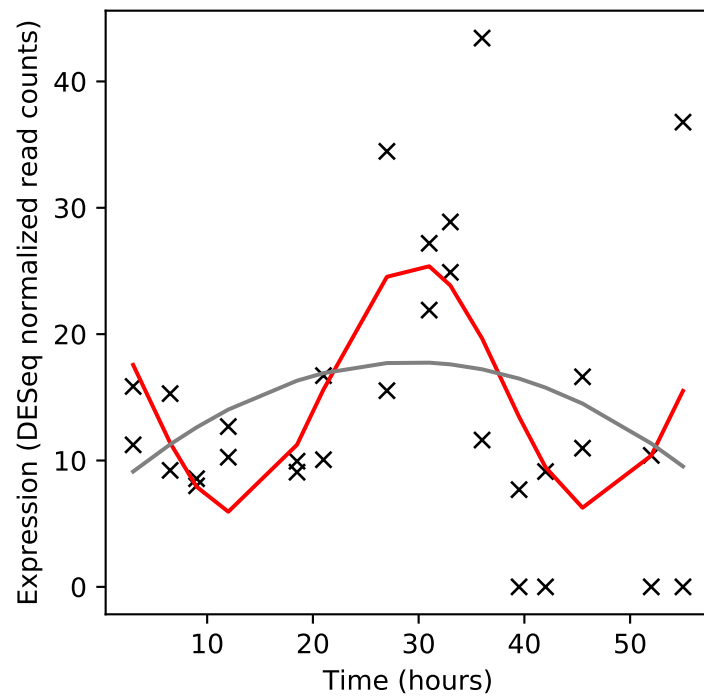

Rv2169c/-

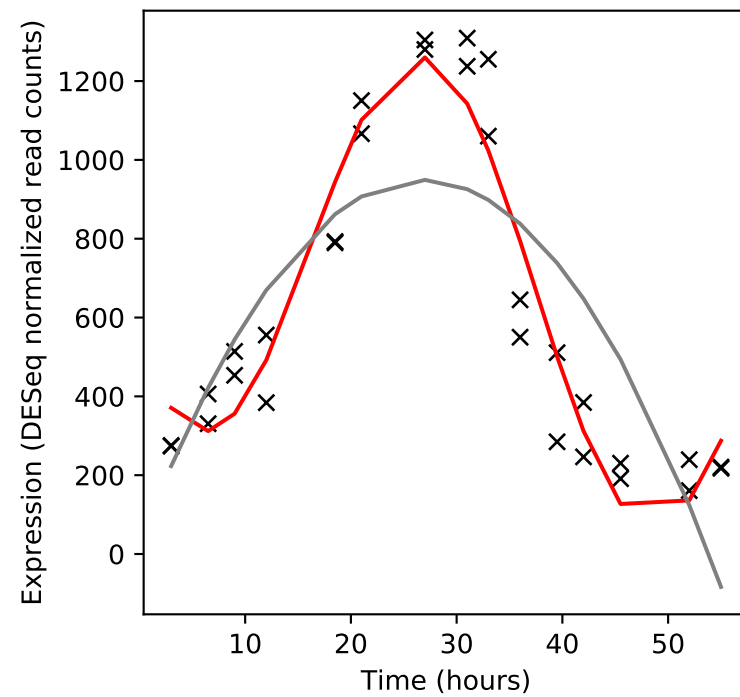

Rv2170/-

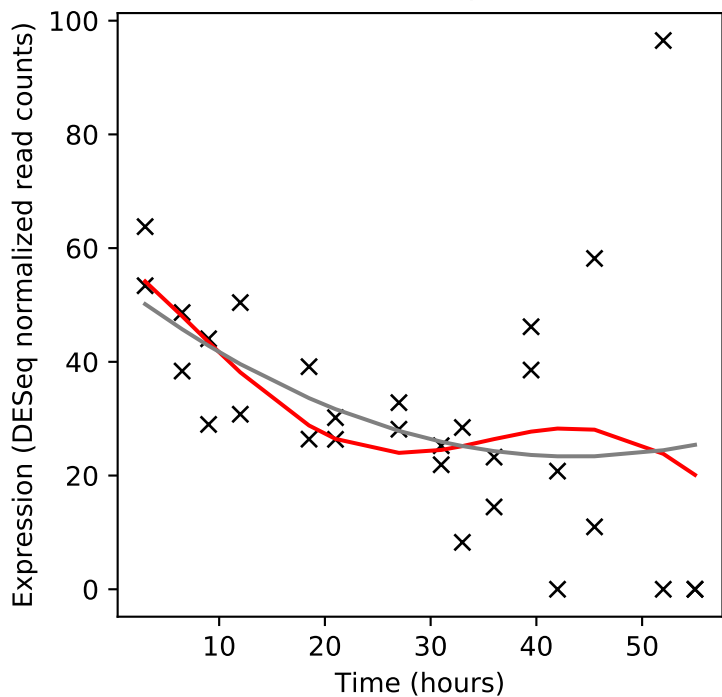

Rv2171/lppM

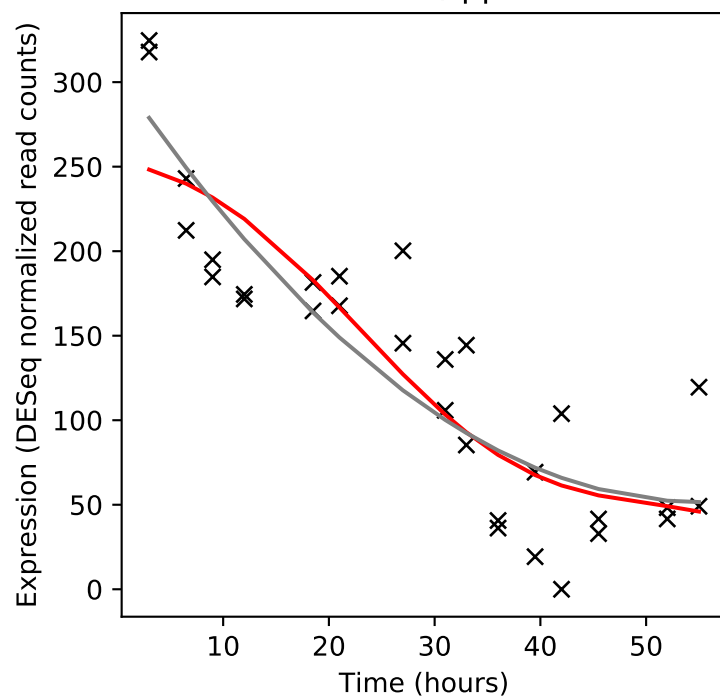

Rv2172c/-

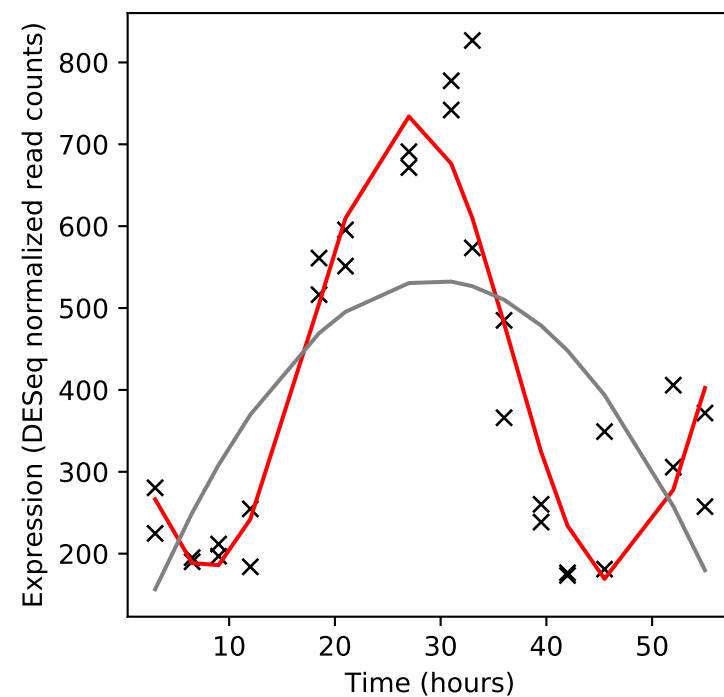

Rv2173/idsA2

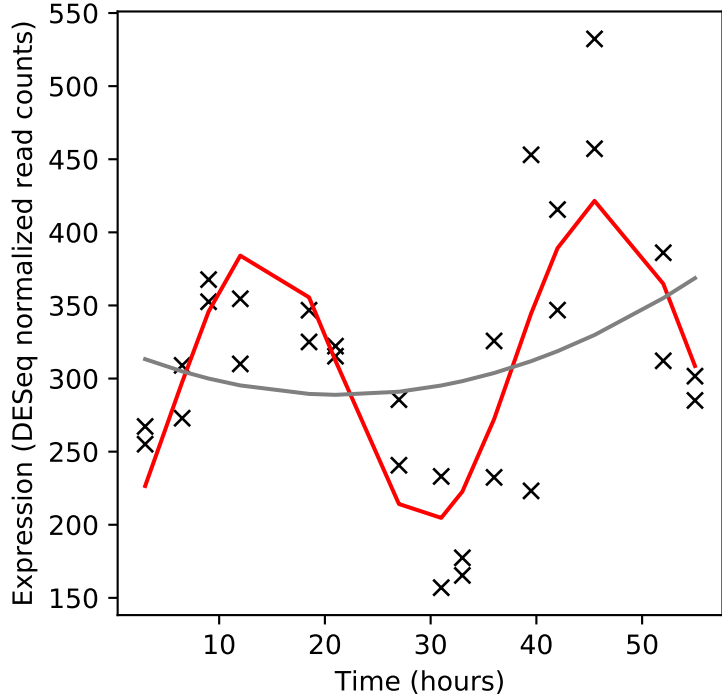

Rv2174/mptA

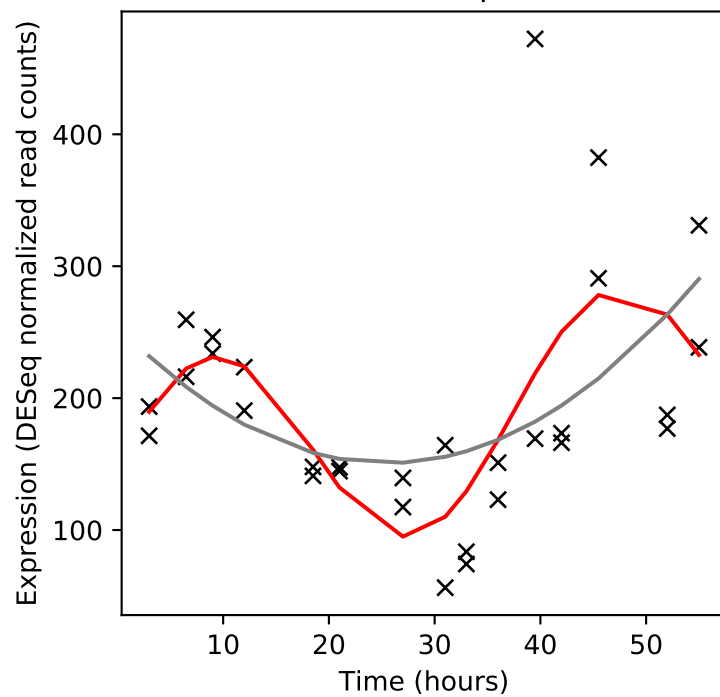

Rv2175c/-

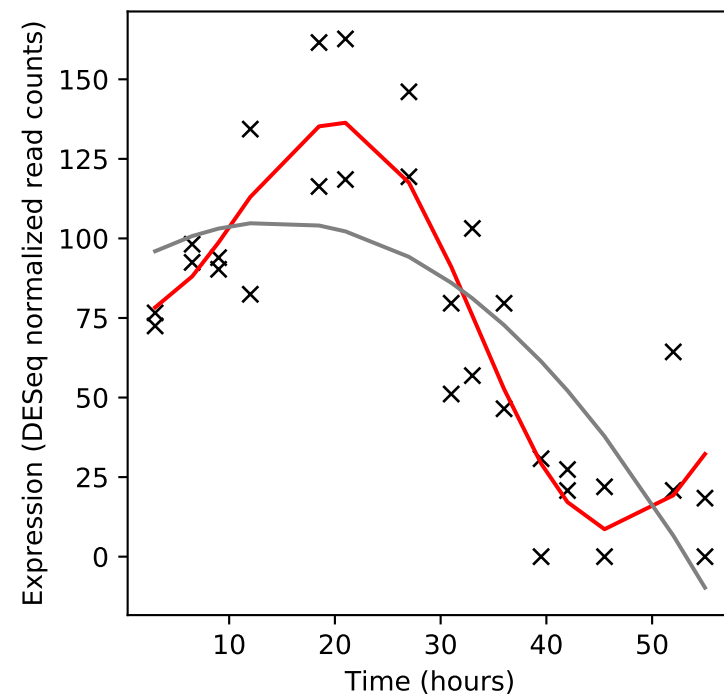

Rv2176/pknL

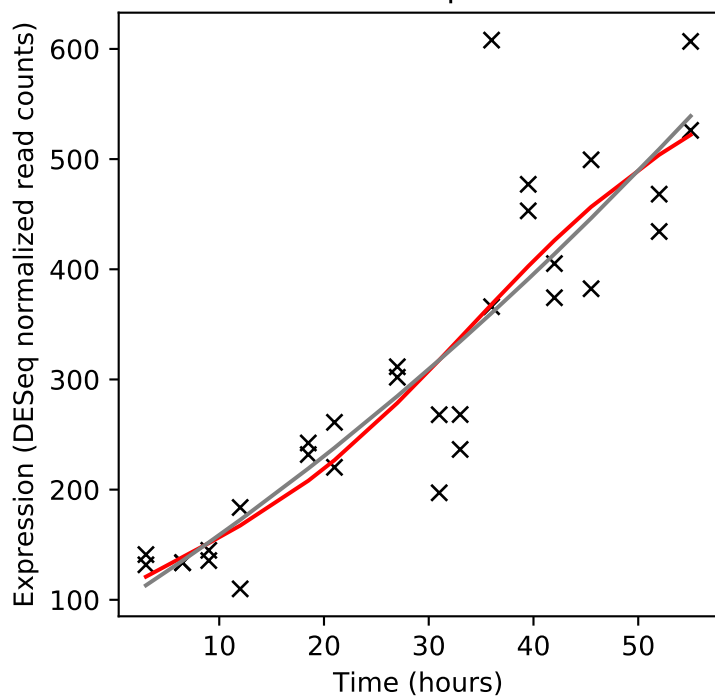

Rv2177c/-

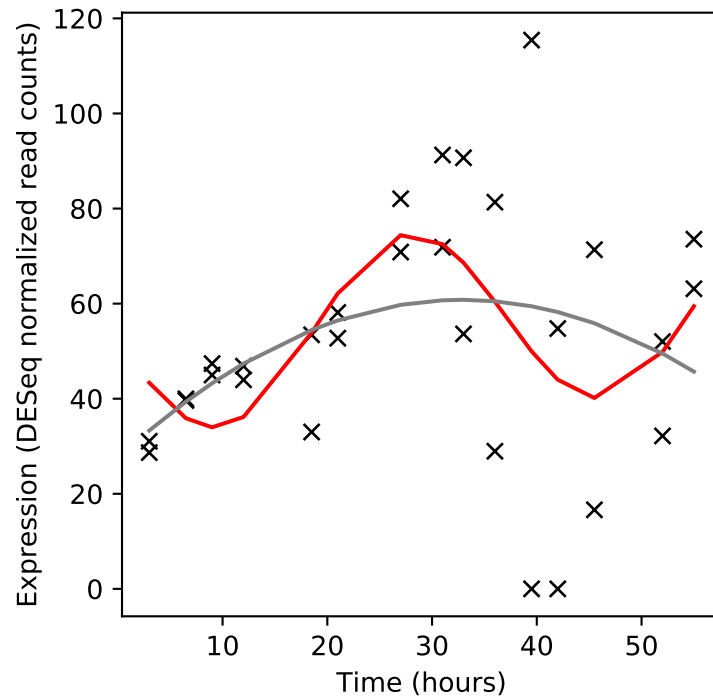

Rv2178c/aroG

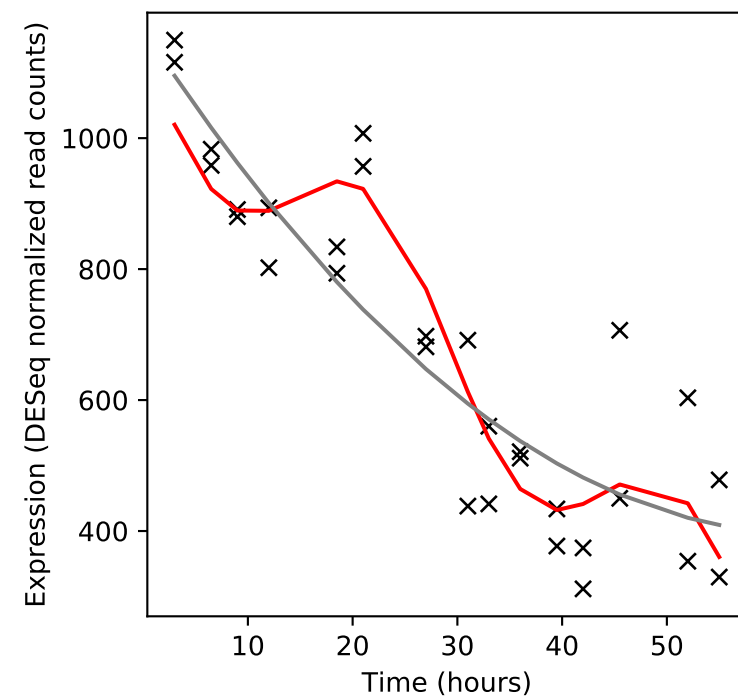

Rv2179c/-

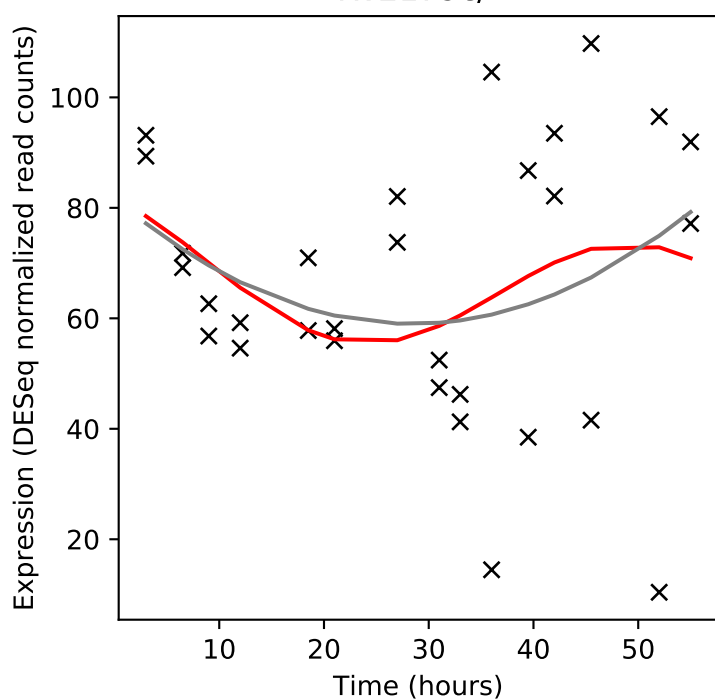

Rv2180c/-

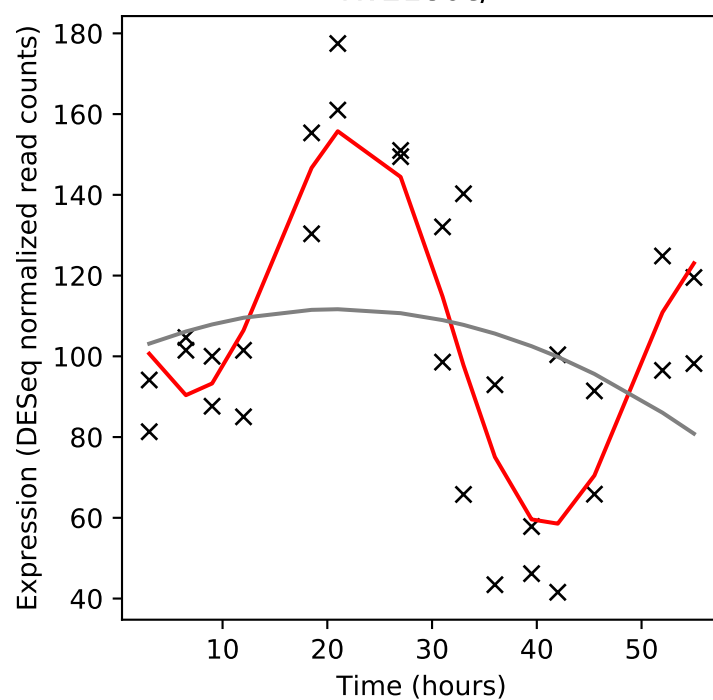

Rv2181/-

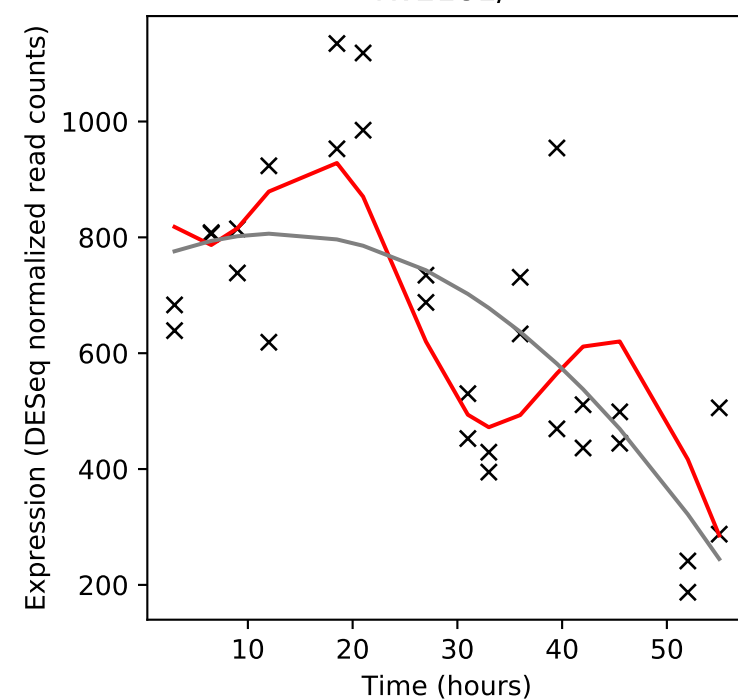

Rv2182c/-

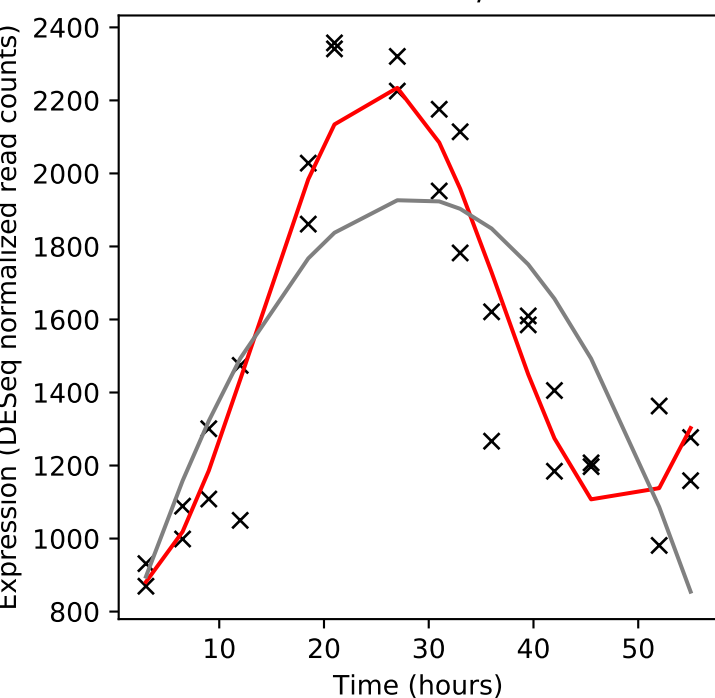

Rv2183c/-

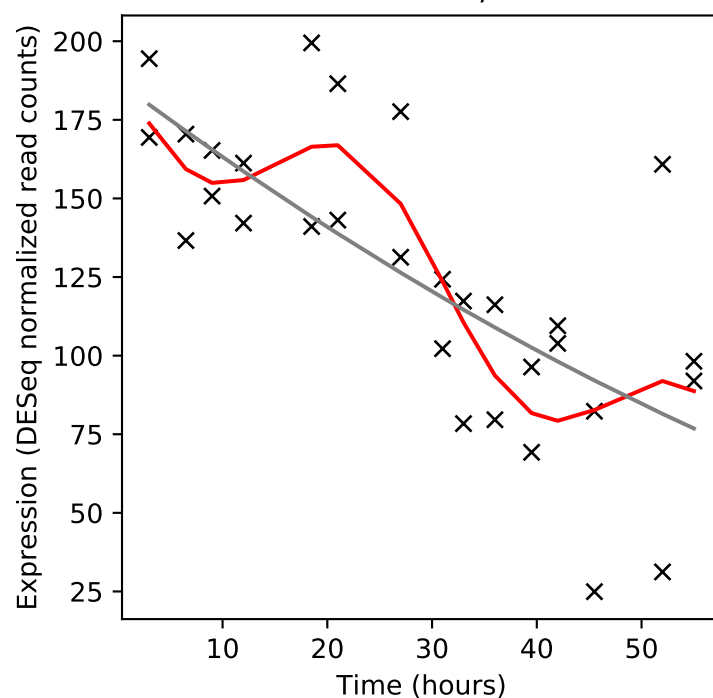

Rv2184c/-

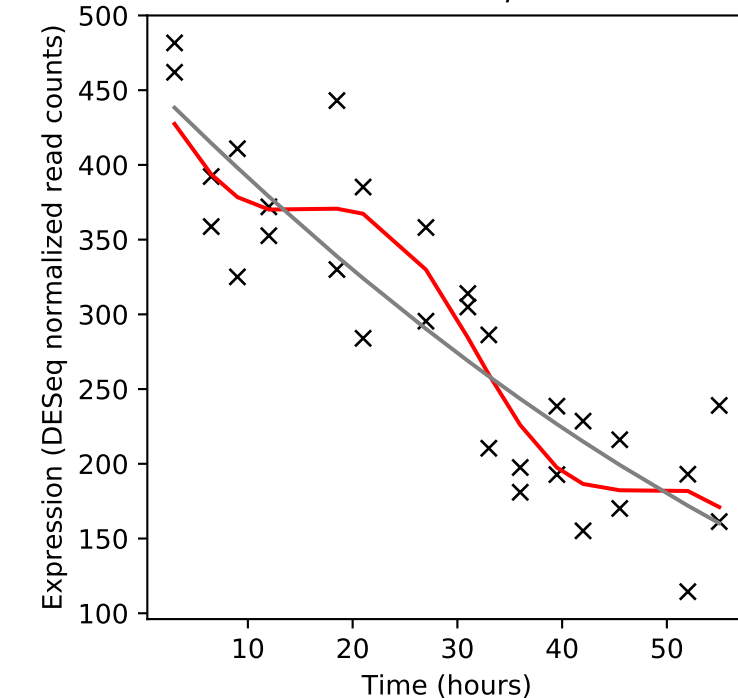

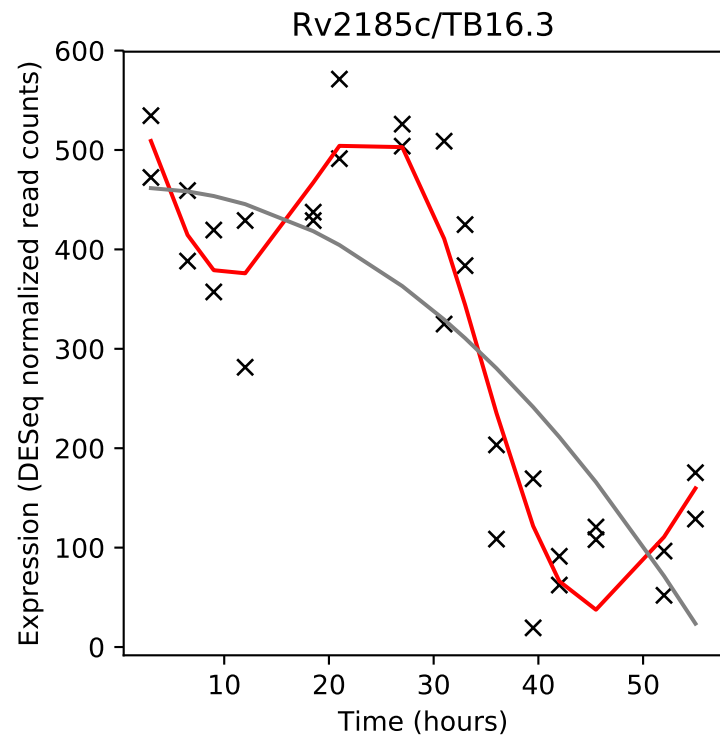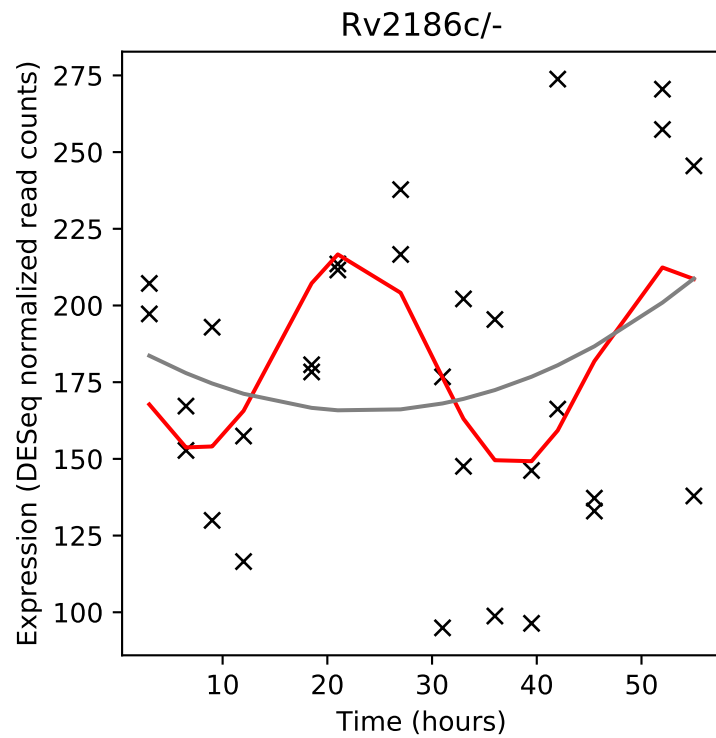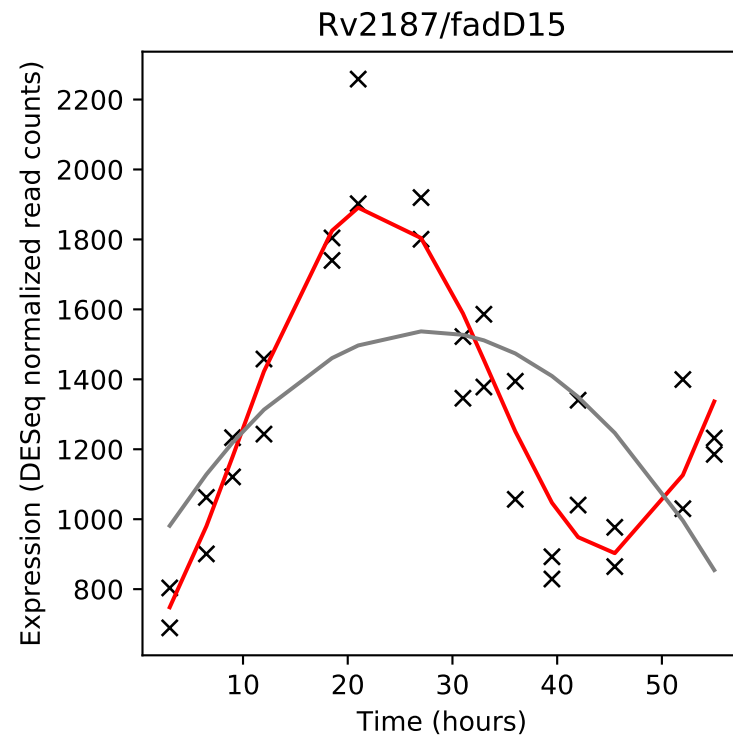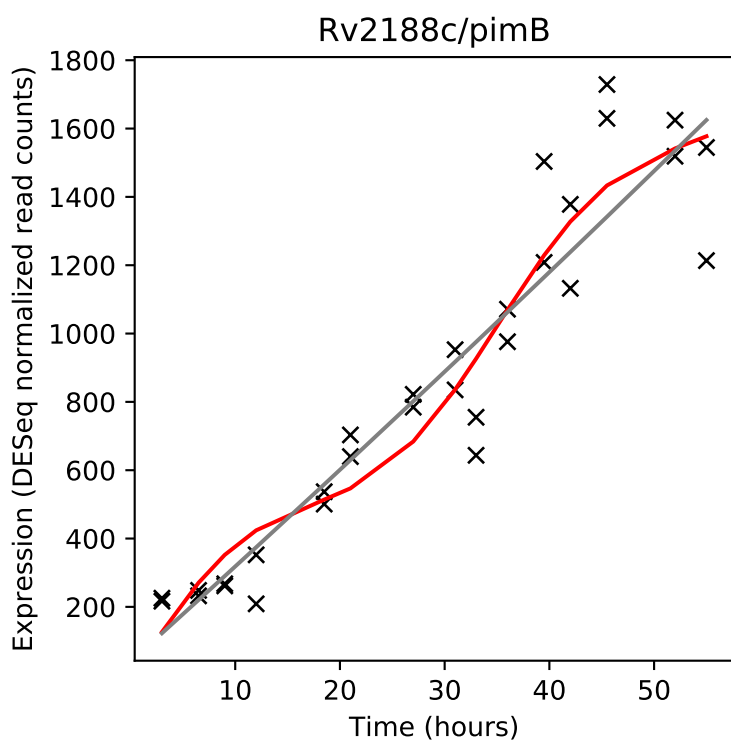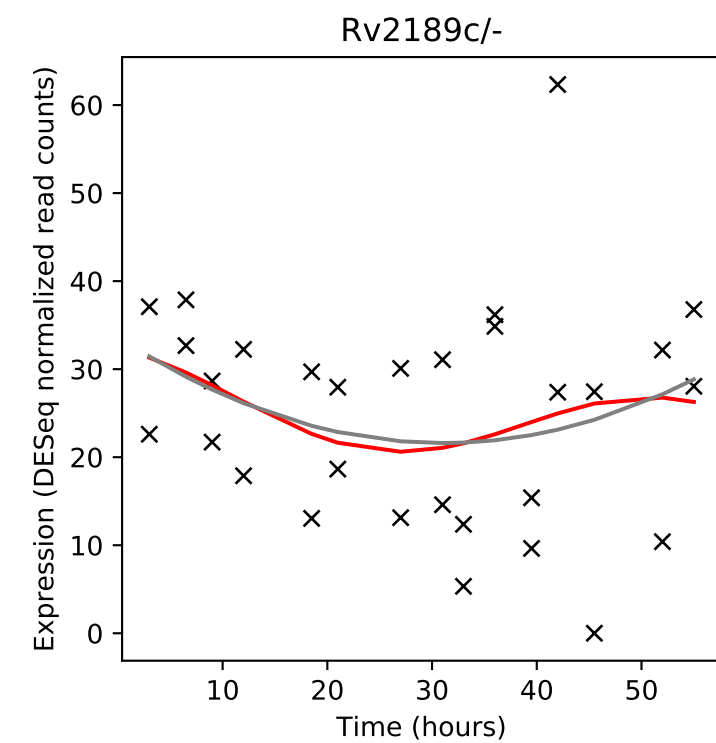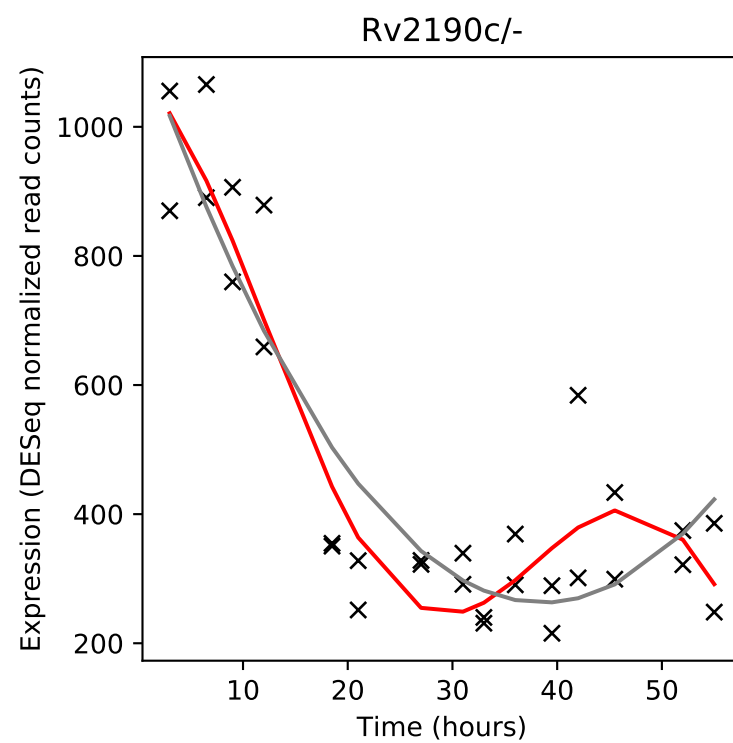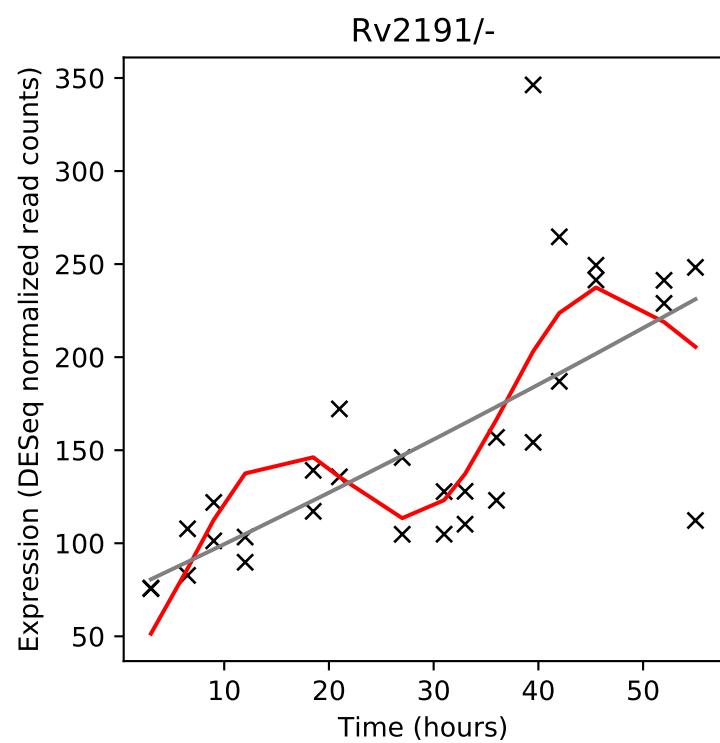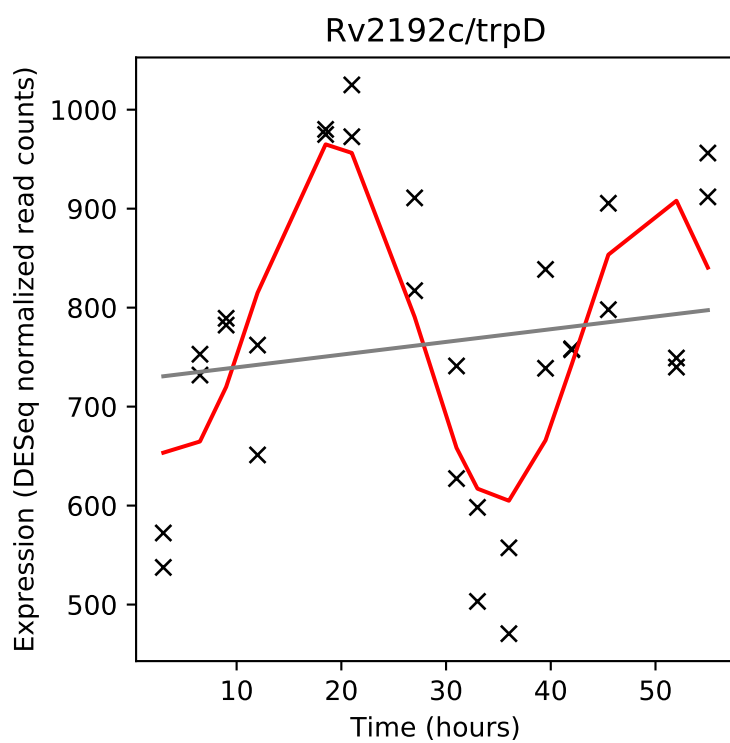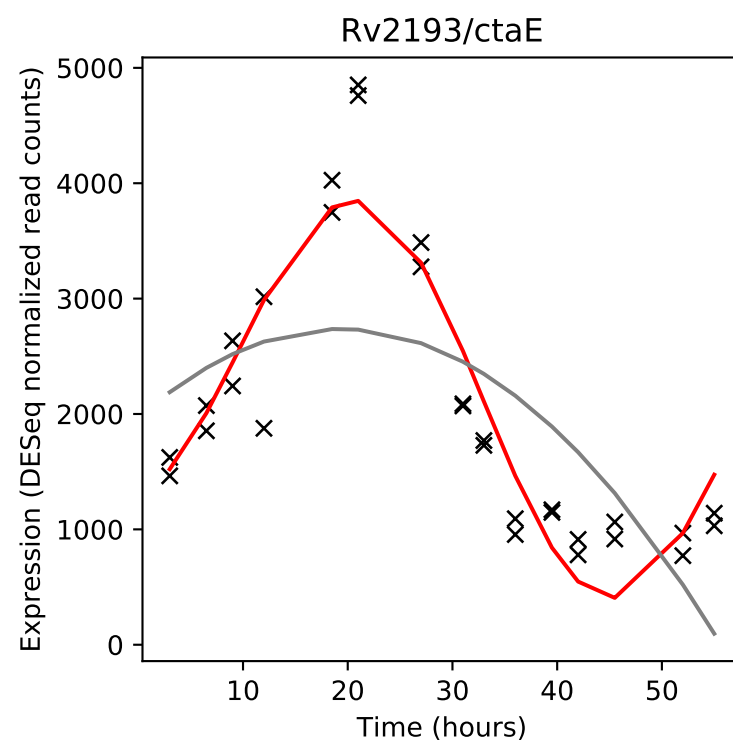

Rv2194/qcrC

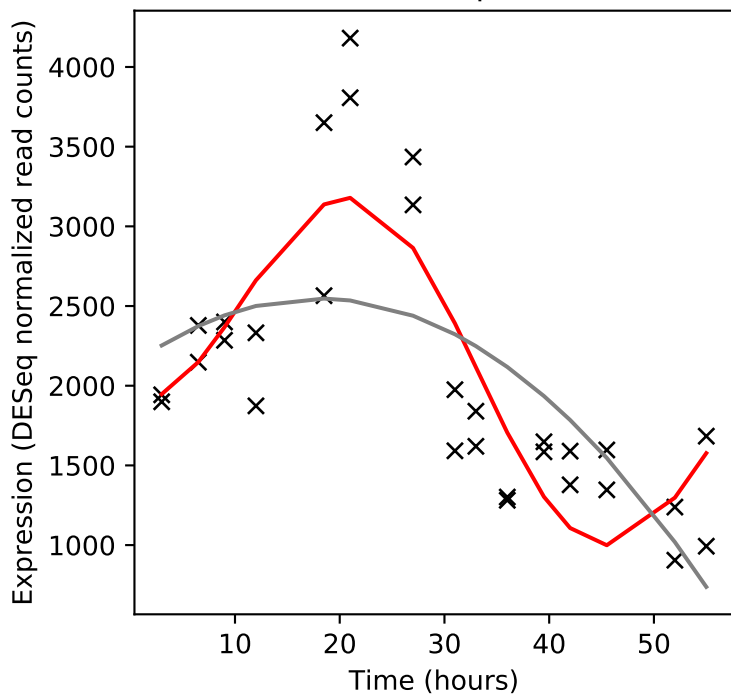

Rv2195/qcrA

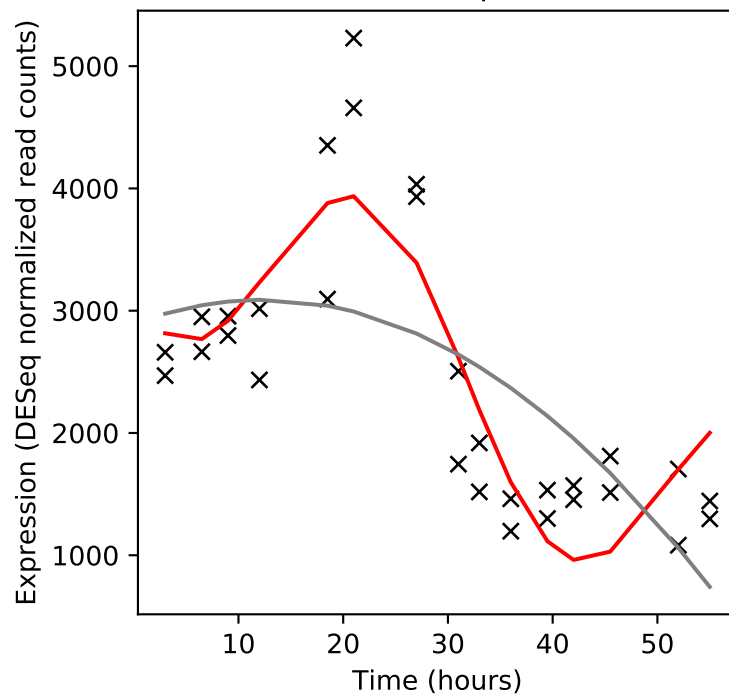

Rv2196/qcrB

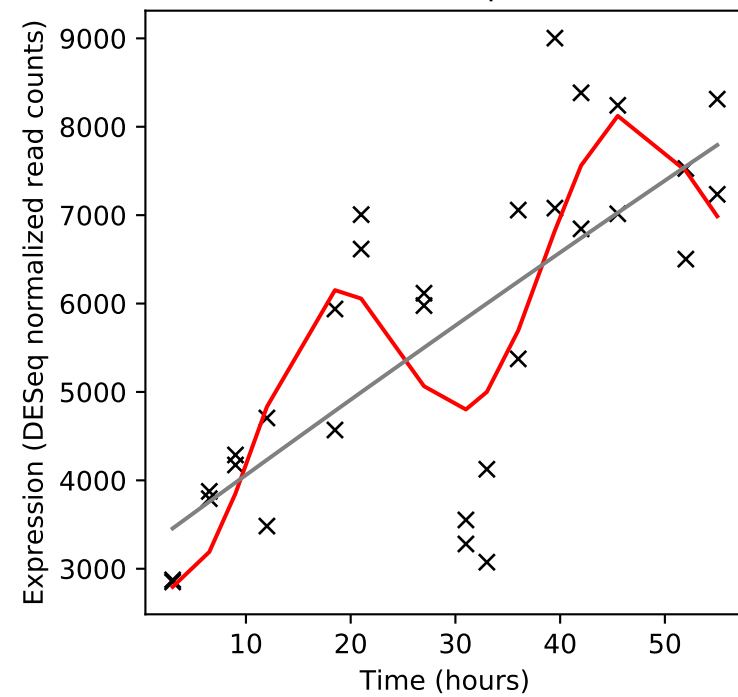

Rv2197c/-

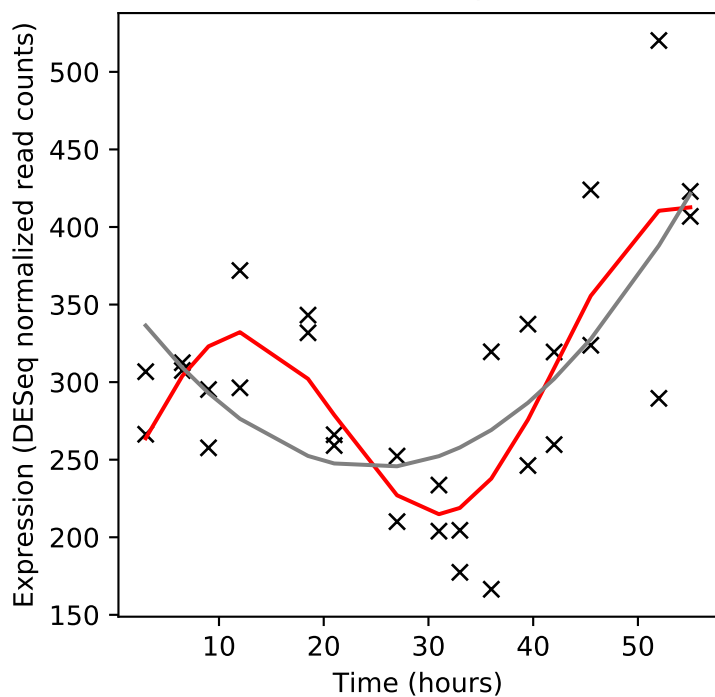

Rv2198c/mmpS3

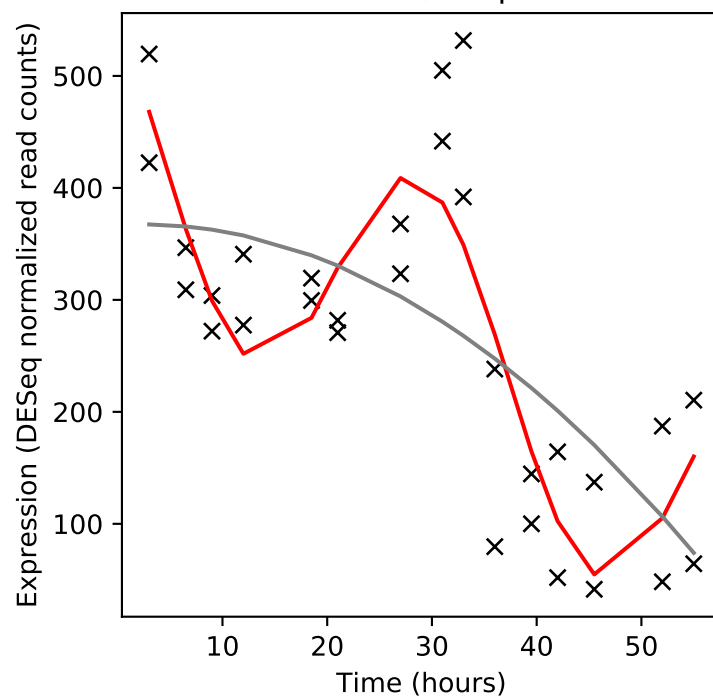

Rv2199c/-

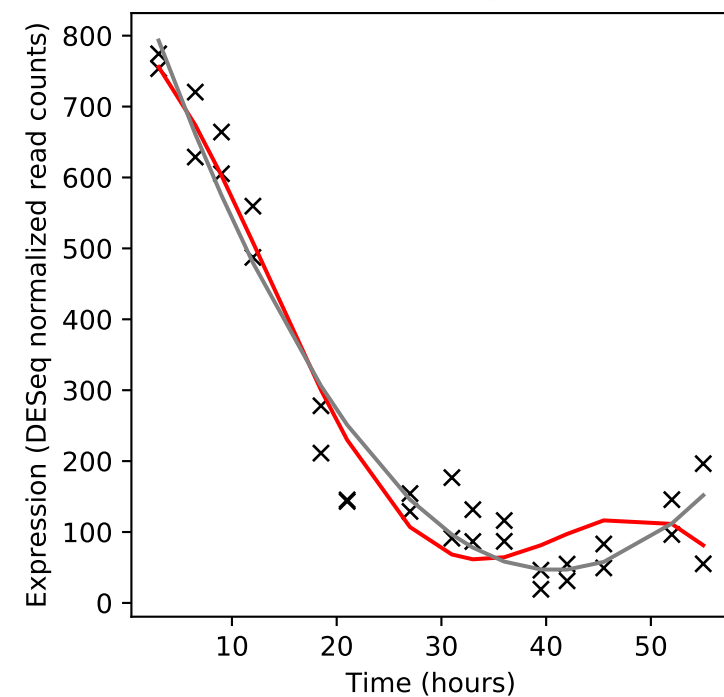

Rv2200c/ctaC

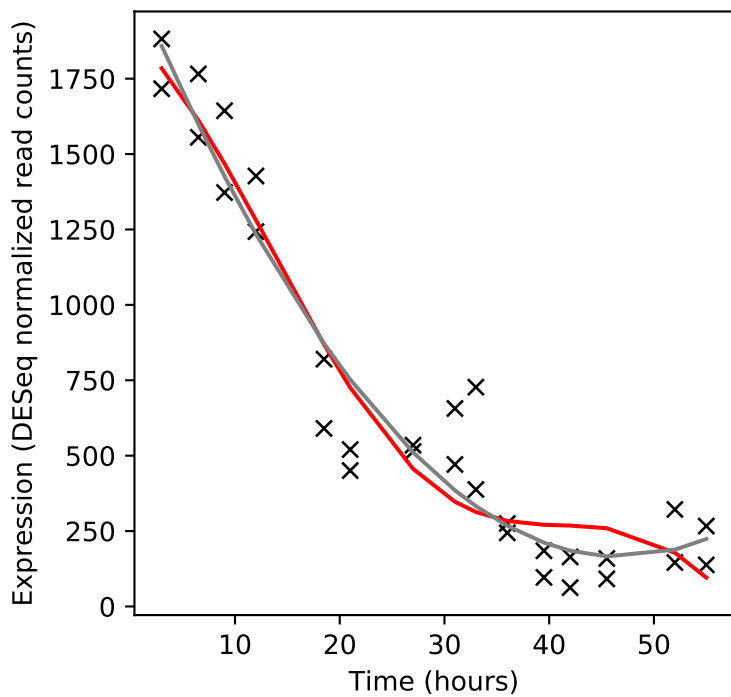

Rv2201/asnB

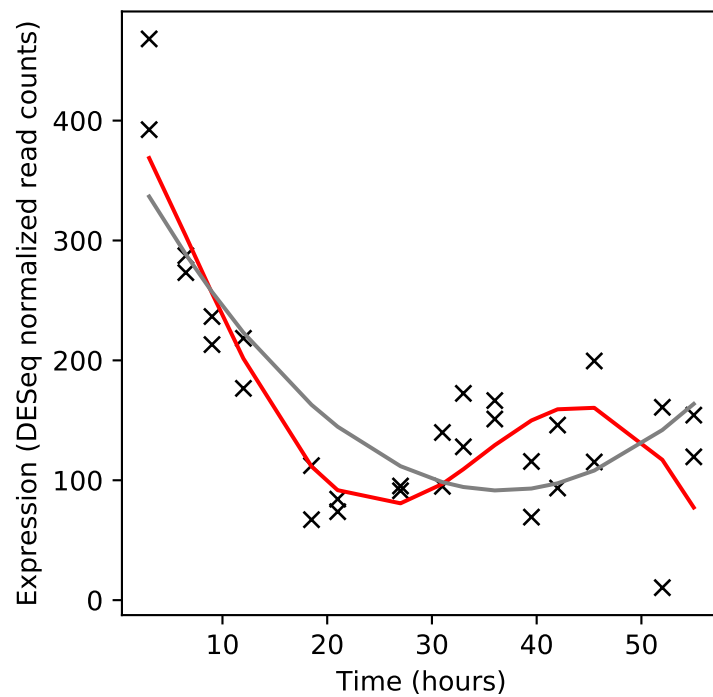

Rv2202c/adoK

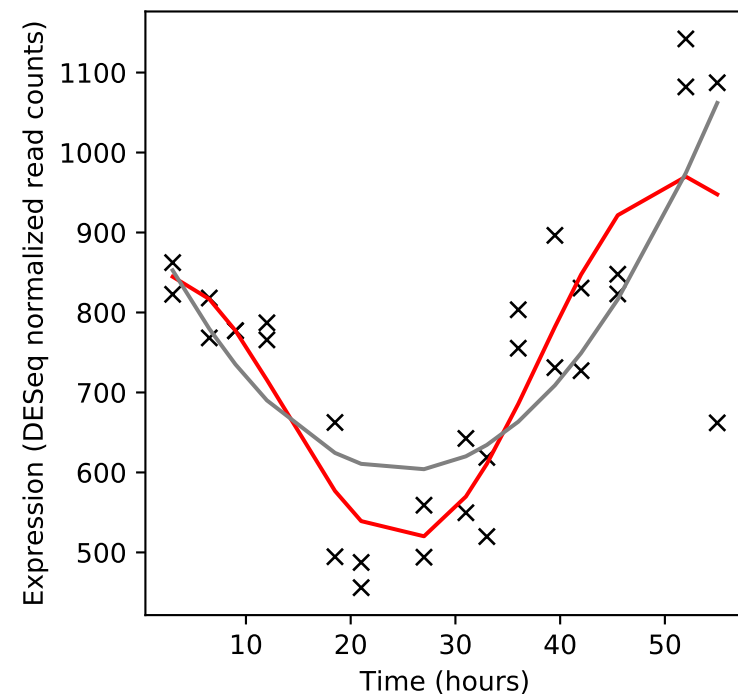

Rv2203/-

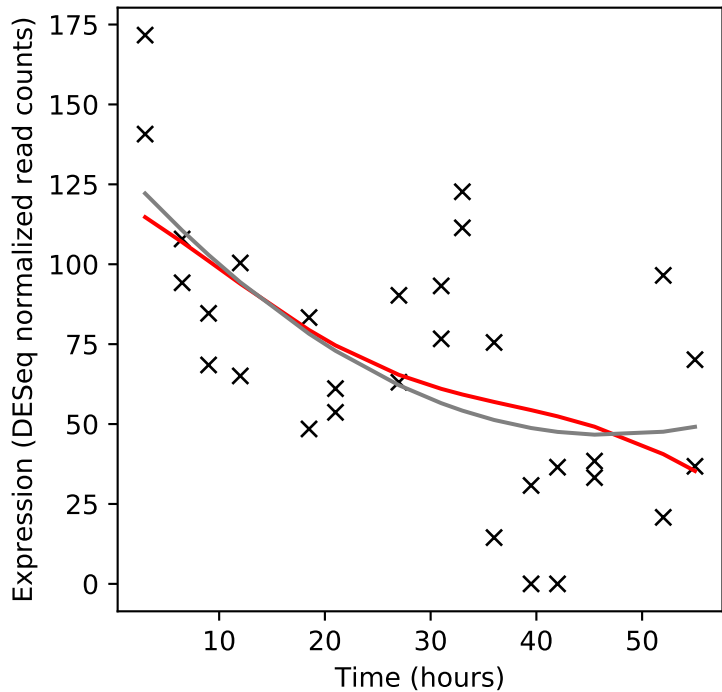

Rv2204c/-

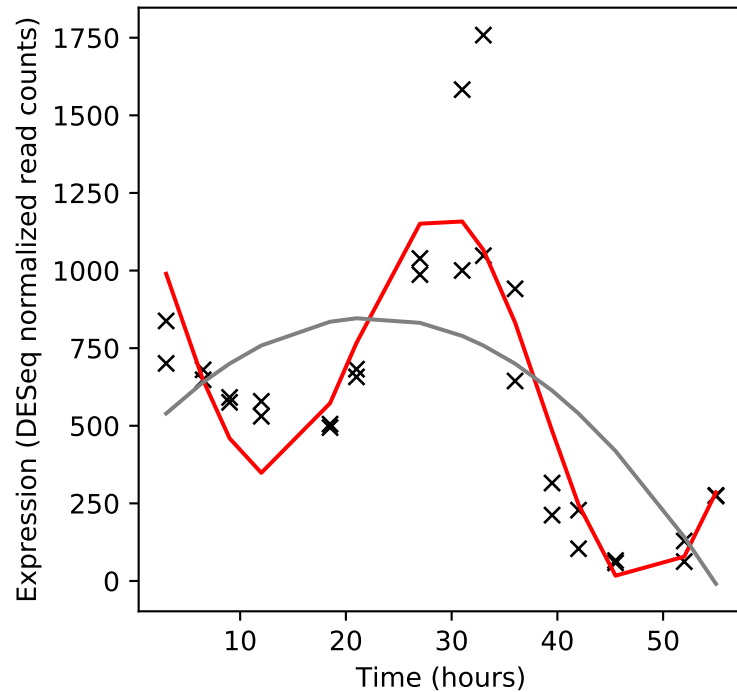

Rv2205c/-

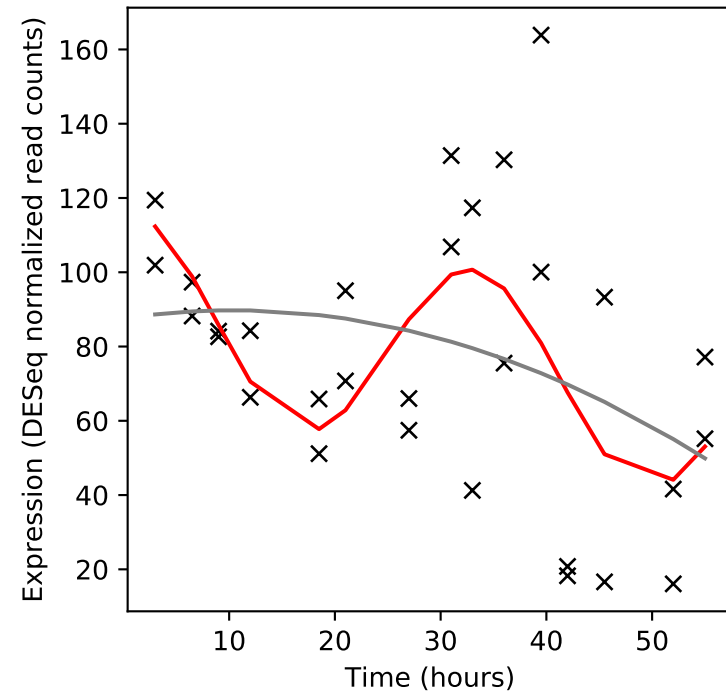

Rv2206/-

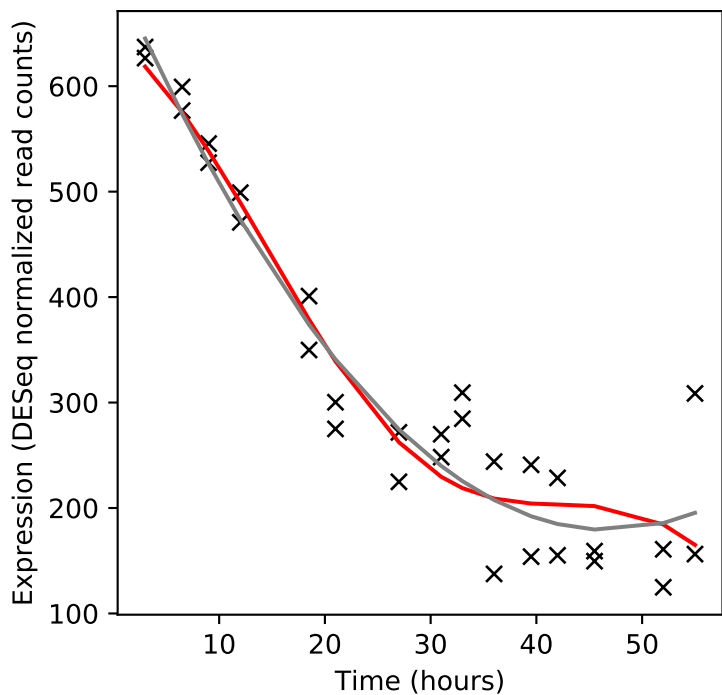

Rv2207/cobT

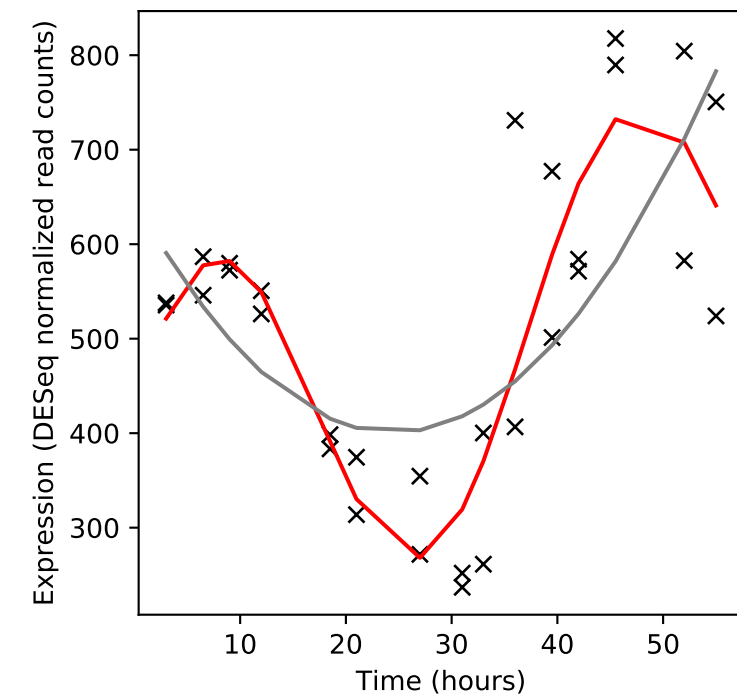

Rv2208/cobS

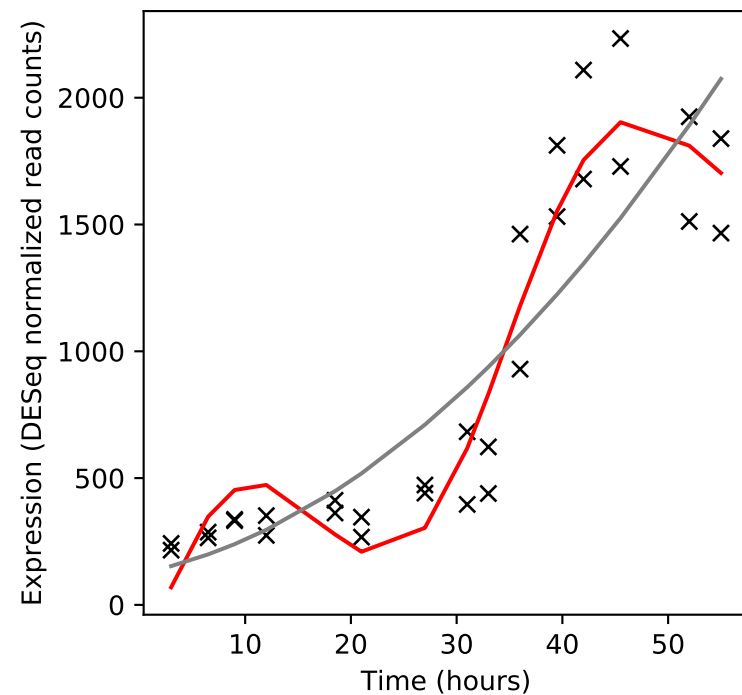

Rv2209/-

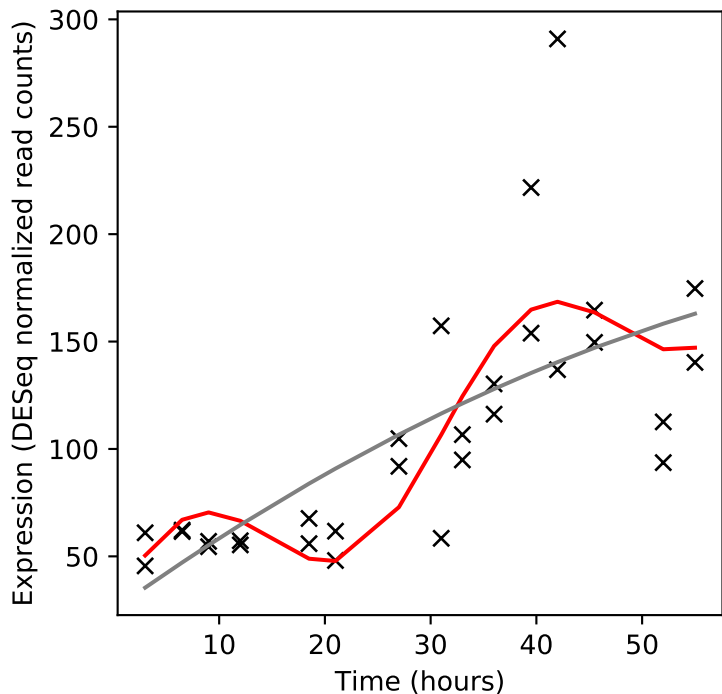

Rv2210c/ilvE

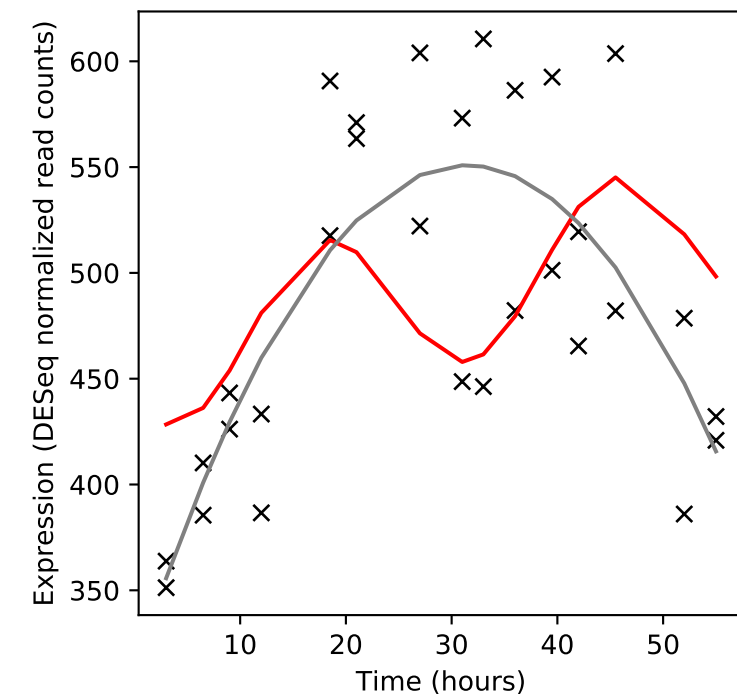

Rv2211c/gcvT

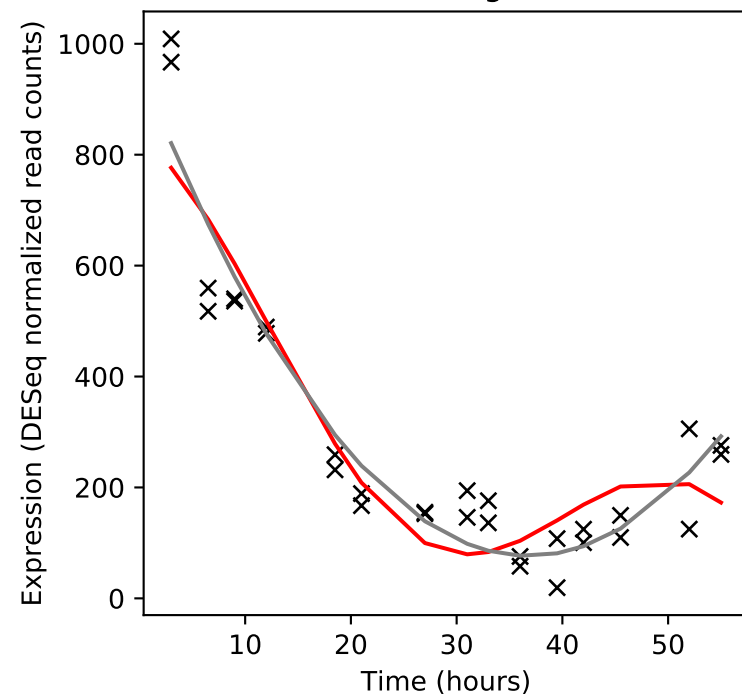

Rv2212/-

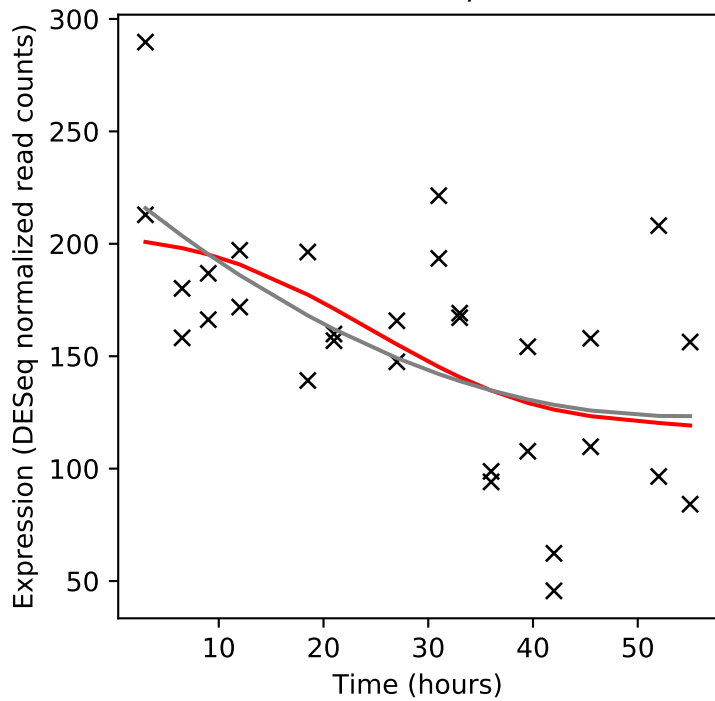

Rv2213/pepB

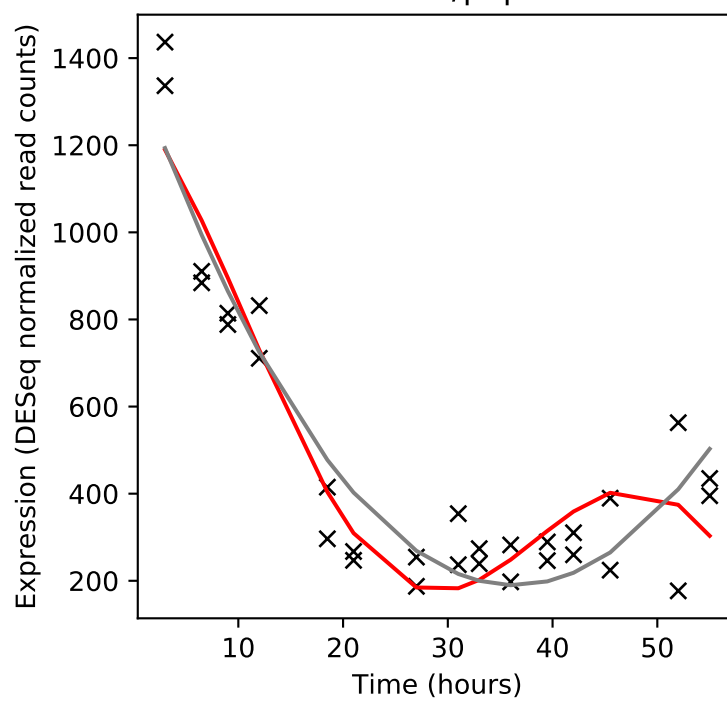

Rv2214c/ephD

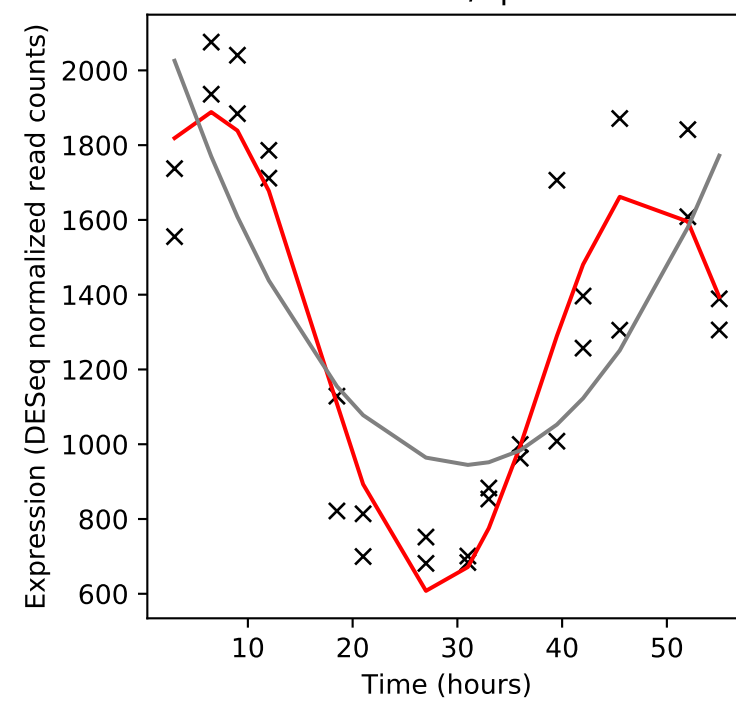

Rv2215/dlaT

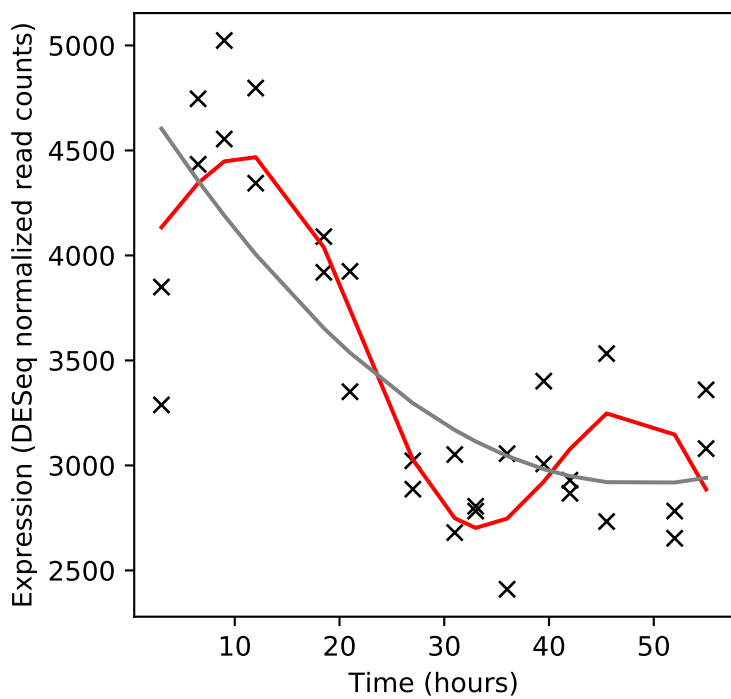

Rv2216/-

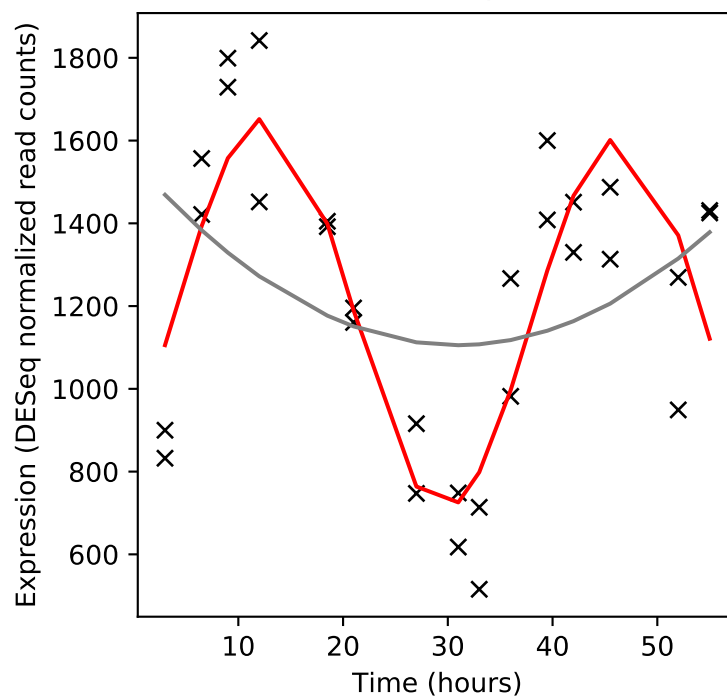

Rv2217/lipB

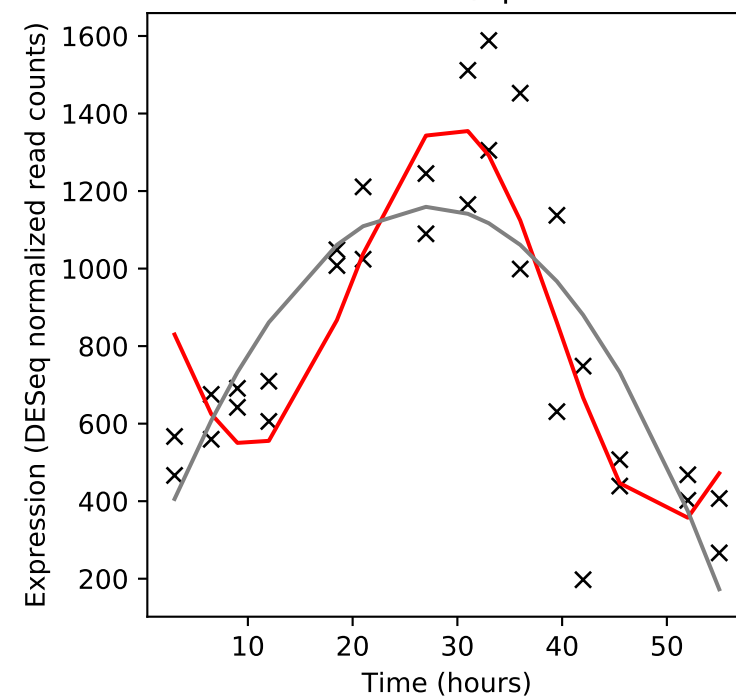

Rv2218/lipA

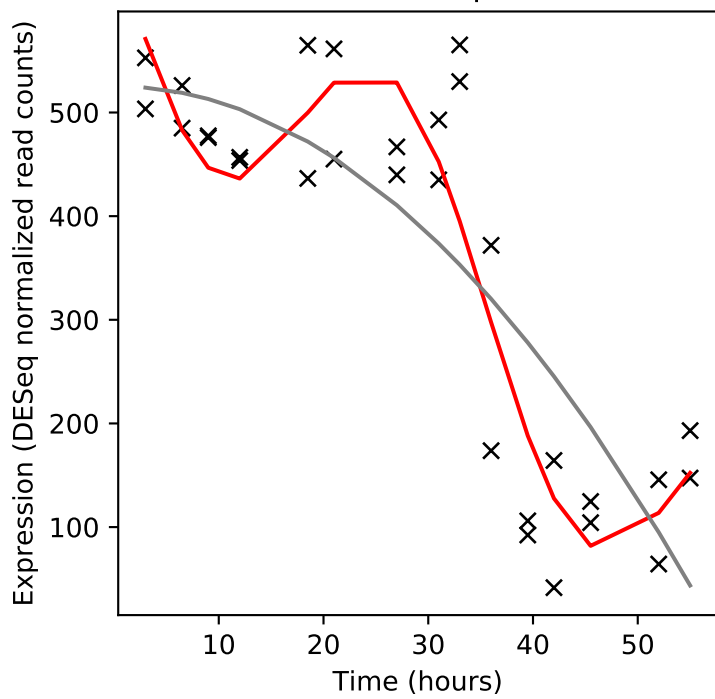

Rv2219/-

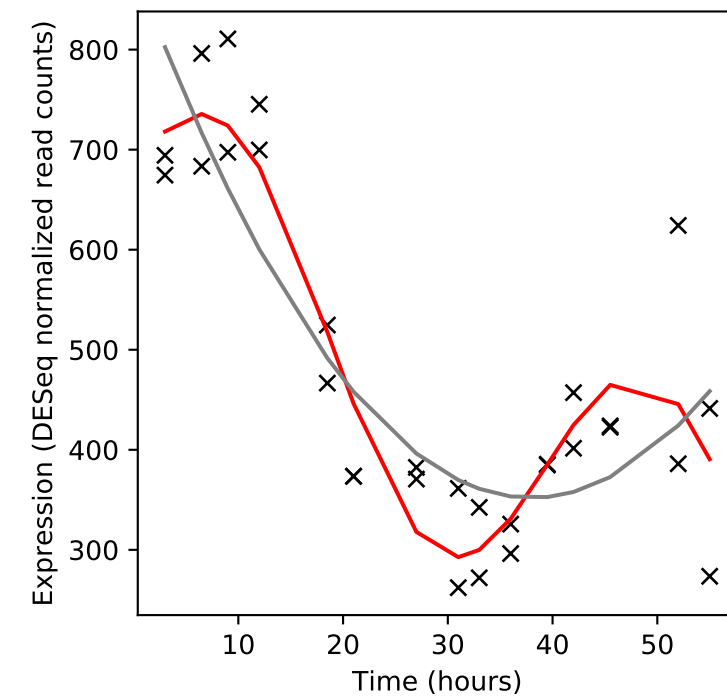

Rv2219A/-

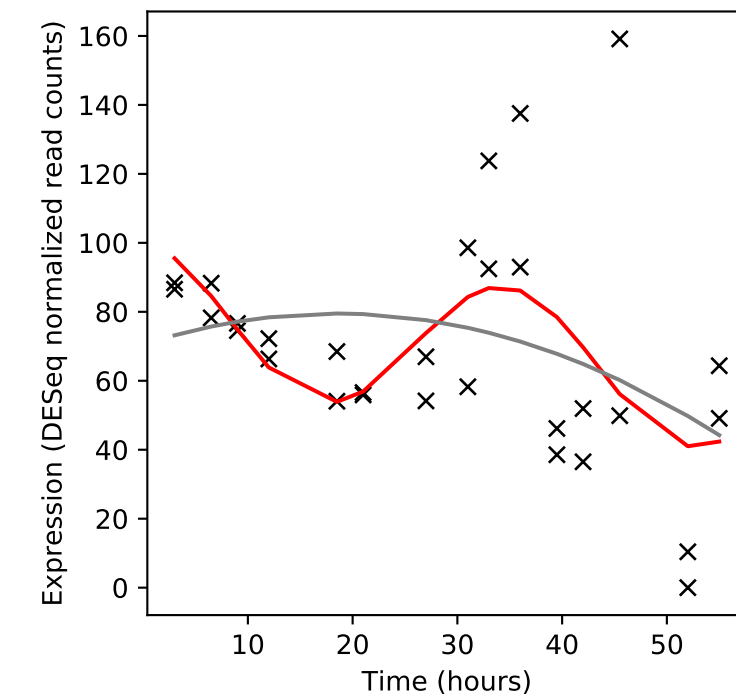

Rv2220/glnA1

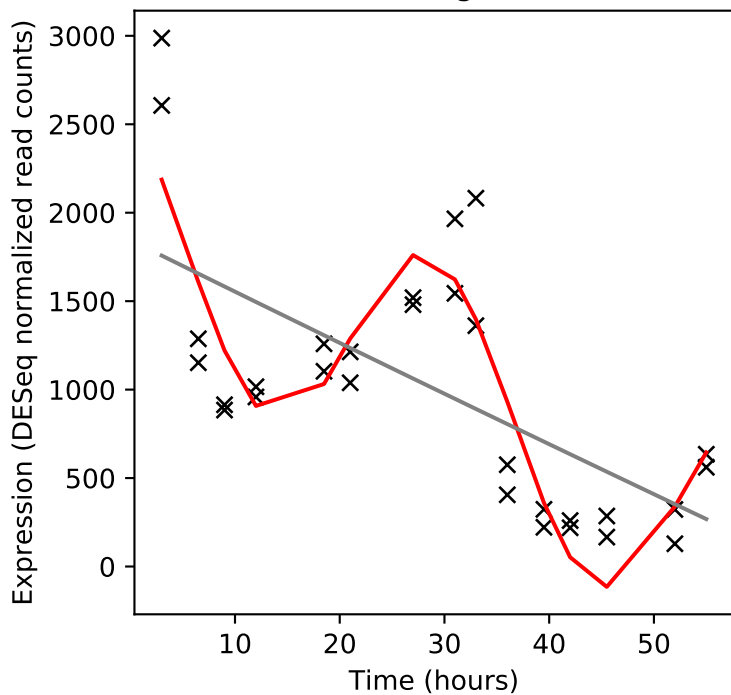

Rv2221c/glnE

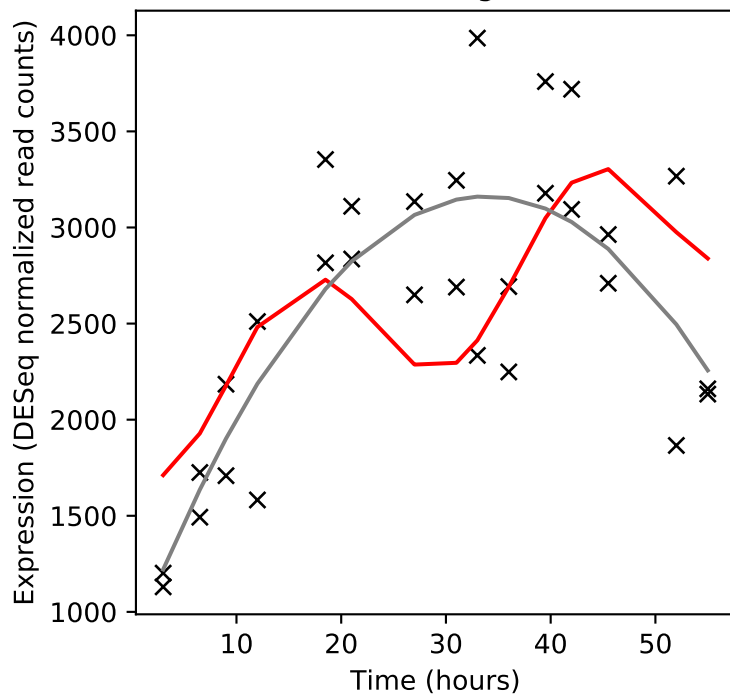

Rv2222c/glnA2

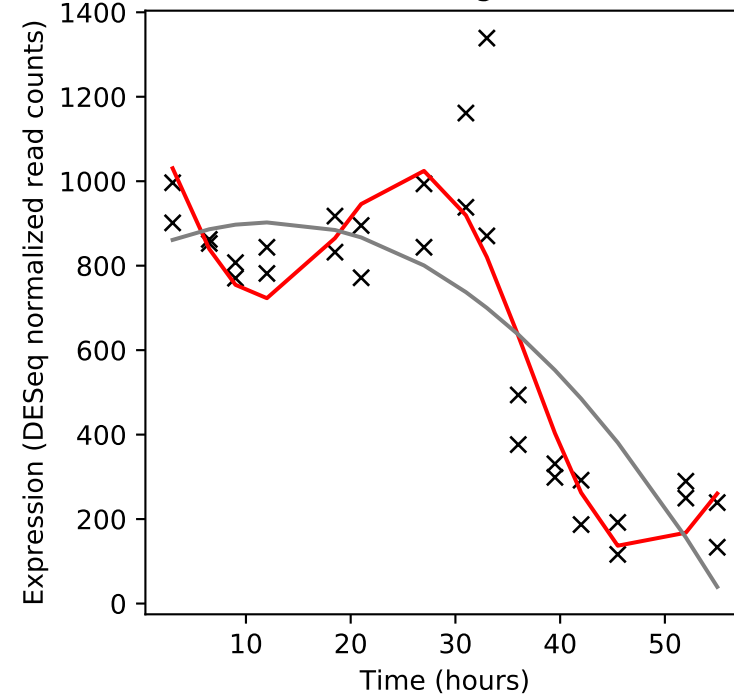

Rv2223c/-

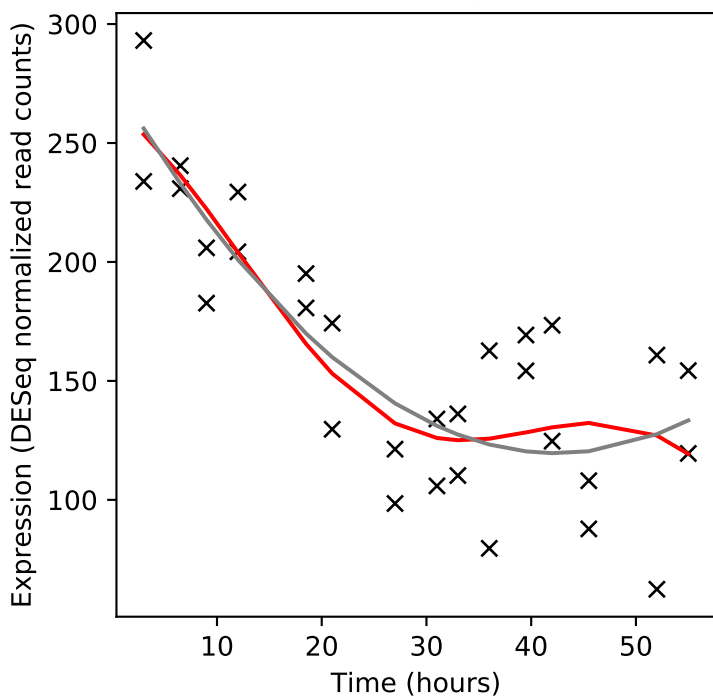

Rv2224c/caeA

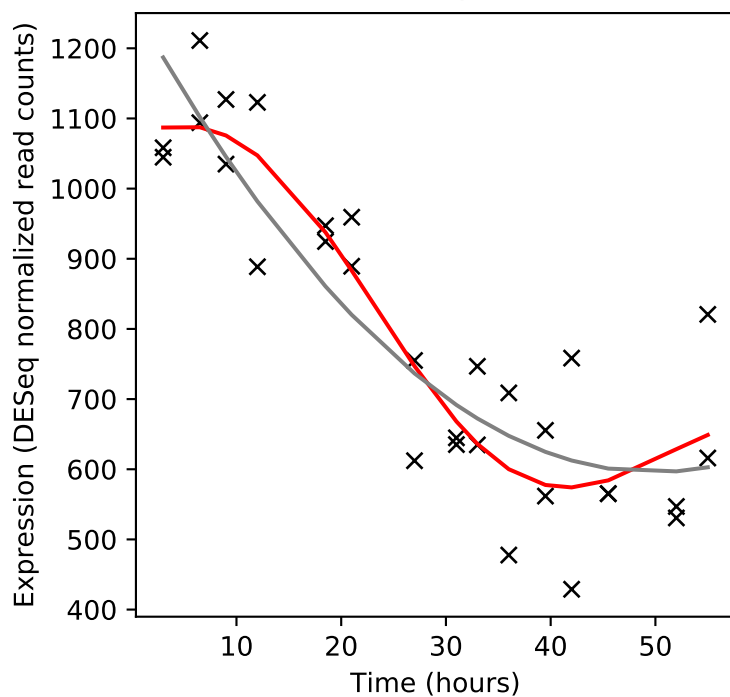

Rv2225/panB

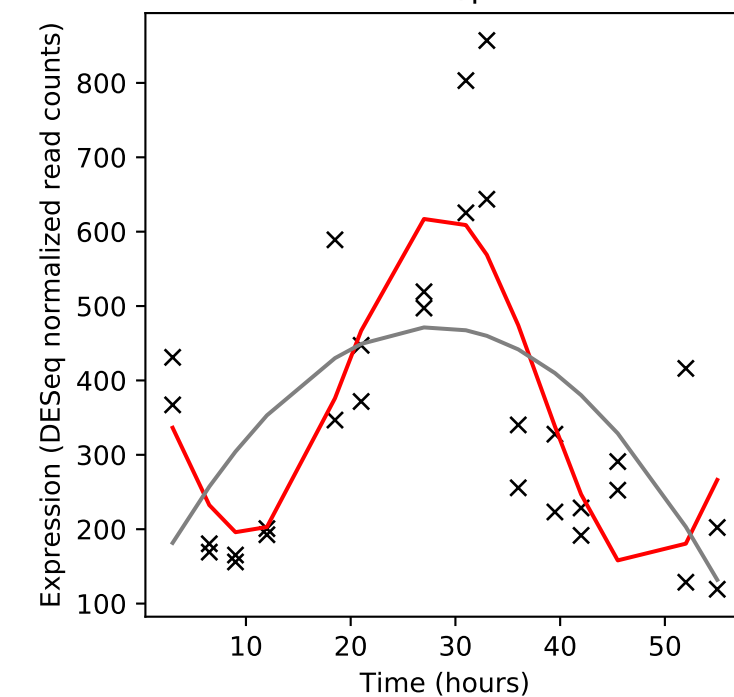

Rv2226/-

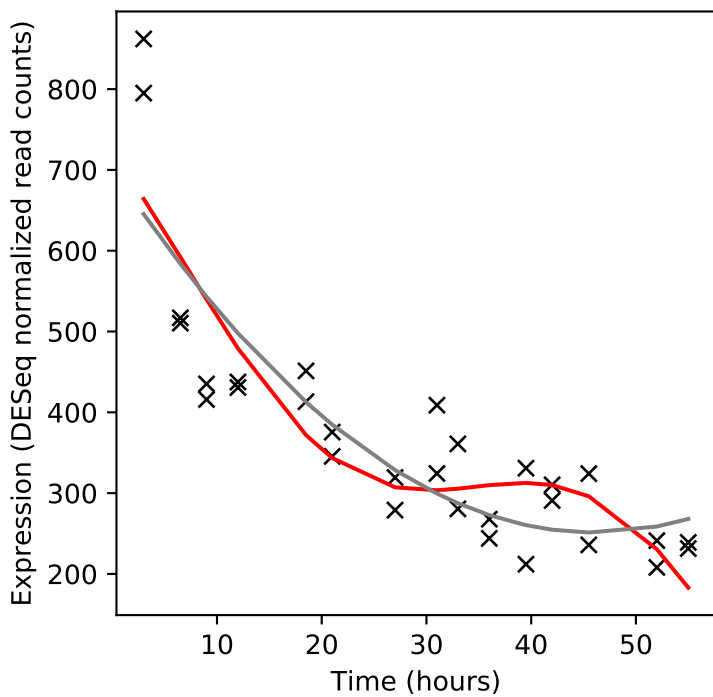

Rv2227/-

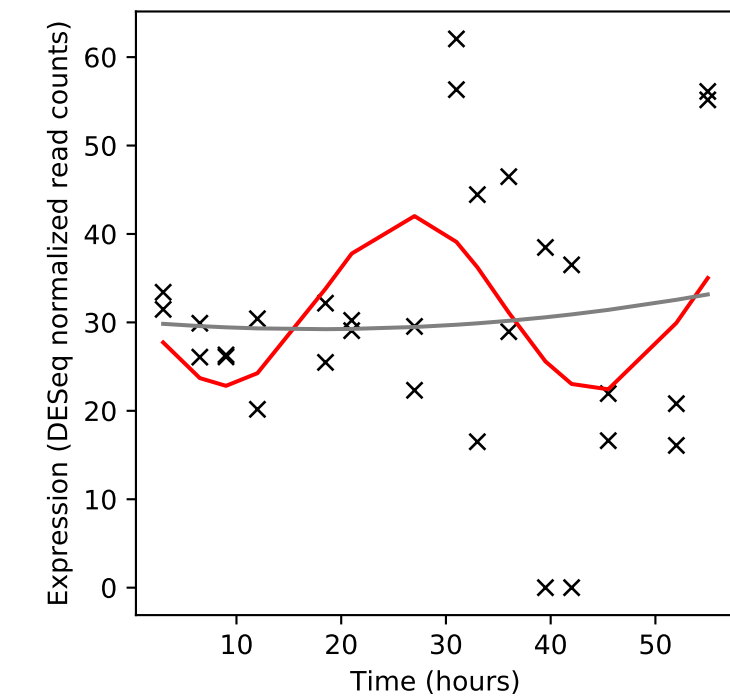

Rv2228c/-

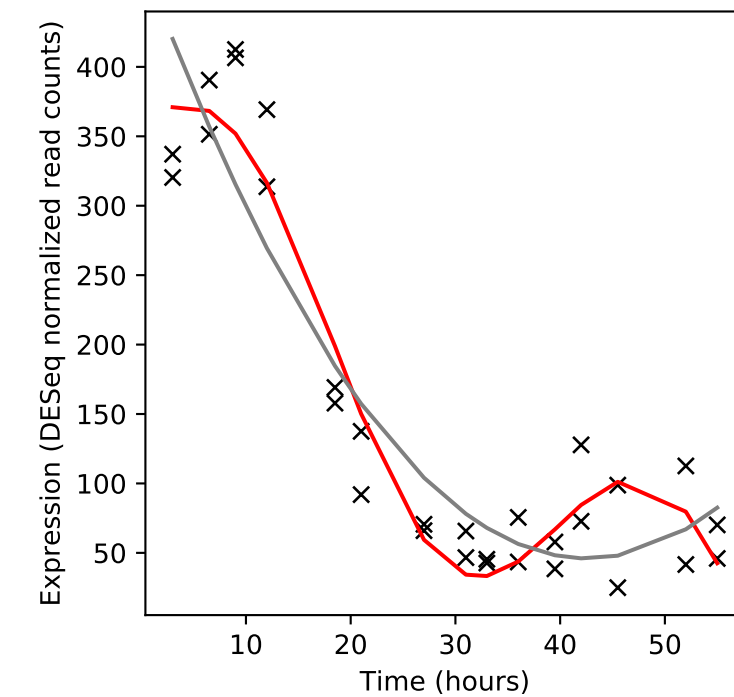



Rv2229c/-

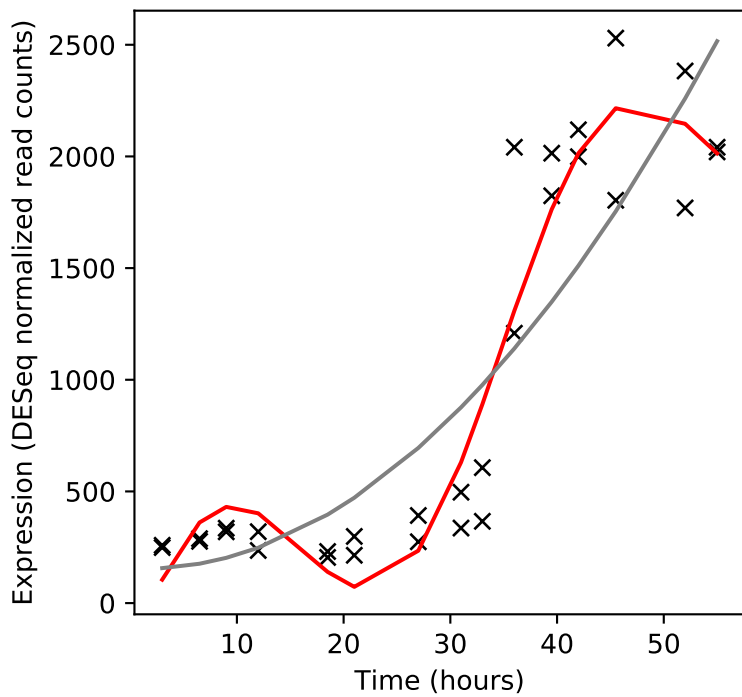

Rv2230c/-

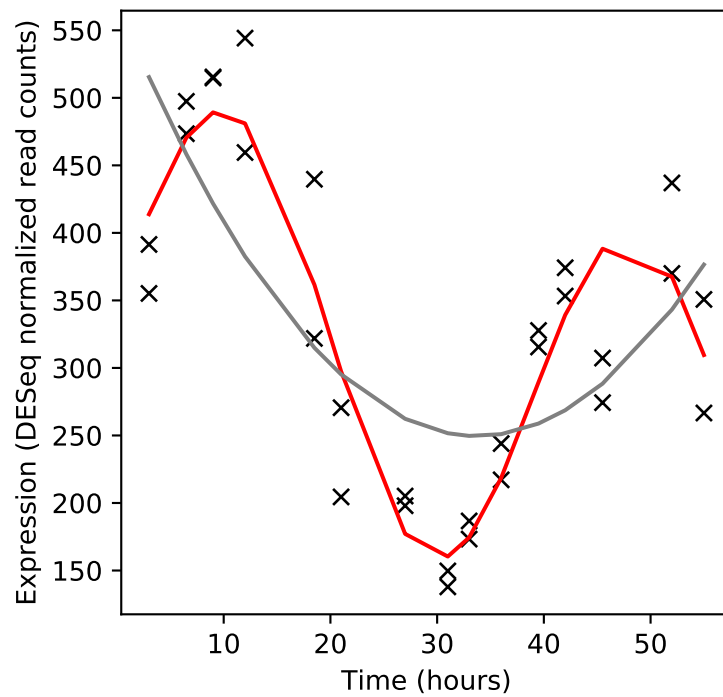

Rv2231c/cobC

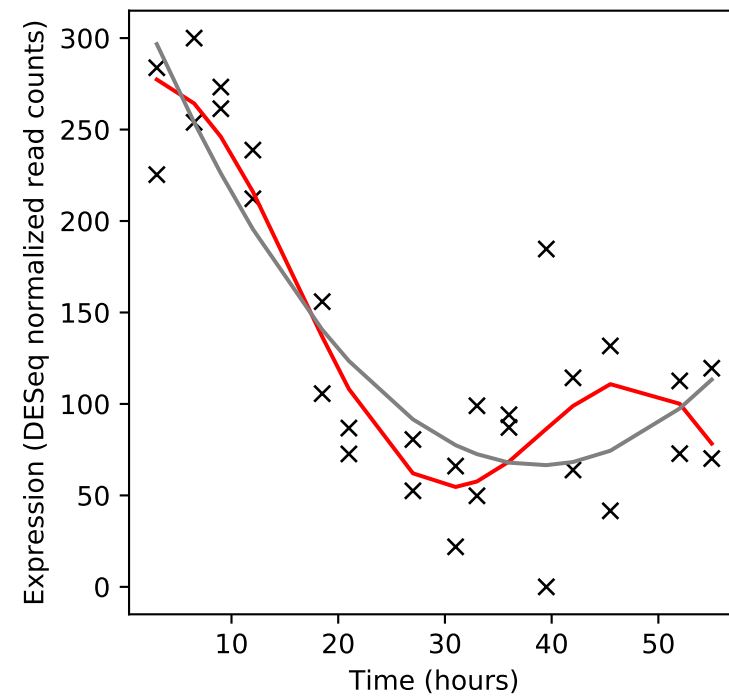

Rv2231A/vapC16

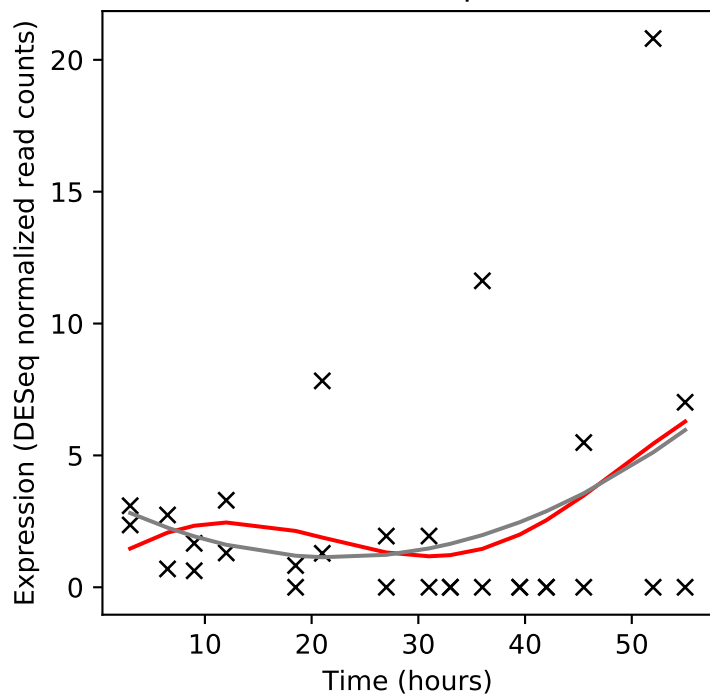

Rv2231B/vapB16

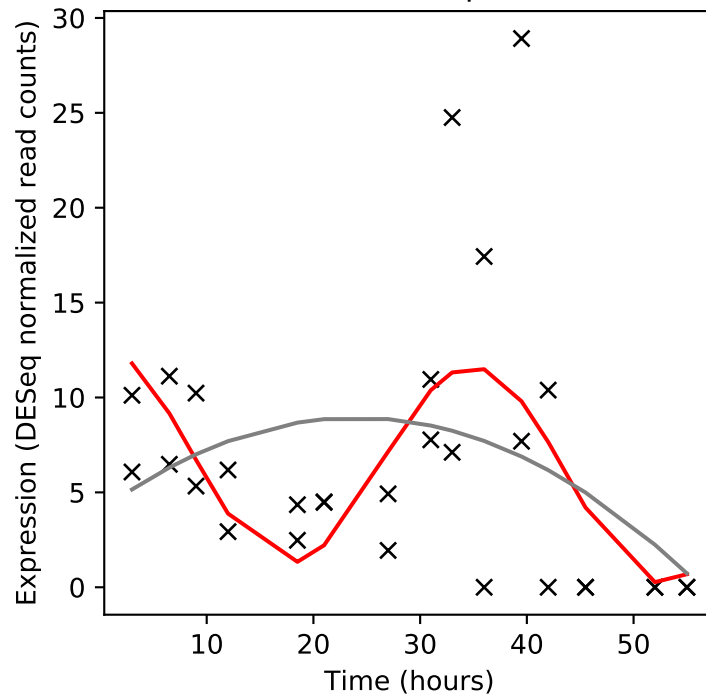

Rv2232/ptkA

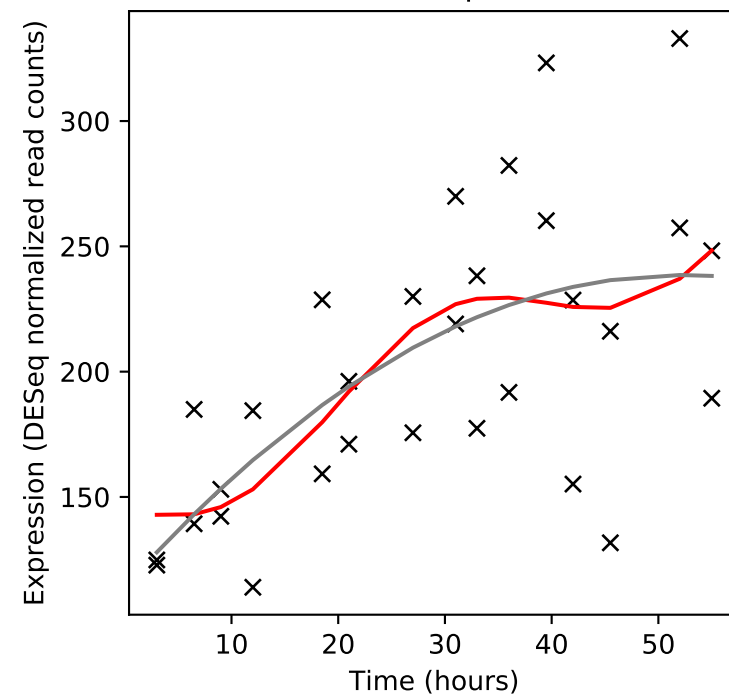

Rv2234/ptpA

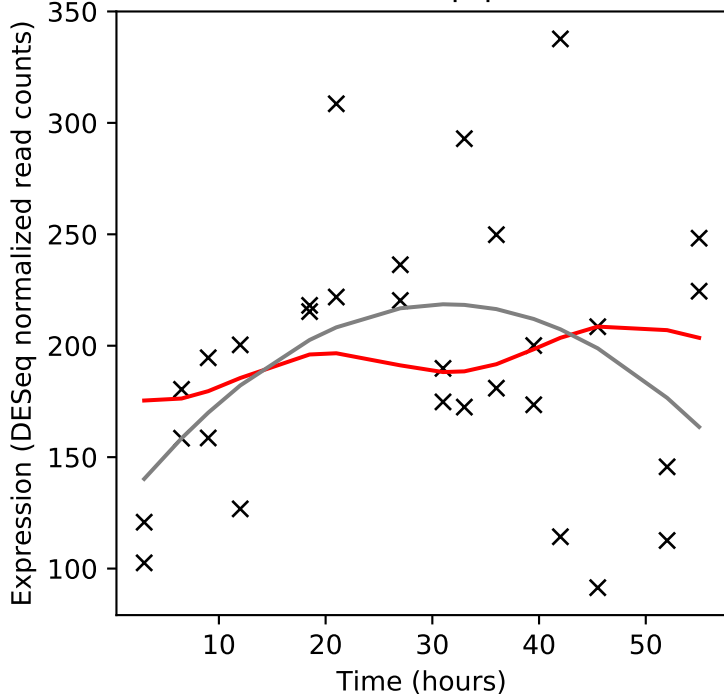

Rv2235/-

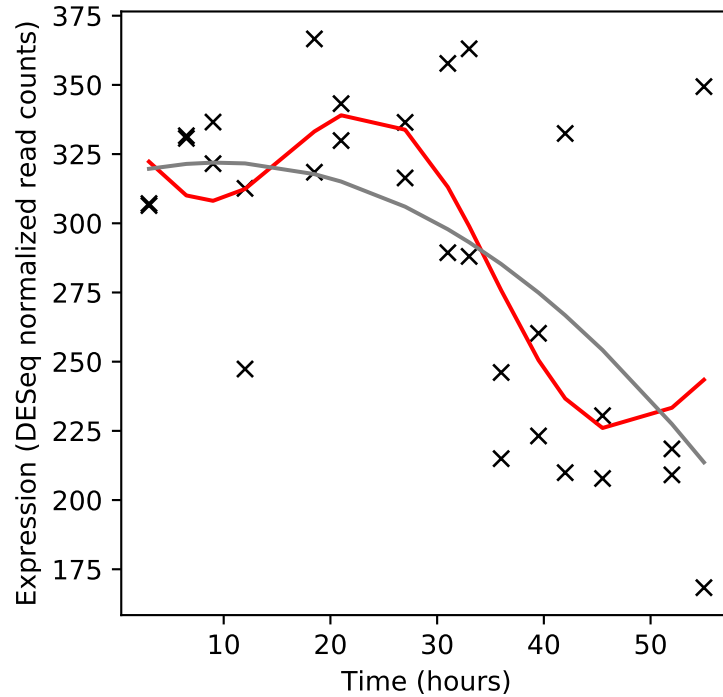

Rv2236c/cobD

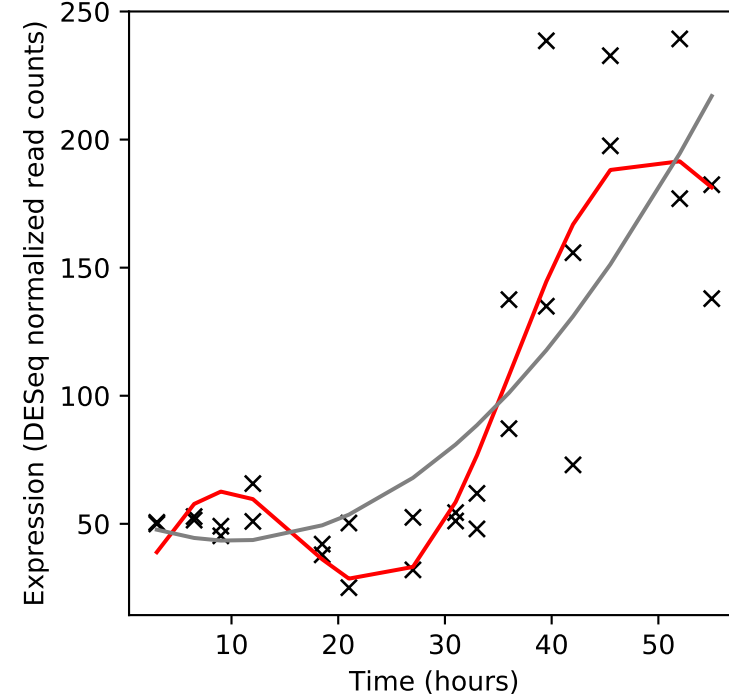

Rv2237/-

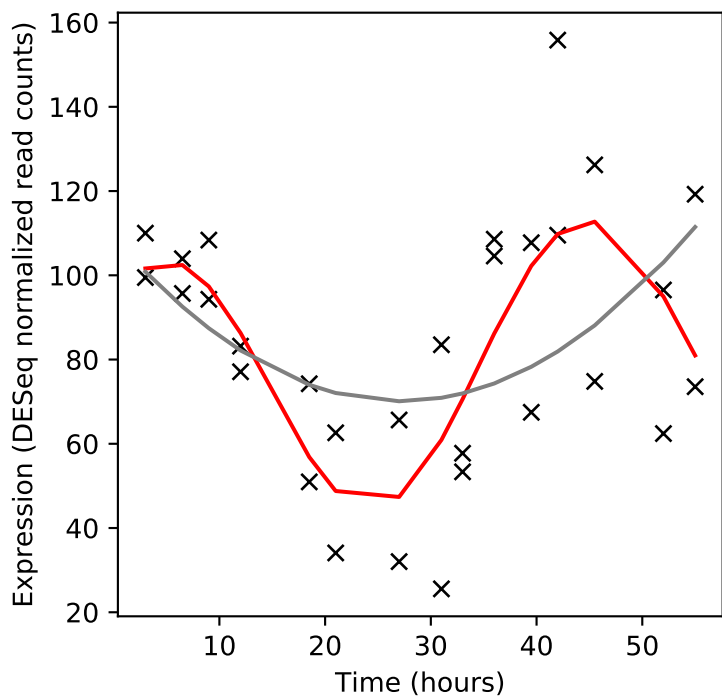

Rv2237A/-

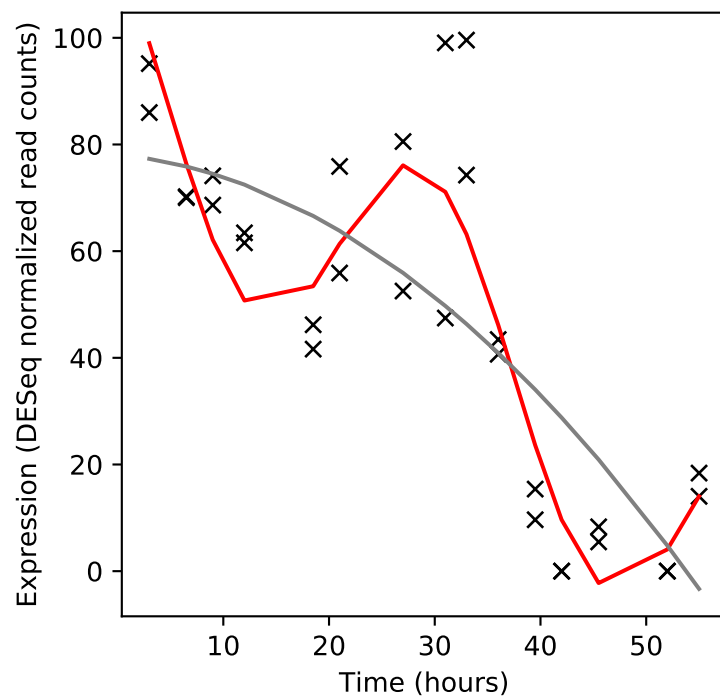

Rv2238c/ahpE

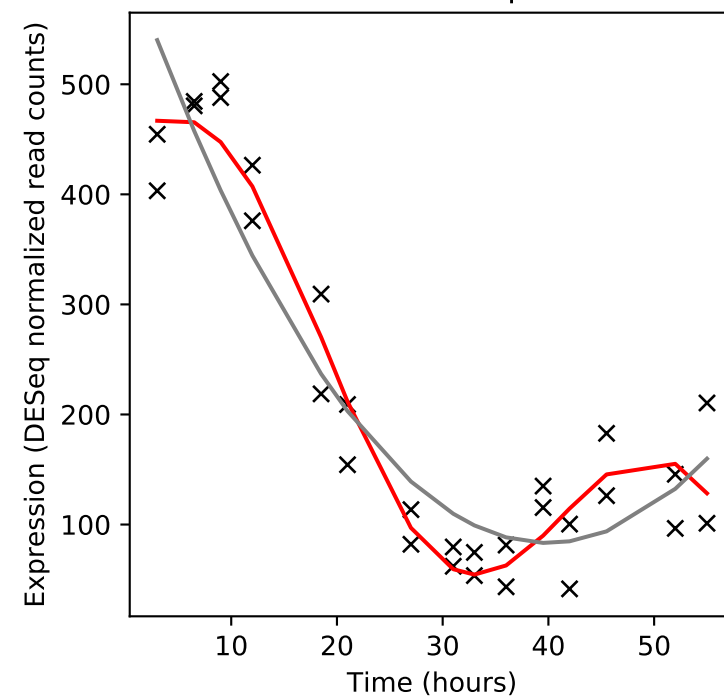

Rv2239c/-

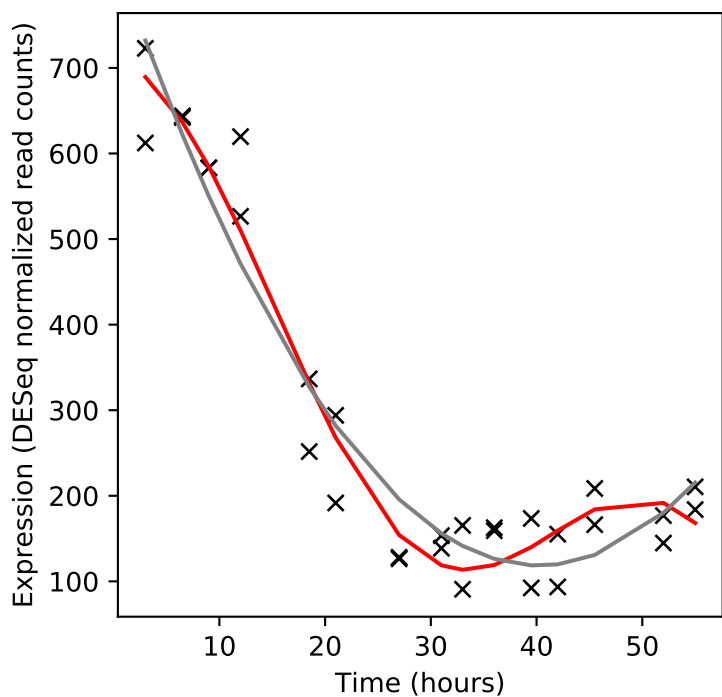

Rv2240c/-

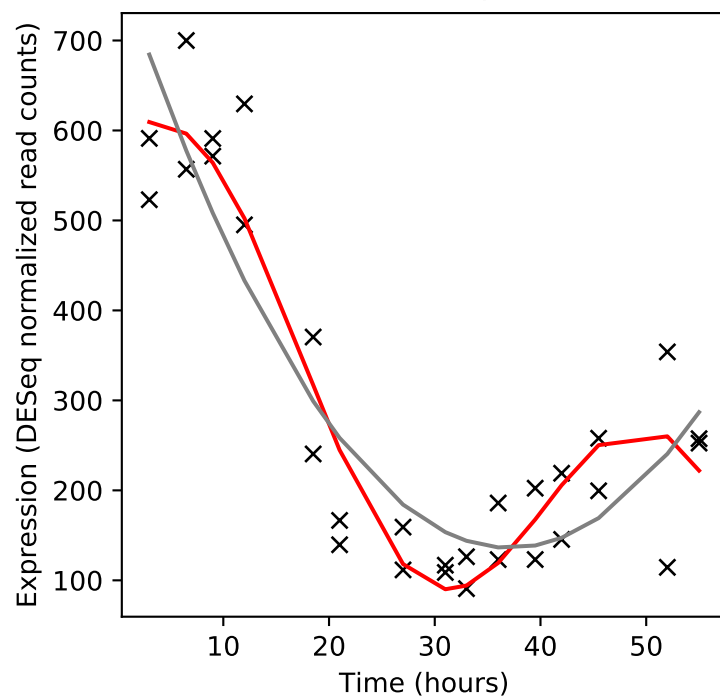

Rv2241/aceE

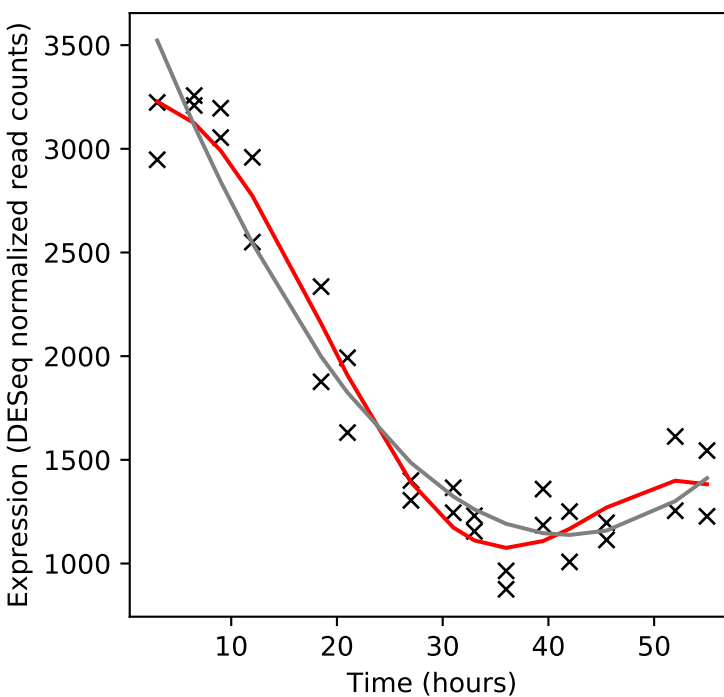

Rv2242/-

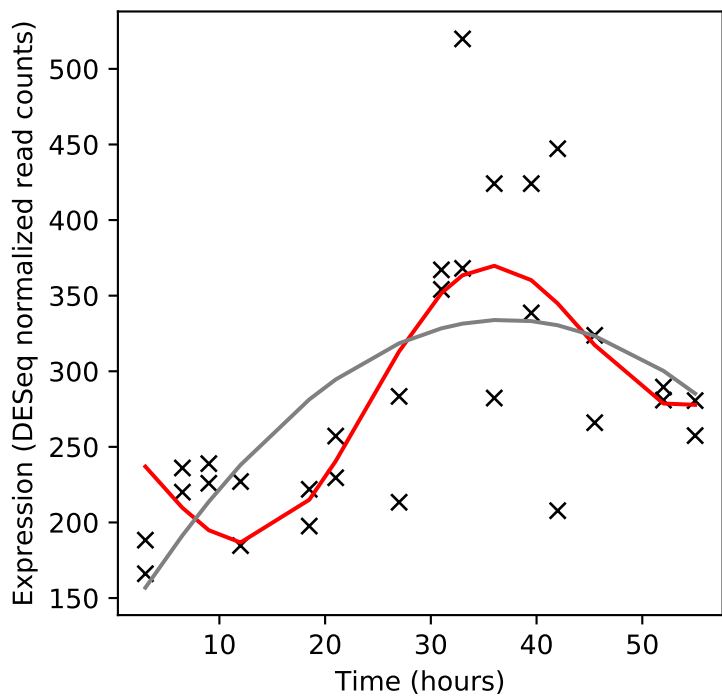

Rv2243/fabD

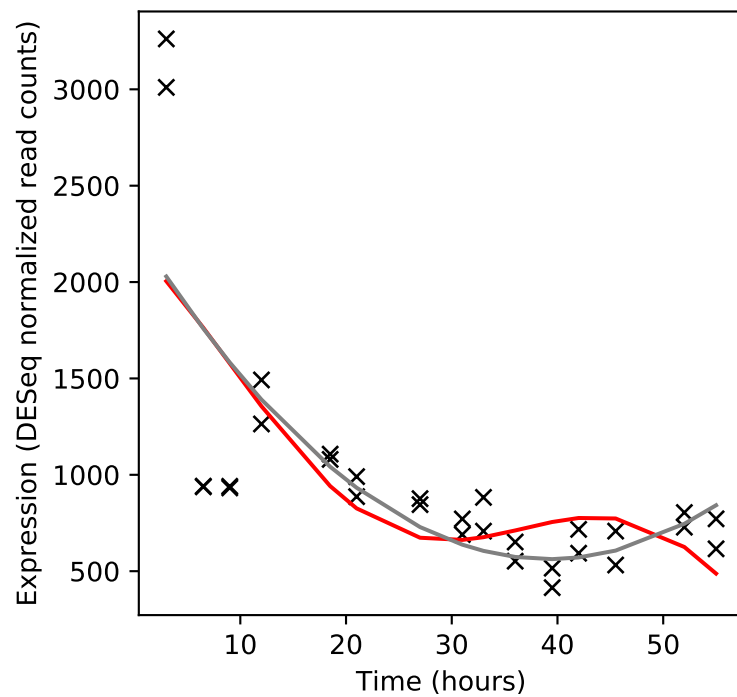

Rv2244/acpM

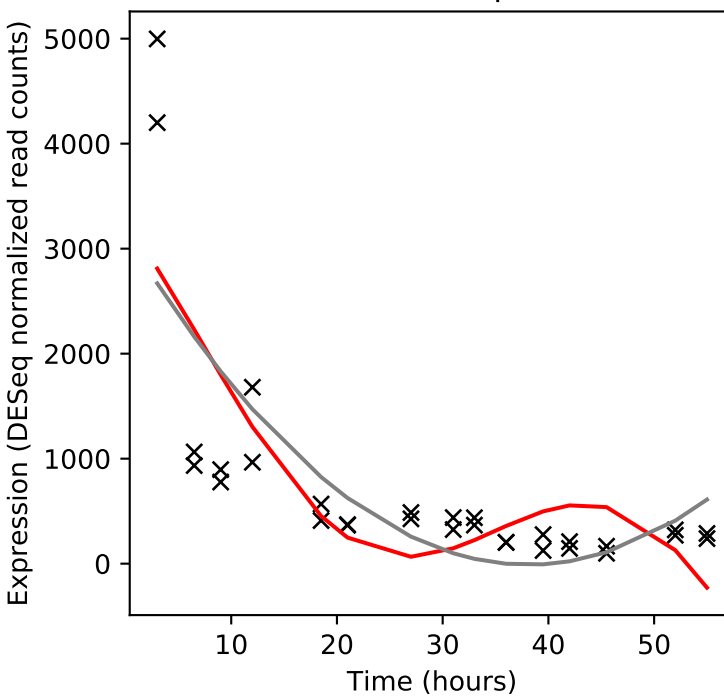

Rv2245/kasA

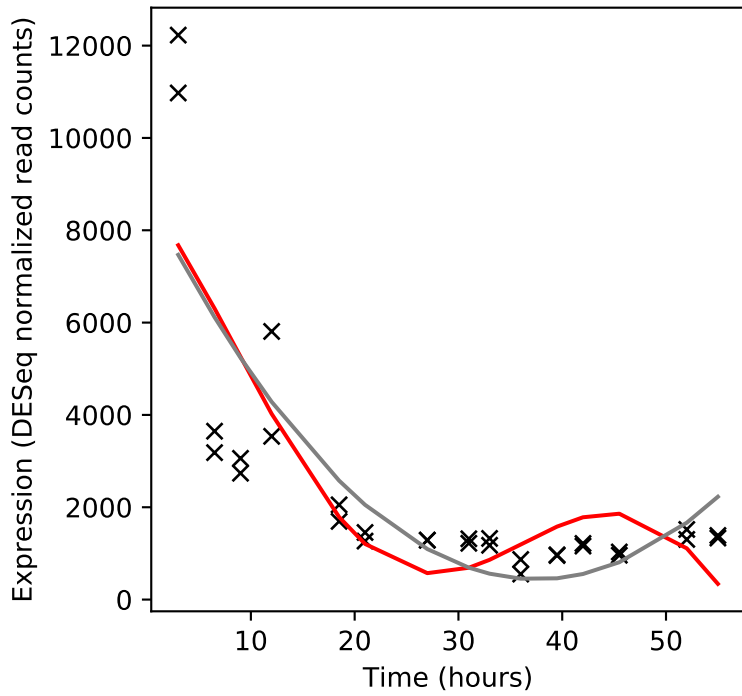

Rv2246/kasB

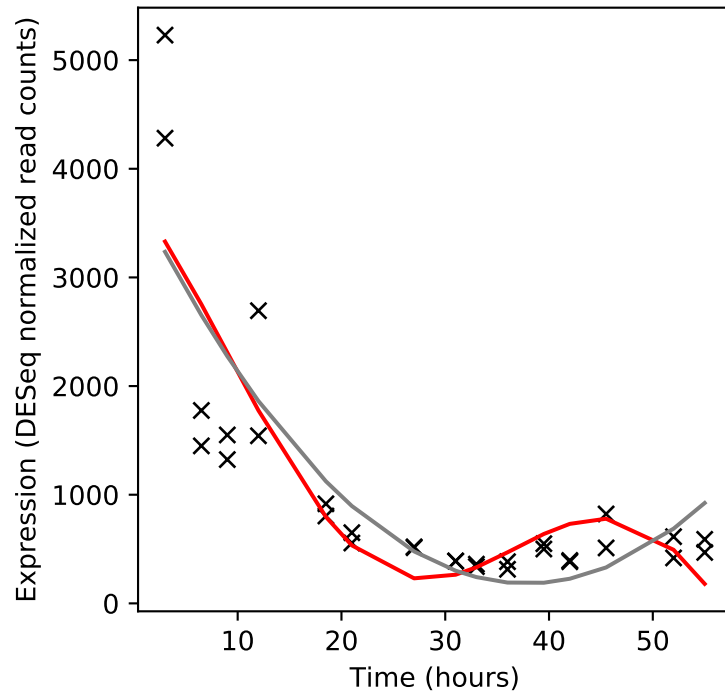

Rv2247/accD6

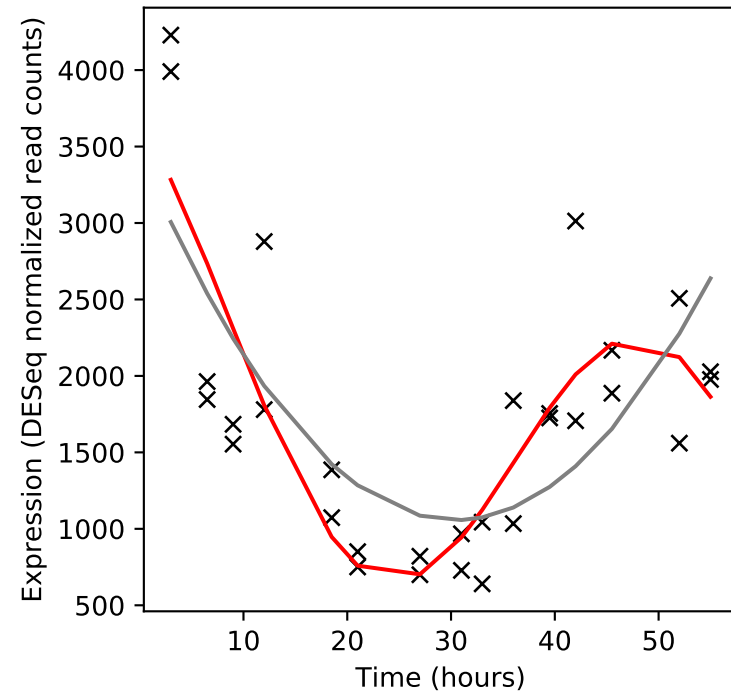

Rv2248/-

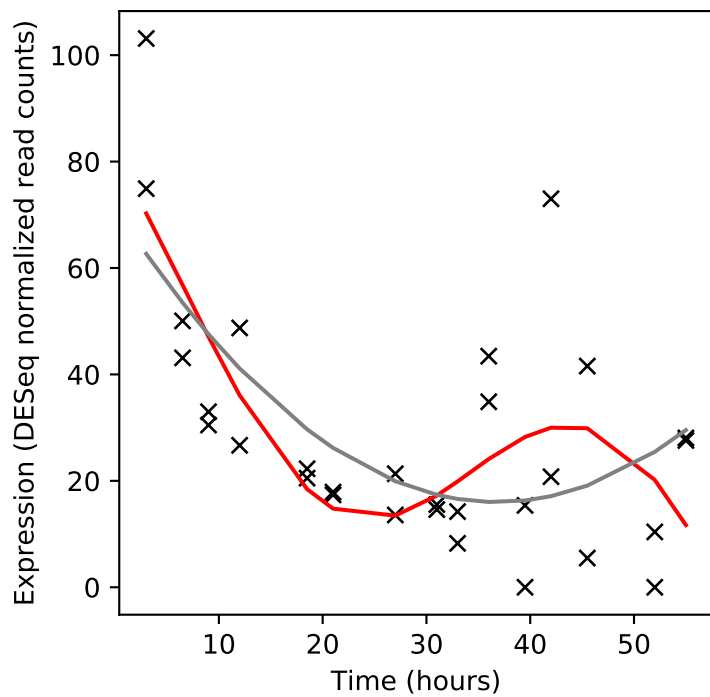

Rv2249c/glpD1

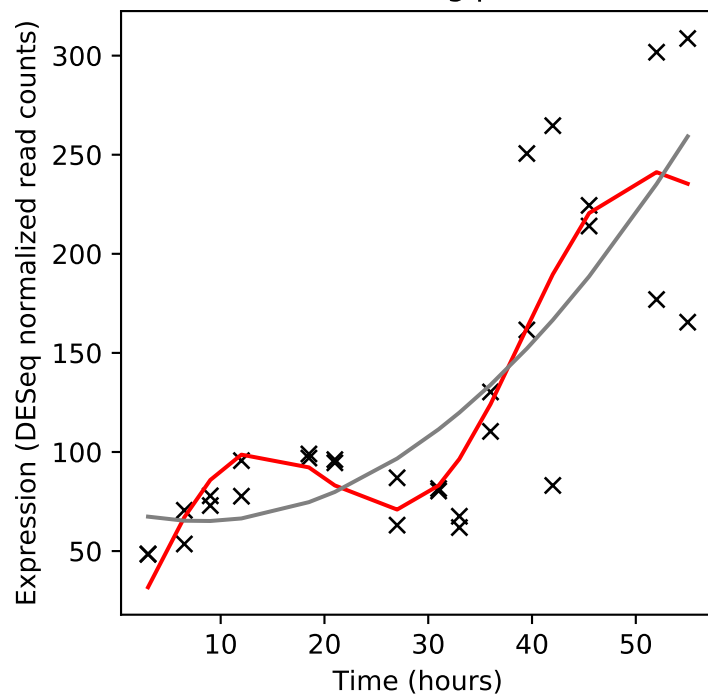

Rv2250c/-

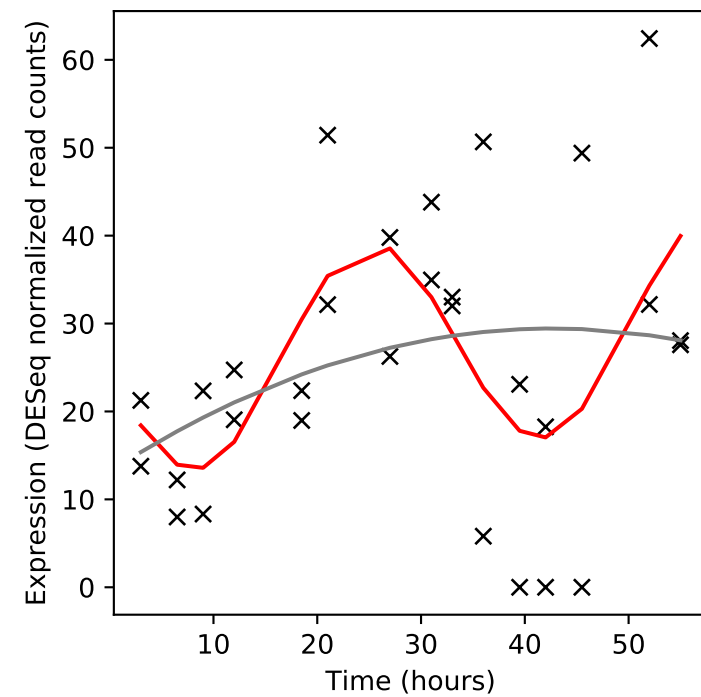

Rv2250A/-

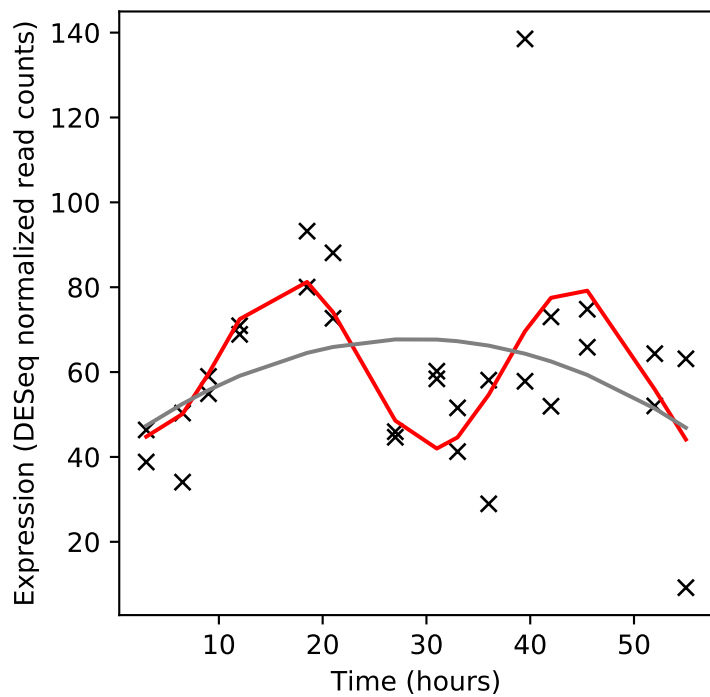

Rv2251/-

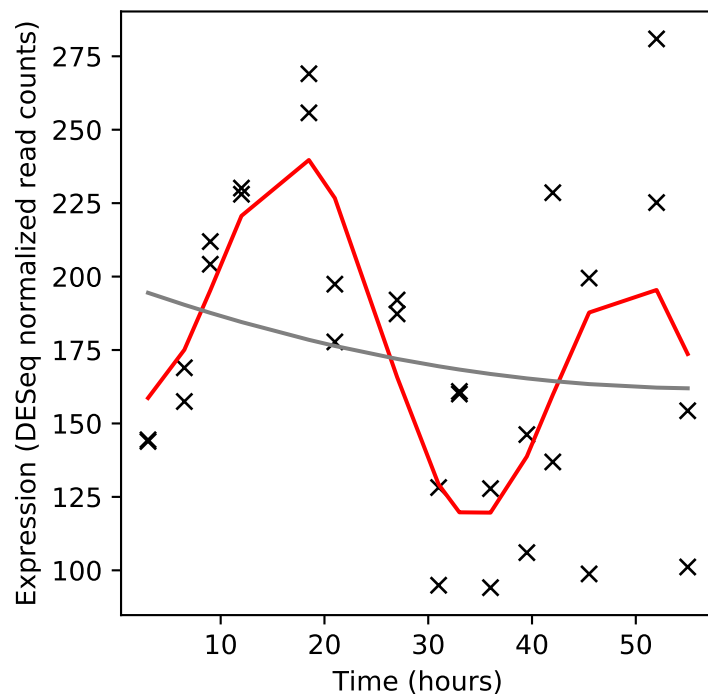

Rv2252/-

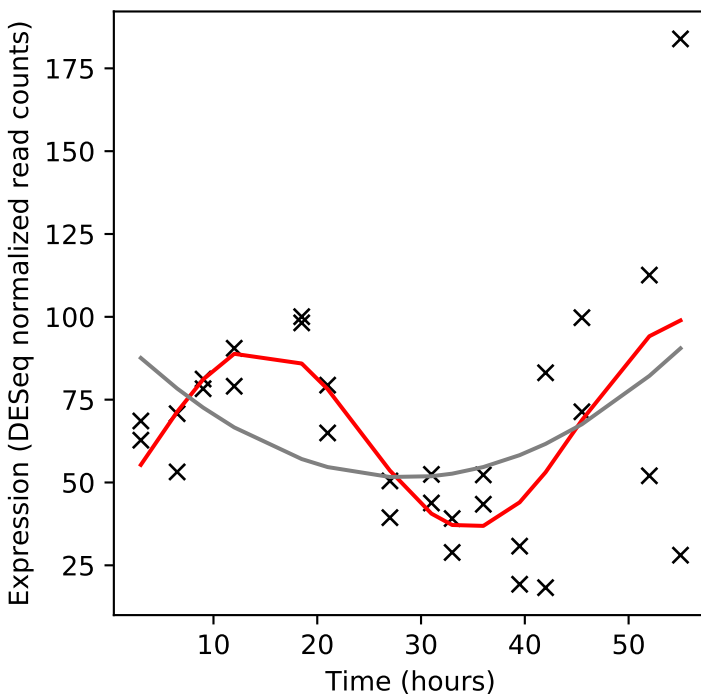

Rv2253/-

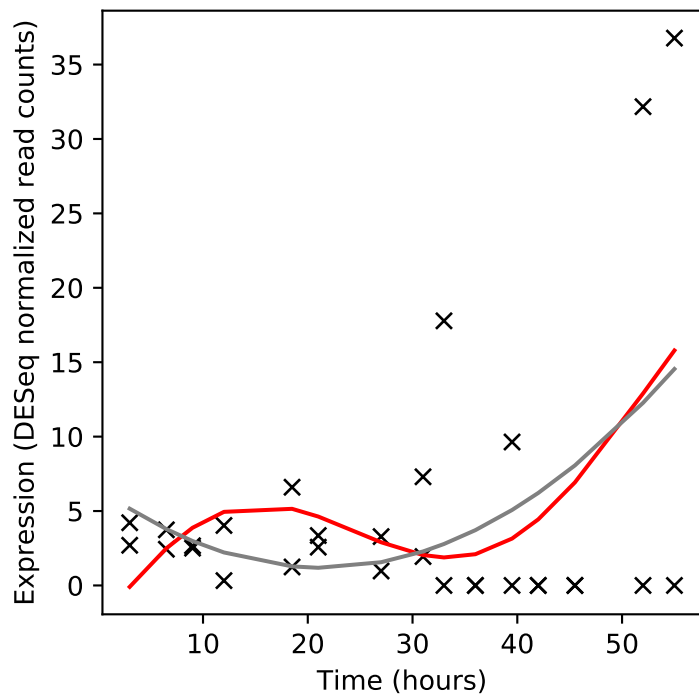

Rv2254c/-

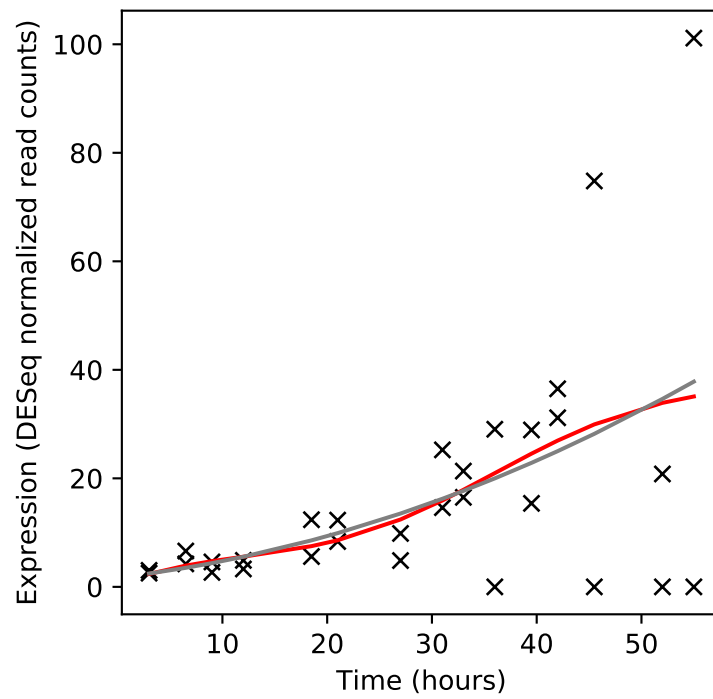

Rv2255c/-

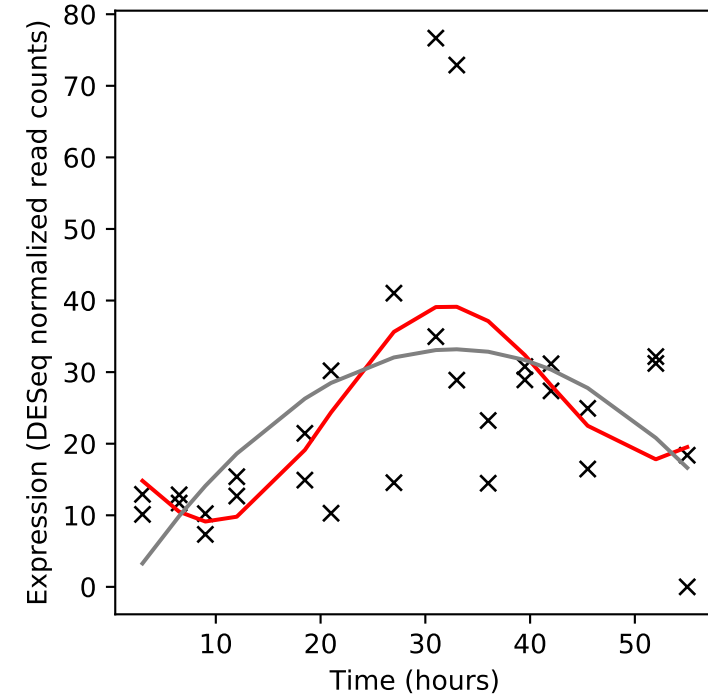

Rv2256c/-

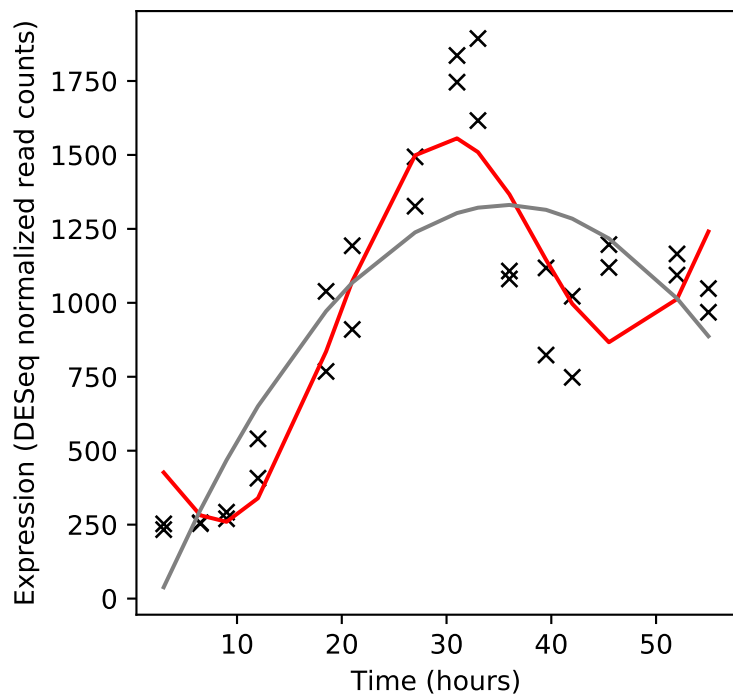

Rv2257c/-

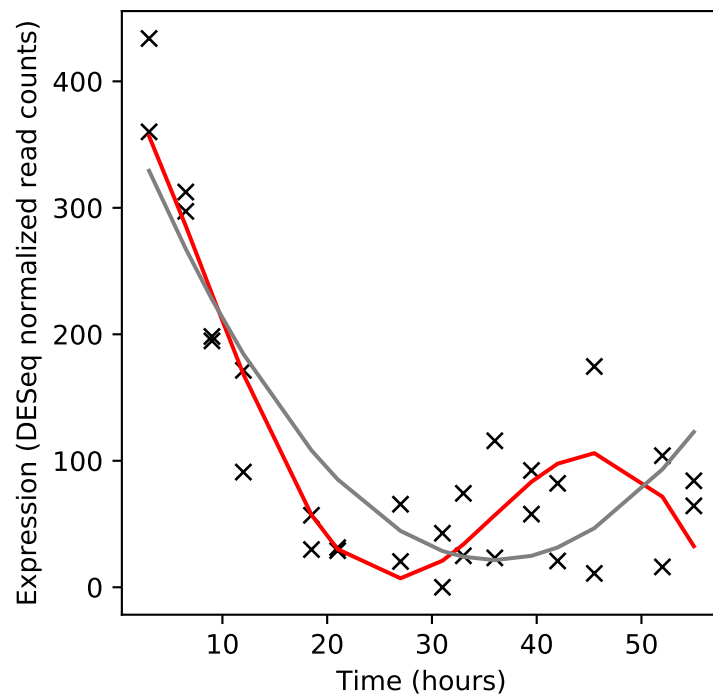

Rv2258c/-

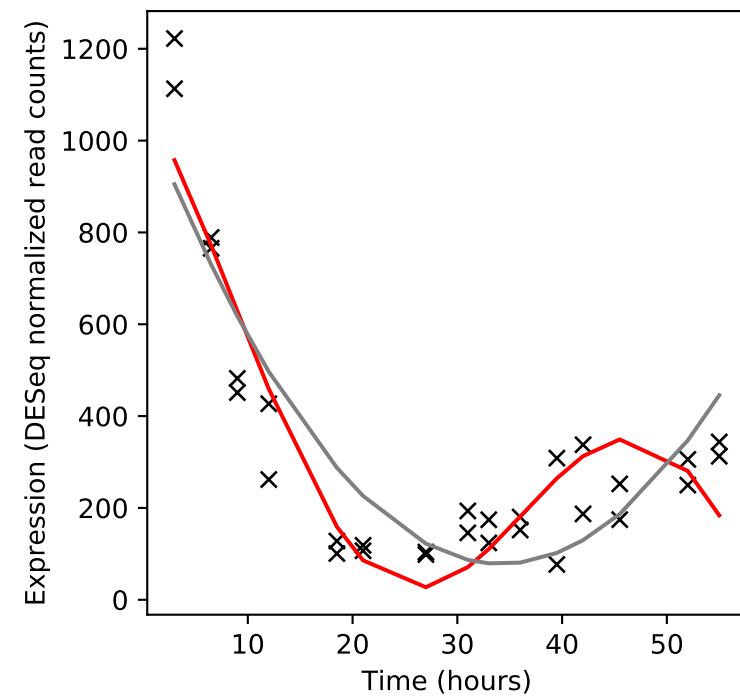

Rv2259/mscR

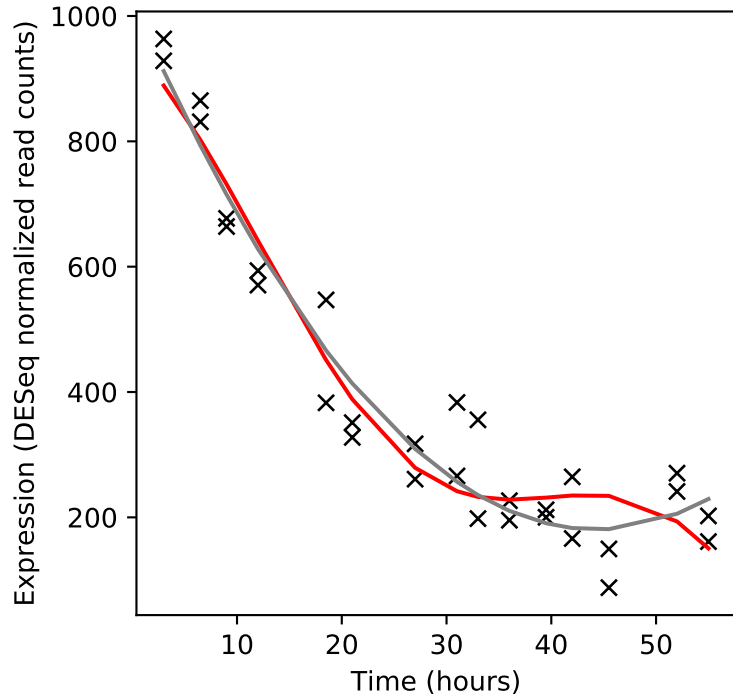

Rv2260/-

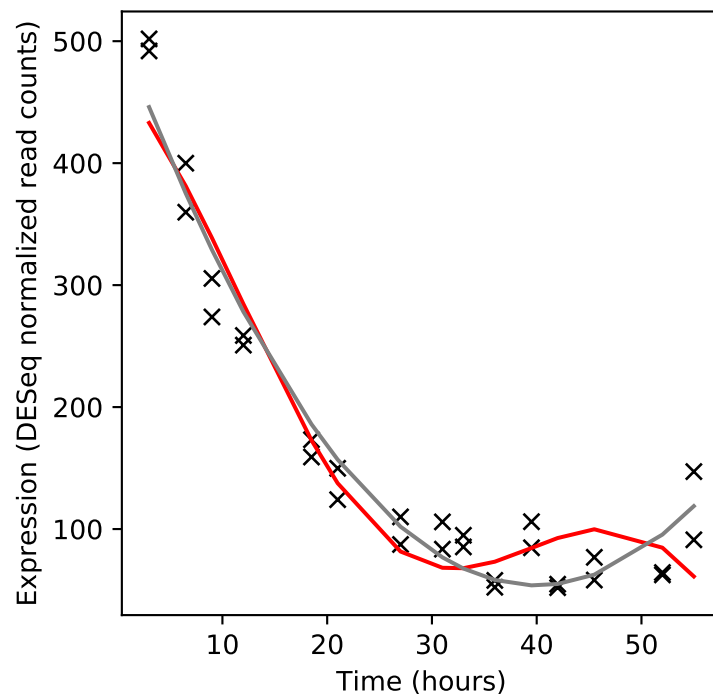

Rv2261c/-

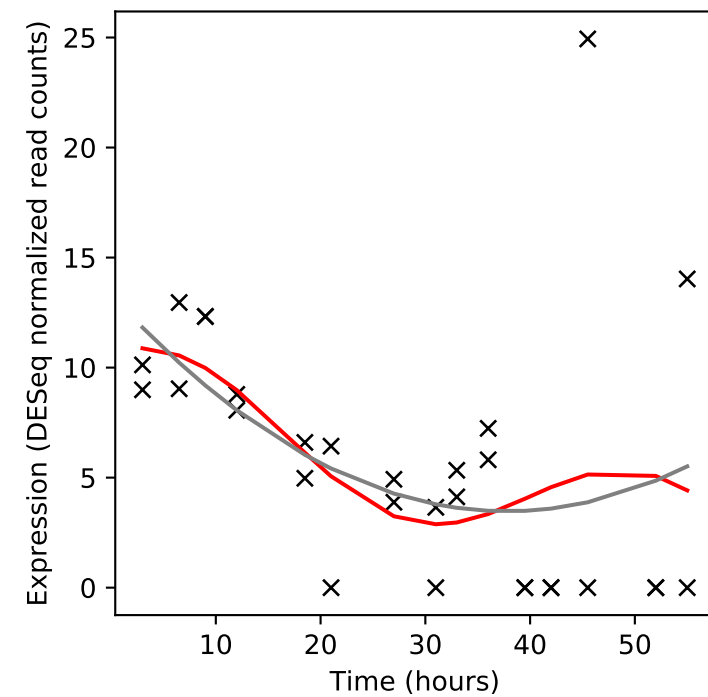

Rv2262c/-

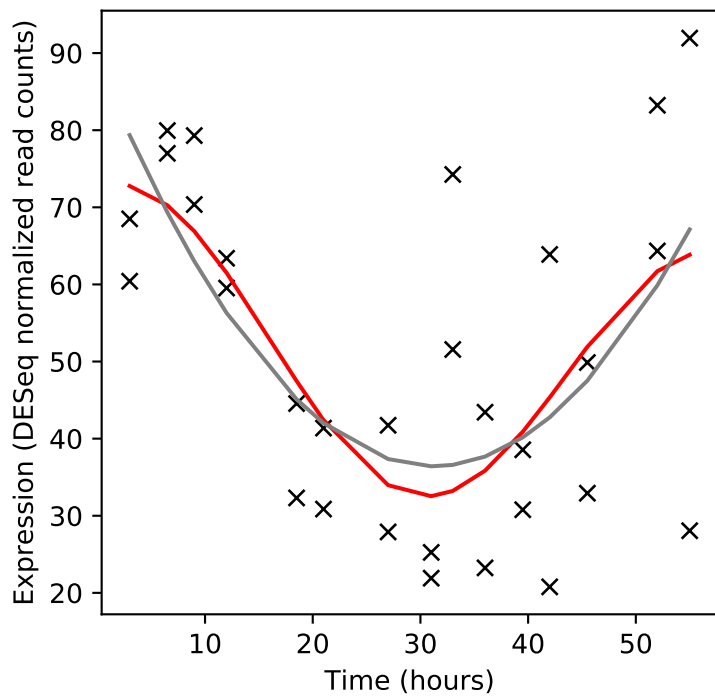

Rv2263/-

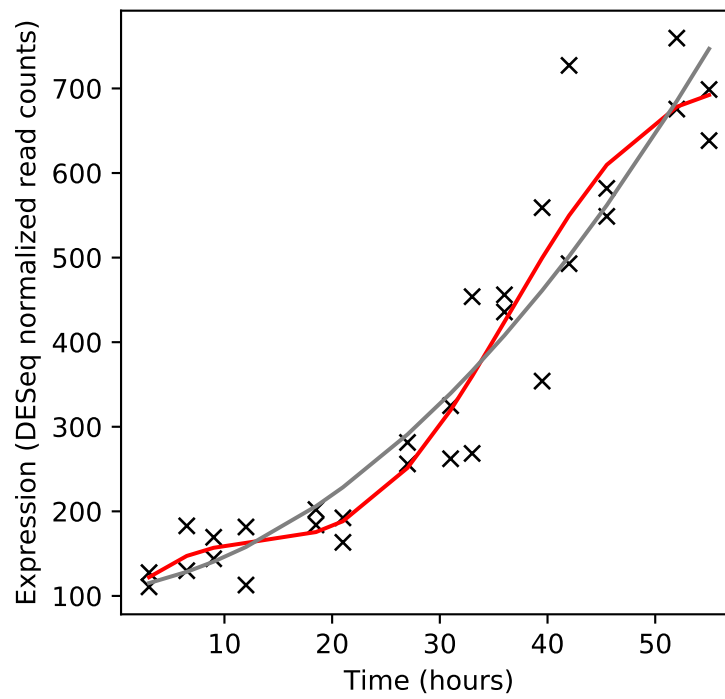

Rv2264c/-

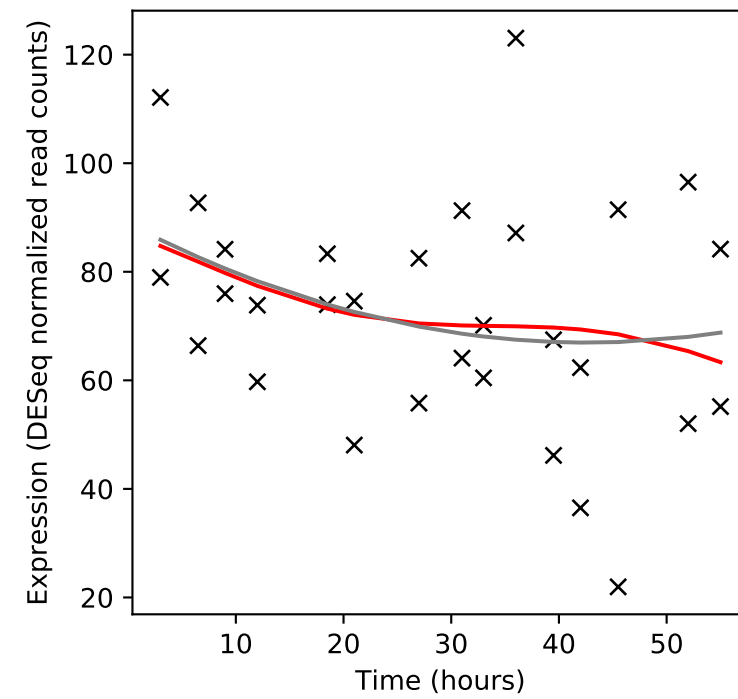

Rv2265/-

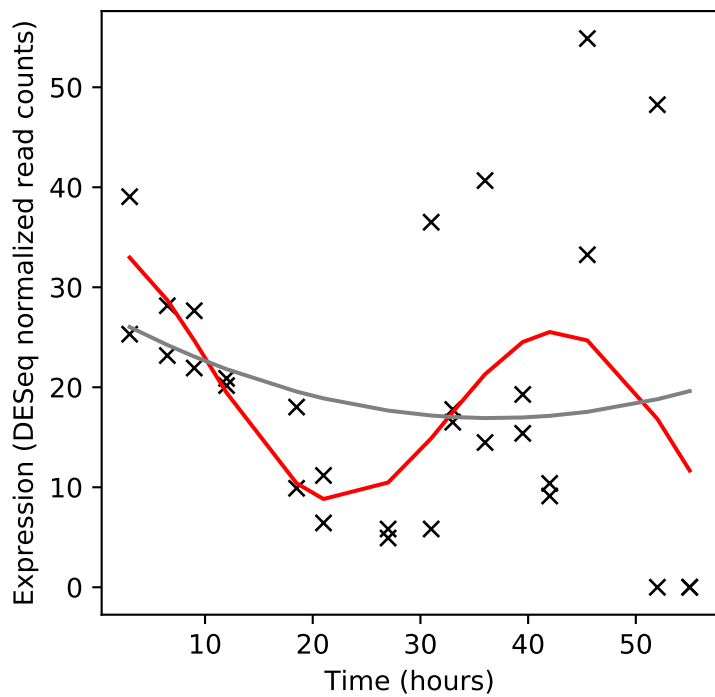

Rv2266/cyp124

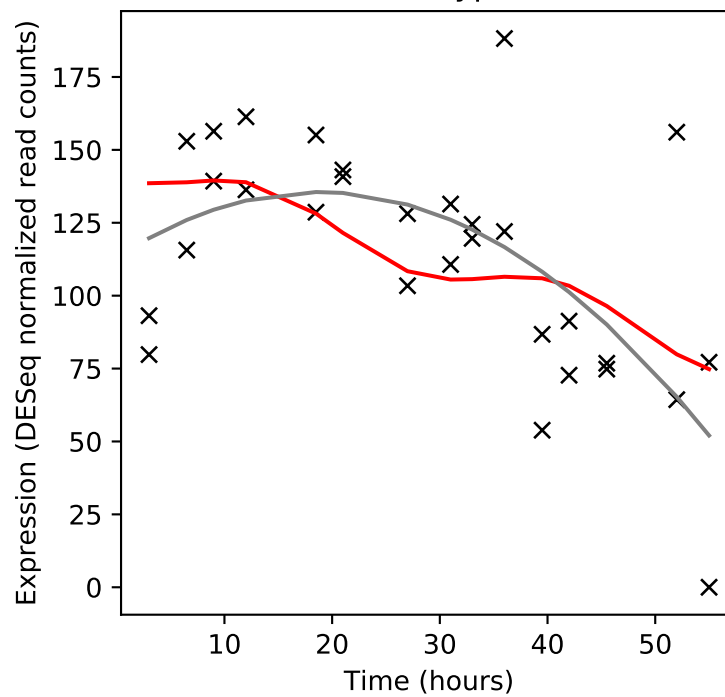

Rv2267c/-

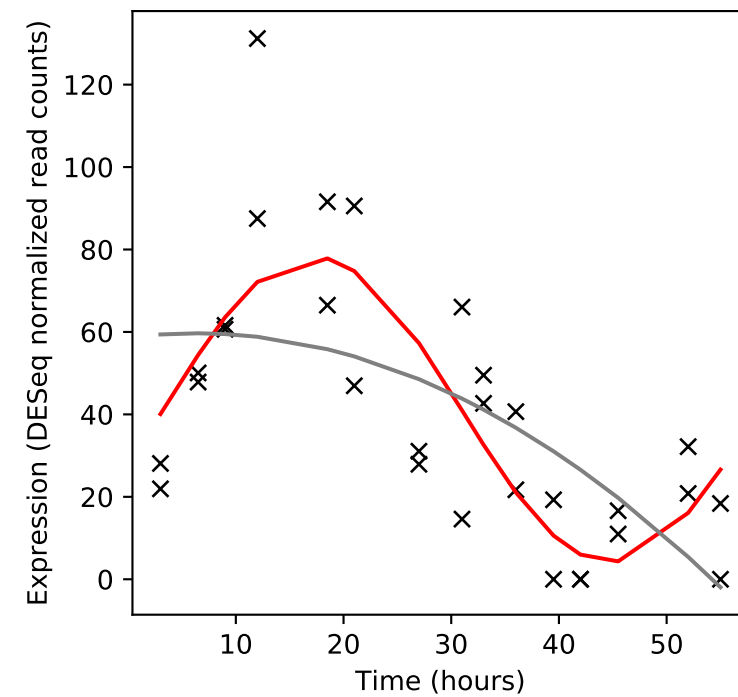

Rv2268c/cyp128

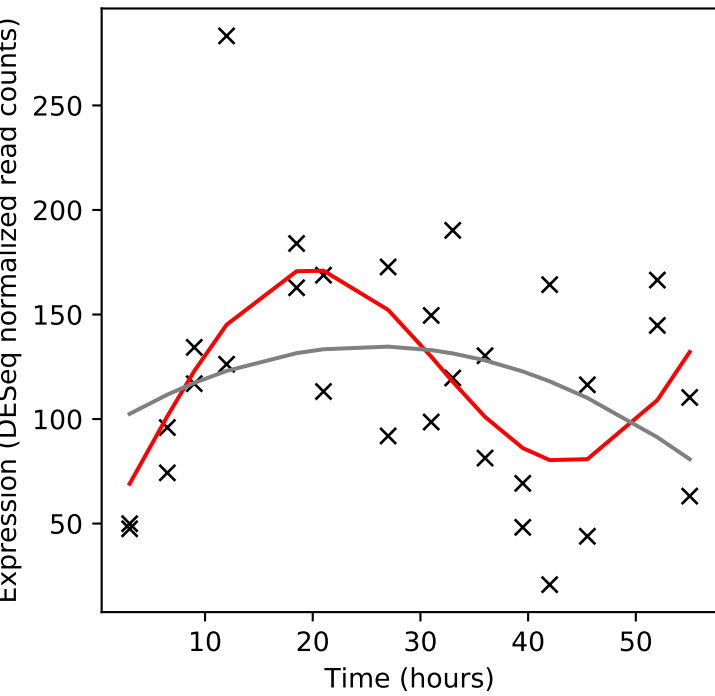

Rv2269c/-

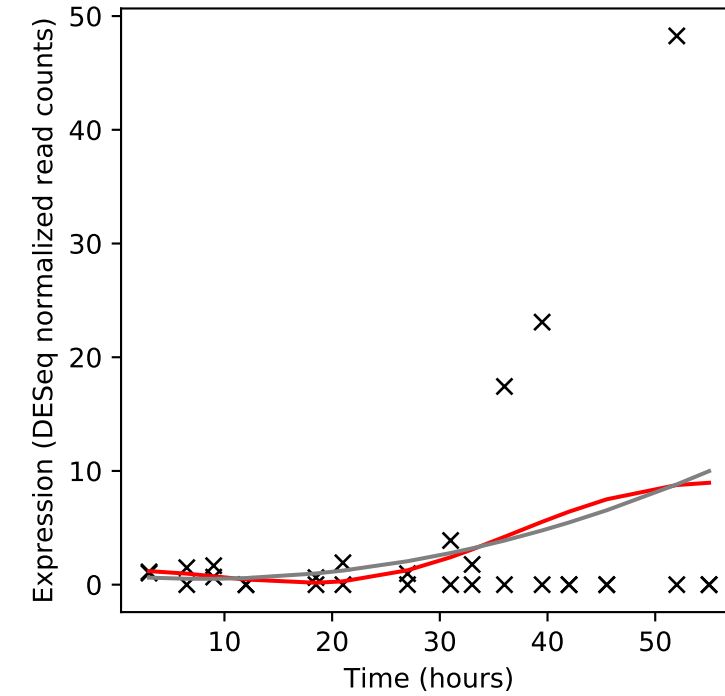

Rv2270/lppN

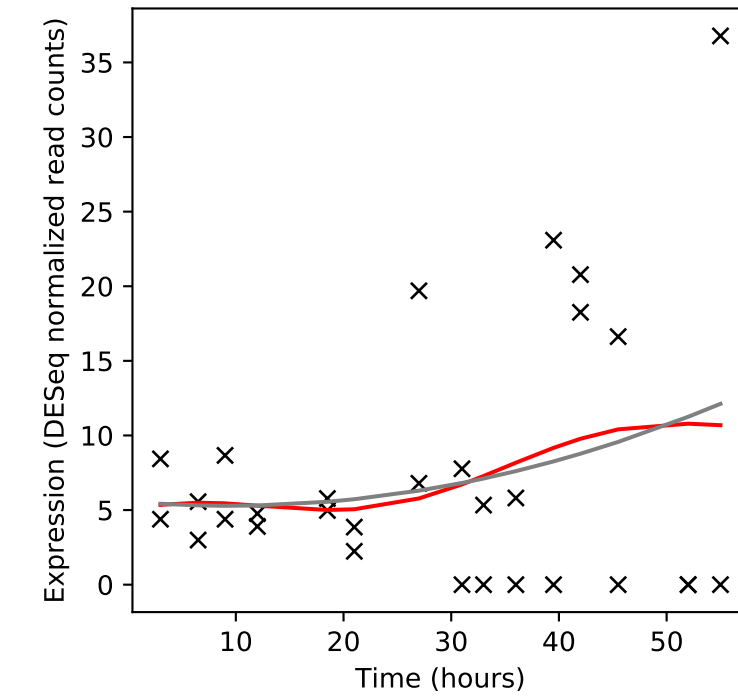

Rv2271/-

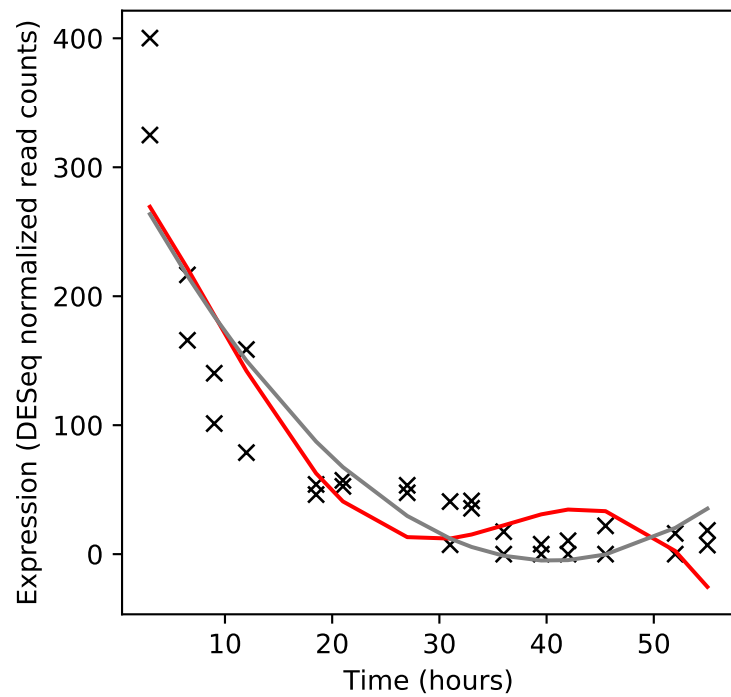

Rv2272/-

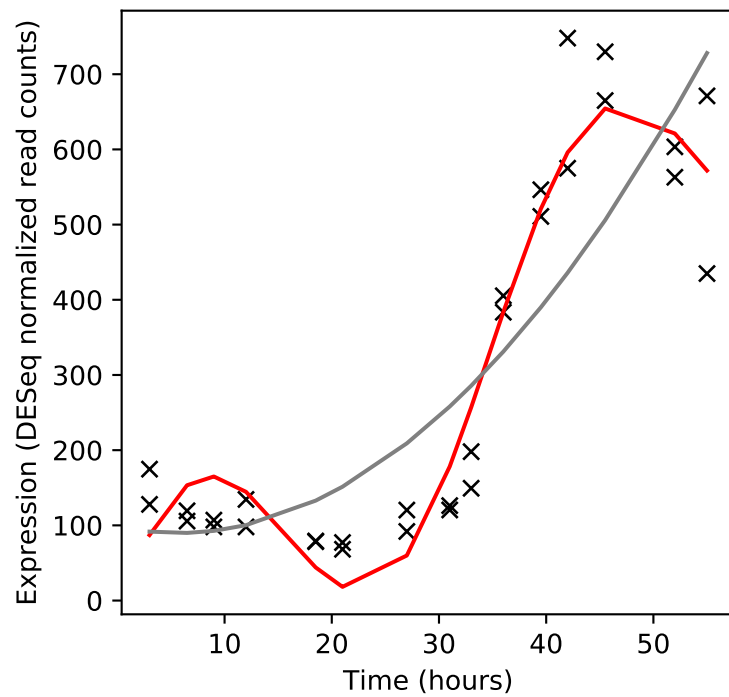

Rv2273/-

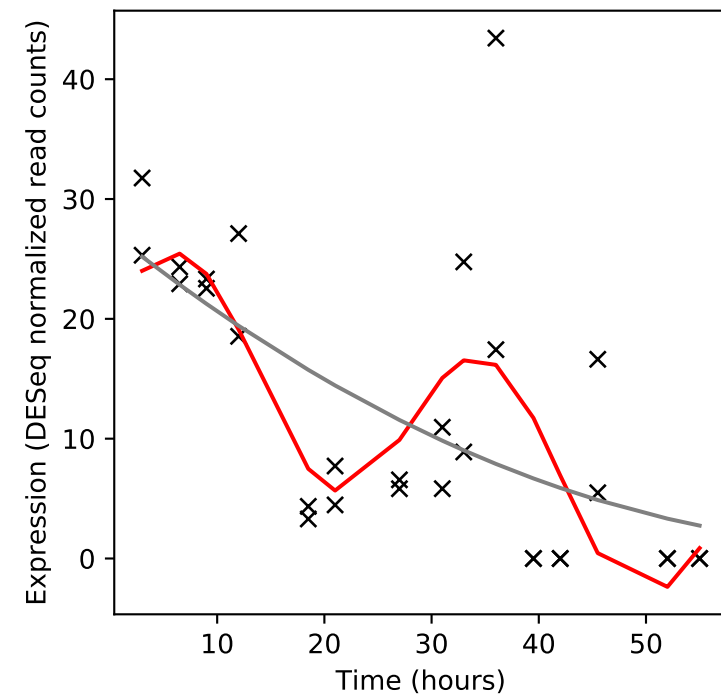

Rv2274c/mazF8

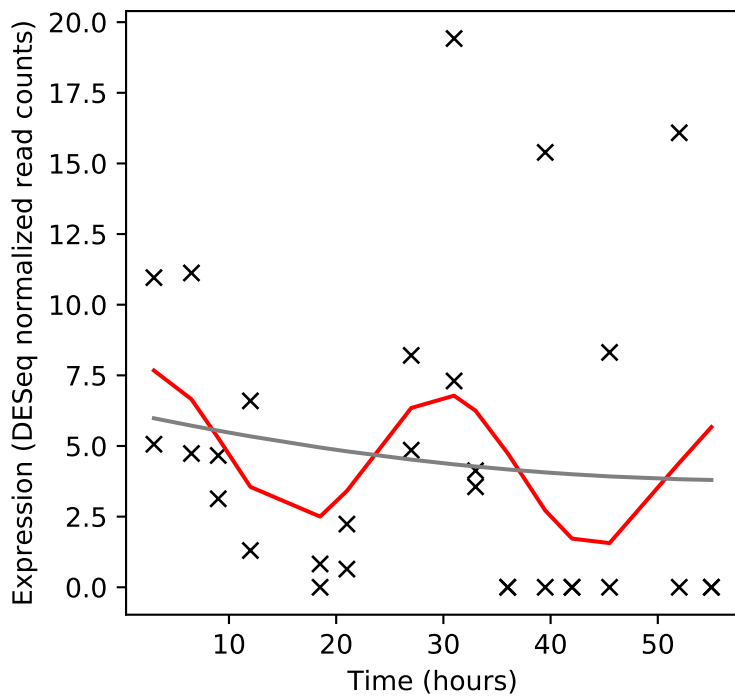

Rv2274A/mazE8

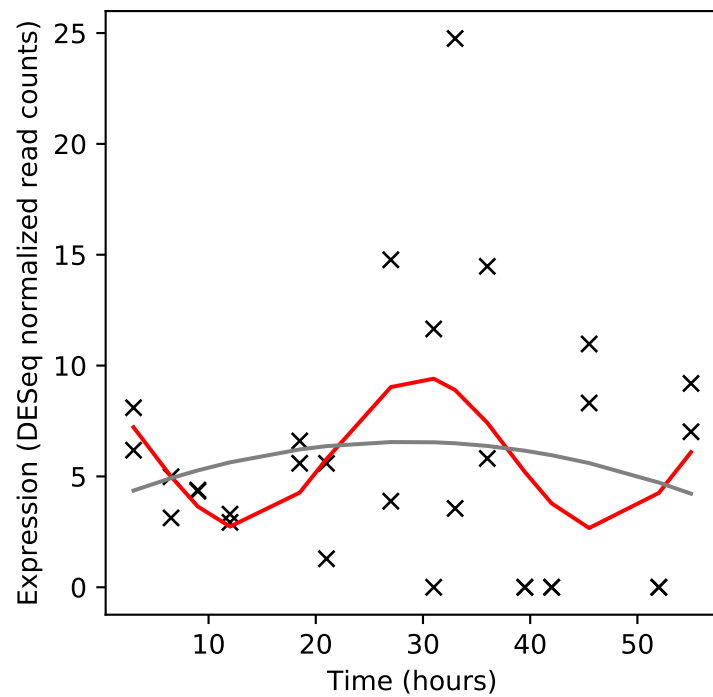

Rv2275/-

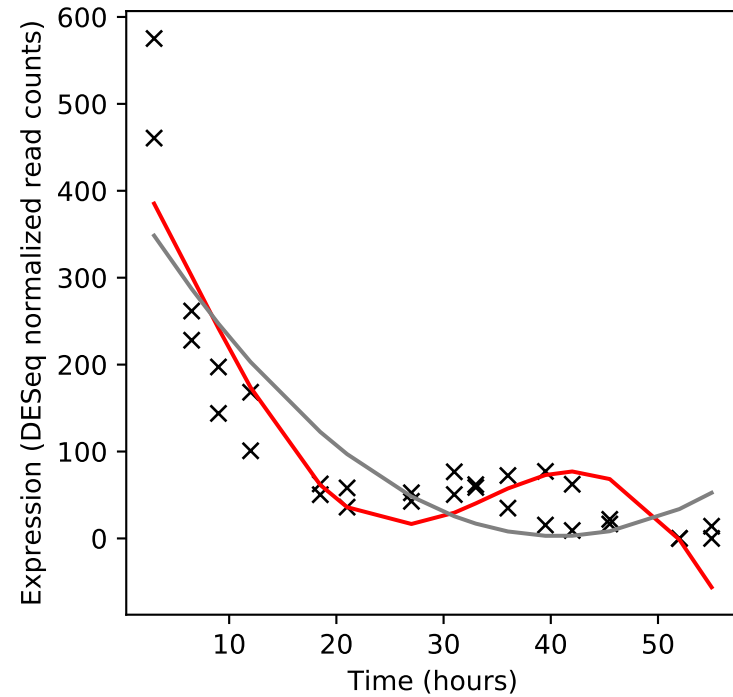

Rv2276/cyp121

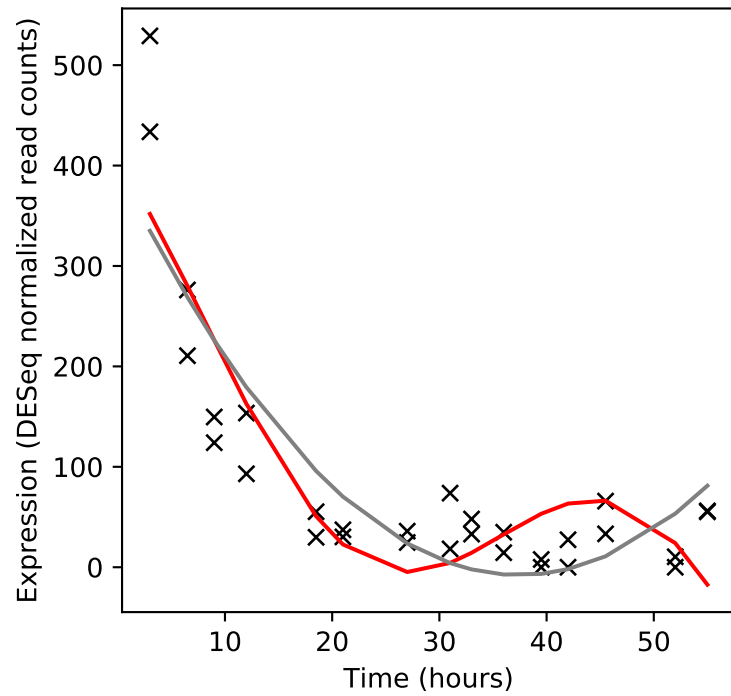

Rv2277c/-

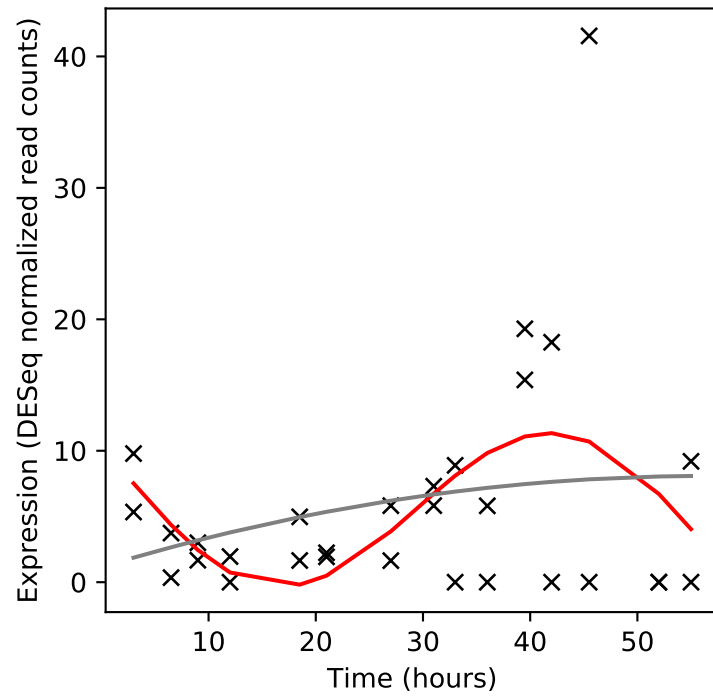

Rv2278/-

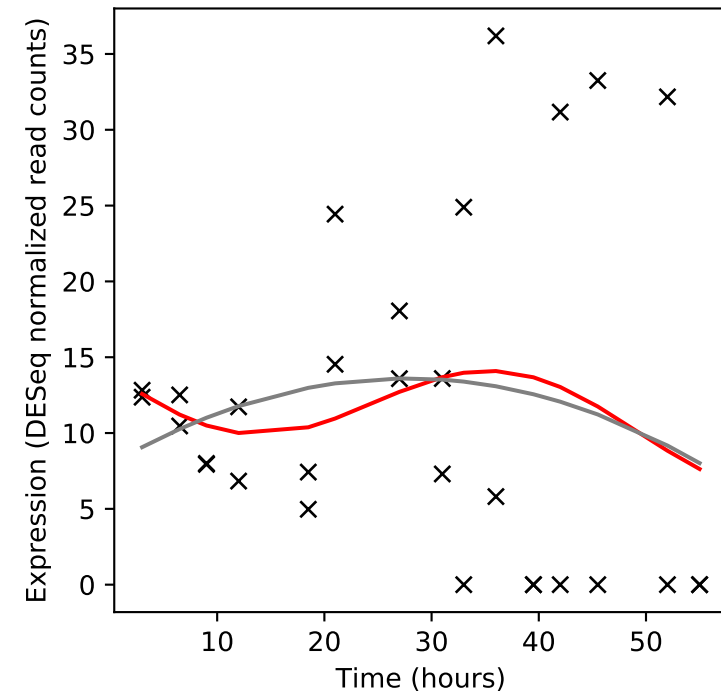

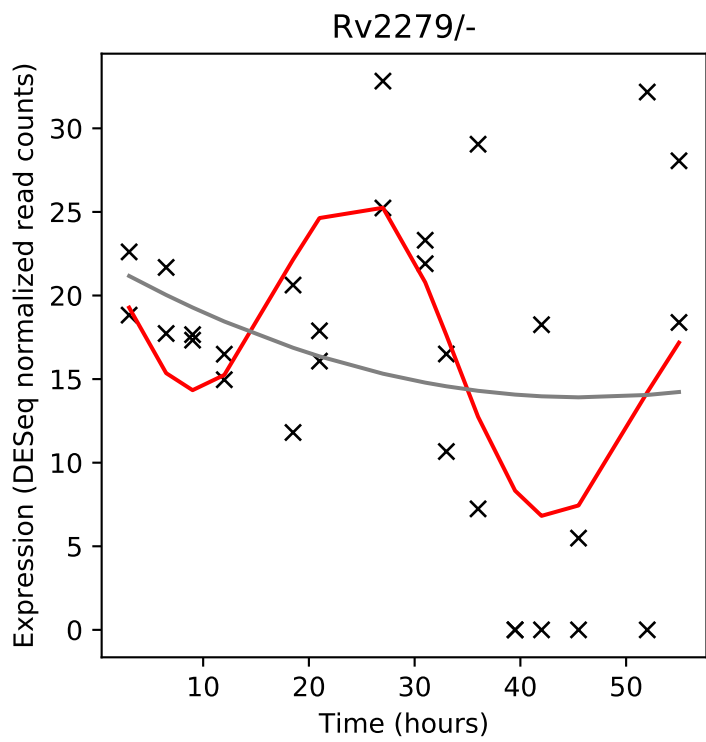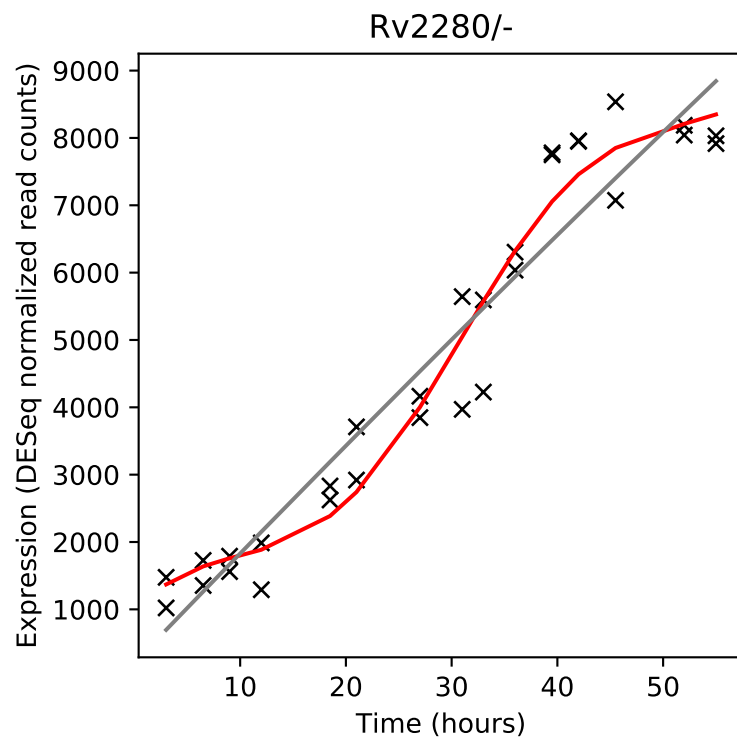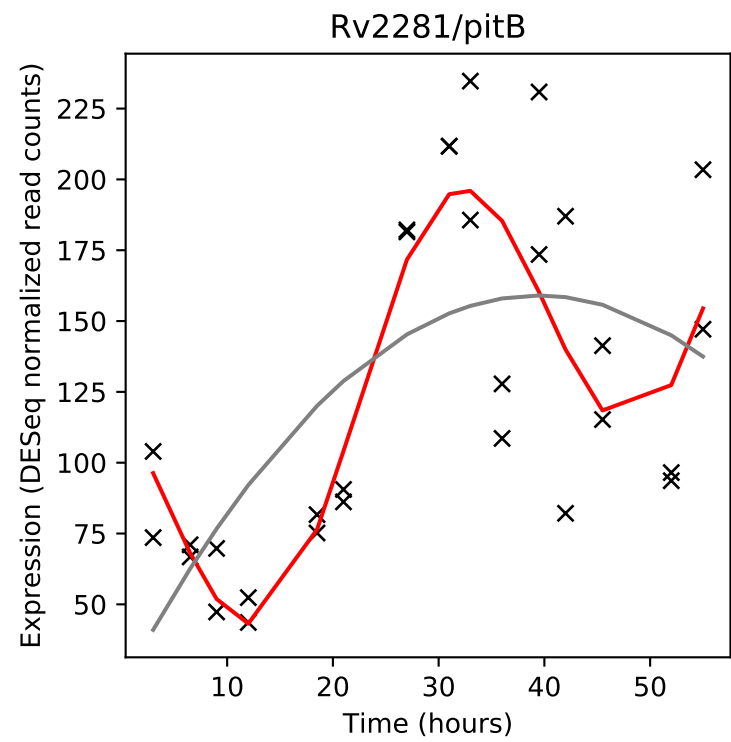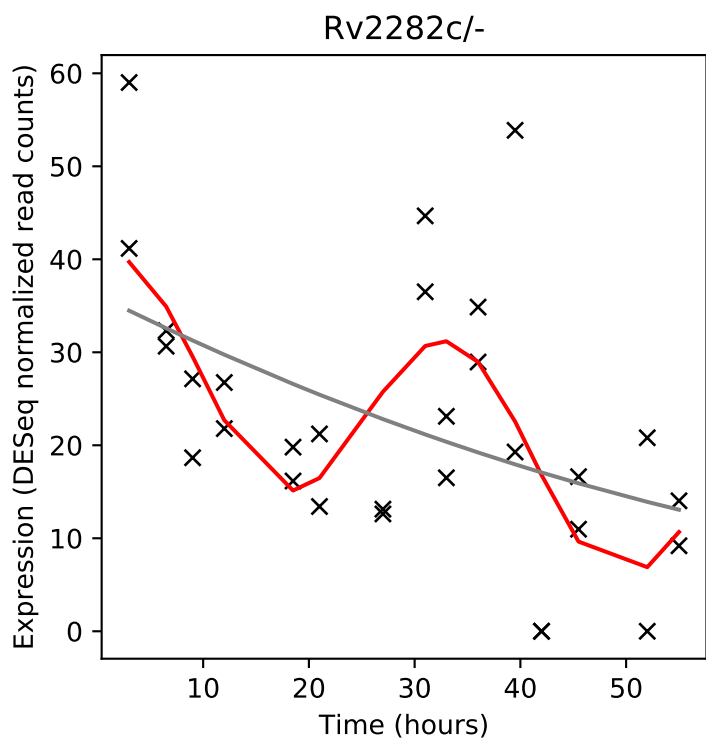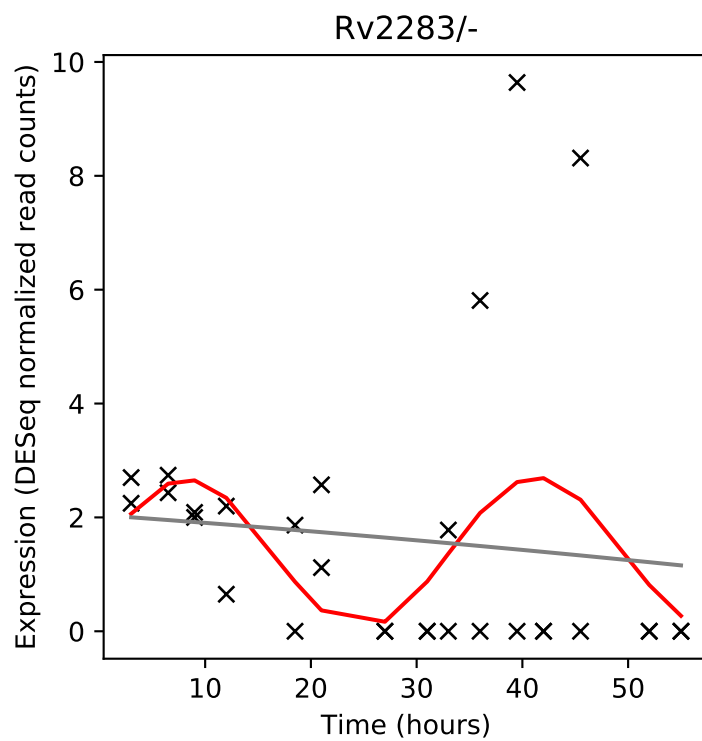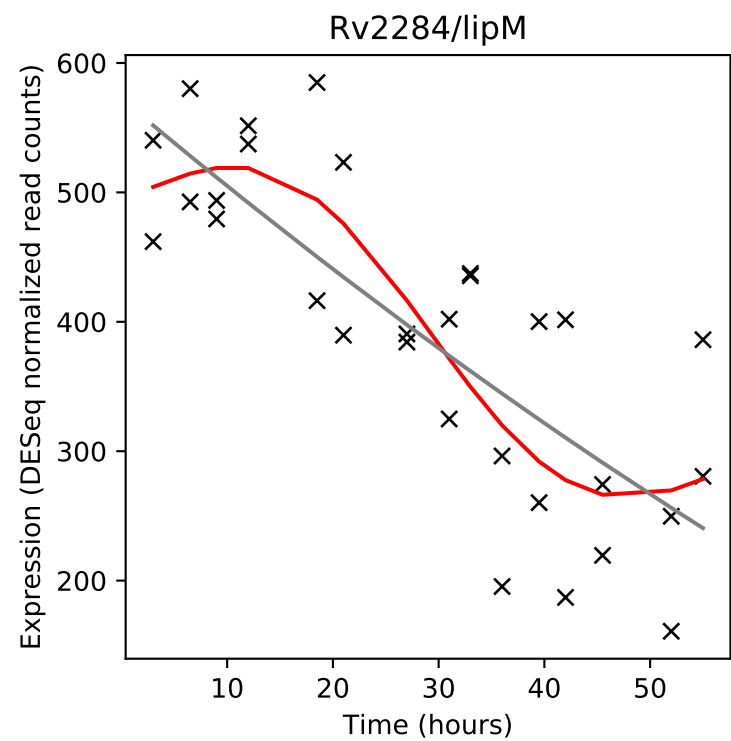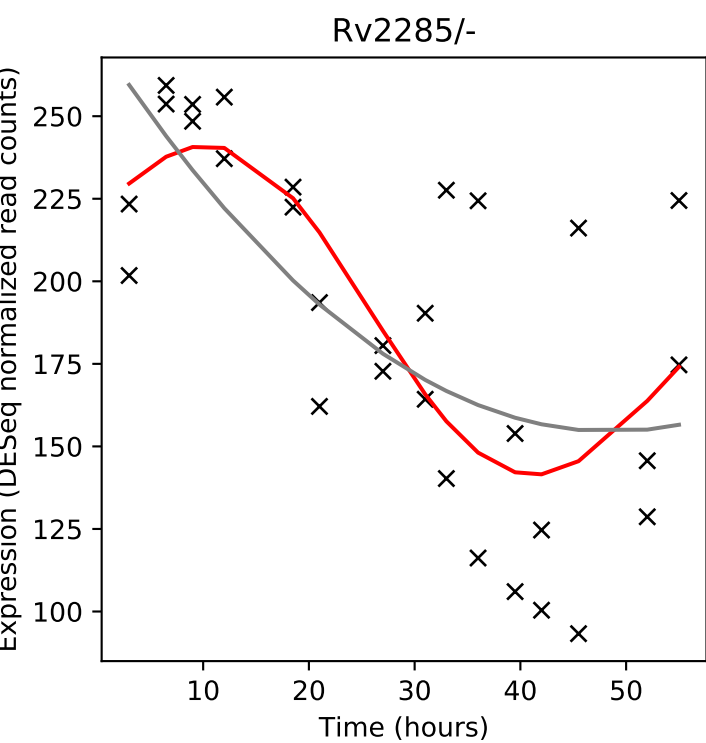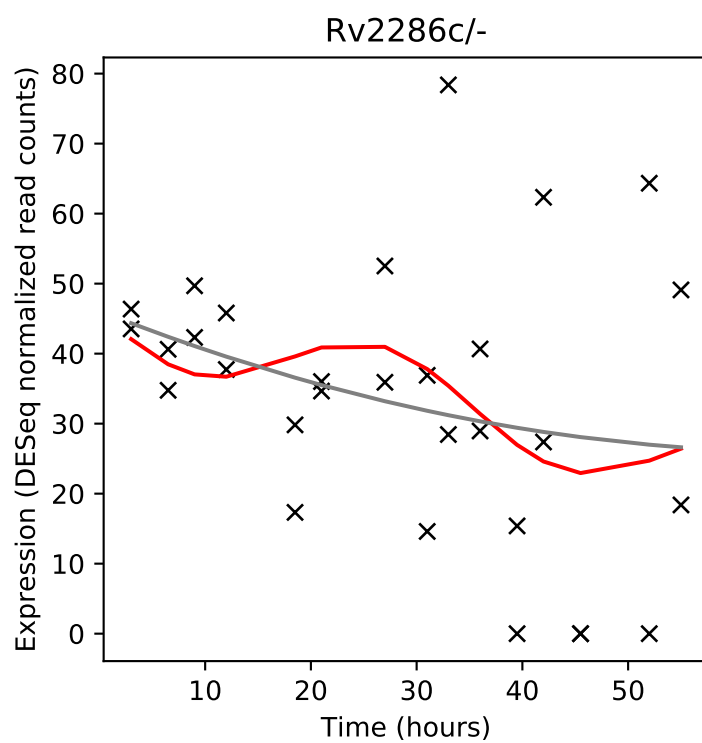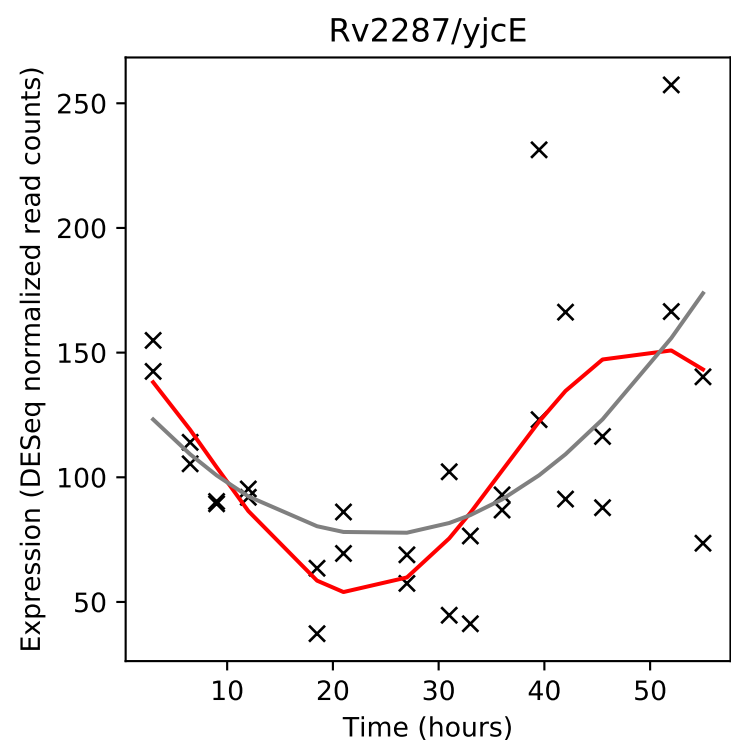



Rv2288/-

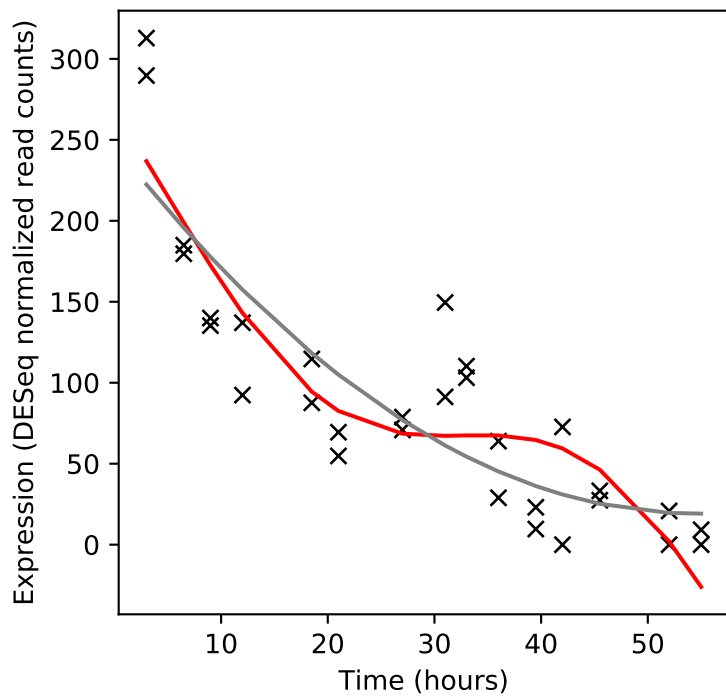

Rv2289/cdh

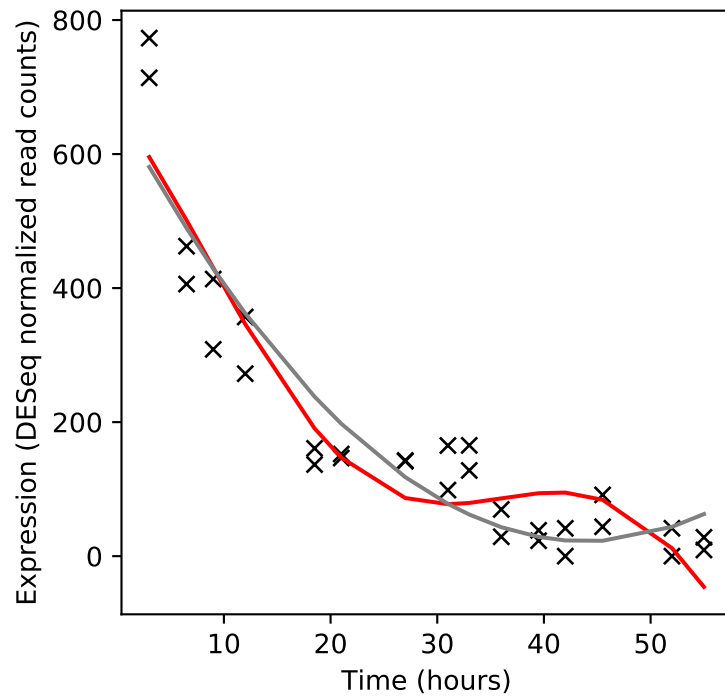

Rv2290/lppO

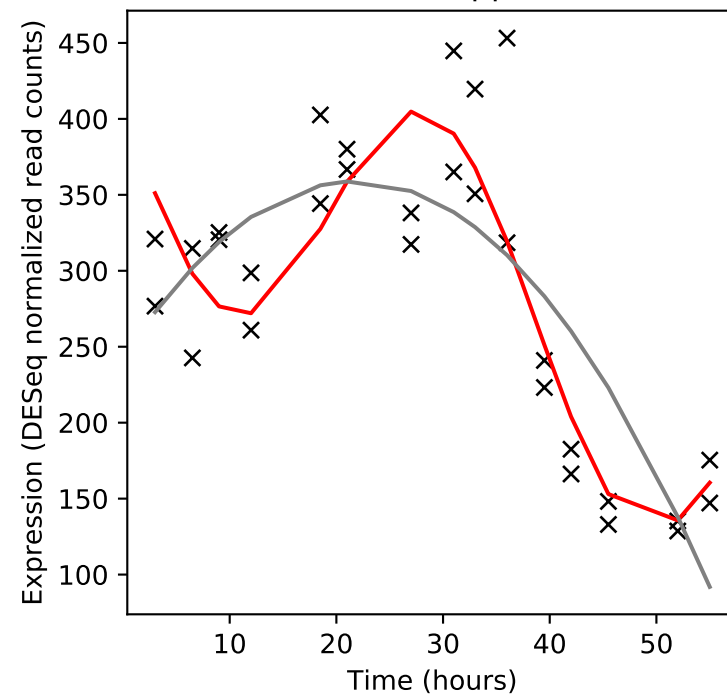

Rv2291/sseB

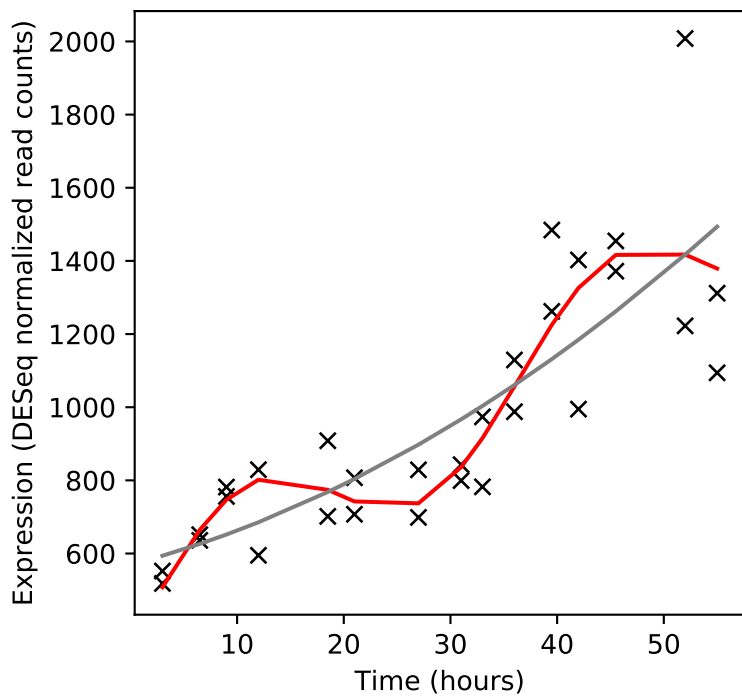

Rv2292c/-

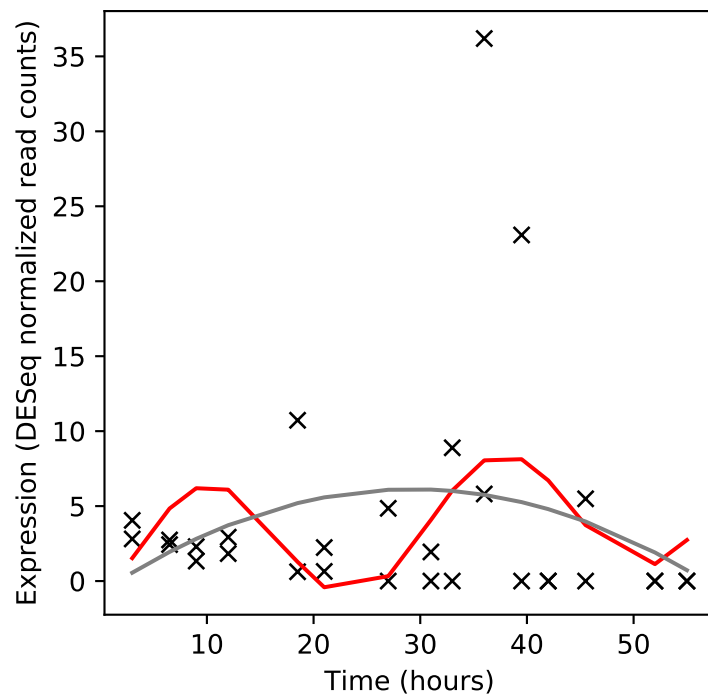

Rv2293c/-

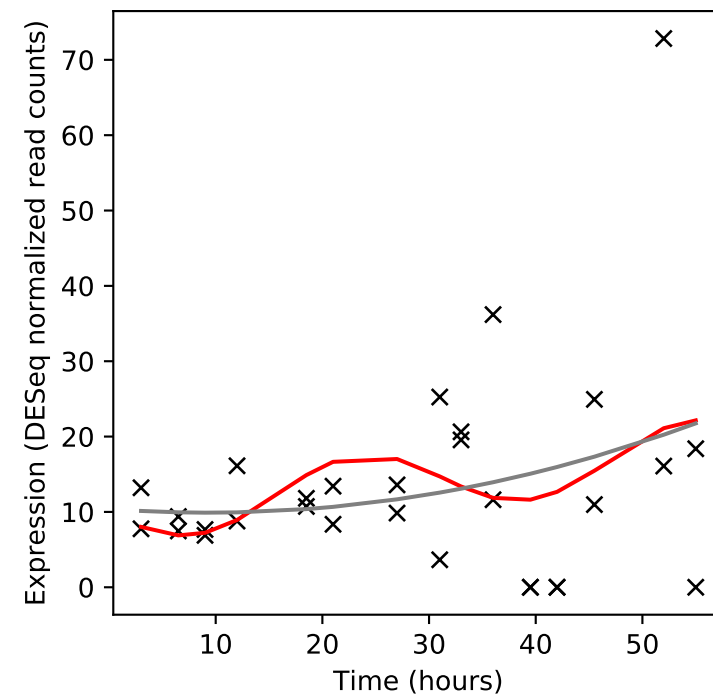

Rv2294/-

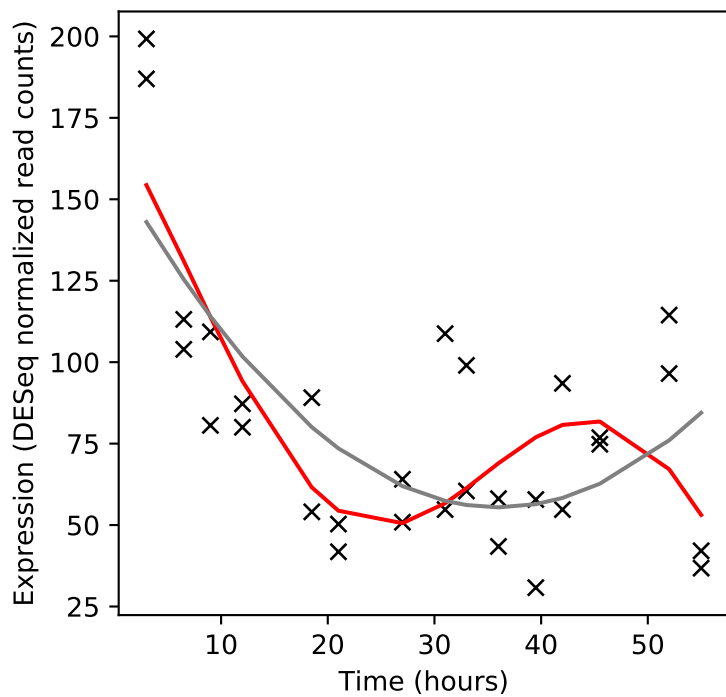

Rv2295/-

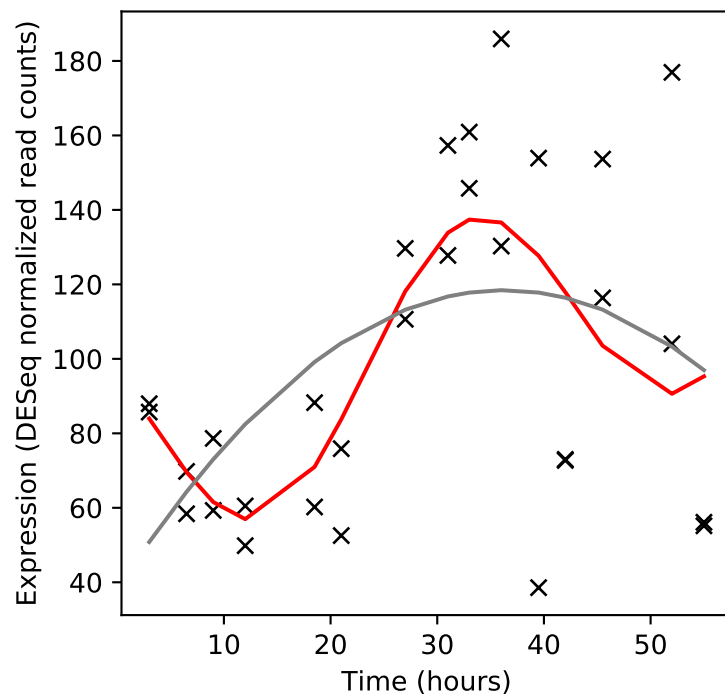

Rv2296/-

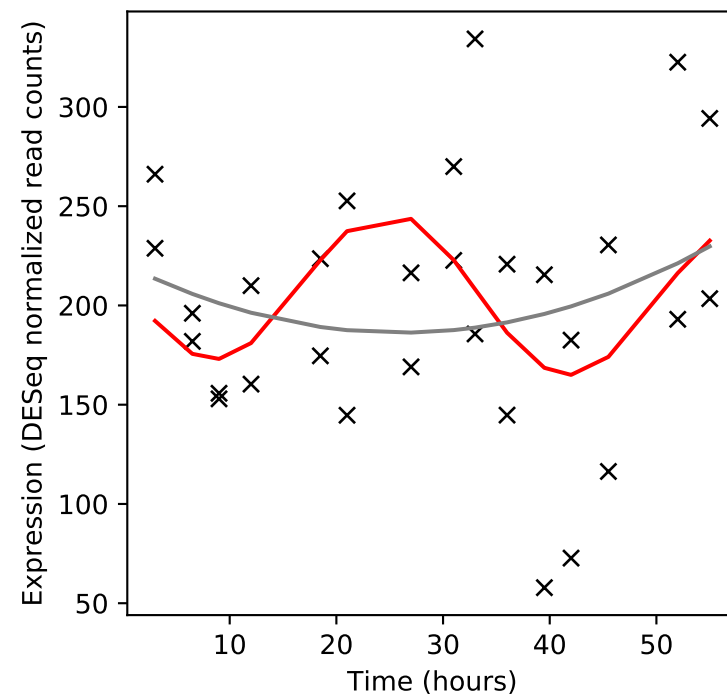

Rv2297/-

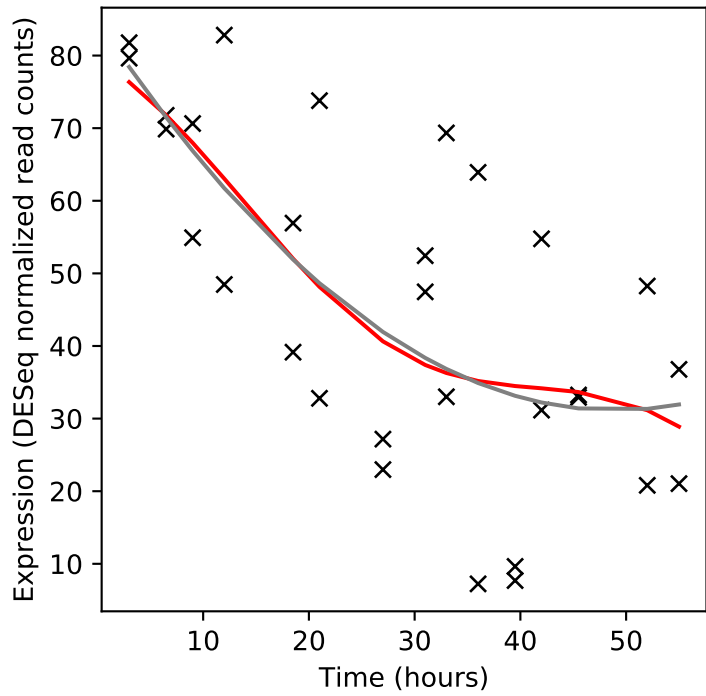

Rv2298/-

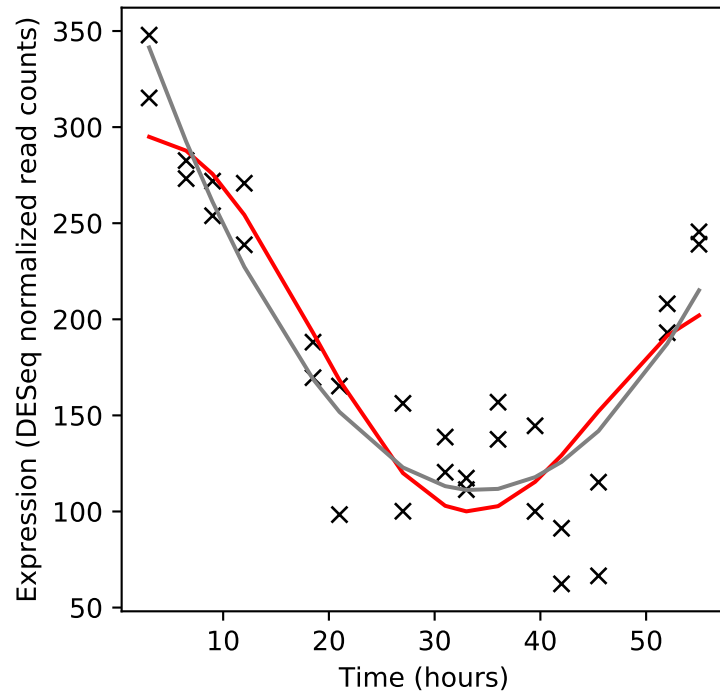

Rv2299c/htpG

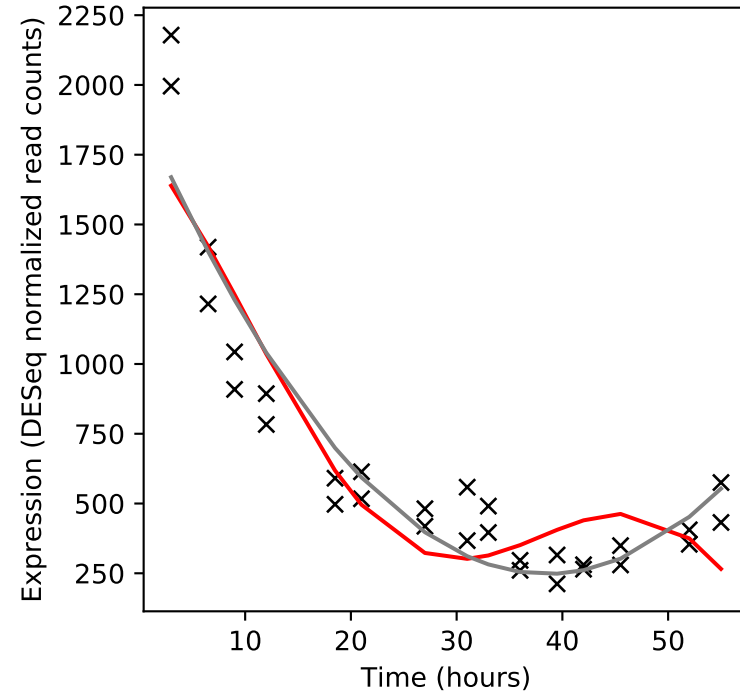

Rv2300c/-

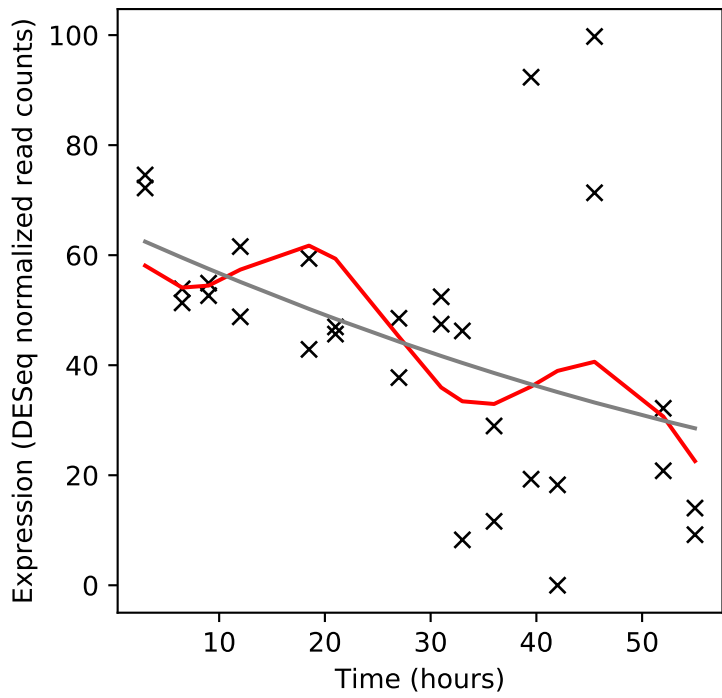

Rv2301/cut2

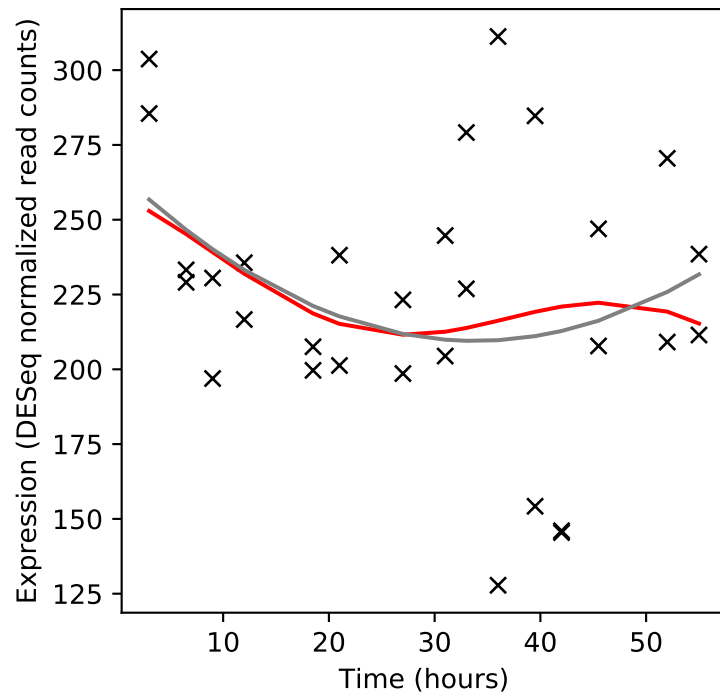

Rv2302/-

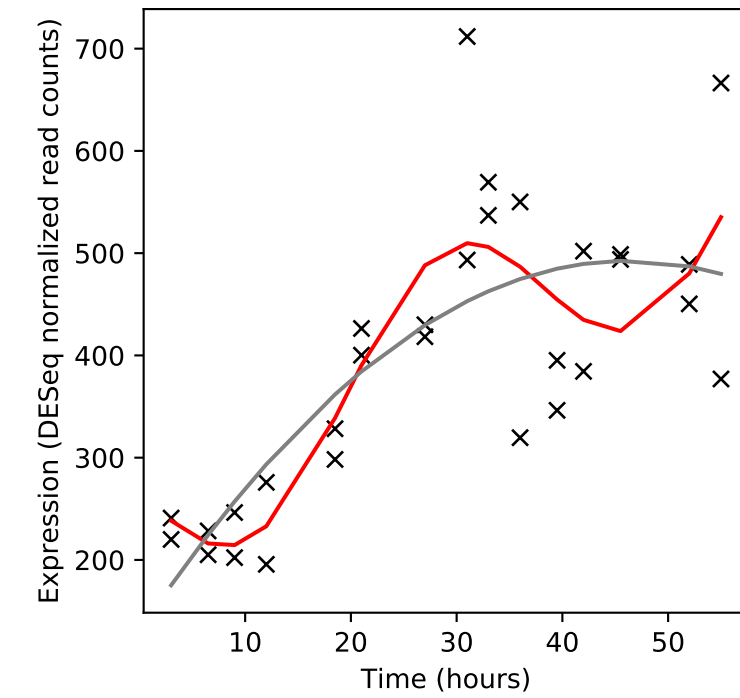

Rv2303c/-

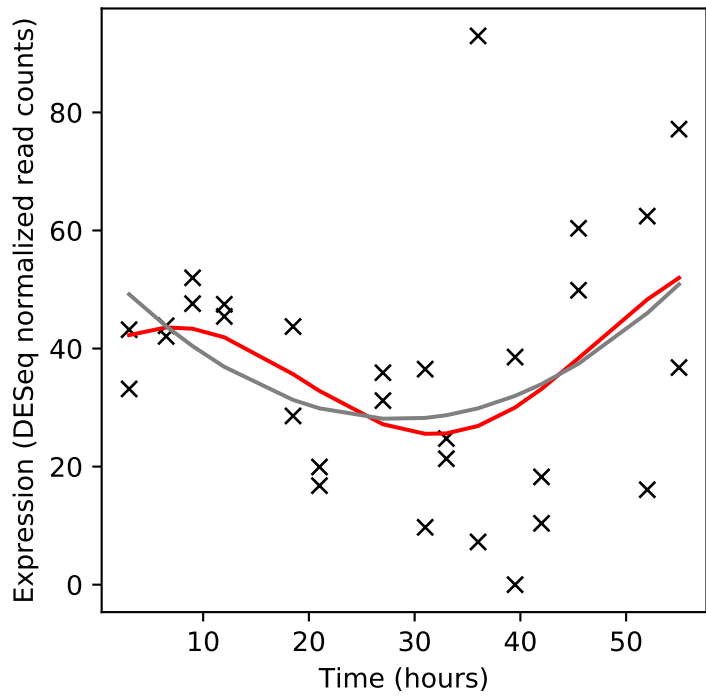

Rv2304c/-

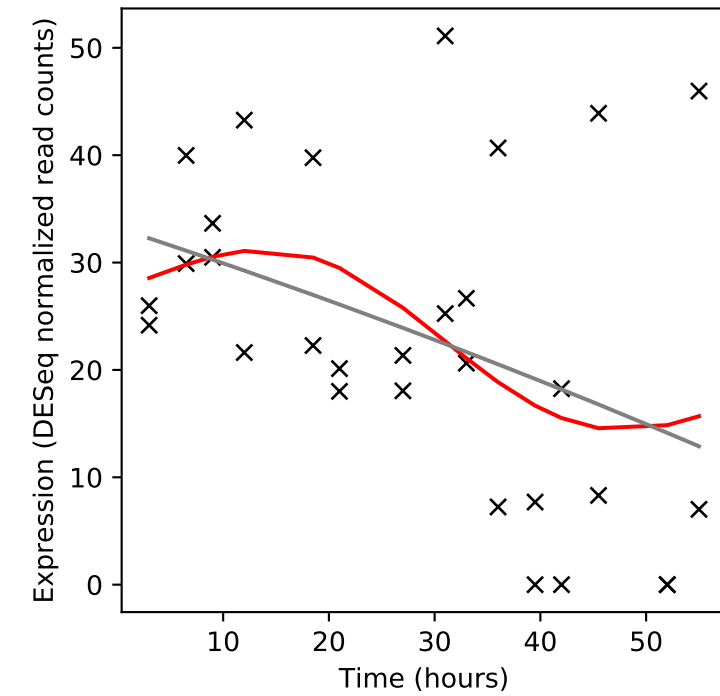

Rv2305/-

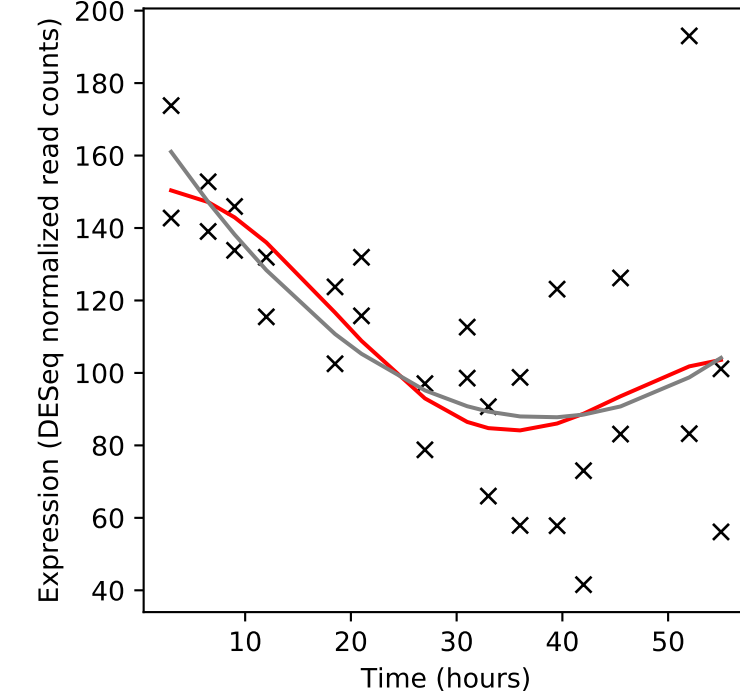

Rv2306A/-

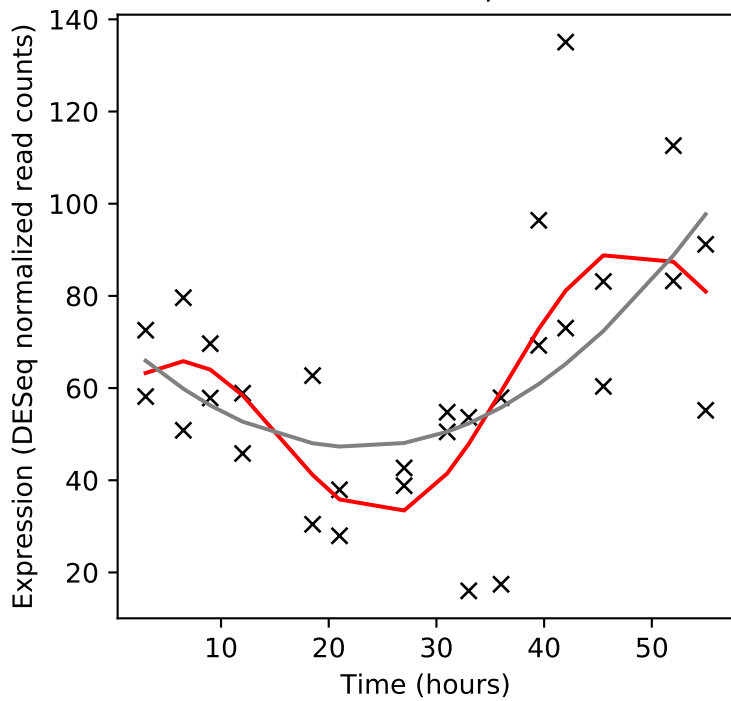

Rv2306B/-

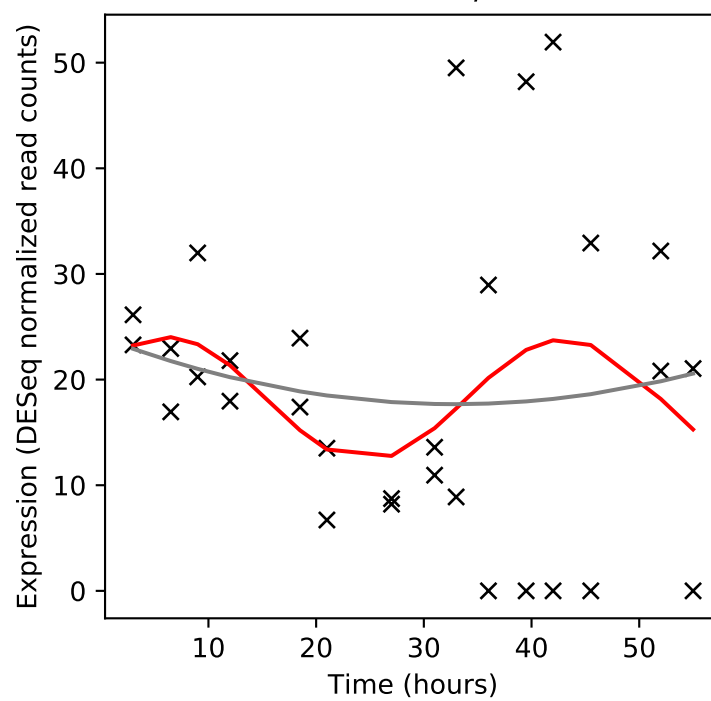

Rv2307c/-

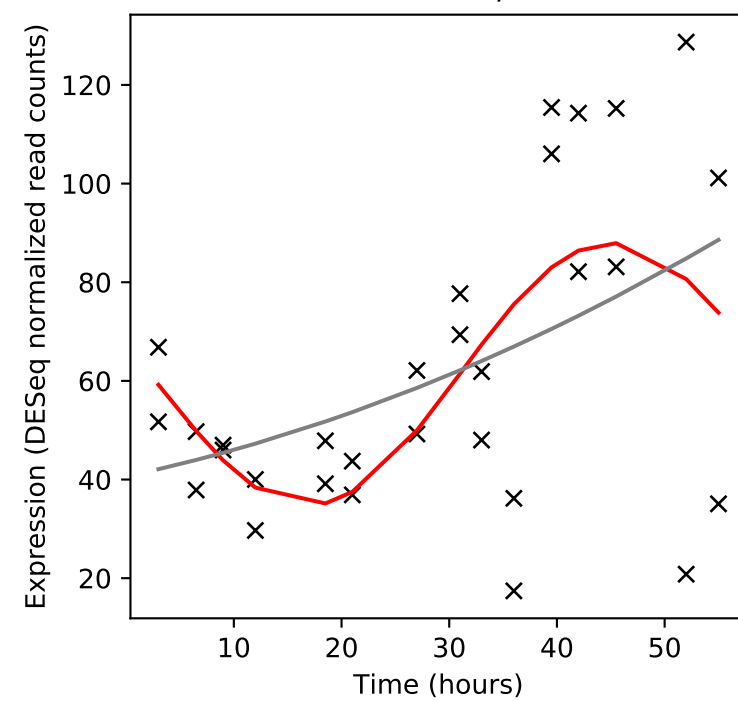

Rv2307A/-

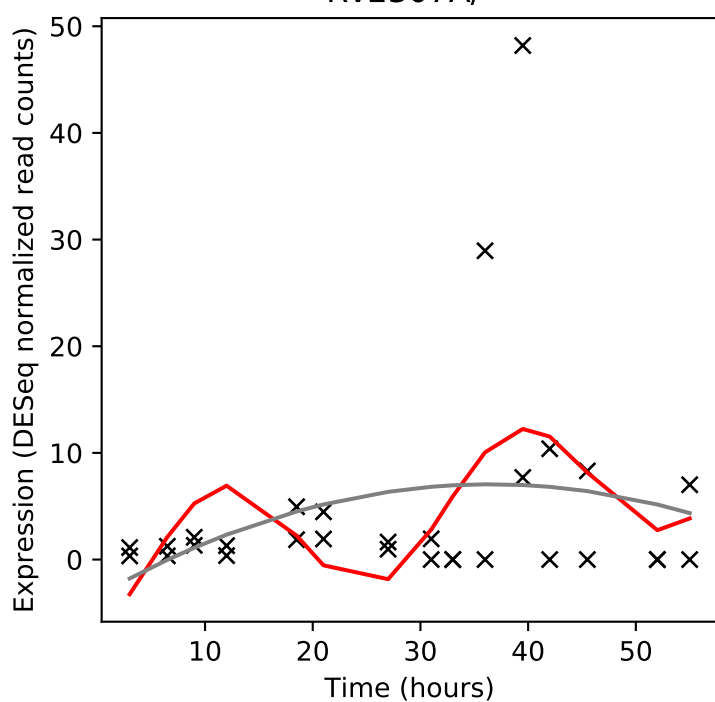

Rv2307B/-

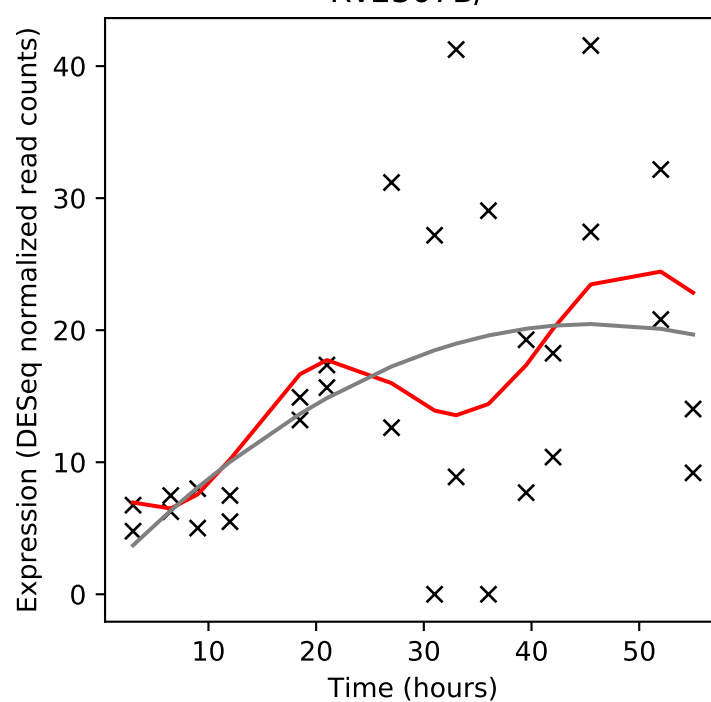

Rv2307D/-

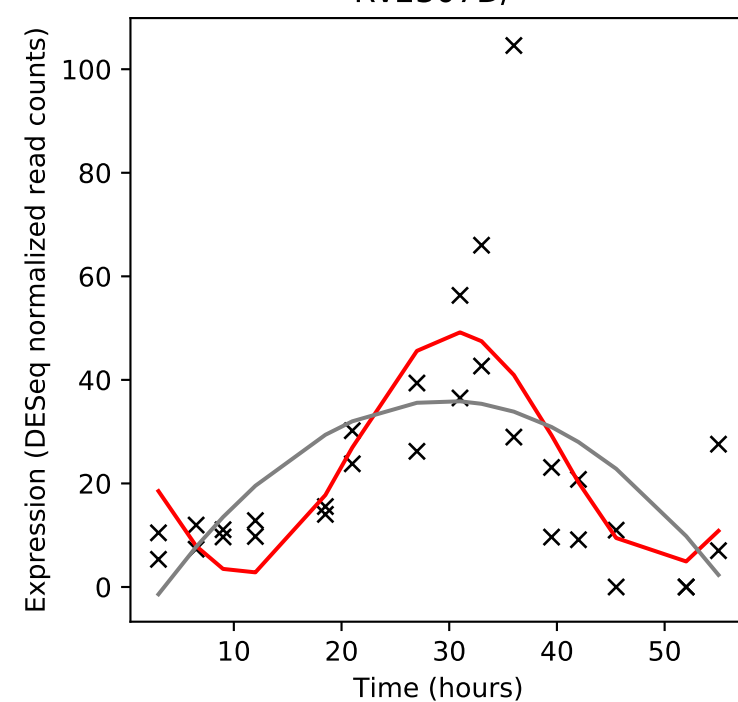

Rv2308/-

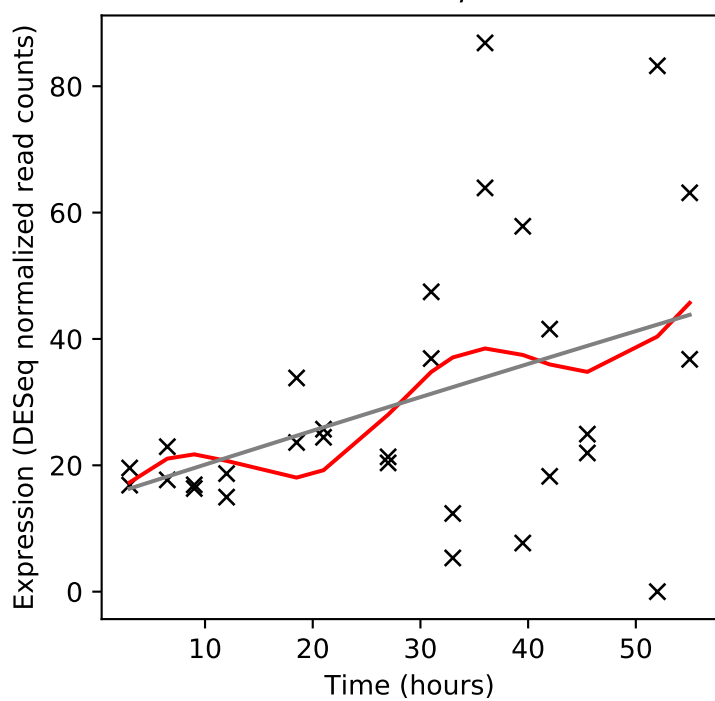

Rv2309c/-

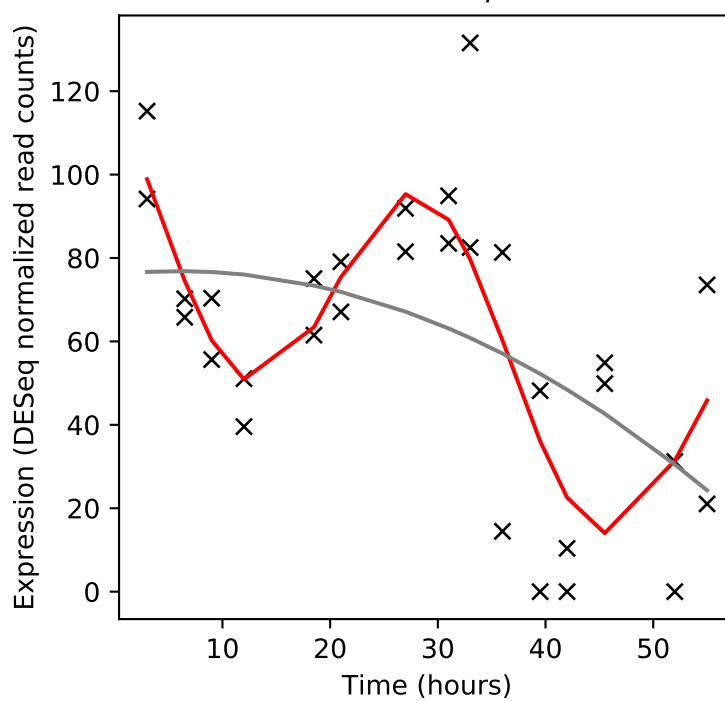

Rv2309A/-

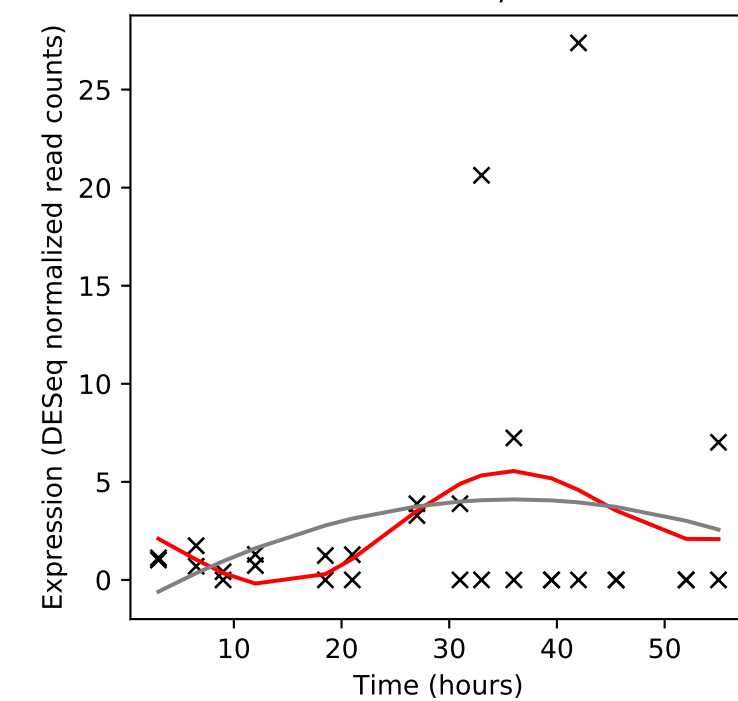

Rv2310/-

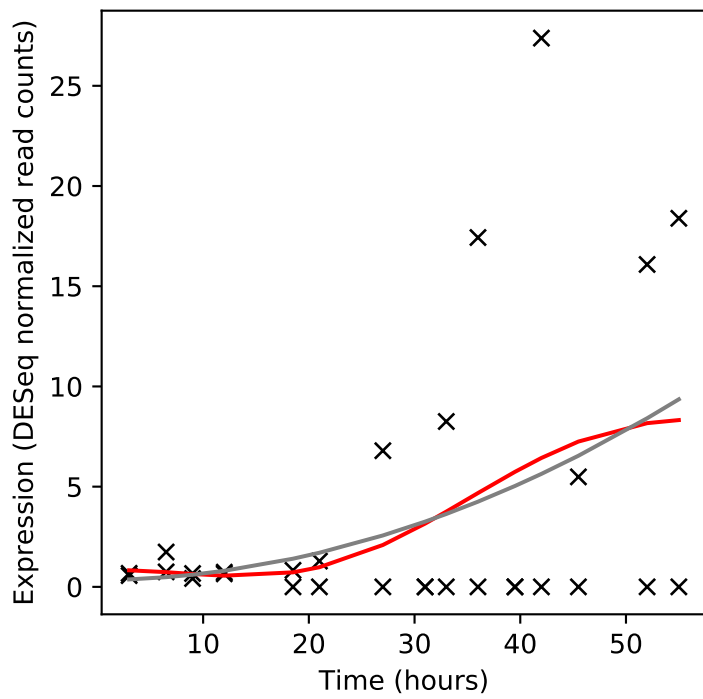

Rv2311/-

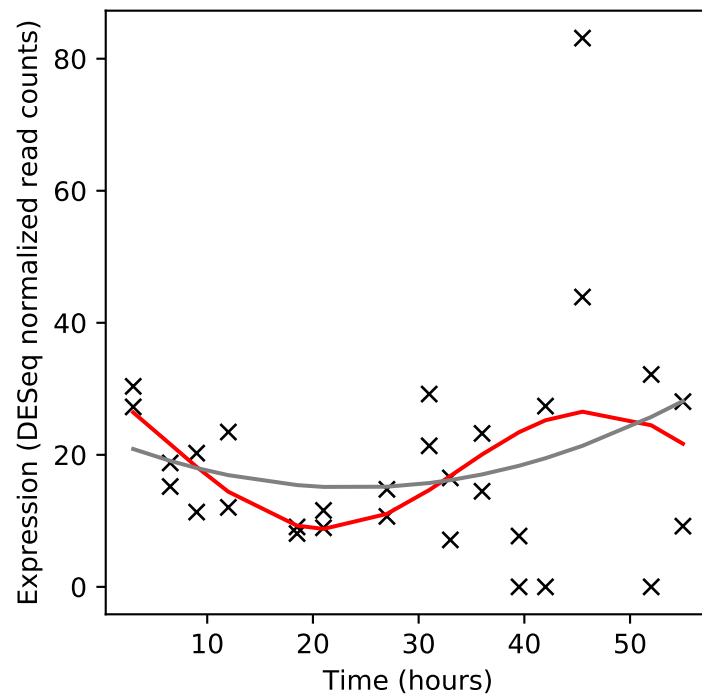

Rv2312/-

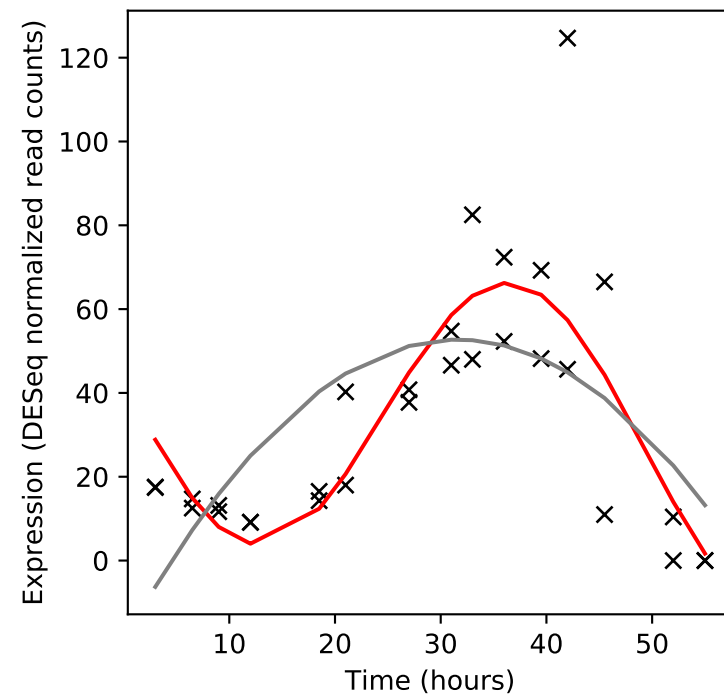

Rv2313c/-

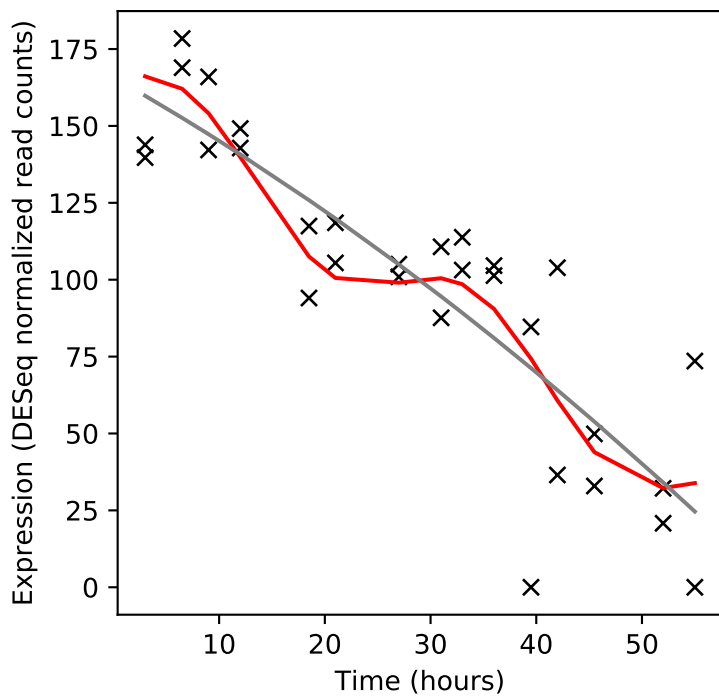

Rv2314c/-

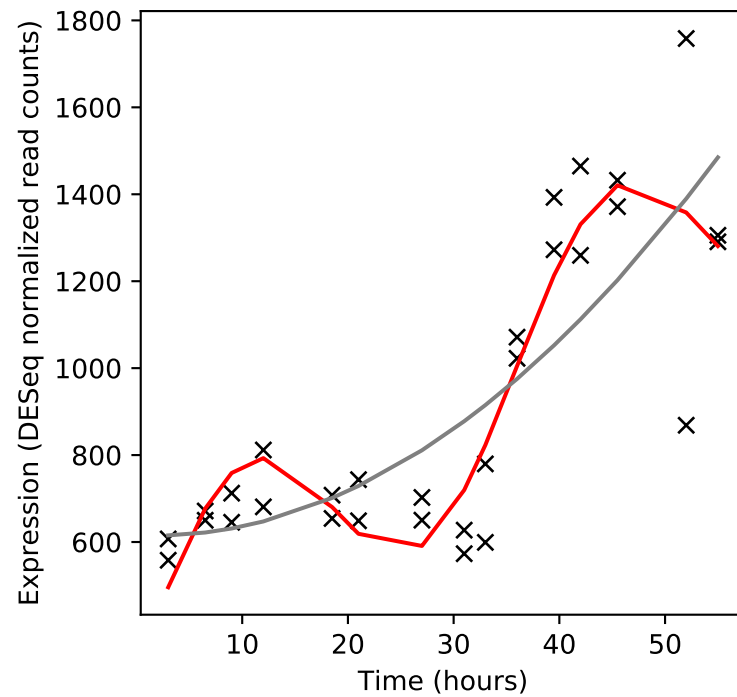

Rv2315c/-

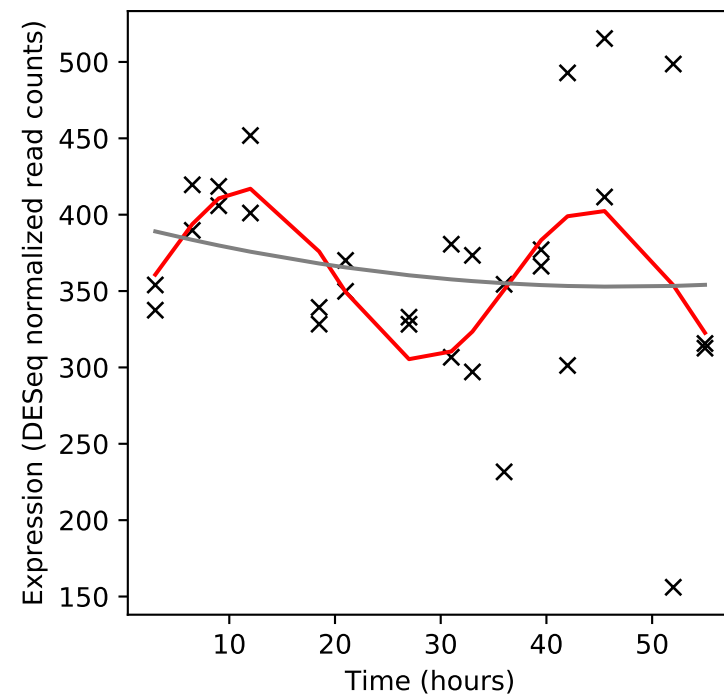

Rv2316/uspA

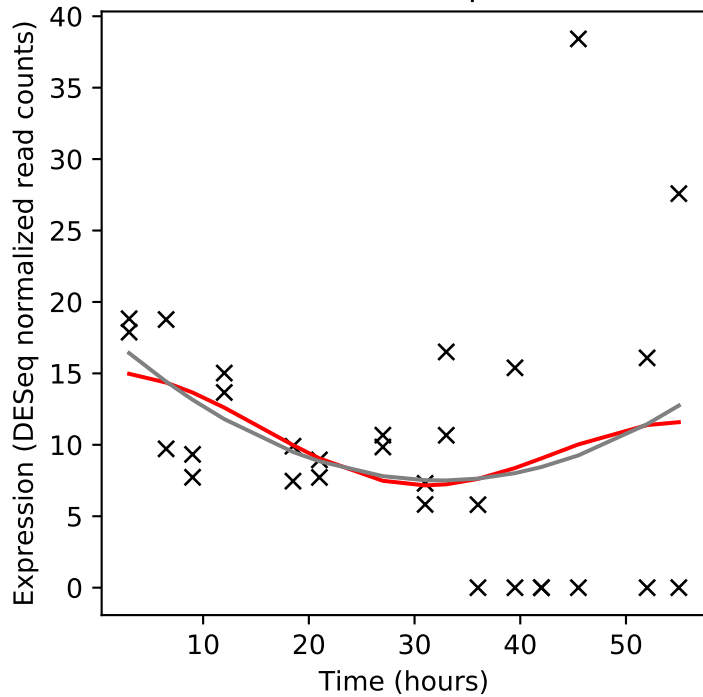

Rv2317/uspB

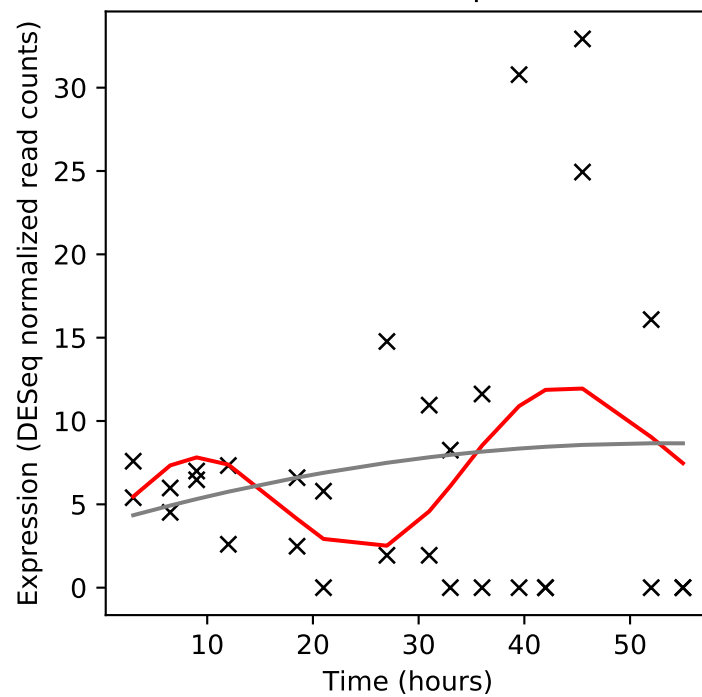

Rv2318/uspC

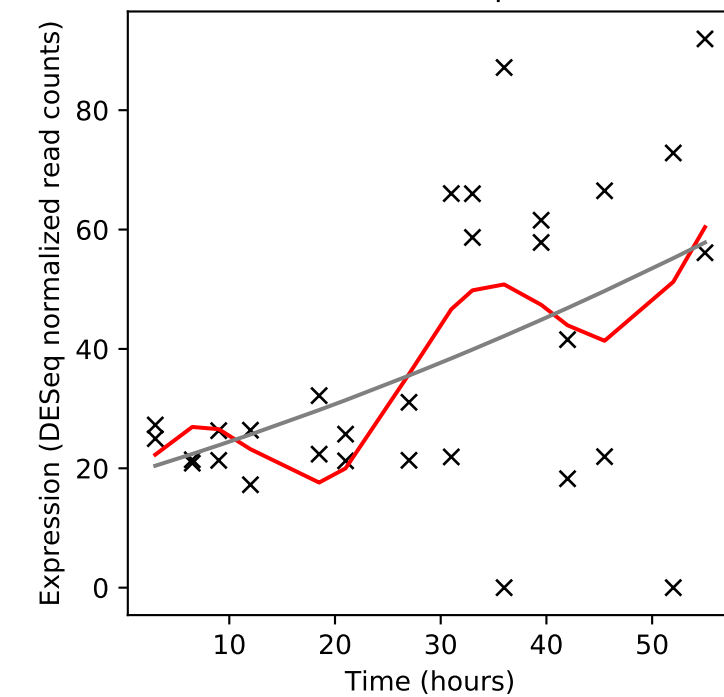

Rv2319c/-

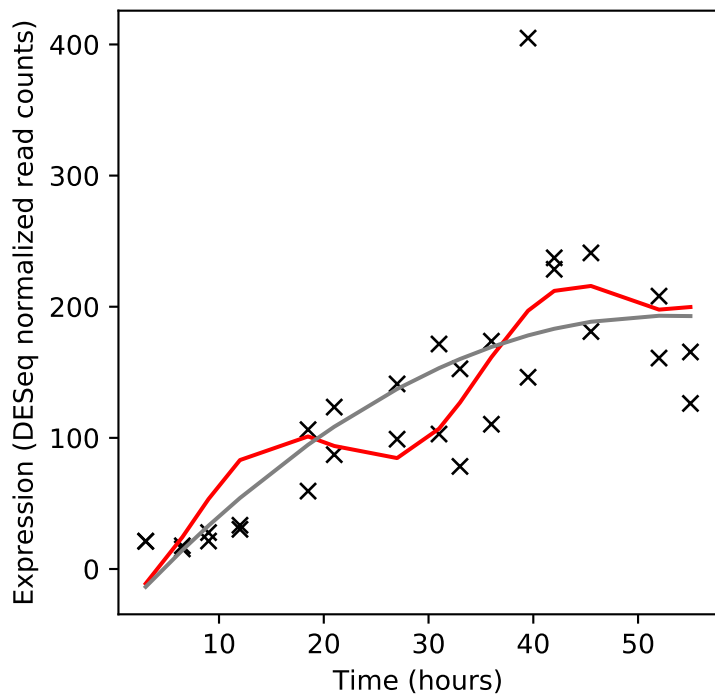

Rv2320c/rocE

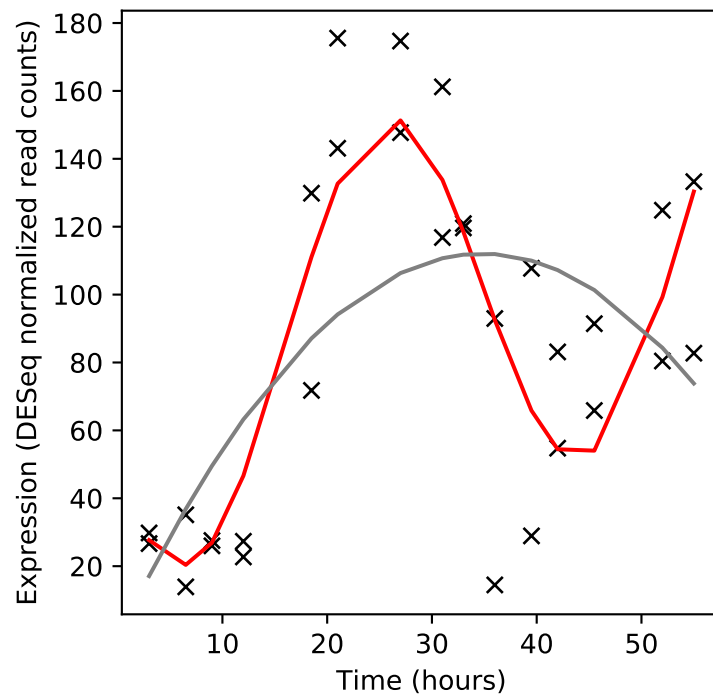

Rv2321c/rocD2

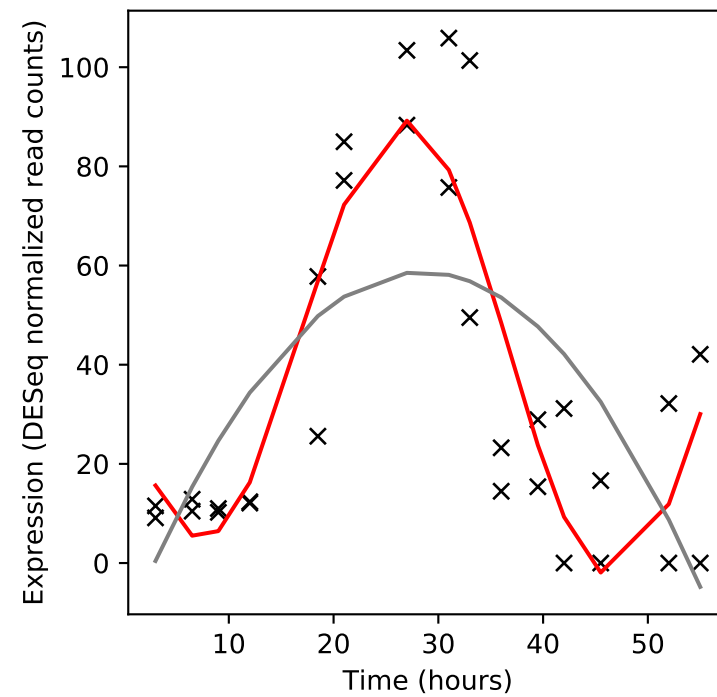

Rv2322c/rocD1

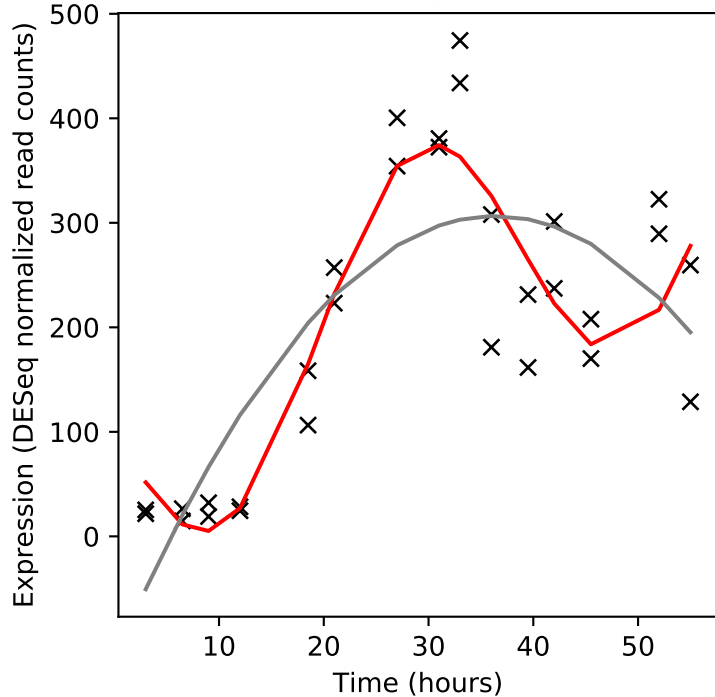

Rv2323c/-

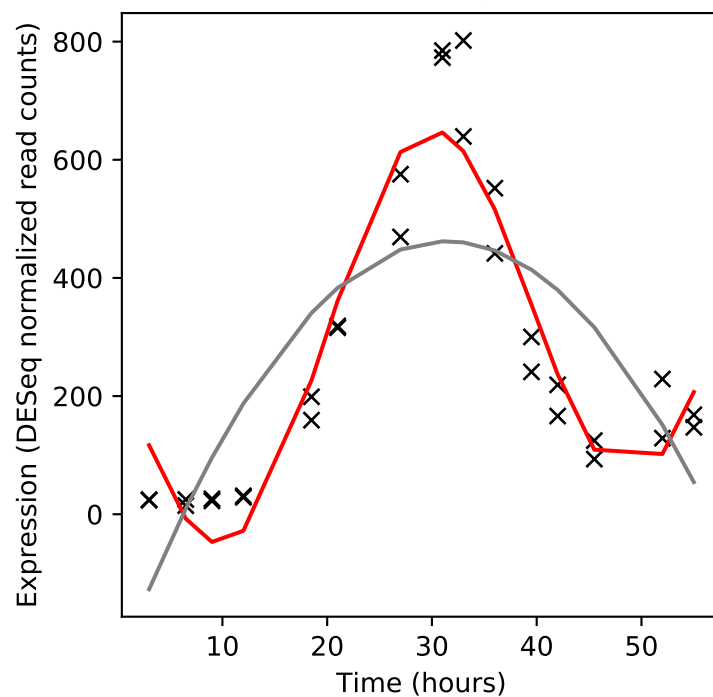

Rv2324c/-

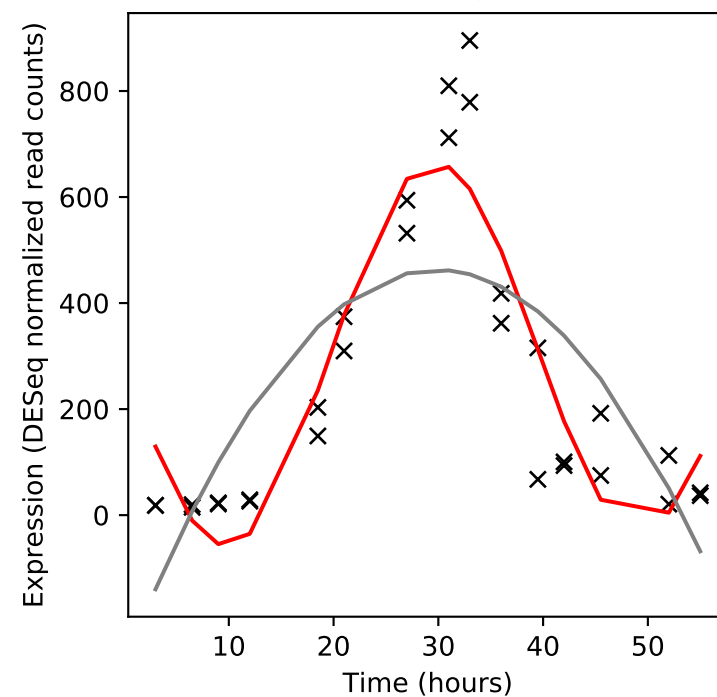

Rv2325c/-

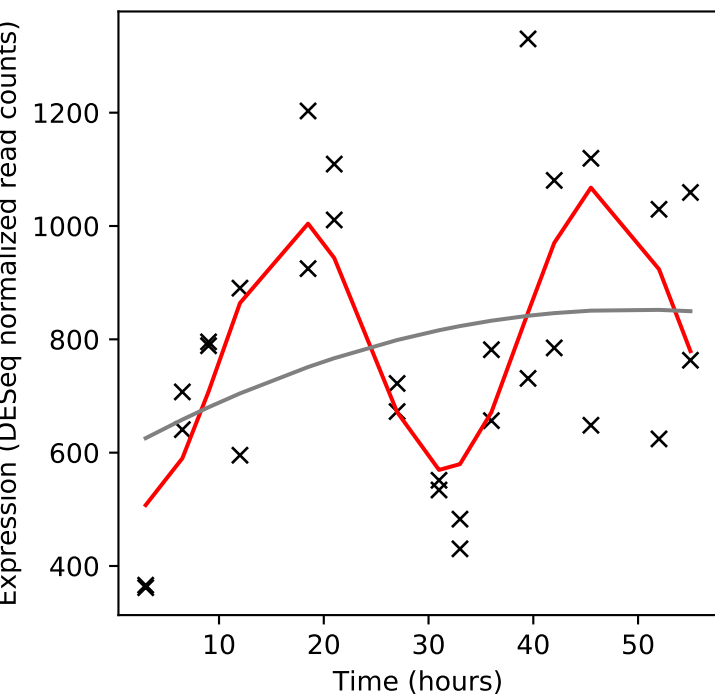

Rv2326c/-

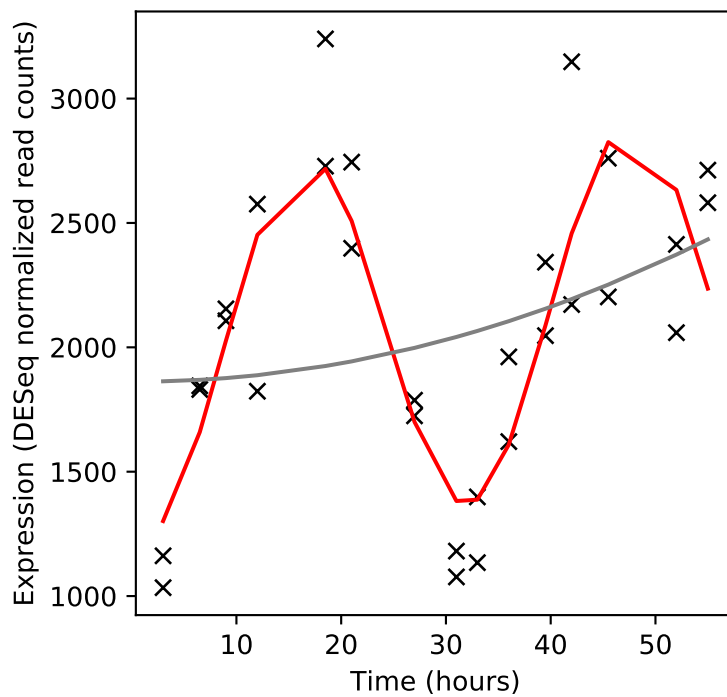

Rv2327c/-

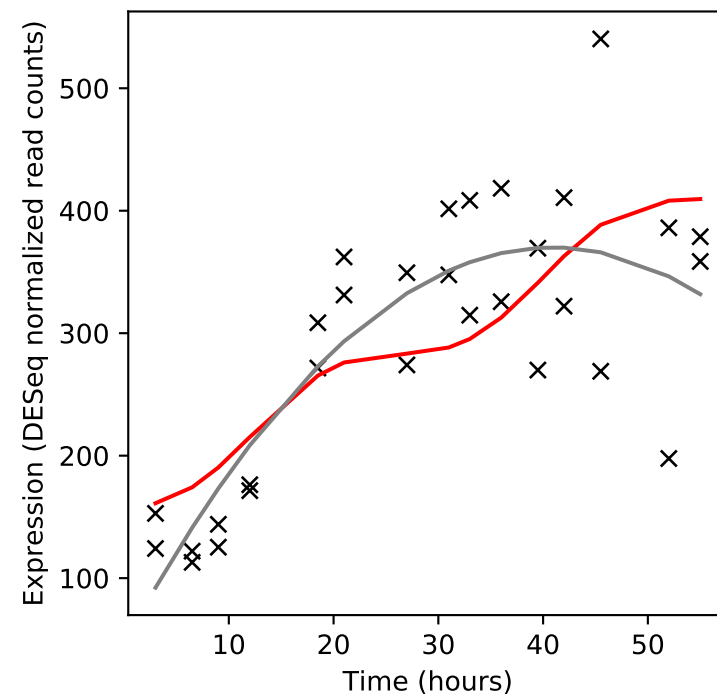

Rv2328/PE23

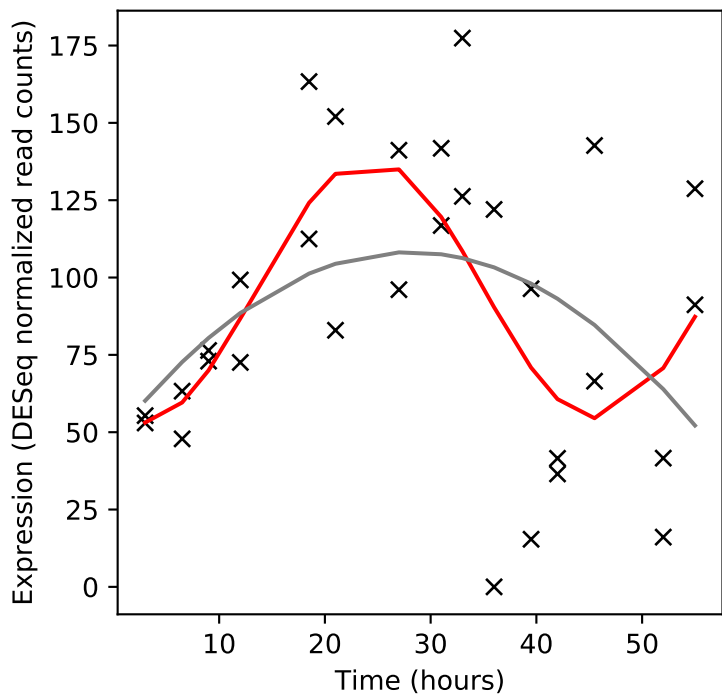

Rv2329c/narK1

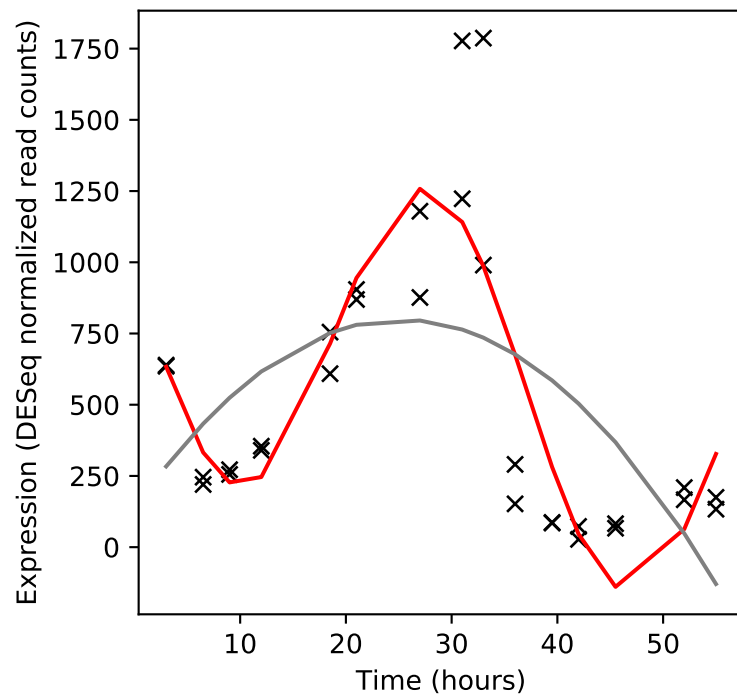

Rv2330c/lppP

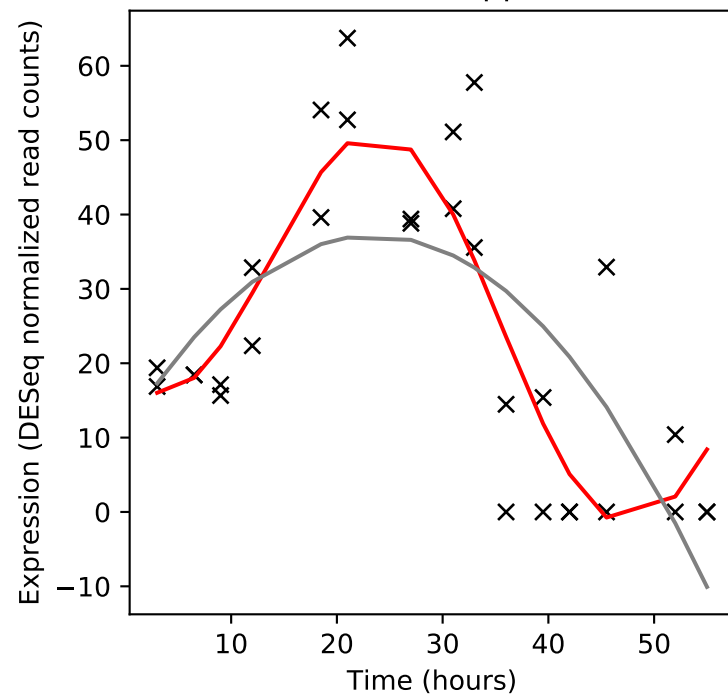

Rv2331/-

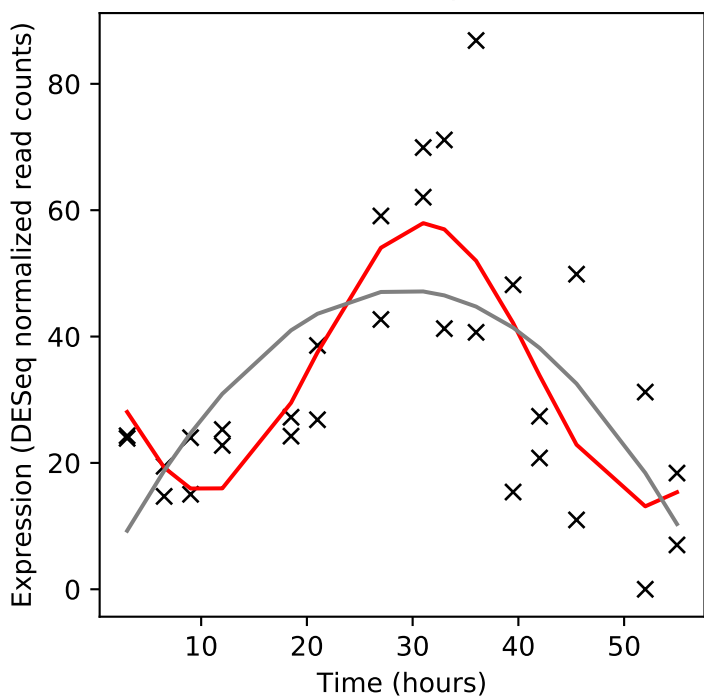

Rv2331A/-

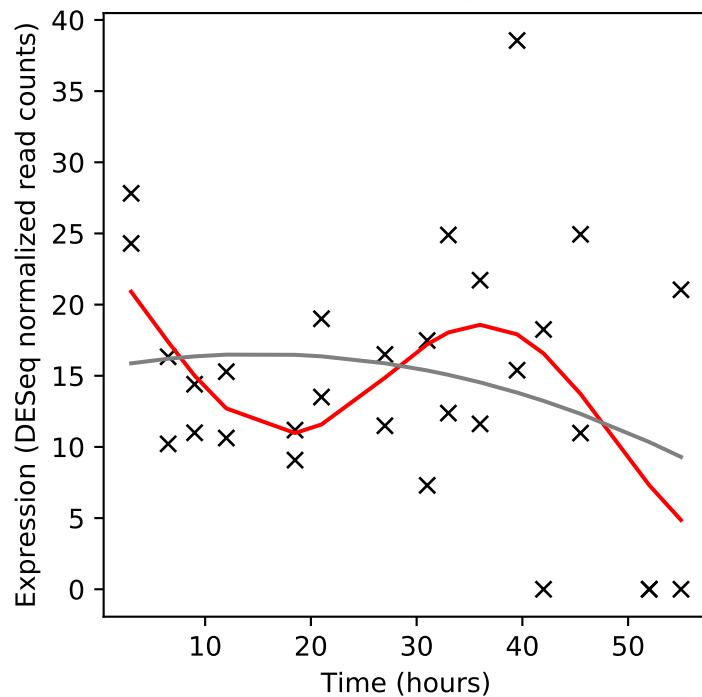

Rv2332/mez

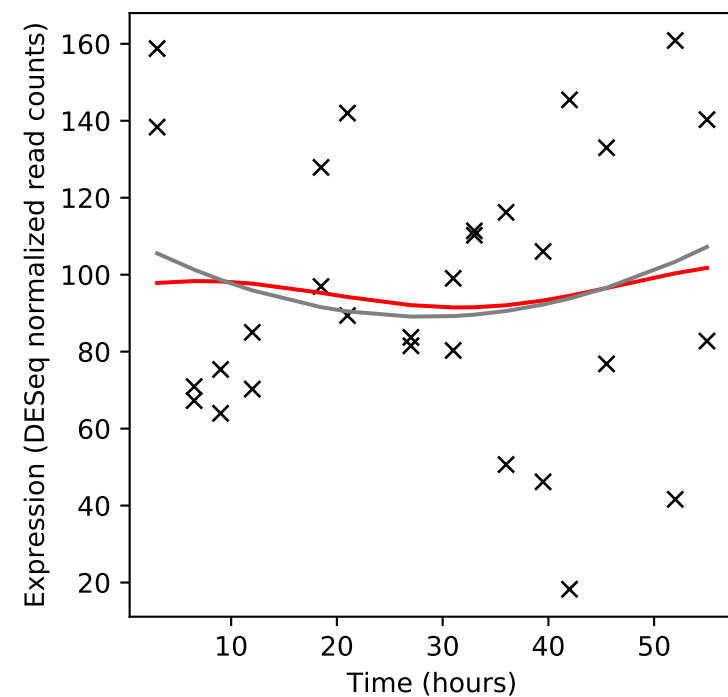

Rv2333c/stp

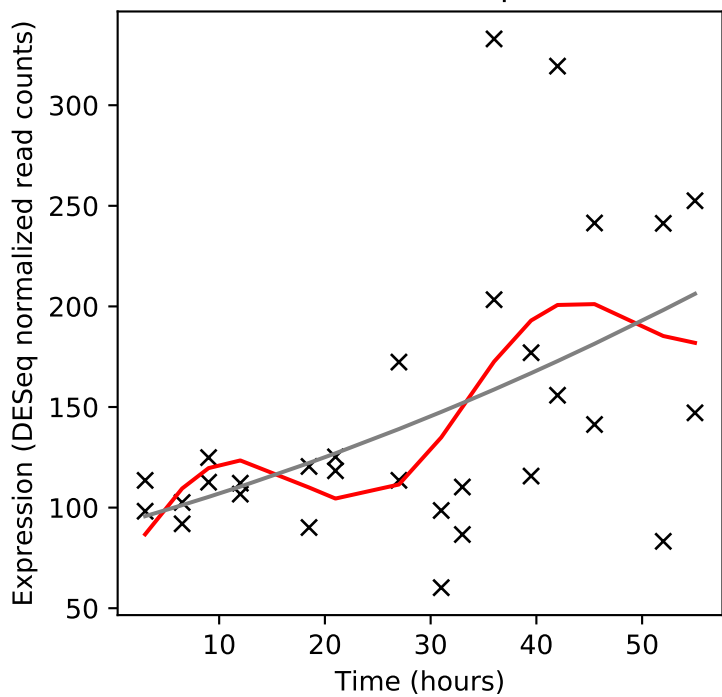

Rv2334/cysK1

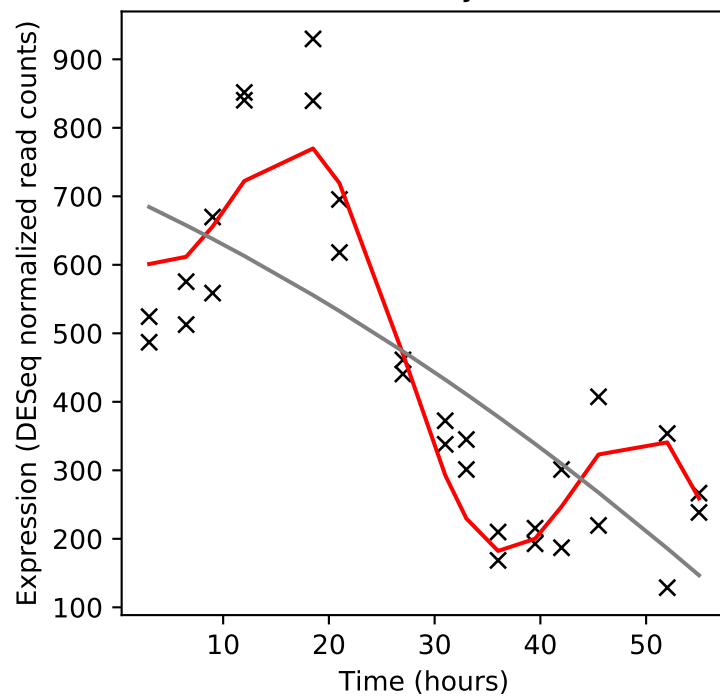

Rv2335/cysE

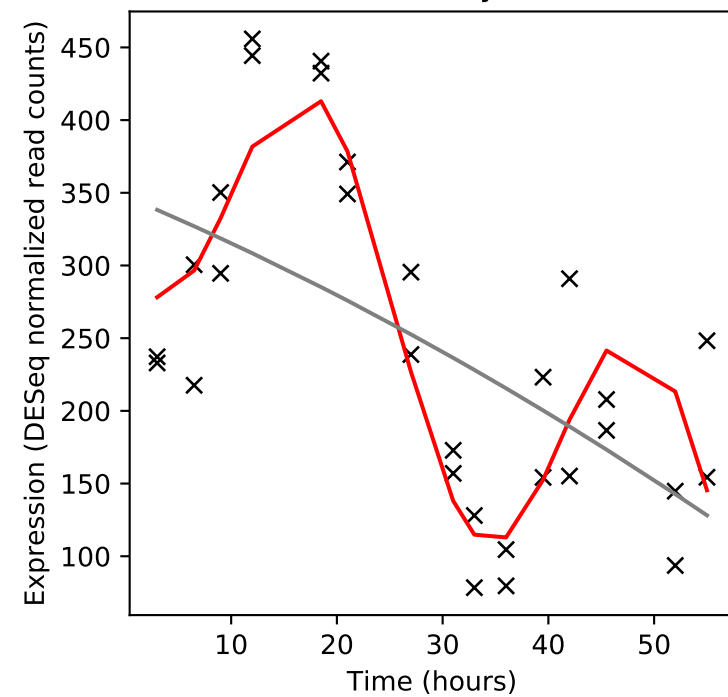

Rv2336/-

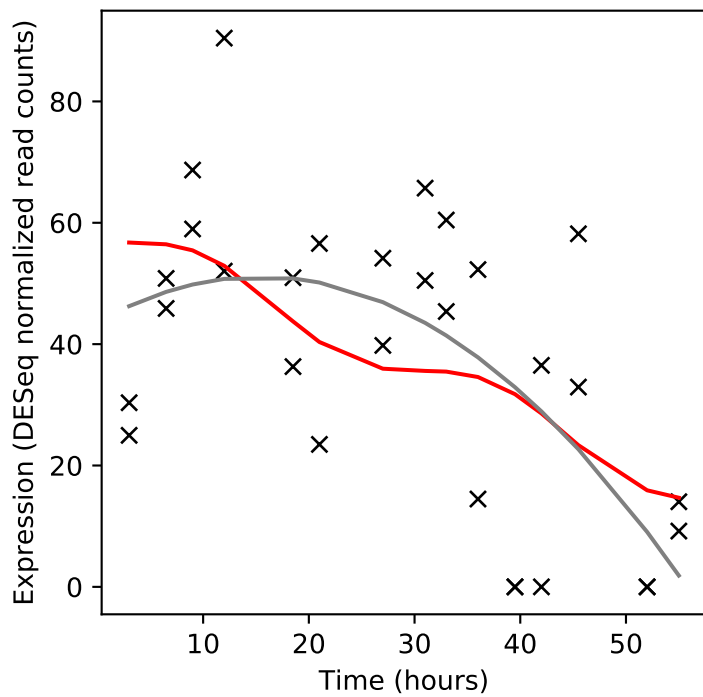

Rv2337c/-

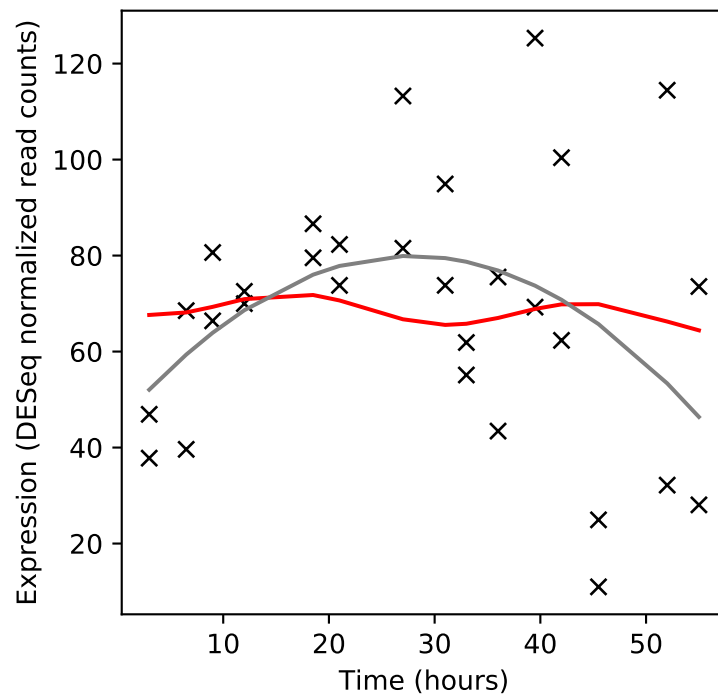

Rv2338c/moeW

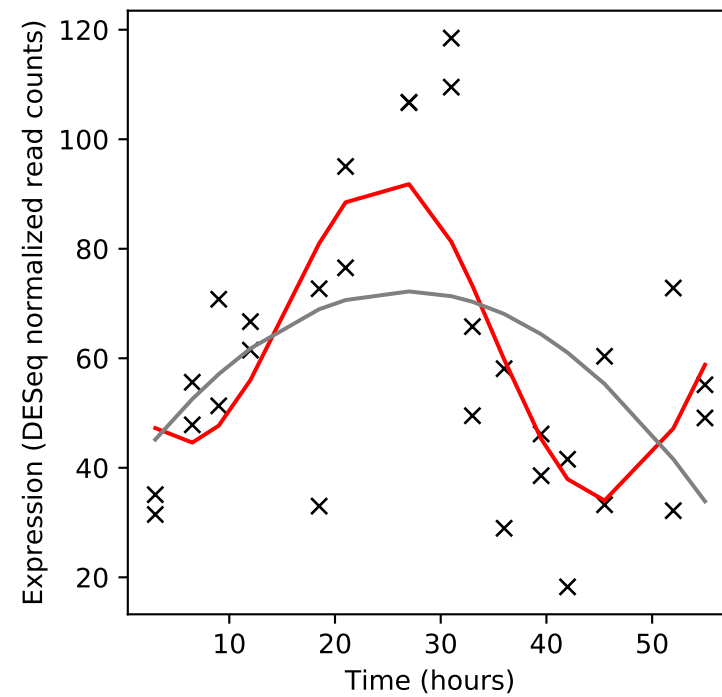

Rv2339/mmpL9

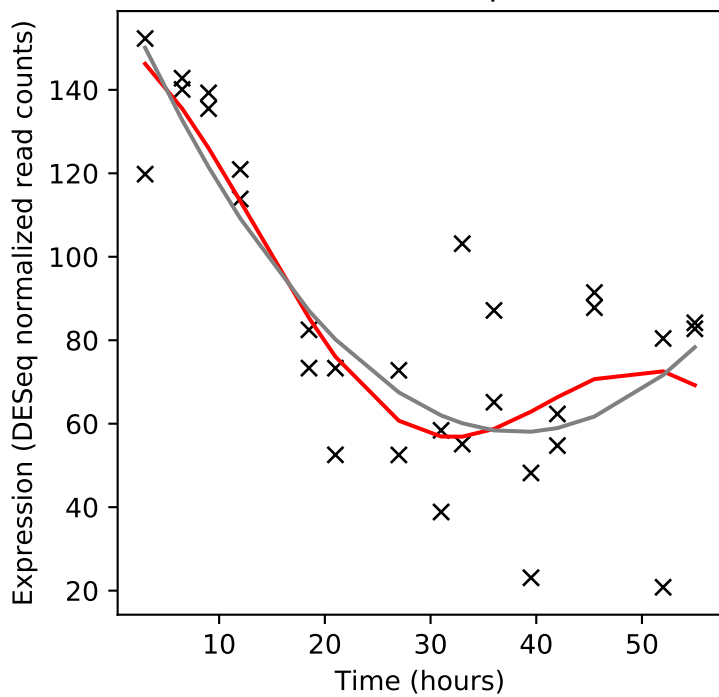

Rv2340c/PE\_PGRS39

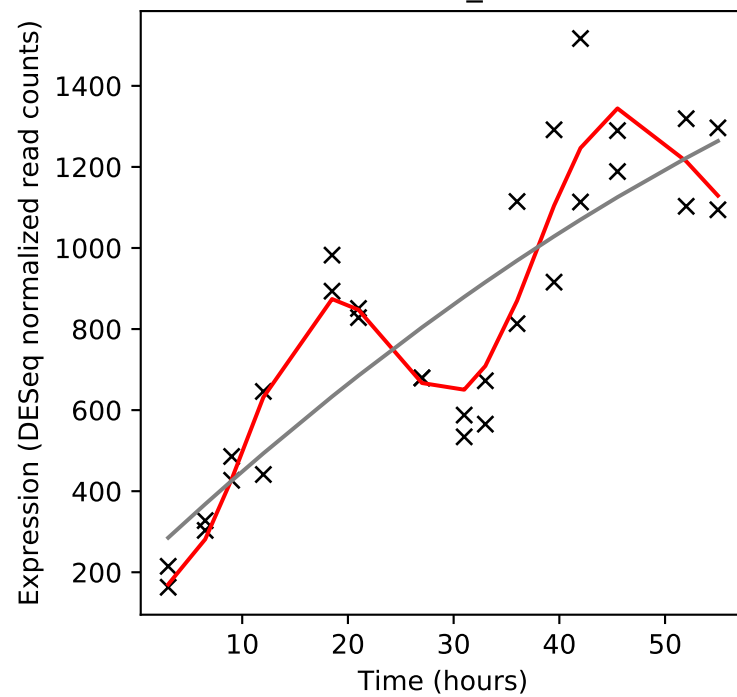

Rv2341/lppQ

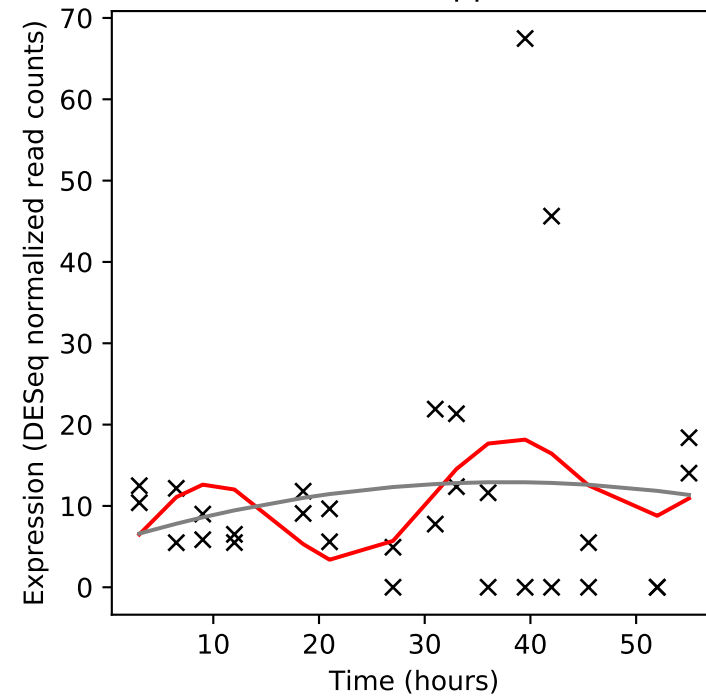

Rv2342/-

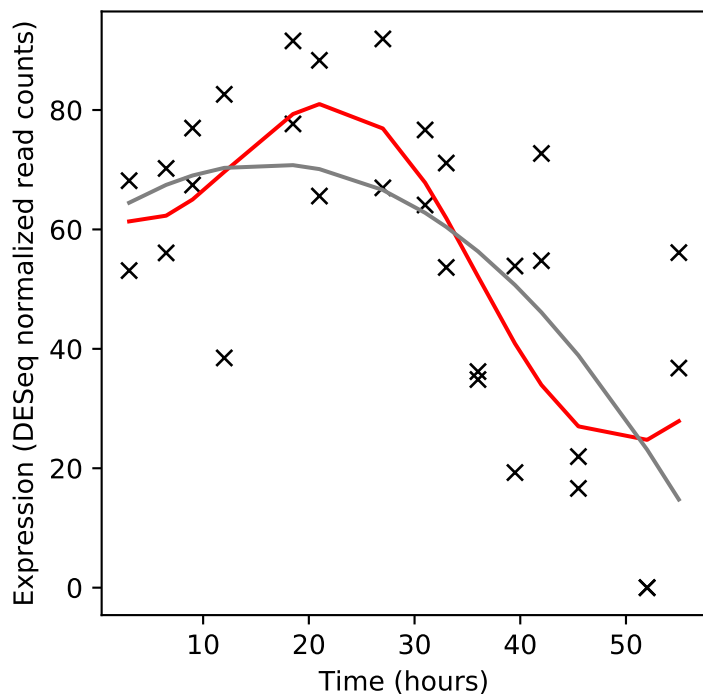

Rv2343c/dnaG

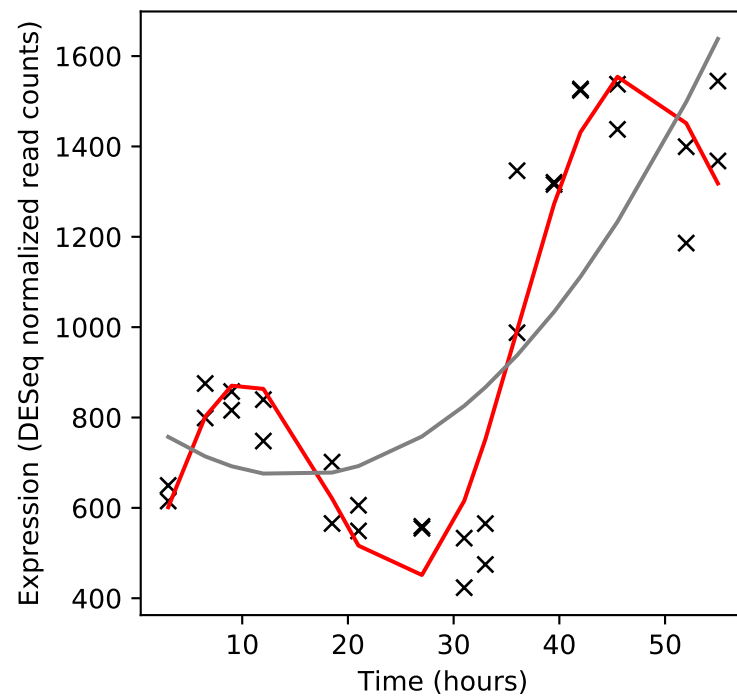

Rv2344c/dgt

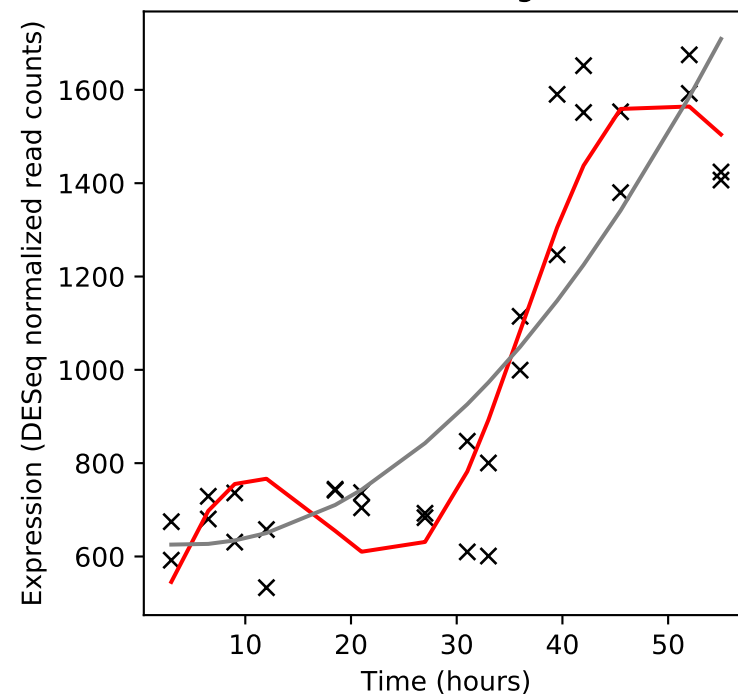



Rv2345/-

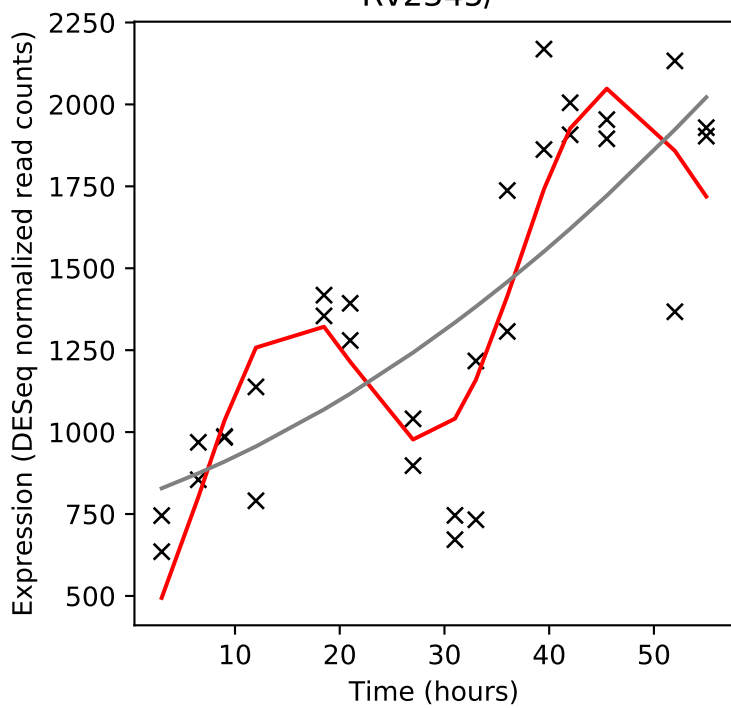

Rv2346c/esxO

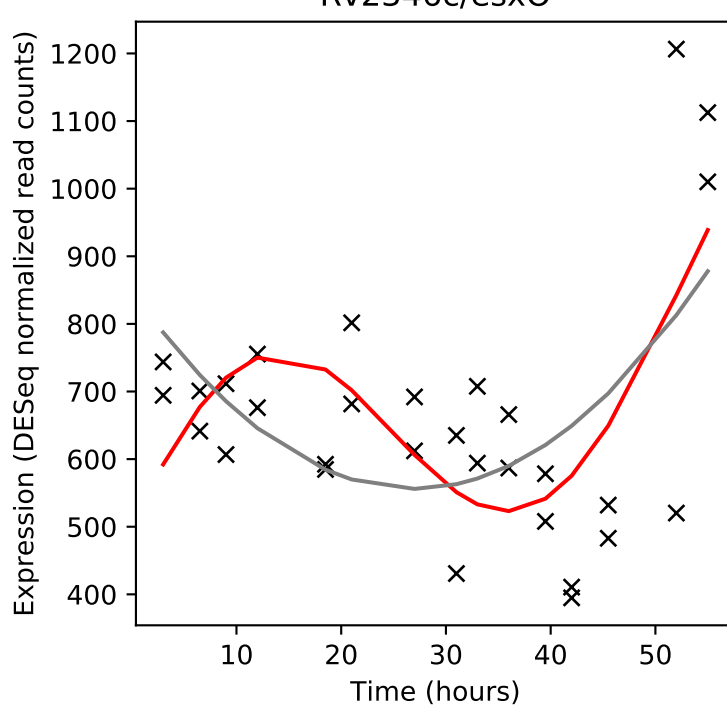

Rv2347c/esxP

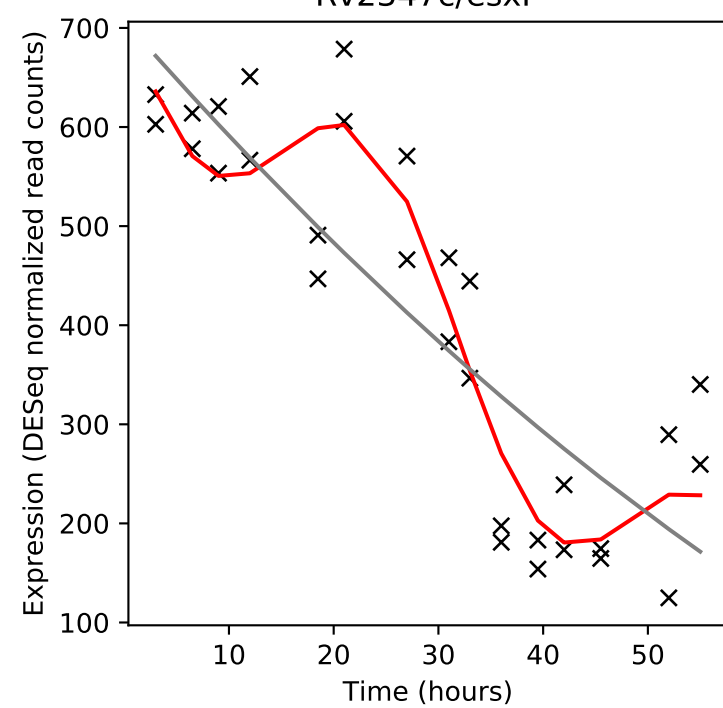

Rv2348c/-

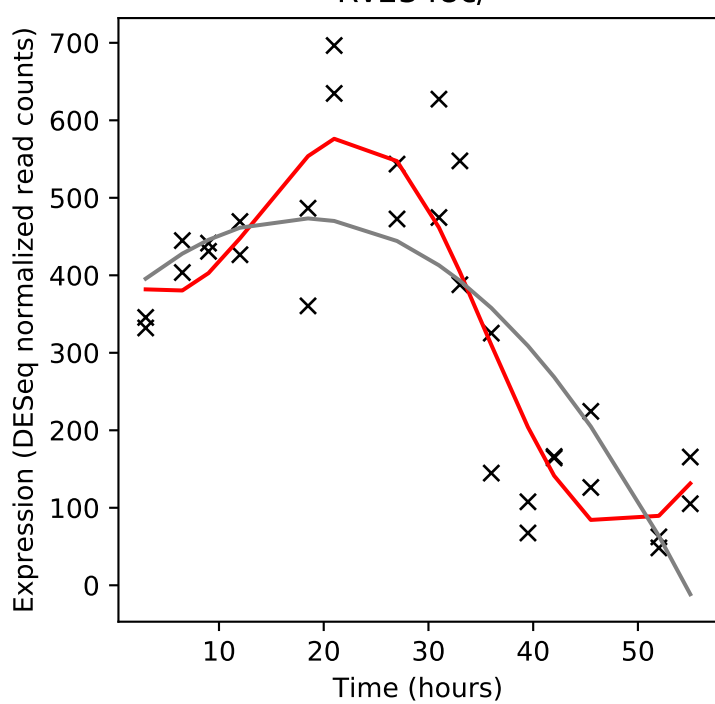

Rv2349c/plcC

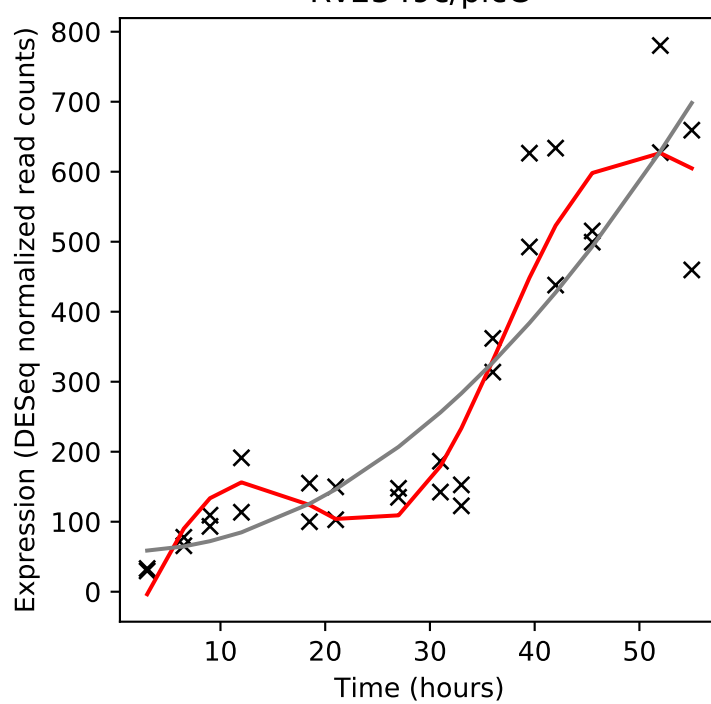

Rv2350c/plcB

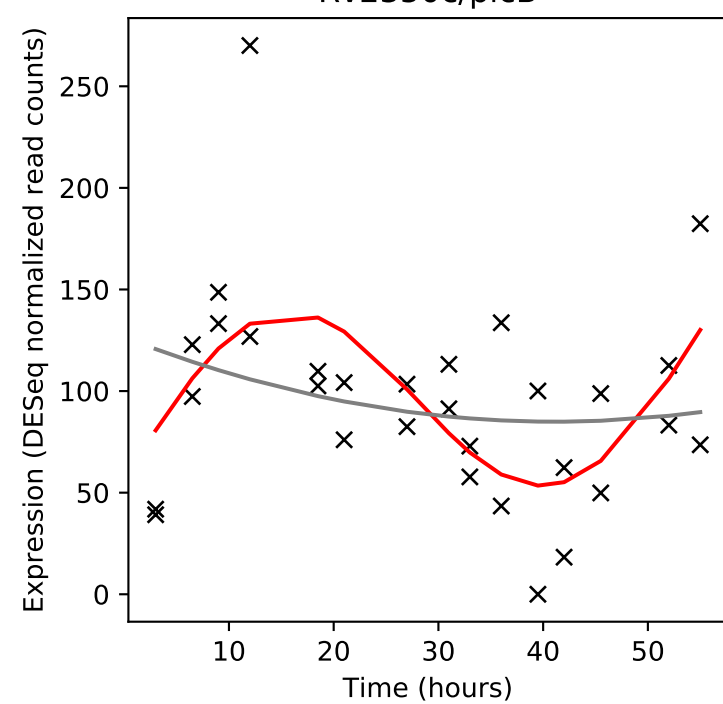

Rv2351c/plcA

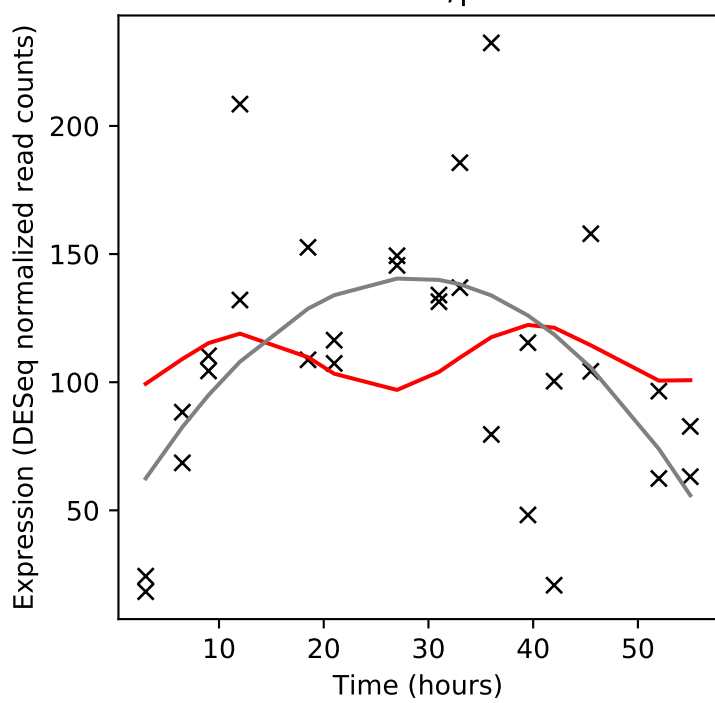

Rv2352c/PPE38

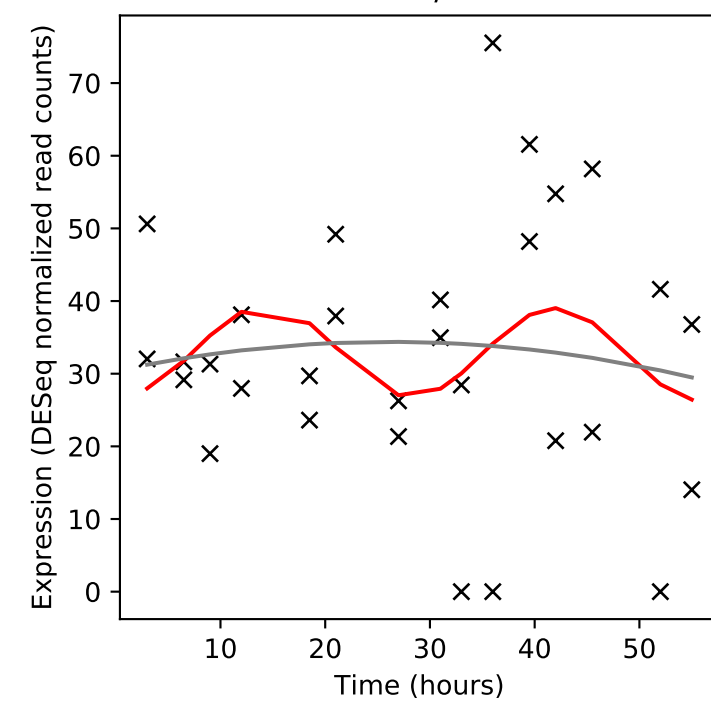

Rv2353c/PPE39

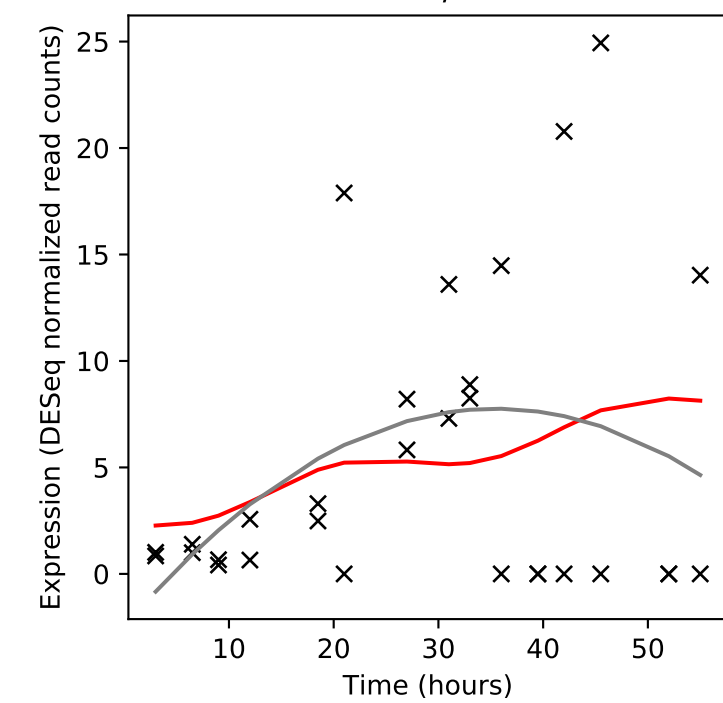

Rv2354/-

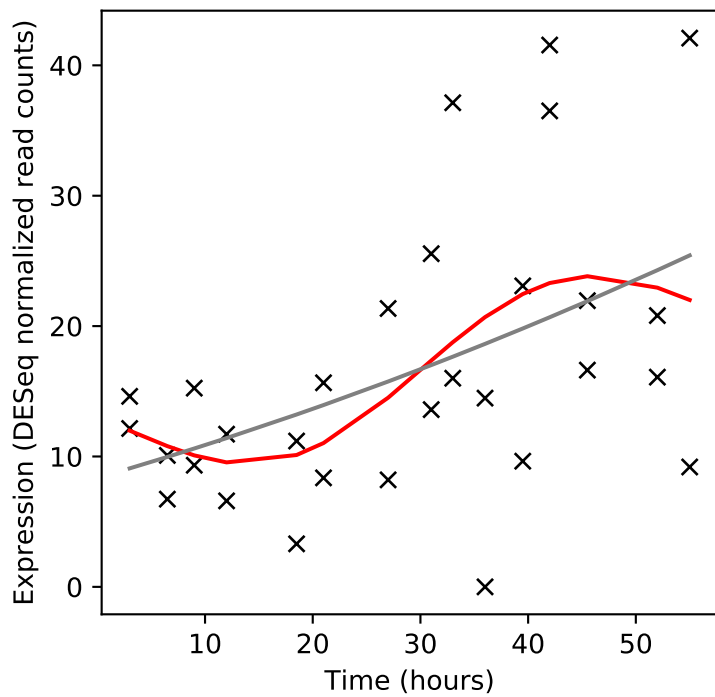

Rv2355/-

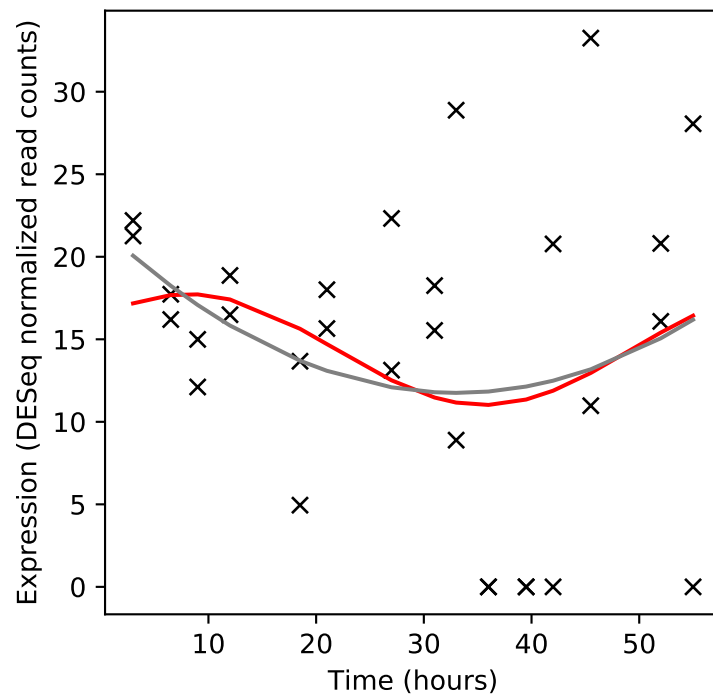

Rv2356c/PPE40

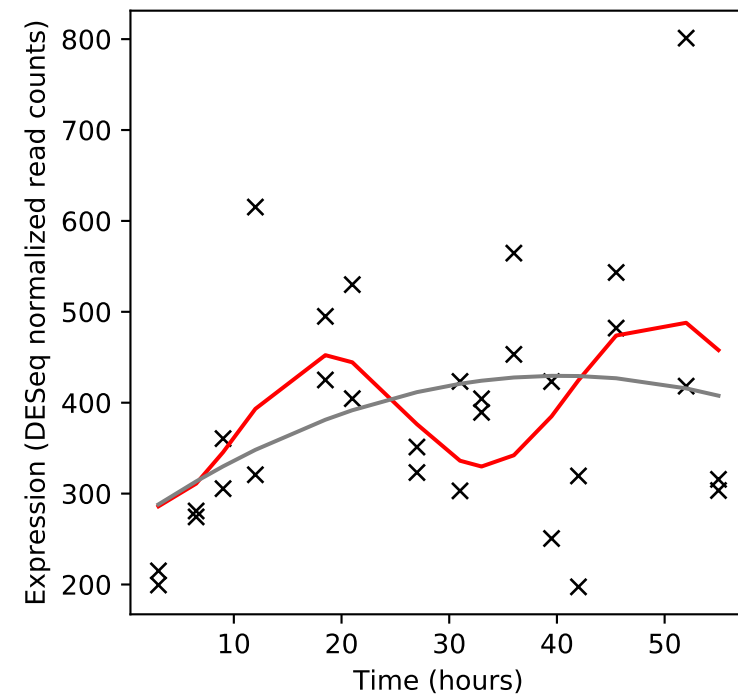

Rv2357c/glyS

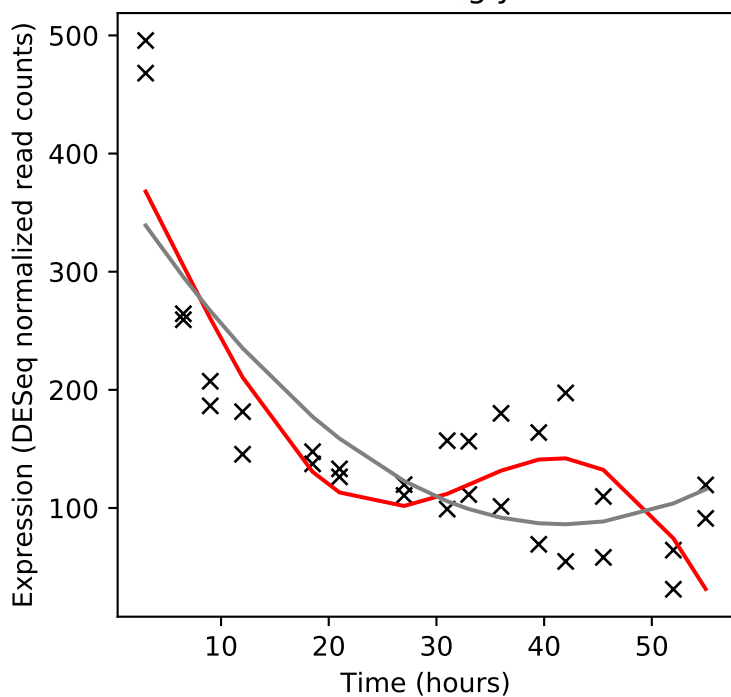

Rv2358/smtB

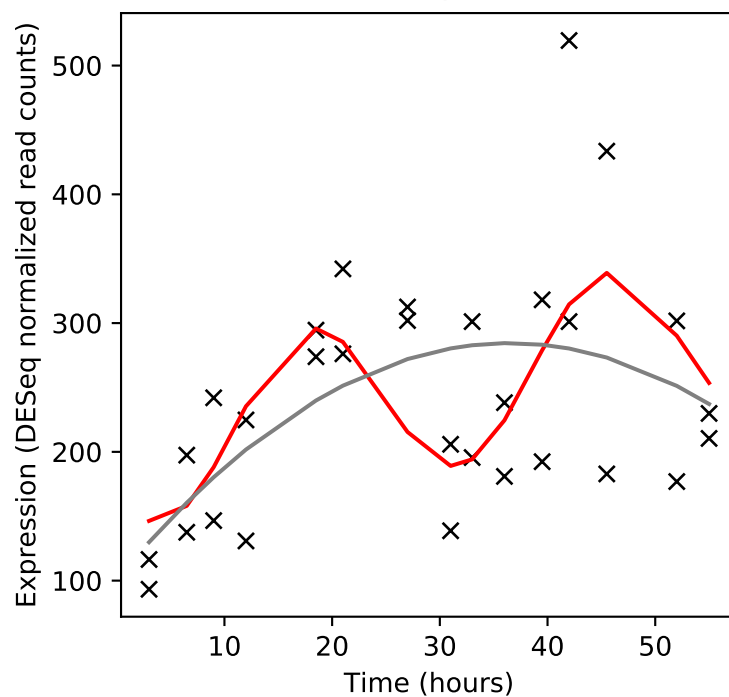

Rv2359/zur

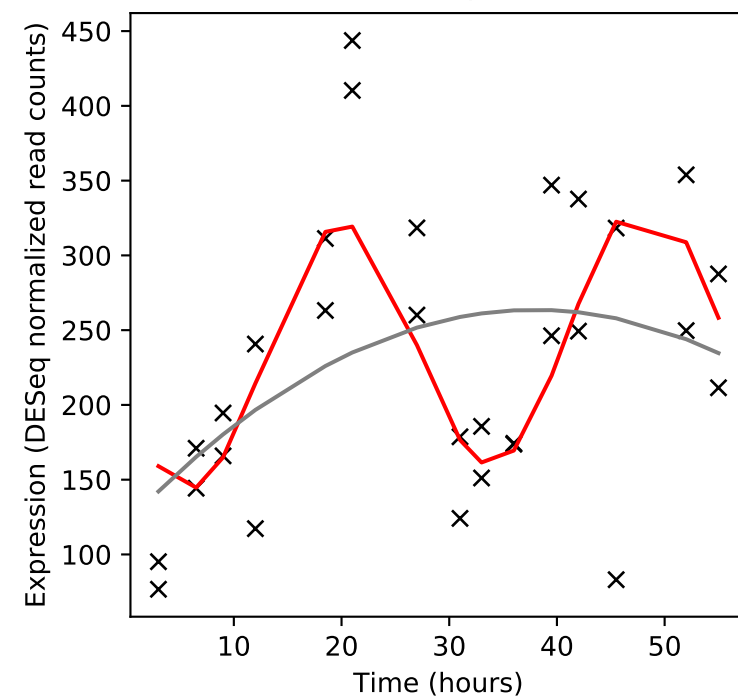

Rv2360c/-

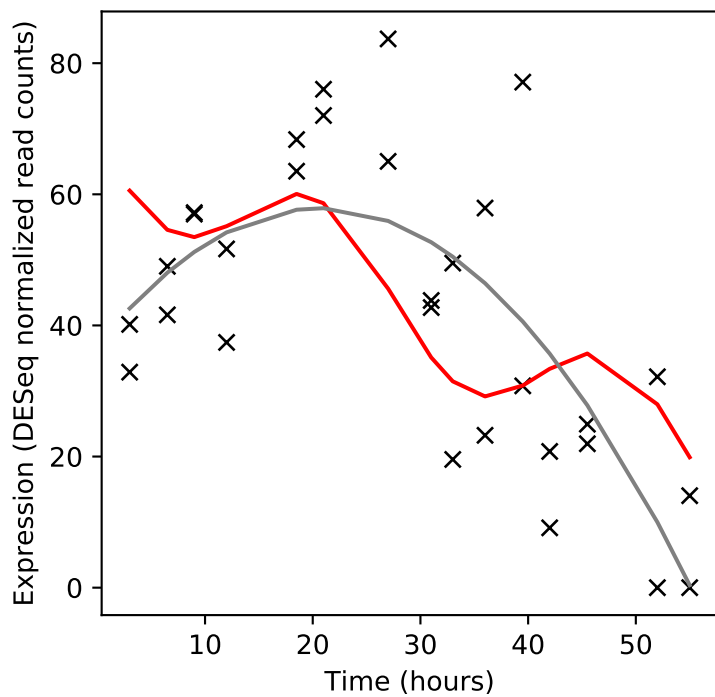

Rv2361c/-

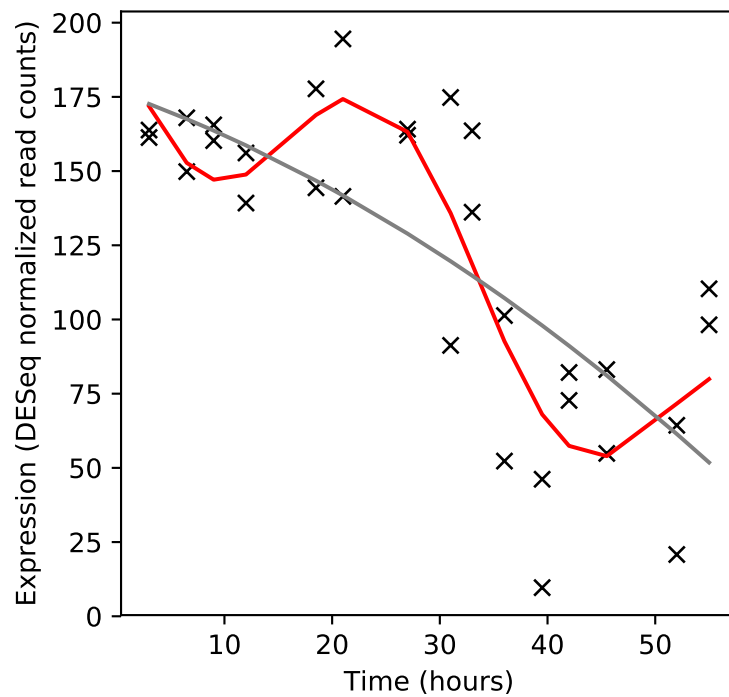

Rv2362c/recO

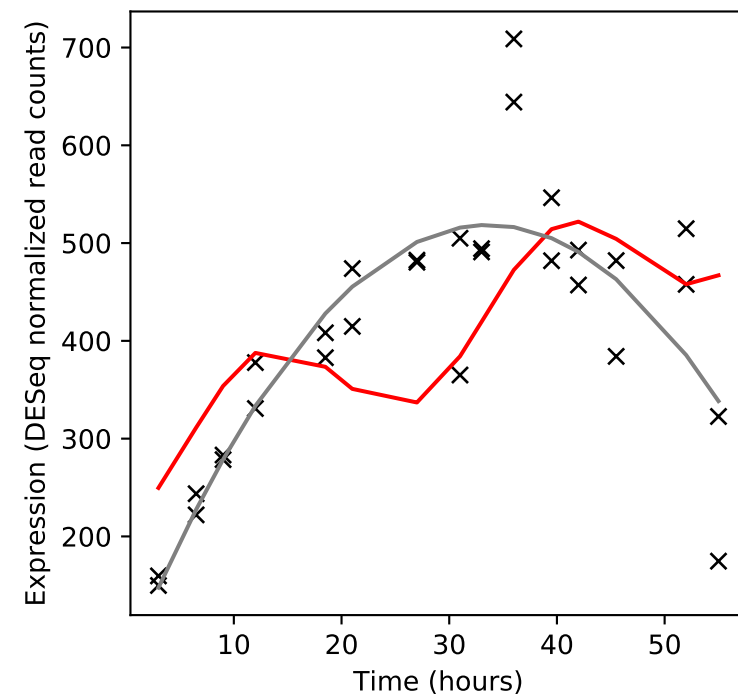

Rv2363/amiA2

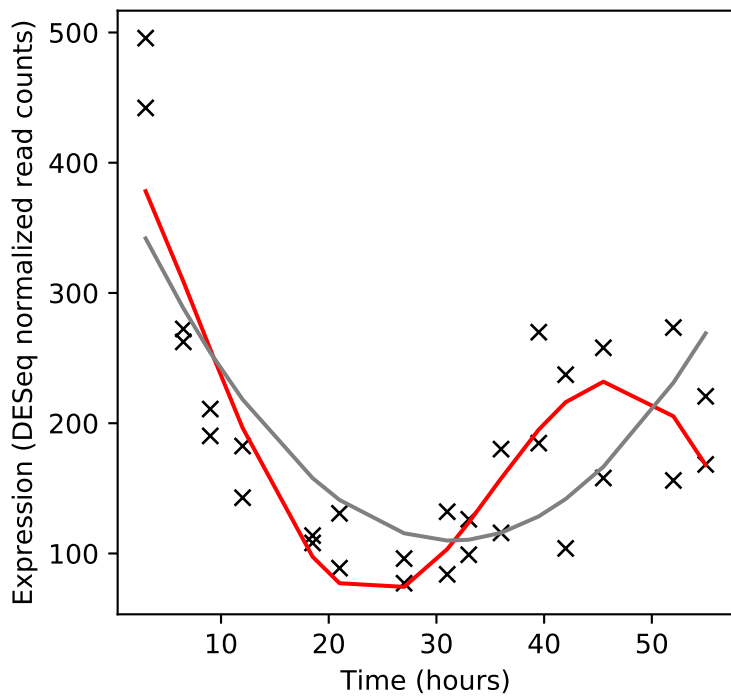

Rv2364c/era

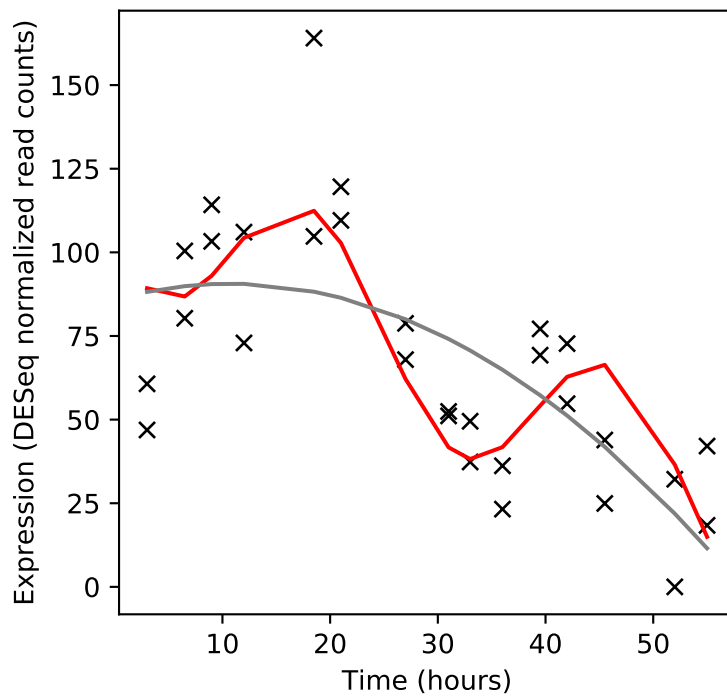

Rv2365c/-

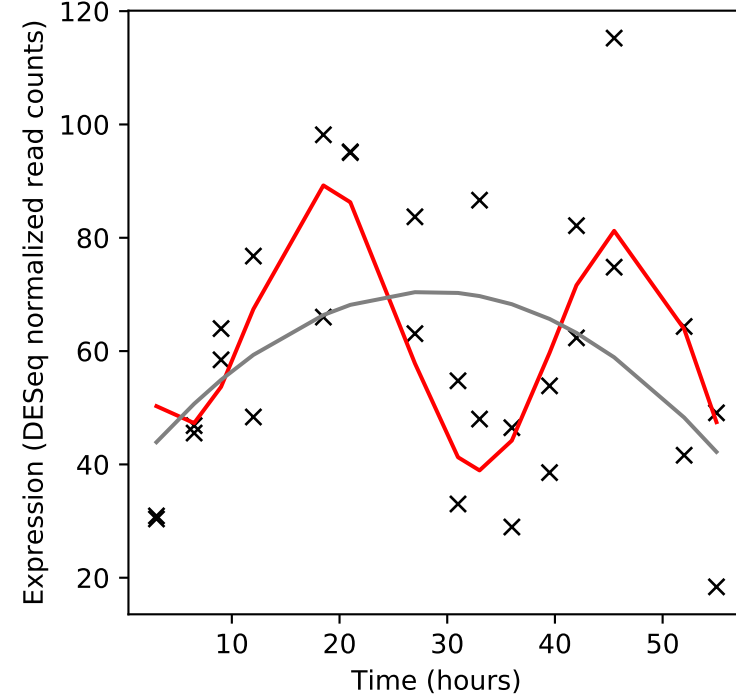

Rv2366c/-

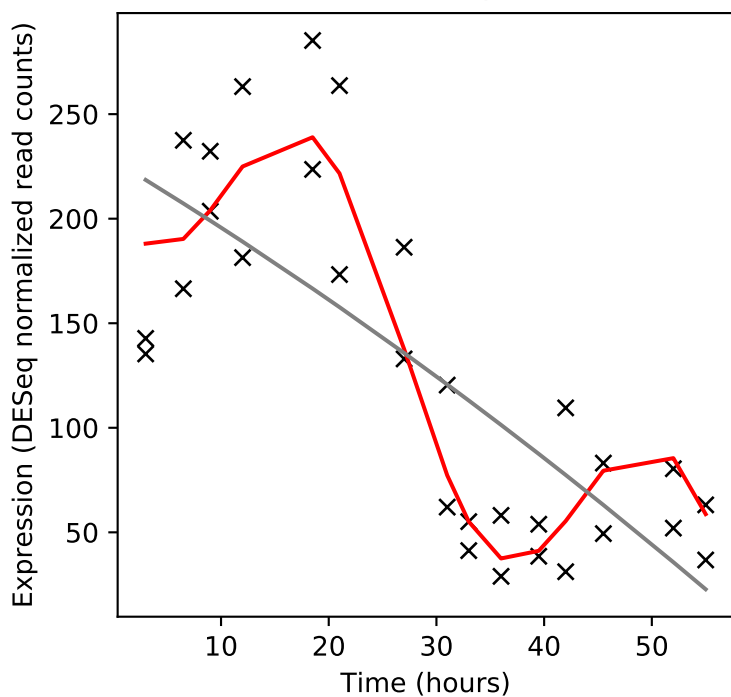

Rv2367c/-

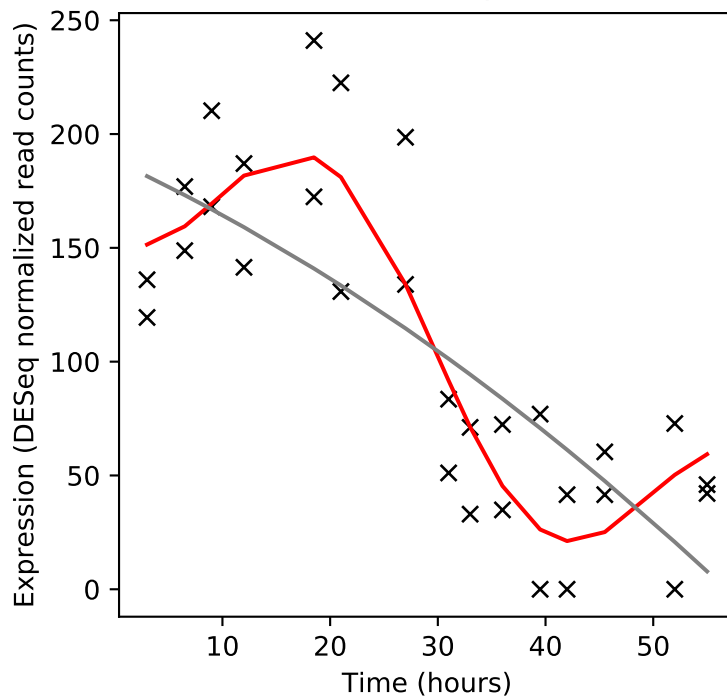

Rv2368c/phoH1

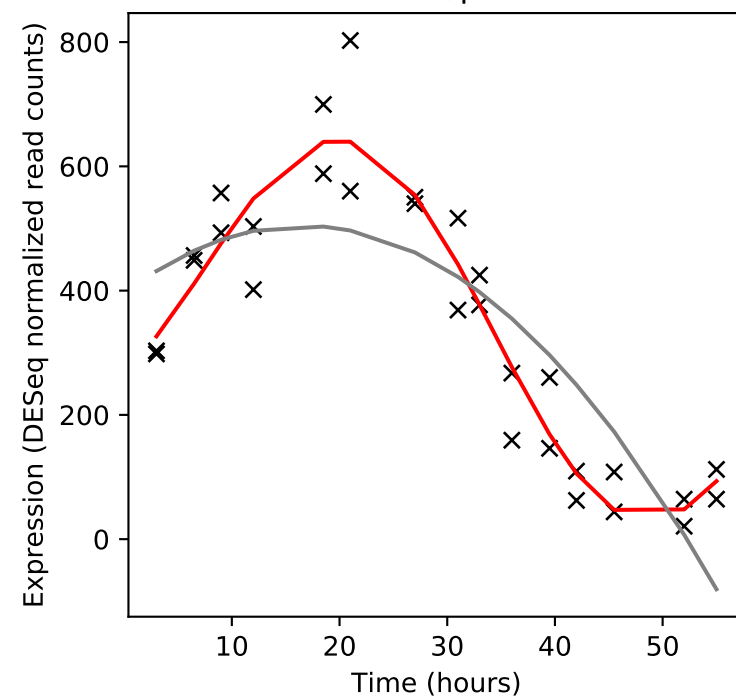

Rv2369c/-

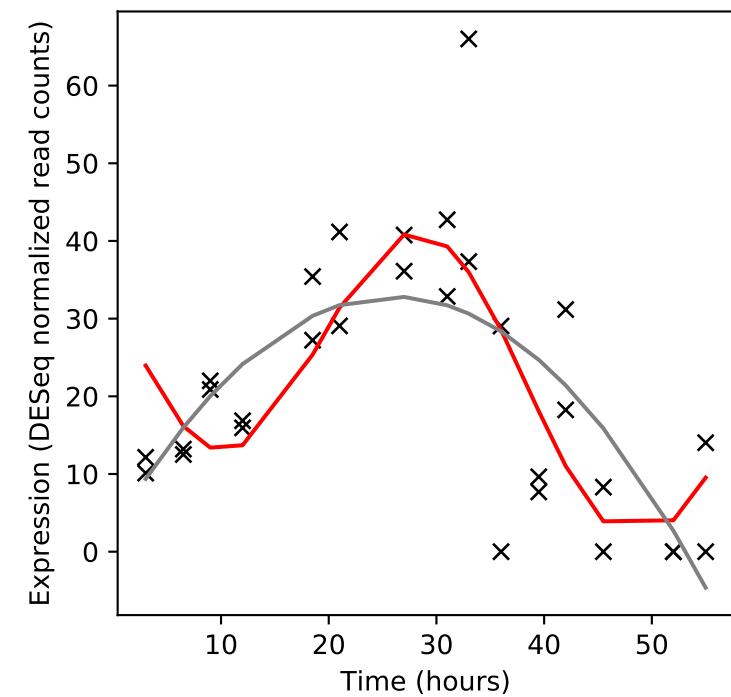

Rv2370c/-

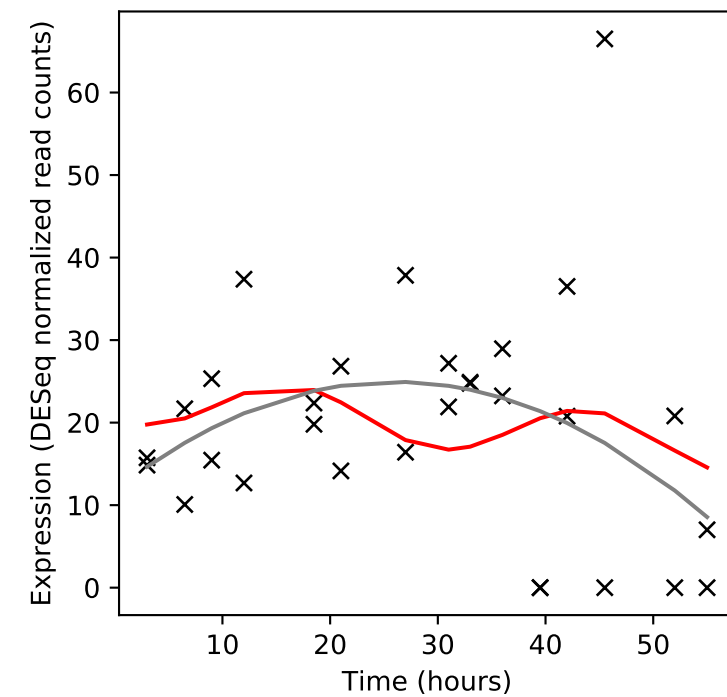

Rv2371/PE\_PGRS40

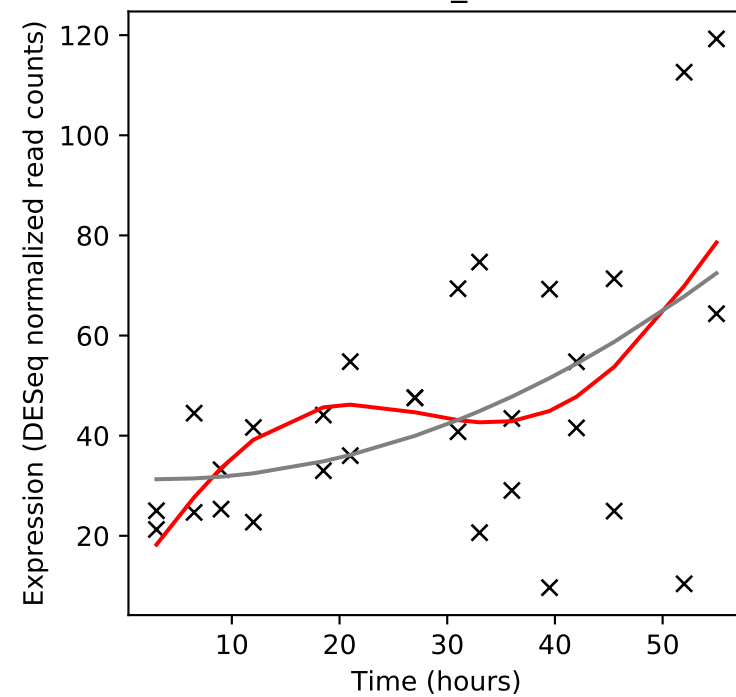

Rv2372c/-

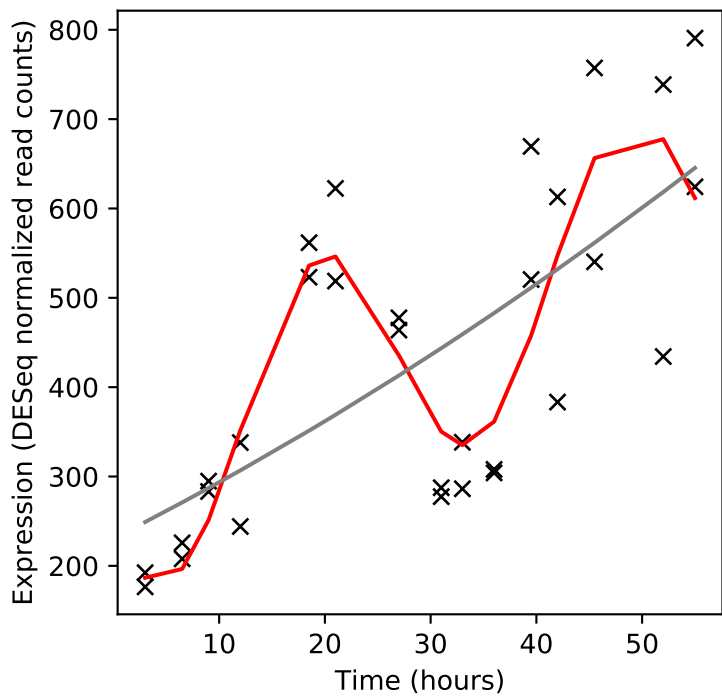

Rv2373c/dnaj2

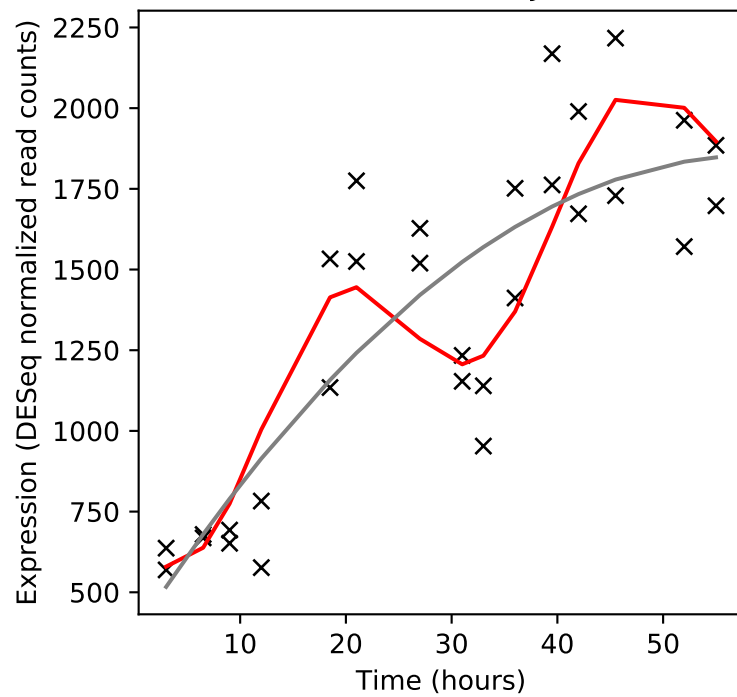

Rv2374c/hrcA

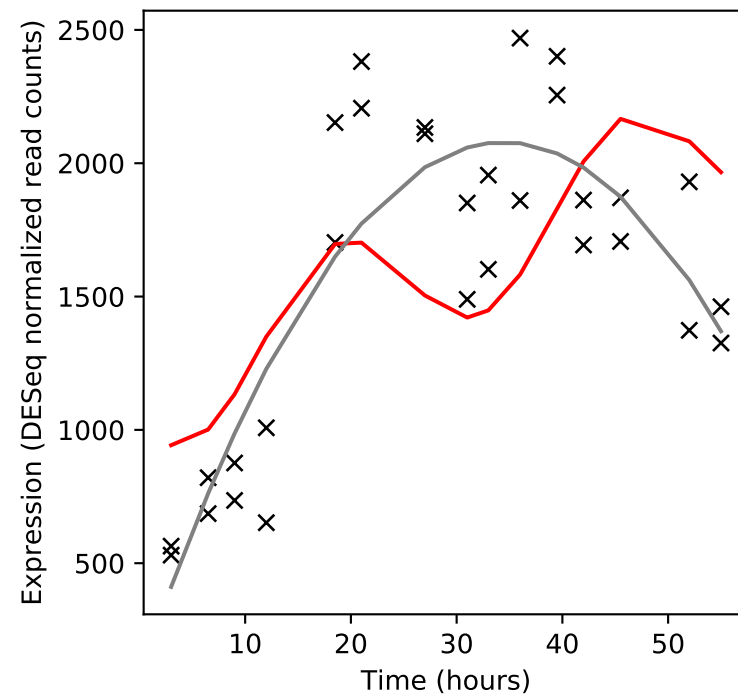

Rv2375/-

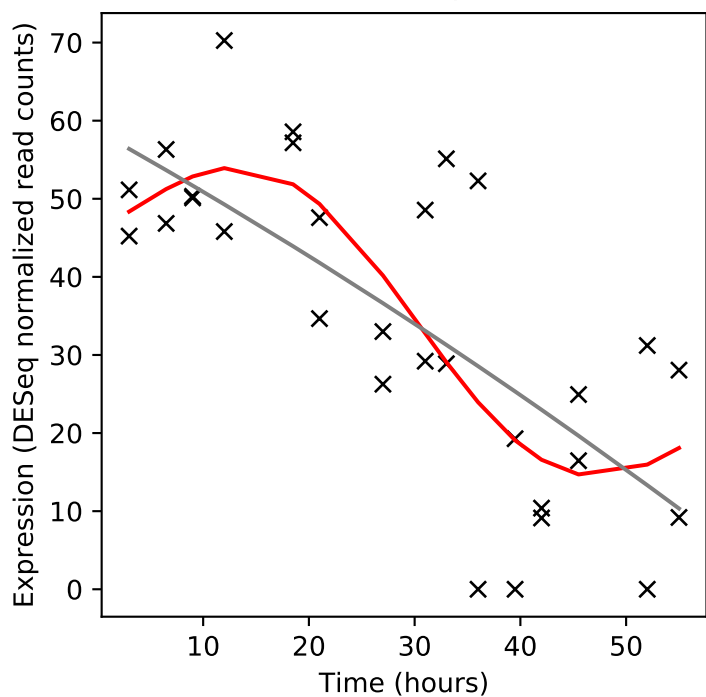

Rv2376c/cfp2

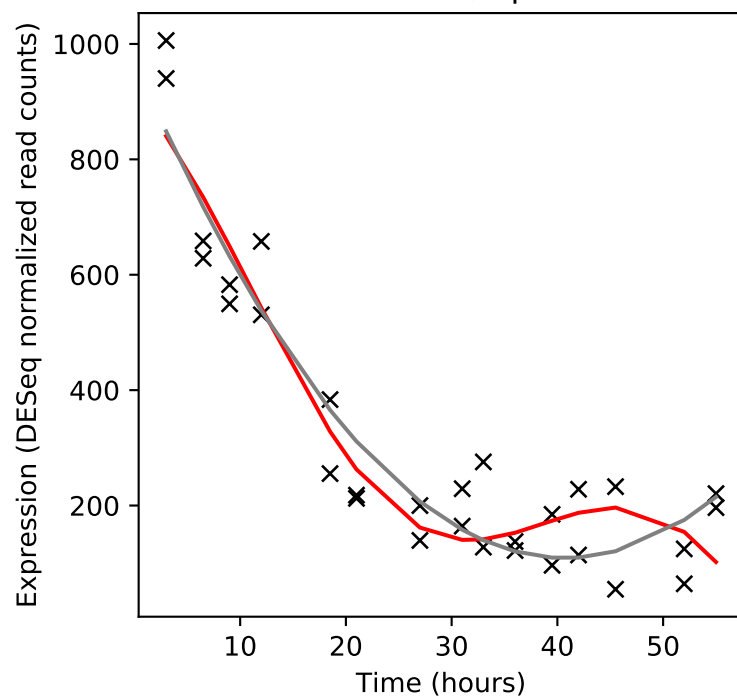

Rv2377c/mbtH

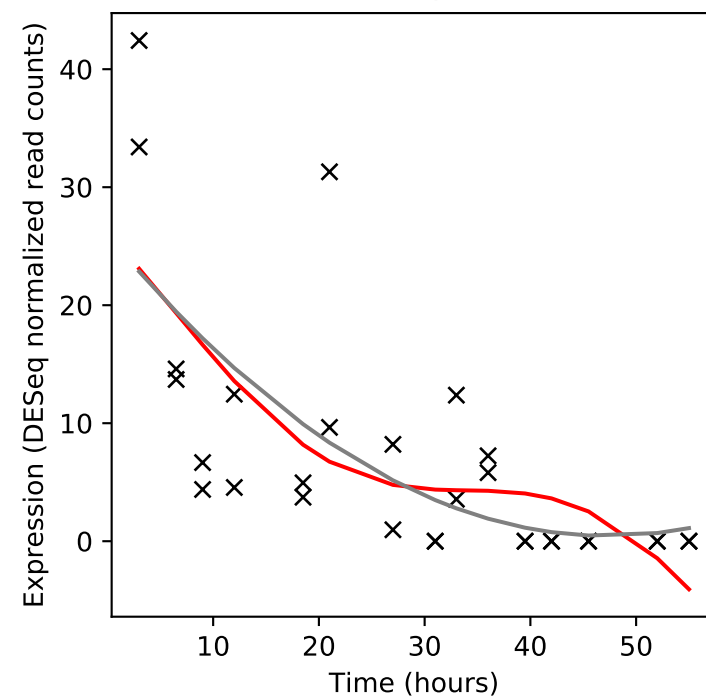

Rv2378c/mbtG

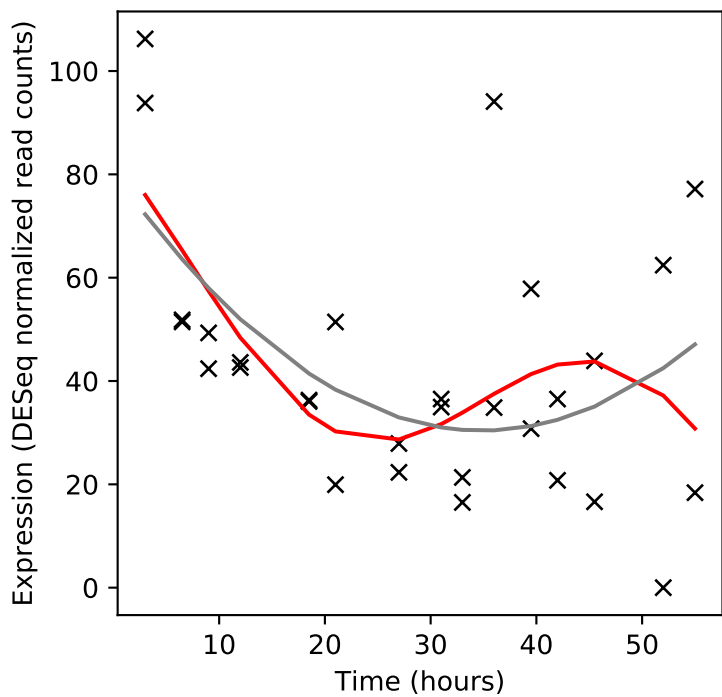

Rv2379c/mbtF

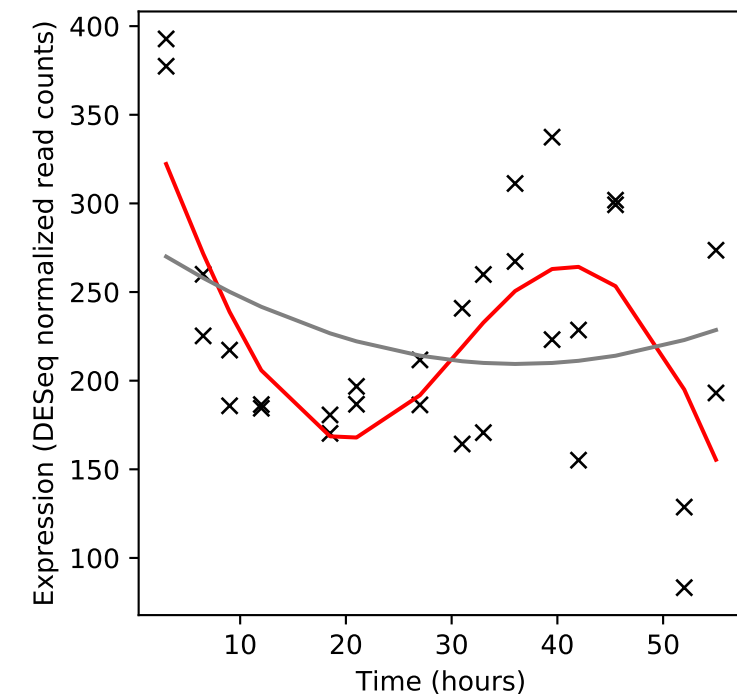

Rv2380c/mbtE

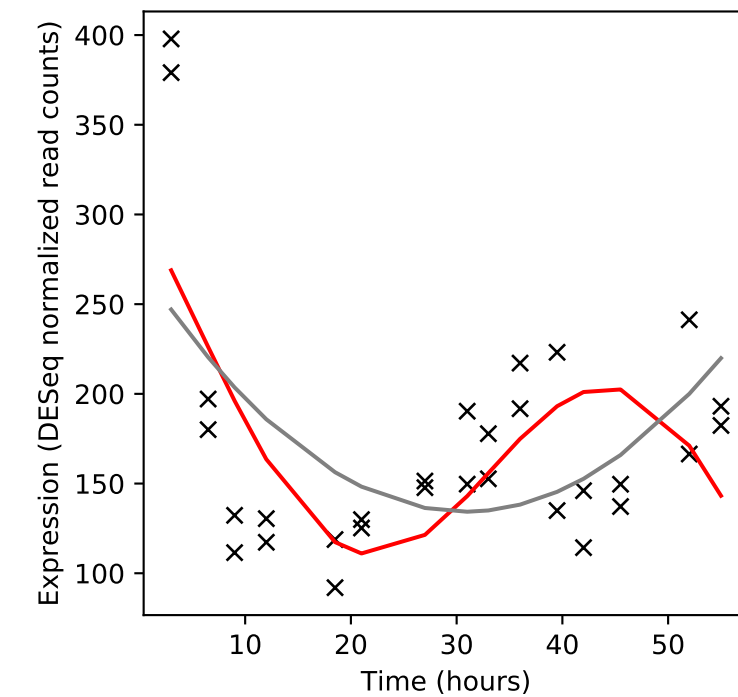

Rv2381c/mbtD

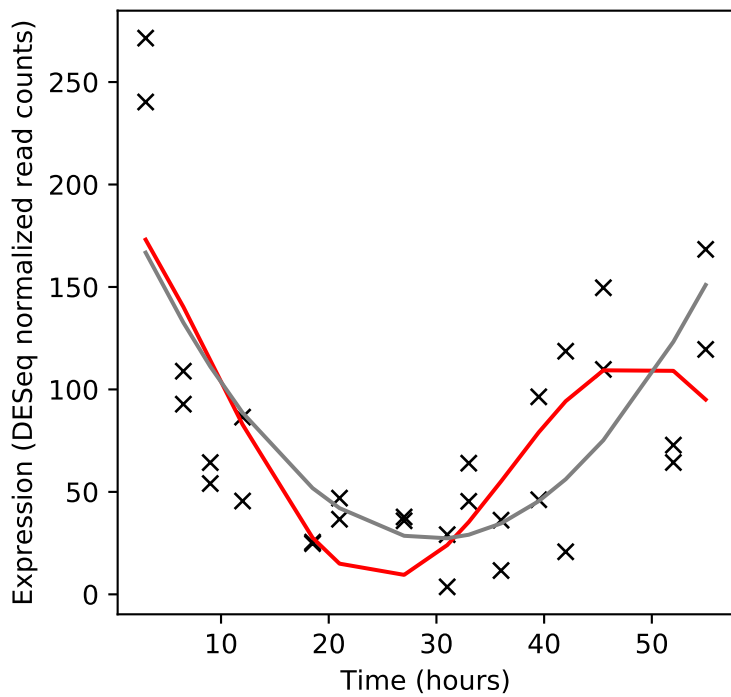

Rv2382c/mbtC

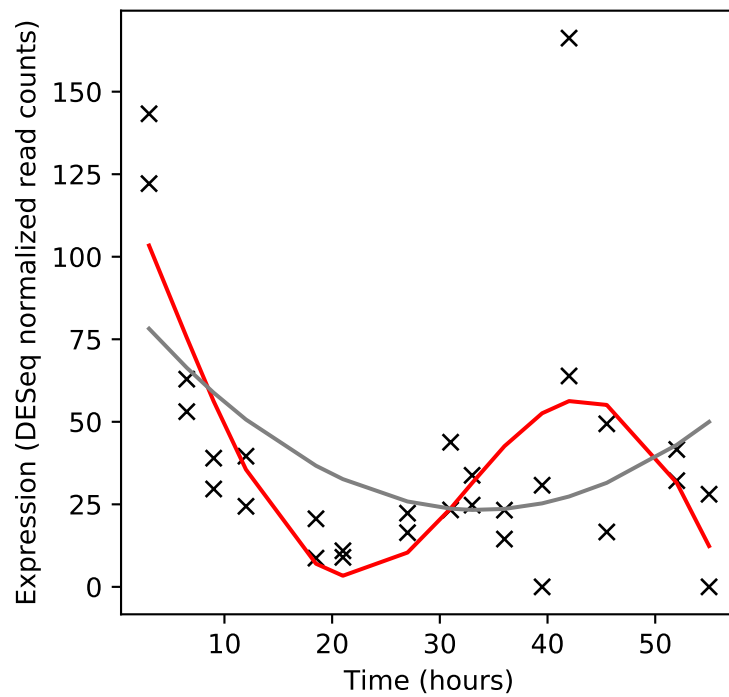

Rv2383c/mbtB

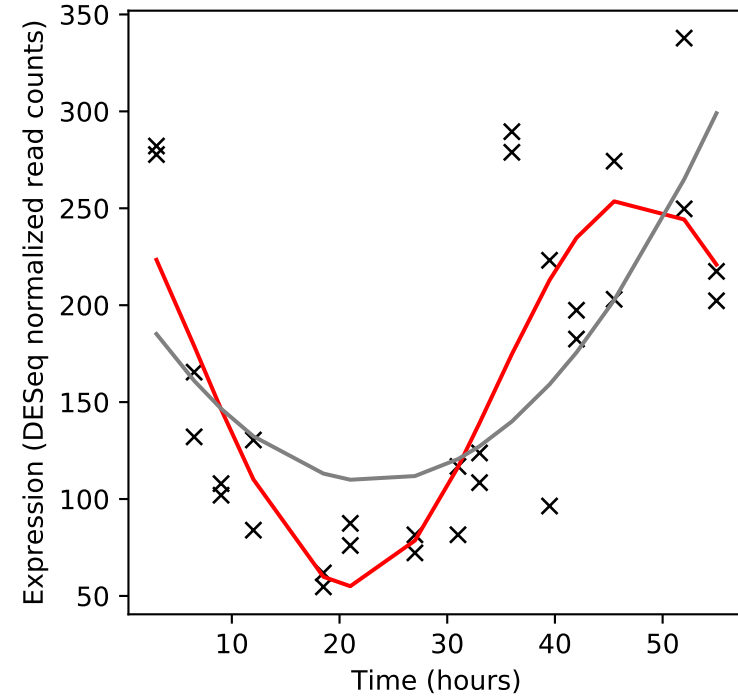

Rv2384/mbtA

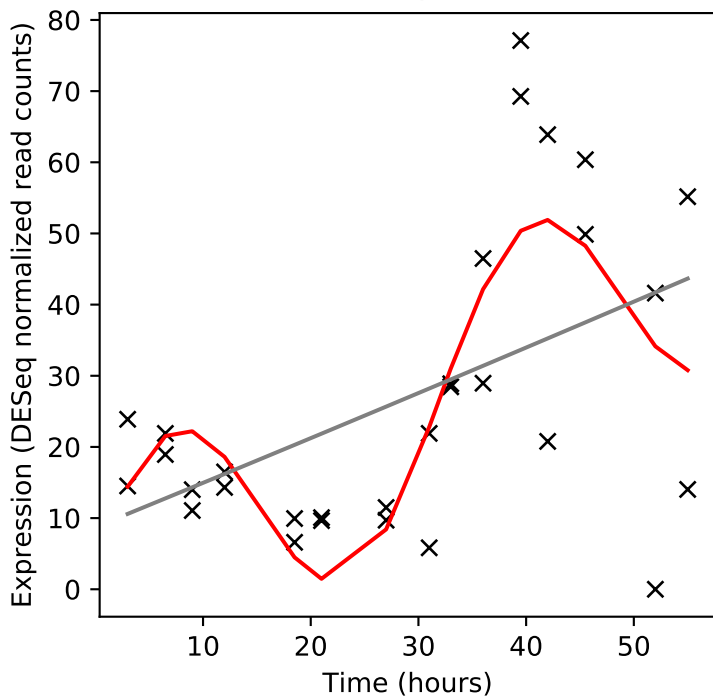

Rv2385/mbtJ

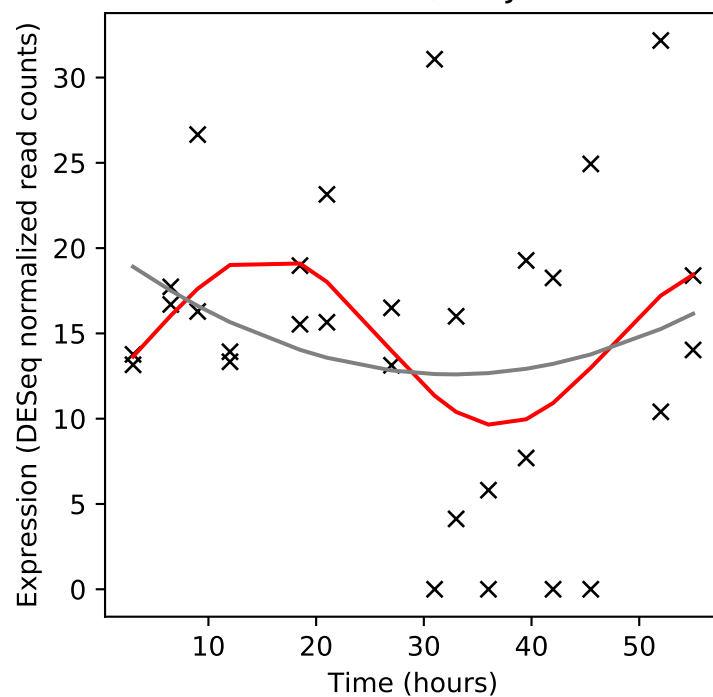

Rv2386c/mbtI

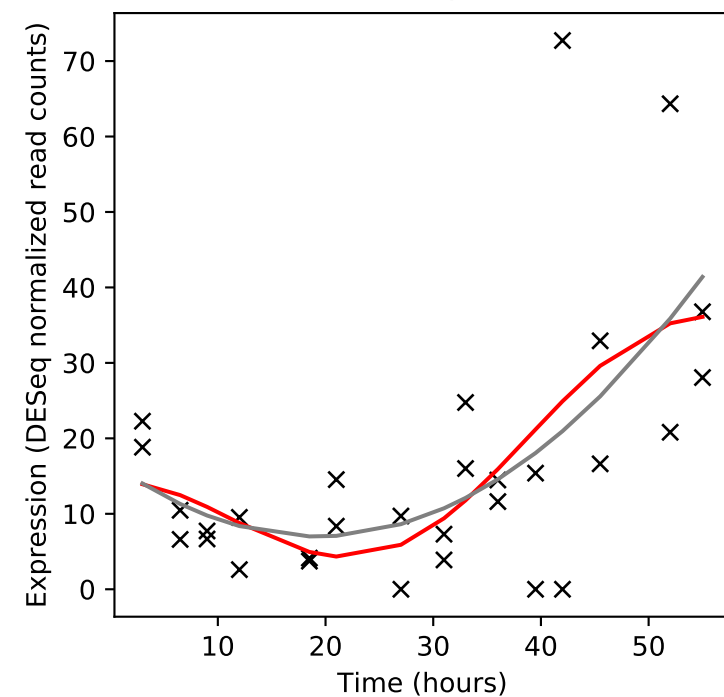

Rv2387/-

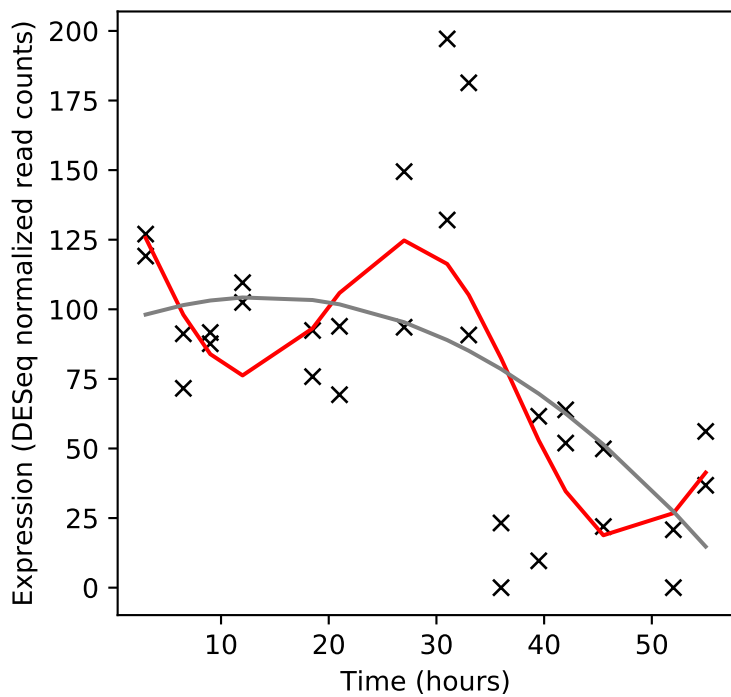

Rv2388c/hemN

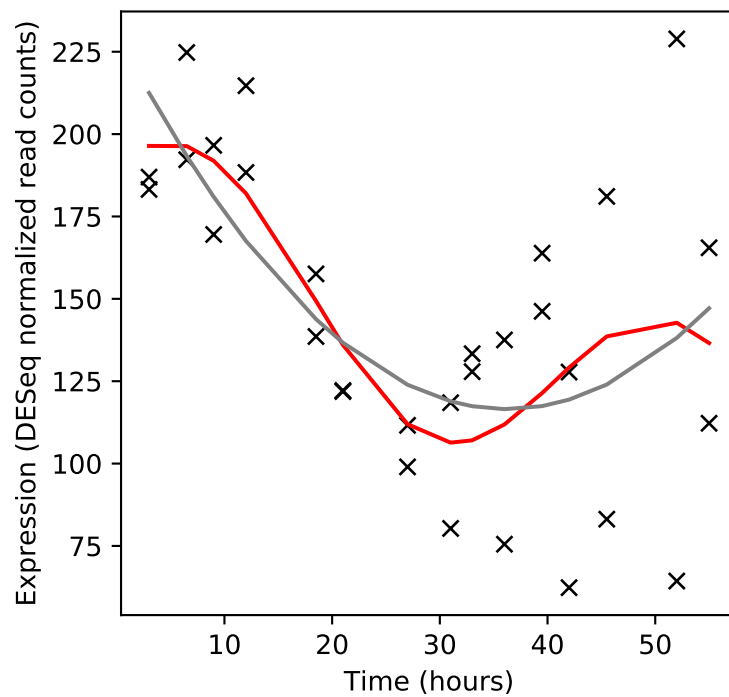

Rv2389c/rpfD

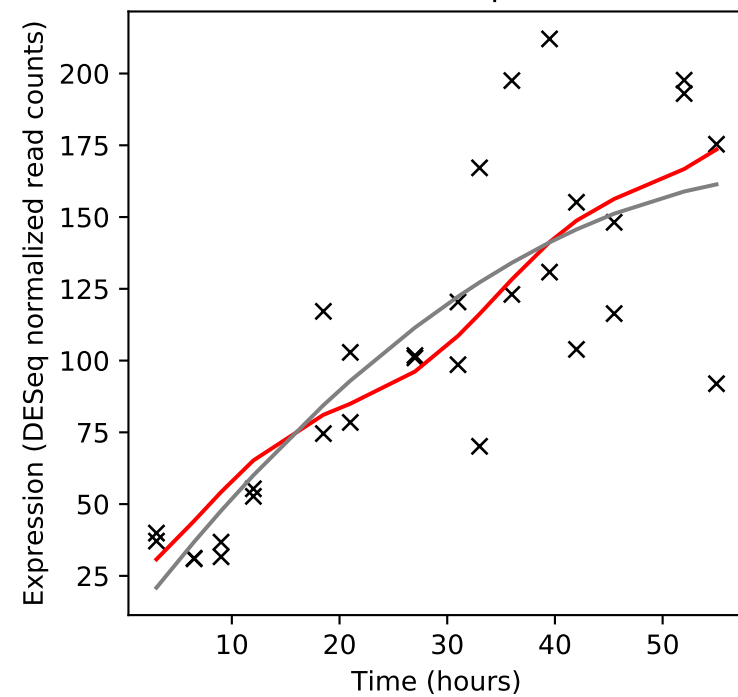

Rv2390c/-

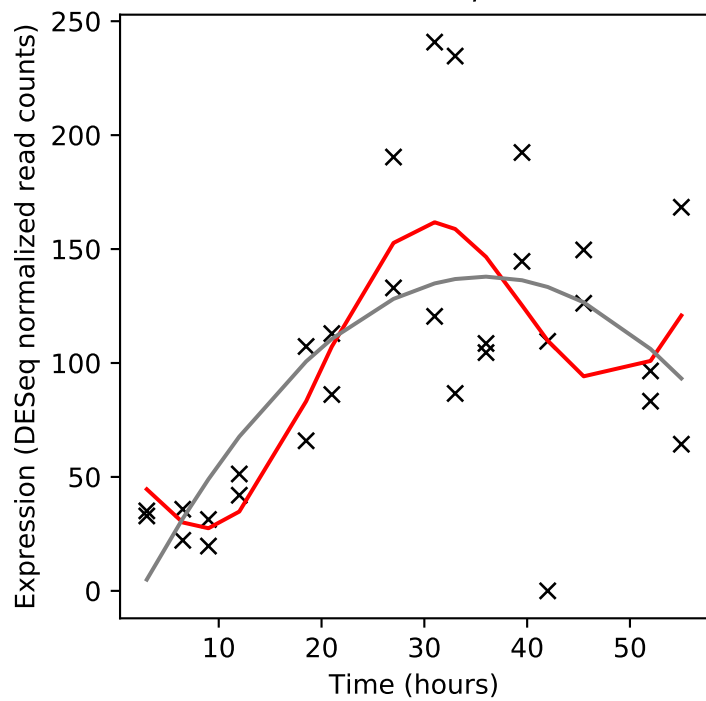

Rv2391/sirA

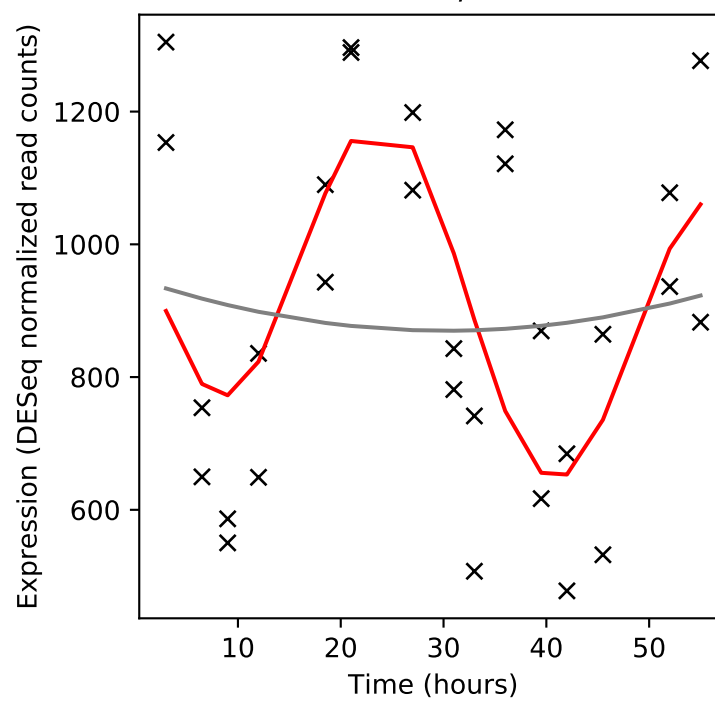

Rv2392/cysH

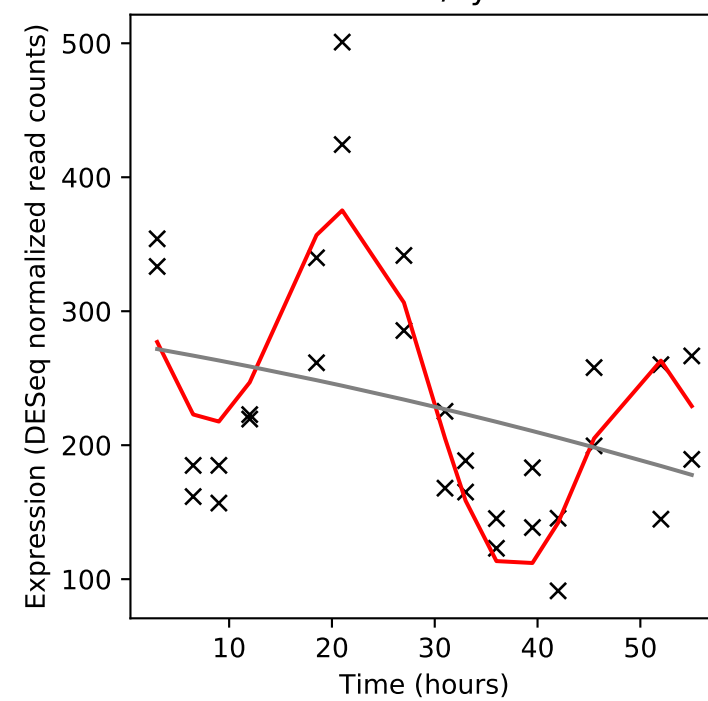

Rv2393/che1

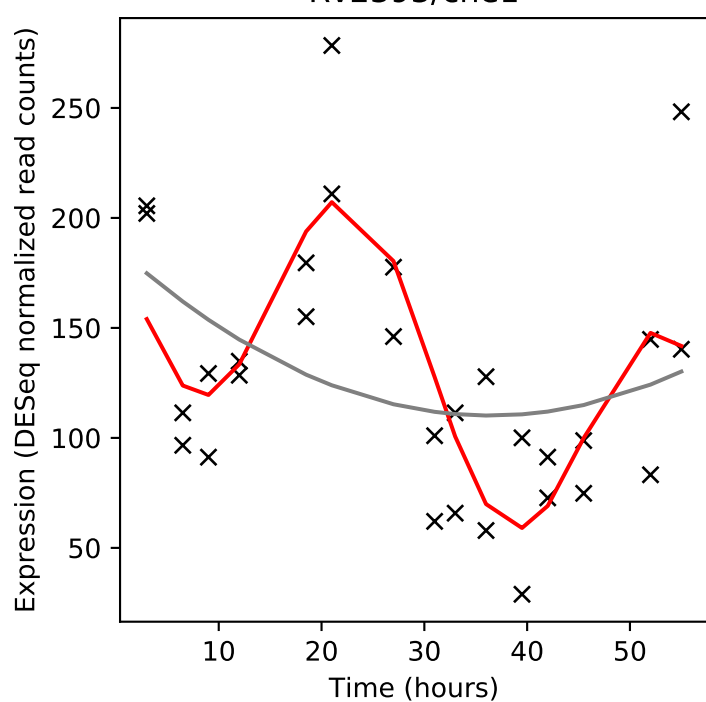

Rv2394/ggtB

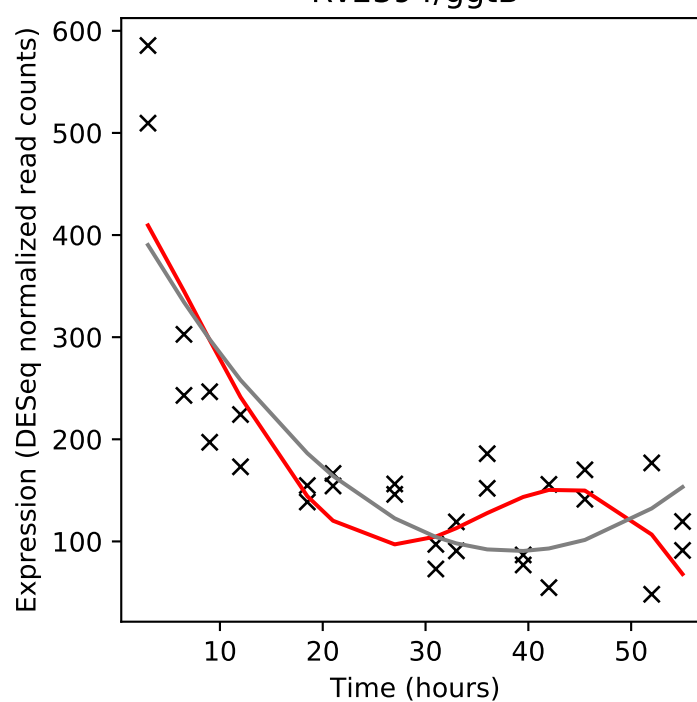

Rv2395/-

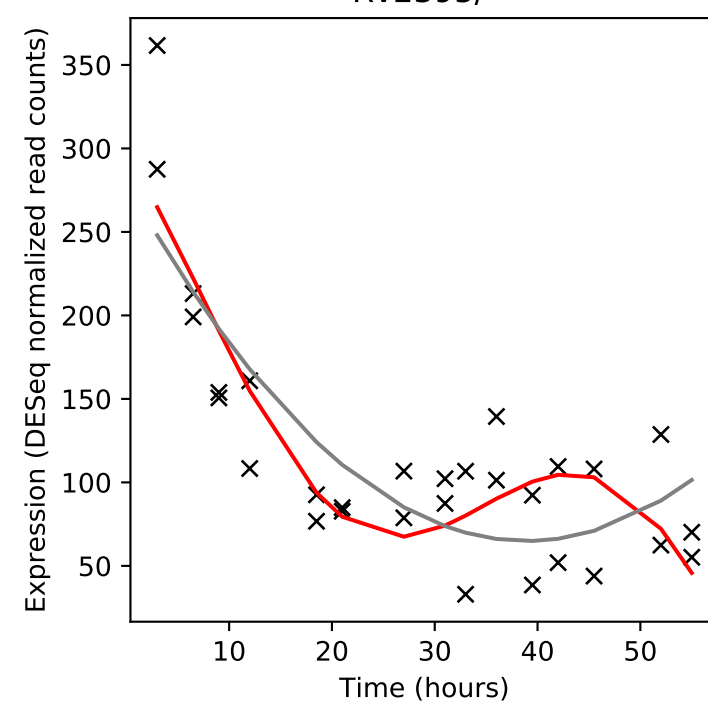

Rv2395A/aprA

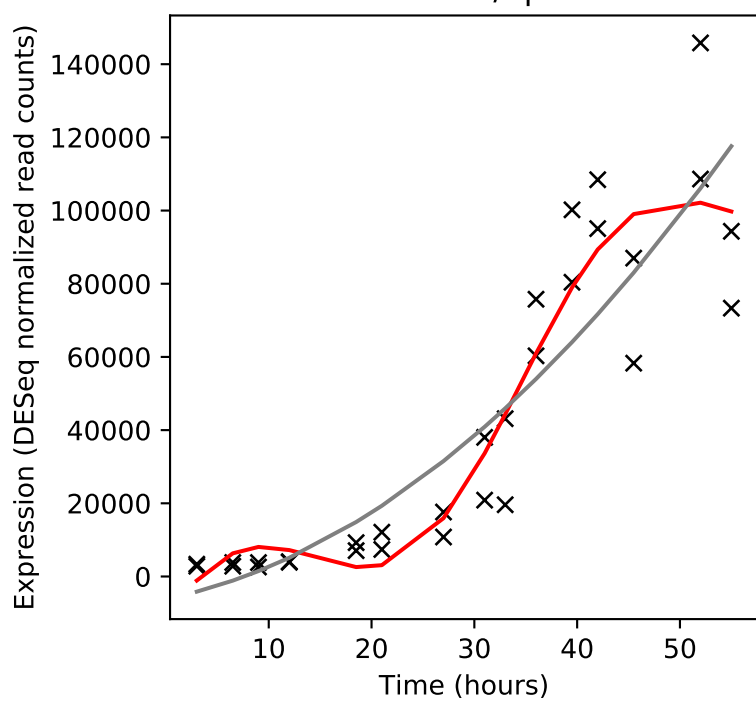

Rv2395B/aprB

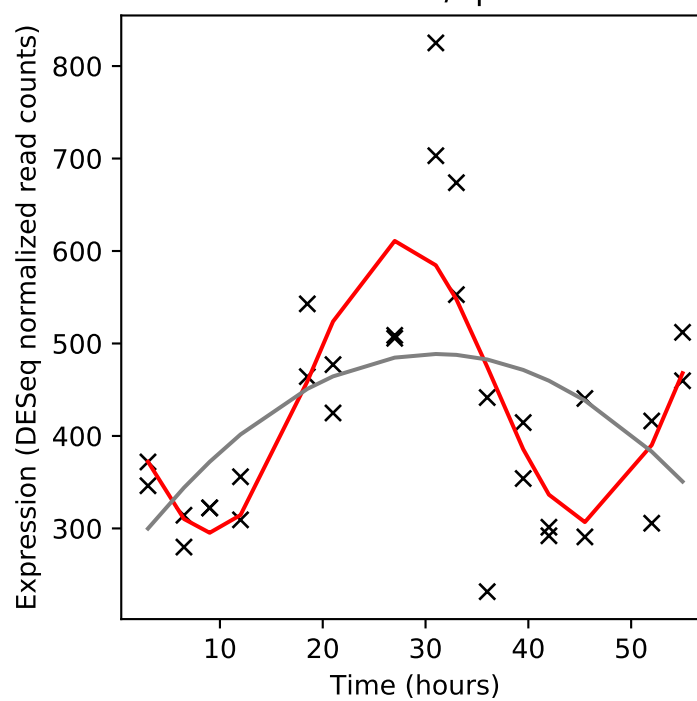

Rv2396/PE\_PGRS41

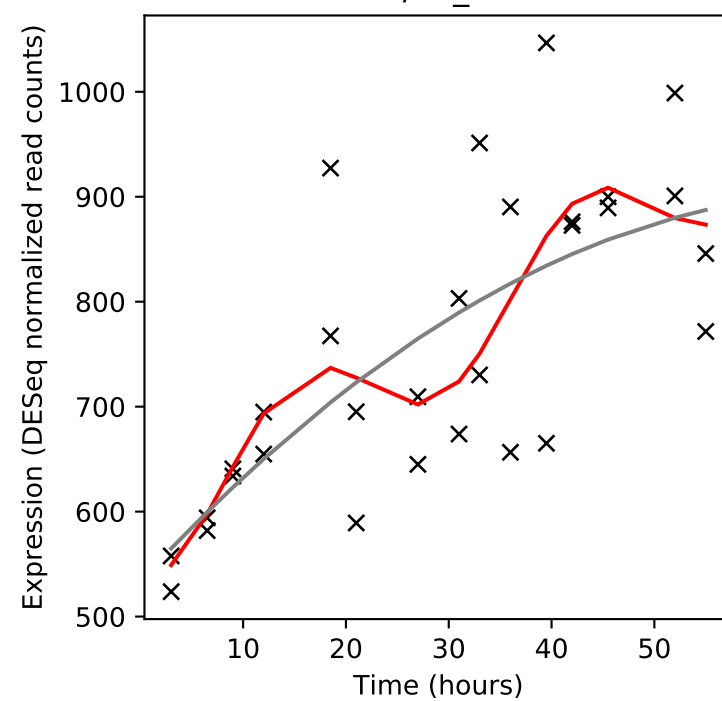

Rv2397c/cysA1

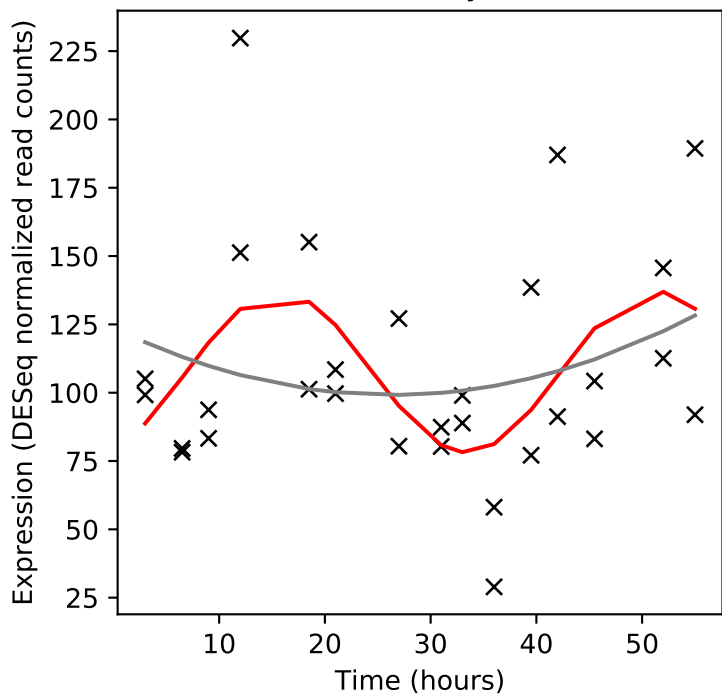

Rv2398c/cysW

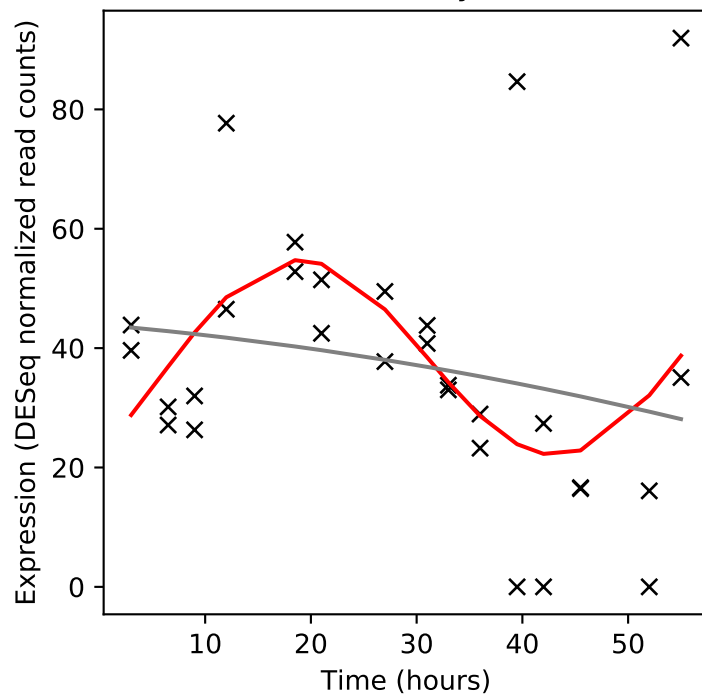

Rv2399c/cysT

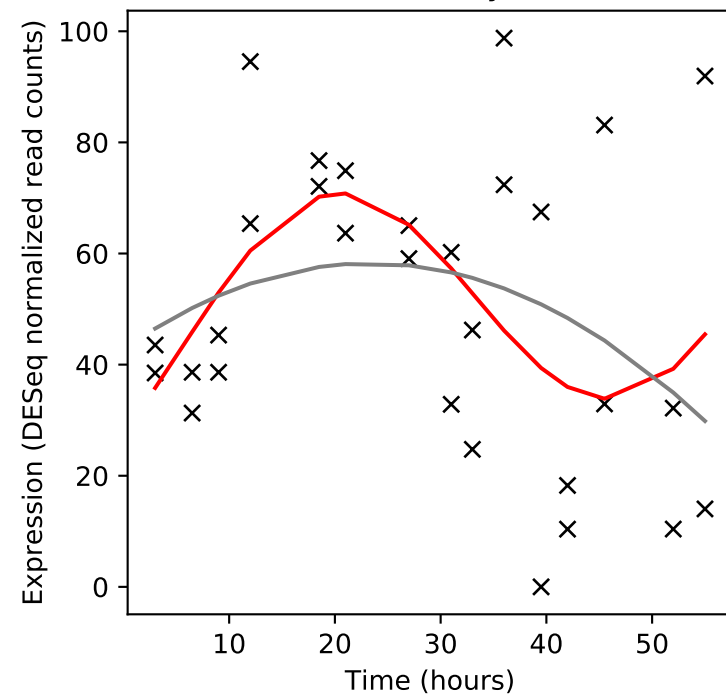

Rv2400c/subI

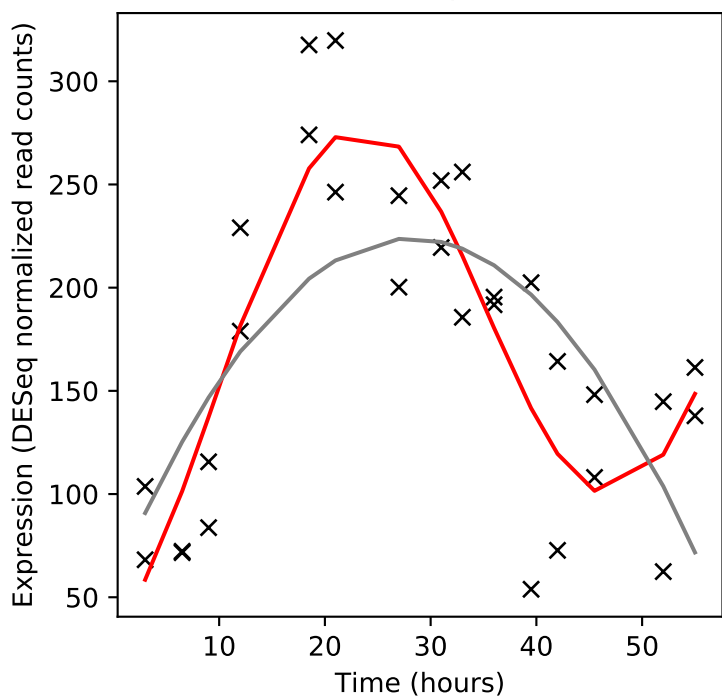

Rv2401/-

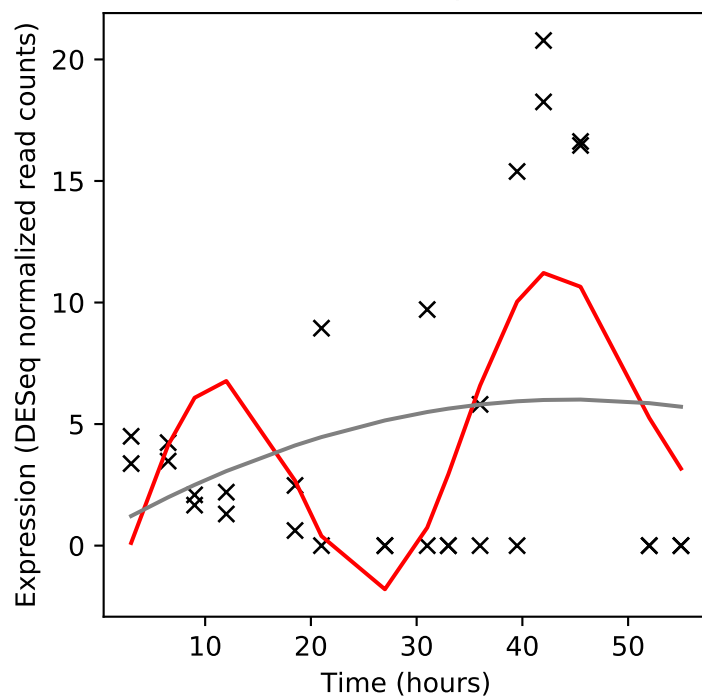

Rv2401A/-

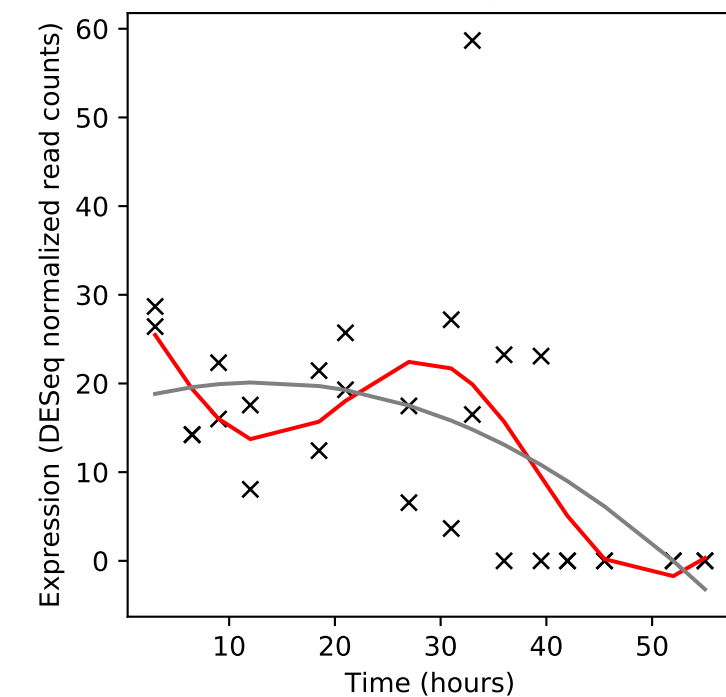

Rv2402/-

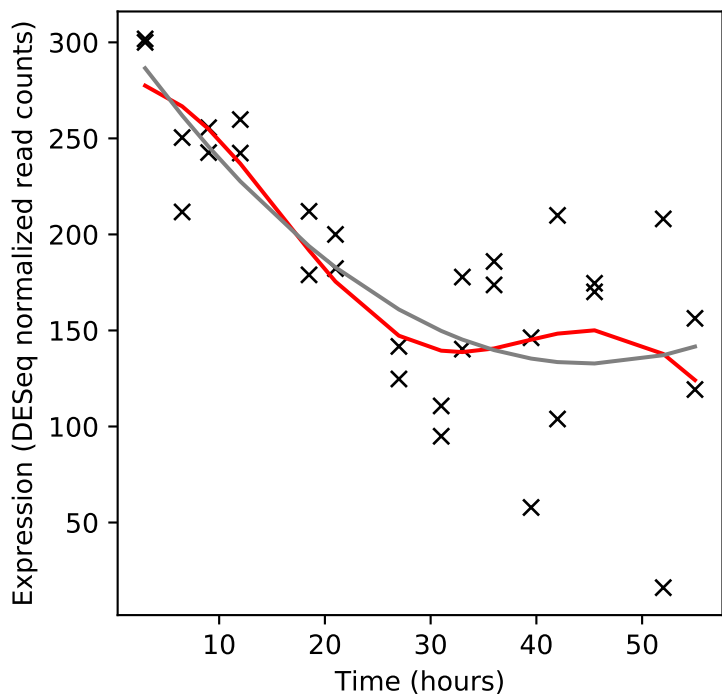

Rv2403c/lppR

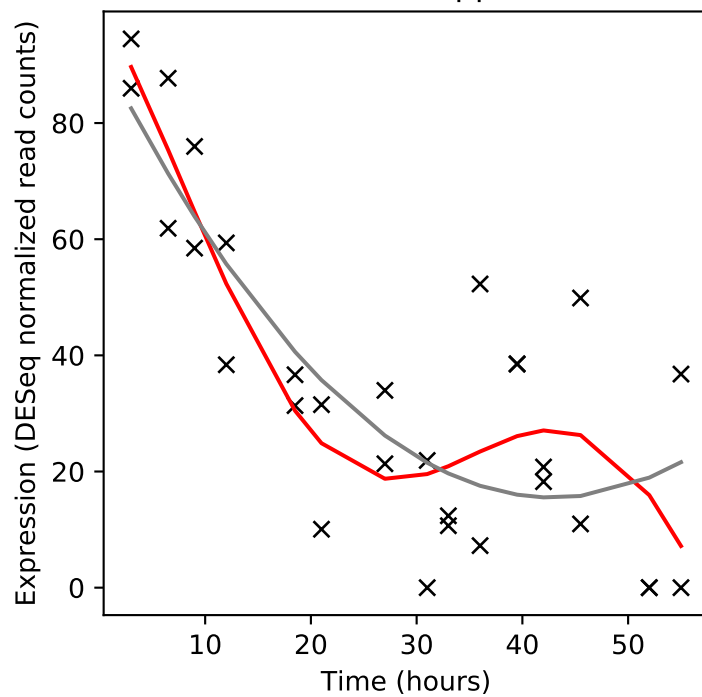

Rv2404c/lepA

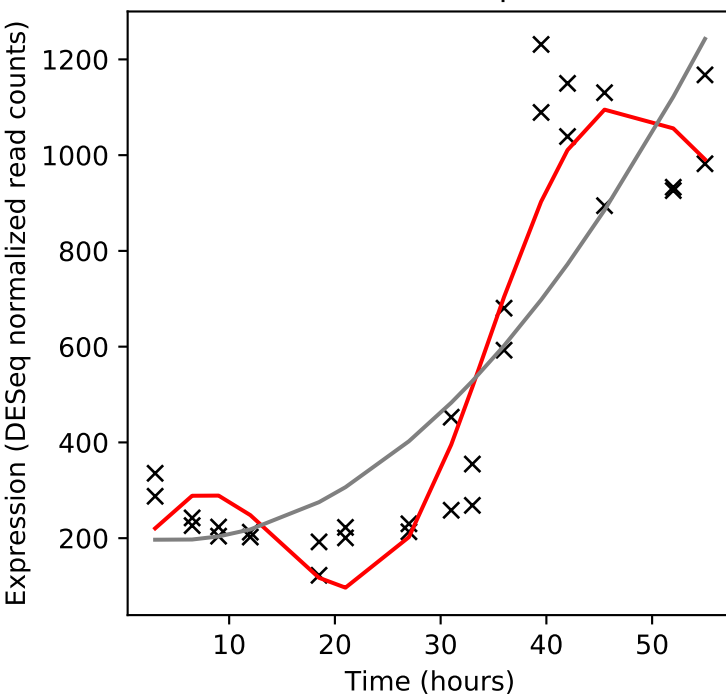



Rv2405/-

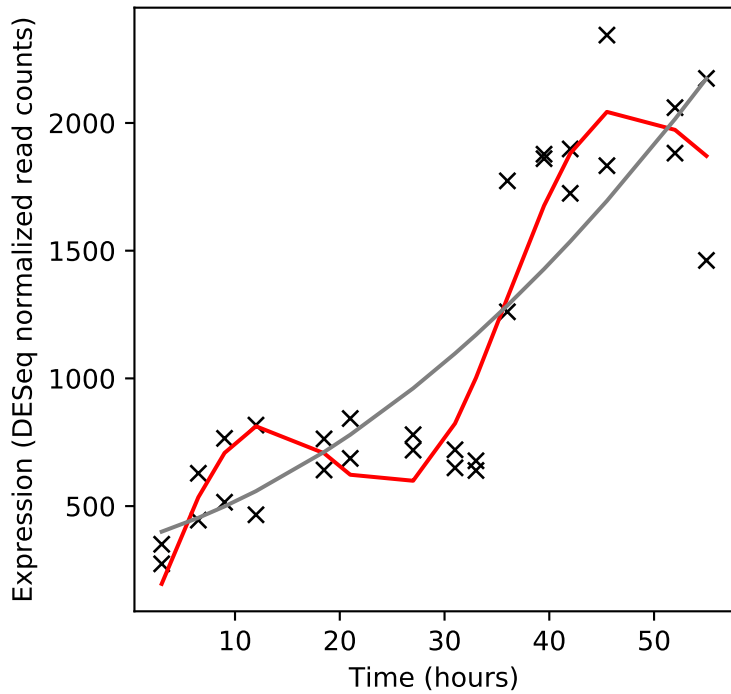

Rv2406c/-

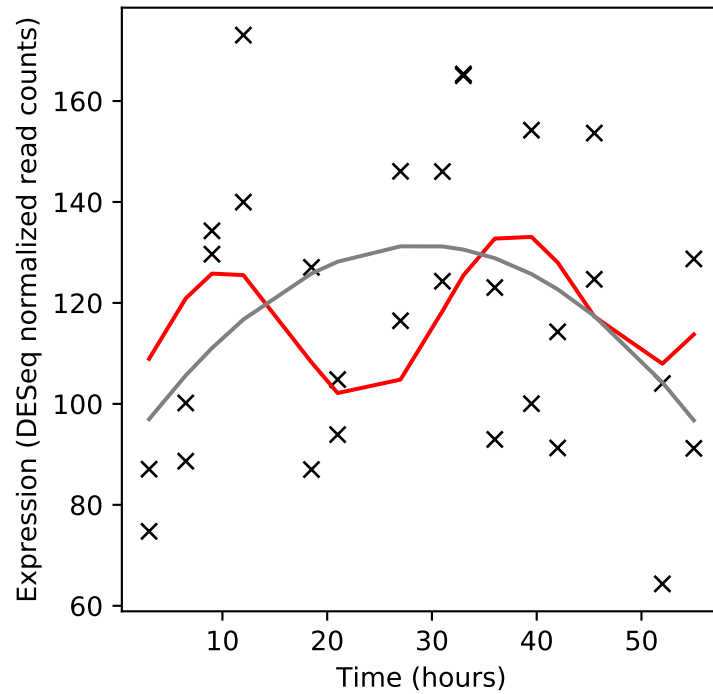

Rv2407/-

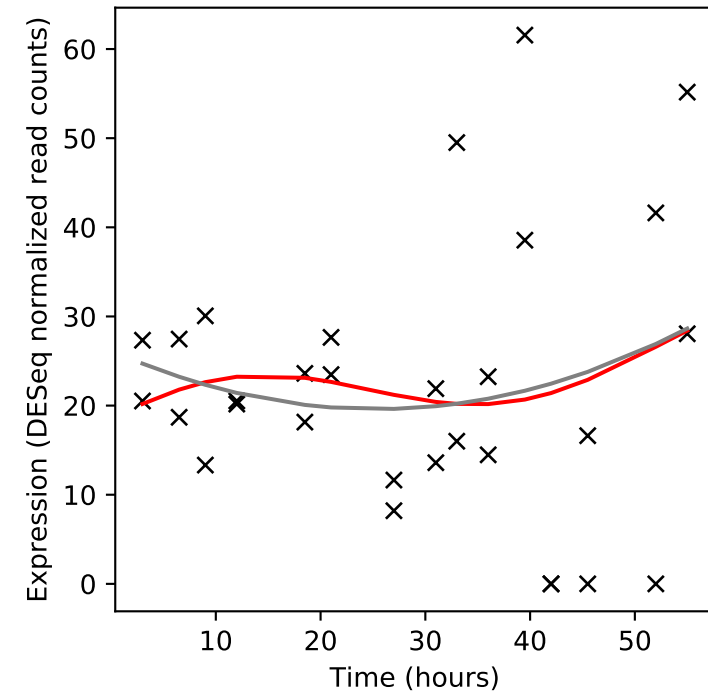

Rv2408/PE24

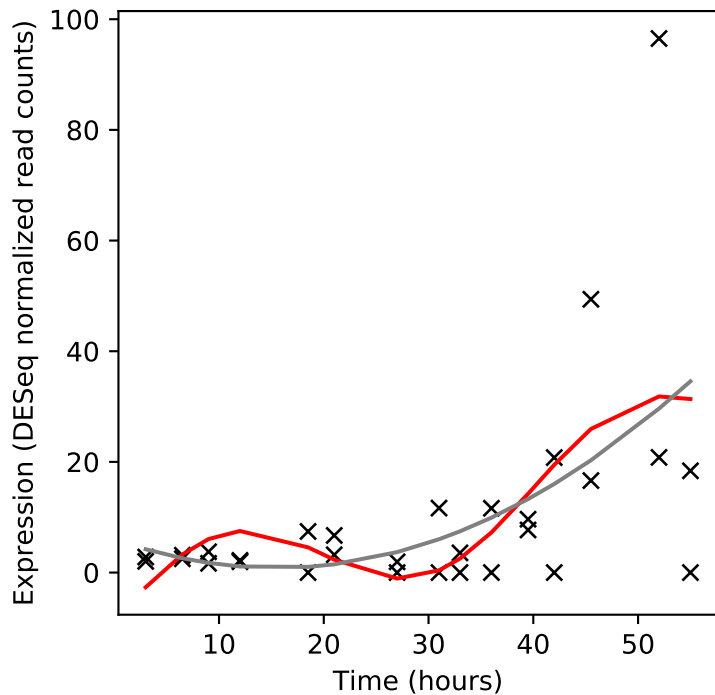

Rv2409c/-

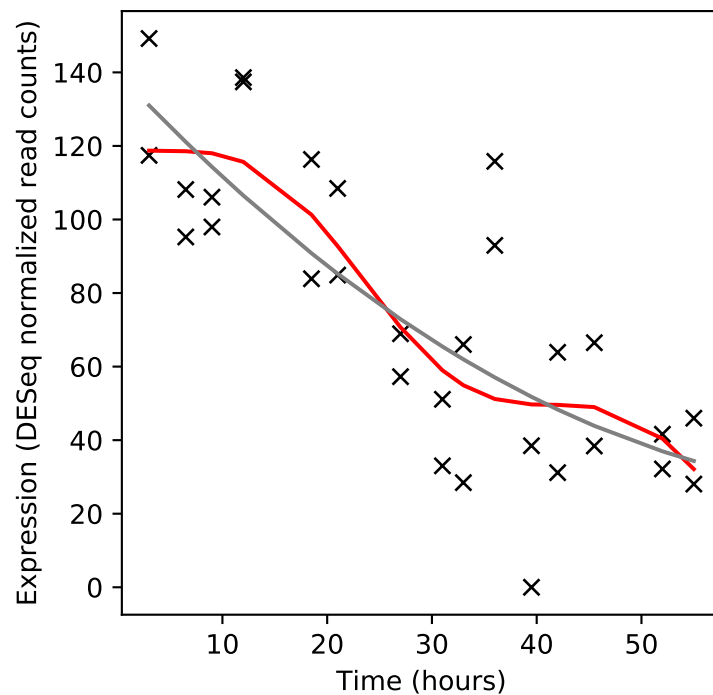

Rv2410c/-

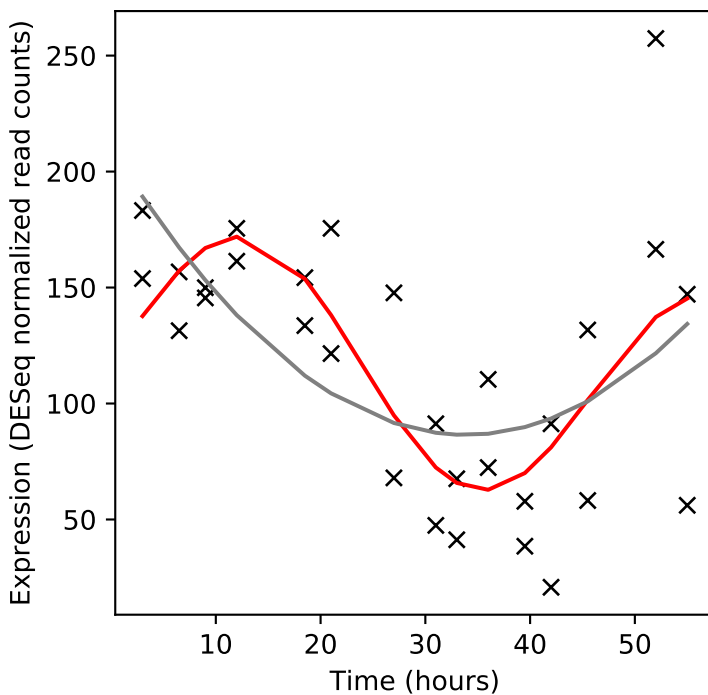

Rv2411c/-

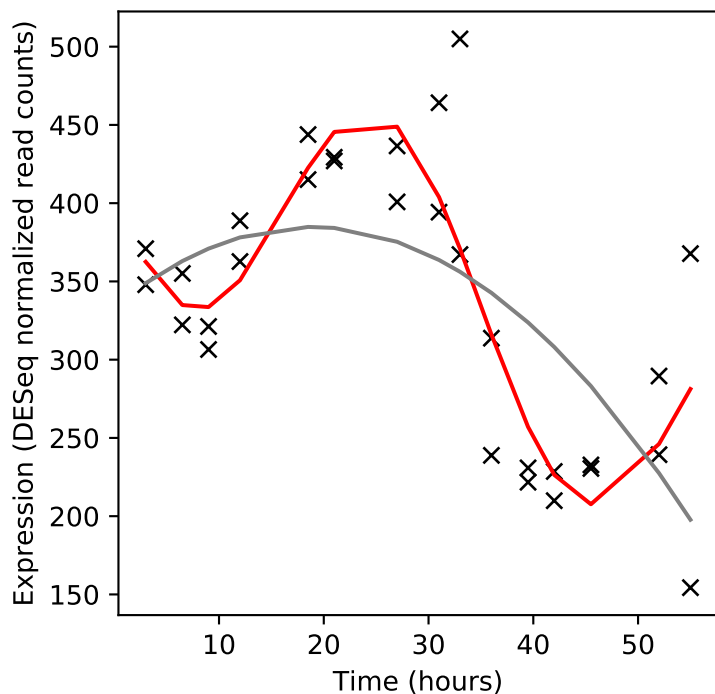

Rv2412/rpsT

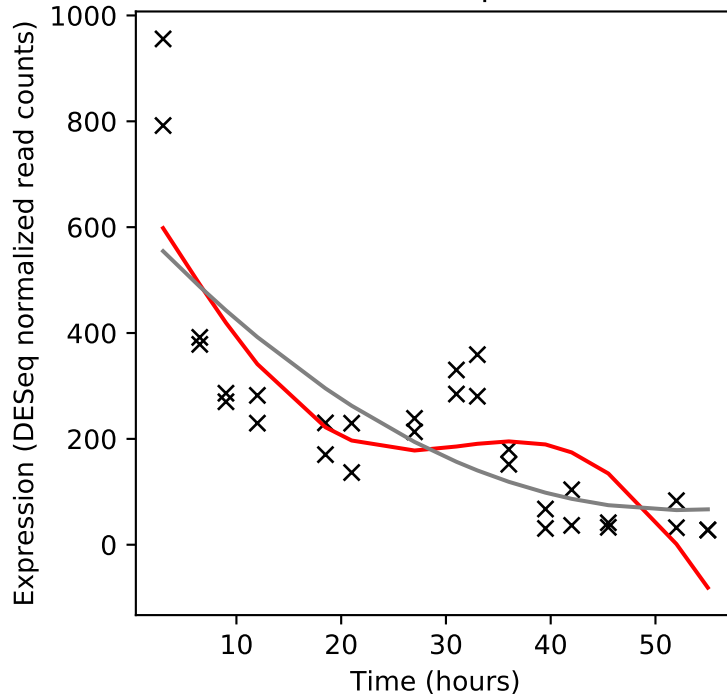

Rv2413c/-

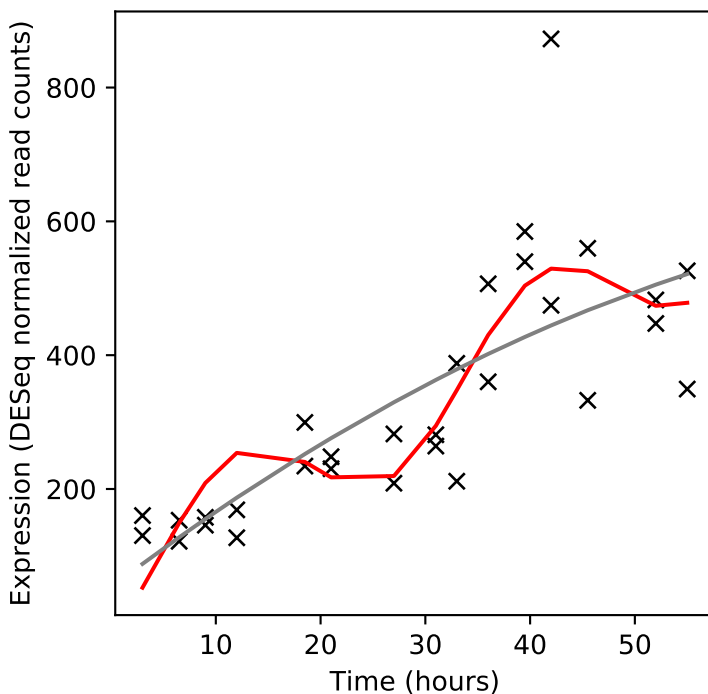

Rv2414c/-

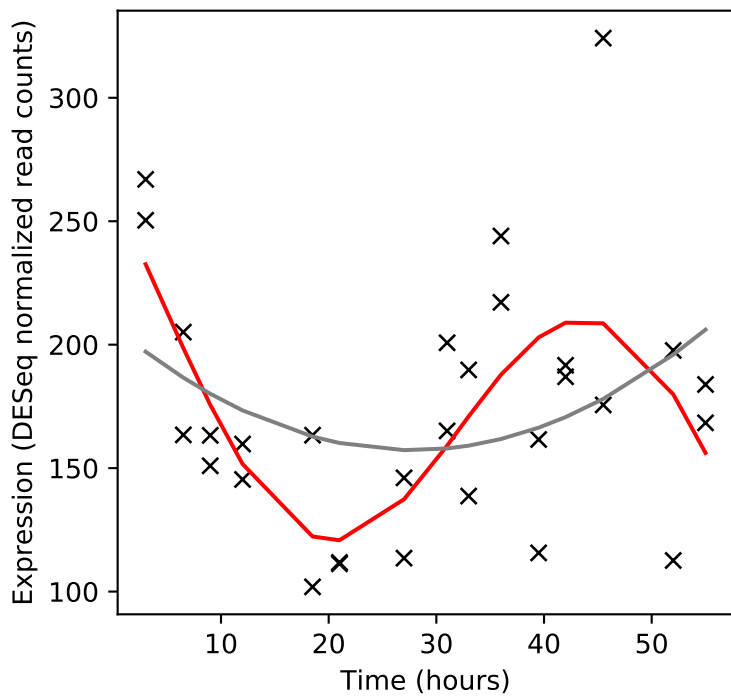

Rv2415c/-

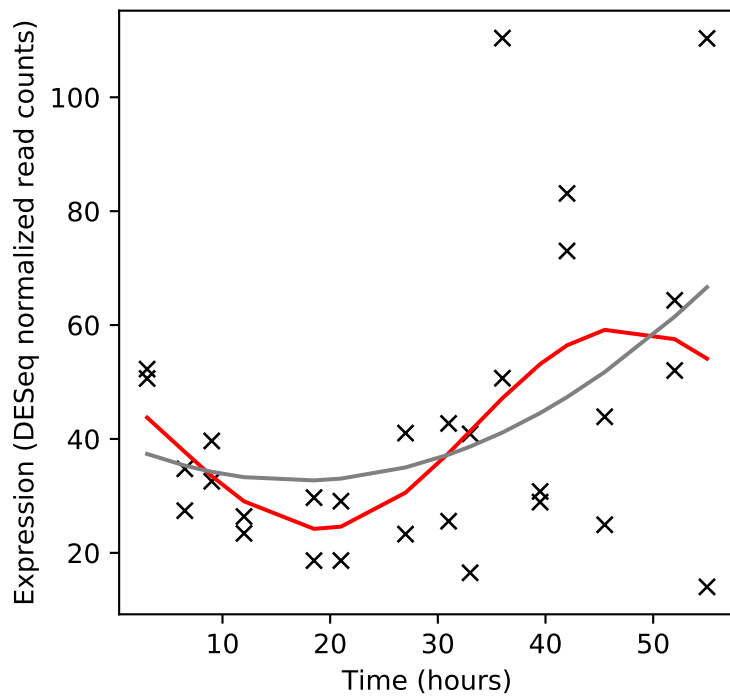

Rv2416c/eis

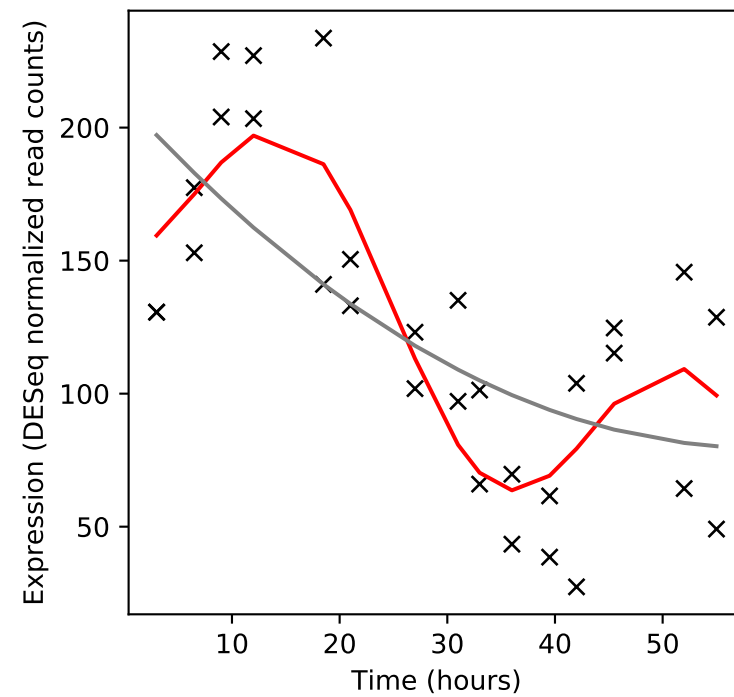

Rv2417c/-

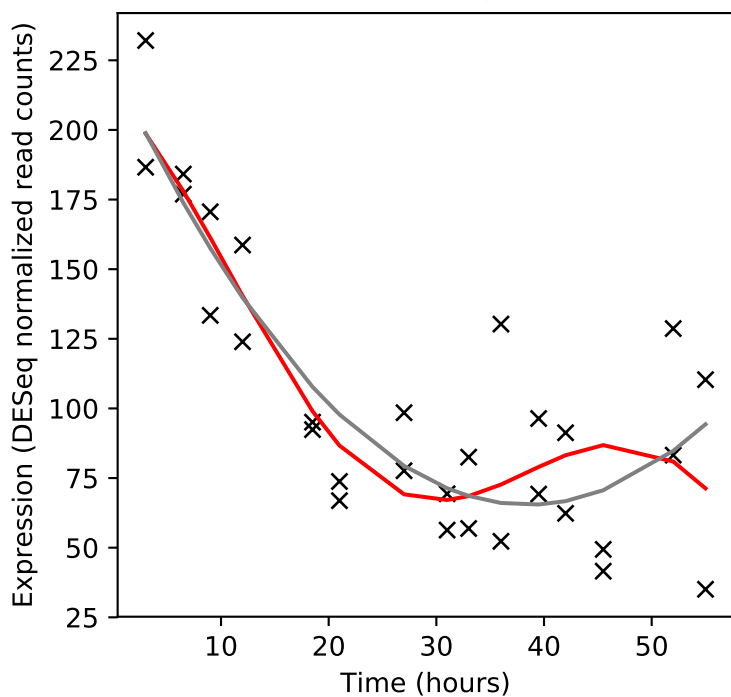

Rv2418c/-

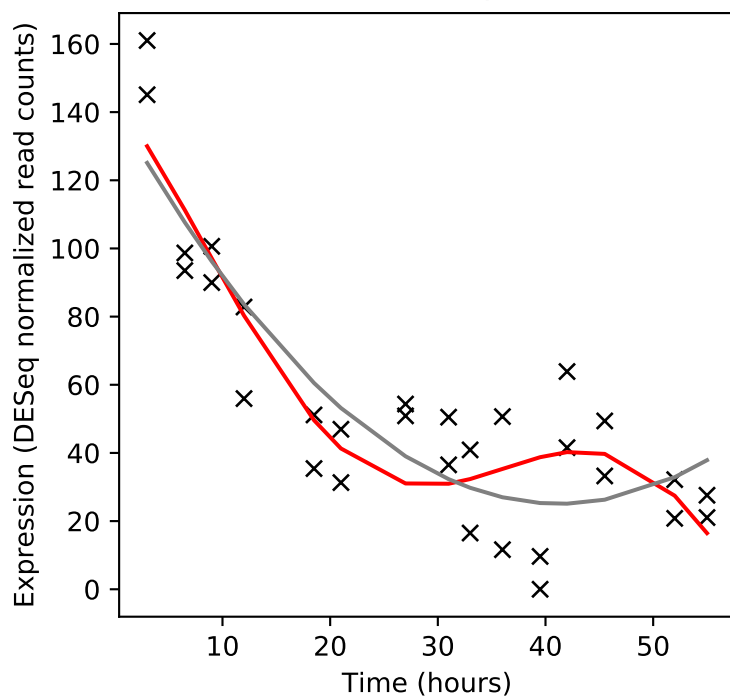

Rv2419c/gpgP

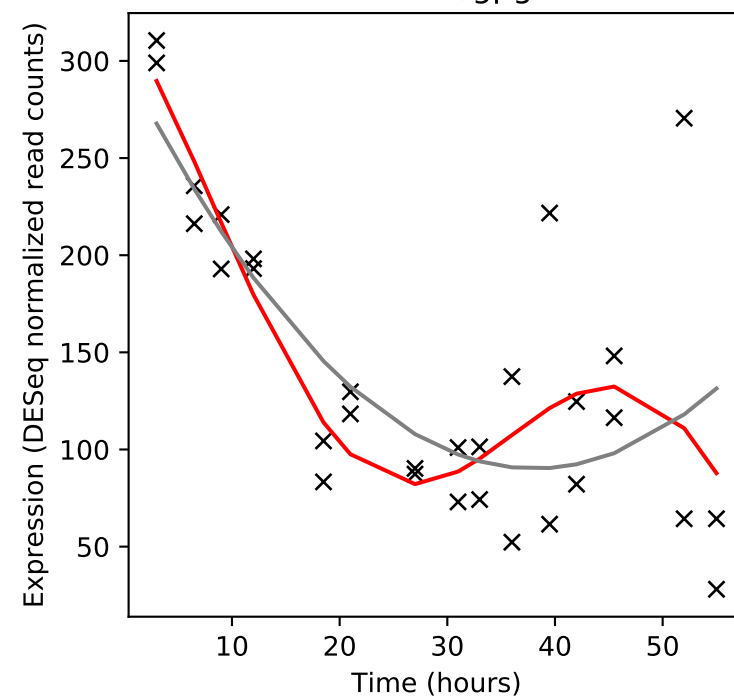

Rv2420c/-

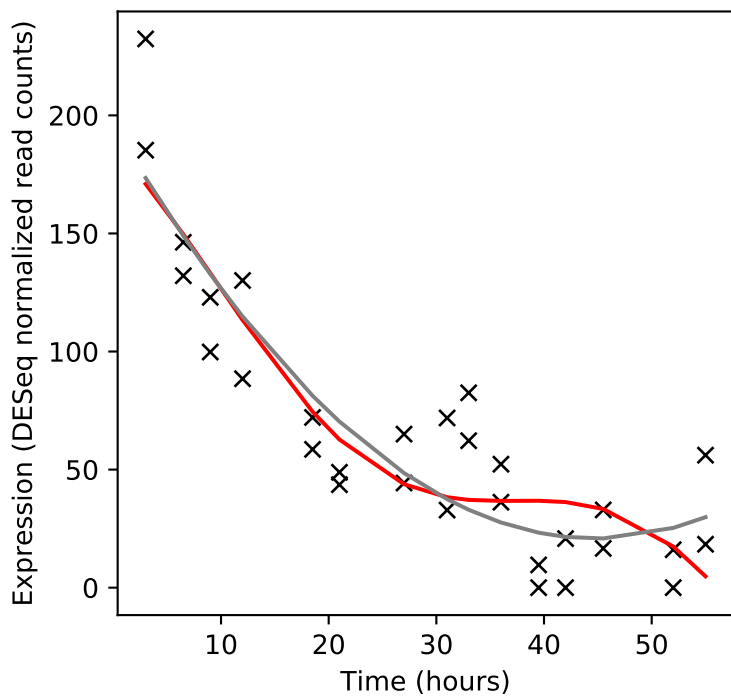

Rv2421c/nadD

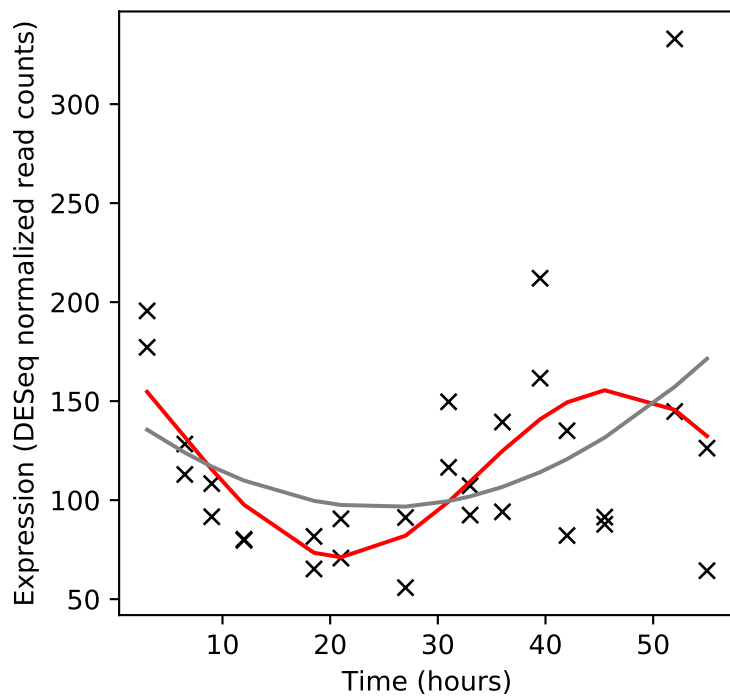

Rv2422/-

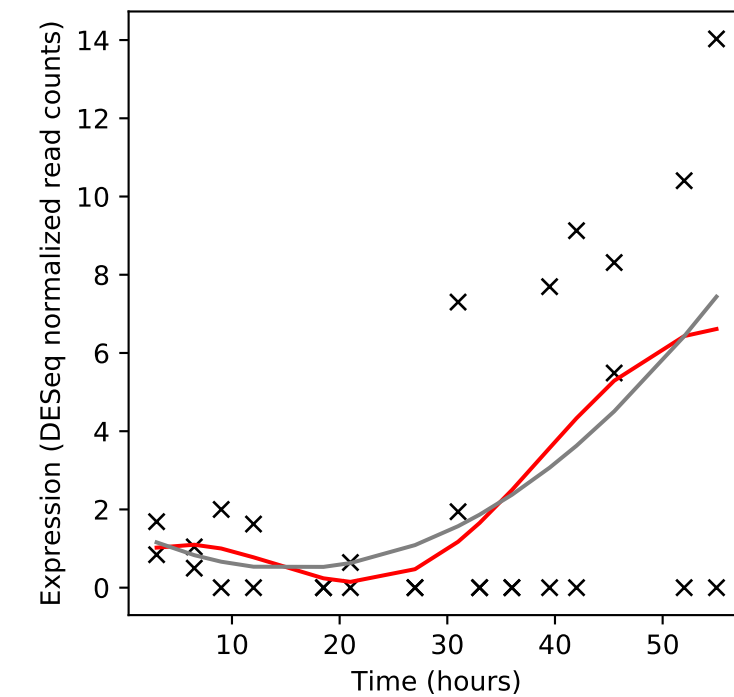

Rv2423/-

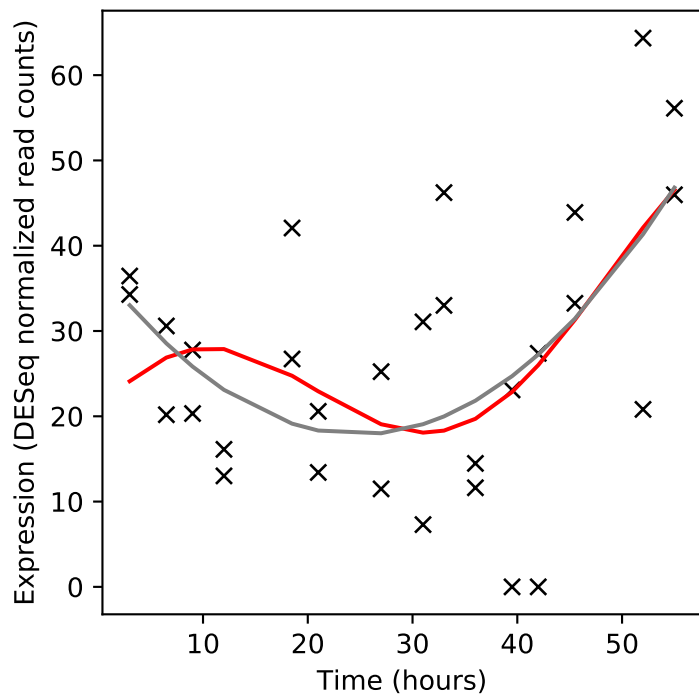

Rv2424c/-

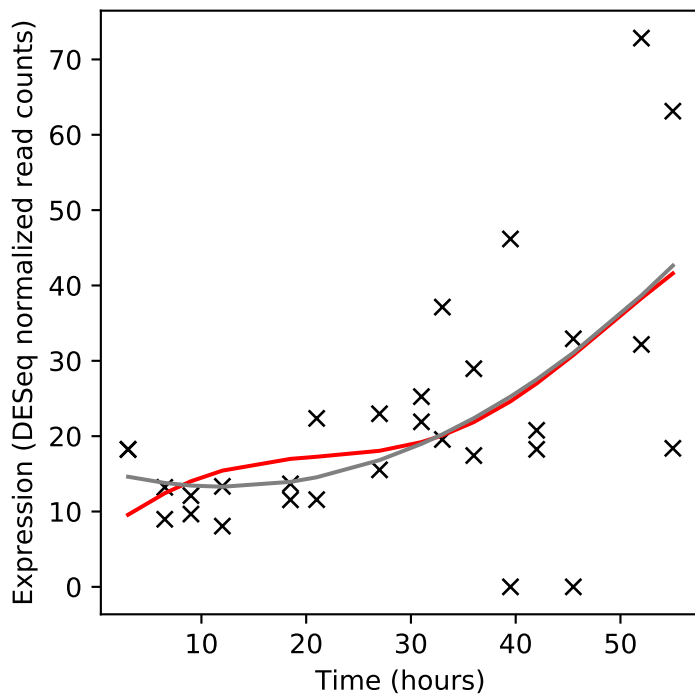

Rv2425c/-

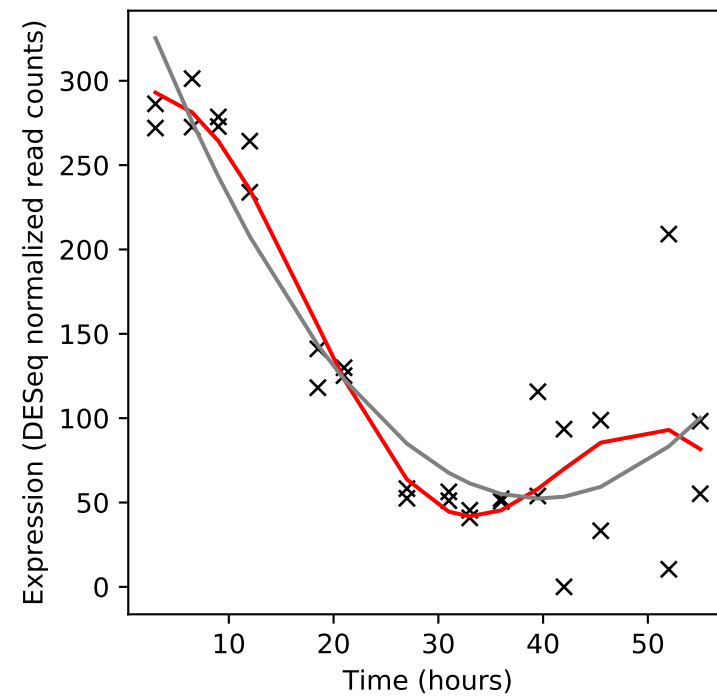

Rv2426c/-

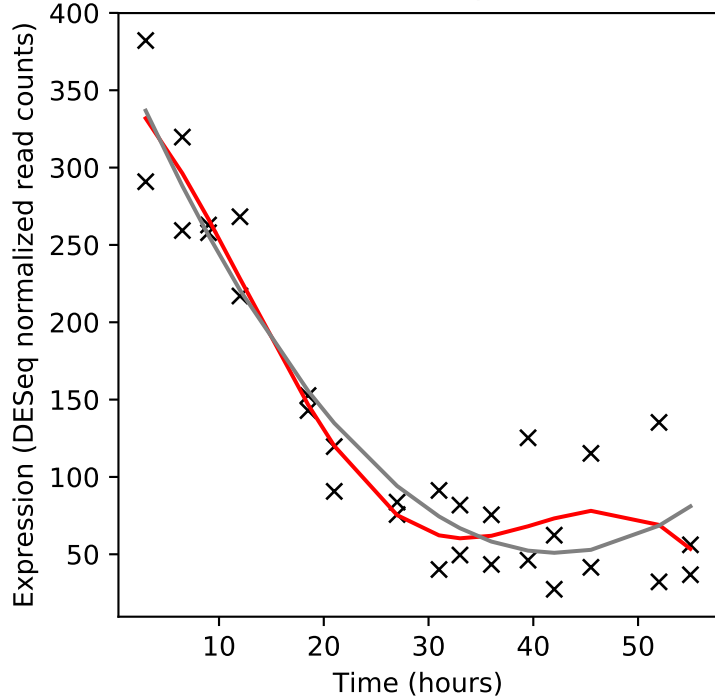

Rv2427c/proA

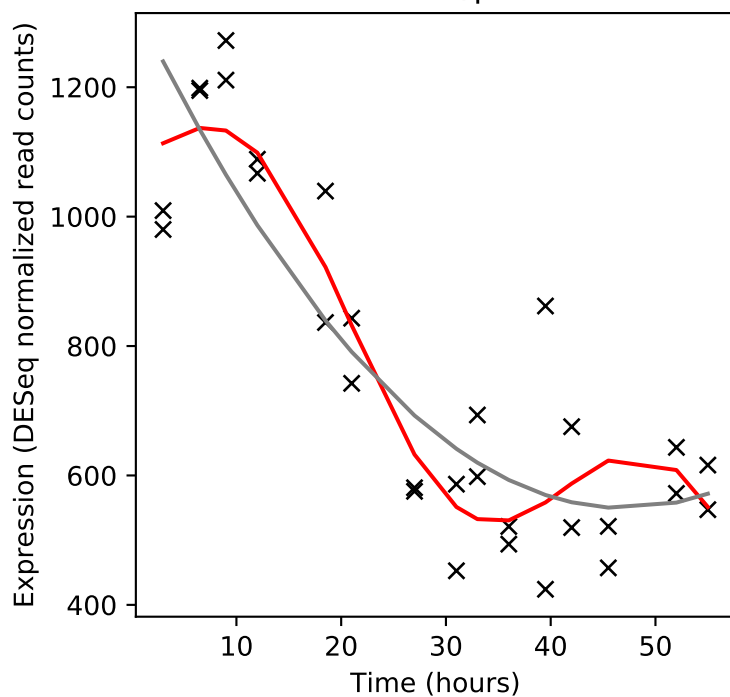

Rv2428/ahpC

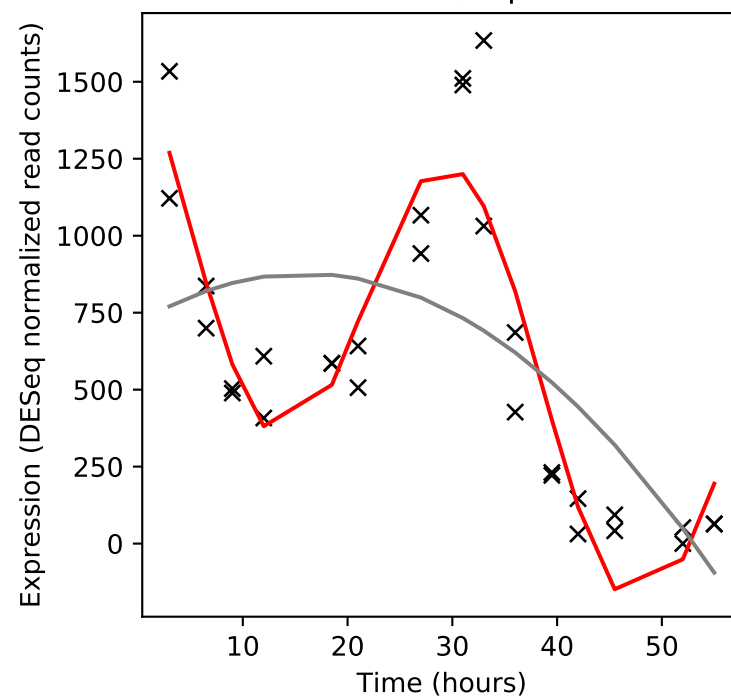

Rv2429/ahpD

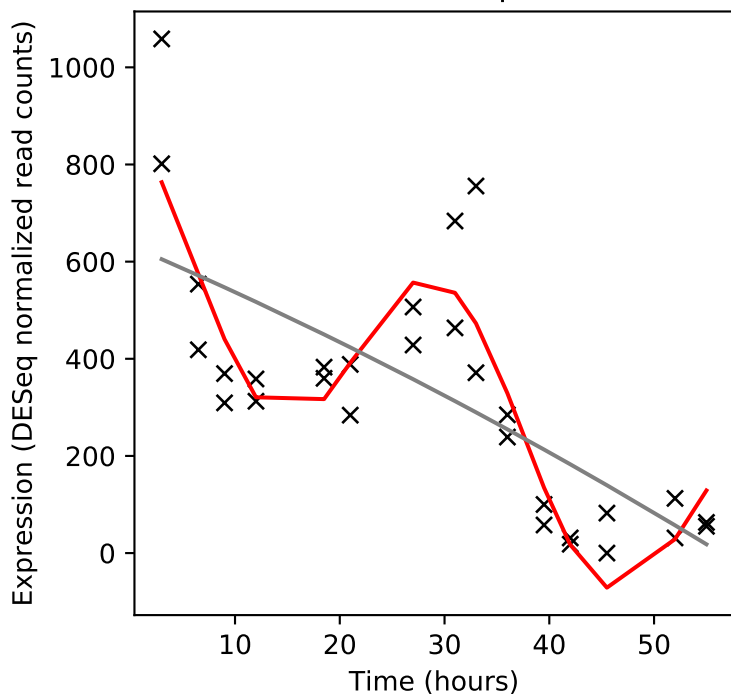

Rv2430c/PPE41

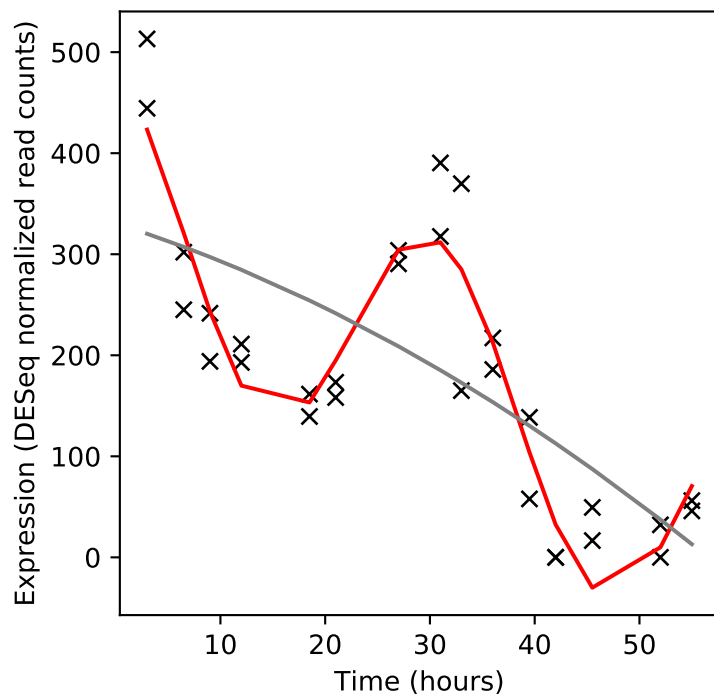

Rv2431c/PE25

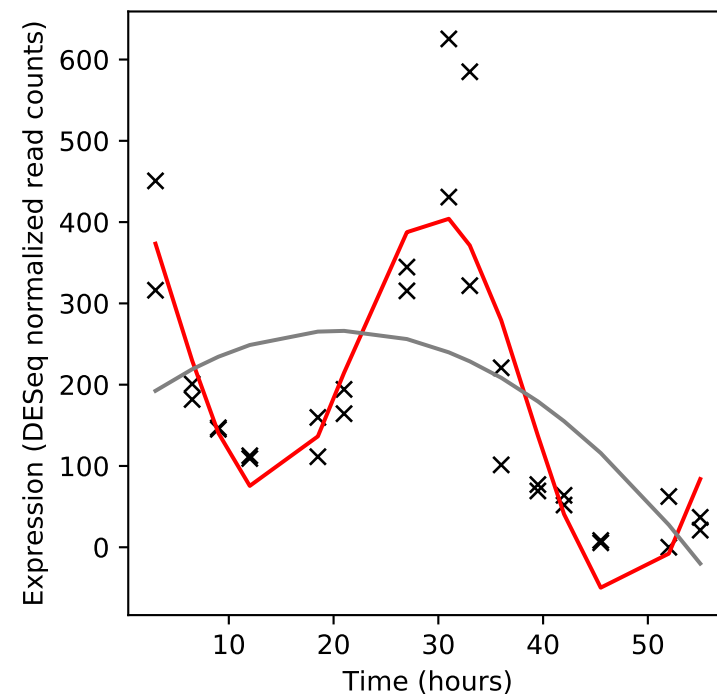

Rv2432c/-

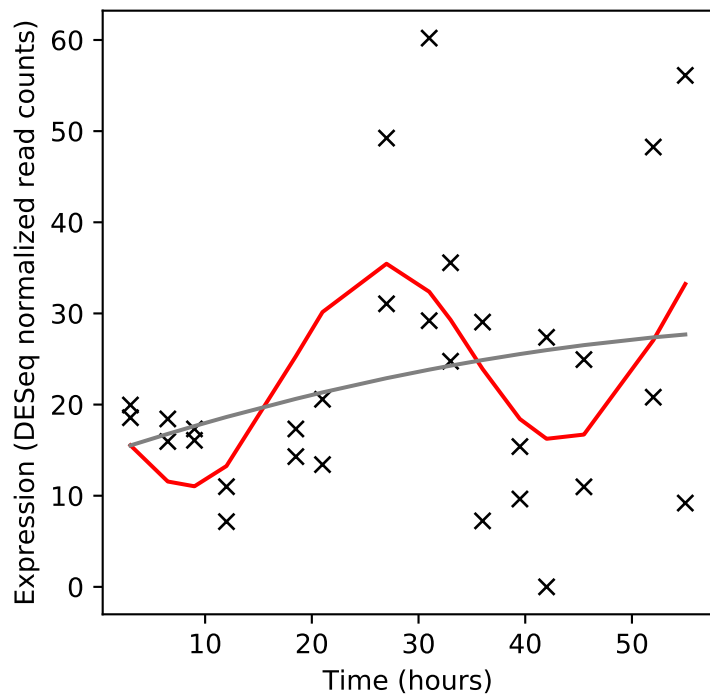

Rv2433c/-

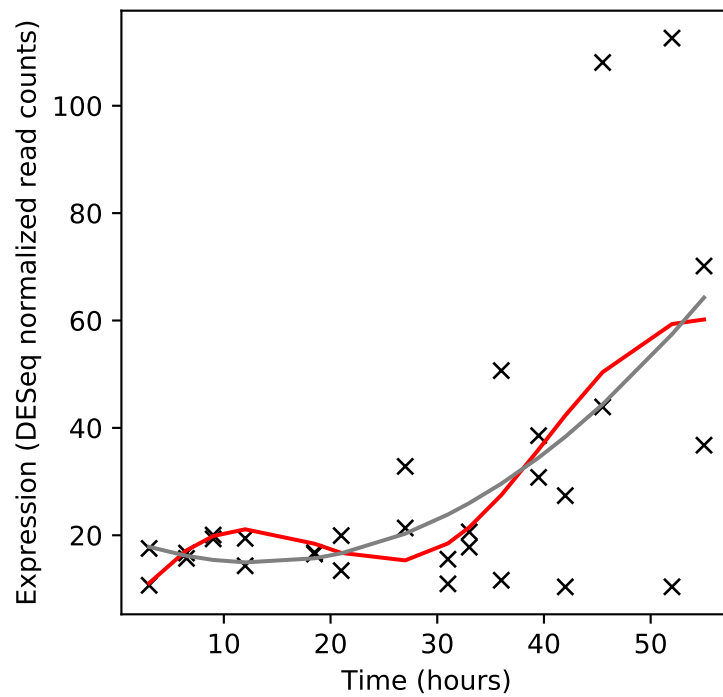

Rv2434c/-

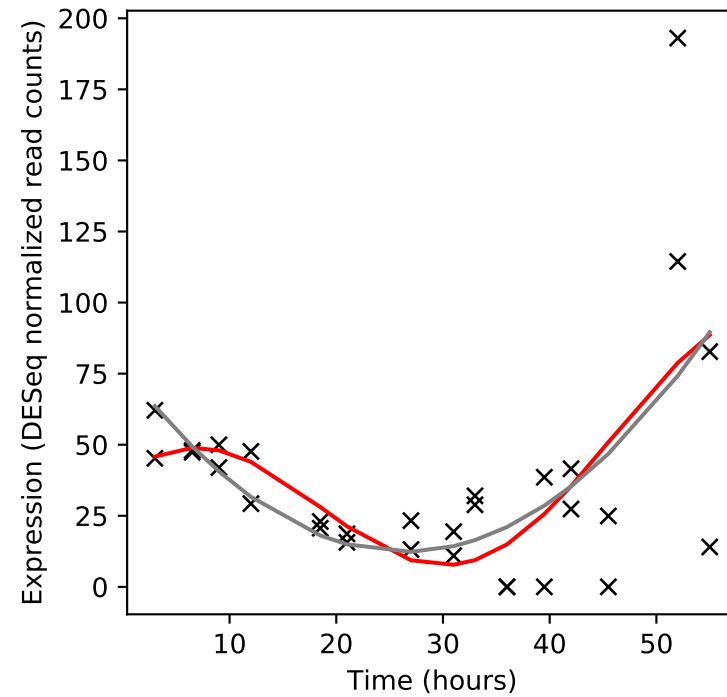

Rv2435c/-

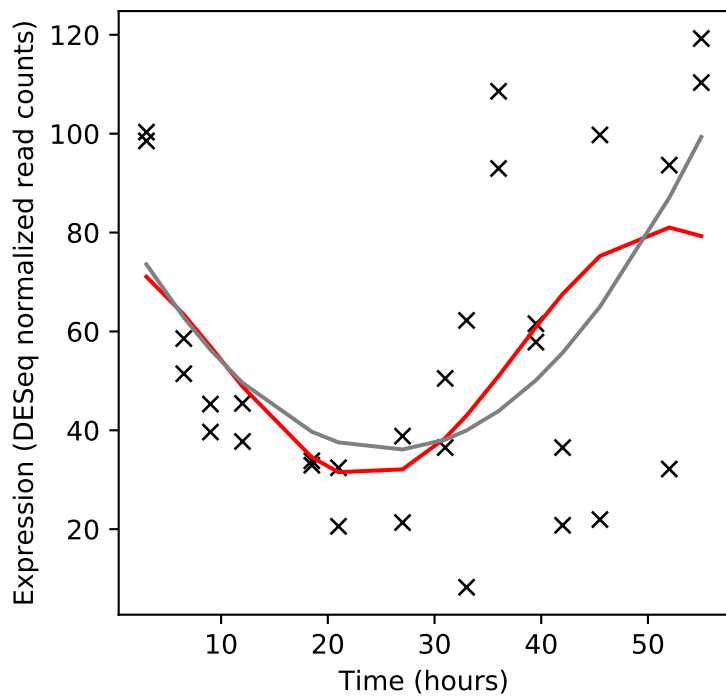

Rv2436/rbsK

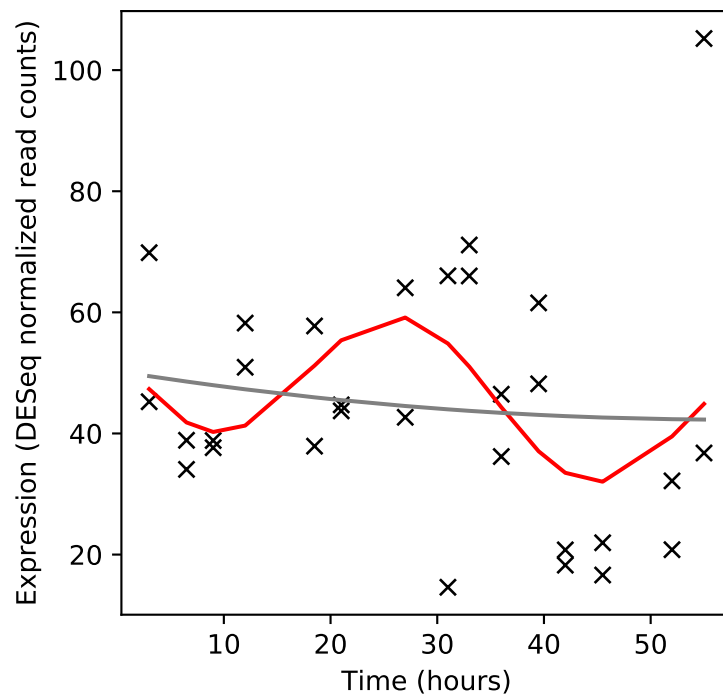

Rv2437/-

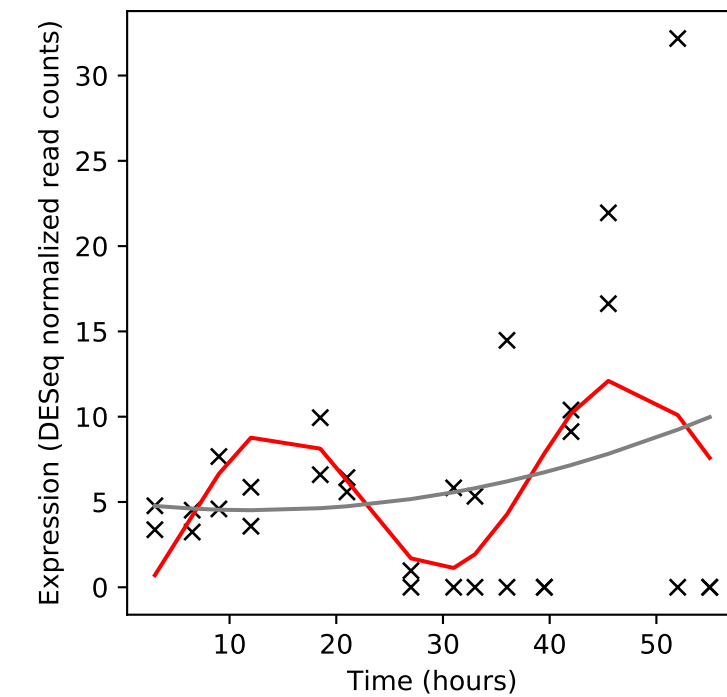

Rv2438c/nadE

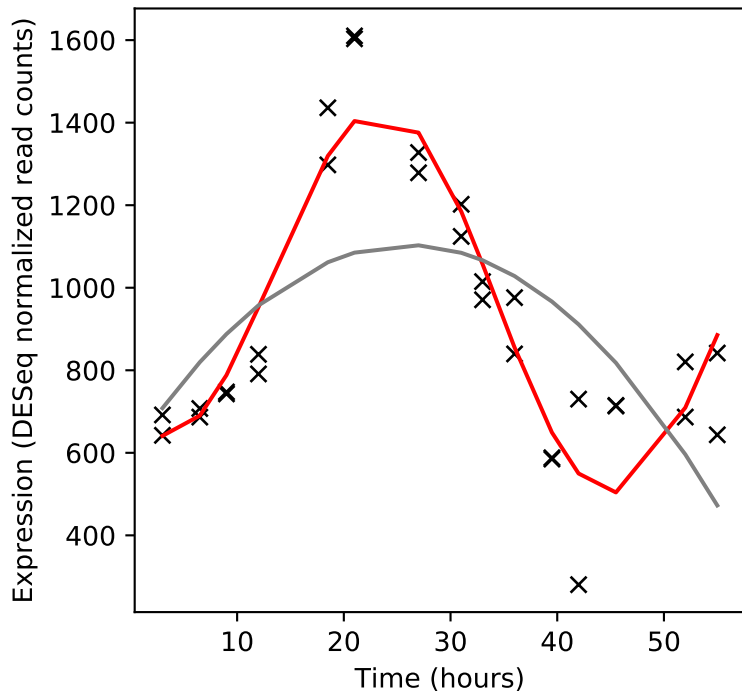

Rv2438A/-

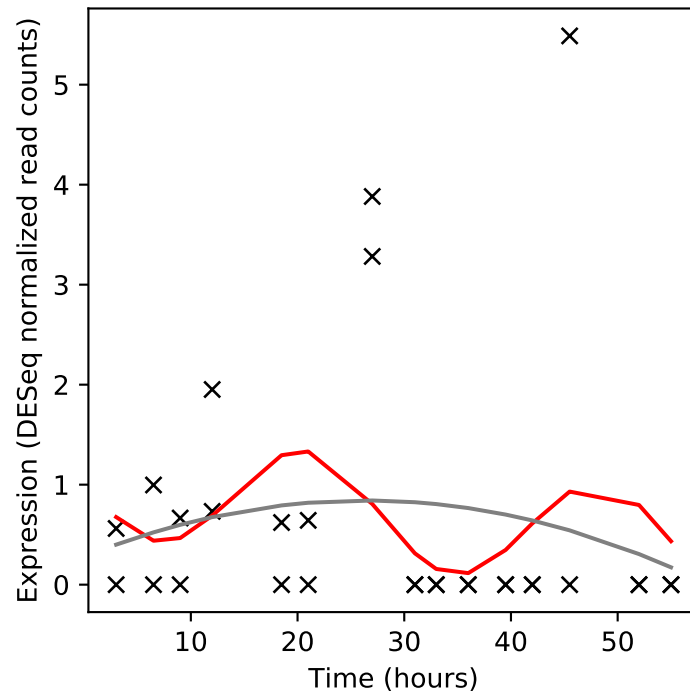

Rv2439c/proB

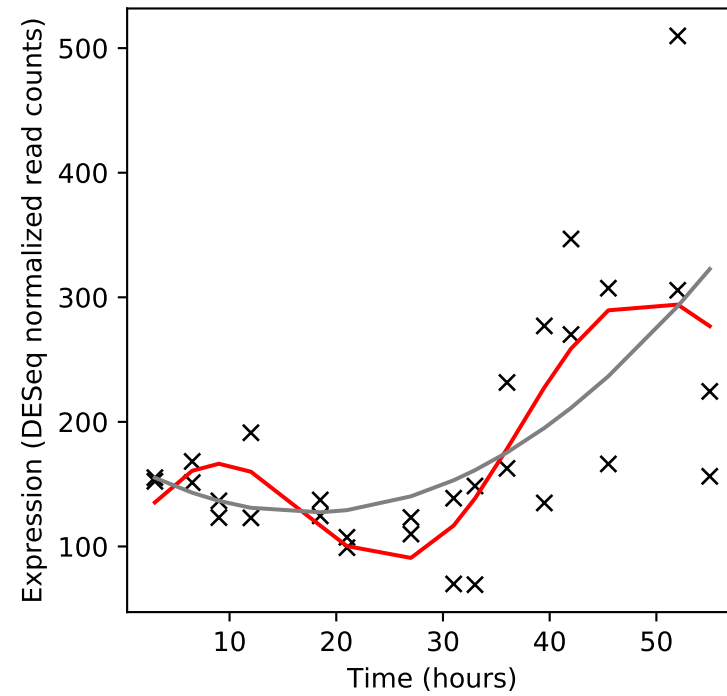

Rv2440c/obg

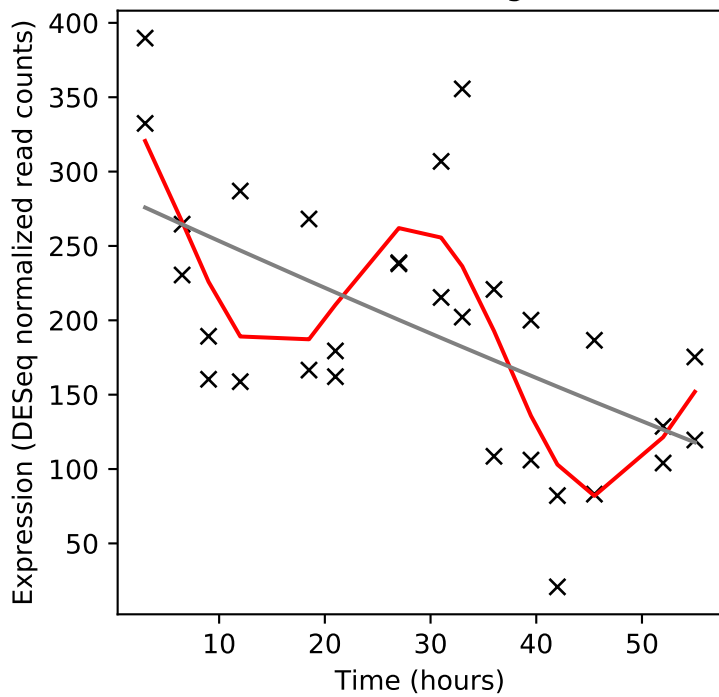

Rv2441c/rpmA

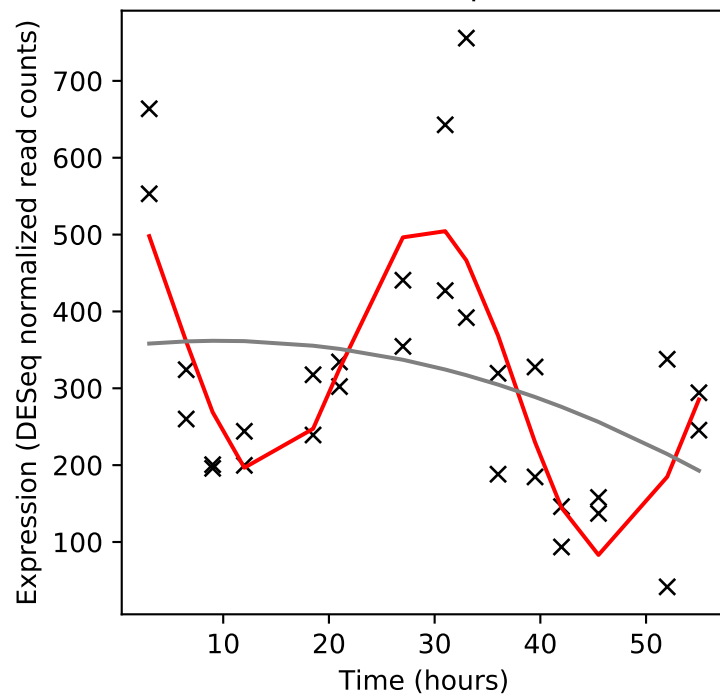

Rv2442c/rplU

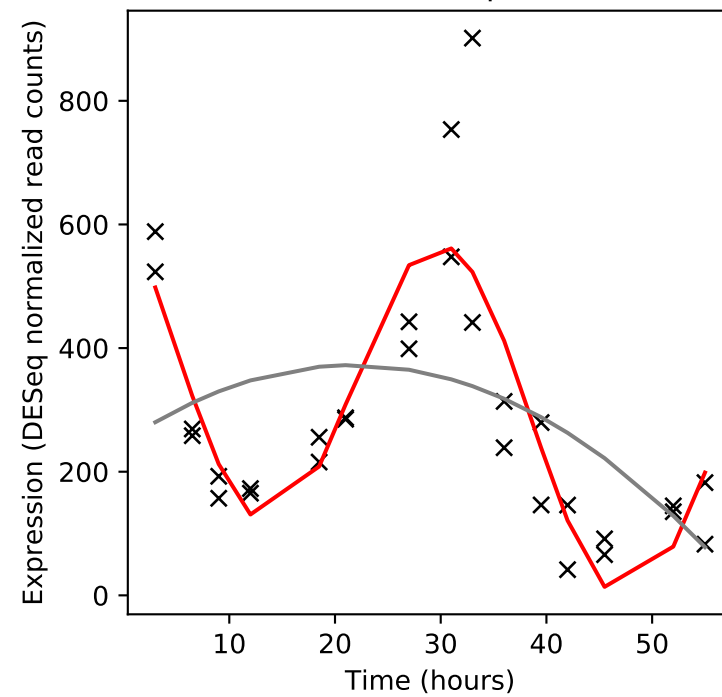

Rv2443/dctA

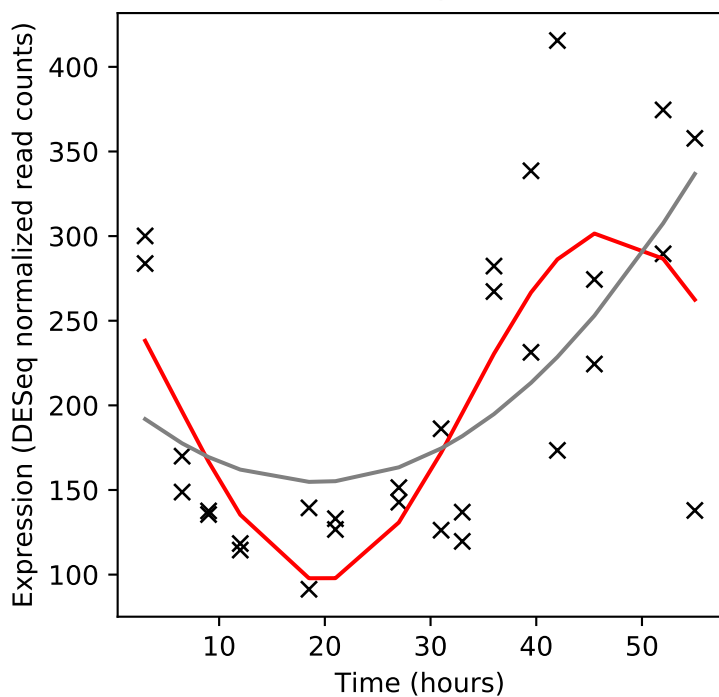

Rv2444c/rne

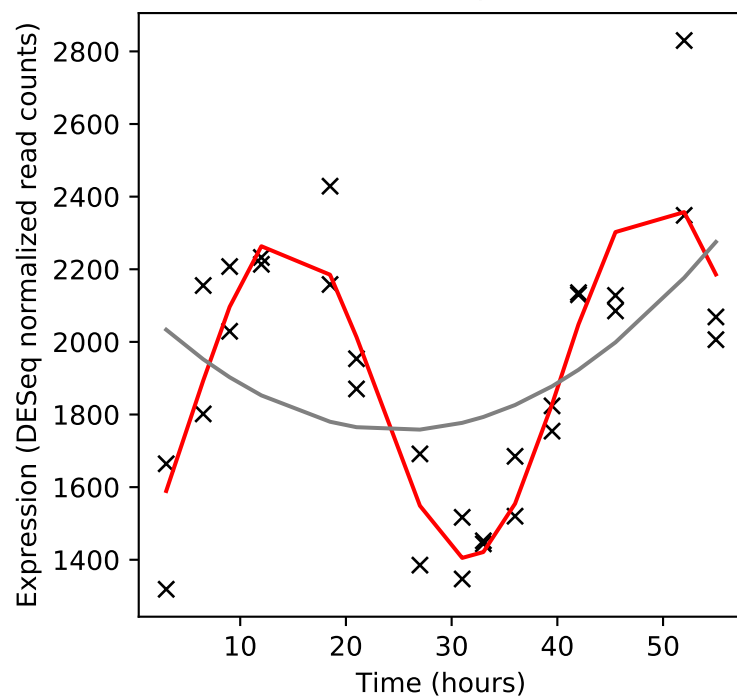

Rv2445c/ndkA

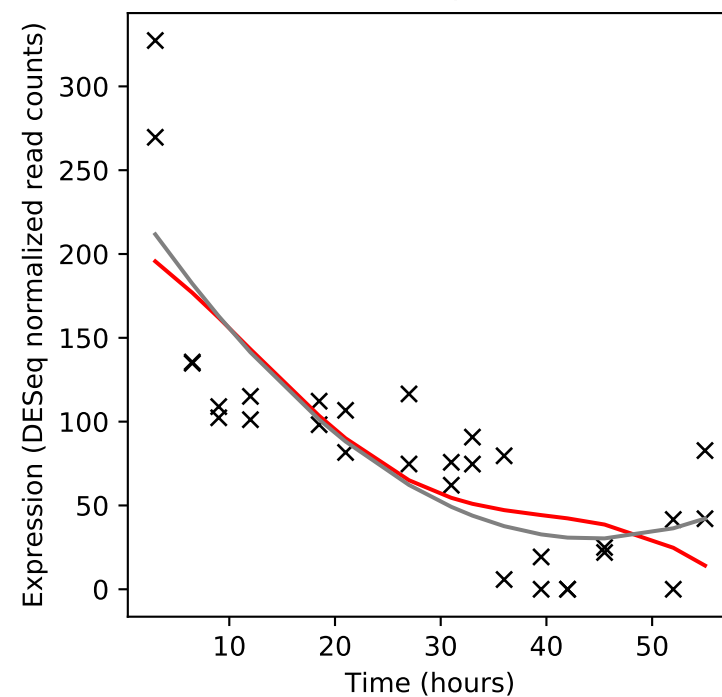

Rv2446c/-

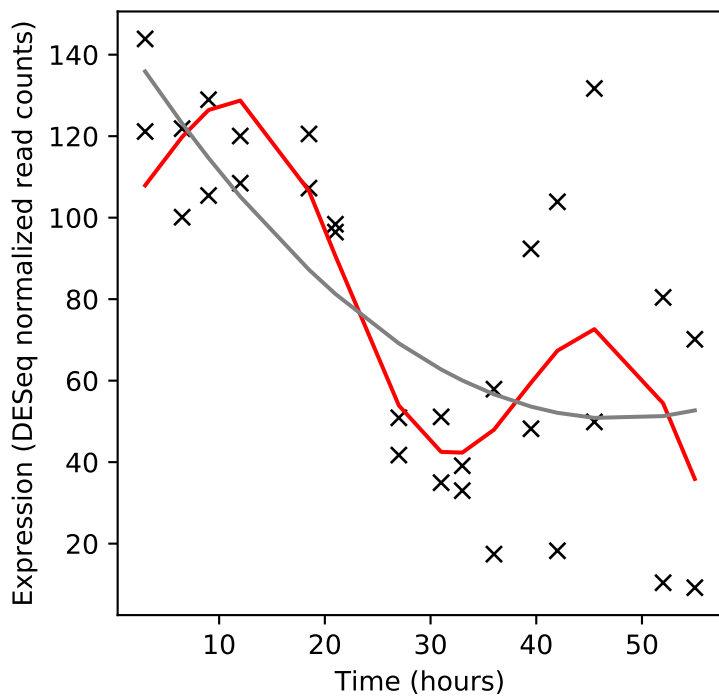

Rv2447c/foIc

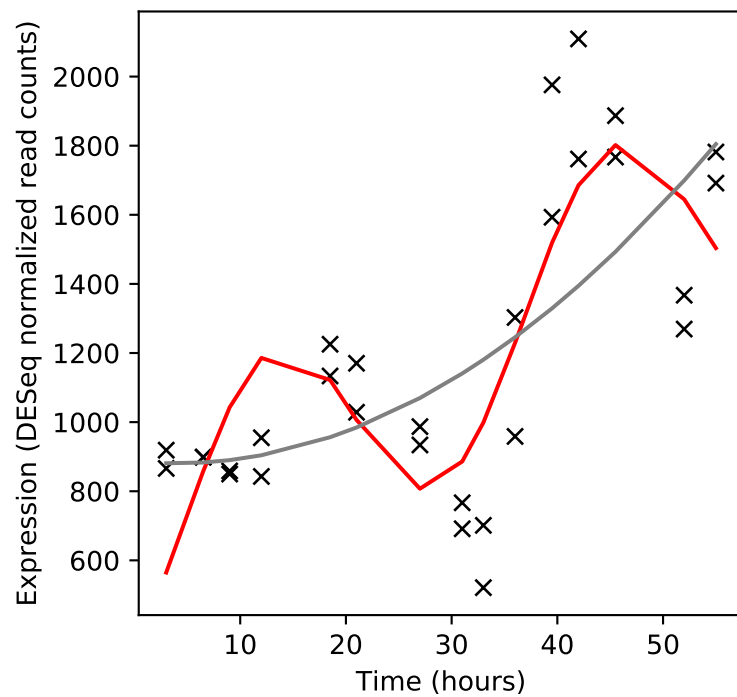

Rv2448c/valS

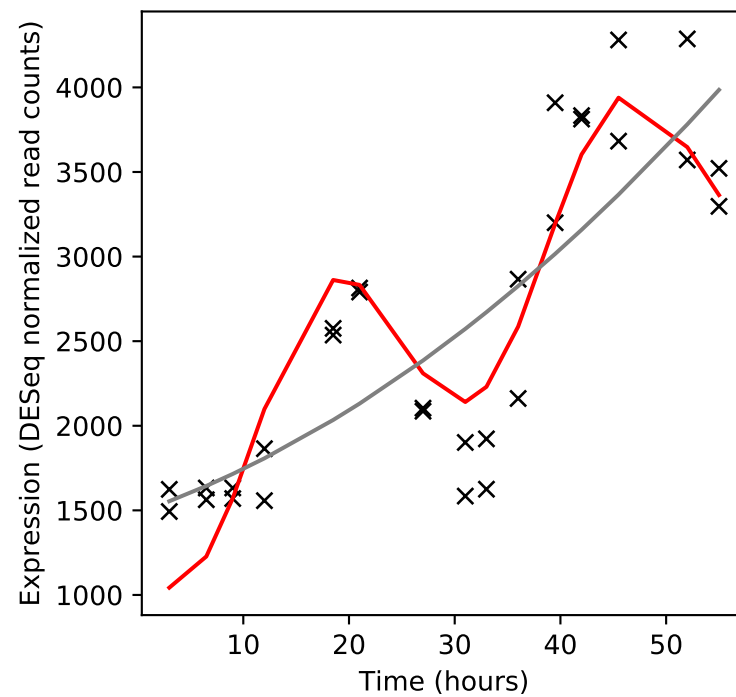

Rv2449c/-

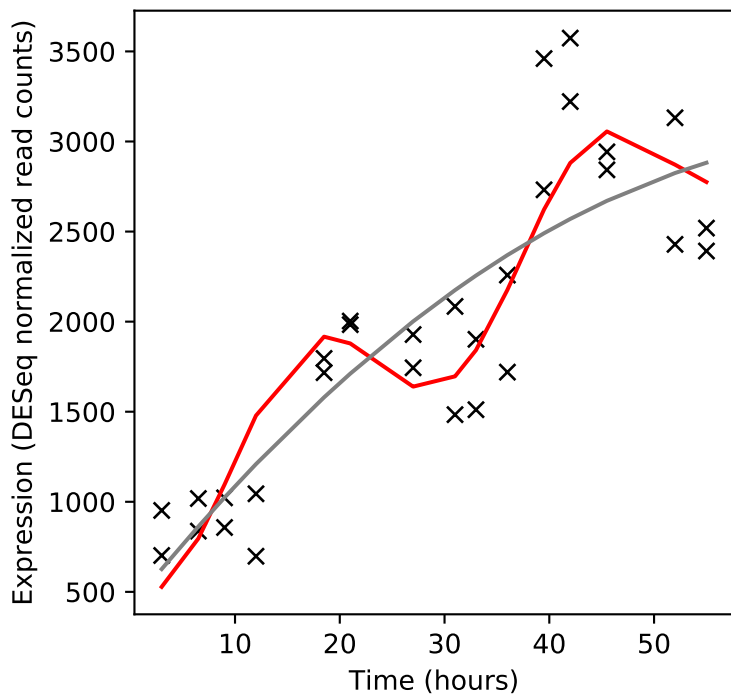

Rv2450c/rpfE

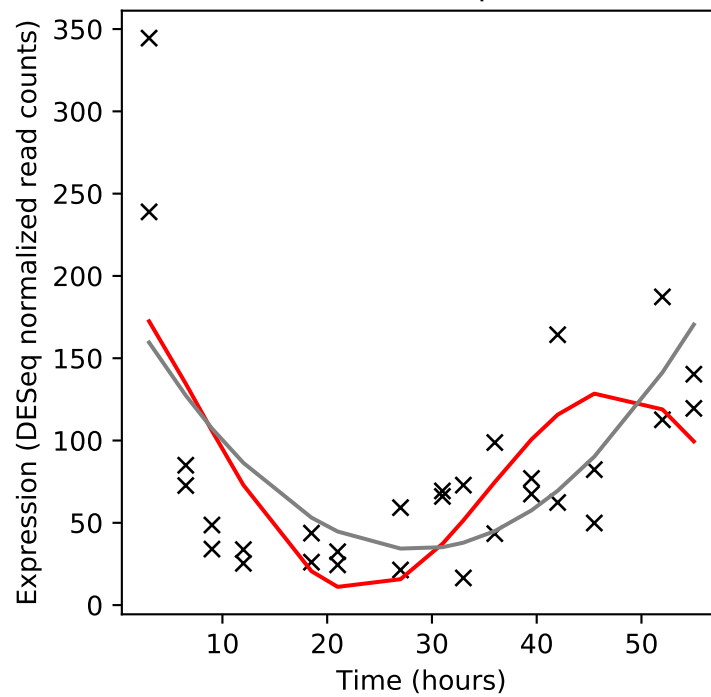

Rv2451/-

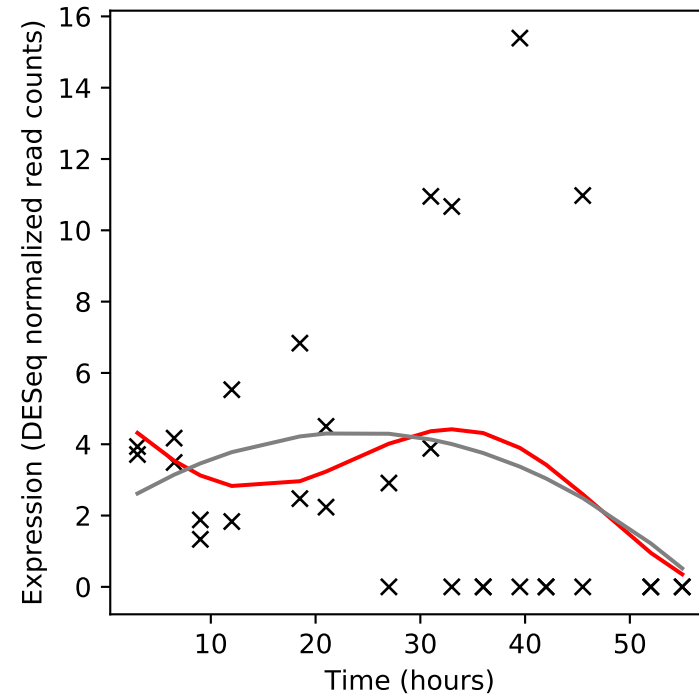

Rv2452c/-

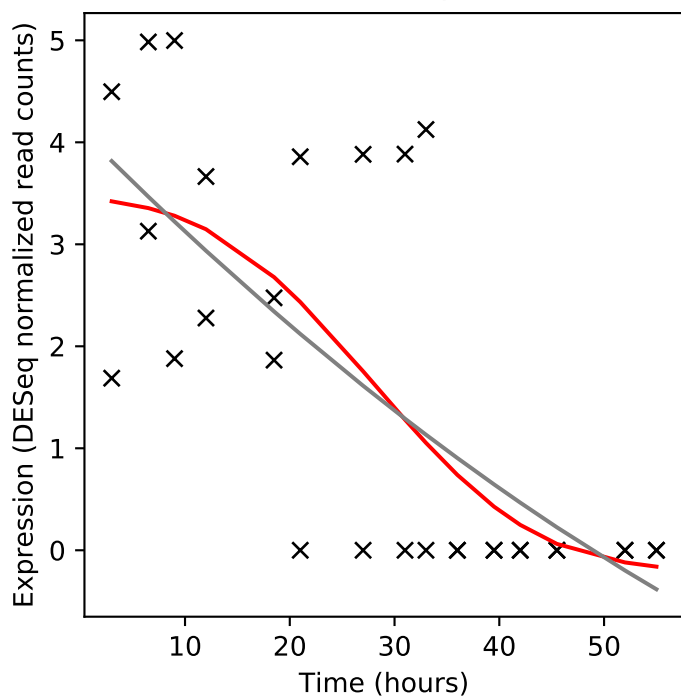

Rv2453c/mobA

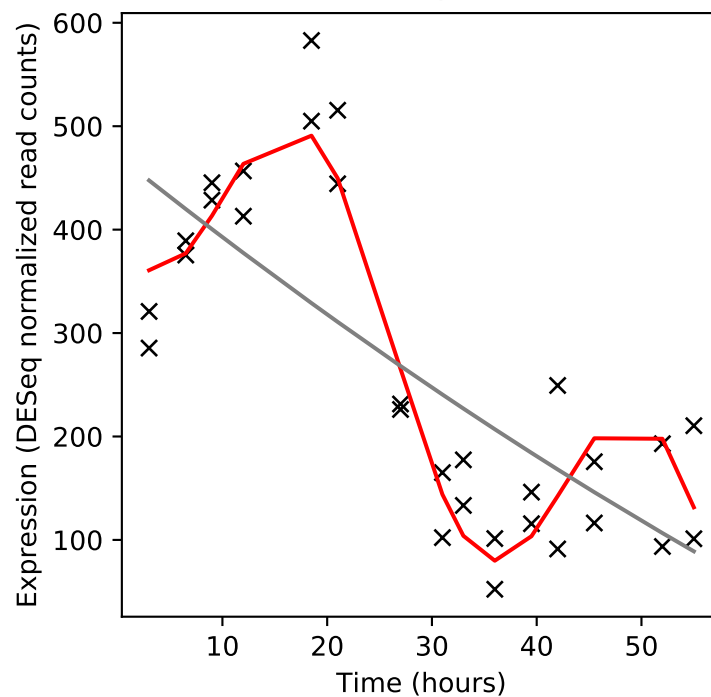

Rv2454c/-

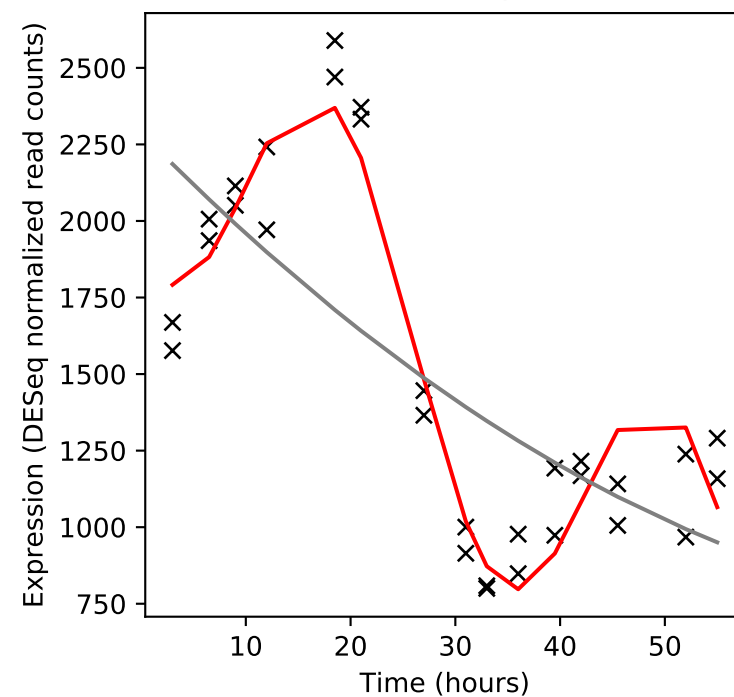

Rv2455c/-

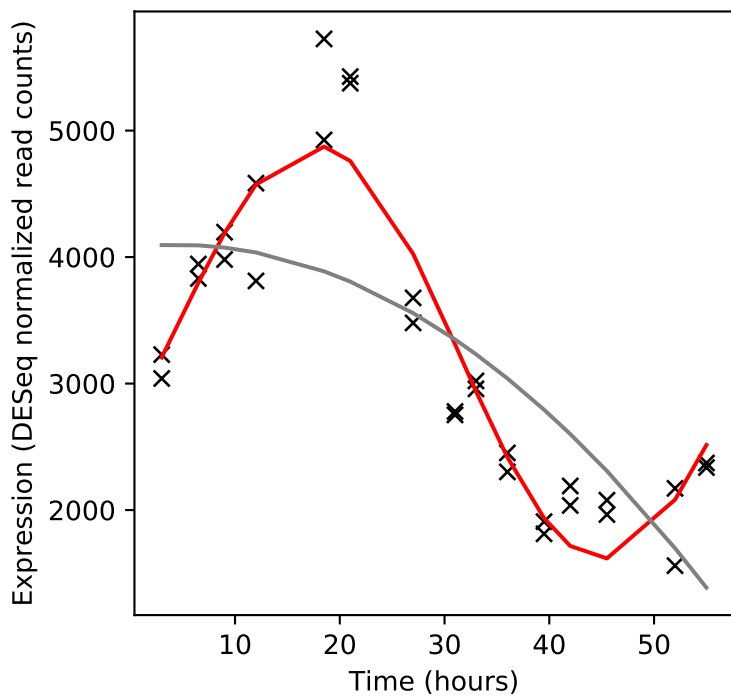

Rv2456c/-

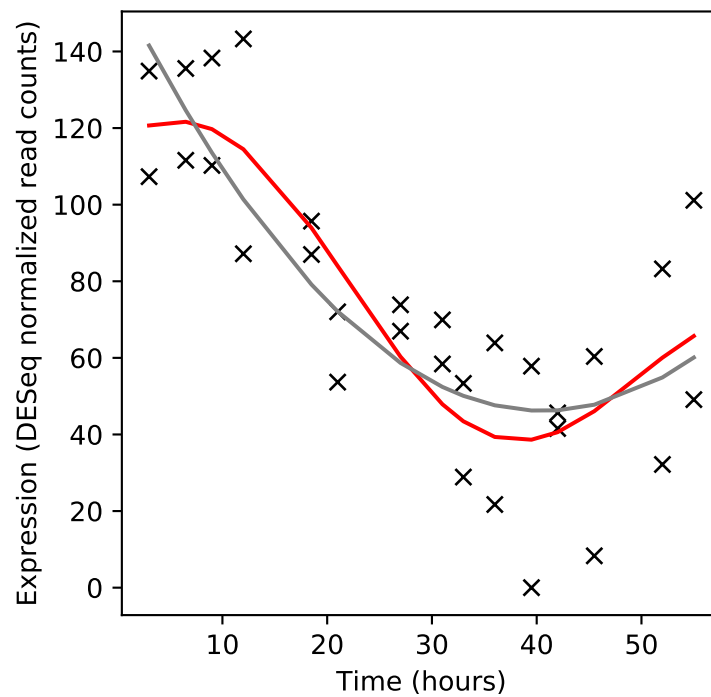

Rv2457c/clpX

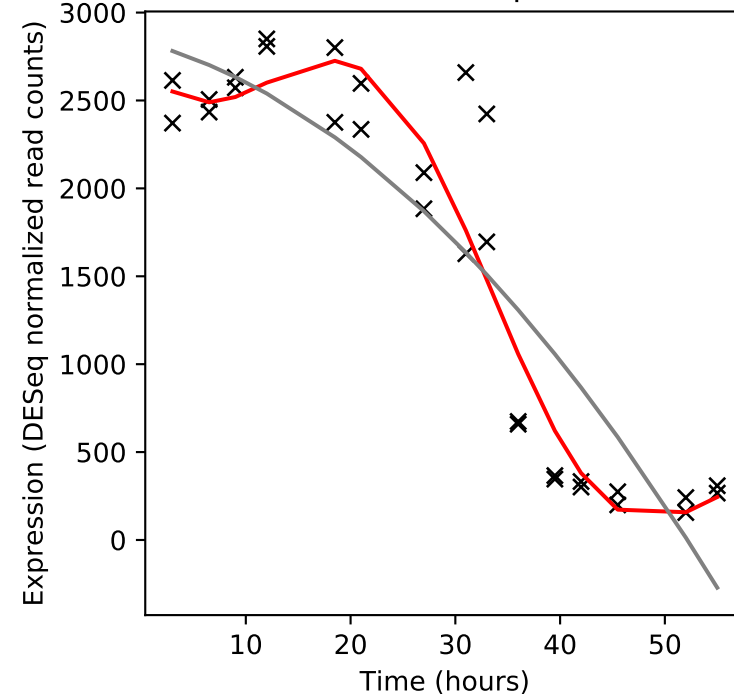

Rv2458/mmuM

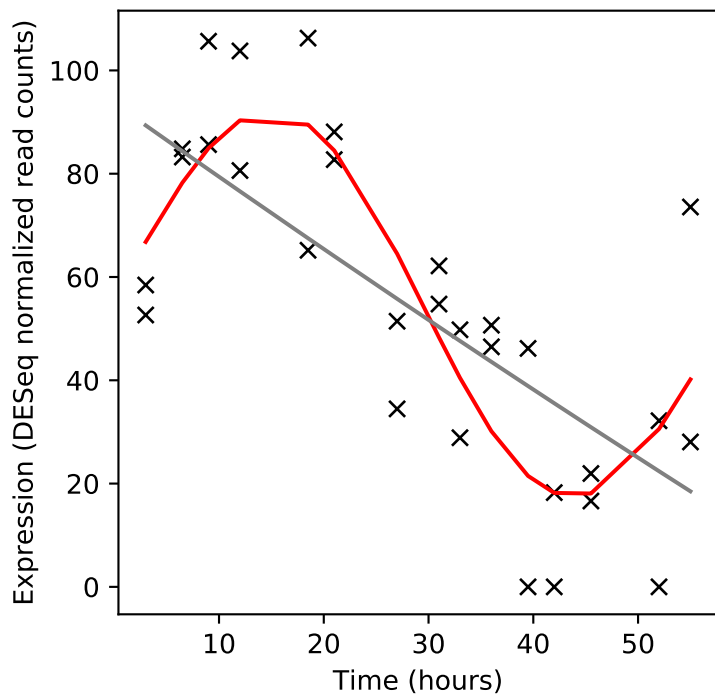

Rv2459/-

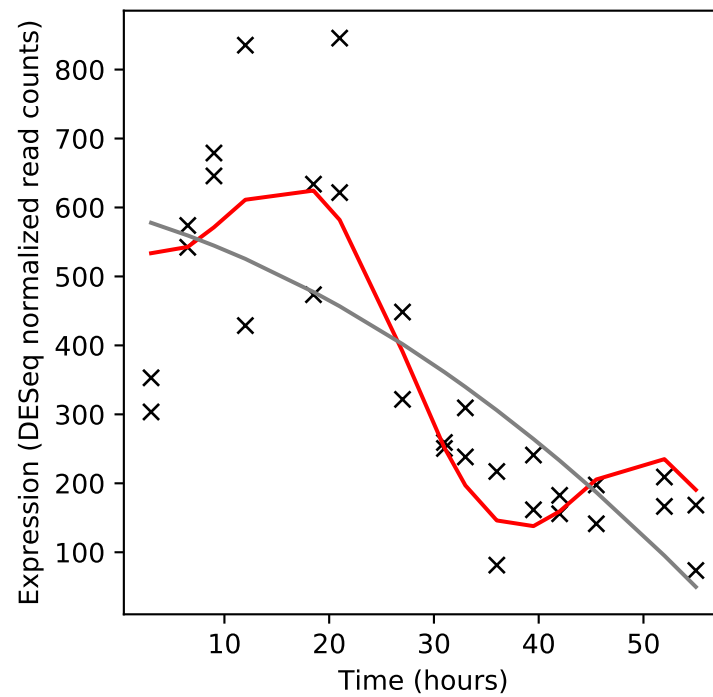

Rv2460c/clpP2

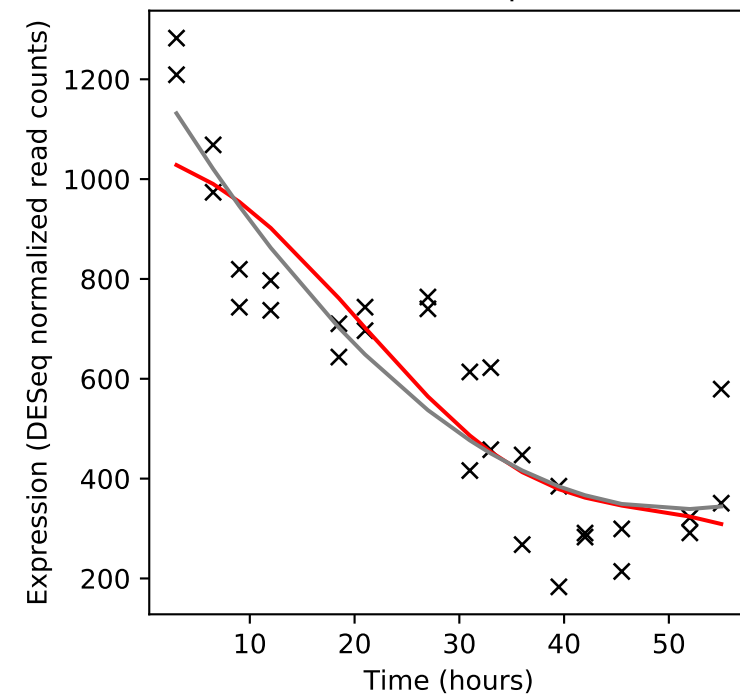

Rv2461c/clpP1

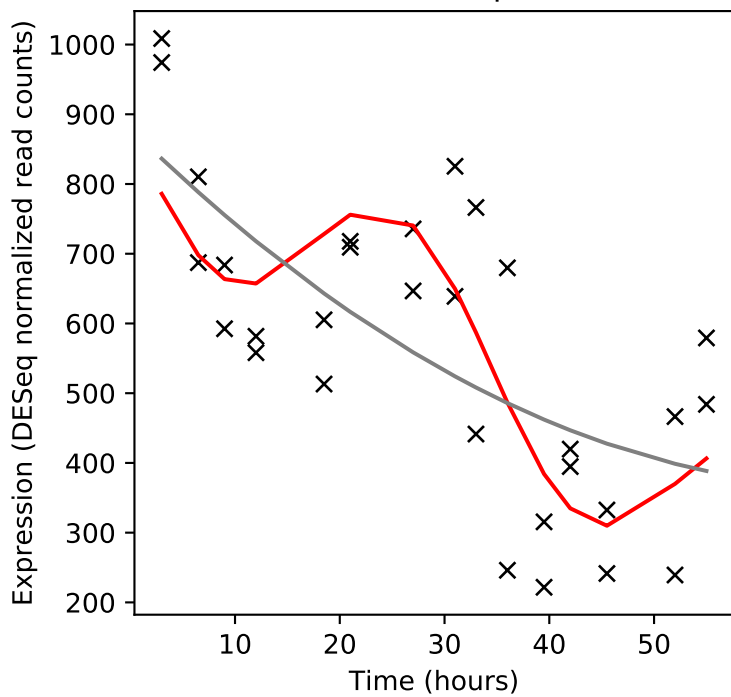

Rv2462c/tig

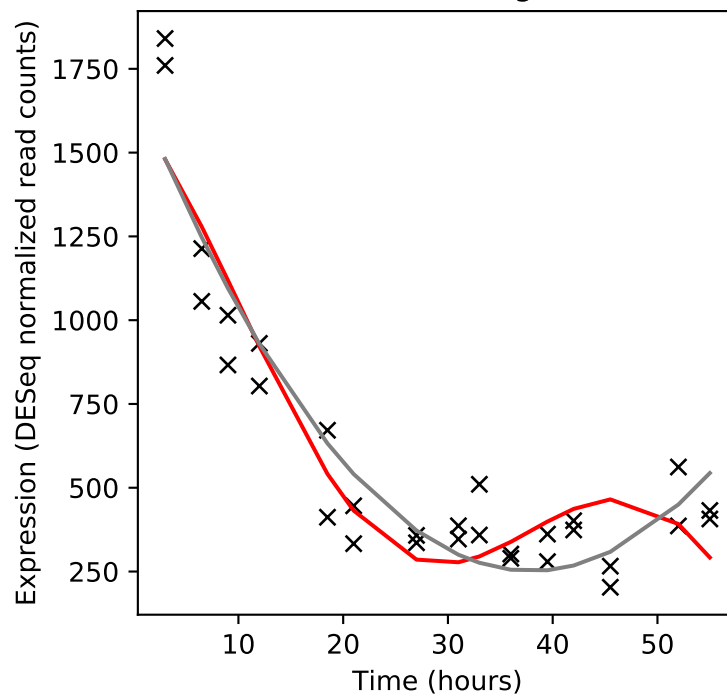

Rv2463/lipP

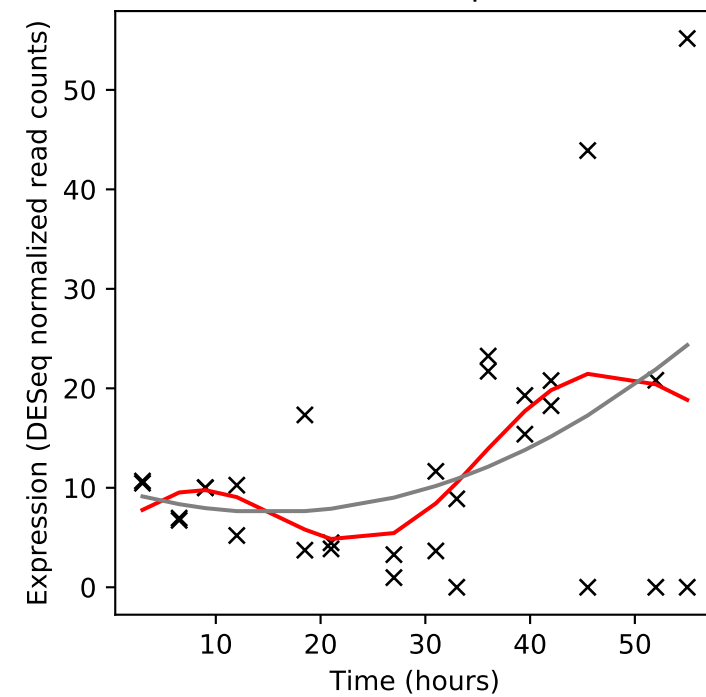

Rv2464c/-

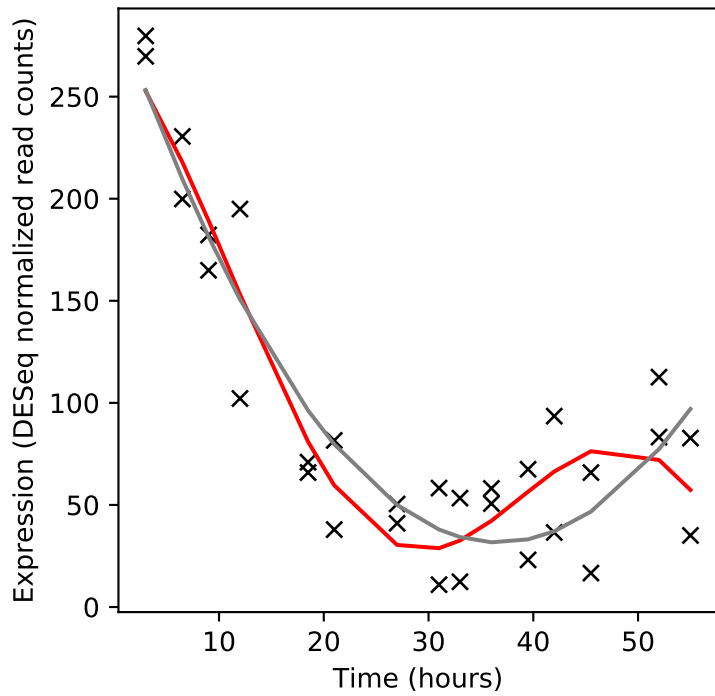

Rv2465c/rpiB

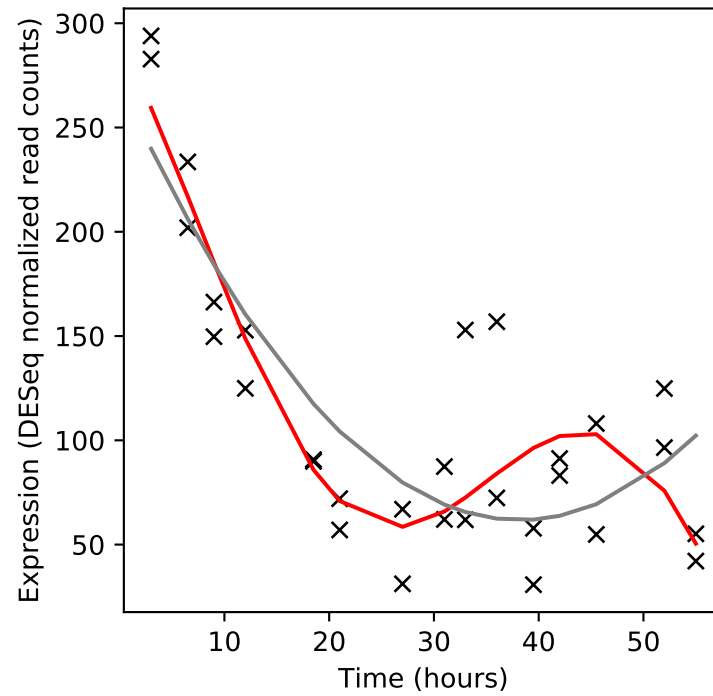

Rv2466c/-

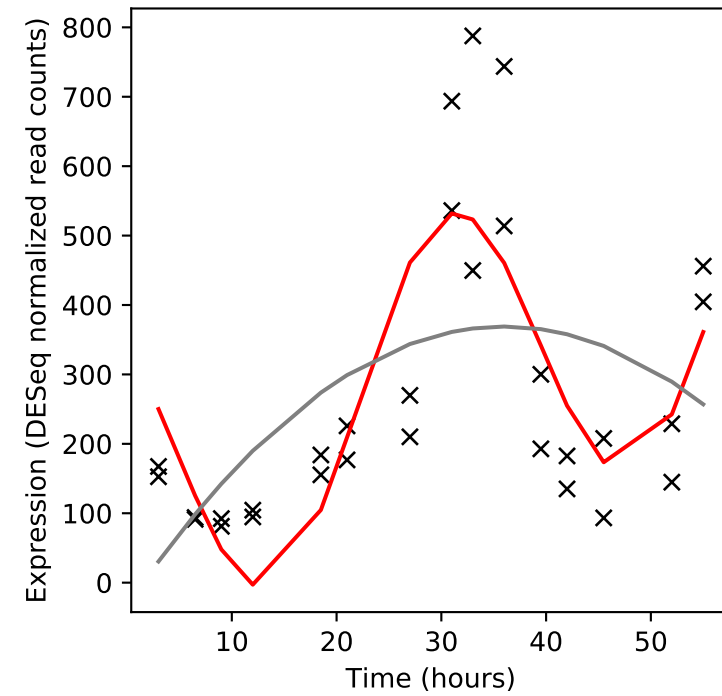



Rv2467/pepN

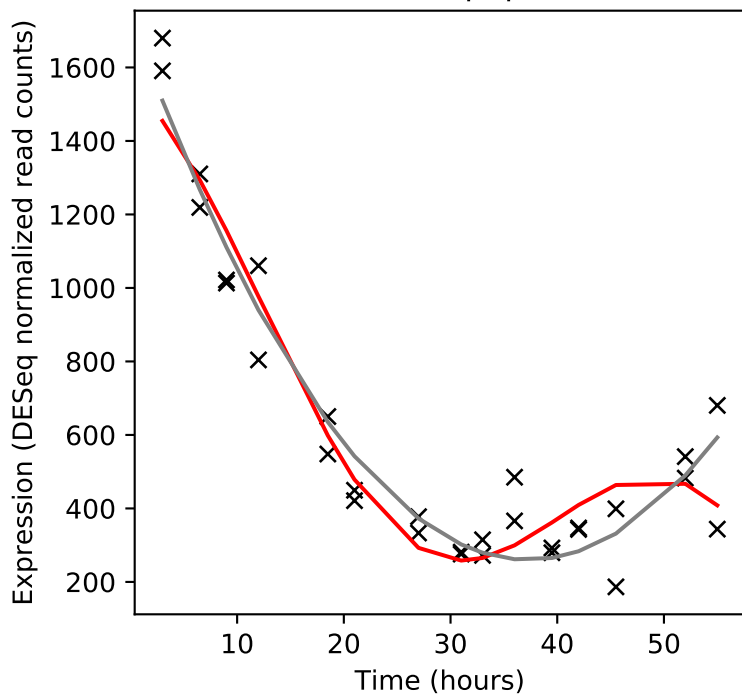

Rv2468c/-

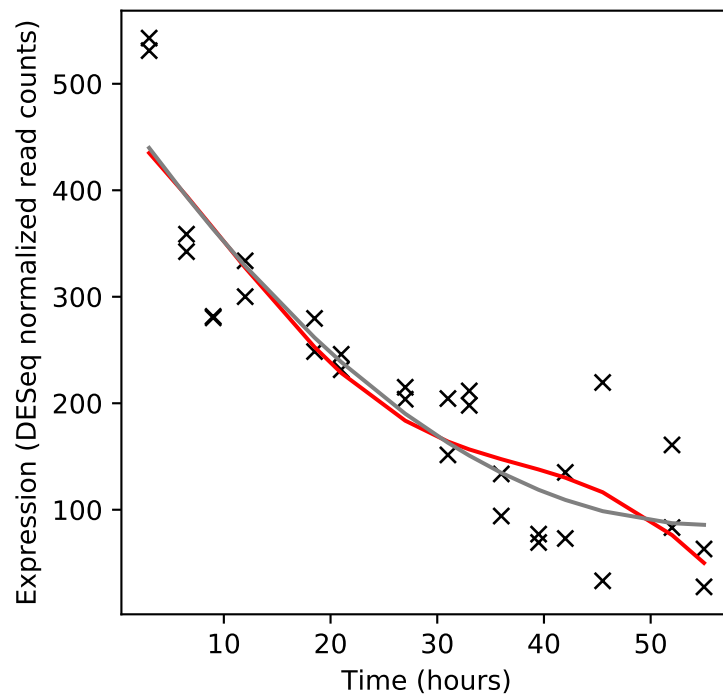

Rv2468A/-

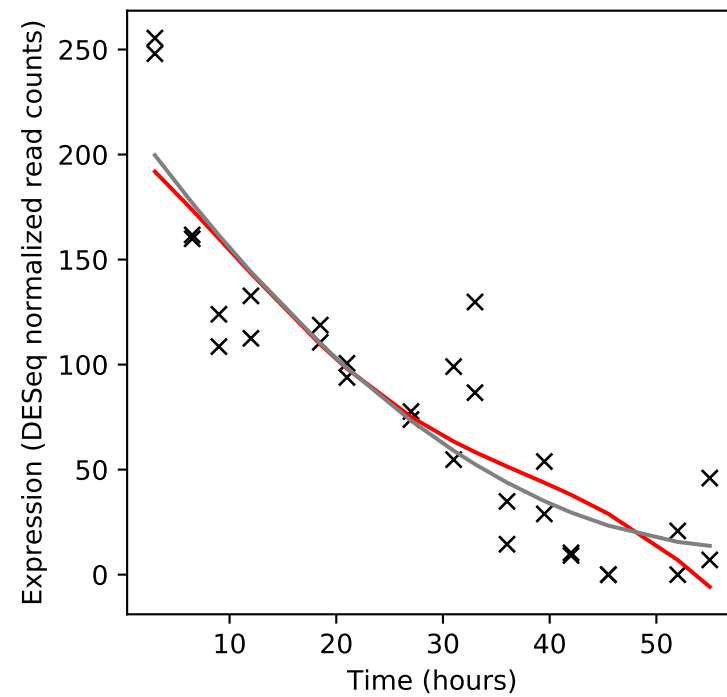

Rv2469c/-

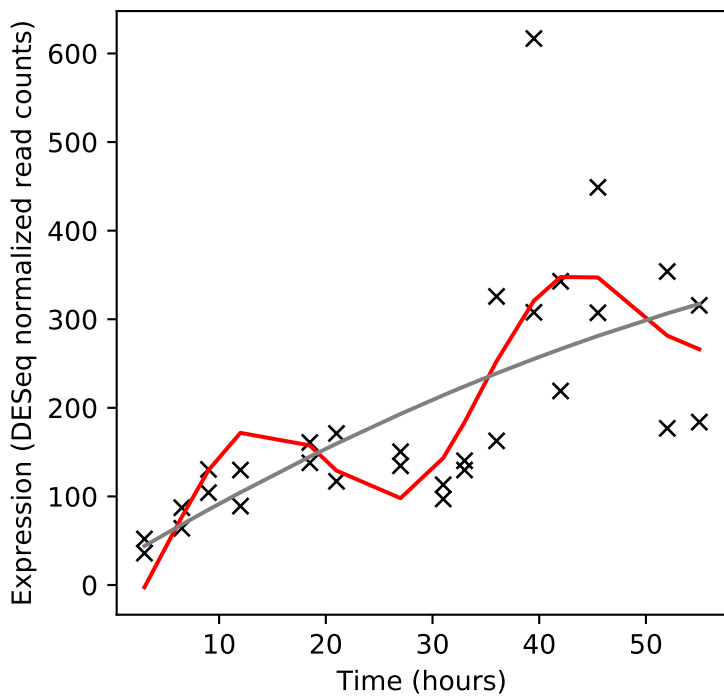

Rv2470/glbO

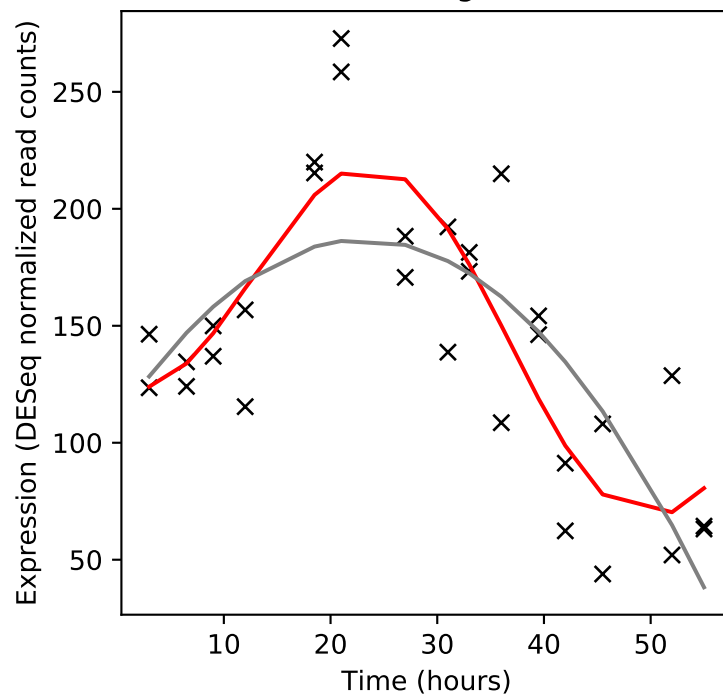

Rv2471/agIA

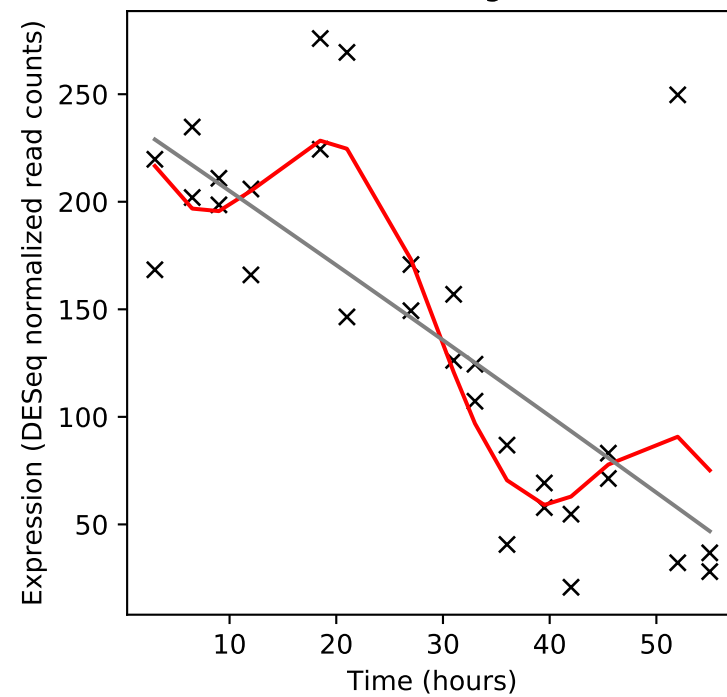

Rv2472/-

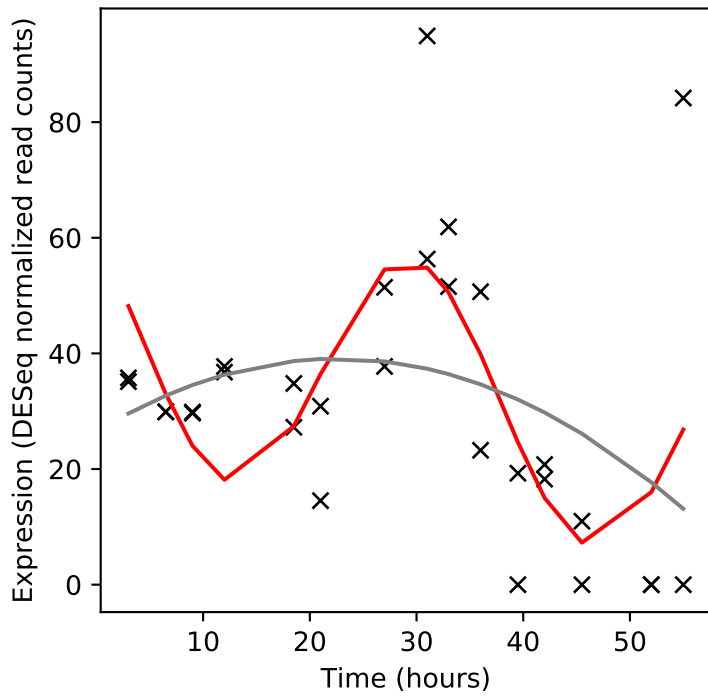

Rv2473/-

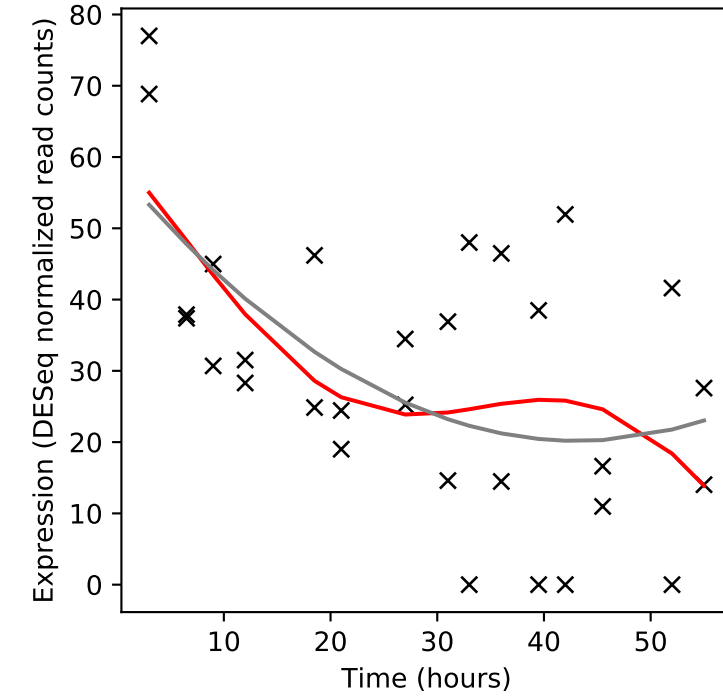

Rv2474c/-

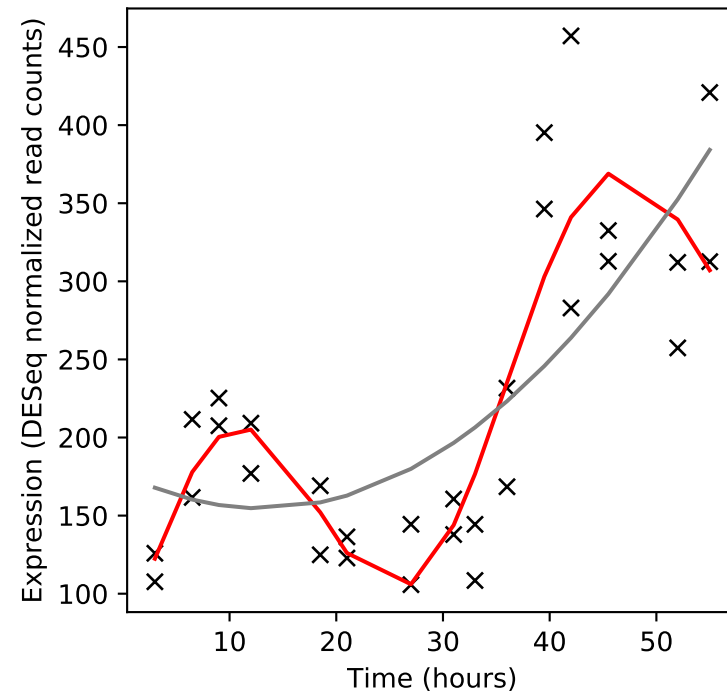

Rv2475c/-

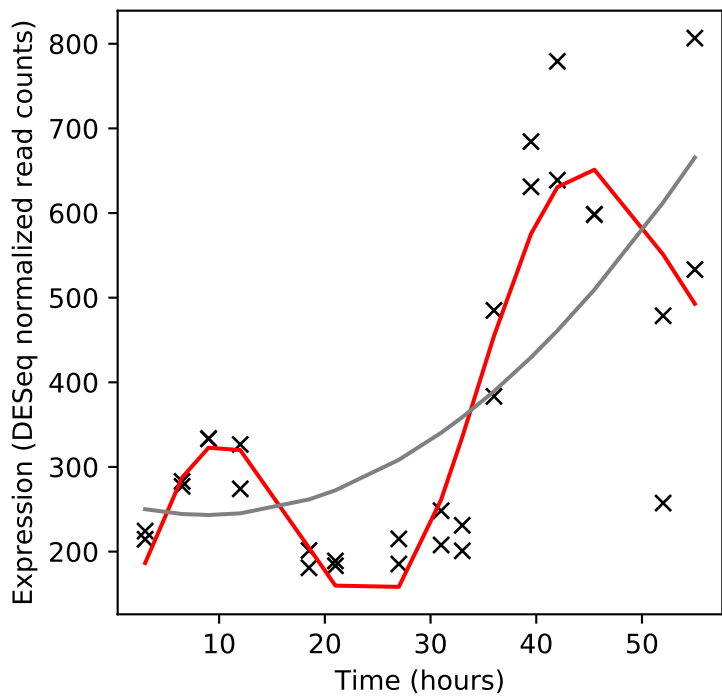

Rv2476c/gdh

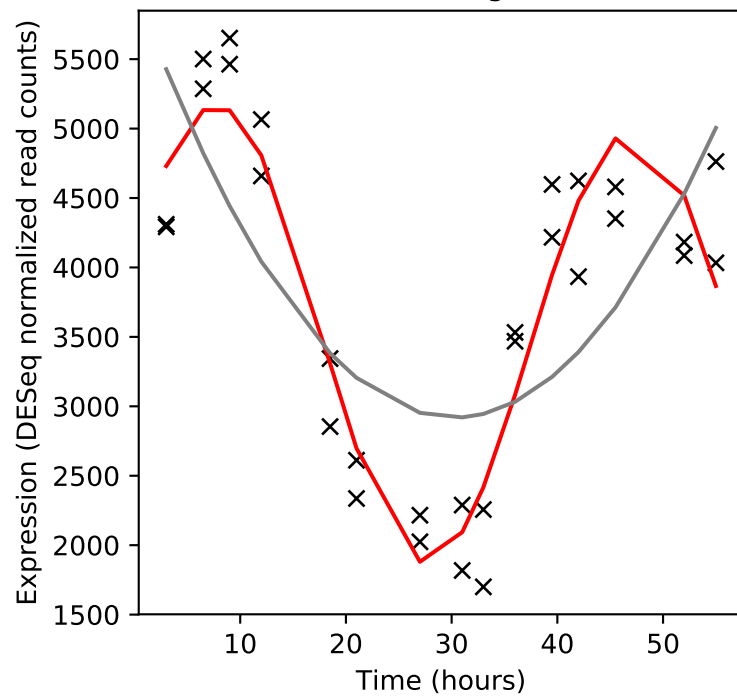

Rv2477c/-

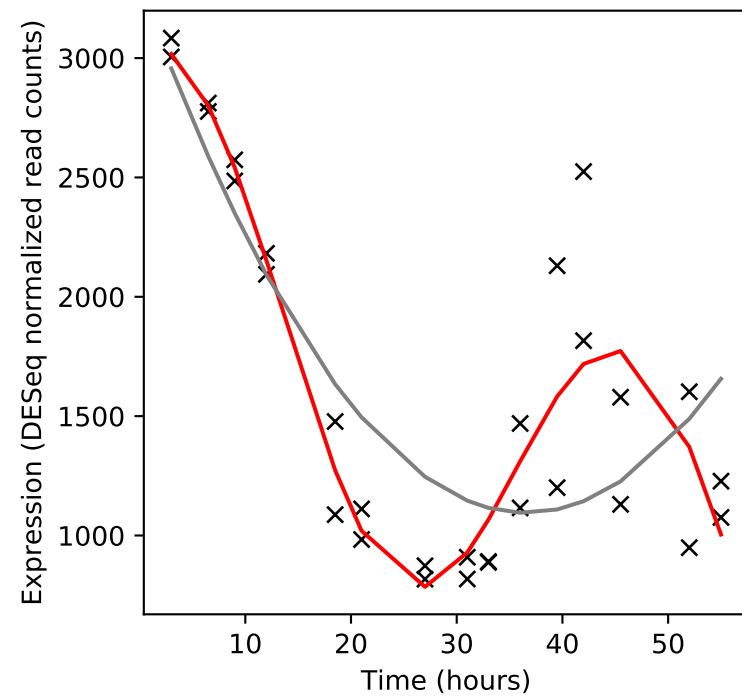

Rv2478c/-

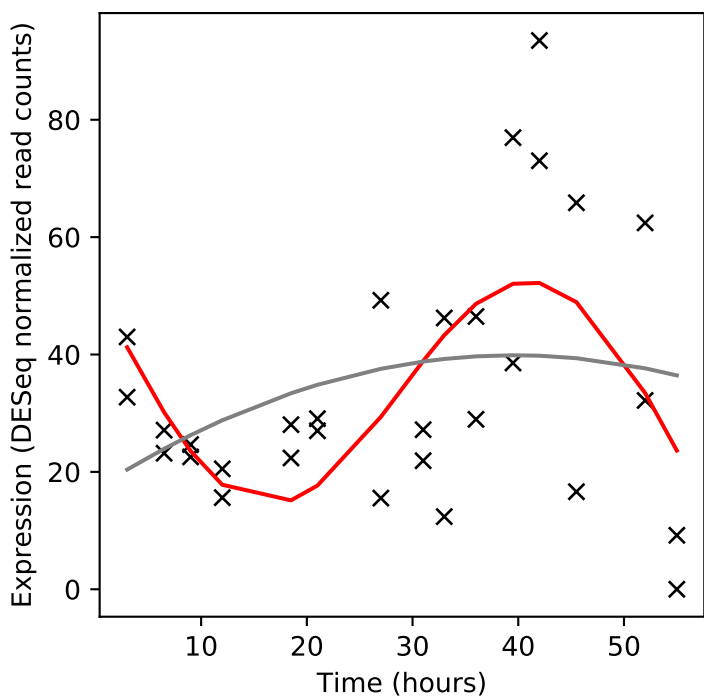

Rv2479c/-

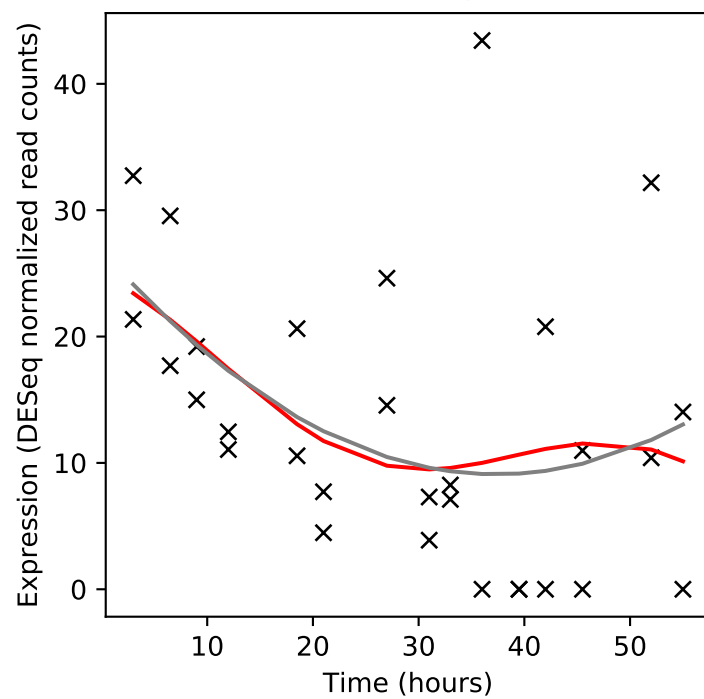

Rv2480c/-

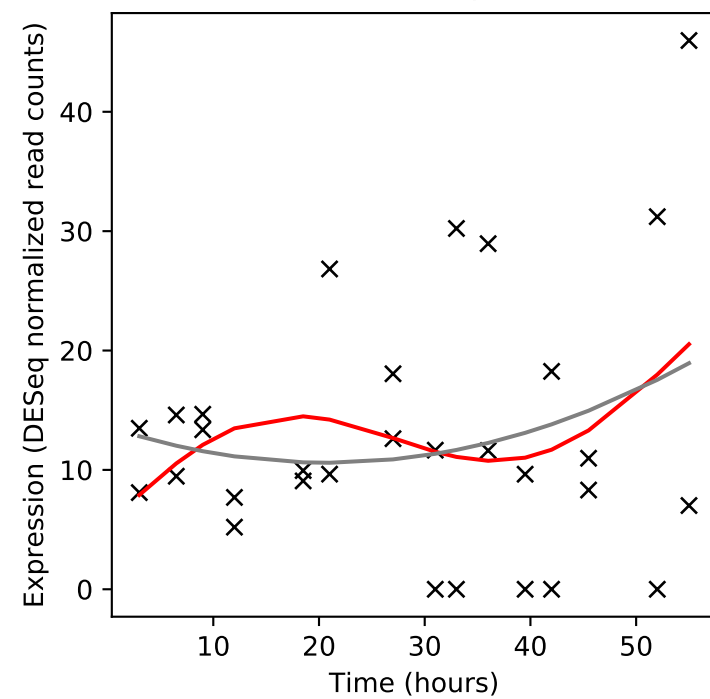

Rv2481c/-

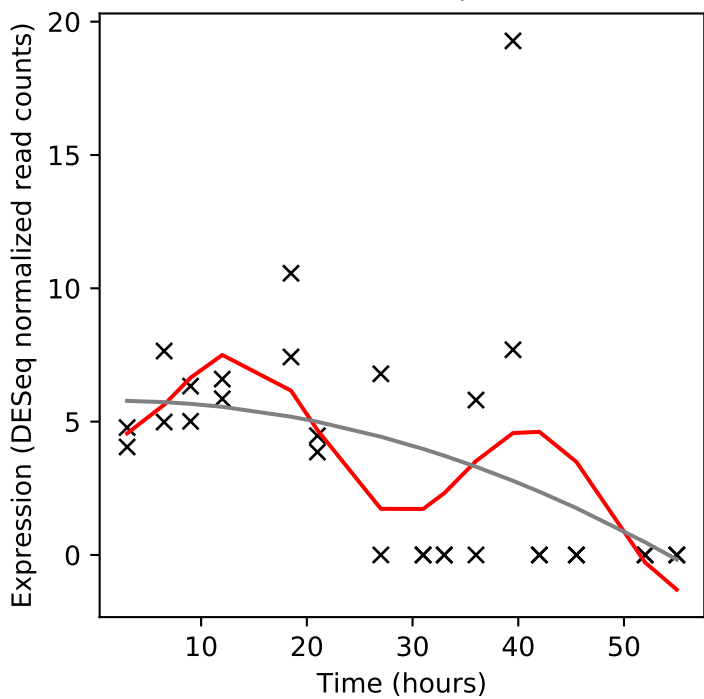

Rv2482c/plsB2

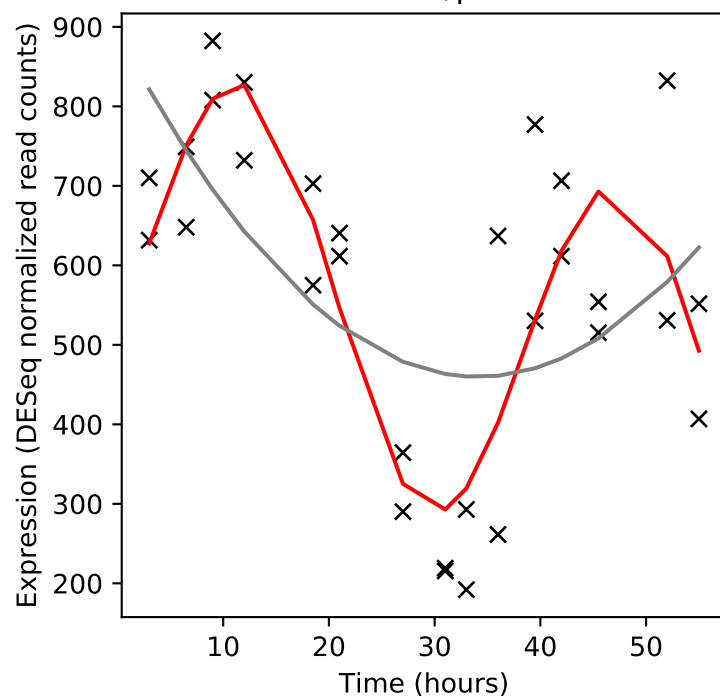

Rv2483c/plsC

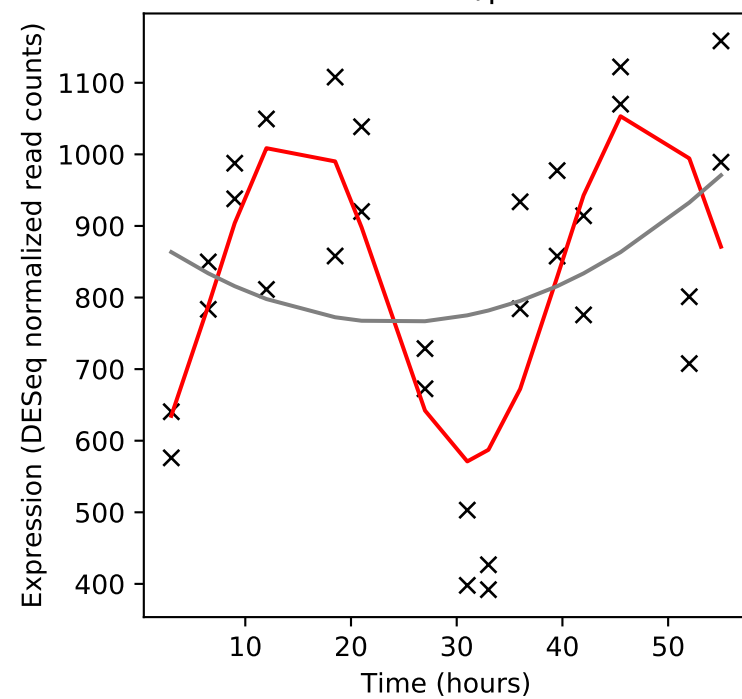

Rv2484c/-

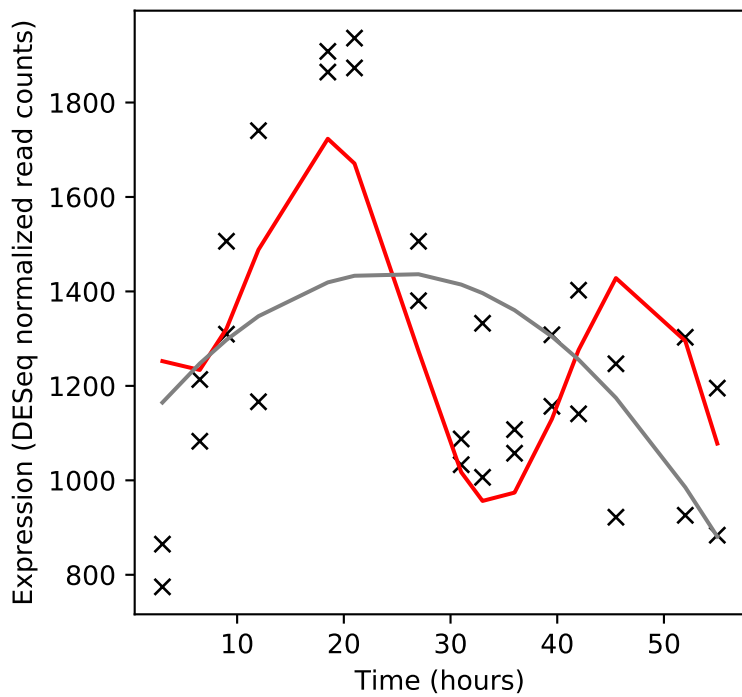

Rv2485c/lipQ

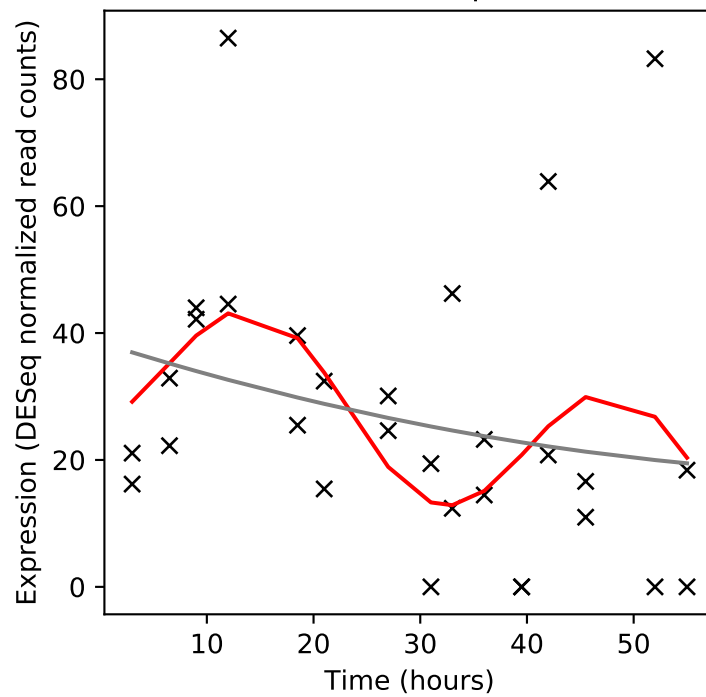

Rv2486/echA14

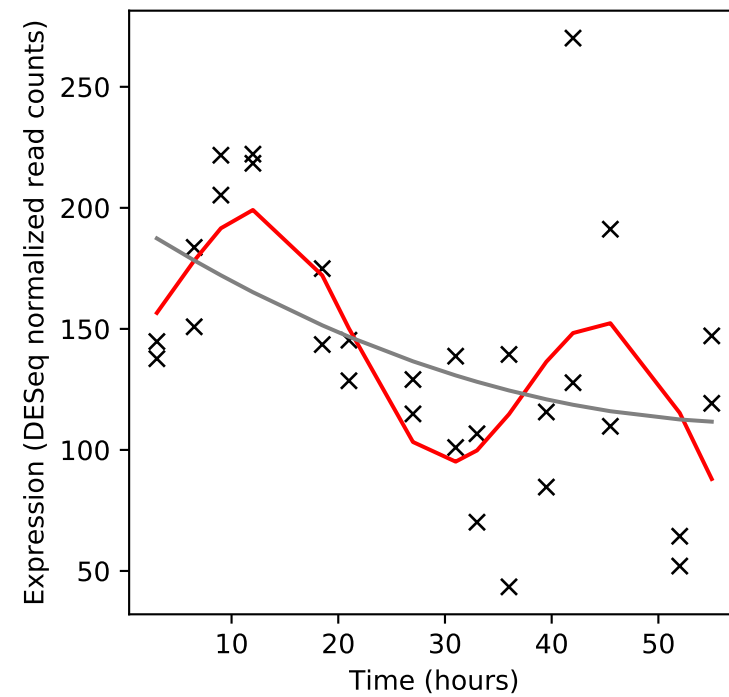

Rv2487c/PE\_PGRS42

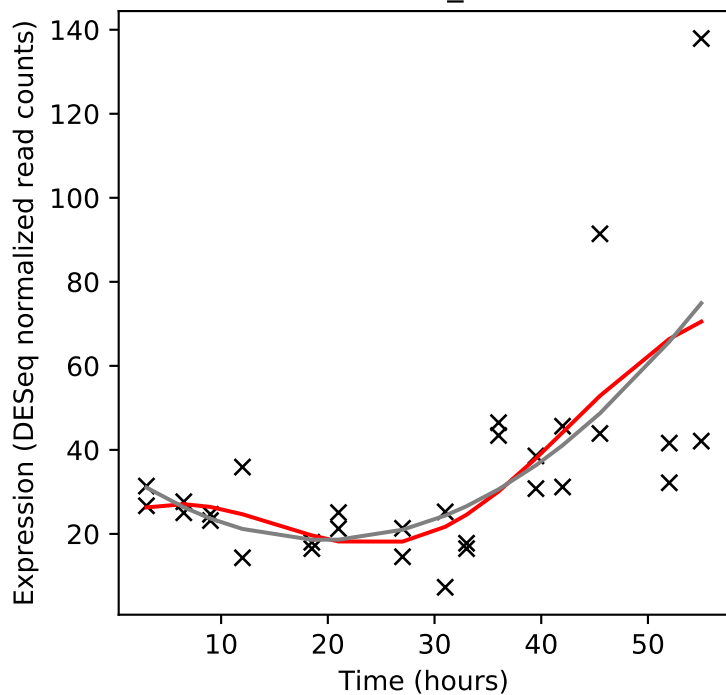

Rv2488c/-

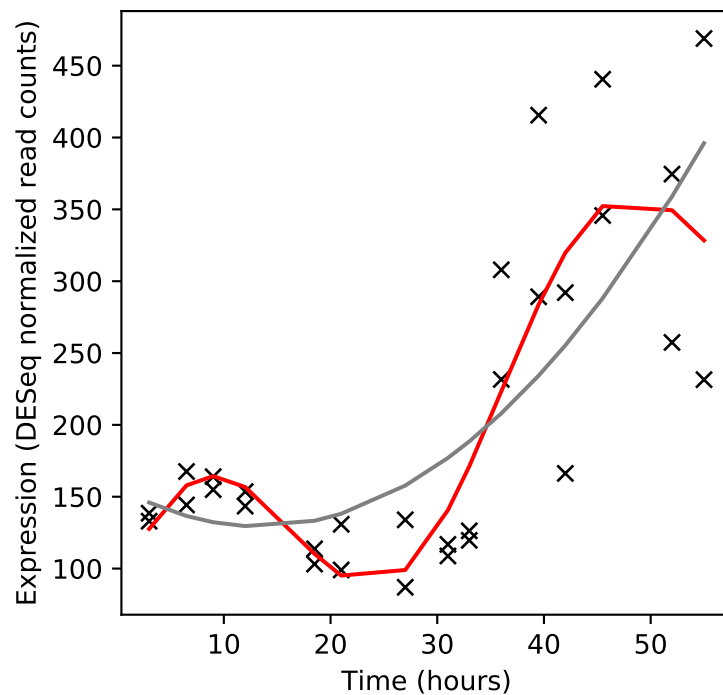

Rv2489c/-

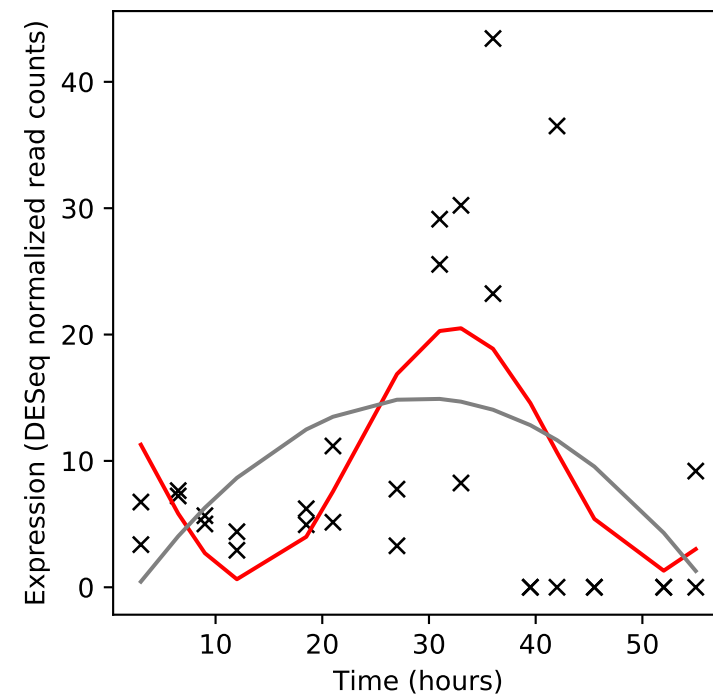

Rv2490c/PE\_PGRS43

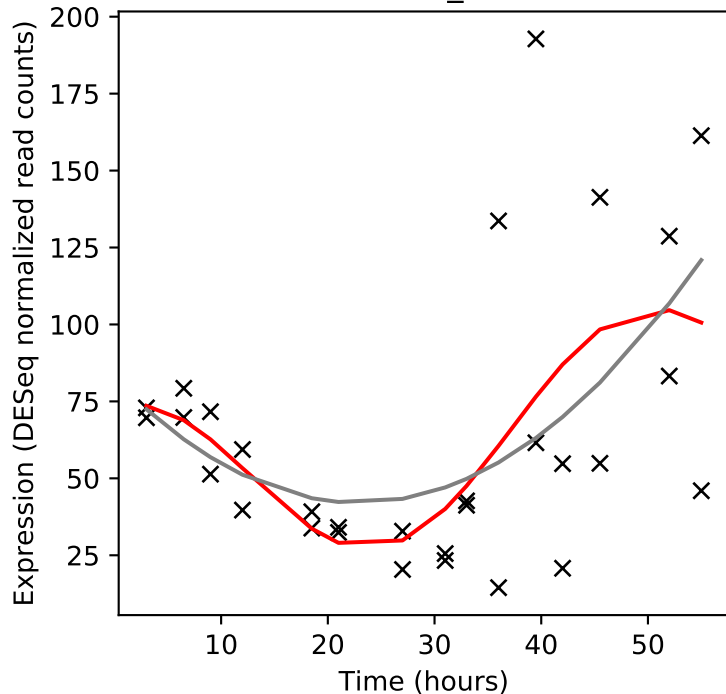

Rv2491/-

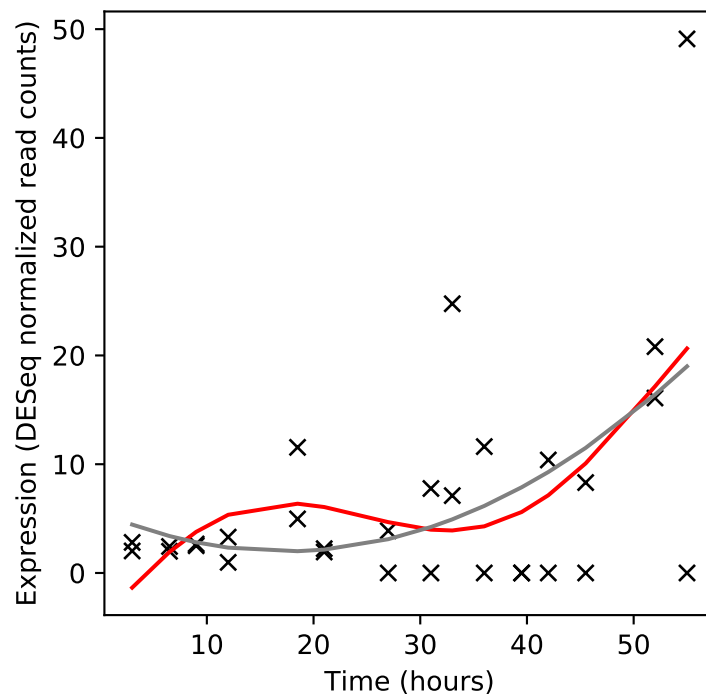

Rv2492/-

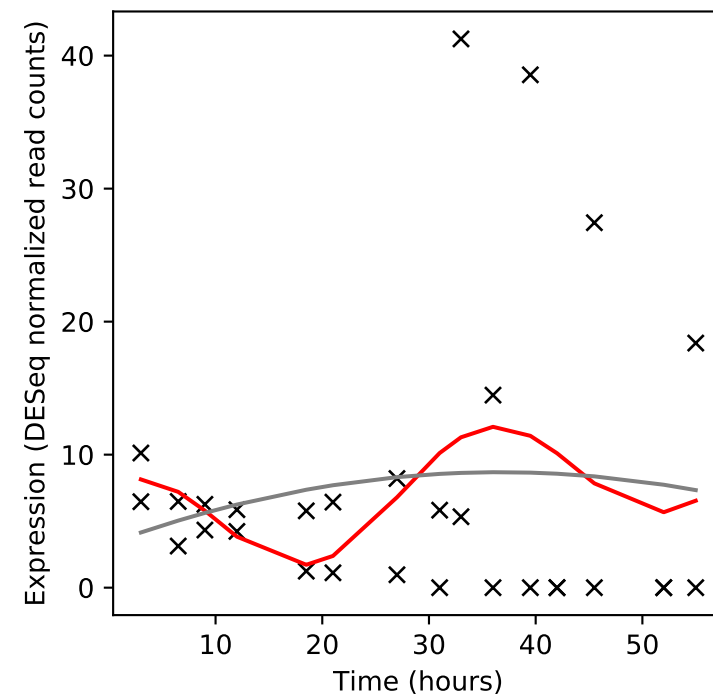

Rv2493/vapB38

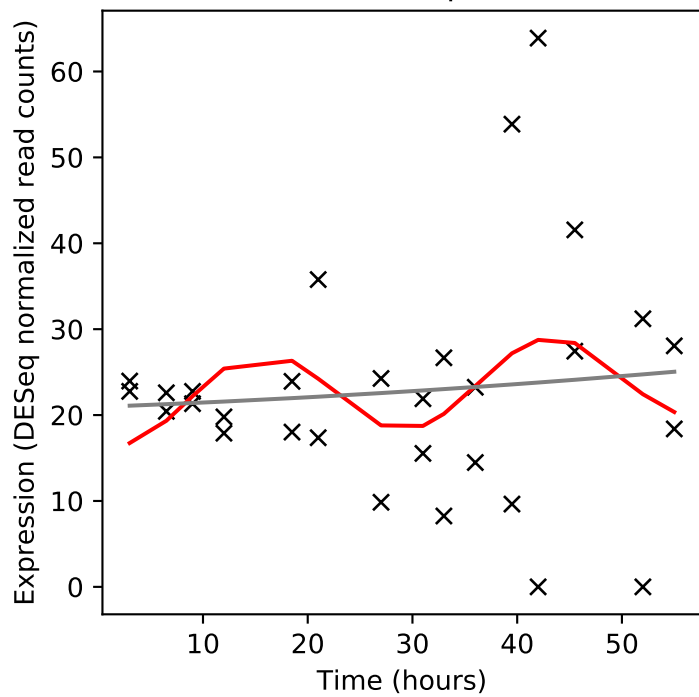

Rv2494/vapC38

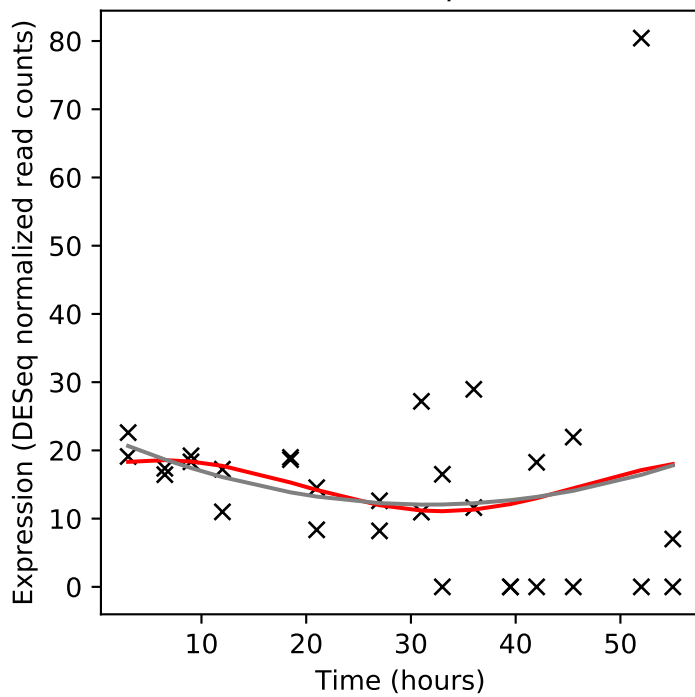

Rv2495c/bkdC

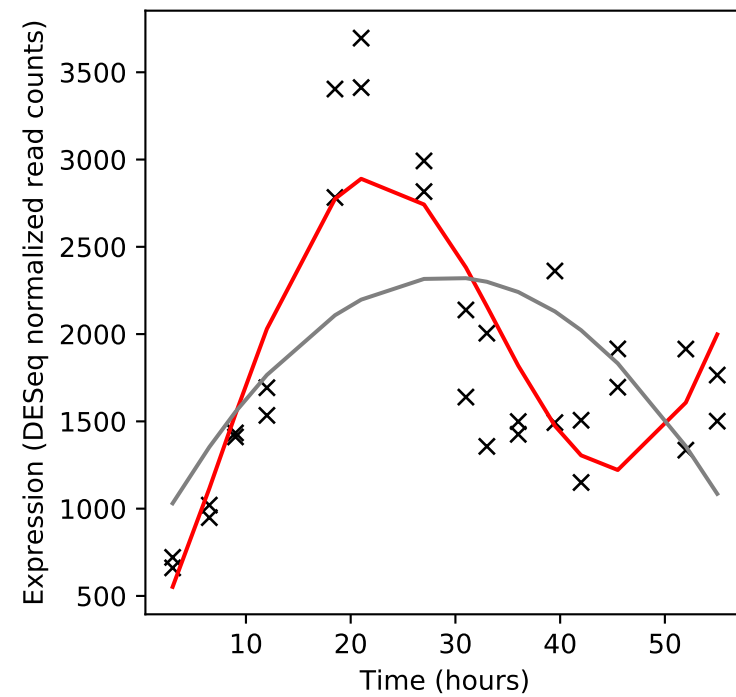

Rv2496c/bkdB

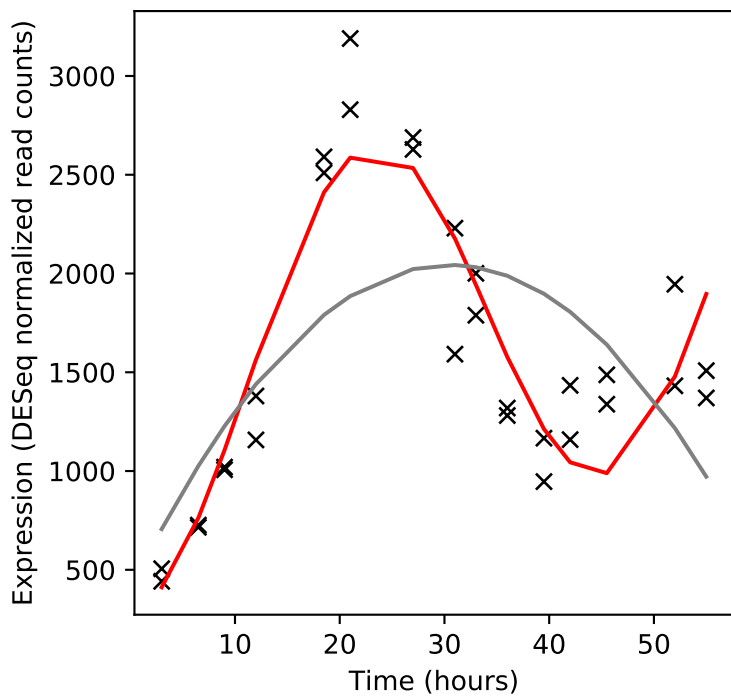

Rv2497c/bkdA

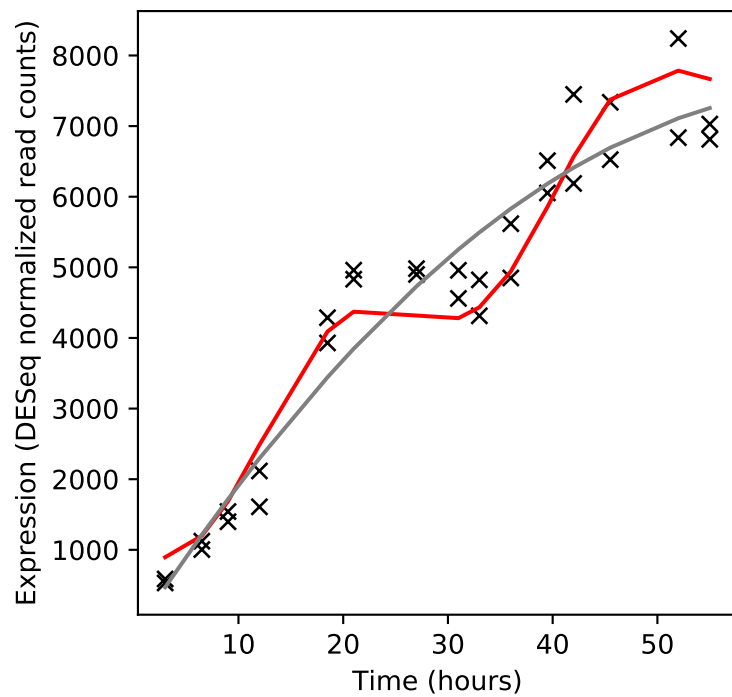

Rv2498c/citE

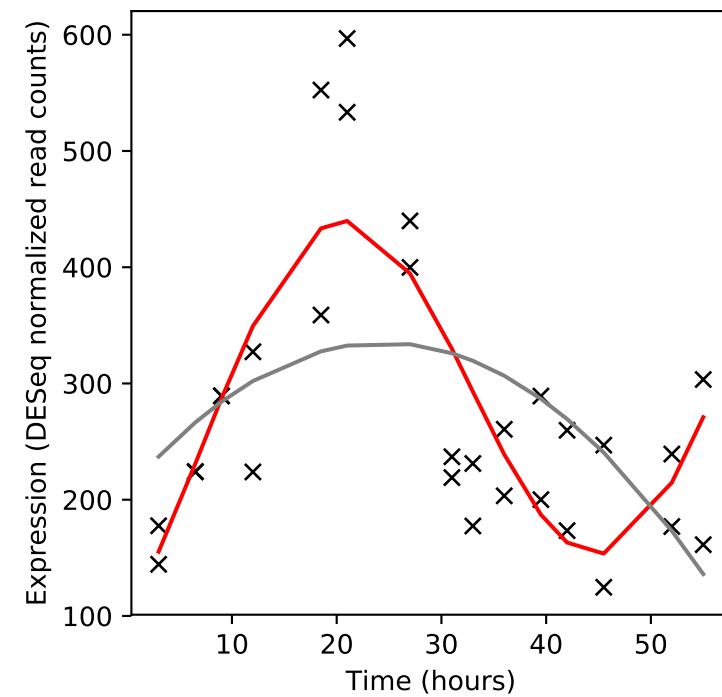

Rv2499c/-

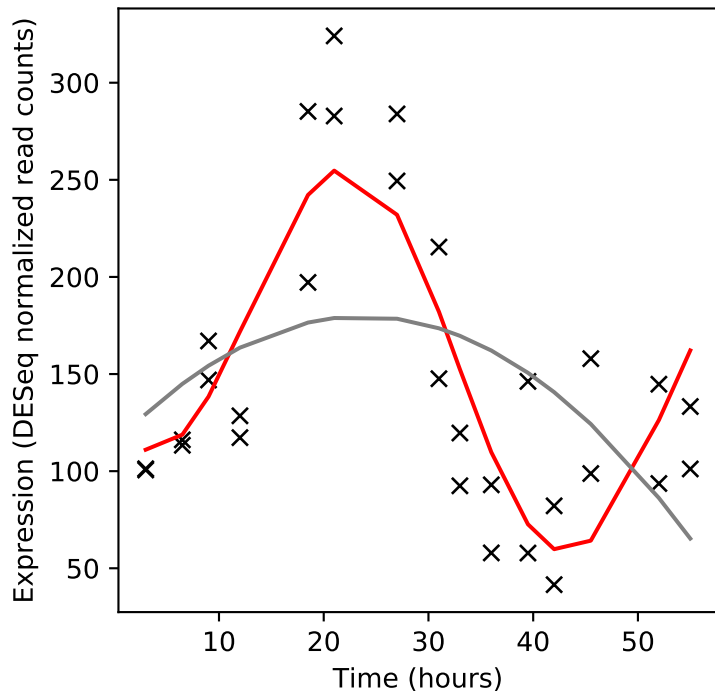

Rv2500c/fadE19

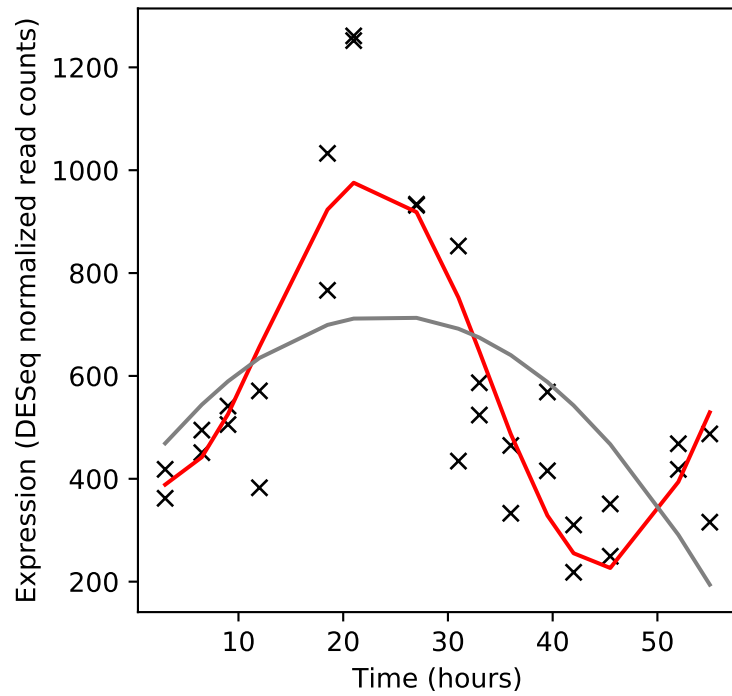

Rv2501c/accA1

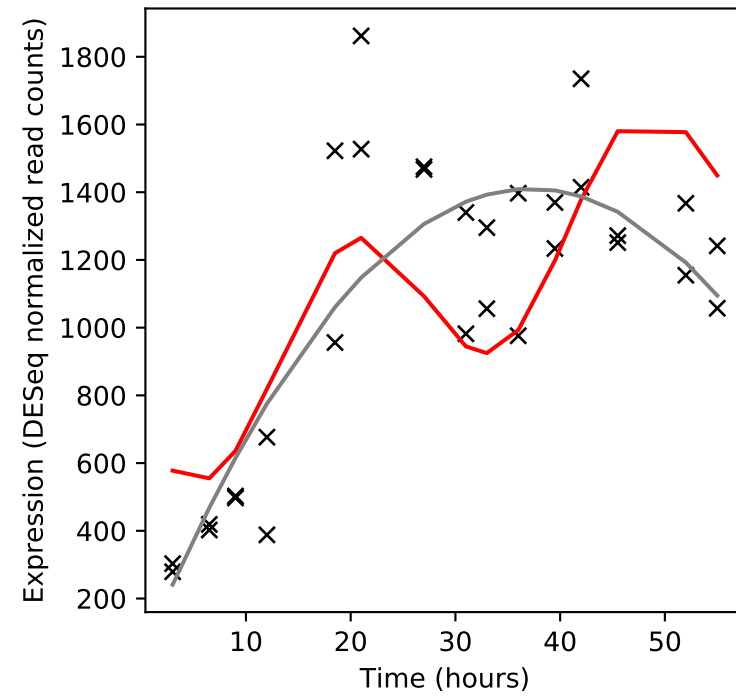

Rv2502c/accD1

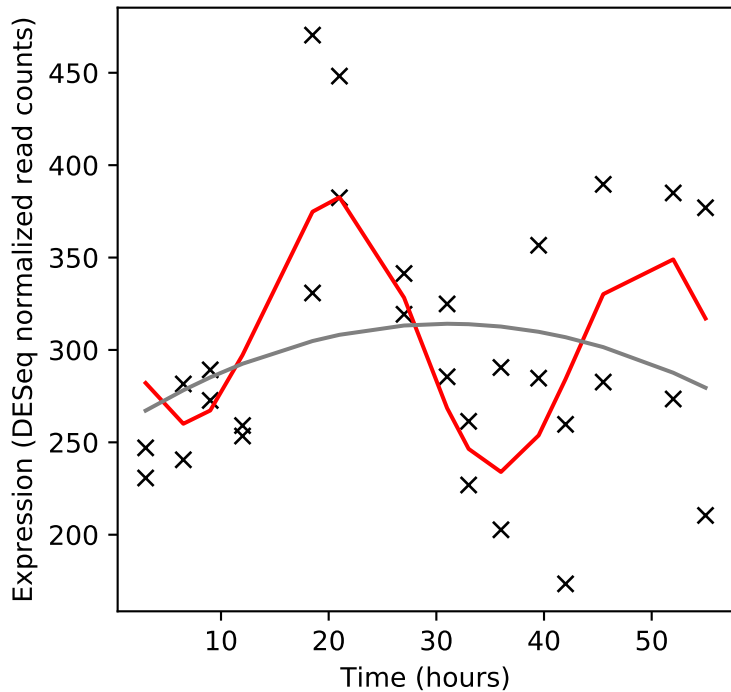

Rv2503c/scoB

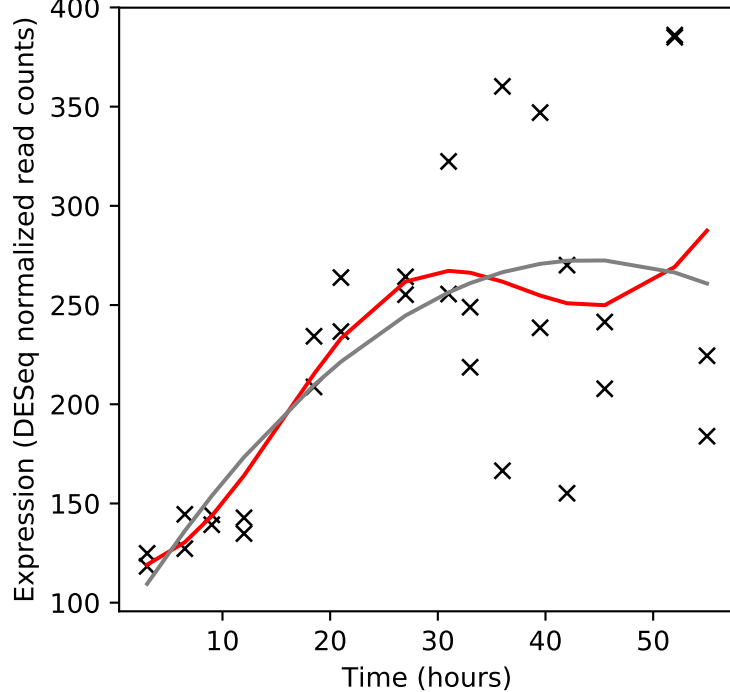

Rv2504c/scoA

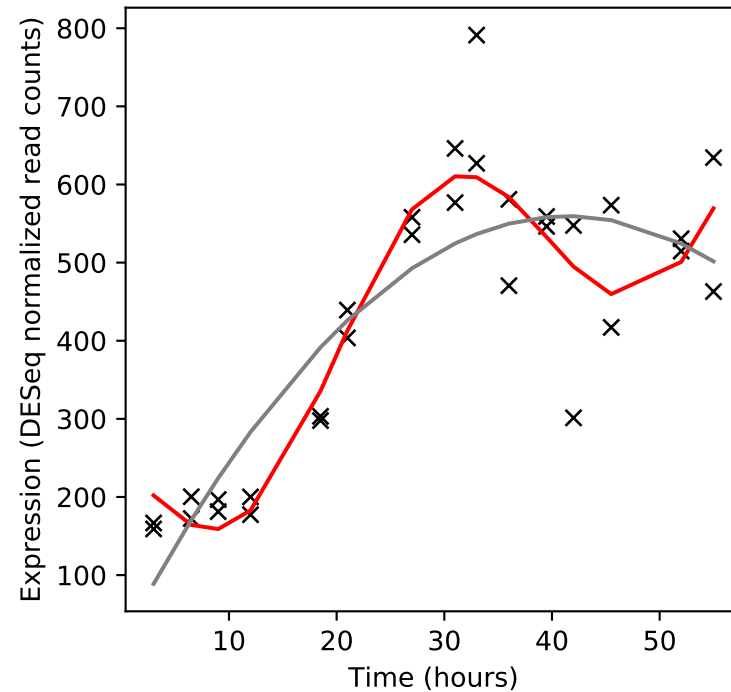

Rv2505c/fadD35

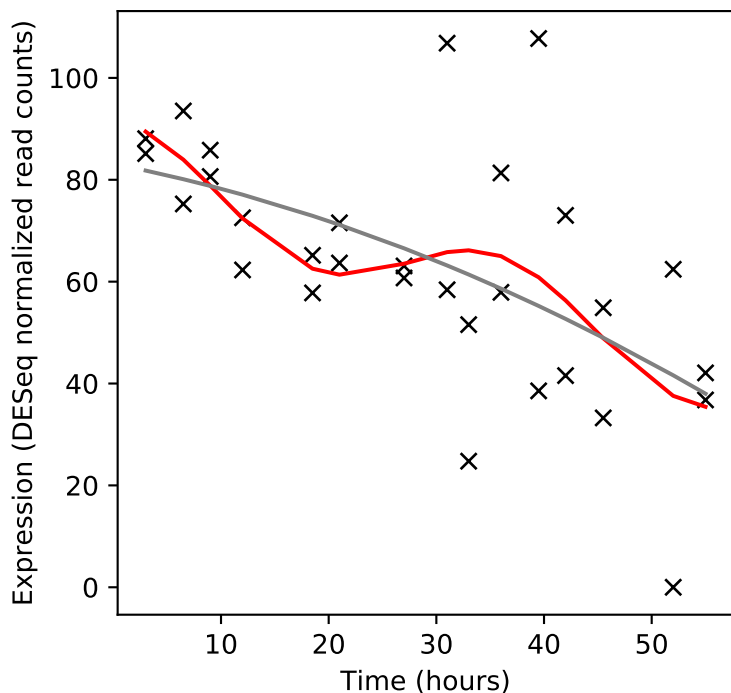

Rv2506/-

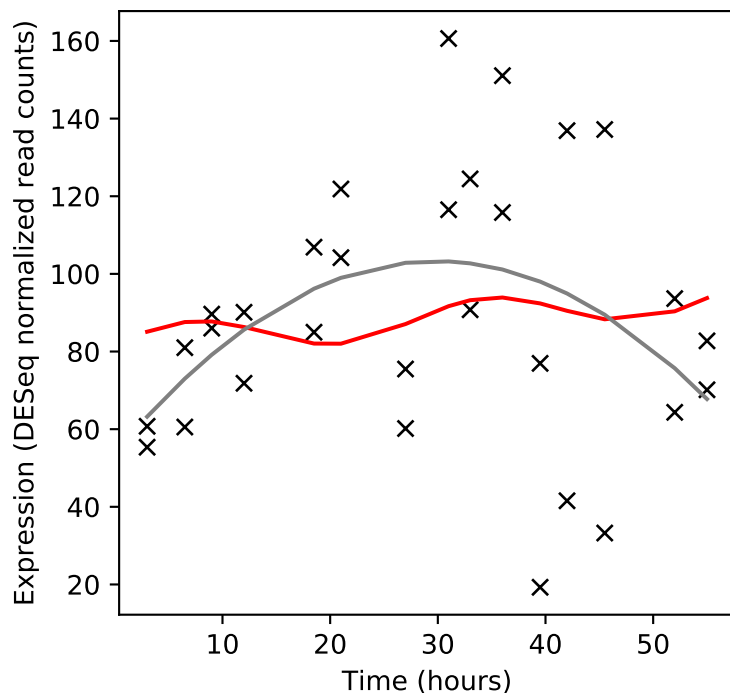

Rv2507/-

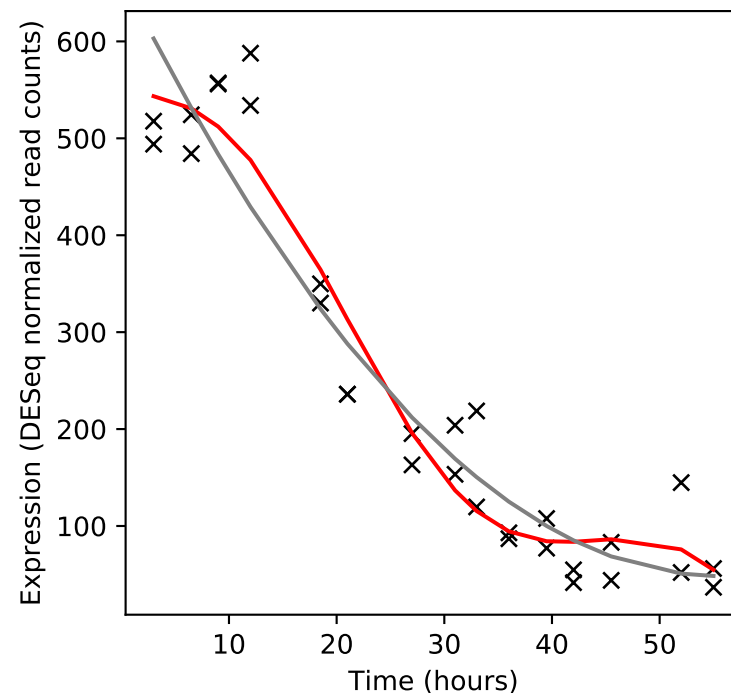

Rv2508c/-

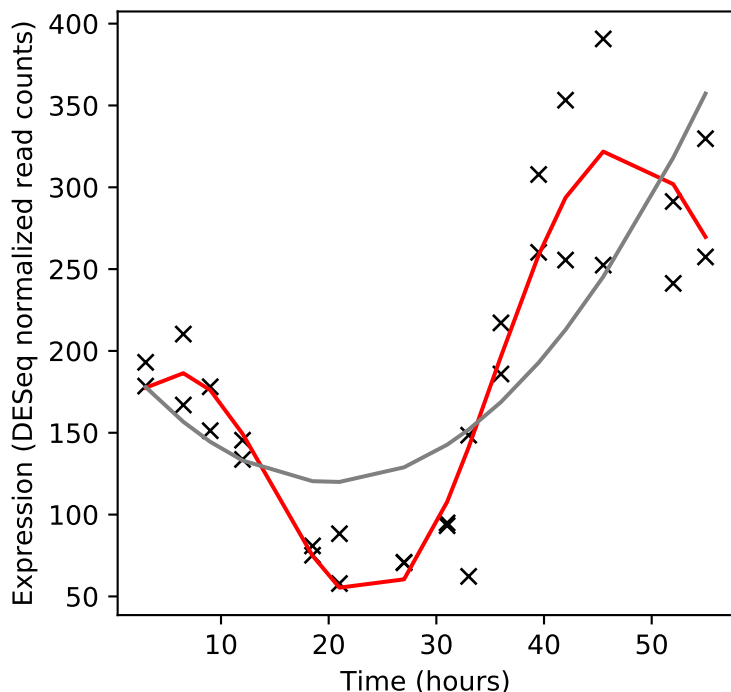

Rv2509/-

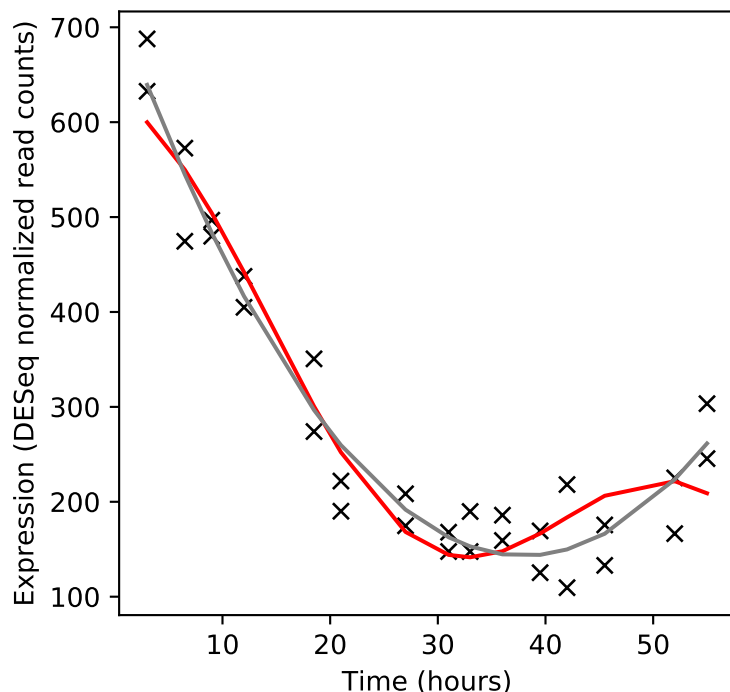

Rv2510c/-

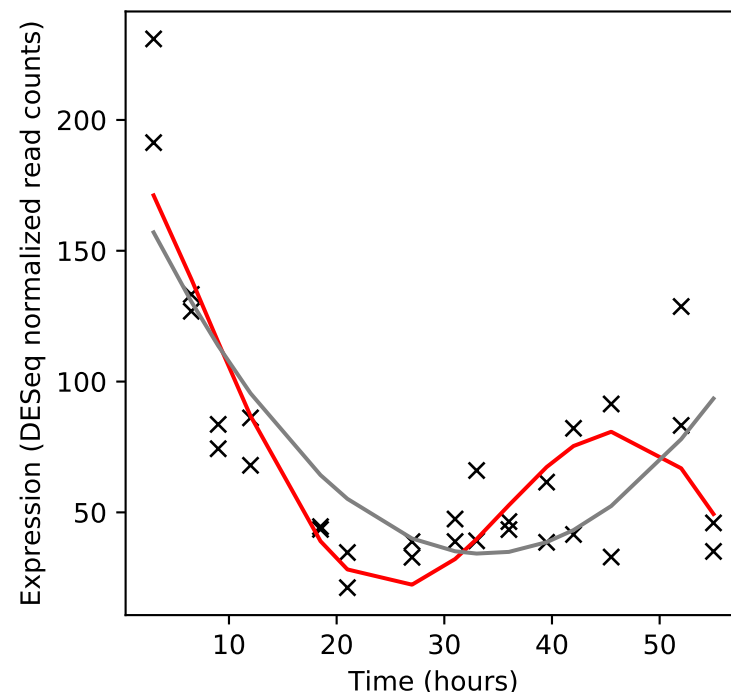

Rv2511/orn

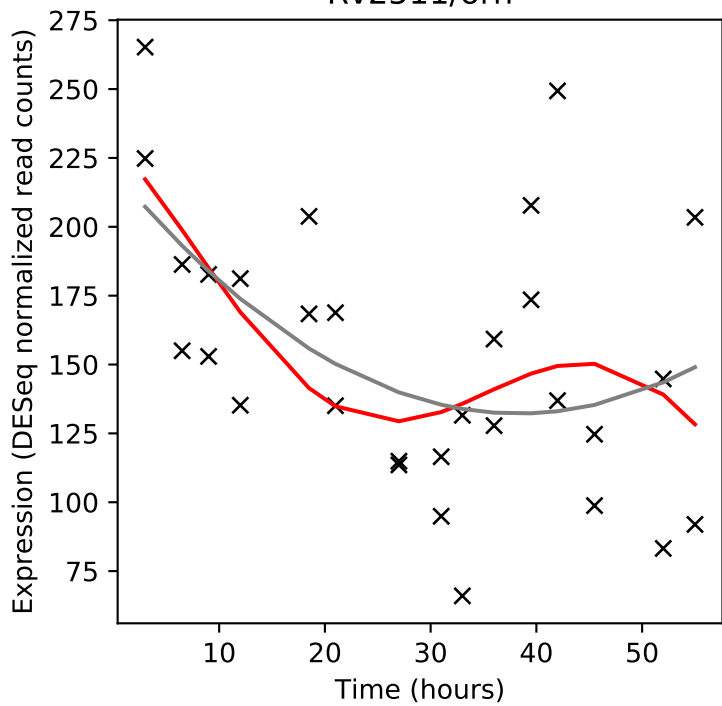

Rv2512c/-

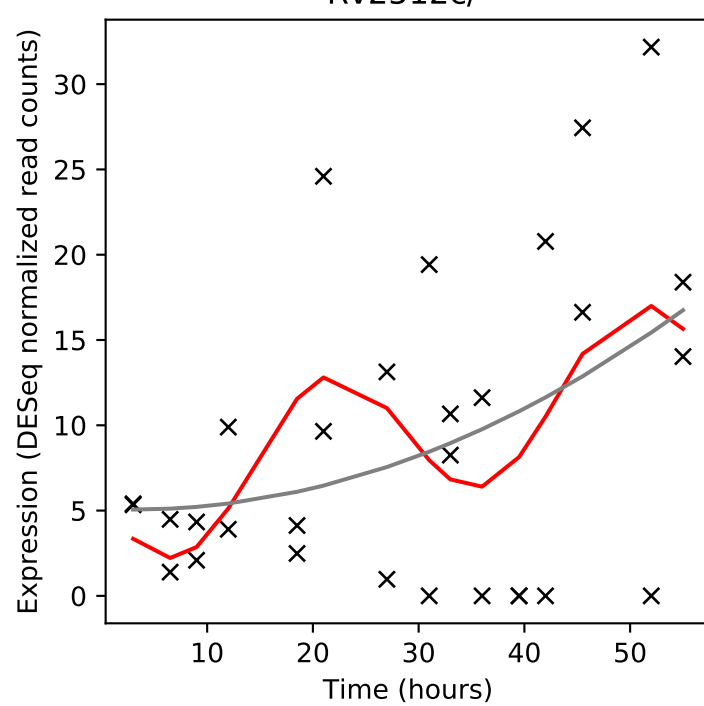

Rv2513/-

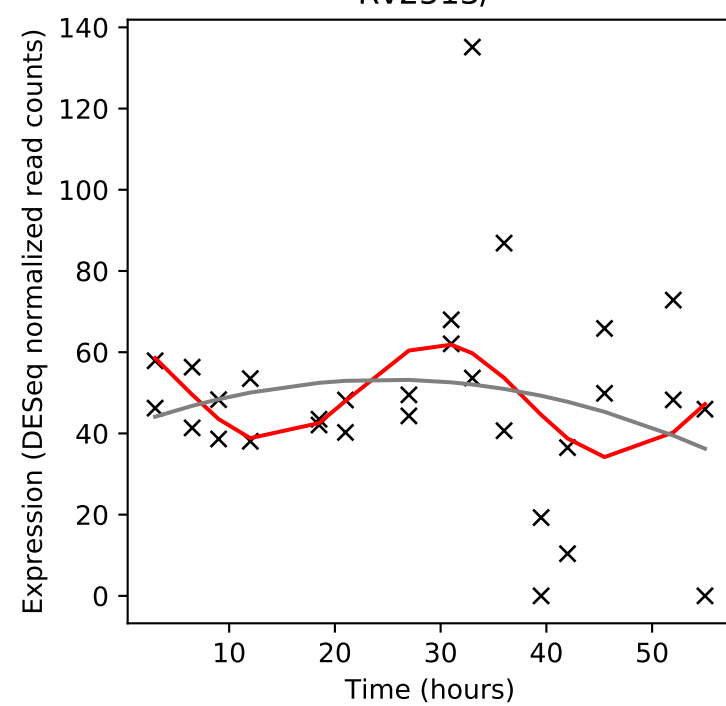

Rv2514c/-

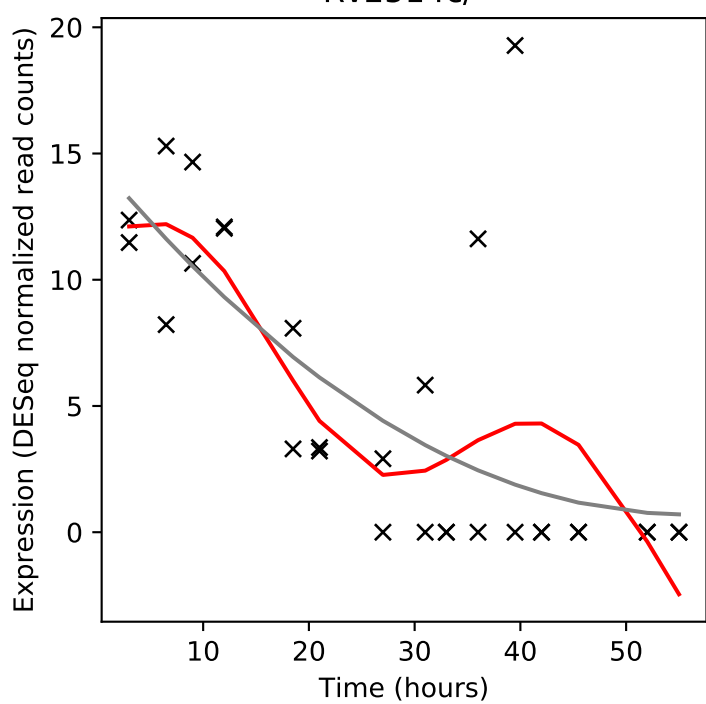

Rv2515c/-

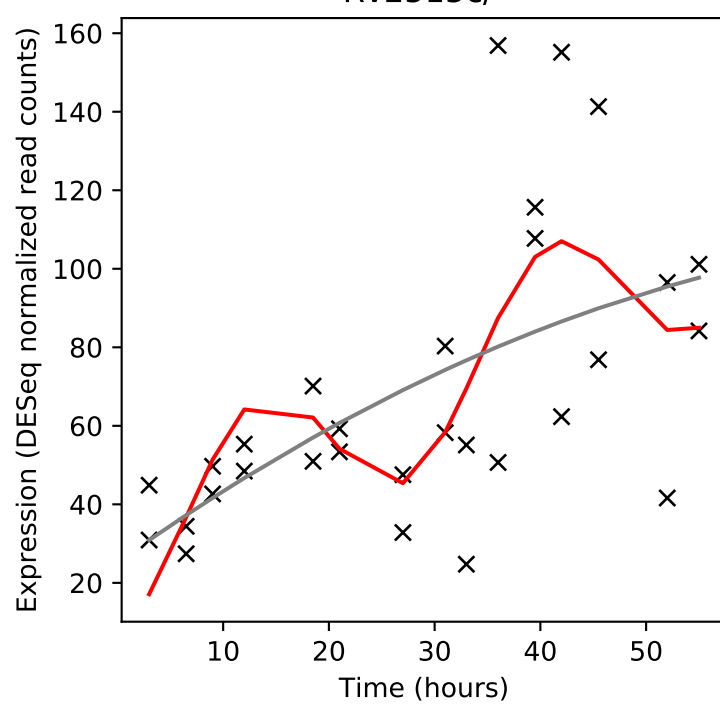

Rv2516c/-

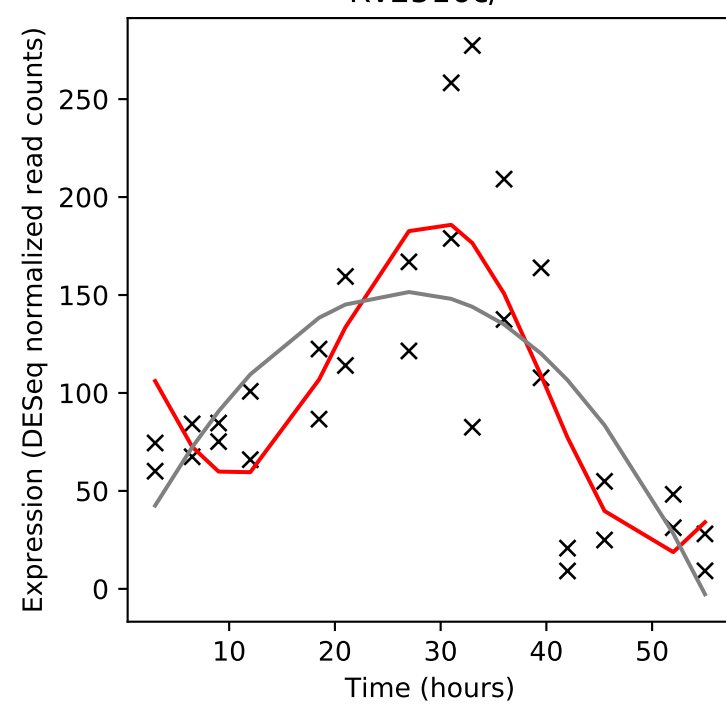

Rv2517c/-

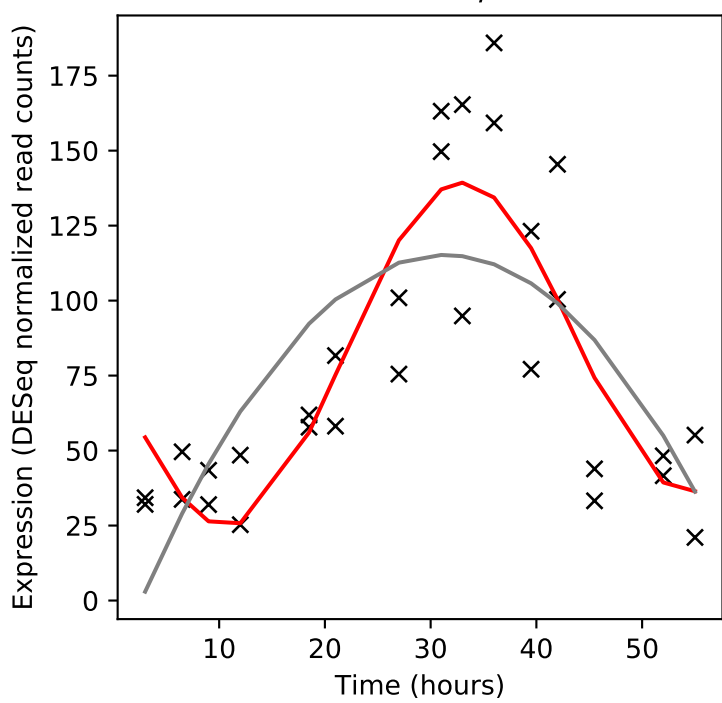

Rv2518c/ldtB

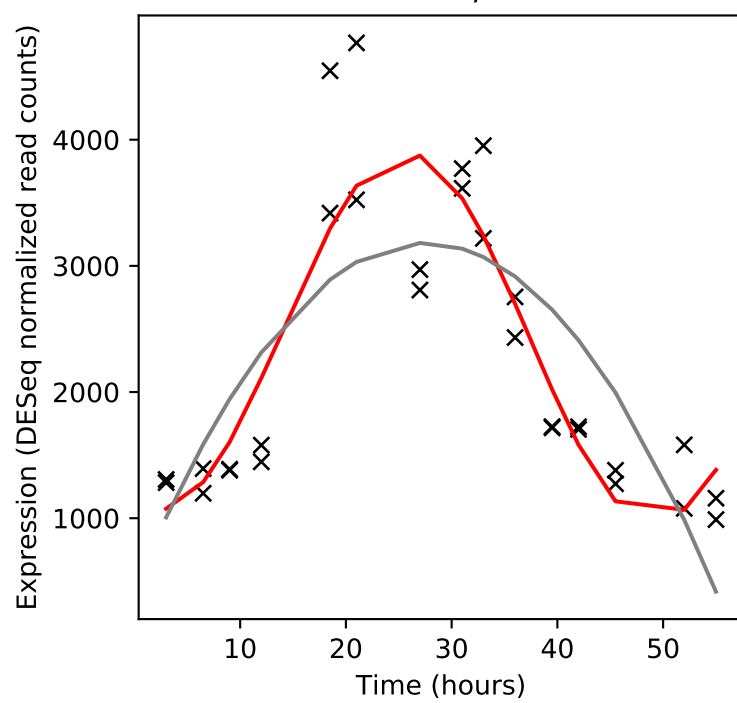

Rv2519/PE26

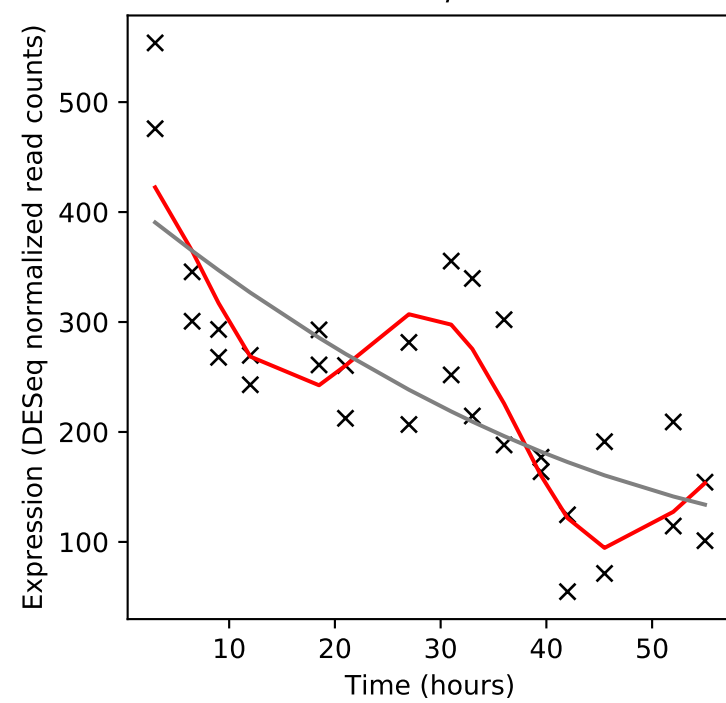

Rv2520c/-

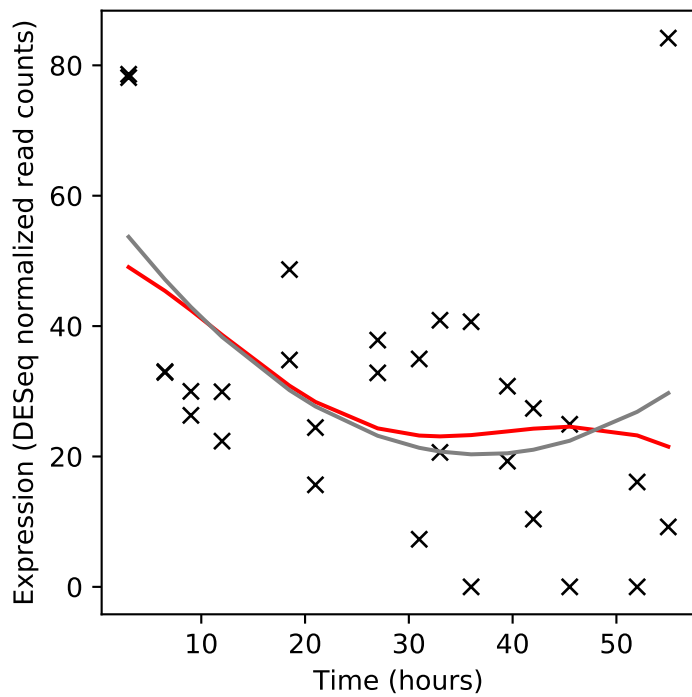

Rv2521/bcp

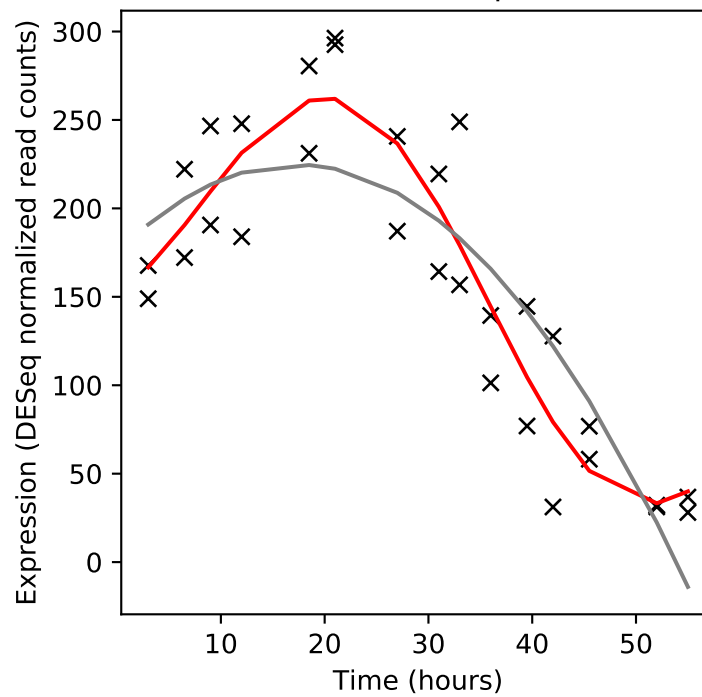

Rv2522c/-

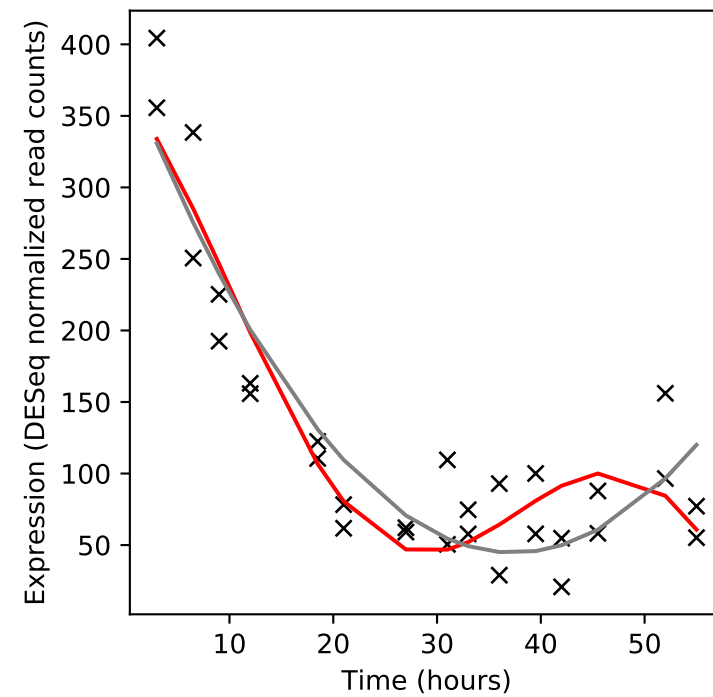

Rv2523c/acpS

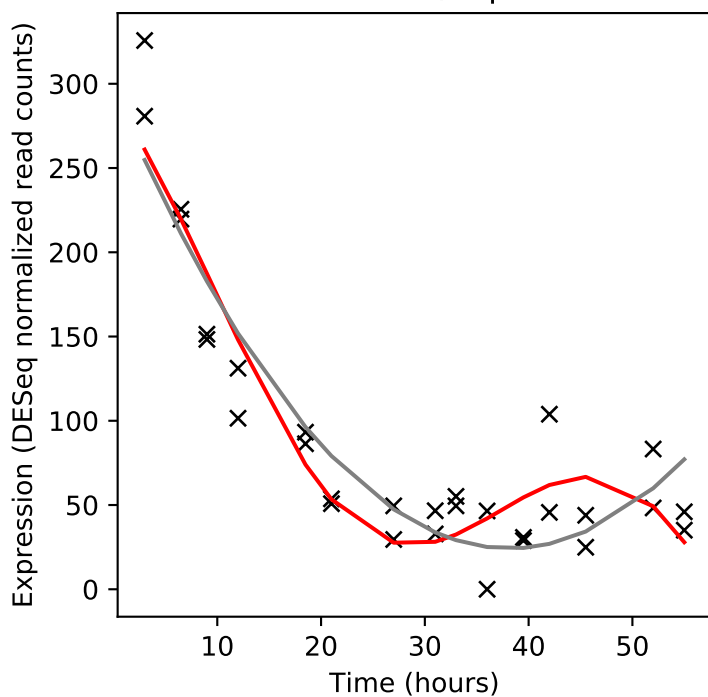

Rv2524c/fas

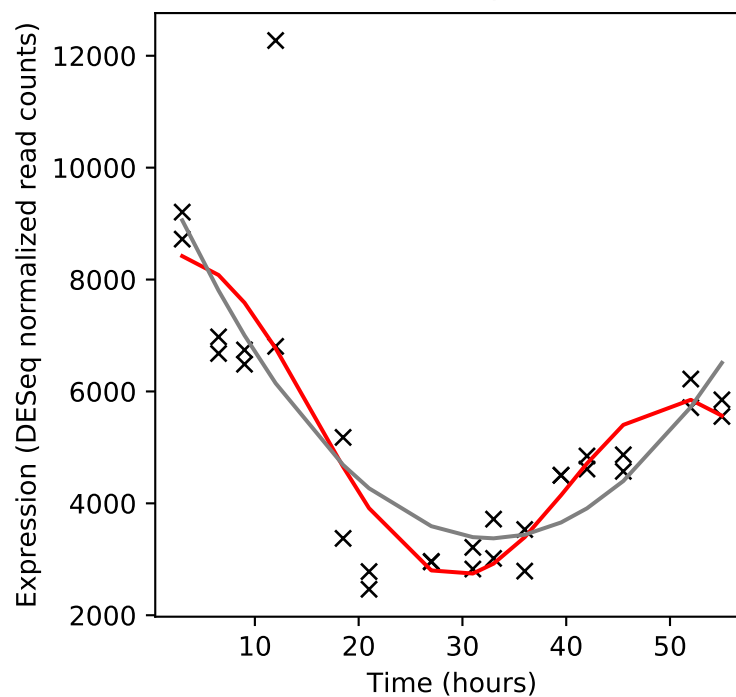

Rv2525c/-

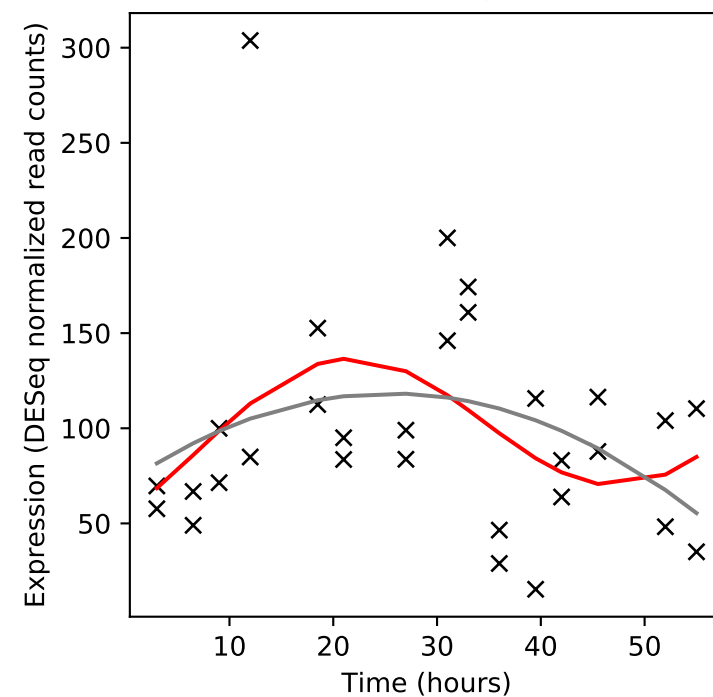

Rv2526/vapB17

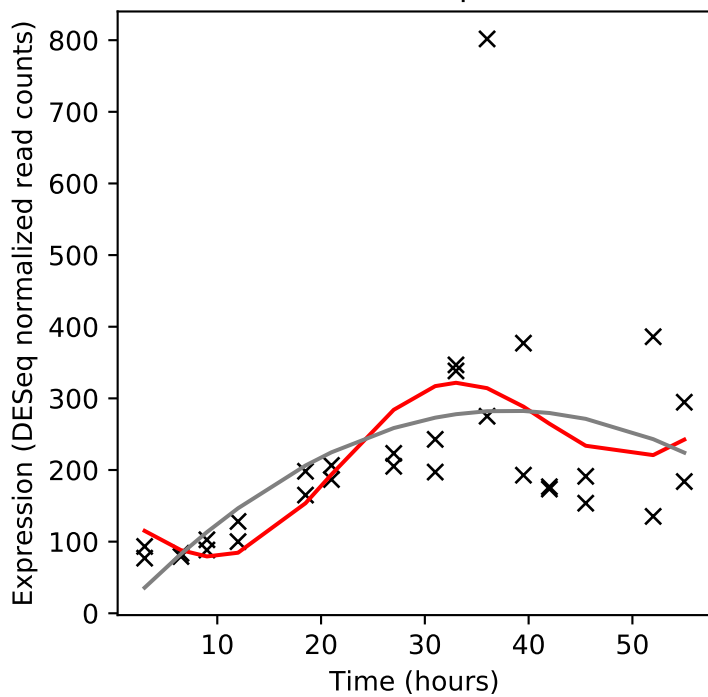

Rv2527/vapC17

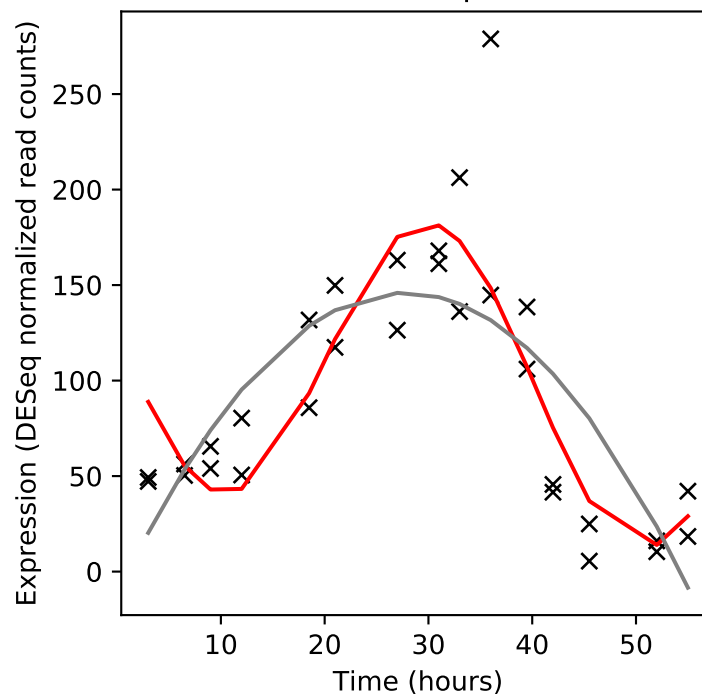

Rv2528c/mrr

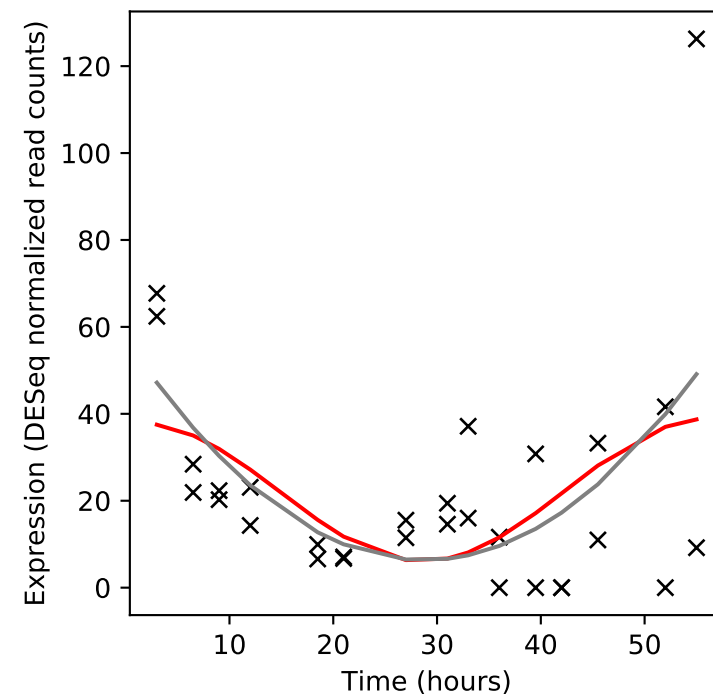



Rv2529/-

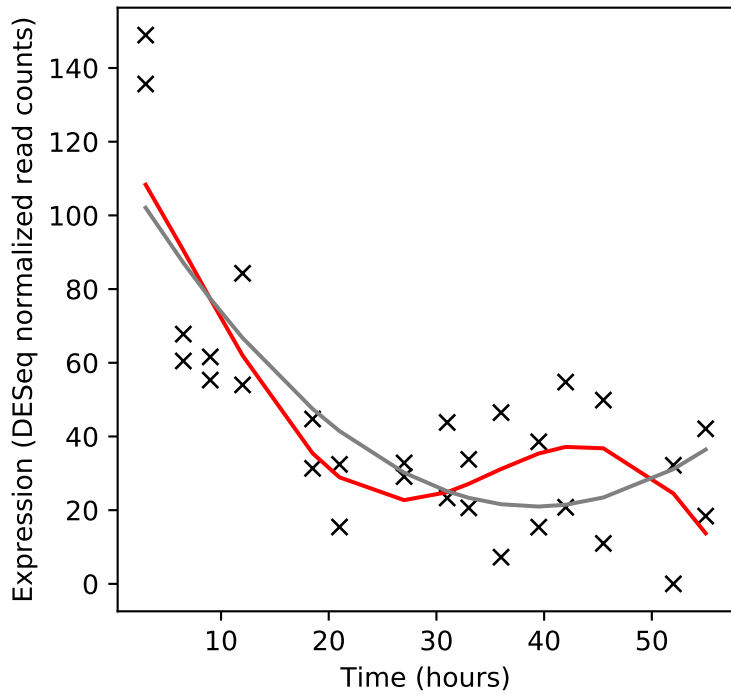

Rv2530c/vapC39

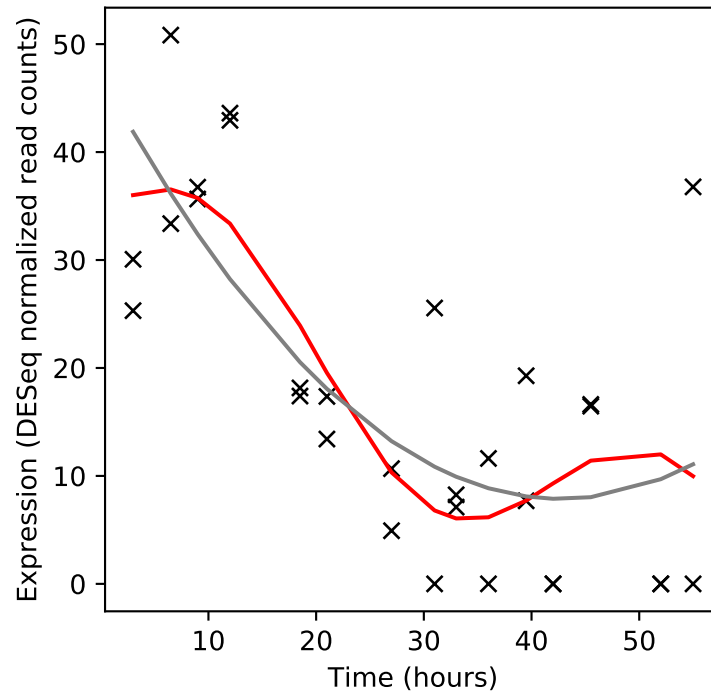

Rv2530A/vapB39

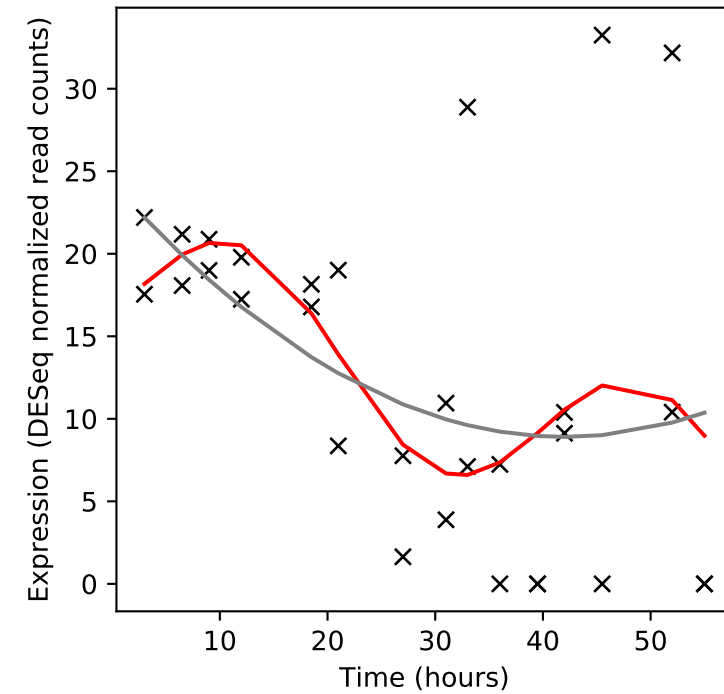

Rv2531c/-

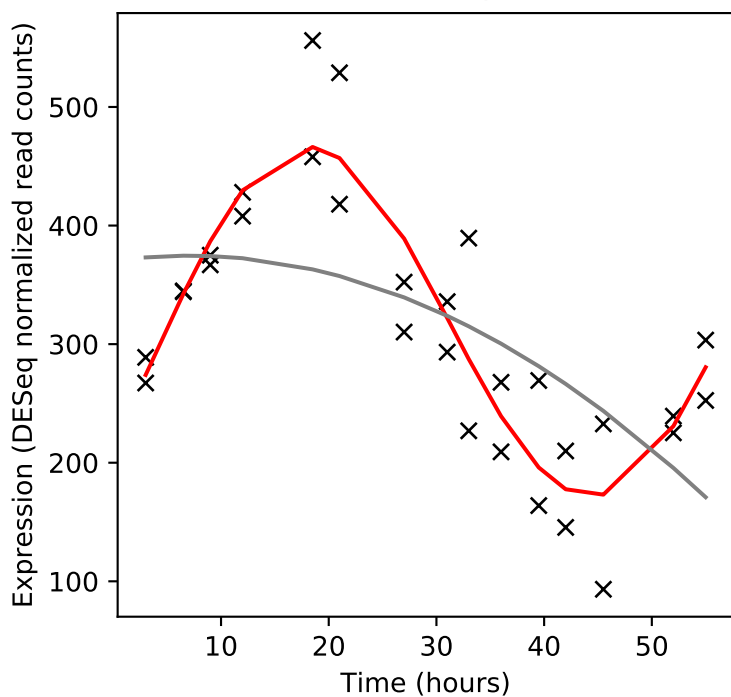

Rv2532c/-

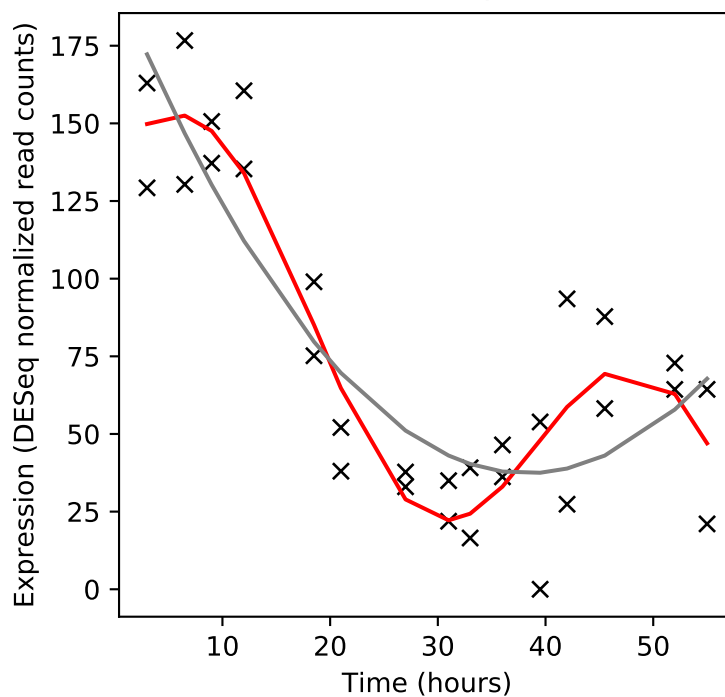

Rv2533c/nusB

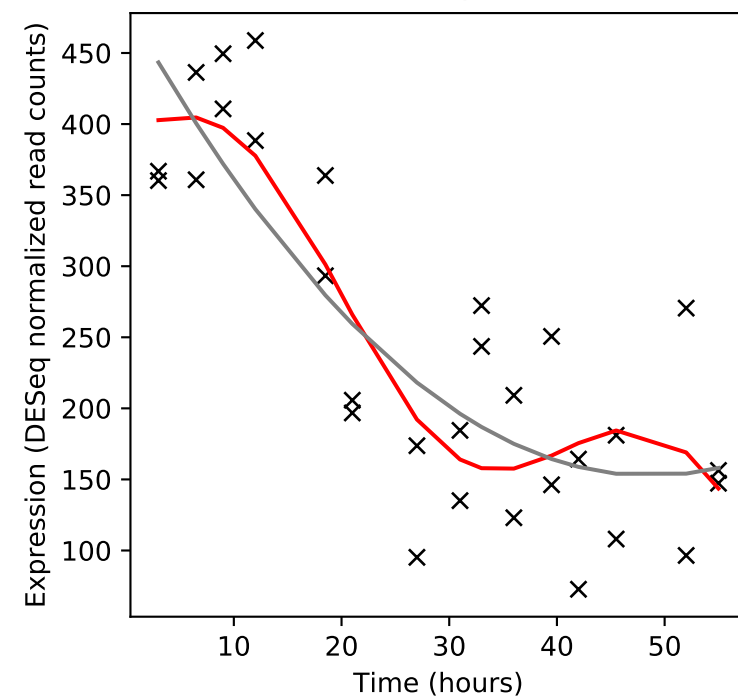

Rv2534c/efp

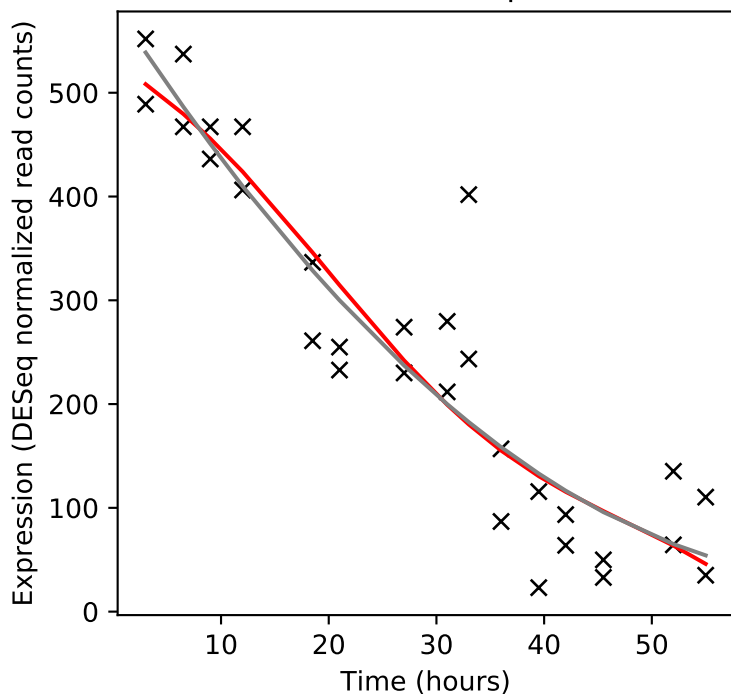

Rv2535c/pepQ

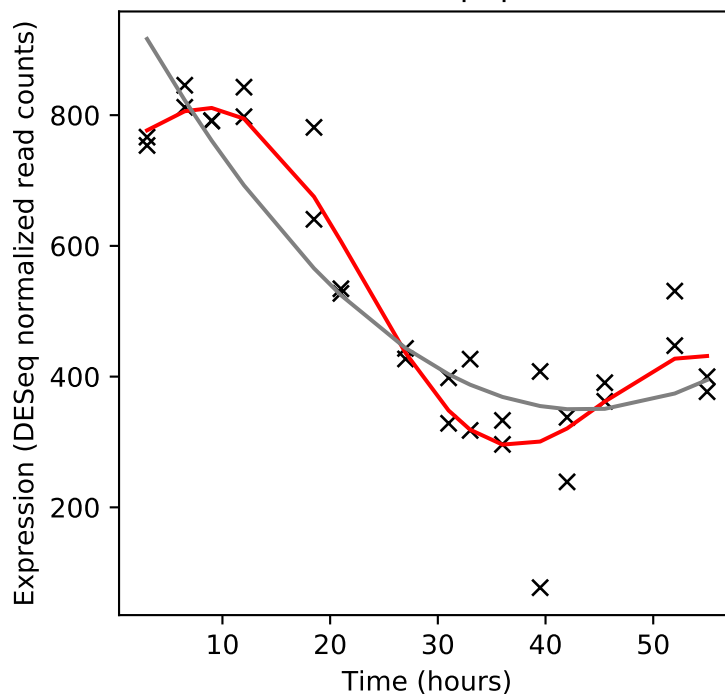

Rv2536/-

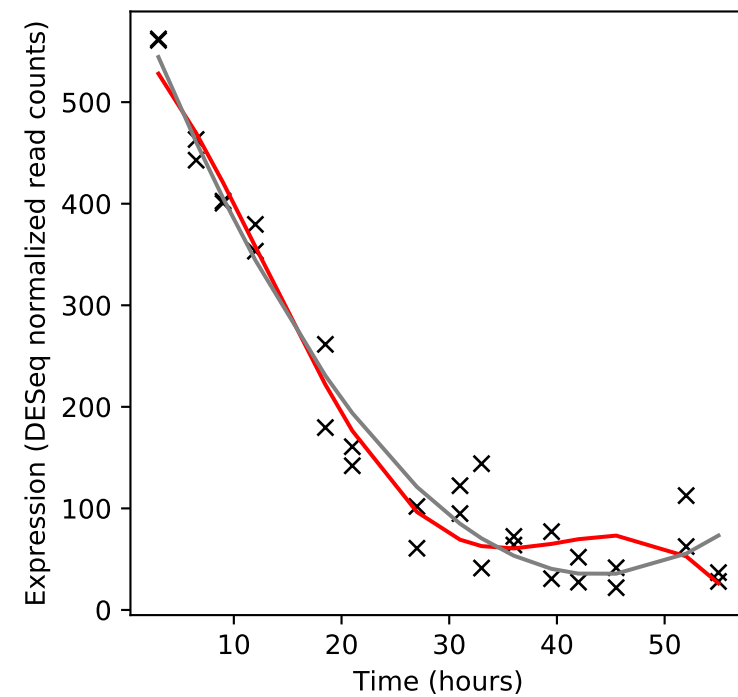

Rv2537c/aroD

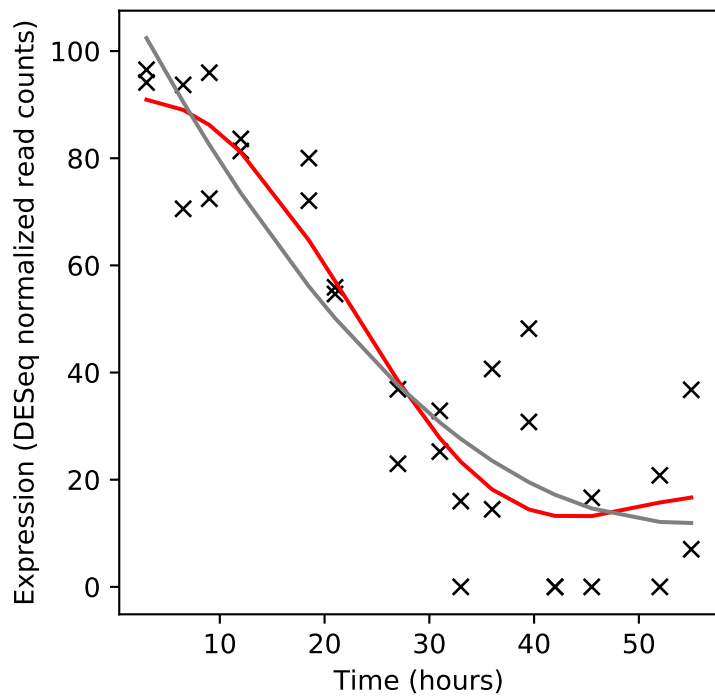

Rv2538c/aroB

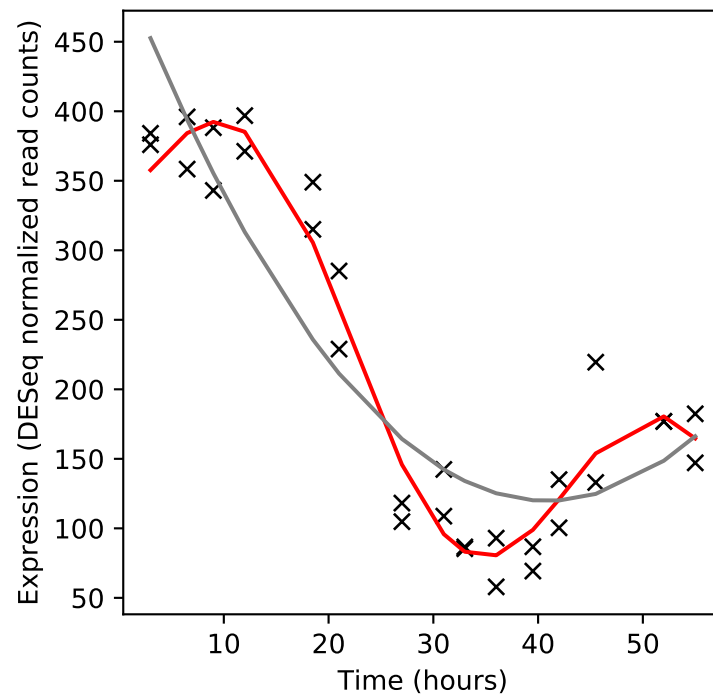

Rv2539c/aroK

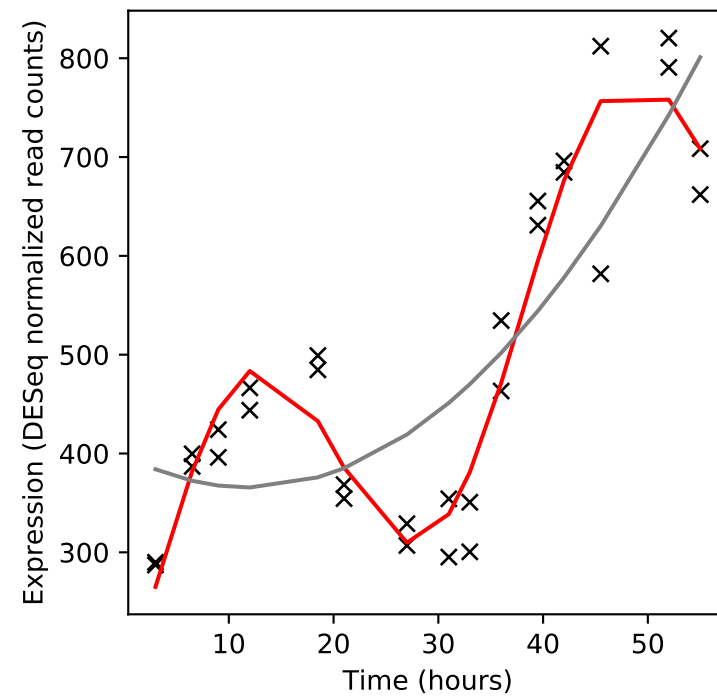

Rv2540c/aroF

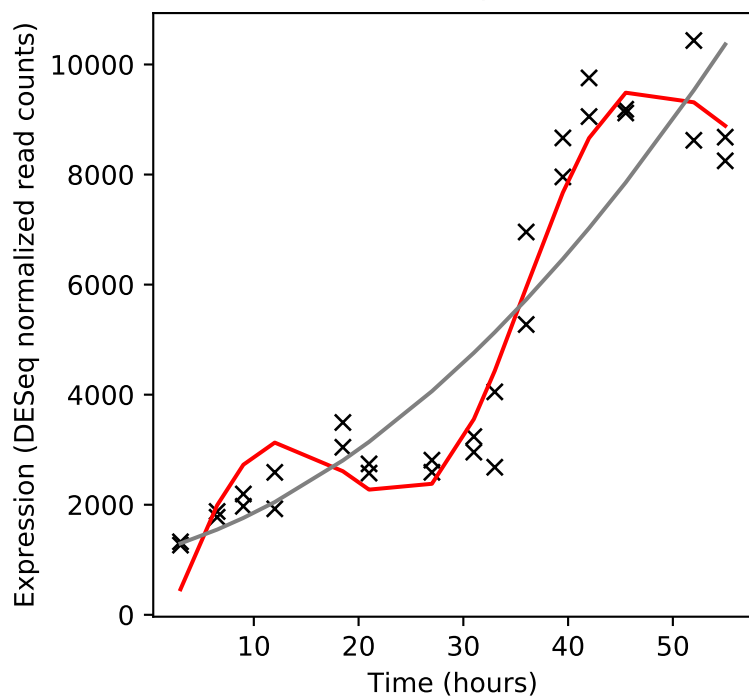

Rv2541/-

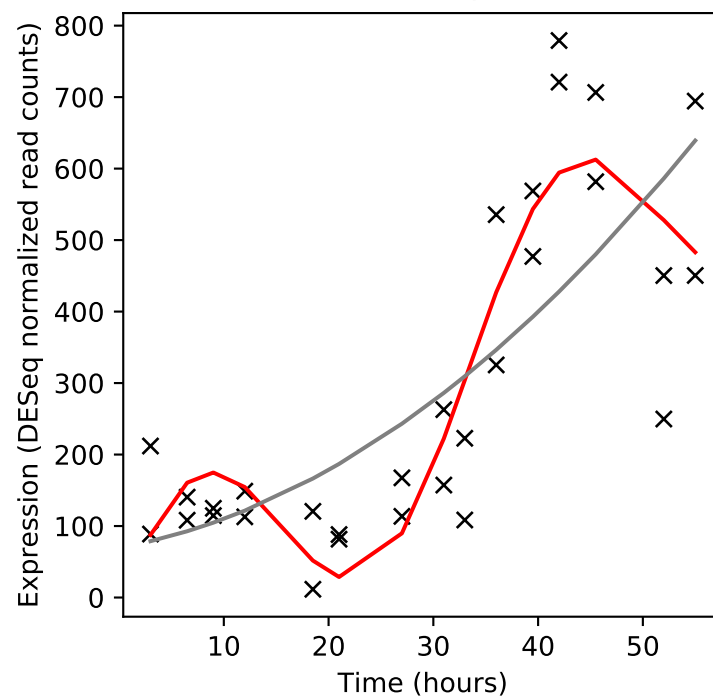

Rv2542/-

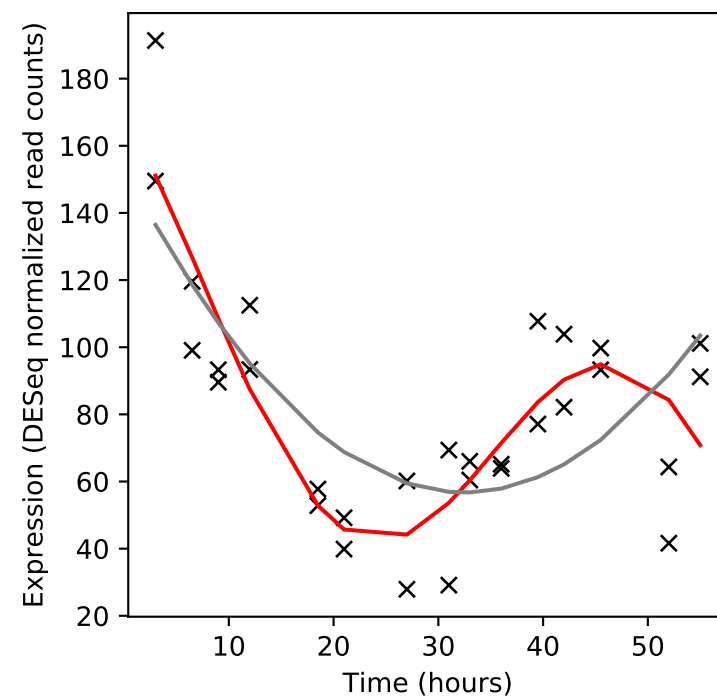

Rv2543/lppA

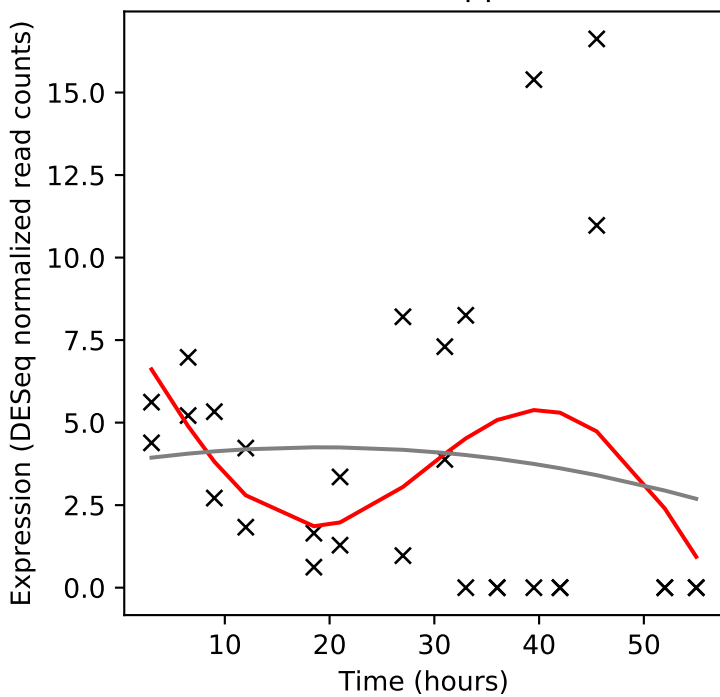

Rv2544/lppB

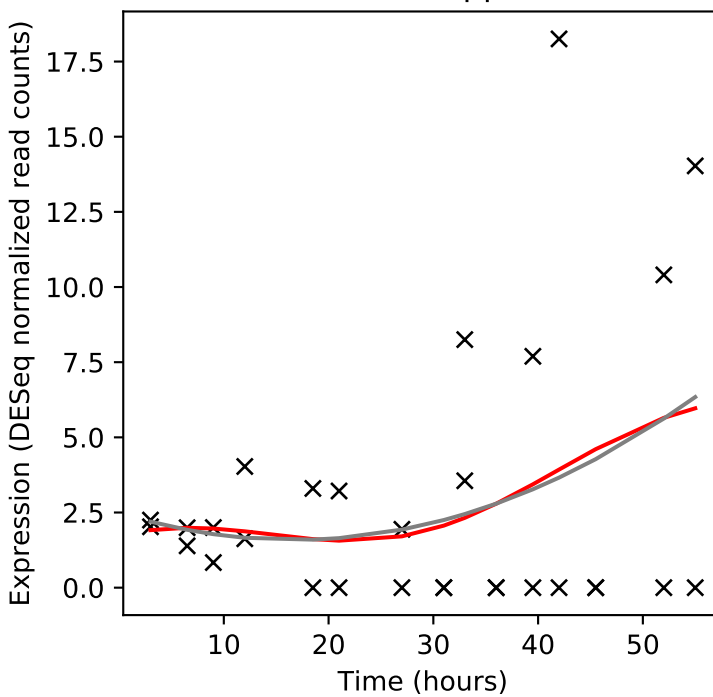

Rv2545/vapB18

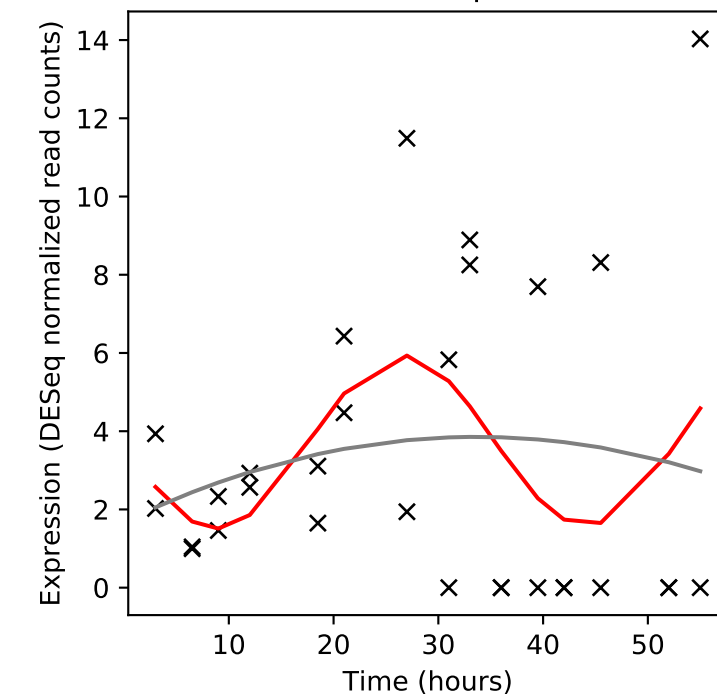

Rv2546/vapC18

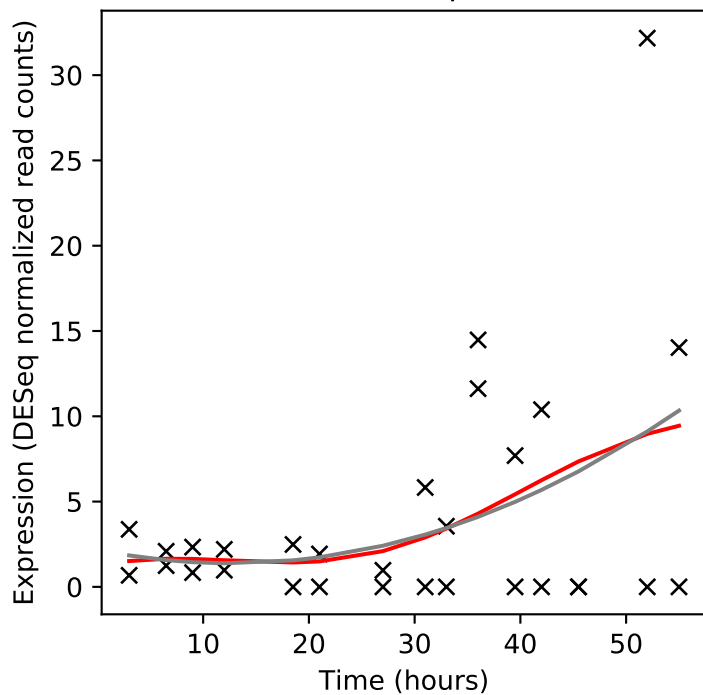

Rv2547/vapB19

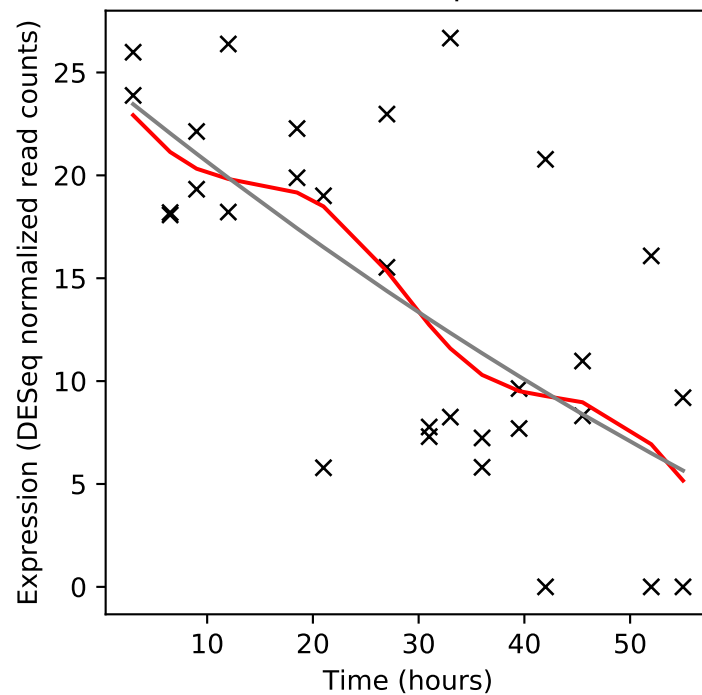

Rv2548/vapC19

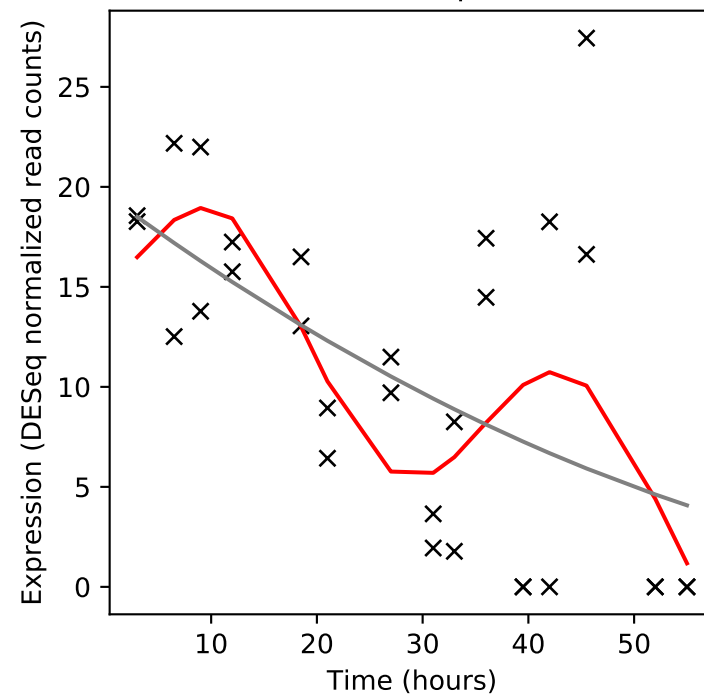

Rv2548A/-

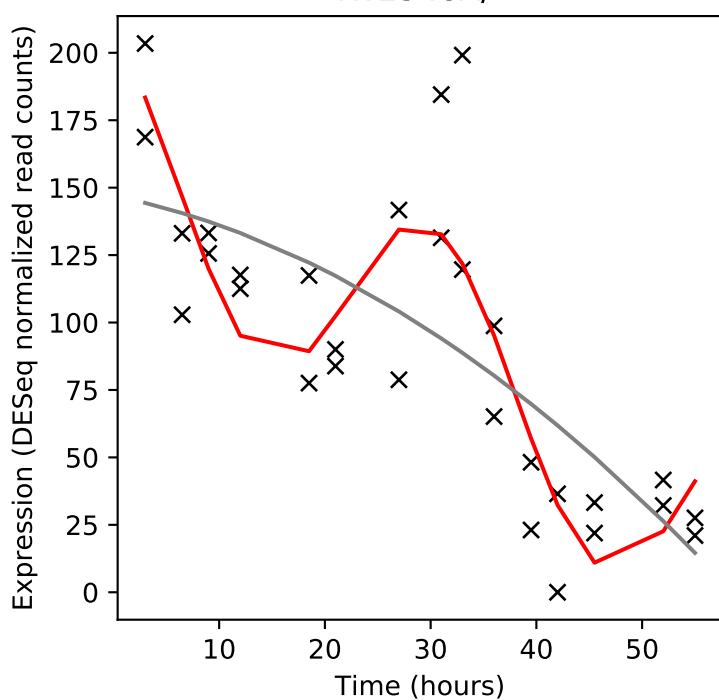

Rv2549c/vapC20

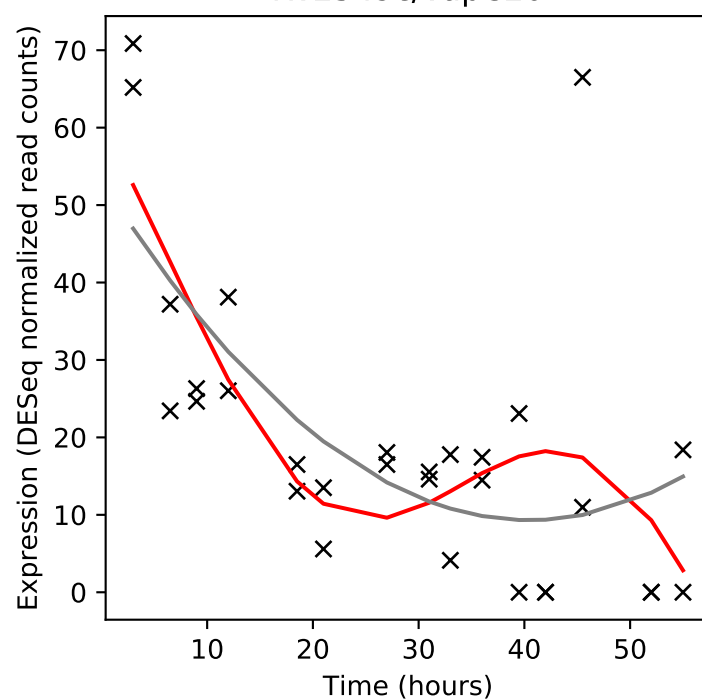

Rv2550c/vapB20

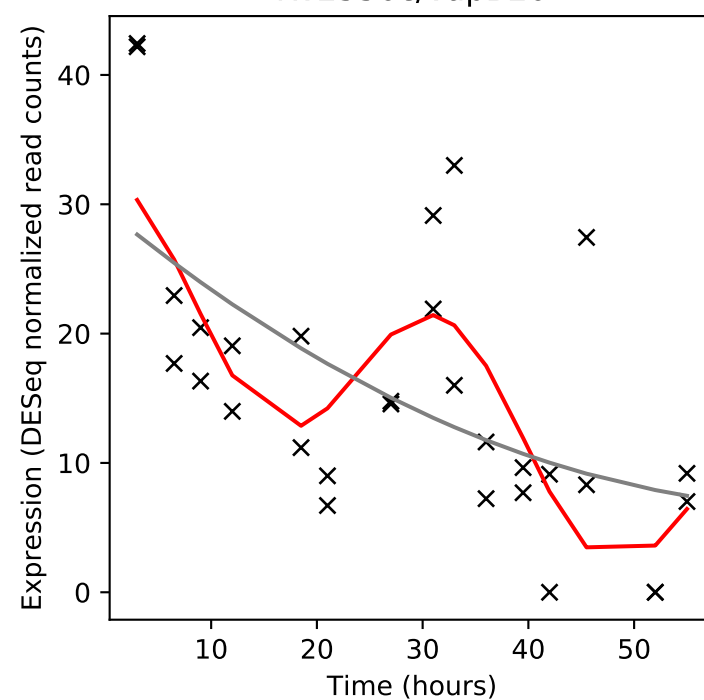

Rv2551c/-

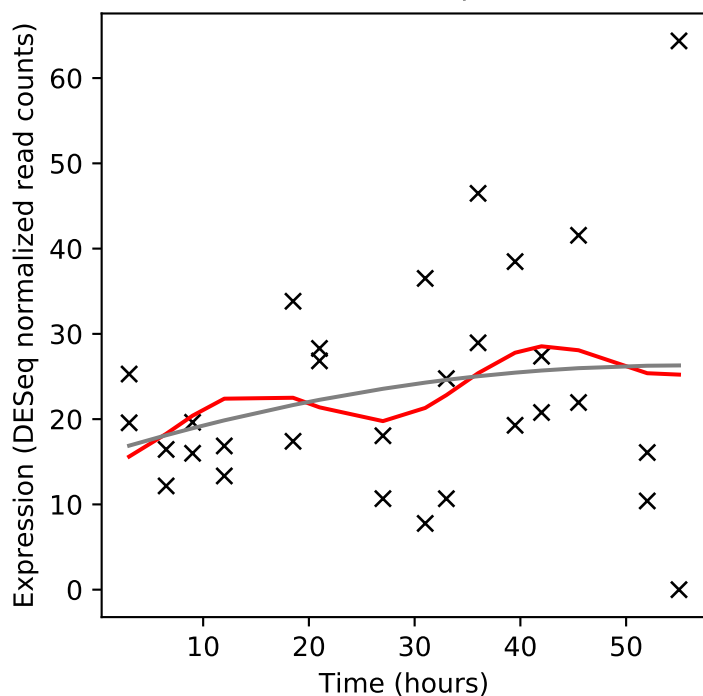

Rv2552c/aroE

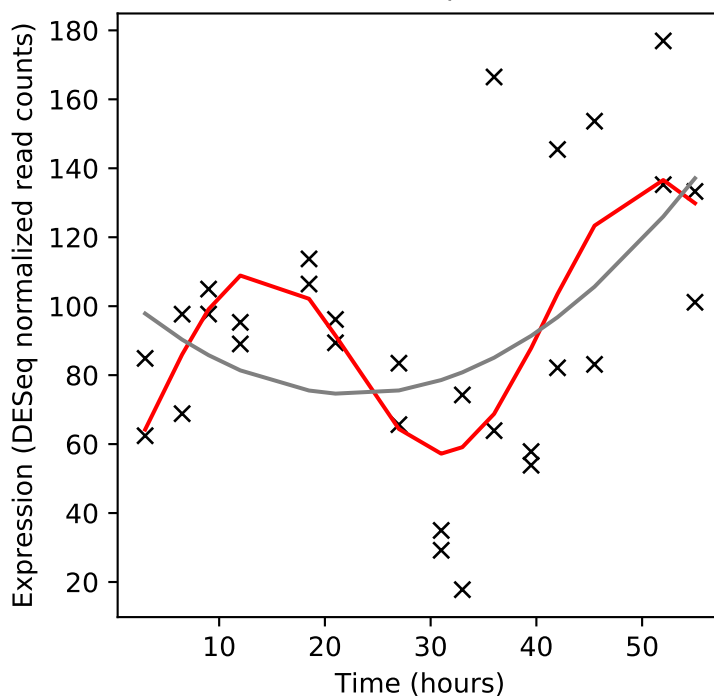

Rv2553c/-

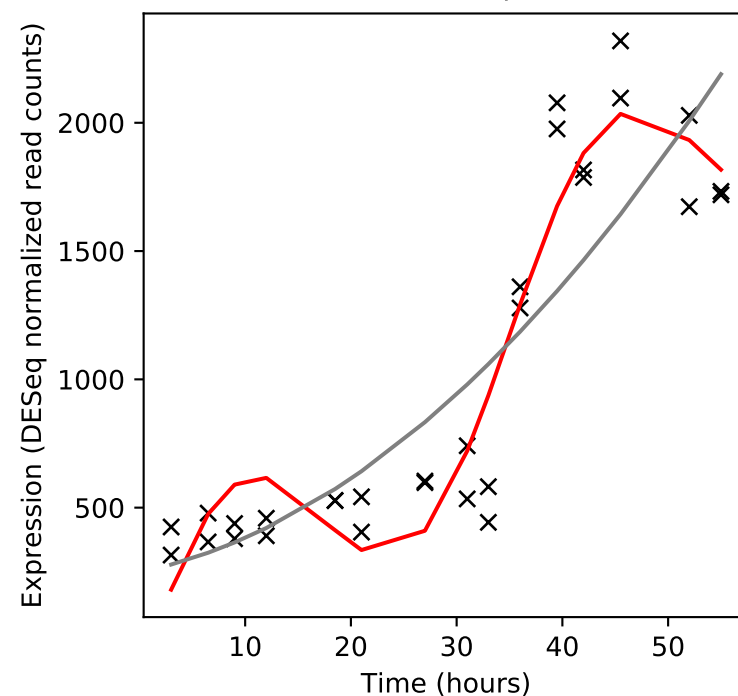

Rv2554c/-

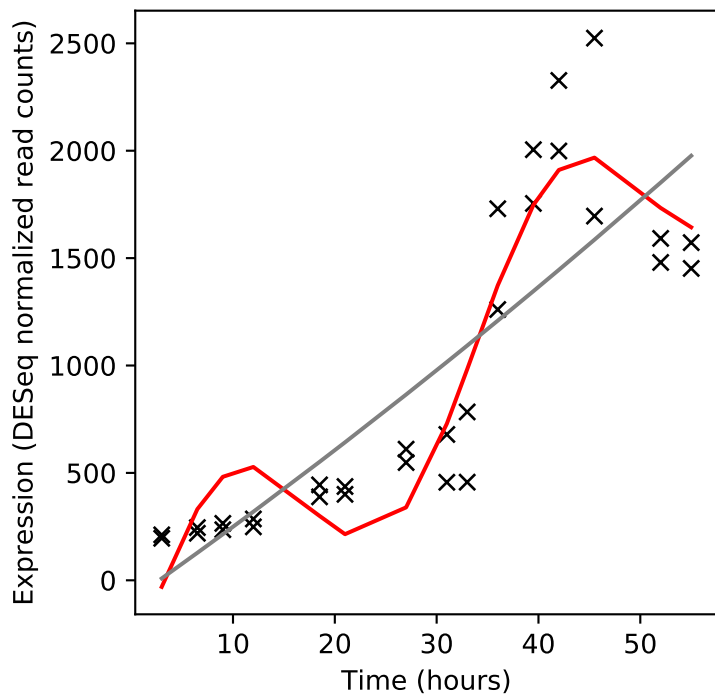

Rv2555c/alaS

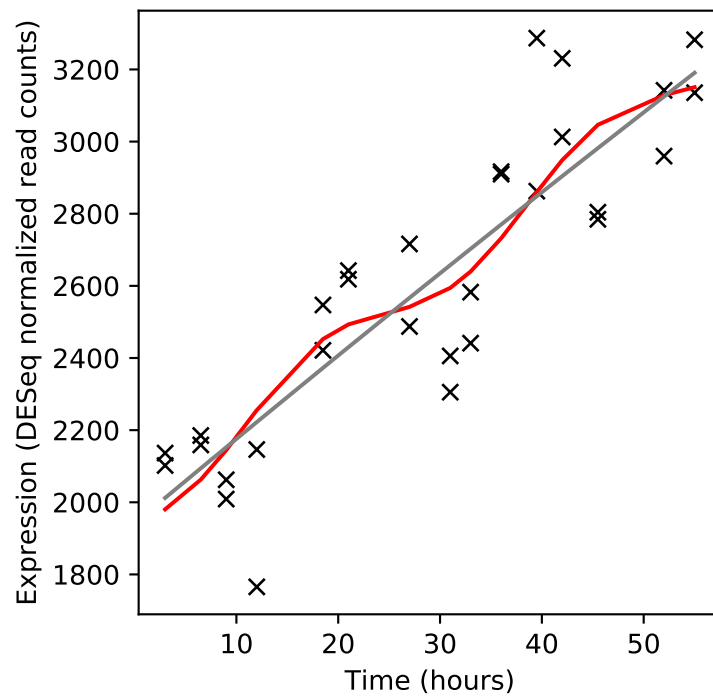

Rv2556c/-

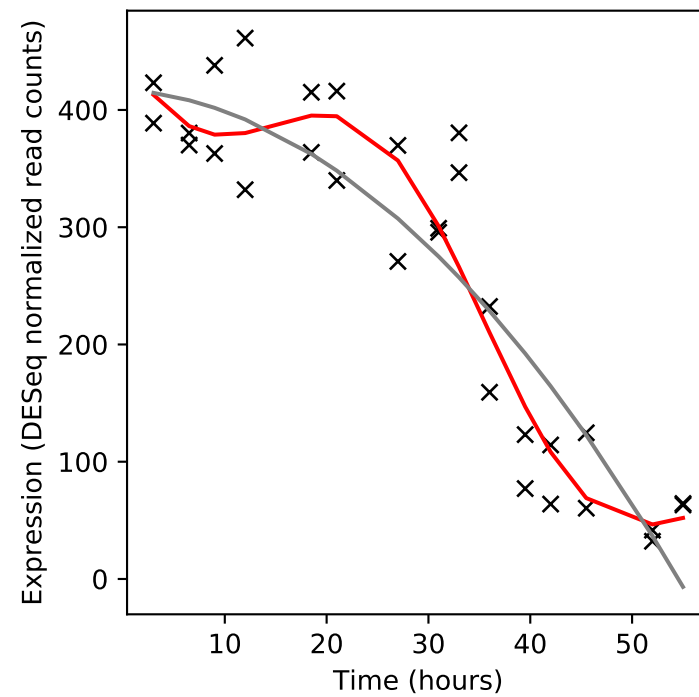

Rv2557/-

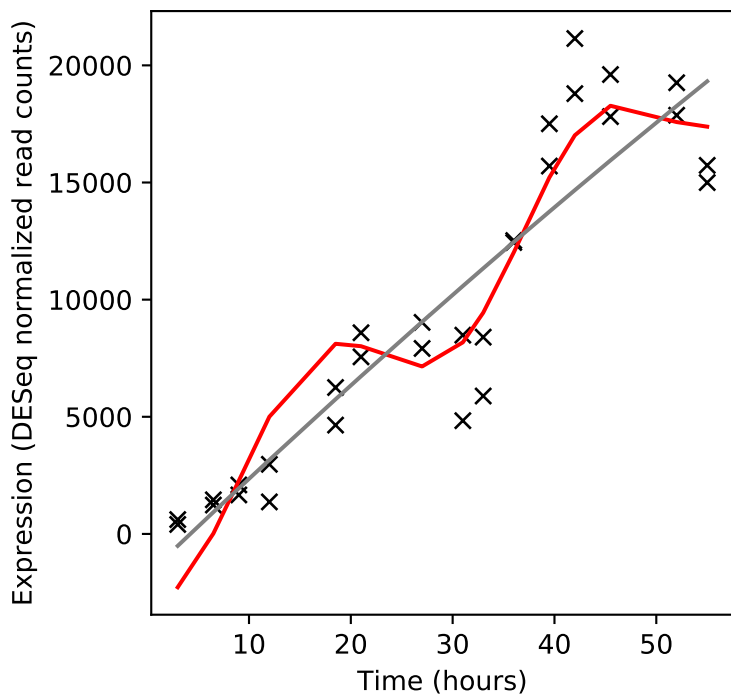

Rv2558/-

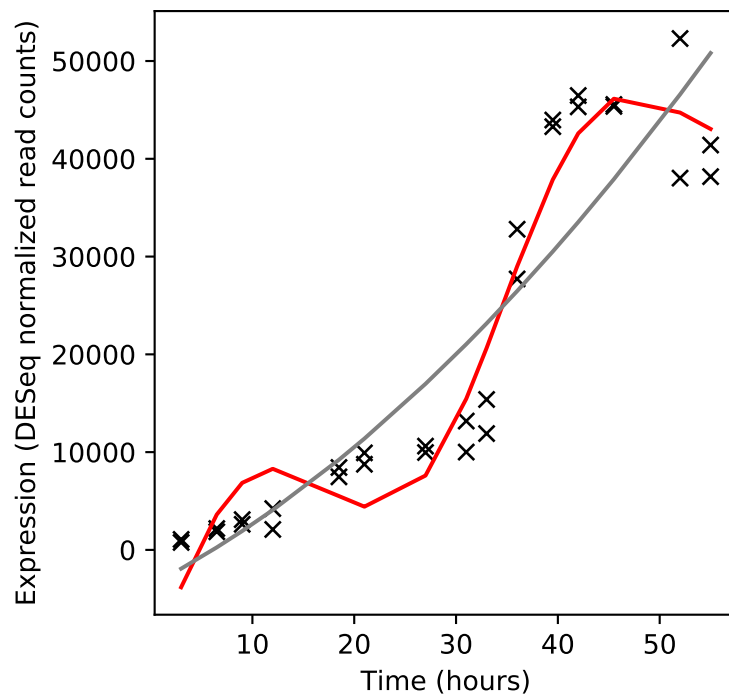

Rv2559c/-

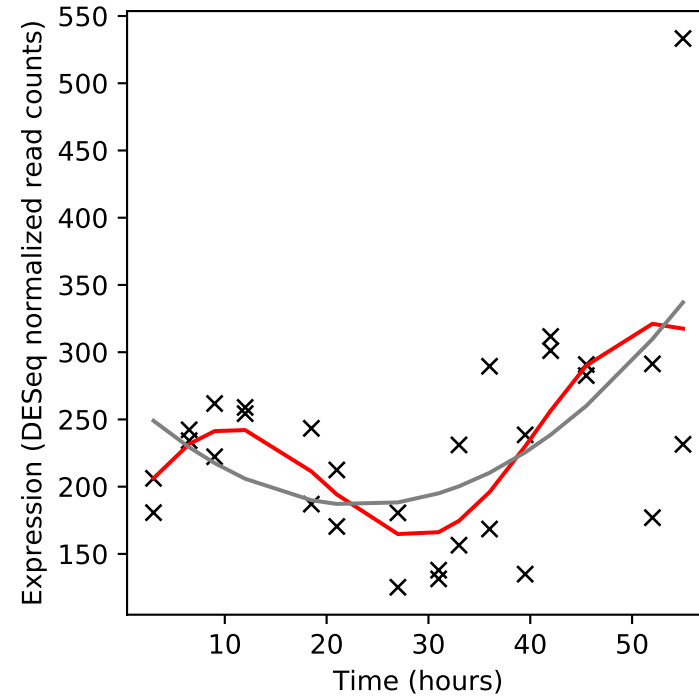

Rv2560/-

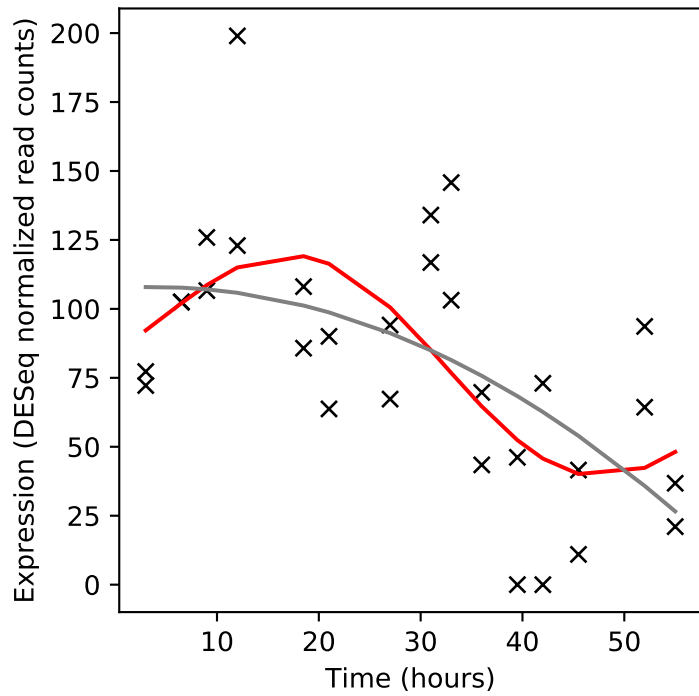

Rv2561/-

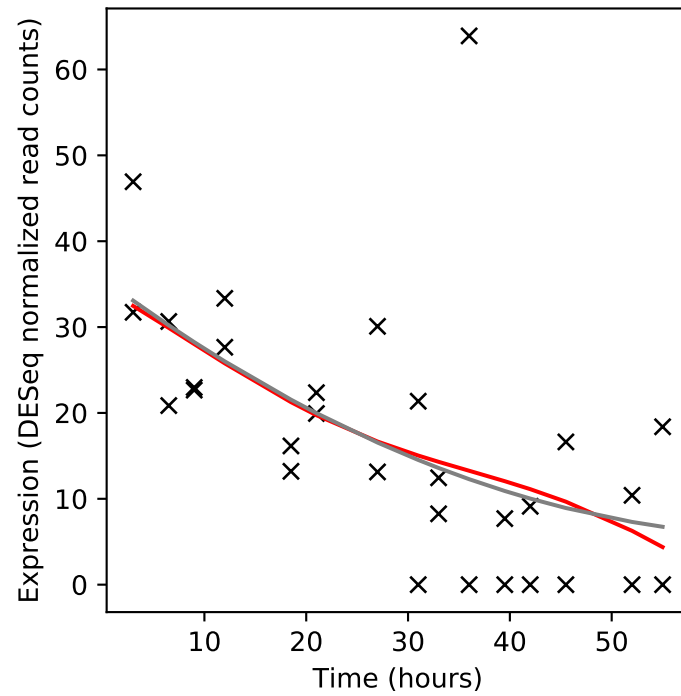

Rv2562/-

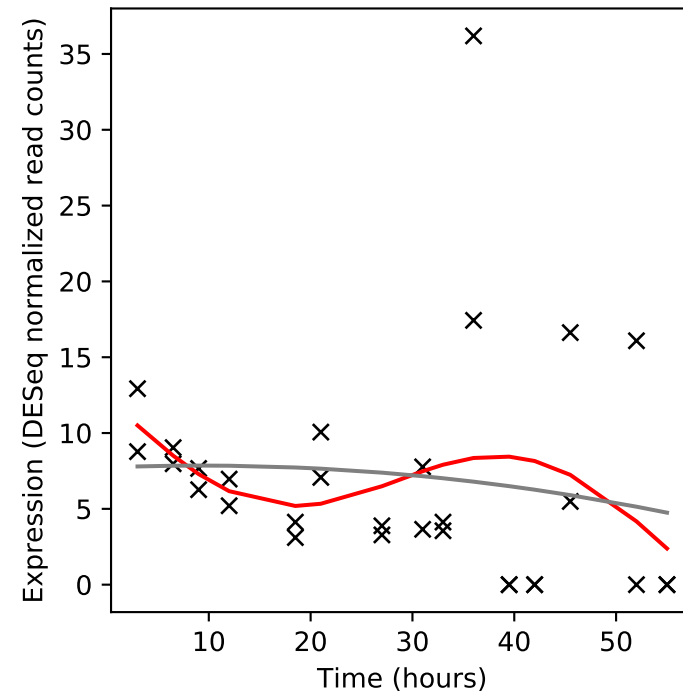

Rv2563/-

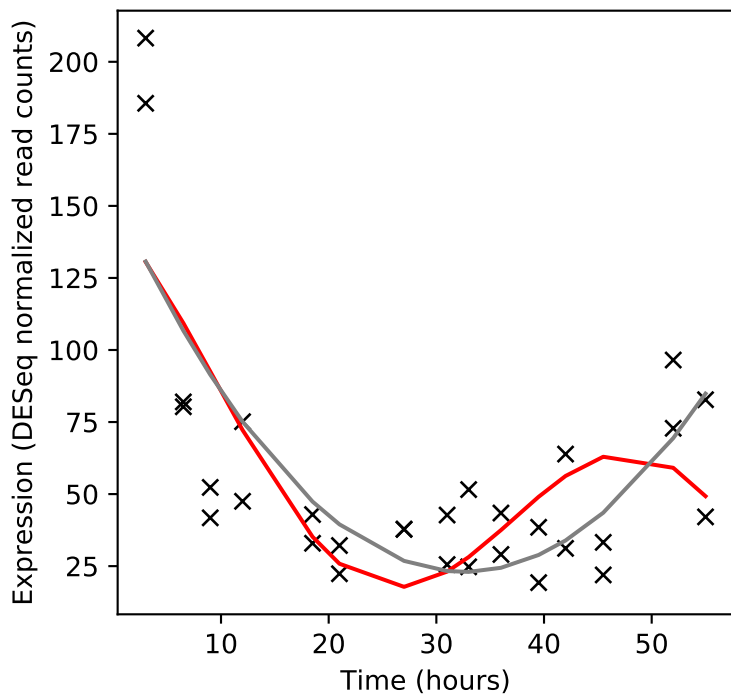

Rv2564/glnQ

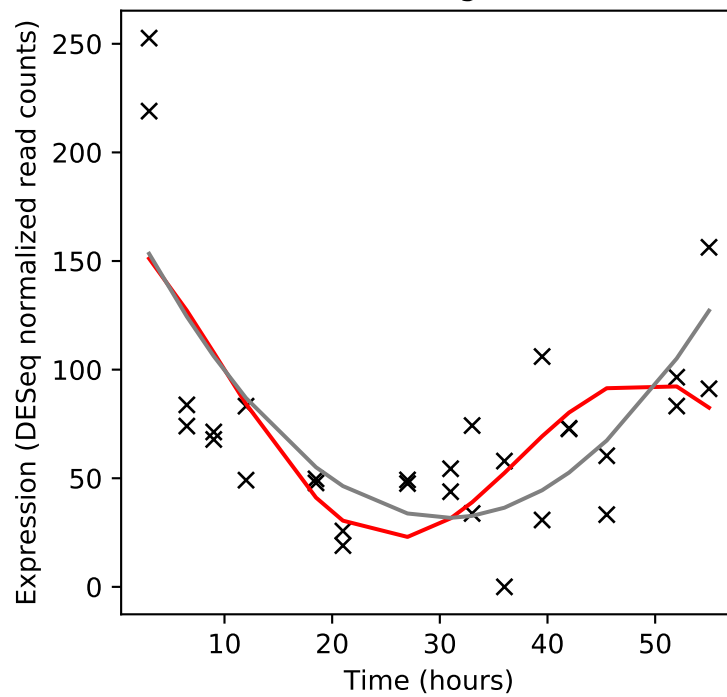

Rv2565/-

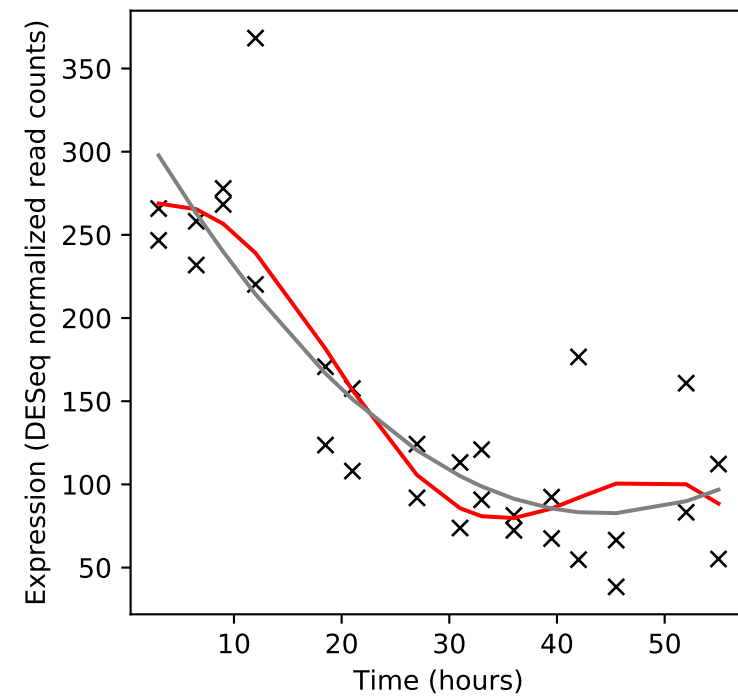

Rv2566/-

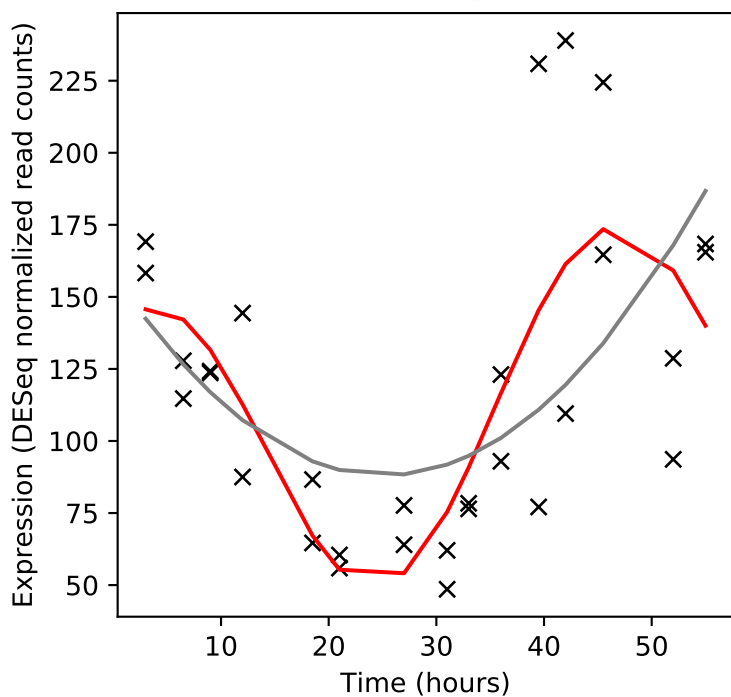

Rv2567/-

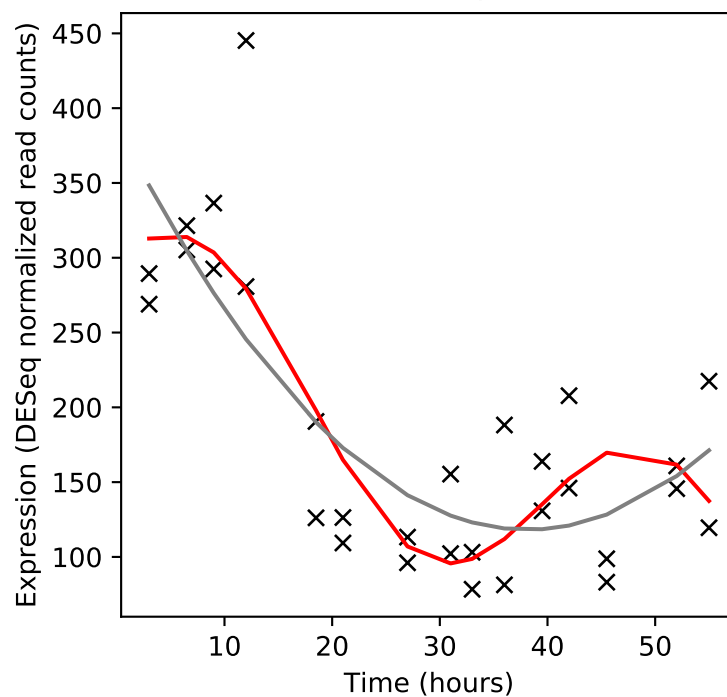

Rv2568c/-

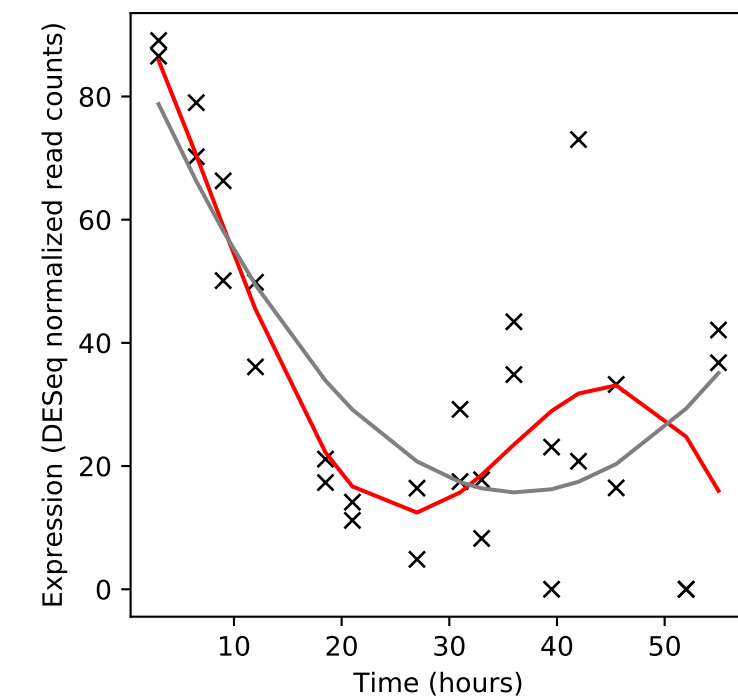

Rv2569c/-

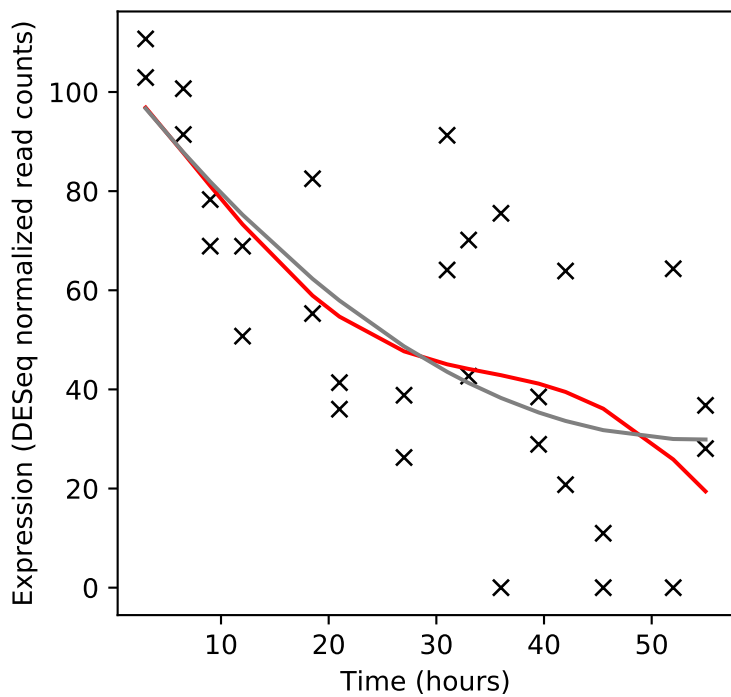

Rv2570/-

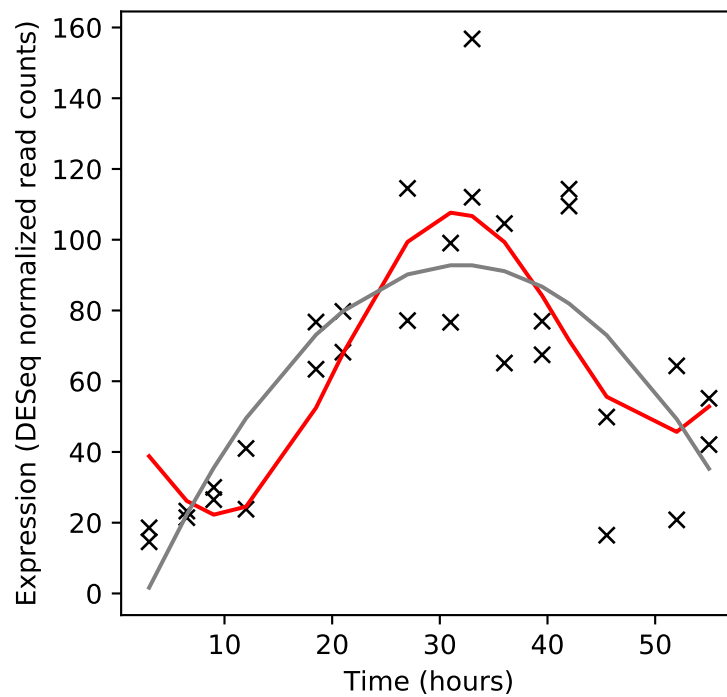

Rv2571c/-

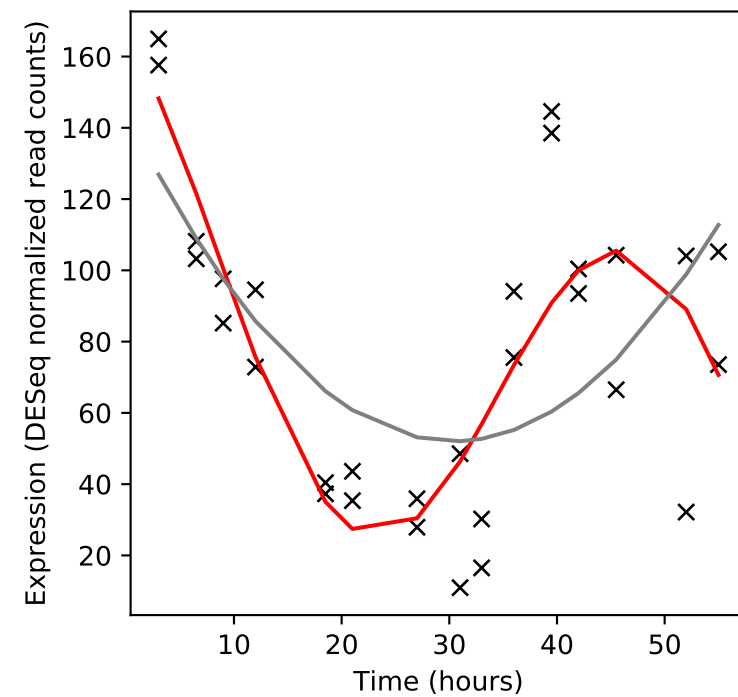

Rv2572c/aspS

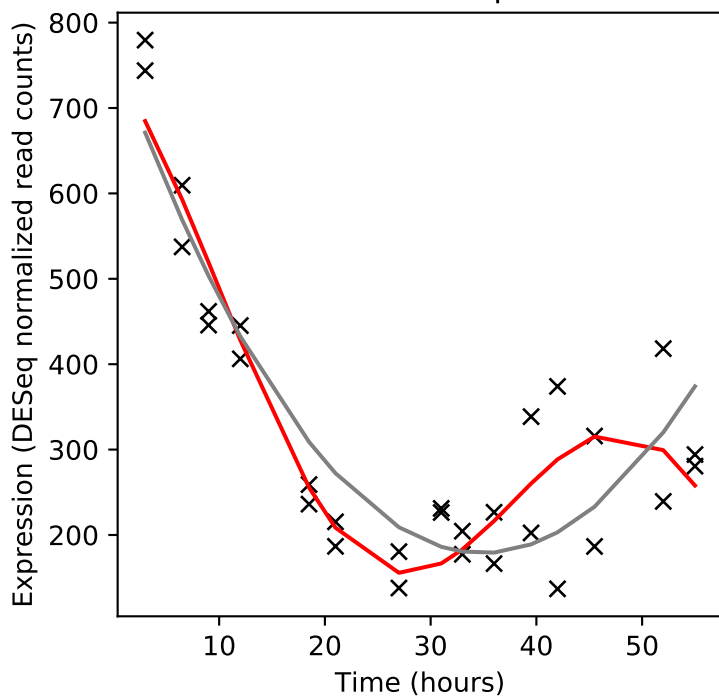

Rv2573/-

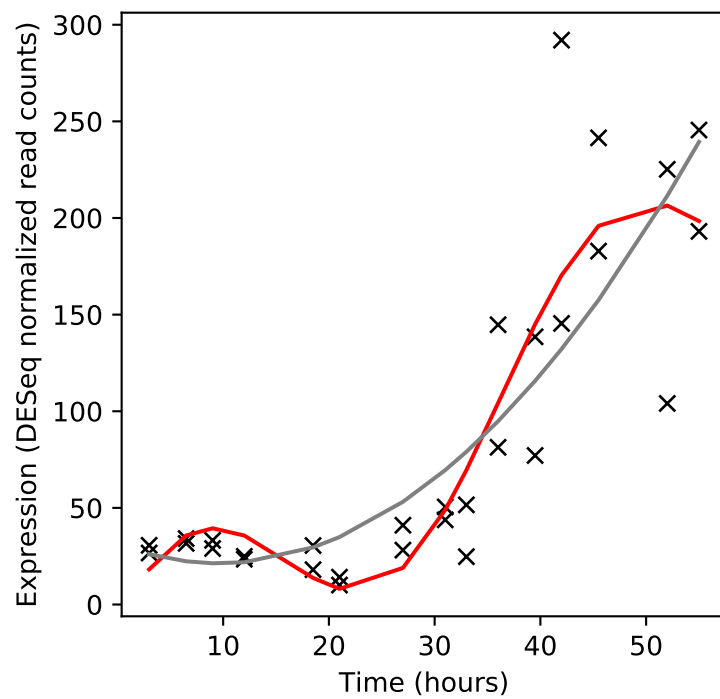

Rv2574/-

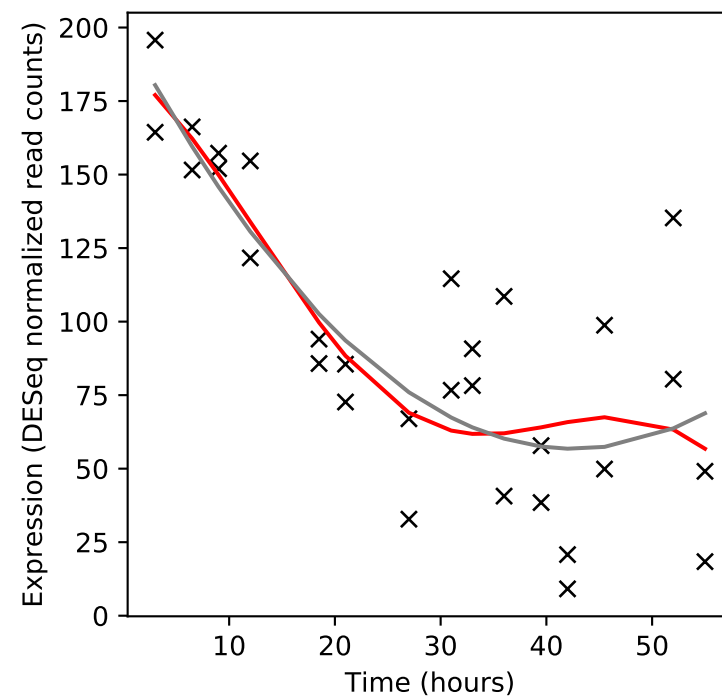

Rv2575/-

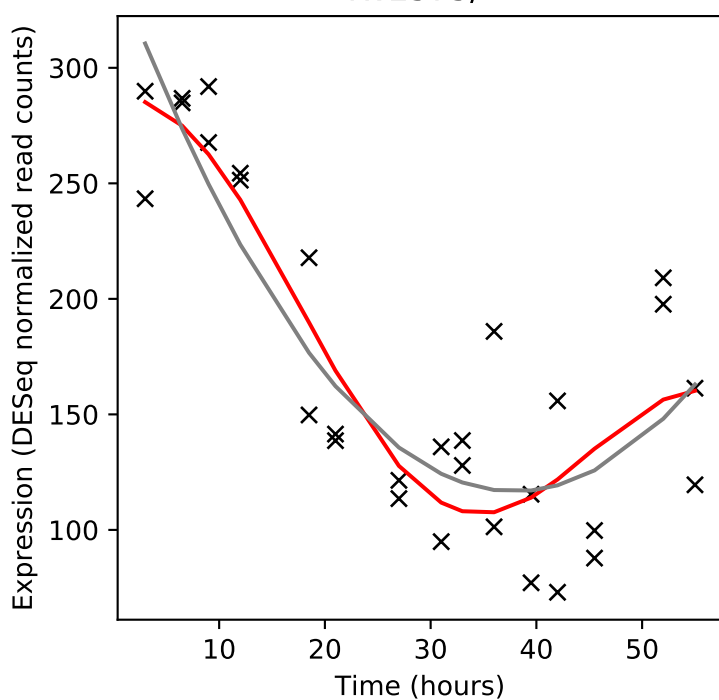

Rv2576c/-

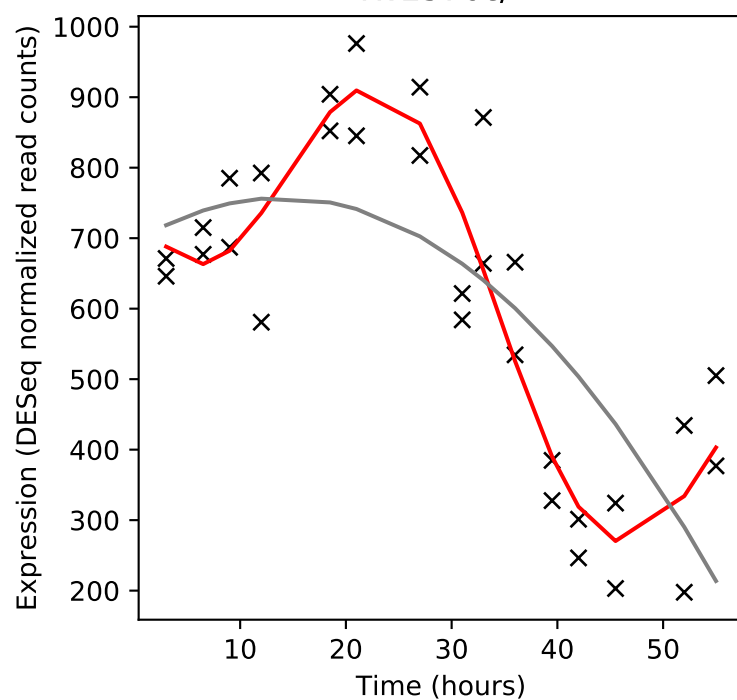

Rv2577/-

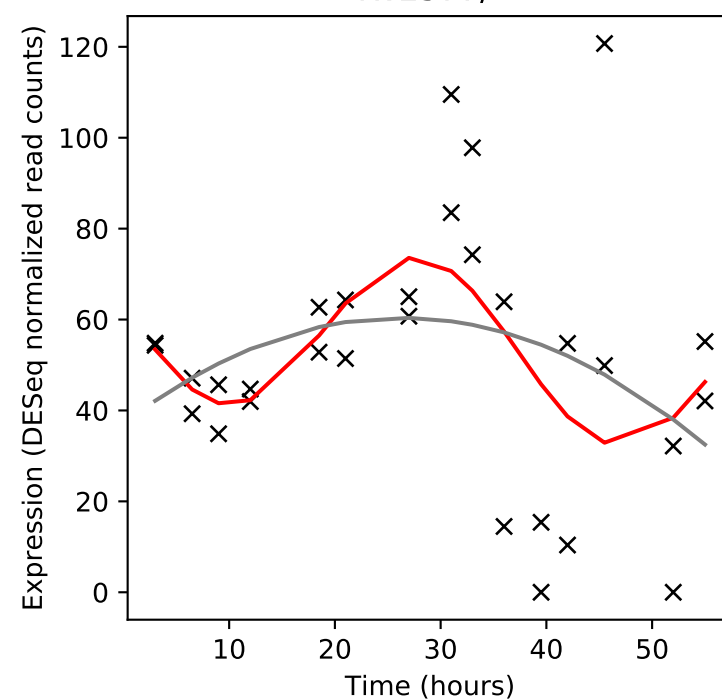

Rv2578c/-

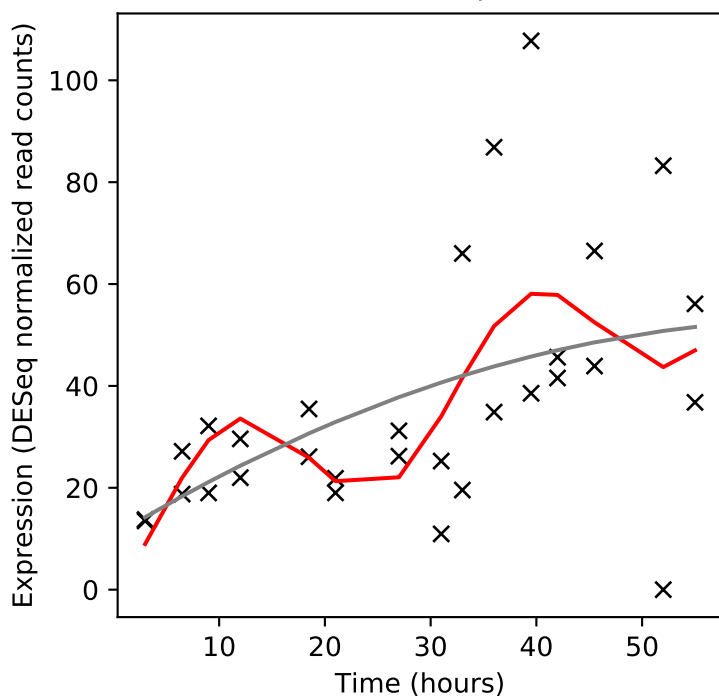

Rv2579/dhaA

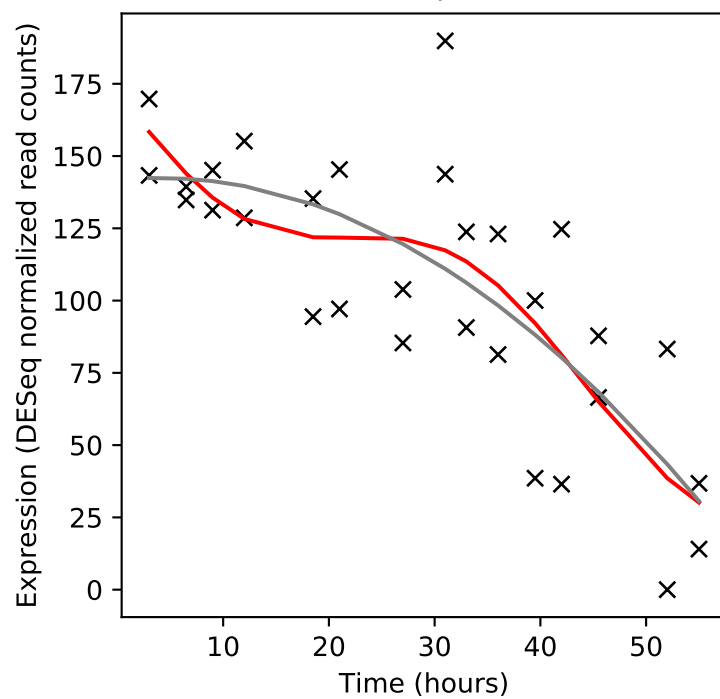

Rv2580c/hisS

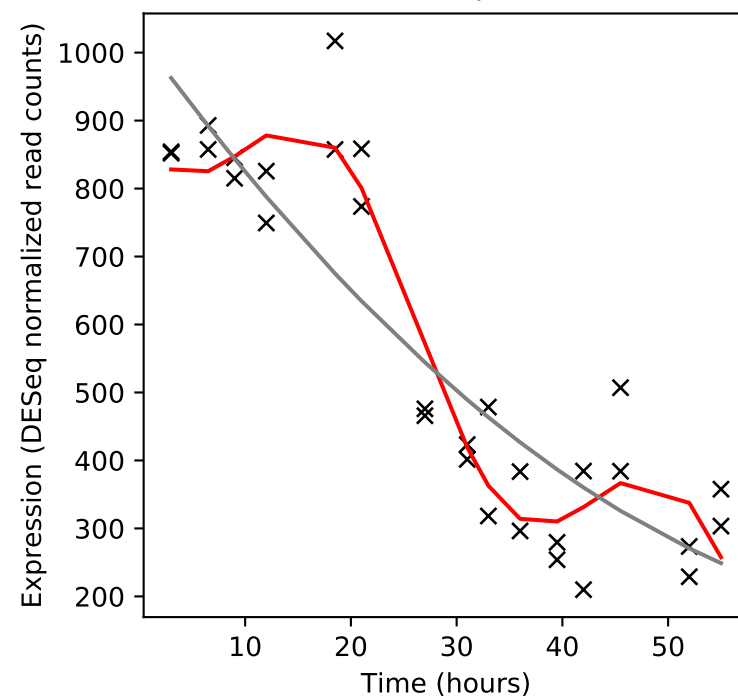

Rv2581c/-

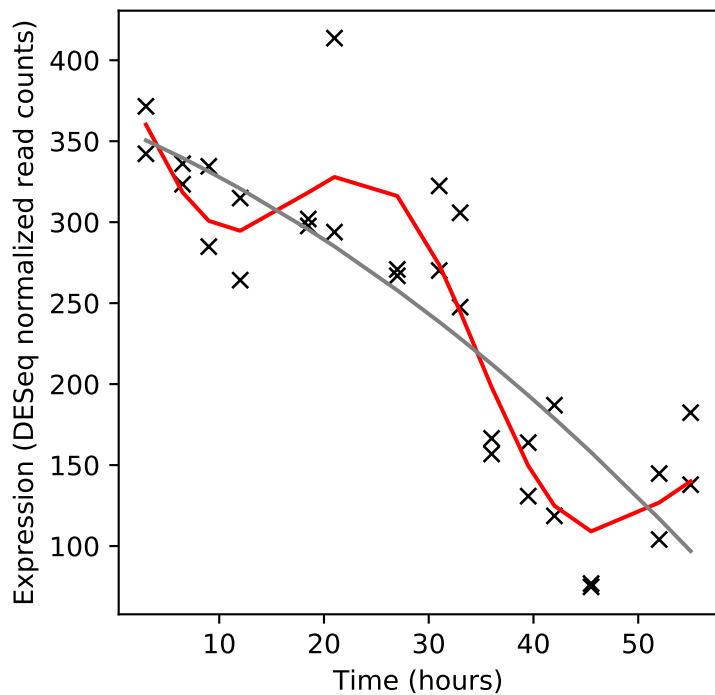

Rv2582/ppiB

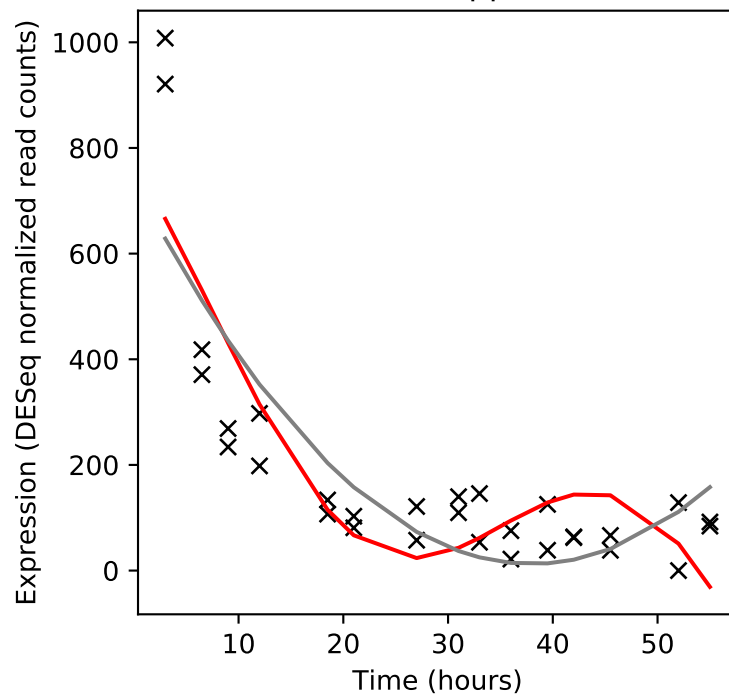

Rv2583c/relA

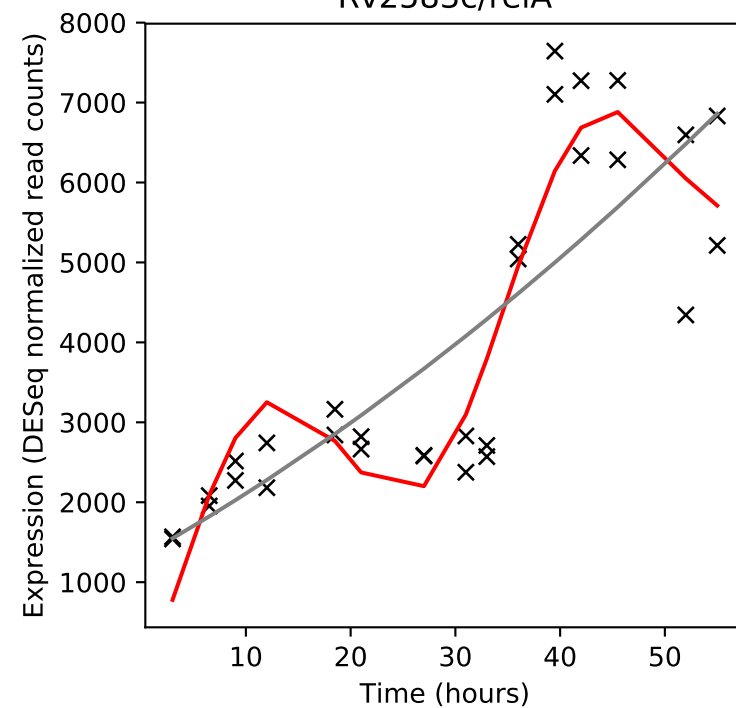

Rv2584c/apt

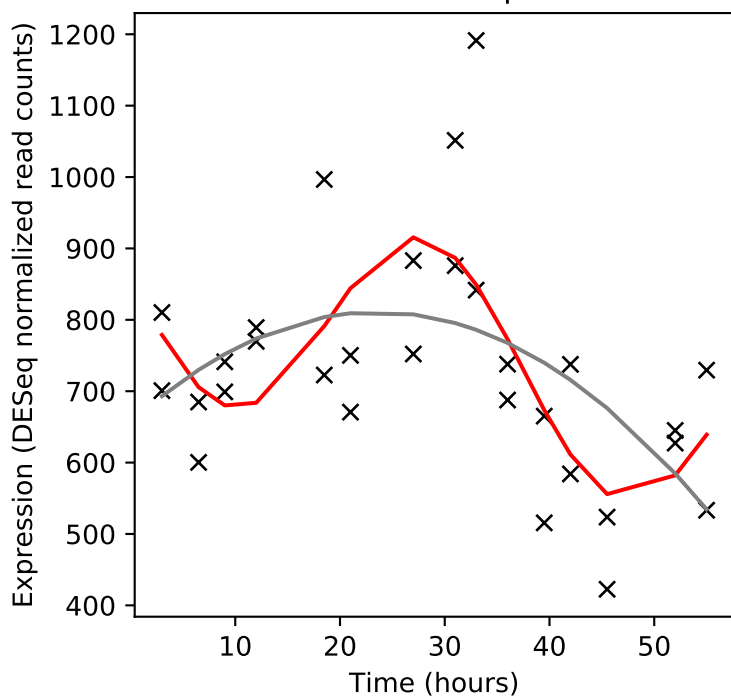

Rv2585c/-

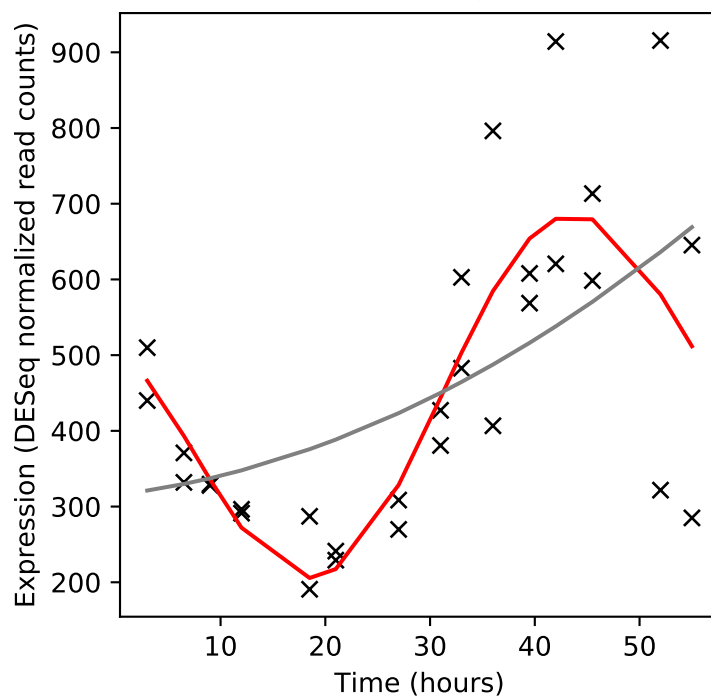

Rv2586c/secF

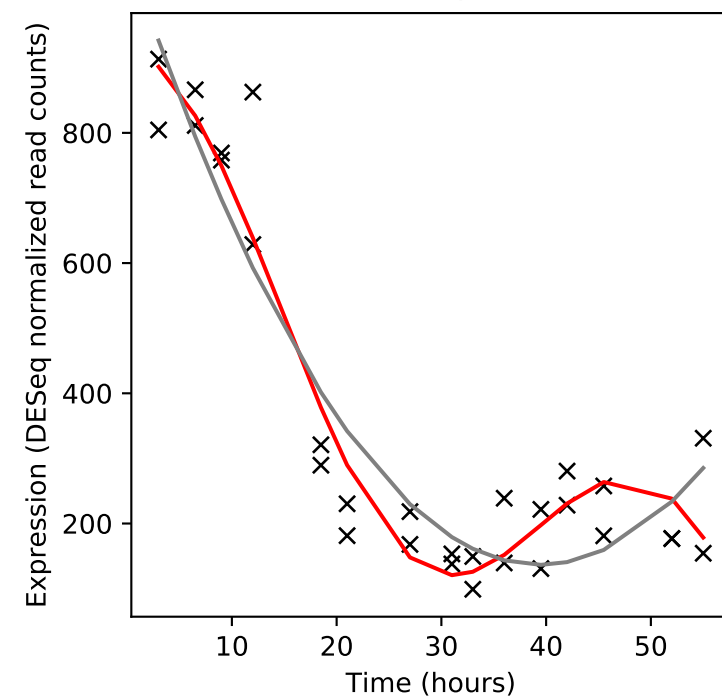

Rv2587c/secD

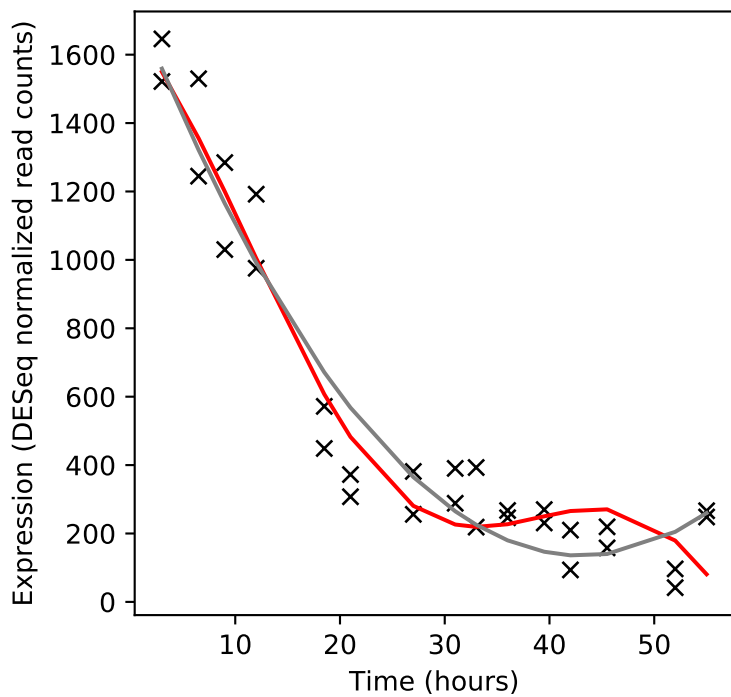

Rv2588c/yajC

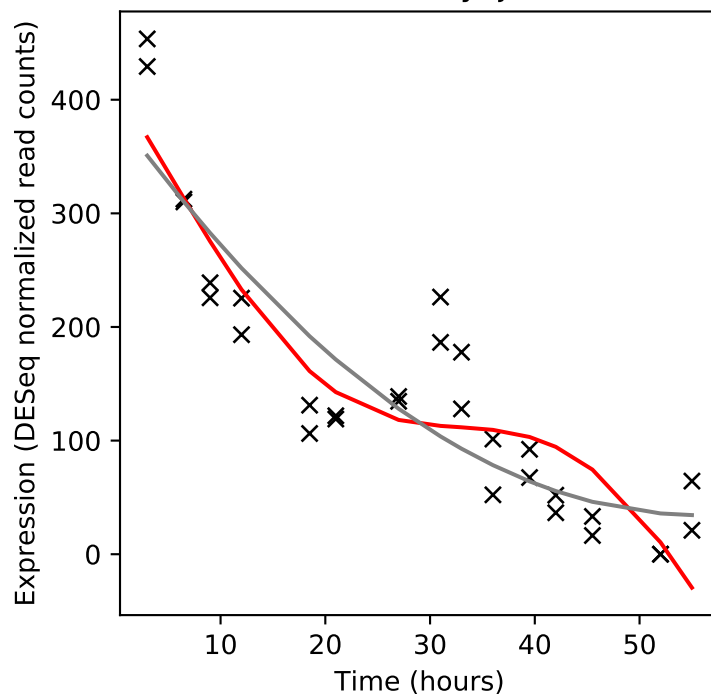

Rv2589/gabT

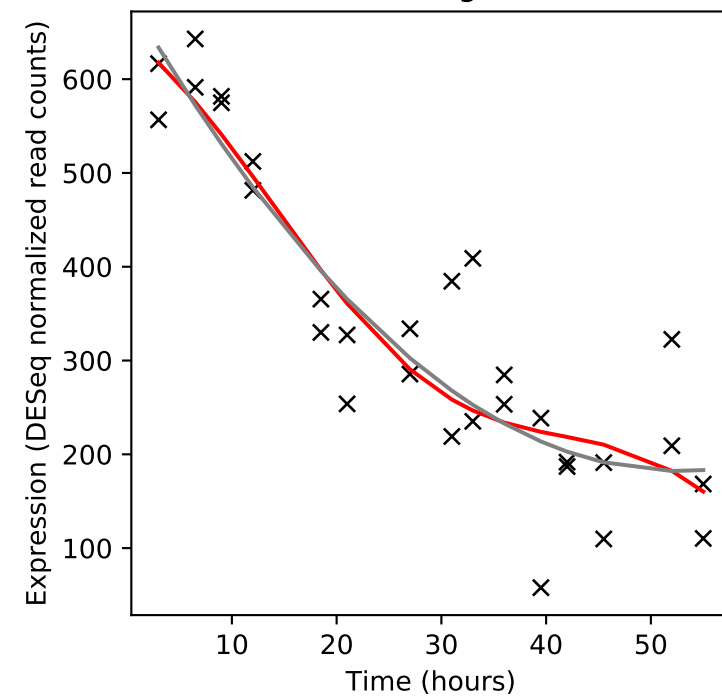



Rv2590/fadD9

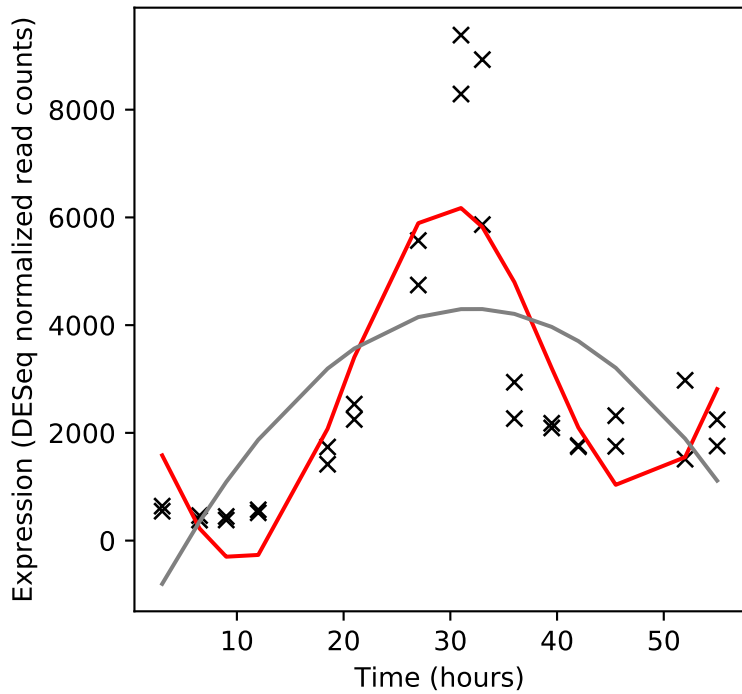

Rv2591/PE\_PGRS44

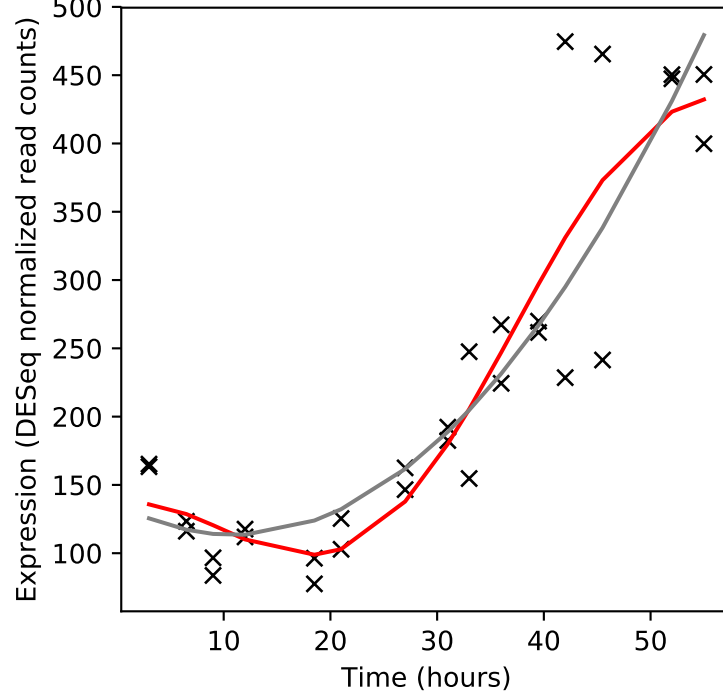

Rv2592c/ruvB

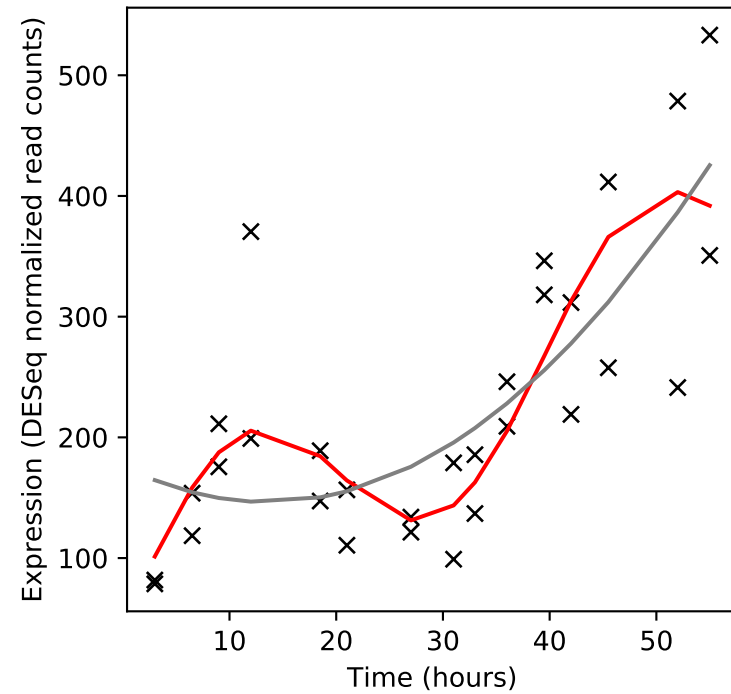

Rv2593c/ruvA

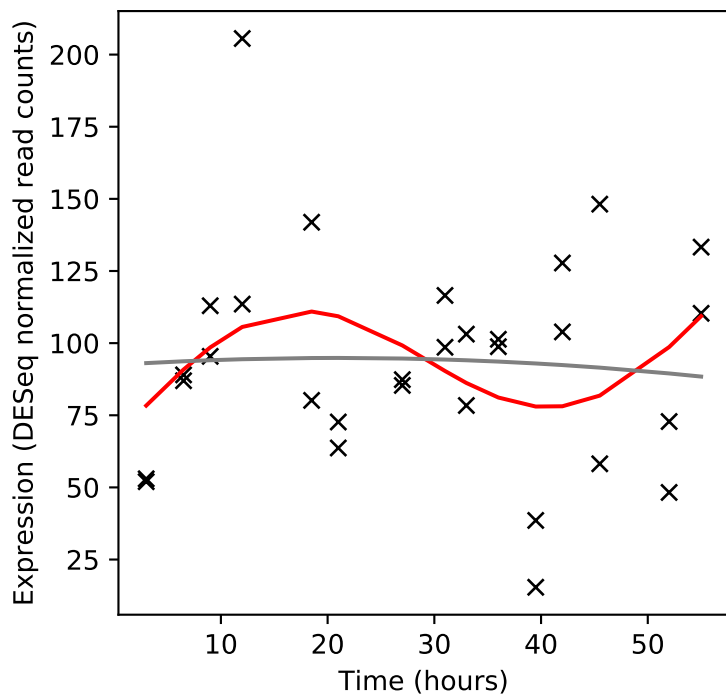

Rv2594c/ruvC

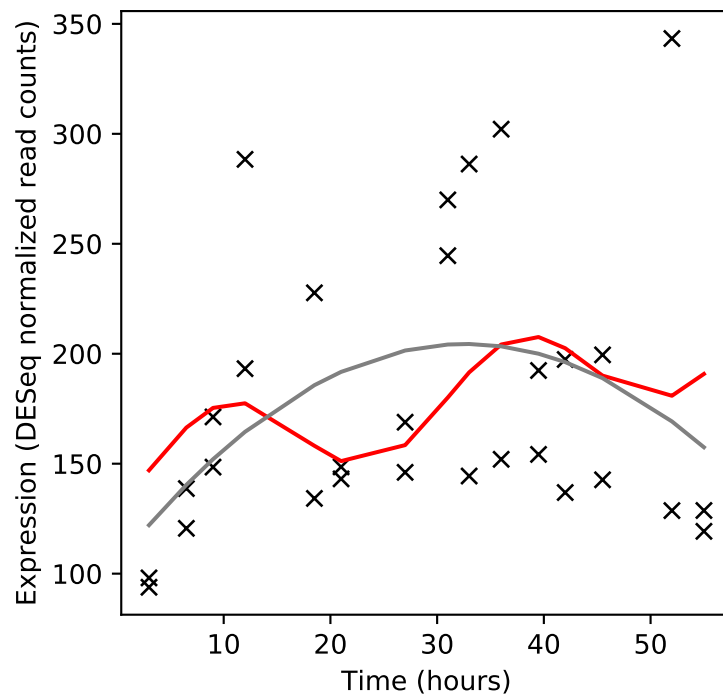

Rv2595/vapB40

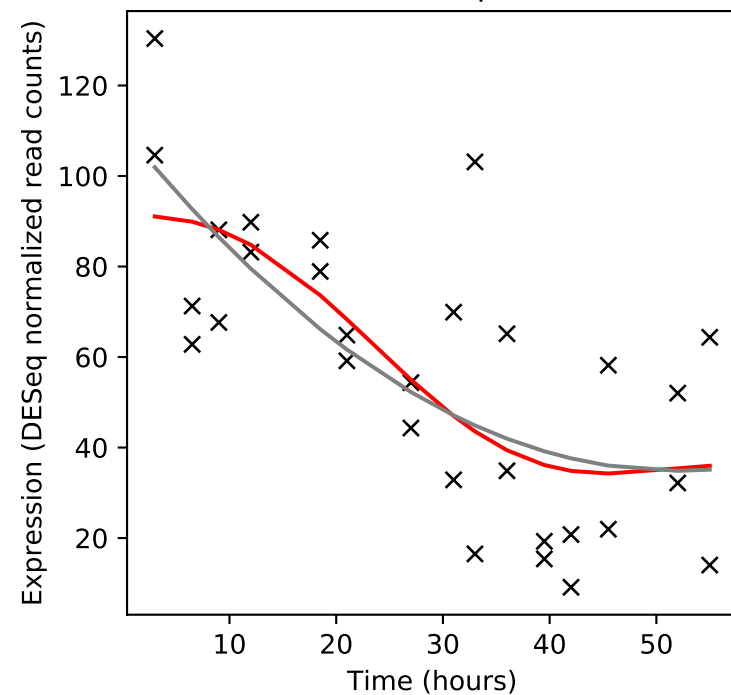

Rv2596/vapC40

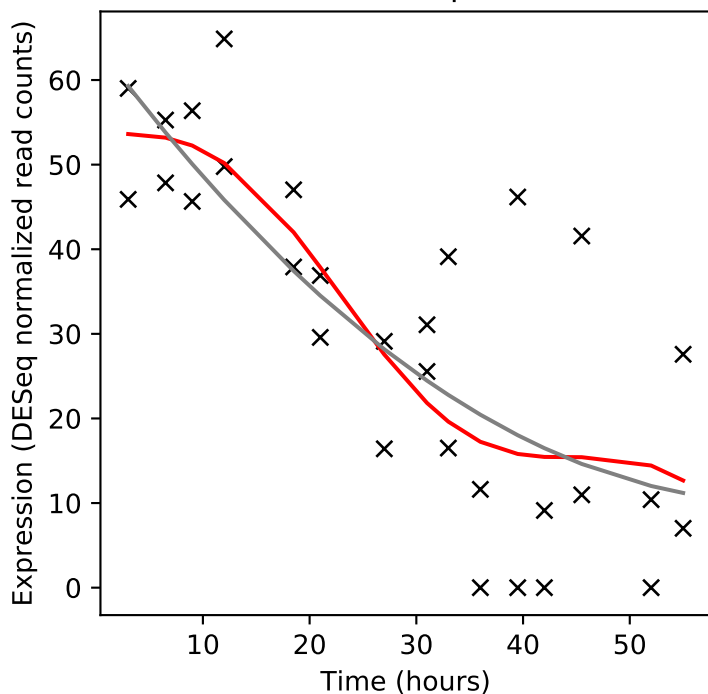

Rv2597/-

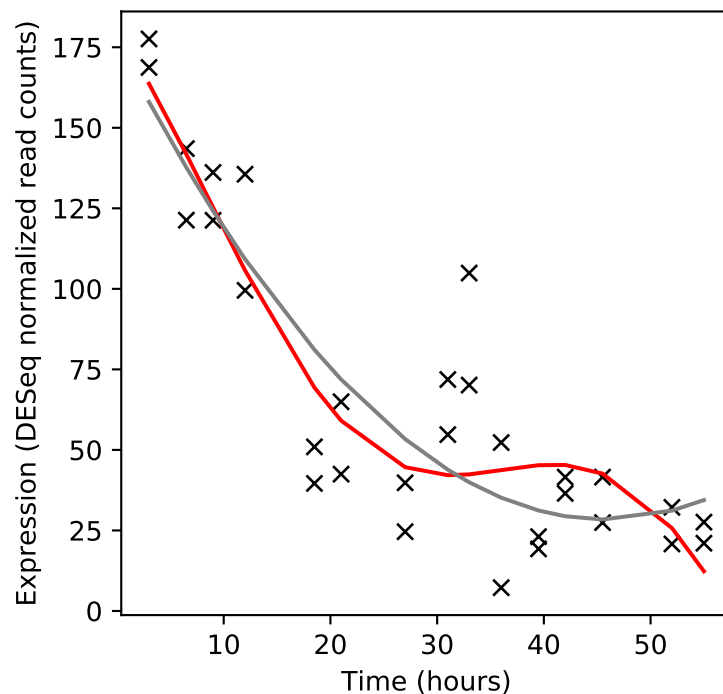

Rv2598/-

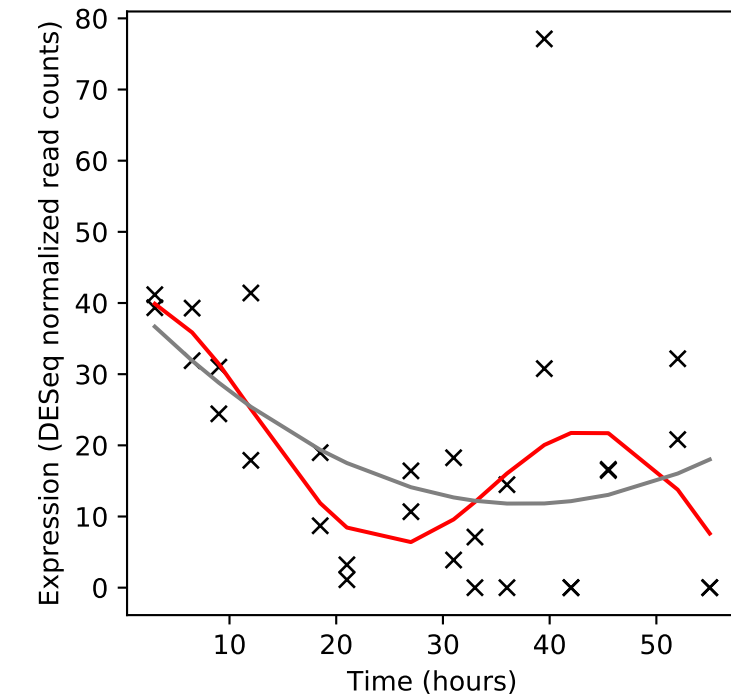

Rv2599/-

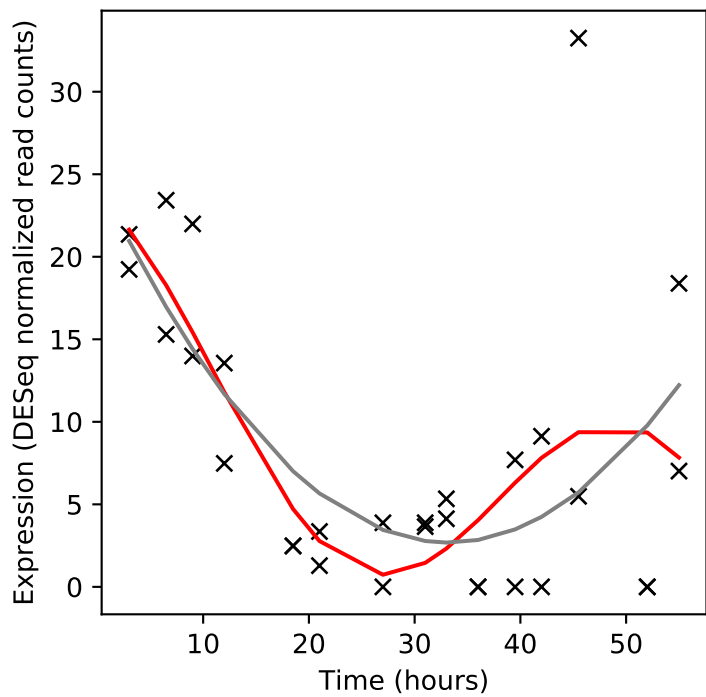

Rv2600/-

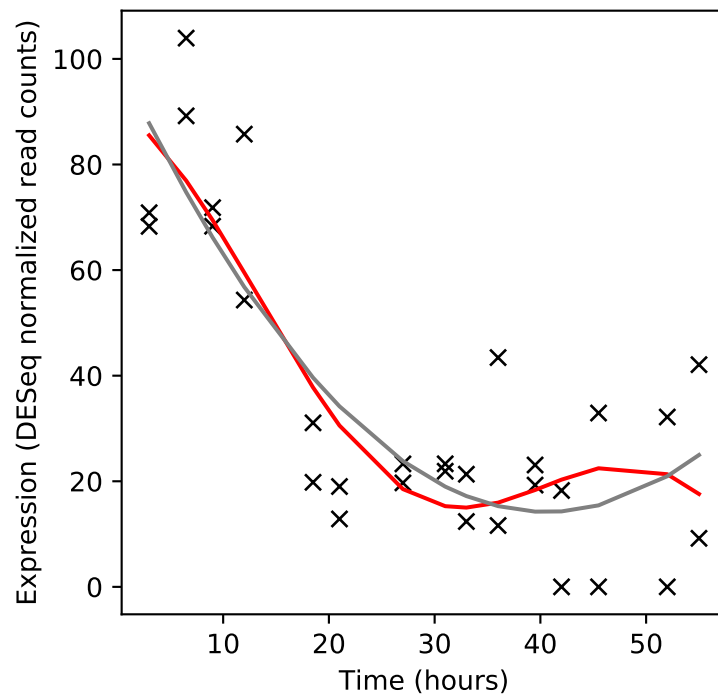

Rv2601/speE

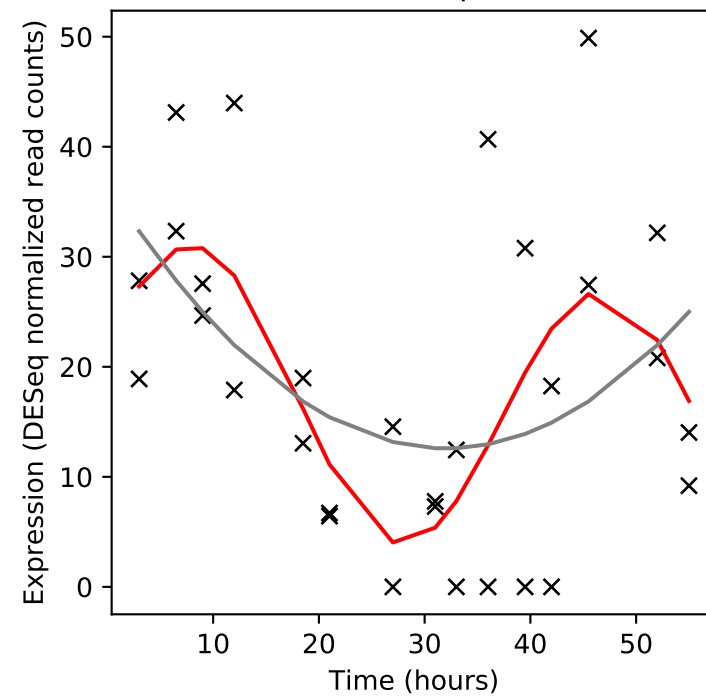

Rv2601A/vapB41

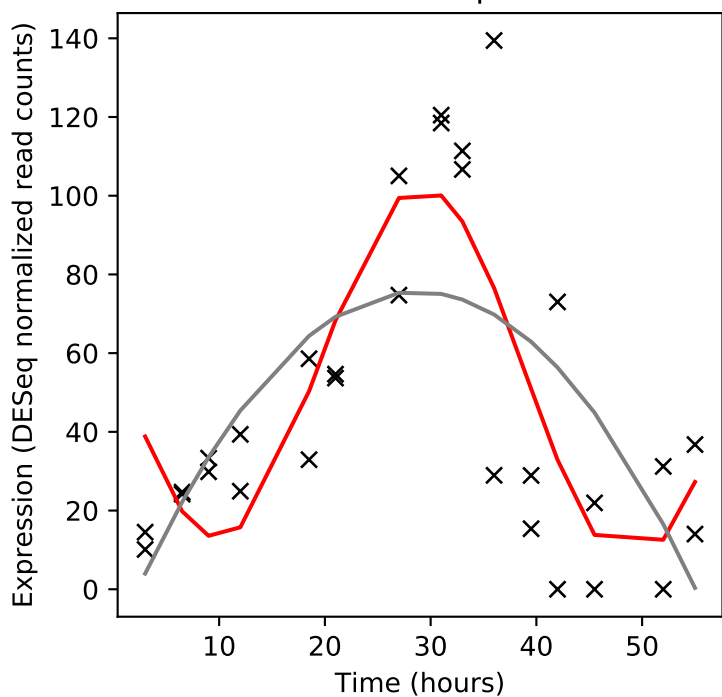

Rv2602/vapC41

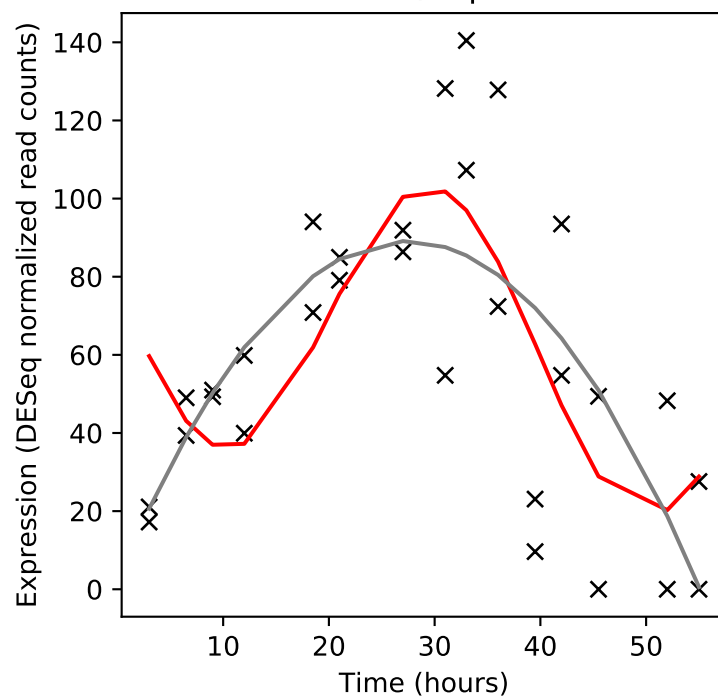

Rv2603c/-

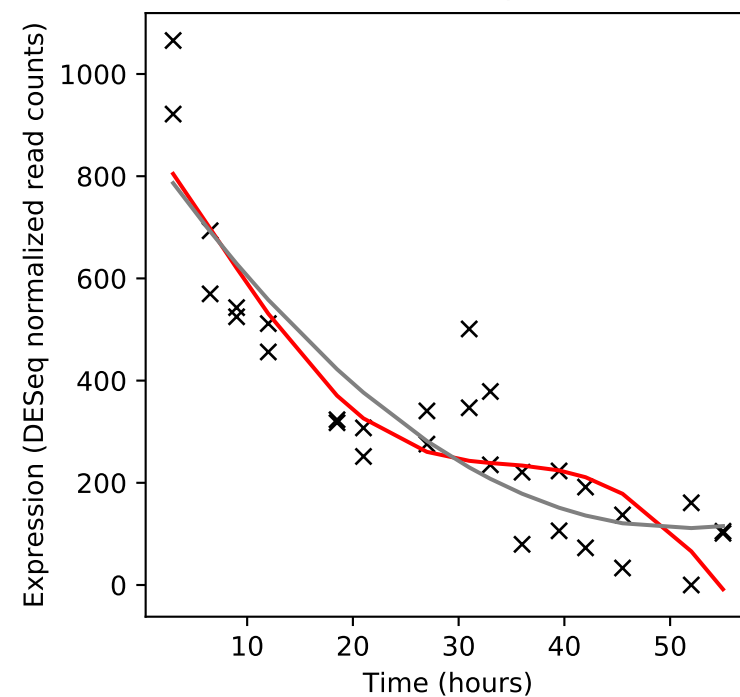

Rv2604c/snoP

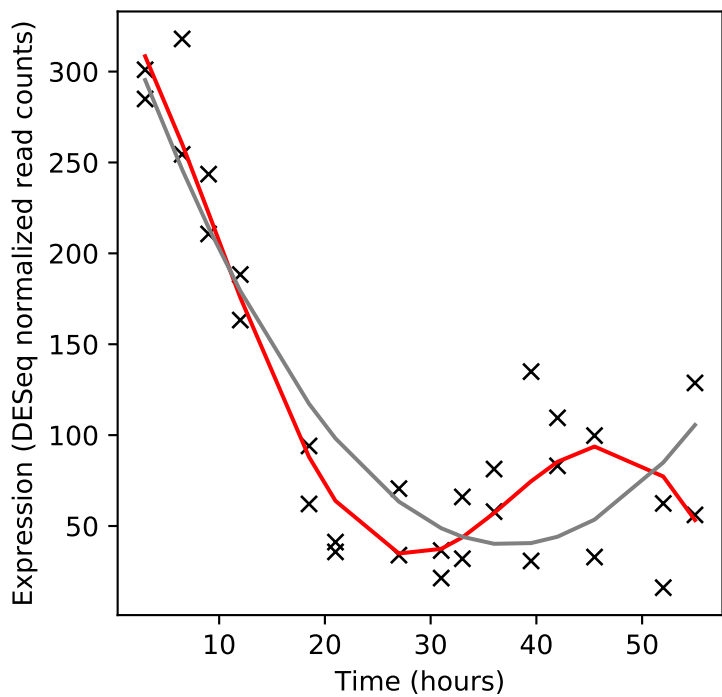

Rv2605c/tesB2

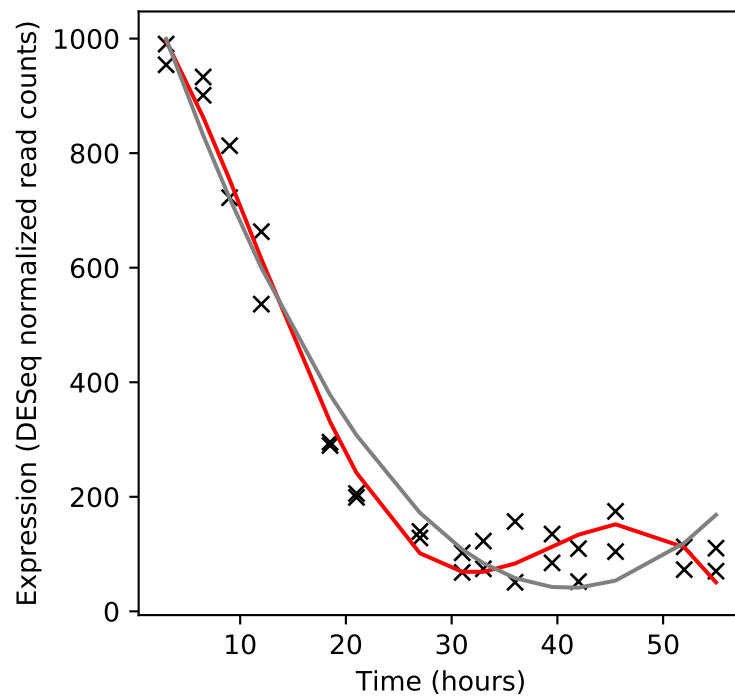

Rv2606c/snzP

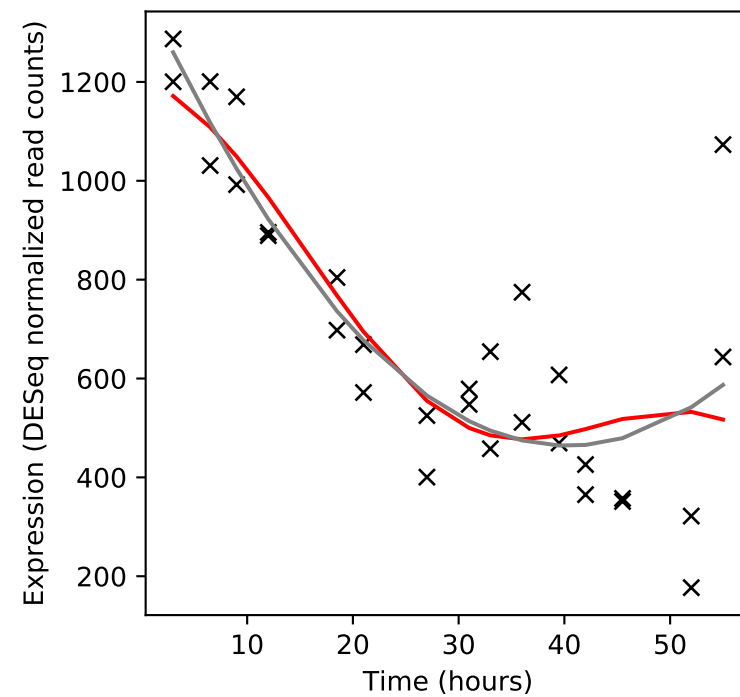

Rv2607/pdxH

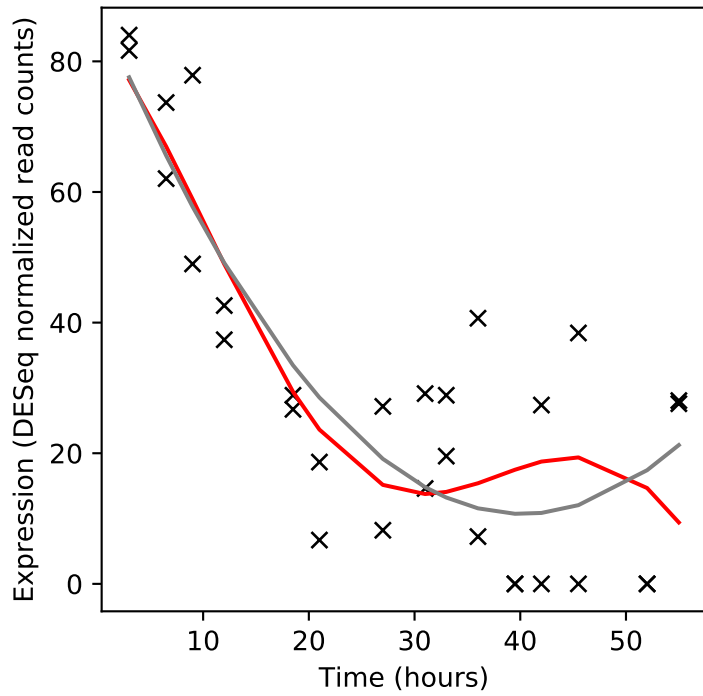

Rv2608/PPE42

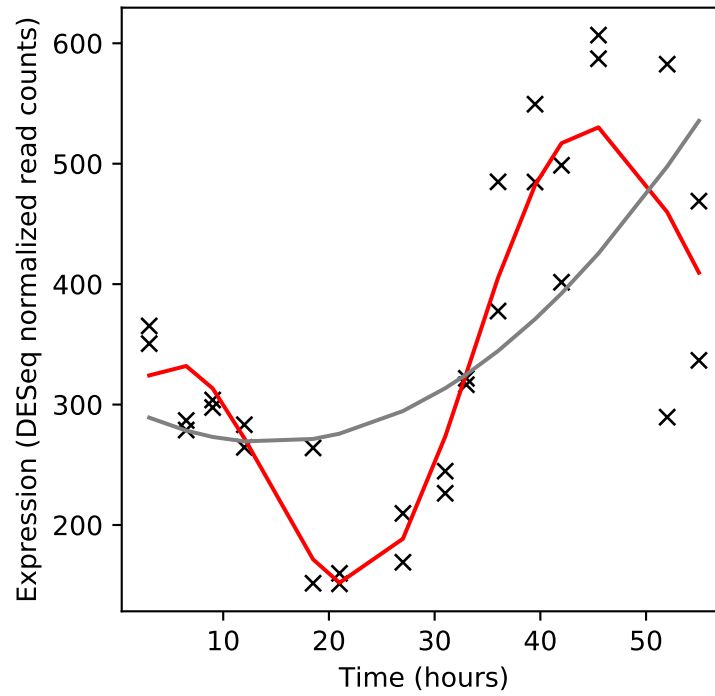

Rv2609c/-

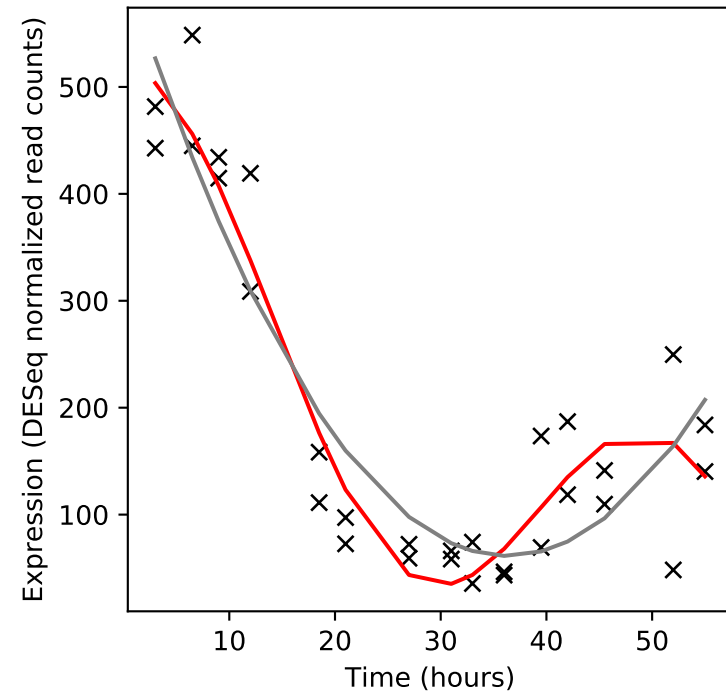

Rv2610c/pimA

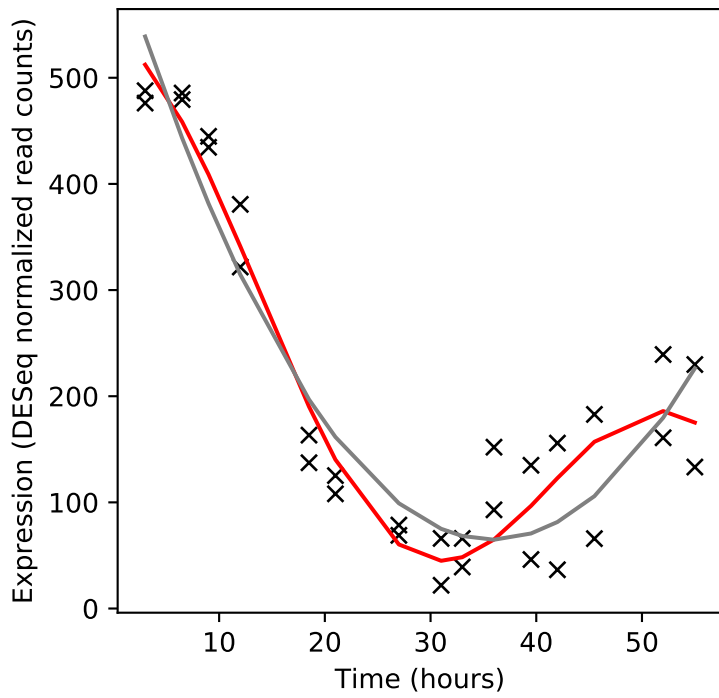

Rv2611c/-

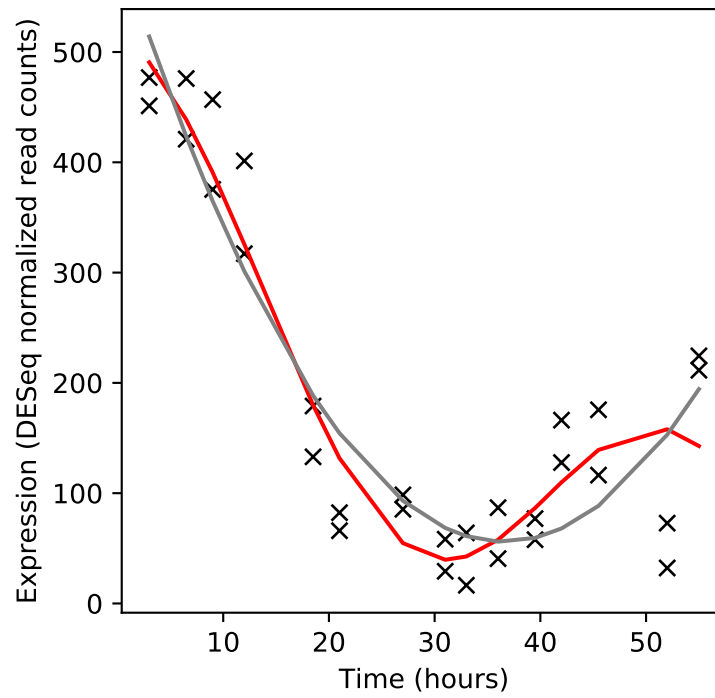

Rv2612c/pgsA1

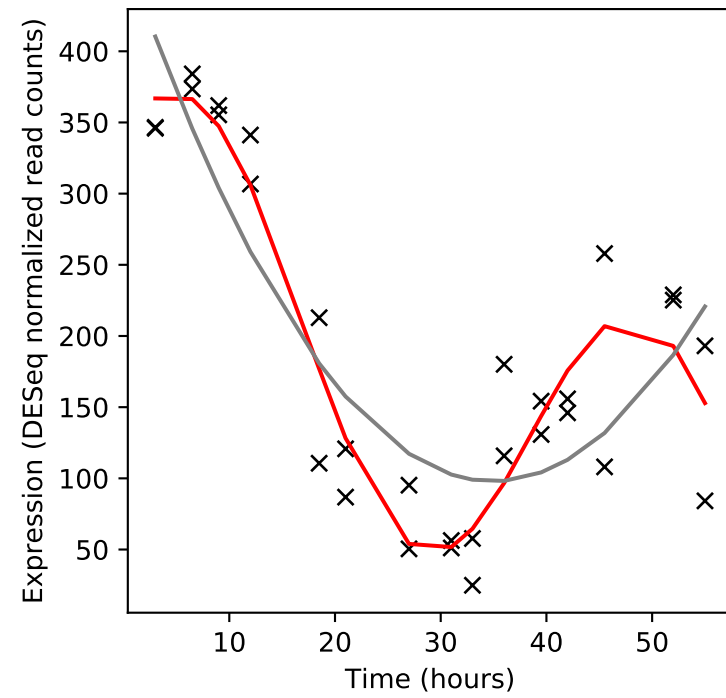

Rv2613c/-

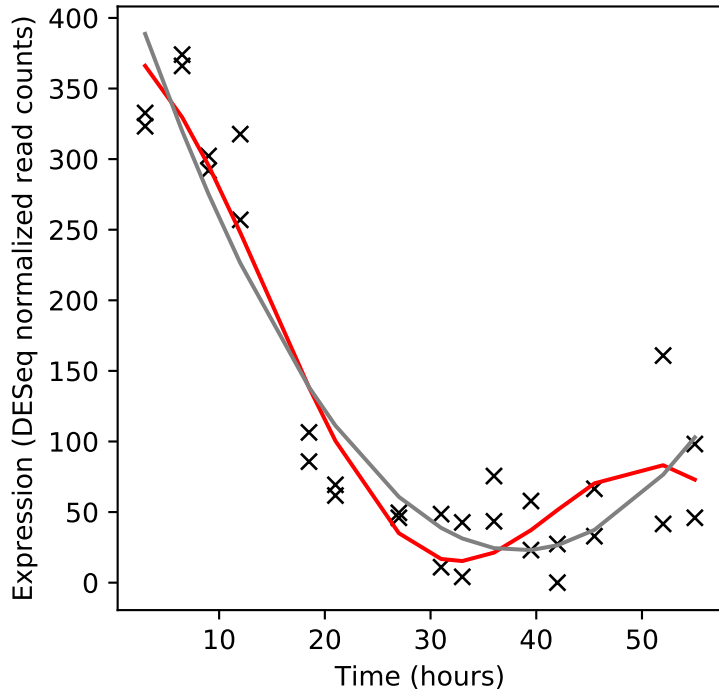

Rv2614c/thrS

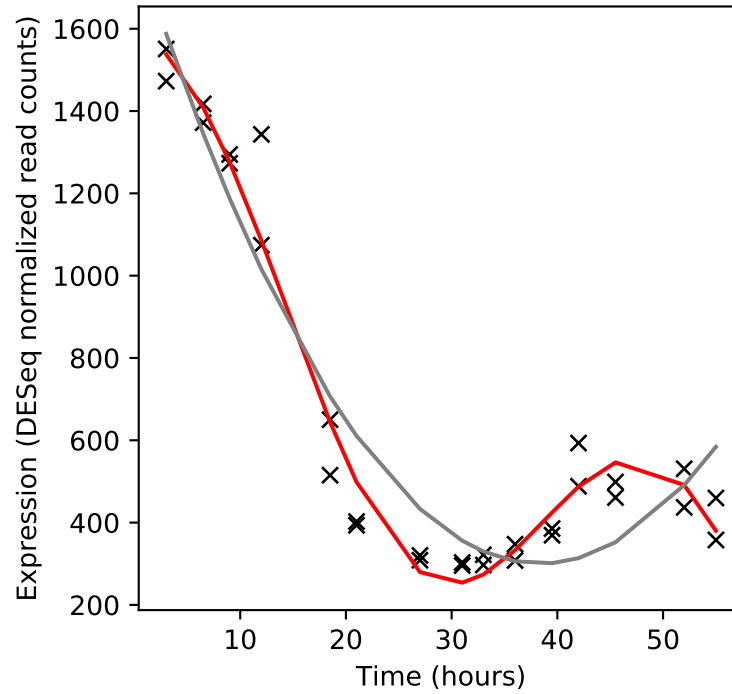

Rv2614A/-

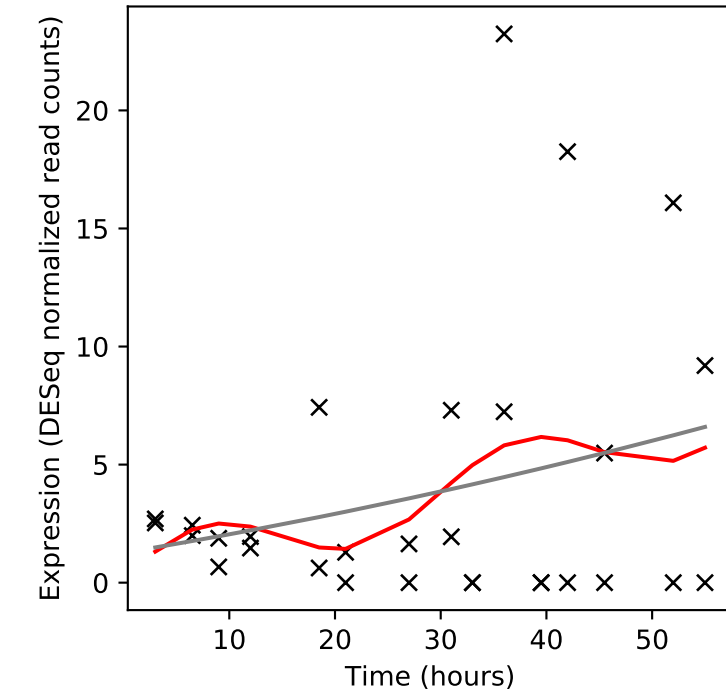

Rv2615c/PE\_PGRS45

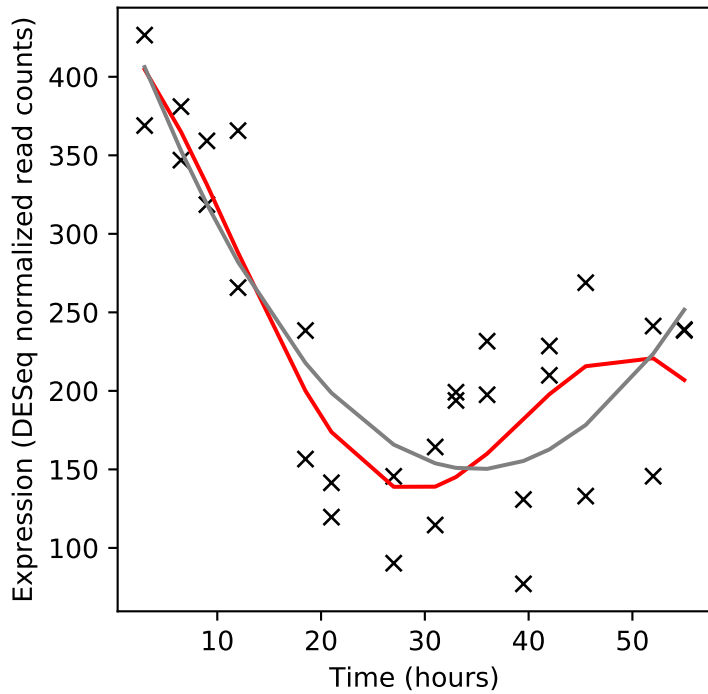

Rv2616/-

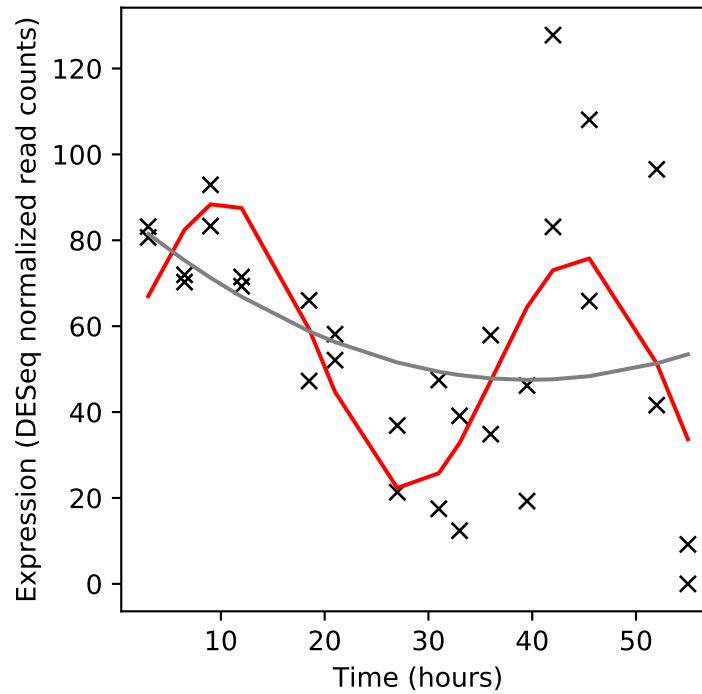

Rv2617c/-

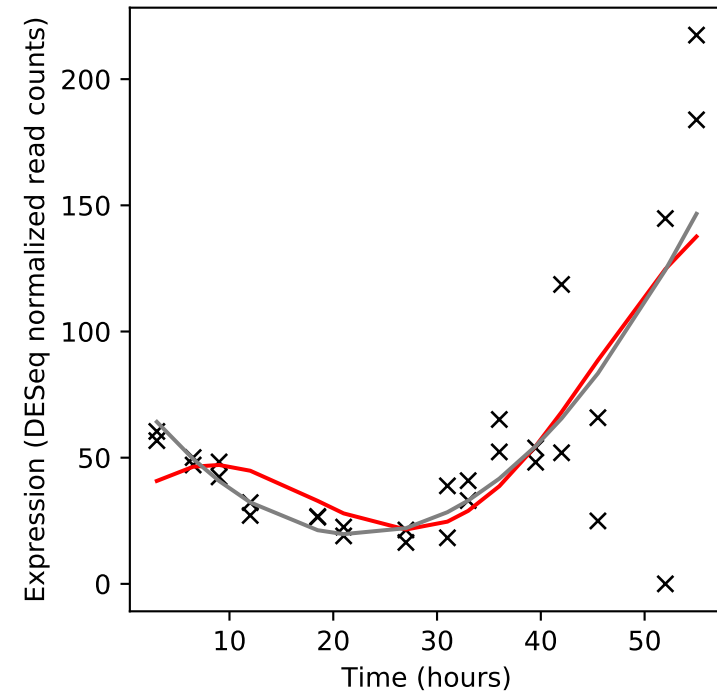

Rv2618/-

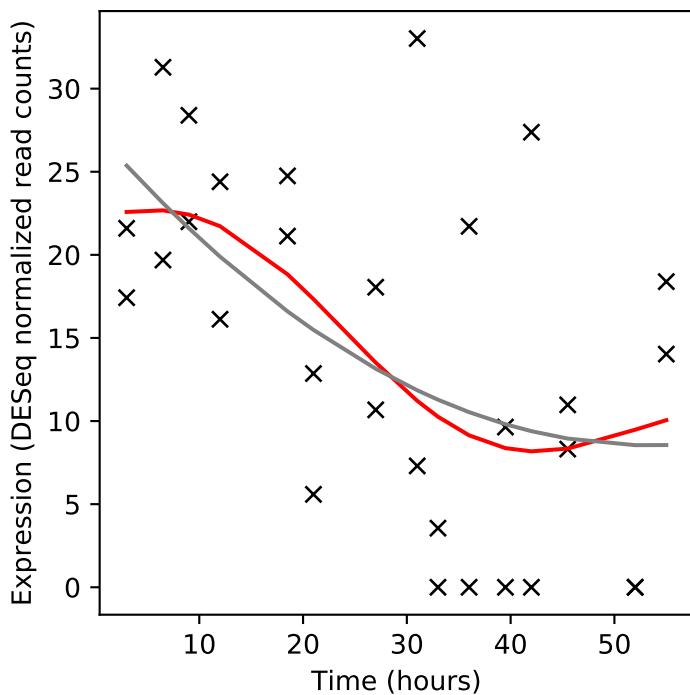

Rv2619c/-

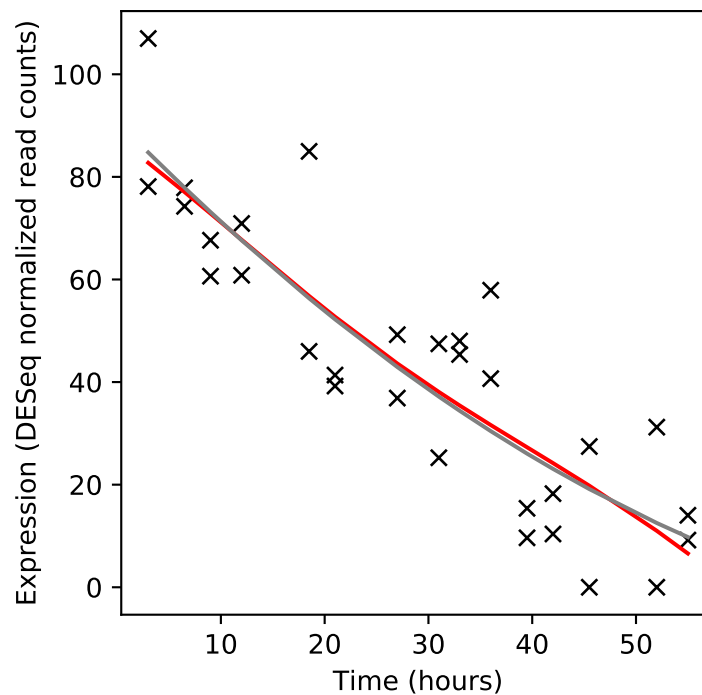

Rv2620c/-

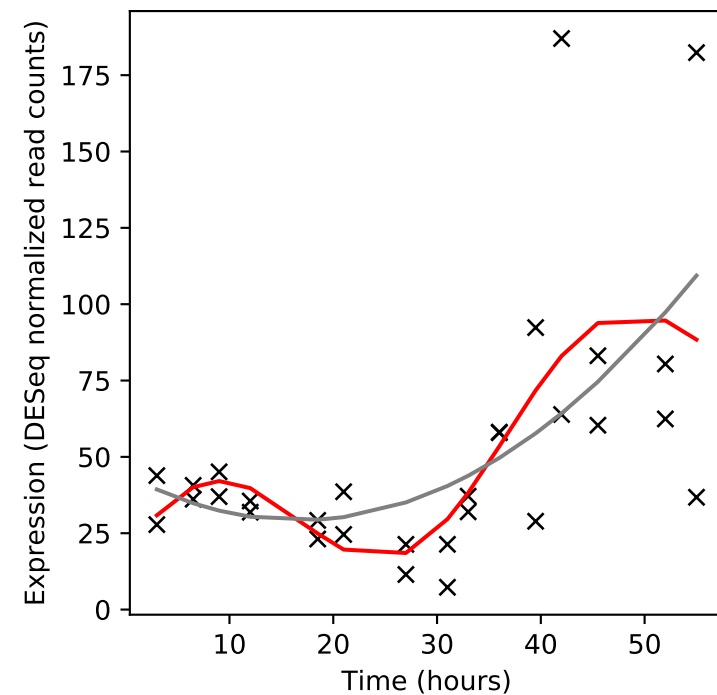

Rv2621c/-

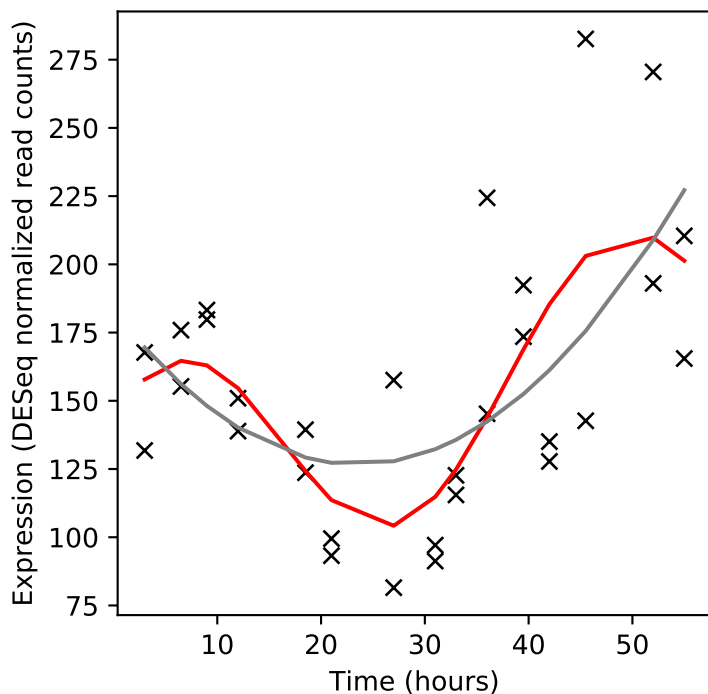

Rv2622/-

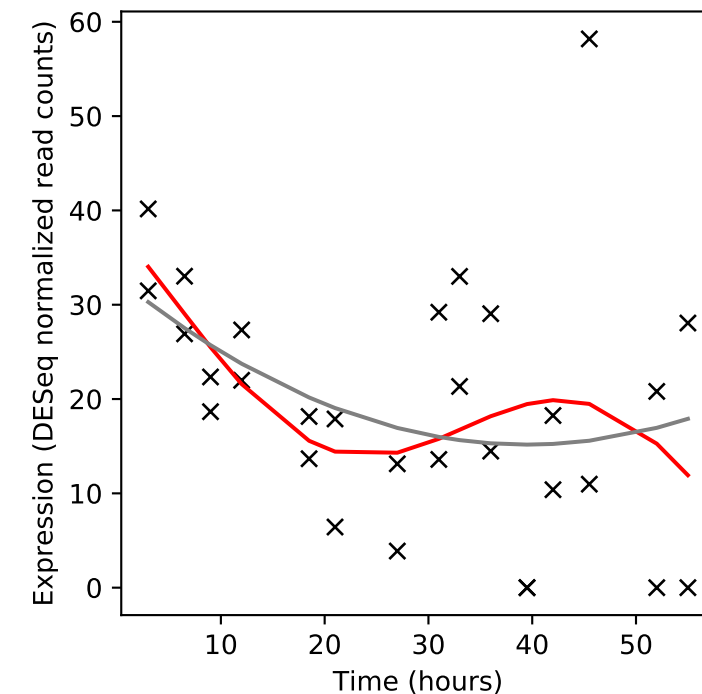

Rv2623/TB31.7

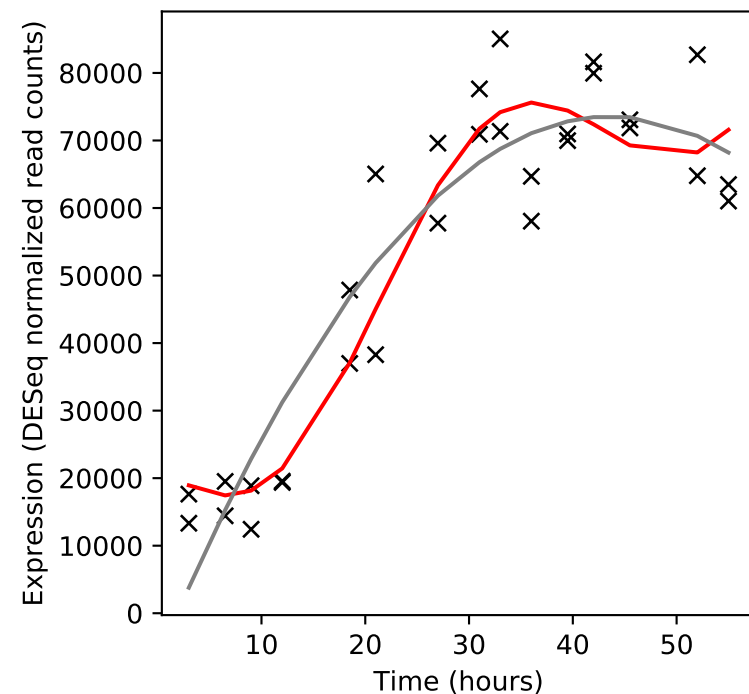

Rv2624c/-

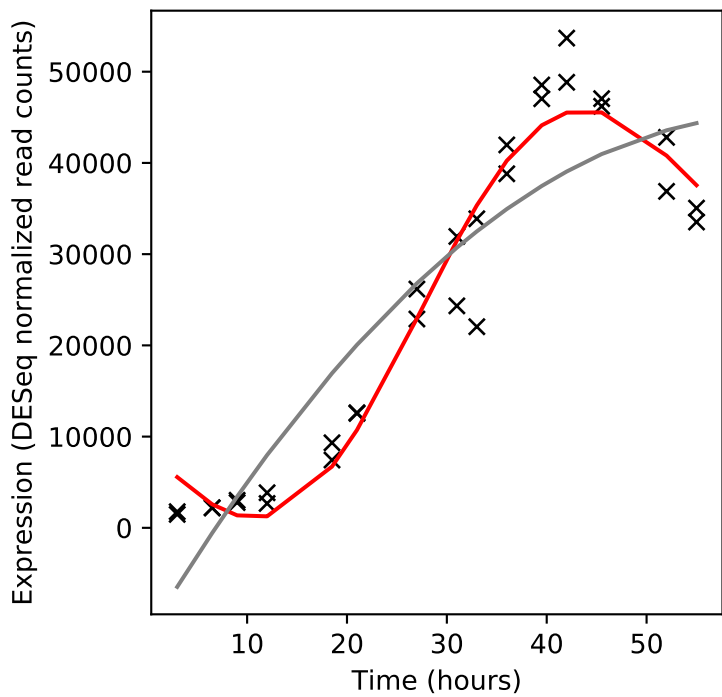

Rv2625c/-

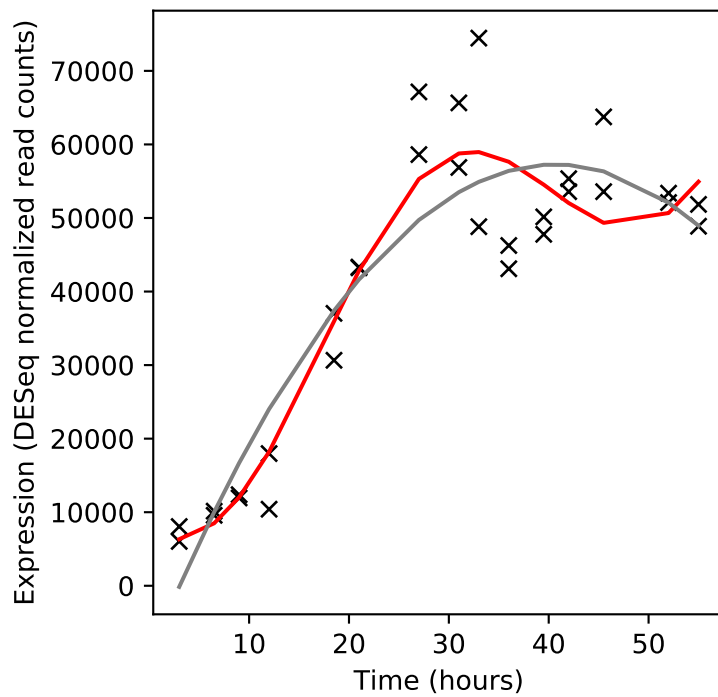

Rv2626c/hrp1

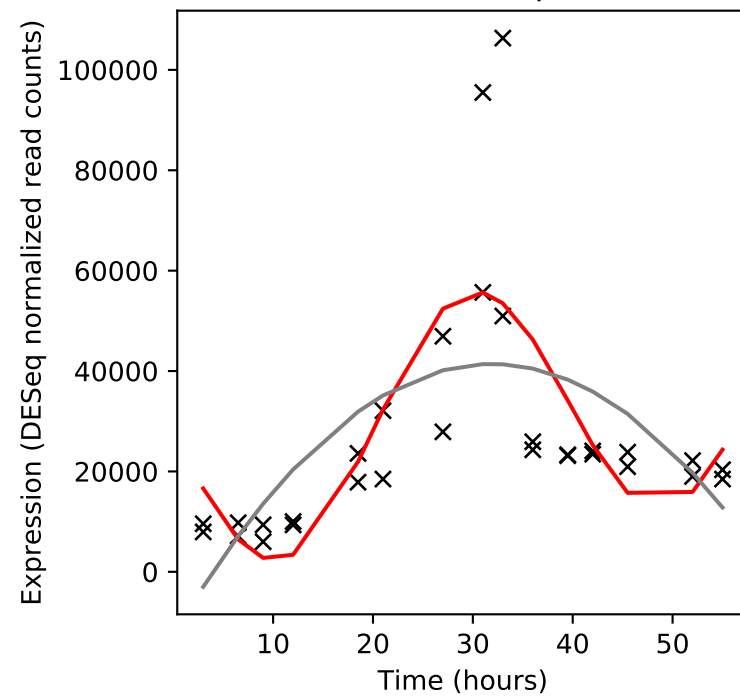

Rv2627c/-

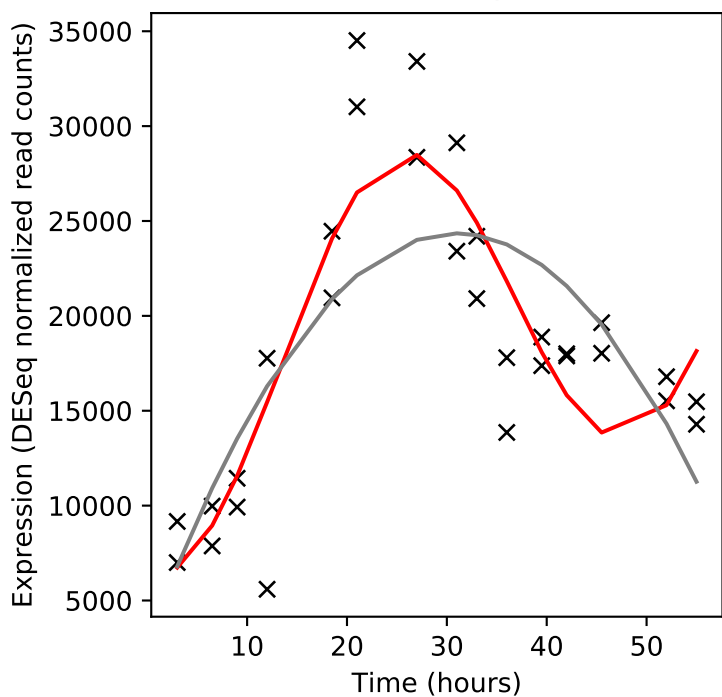

Rv2628/-

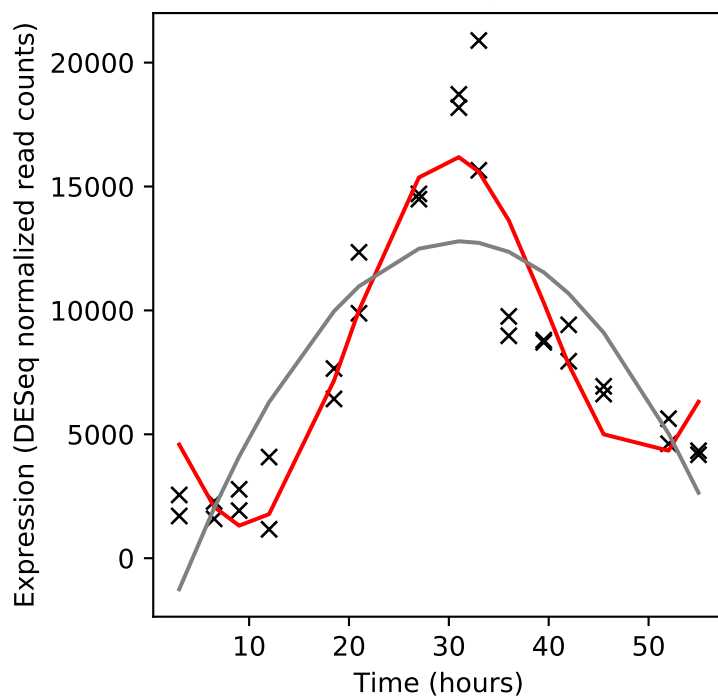

Rv2629/-

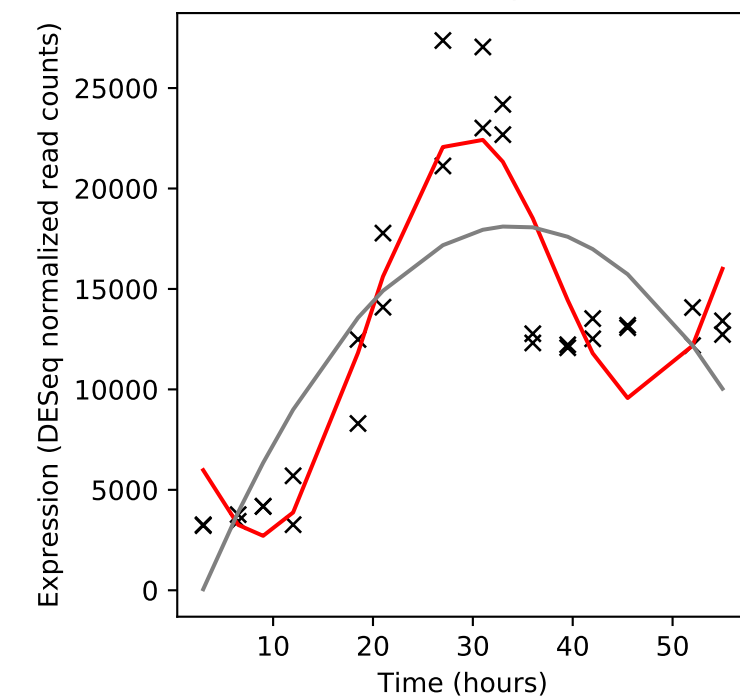

Rv2630/-

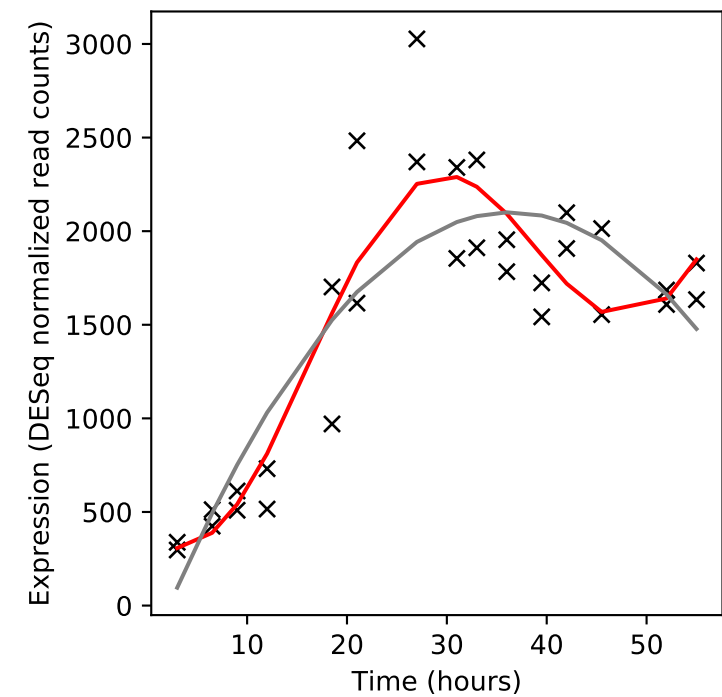

Rv2631/-

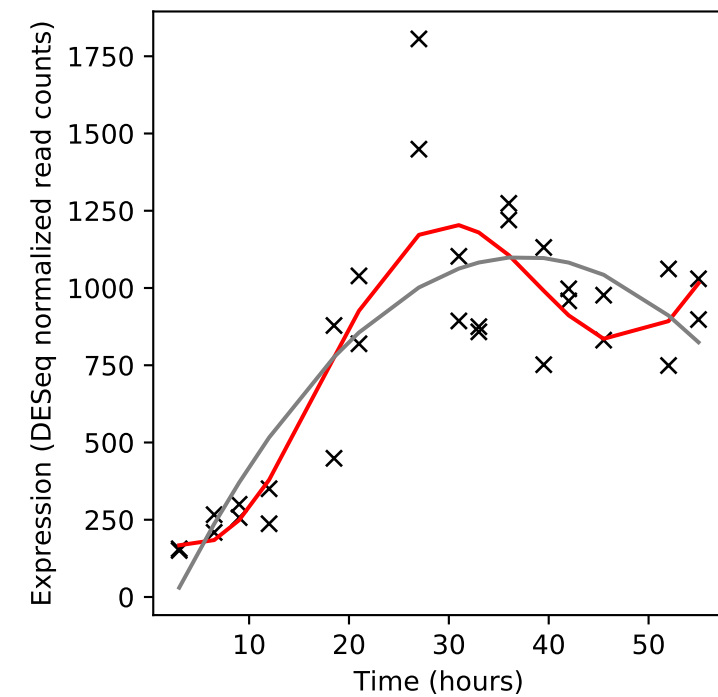

Rv2632c/-

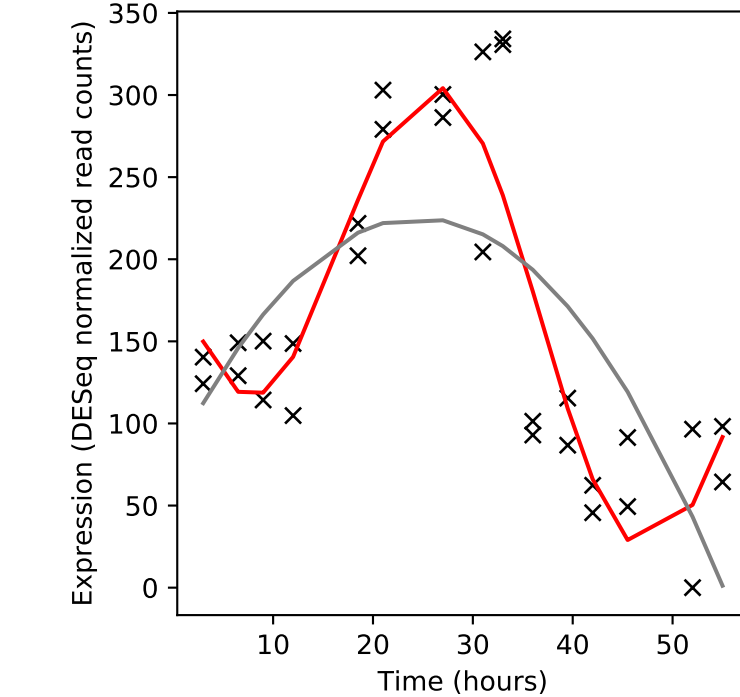

Rv2633c/-

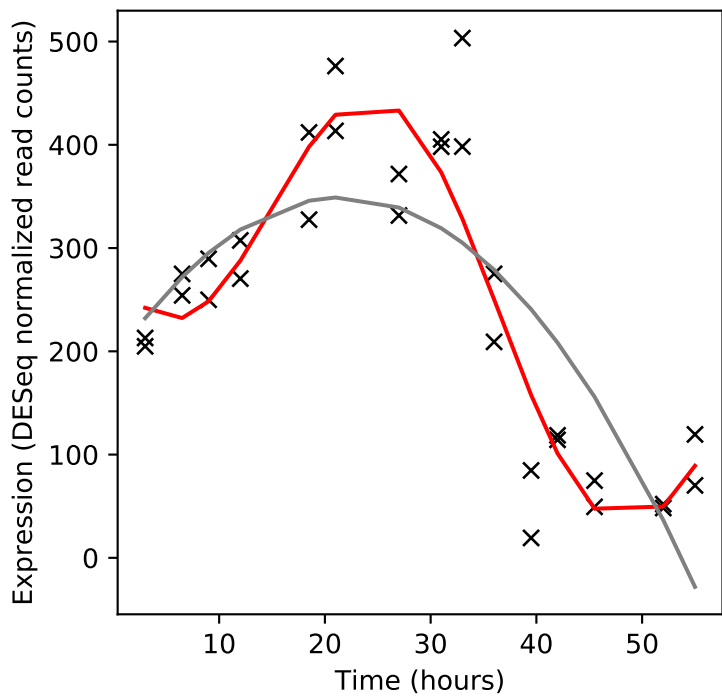

Rv2634c/PE\_PGRS46

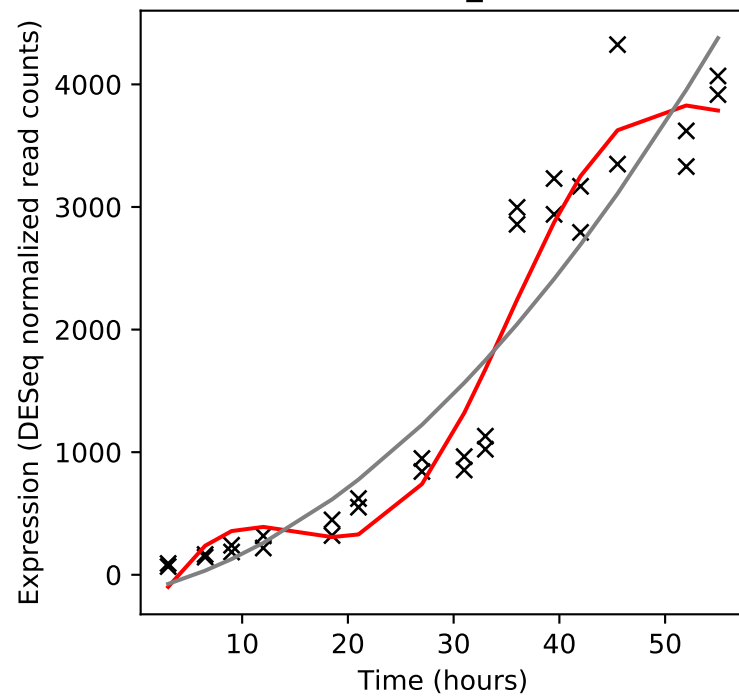

Rv2635/-

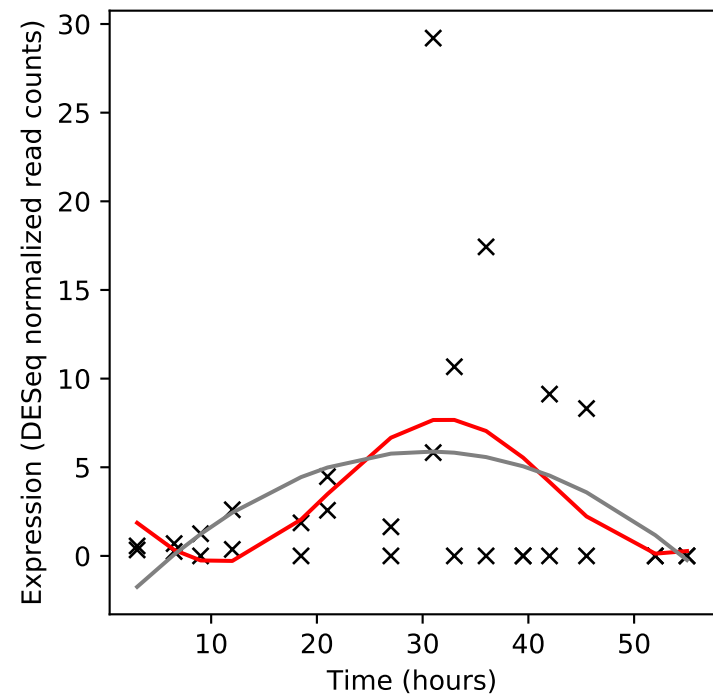

Rv2636/-

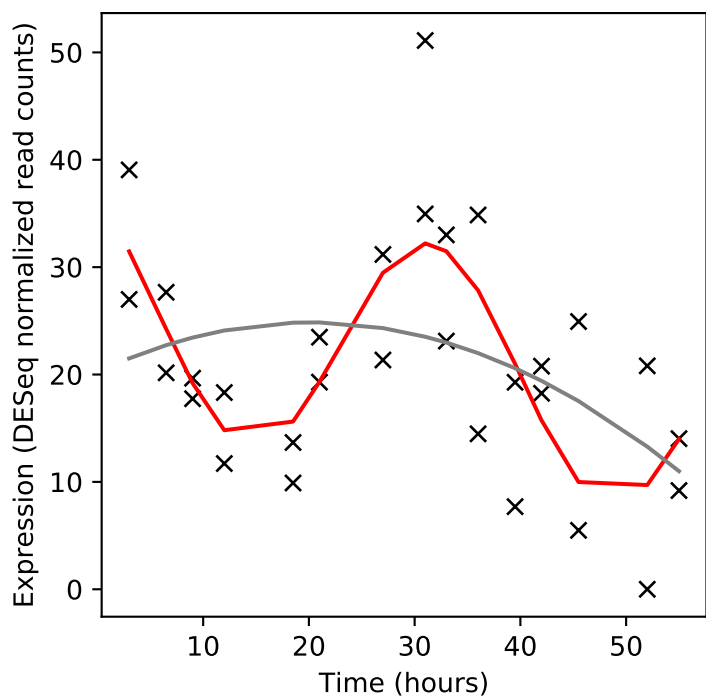

Rv2637/dedA

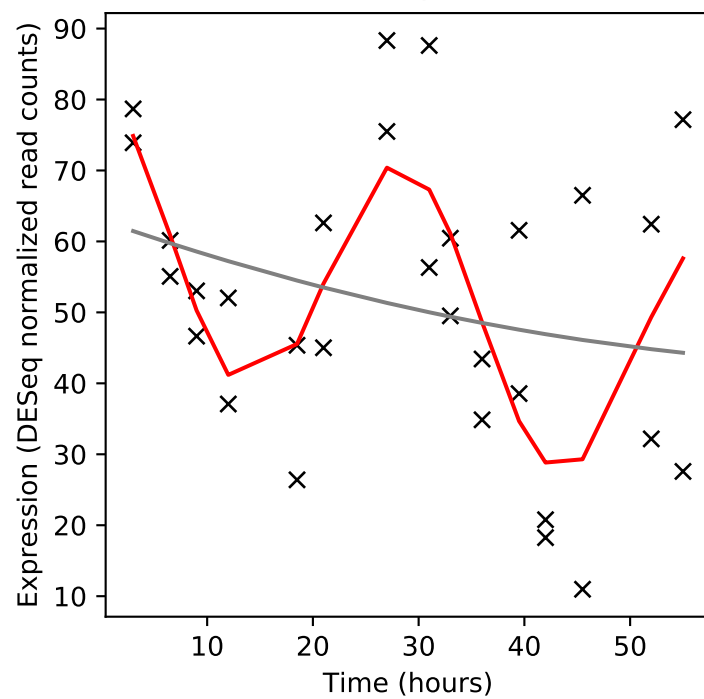

Rv2638/-

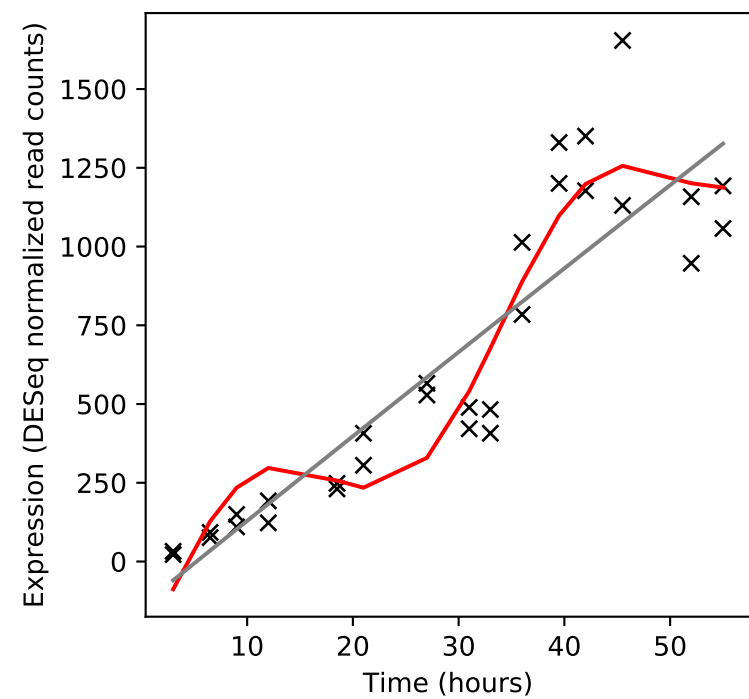

Rv2639c/-

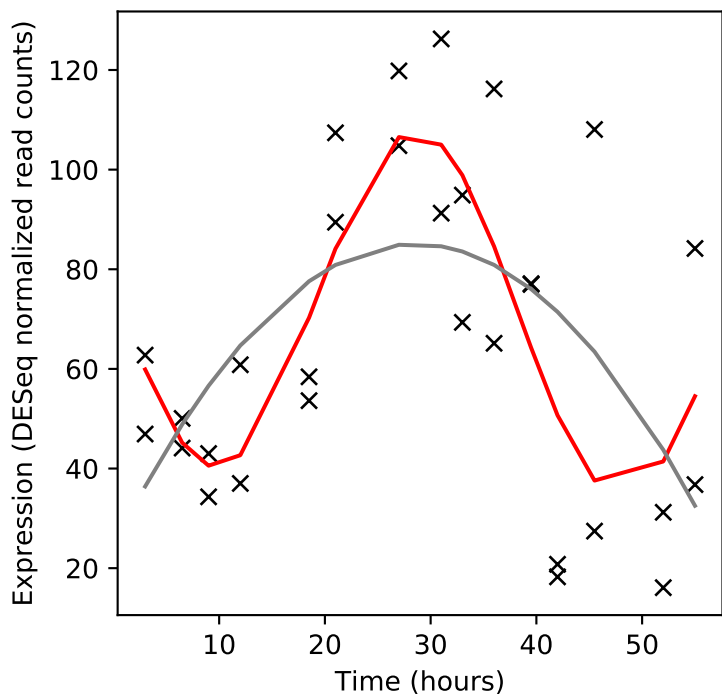

Rv2640c/-

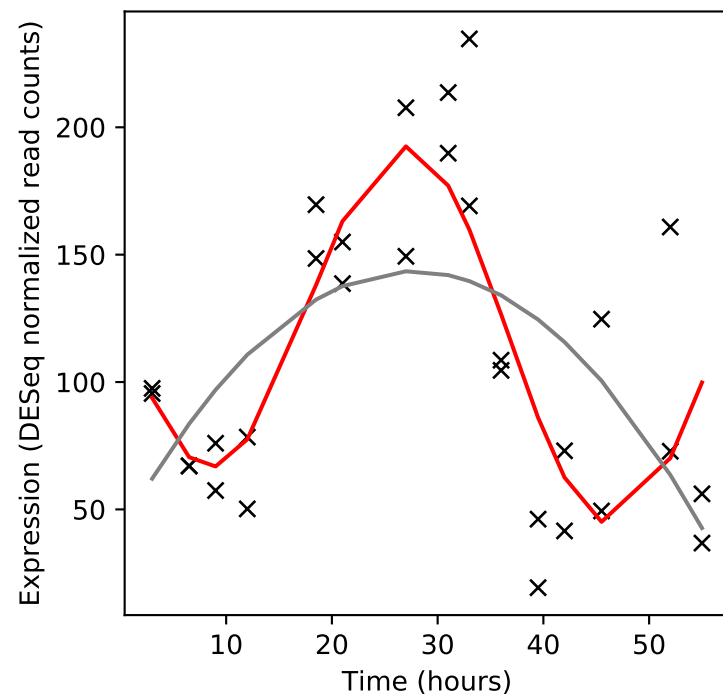

Rv2641/cadI

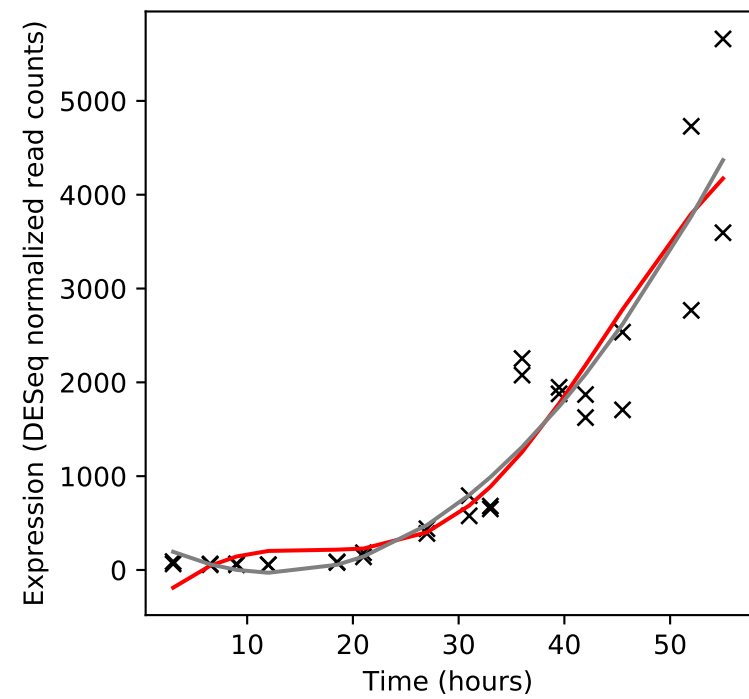

Rv2642/-

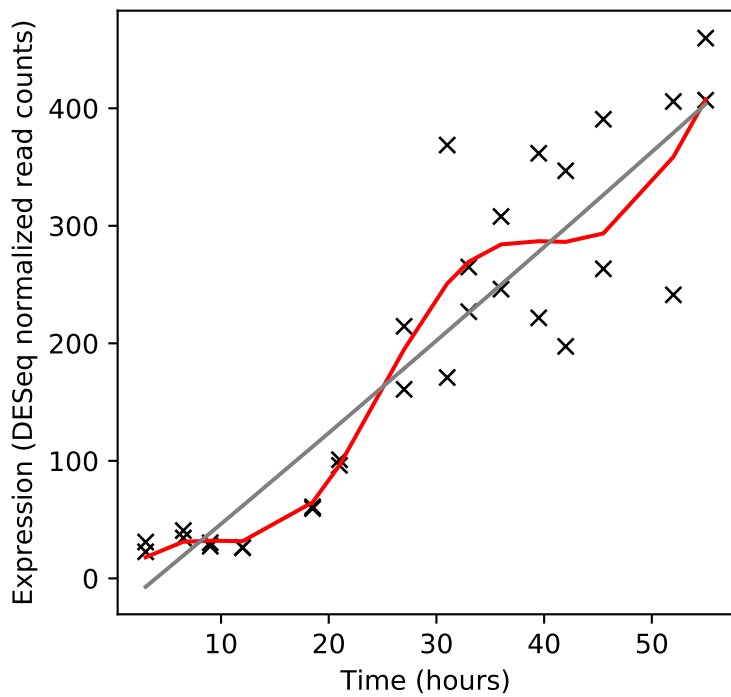

Rv2643/arsC

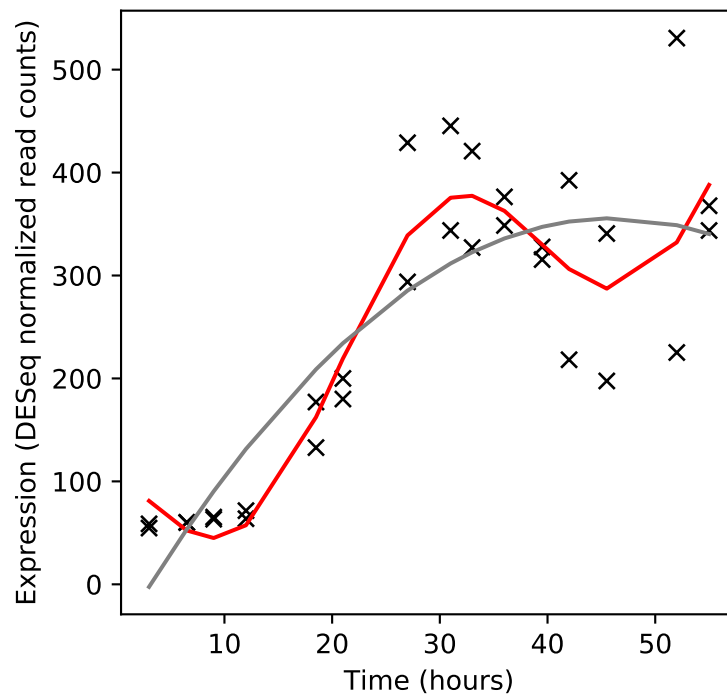

Rv2644c/-

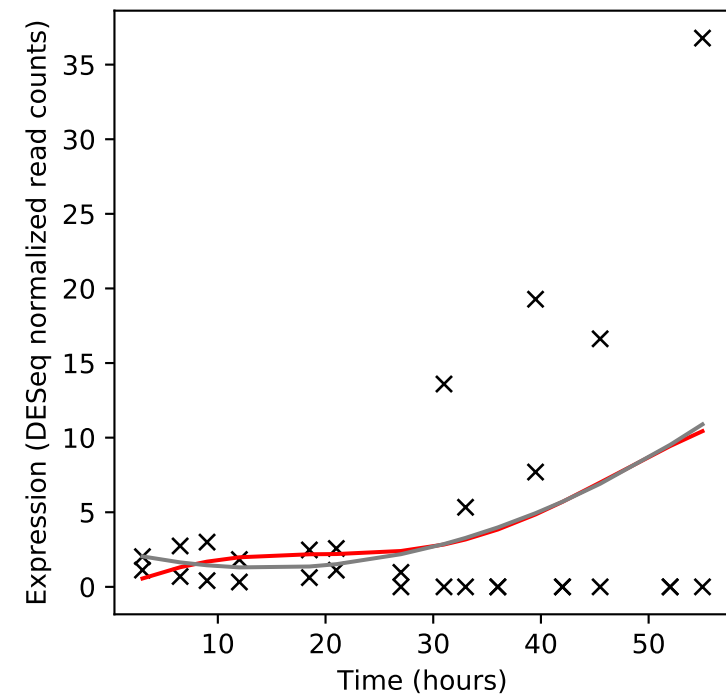

Rv2645/-

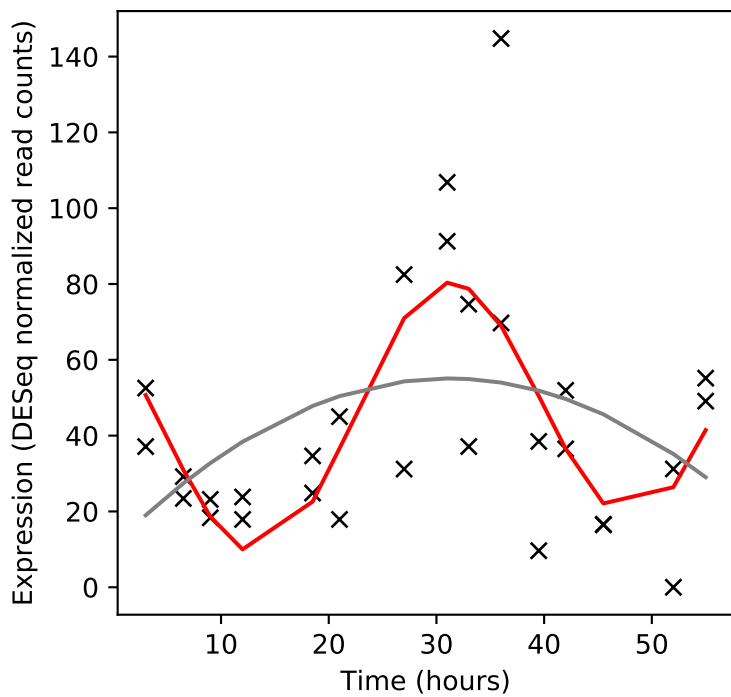

Rv2646/-

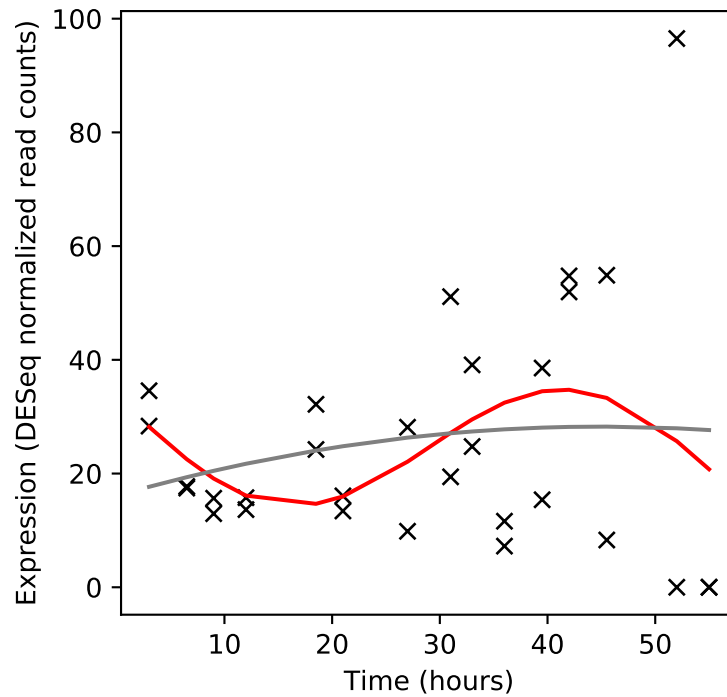

Rv2647/-

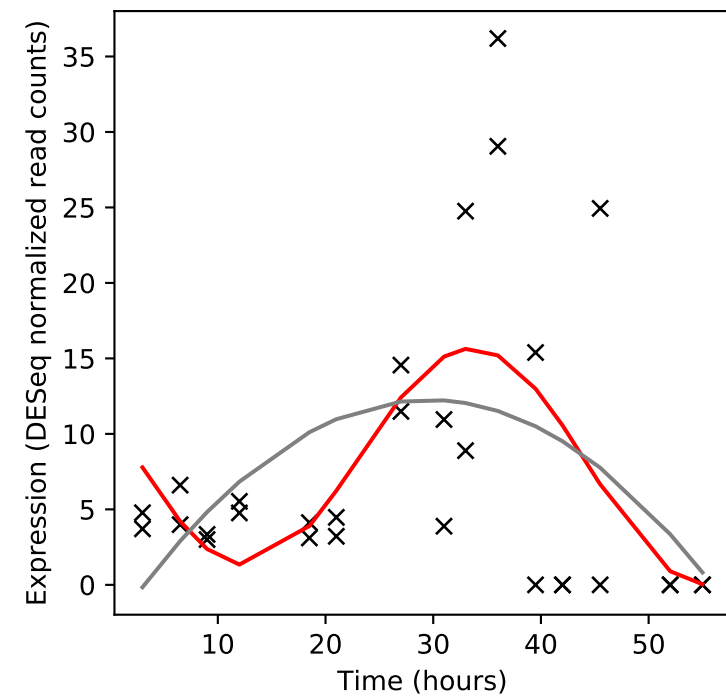

Rv2648/-

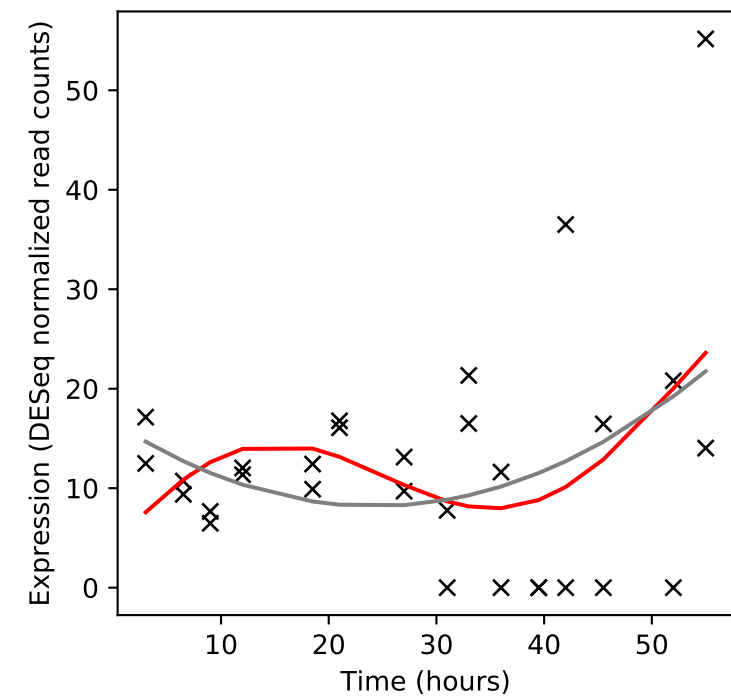

Rv2649/-

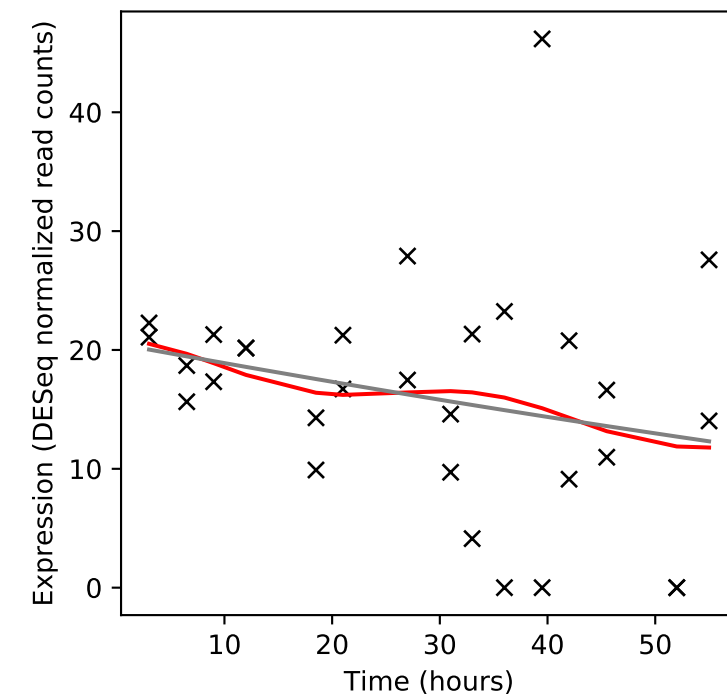

Rv2650c/-

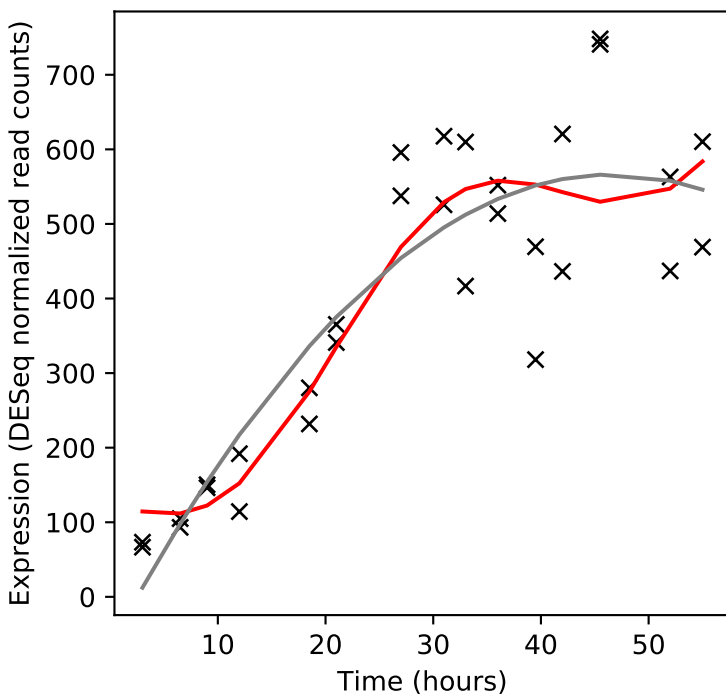



Rv2651c/-

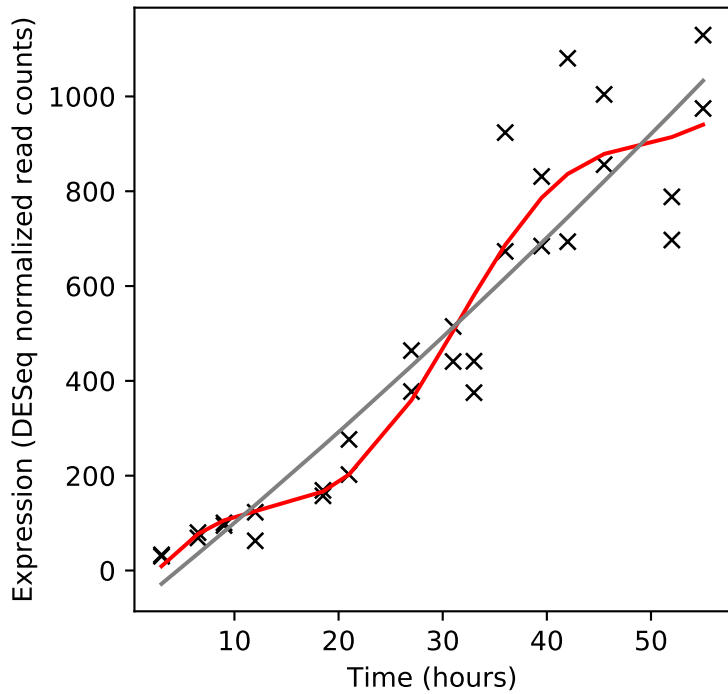

Rv2652c/-

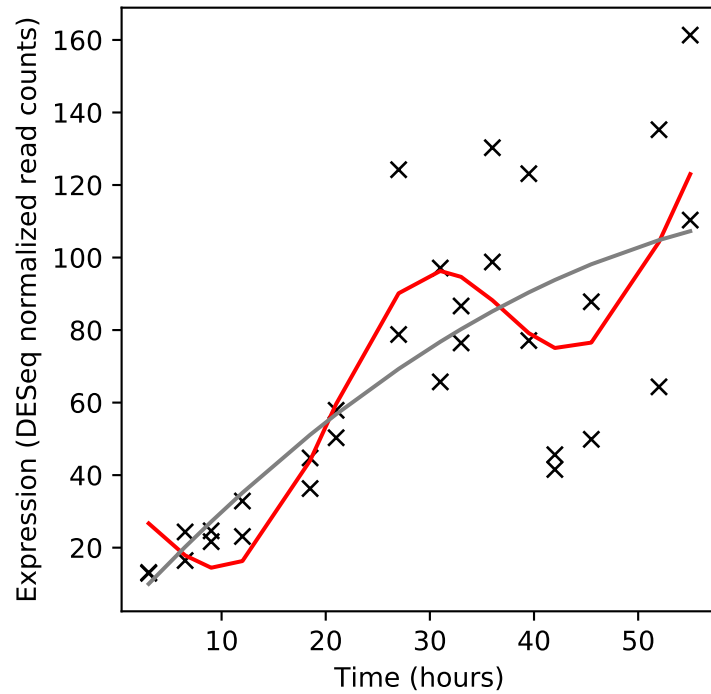

Rv2653c/-

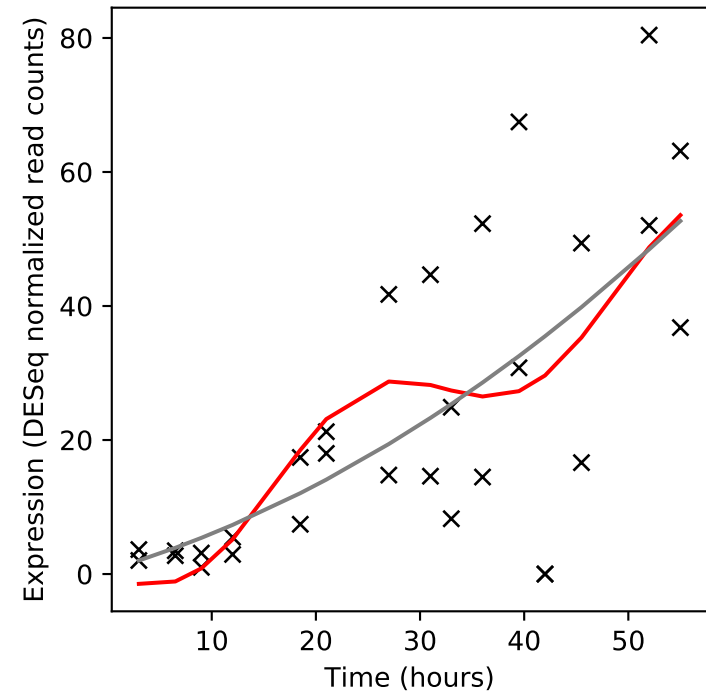

Rv2654c/-

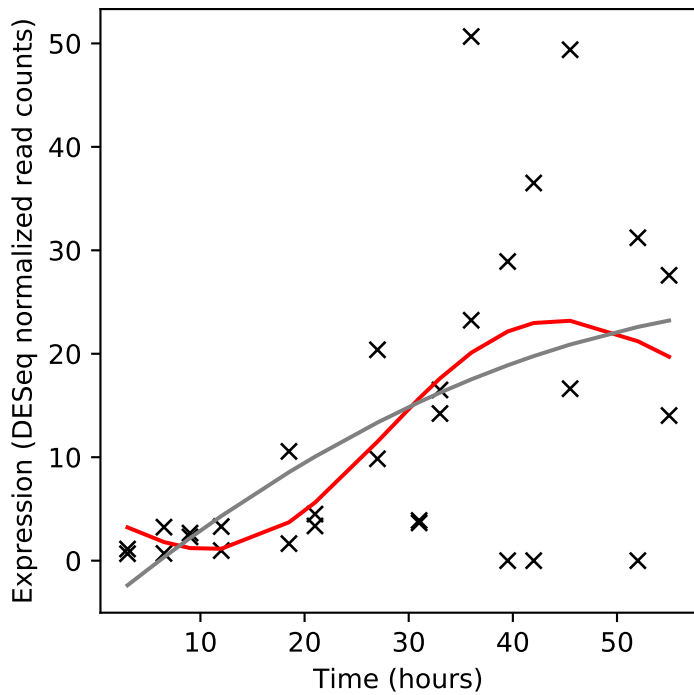

Rv2655c/-

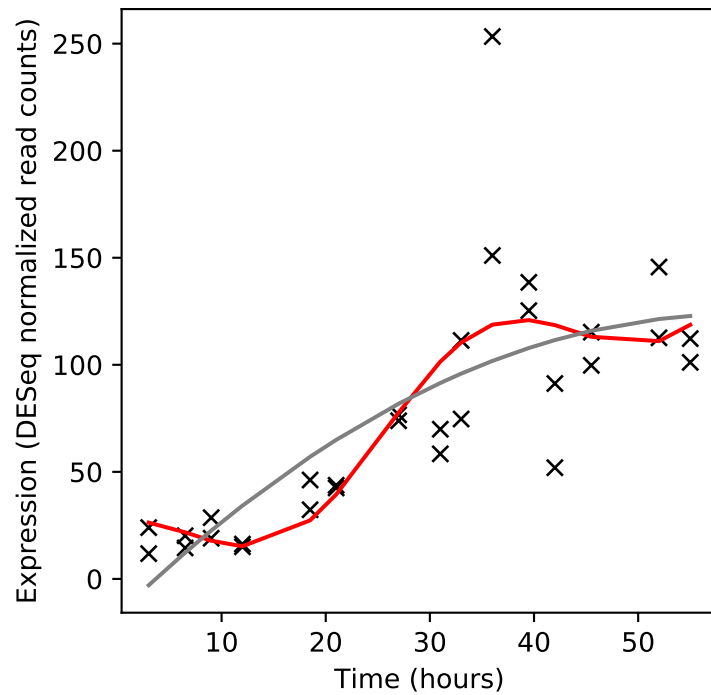

Rv2656c/-

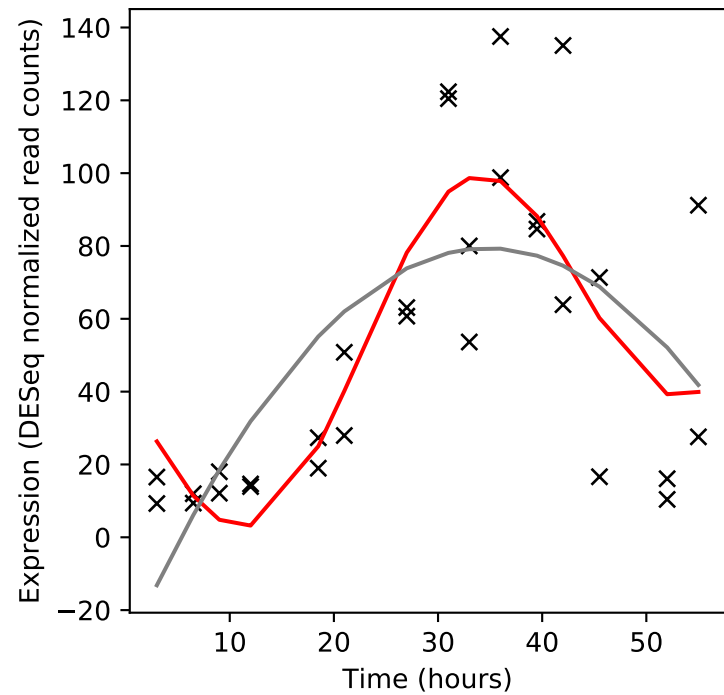

Rv2657c/-

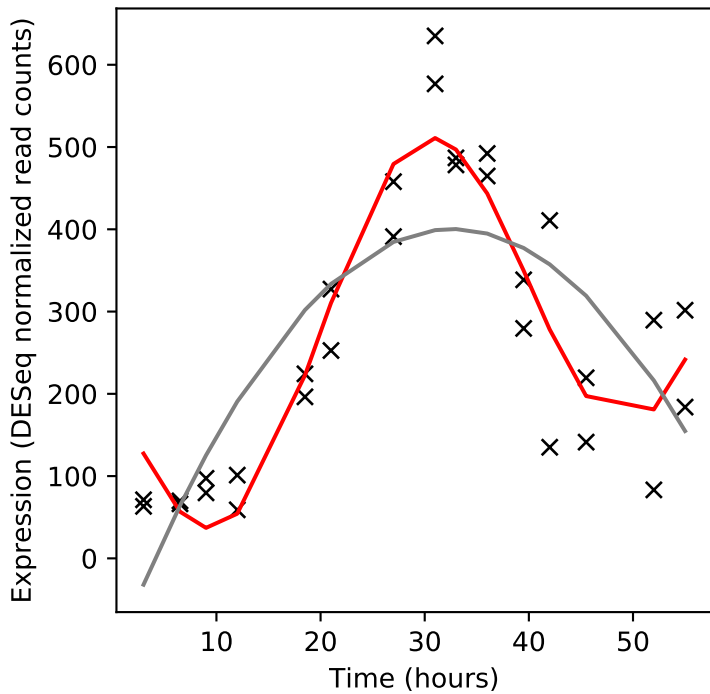

Rv2658c/-

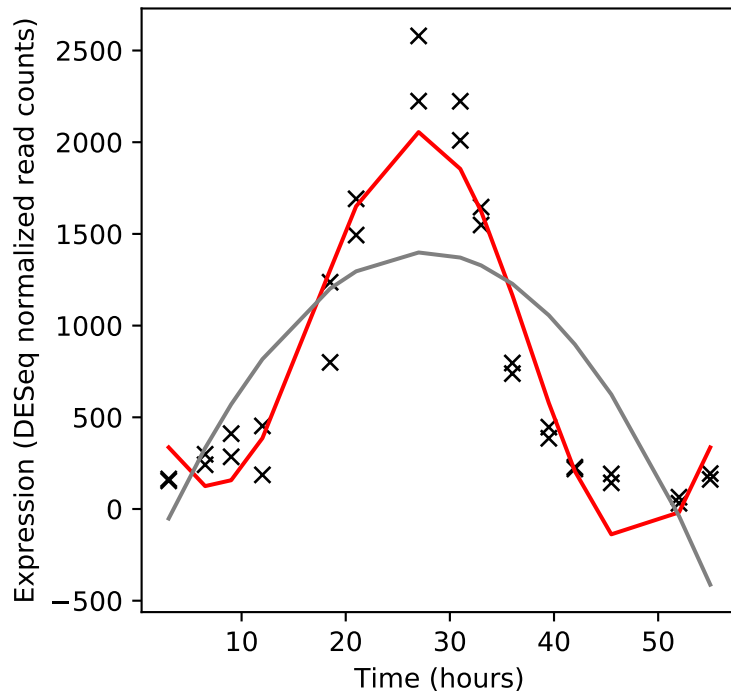

Rv2659c/-

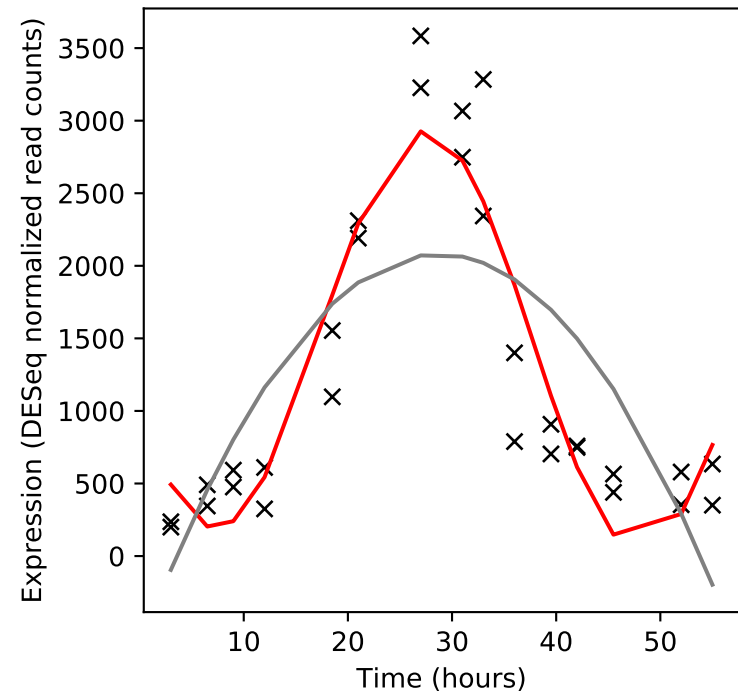

Rv2660c/-

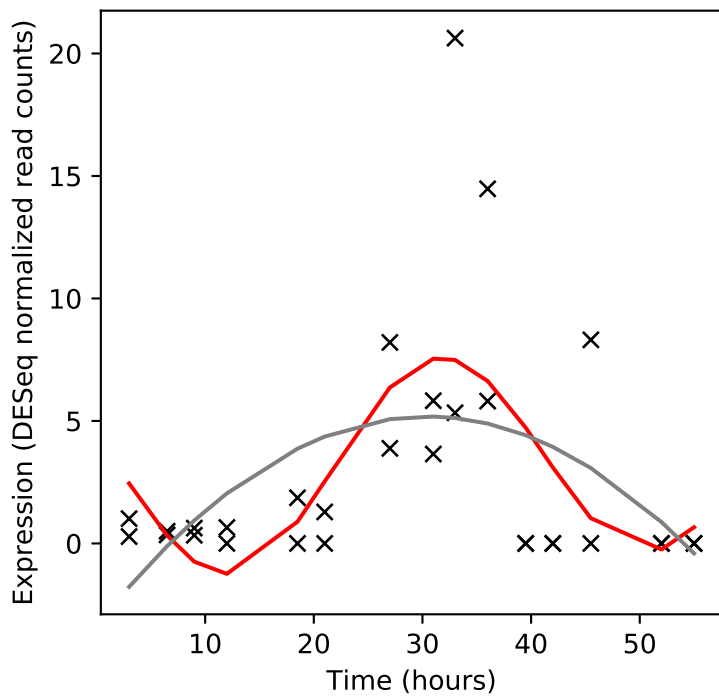

Rv2661c/-

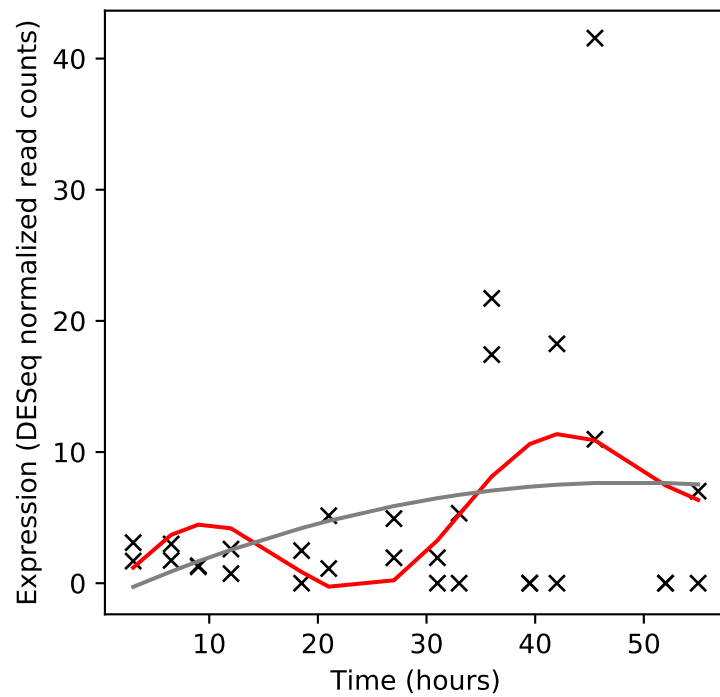

Rv2662/-

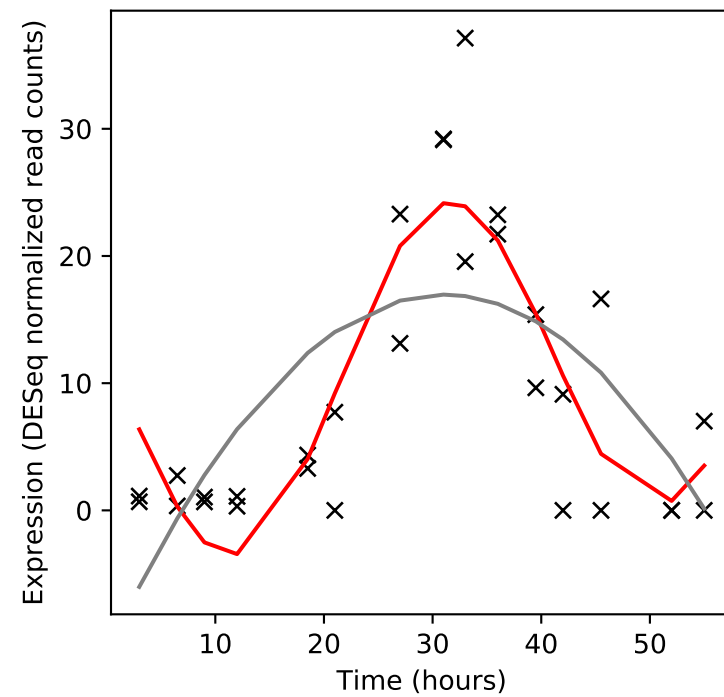

Rv2663/-

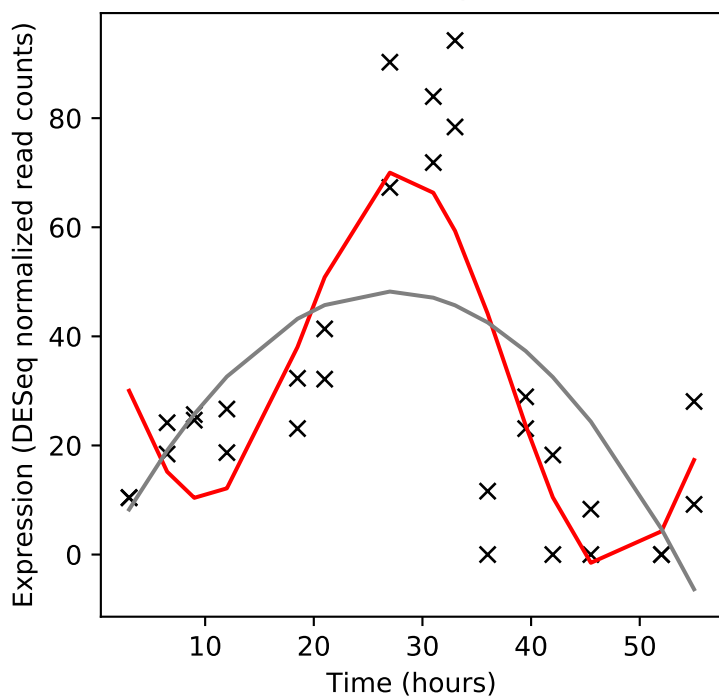

Rv2664/-

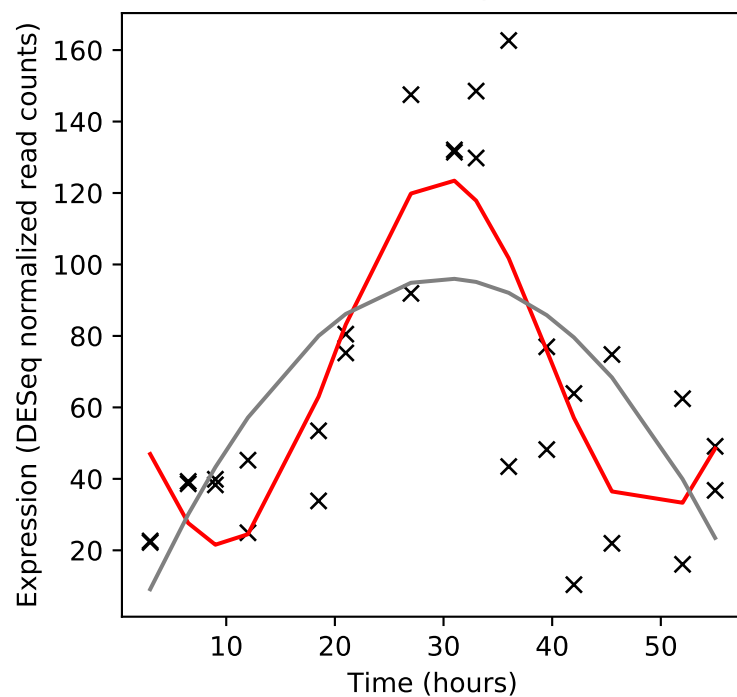

Rv2665/-

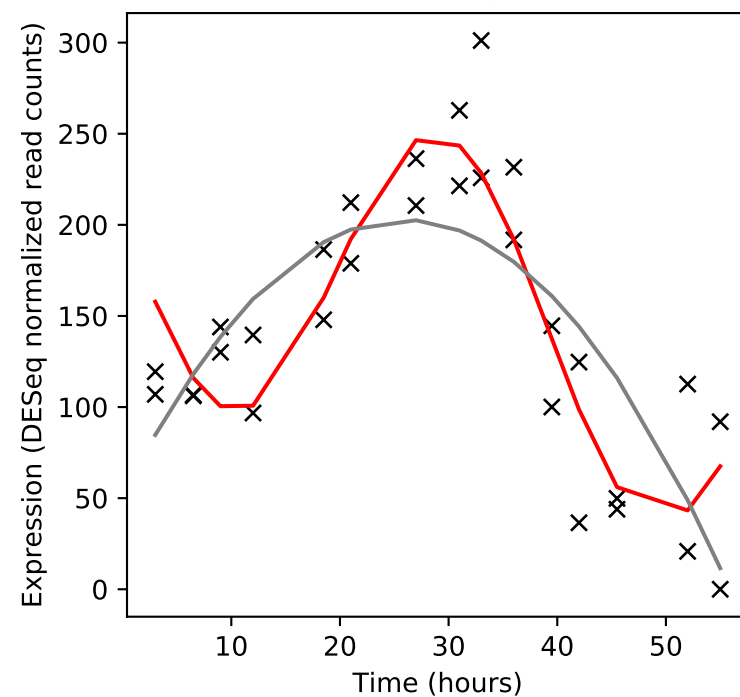

Rv2666/-

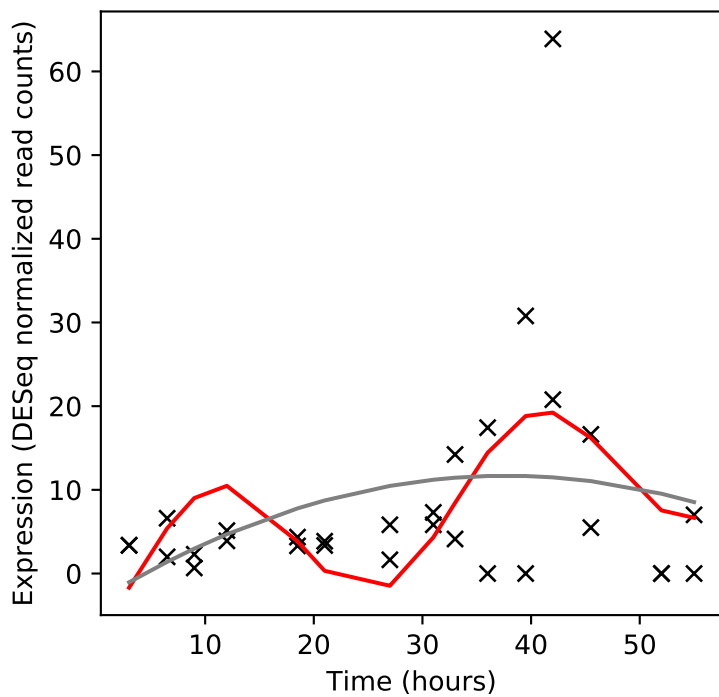

Rv2667/clpC2

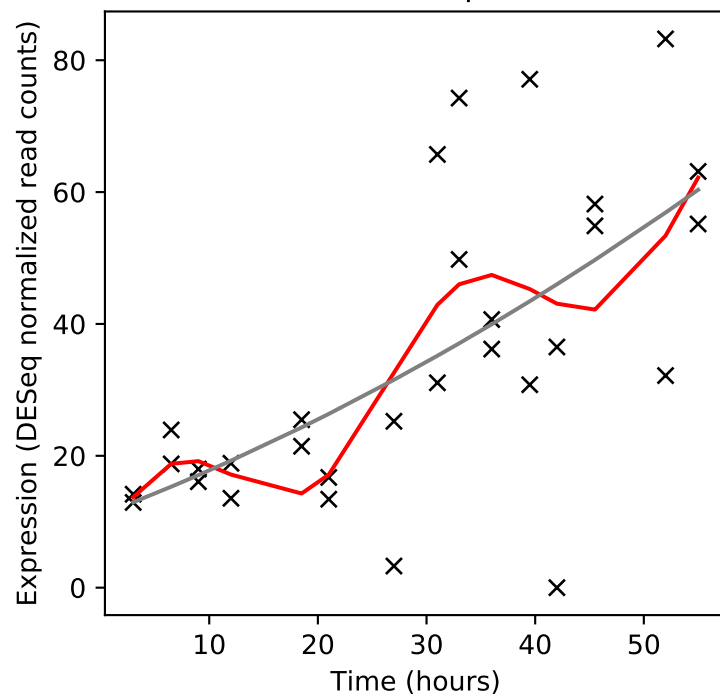

Rv2668/-

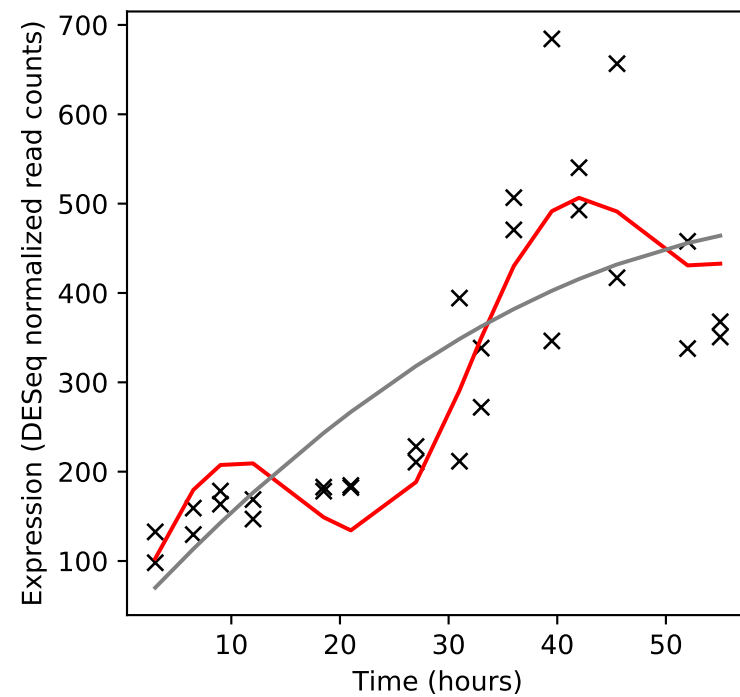

Rv2669/-

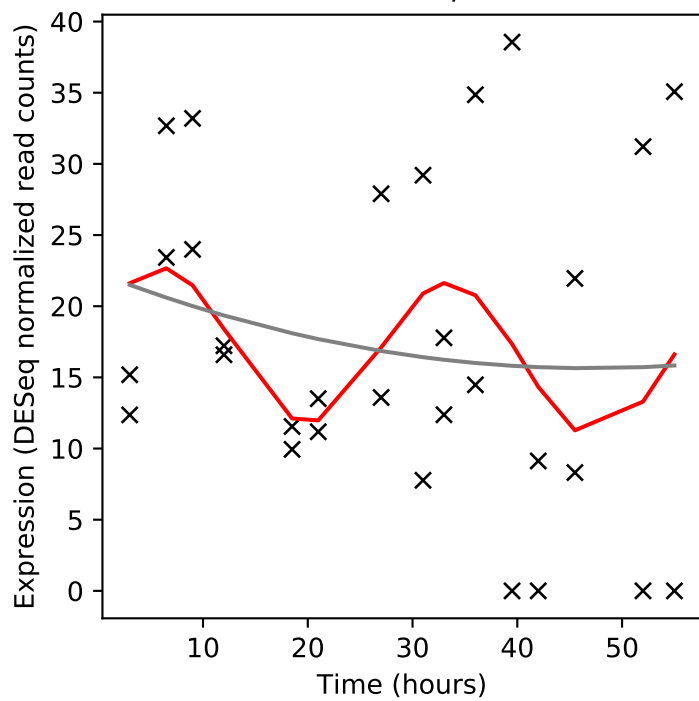

Rv2670c/-

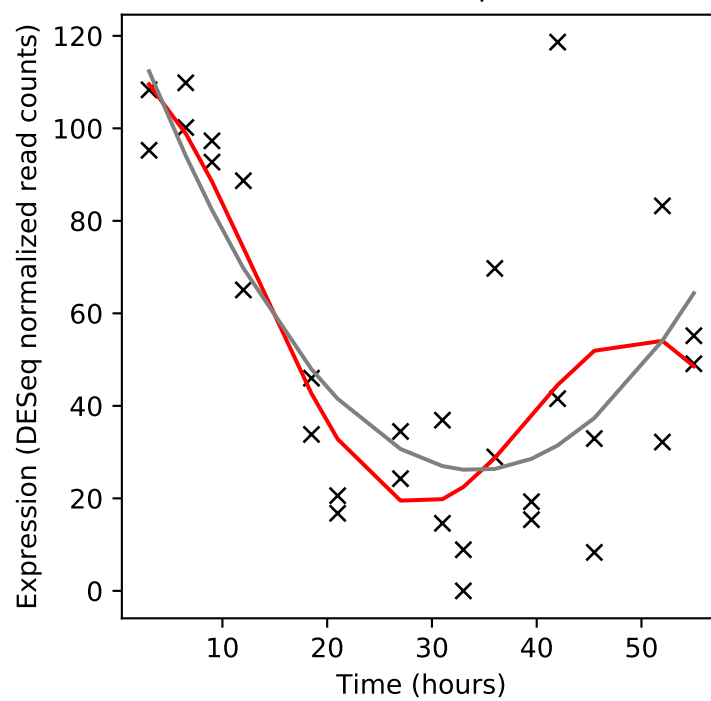

Rv2671/ribD

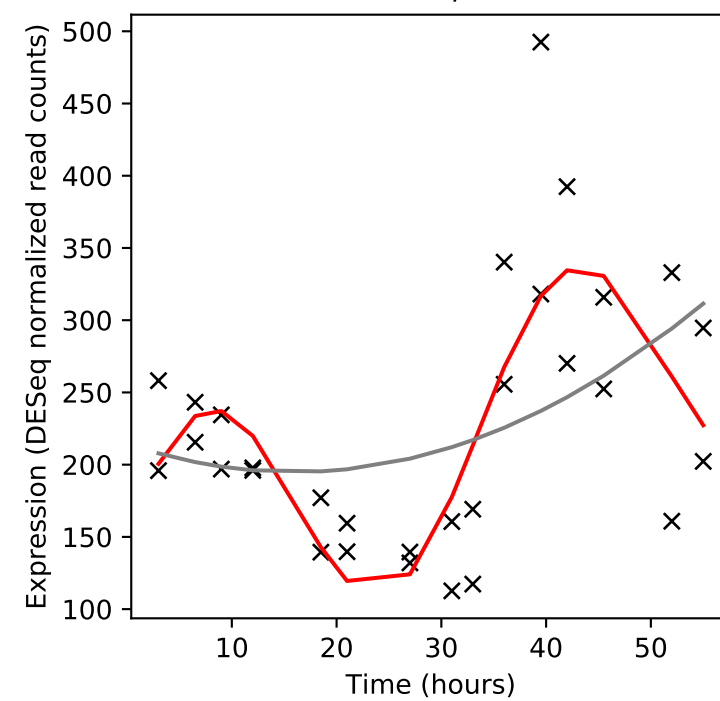

Rv2672/-

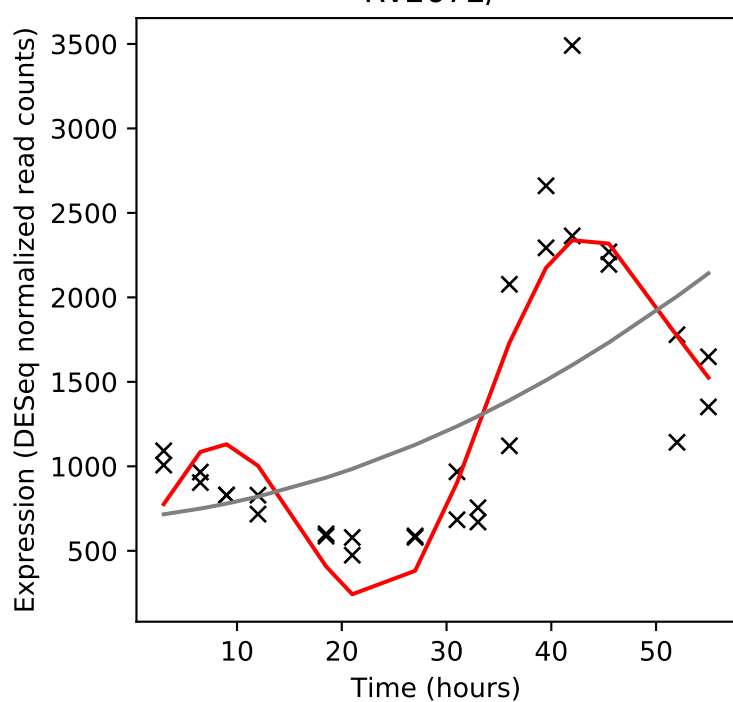

Rv2673/aftC

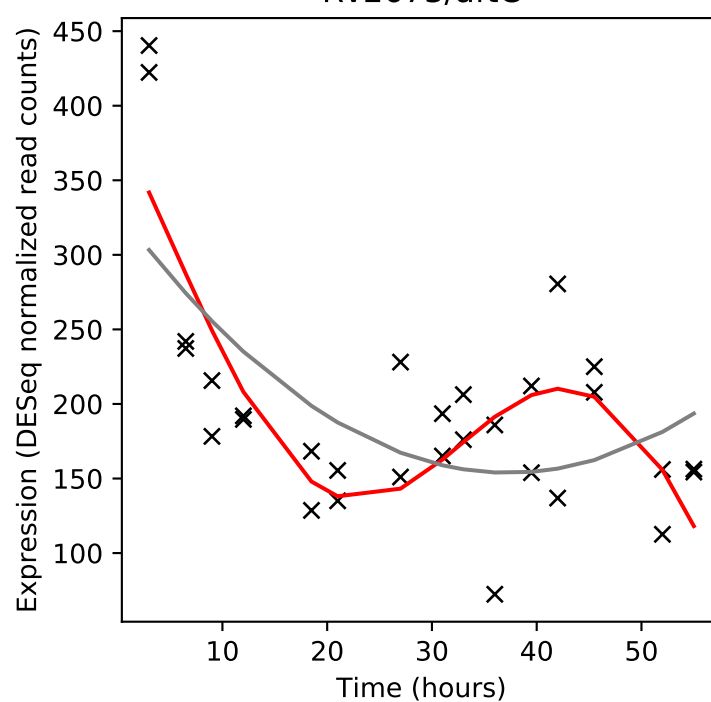

Rv2674/msrB

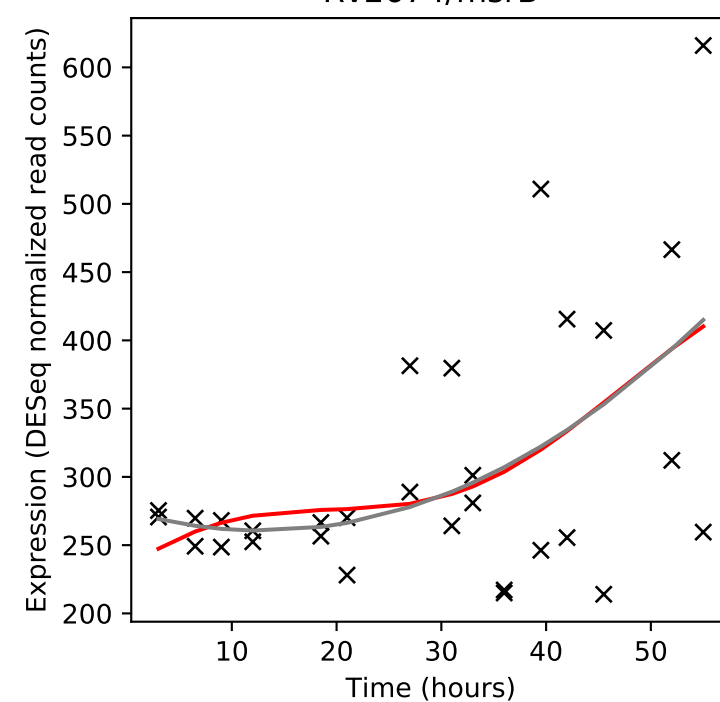

Rv2675c/-

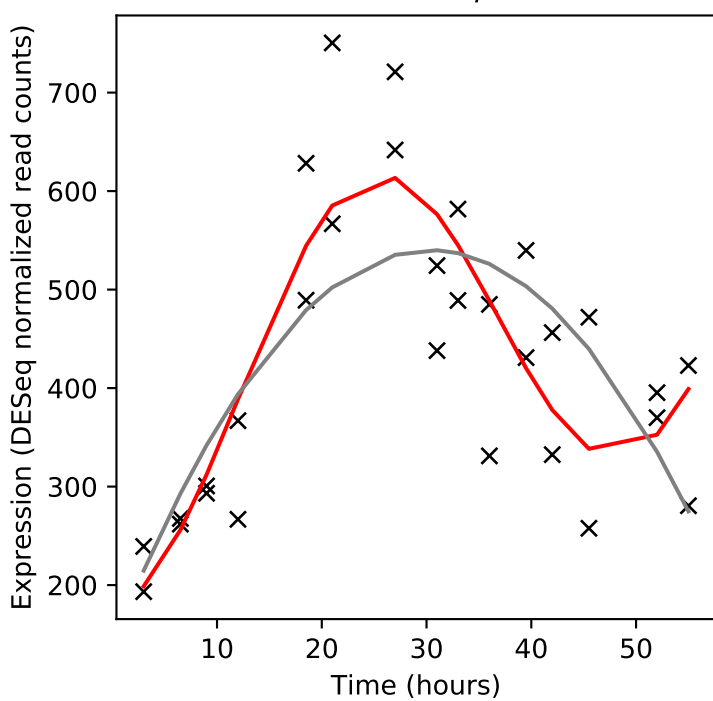

Rv2676c/-

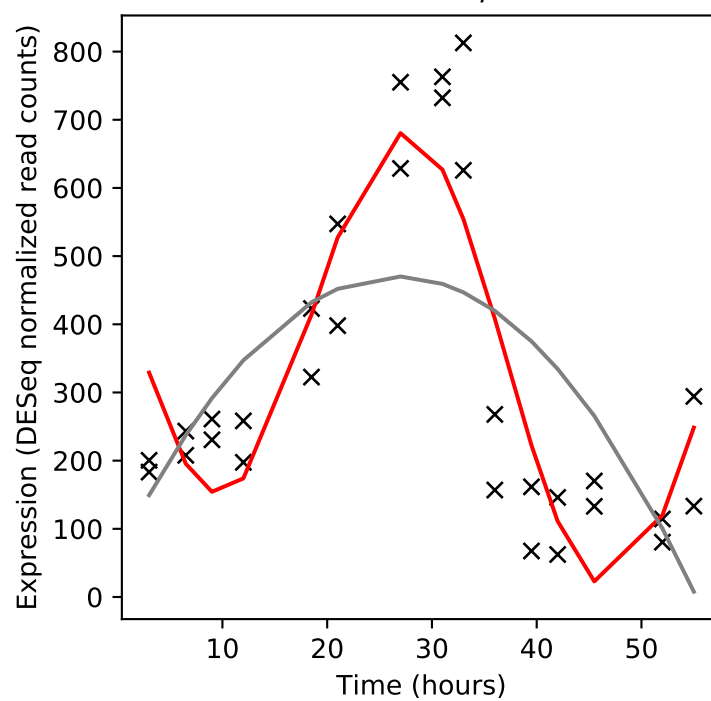

Rv2677c/hemY

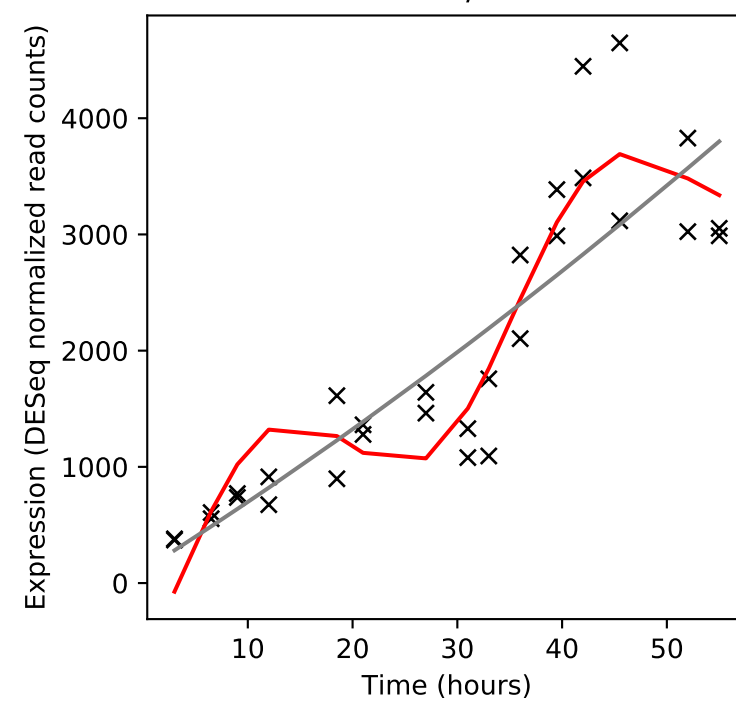

Rv2678c/hemE

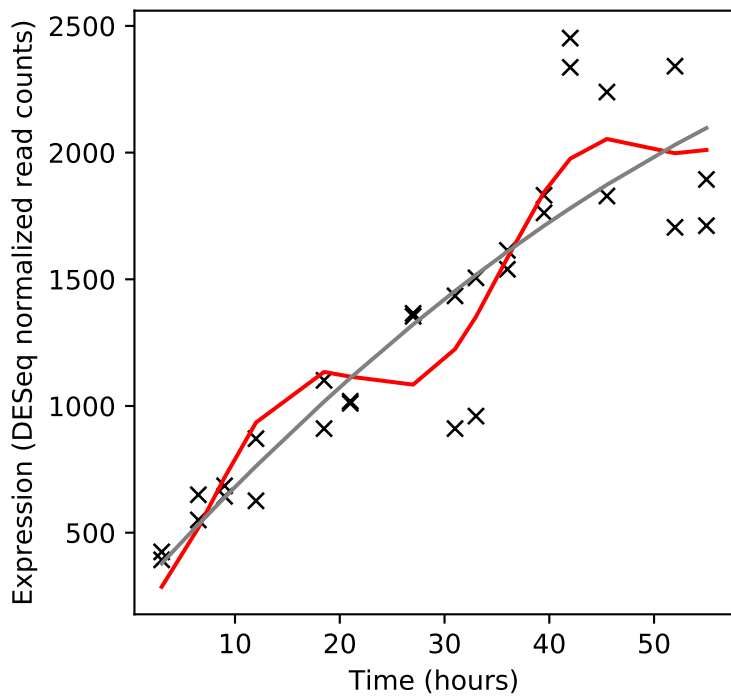

Rv2679/echA15

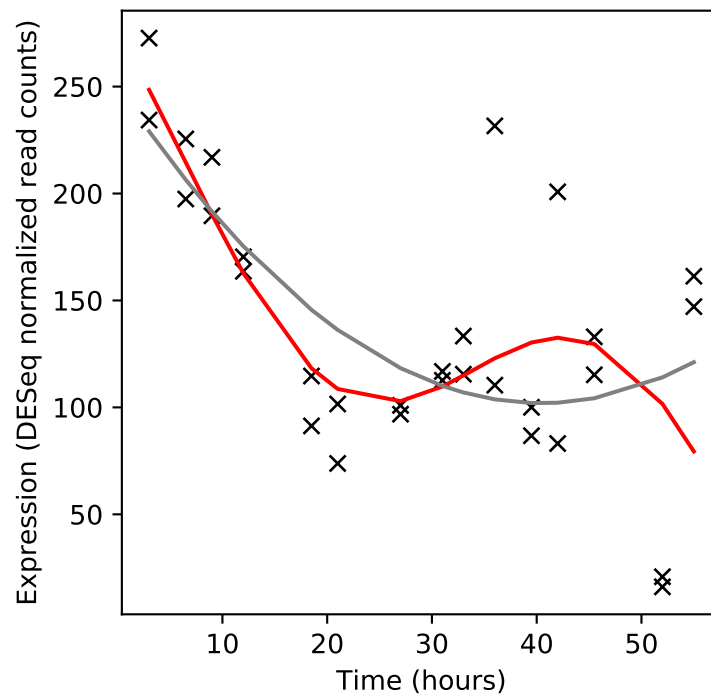

Rv2680/-

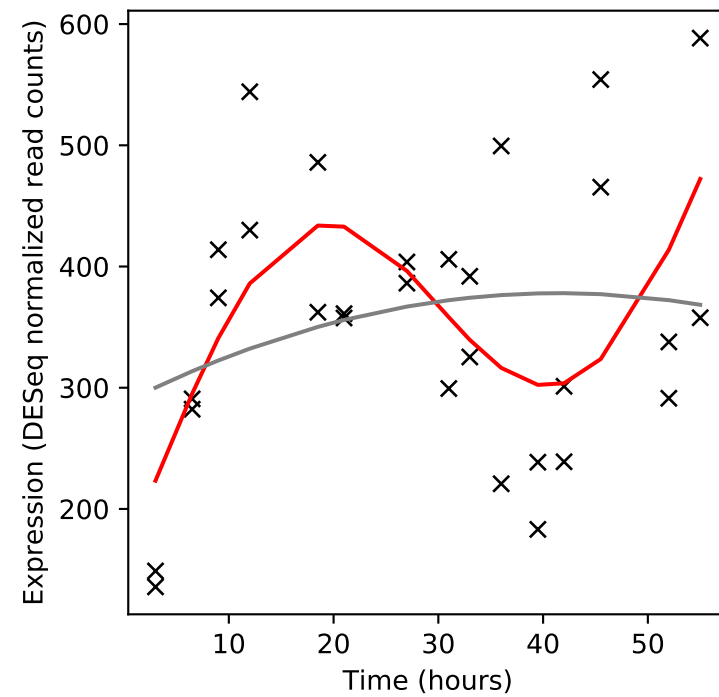

Rv2681/-

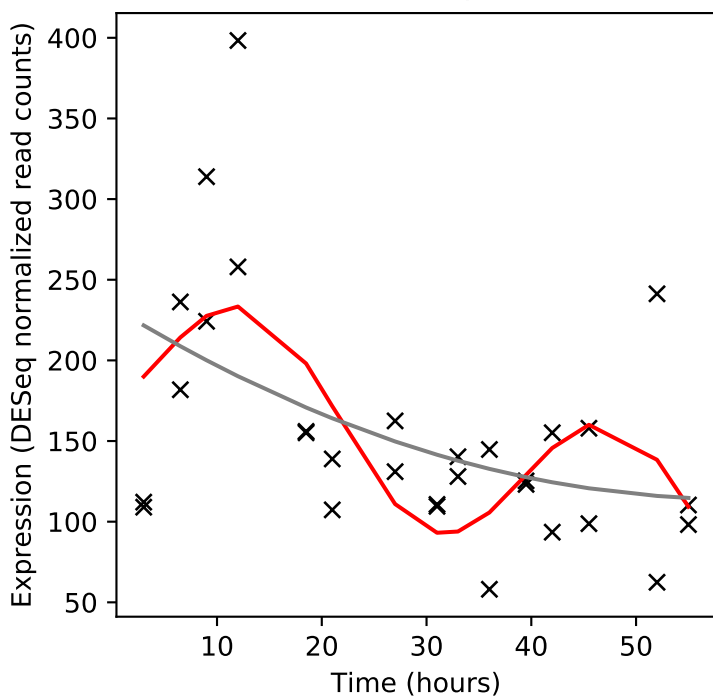

Rv2682c/dxs1

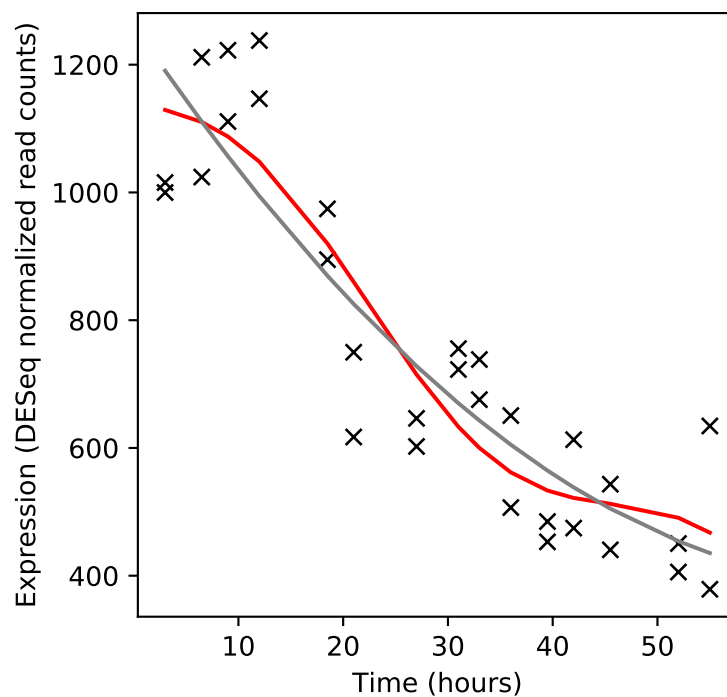

Rv2683/-

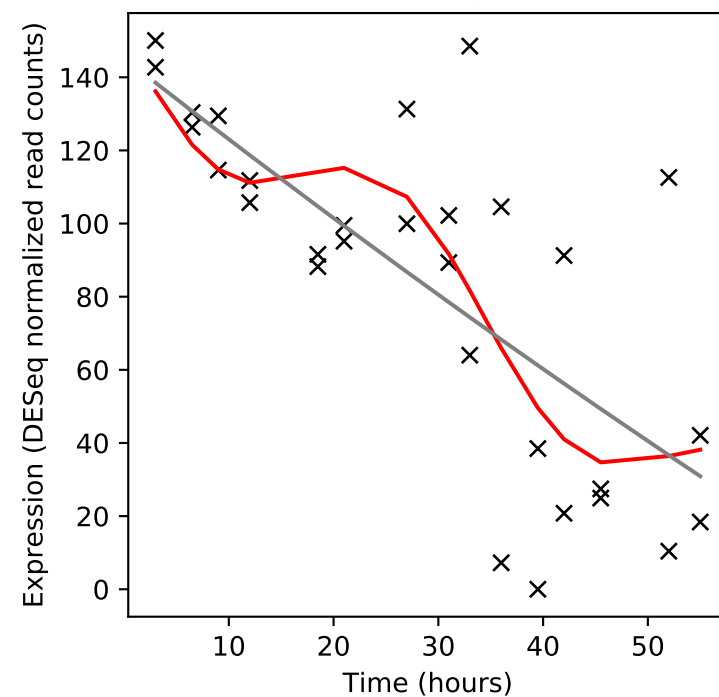

Rv2684/arsA

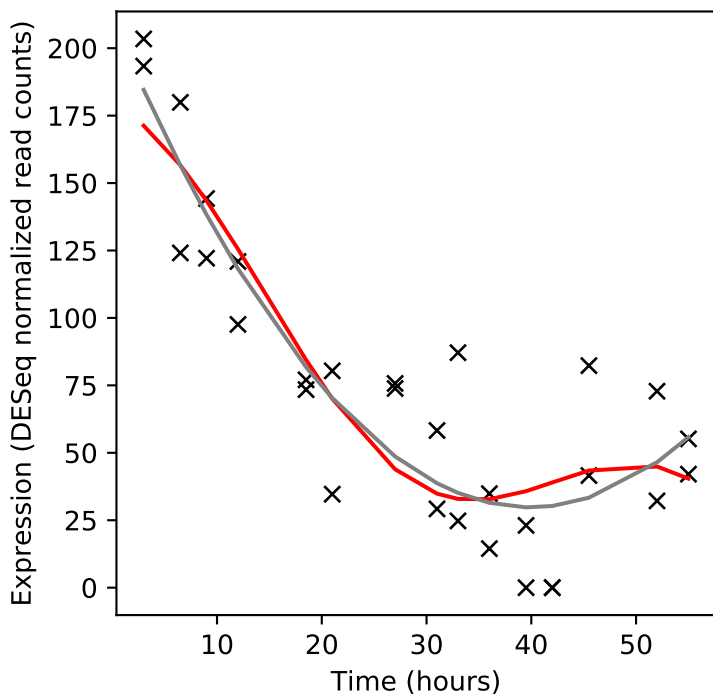

Rv2685/arsB1

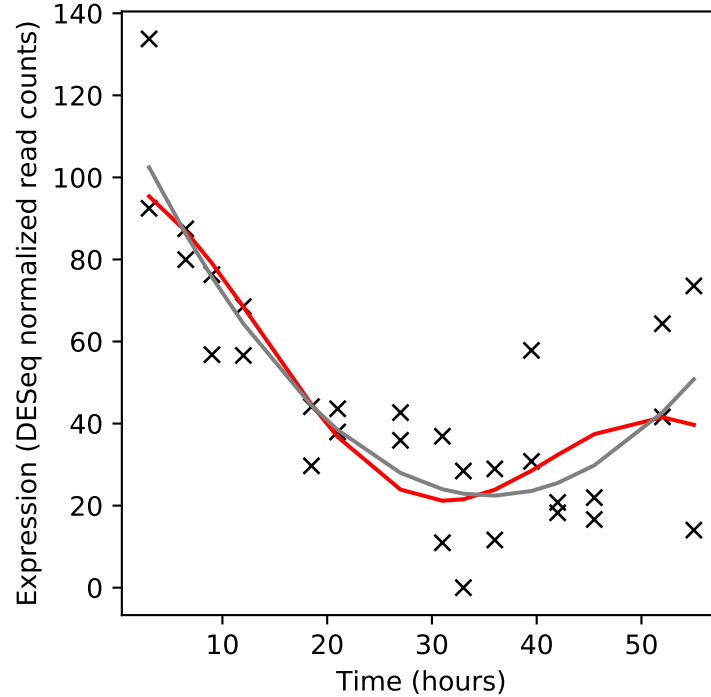

Rv2686c/-

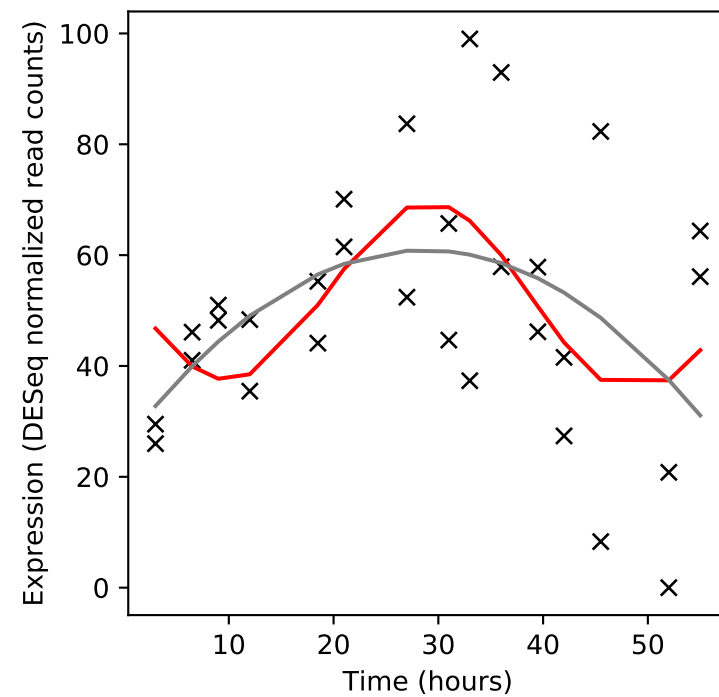

Rv2687c/-

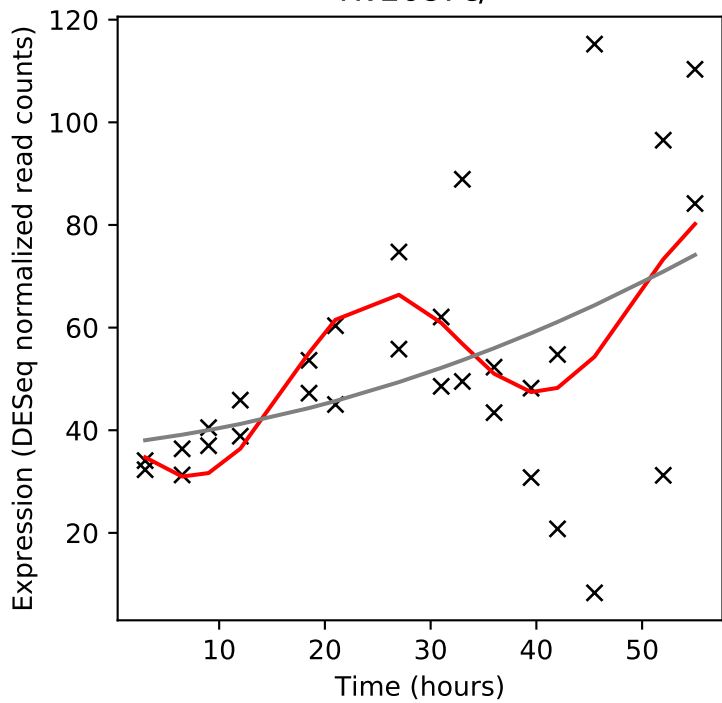

Rv2688c/-

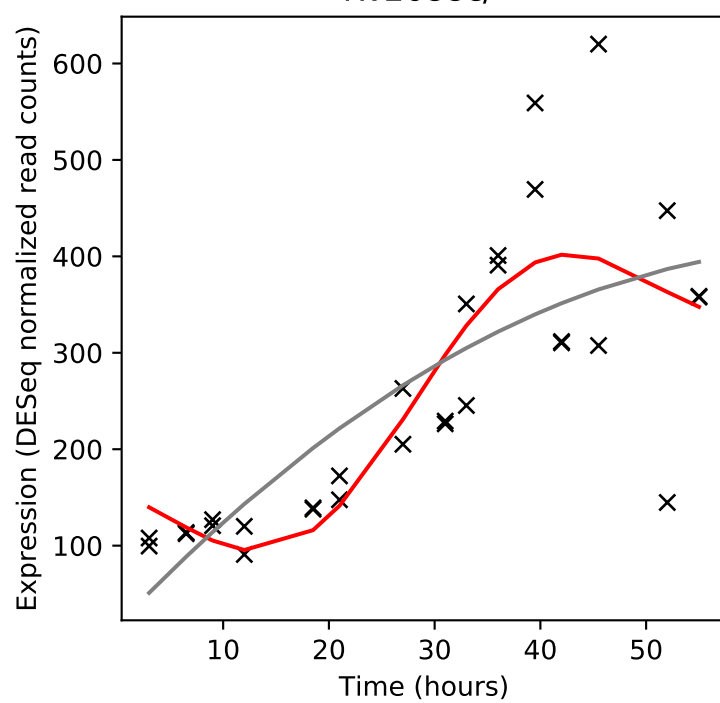

Rv2689c/-

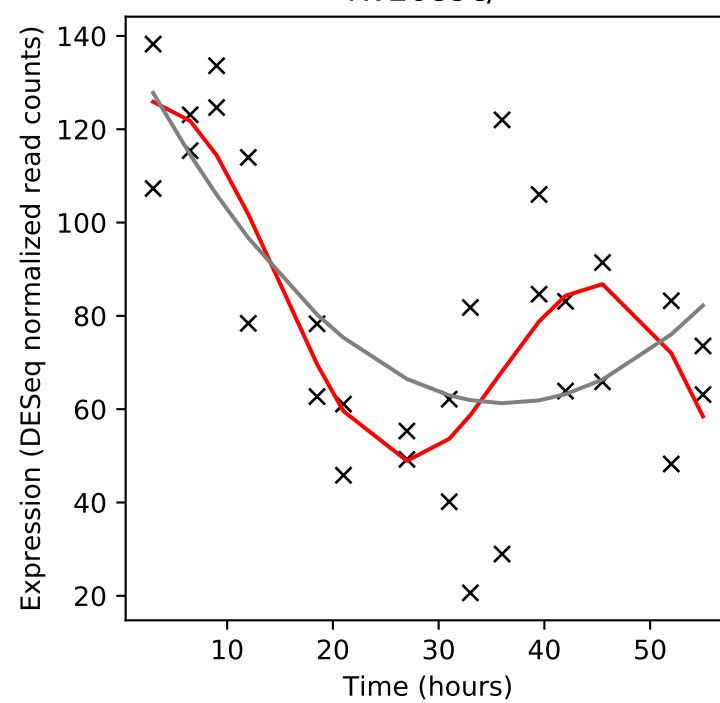

Rv2690c/-

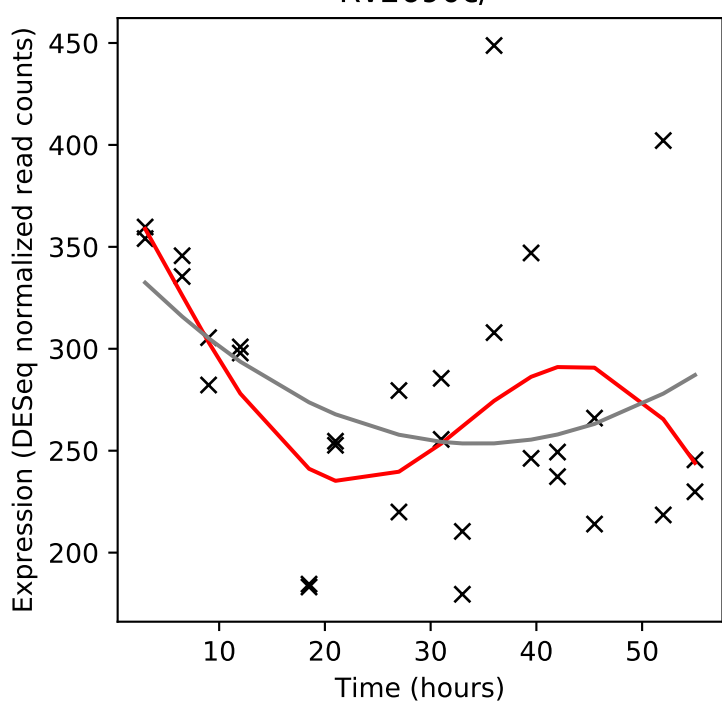

Rv2691/ceoB

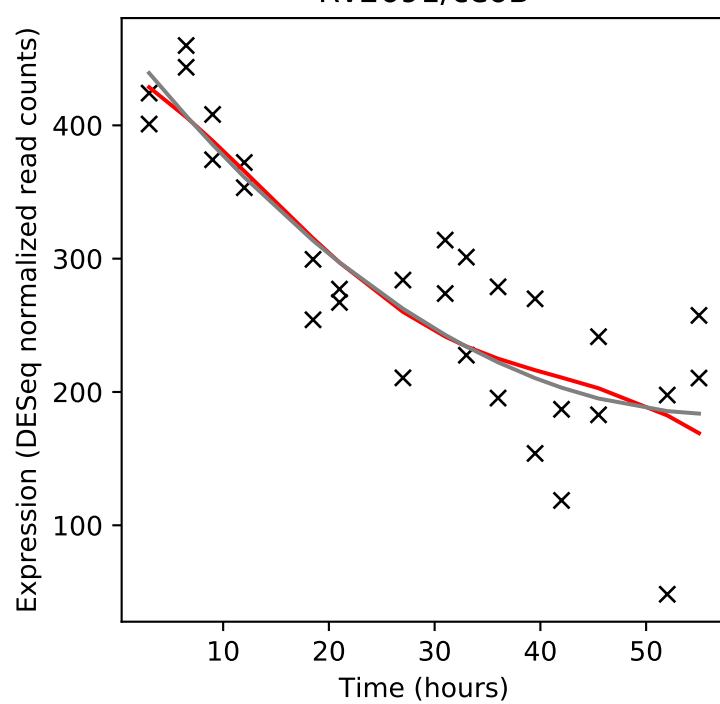

Rv2692/ceoC

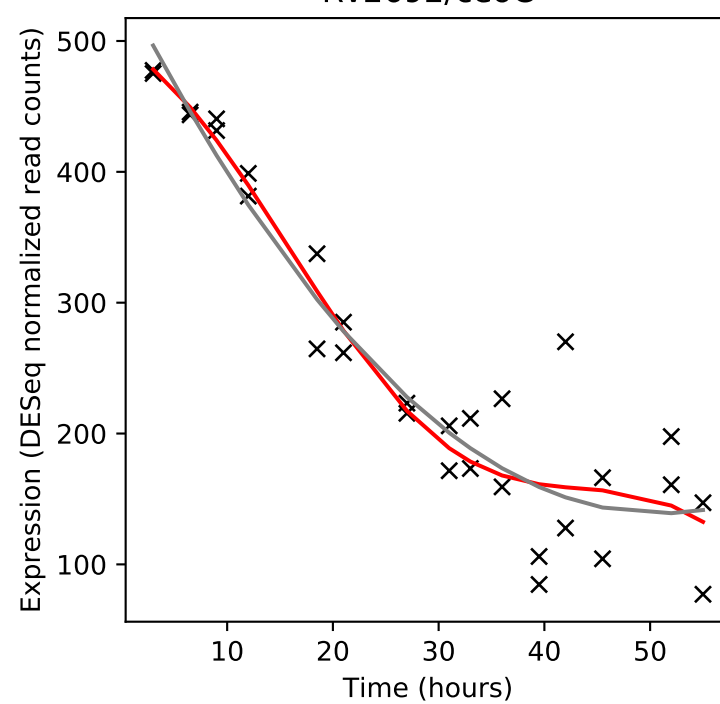

Rv2693c/-

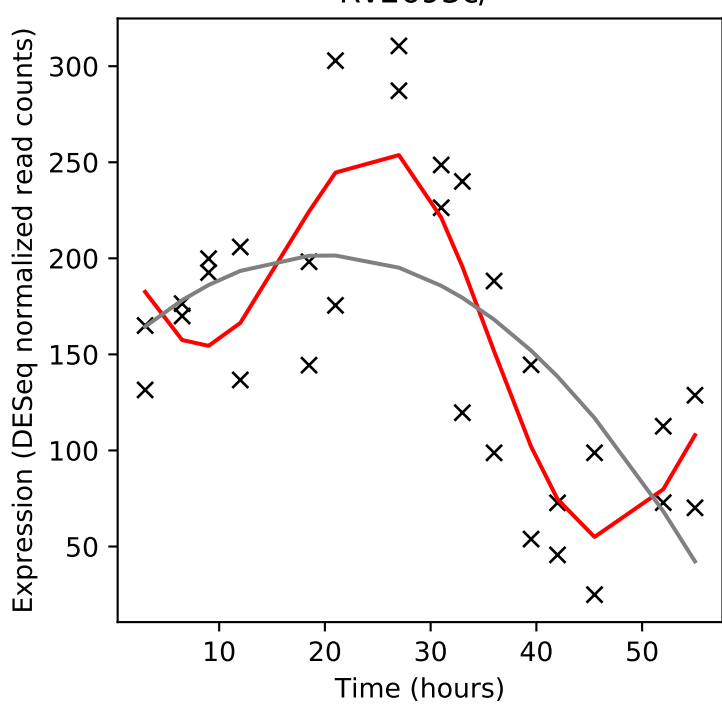

Rv2694c/-

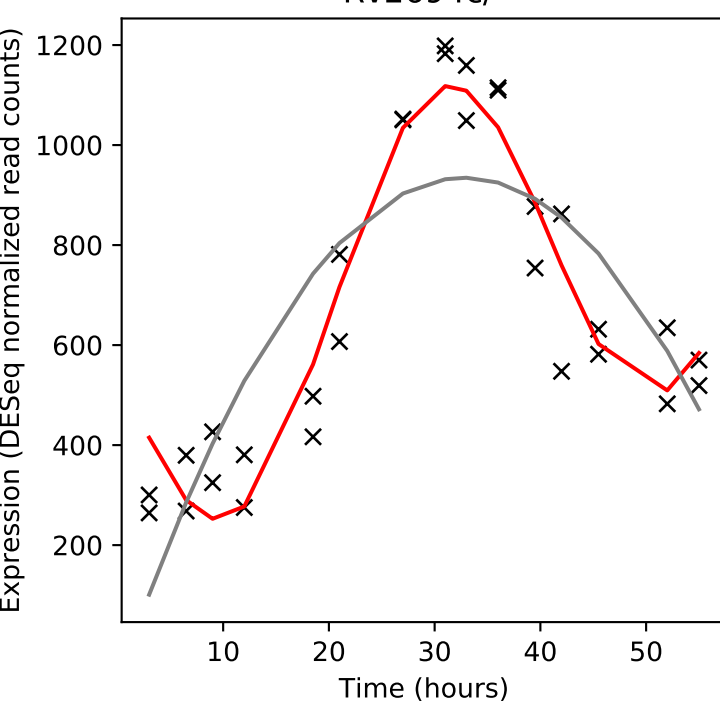

Rv2695/-

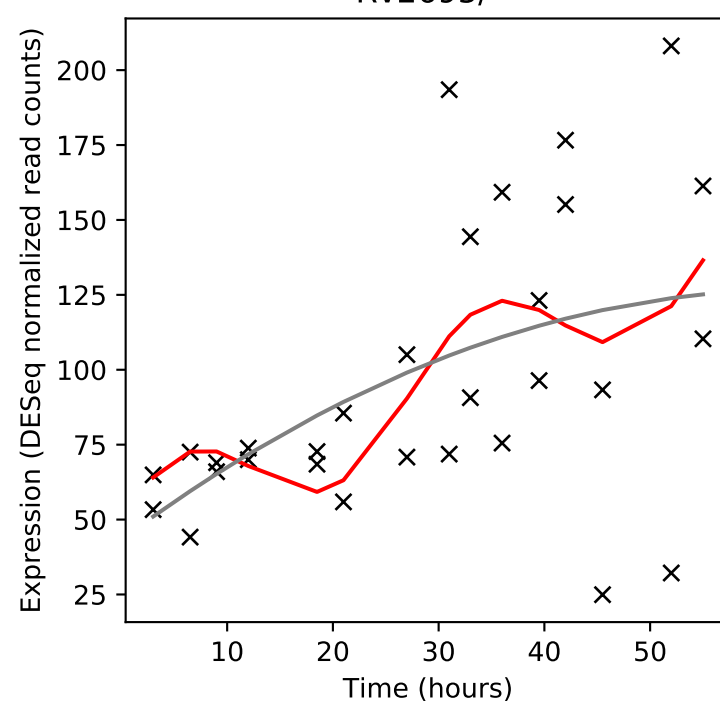

Rv2696c/-

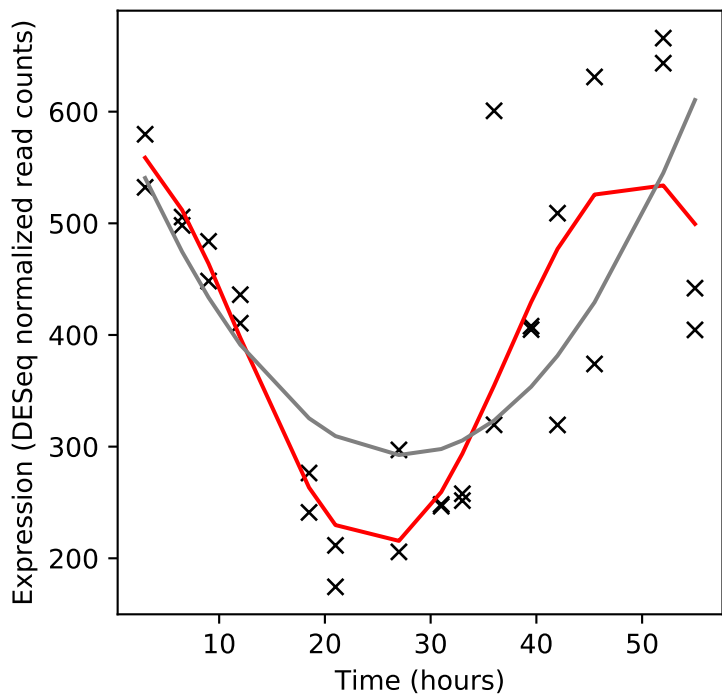

Rv2697c/dut

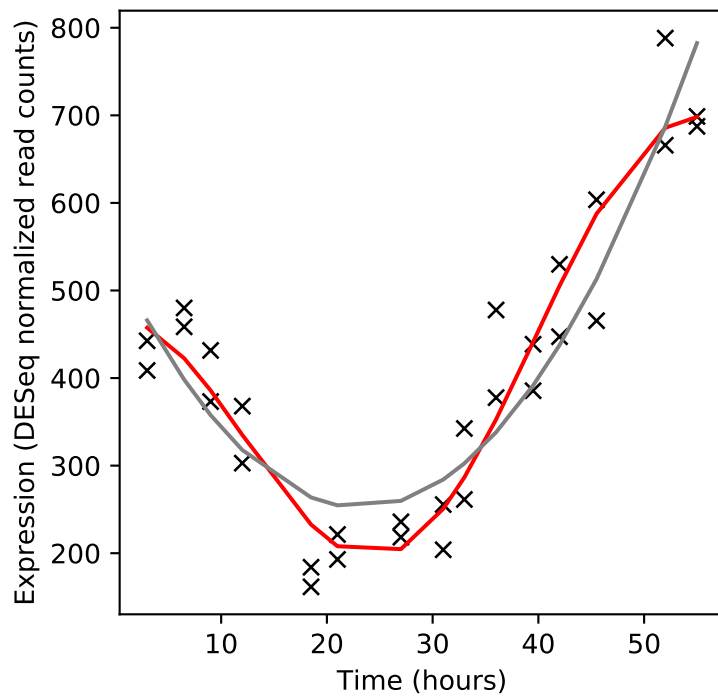

Rv2698/-

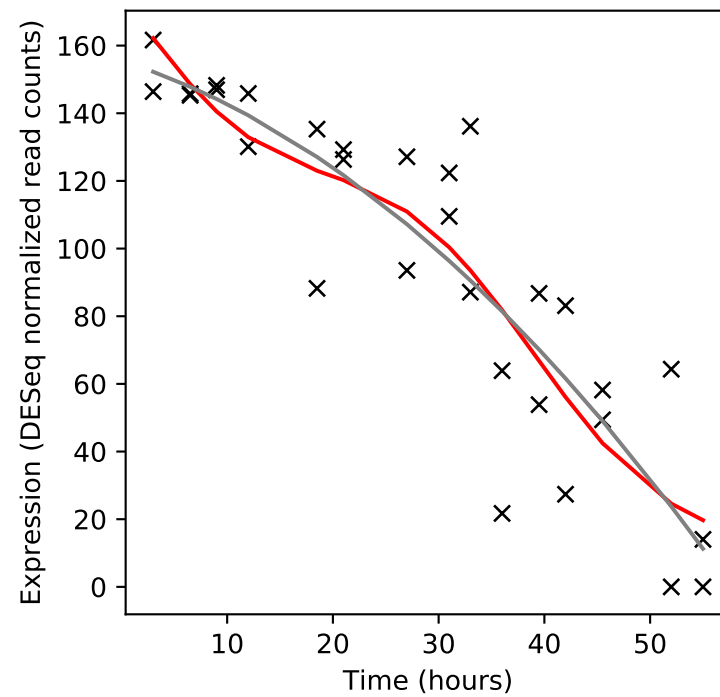

Rv2699c/-

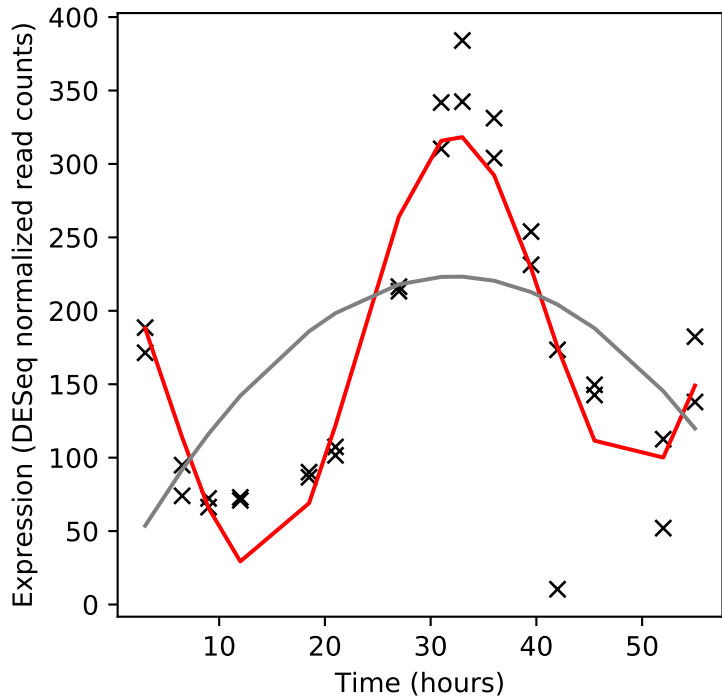

Rv2700/-

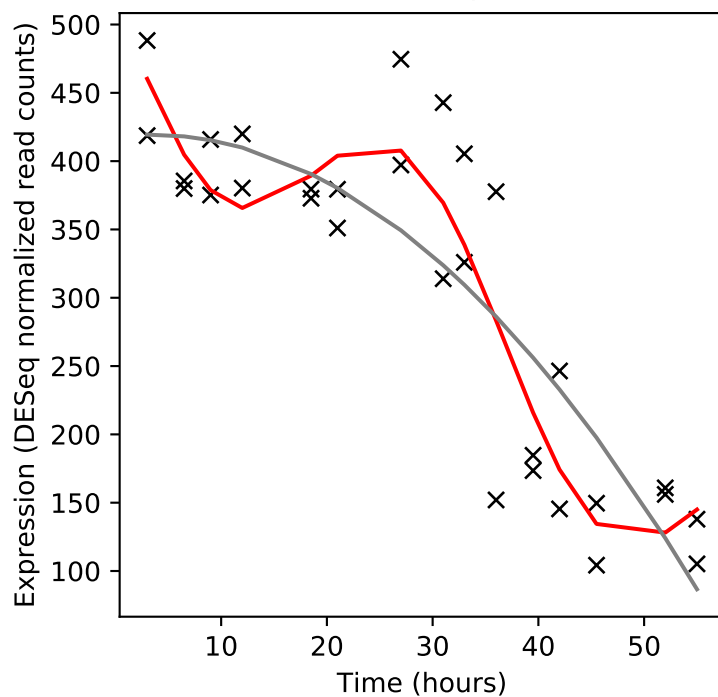

Rv2701c/suhB

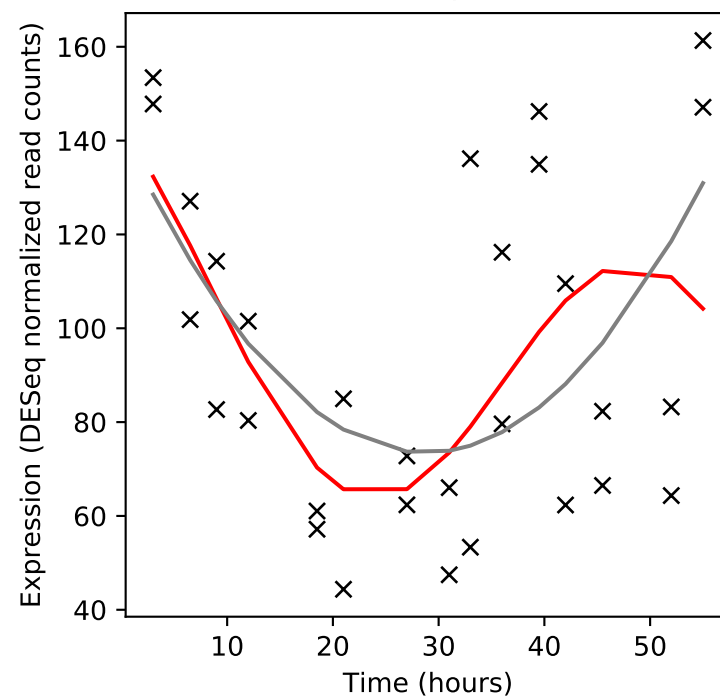

Rv2702/ppgK

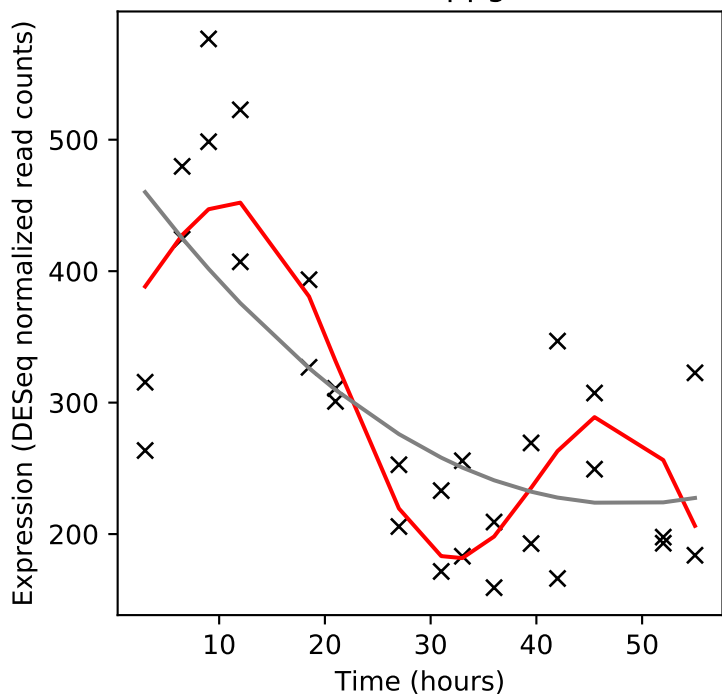

Rv2703/sigA

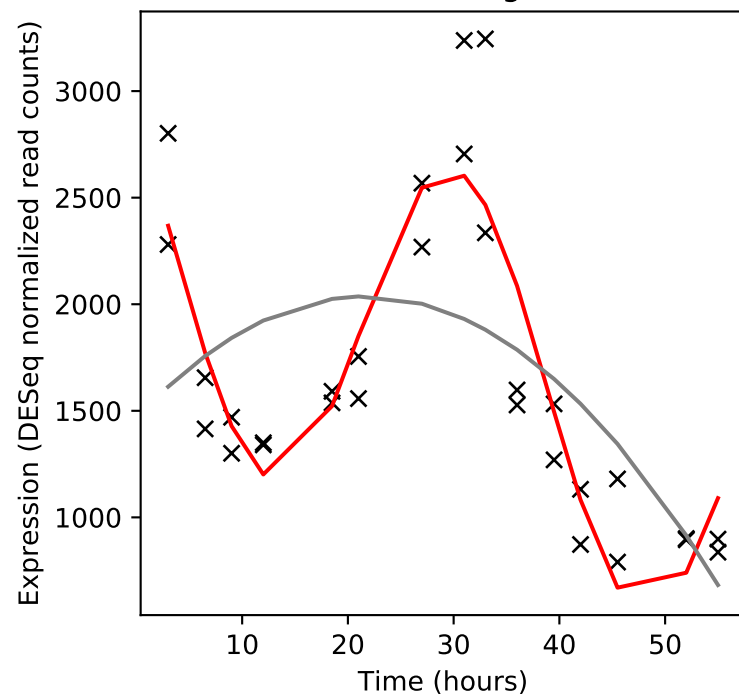

Rv2704/-

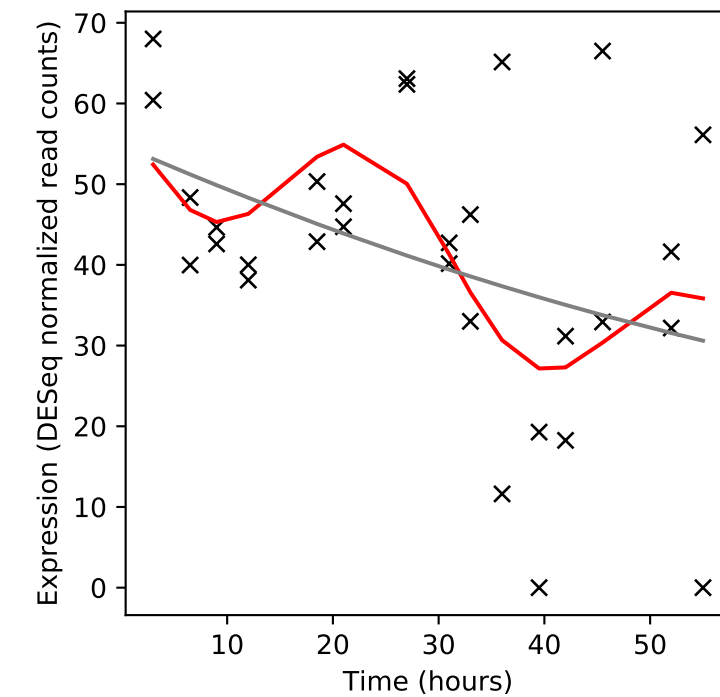

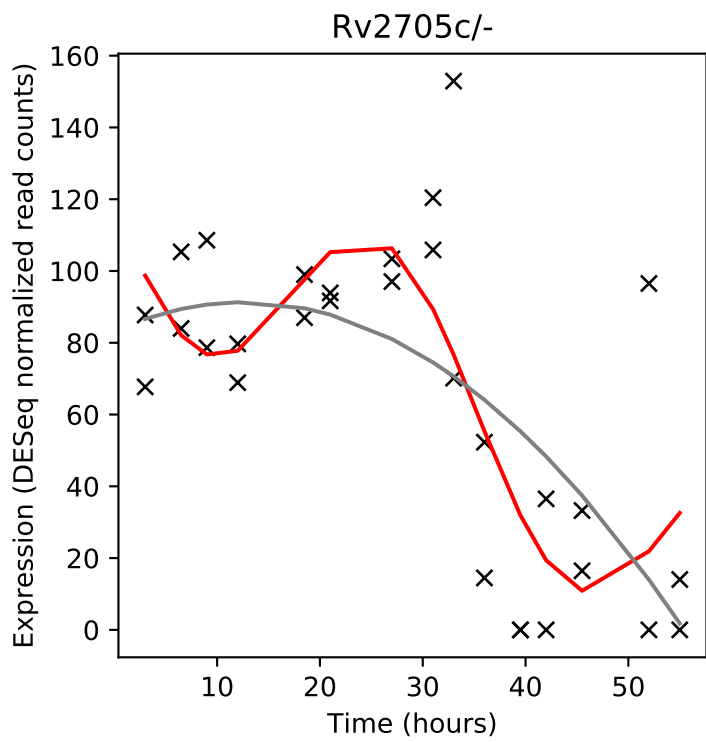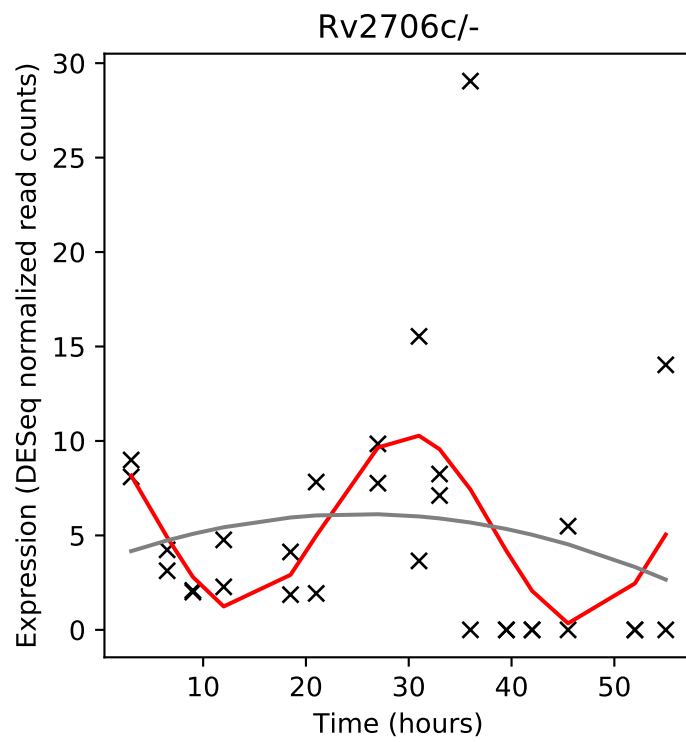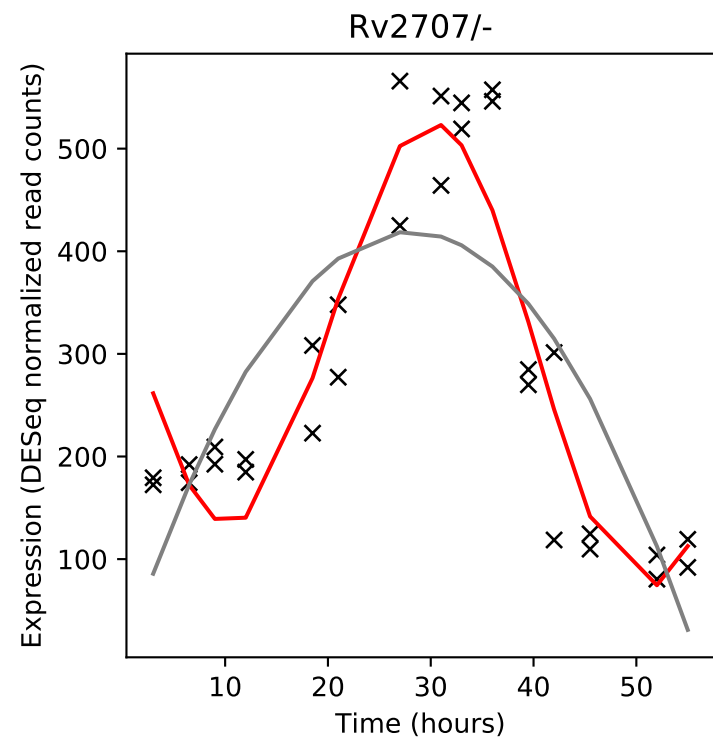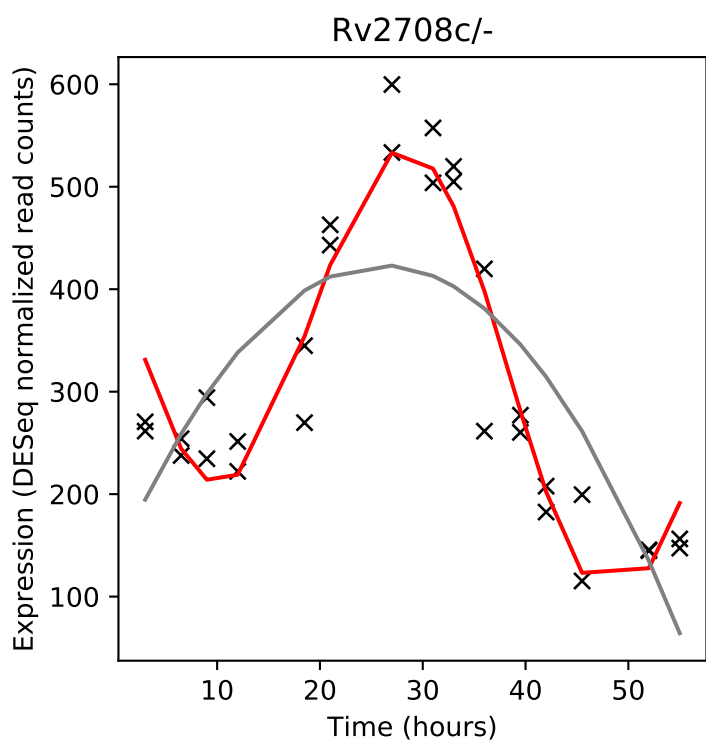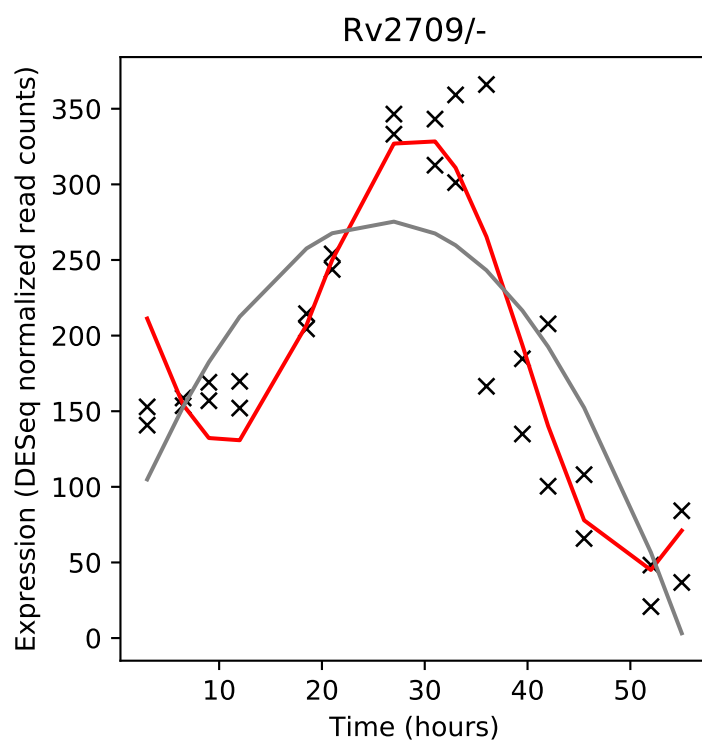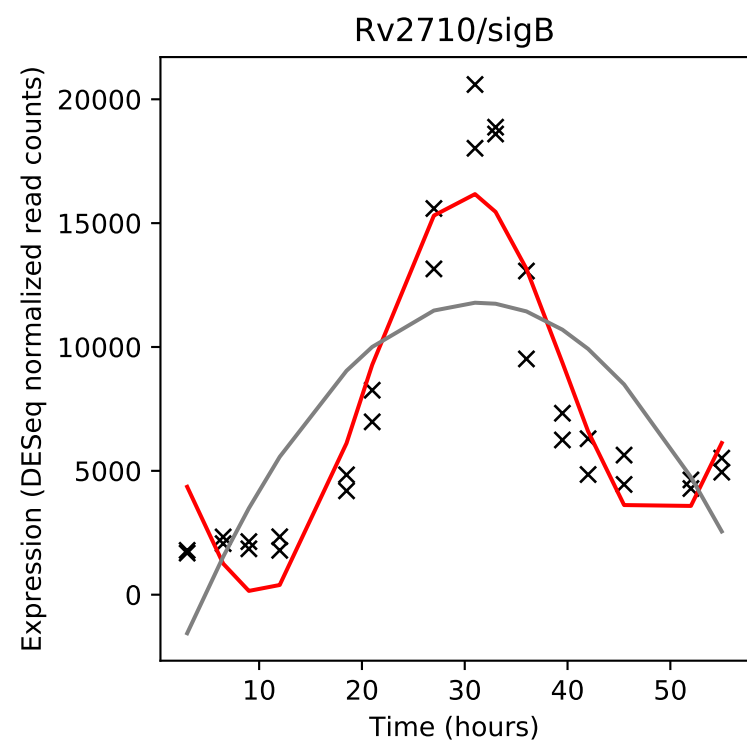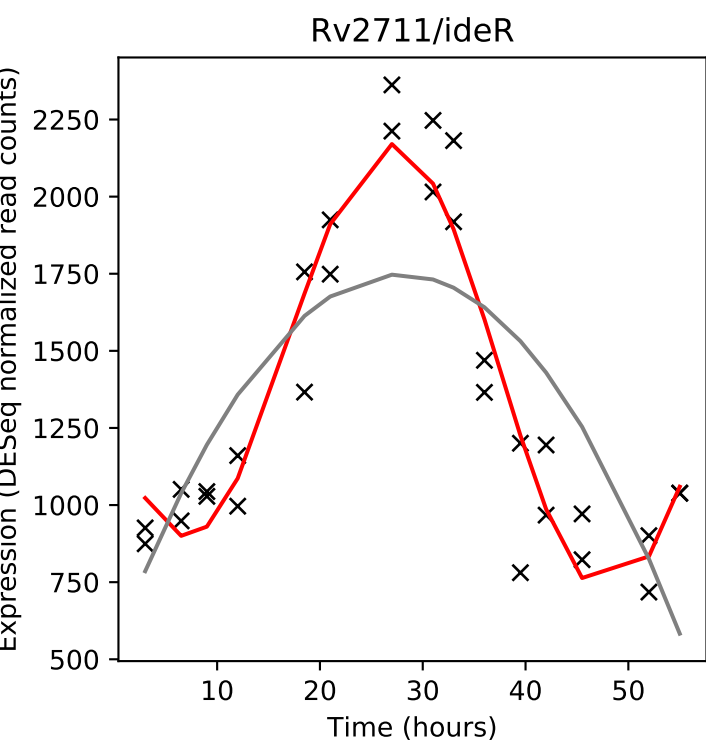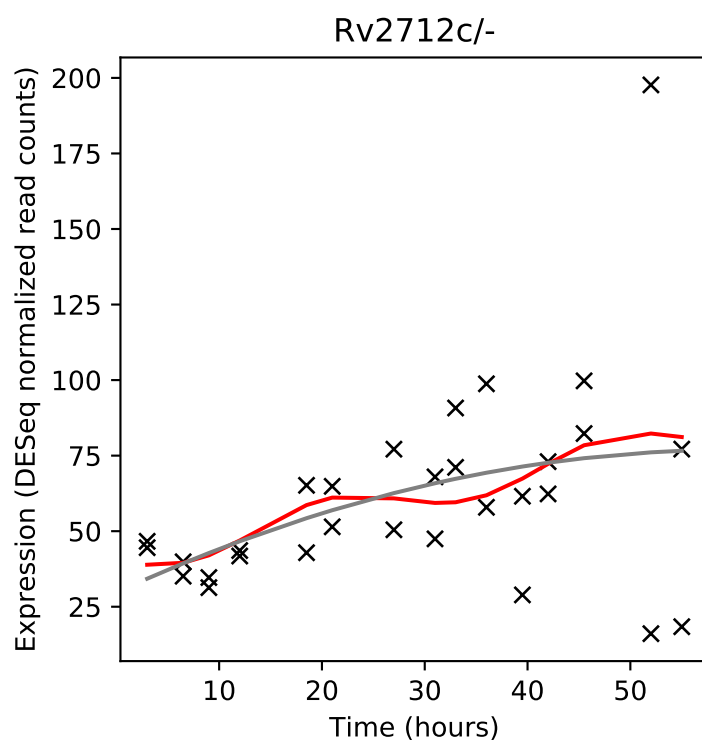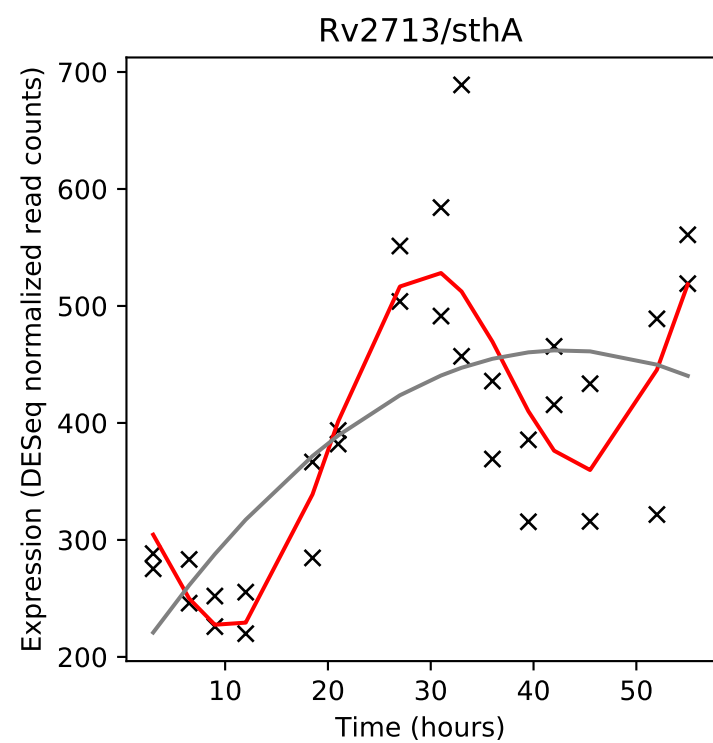



Rv2714/-

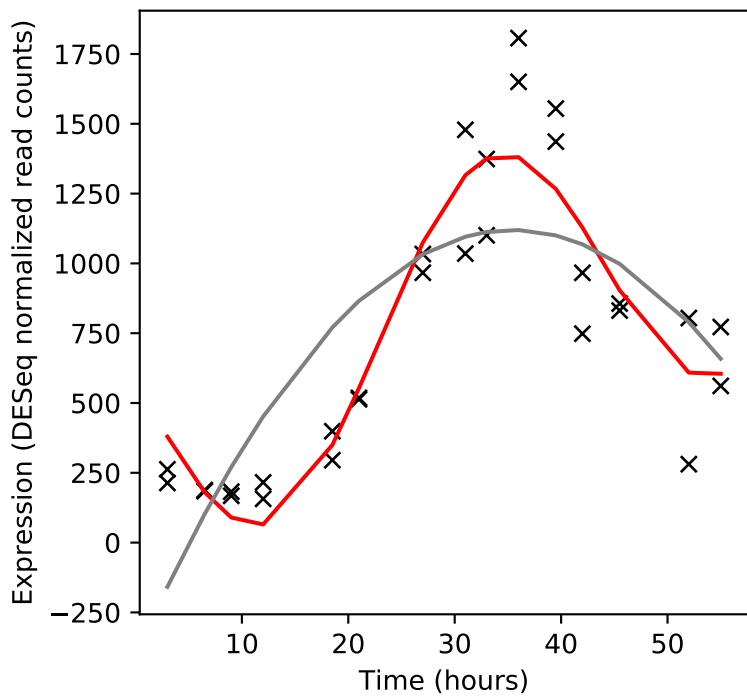

Rv2715/-

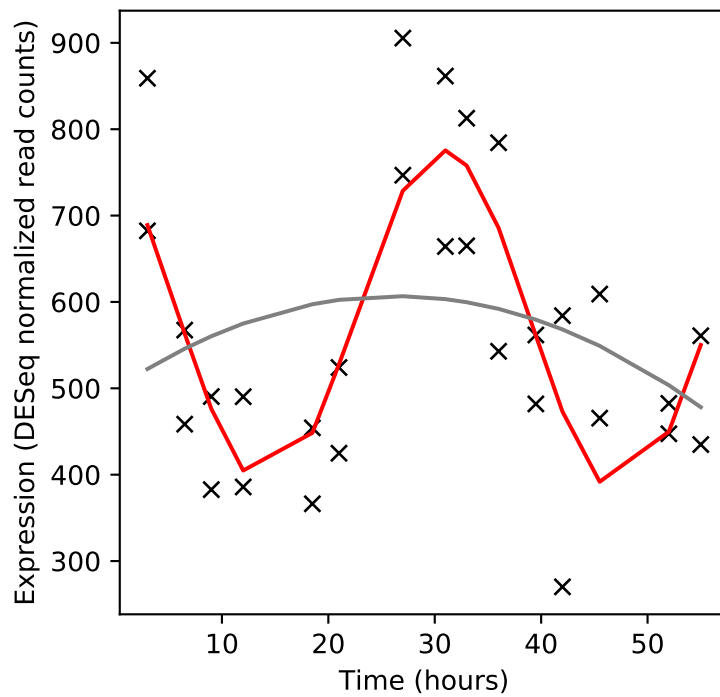

Rv2716/-

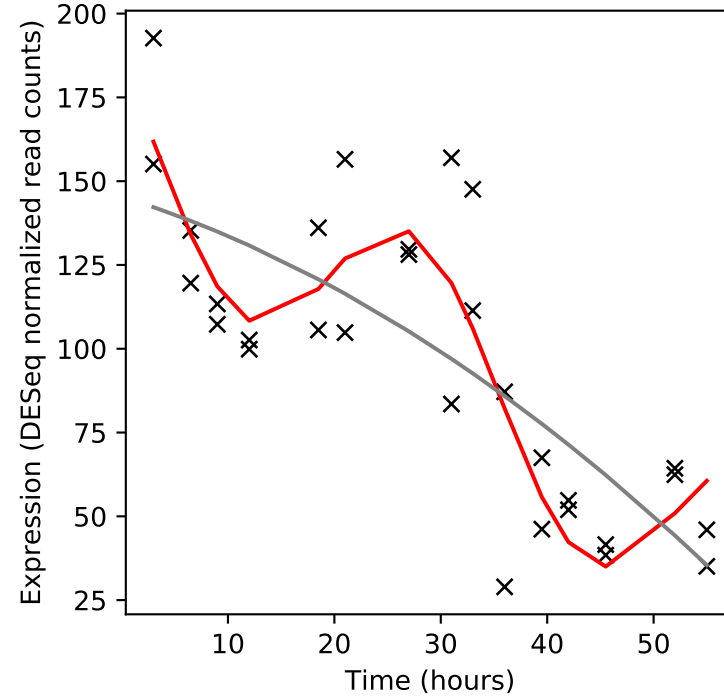

Rv2717c/-

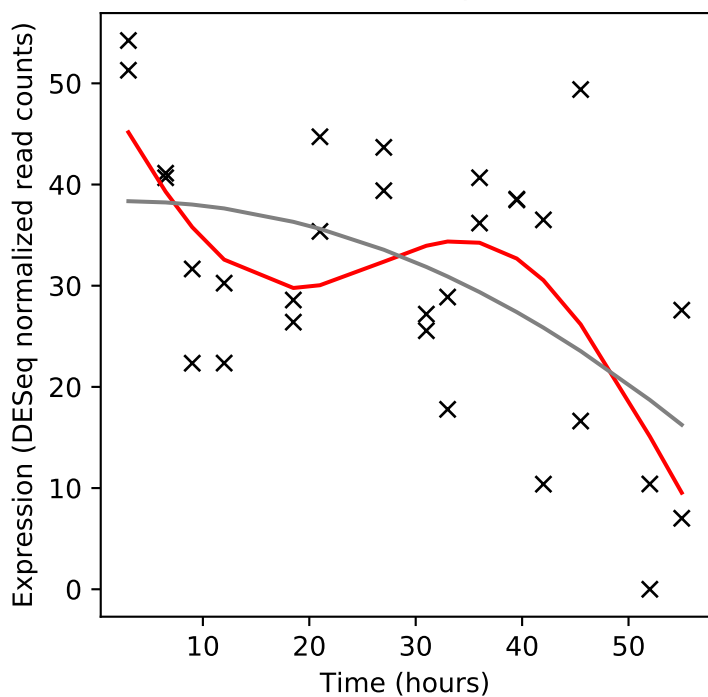

Rv2718c/nrdR

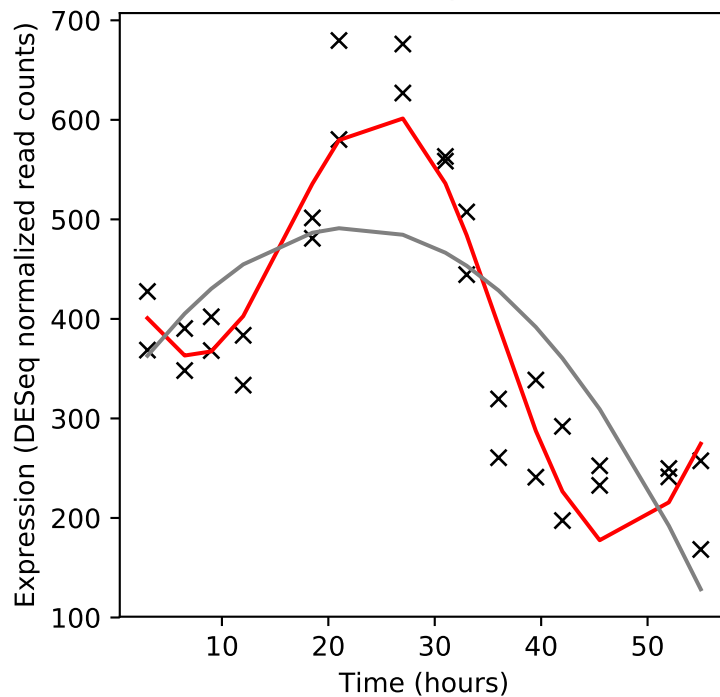

Rv2719c/-

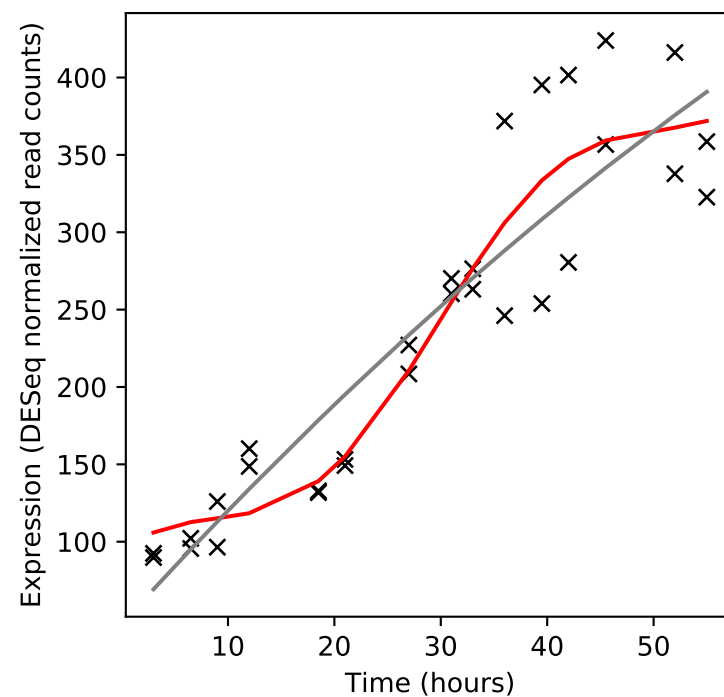

Rv2720/lexA

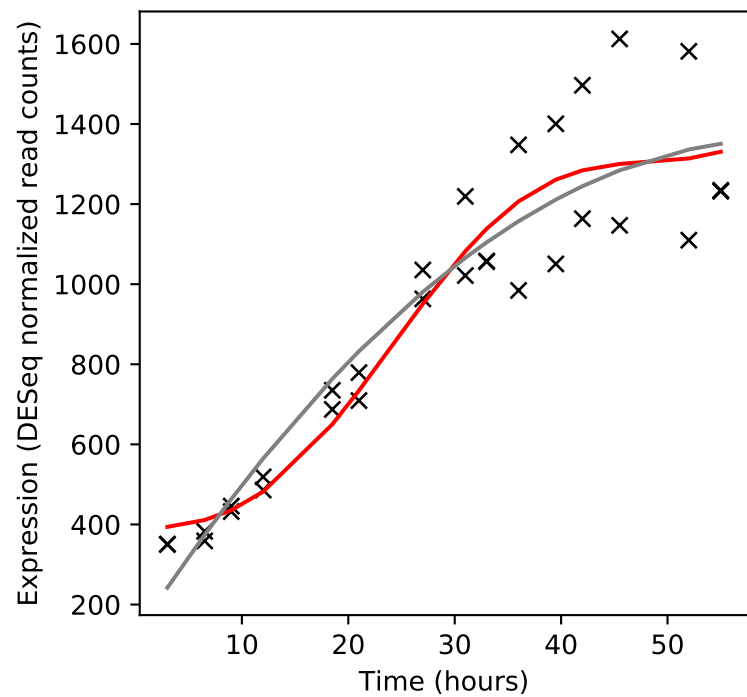

Rv2721c/-

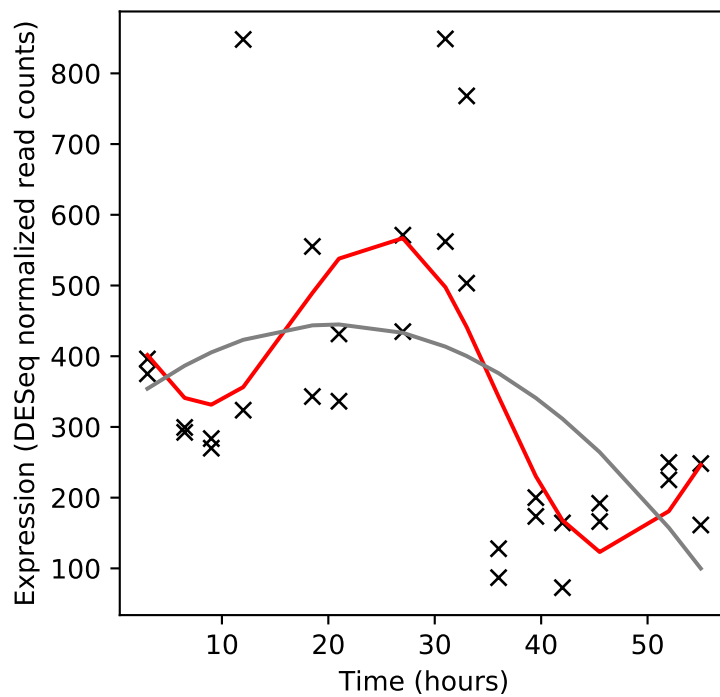

Rv2722/-

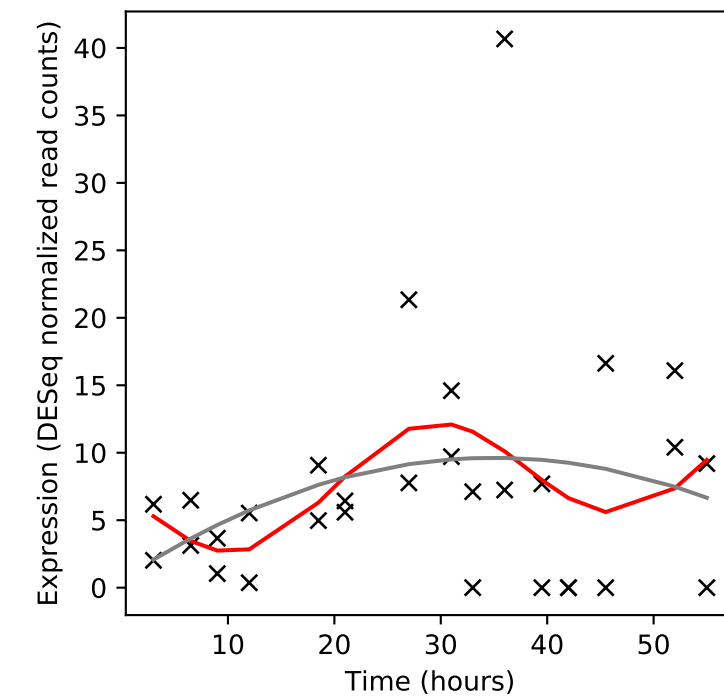

Rv2723/-

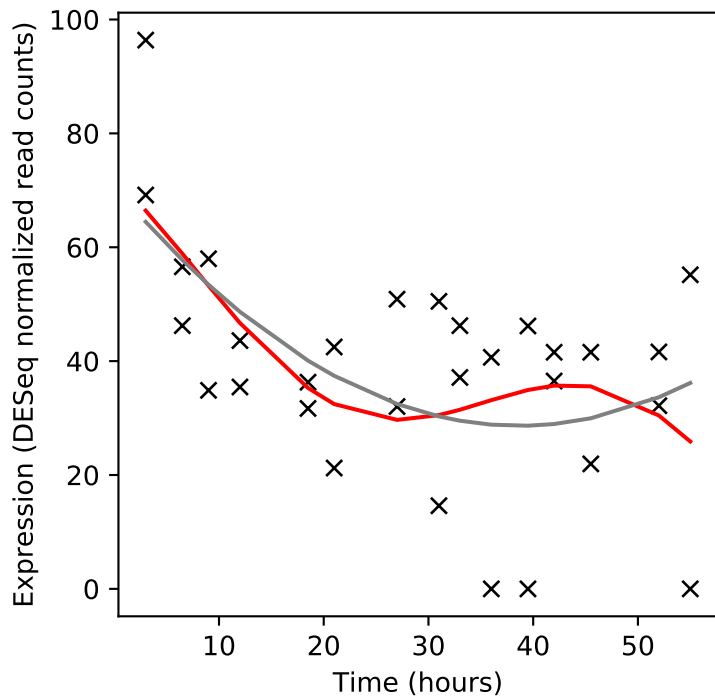

Rv2724c/fadE20

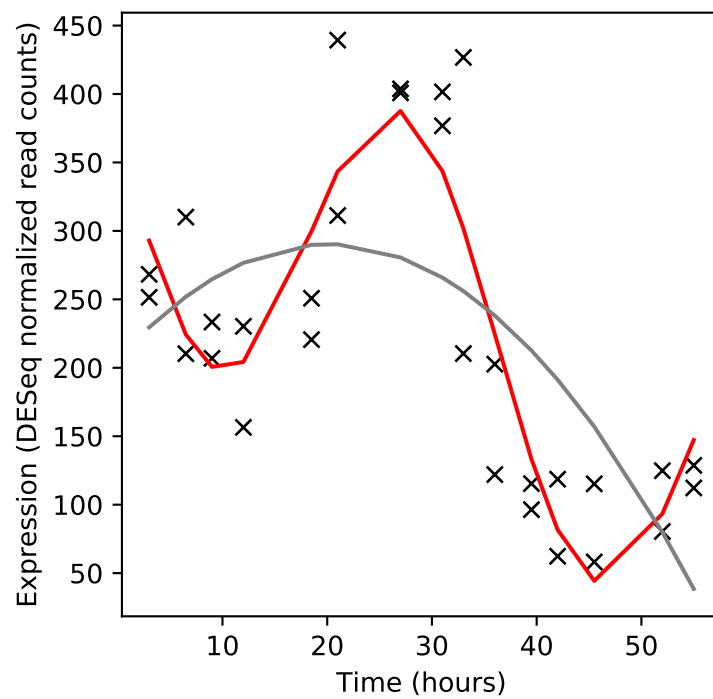

Rv2725c/hflX

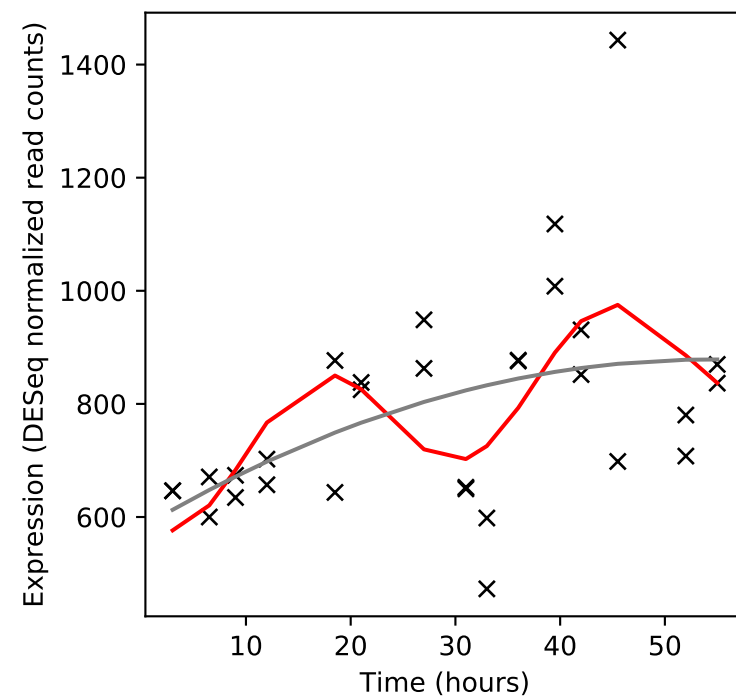

Rv2726c/dapF

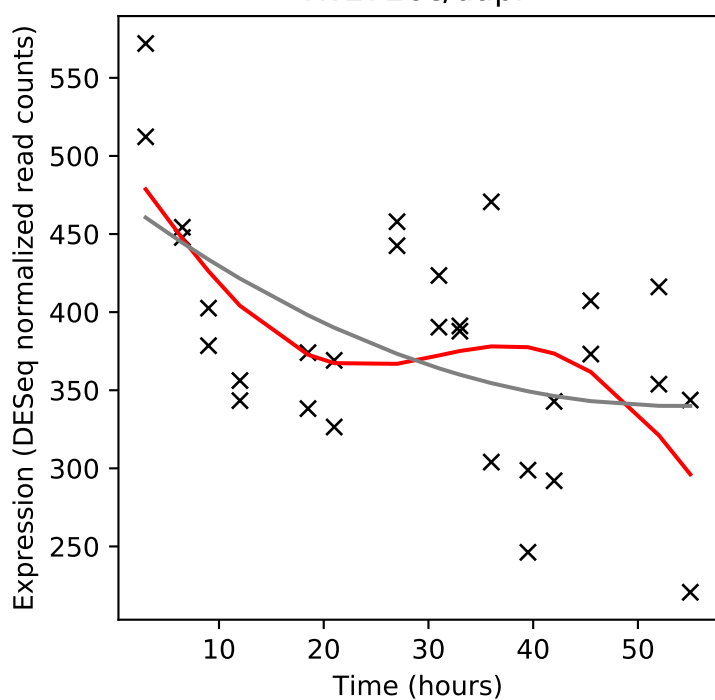

Rv2727c/miaA

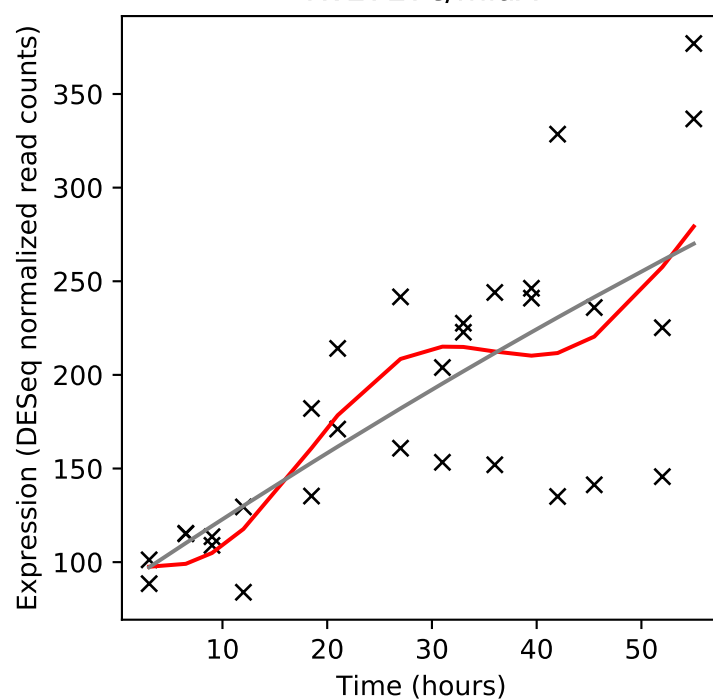

Rv2728c/-

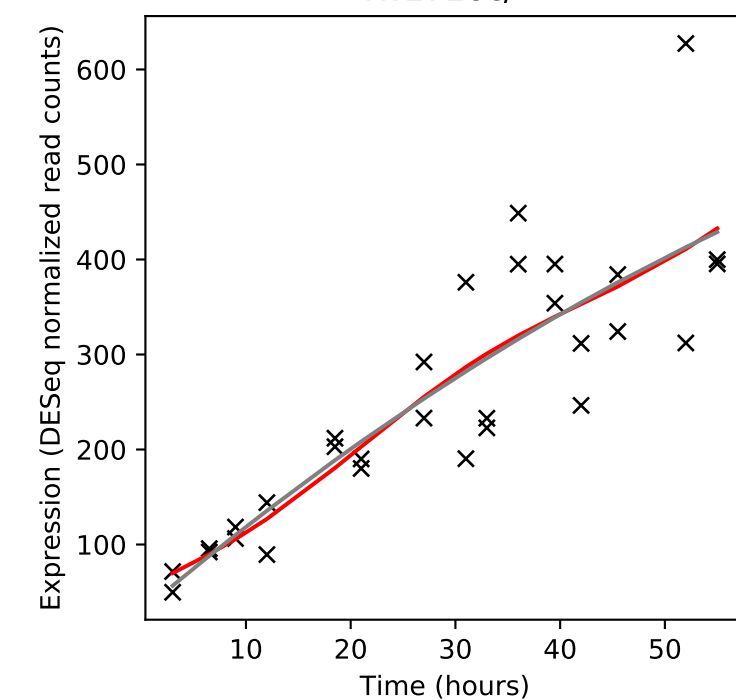

Rv2729c/-

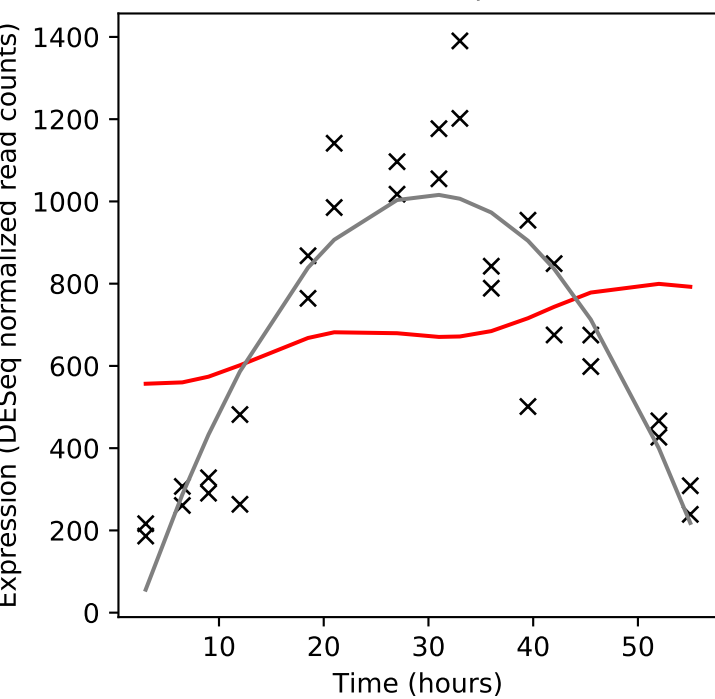

Rv2730/-

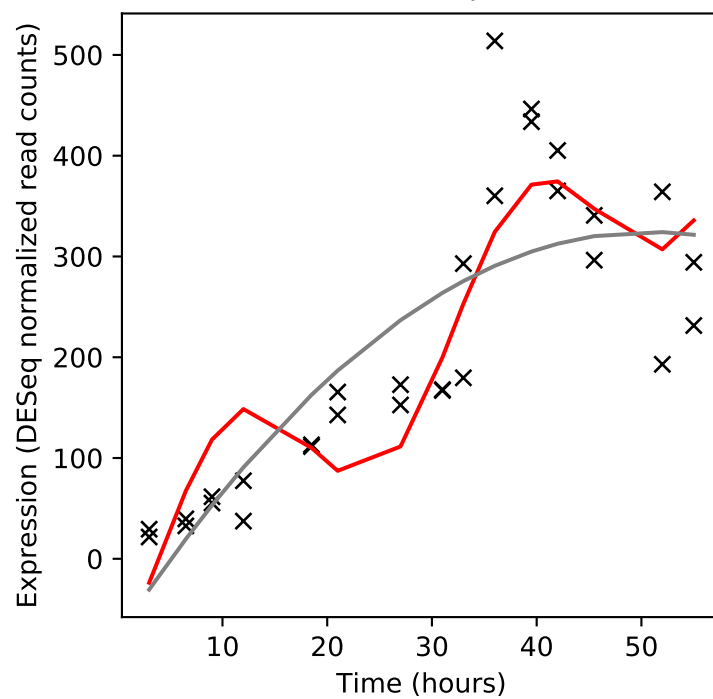

Rv2731/-

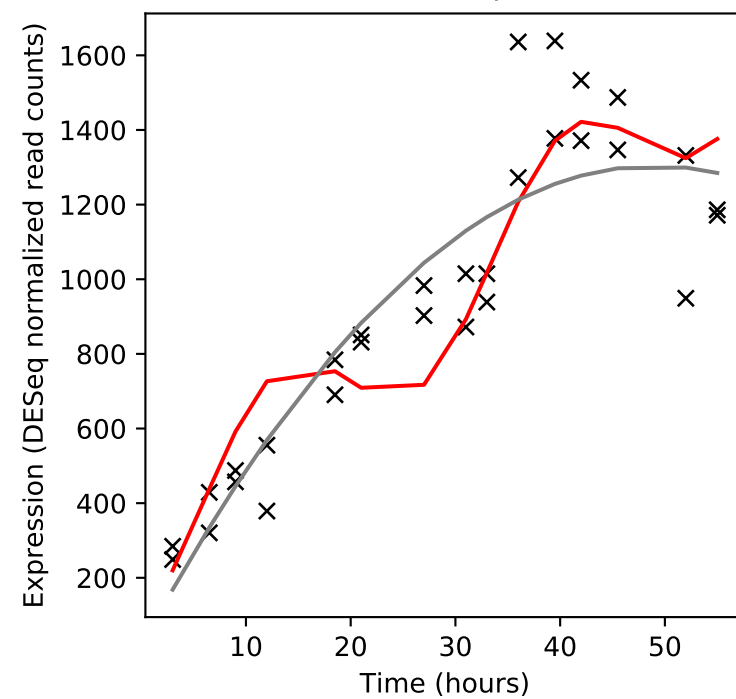

Rv2732c/-

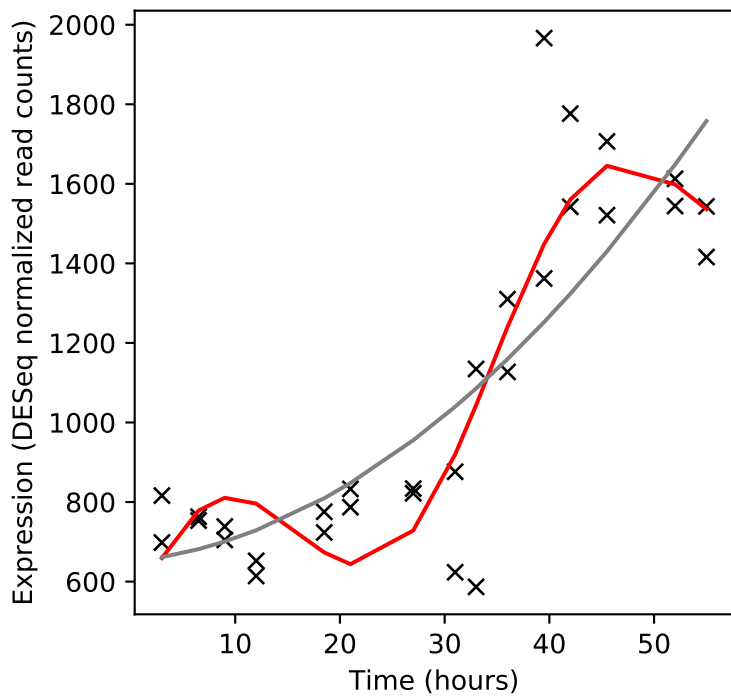

Rv2733c/-

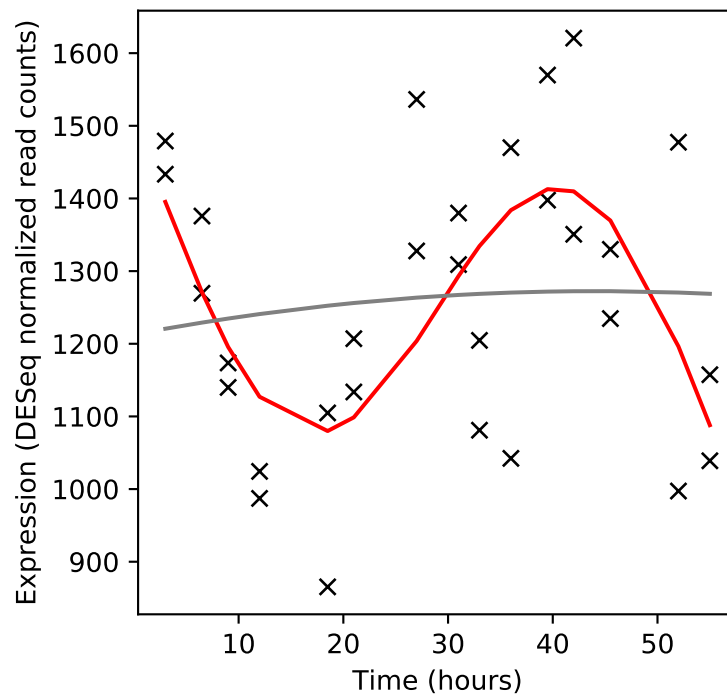

Rv2734/-

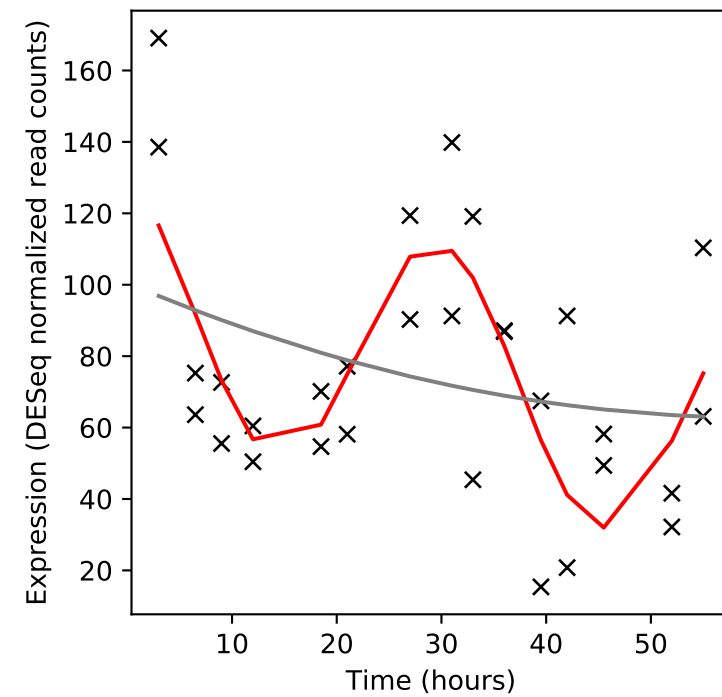

Rv2735c/-

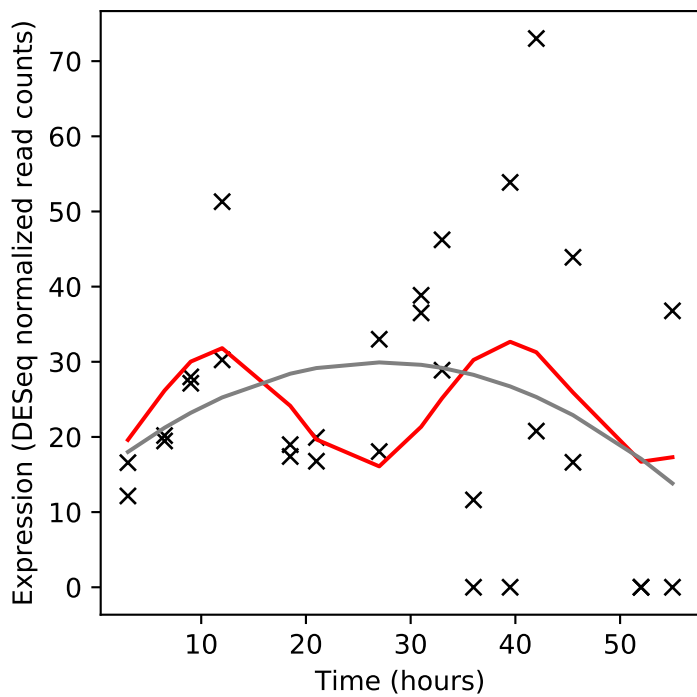

Rv2736c/recX

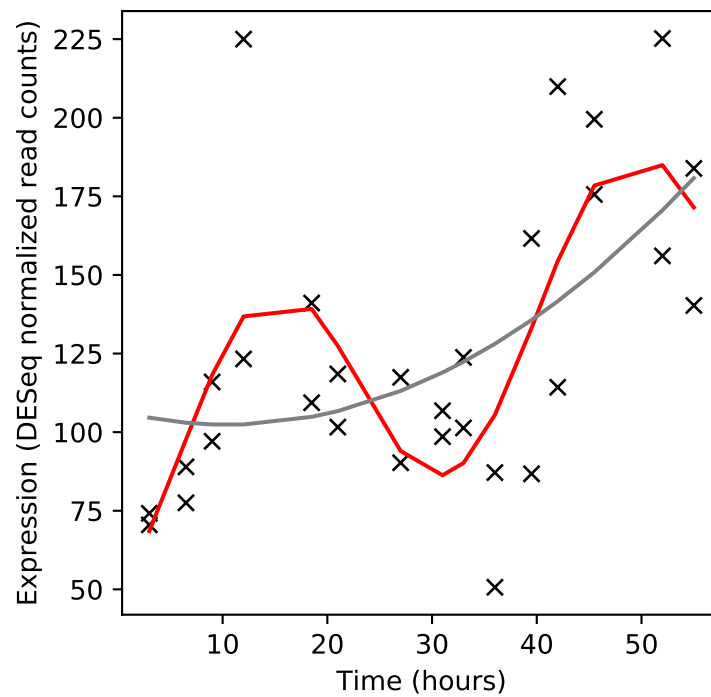

Rv2737c/recA

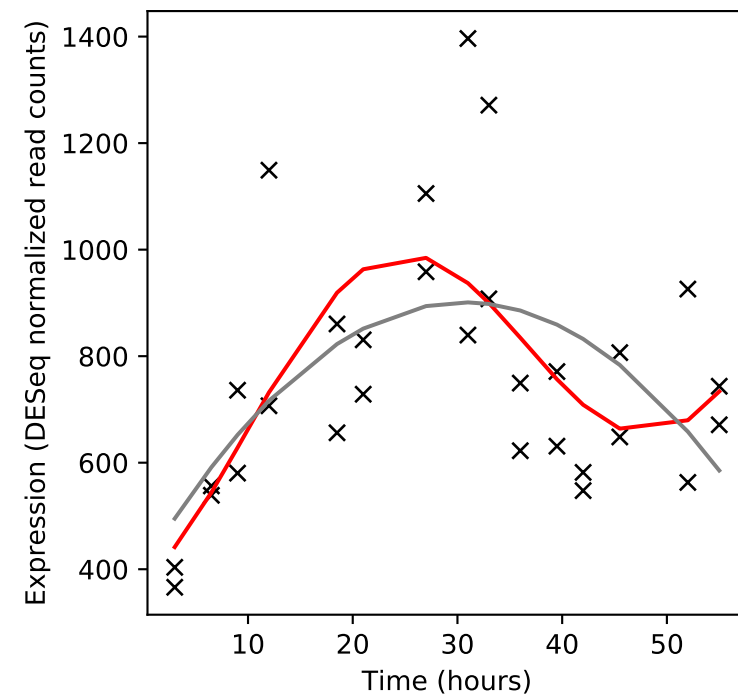

Rv2737A/-

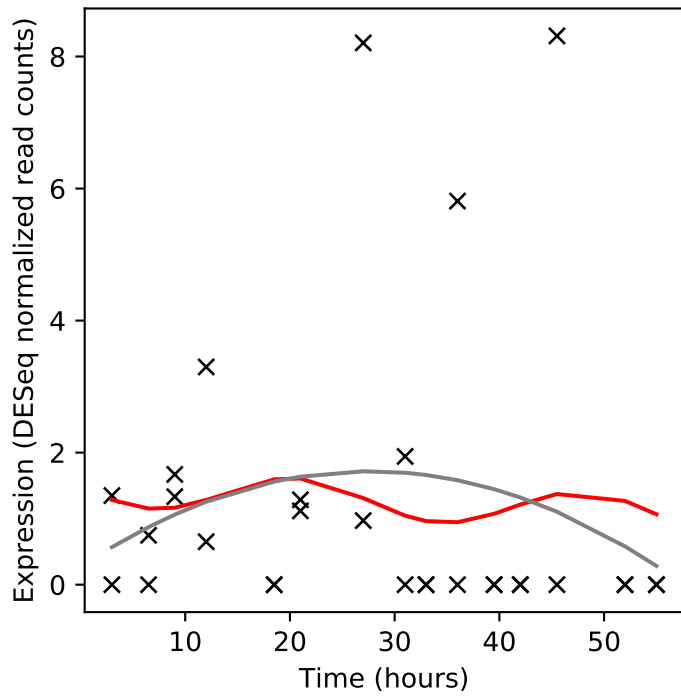

Rv2738c/-

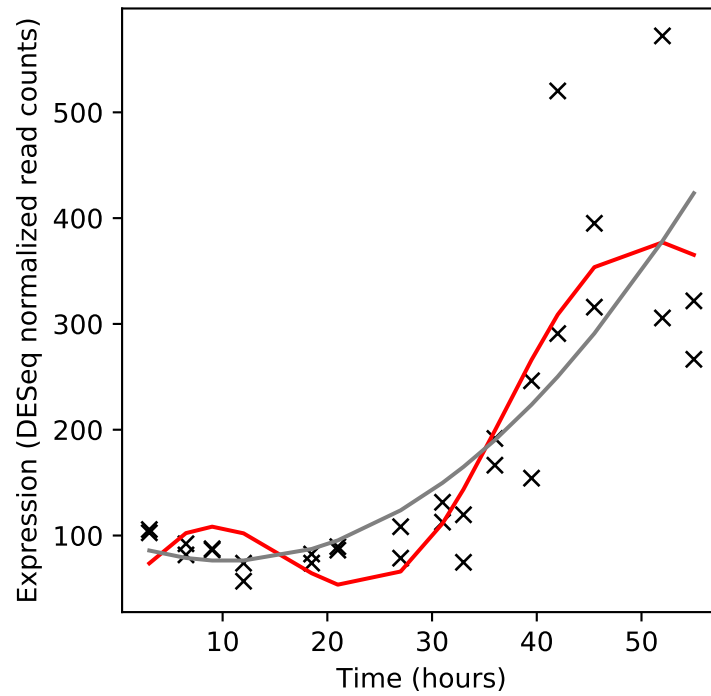

Rv2739c/-

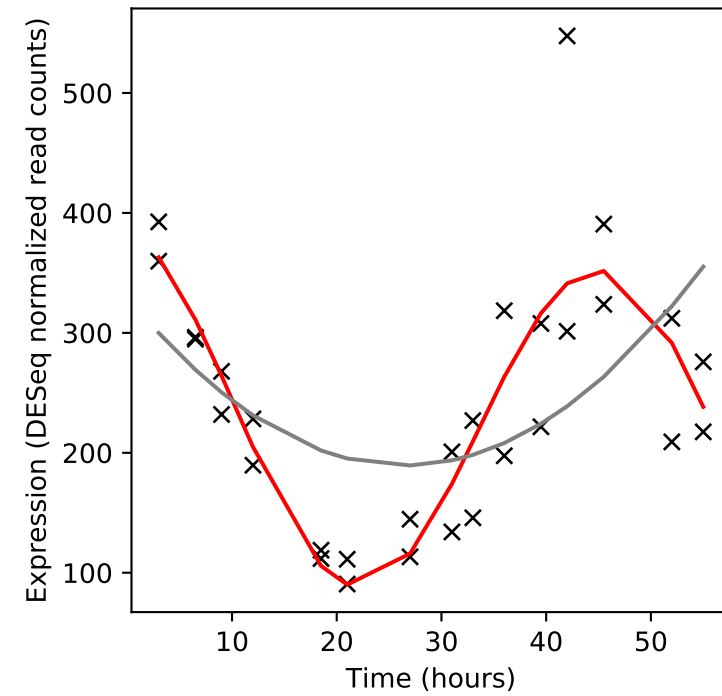

Rv2740/ephG

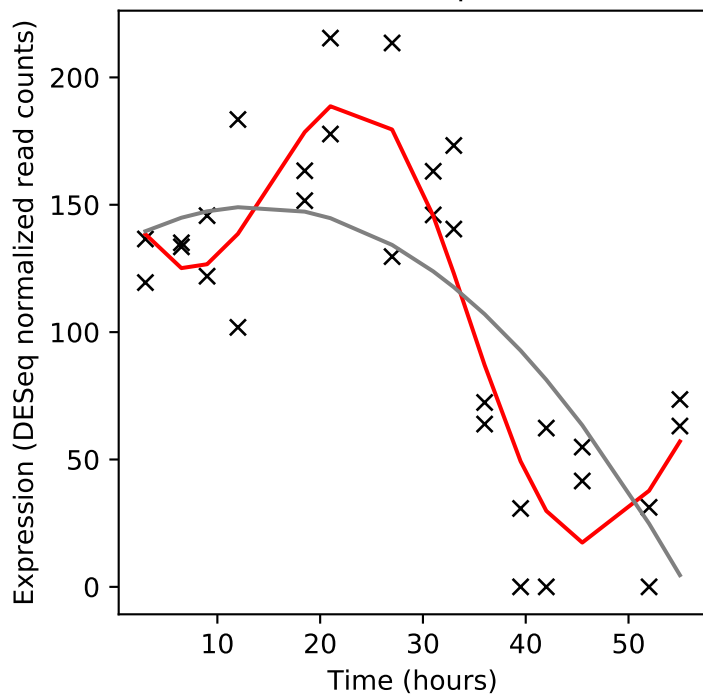

Rv2741/PE\_PGRS47

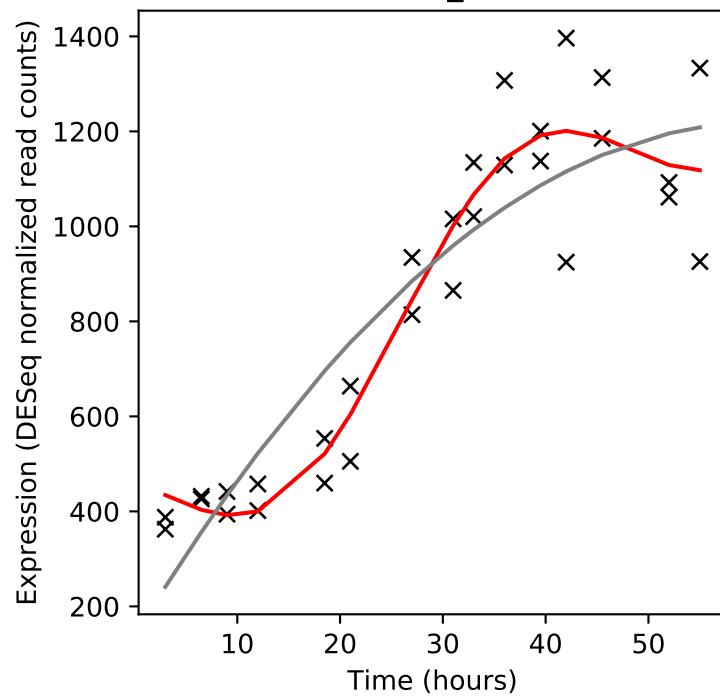

Rv2742c/-

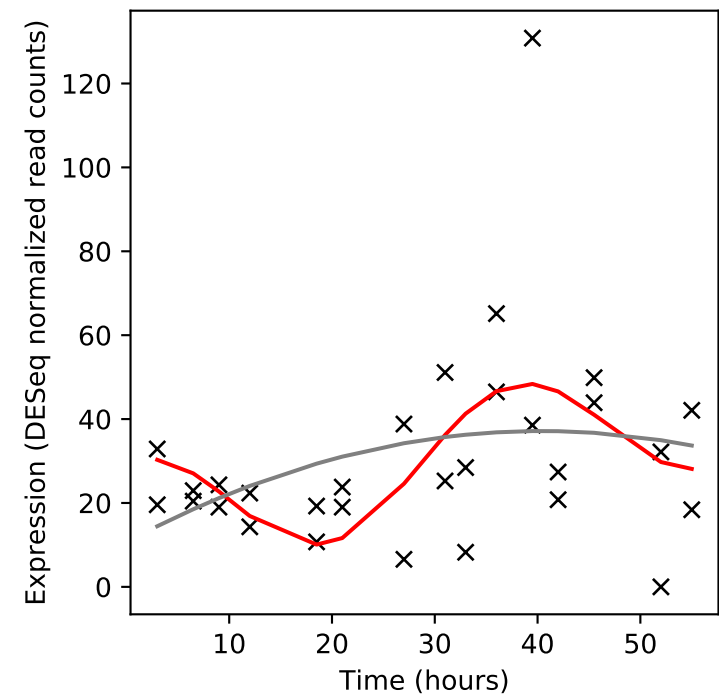

Rv2743c/-

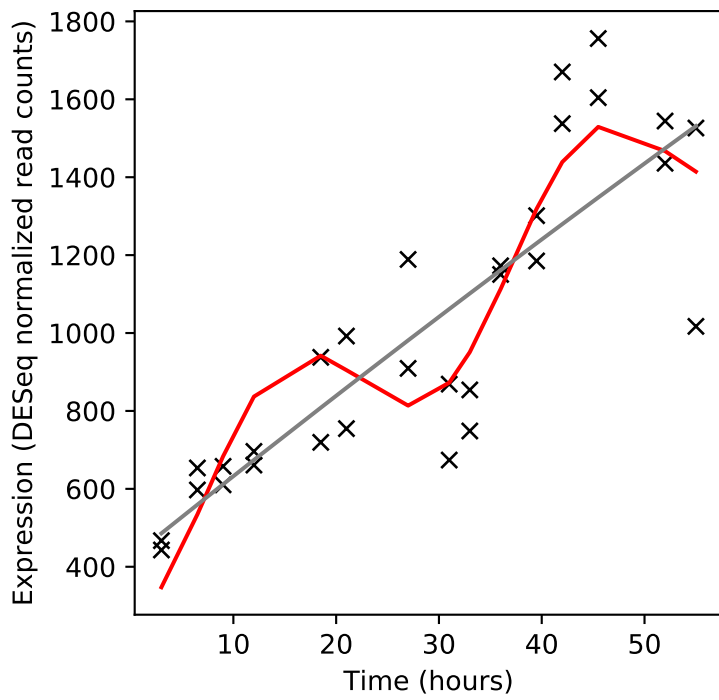

Rv2744c/35kd\_ag

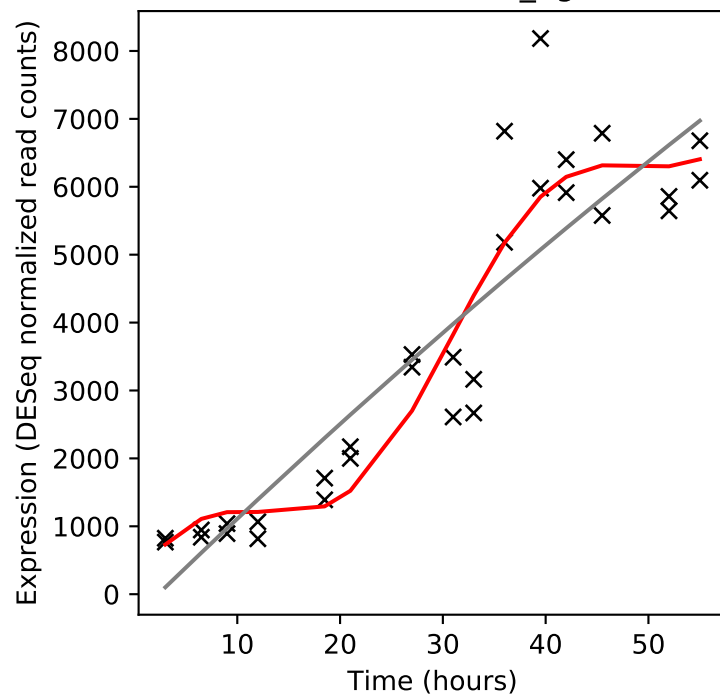

Rv2745c/clgR

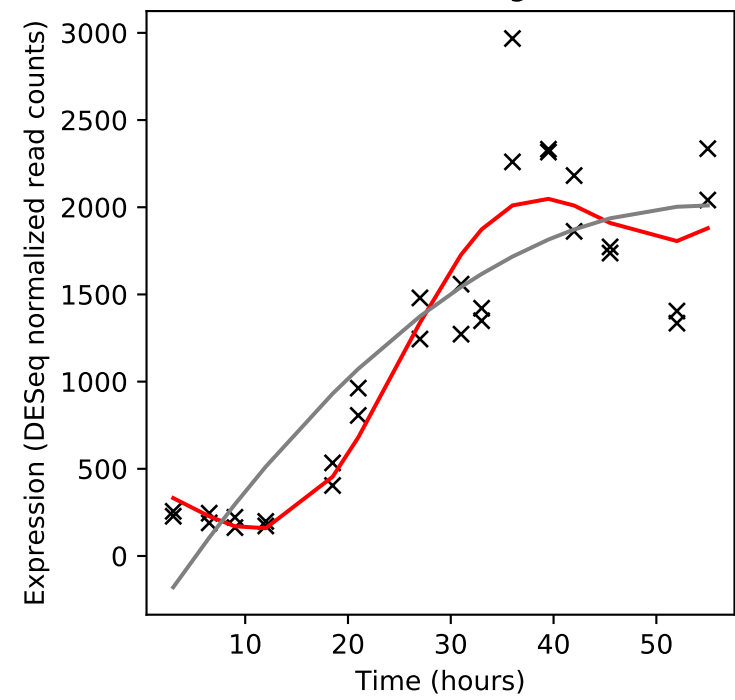

Rv2746c/pgsA3

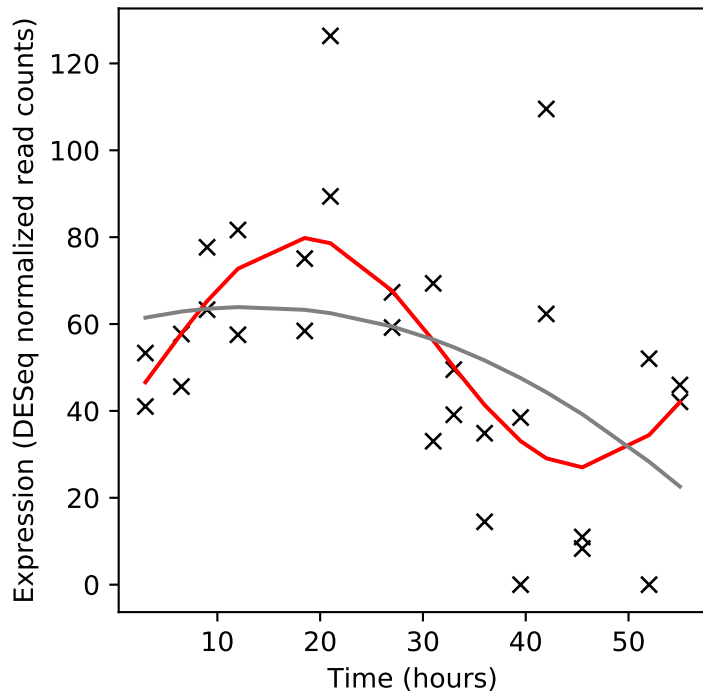

Rv2747/argA

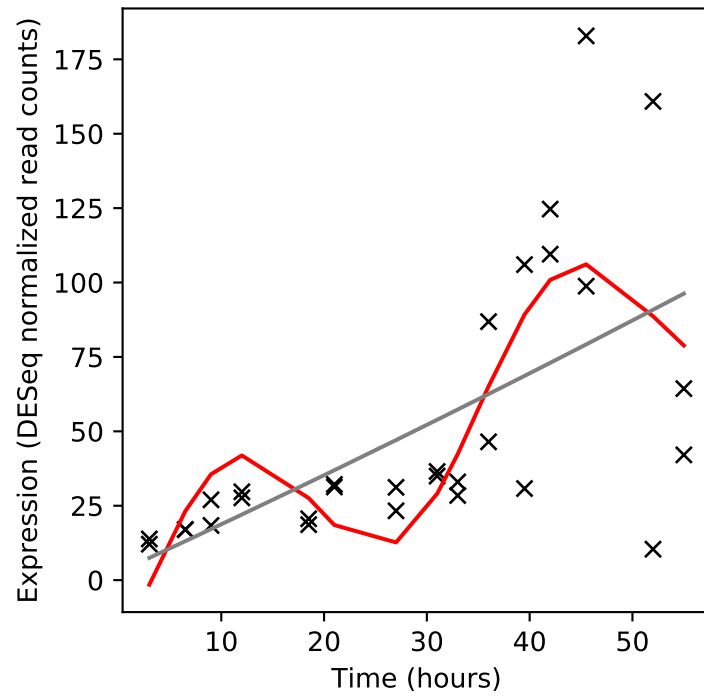

Rv2748c/ftsK

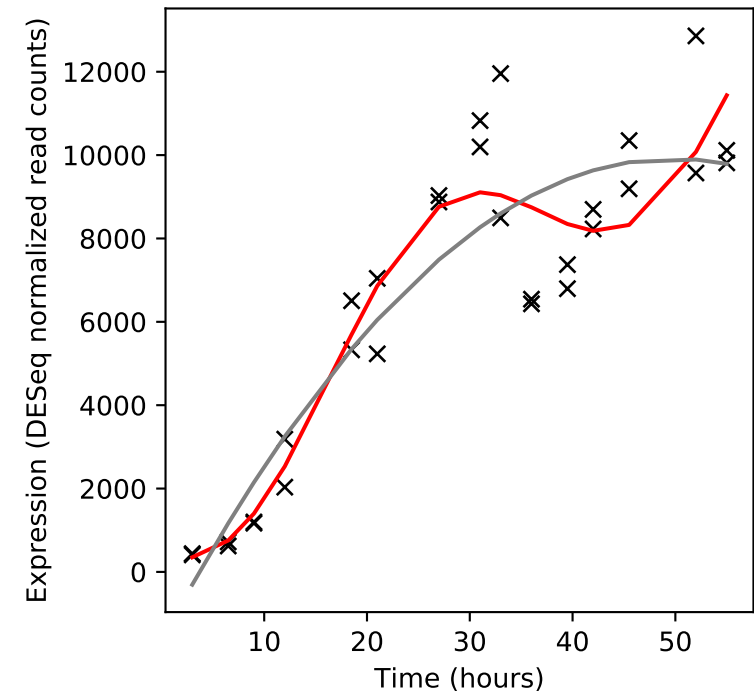

Rv2749/-

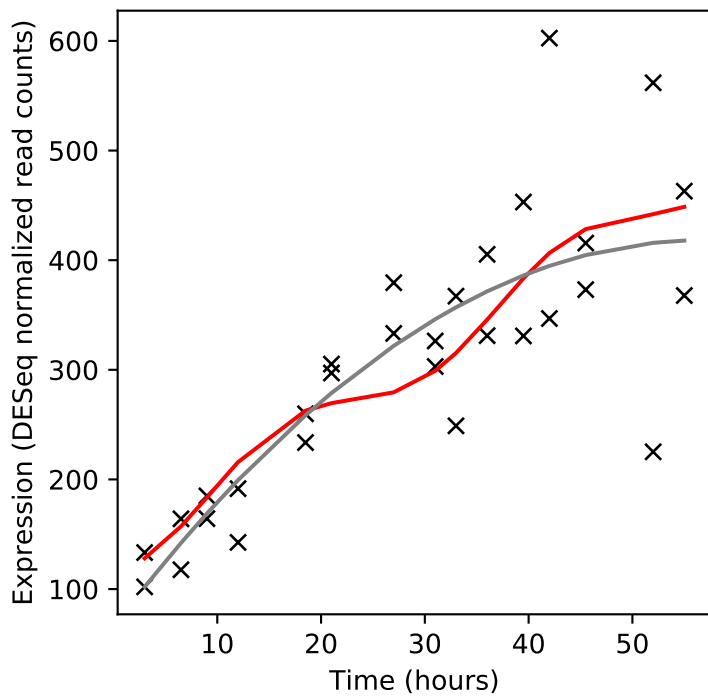

Rv2750/-

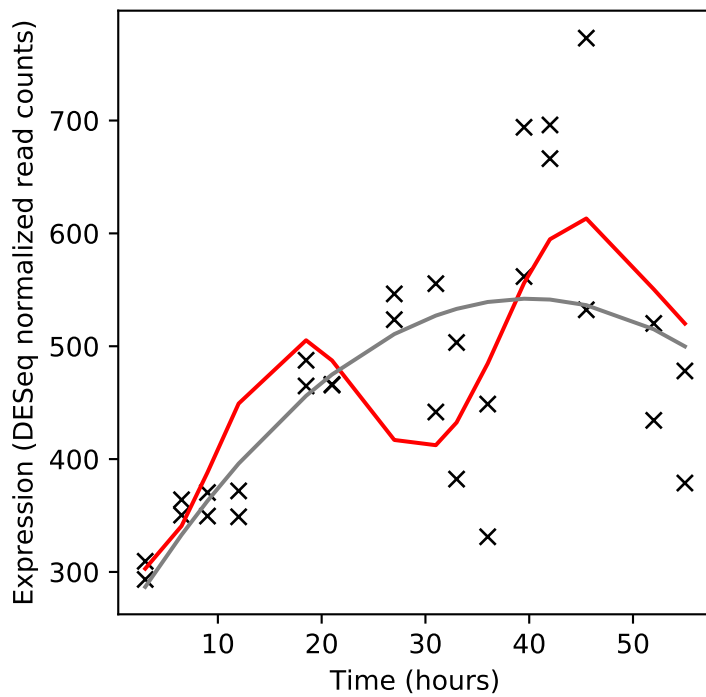

Rv2751/-

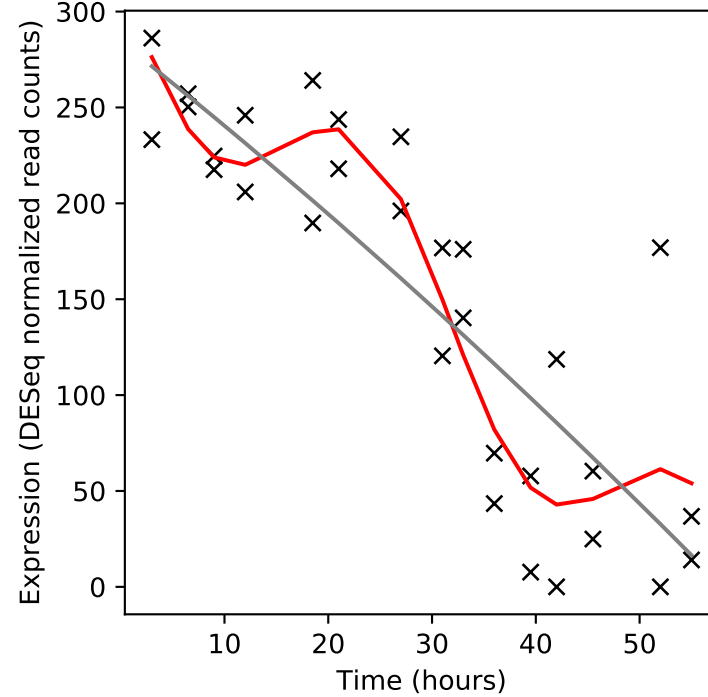

Rv2752c/-

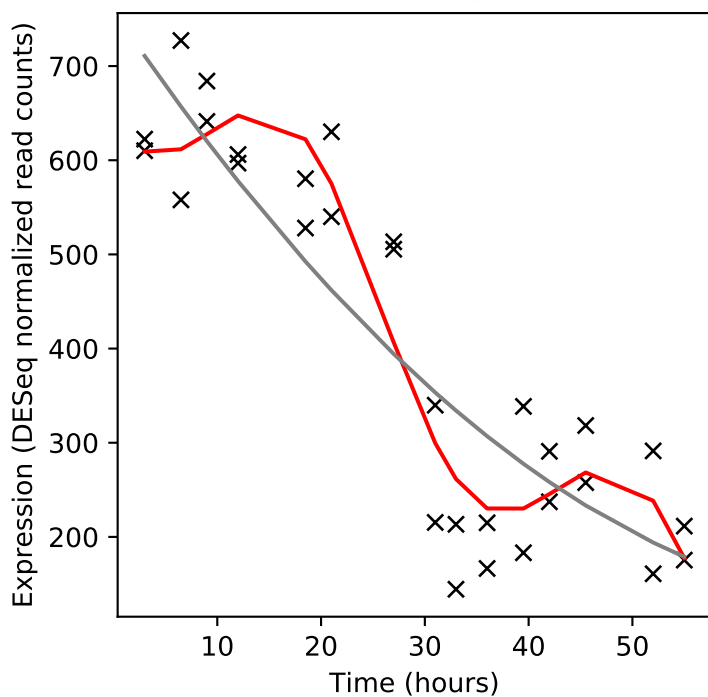

Rv2753c/dapA

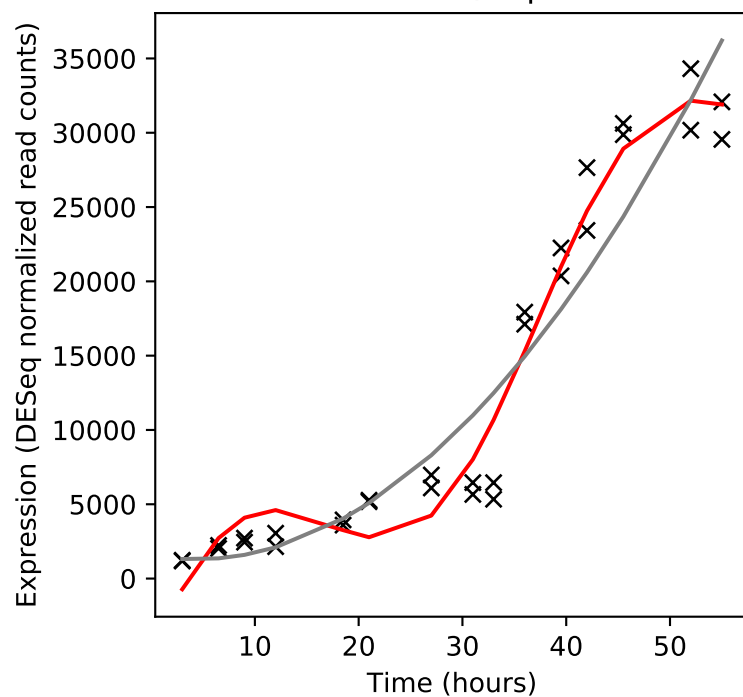

Rv2754c/thyX

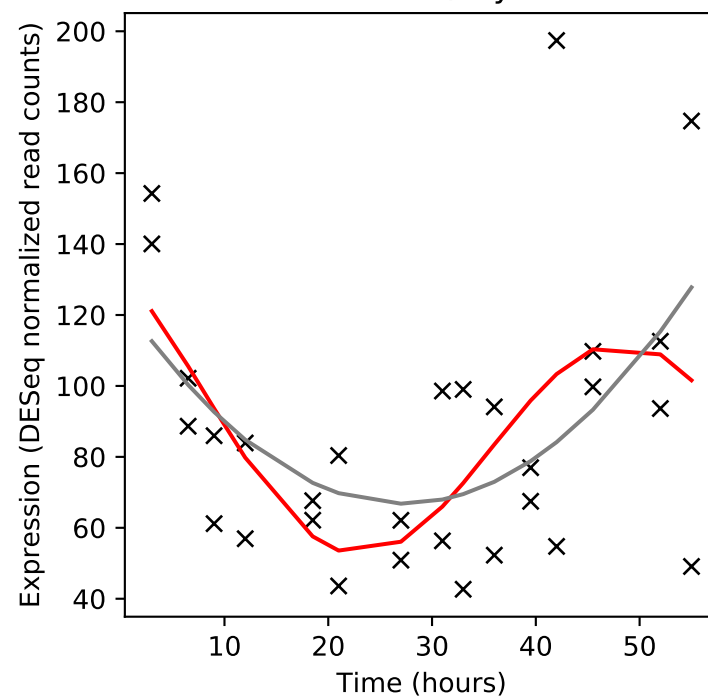

Rv2755c/hsdS.1

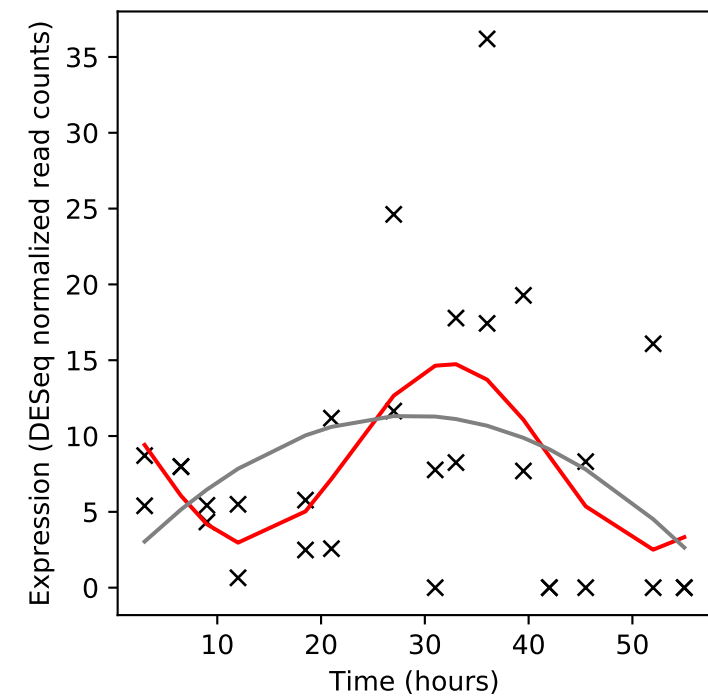

Rv2756c/hsdM

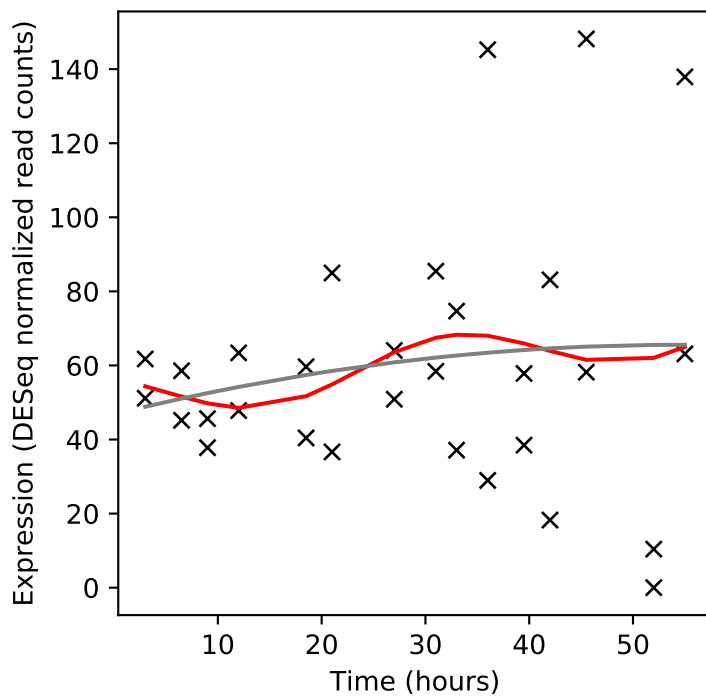

Rv2757c/vapC21

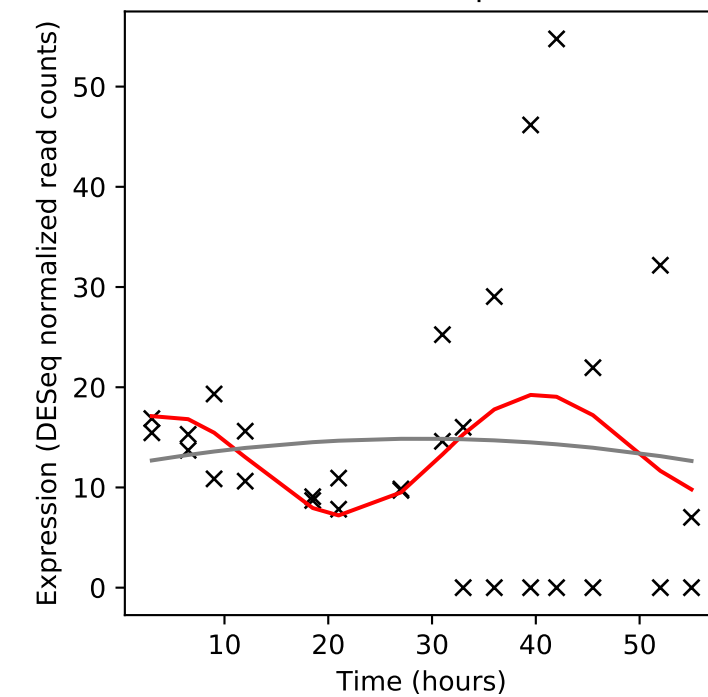

Rv2758c/vapB21

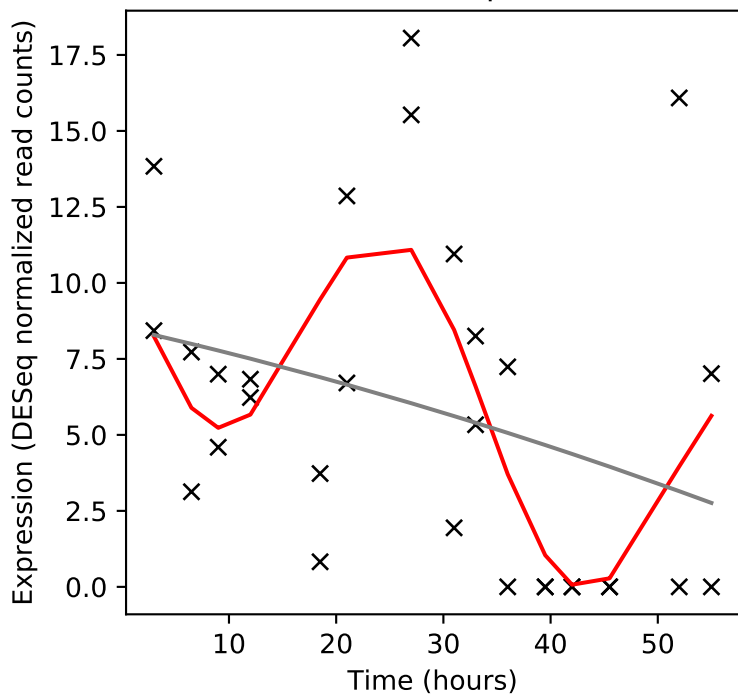

Rv2759c/vapC42

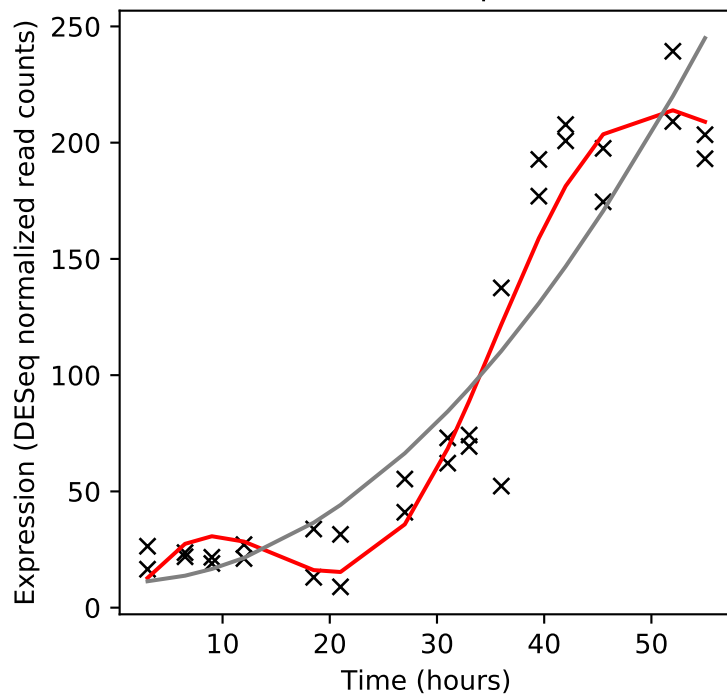

Rv2760c/vapB42

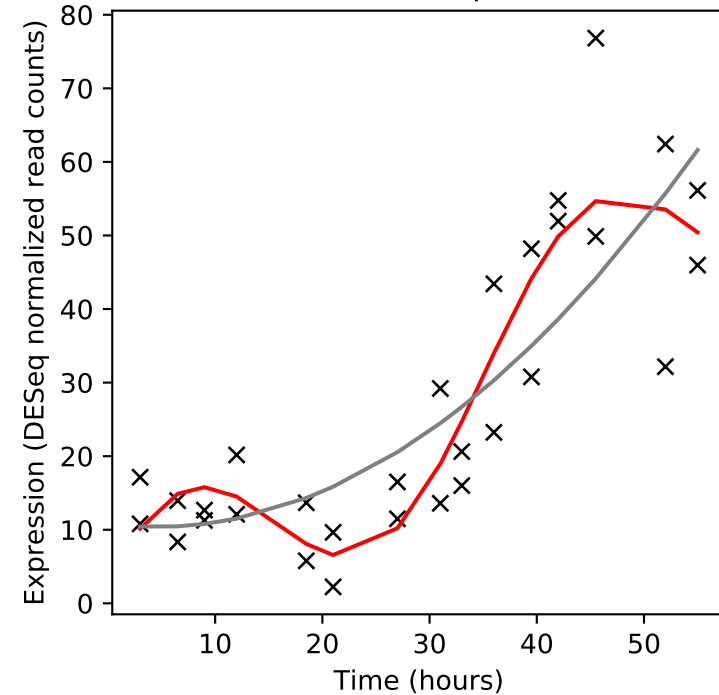

Rv2761c/hsdS

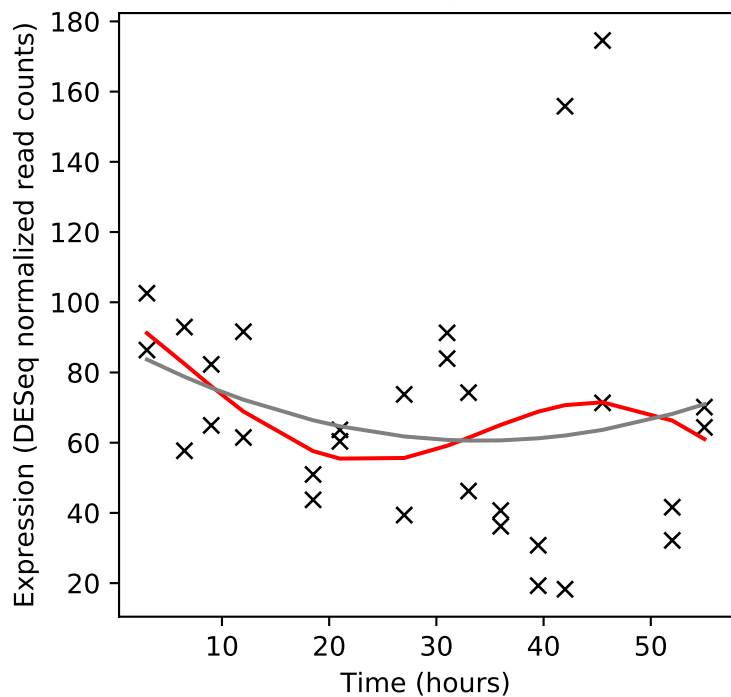

Rv2762c/-

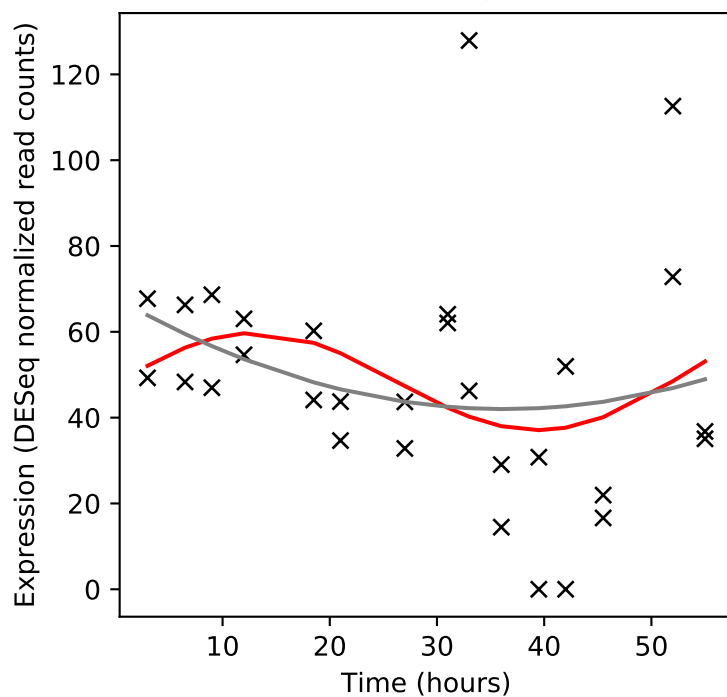

Rv2763c/dfrA

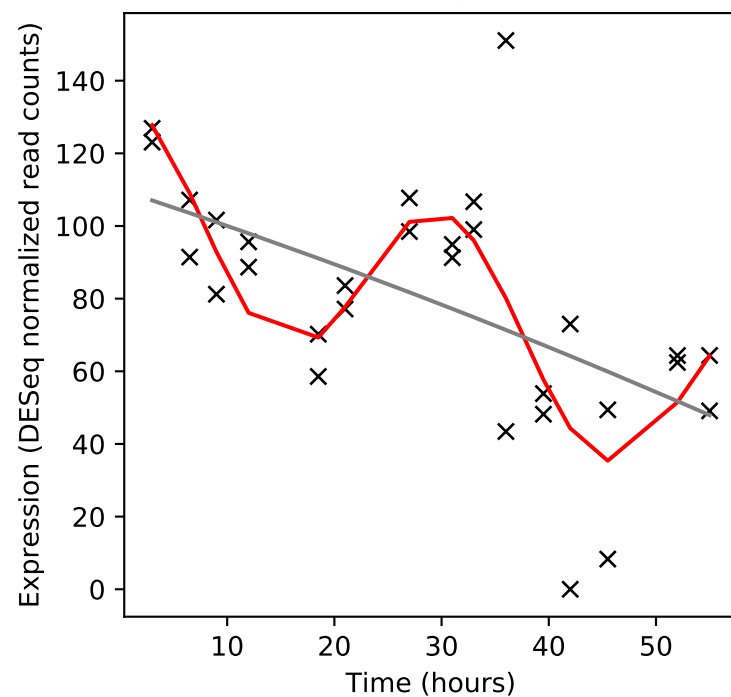

Rv2764c/thyA

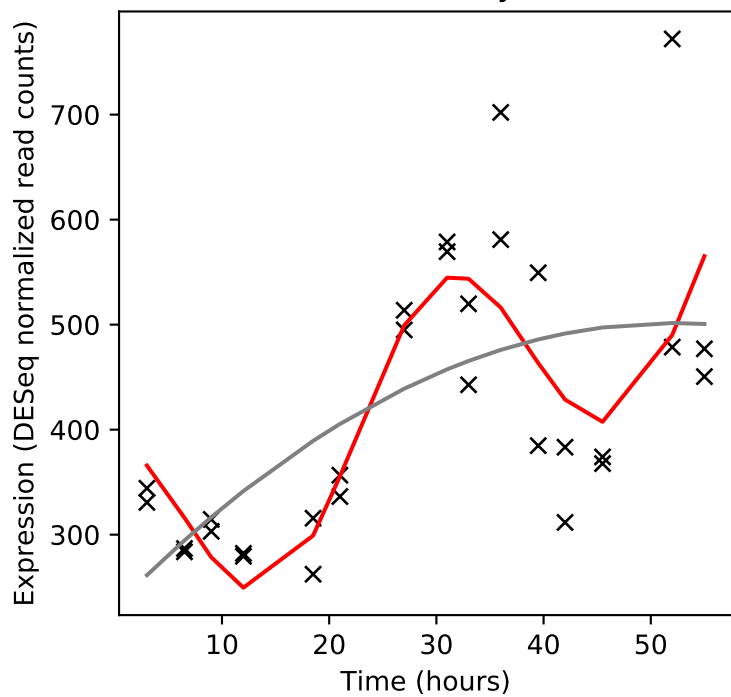

Rv2765c/-

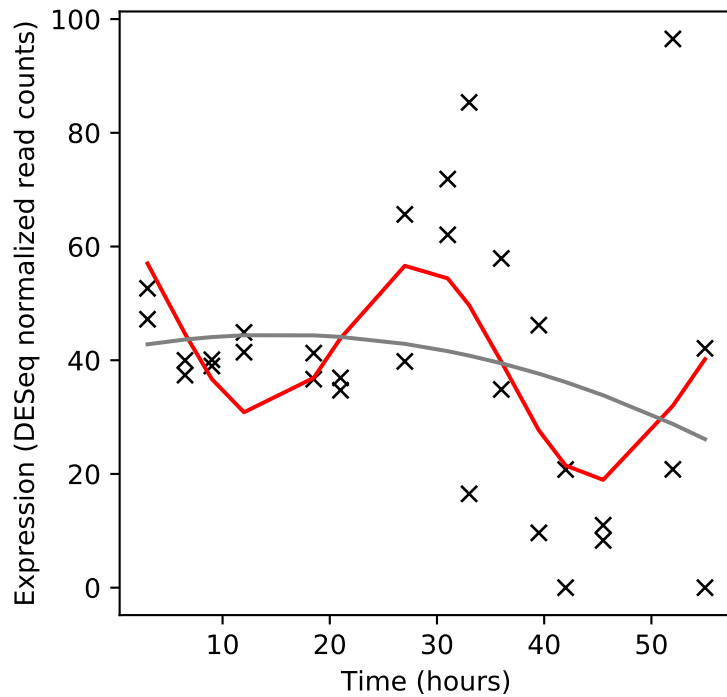

Rv2766c/-

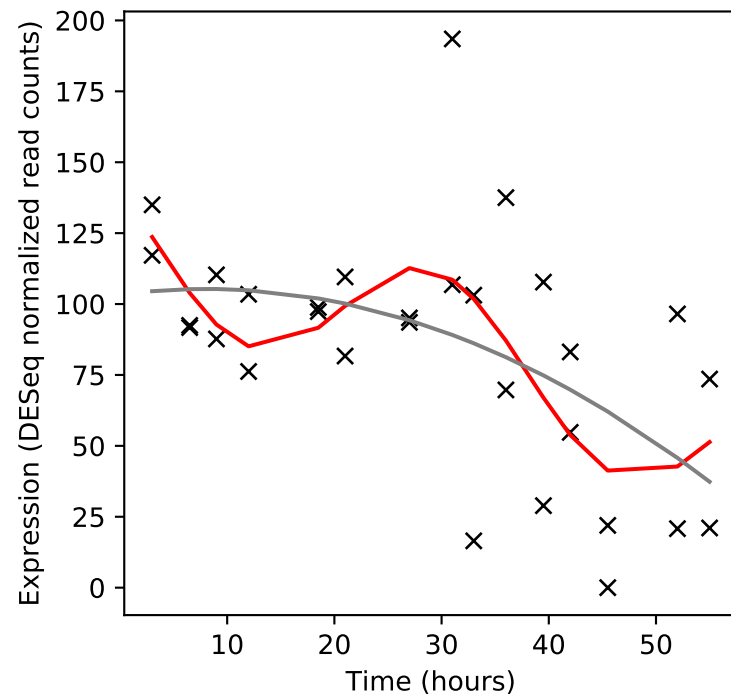

Rv2767c/-

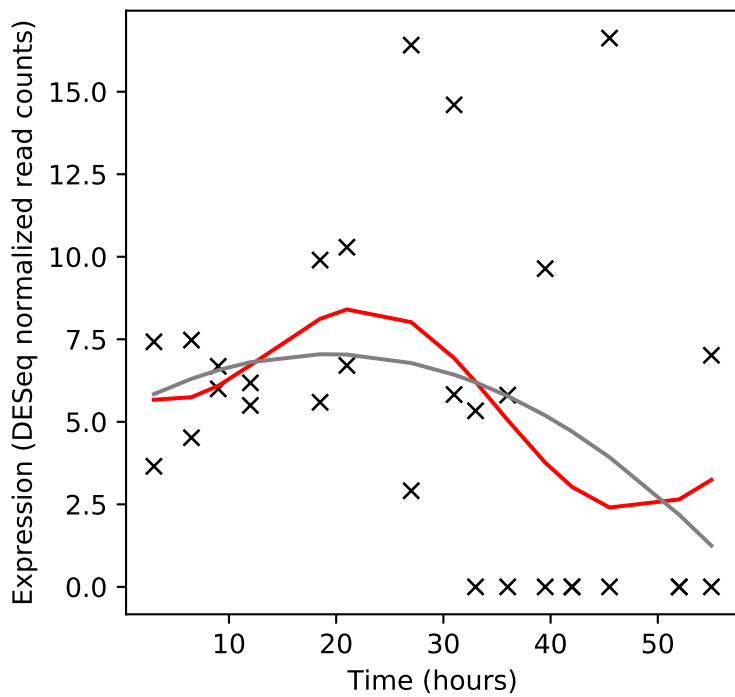

Rv2768c/PPE43

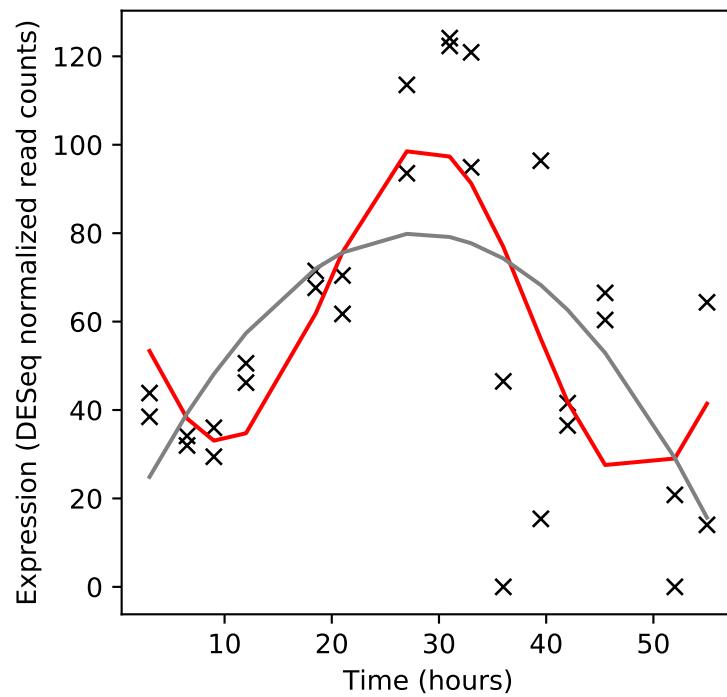

Rv2769c/PE27

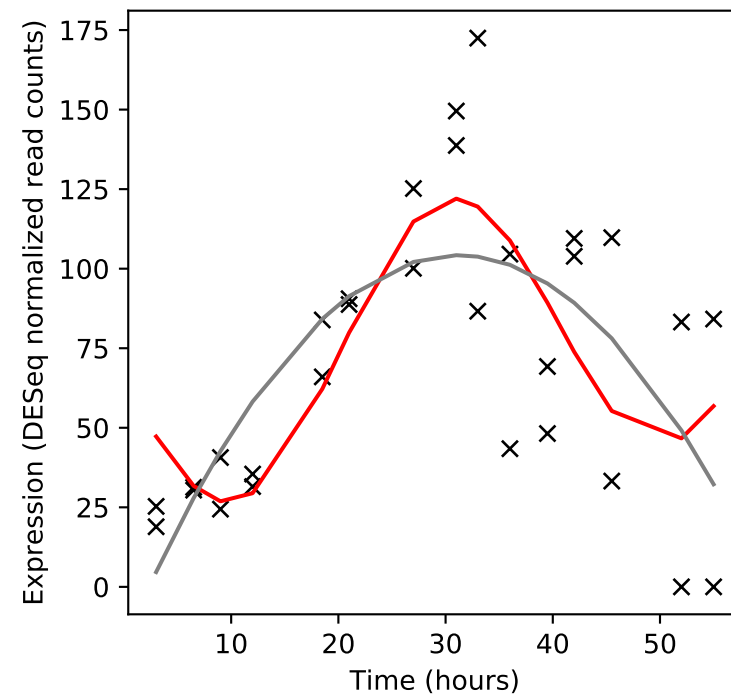

Rv2770c/PPE44

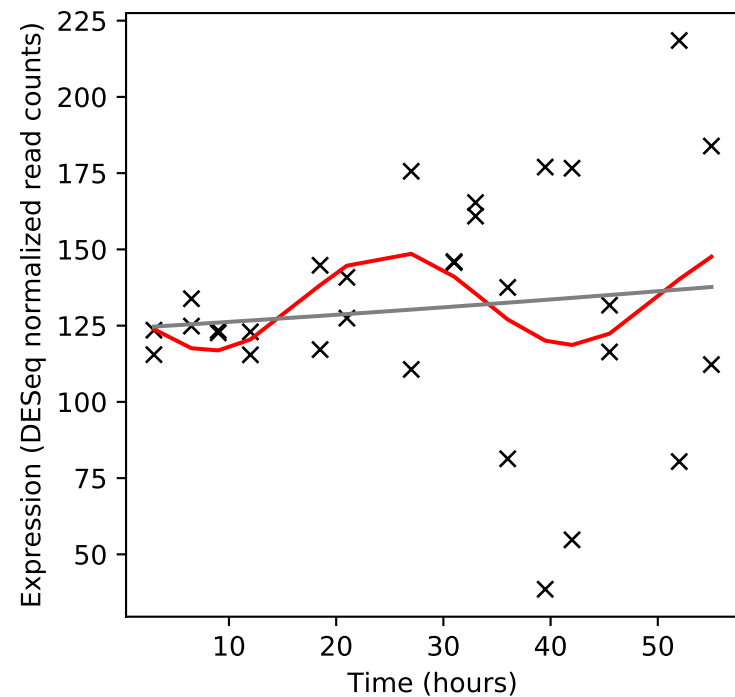

Rv2771c/-

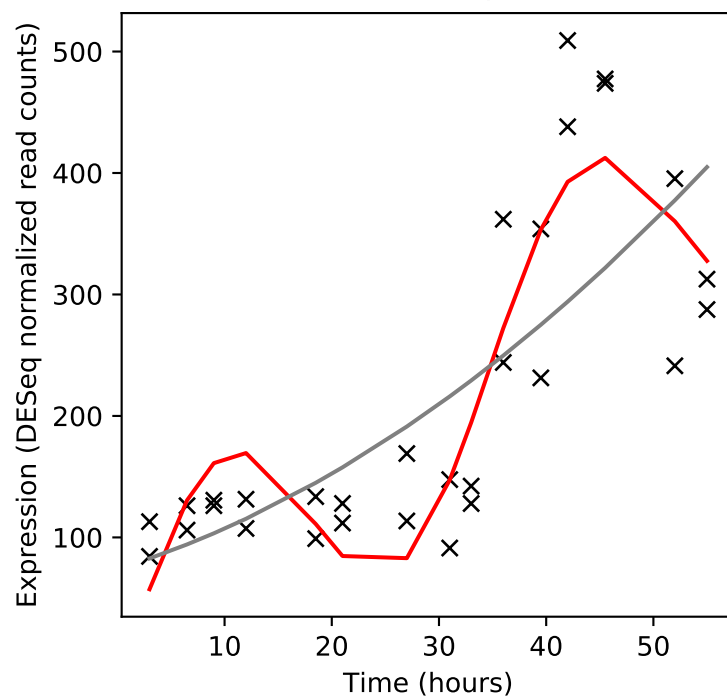

Rv2772c/-

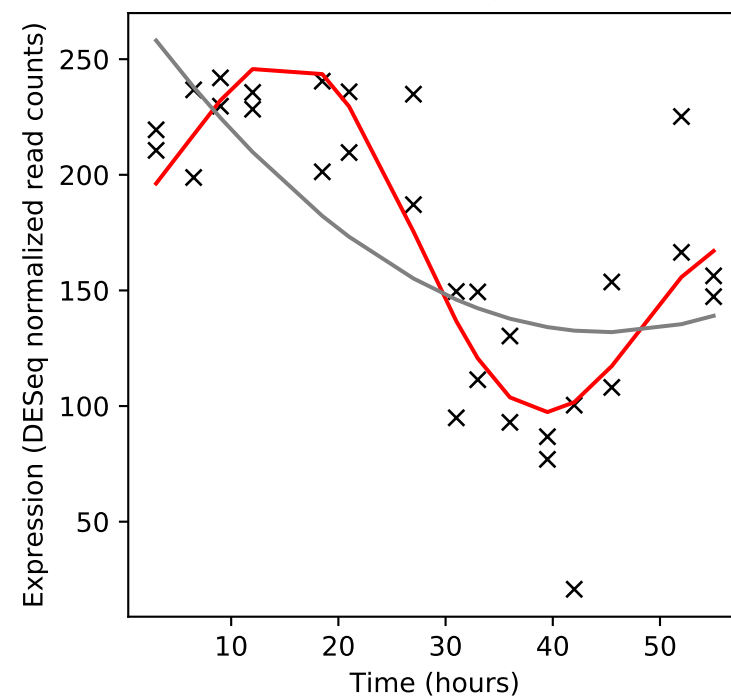

Rv2773c/dapB

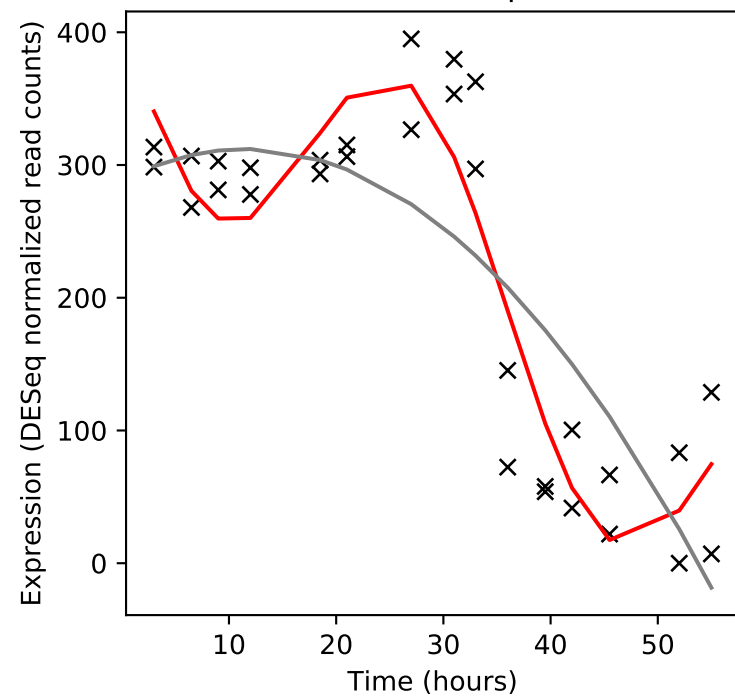

Rv2774c/-

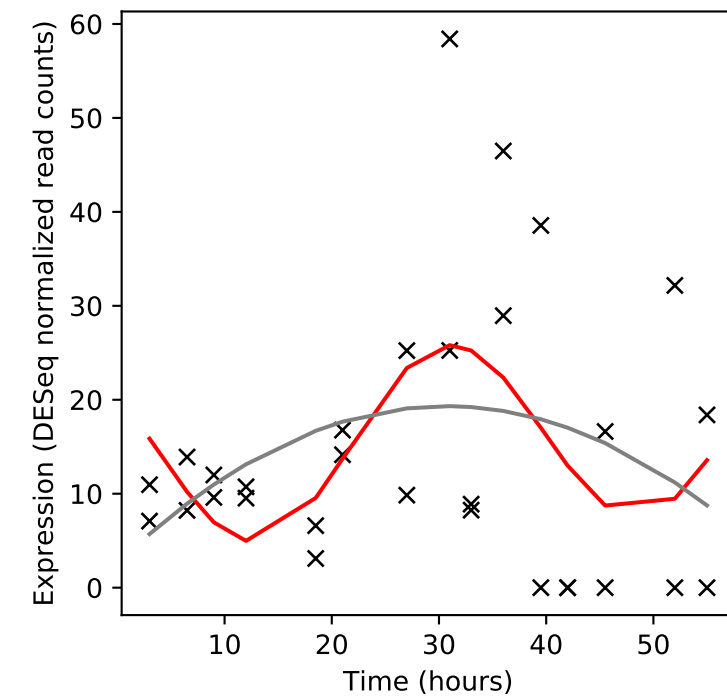

Rv2775/-

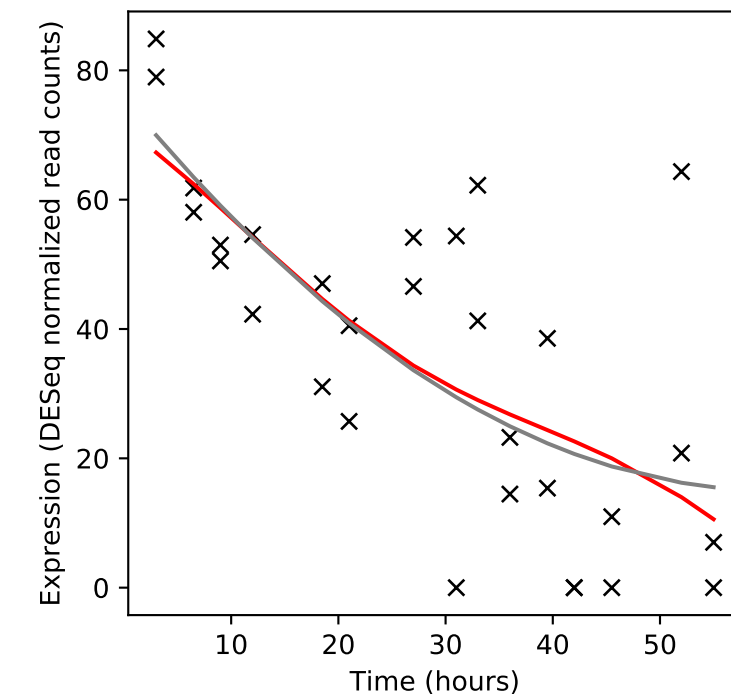



Rv2776c/-

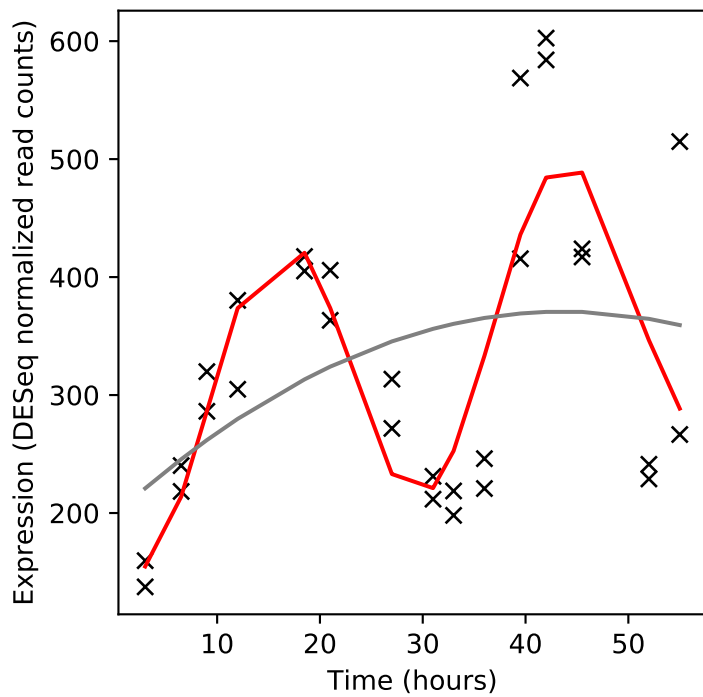

Rv2777c/-

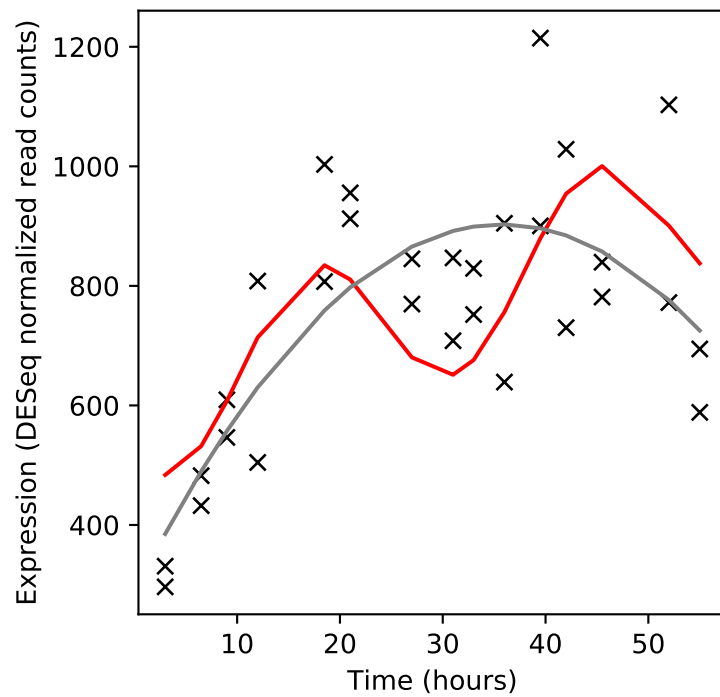

Rv2778c/-

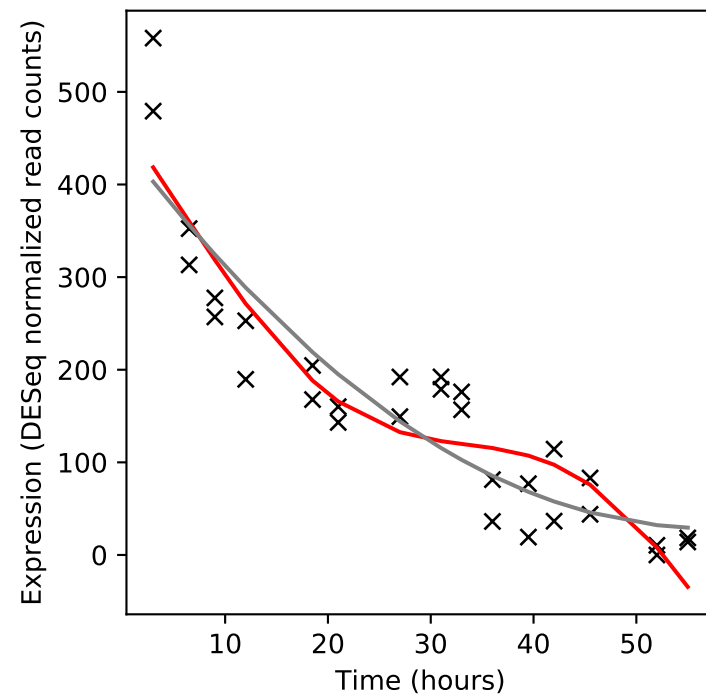

Rv2779c/-

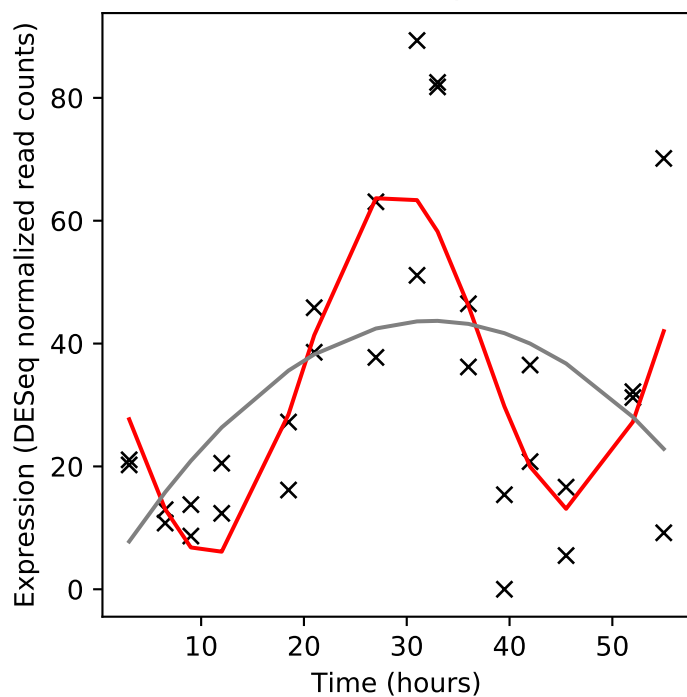

Rv2780/ald

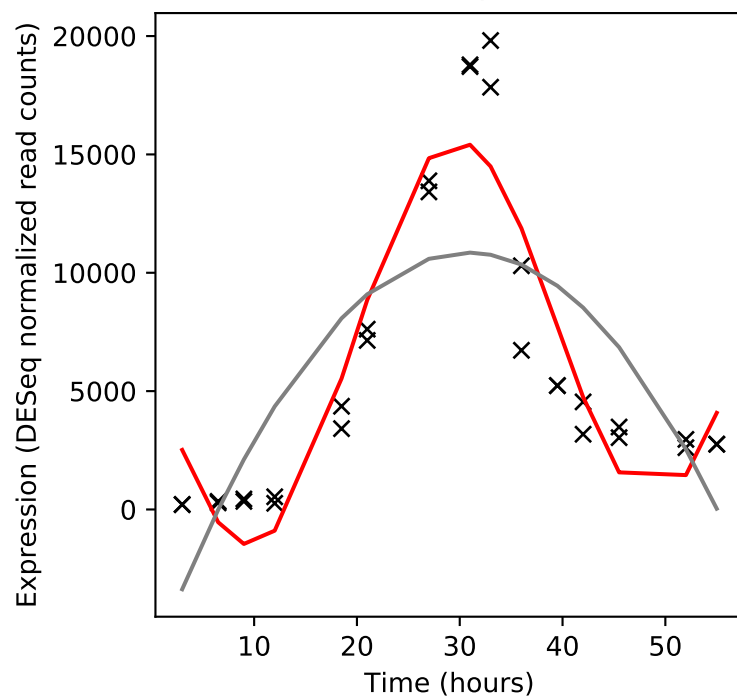

Rv2781c/-

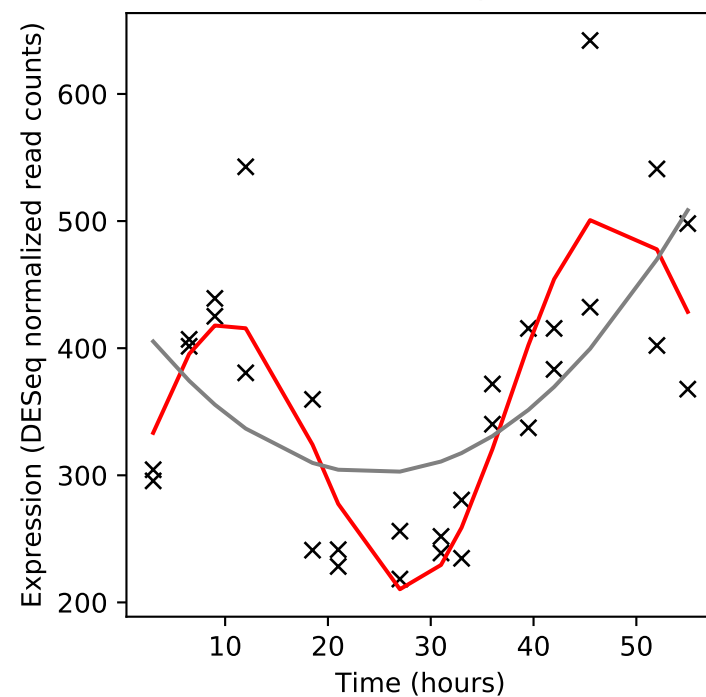

Rv2782c/pepR

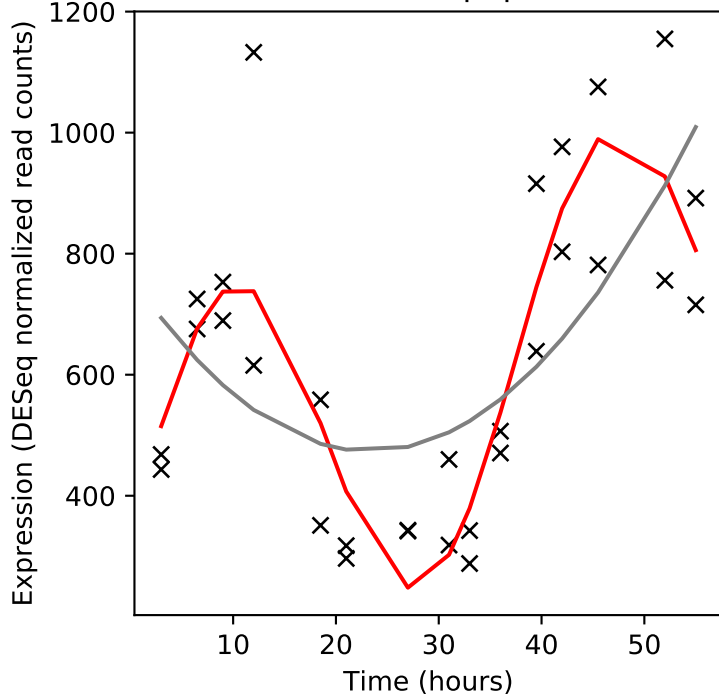

Rv2783c/gpsI

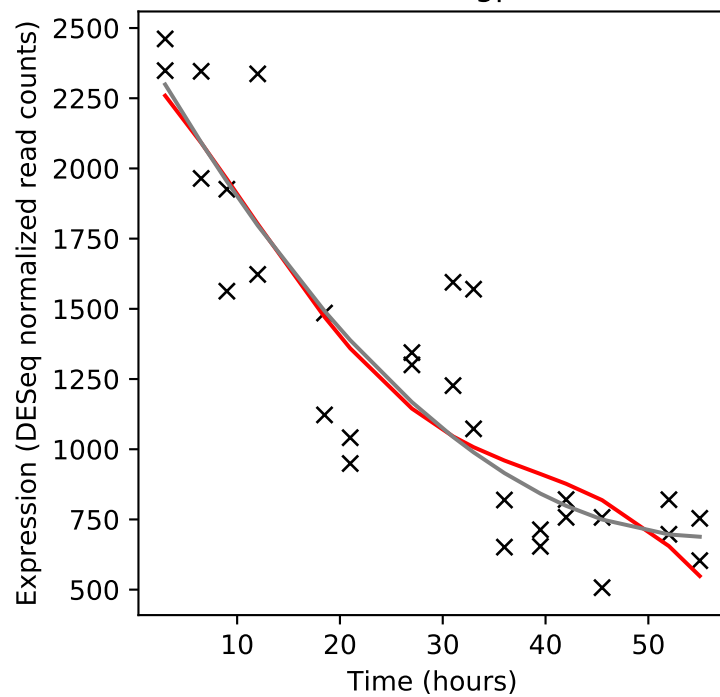

Rv2784c/lppU

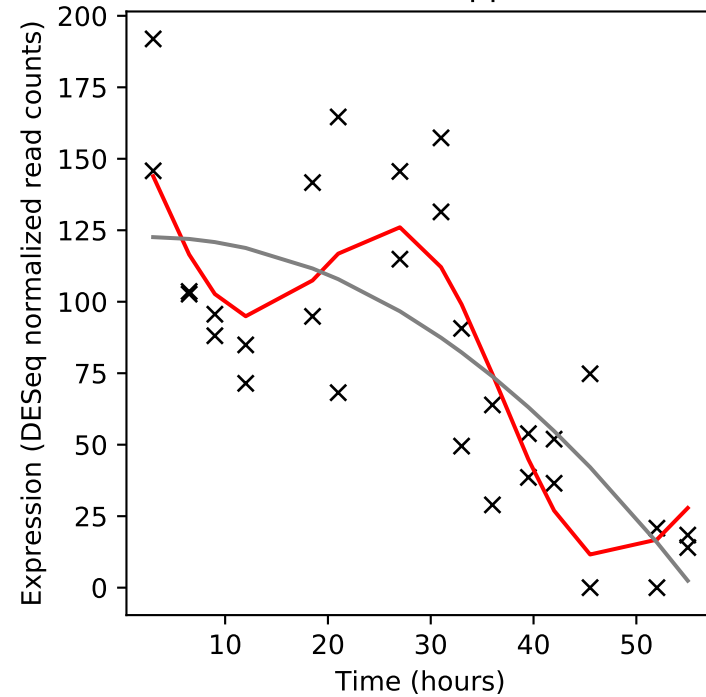

Rv2785c/rpsO

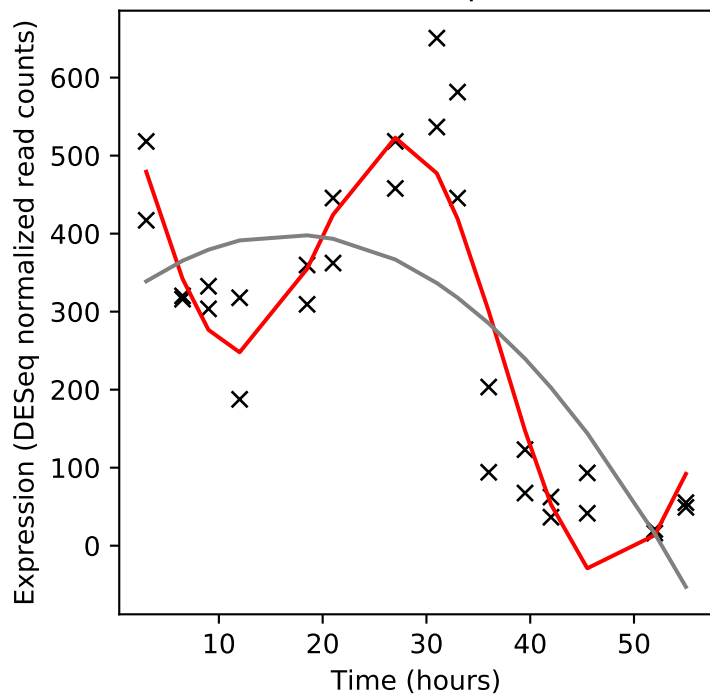

Rv2786c/ribF

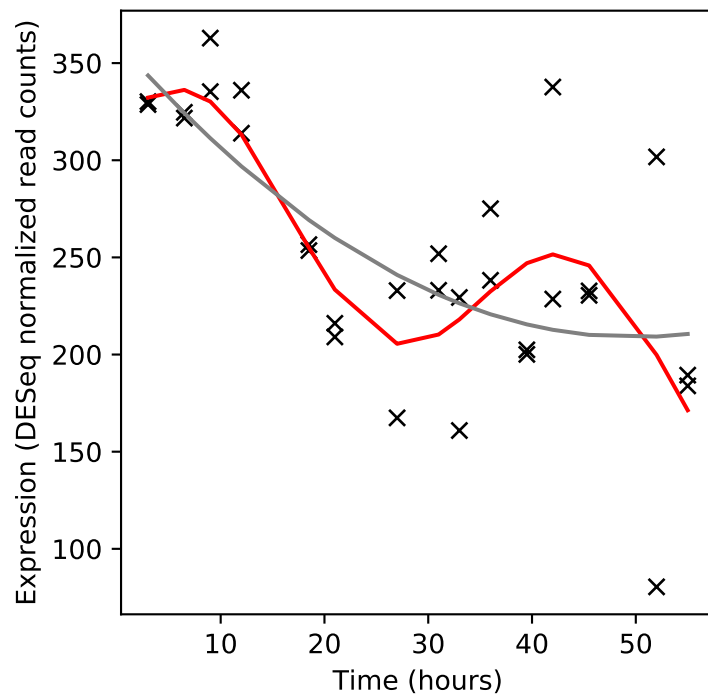

Rv2787c/-

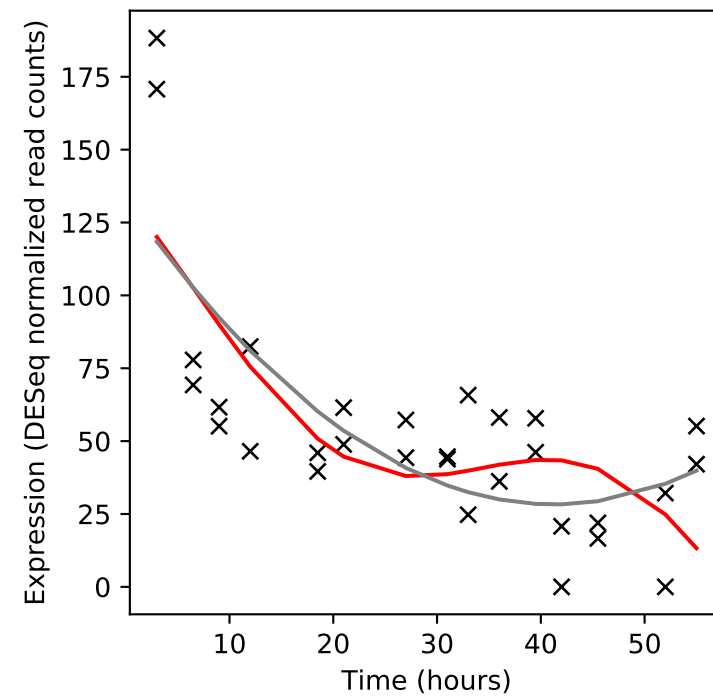

Rv2788c/sirR

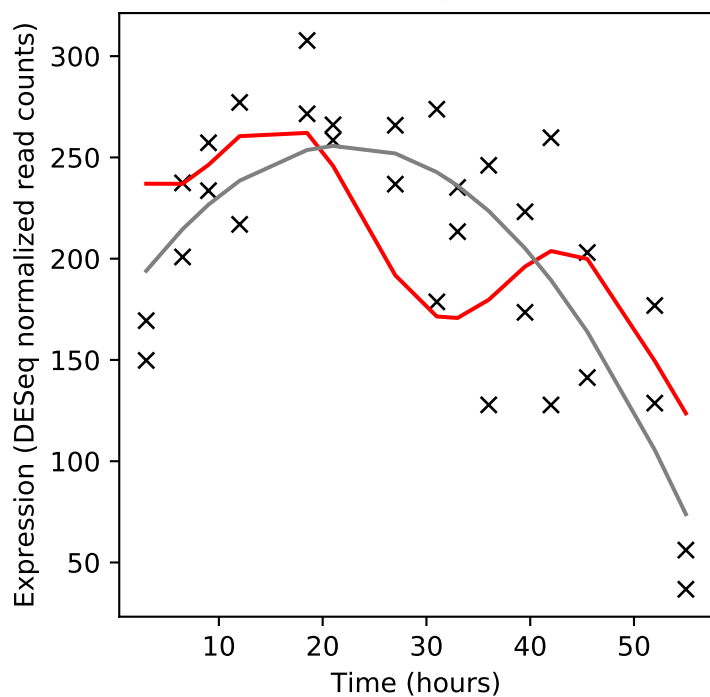

Rv2789c/fadE21

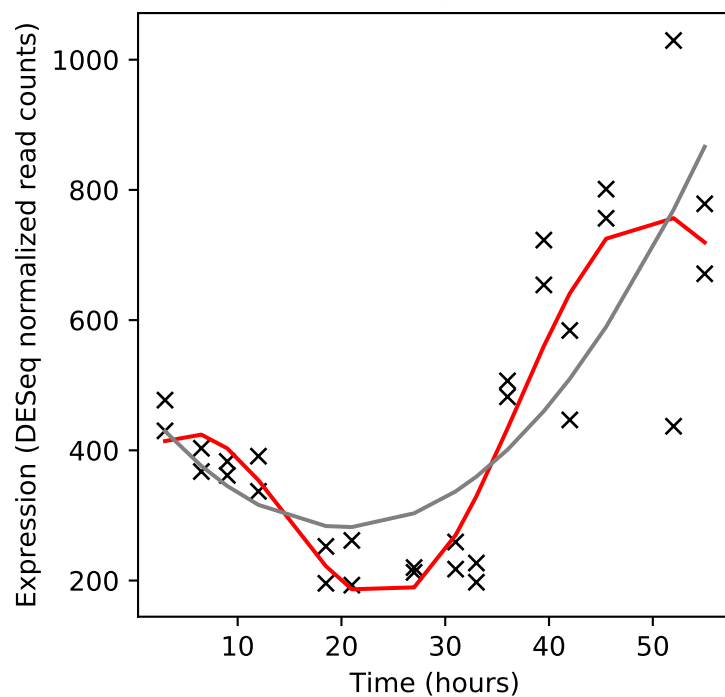

Rv2790c/ltp1

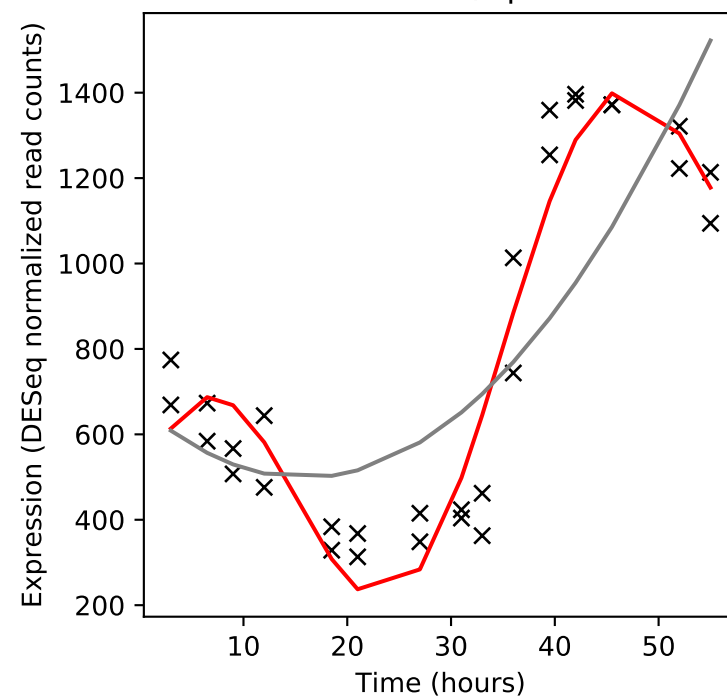

Rv2791c/-

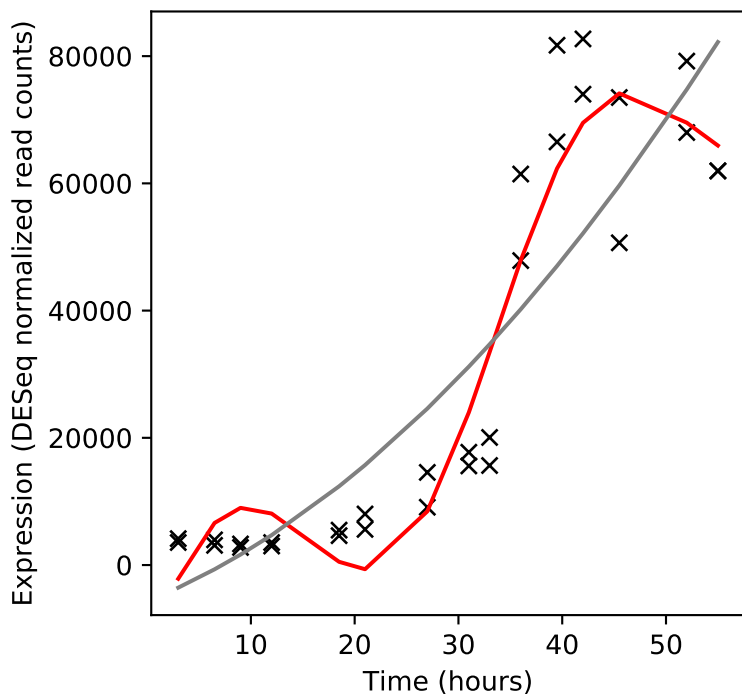

Rv2792c/-

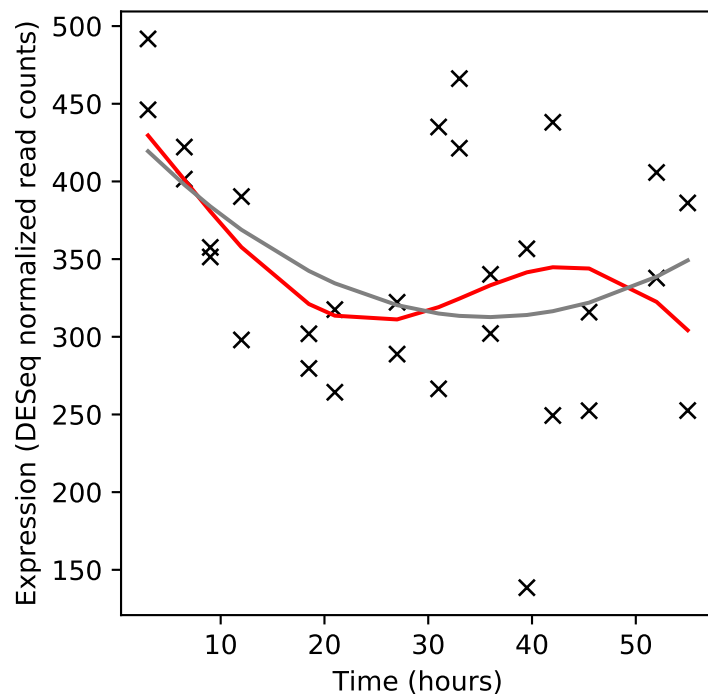

Rv2793c/truB

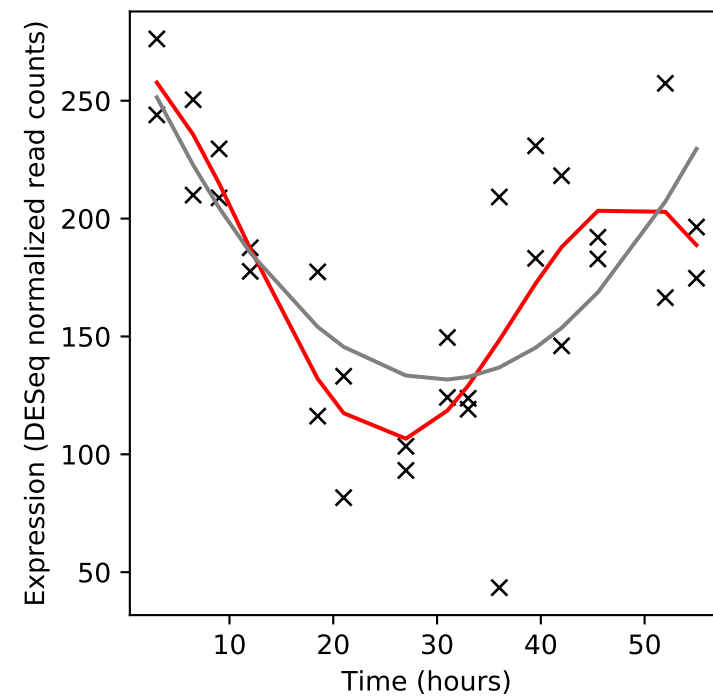

Rv2794c/pptT

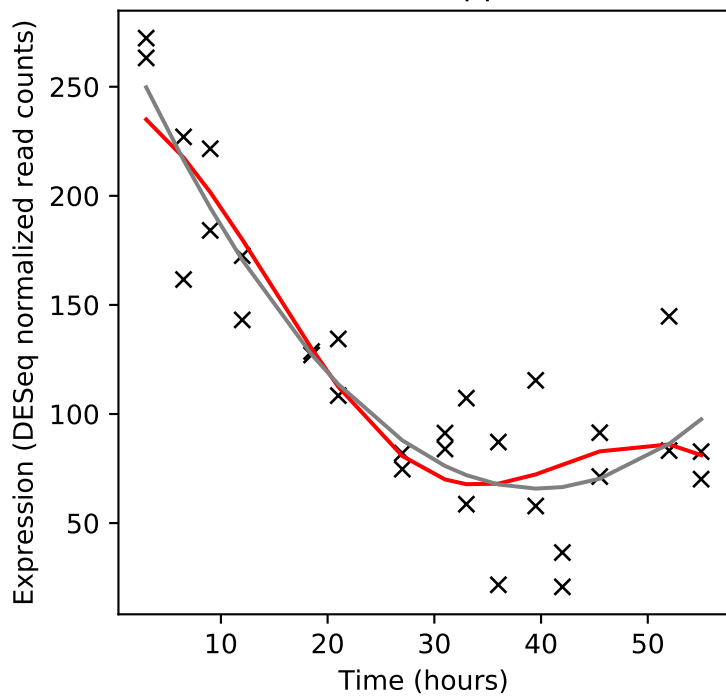

Rv2795c/-

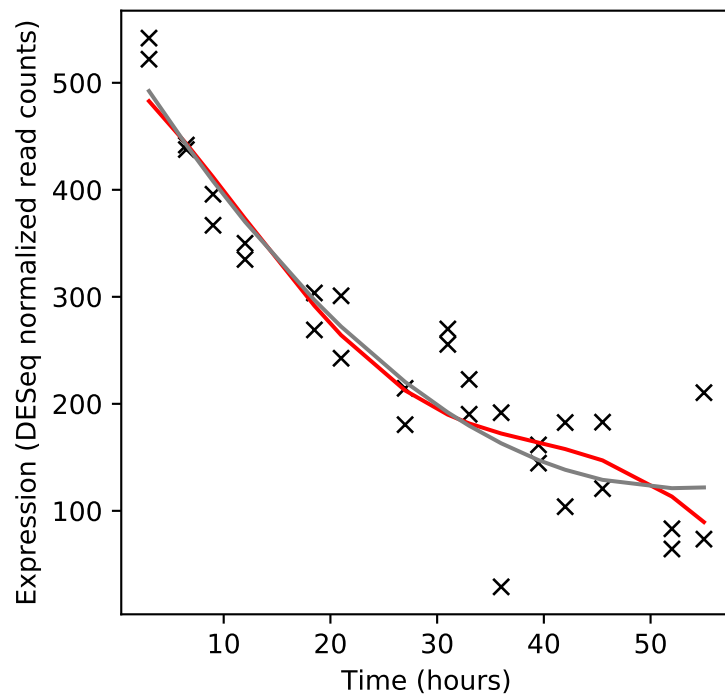

Rv2796c/lppV

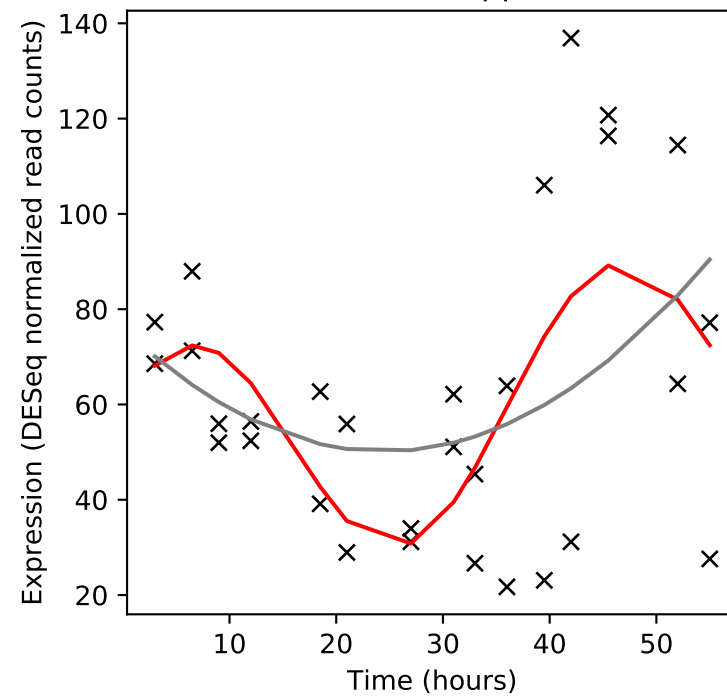

Rv2797c/-

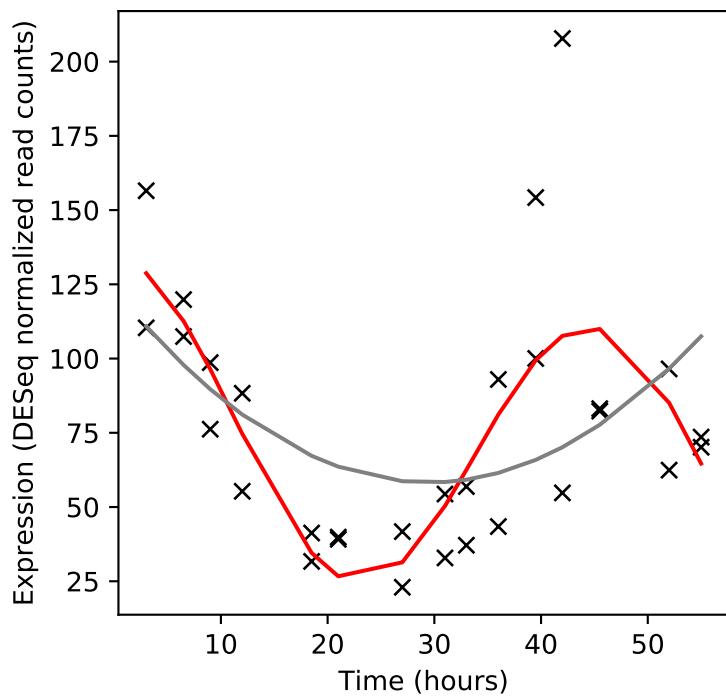

Rv2798c/-

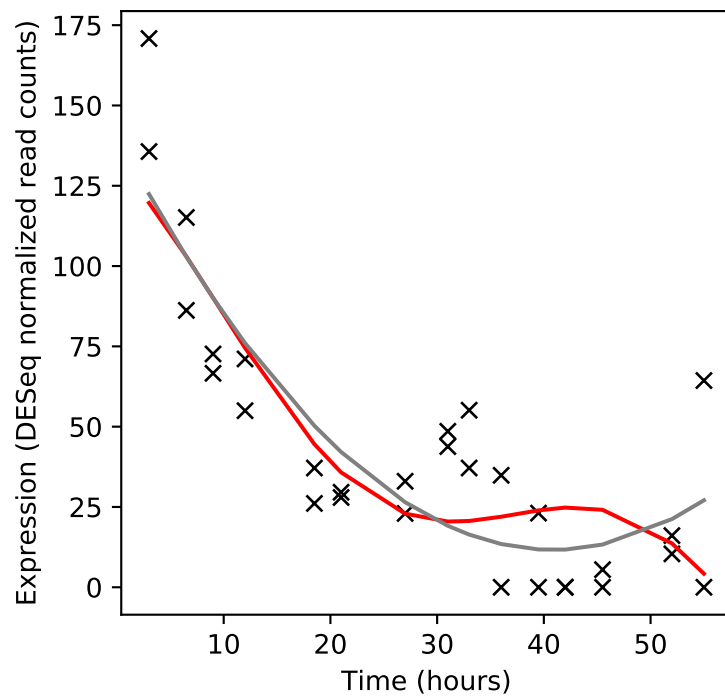

Rv2799/-

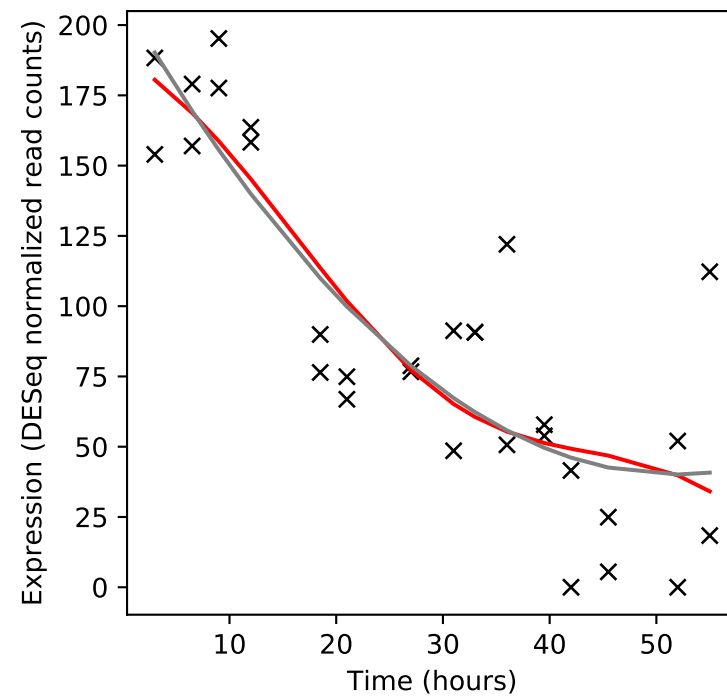

Rv2800/-

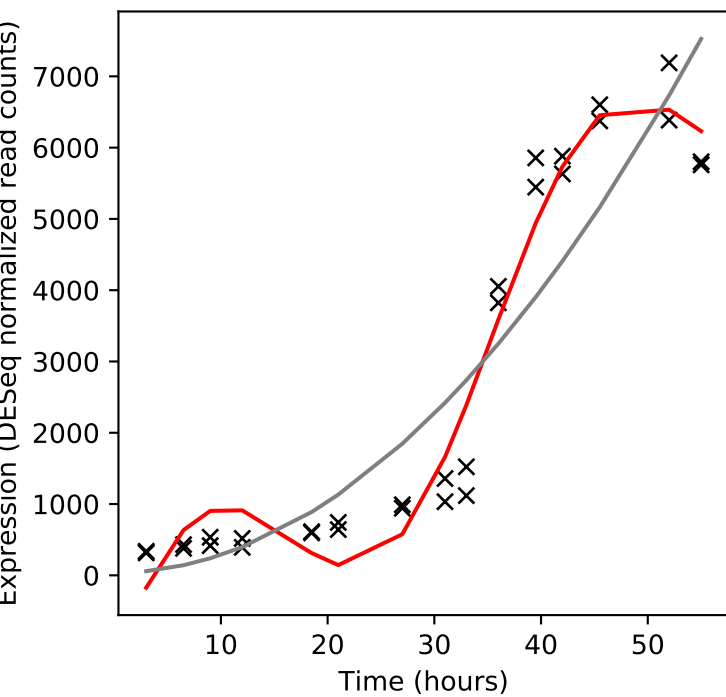

Rv2801c/mazF9

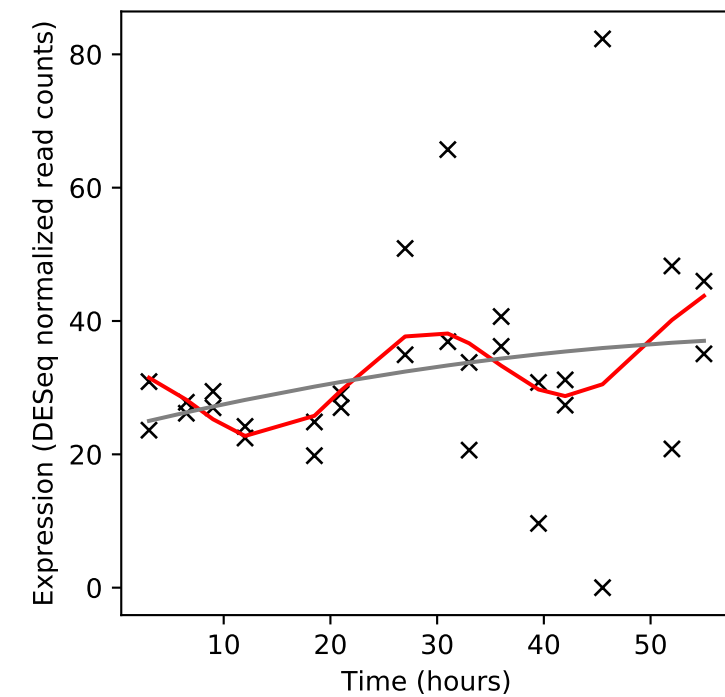

Rv2801A/mazE9

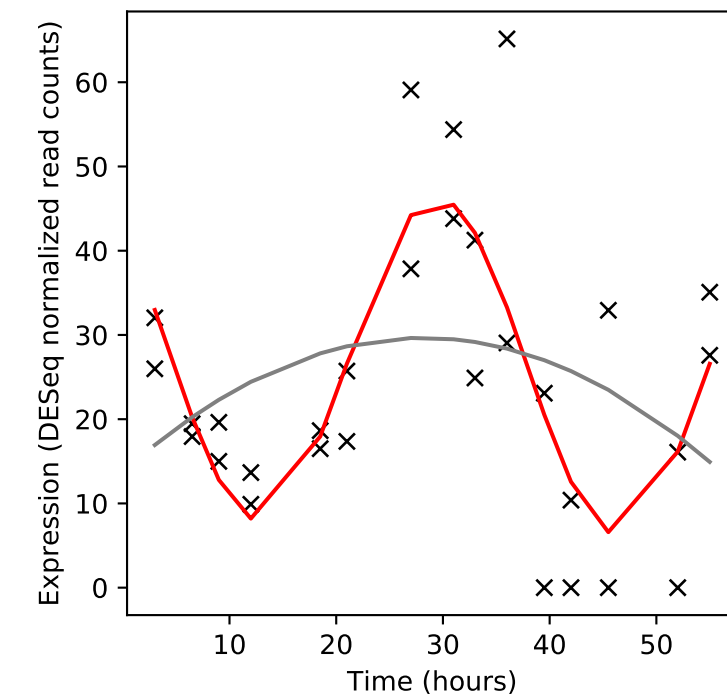

Rv2802c/-

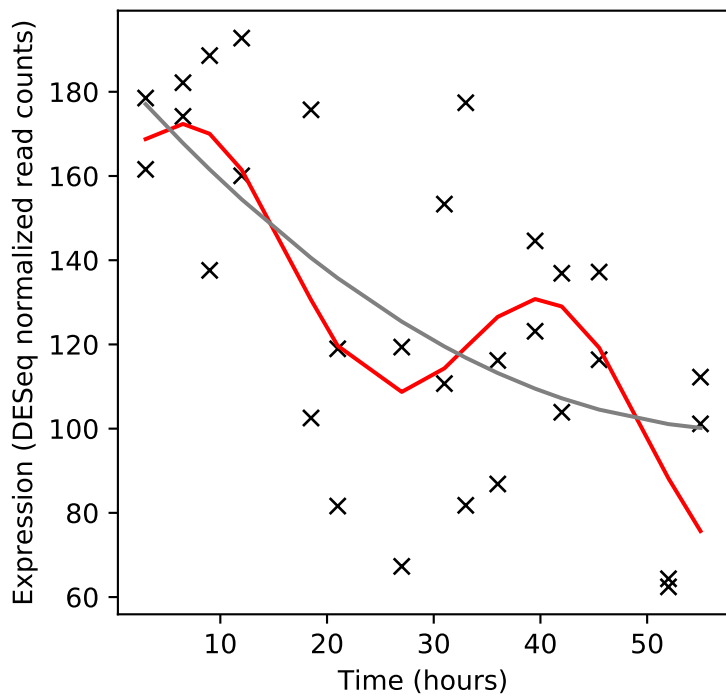

Rv2803/-

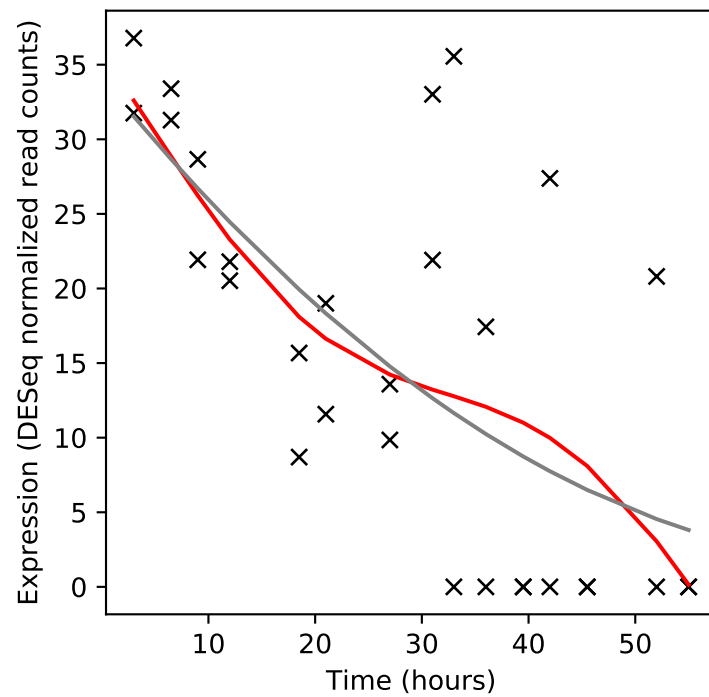

Rv2804c/-

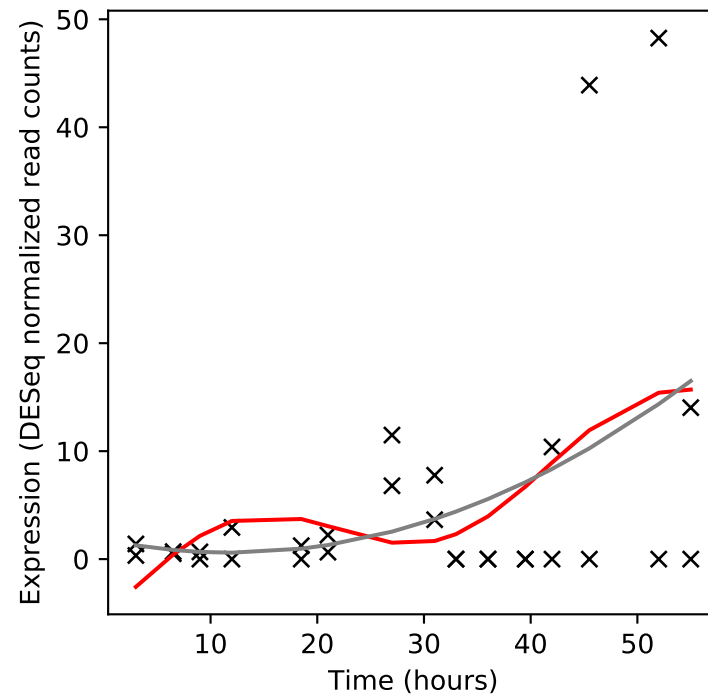

Rv2805/-

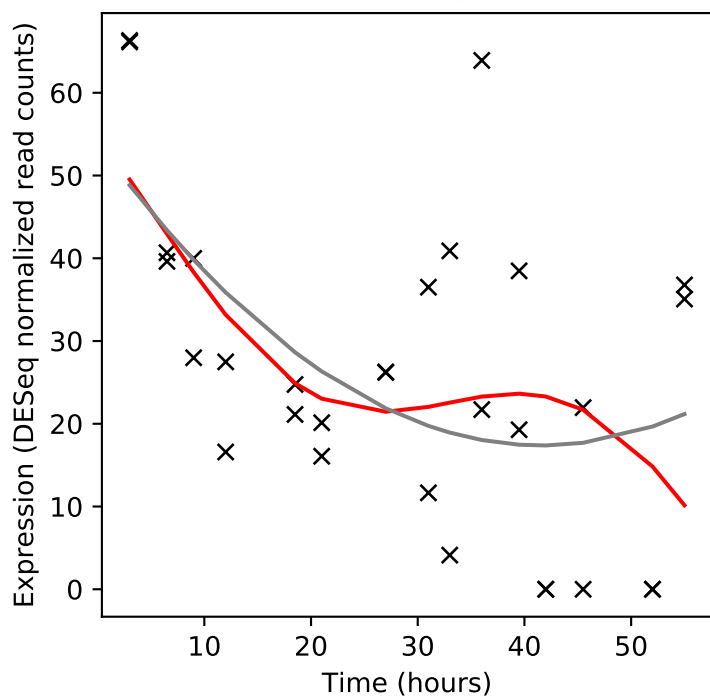

Rv2806/-

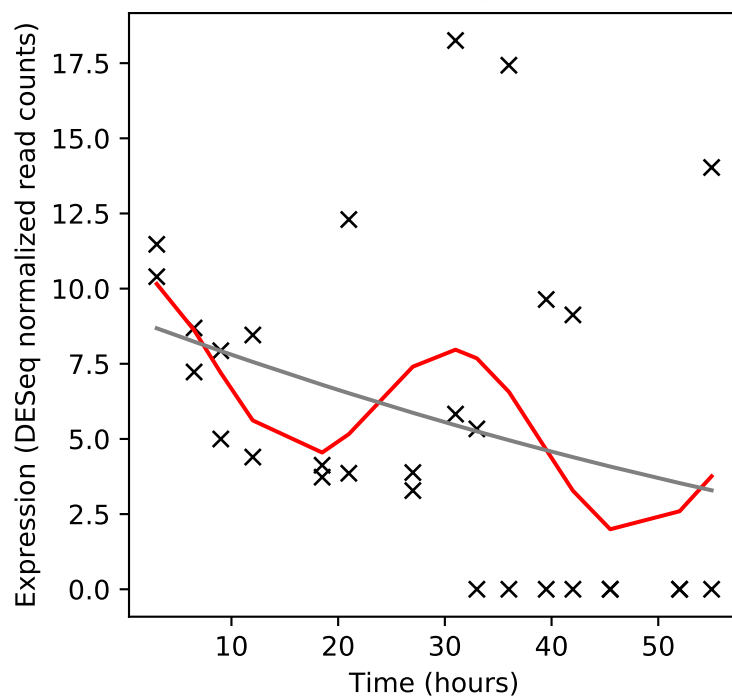

Rv2807/-

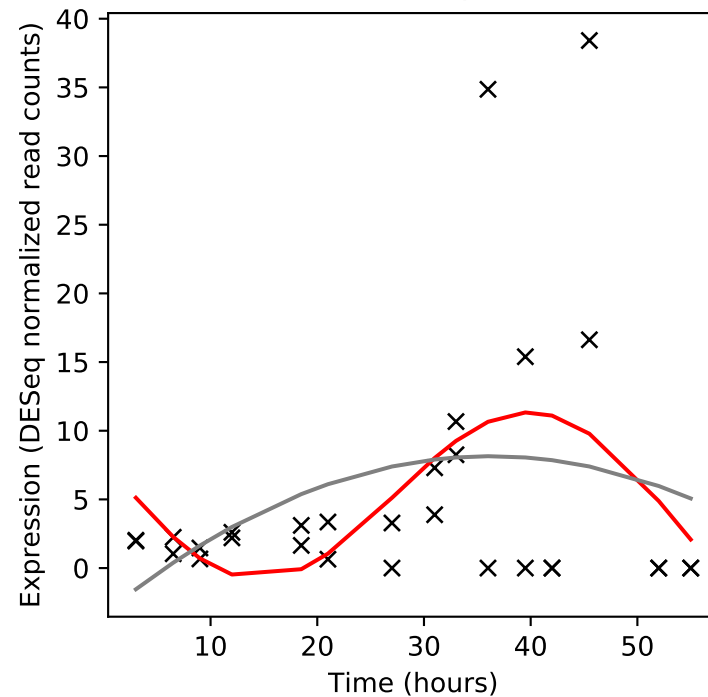

Rv2808/-

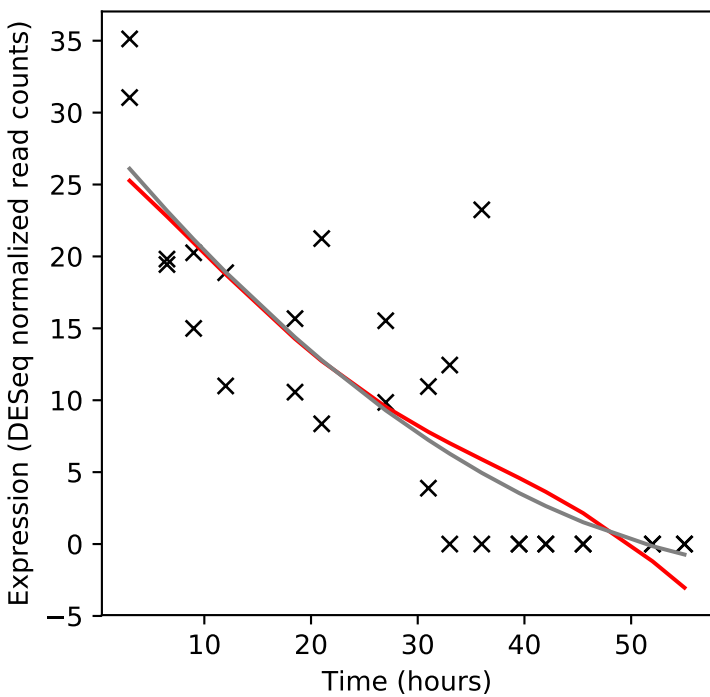

Rv2809/-

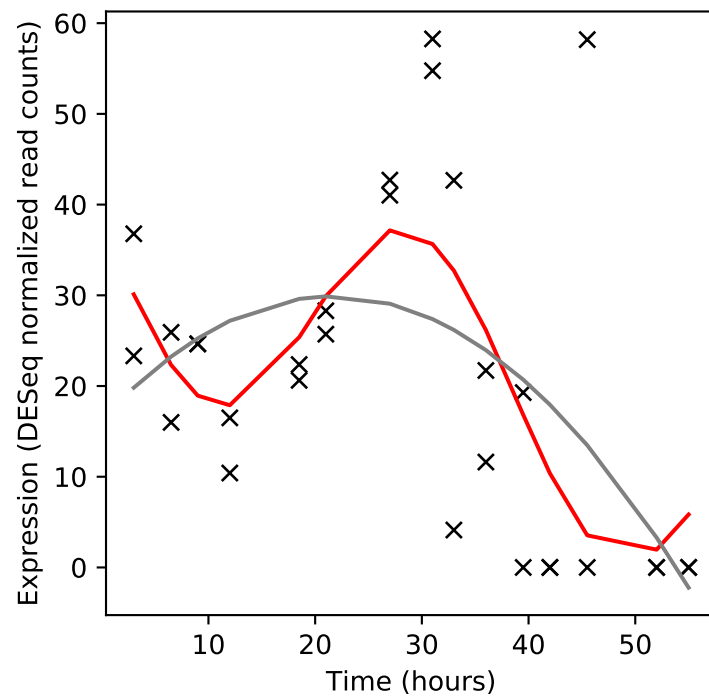

Rv2810c/-

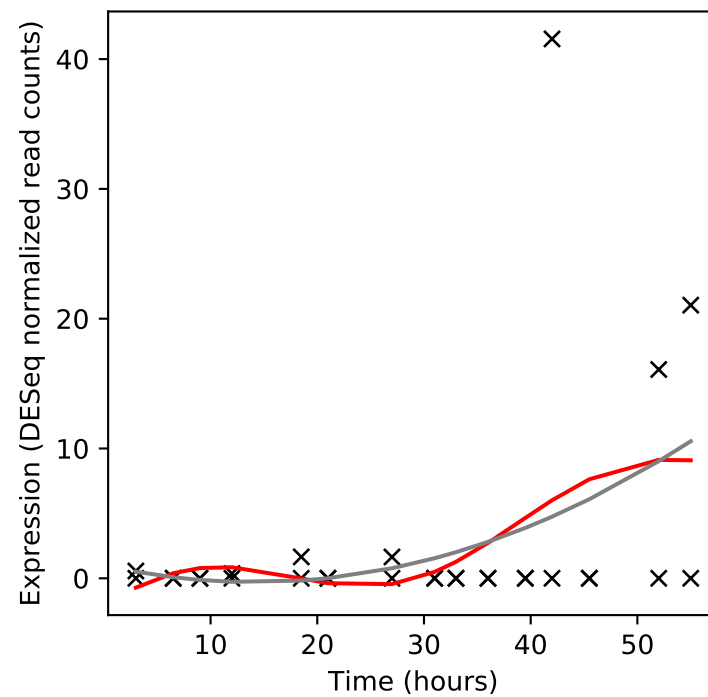

Rv2811/-

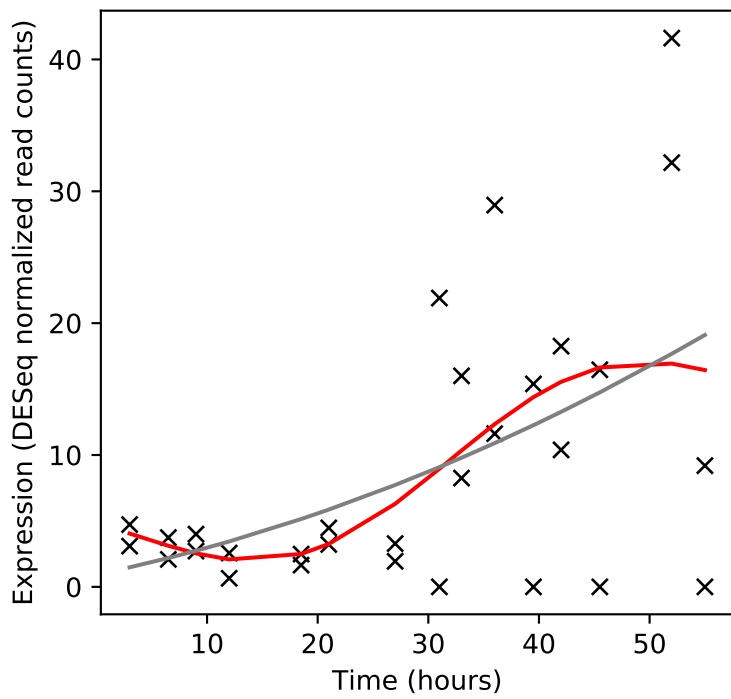

Rv2812/-

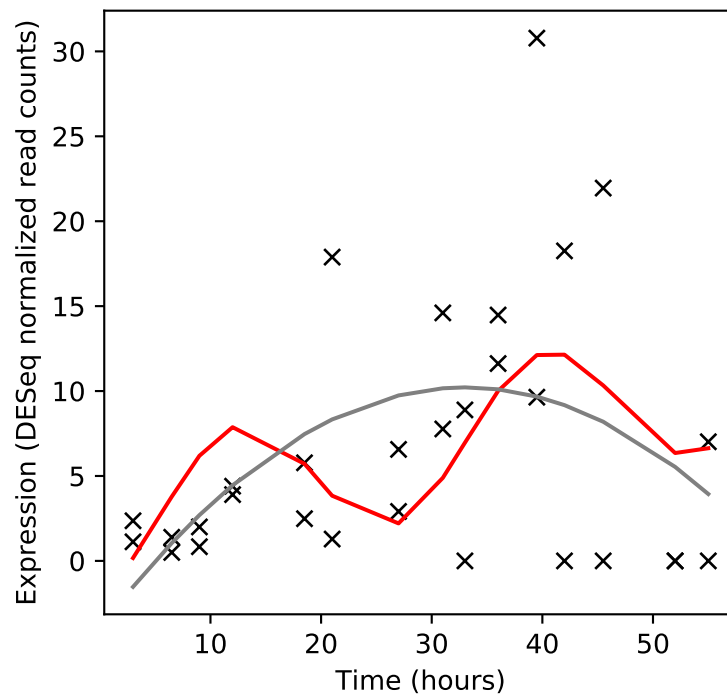

Rv2813/-

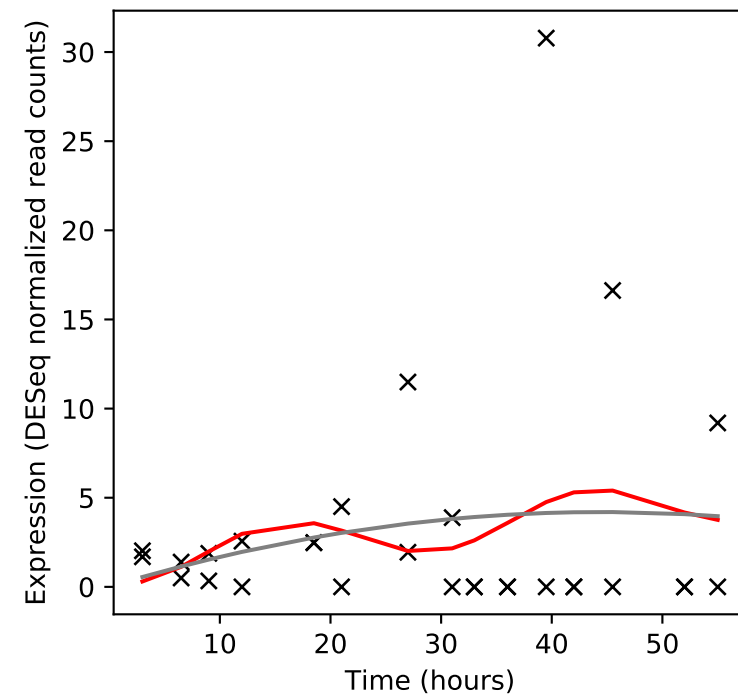

Rv2814c/-

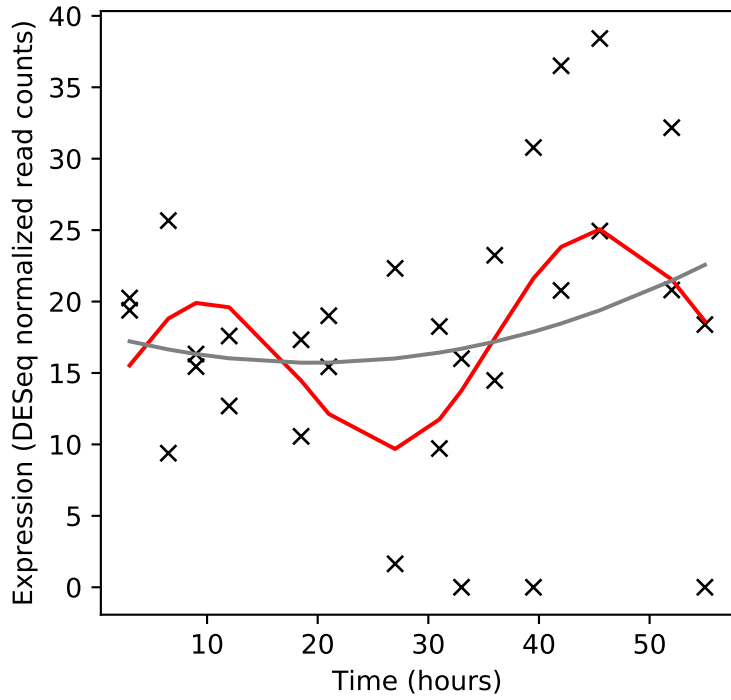

Rv2815c/-

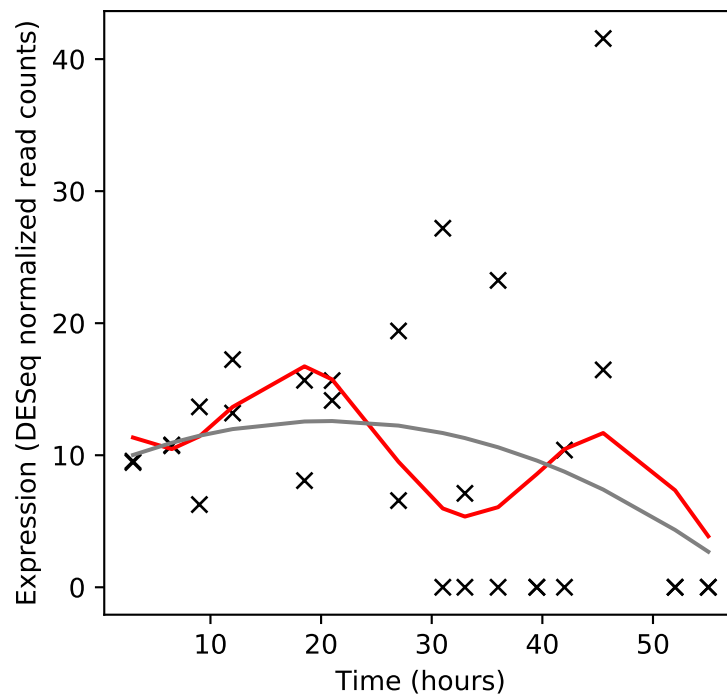

Rv2816c/-

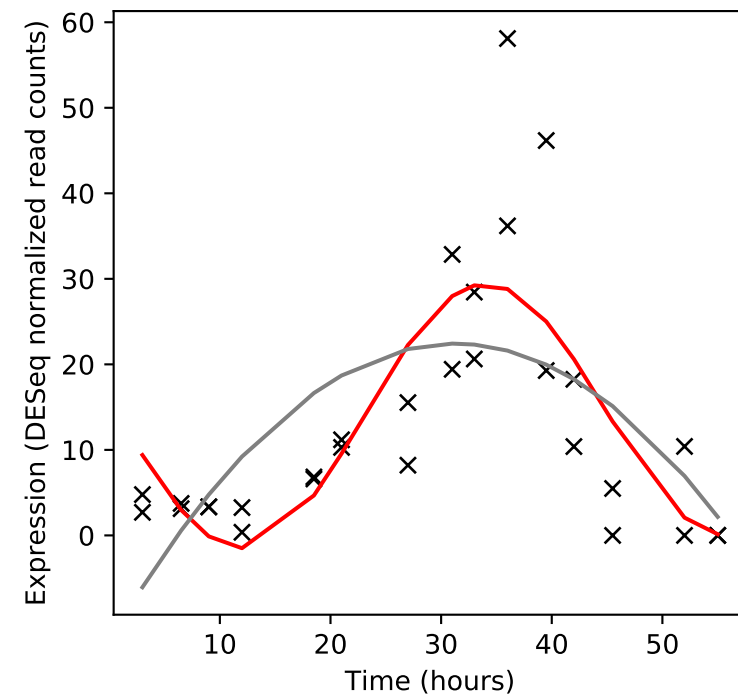

Rv2817c/-

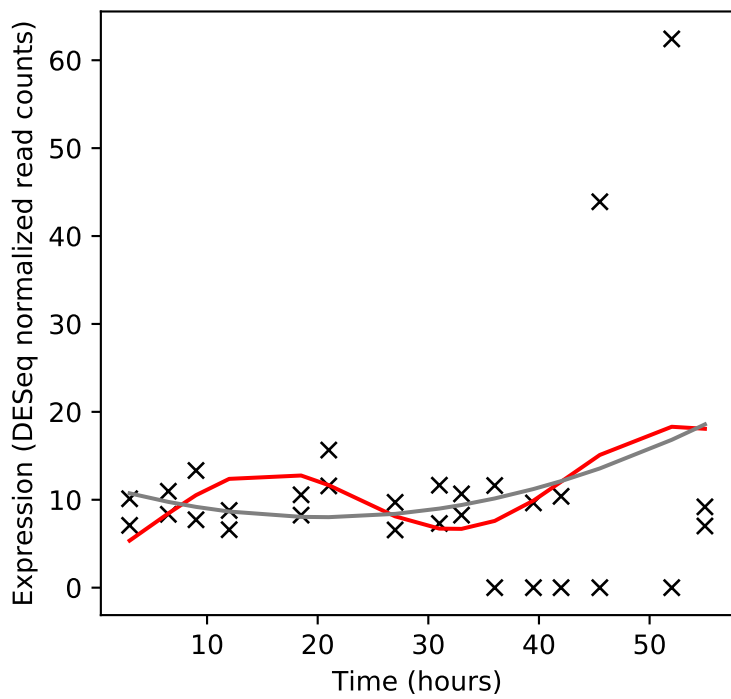

Rv2818c/-

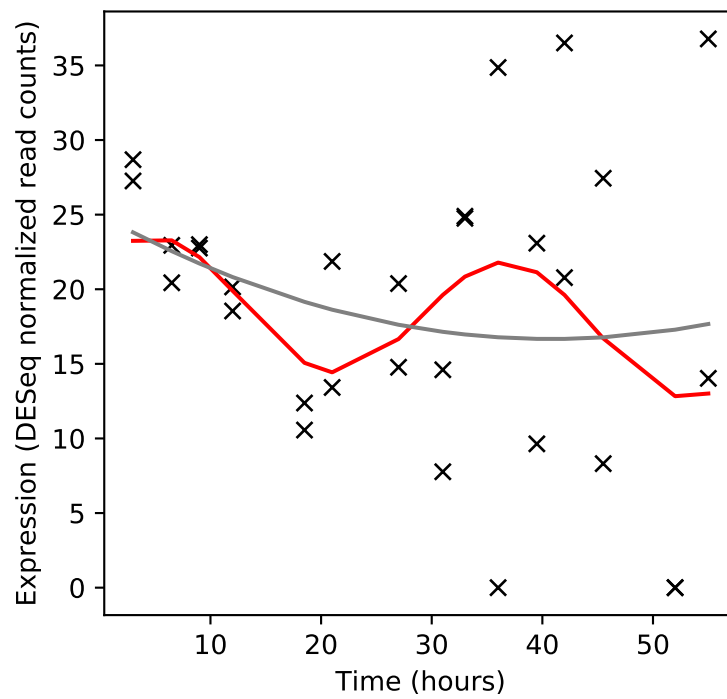

Rv2819c/-

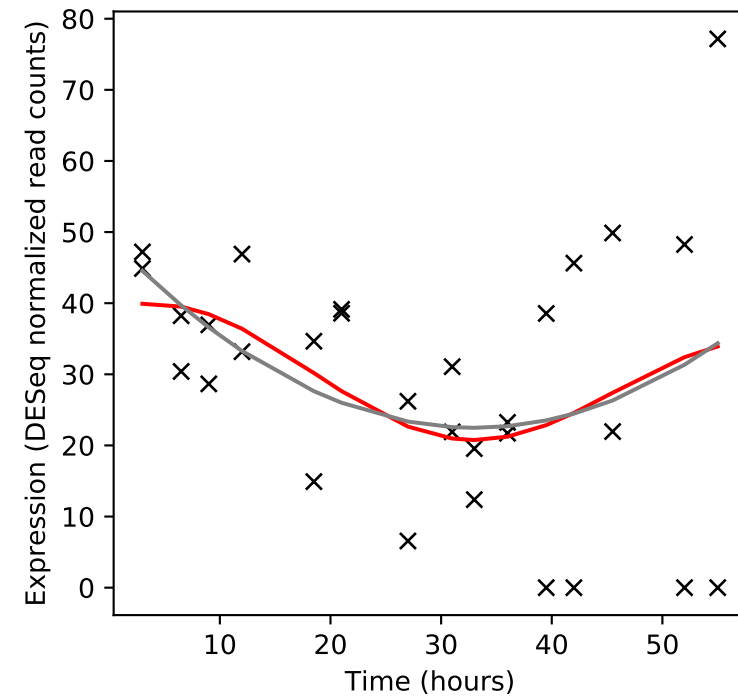

Rv2820c/-

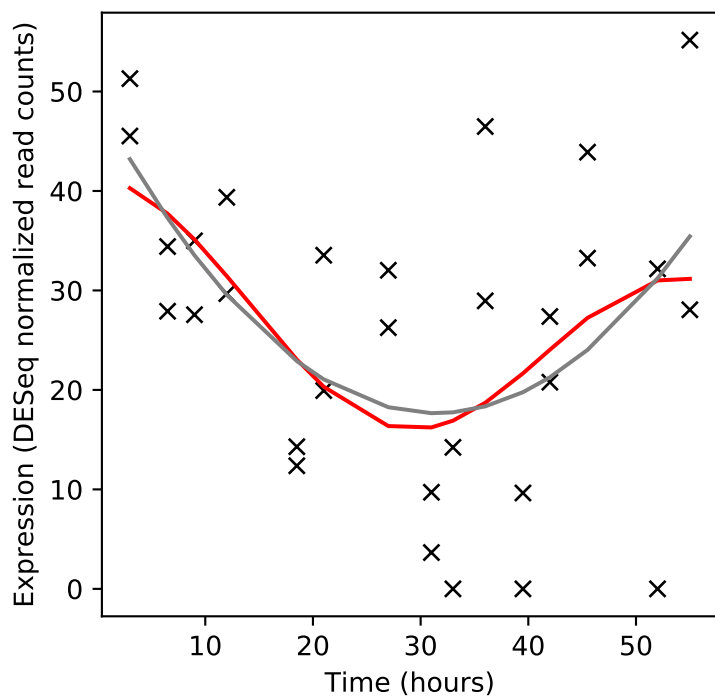

Rv2821c/-

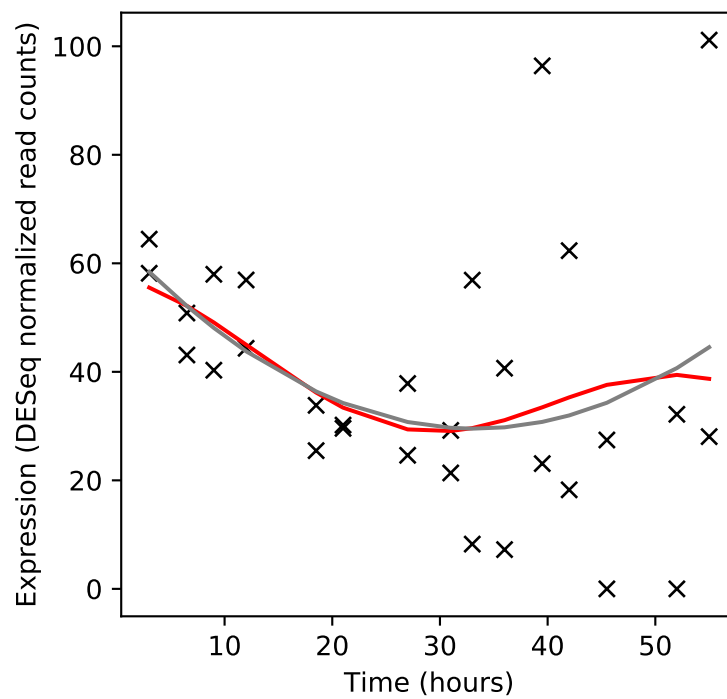

Rv2822c/-

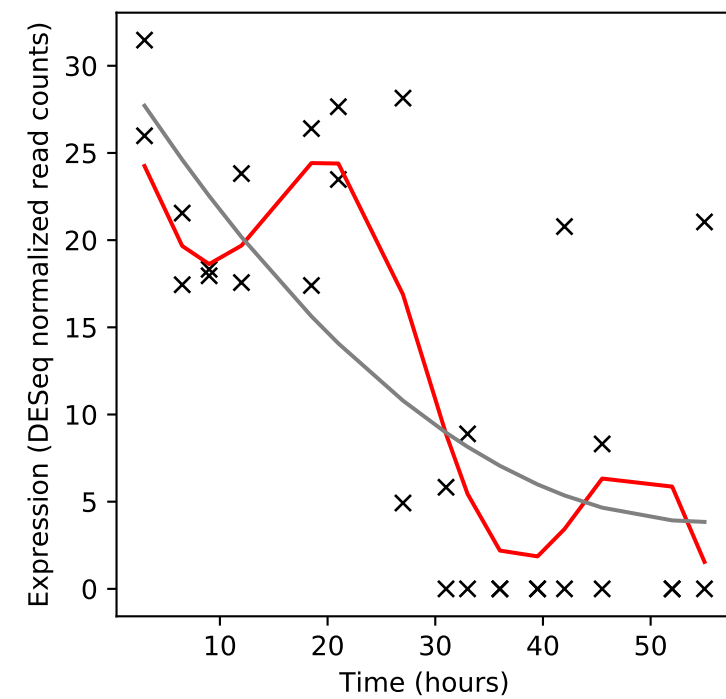

Rv2823c/-

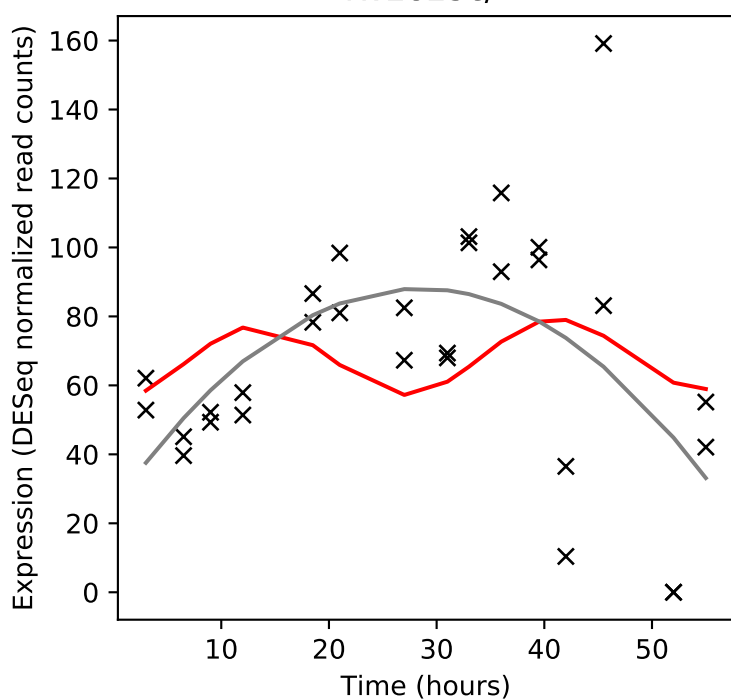

Rv2824c/-

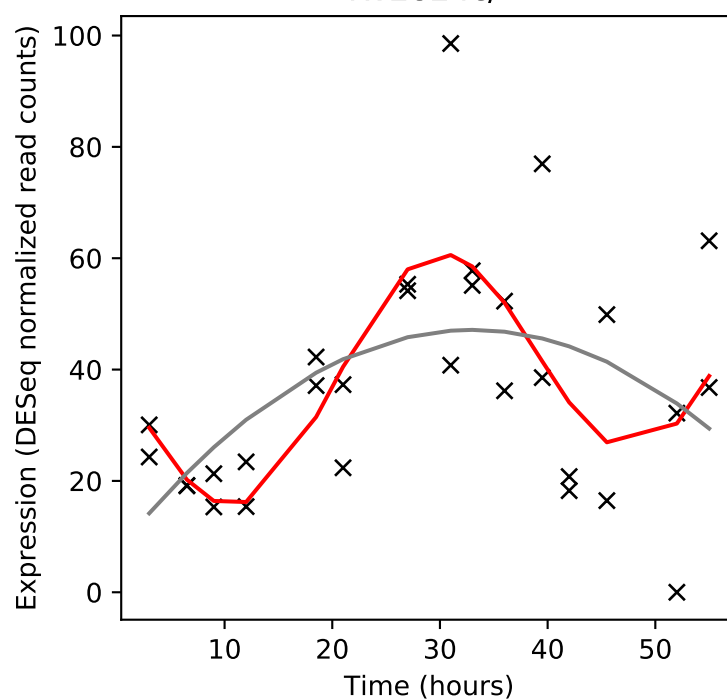

Rv2825c/-

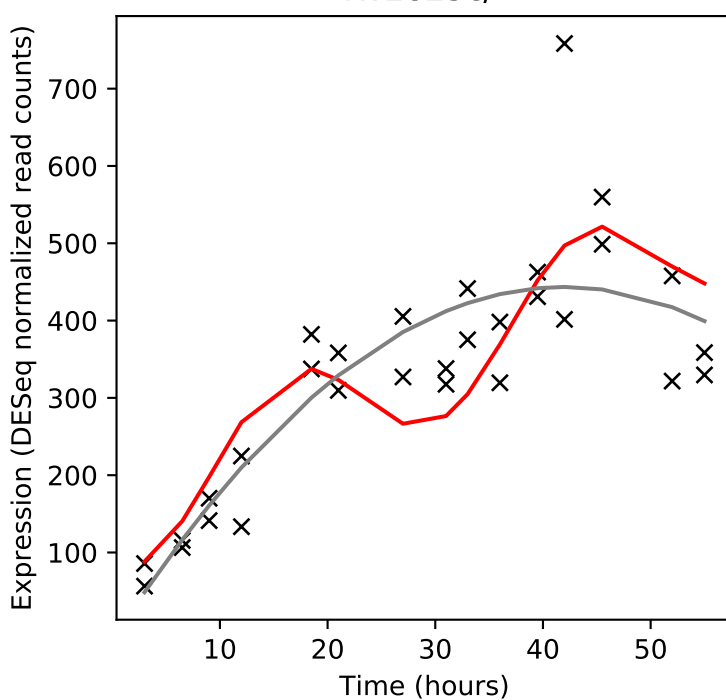

Rv2826c/-

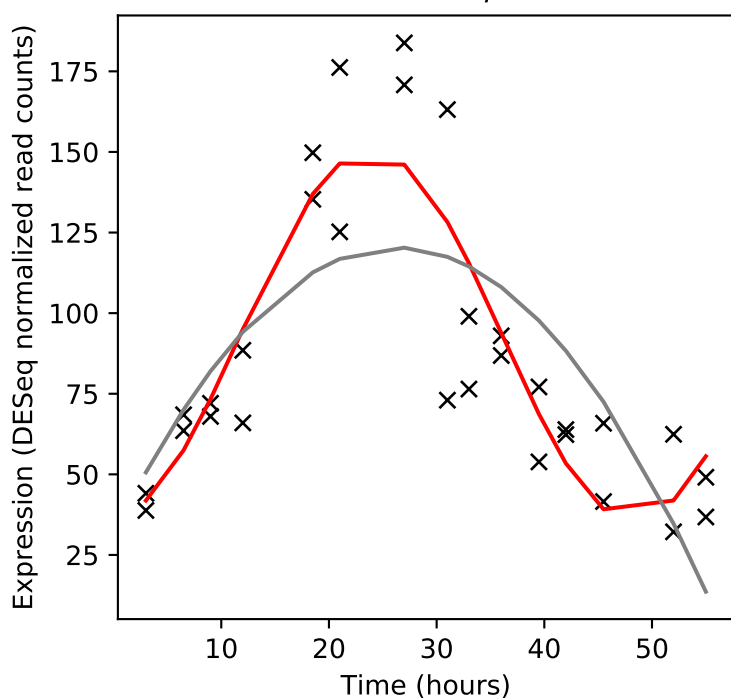

Rv2827c/-

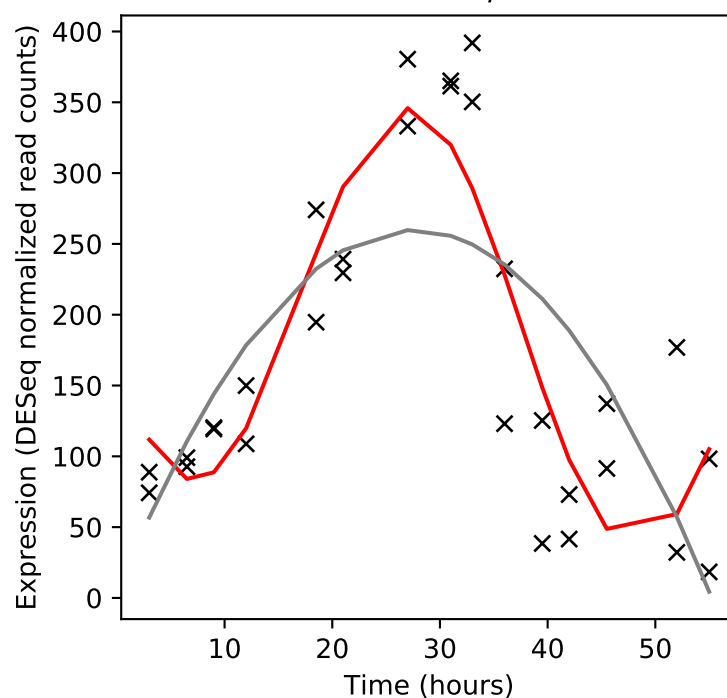

Rv2828c/-

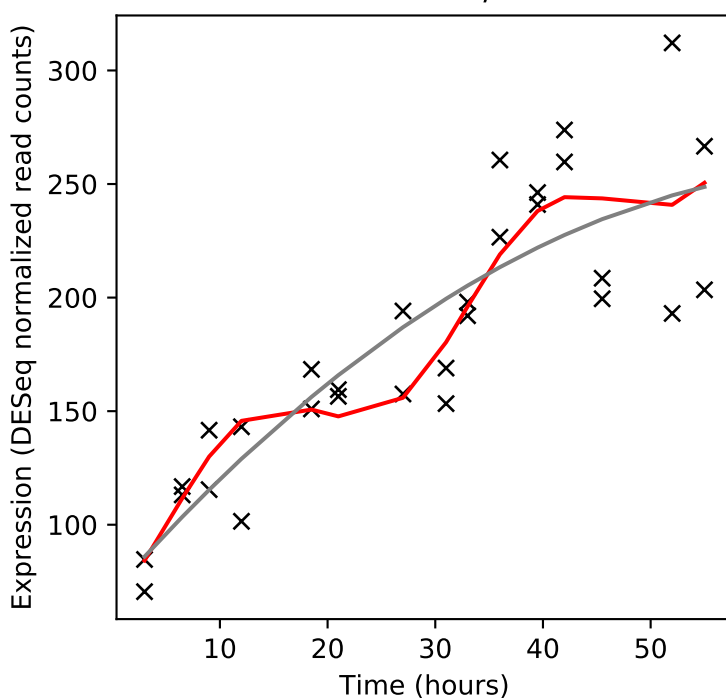

Rv2828A/-

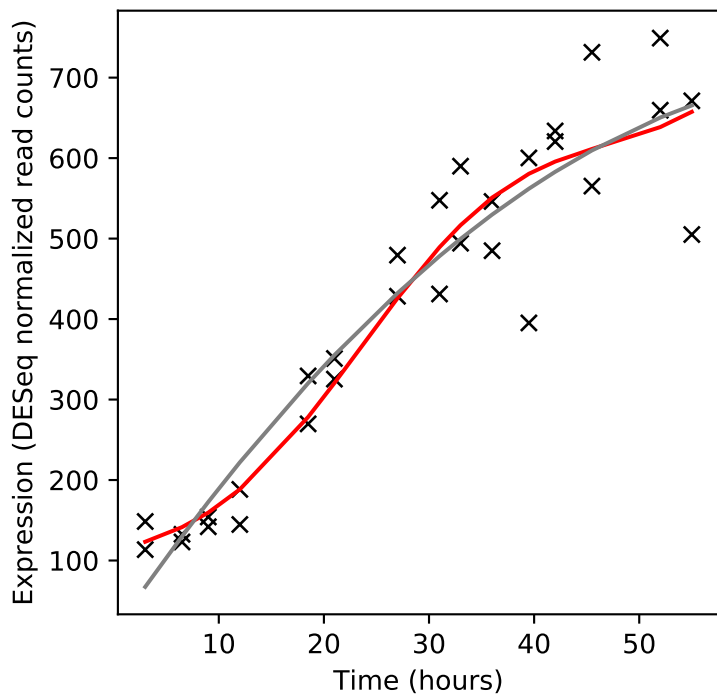

Rv2829c/vapC22

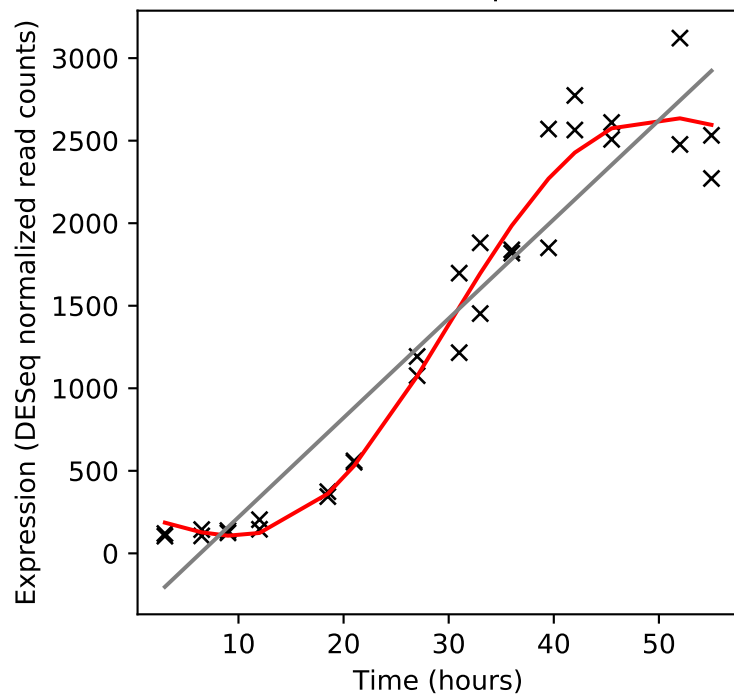

Rv2830c/vapB22

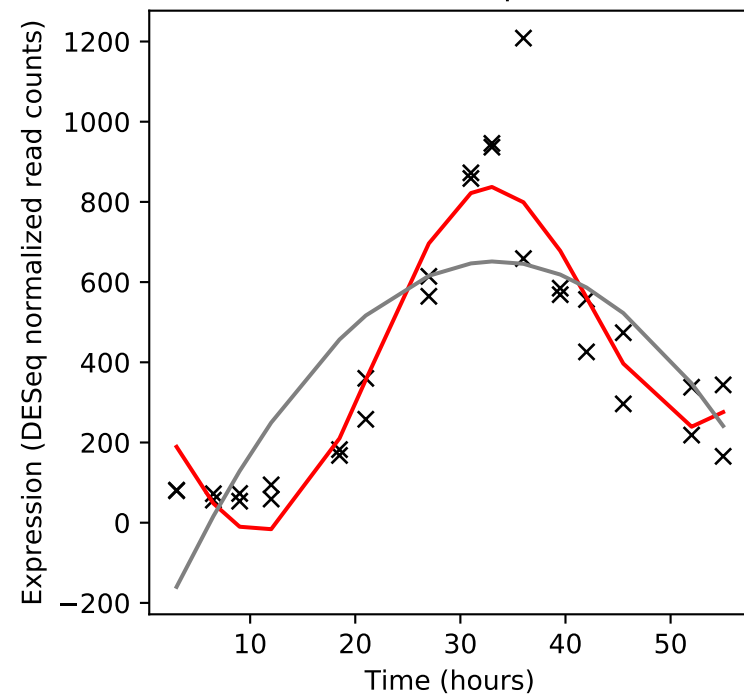

Rv2831/echA16

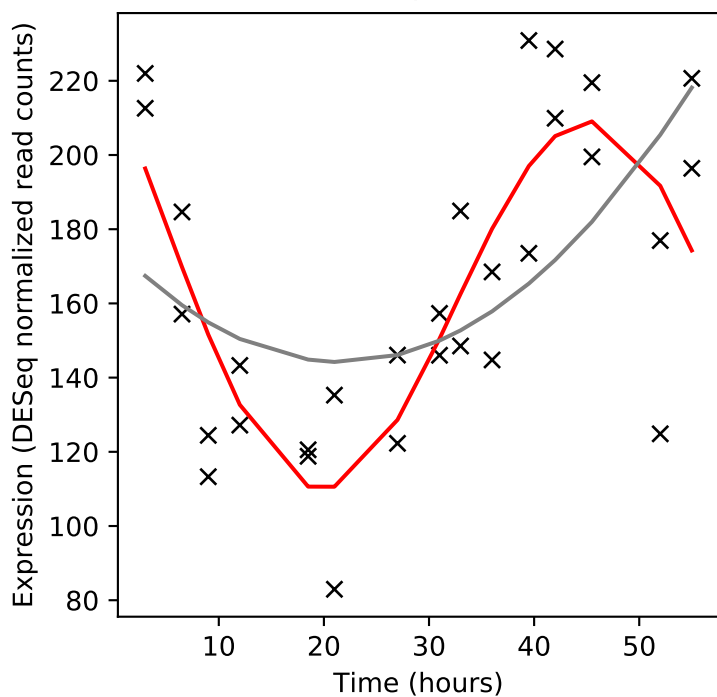

Rv2832c/ugpC

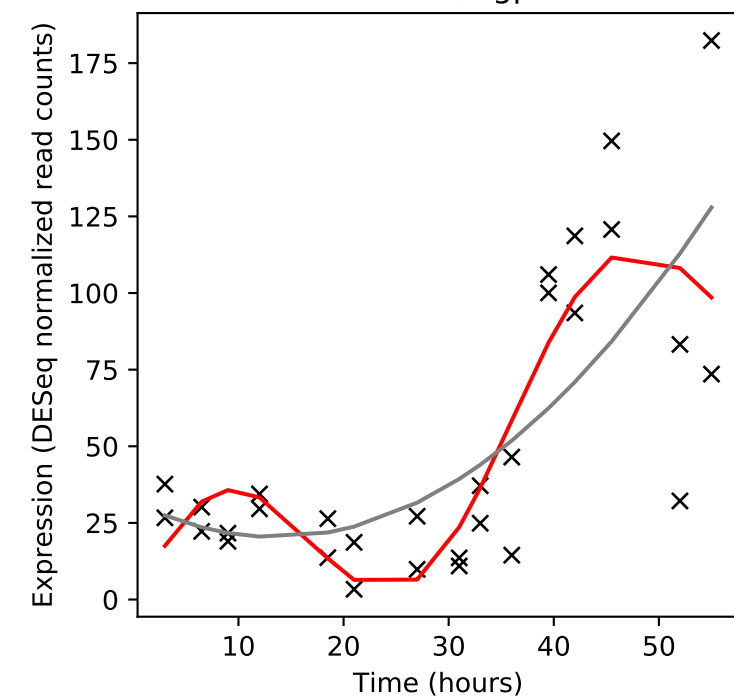

Rv2833c/ugpB

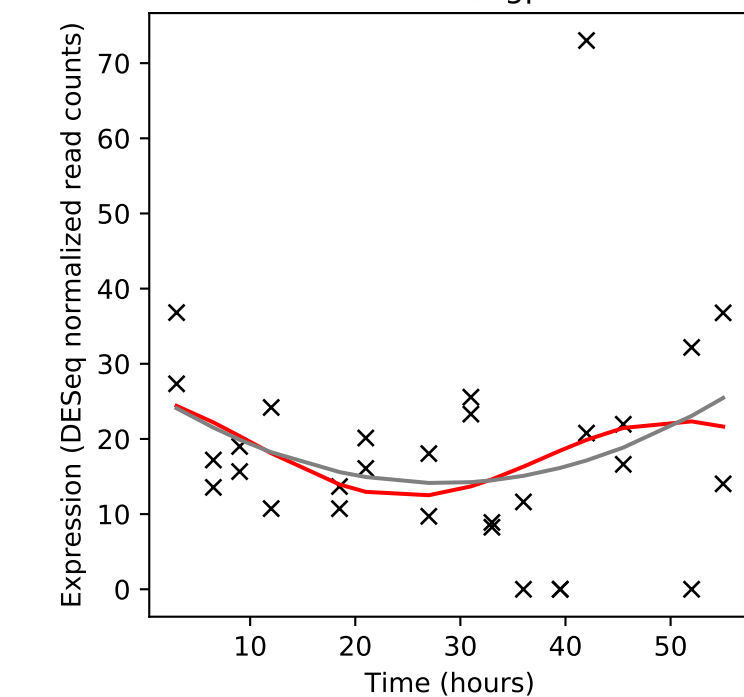

Rv2834c/ugpE

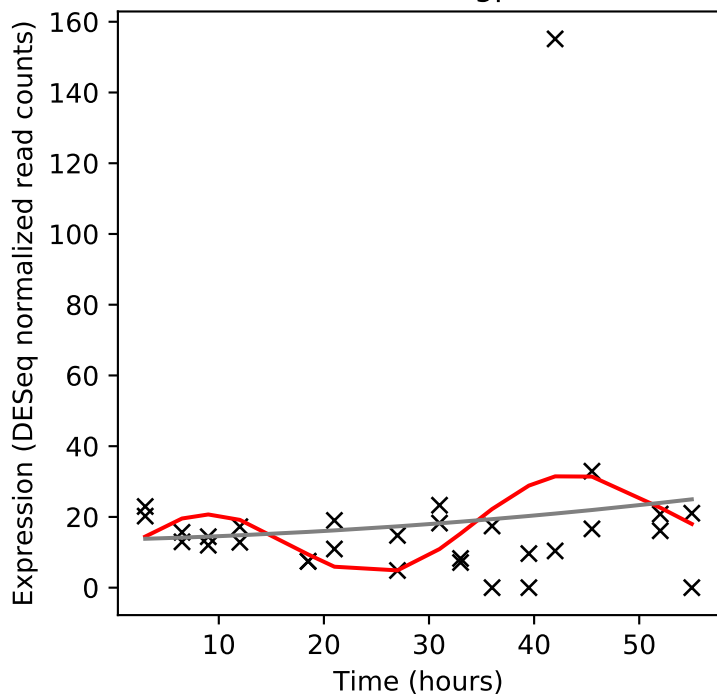

Rv2835c/ugpA

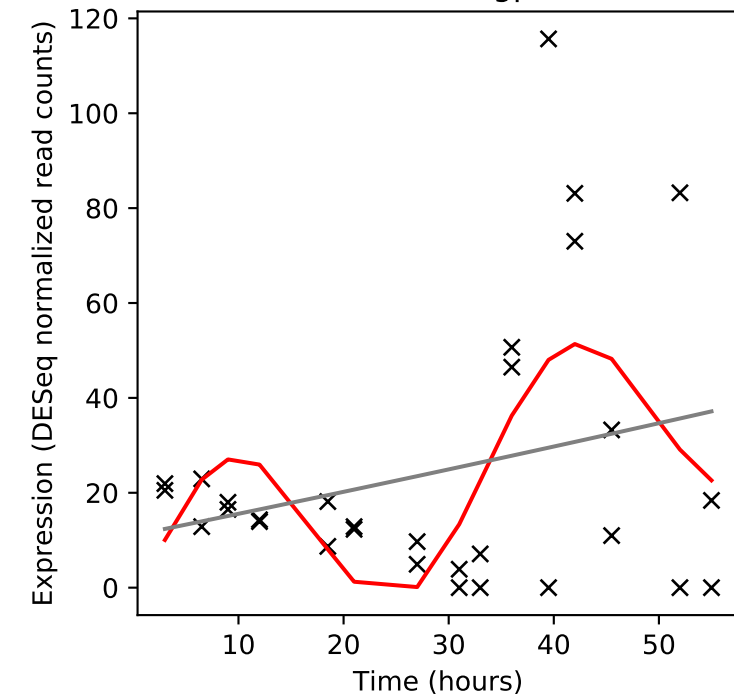

Rv2836c/dinF

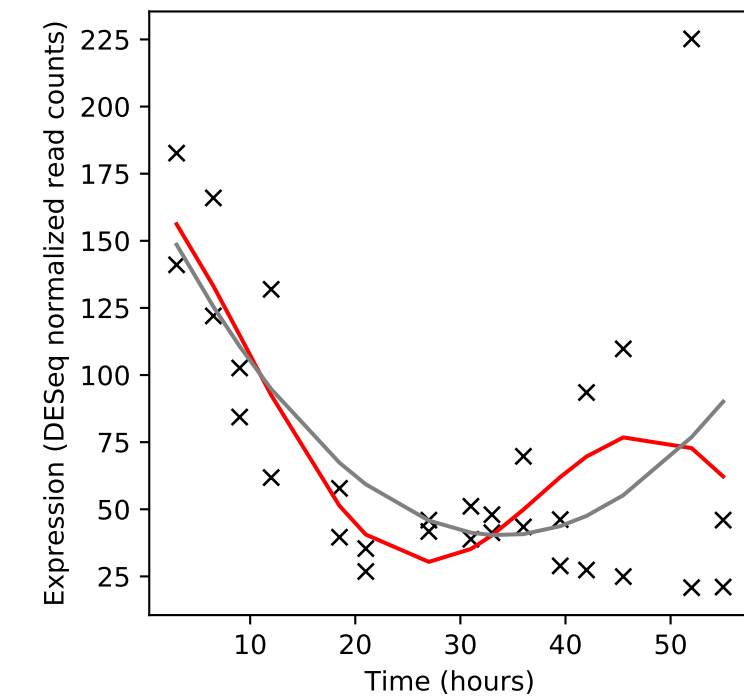



Rv2837c/-

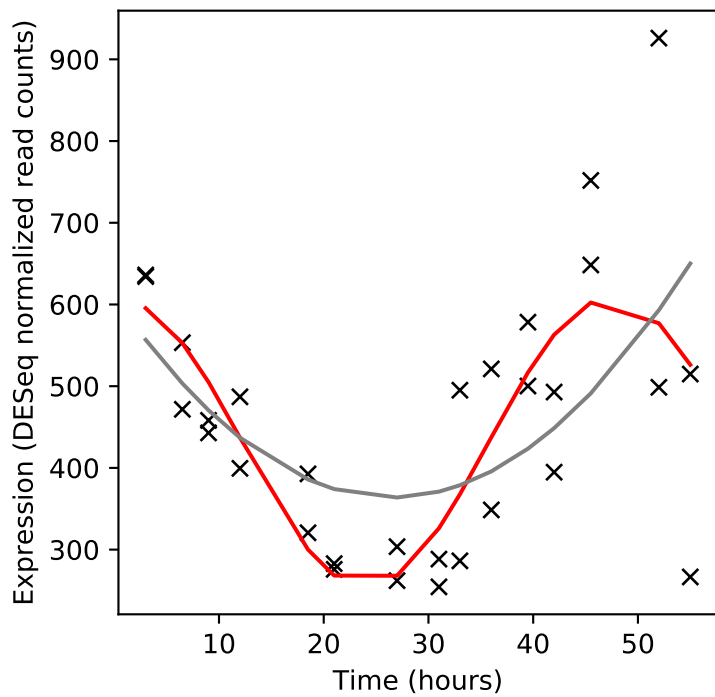

Rv2838c/rbfA

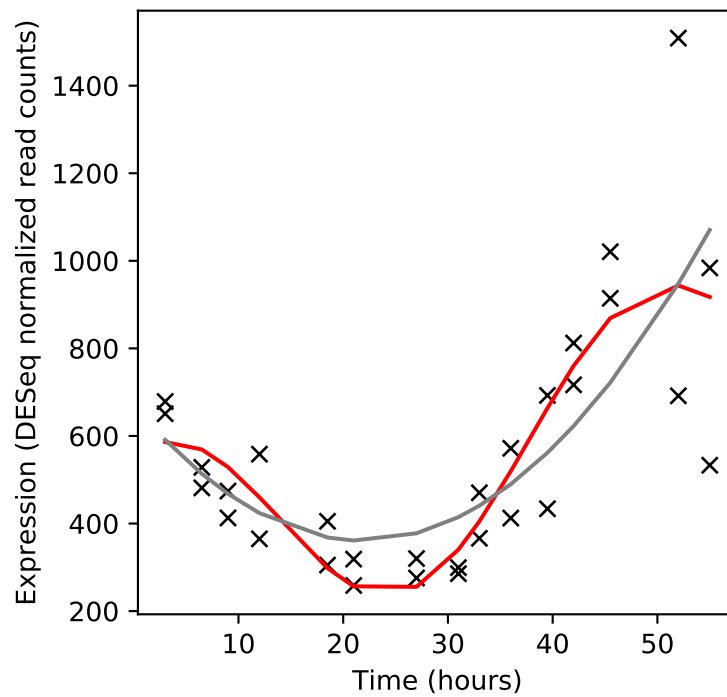

Rv2839c/infB

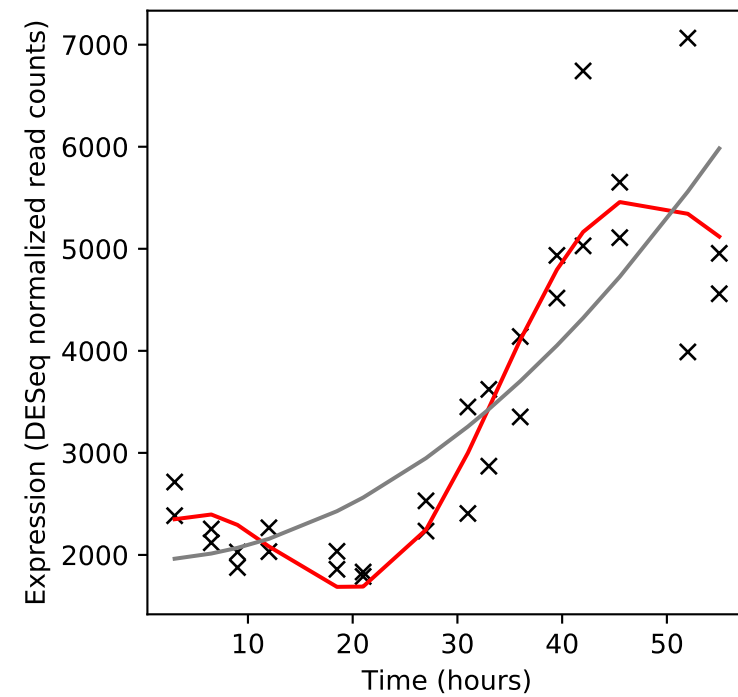

Rv2840c/-

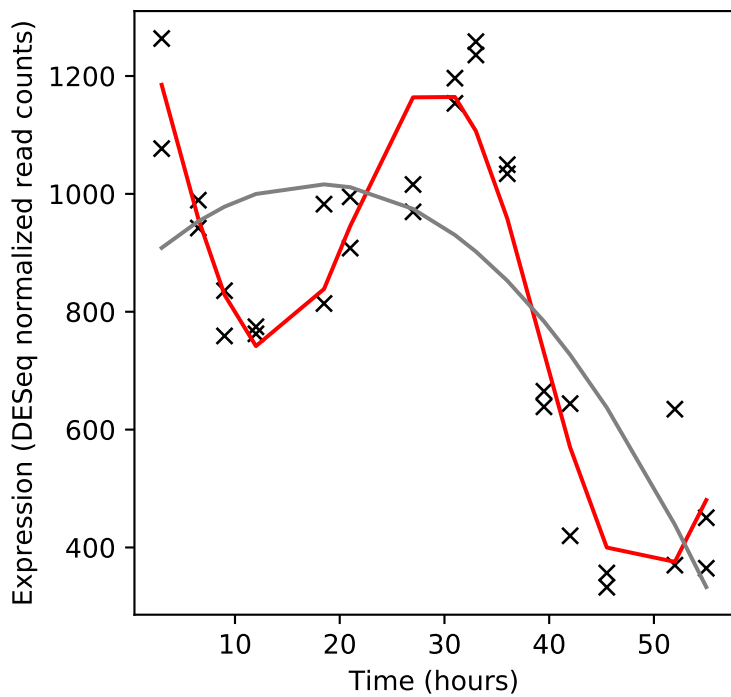

Rv2841c/nusA

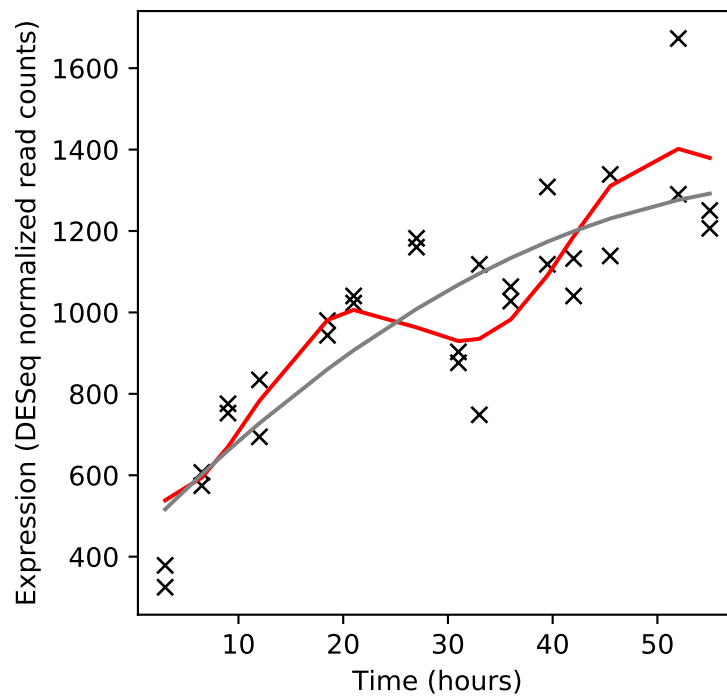

Rv2842c/-

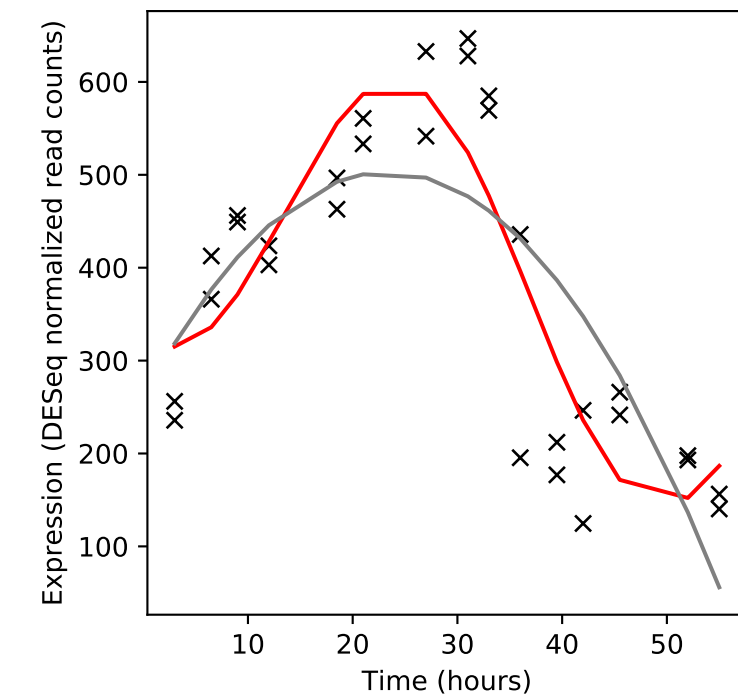

Rv2843/-

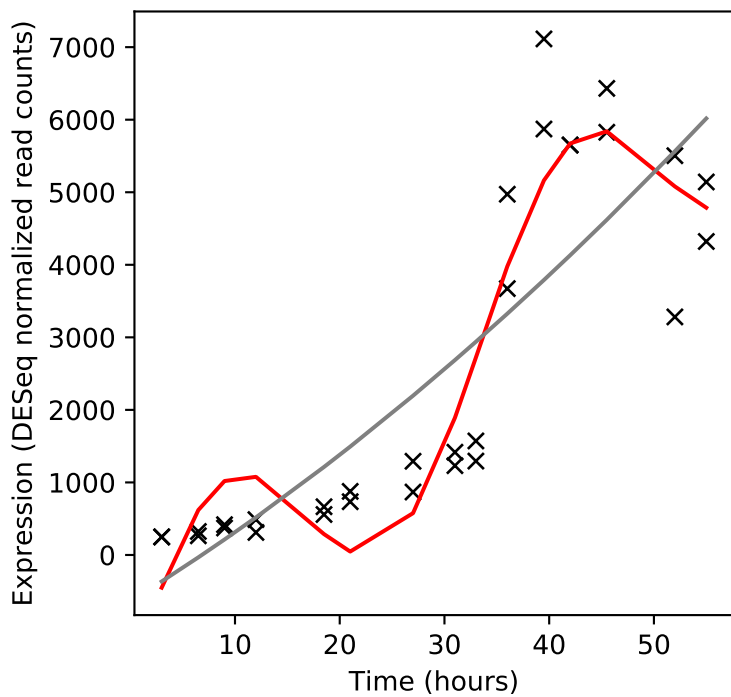

Rv2844/-

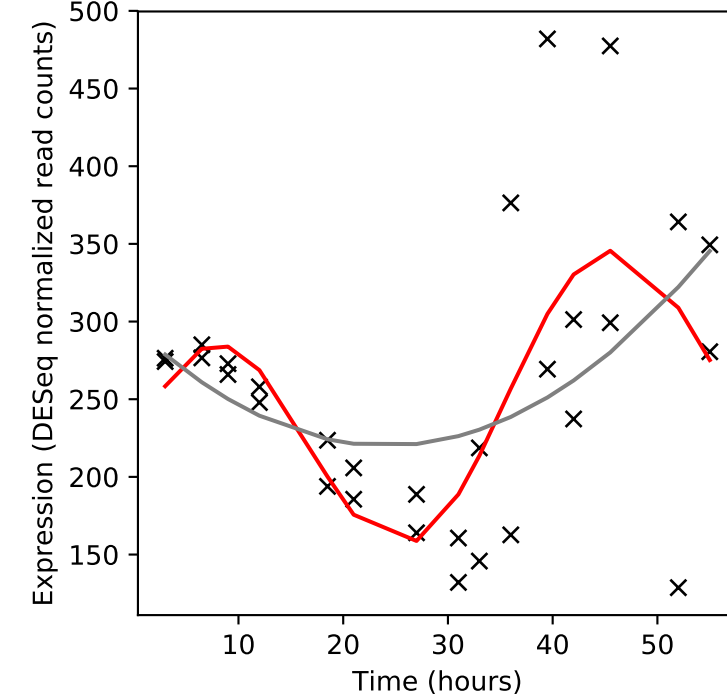

Rv2845c/proS

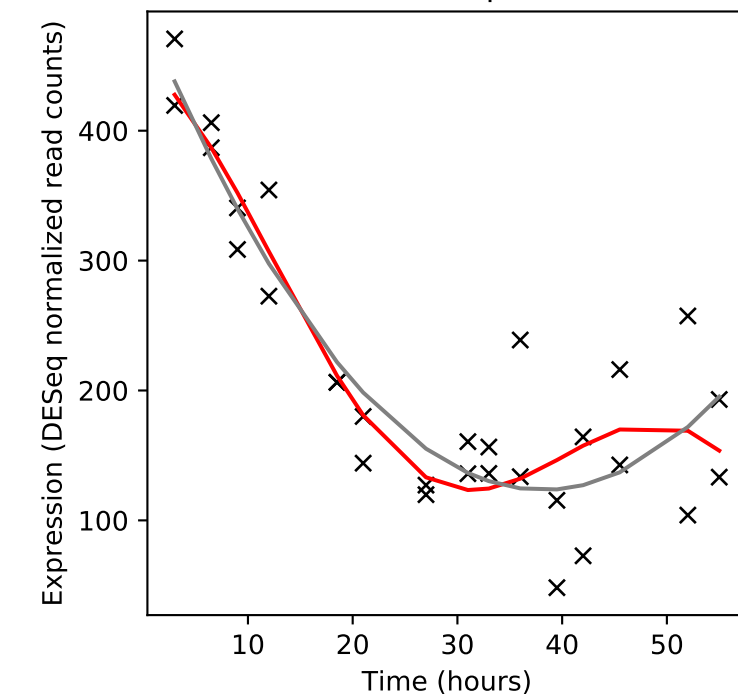

Rv2846c/efpA

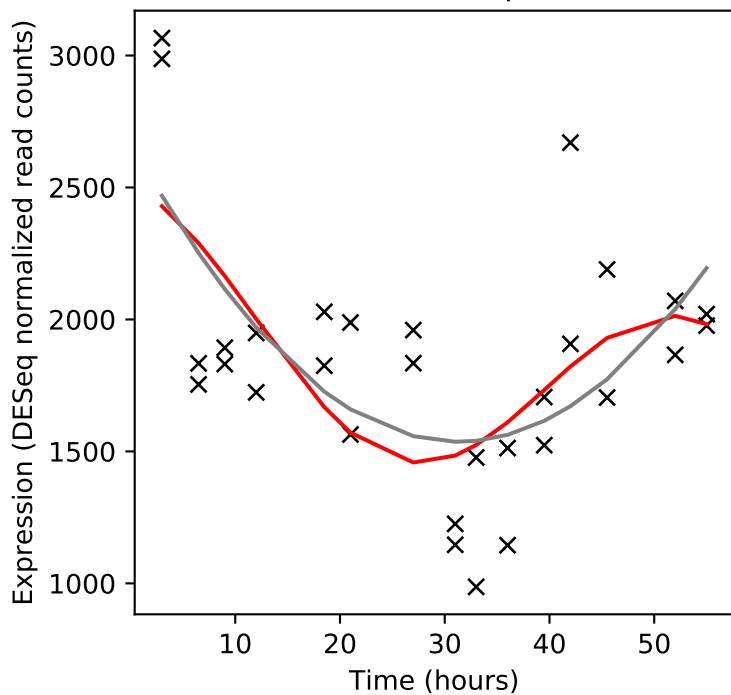

Rv2847c/cysG

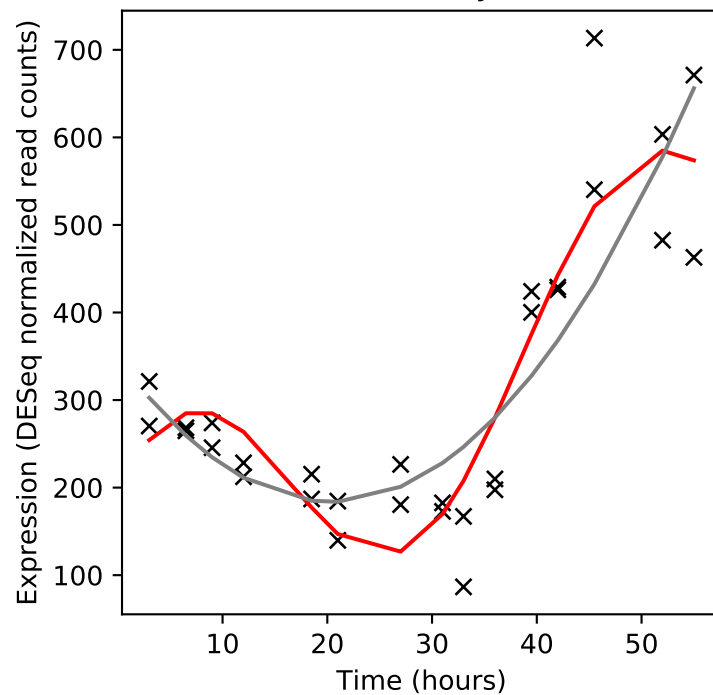

Rv2848c/cobB

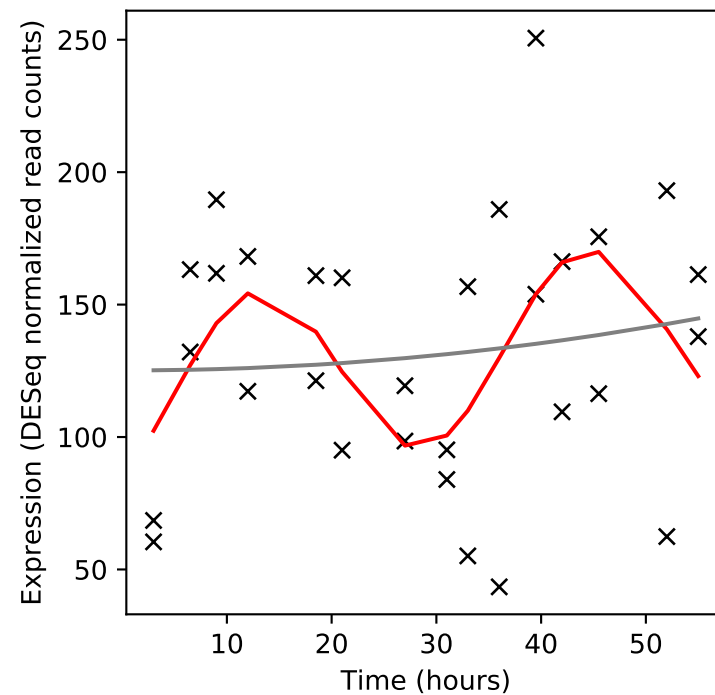

Rv2849c/cobO

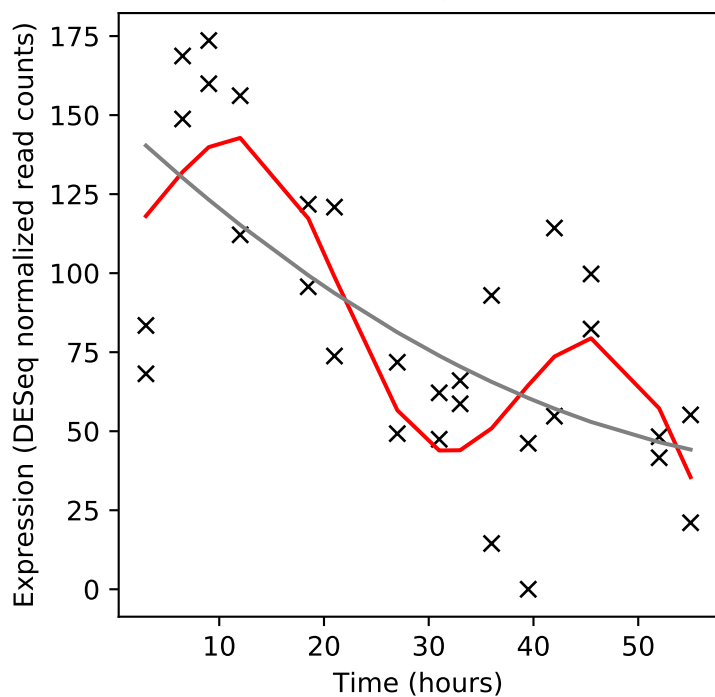

Rv2850c/-

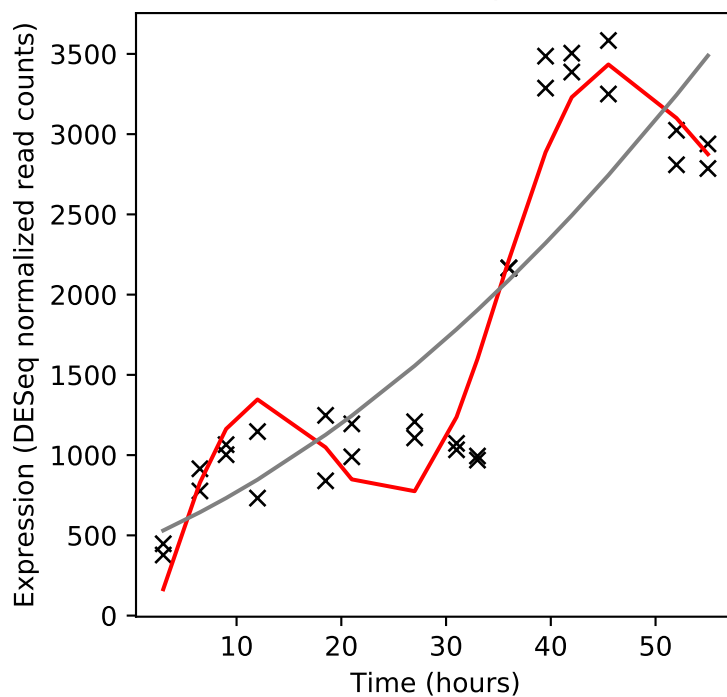

Rv2851c/-

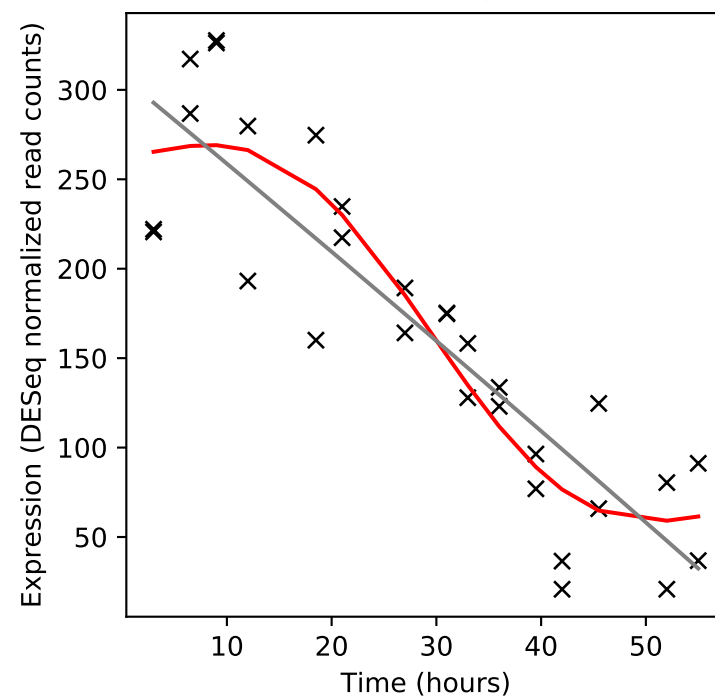

Rv2852c/mqo

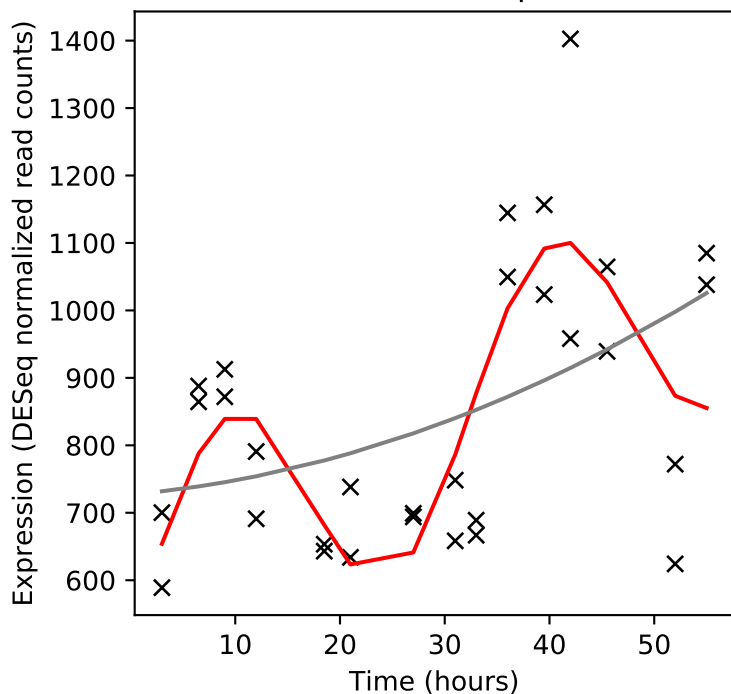

Rv2853/PE\_PGRS48

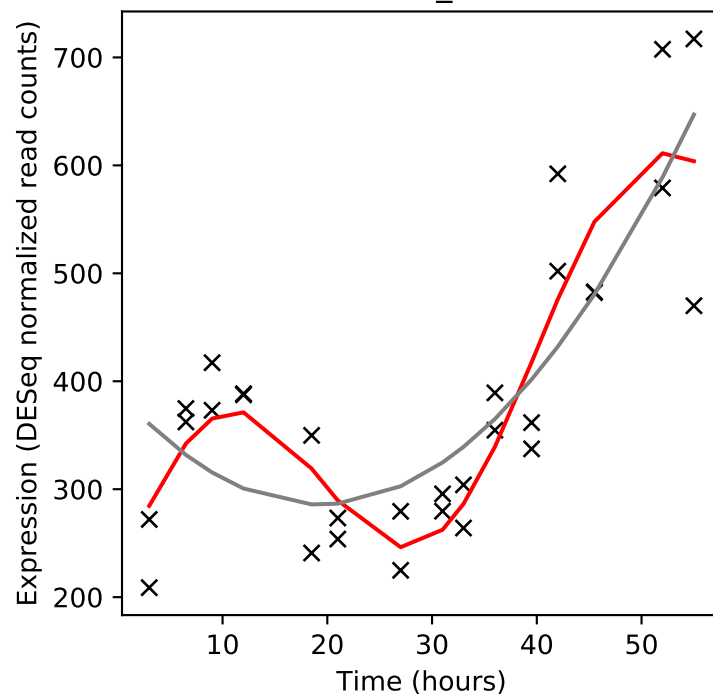

Rv2854c/-

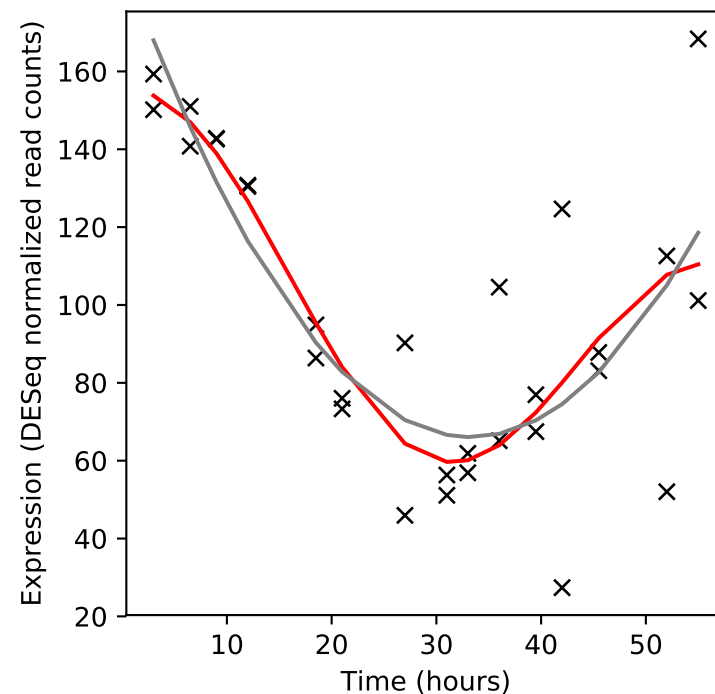

Rv2855/mtr

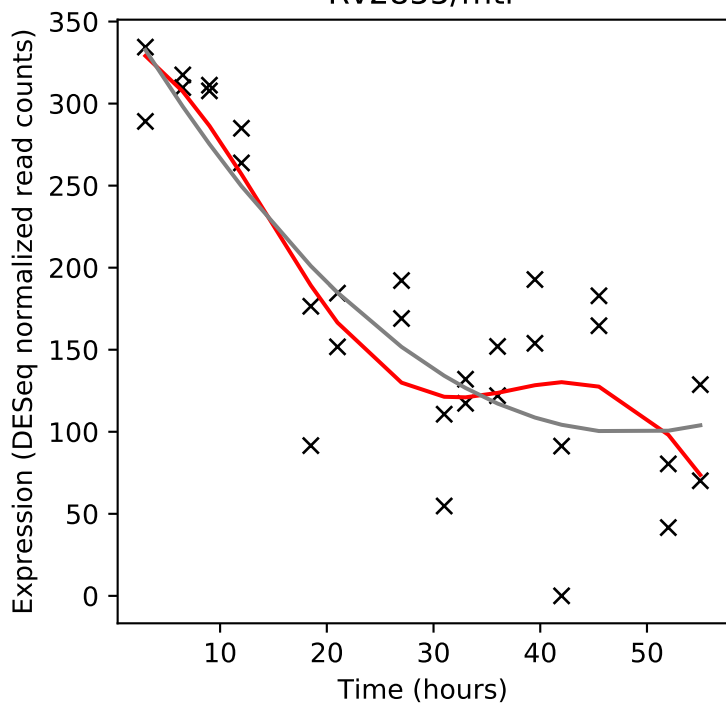

Rv2856/nicT

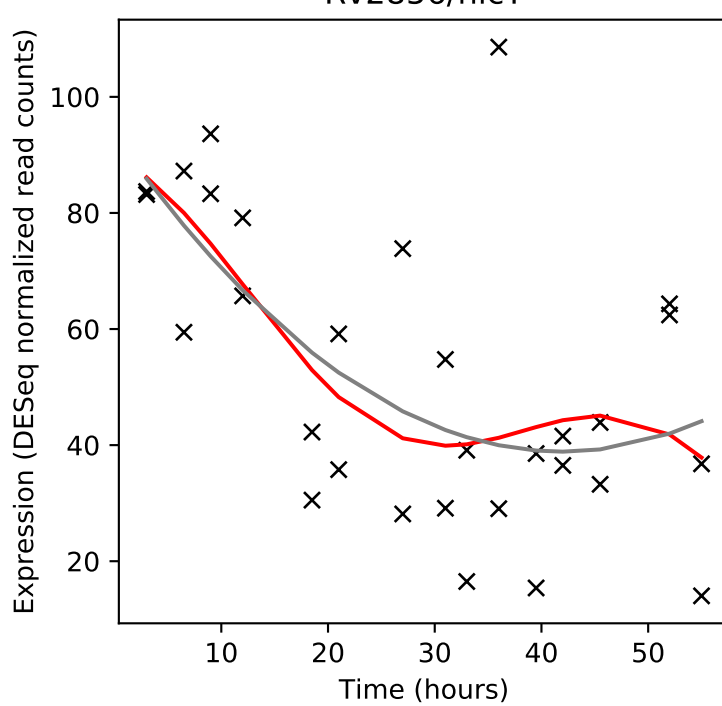

Rv2857c/-

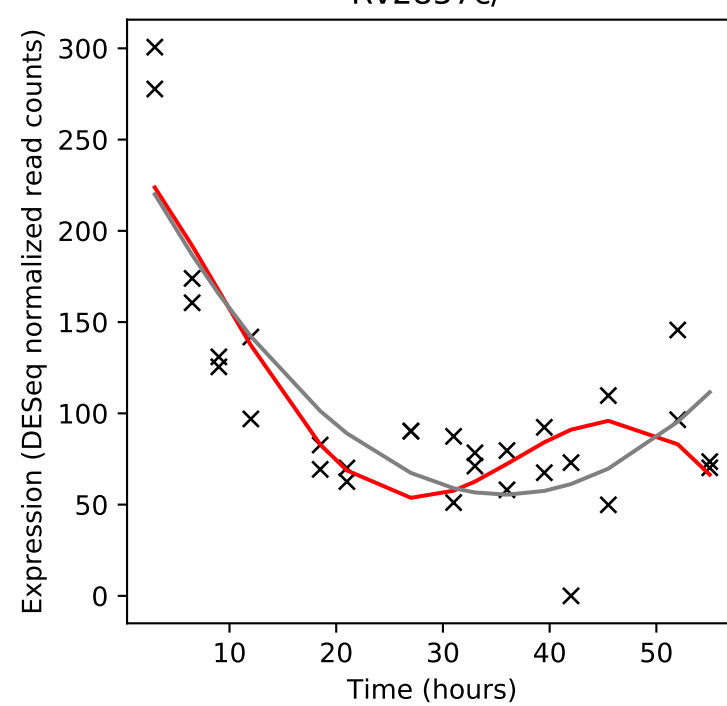

Rv2858c/aldC

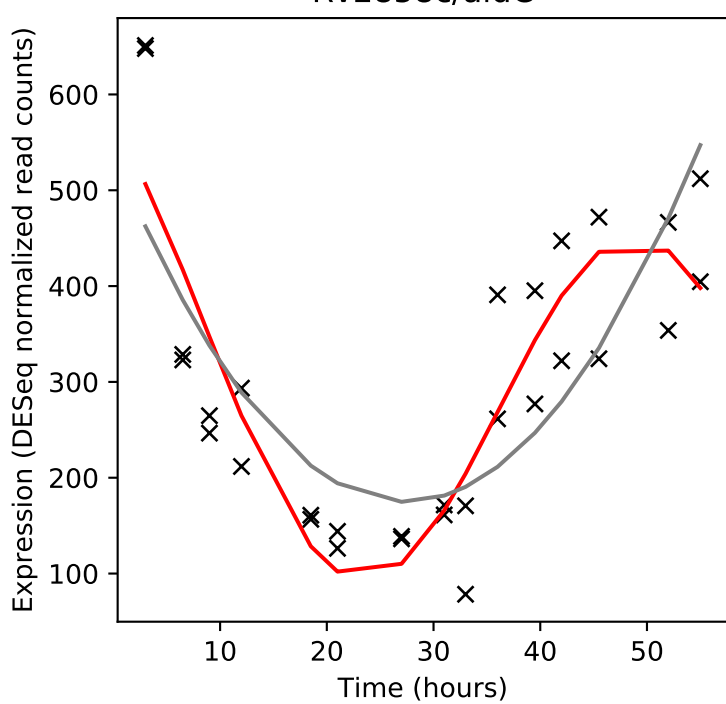

Rv2859c/-

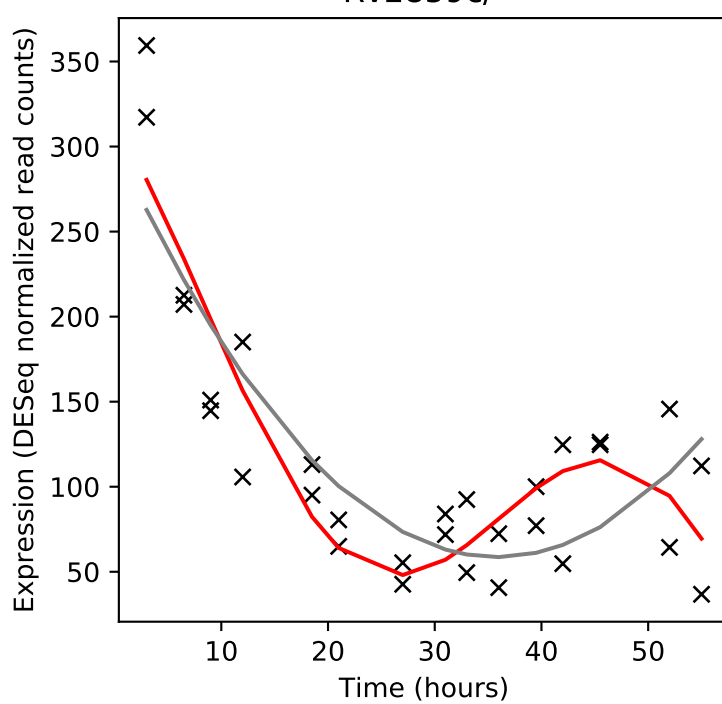

Rv2860c/glnA4

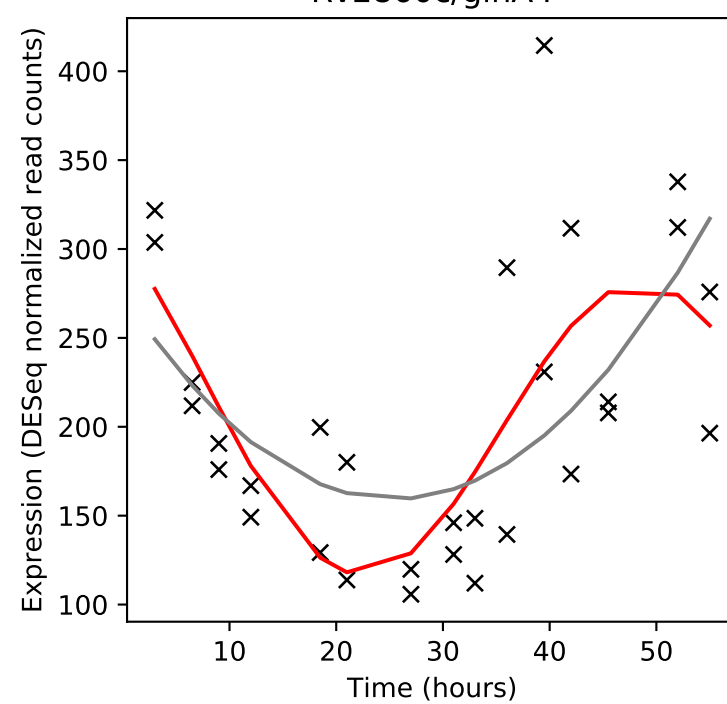

Rv2861c/mapB

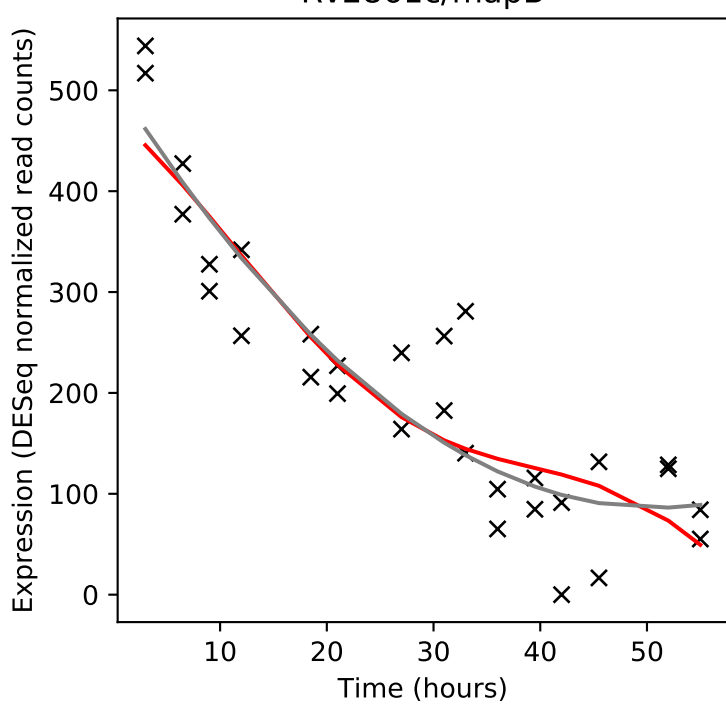

Rv2862c/-

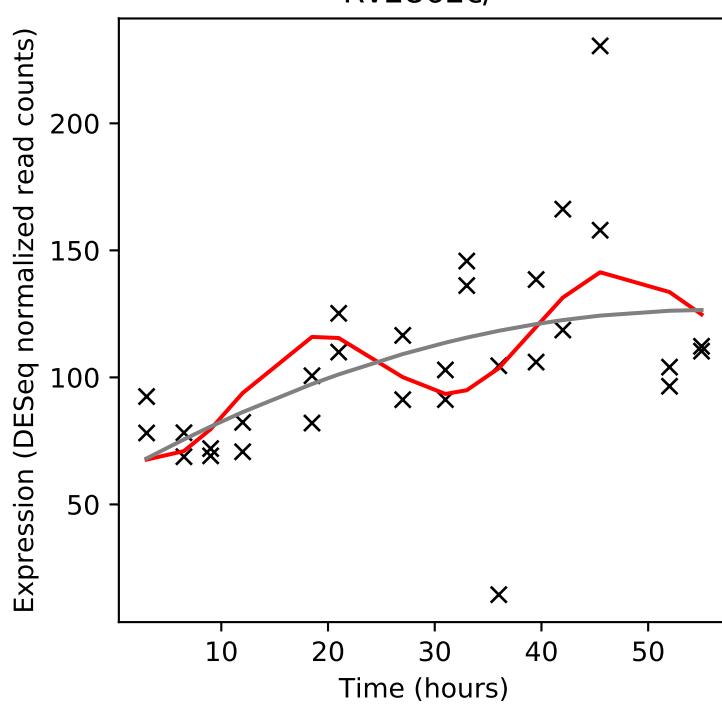

Rv2862A/vapB23

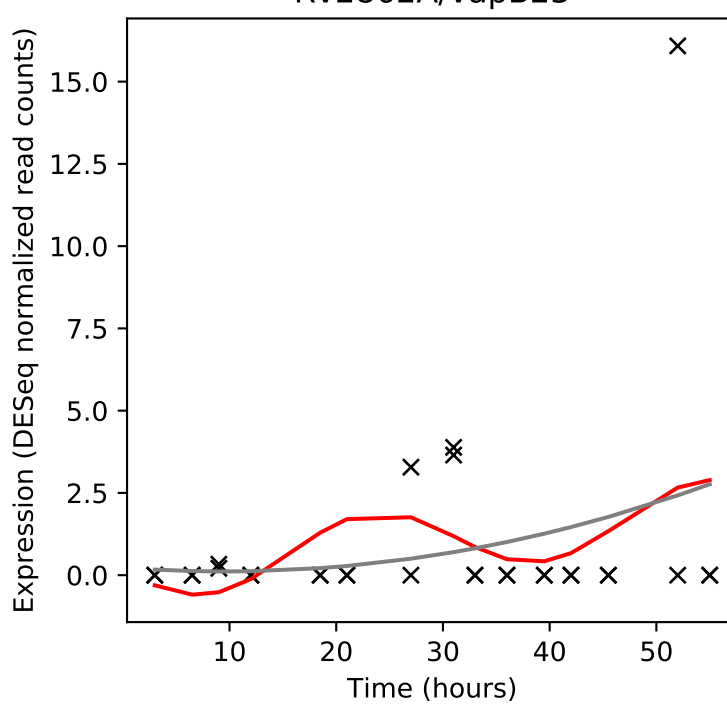

Rv2863/vapC23

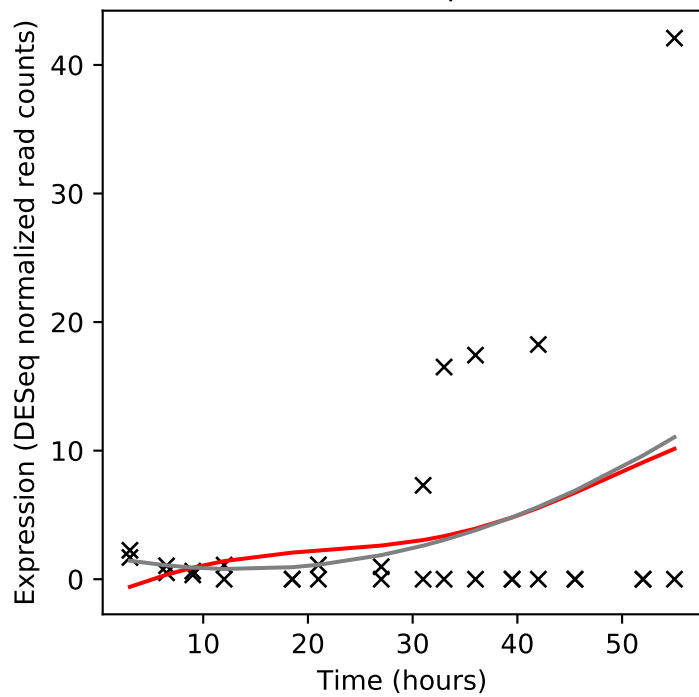

Rv2864c/-

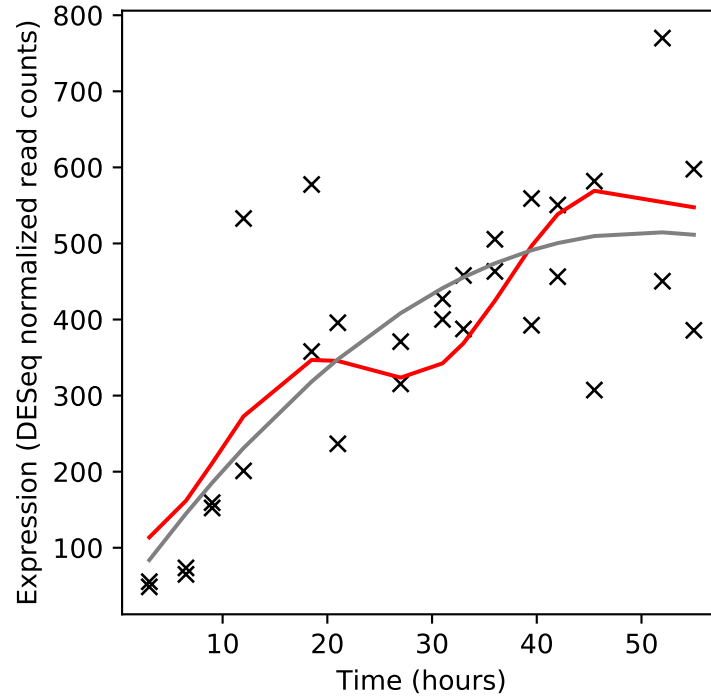

Rv2865/reIF

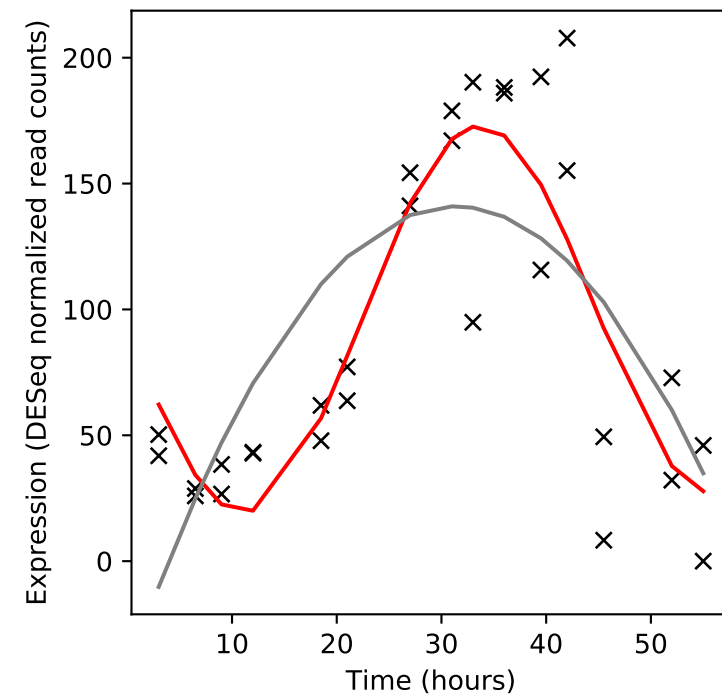

Rv2866/reIG

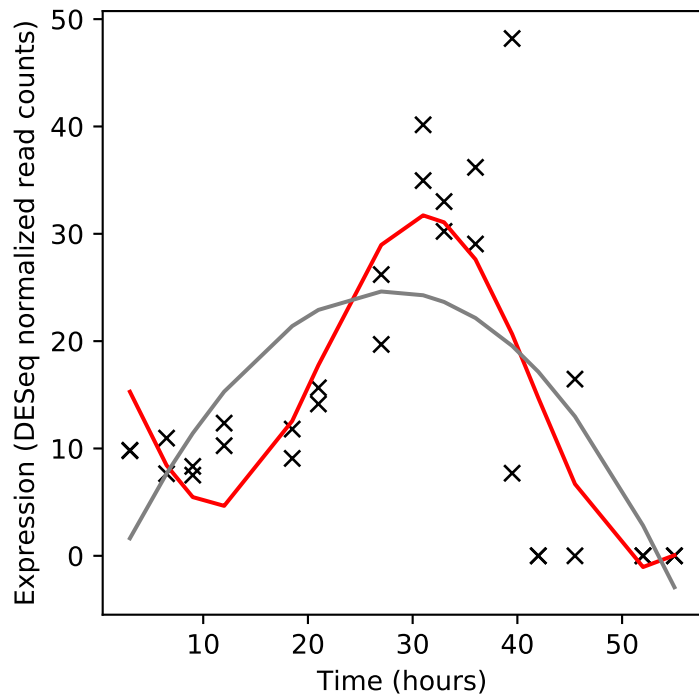

Rv2867c/-

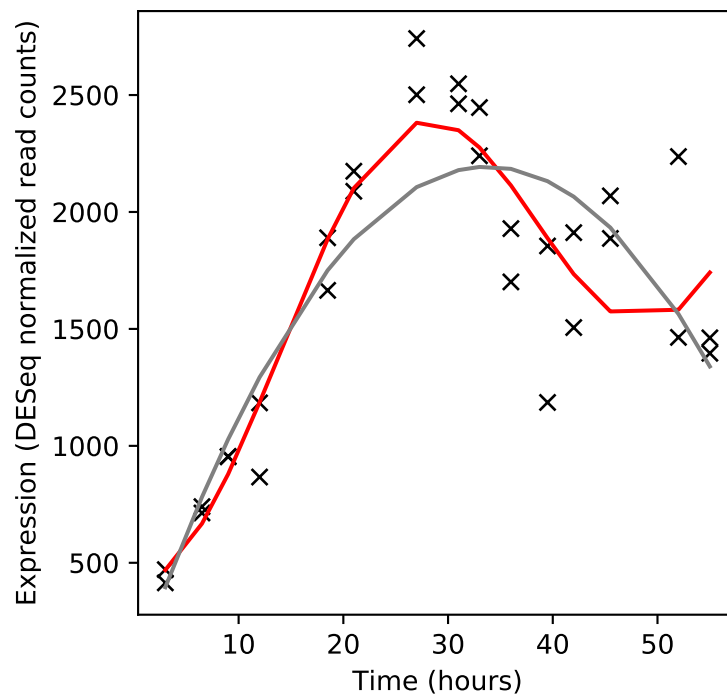

Rv2868c/gcpE

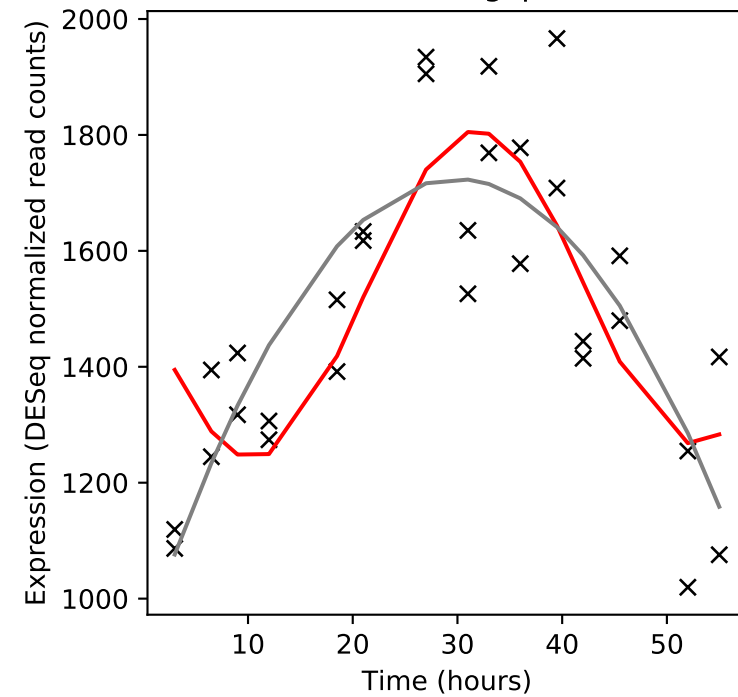

Rv2869c/rip

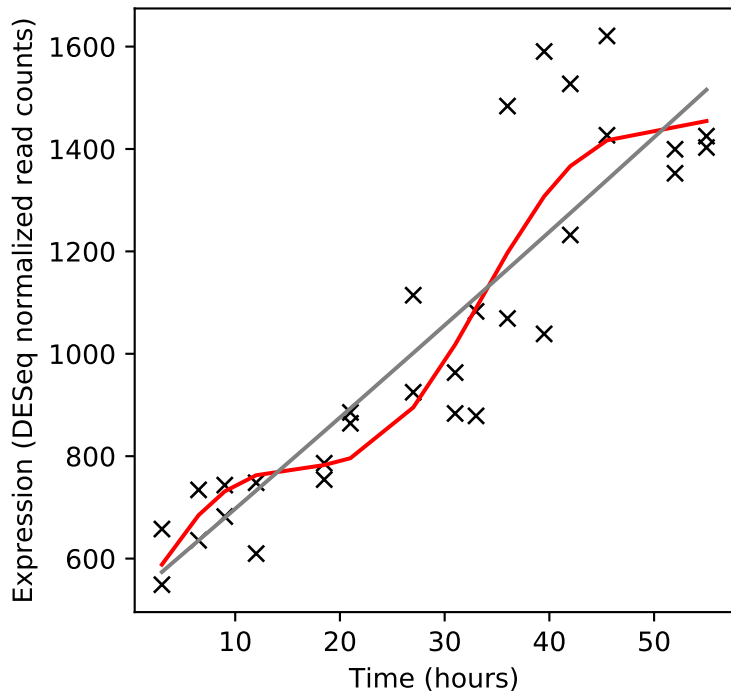

Rv2870c/dxr

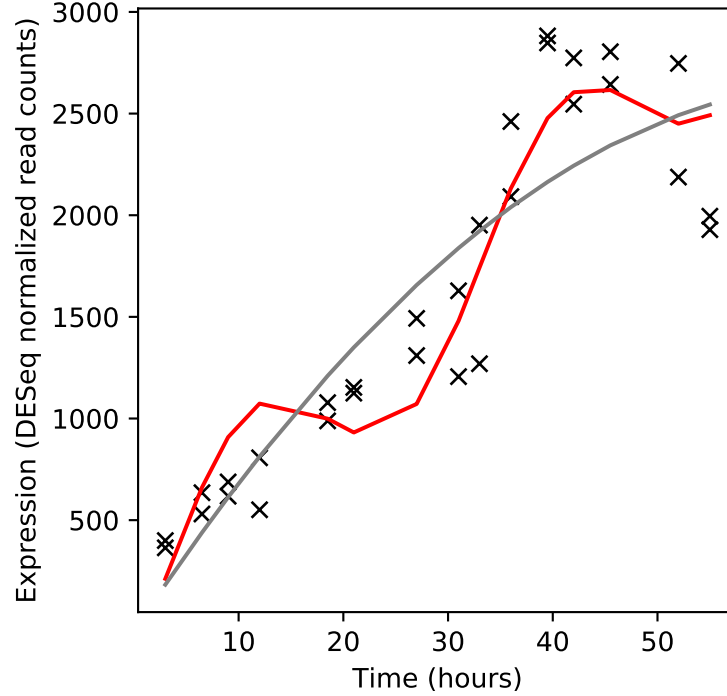

Rv2871/vapB43

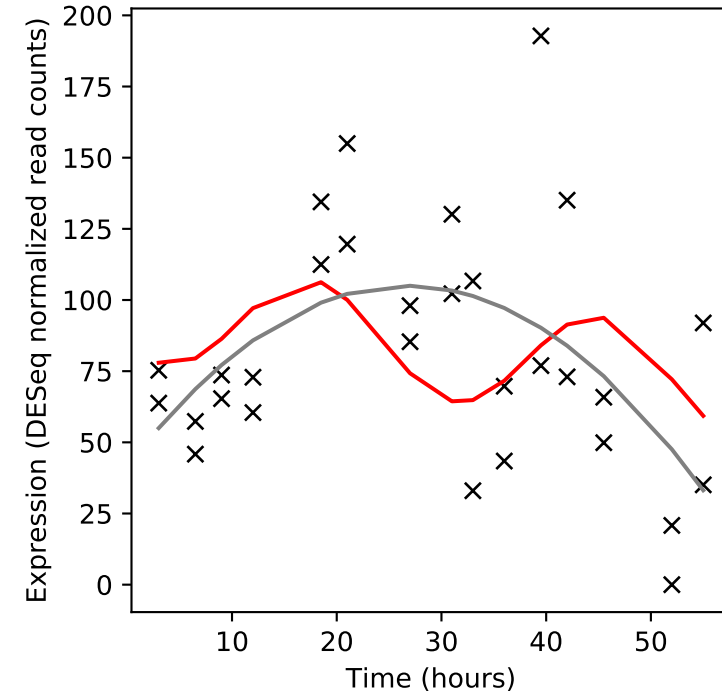

Rv2872/vapC43

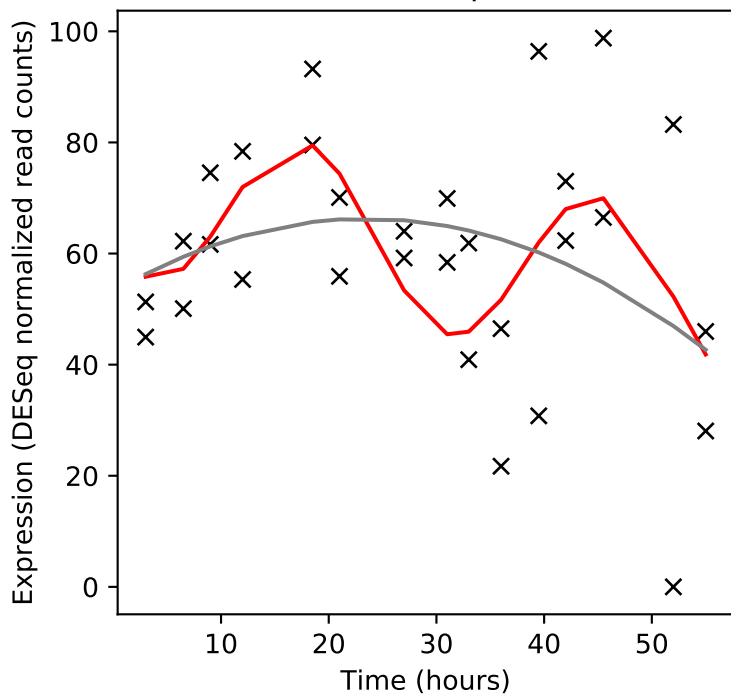

Rv2873/mpt83

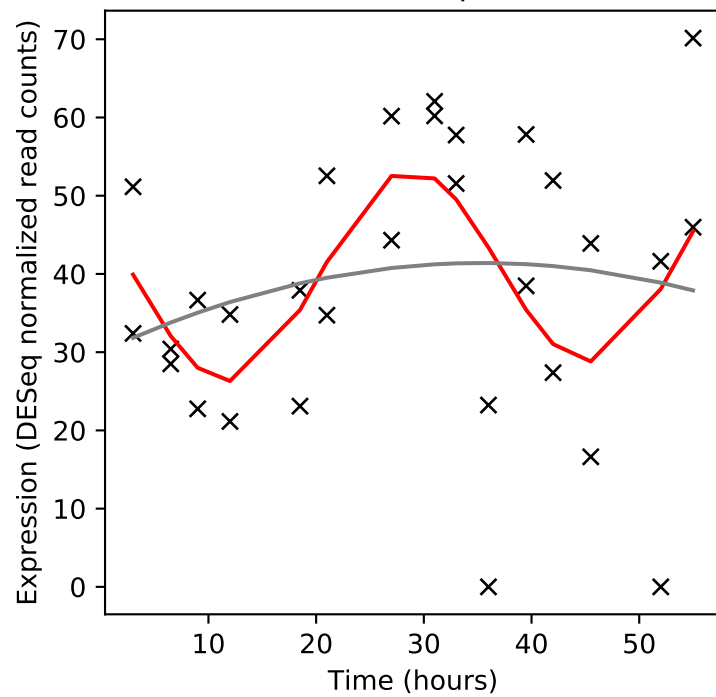

Rv2874/dipZ

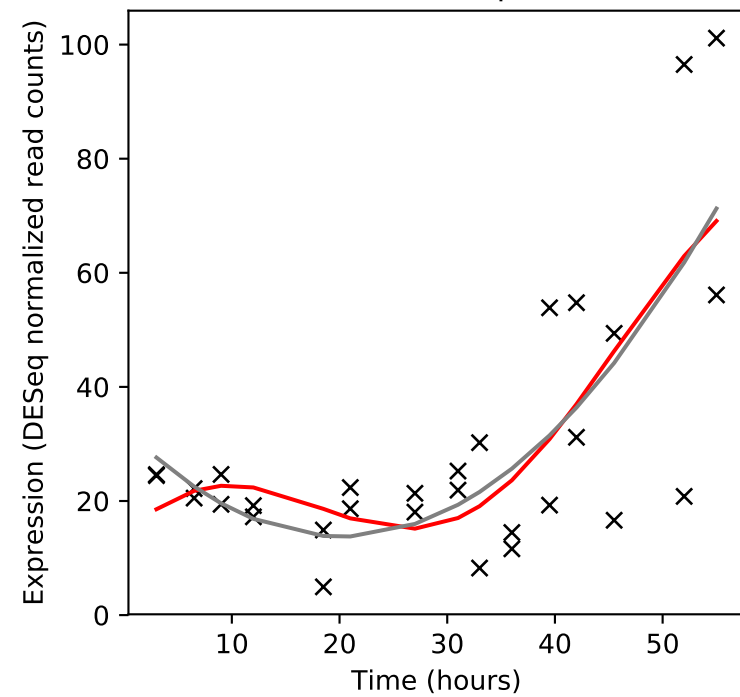

Rv2875/mpt70

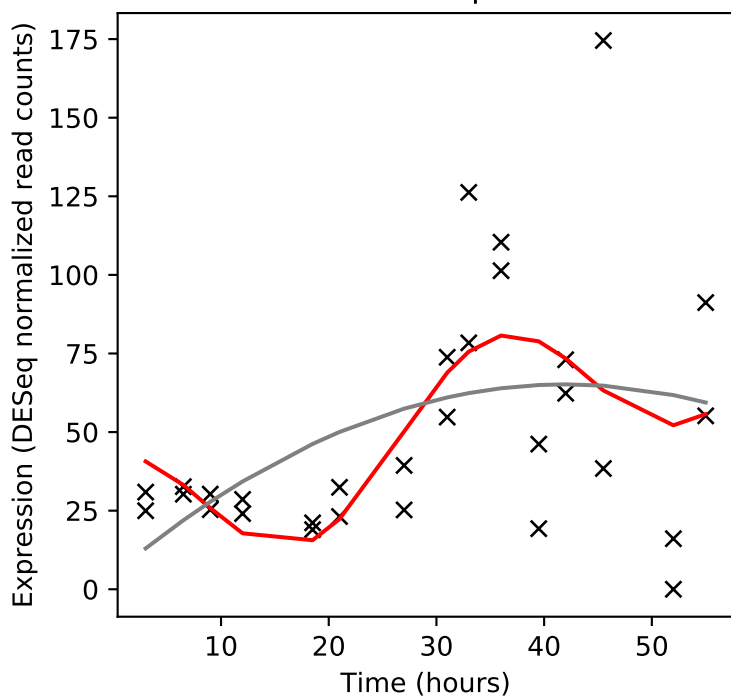

Rv2876/-

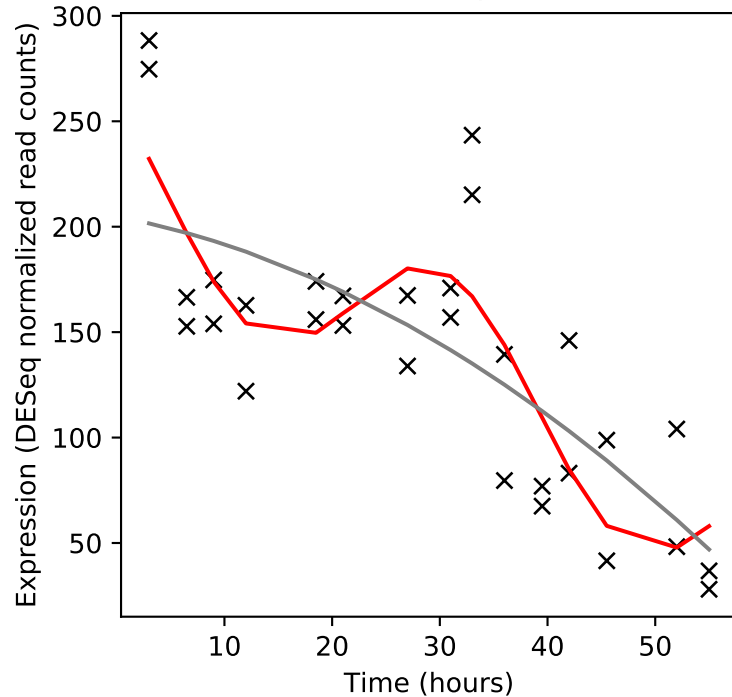

Rv2877c/-

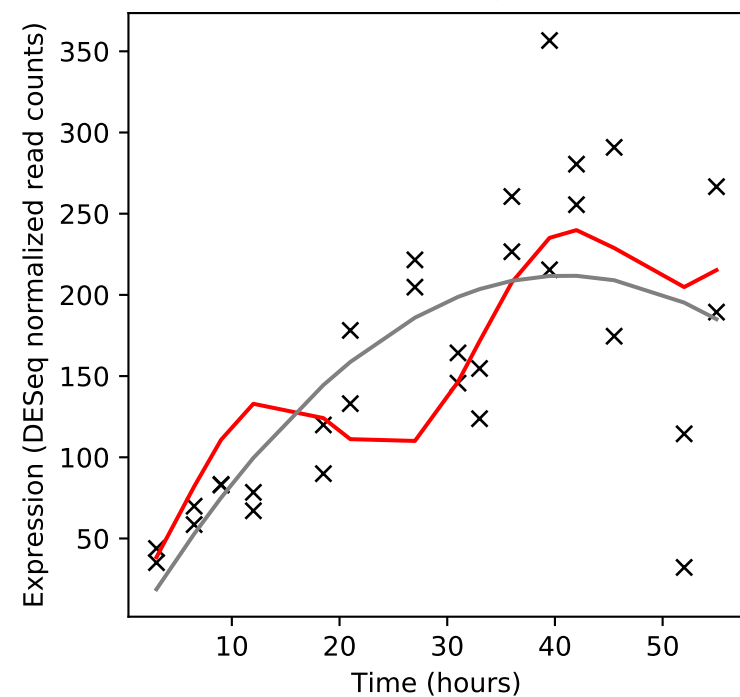

Rv2878c/mpt53

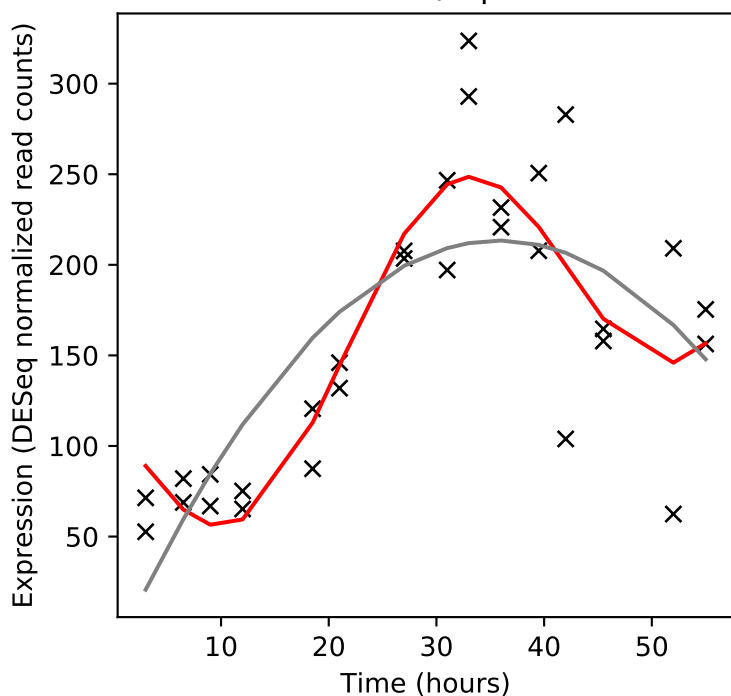

Rv2879c/-

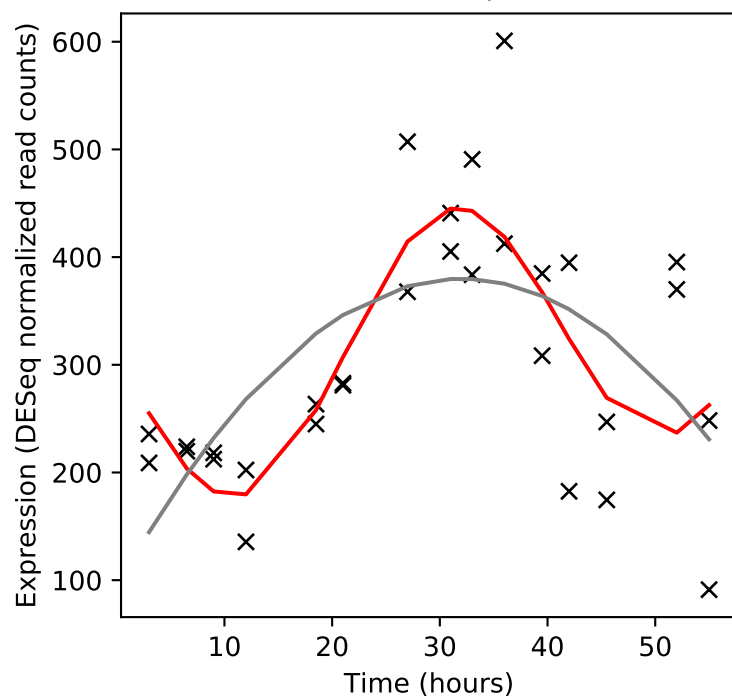

Rv2880c/-

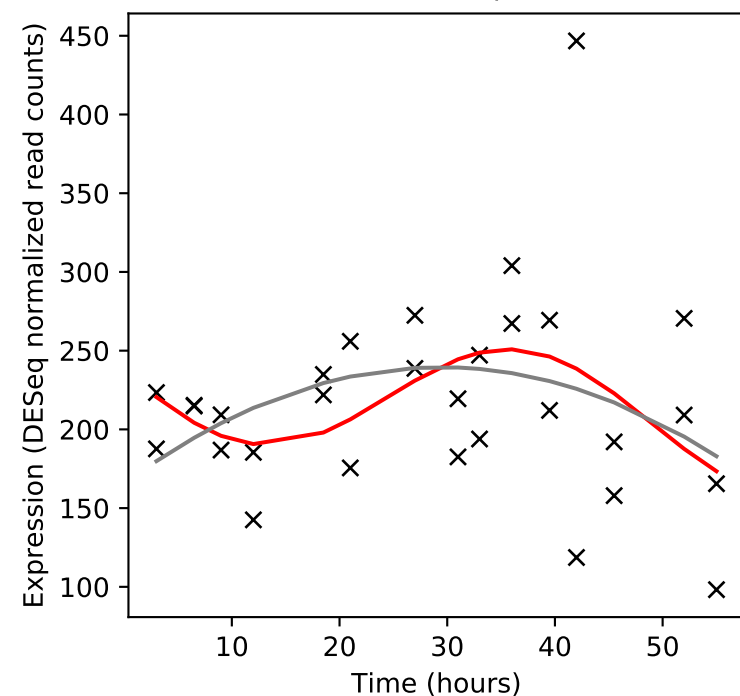

Rv2881c/cdsA

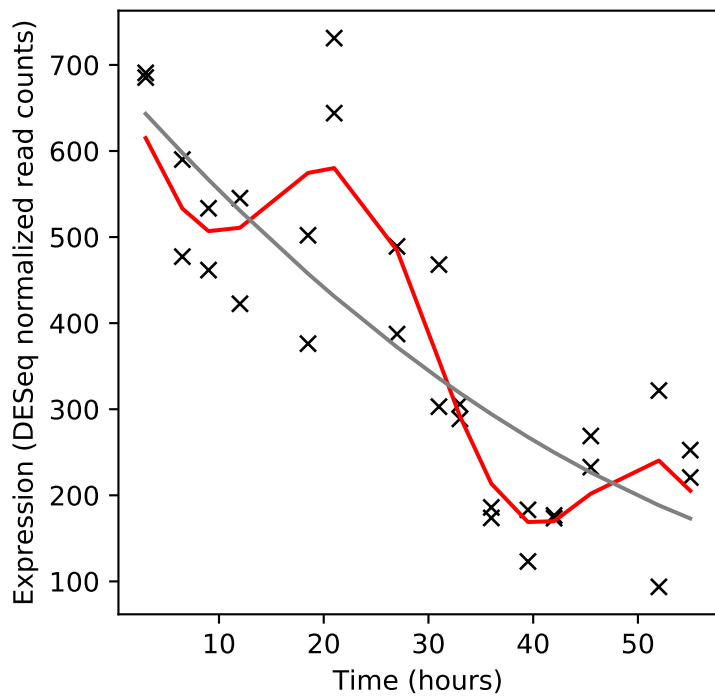

Rv2882c/frr

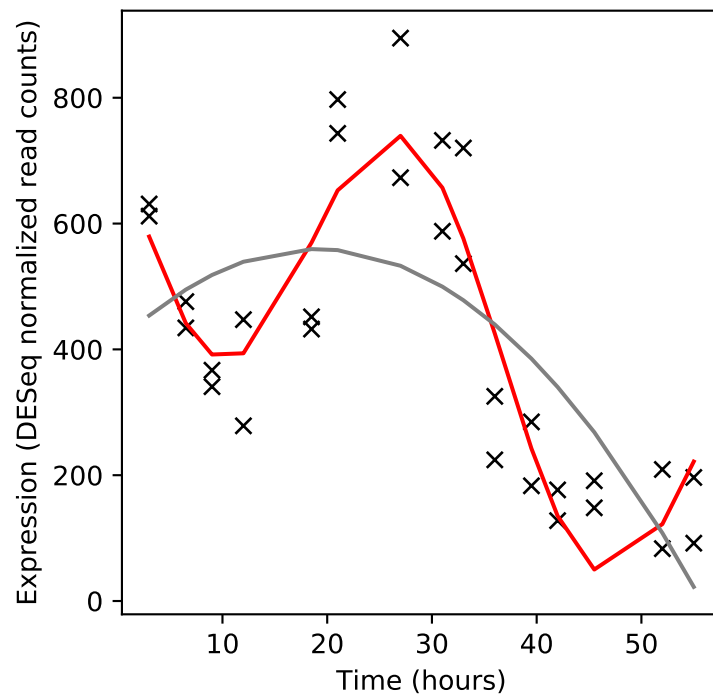

Rv2883c/pyrH

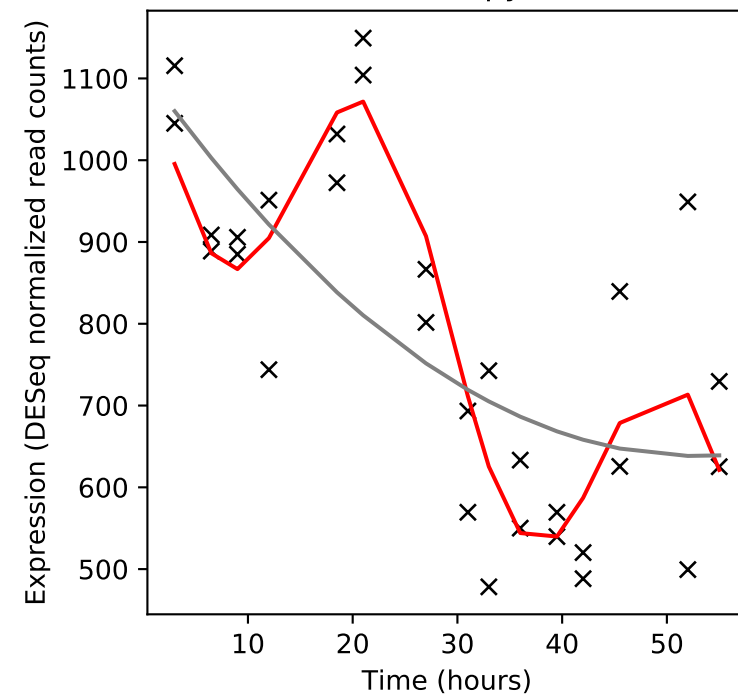

Rv2884/-

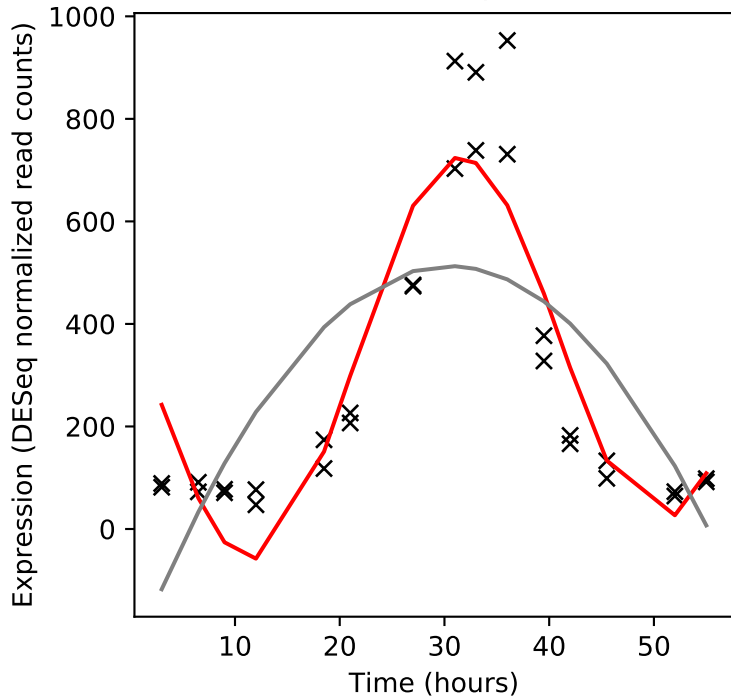

Rv2885c/-

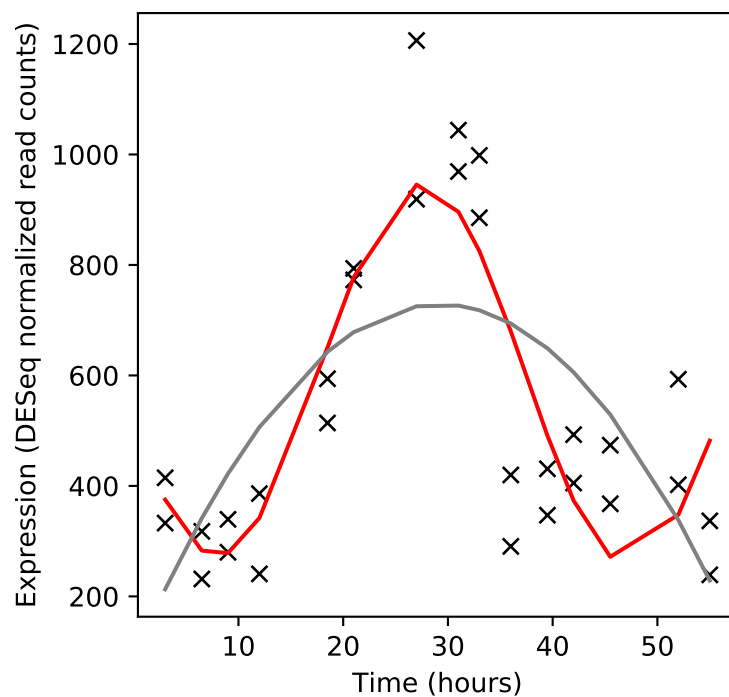

Rv2886c/-

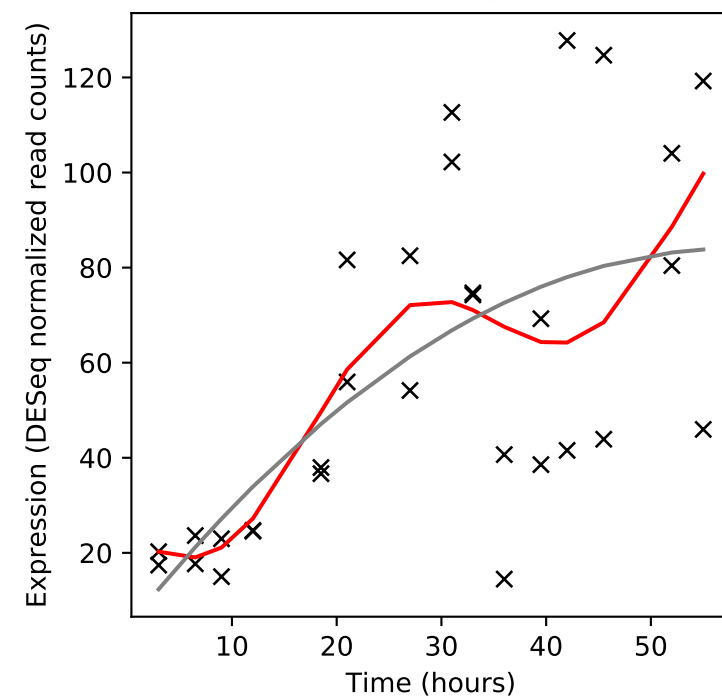

Rv2887/-

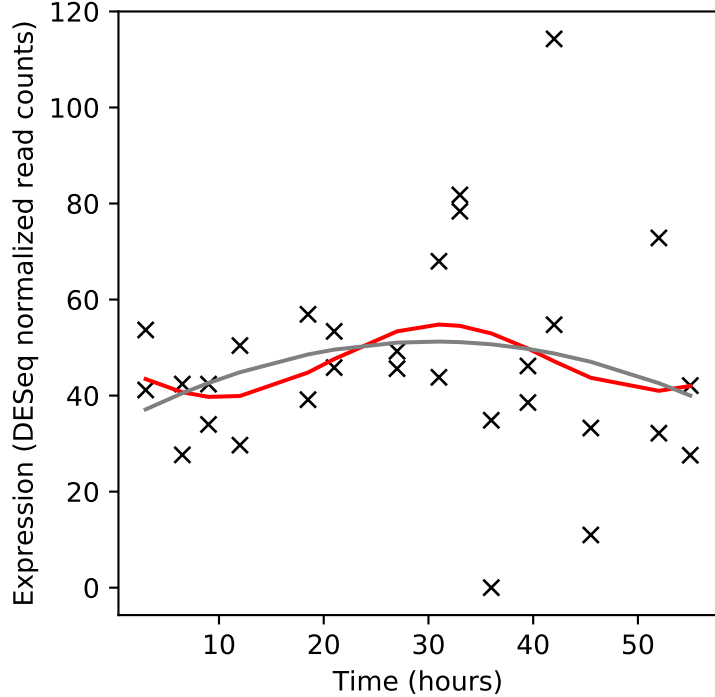

Rv2888c/amiC

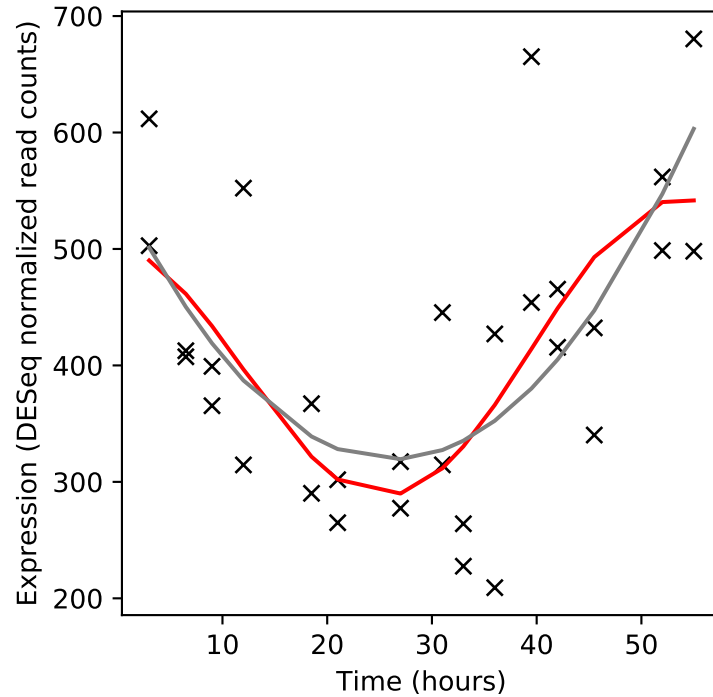

Rv2889c/tsf

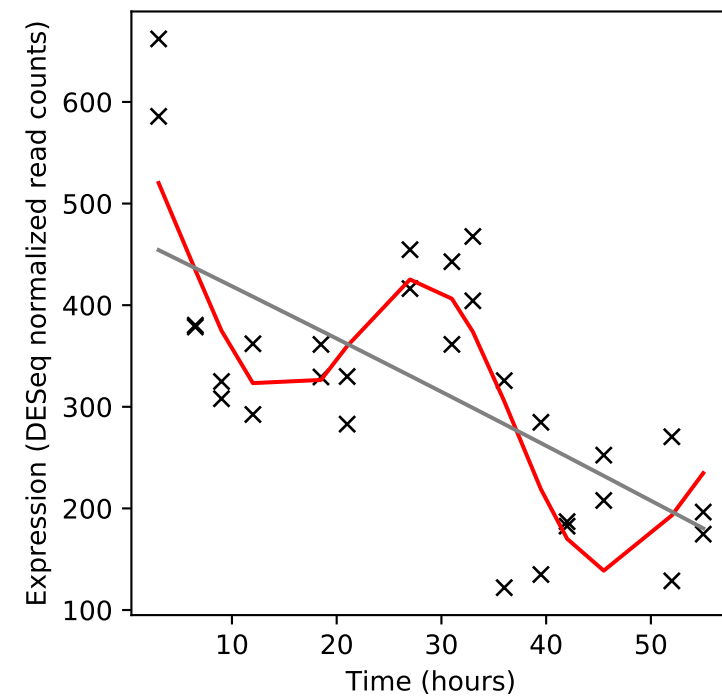

Rv2890c/rpsB

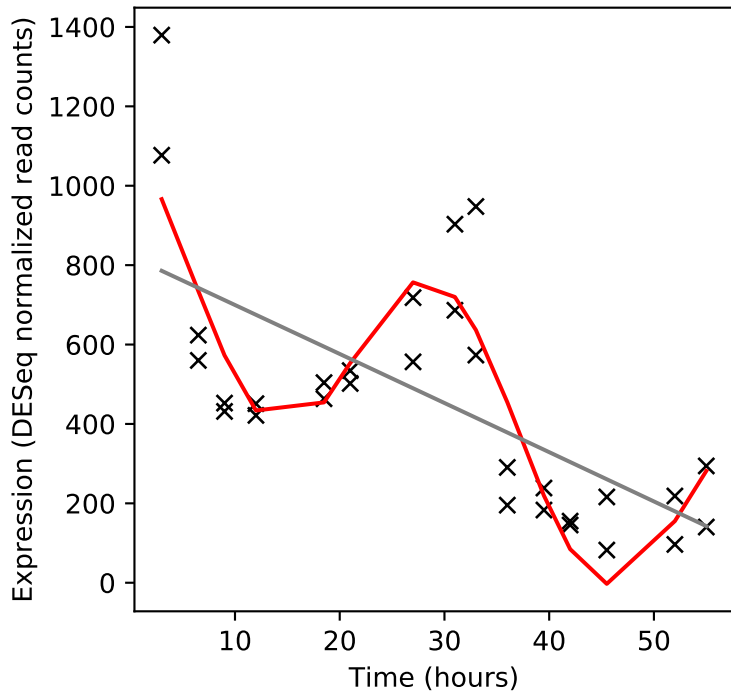

Rv2891/-

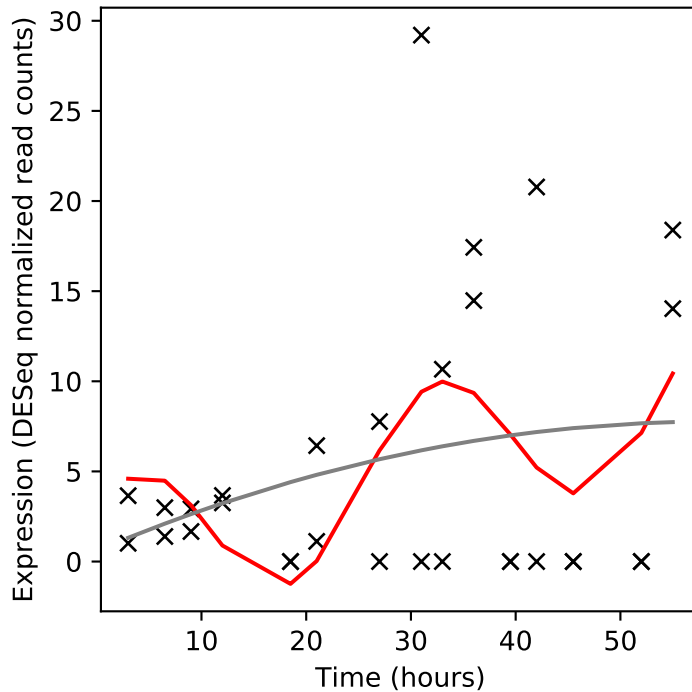

Rv2892c/PPE45

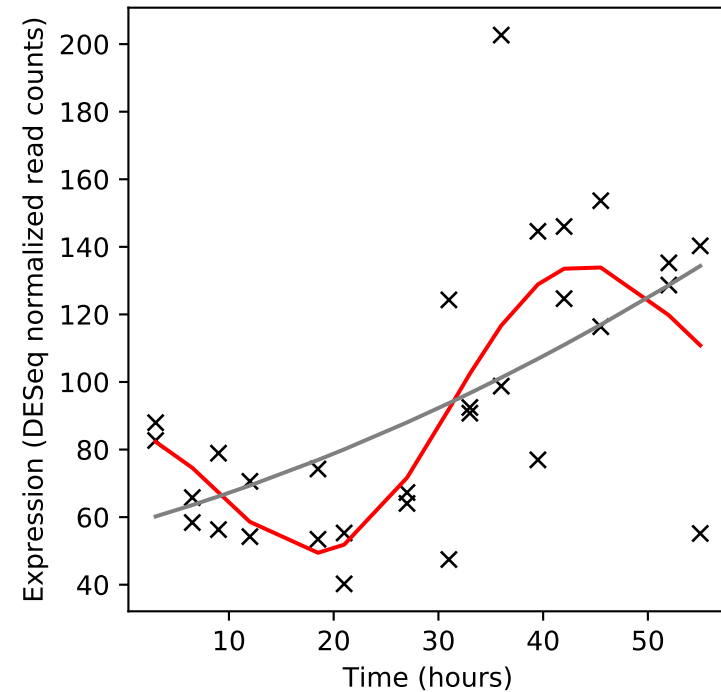

Rv2893/-

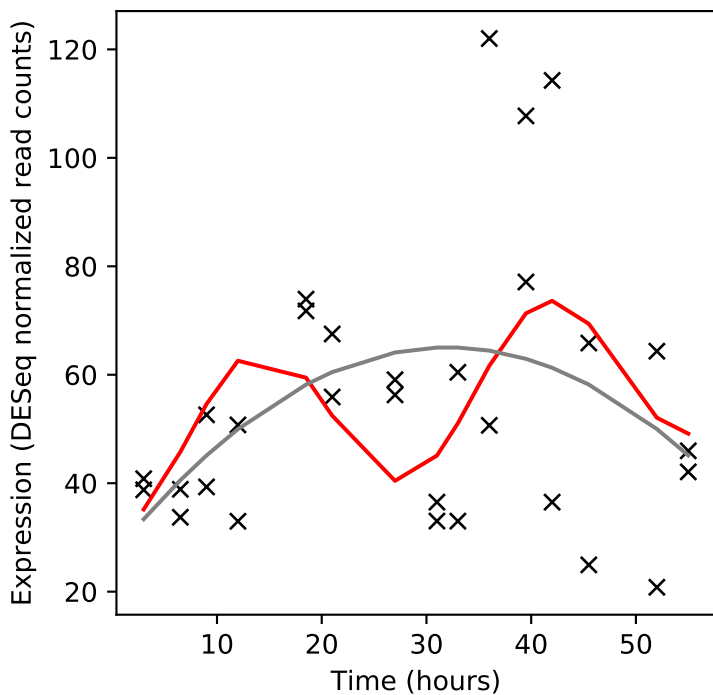

Rv2894c/xerC

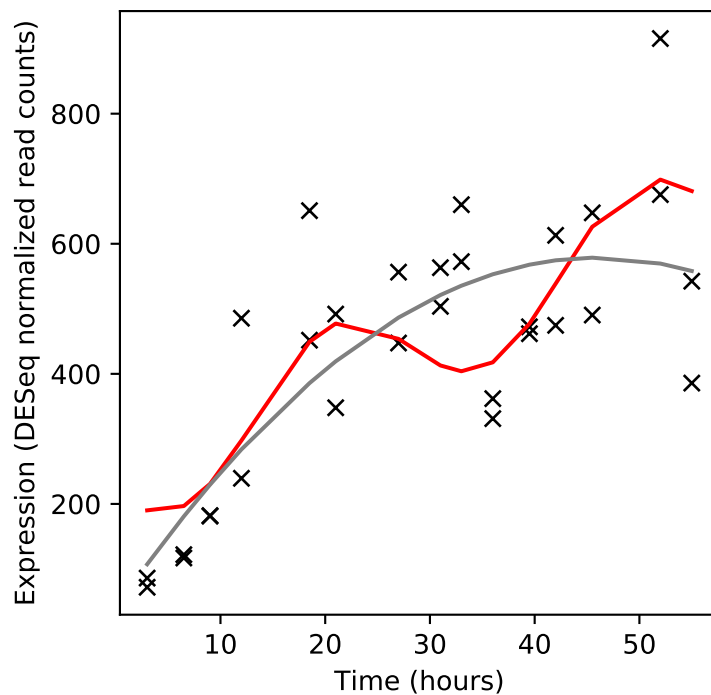

Rv2895c/viuB

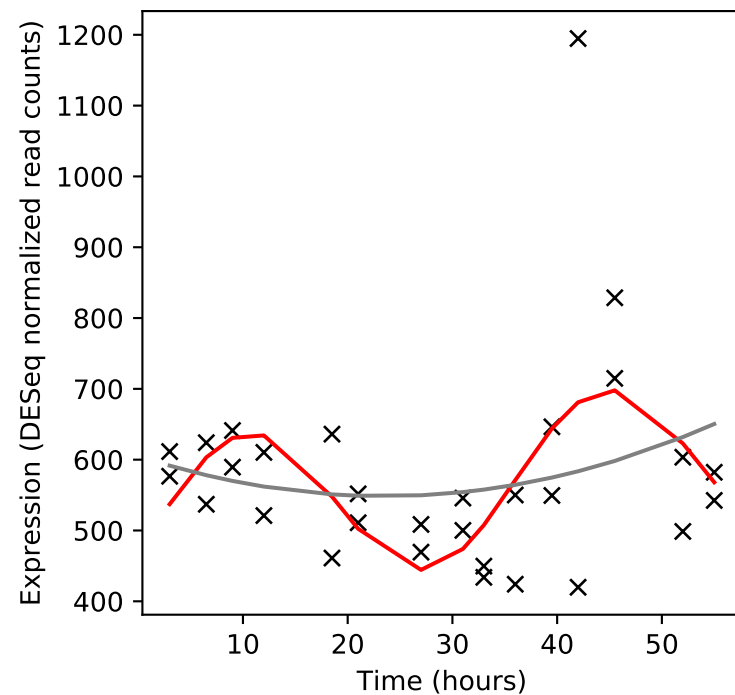

Rv2896c/-

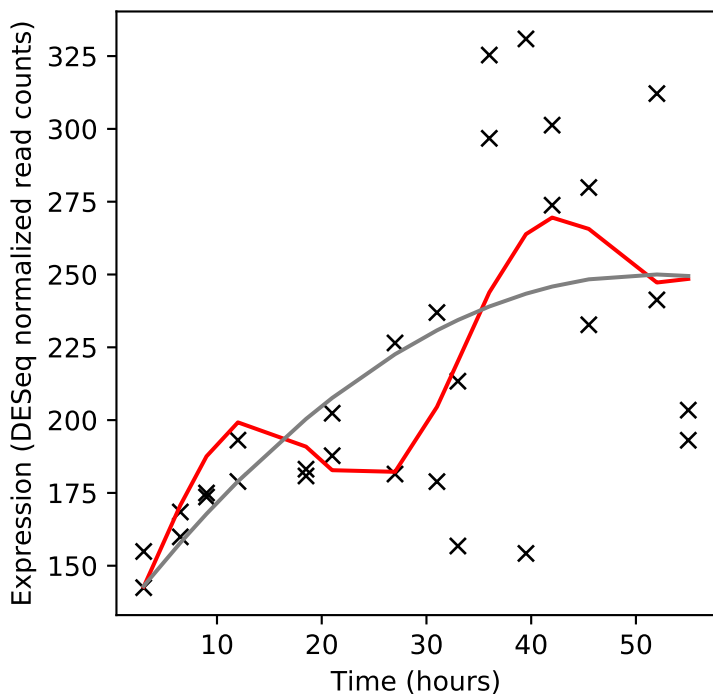

Rv2897c/-

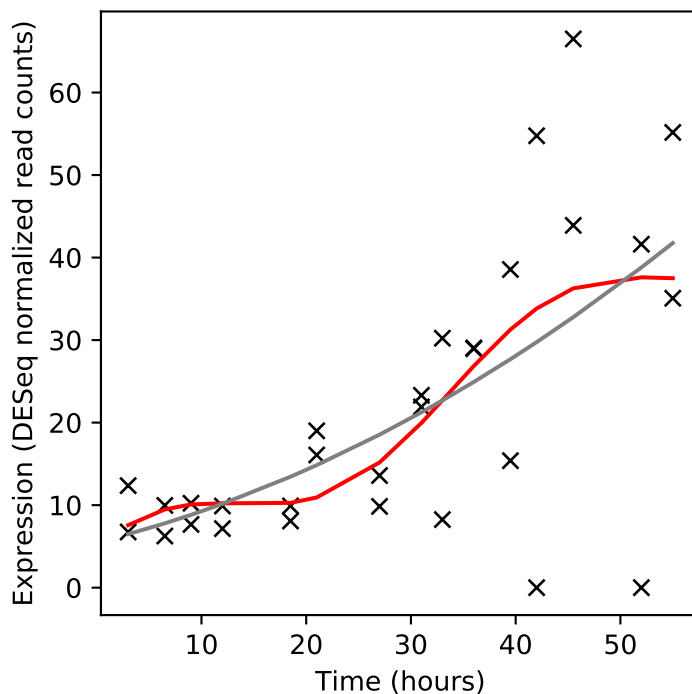

Rv2898c/-

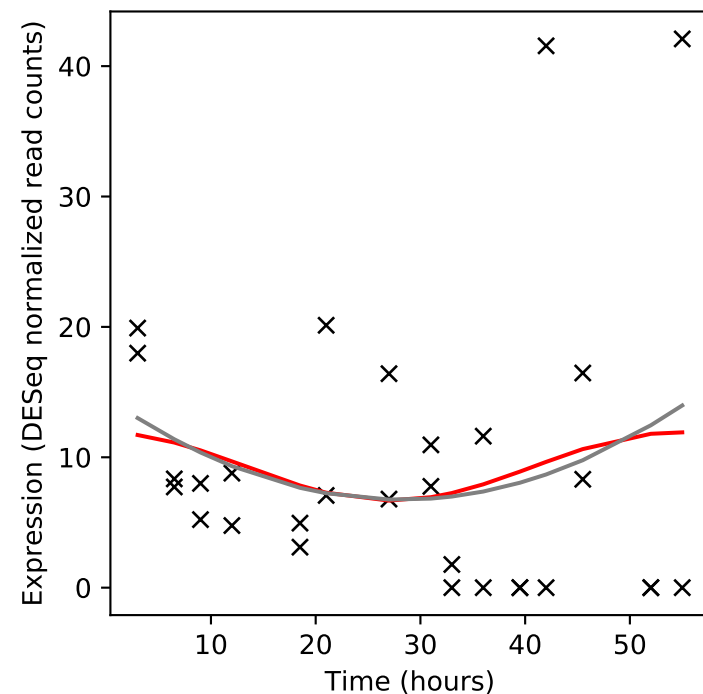



Rv2899c/fdhD

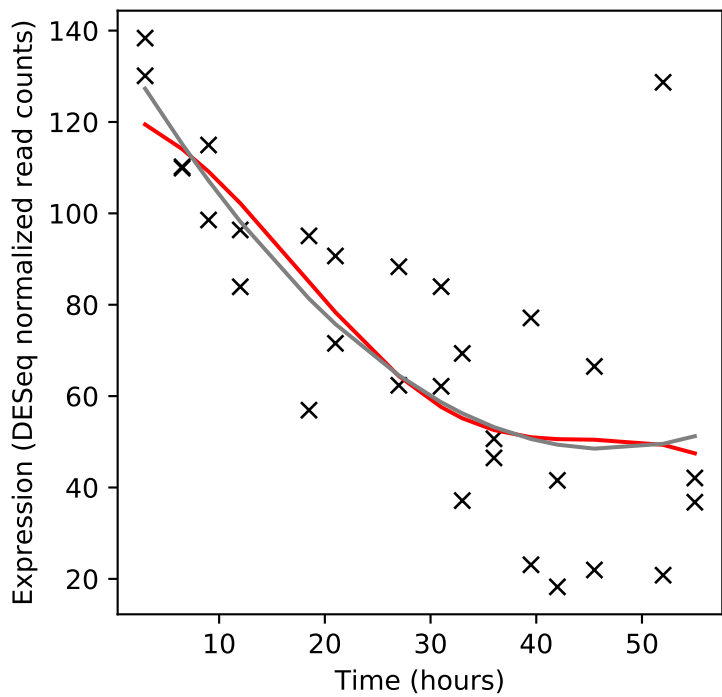

Rv2900c/fdhF

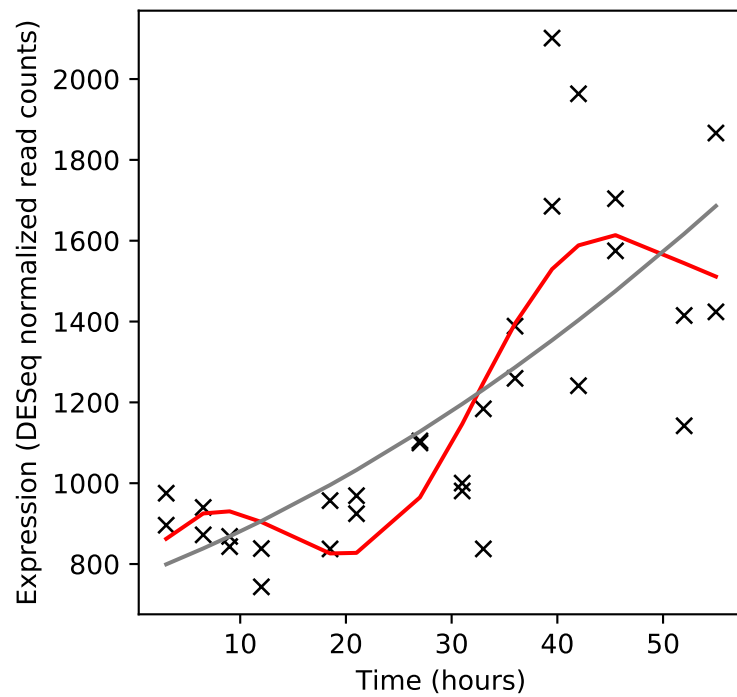

Rv2901c/-

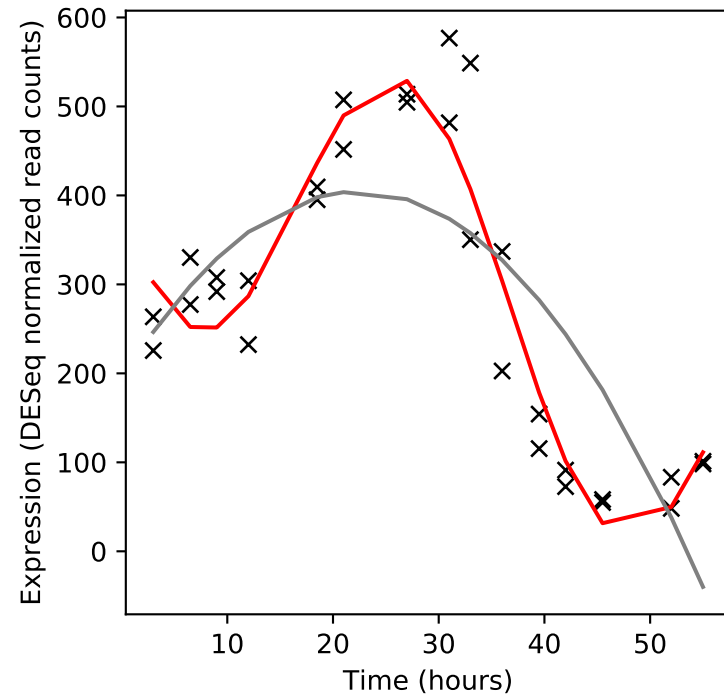

Rv2902c/rnhB

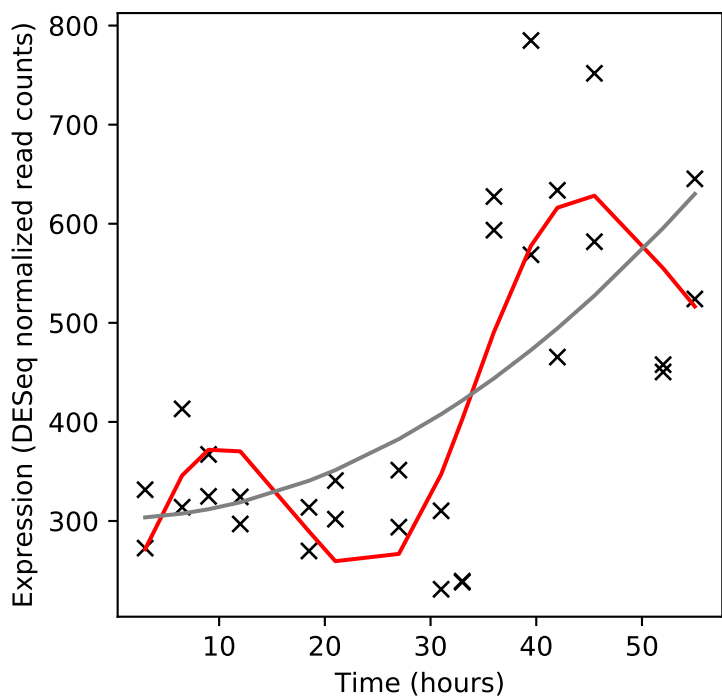

Rv2903c/lepB

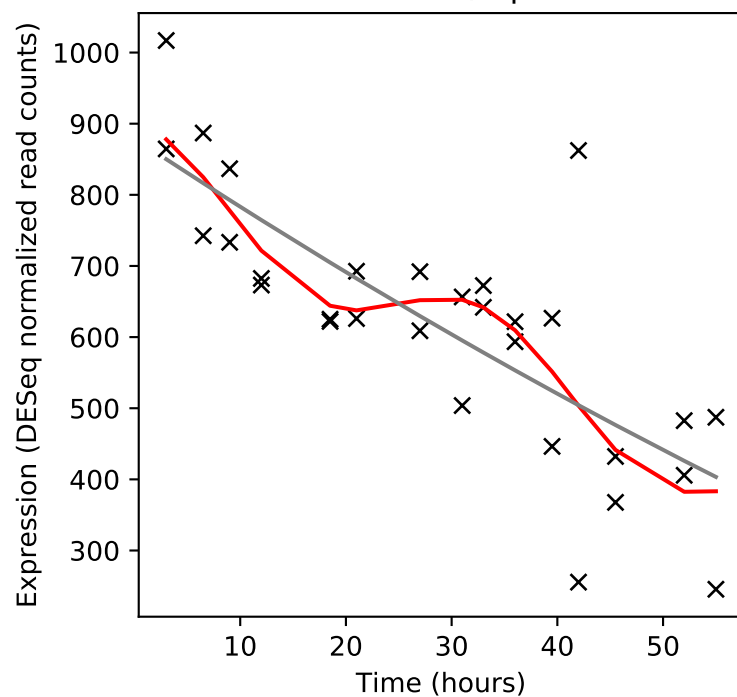

Rv2904c/rplS

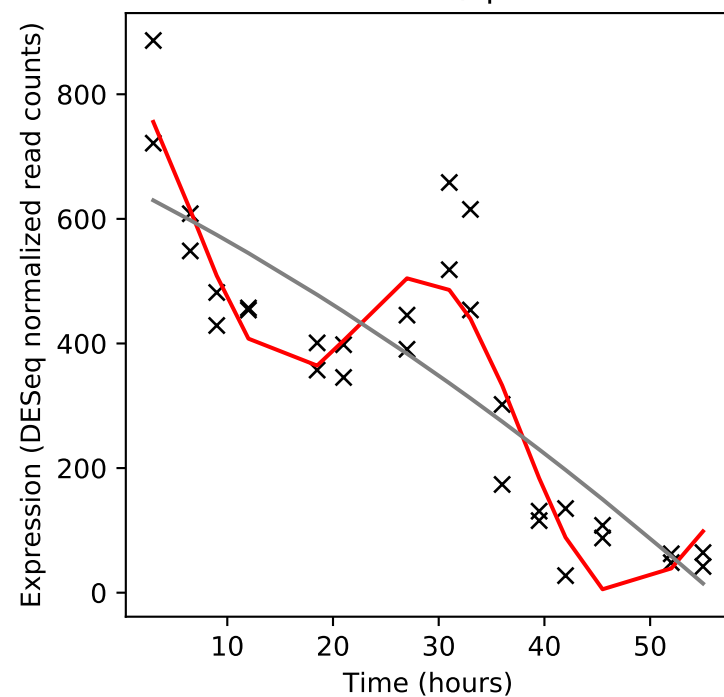

Rv2905/lppW

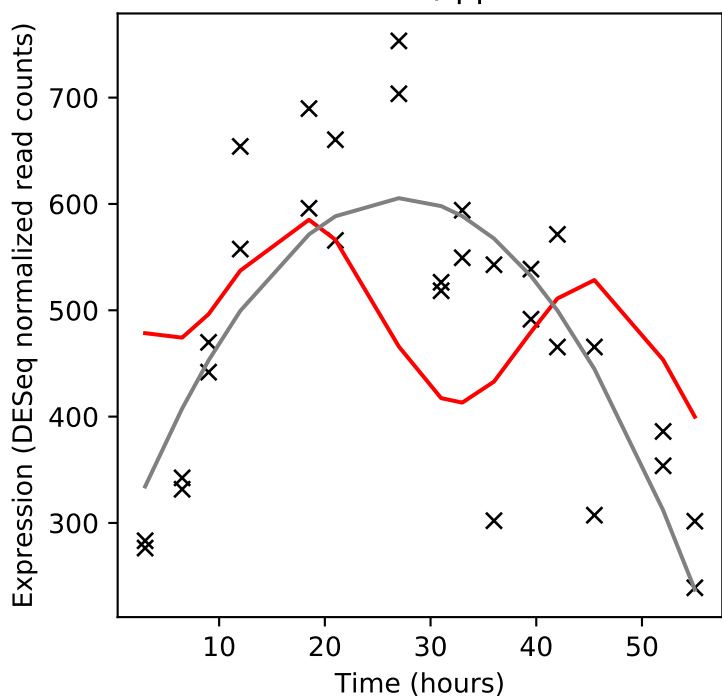

Rv2906c/trmD

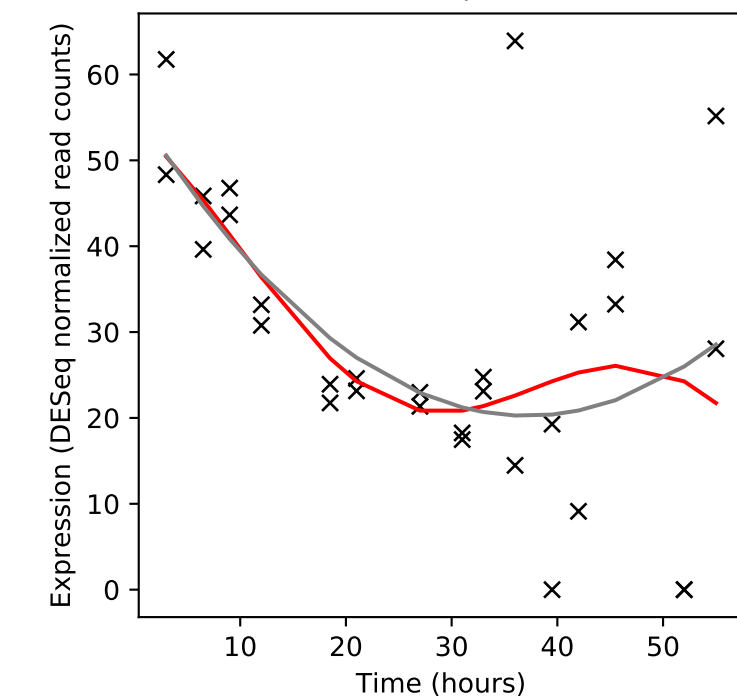

Rv2907c/rimM

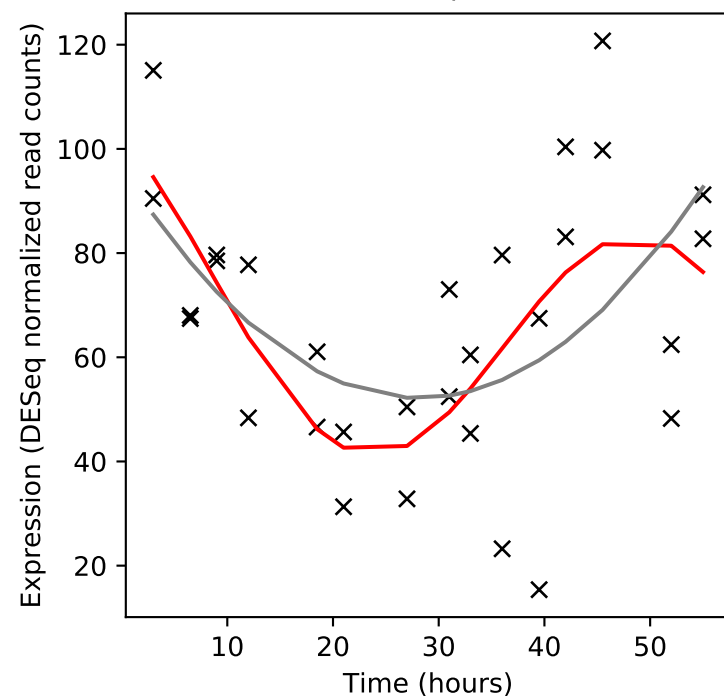

Rv2908c/-

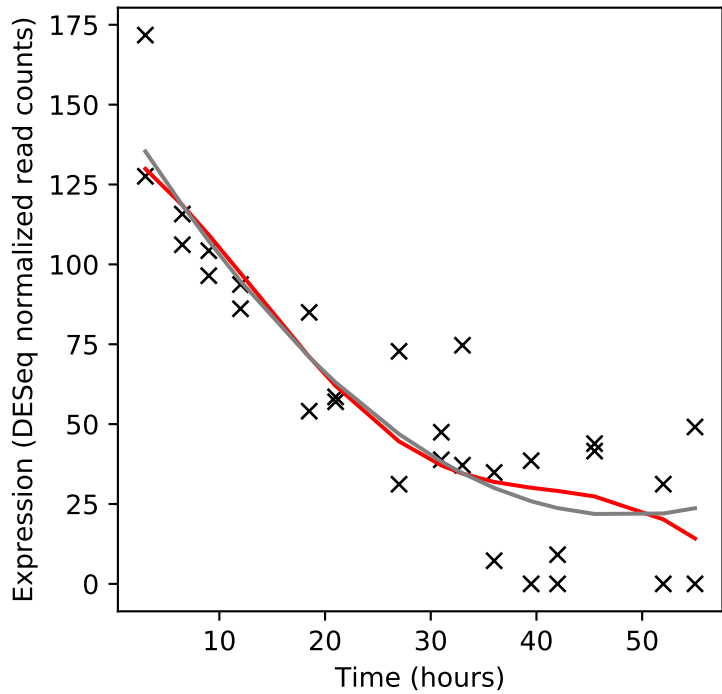

Rv2909c/rpsP

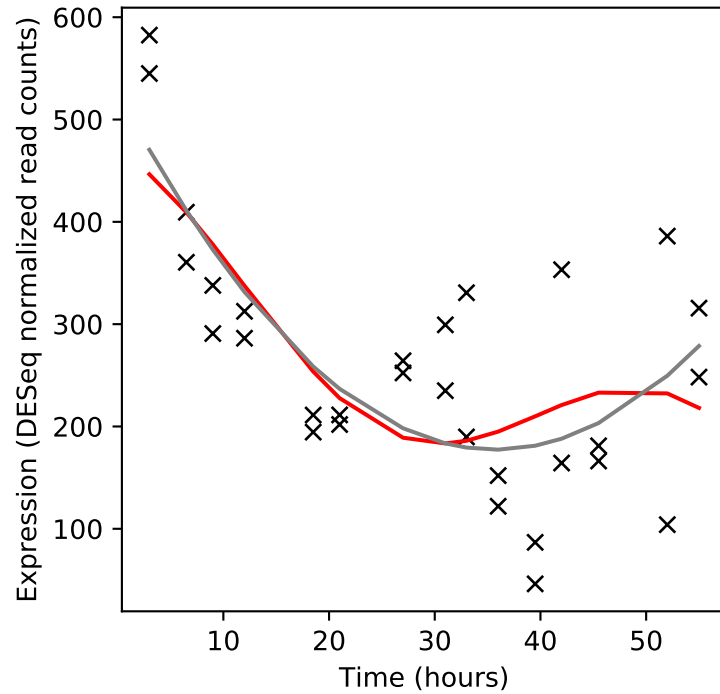

Rv2910c/-

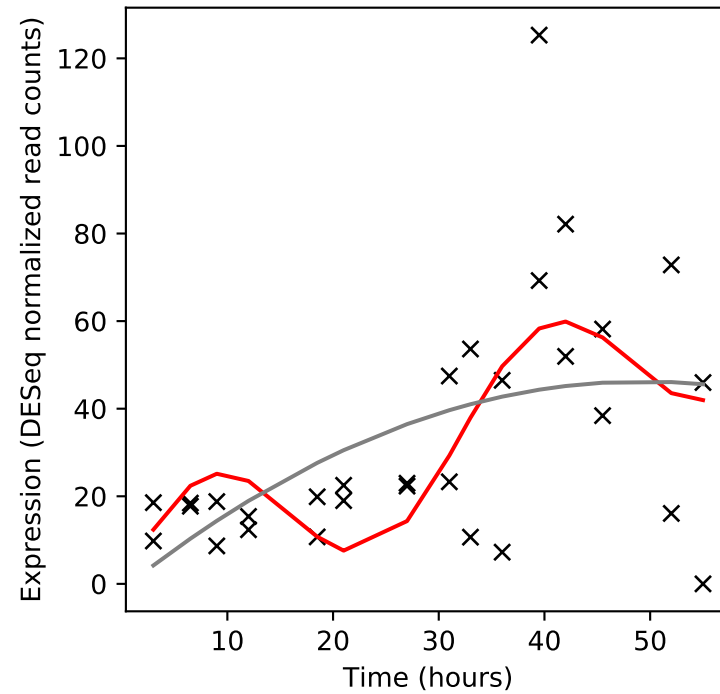

Rv2911/dacB2

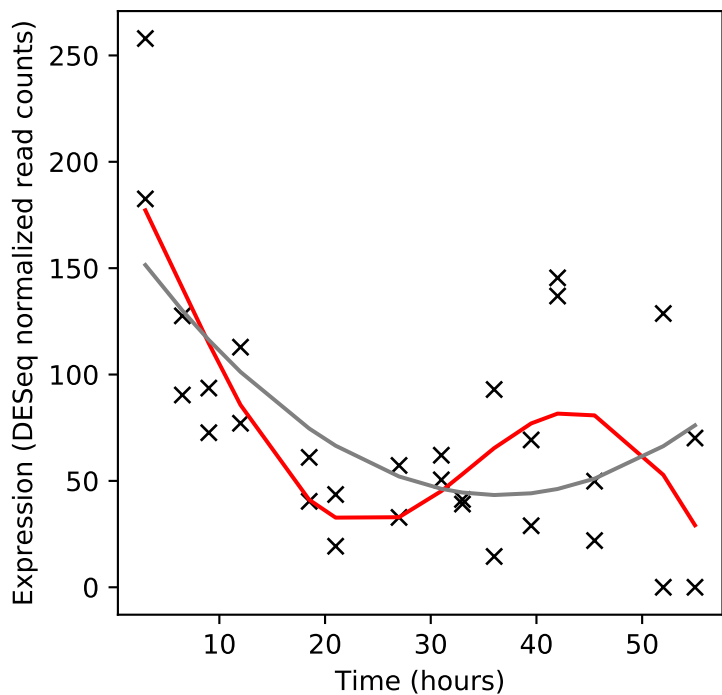

Rv2912c/-

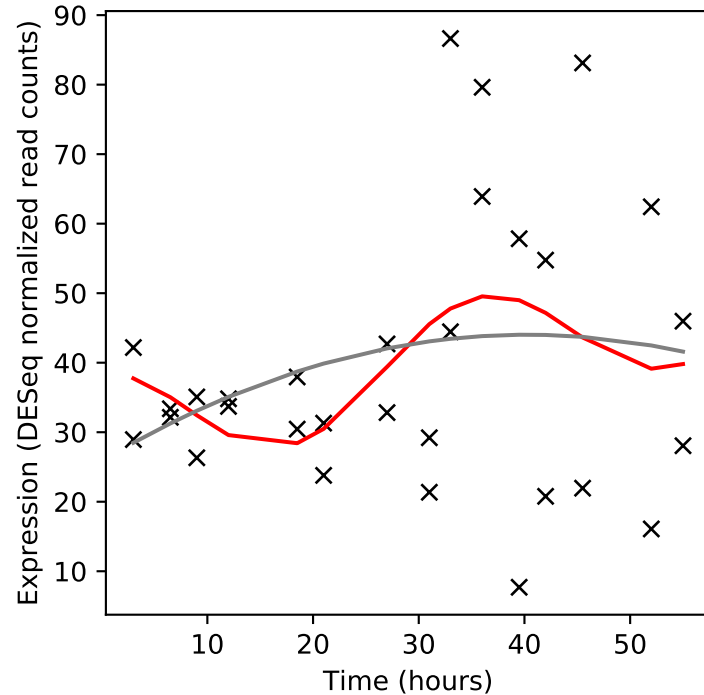

Rv2913c/-

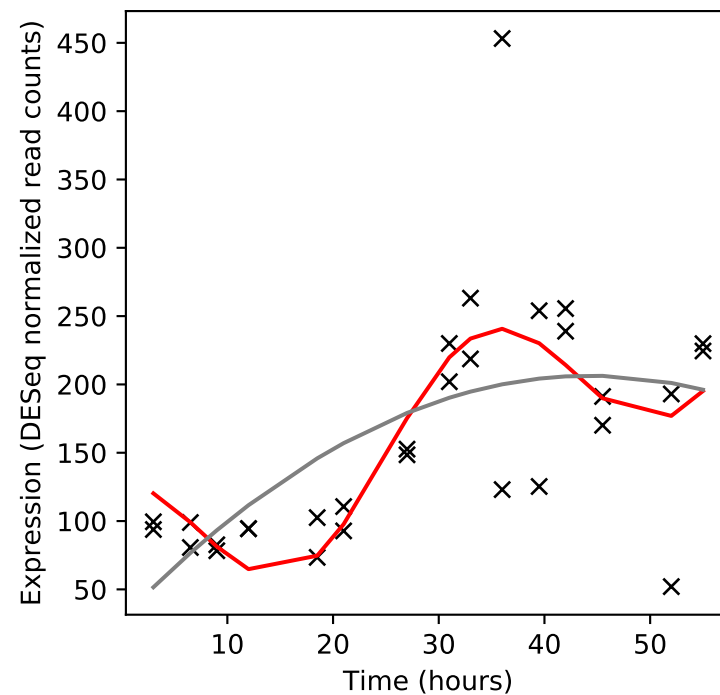

Rv2914c/pknl

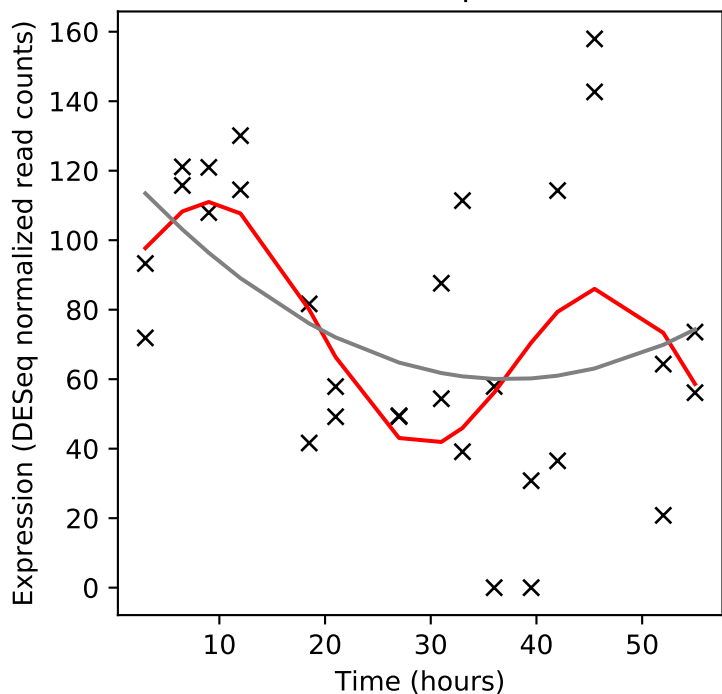

Rv2915c/-

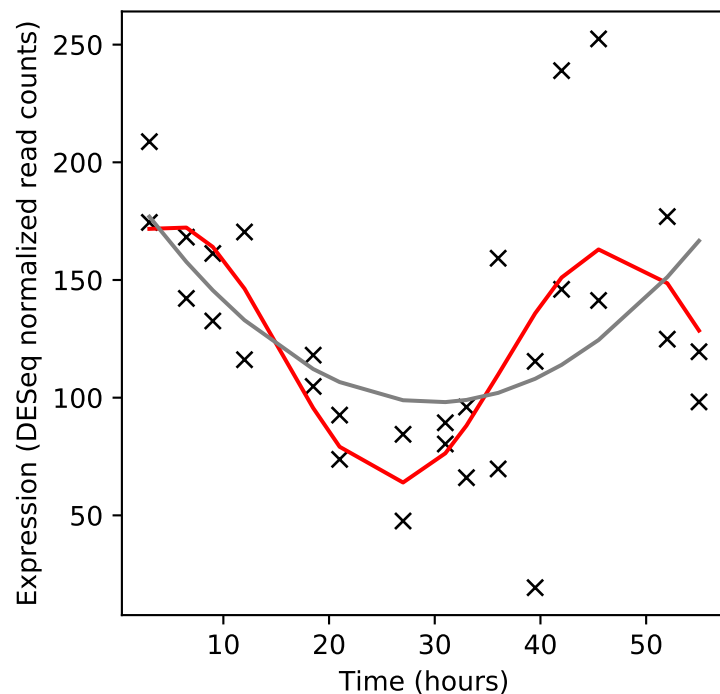

Rv2916c/ffh

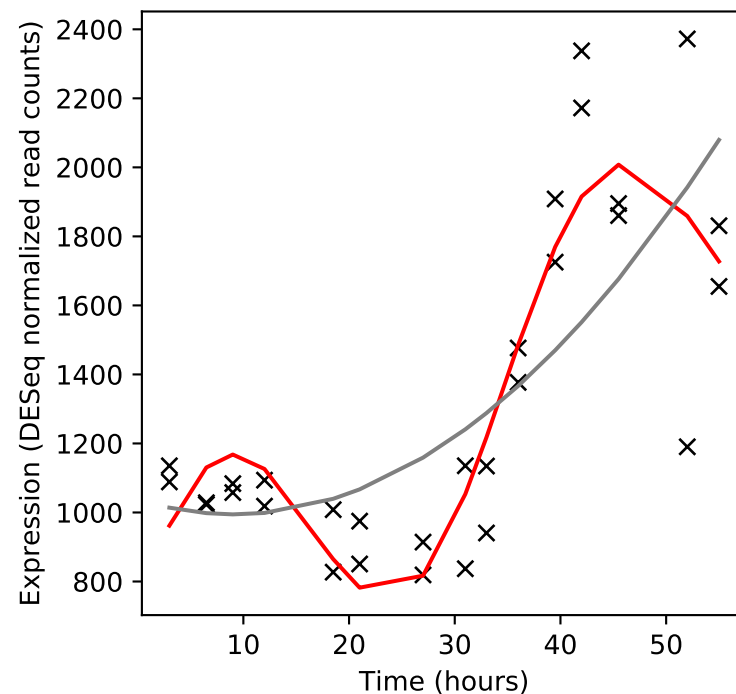

Rv2917/-

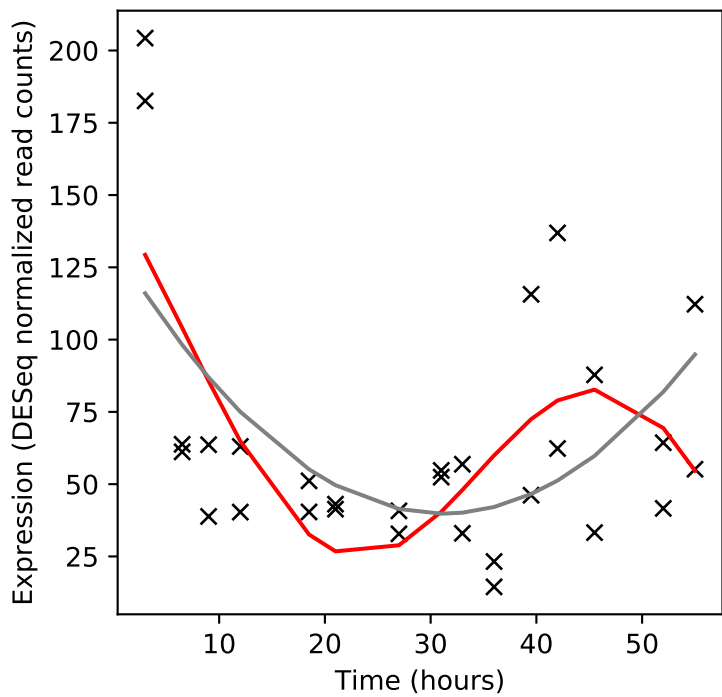

Rv2918c/glnD

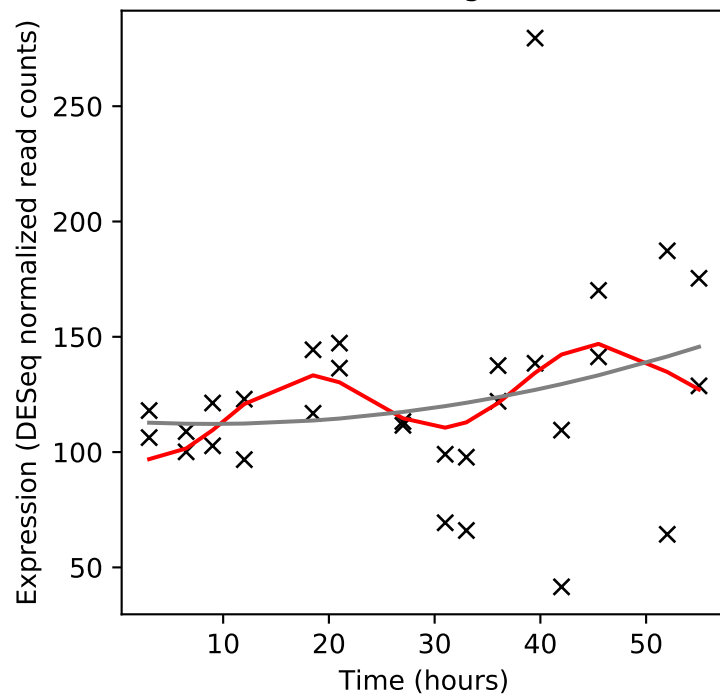

Rv2919c/glnB

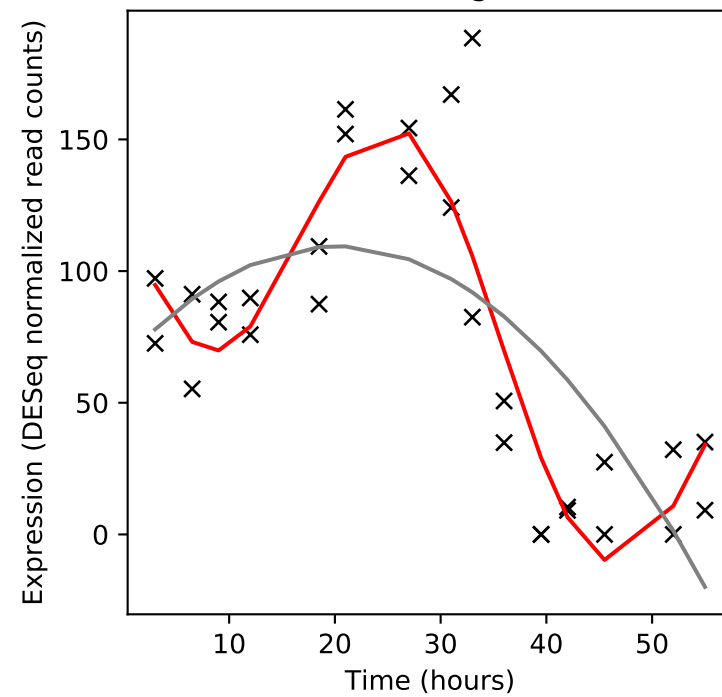

Rv2920c/amt

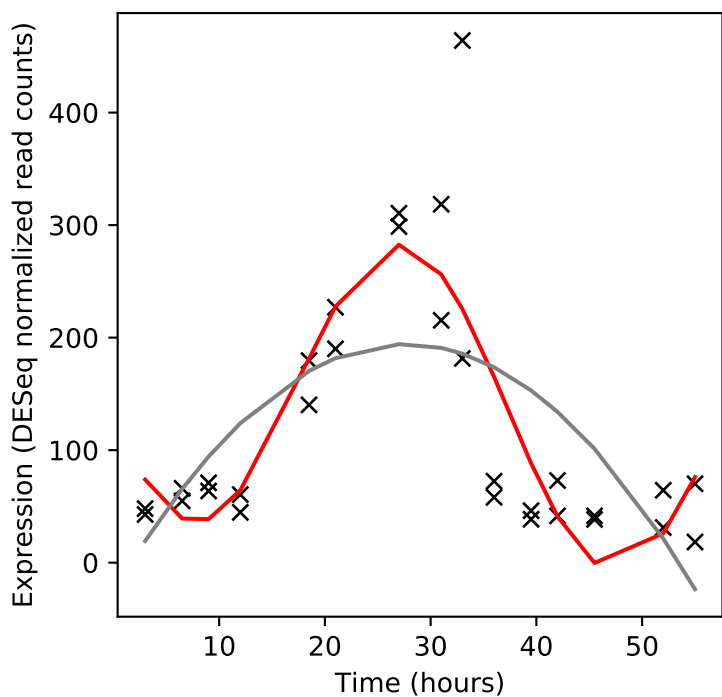

Rv2921c/ftsY

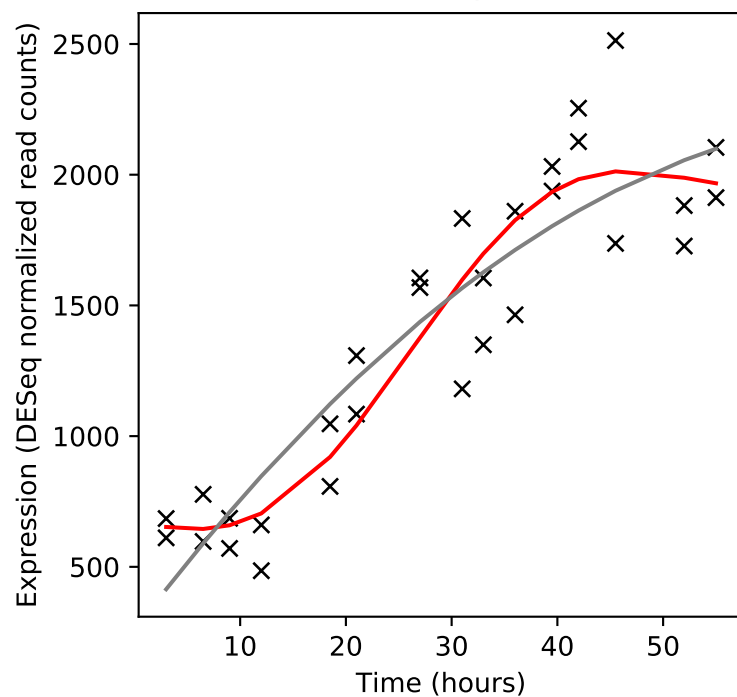

Rv2922c/smc

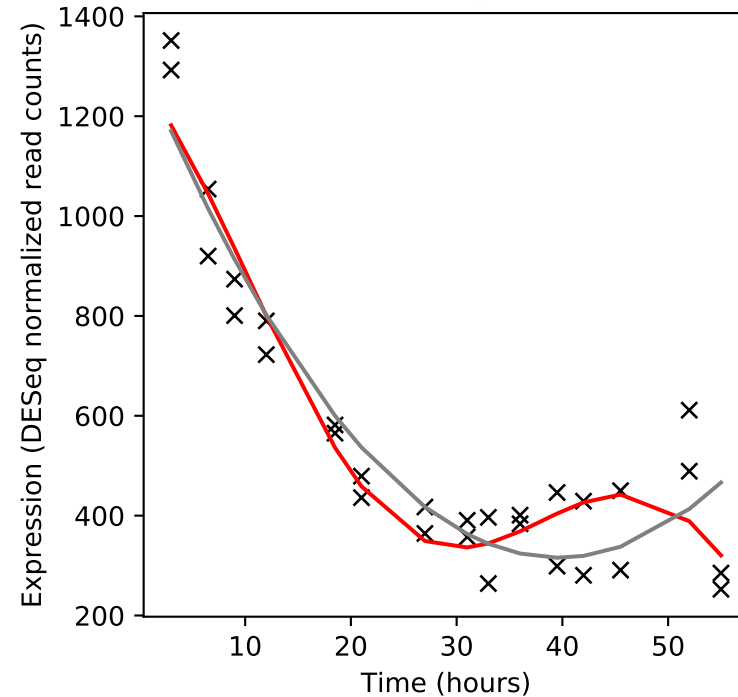

Rv2922A/acyP

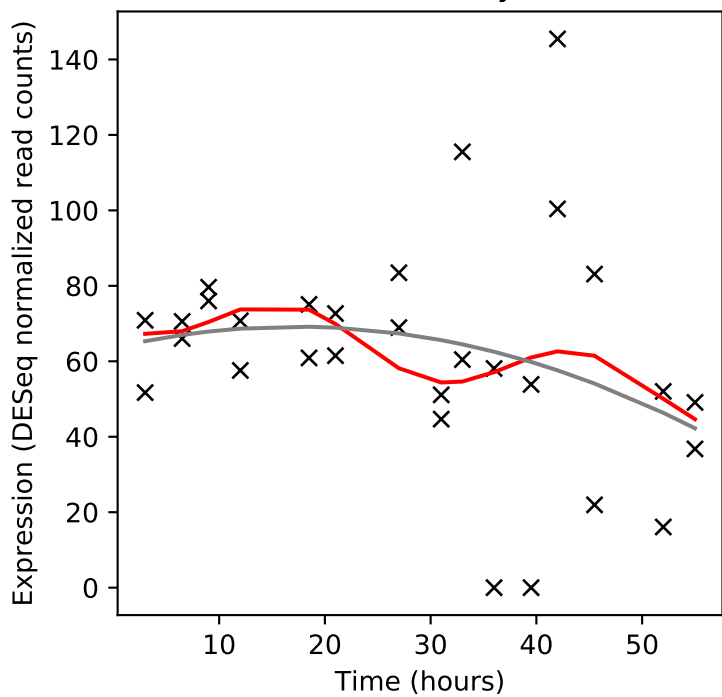

Rv2923c/-

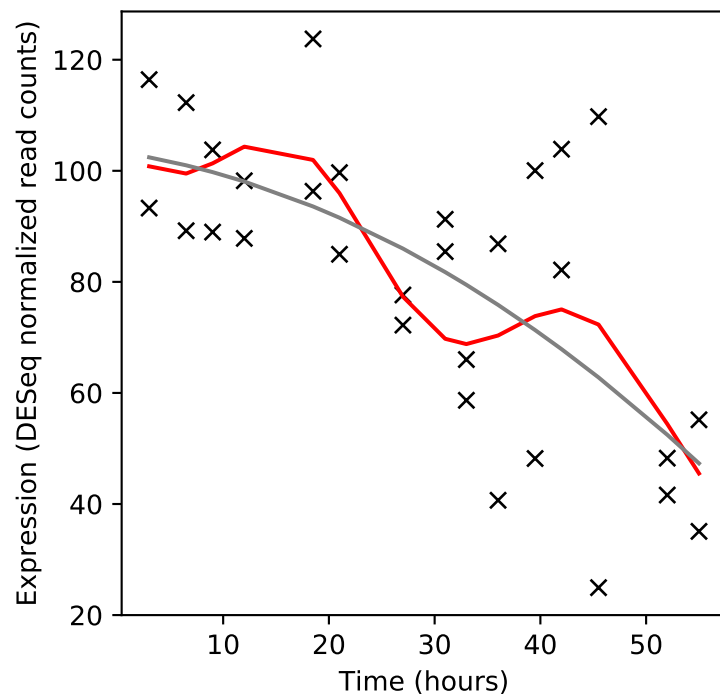

Rv2924c/fpg

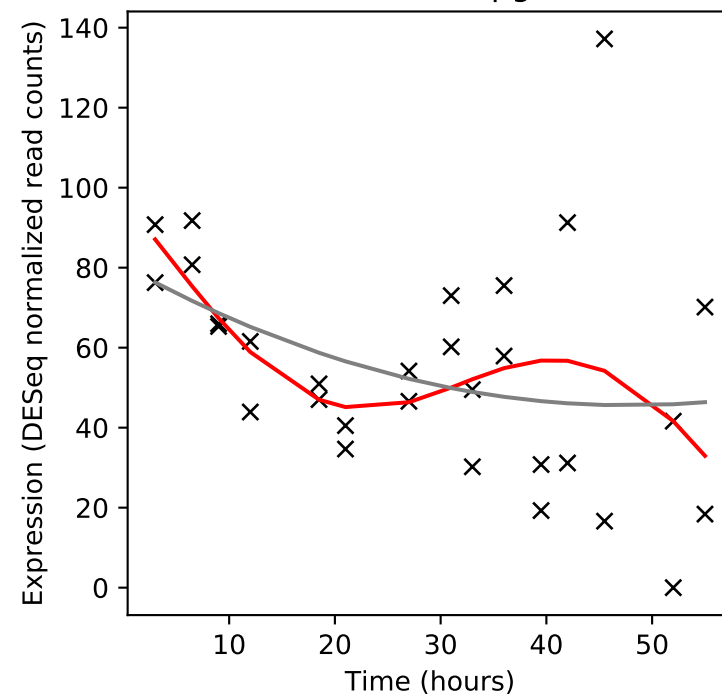

Rv2925c/rnc

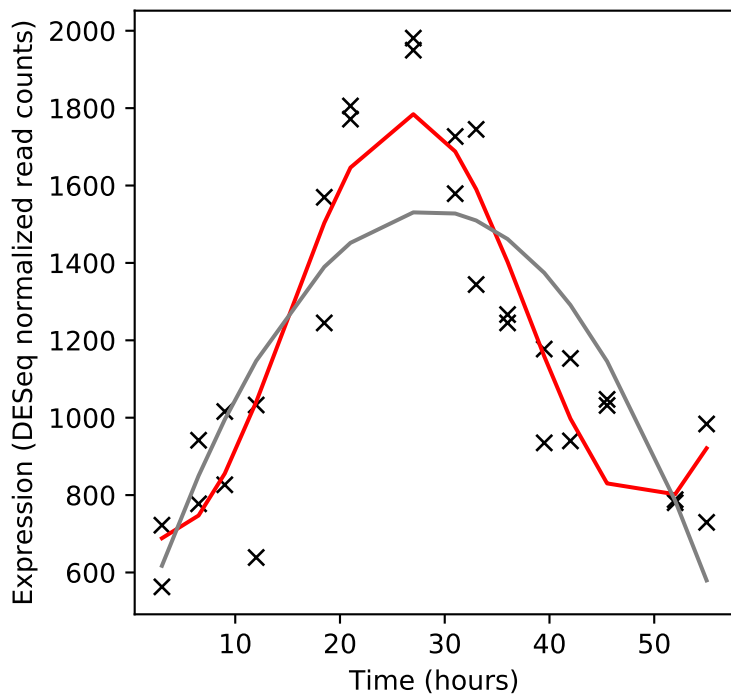

Rv2926c/-

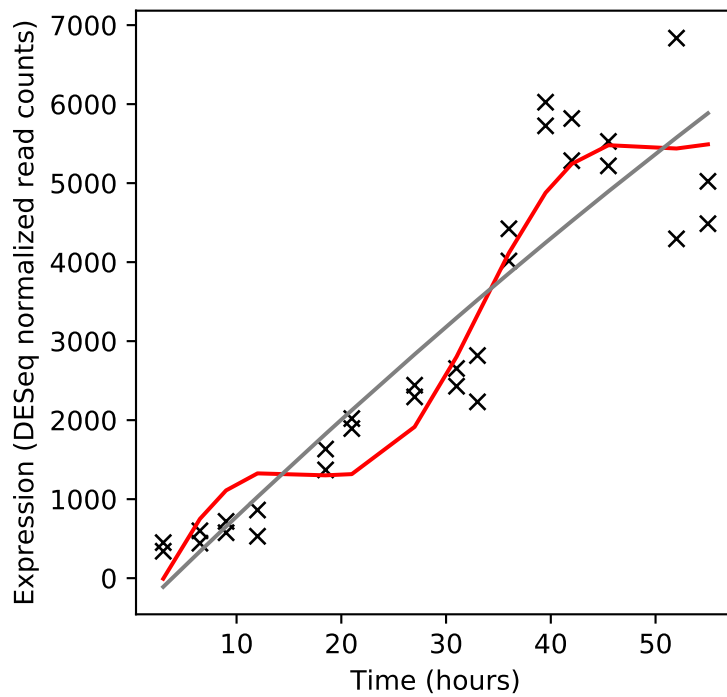

Rv2927c/-

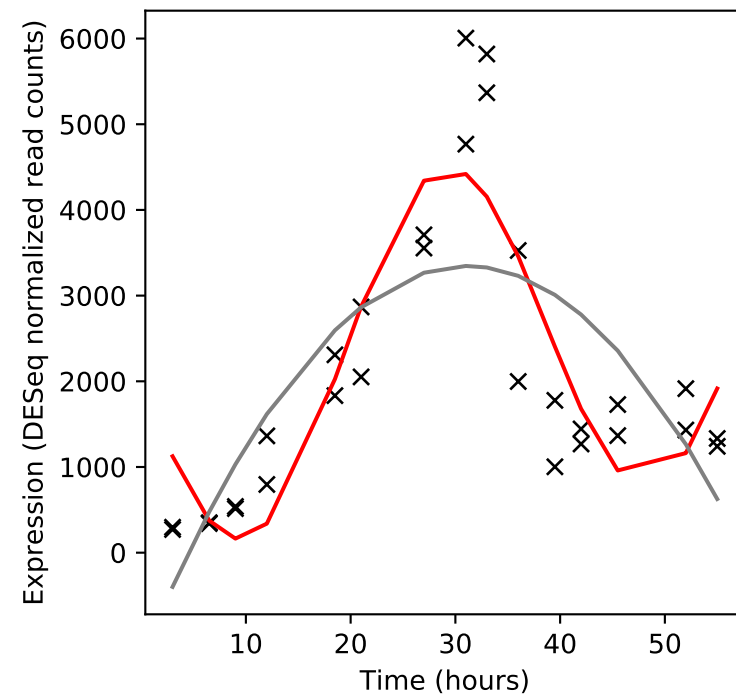

Rv2928/tesA

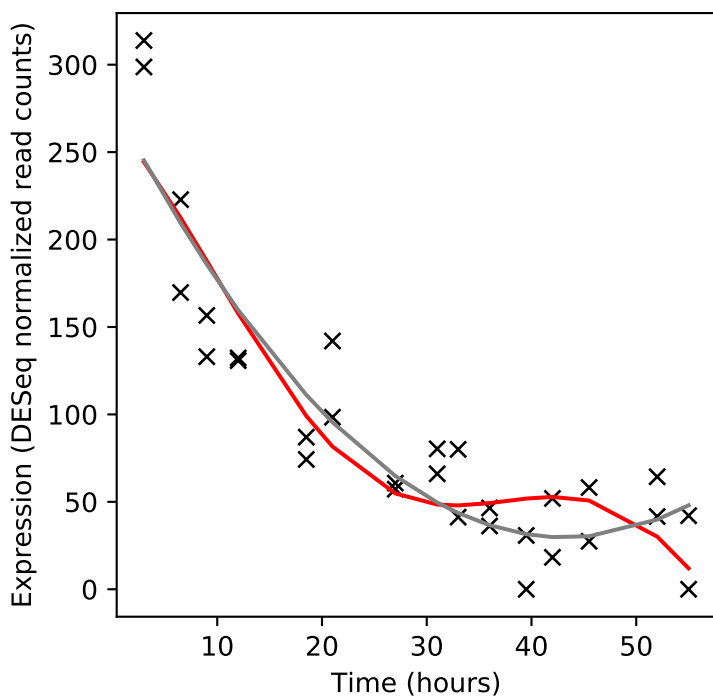

Rv2929/-

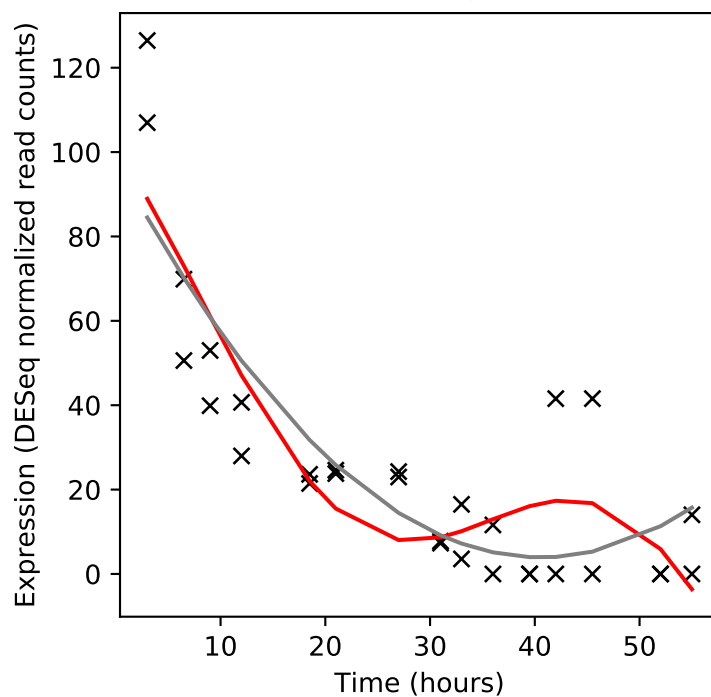

Rv2930/fadD26

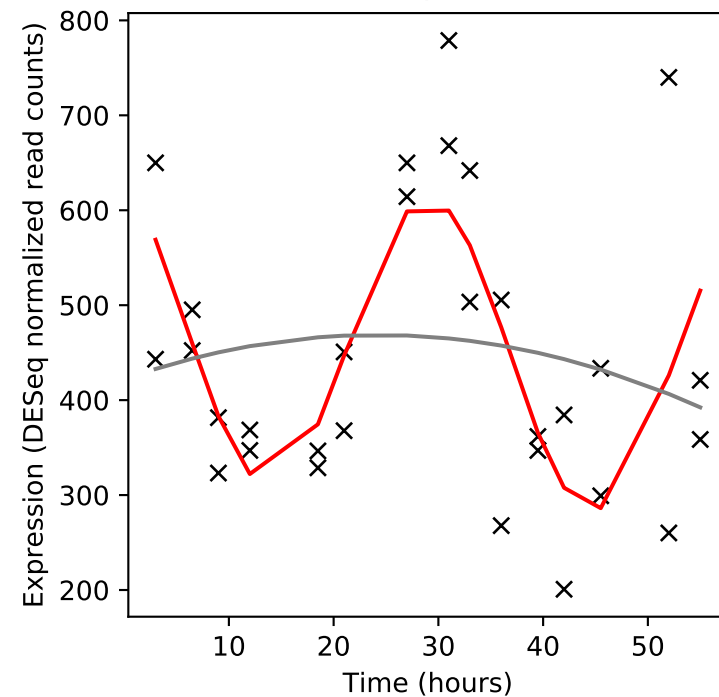

Rv2931/ppsA

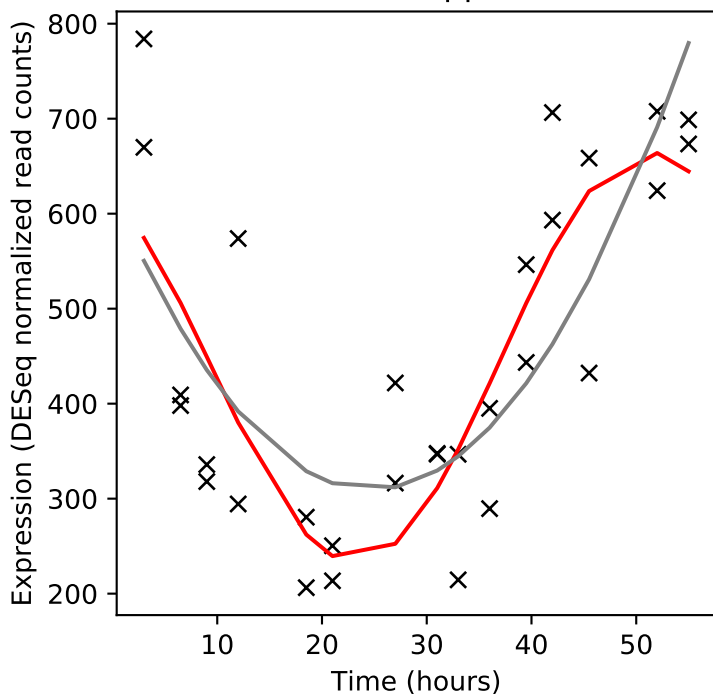

Rv2932/ppsB

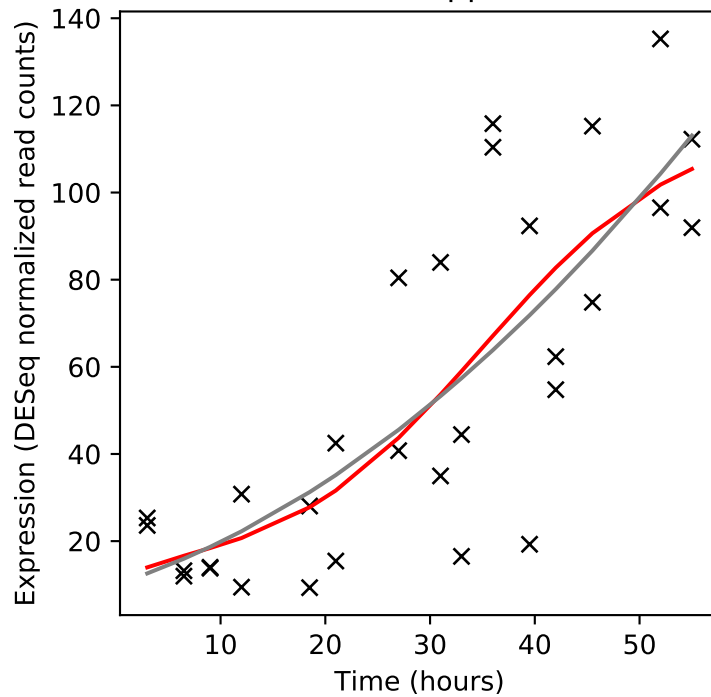

Rv2933/ppsC

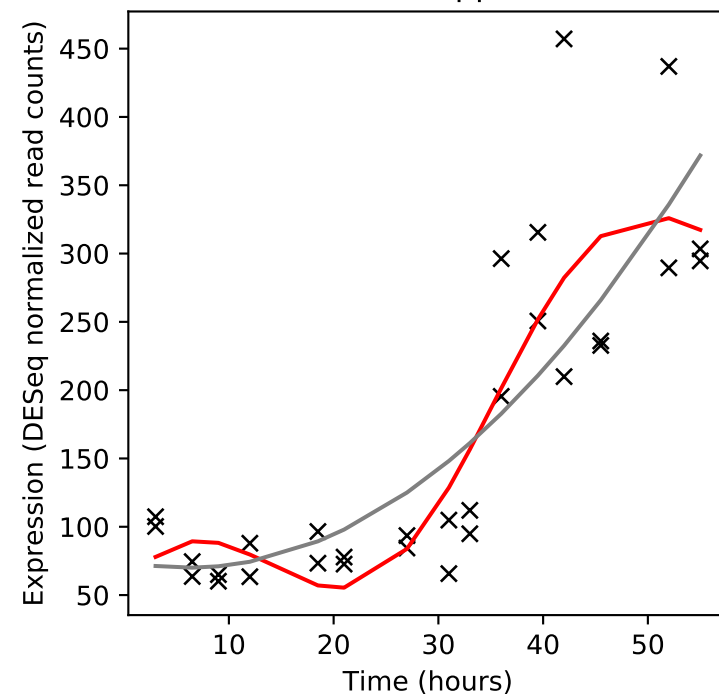

Rv2934/ppsD

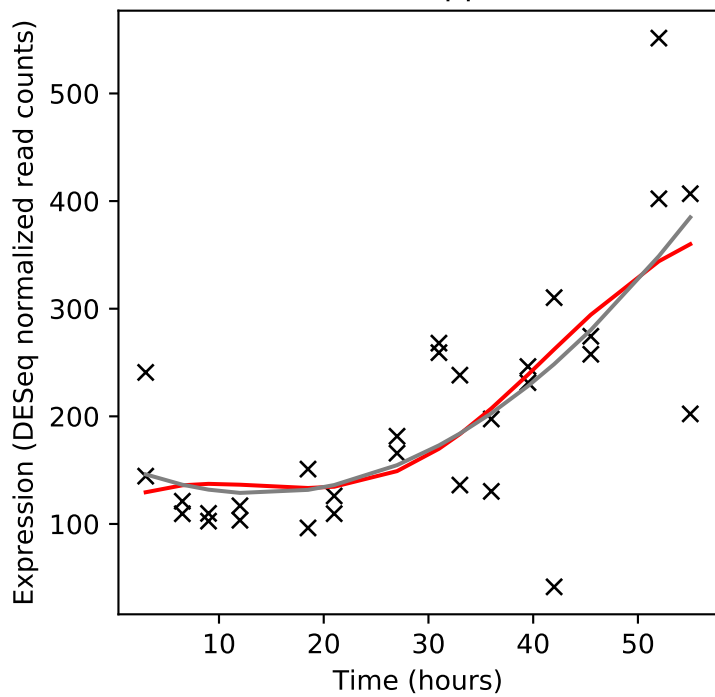

Rv2935/ppsE

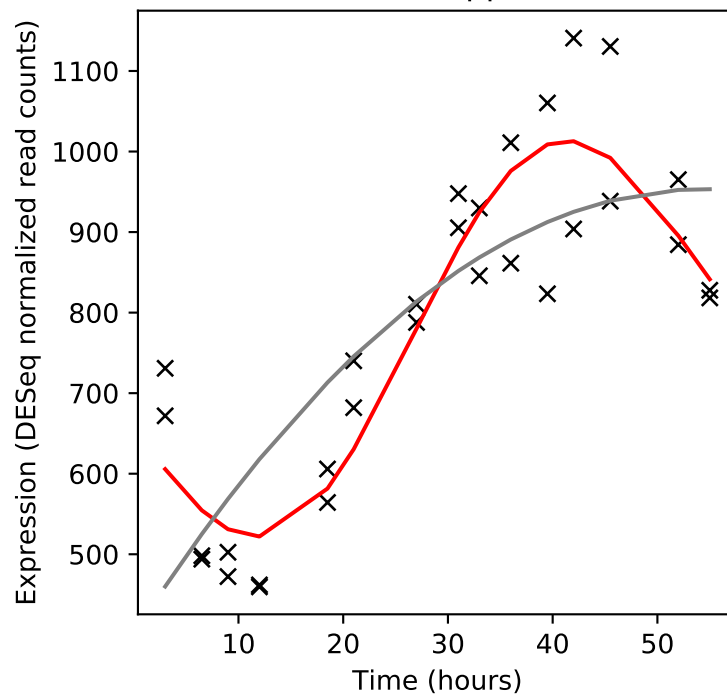

Rv2936/drrA

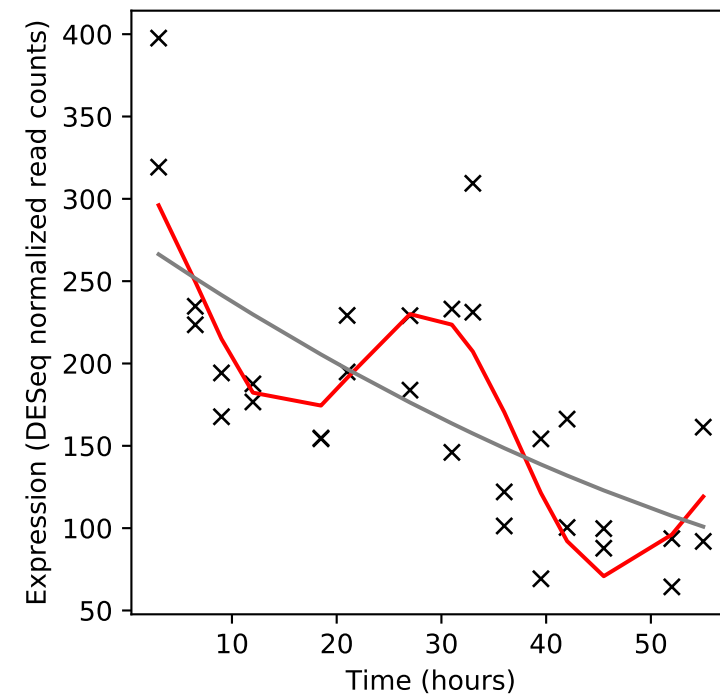

Rv2937/drrB

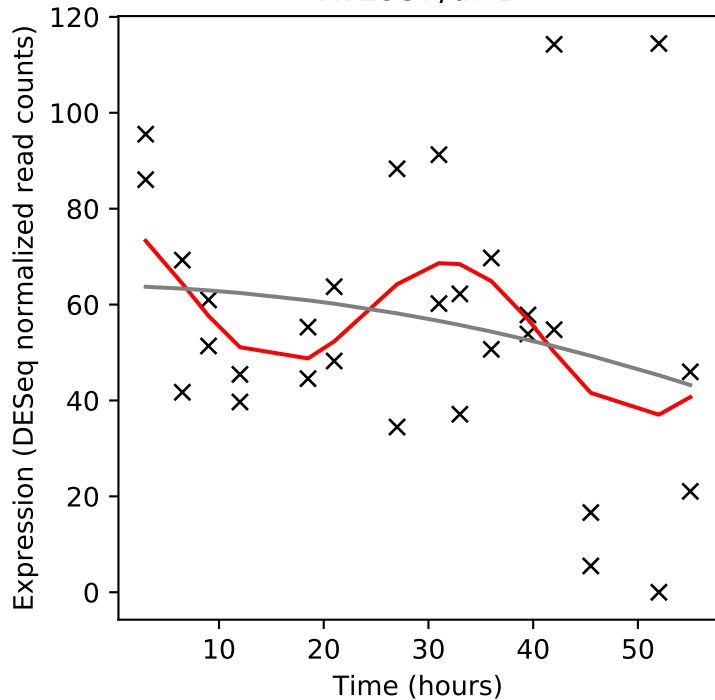

Rv2938/drrC

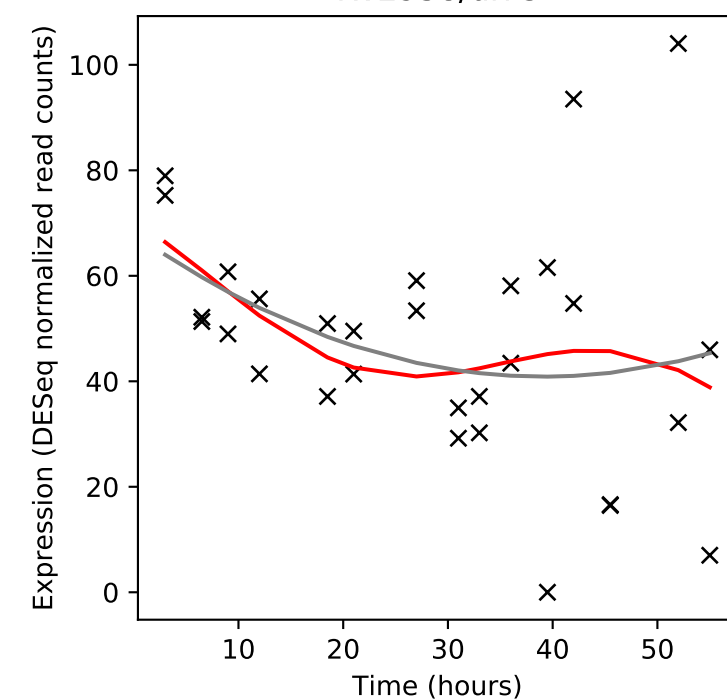

Rv2939/papA5

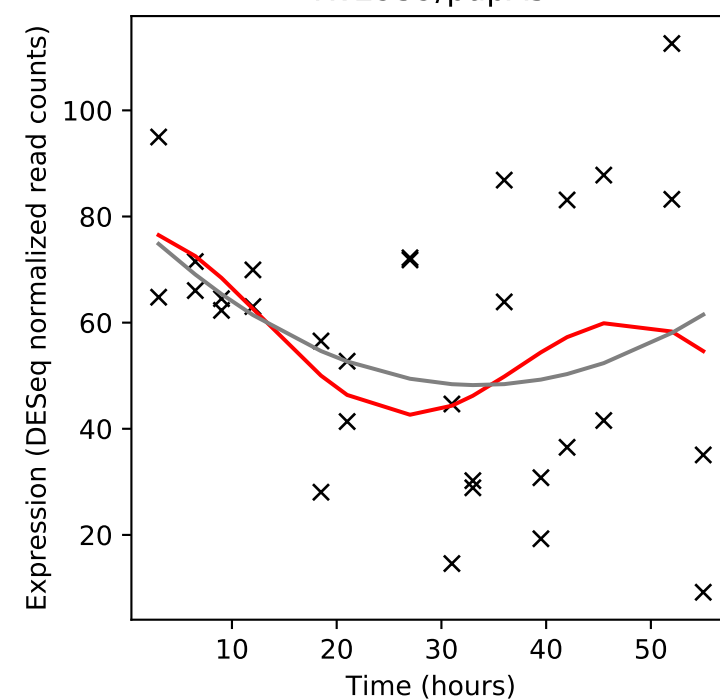

Rv2940c/mas

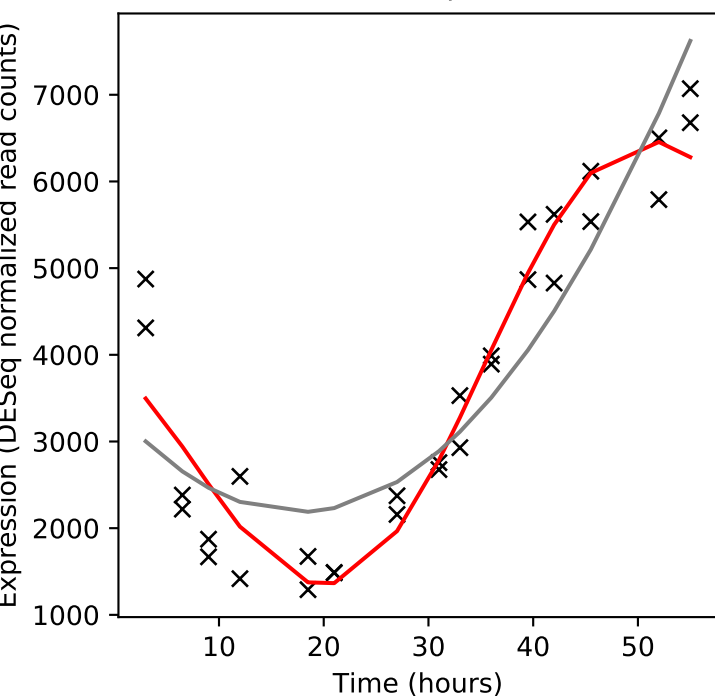

Rv2941/fadD28

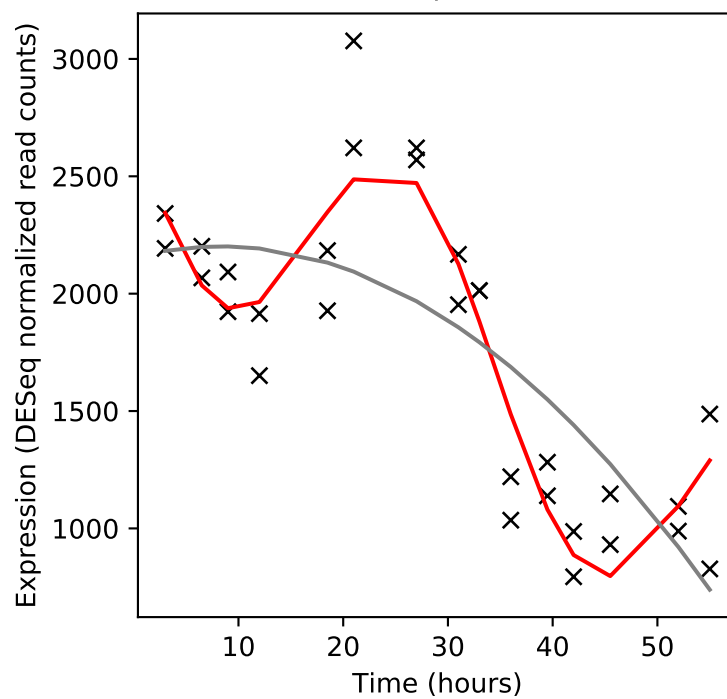

Rv2942/mmpL7

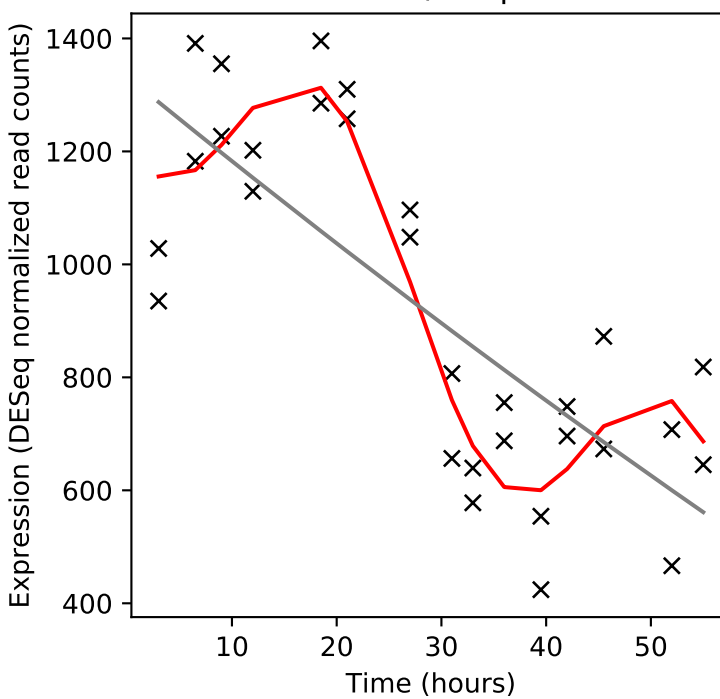

Rv2943/-

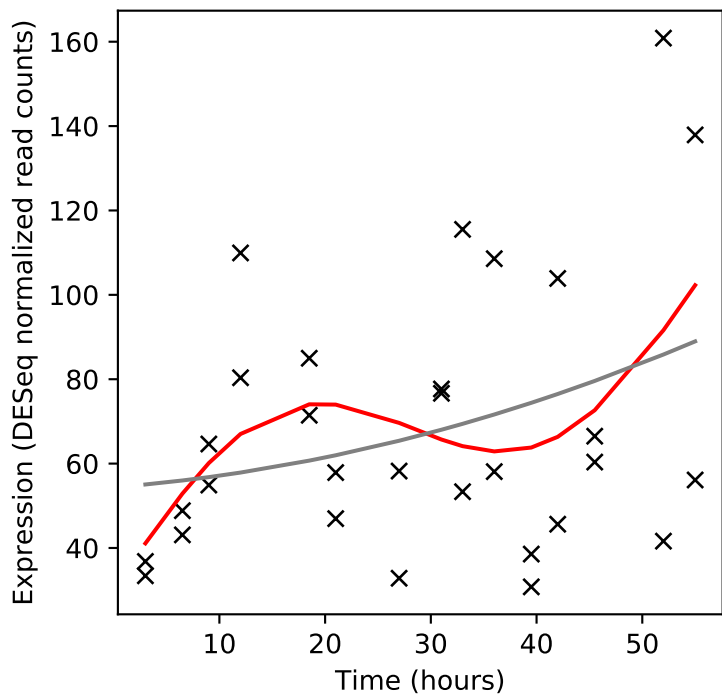

Rv2943A/-

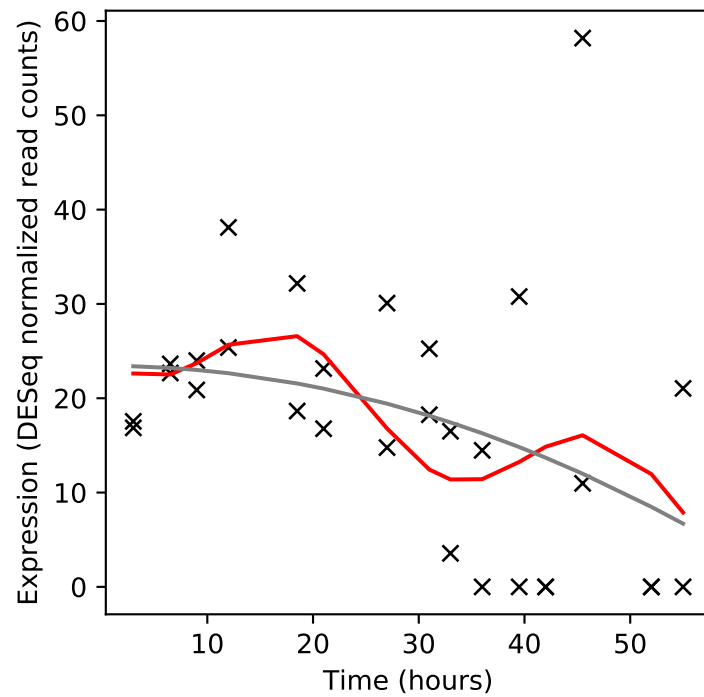

Rv2944/-

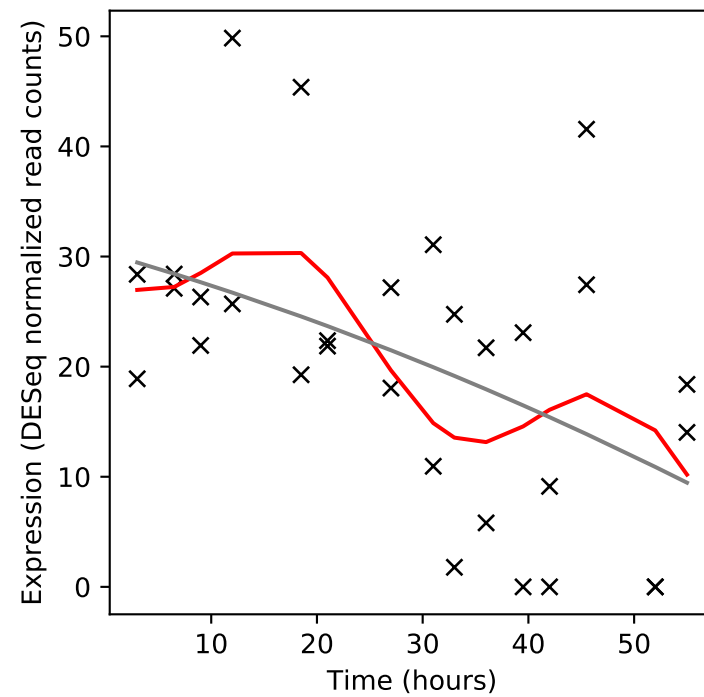

Rv2945c/lppX

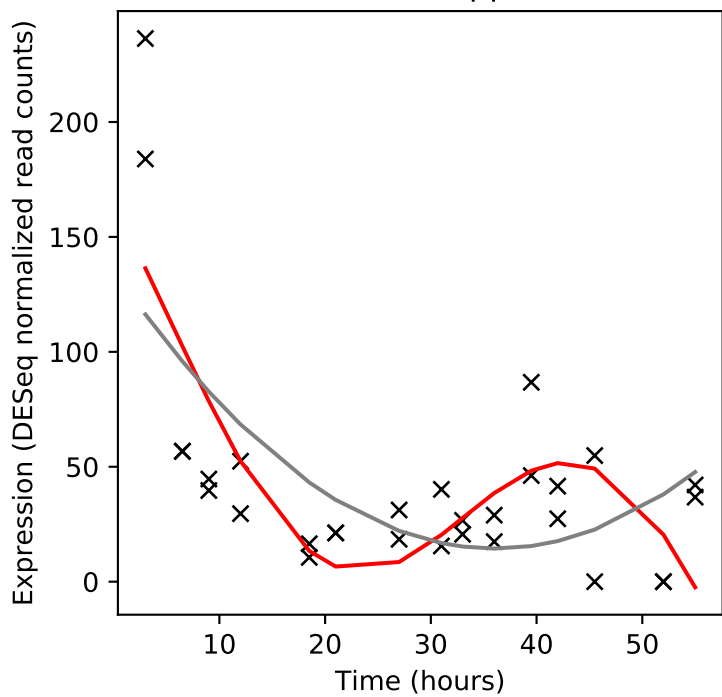

Rv2946c/pks1

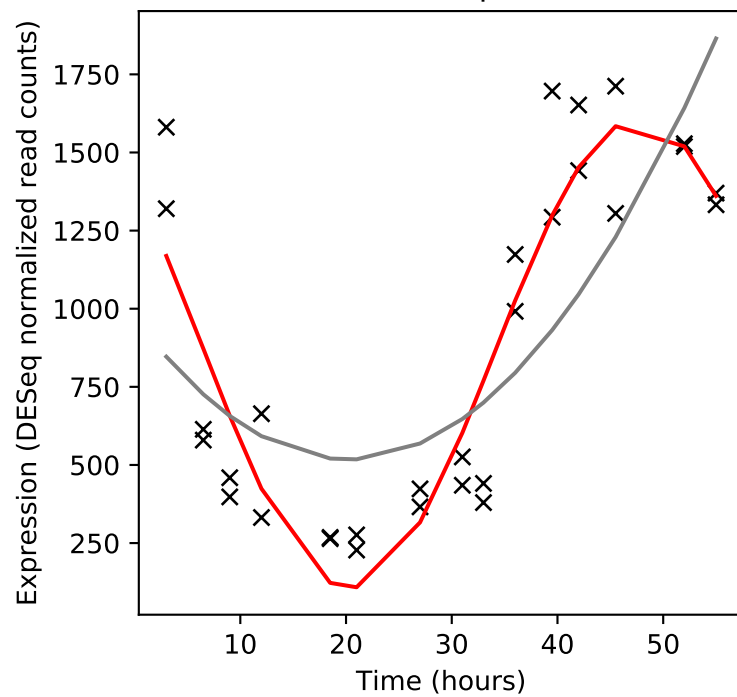

Rv2947c/pks15

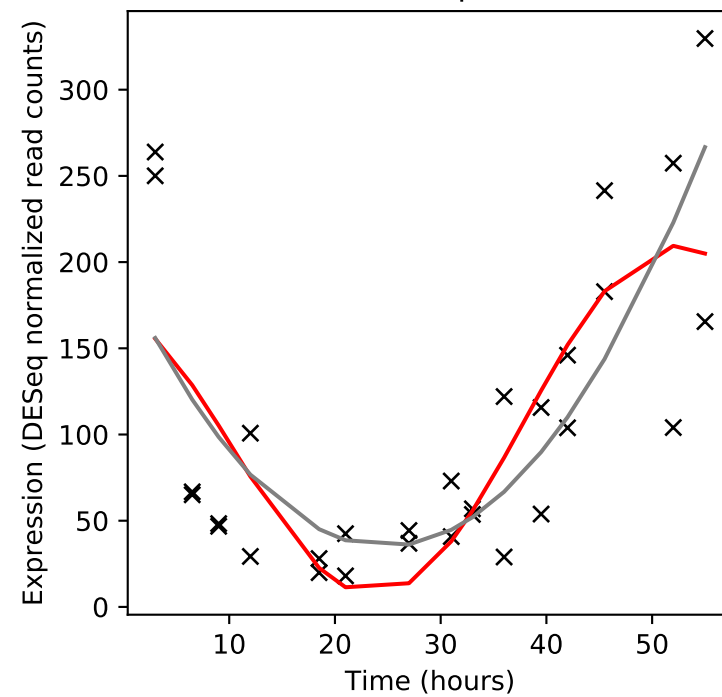

Rv2948c/fadD22

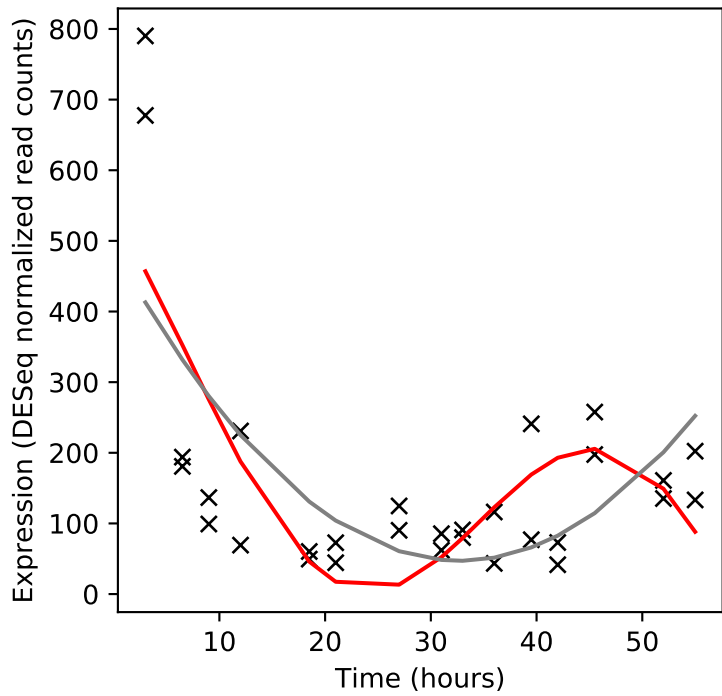

Rv2949c/-

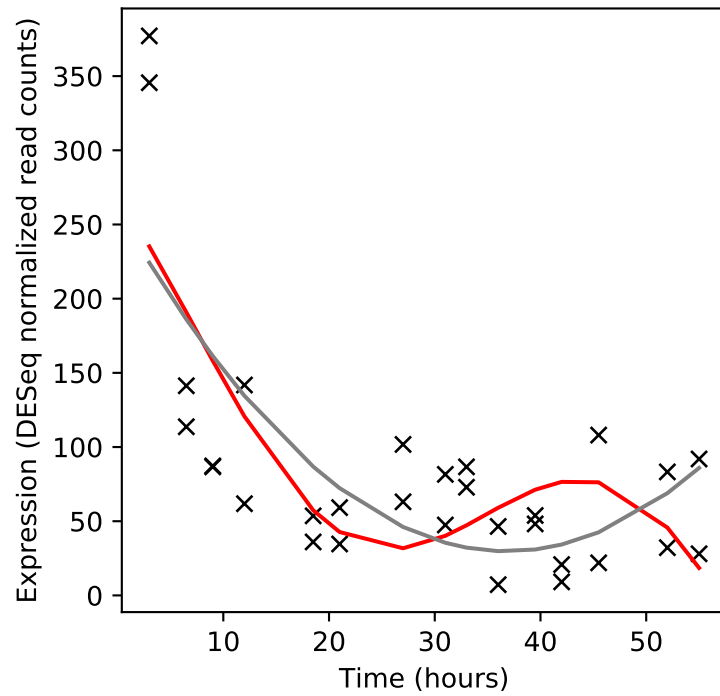

Rv2950c/fadD29

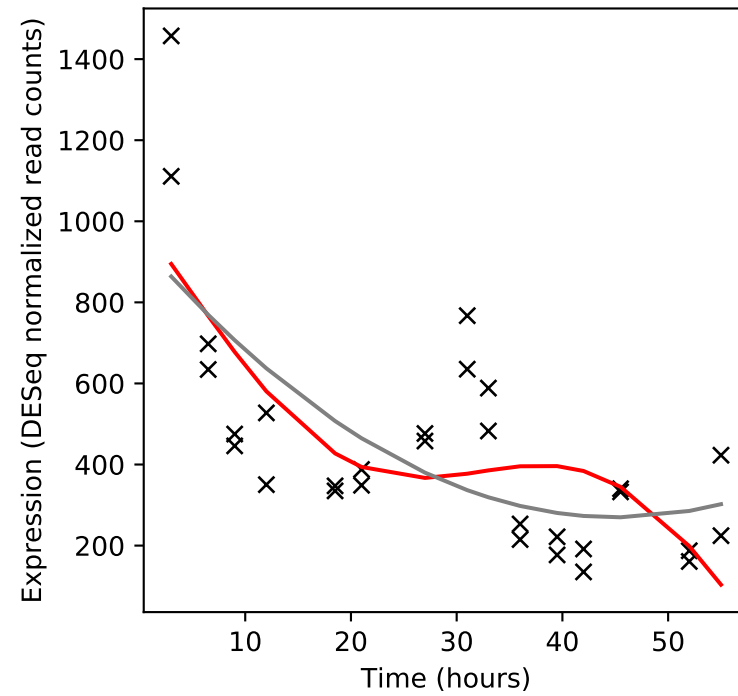

Rv2951c/-

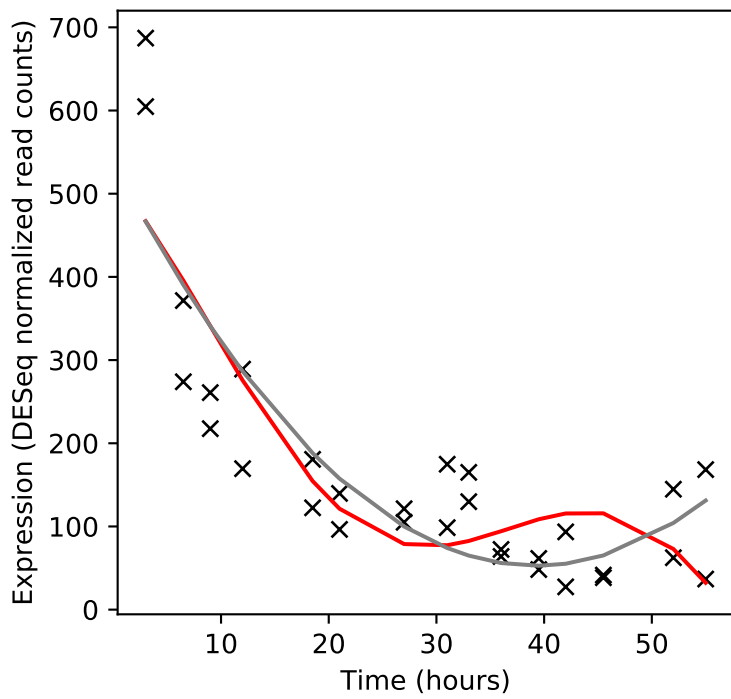

Rv2952/-

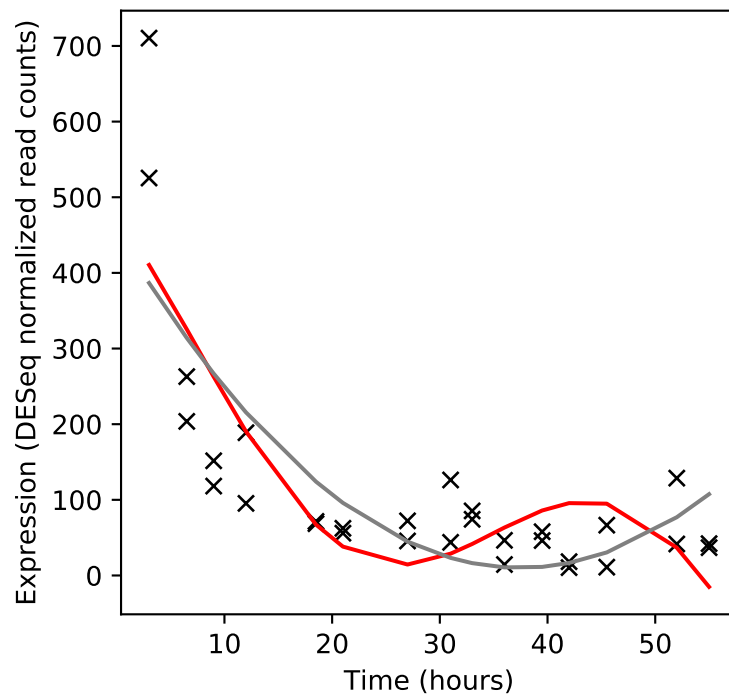

Rv2953/-

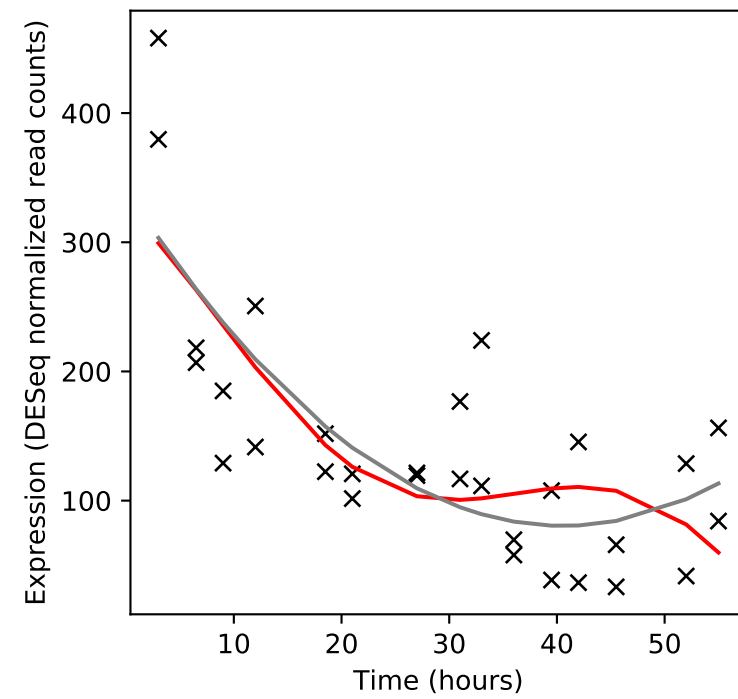

Rv2954c/-

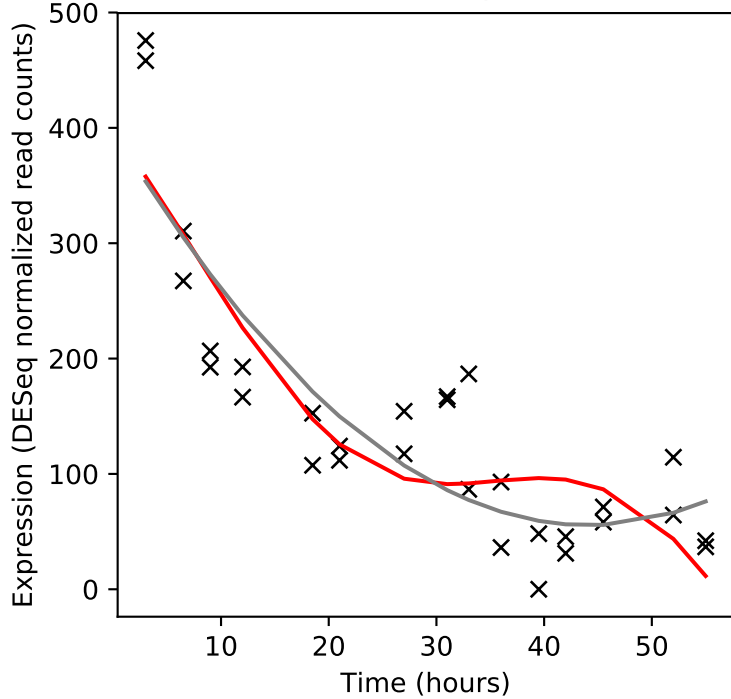

Rv2955c/-

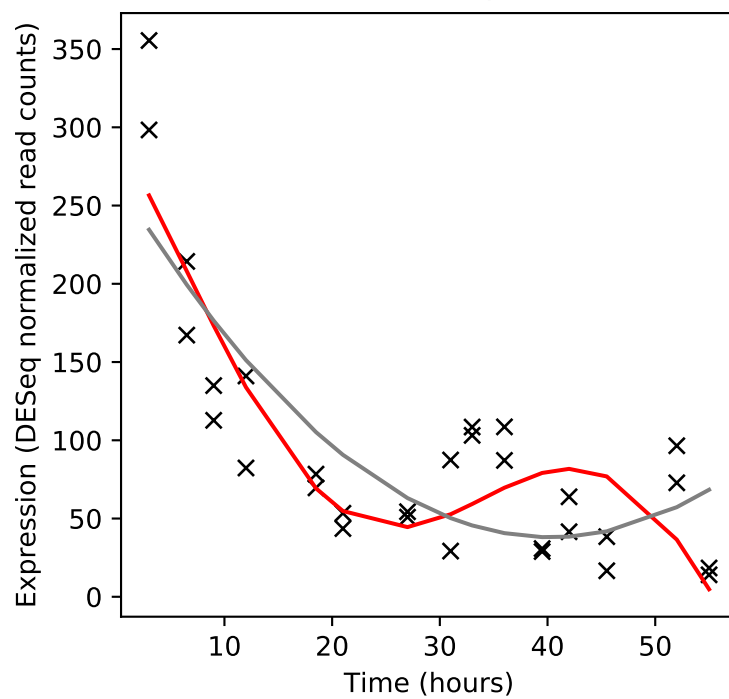

Rv2956/-

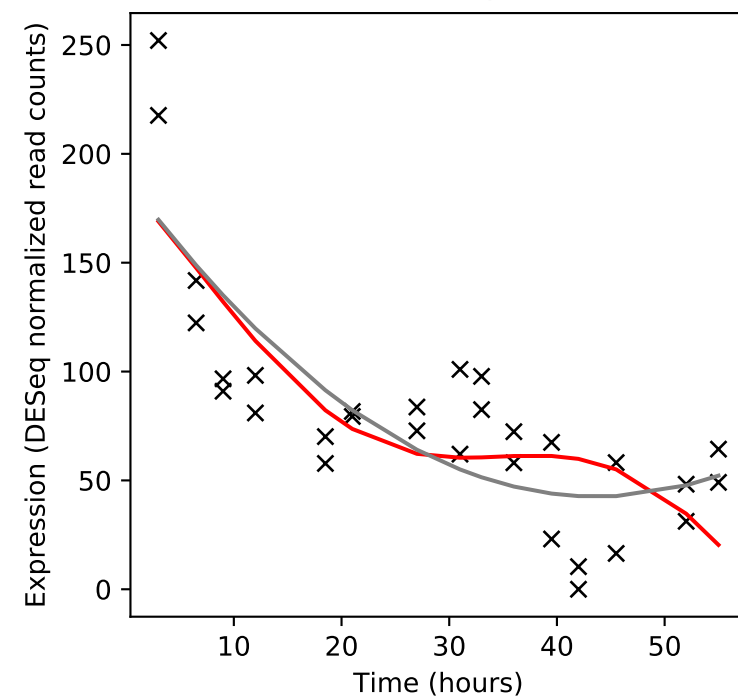

Rv2957/-

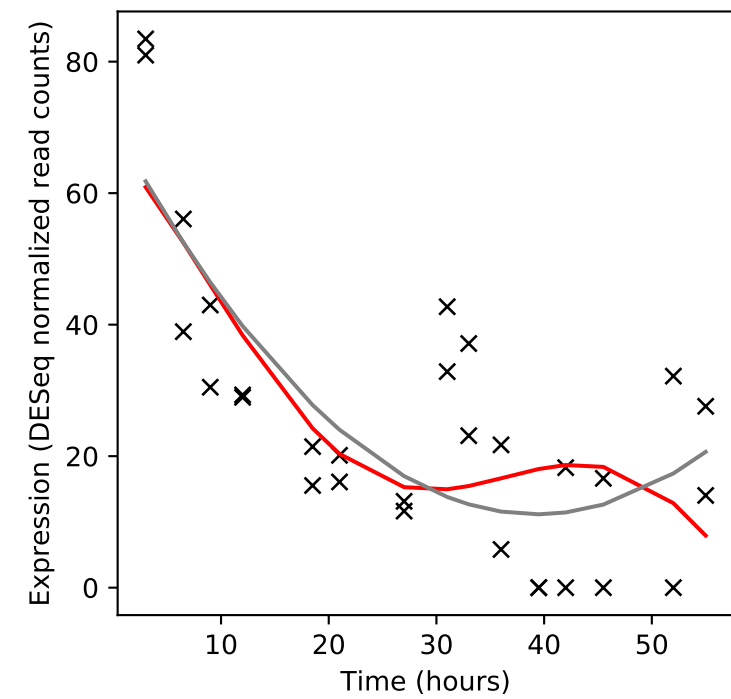

Rv2958c/-

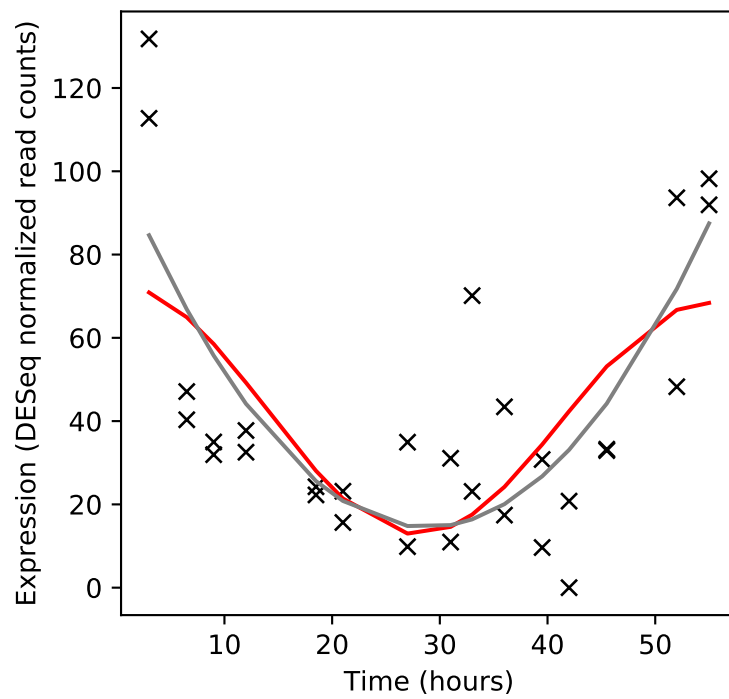

Rv2959c/-

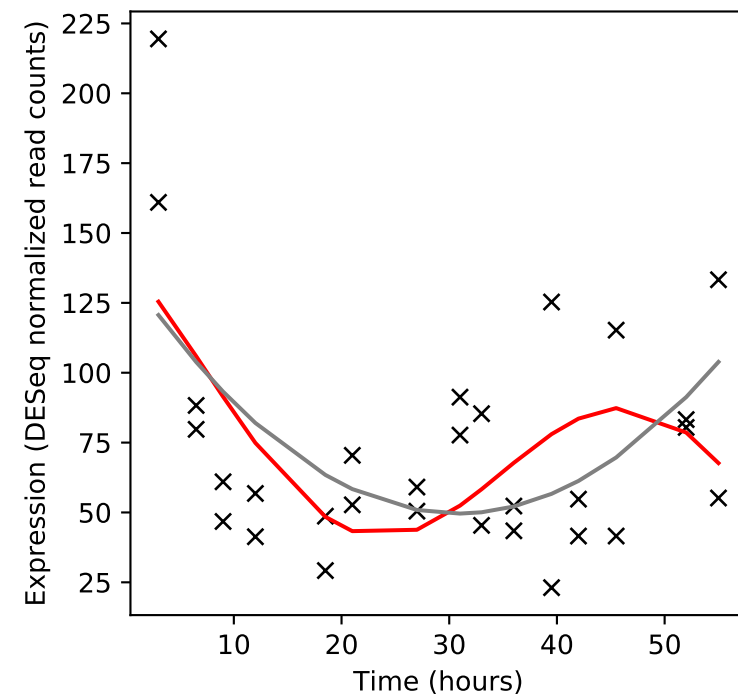



Rv2960c/-

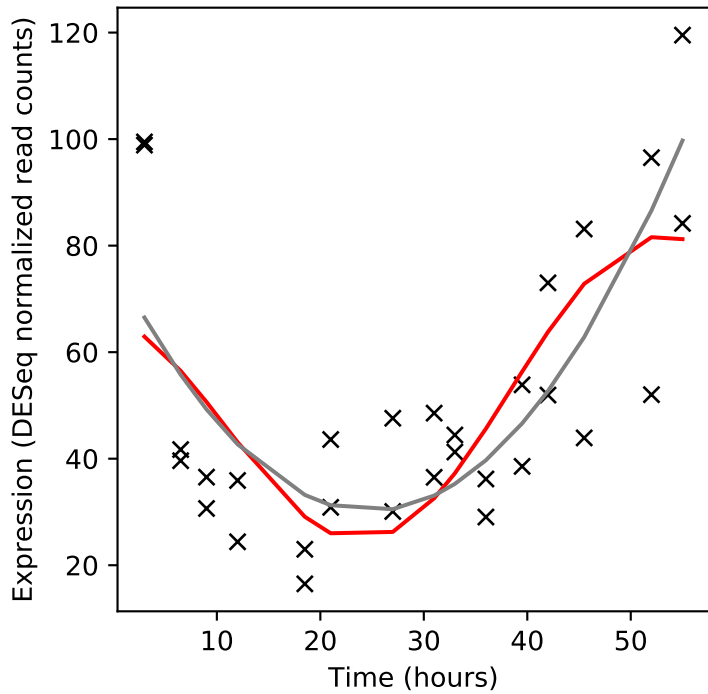

Rv2961/-

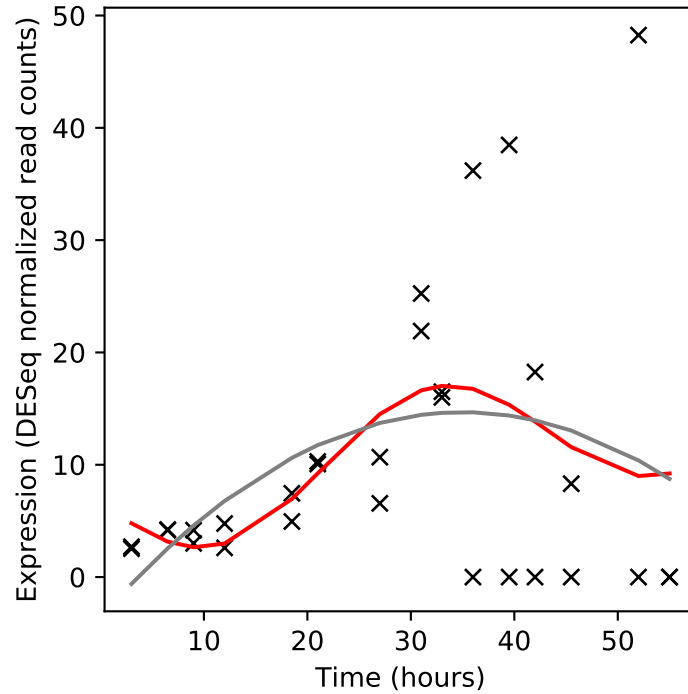

Rv2962c/-

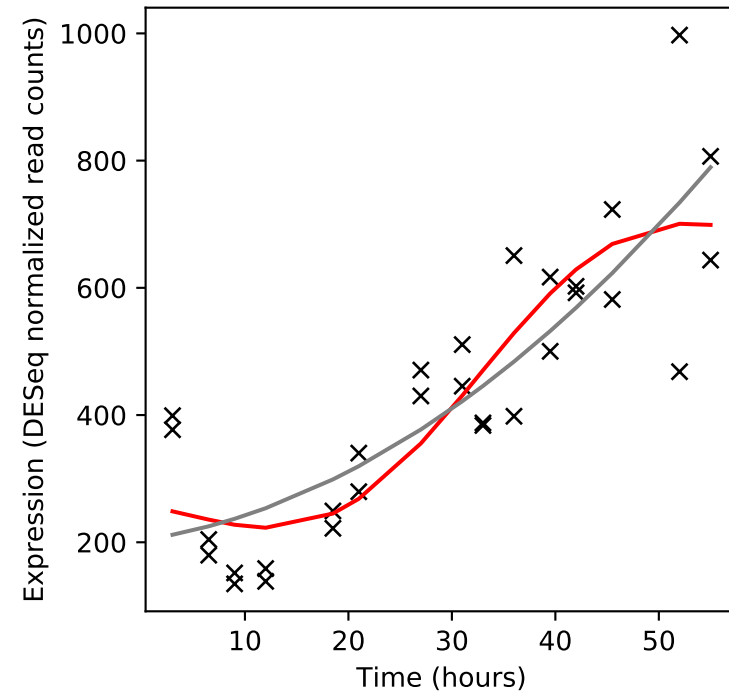

Rv2963/-

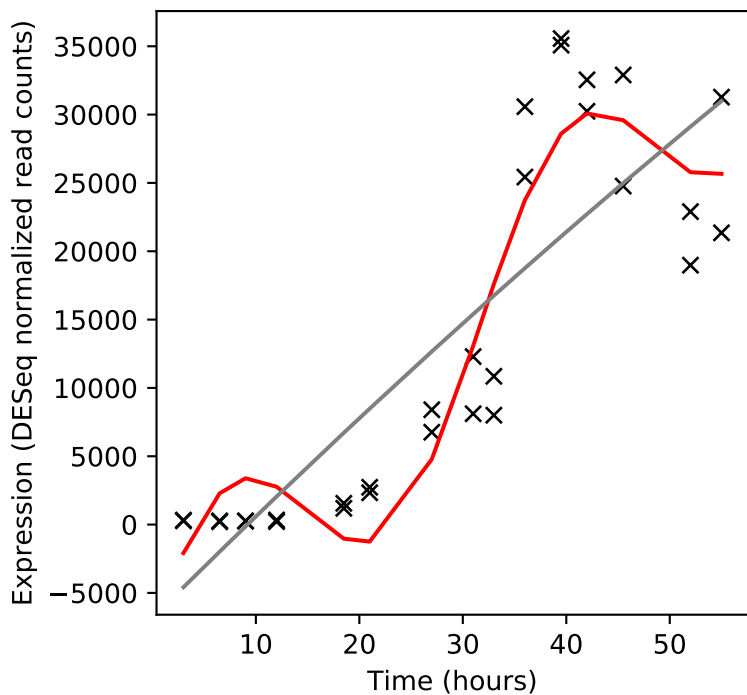

Rv2964/purU

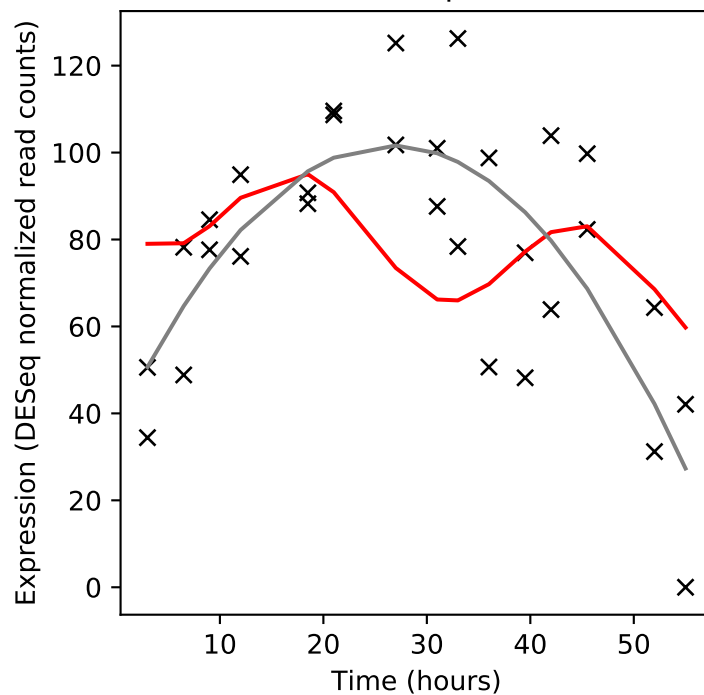

Rv2965c/kdtB

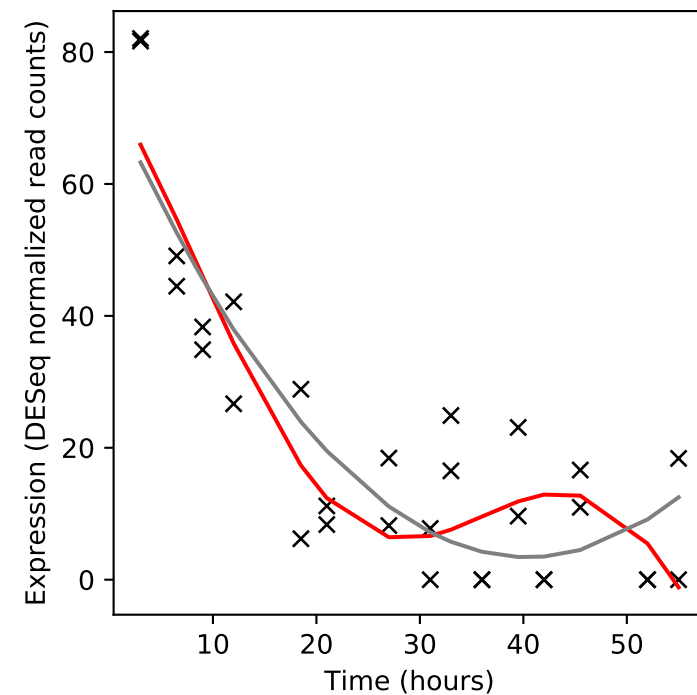

Rv2966c/-

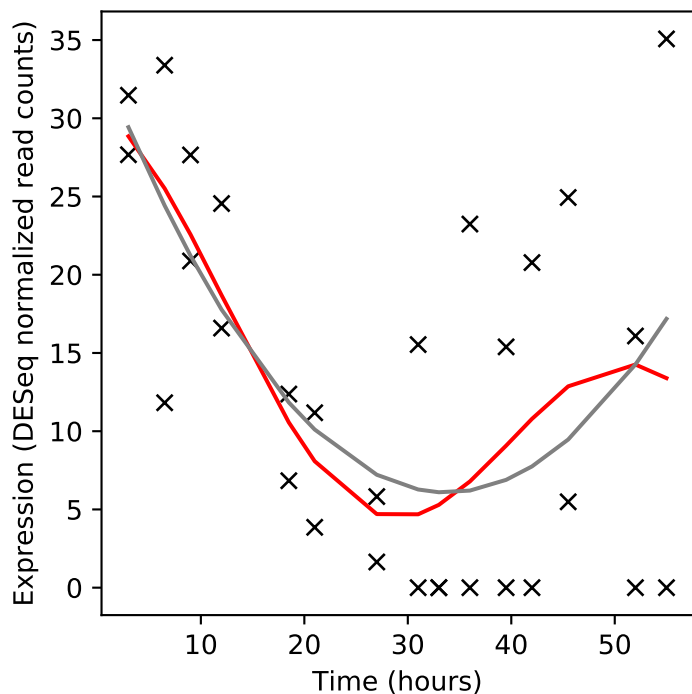

Rv2967c/pca

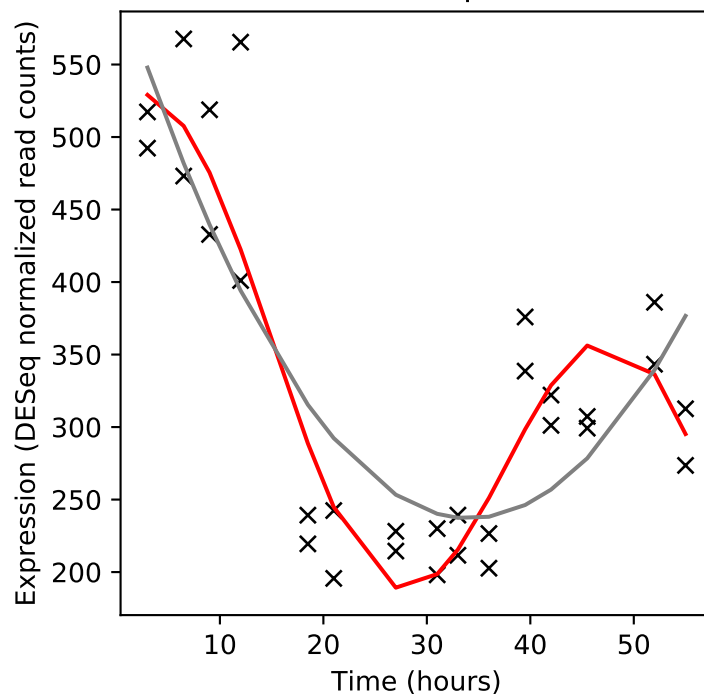

Rv2968c/-

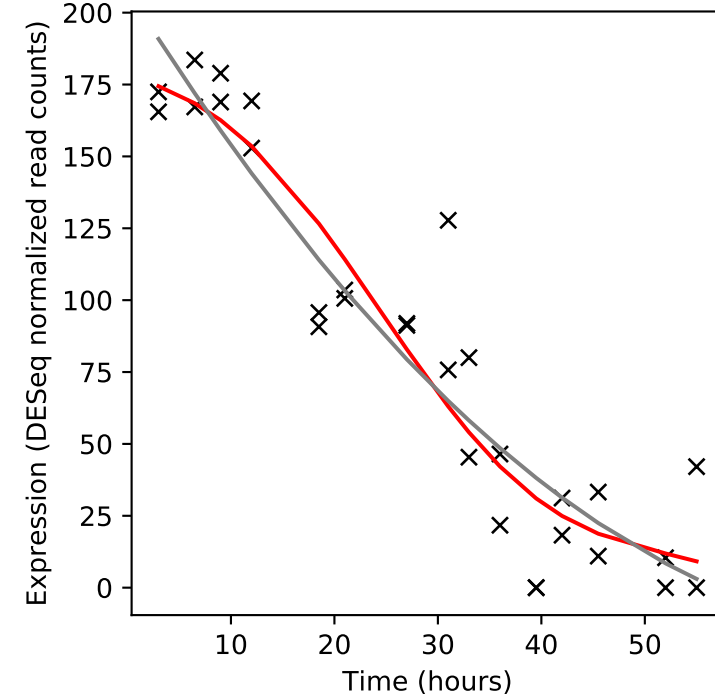

Rv2969c/-

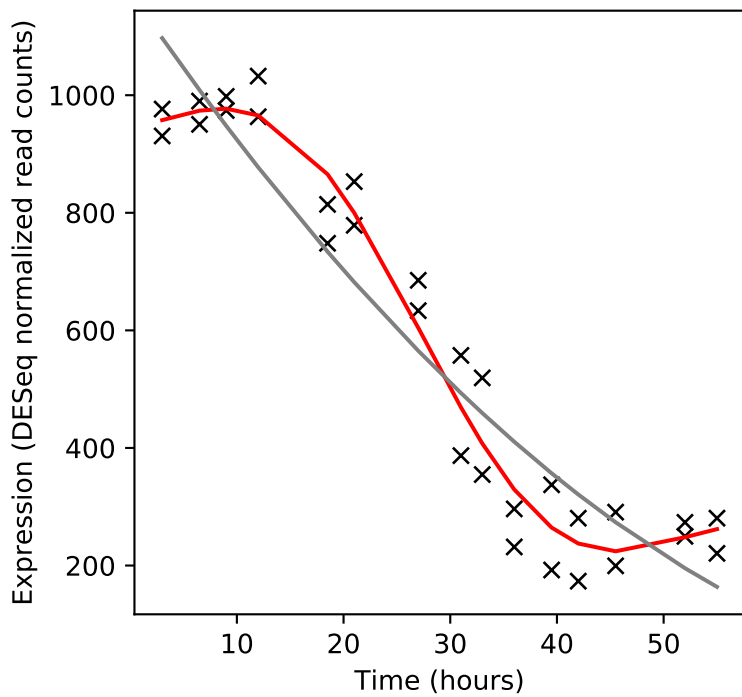

Rv2970c/lipN

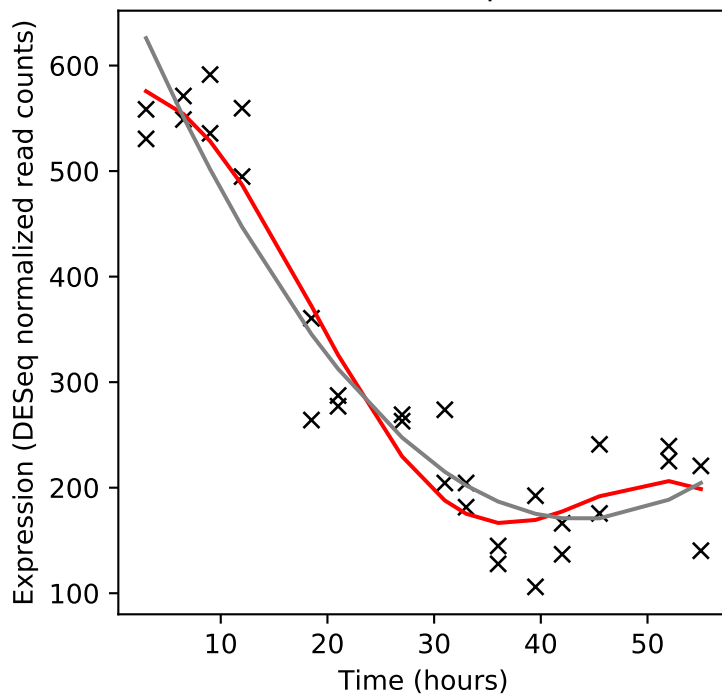

Rv2970A/-

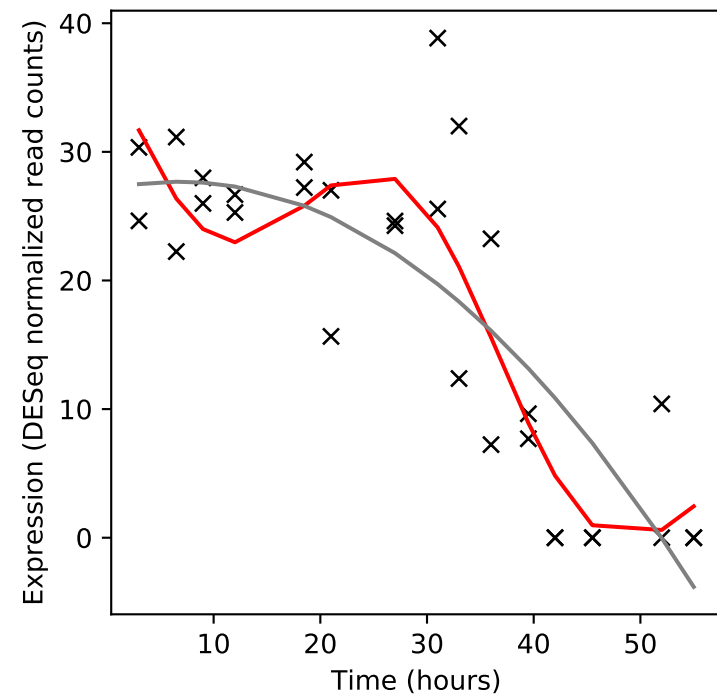

Rv2971/-

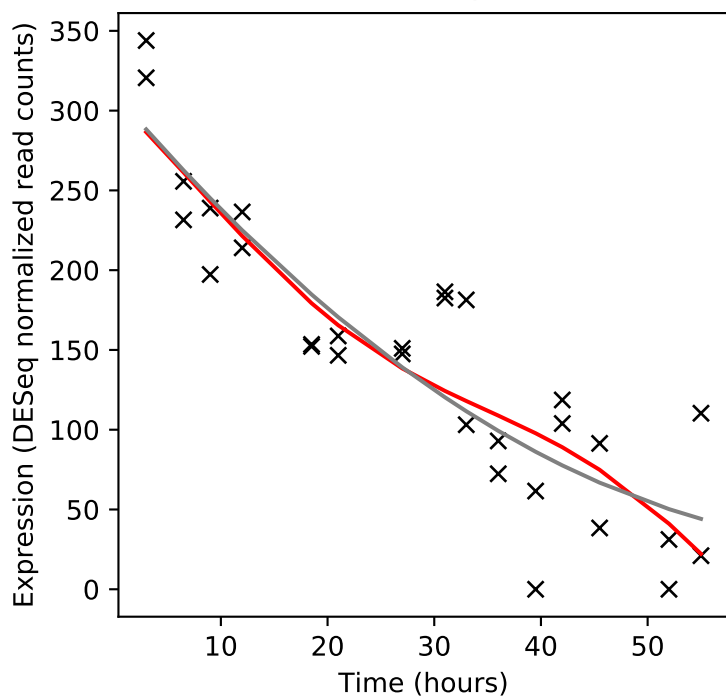

Rv2972c/-

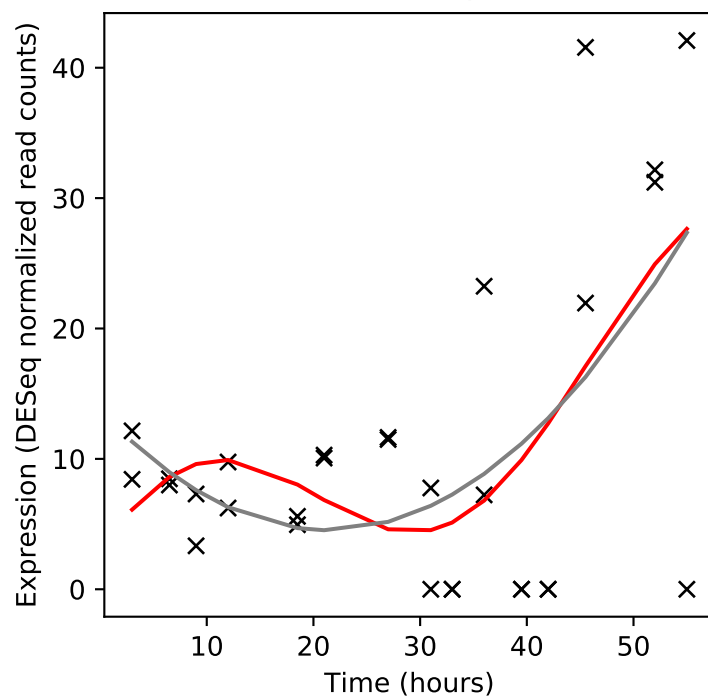

Rv2973c/recG

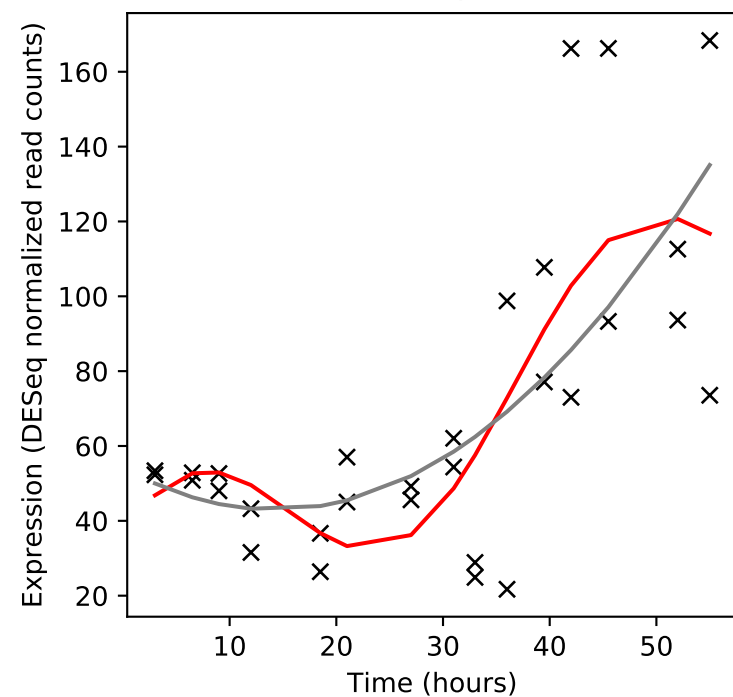

Rv2974c/-

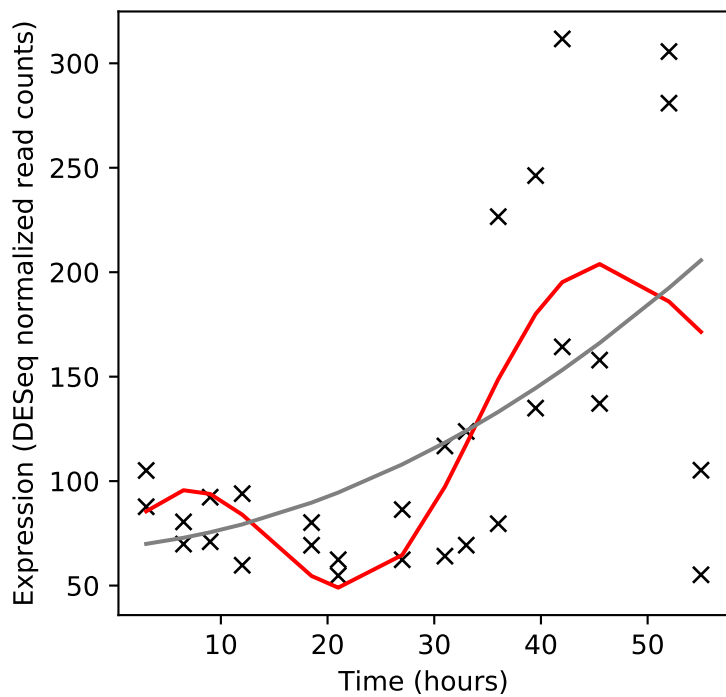

Rv2975c/-

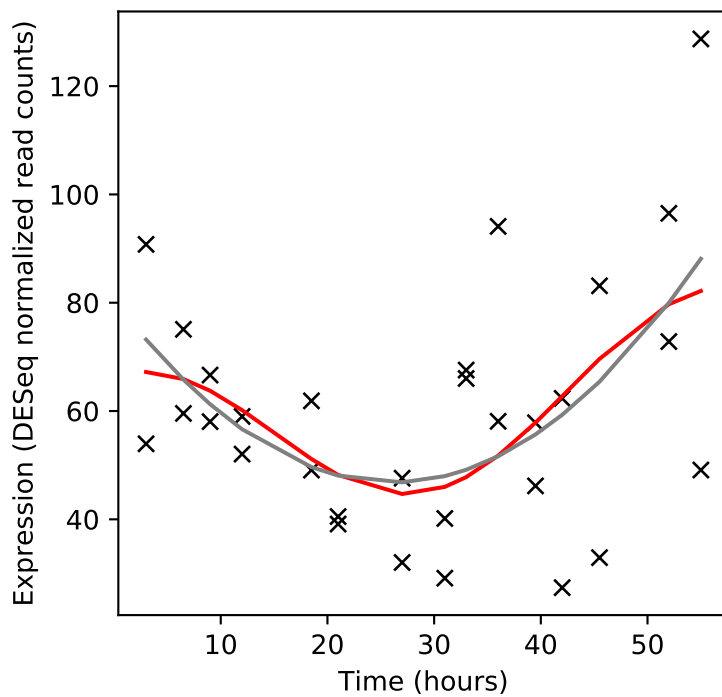

Rv2976c/ung

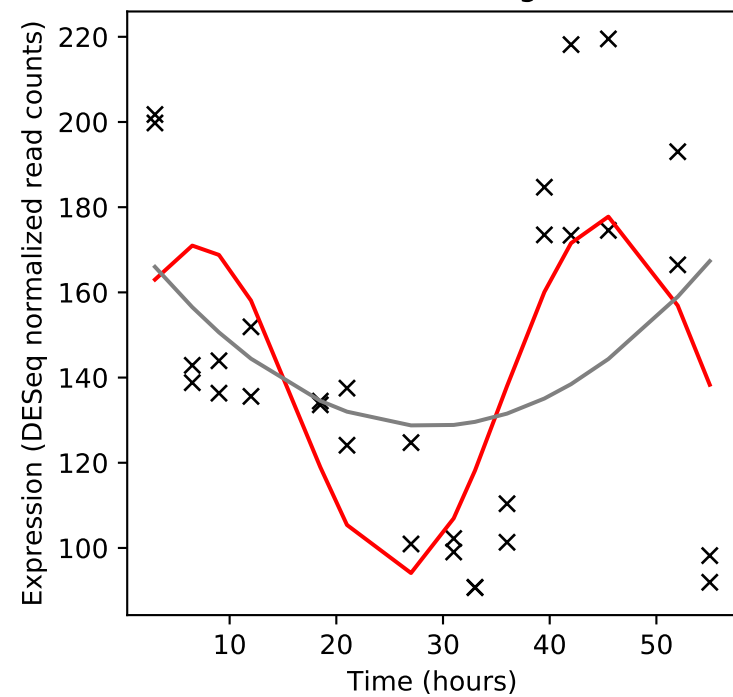

Rv2977c/thiL

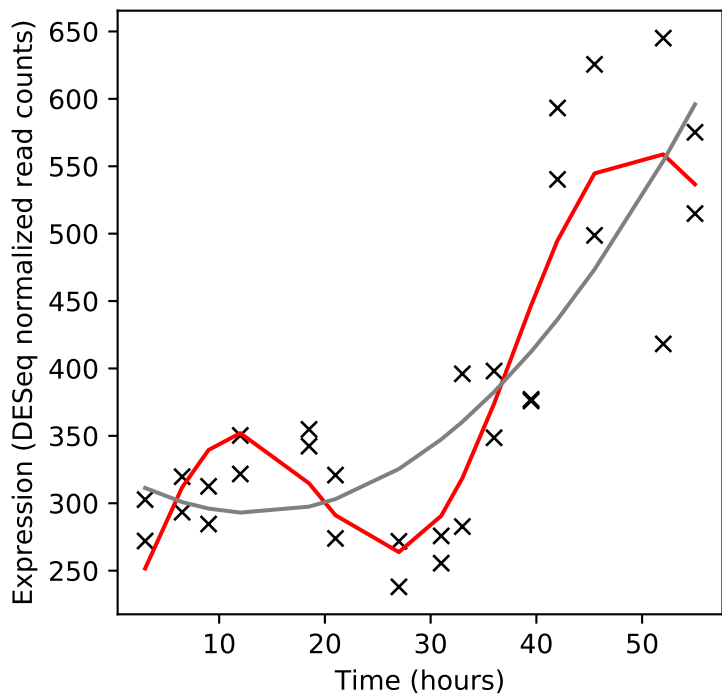

Rv2978c/-

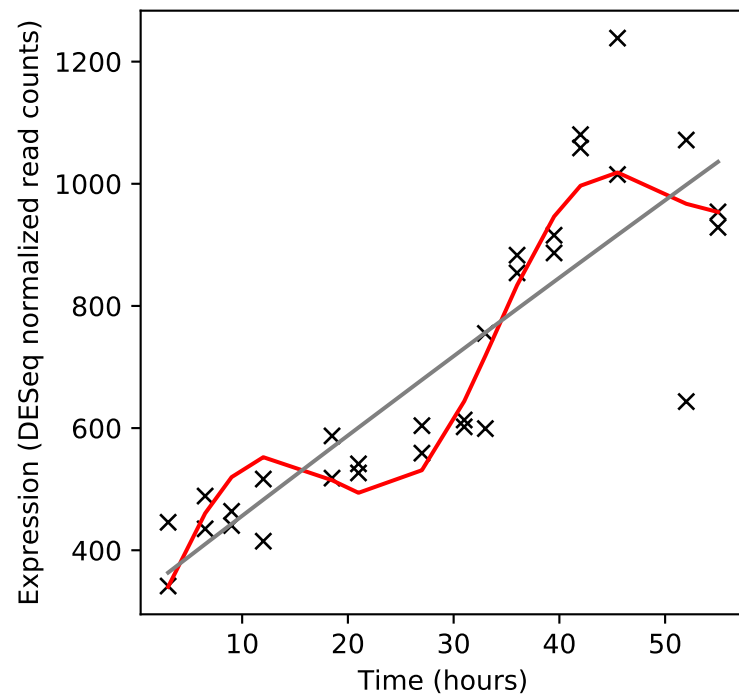

Rv2979c/-

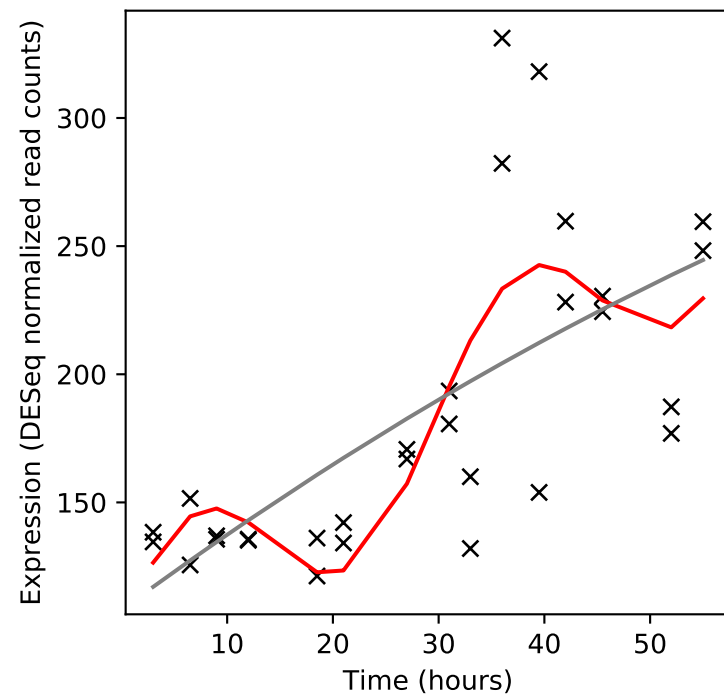

Rv2980/-

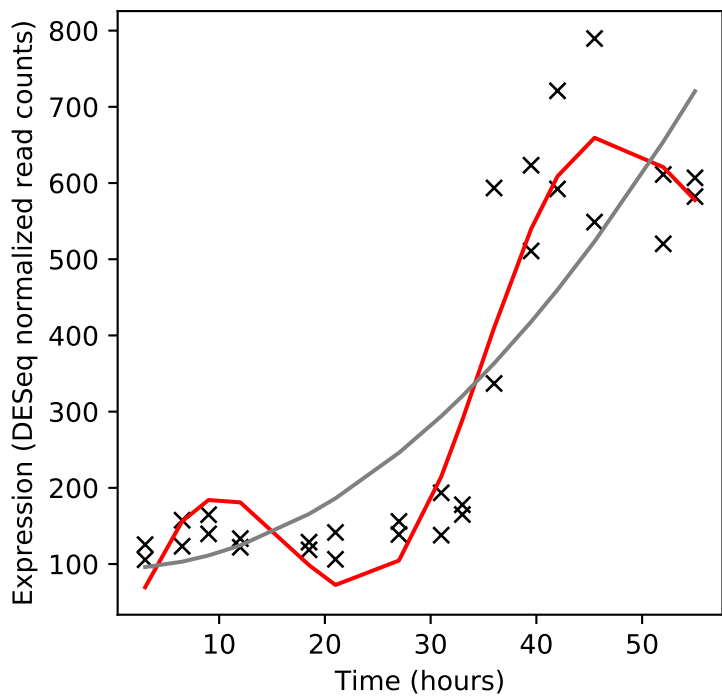

Rv2981c/ddIA

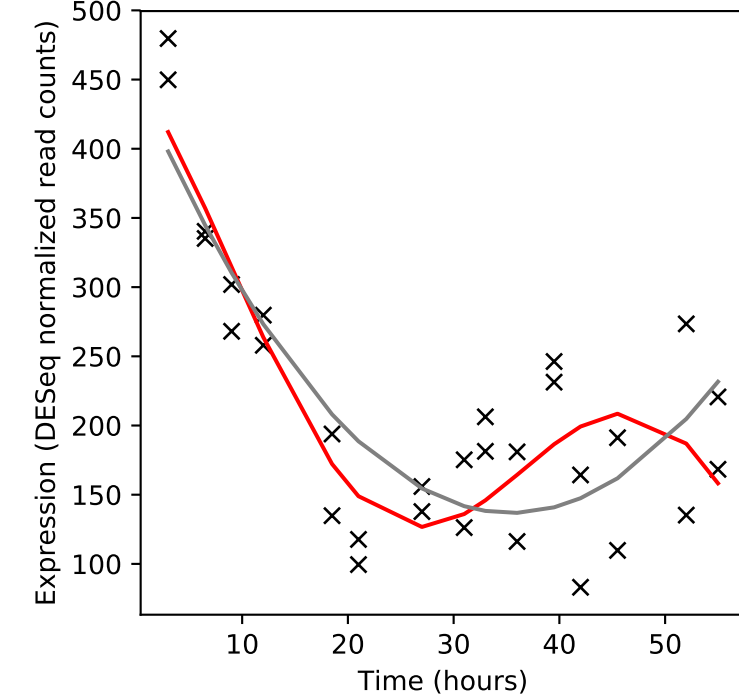

Rv2982c/gpdA2

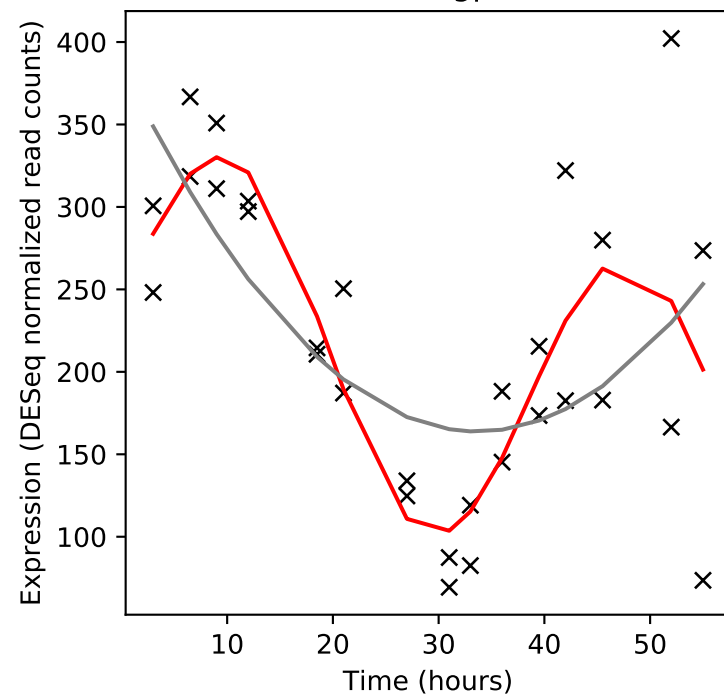

Rv2983/-

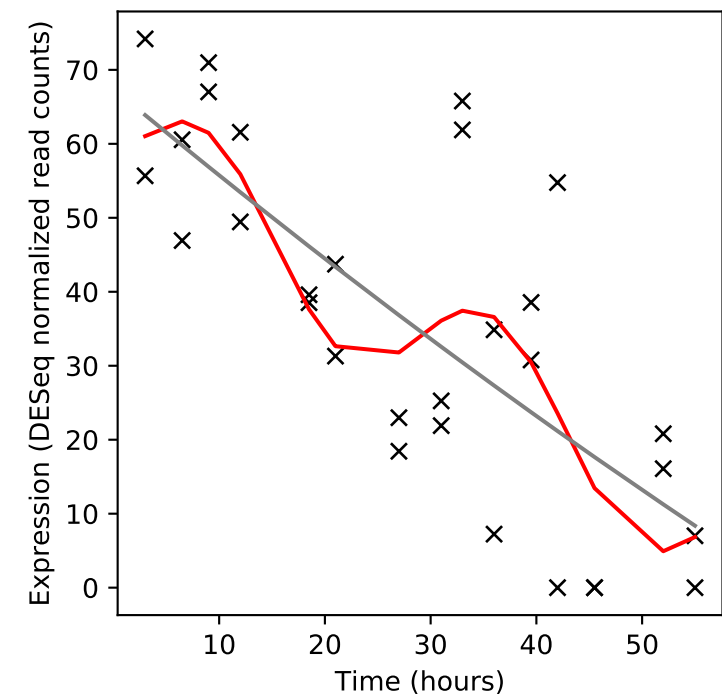

Rv2984/ppk1

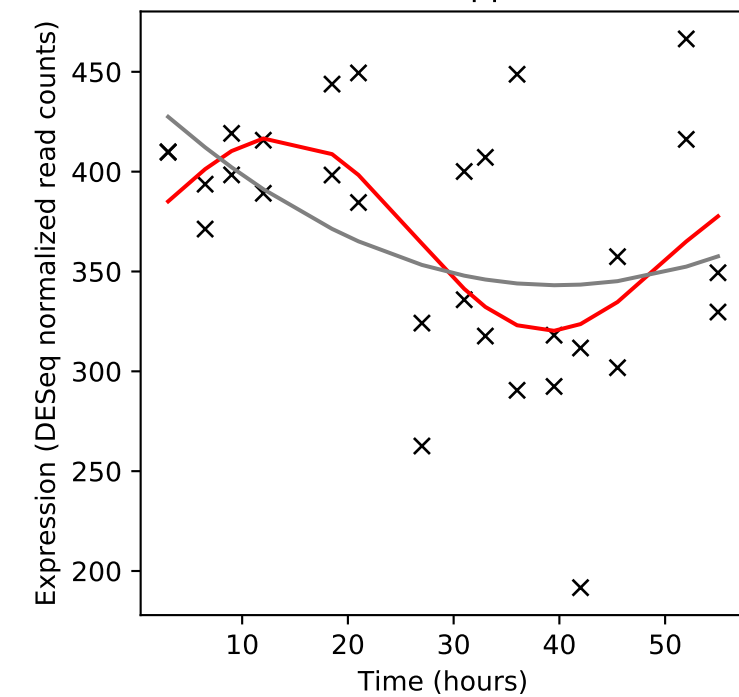

Rv2985/mutT1

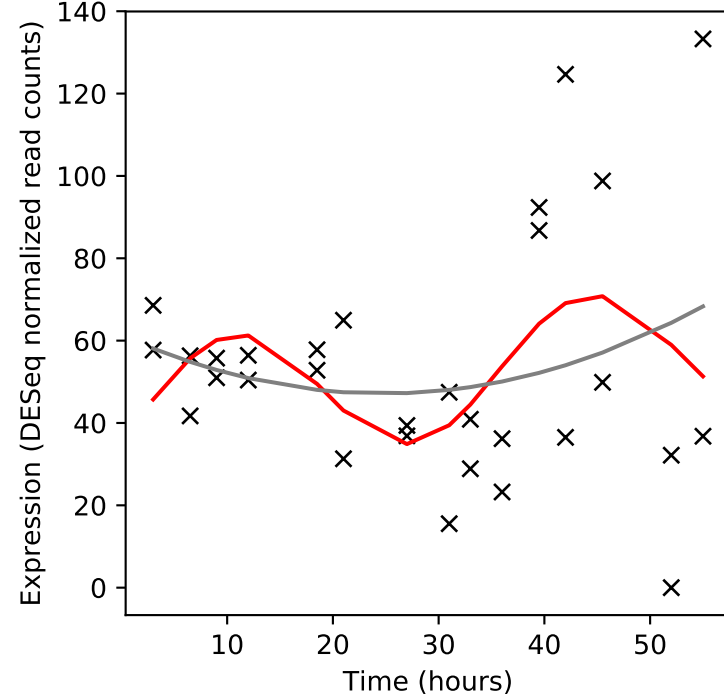

Rv2986c/hupB

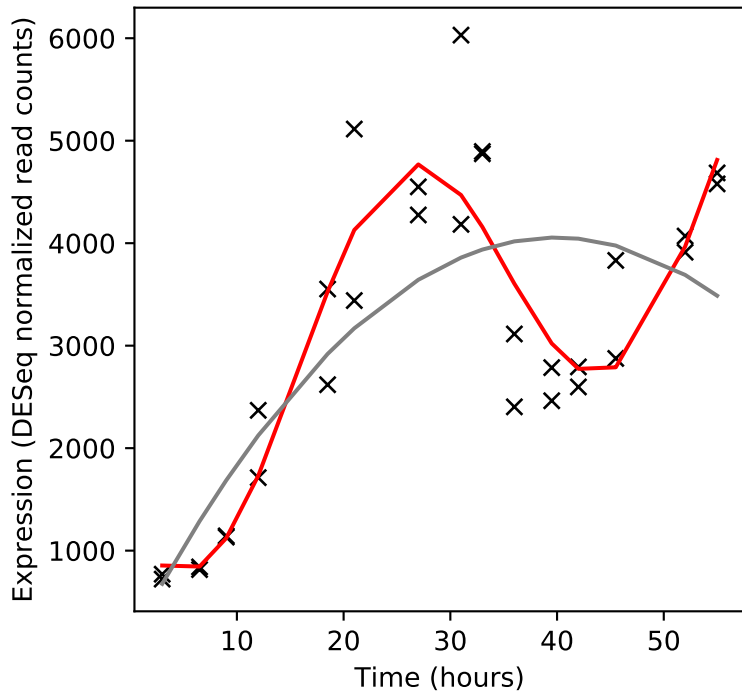

Rv2987c/leuD

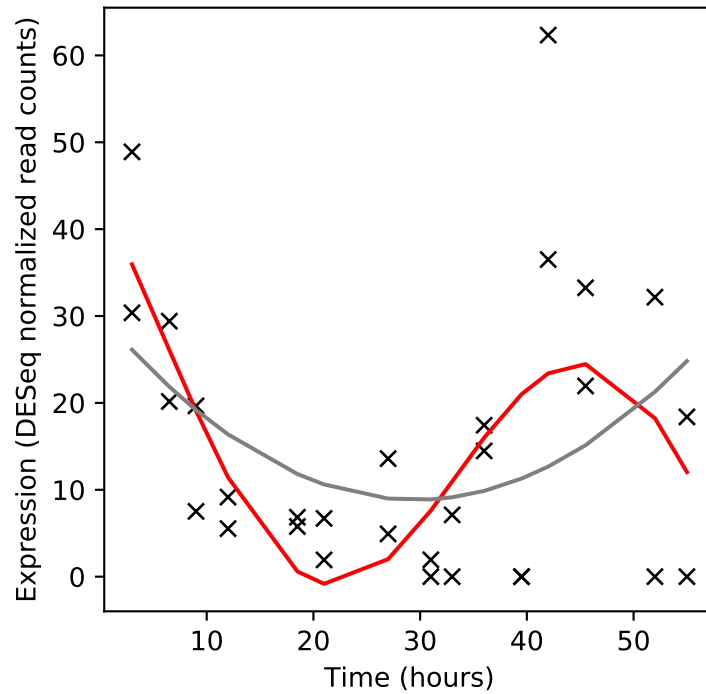

Rv2988c/leuC

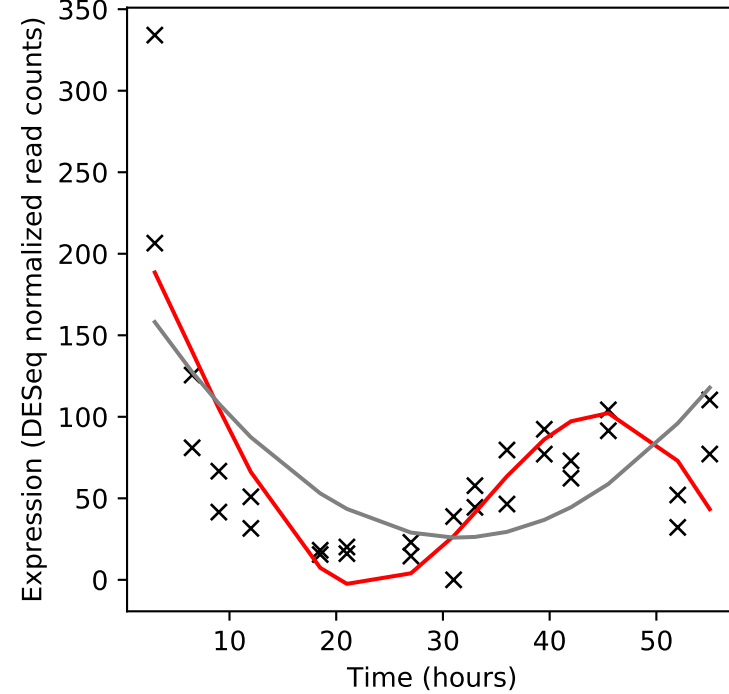

Rv2989/-

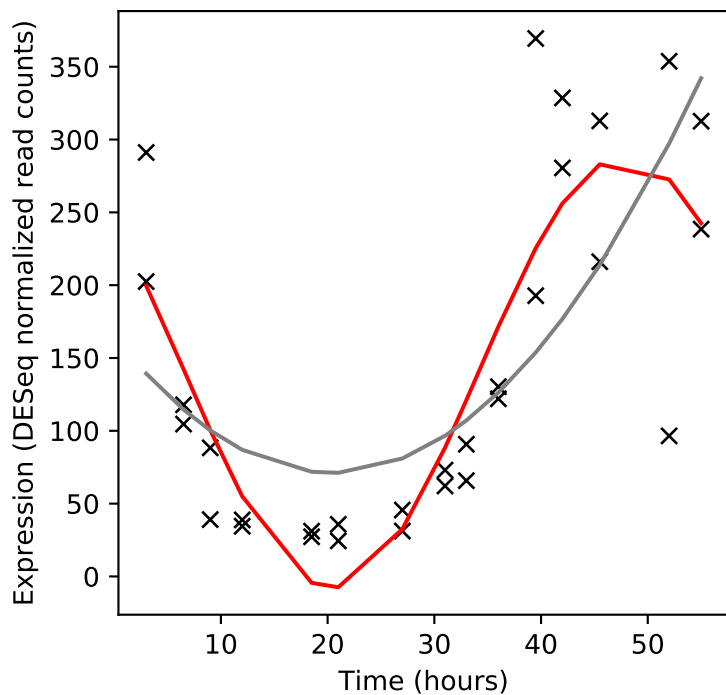

Rv2990c/-

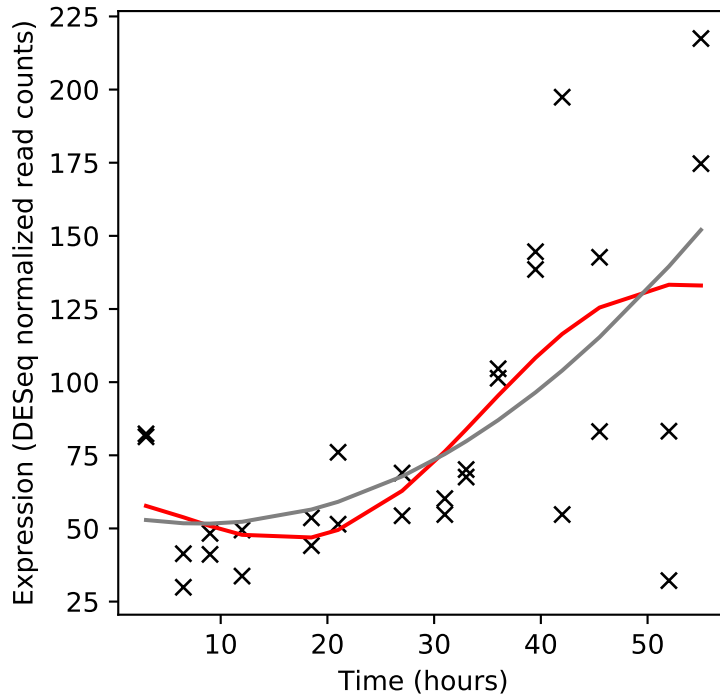

Rv2991/-

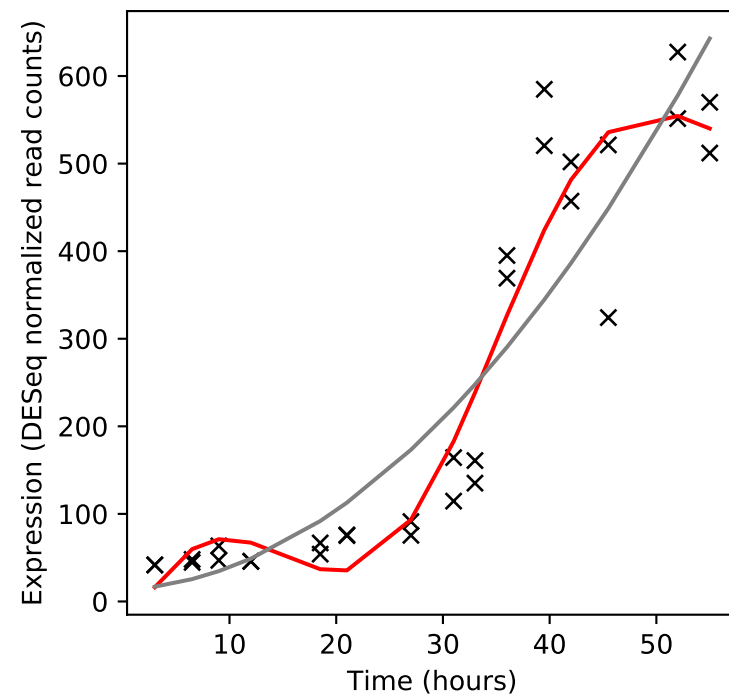

Rv2992c/gltS

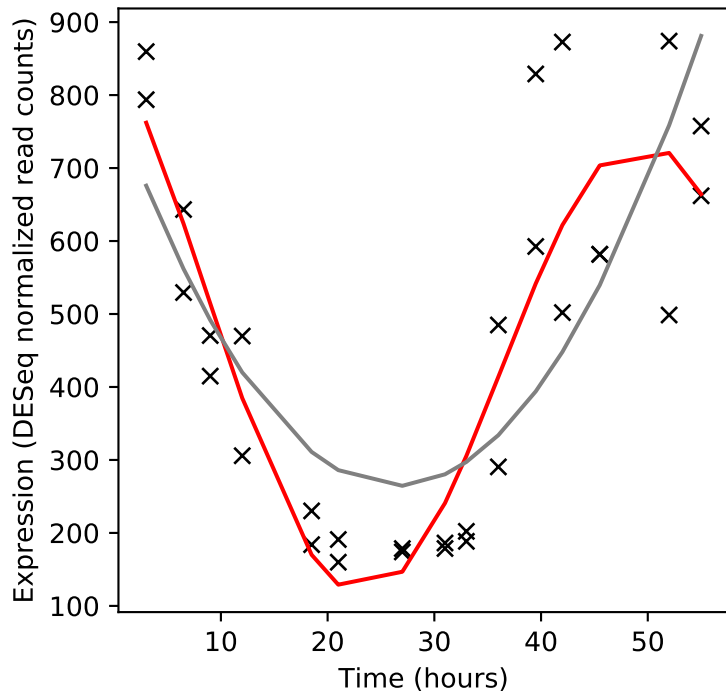

Rv2993c/-

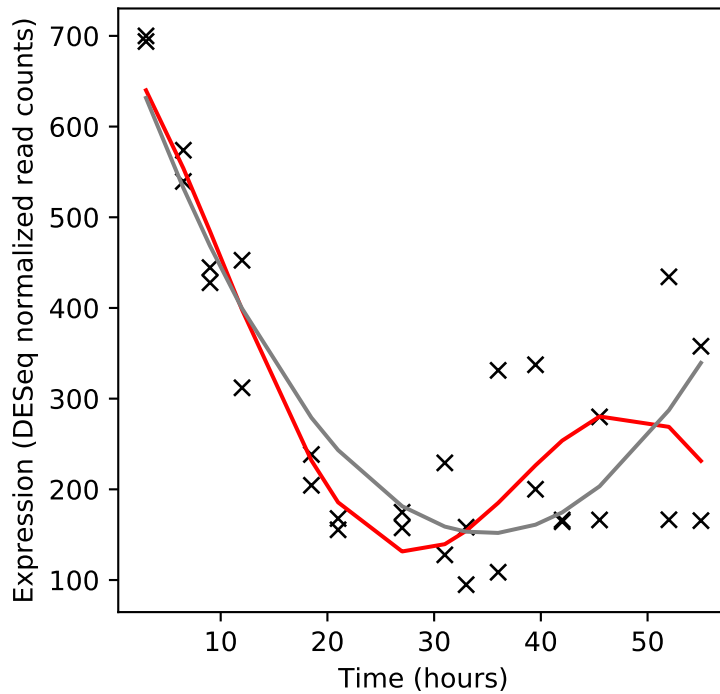

Rv2994/-

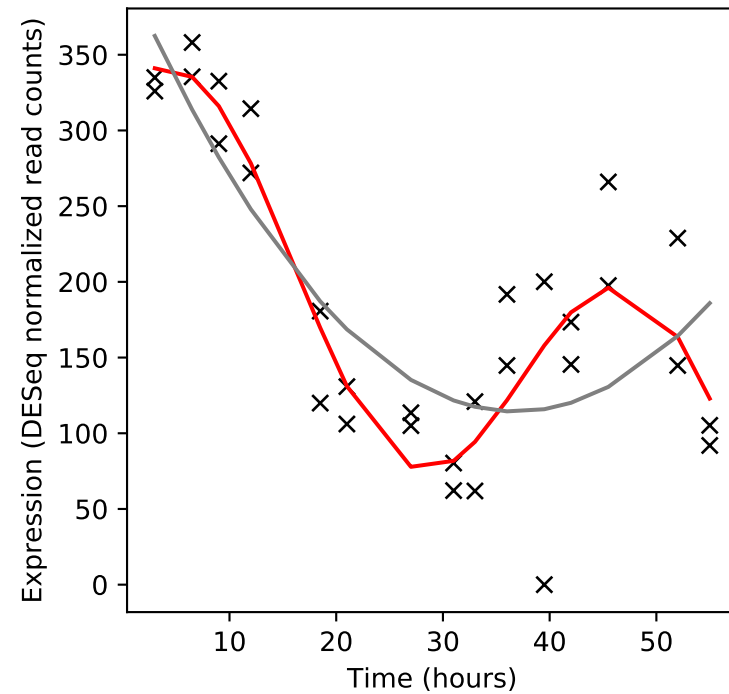

Rv2995c/leuB

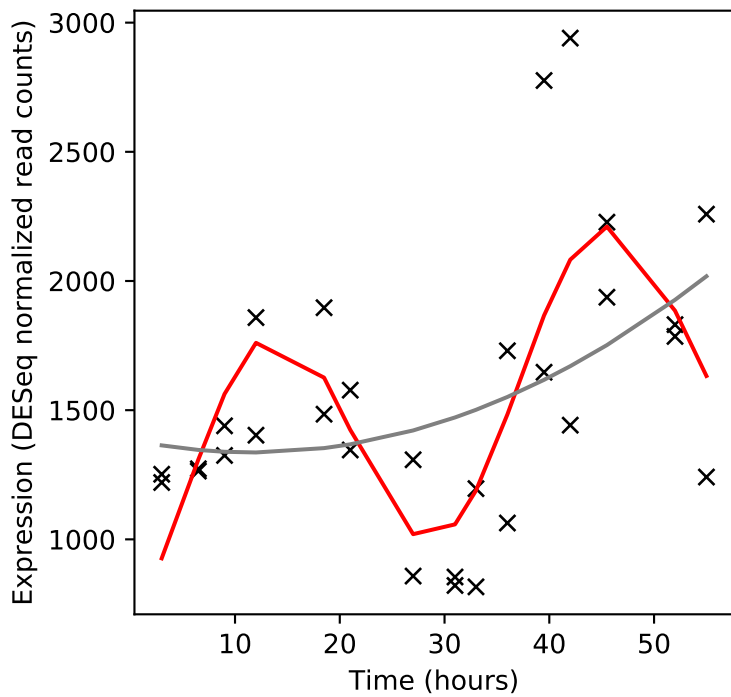

Rv2996c/serA1

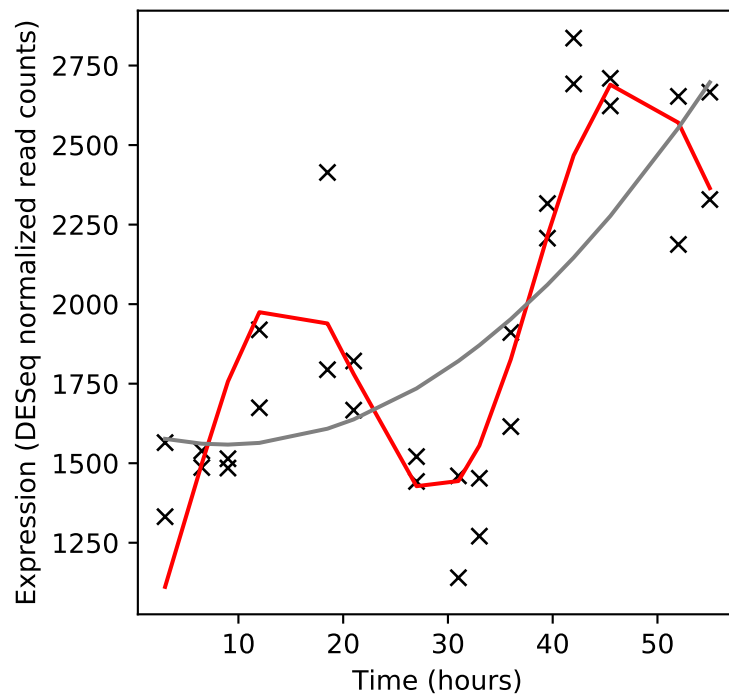

Rv2997/-

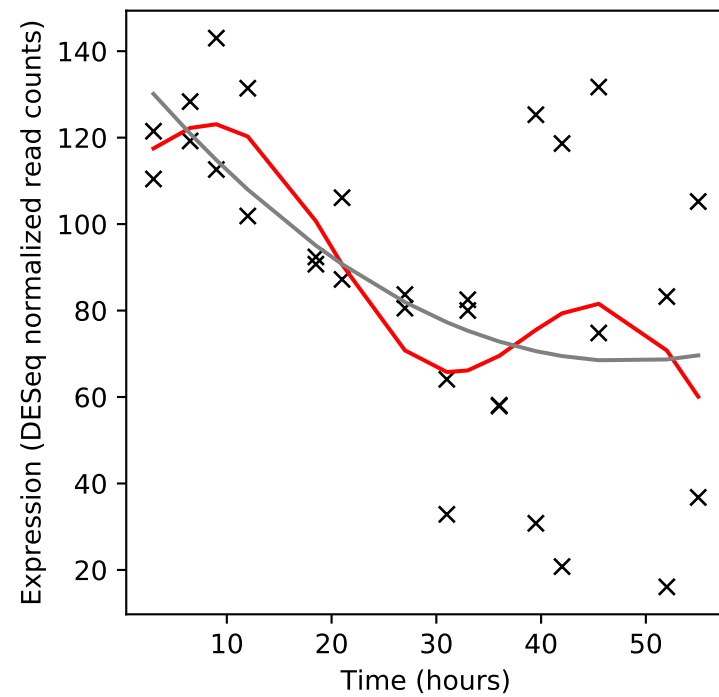

Rv2998/-

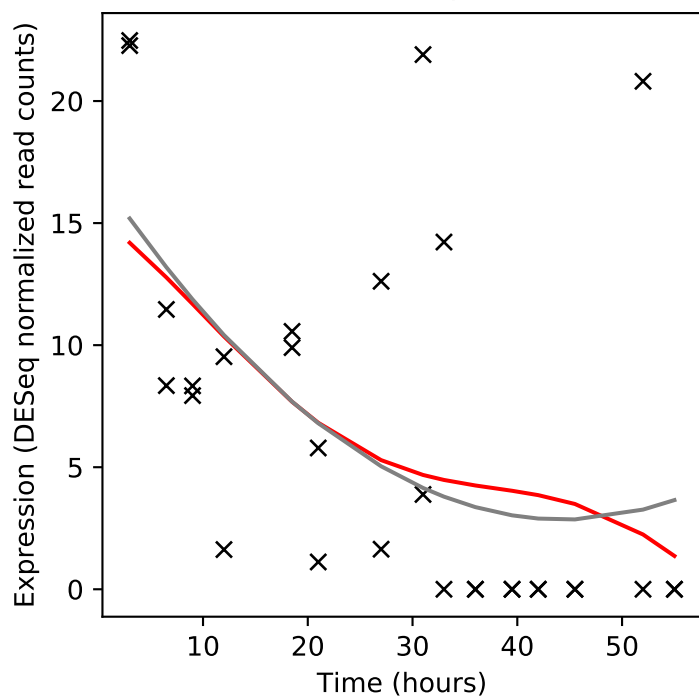

Rv2998A/-

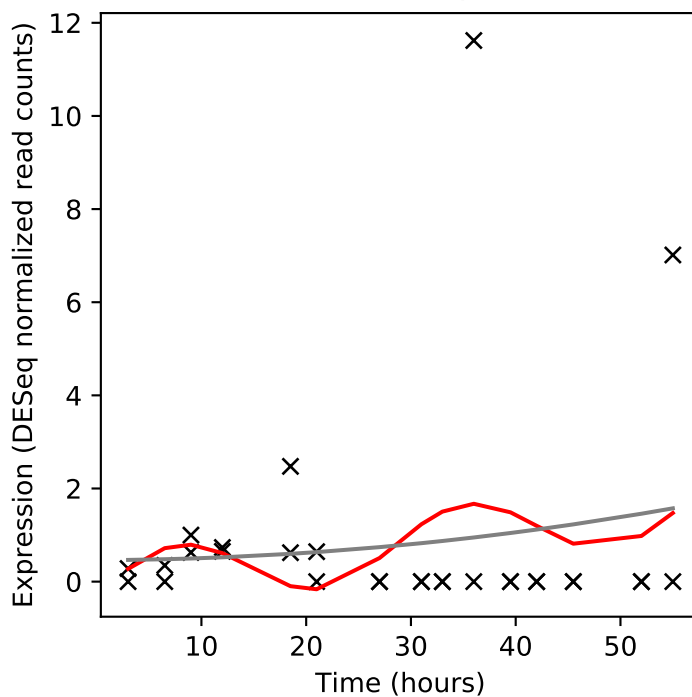

Rv2999/lppY

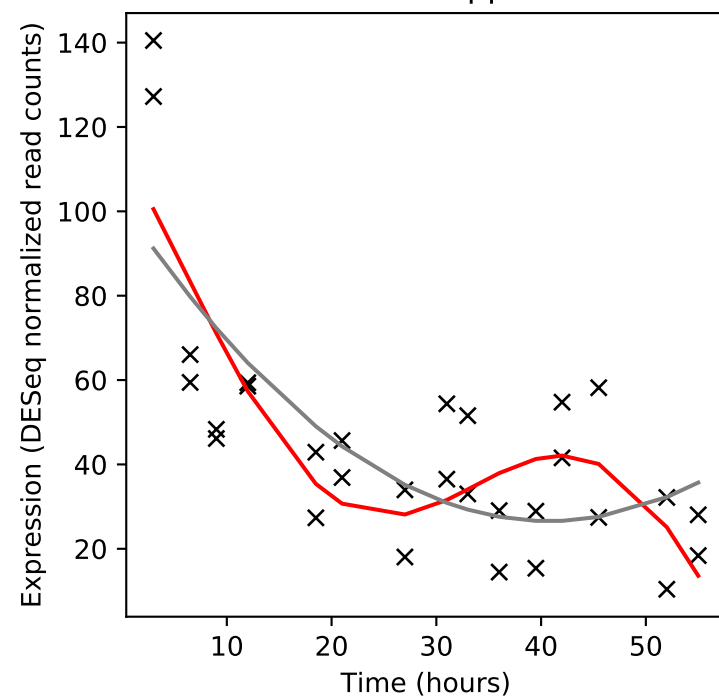

Rv3000/-

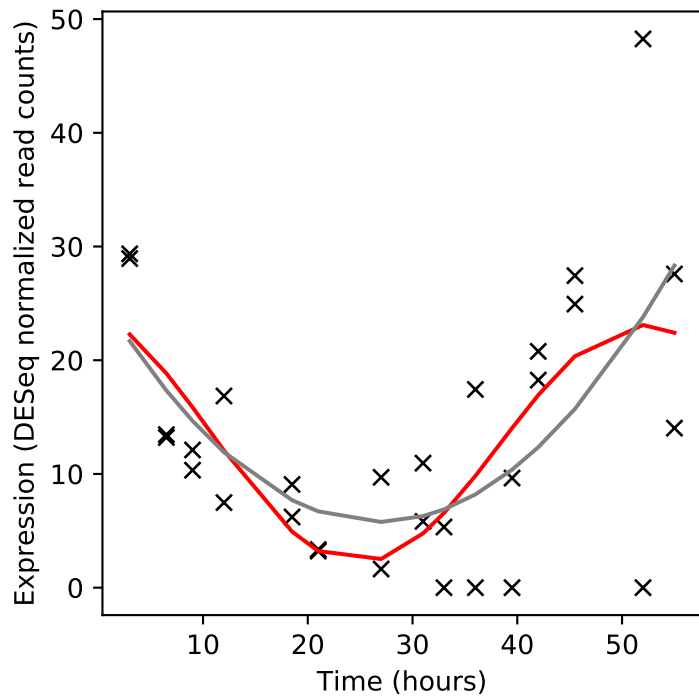

Rv3001c/ilvC

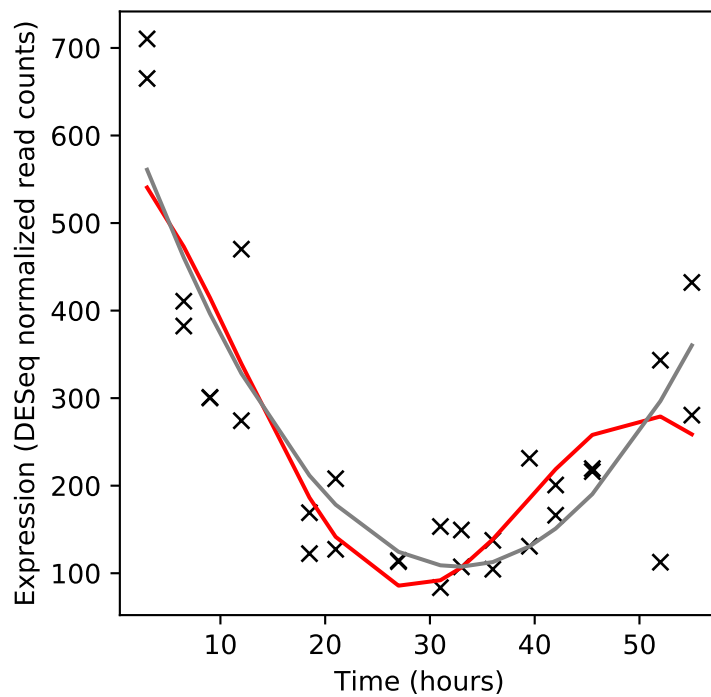

Rv3002c/ilvN

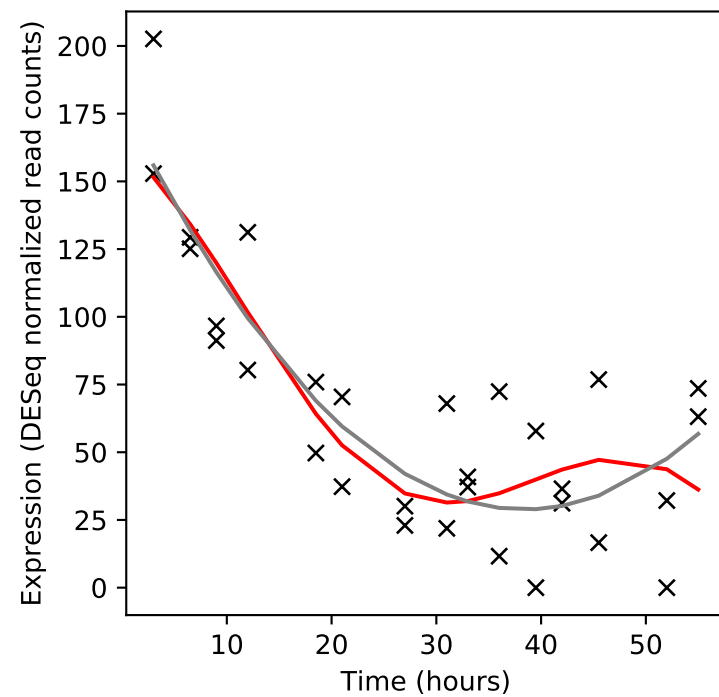

Rv3003c/ilvB1

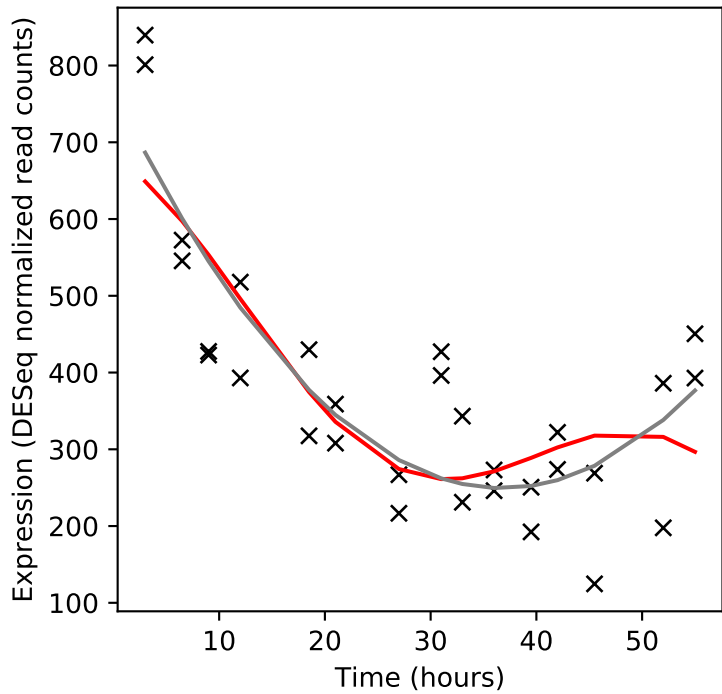

Rv3004c/cfp6

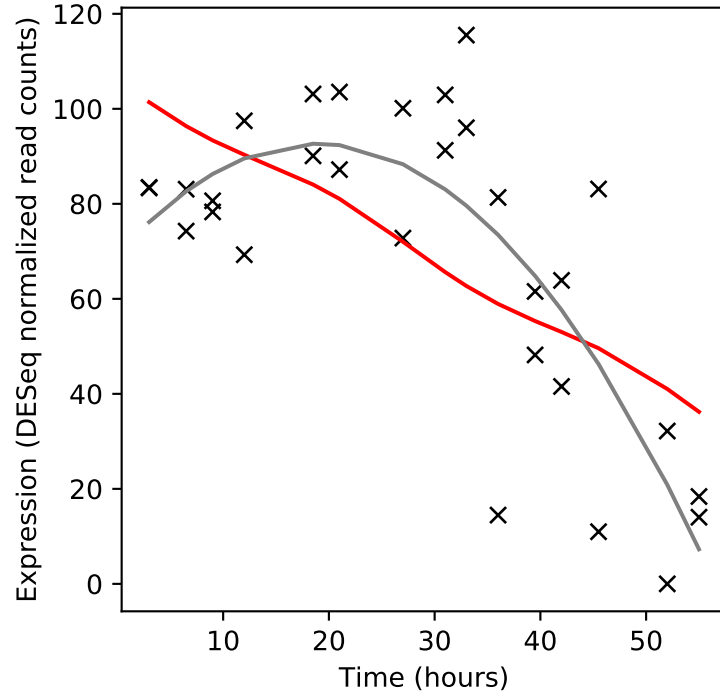

Rv3005c/-

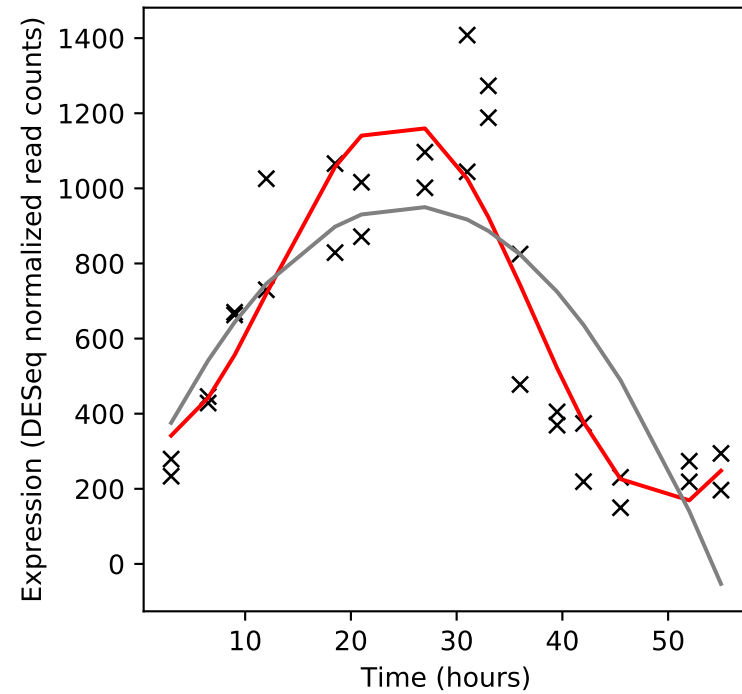

Rv3006c/lppZ

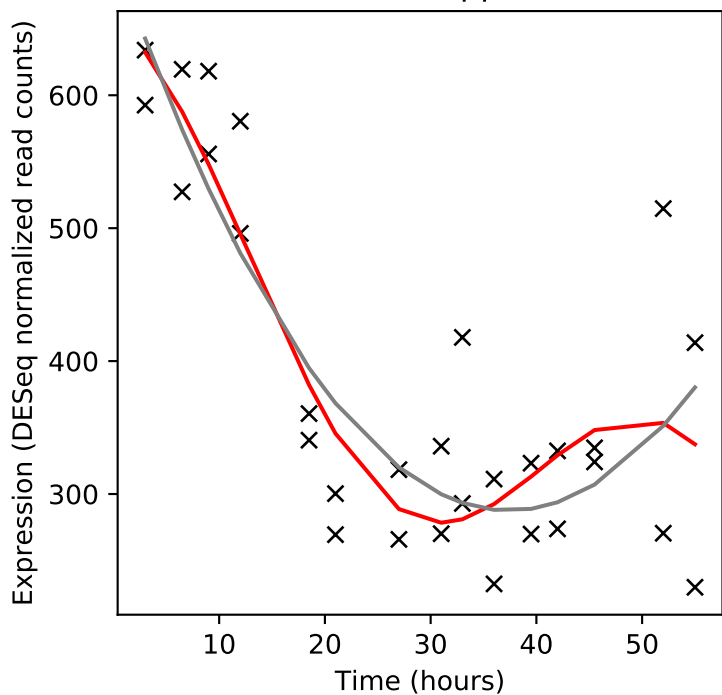

Rv3007c/-

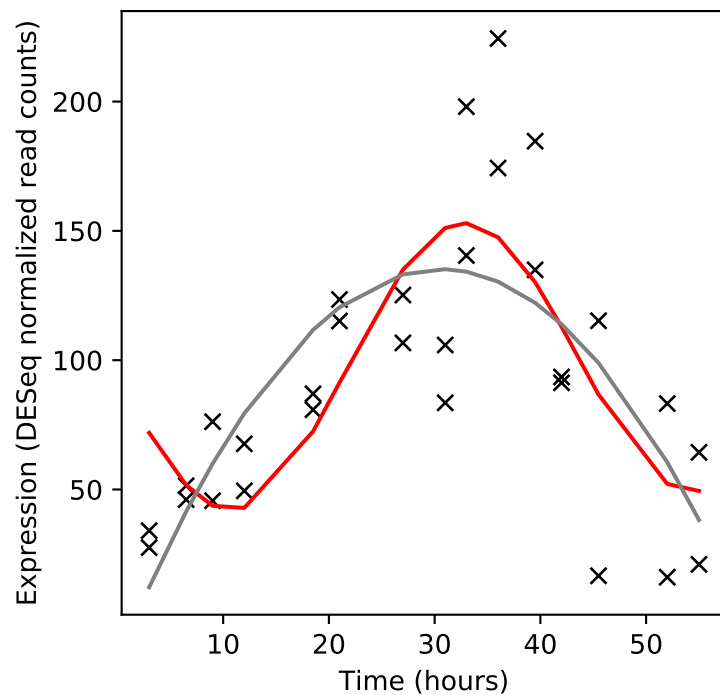

Rv3008c/-

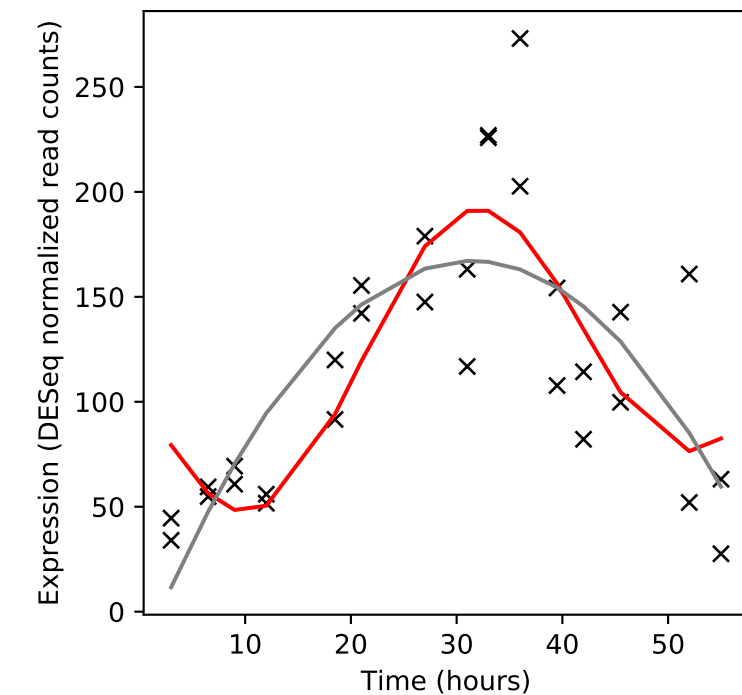

Rv3009c/gatB

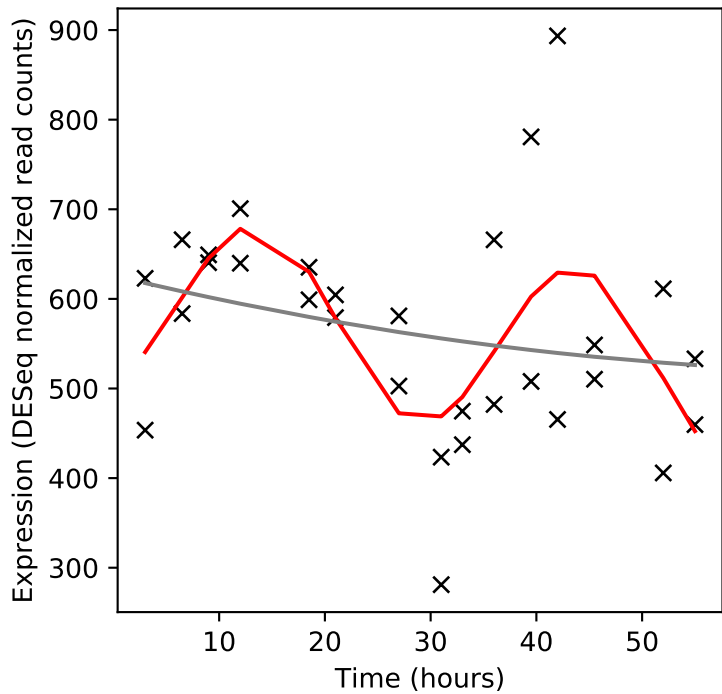

Rv3010c/pfkA

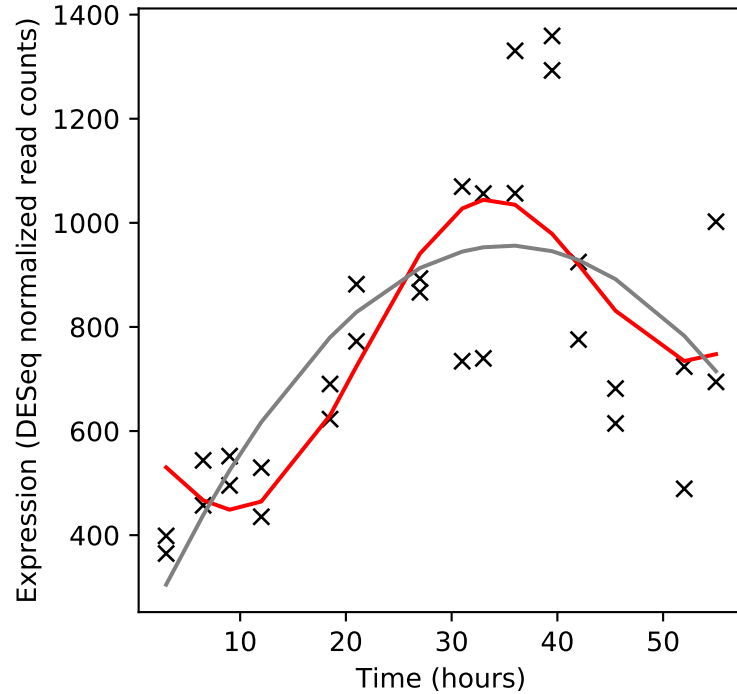

Rv3011c/gatA

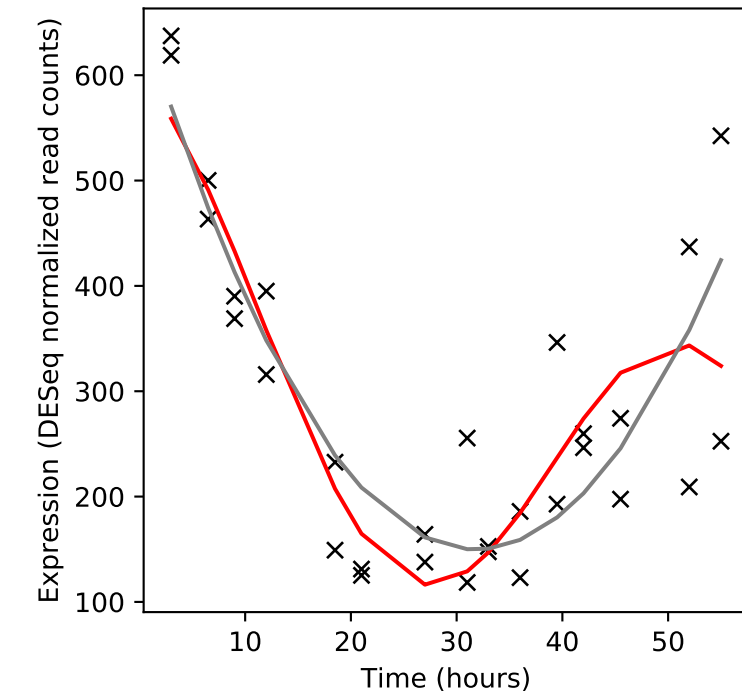

Rv3012c/gatC

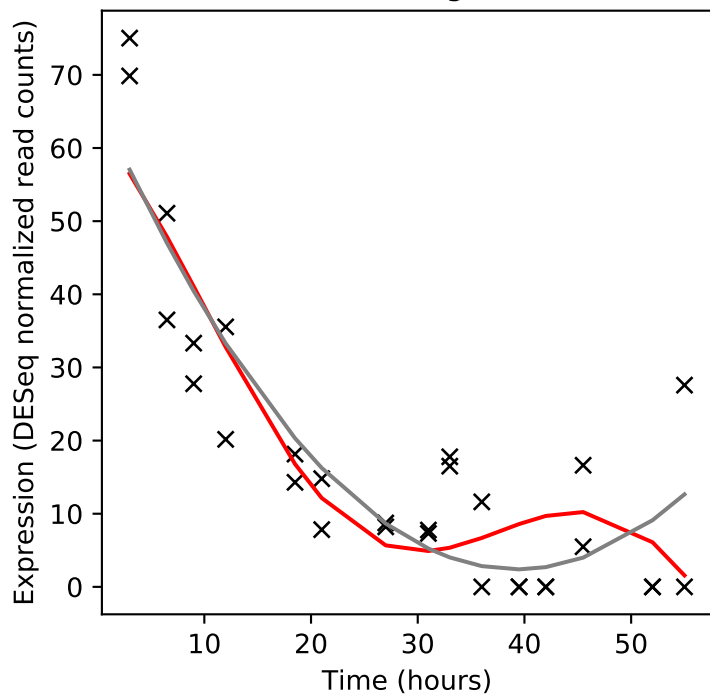

Rv3013/-

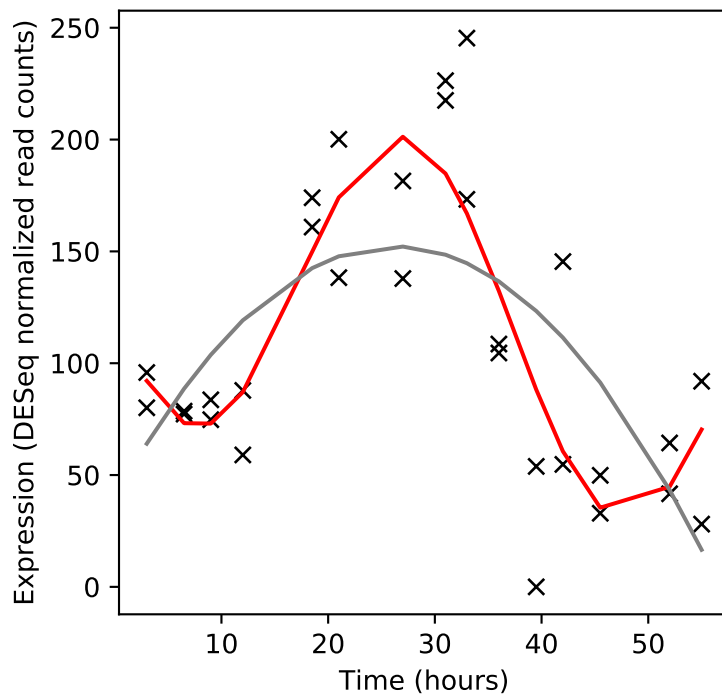

Rv3014c/ligA

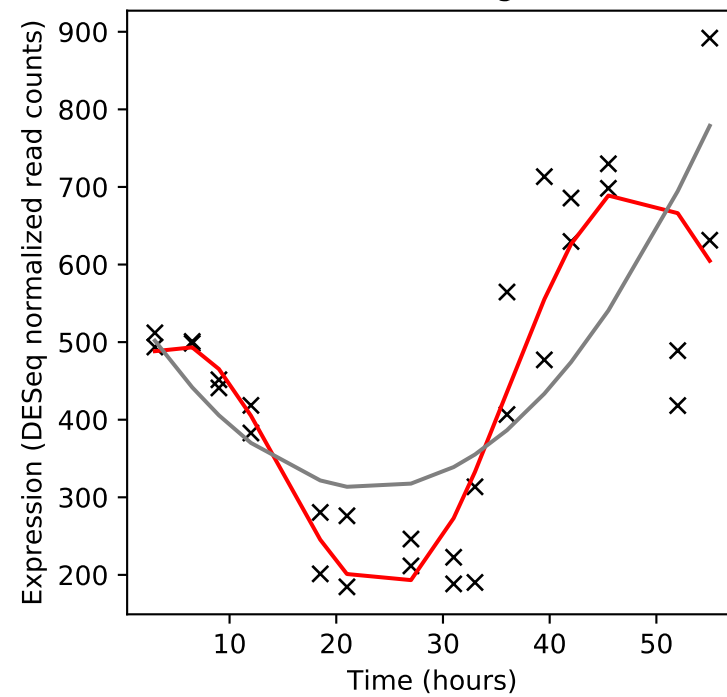

Rv3015c/-

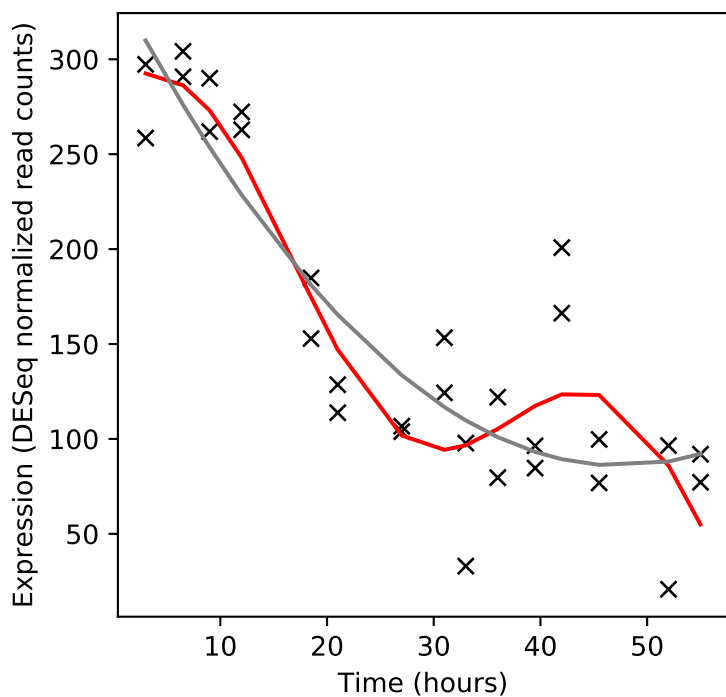

Rv3016/lpqA

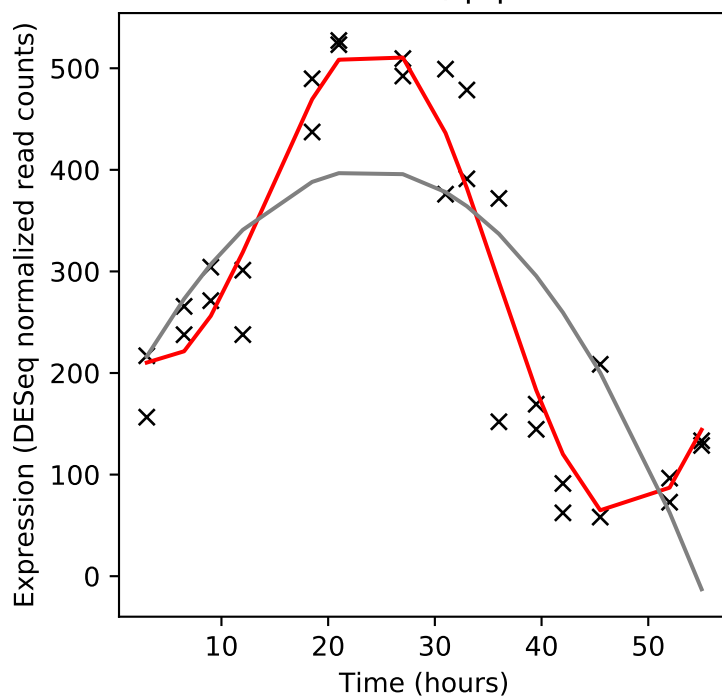

Rv3017c/esxQ

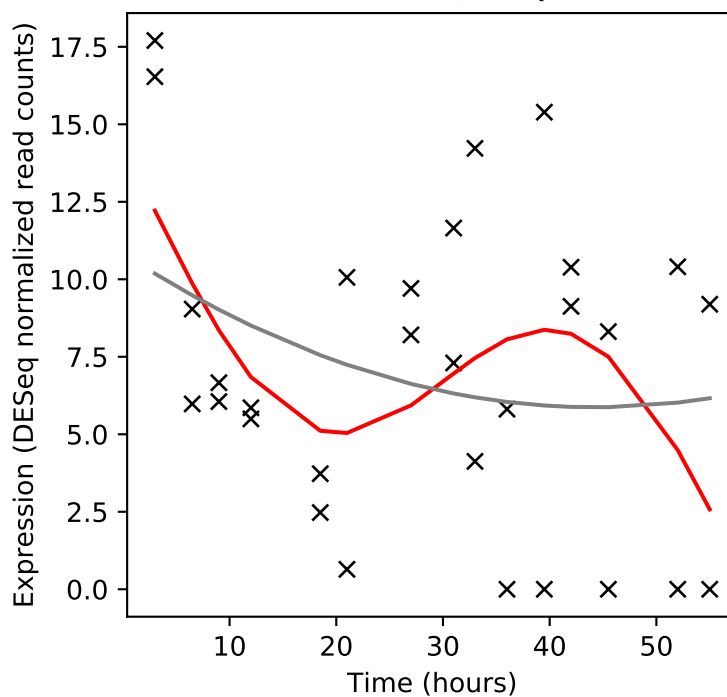

Rv3018c/PPE46

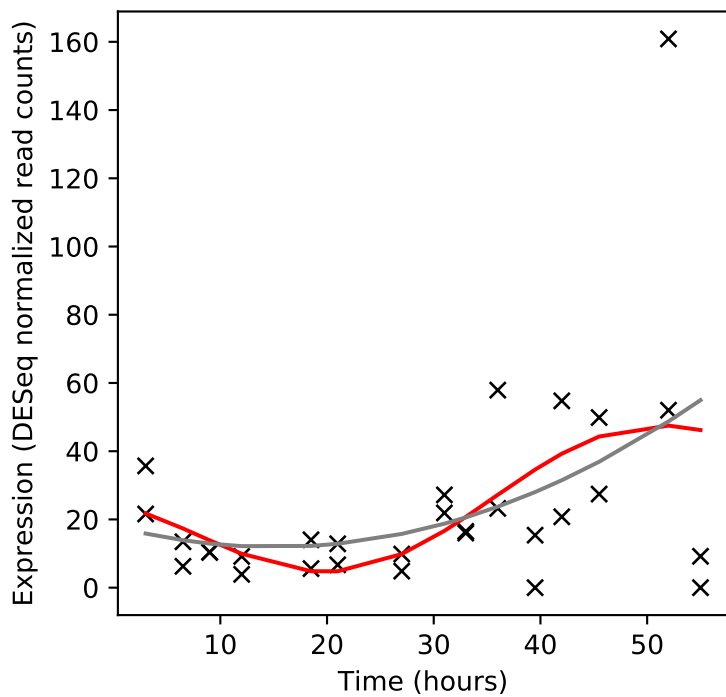

Rv3018A/PE27A

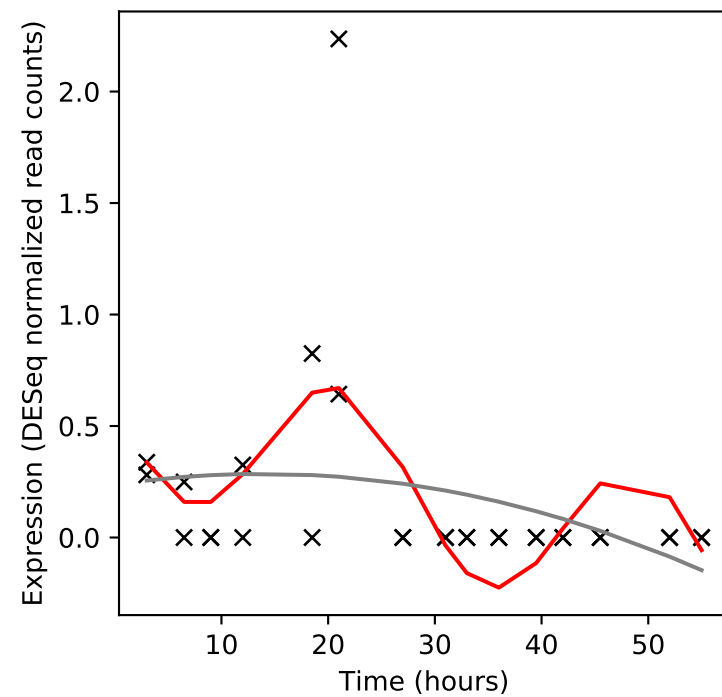

Rv3019c/esxR

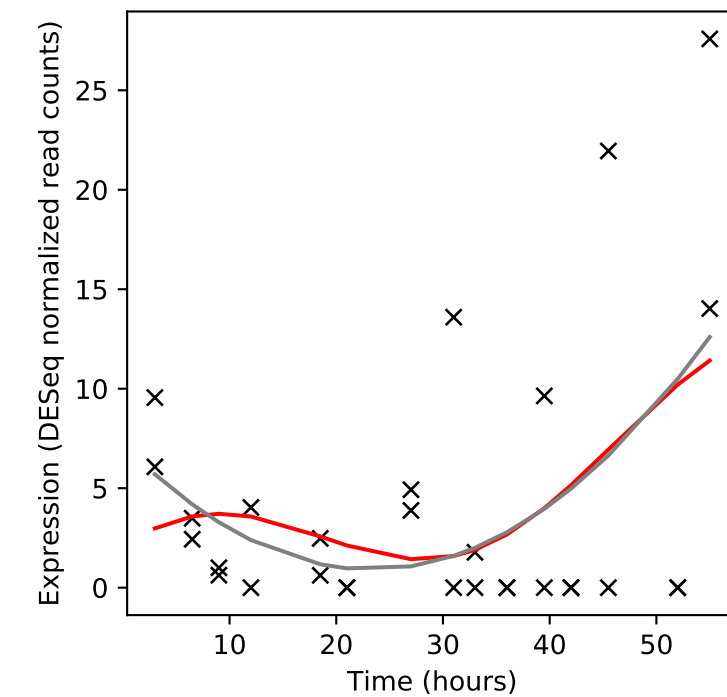



Rv3020c/esxS

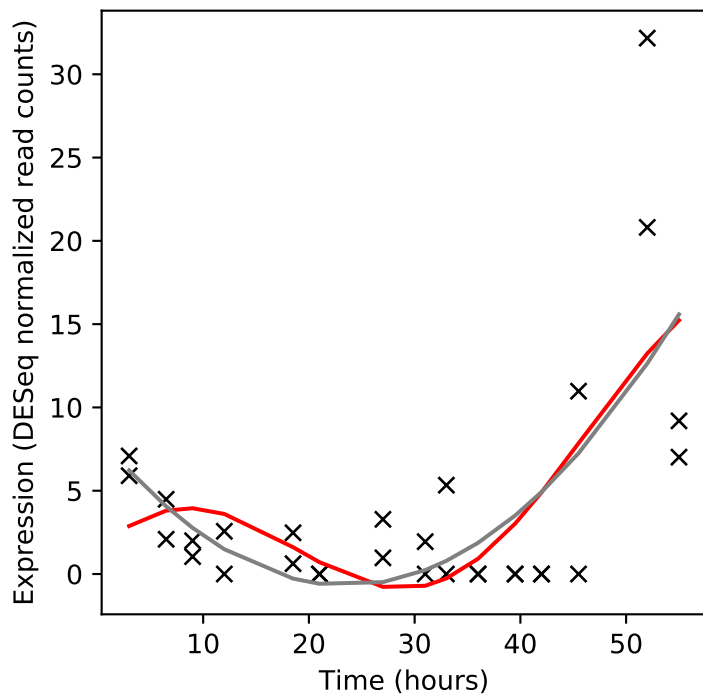

Rv3022A/PE29

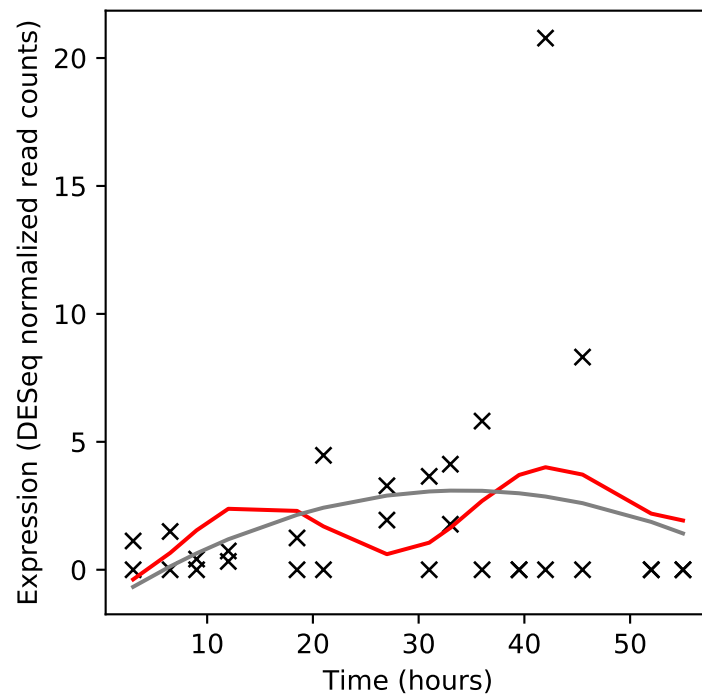

Rv3023c/-

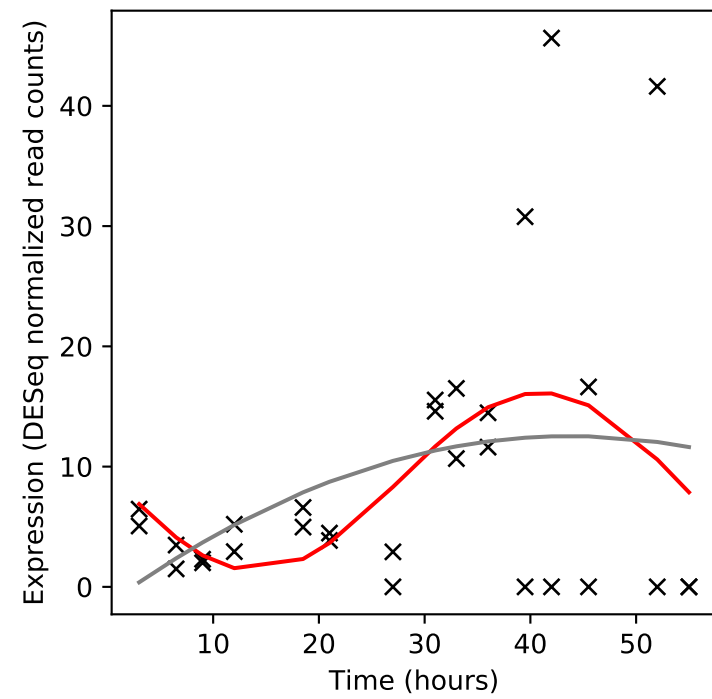

Rv3024c/trmU

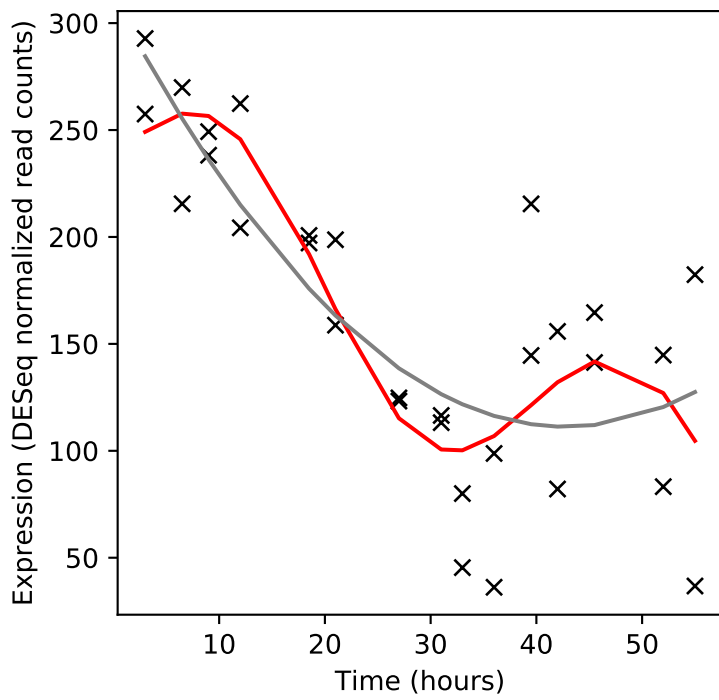

Rv3025c/iscS

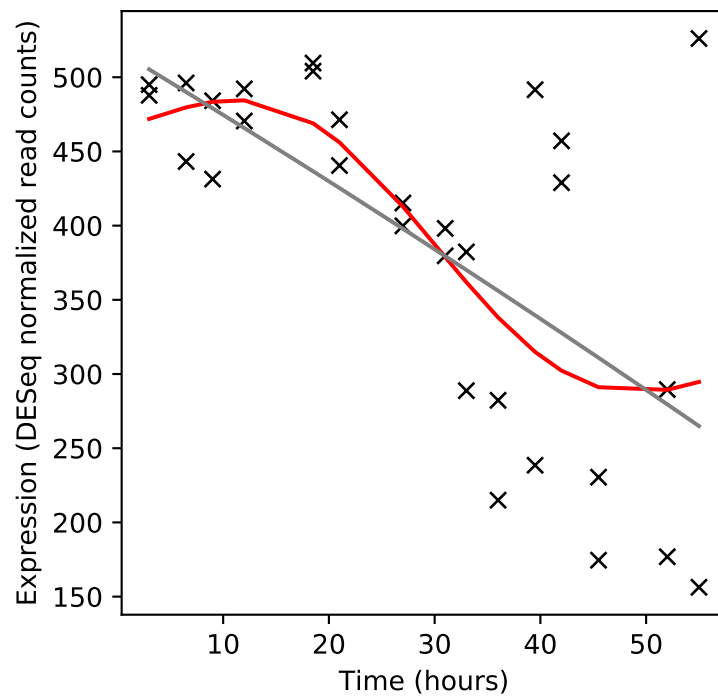

Rv3026c/-

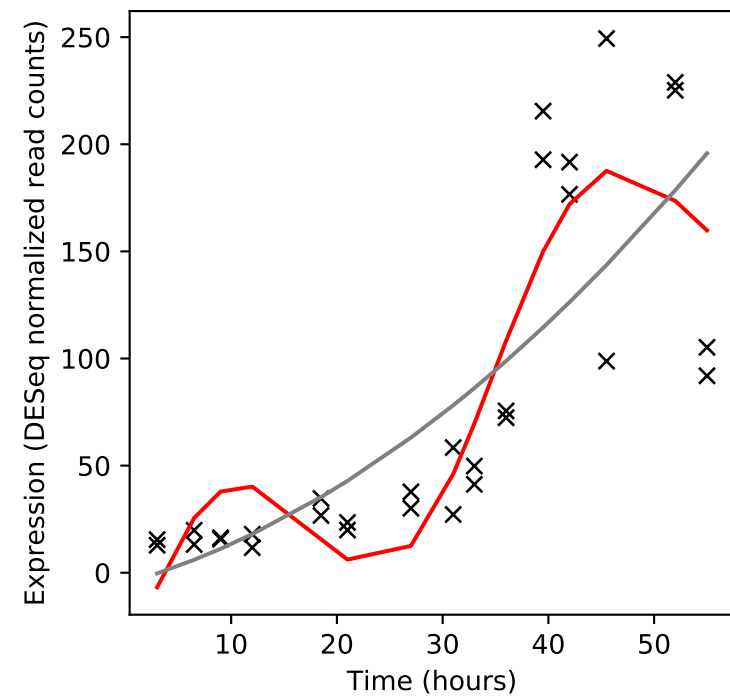

Rv3027c/-

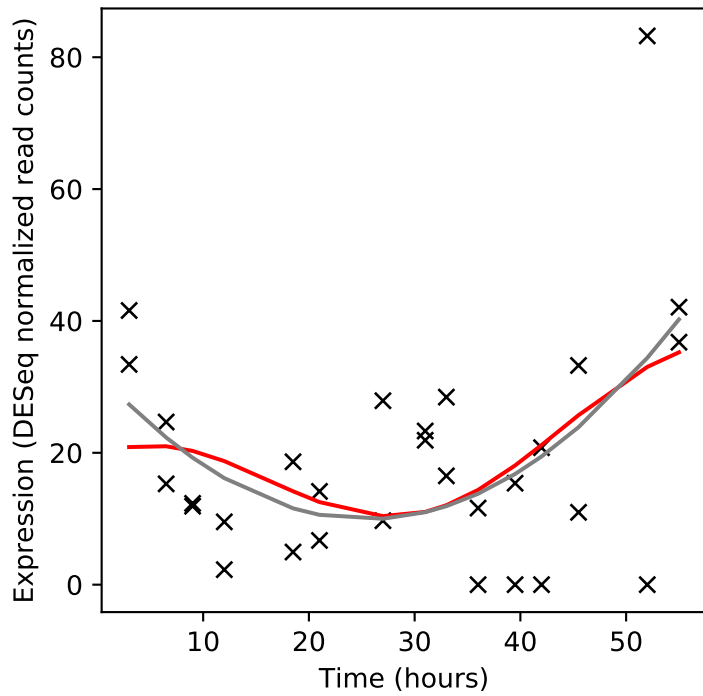

Rv3028c/fixB

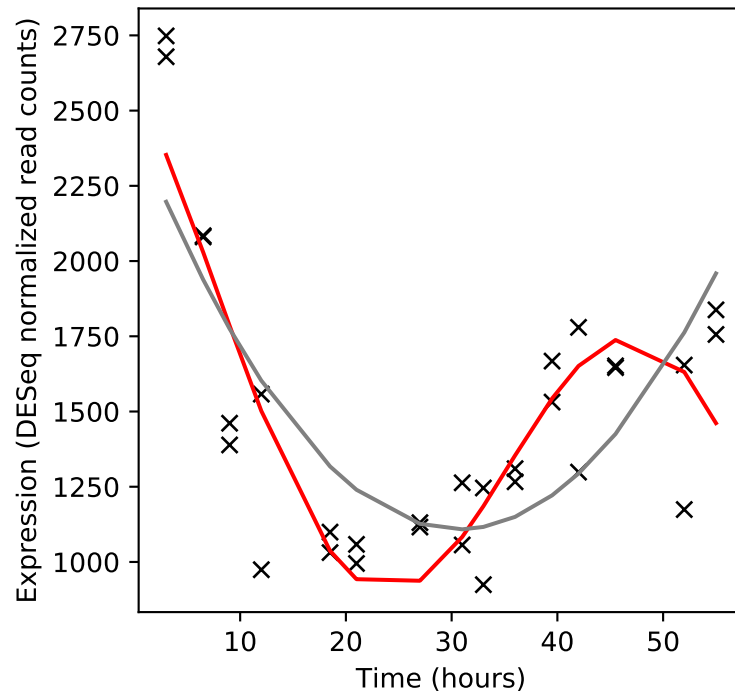

Rv3029c/fixA

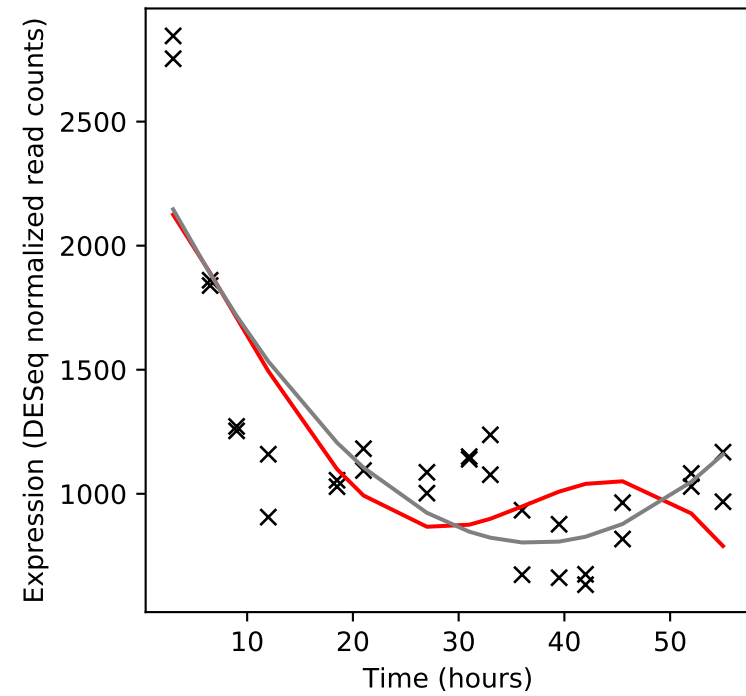

Rv3030/-

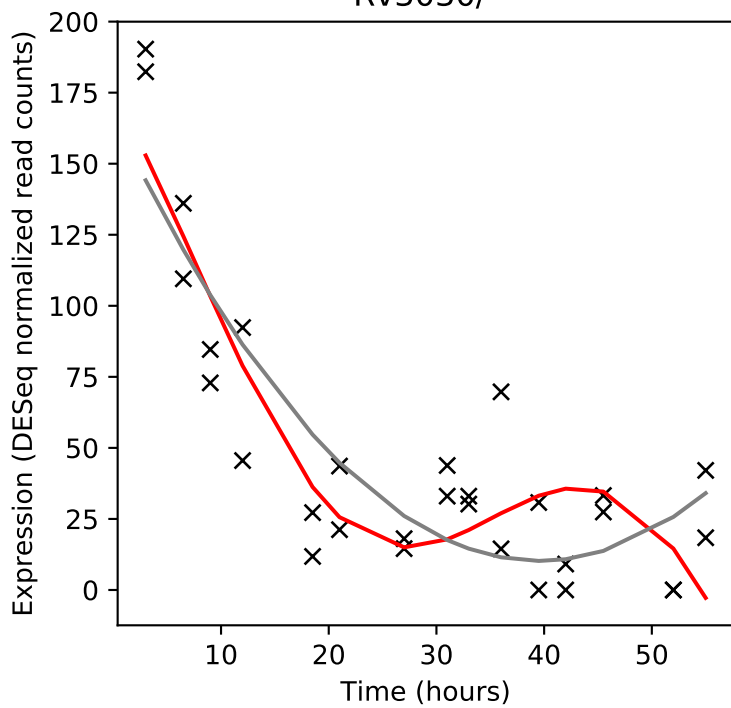

Rv3031/-

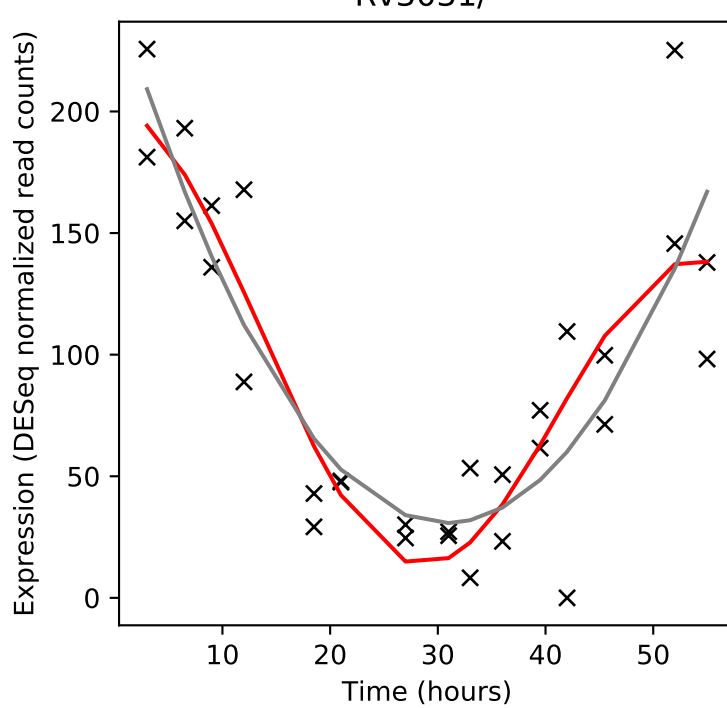

Rv3032/-

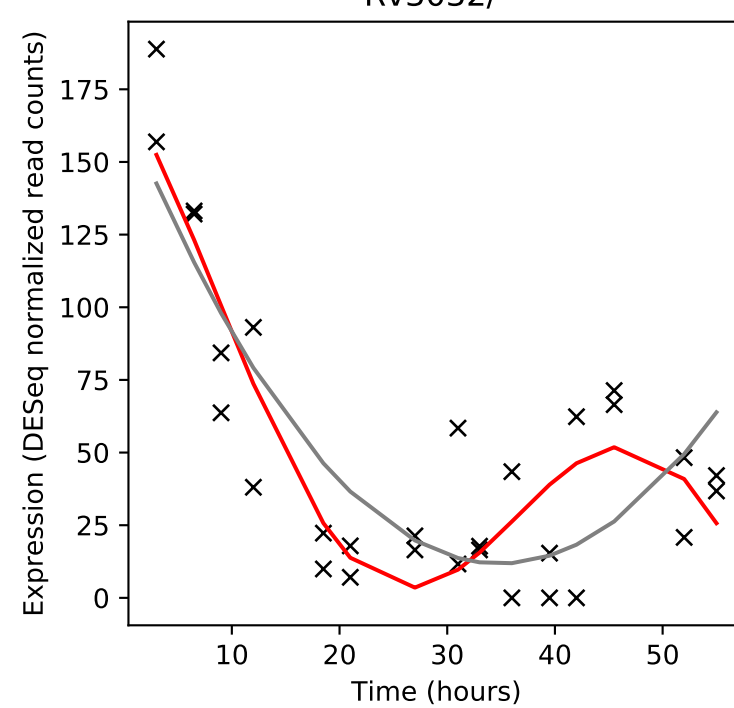

Rv3032A/-

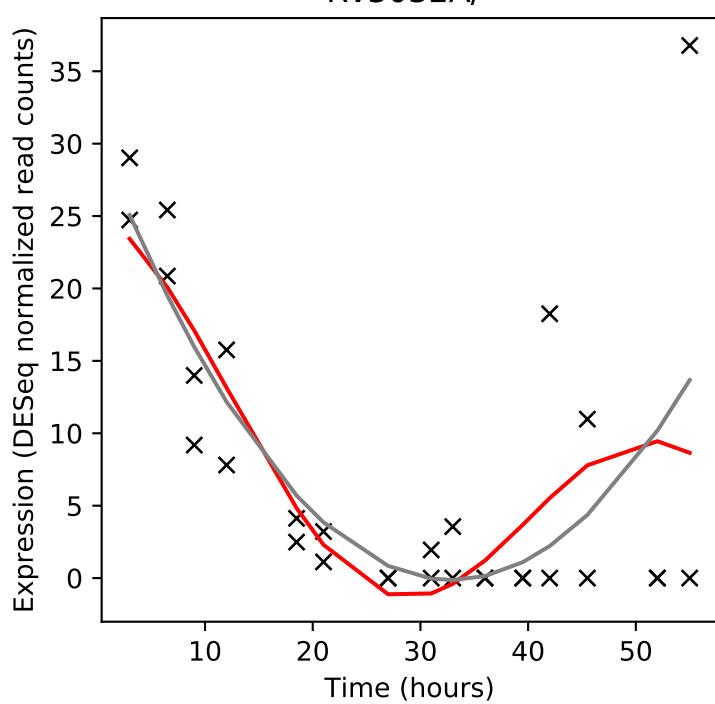

Rv3033/-

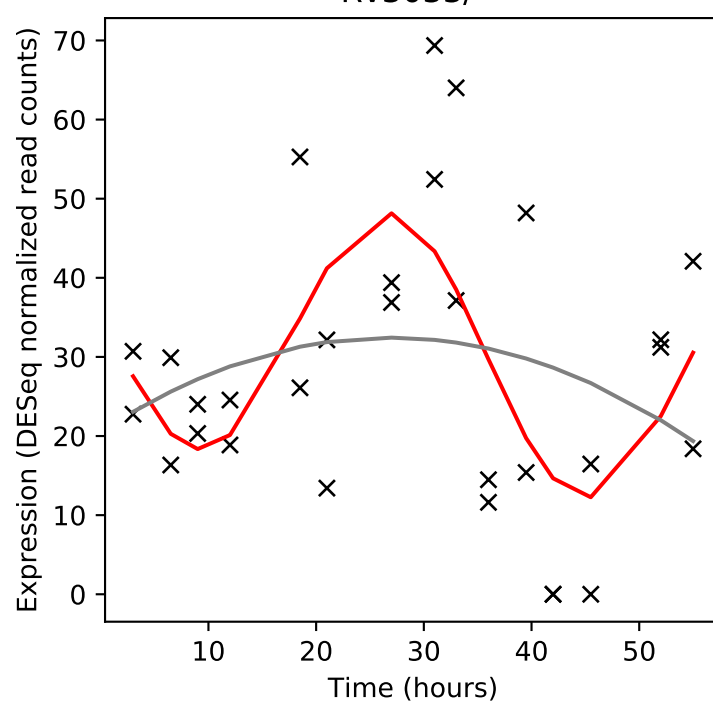

Rv3034c/-

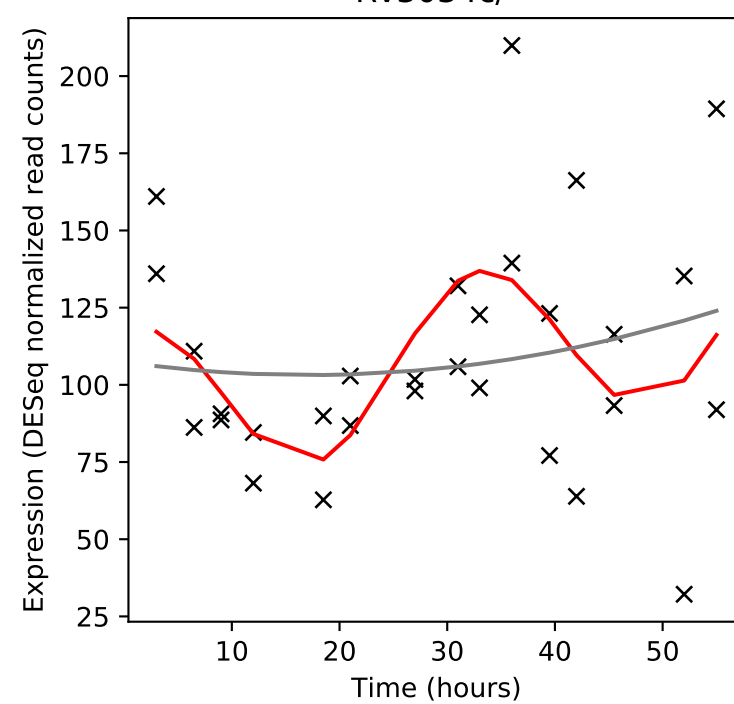

Rv3035/-

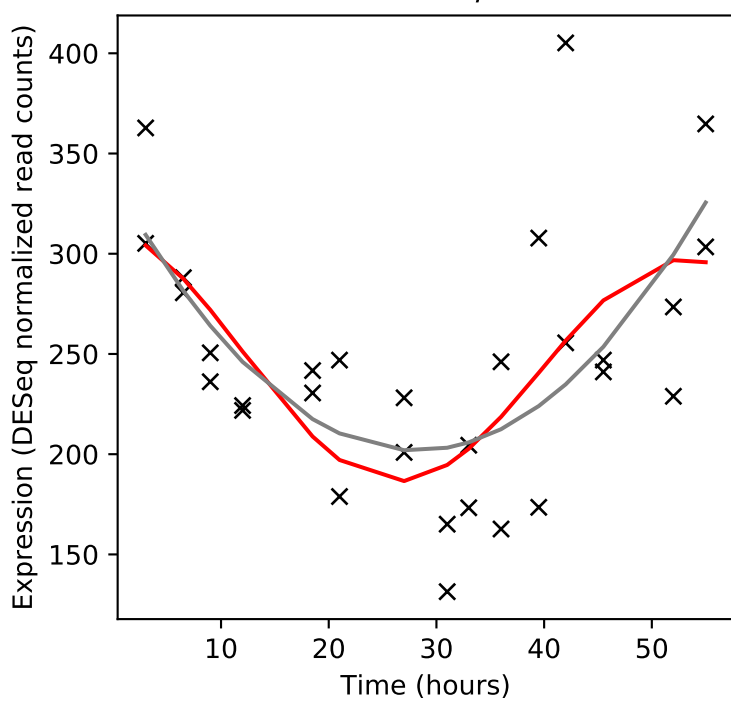

Rv3036c/TB22.2

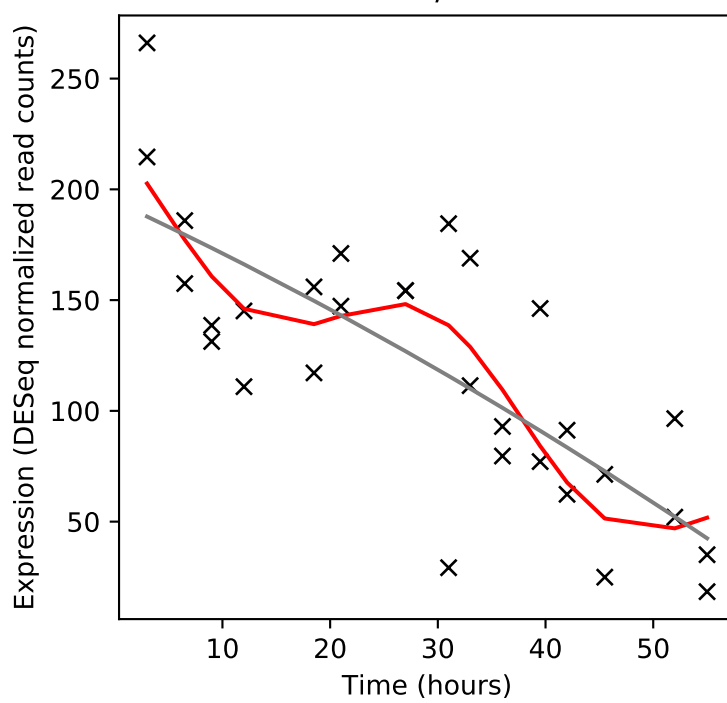

Rv3037c/-

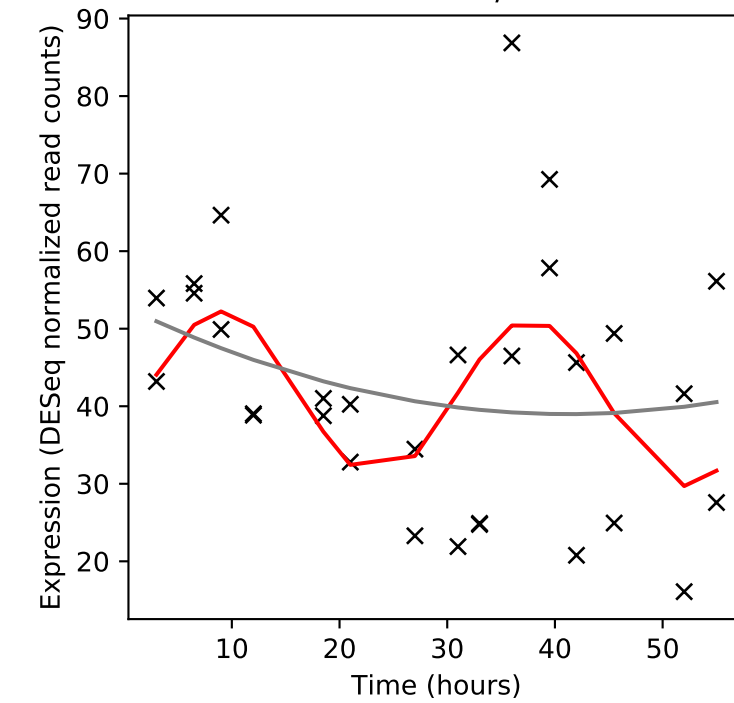

Rv3038c/-

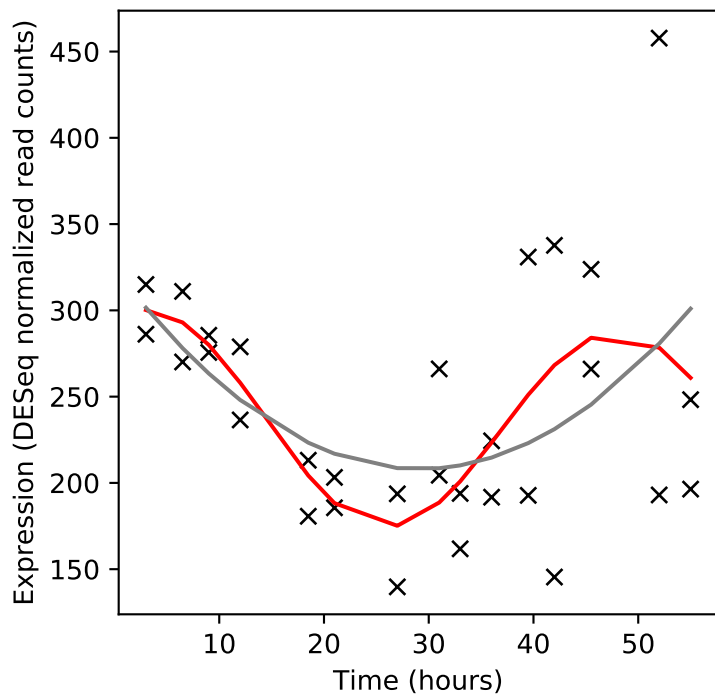

Rv3039c/echA17

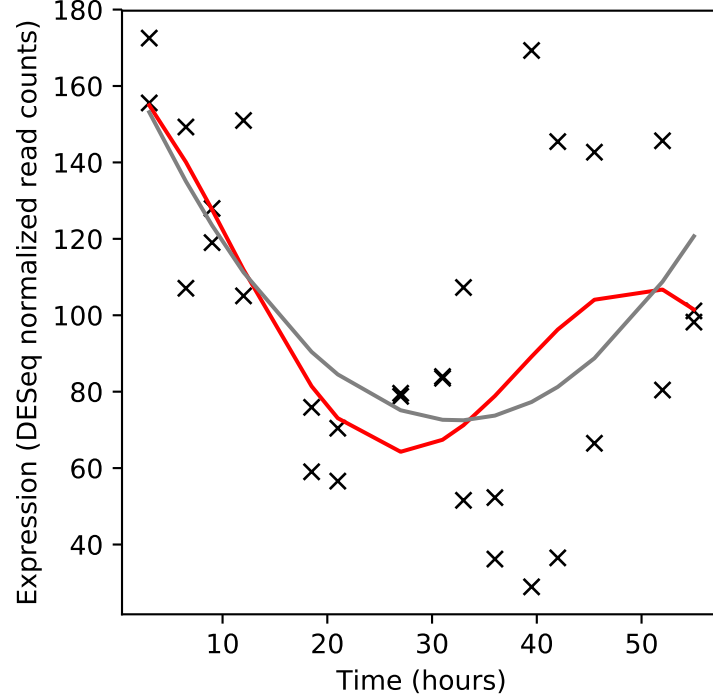

Rv3040c/-

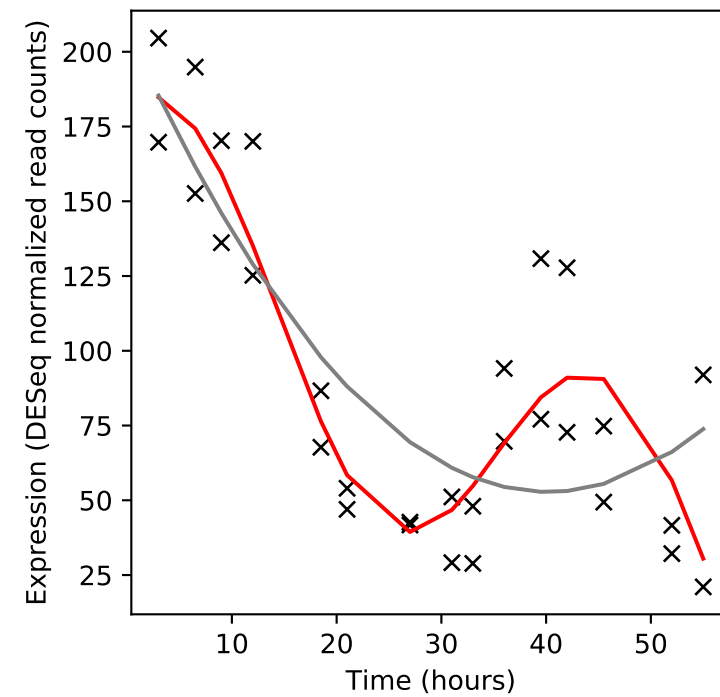

Rv3041c/-

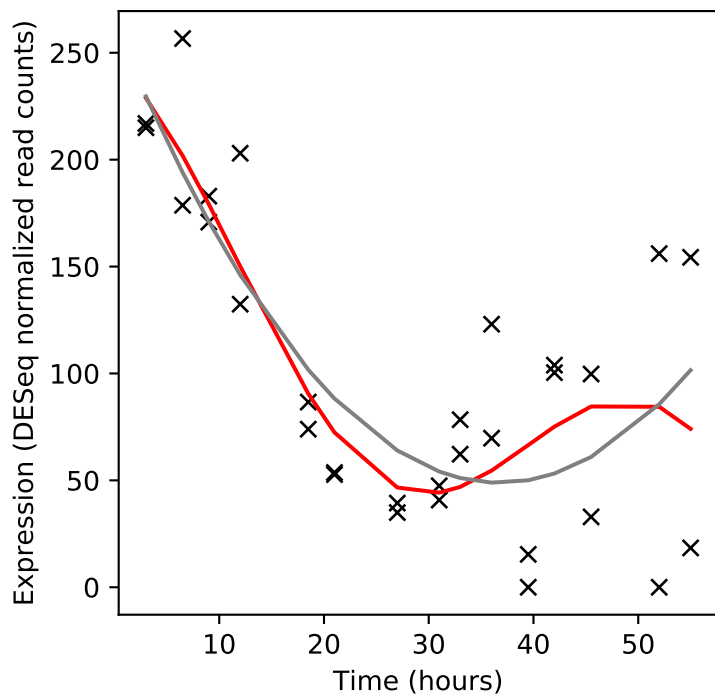

Rv3042c/serB2

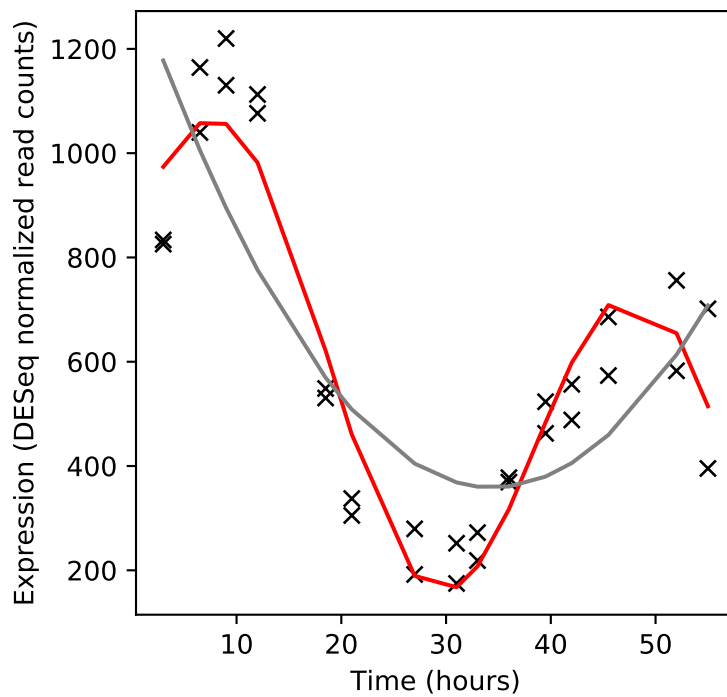

Rv3043c/ctaD

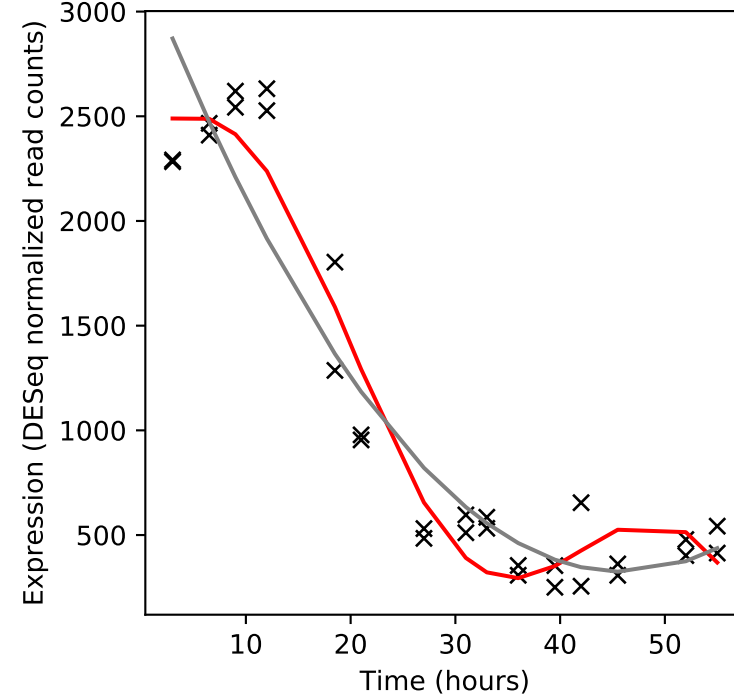

Rv3044/fecB

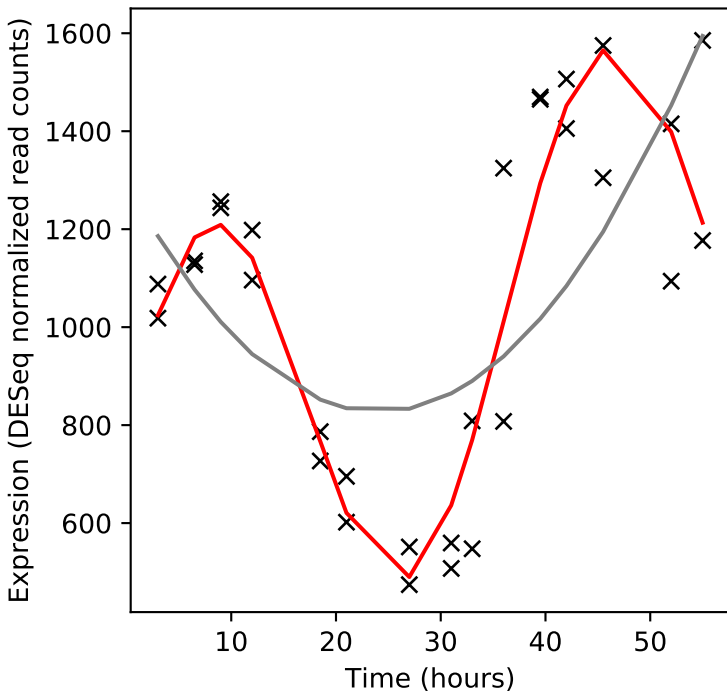

Rv3045/adhC

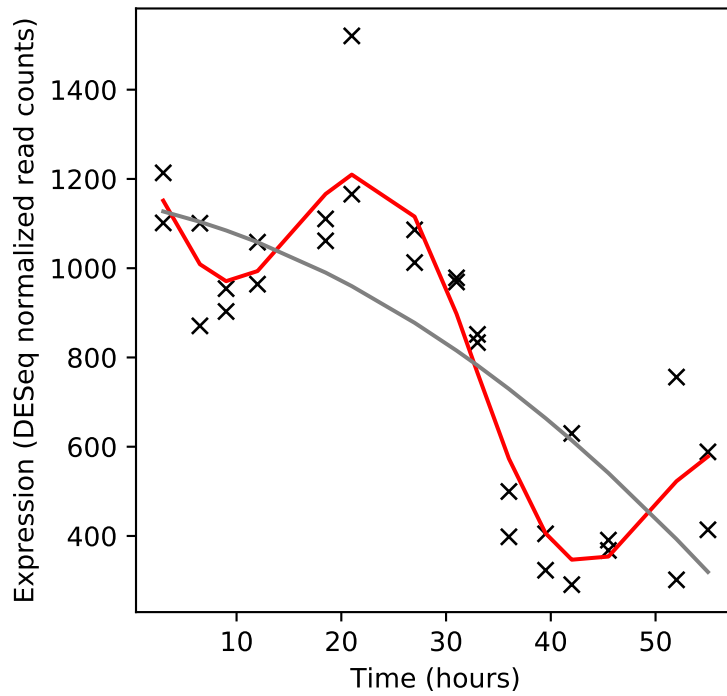

Rv3046c/-

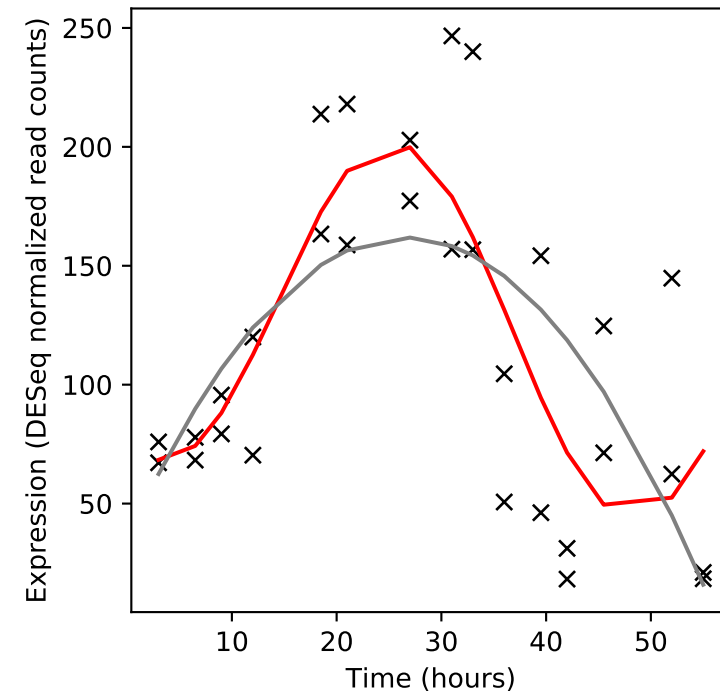

Rv3047c/-

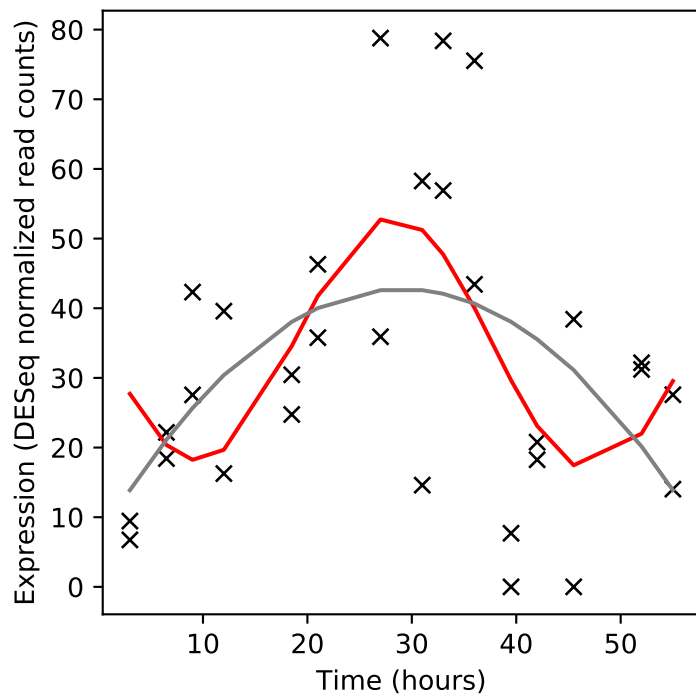

Rv3048c/nrdF2

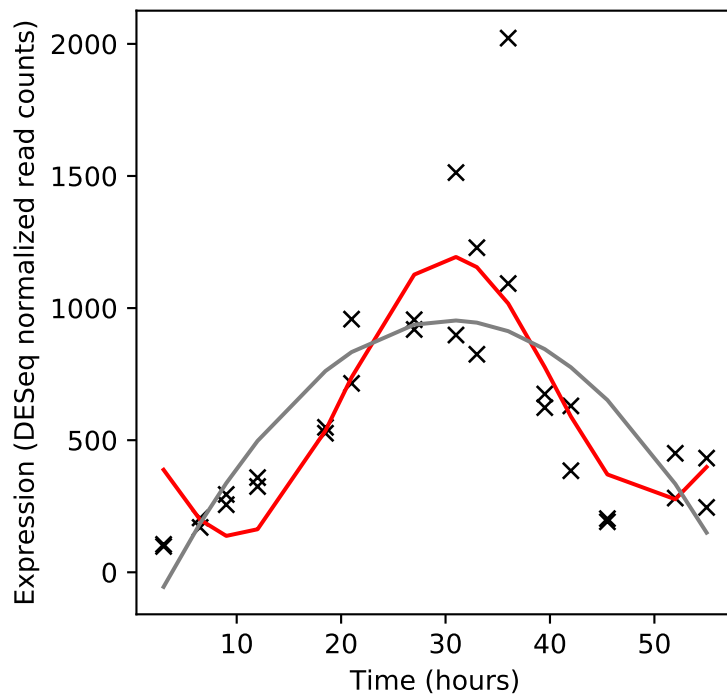

Rv3049c/-

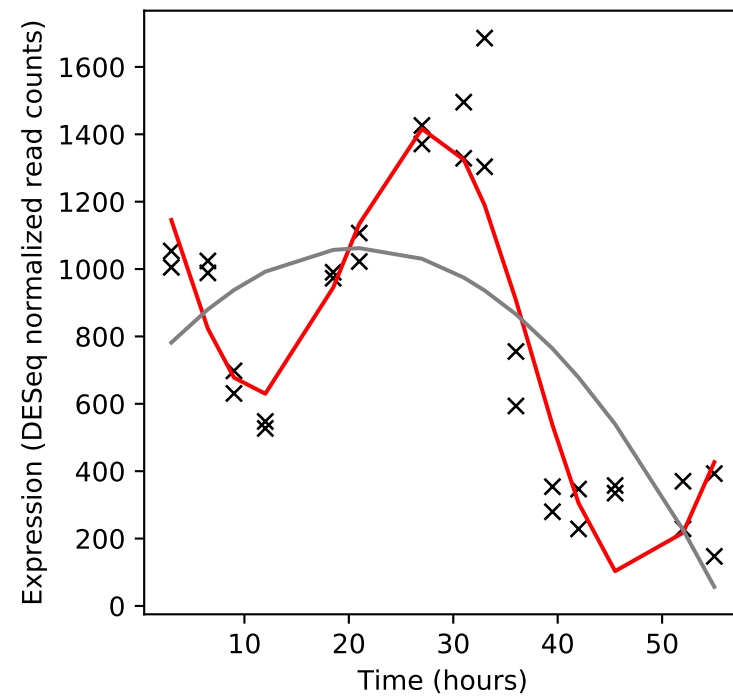

Rv3050c/-

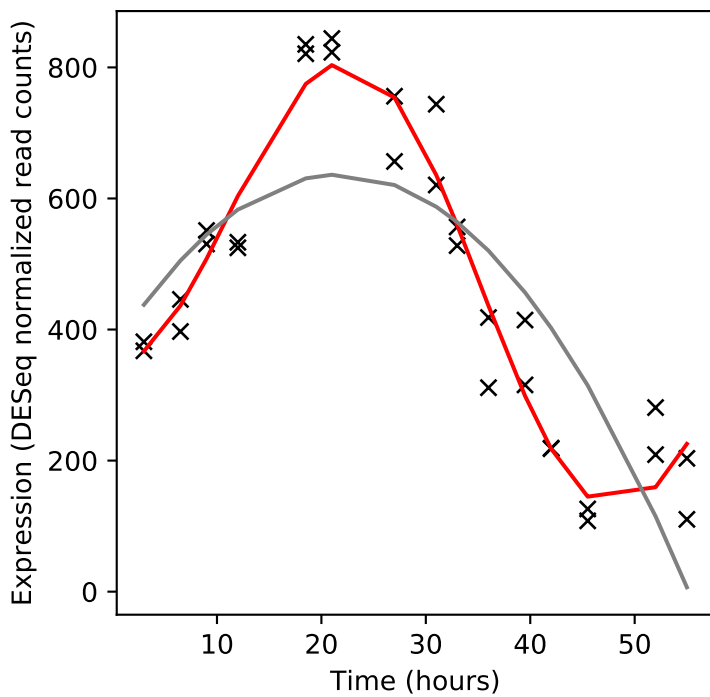

Rv3051c/nrdE

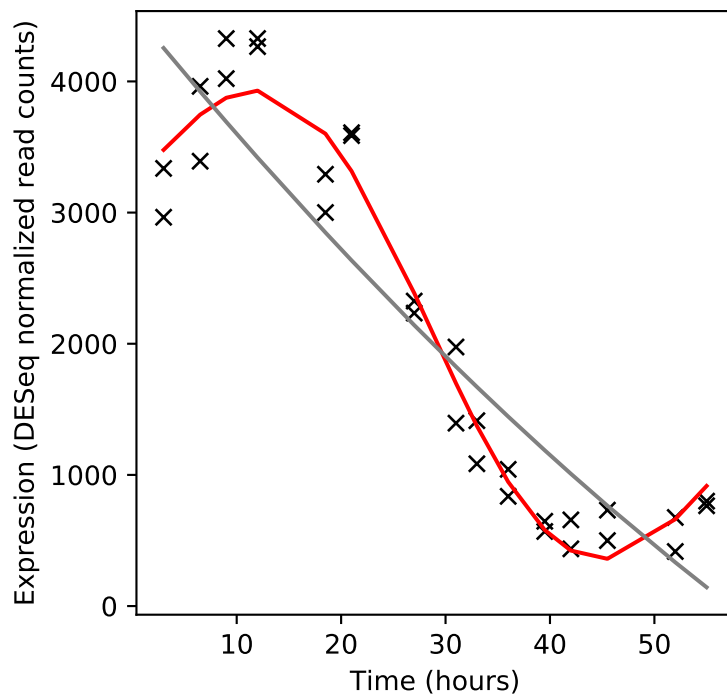

Rv3052c/nrdI

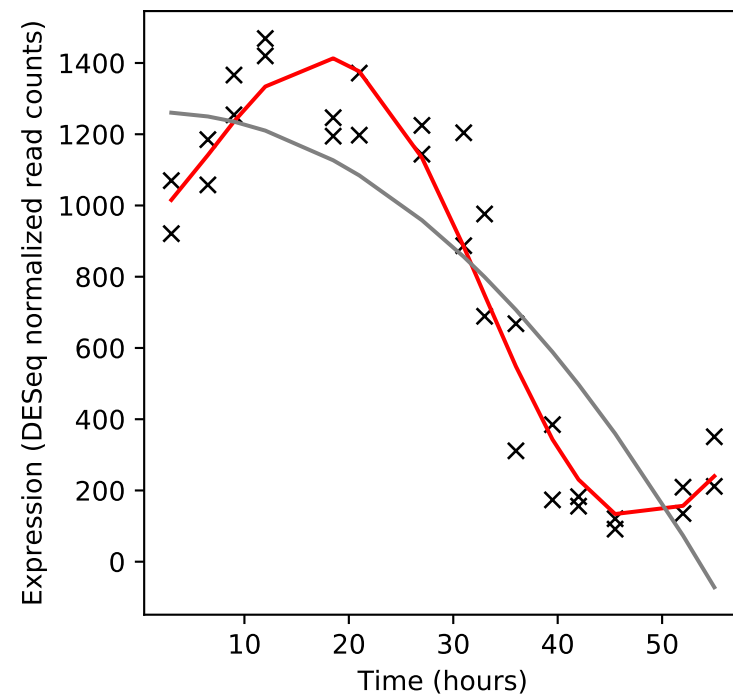

Rv3053c/nrdH

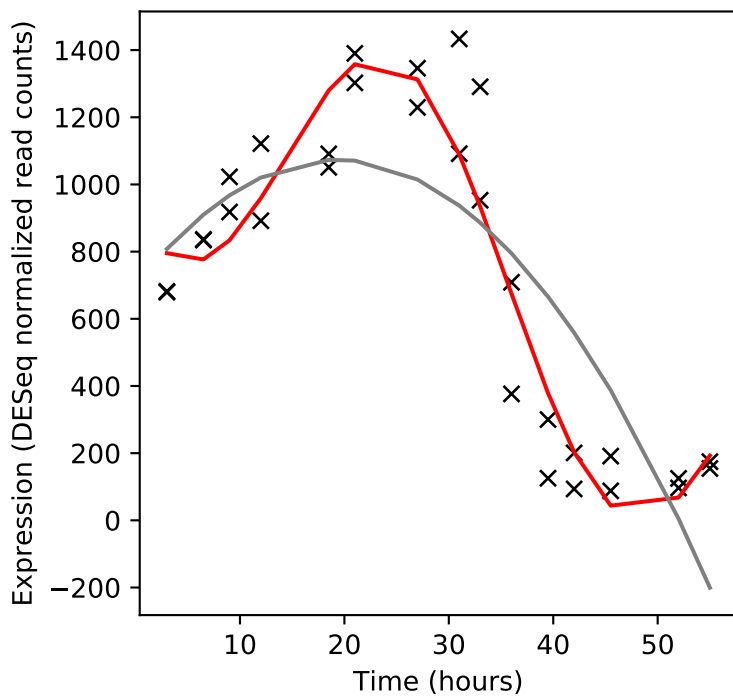

Rv3054c/-

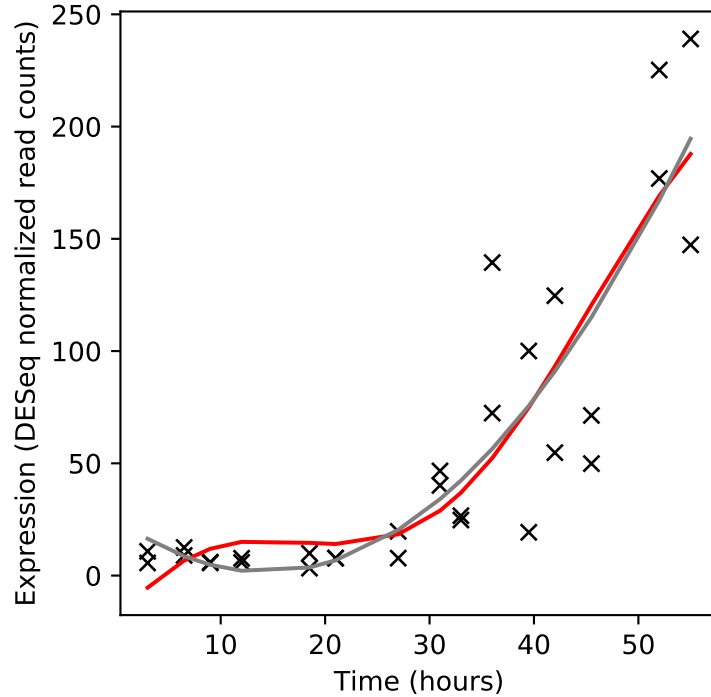

Rv3055/-

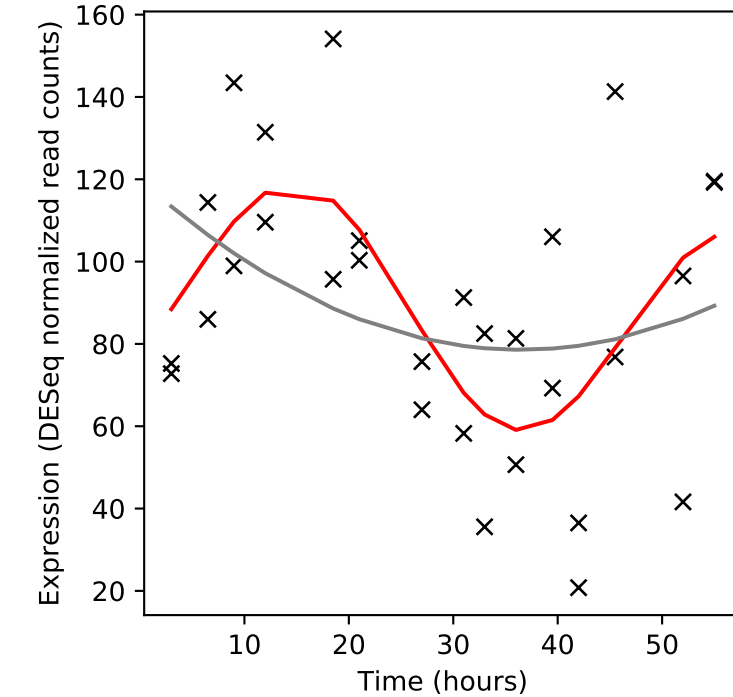

Rv3056/dinP

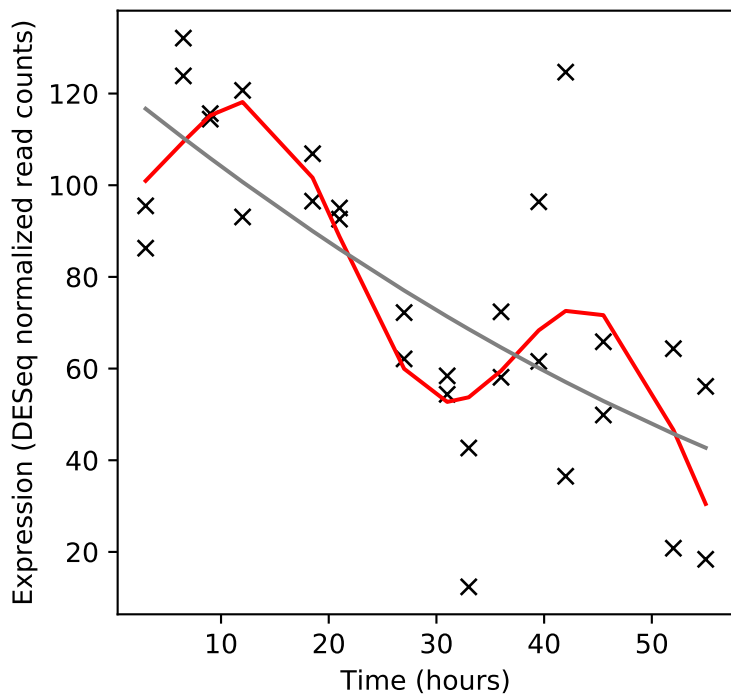

Rv3057c/-

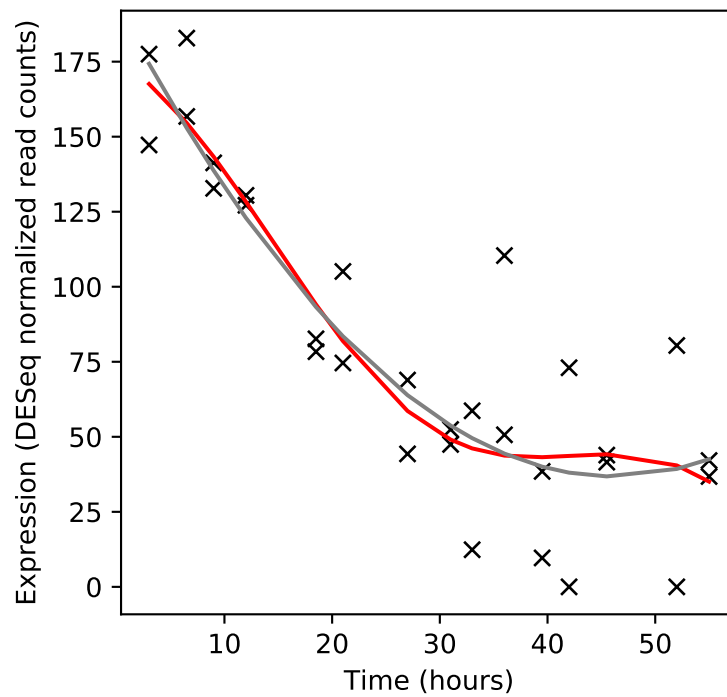

Rv3058c/-

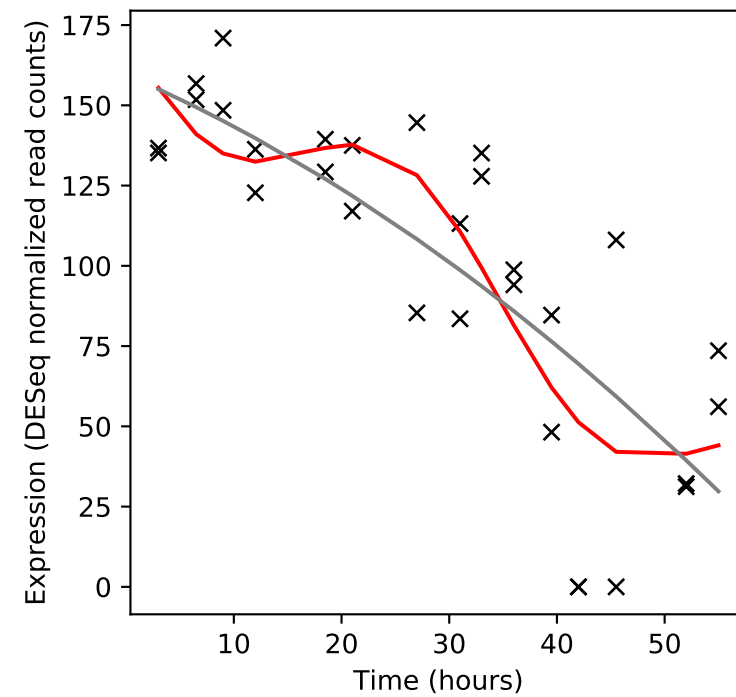

Rv3059/cyp136

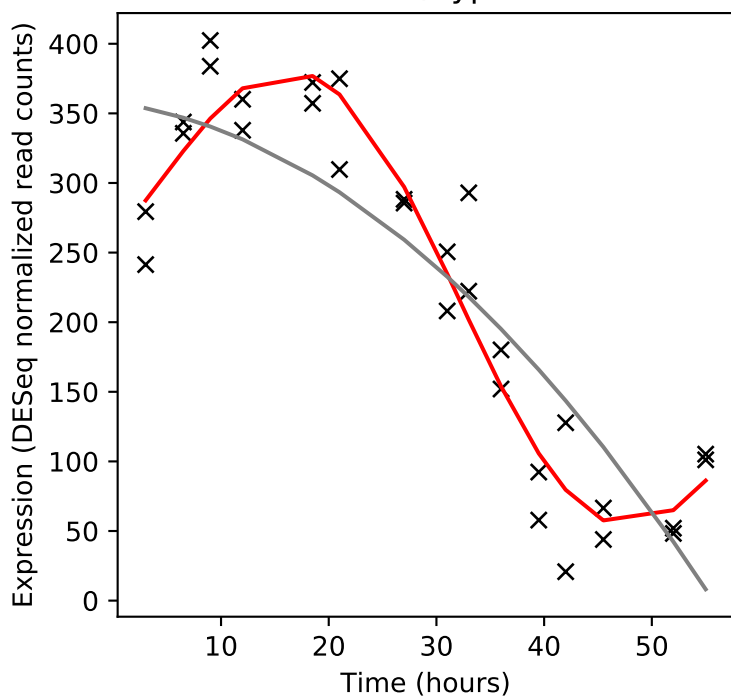

Rv3060c/-

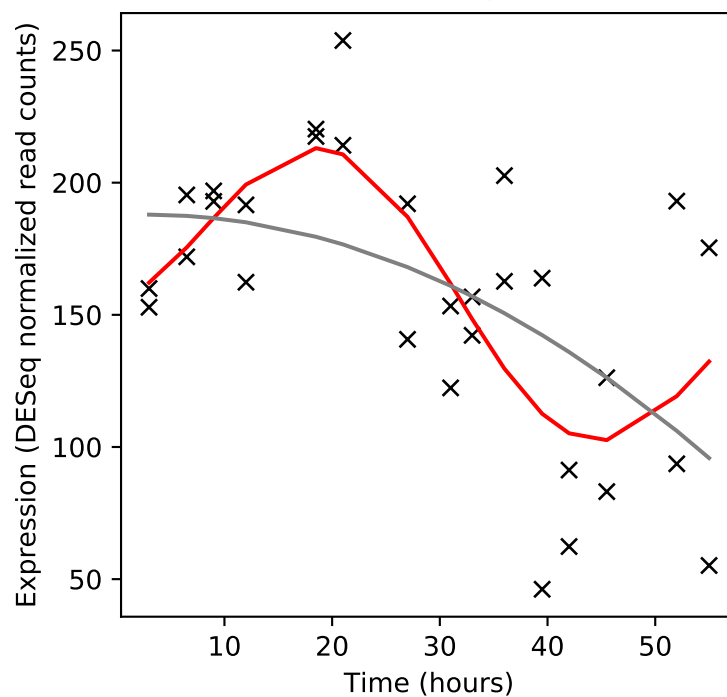

Rv3061c/fadE22

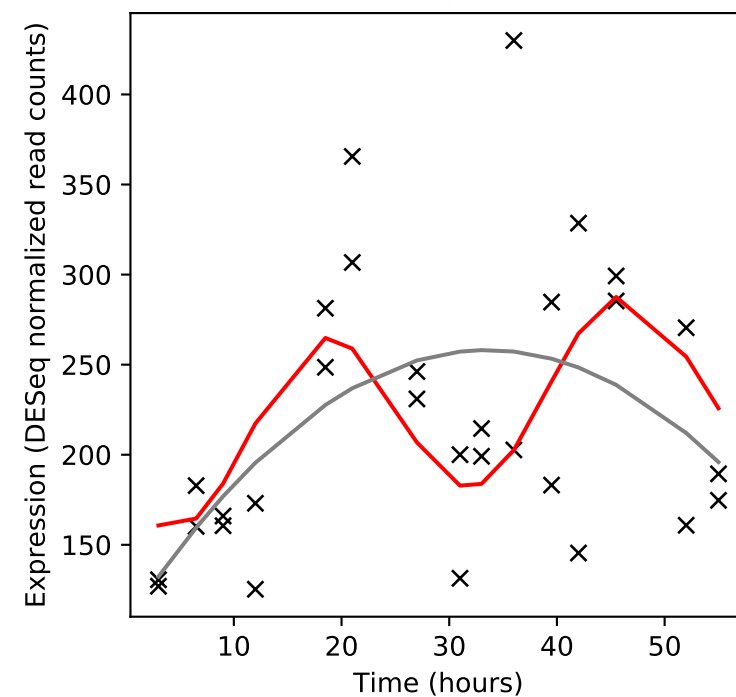

Rv3062/ligB

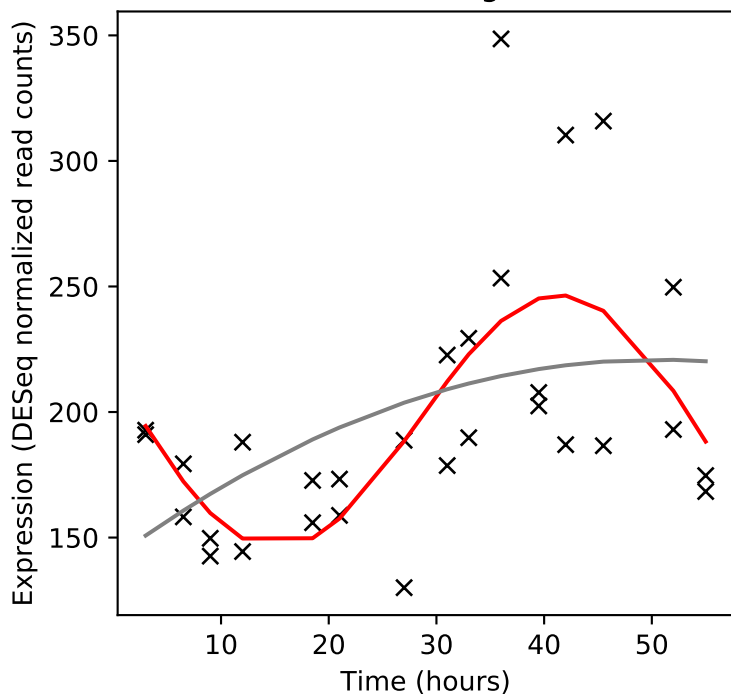

Rv3063/cstA

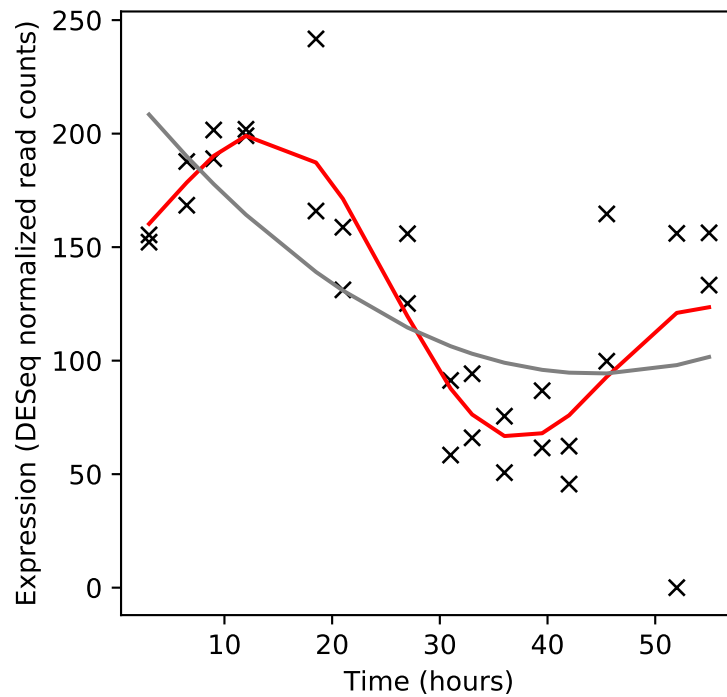

Rv3064c/-

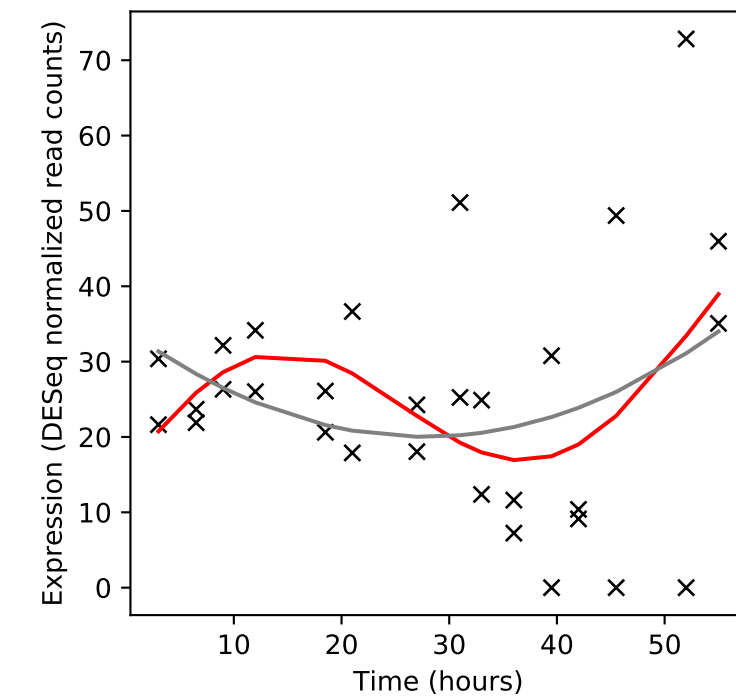

Rv3065/mmr

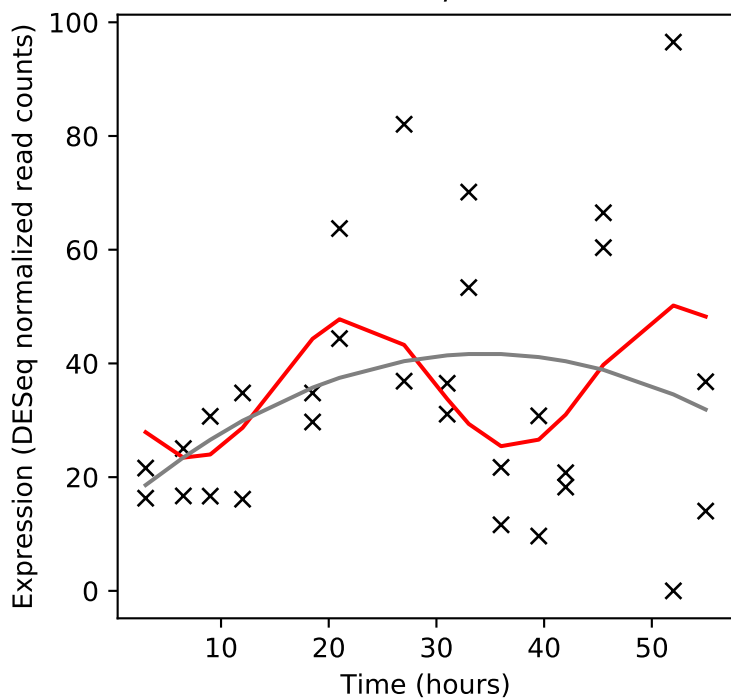

Rv3066/-

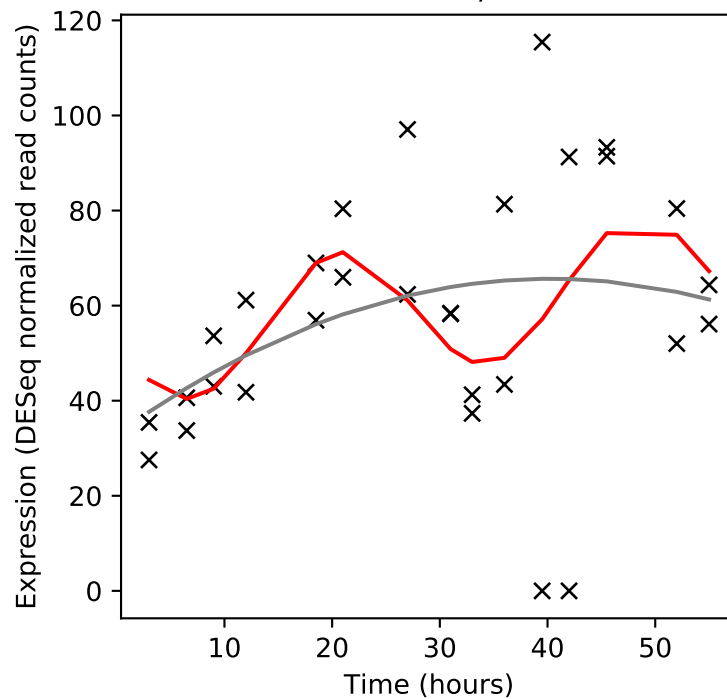

Rv3067/-

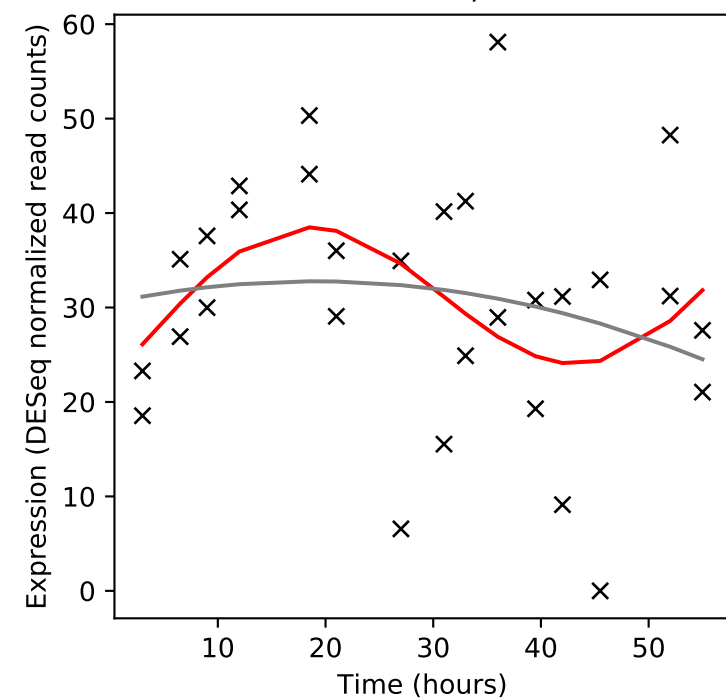

Rv3068c/pgmA

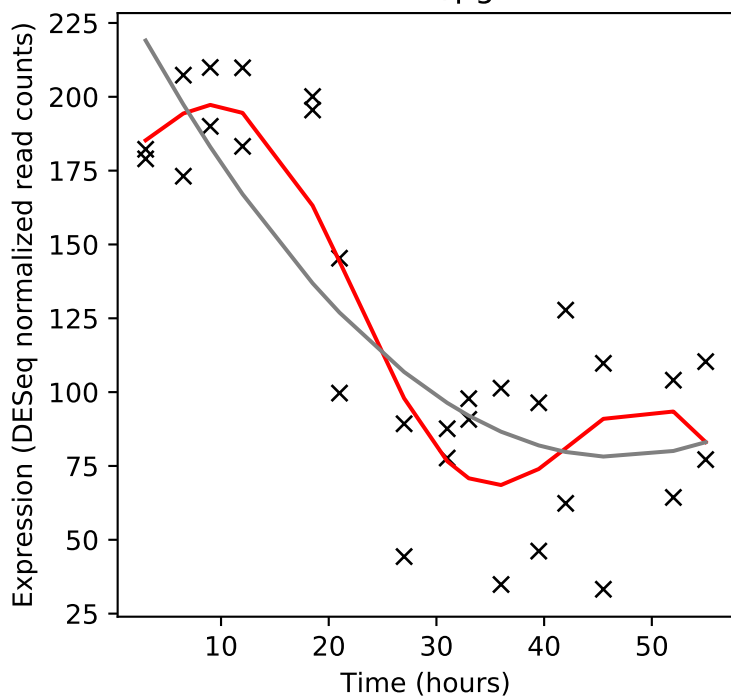

Rv3069/-

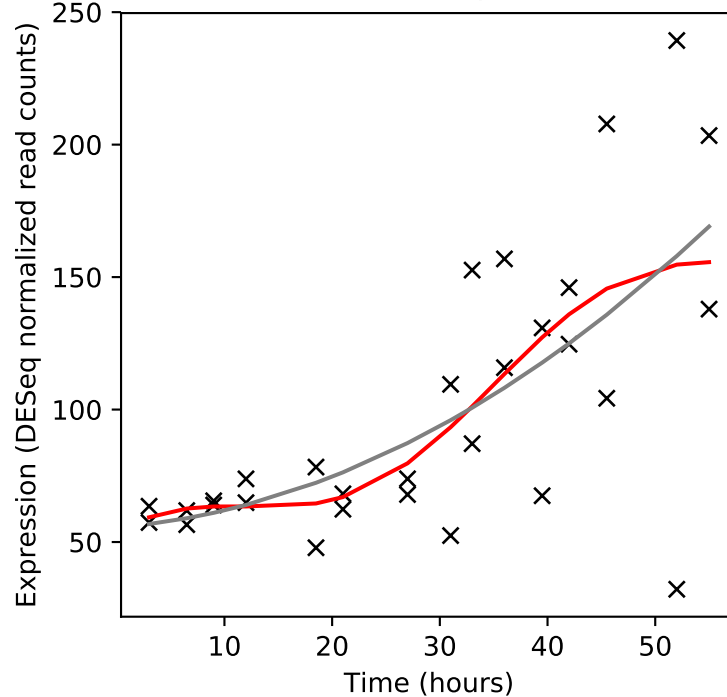

Rv3070/-

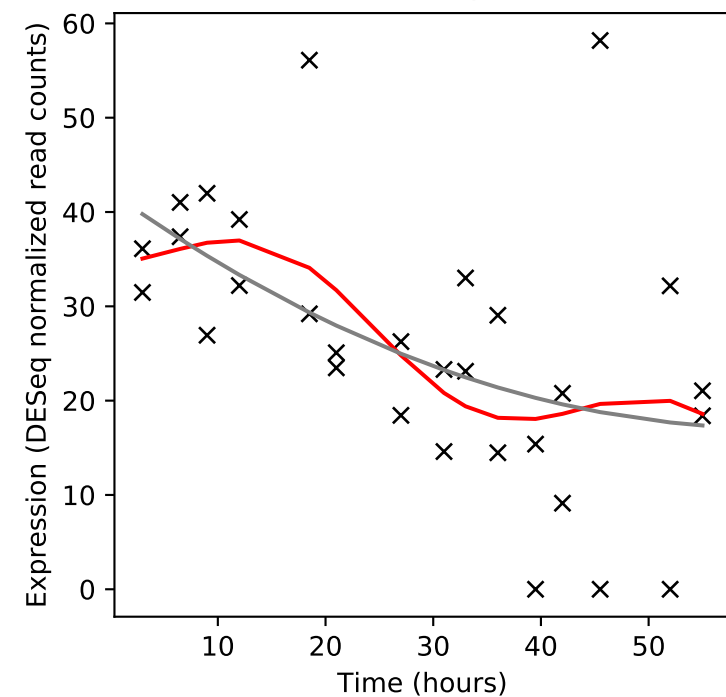

Rv3071/-

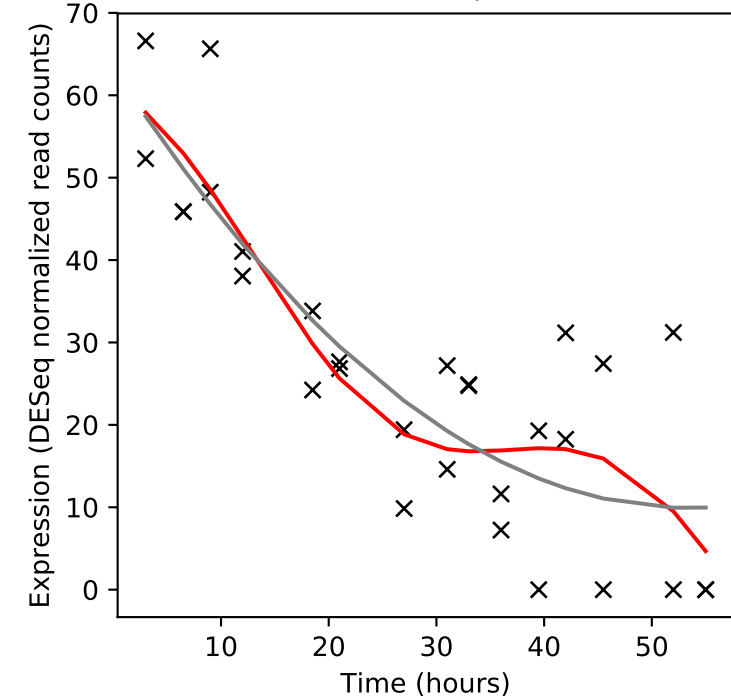

Rv3072c/-

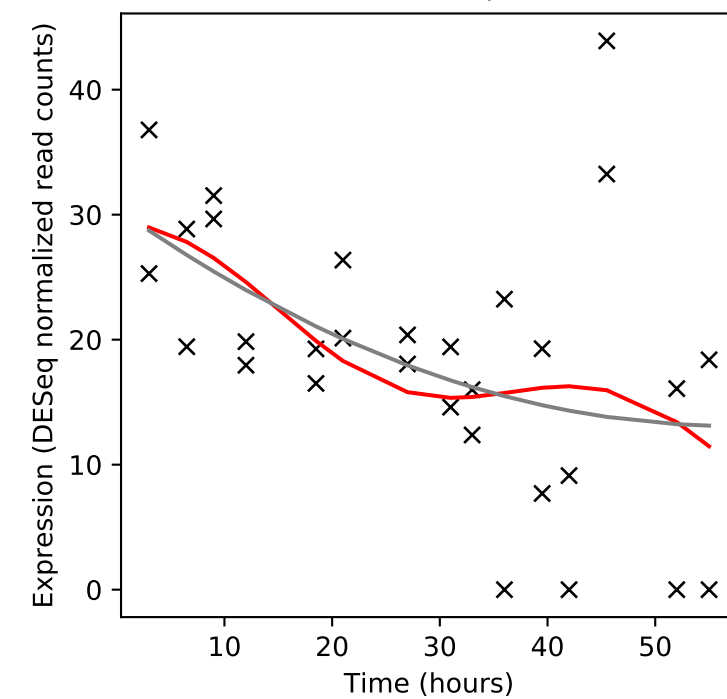

Rv3073c/-

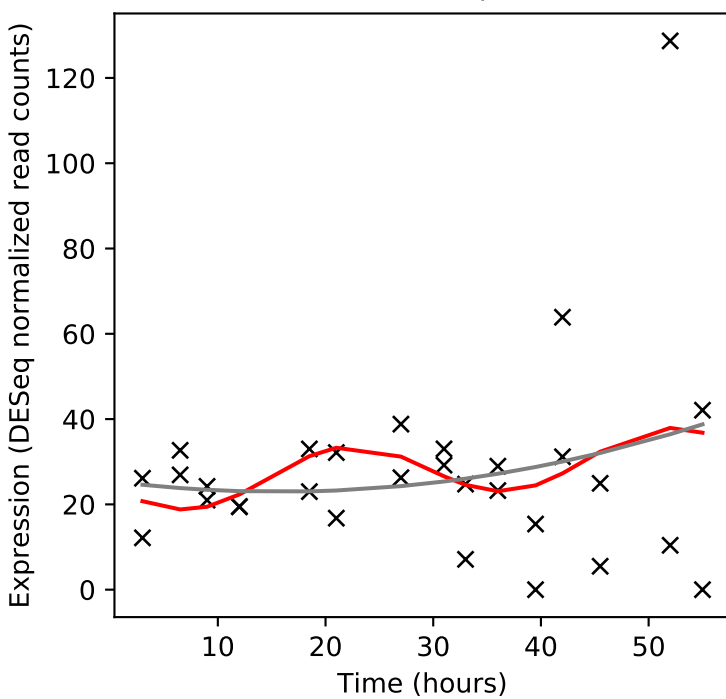

Rv3074/-

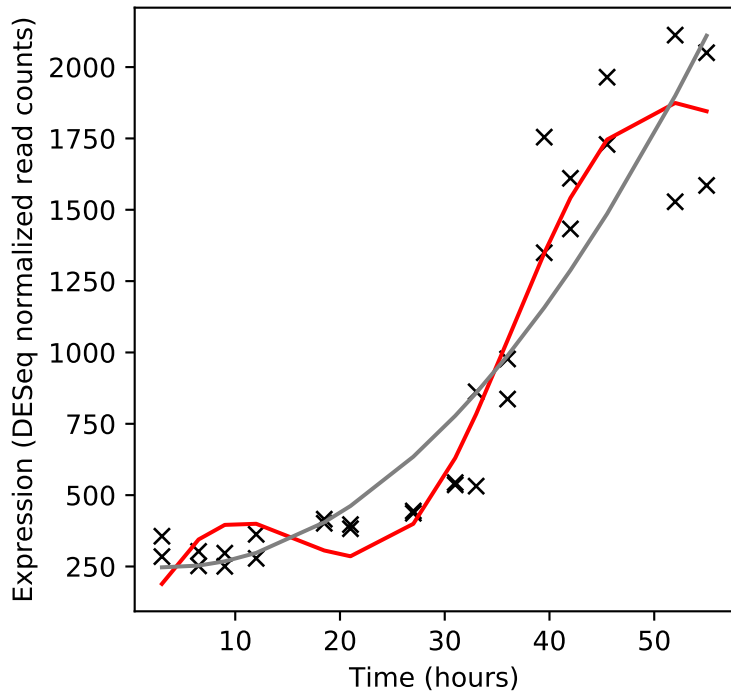

Rv3075c/-

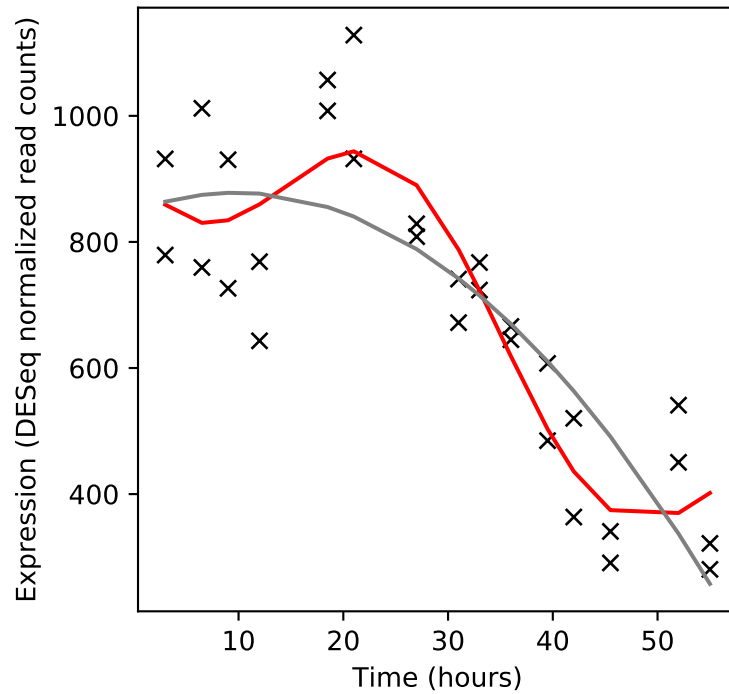

Rv3076/-

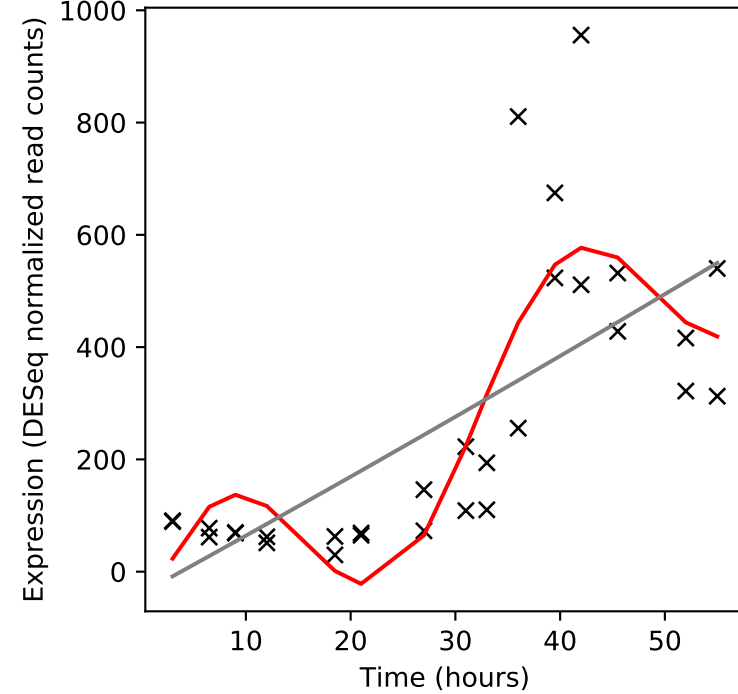

Rv3077/-

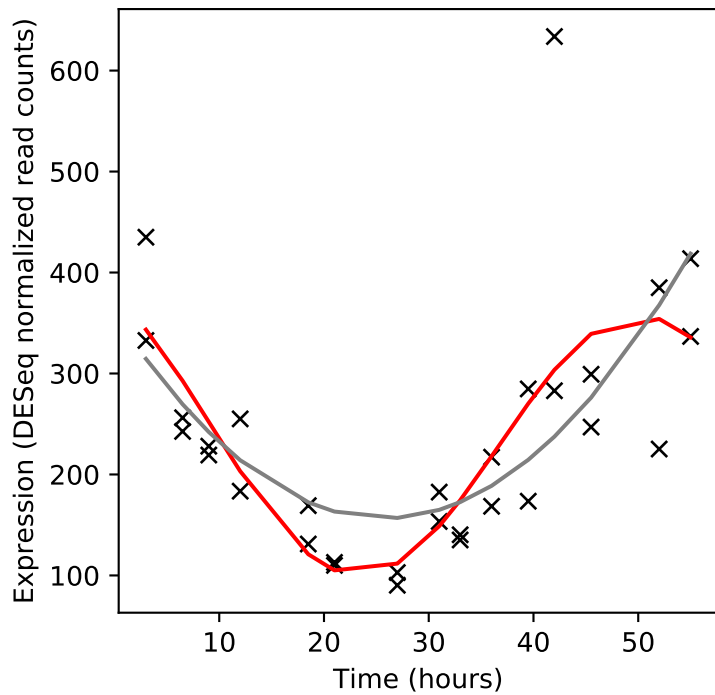

Rv3078/hab

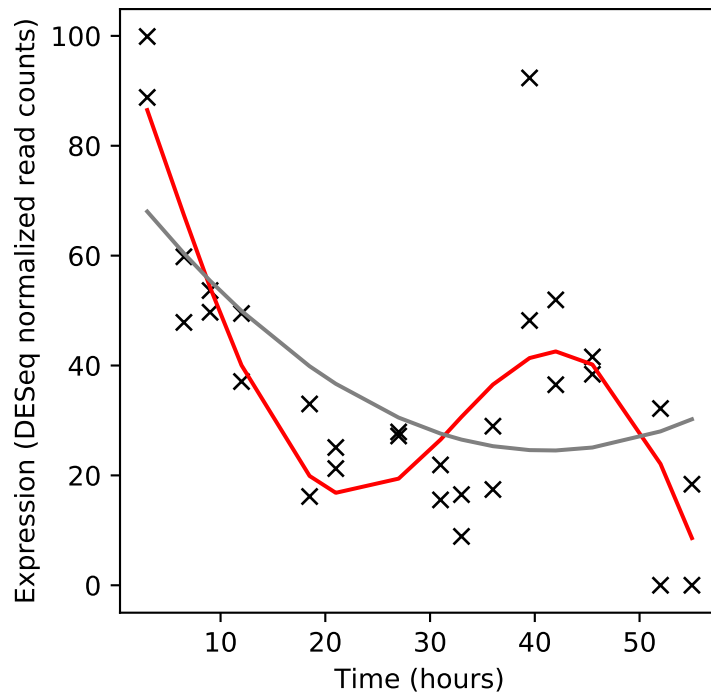

Rv3079c/-

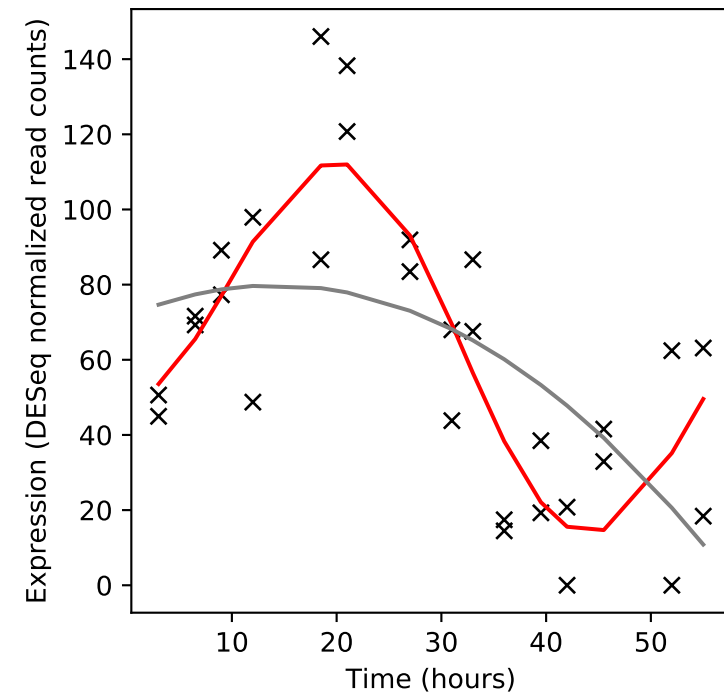

Rv3080c/pknK

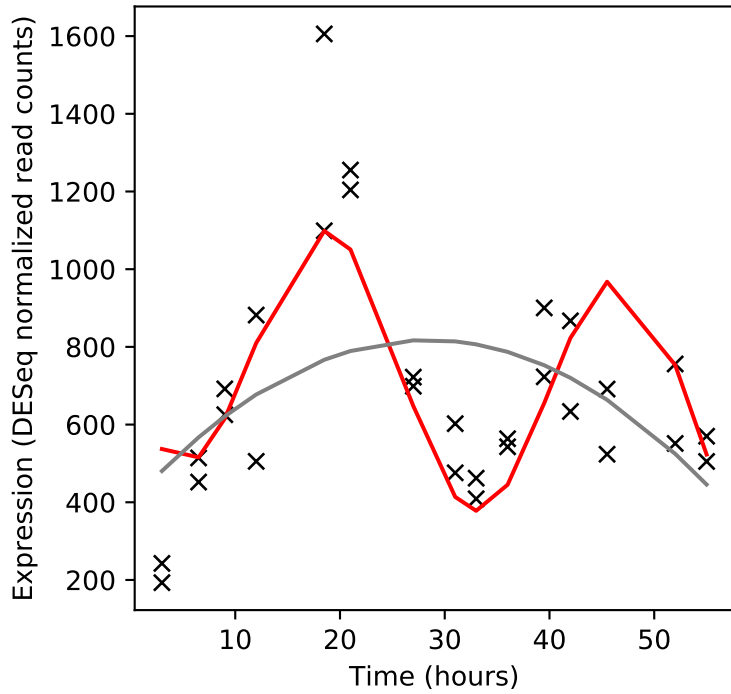

Rv3081/-

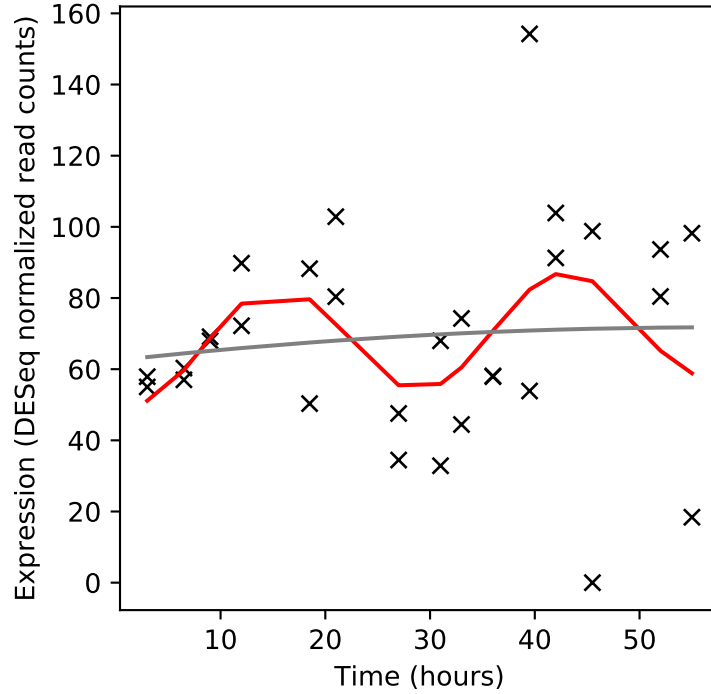

Rv3082c/virS

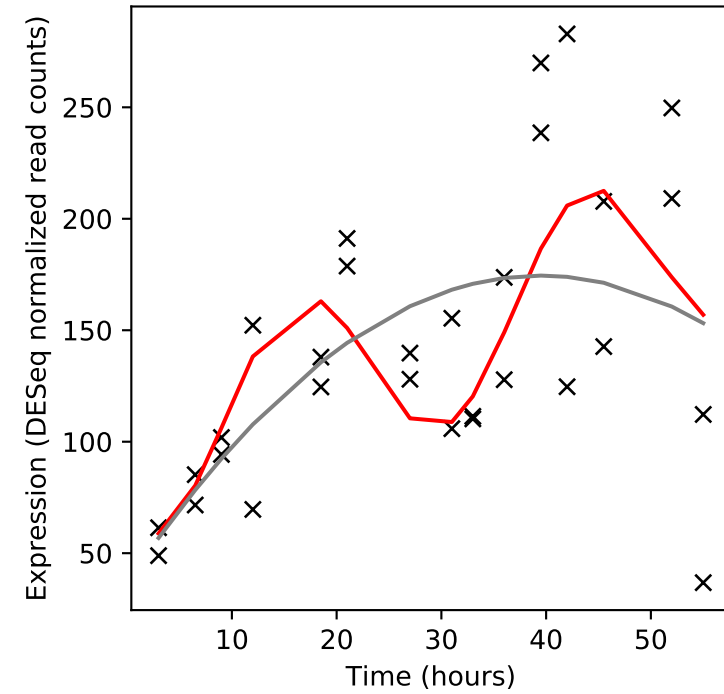



Rv3083/-

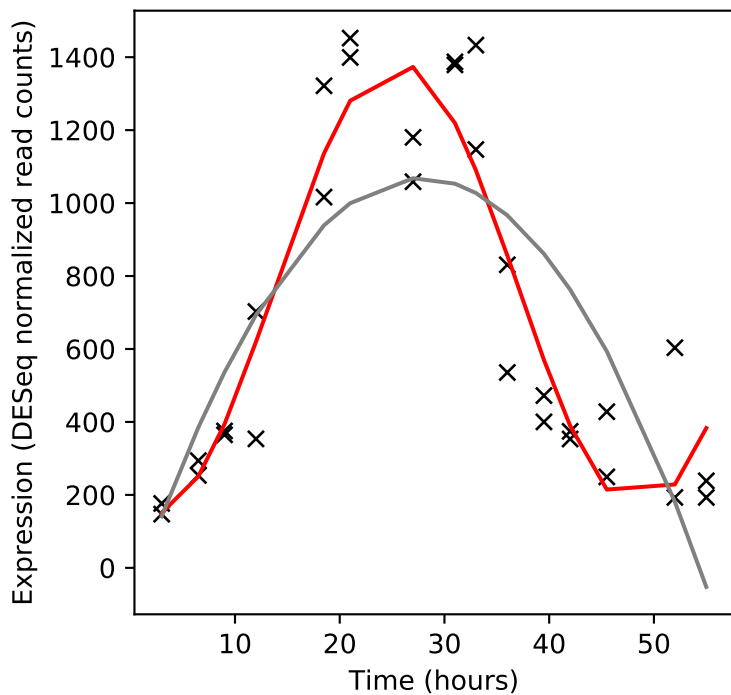

Rv3084/lipR

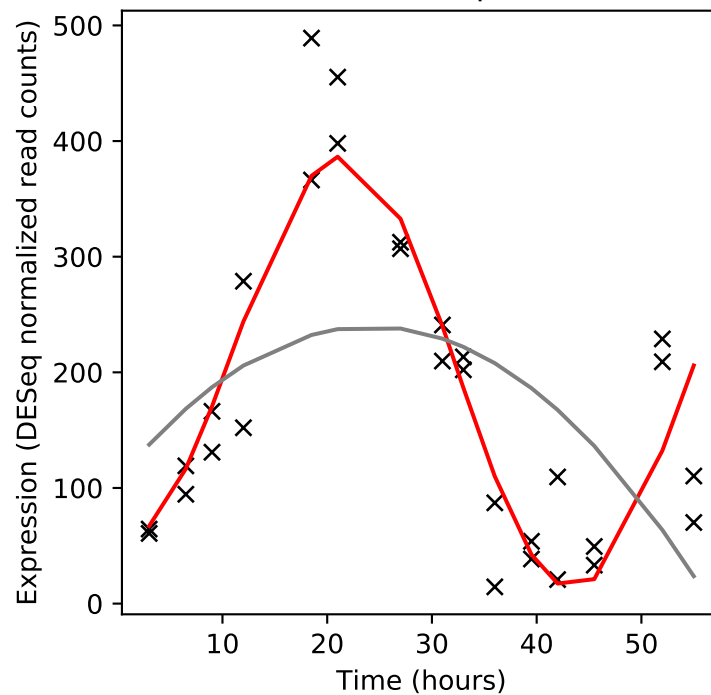

Rv3085/-

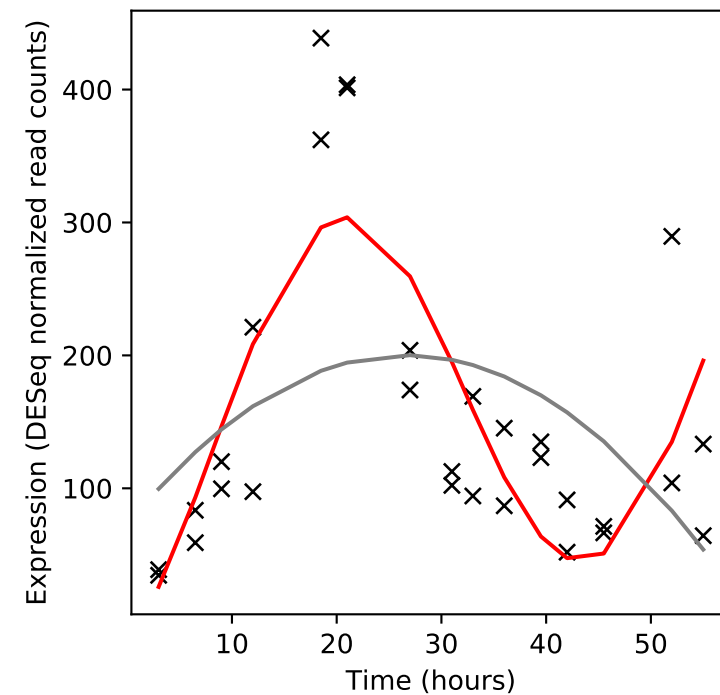

Rv3086/adhD

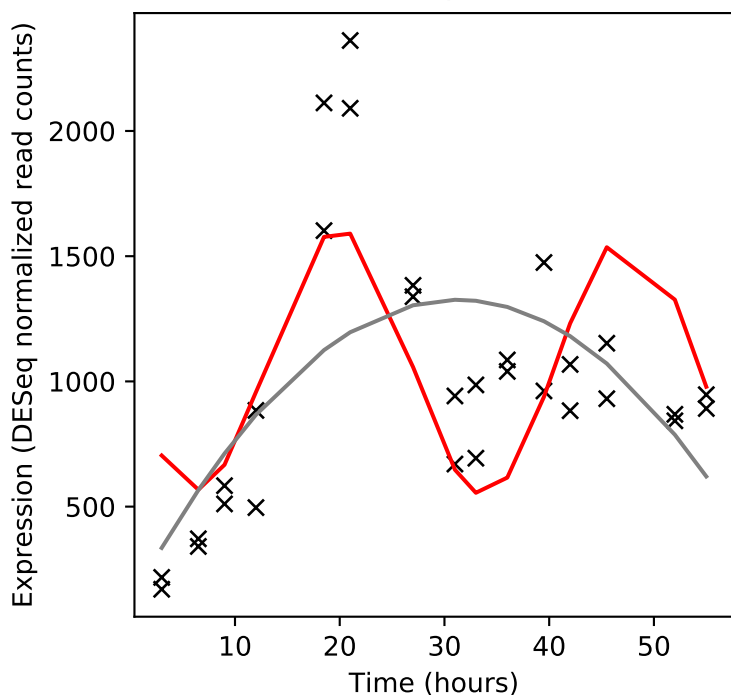

Rv3087/-

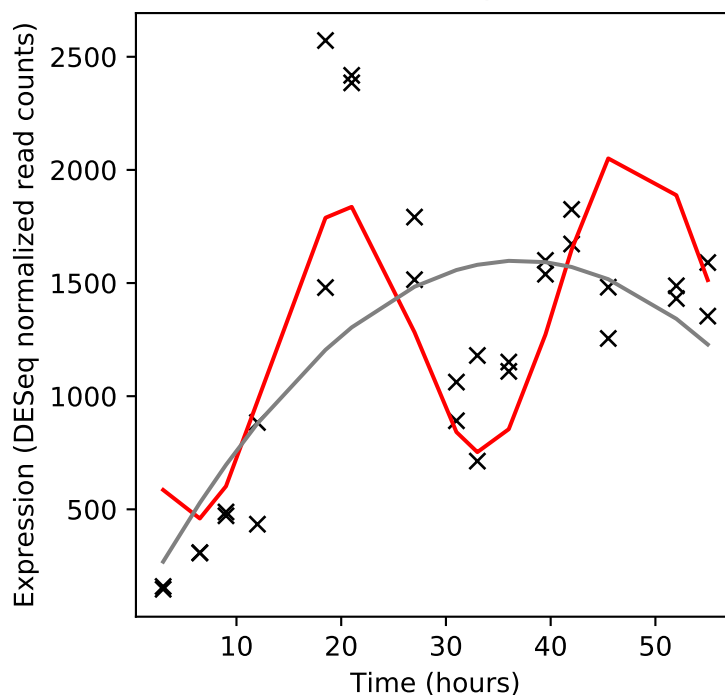

Rv3088/tgs4

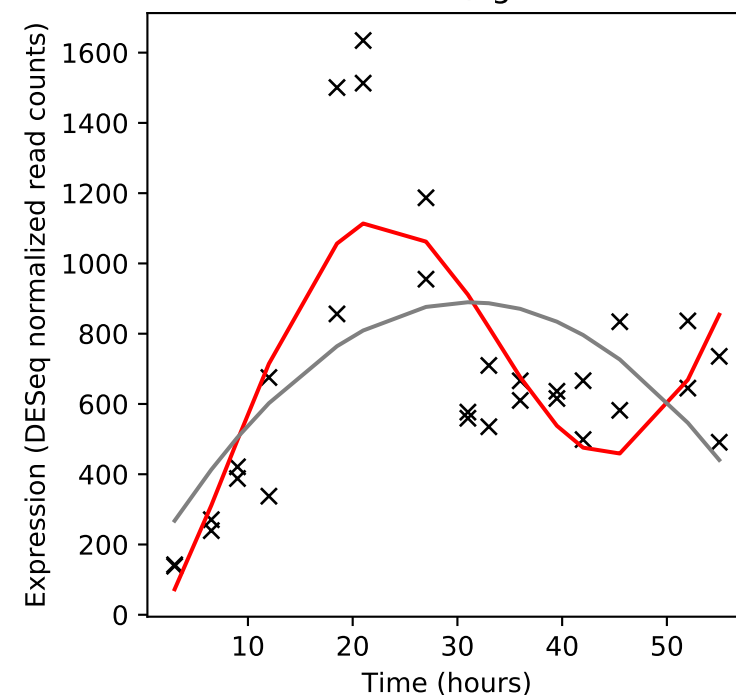

Rv3089/fadD13

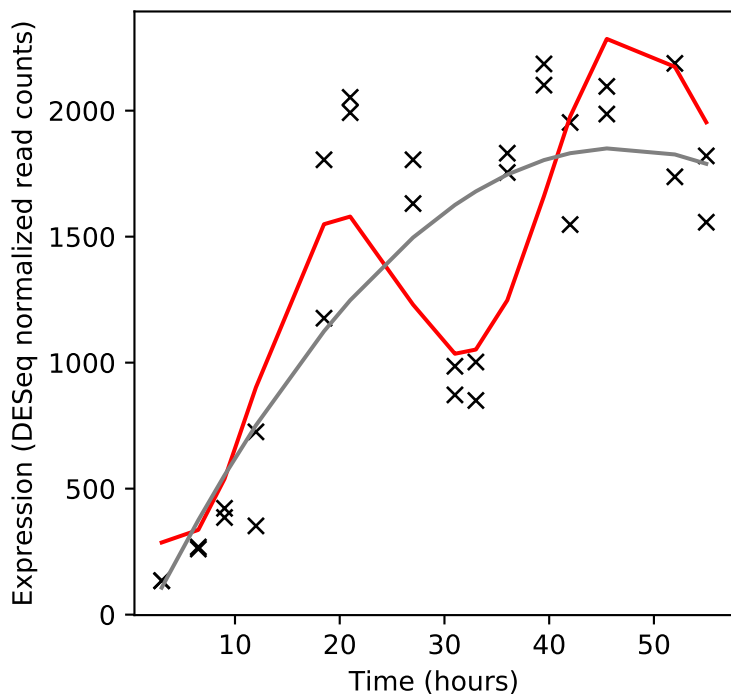

Rv3090/-

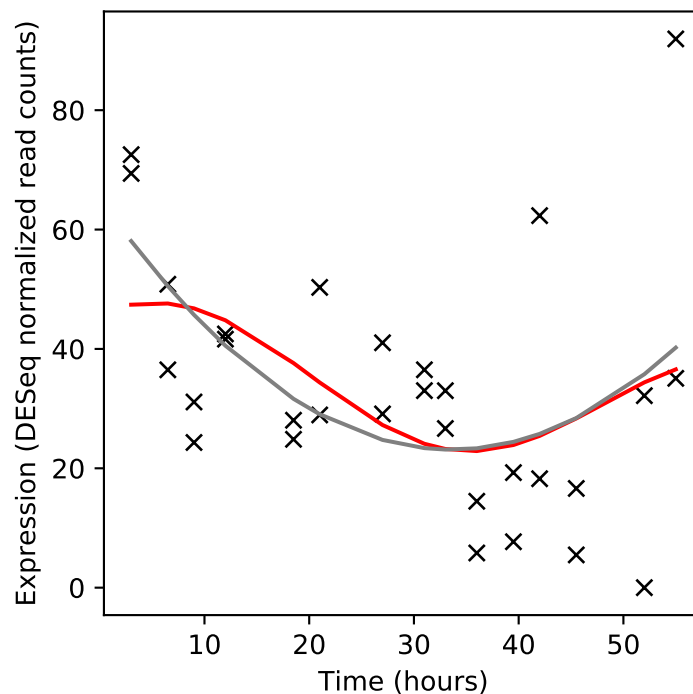

Rv3091/-

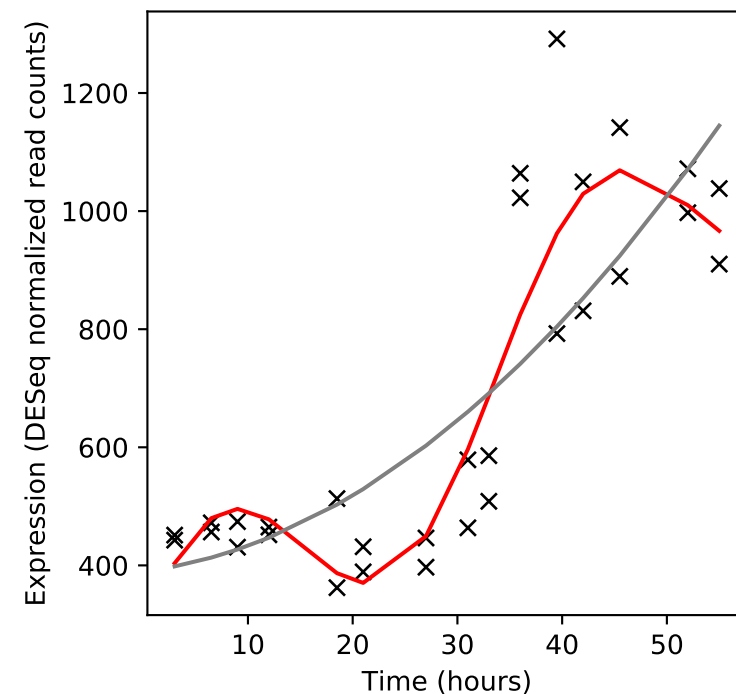

Rv3092c/-

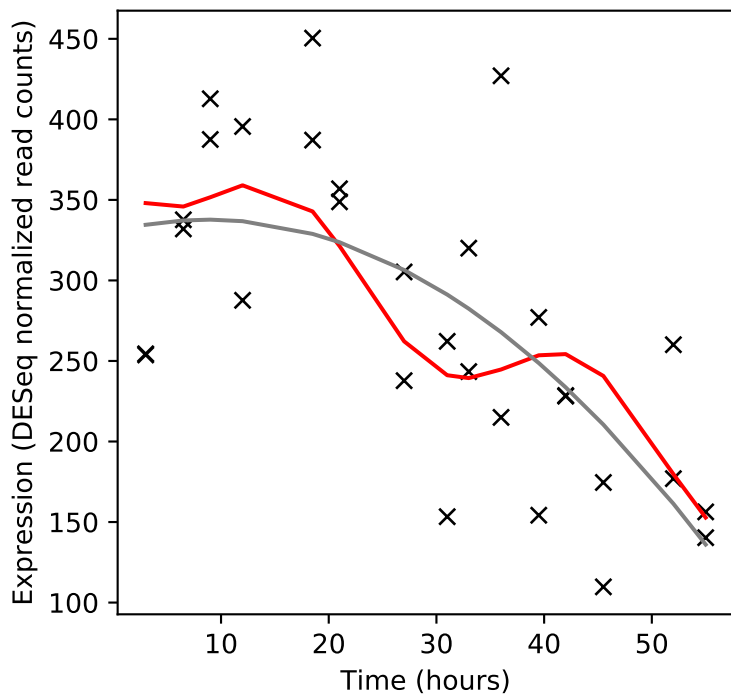

Rv3093c/-

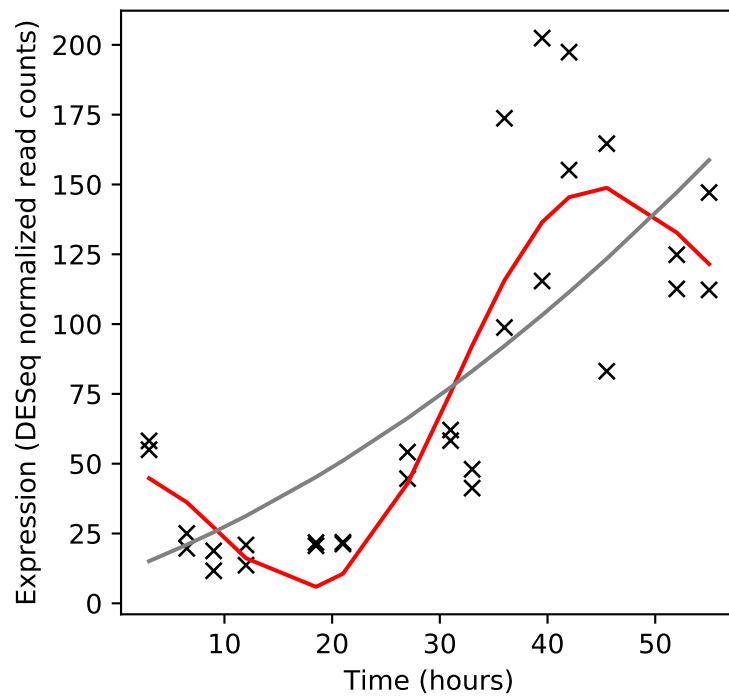

Rv3094c/-

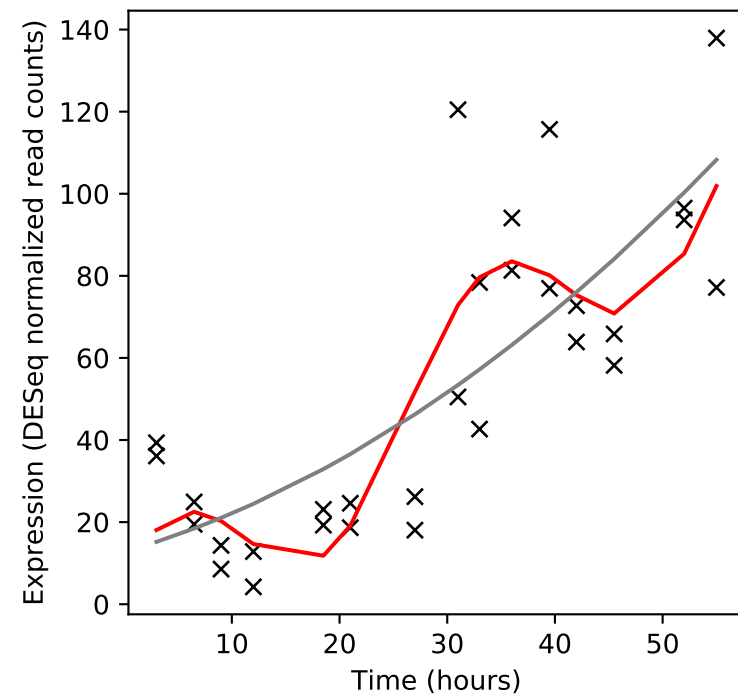

Rv3095/-

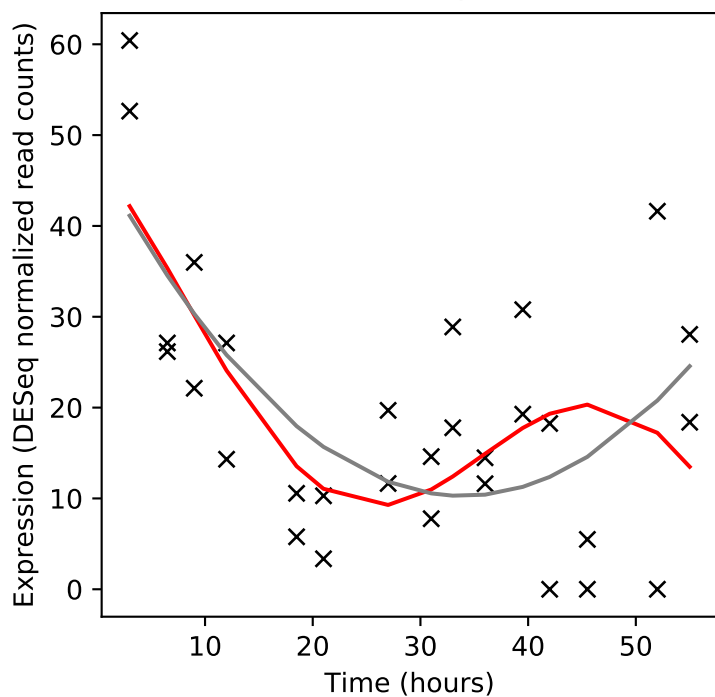

Rv3096/-

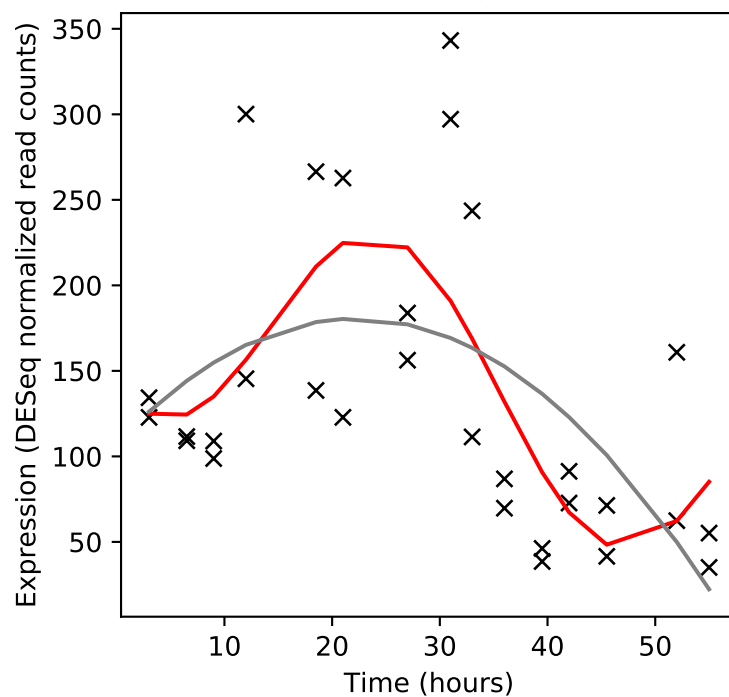

Rv3097c/lipY

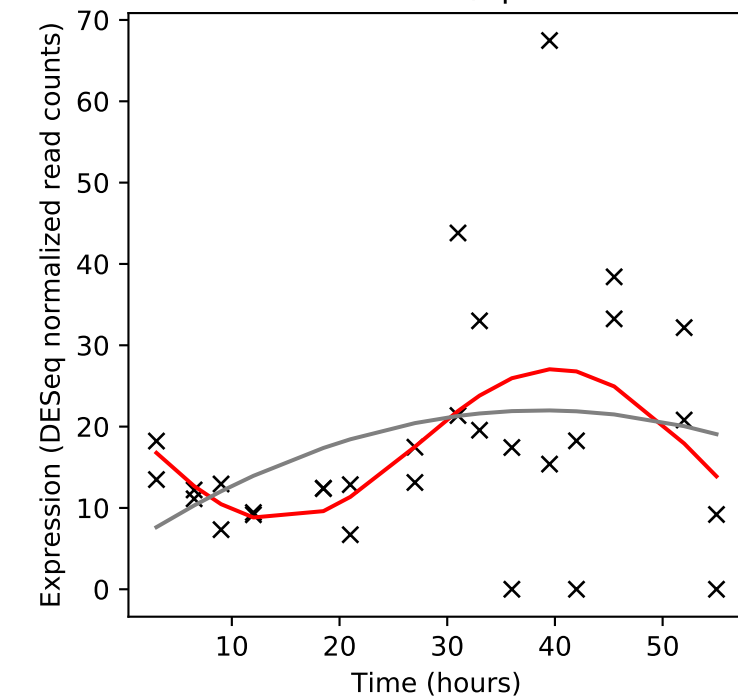

Rv3098c/-

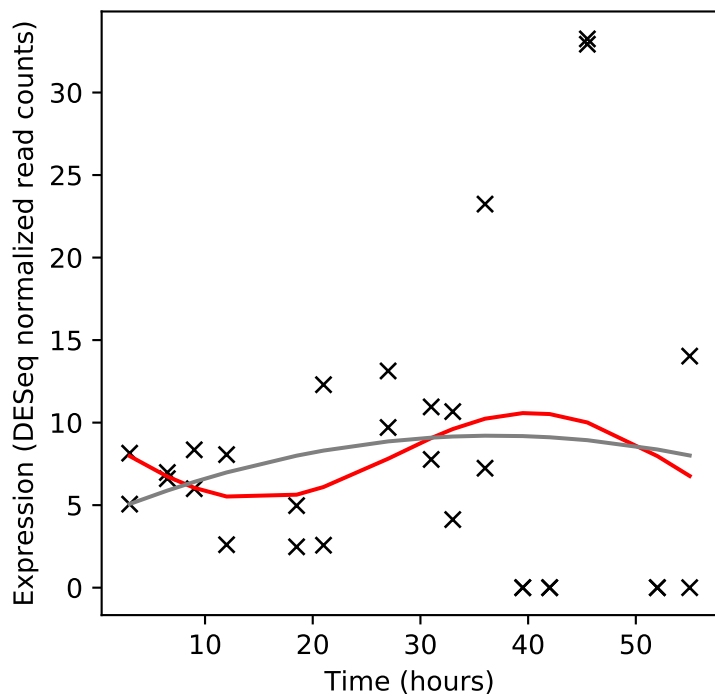

Rv3098A/-

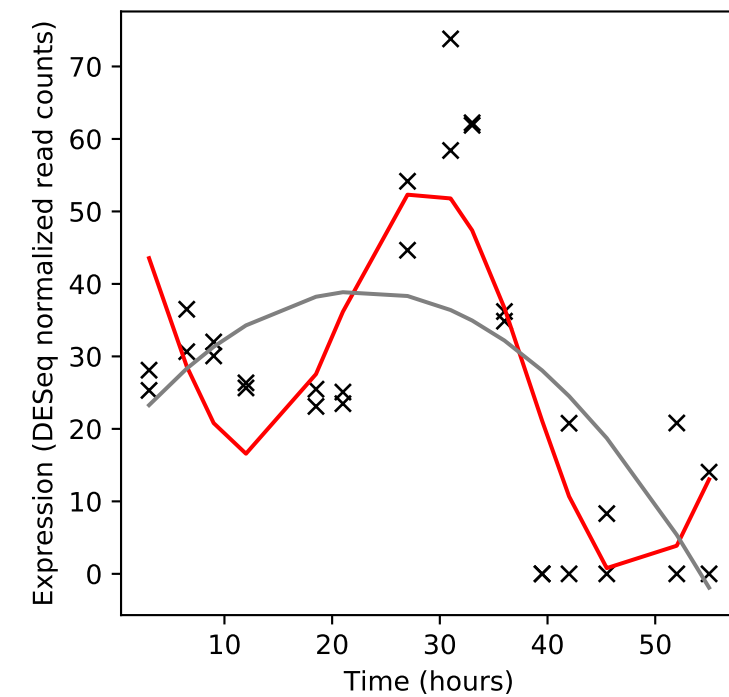

Rv3099c/-

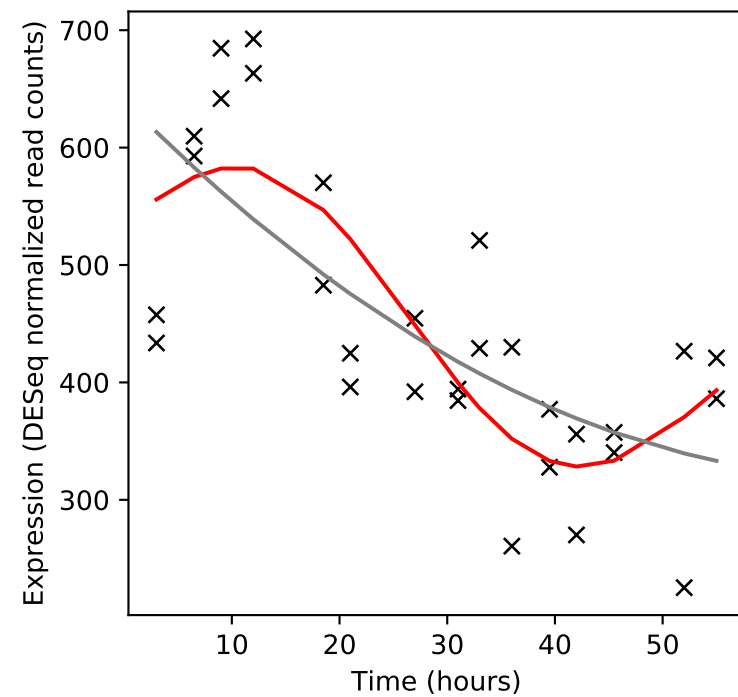

Rv3100c/smpB

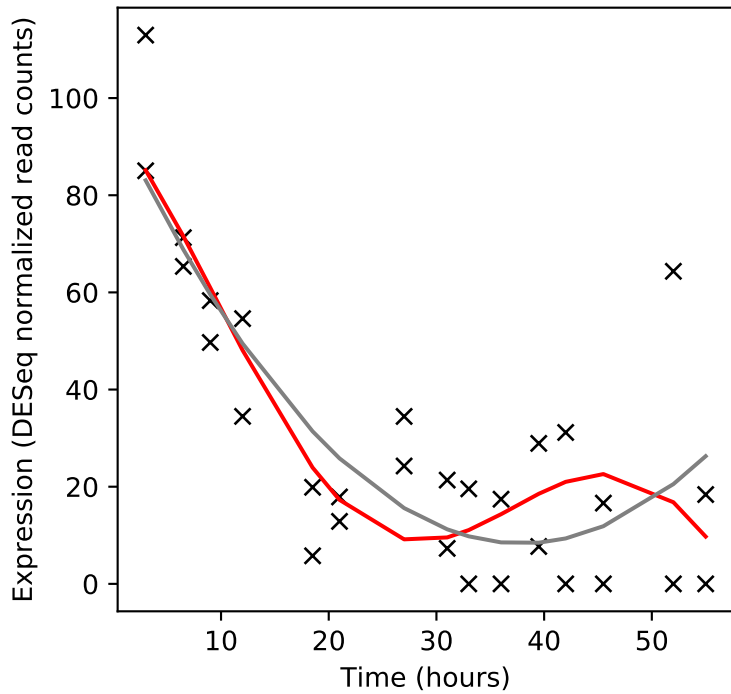

Rv3101c/ftsX

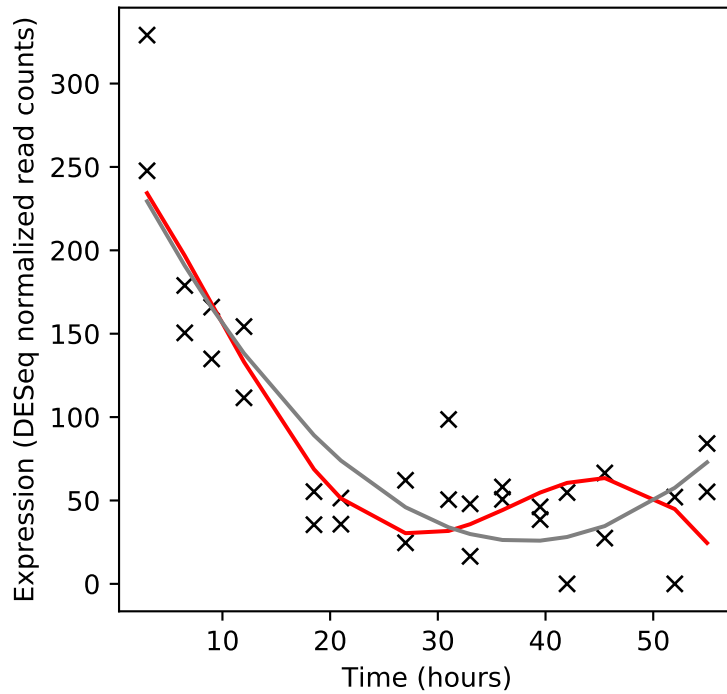

Rv3102c/ftsE

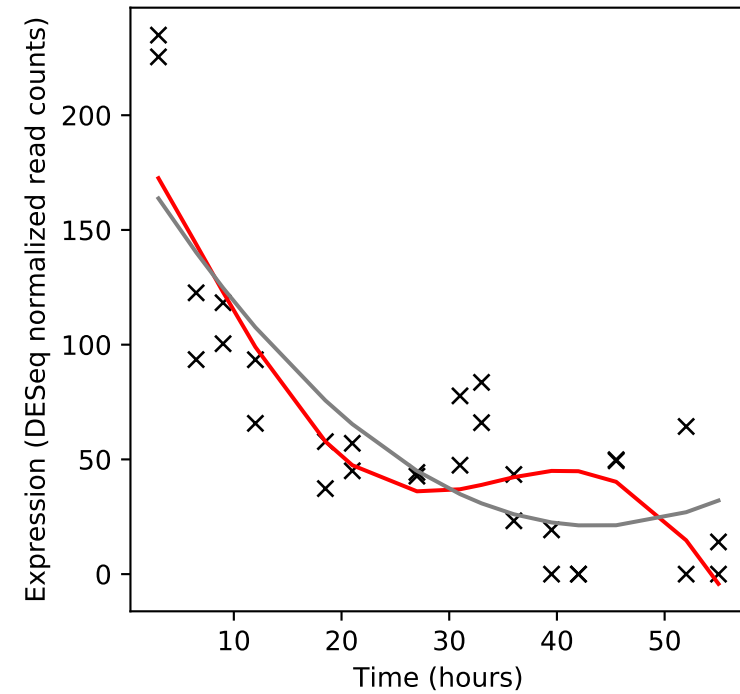

Rv3103c/-

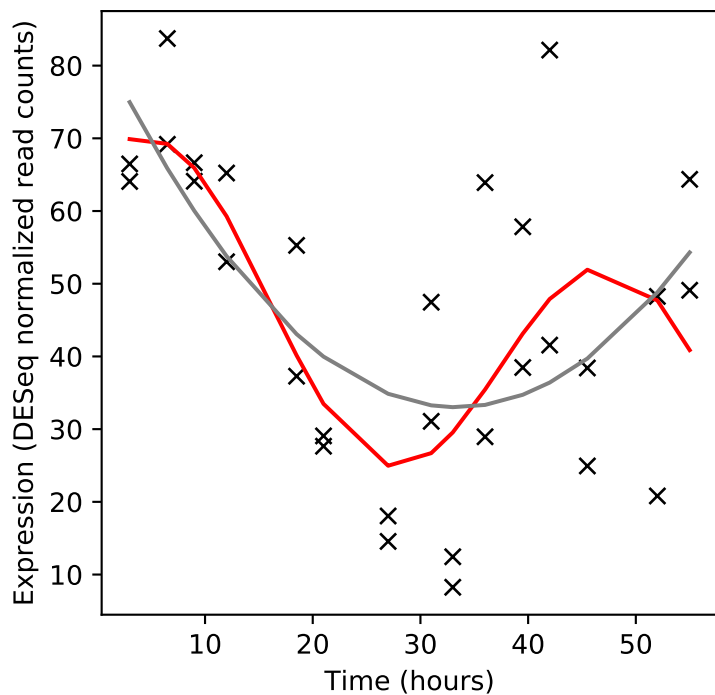

Rv3104c/-

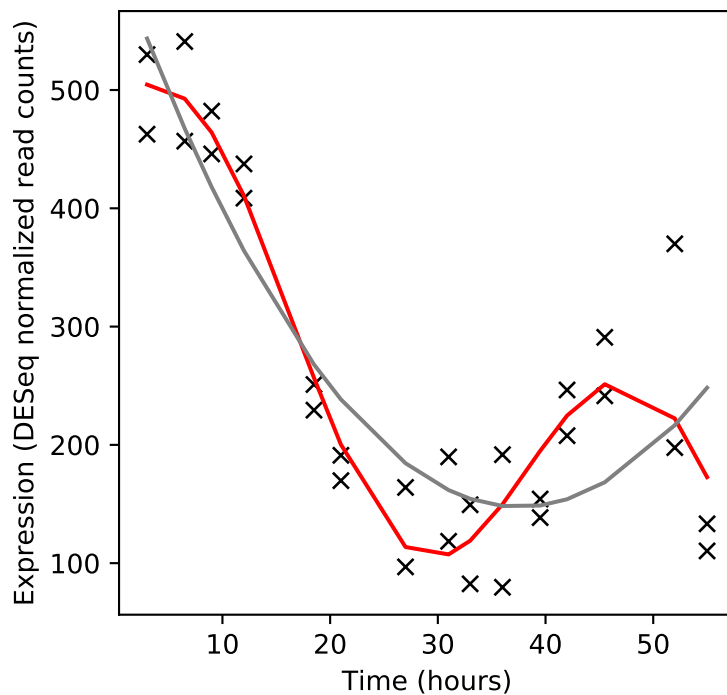

Rv3105c/prfB

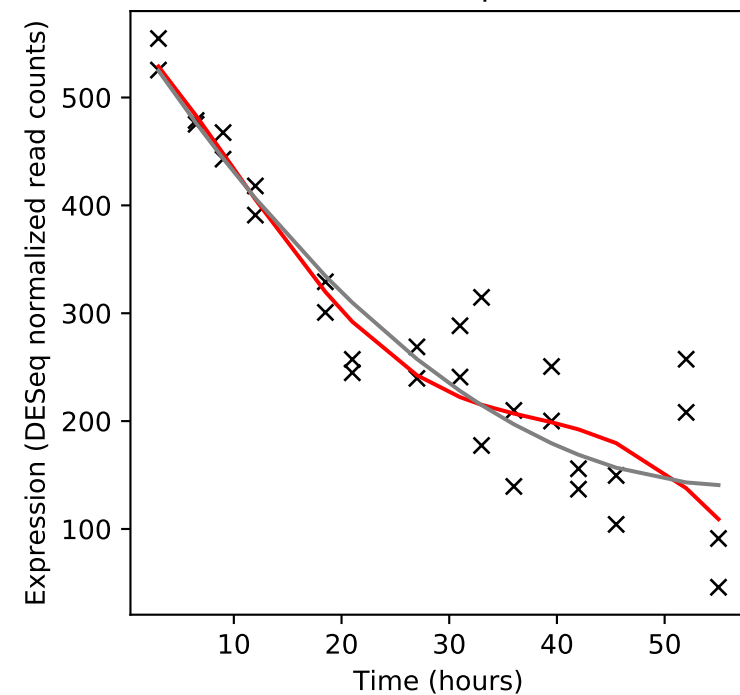

Rv3106c/fprA

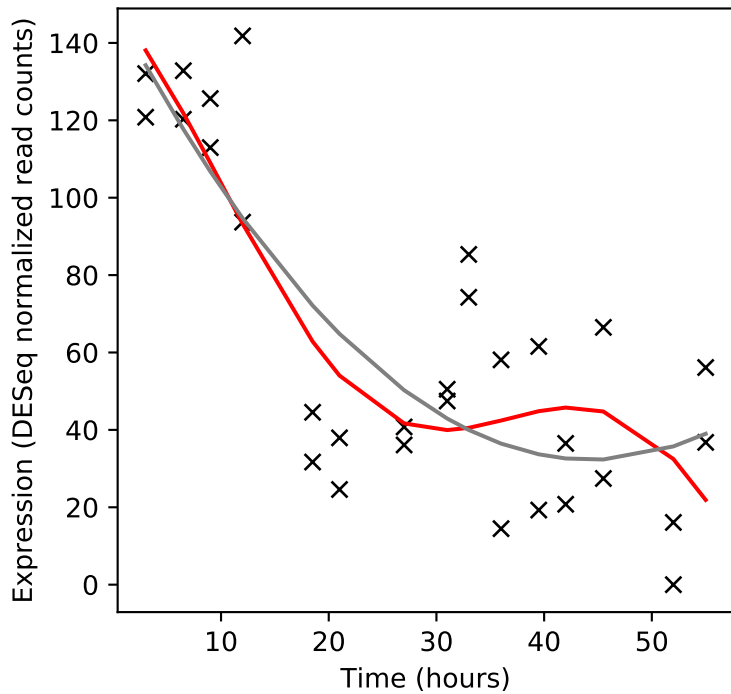

Rv3107c/agpS

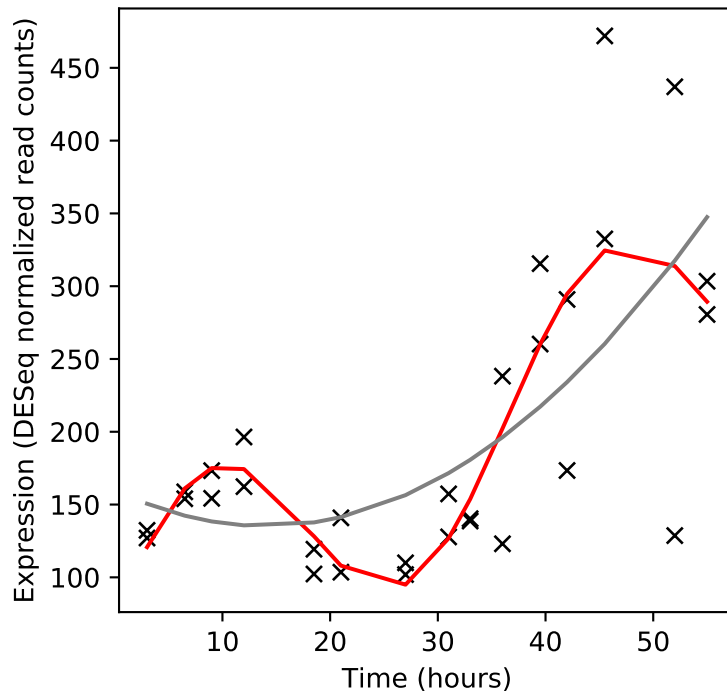

Rv3108c/-

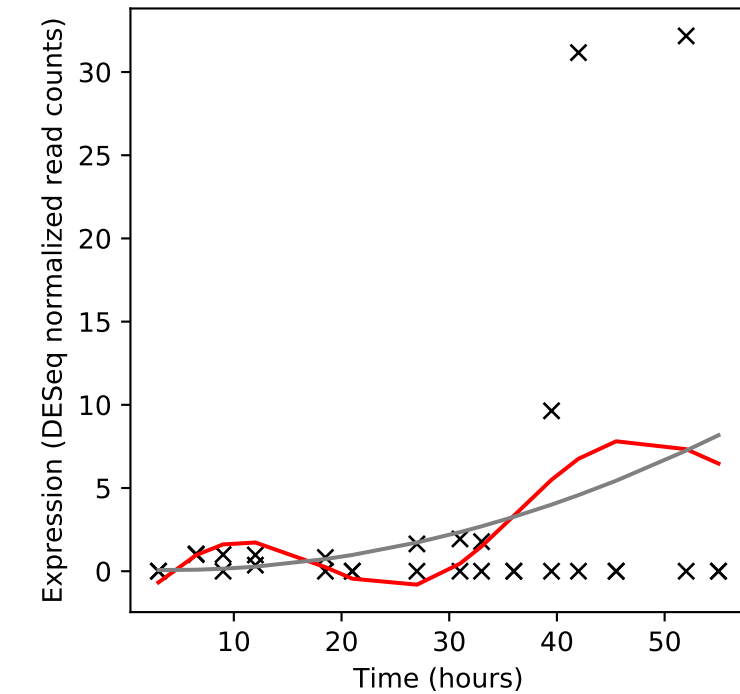

Rv3109/moaA1

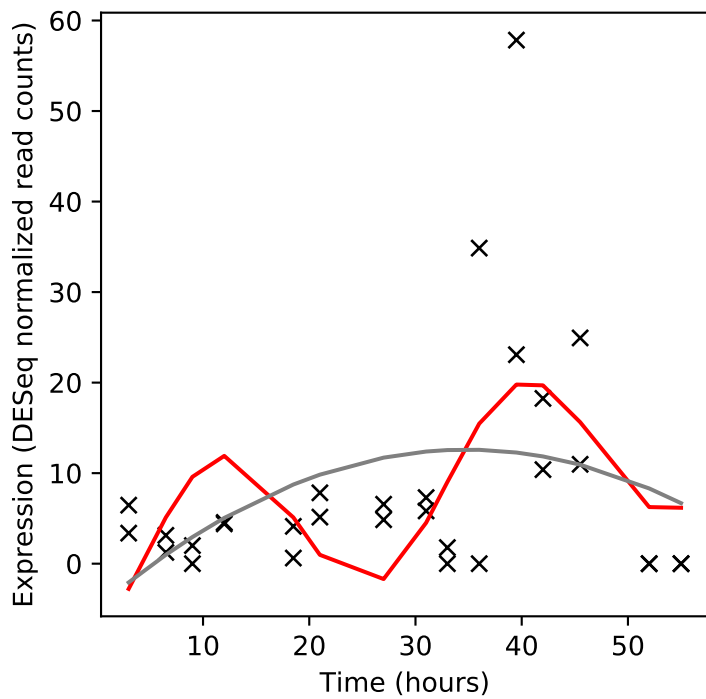

Rv3110/moaB1

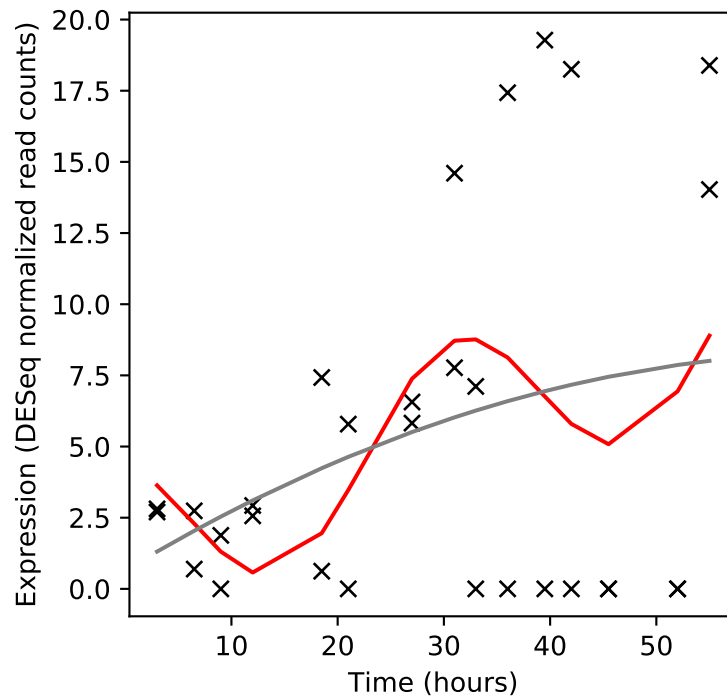

Rv3111/moaC1

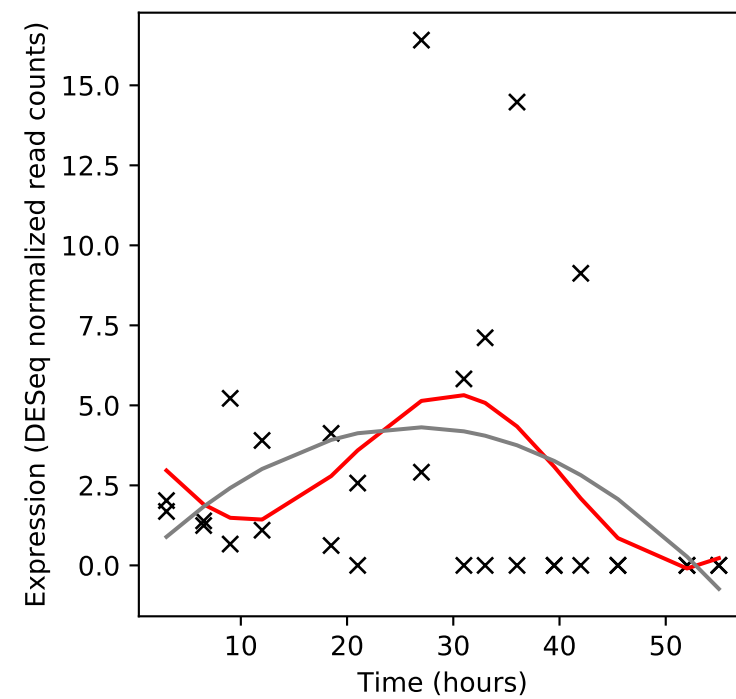

Rv3112/moaD1

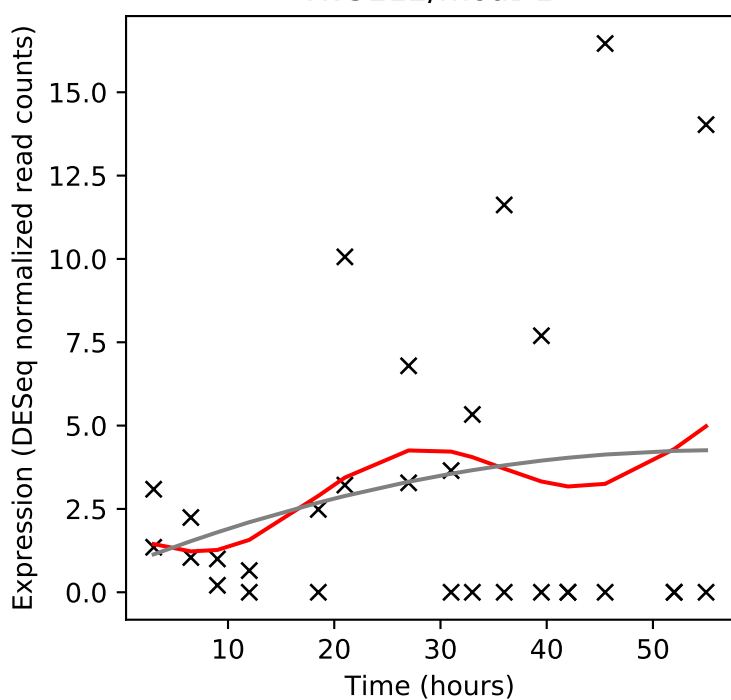

Rv3113/-

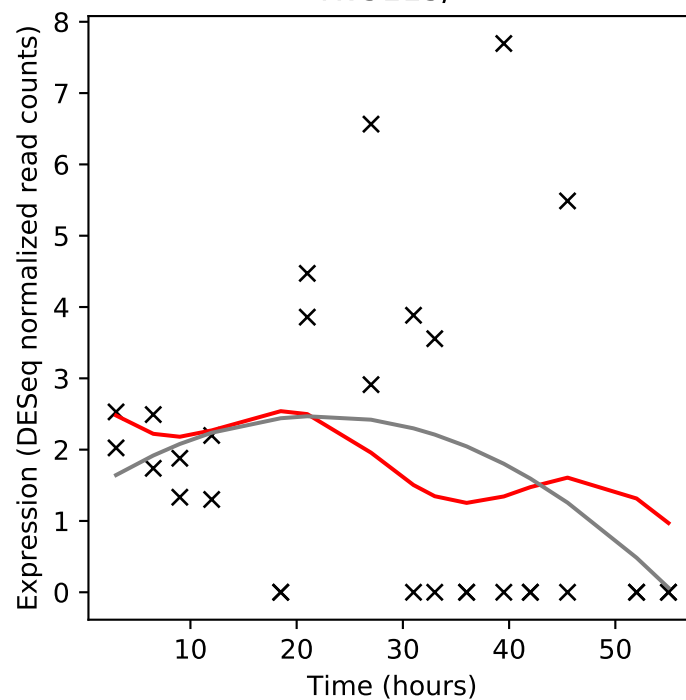

Rv3114/-

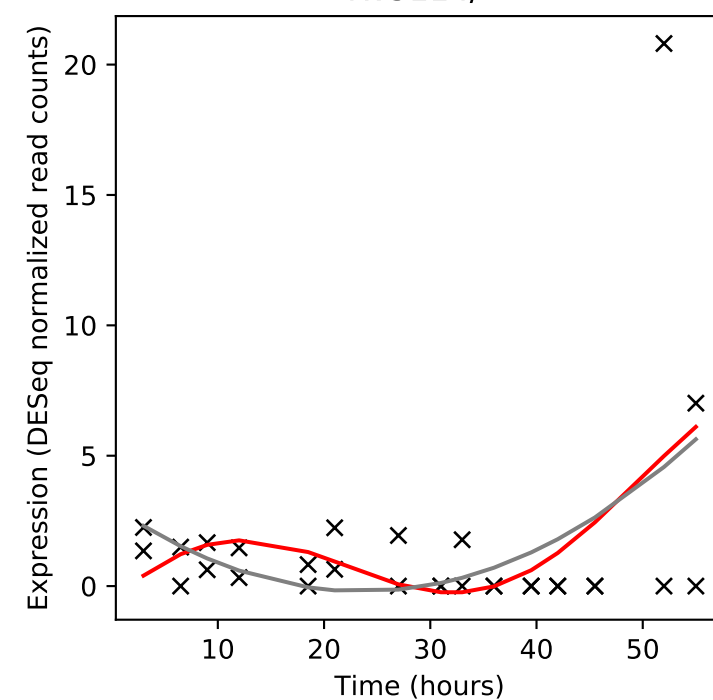

Rv3115/-

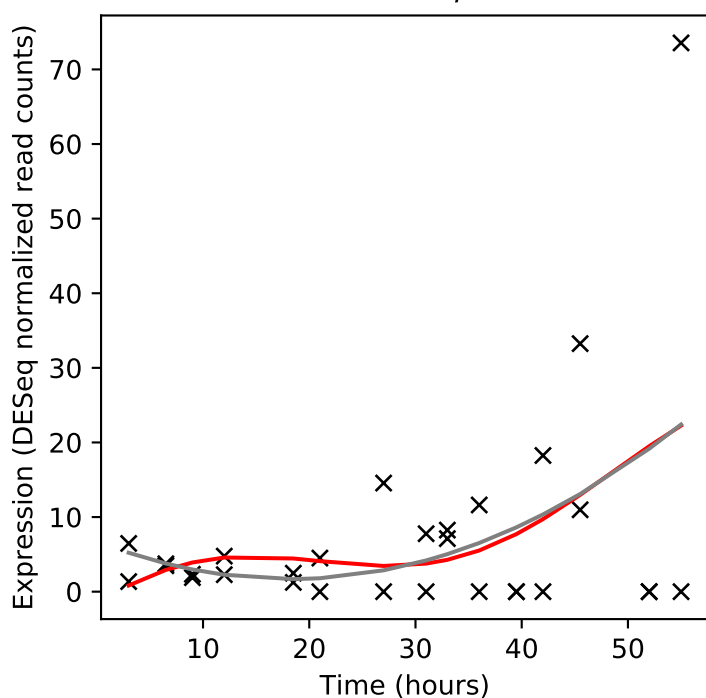

Rv3116/moeB2

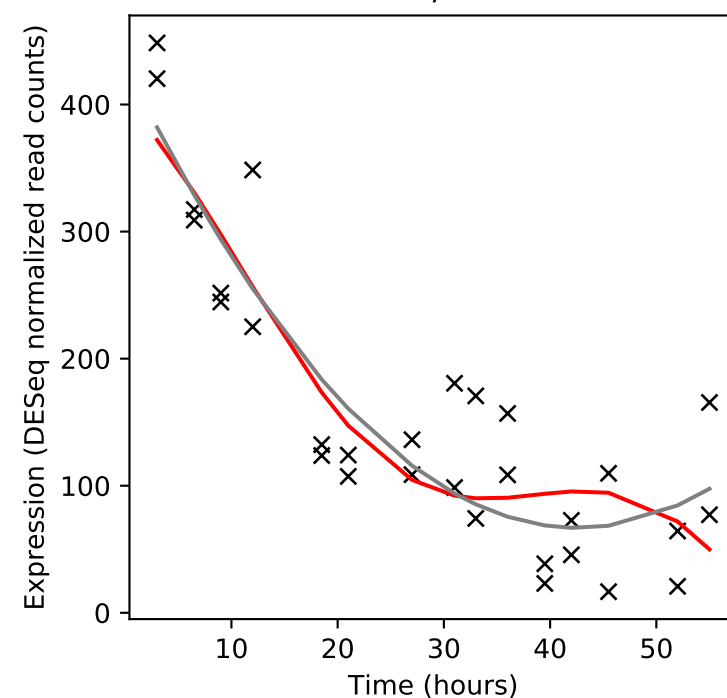

Rv3117/cysA3

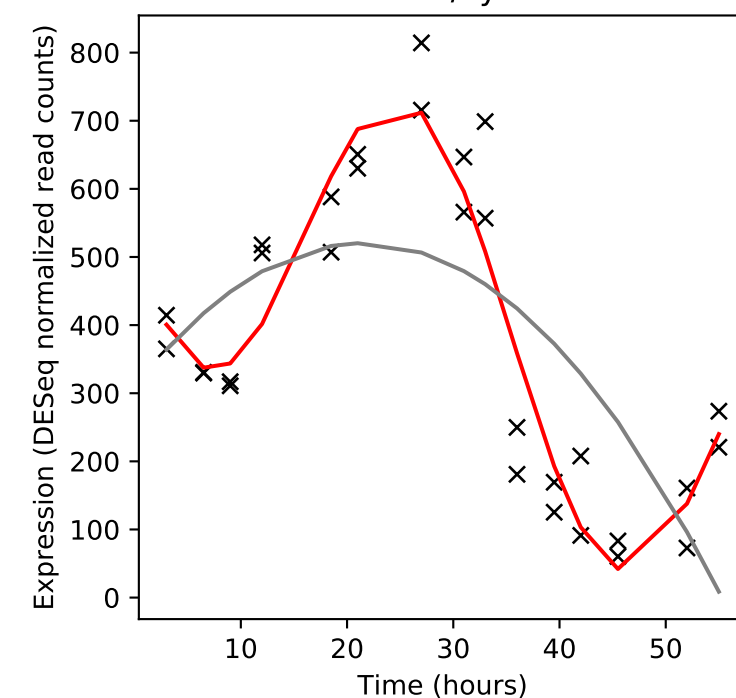

Rv3118/sseC1

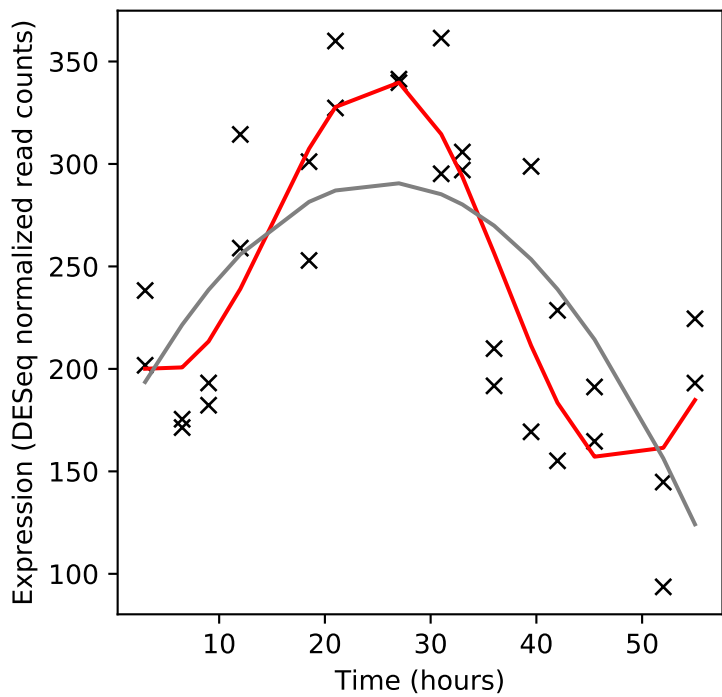

Rv3119/moaE1

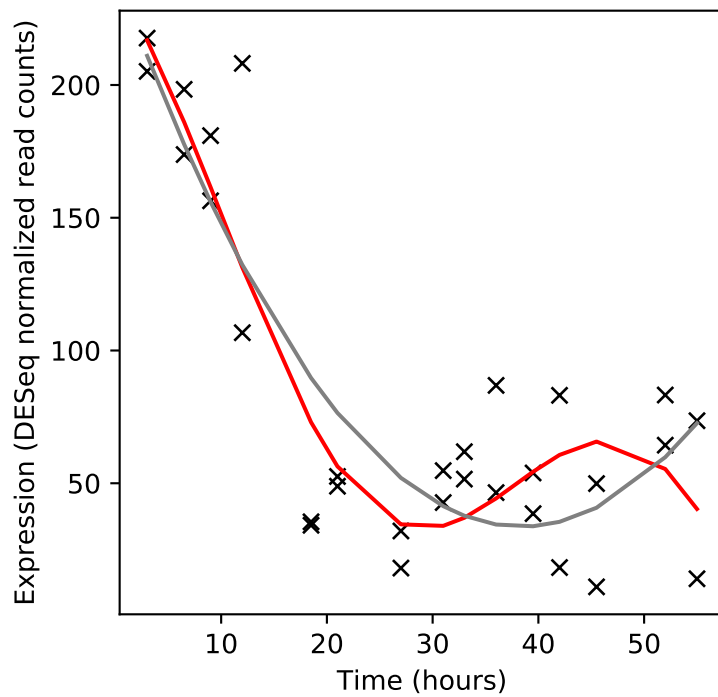

Rv3120/-

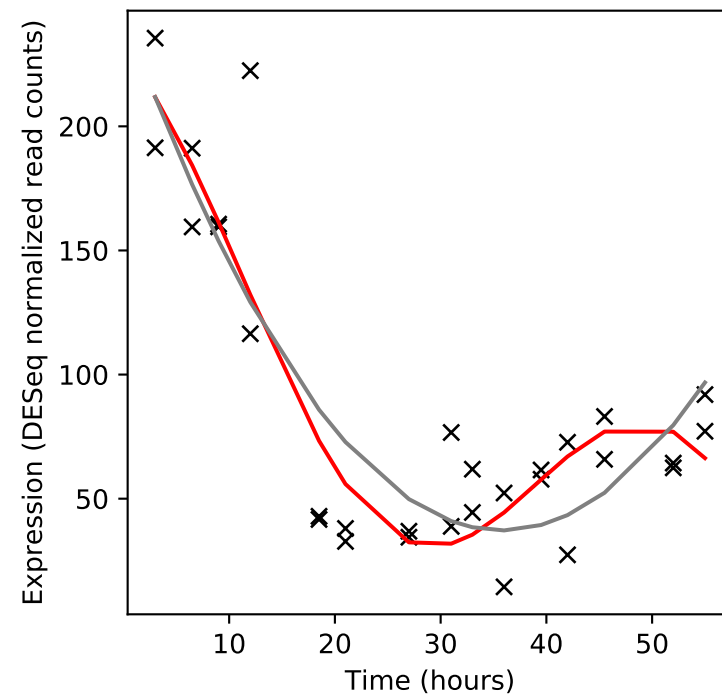

Rv3121/cyp141

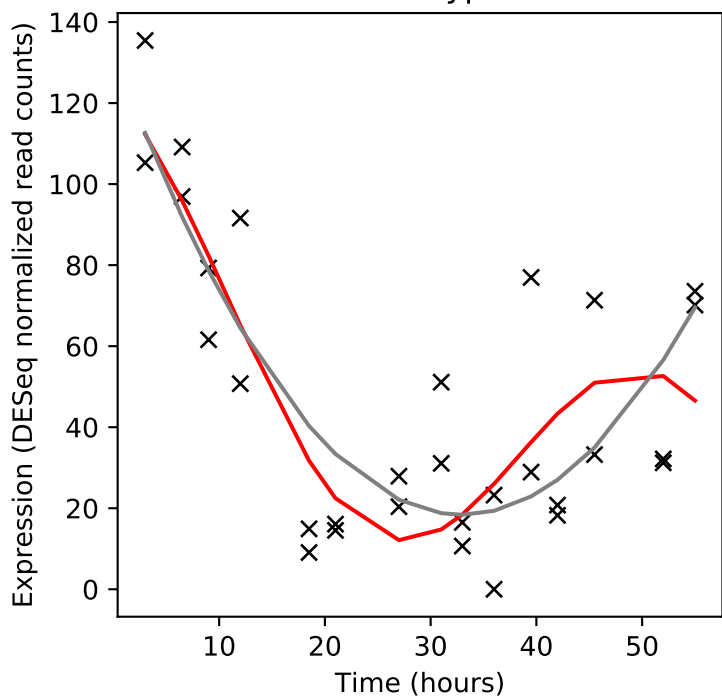

Rv3122/-

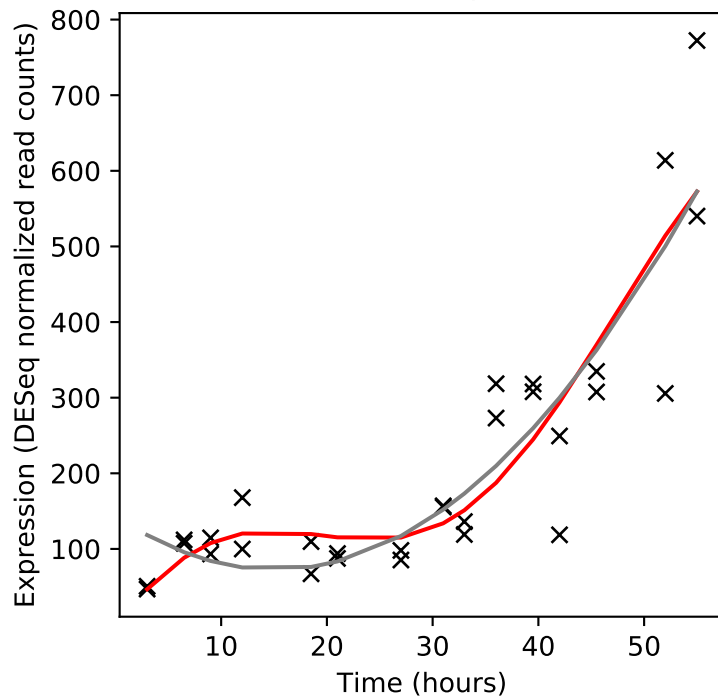

Rv3123/-

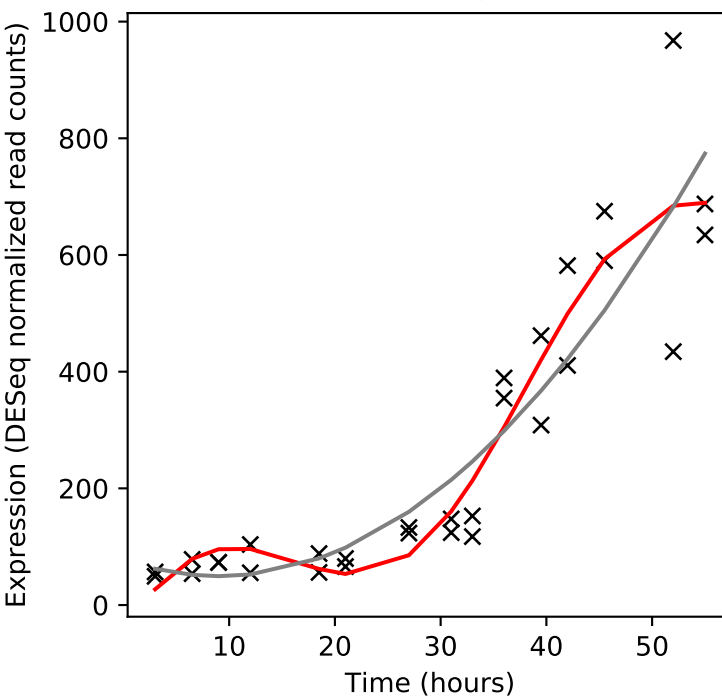

Rv3124/moaR1

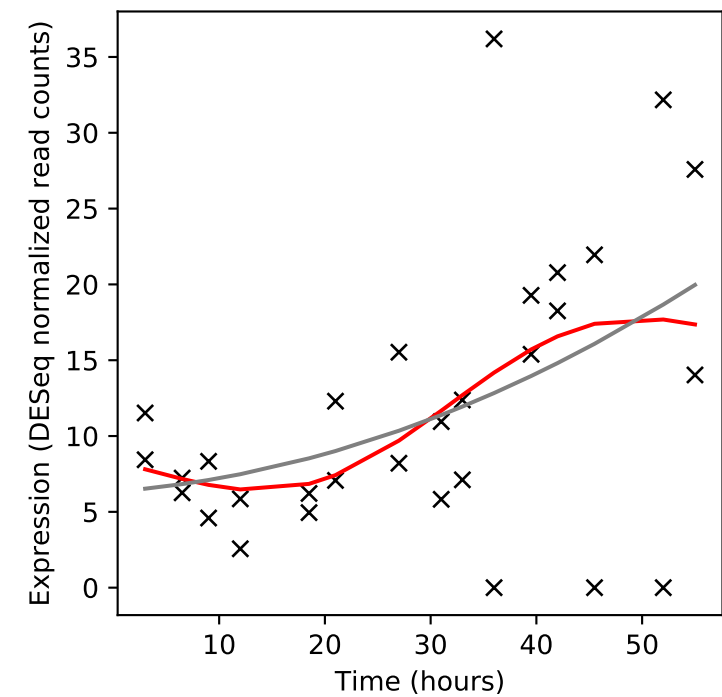

Rv3125c/PPE49

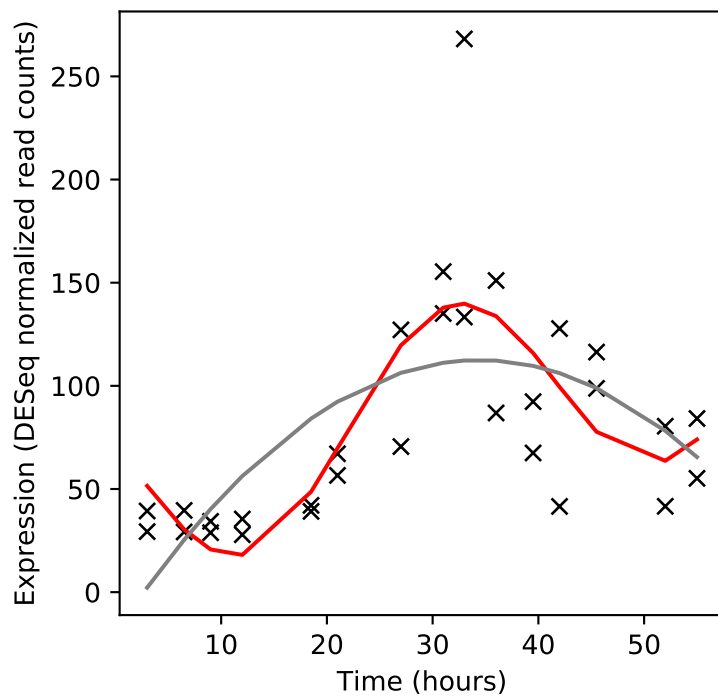

Rv3126c/-

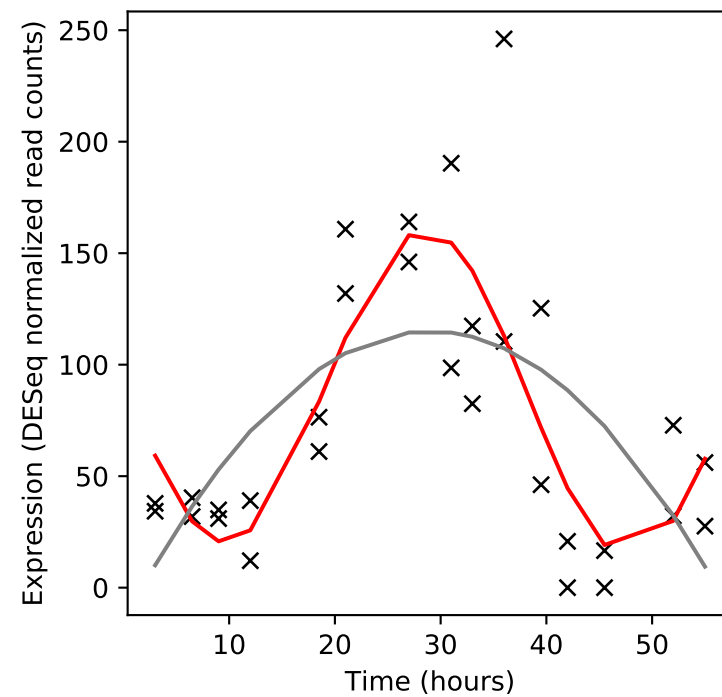

Rv3127/-

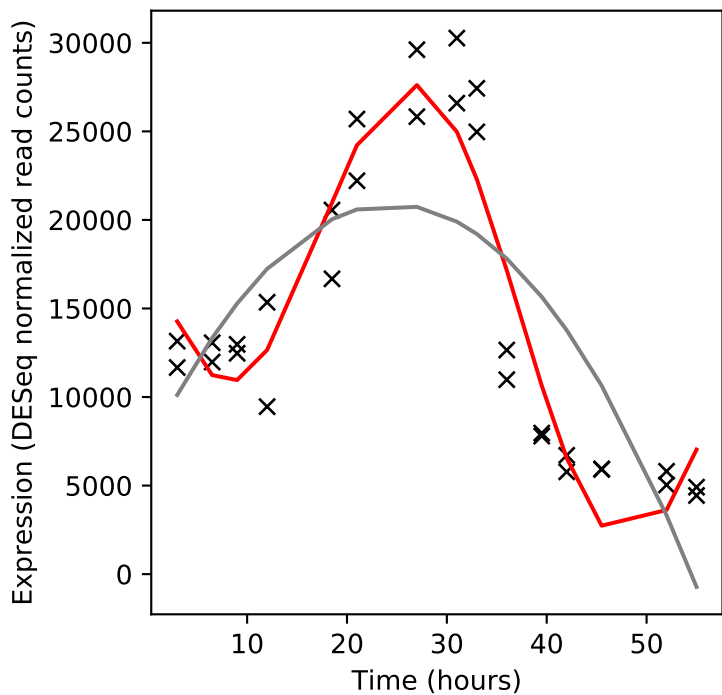

Rv3129/-

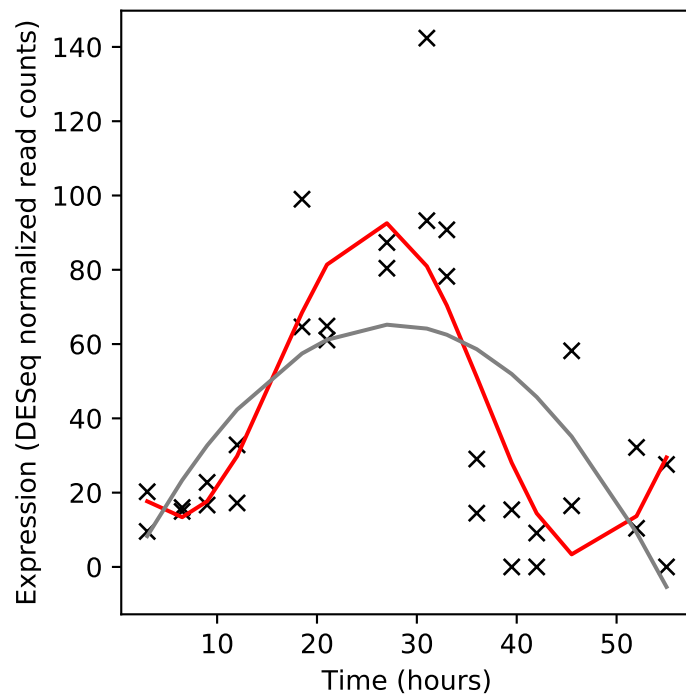

Rv3130c/tgs1

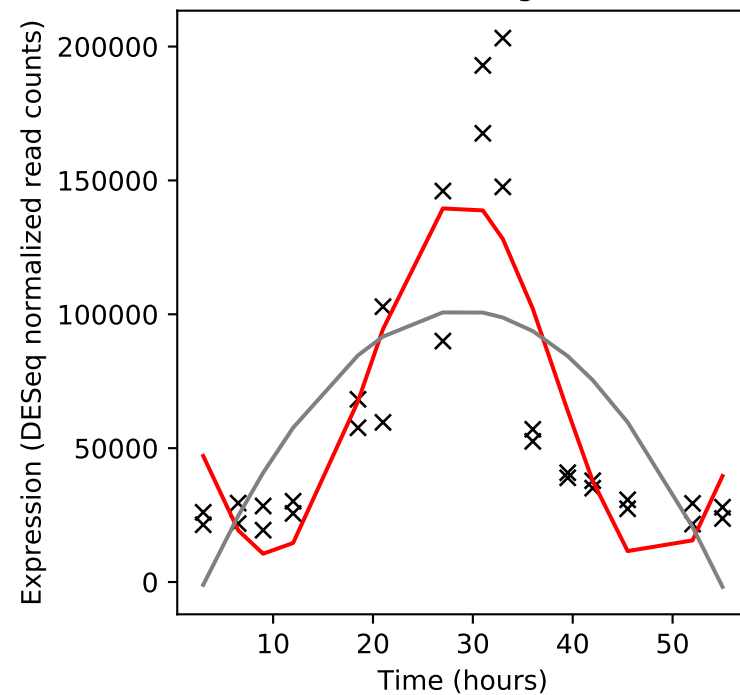

Rv3131/-

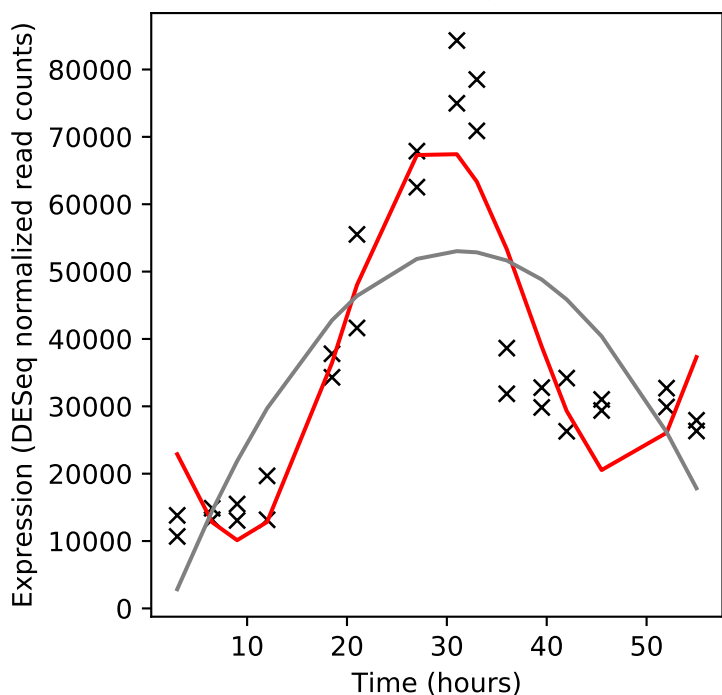

Rv3132c/devS

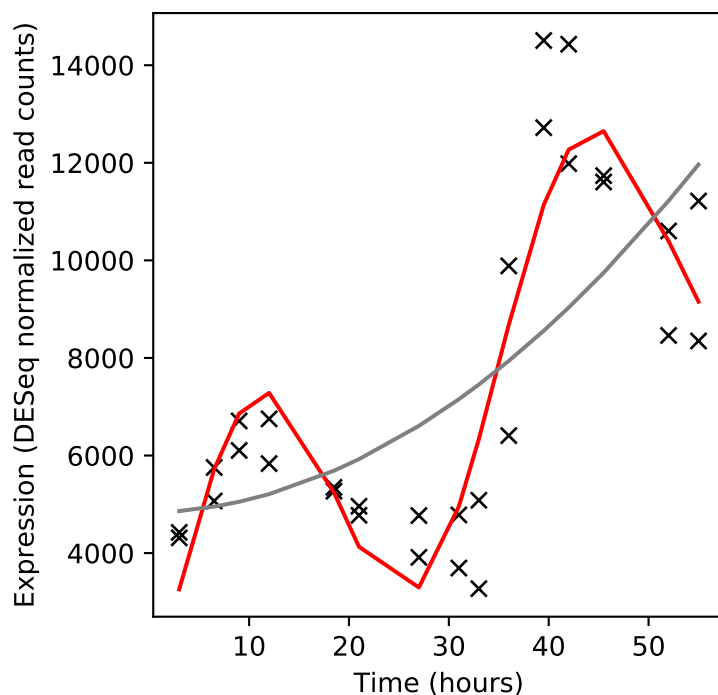

Rv3133c/devR

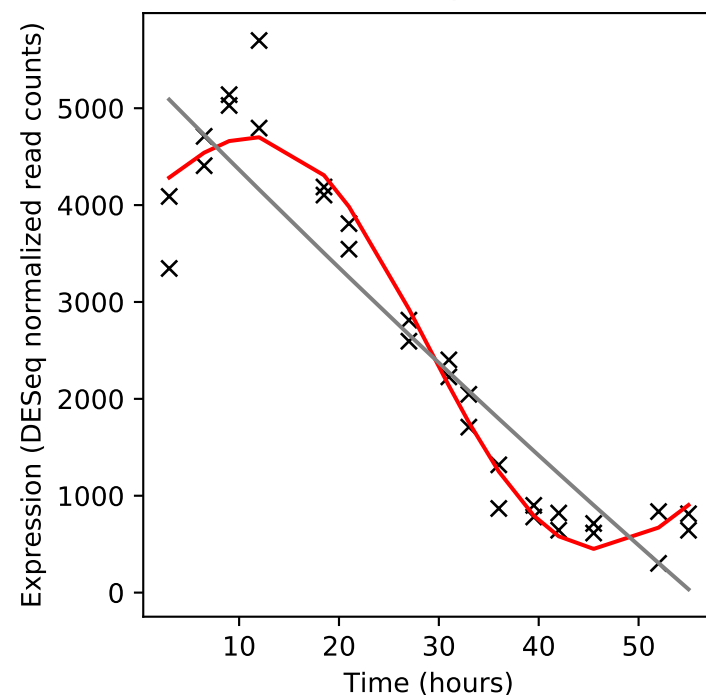

Rv3134c/-

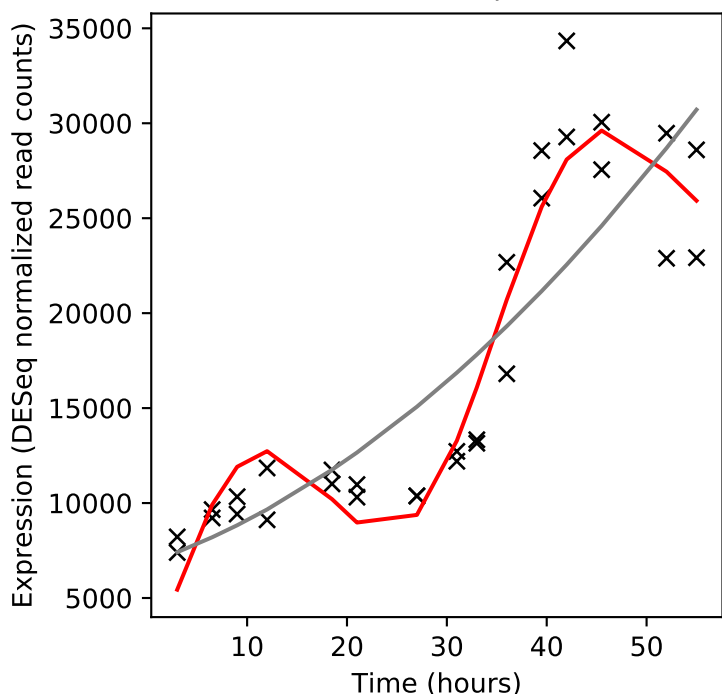

Rv3135/PPE50

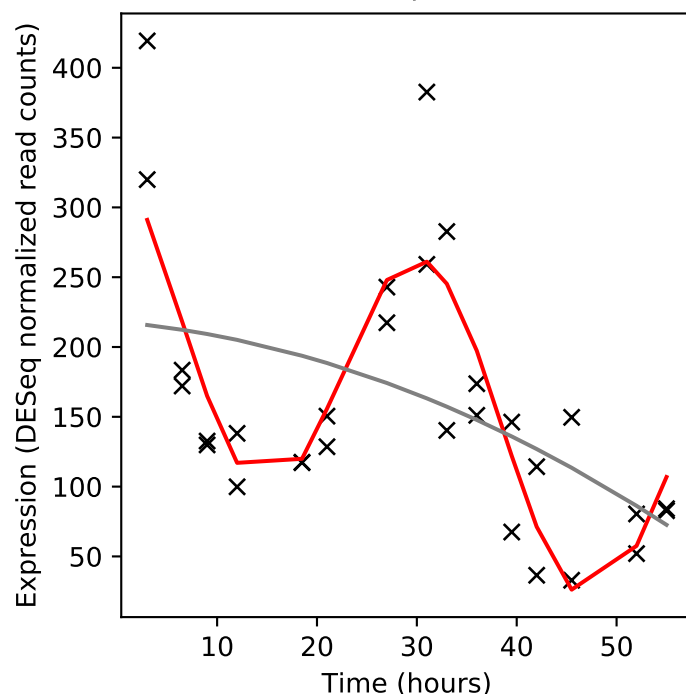

Rv3136/PPE51

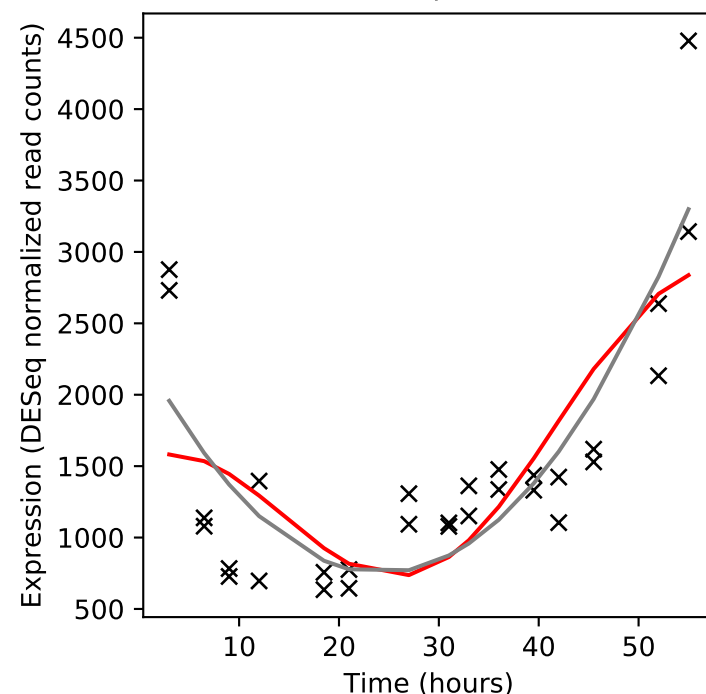

Rv3136A/-

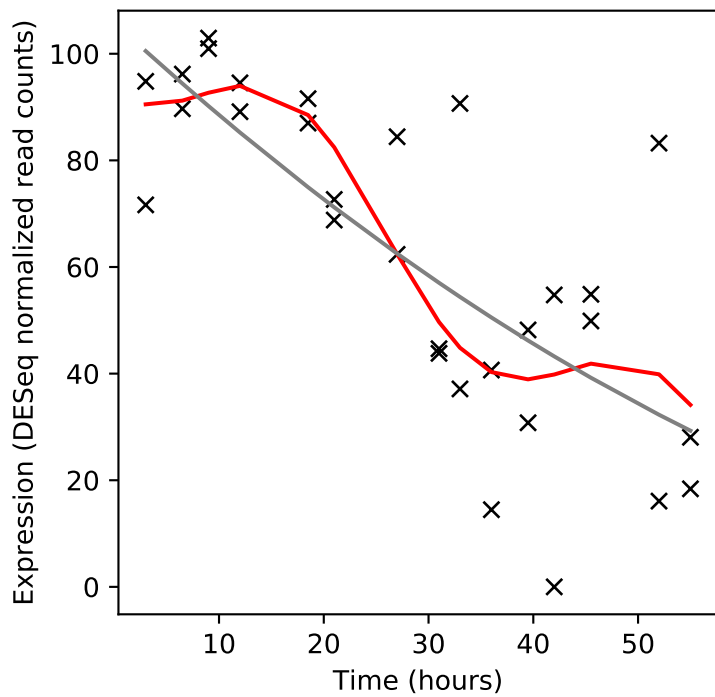

Rv3137/-

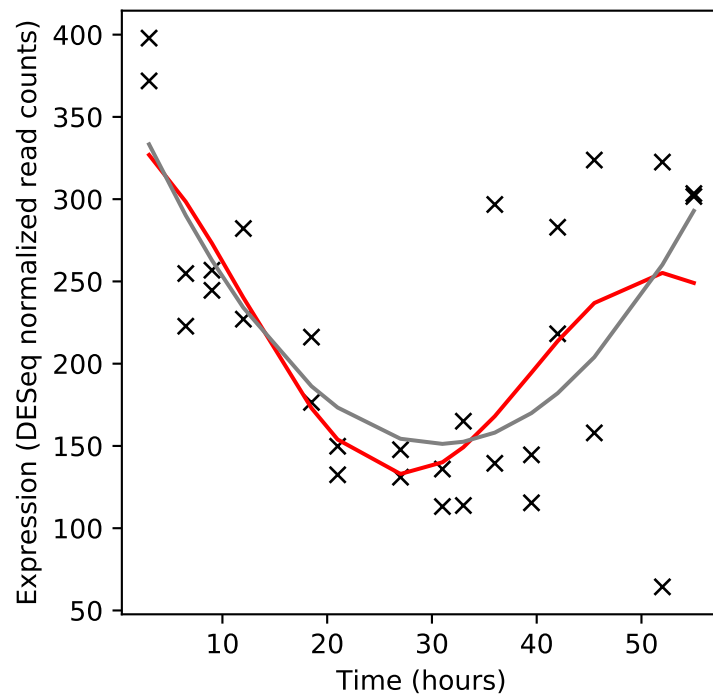

Rv3138/pflA

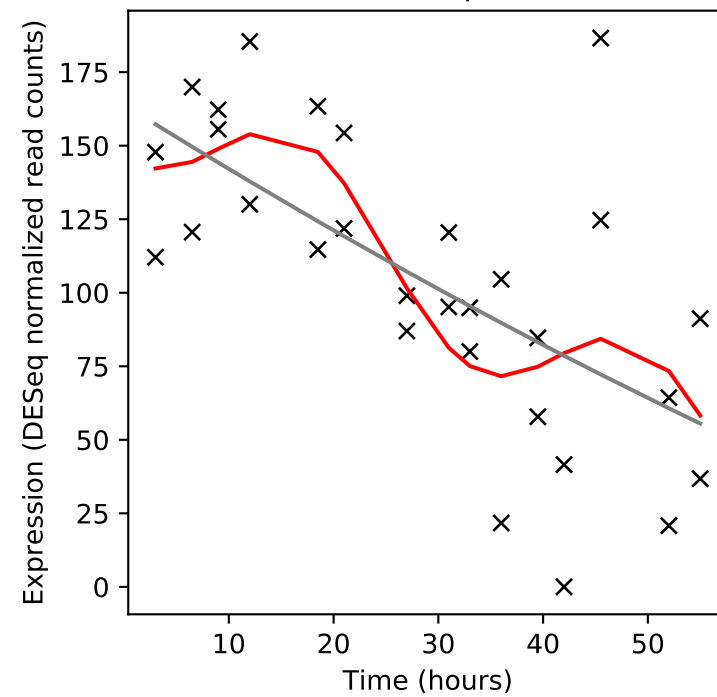

Rv3139/fadE24

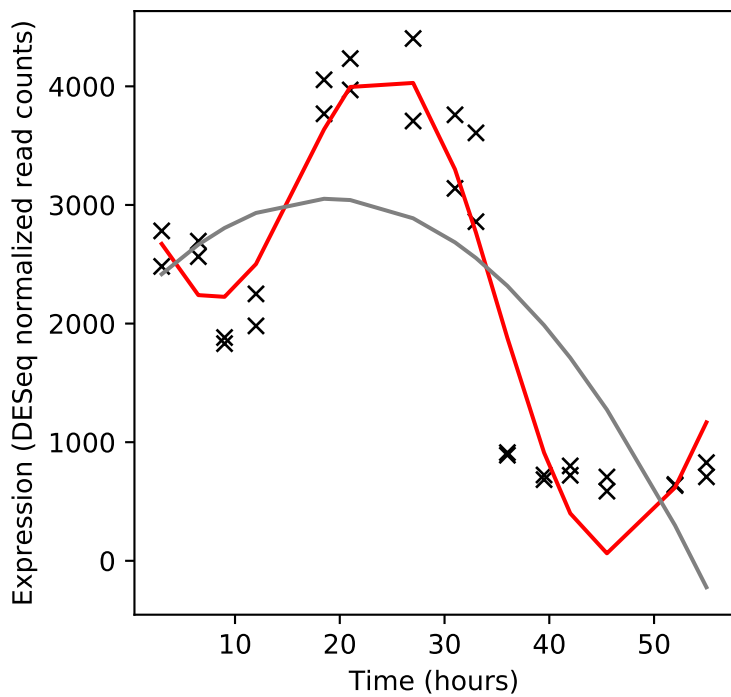

Rv3140/fadE23

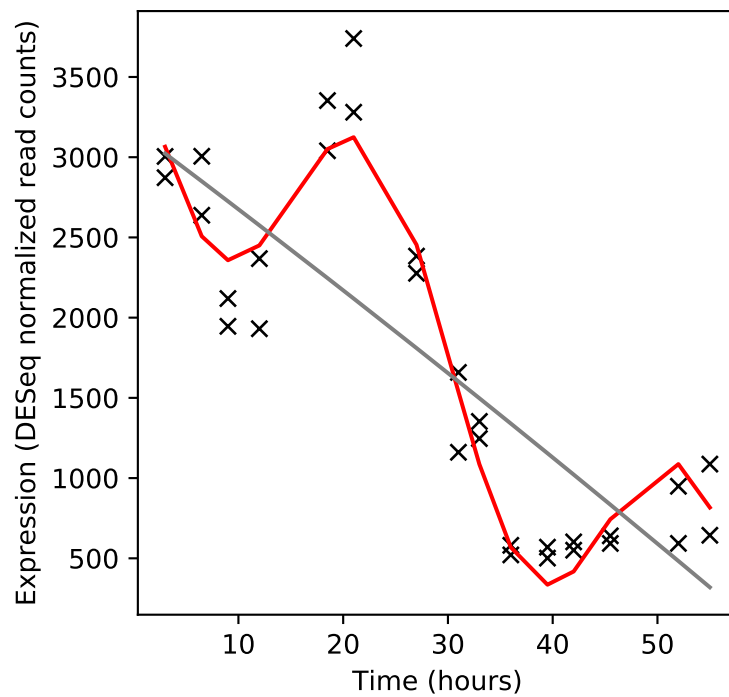

Rv3141/fadB4

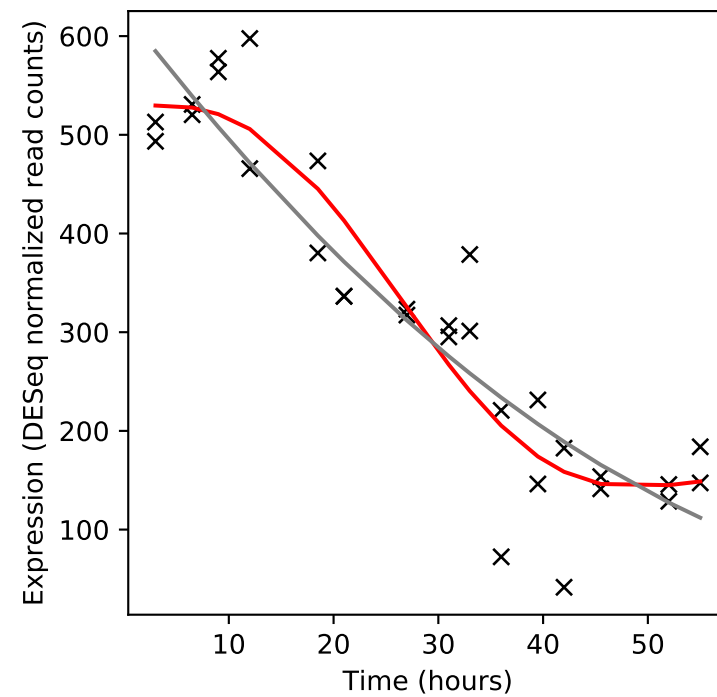

Rv3142c/-

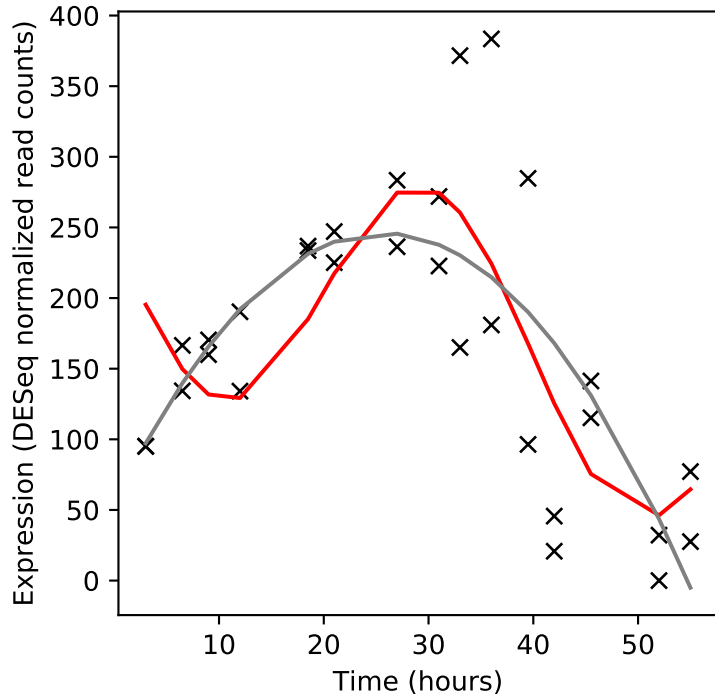

Rv3143/-

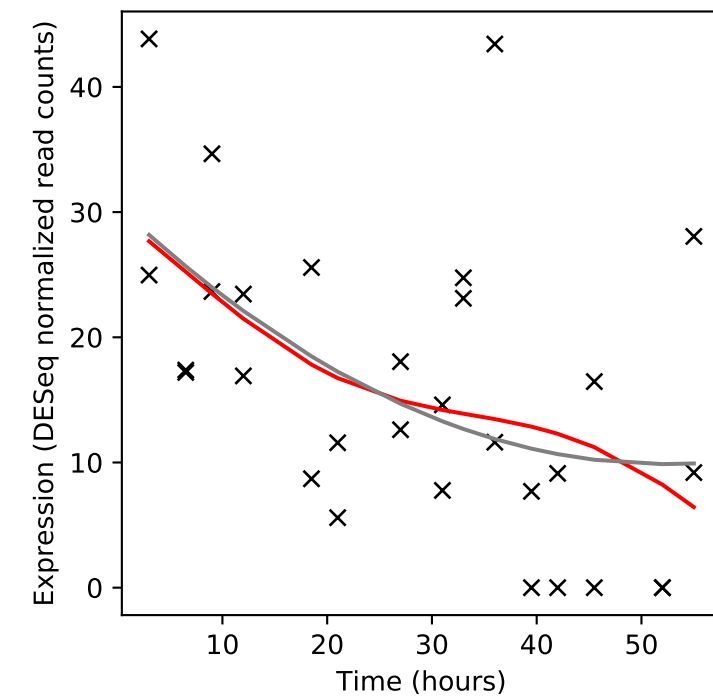

Rv3144c/PPE52

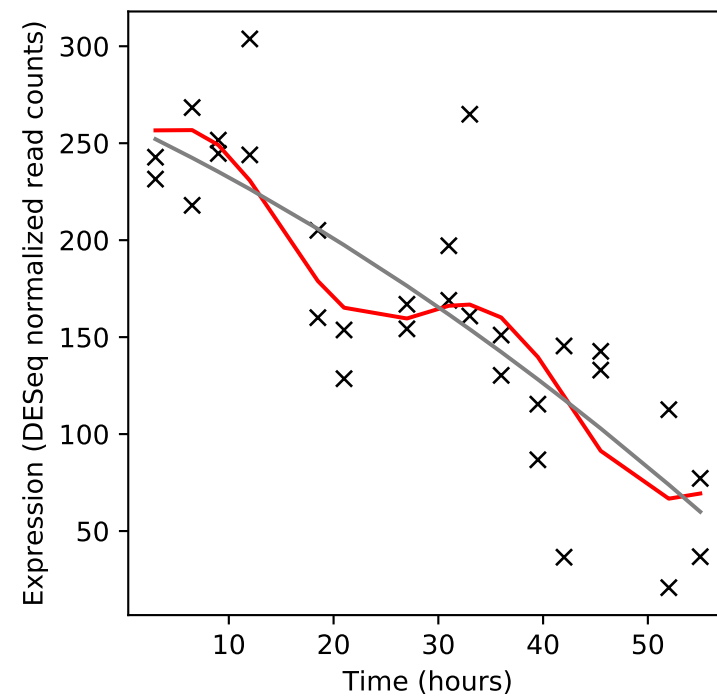



Rv3145/nuoA

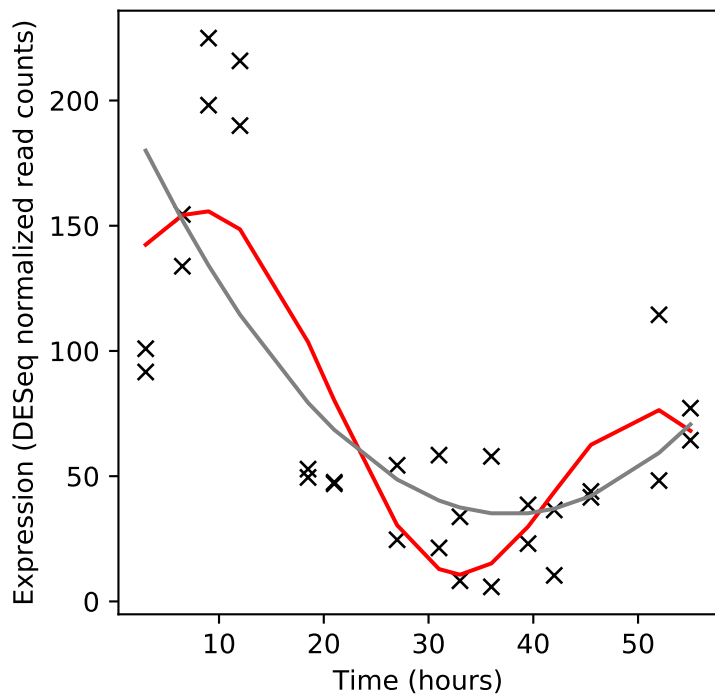

Rv3146/nuoB

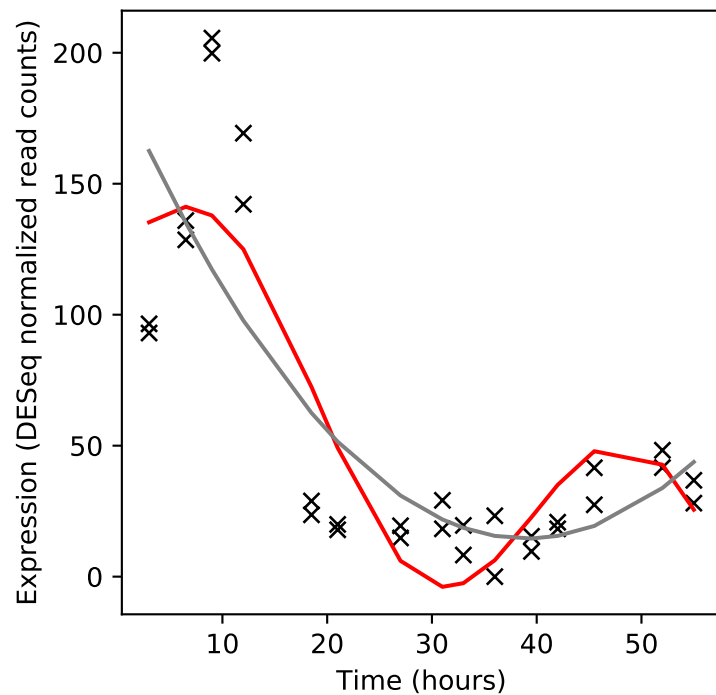

Rv3147/nuoC

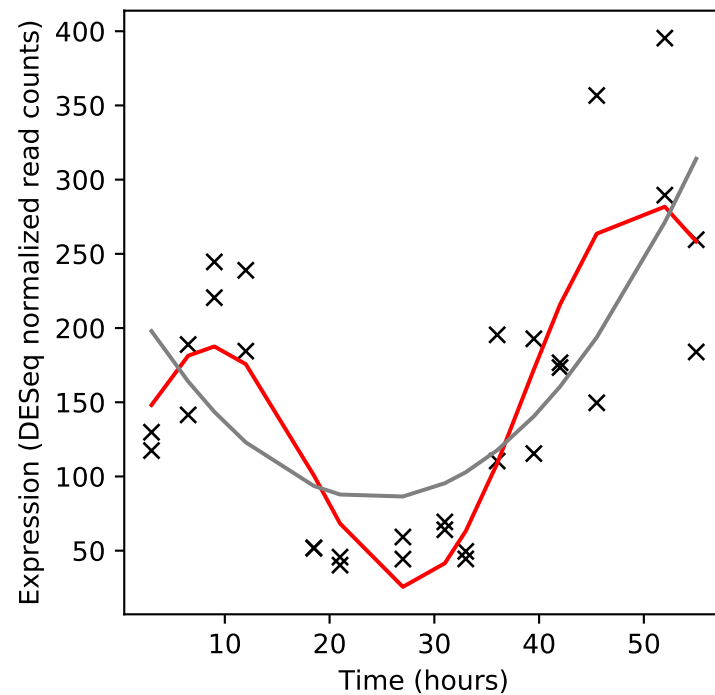

Rv3148/nuoD

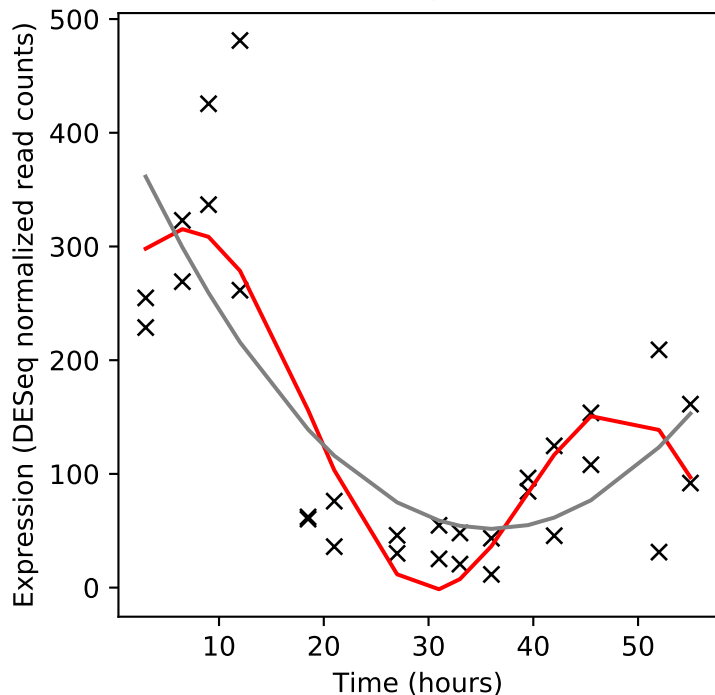

Rv3149/nuoE

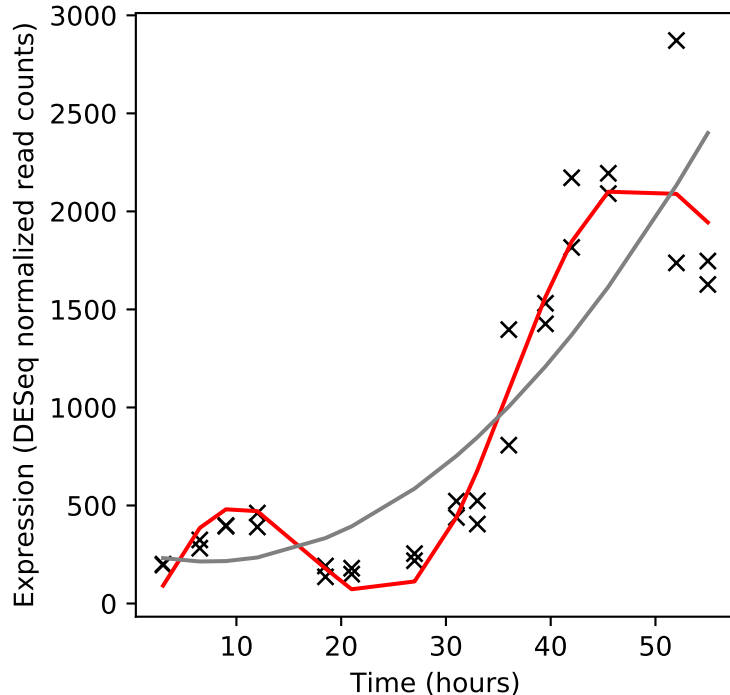

Rv3150/nuoF

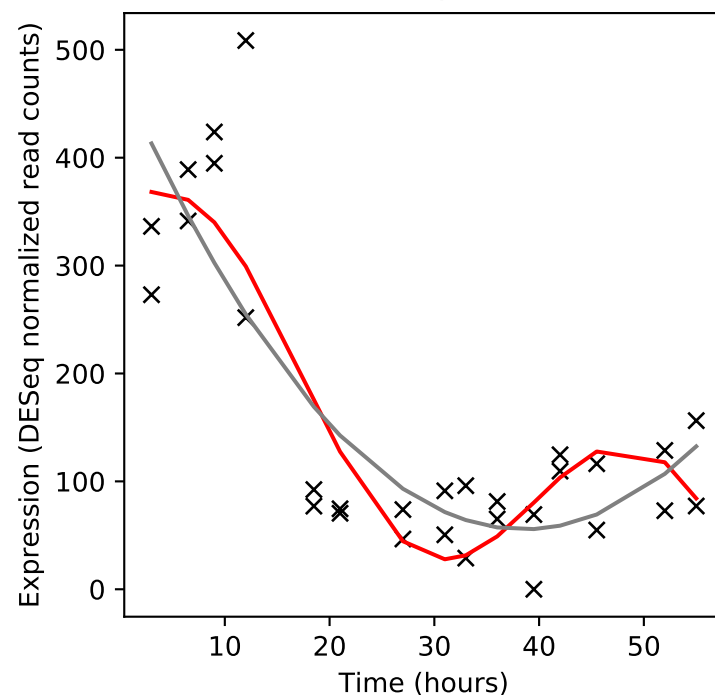

Rv3151/nuoG

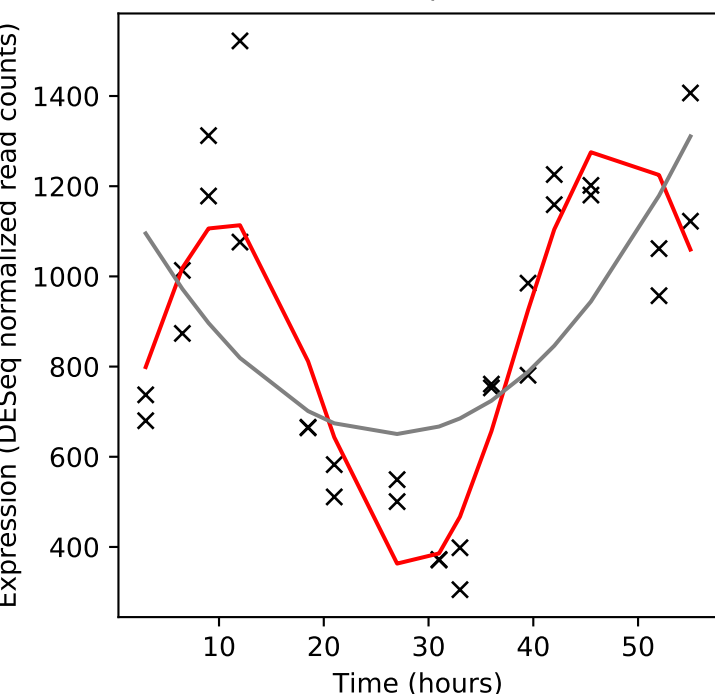

Rv3152/nuoH

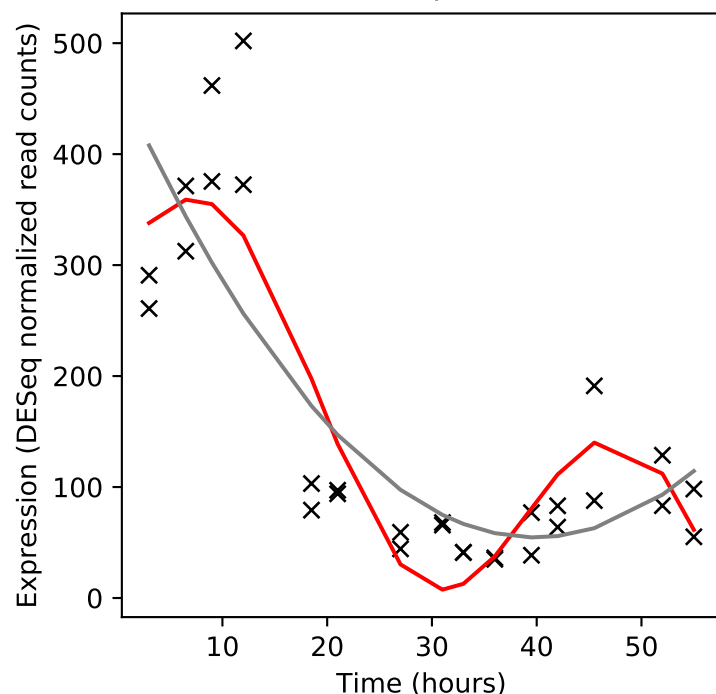

Rv3153/nuoI

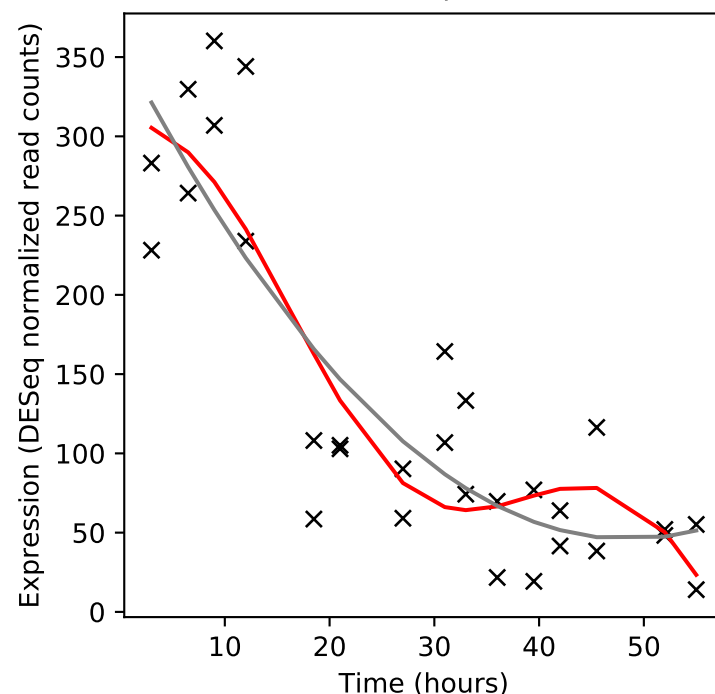

Rv3154/nuoj

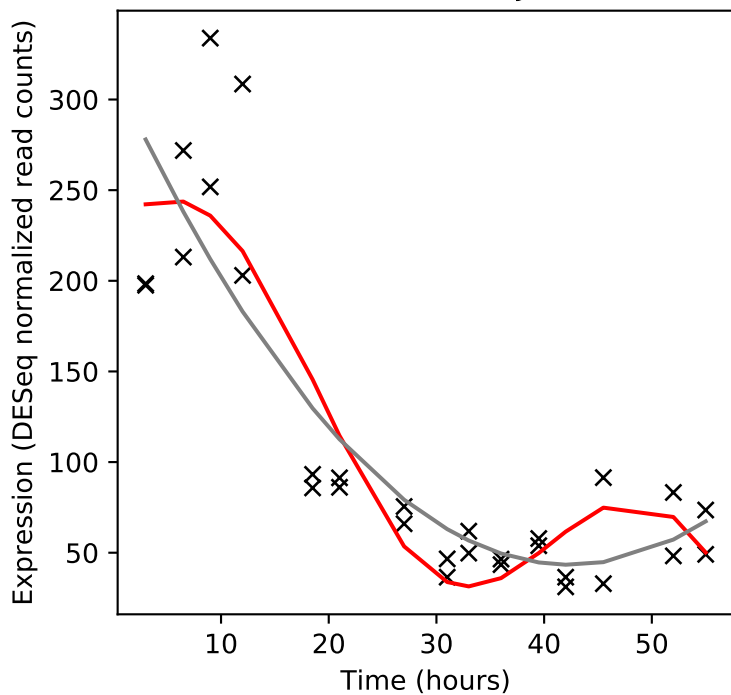

Rv3155/nuoK

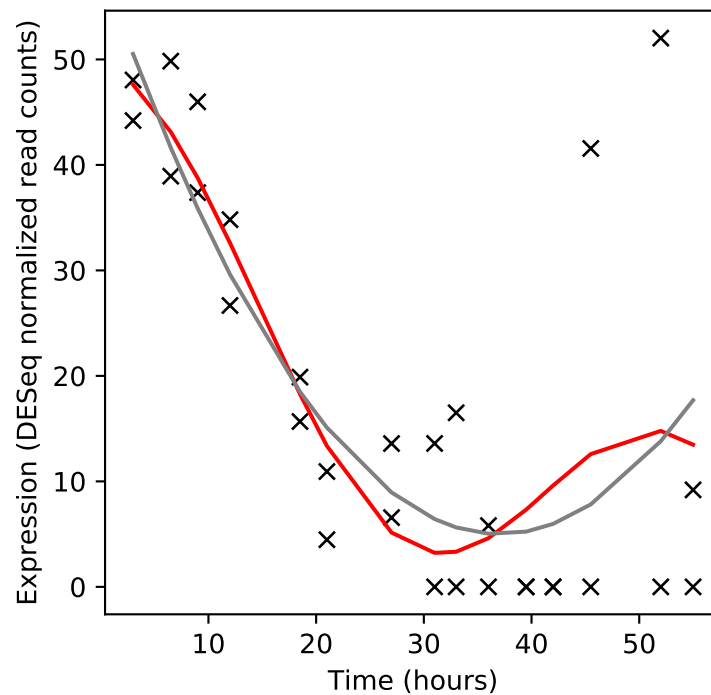

Rv3156/nuoL

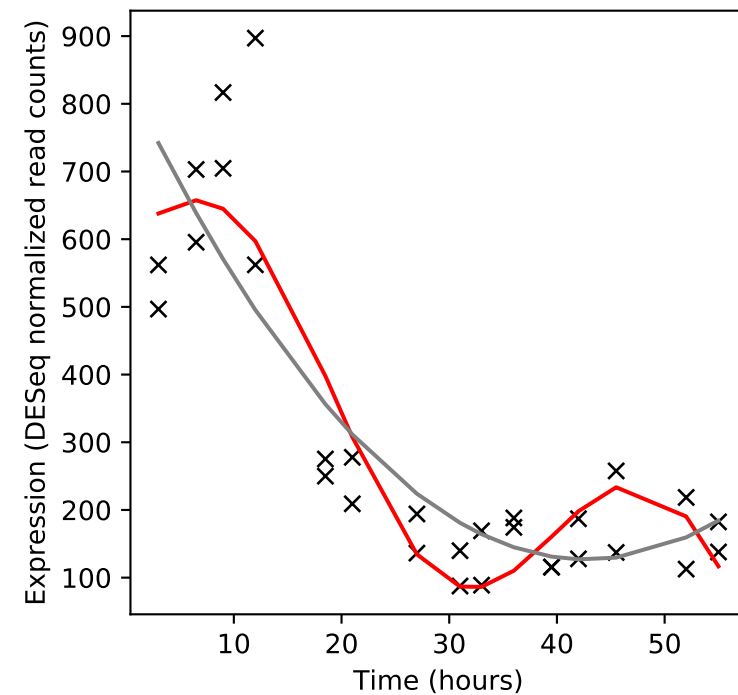

Rv3157/nuoM

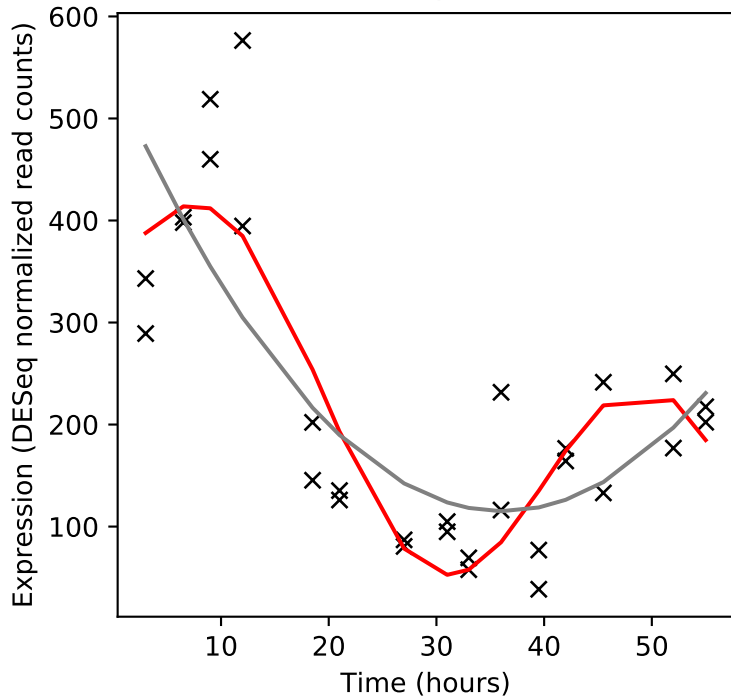

Rv3158/nuoN

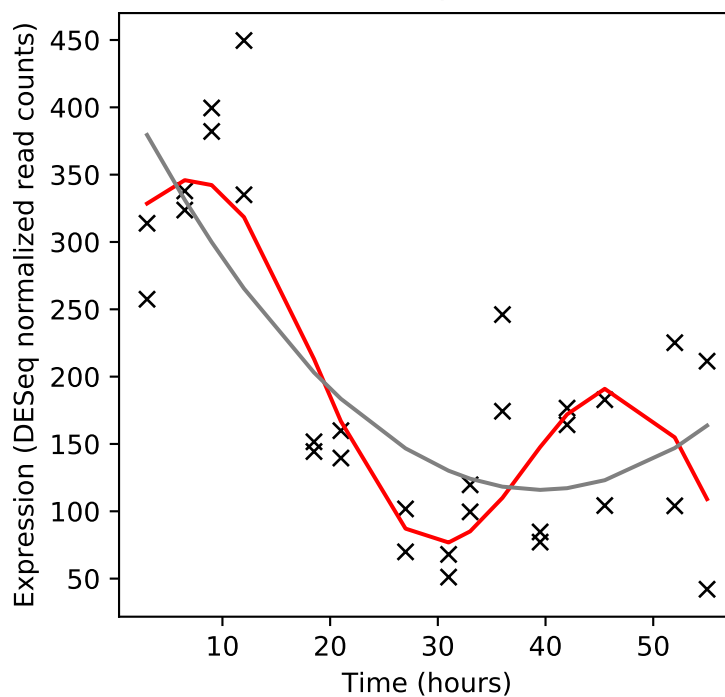

Rv3159c/PPE53

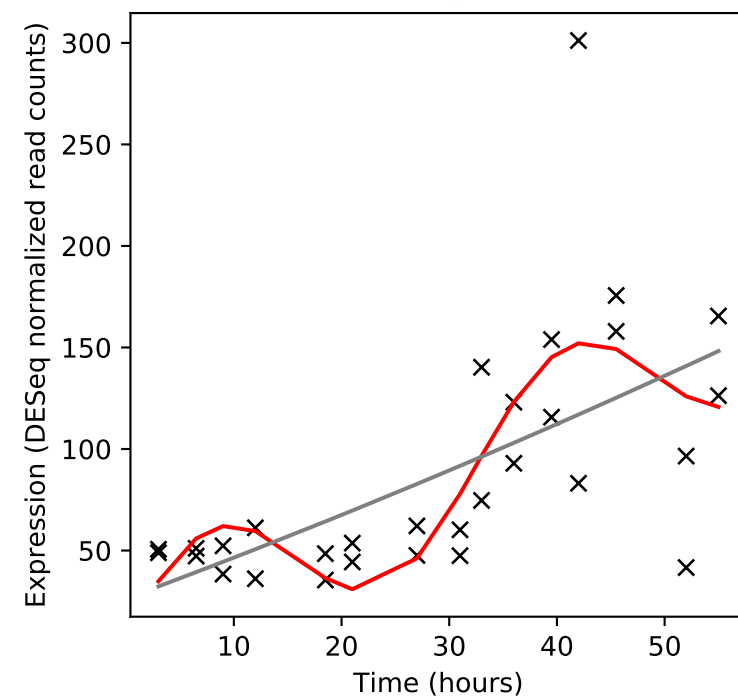

Rv3160c/-

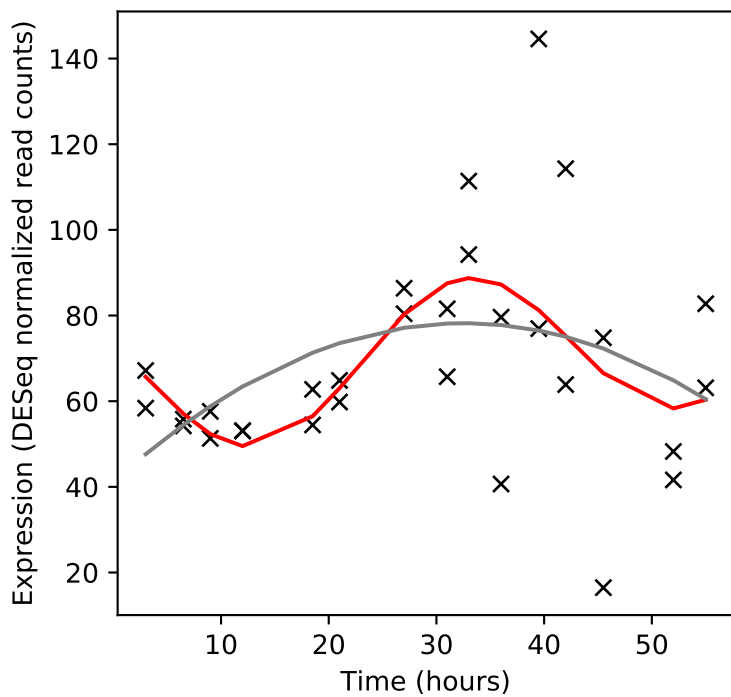

Rv3161c/-

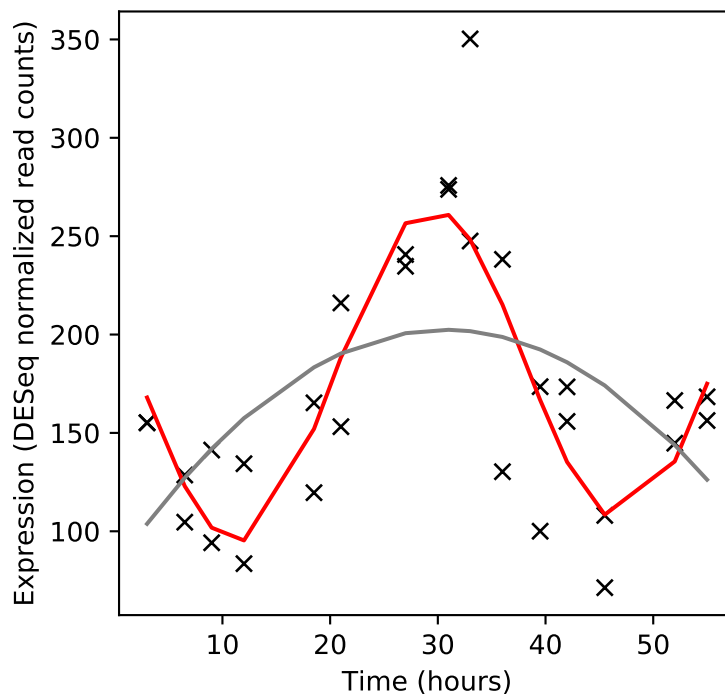

Rv3162c/-

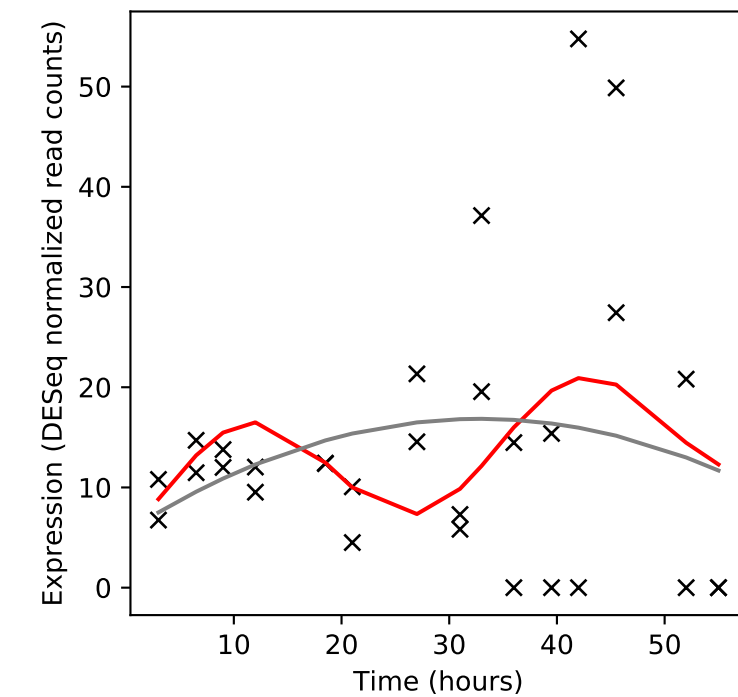

Rv3163c/-

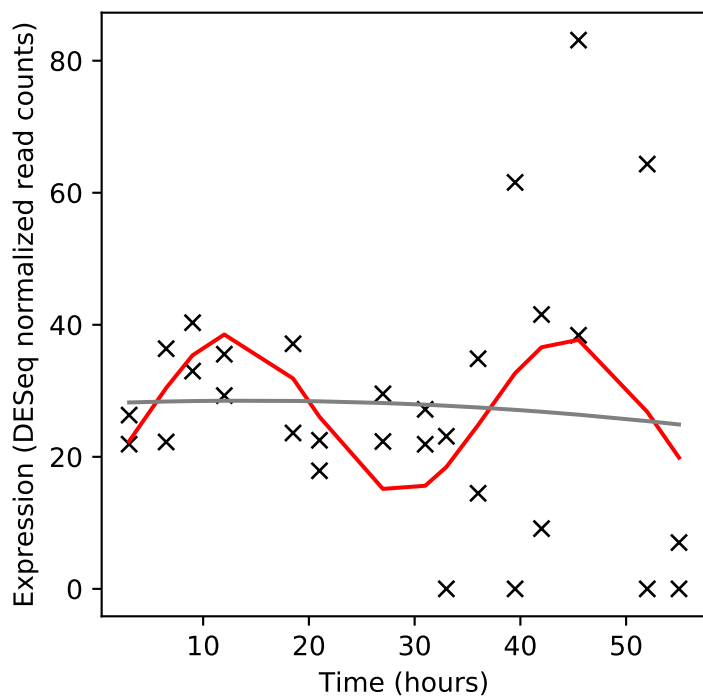

Rv3164c/moxR3

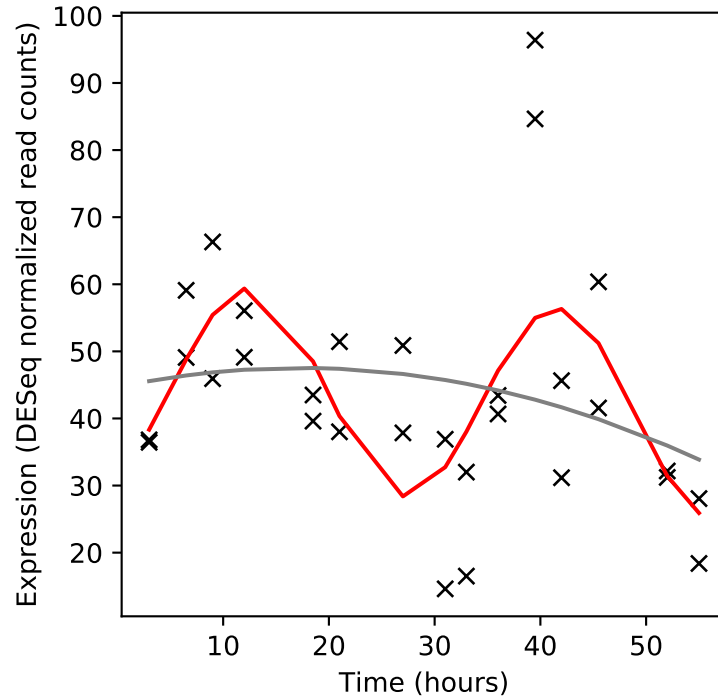

Rv3165c/-

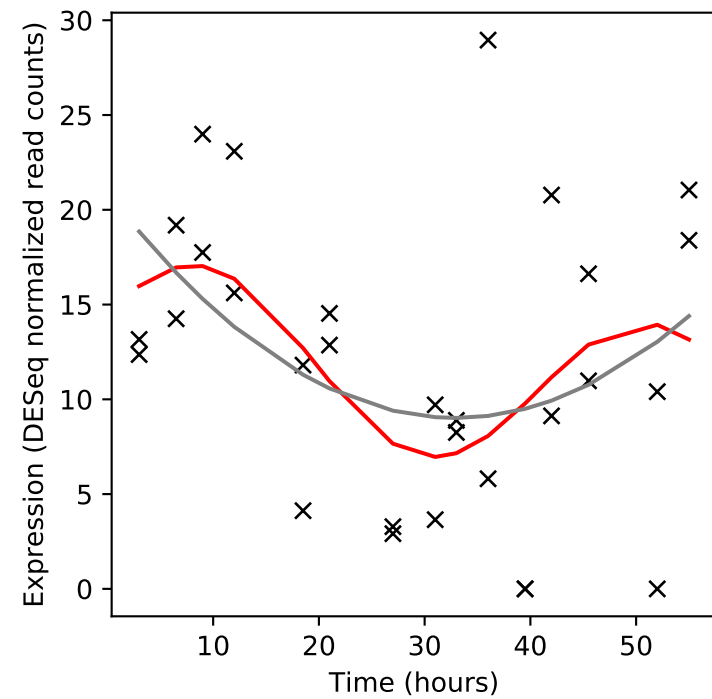

Rv3166c/-

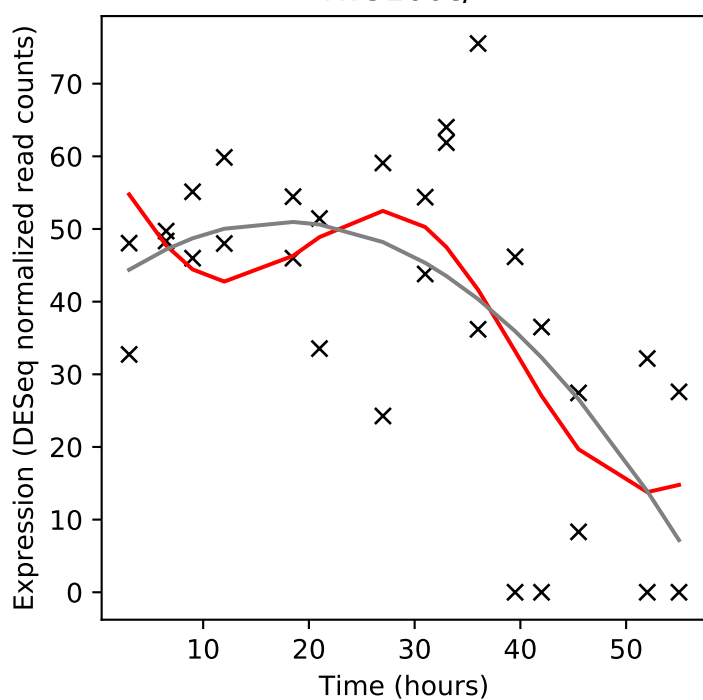

Rv3167c/-

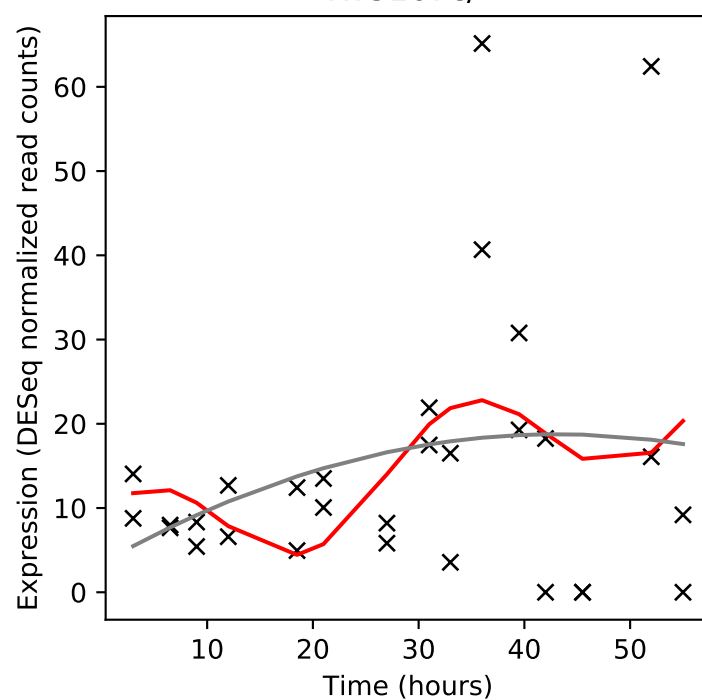

Rv3168/-

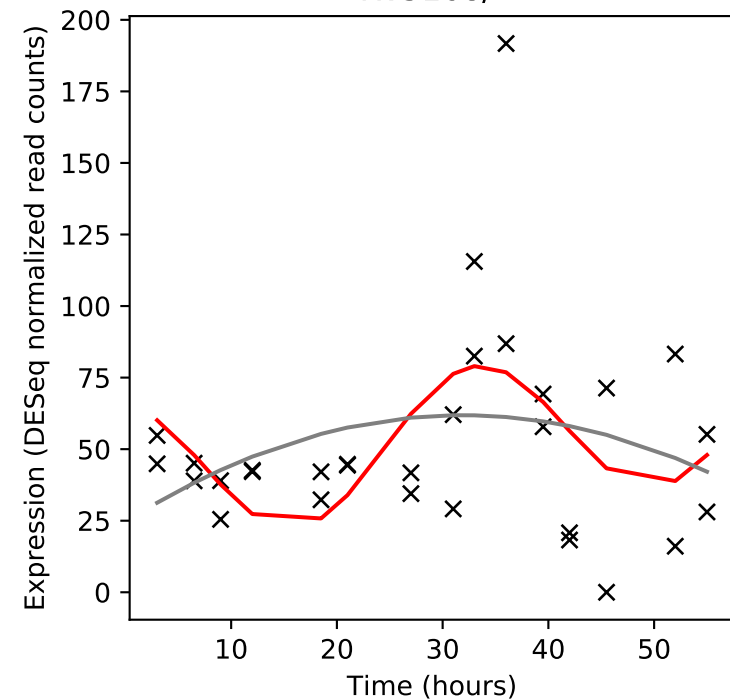

Rv3169/-

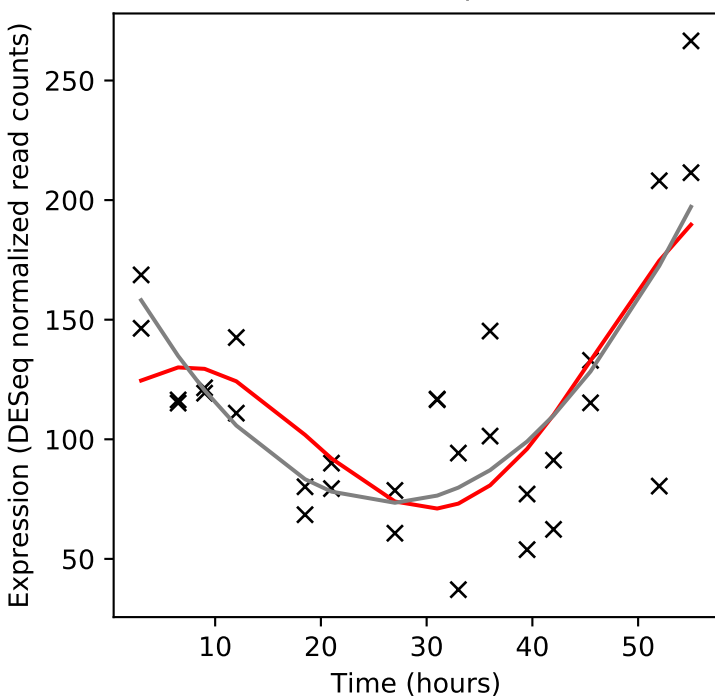

Rv3170/aofH

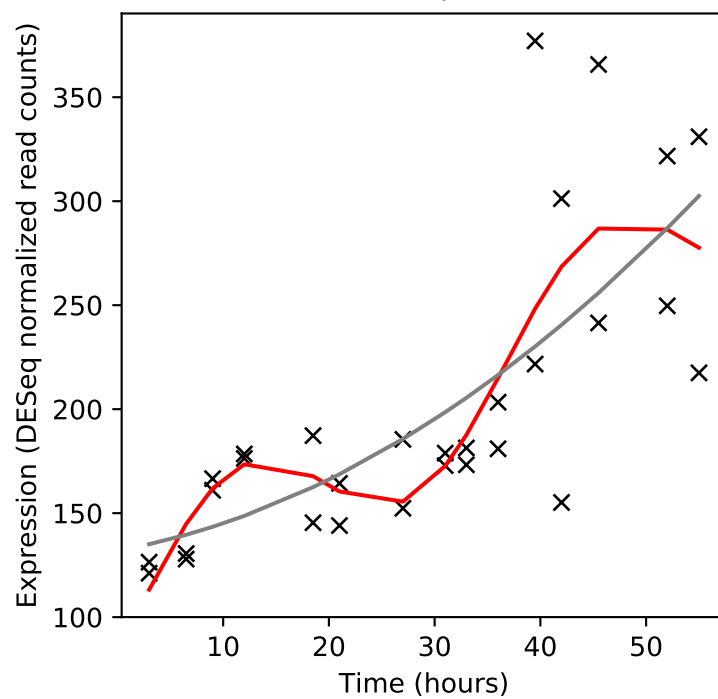

Rv3171c/hpx

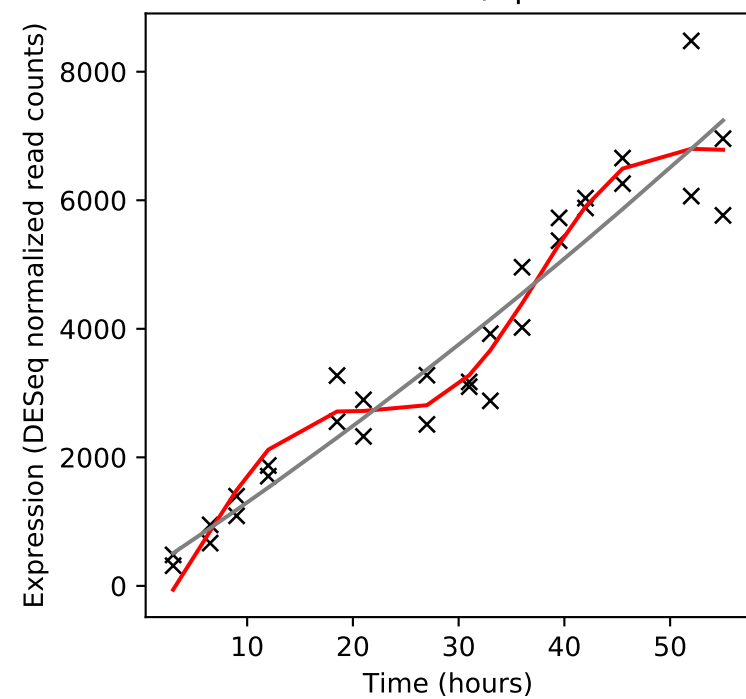

Rv3172c/-

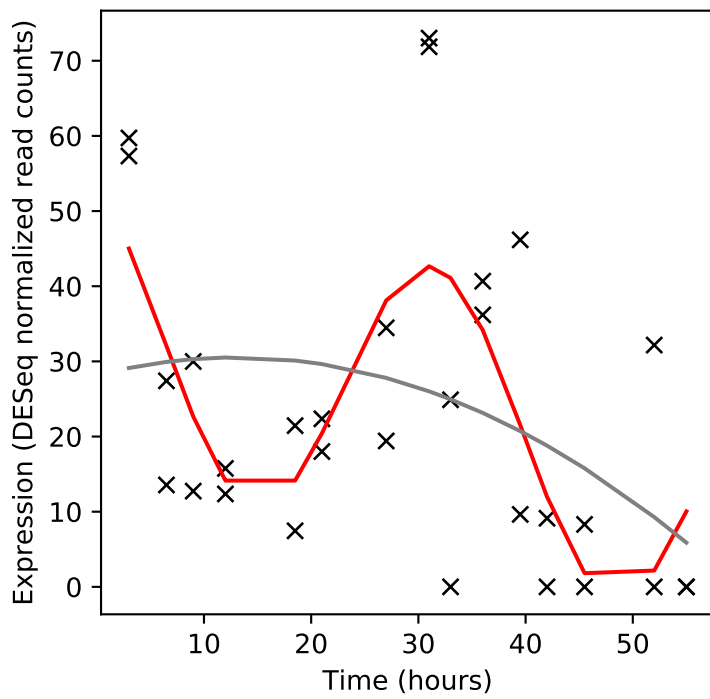

Rv3173c/-

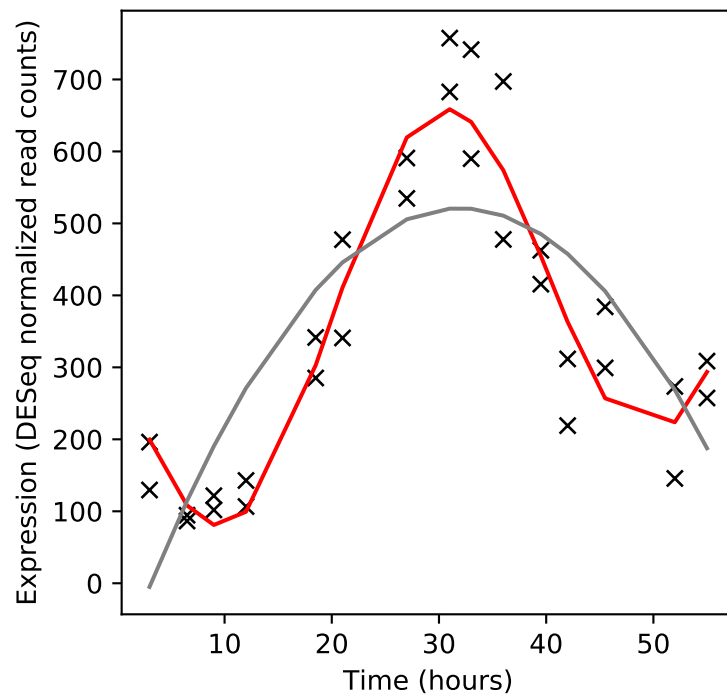

Rv3174/-

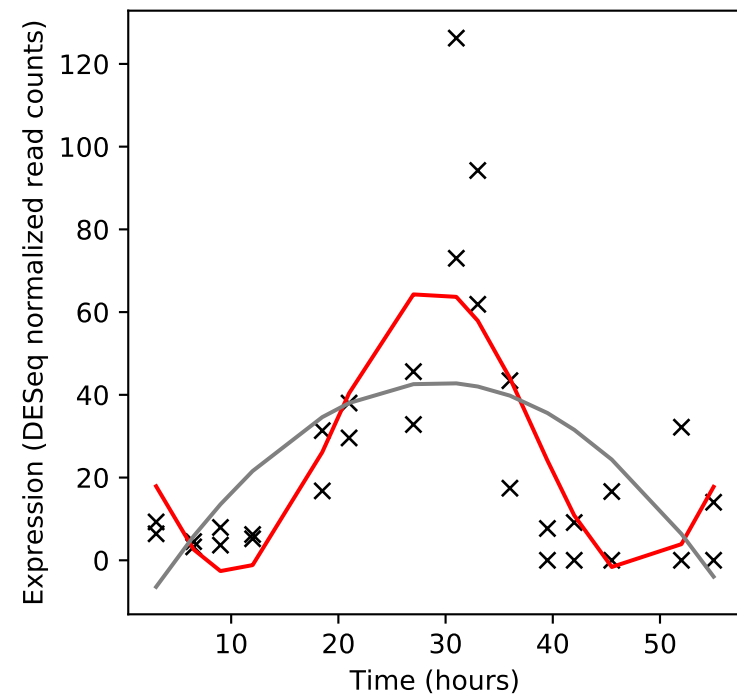

Rv3175/-

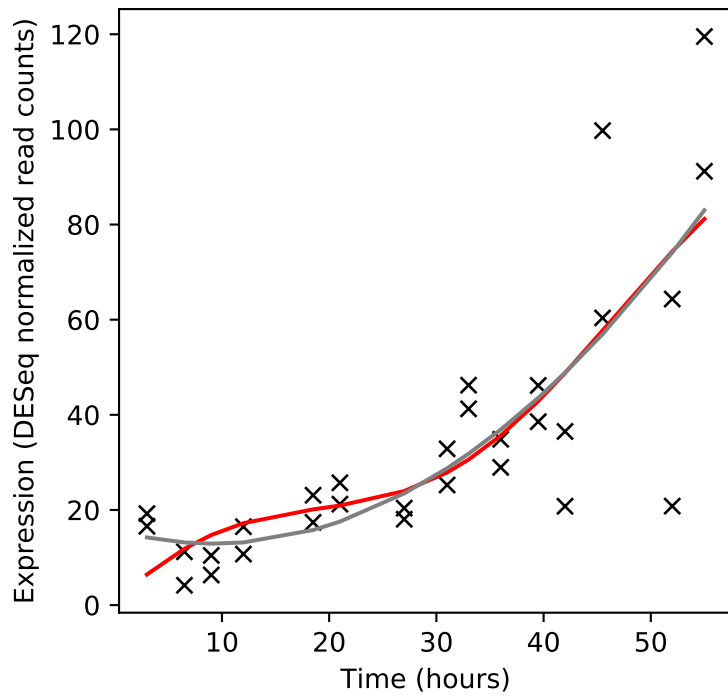

Rv3176c/mesT

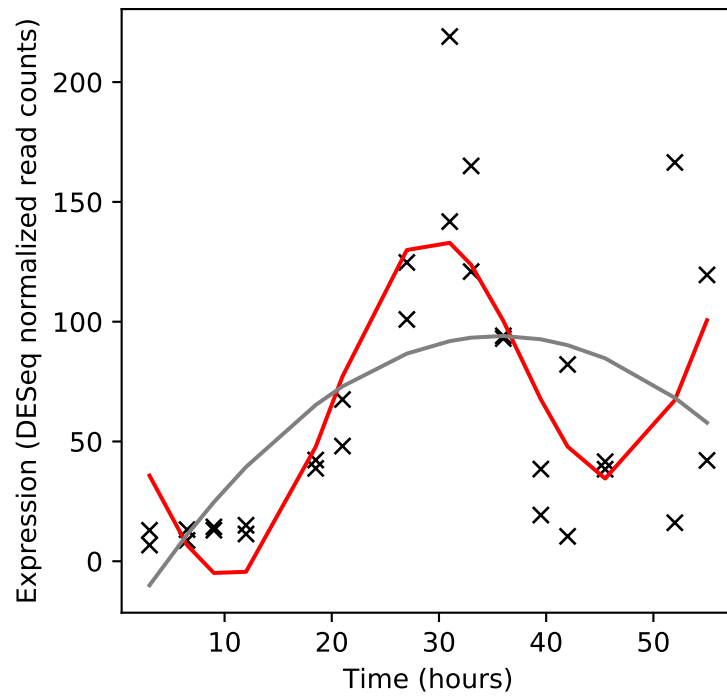

Rv3177/-

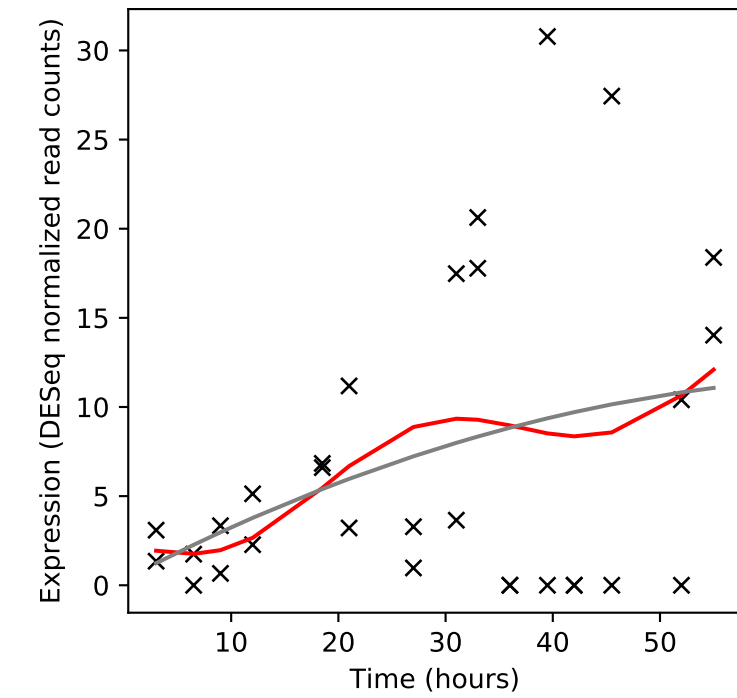

Rv3178/-

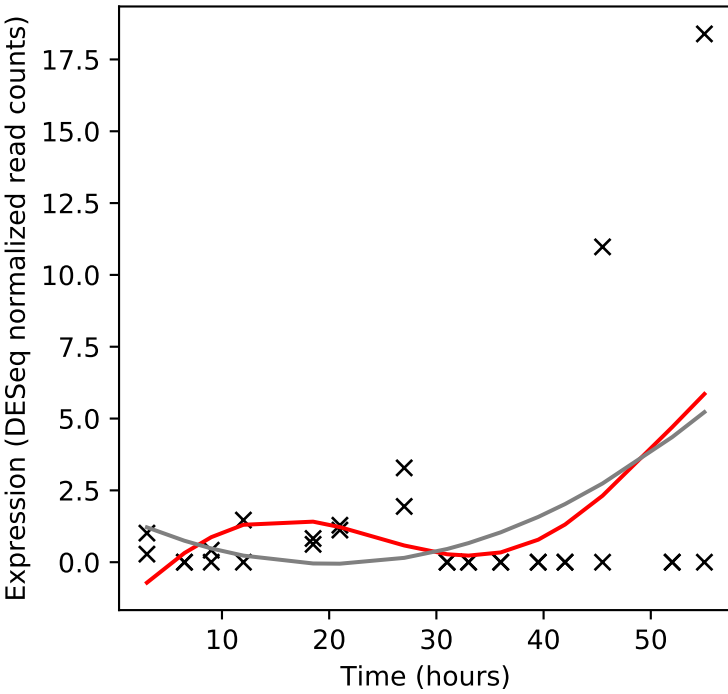

Rv3179/-

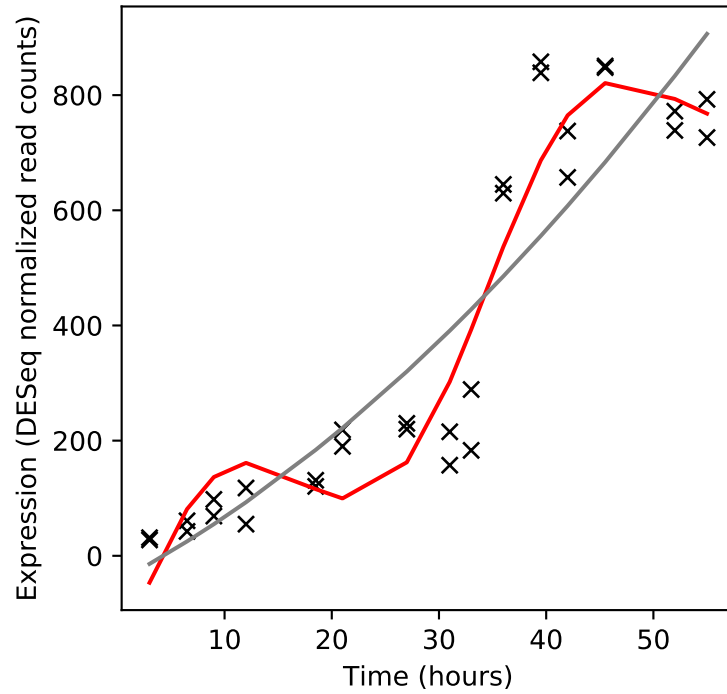

Rv3180c/-

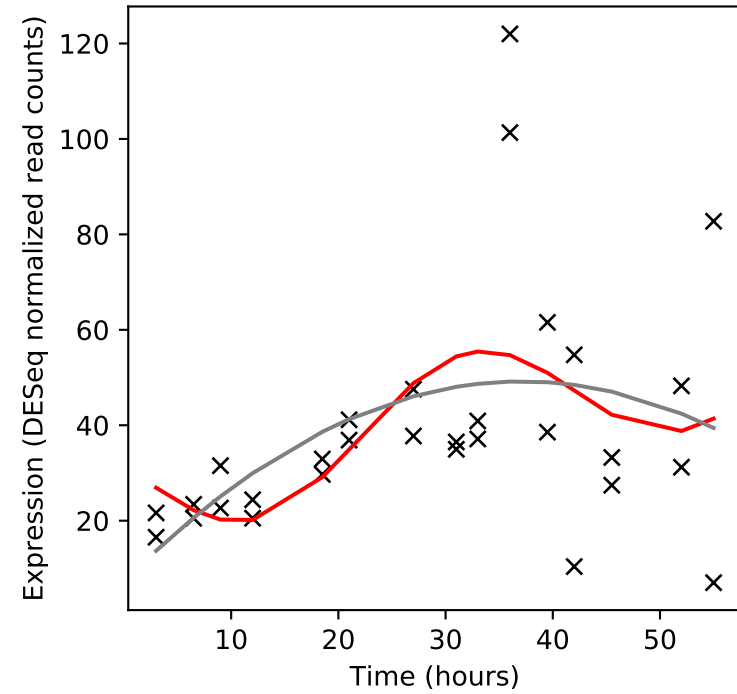

Rv3181c/-

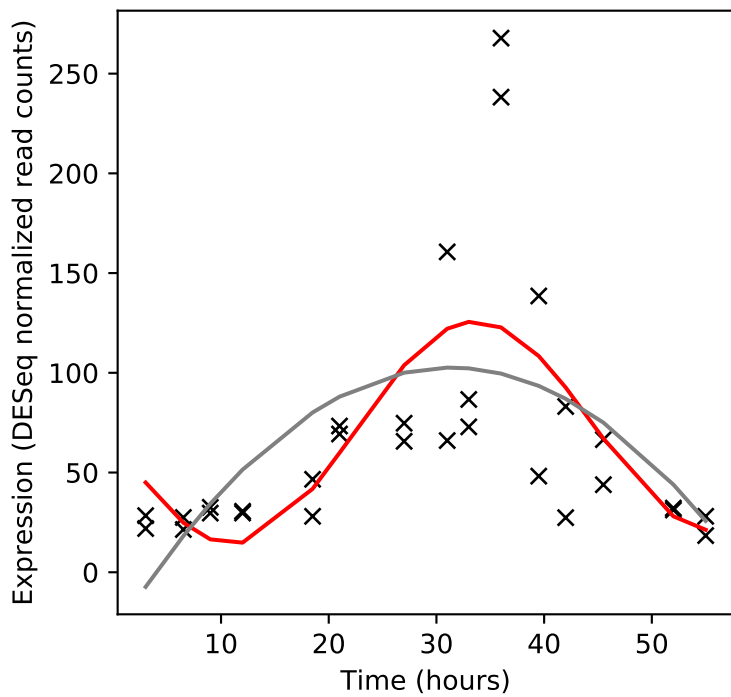

Rv3182/-

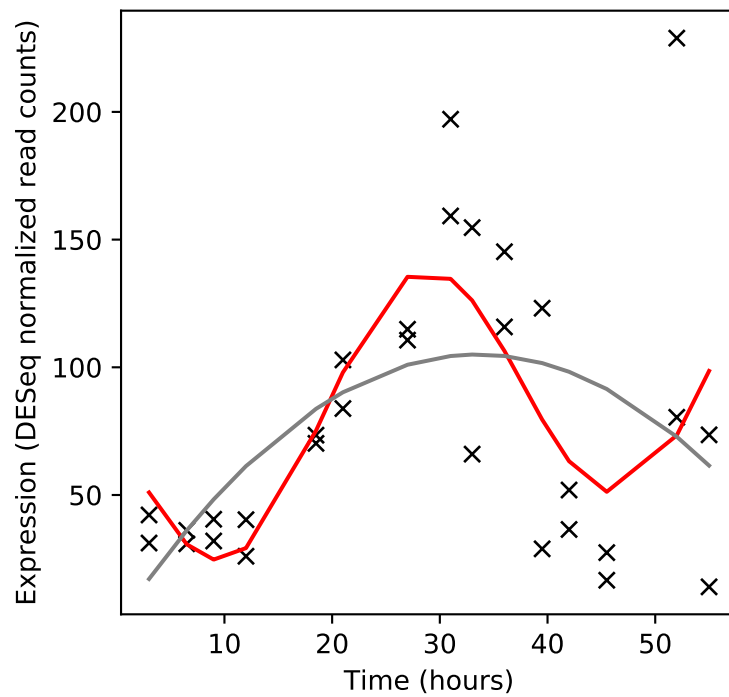

Rv3183/-

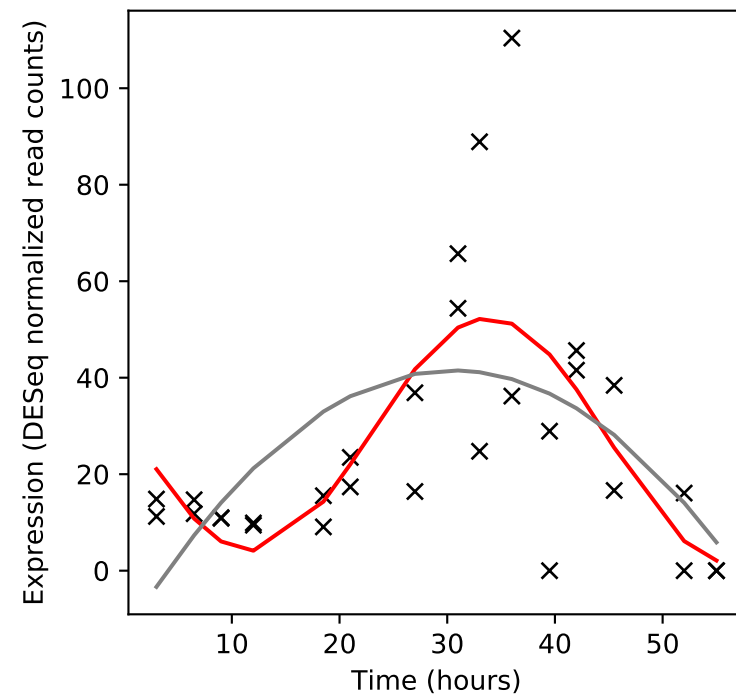

Rv3184/-

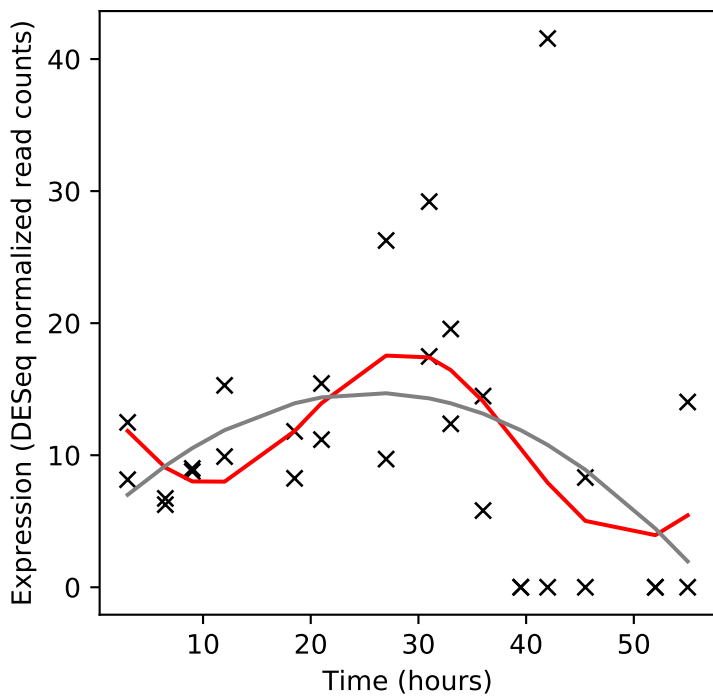

Rv3185/-

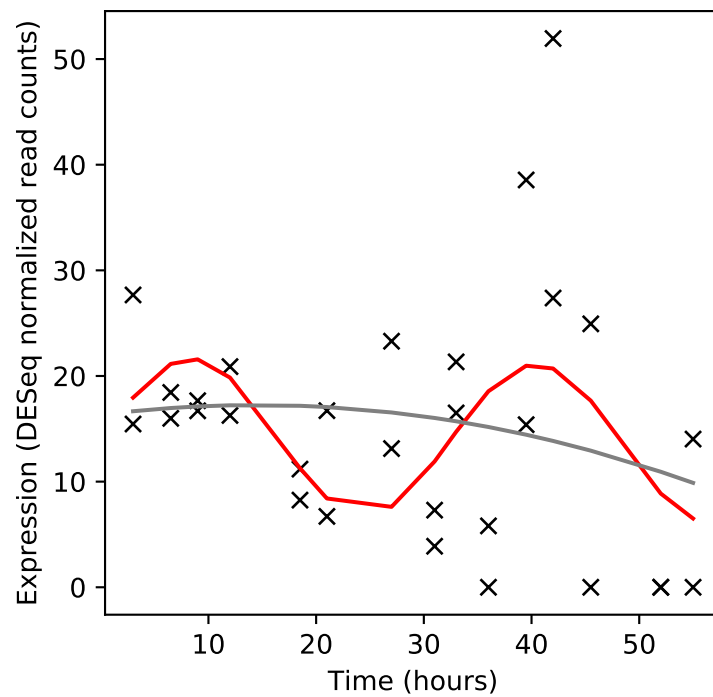

Rv3186/-

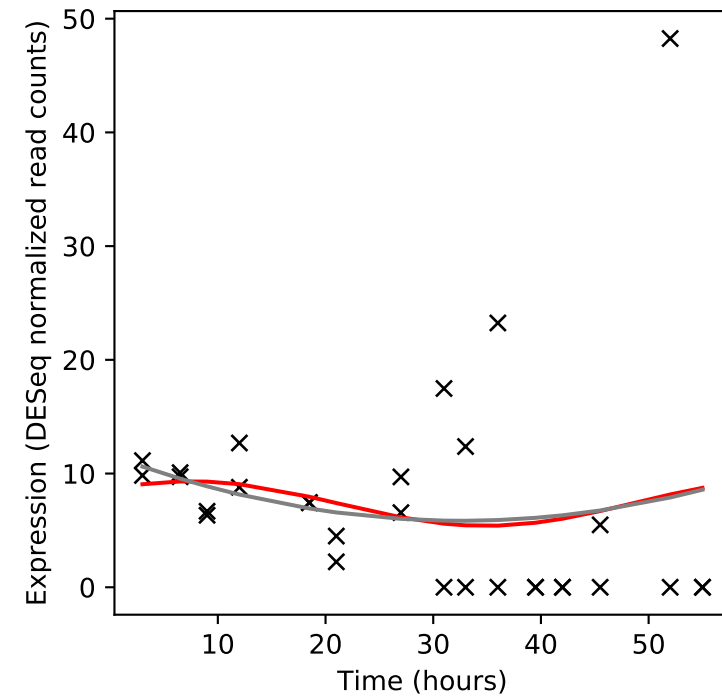

Rv3187/-

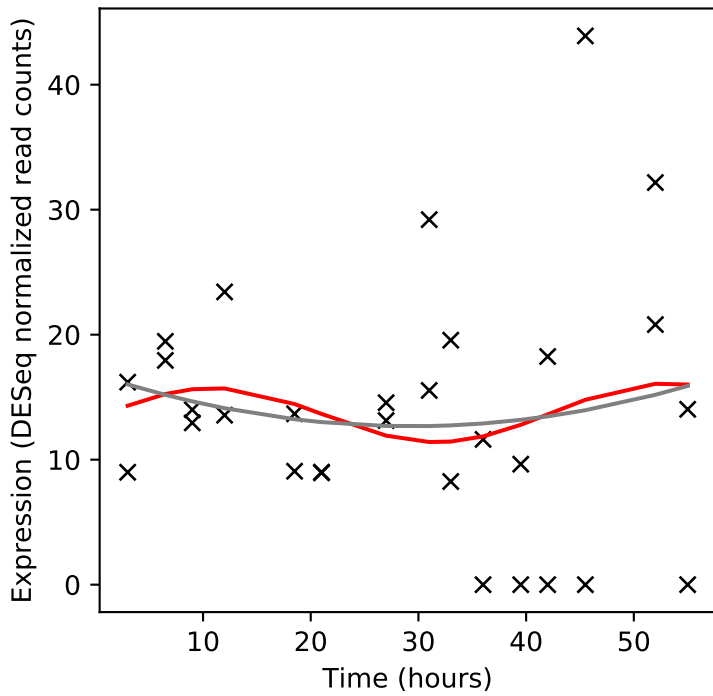

Rv3188/-

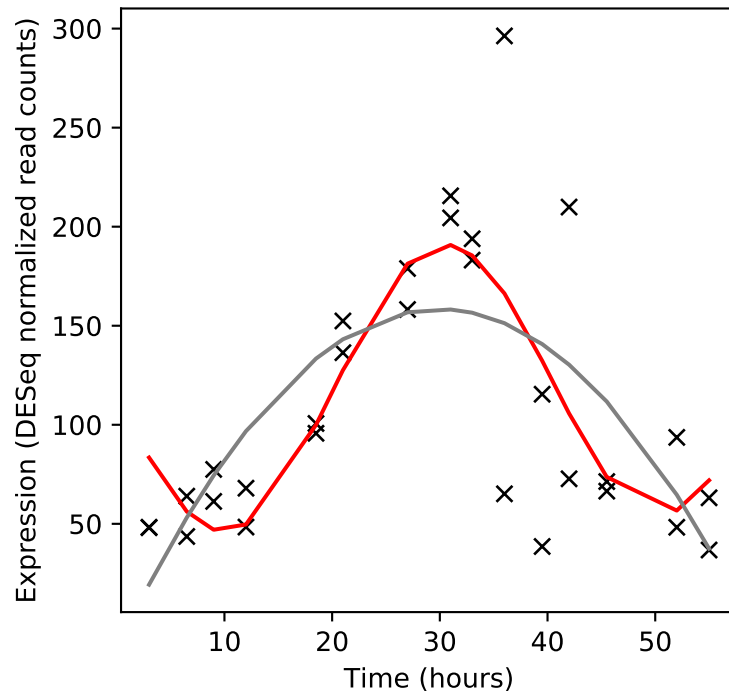

Rv3189/-

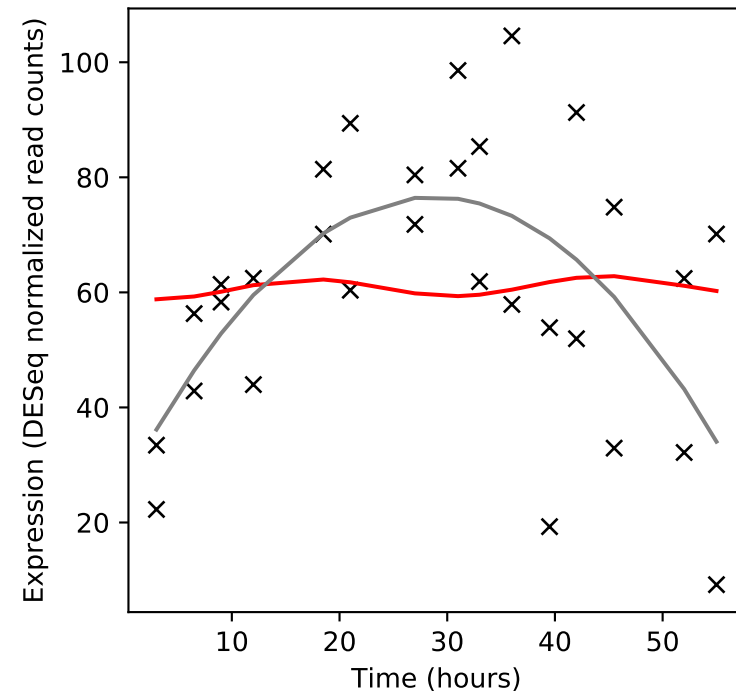

Rv3190c/-

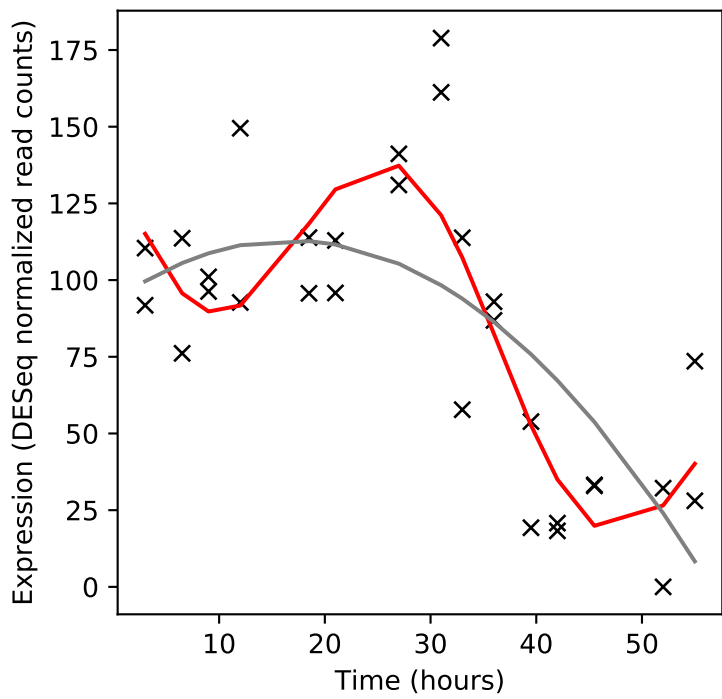

Rv3190A/-

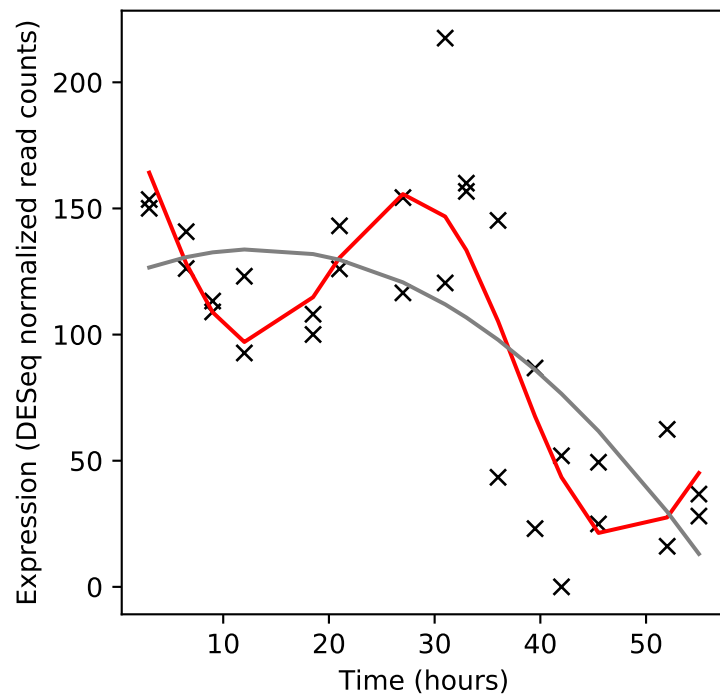

Rv3191c/-

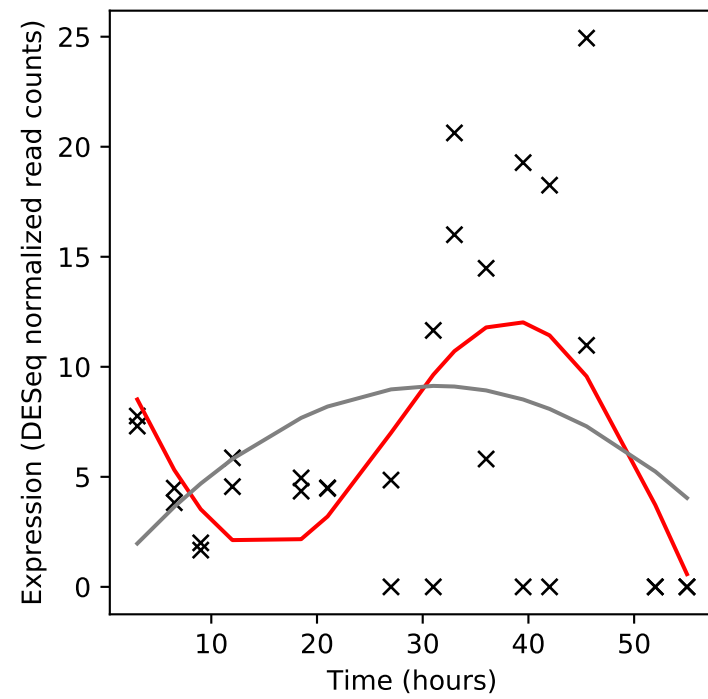

Rv3192/-

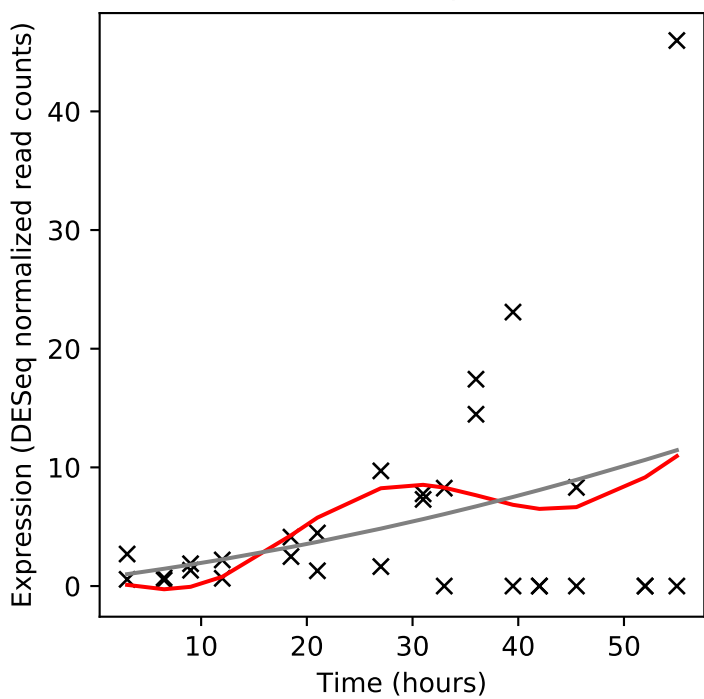

Rv3193c/-

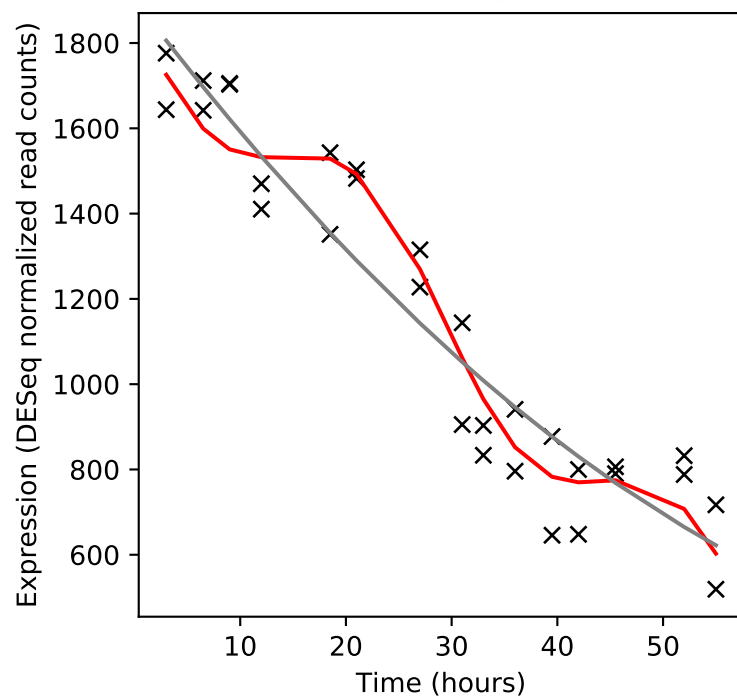

Rv3194c/-

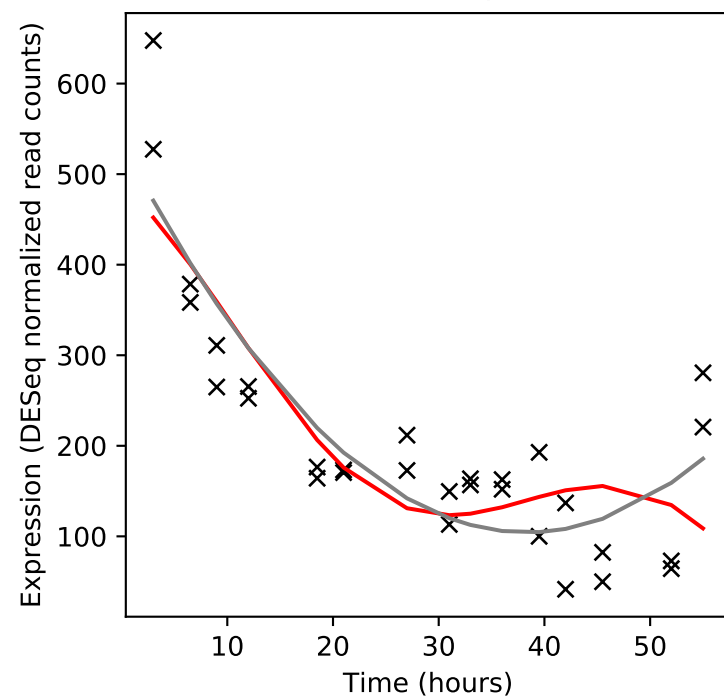

Rv3195/-

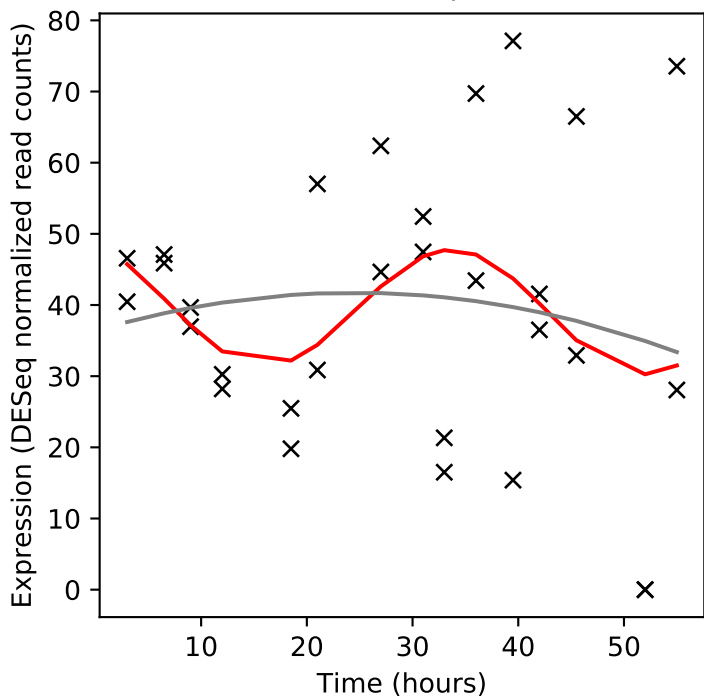

Rv3196/-

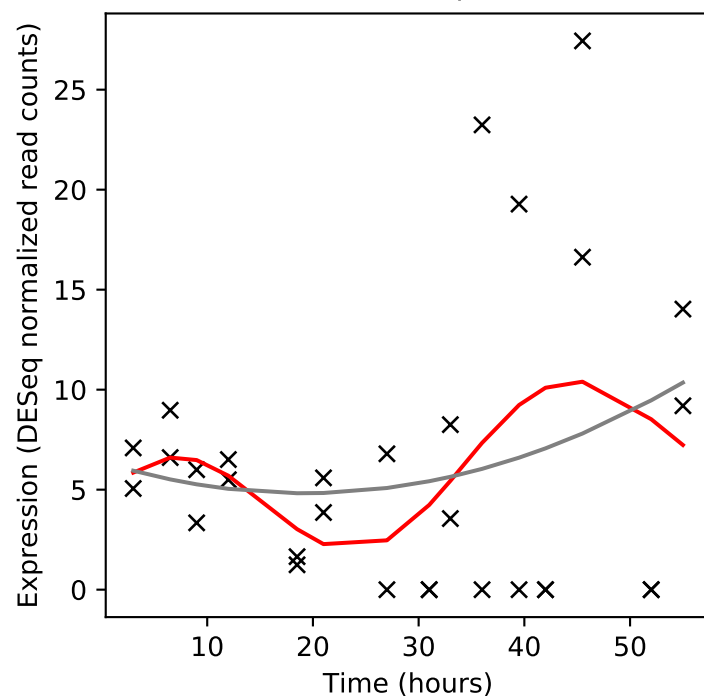

Rv3196A/-

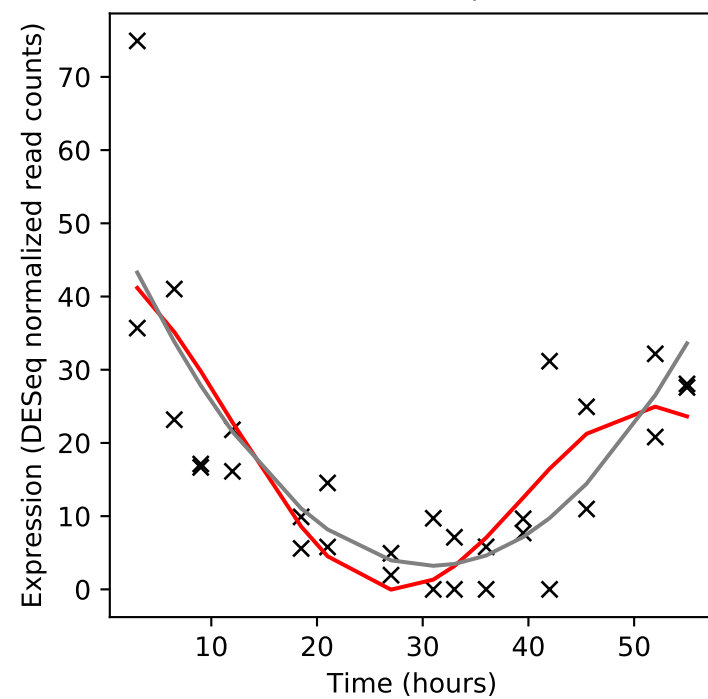

Rv3197/-

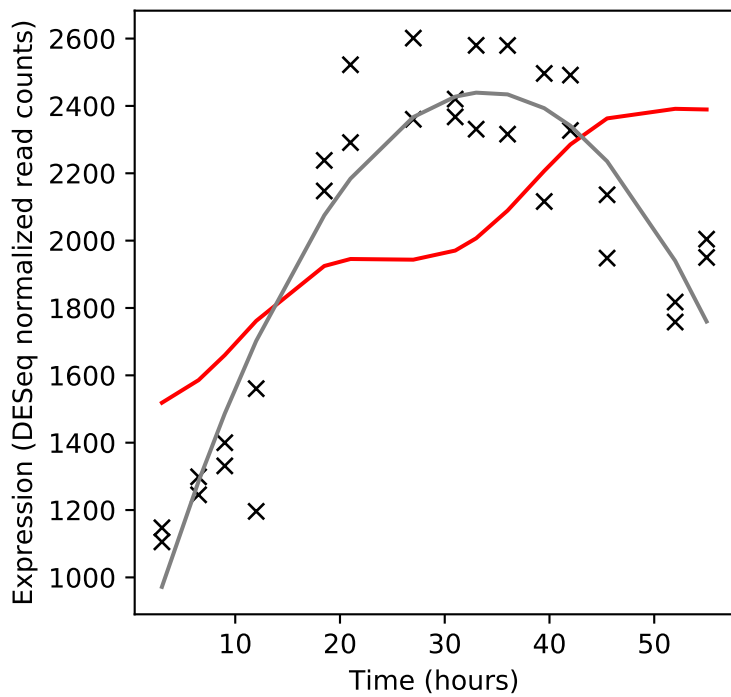

Rv3197A/whiB7

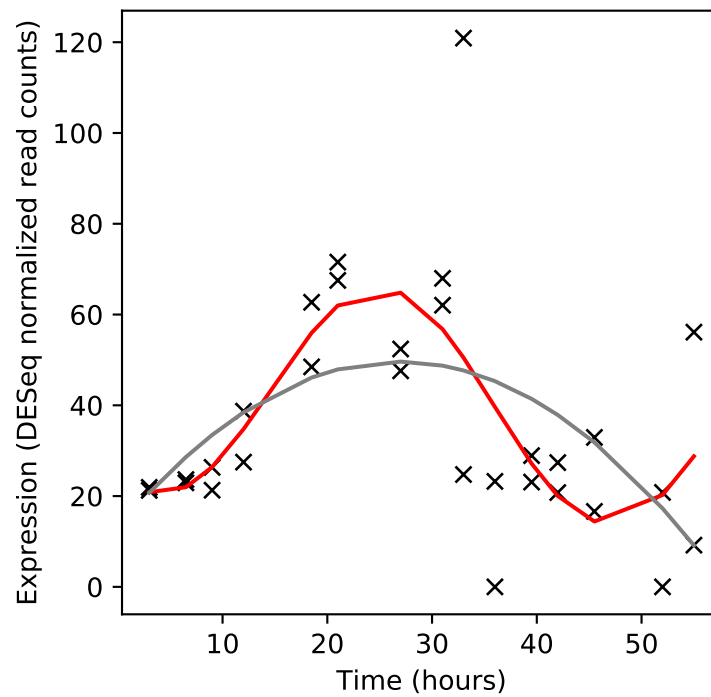

Rv3198c/uvrD2

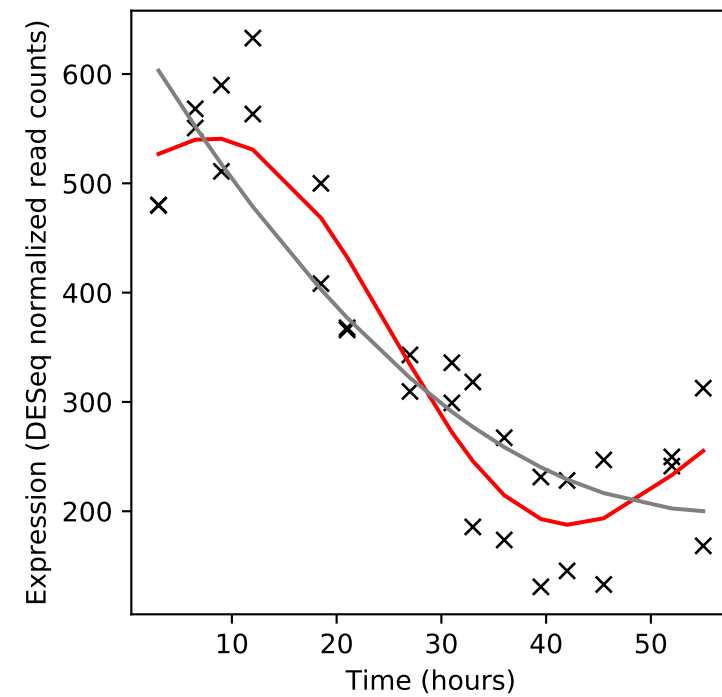

Rv3198A/-

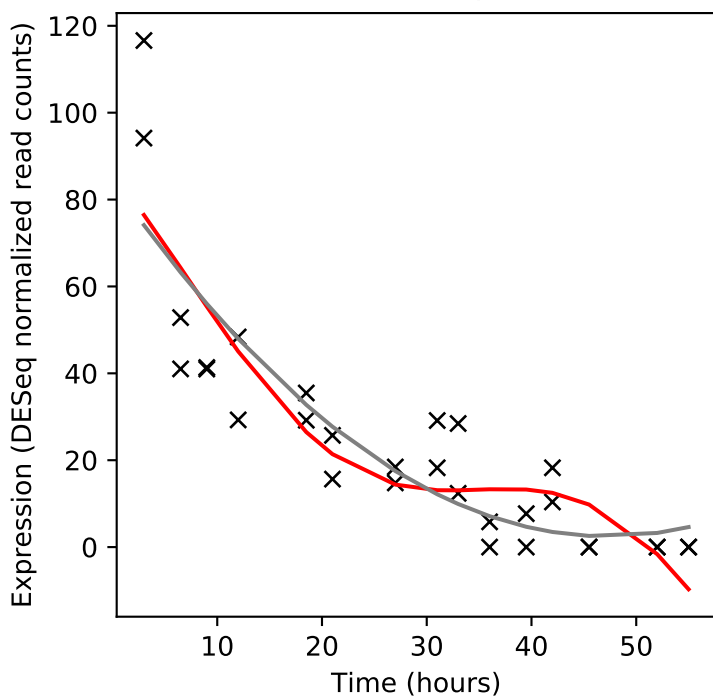

Rv3199c/nudC

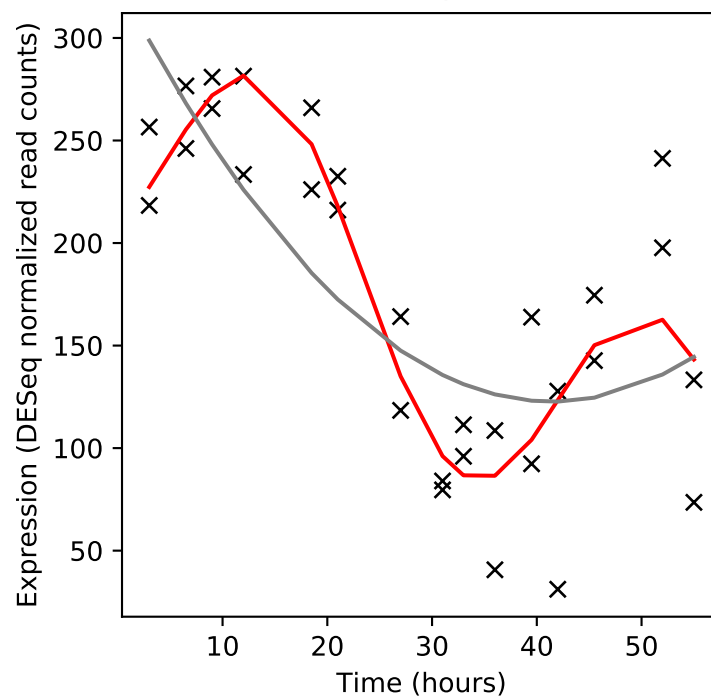

Rv3200c/-

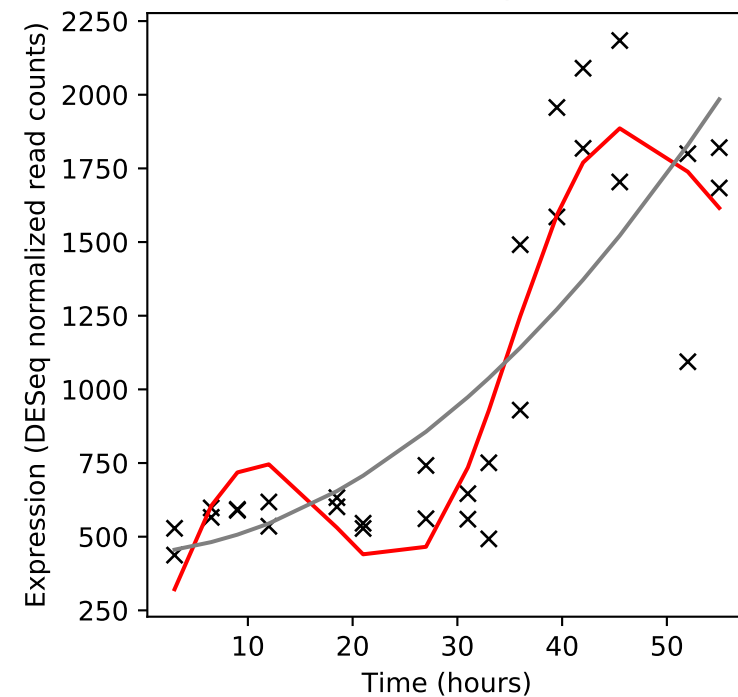

Rv3201c/-

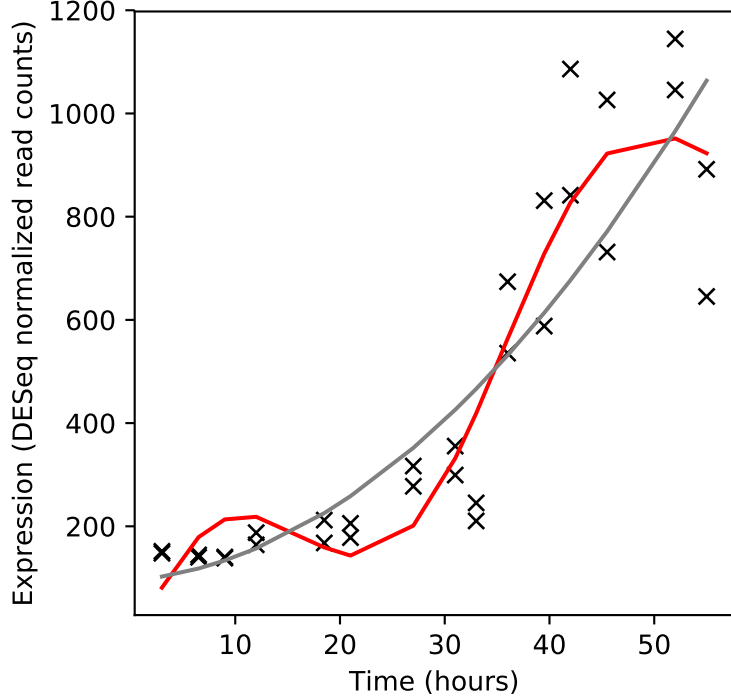

Rv3202c/-

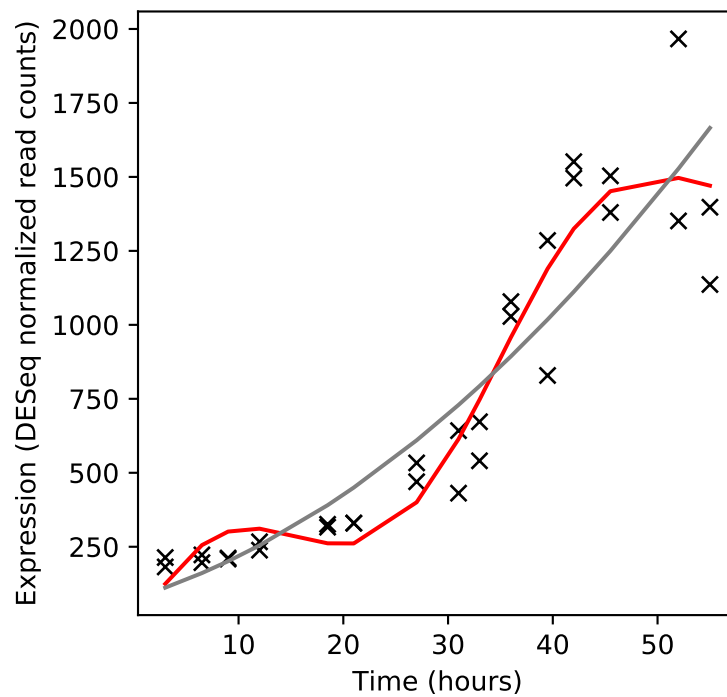

Rv3203/lipV

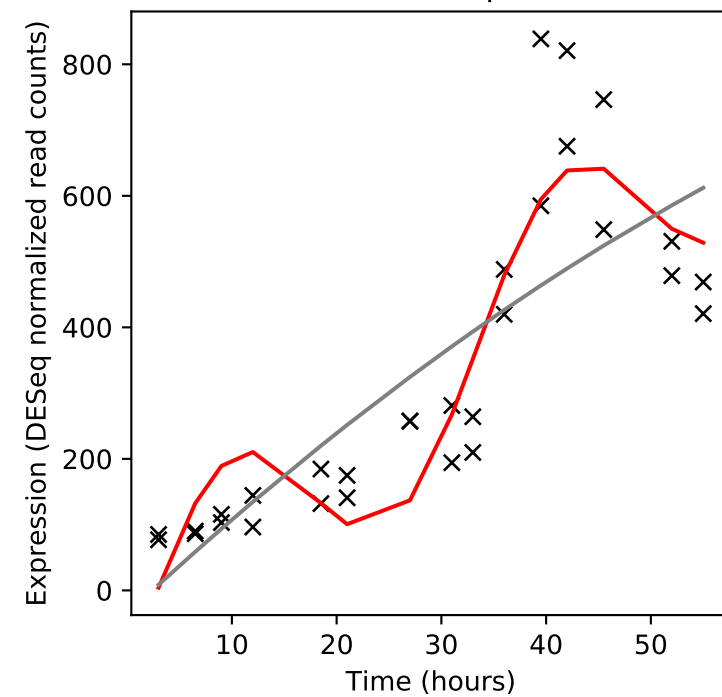



Rv3204/-

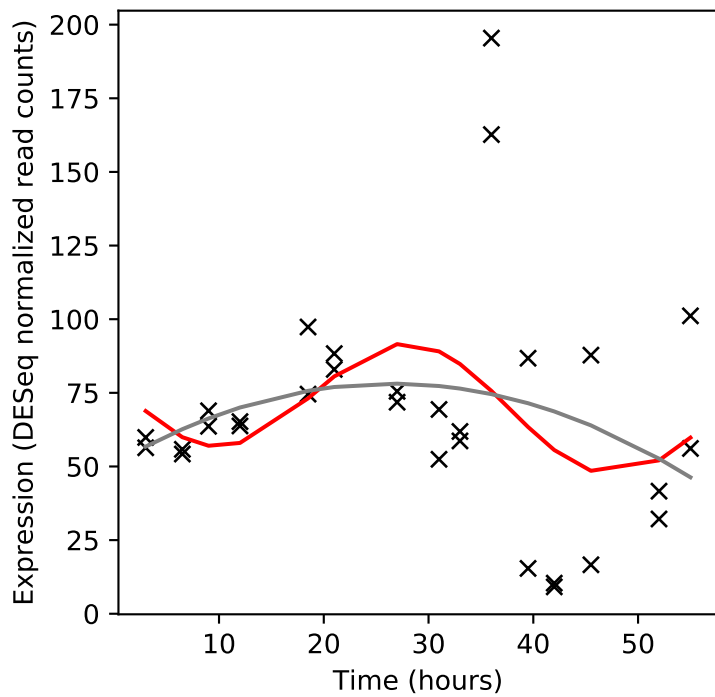

Rv3205c/-

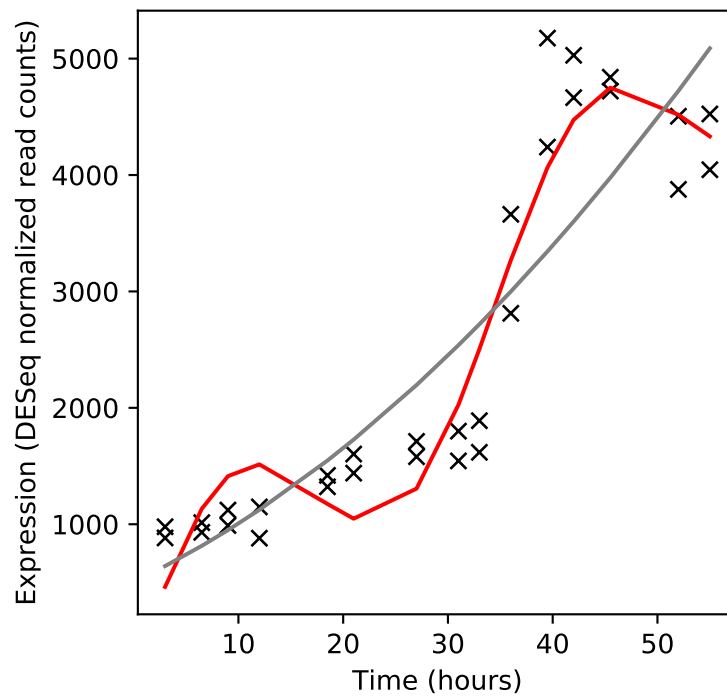

Rv3206c/moeB1

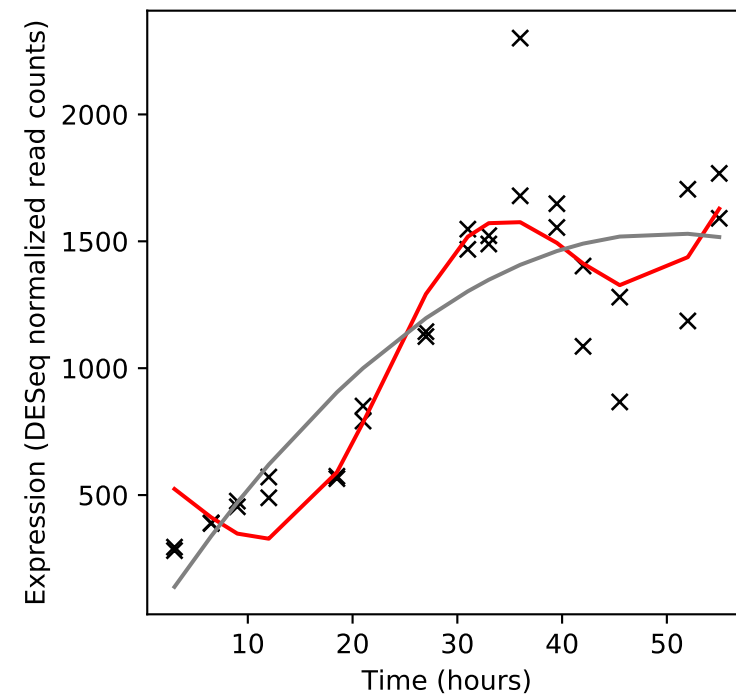

Rv3207c/-

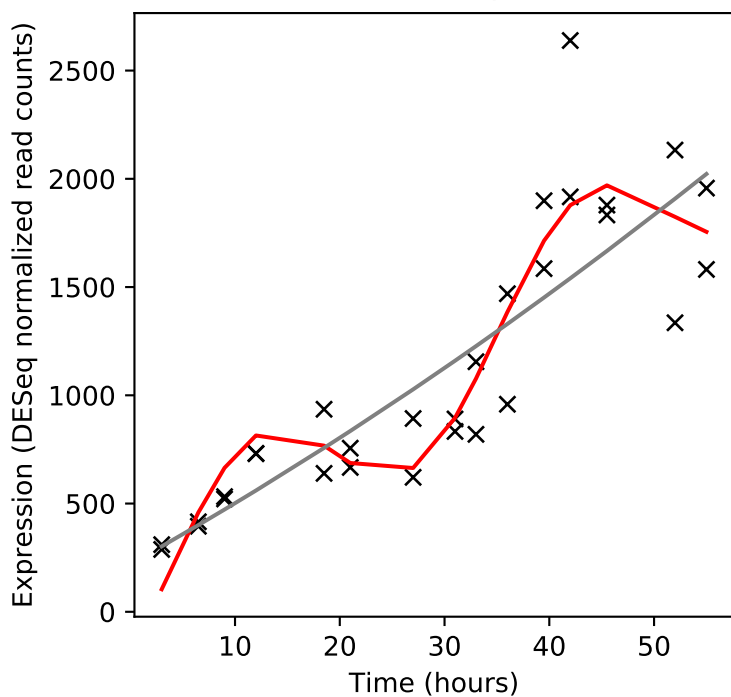

Rv3208/-

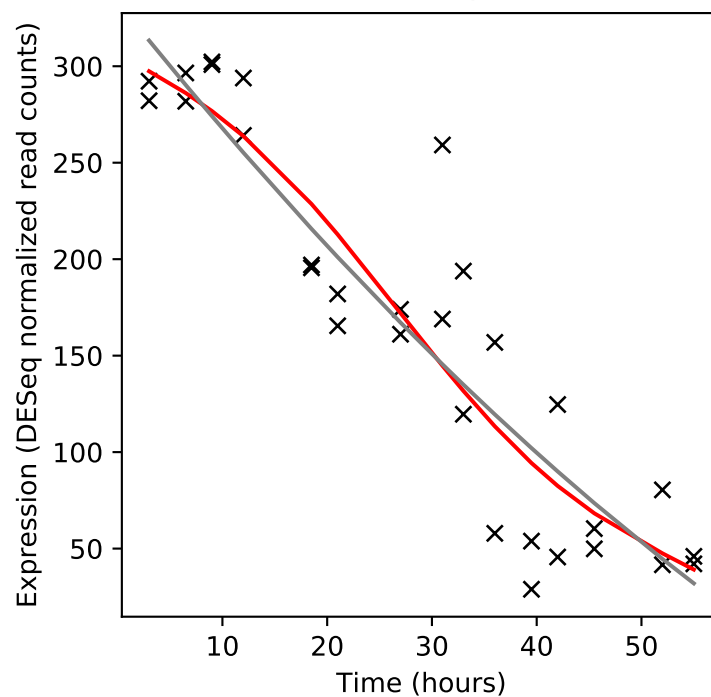

Rv3208A/TB9.4

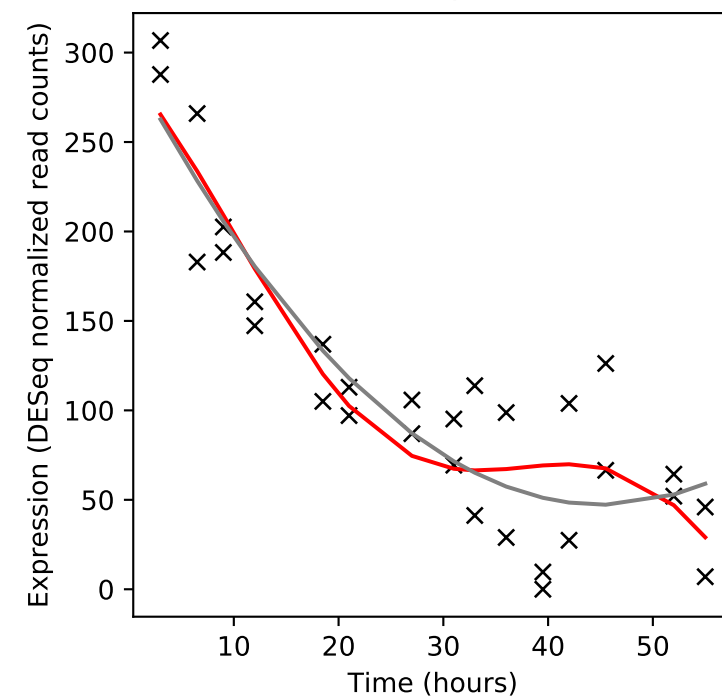

Rv3209/-

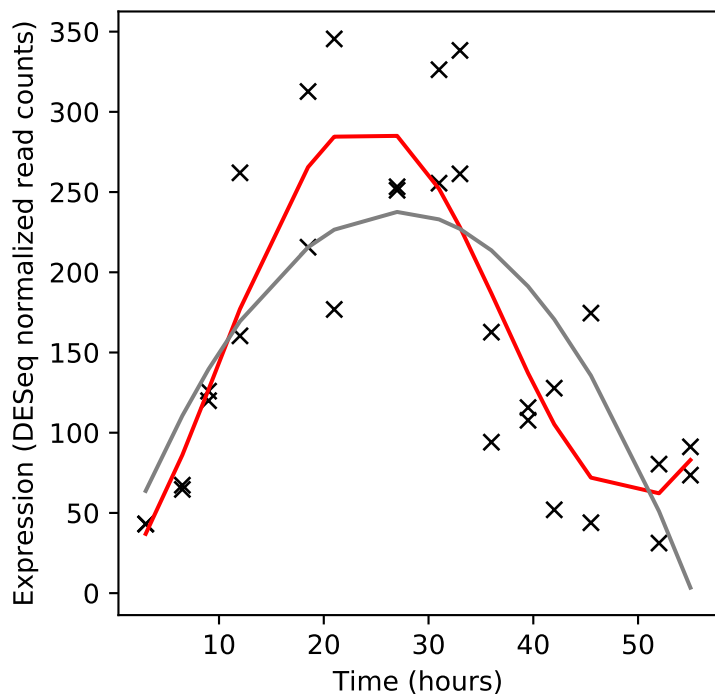

Rv3210c/-

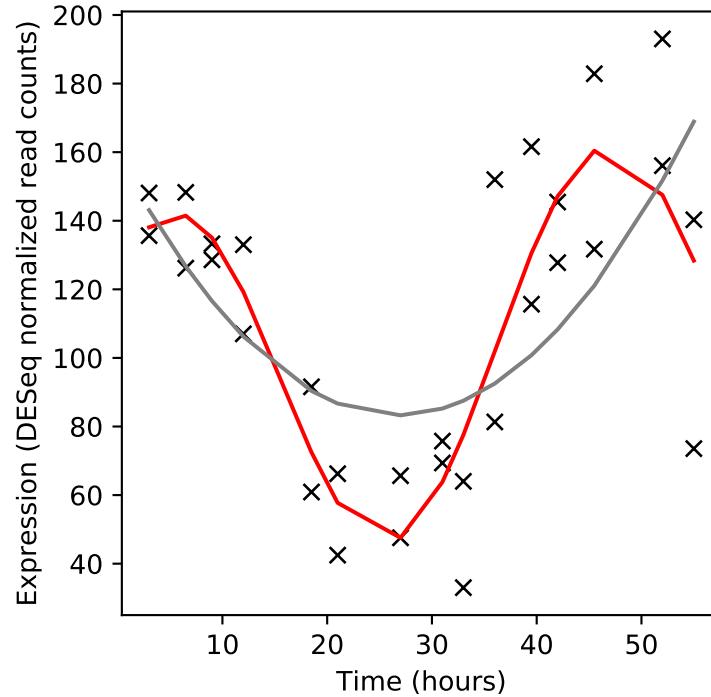

Rv3211/rhIE

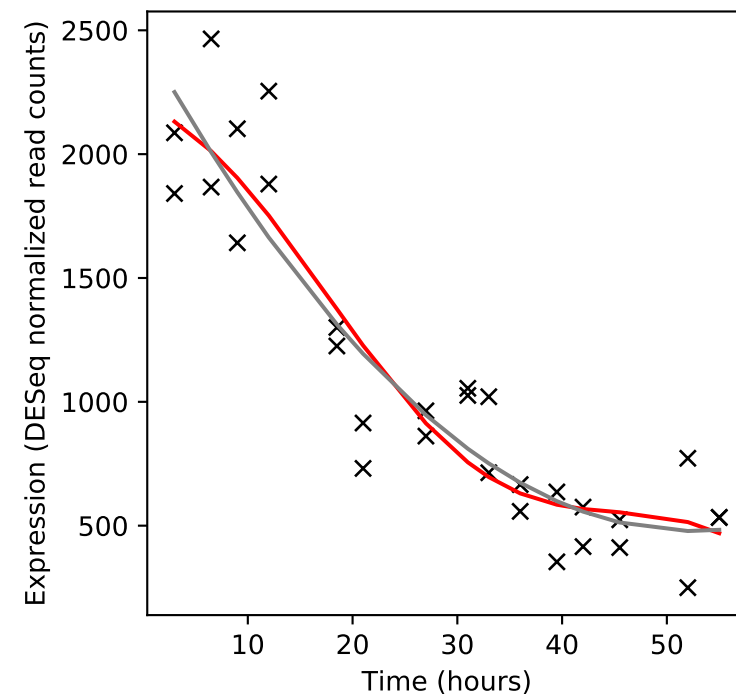

Rv3212/-

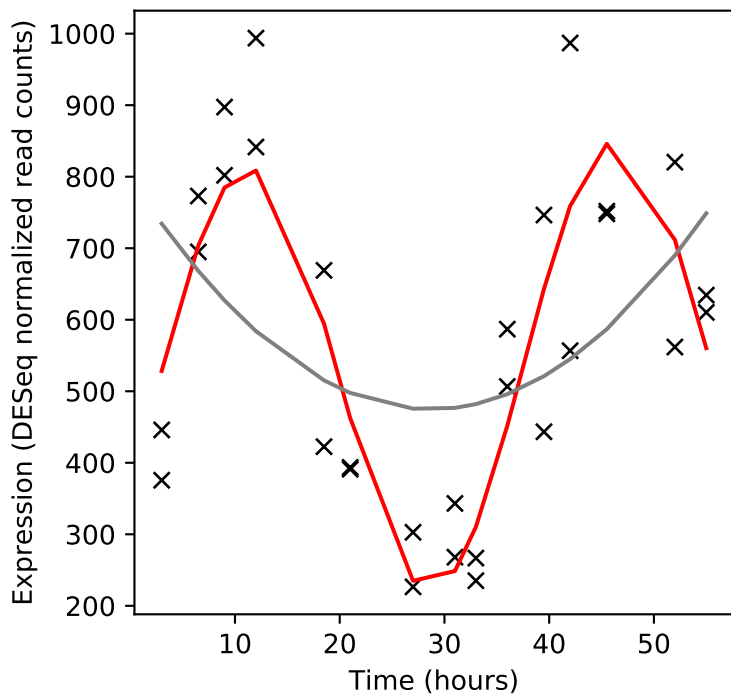

Rv3213c/-

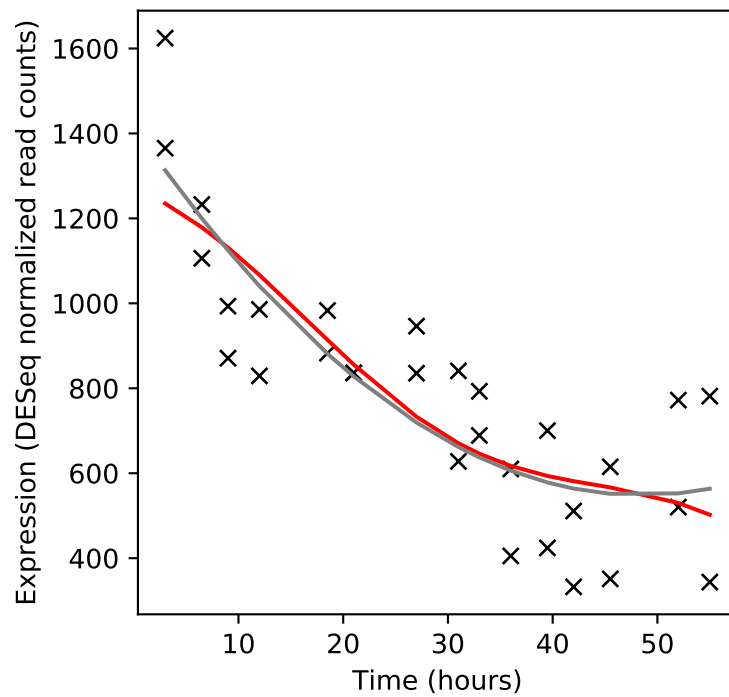

Rv3214/gpm2

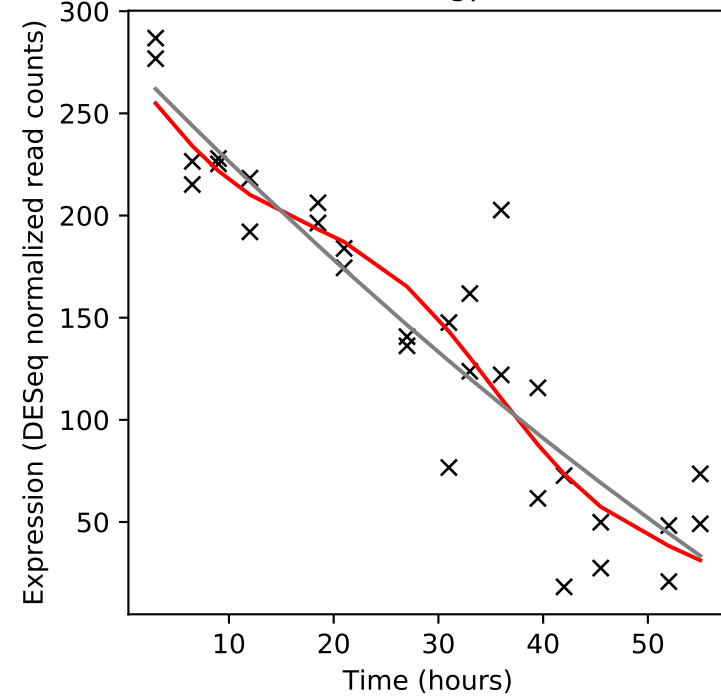

Rv3215/entC

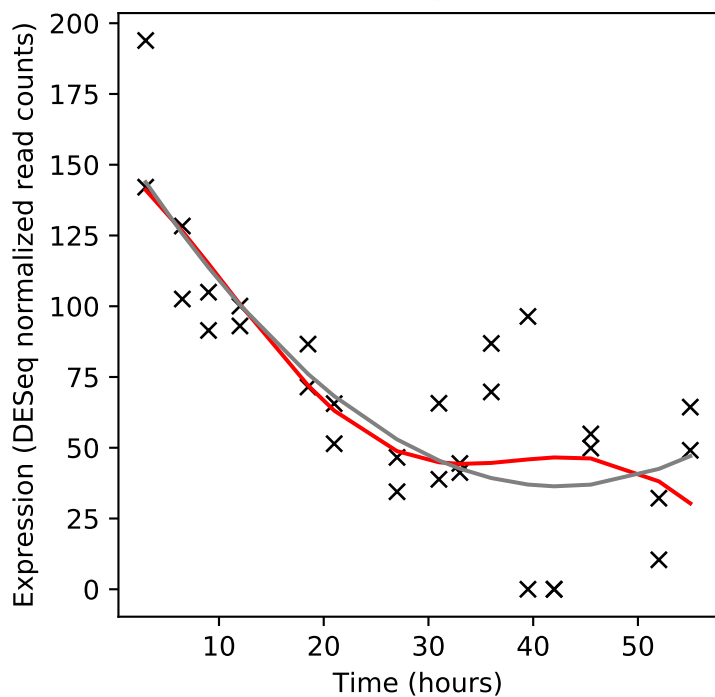

Rv3217c/-

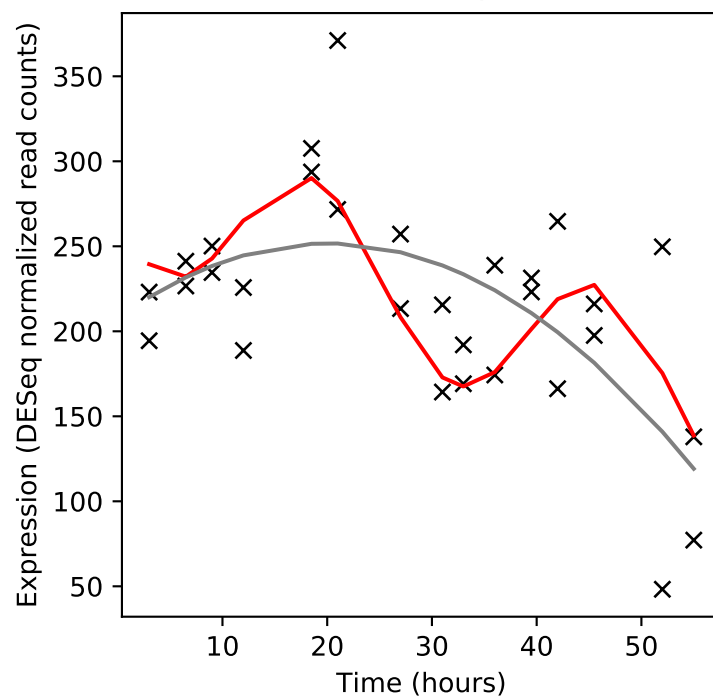

Rv3218/-

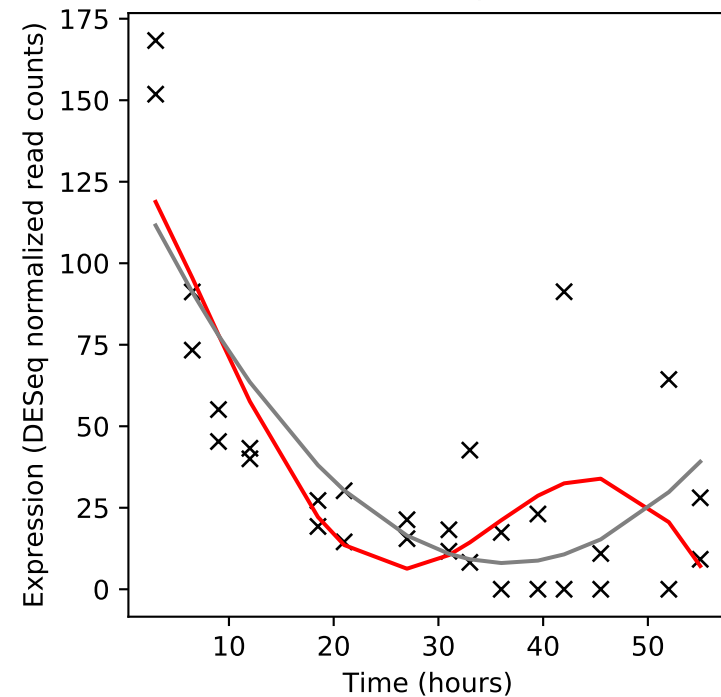

Rv3219/whiB1

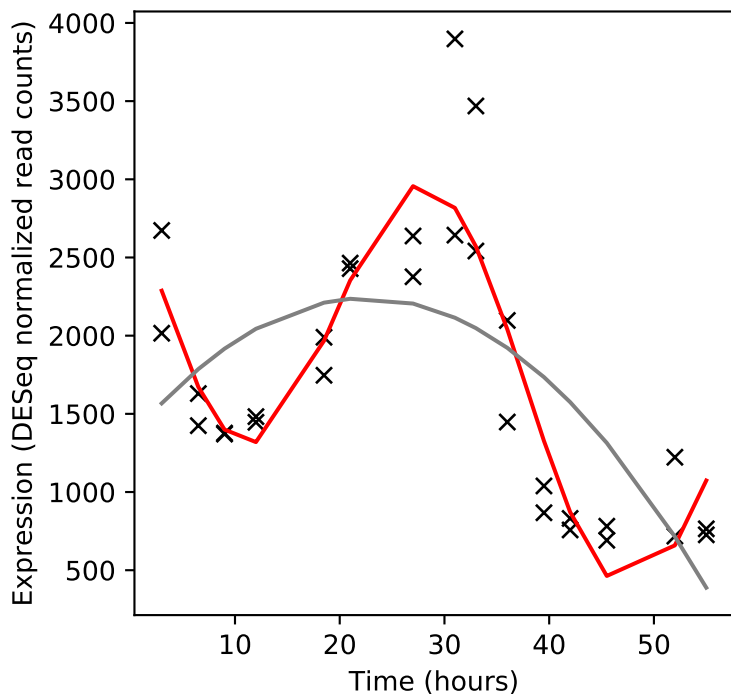

Rv3220c/-

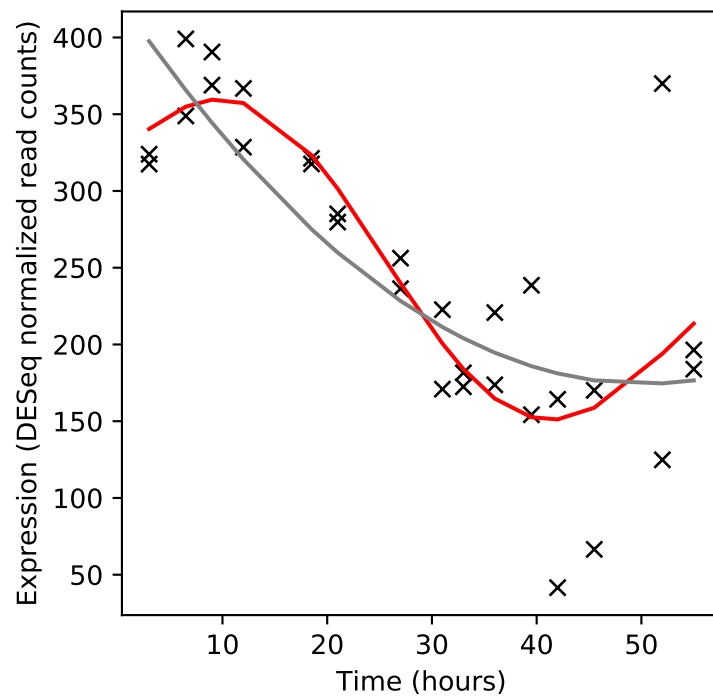

Rv3221c/TB7.3

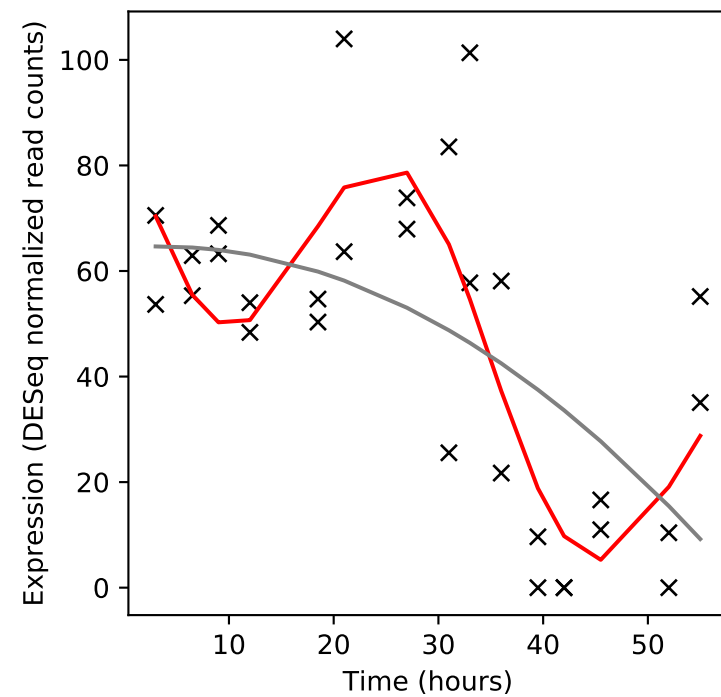

Rv3221A/rshA

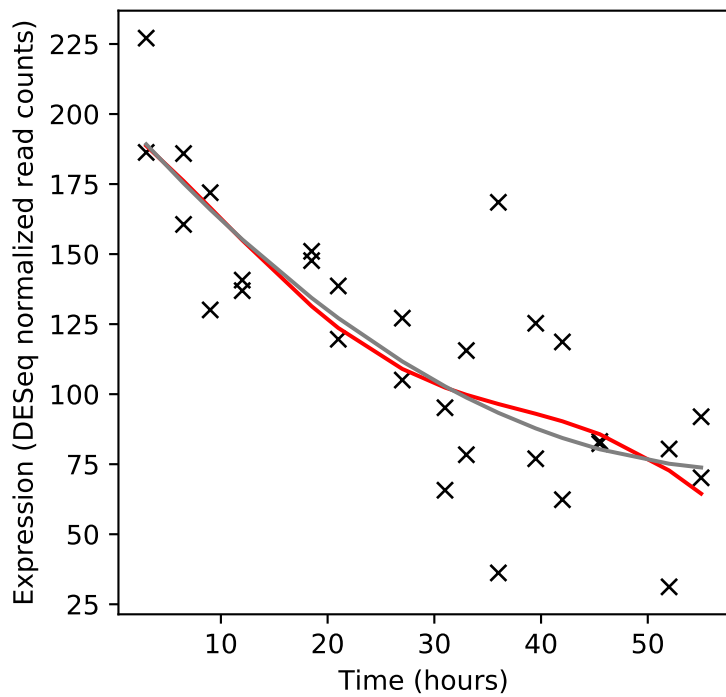

Rv3222c/-

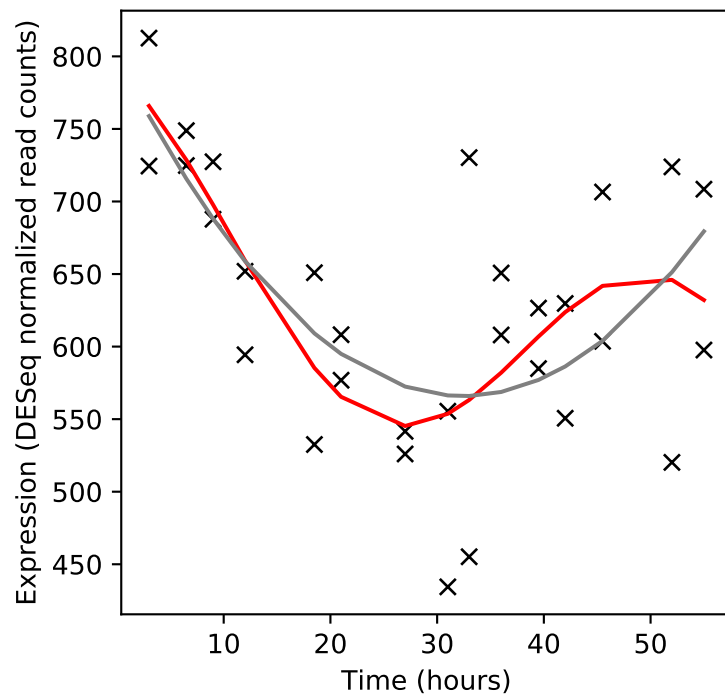

Rv3223c/sigH

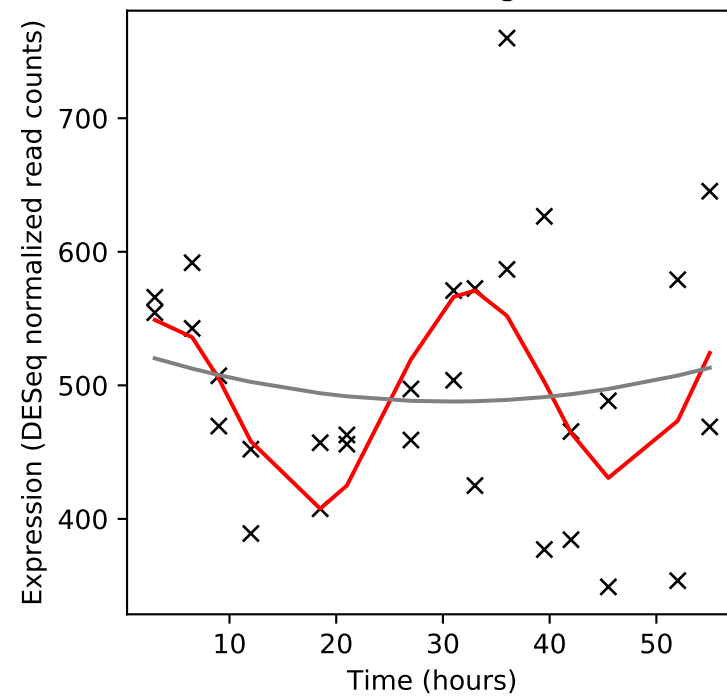

Rv3224/-

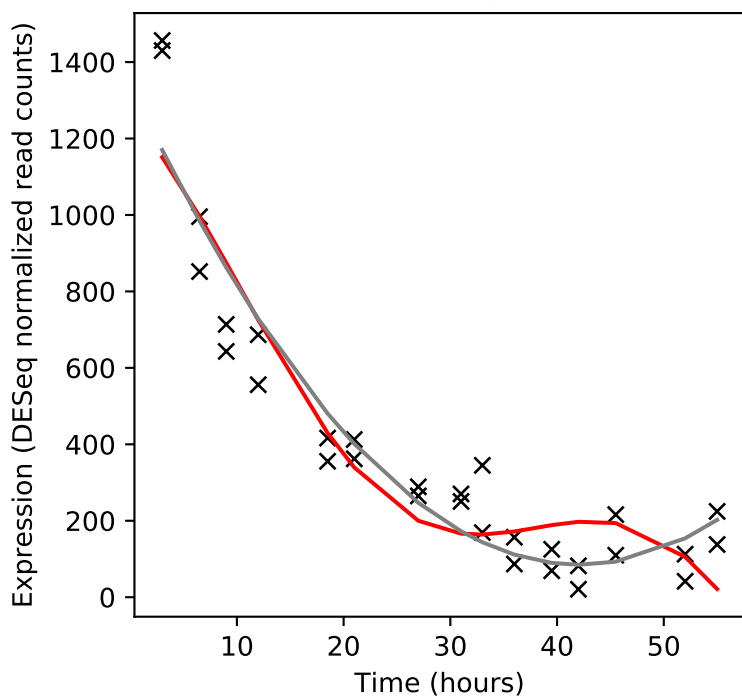

Rv3224A/-

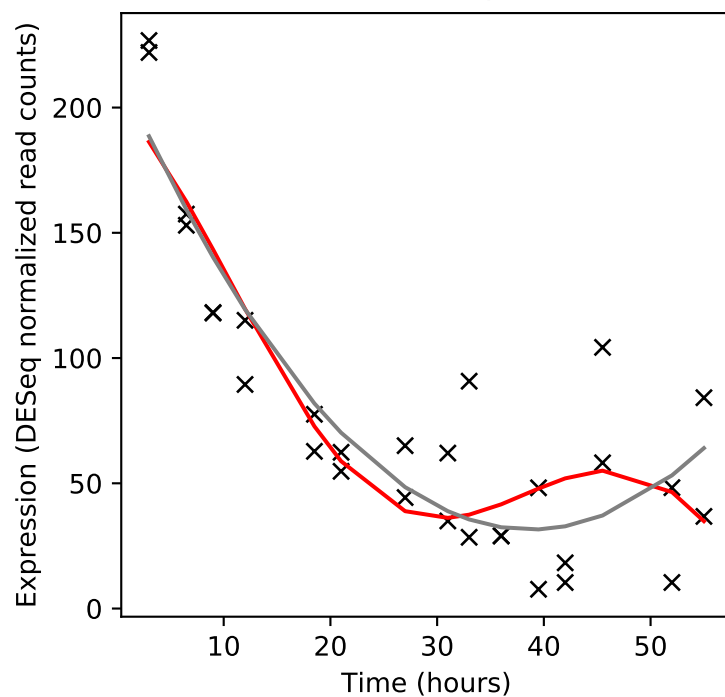

Rv3224B/-

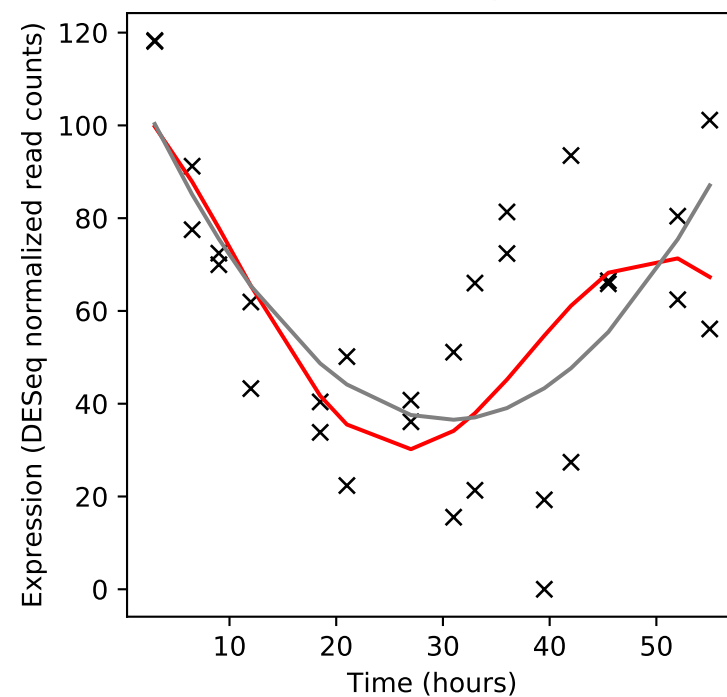

Rv3225c/-

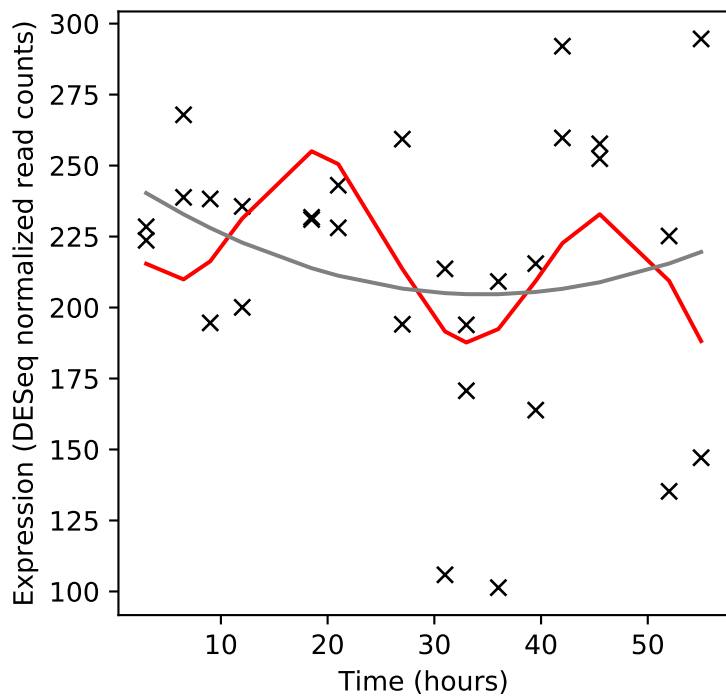

Rv3226c/-

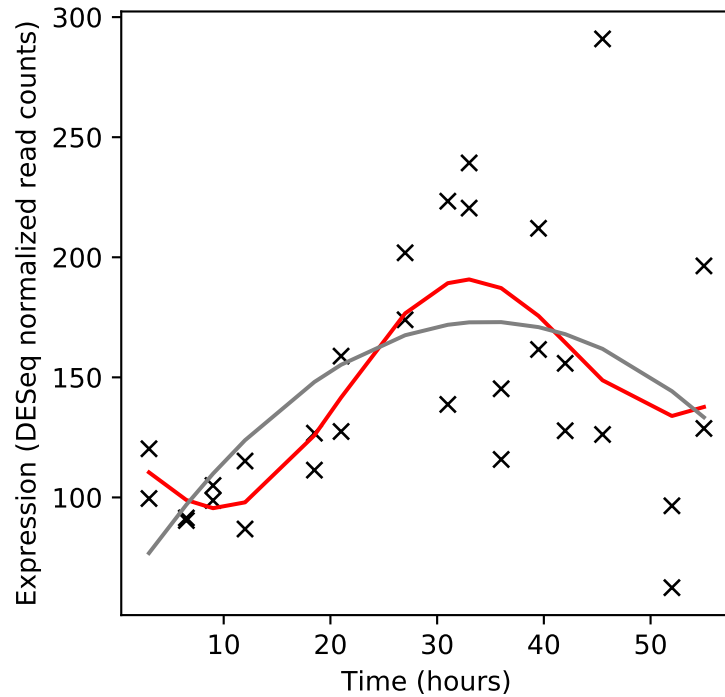

Rv3227/aroA

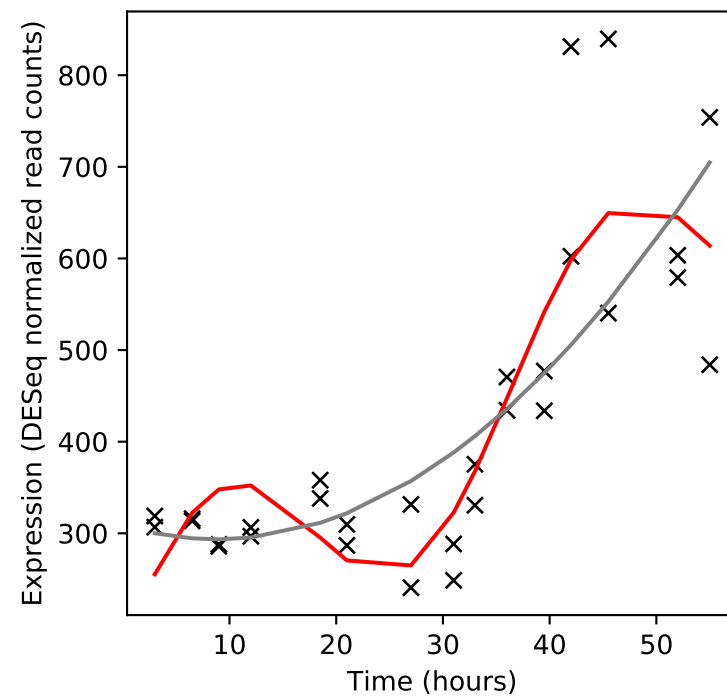

Rv3228/-

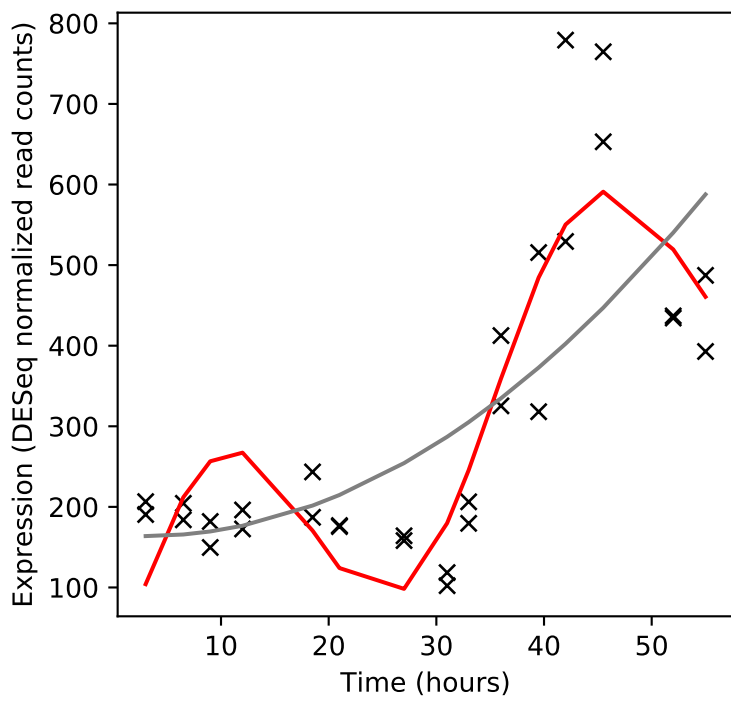

Rv3229c/desA3

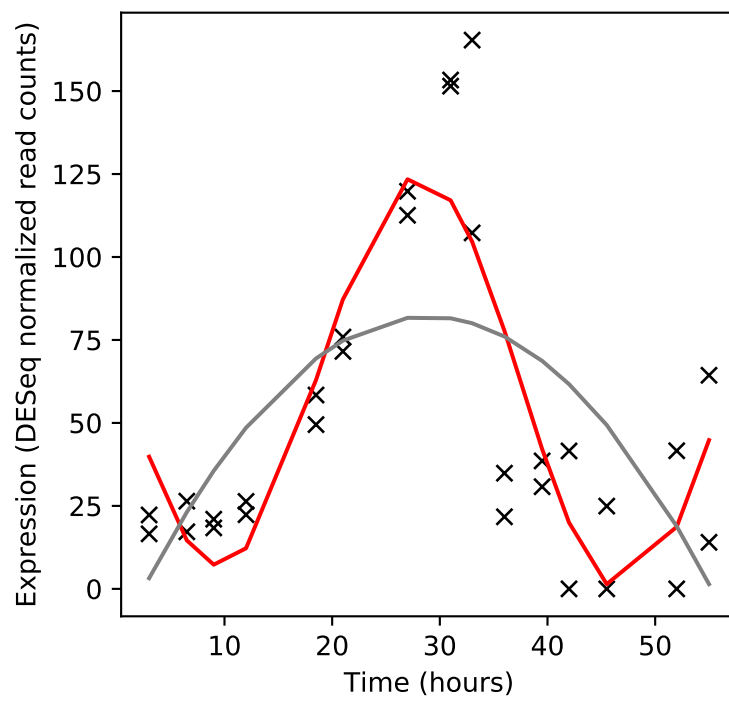

Rv3230c/-

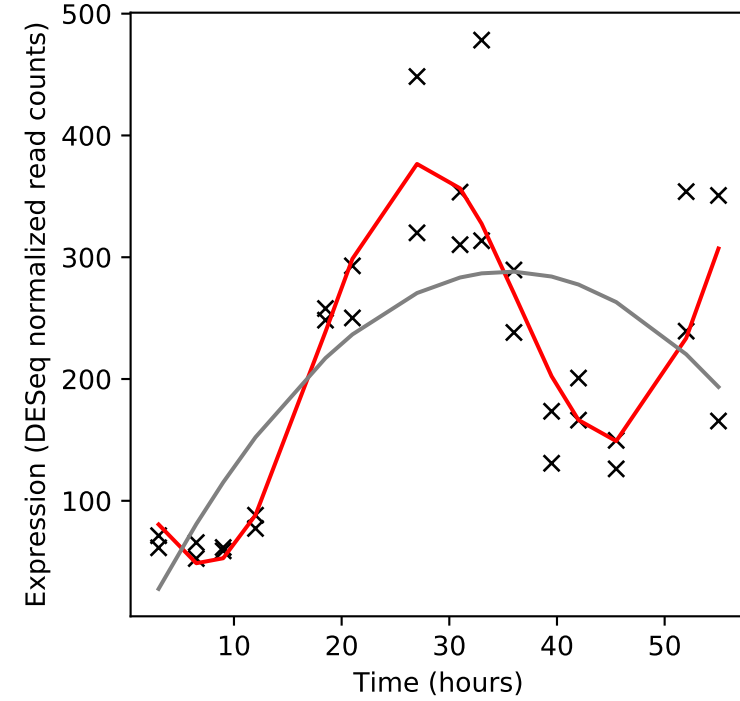

Rv3231c/-

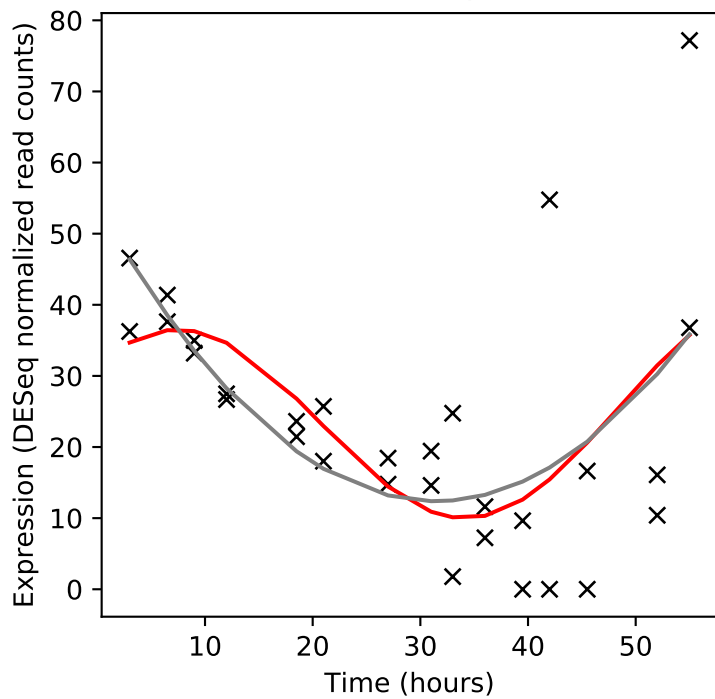

Rv3232c/ppk2

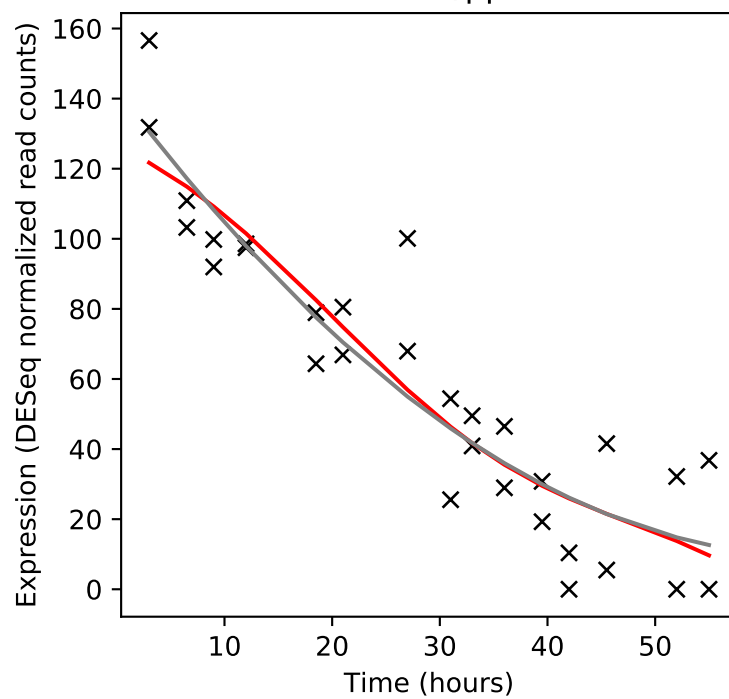

Rv3233c/-

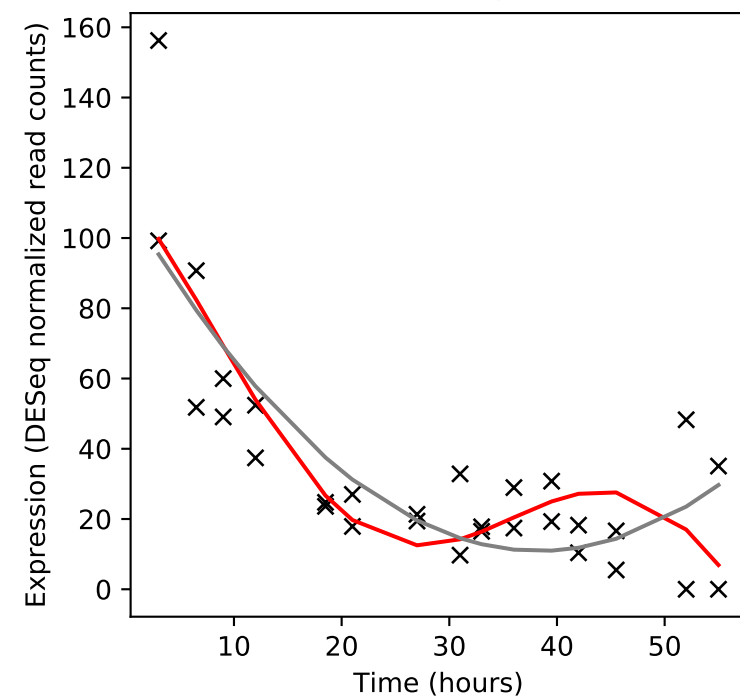

Rv3234c/tgs3

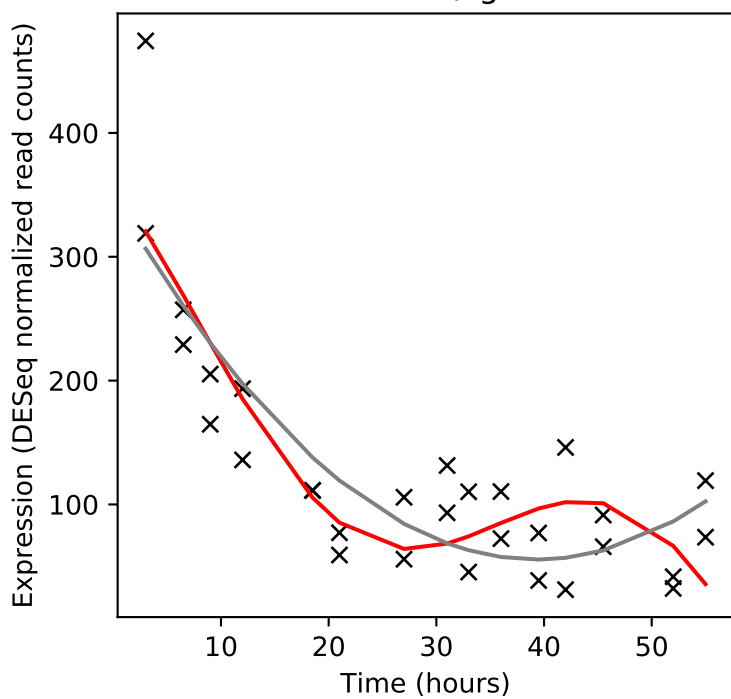

Rv3235/-

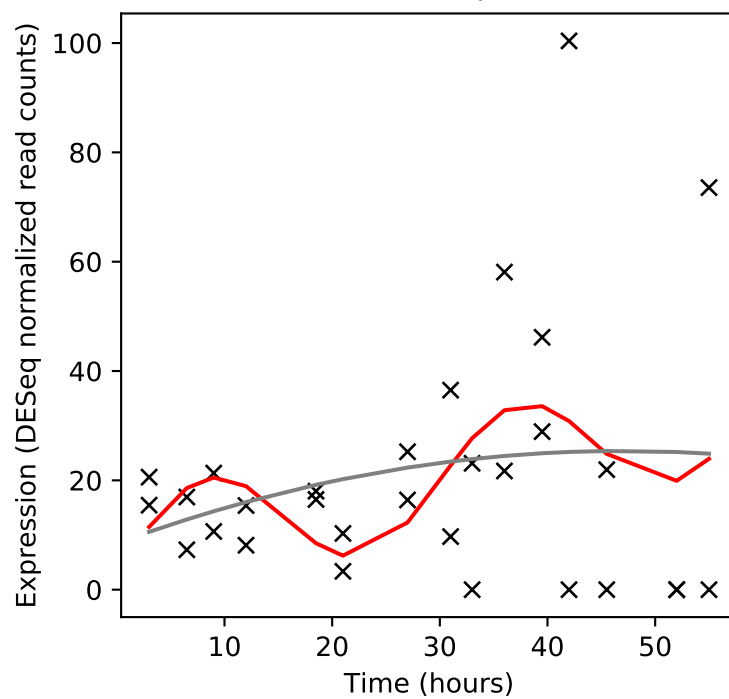

Rv3236c/-

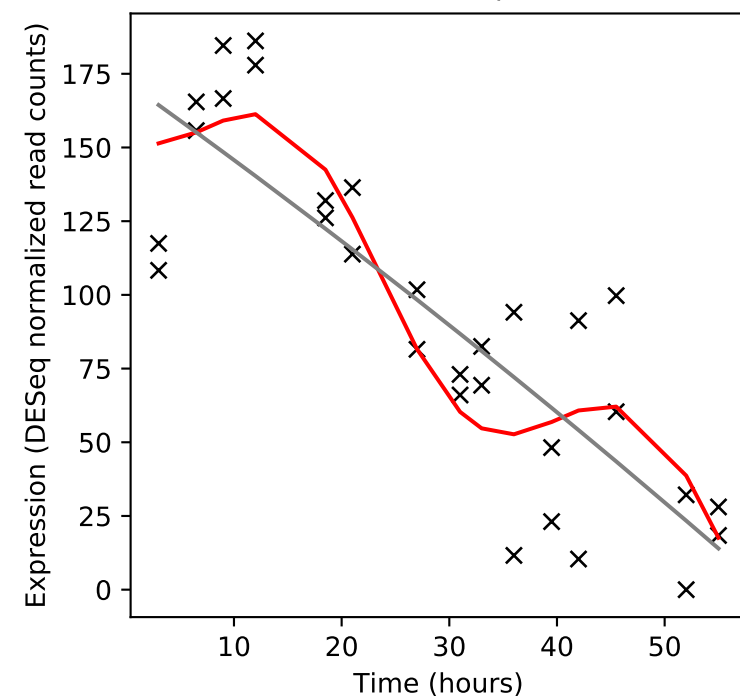

Rv3237c/-

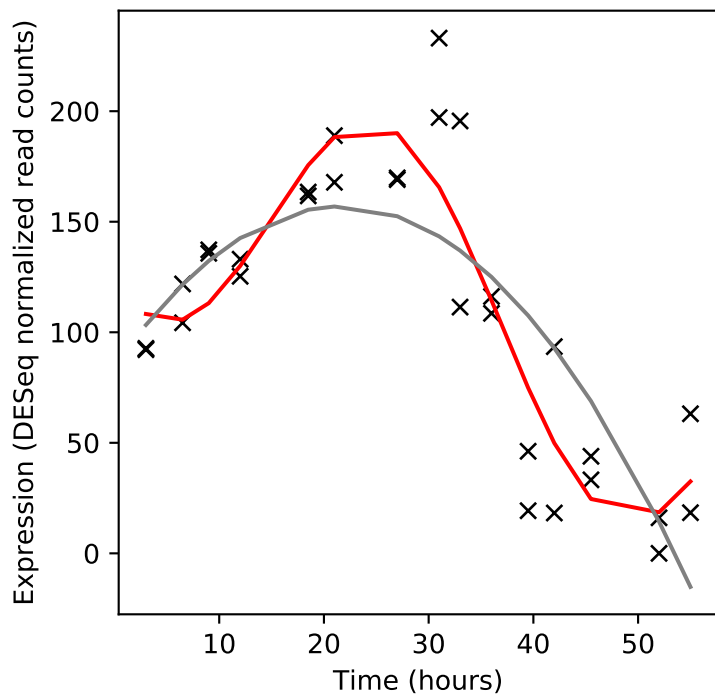

Rv3238c/-

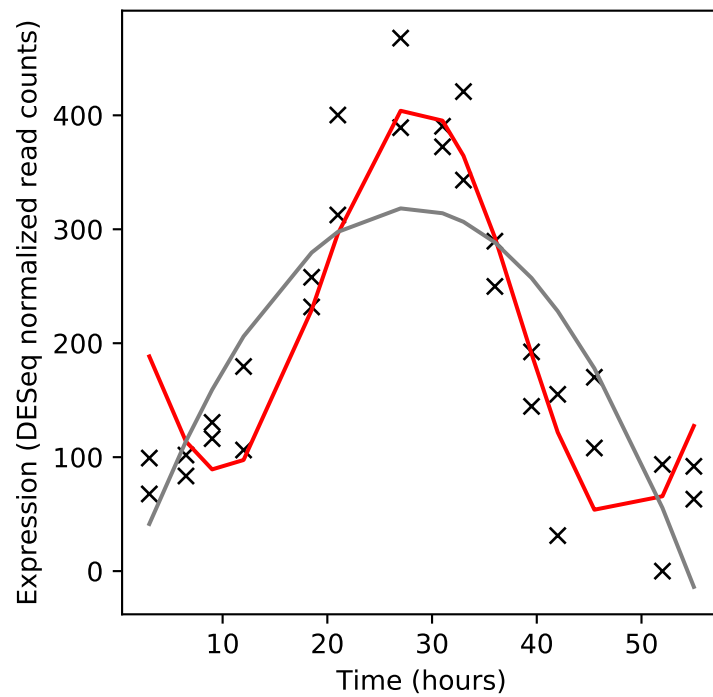

Rv3239c/-

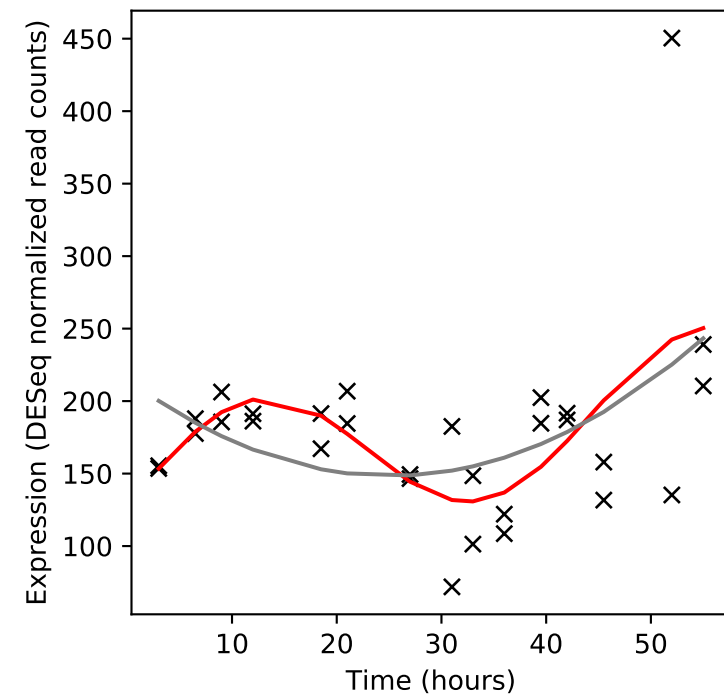

Rv3240c/secA1

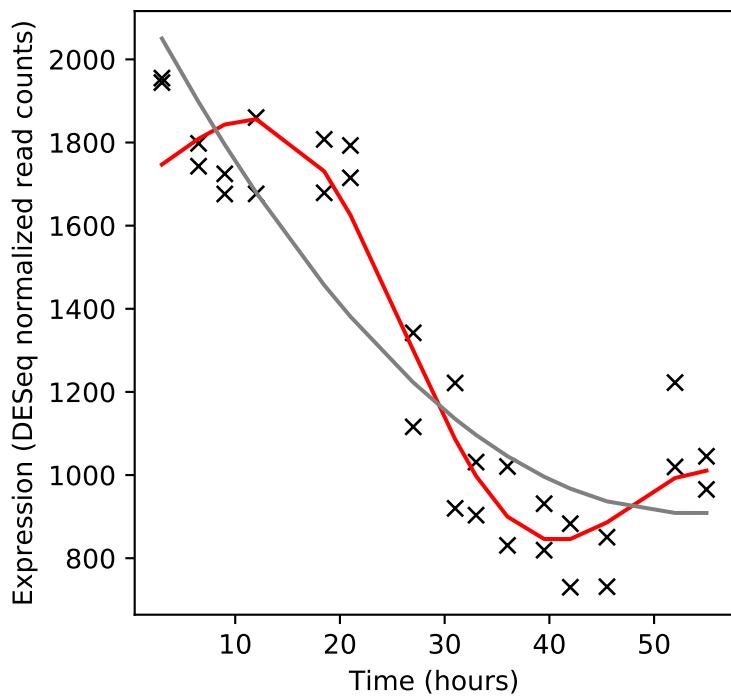

Rv3241c/-

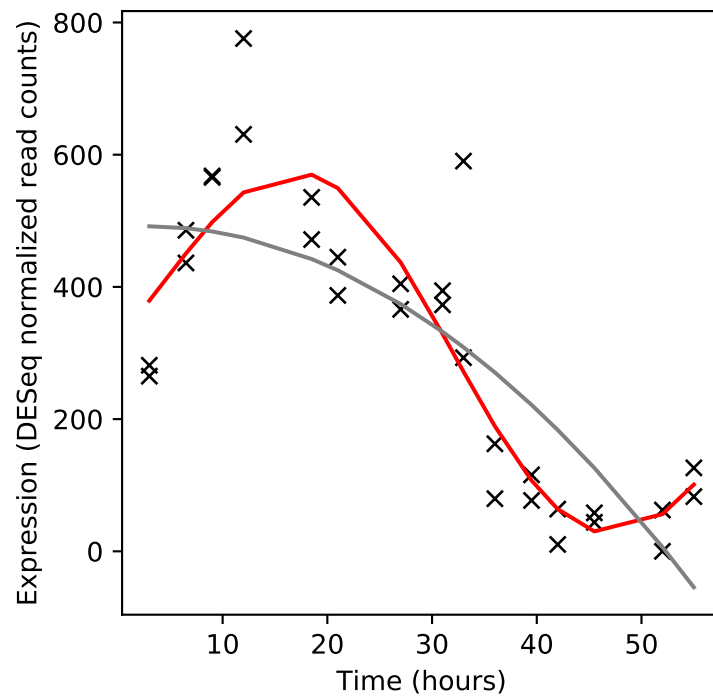

Rv3242c/-

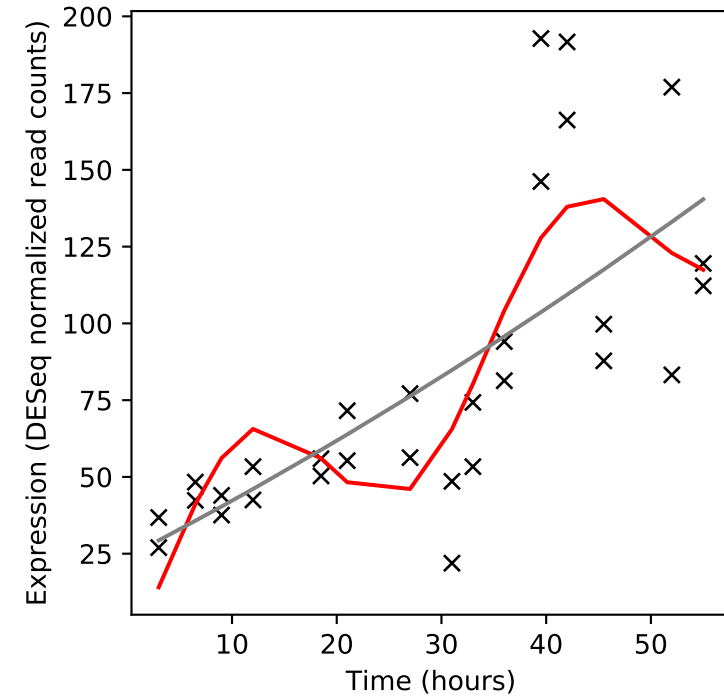

Rv3243c/-

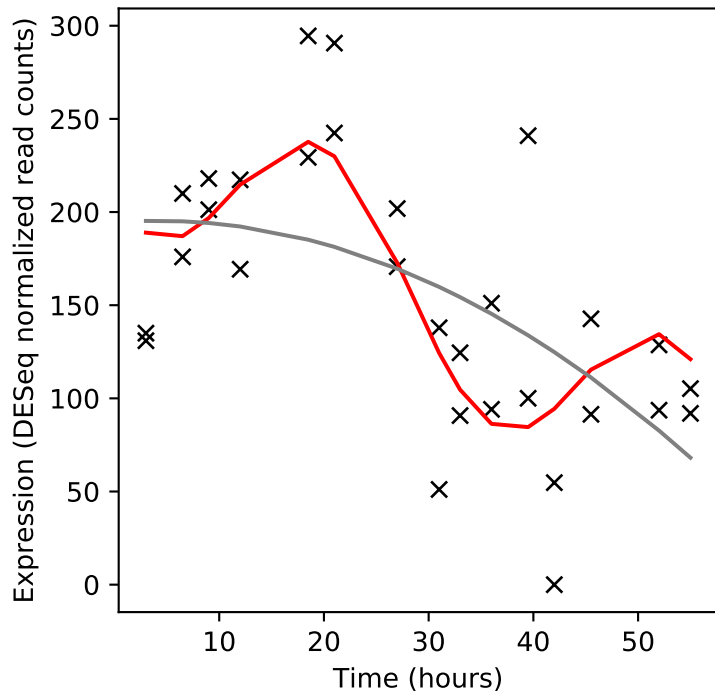

Rv3244c/lpqB

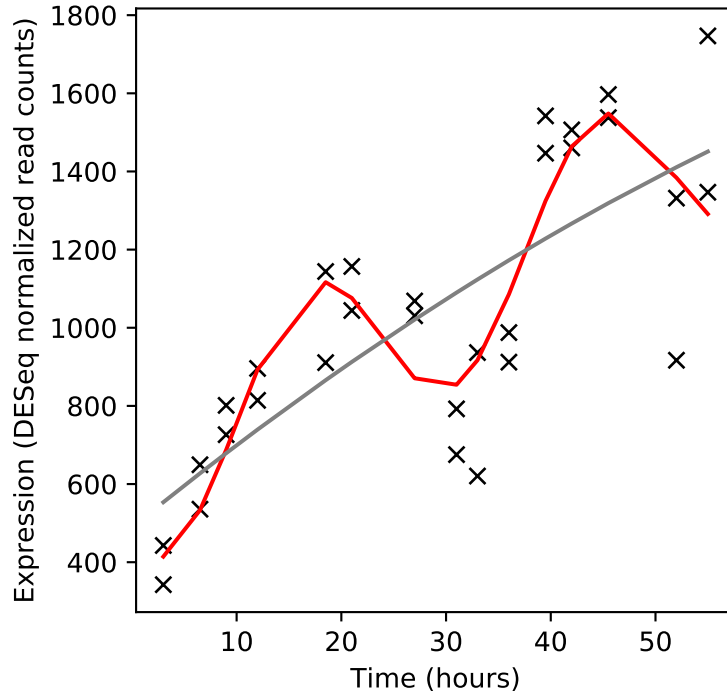

Rv3245c/mtrB

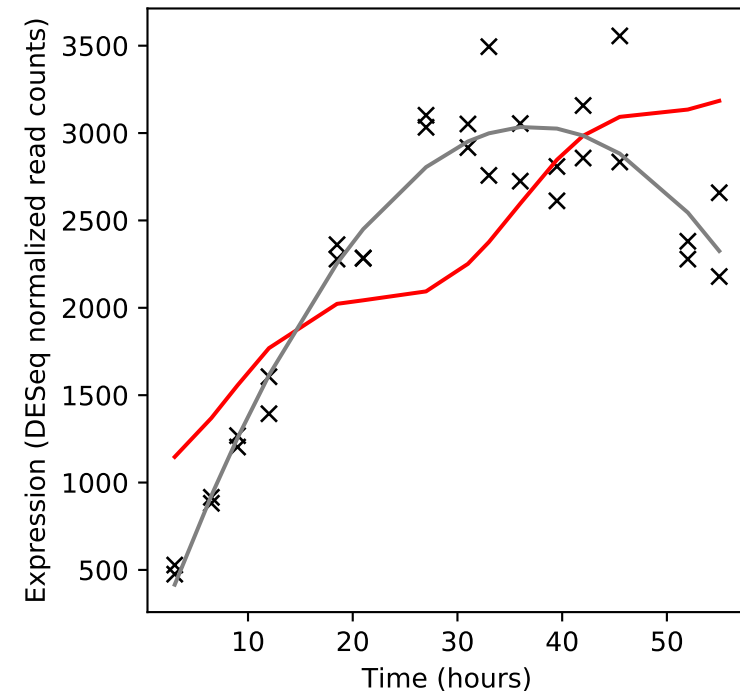

Rv3246c/mtrA

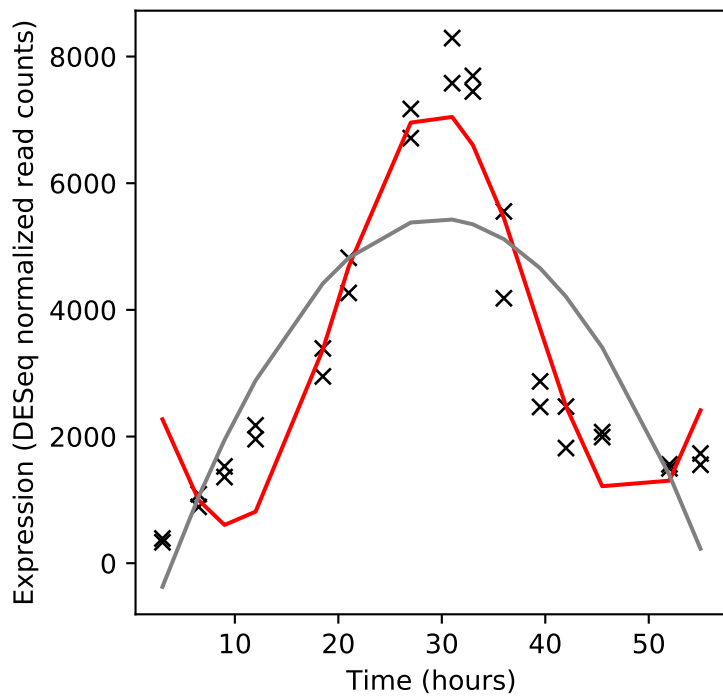

Rv3247c/tmk

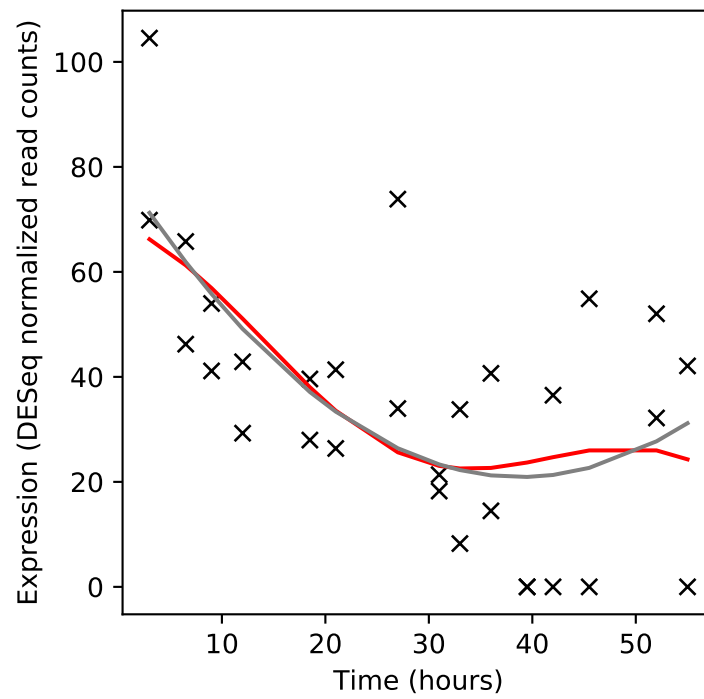

Rv3248c/sahH

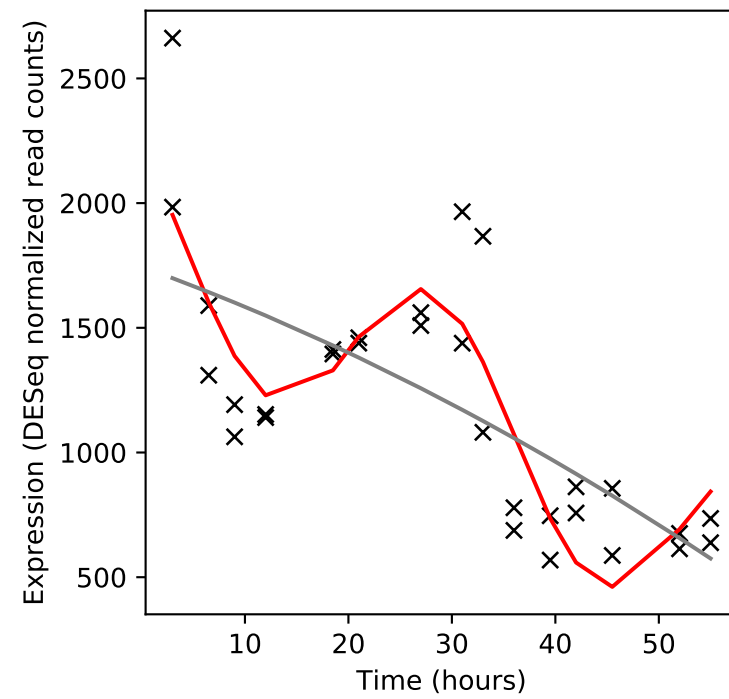

Rv3249c/-

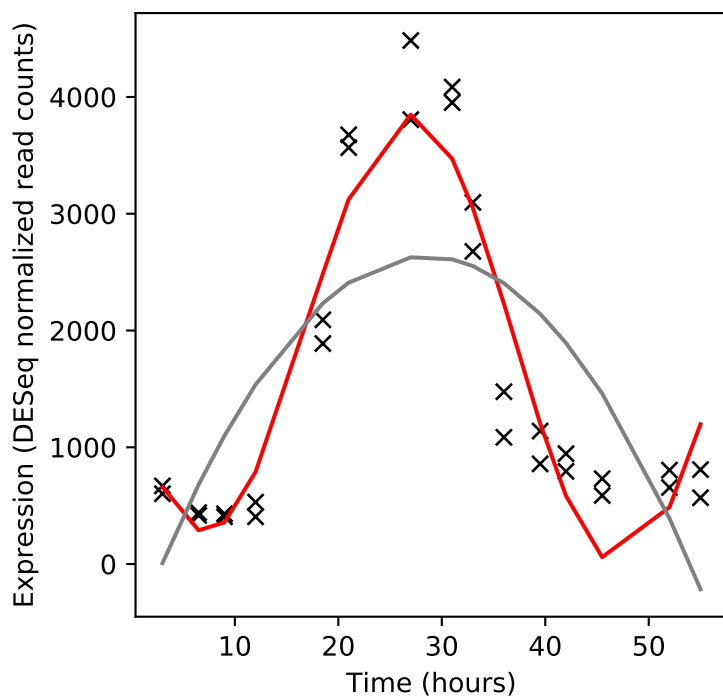

Rv3250c/rubB

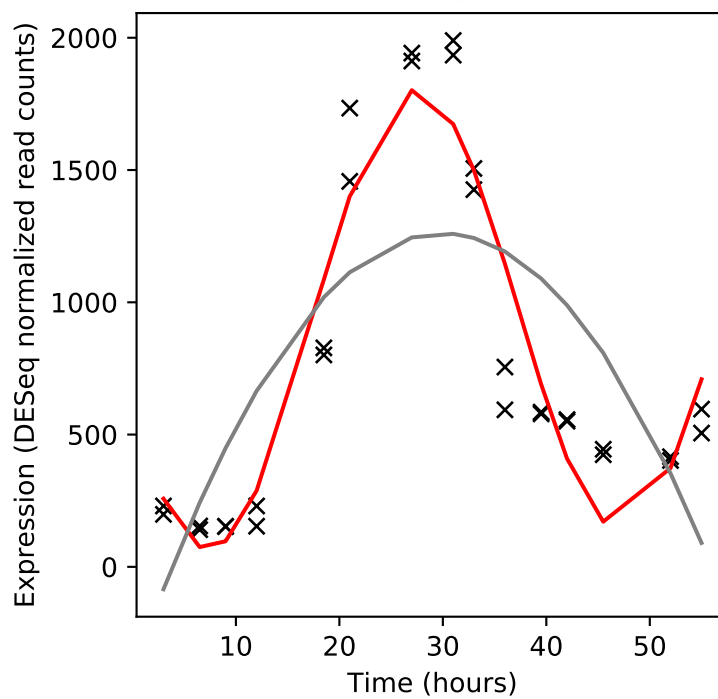

Rv3251c/rubA

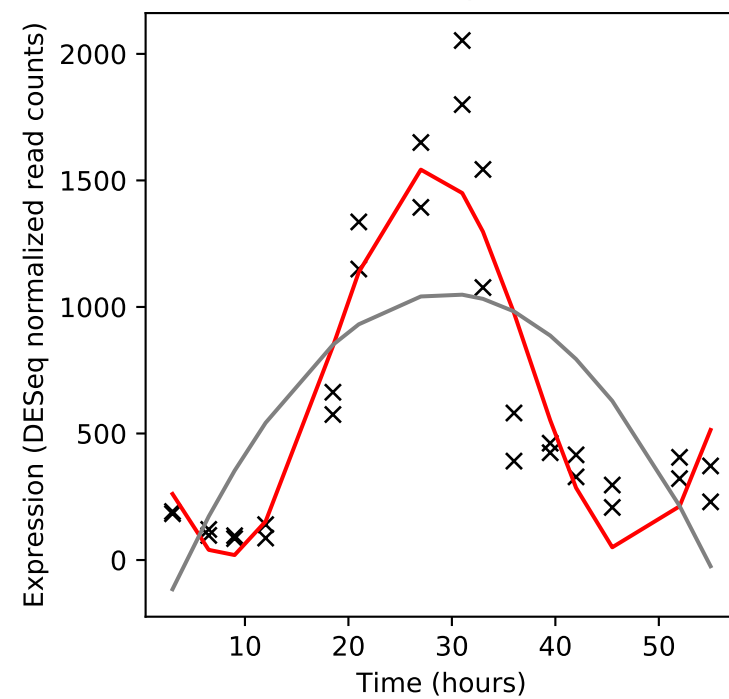

Rv3252c/alkB

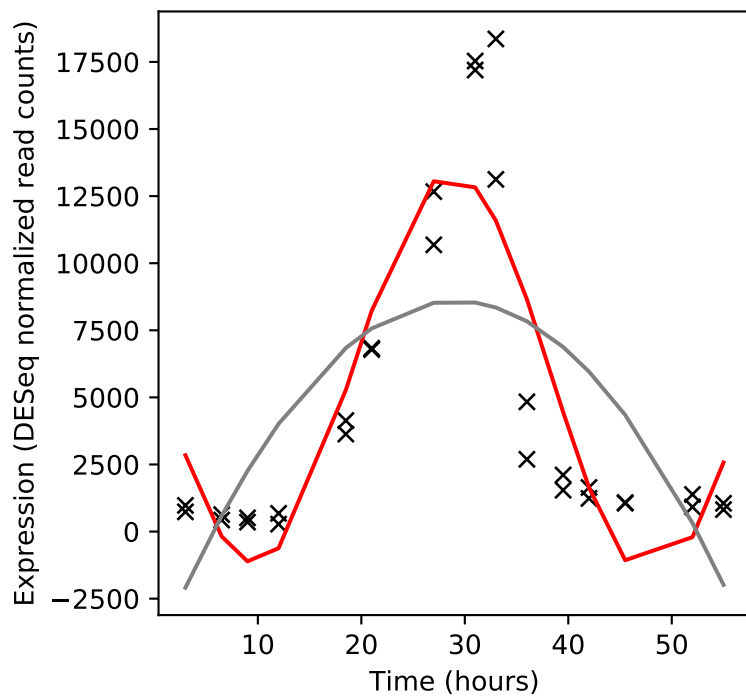

Rv3253c/-

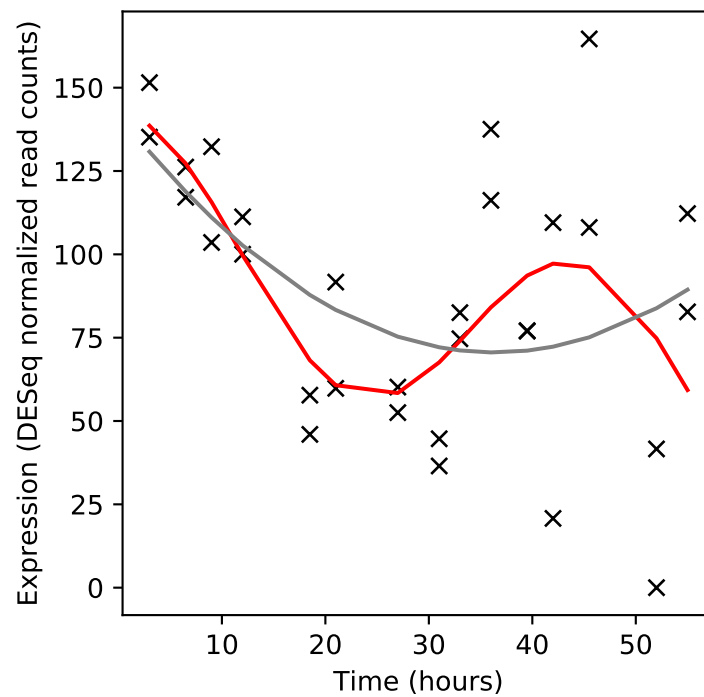

Rv3254c/-

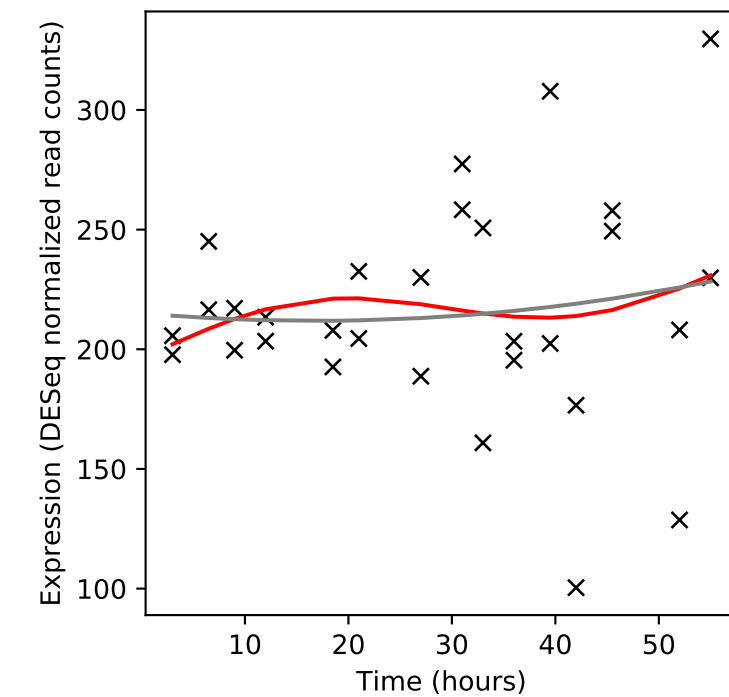

Rv3255c/mana

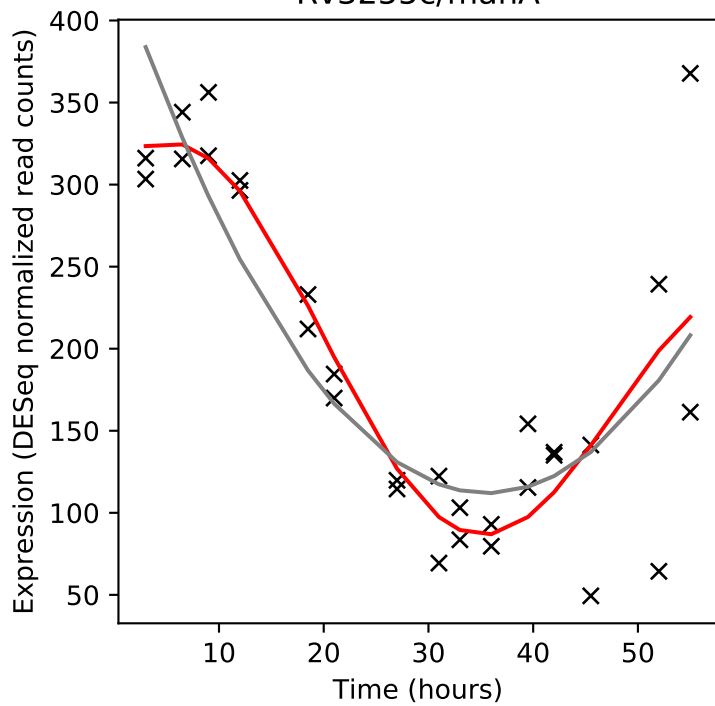

Rv3256c/-

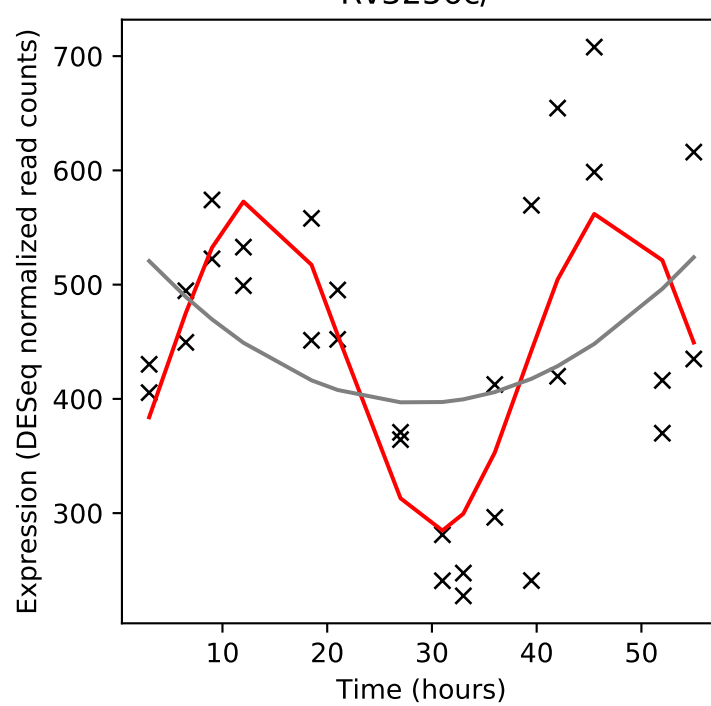

Rv3257c/pmmA

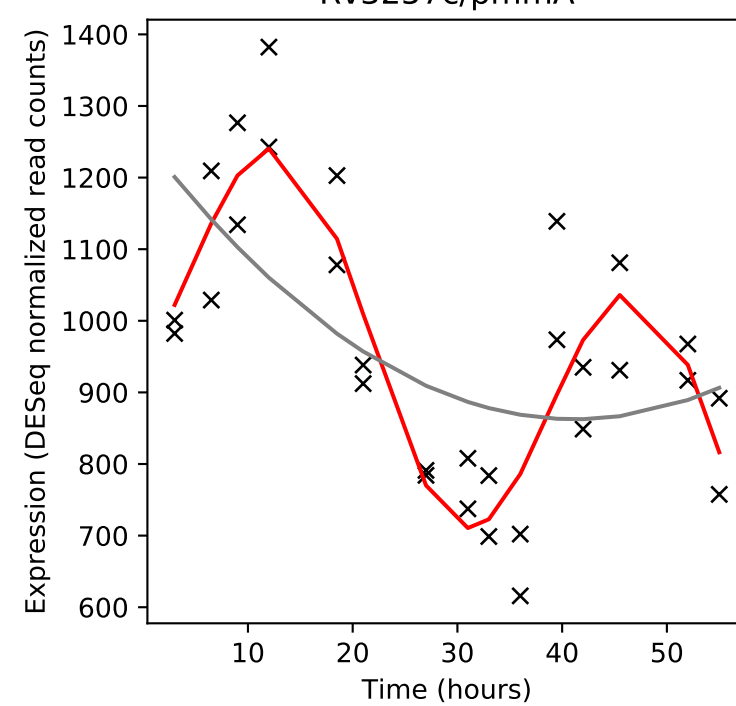

Rv3258c/-

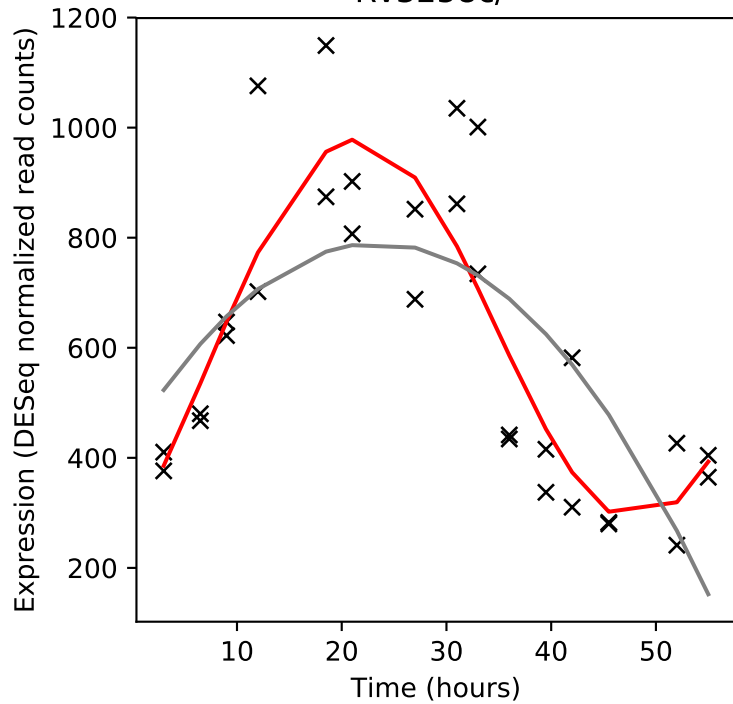

Rv3259/-

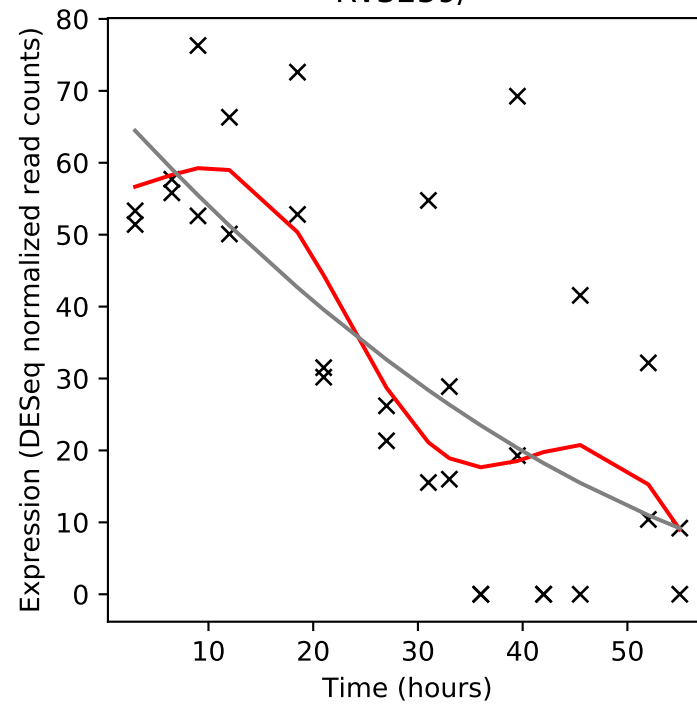

Rv3260c/whiB2

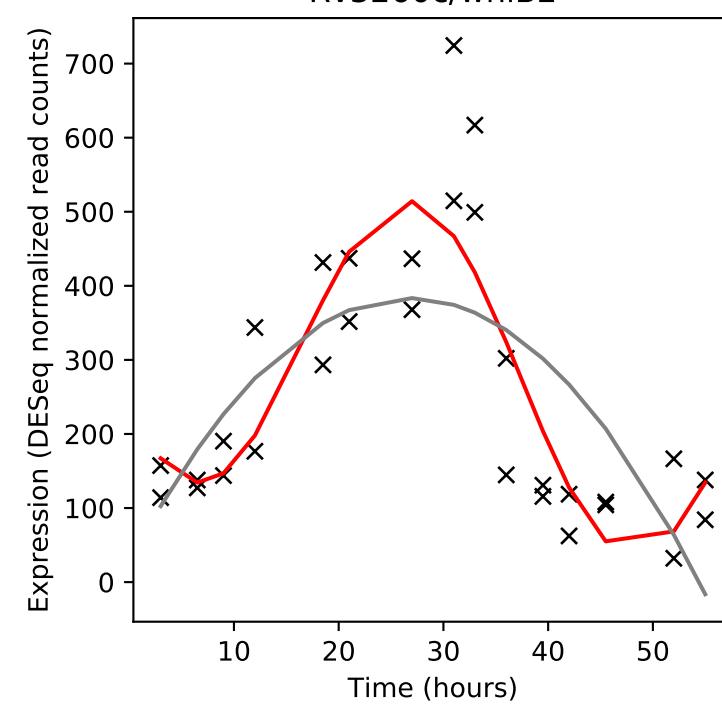

Rv3261/fbiA

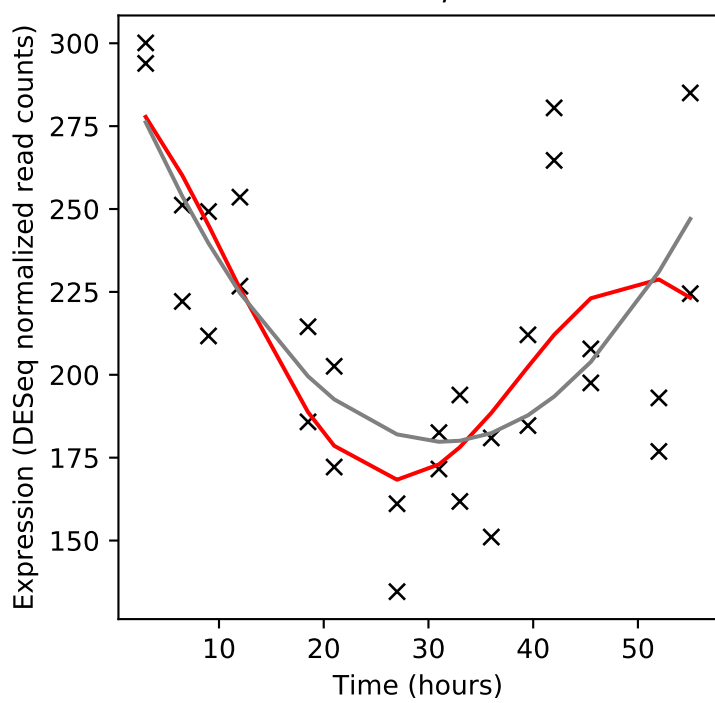

Rv3262/fbiB

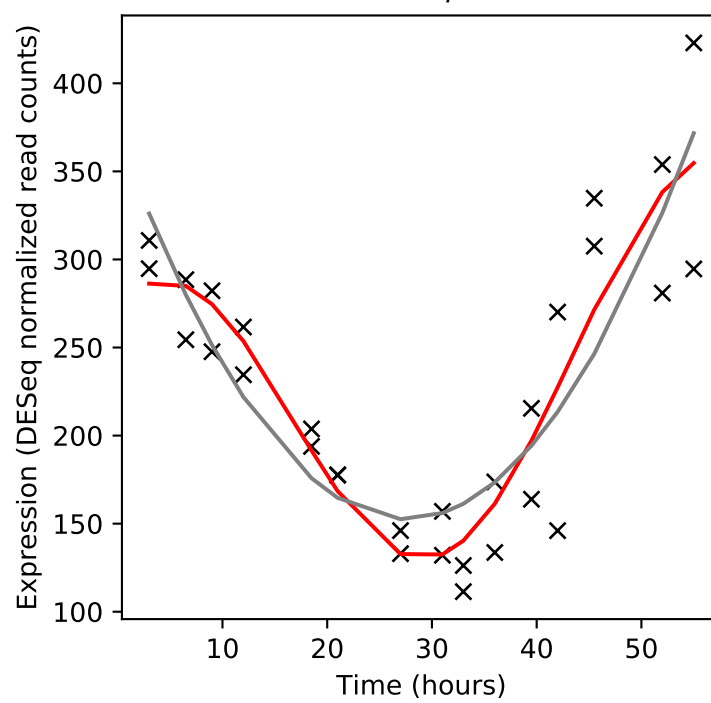

Rv3263/-

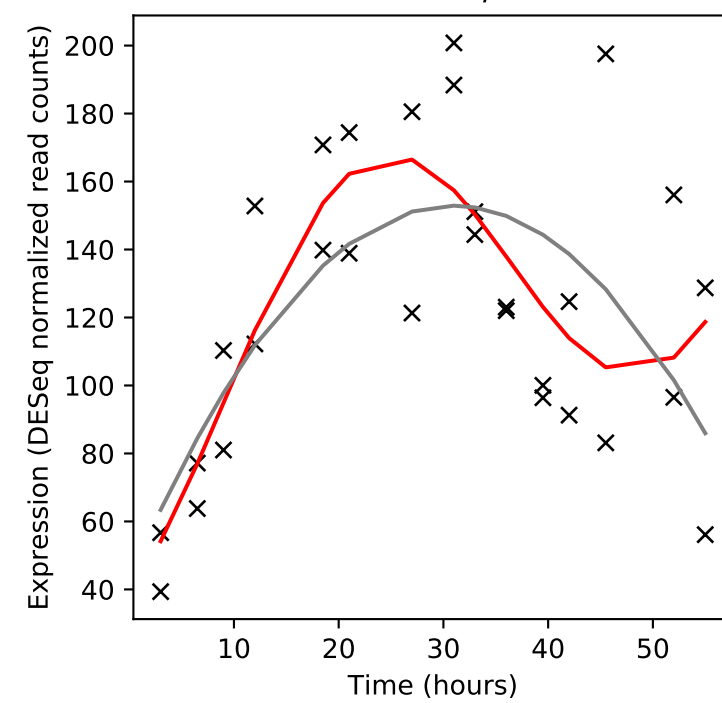



Rv3264c/manB

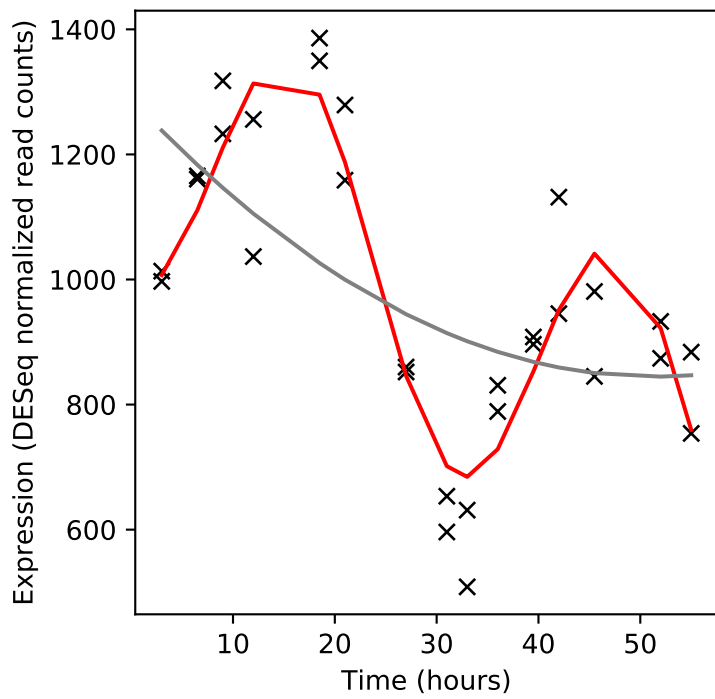

Rv3265c/wbbL1

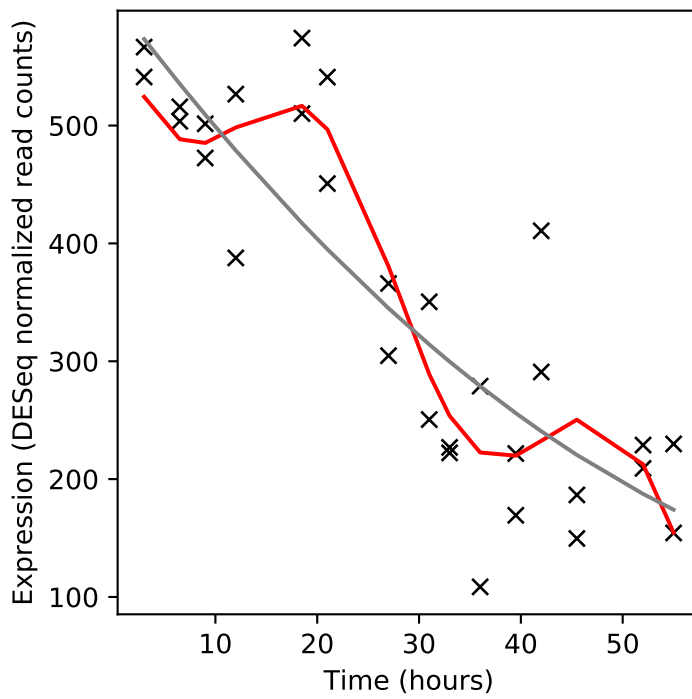

Rv3266c/rmlD

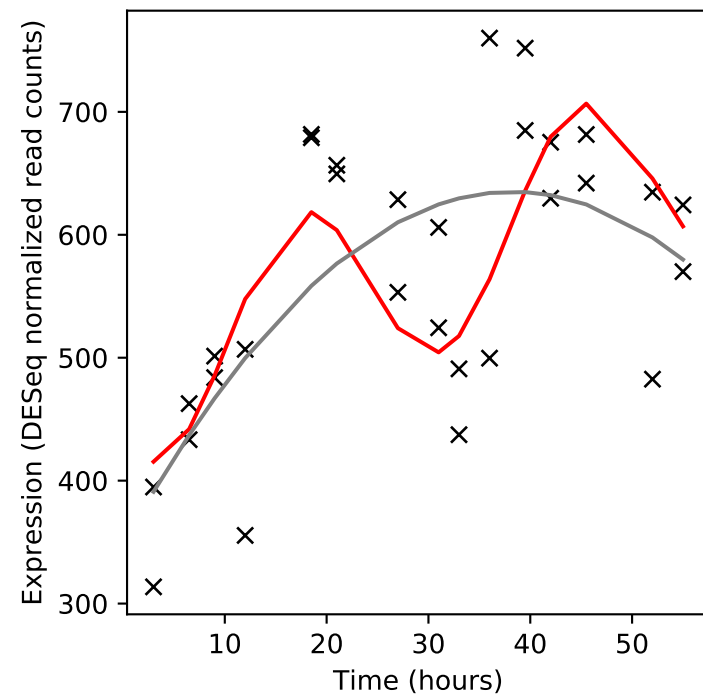

Rv3267/-

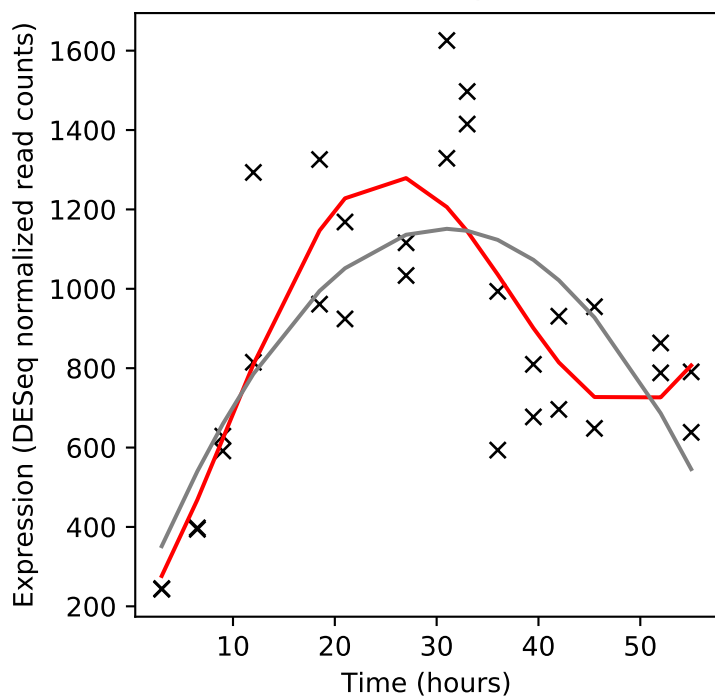

Rv3268/-

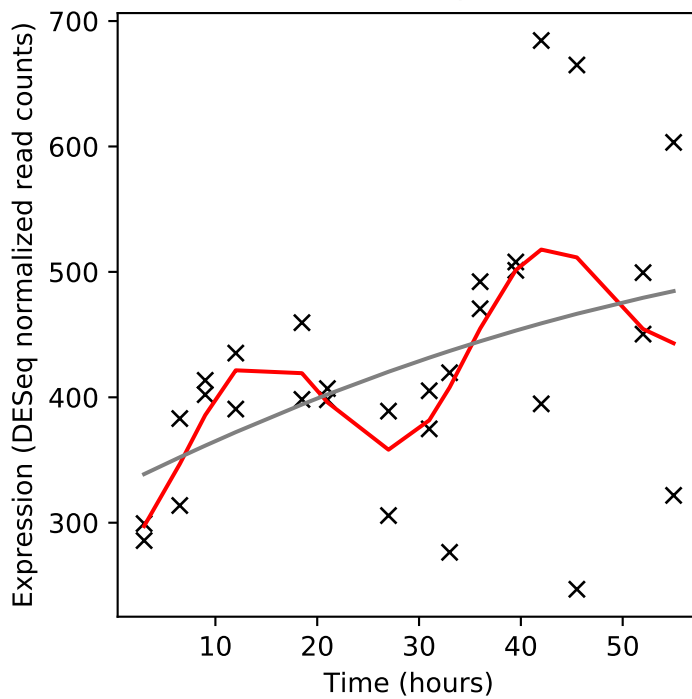

Rv3269/-

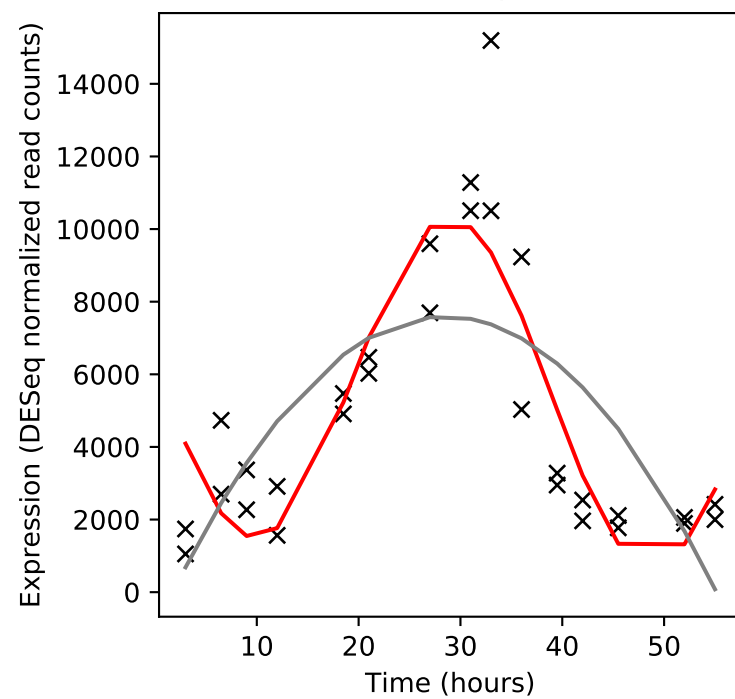

Rv3270/ctpC

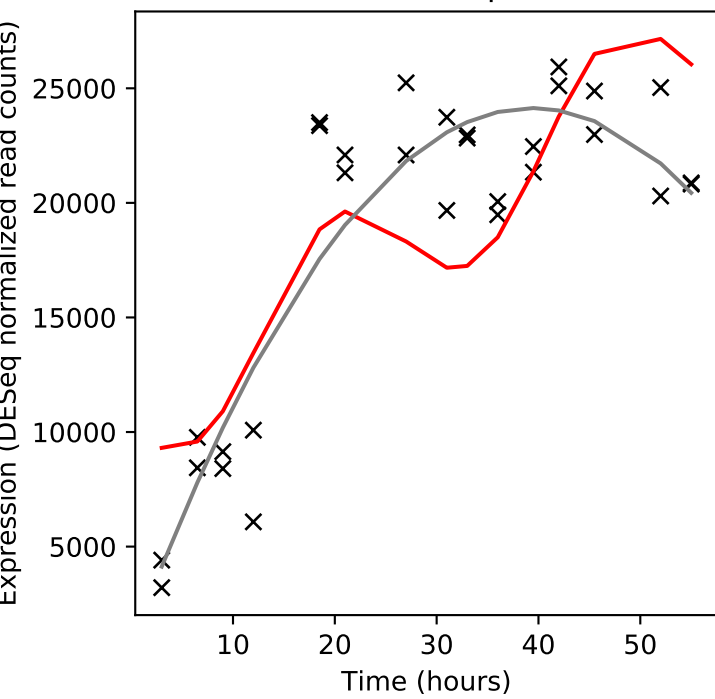

Rv3271c/-

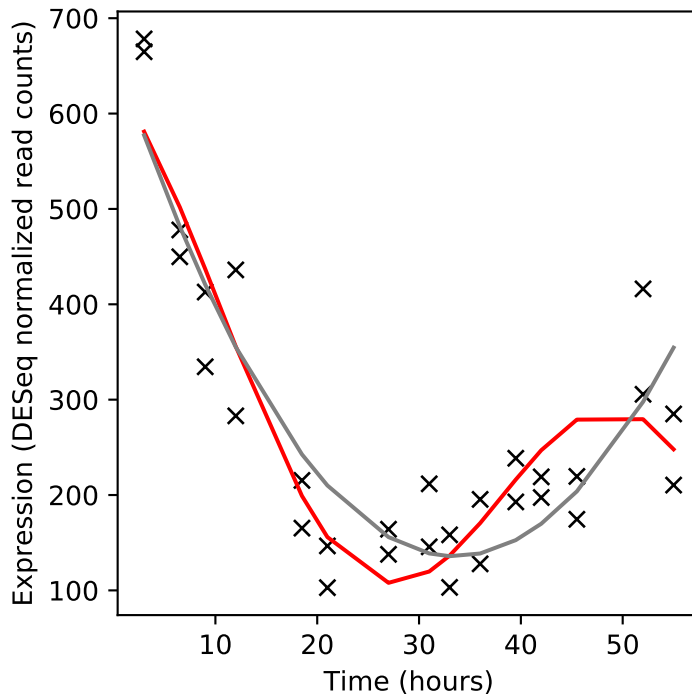

Rv3272/-

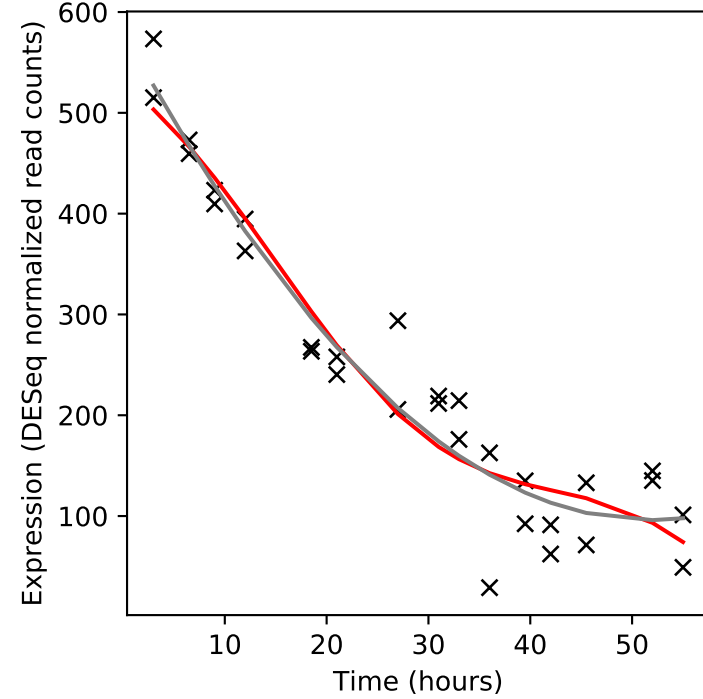

Rv3273/-

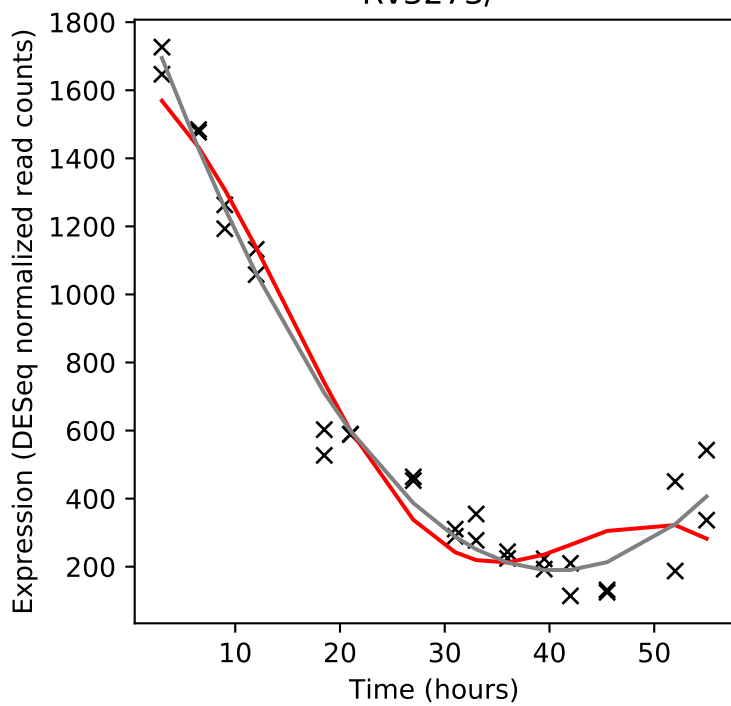

Rv3274c/fadE25

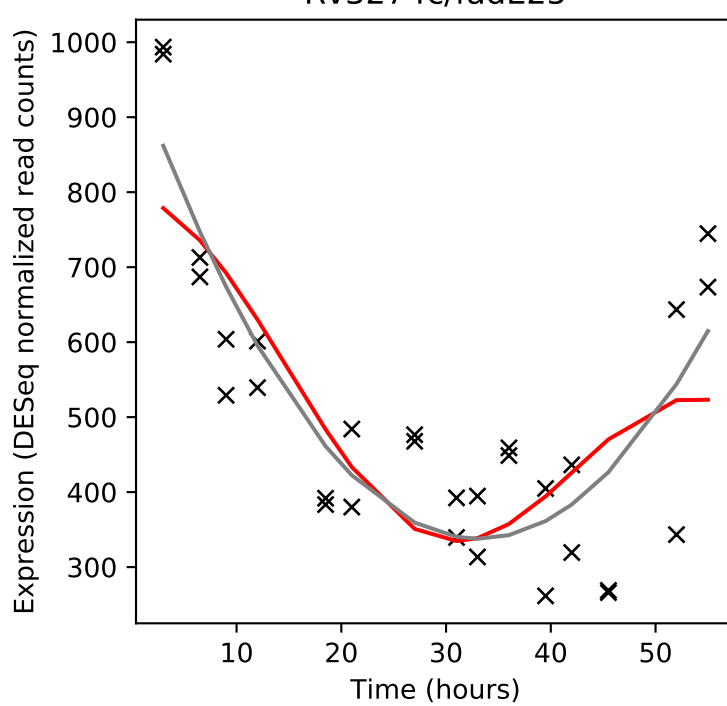

Rv3275c/purE

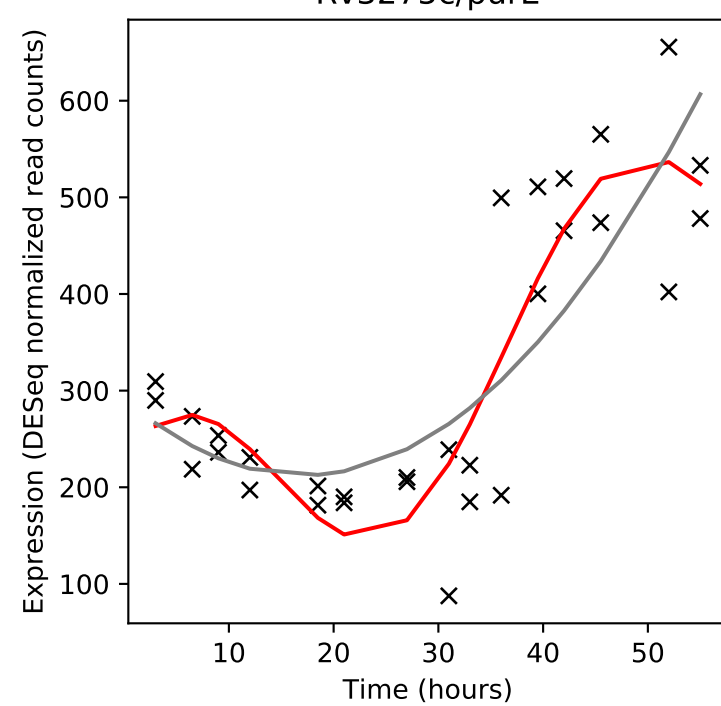

Rv3276c/purK

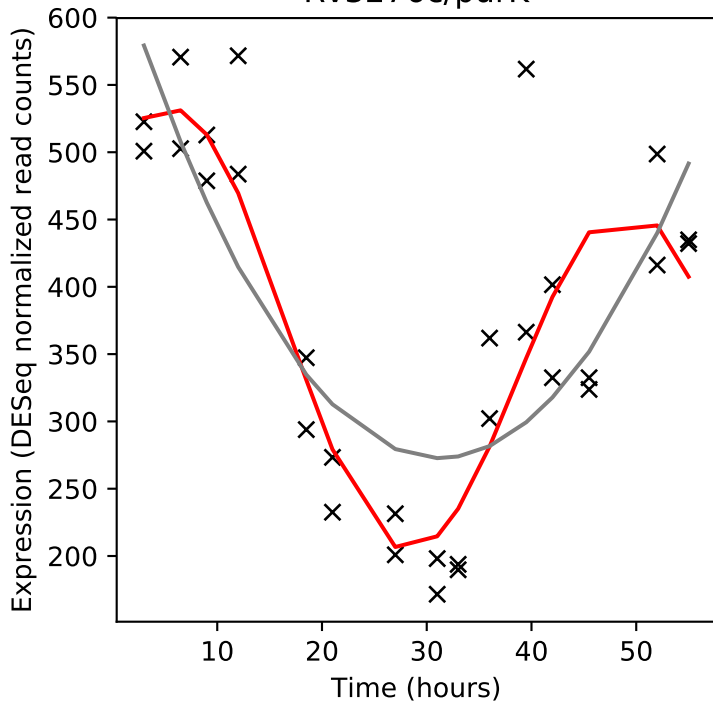

Rv3277/-

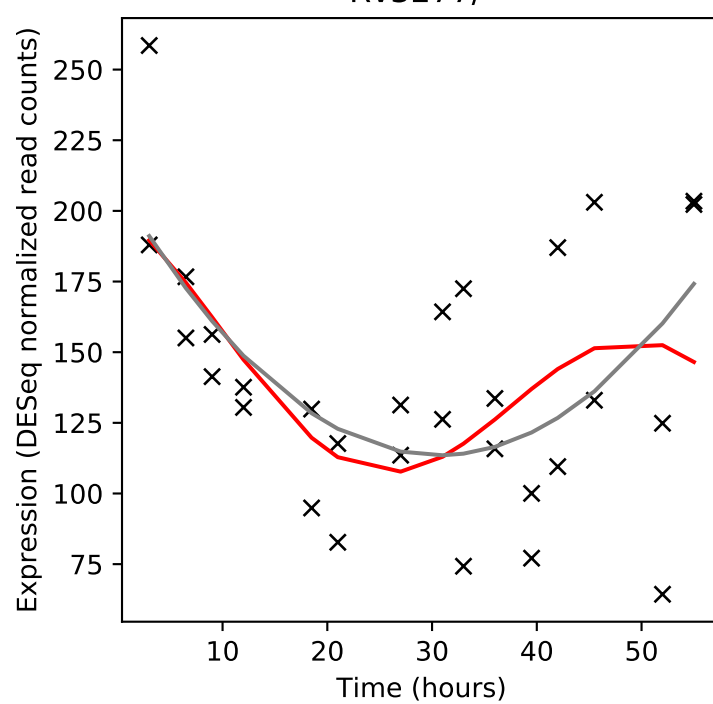

Rv3278c/-

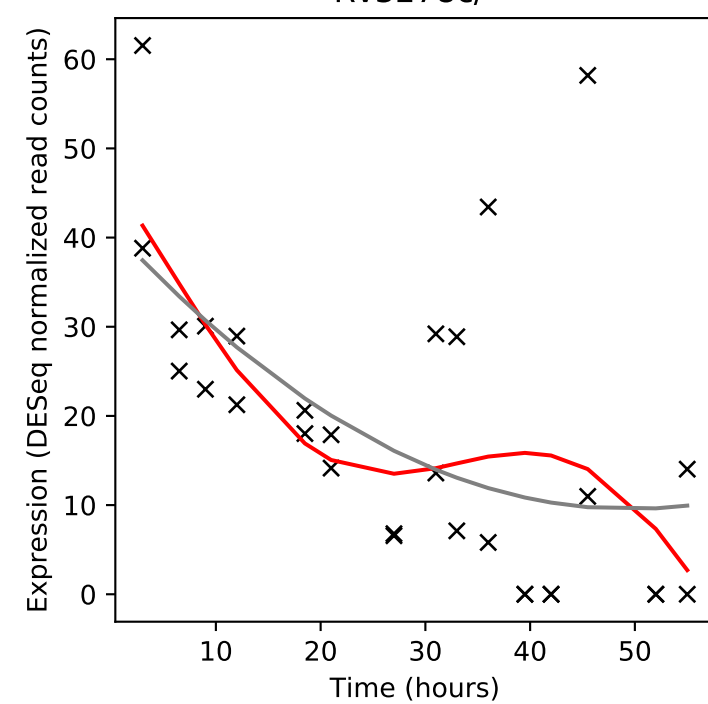

Rv3279c/birA

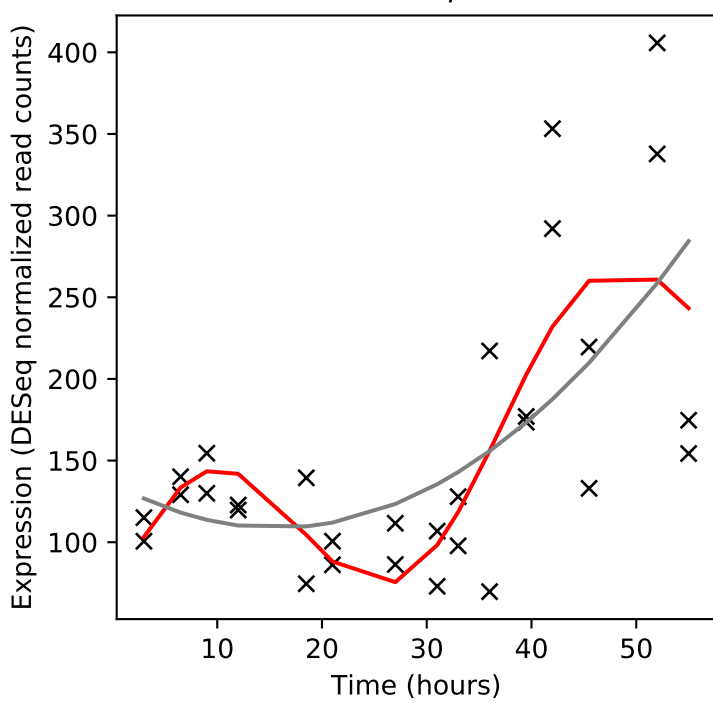

Rv3280/accD5

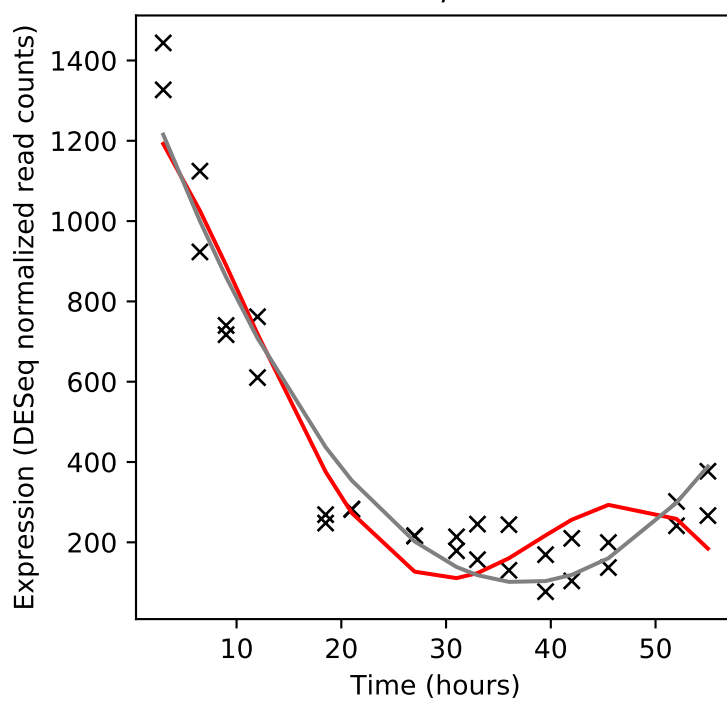

Rv3281/accE5

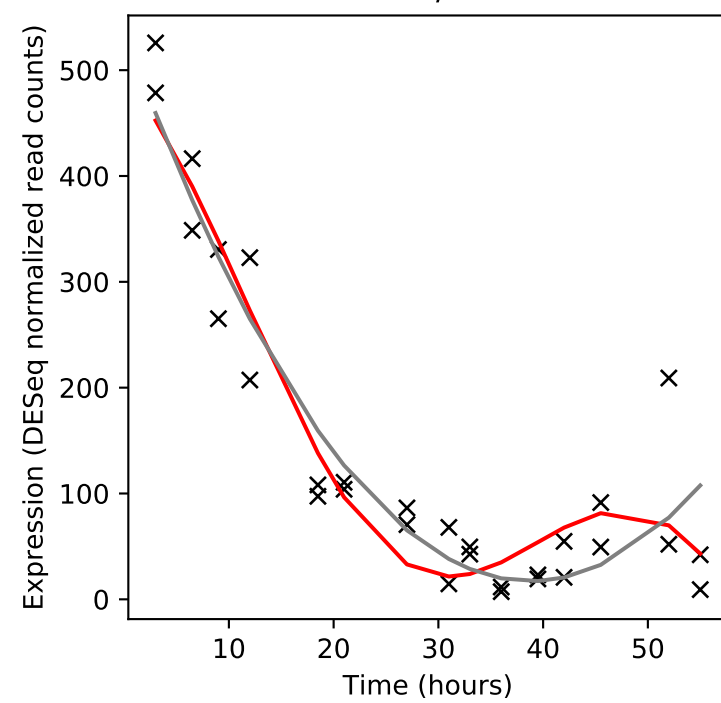

Rv3282/-

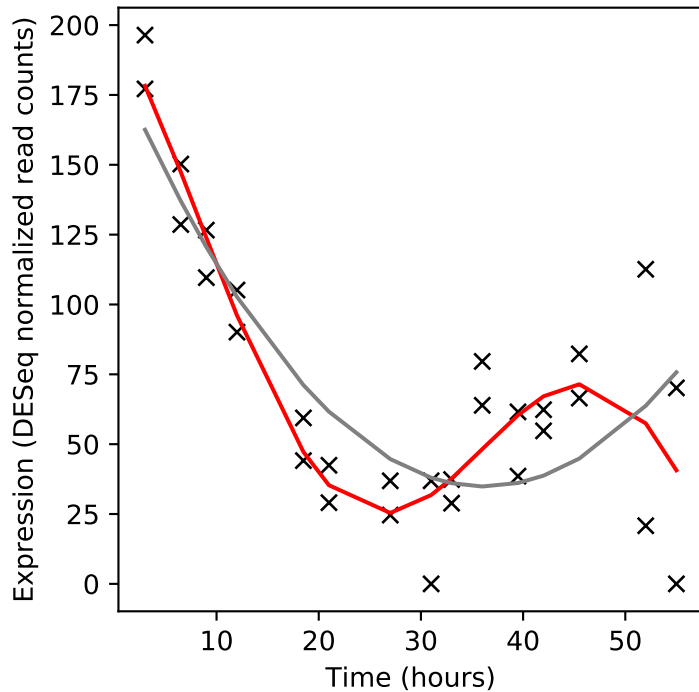

Rv3283/sseA

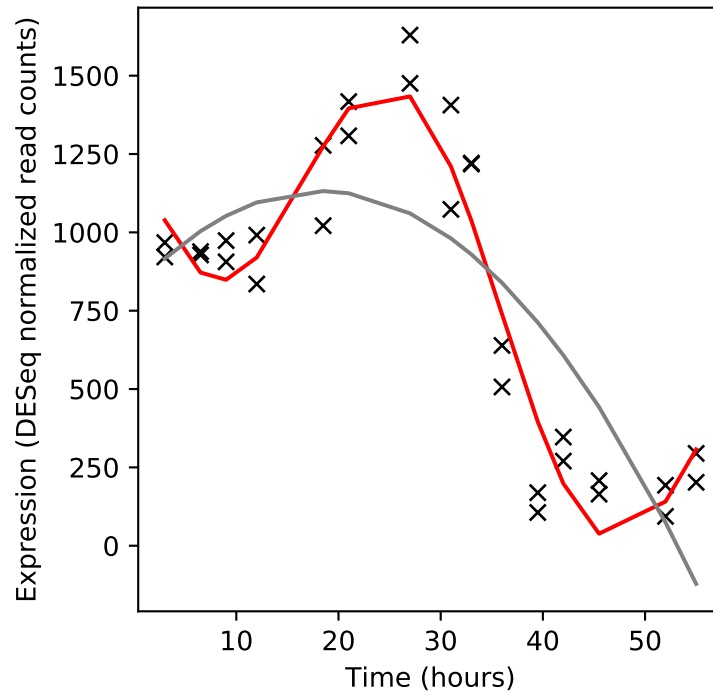

Rv3284/-

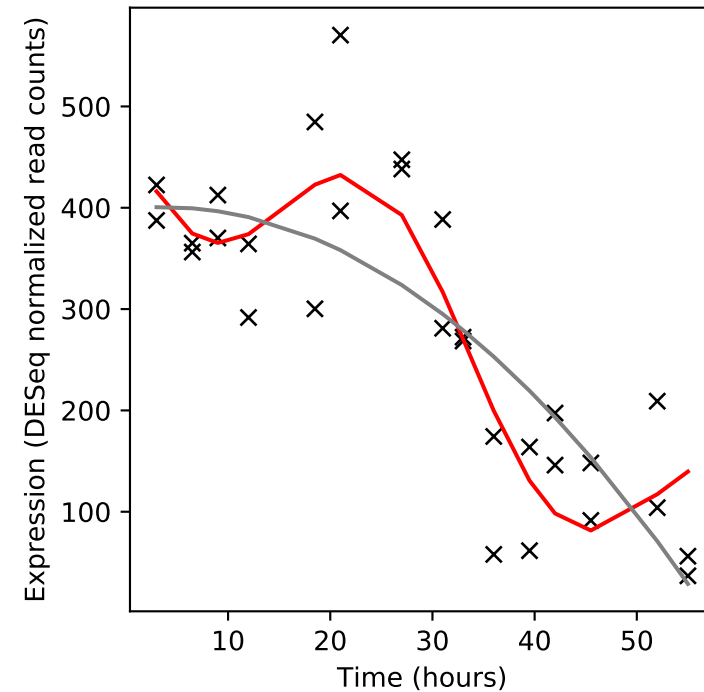

Rv3285/accA3

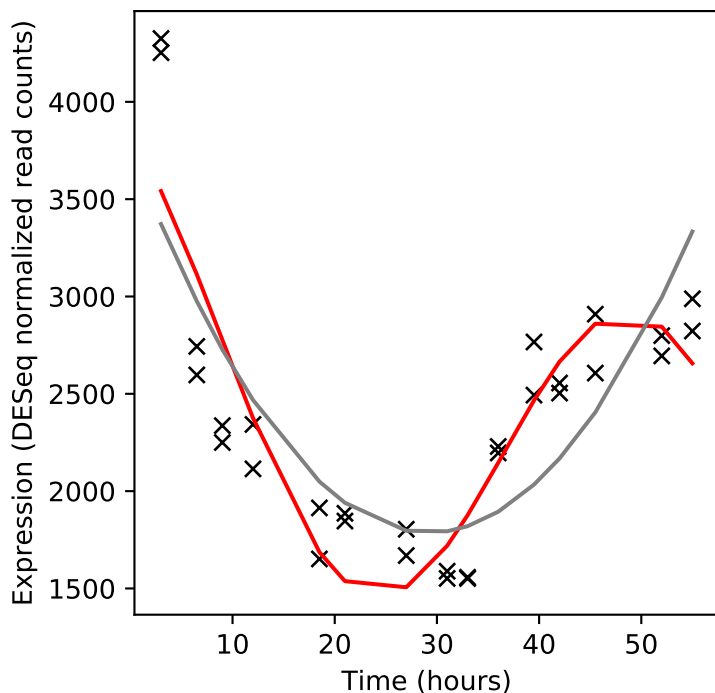

Rv3286c/sigF

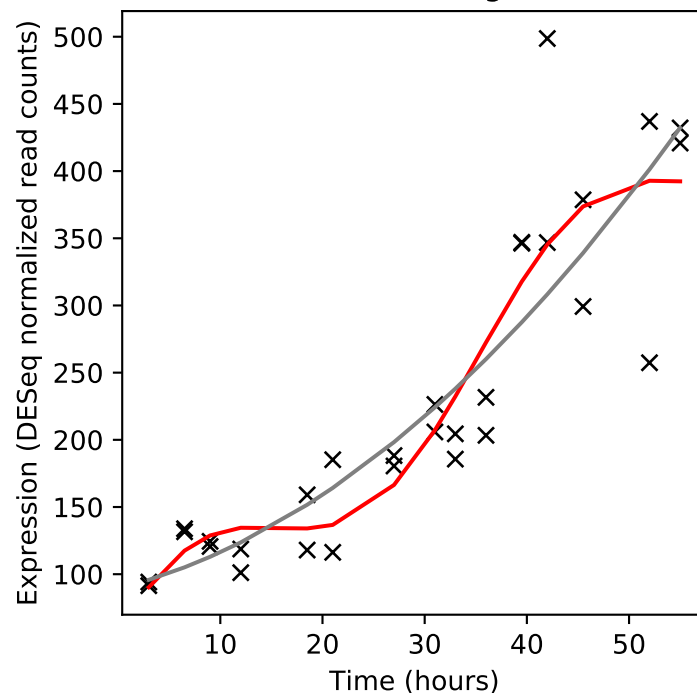

Rv3287c/rsbW

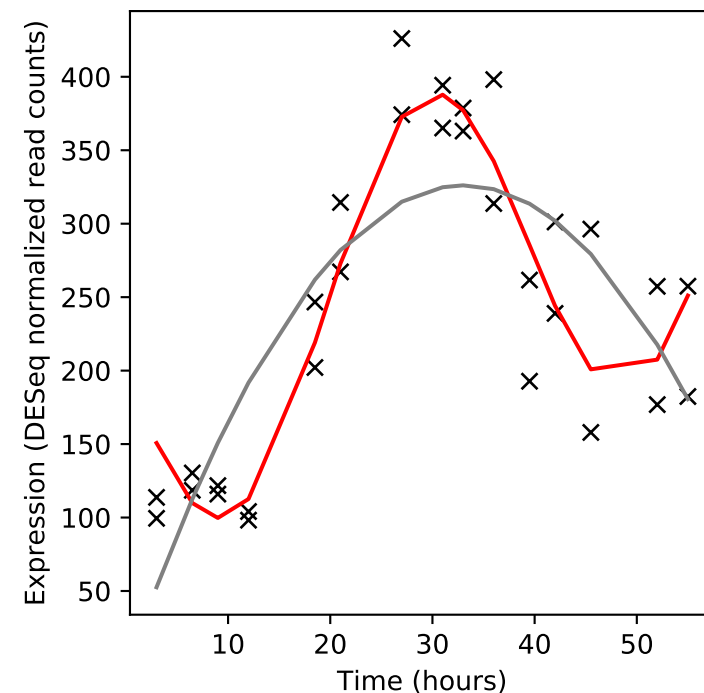

Rv3288c/usfY

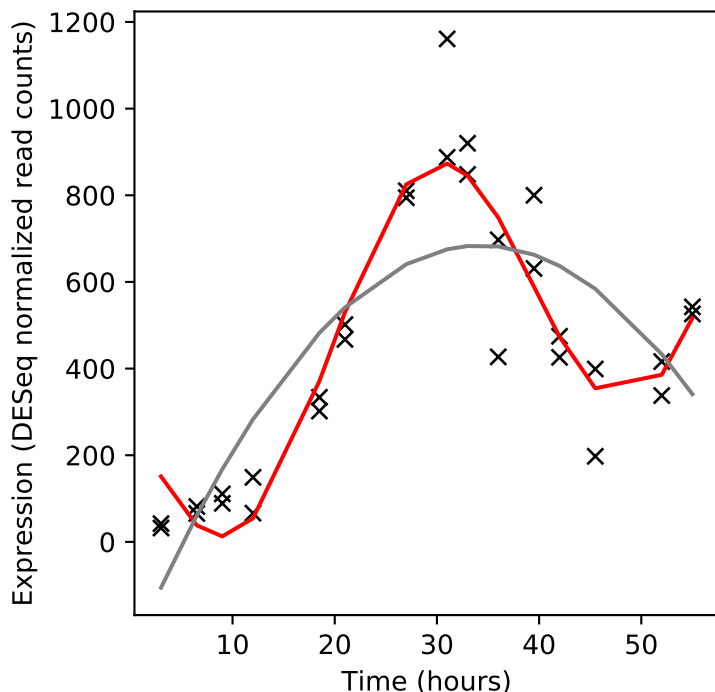

Rv3289c/-

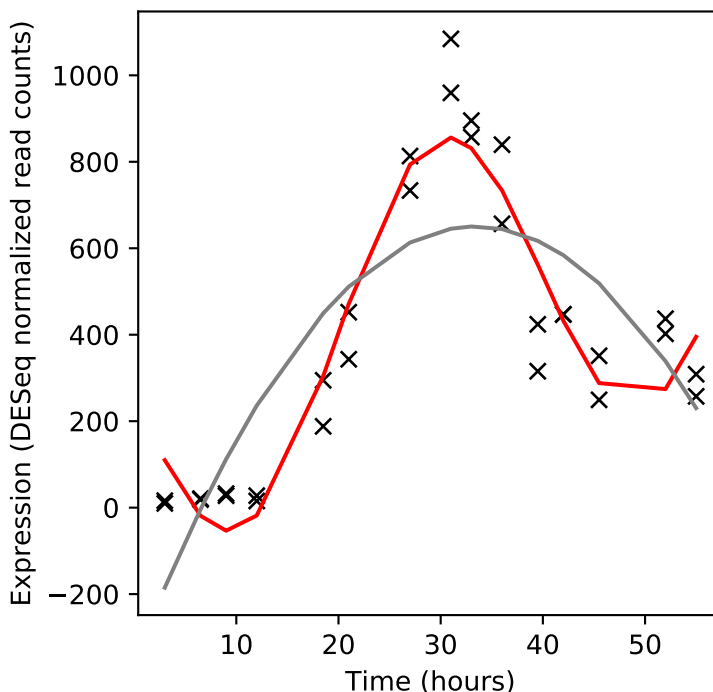

Rv3290c/lat

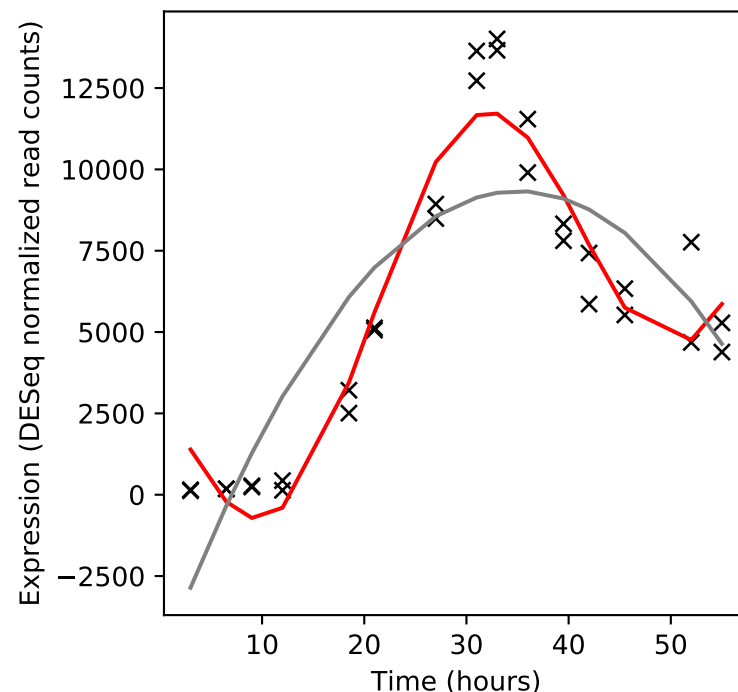

Rv3291c/lrpA

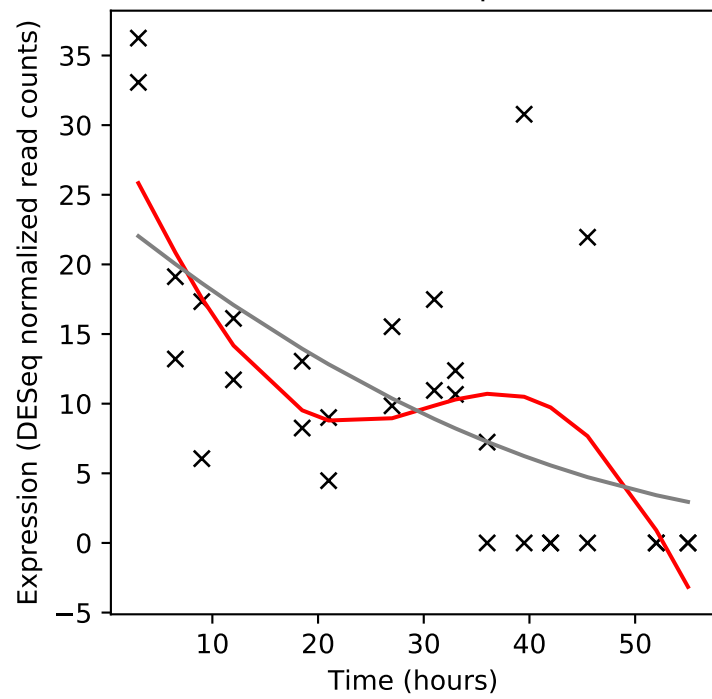

Rv3292/-

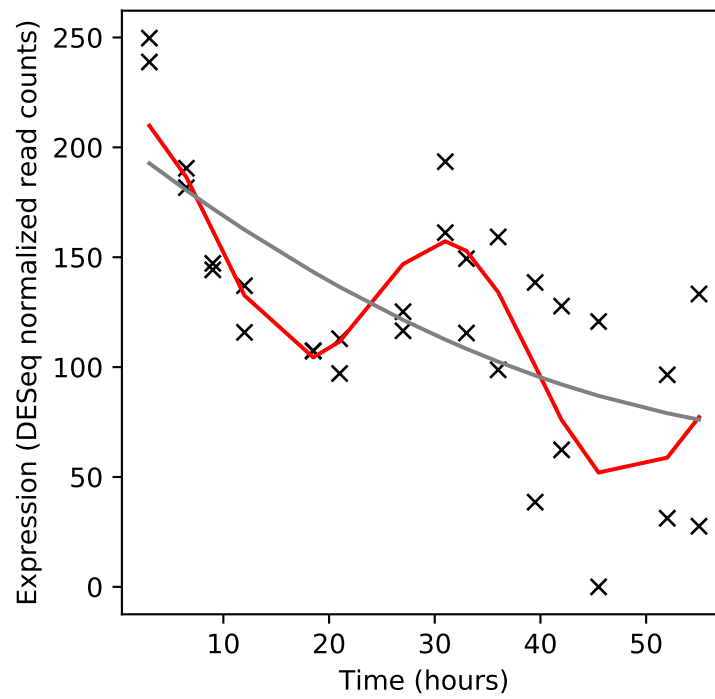

Rv3293/pcd

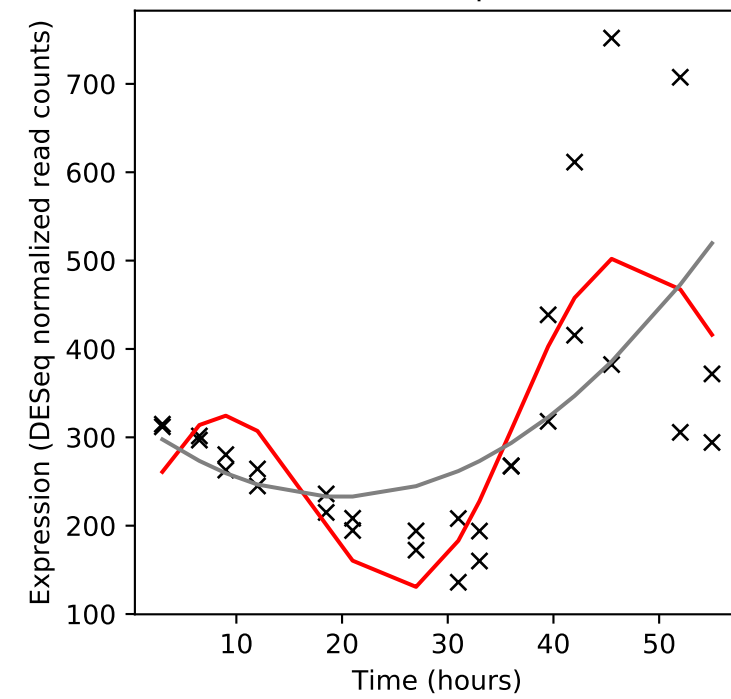

Rv3294c/-

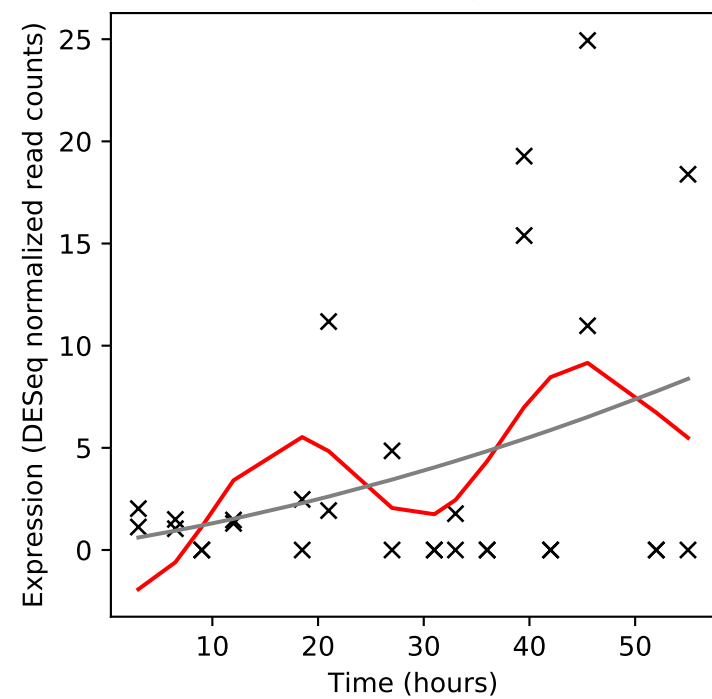

Rv3295/-

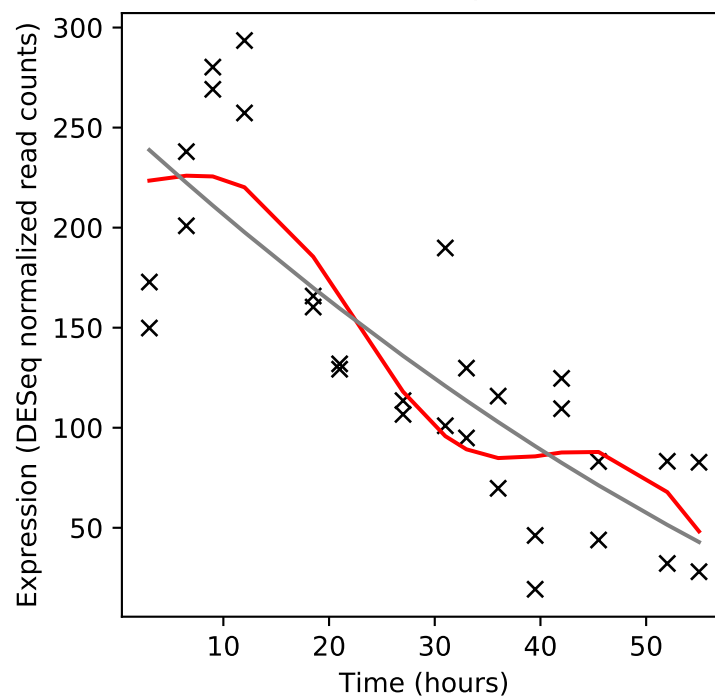

Rv3296/lhr

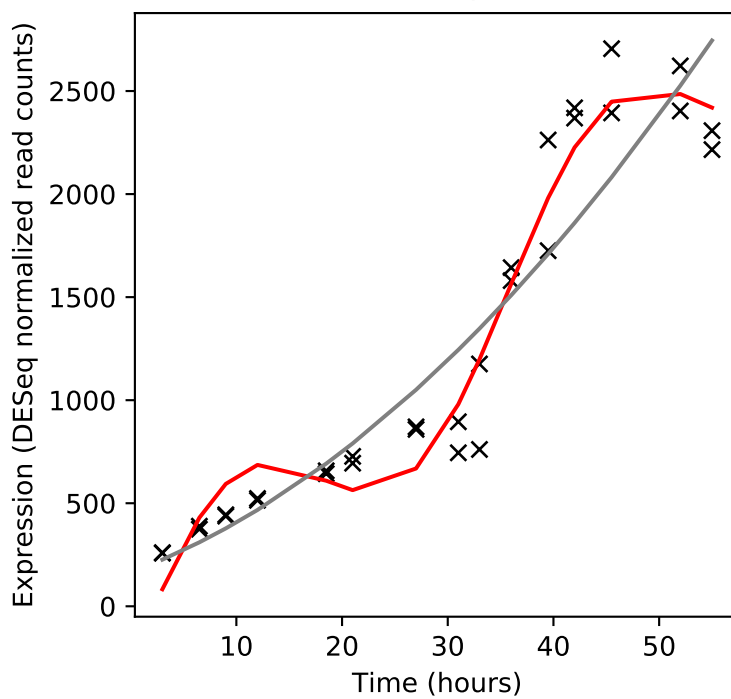

Rv3297/nei

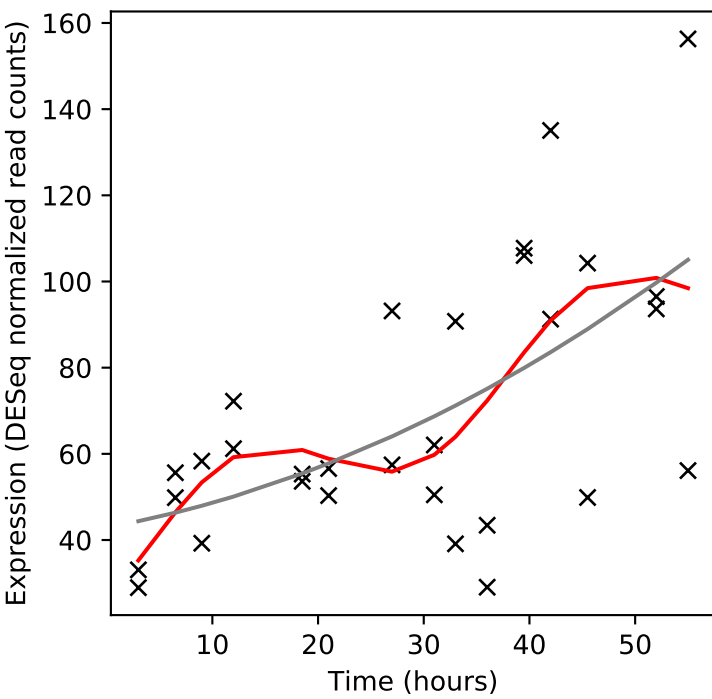

Rv3298c/lpqC

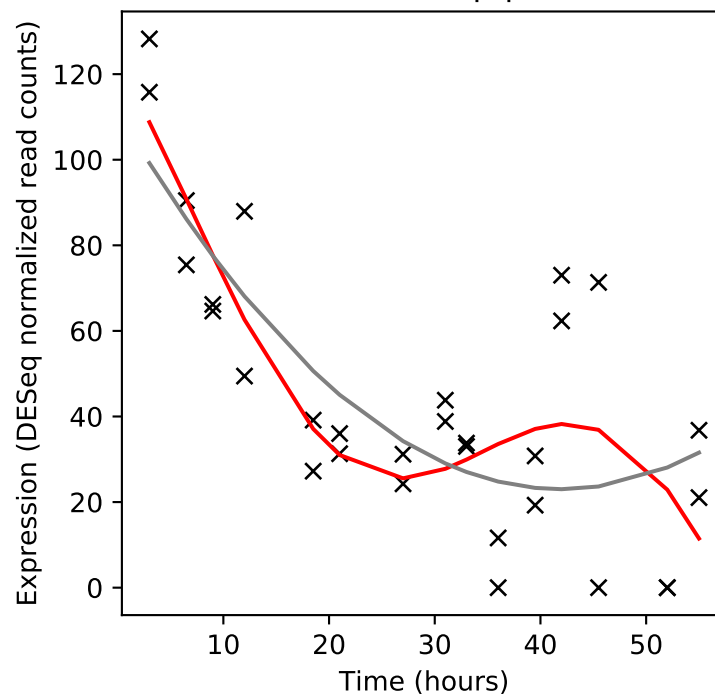

Rv3299c/atsB

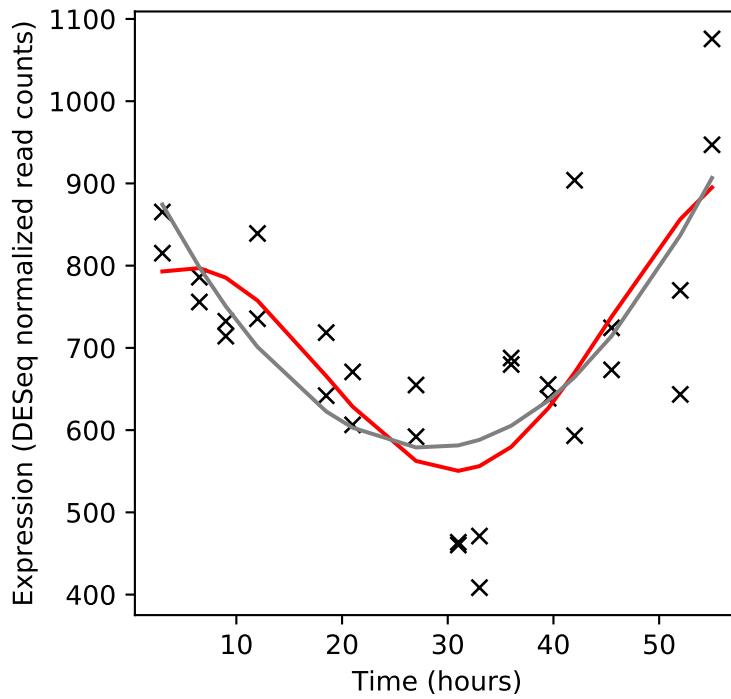

Rv3300c/-

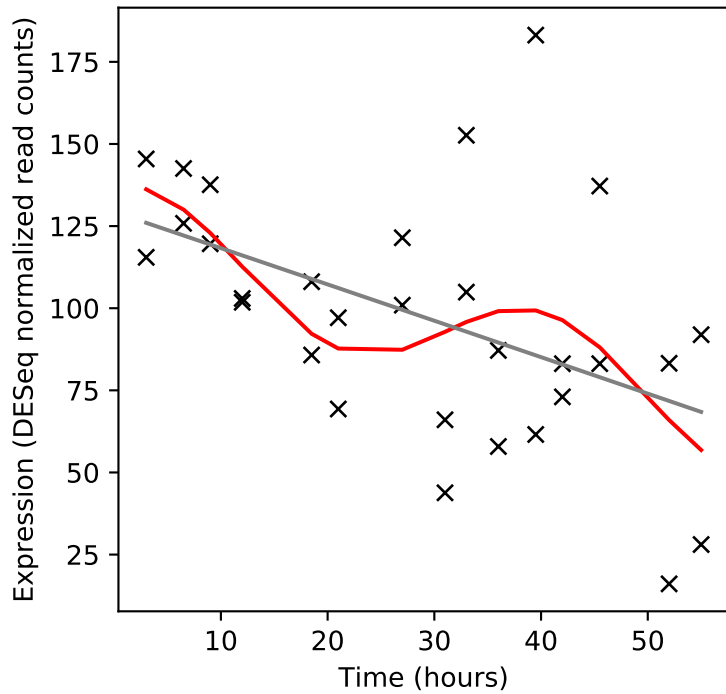

Rv3301c/phoY1

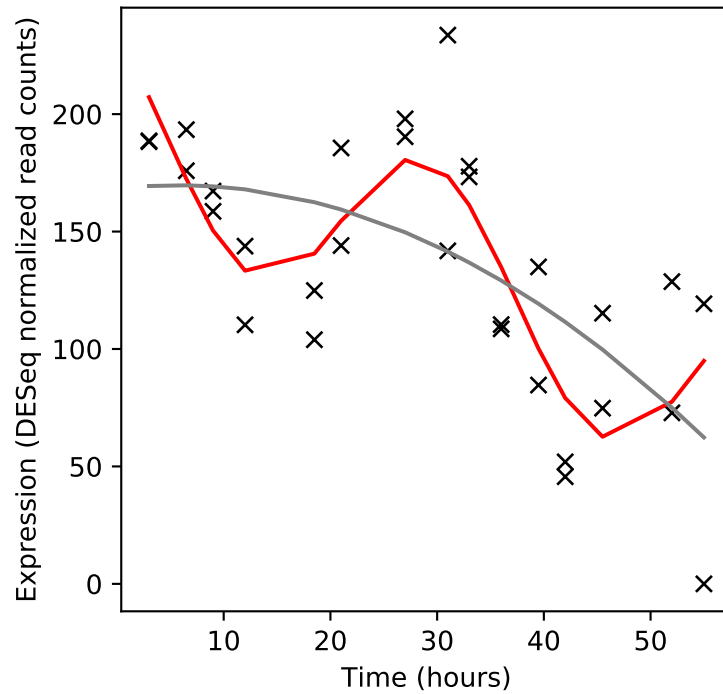

Rv3302c/glpD2

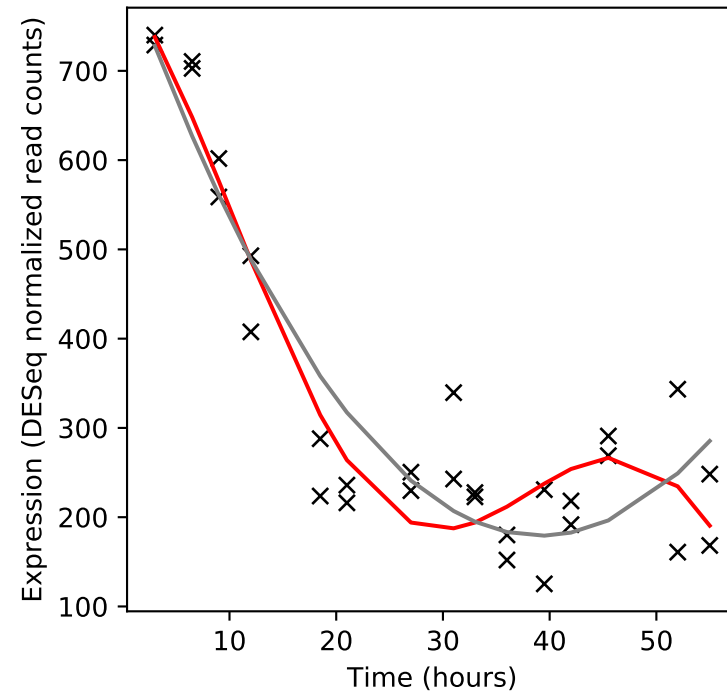

Rv3303c/lpdA

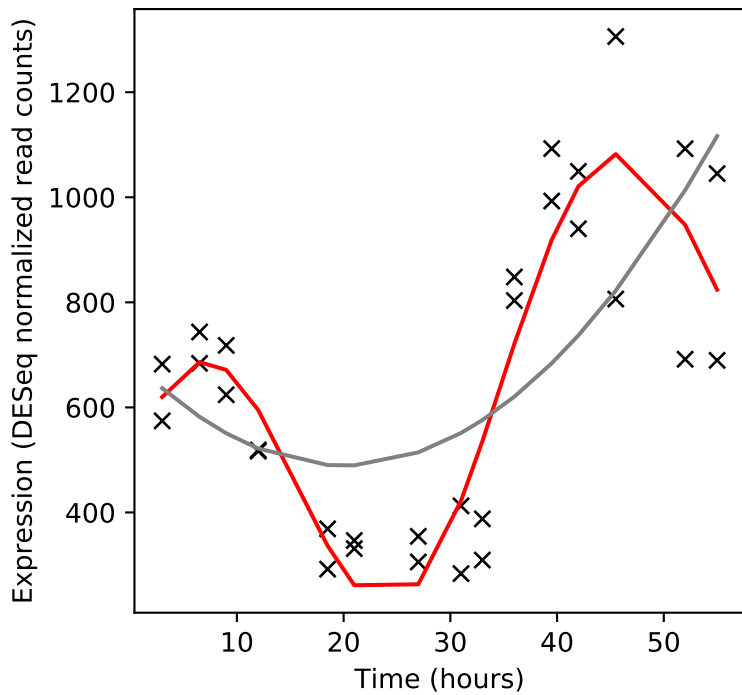

Rv3304c/-

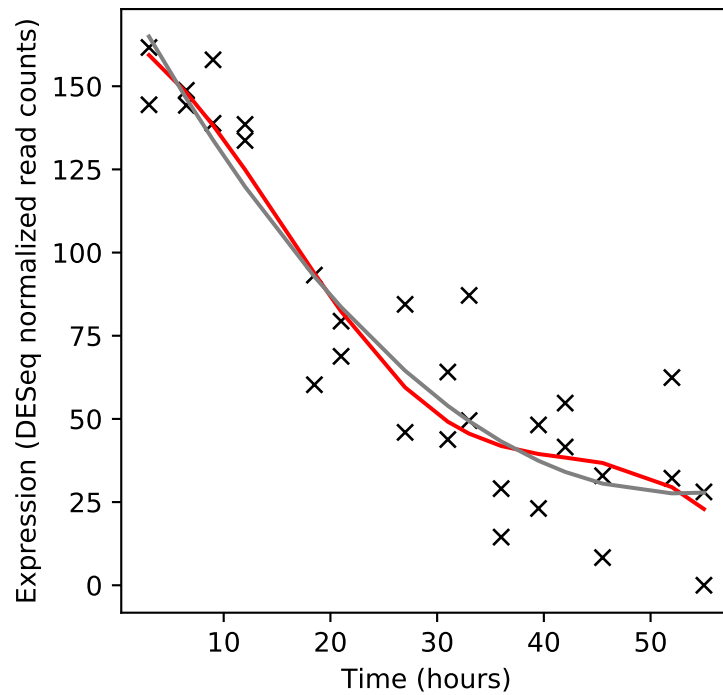

Rv3305c/amiA1

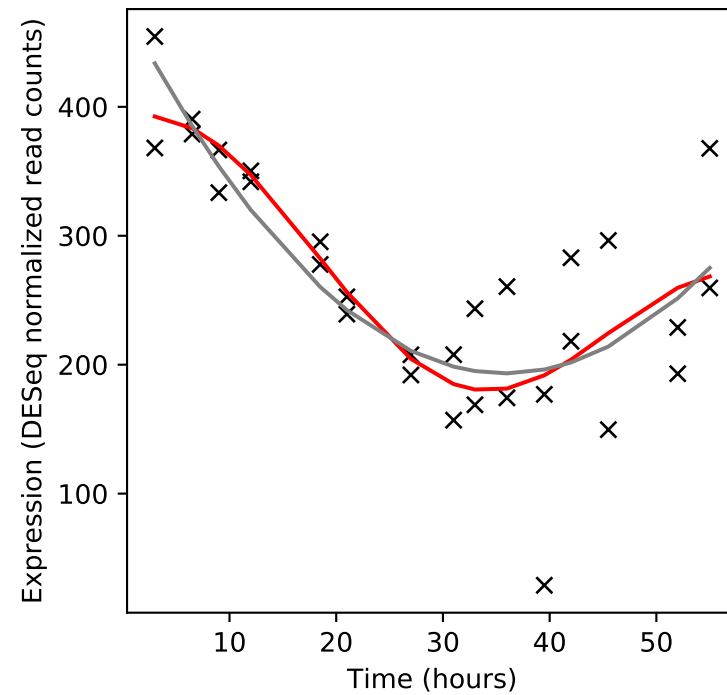

Rv3306c/amiB1

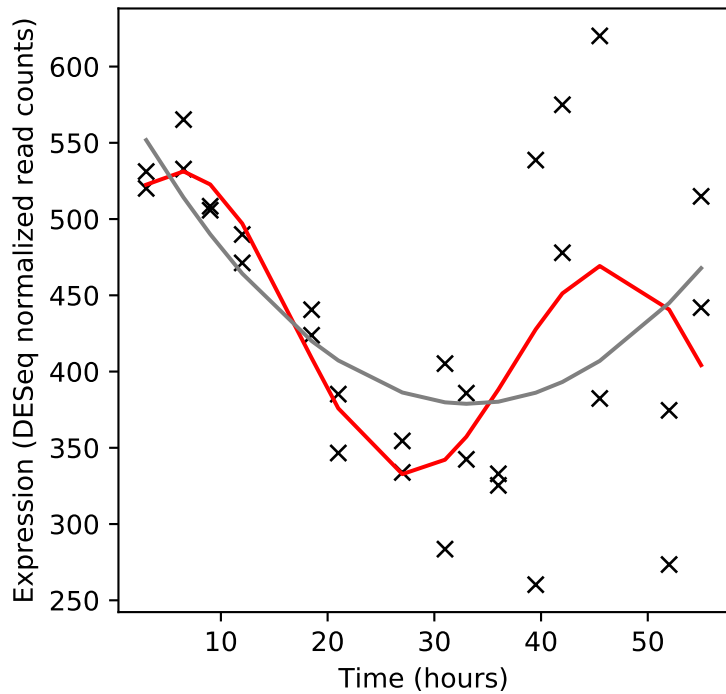

Rv3307c/deoD

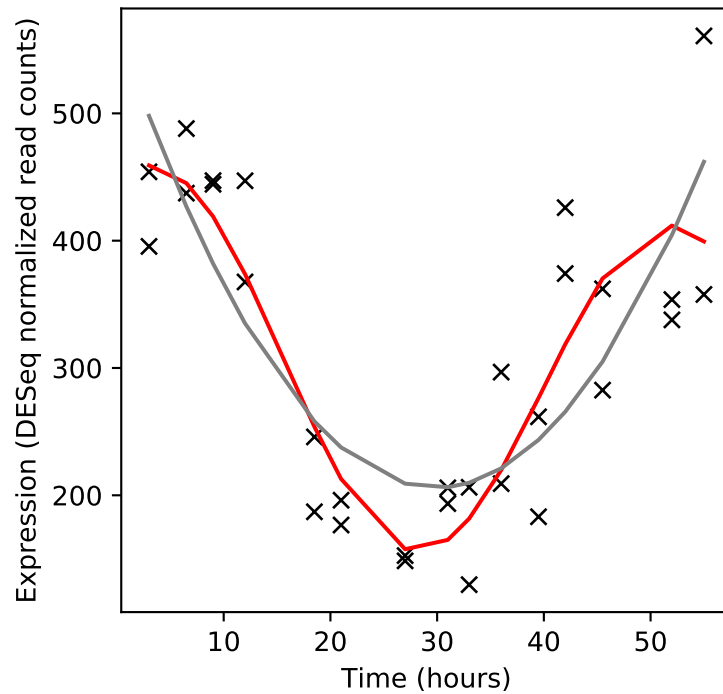

Rv3308c/pmmB

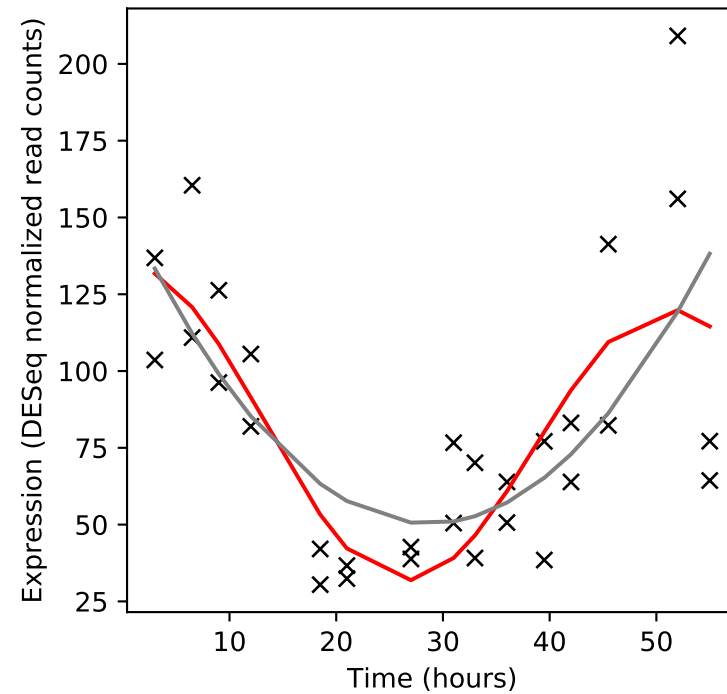

Rv3309c/upp

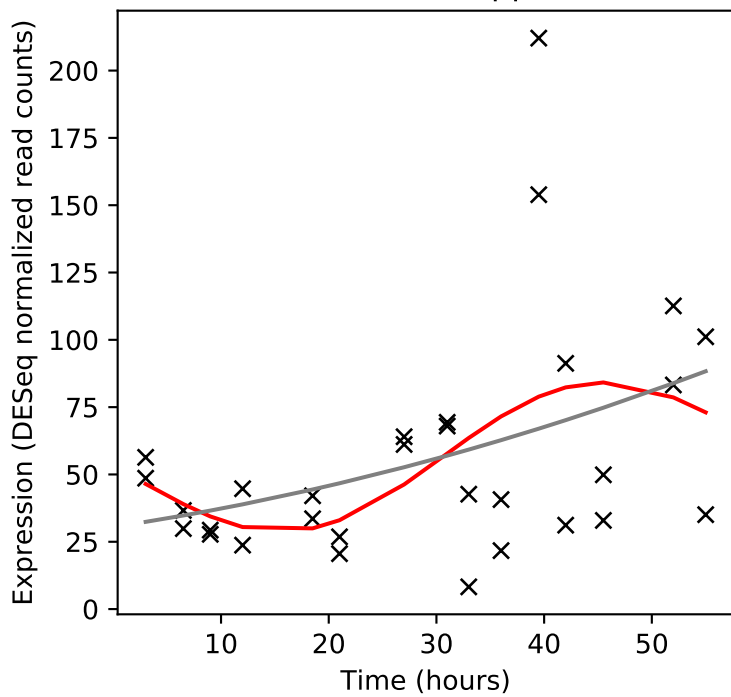

Rv3310/sapM

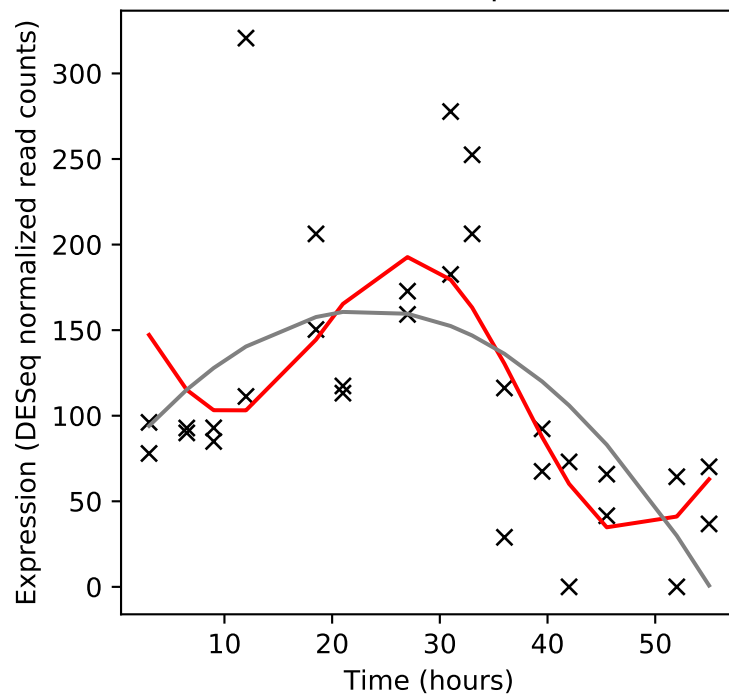

Rv3311/-

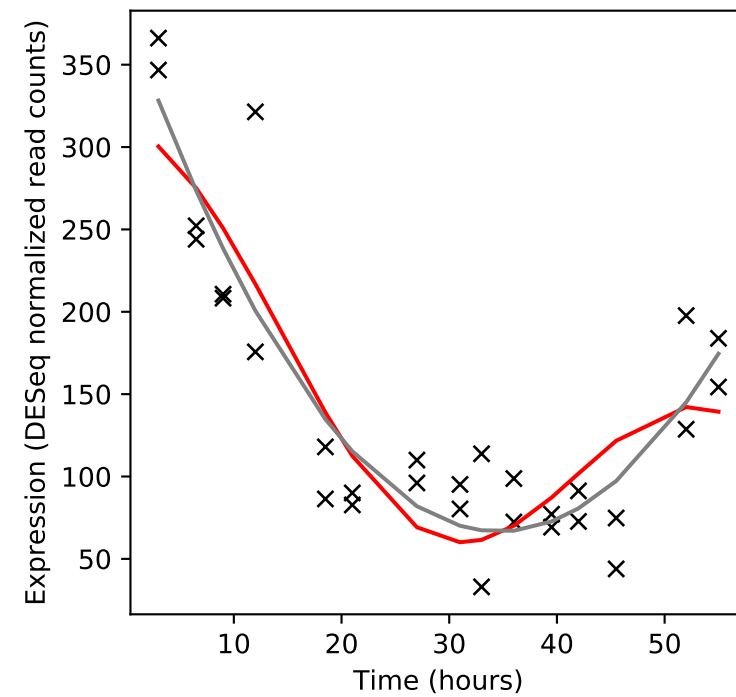

Rv3312c/-

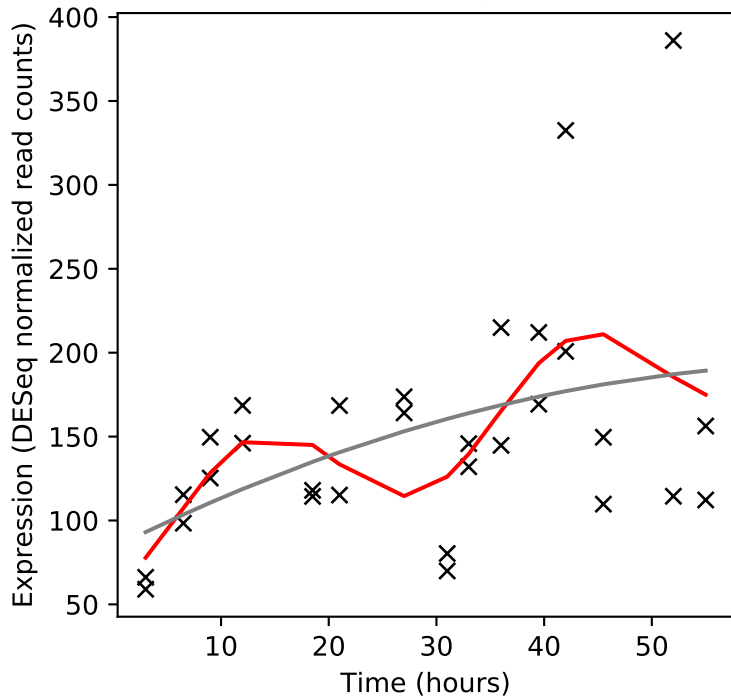

Rv3312A/-

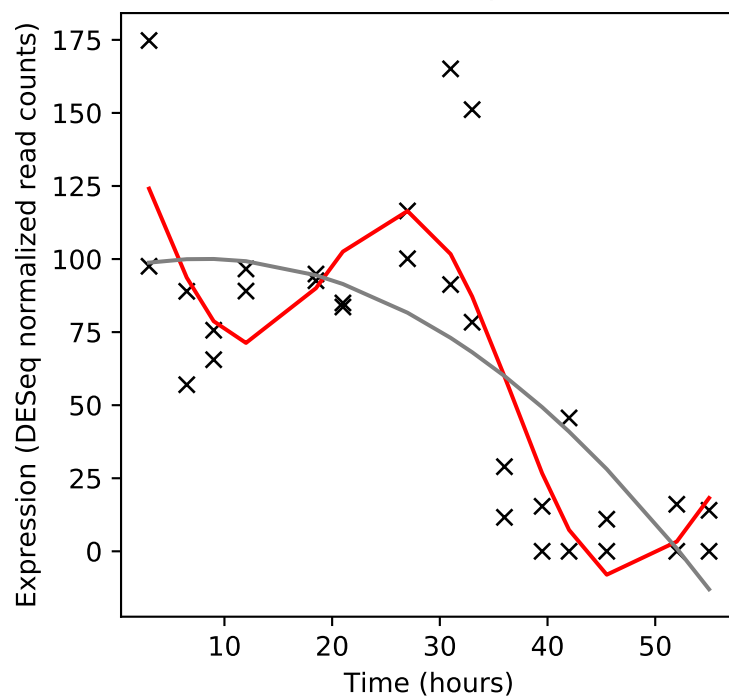

Rv3313c/add

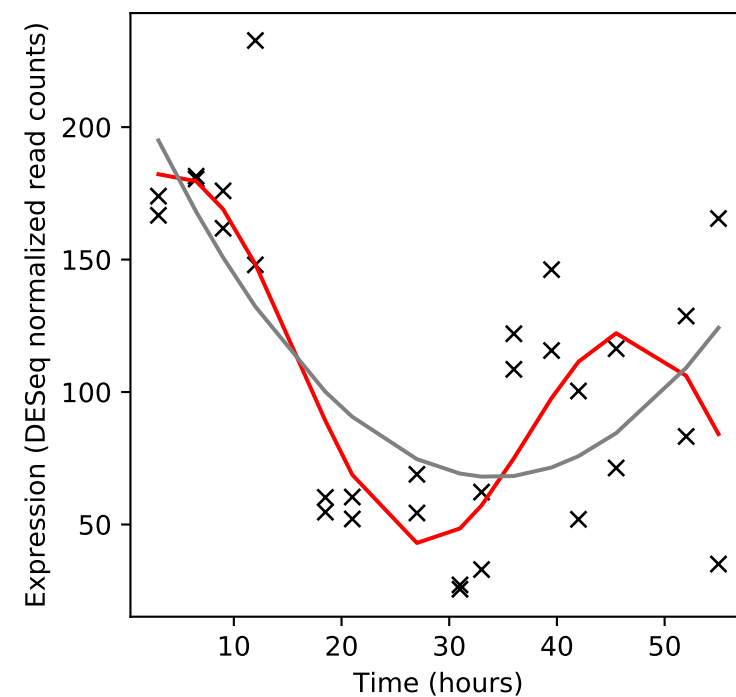

Rv3314c/deoA

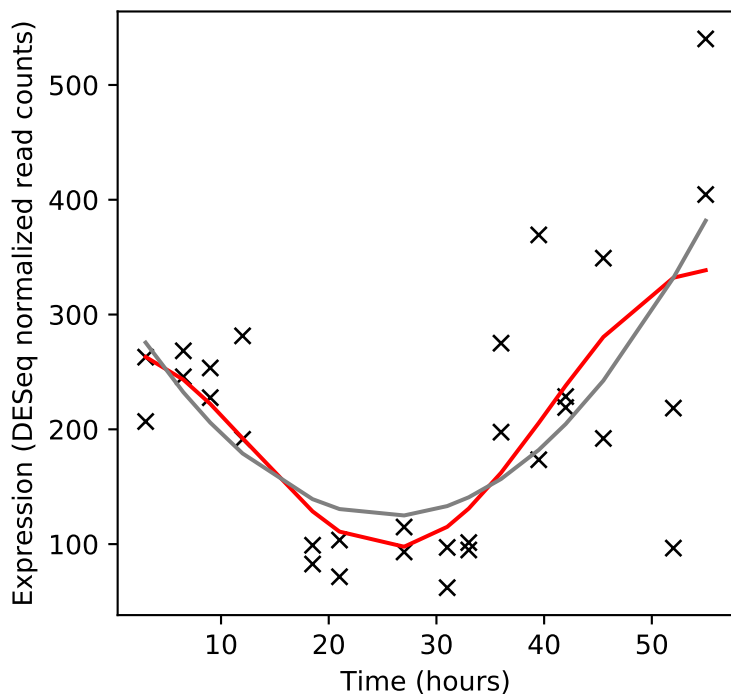

Rv3315c/cdd

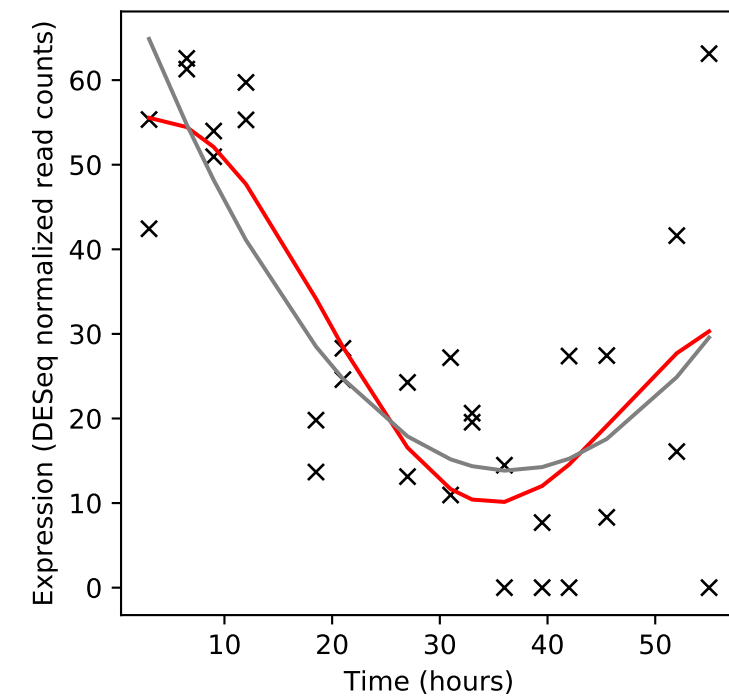

Rv3316/sdhC

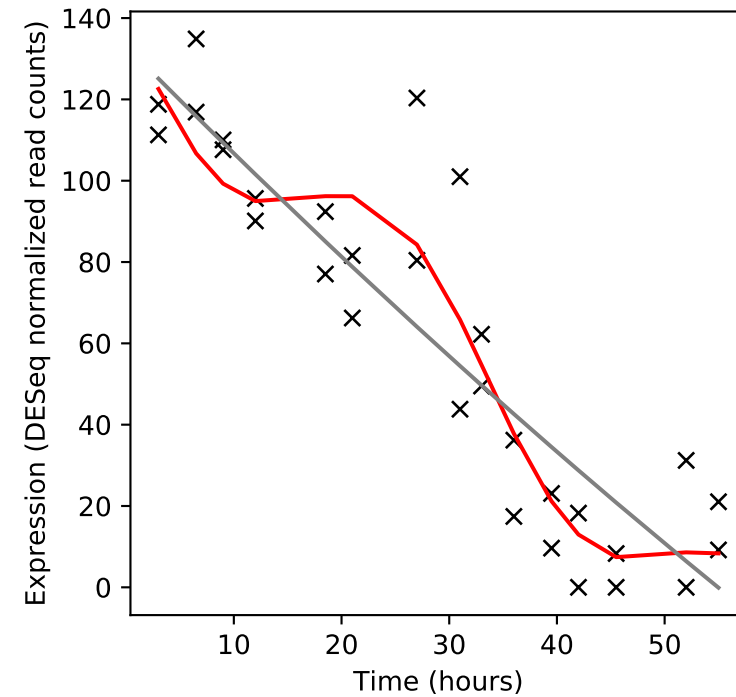

Rv3317/sdhD

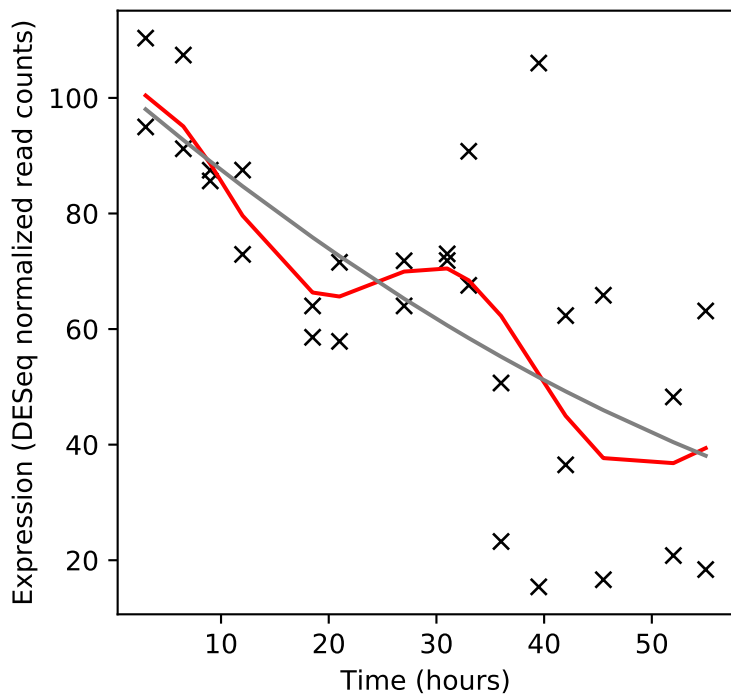

Rv3318/sdhA

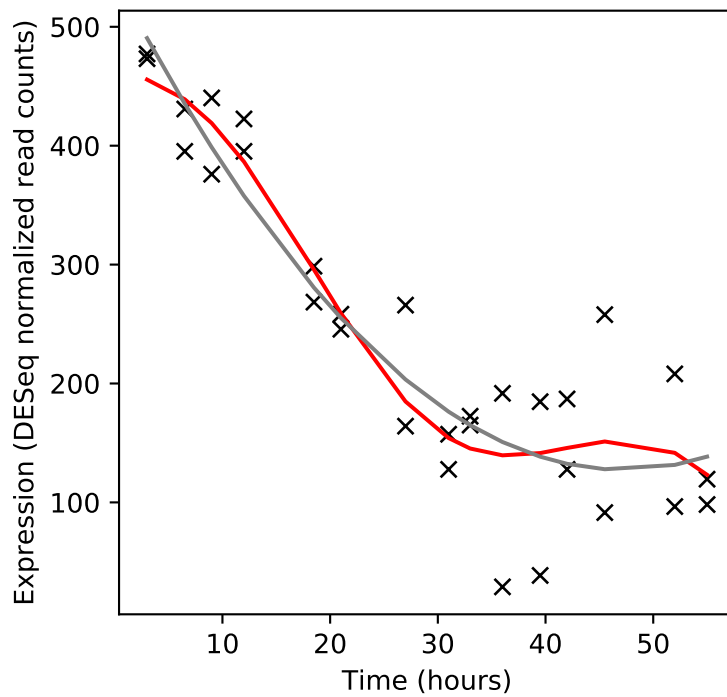

Rv3319/sdhB

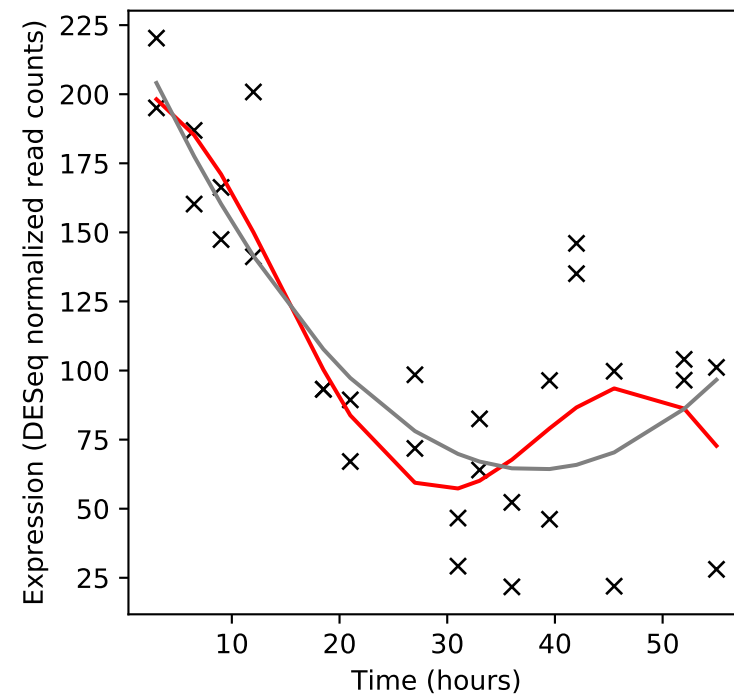

Rv3320c/vapC44

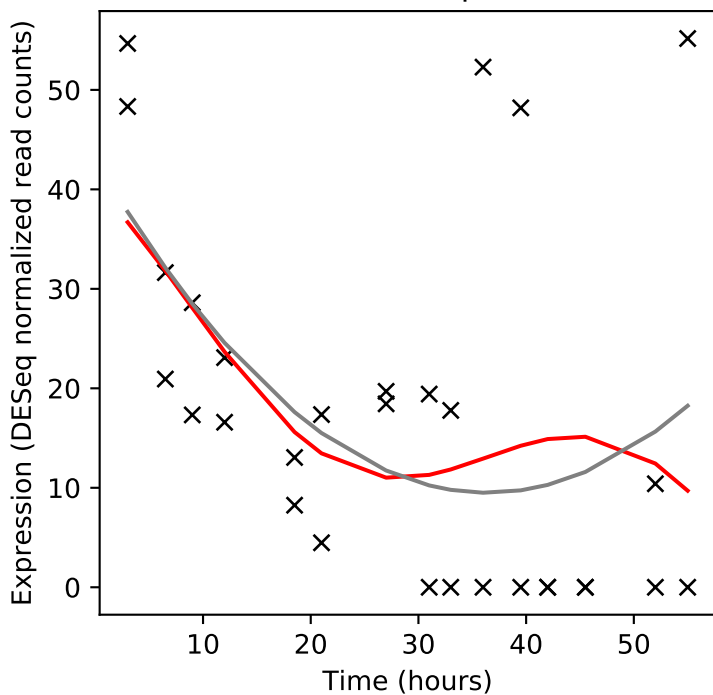

Rv3321c/vapB44

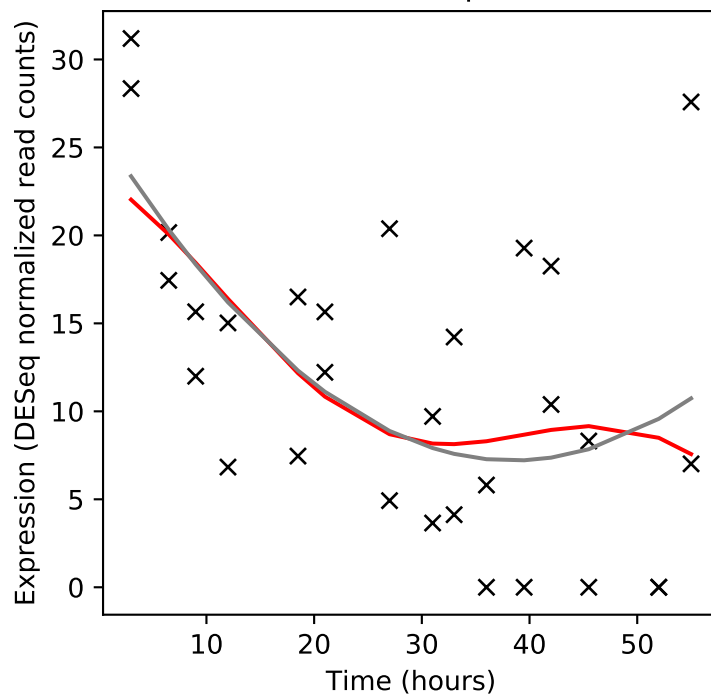

Rv3322c/-

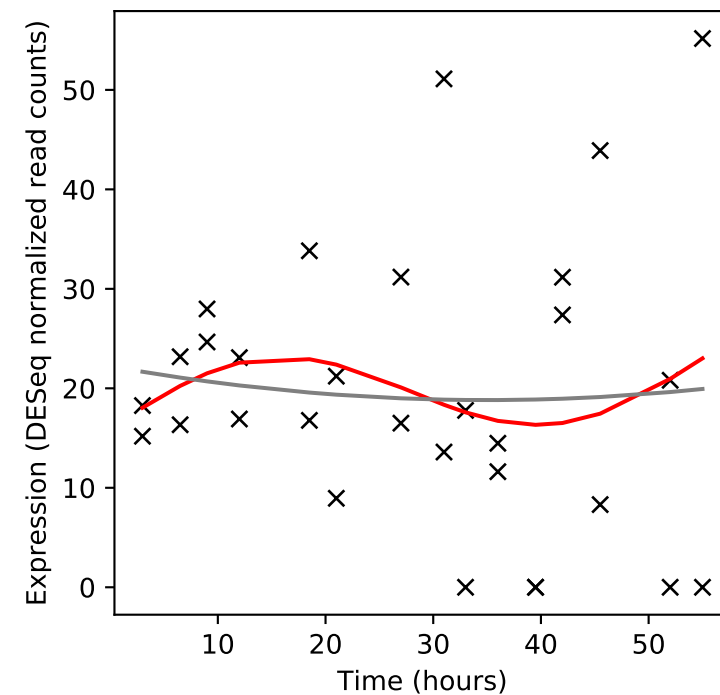

Rv3323c/moaX

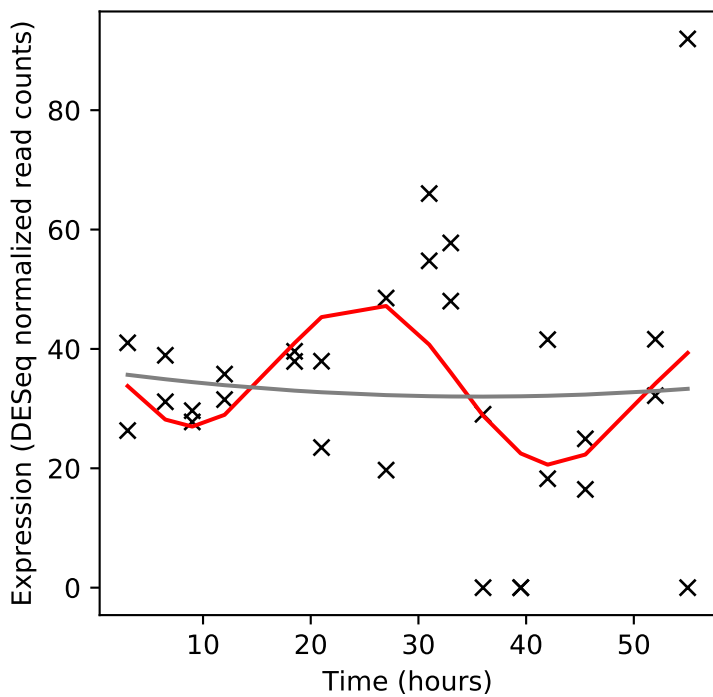

Rv3324c/moaC3

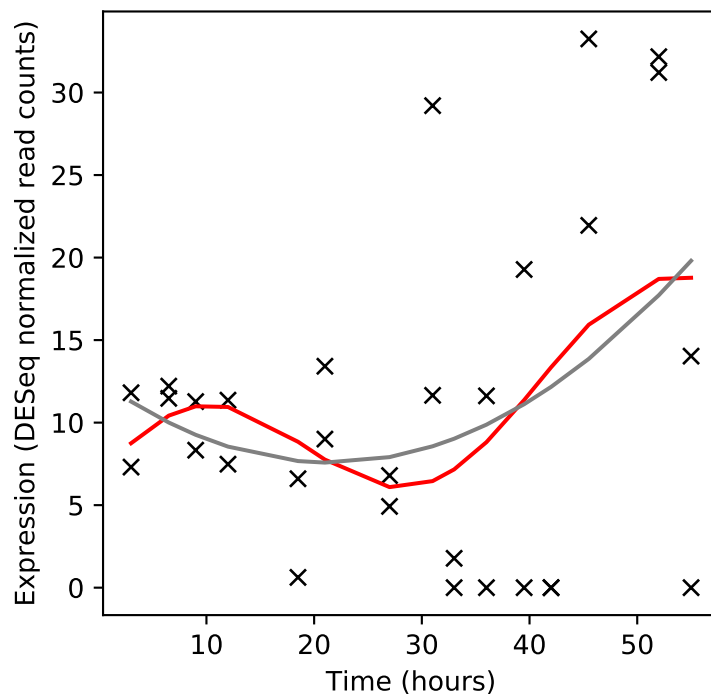

Rv3325/-

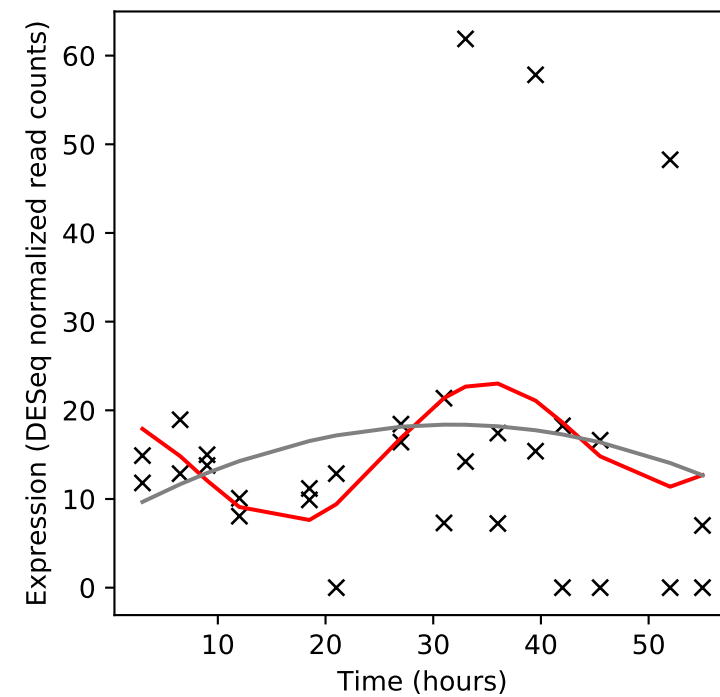



Rv3326/-

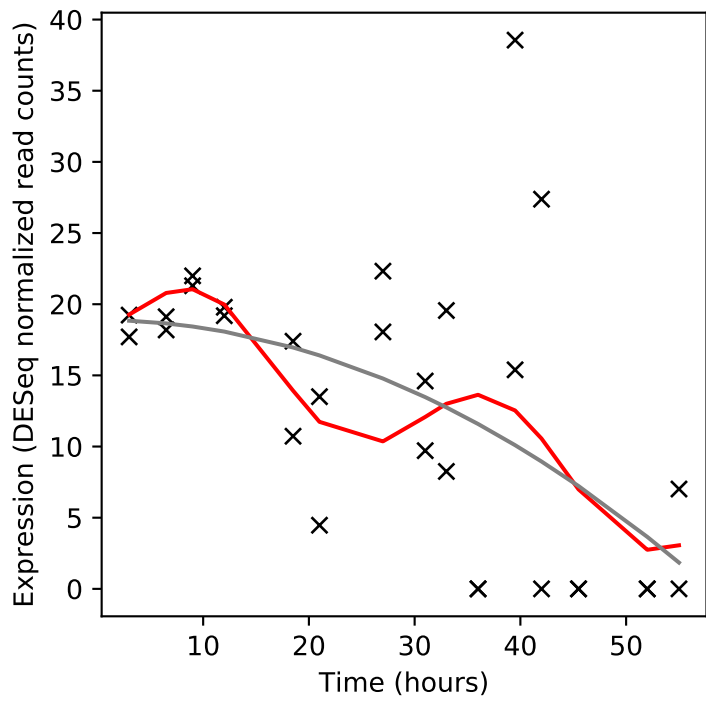

Rv3327/-

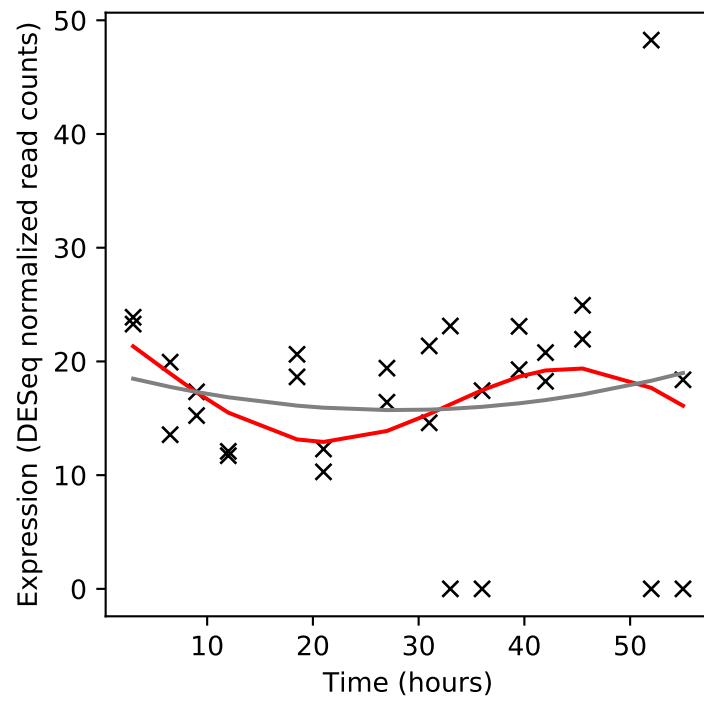

Rv3328c/sigJ

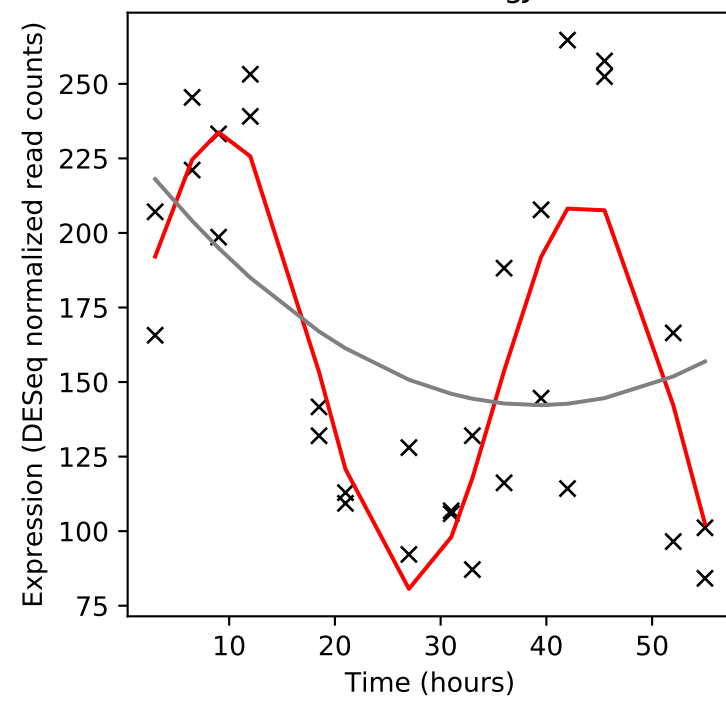

Rv3329/-

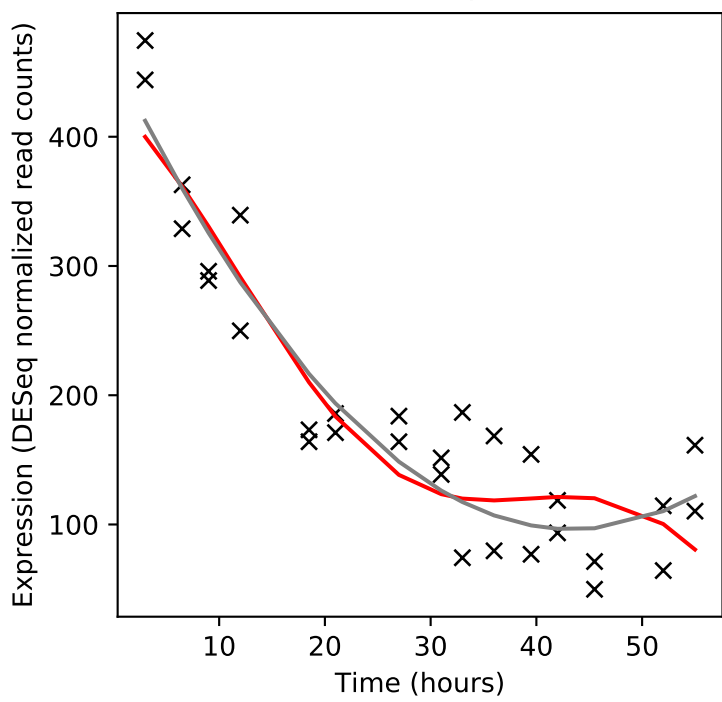

Rv3330/dacB1

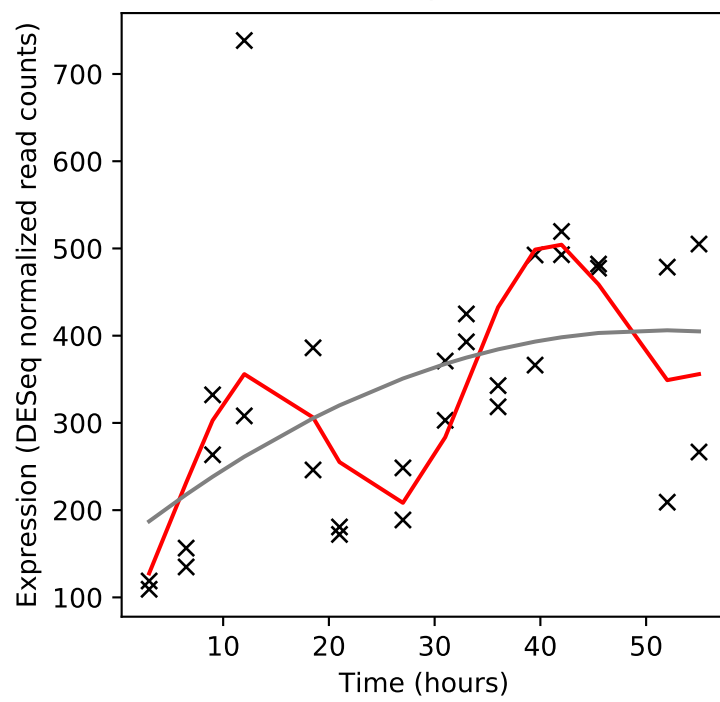

Rv3331/sugJ

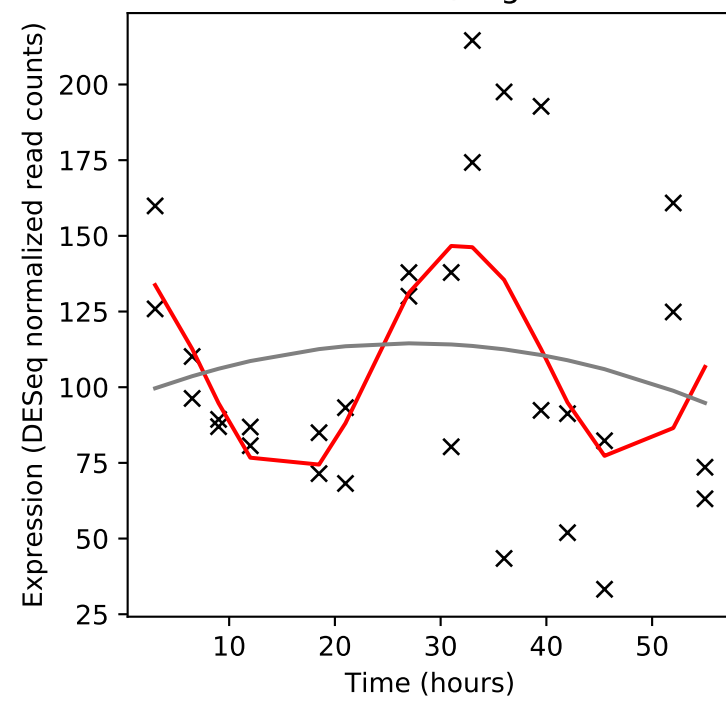

Rv3332/nagA

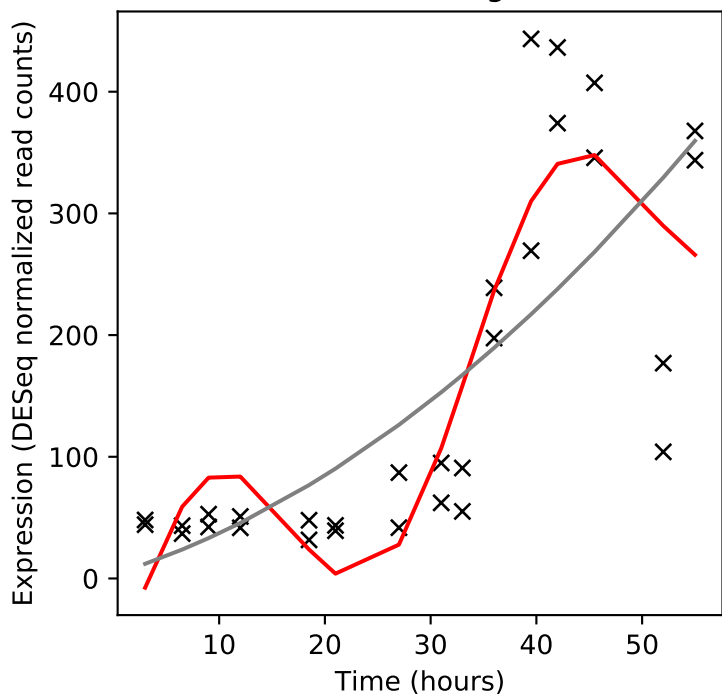

Rv3333c/-

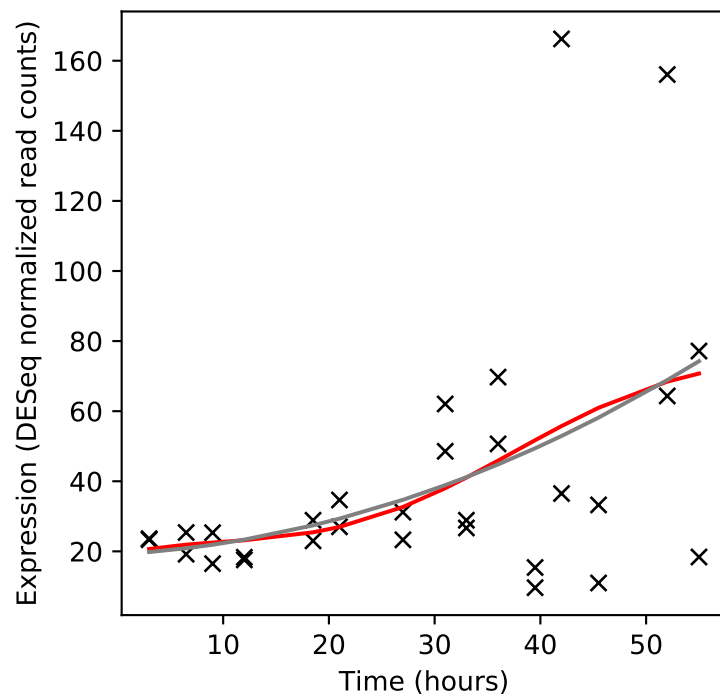

Rv3334/-

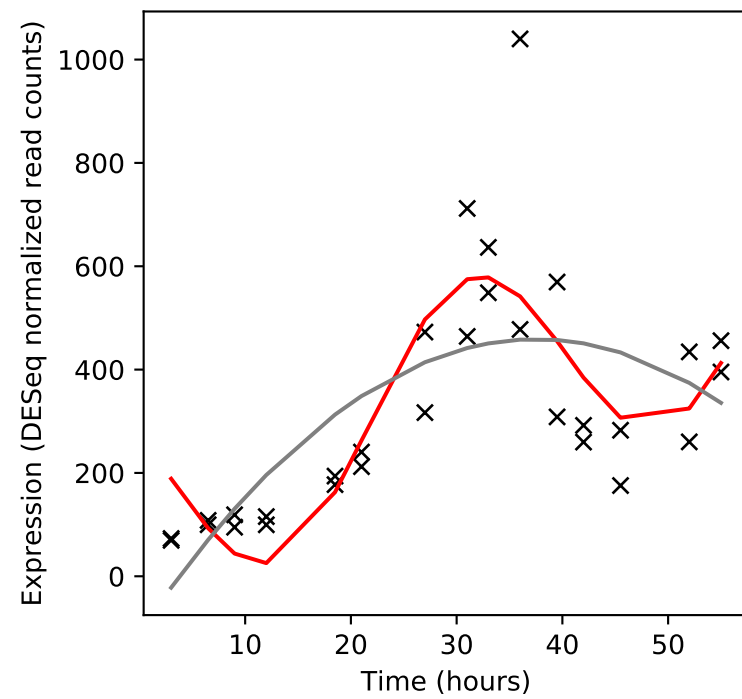

Rv3335c/-

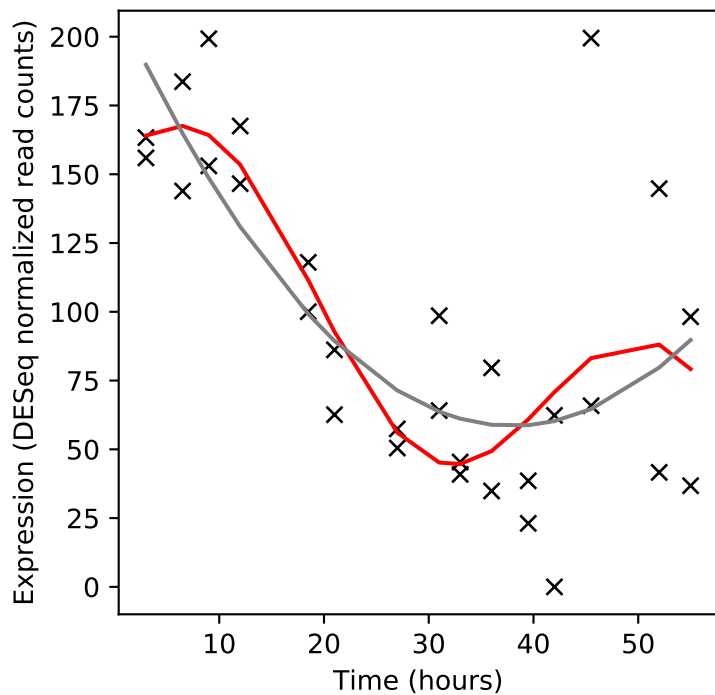

Rv3336c/trpS

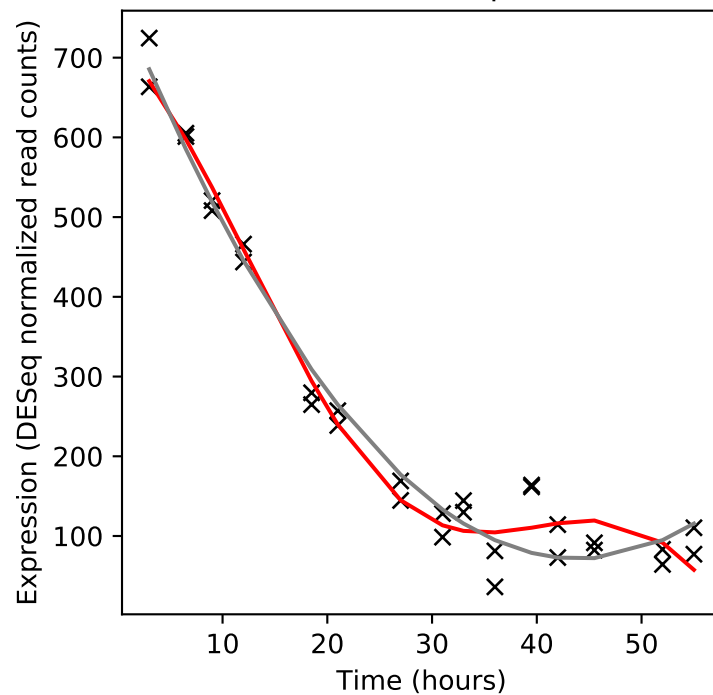

Rv3337/-

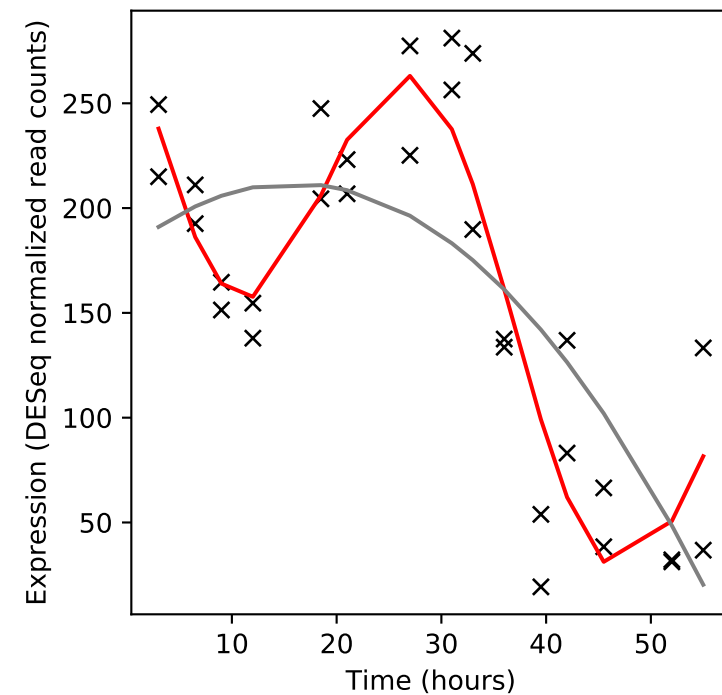

Rv3338/-

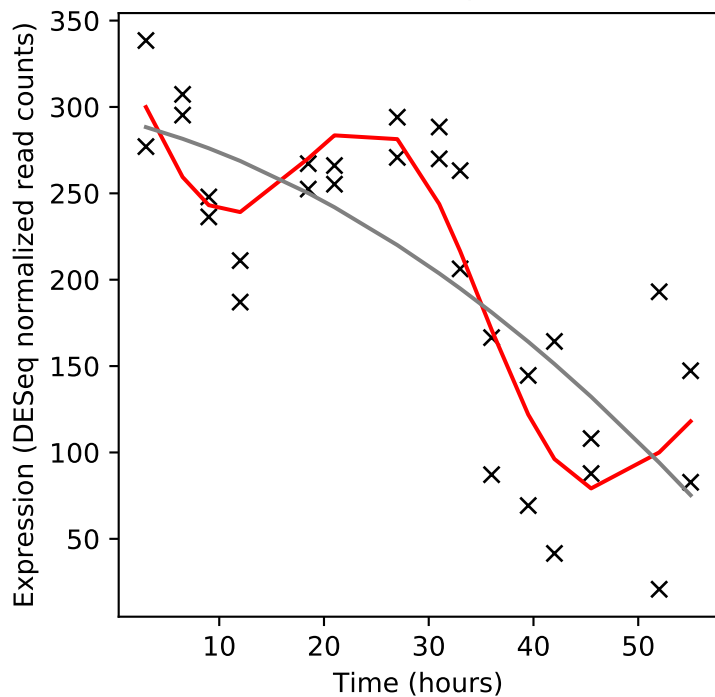

Rv3339c/icd1

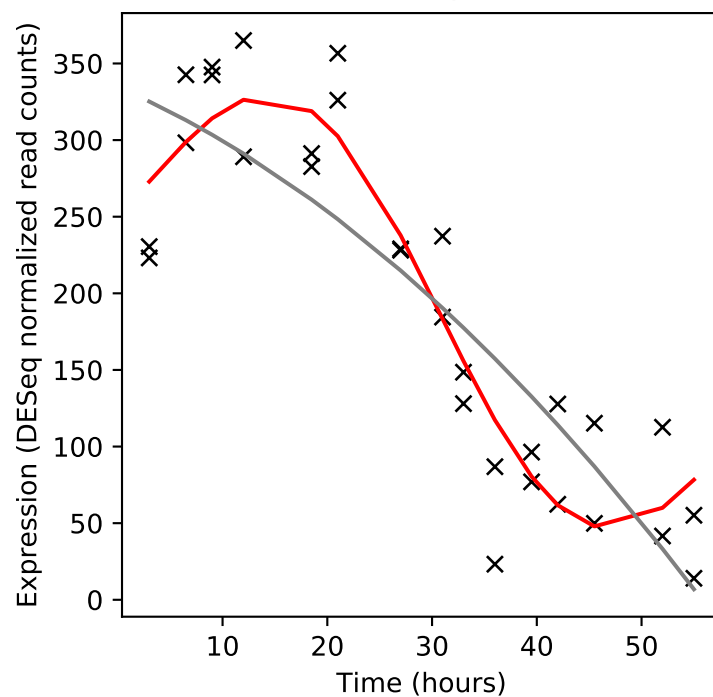

Rv3340/metC

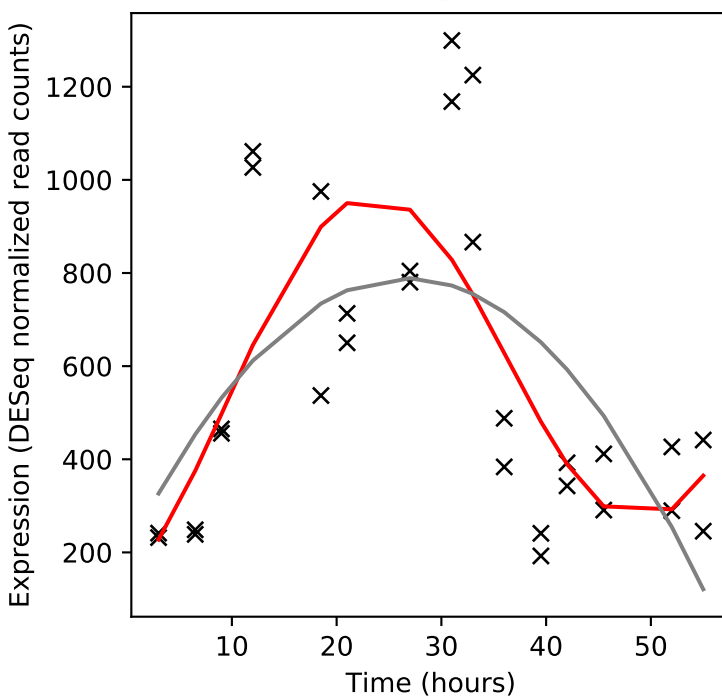

Rv3341/metA

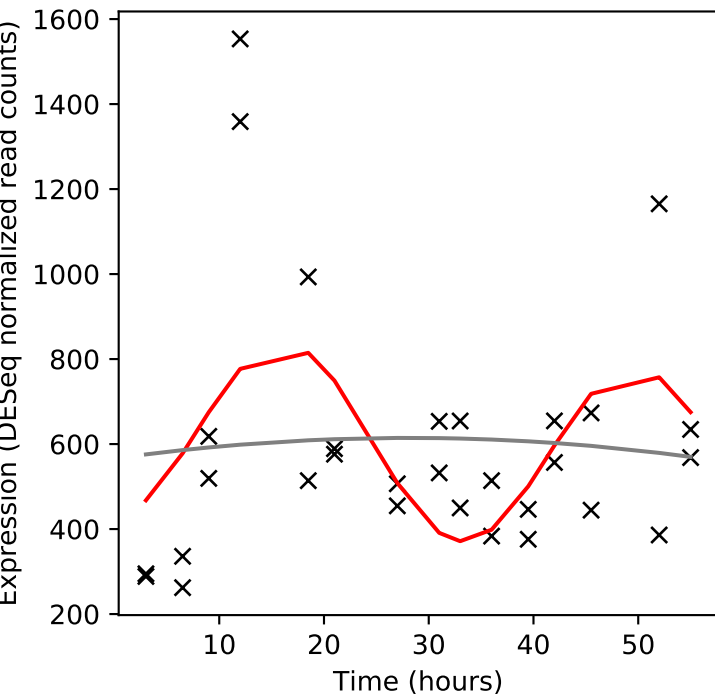

Rv3342/-

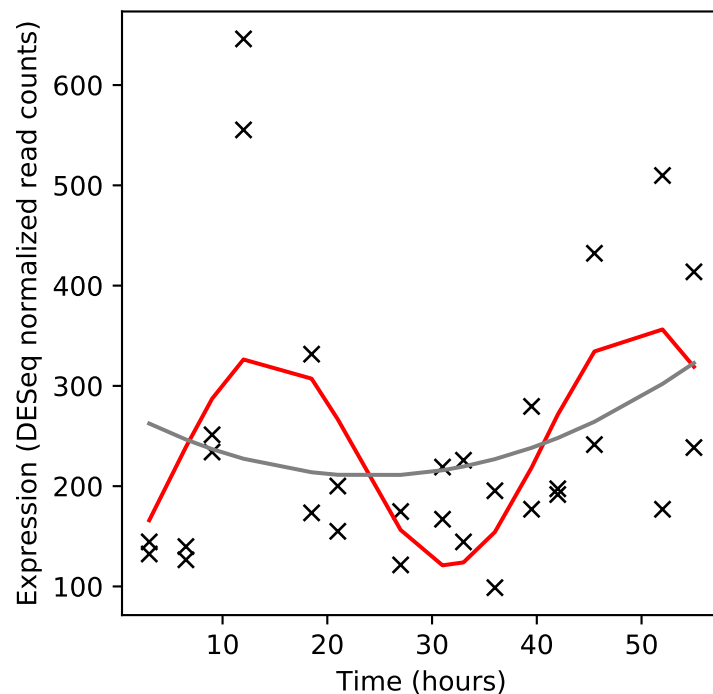

Rv3343c/PPE54

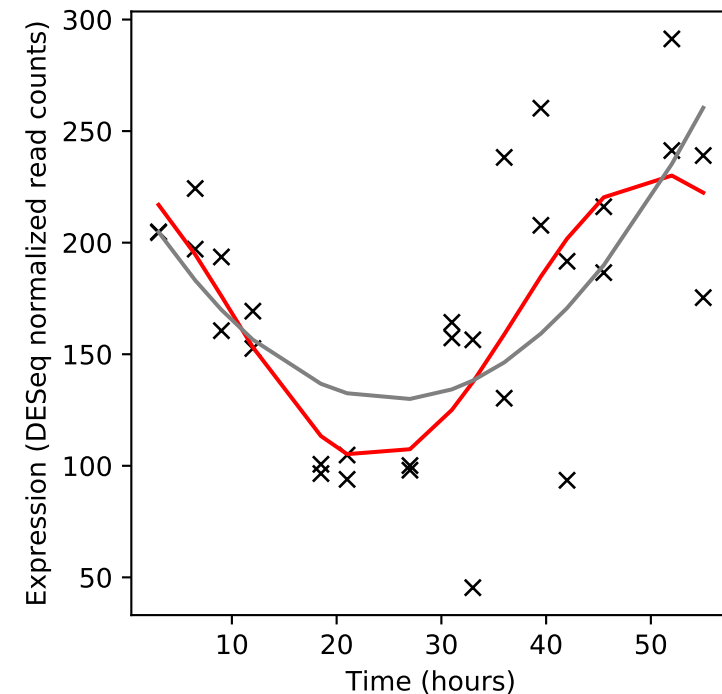

Rv3344c/PE\_PGRS49

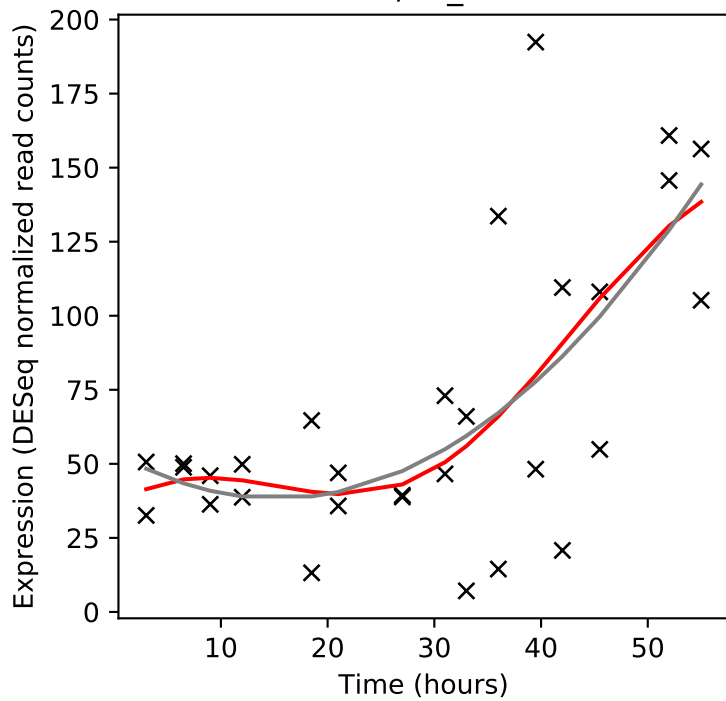

Rv3345c/PE\_PGRS50

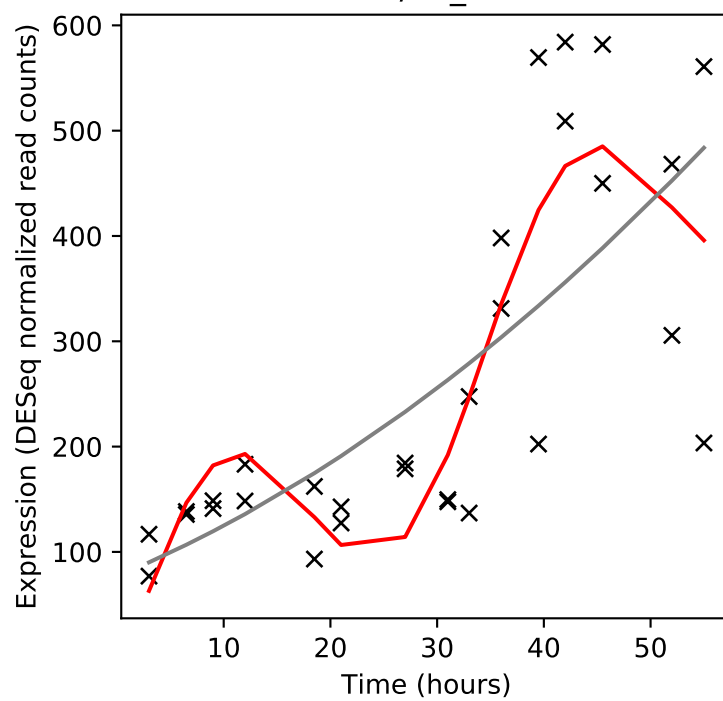

Rv3346c/-

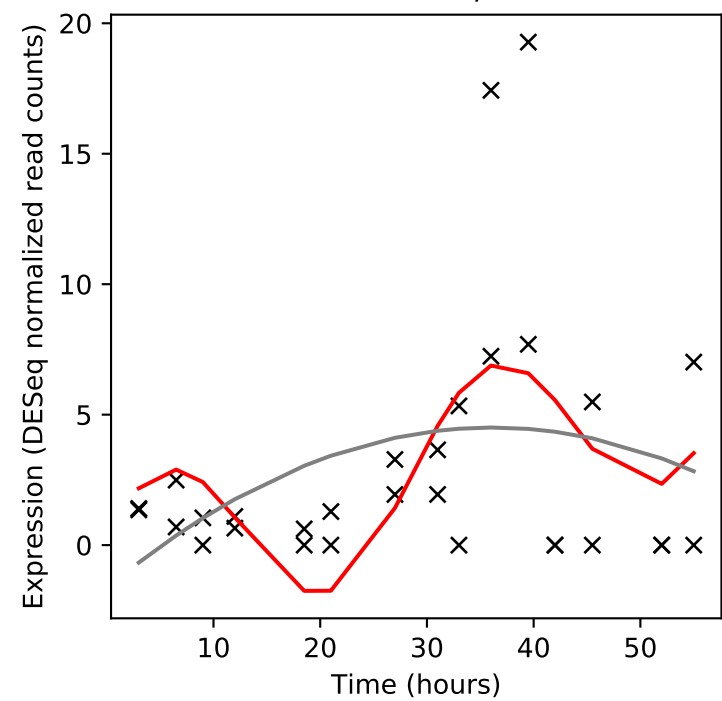

Rv3347c/PPE55

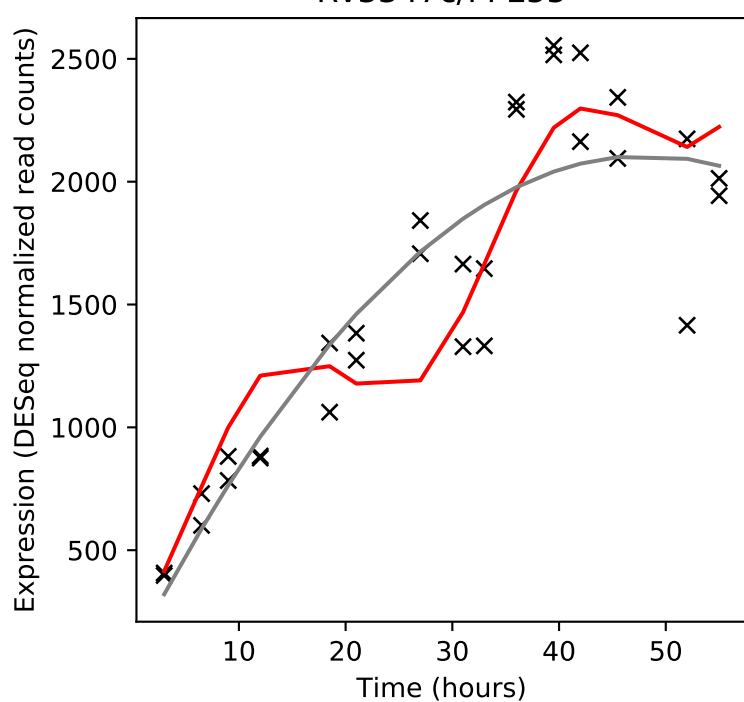

Rv3348/-

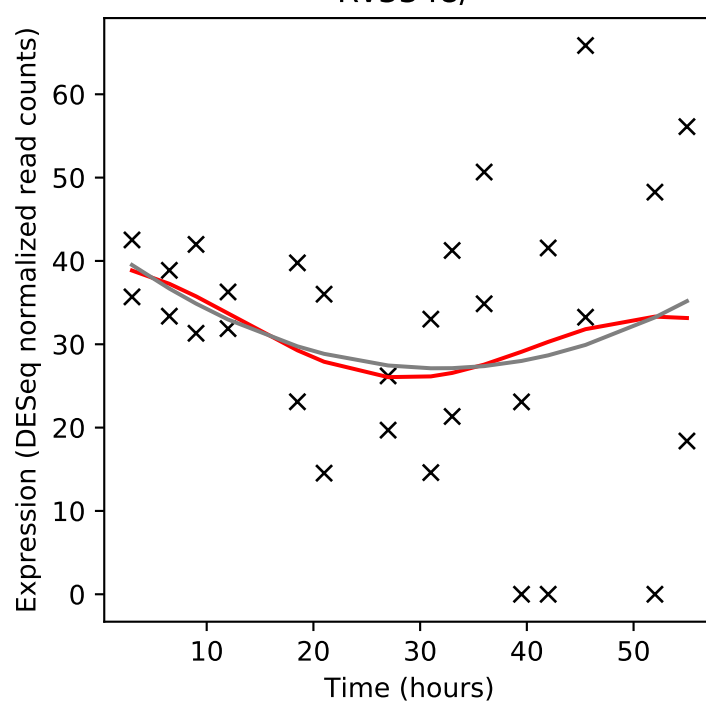

Rv3349c/-

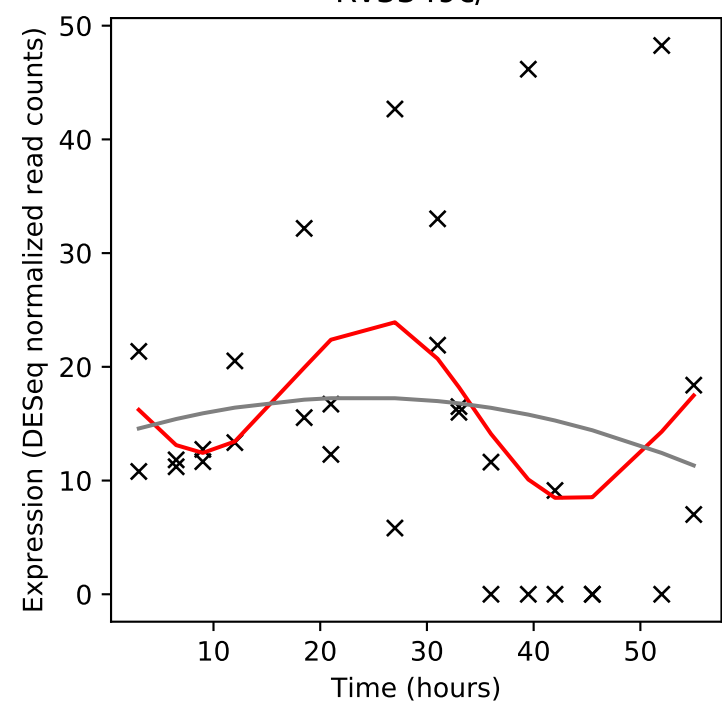

Rv3350c/PPE56

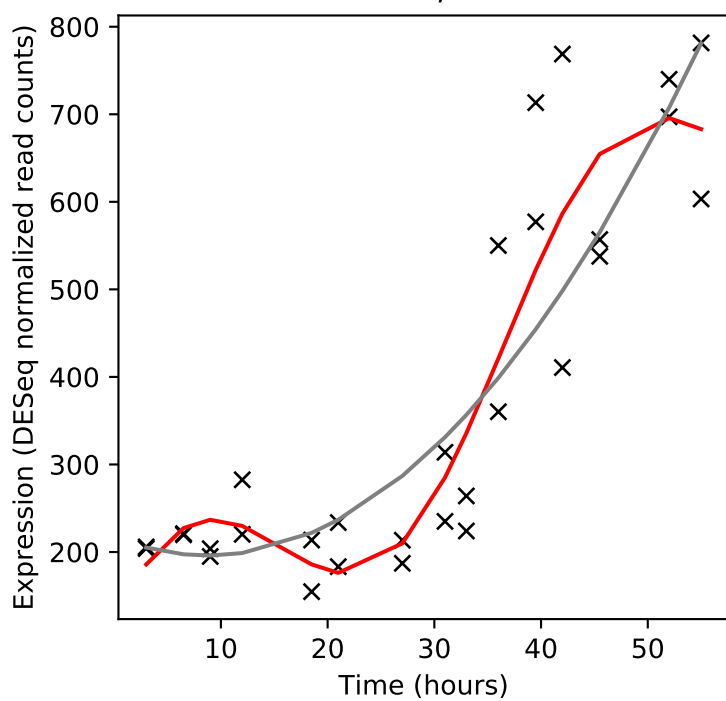

Rv3351c/-

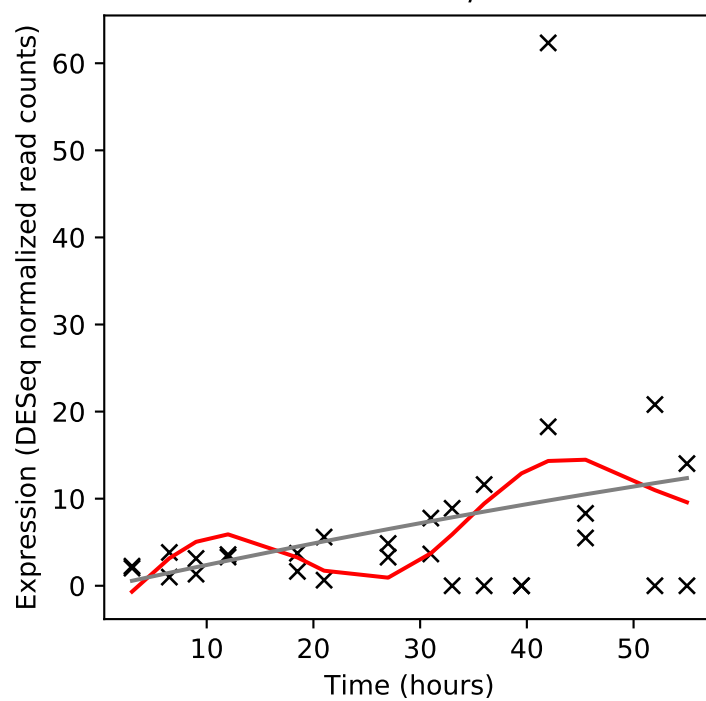

Rv3352c/-

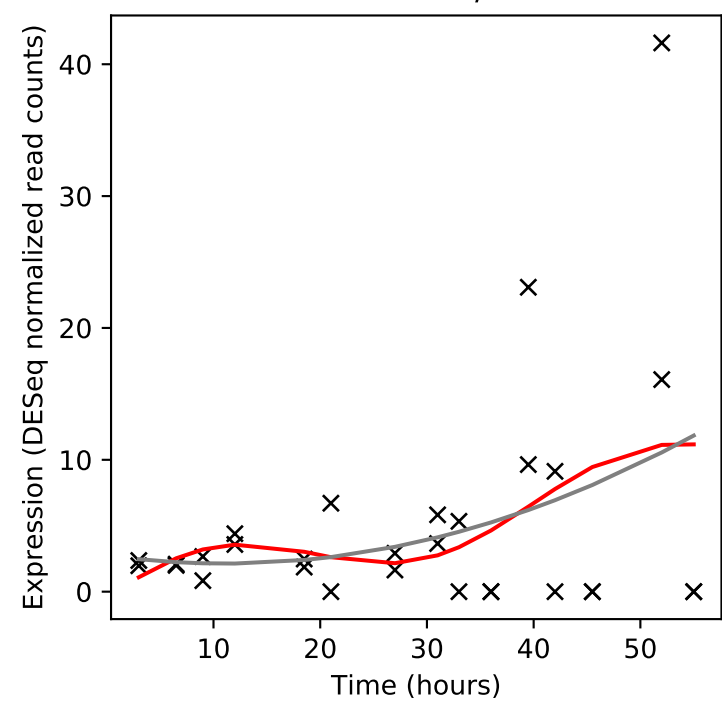

Rv3353c/-

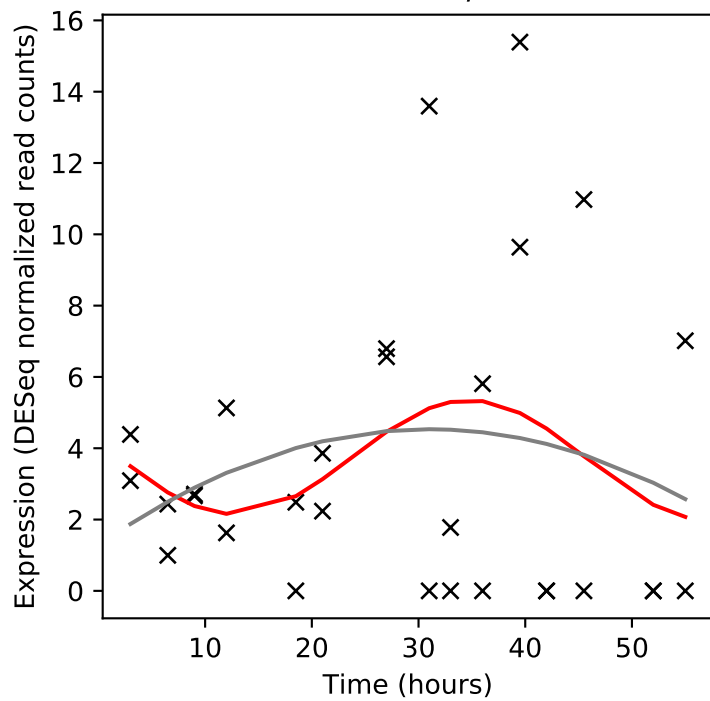

Rv3354/-

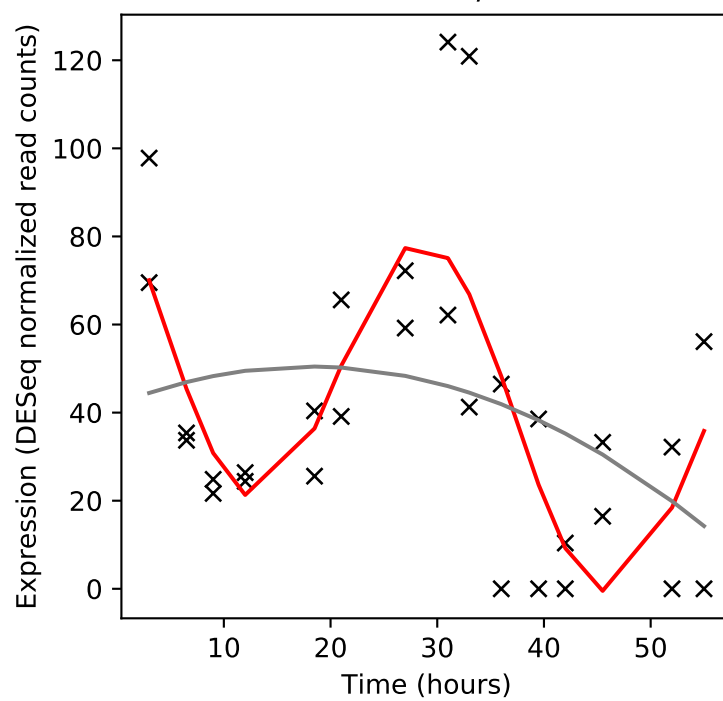

Rv3355c/-

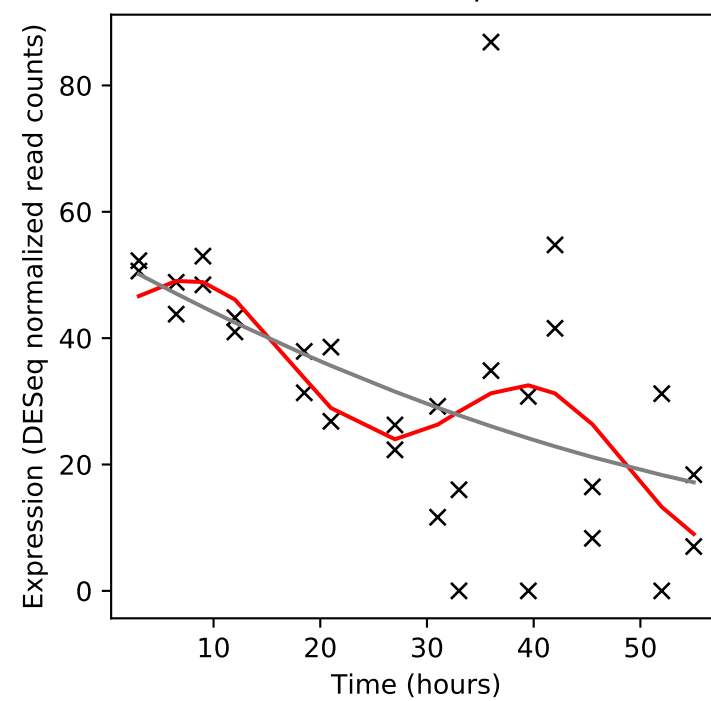

Rv3356c/fold

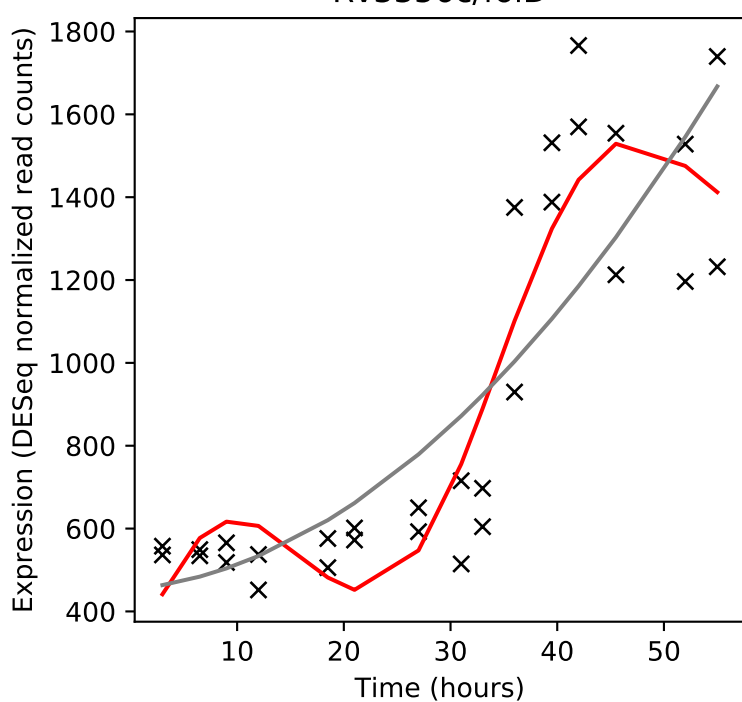

Rv3357/relJ

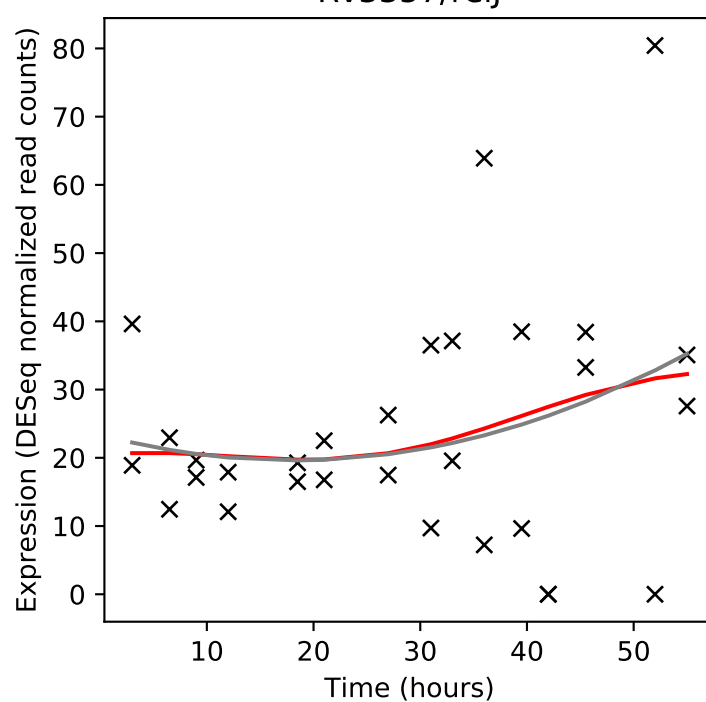

Rv3358/relK

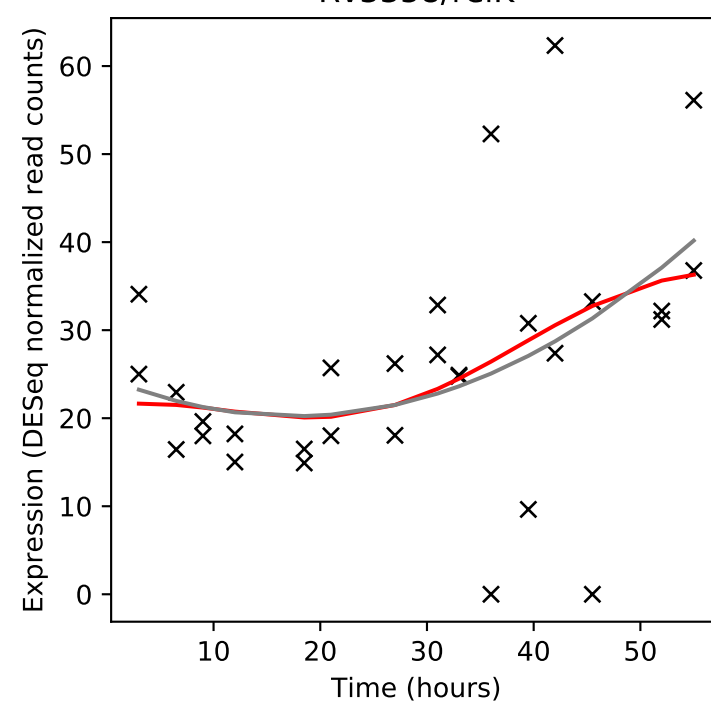

Rv3359/-

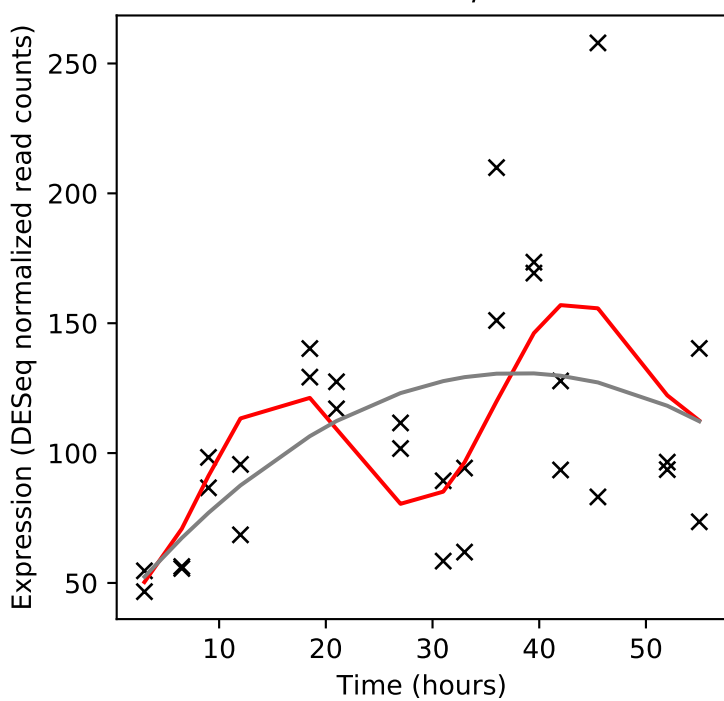

Rv3360/-

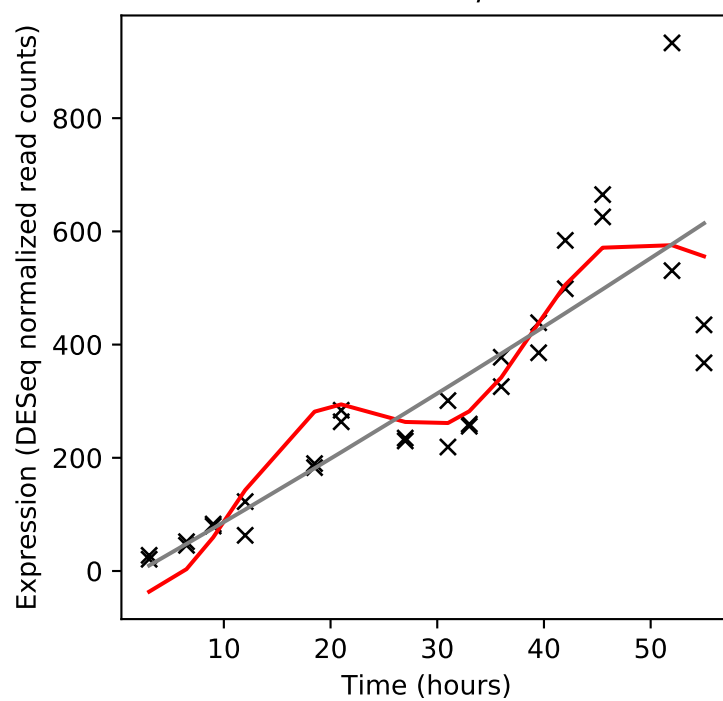

Rv3361c/-

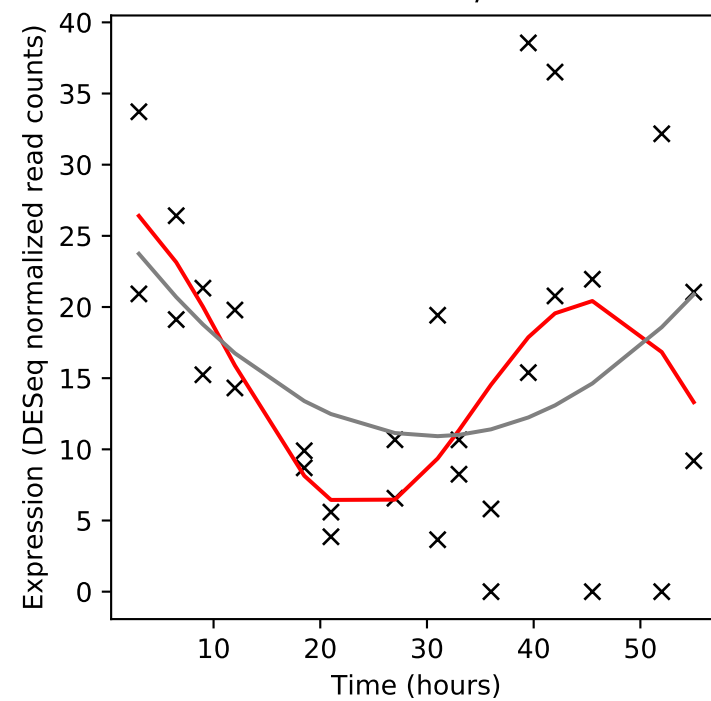

Rv3362c/-

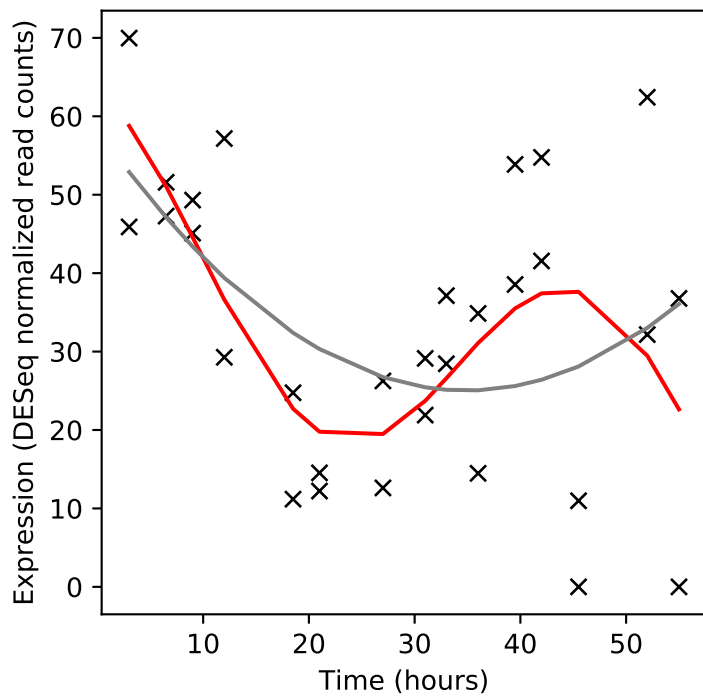

Rv3363c/-

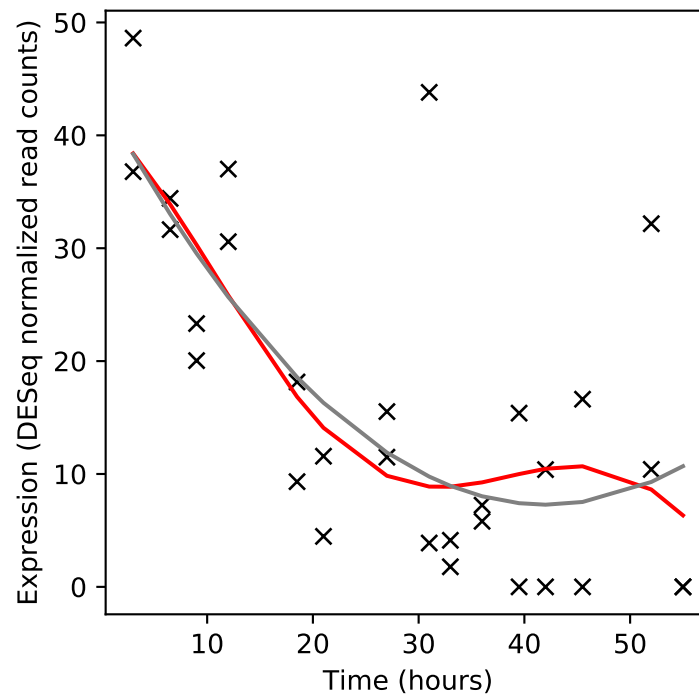

Rv3364c/-

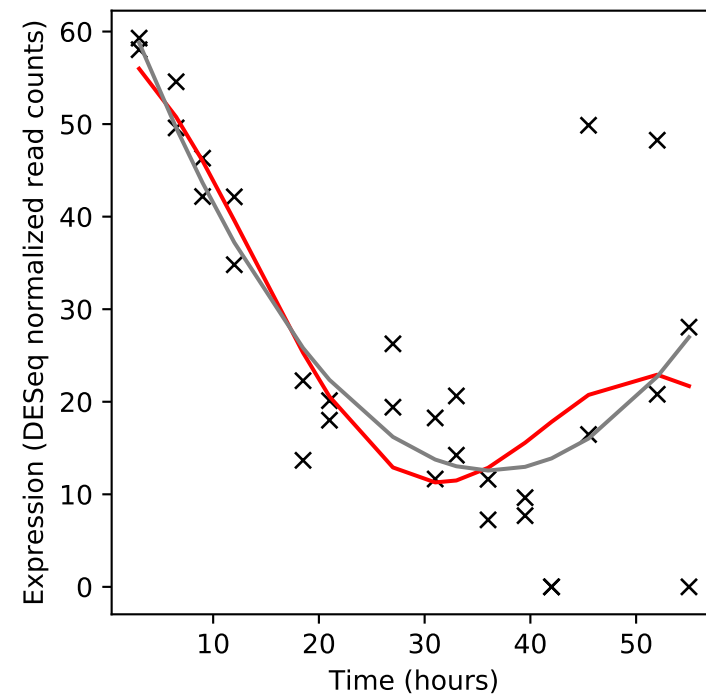

Rv3365c/-

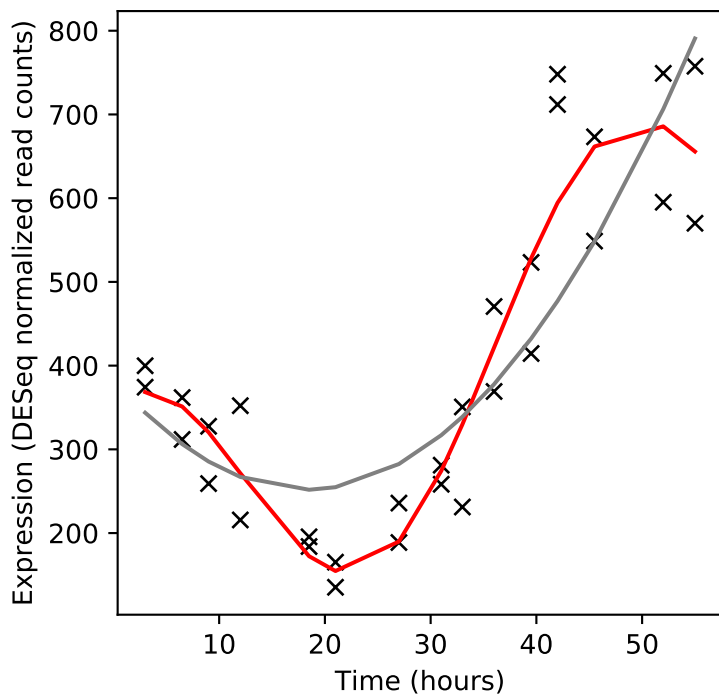

Rv3366/spoU

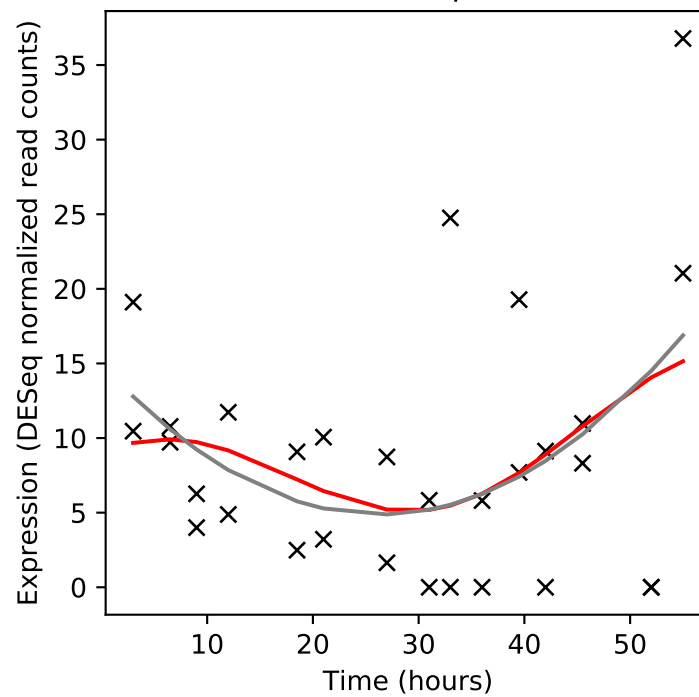

Rv3367/PE\_PGRS51

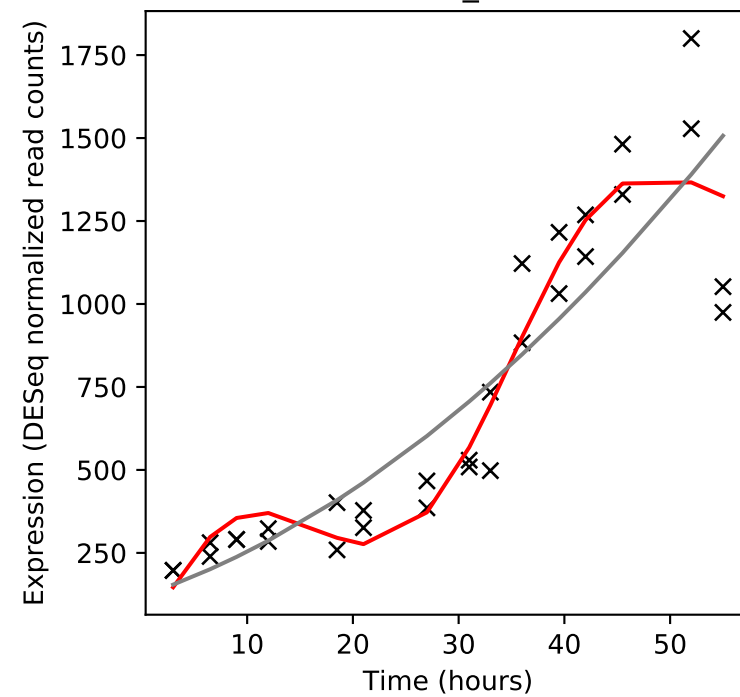

Rv3368c/-

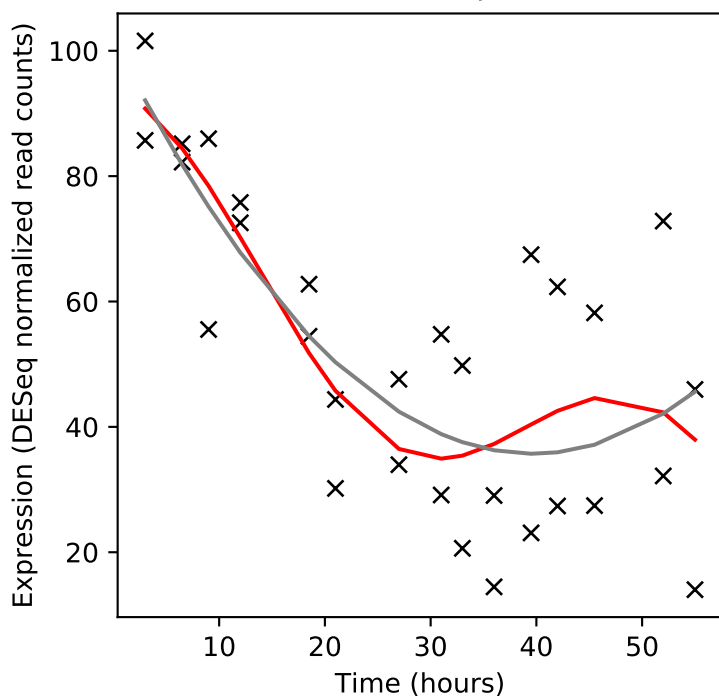

Rv3369/-

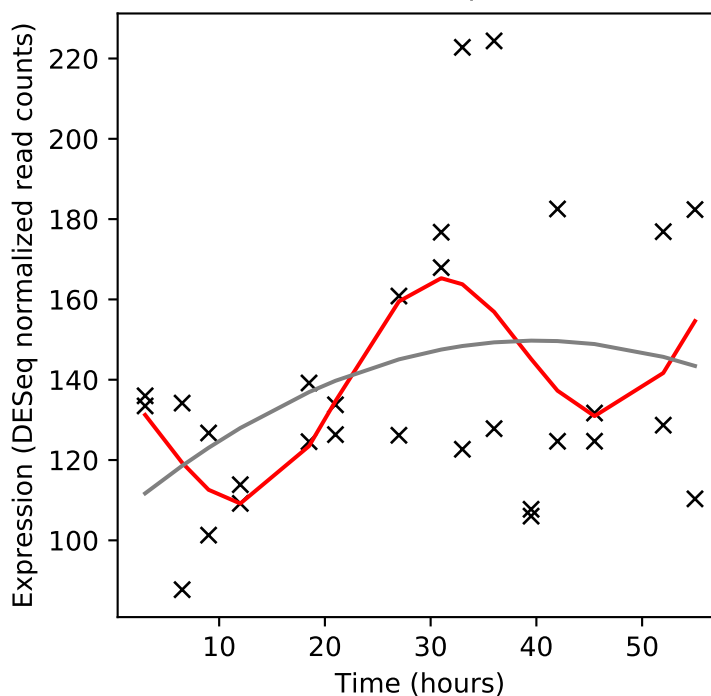

Rv3370c/dnaE2

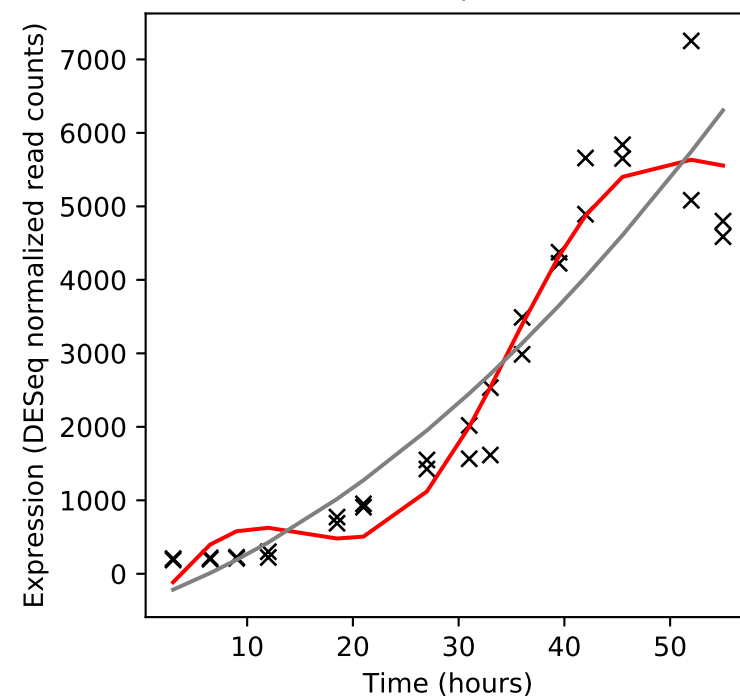

Rv3371/-

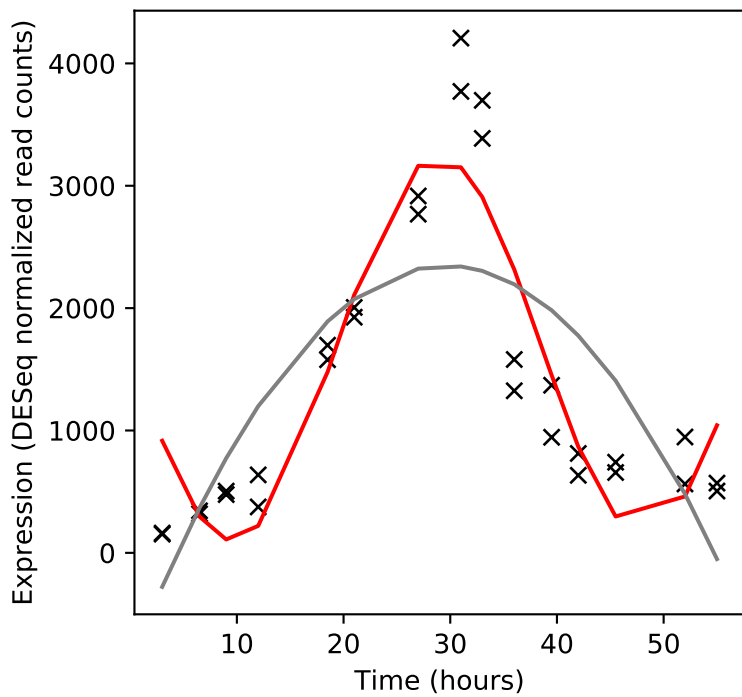

Rv3372/otsB2

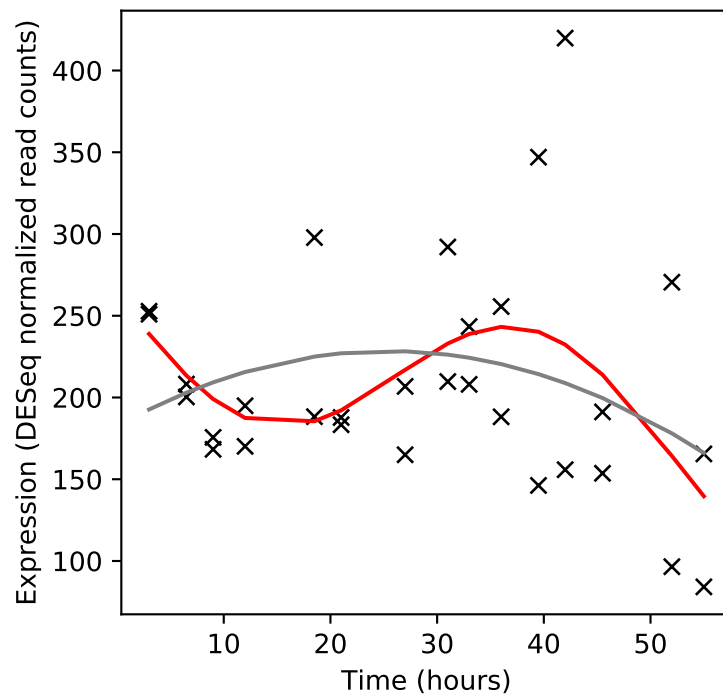

Rv3373/echA18

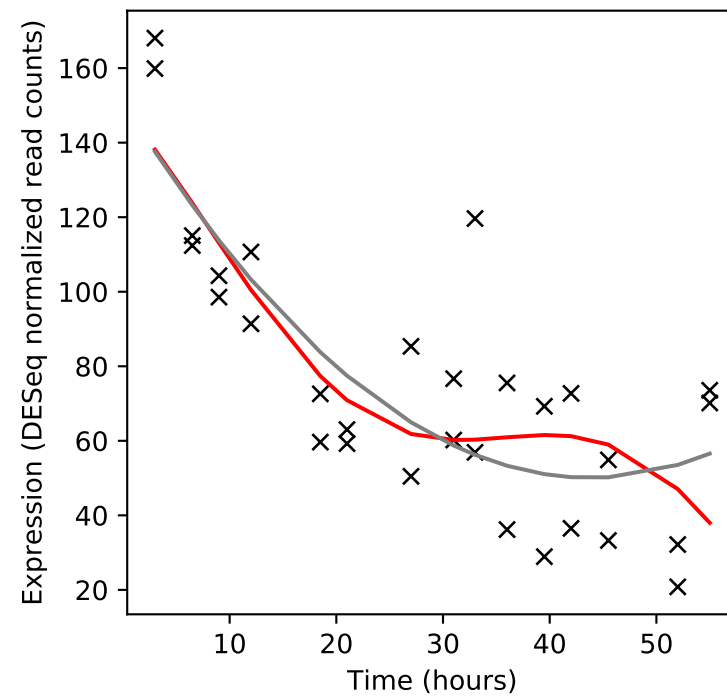

Rv3374/echA18.1

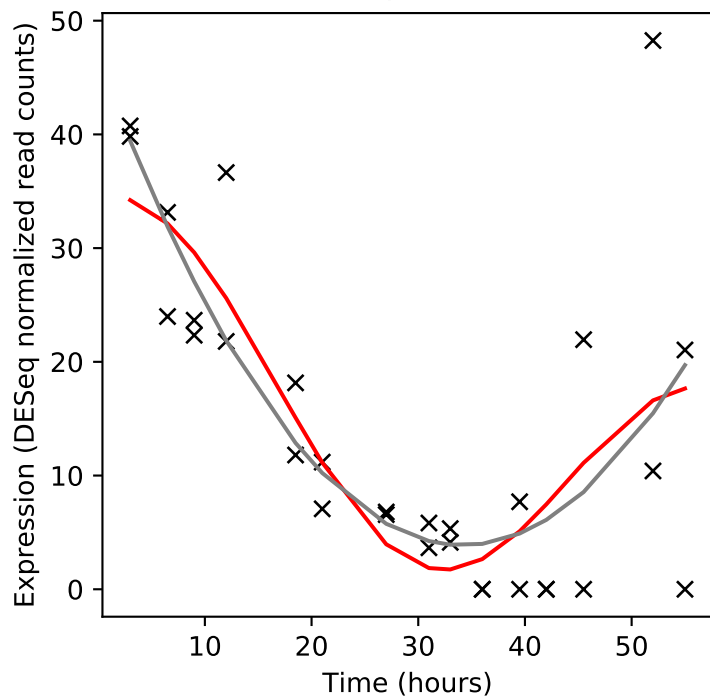

Rv3375/amiD

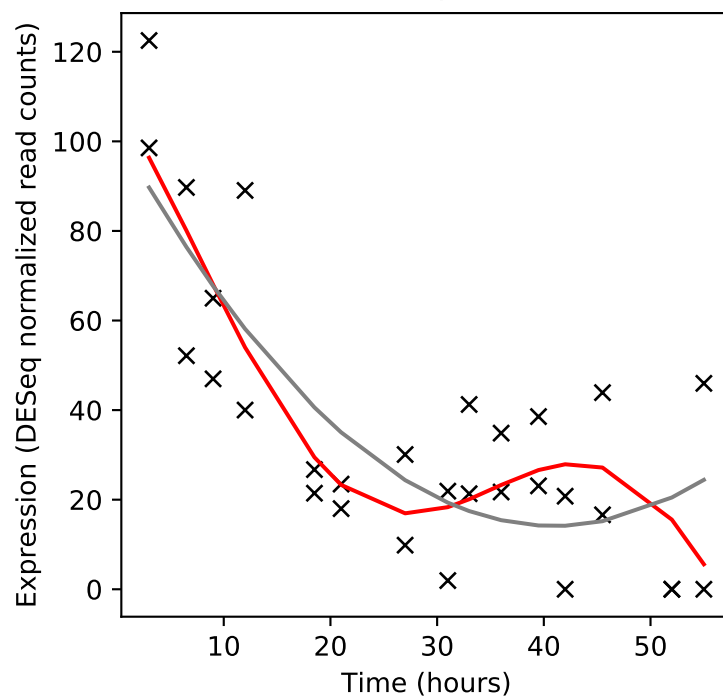

Rv3376/-

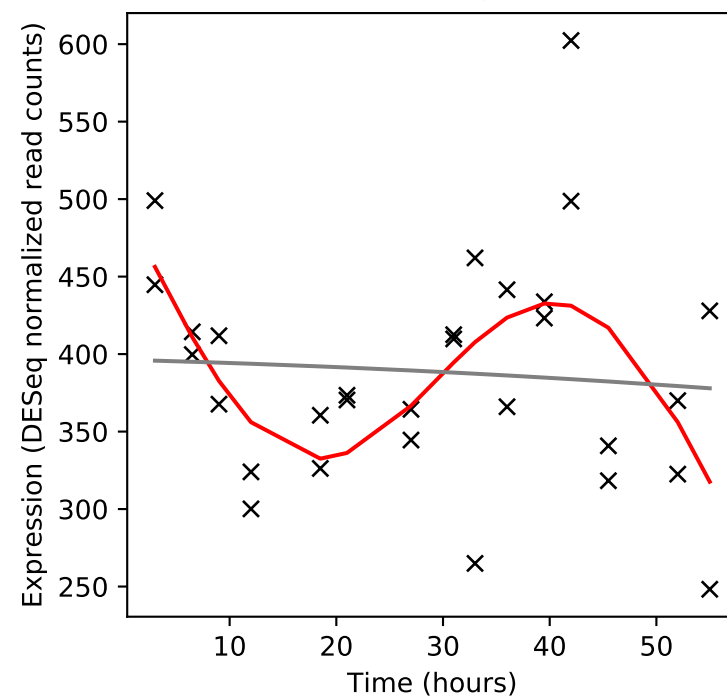

Rv3377c/-

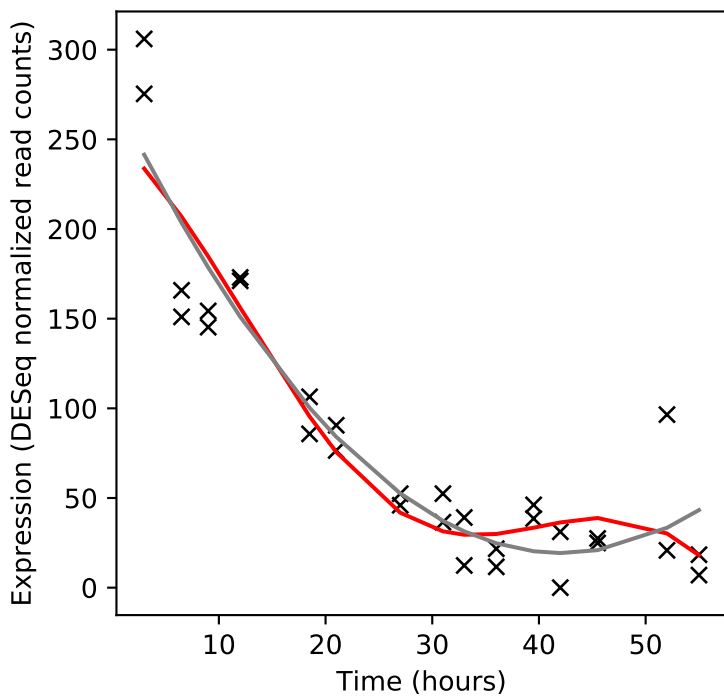

Rv3378c/-

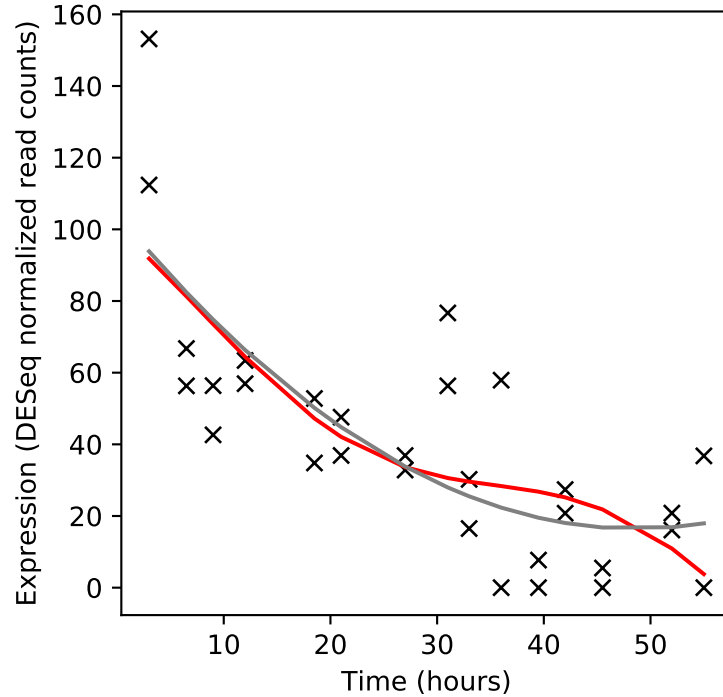

Rv3379c/dxs2

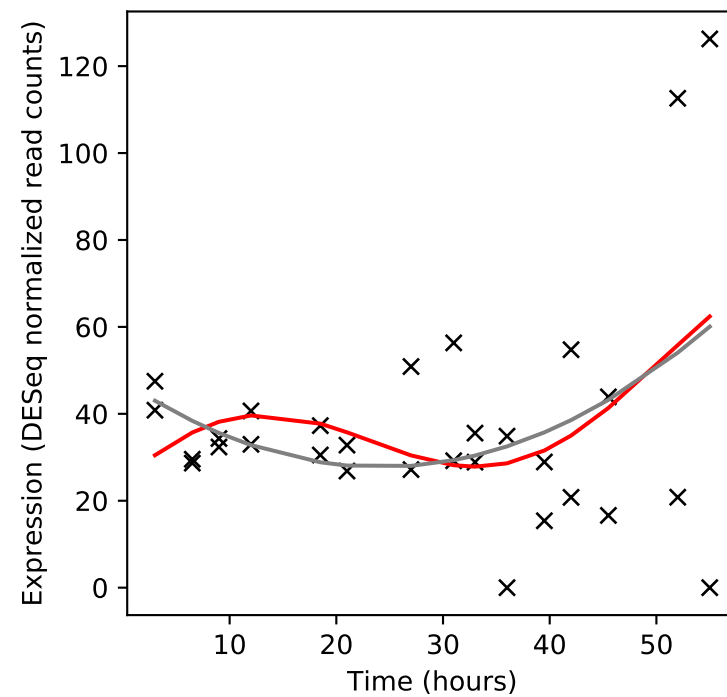

Rv3380c/-

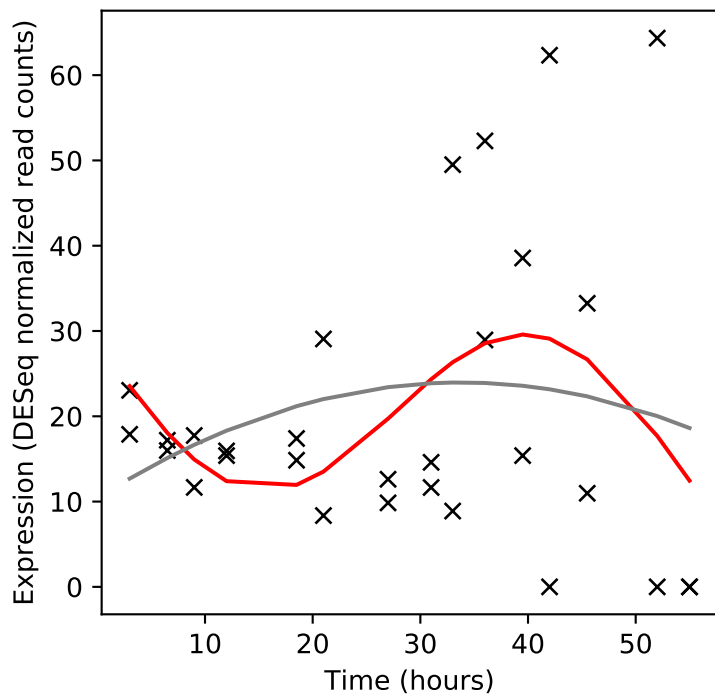

Rv3381c/-

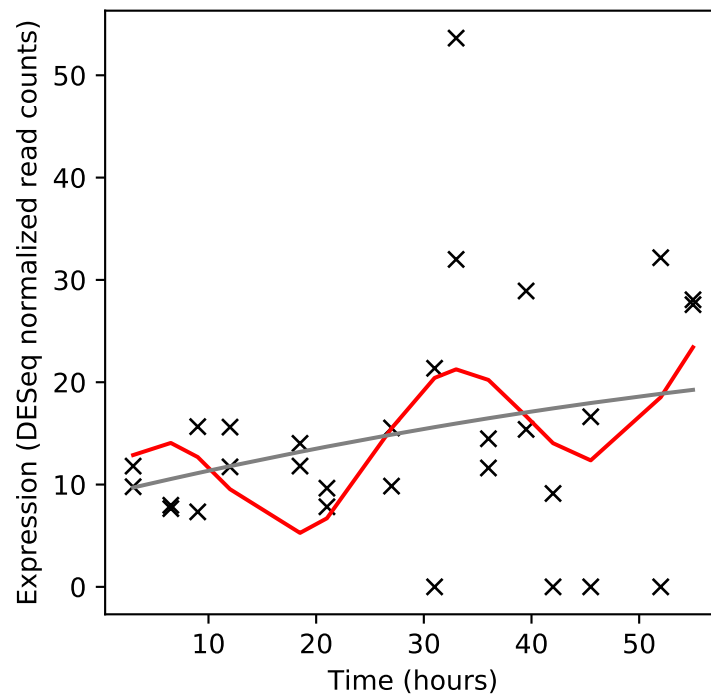

Rv3382c/lytB1

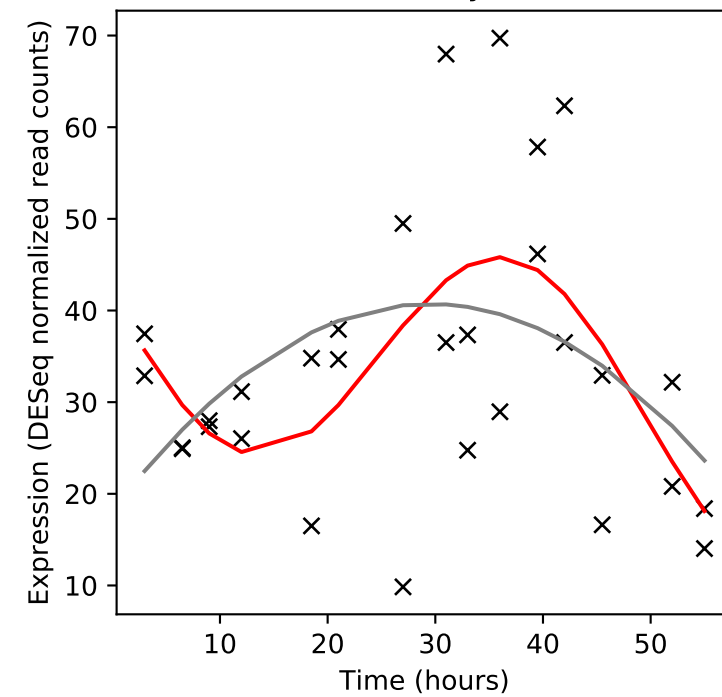

Rv3383c/idsB

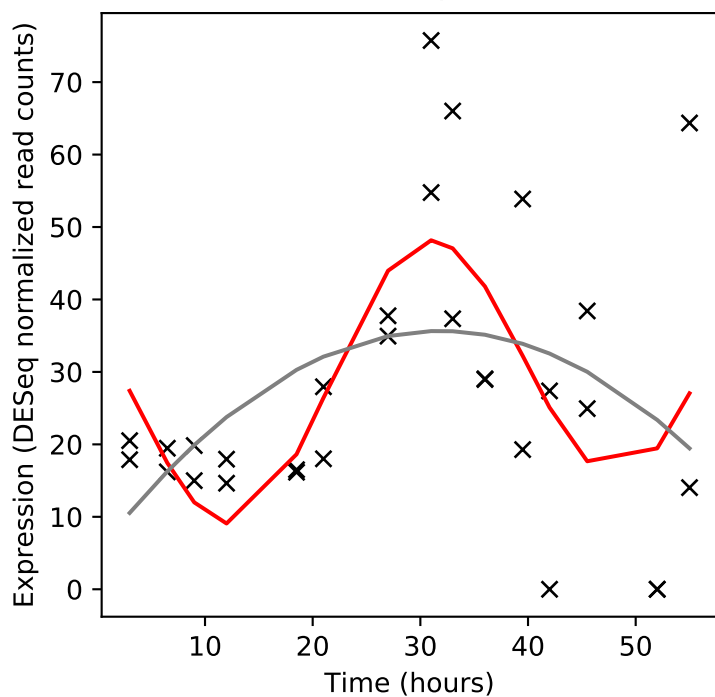

Rv3384c/vapC46

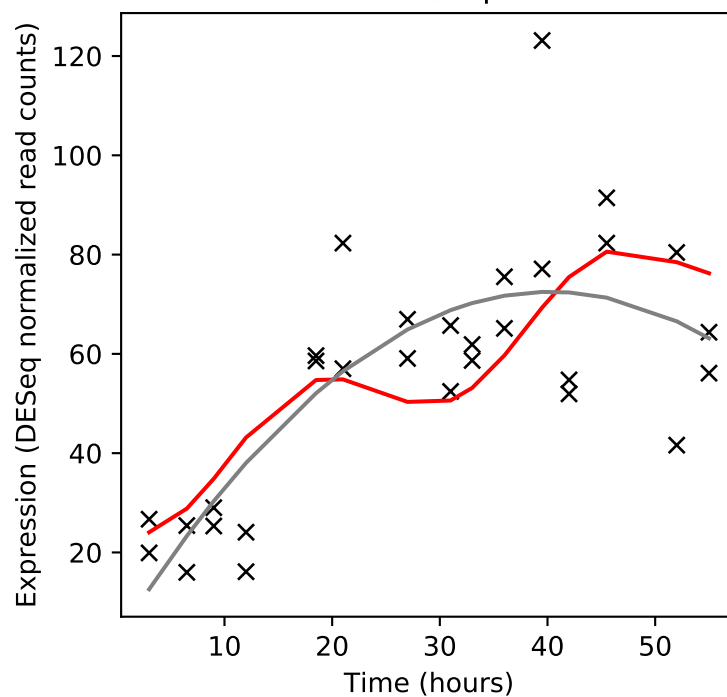

Rv3385c/vapB46

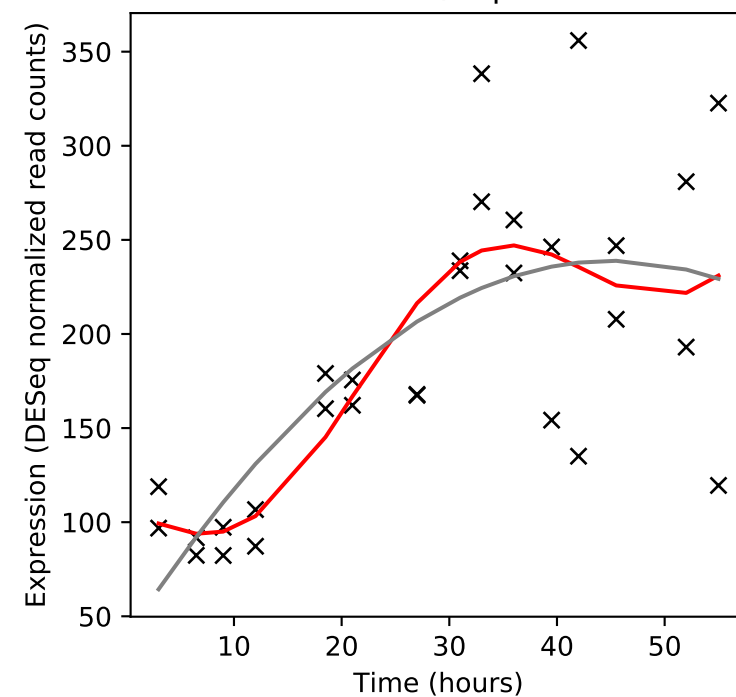

Rv3386/-

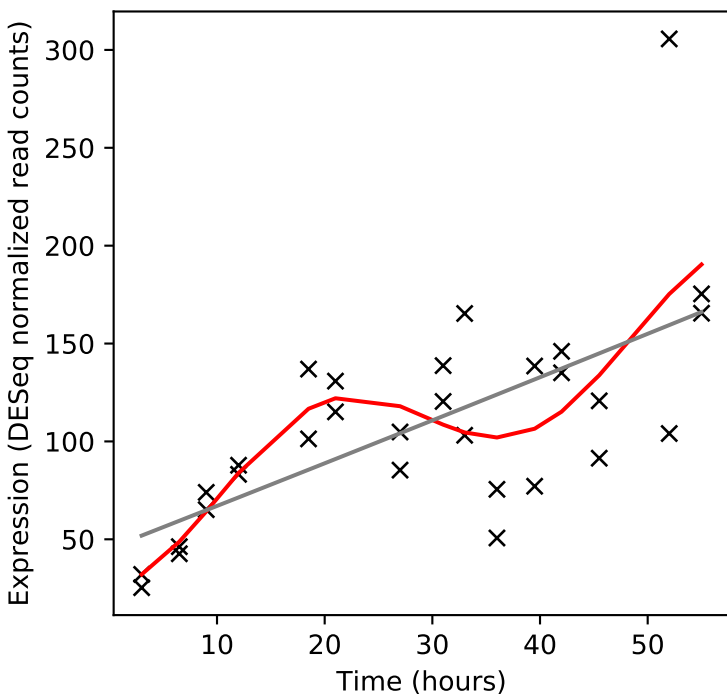

Rv3387/-

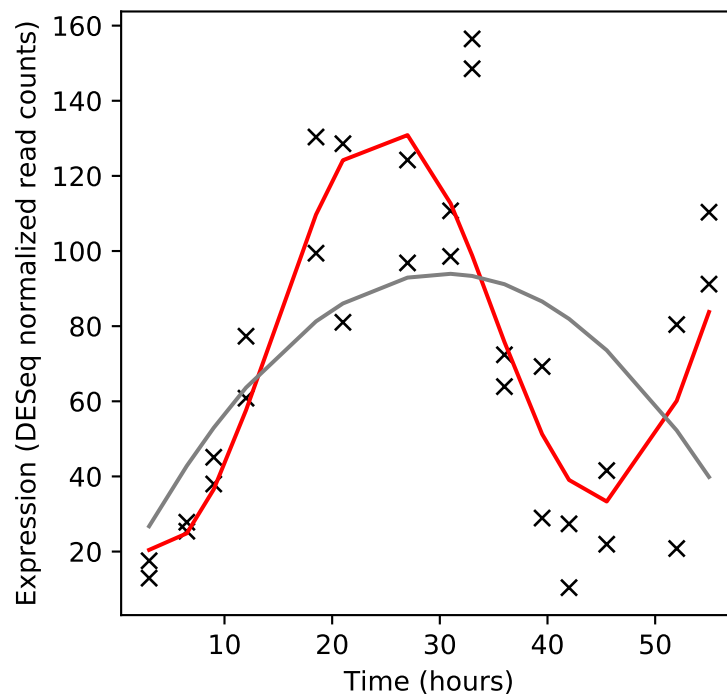

Rv3388/PE\_PGRS52

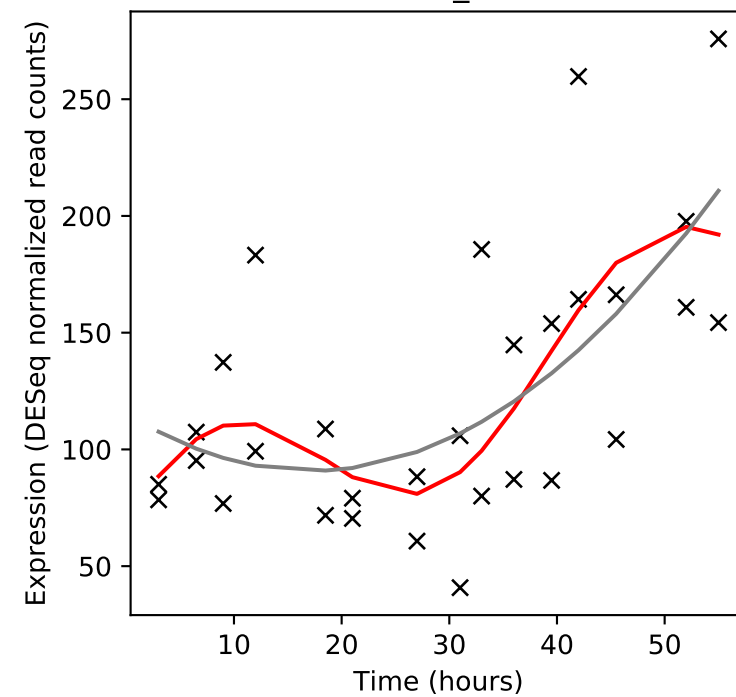



Rv3389c/htdY

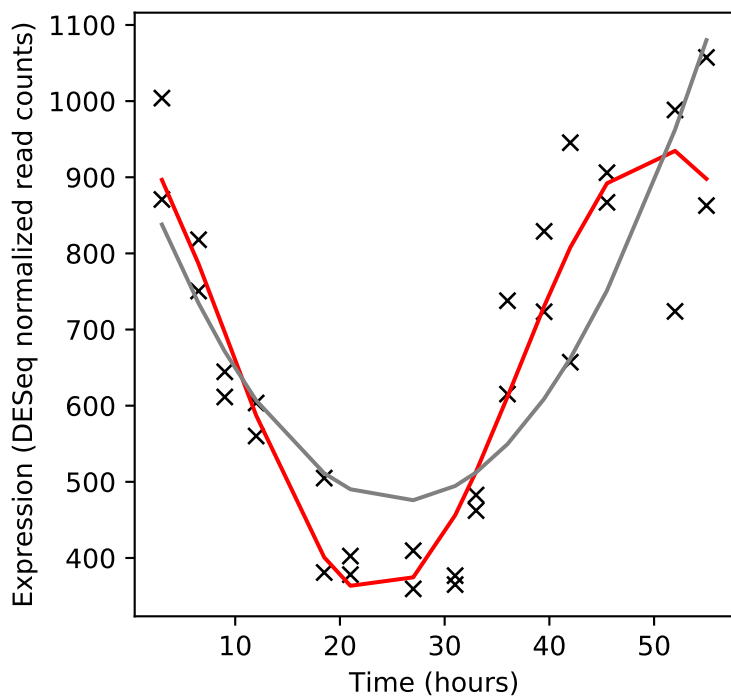

Rv3390/lpqD

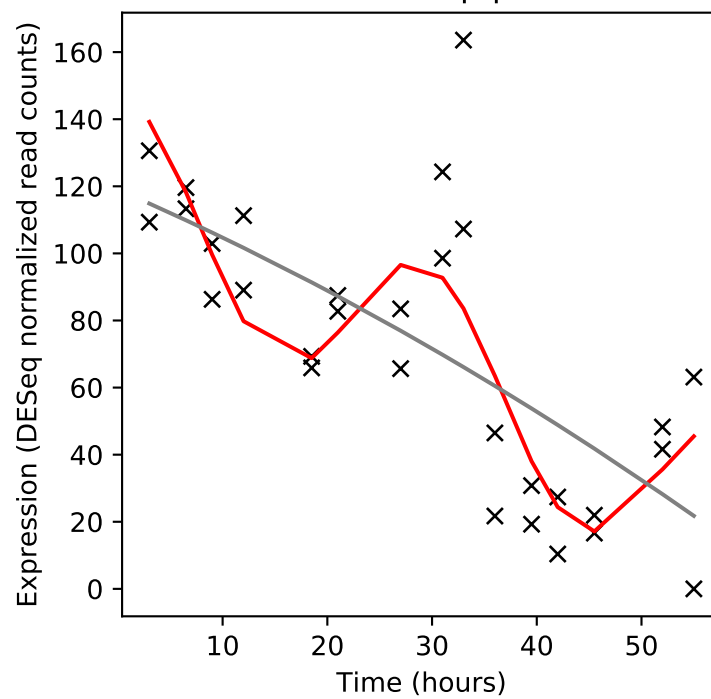

Rv3391/acrA1

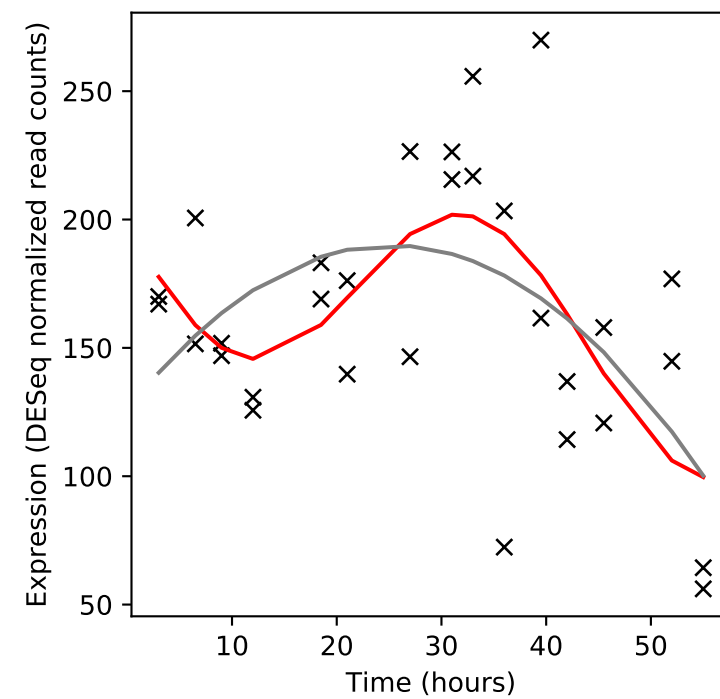

Rv3392c/cmaA1

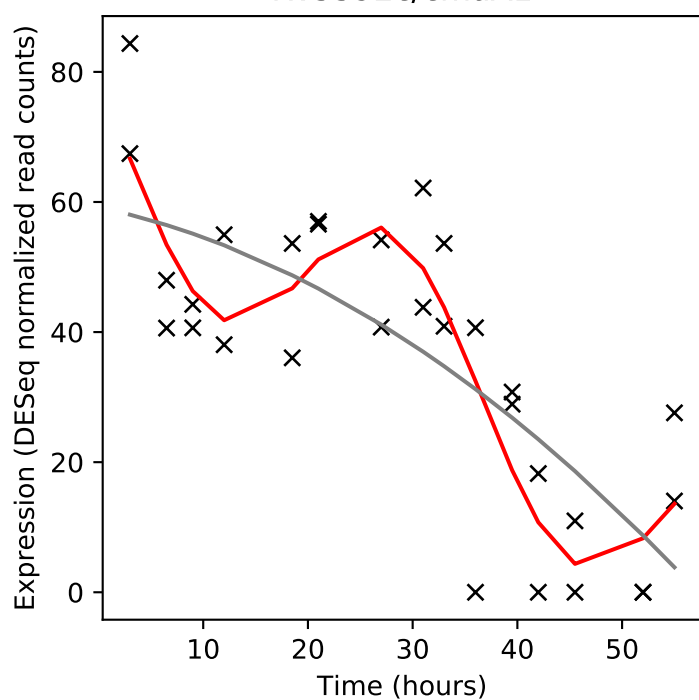

Rv3393/iunH

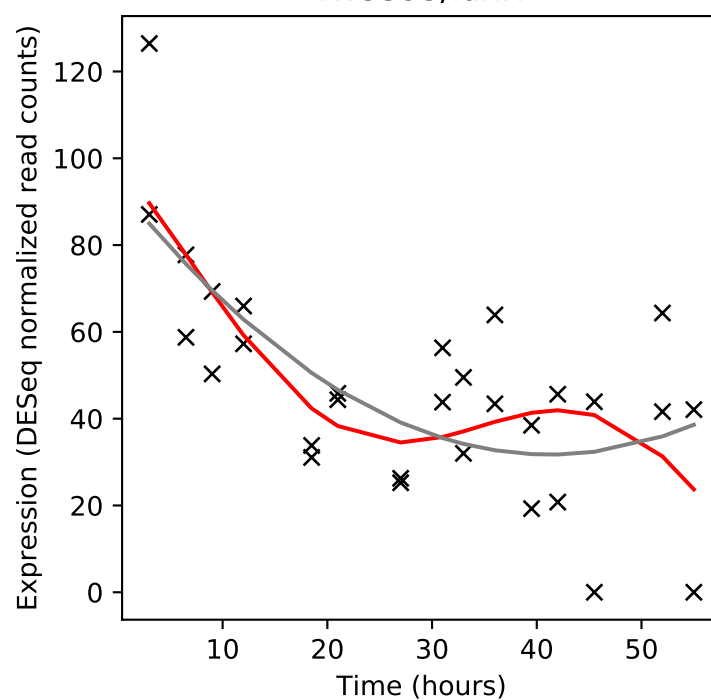

Rv3394c/-

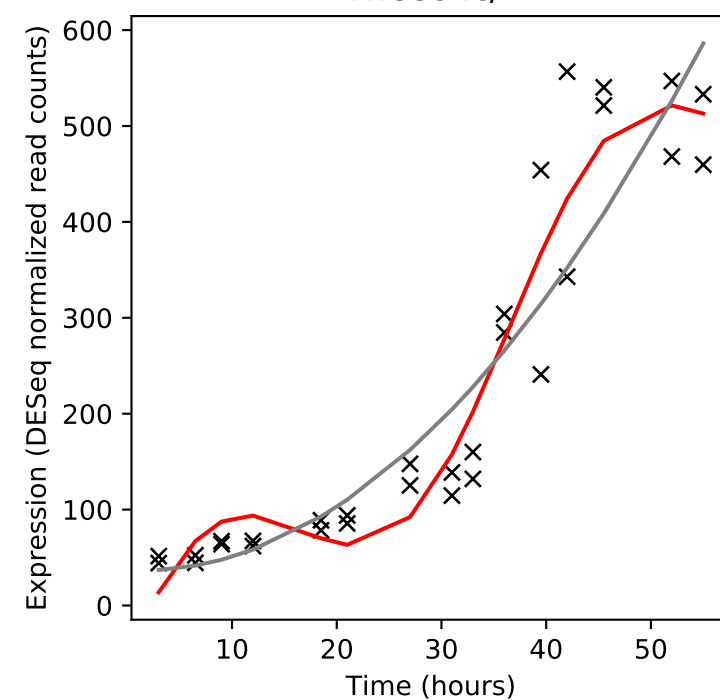

Rv3395c/-

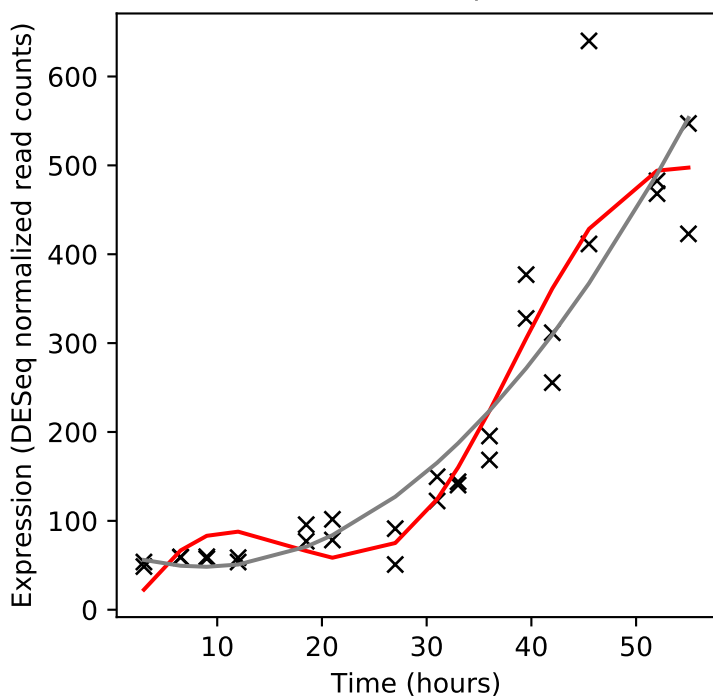

Rv3395A/-

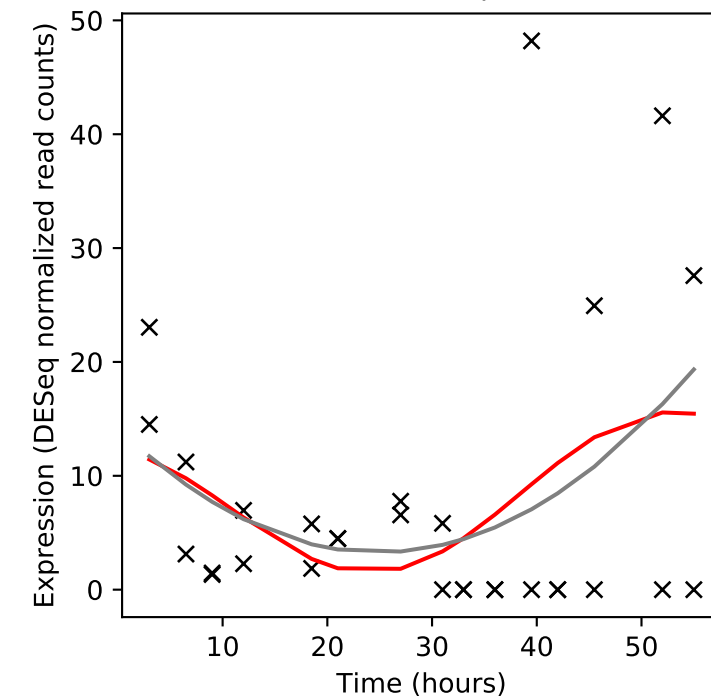

Rv3396c/guaA

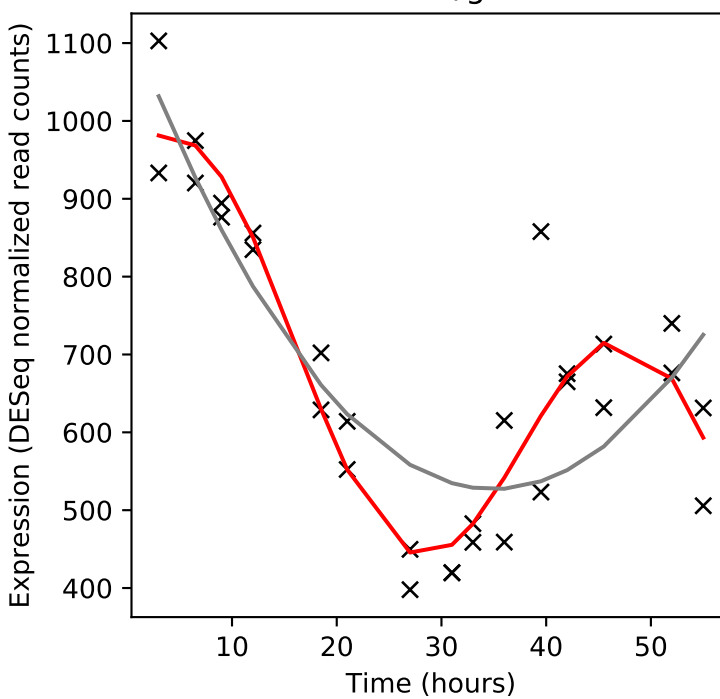

Rv3397c/phyA

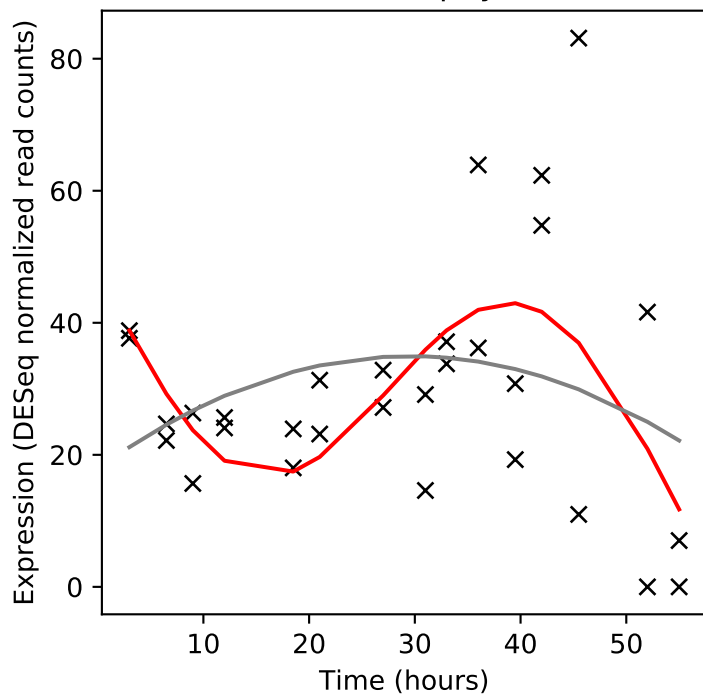

Rv3398c/idsA1

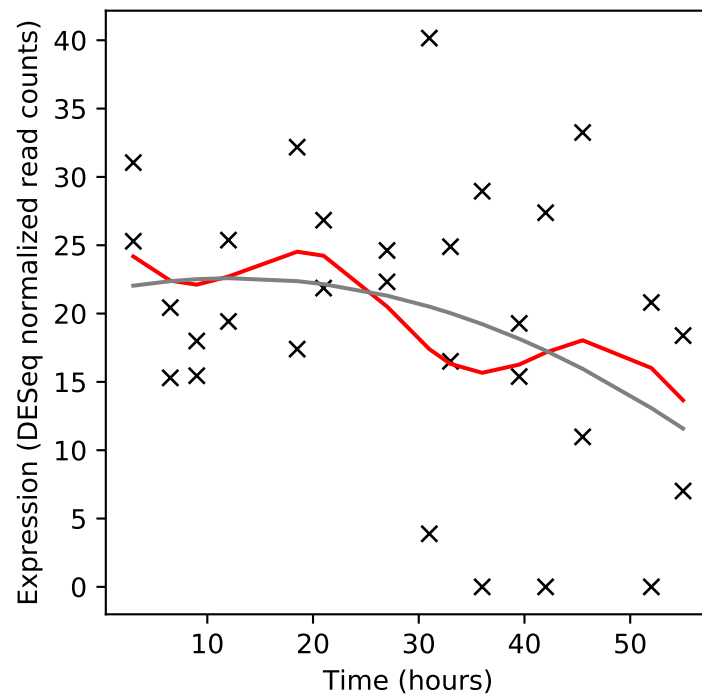

Rv3399c/-

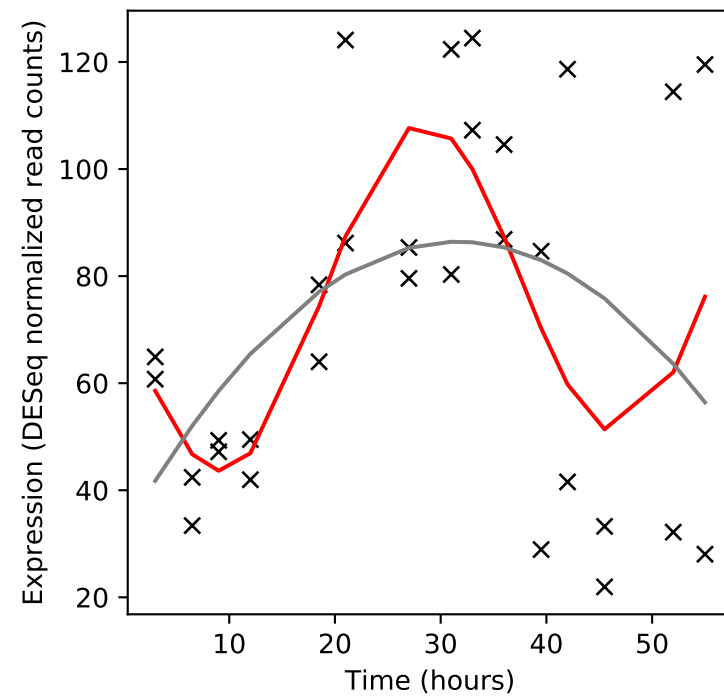

Rv3400c/-

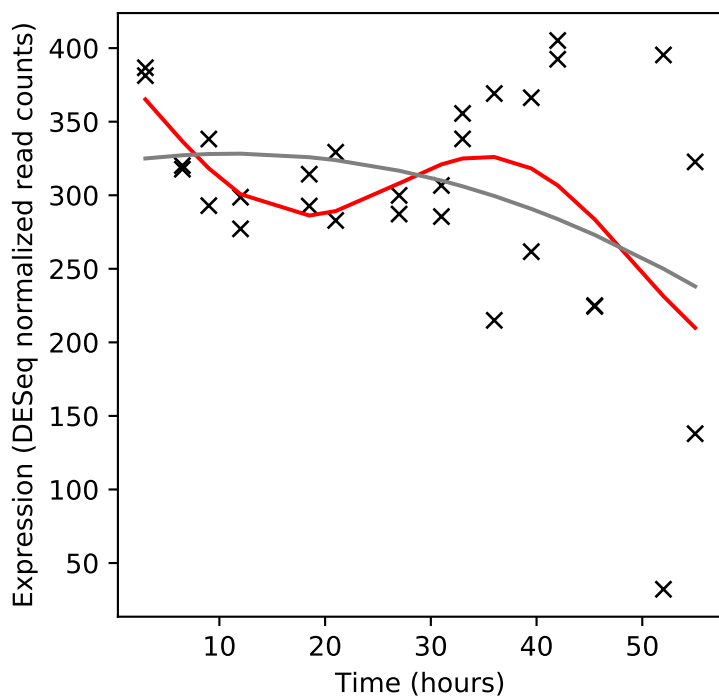

Rv3401c/-

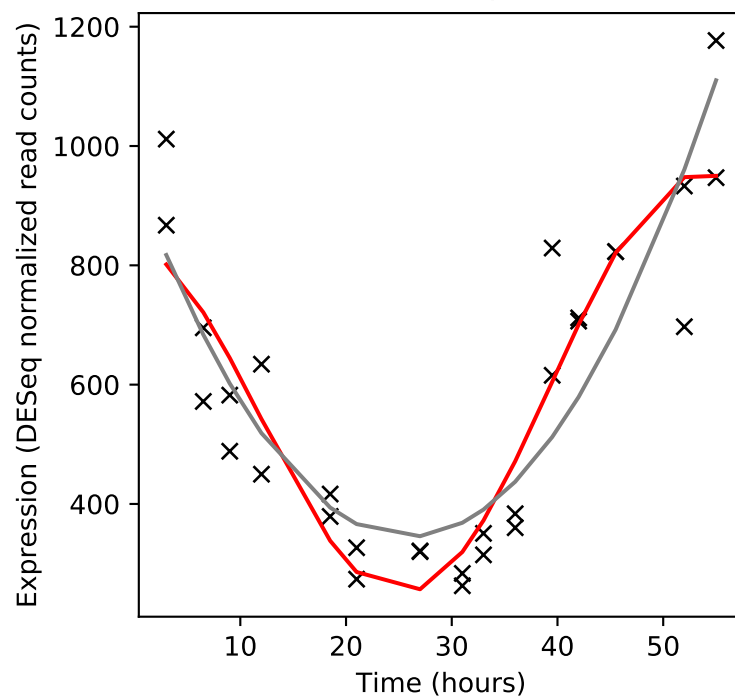

Rv3402c/-

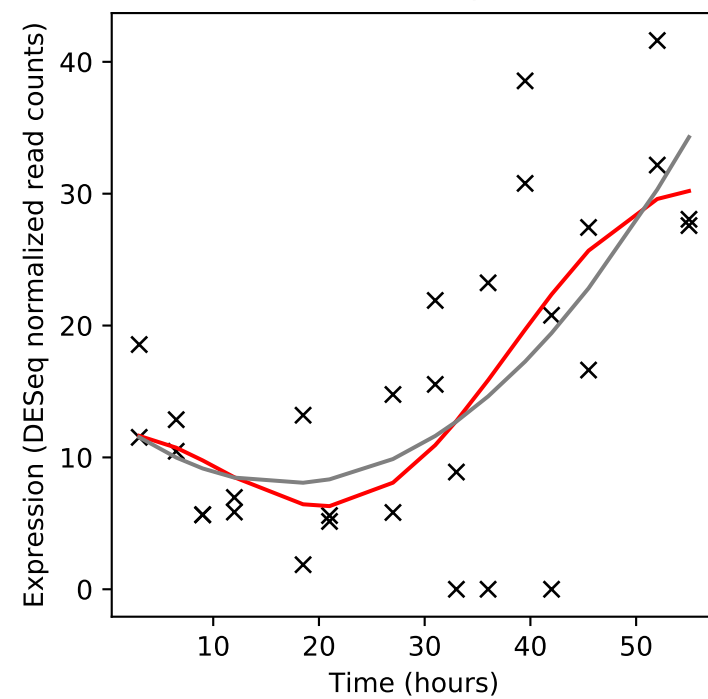

Rv3403c/-

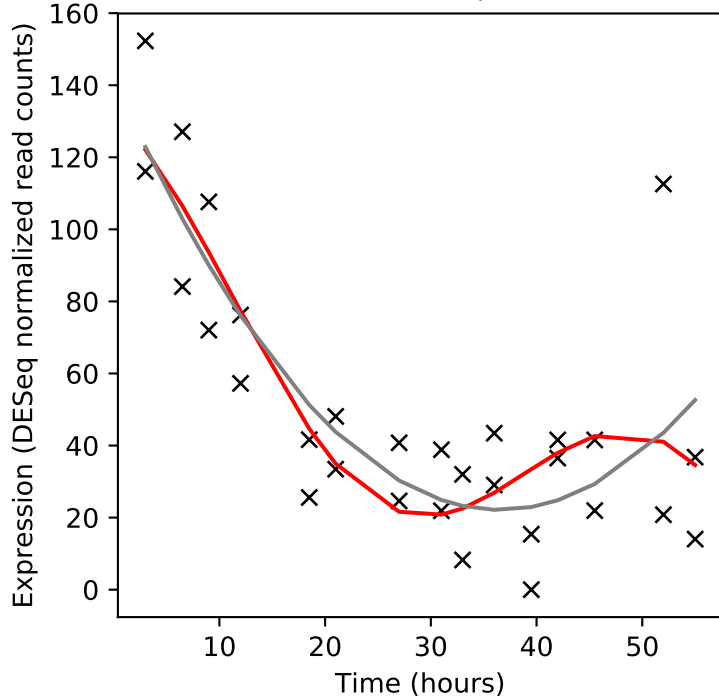

Rv3404c/-

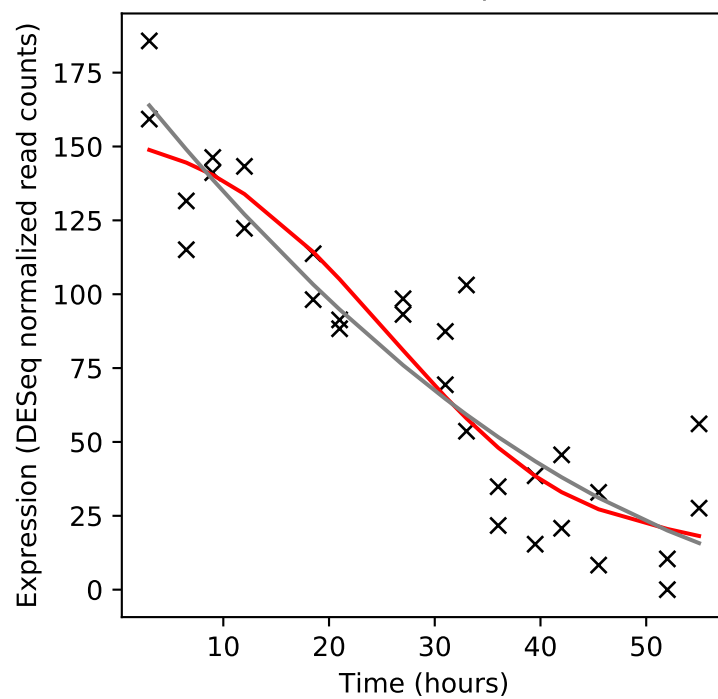

Rv3405c/-

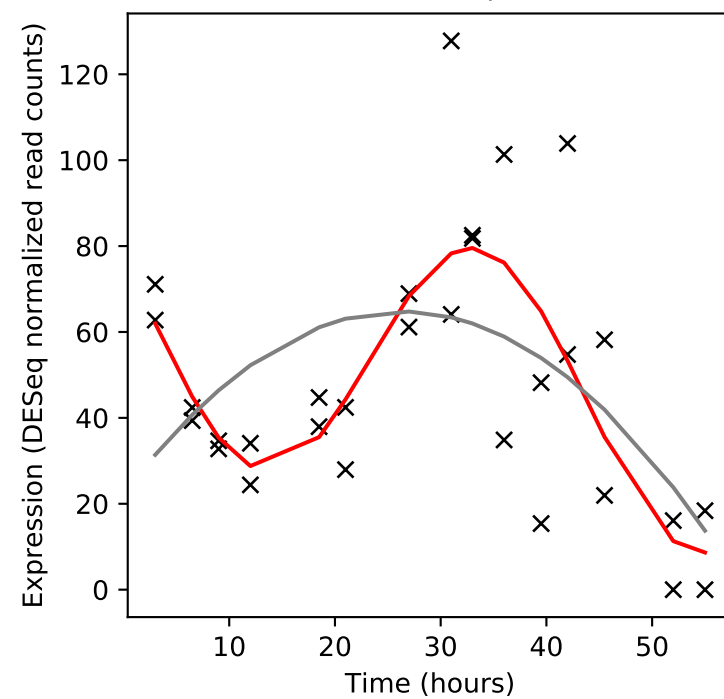

Rv3406/-

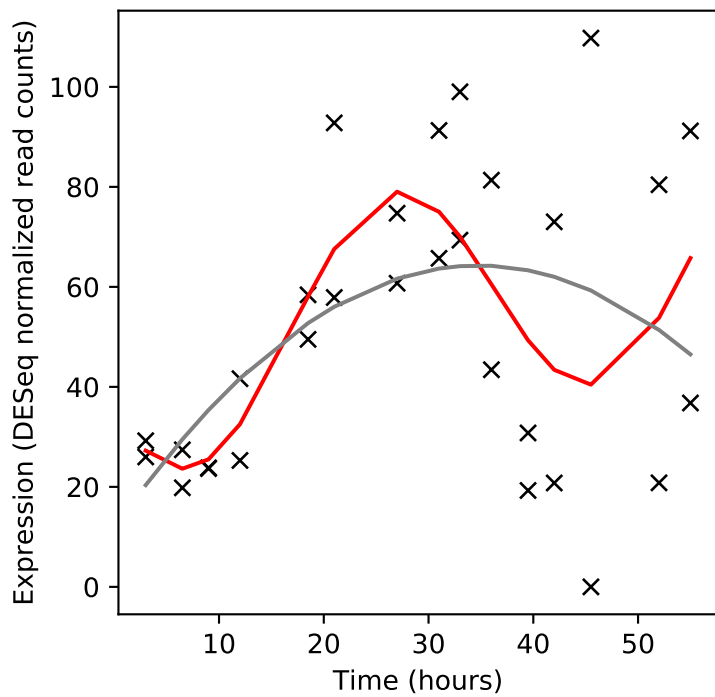

Rv3407/vapB47

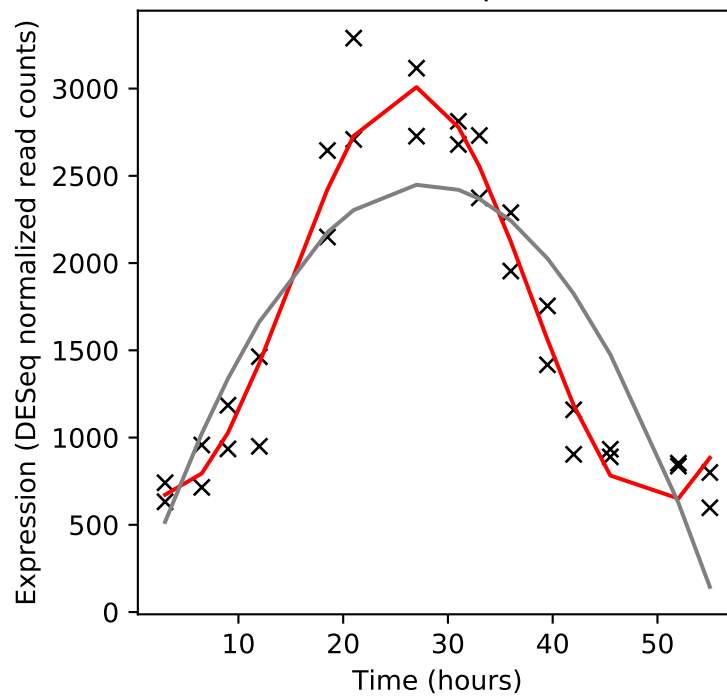

Rv3408/vapC47

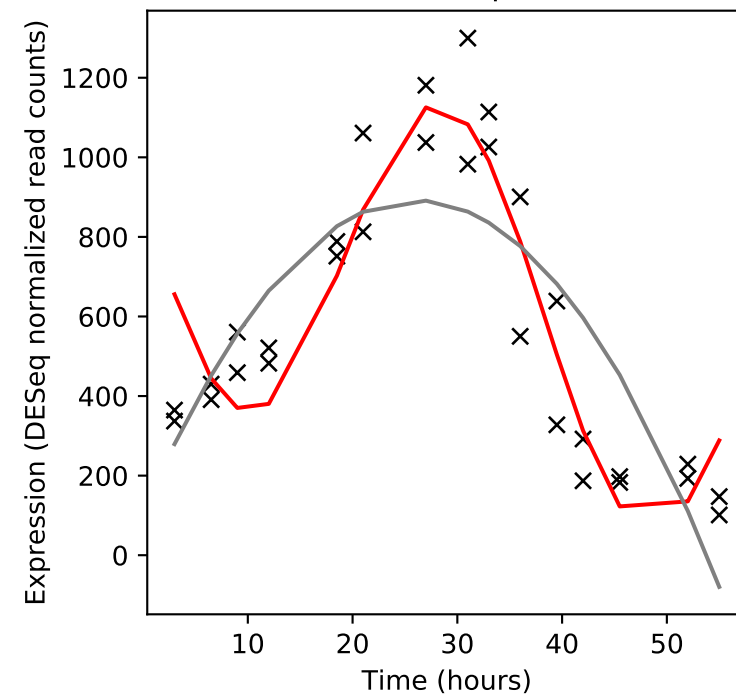

Rv3409c/choD

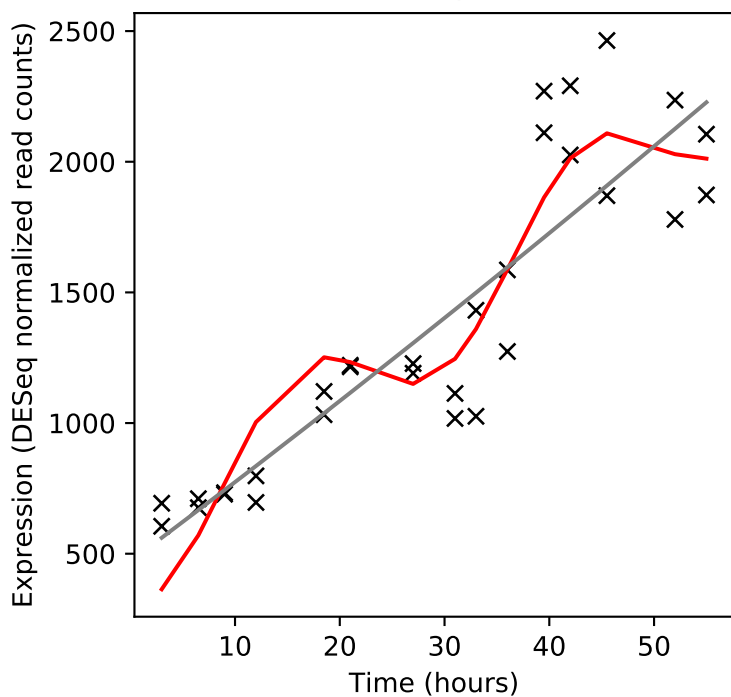

Rv3410c/guaB3

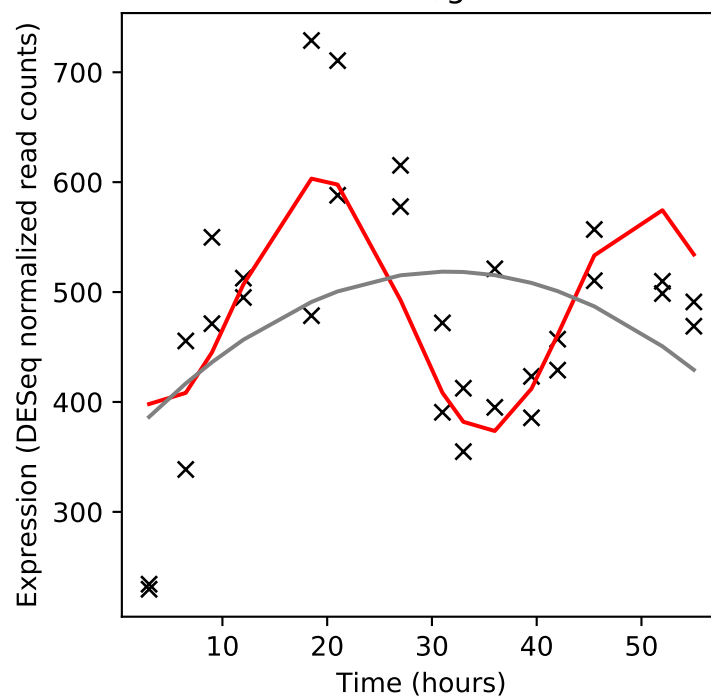

Rv3411c/guaB2

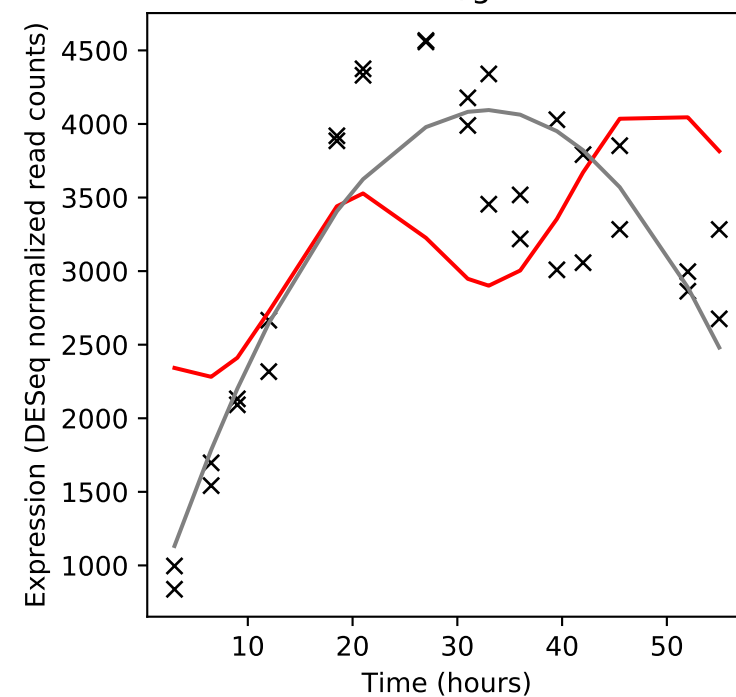

Rv3412/-

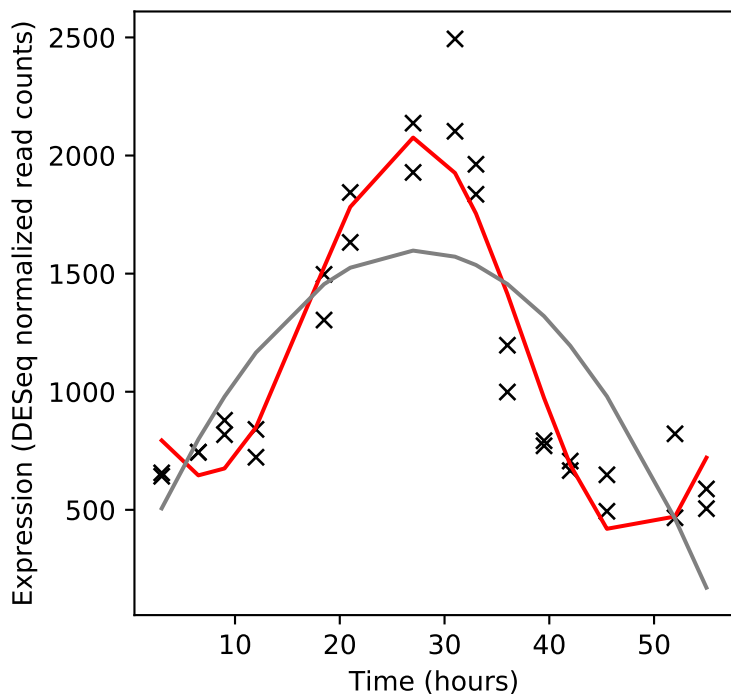

Rv3413c/-

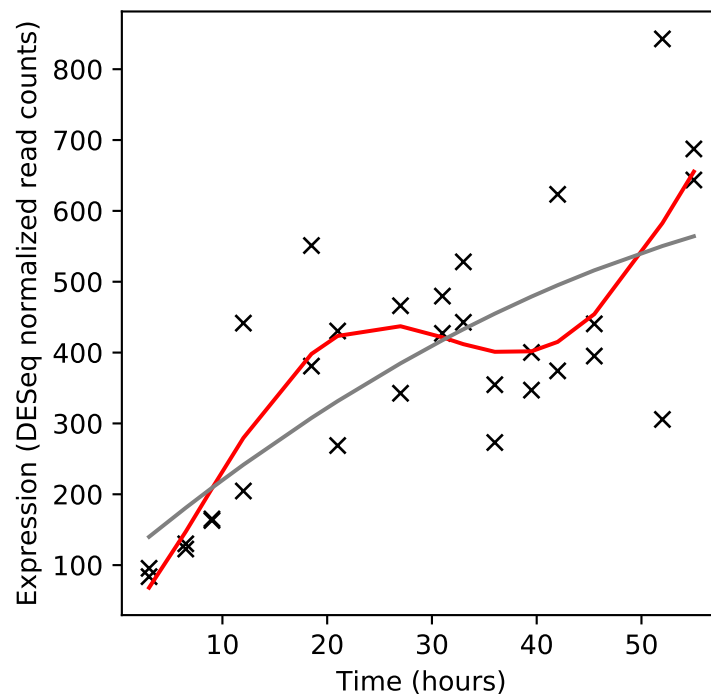

Rv3414c/sigD

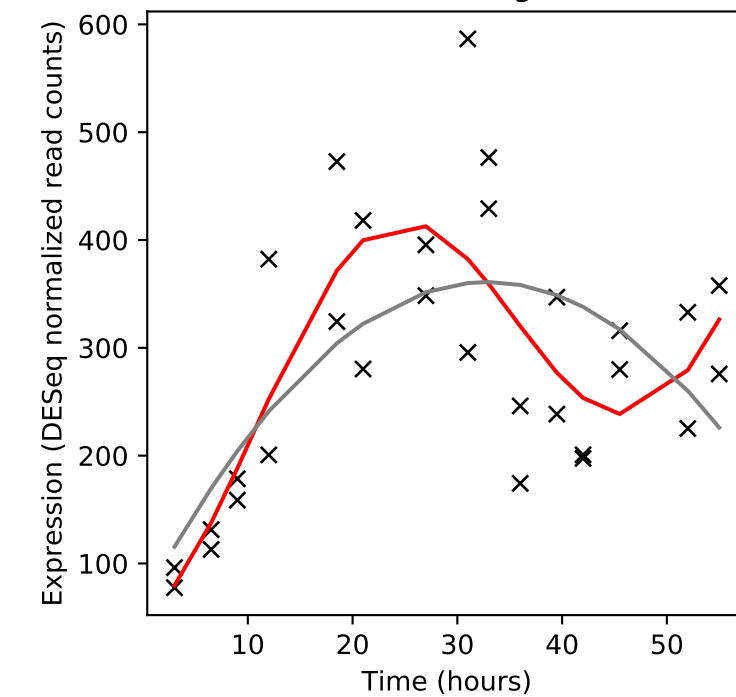

Rv3415c/-

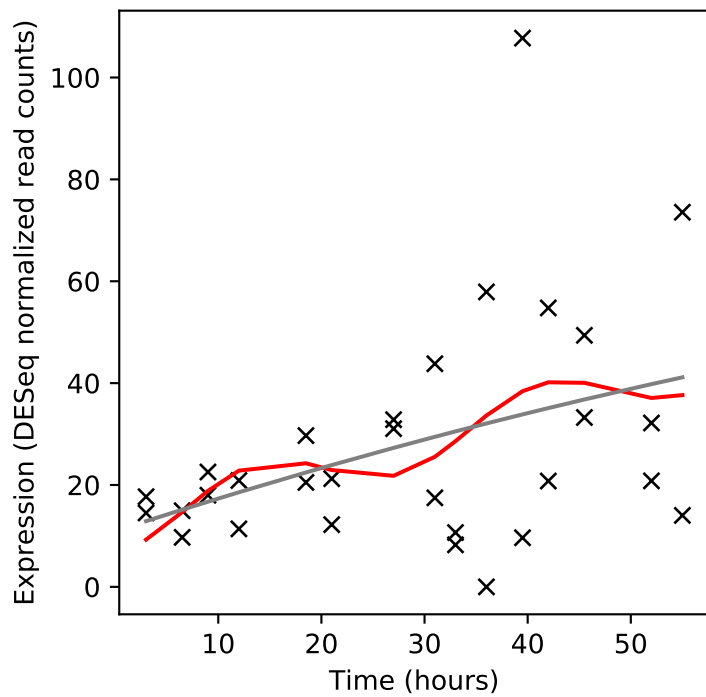

Rv3416/whiB3

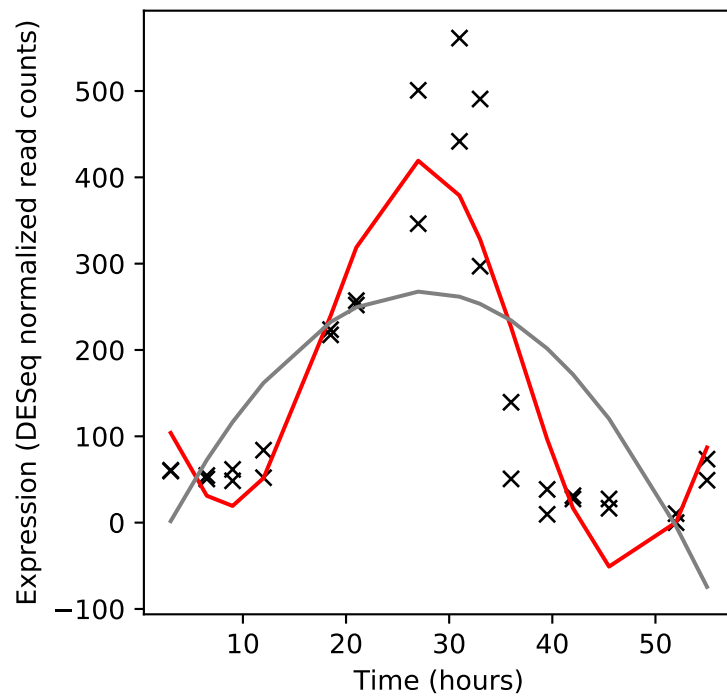

Rv3417c/groEL1

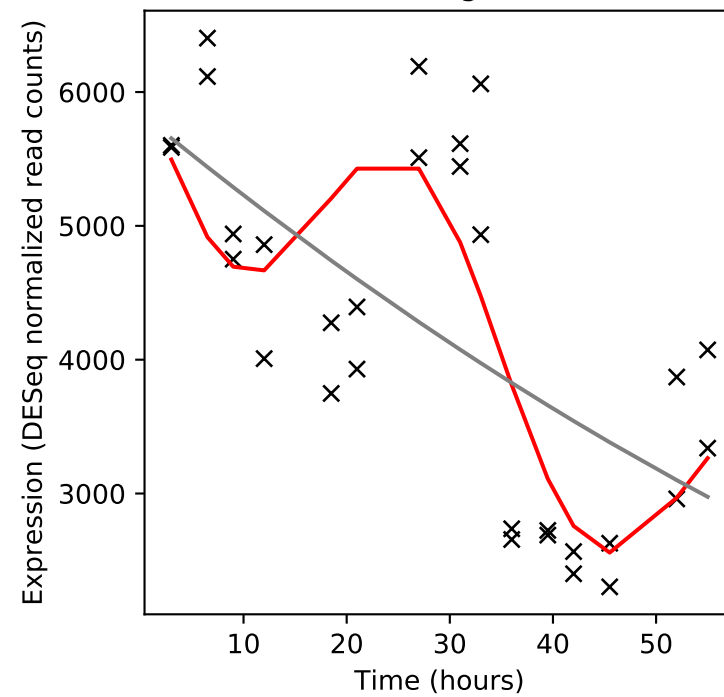

Rv3418c/groES

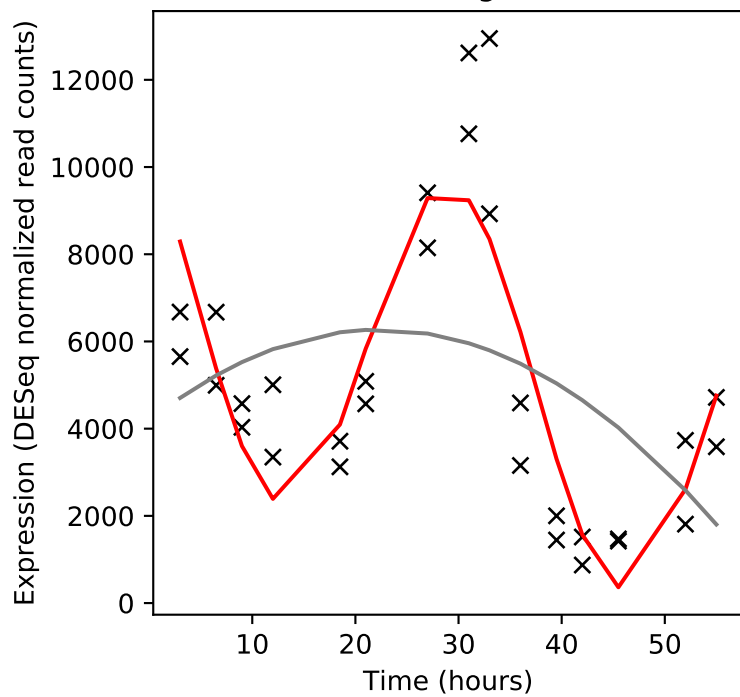

Rv3419c/gcp

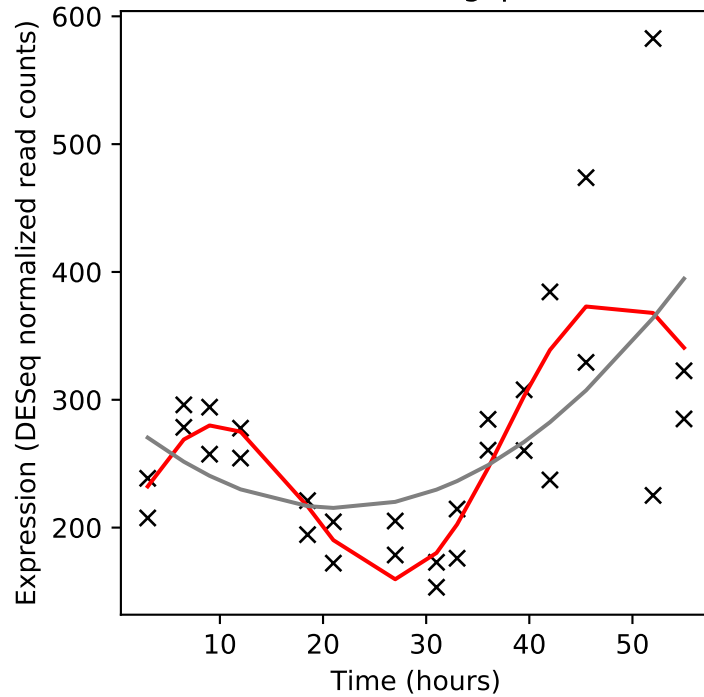

Rv3420c/rimI

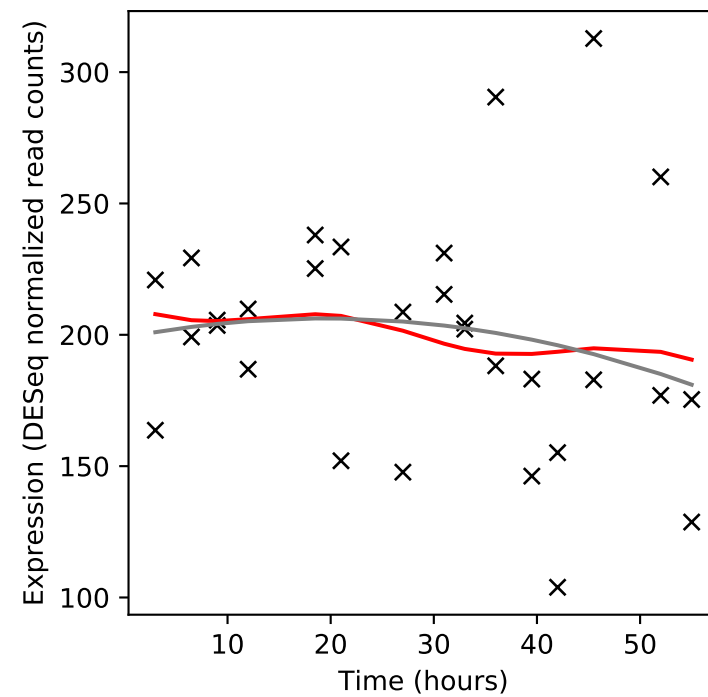

Rv3421c/-

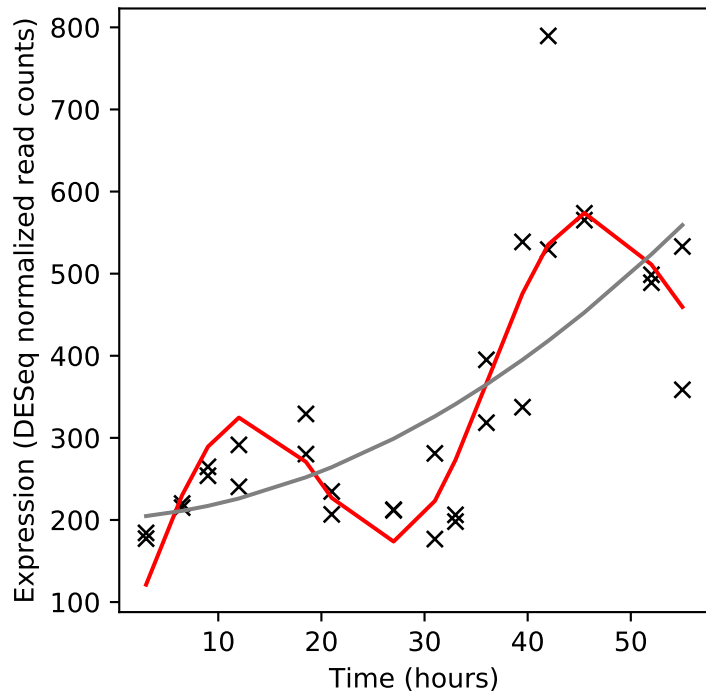

Rv3422c/-

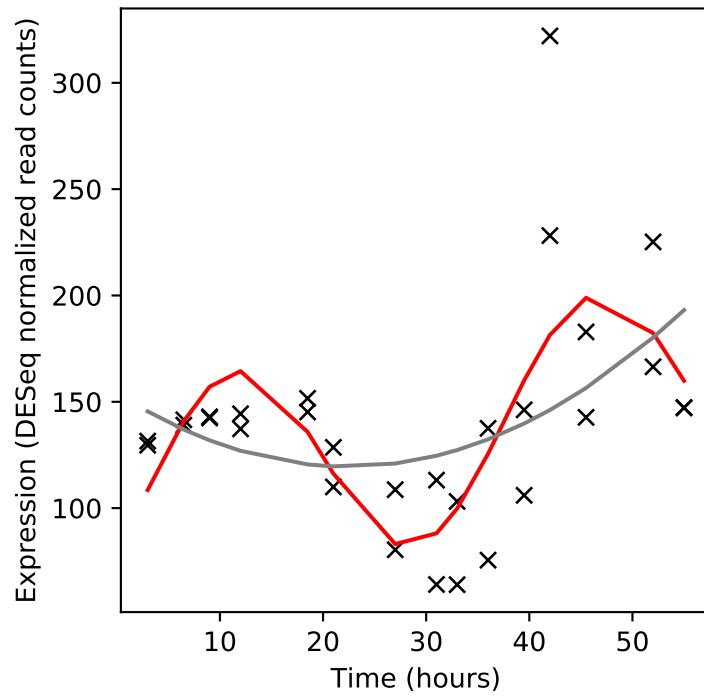

Rv3423c/alr

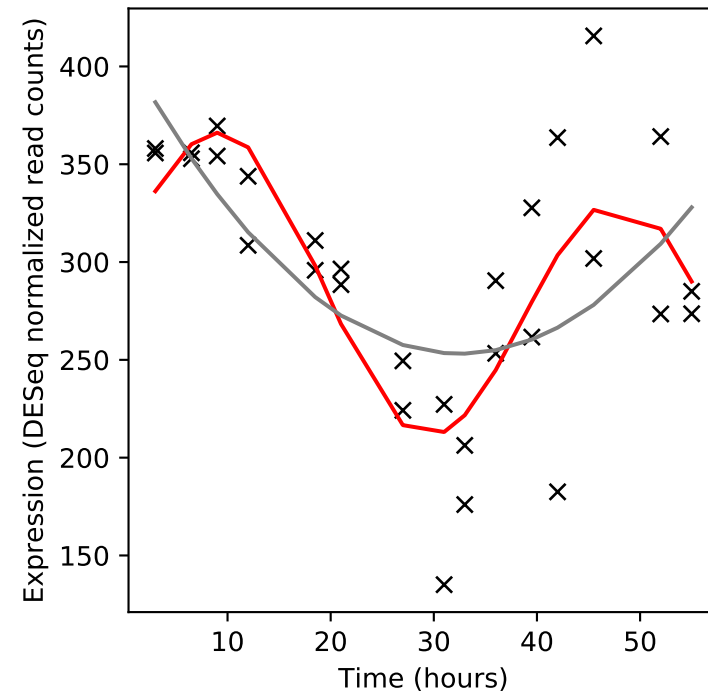

Rv3424c/-

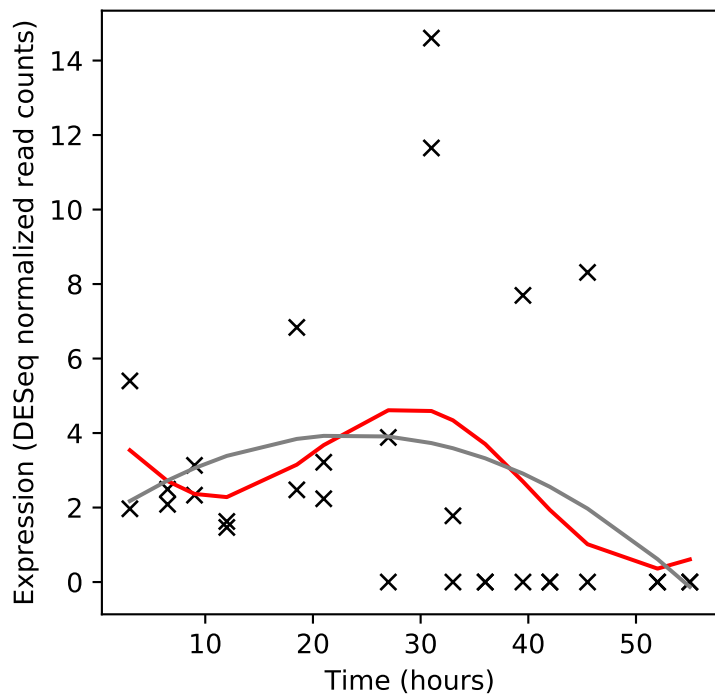

Rv3425/PPE57

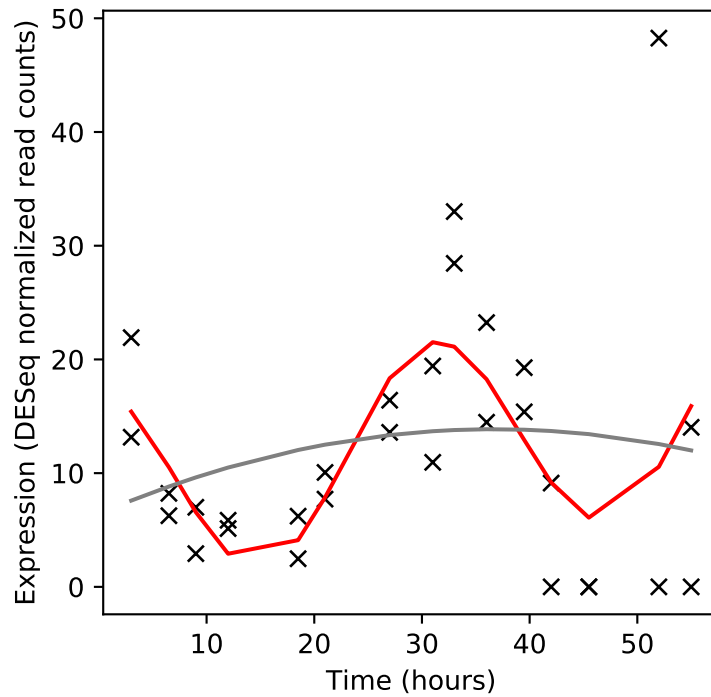

Rv3426/PPE58

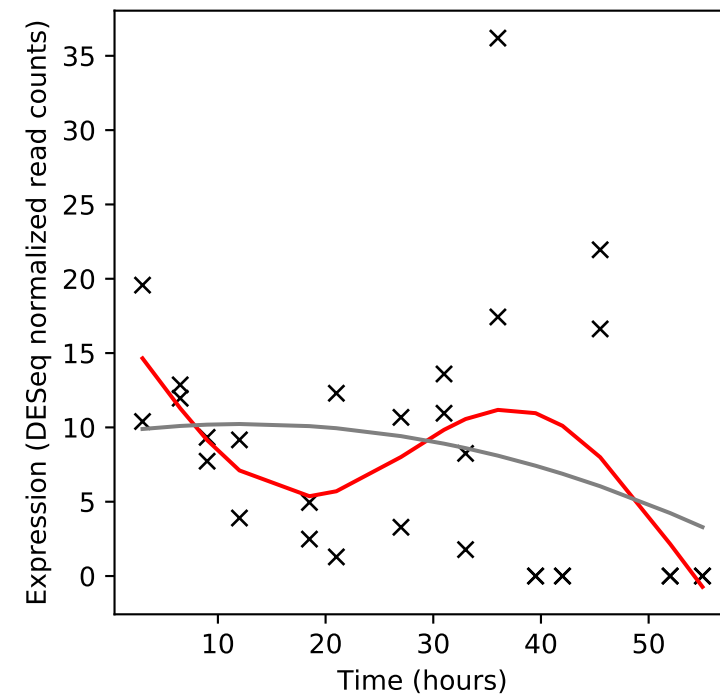

Rv3427c/-

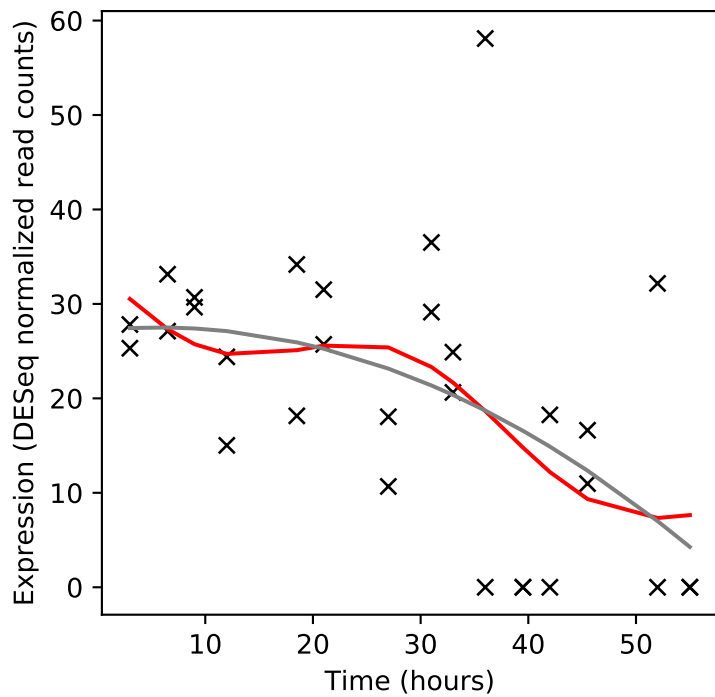

Rv3428c/-

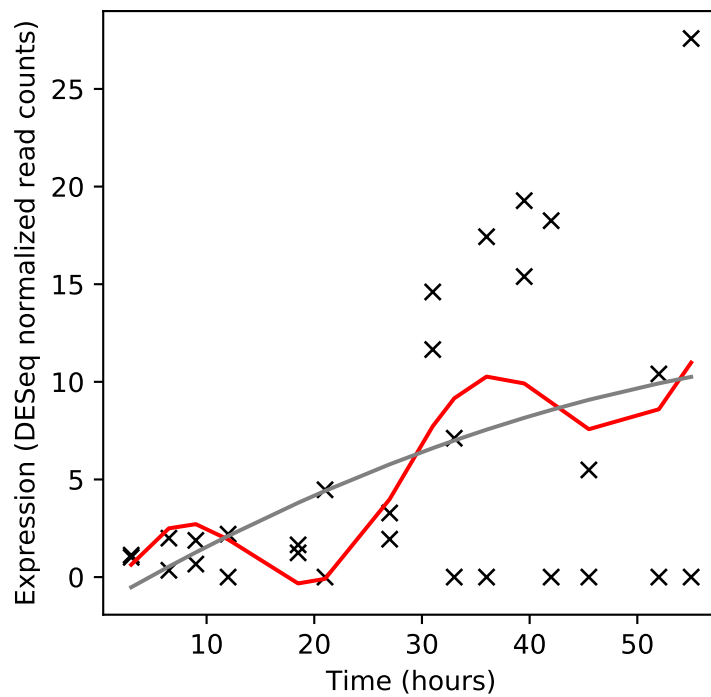

Rv3429/PPE59

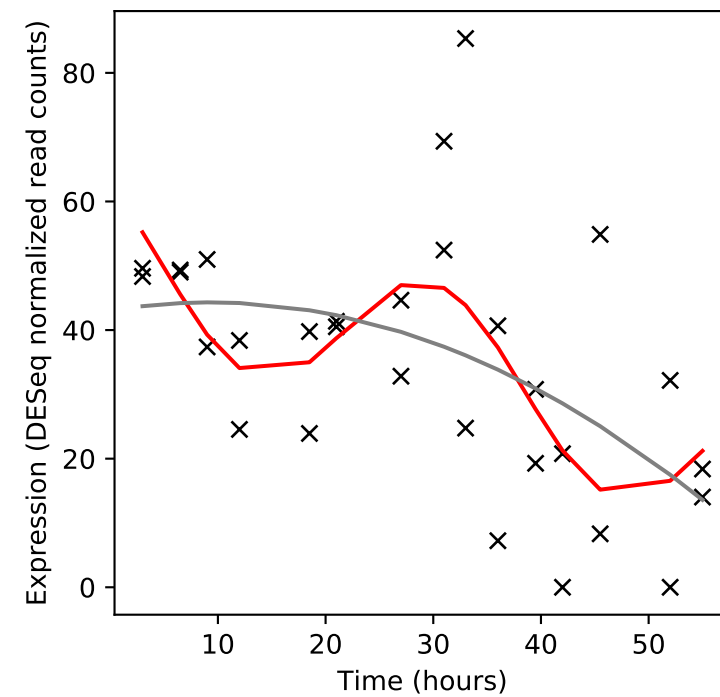

Rv3430c/-

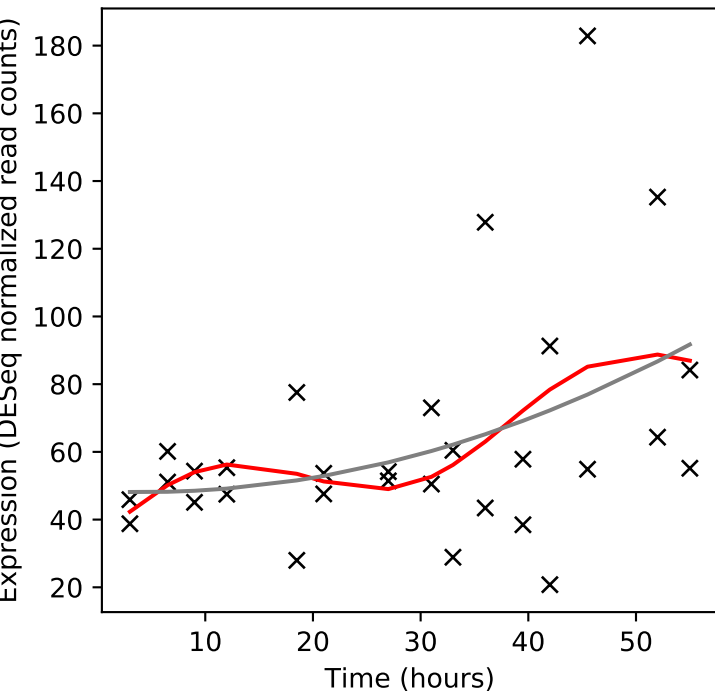

Rv3431c/-

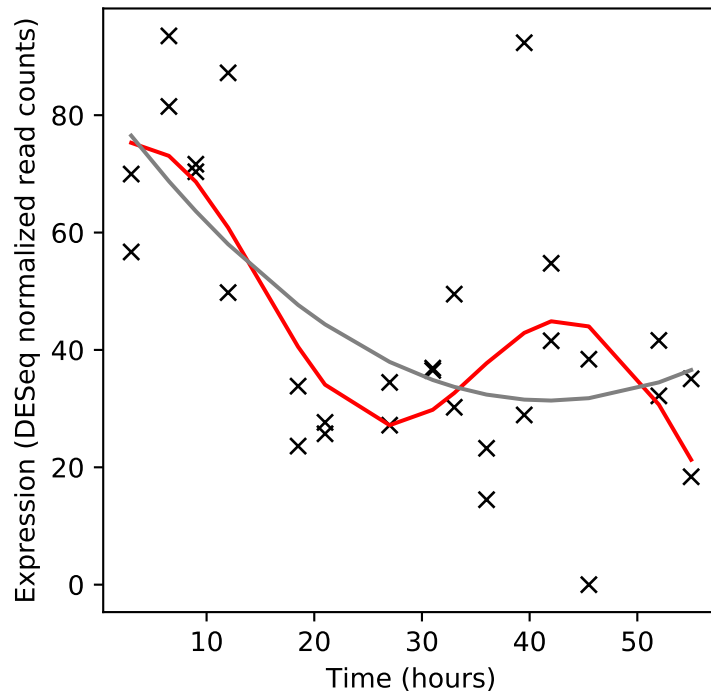

Rv3432c/gadB

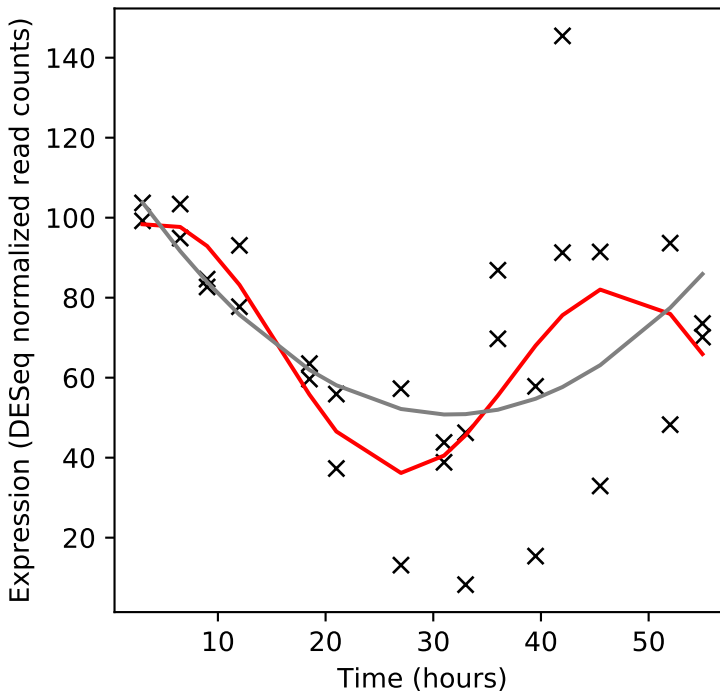

Rv3433c/-

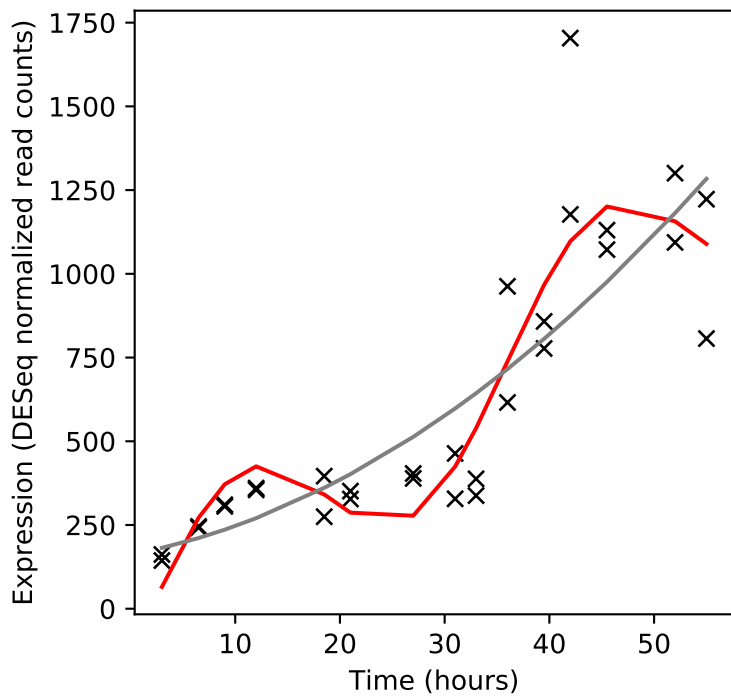

Rv3434c/-

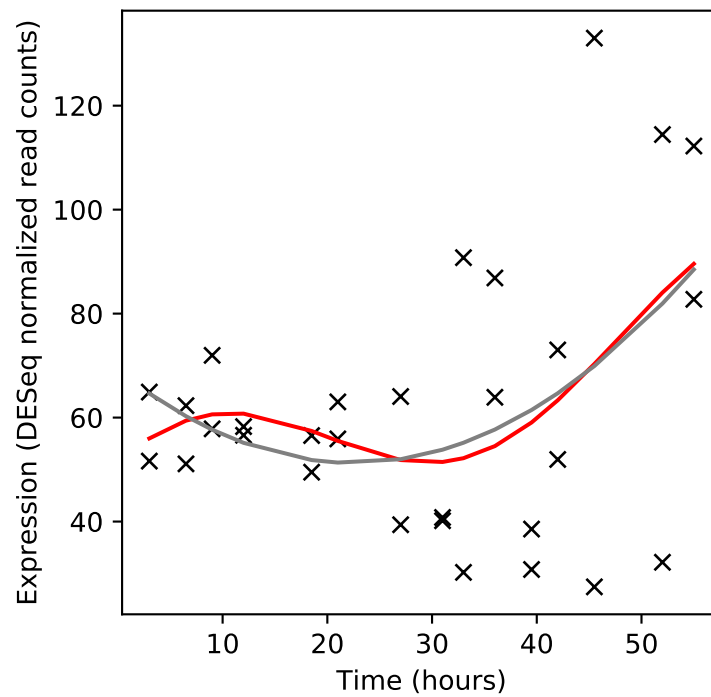

Rv3435c/-

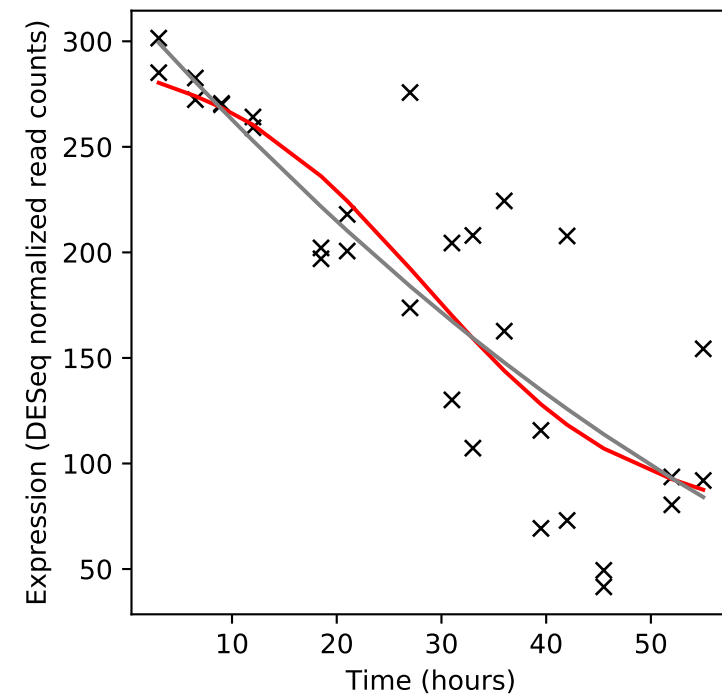

Rv3436c/glmS

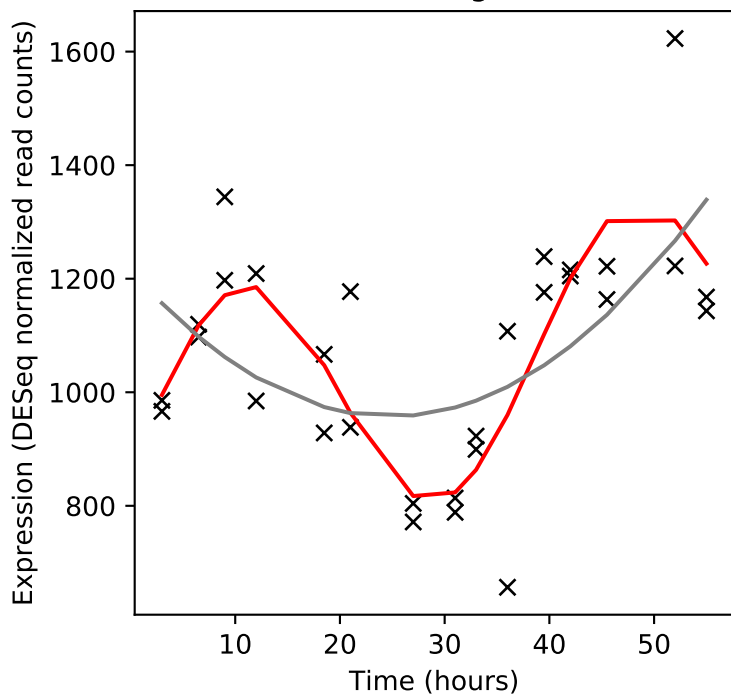

Rv3437/-

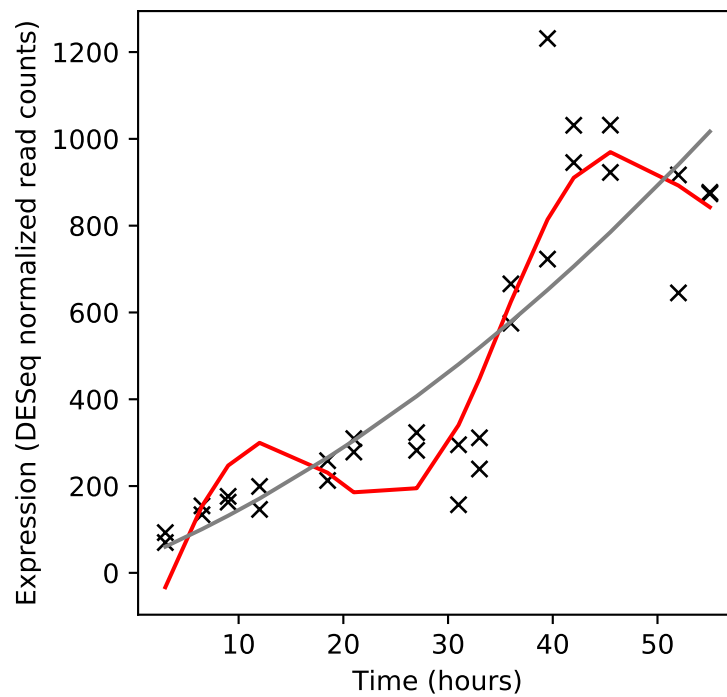

Rv3438/-

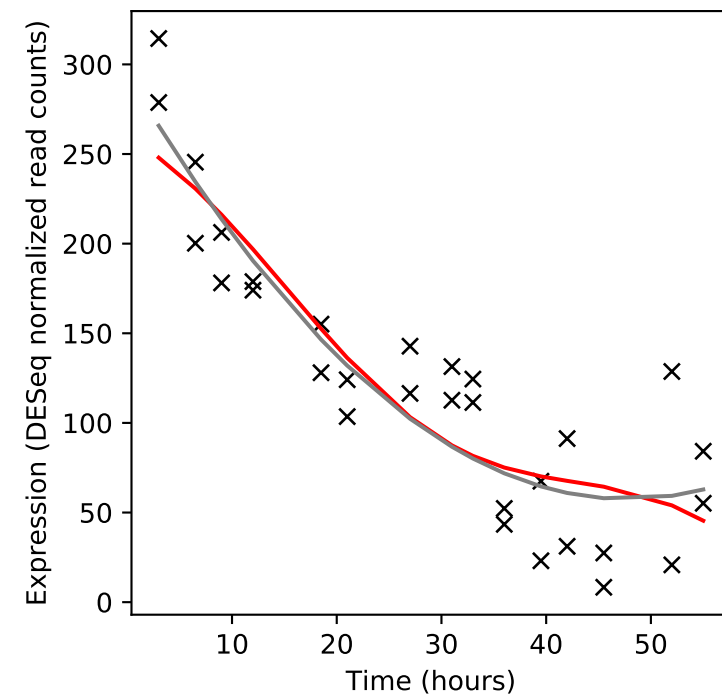

Rv3439c/-

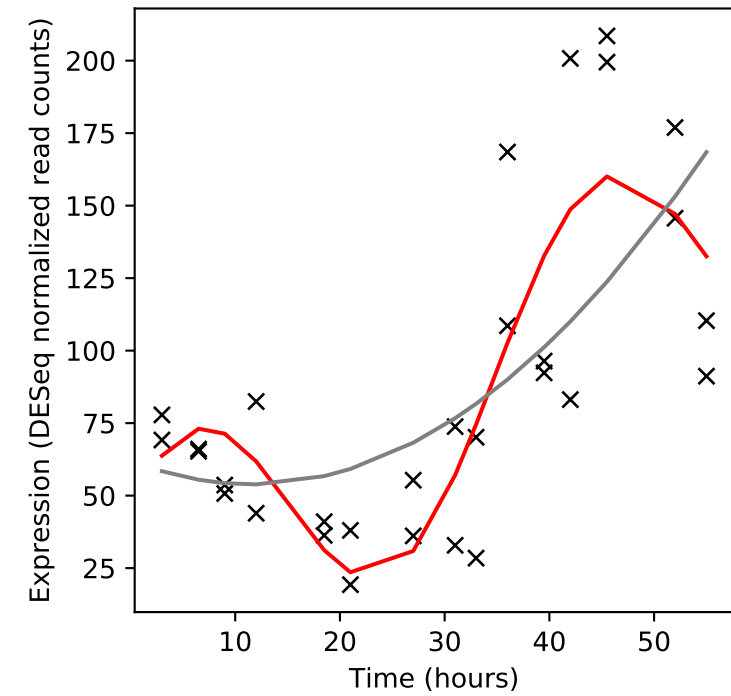

Rv3440c/-

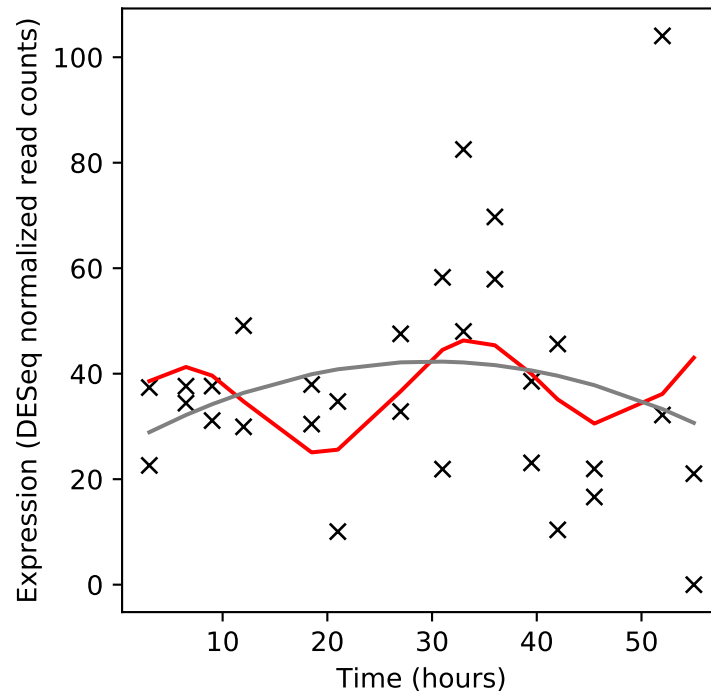

Rv3441c/mrsA

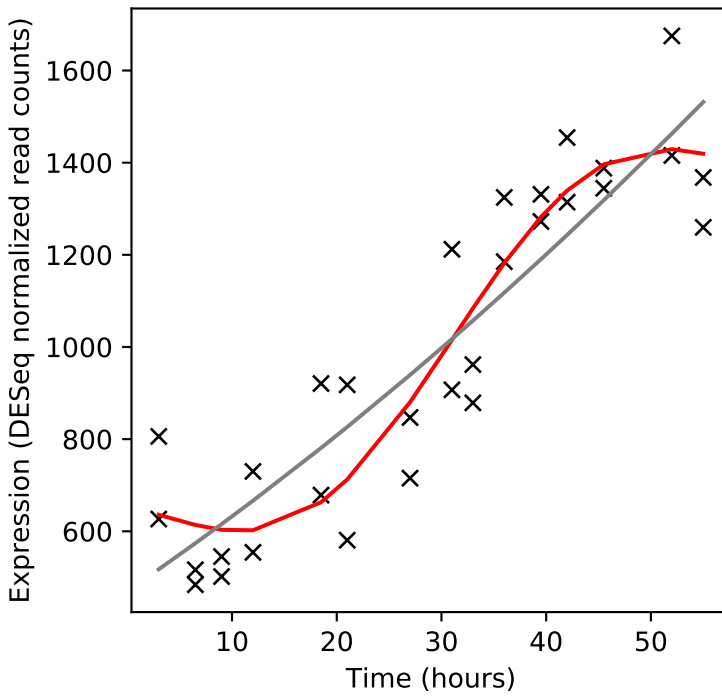

Rv3442c/rpsI

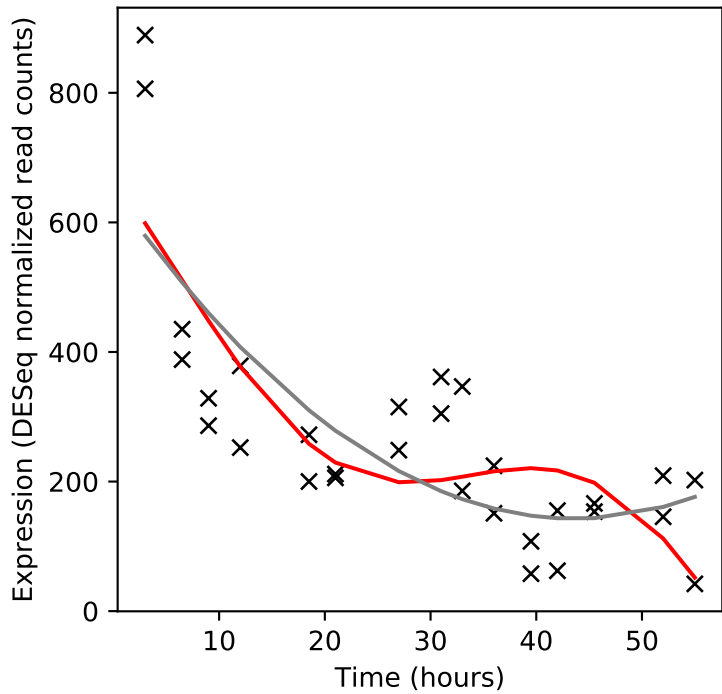

Rv3443c/rplM

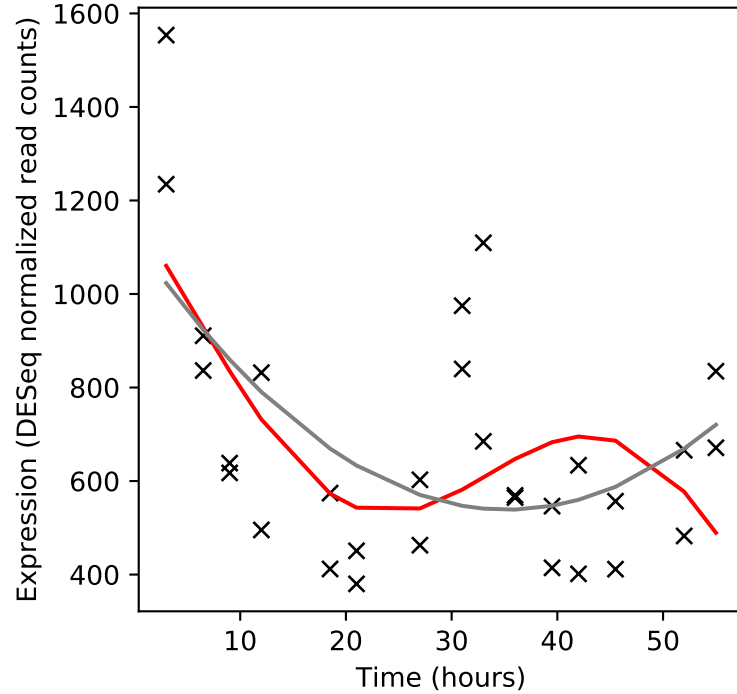

Rv3444c/esxT

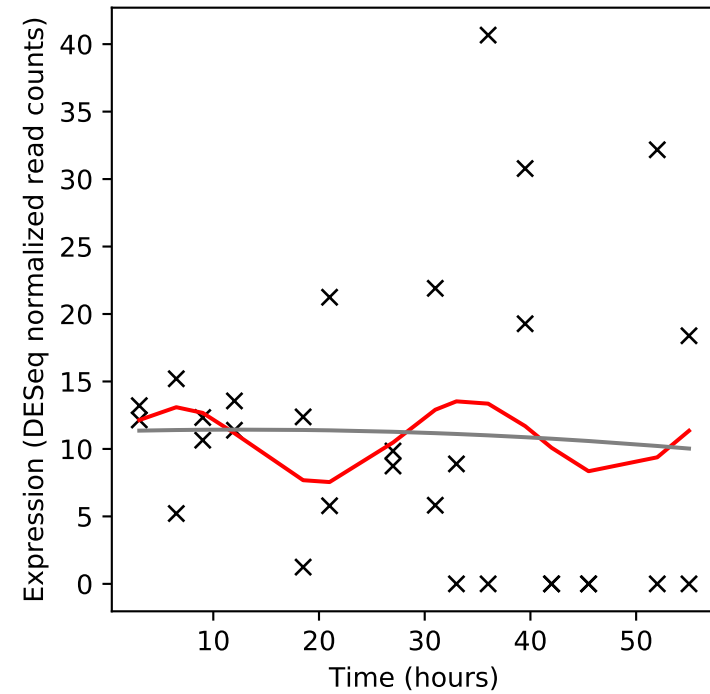

Rv3445c/esxU

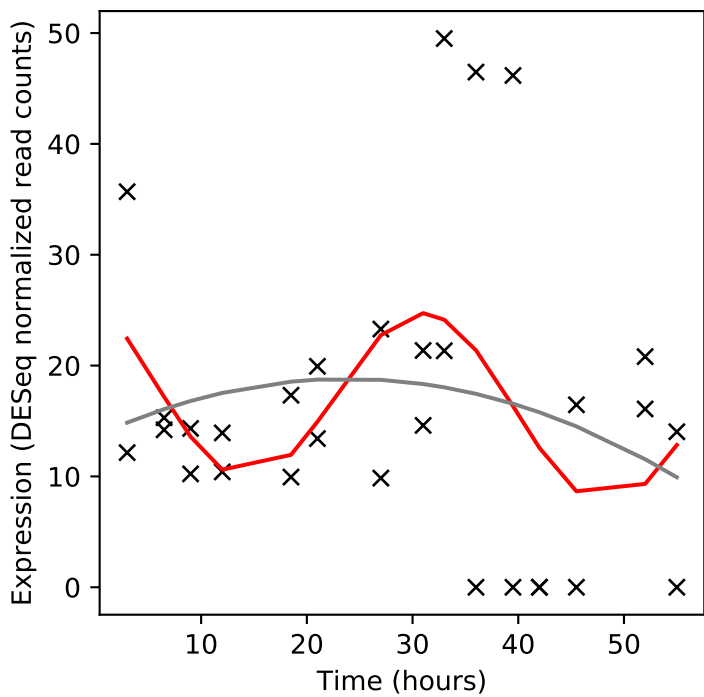

Rv3446c/-

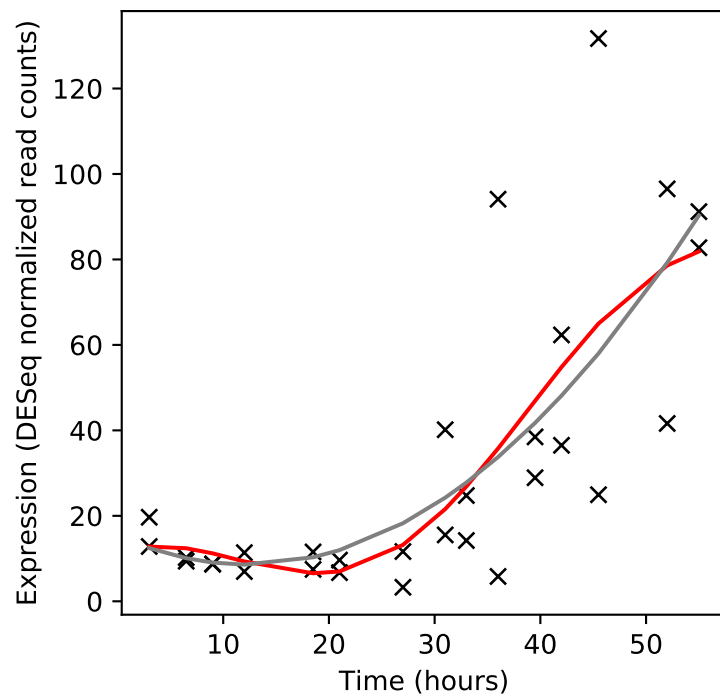

Rv3447c/eccC4

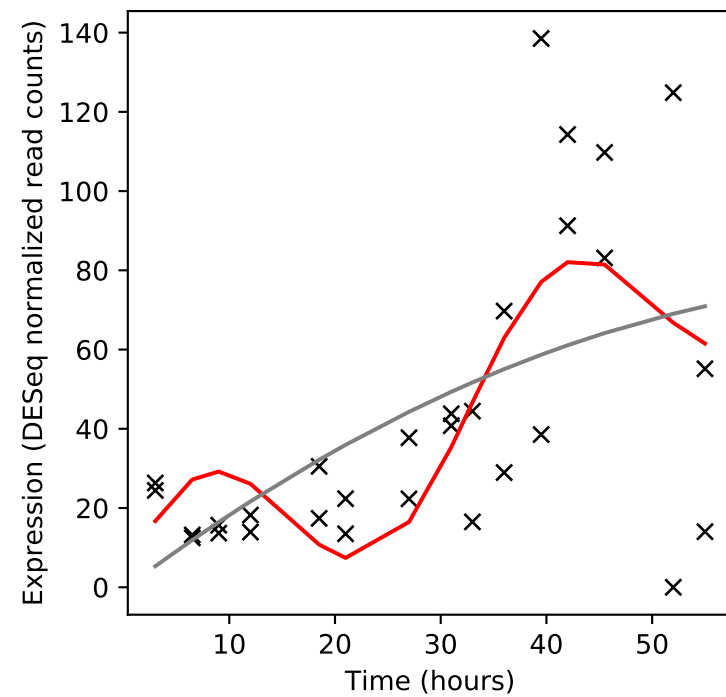

Rv3448c/eccD4

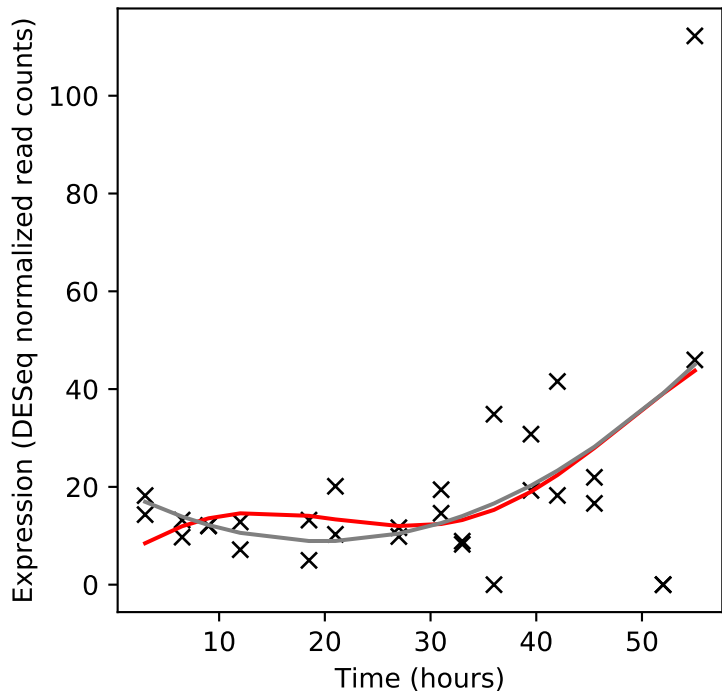

Rv3449c/mycP4

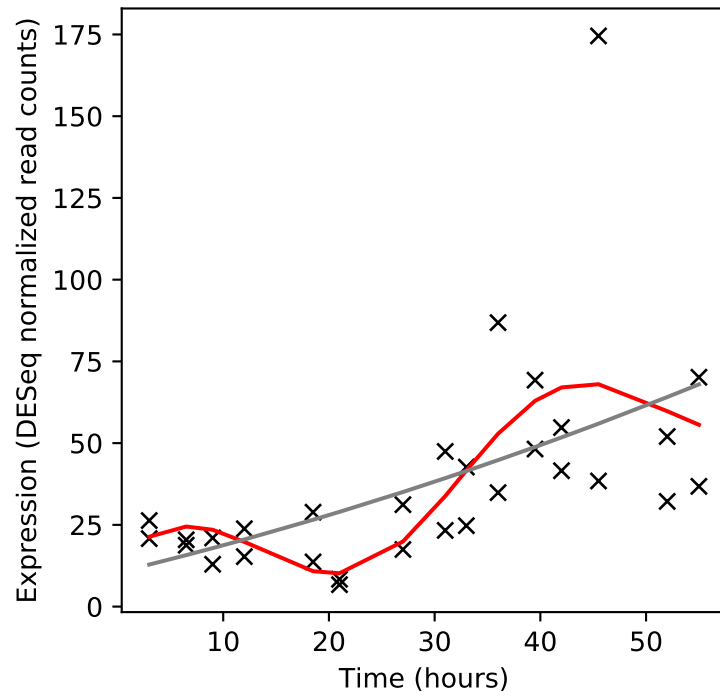

Rv3450c/eccB4

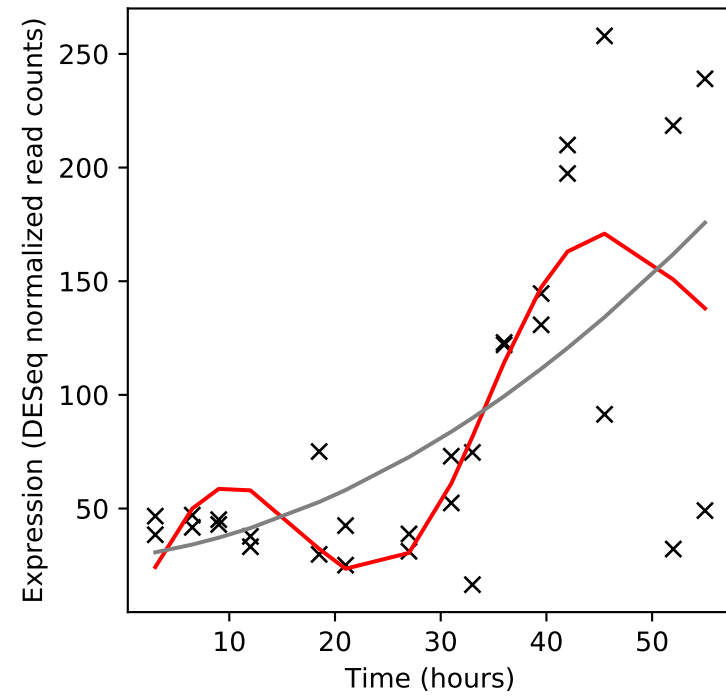



Rv3451/cut3

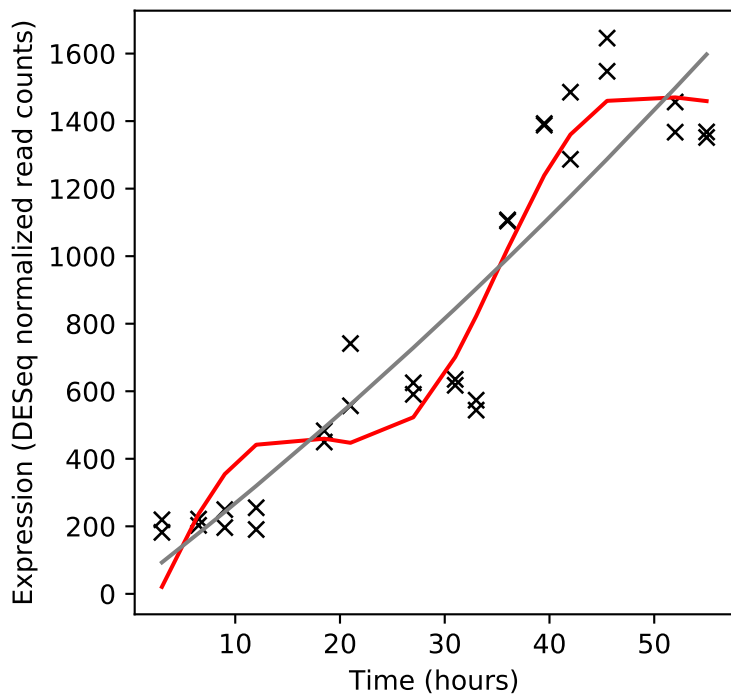

Rv3452/cut4

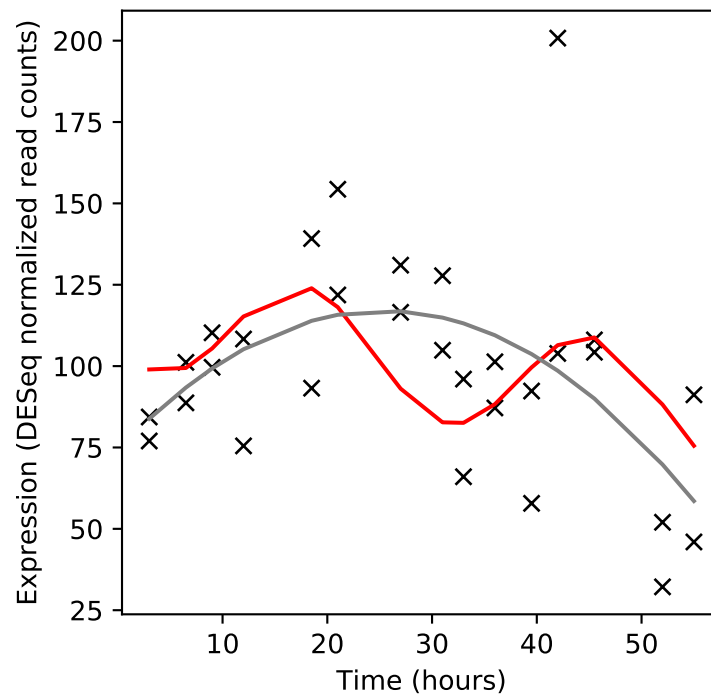

Rv3453/-

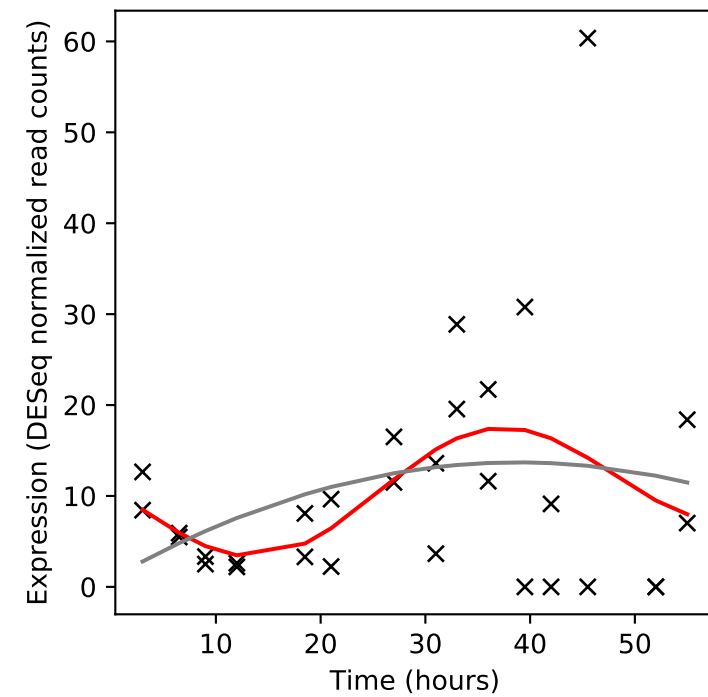

Rv3454/-

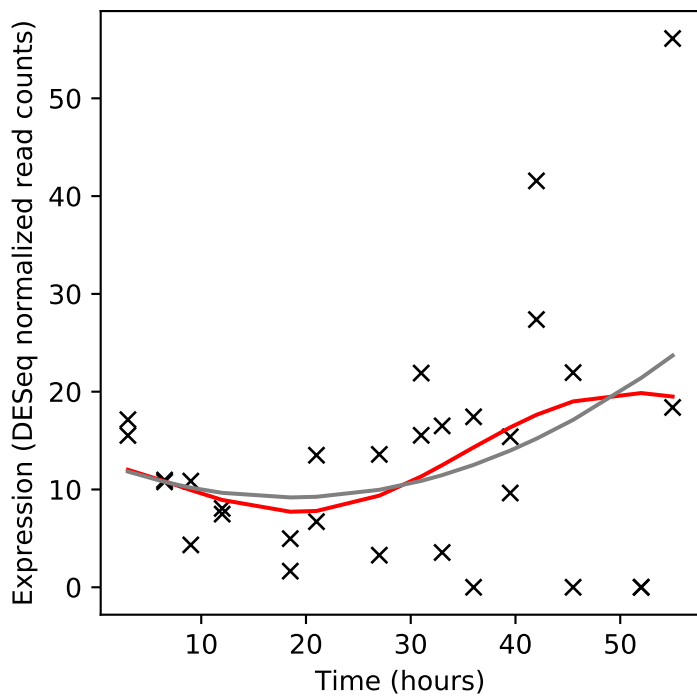

Rv3455c/truA

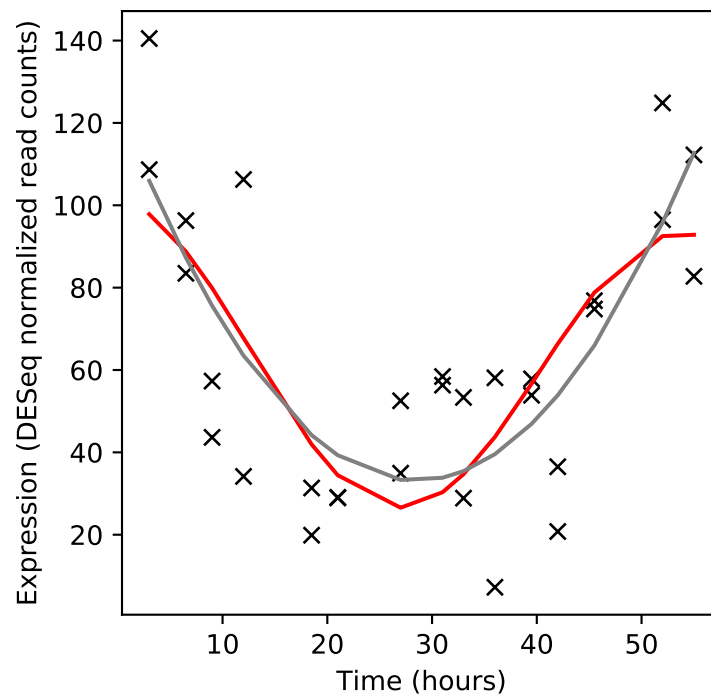

Rv3456c/rplQ

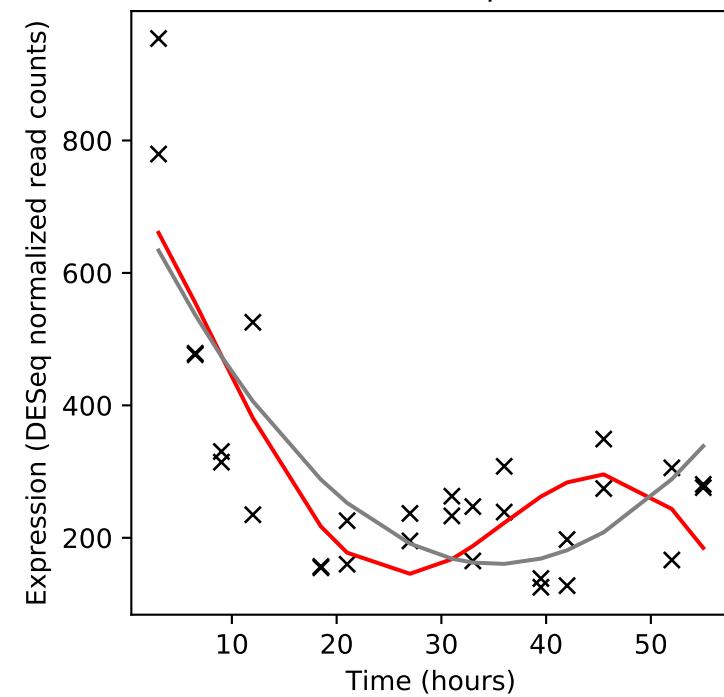

Rv3457c/rpoA

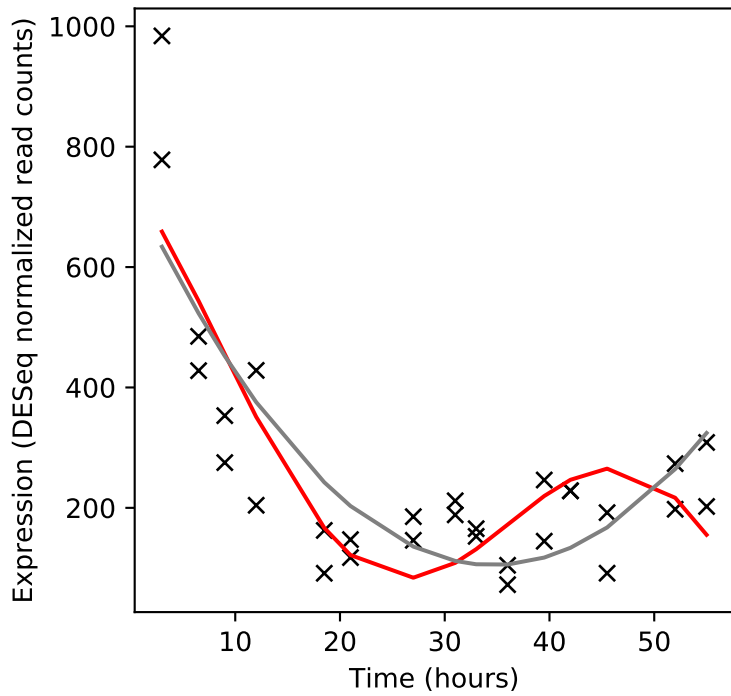

Rv3458c/rpsD

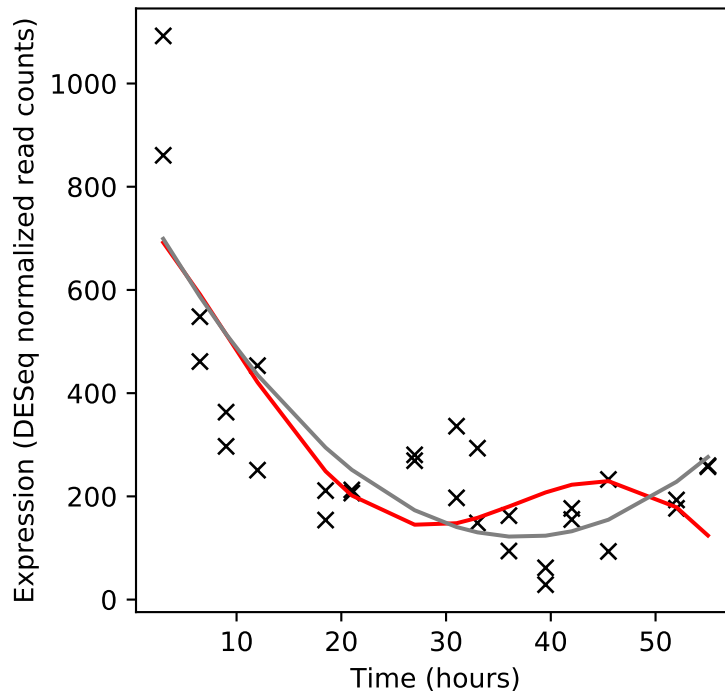

Rv3459c/rpsK

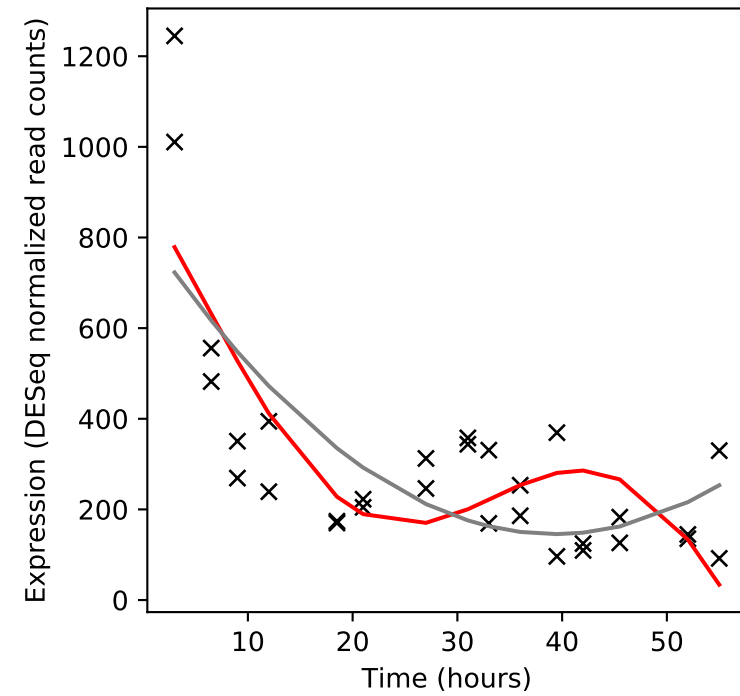

Rv3460c/rpsM

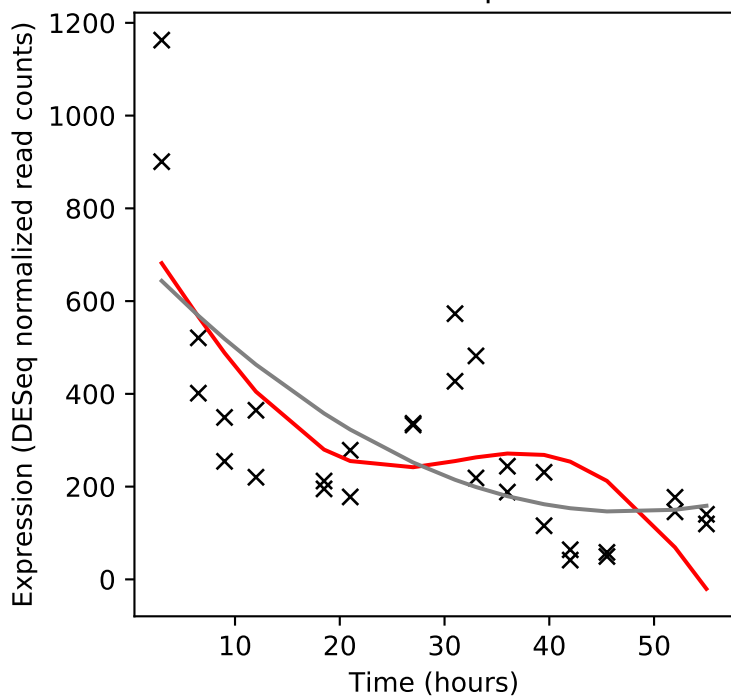

Rv3461c/rpmJ

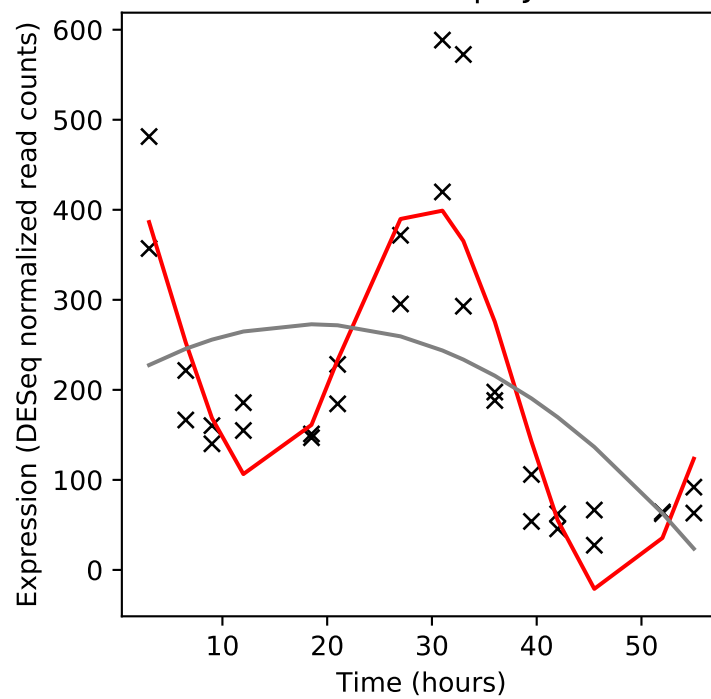

Rv3462c/infA

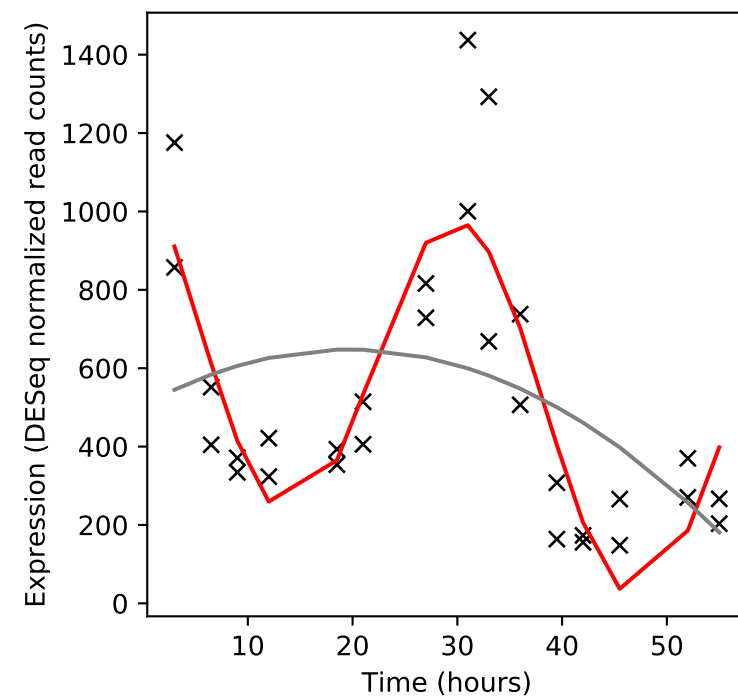

Rv3463/-

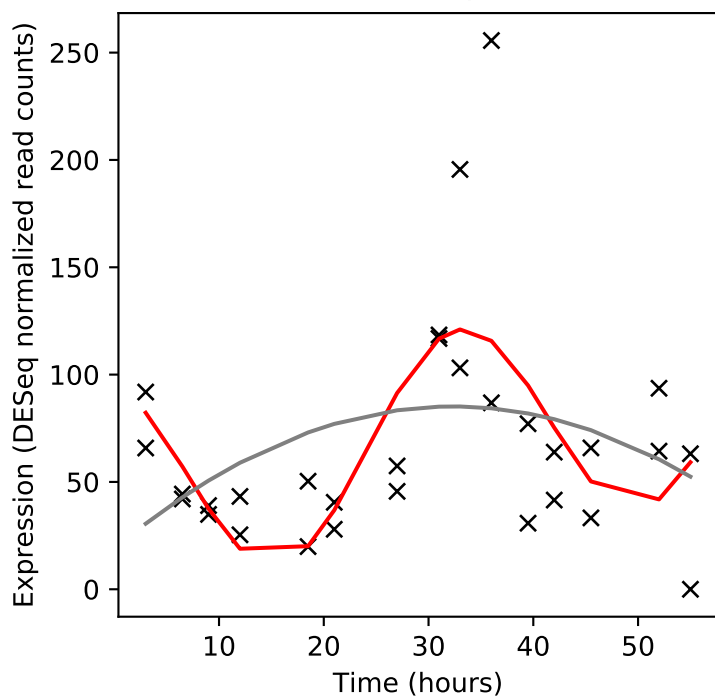

Rv3464/rmlB

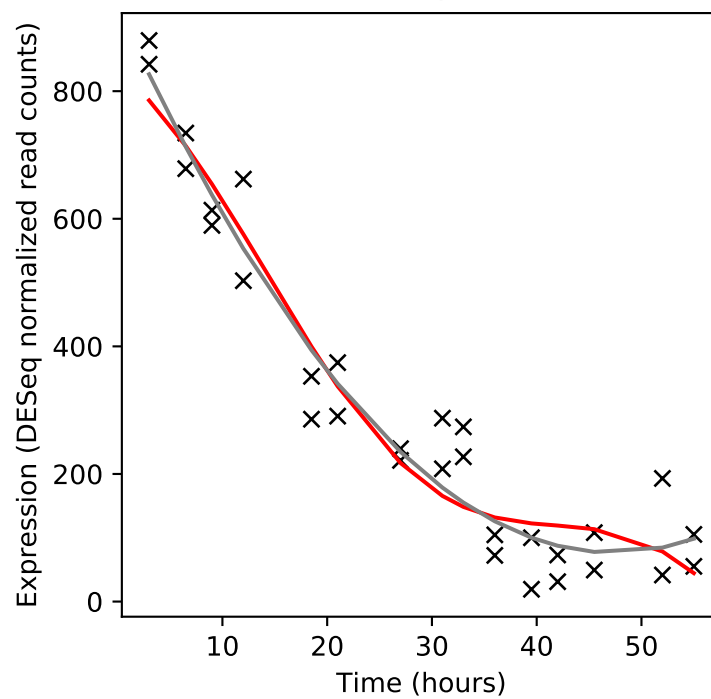

Rv3465/rmlC

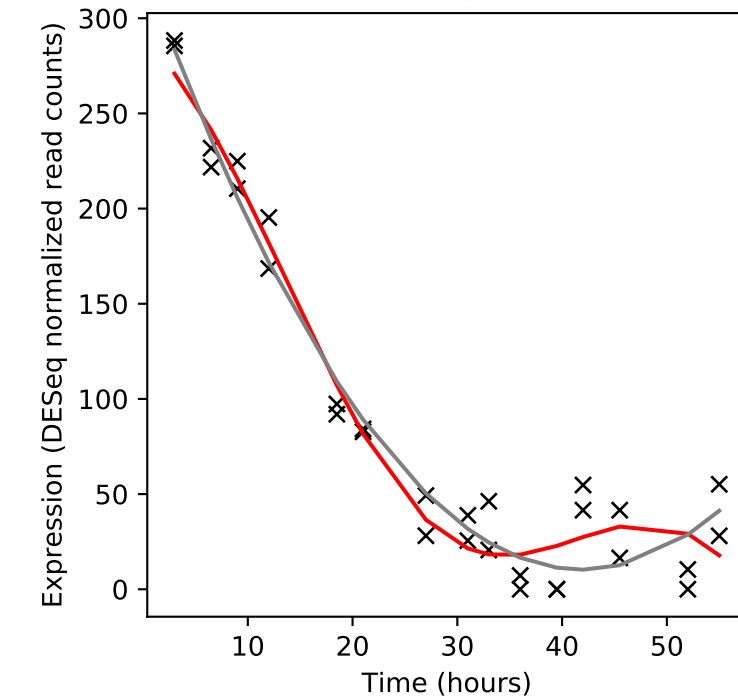

Rv3466/-

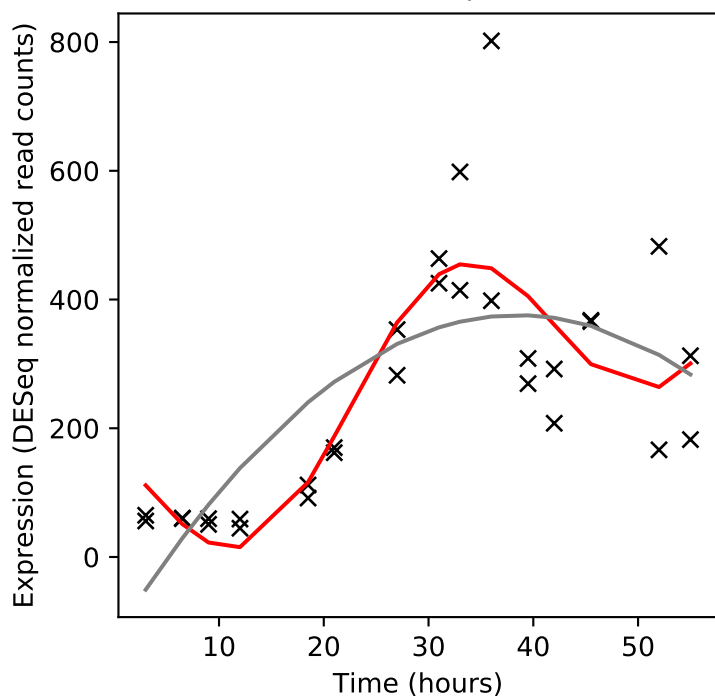

Rv3467/-

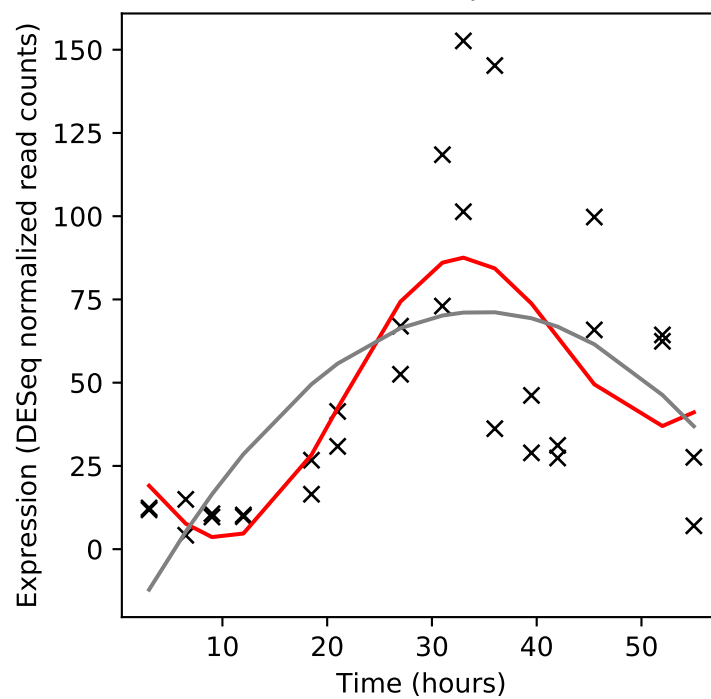

Rv3468c/-

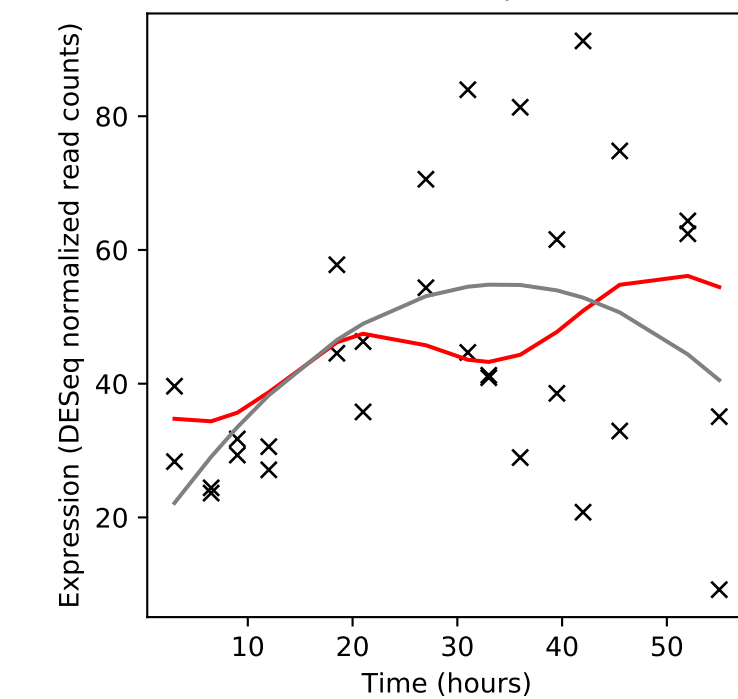

Rv3469c/mhpE

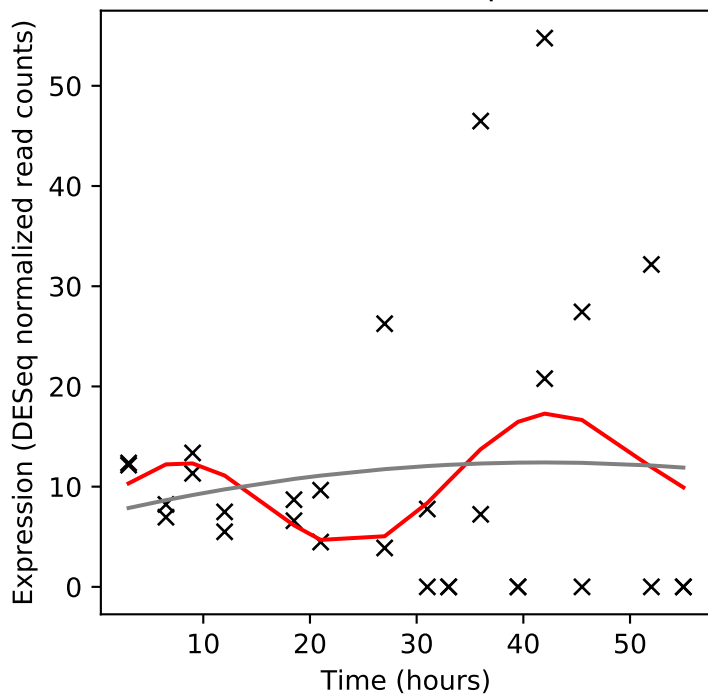

Rv3470c/ilvB2

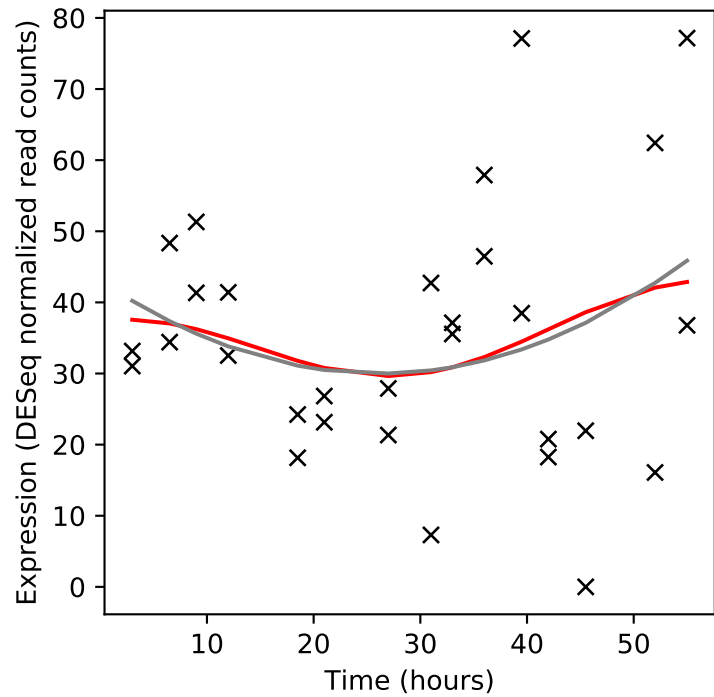

Rv3471c/-

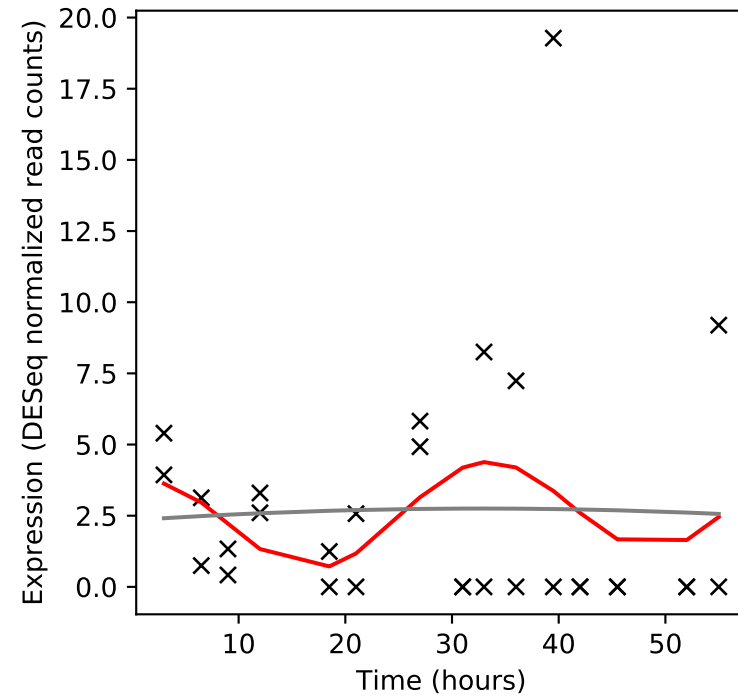

Rv3472/-

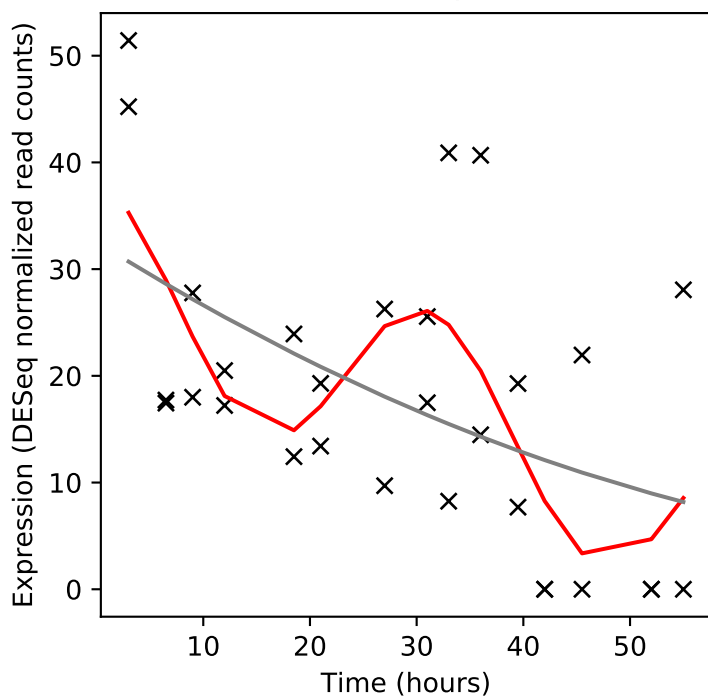

Rv3473c/bpoA

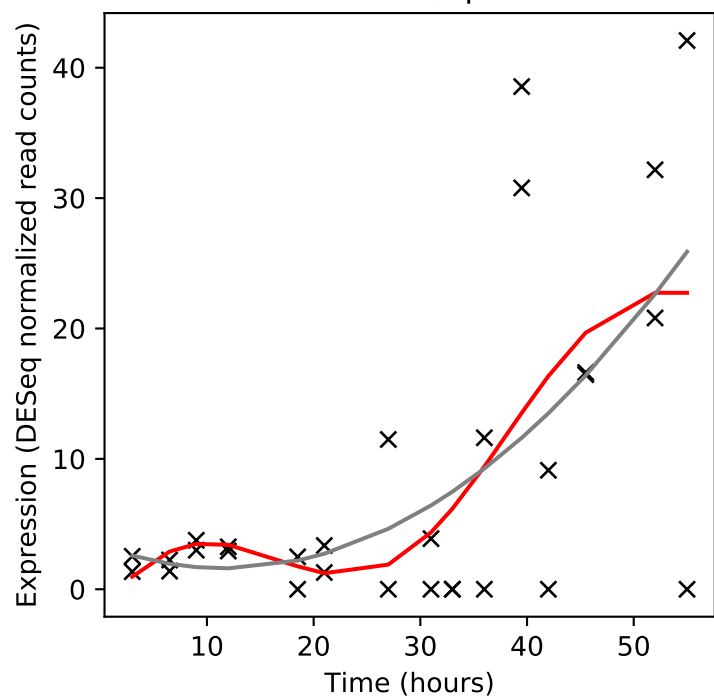

Rv3474/-

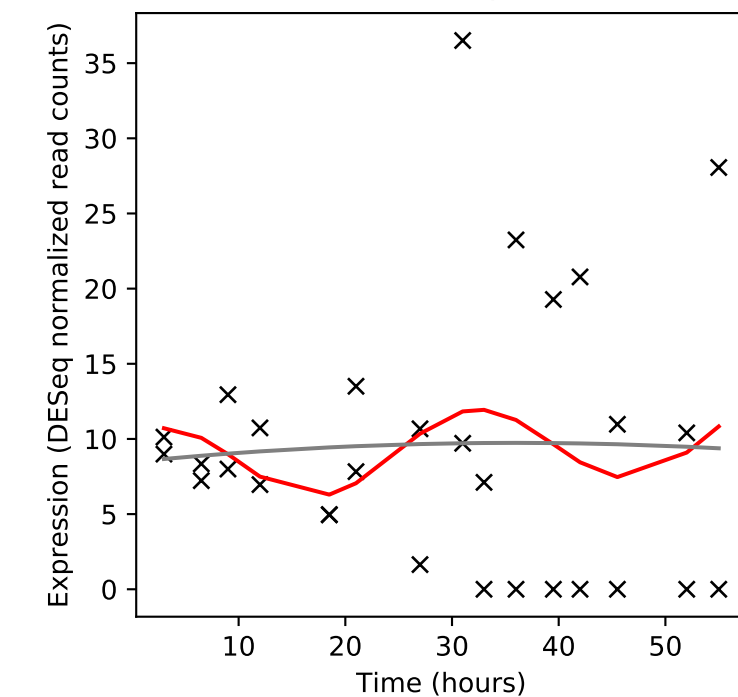

Rv3475/-

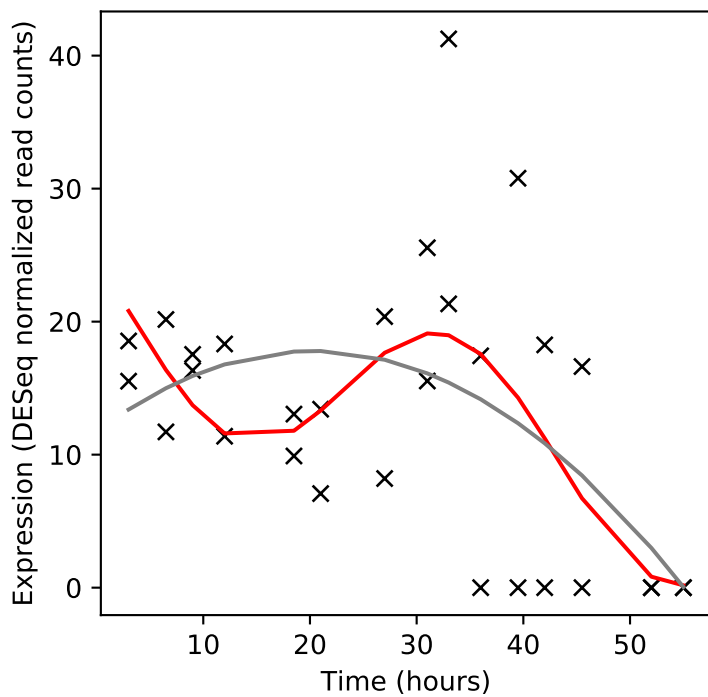

Rv3476c/kgtP

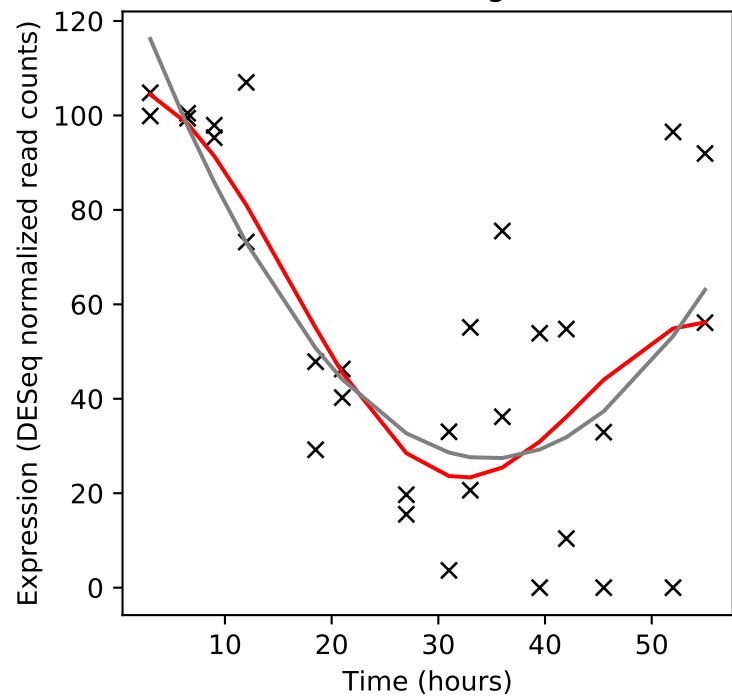

Rv3477/PE31

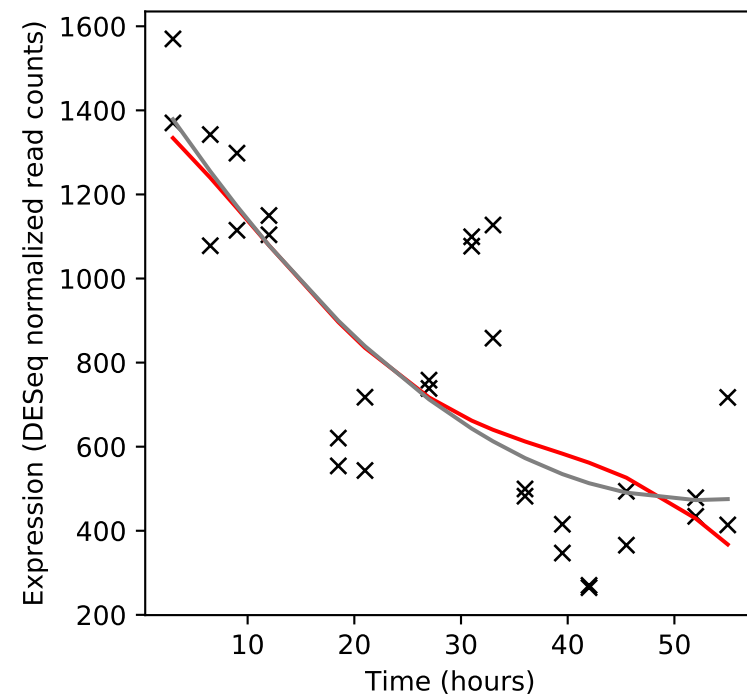

Rv3478/PPE60

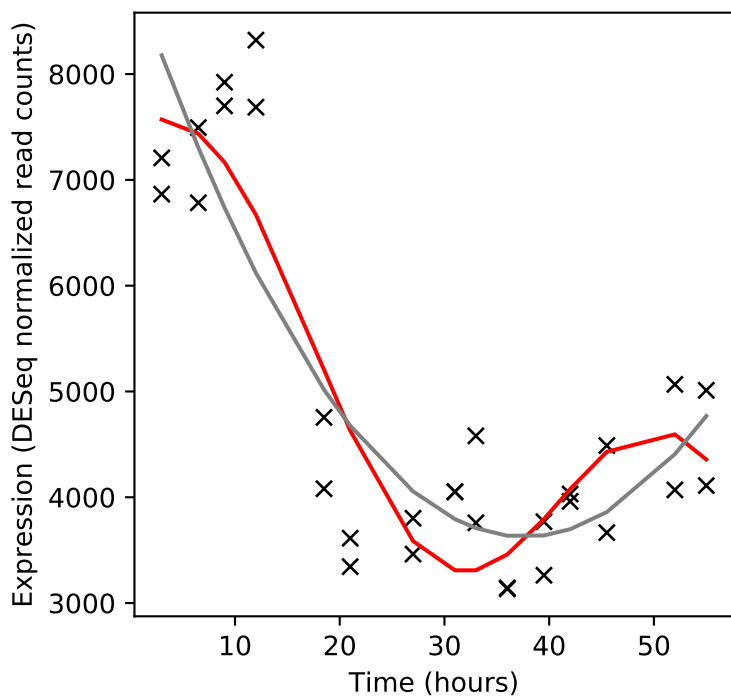

Rv3479/-

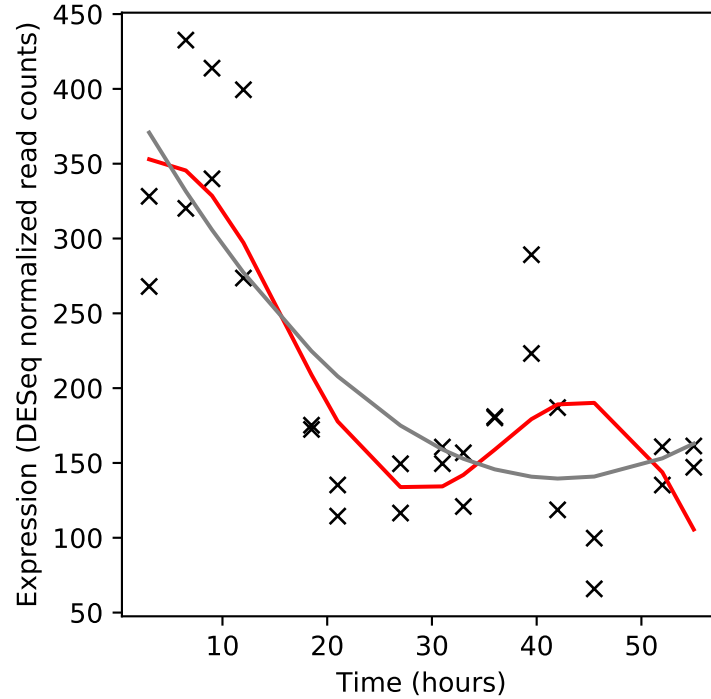

Rv3480c/-

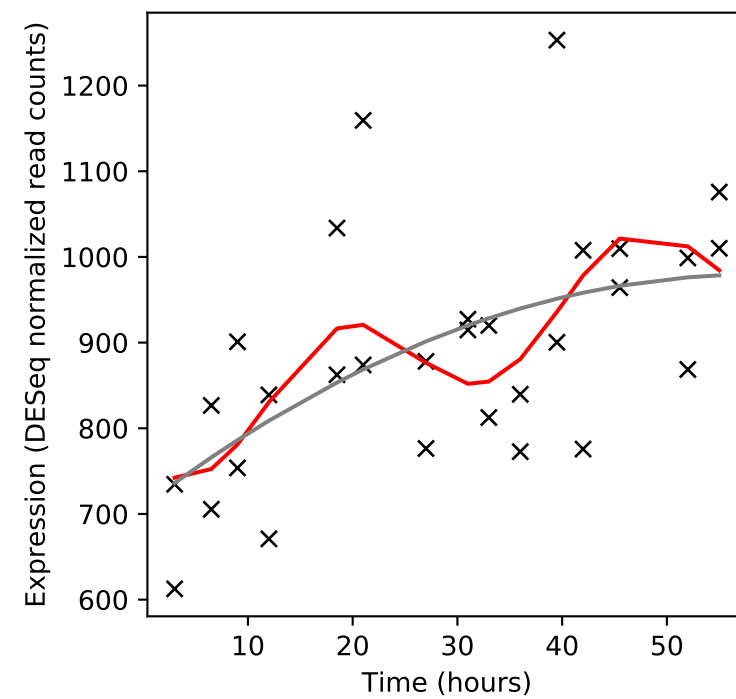

Rv3481c/-

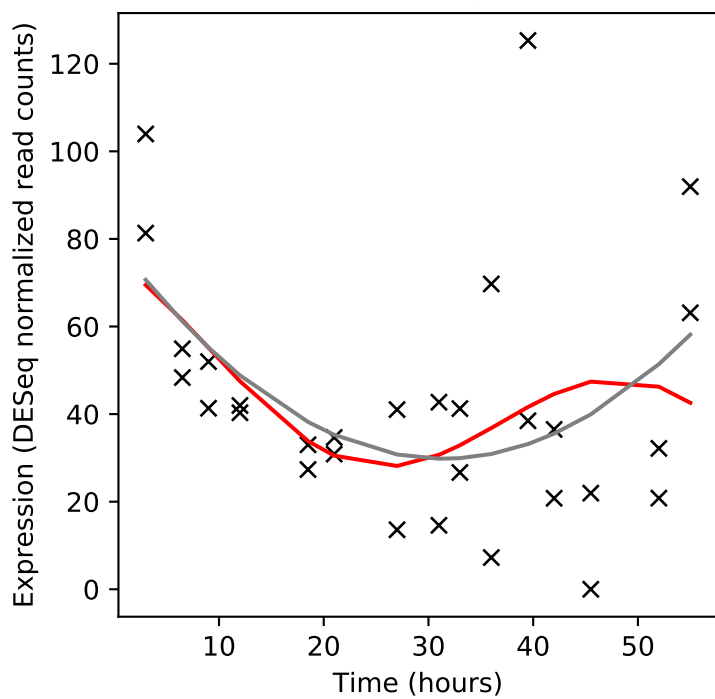

Rv3482c/-

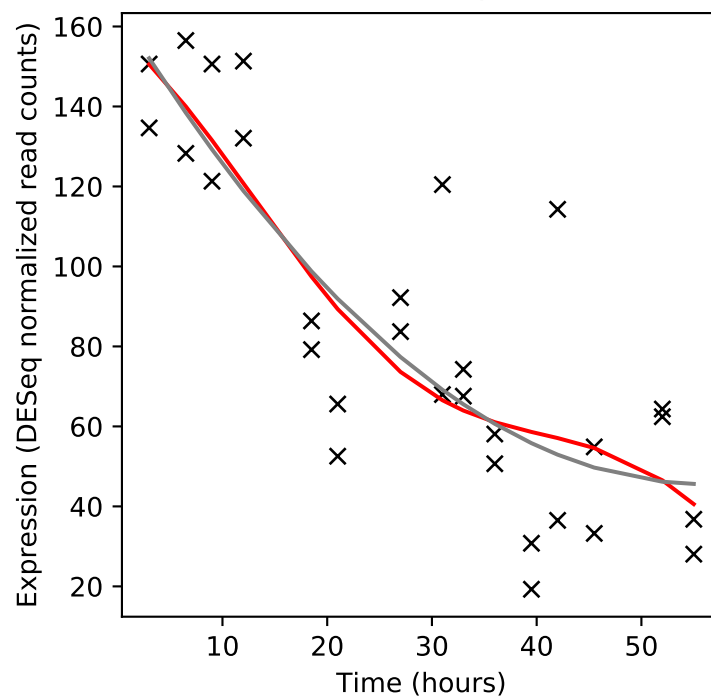

Rv3483c/-

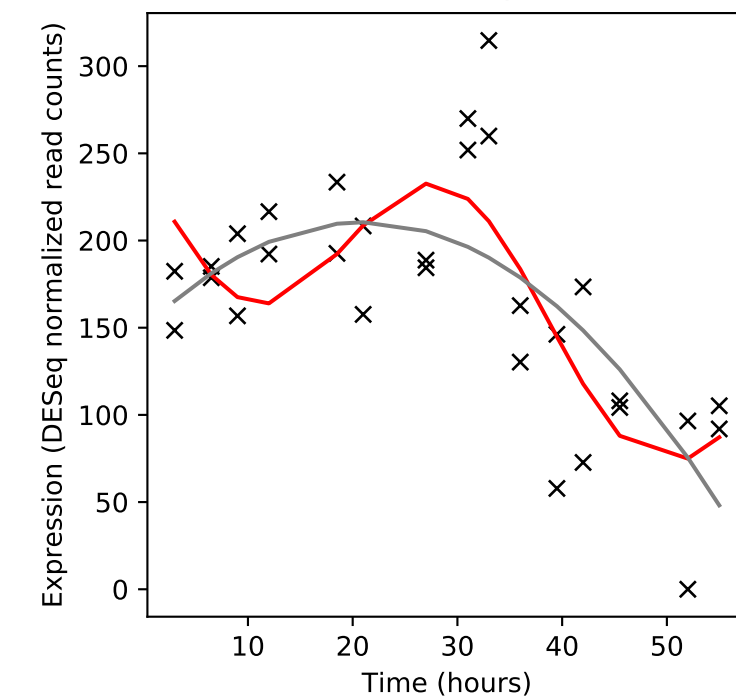

Rv3484/cpsA

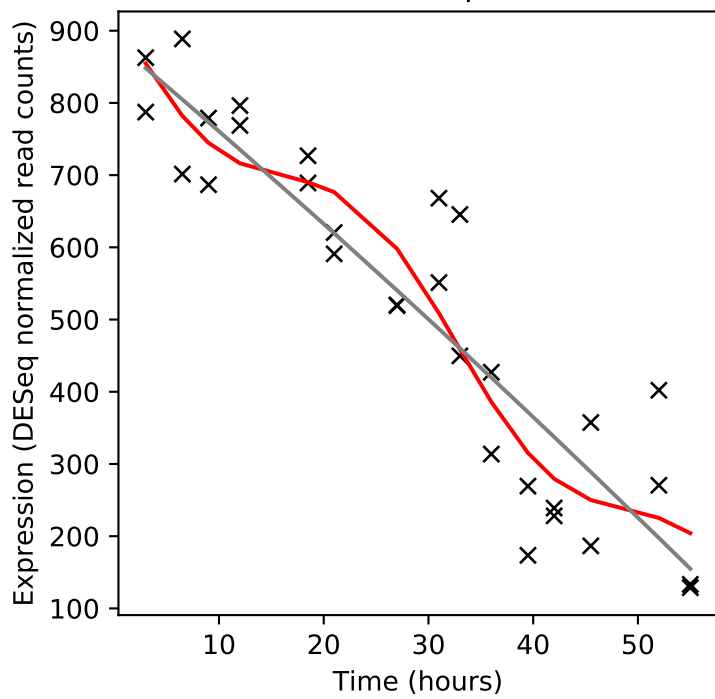

Rv3485c/-

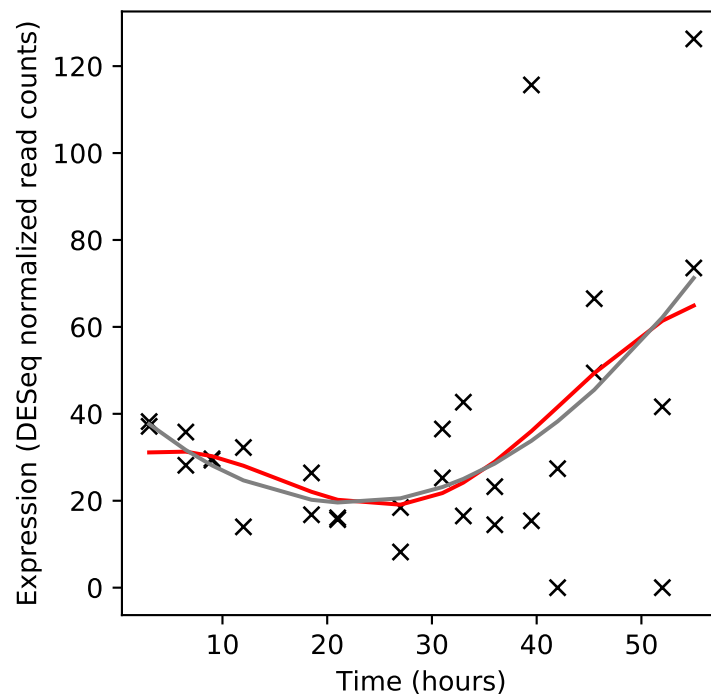

Rv3486/-

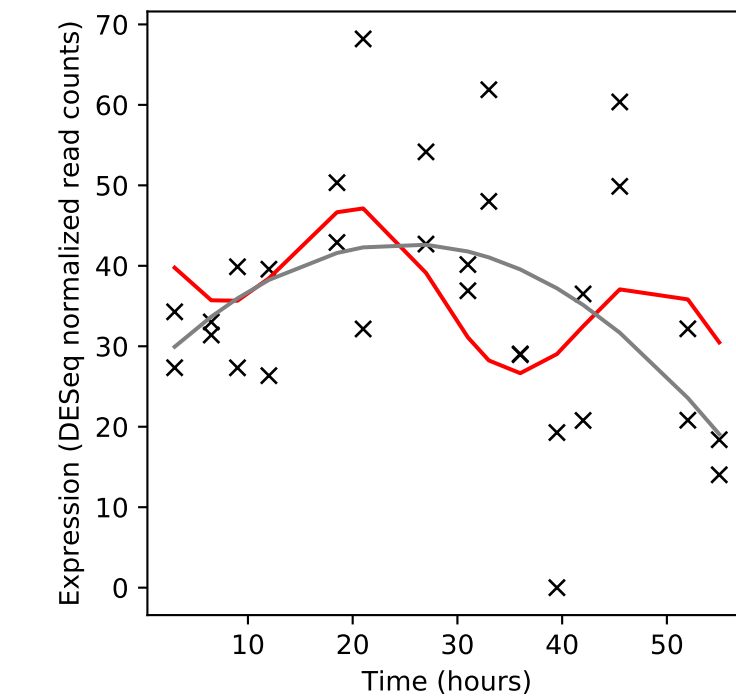

Rv3487c/lipF

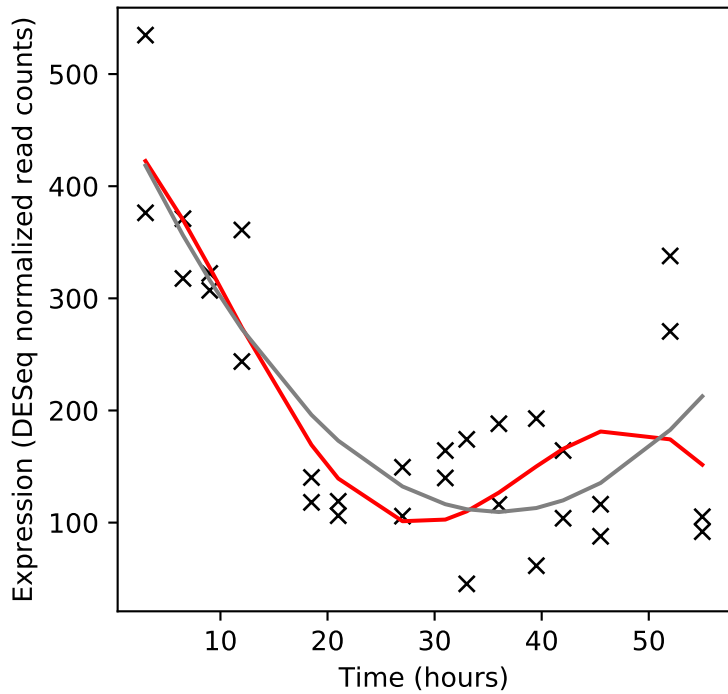

Rv3488/-

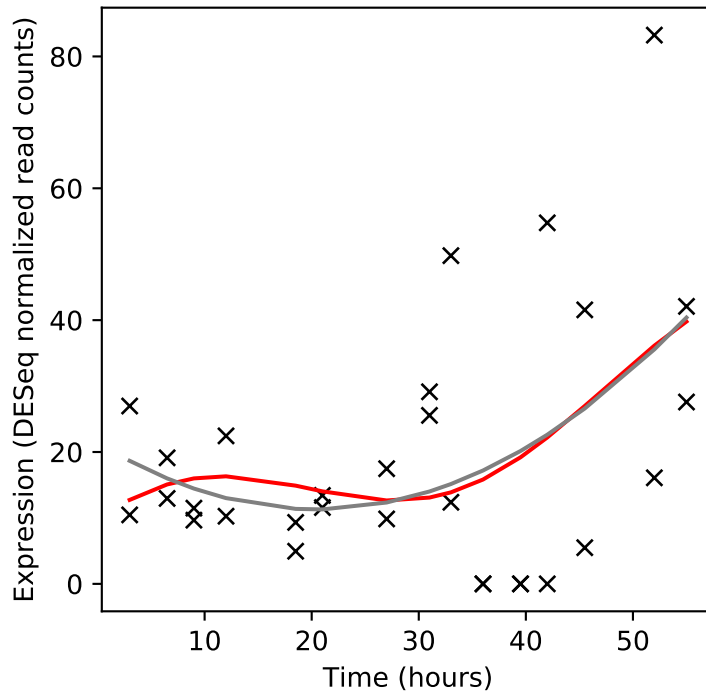

Rv3489/-

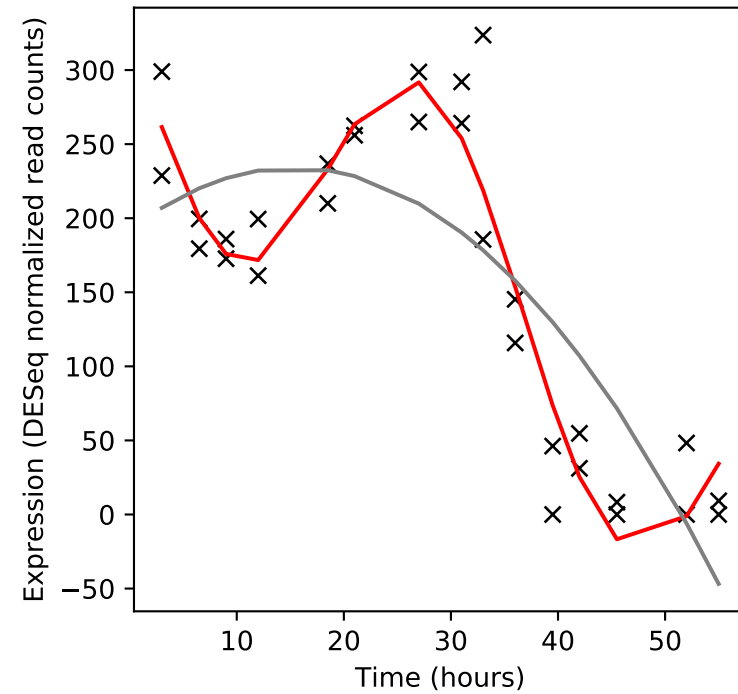

Rv3490/otsA

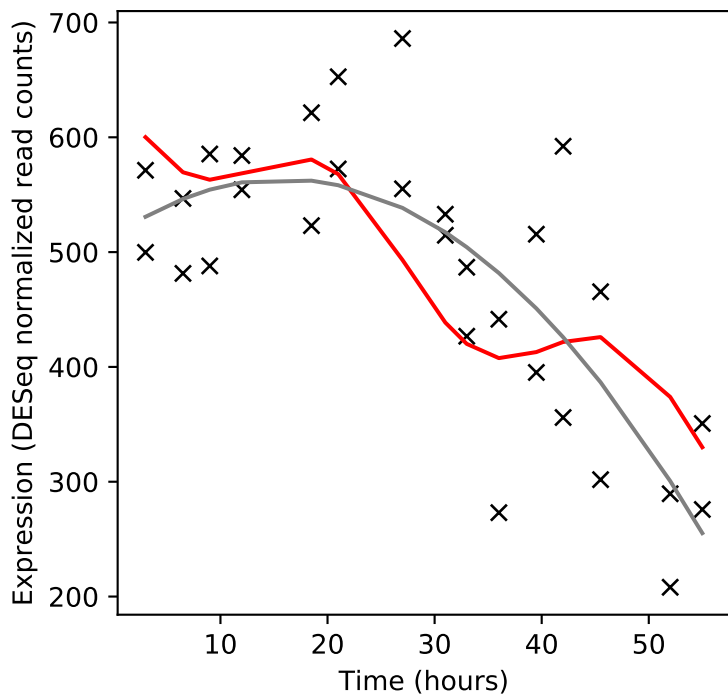

Rv3491/-

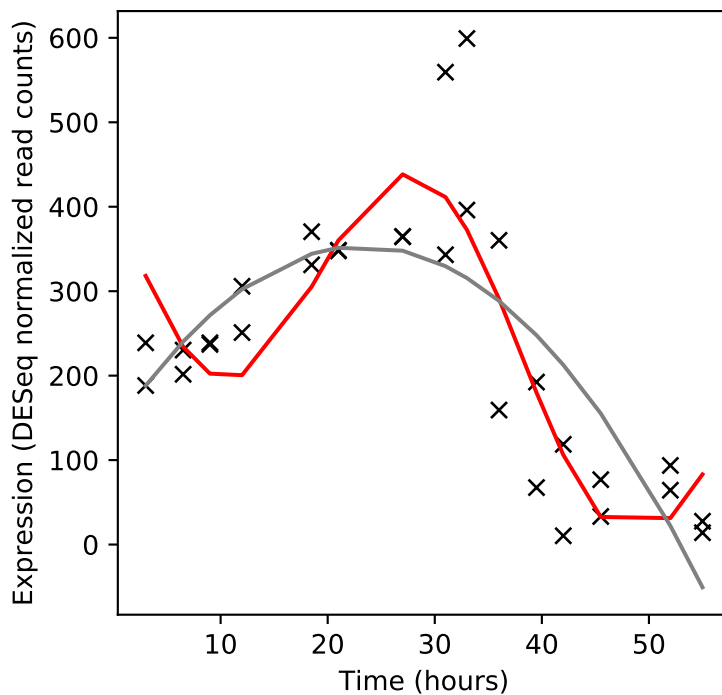

Rv3492c/-

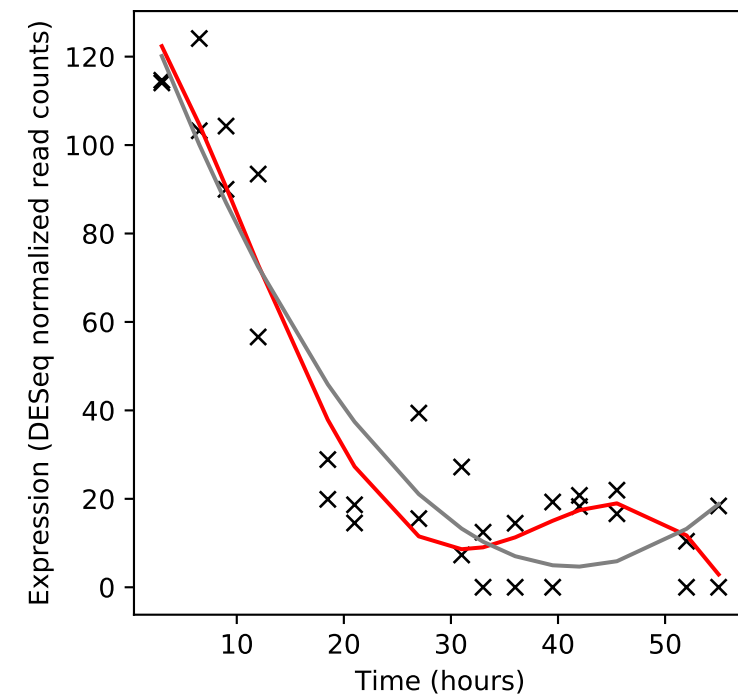

Rv3493c/-

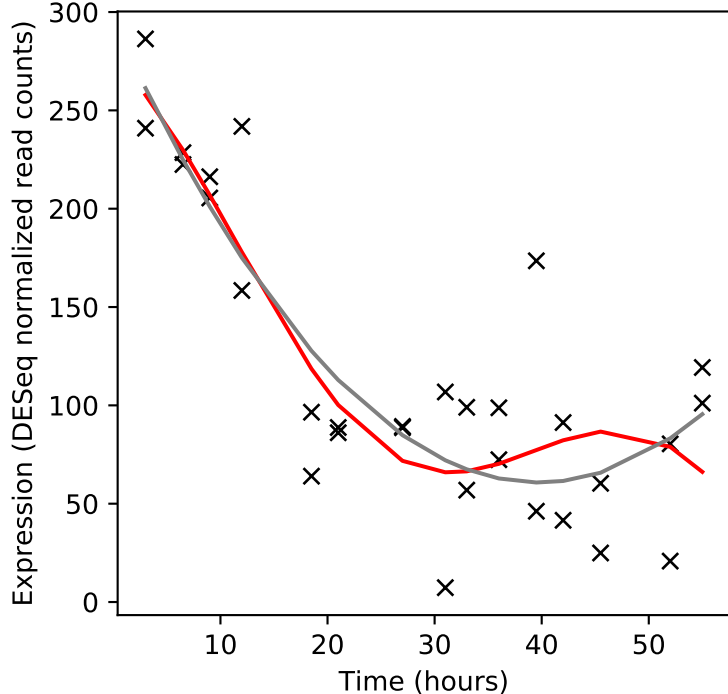

Rv3494c/mce4F

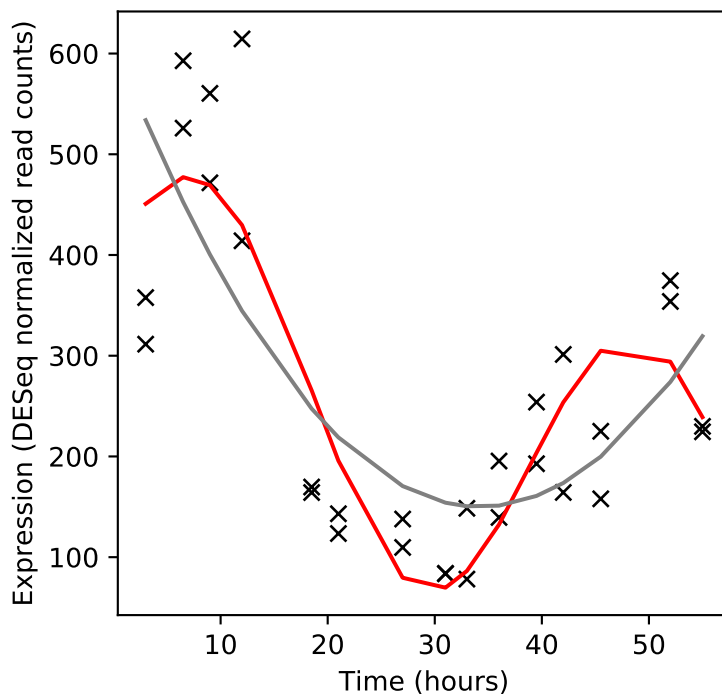

Rv3495c/lprN

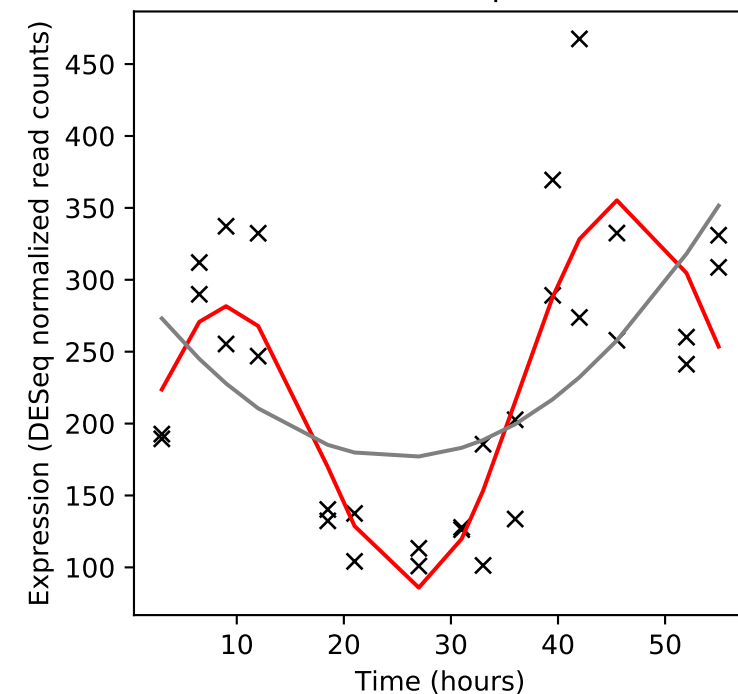

Rv3496c/mce4D

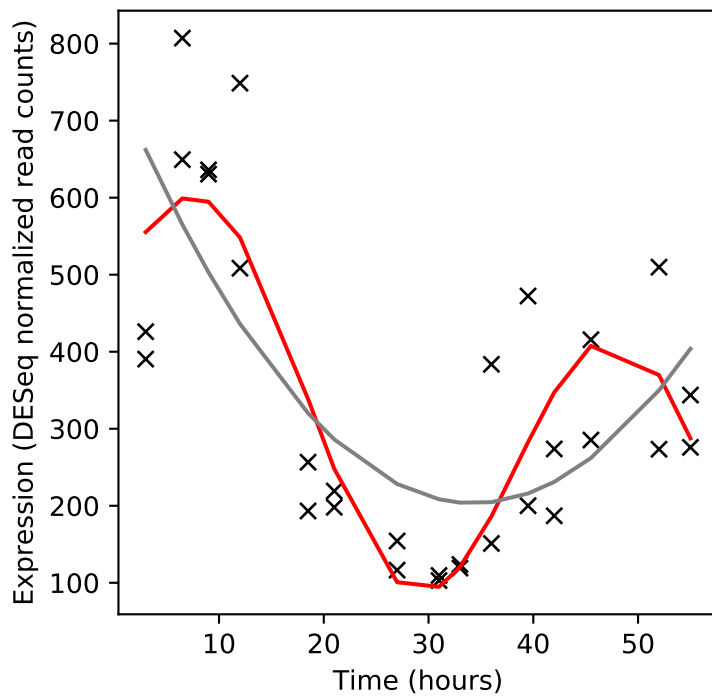

Rv3497c/mce4C

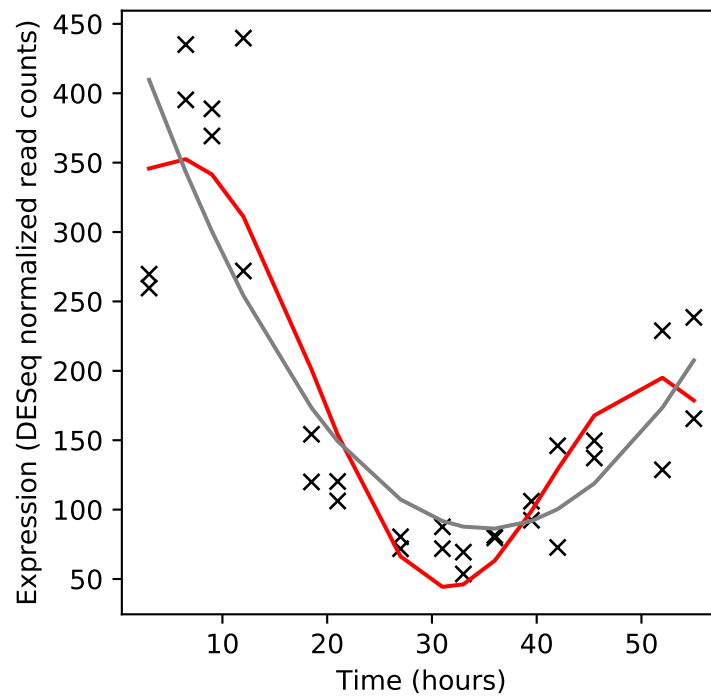

Rv3498c/mce4B

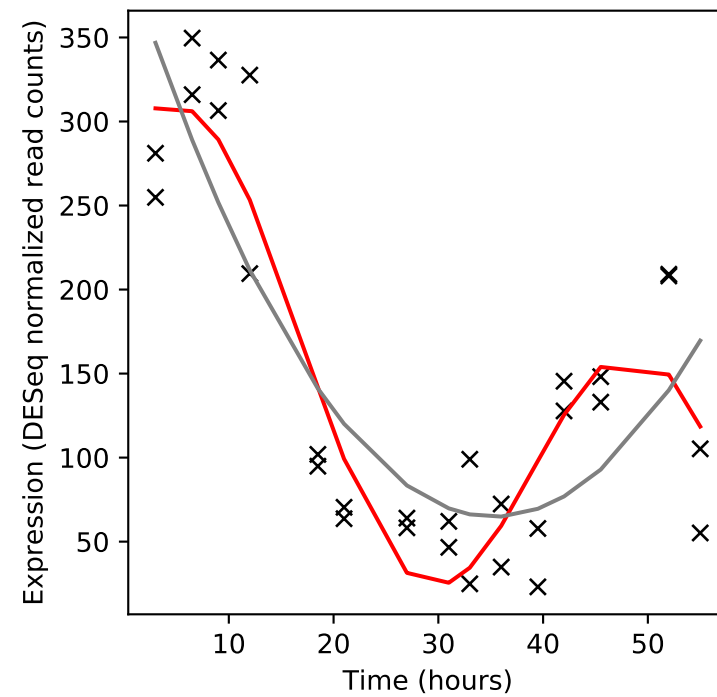

Rv3499c/mce4A

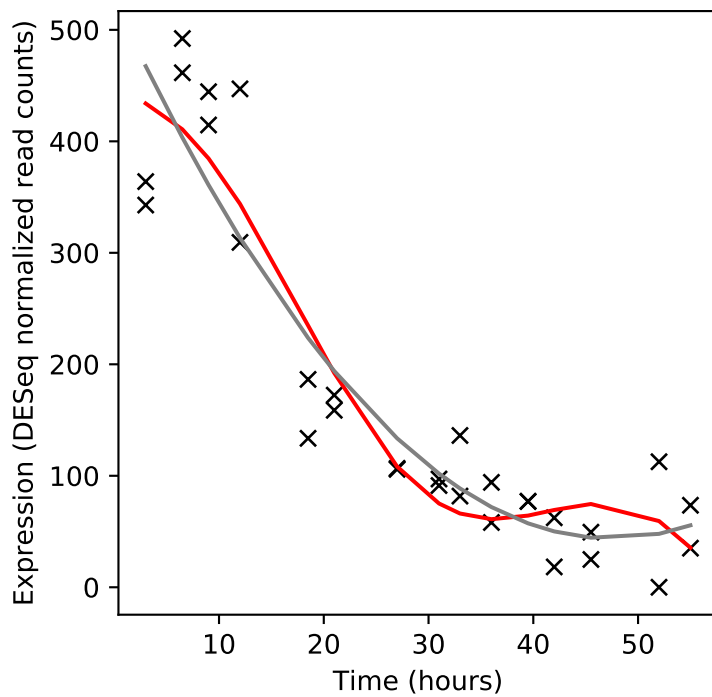

Rv3500c/yrbE4B

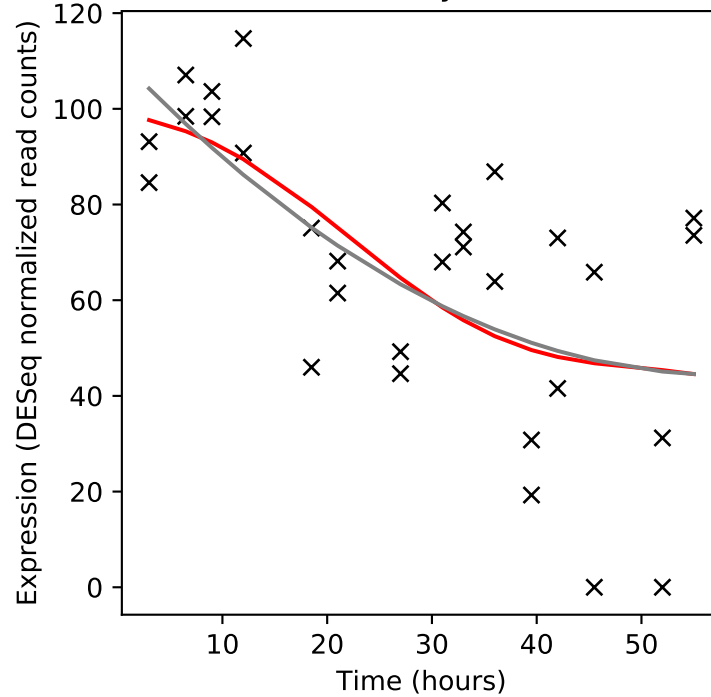

Rv3501c/yrbE4A

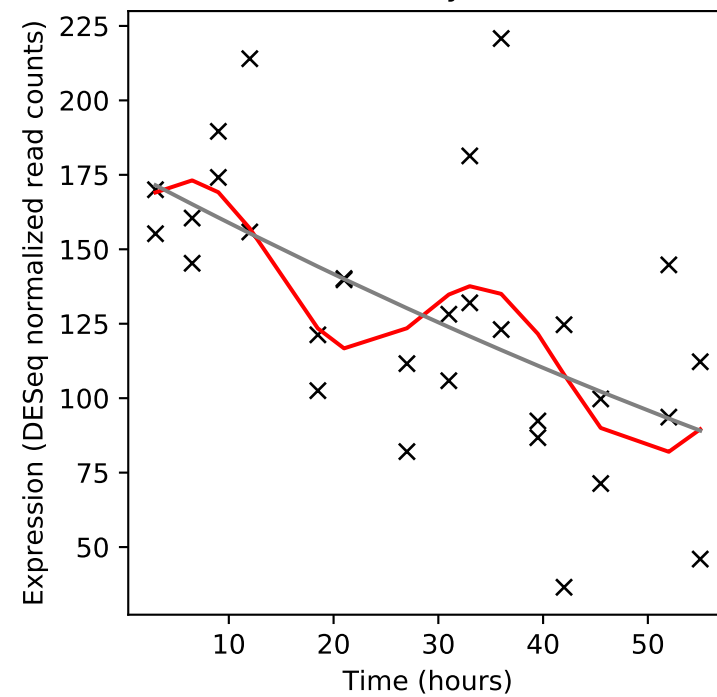

Rv3502c/-

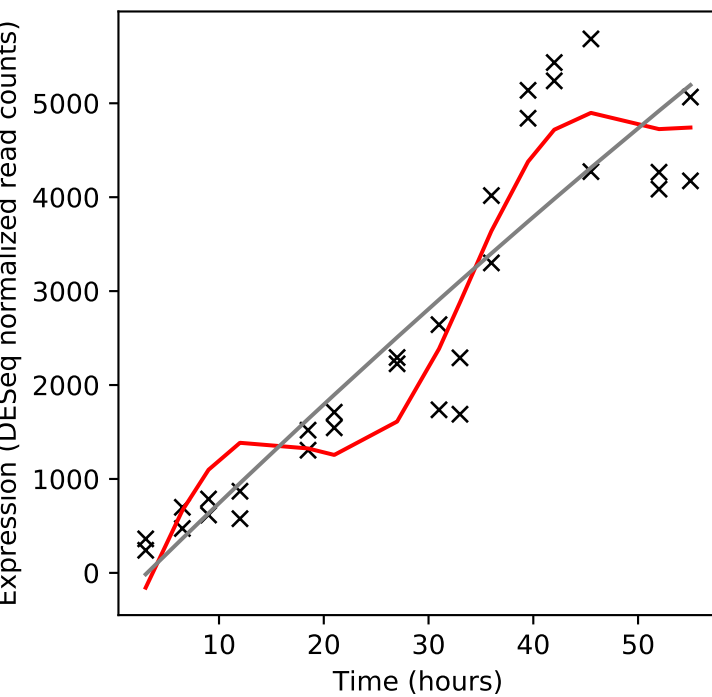

Rv3503c/fdxD

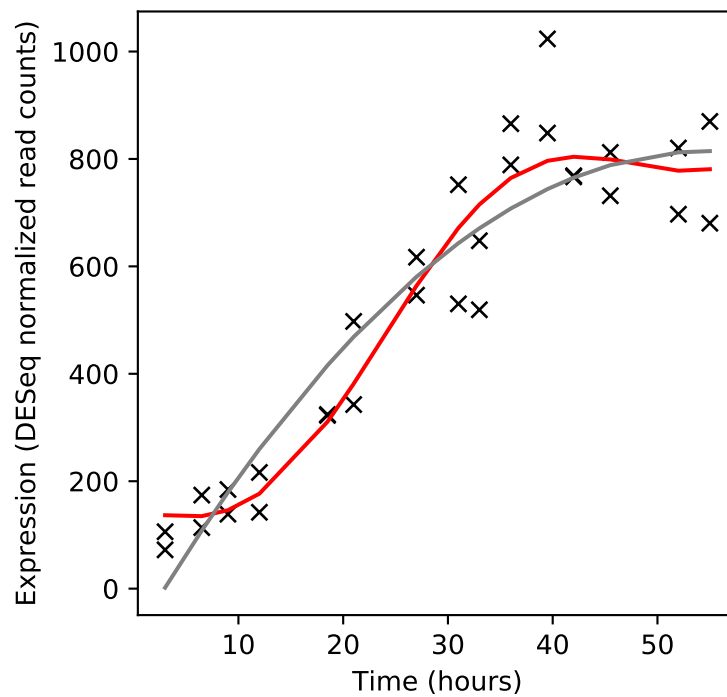

Rv3504/fadE26

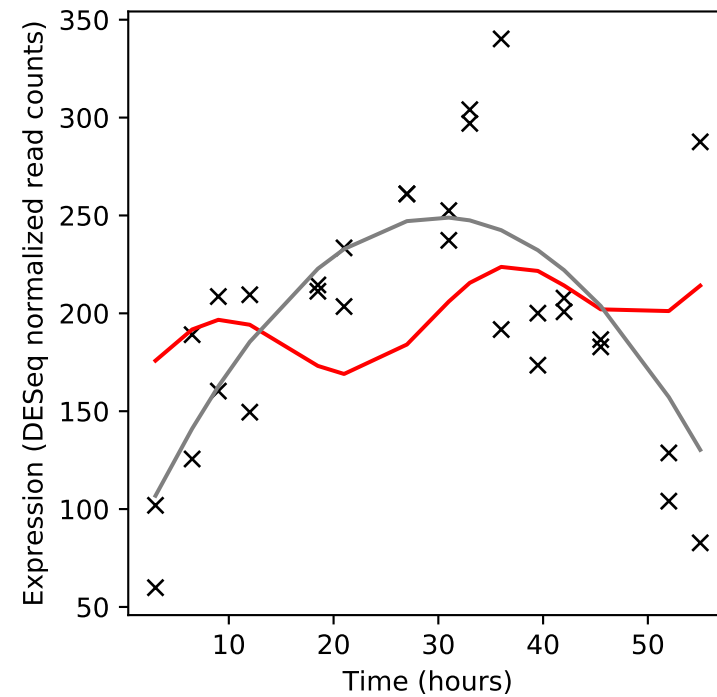

Rv3505/fadE27

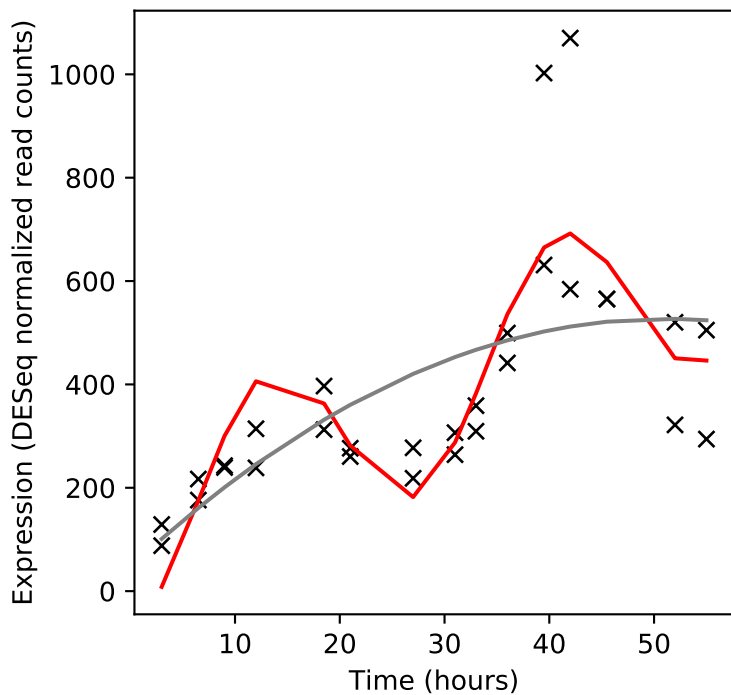

Rv3506/fadD17

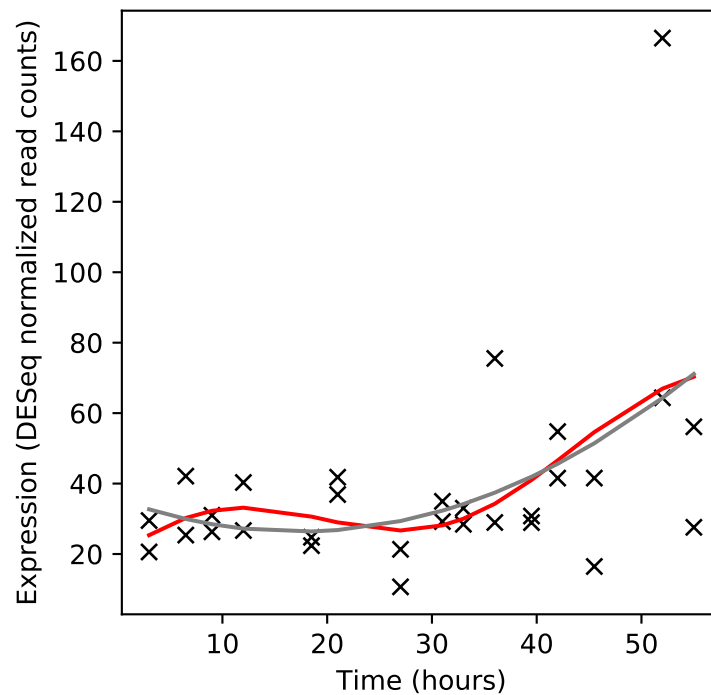

Rv3507/PE\_PGRS53

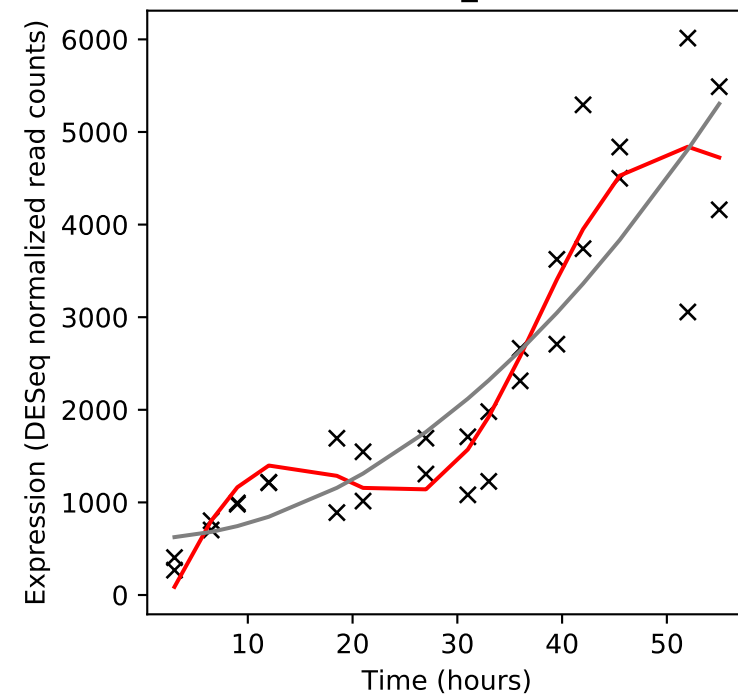

Rv3508/PE\_PGRS54

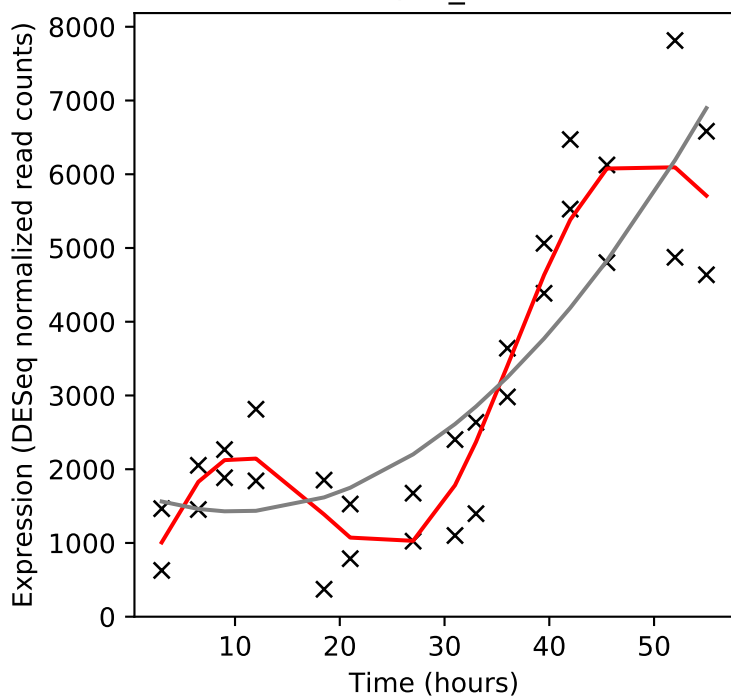

Rv3509c/ilvX

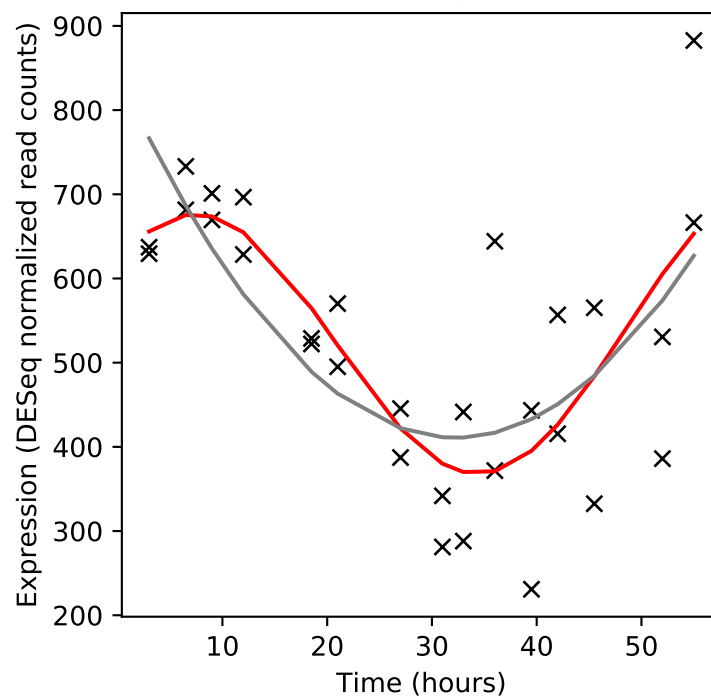

Rv3510c/-

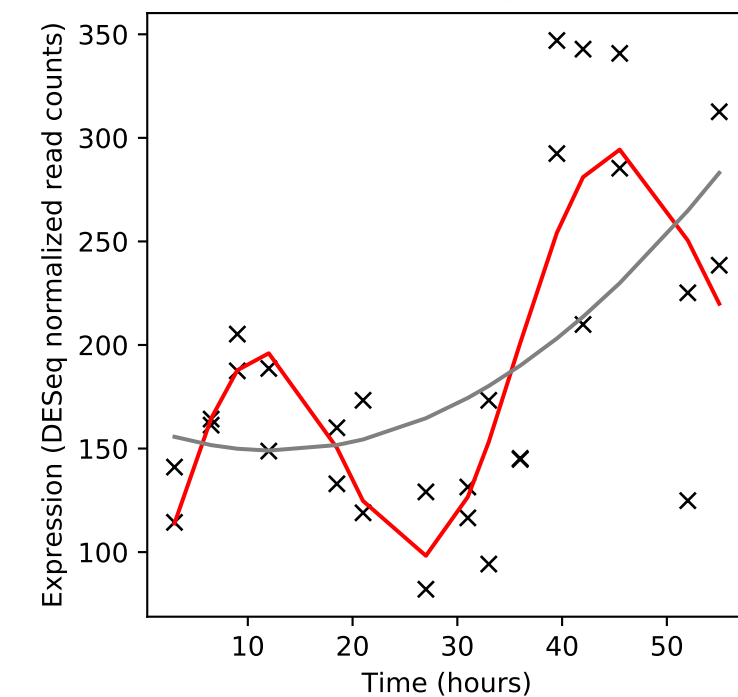

Rv3511/PE\_PGRS55

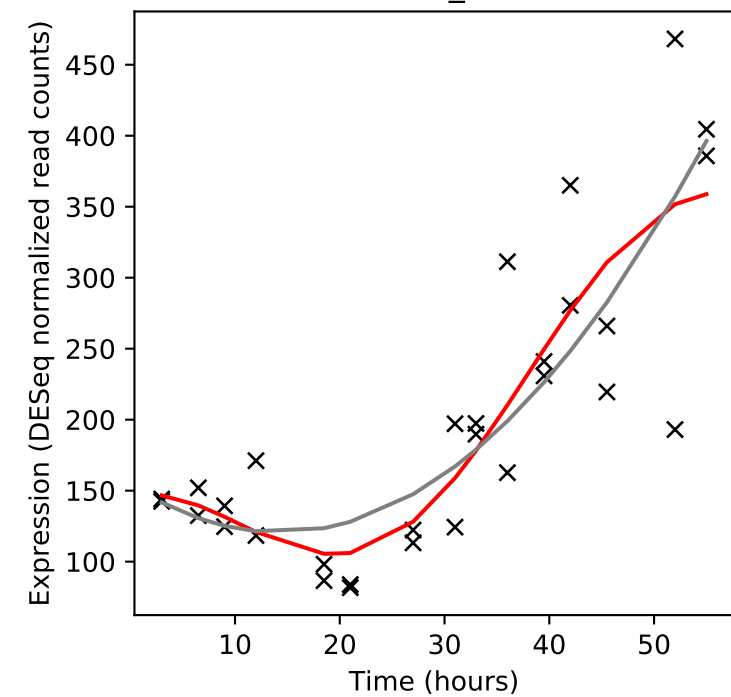

Rv3512/PE\_PGRS56

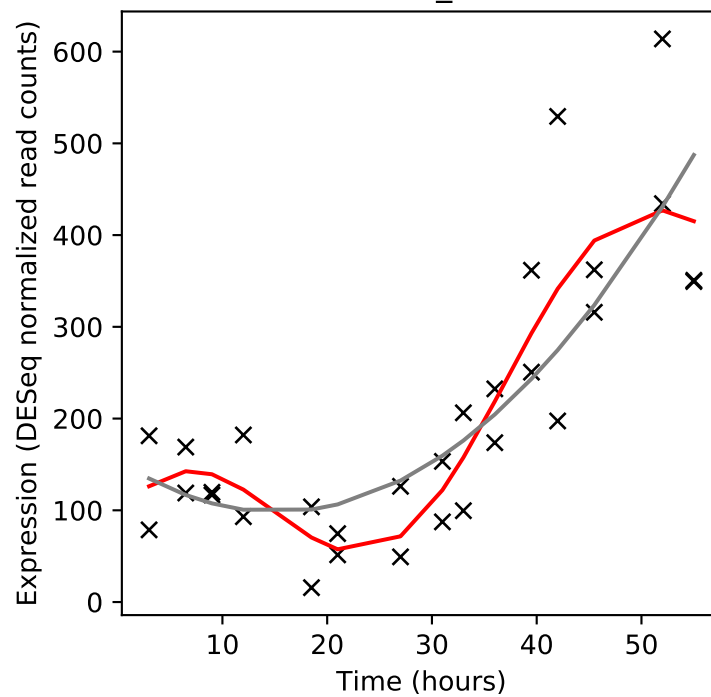

Rv3513c/fadD18

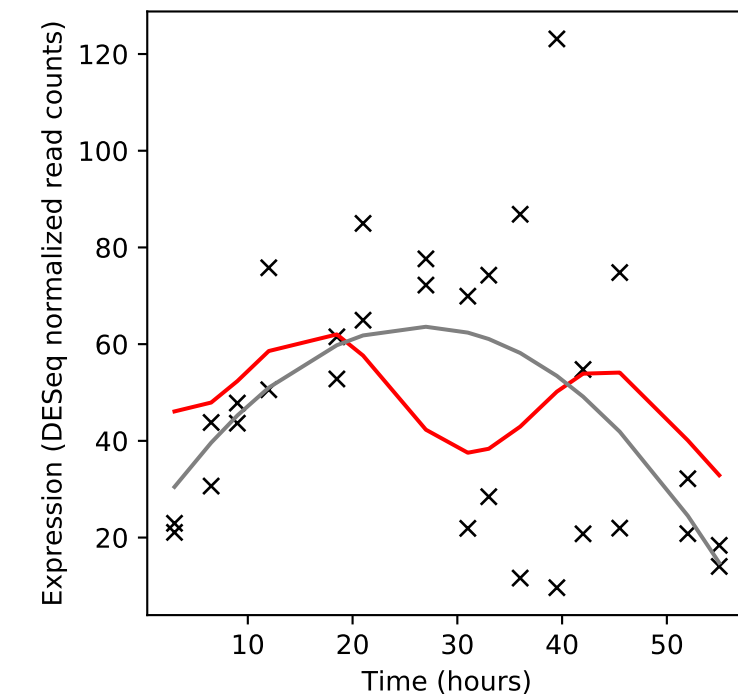



Rv3514/PE\_PGRS57

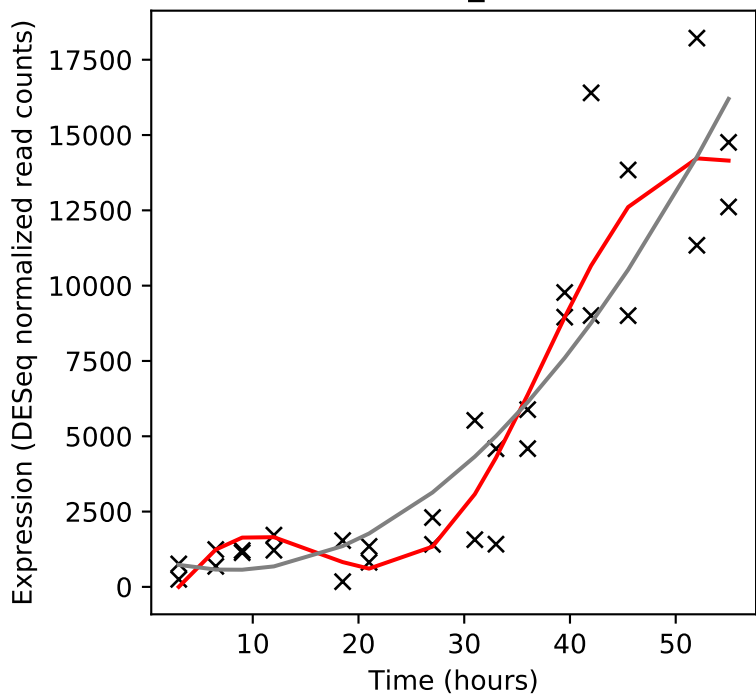

Rv3515c/fadD19

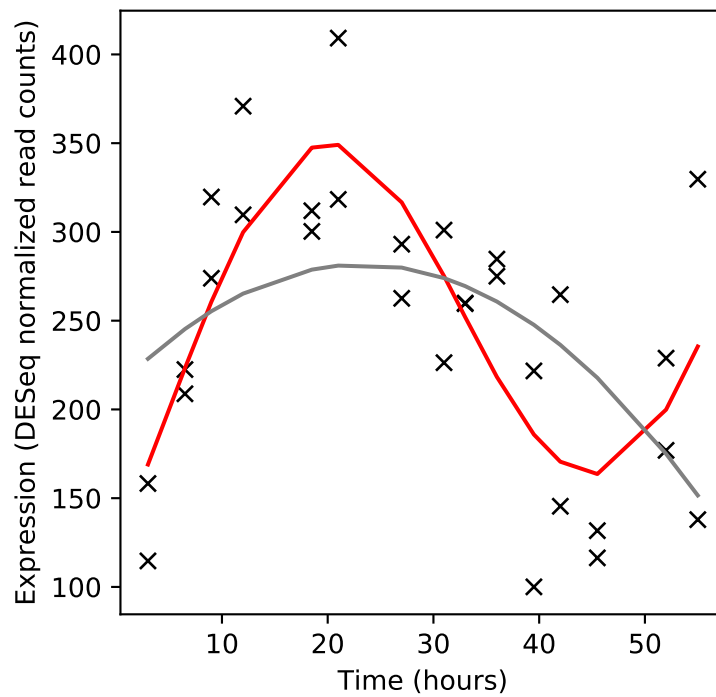

Rv3516/echA19

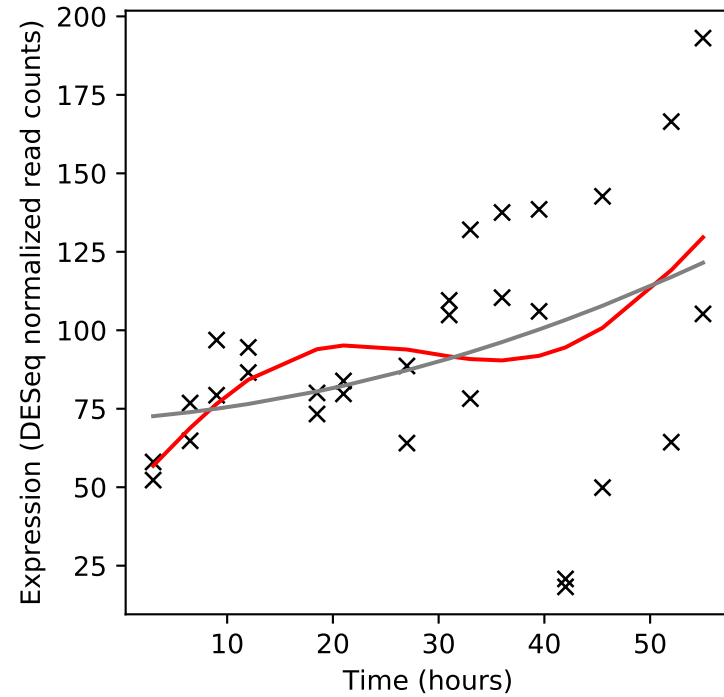

Rv3517/-

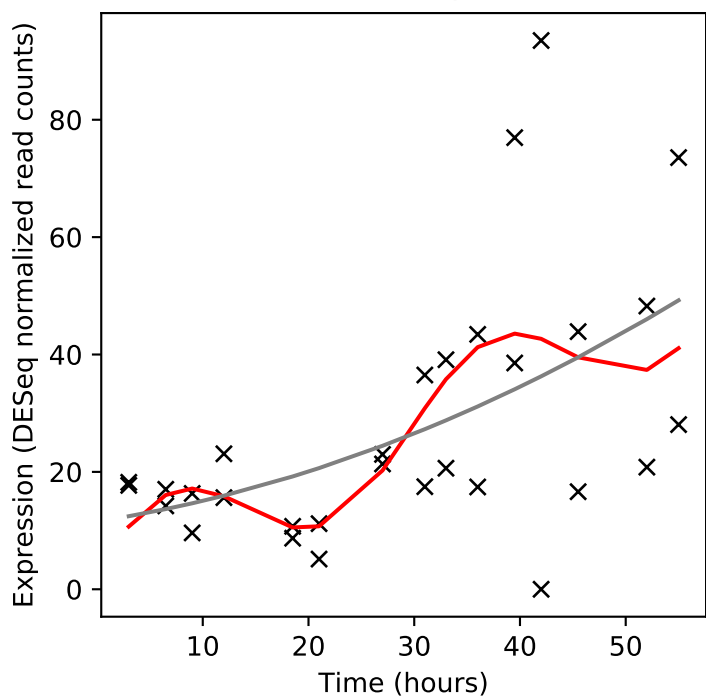

Rv3518c/cyp142

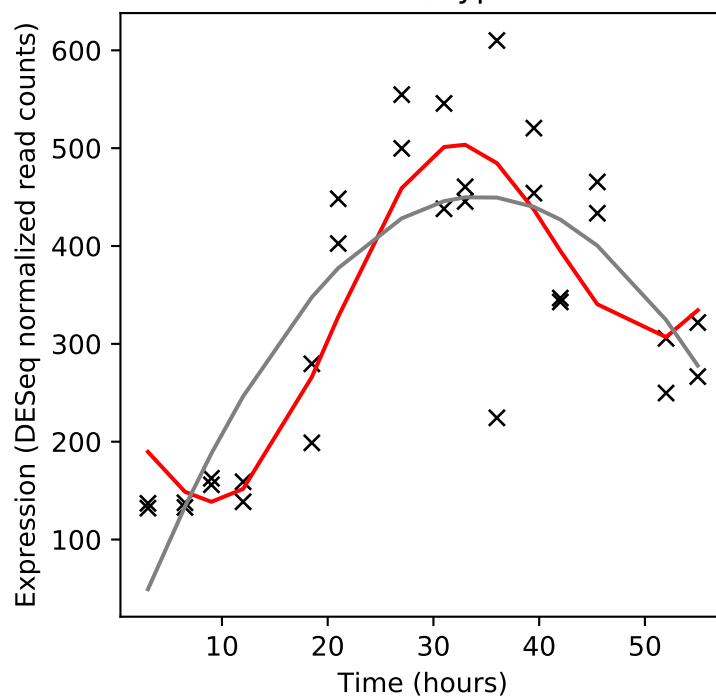

Rv3519/-

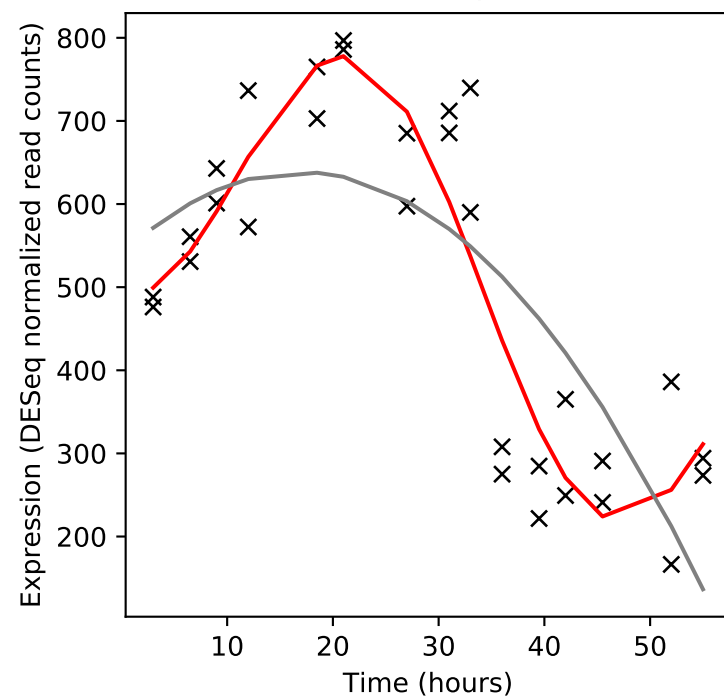

Rv3520c/-

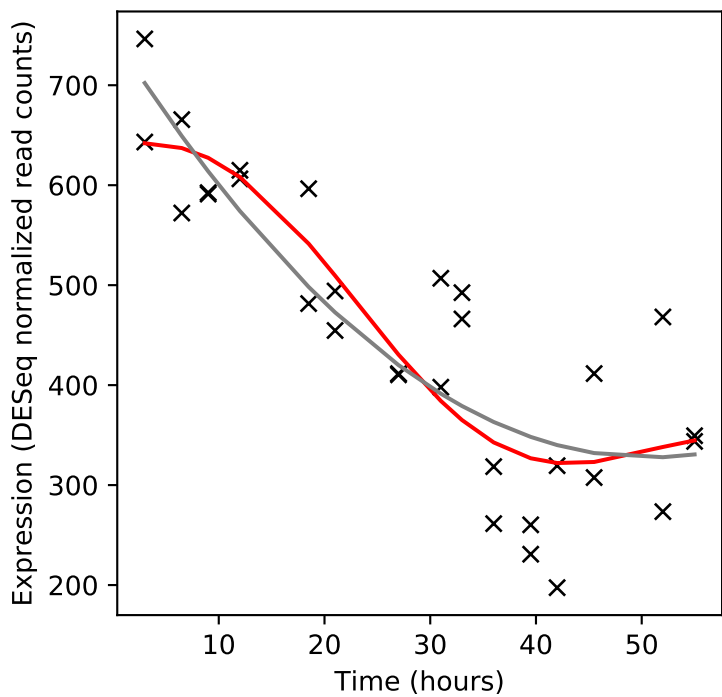

Rv3521/-

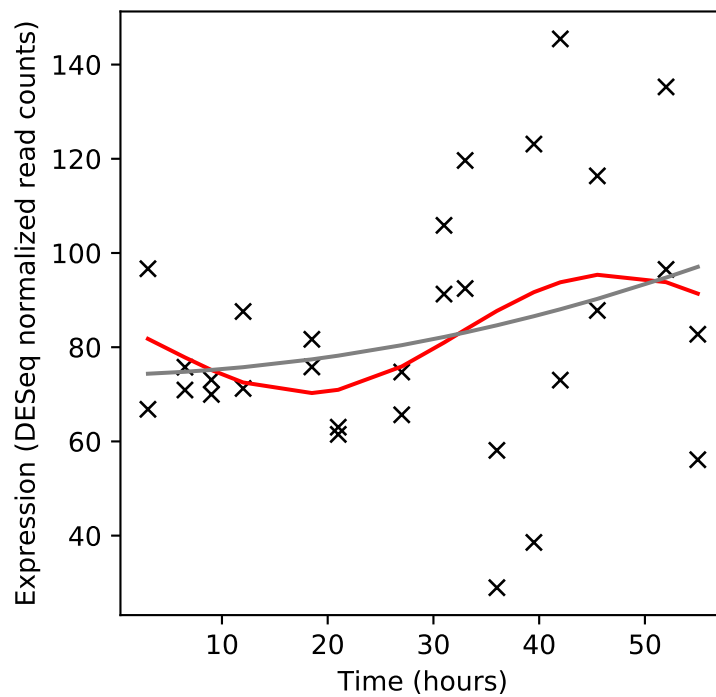

Rv3522/ltp4

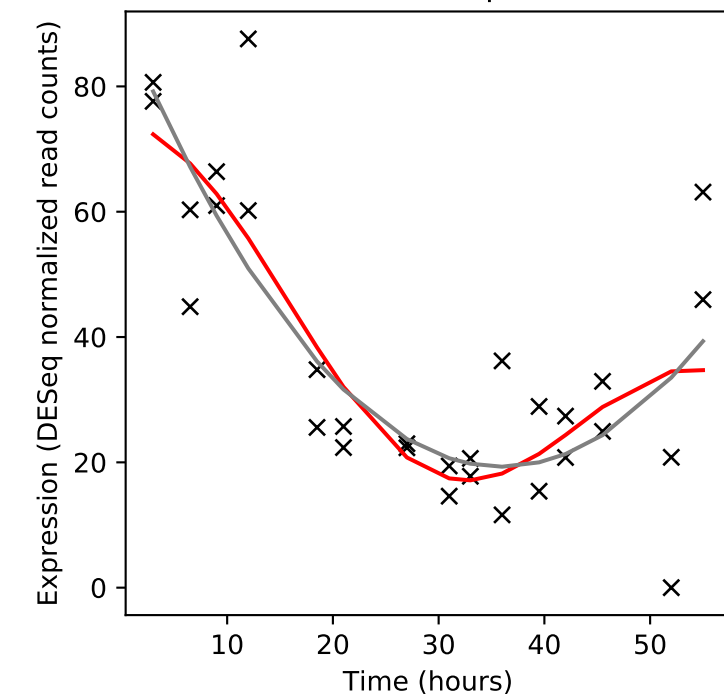

Rv3523/ltp3

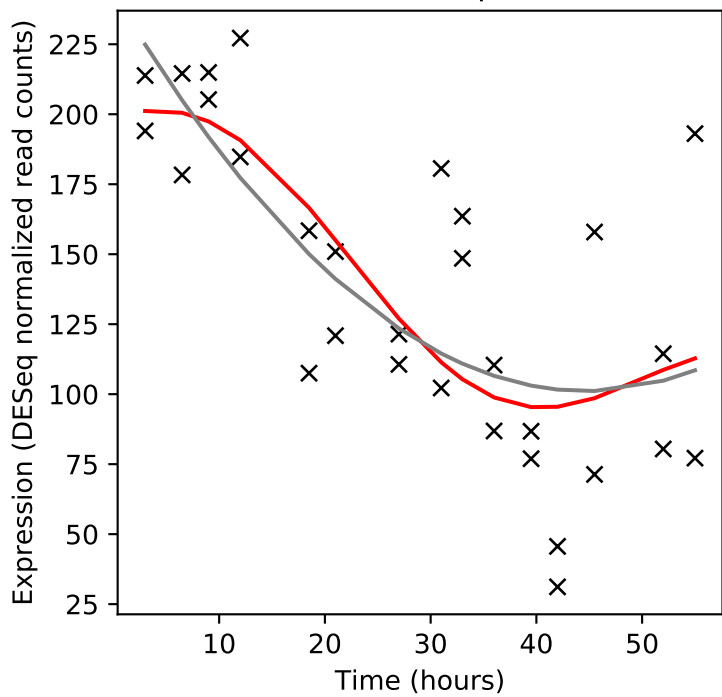

Rv3524/-

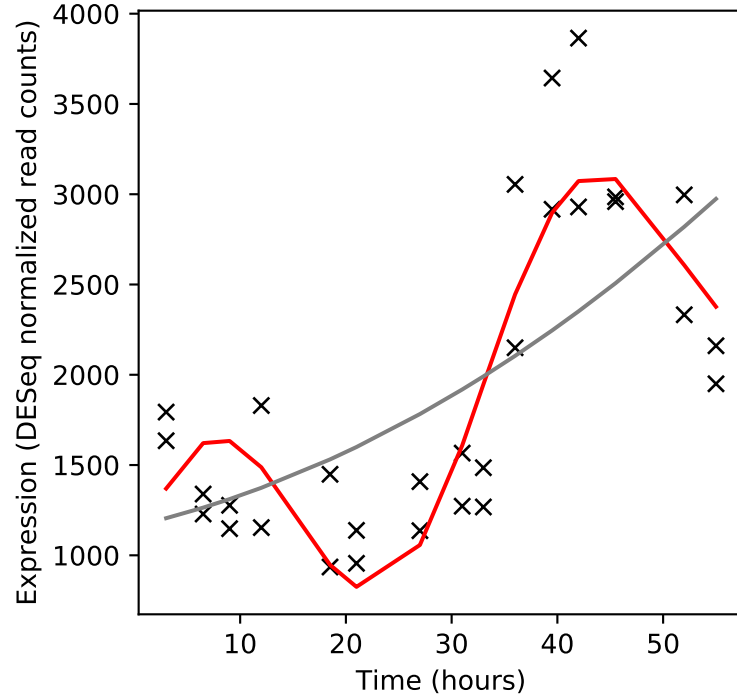

Rv3525c/-

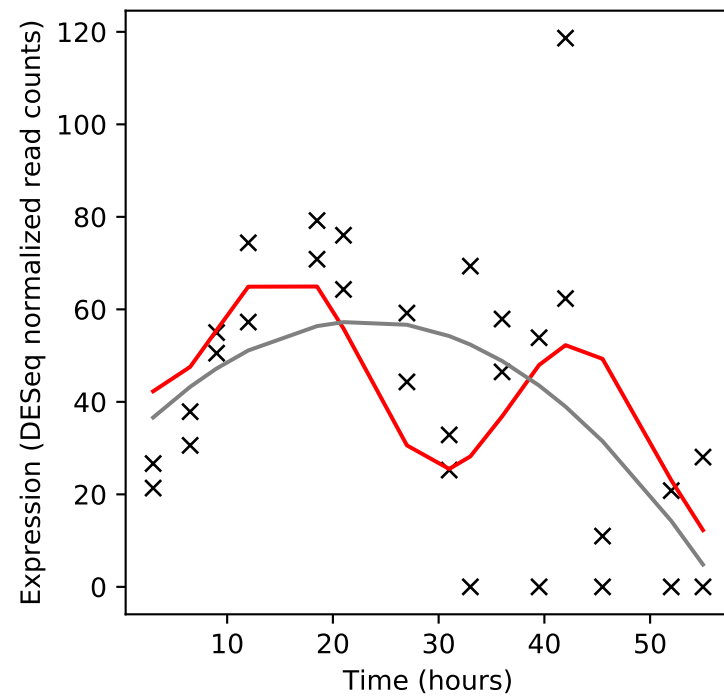

Rv3526/kshA

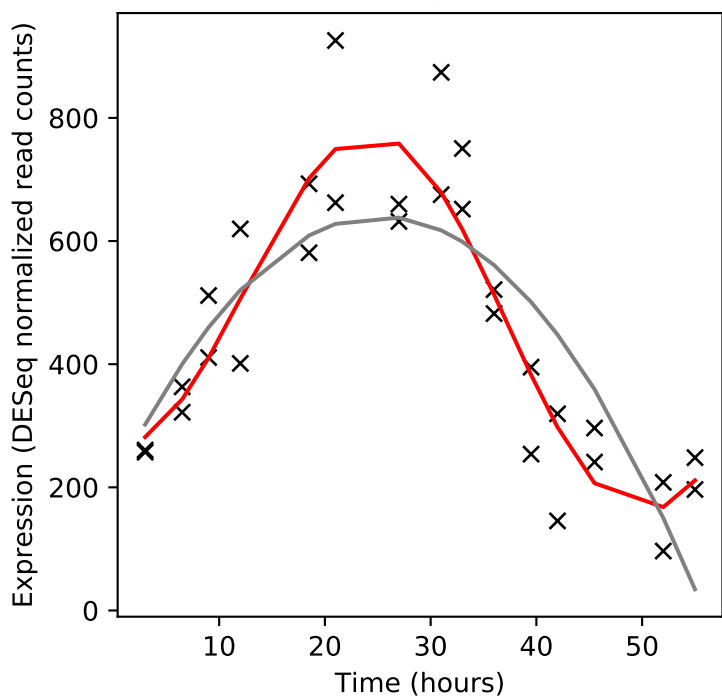

Rv3527/-

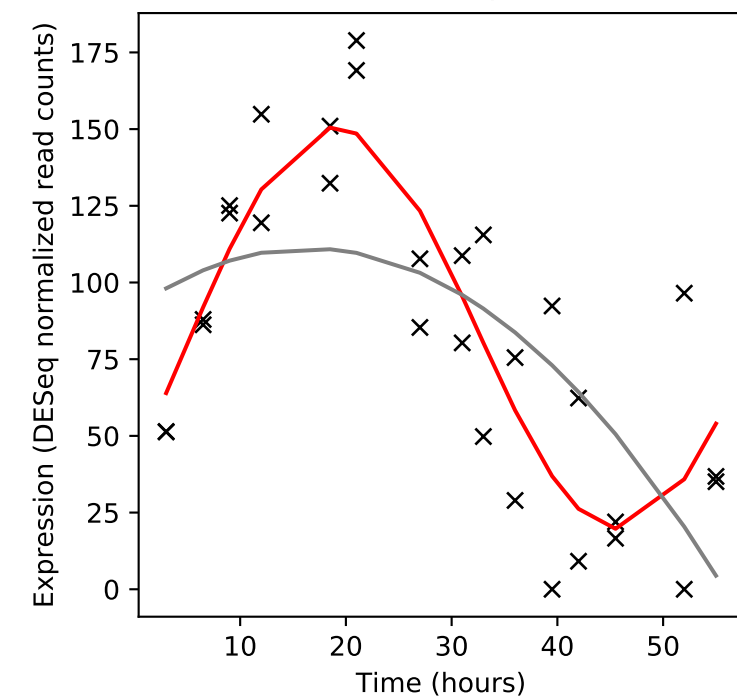

Rv3528c/-

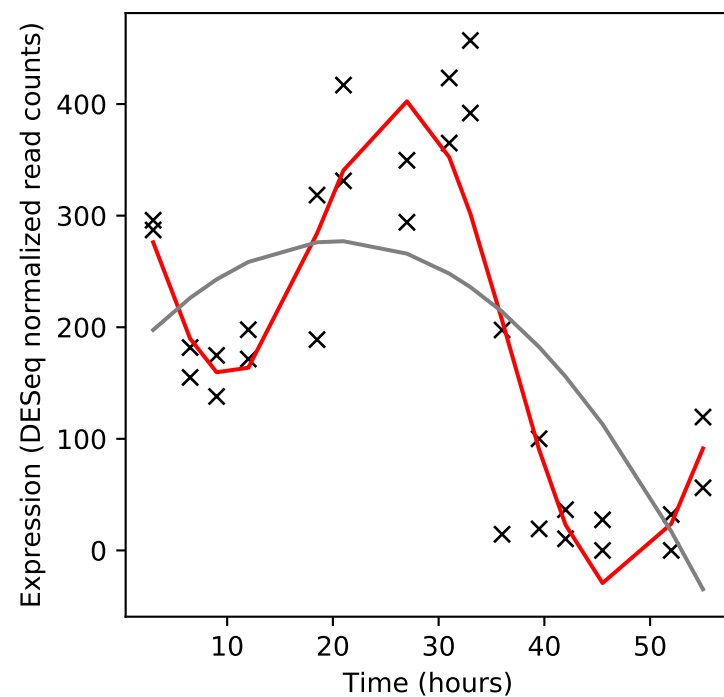

Rv3529c/-

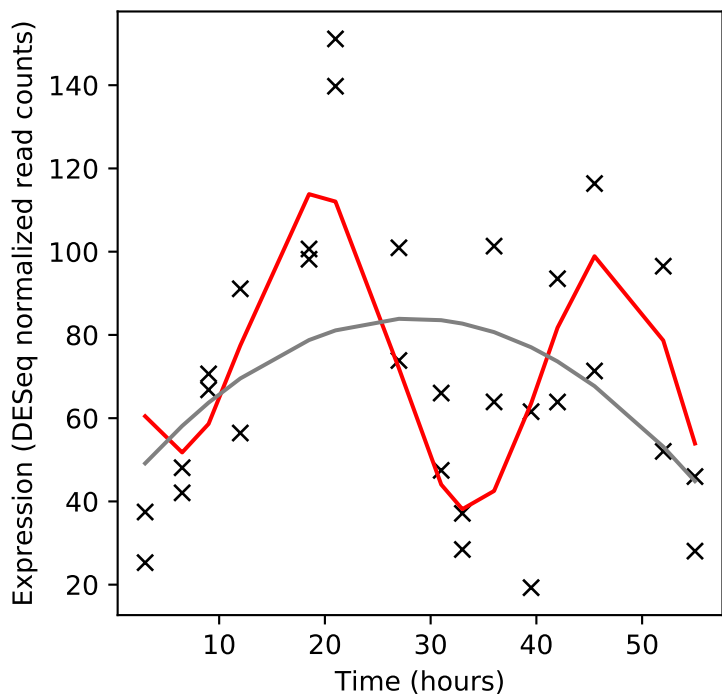

Rv3530c/-

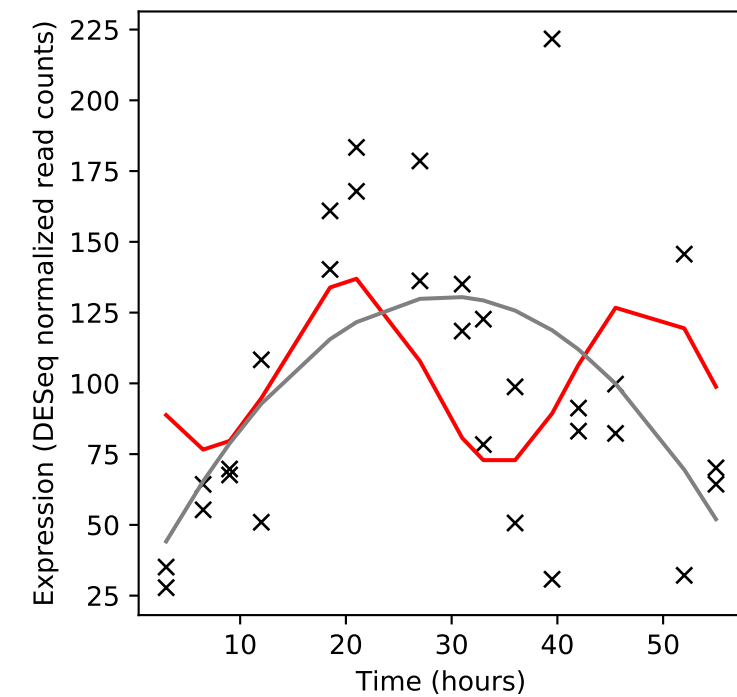

Rv3531c/-

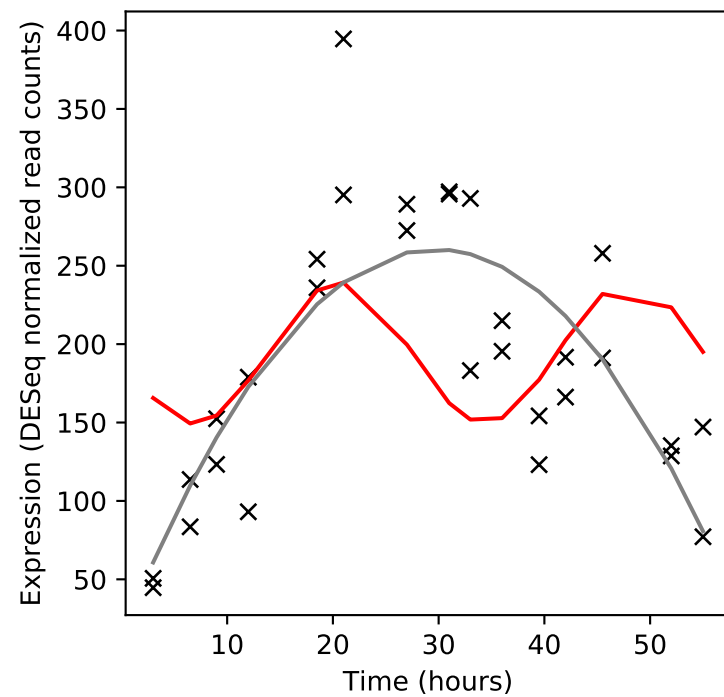

Rv3532/PPE61

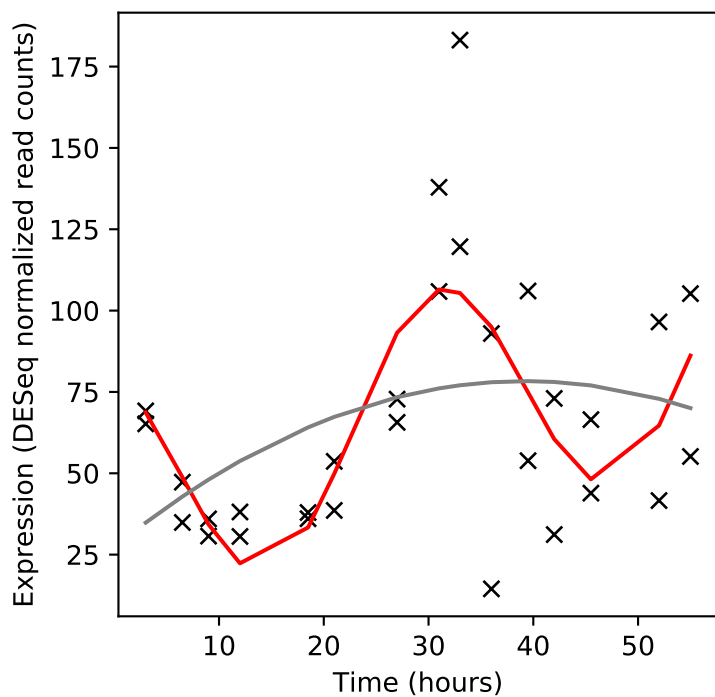

Rv3533c/PPE62

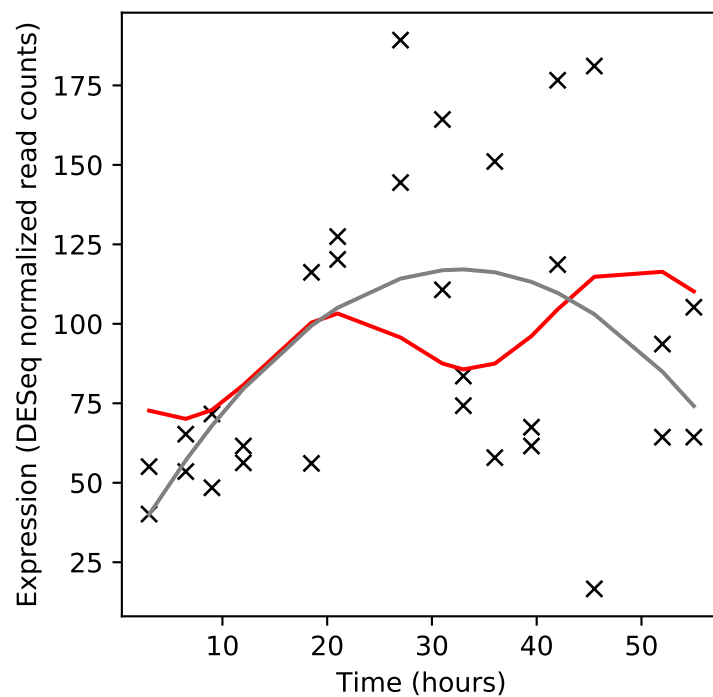

Rv3534c/hsaF

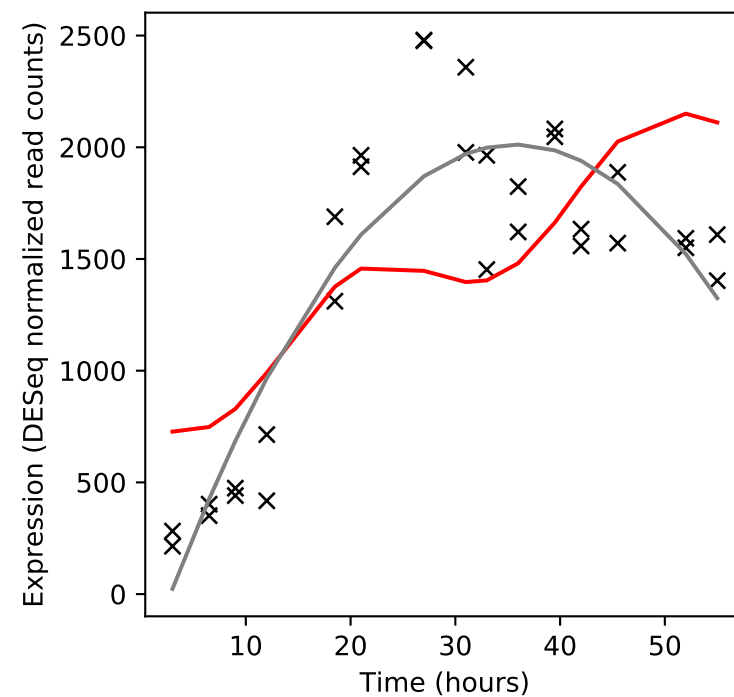

Rv3535c/hsaG

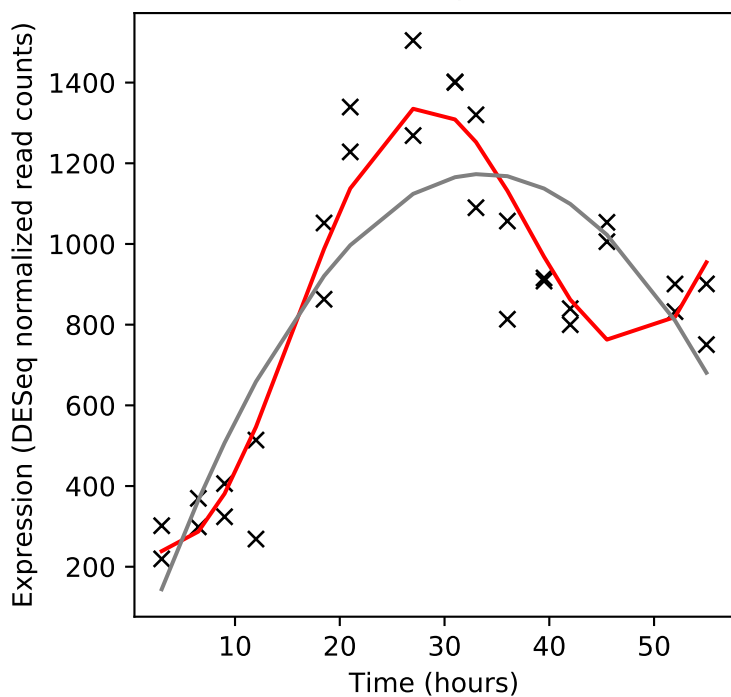

Rv3536c/hsaE

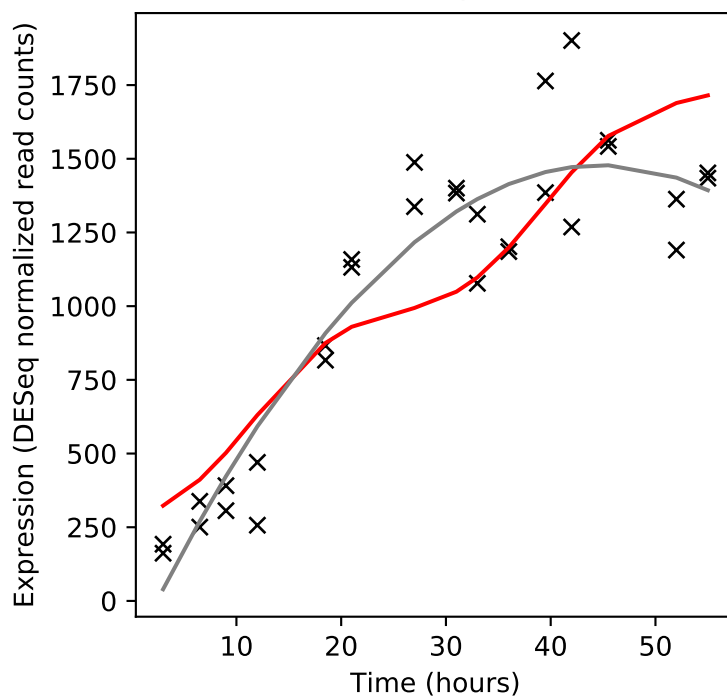

Rv3537/kstD

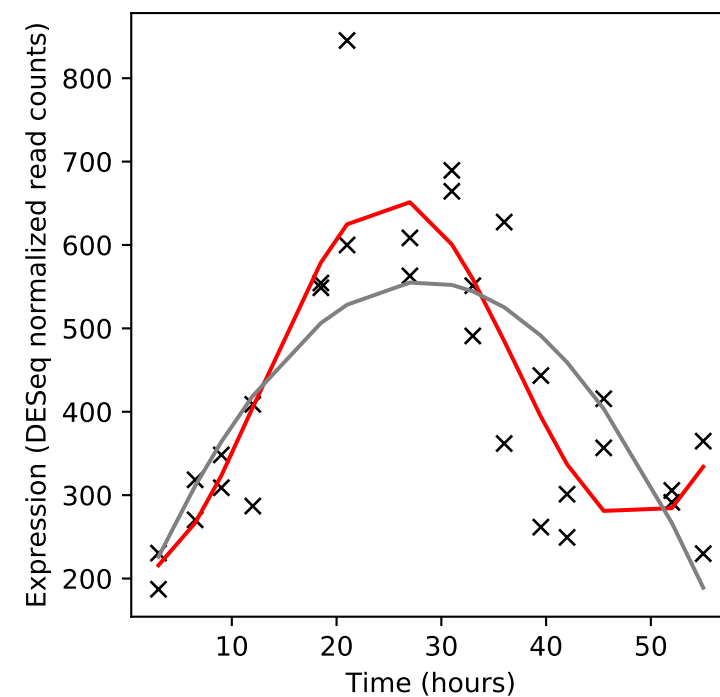

Rv3538/-

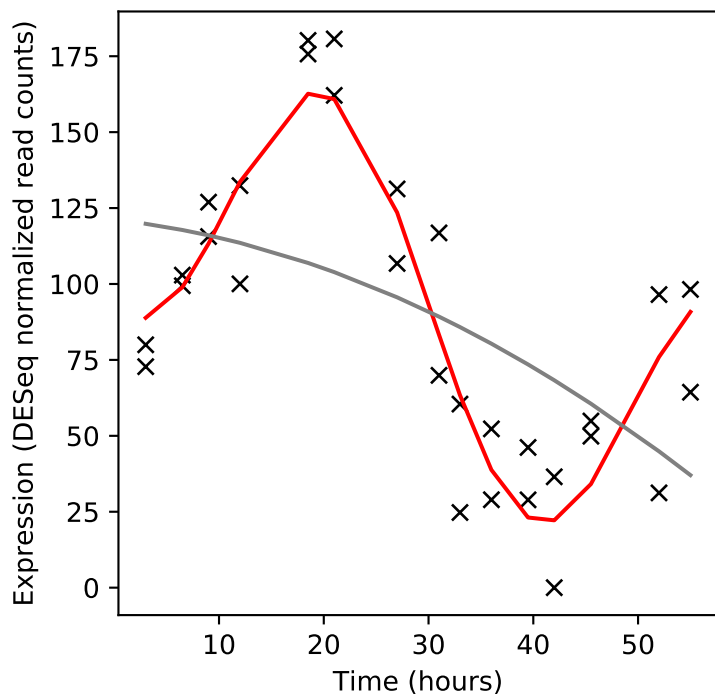

Rv3539/PPE63

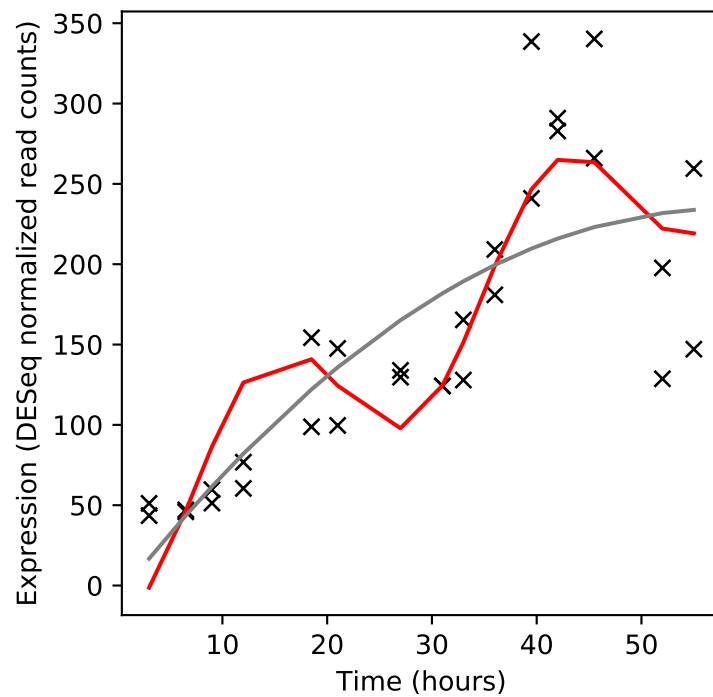

Rv3540c/Itp2

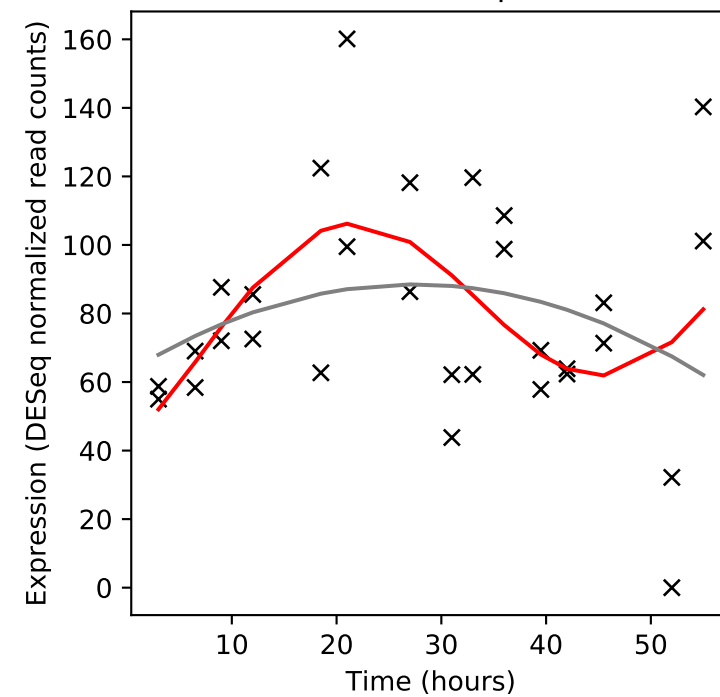

Rv3541c/-

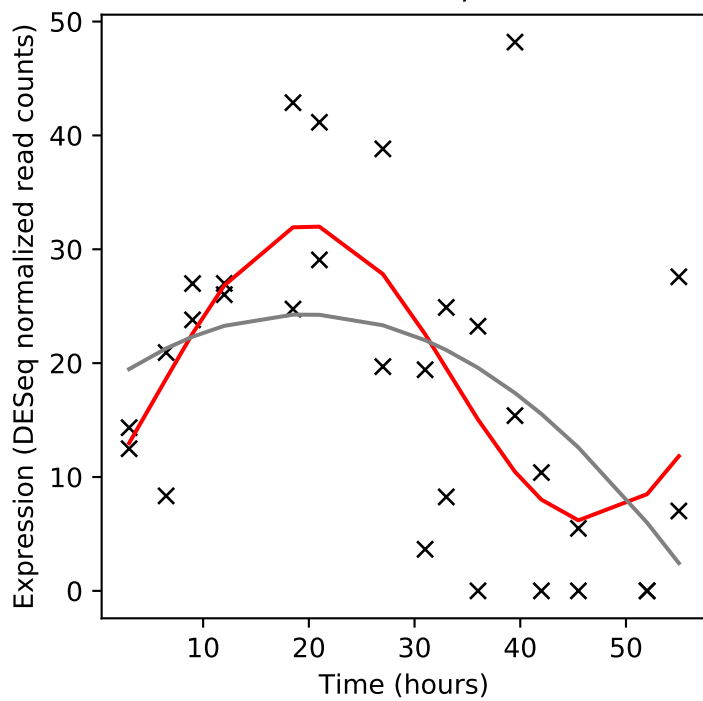

Rv3542c/-

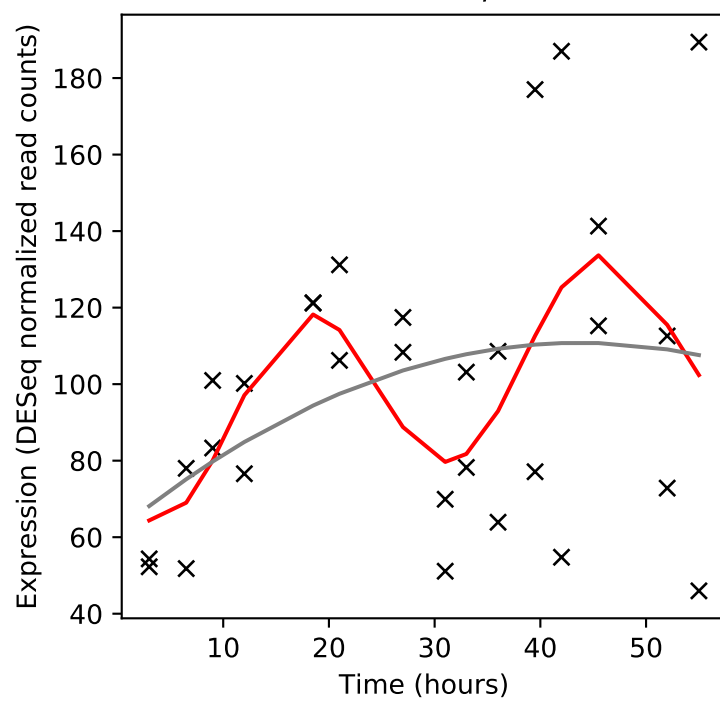

Rv3543c/fadE29

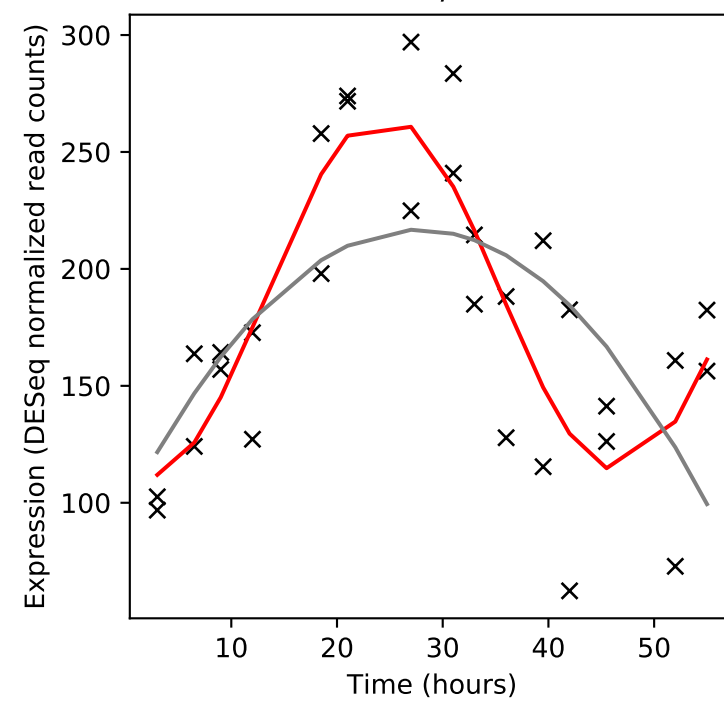

Rv3544c/fadE28

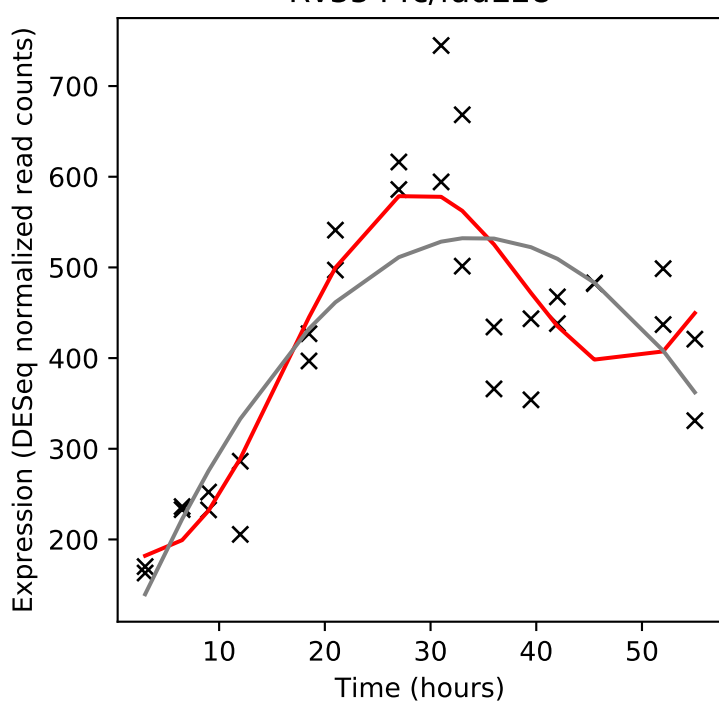

Rv3545c/cyp125

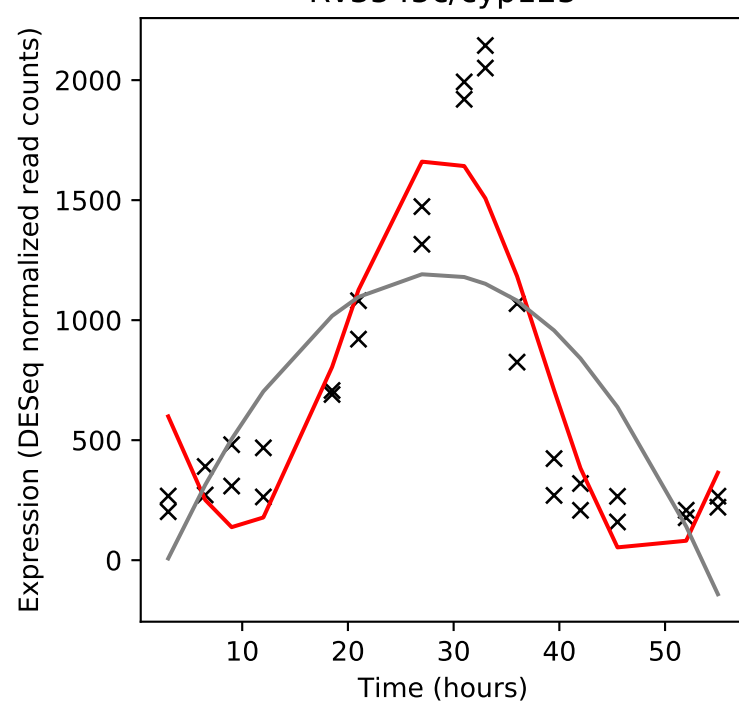

Rv3546/fadA5

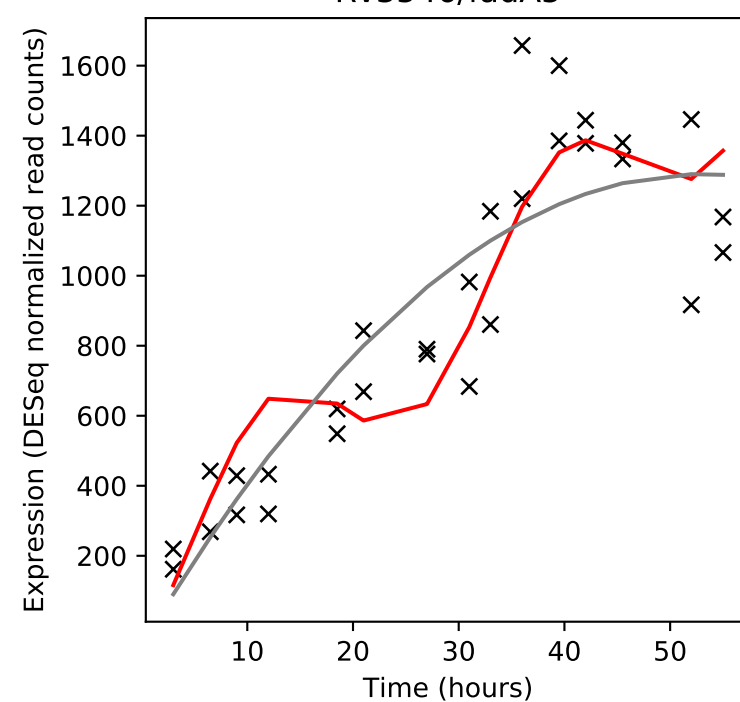

Rv3547/ddn

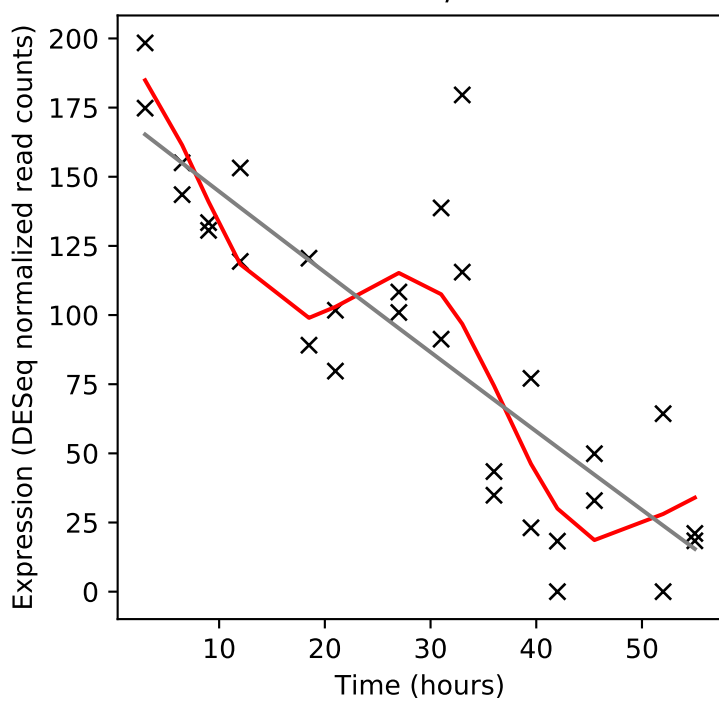

Rv3548c/-

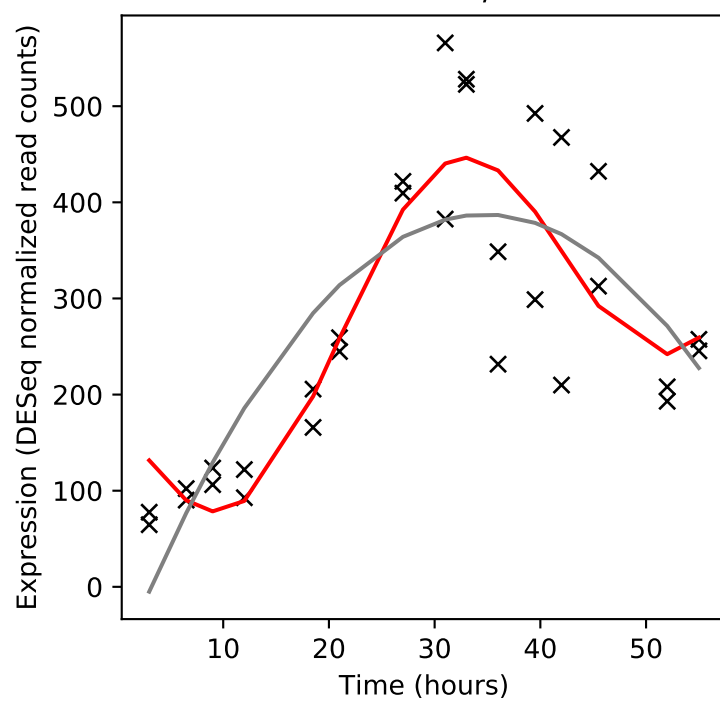

Rv3549c/-

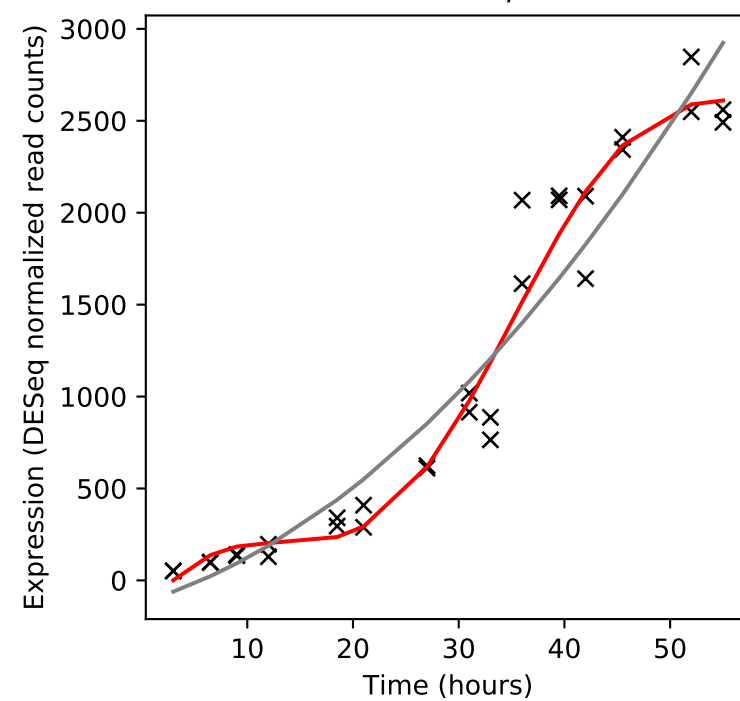

Rv3550/echA20

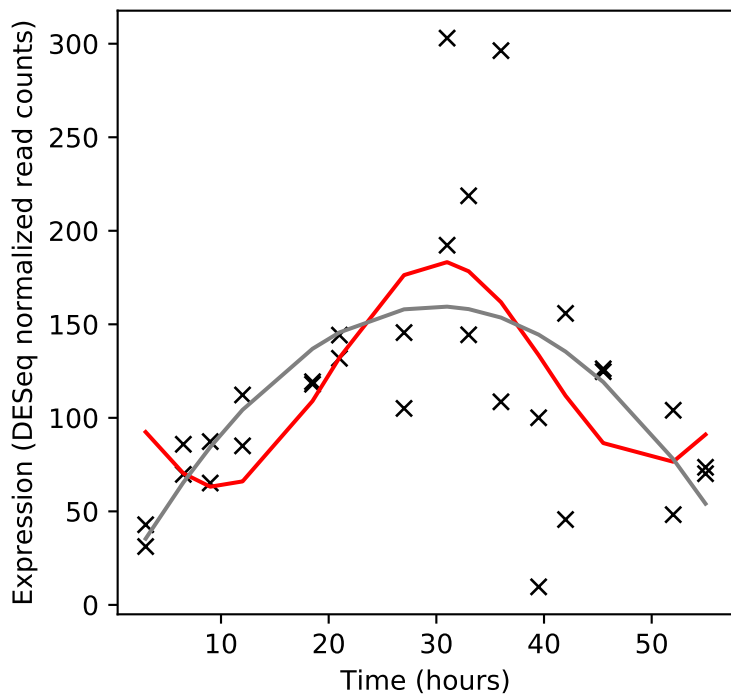

Rv3551/-

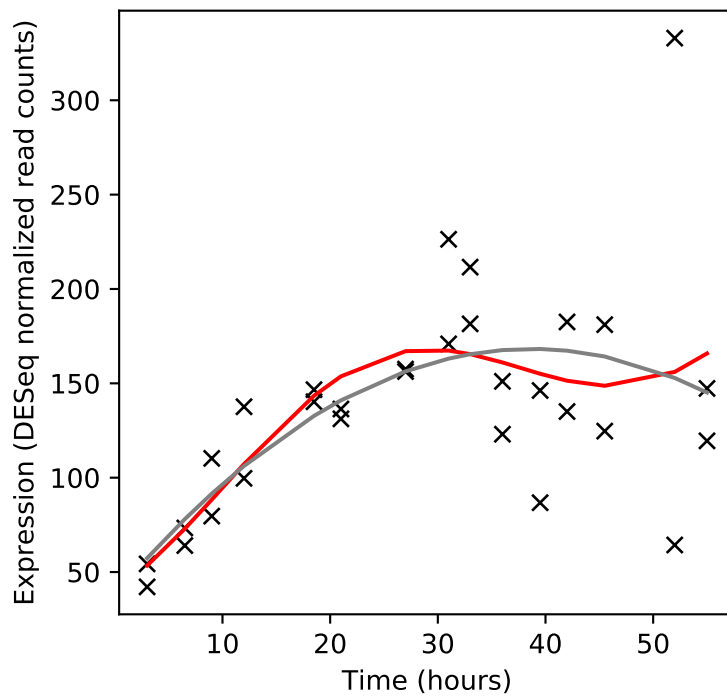

Rv3552/-

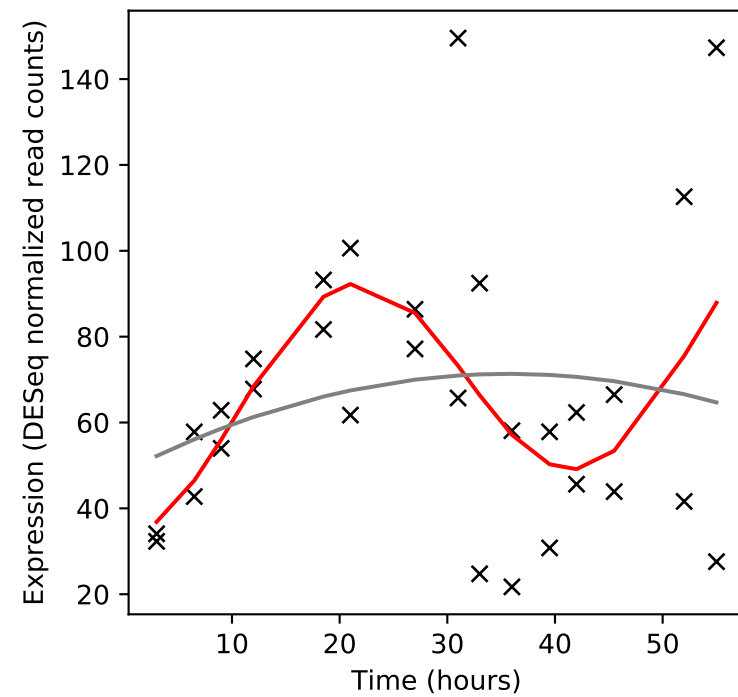

Rv3553/-

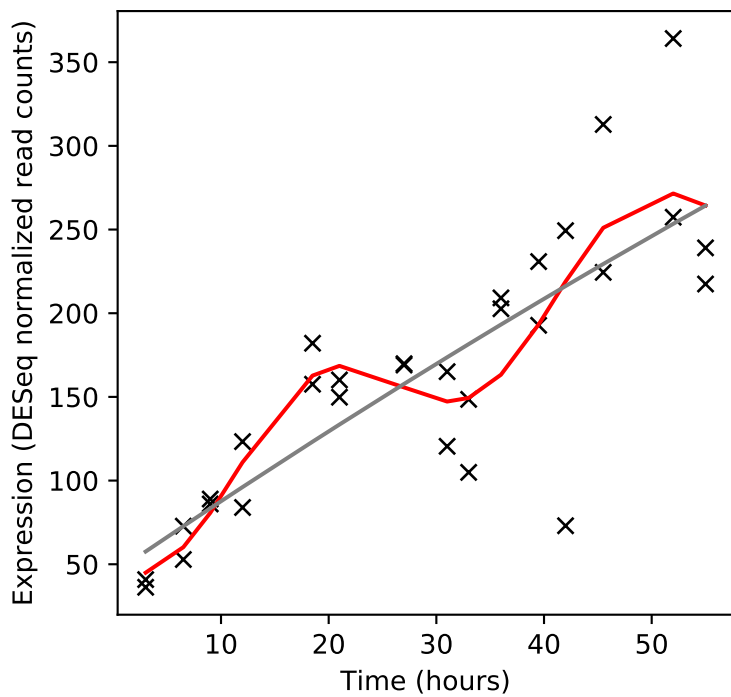

Rv3554/fdxB

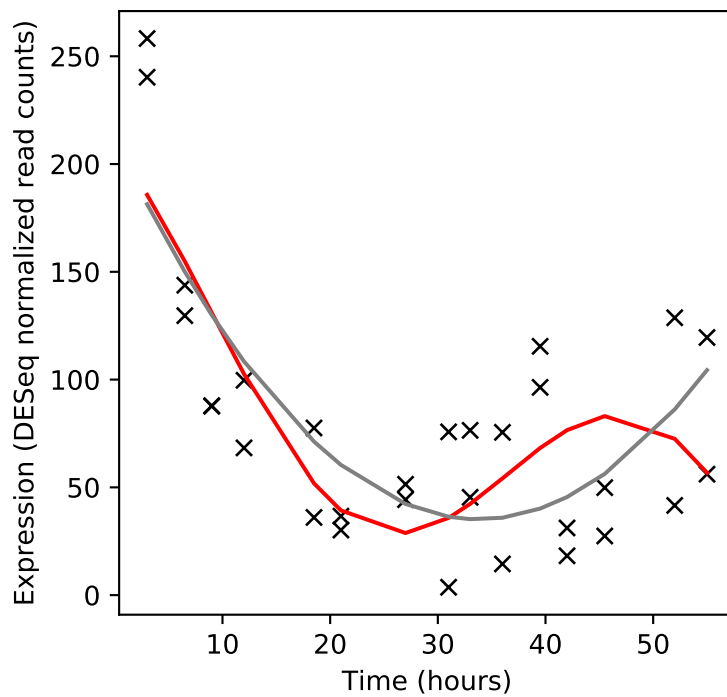

Rv3555c/-

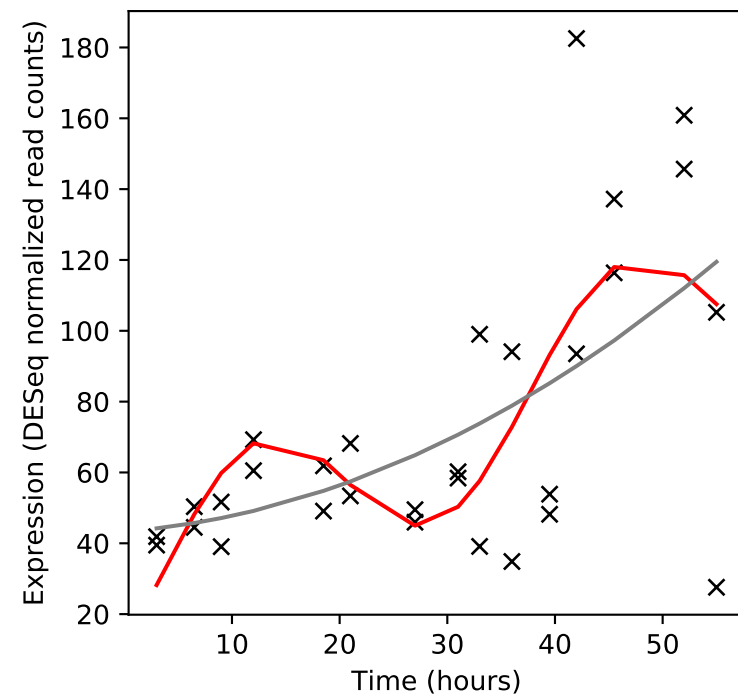

Rv3556c/fadA6

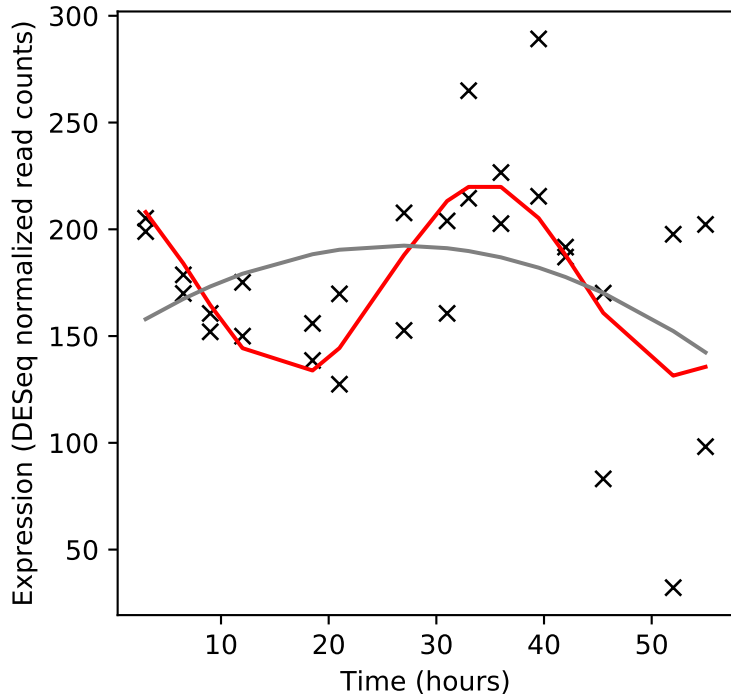

Rv3557c/-

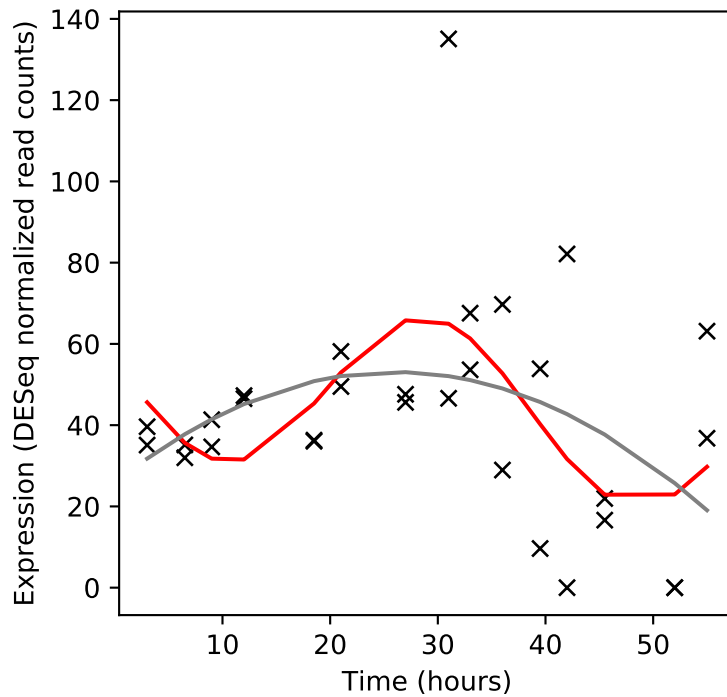

Rv3558/PPE64

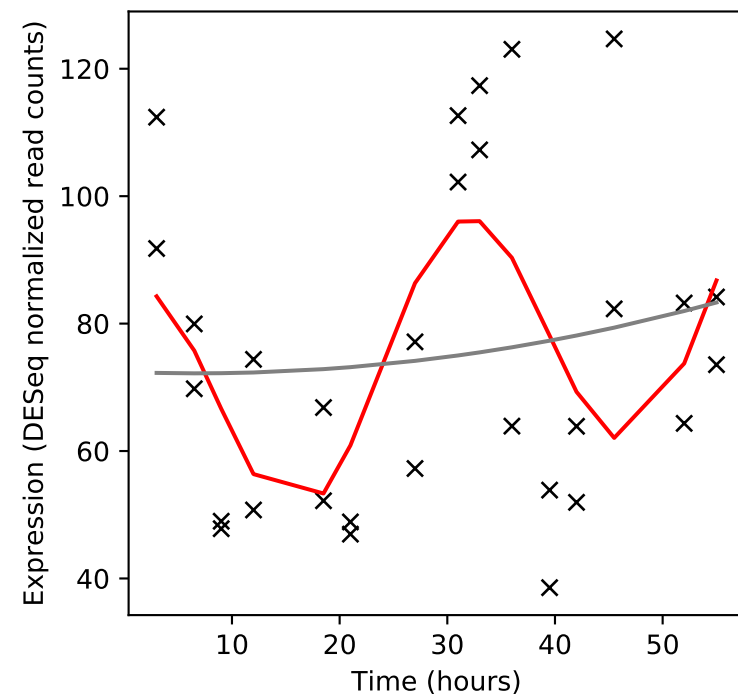

Rv3559c/-

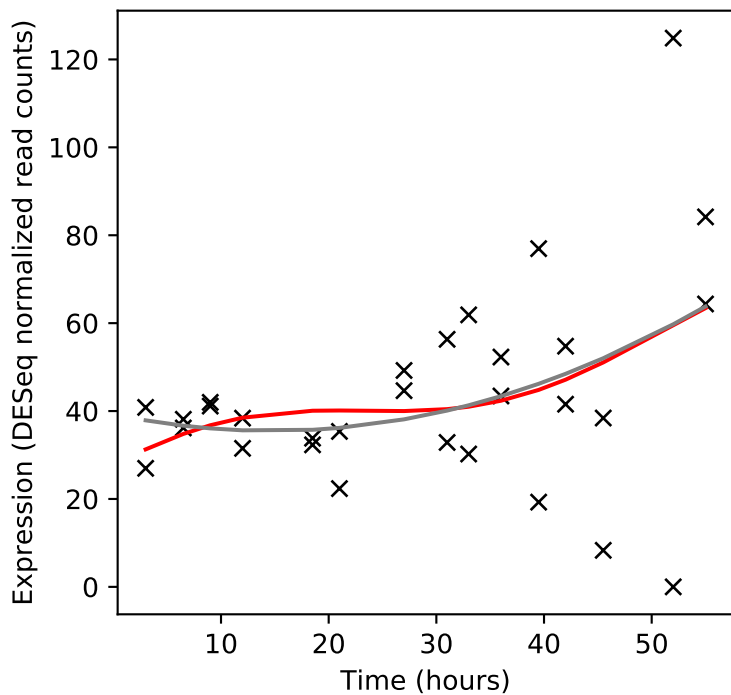

Rv3560c/fadE30

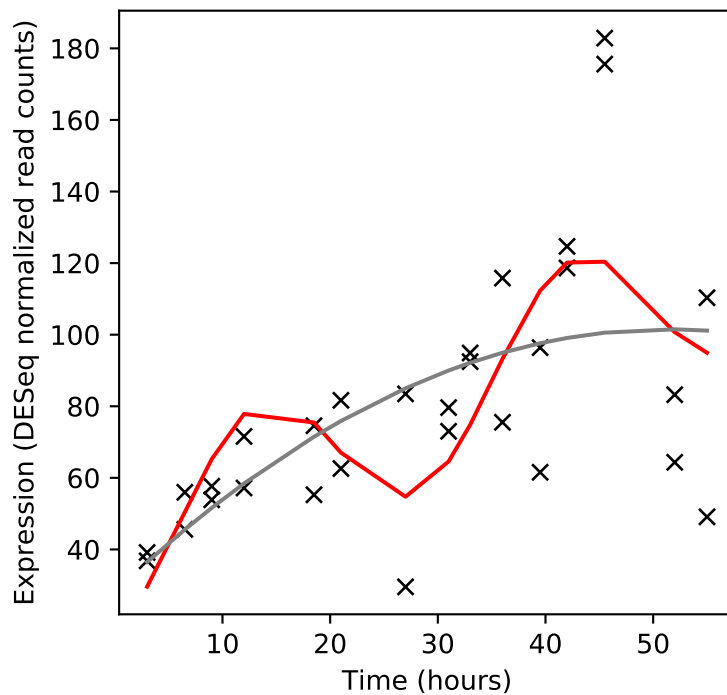

Rv3561/fadD3

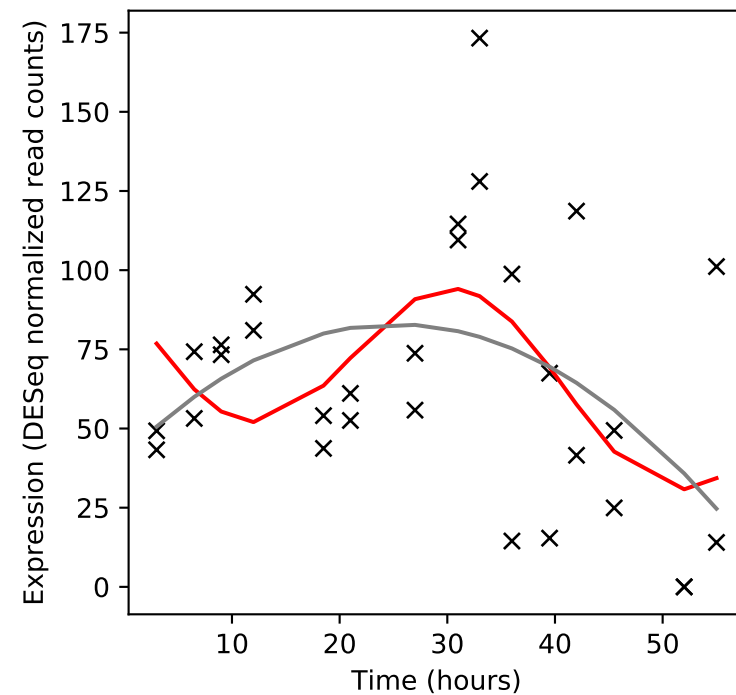

Rv3562/fadE31

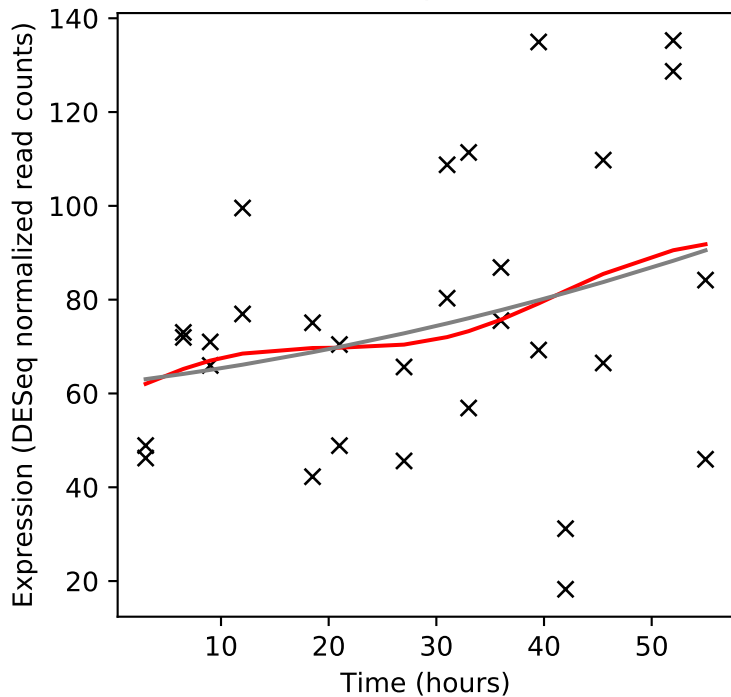

Rv3563/fadE32

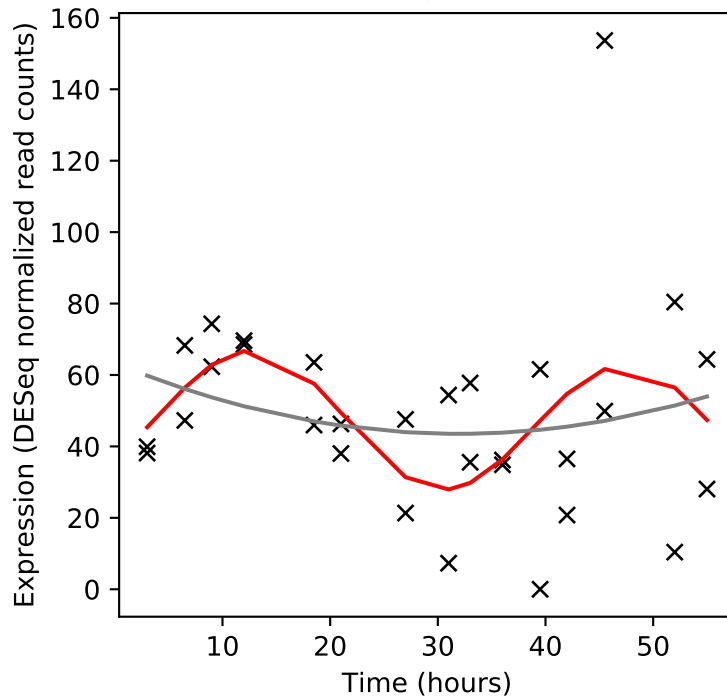

Rv3564/fadE33

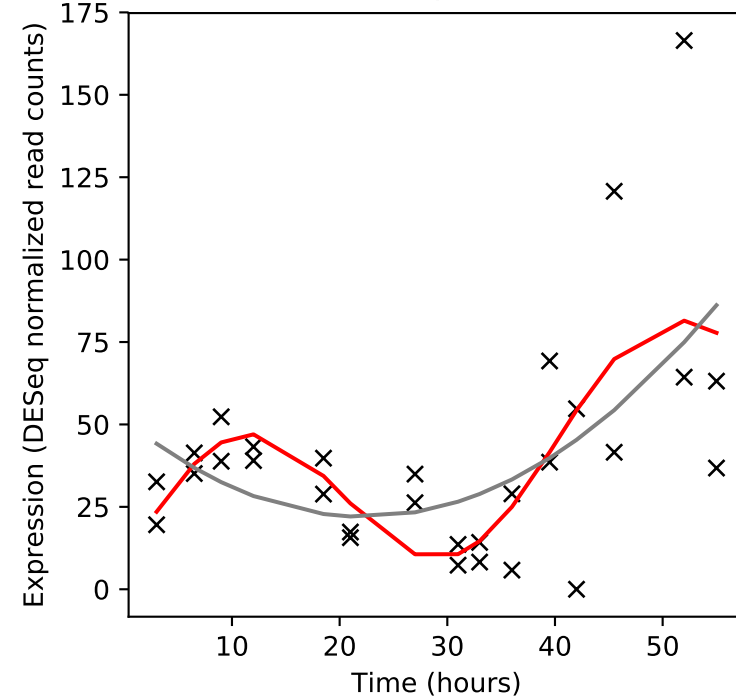

Rv3565/aspB

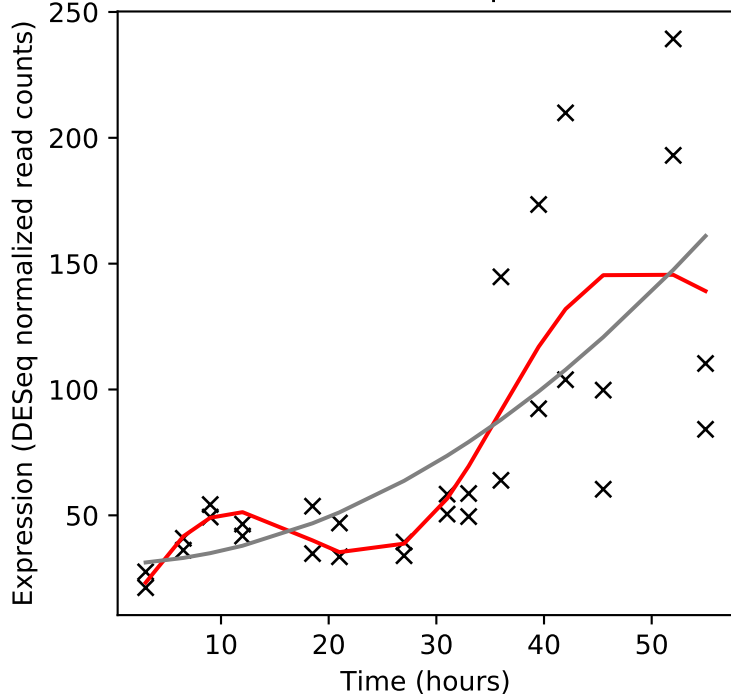

Rv3566c/nat

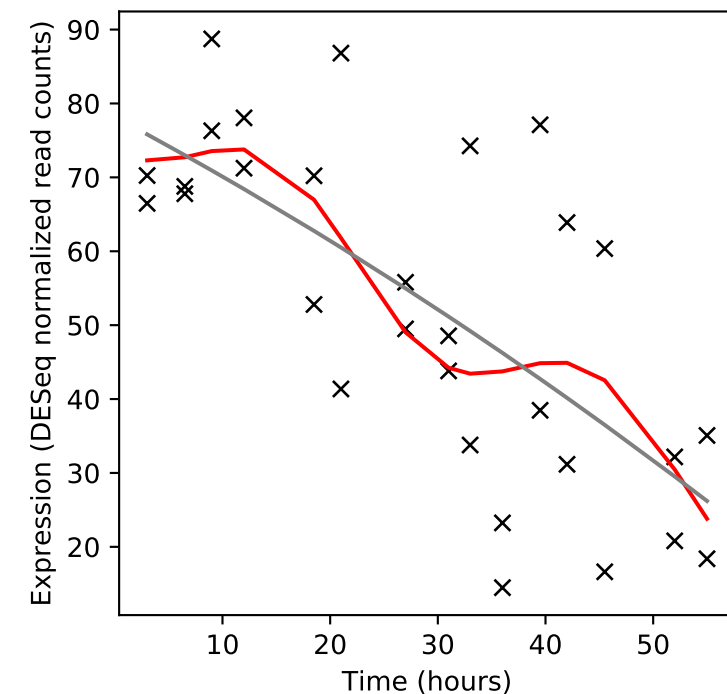

Rv3566A/-

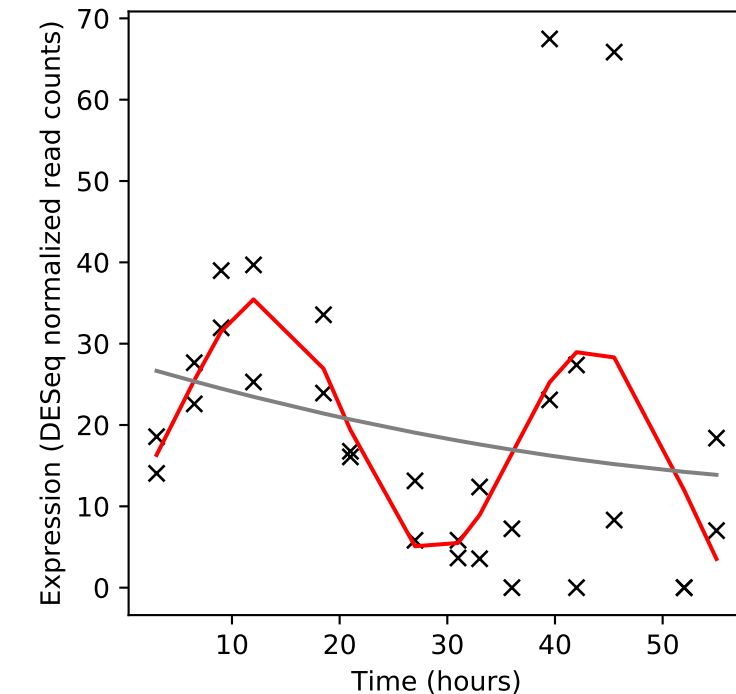

Rv3567c/hsaB

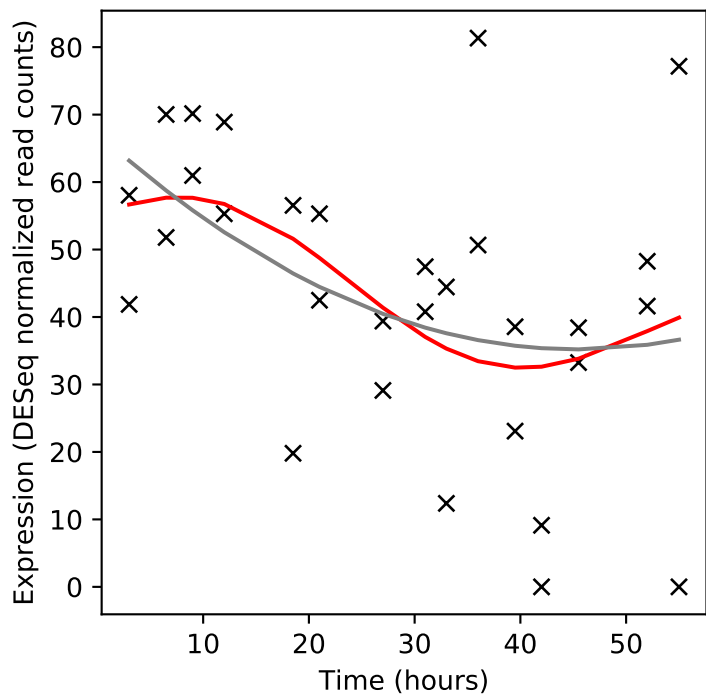

Rv3568c/hsaC

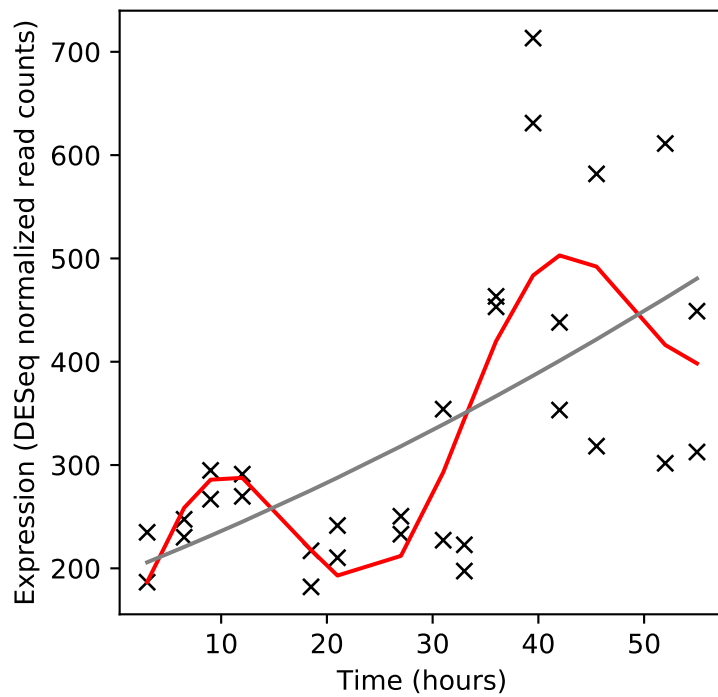

Rv3569c/hsaD

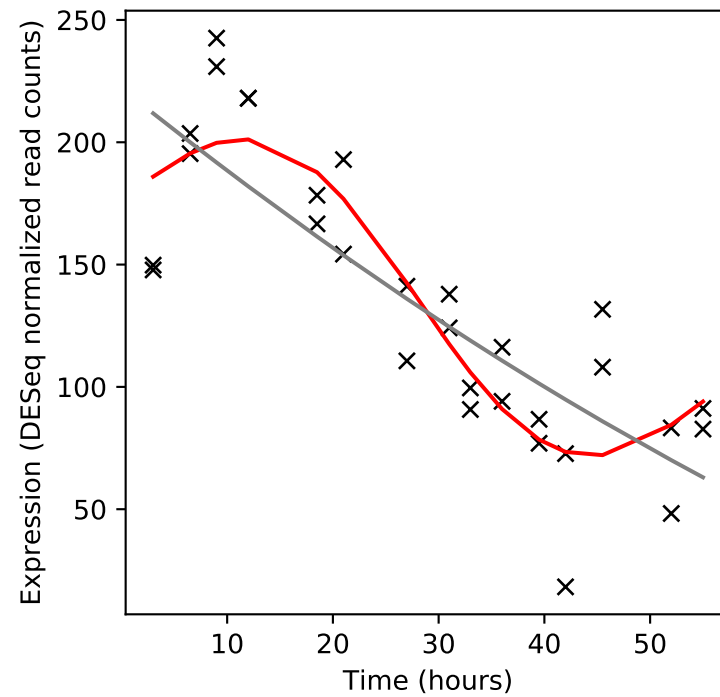

Rv3570c/hsaA

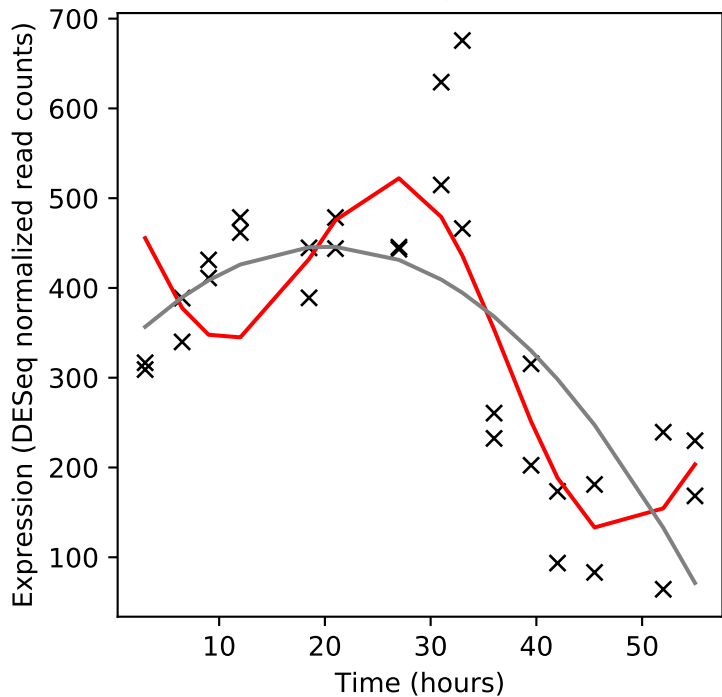

Rv3571/kshB

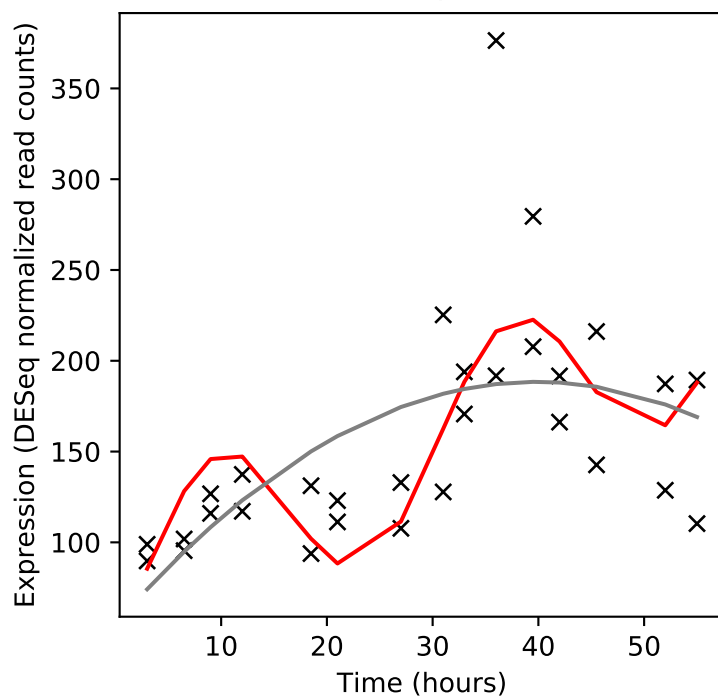

Rv3572/-

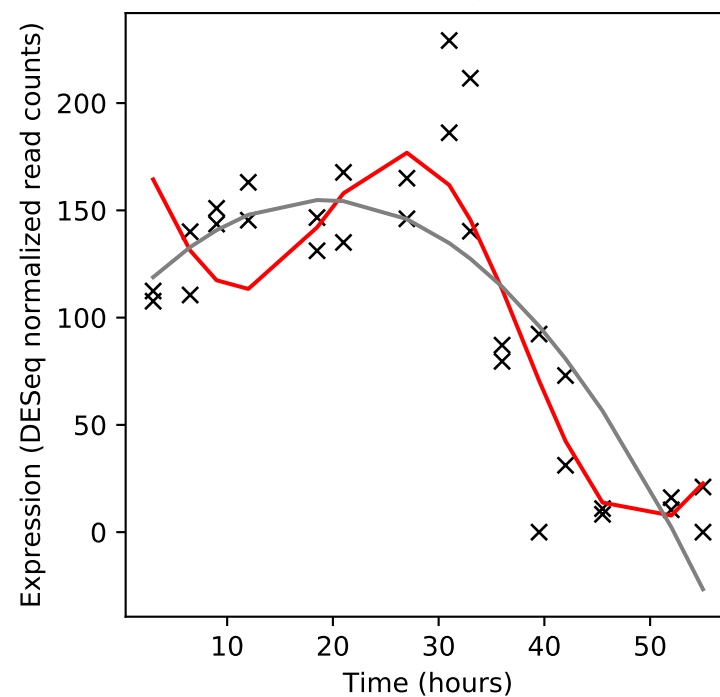

Rv3573c/fadE34

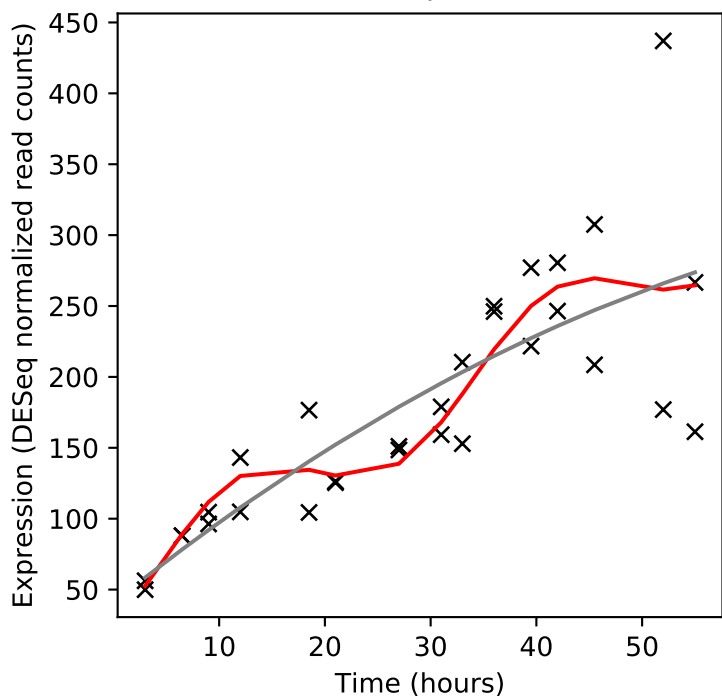

Rv3574/kstR

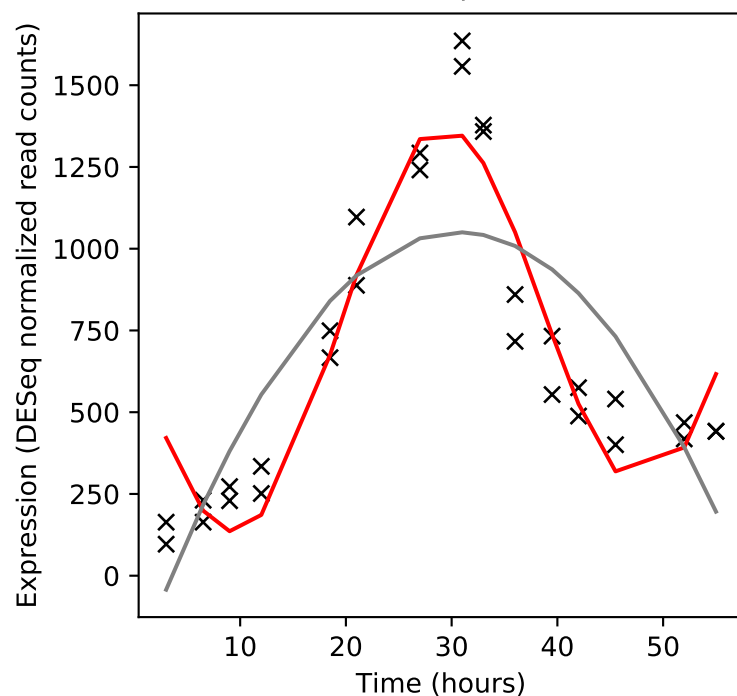

Rv3575c/-

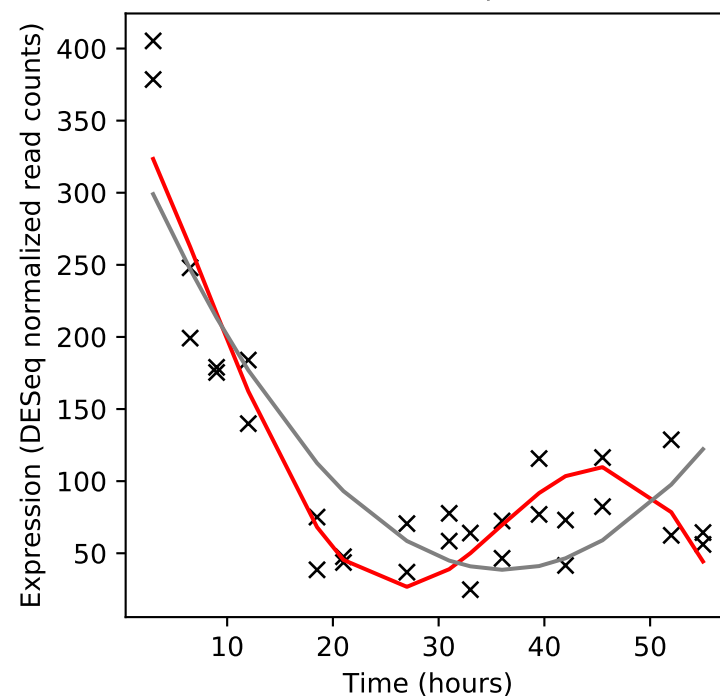



Rv3576/lppH

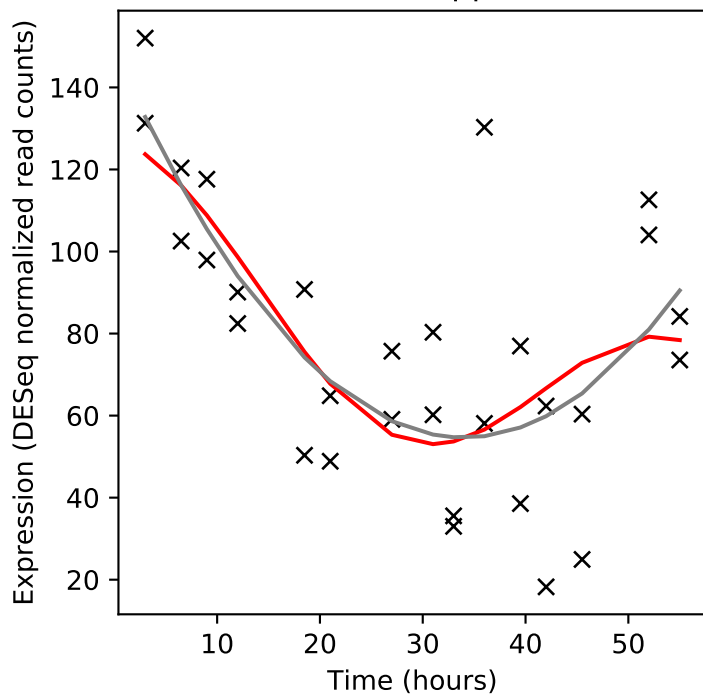

Rv3577/-

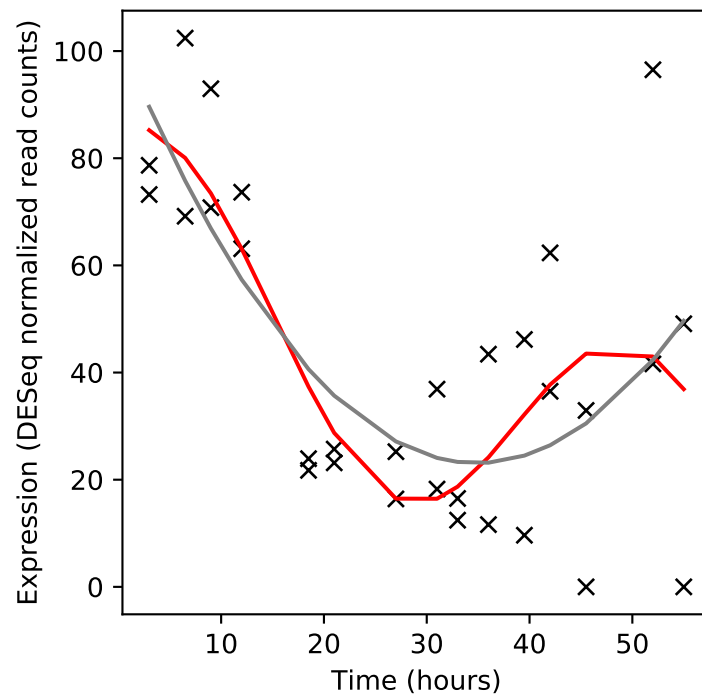

Rv3578/arsB2

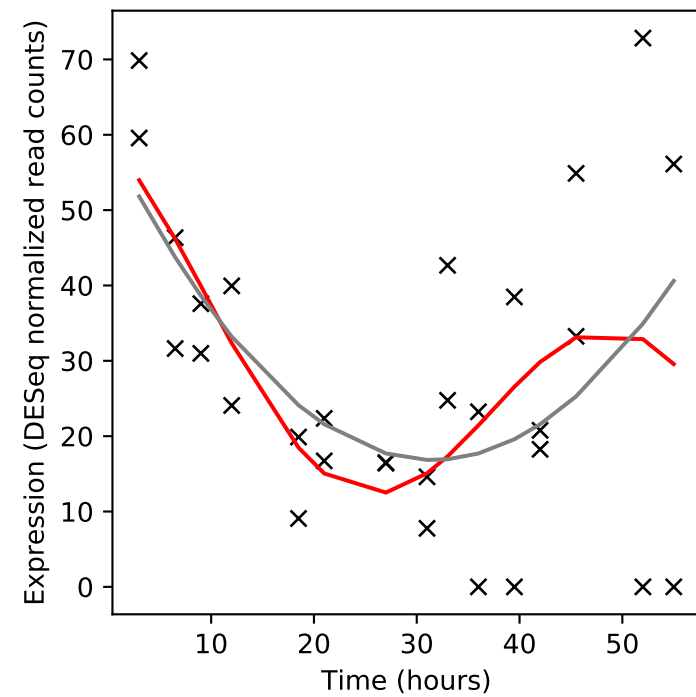

Rv3579c/-

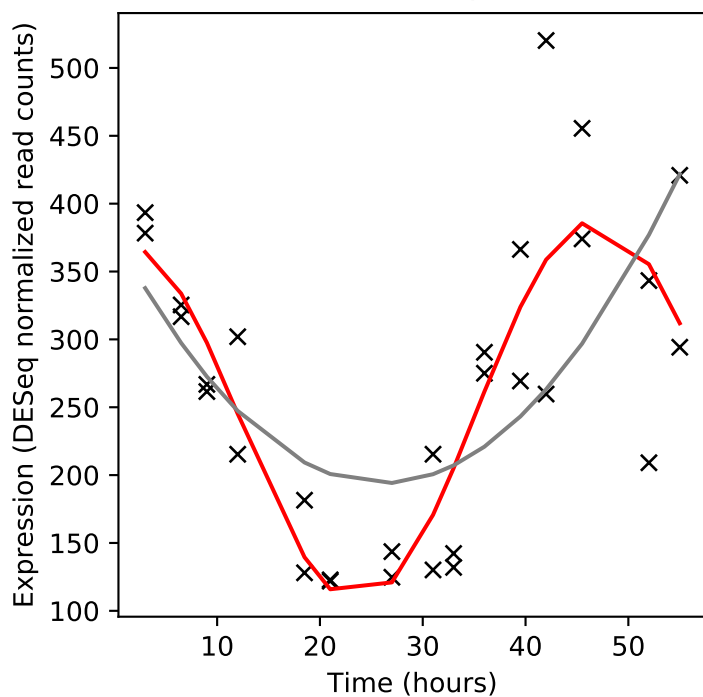

Rv3580c/cysS1

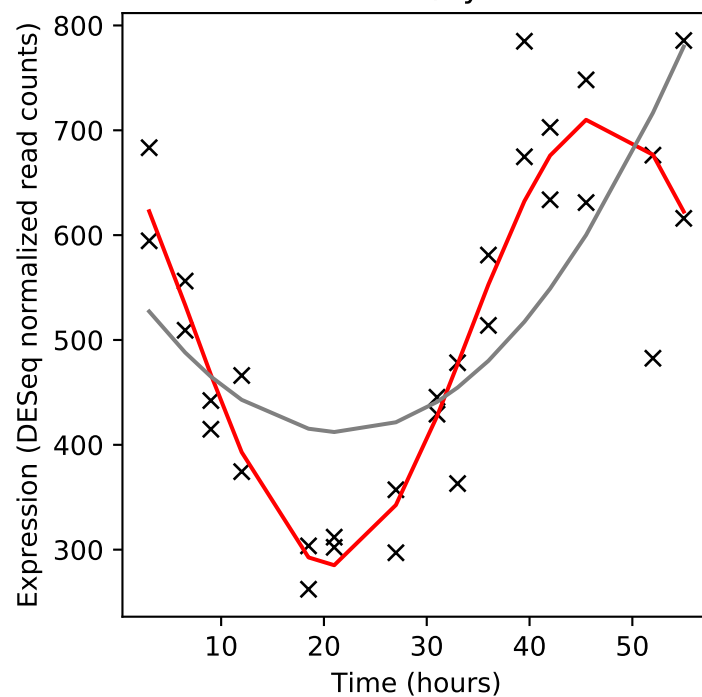

Rv3581c/ispF

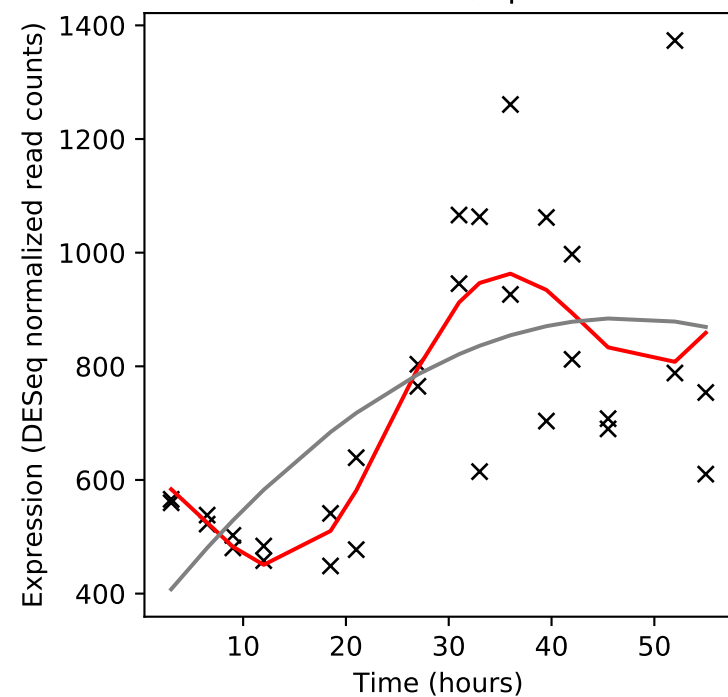

Rv3582c/ispD

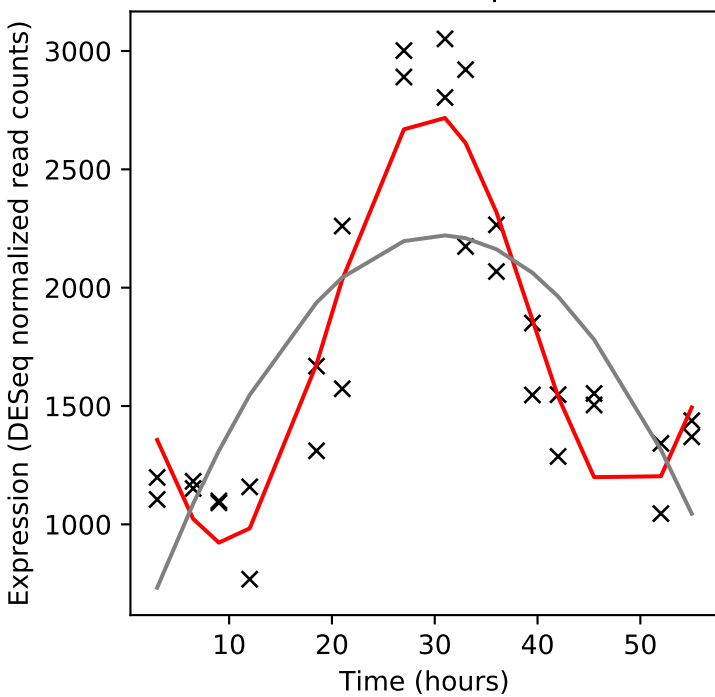

Rv3583c/-

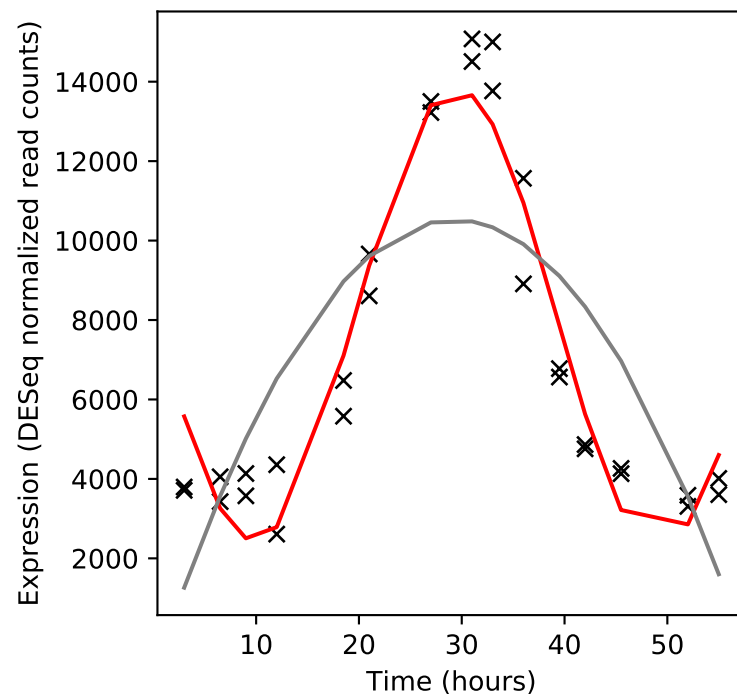

Rv3584/lpqE

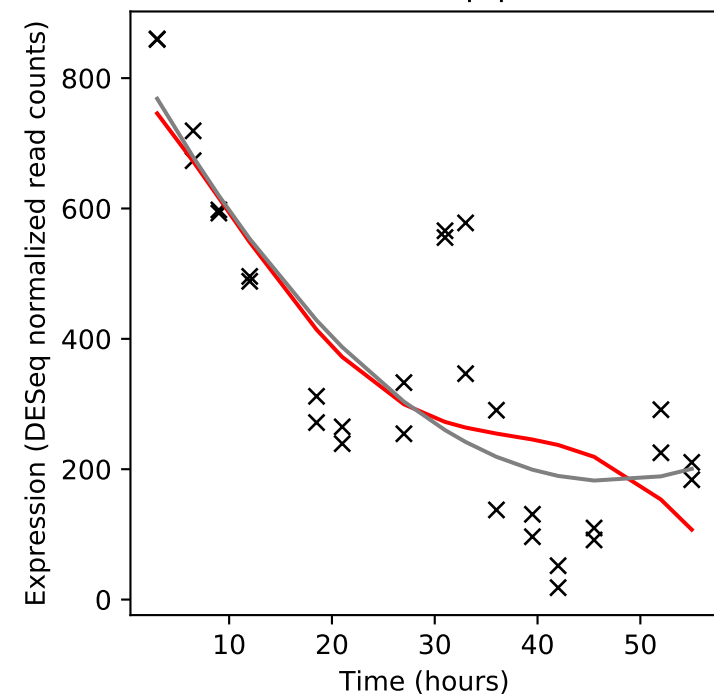

Rv3585/radA

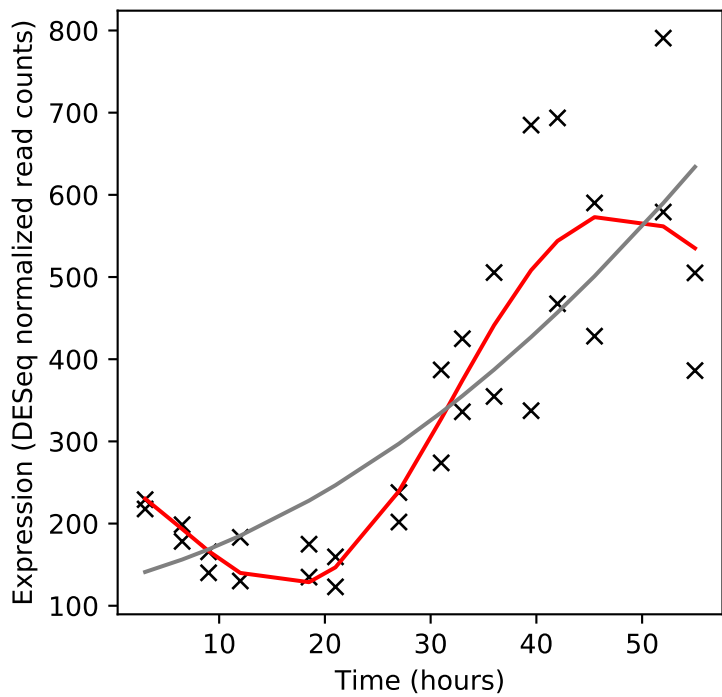

Rv3586/-

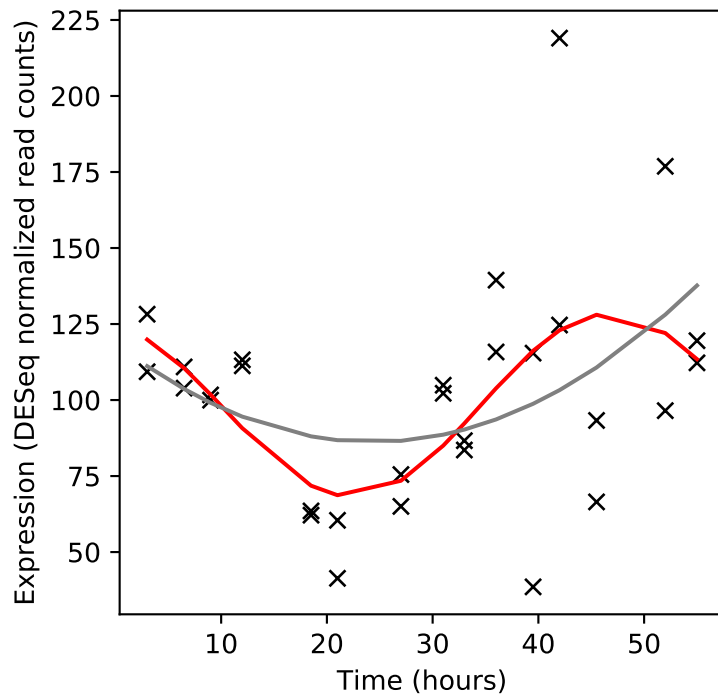

Rv3587c/-

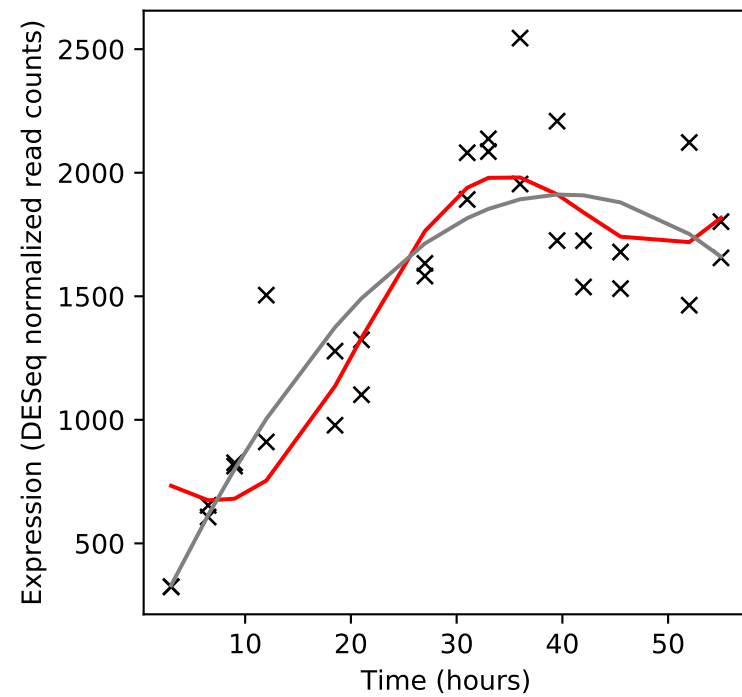

Rv3588c/canB

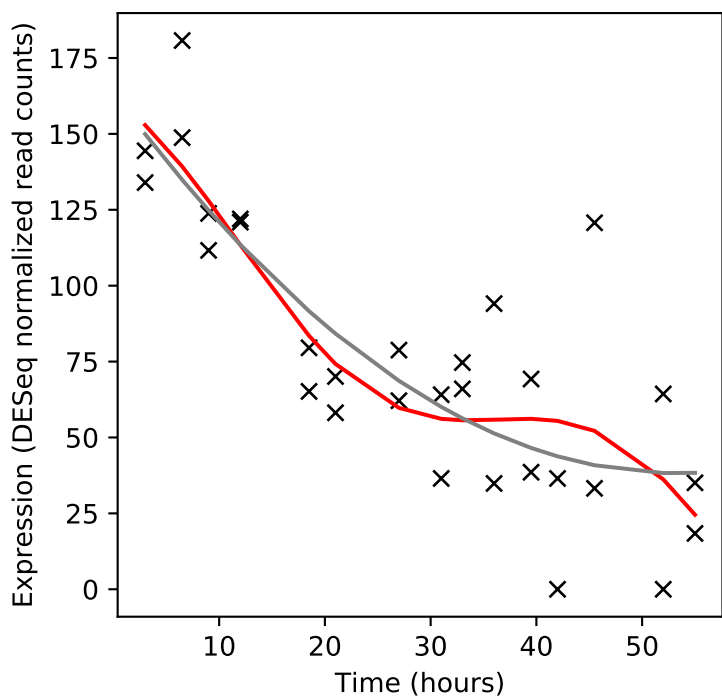

Rv3589/mutY

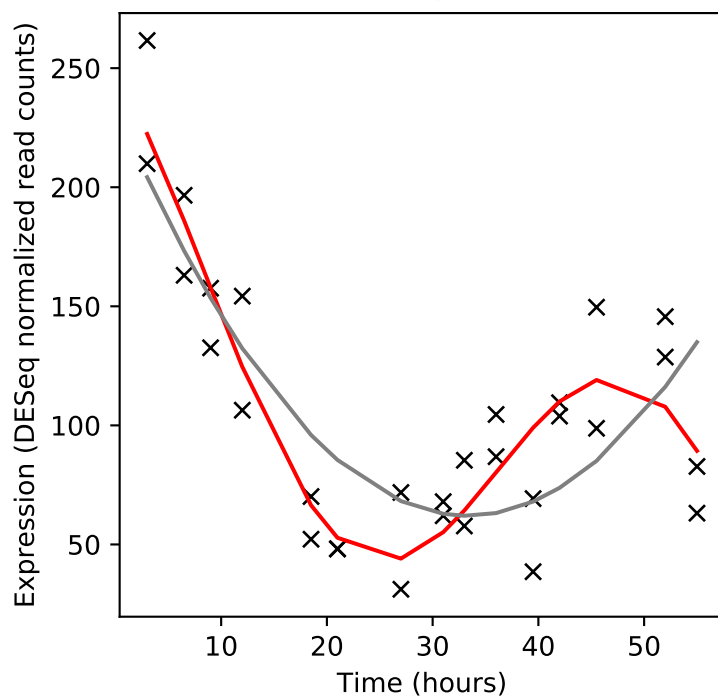

Rv3590c/PE\_PGRS58

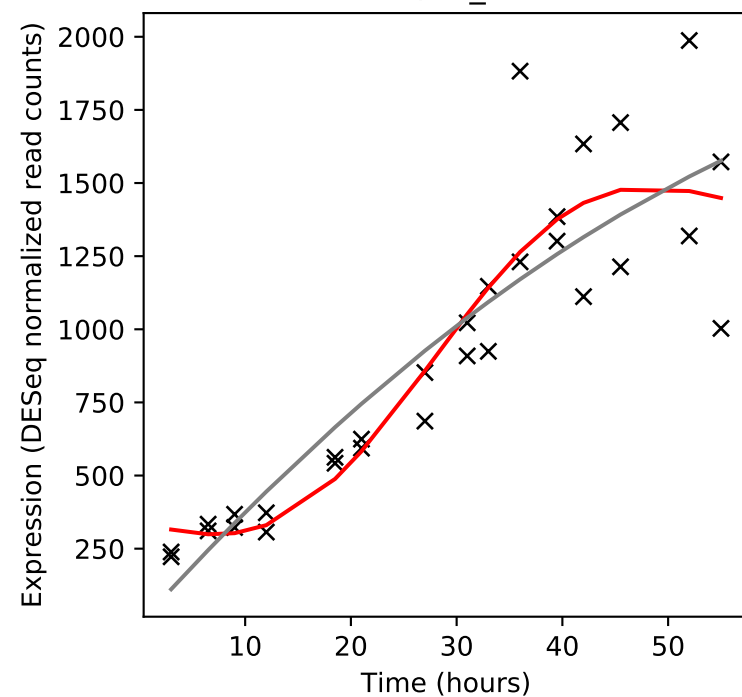

Rv3591c/-

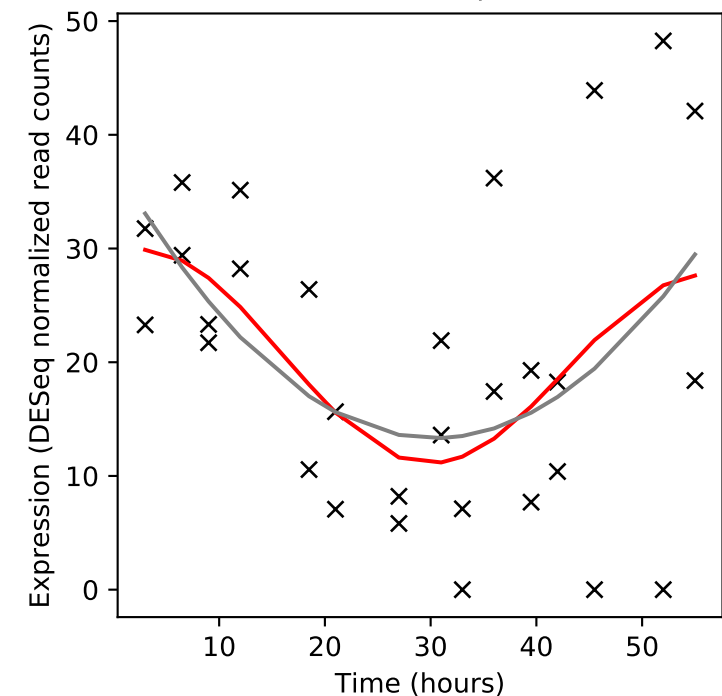

Rv3592/mhuD

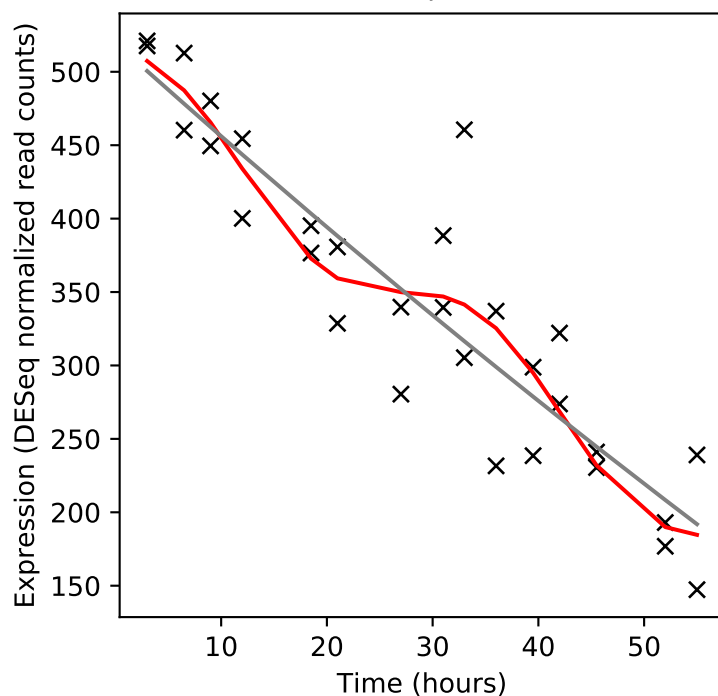

Rv3593/lpqF

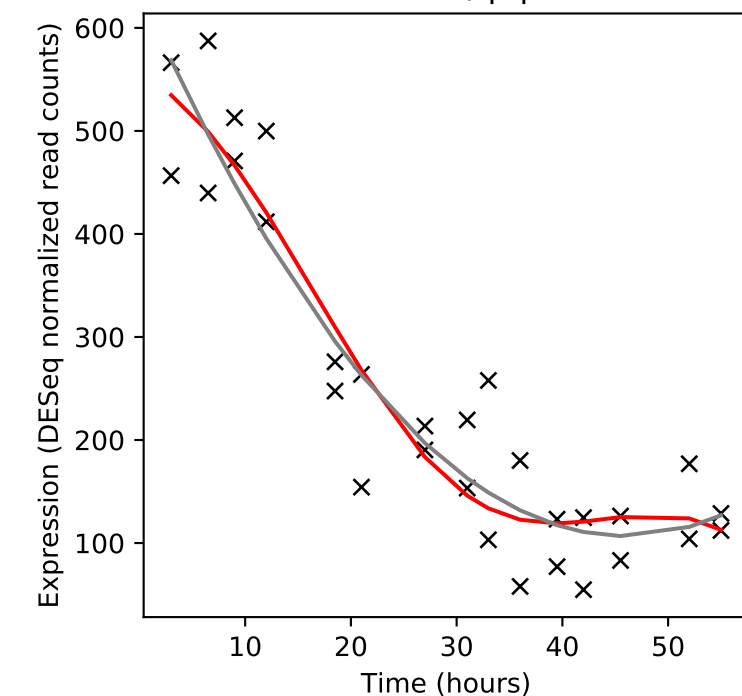

Rv3594/-

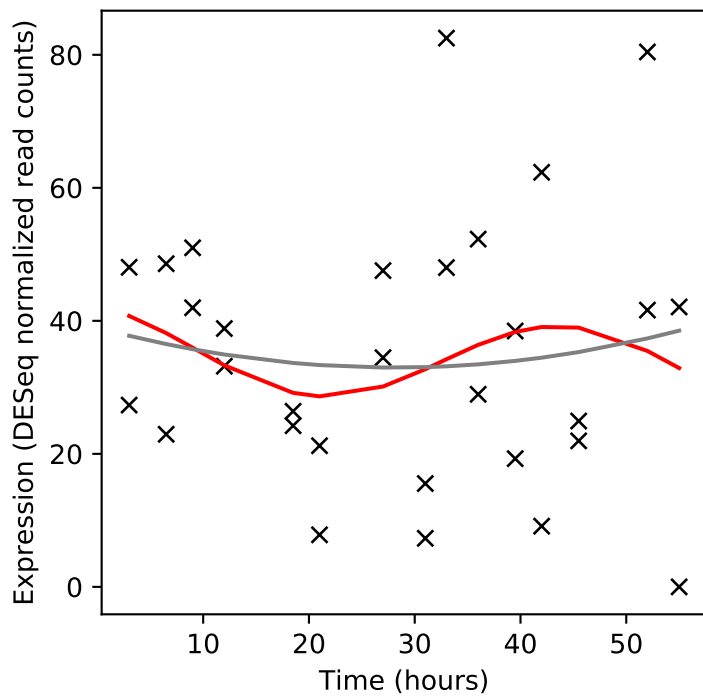

Rv3595c/PE\_PGRS59

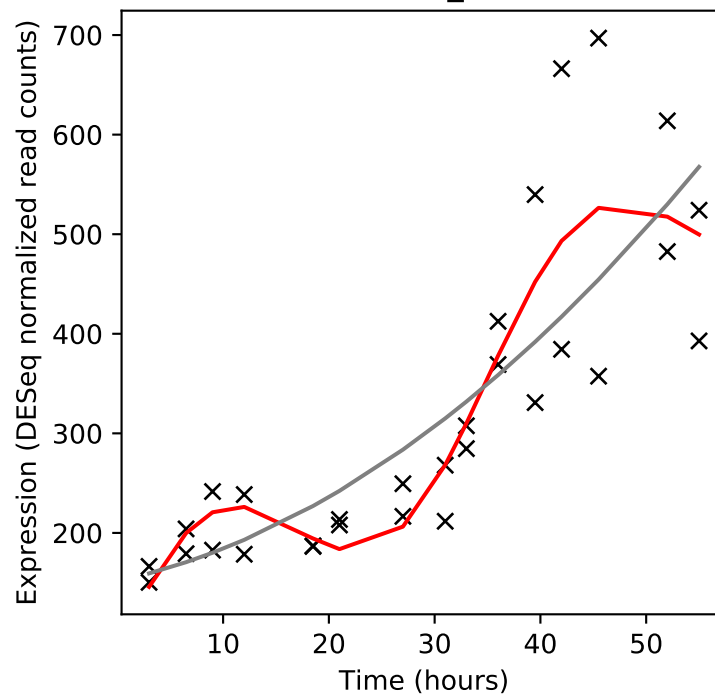

Rv3596c/clpC1

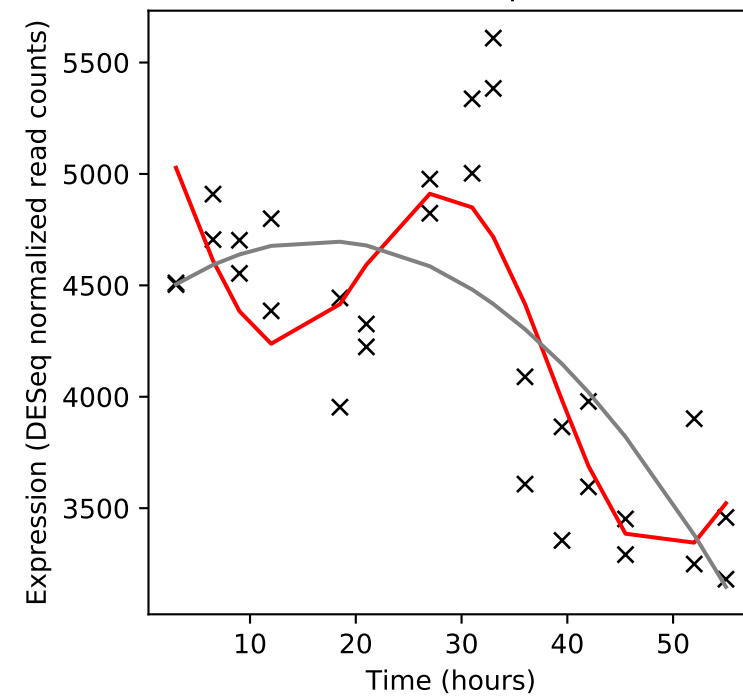

Rv3597c/lsr2

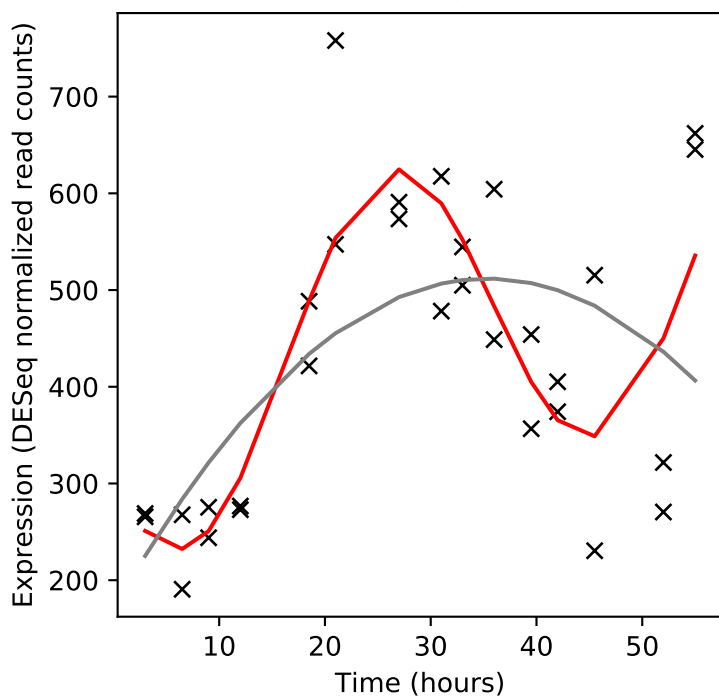

Rv3598c/lysS

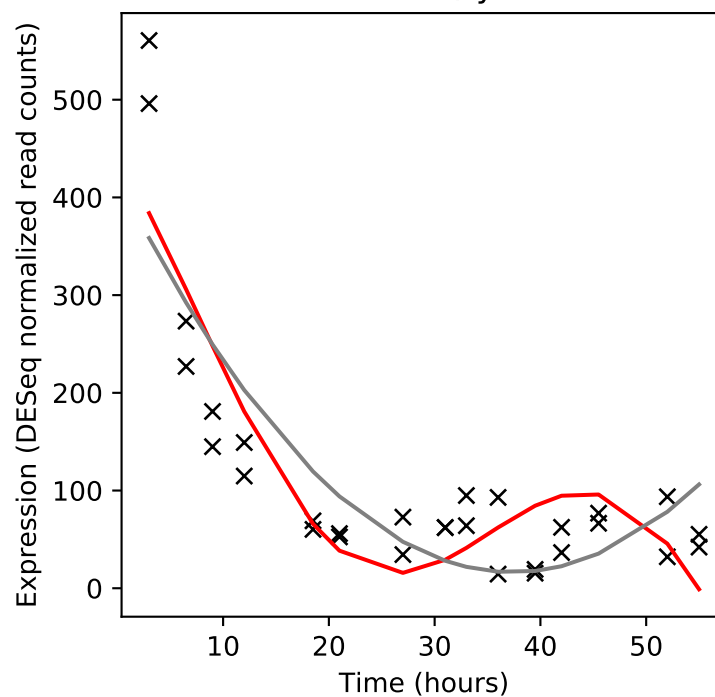

Rv3599c/-

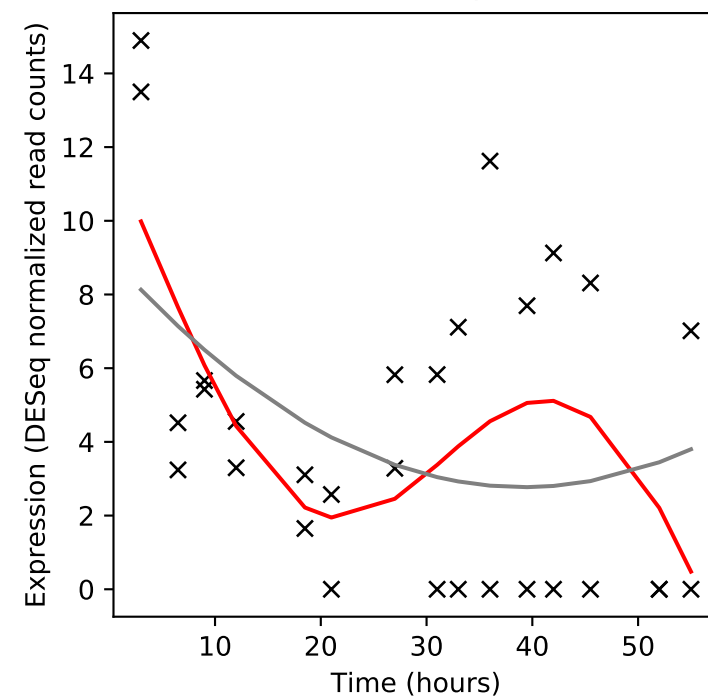

Rv3600c/-

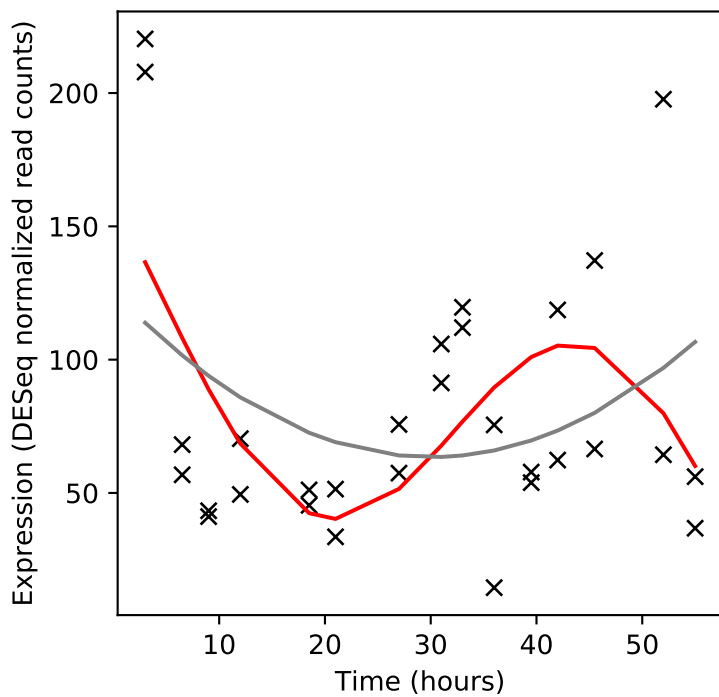

Rv3601c/panD

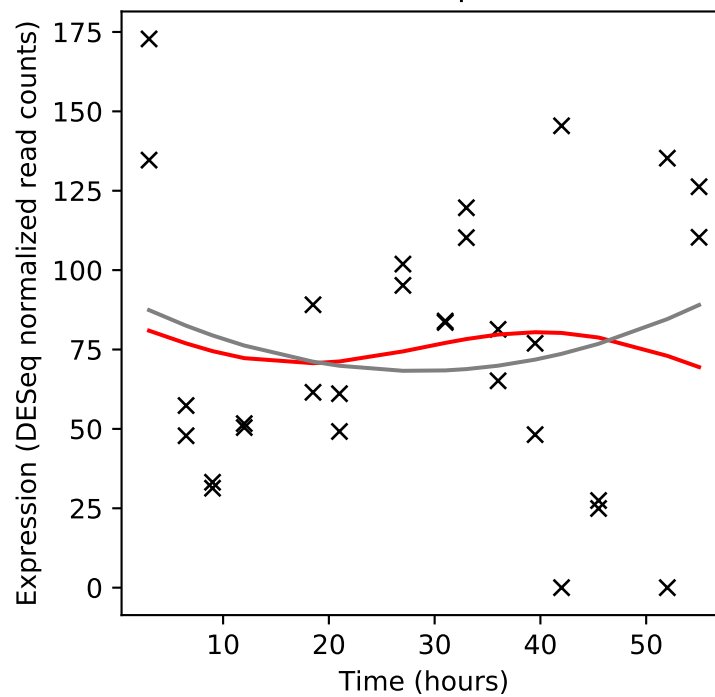

Rv3602c/panC

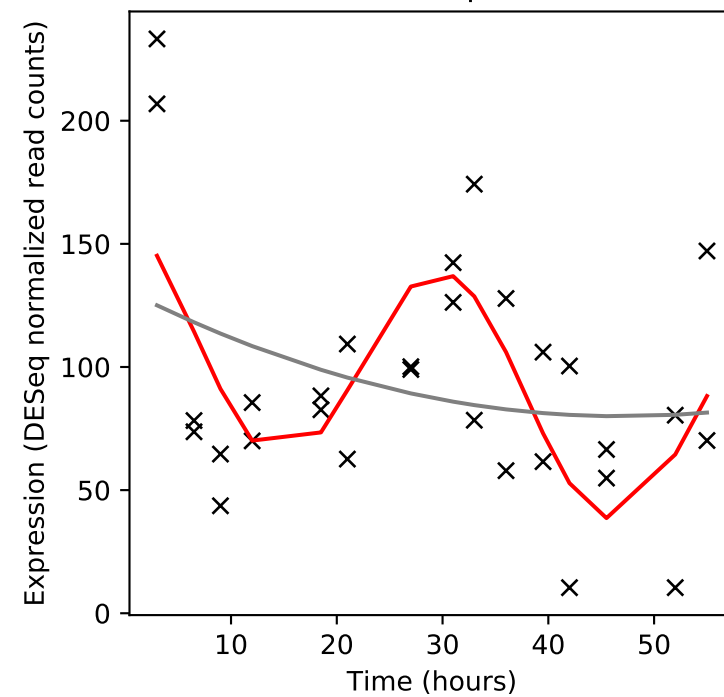

Rv3603c/-

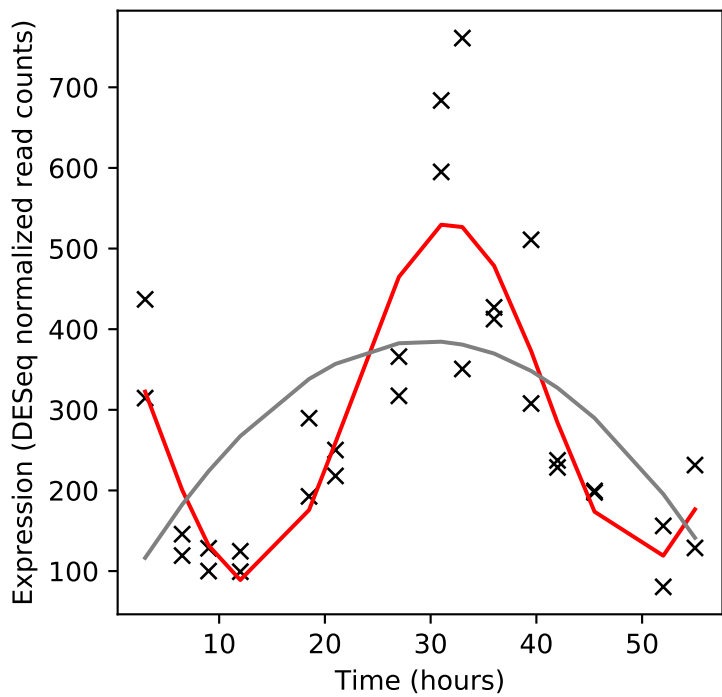

Rv3604c/-

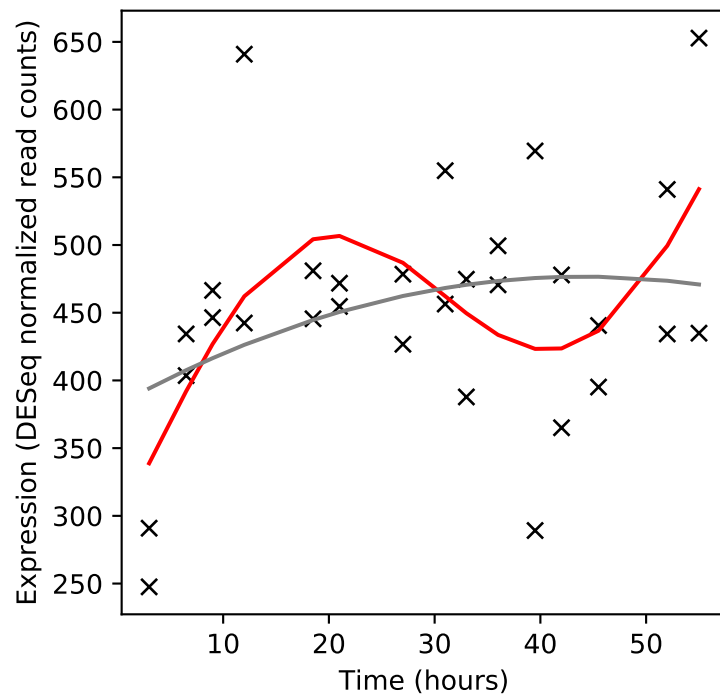

Rv3605c/-

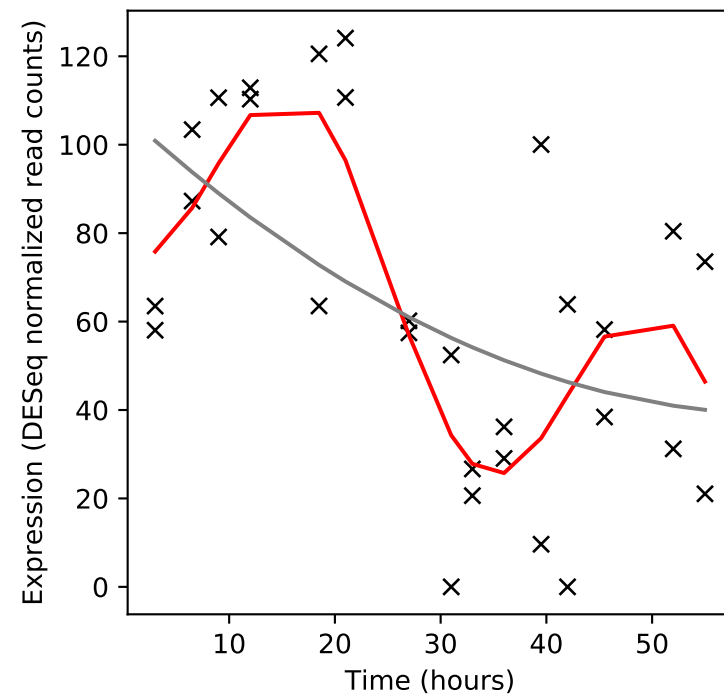

Rv3606c/folK

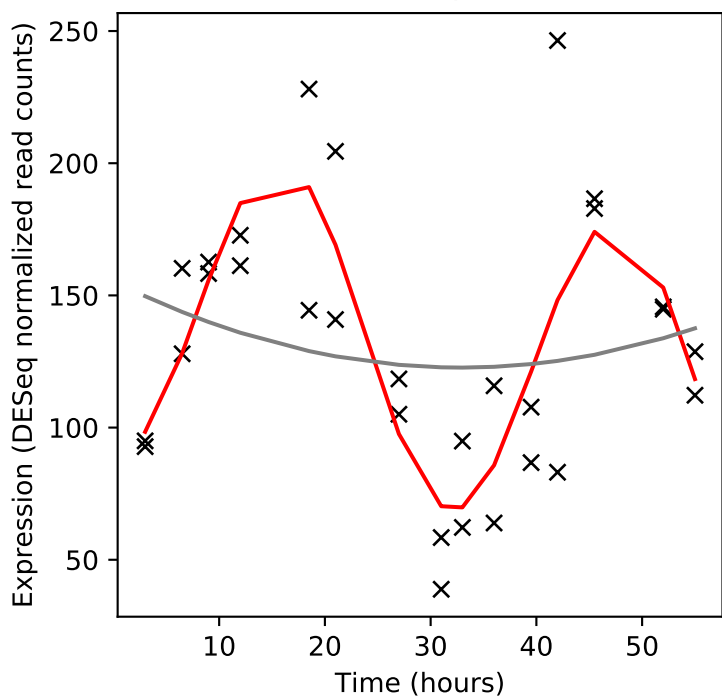

Rv3607c/folB

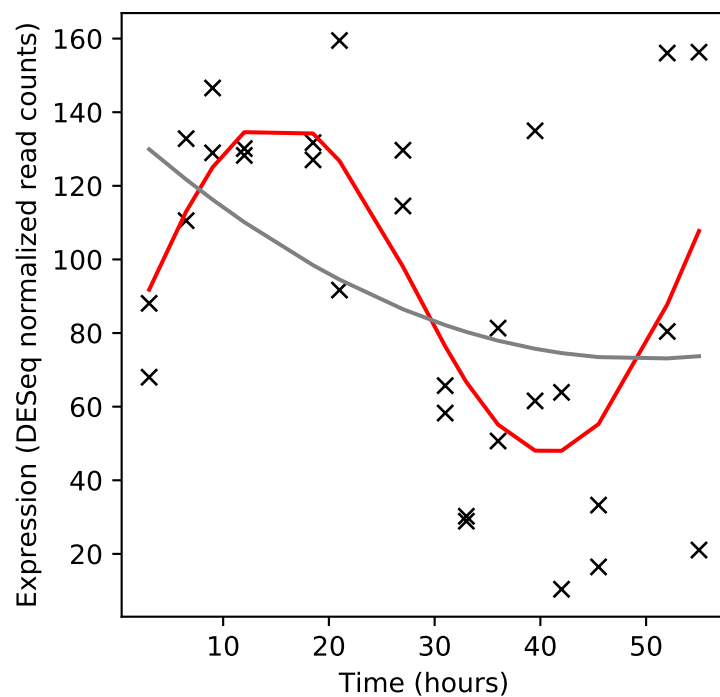

Rv3608c/folP1

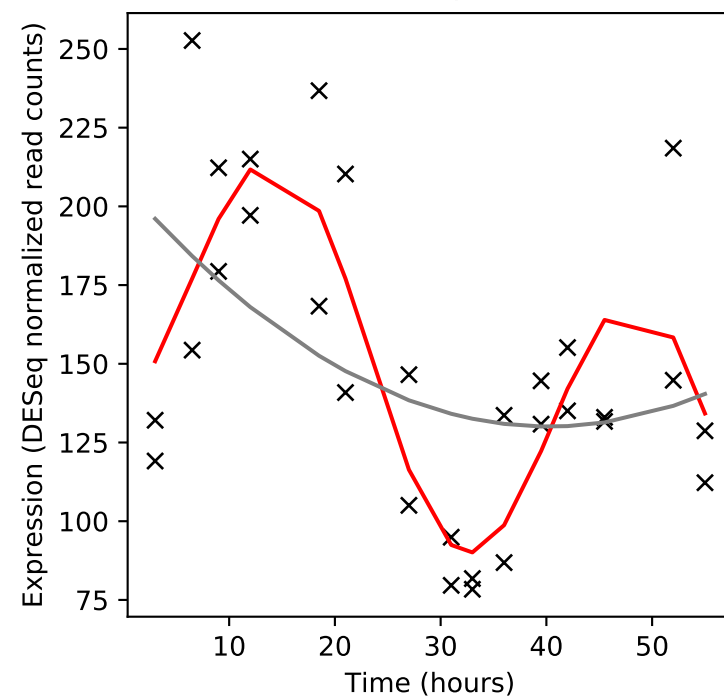

Rv3609c/folE

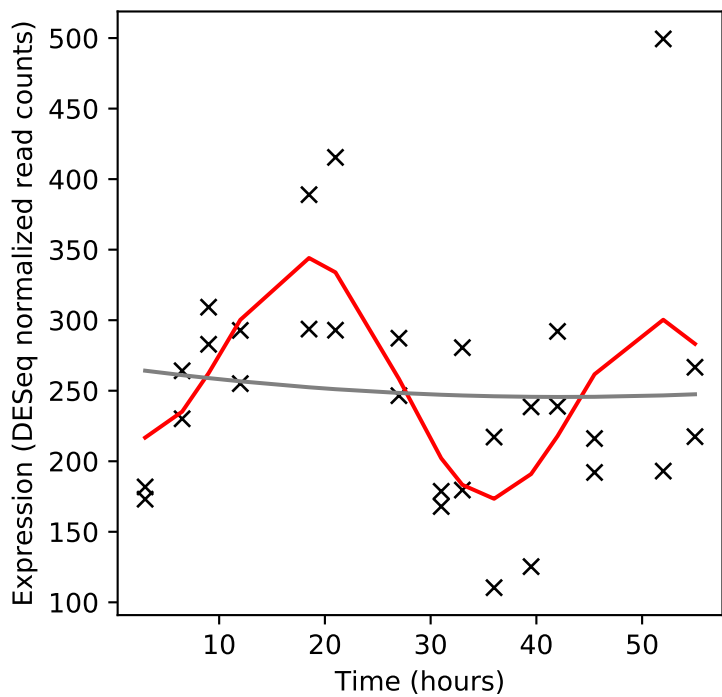

Rv3610c/ftsH

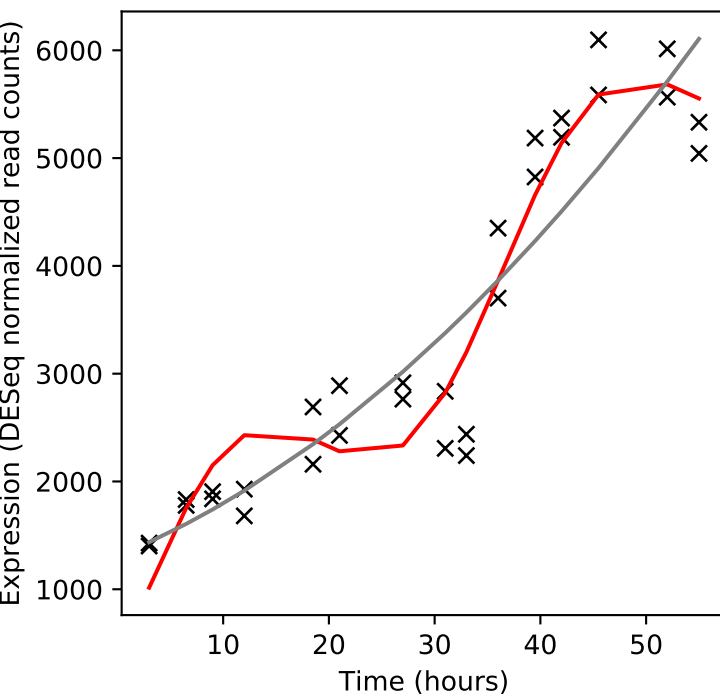

Rv3611/-

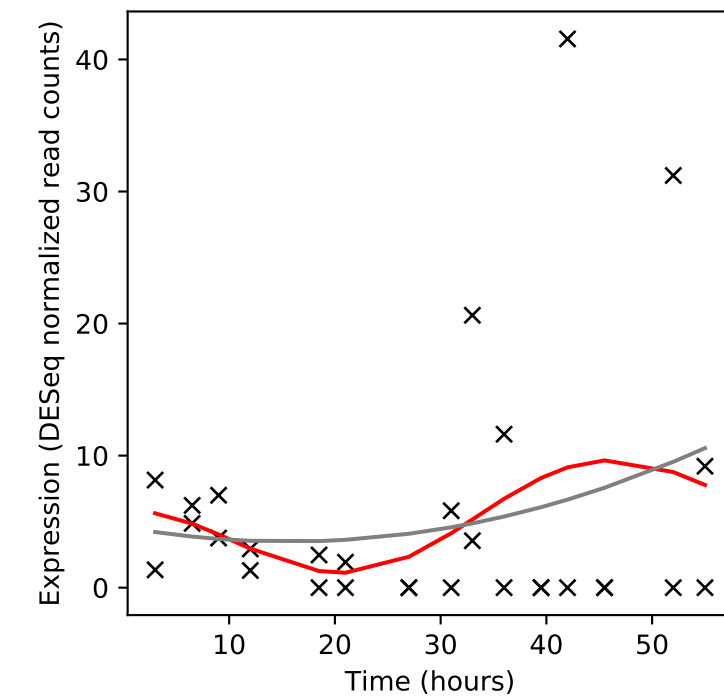

Rv3612c/-

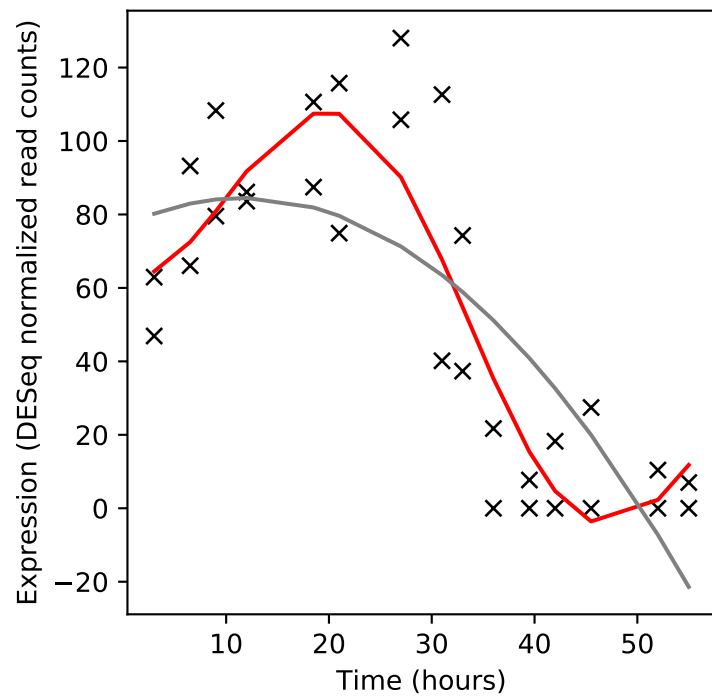

Rv3613c/-

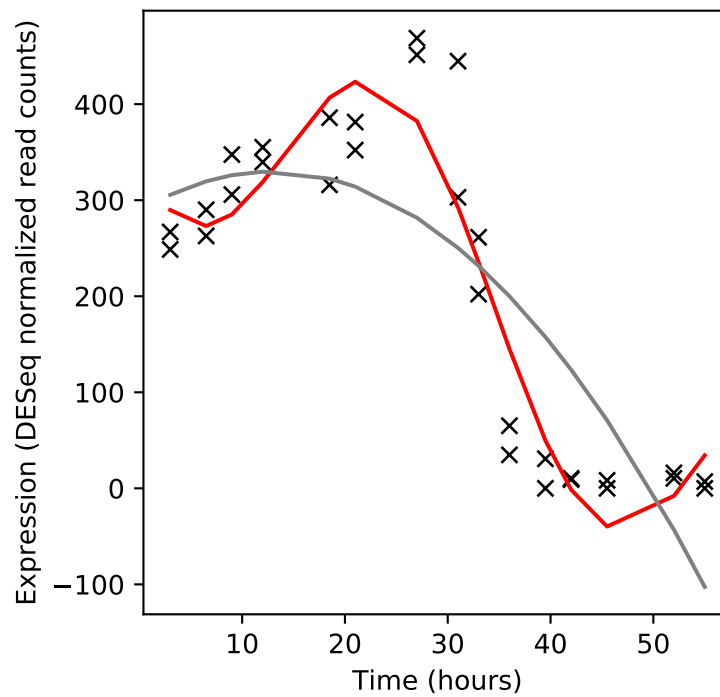

Rv3614c/espD

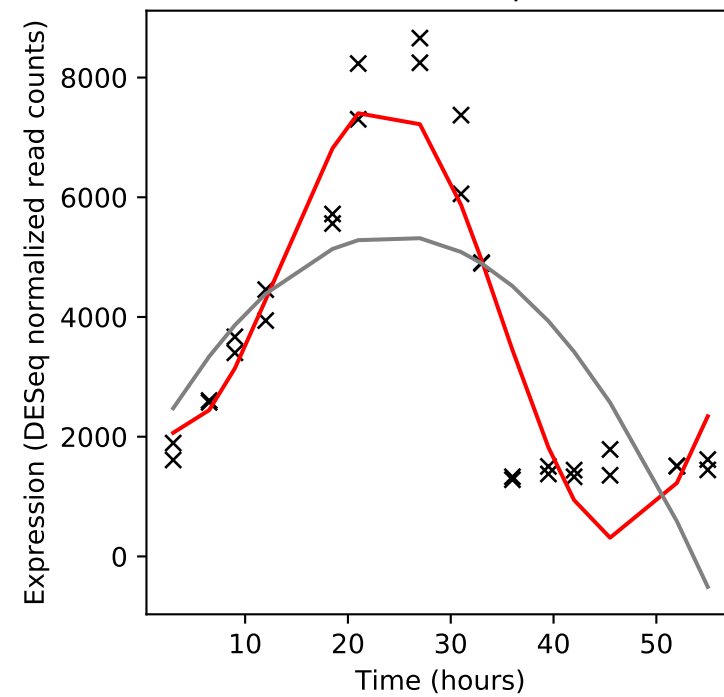

Rv3615c/espC

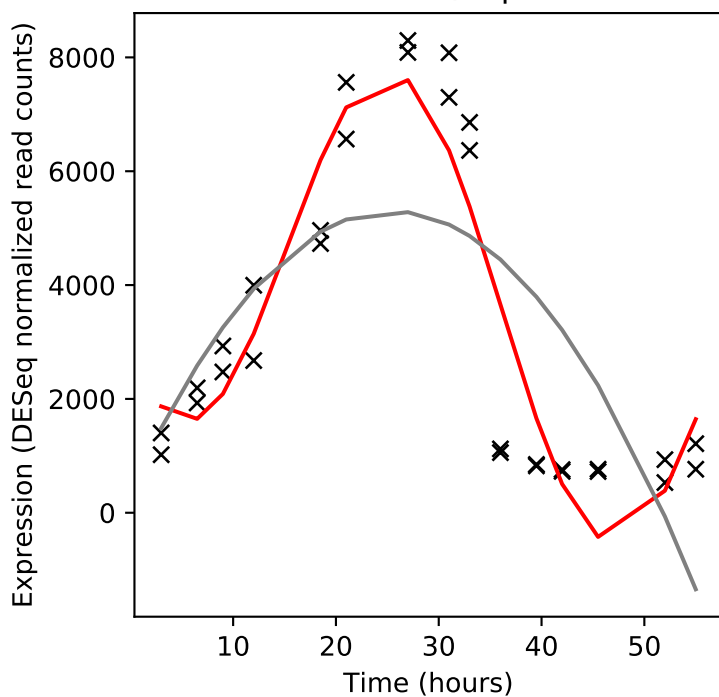

Rv3616c/espA

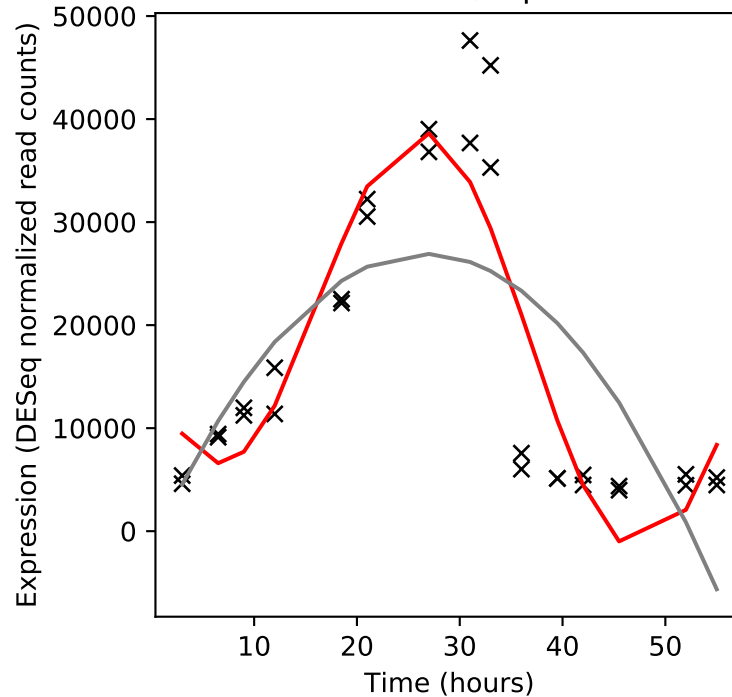

Rv3617/ephA

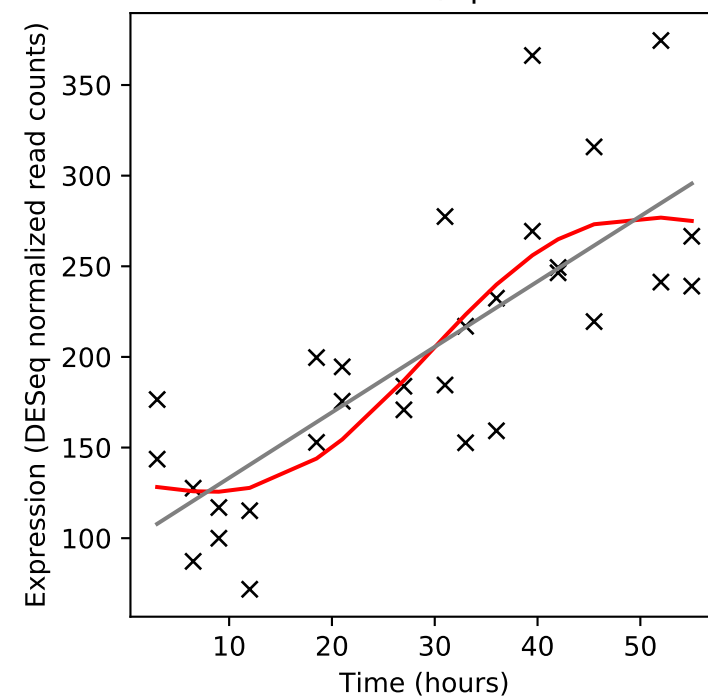

Rv3618/-

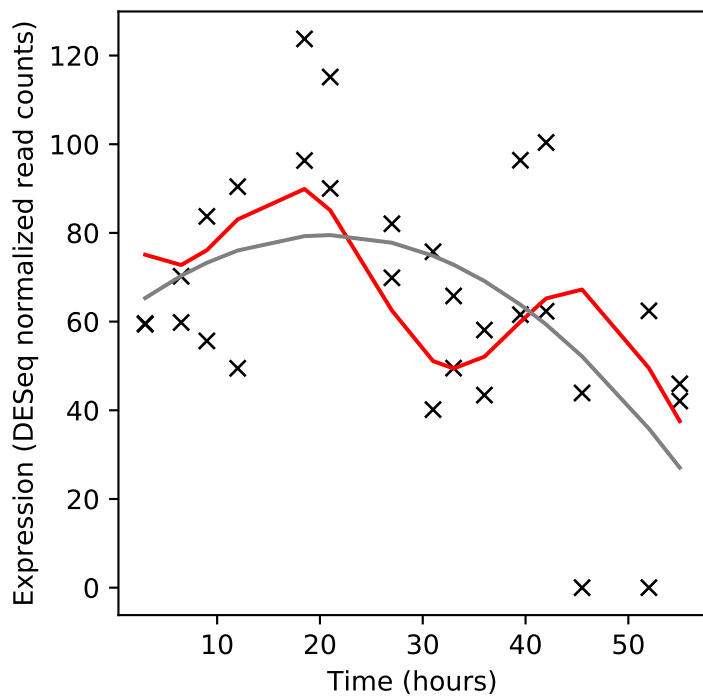

Rv3619c/esxV

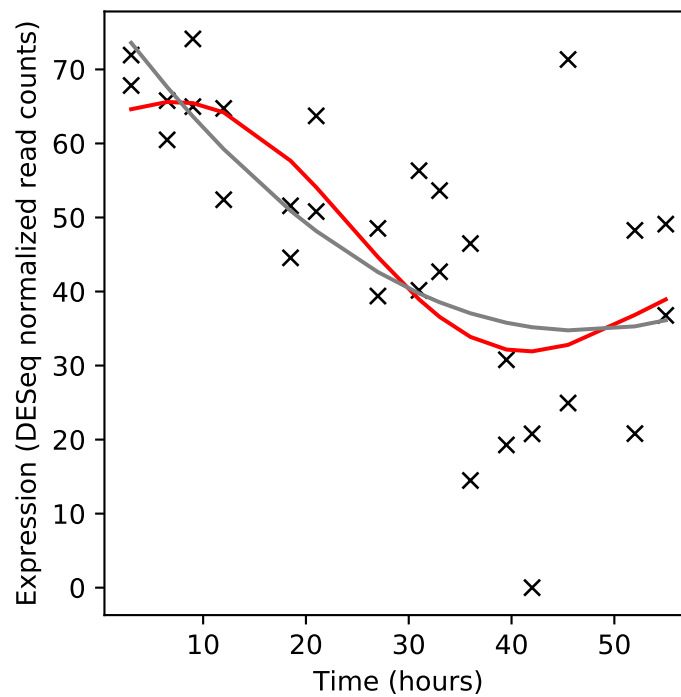

Rv3620c/esxW

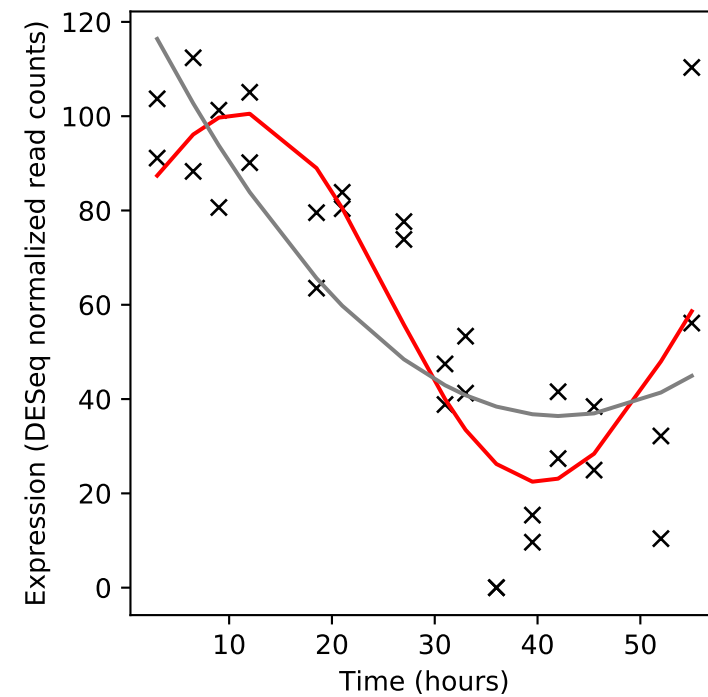

Rv3621c/PPE65

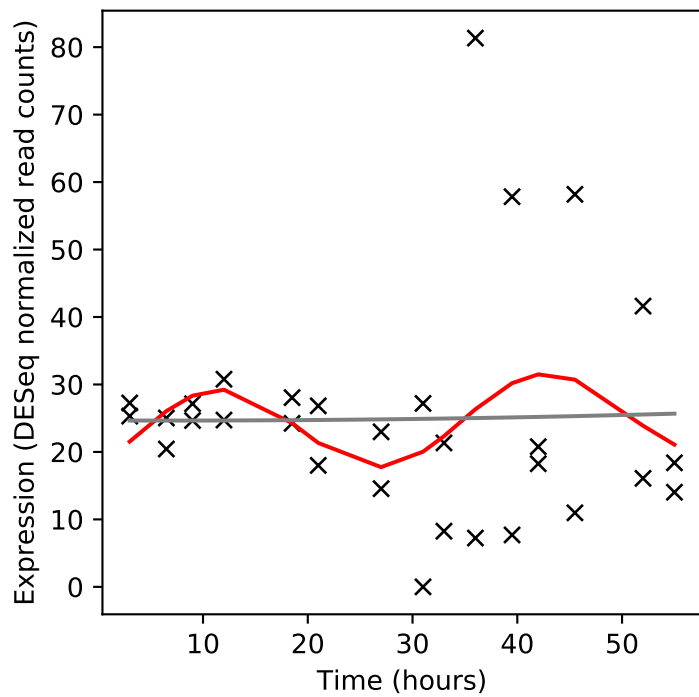

Rv3622c/PE32

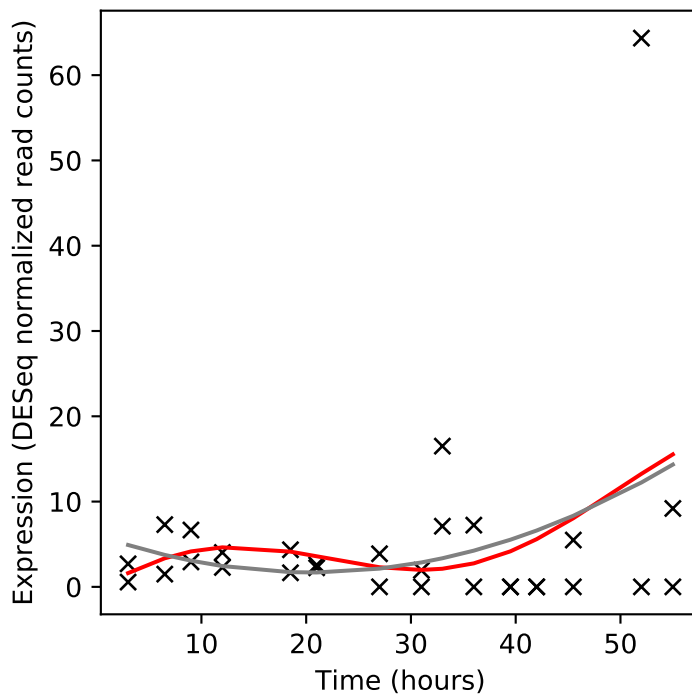

Rv3623/lpqG

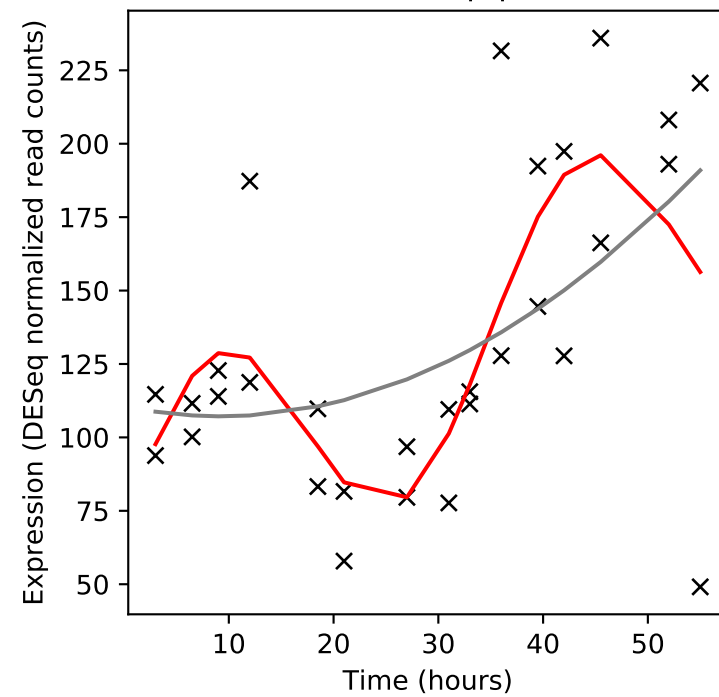

Rv3624c/hpt

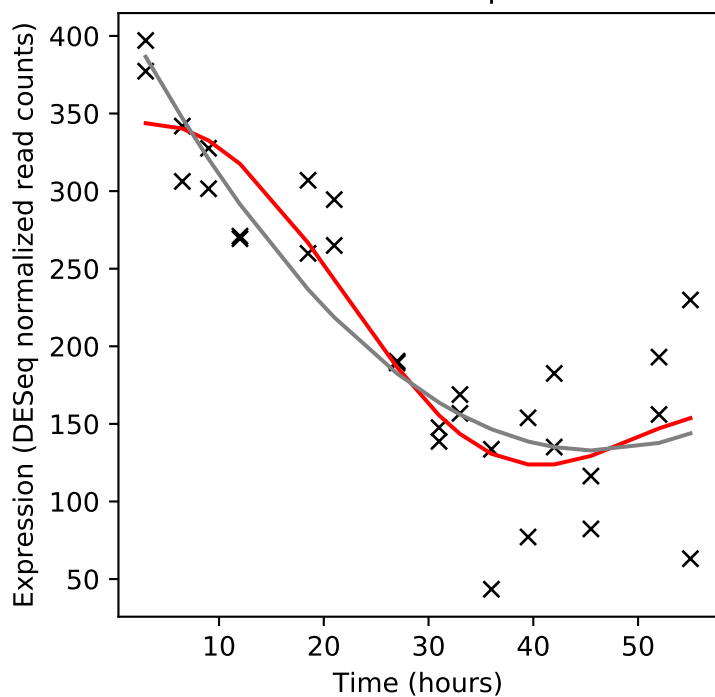

Rv3625c/mesJ

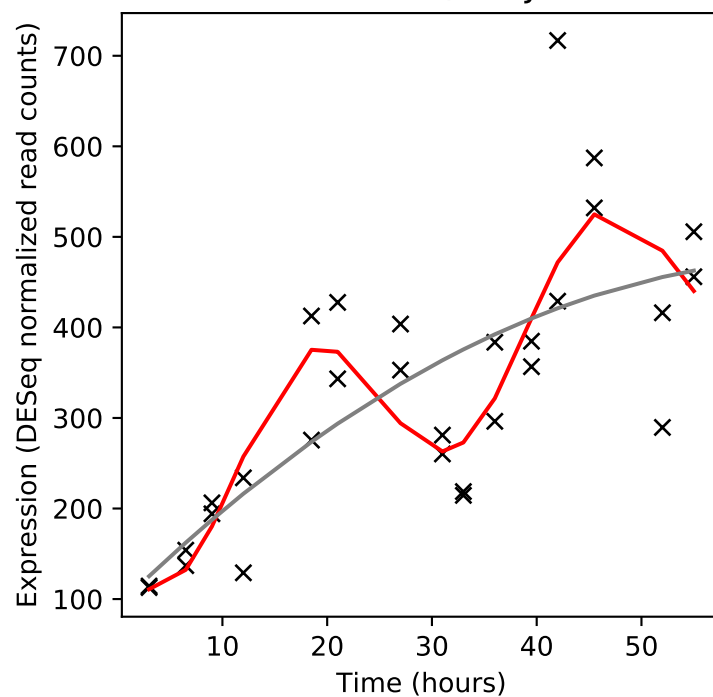

Rv3626c/-

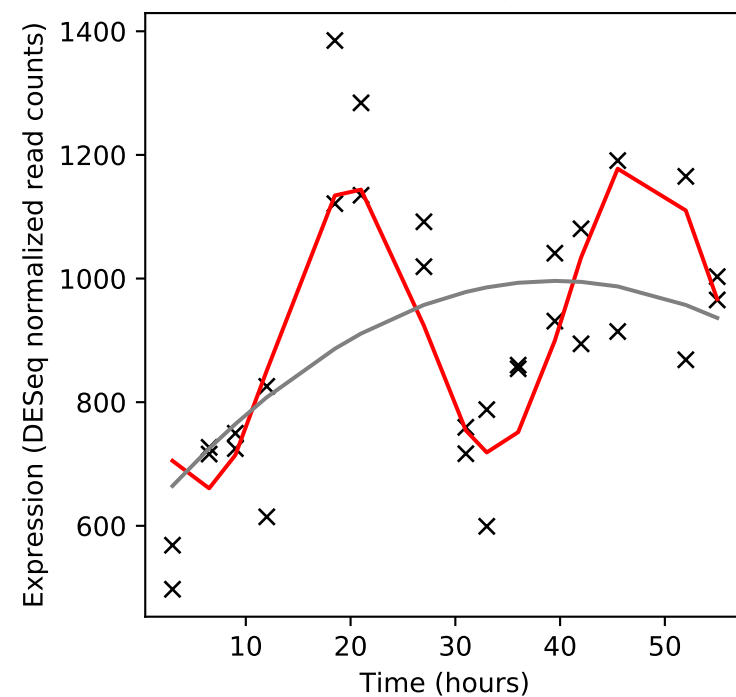

Rv3627c/-

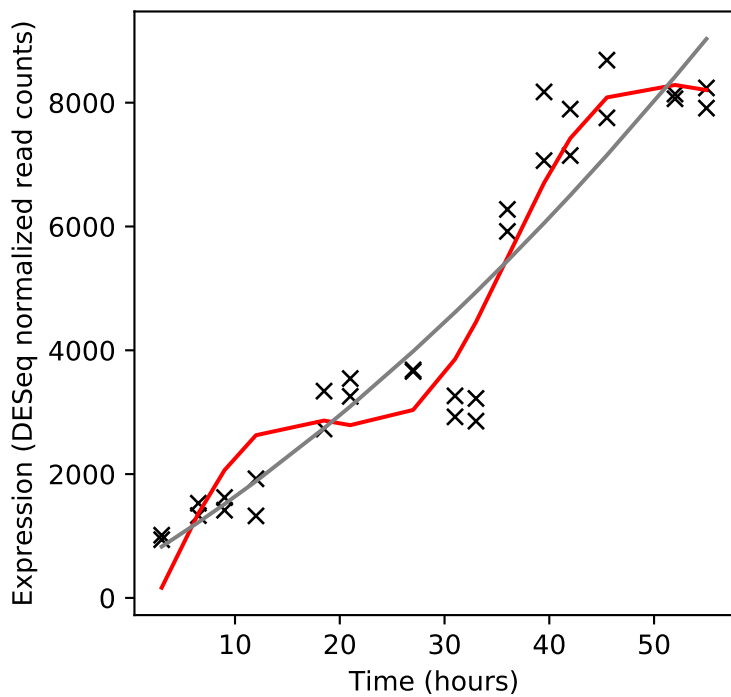

Rv3628/ppa

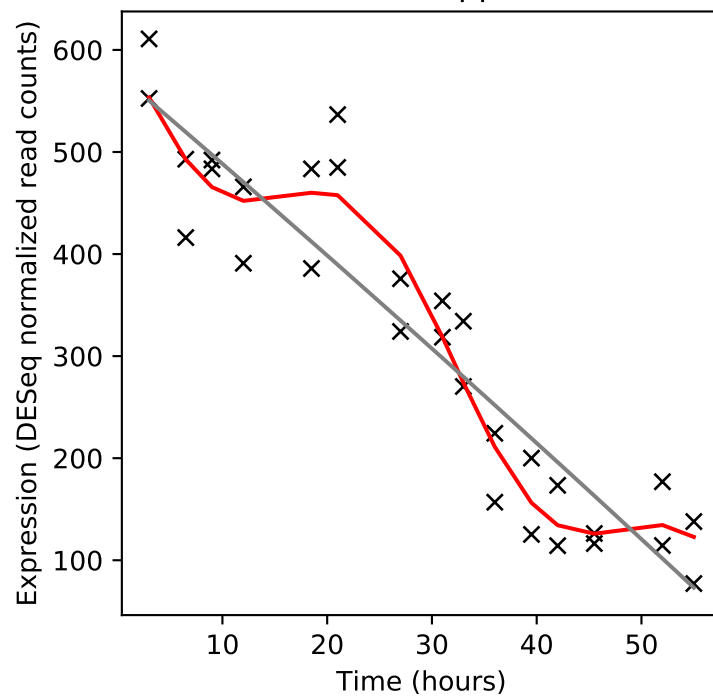

Rv3629c/-

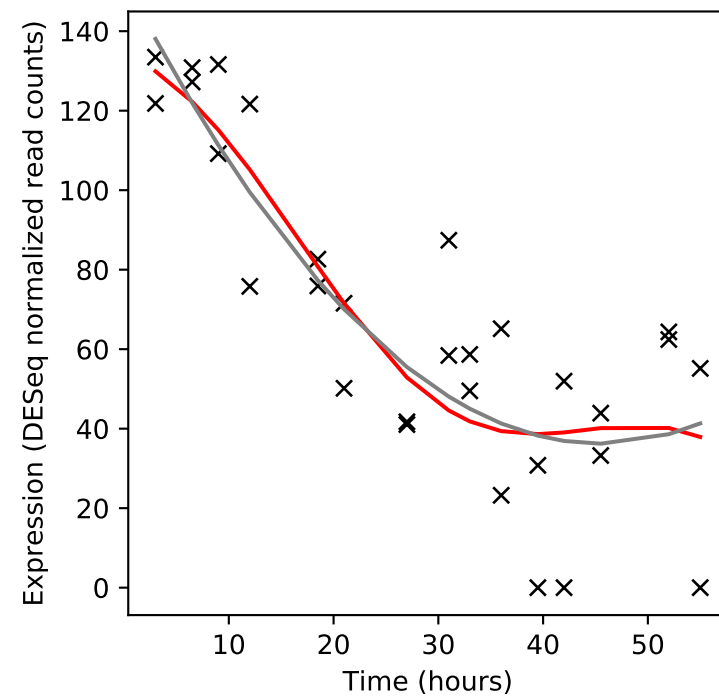

Rv3630/-

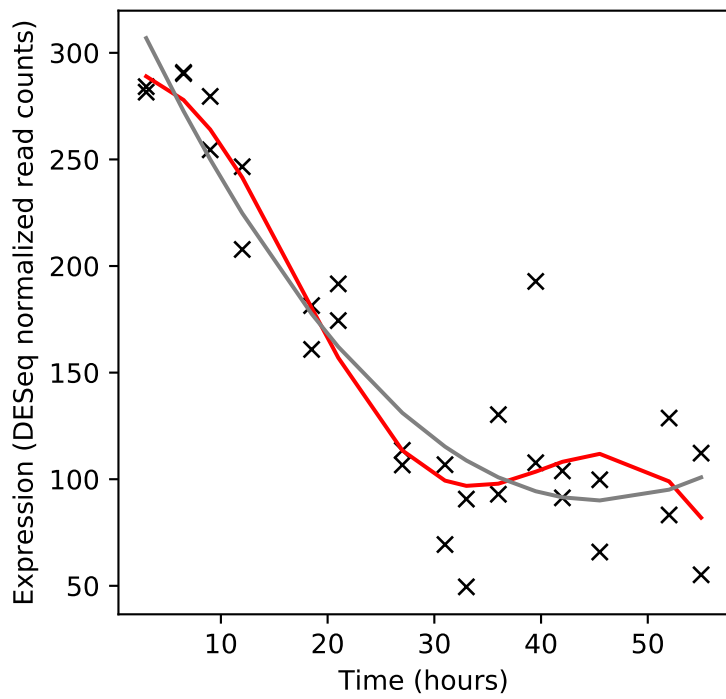

Rv3631/-

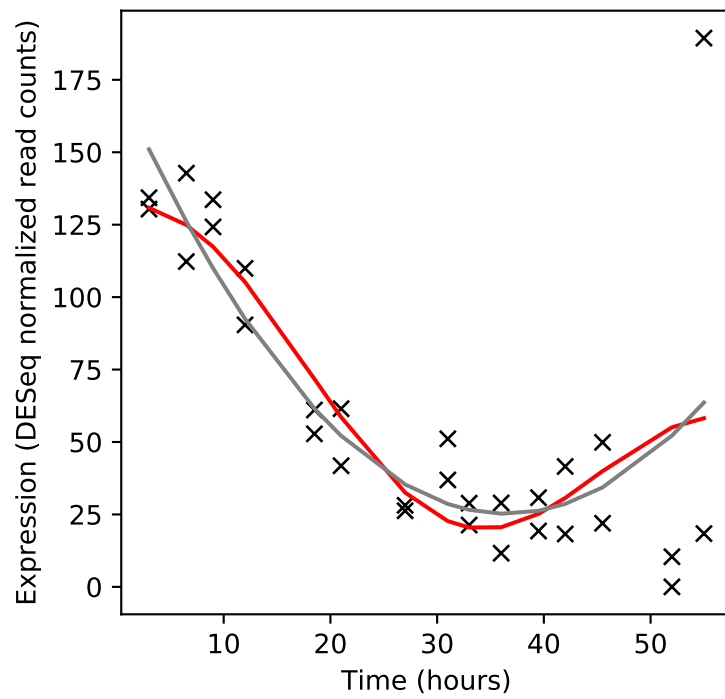

Rv3632/-

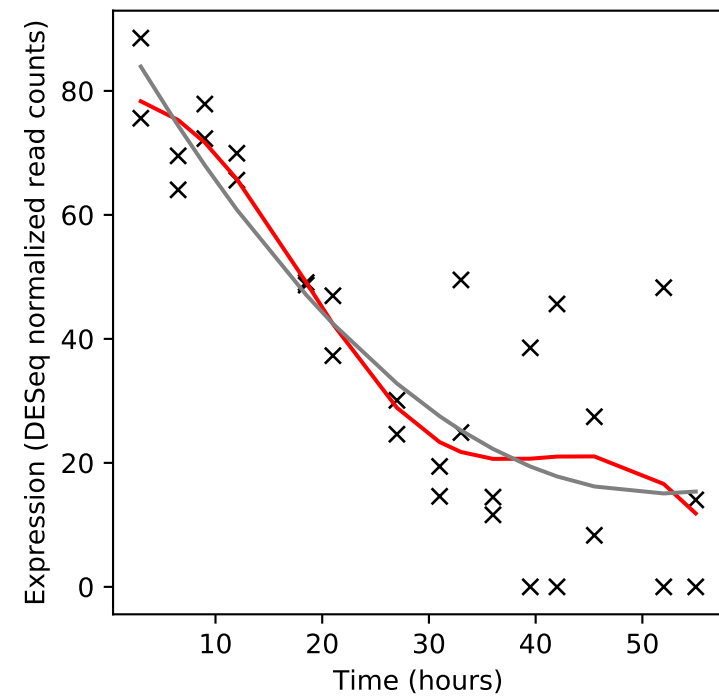

Rv3633/-

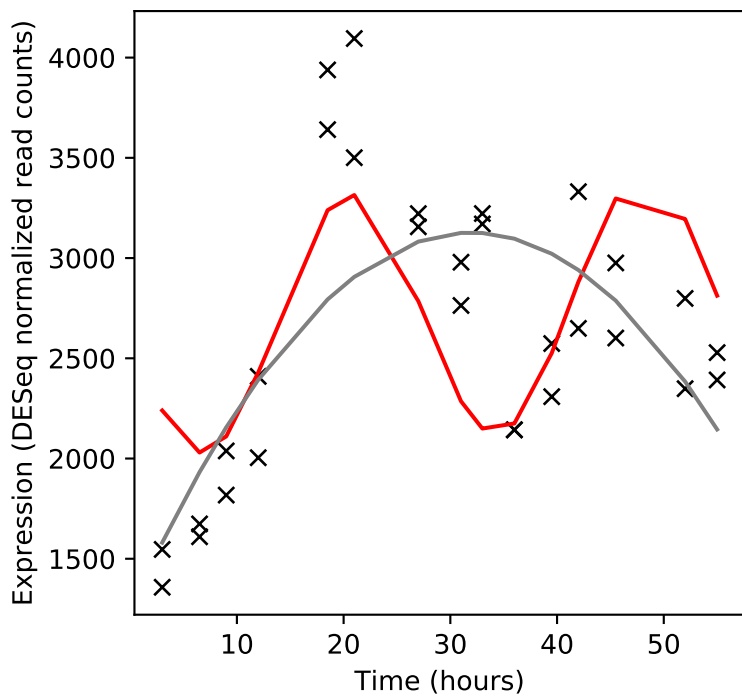

Rv3634c/galE1

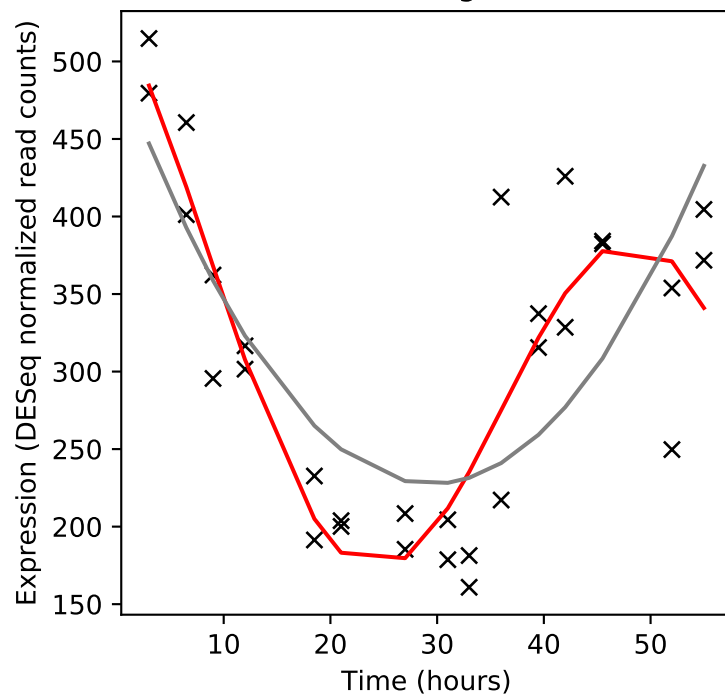

Rv3635/-

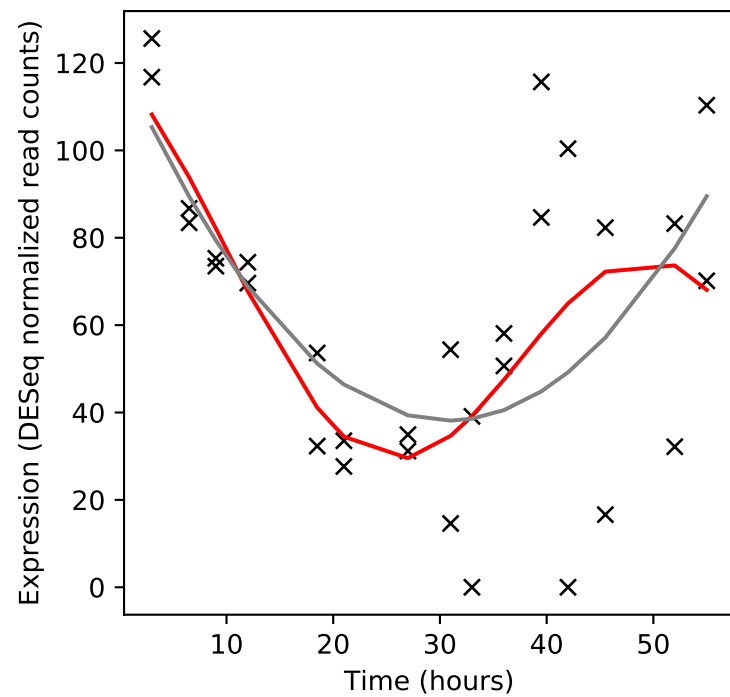

Rv3636/-

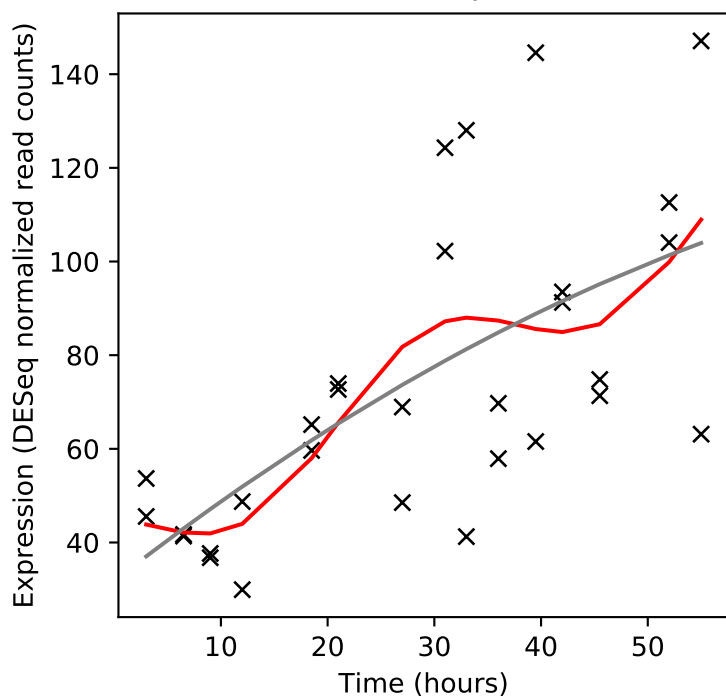

Rv3637/-

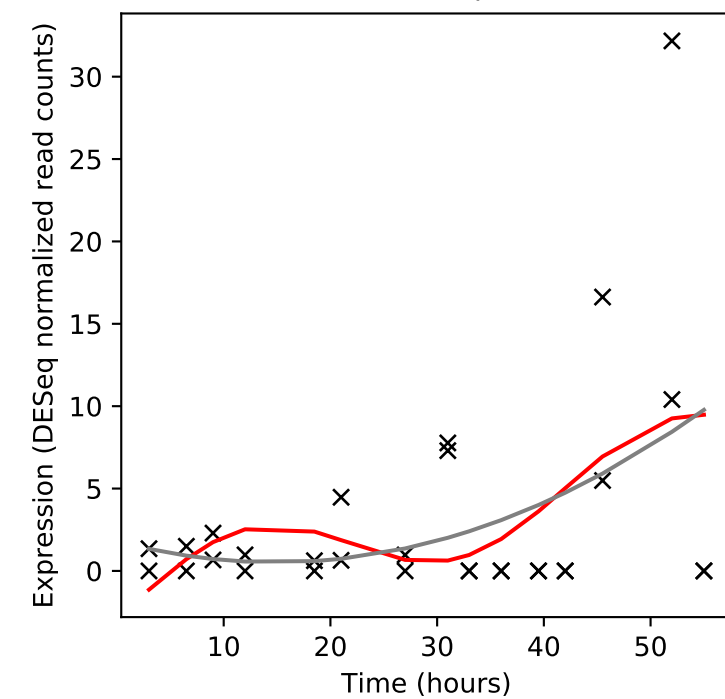

Rv3638/-

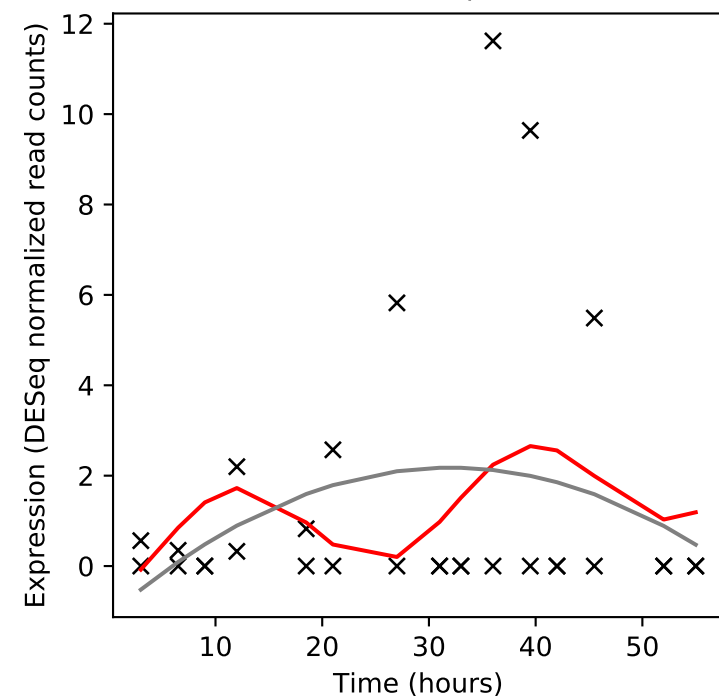



Rv3639c/-

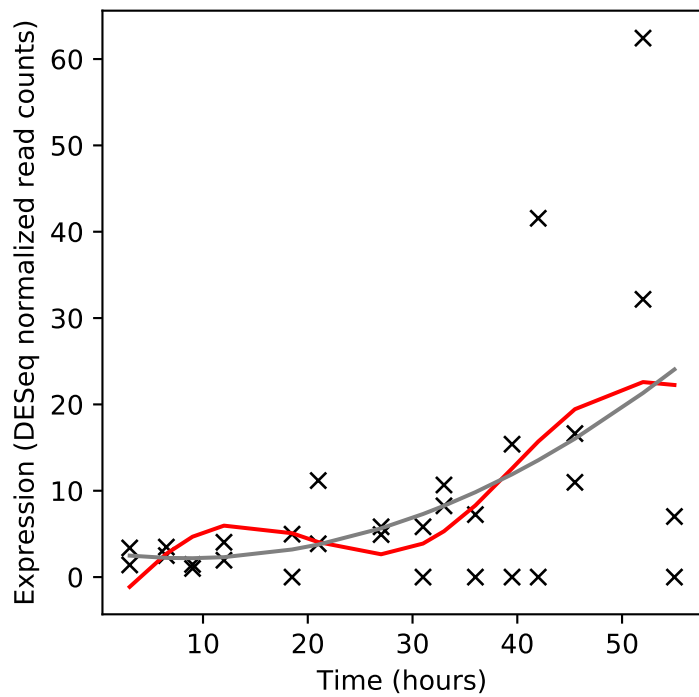

Rv3640c/-

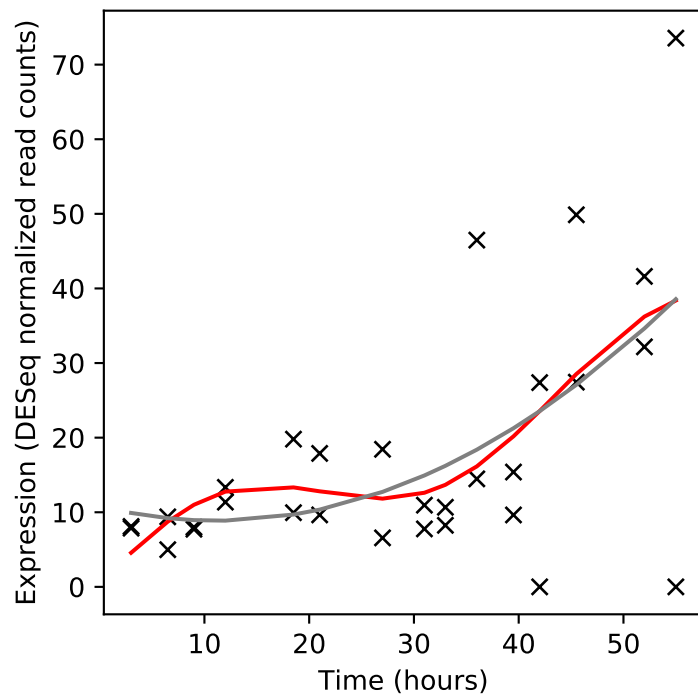

Rv3641c/fic

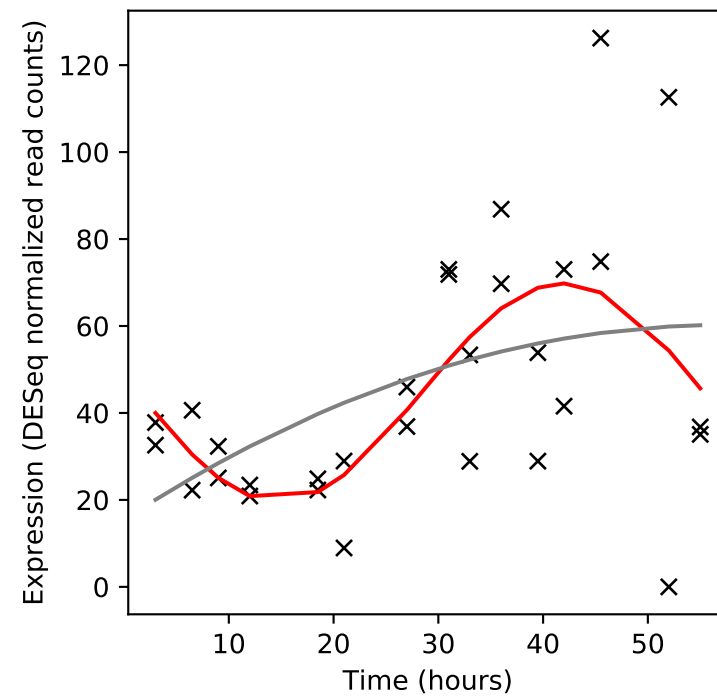

Rv3642c/-

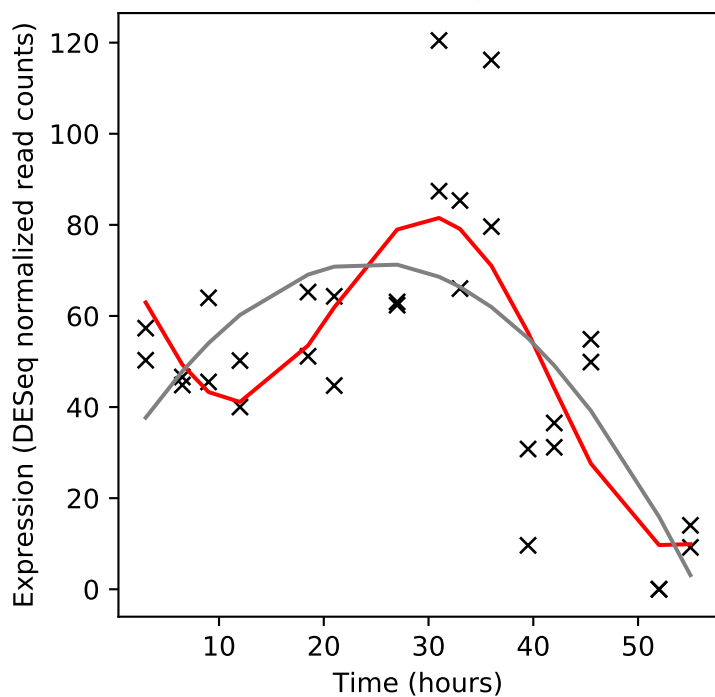

Rv3643/-

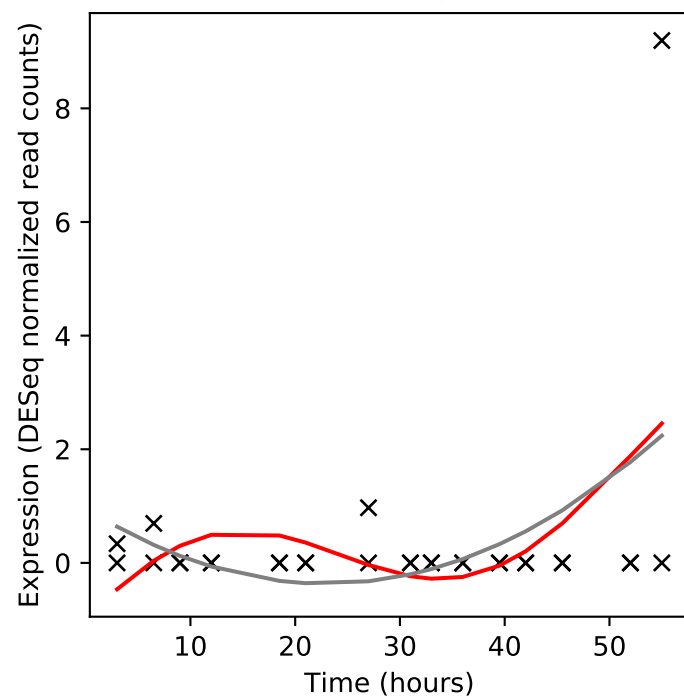

Rv3644c/-

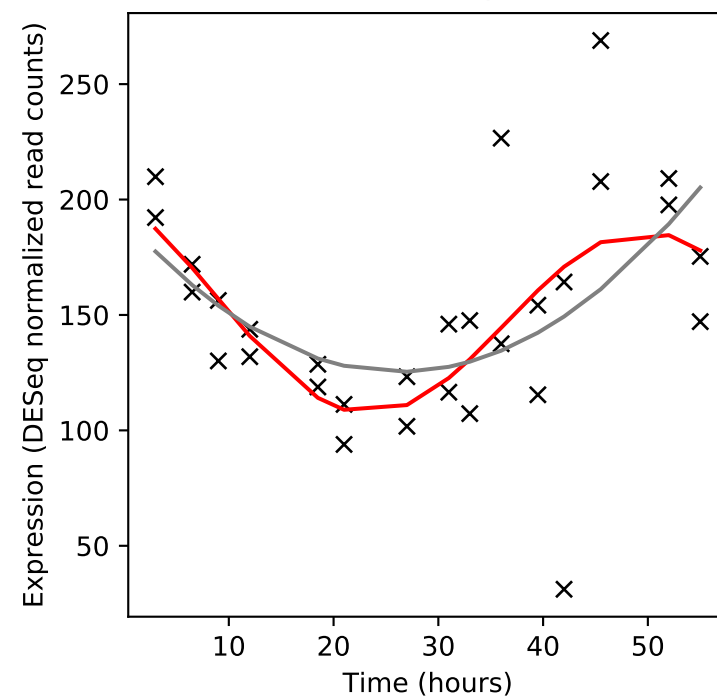

Rv3645/-

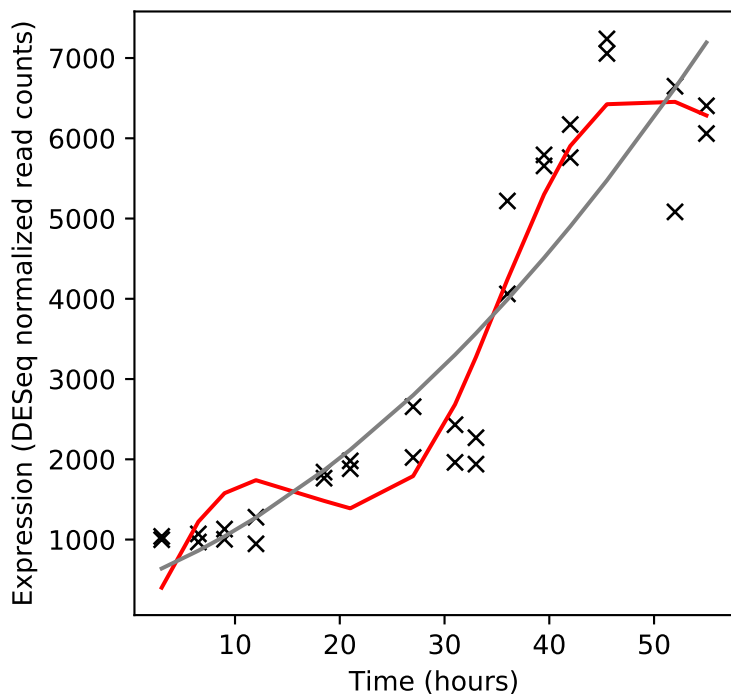

Rv3646c/topA

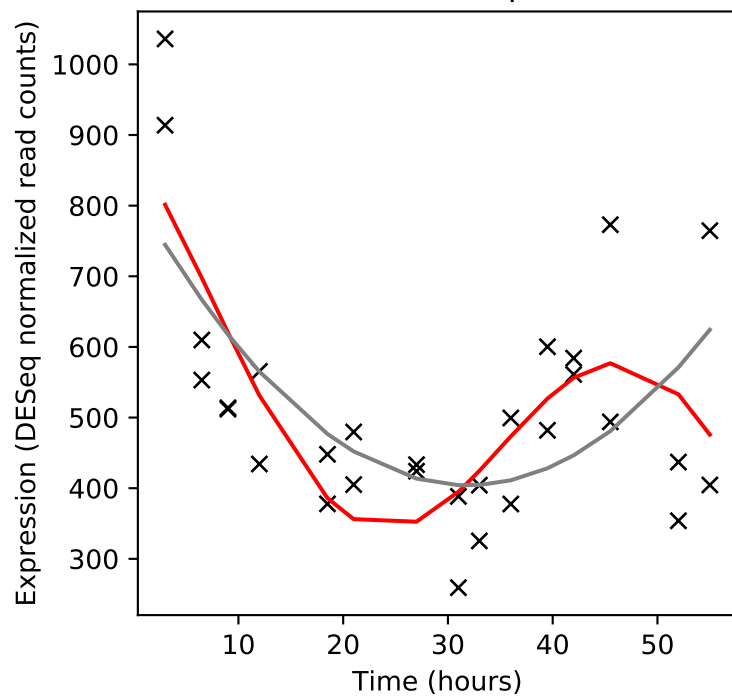

Rv3647c/-

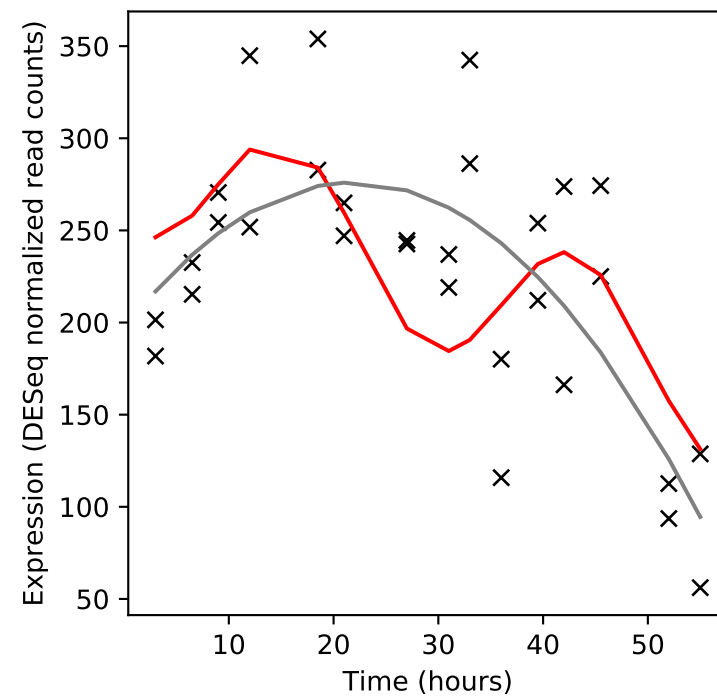

Rv3648c/cspA

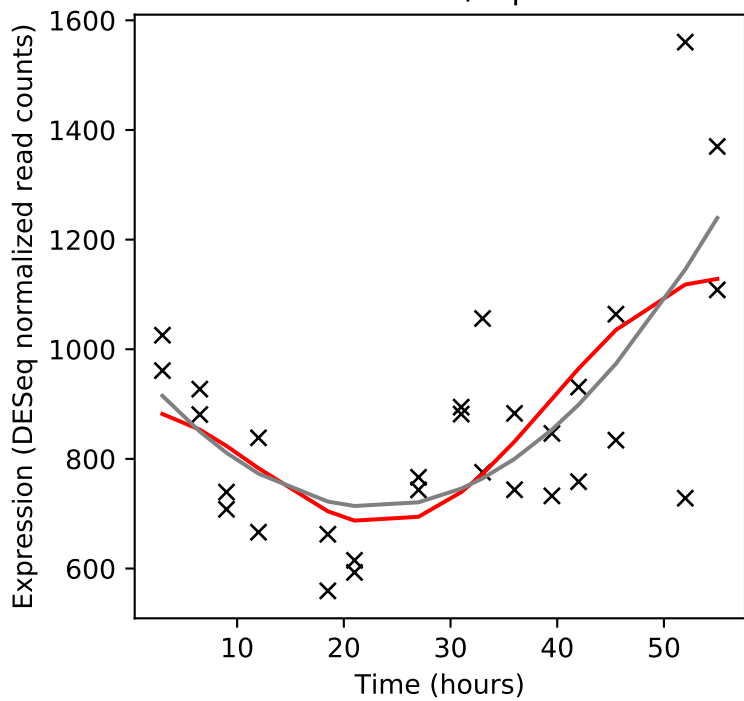

Rv3649/-

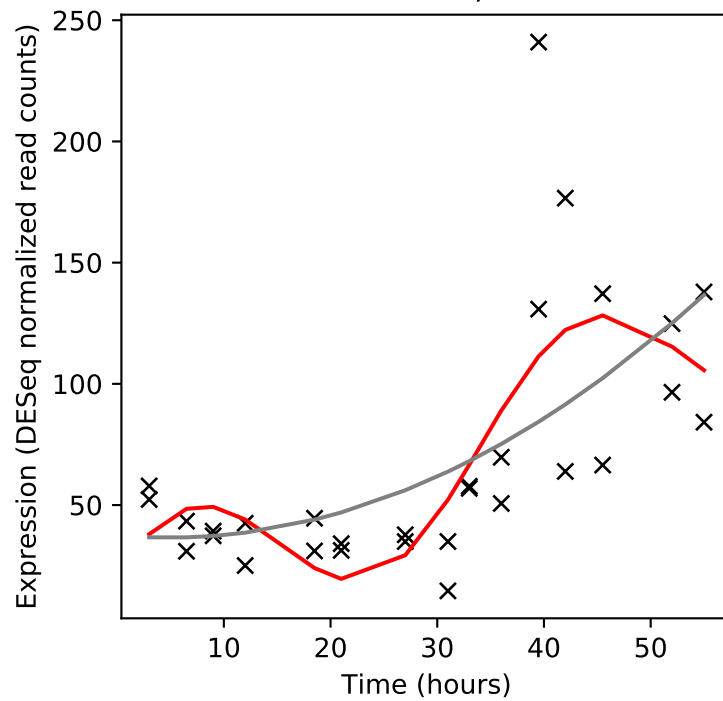

Rv3650/PE33

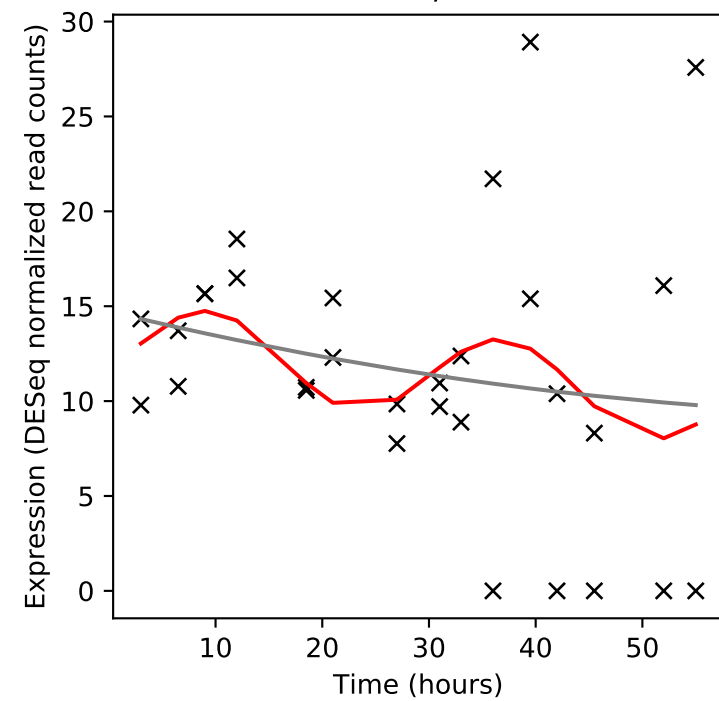

Rv3651/-

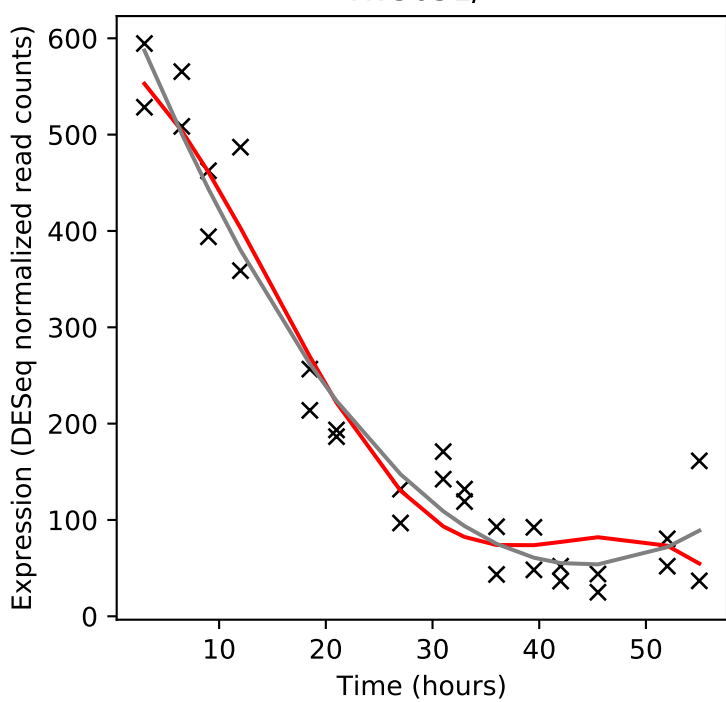

Rv3652/PE\_PGRS60

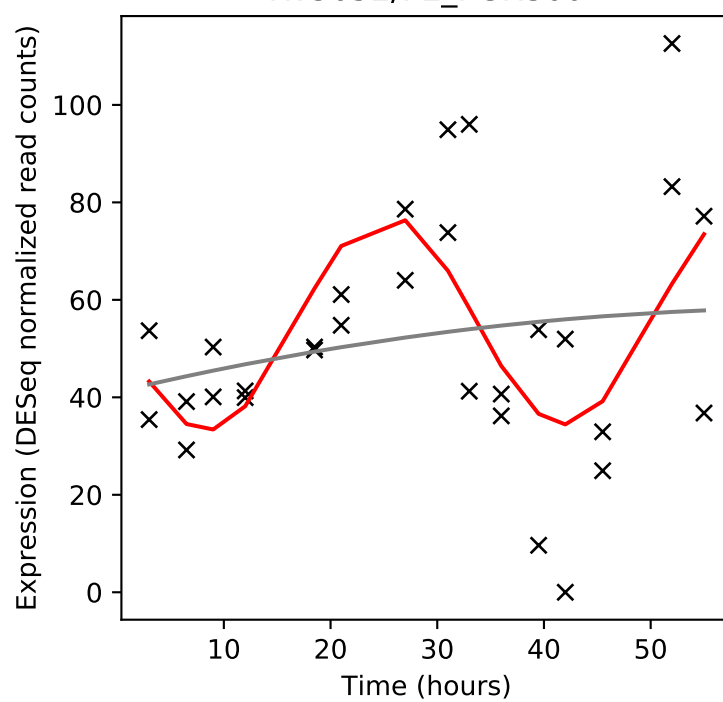

Rv3653/PE\_PGRS61

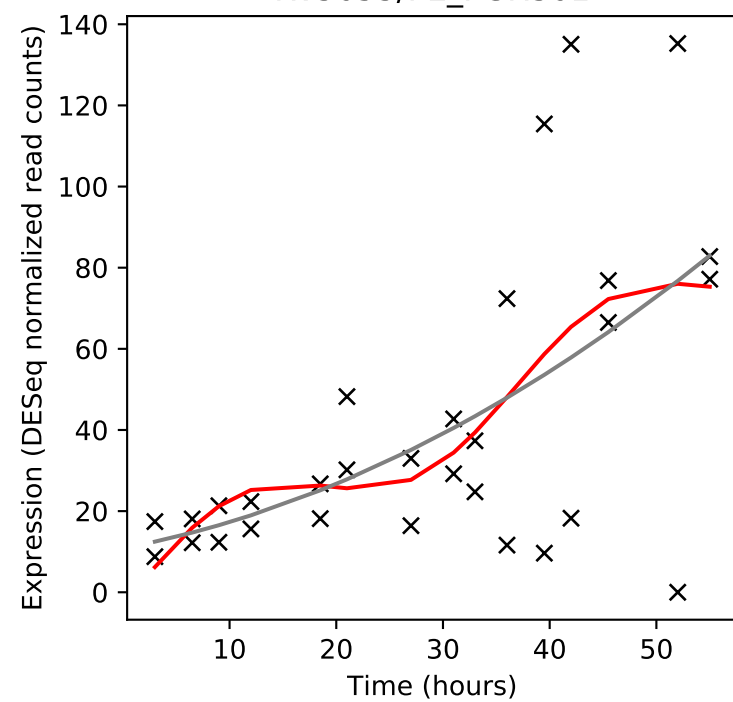

Rv3654c/-

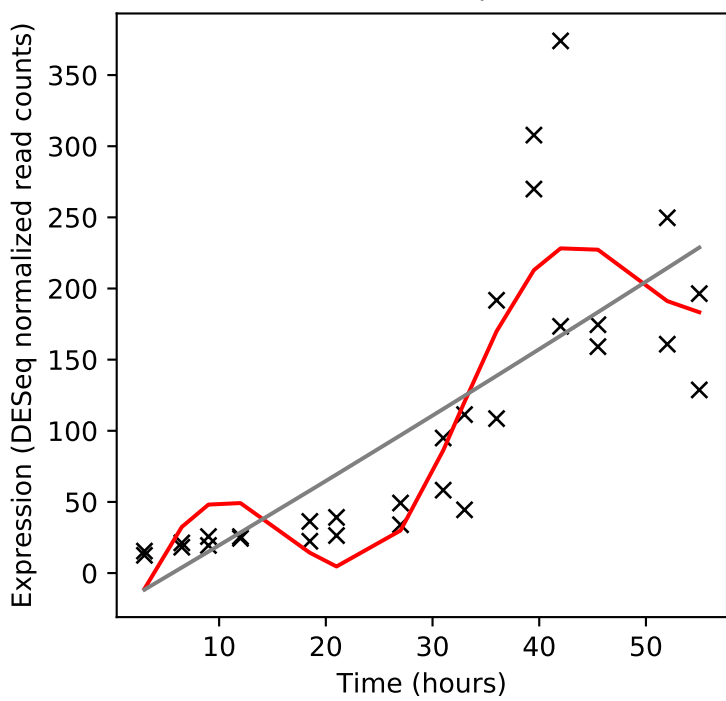

Rv3655c/-

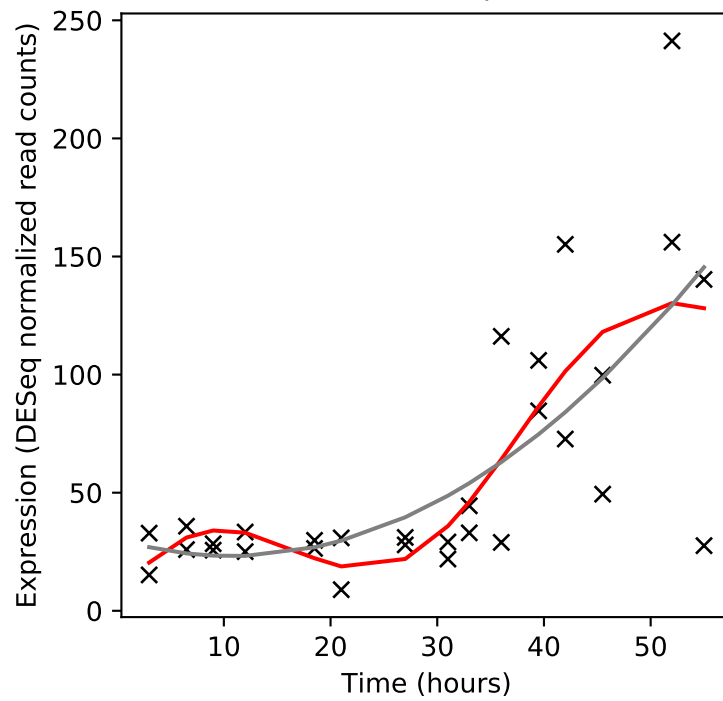

Rv3656c/-

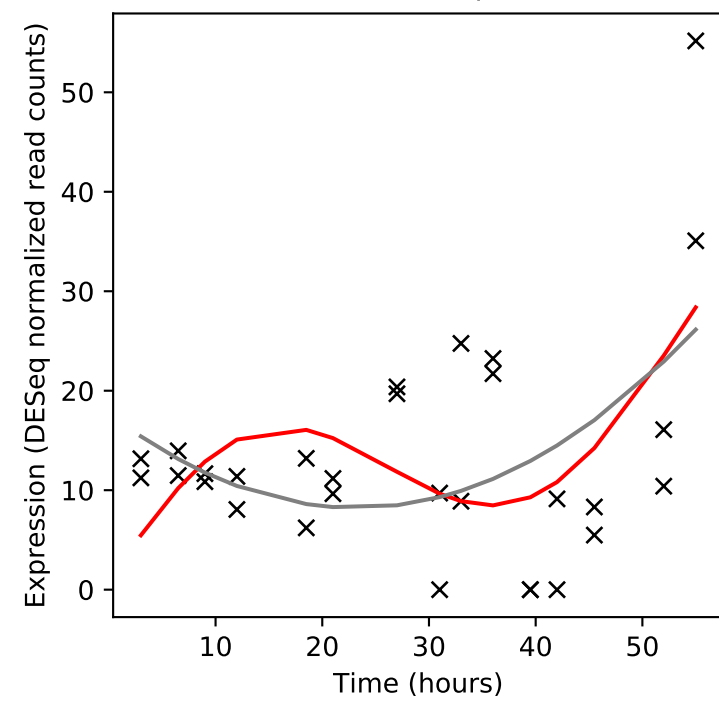

Rv3657c/-

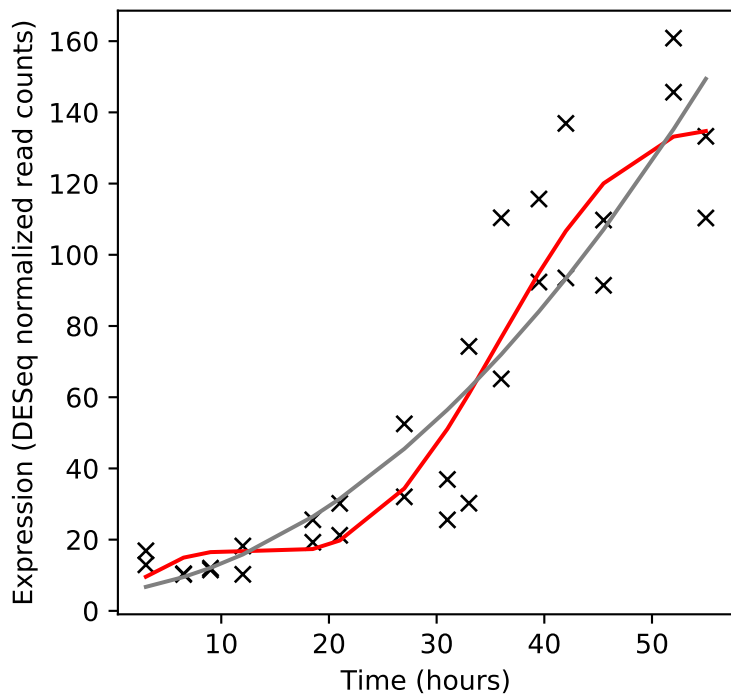

Rv3658c/-

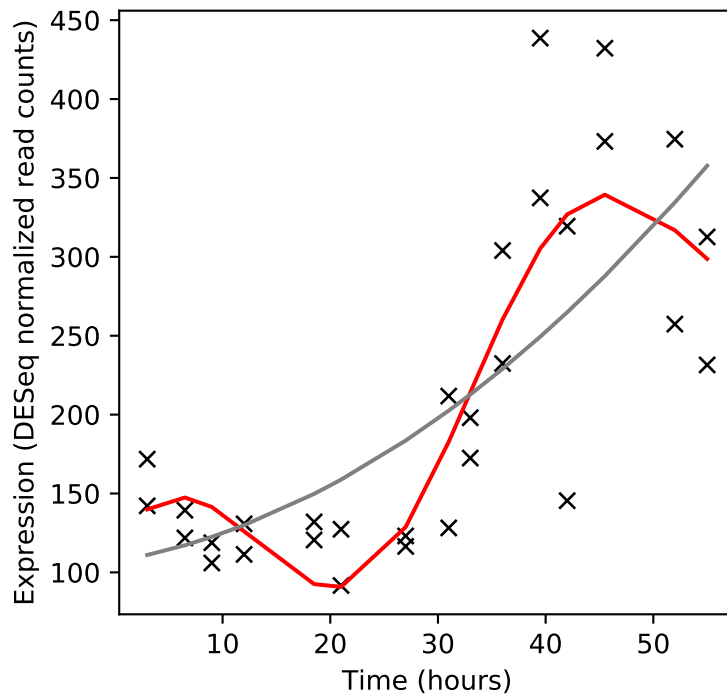

Rv3659c/-

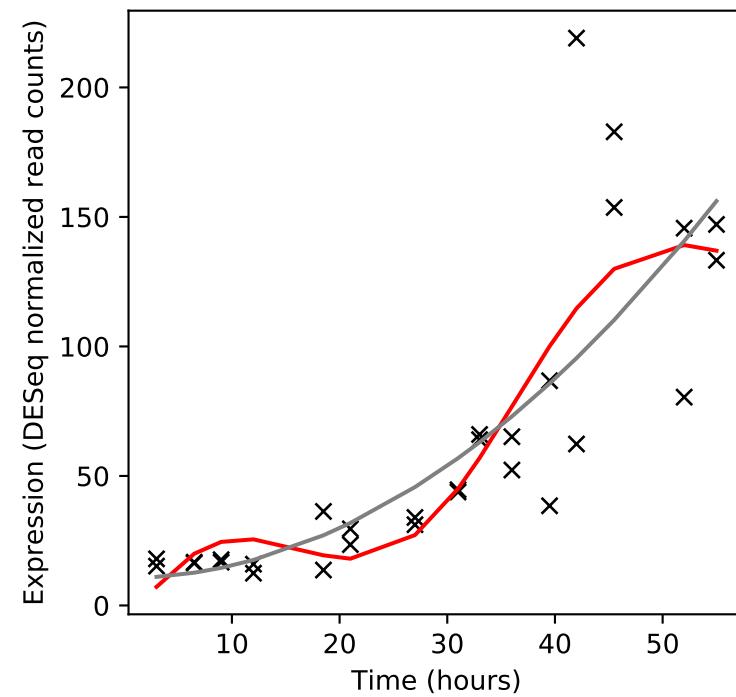

Rv3660c/-

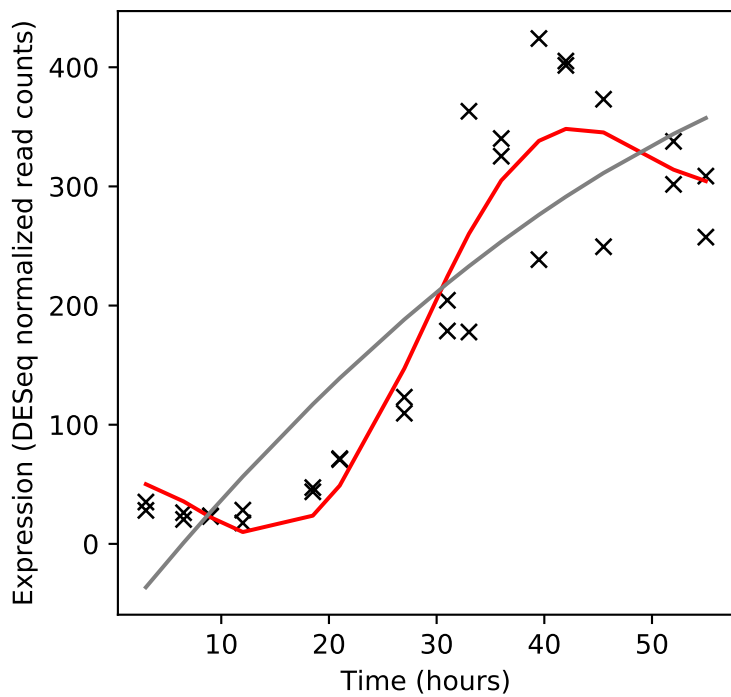

Rv3661/-

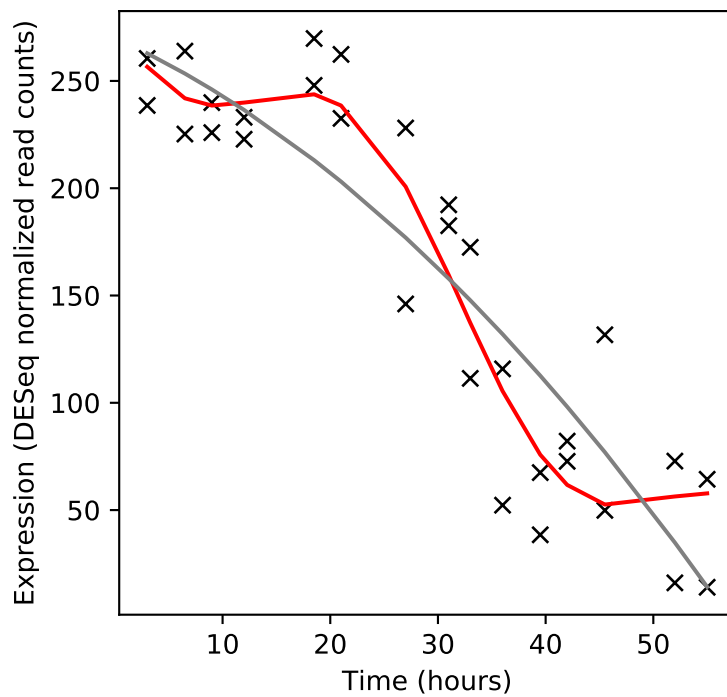

Rv3662c/-

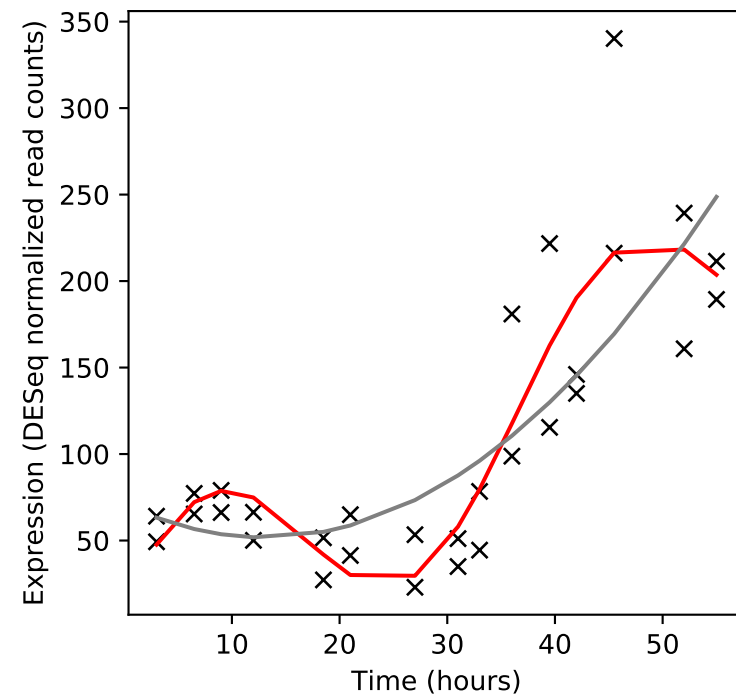

Rv3663c/dppD

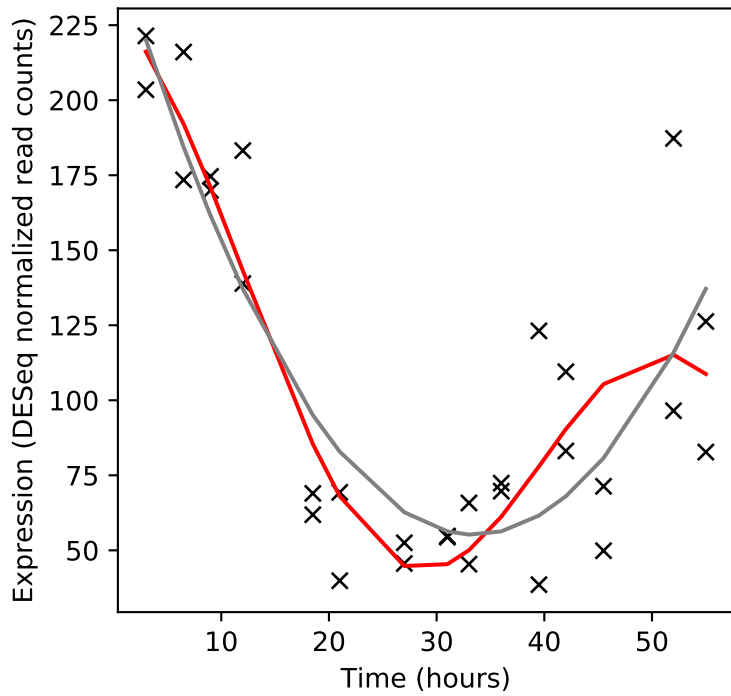

Rv3664c/dppC

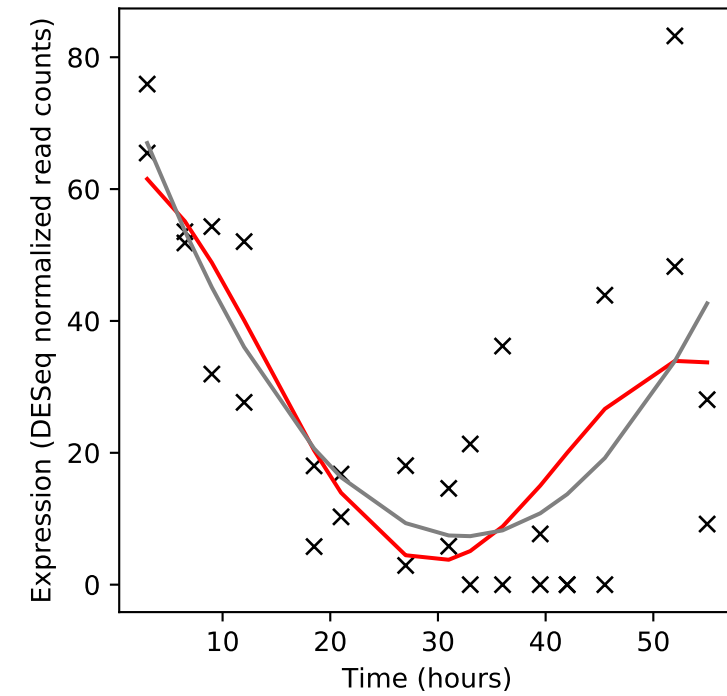

Rv3665c/dppB

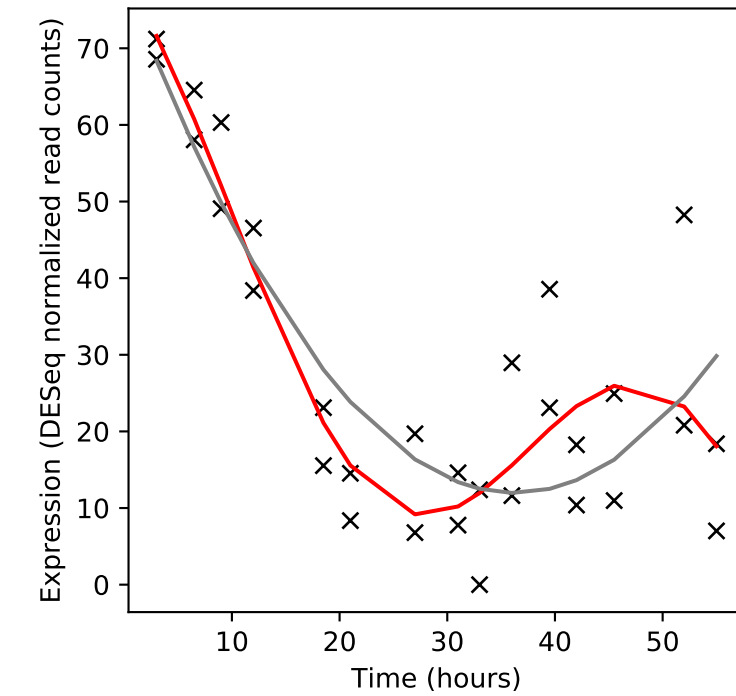

Rv3666c/dppA

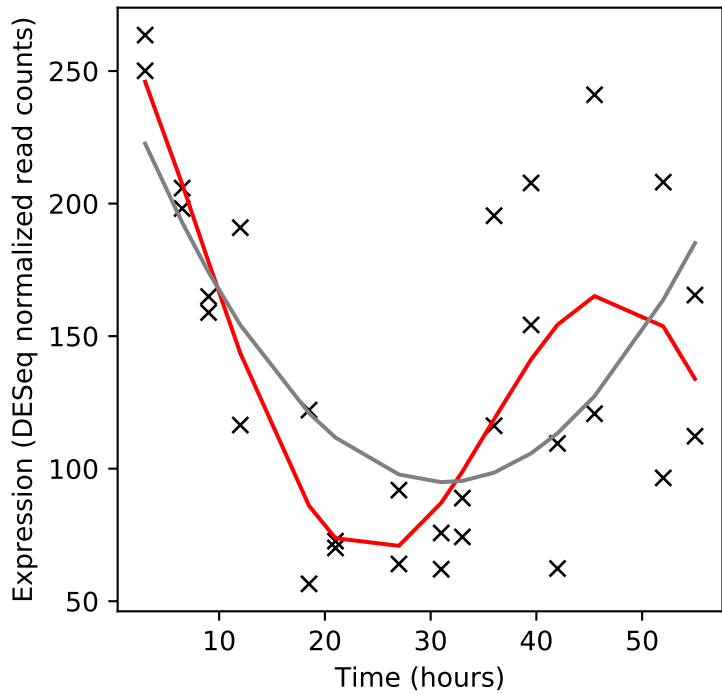

Rv3667/acs

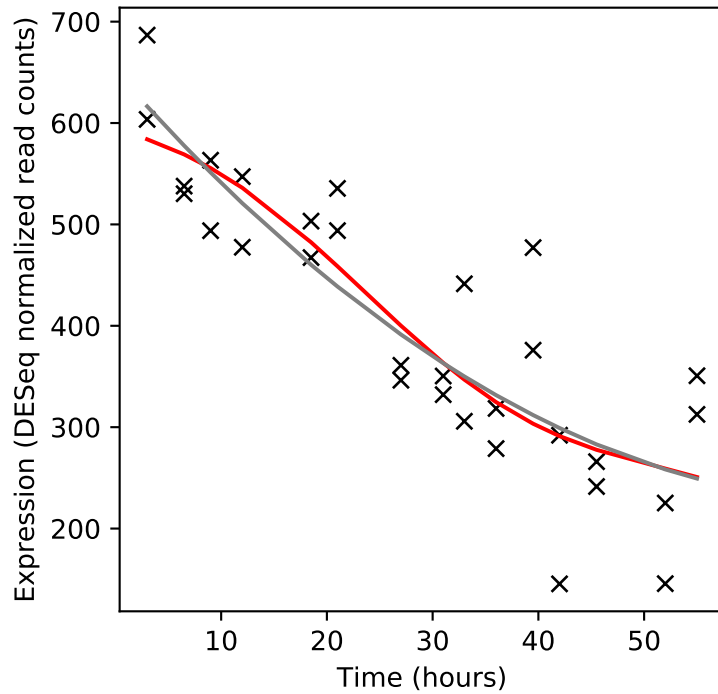

Rv3668c/-

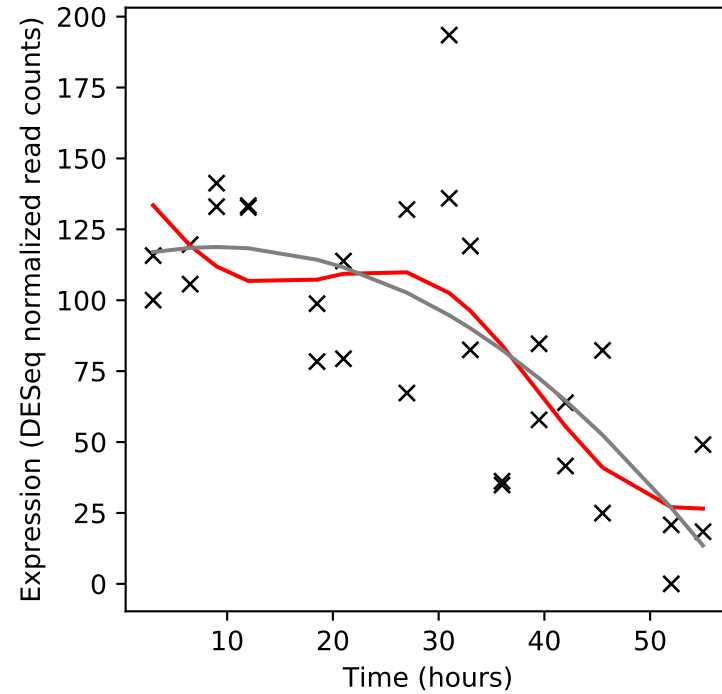

Rv3669/-

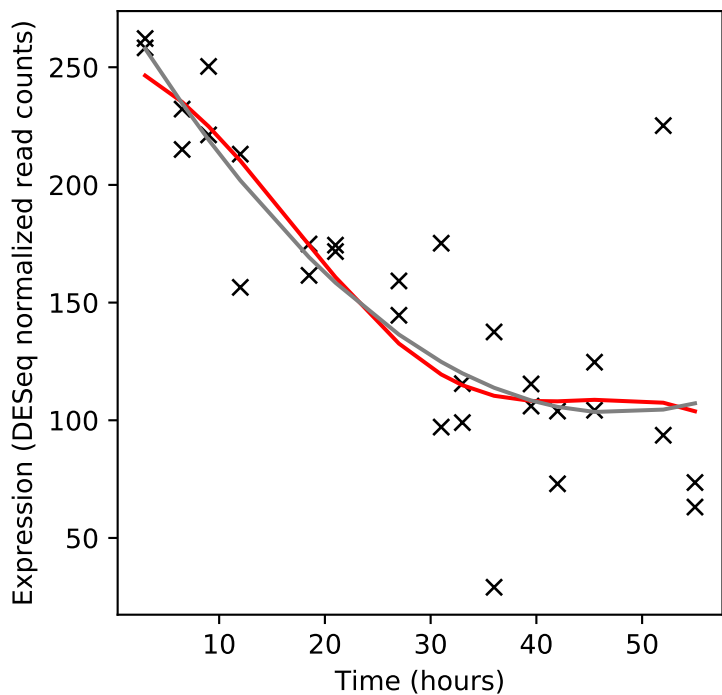

Rv3670/ephE

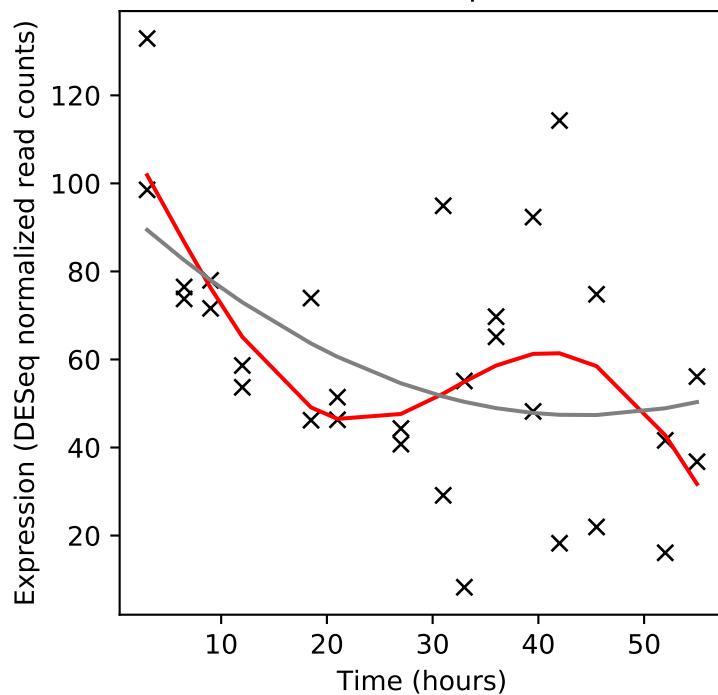

Rv3671c/-

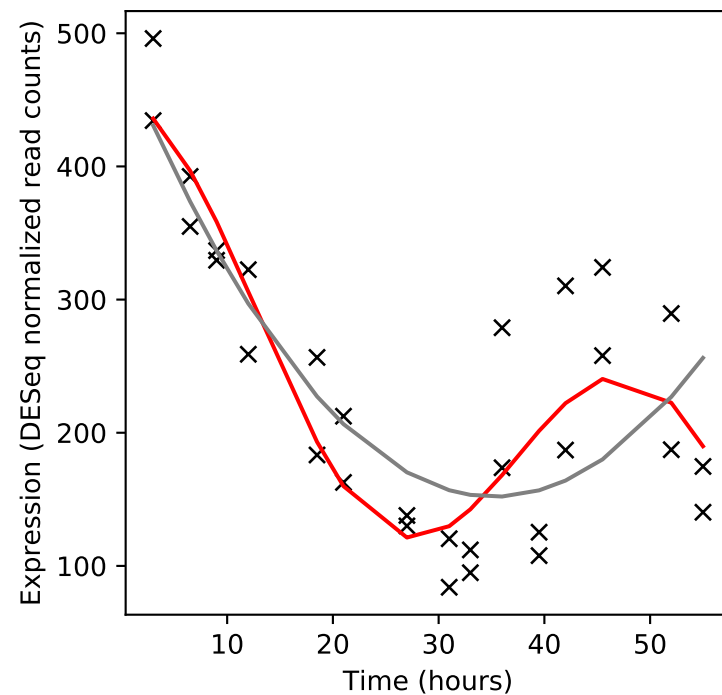

Rv3672c/-

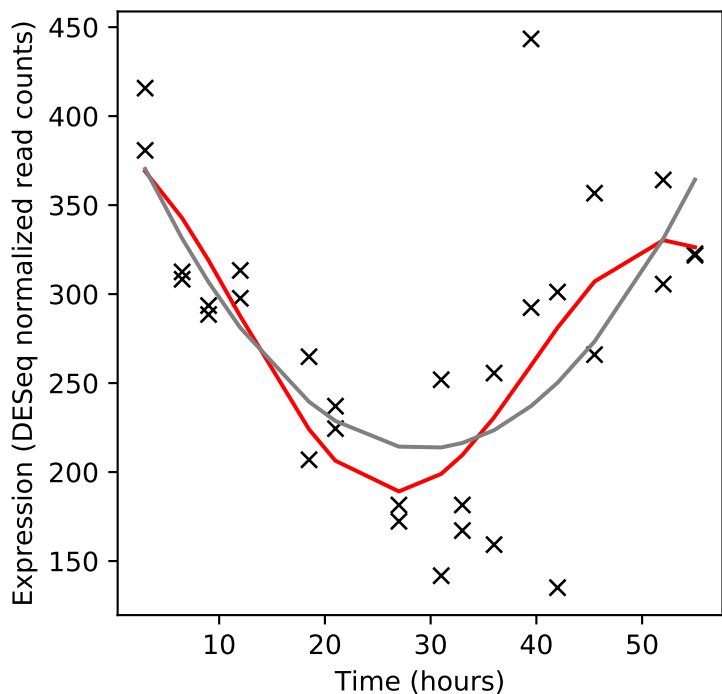

Rv3673c/-

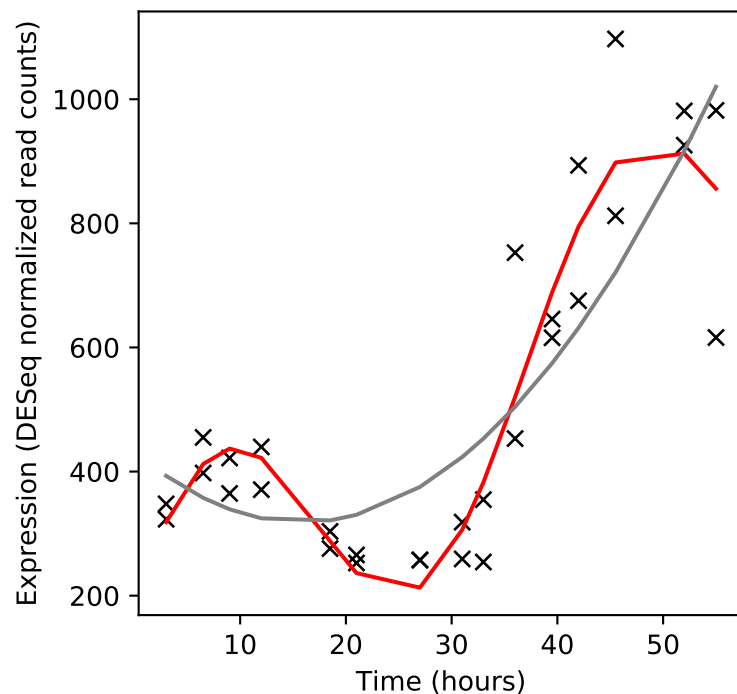

Rv3674c/nth

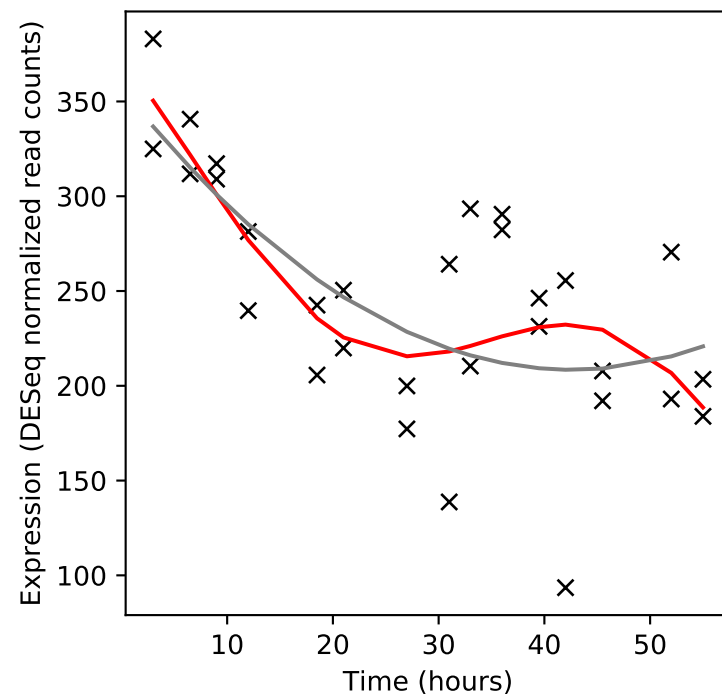

Rv3675/-

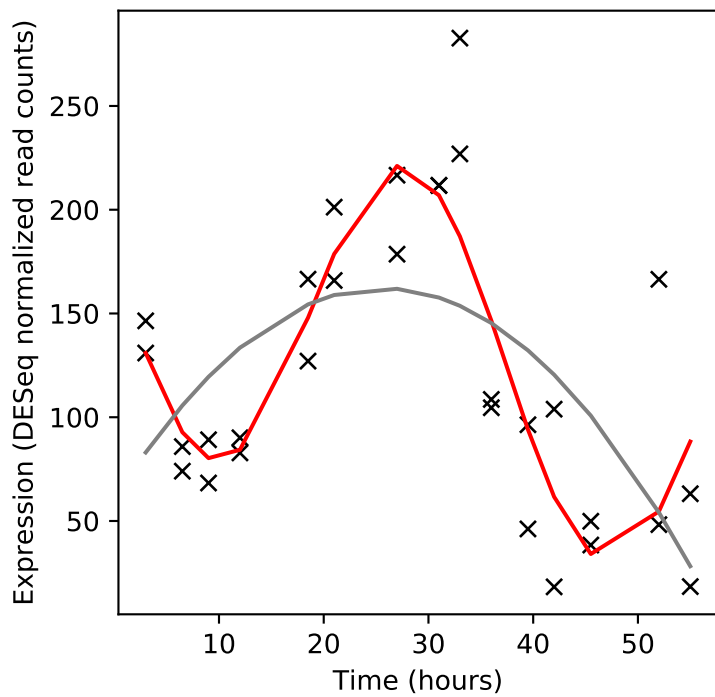

Rv3676/crp

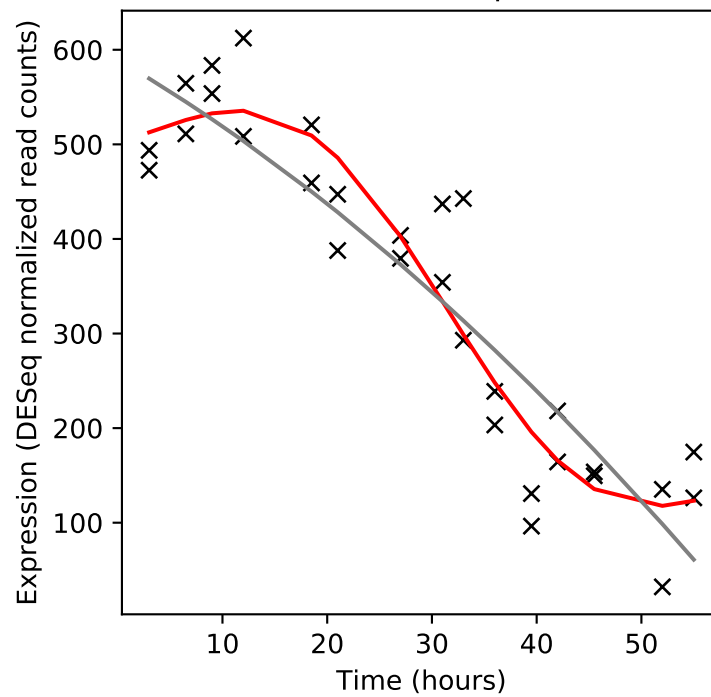

Rv3677c/-

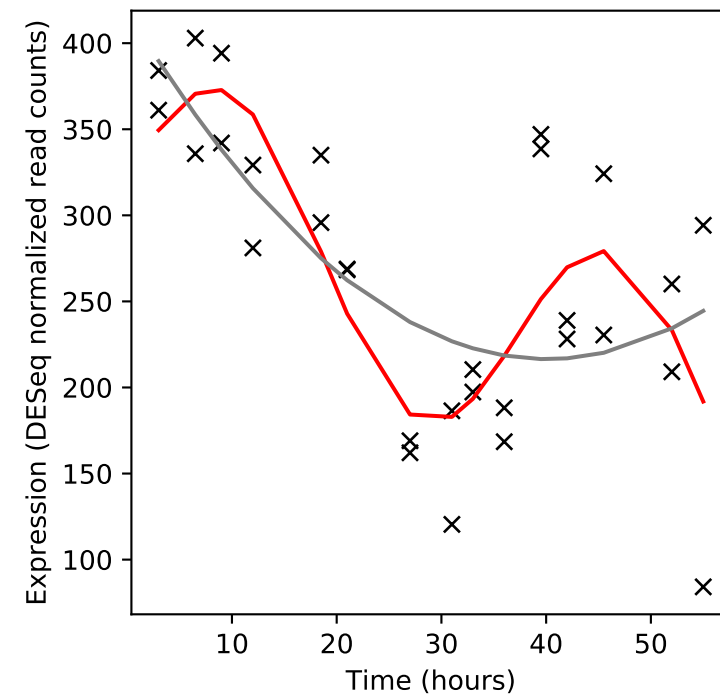

Rv3678c/-

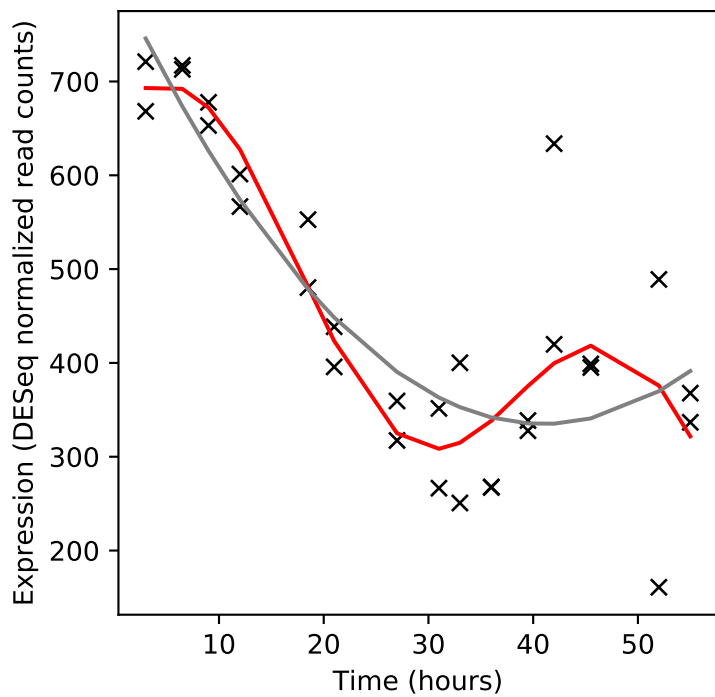

Rv3678A/-

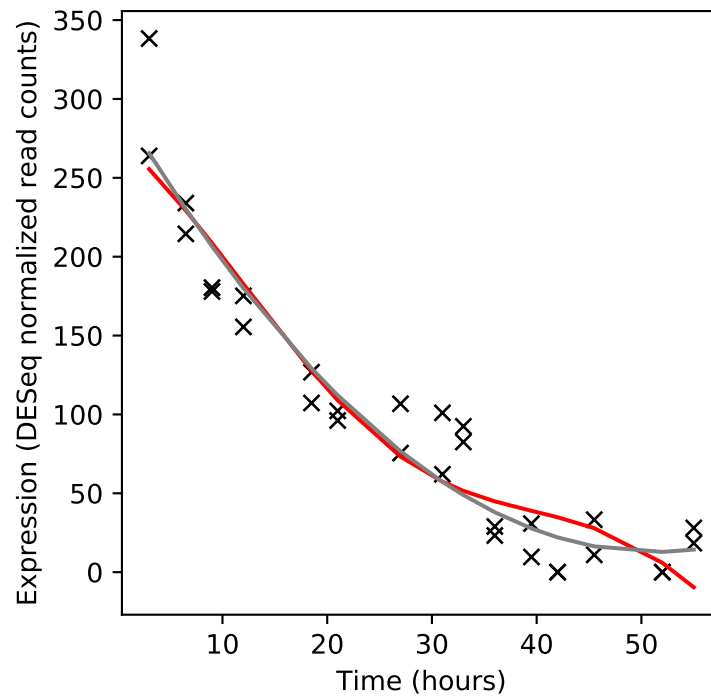

Rv3679/-

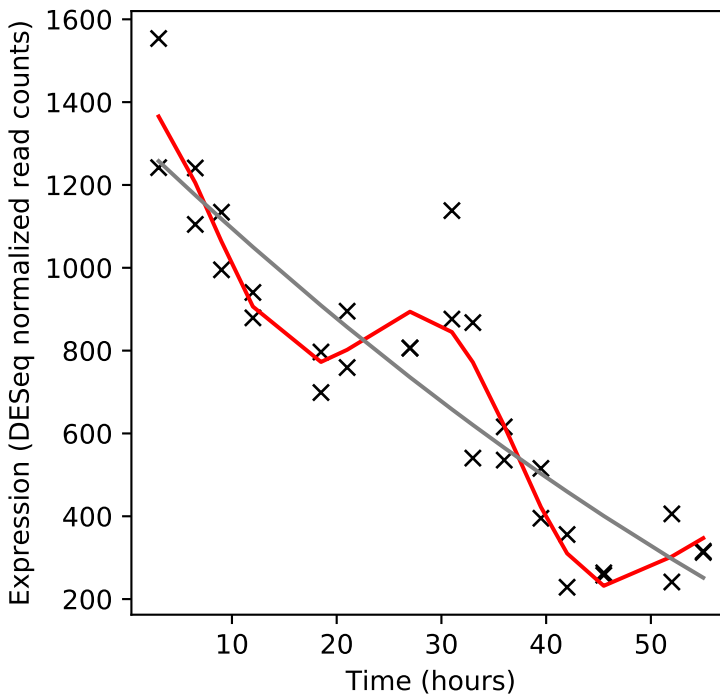

Rv3680/-

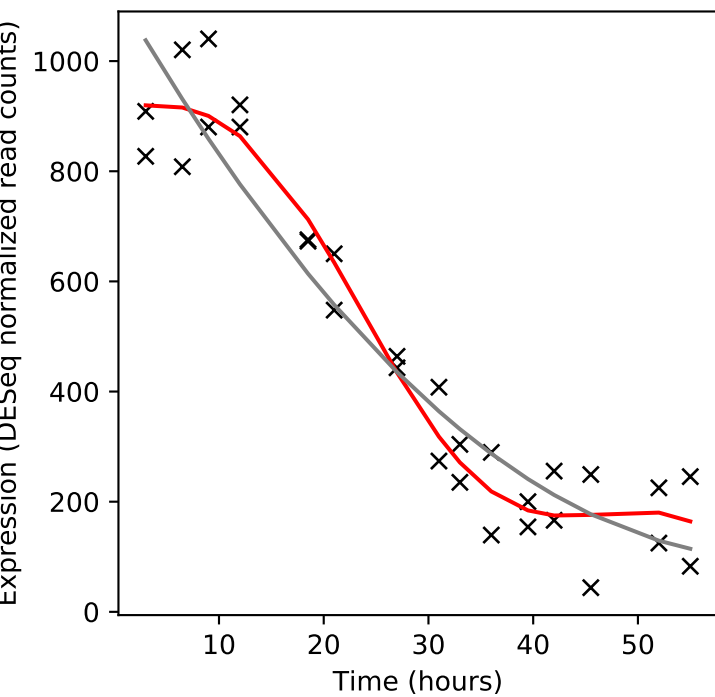

Rv3681c/whiB4

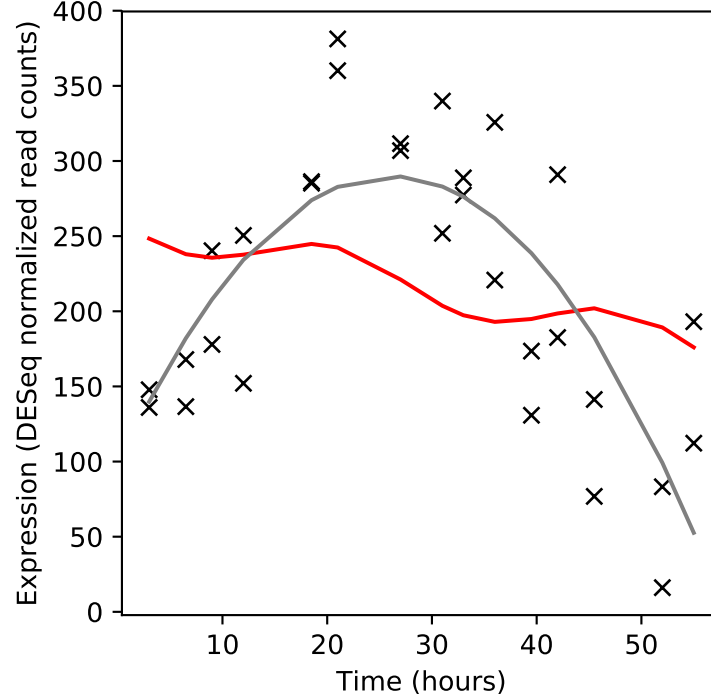

Rv3682/ponA2

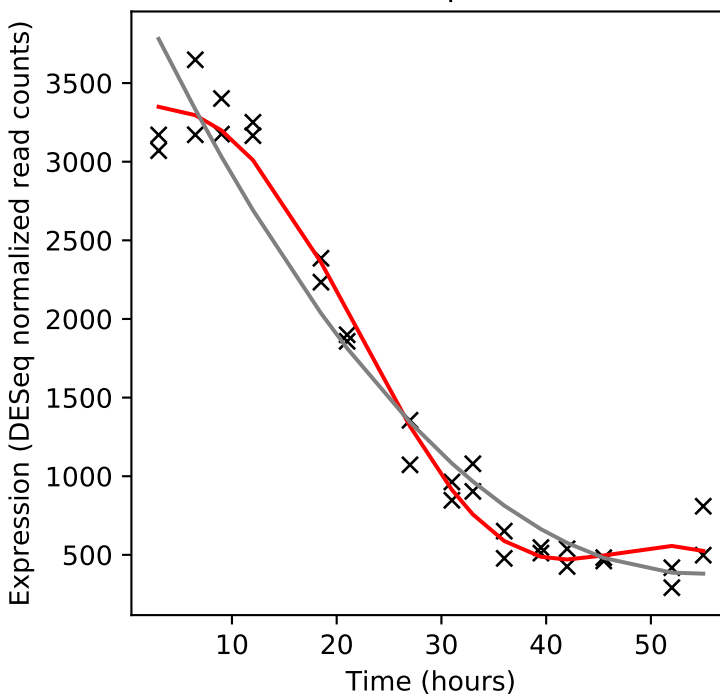

Rv3683/-

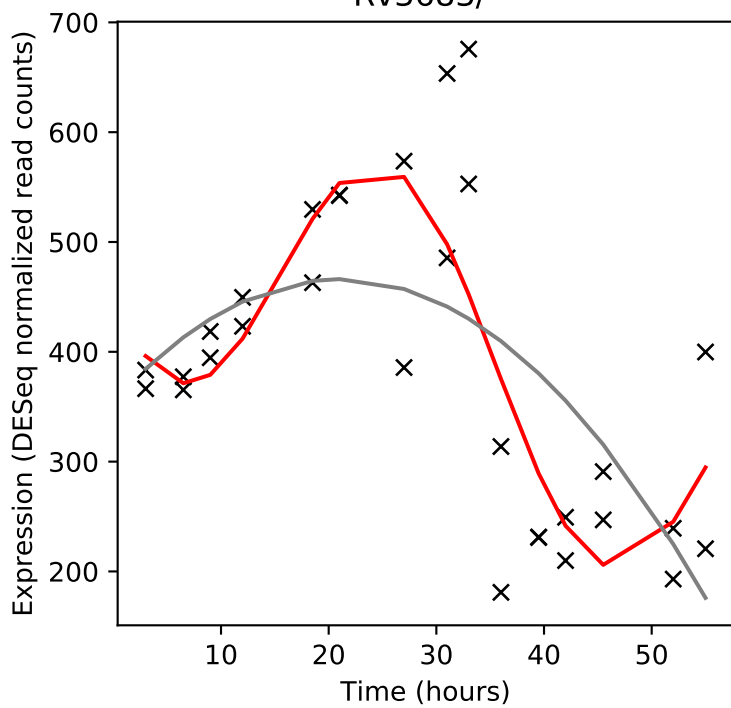

Rv3684/-

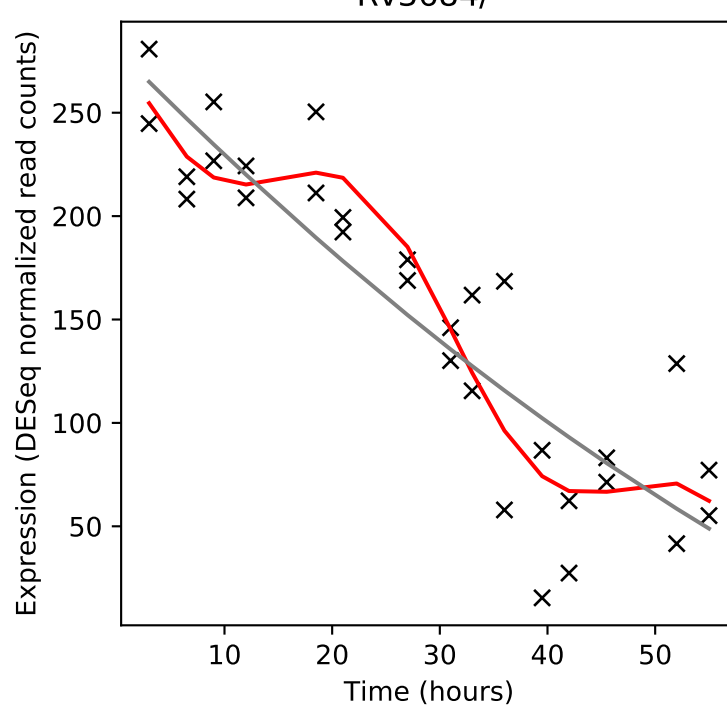

Rv3685c/cyp137

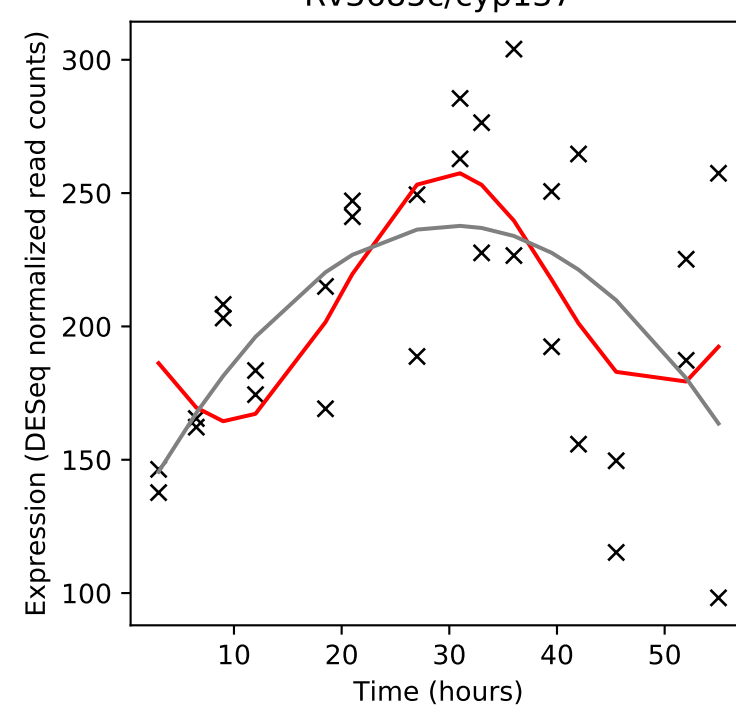

Rv3686c/-

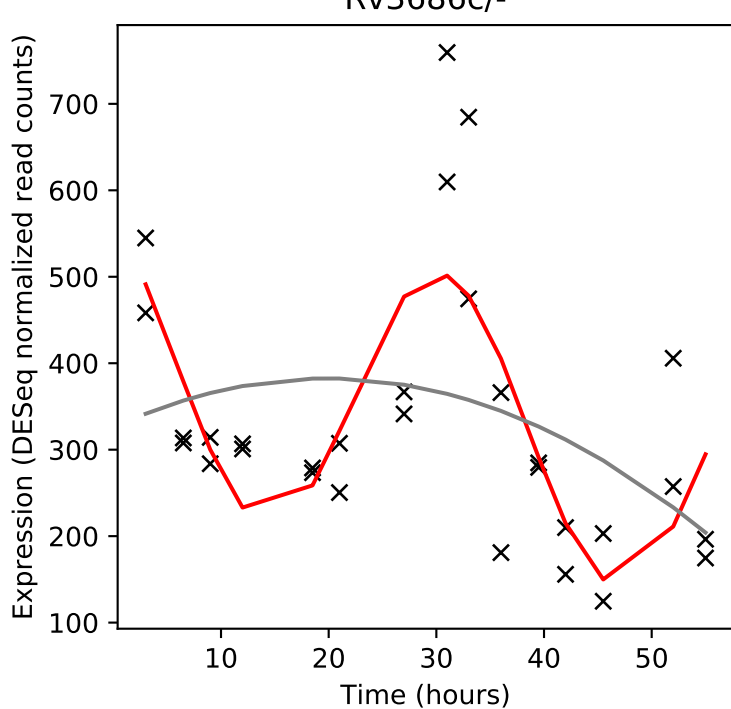

Rv3687c/rsfB

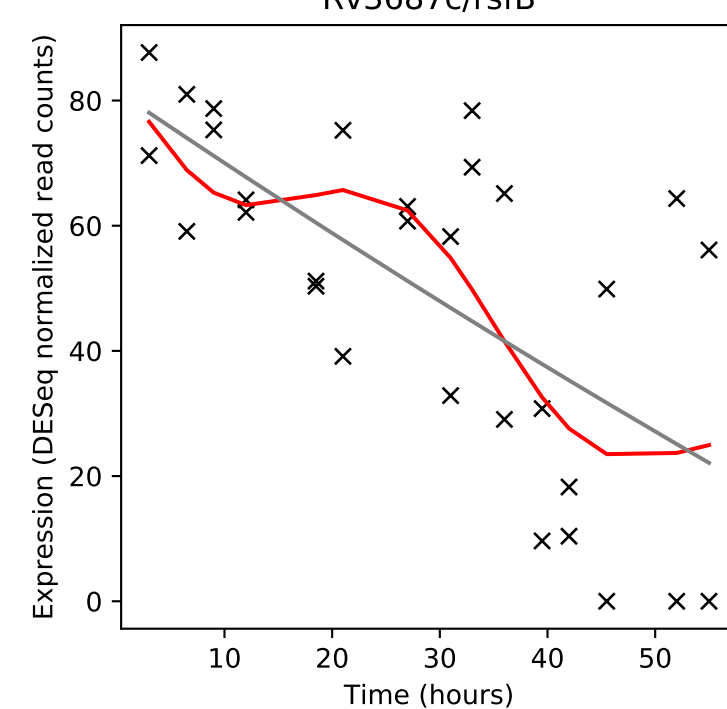

Rv3688c/-

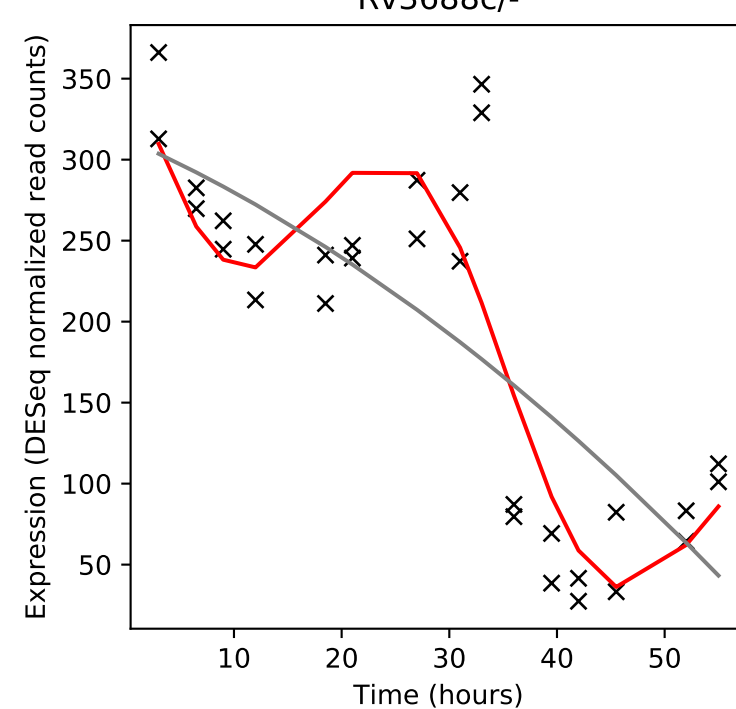

Rv3689/-

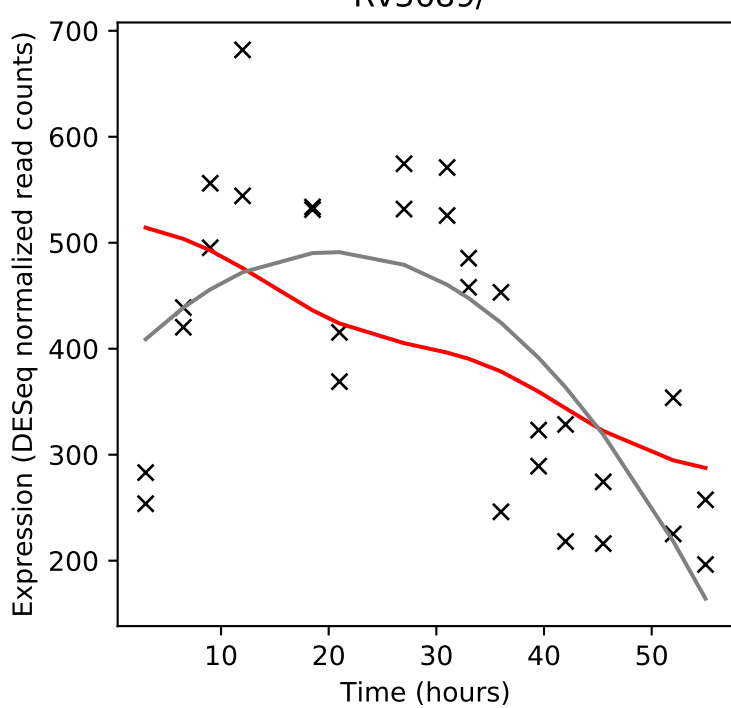

Rv3690/-

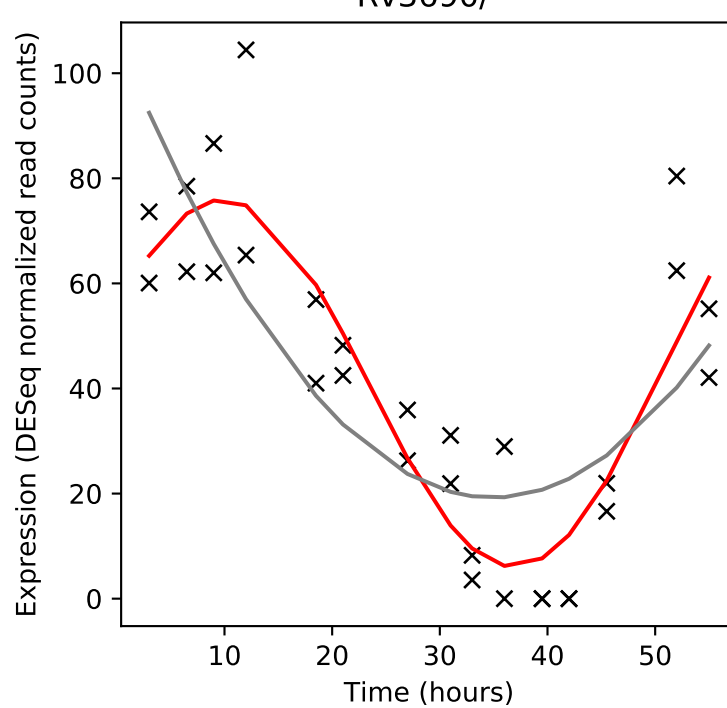

Rv3691/-

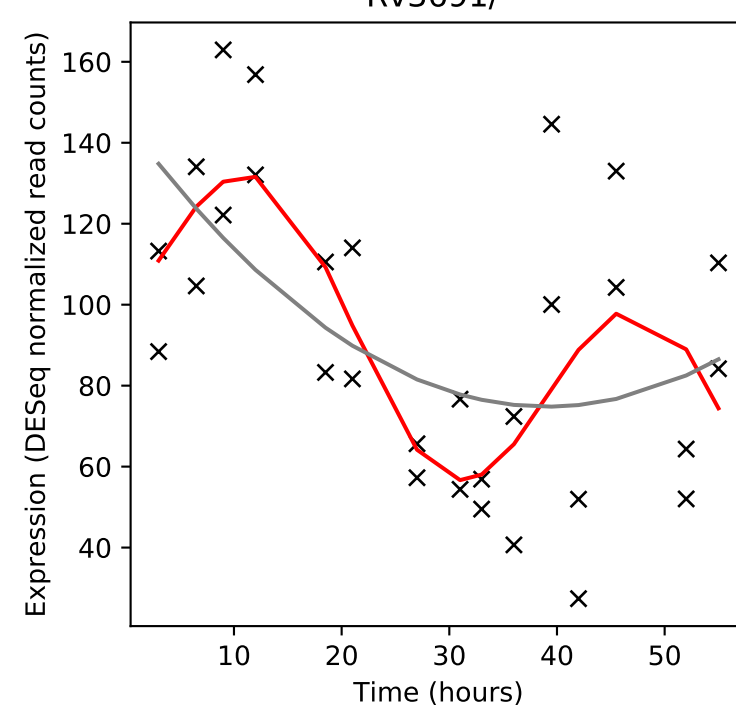

Rv3692/moxR2

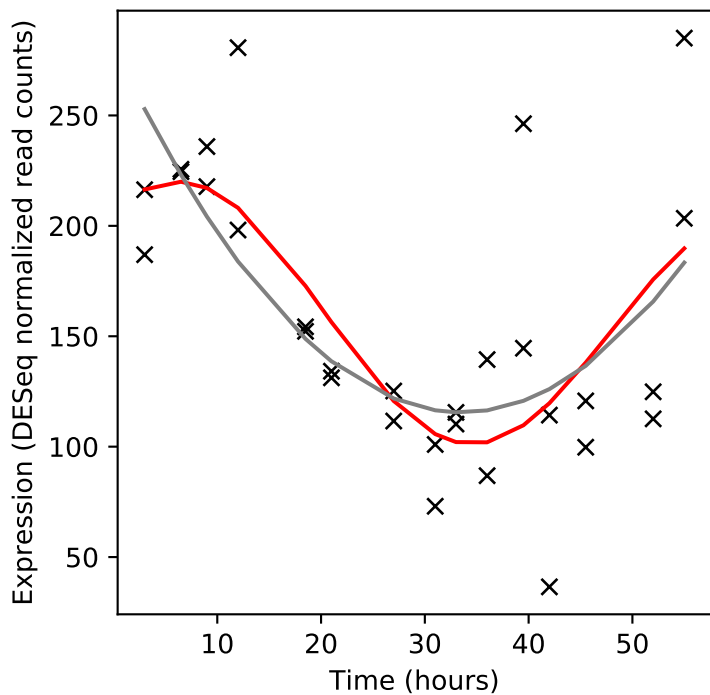

Rv3693/-

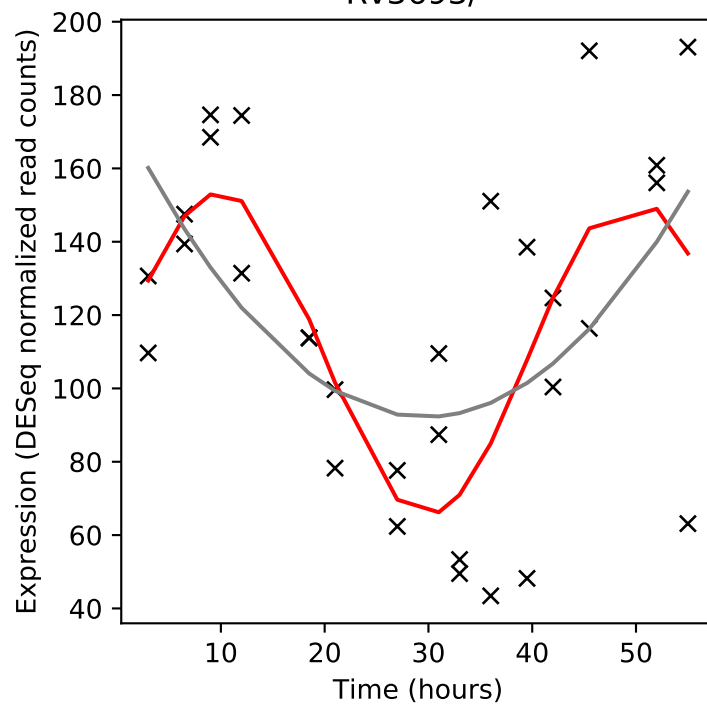

Rv3694c/-

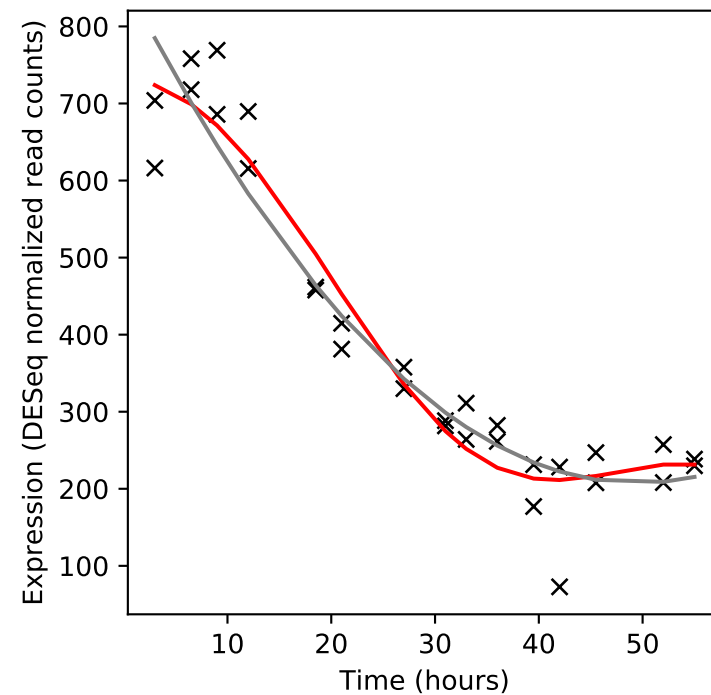

Rv3695/-

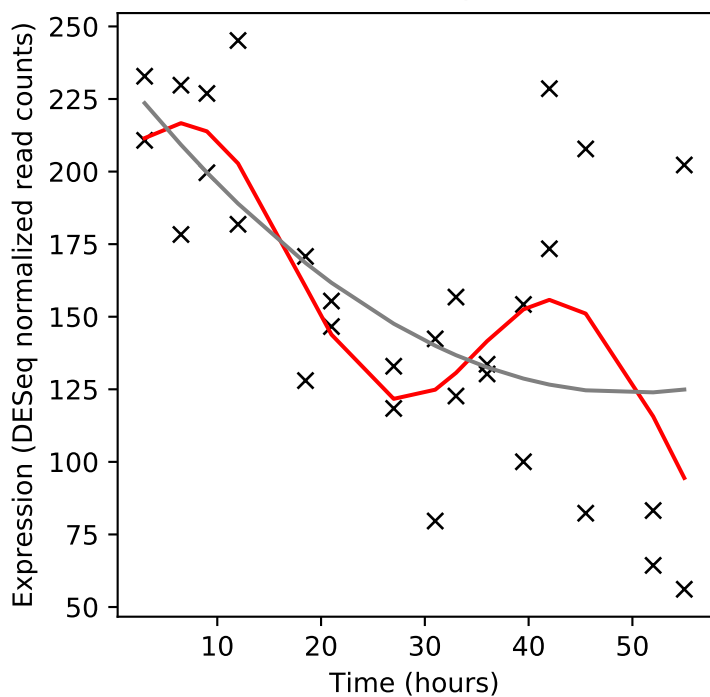

Rv3696c/glpK

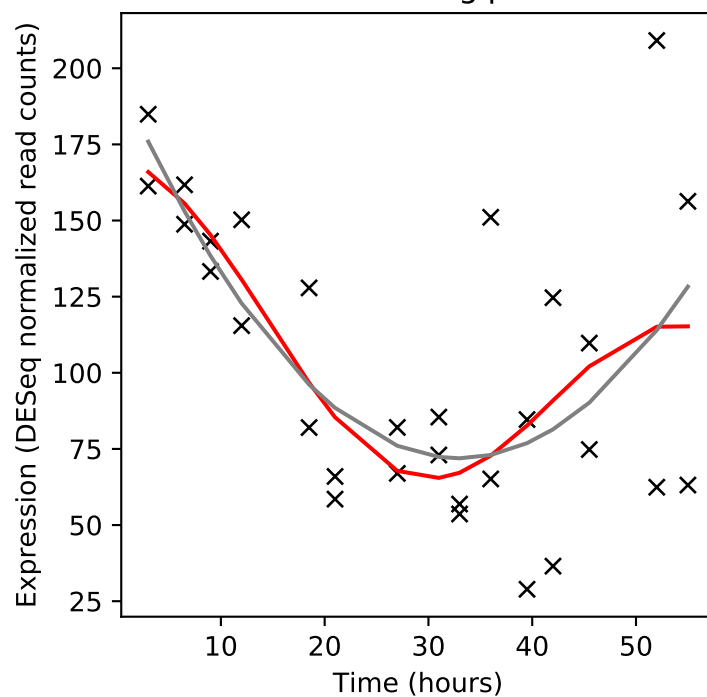

Rv3697c/vapC48

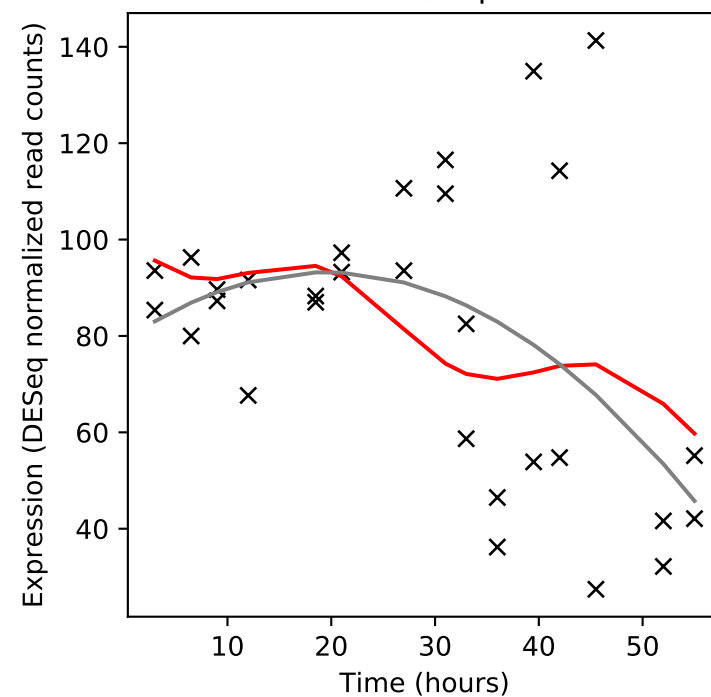

Rv3697A/vapB48

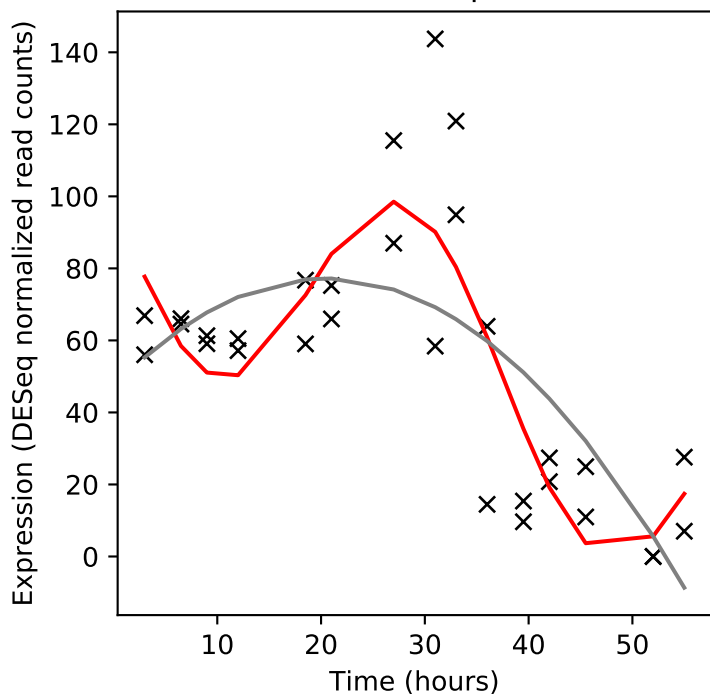

Rv3698/-

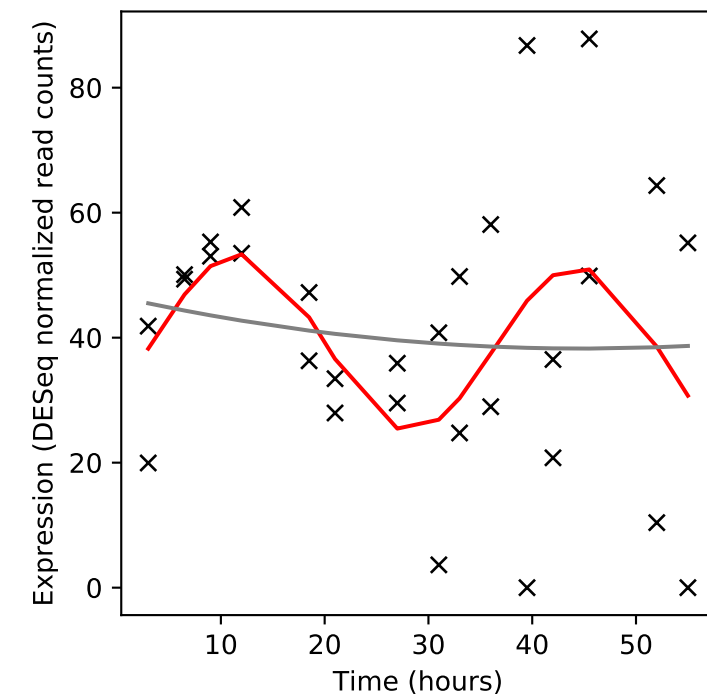

Rv3699/-

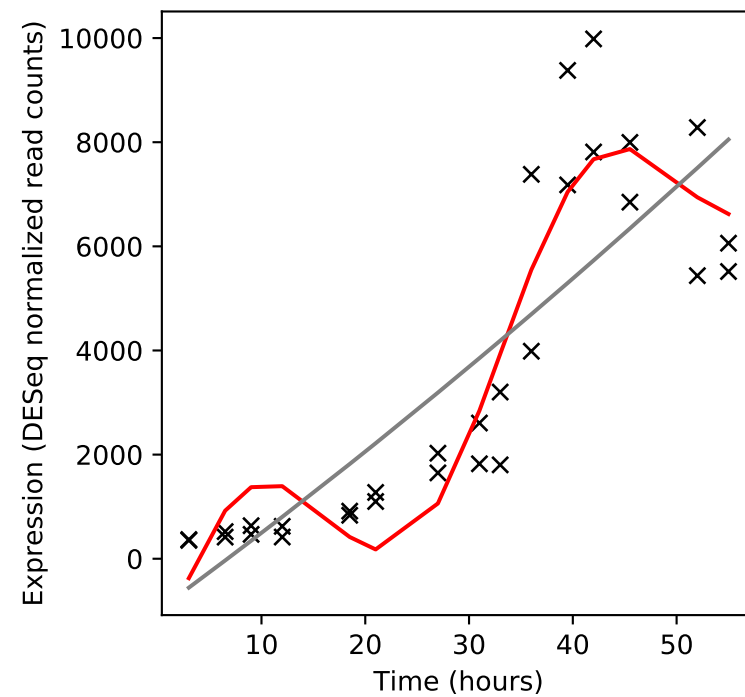



Rv3700c/-

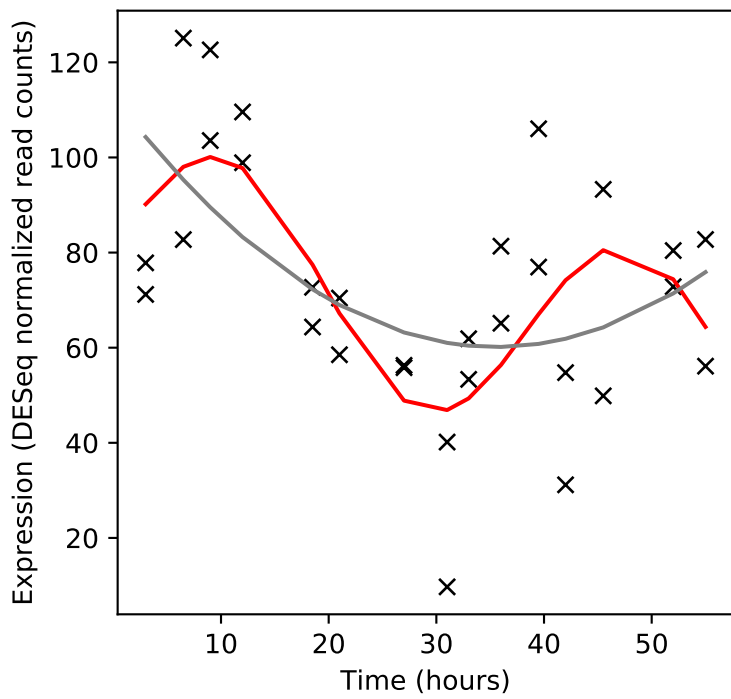

Rv3701c/-

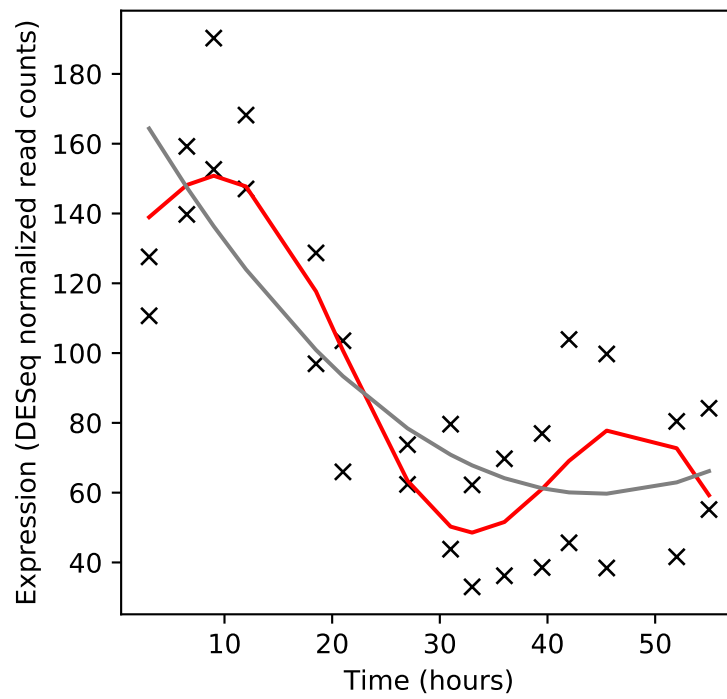

Rv3702c/-

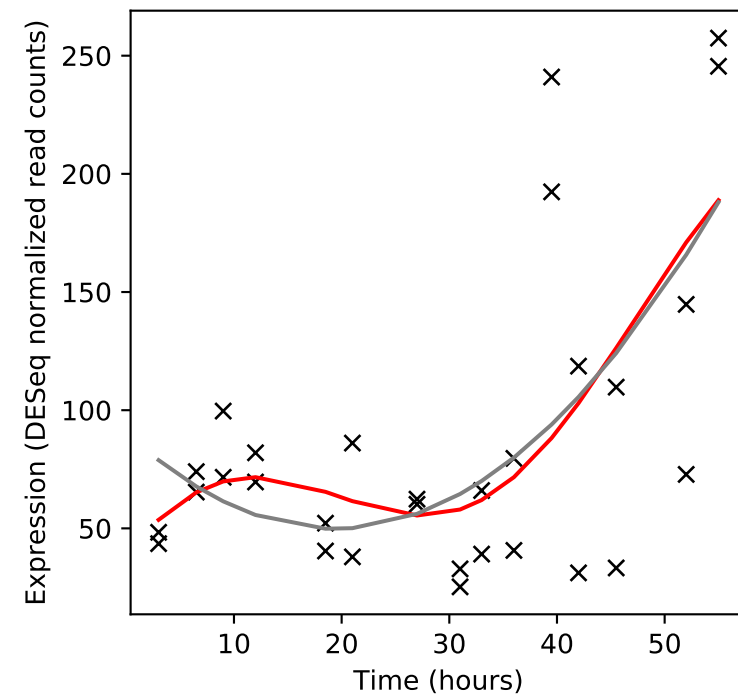

Rv3703c/-

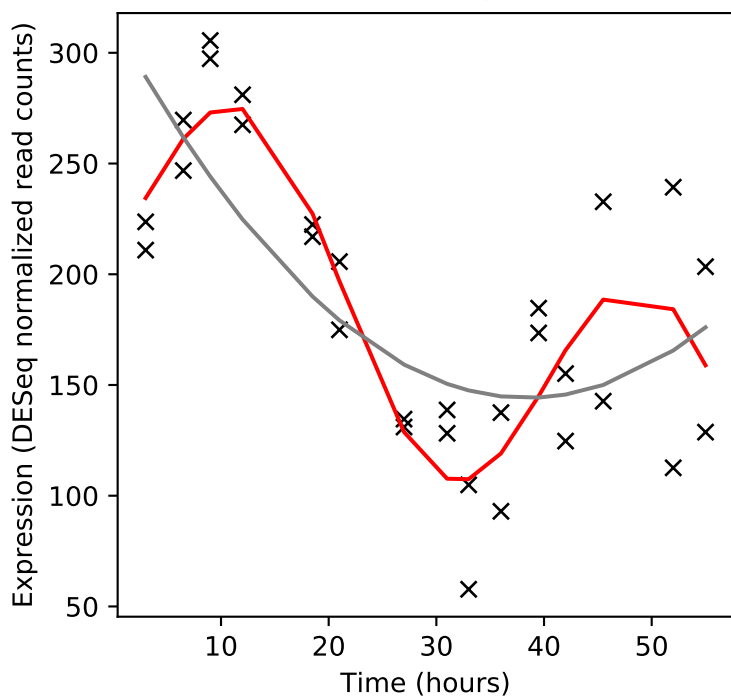

Rv3704c/gshA

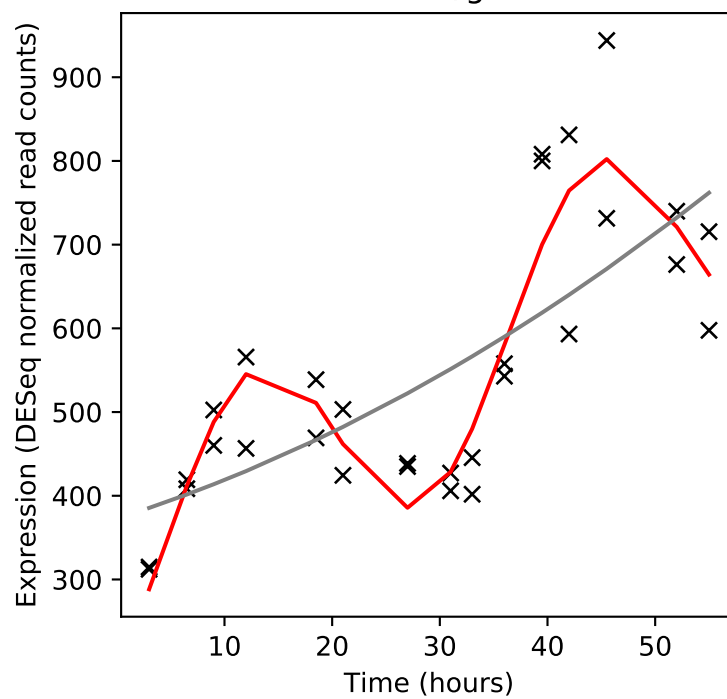

Rv3705c/-

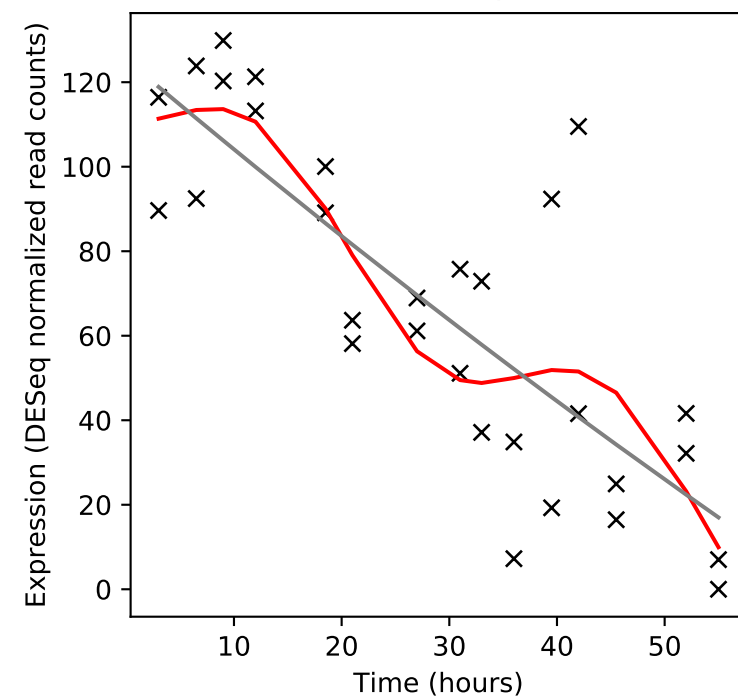

Rv3705A/-

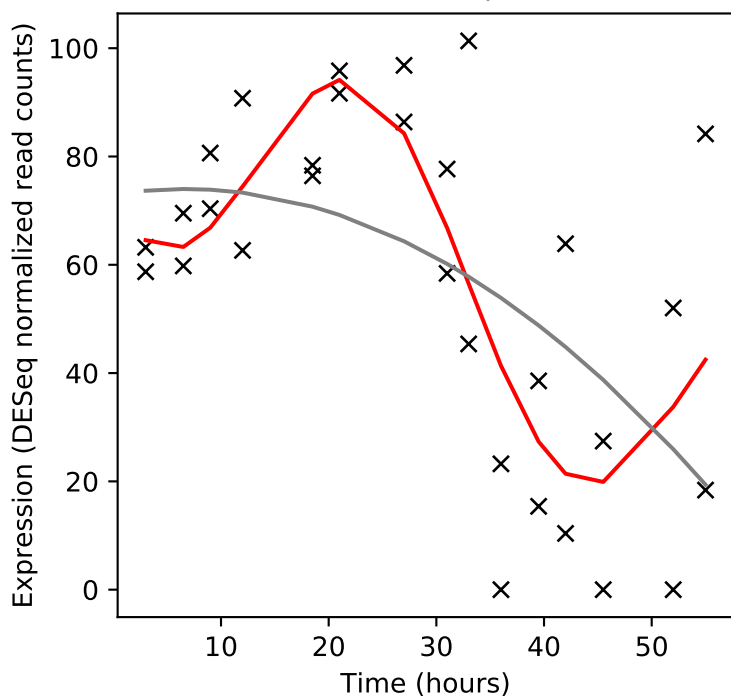

Rv3706c/-

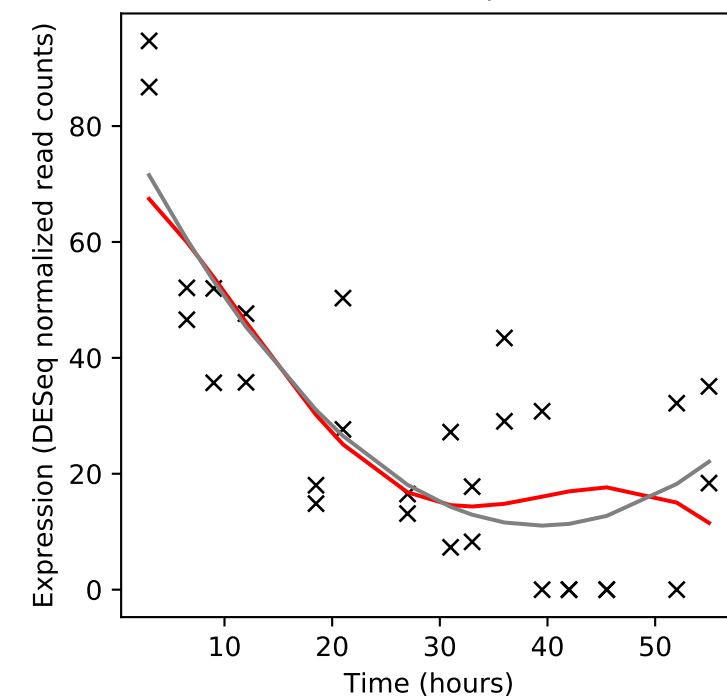

Rv3707c/-

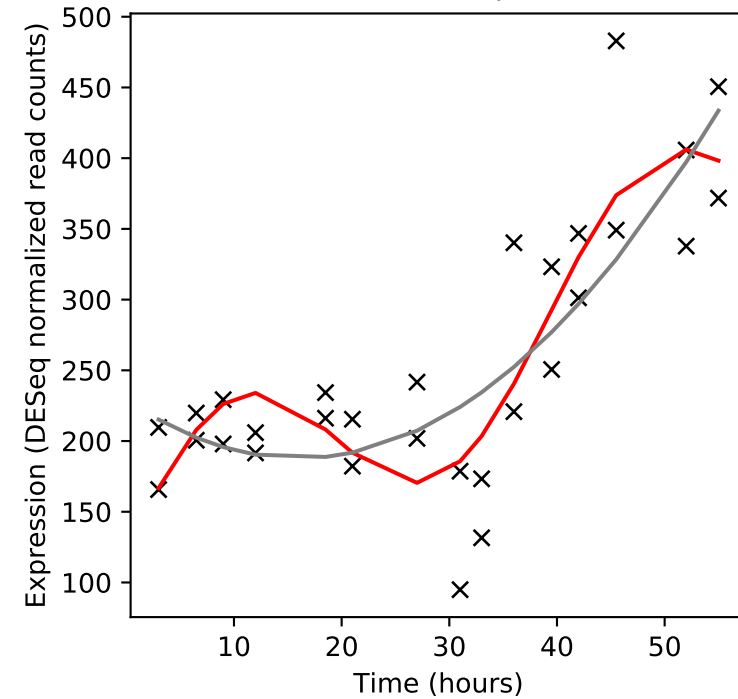

Rv3708c/asd

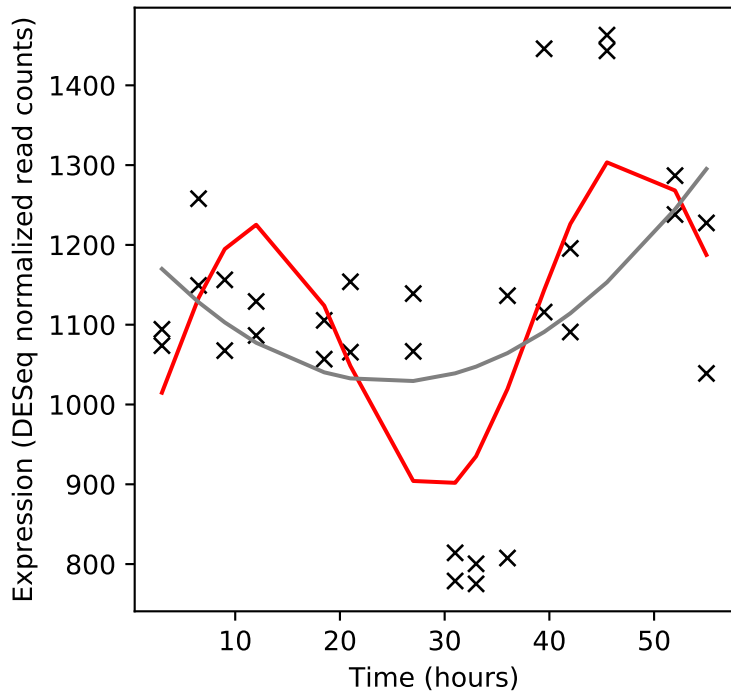

Rv3709c/ask

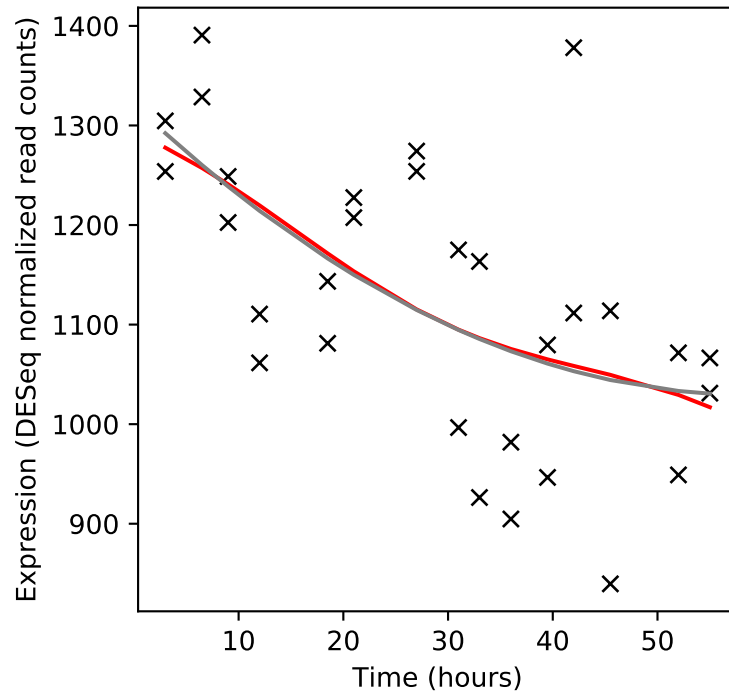

Rv3710/leuA

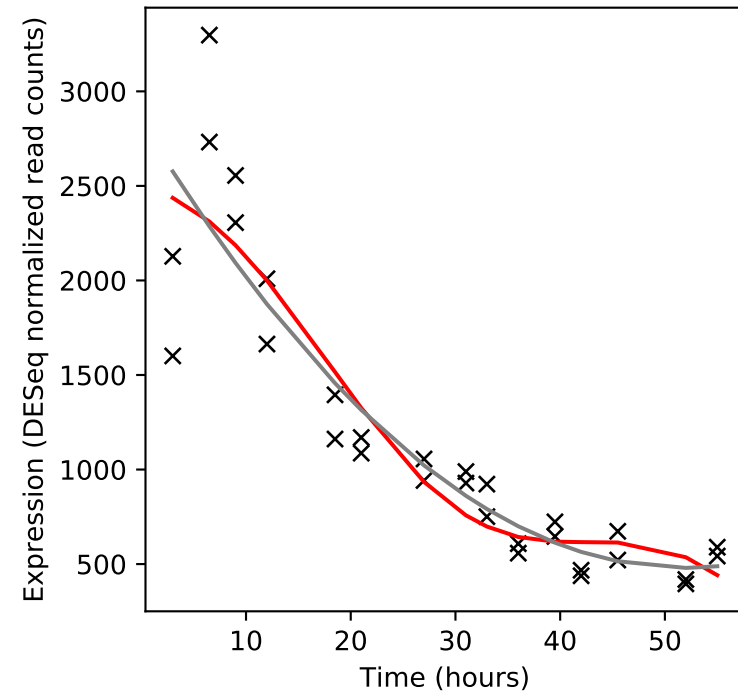

Rv3711c/dnaQ

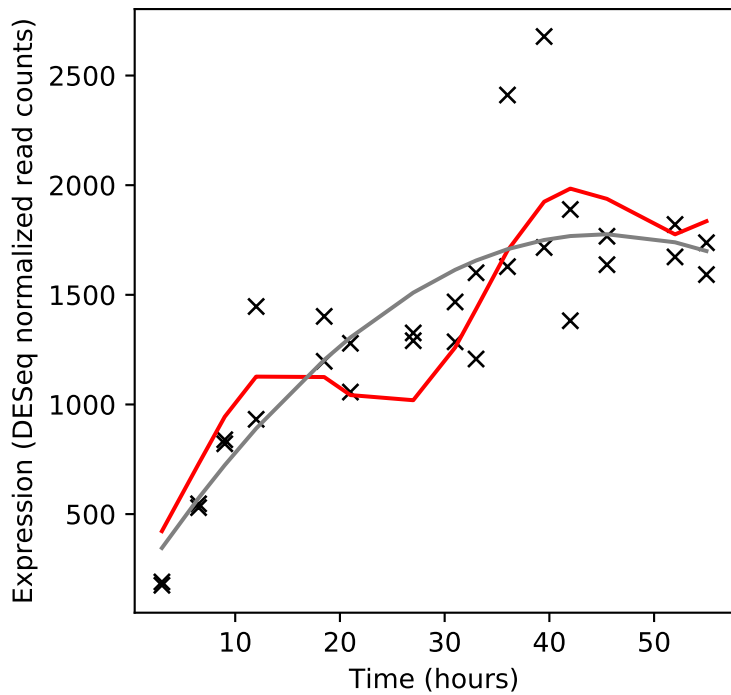

Rv3712/-

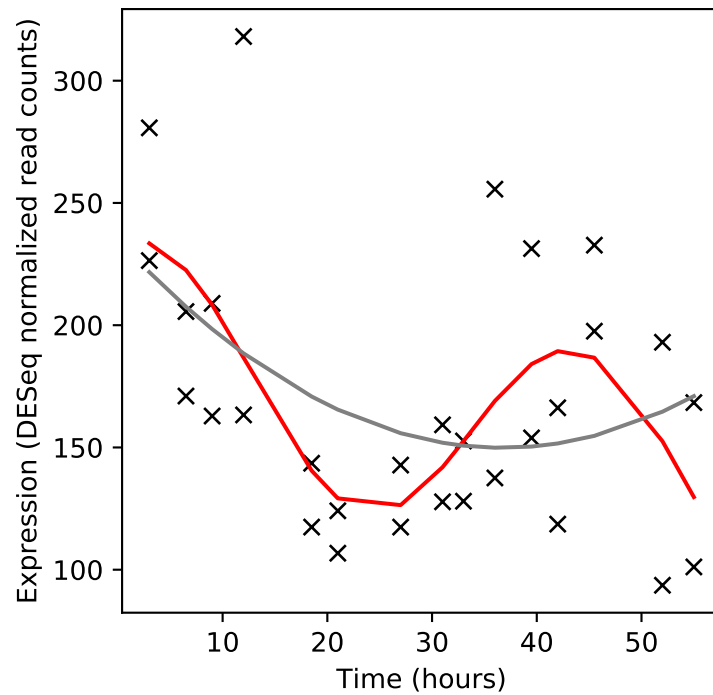

Rv3713/cobQ2

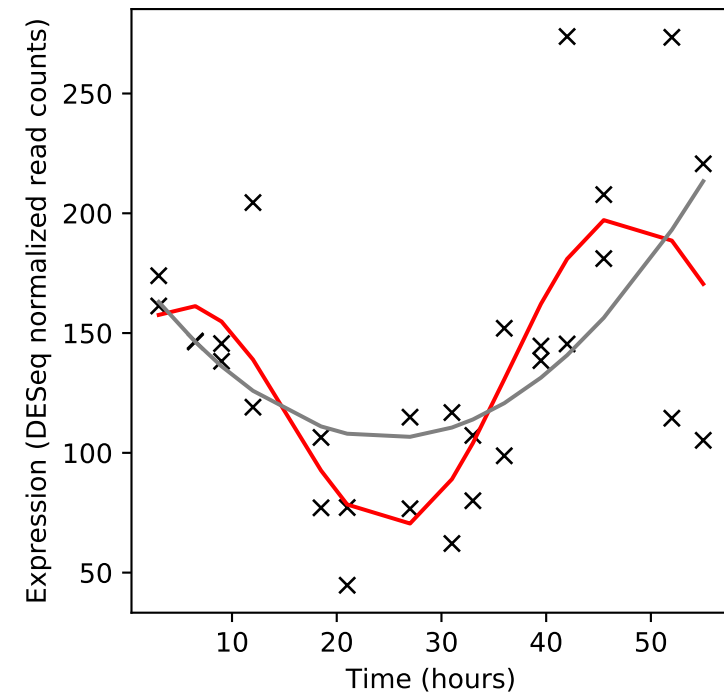

Rv3714c/-

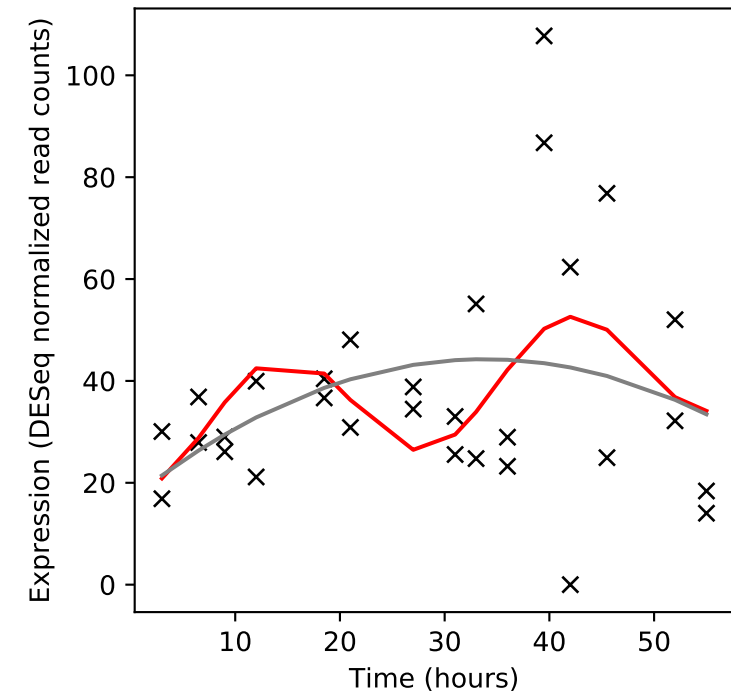

Rv3715c/recR

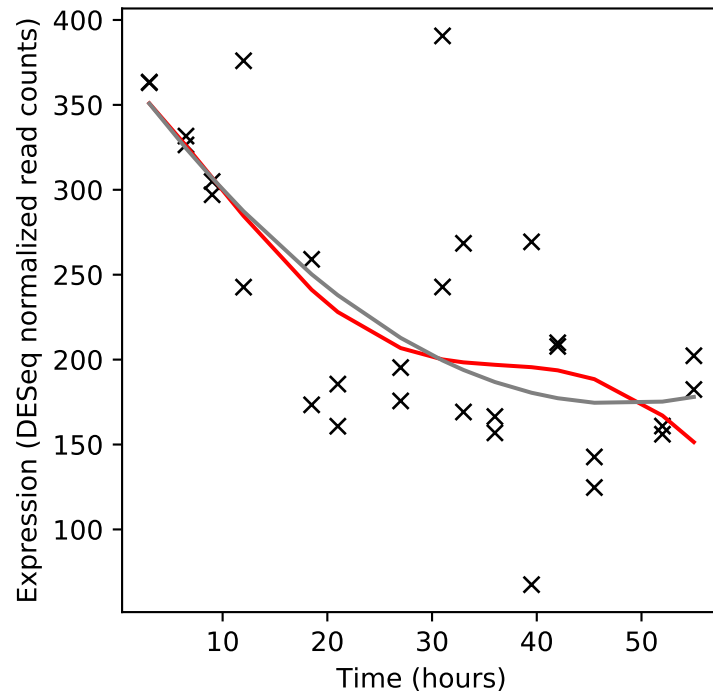

Rv3716c/-

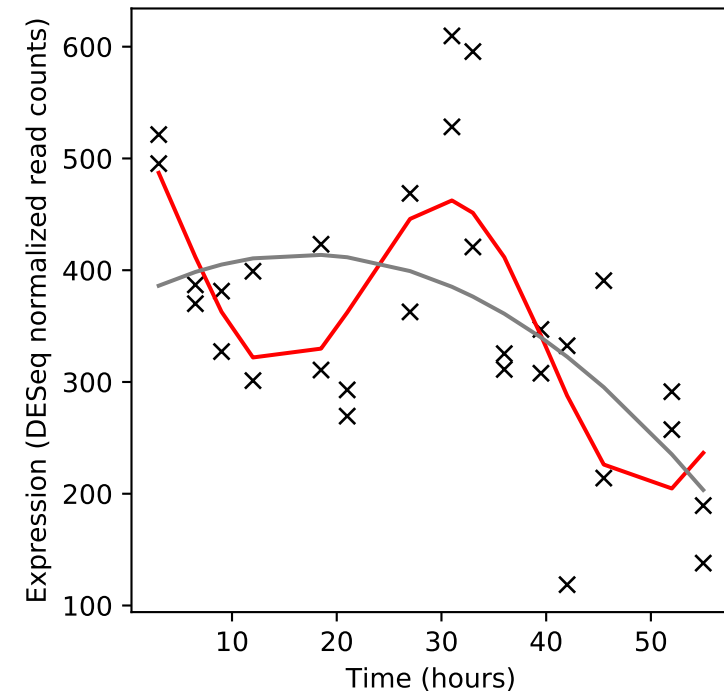

Rv3717/-

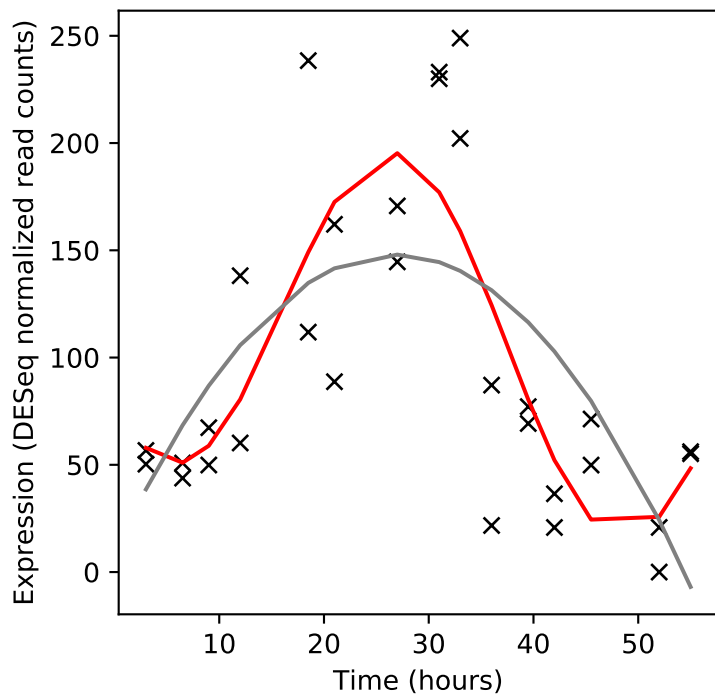

Rv3718c/-

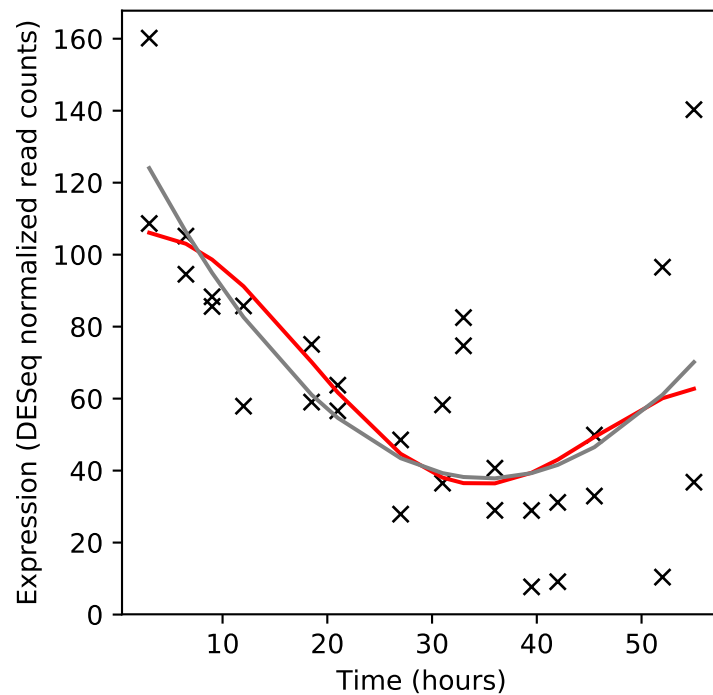

Rv3719/-

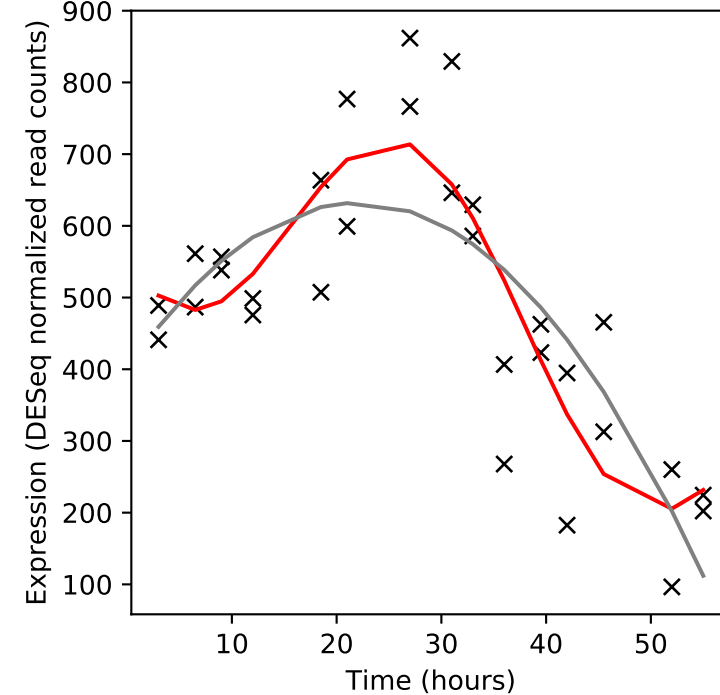

Rv3720/-

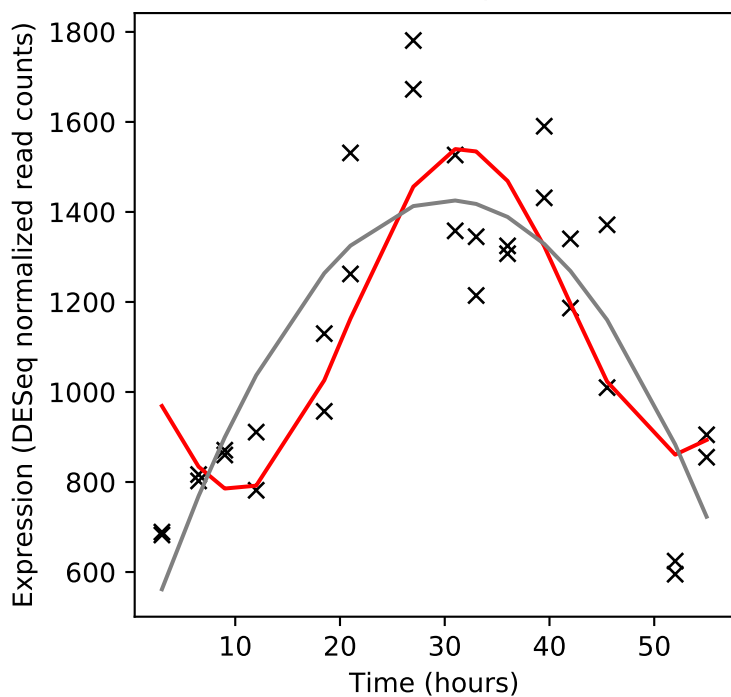

Rv3721c/dnaZX

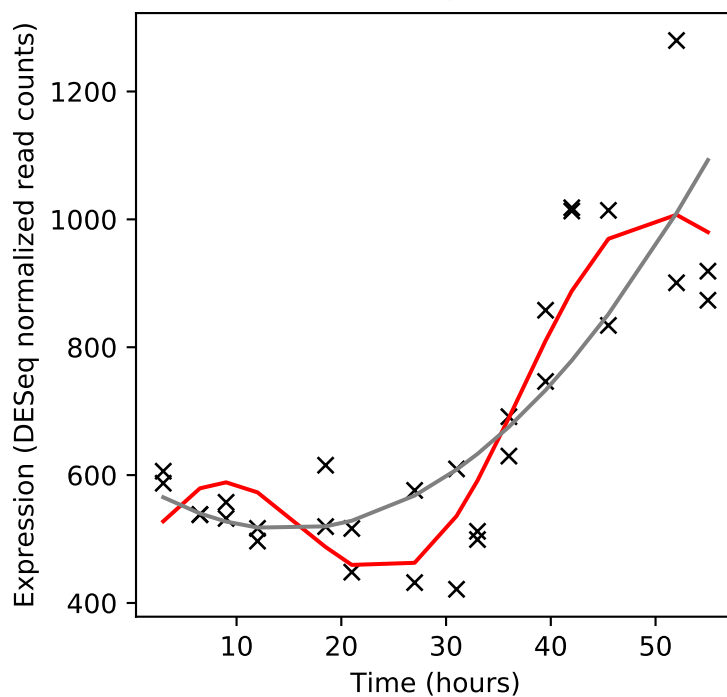

Rv3722c/-

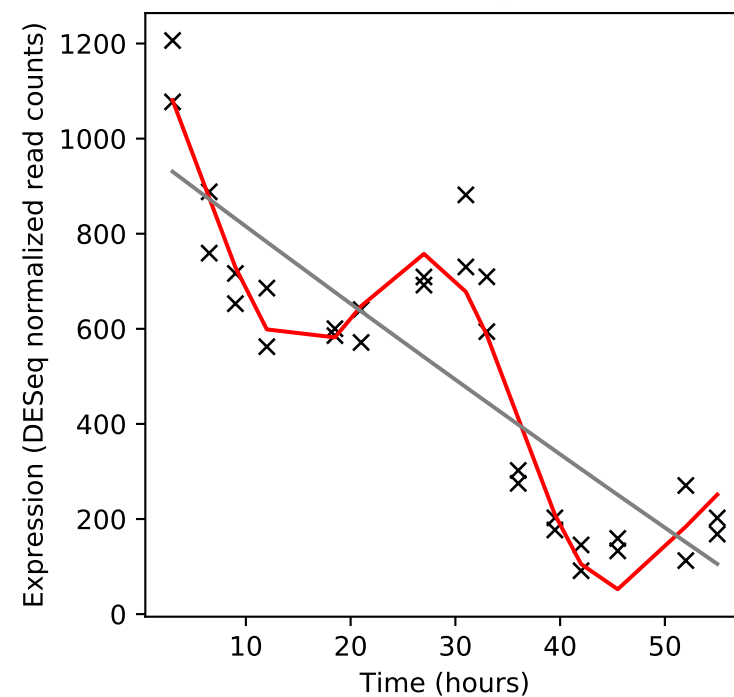

Rv3723/-

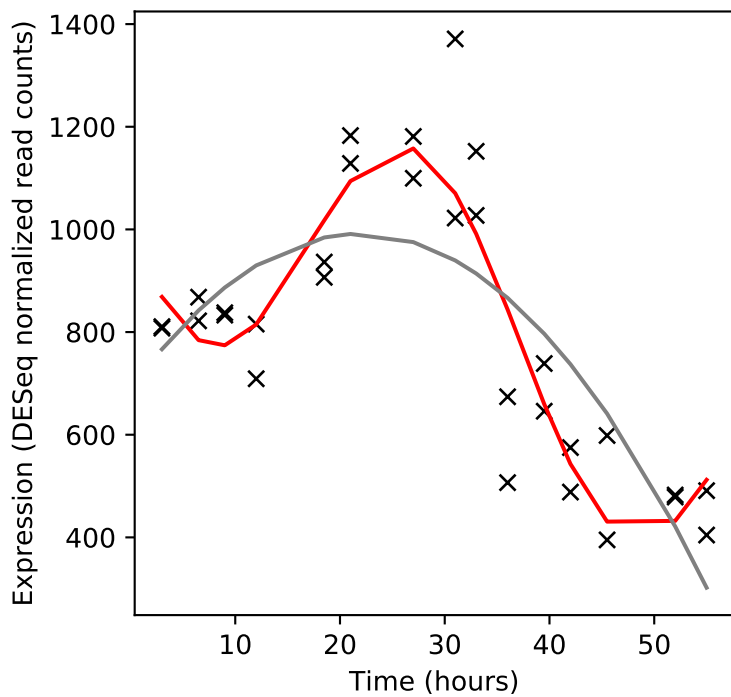

Rv3724A/cut5a

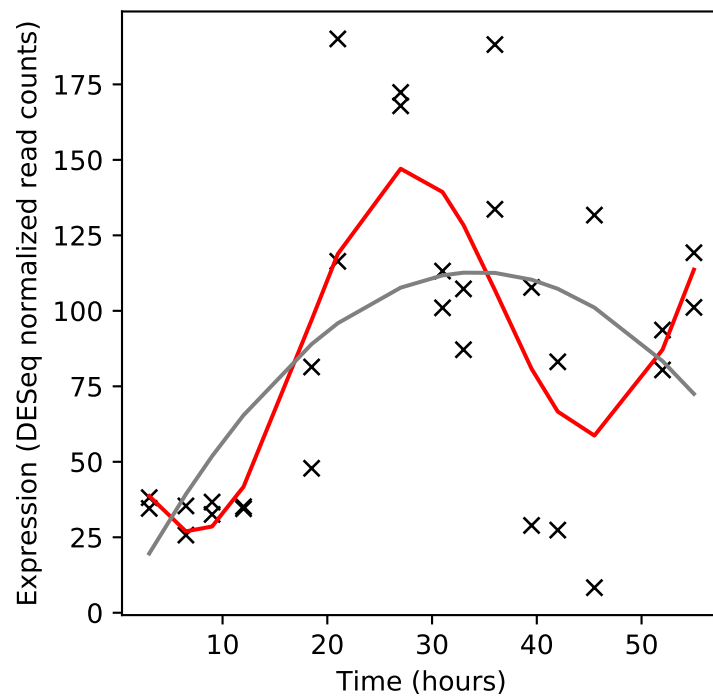

Rv3724B/cut5b

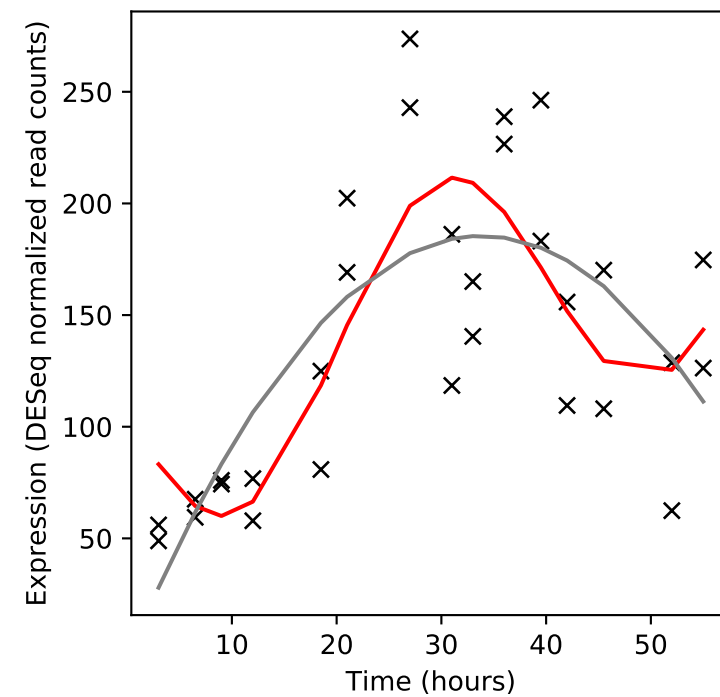

Rv3725/-

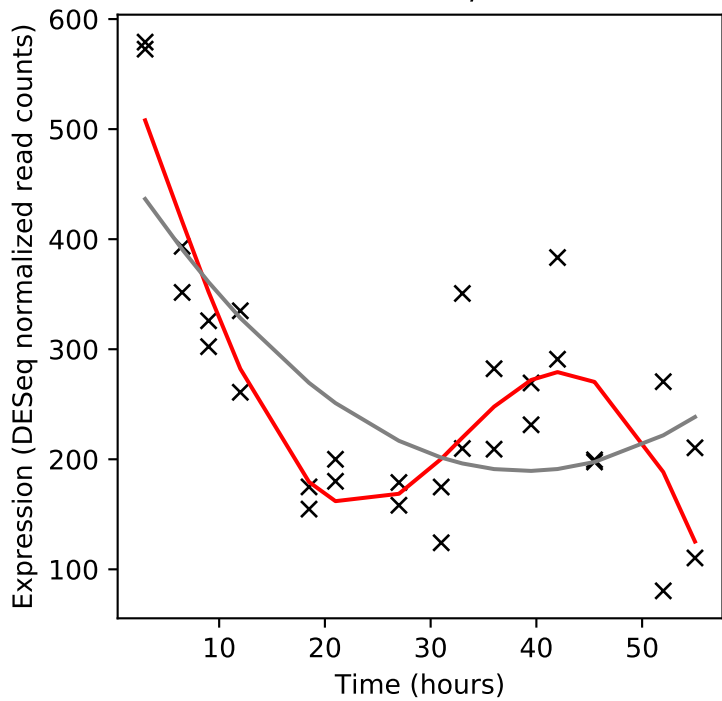

Rv3726/-

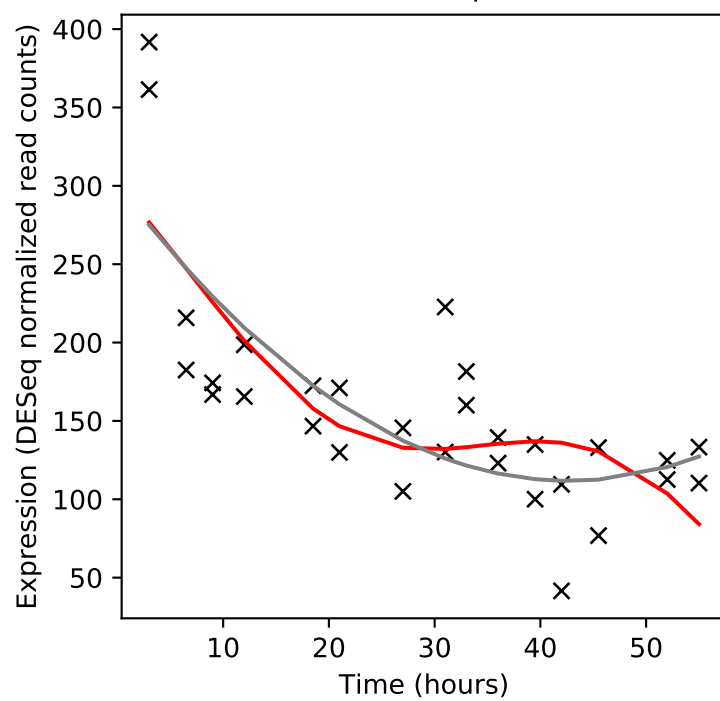

Rv3727/-

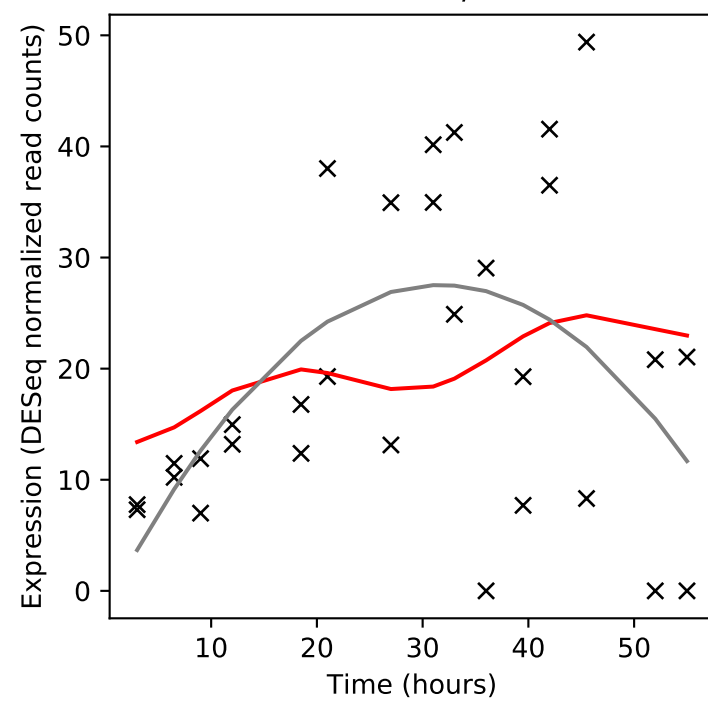

Rv3728/-

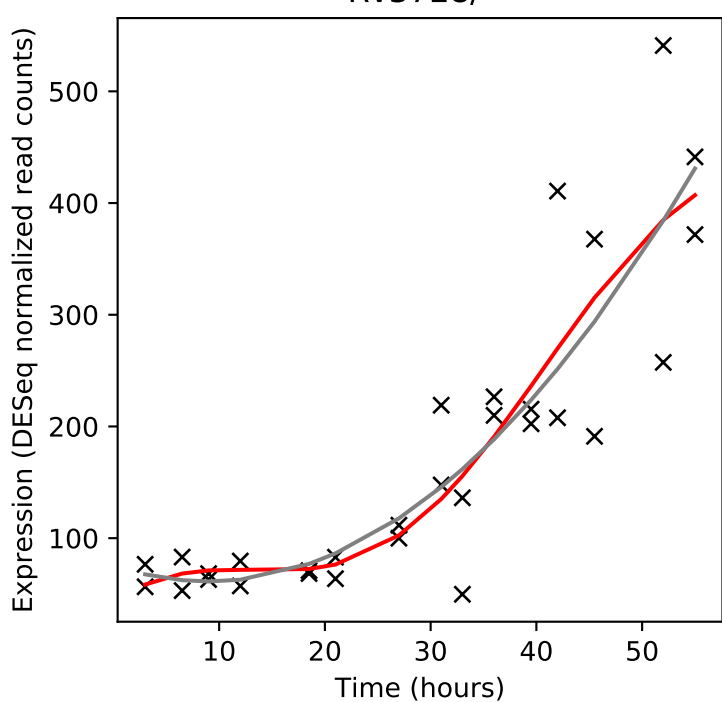

Rv3729/-

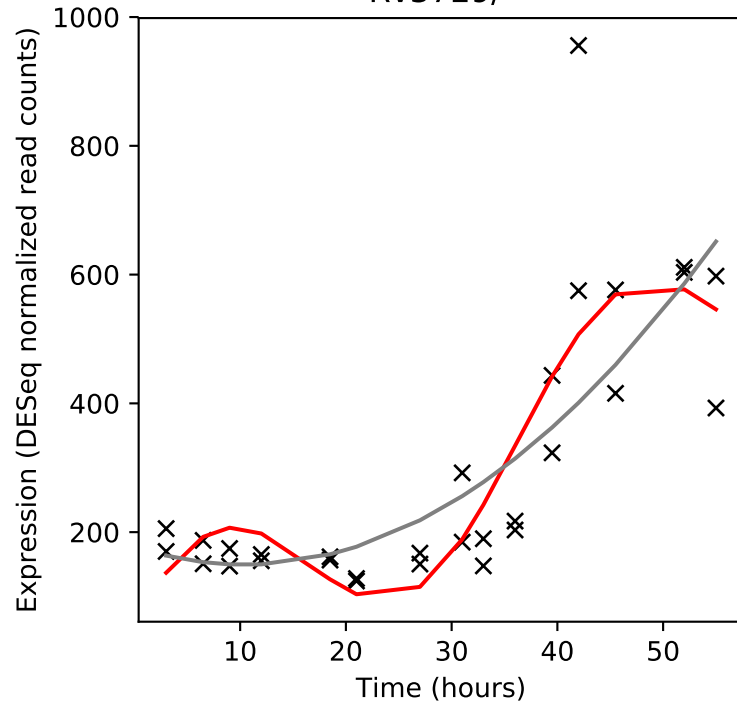

Rv3730c/-

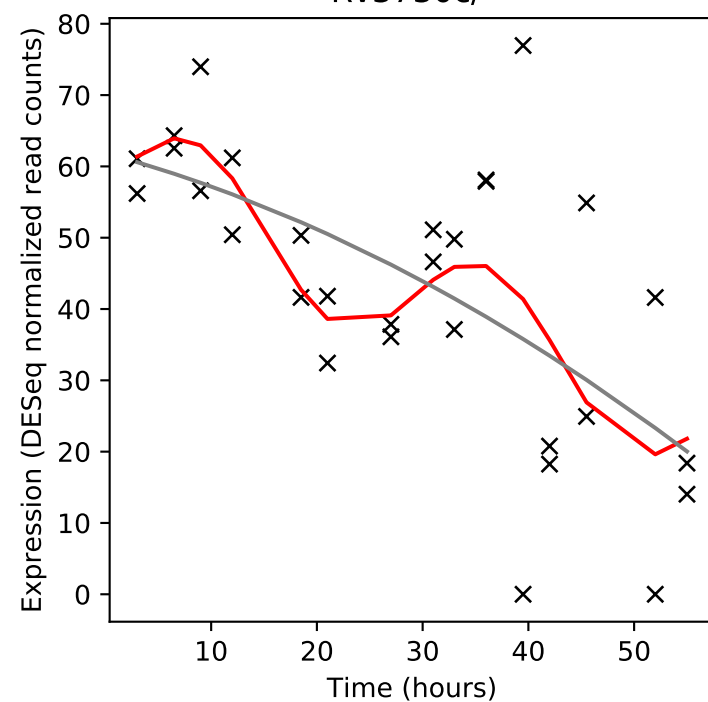

Rv3731/ligC

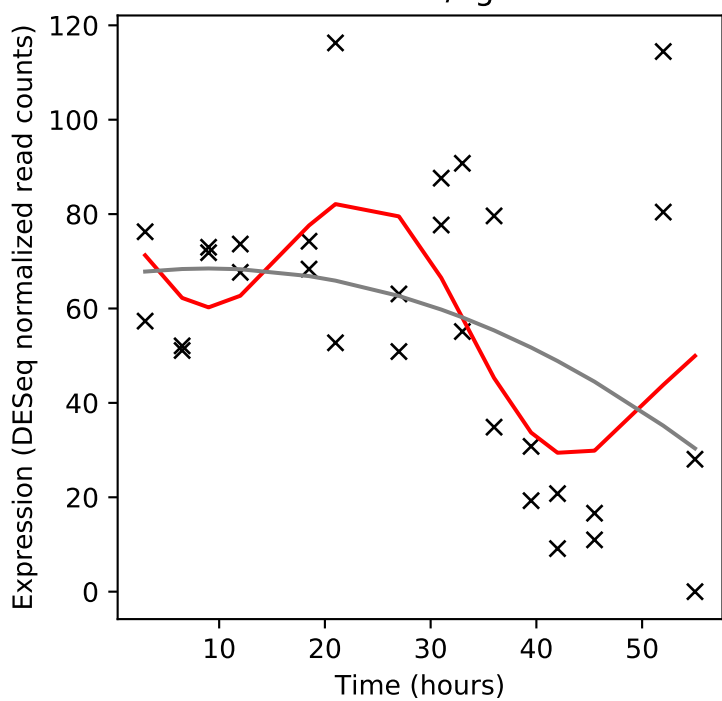

Rv3732/-

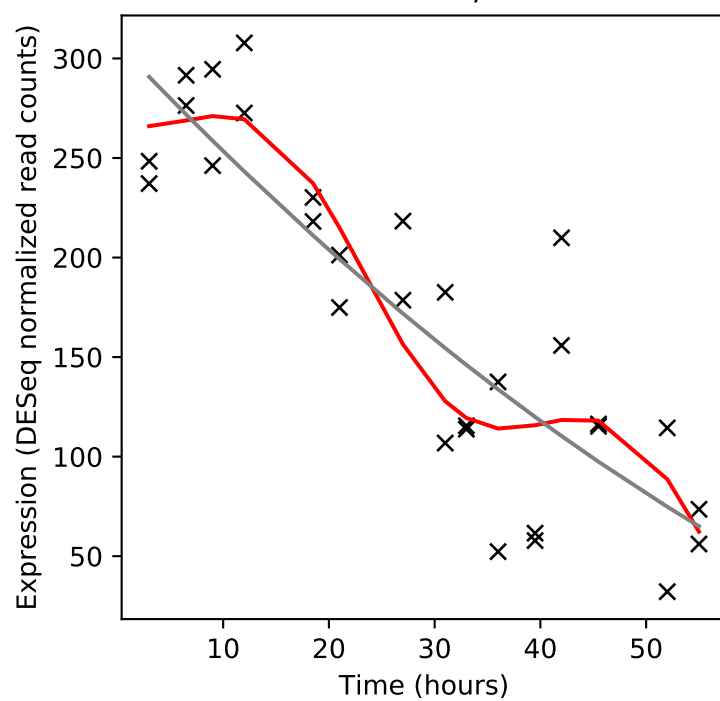

Rv3733c/-

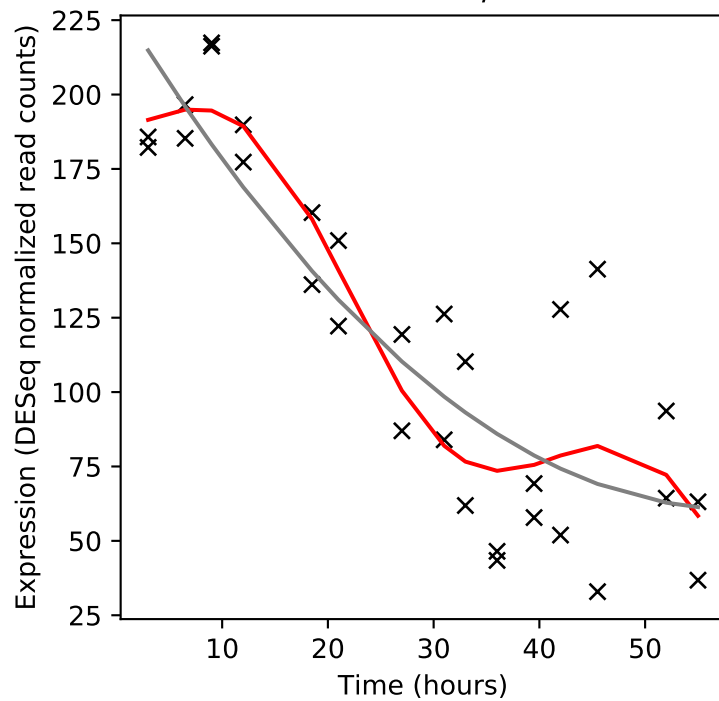

Rv3734c/tgs2

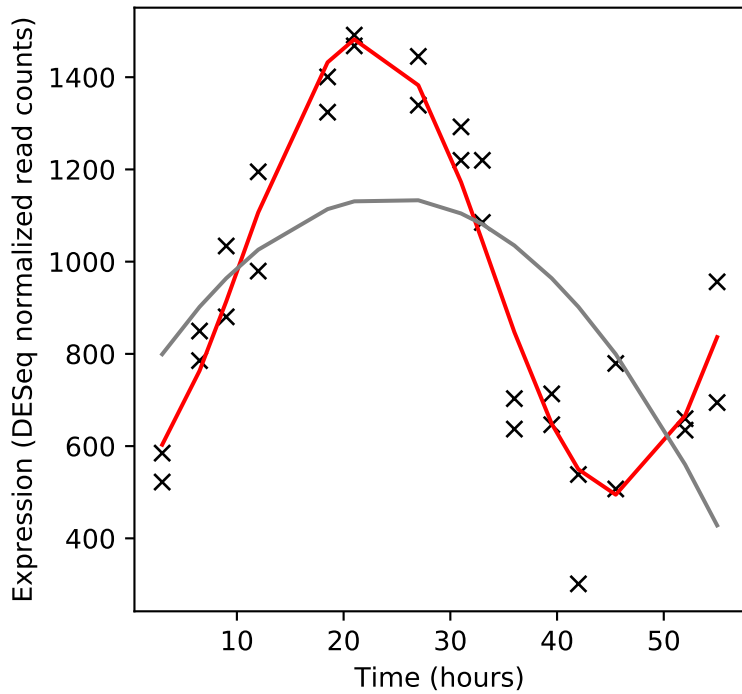

Rv3735/-

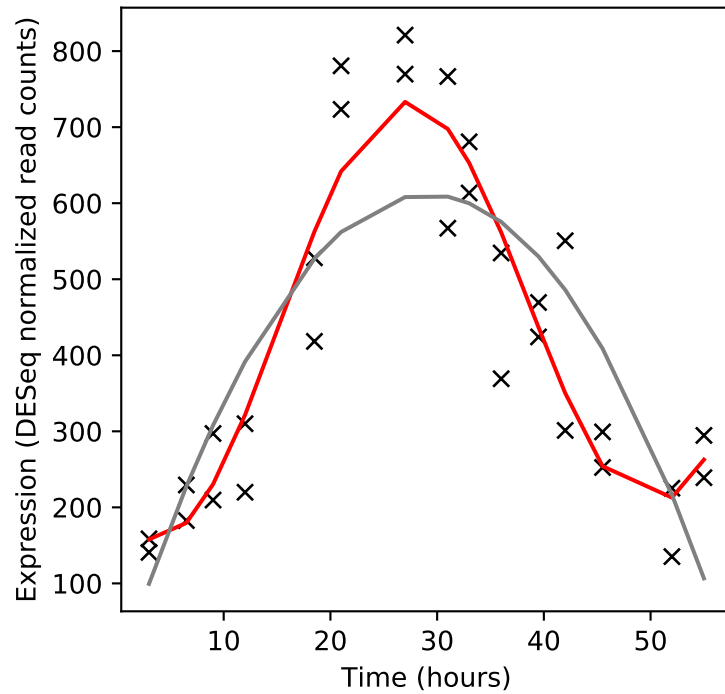

Rv3736/-

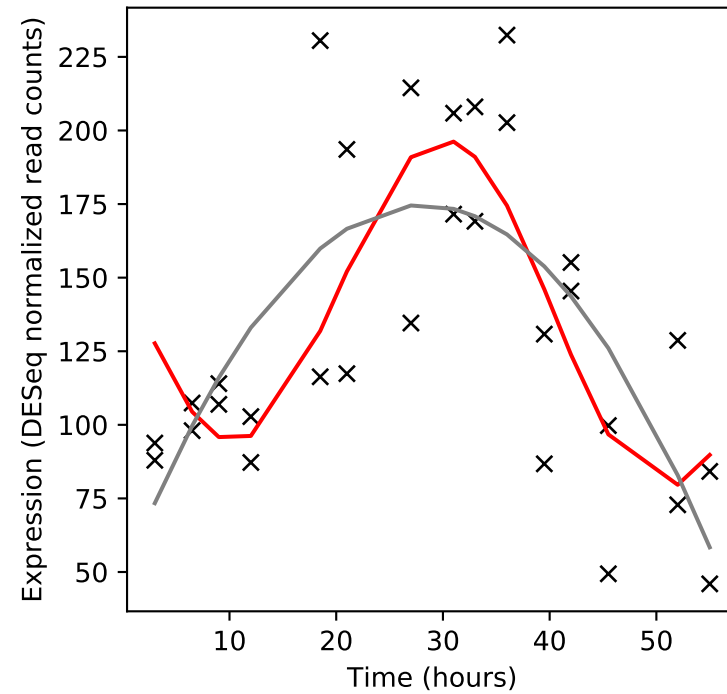

Rv3737/-

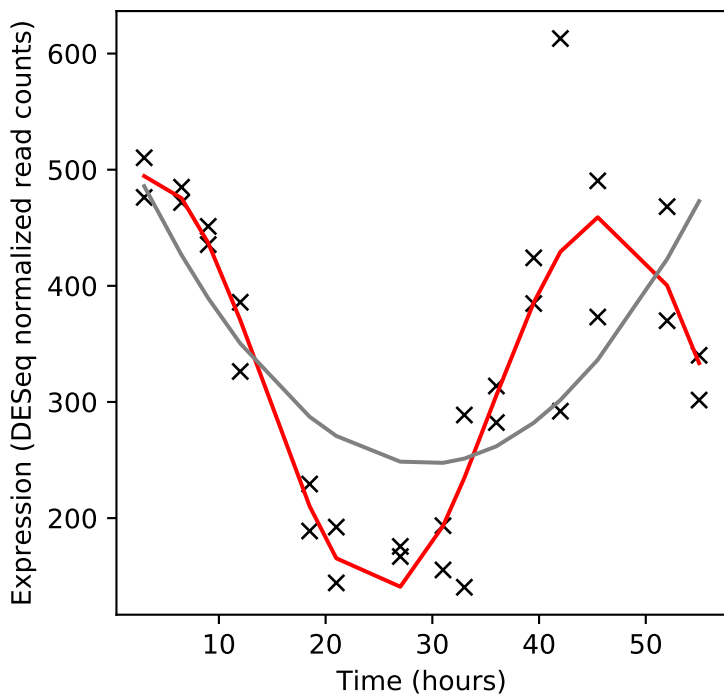

Rv3738c/PPE66

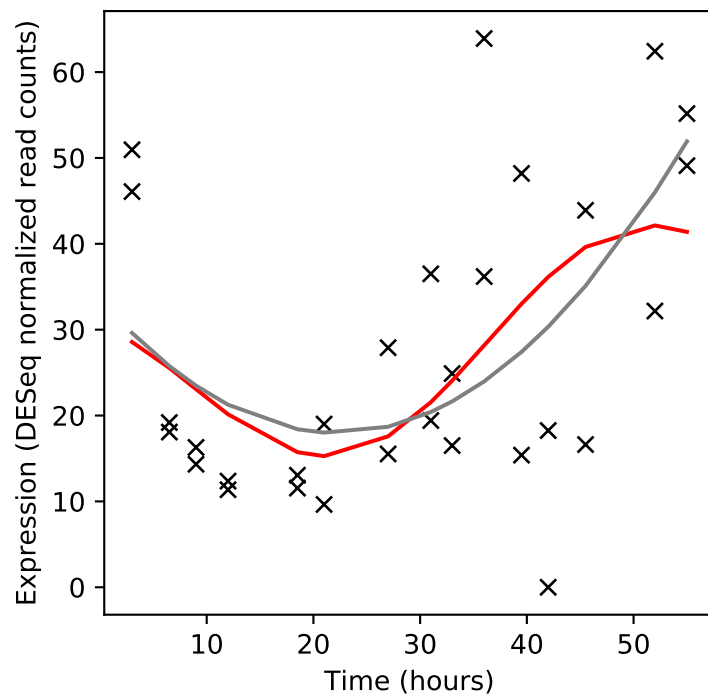

Rv3739c/PPE67

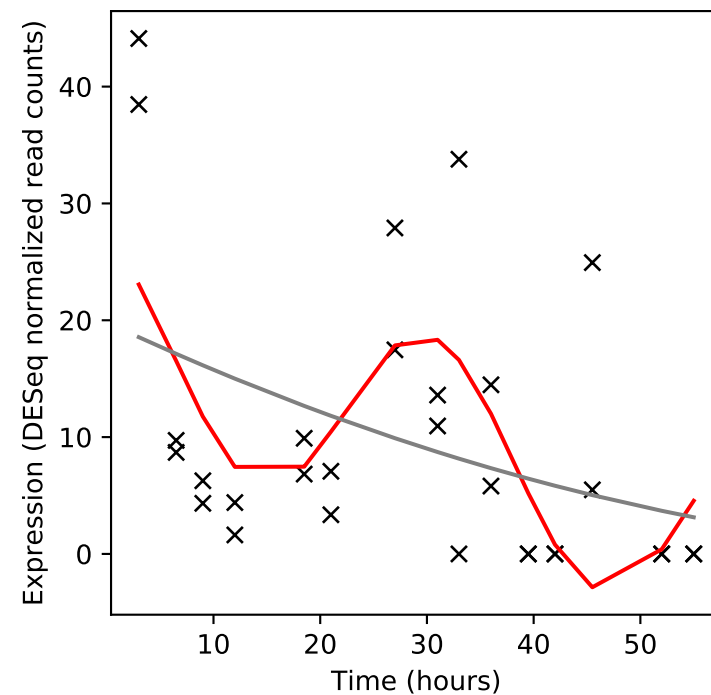

Rv3740c/-

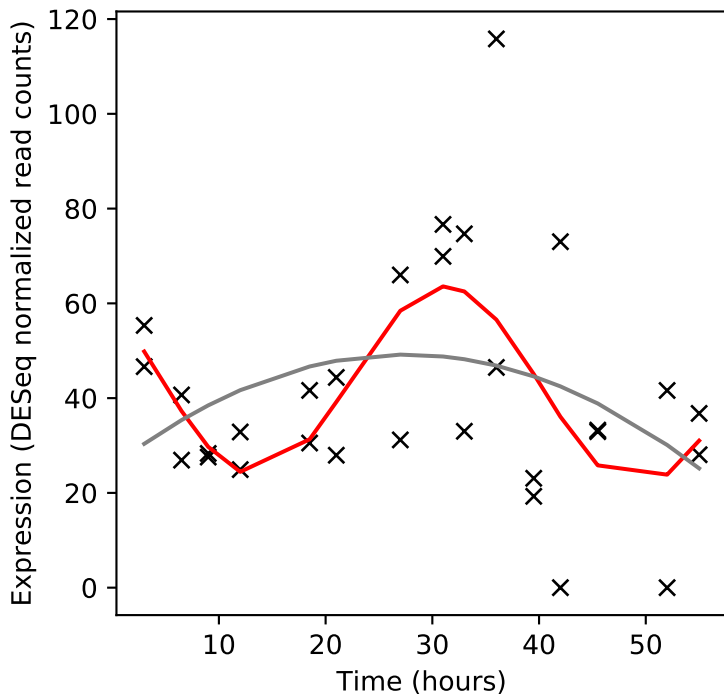

Rv3741c/-

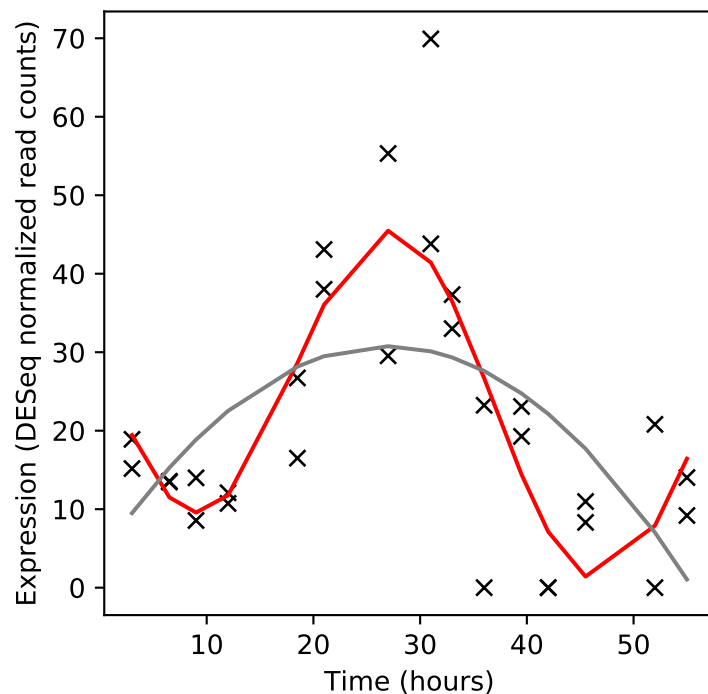

Rv3742c/-

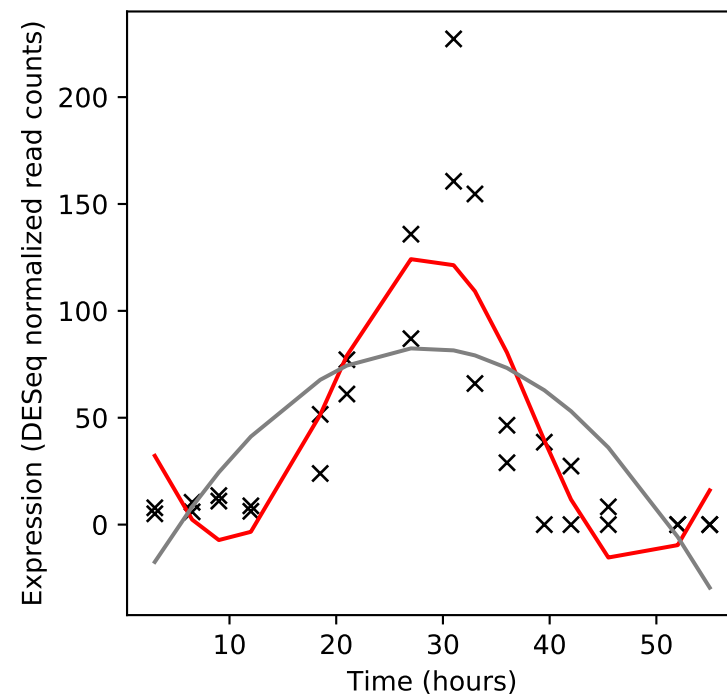

Rv3743c/ctpj

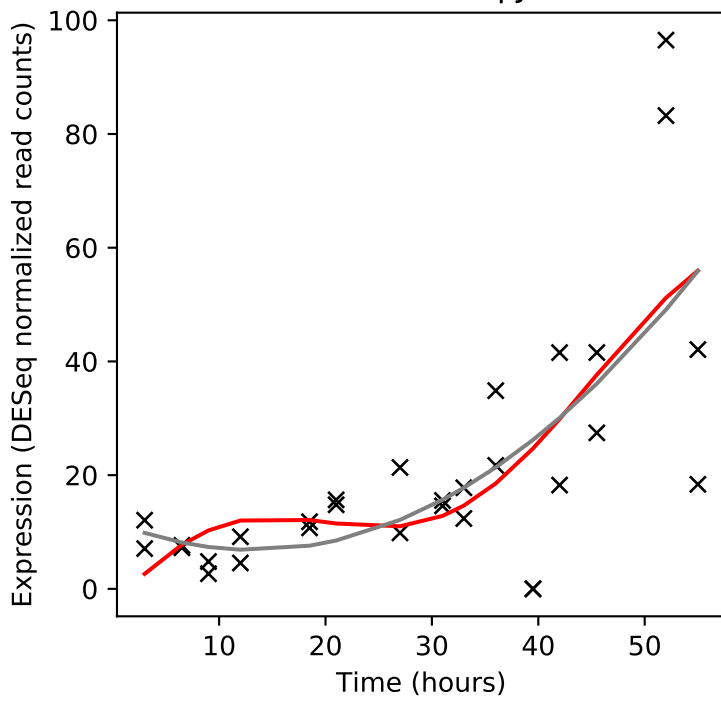

Rv3744/nmtR

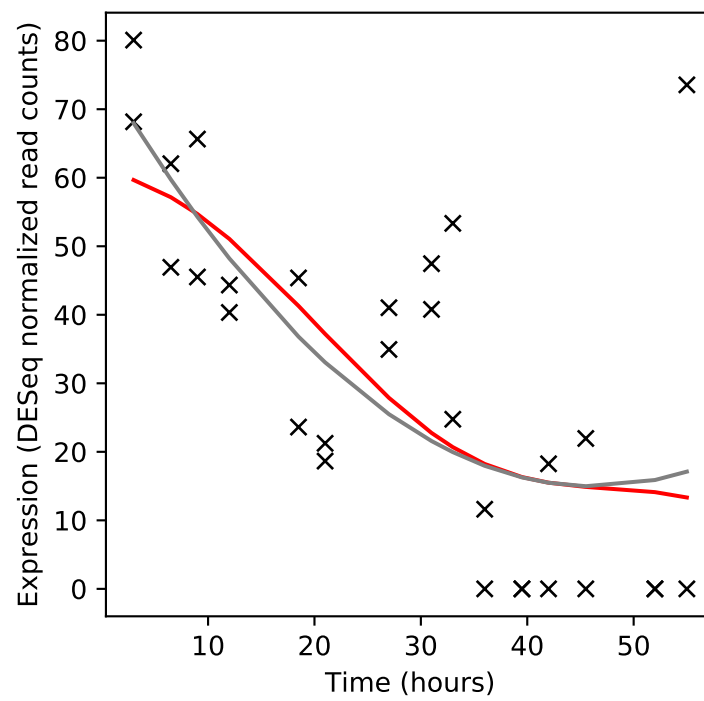

Rv3745c/-

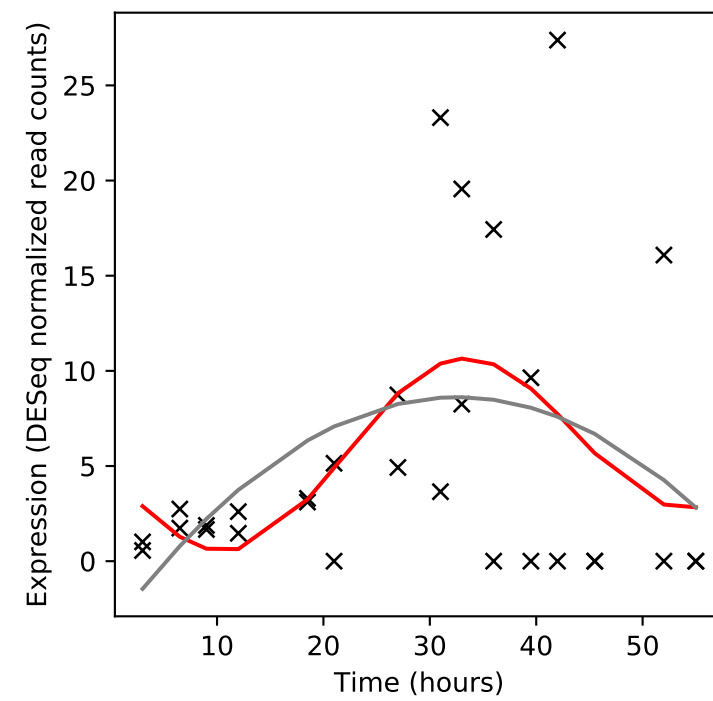

Rv3746c/PE34

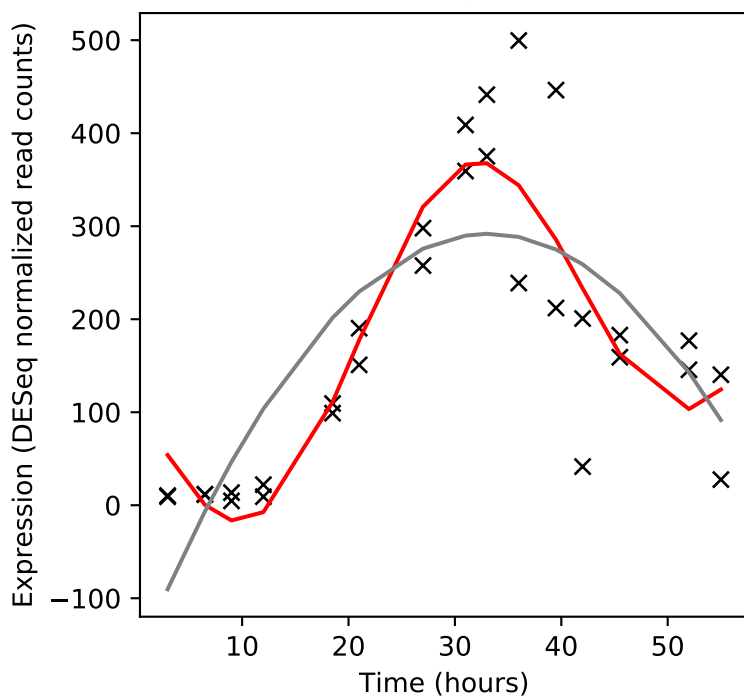

Rv3747/-

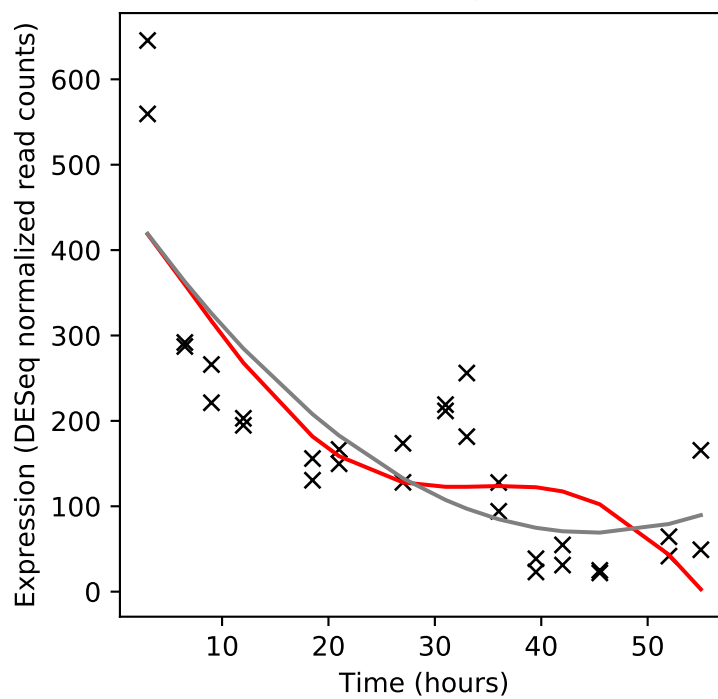

Rv3748/-

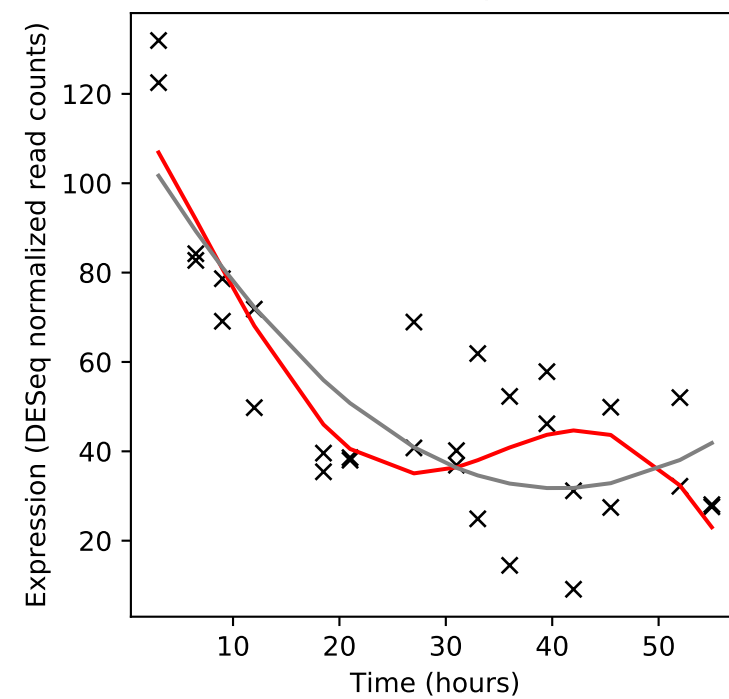

Rv3749c/-

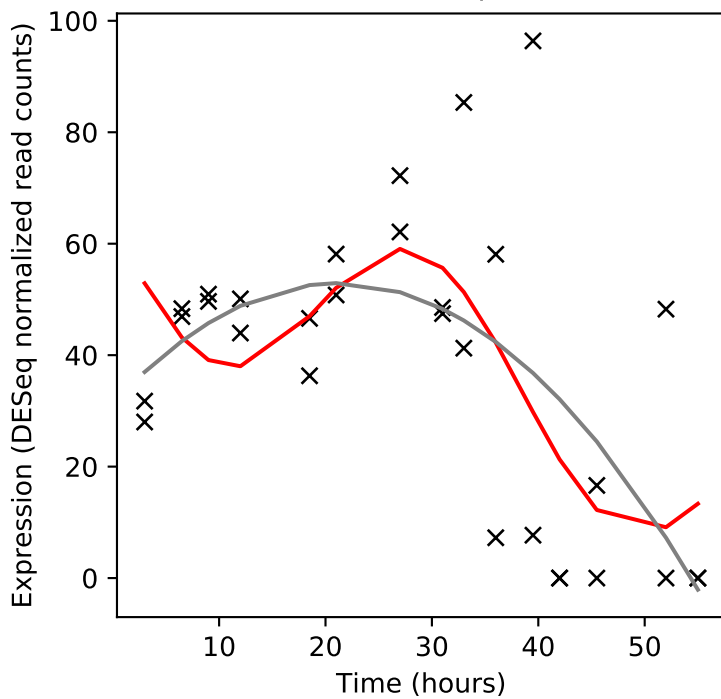

Rv3750c/-

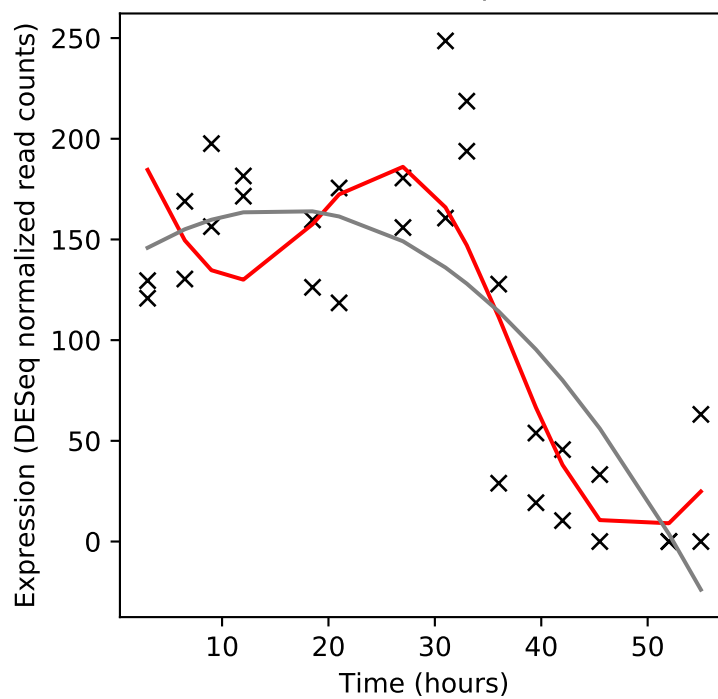

Rv3751/-

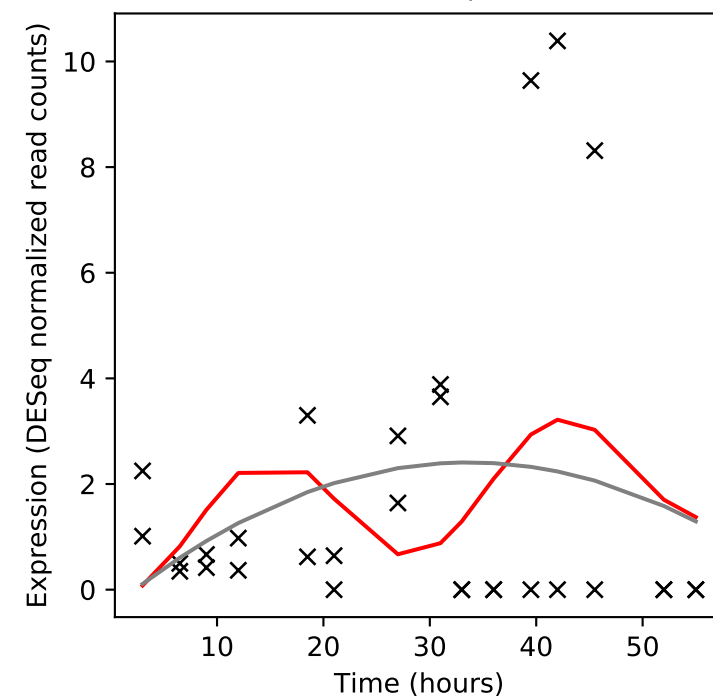

Rv3752c/-

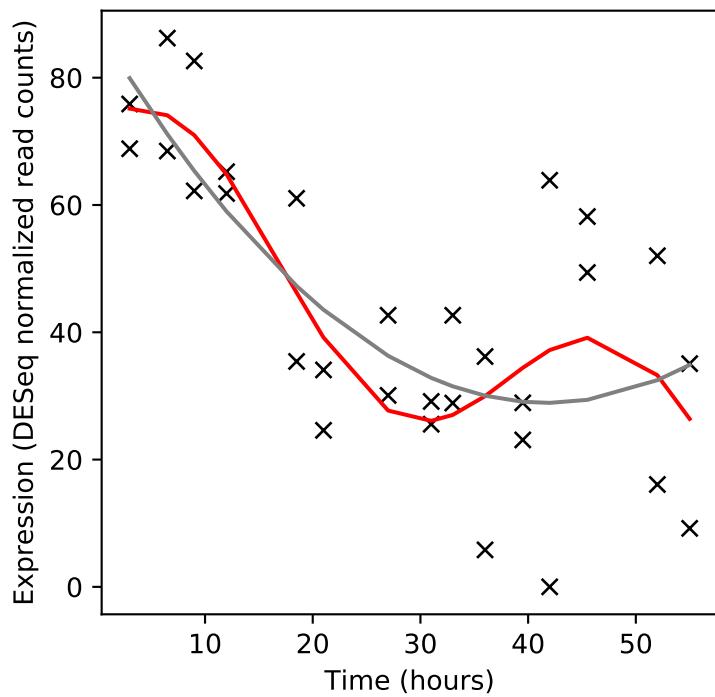

Rv3753c/-

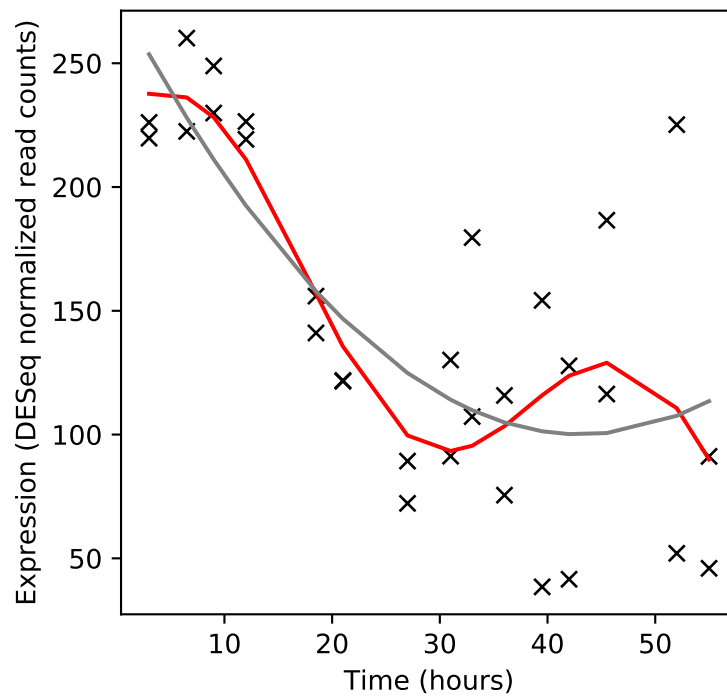

Rv3754/tyrA

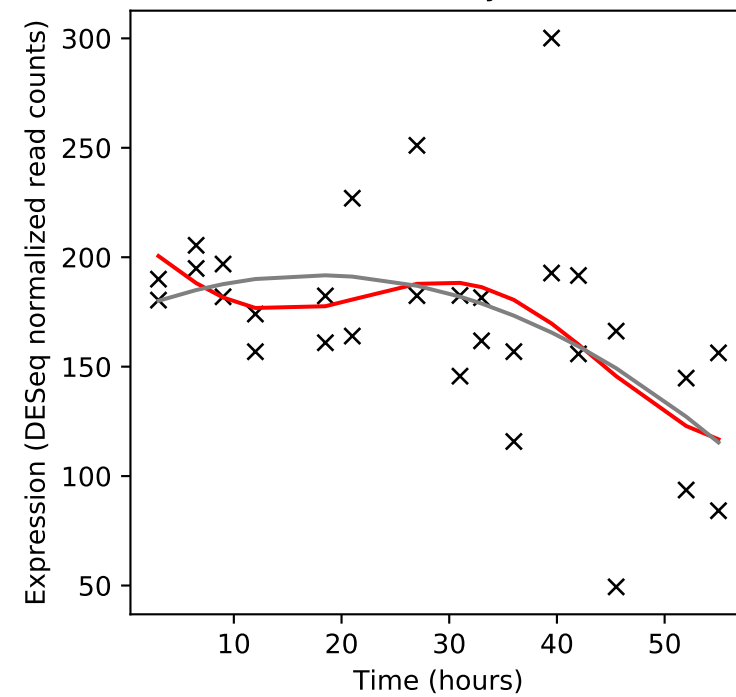

Rv3755c/-

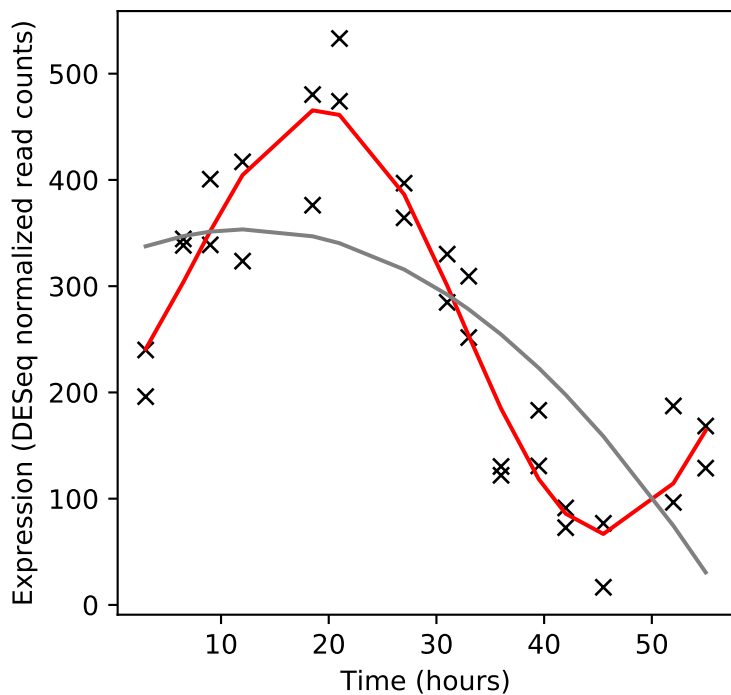

Rv3756c/proZ

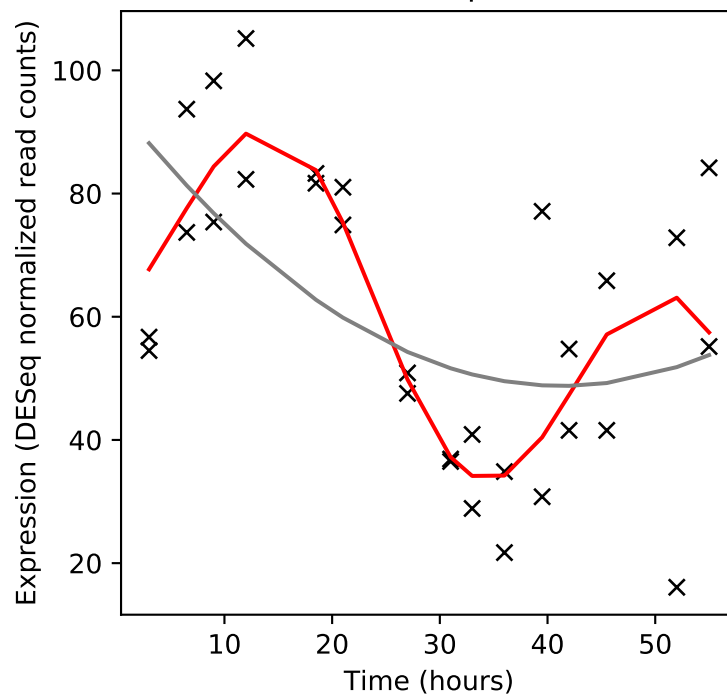

Rv3757c/proW

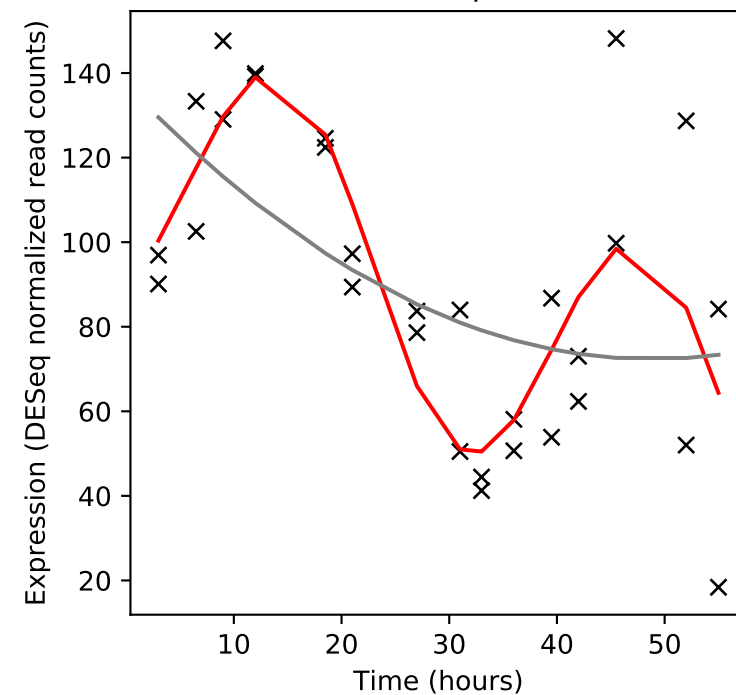

Rv3758c/proV

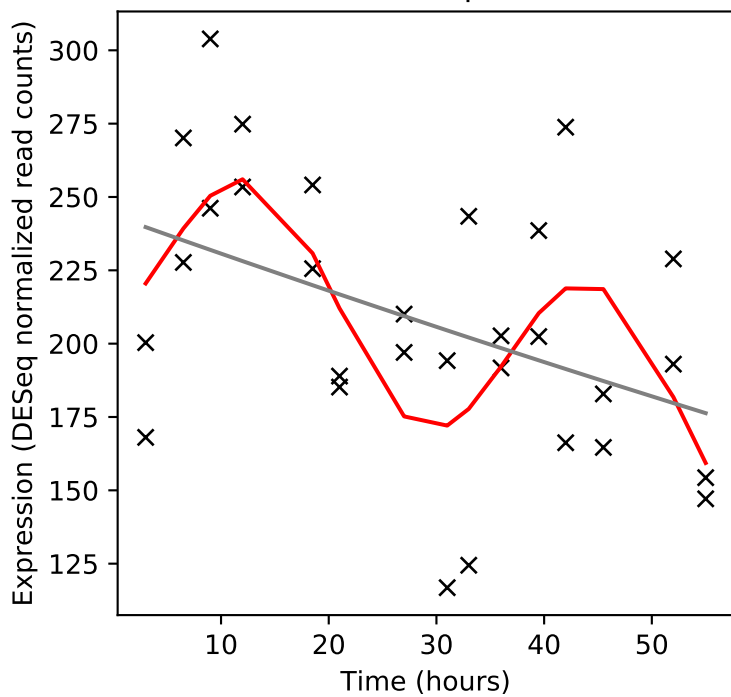

Rv3759c/proX

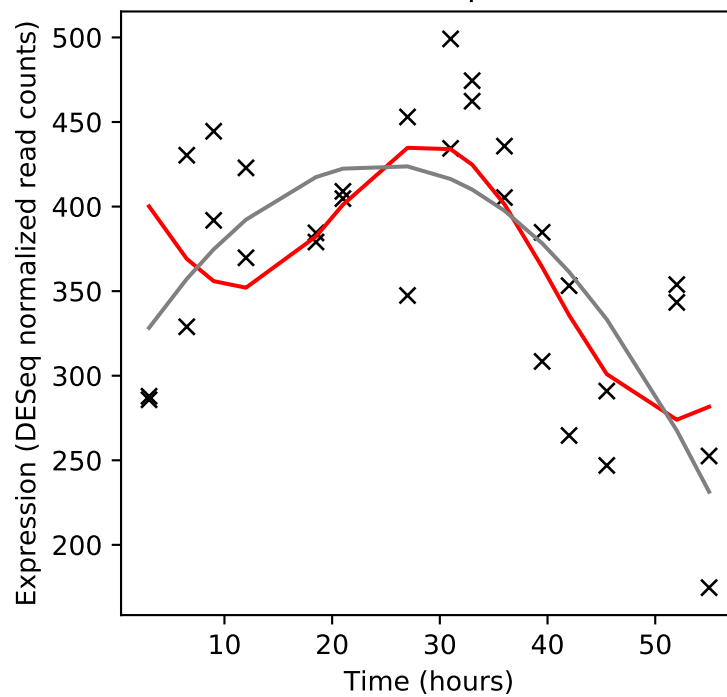

Rv3760/-

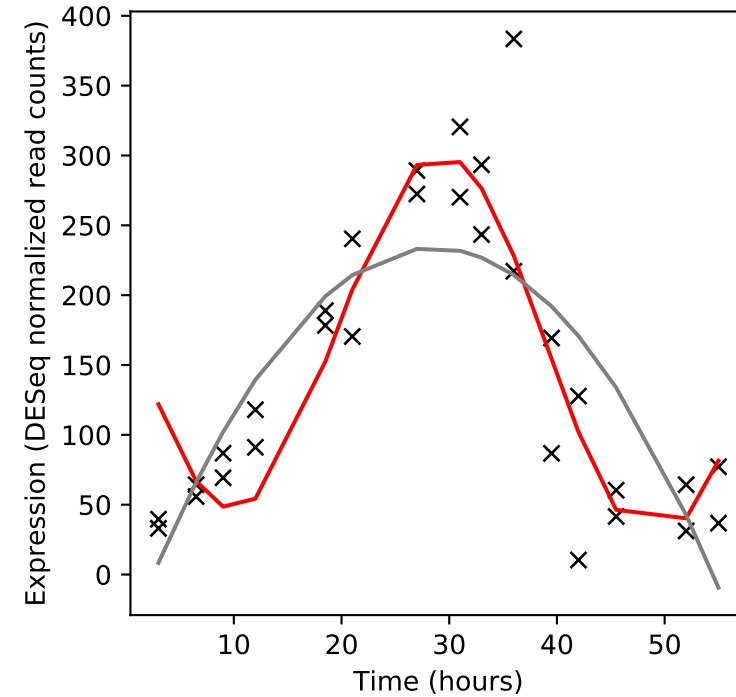



Rv3761c/fadE36

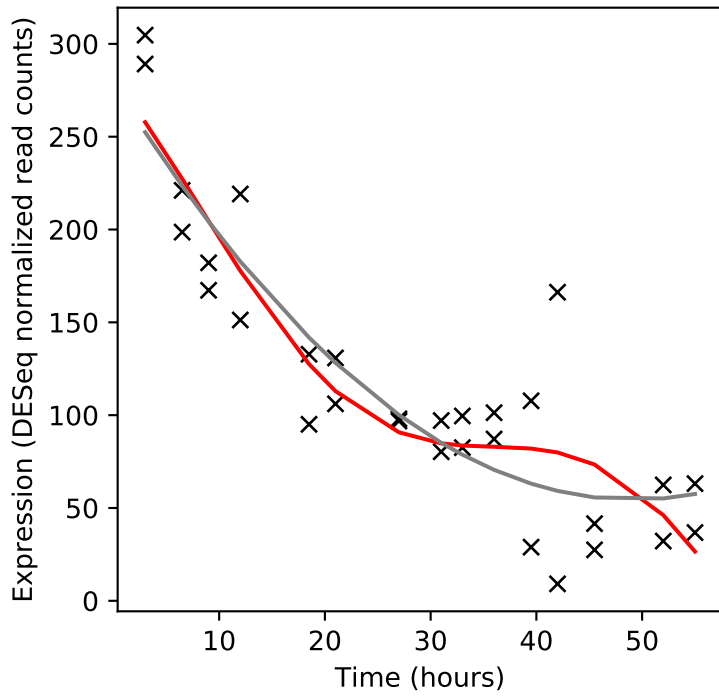

Rv3762c/-

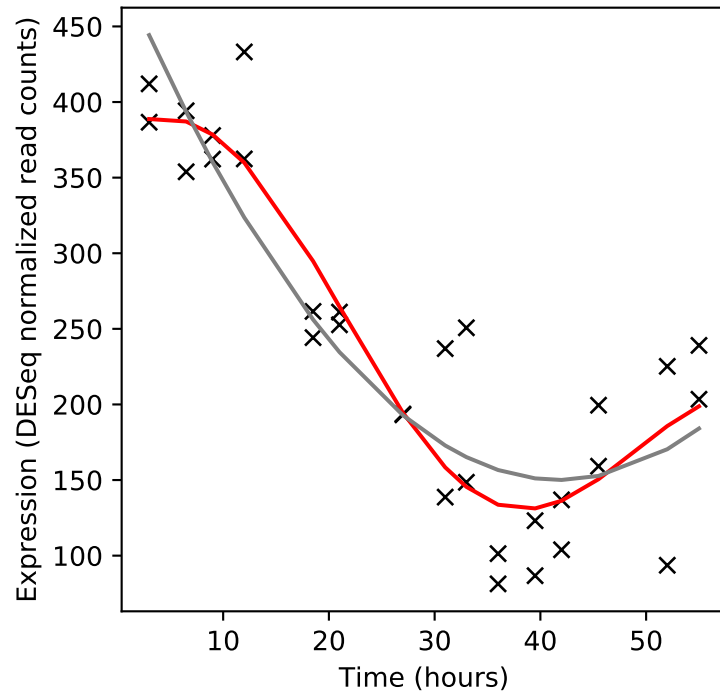

Rv3763/lpqH

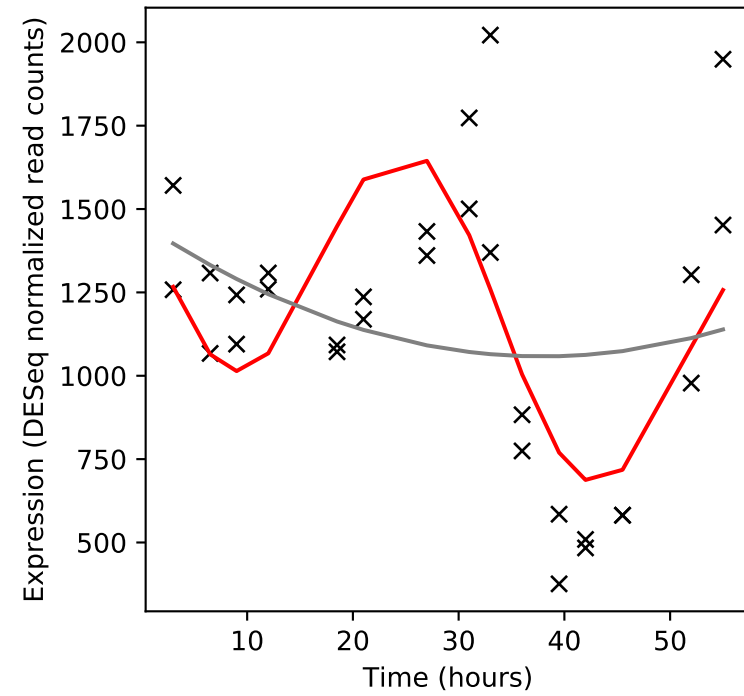

Rv3764c/tcrY

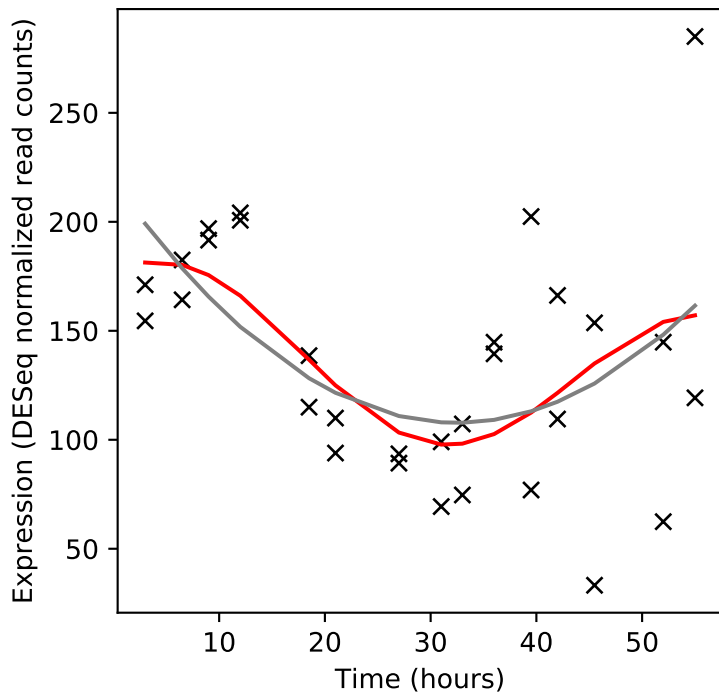

Rv3765c/tcrX

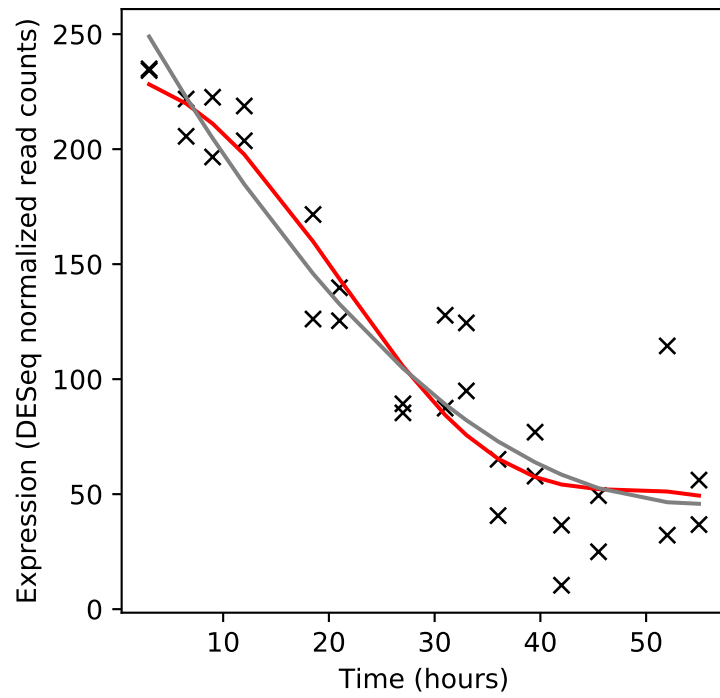

Rv3766/-

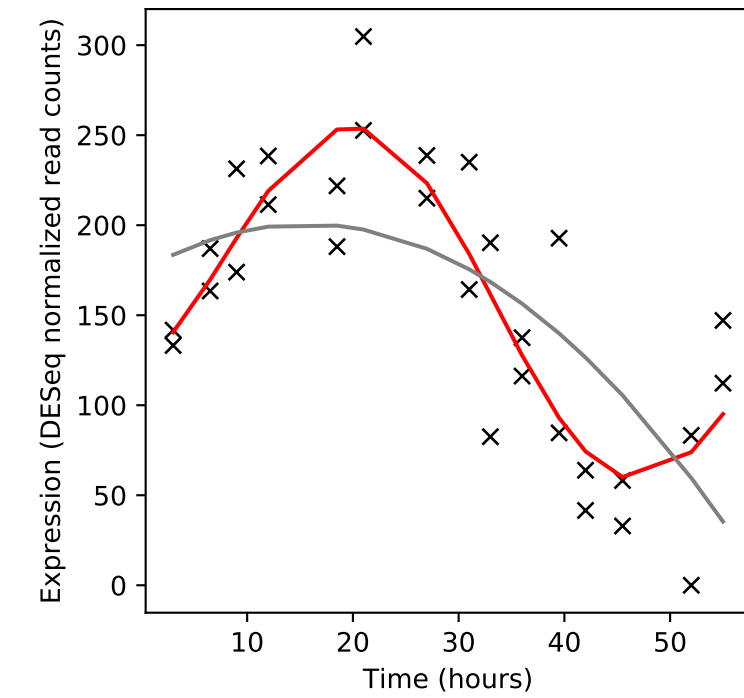

Rv3767c/-

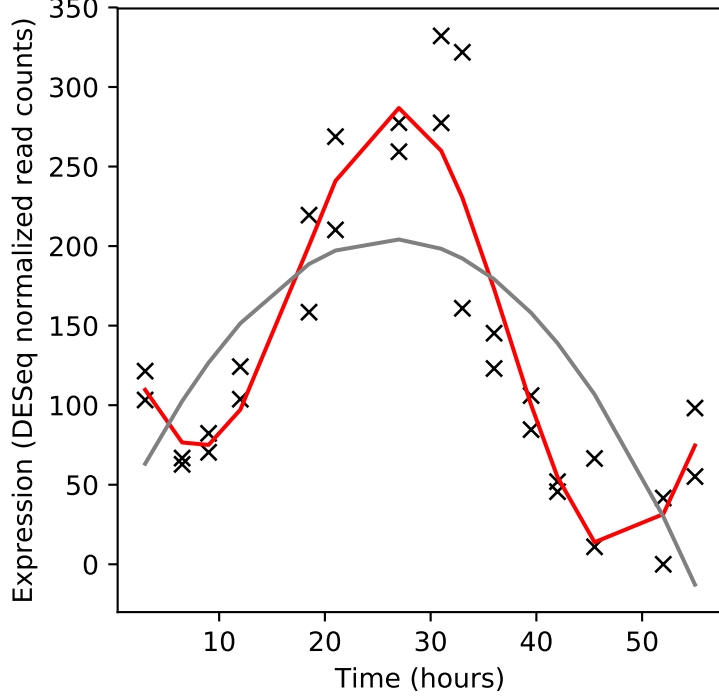

Rv3768/-

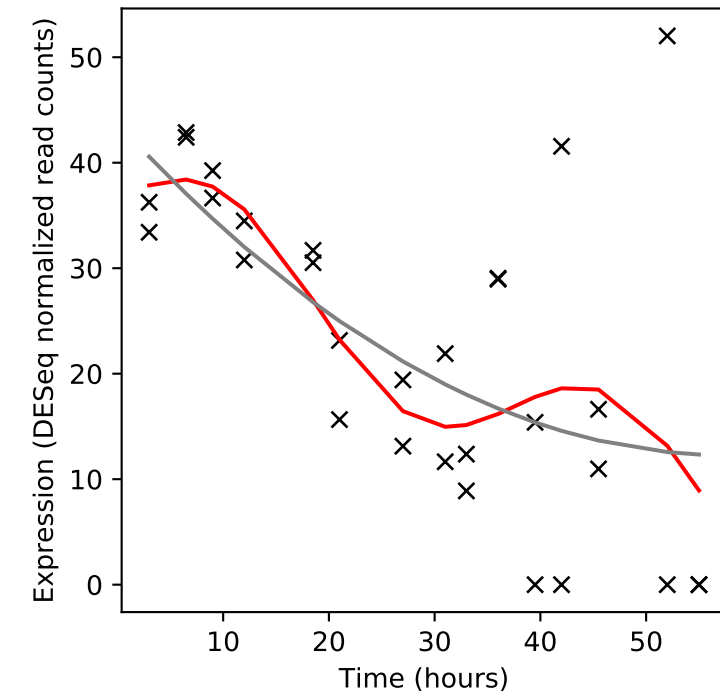

Rv3769/-

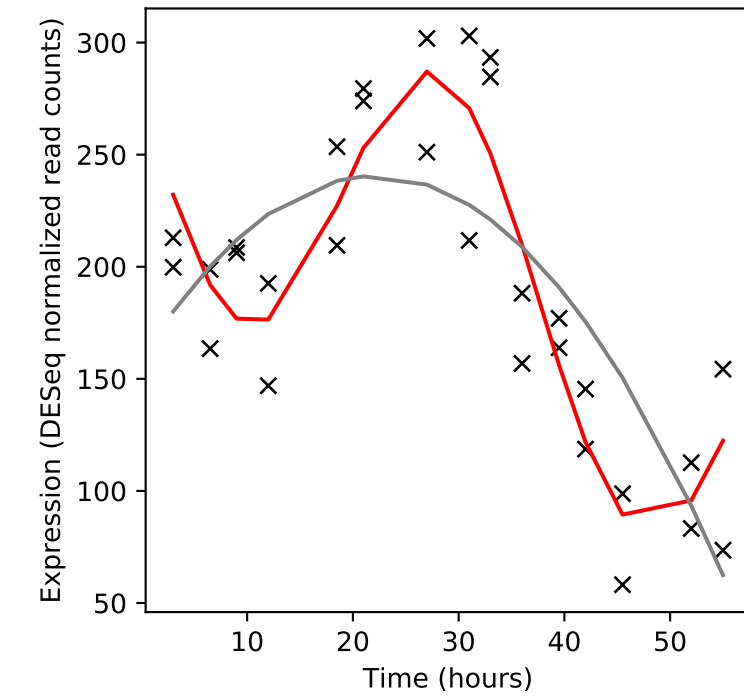

Rv3770c/-

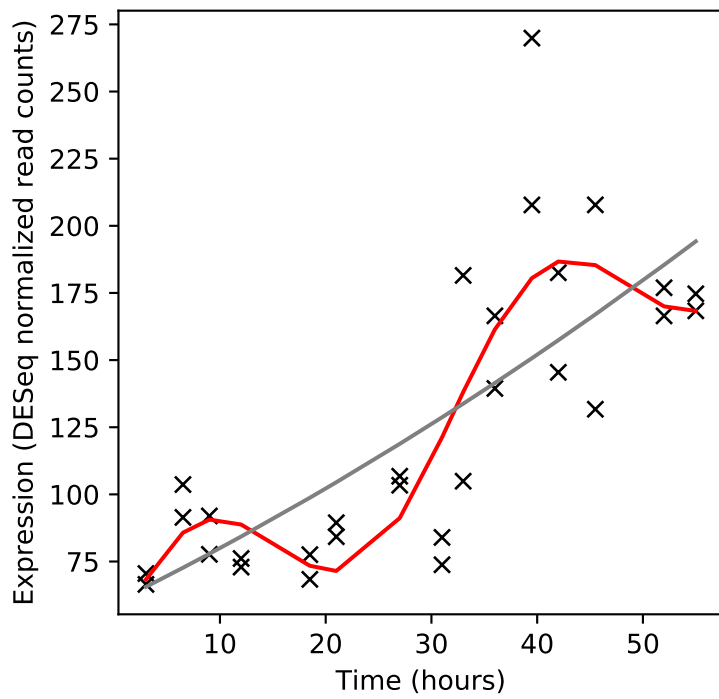

Rv3770A/-

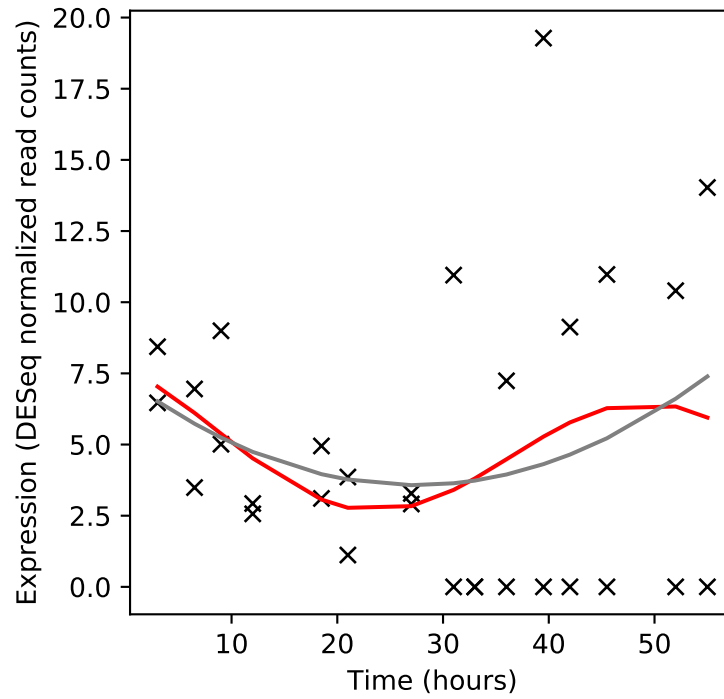

Rv3770B/-

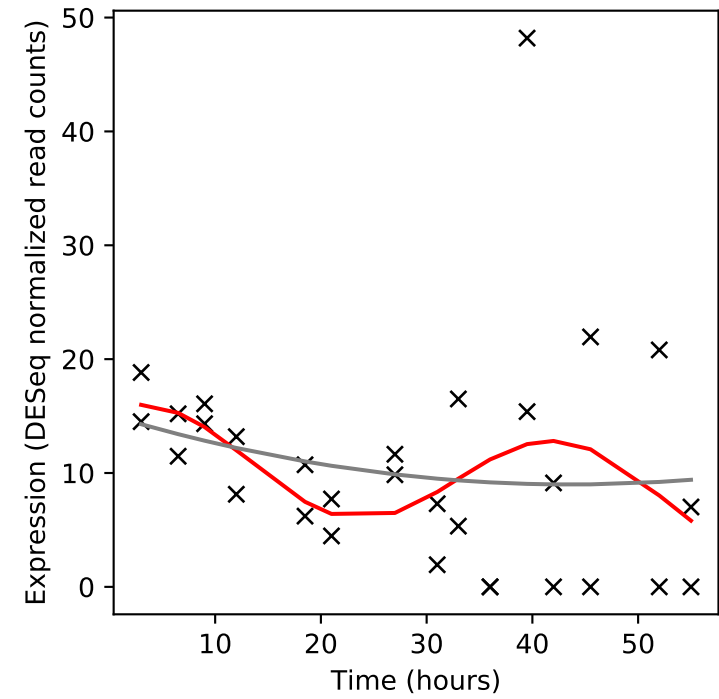

Rv3771c/-

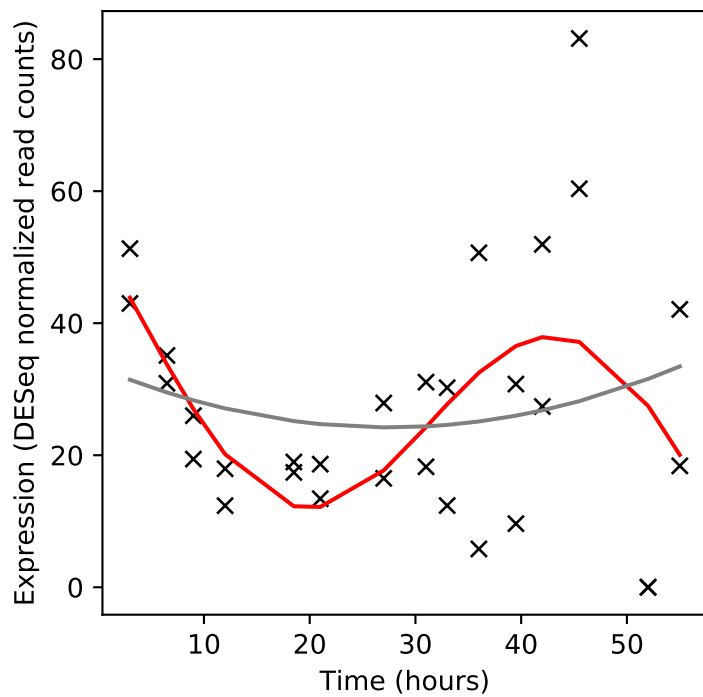

Rv3772/hisC2

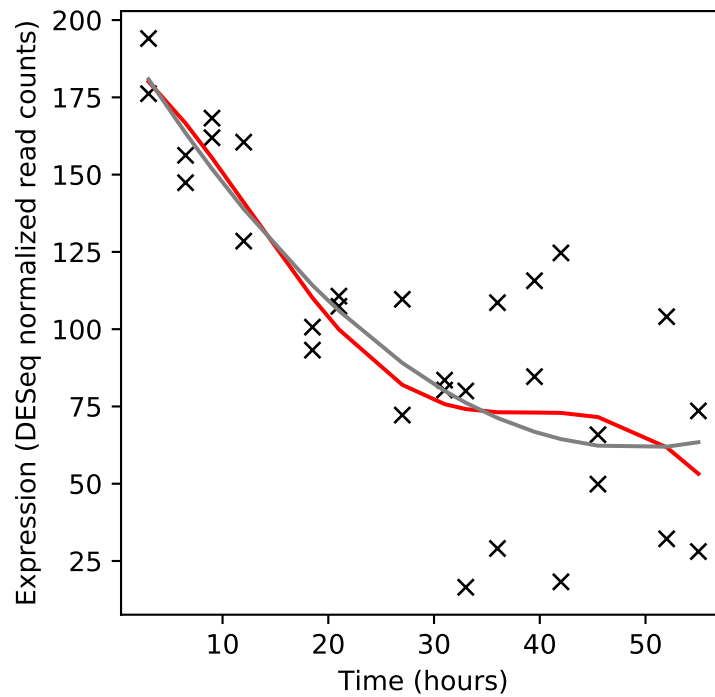

Rv3773c/-

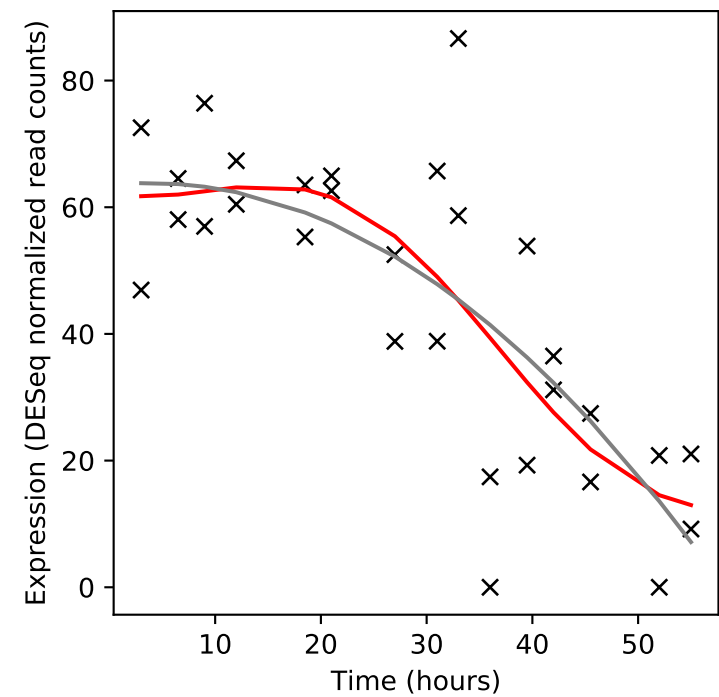

Rv3774/echA21

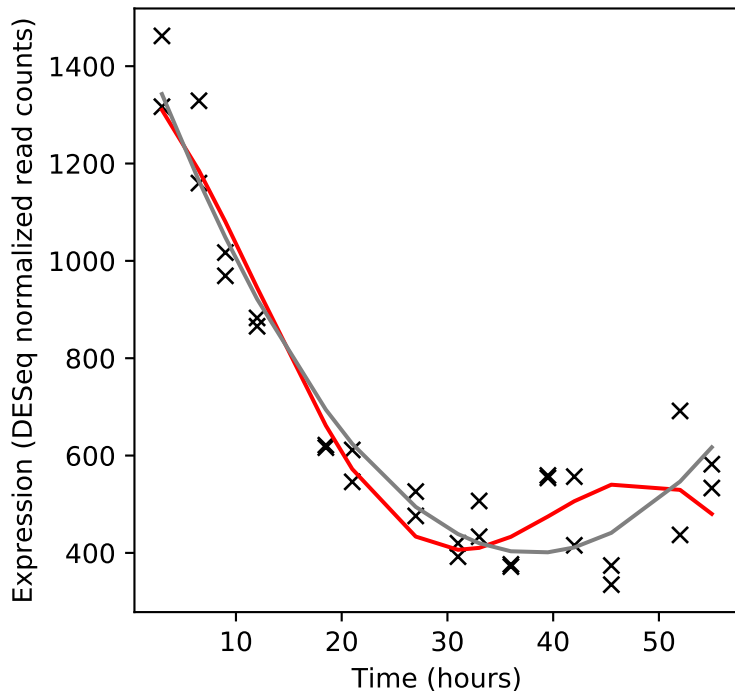

Rv3775/lipE

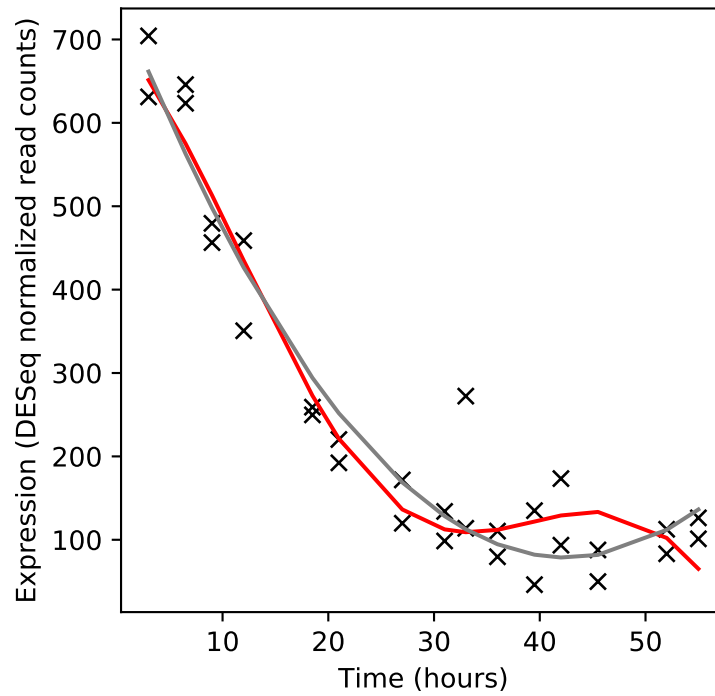

Rv3776/-

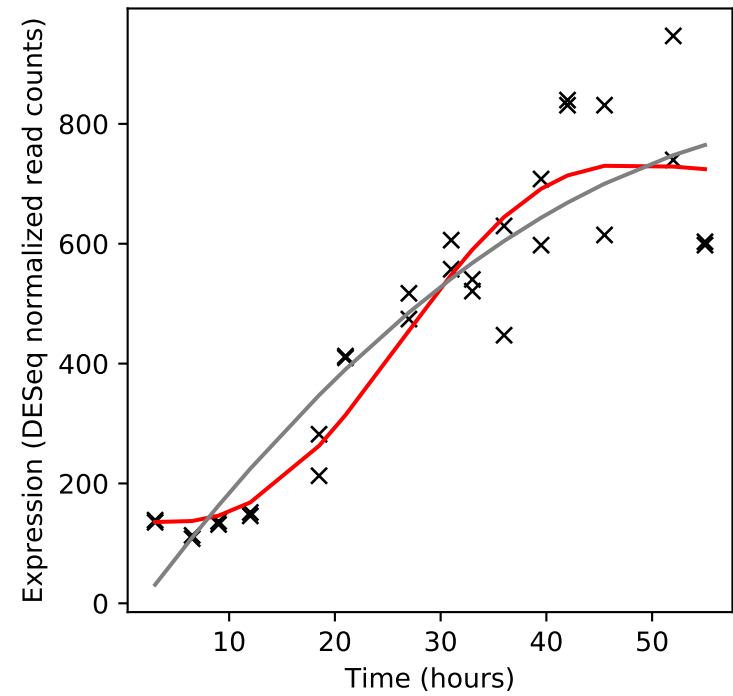

Rv3777/-

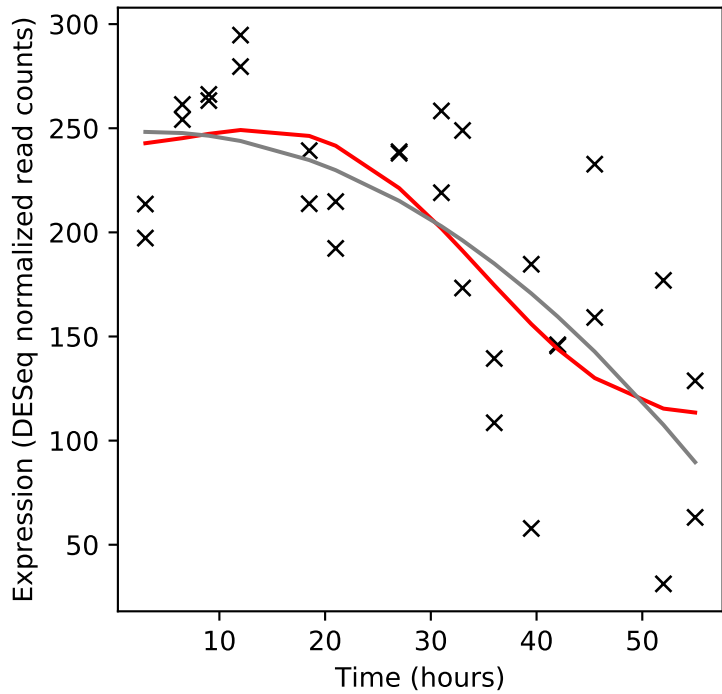

Rv3778c/-

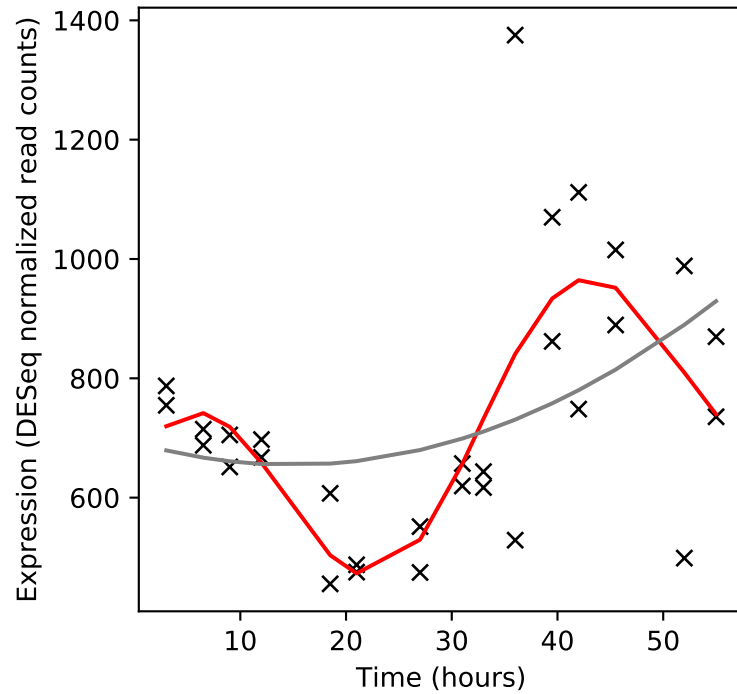

Rv3779/-

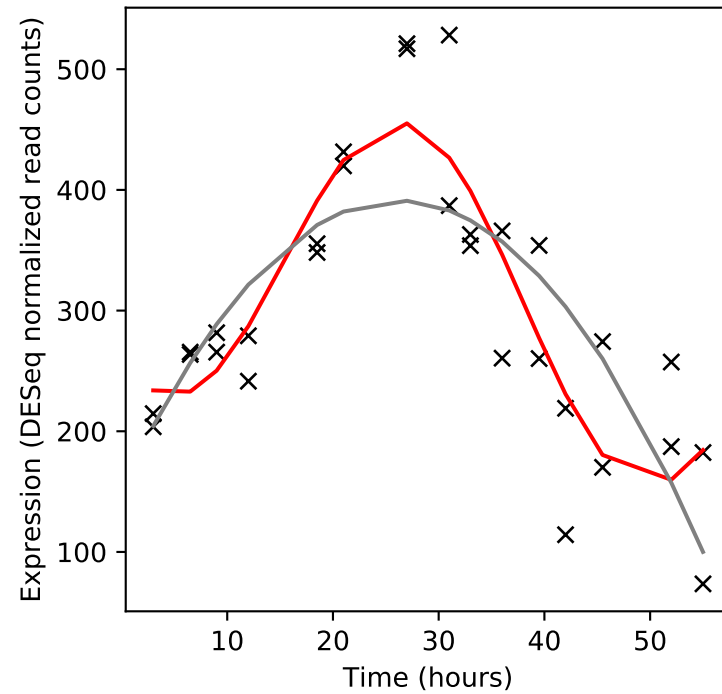

Rv3780/-

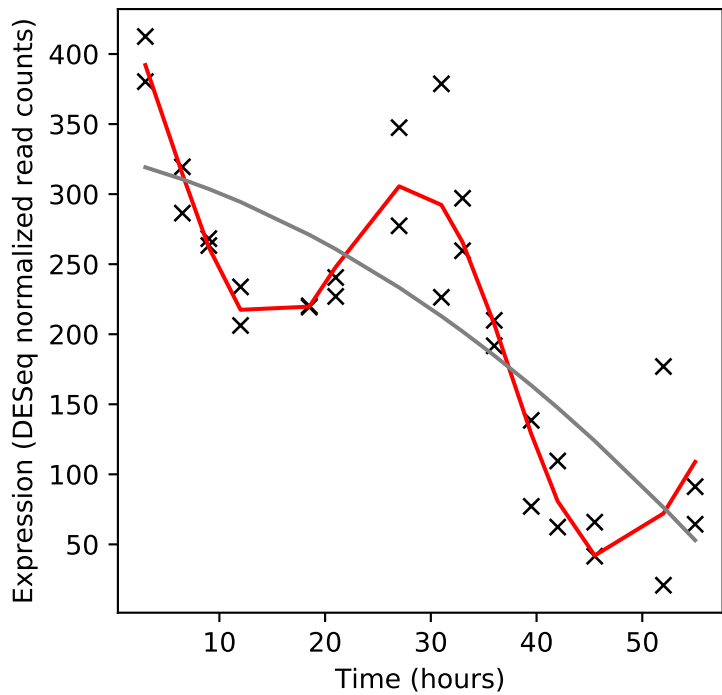

Rv3781/rfbE

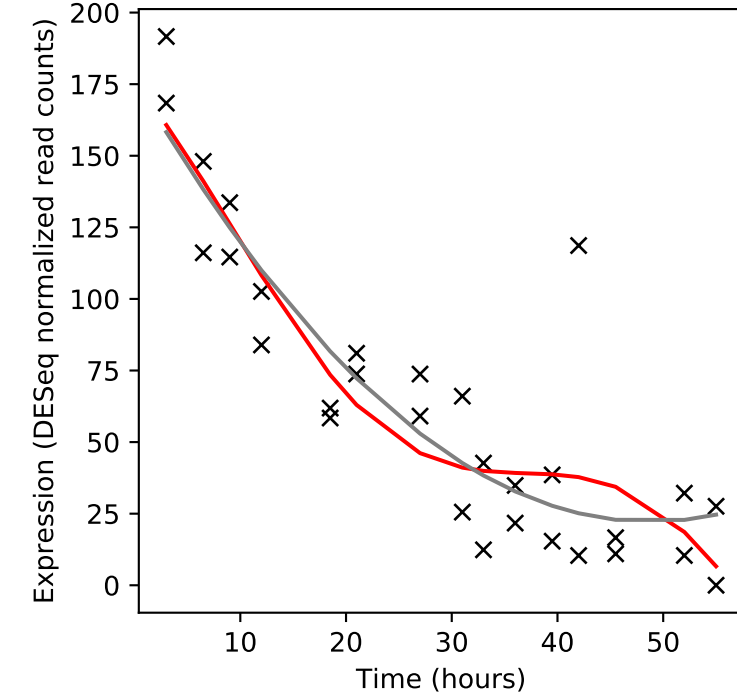

Rv3782/glfT1

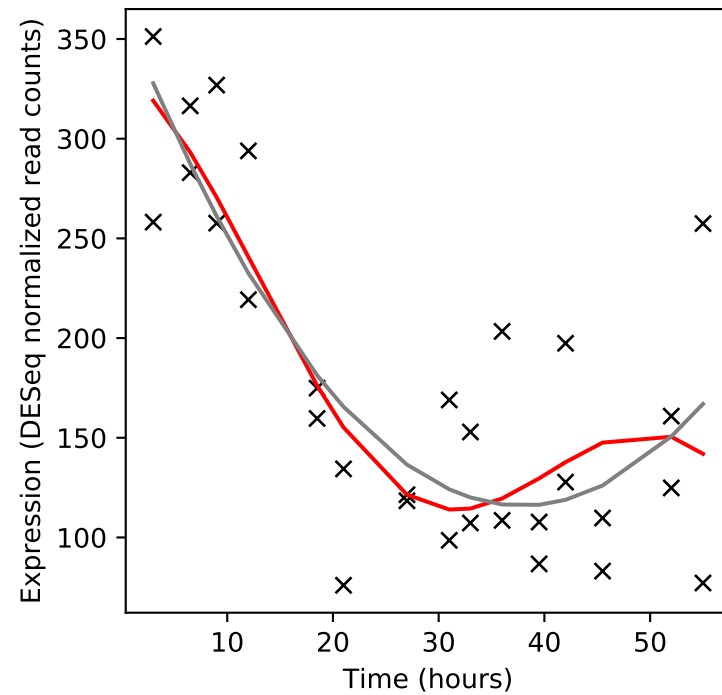

Rv3783/rfbD

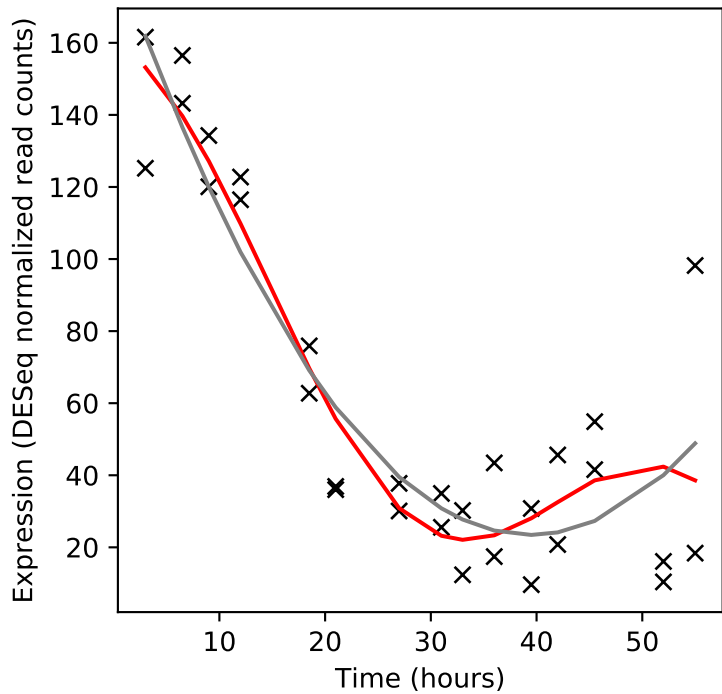

Rv3784/-

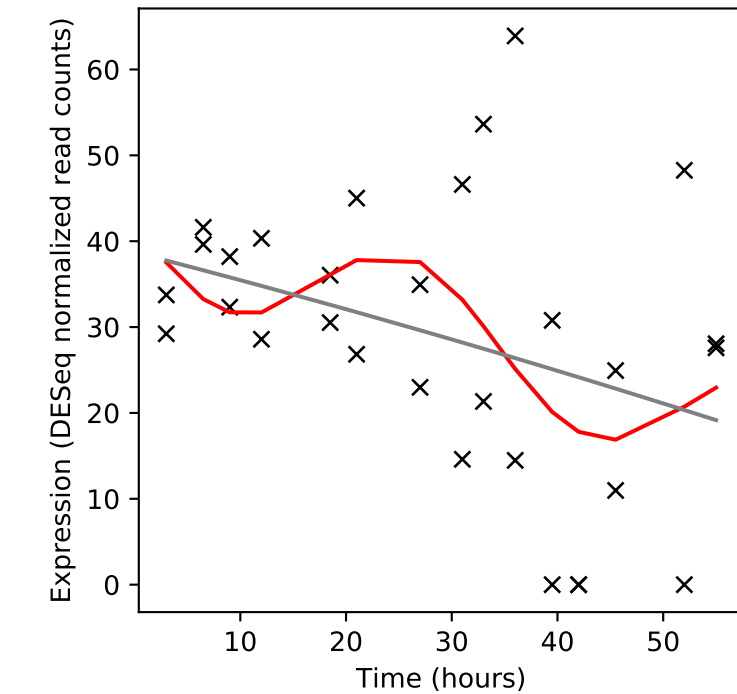

Rv3785/-

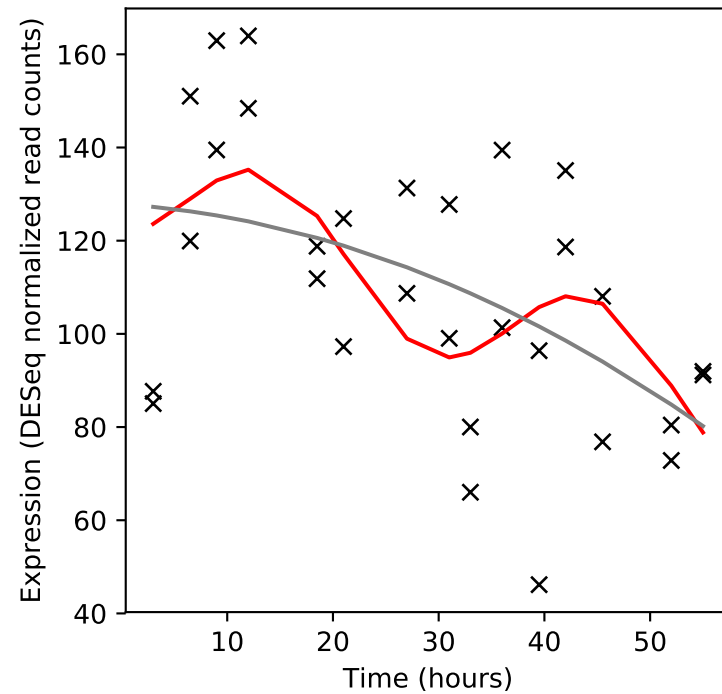

Rv3786c/-

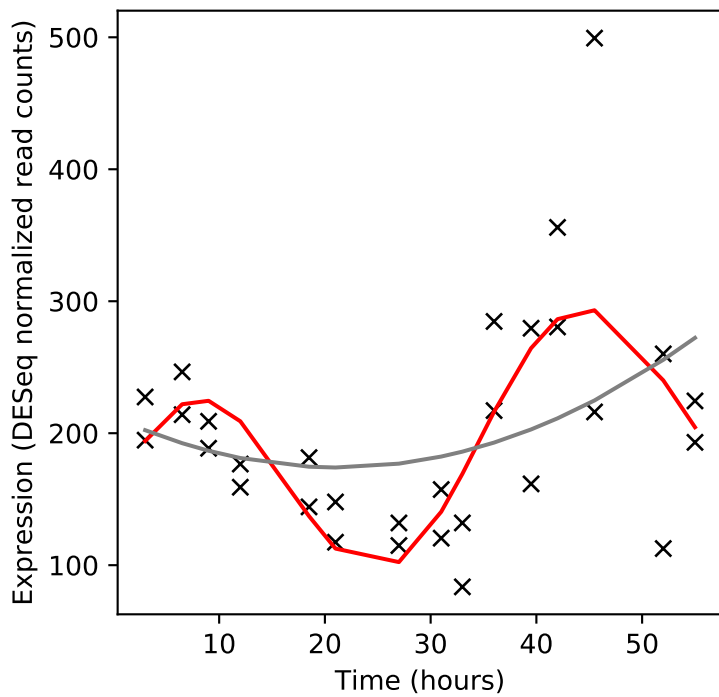

Rv3787c/-

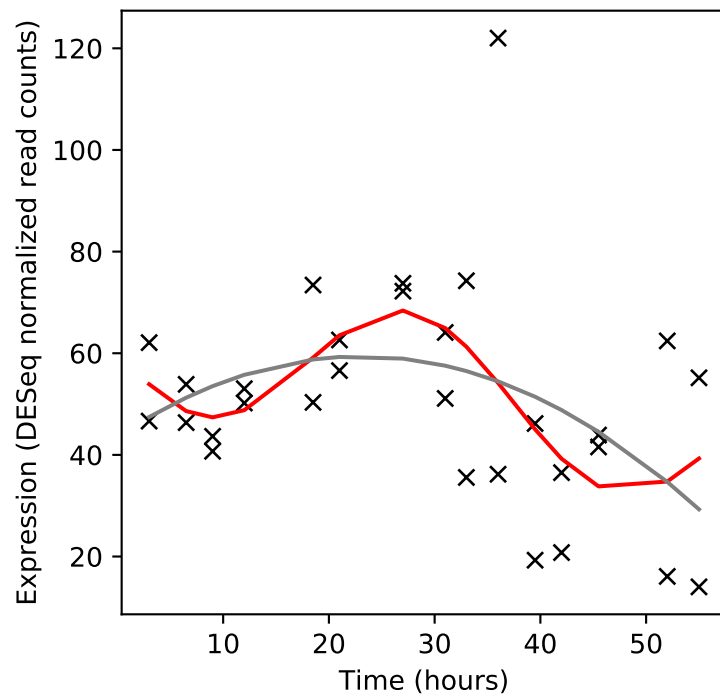

Rv3788/-

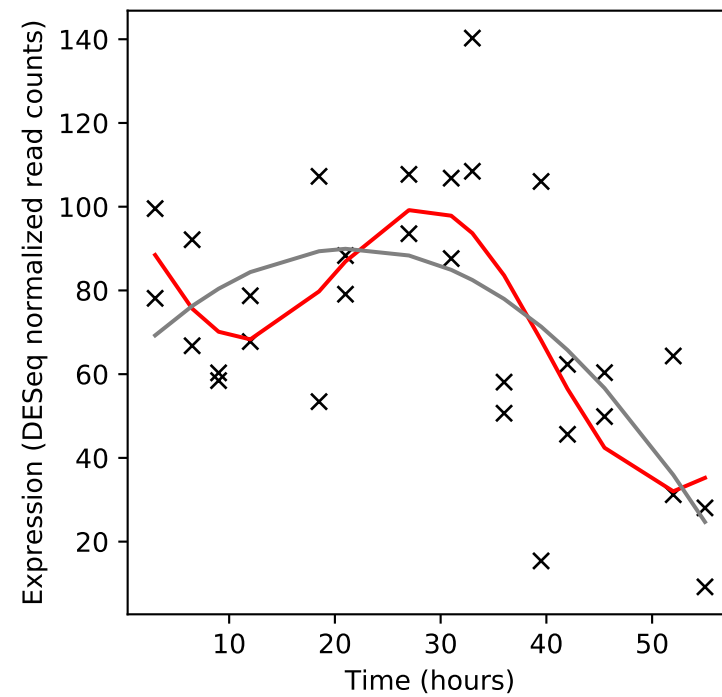

Rv3789/-

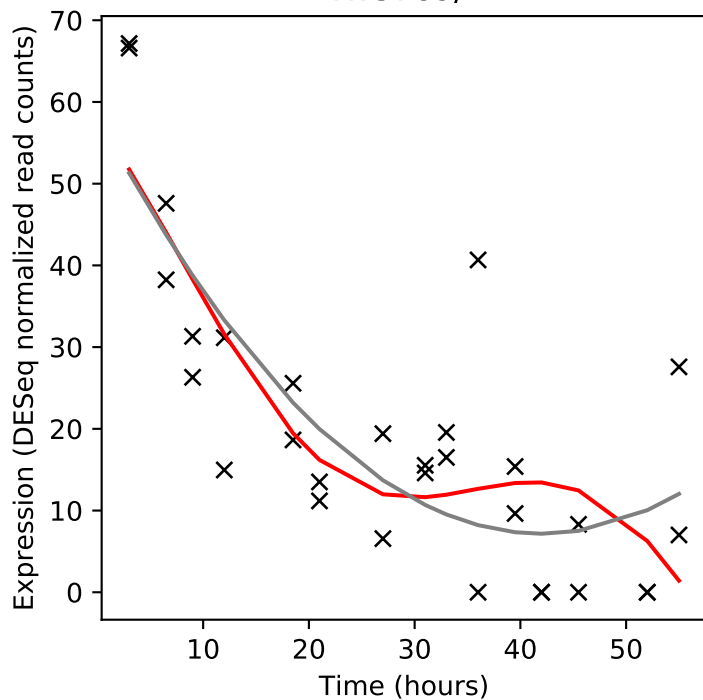

Rv3790/dprE1

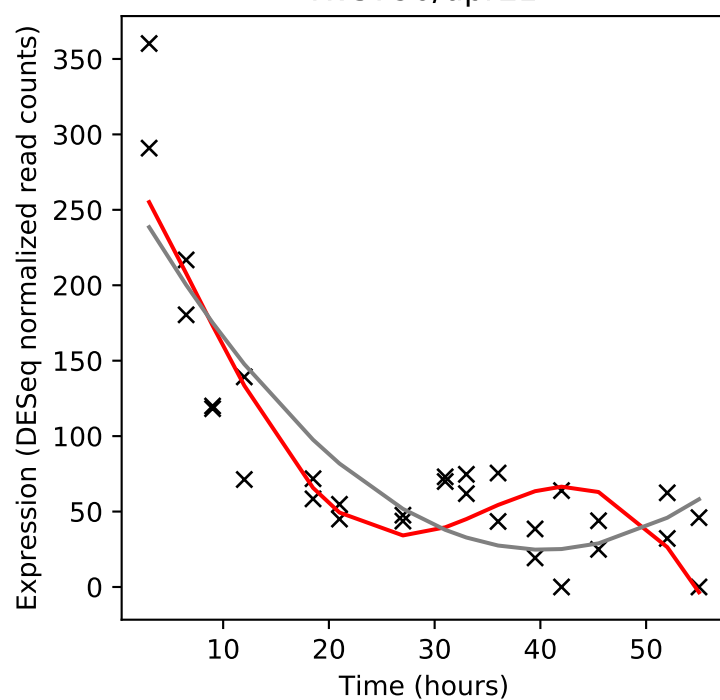

Rv3791/dprE2

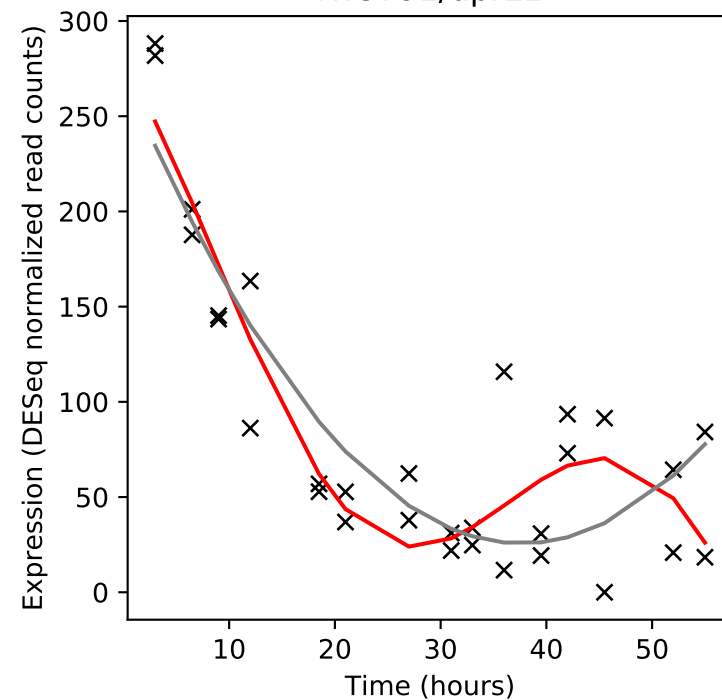

Rv3792/aftA

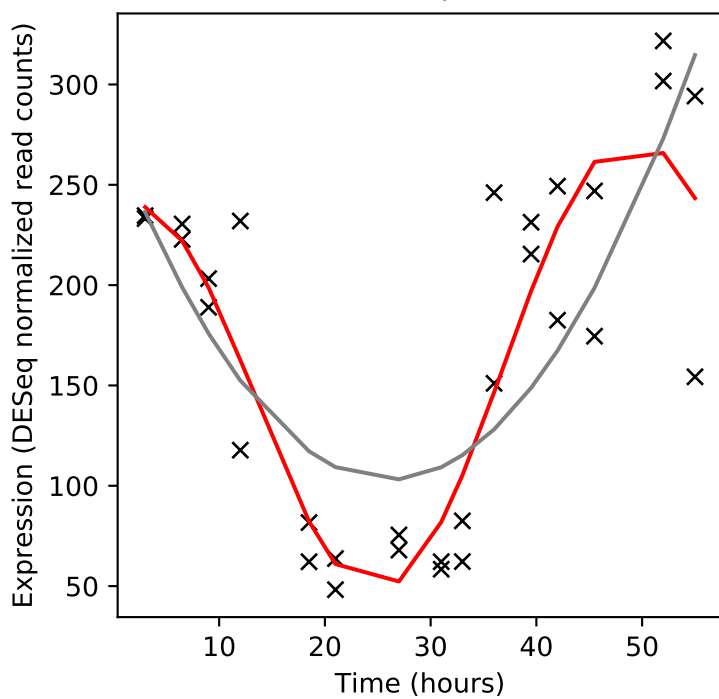

Rv3793/embC

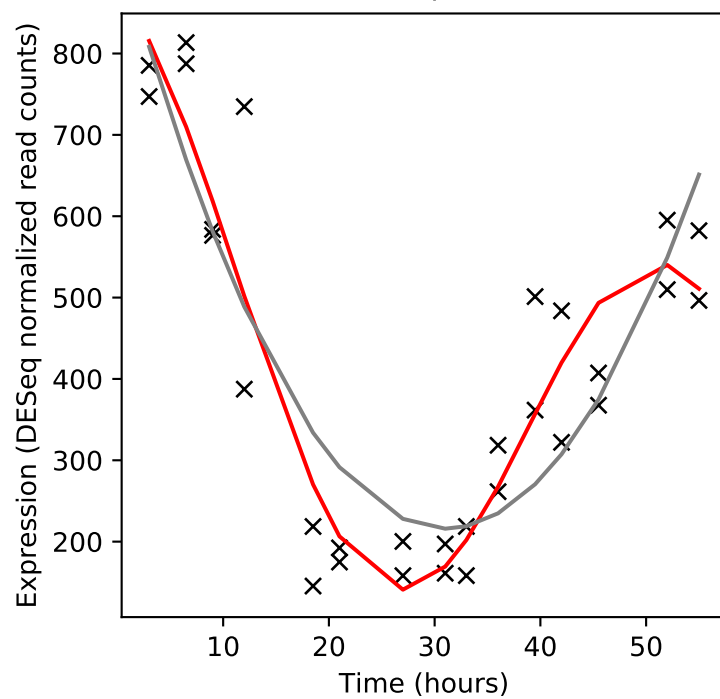

Rv3794/embA

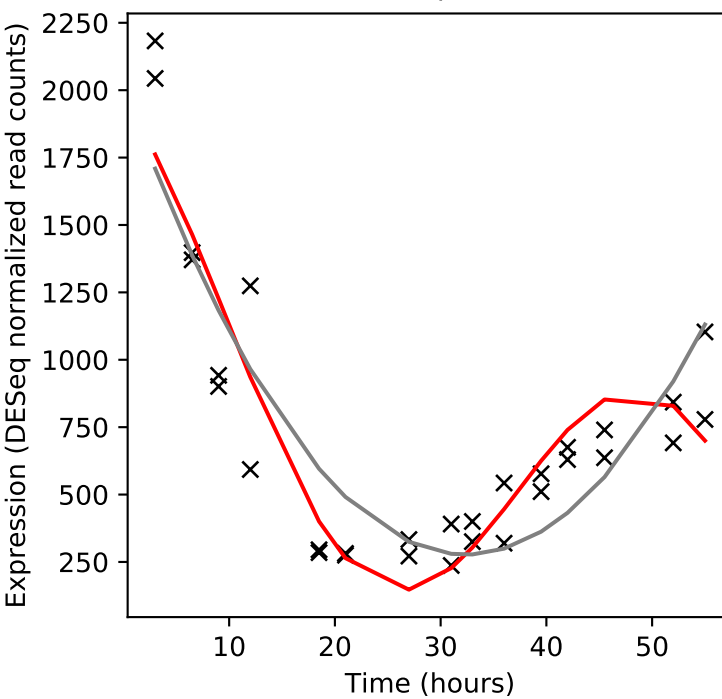

Rv3795/embB

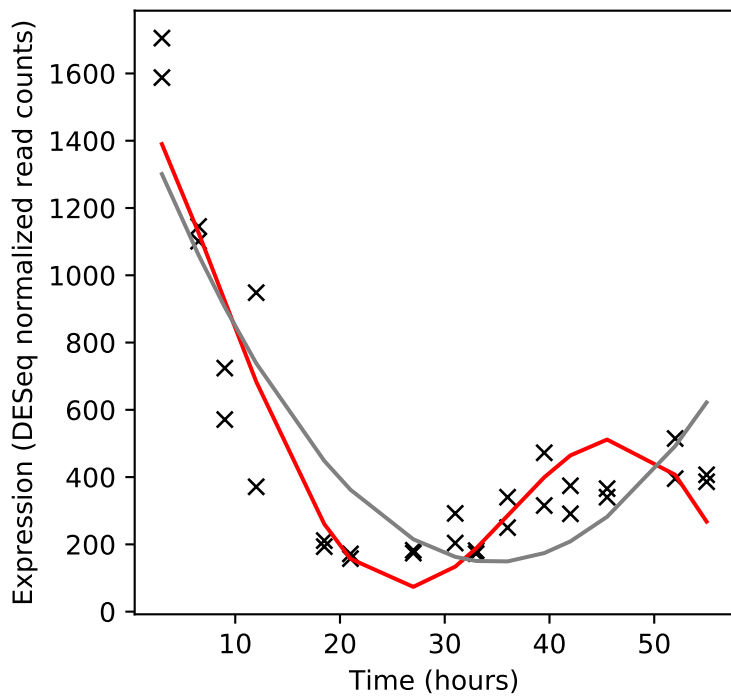

Rv3796/-

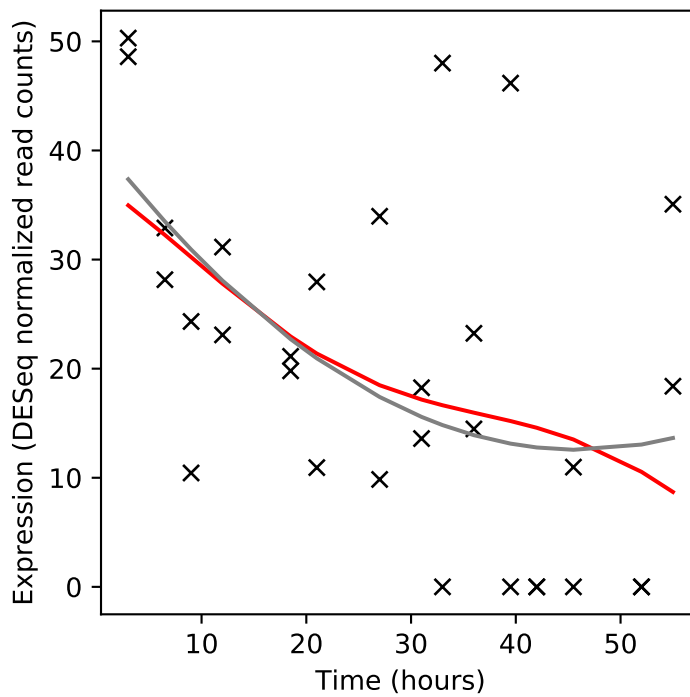

Rv3797/fadE35

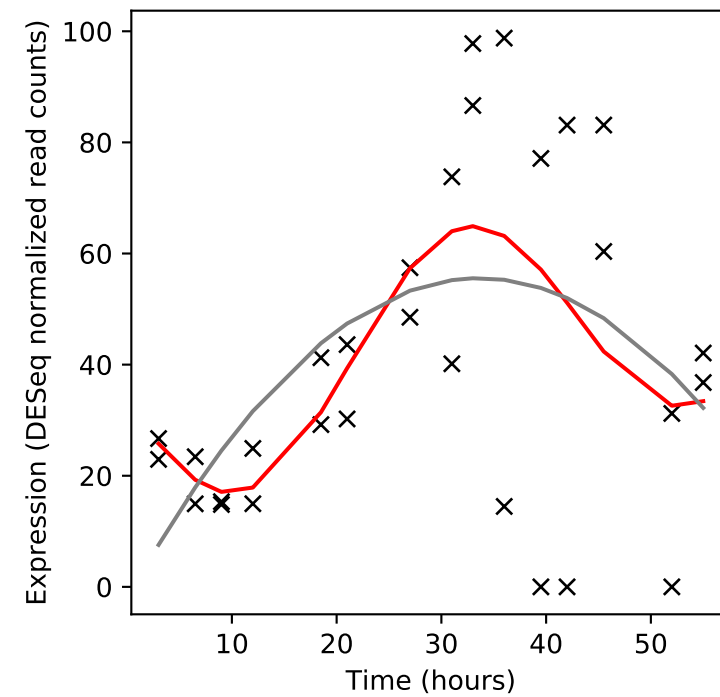

Rv3798/-

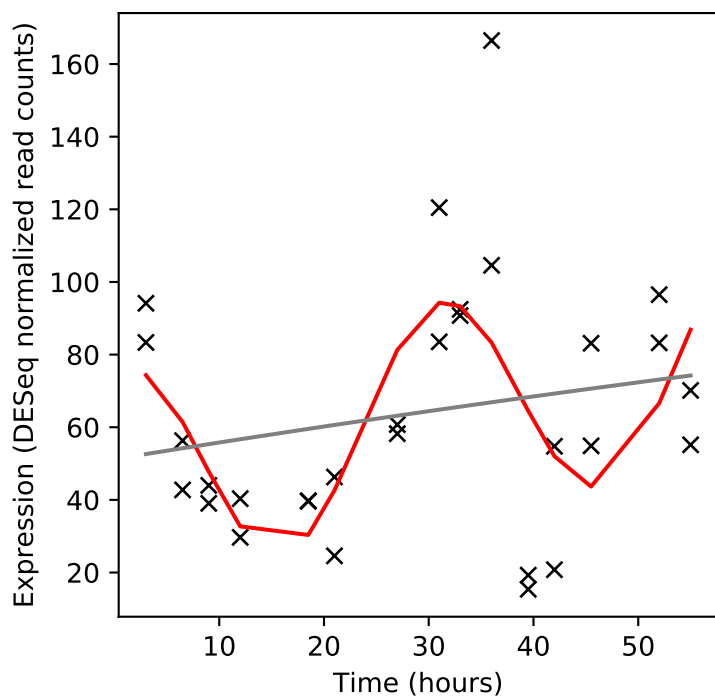

Rv3799c/accD4

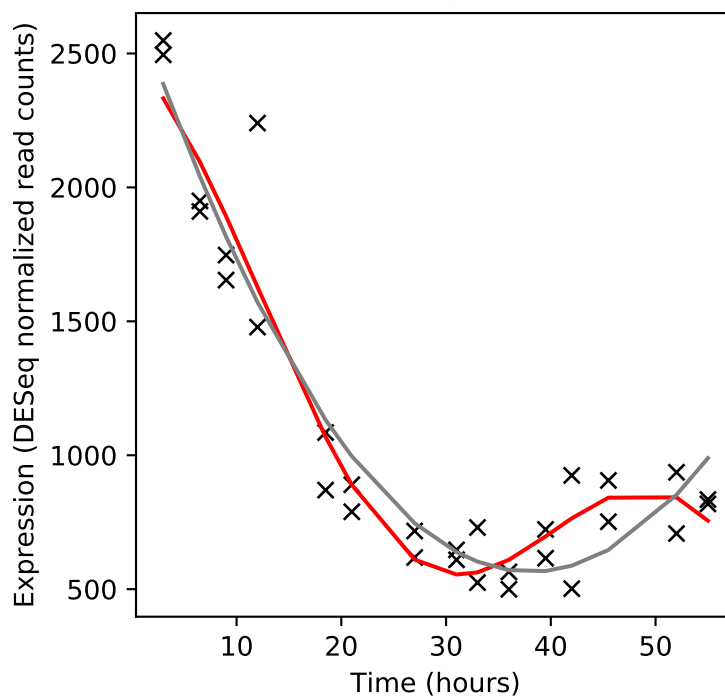

Rv3800c/pks13

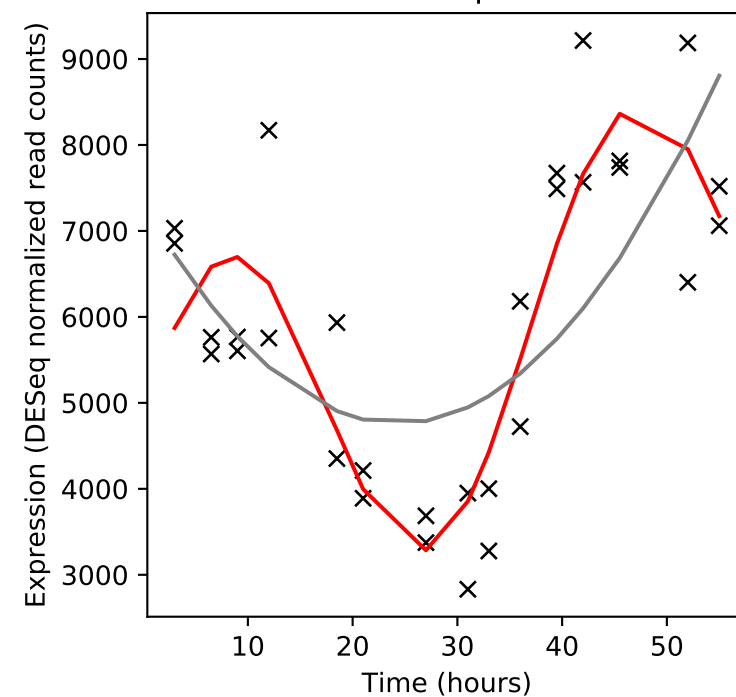

Rv3801c/fadD32

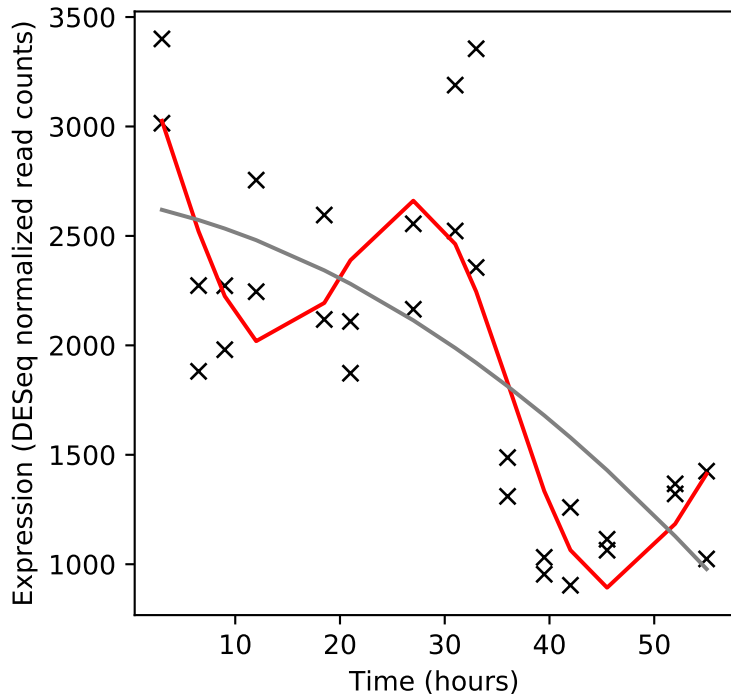

Rv3802c/-

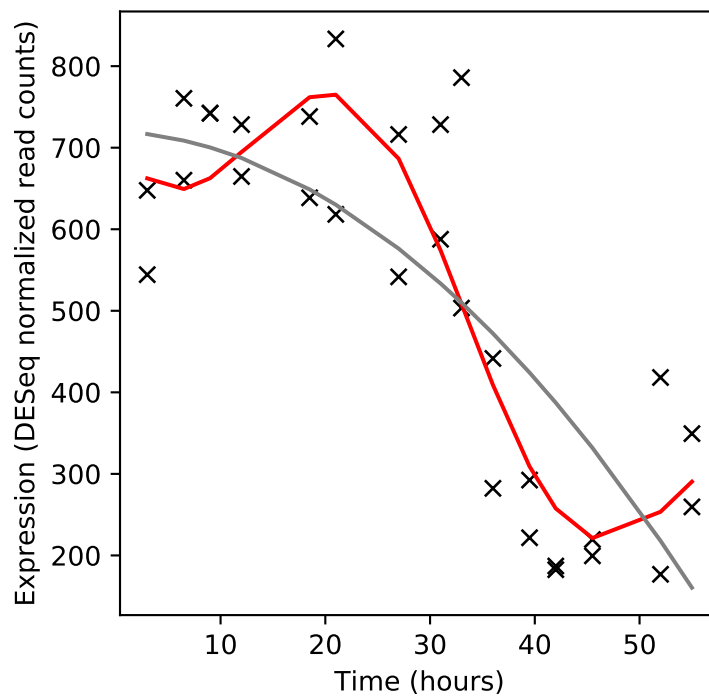

Rv3803c/fbpD

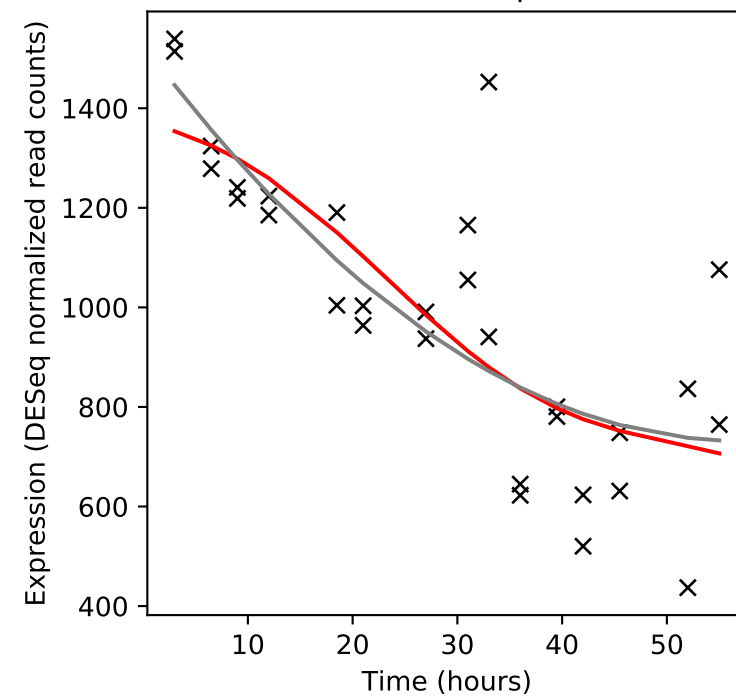

Rv3804c/fbpA

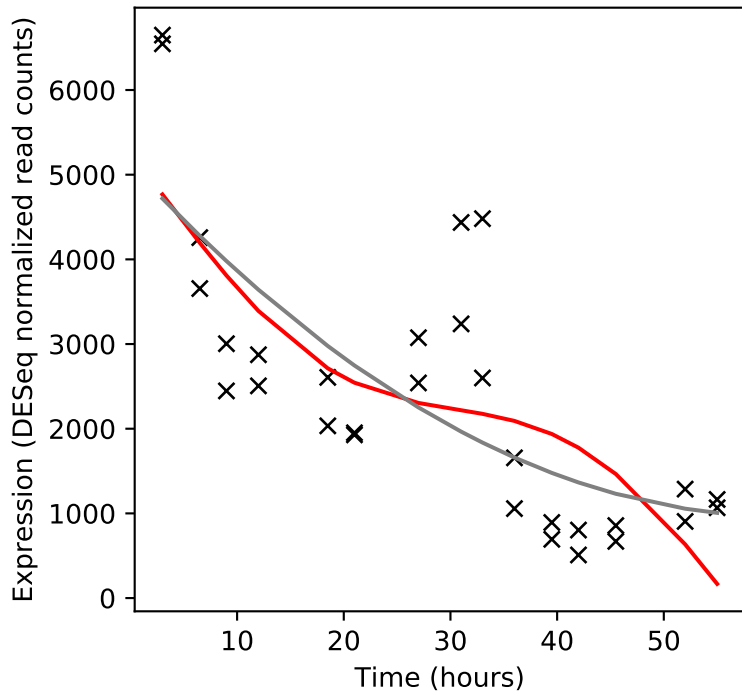

Rv3805c/aftB

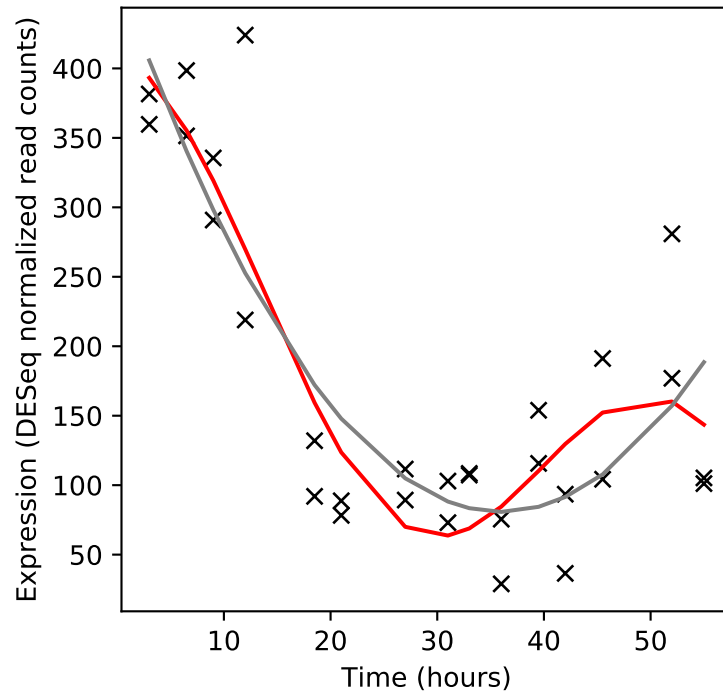

Rv3806c/ubiA

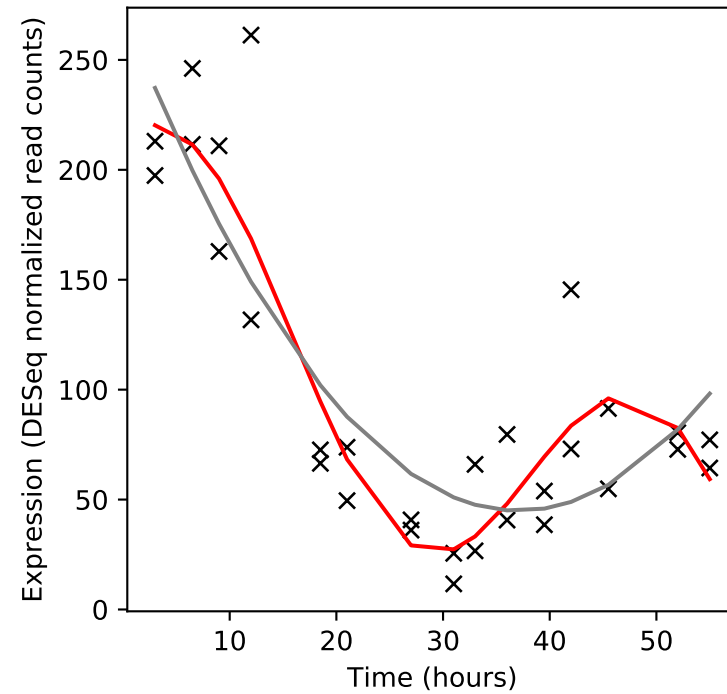

Rv3807c/-

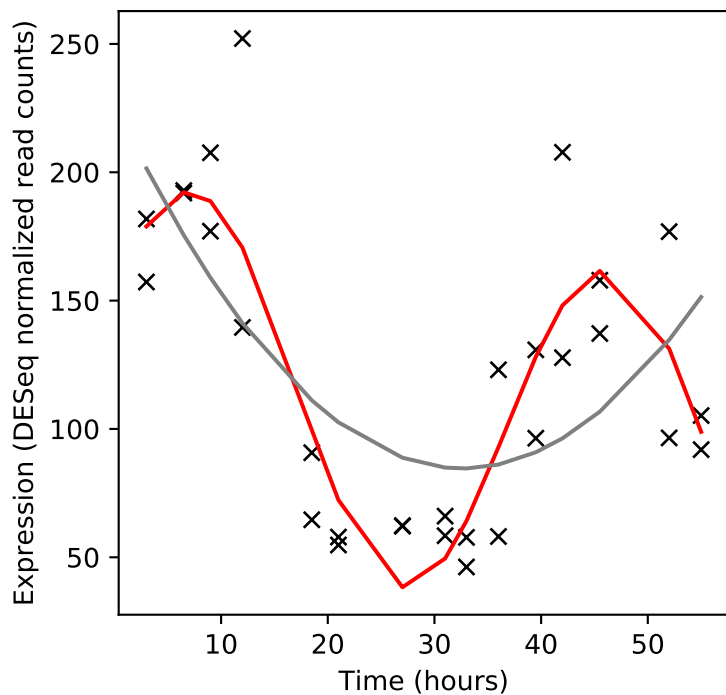

Rv3808c/glfT2

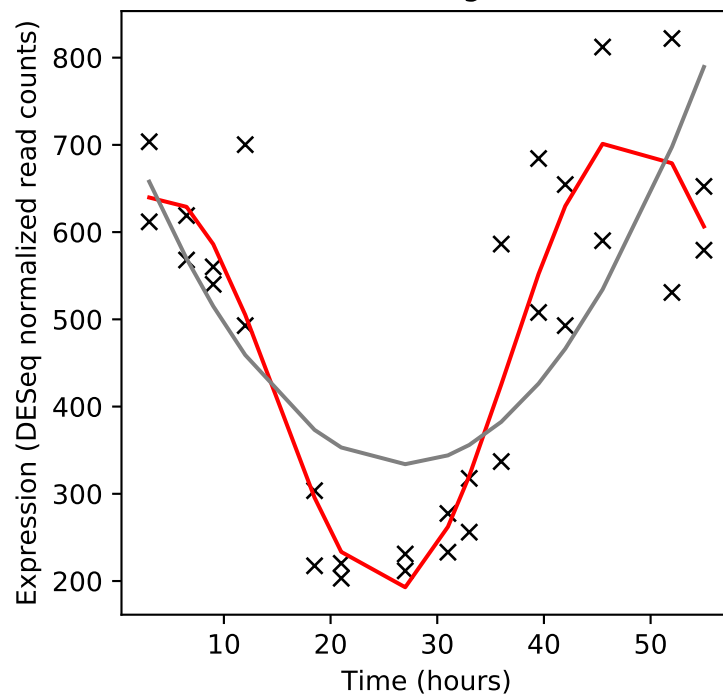

Rv3809c/glf

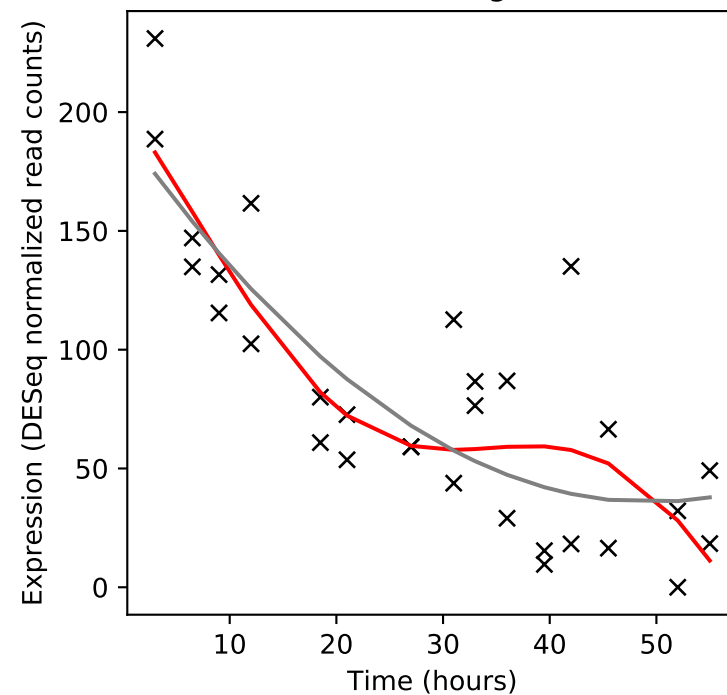

Rv3810/pirG

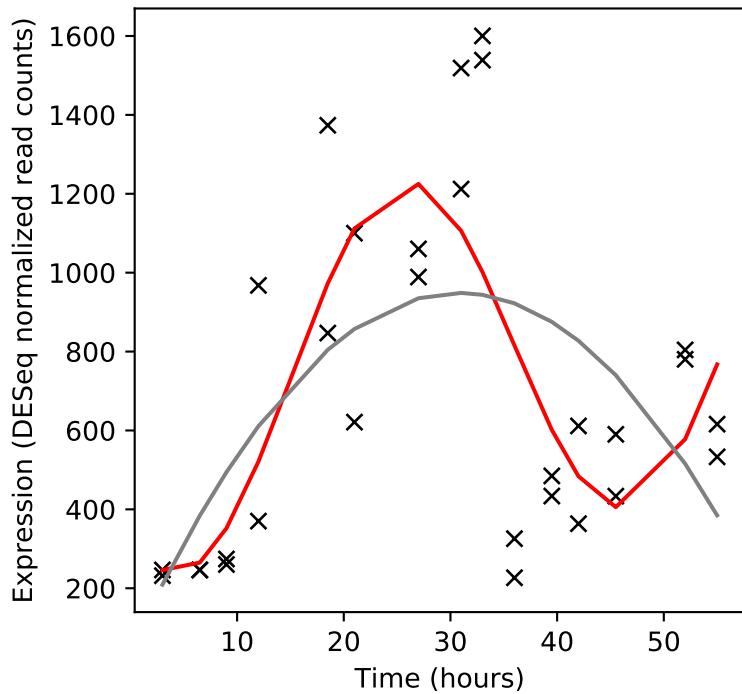

Rv3811c/-

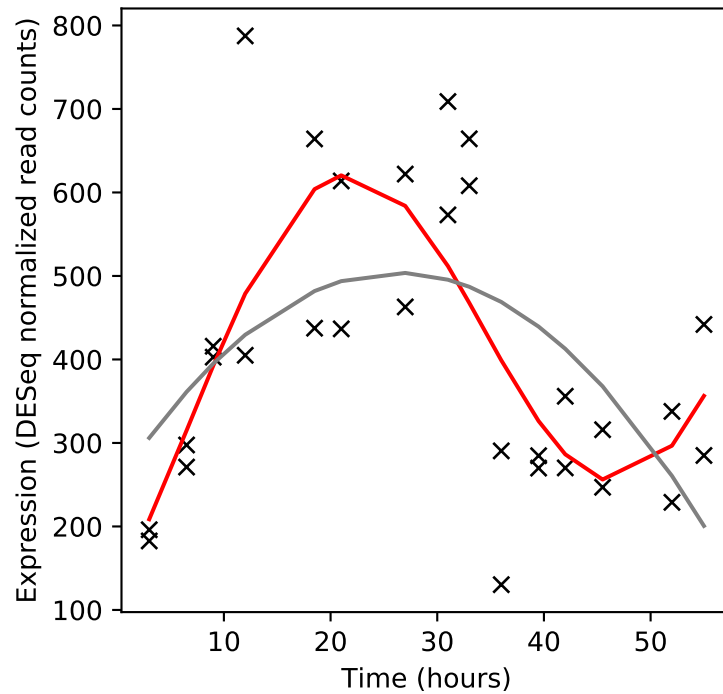

Rv3812/PE\_PGRS62

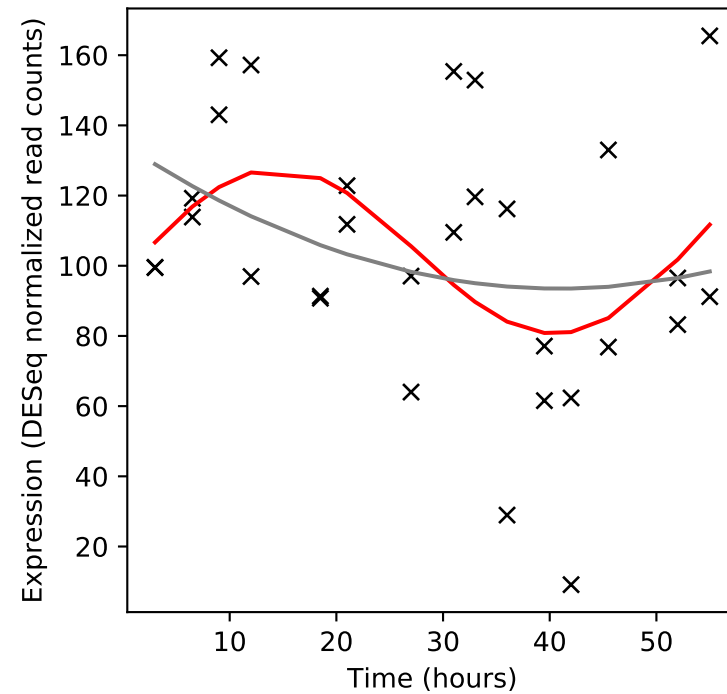

Rv3813c/-

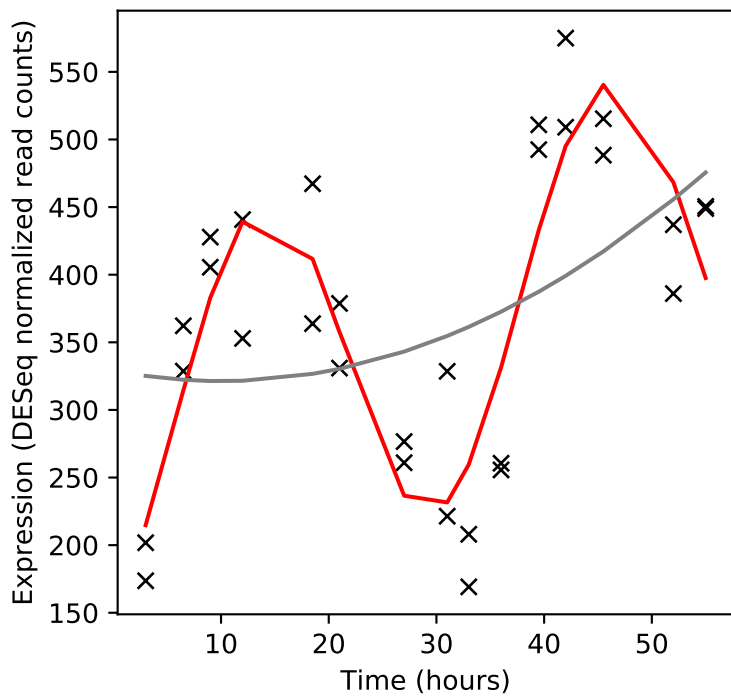

Rv3814c/-

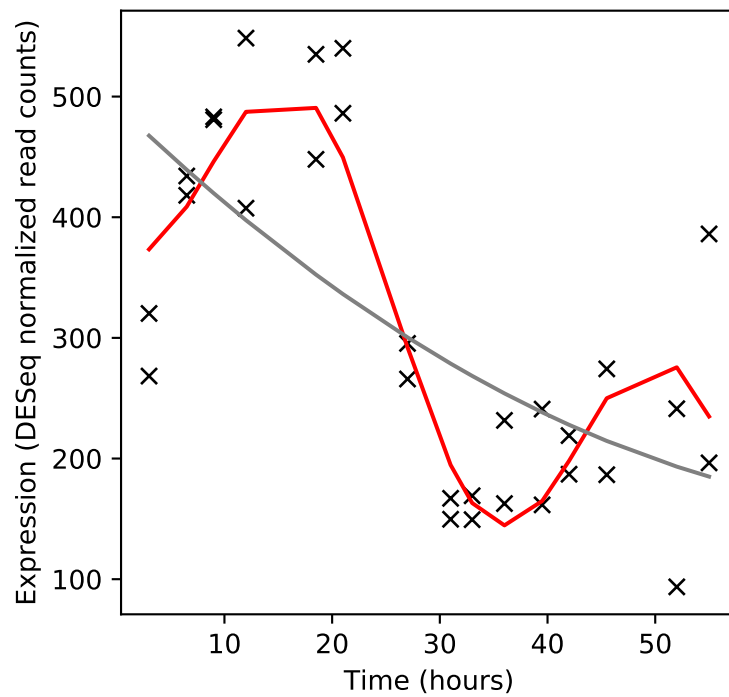

Rv3815c/-

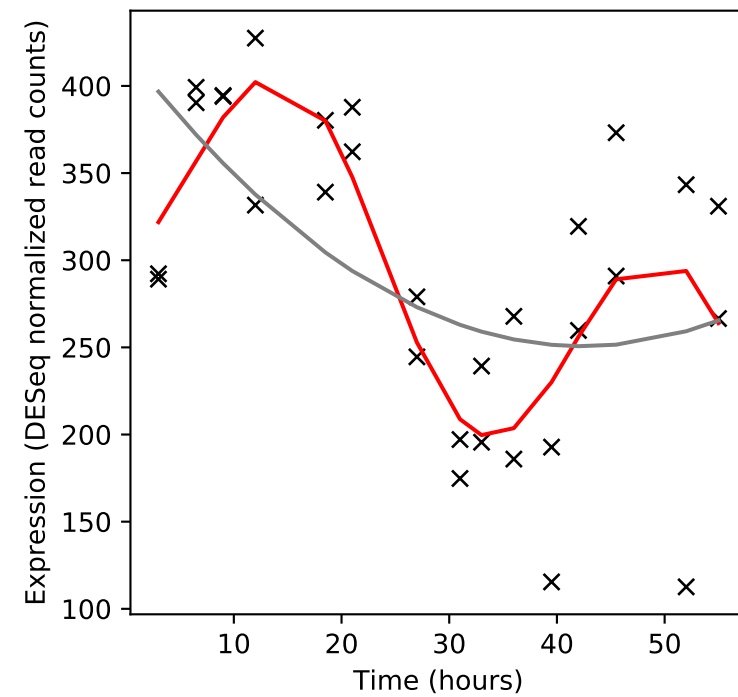

Rv3816c/-

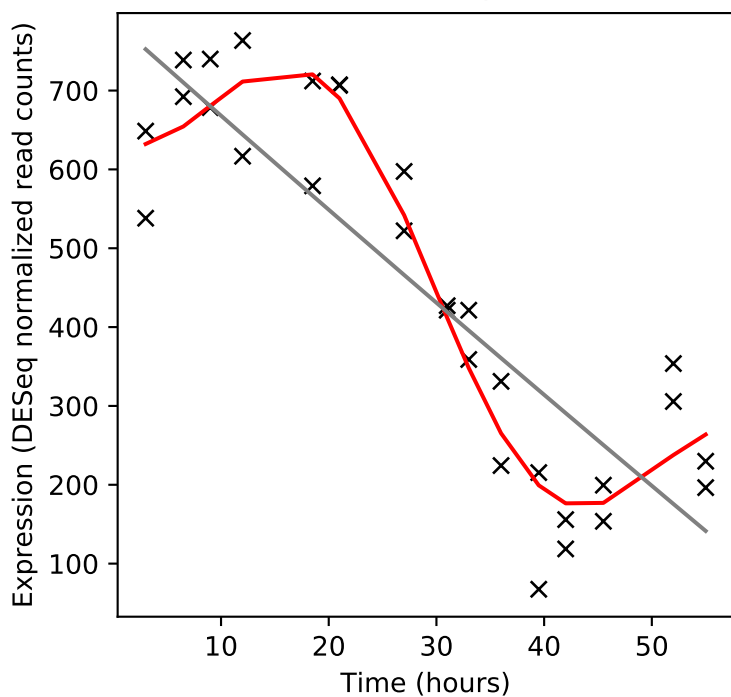

Rv3817/-

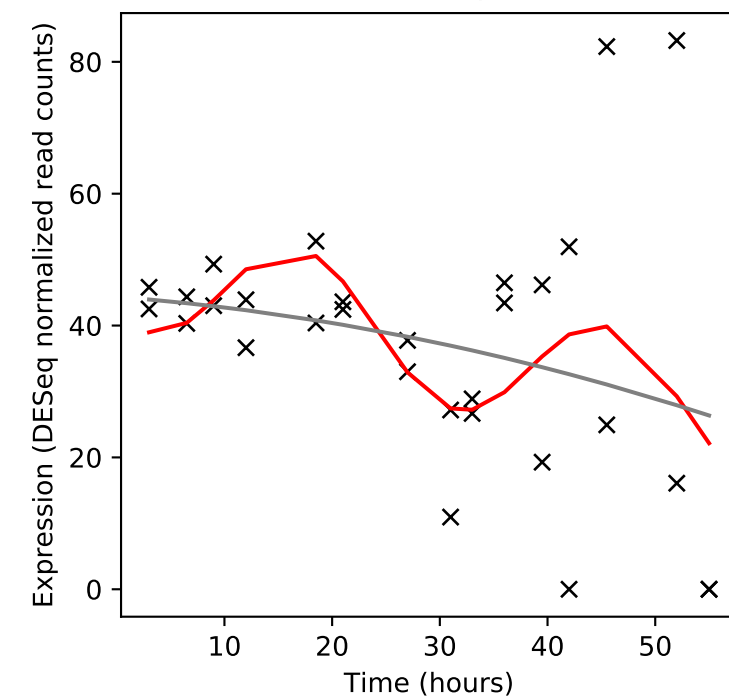

Rv3818/-

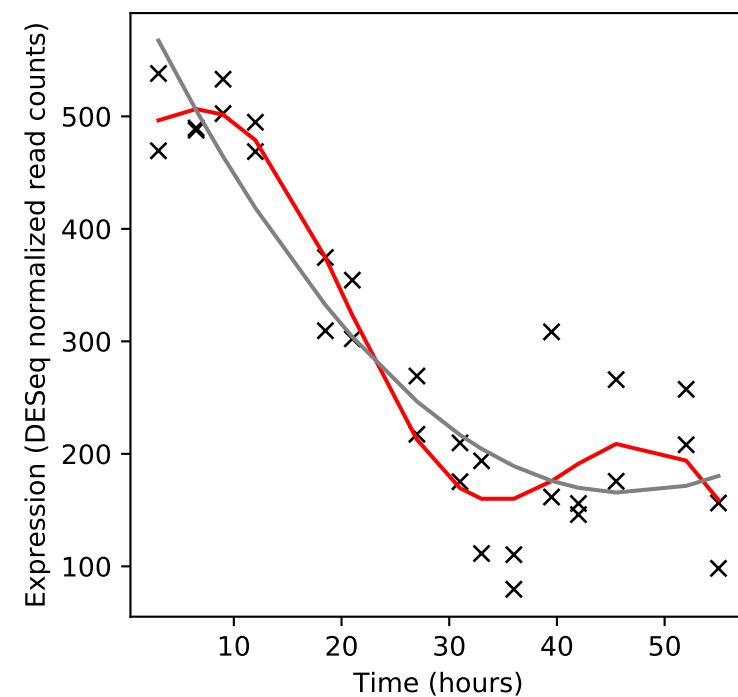

Rv3819/-

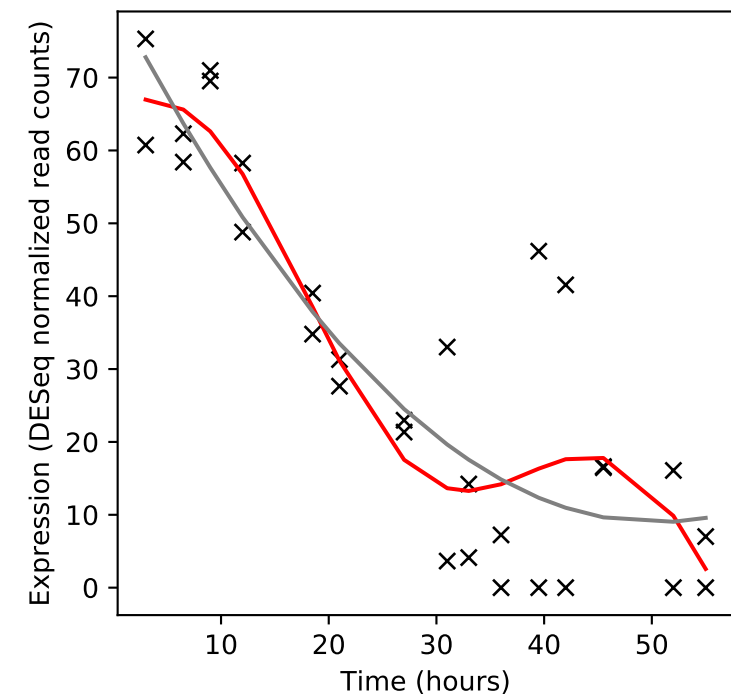

Rv3820c/papA2

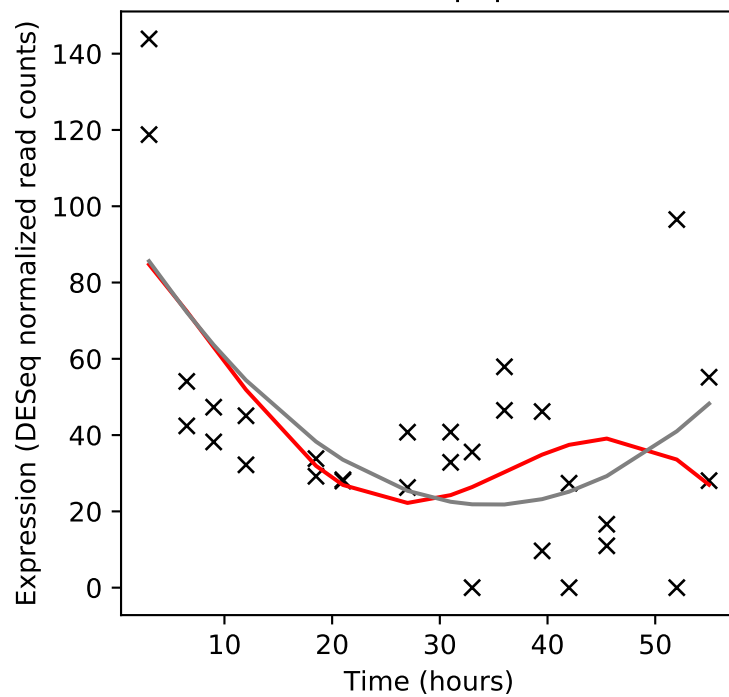

Rv3821/-

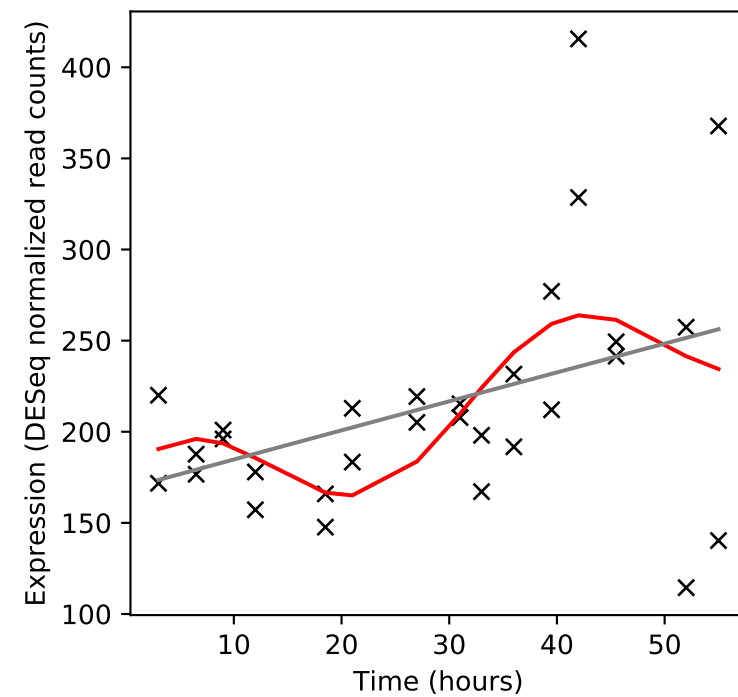



Rv3822/-

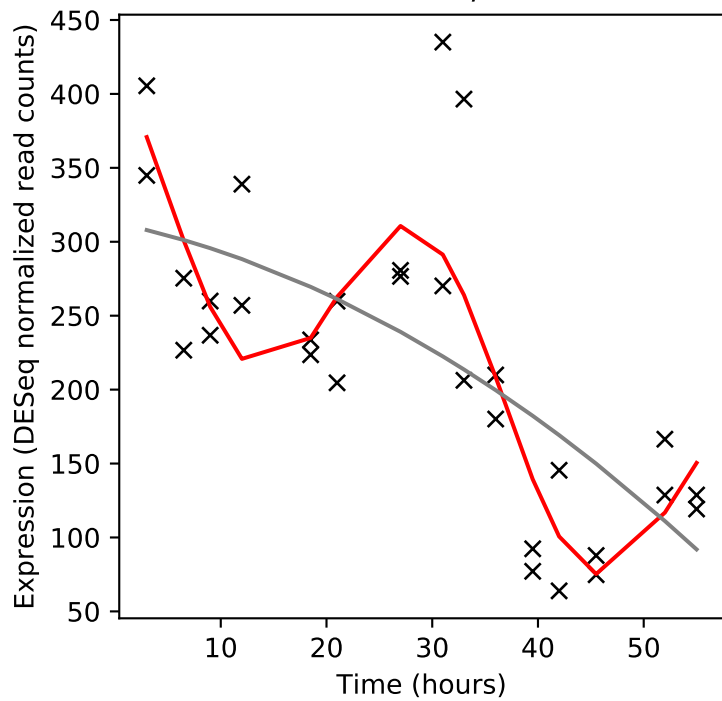

Rv3823c/mmpL8

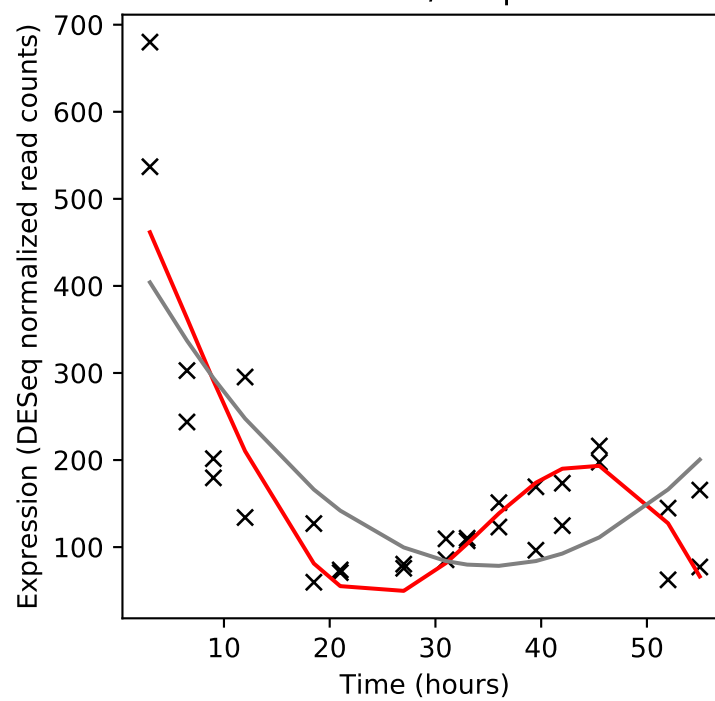

Rv3824c/papA1

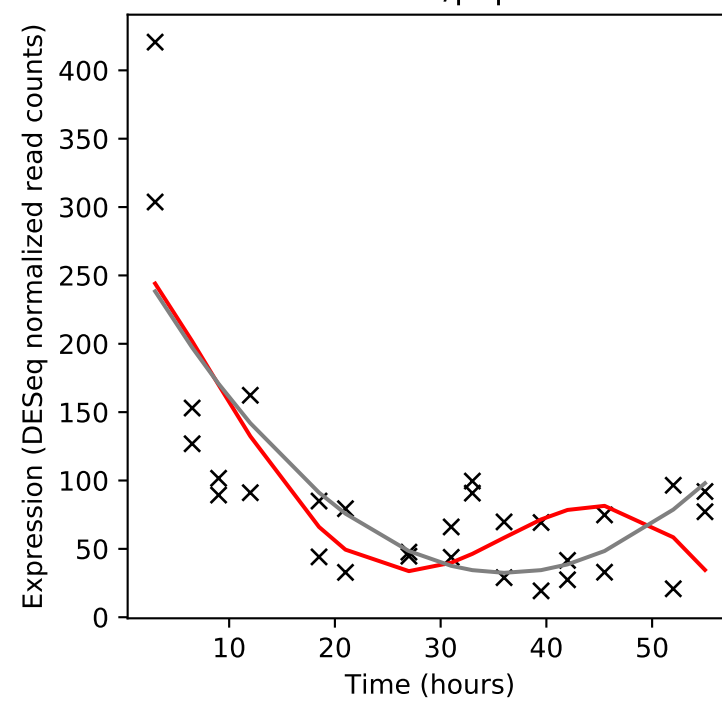

Rv3825c/pks2

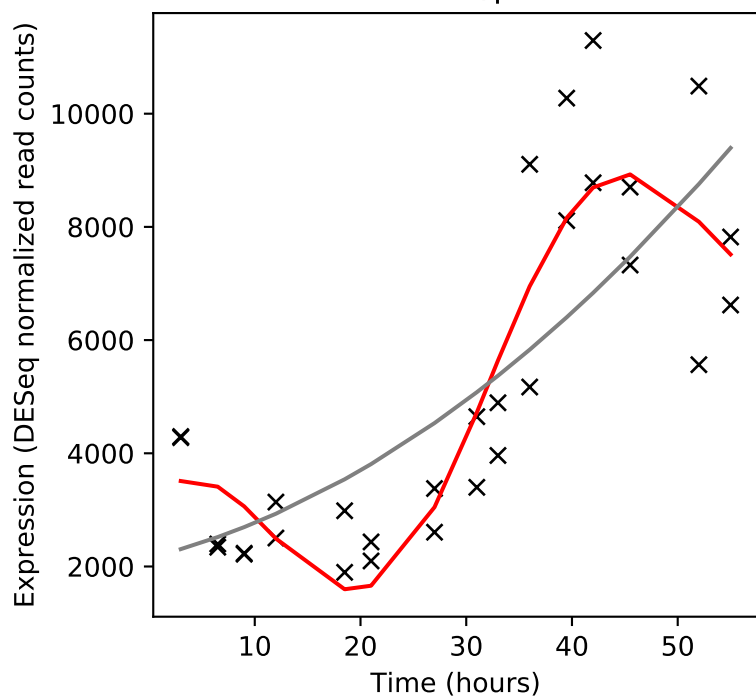

Rv3826/fadD23

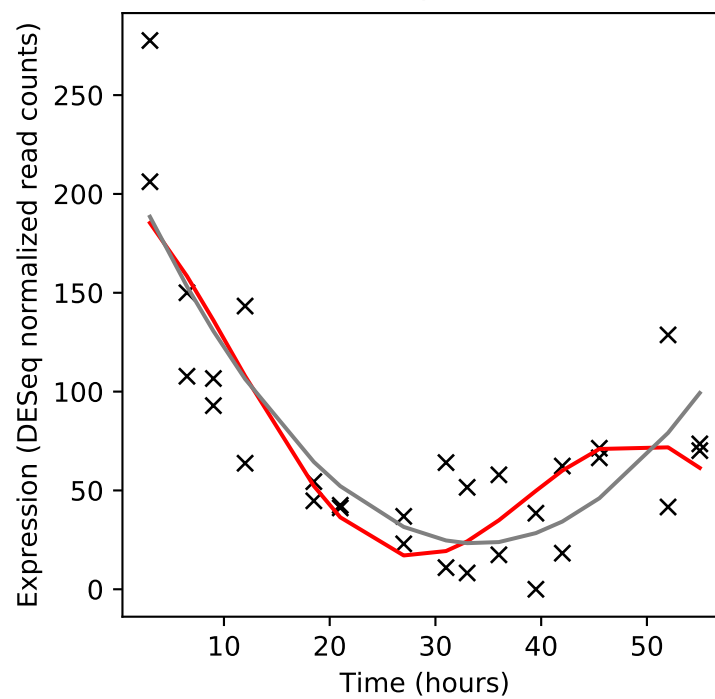

Rv3827c/-

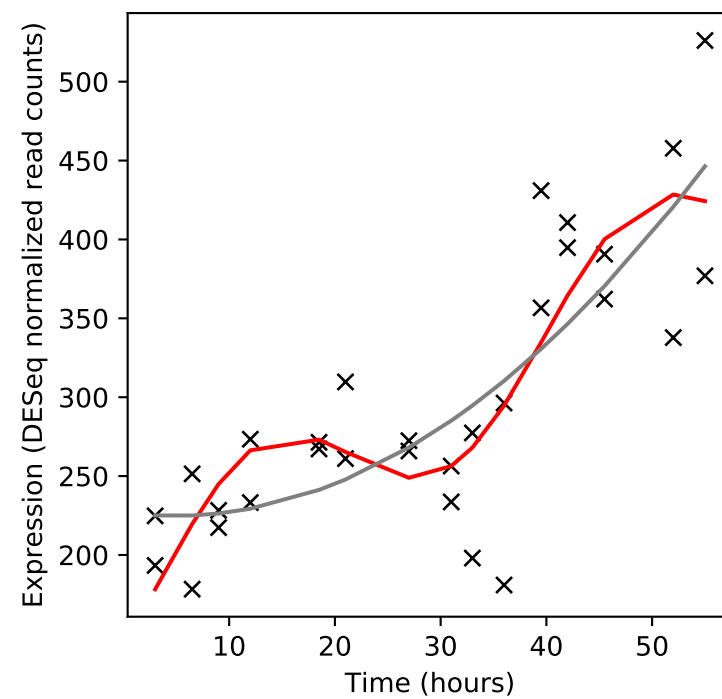

Rv3828c/-

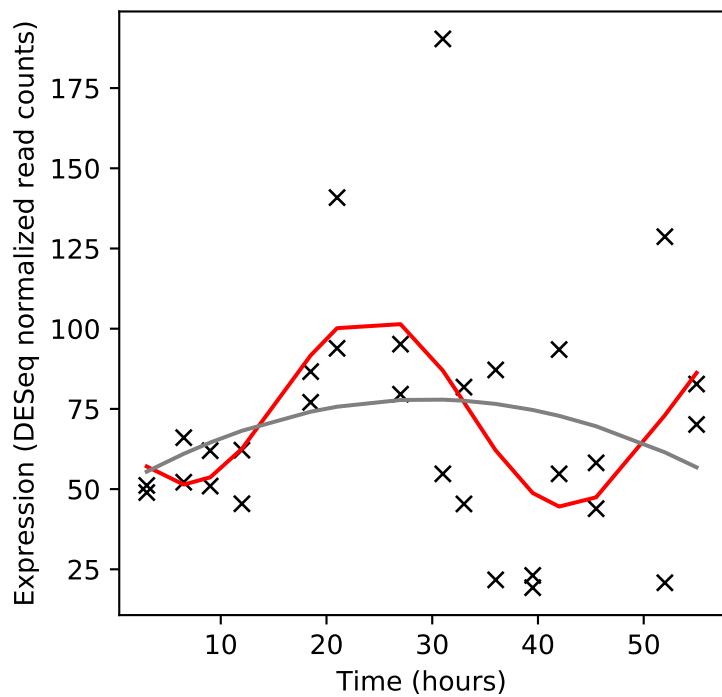

Rv3829c/-

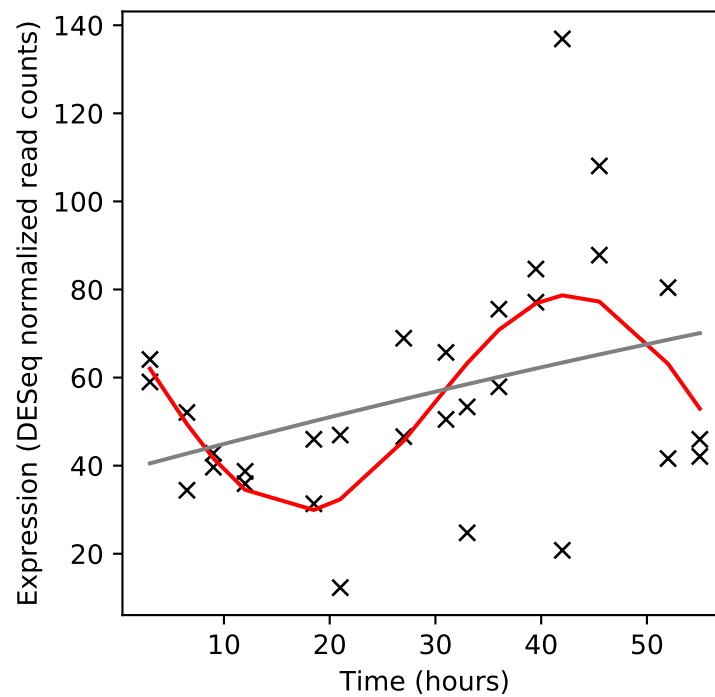

Rv3830c/-

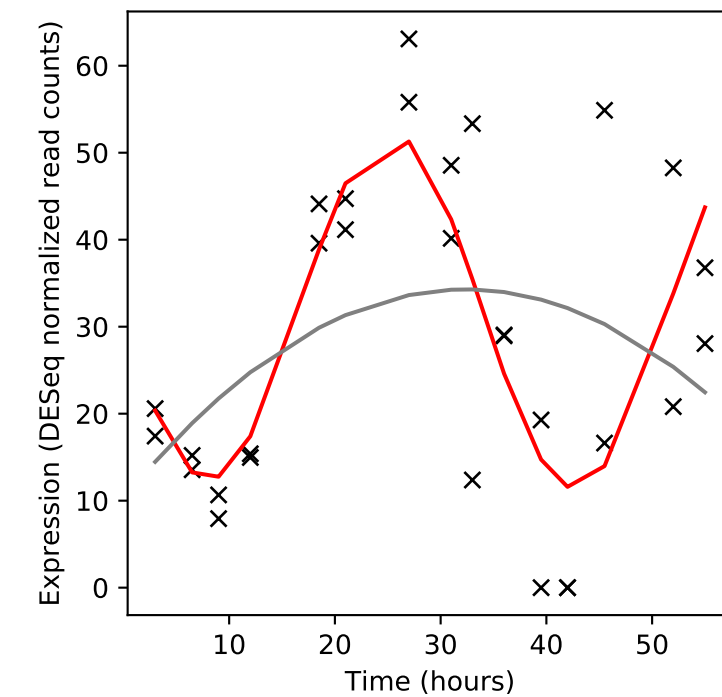

Rv3831/-

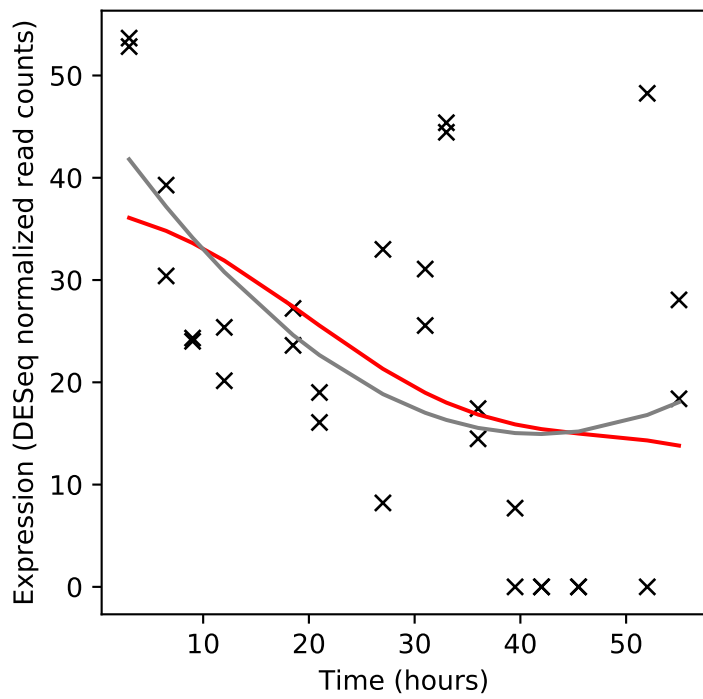

Rv3832c/-

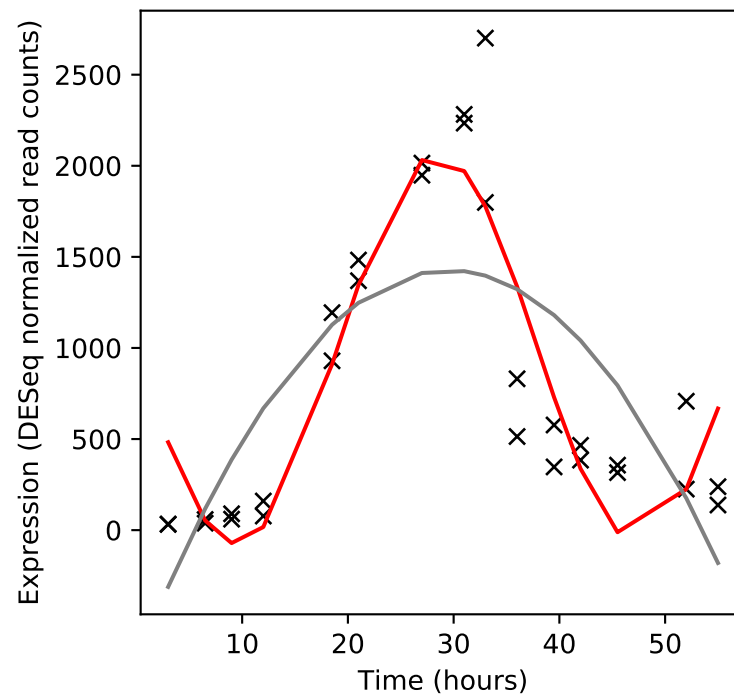

Rv3833/-

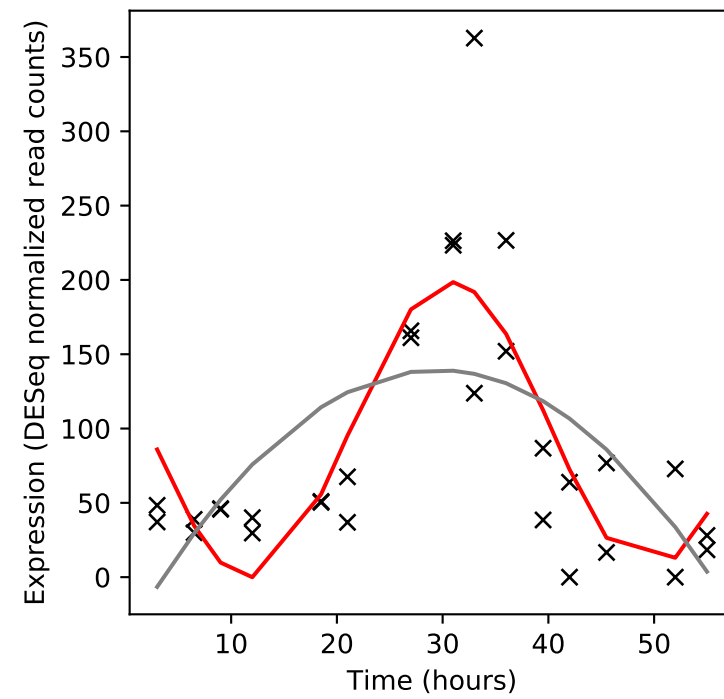

Rv3834c/serS

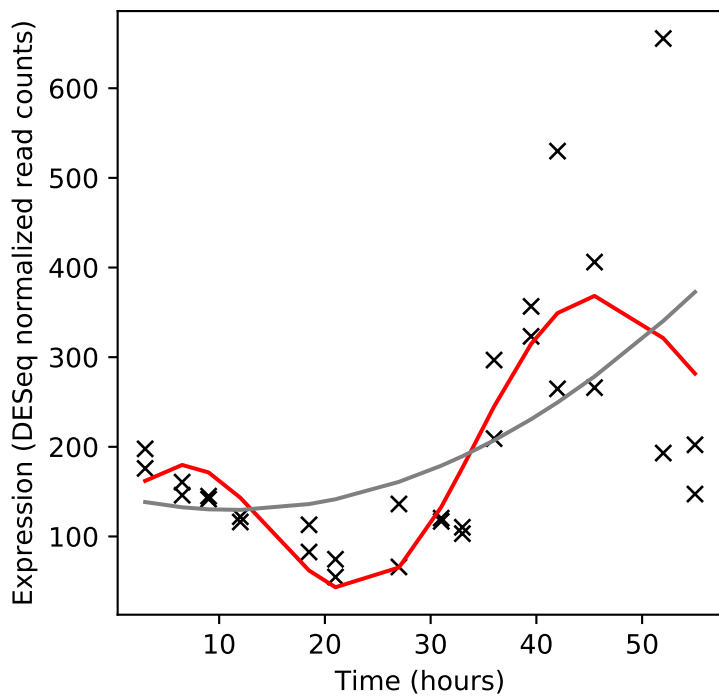

Rv3835/-

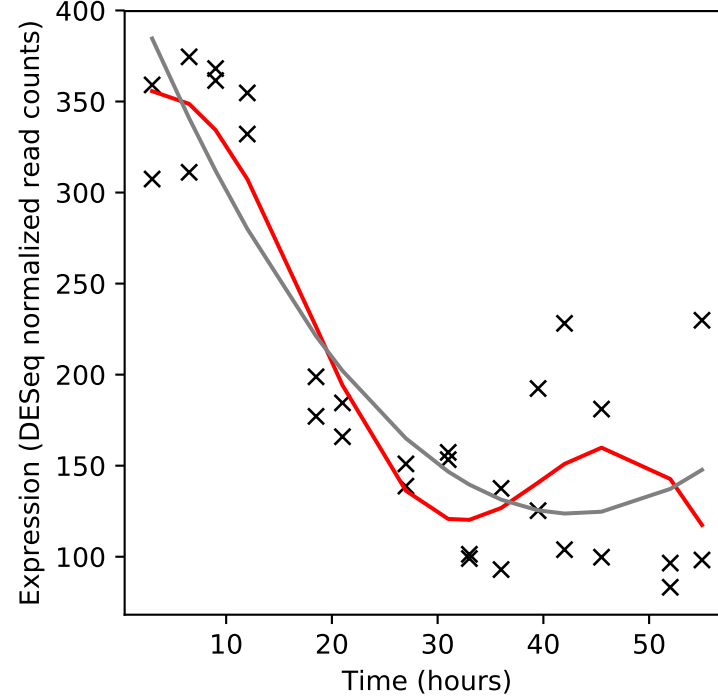

Rv3836/-

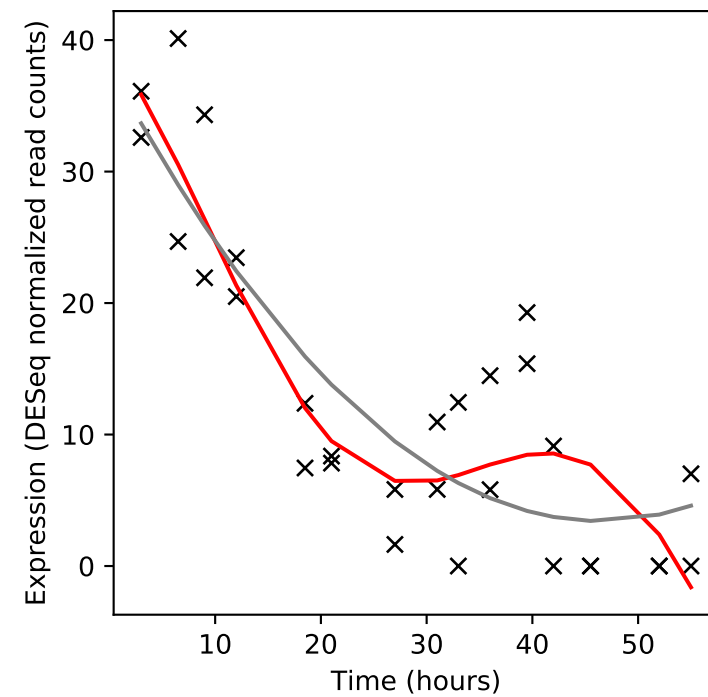

Rv3837c/-

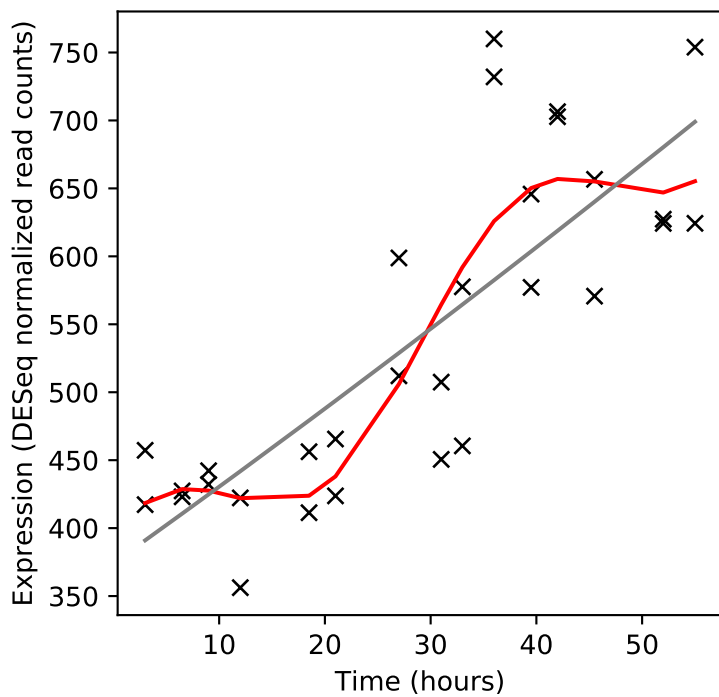

Rv3838c/pheA

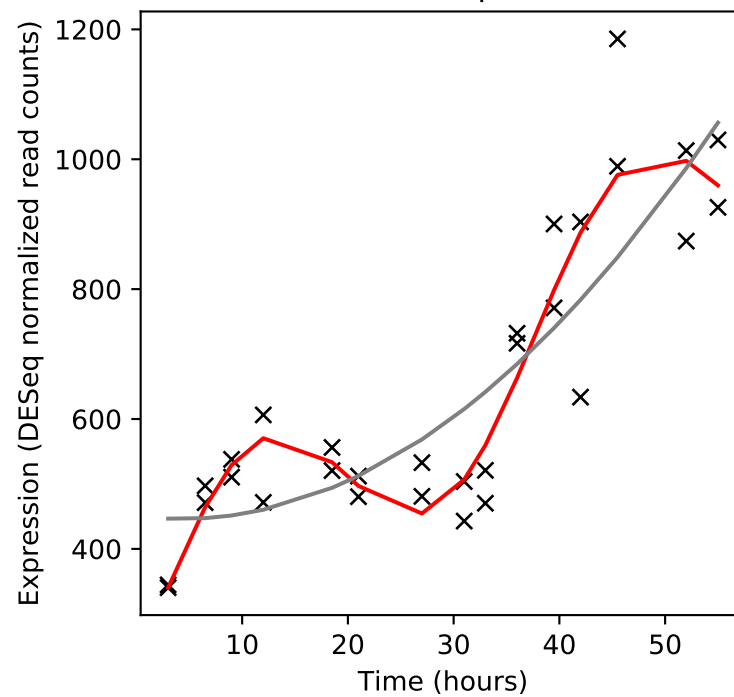

Rv3839/-

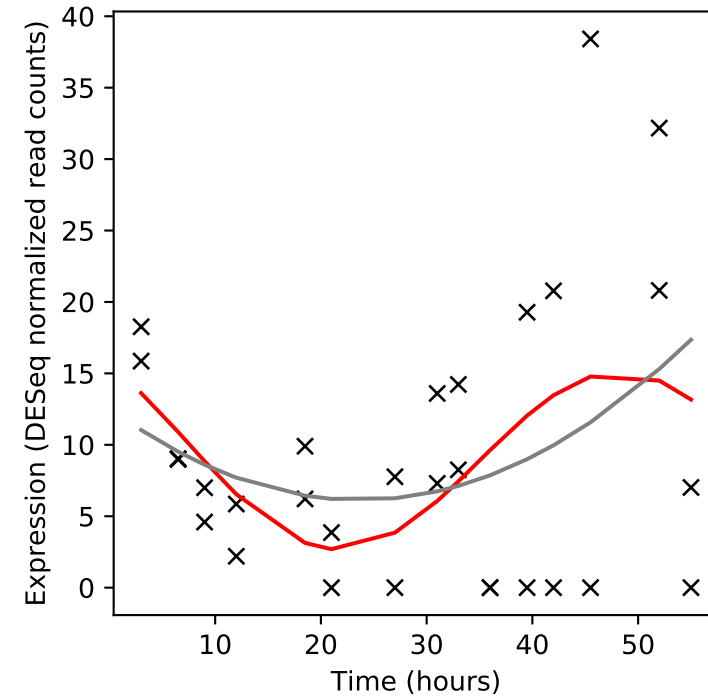

Rv3840/-

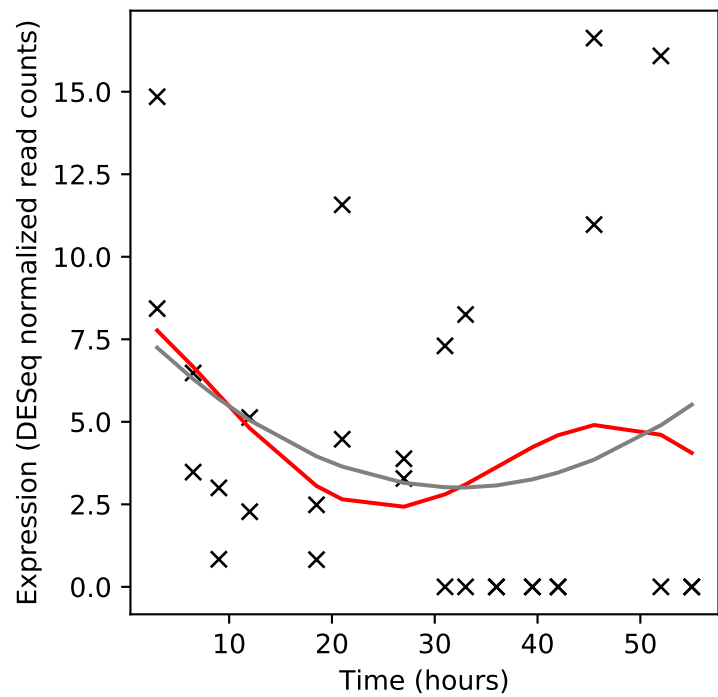

Rv3841/bfrB

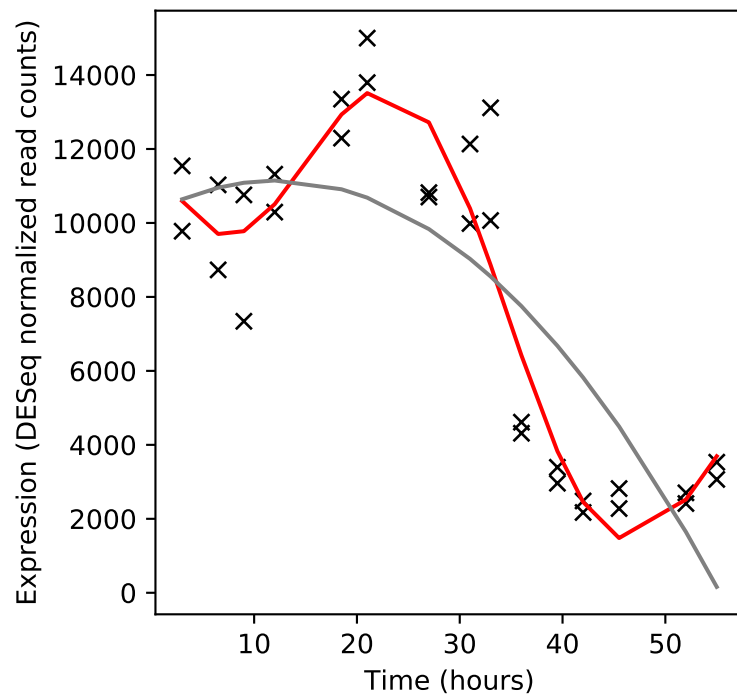

Rv3842c/glpQ1

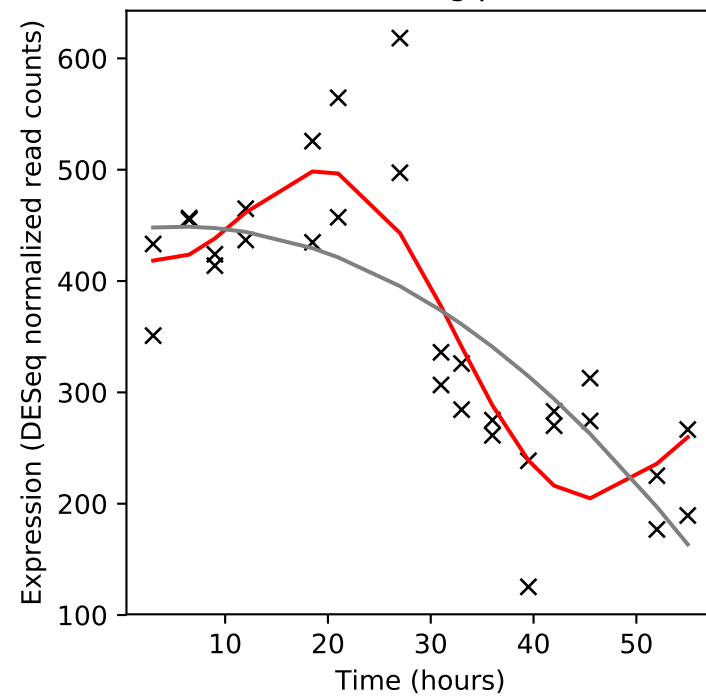

Rv3843c/-

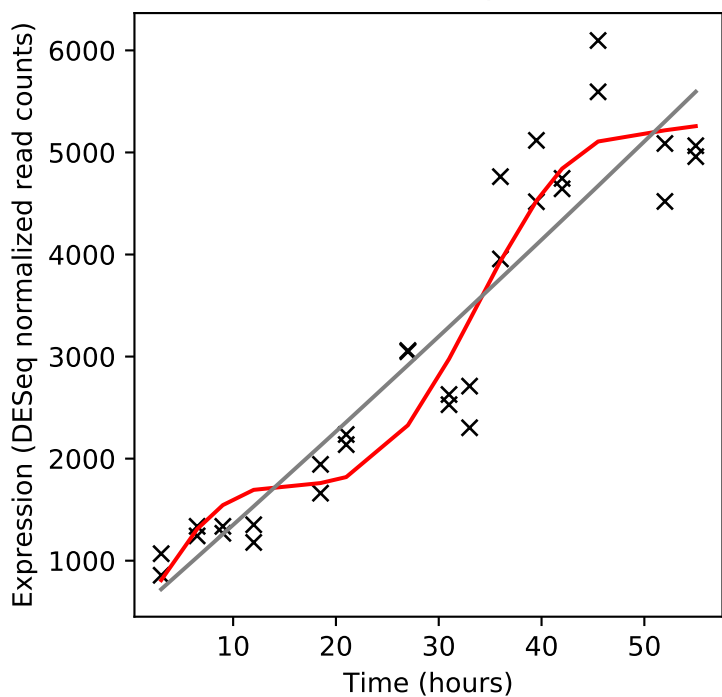

Rv3844/-

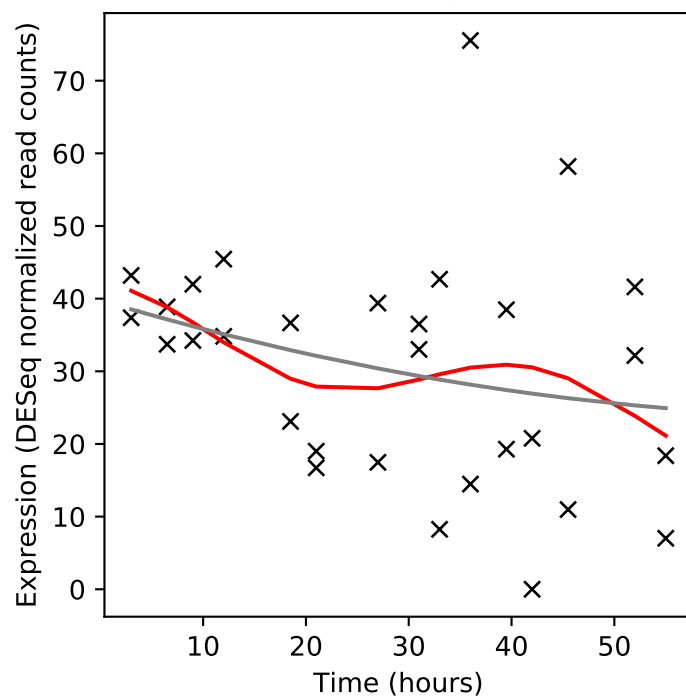

Rv3845/-

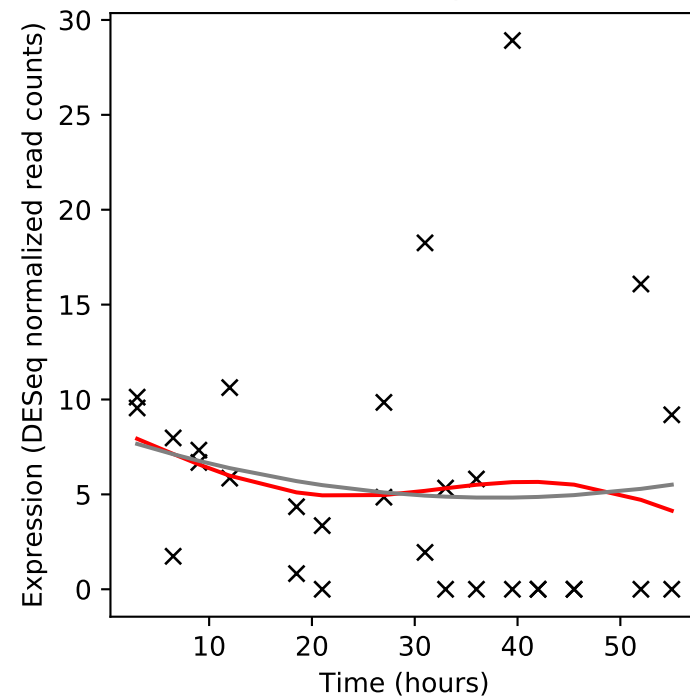

Rv3846/sodA

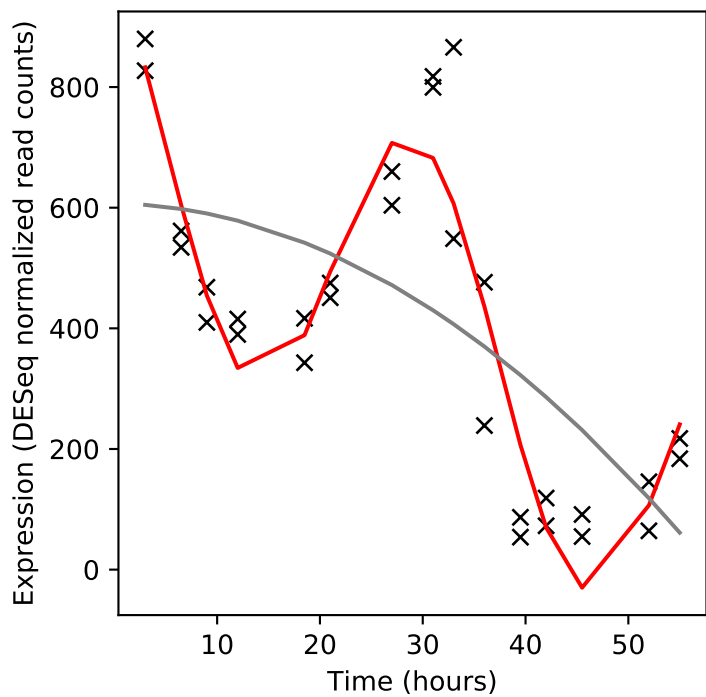

Rv3847/-

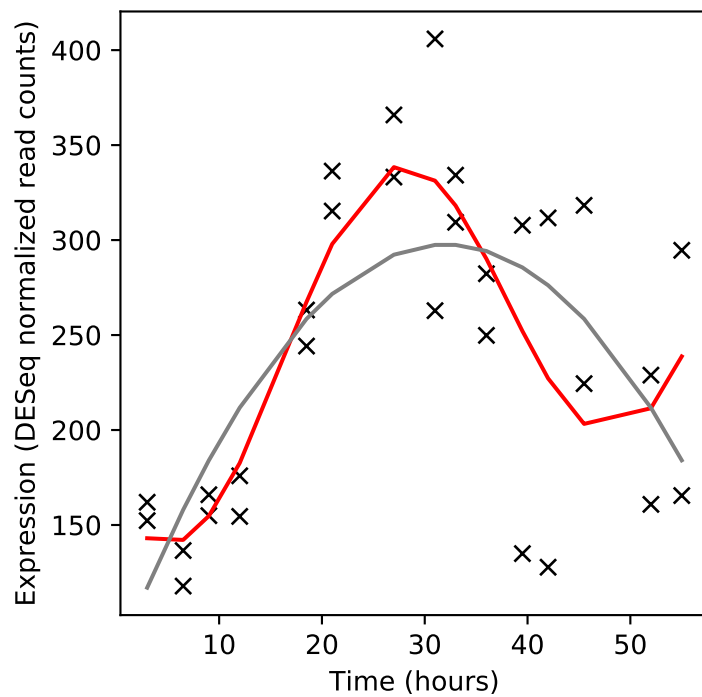

Rv3848/-

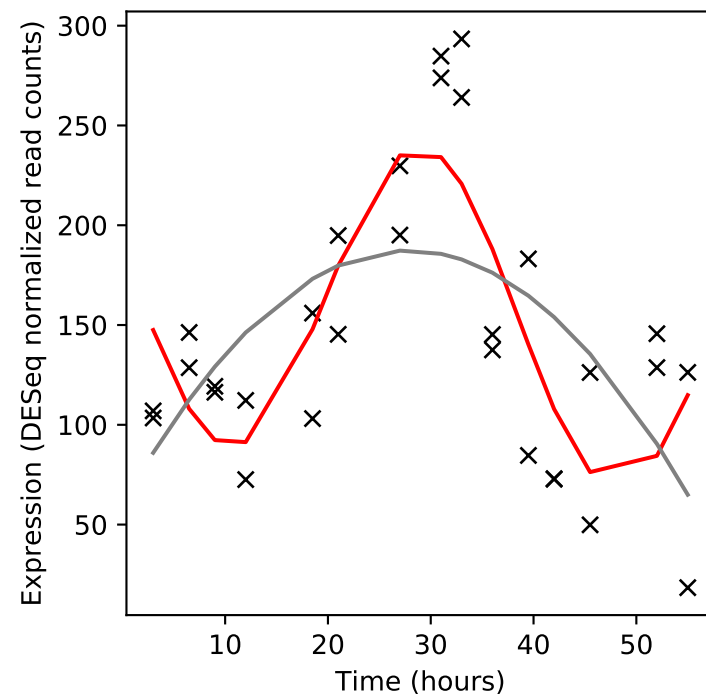

Rv3849/espR

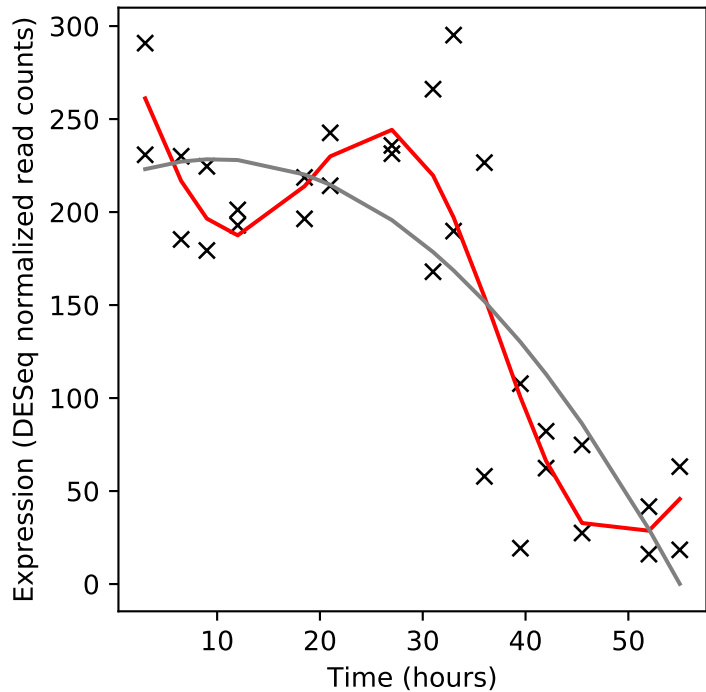

Rv3850/-

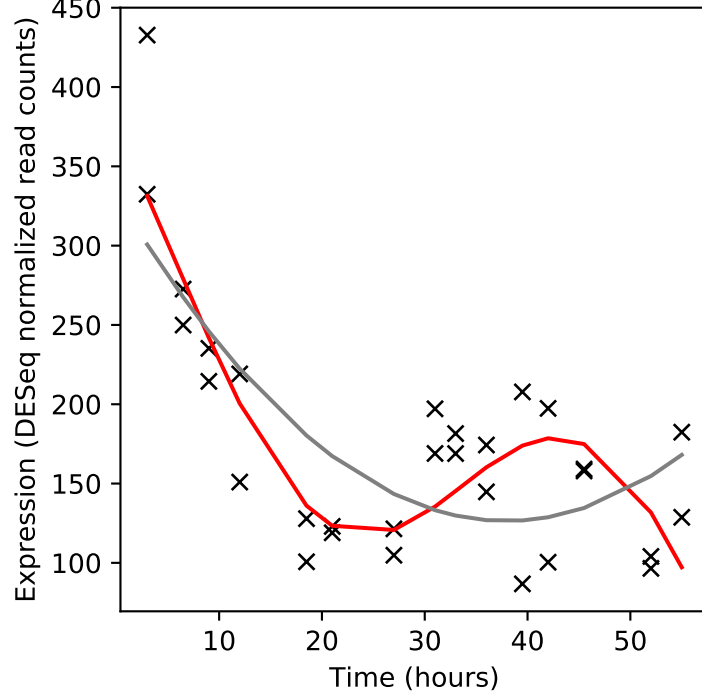

Rv3851/-

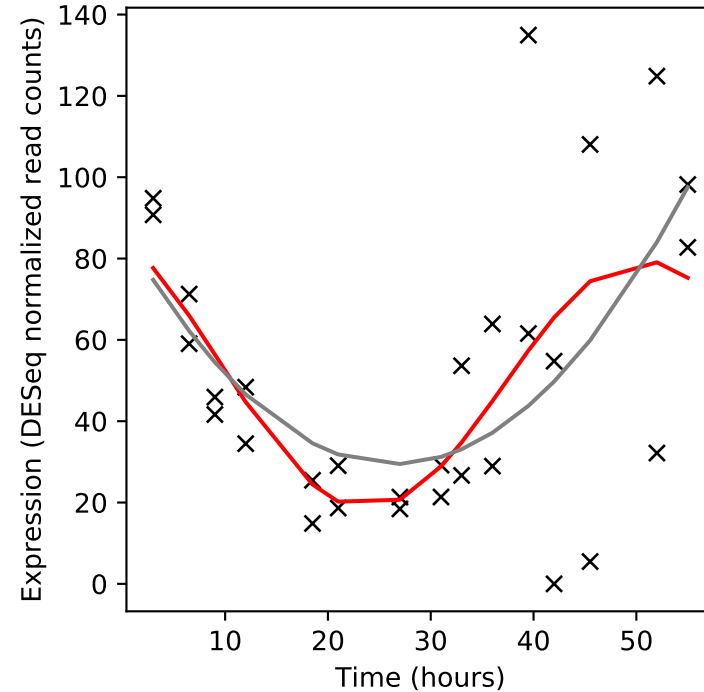

Rv3852/hns

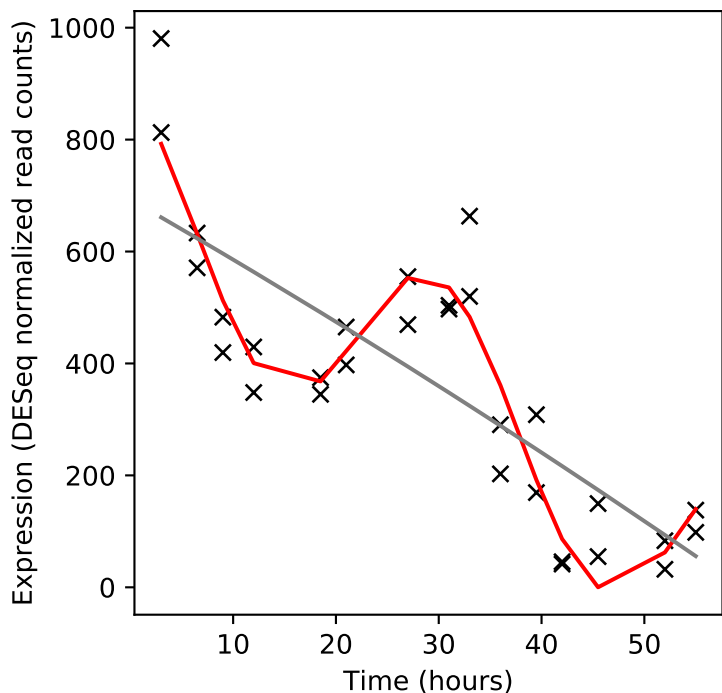

Rv3853/rraA

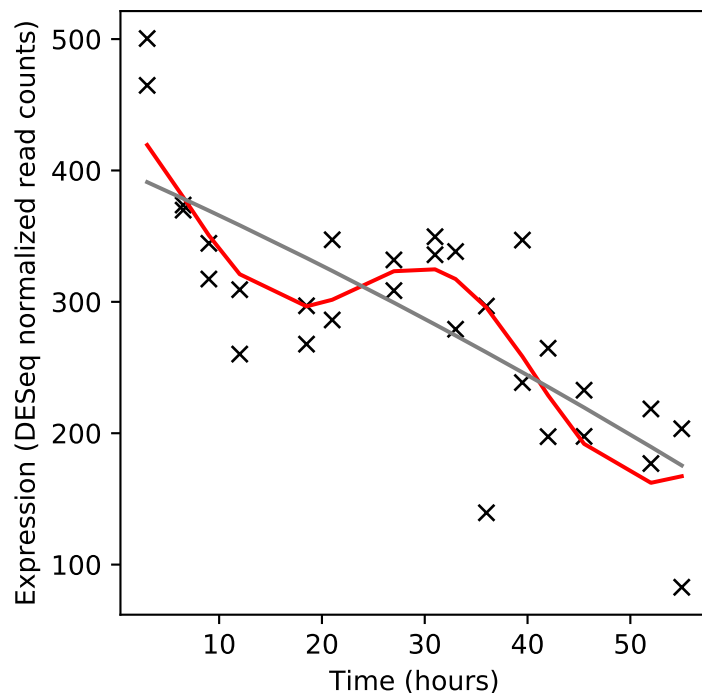

Rv3854c/ethA

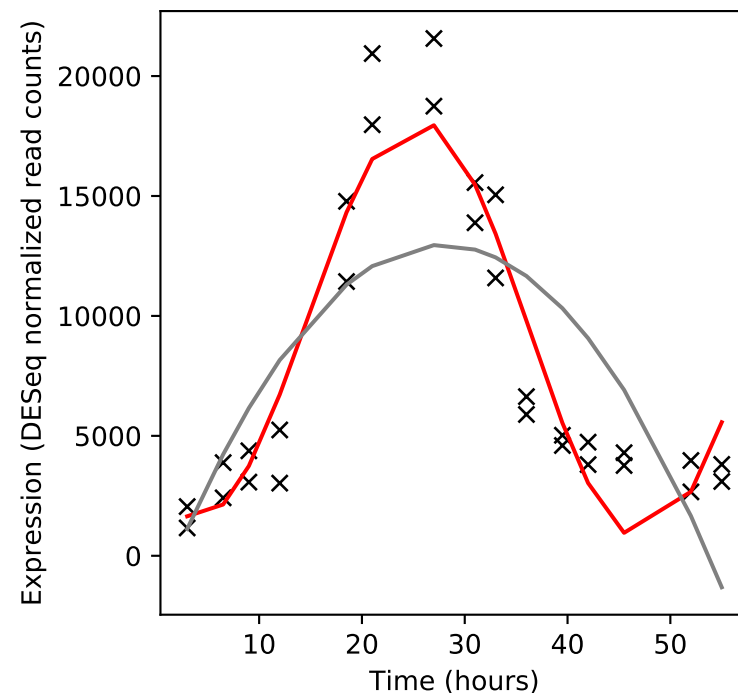

Rv3855/ethR

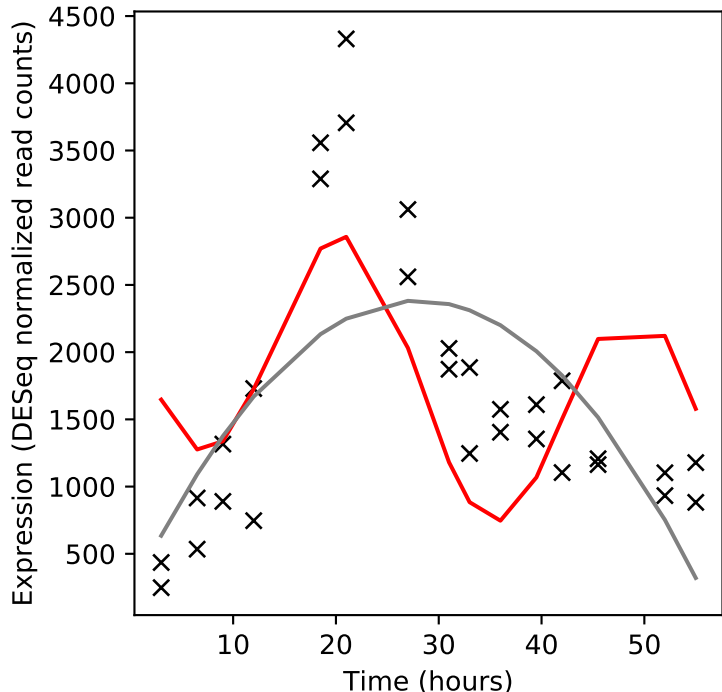

Rv3856c/-

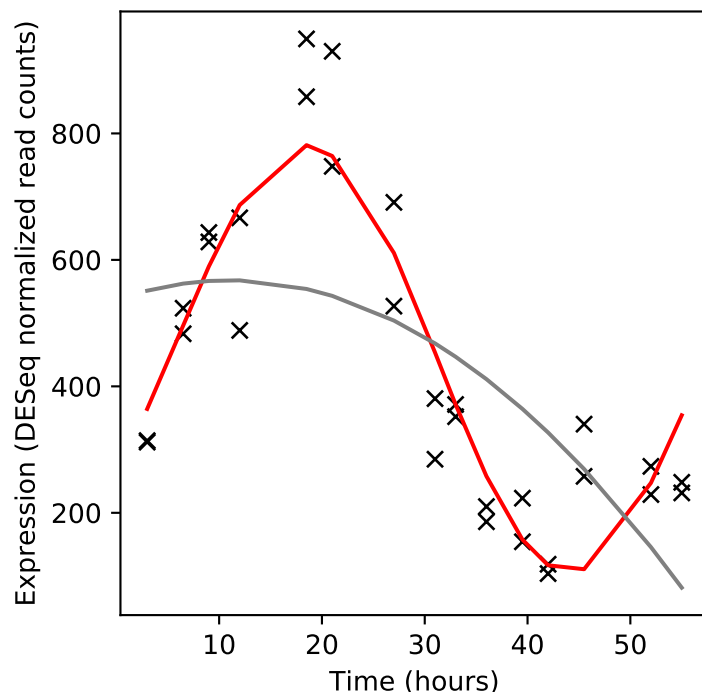

Rv3857c/-

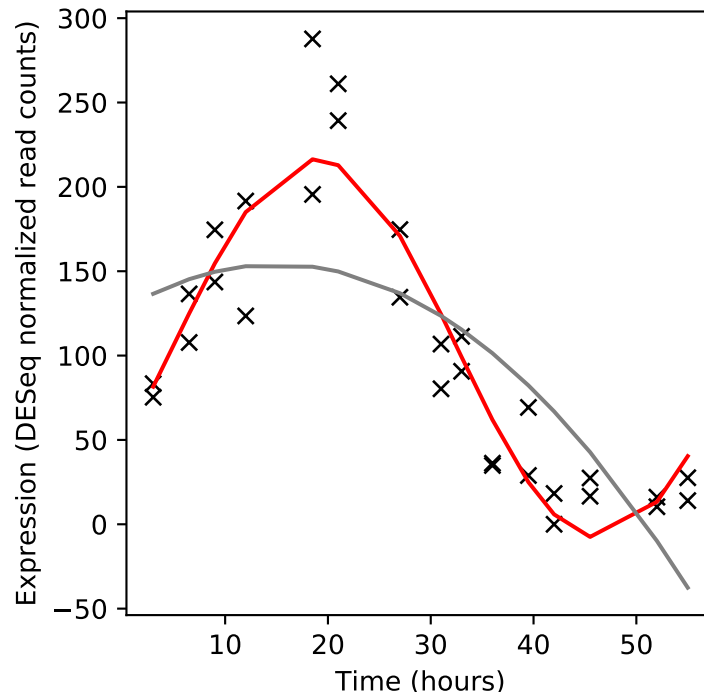

Rv3858c/gltD

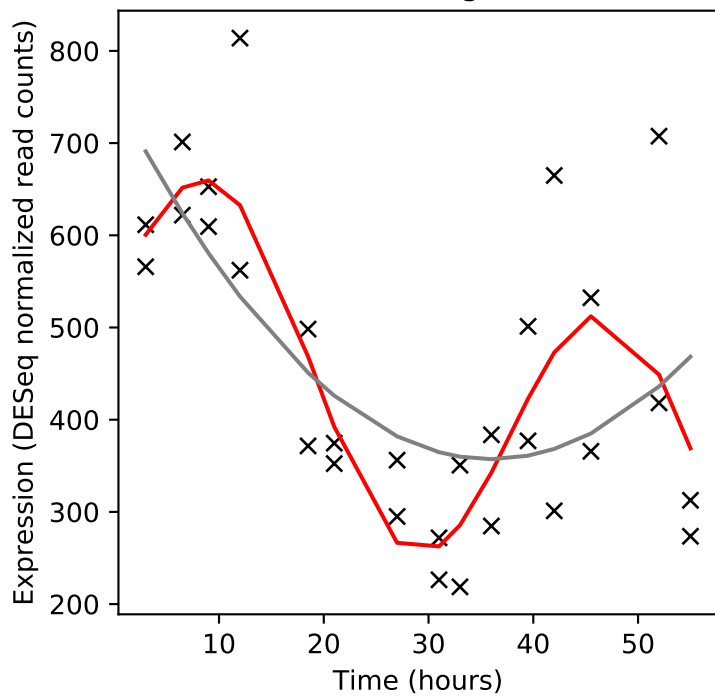

Rv3859c/gltB

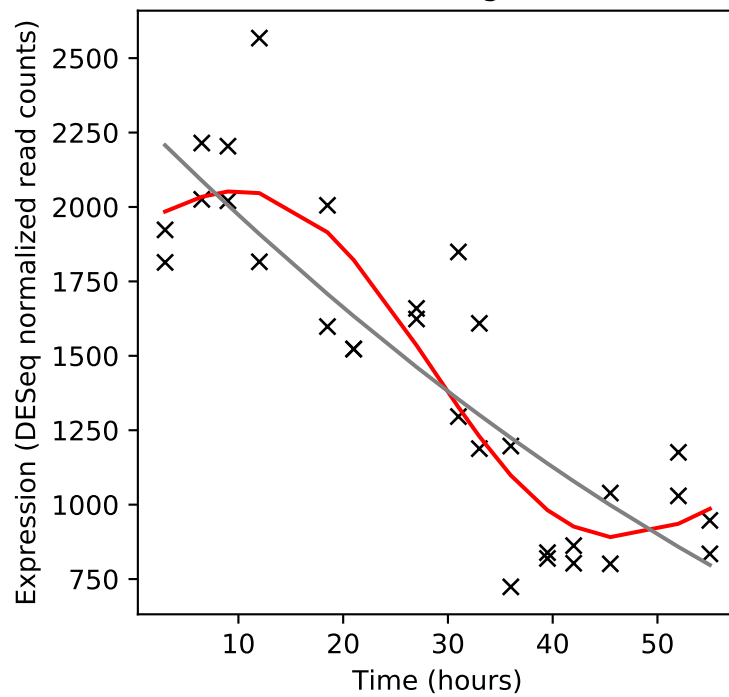

Rv3860/-

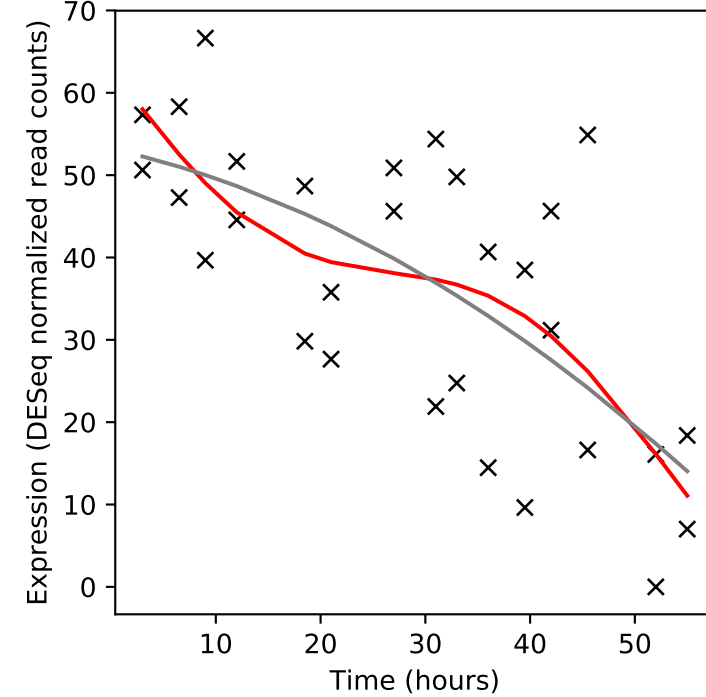

Rv3861/-

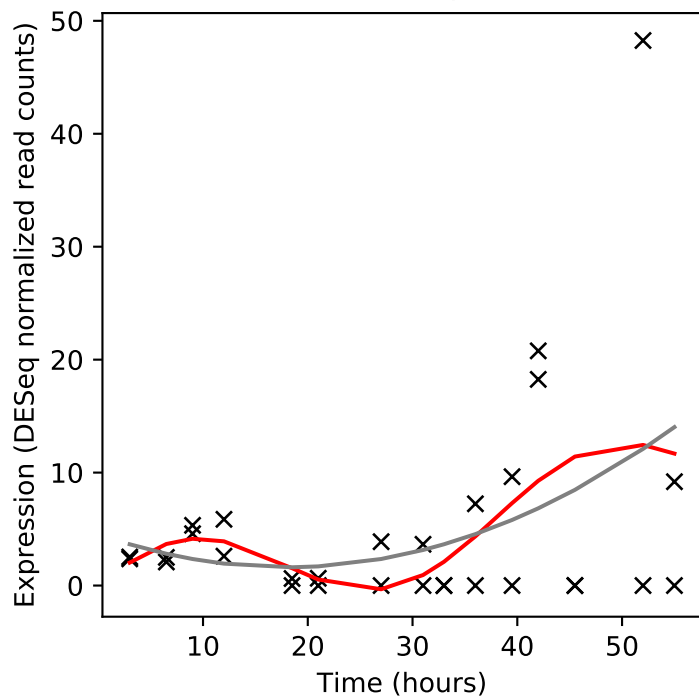

Rv3862c/whiB6

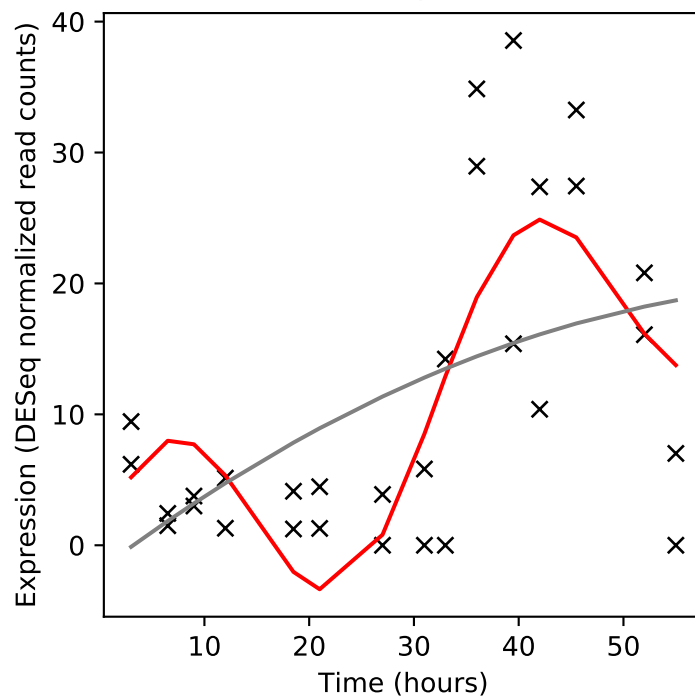

Rv3863/-

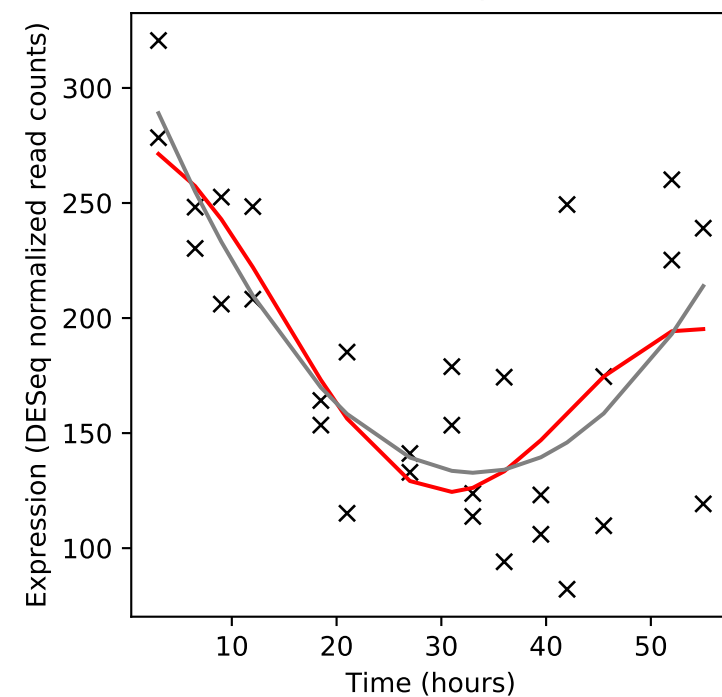

Rv3864/espE

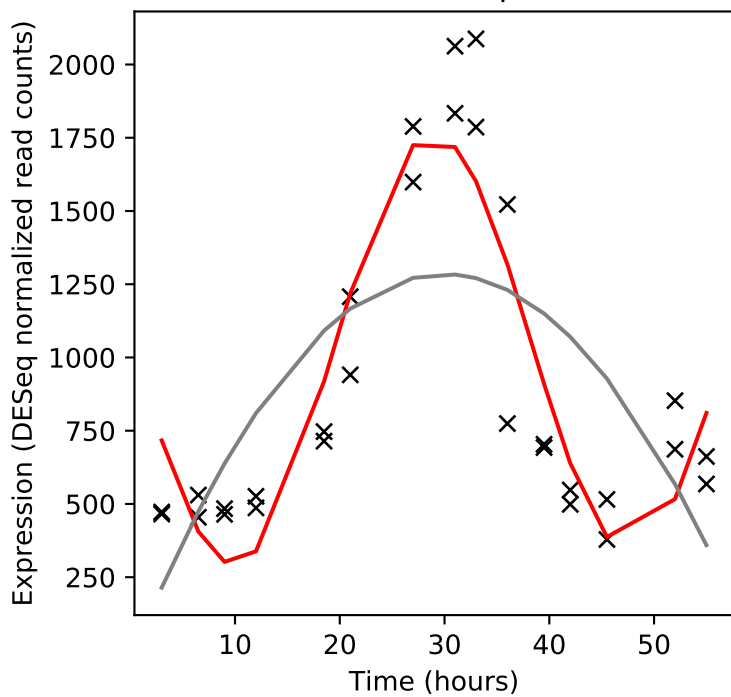

Rv3865/espF

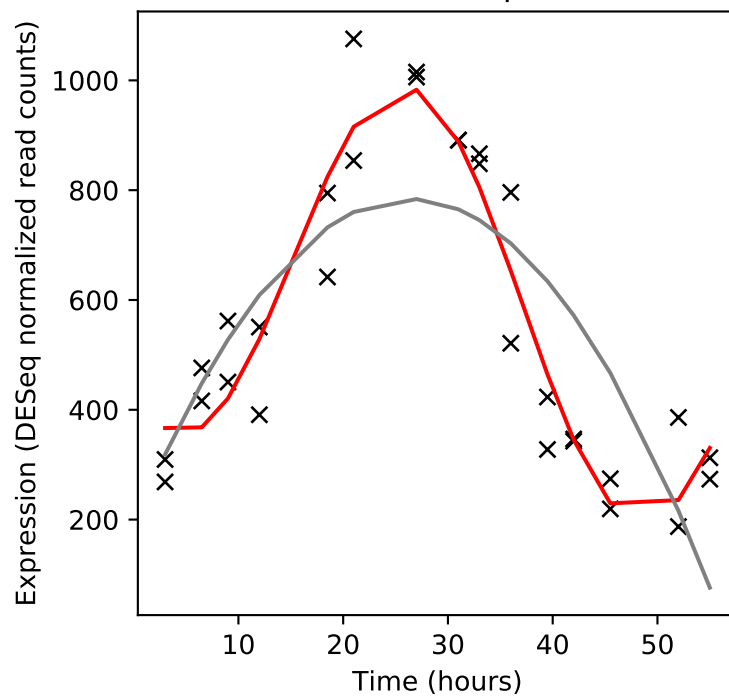

Rv3866/espG1

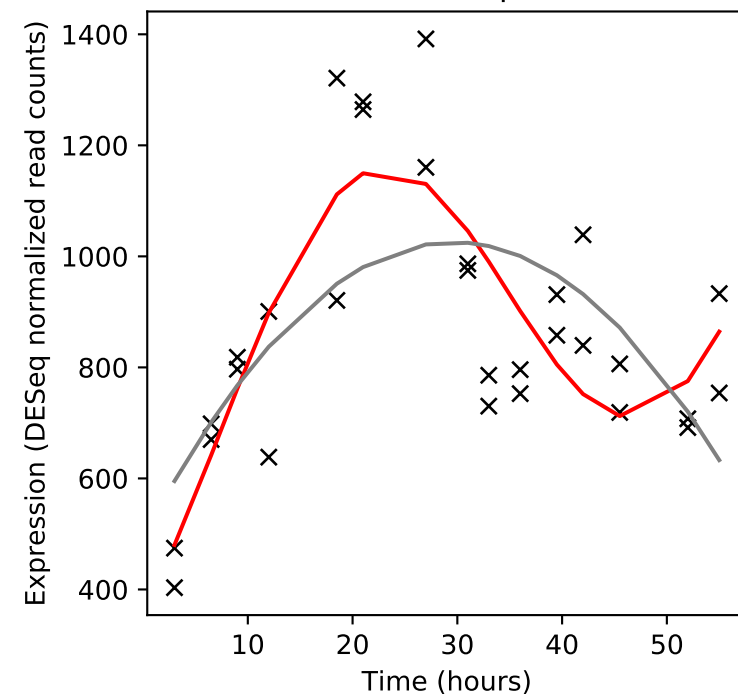

Rv3867/espH

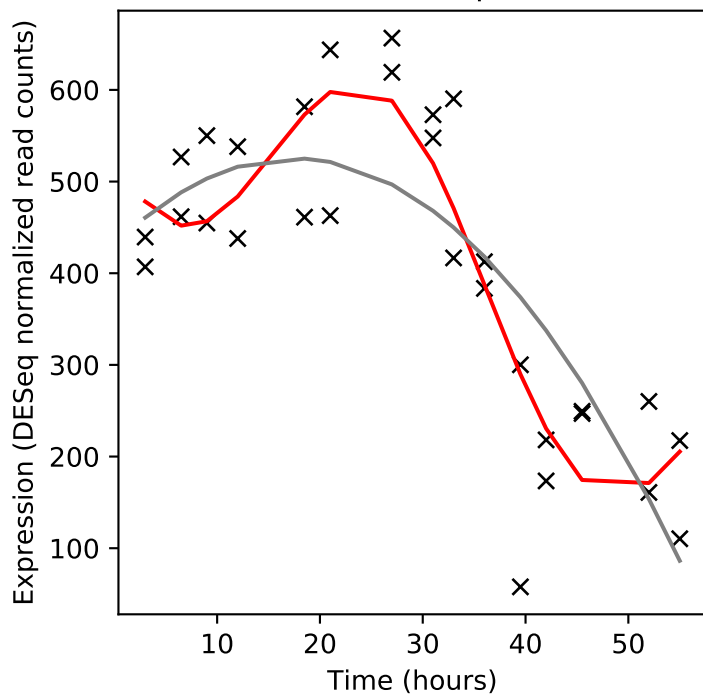

Rv3868/eccA1

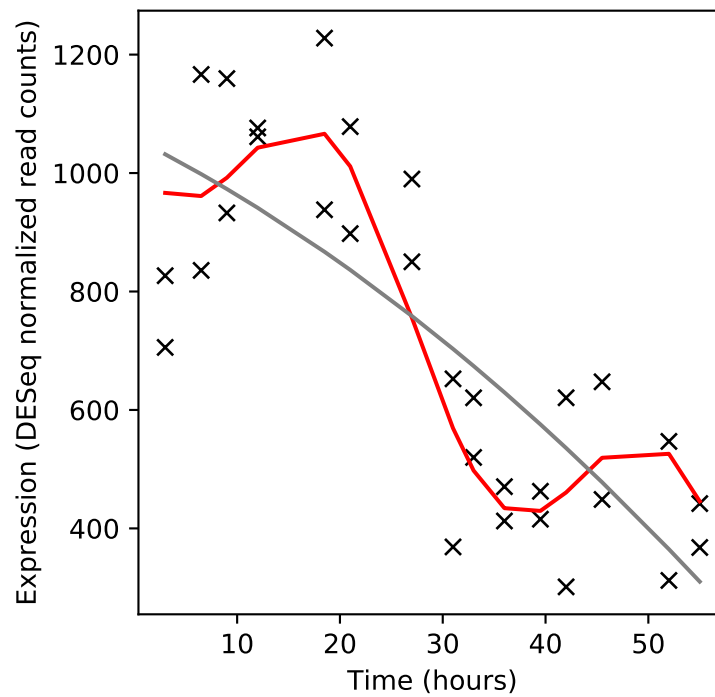

Rv3869/eccB1

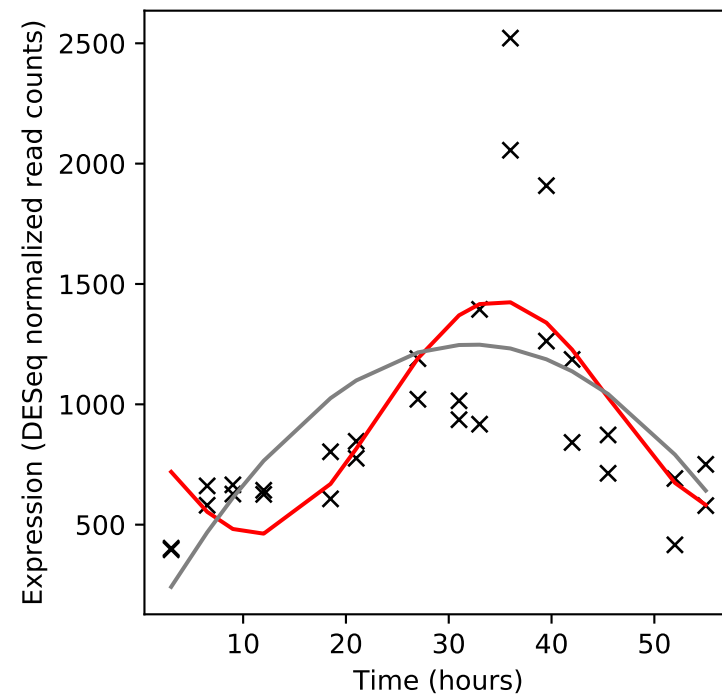

Rv3870/eccCa1

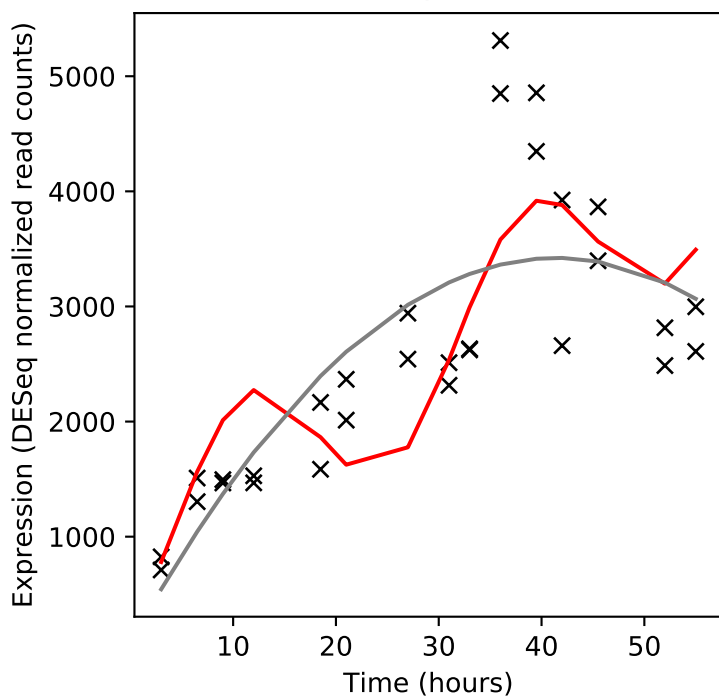

Rv3871/eccCb1

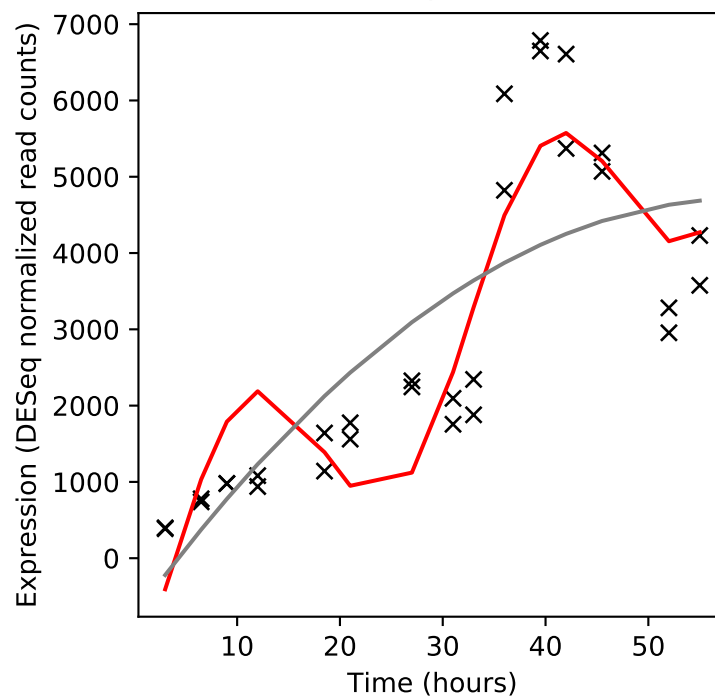

Rv3872/PE35

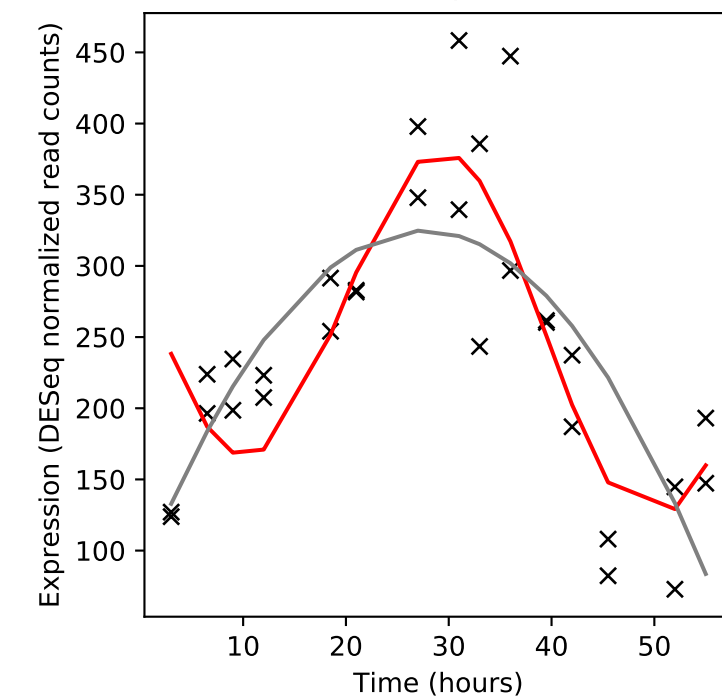

Rv3873/PPE68

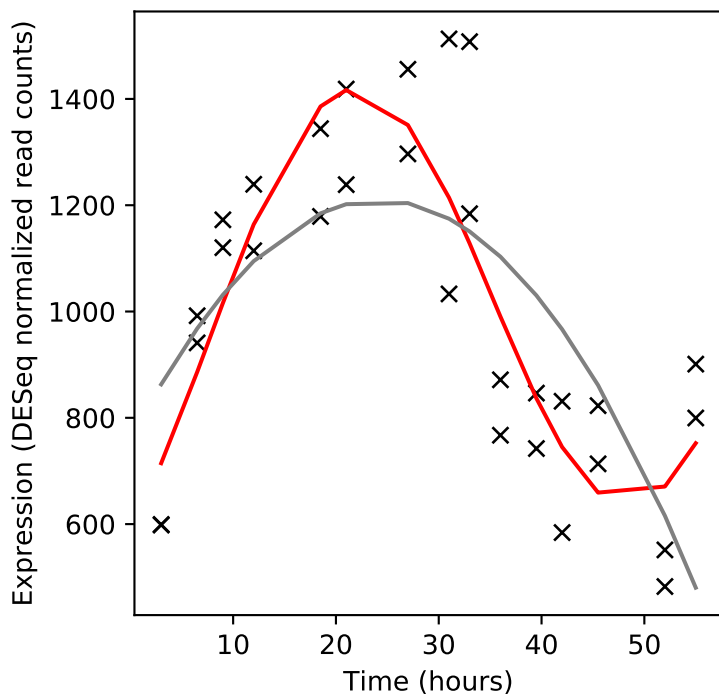

Rv3874/esxB

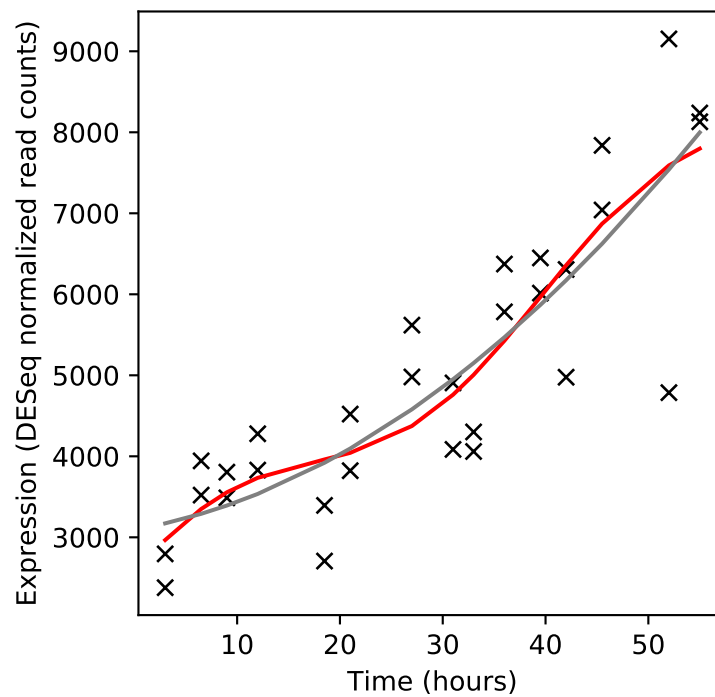

Rv3875/esxA

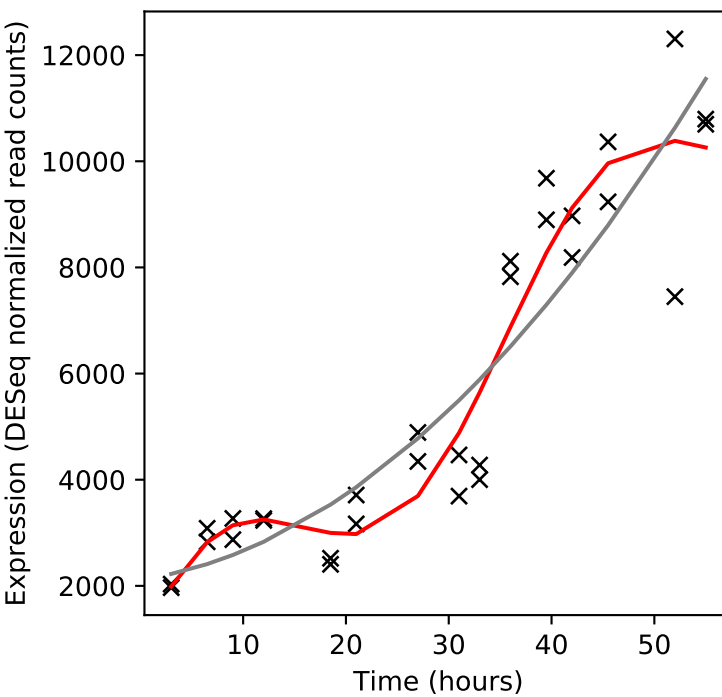

Rv3876/espl

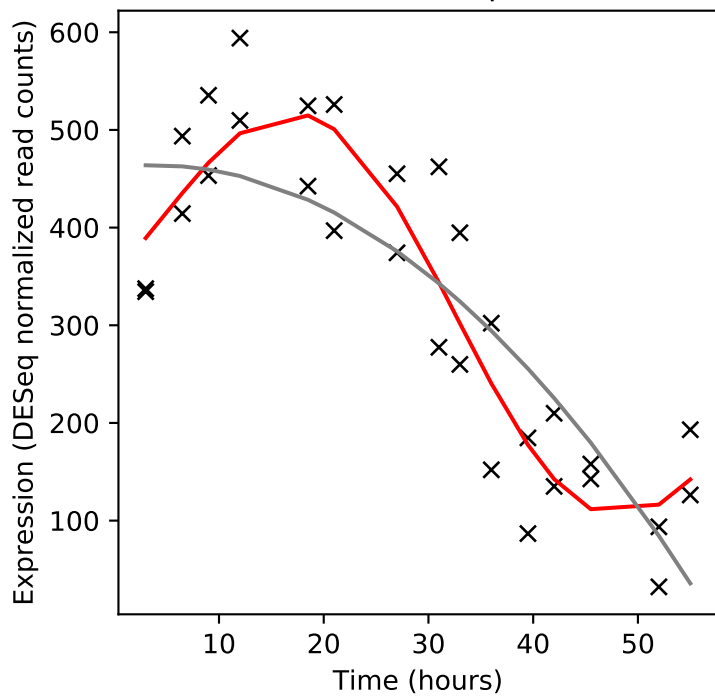

Rv3877/eccD1

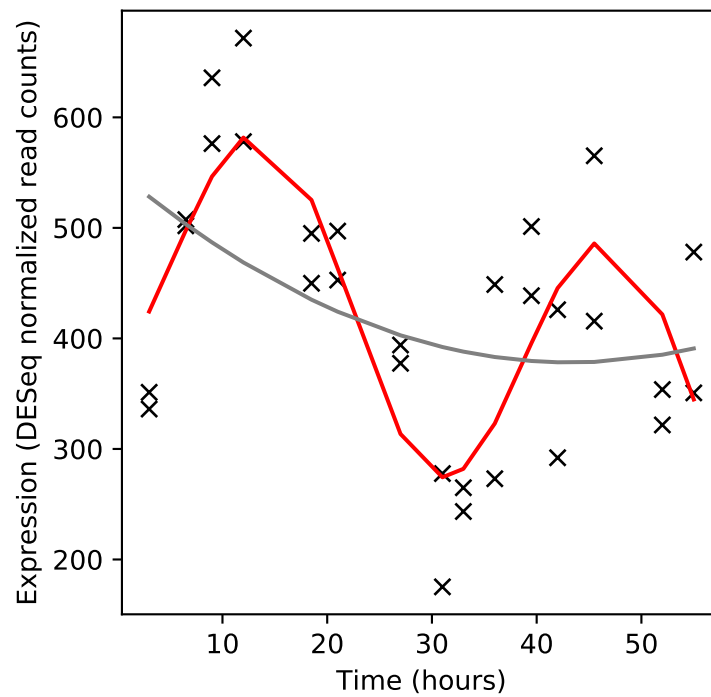

Rv3878/espj

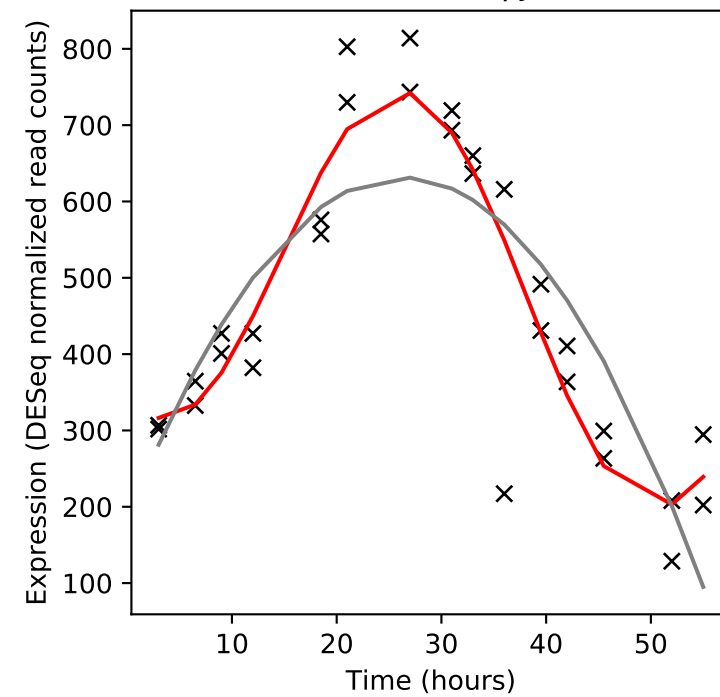

Rv3879c/espK

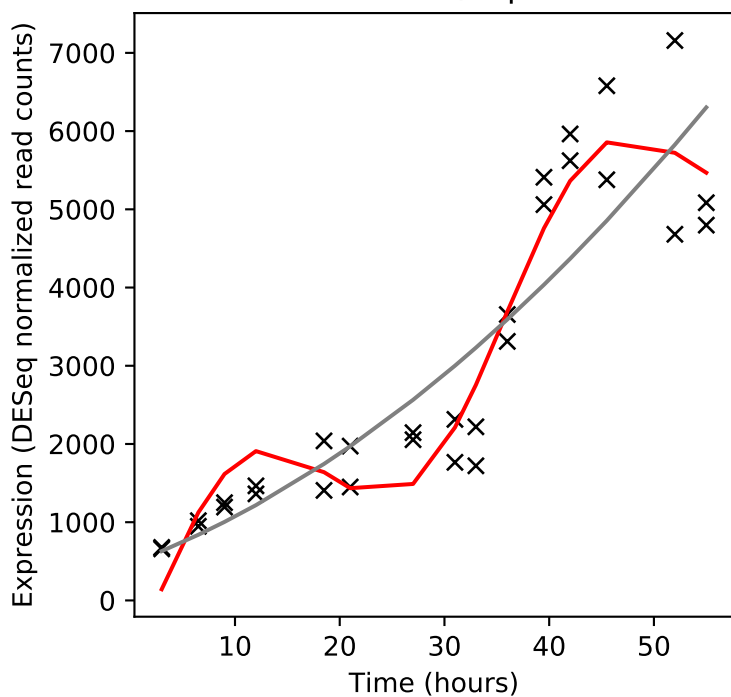

Rv3880c/espL

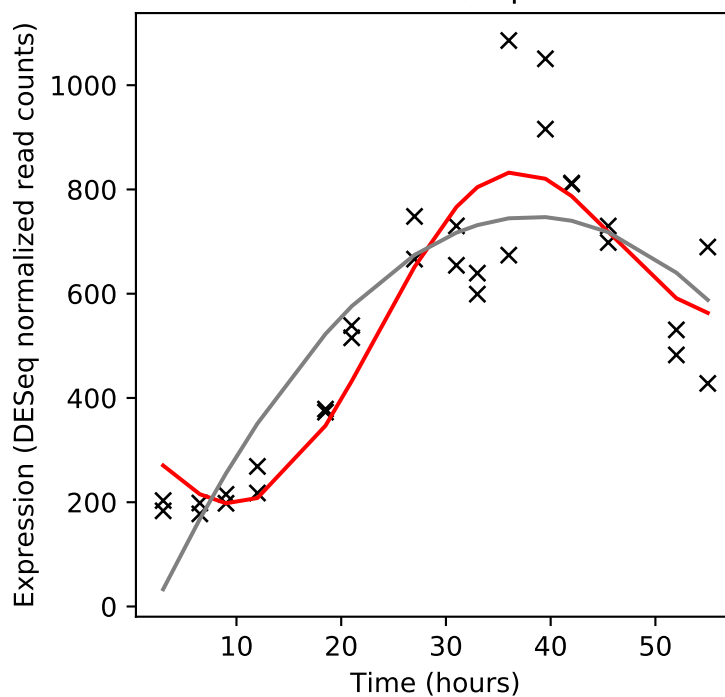

Rv3881c/espB

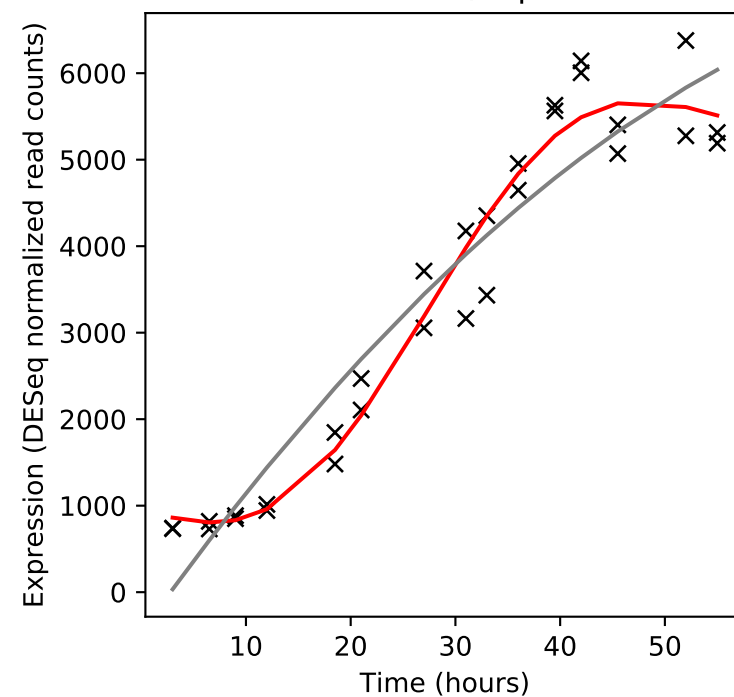

Rv3882c/eccE1

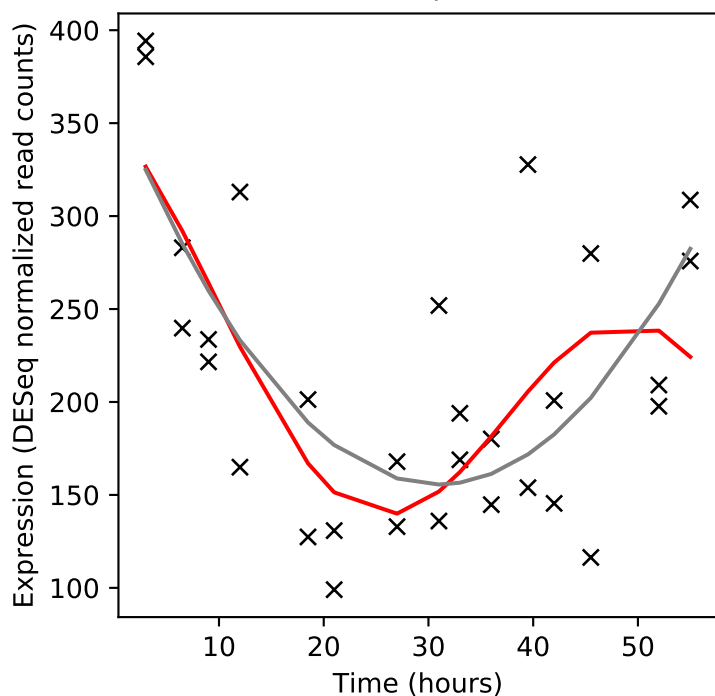

Rv3883c/mycP1

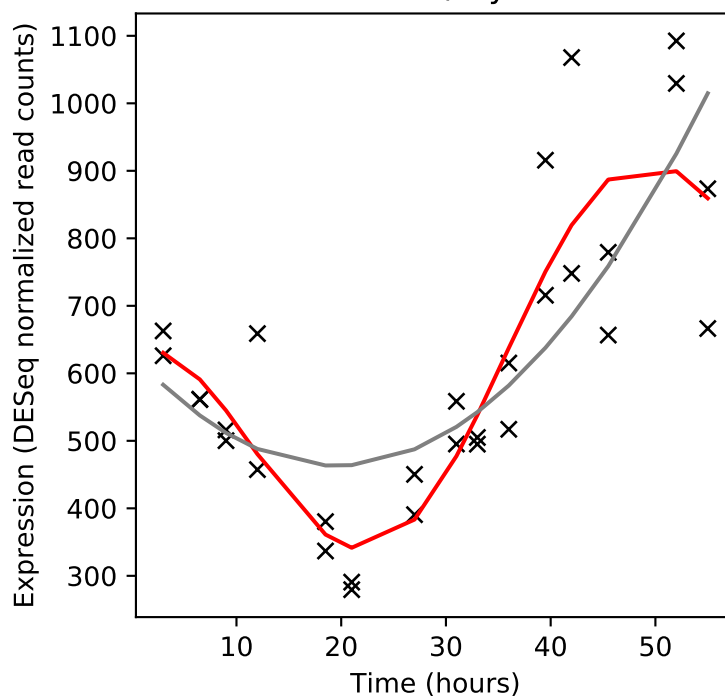

Rv3884c/eccA2

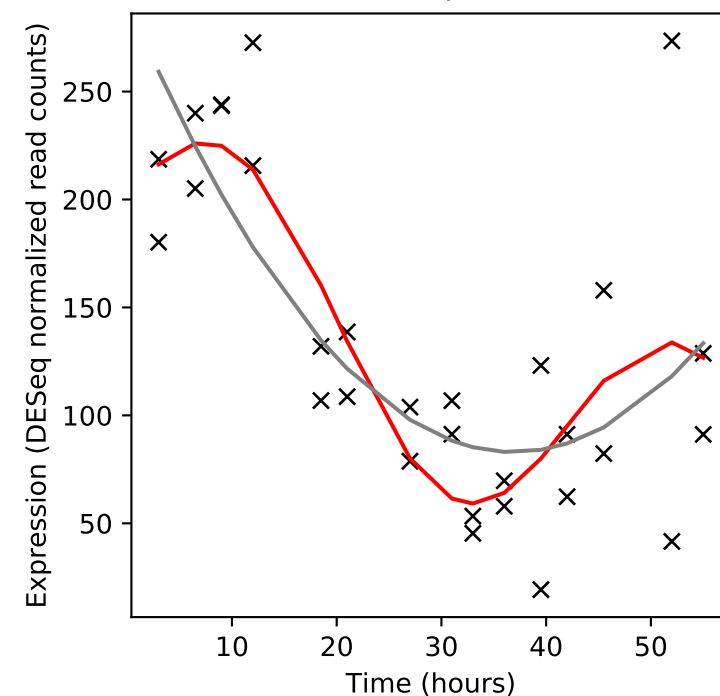



Rv3885c/eccE2

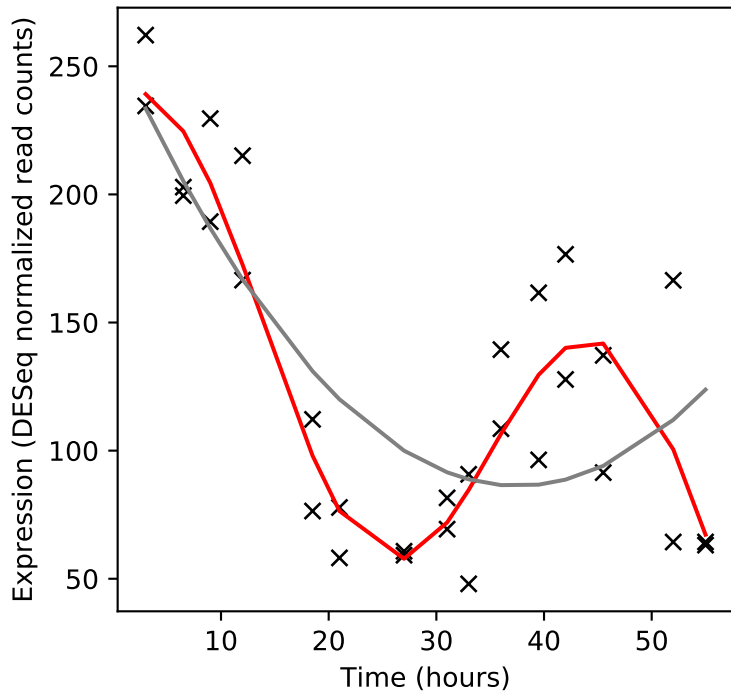

Rv3886c/mycP2

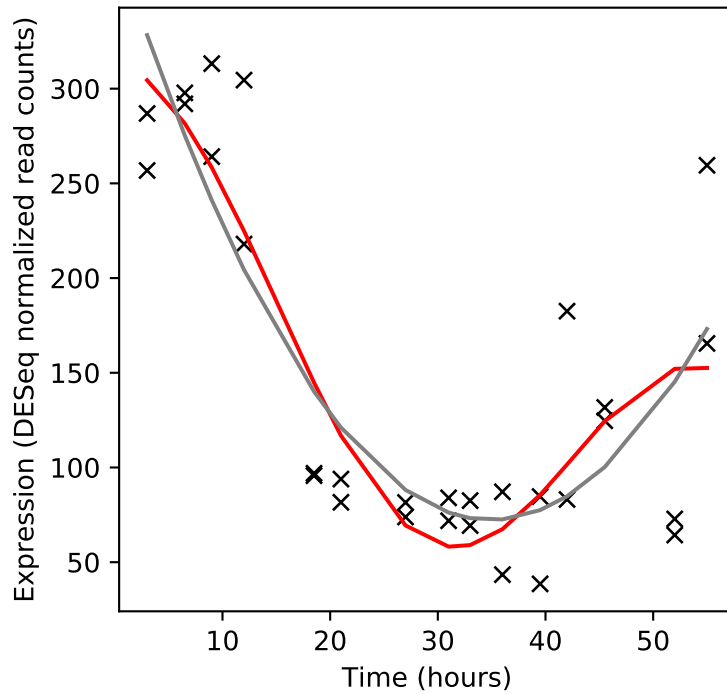

Rv3887c/eccD2

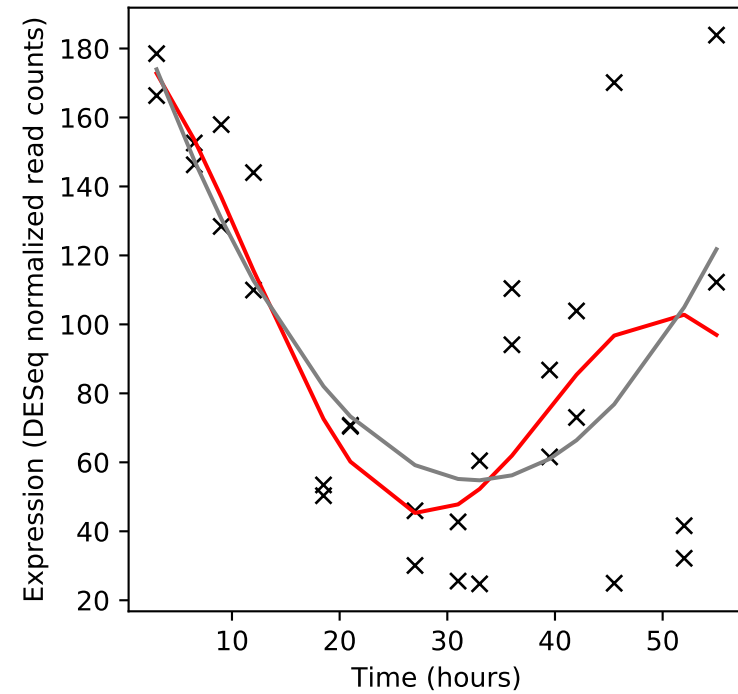

Rv3888c/-

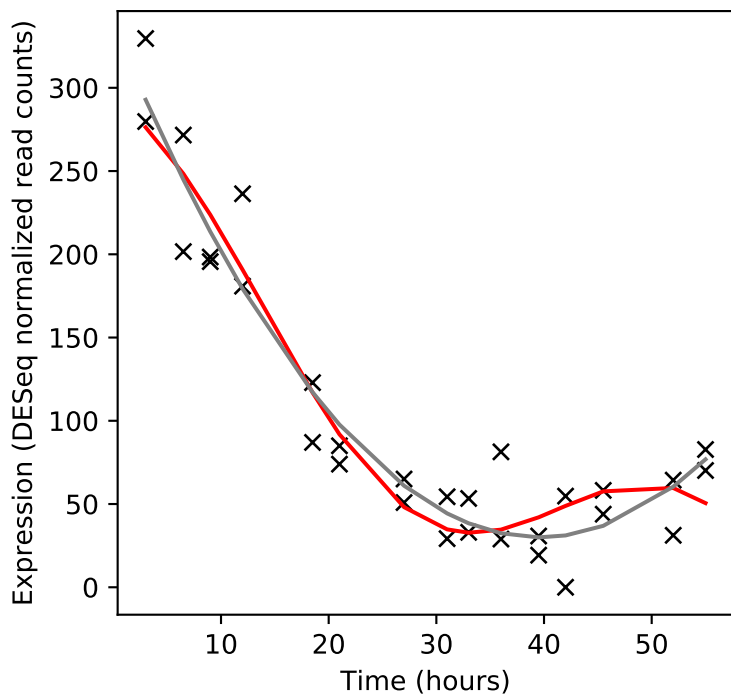

Rv3889c/espG2

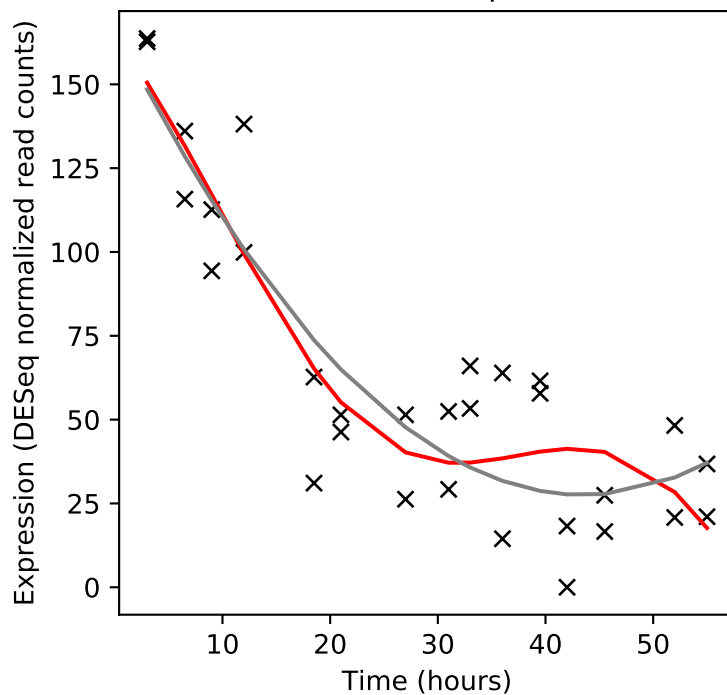

Rv3890c/esxC

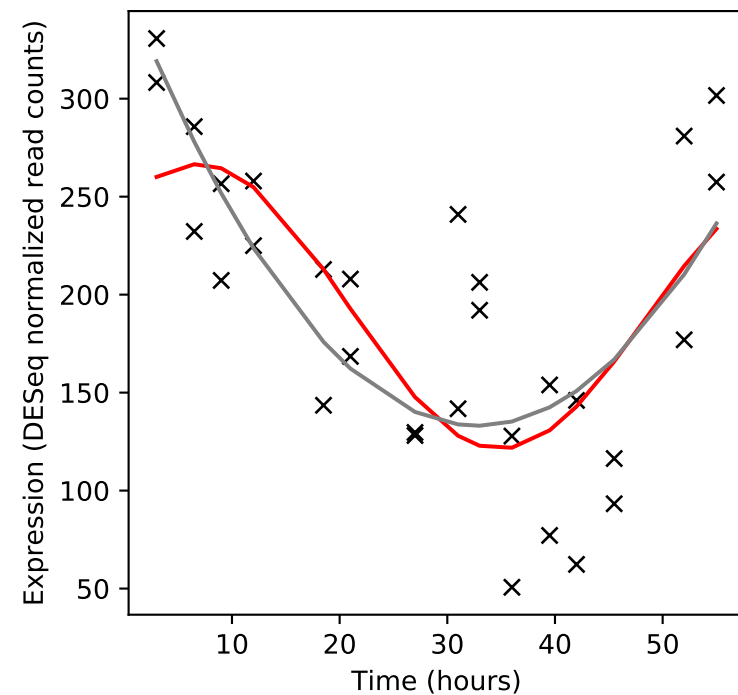

Rv3891c/esxD

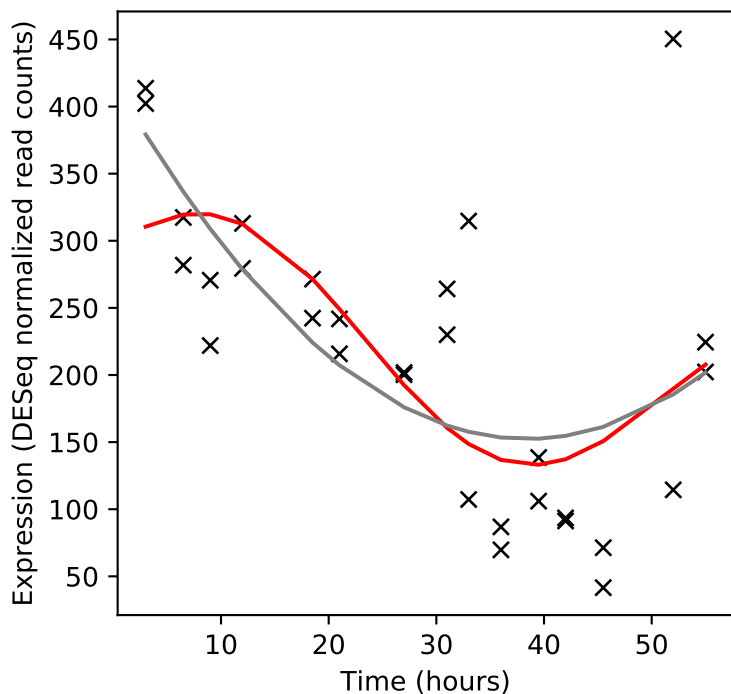

Rv3892c/PPE69

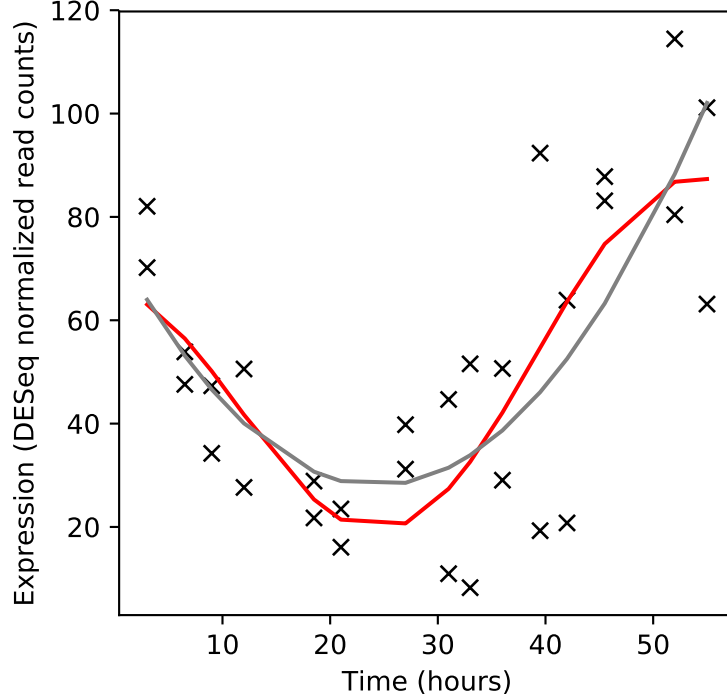

Rv3893c/PE36

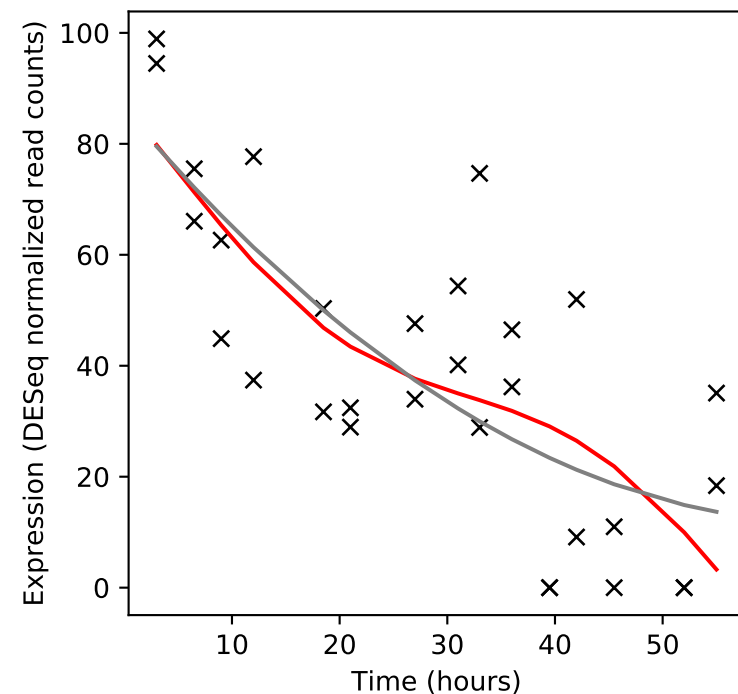

Rv3894c/eccC2

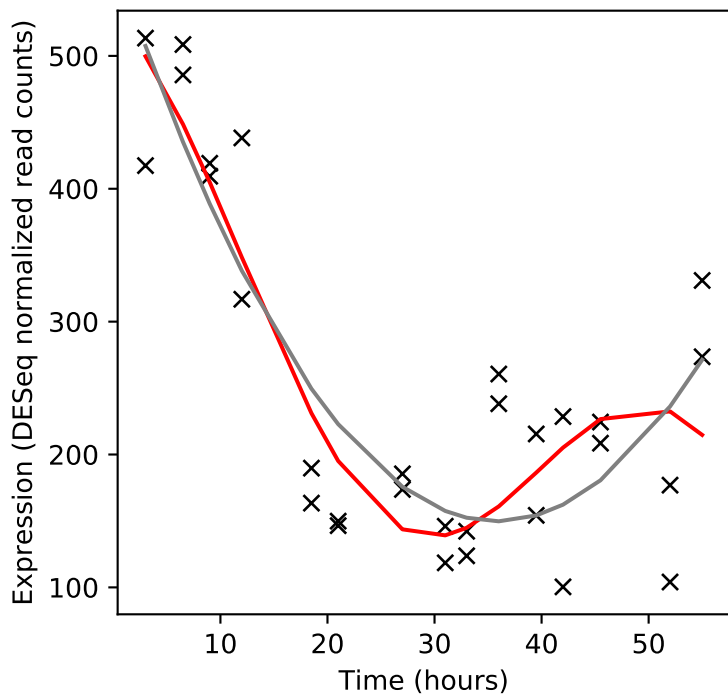

Rv3895c/eccB2

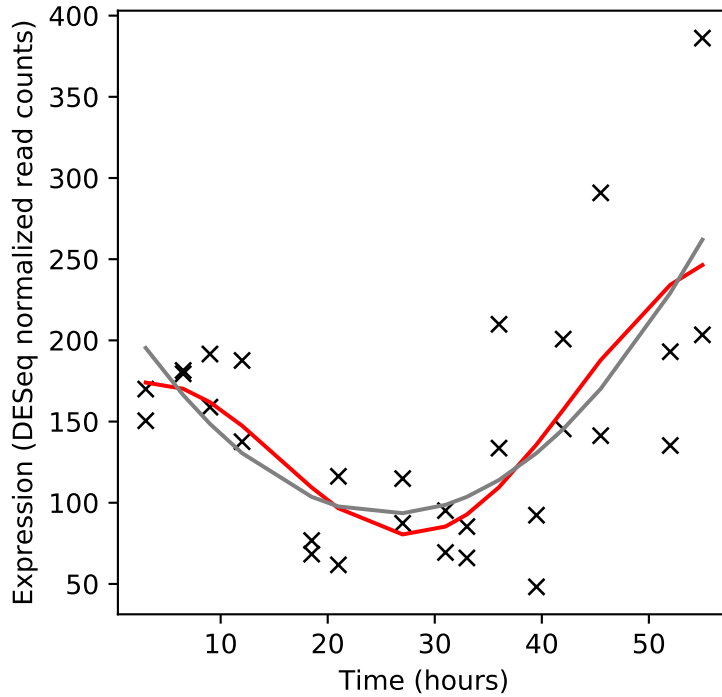

Rv3896c/-

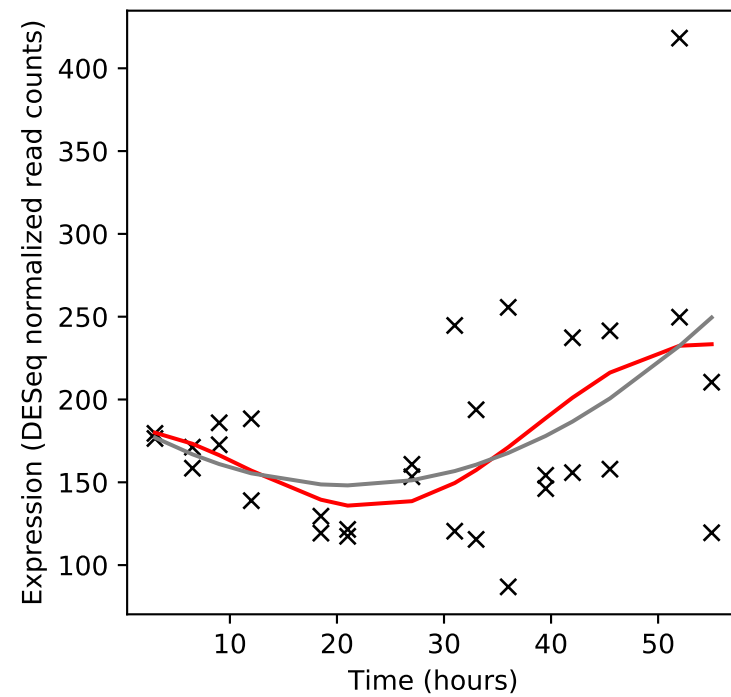

Rv3897c/-

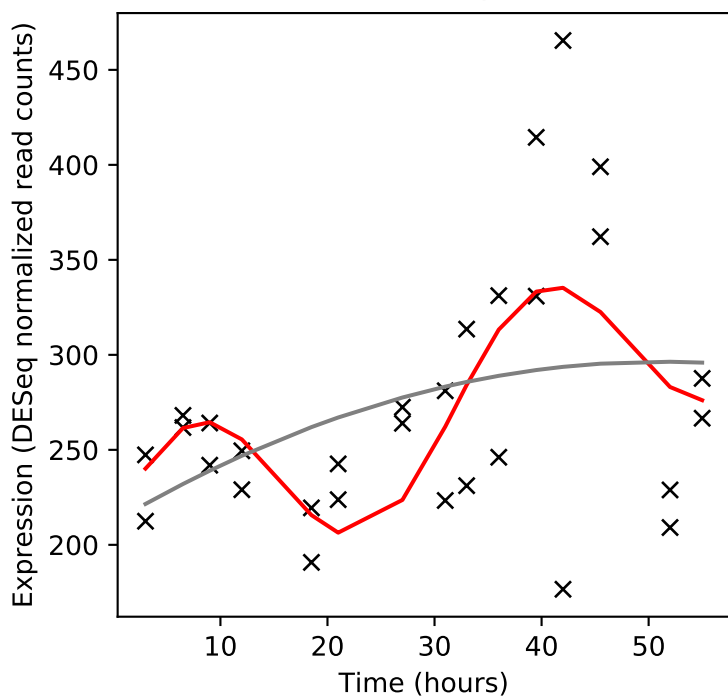

Rv3898c/-

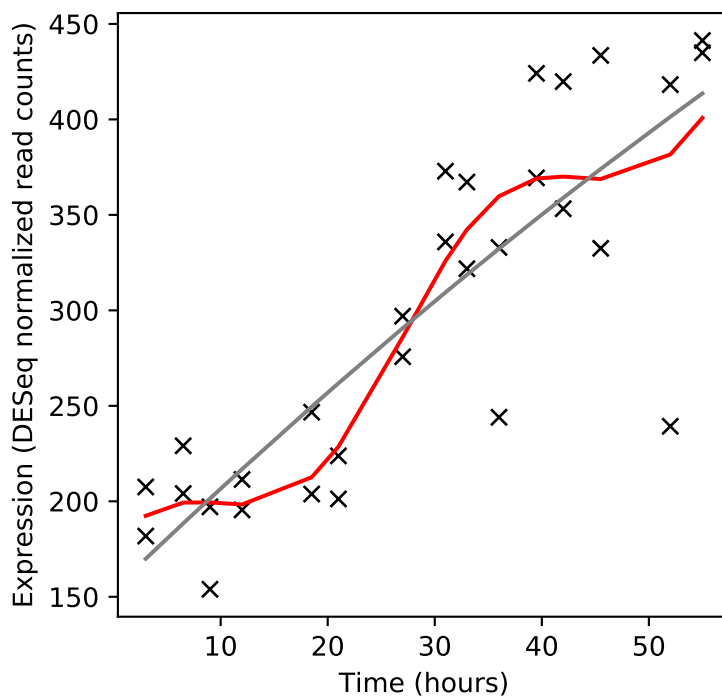

Rv3899c/-

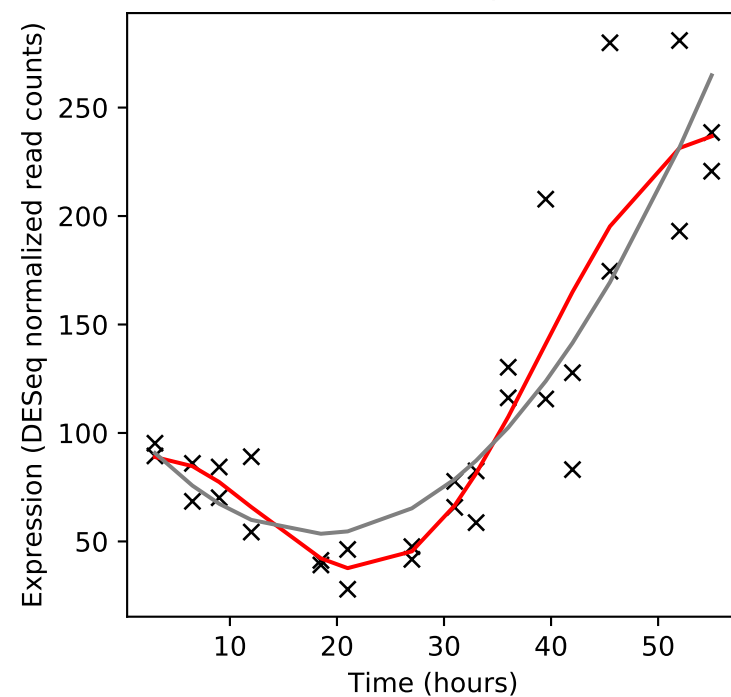

Rv3900c/-

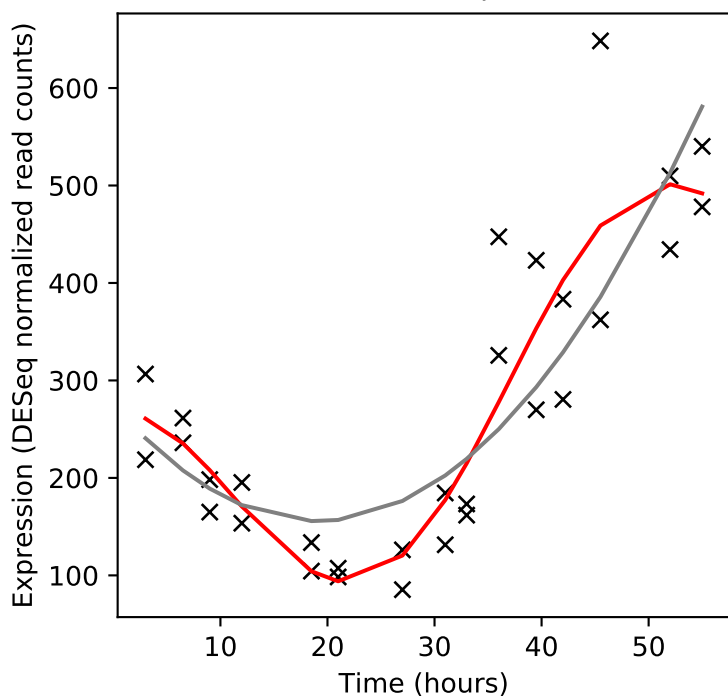

Rv3901c/-

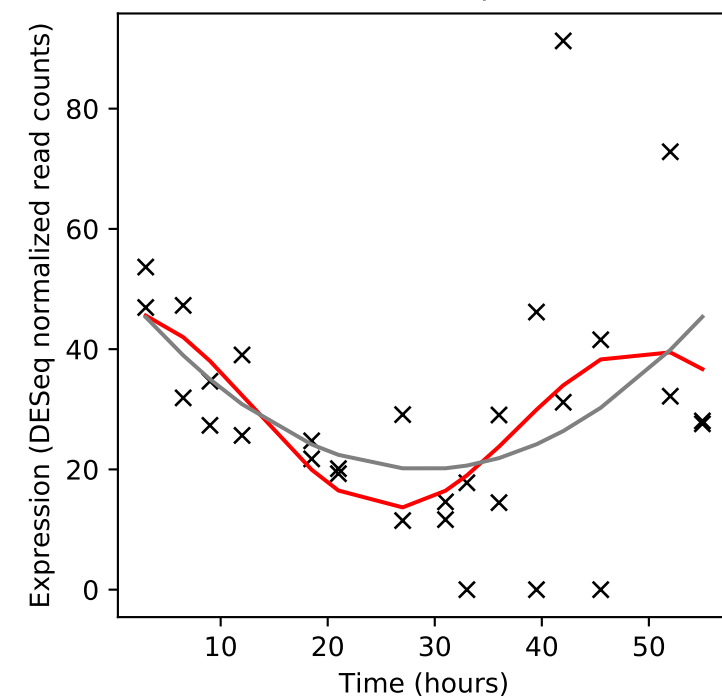

Rv3902c/-

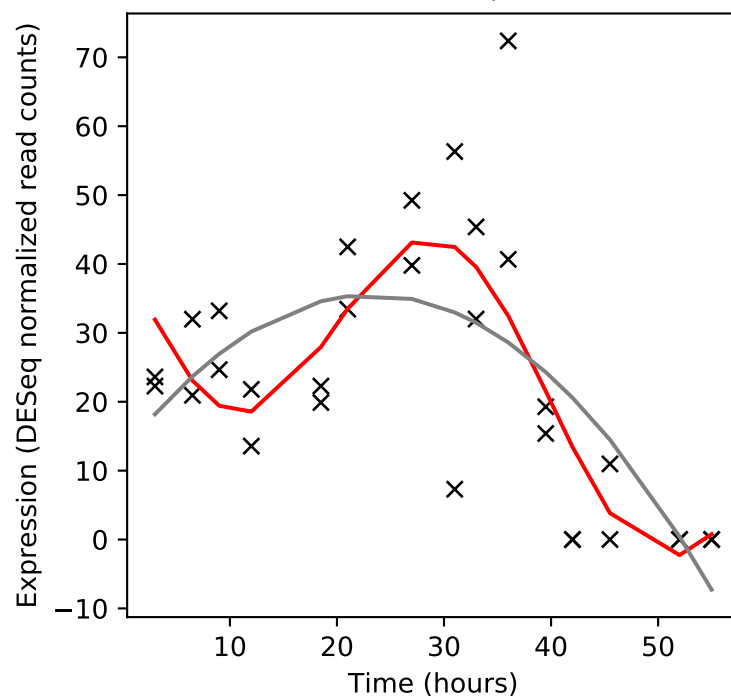

Rv3903c/-

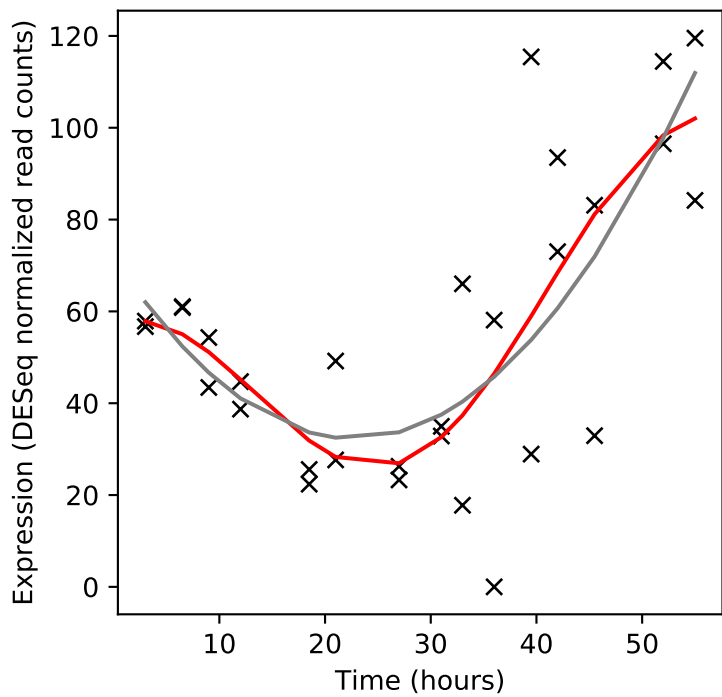

Rv3904c/esxE

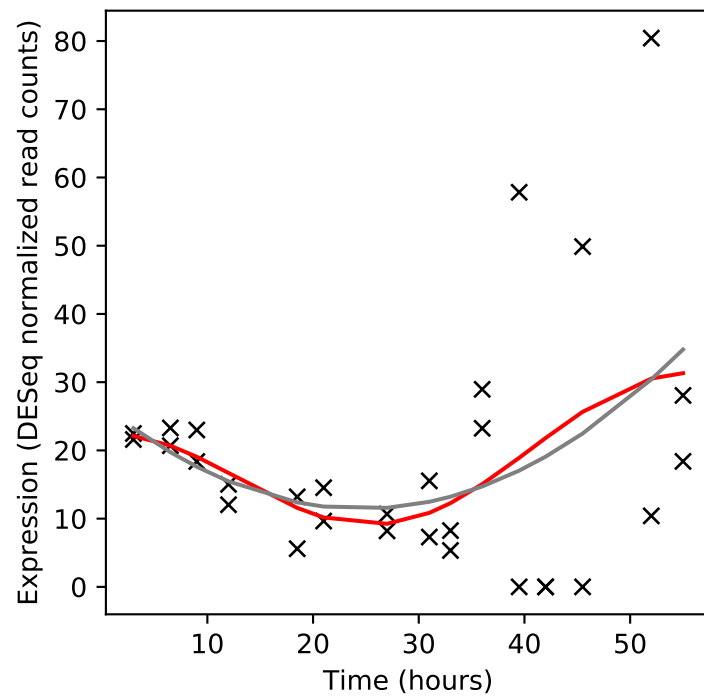

Rv3905c/esxF

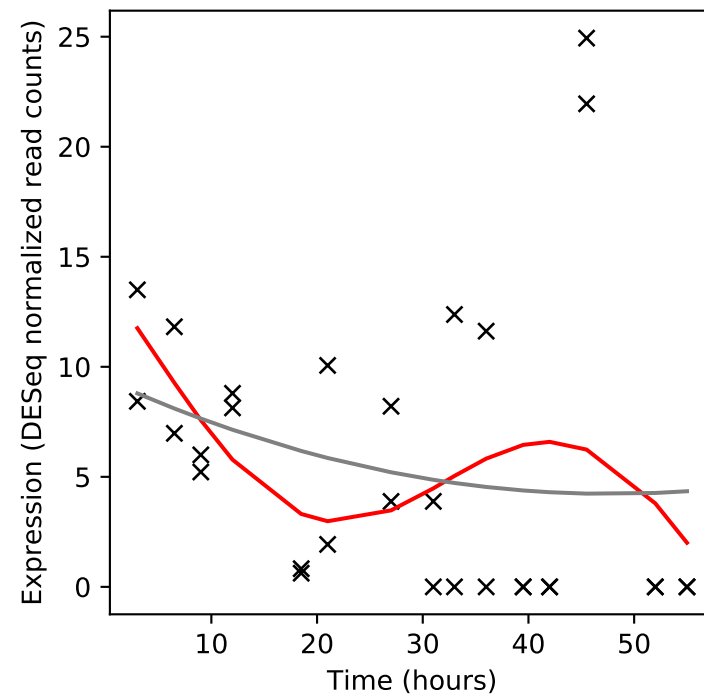

Rv3906c/-

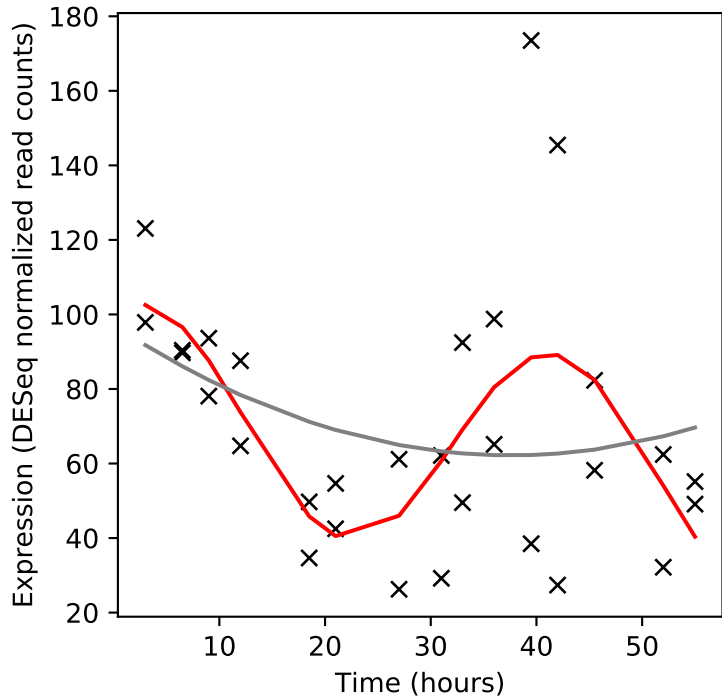

Rv3907c/pcnA

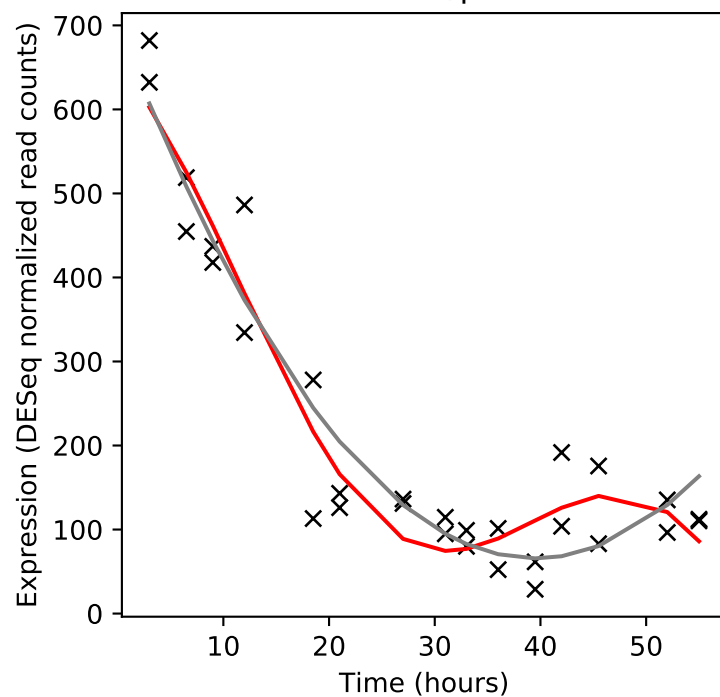

Rv3908/mutT4

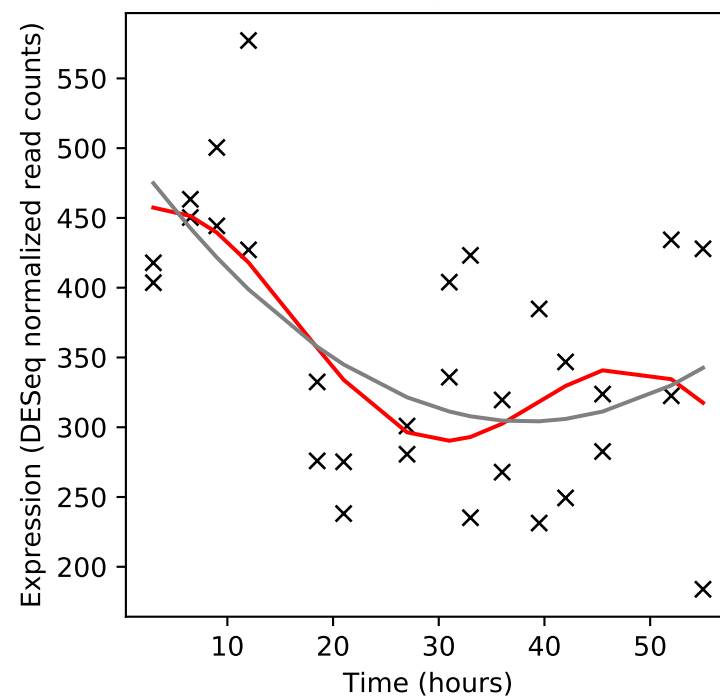

Rv3909c/-

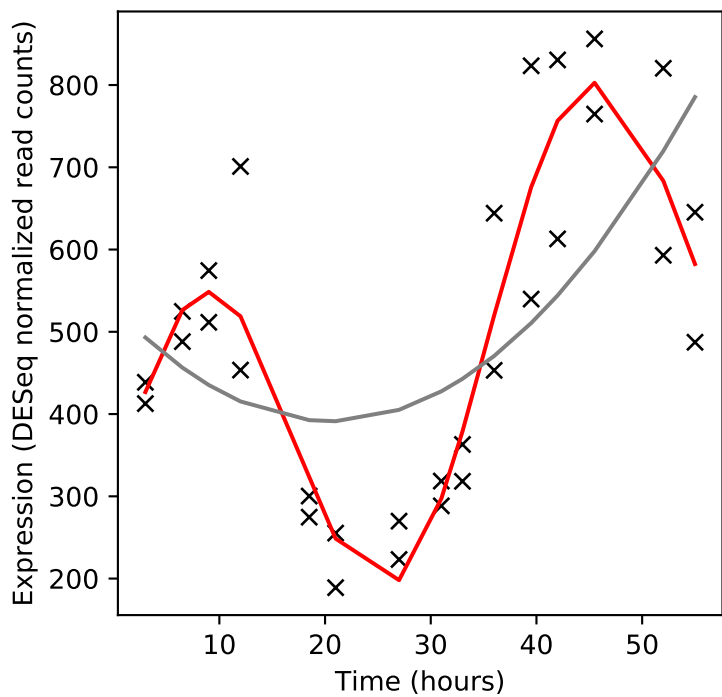

Rv3910c/-

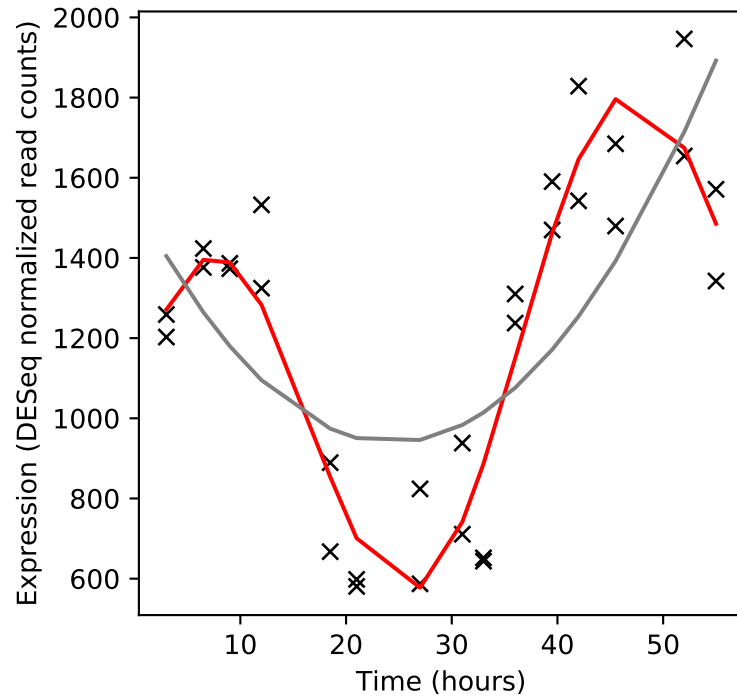

Rv3911/sigM

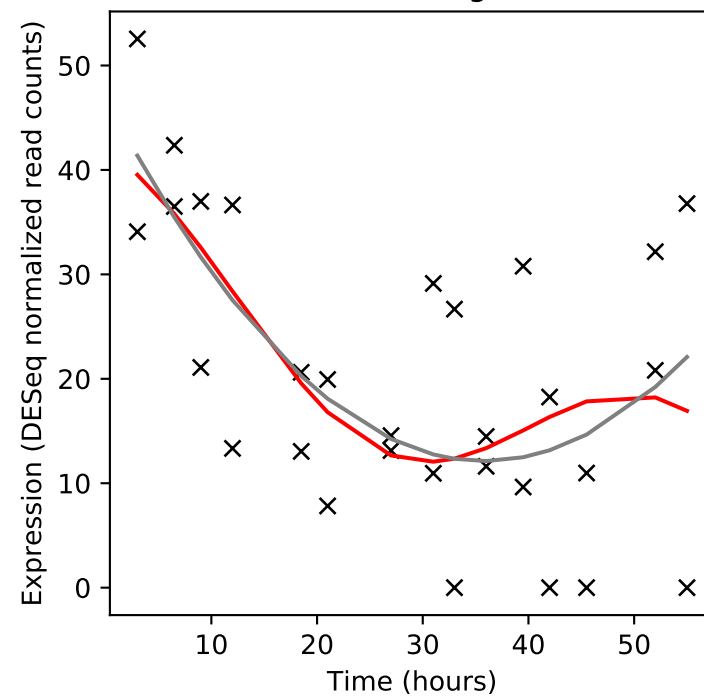

Rv3912/-

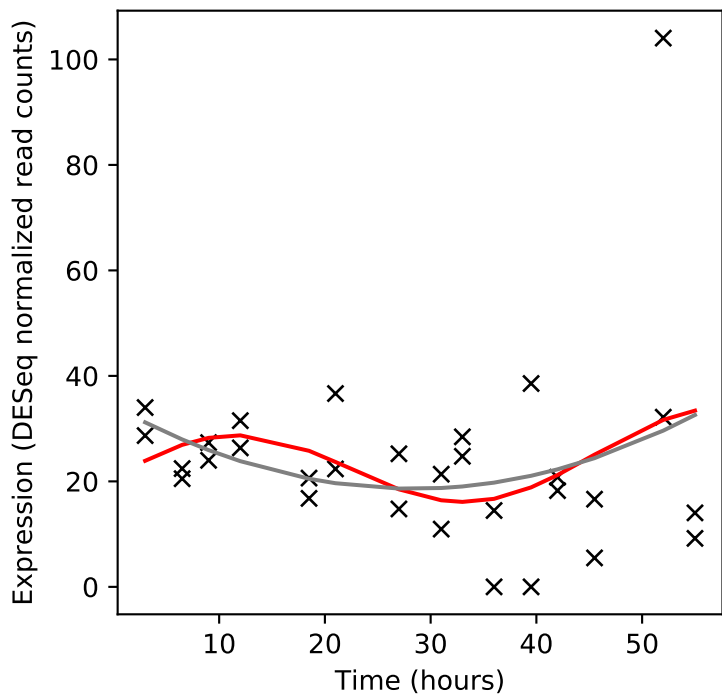

Rv3913/trxB2

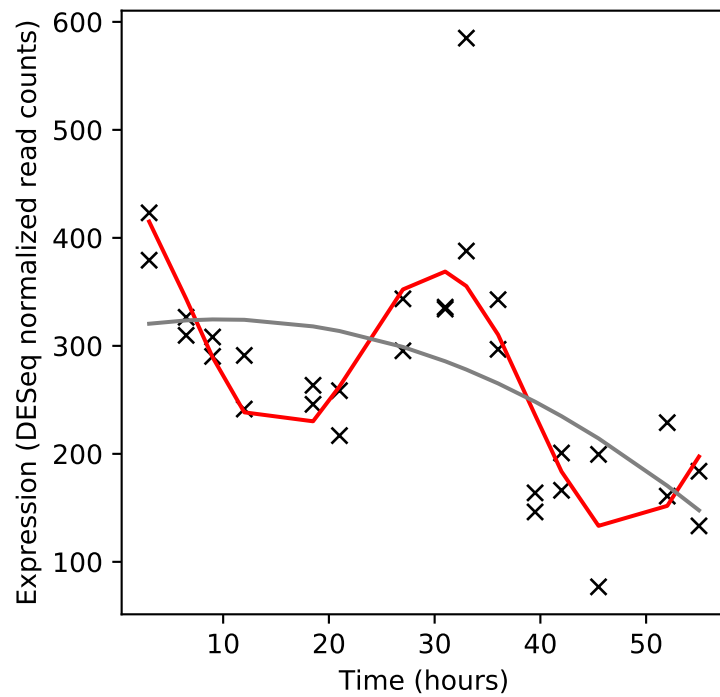

Rv3914/trxC

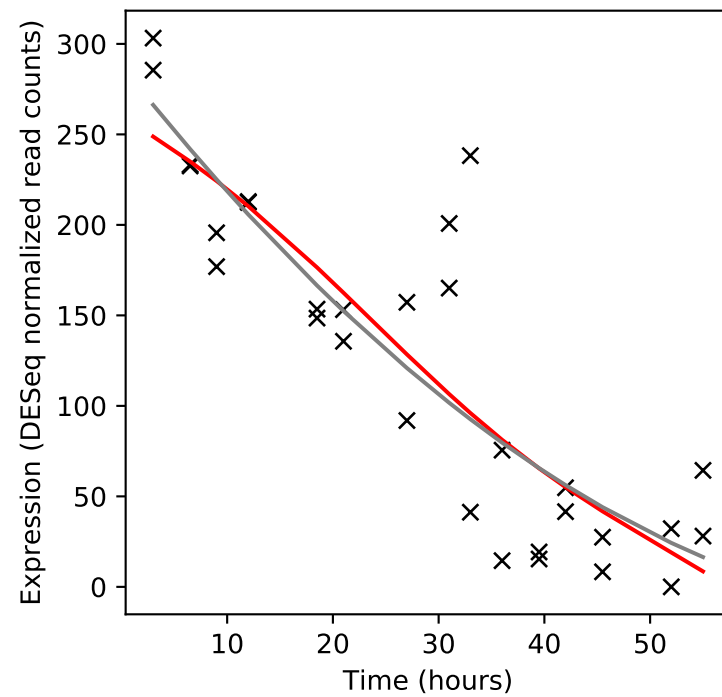

Rv3915/-

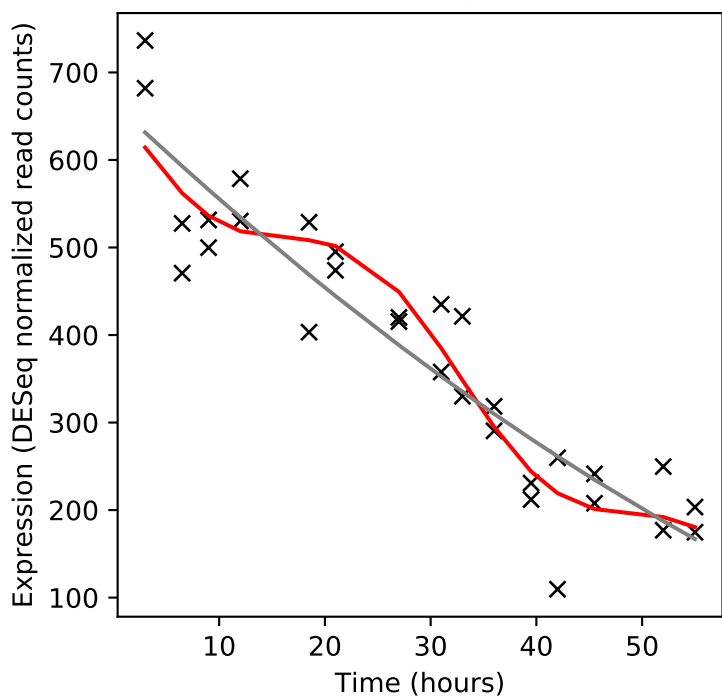

Rv3916c/-

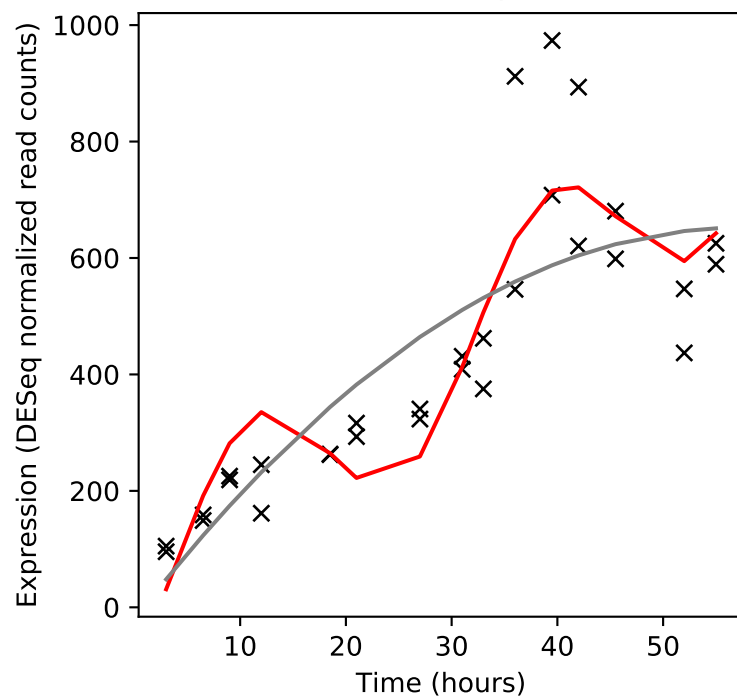

Rv3917c/parB

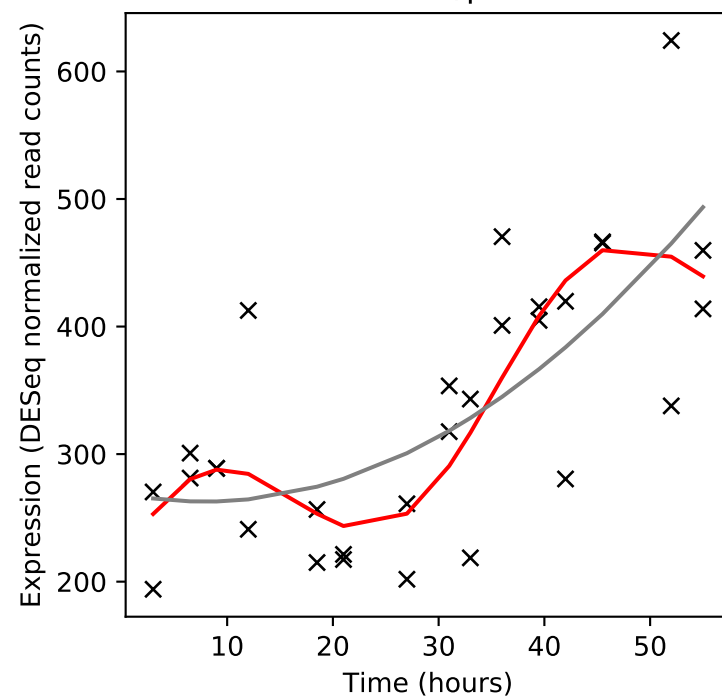

Rv3918c/parA

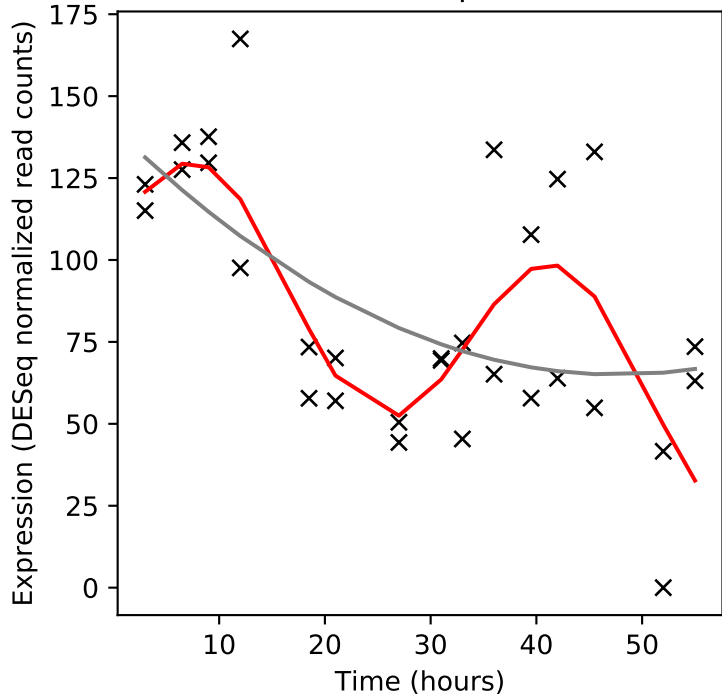

Rv3919c/gid

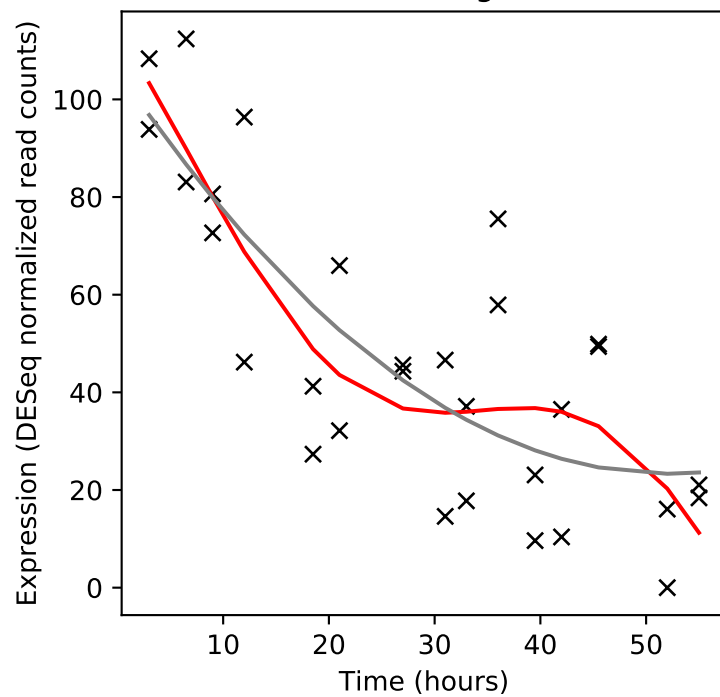

Rv3920c/-

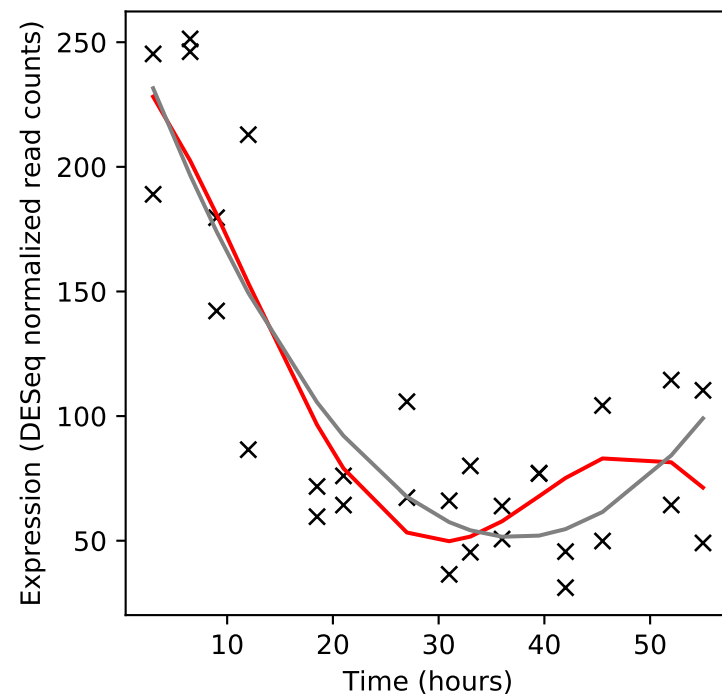

Rv3921c/-

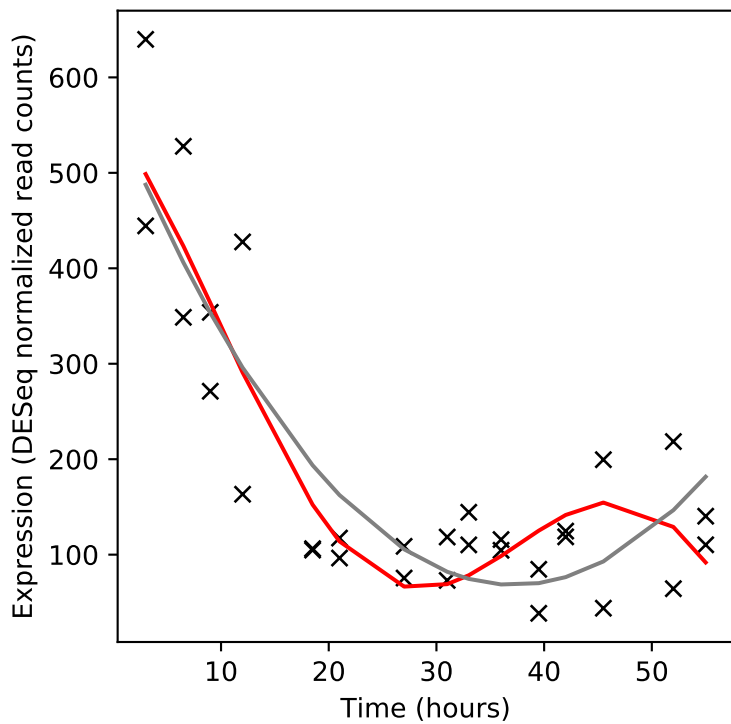

Rv3922c/-

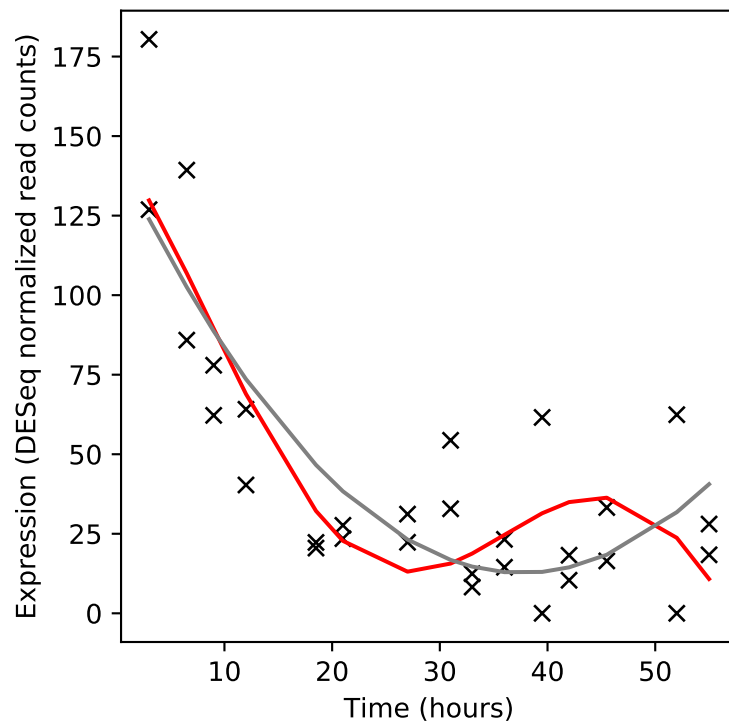

Rv3923c/rnpA

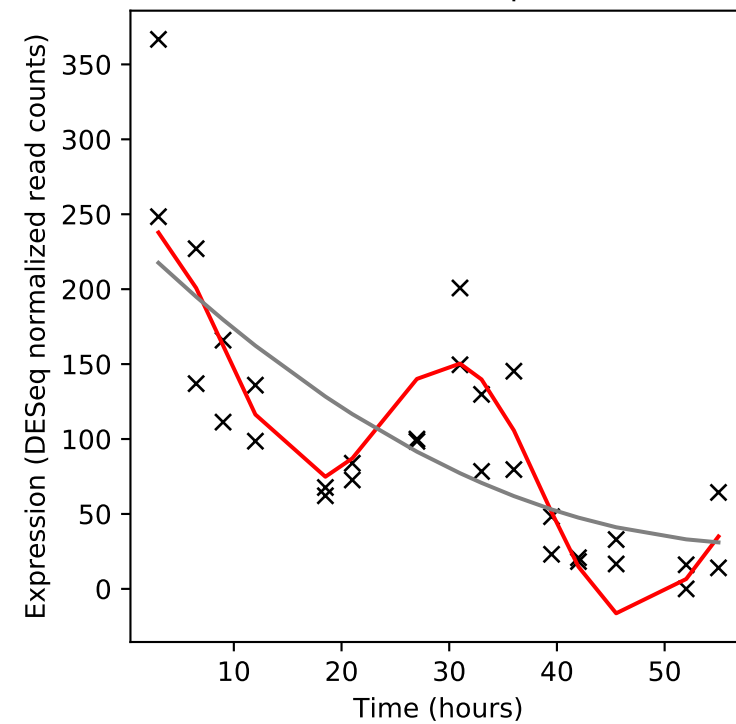

Rv3924c/rpmH

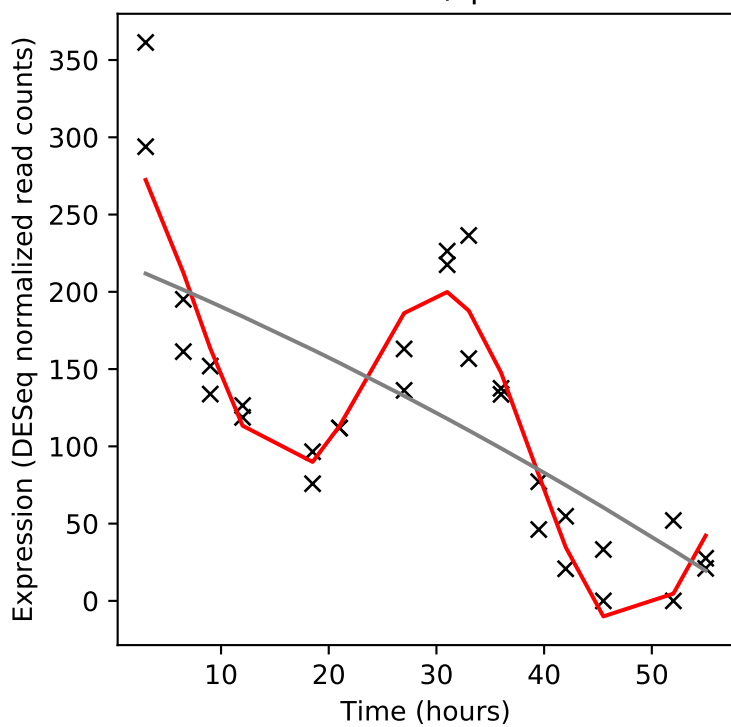

Rv0001/dnaA

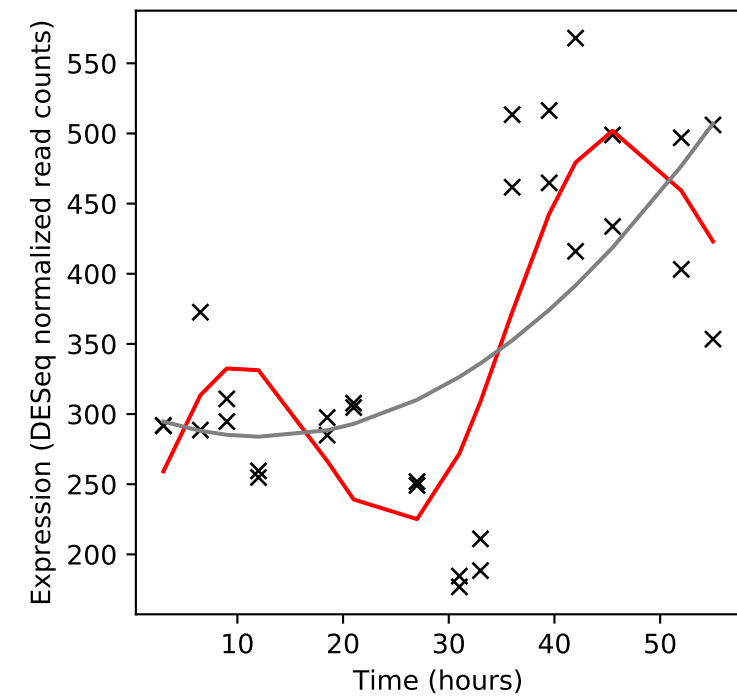

Rv0002/dnaN

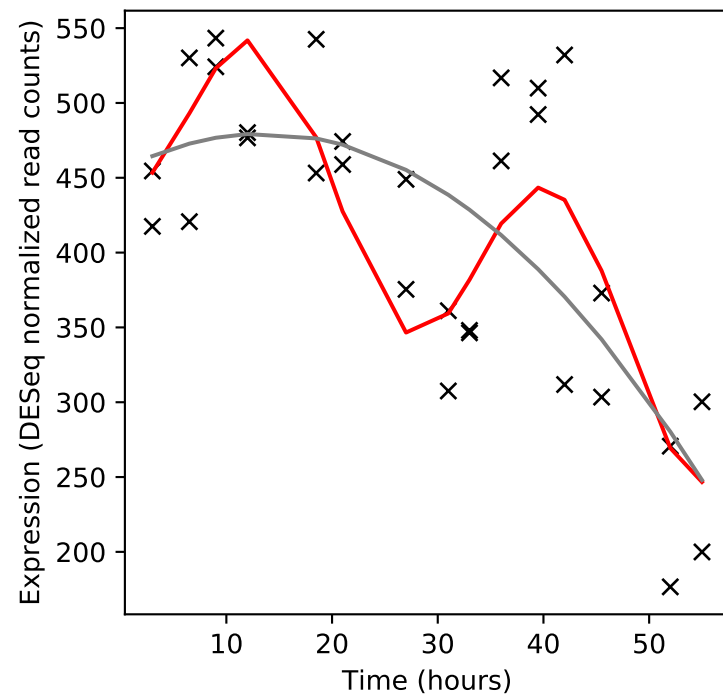

Rv0003/recF

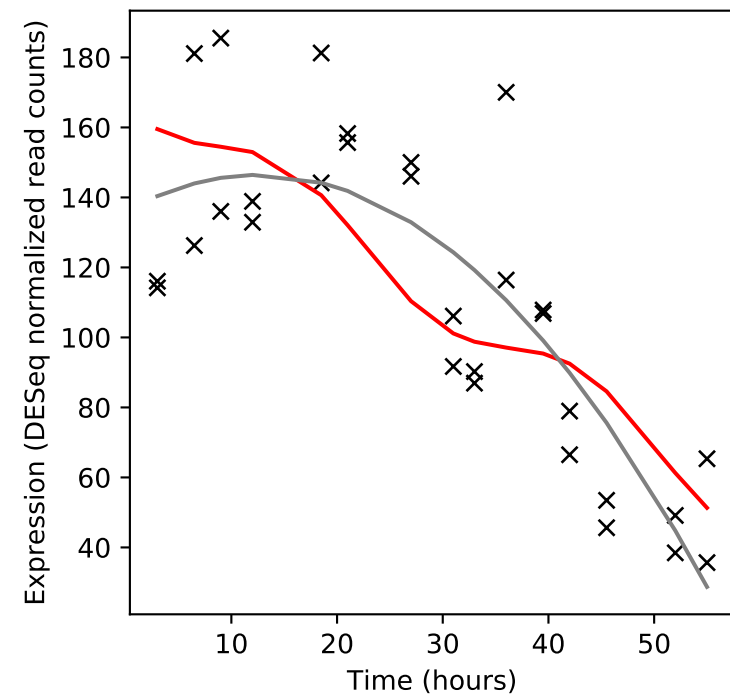

Rv0004/-

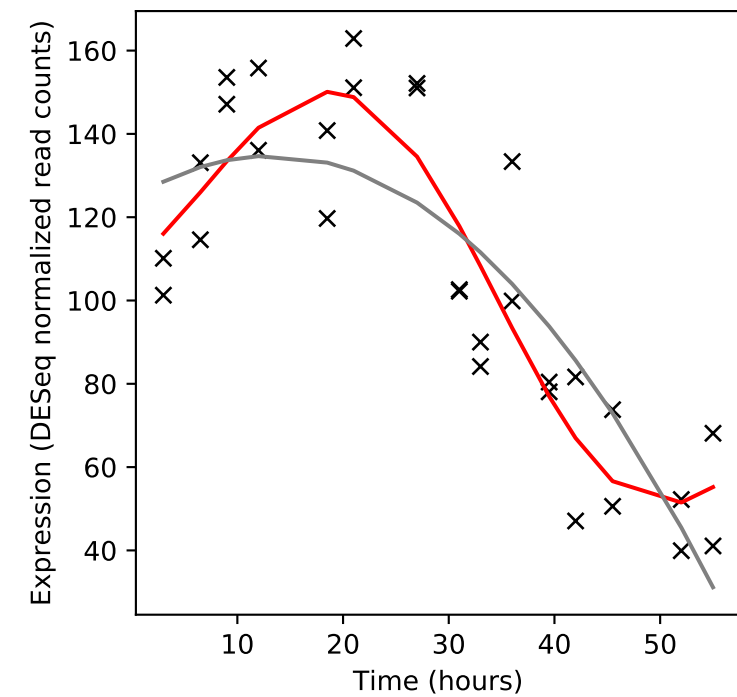

Rv0005/gyrB

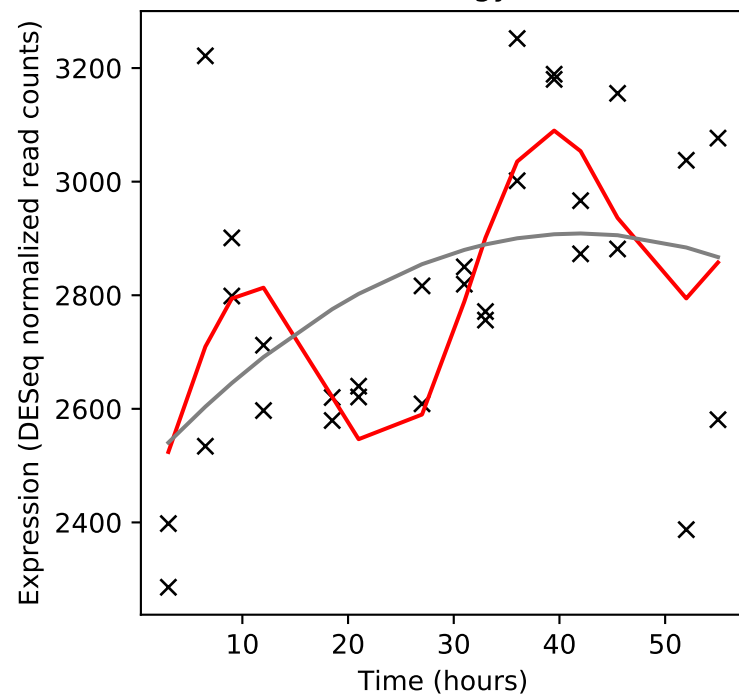

Rv0006/gyrA

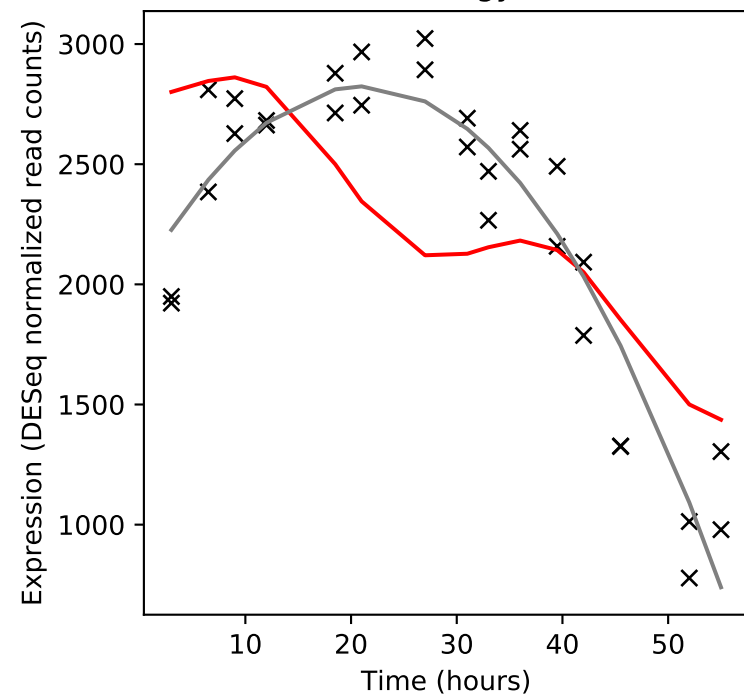

Rv0007/-

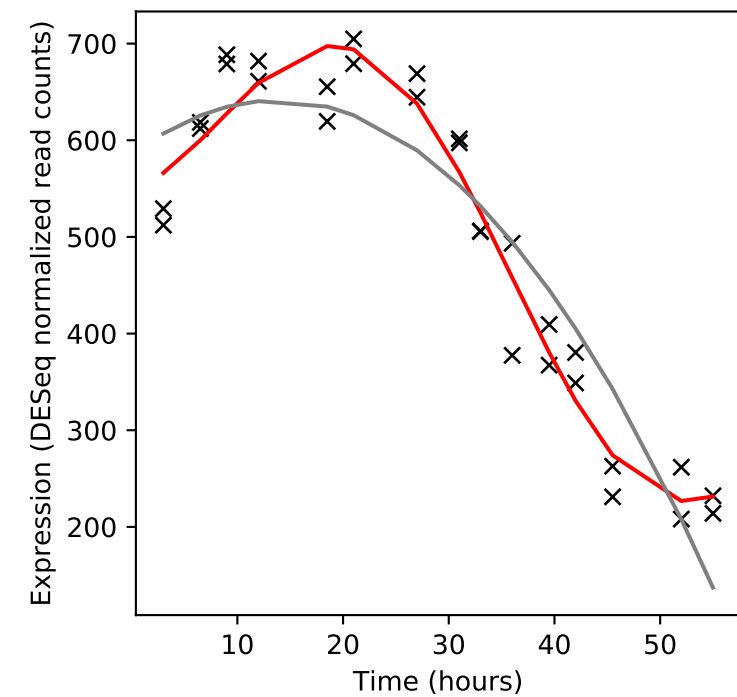

Rv0008c/-

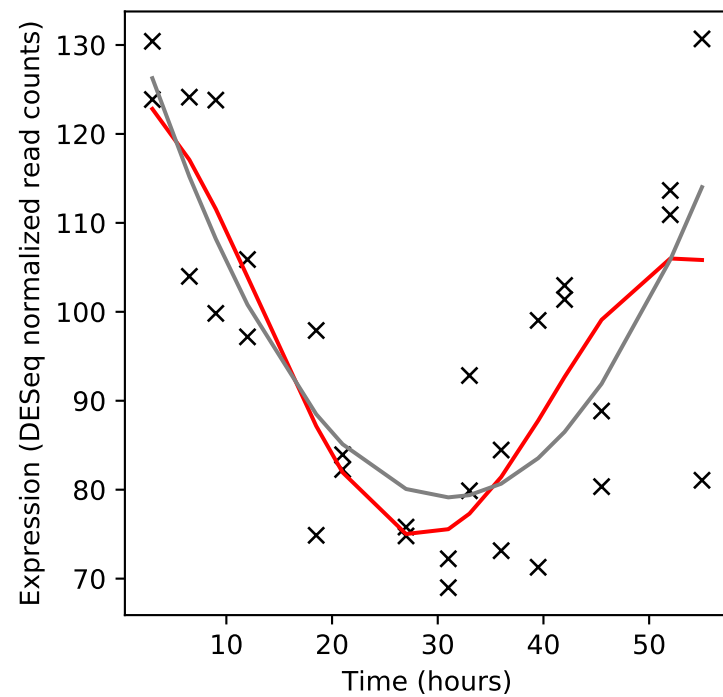

Rv0009/ppiA

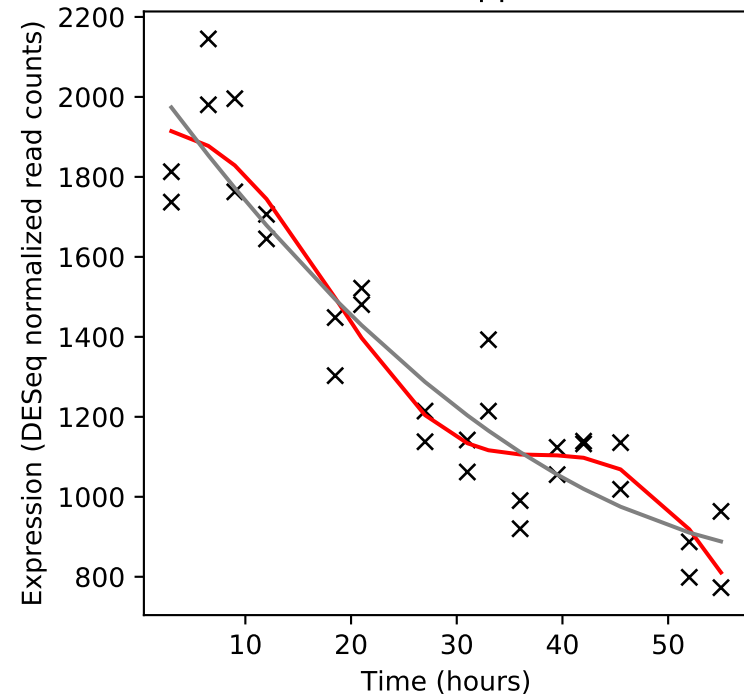

Rv0010c/-

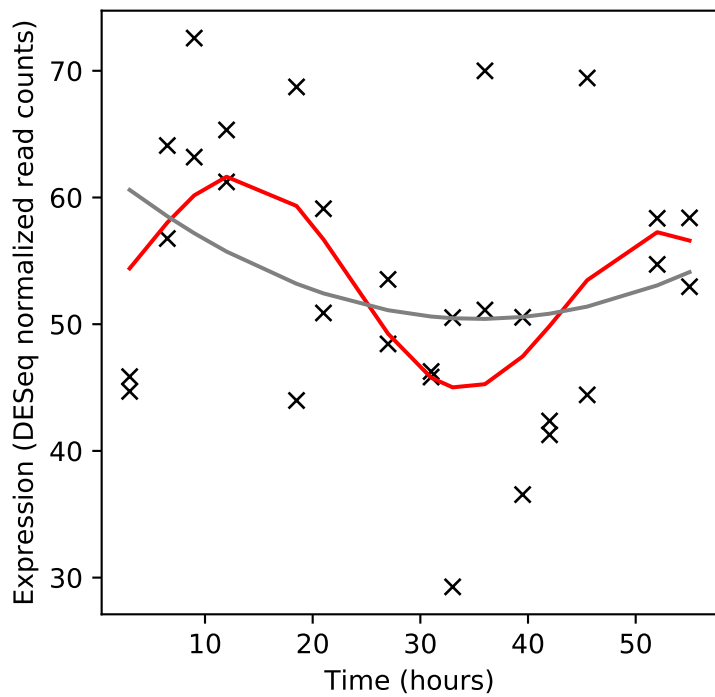

Rv0011c/-

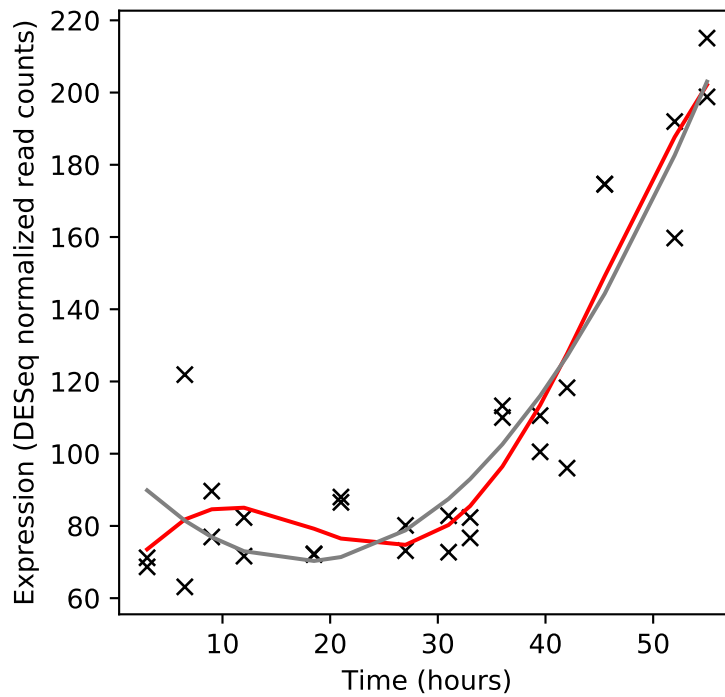

Rv0012c/-

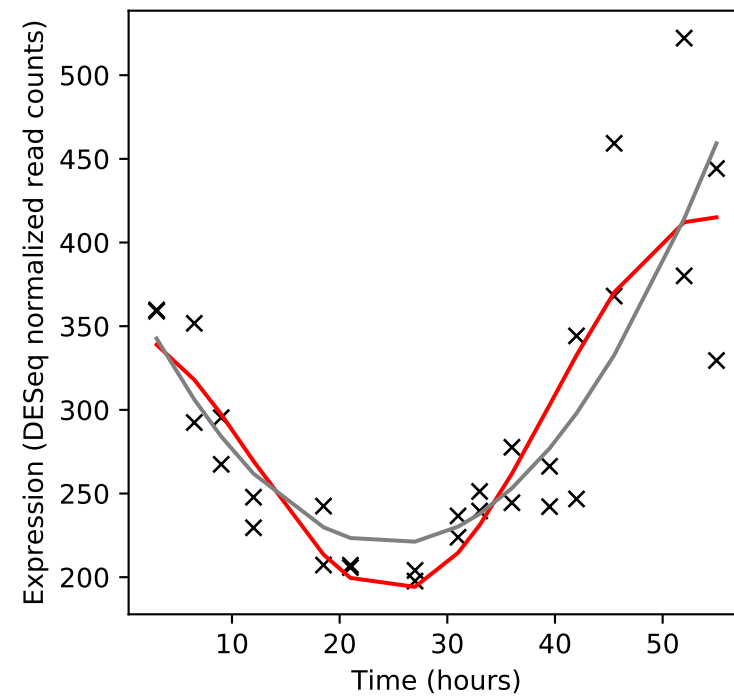

Rv0013/trpG

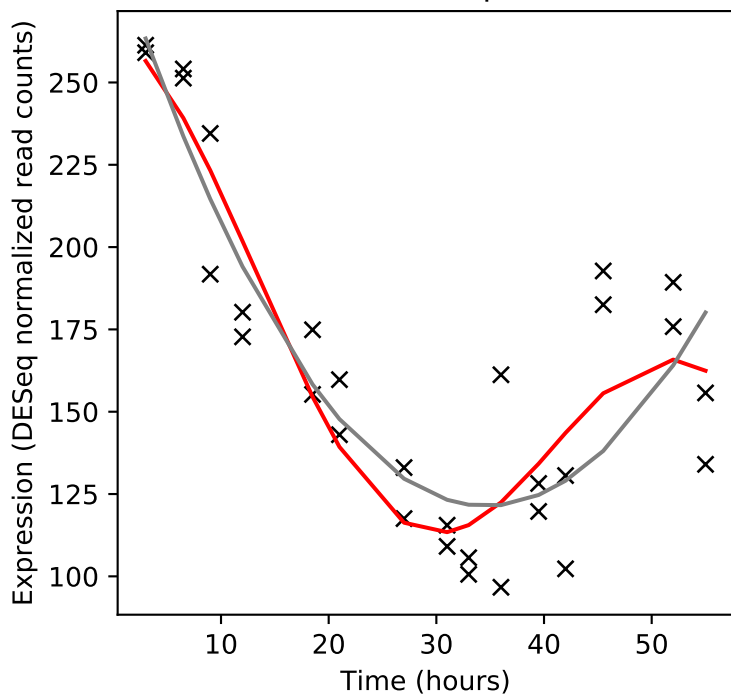

Rv0014c/pknB

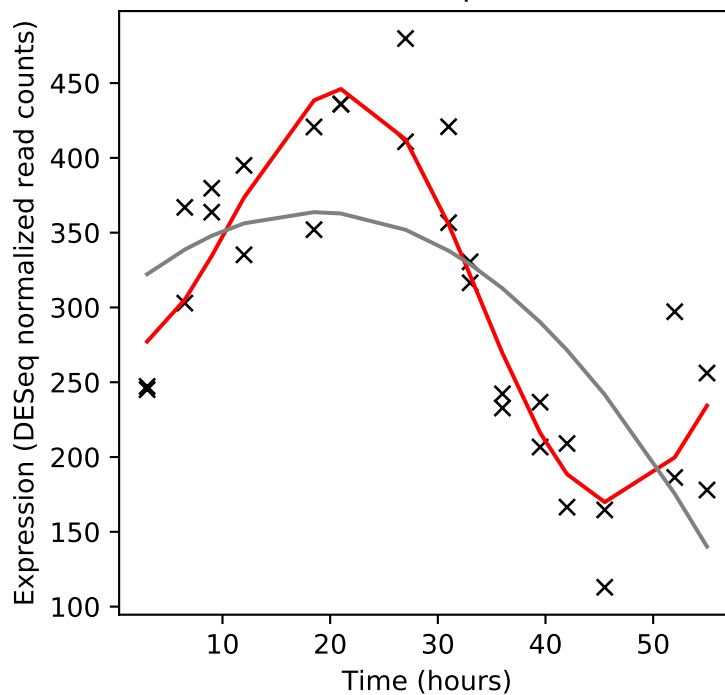

Rv0015c/pknA

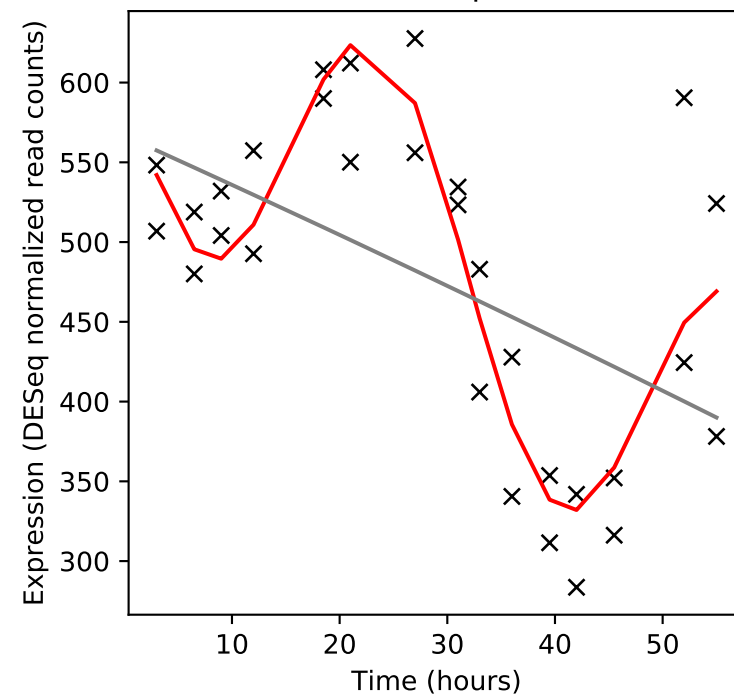

Rv0016c/pbpA

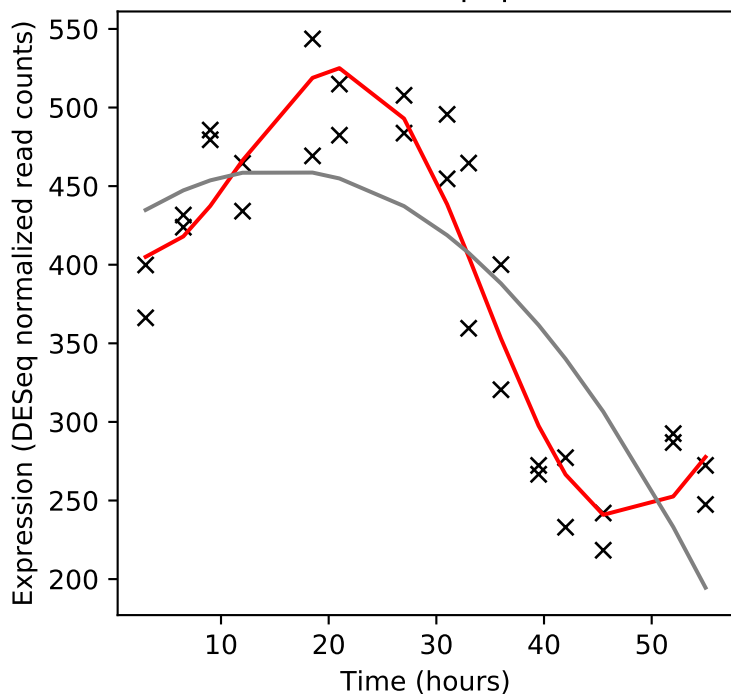

Rv0017c/rodA

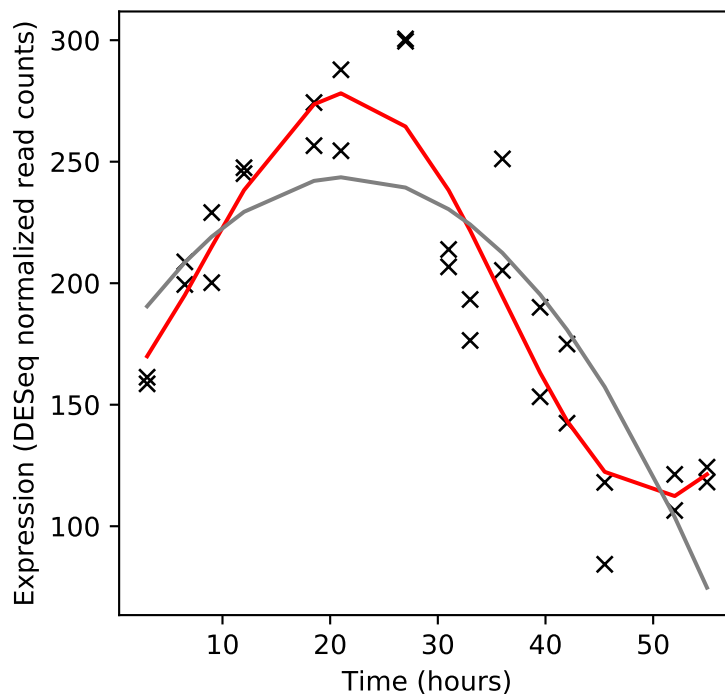

Rv0018c/pstP

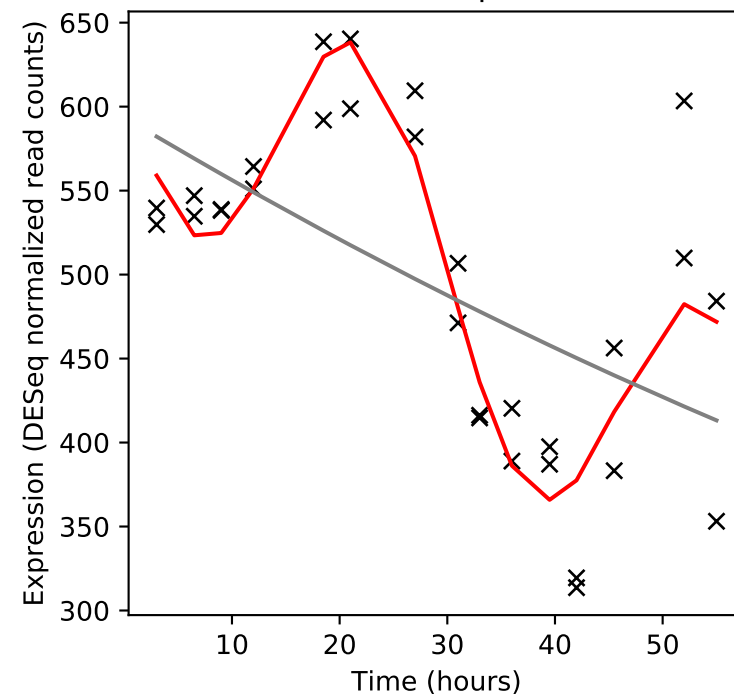



Rv0019c/fhaB

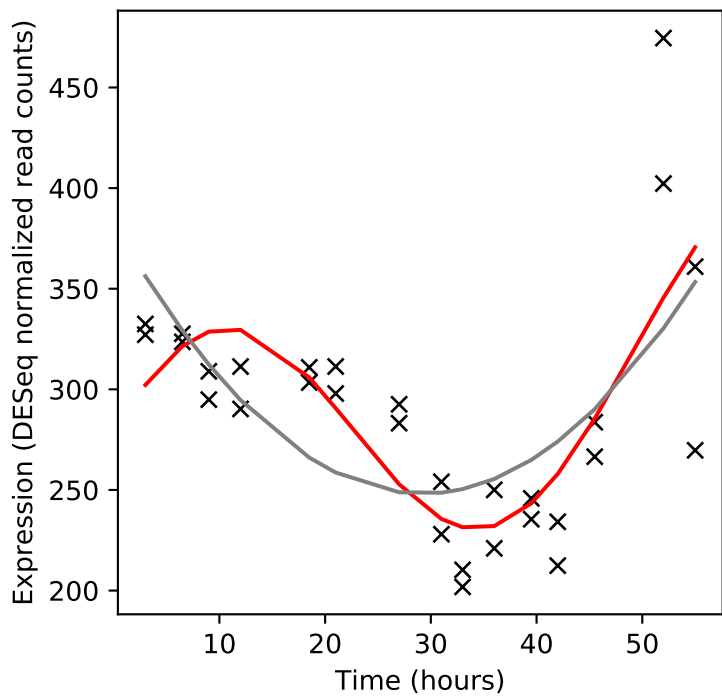

Rv0020c/fhaA

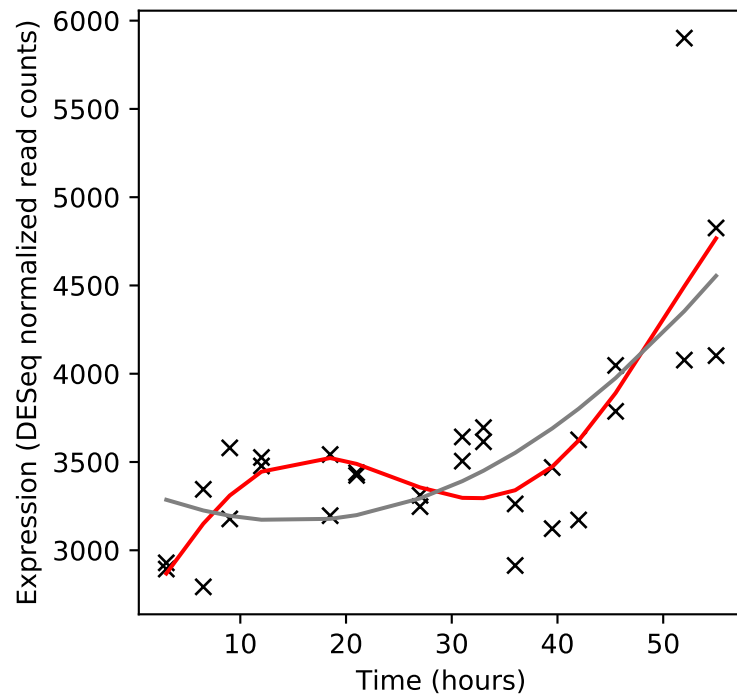

Rv0021c/-

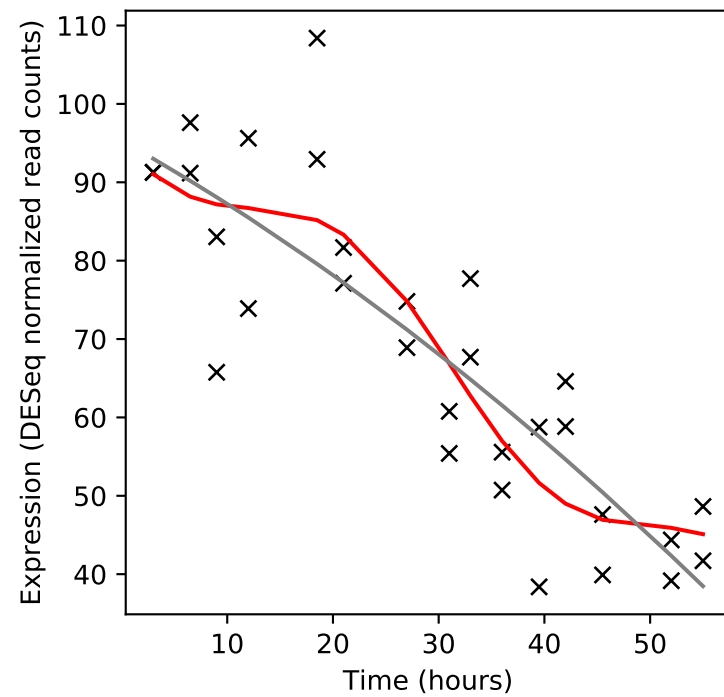

Rv0022c/whiB5

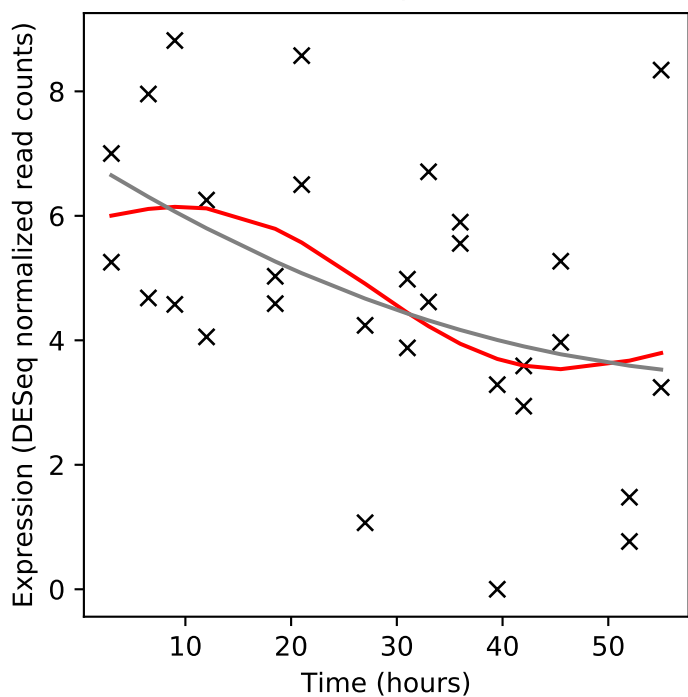

Rv0023/-

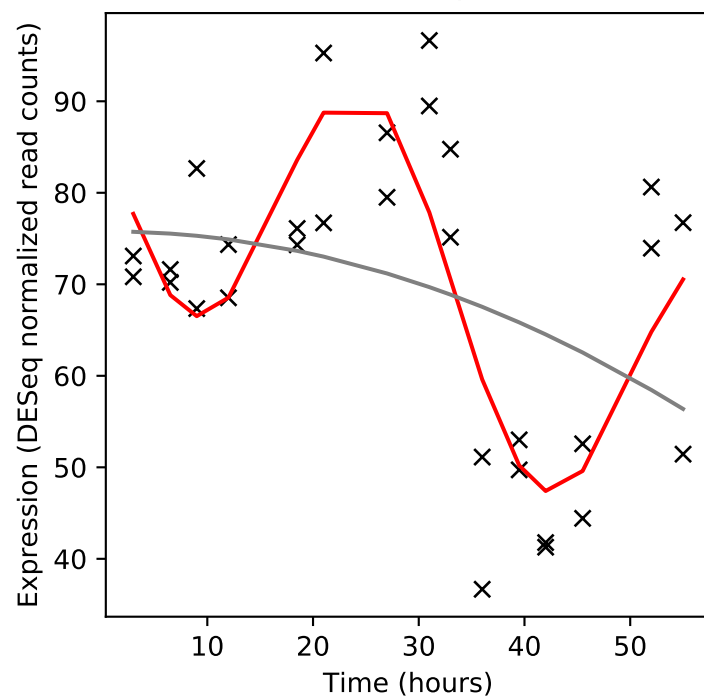

Rv0024/-

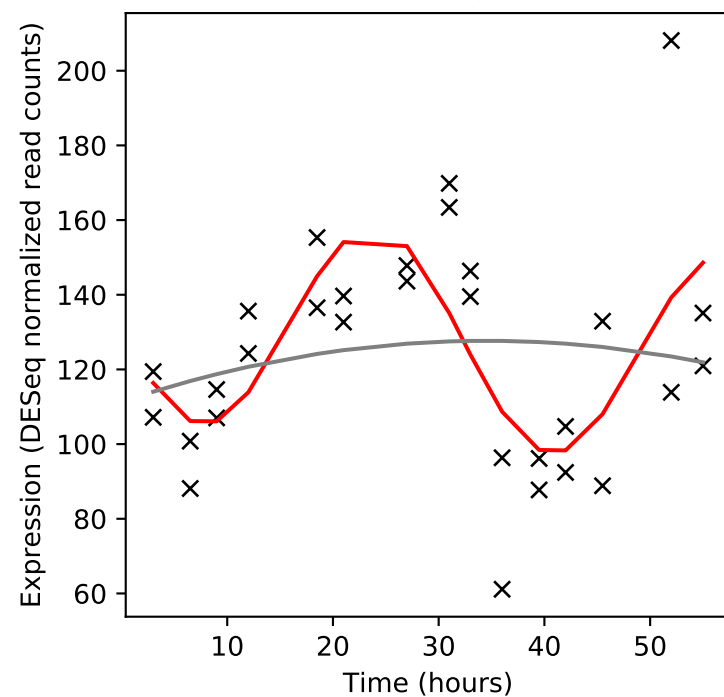

Rv0025/-

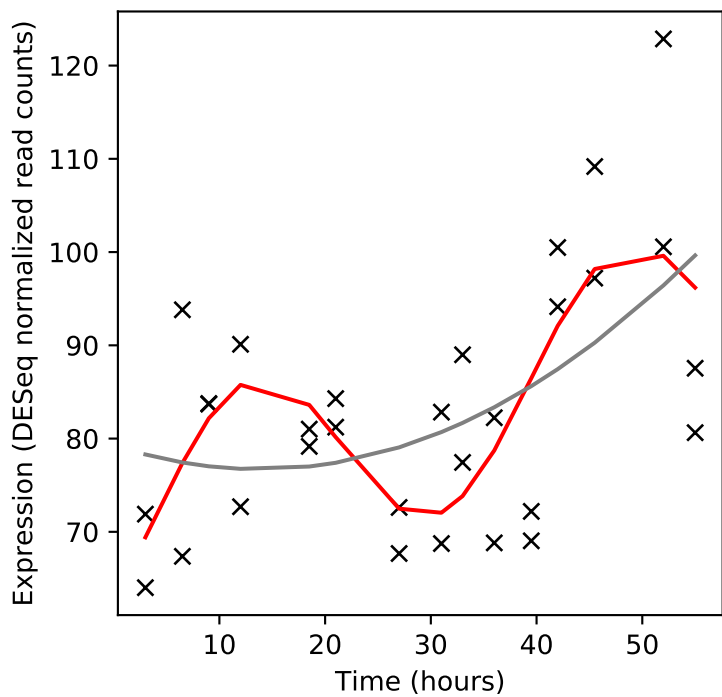

Rv0026/-

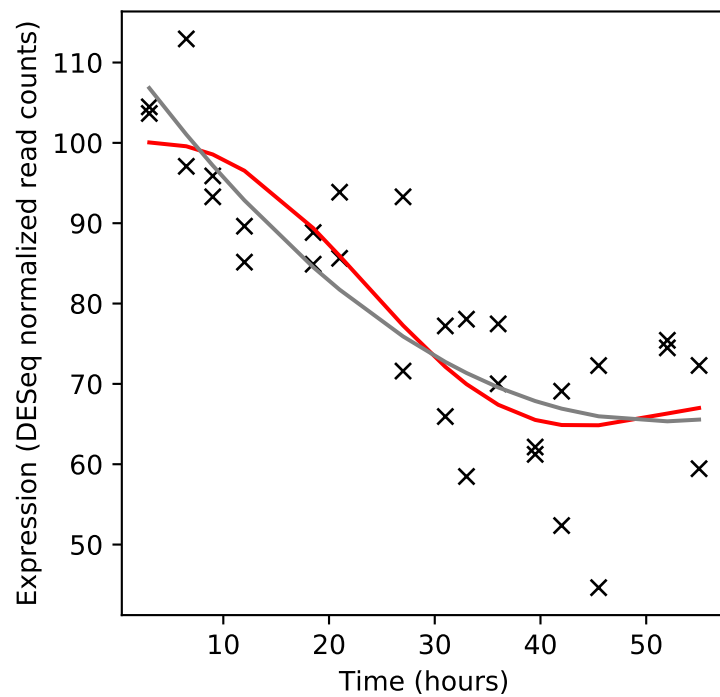

Rv0027/-

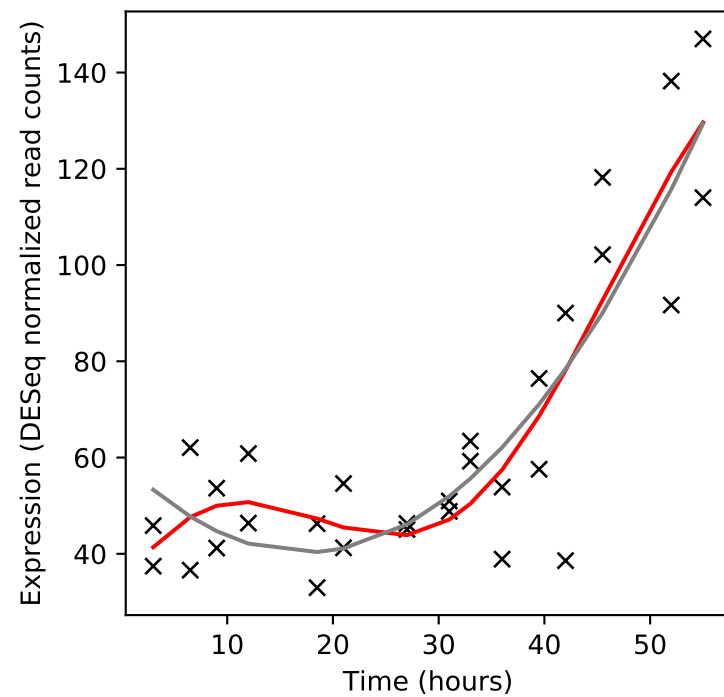

Rv0028/-

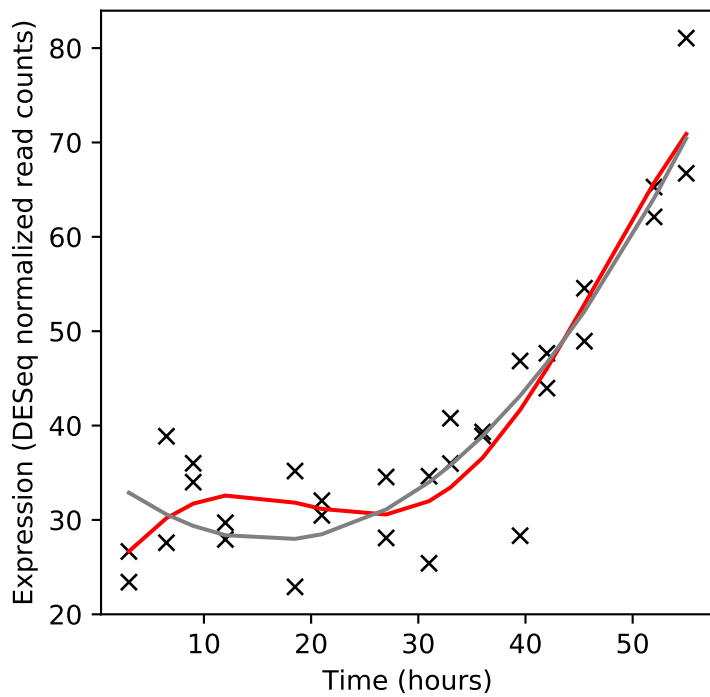

Rv0029/-

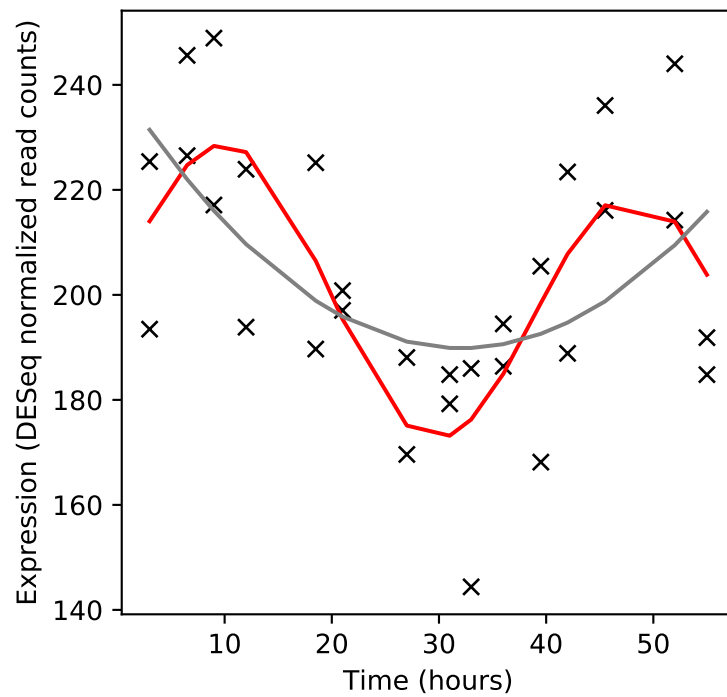

Rv0030/-

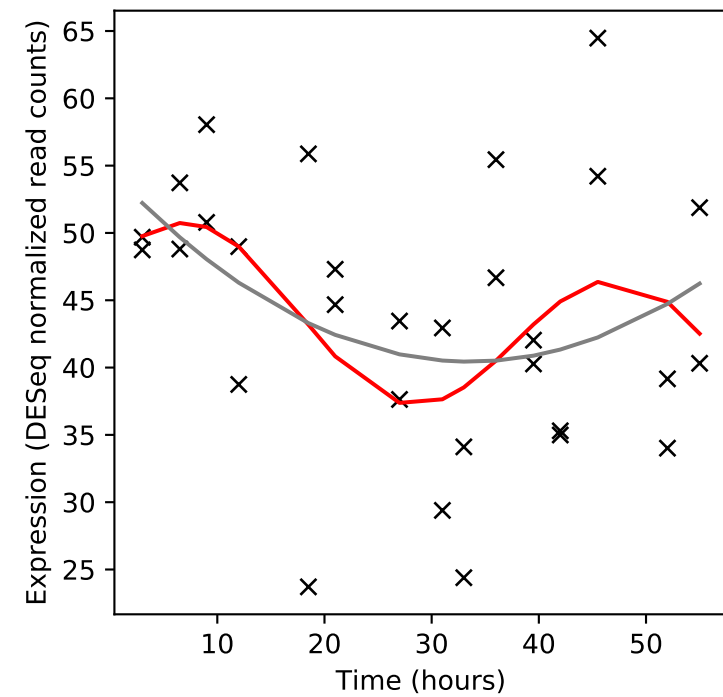

Rv0031/-

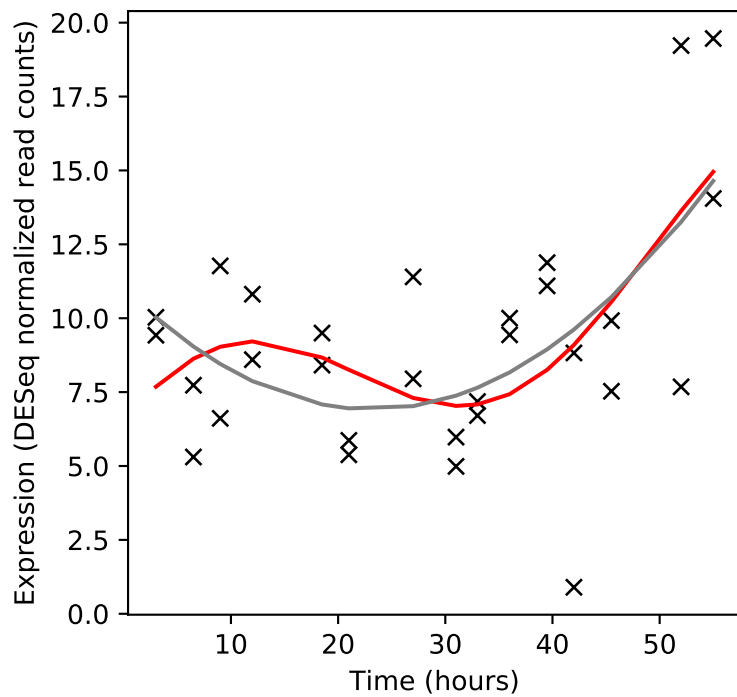

Rv0032/bioF2

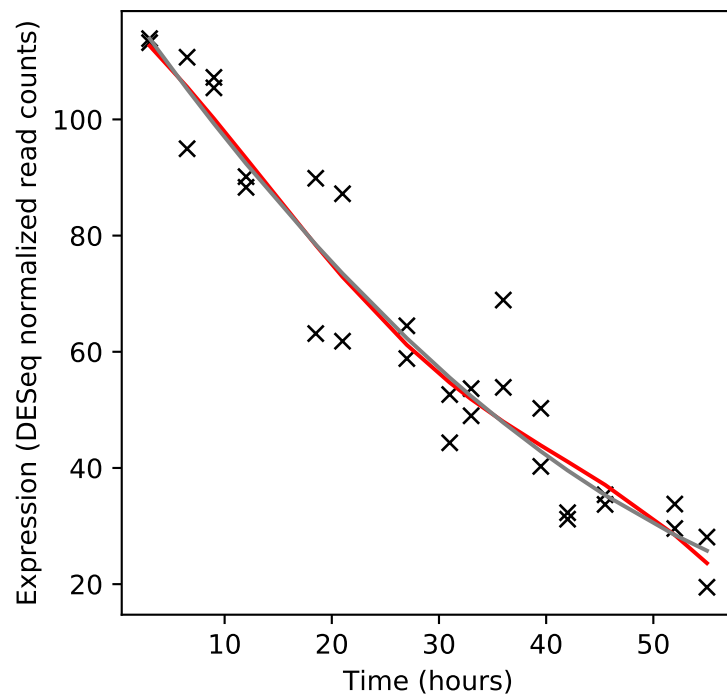

Rv0033/acpA

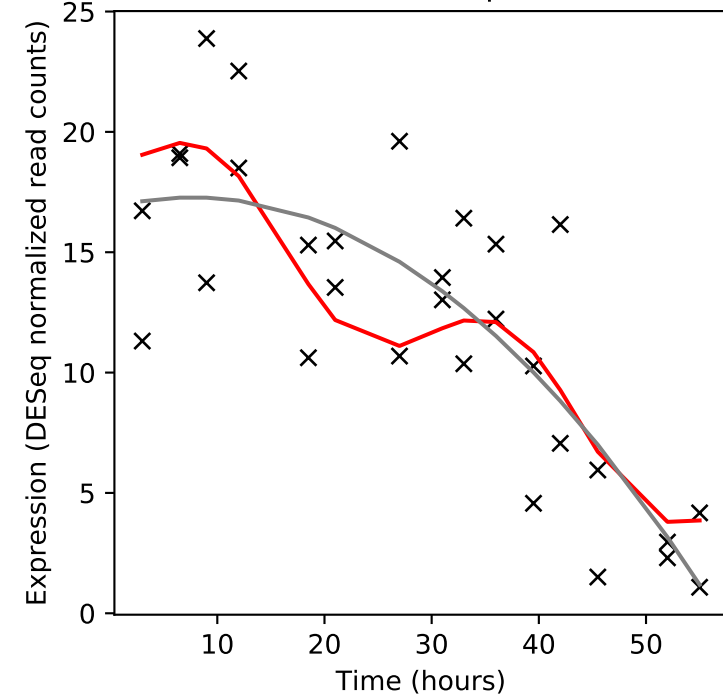

Rv0034/-

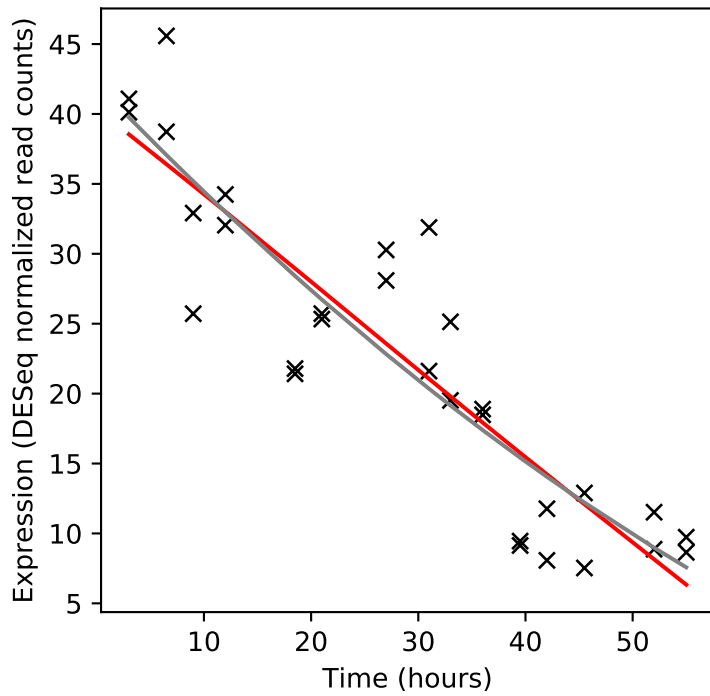

Rv0035/fadD34

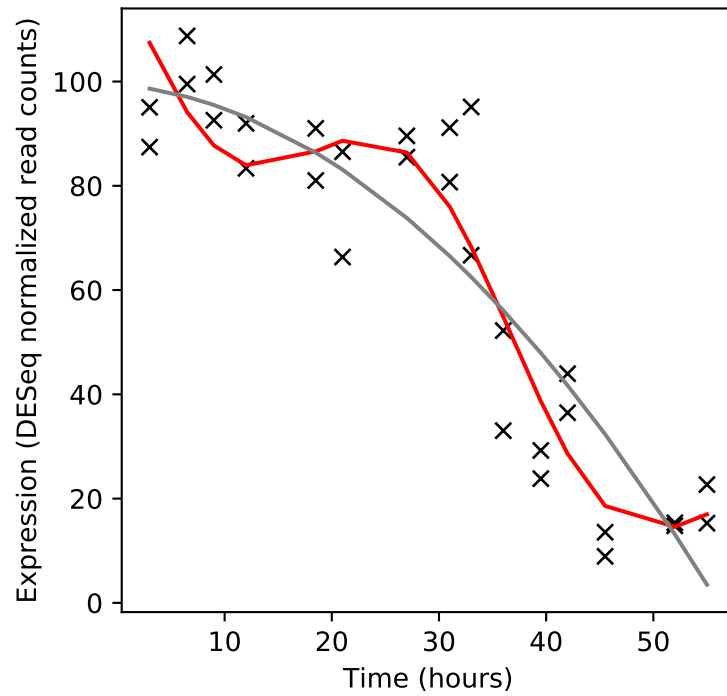

Rv0036c/-

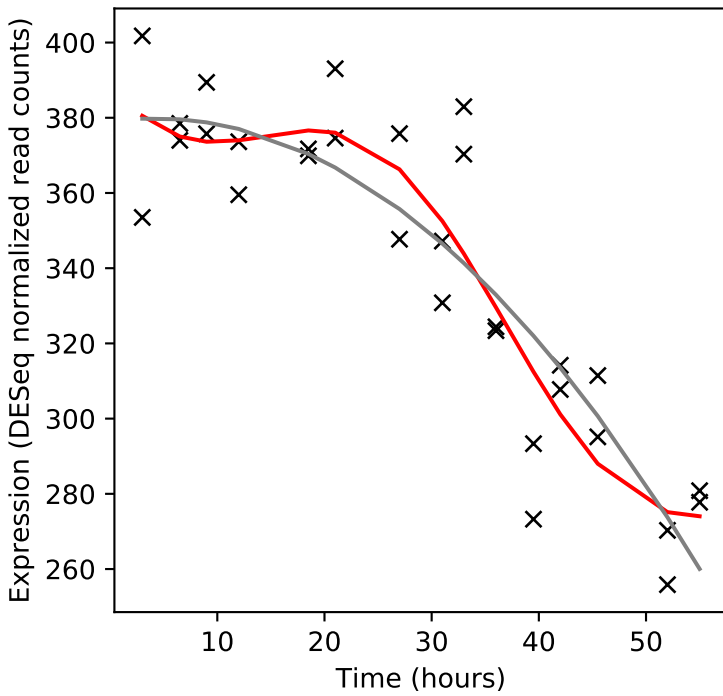

Rv0037c/-

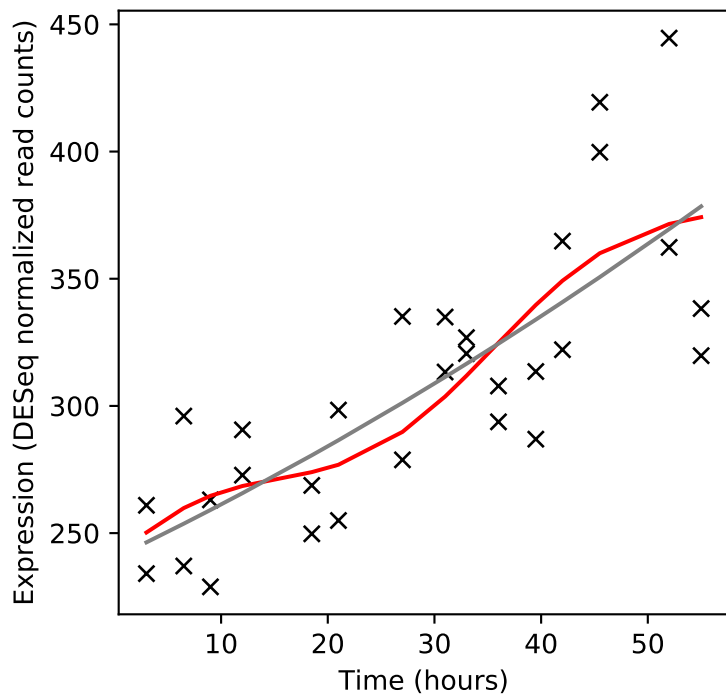

Rv0038/-

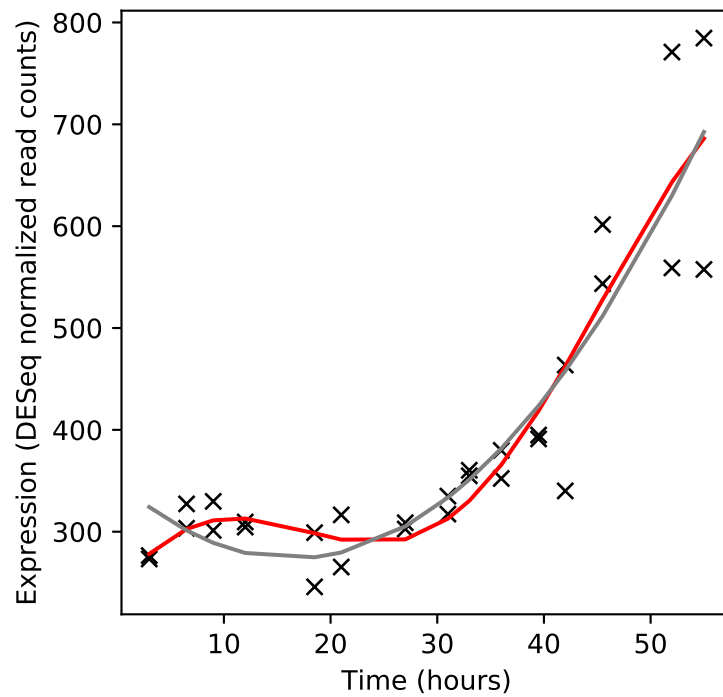

Rv0039c/-

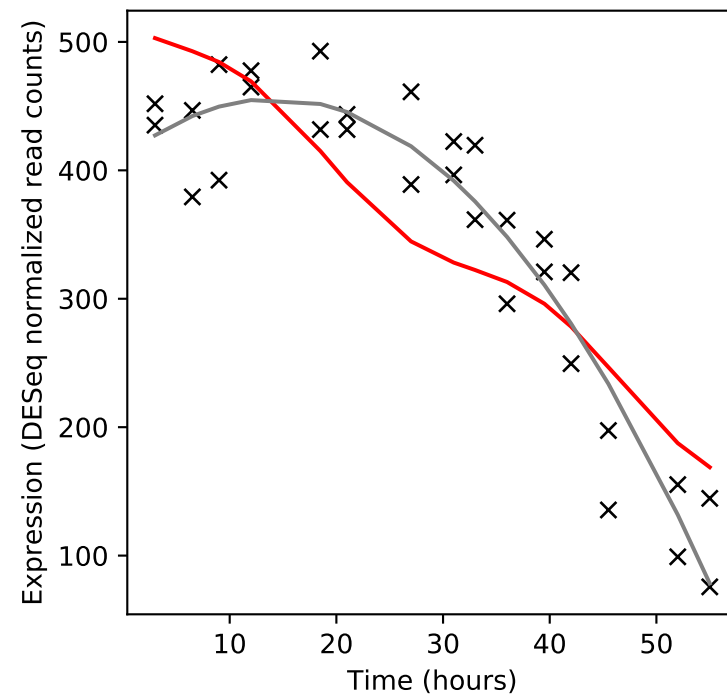

Rv0040c/mtc28

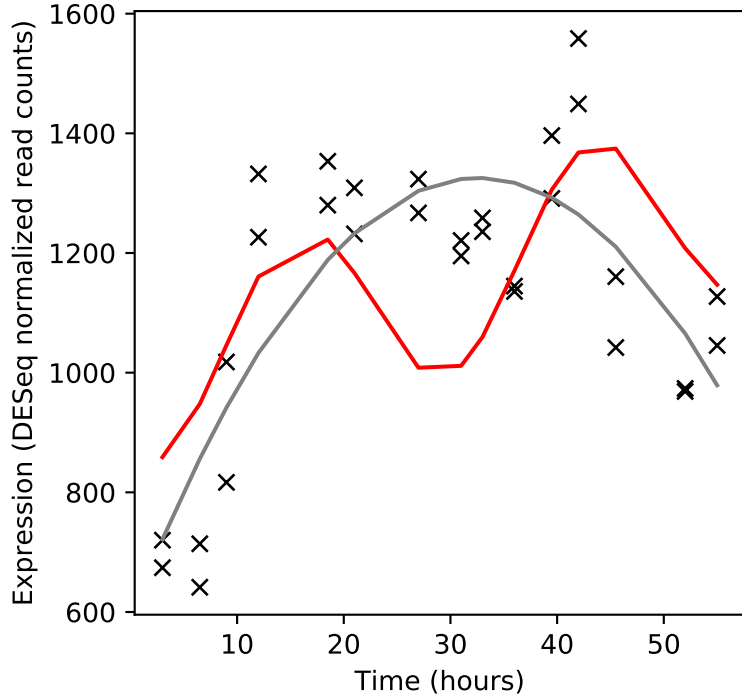

Rv0041/leuS

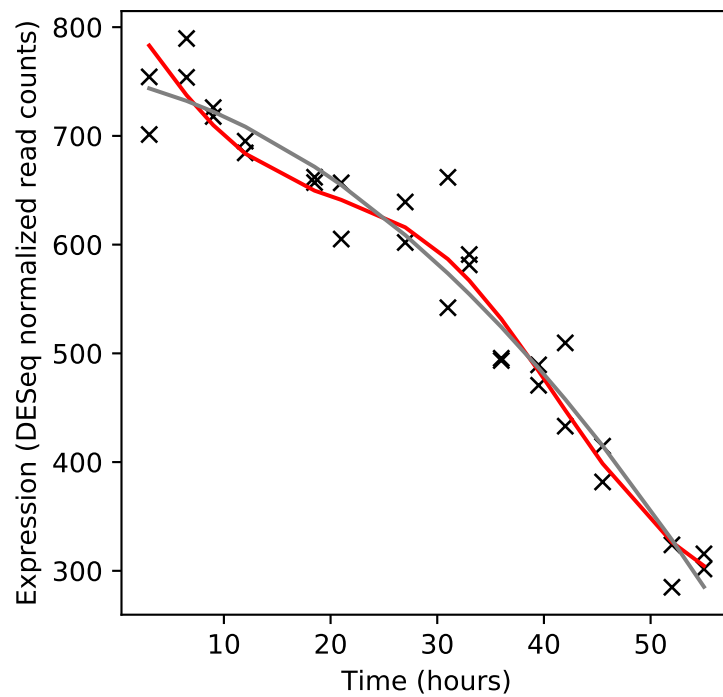

Rv0042c/-

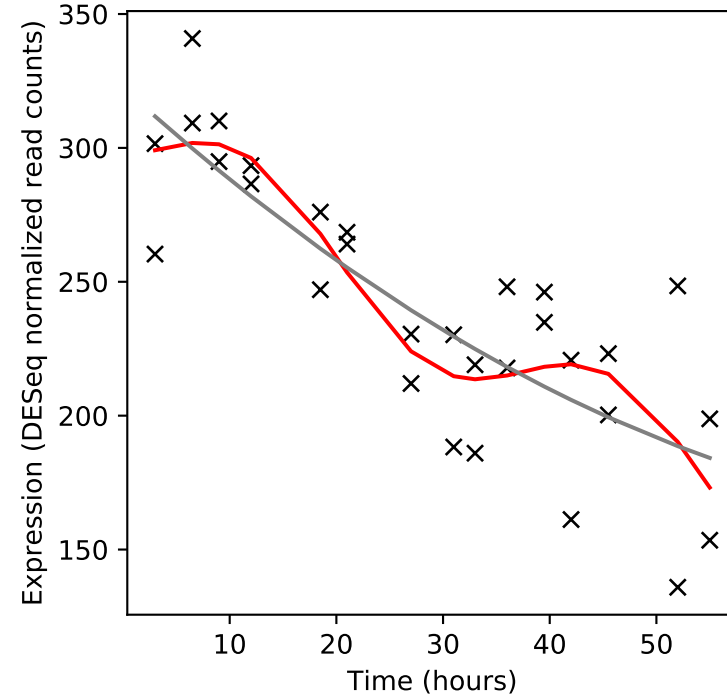

Rv0043c/-

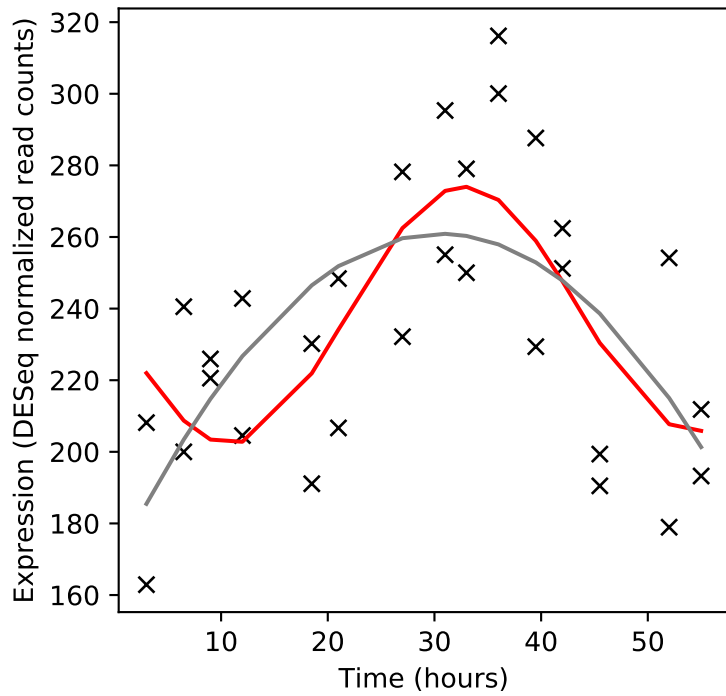

Rv0044c/-

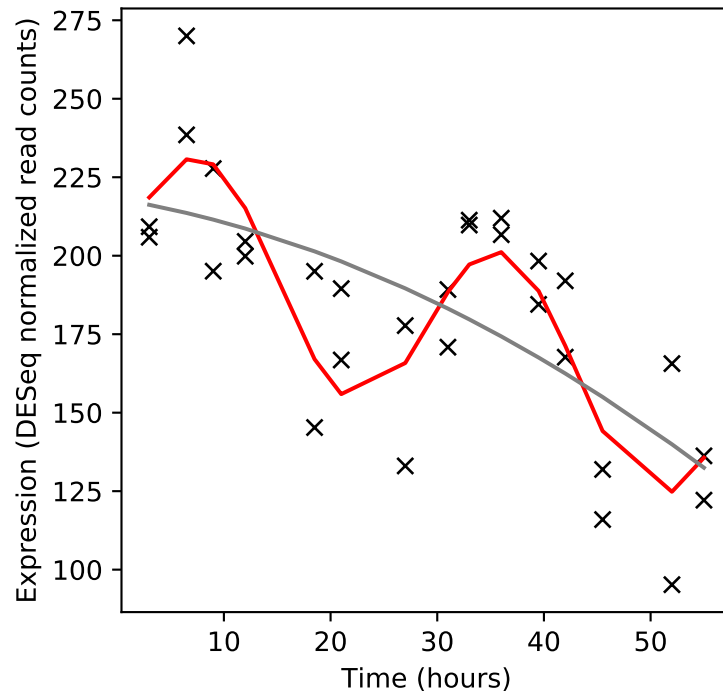

Rv0045c/-

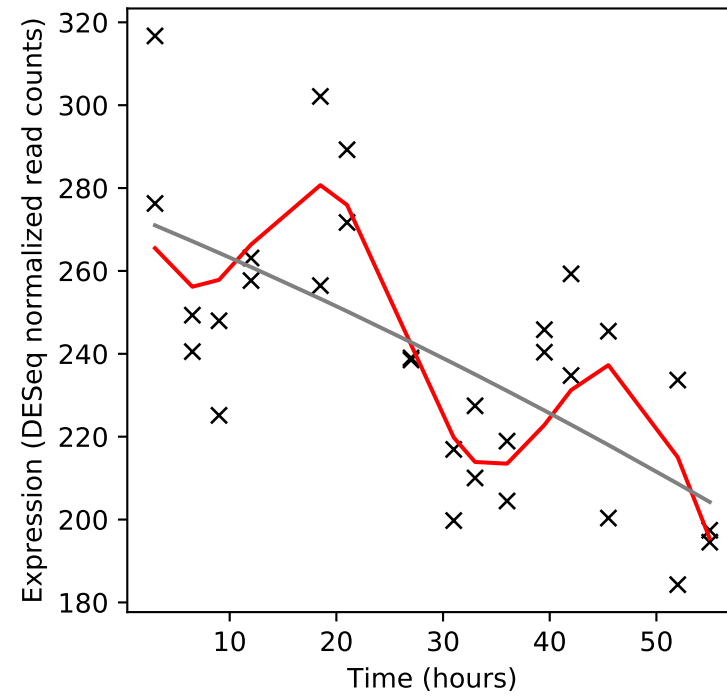

Rv0046c/ino1

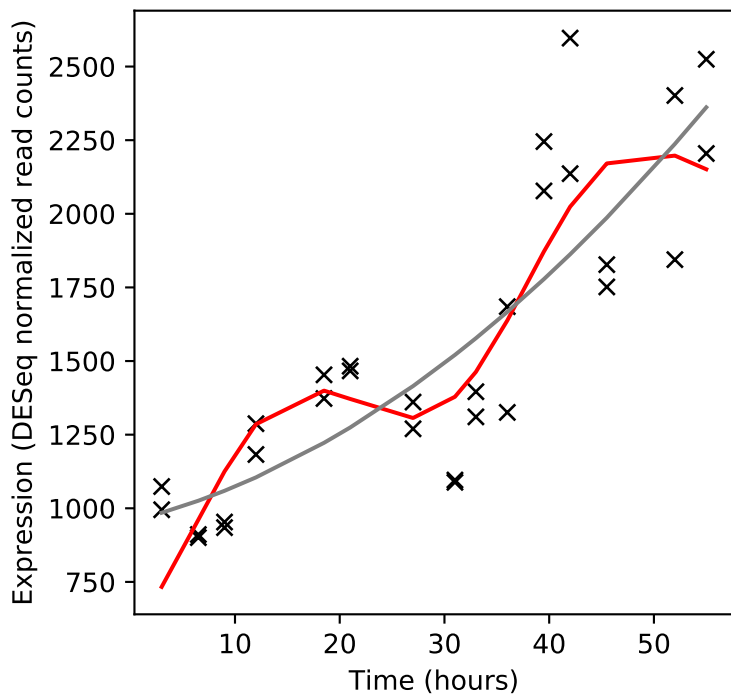

Rv0047c/-

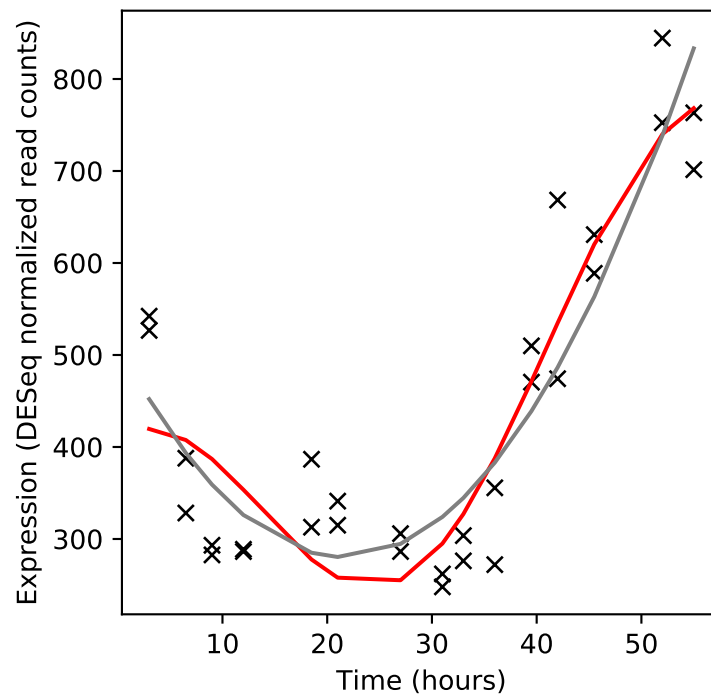

Rv0048c/-

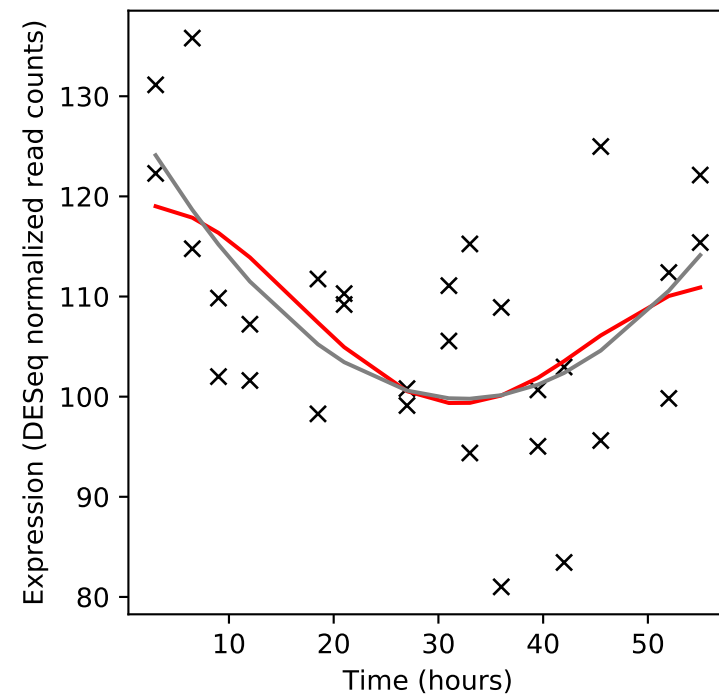

Rv0049/-

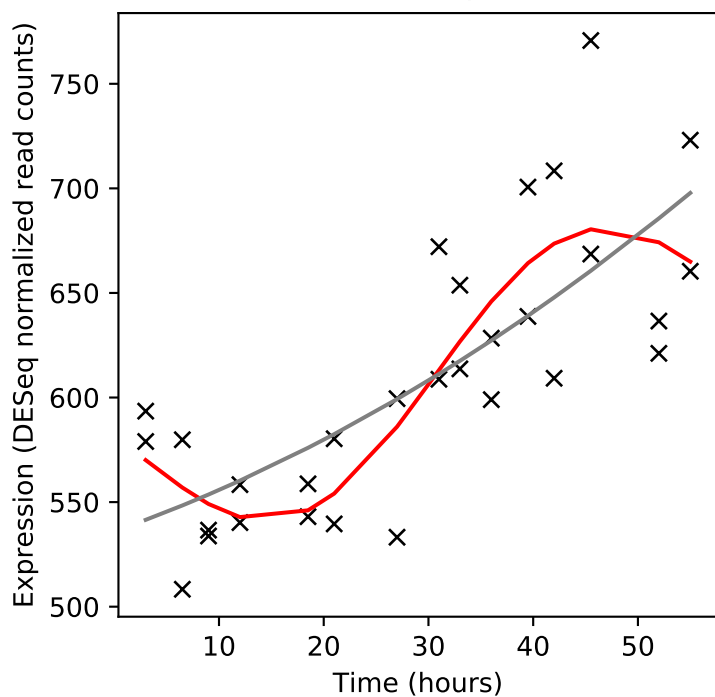

Rv0050/ponA1

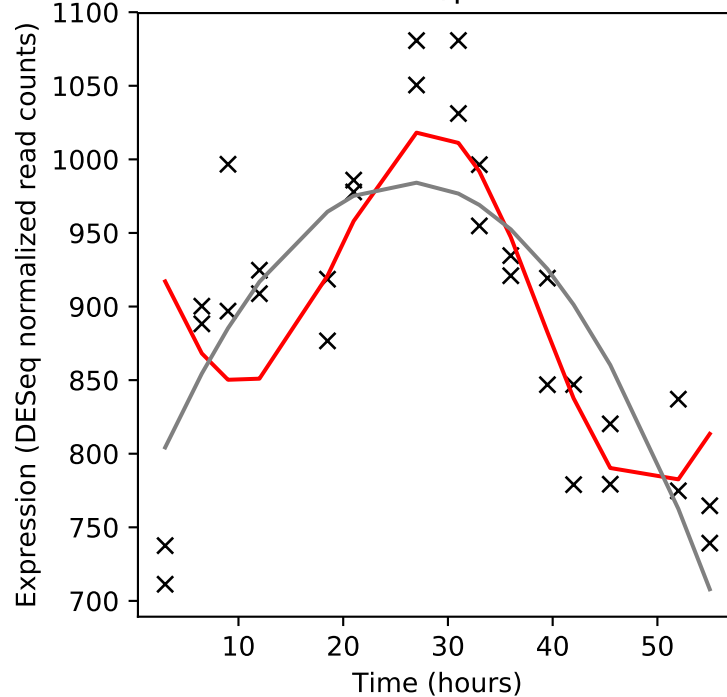

Rv0051/-

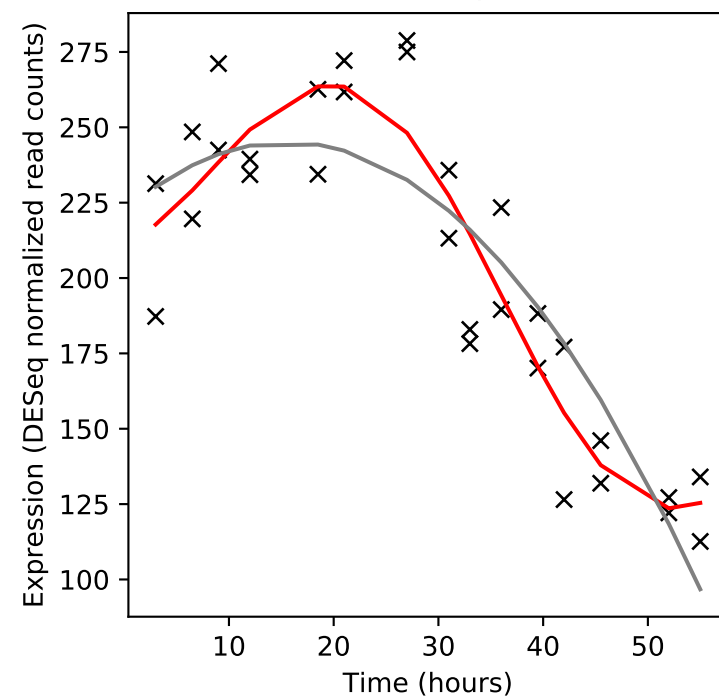

Rv0052/-

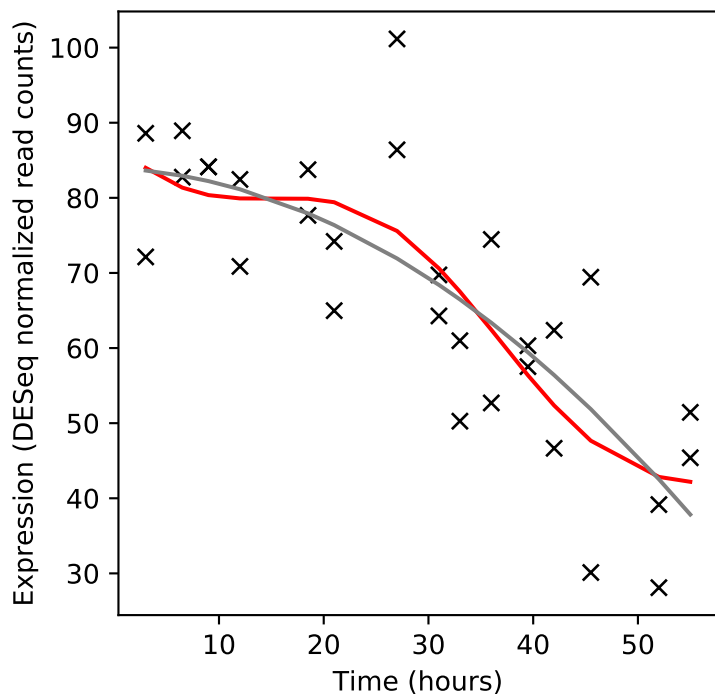

Rv0053/rpsF

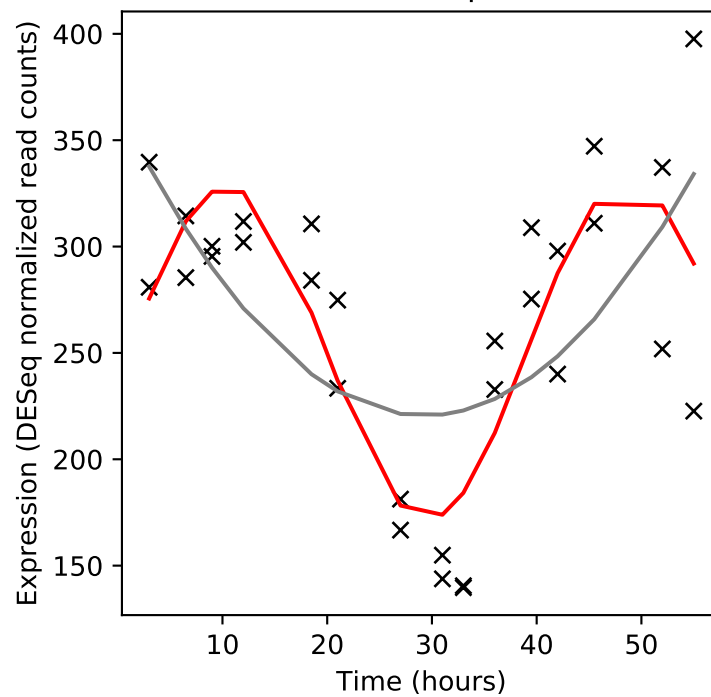

Rv0054/ssb

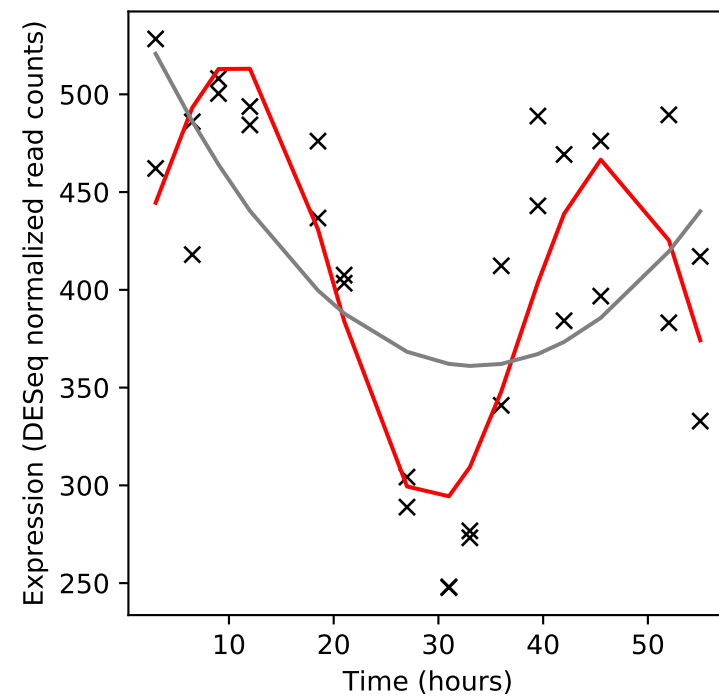

Rv0055/rpsR1

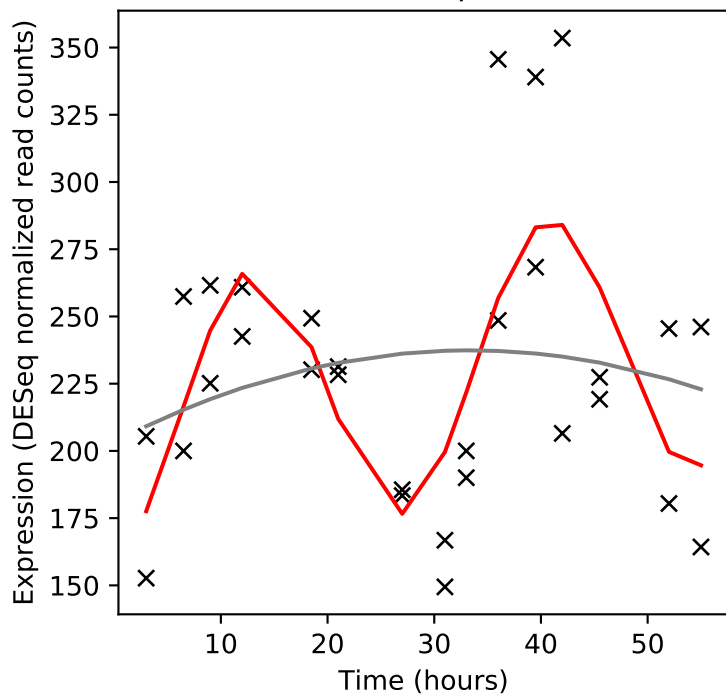

Rv0056/rplI

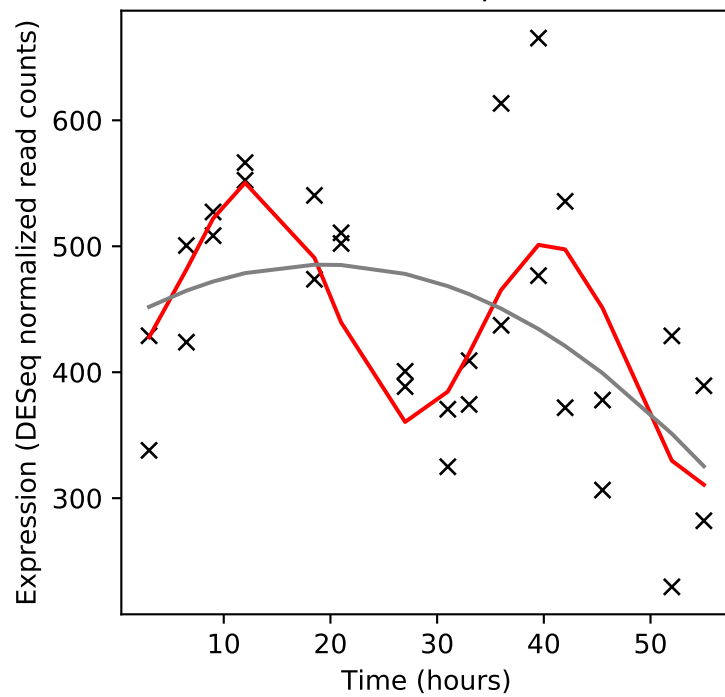

Rv0057/-

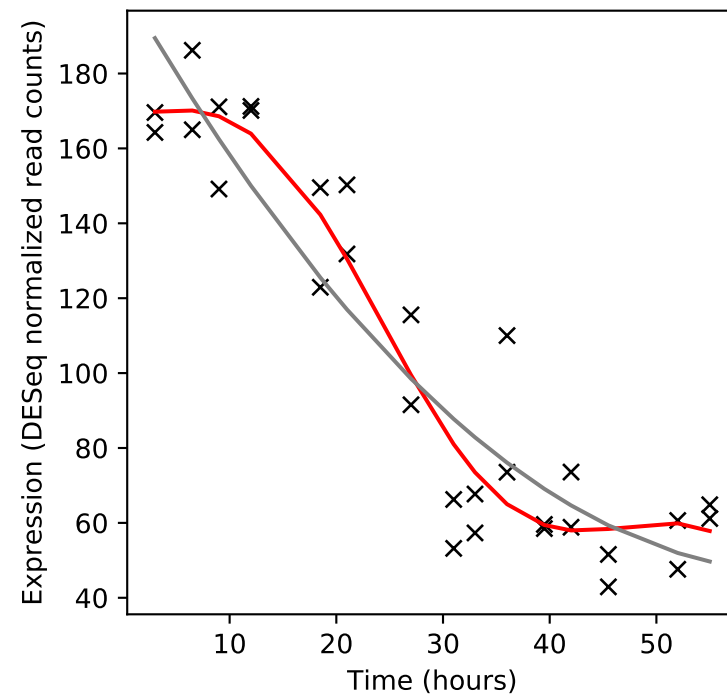

Rv0058/dnaB

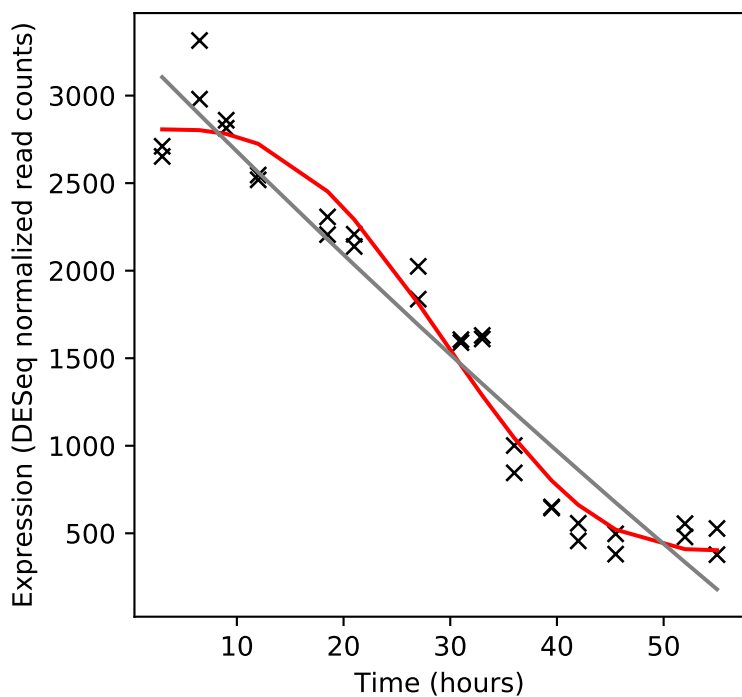

Rv0059/-

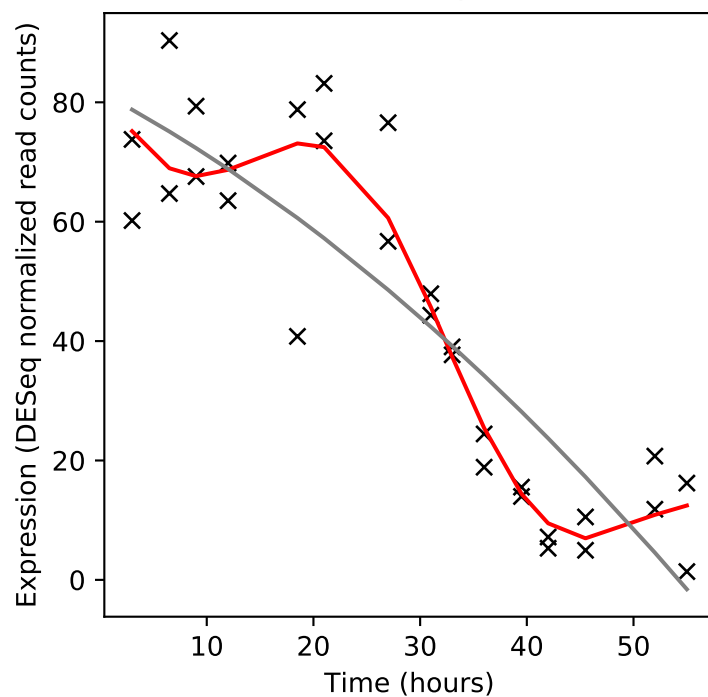

Rv0060/-

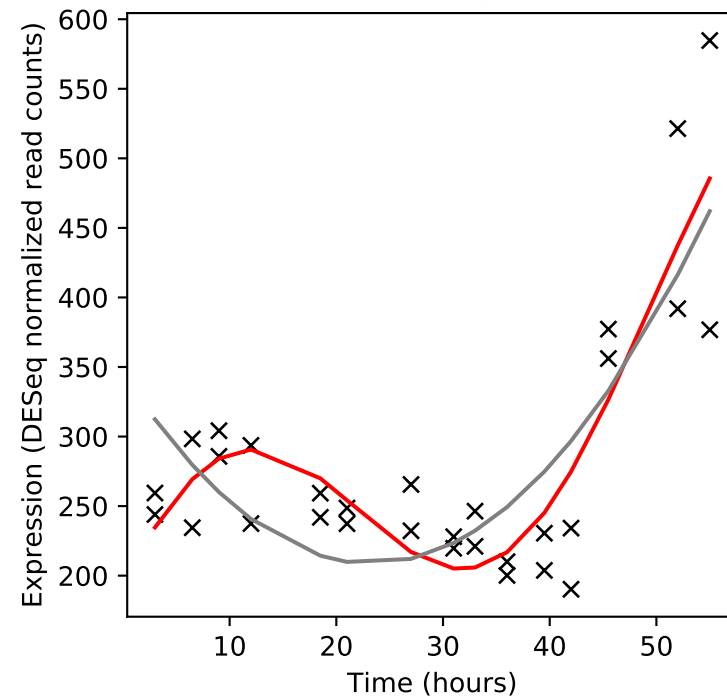

Rv0061c/-

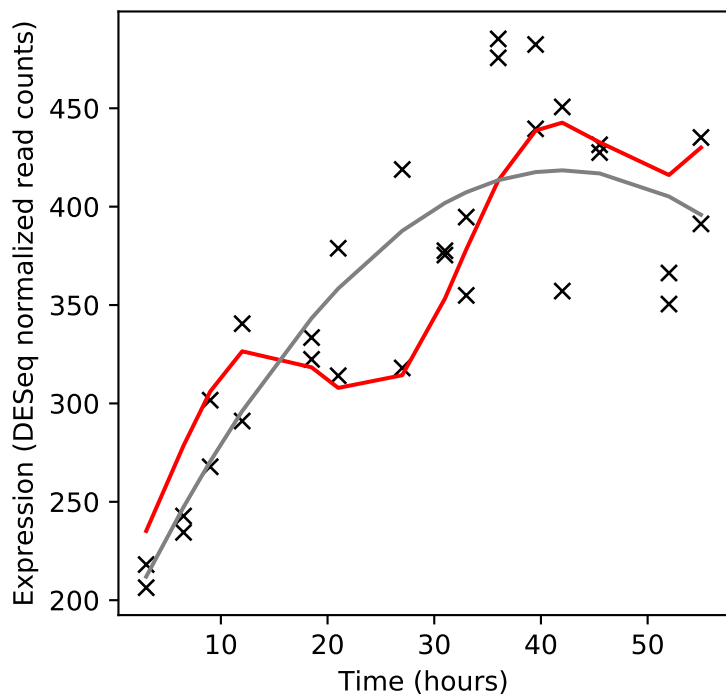

Rv0062/celA1

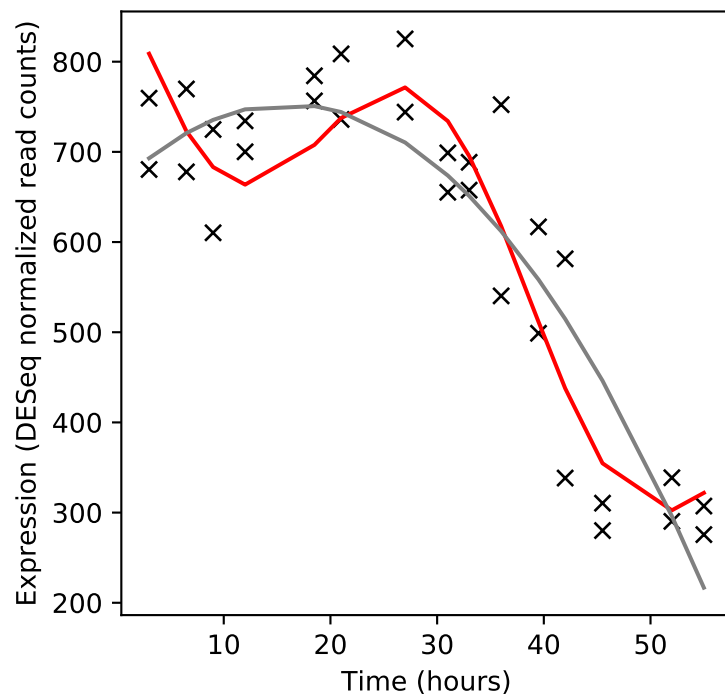

Rv0063/-

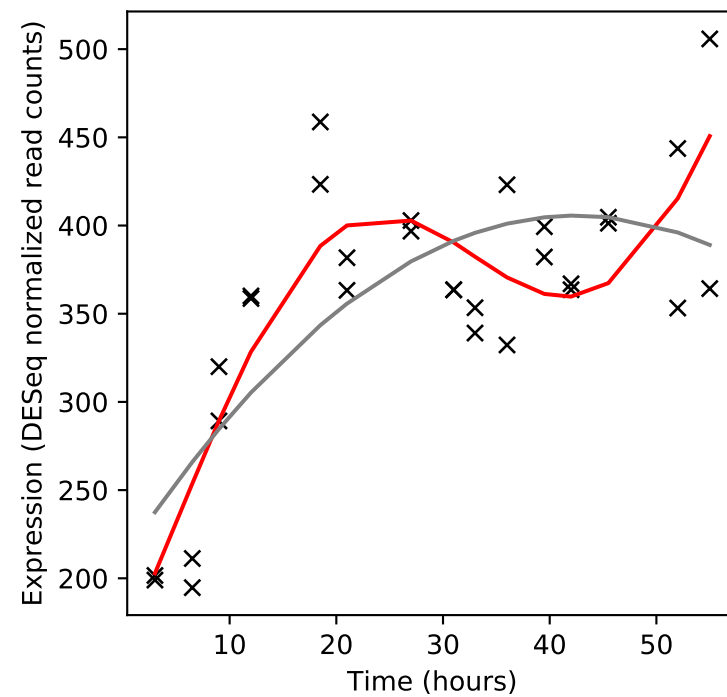

Rv0064/-

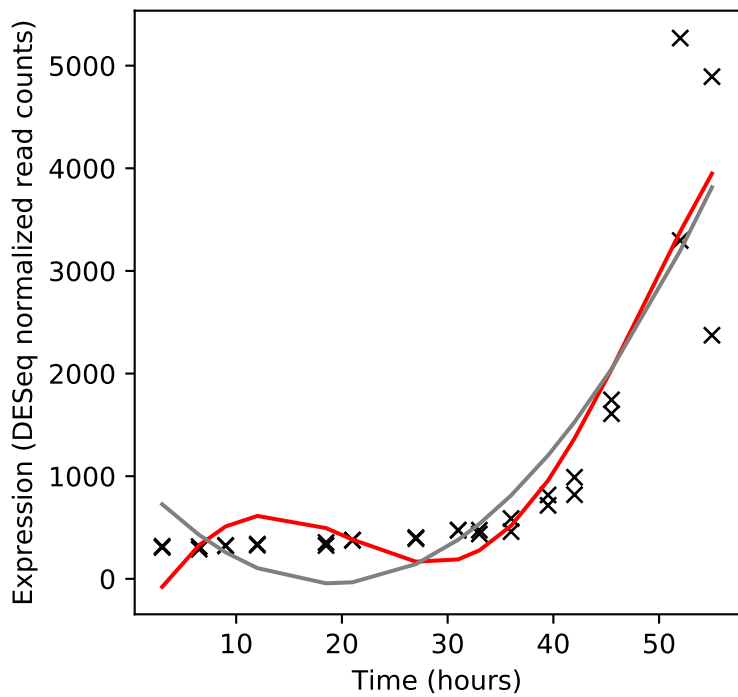

Rv0064A/vapB1

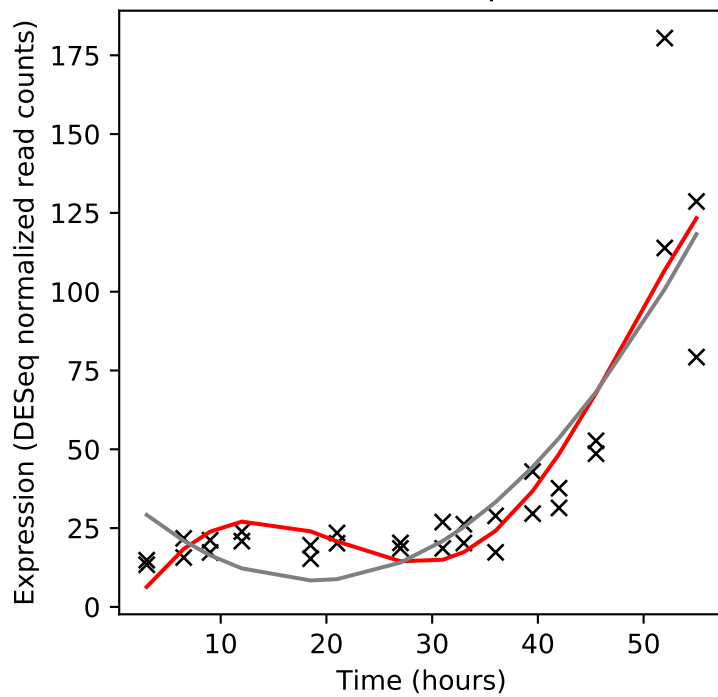

Rv0065/vapC1

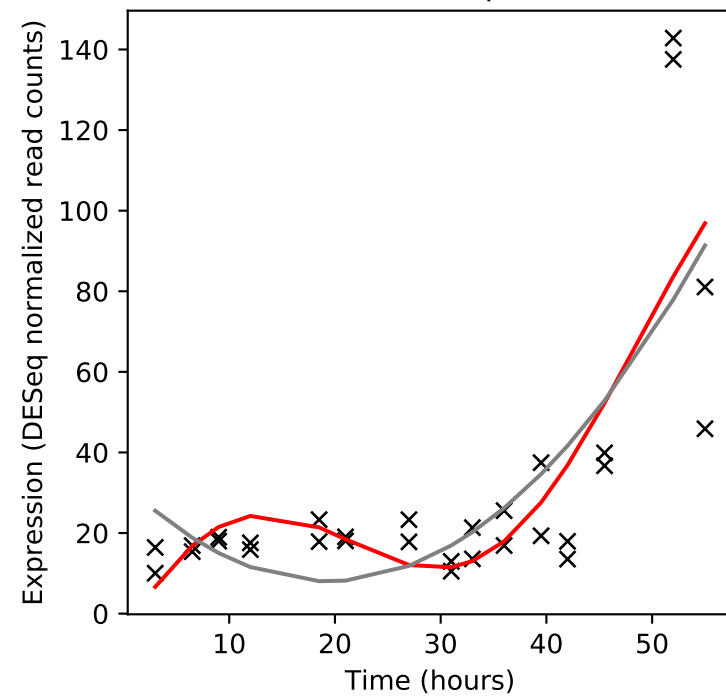

Rv0066c/icd2

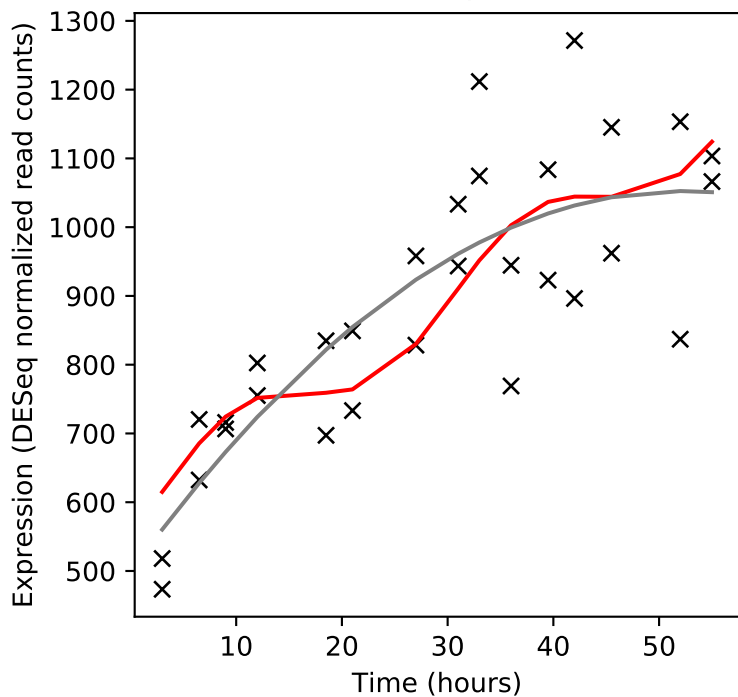

Rv0067c/-

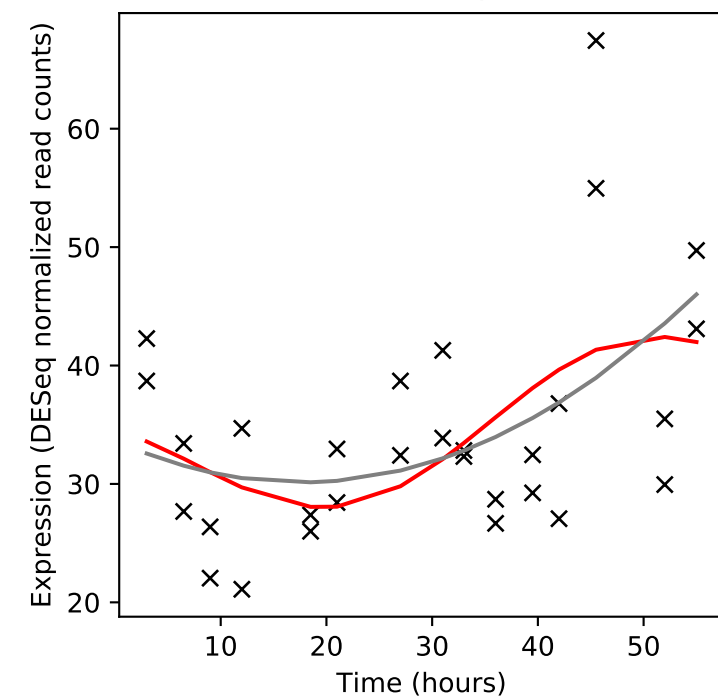

Rv0068/-

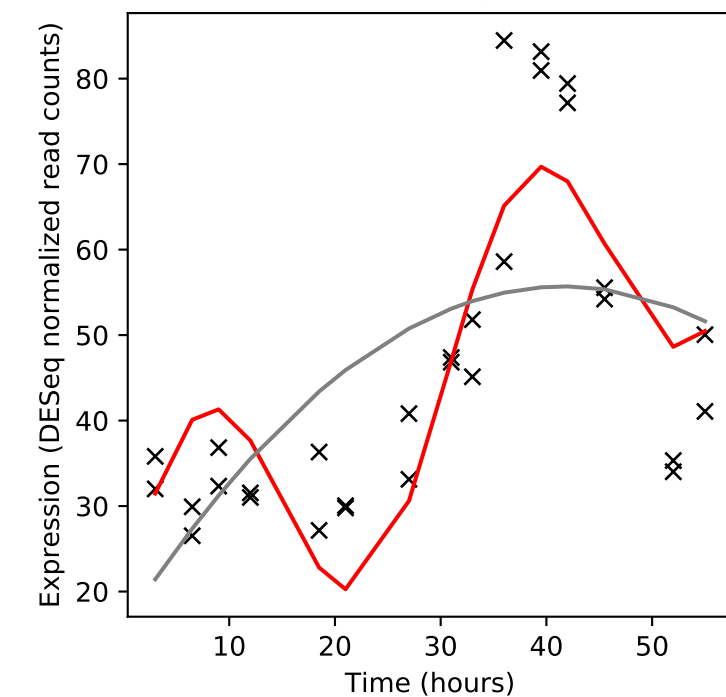

Rv0069c/sdaA

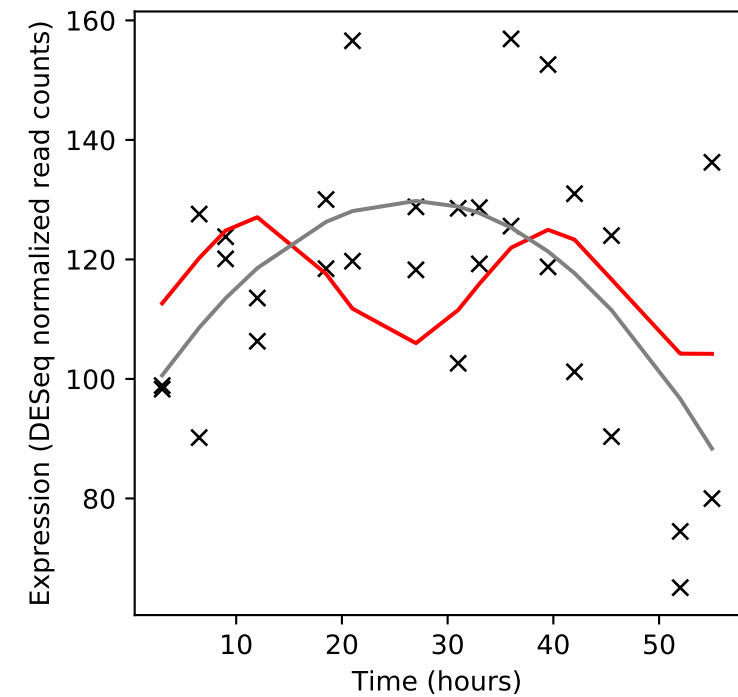

Rv0070c/glyA2

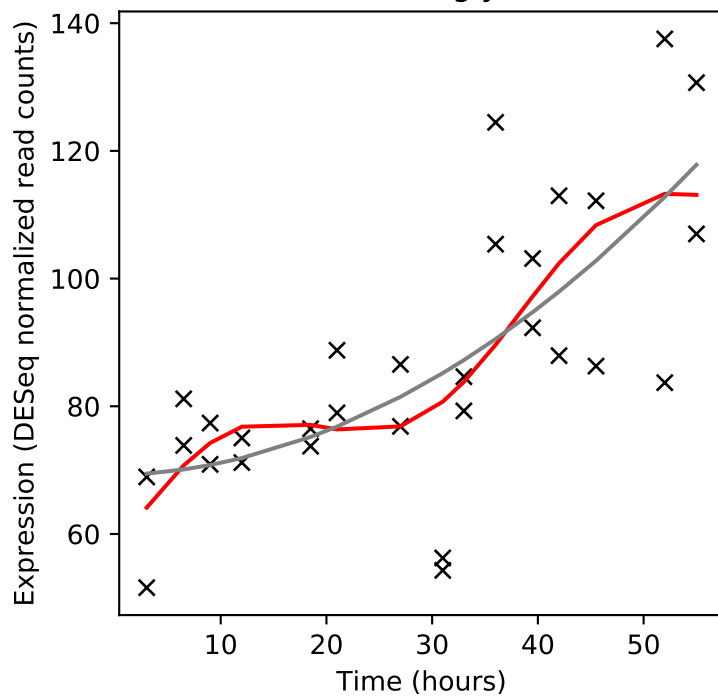

Rv0071/-

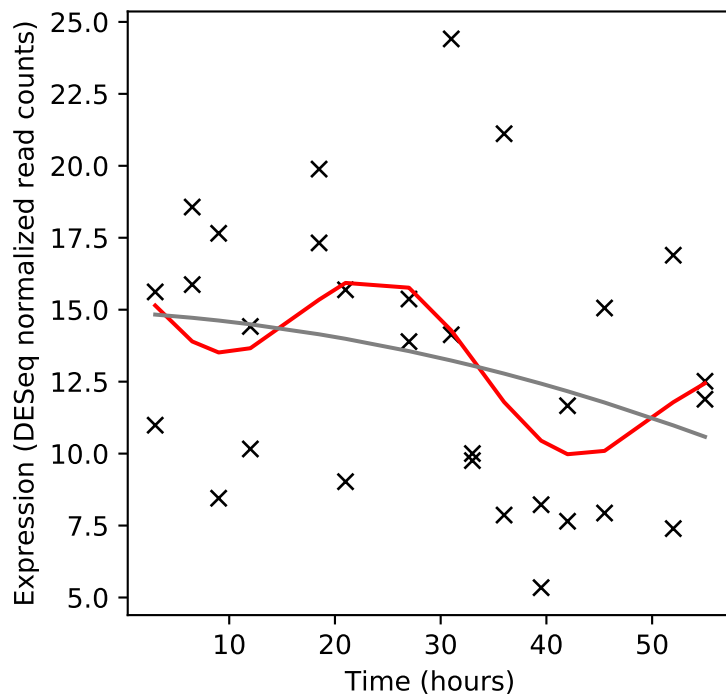

Rv0072/-

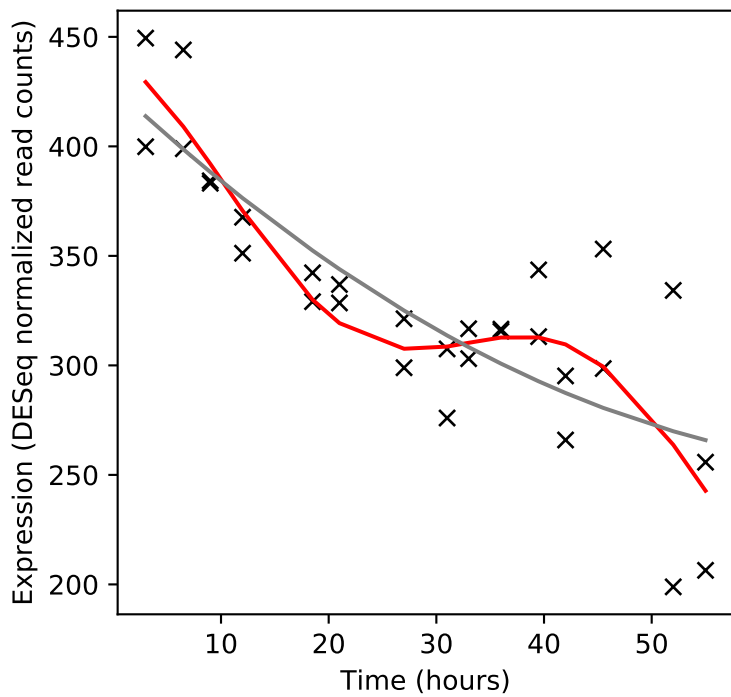

Rv0073/-

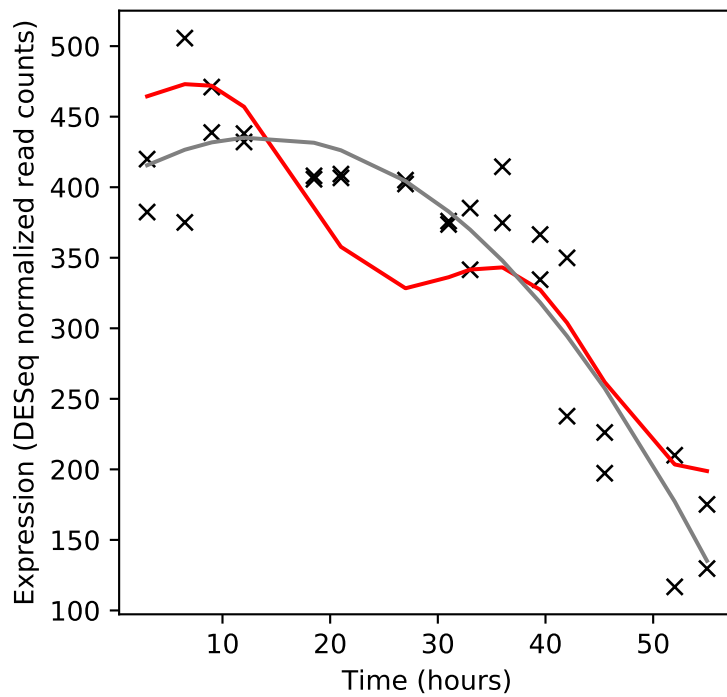

Rv0074/-

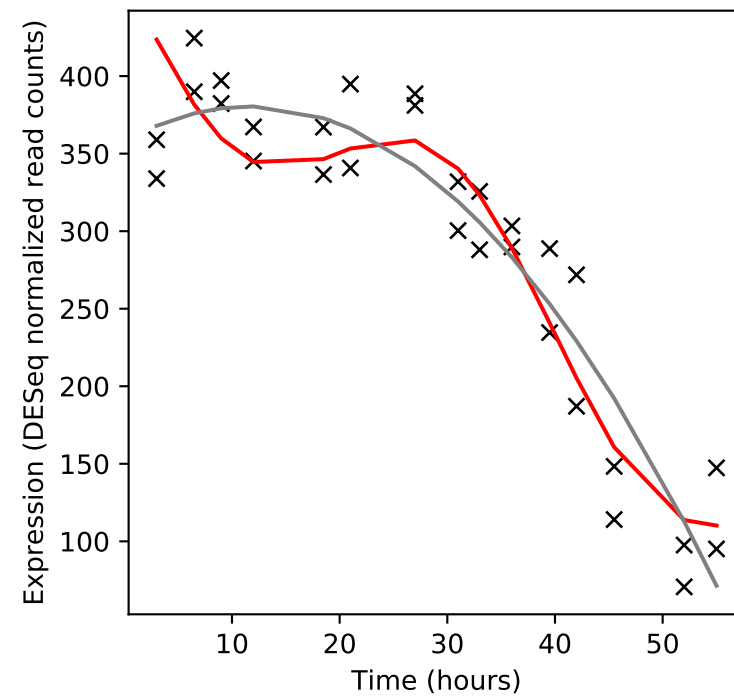

Rv0075/-

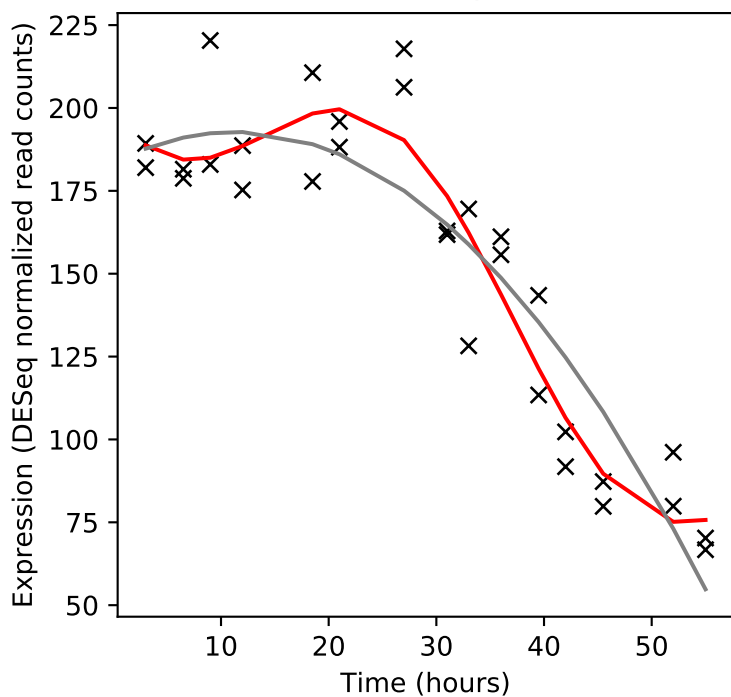

Rv0076c/-

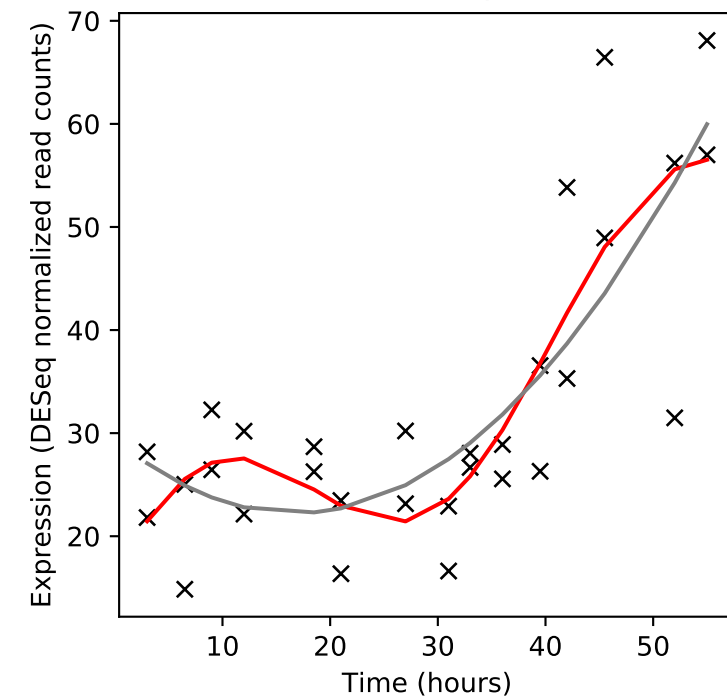

Rv0077c/-

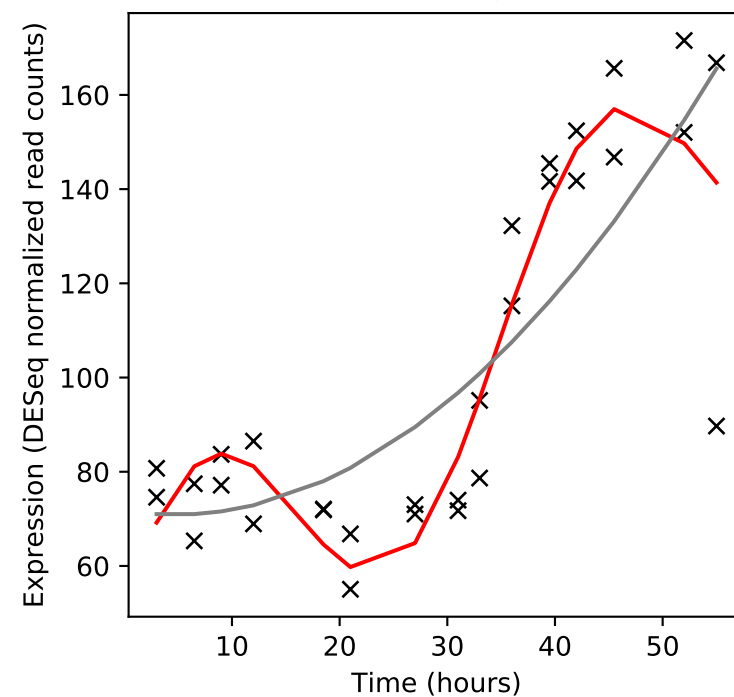

Rv0078/-

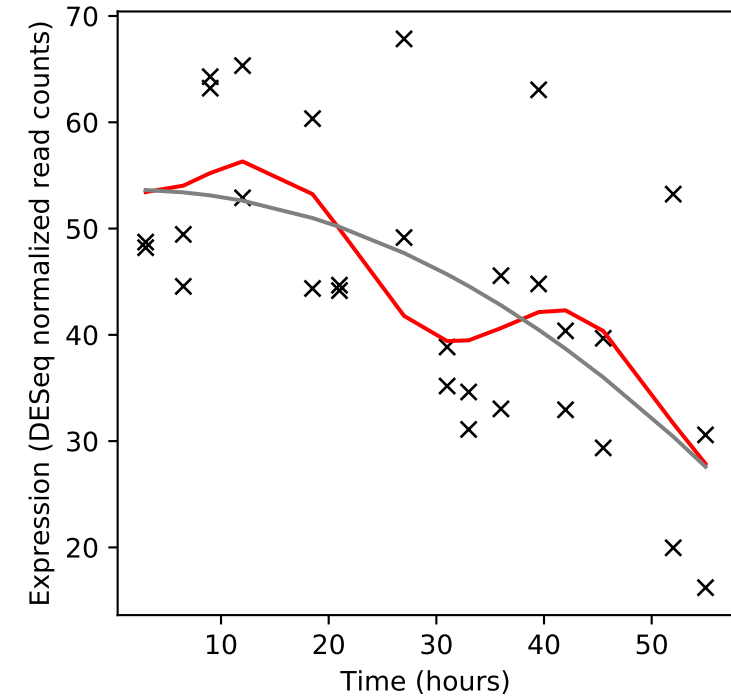

Rv0078A/-

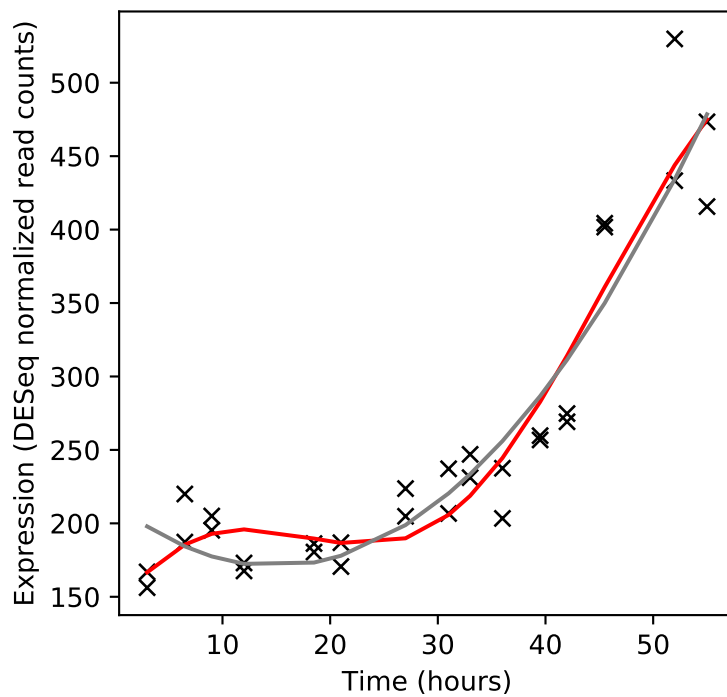

Rv0078B/-

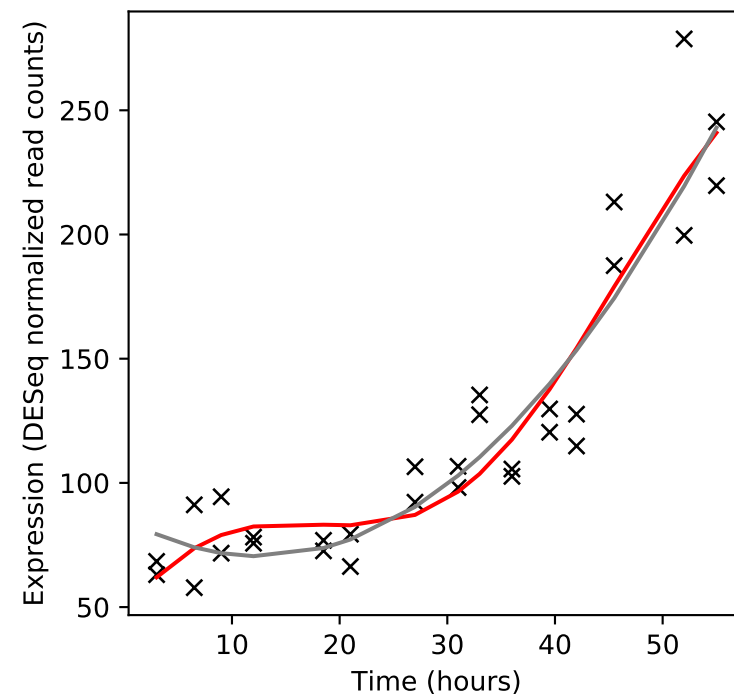



Rv0079/-

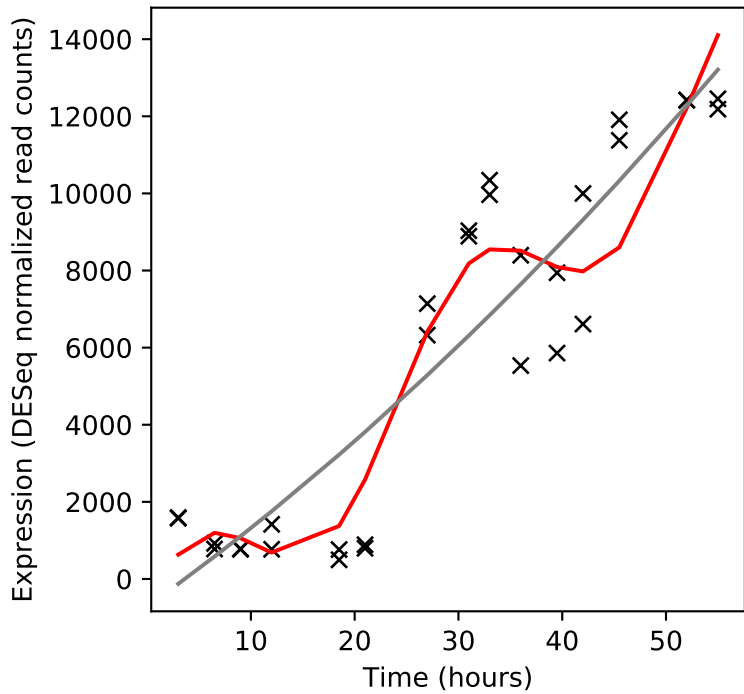

Rv0080/-

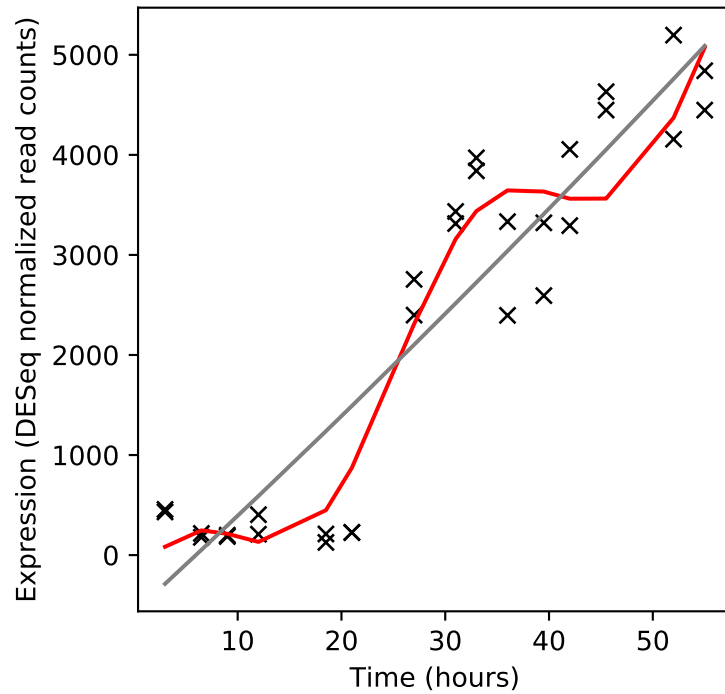

Rv0081/-

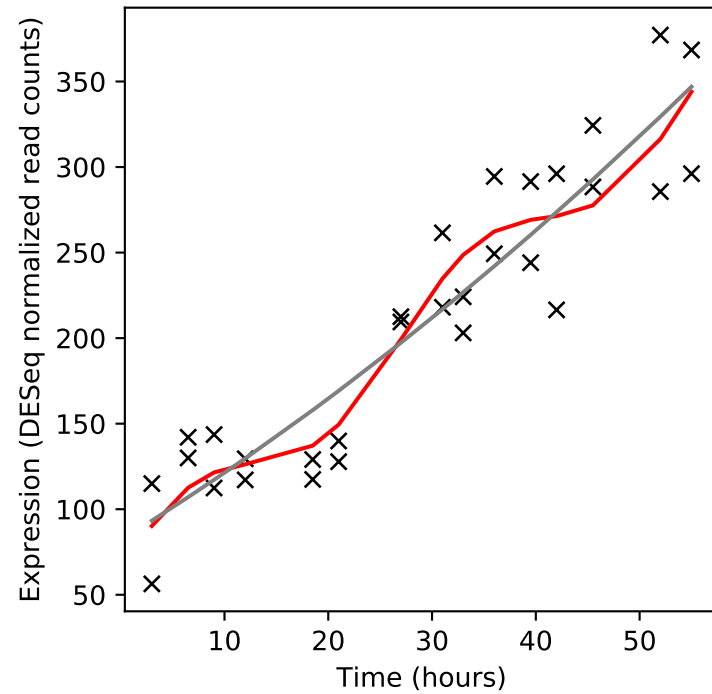

Rv0082/-

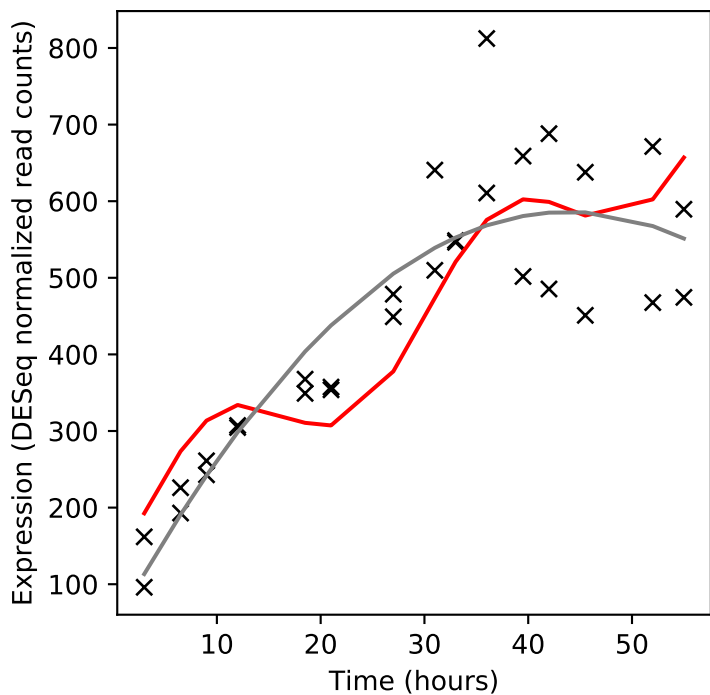

Rv0083/-

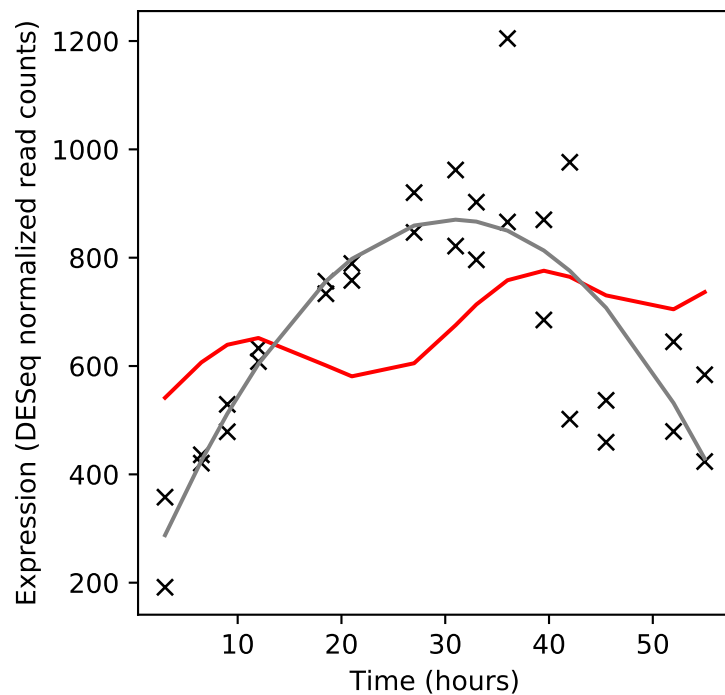

Rv0084/hycD

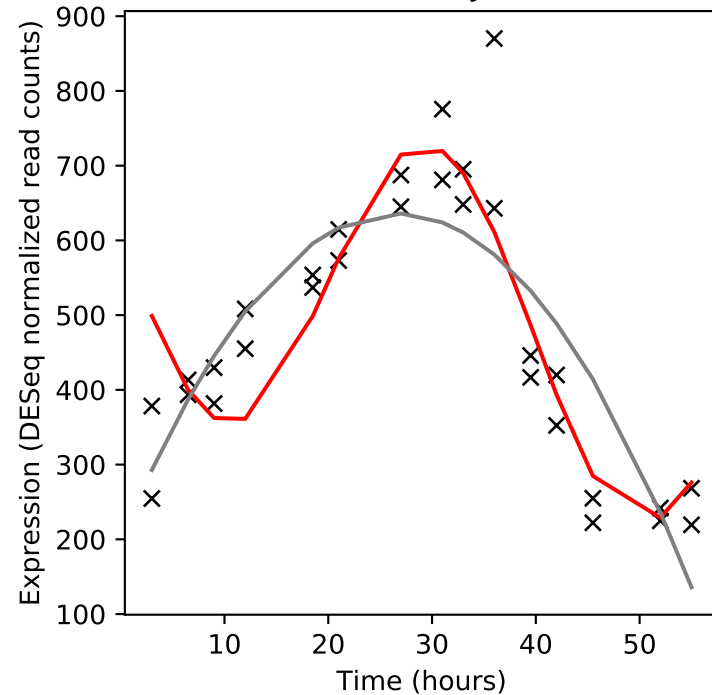

Rv0085/hycP

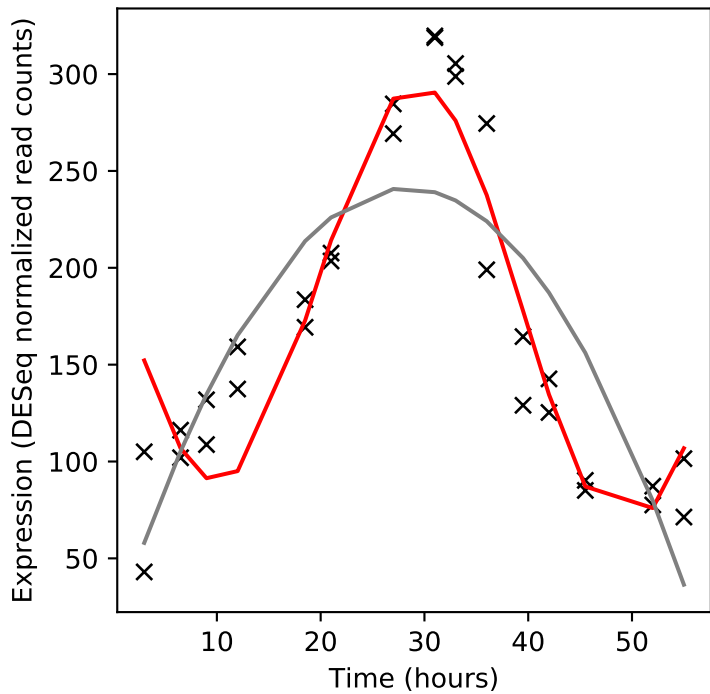

Rv0086/hycQ

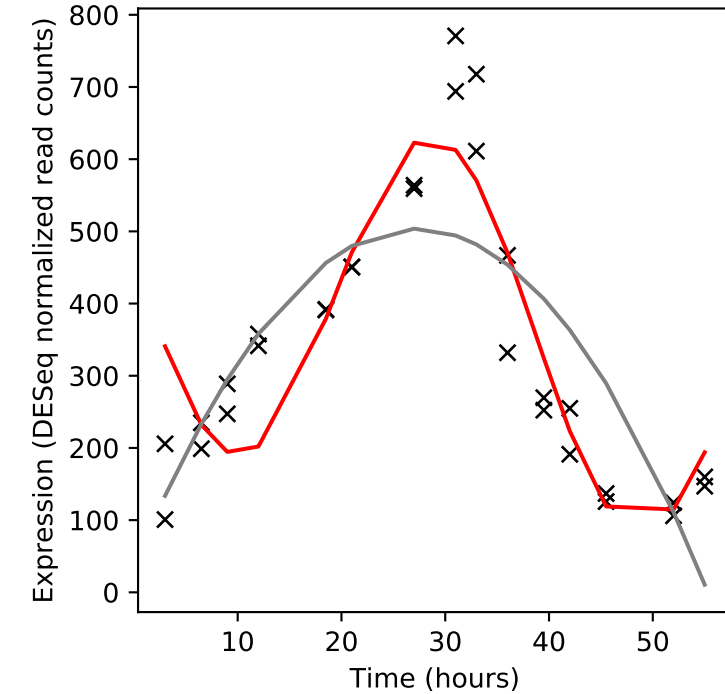

Rv0087/hycE

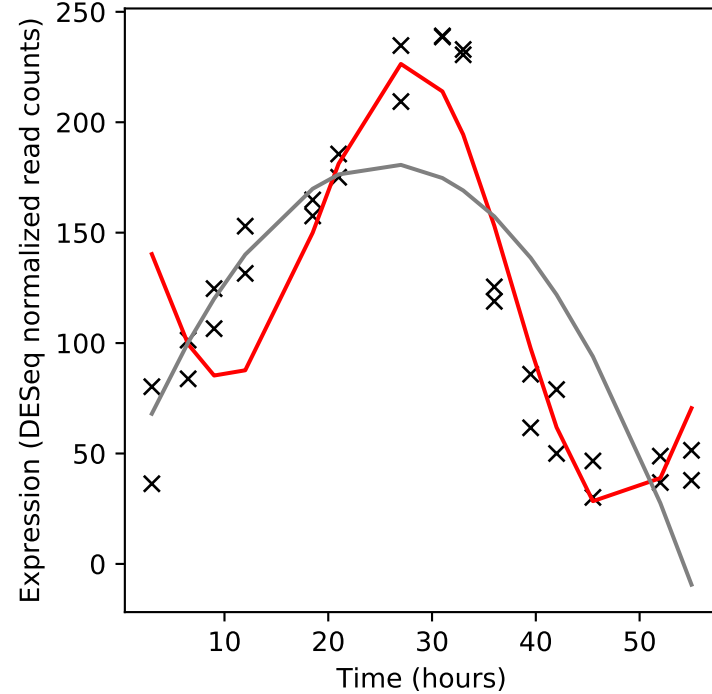

Rv0088/-

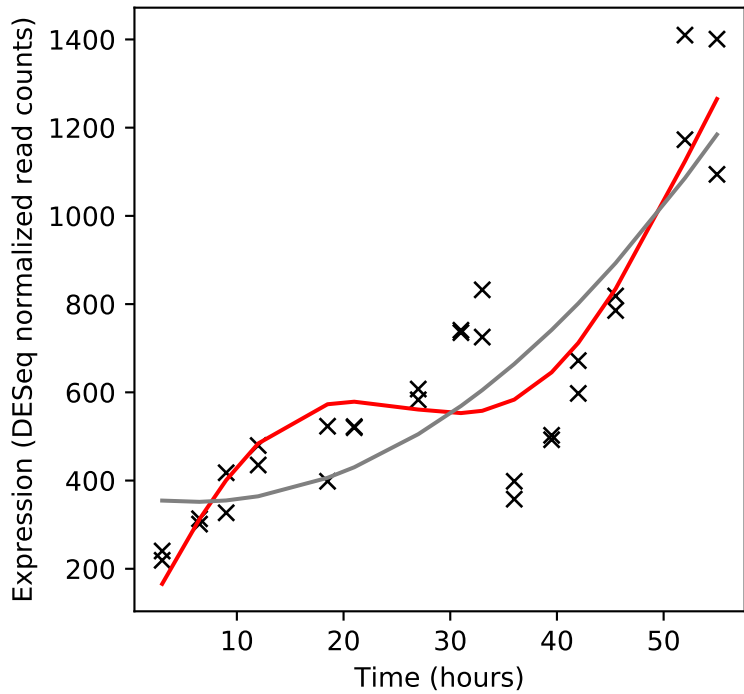

Rv0089/-

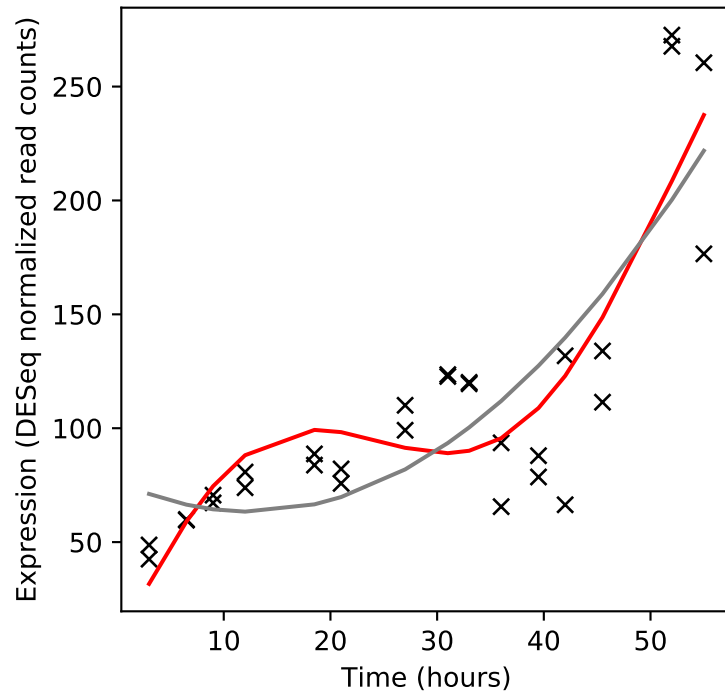

Rv0090/-

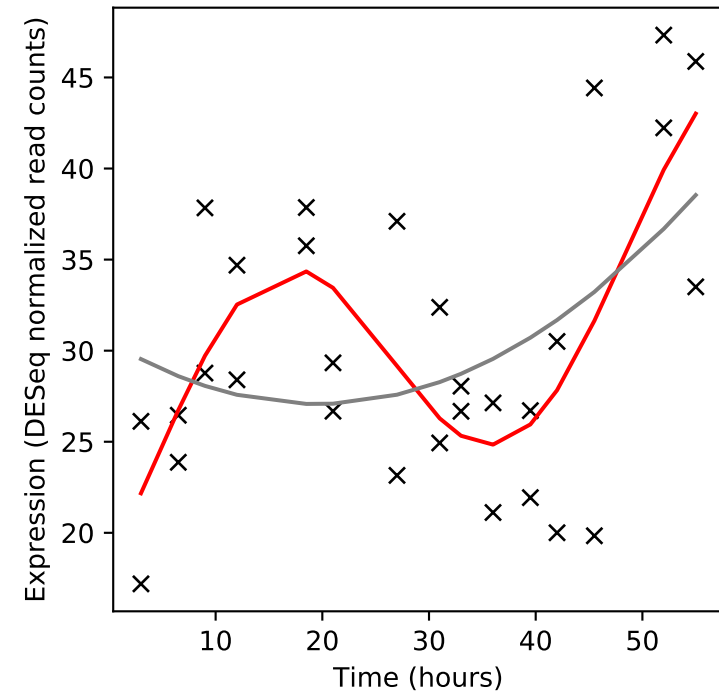

Rv0091/mtn

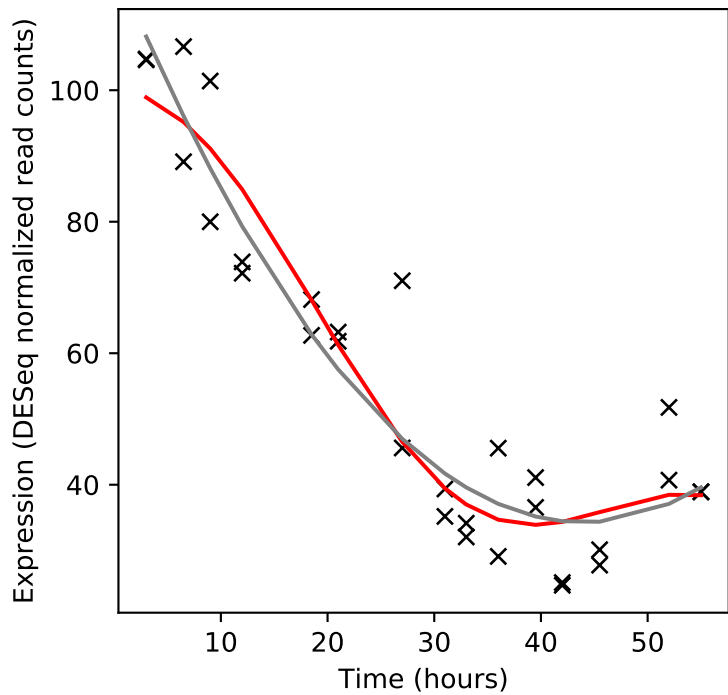

Rv0092/ctpA

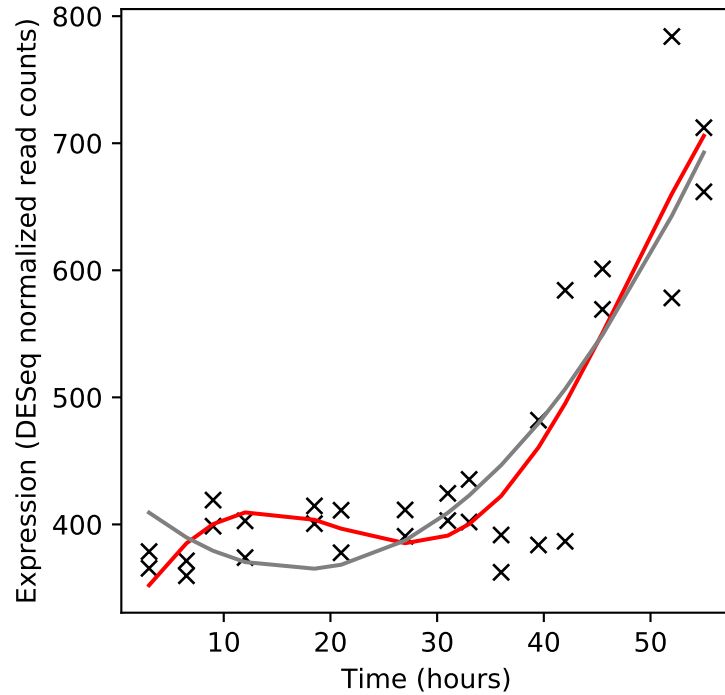

Rv0093c/-

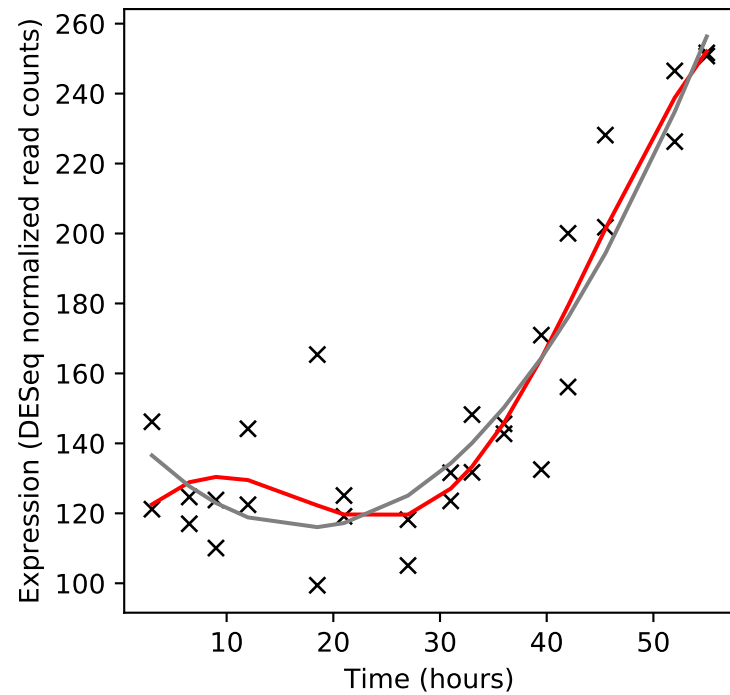

Rv0094c/-

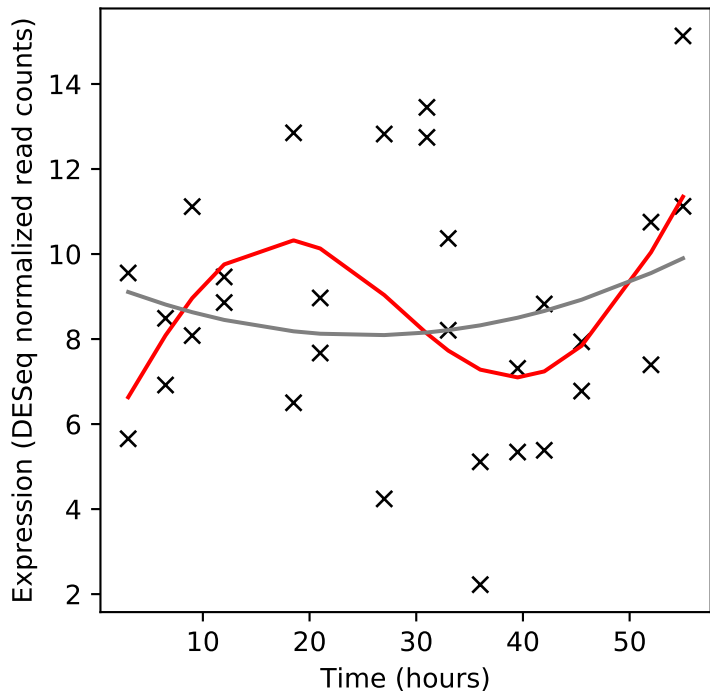

Rv0095c/-

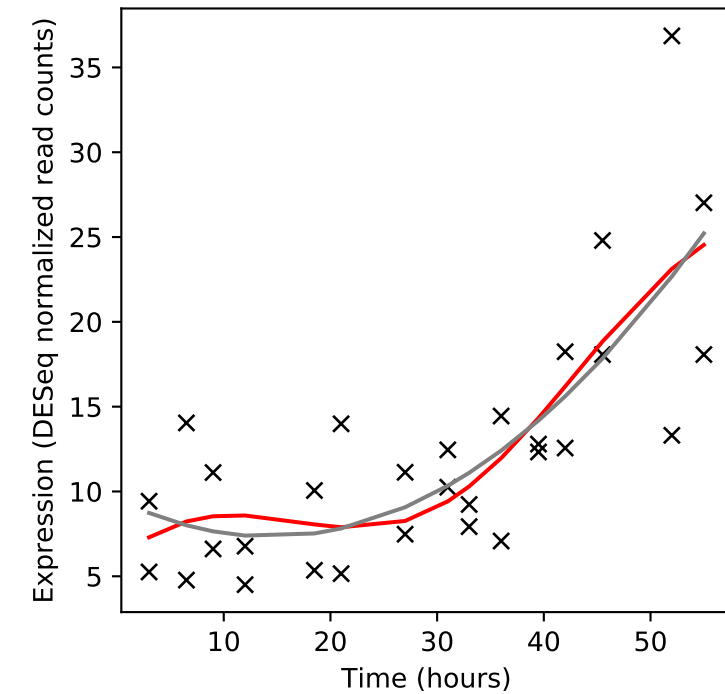

Rv0096/PPE1

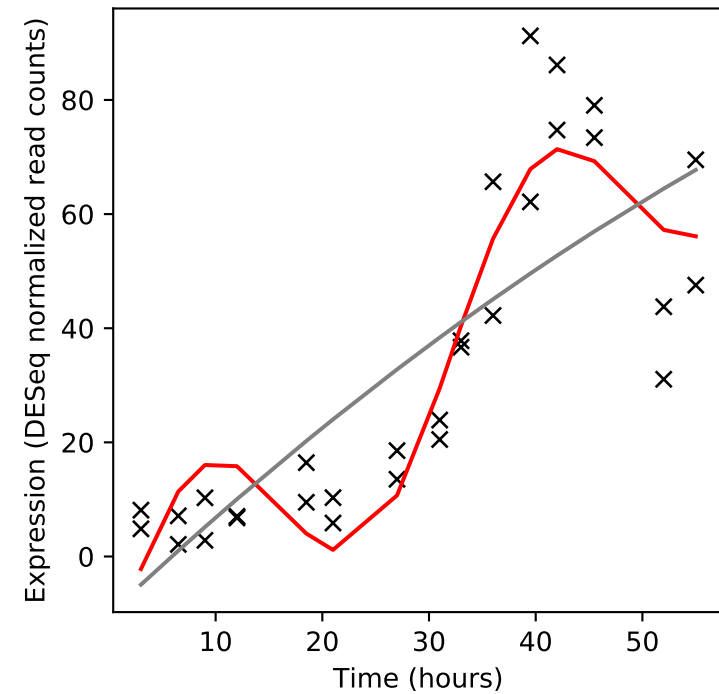

Rv0097/-

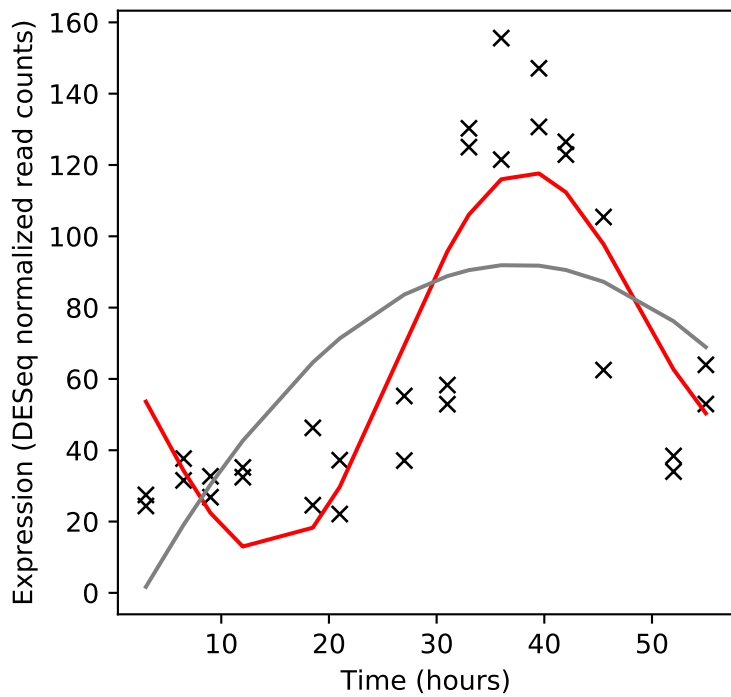

Rv0098/fcoT

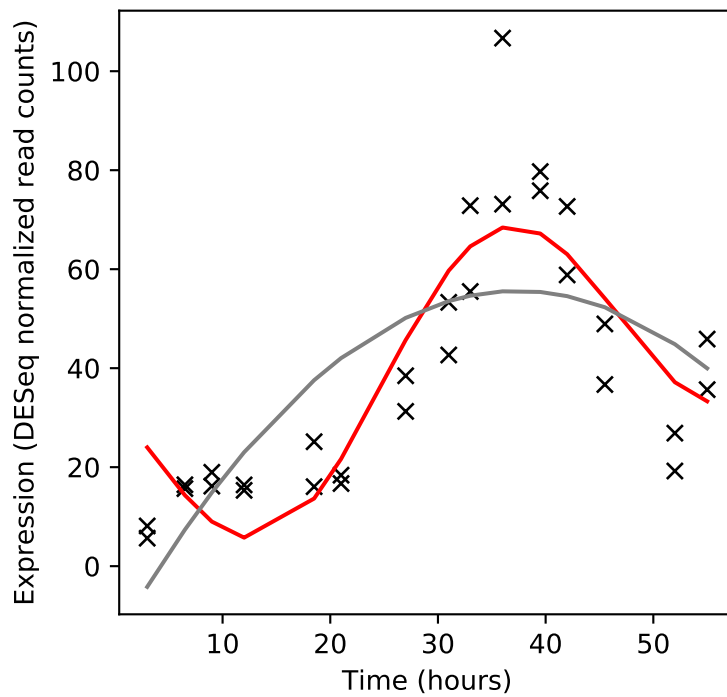

Rv0099/fadD10

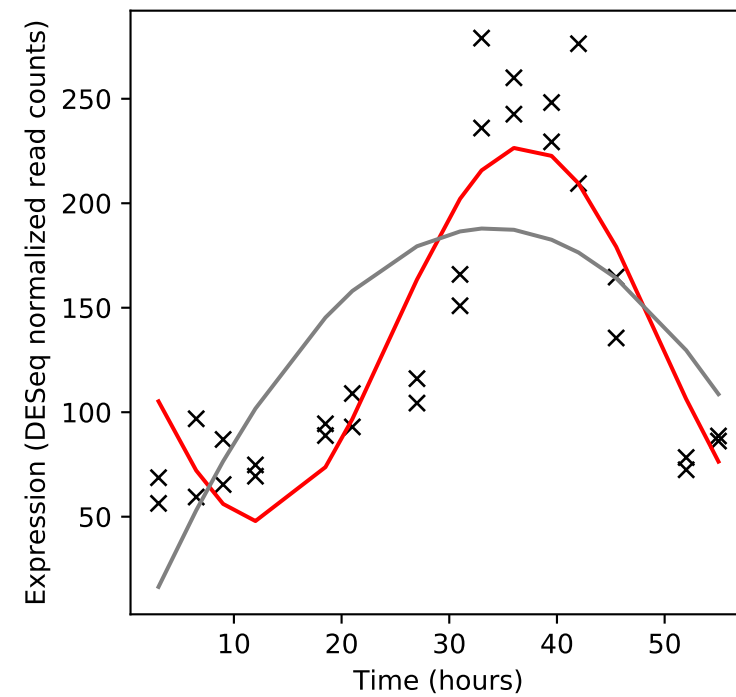

Rv0100/-

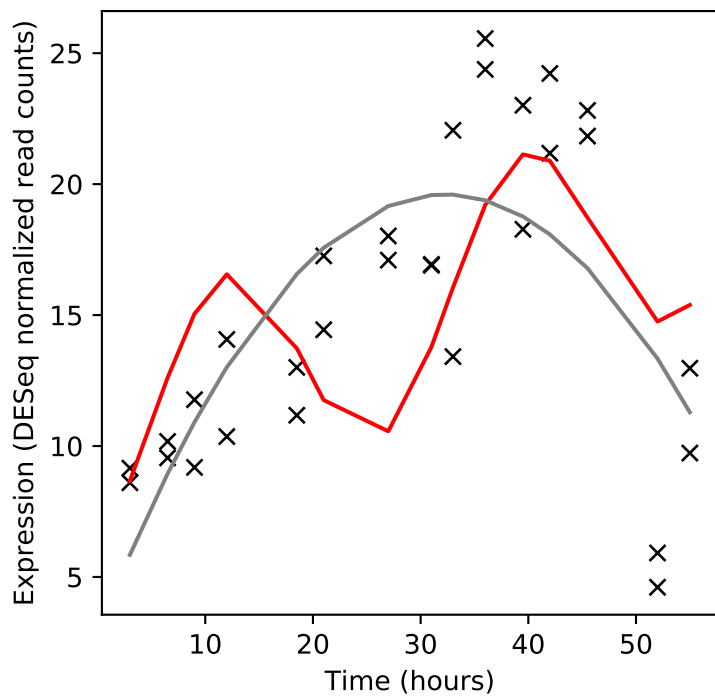

Rv0101/nrp

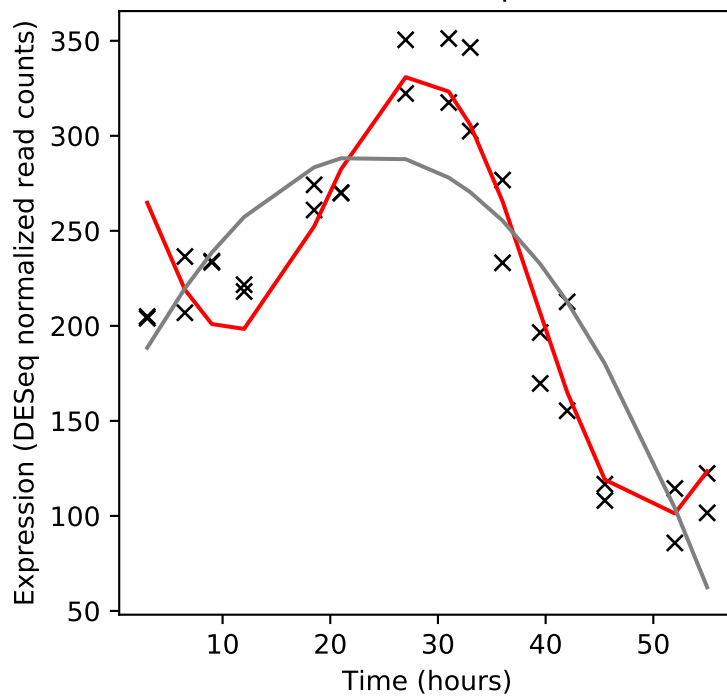

Rv0102/-

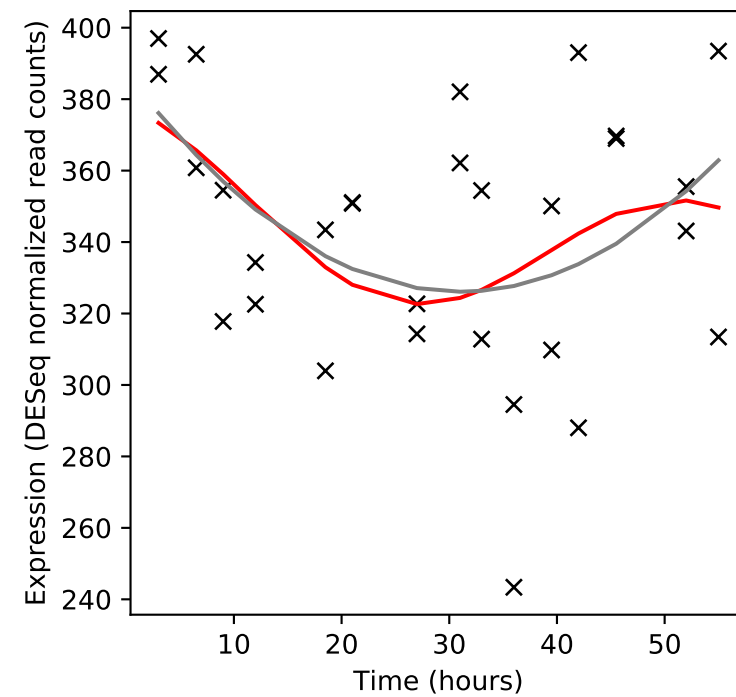

Rv0103c/ctpB

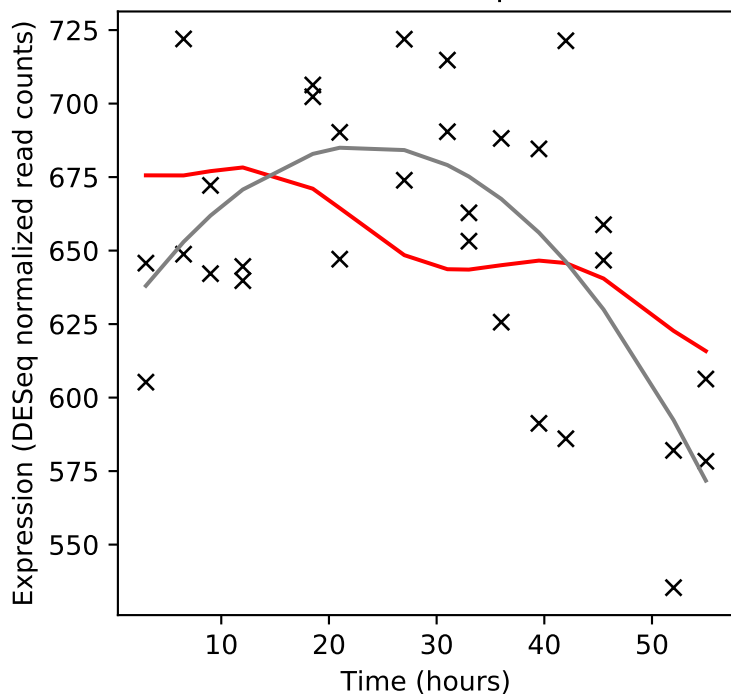

Rv0104/-

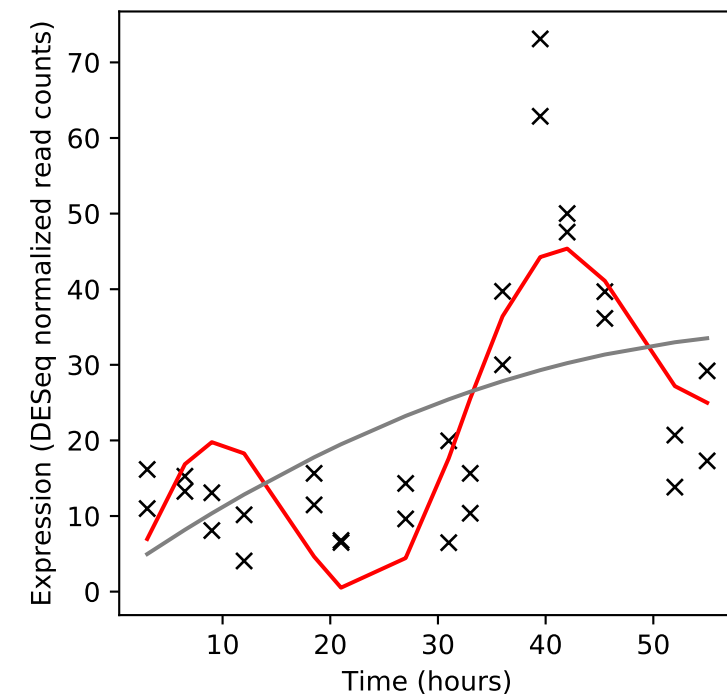

Rv0105c/rpmB1

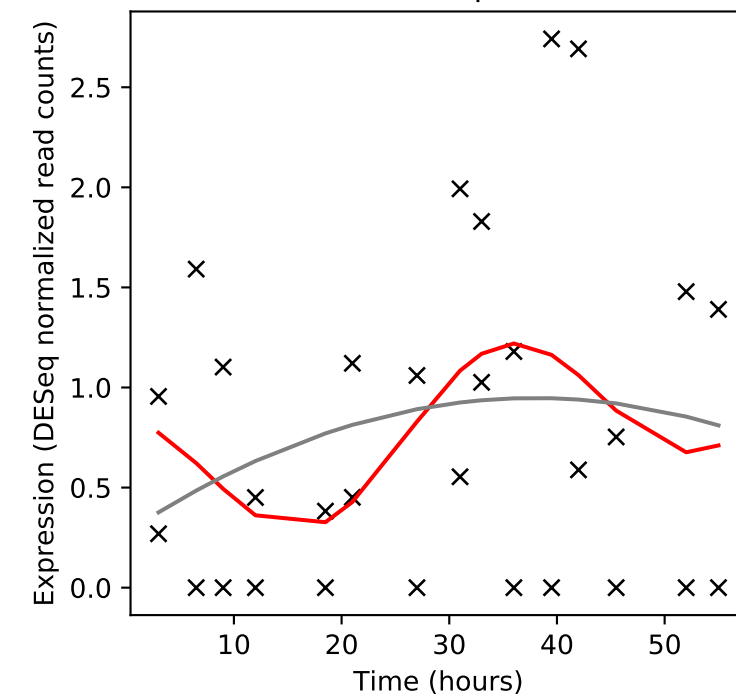

Rv0106/-

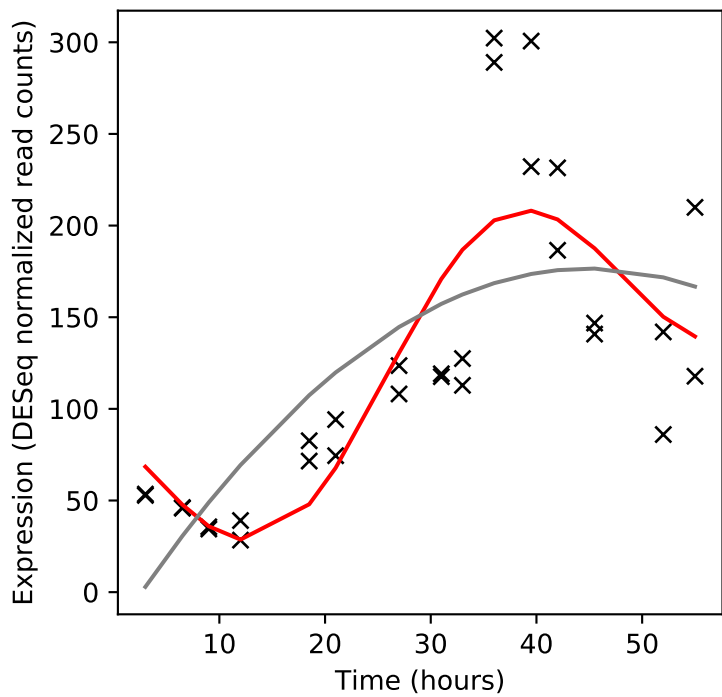

Rv0107c/ctpl

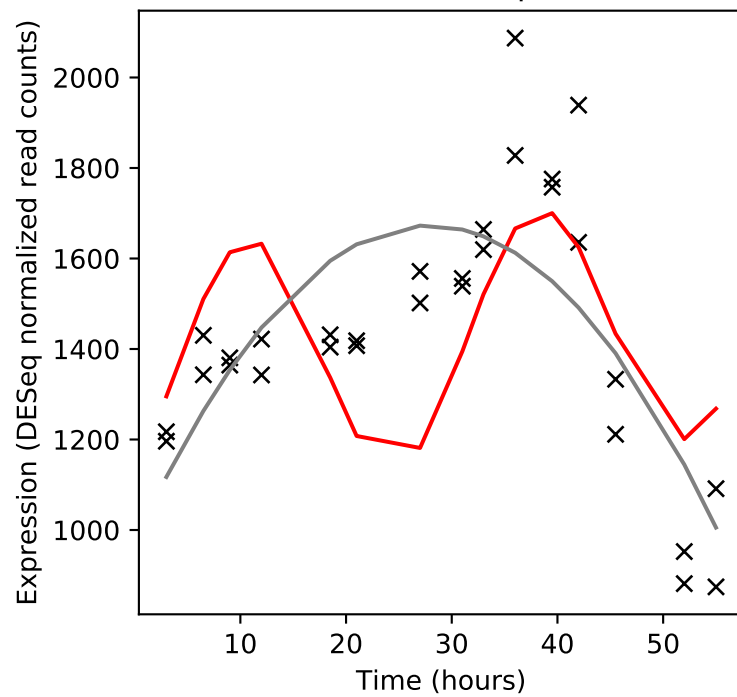

Rv0108c/-

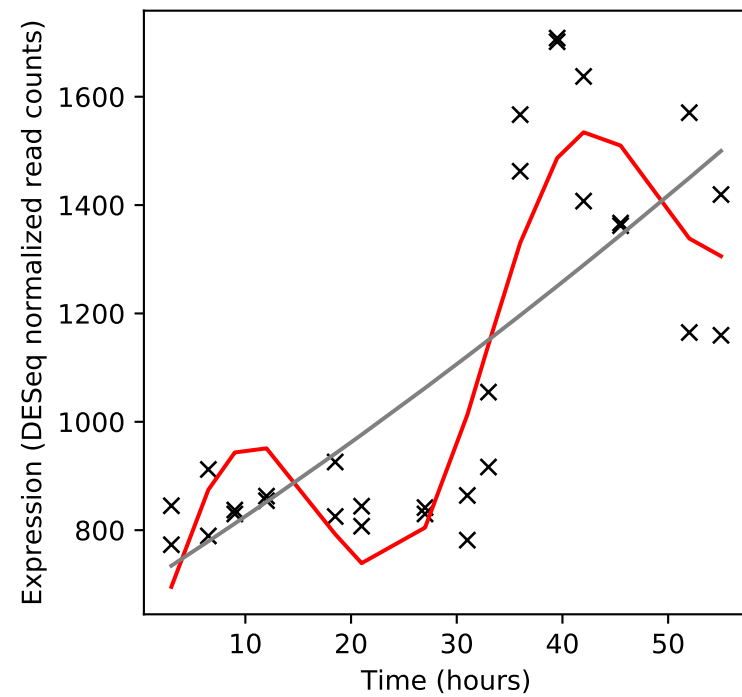

Rv0109/PE\_PGRS1

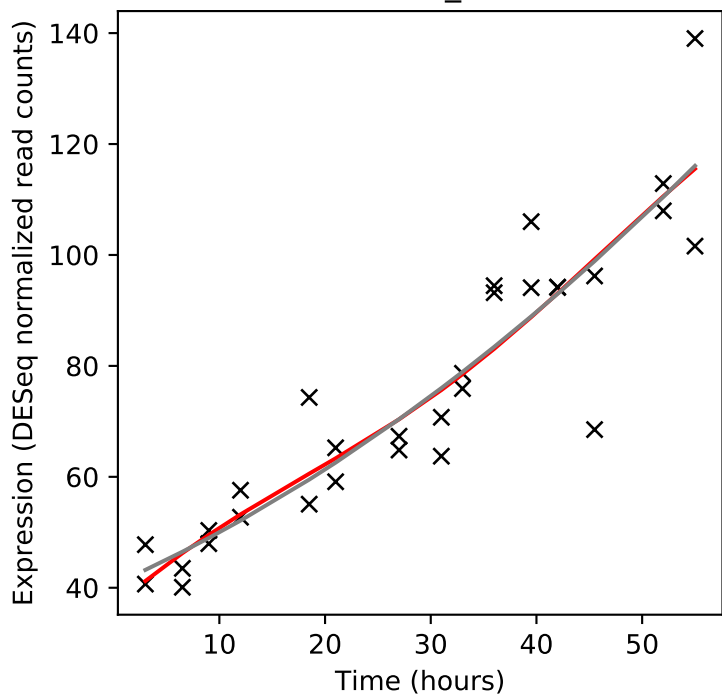

Rv0110/-

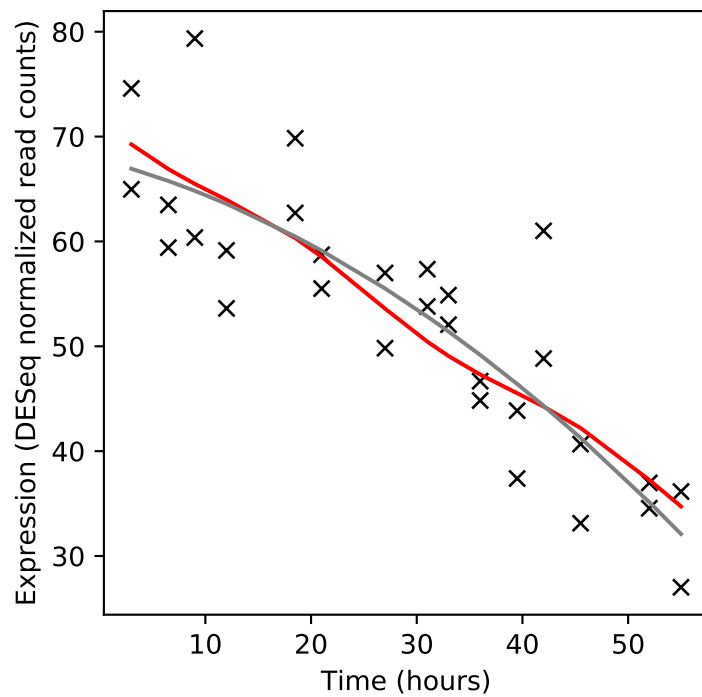

Rv0111/-

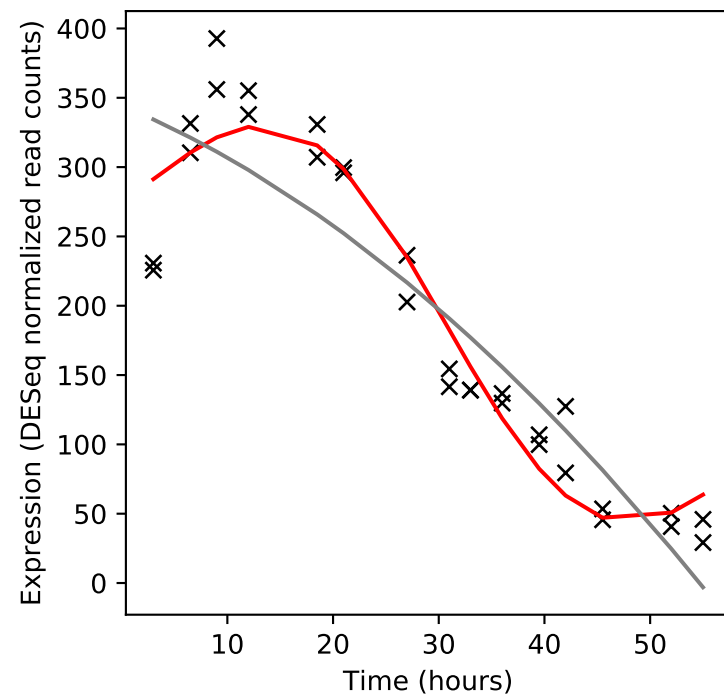

Rv0112/gca

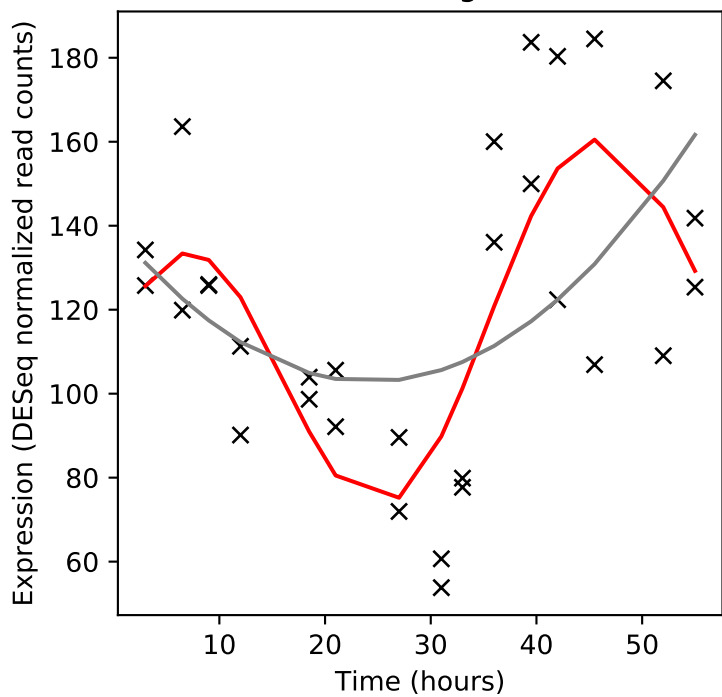

Rv0113/gmhA

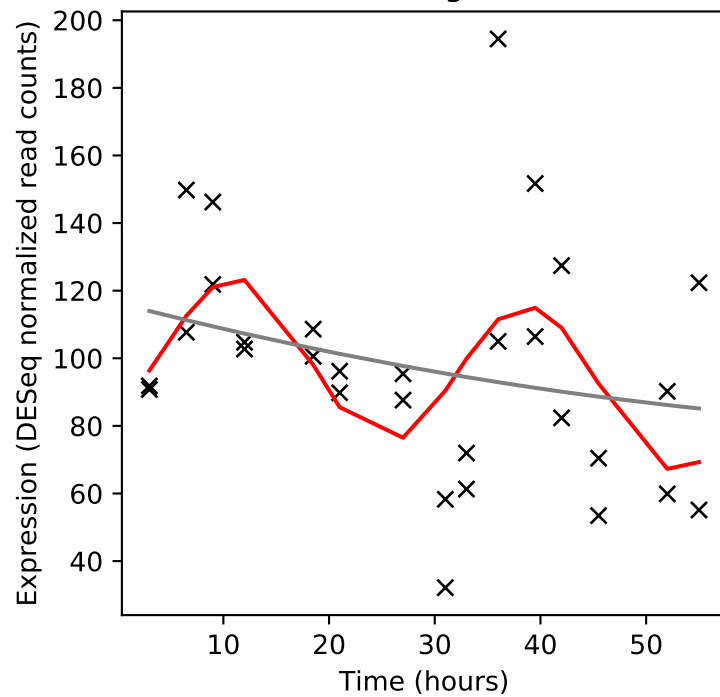

Rv0114/gmhB

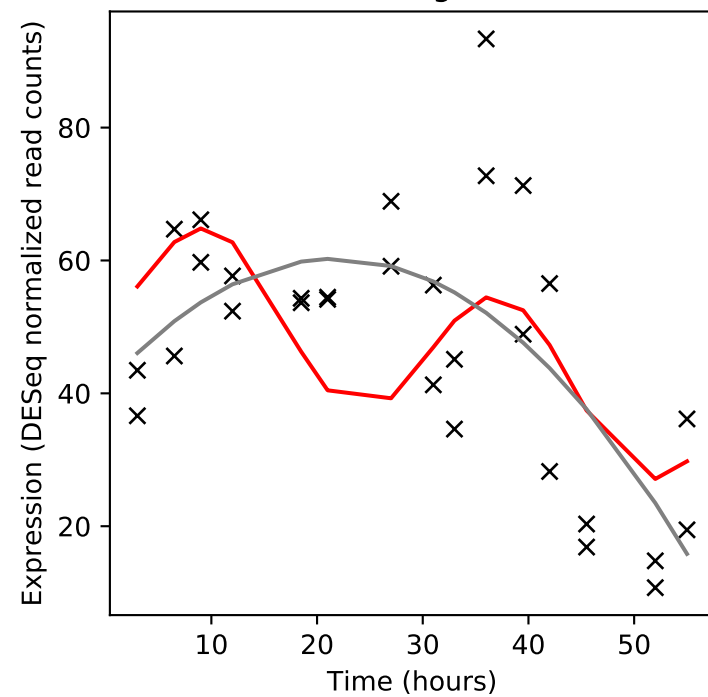

Rv0115/hddA

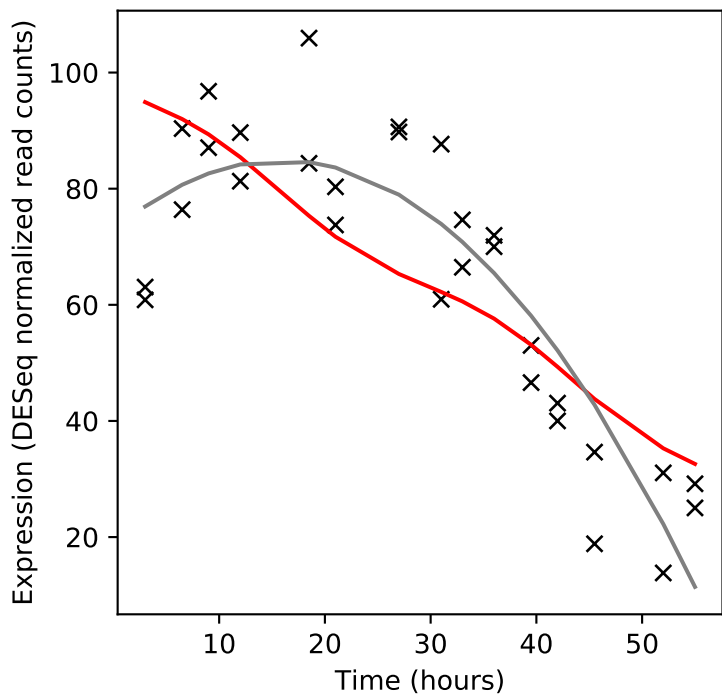

Rv0116c/ldtA

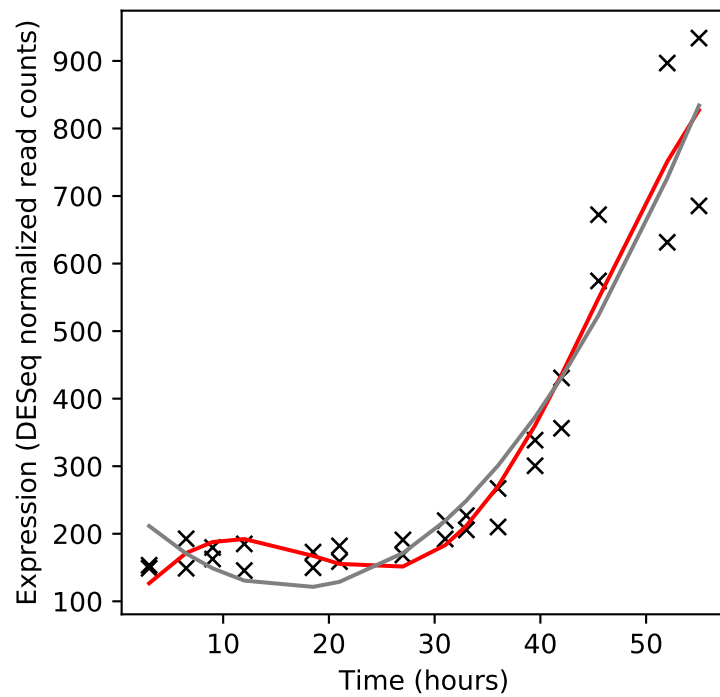

Rv0117/oxyS

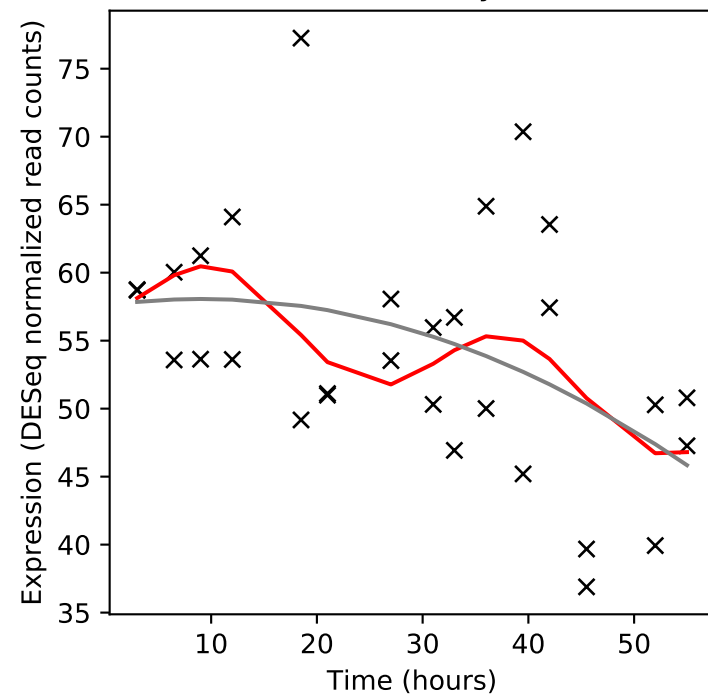

Rv0118c/oxcA

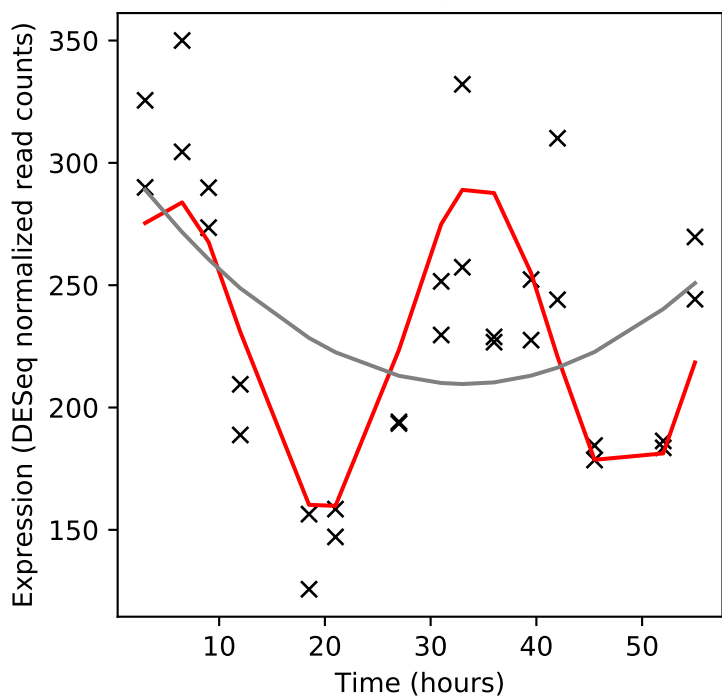

Rv0119/fadD7

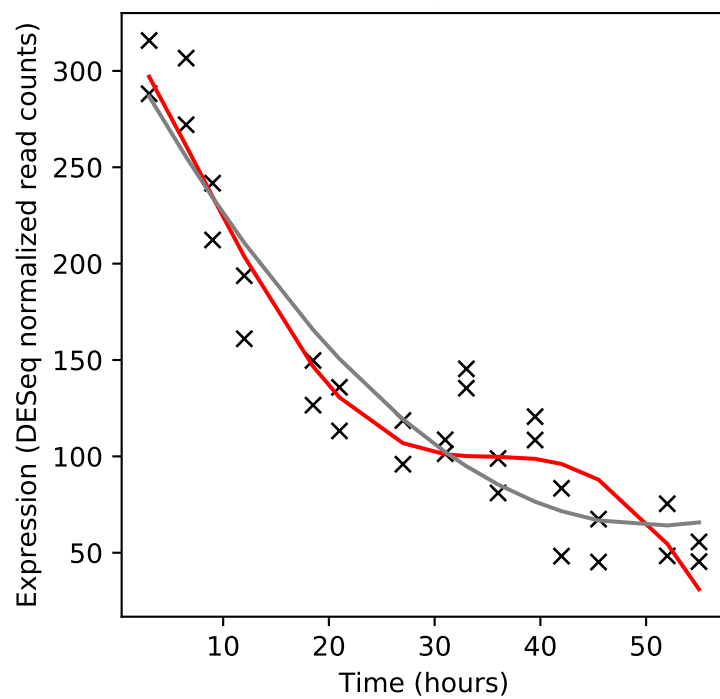

Rv0120c/fusA2

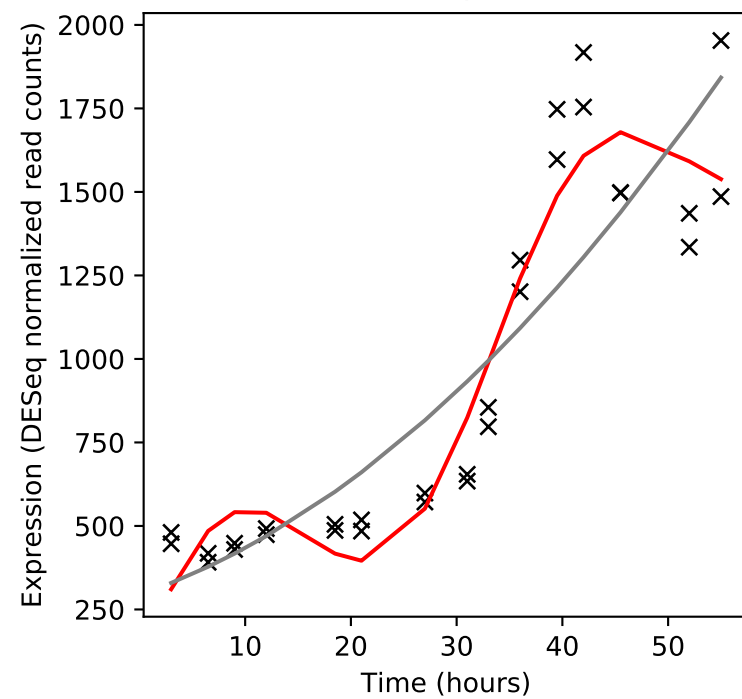

Rv0121c/-

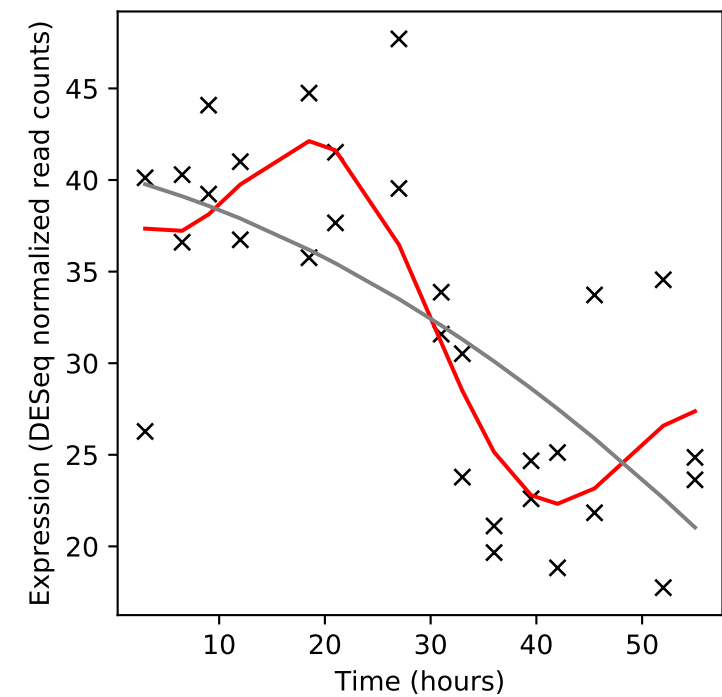

Rv0122/-

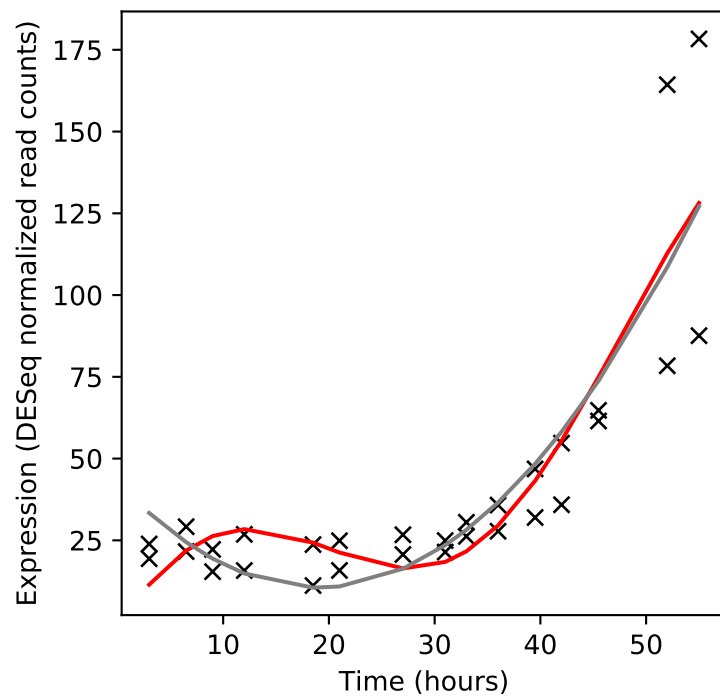

Rv0123/-

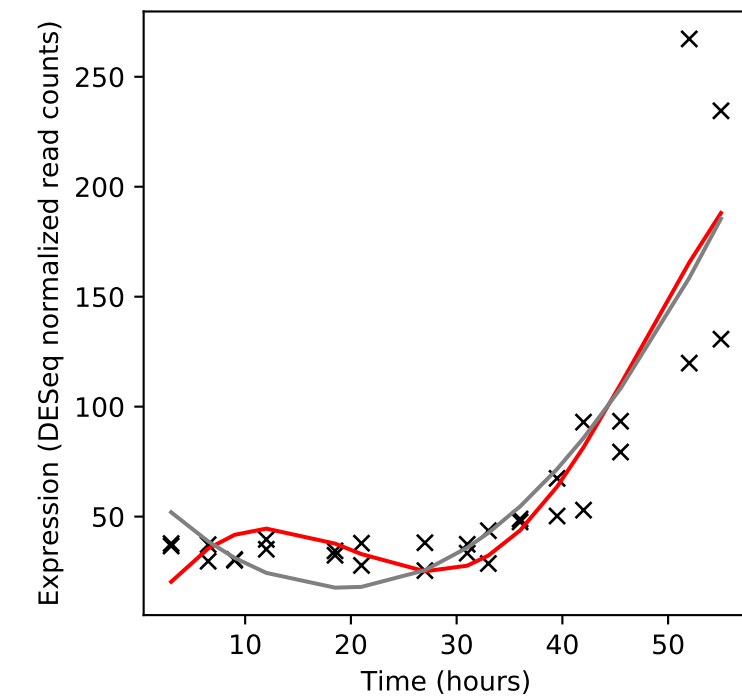

Rv0124/PE\_PGRS2

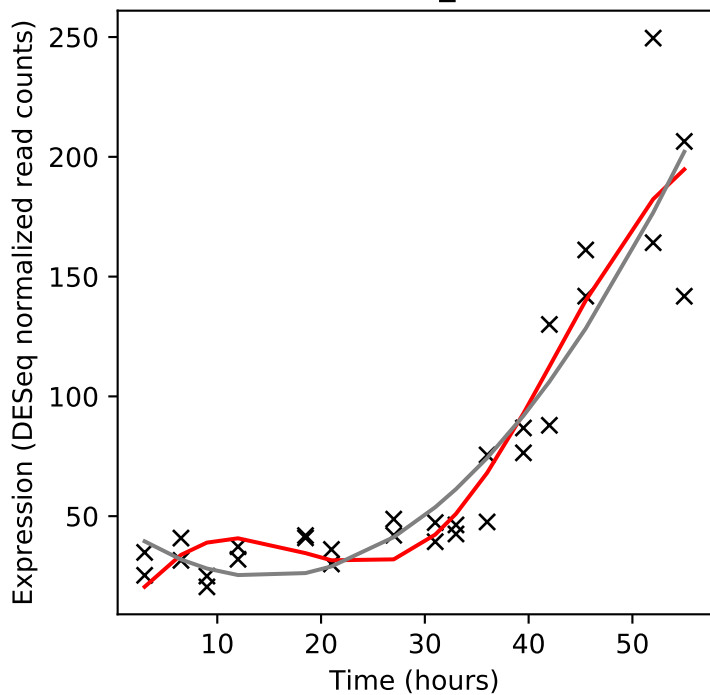

Rv0125/pepA

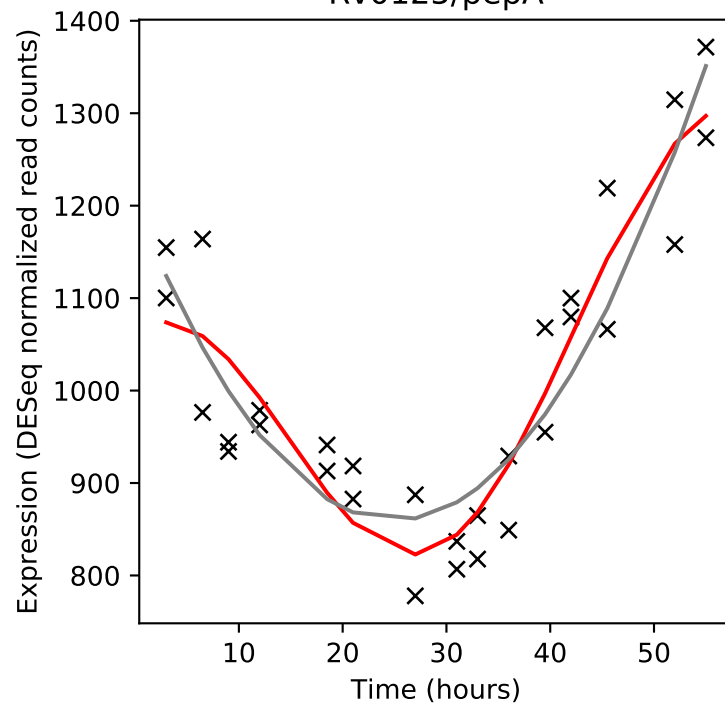

Rv0126/treS

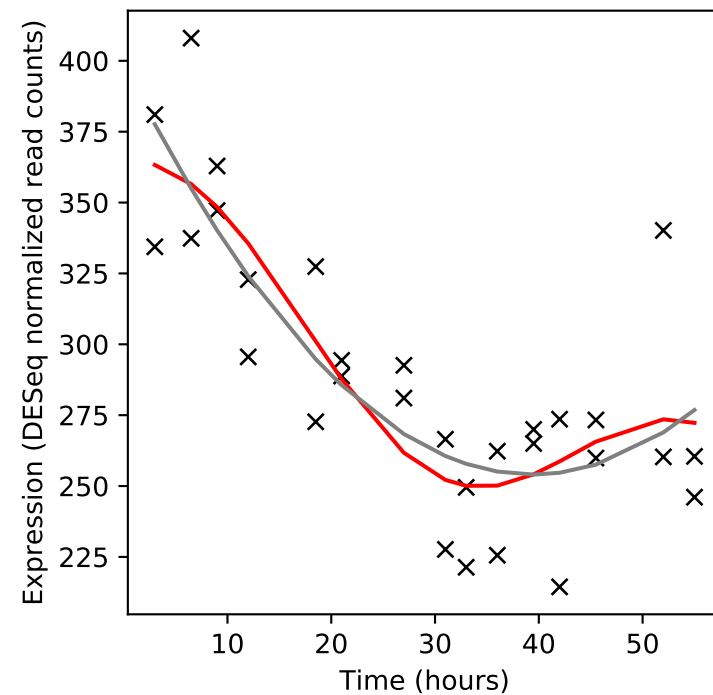

Rv0127/mak

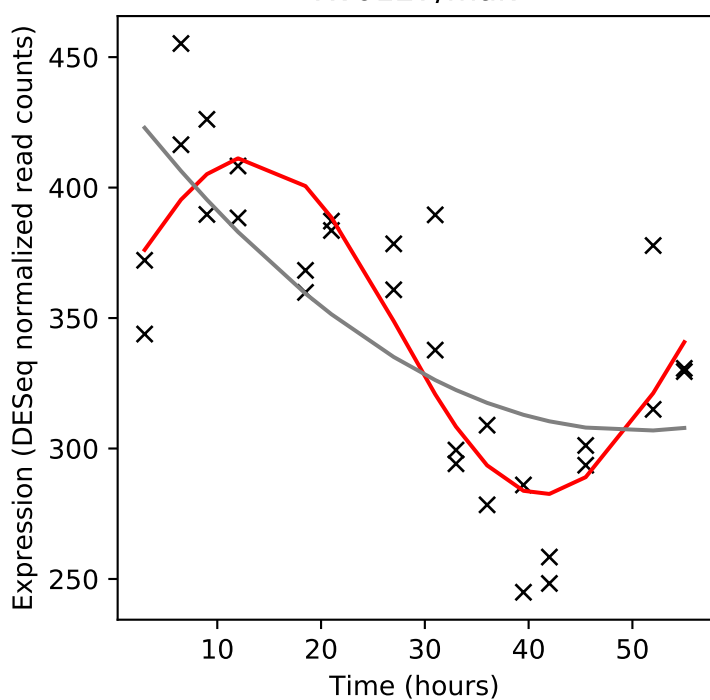

Rv0128/-

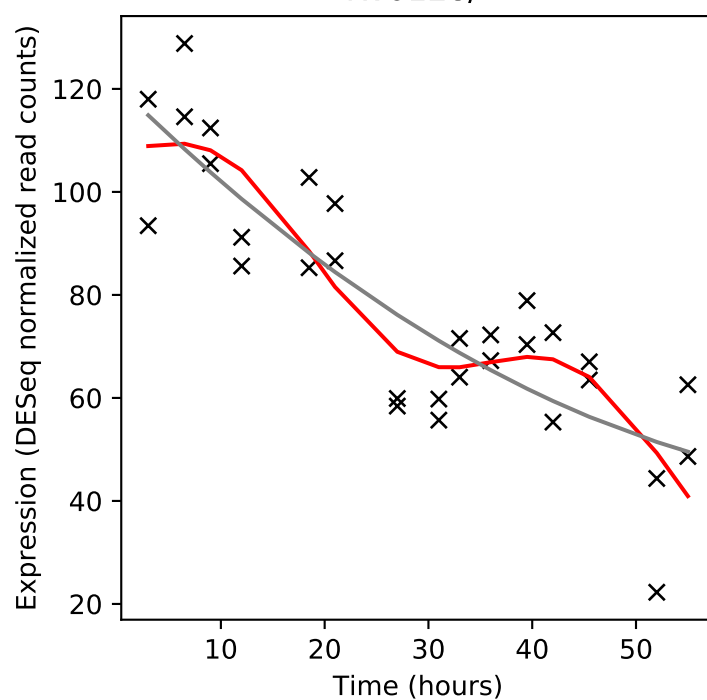

Rv0129c/fbpC

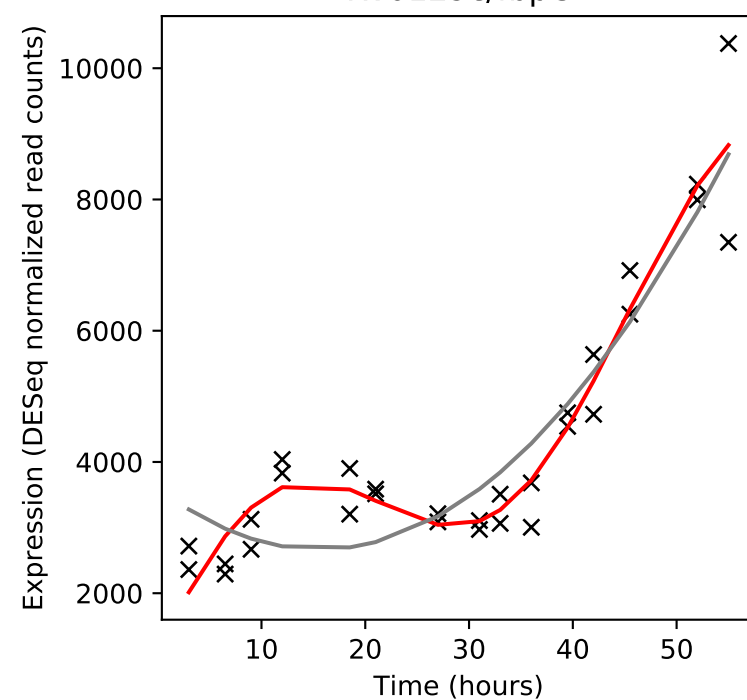

Rv0130/htdZ

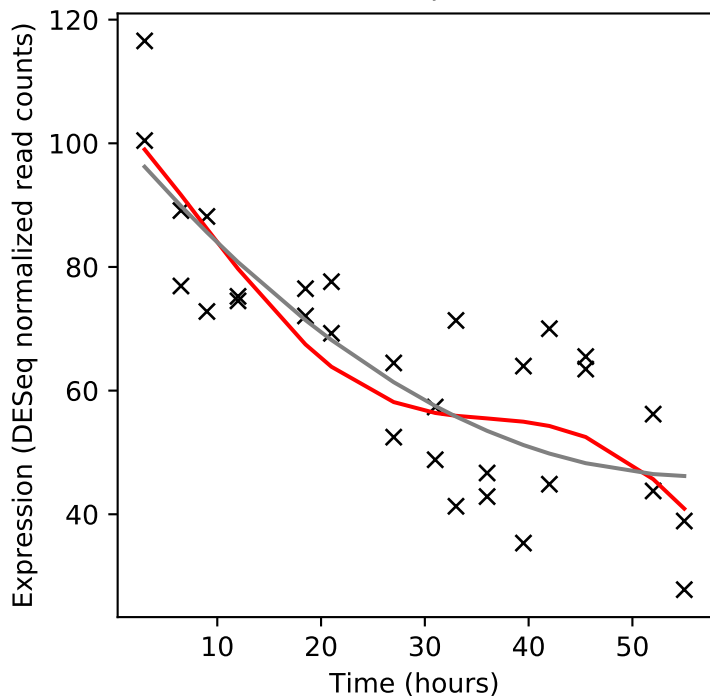

Rv0131c/fadE1

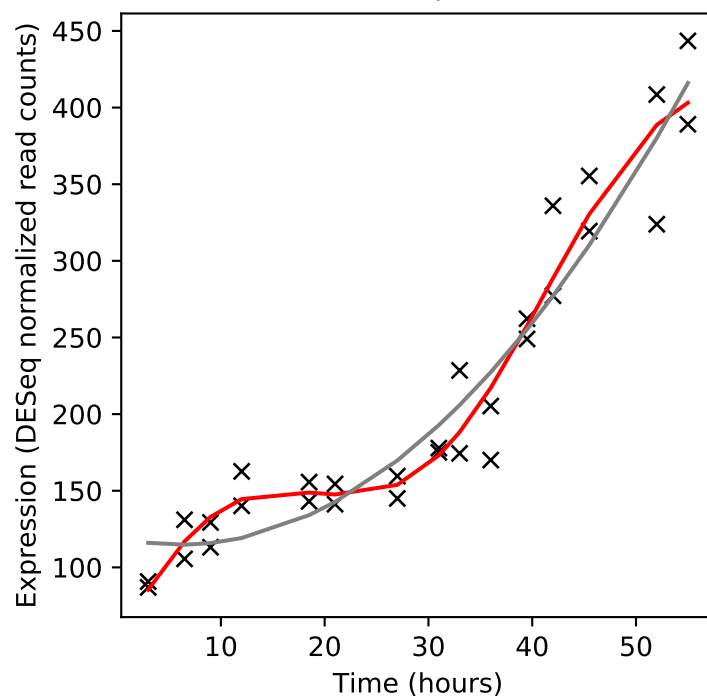

Rv0132c/fgd2

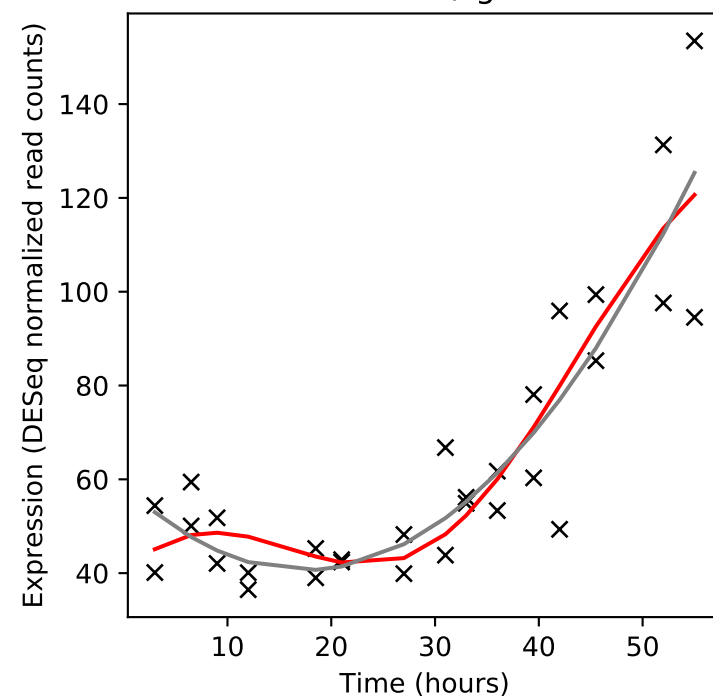

Rv0133/-

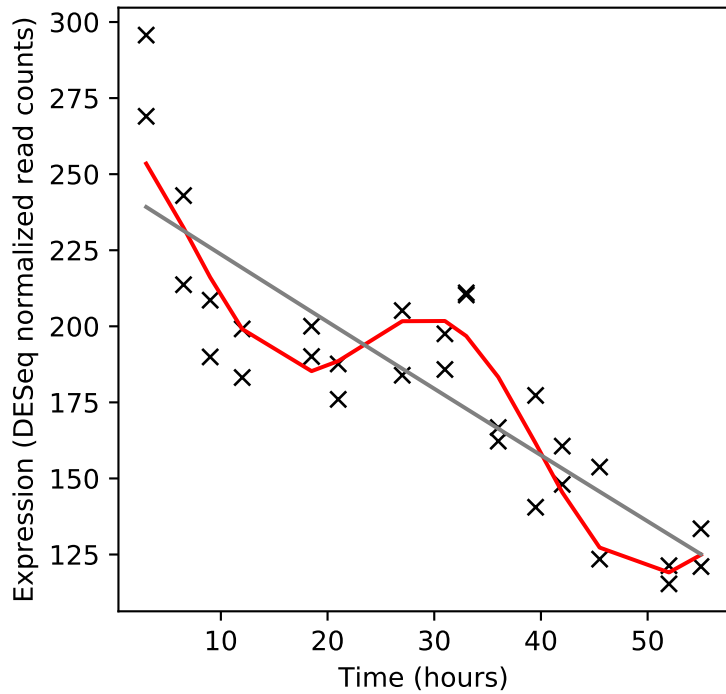

Rv0134/ephF

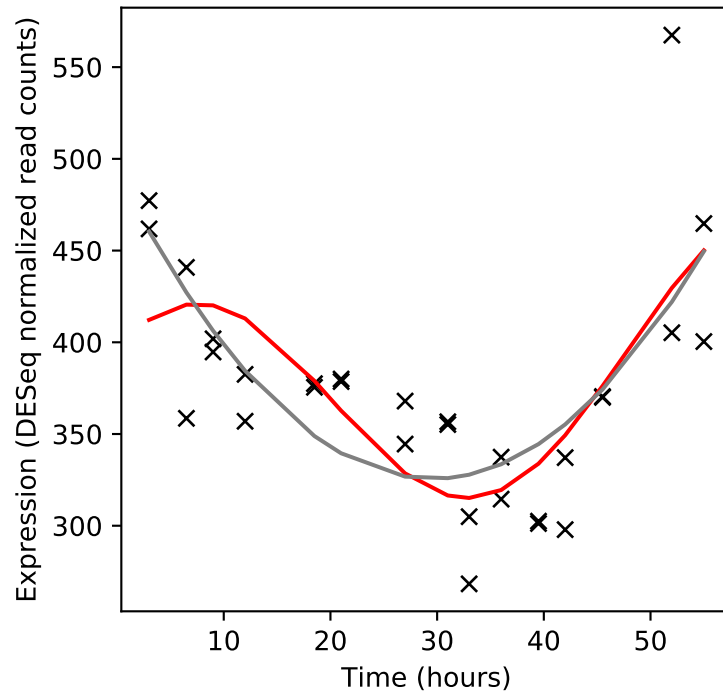

Rv0135c/-

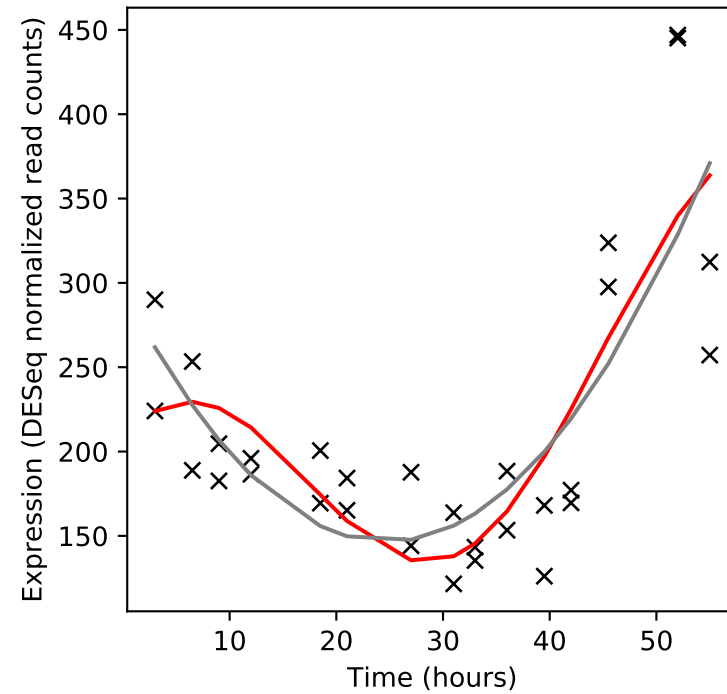

Rv0136/cyp138

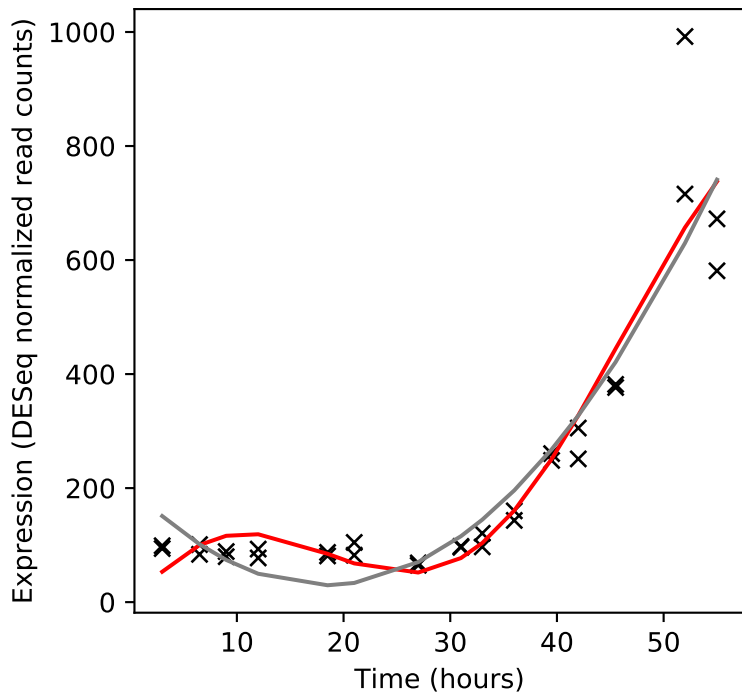

Rv0137c/msrA

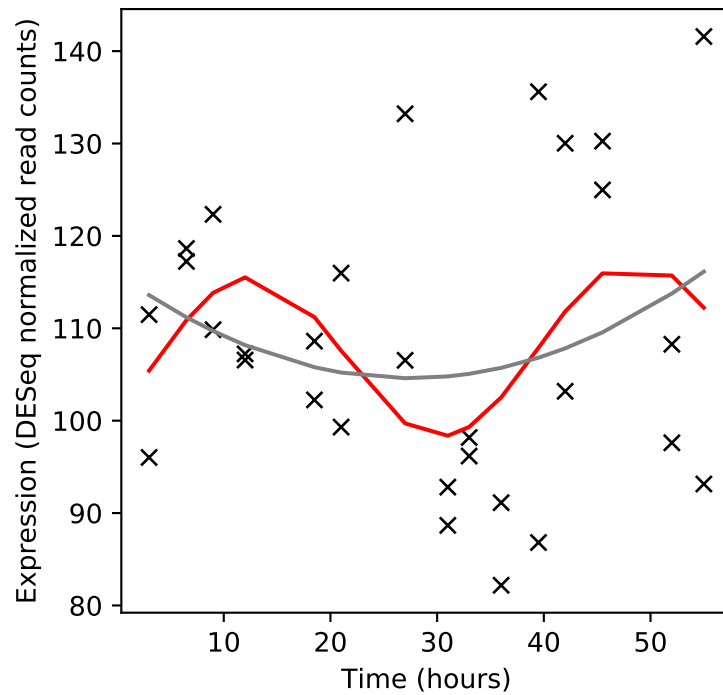

Rv0138/-

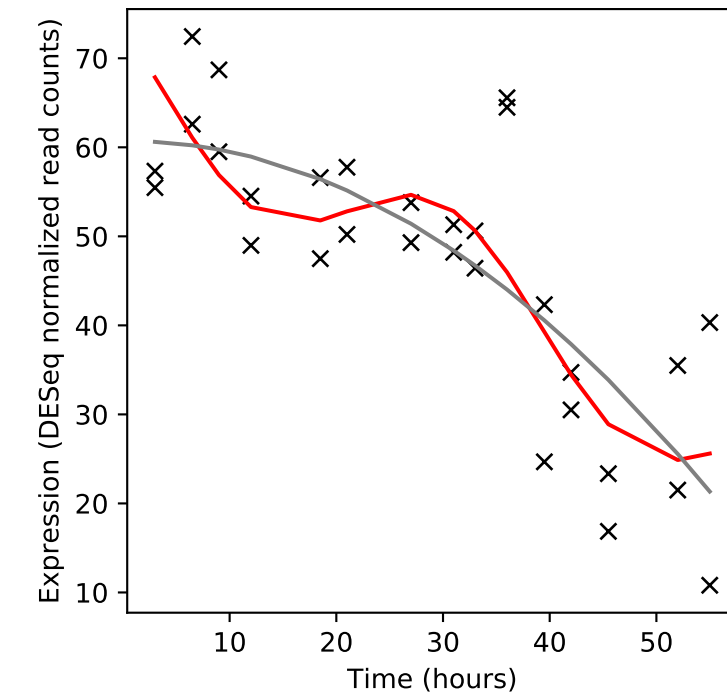

Rv0139/-

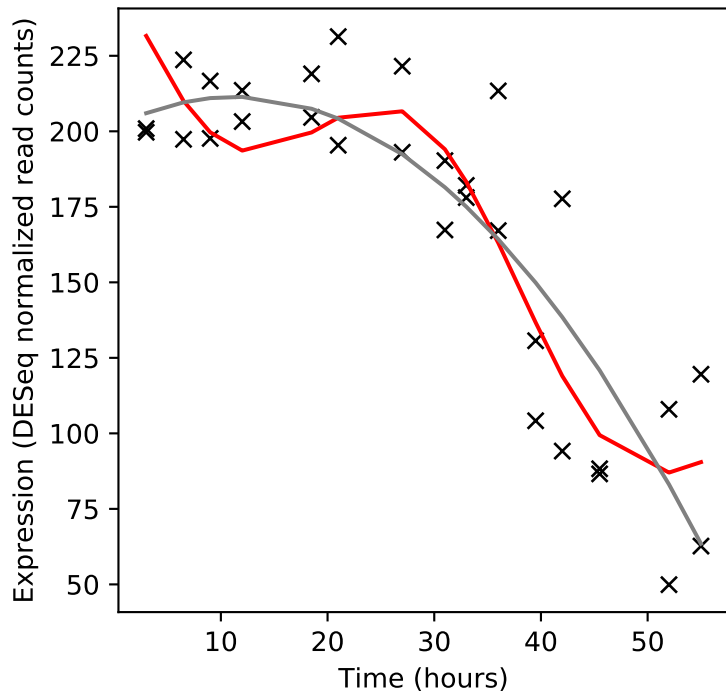

Rv0140/-

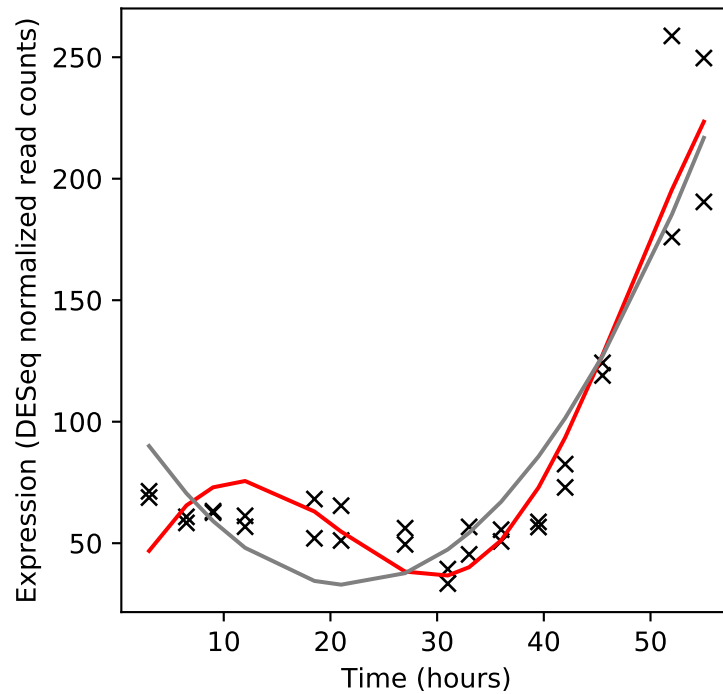

Rv0141c/-

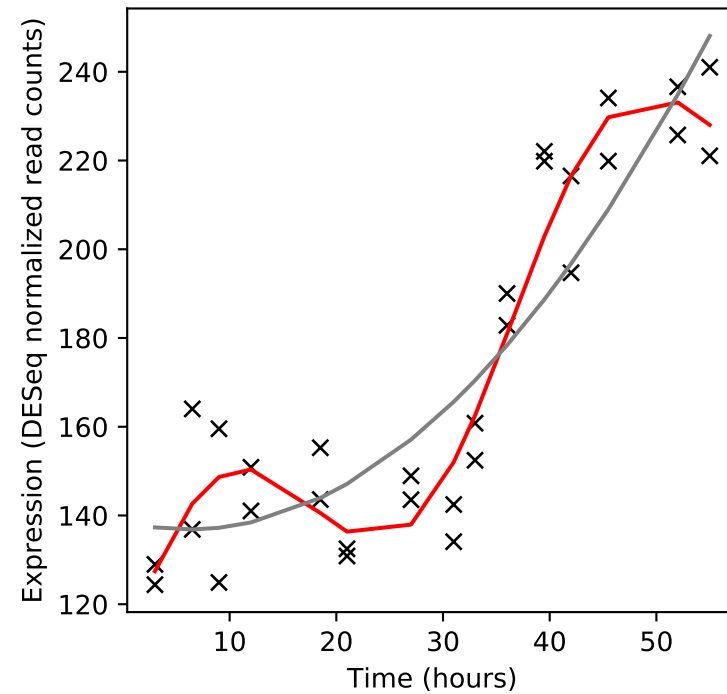



Rv0142/-

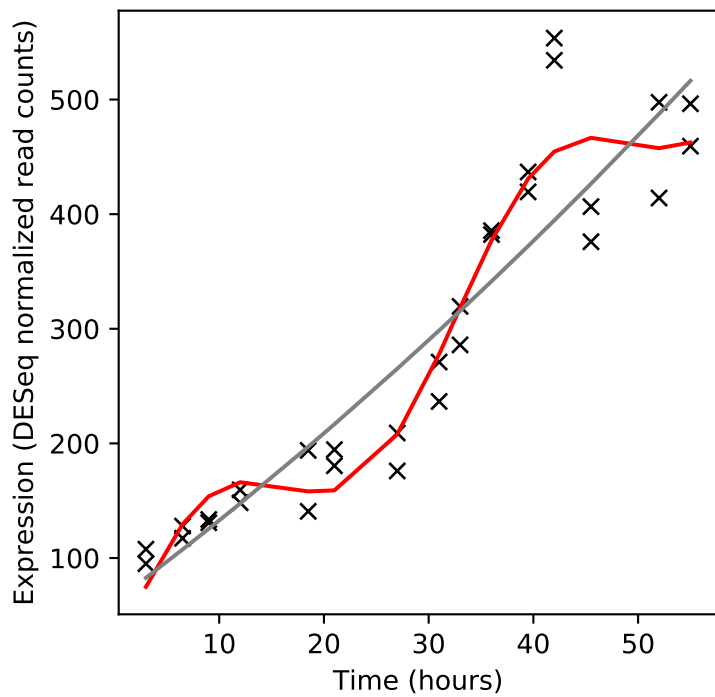

Rv0143c/-

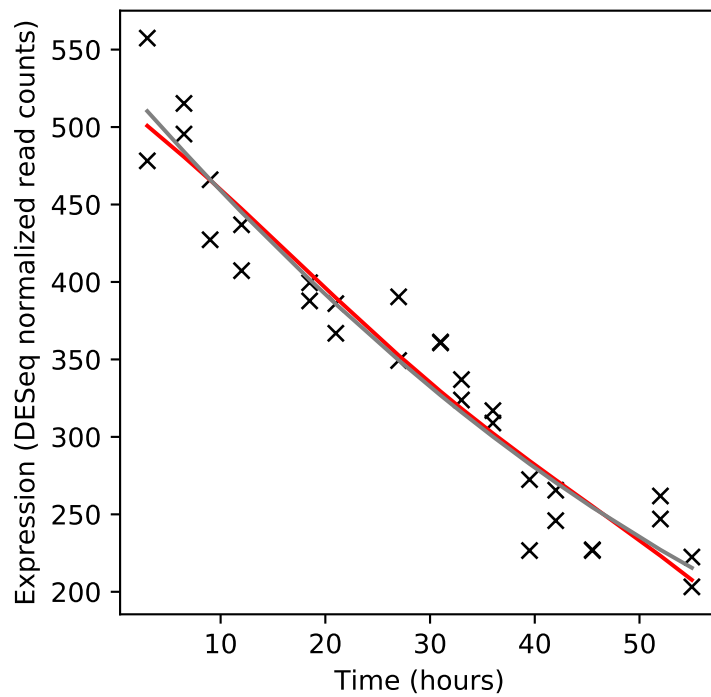

Rv0144/-

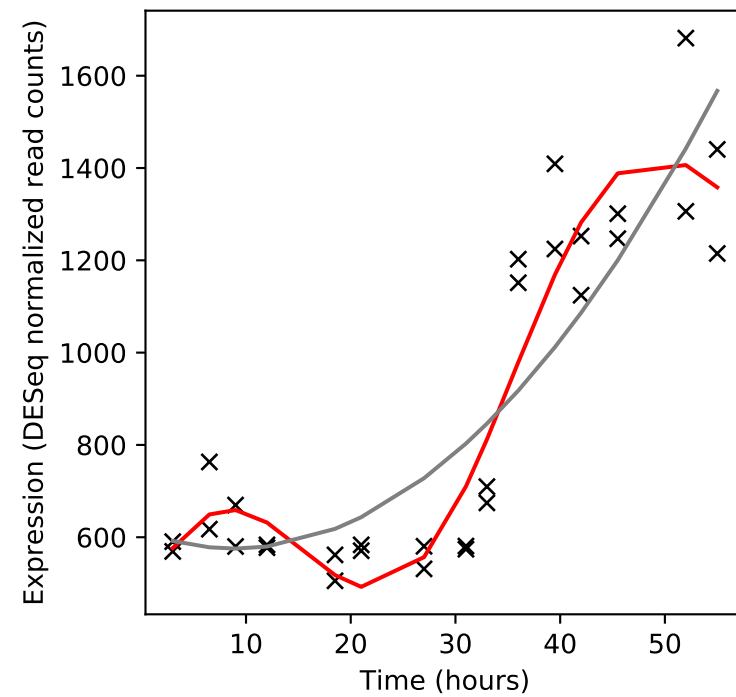

Rv0145/-

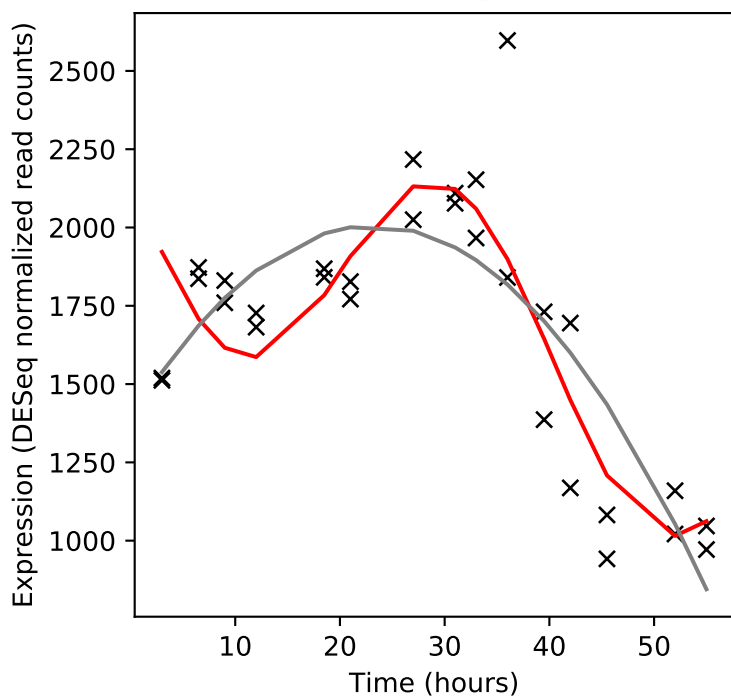

Rv0146/-

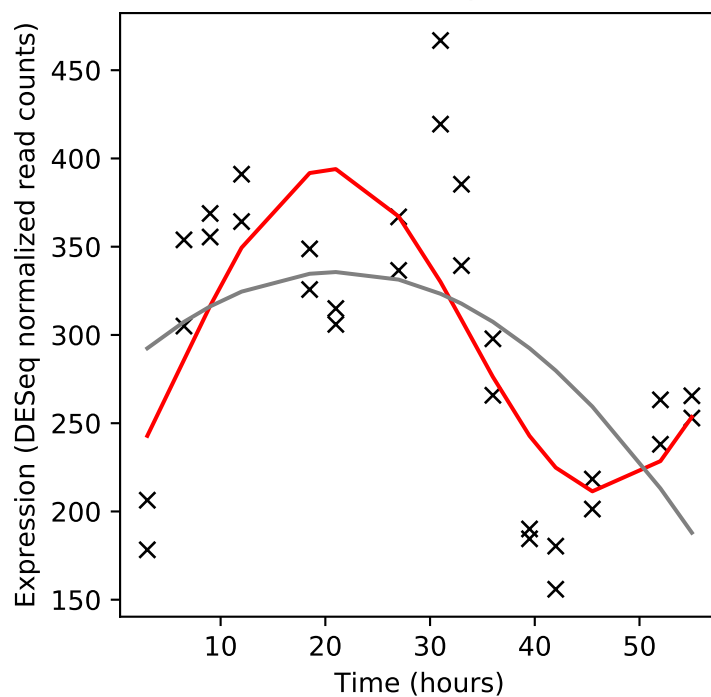

Rv0147/-

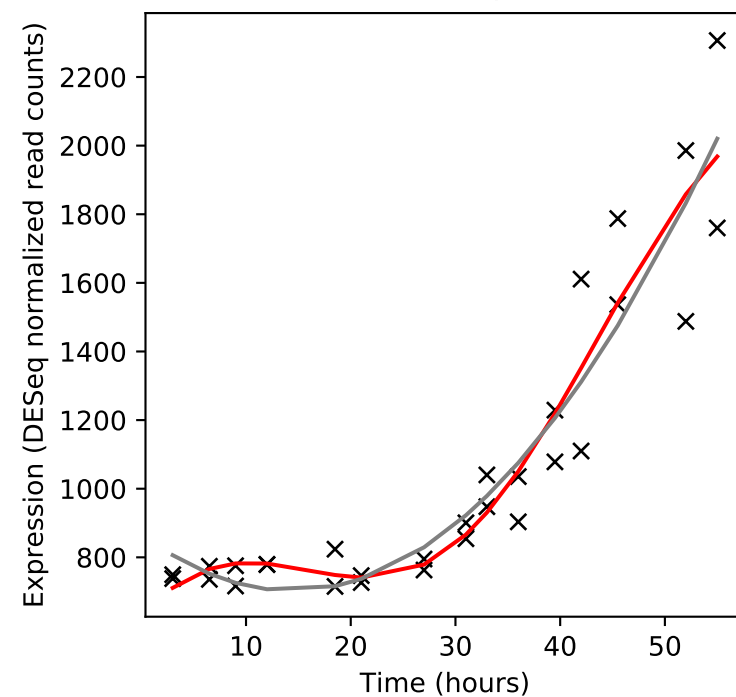

Rv0148/-

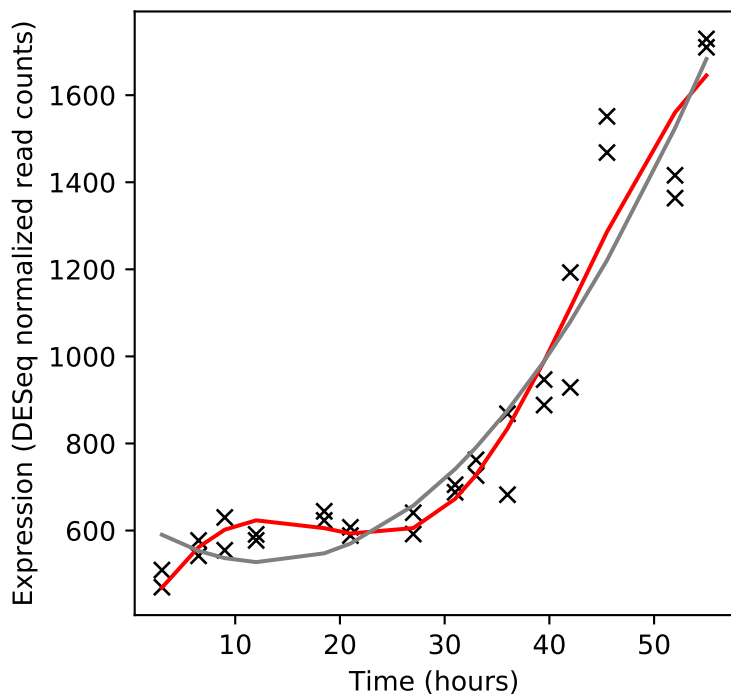

Rv0149/-

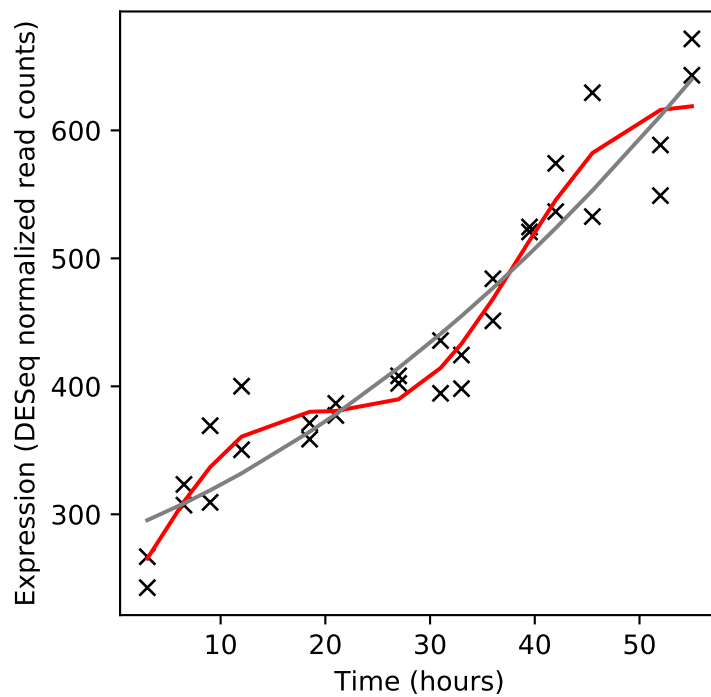

Rv0150c/-

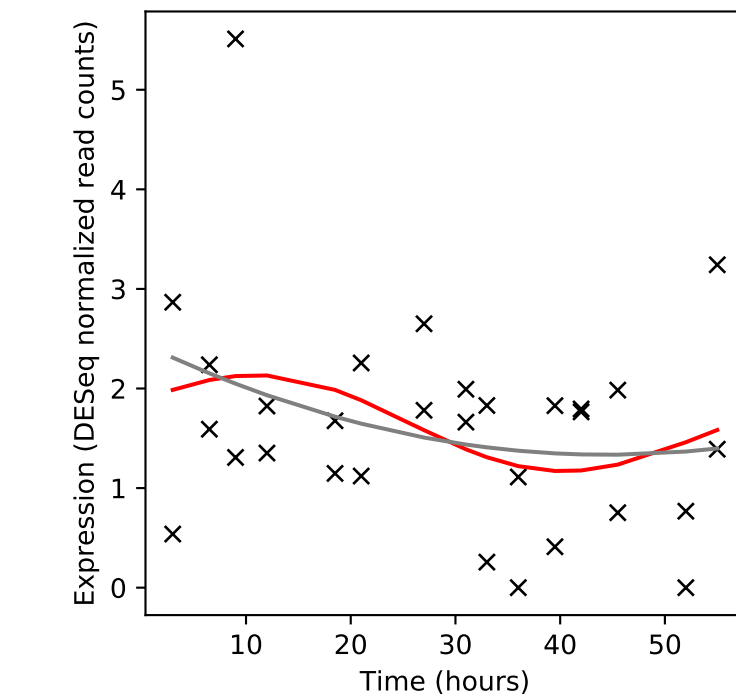

Rv0151c/PE1

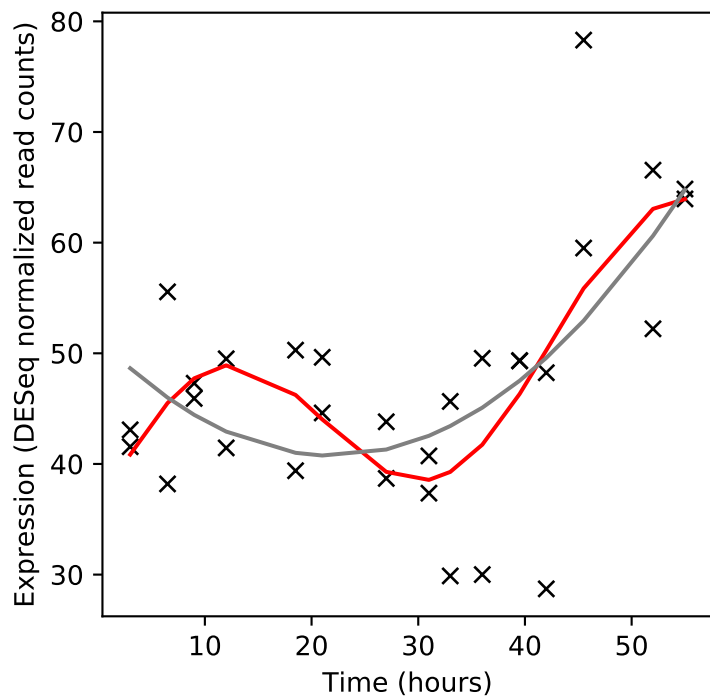

Rv0152c/PE2

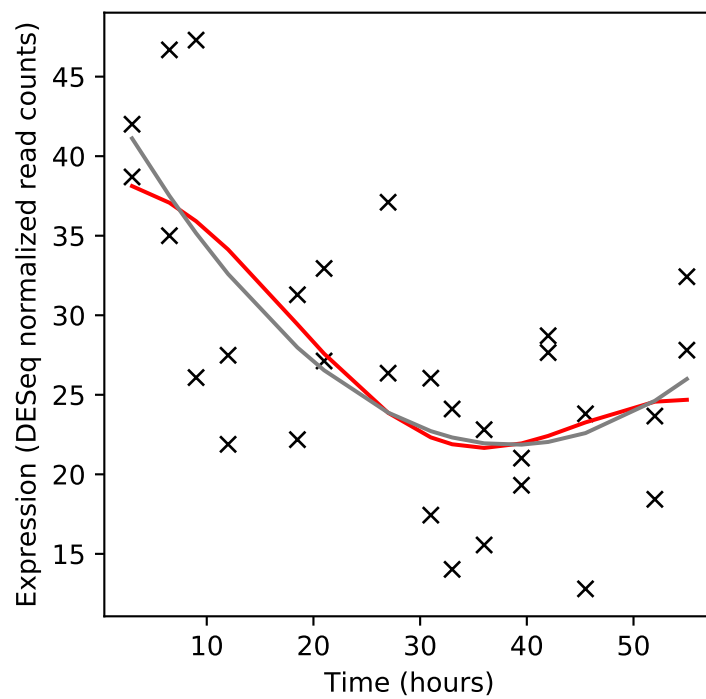

Rv0153c/ptbB

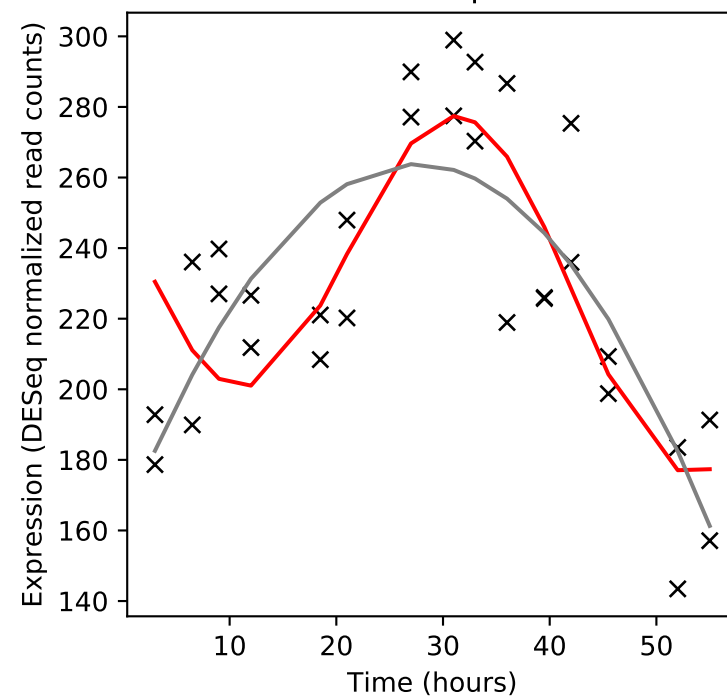

Rv0154c/fadE2

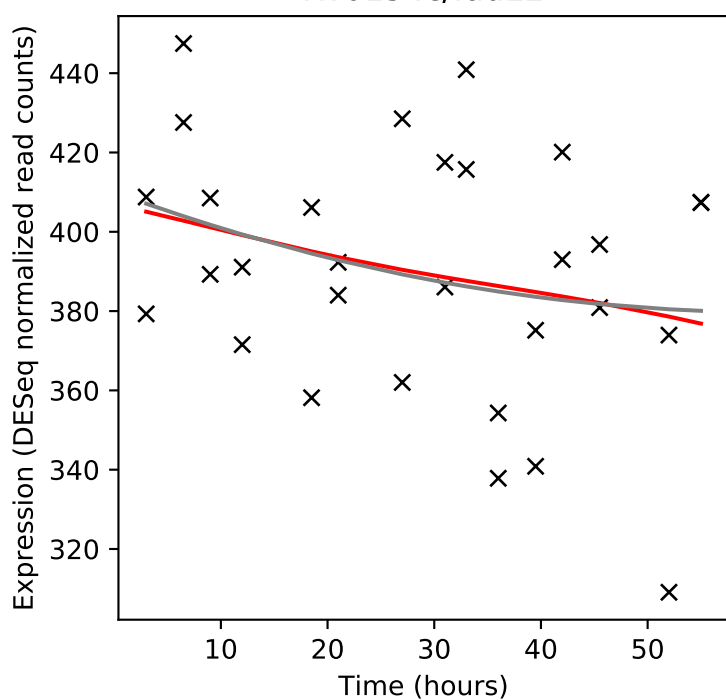

Rv0155/pntAa

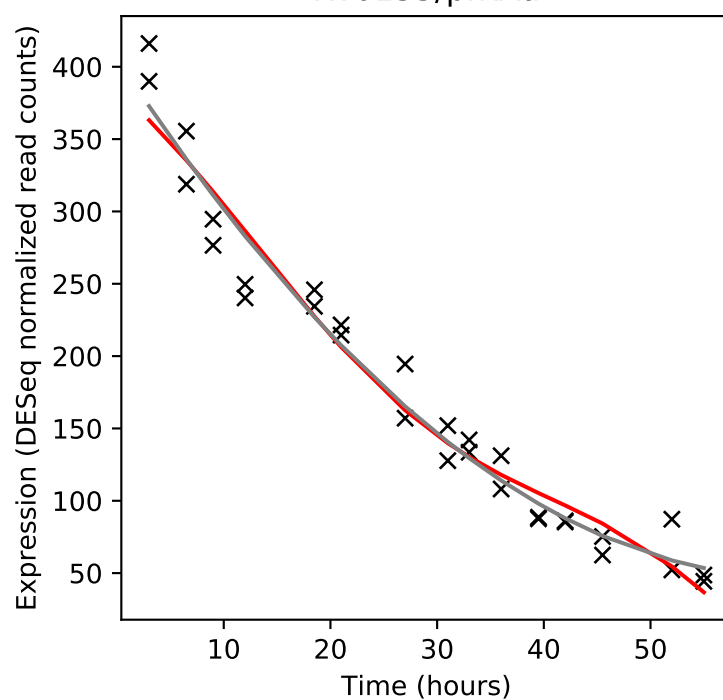

Rv0156/pntAb

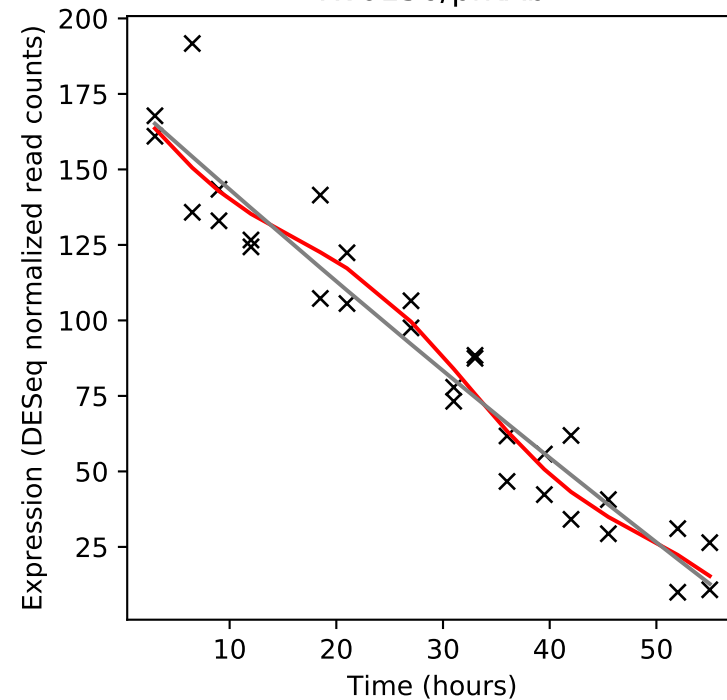

Rv0157/pntB

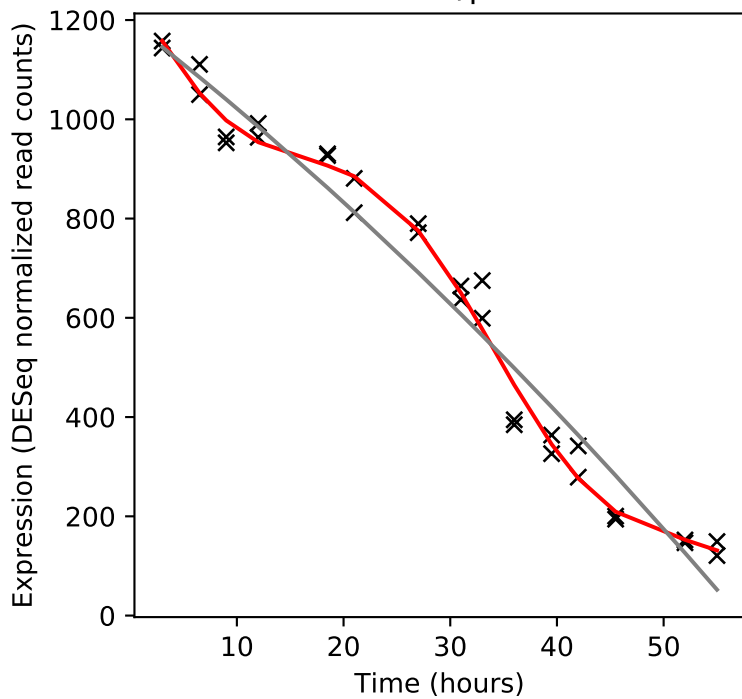

Rv0157A/-

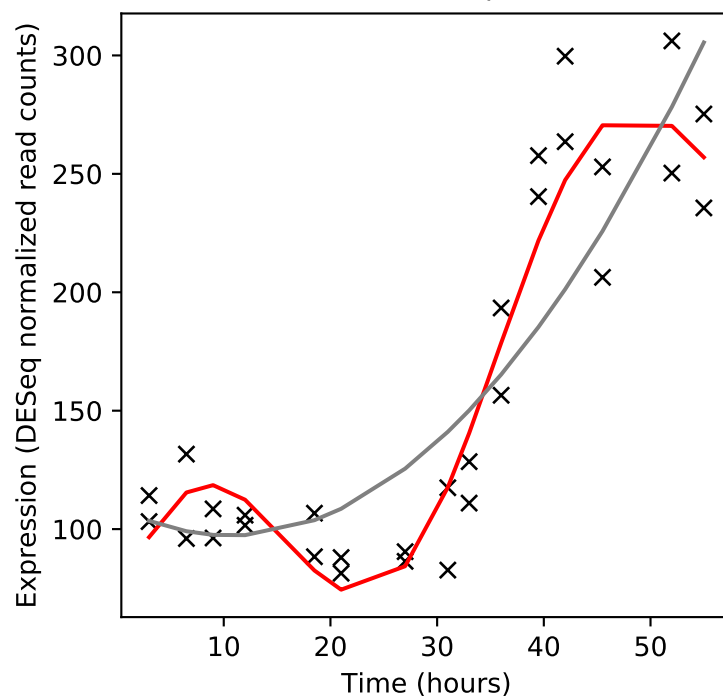

Rv0158/-

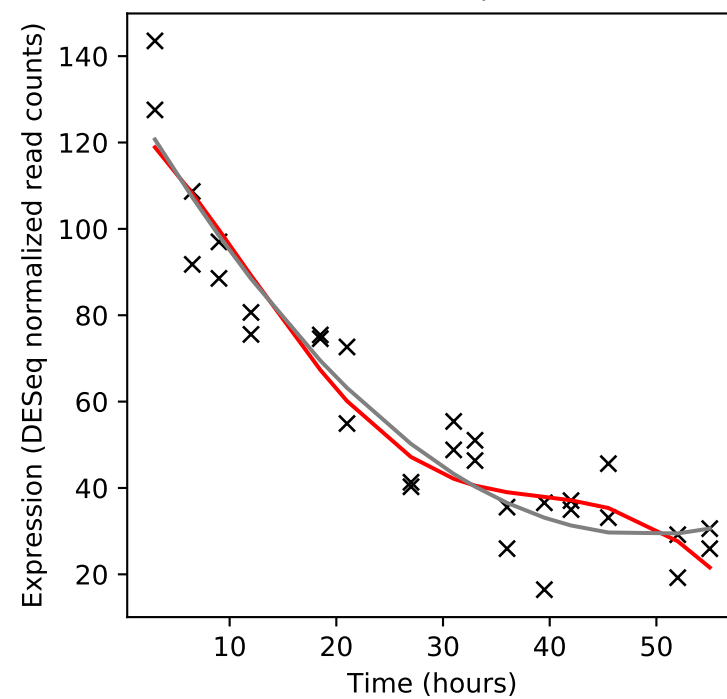

Rv0159c/PE3

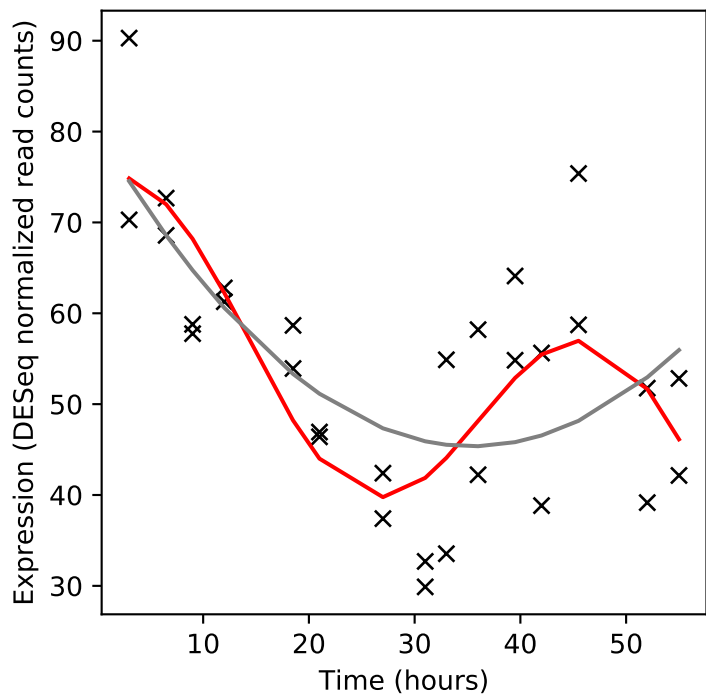

Rv0160c/PE4

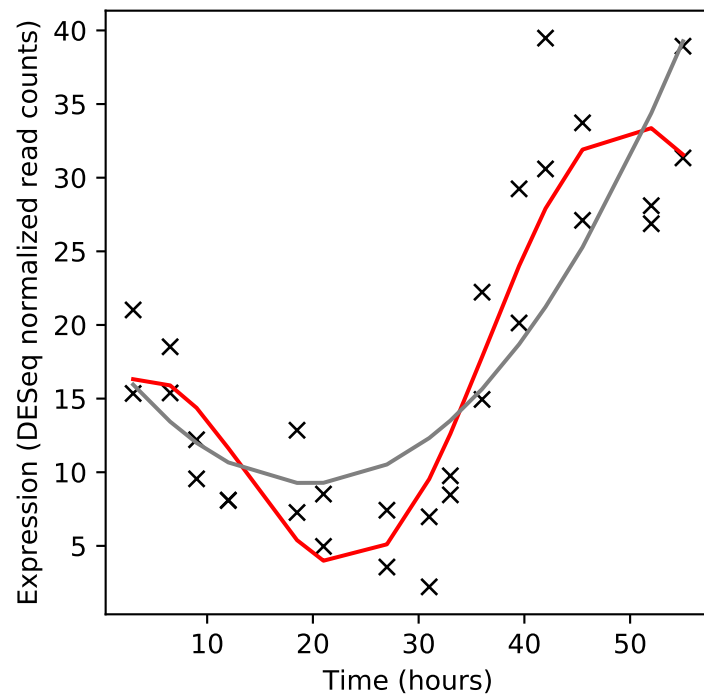

Rv0161/-

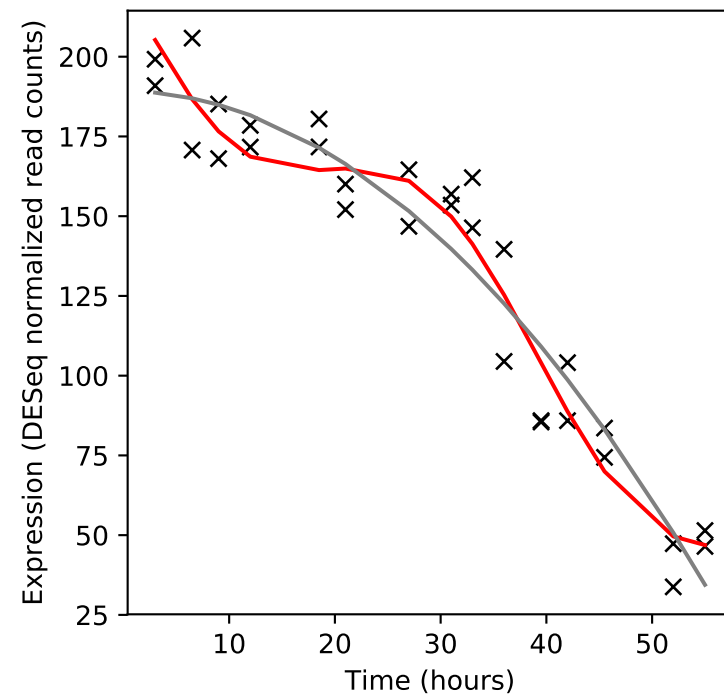

Rv0162c/adhE1

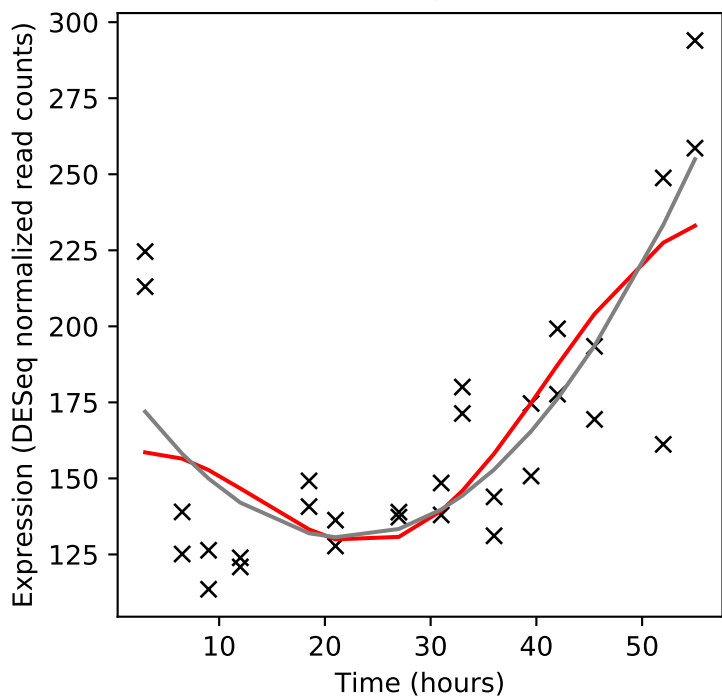

Rv0163/-

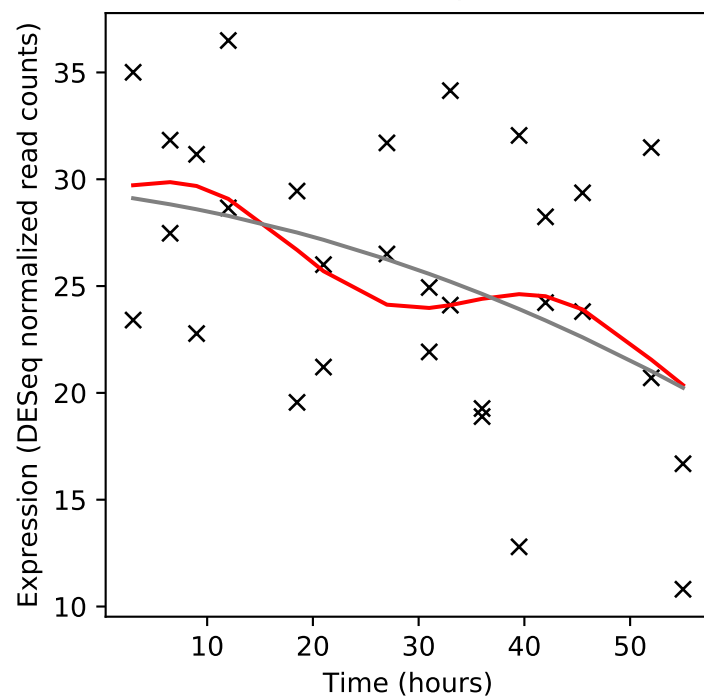

Rv0164/TB18.5

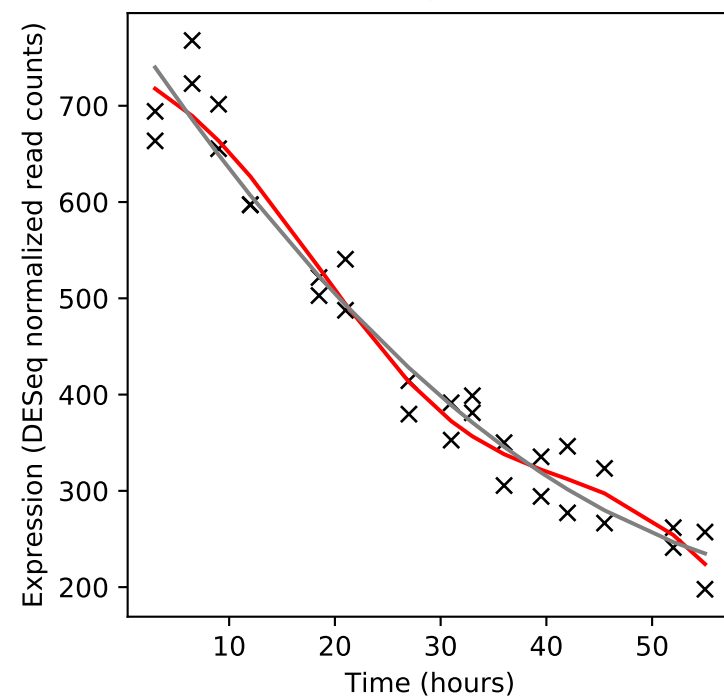

Rv0165c/mce1R

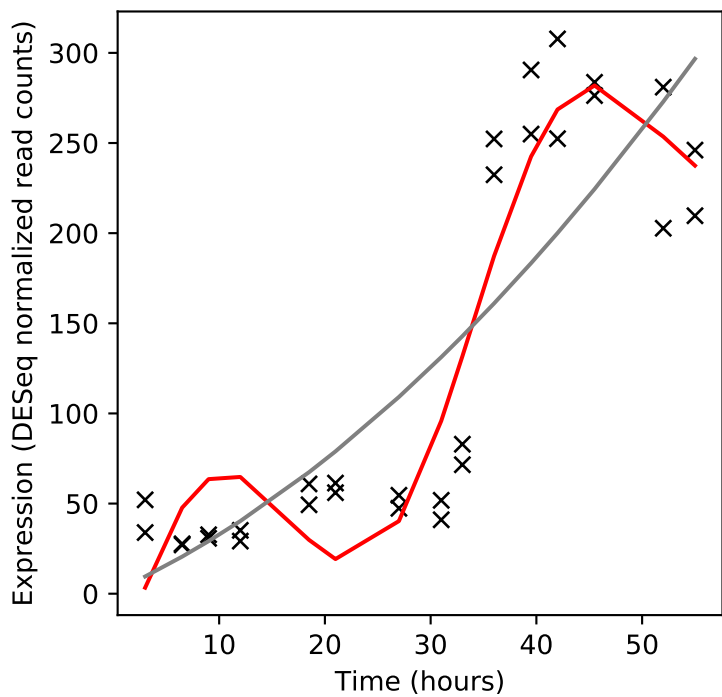

Rv0166/fadD5

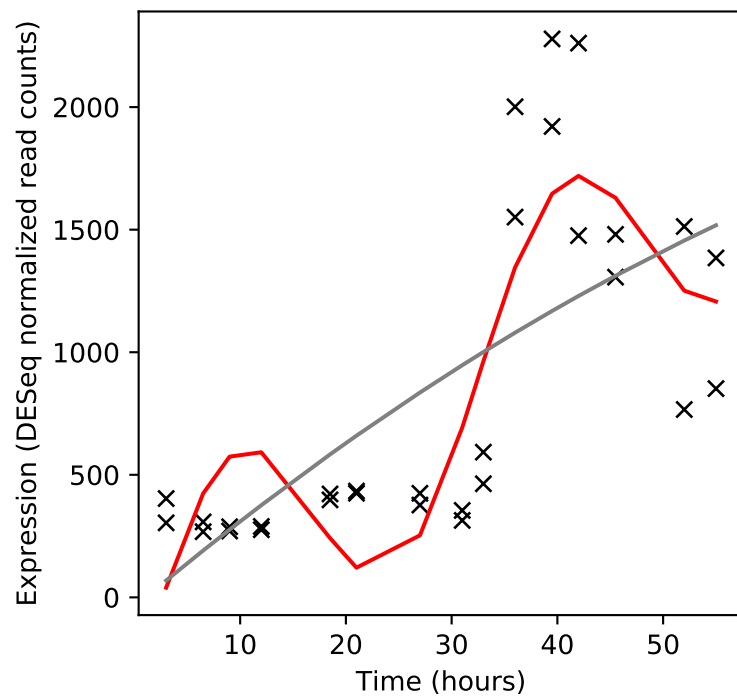

Rv0167/yrbE1A

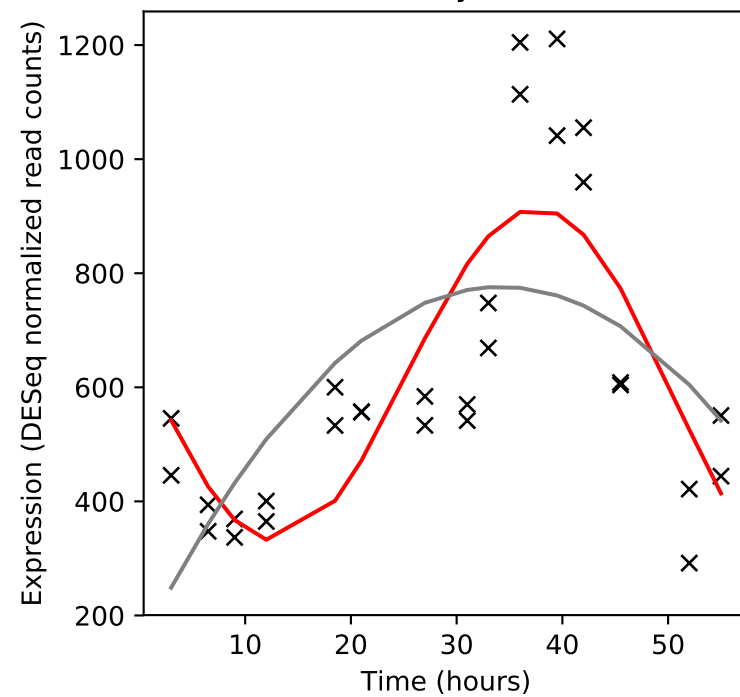

Rv0168/yrbE1B

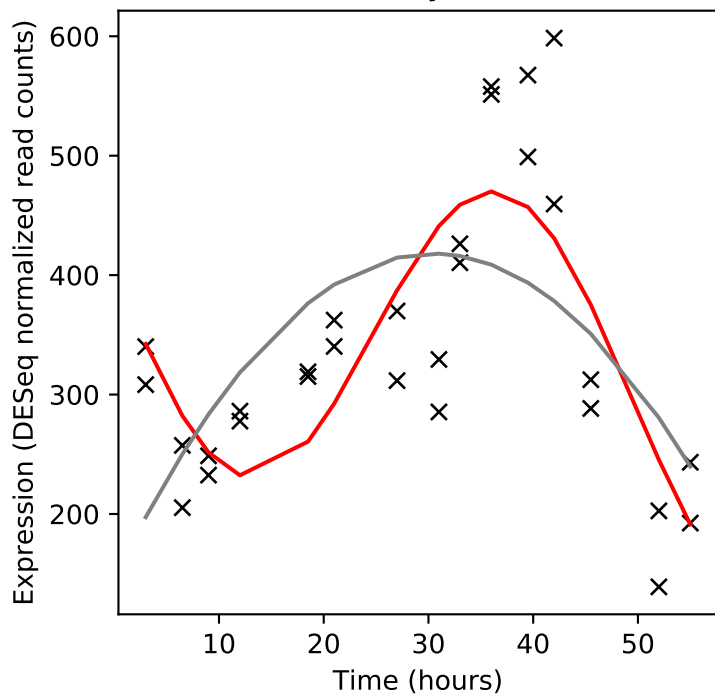

Rv0169/mce1A

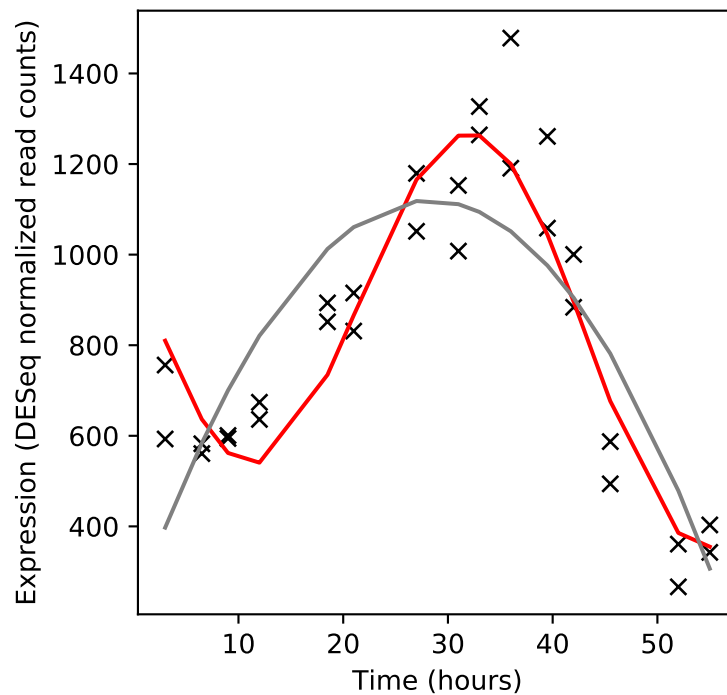

Rv0170/mce1B

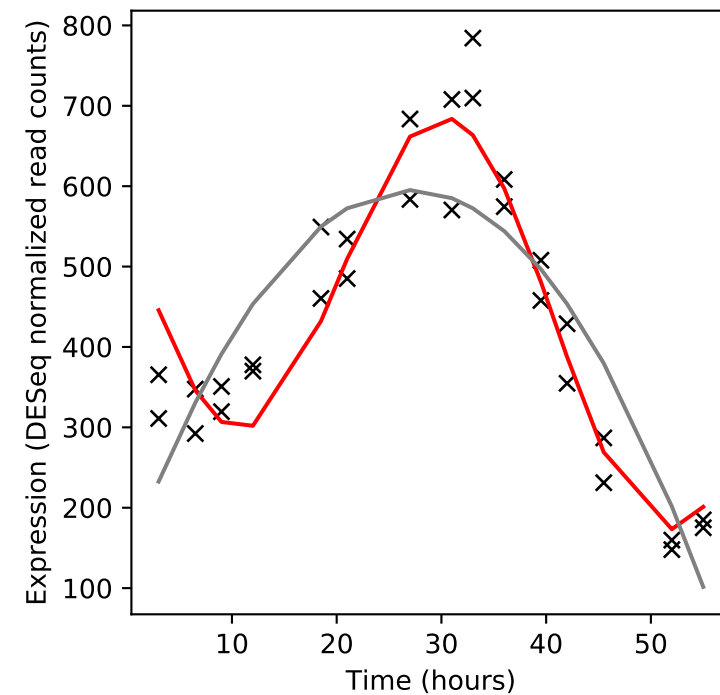

Rv0171/mce1C

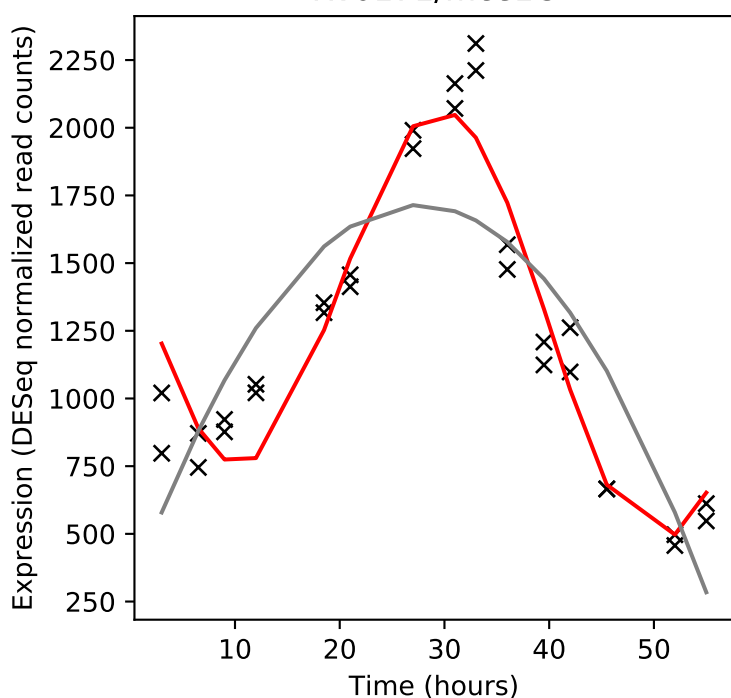

Rv0172/mce1D

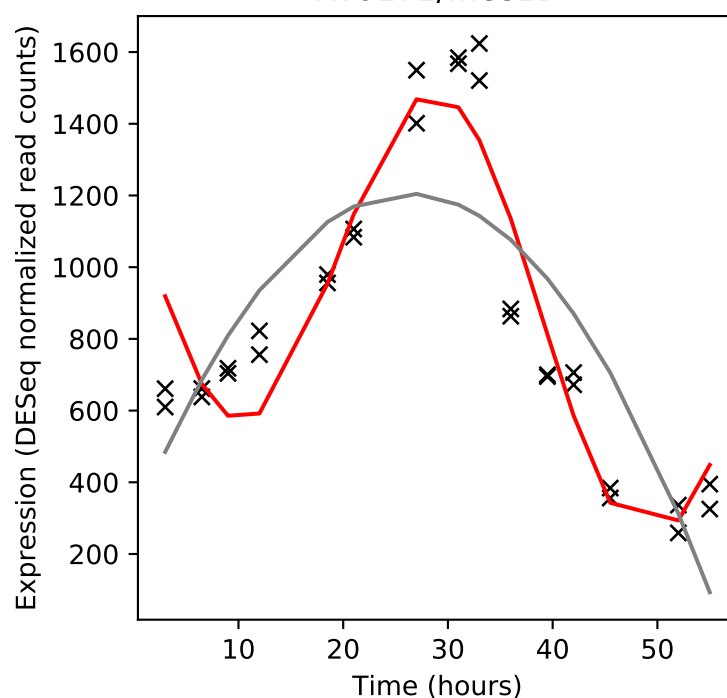

Rv0173/lprK

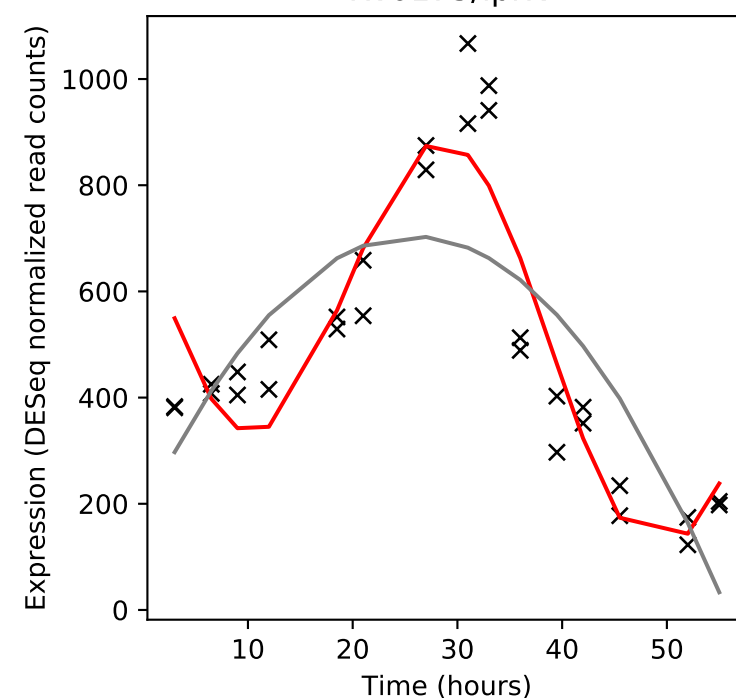

Rv0174/mce1F

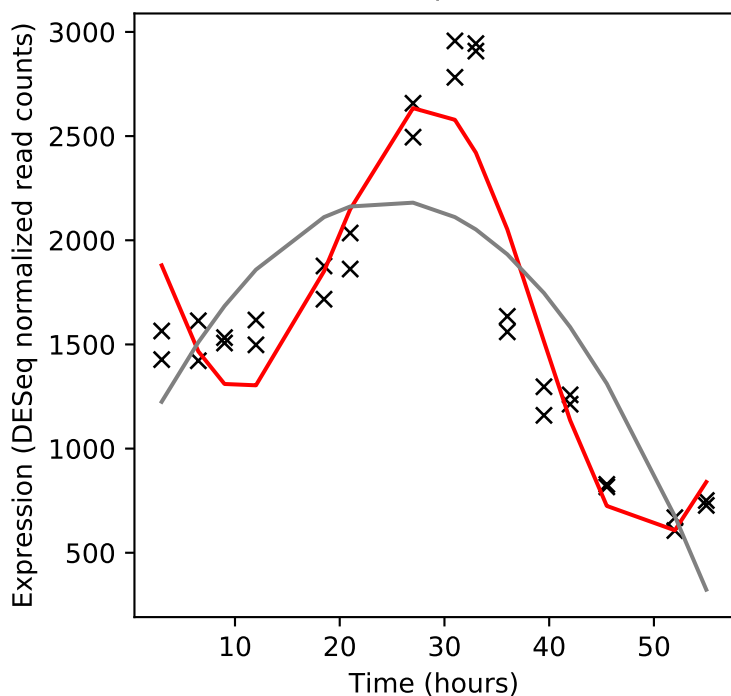

Rv0175/-

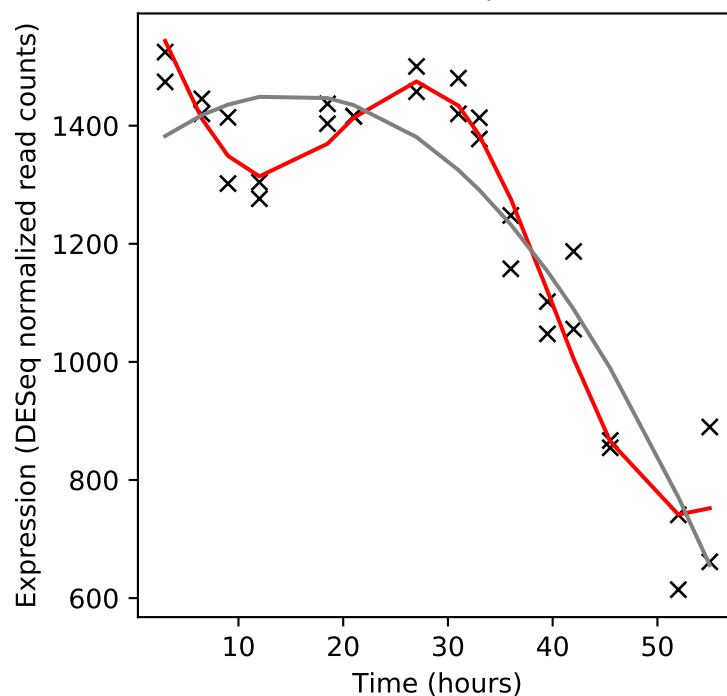

Rv0176/-

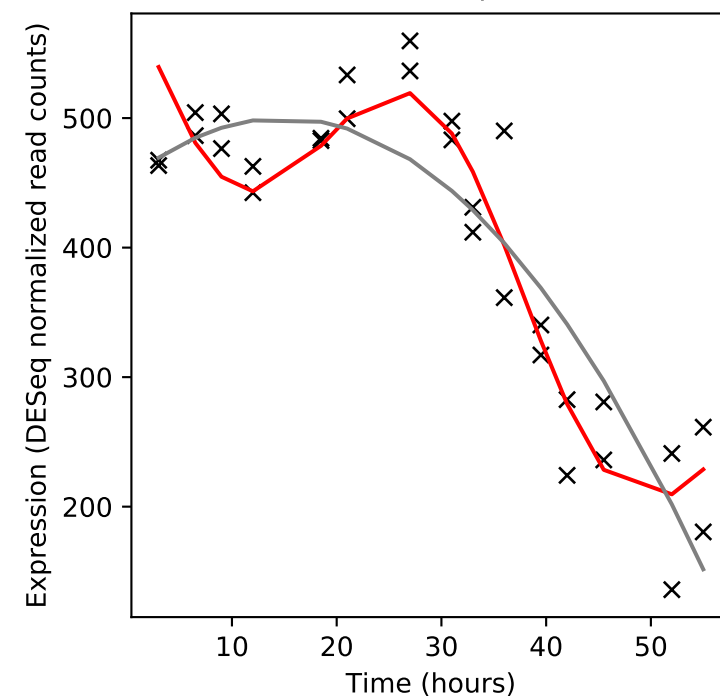

Rv0177/-

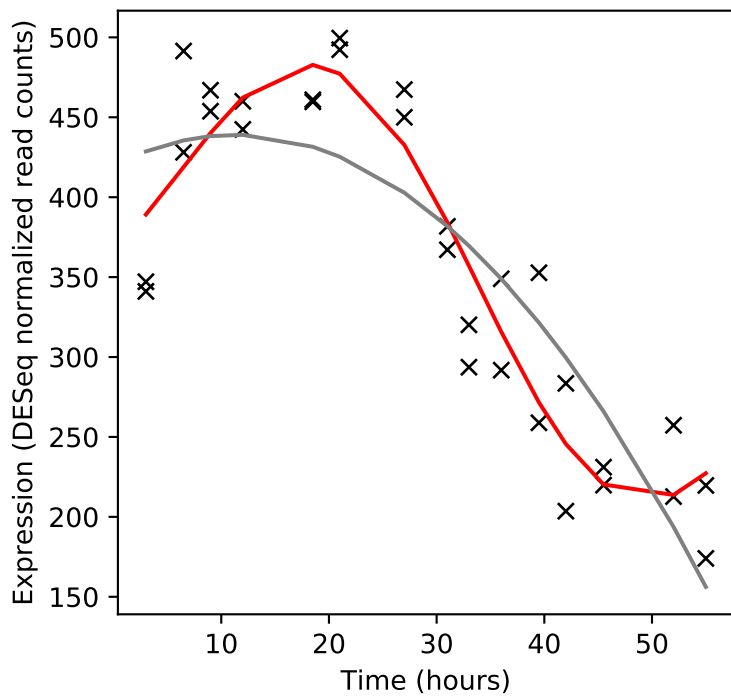

Rv0178/-

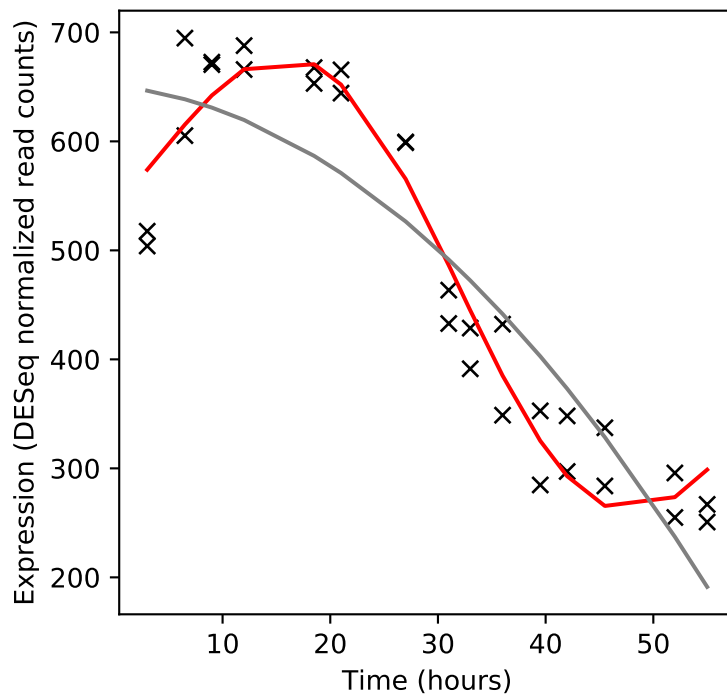

Rv0179c/lprO

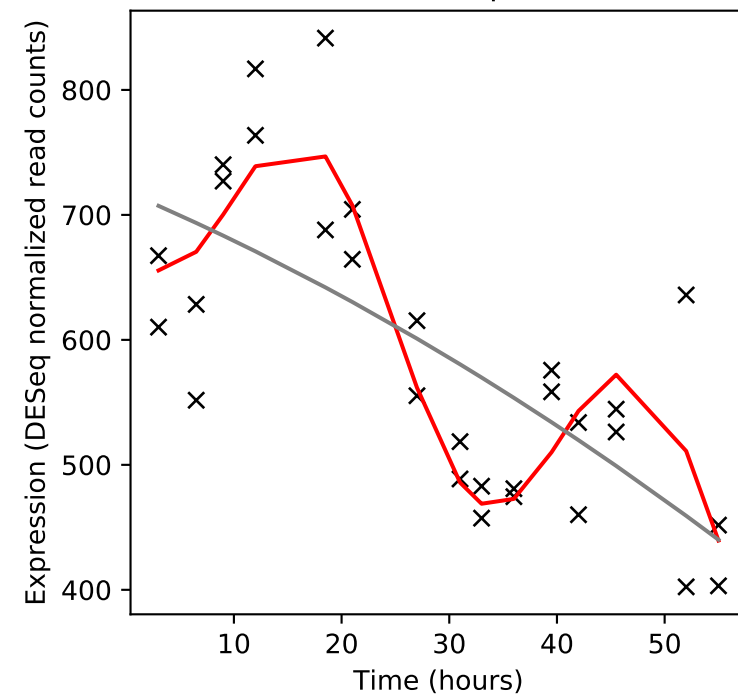

Rv0180c/-

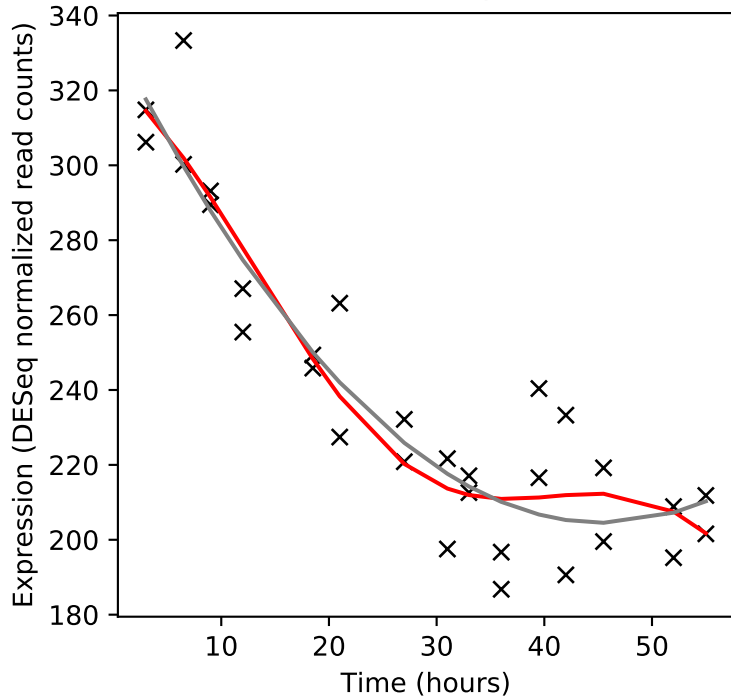

Rv0181c/-

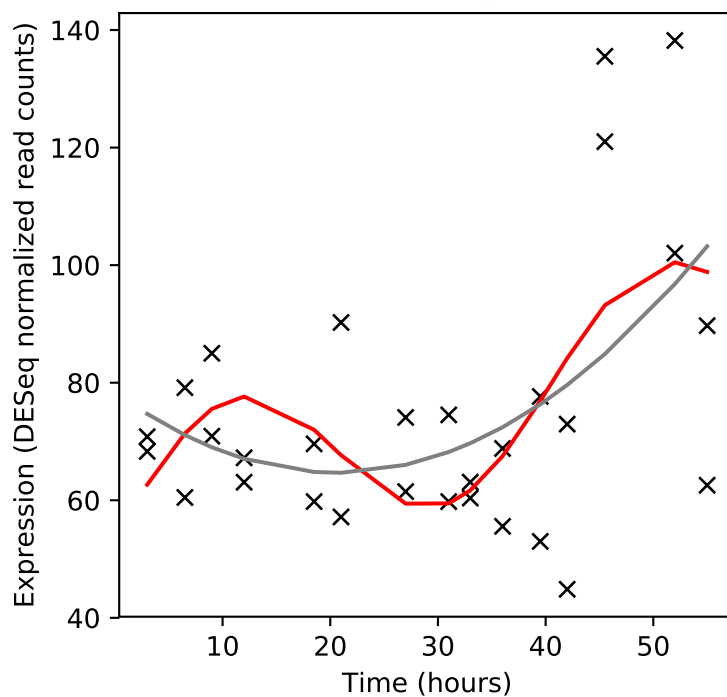

Rv0182c/sigG

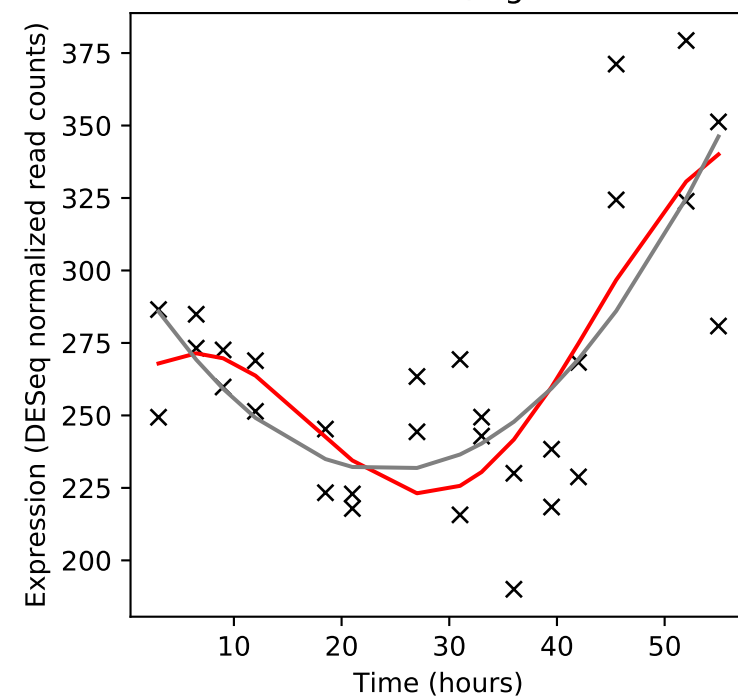

Rv0183/-

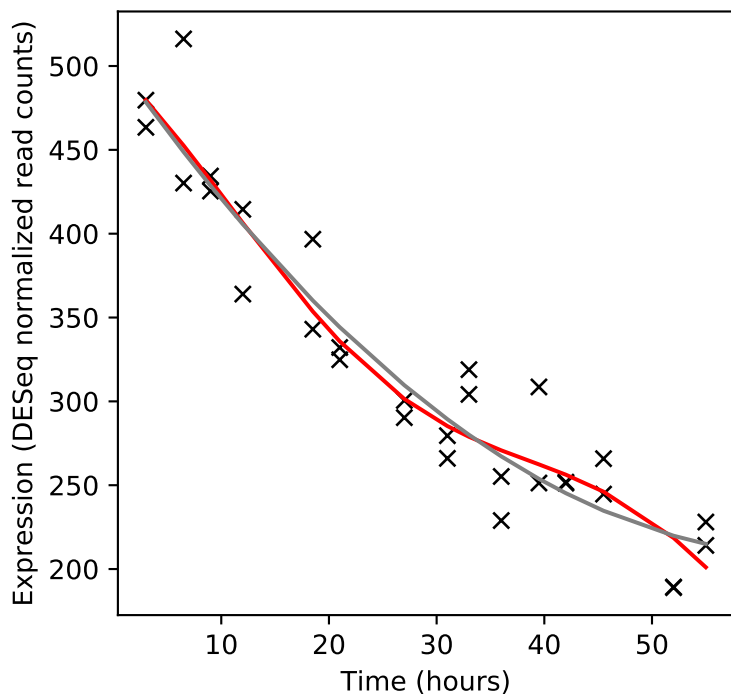

Rv0184/-

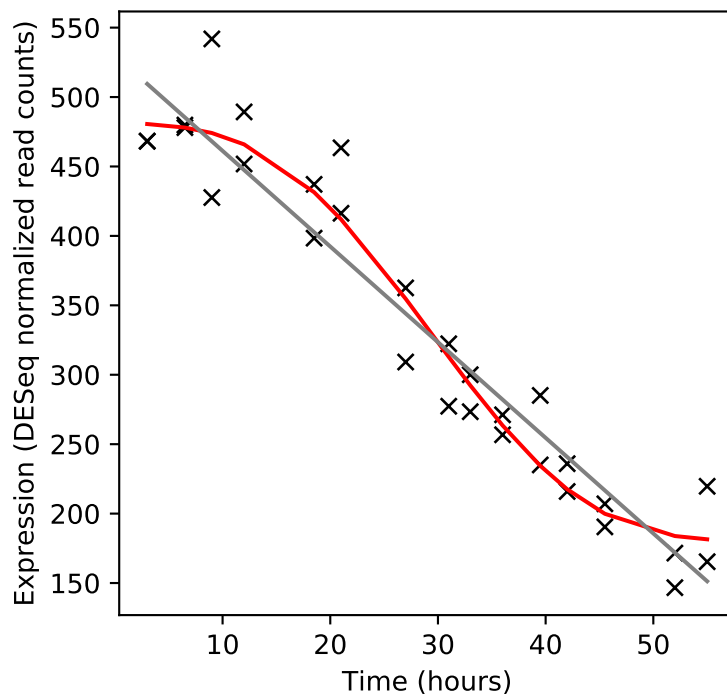

Rv0185/-

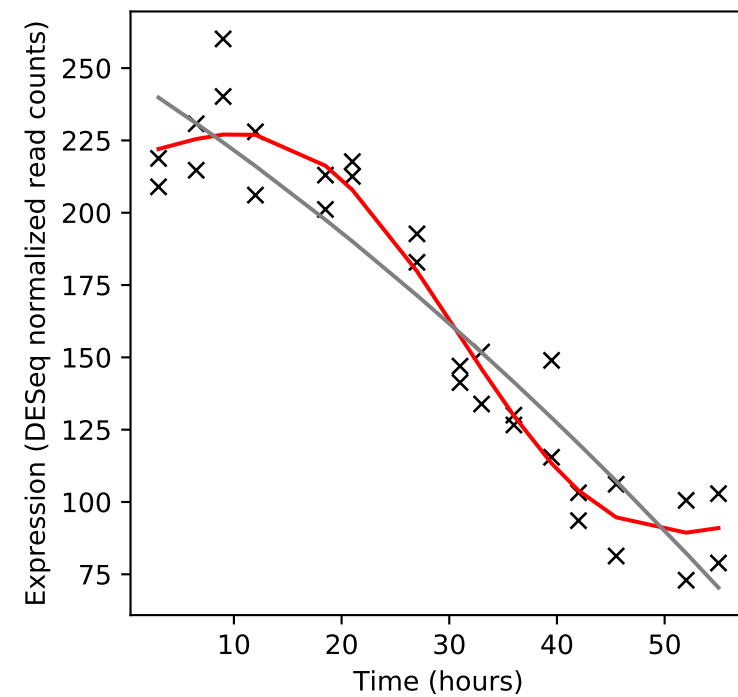

Rv0186/bgIS

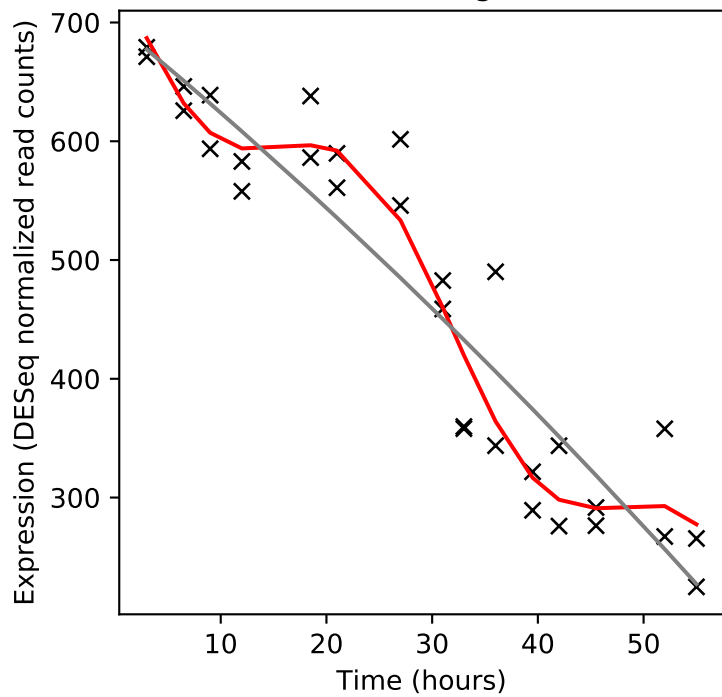

Rv0186A/mymT

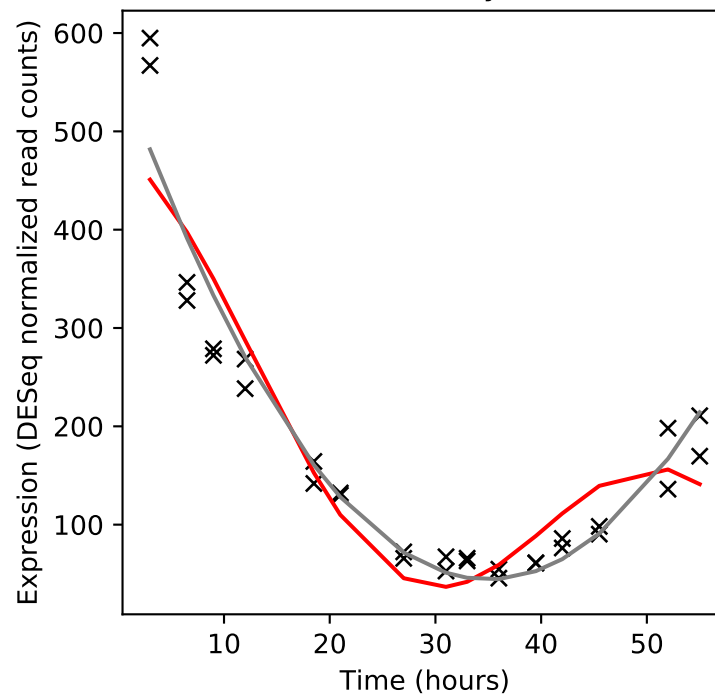

Rv0187/-

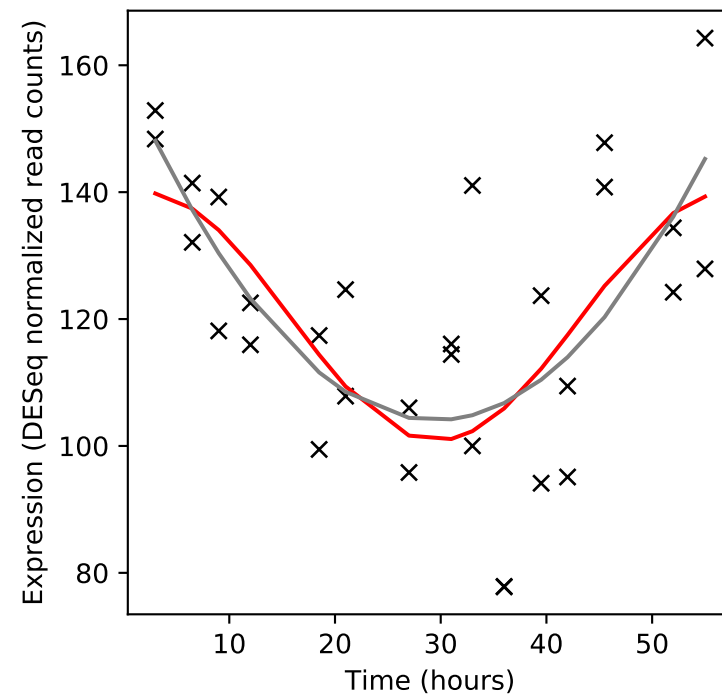

Rv0188/-

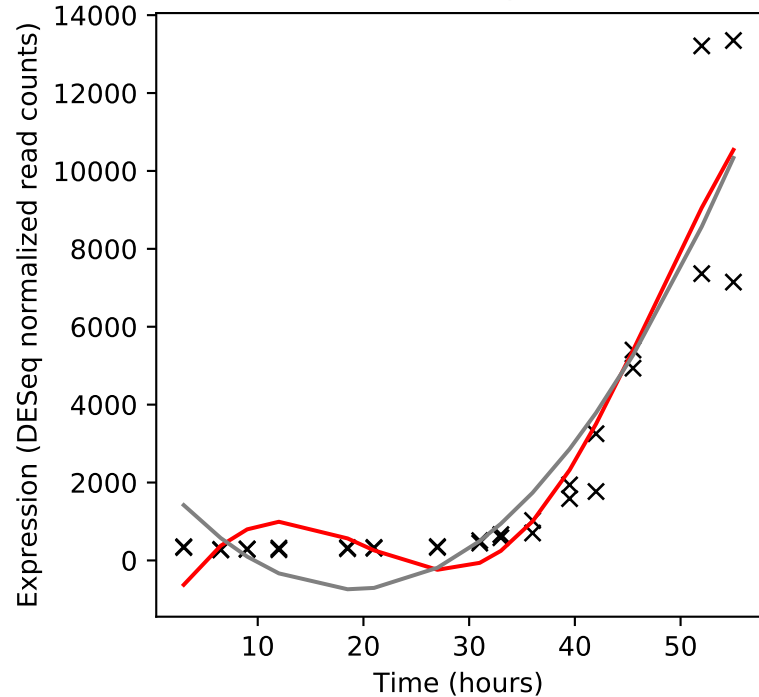

Rv0189c/ilvD

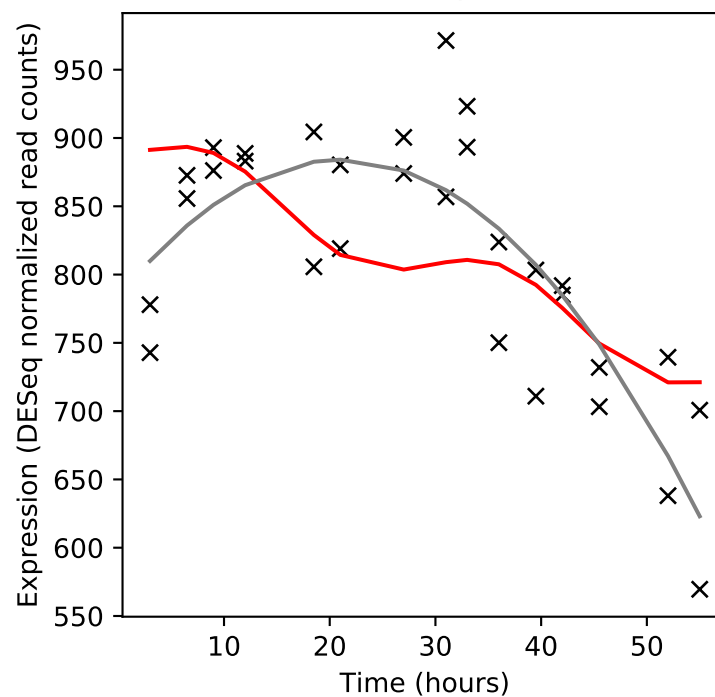

Rv0190/-

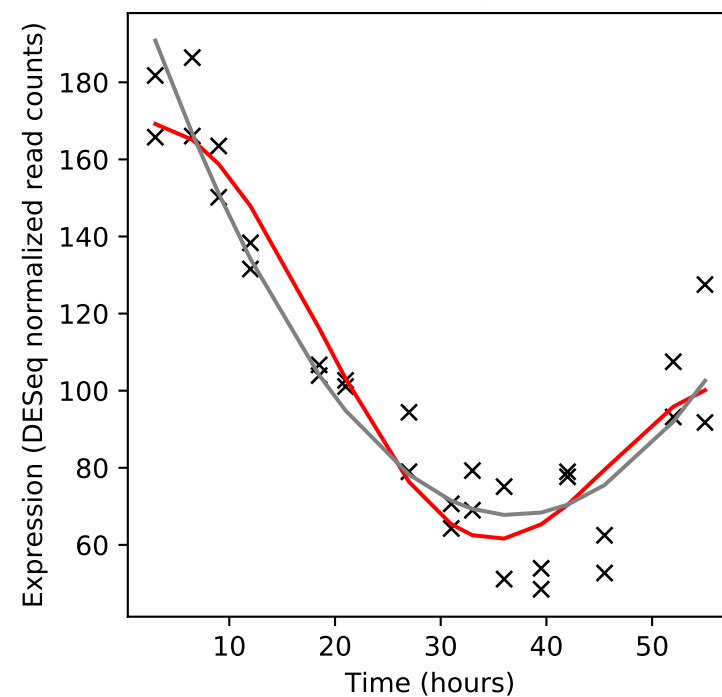

Rv0191/-

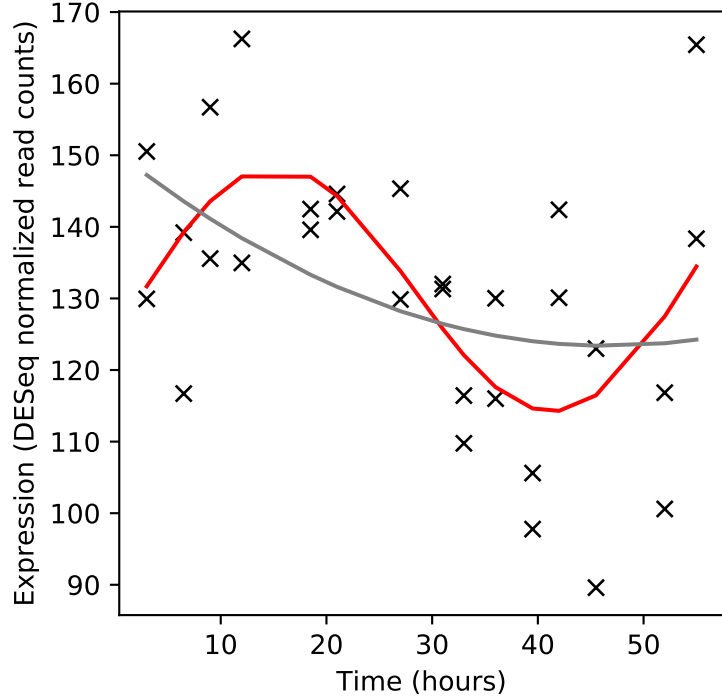

Rv0192/-

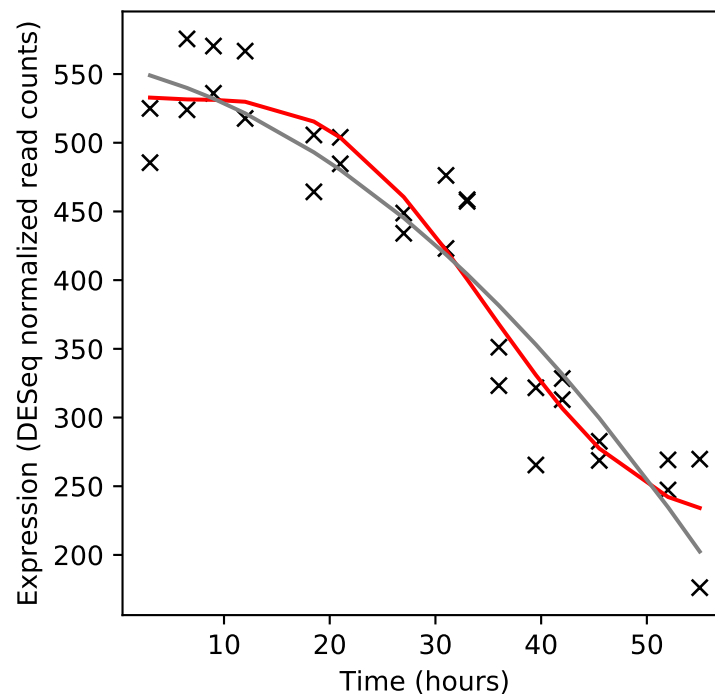

Rv0192A/-

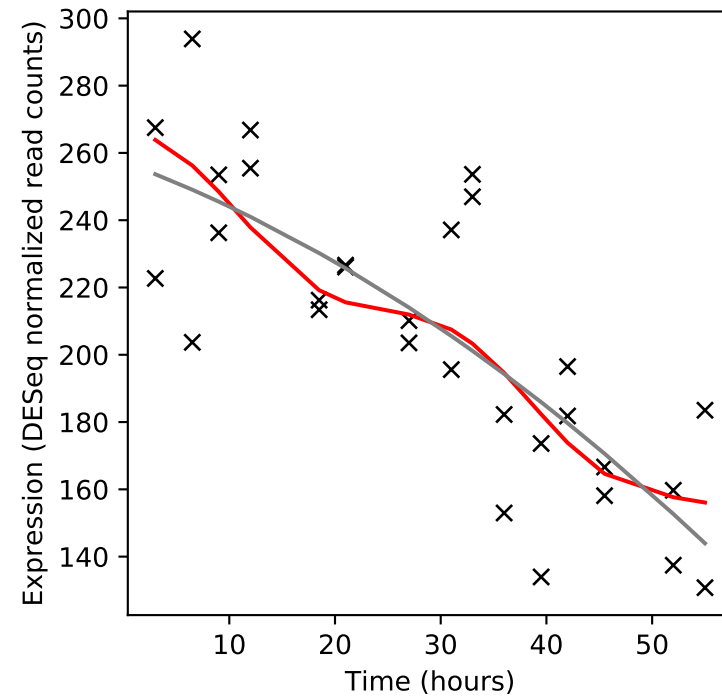

Rv0193c/-

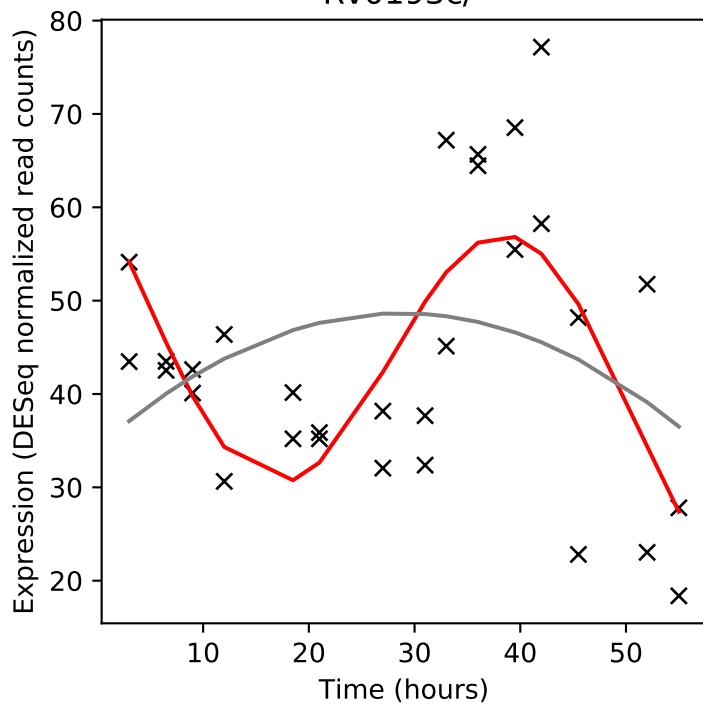

Rv0194/-

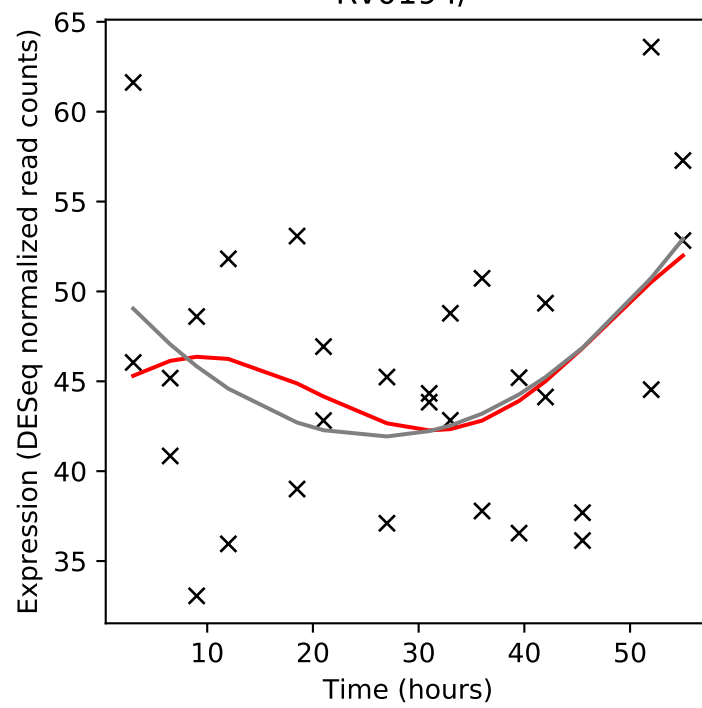

Rv0195/-

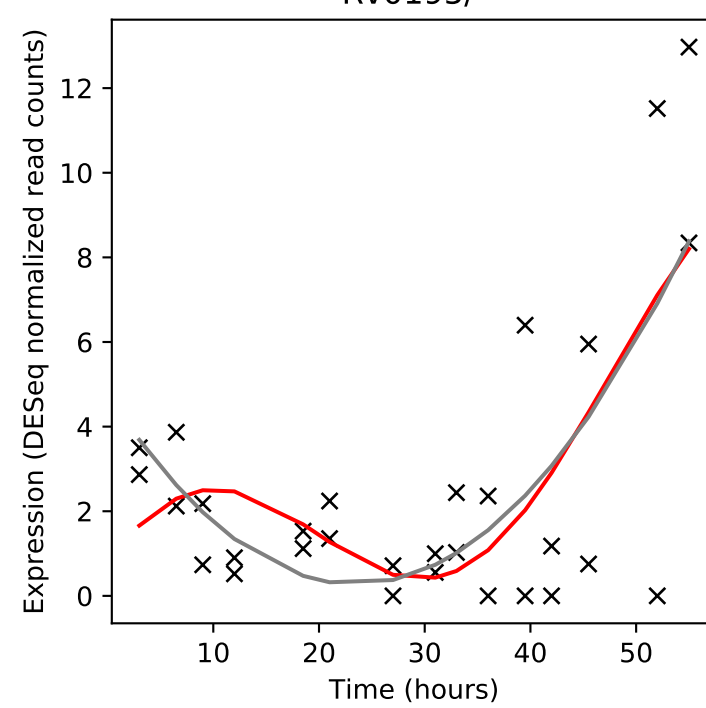

Rv0196/-

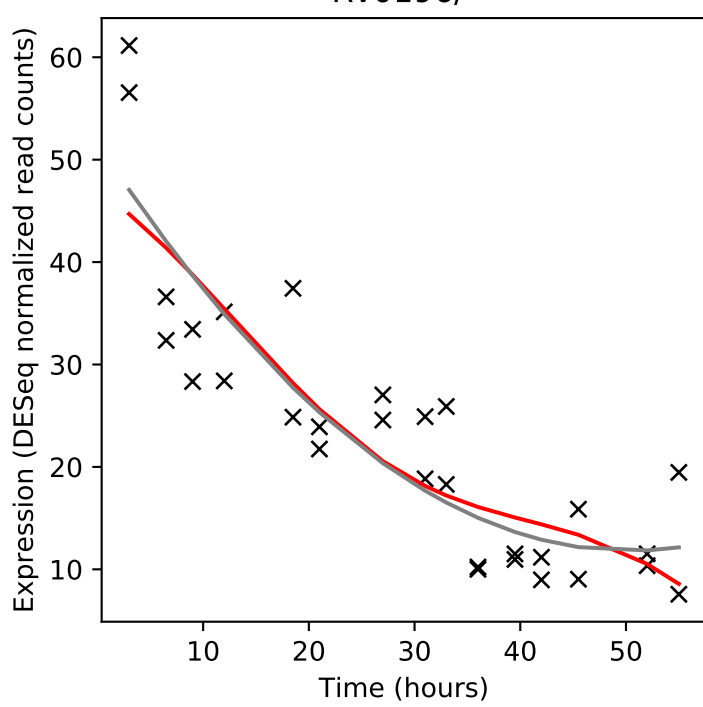

Rv0197/-

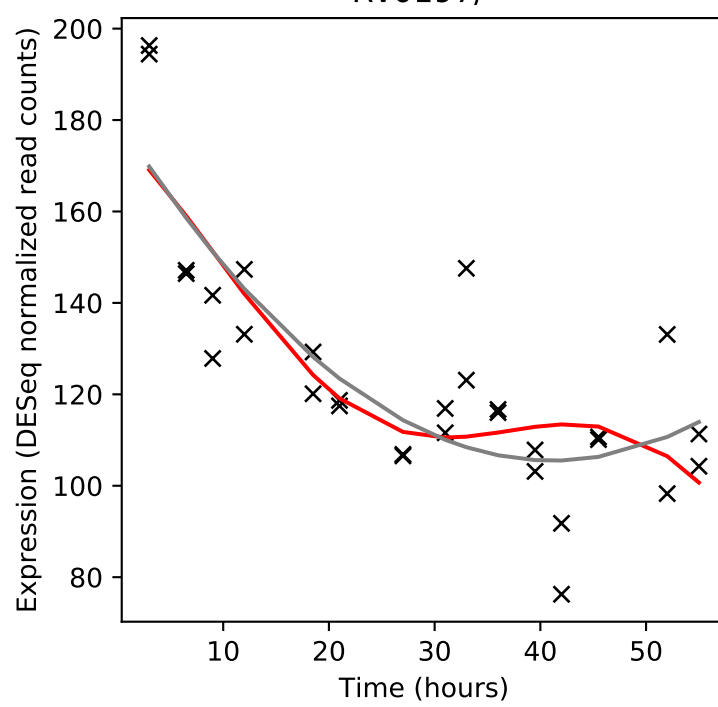

Rv0198c/zmp1

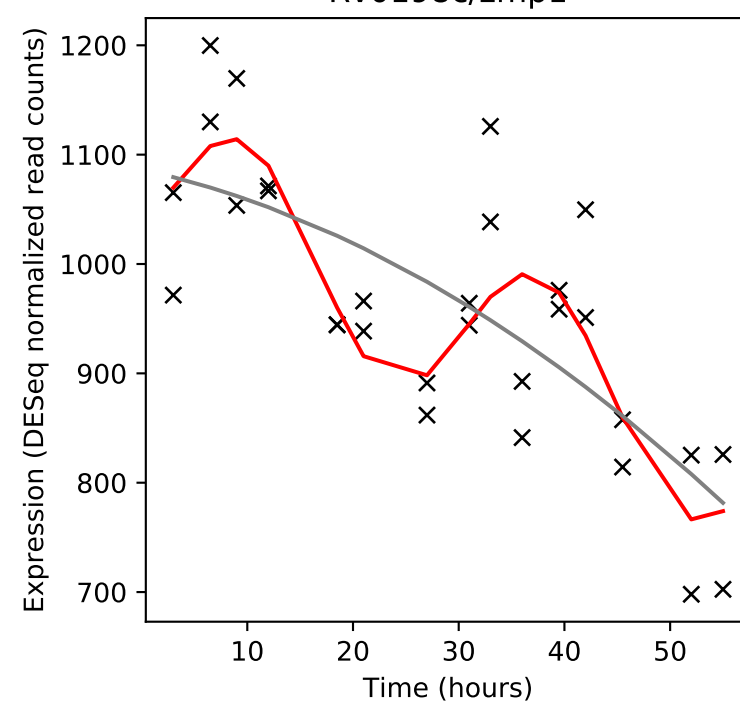

Rv0199/-

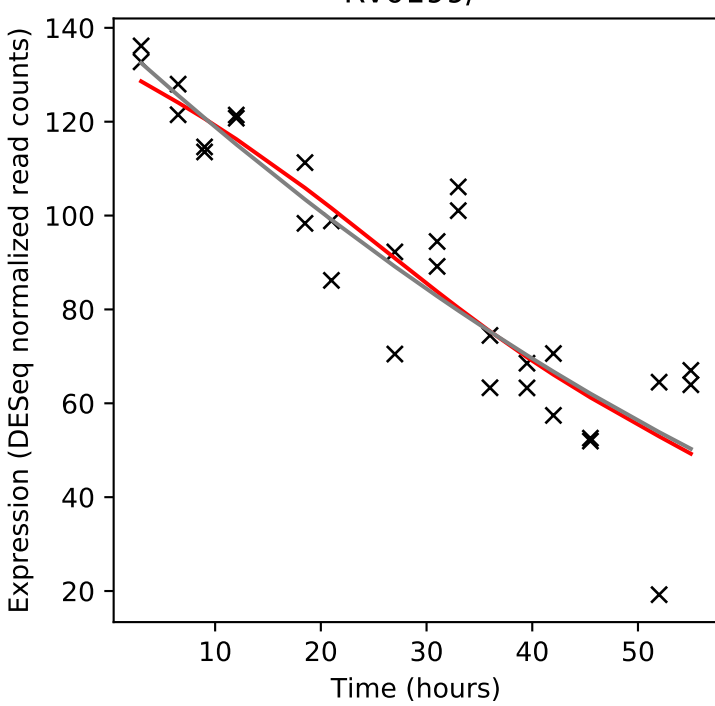

Rv0200/-

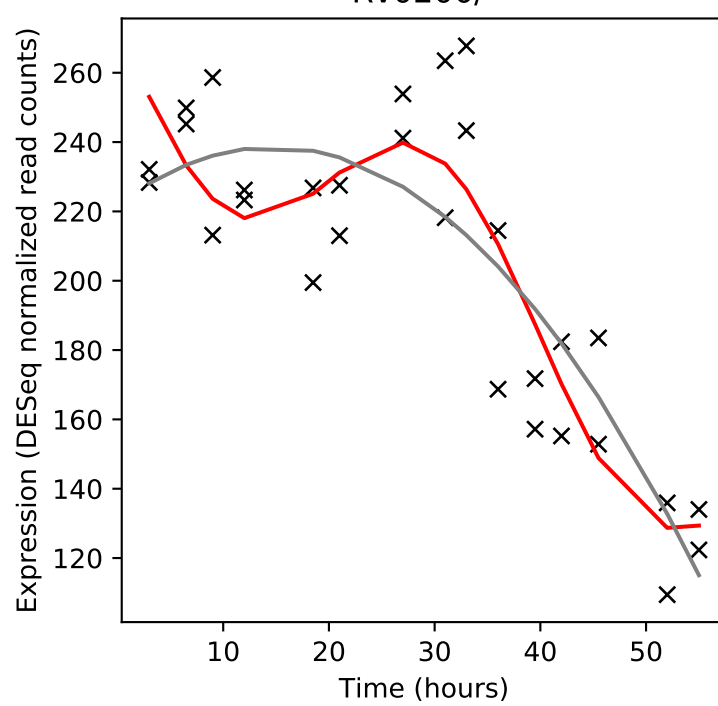

Rv0201c/-

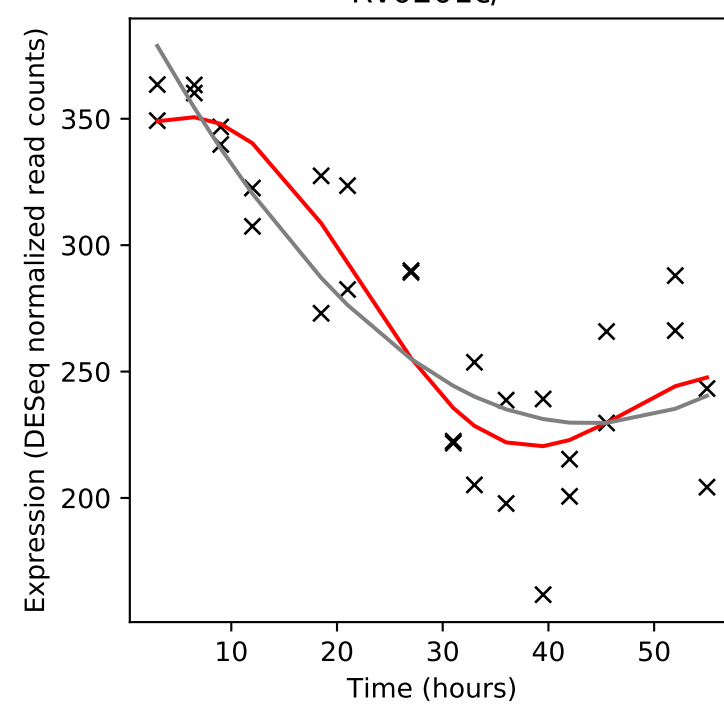



Rv0202c/mmpL11

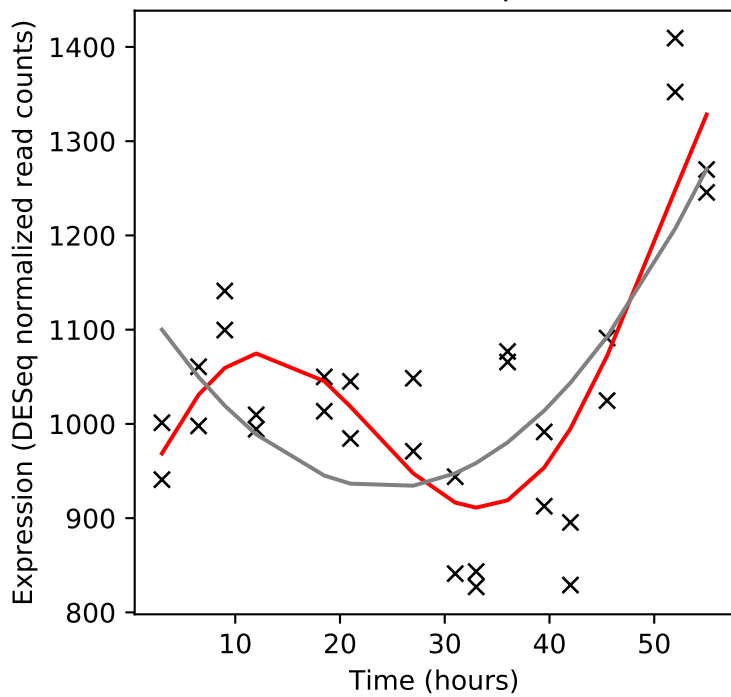

Rv0203/-

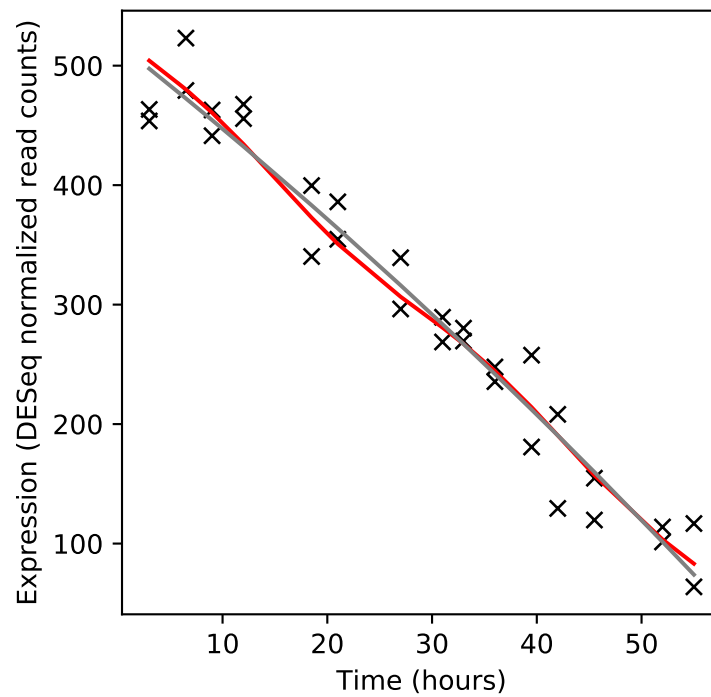

Rv0204c/-

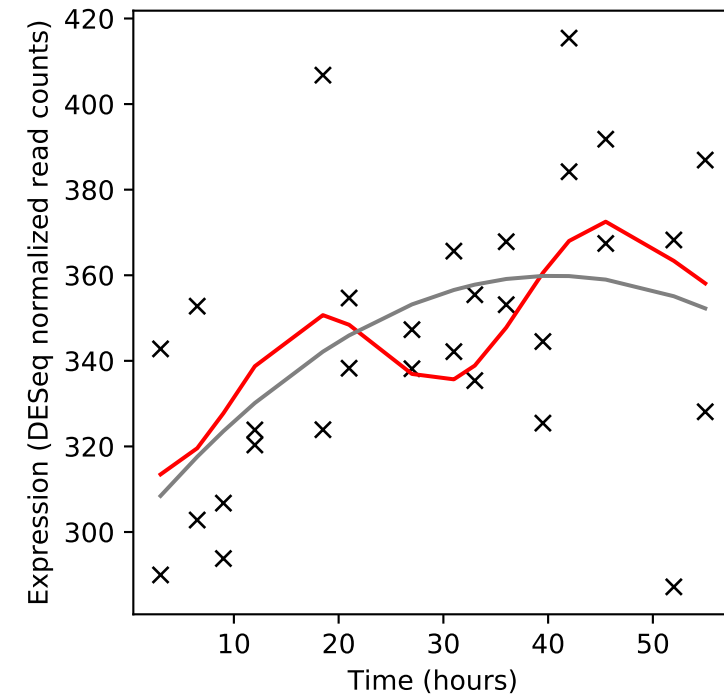

Rv0205/-

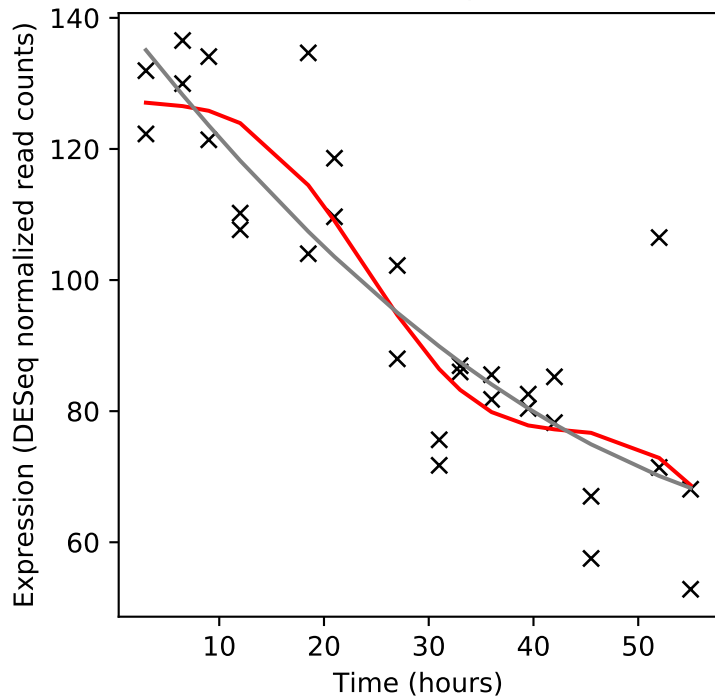

Rv0206c/mmpL3

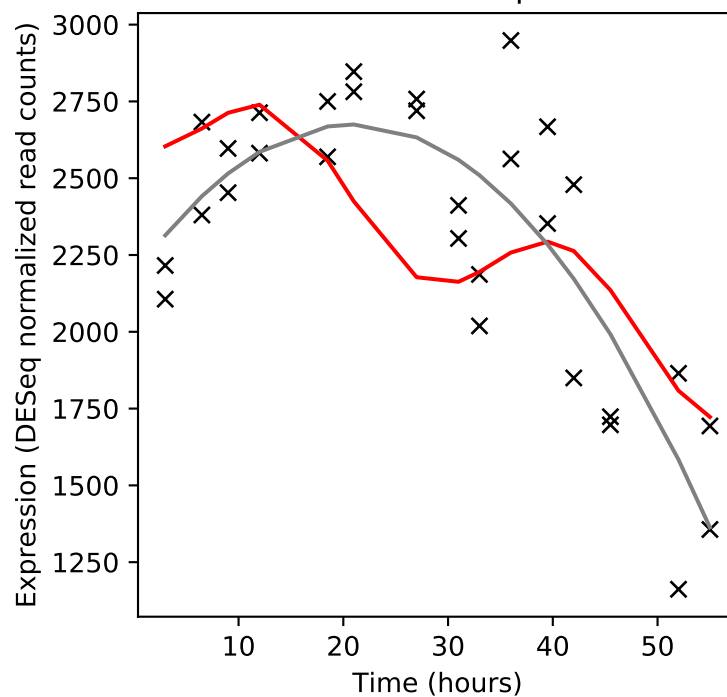

Rv0207c/-

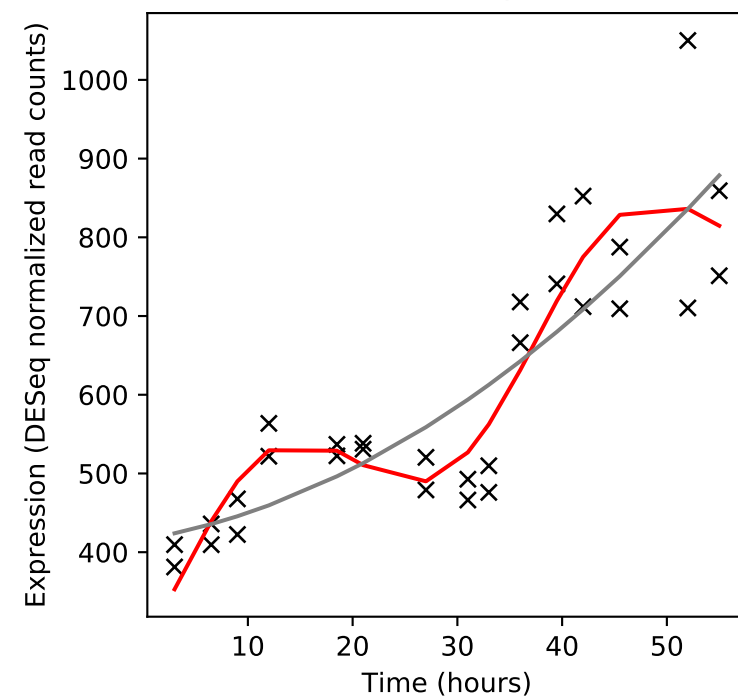

Rv0208c/-

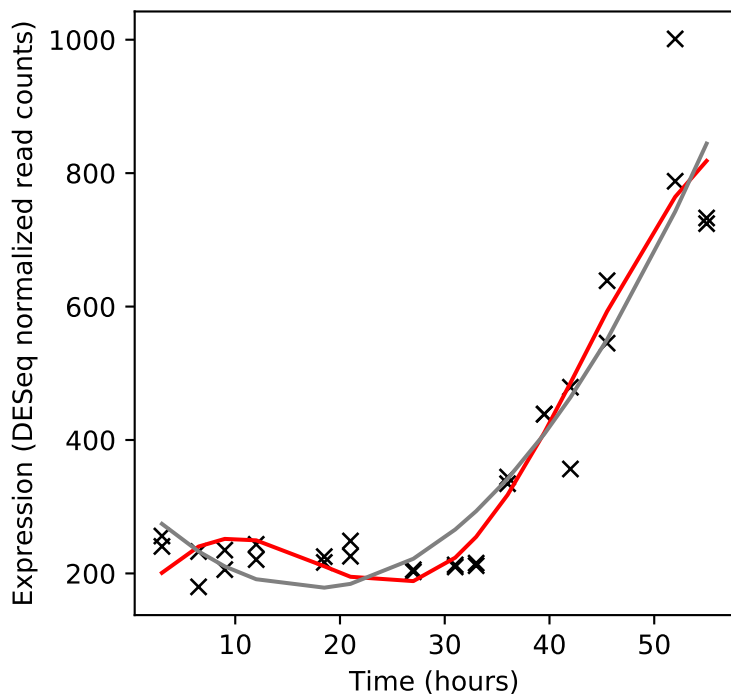

Rv0209/-

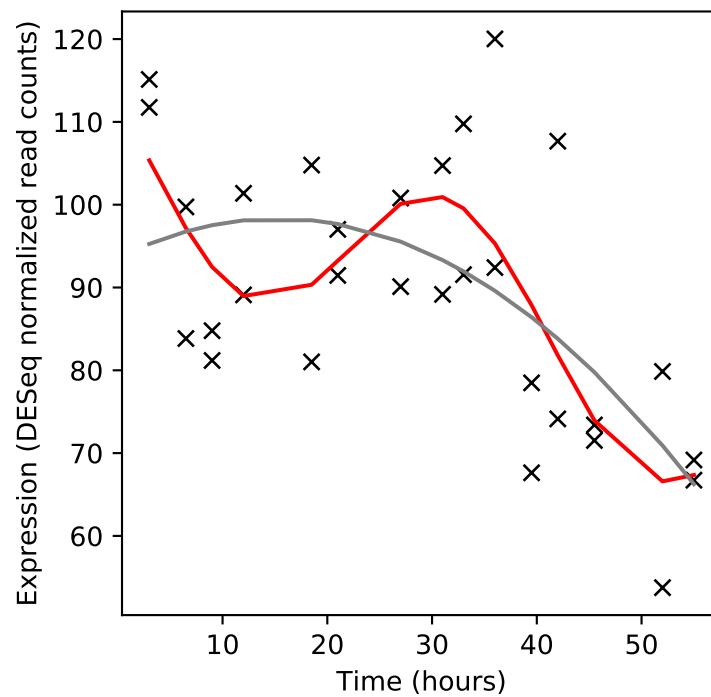

Rv0210/-

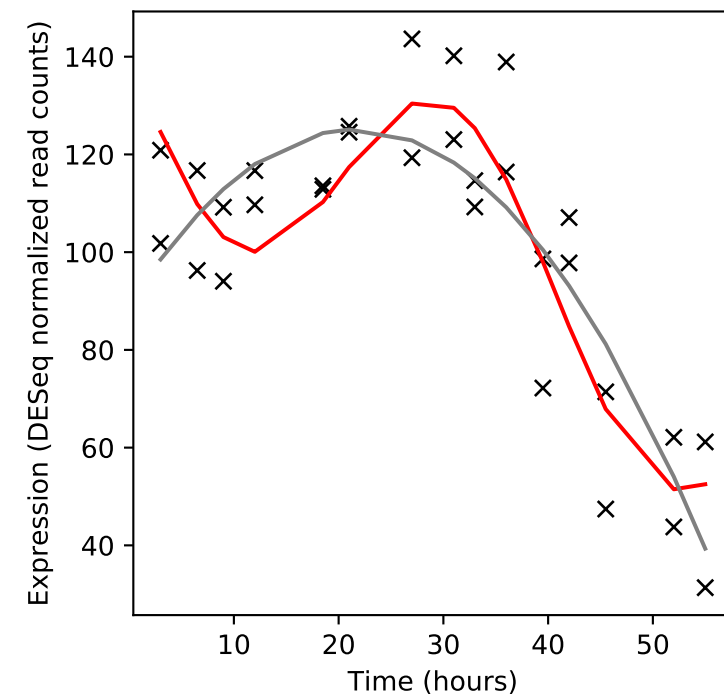

Rv0211/pckA

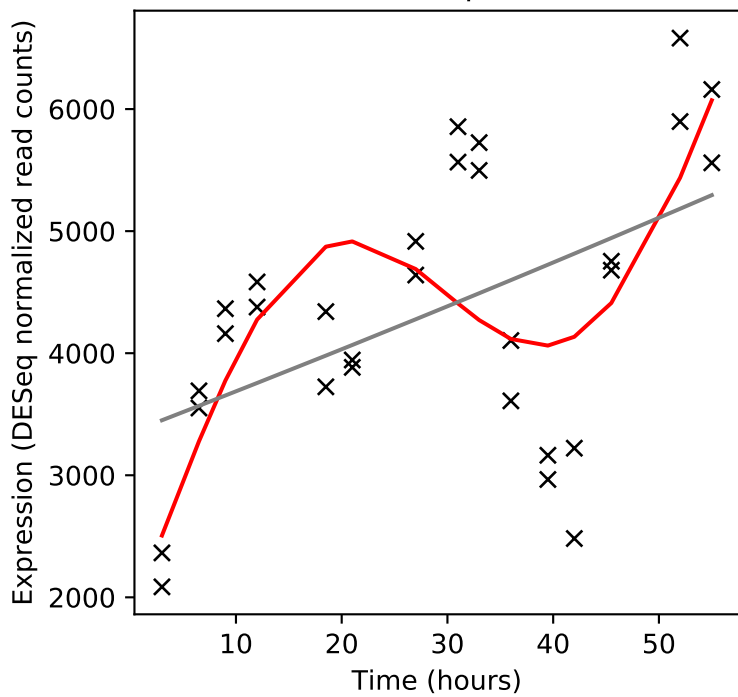

Rv0212c/nadR

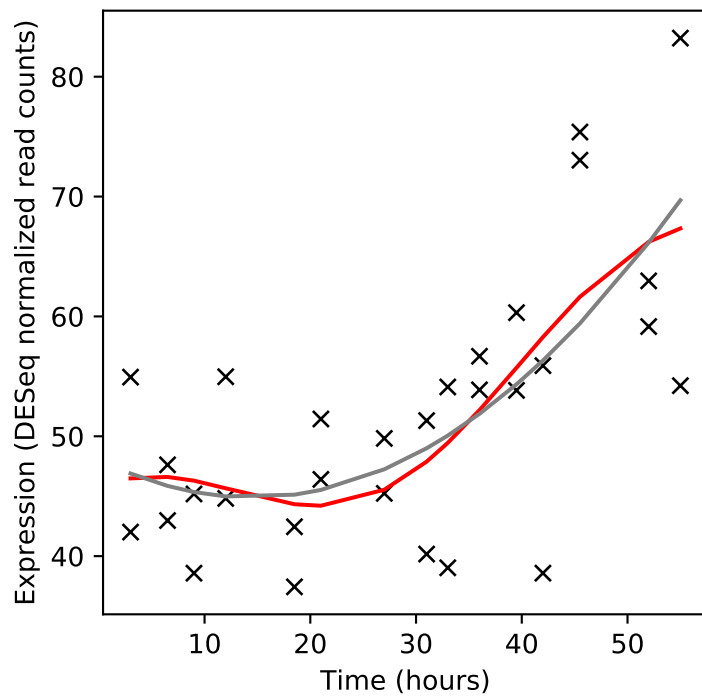

Rv0213c/-

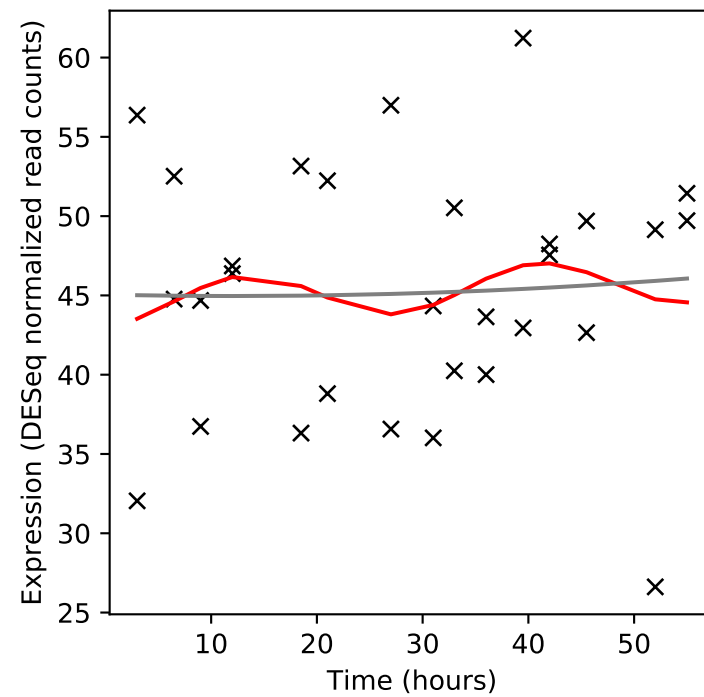

Rv0214/fadD4

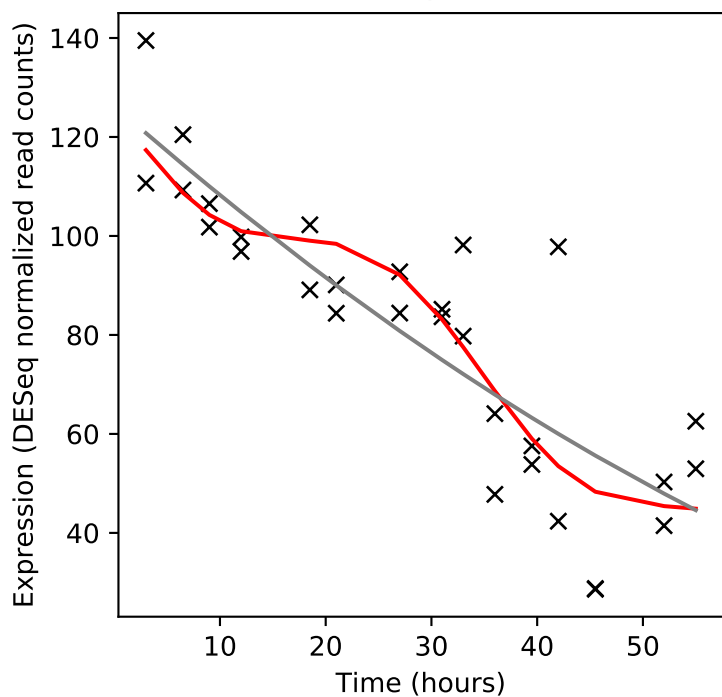

Rv0215c/fadE3

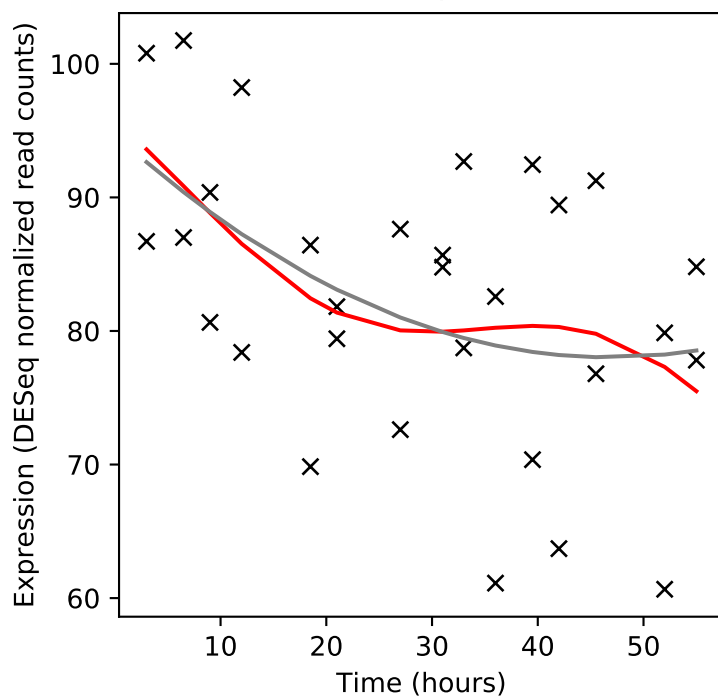

Rv0216/-

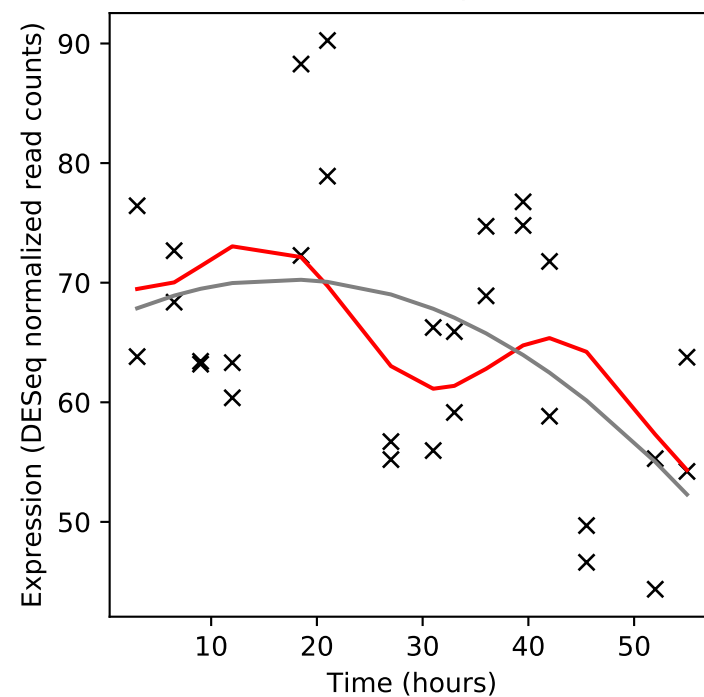

Rv0217c/lipW

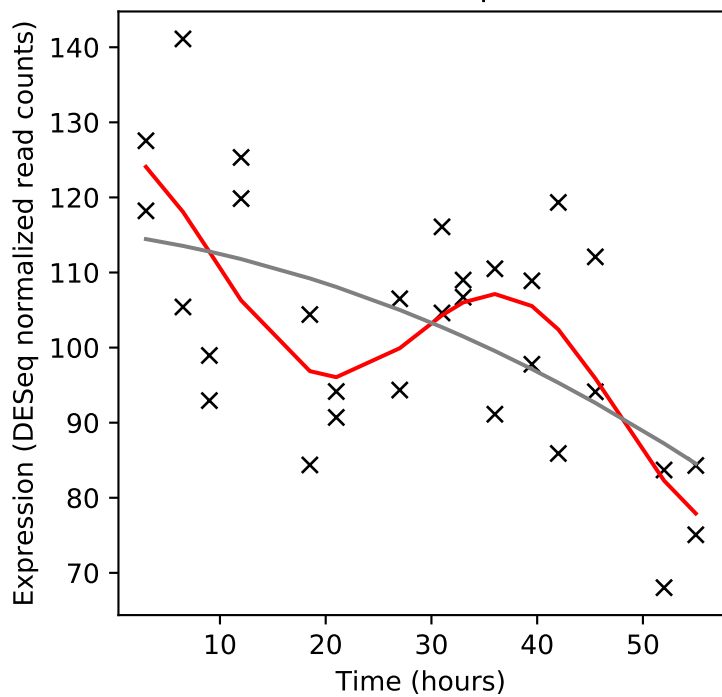

Rv0218/-

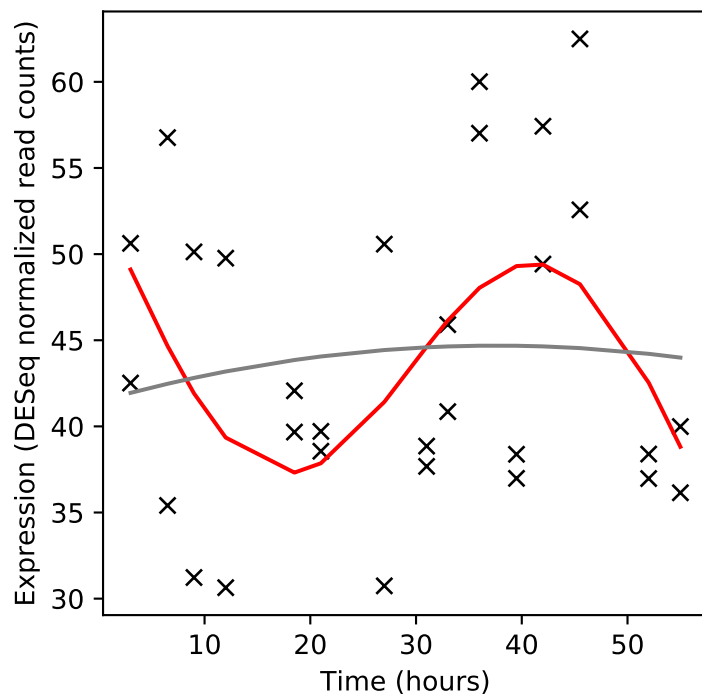

Rv0219/-

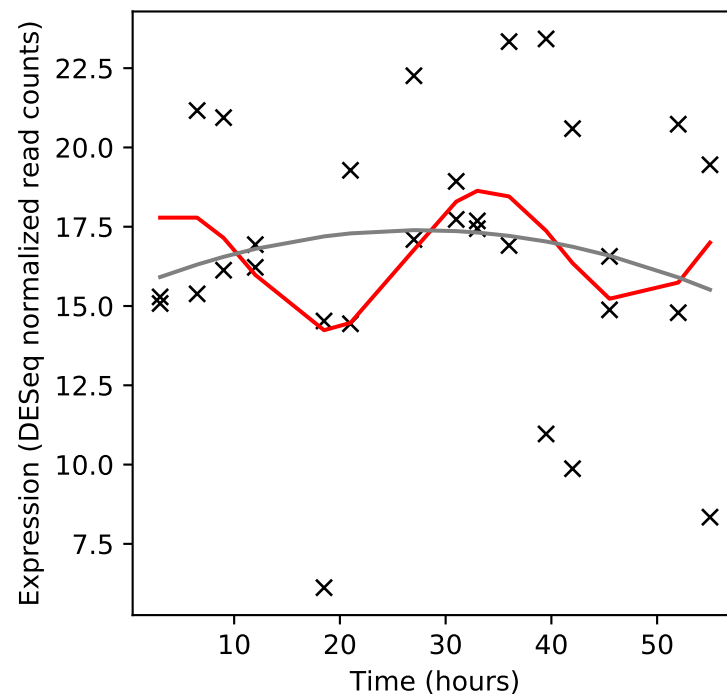

Rv0220/lipC

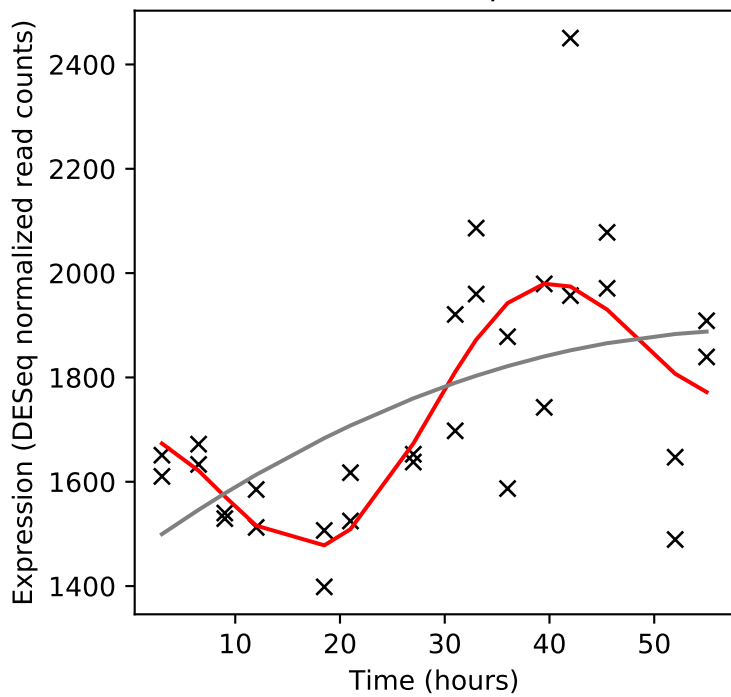

Rv0221/-

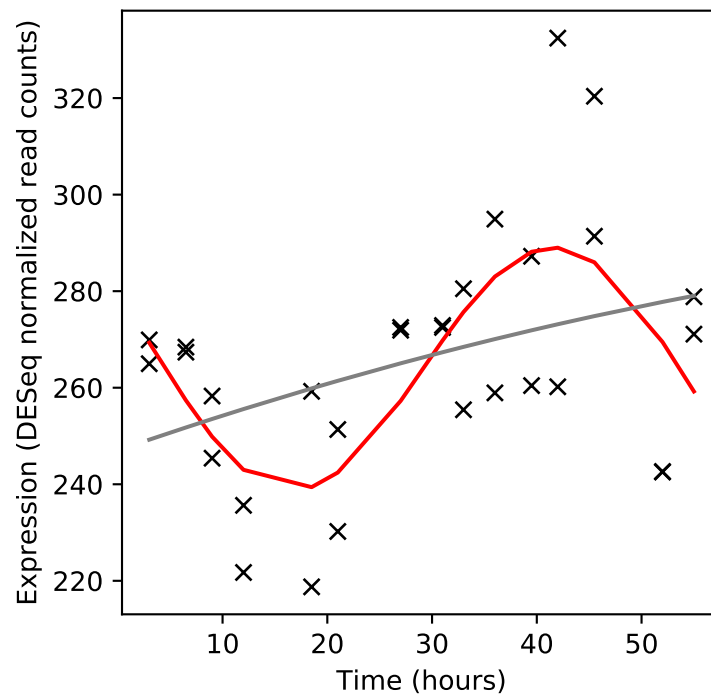

Rv0222/echA1

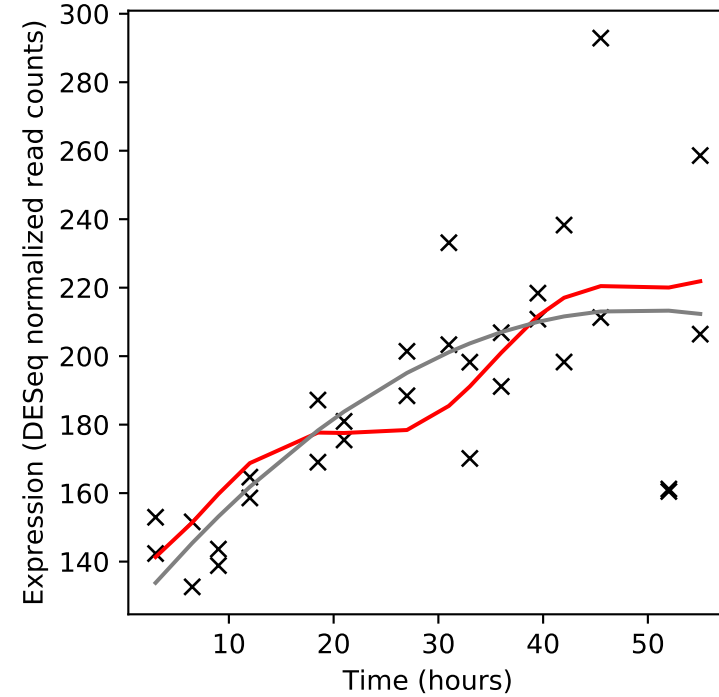

Rv0223c/-

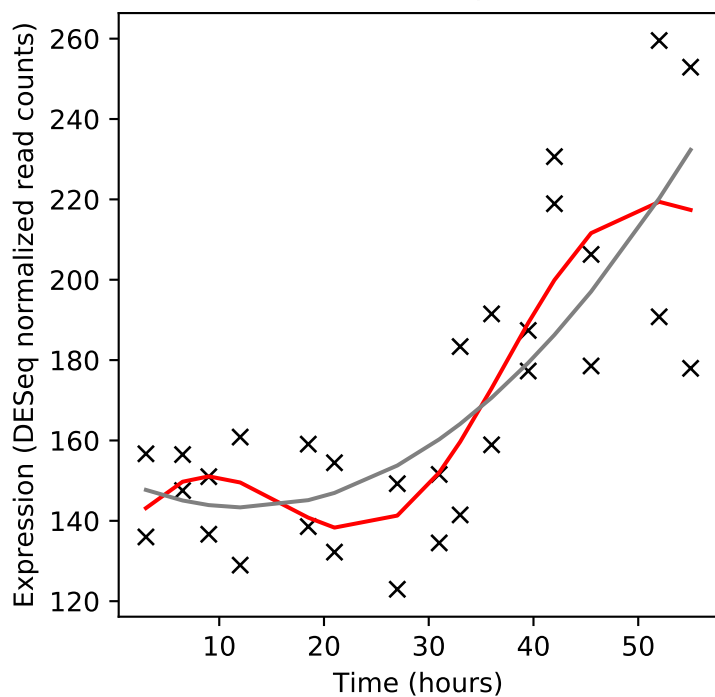

Rv0224c/-

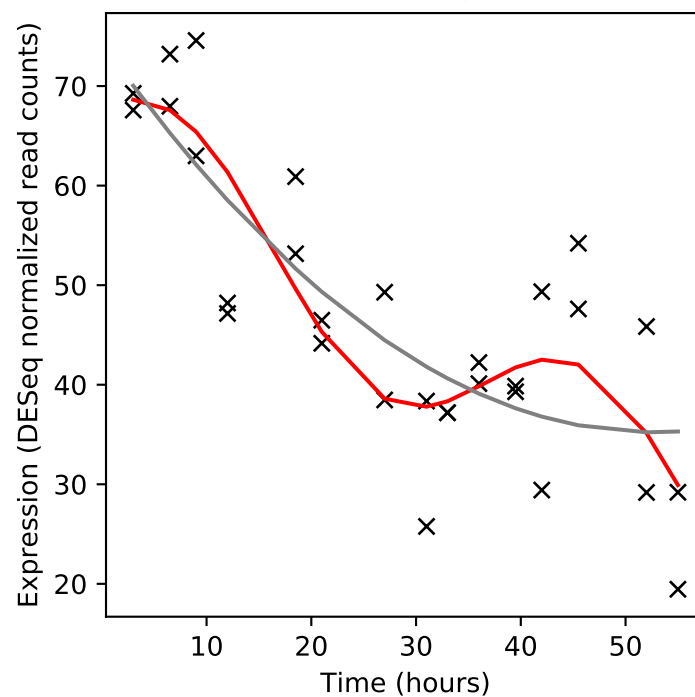

Rv0225/-

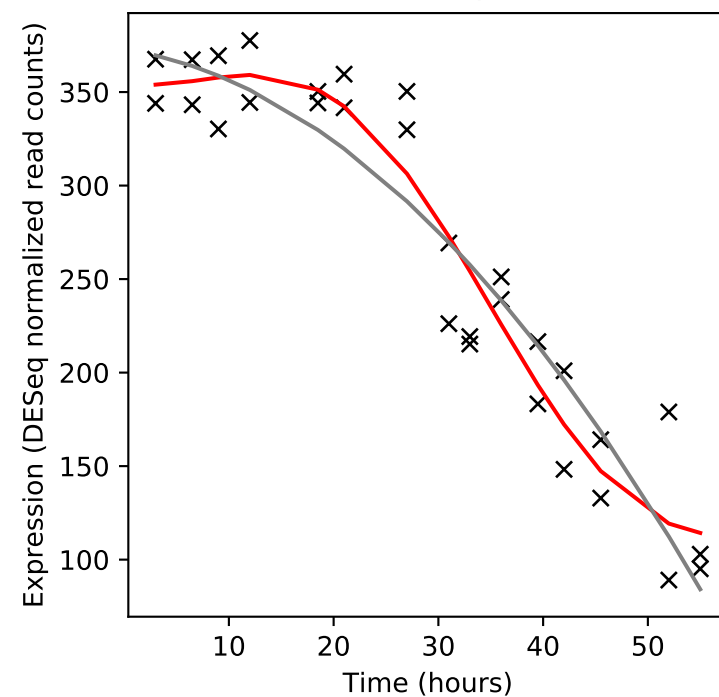

Rv0226c/-

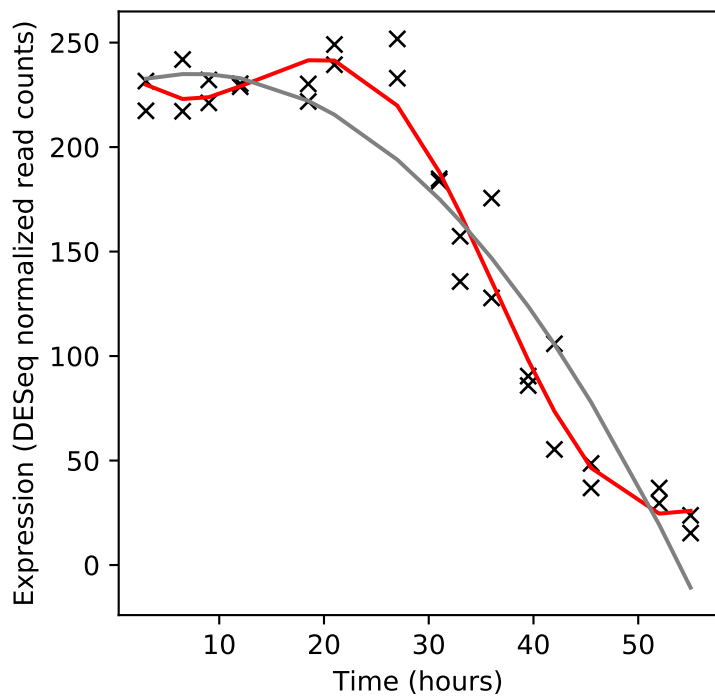

Rv0227c/-

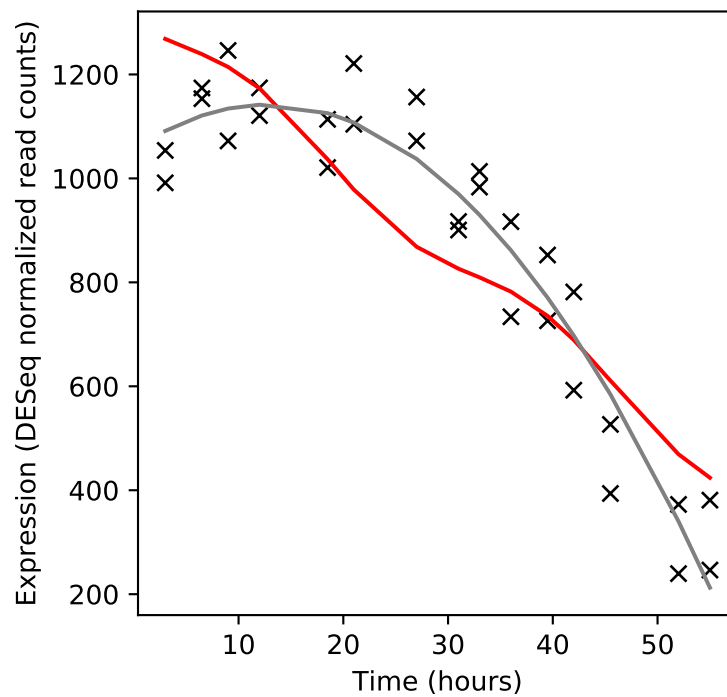

Rv0228/-

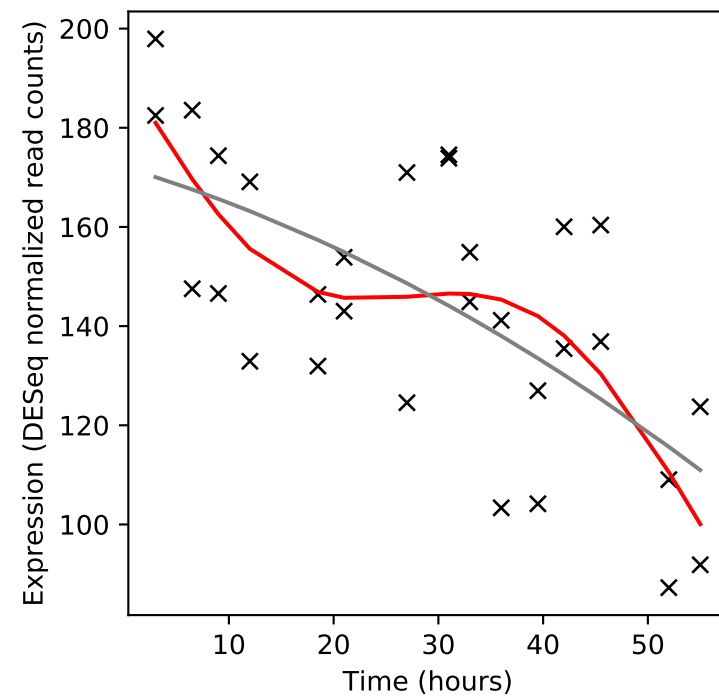

Rv0229c/-

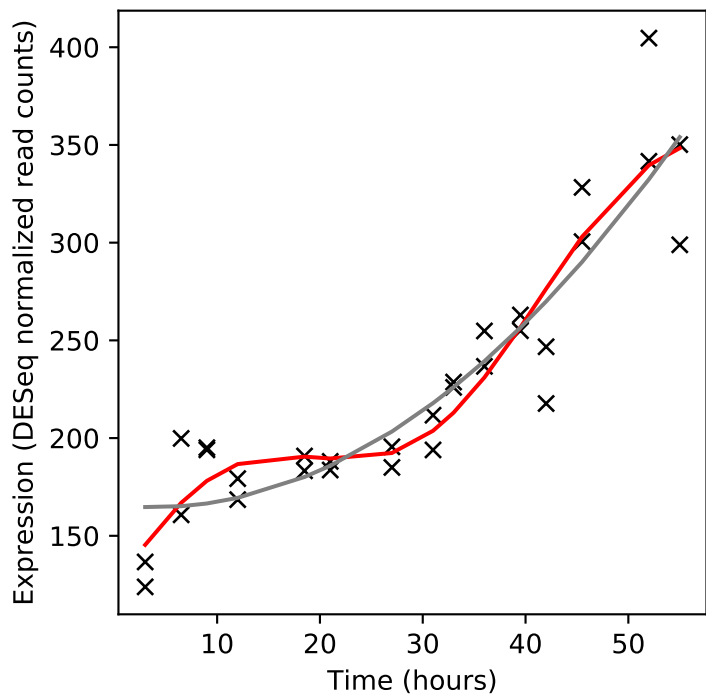

Rv0230c/php

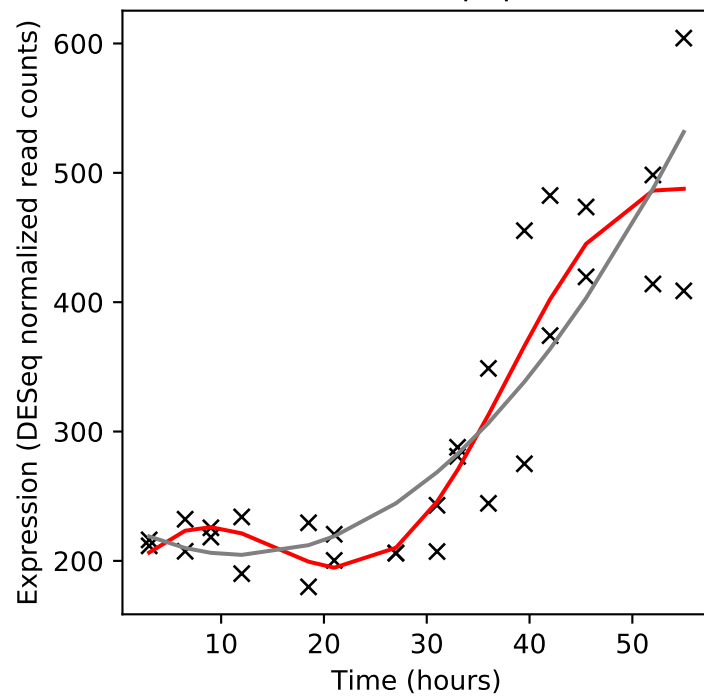

Rv0231/fadE4

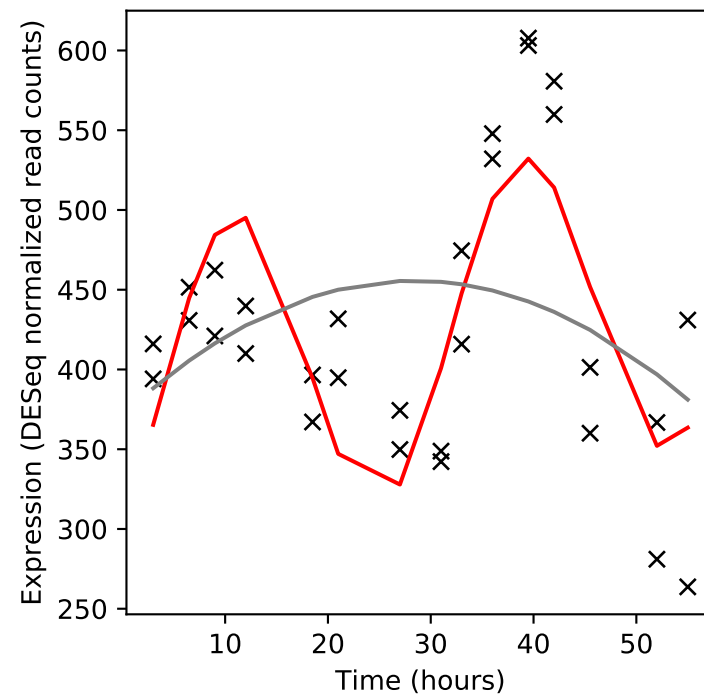

Rv0232/-

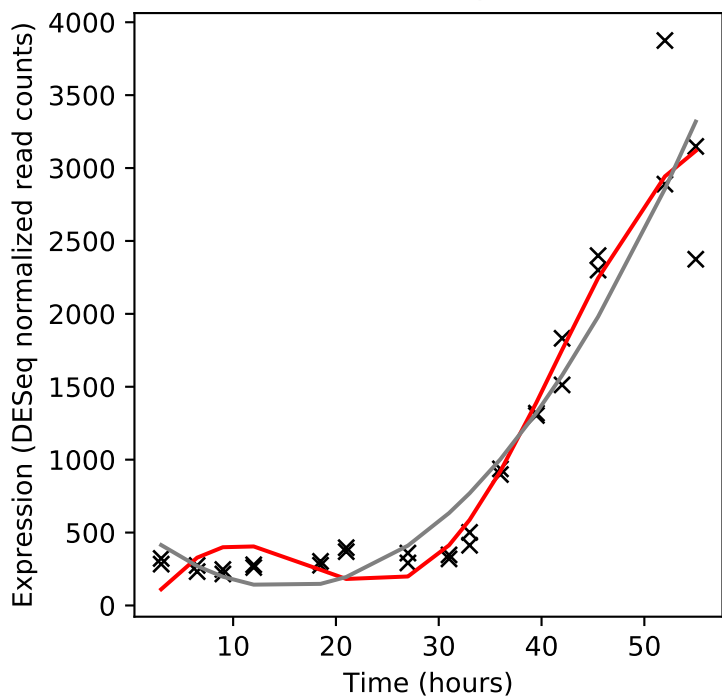

Rv0233/nrdB

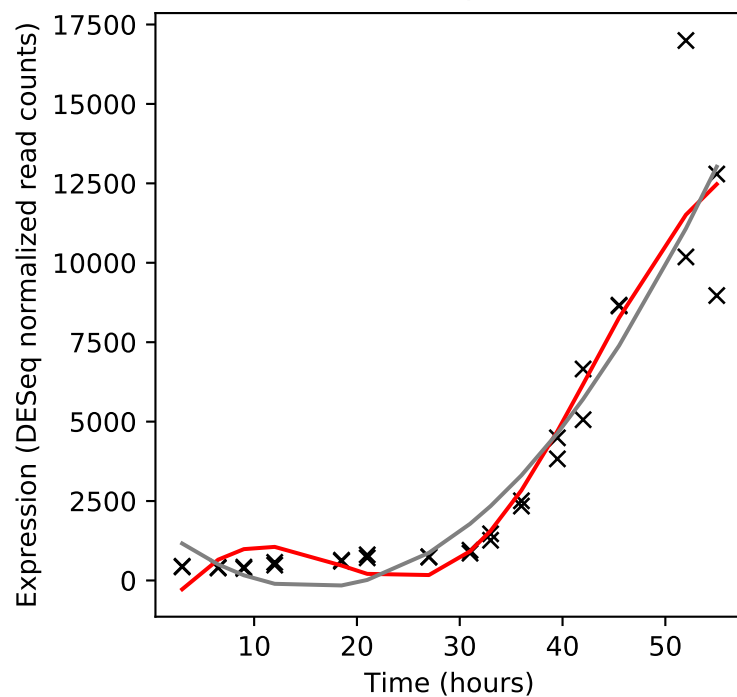

Rv0234c/gabD1

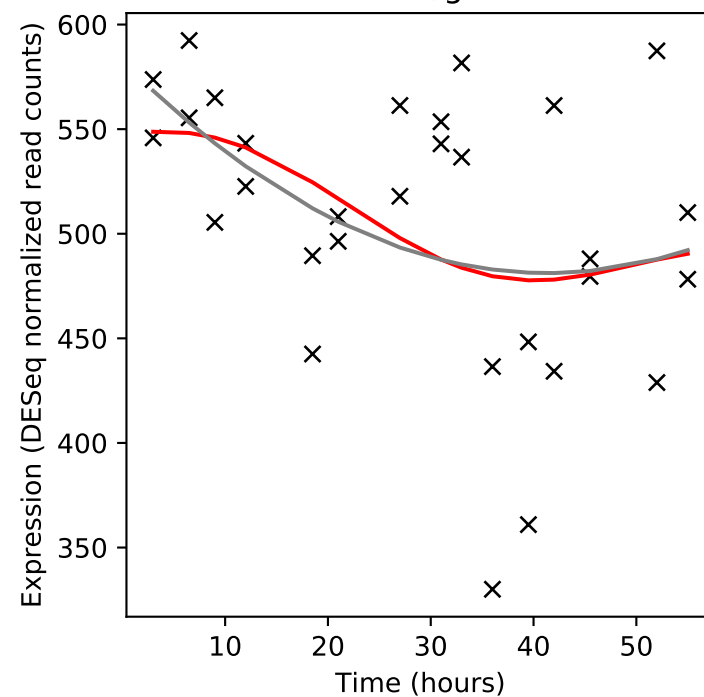

Rv0235c/-

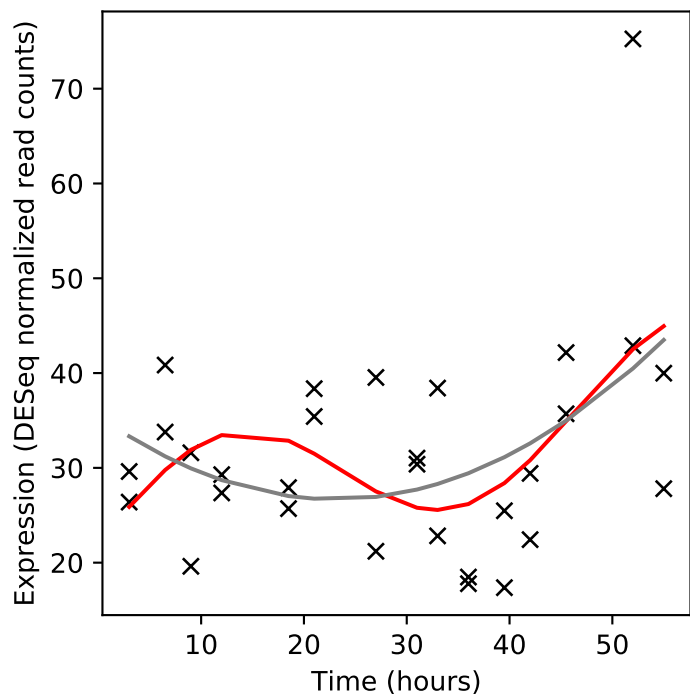

Rv0236c/aftD

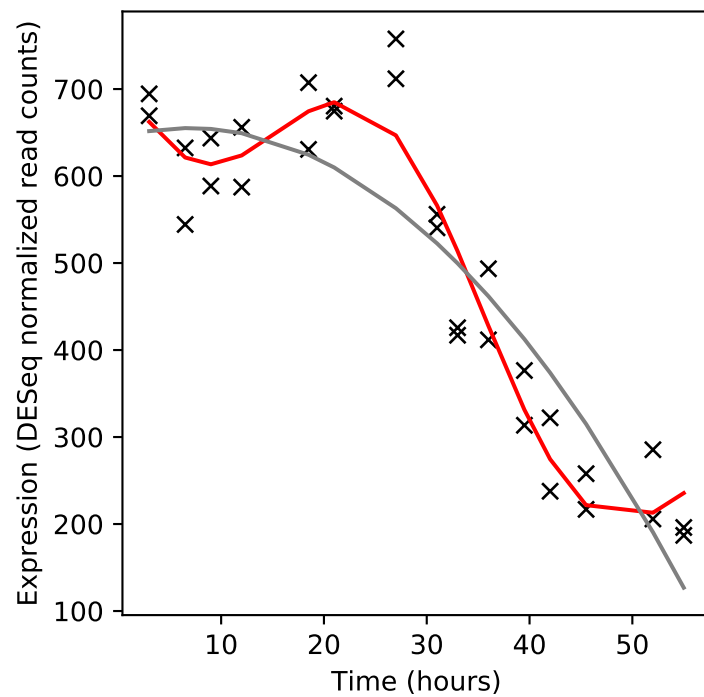

Rv0236A/-

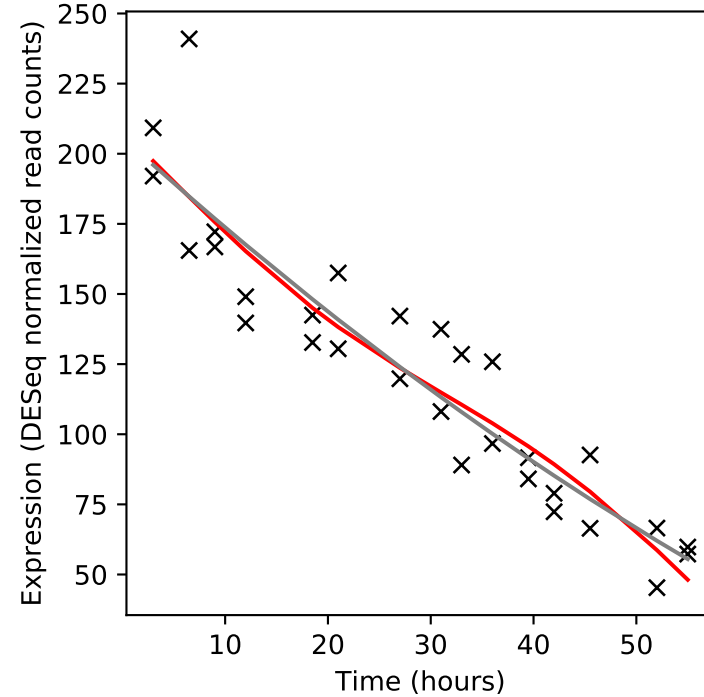

Rv0237/lpqI

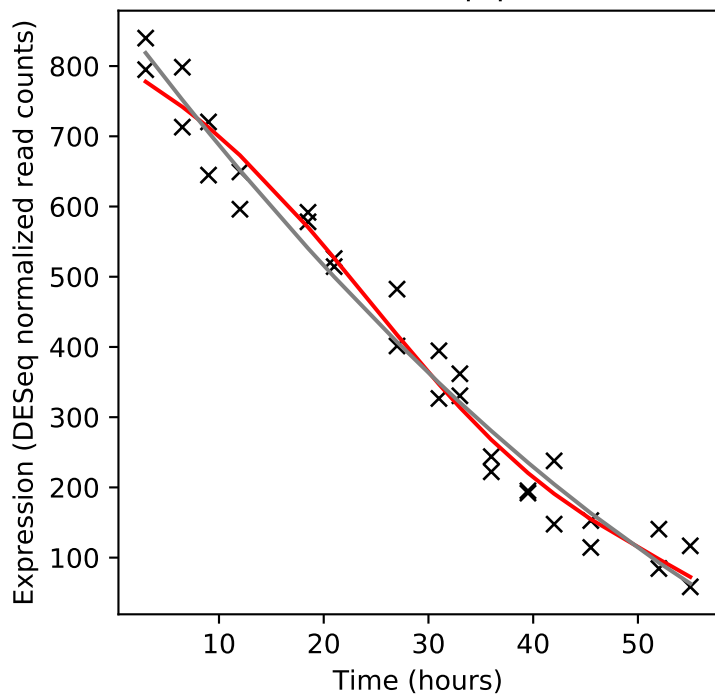

Rv0238/-

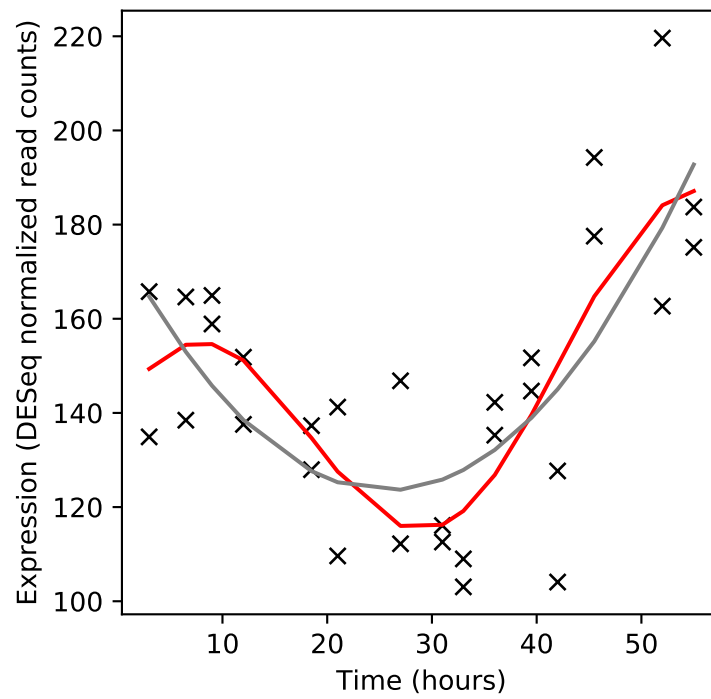

Rv0239/vapB24

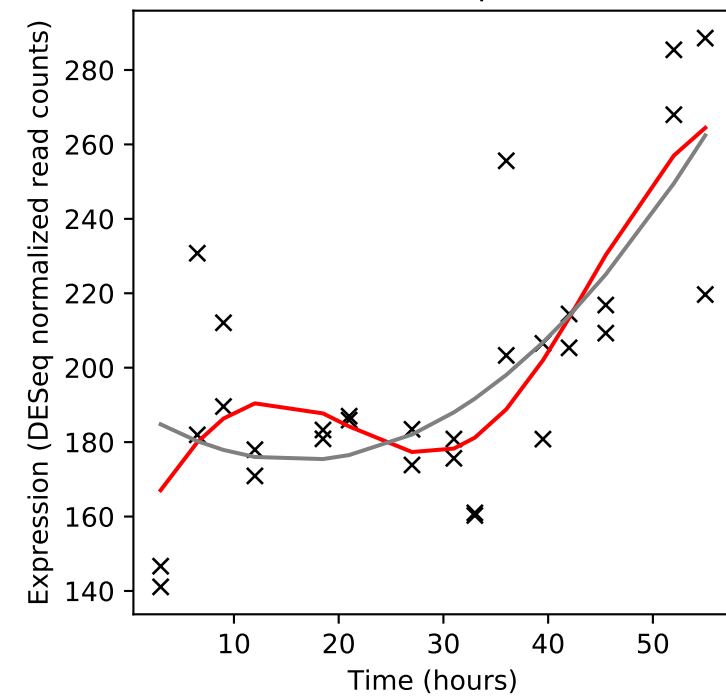

Rv0240/vapC24

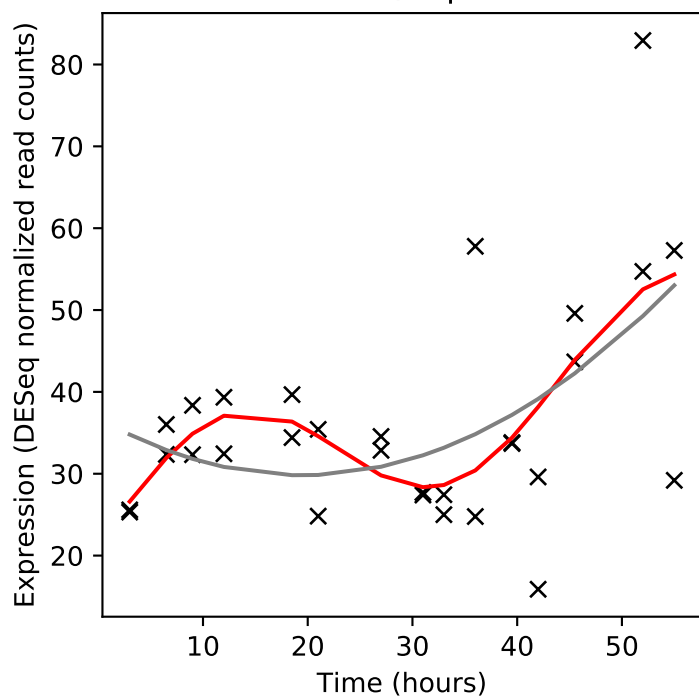

Rv0241c/htdX

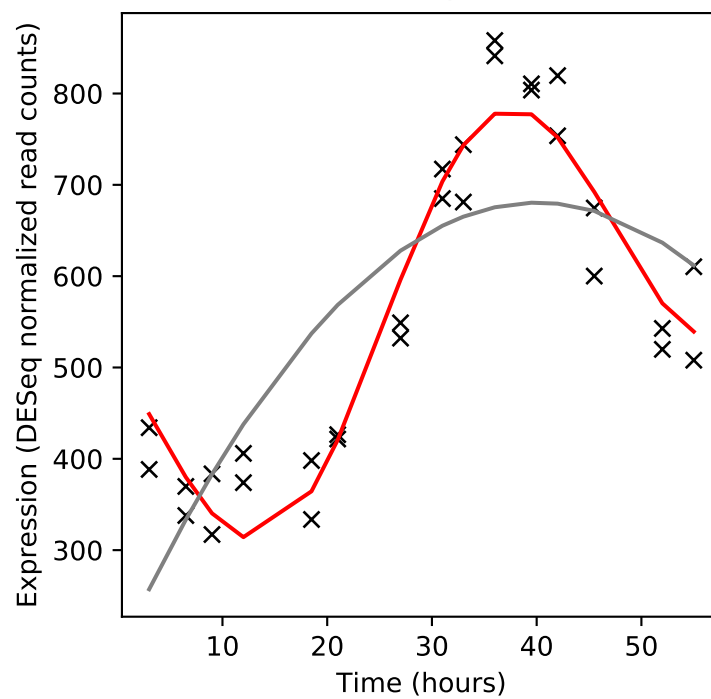

Rv0242c/fabG4

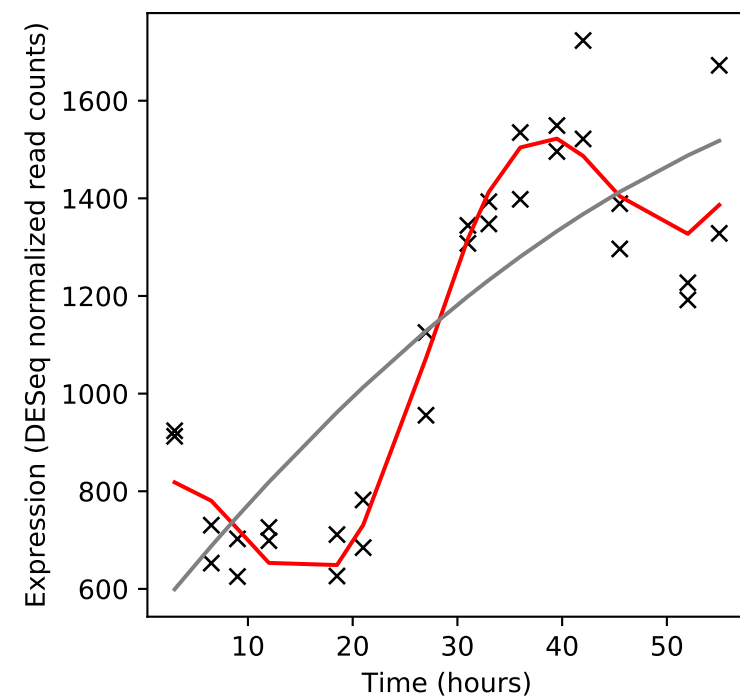

Rv0243/fadA2

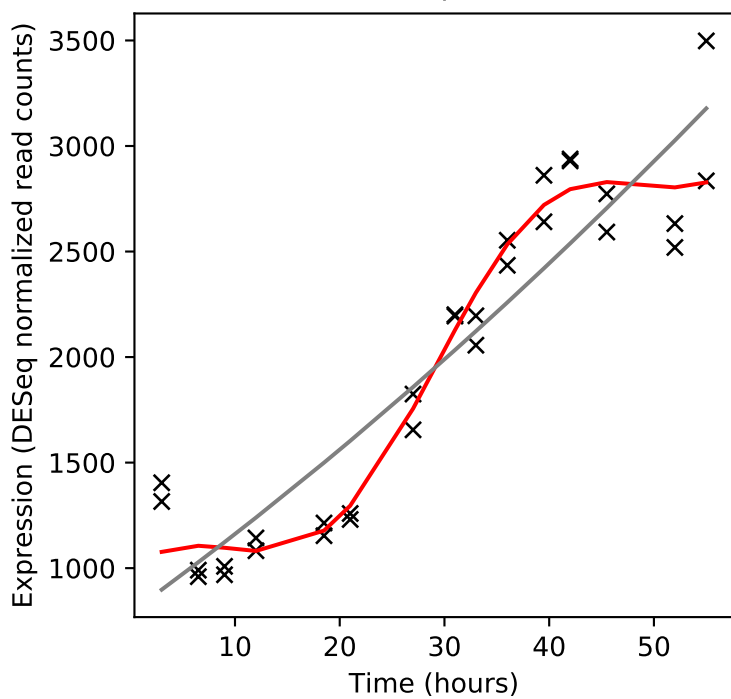

Rv0244c/fadE5

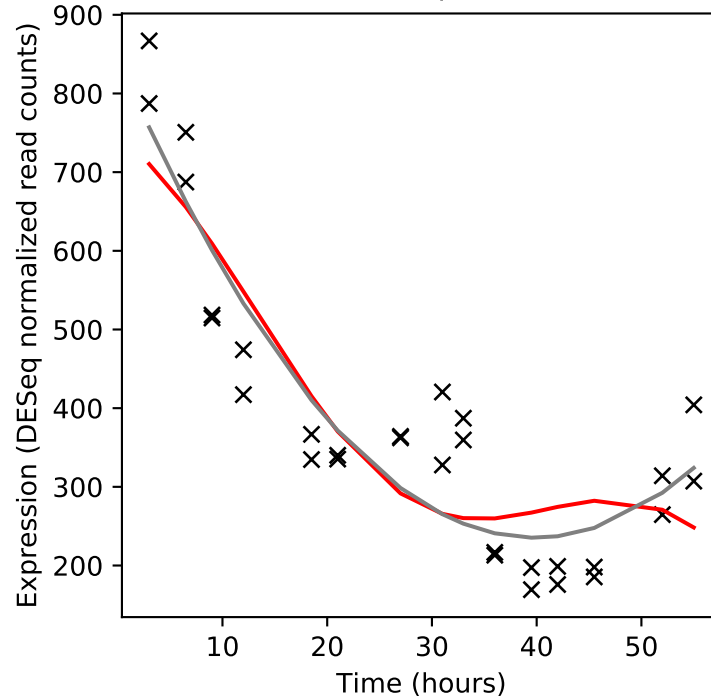

Rv0245/-

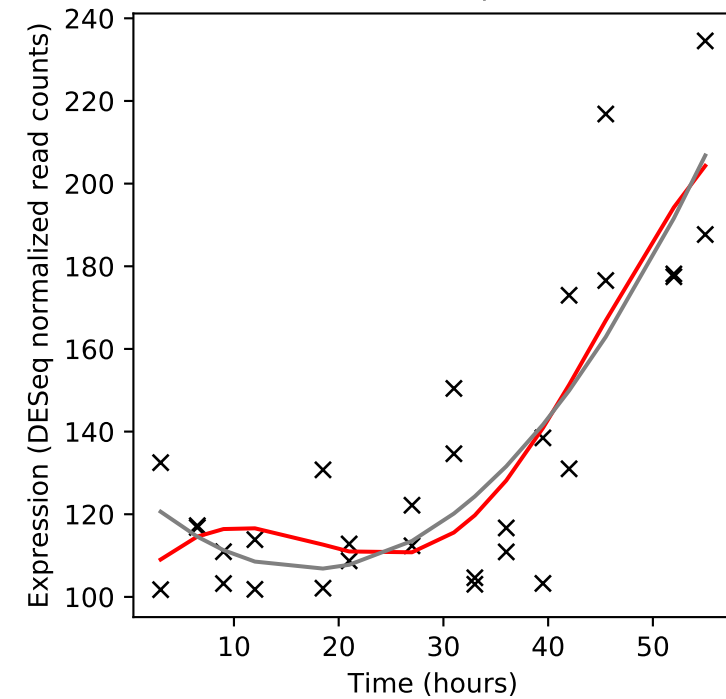

Rv0246/-

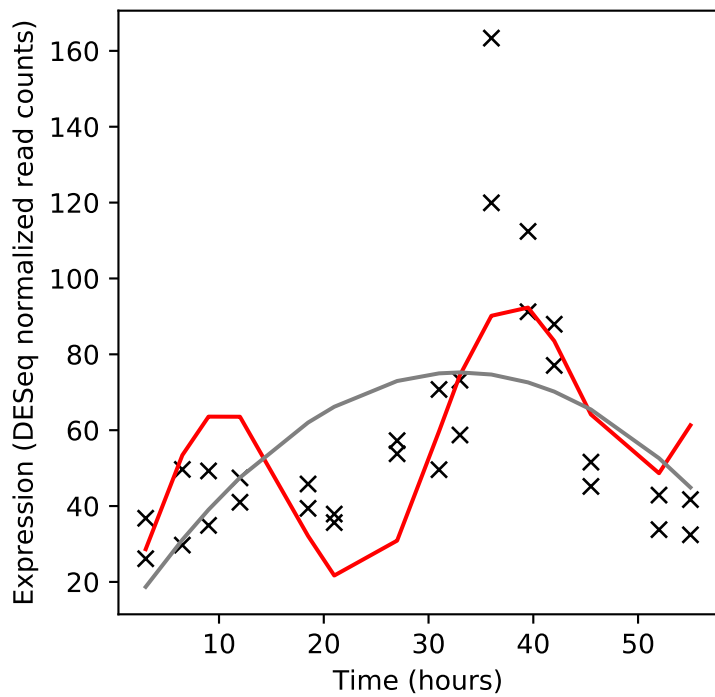

Rv0247c/-

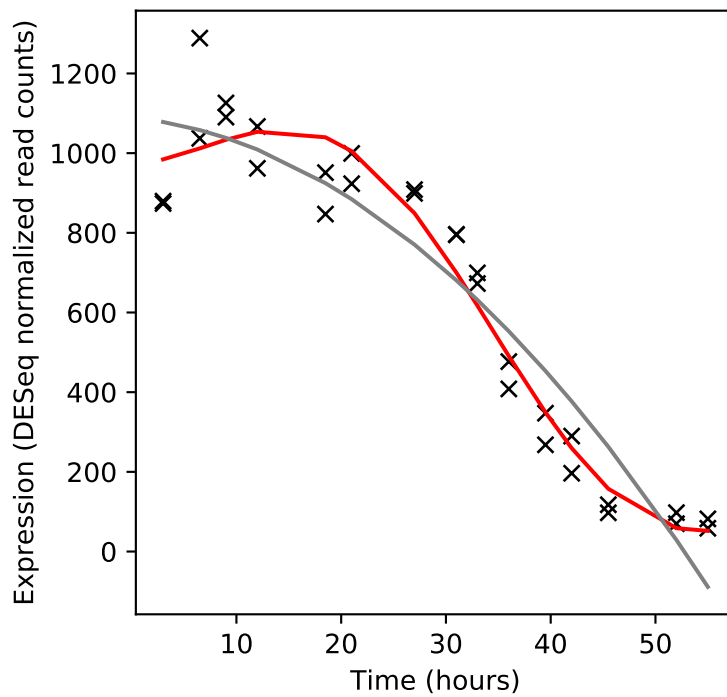

Rv0248c/-

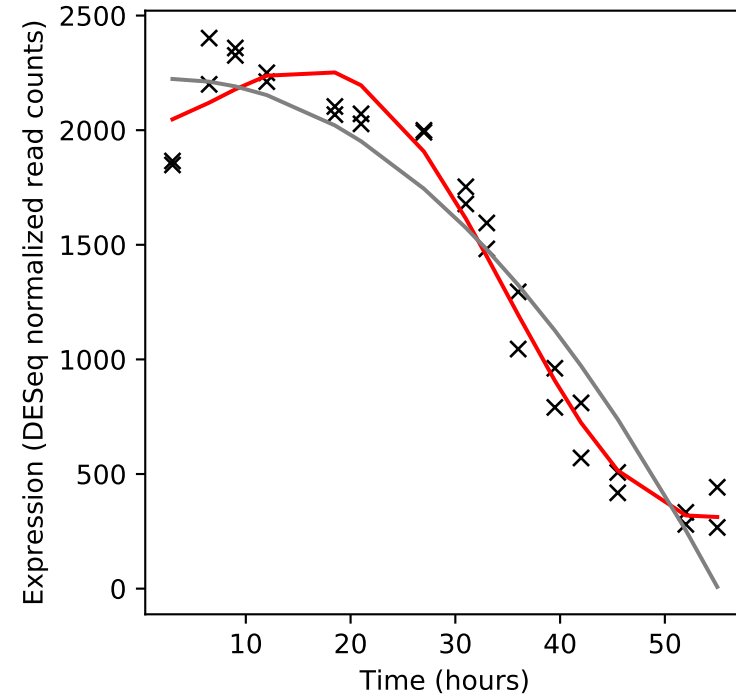

Rv0249c/-

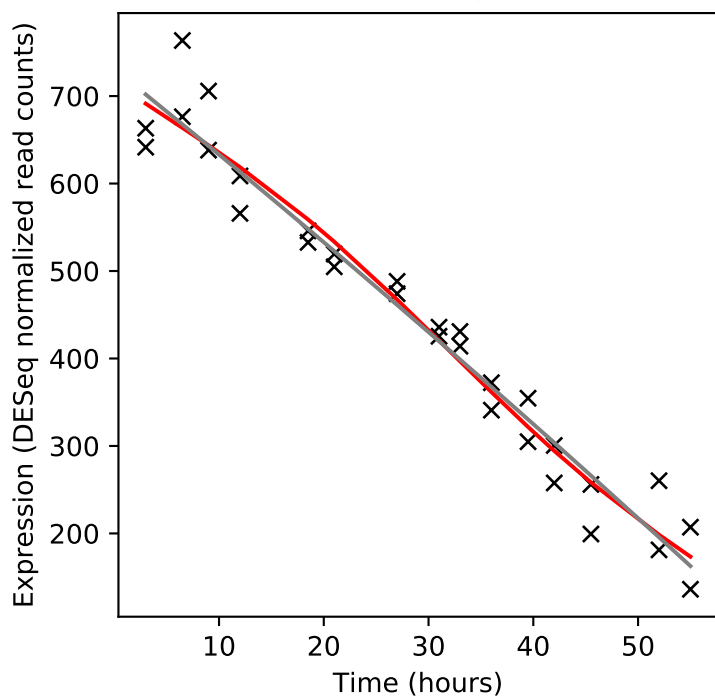

Rv0250c/-

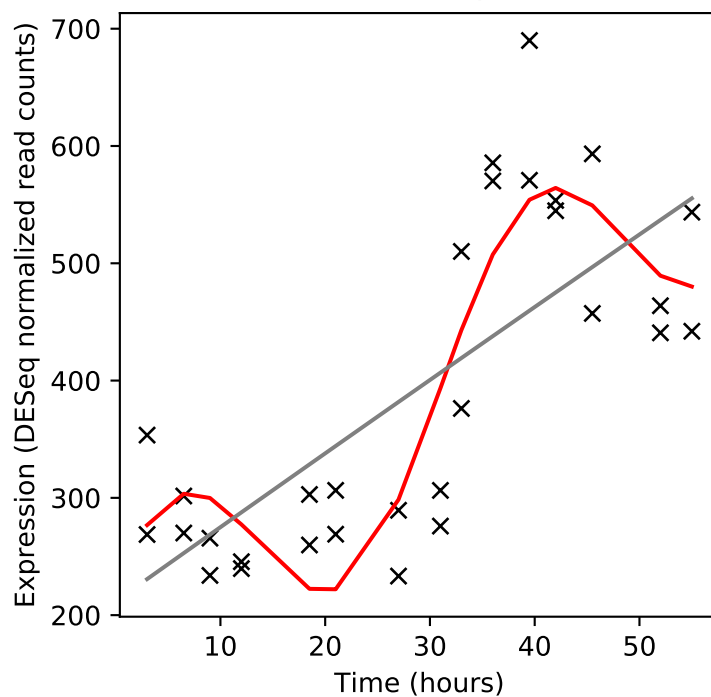

Rv0251c/hsp

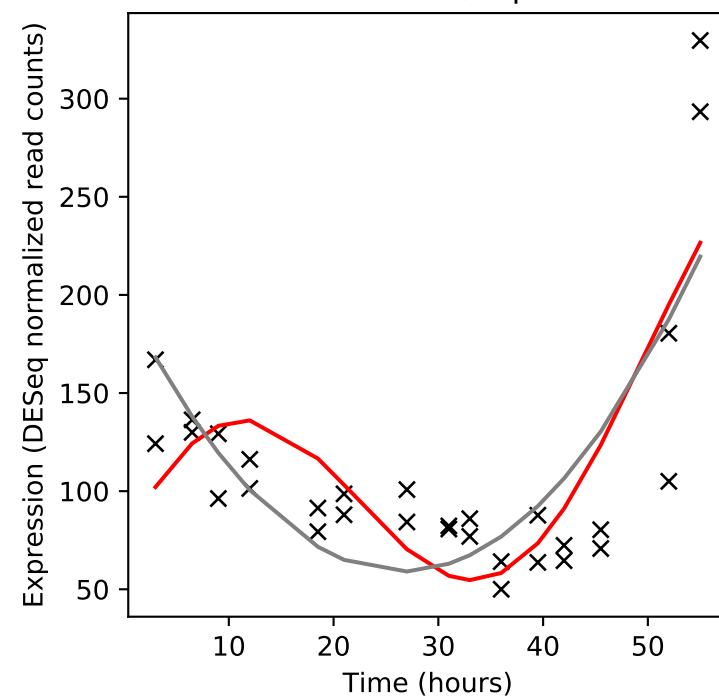

Rv0252/nirB

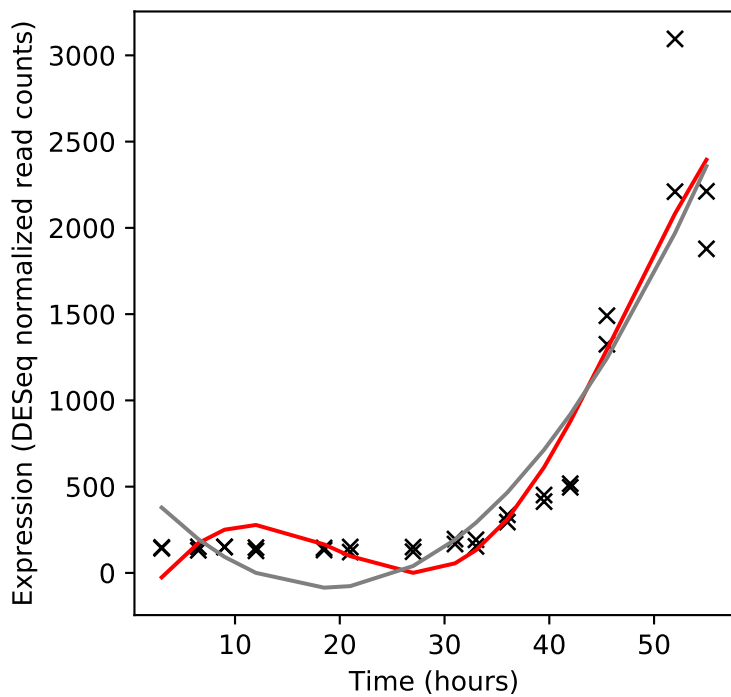

Rv0253/nirD

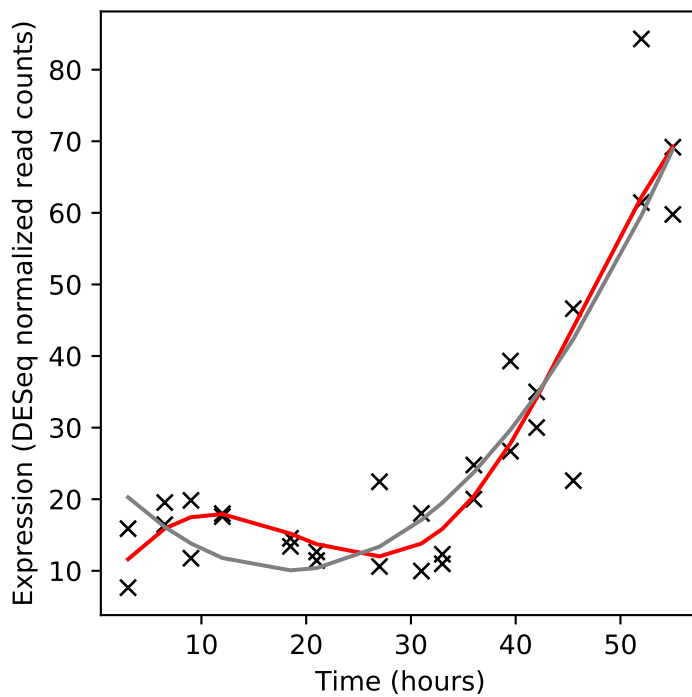

Rv0254c/cobU

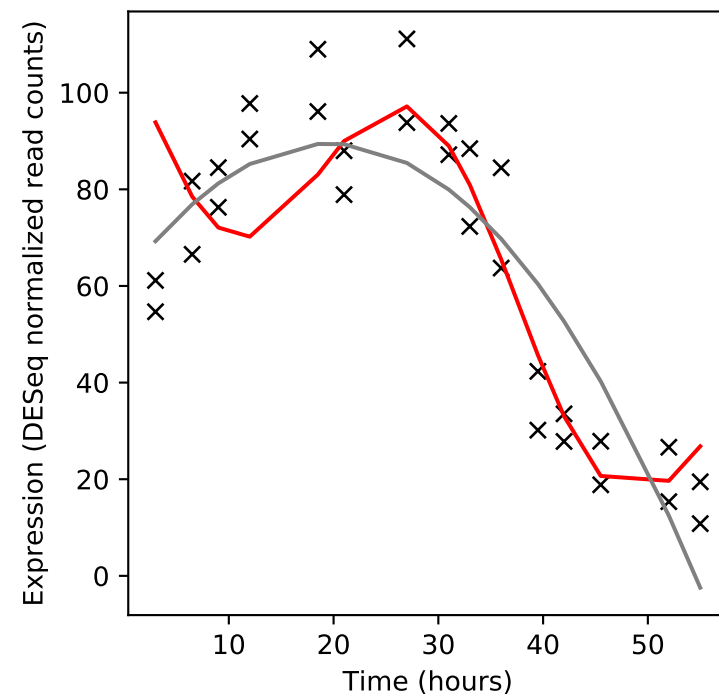

Rv0255c/cobQ1

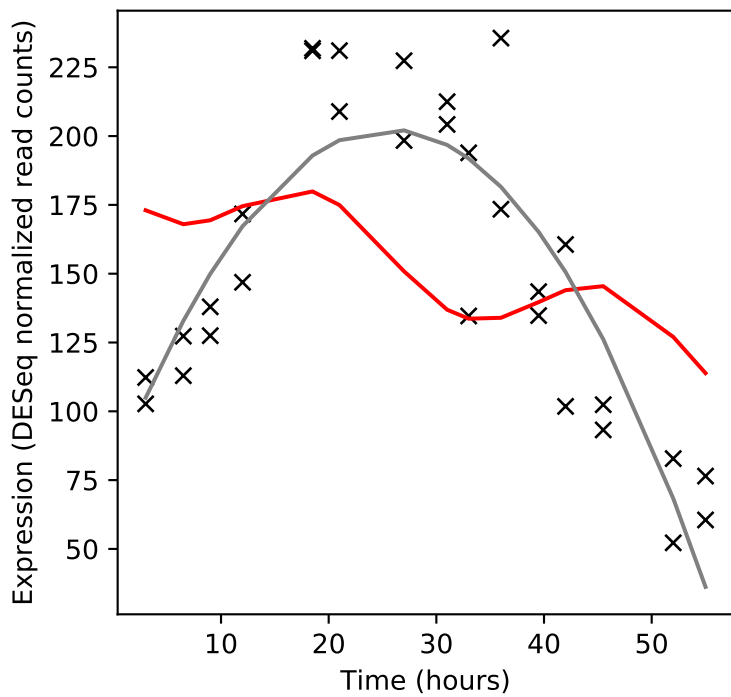

Rv0256c/PPE2

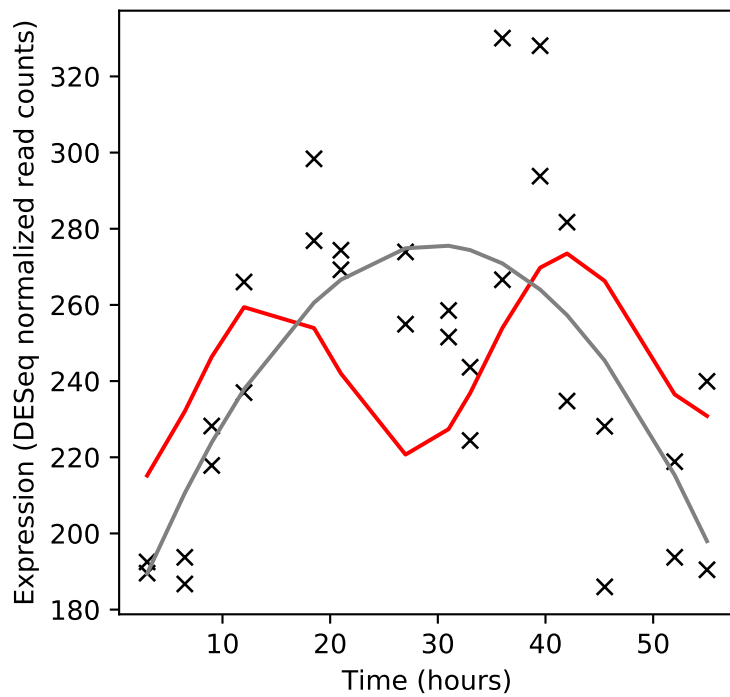

Rv0257c/-

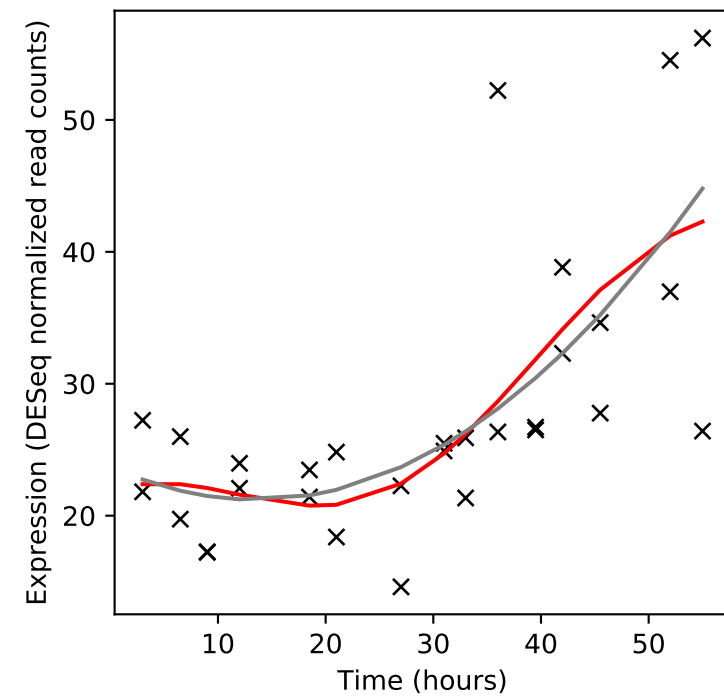

Rv0258c/-

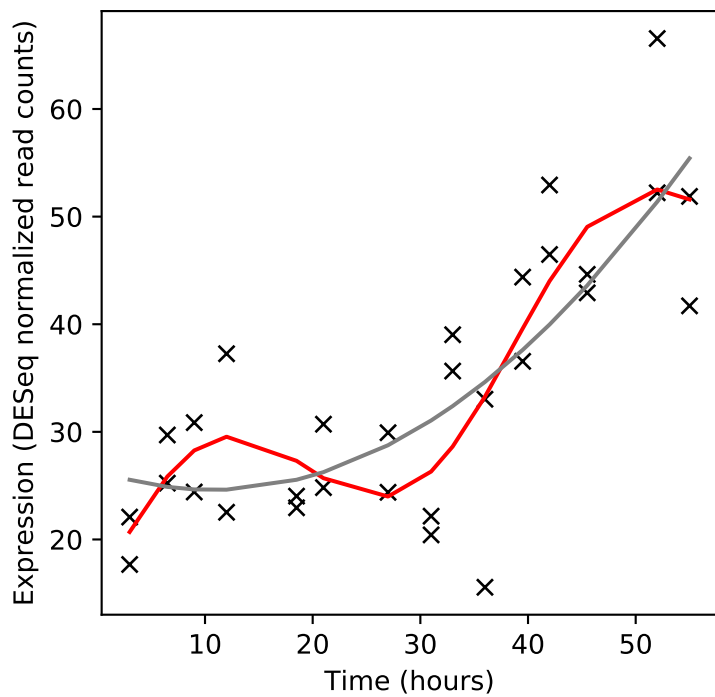

Rv0259c/-

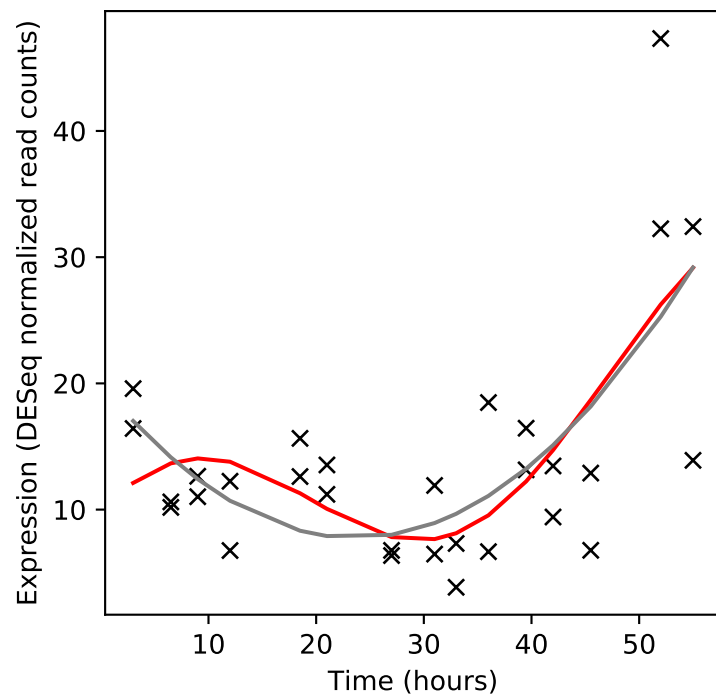

Rv0260c/-

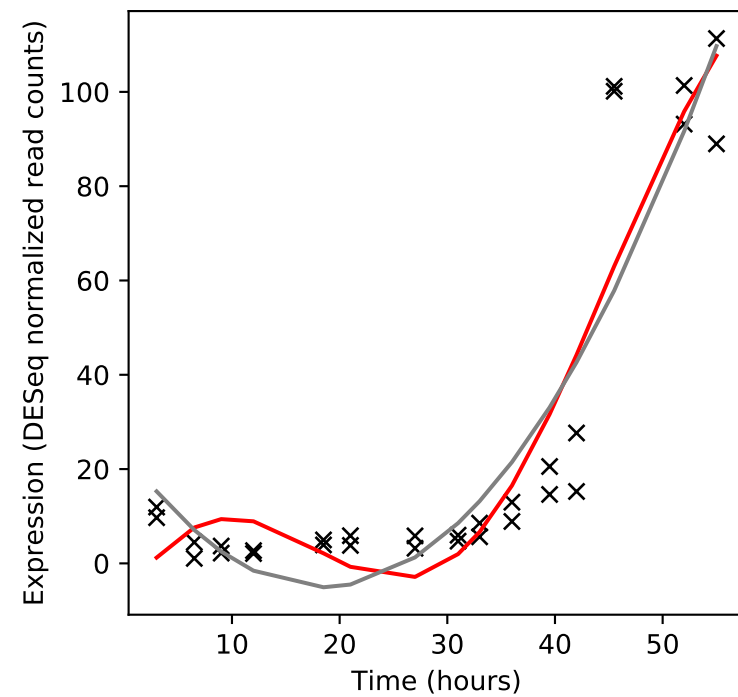

Rv0261c/narK3

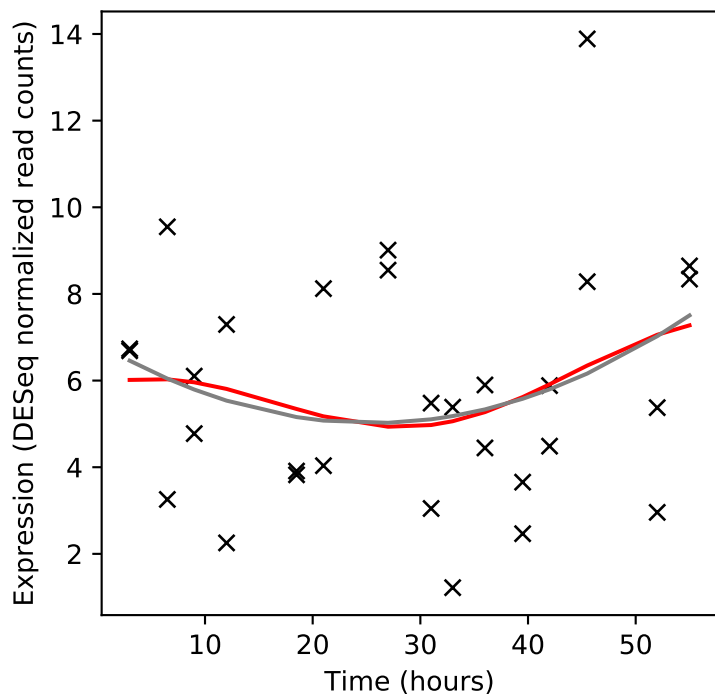

Rv0262c/aac

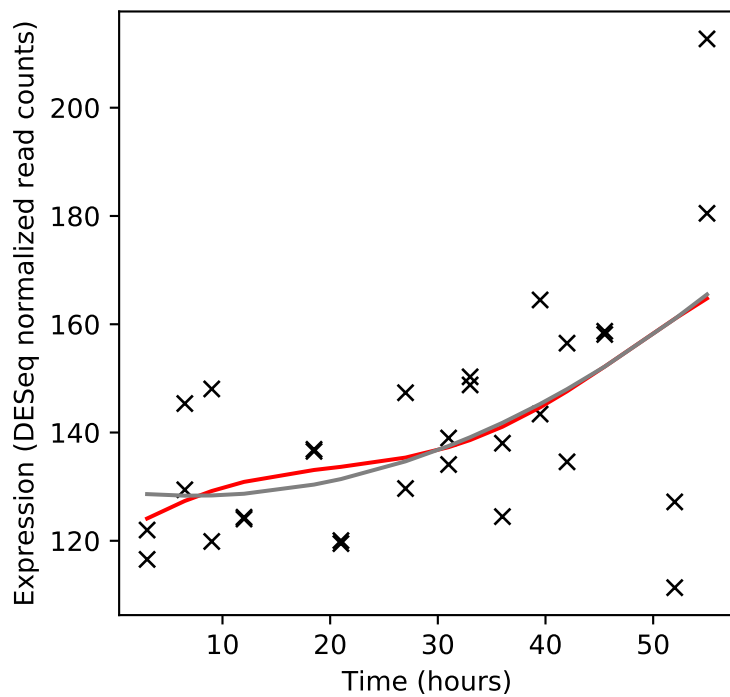

Rv0263c/-

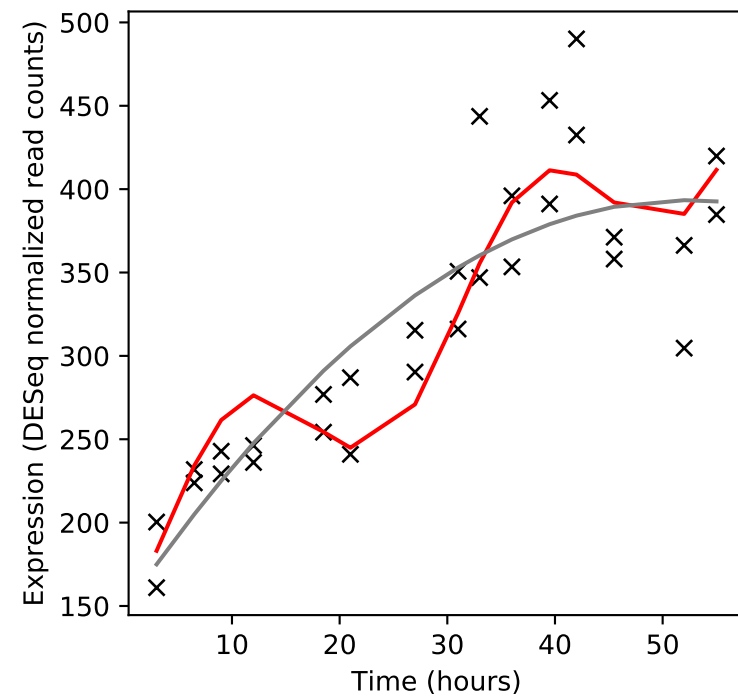



Rv0264c/-

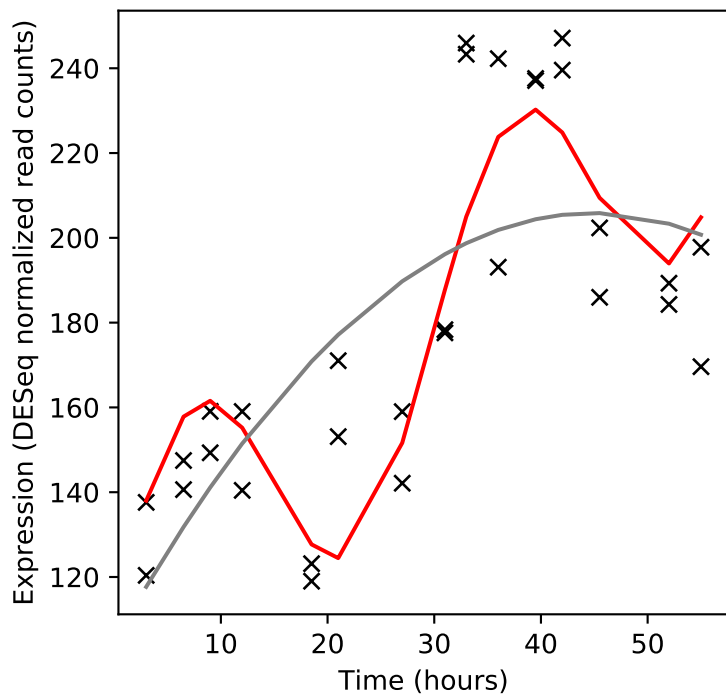

Rv0265c/-

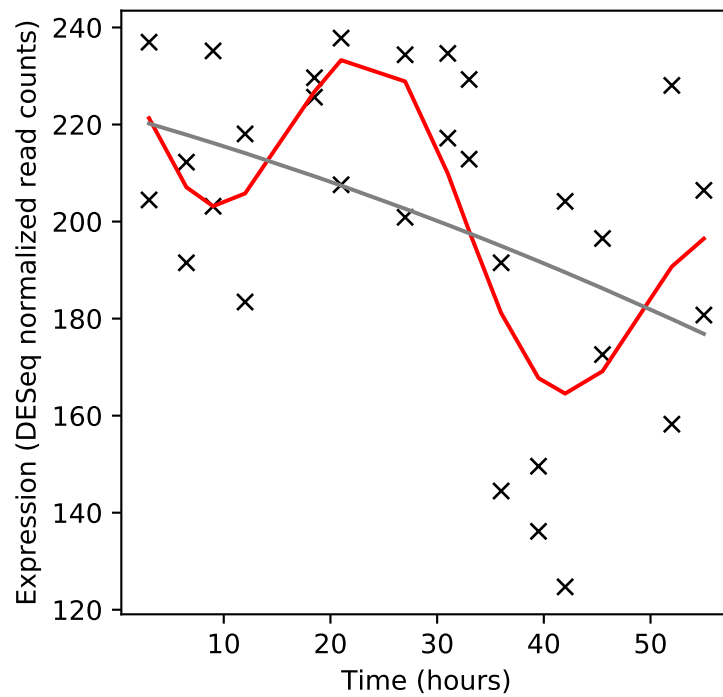

Rv0266c/oplA

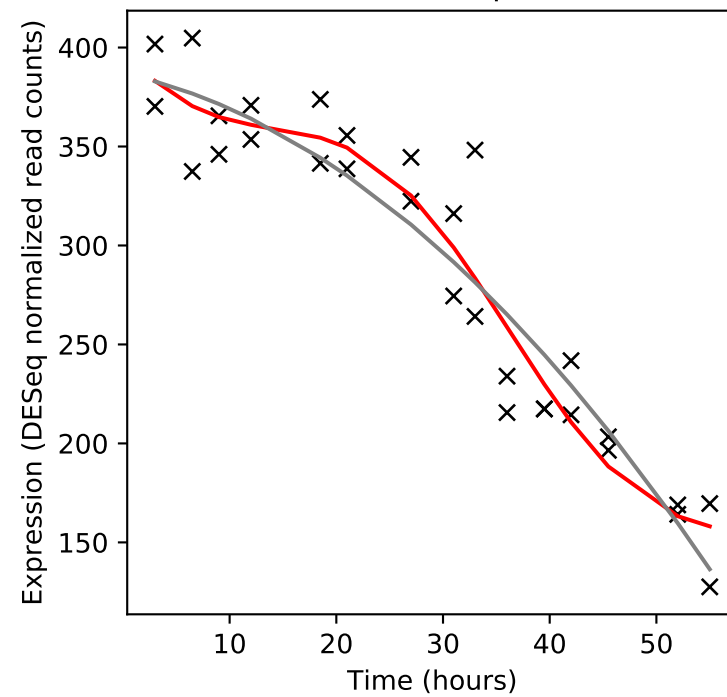

Rv0267/narU

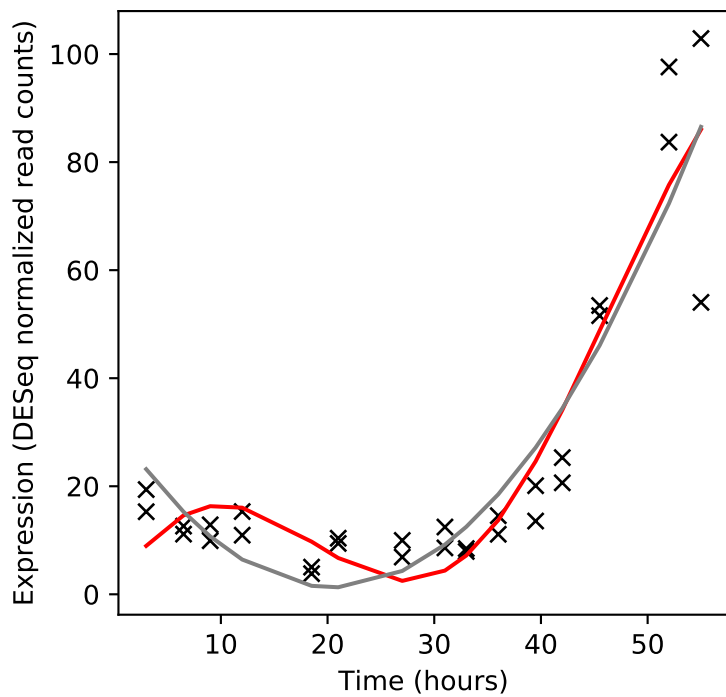

Rv0268c/-

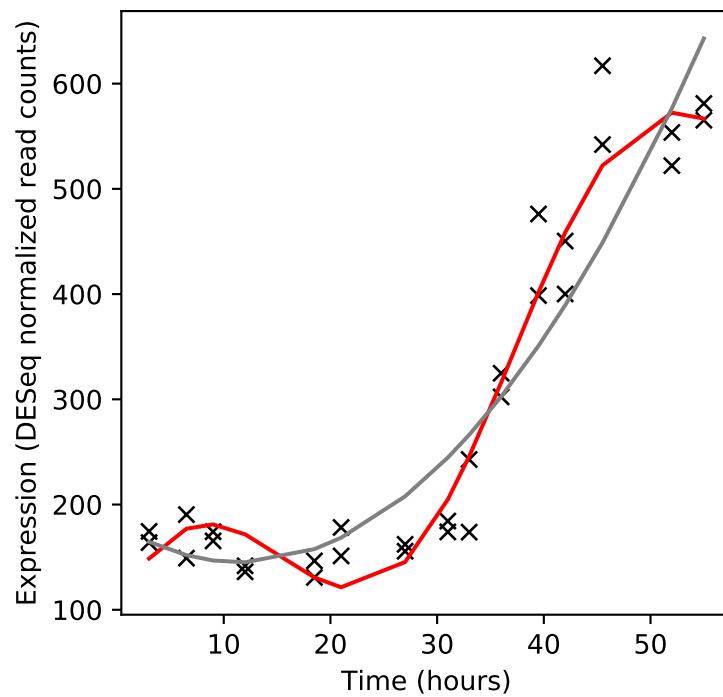

Rv0269c/-

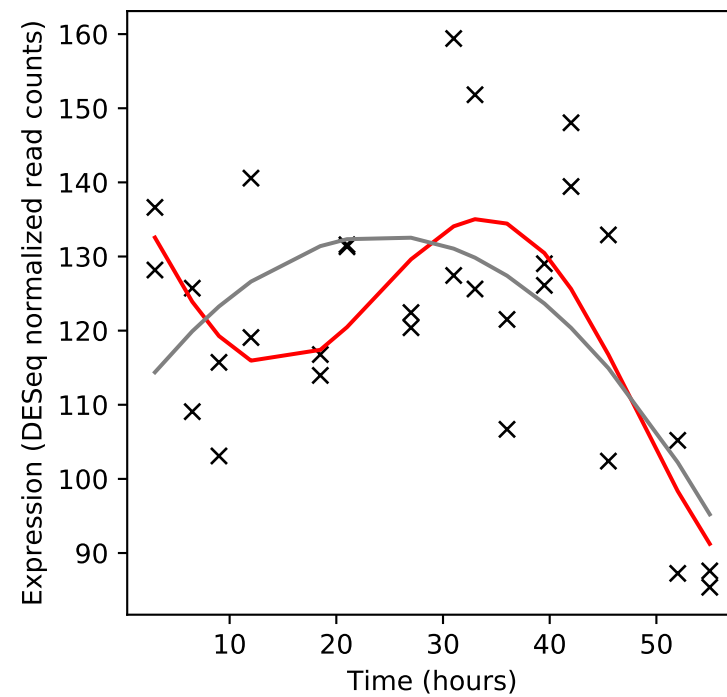

Rv0270/fadD2

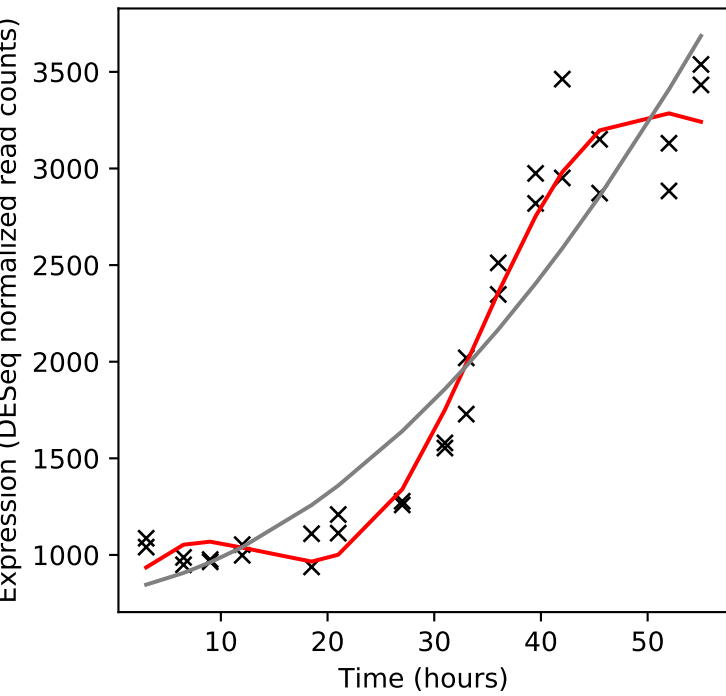

Rv0271c/fadE6

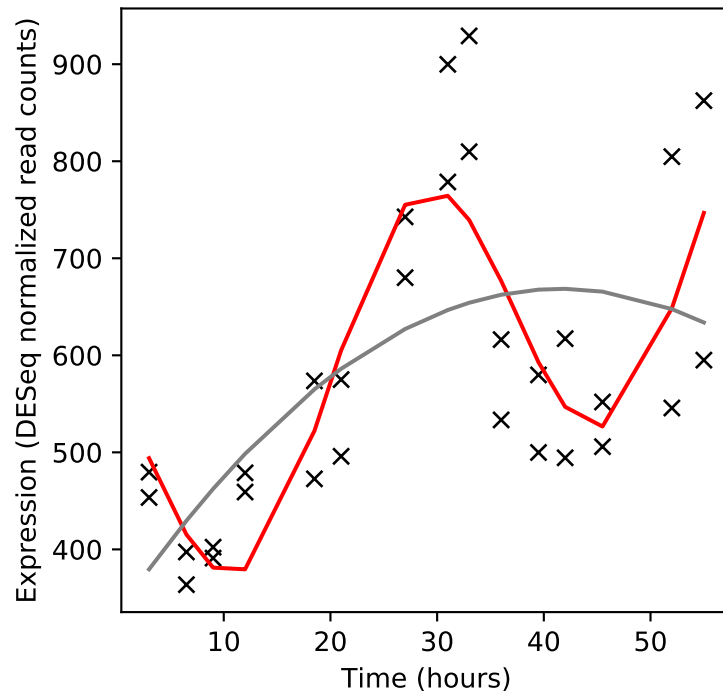

Rv0272c/-

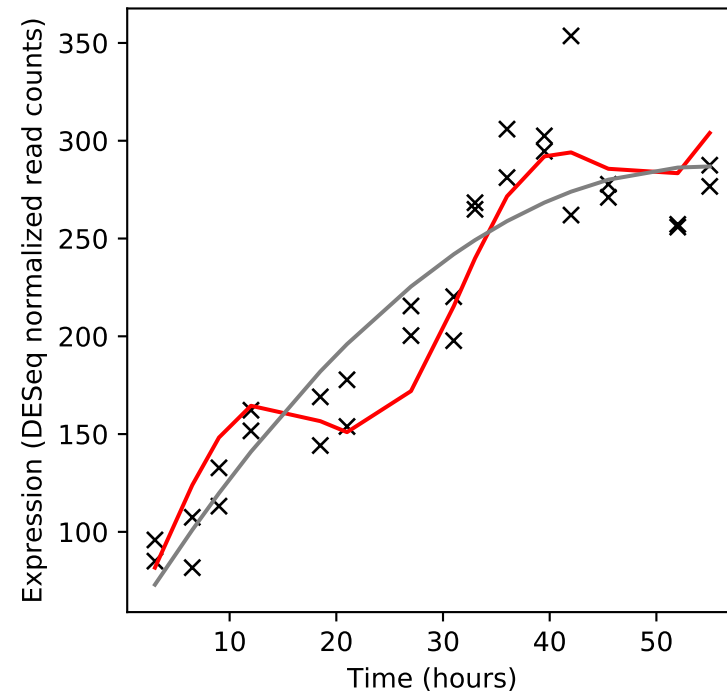

Rv0273c/-

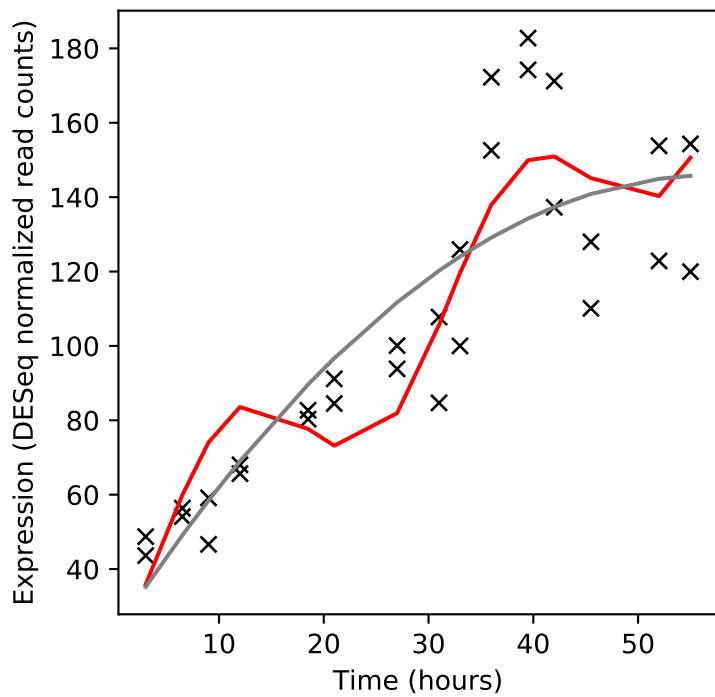

Rv0274/-

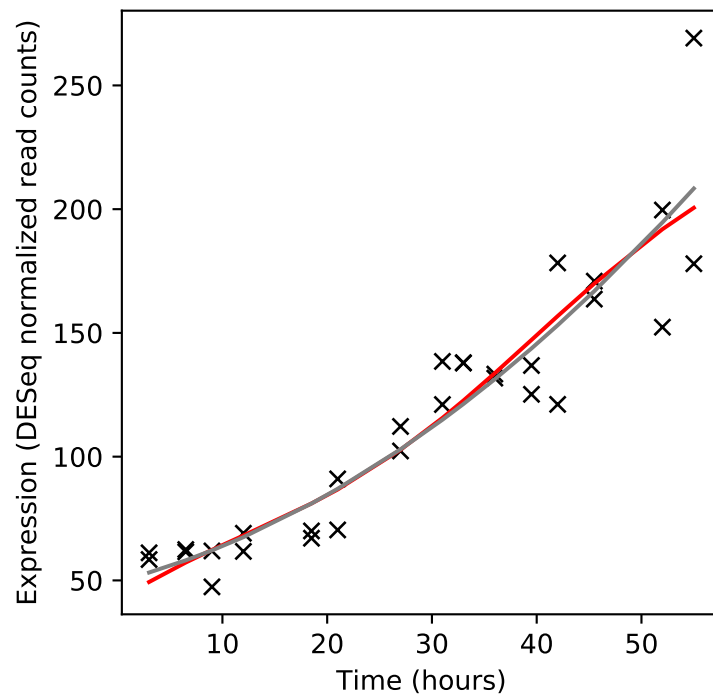

Rv0275c/-

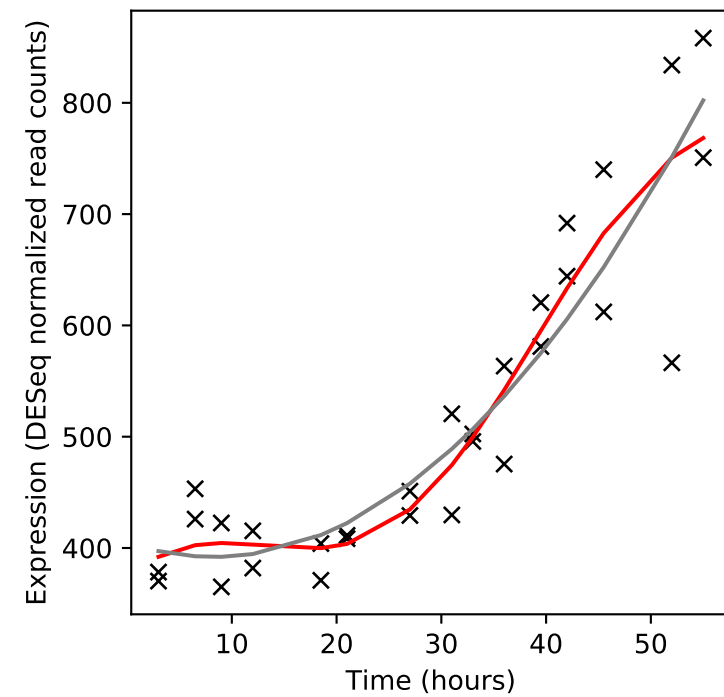

Rv0276/-

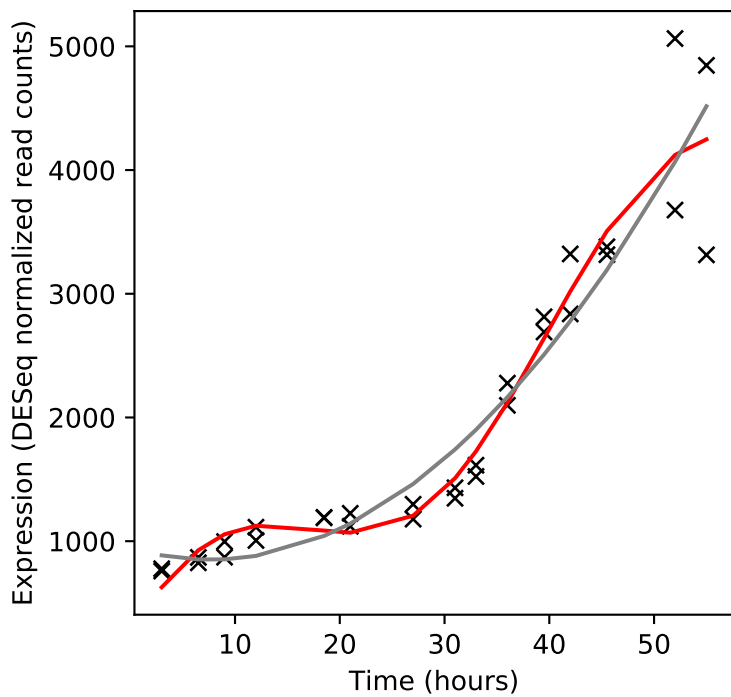

Rv0277c/vapC25

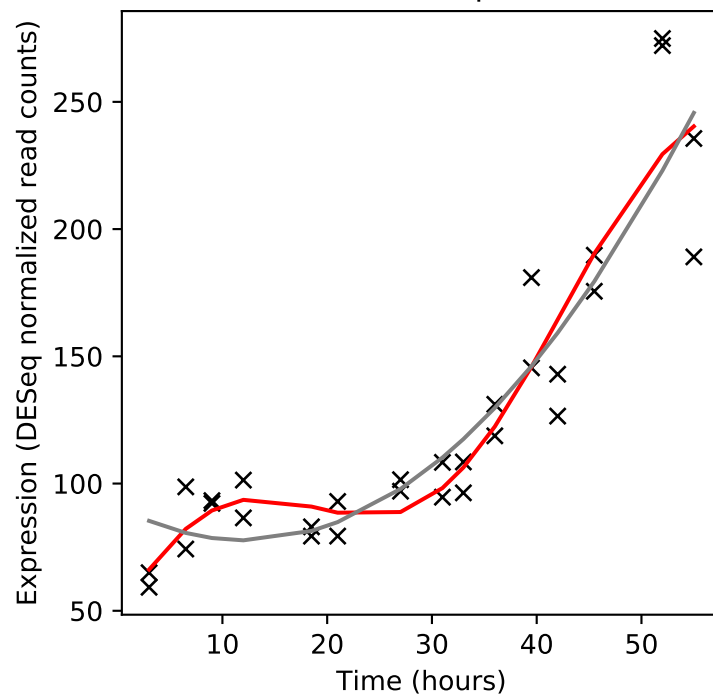

Rv0278c/PE\_PGRS3

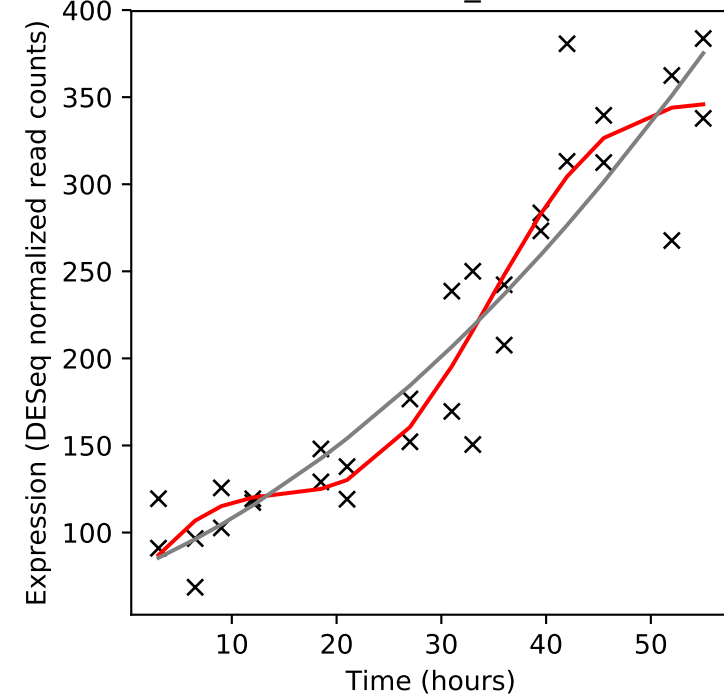

Rv0279c/PE\_PGRS4

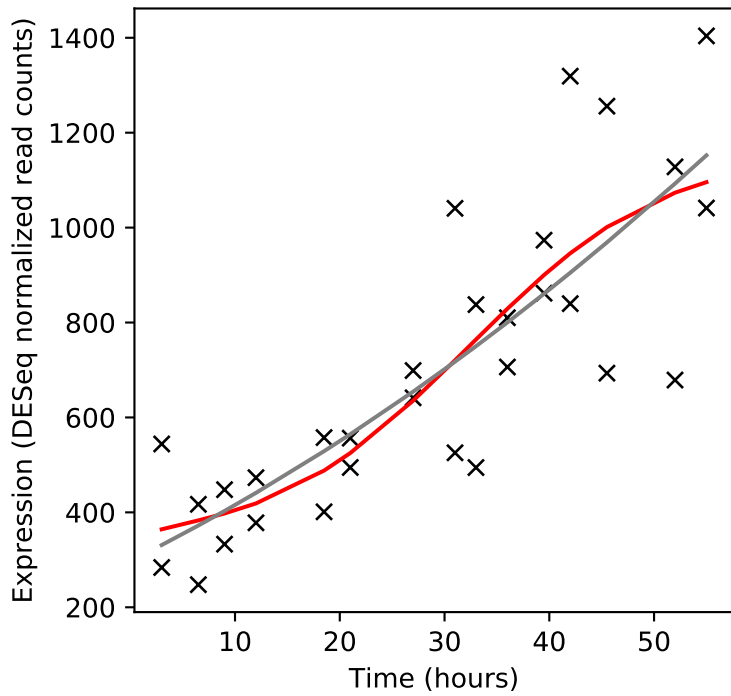

Rv0280/PPE3

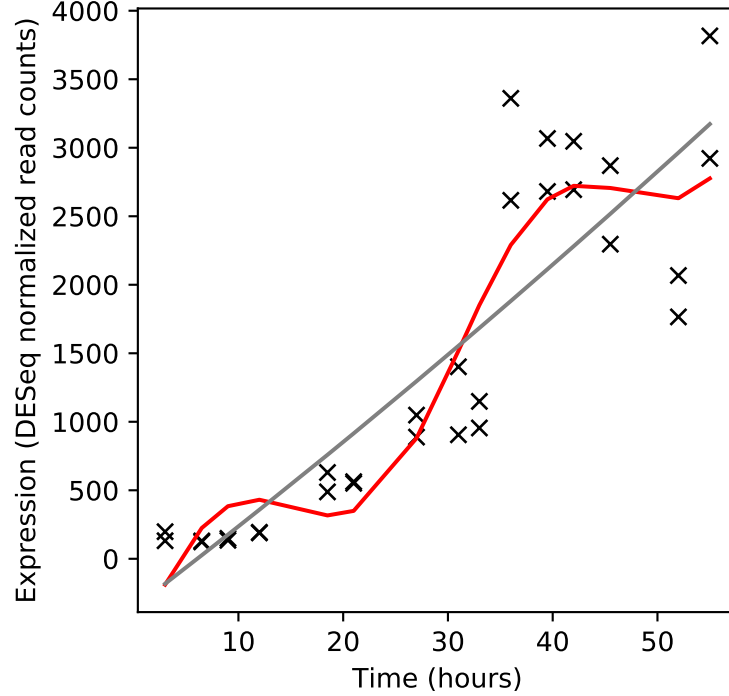

Rv0281/-

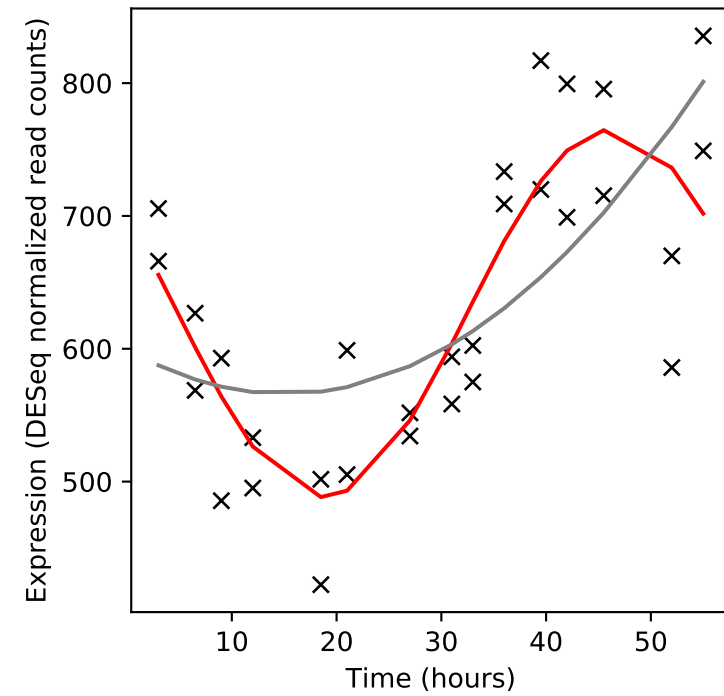

Rv0282/eccA3

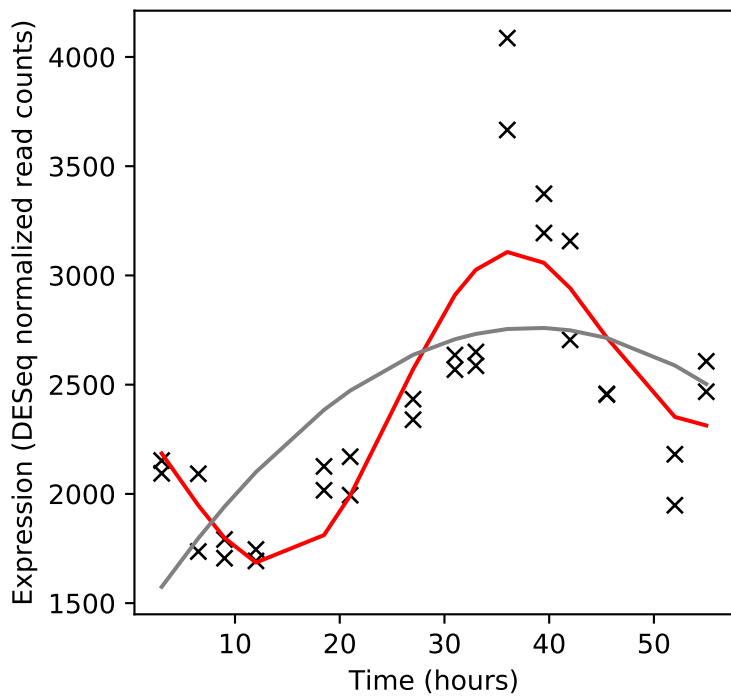

Rv0283/eccB3

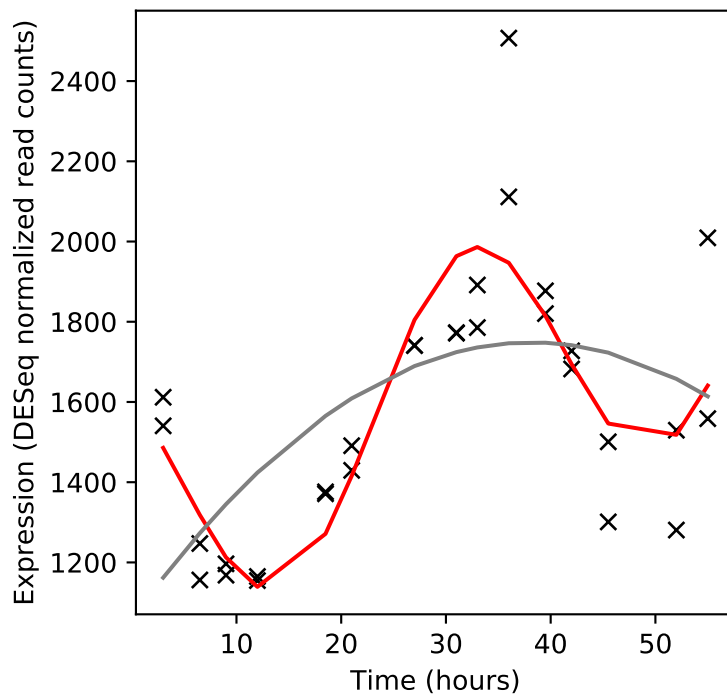

Rv0284/eccC3

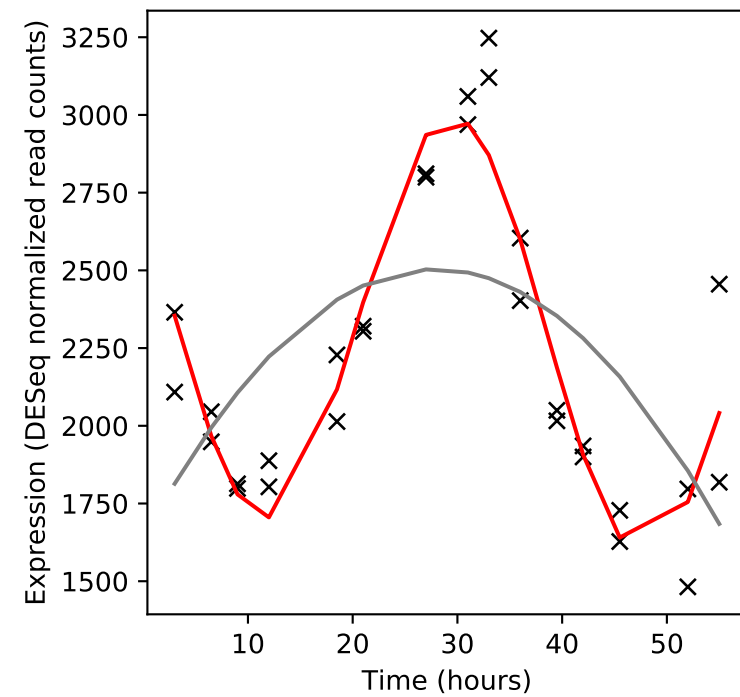

Rv0285/PE5

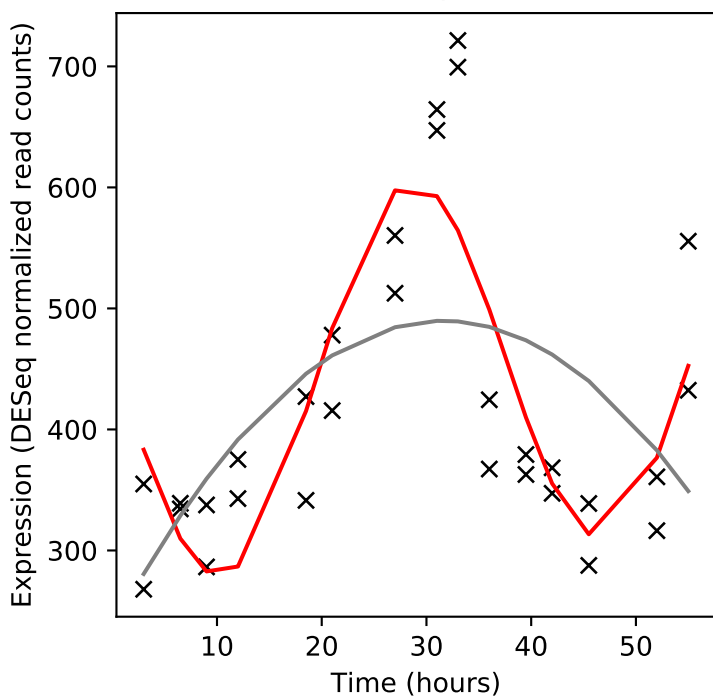

Rv0286/PPE4

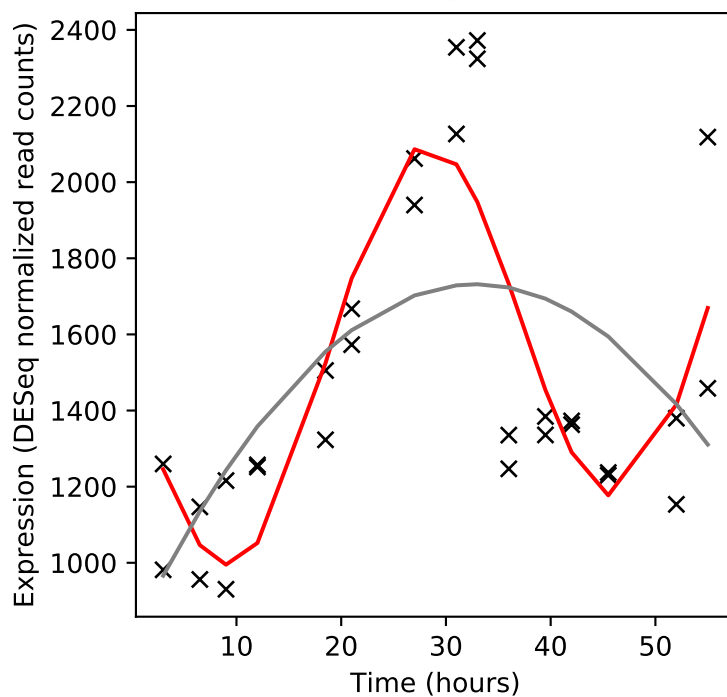

Rv0287/esxG

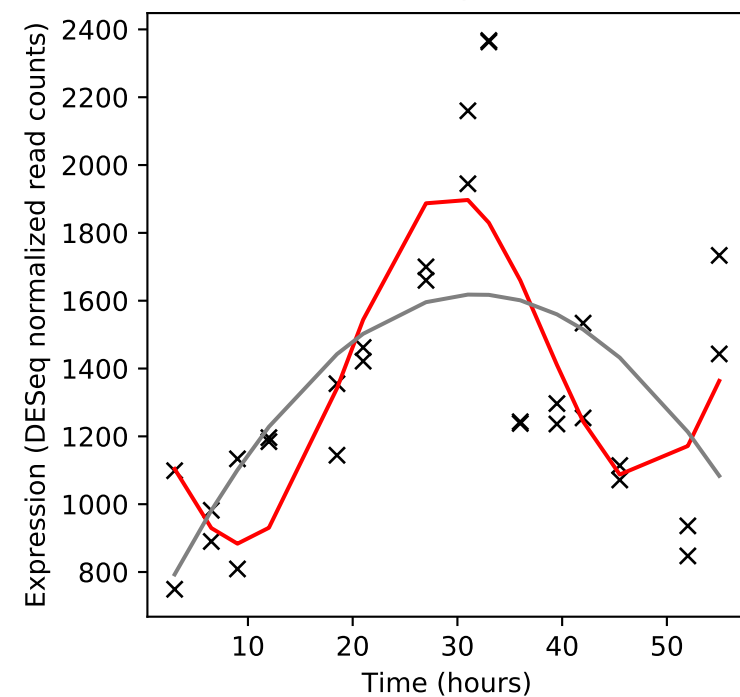

Rv0288/esxH

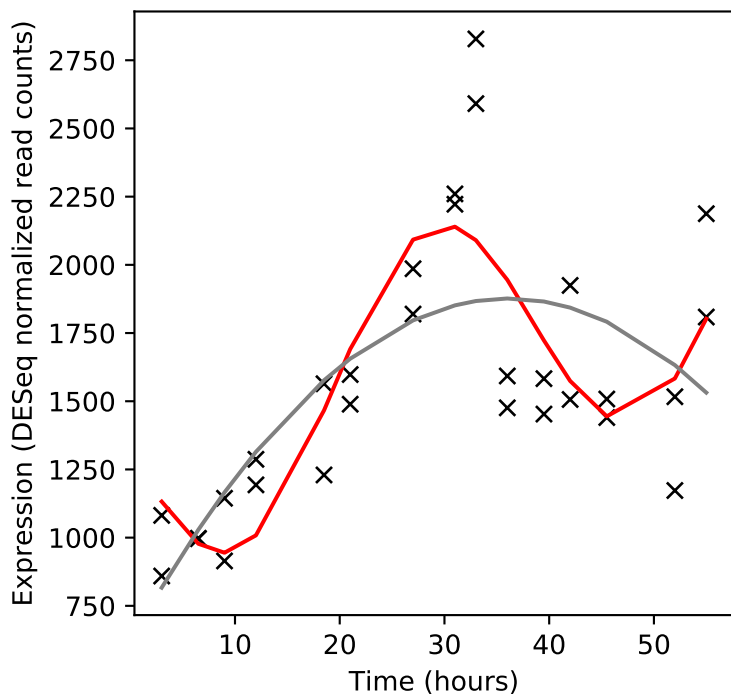

Rv0289/espG3

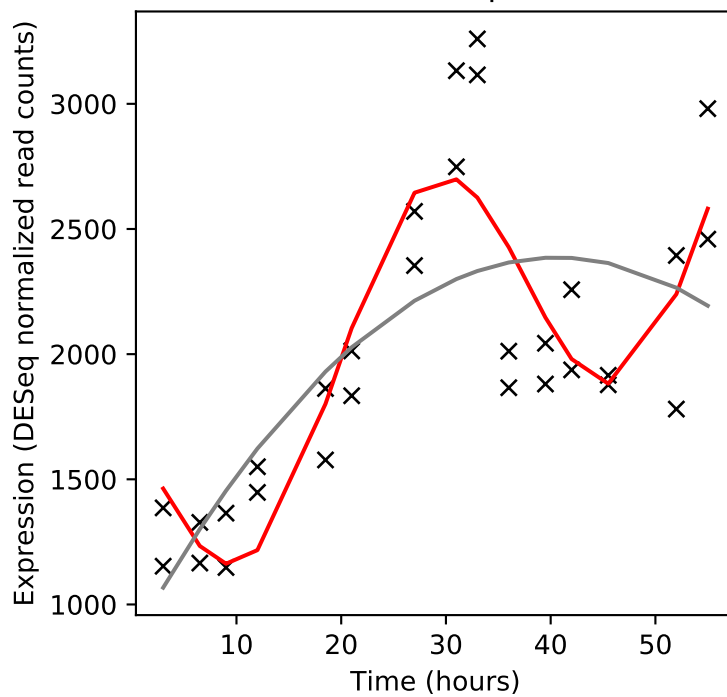

Rv0290/eccD3

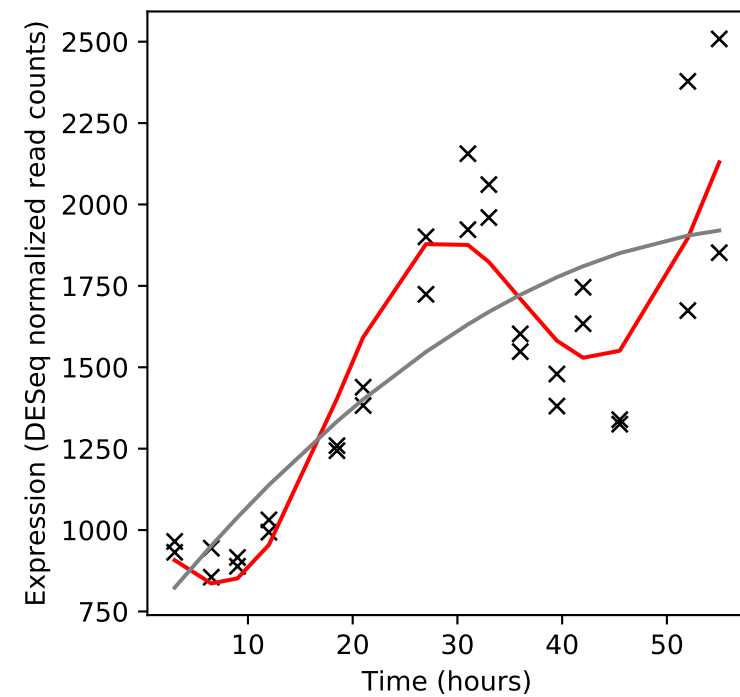

Rv0291/mycP3

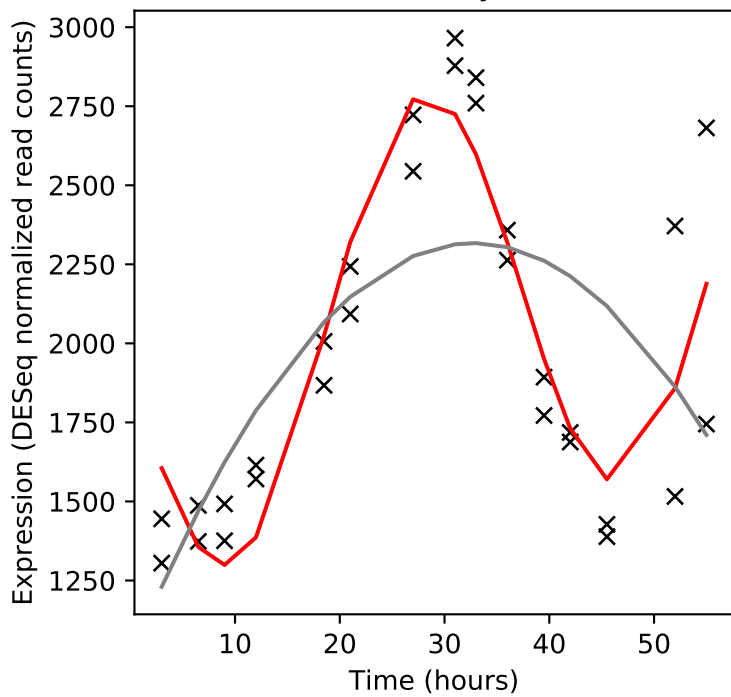

Rv0292/eccE3

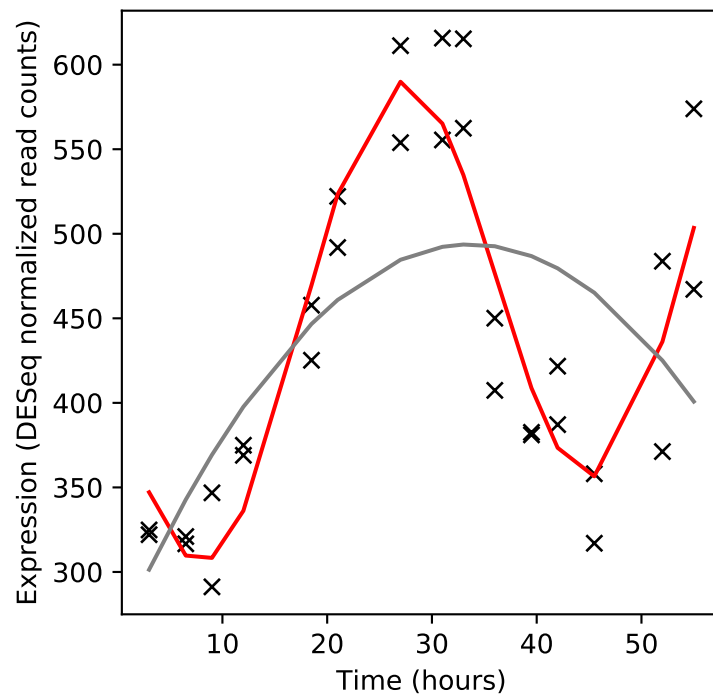

Rv0293c/-

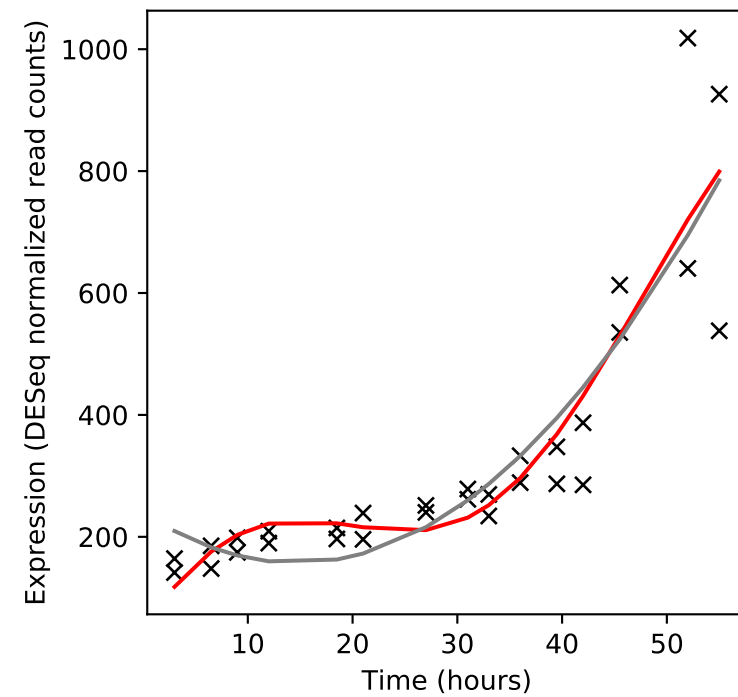

Rv0294/tam

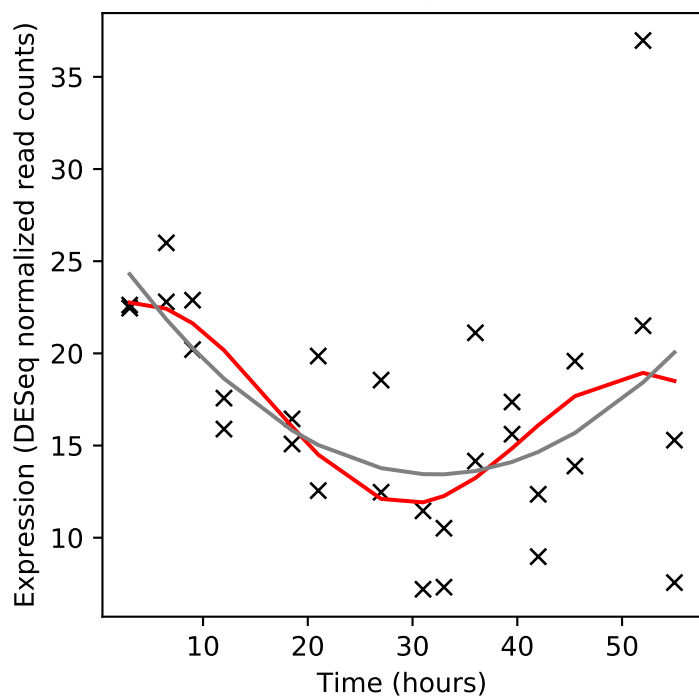

Rv0295c/-

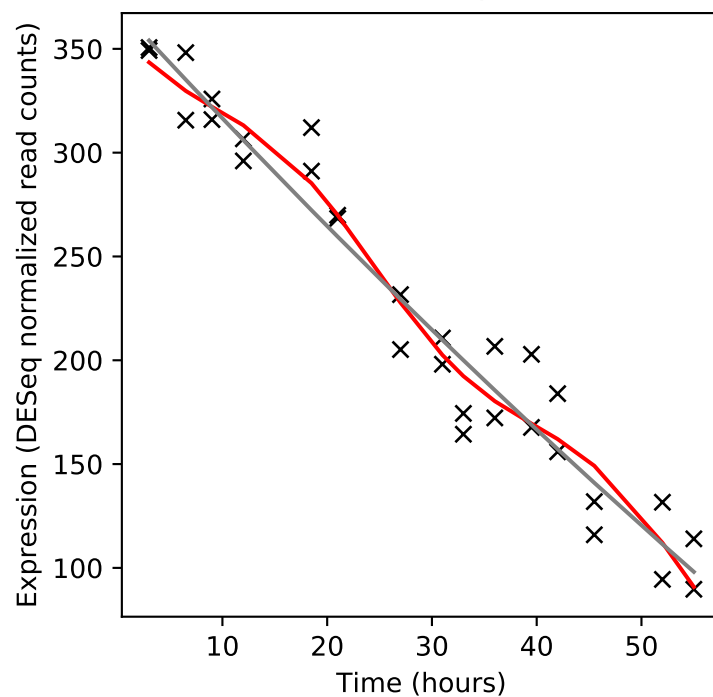

Rv0296c/-

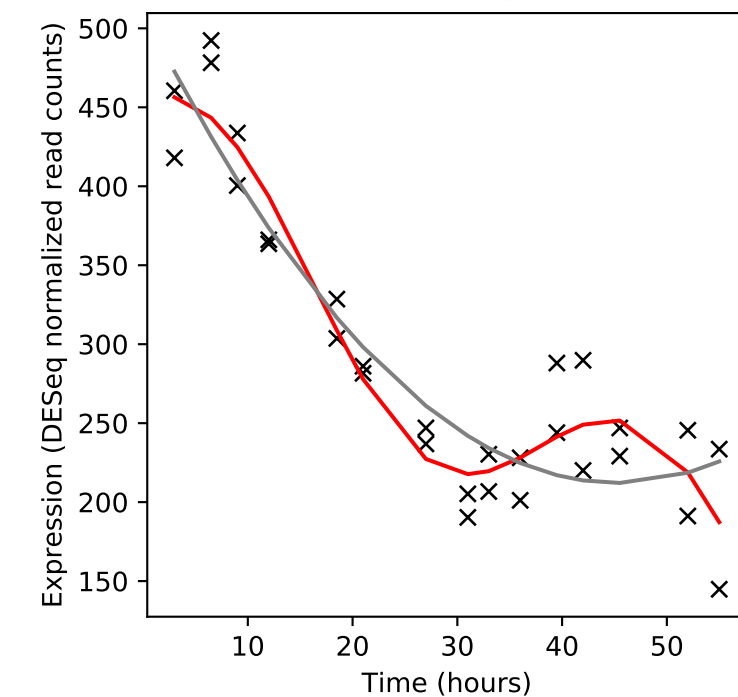

Rv0297/PE\_PGRS5

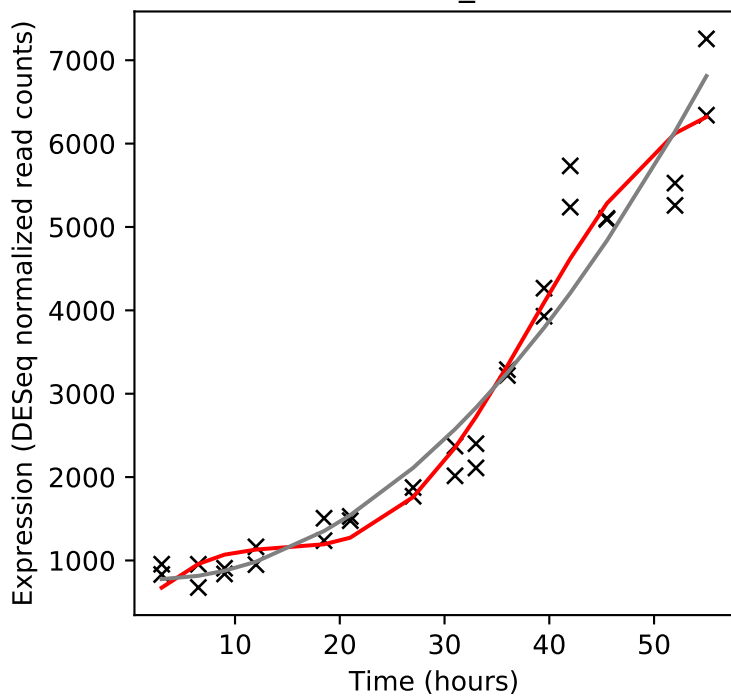

Rv0298/-

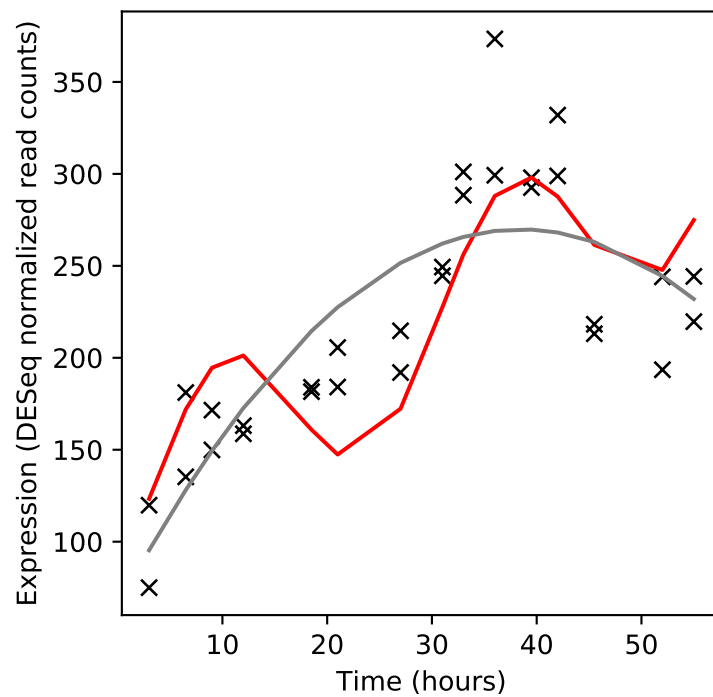

Rv0299/-

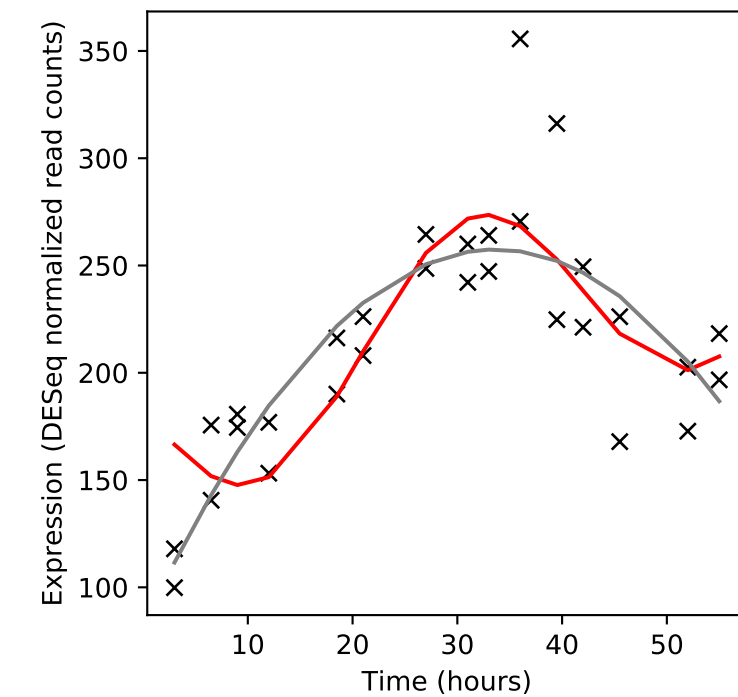

Rv0300/vapB2

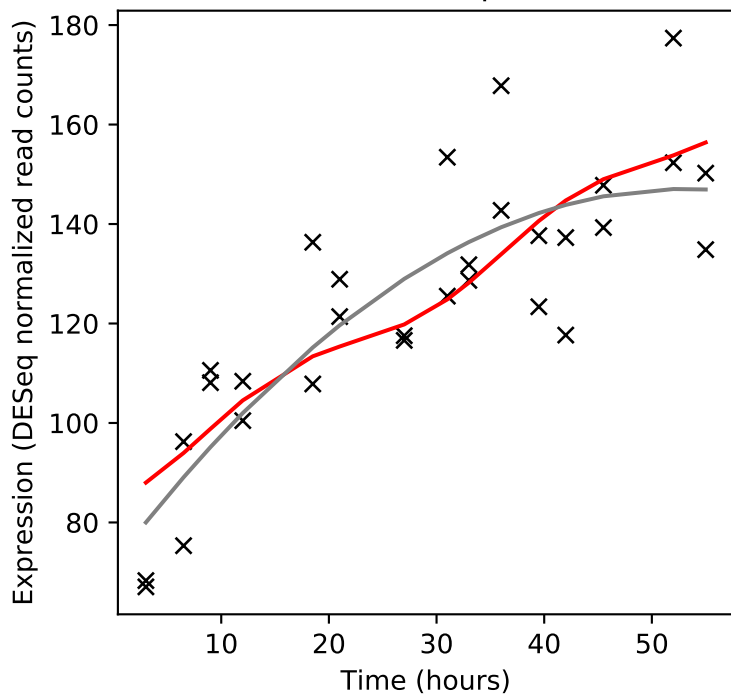

Rv0301/vapC2

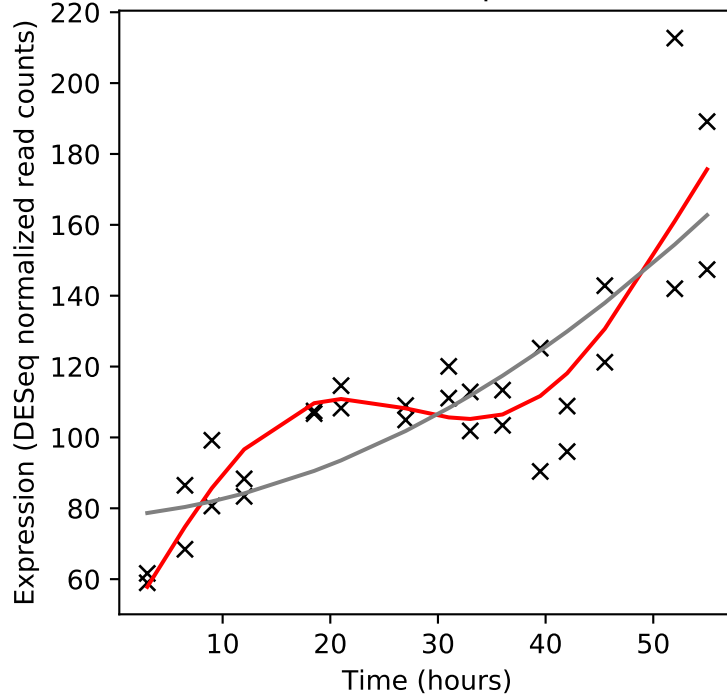

Rv0302/-

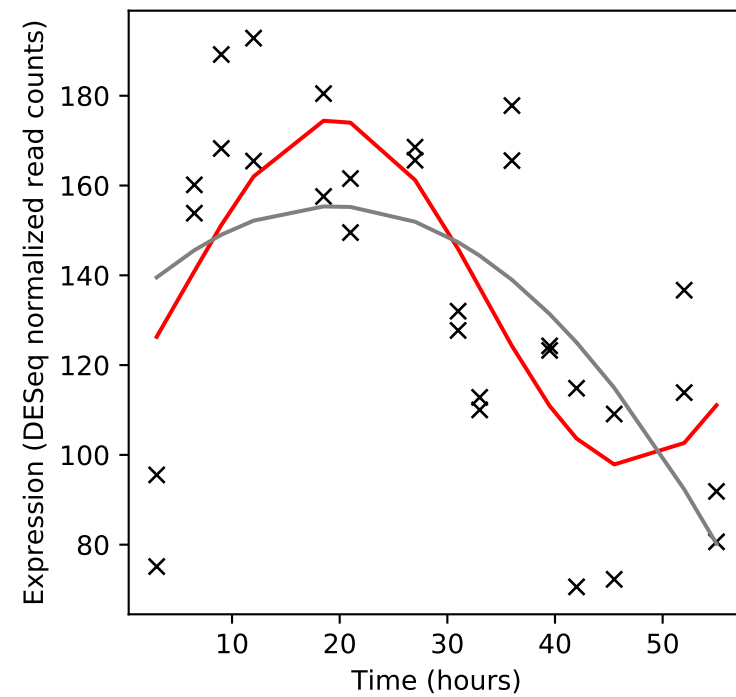

Rv0303/-

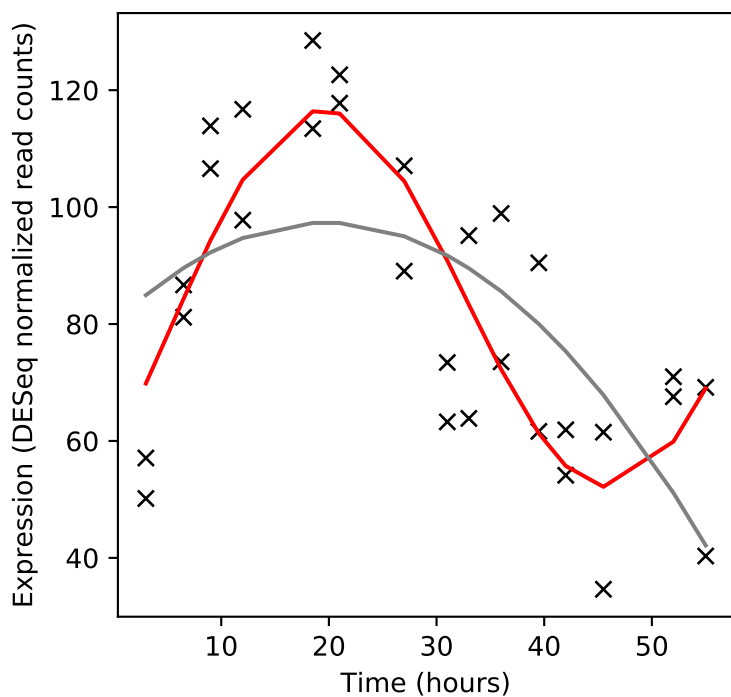

Rv0304c/PPE5

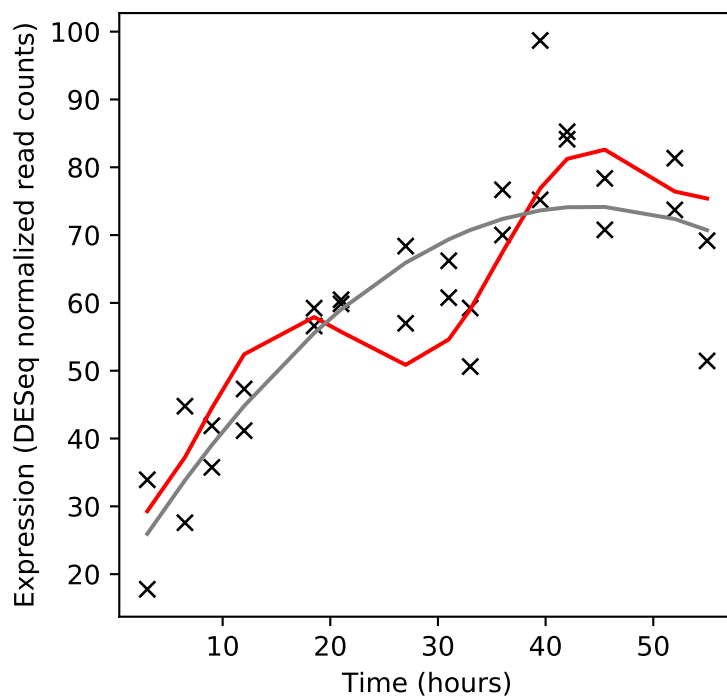

Rv0305c/PPE6

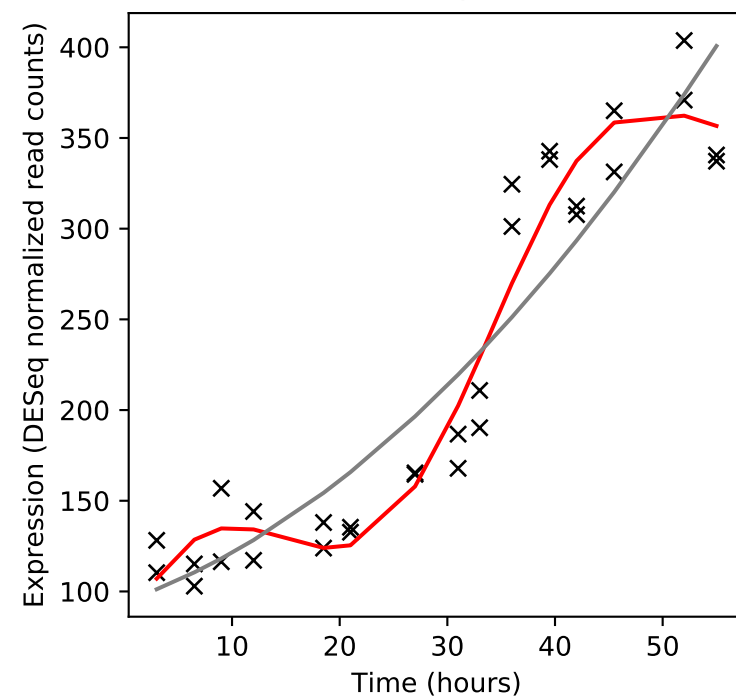

Rv0306/-

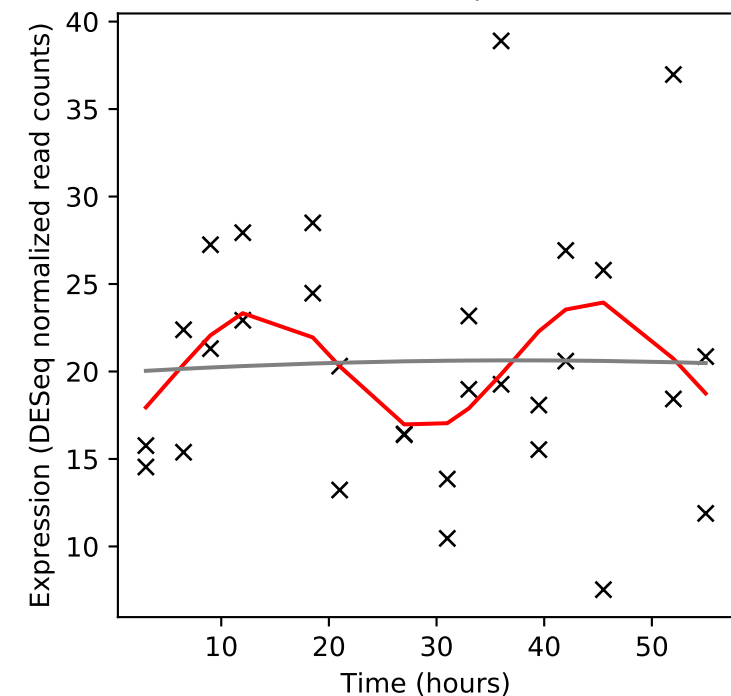

Rv0307c/-

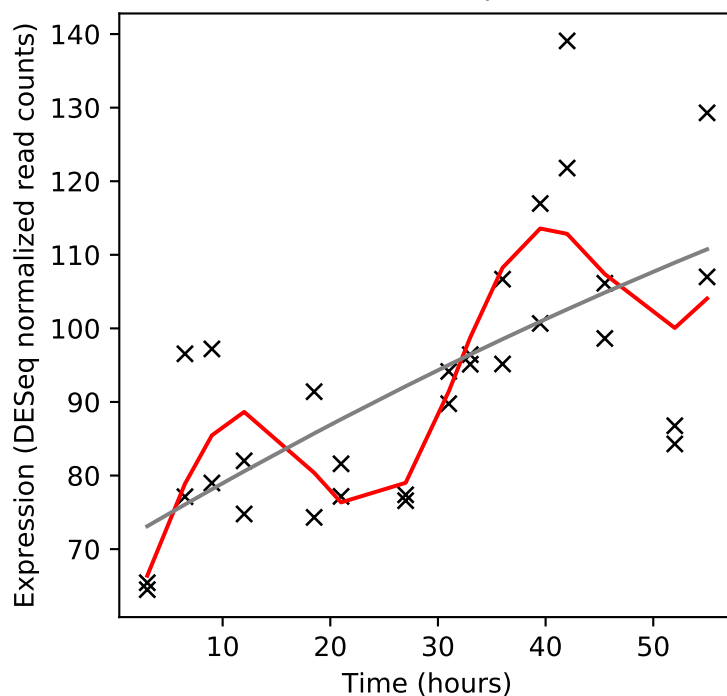

Rv0308/-

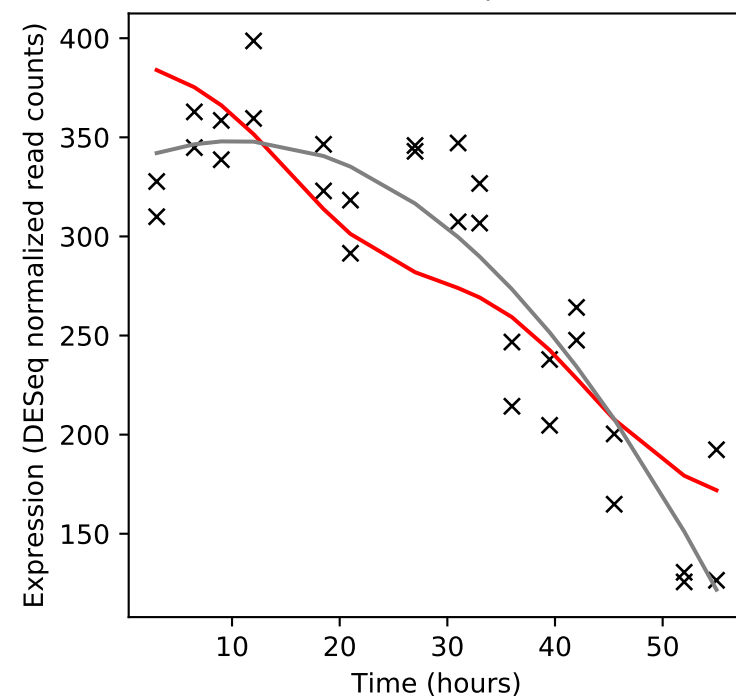

Rv0309/-

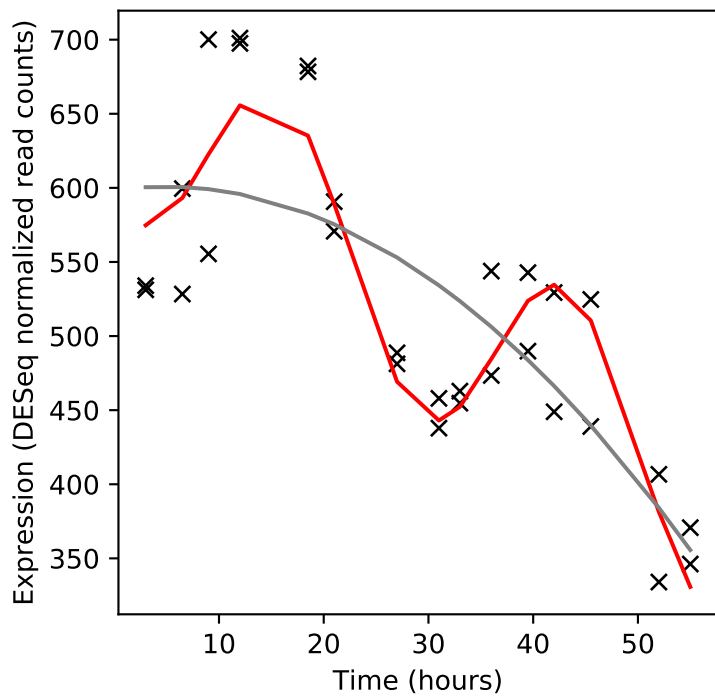

Rv0310c/-

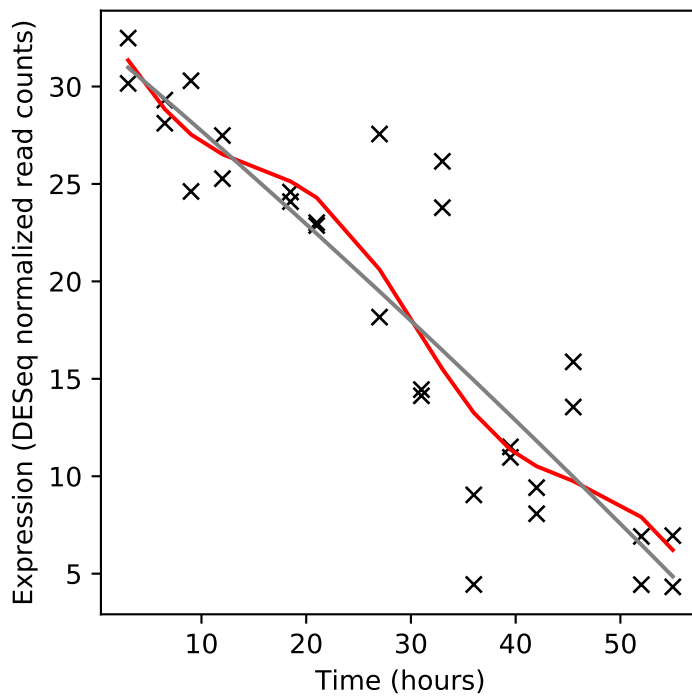

Rv0311/-

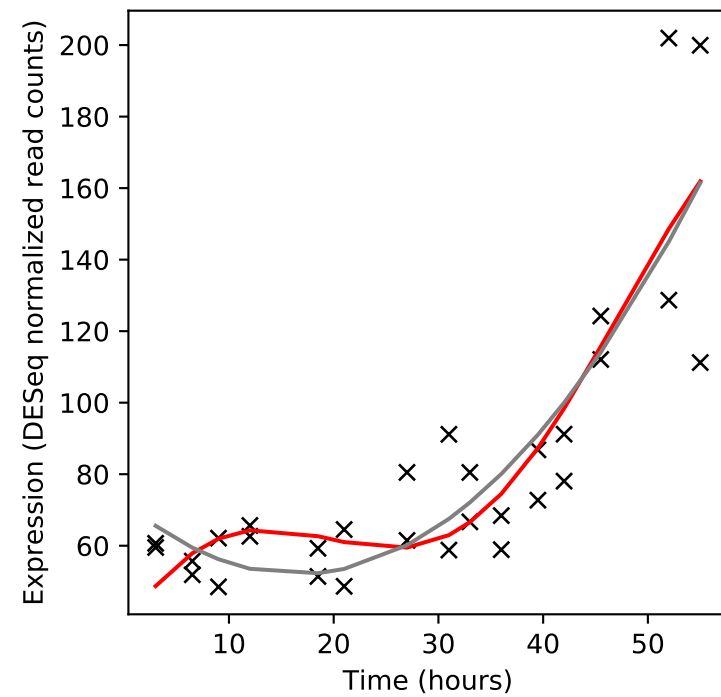

Rv0312/-

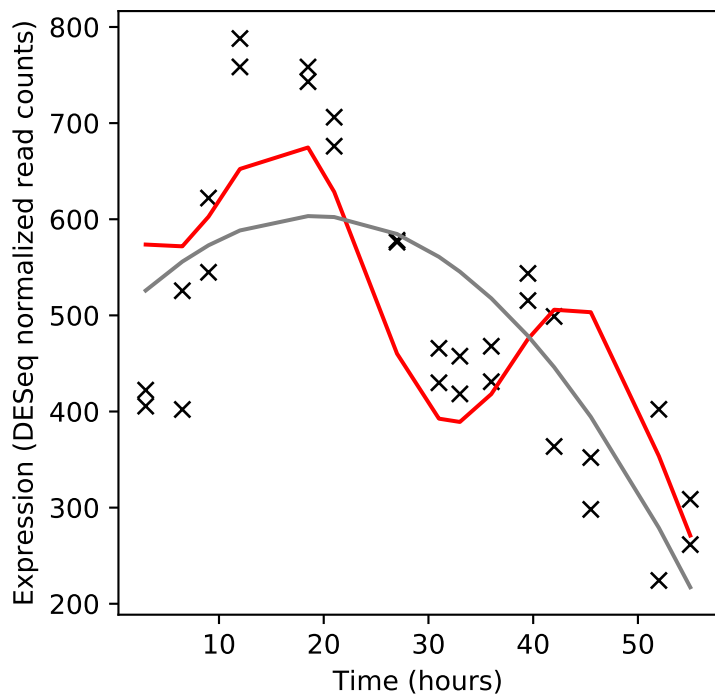

Rv0313/-

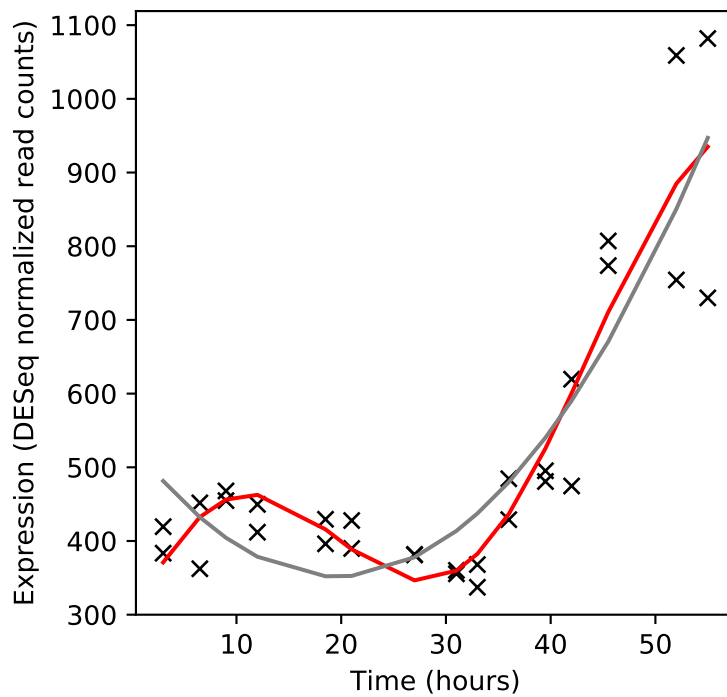

Rv0314c/-

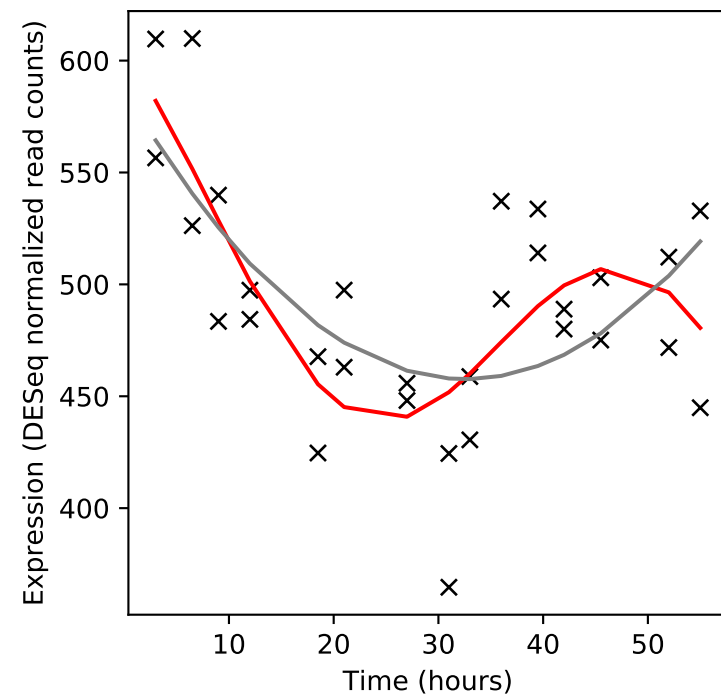

Rv0315/-

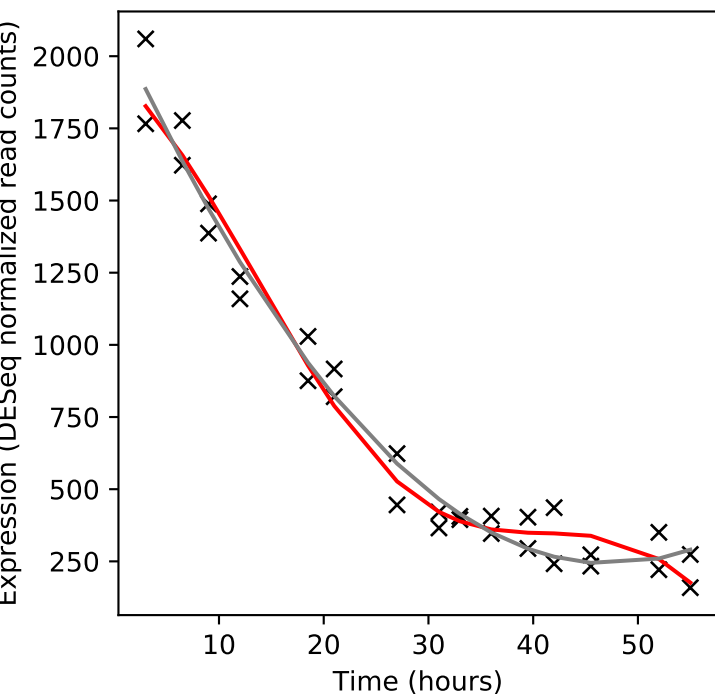

Rv0316/-

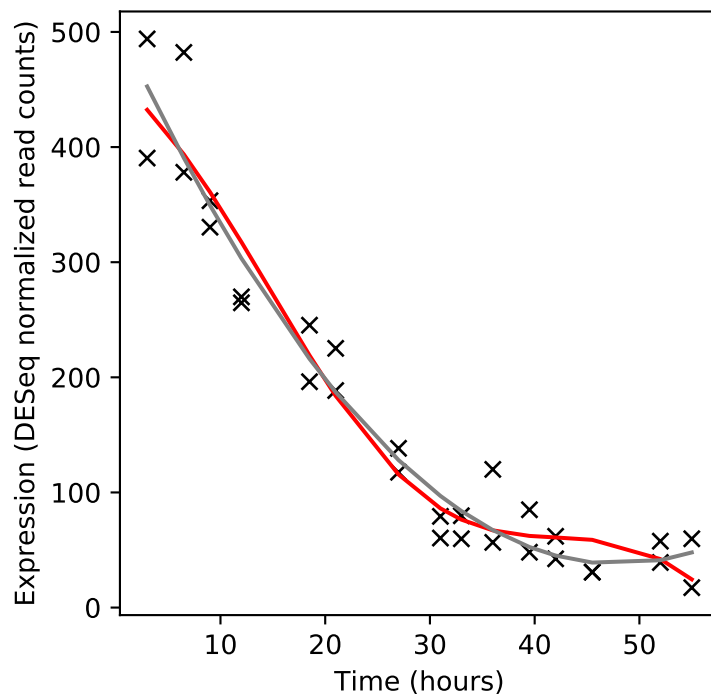

Rv0317c/glpQ2

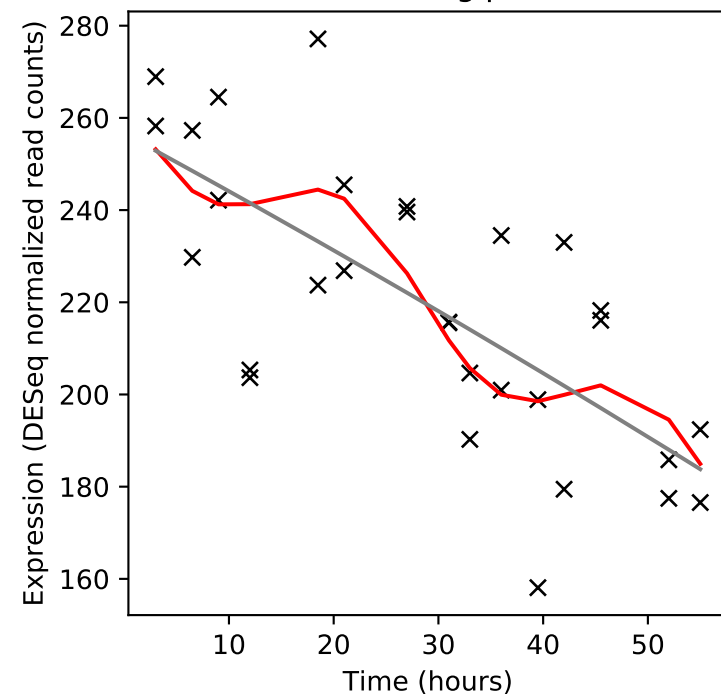

Rv0318c/-

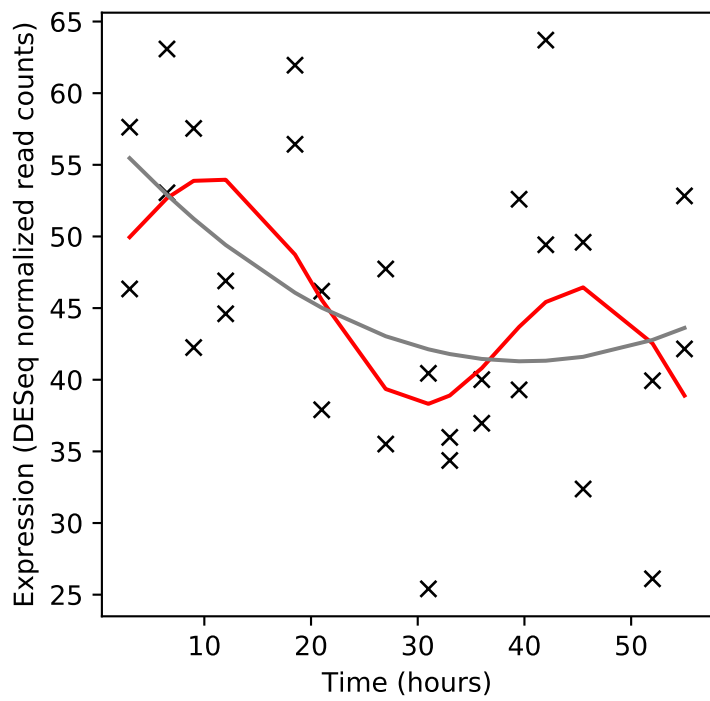

Rv0319/pcp

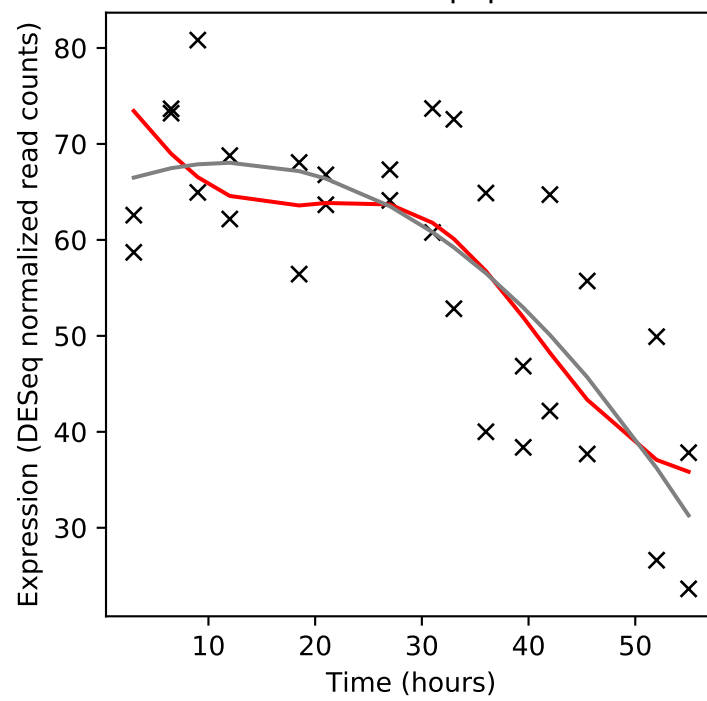

Rv0320/-

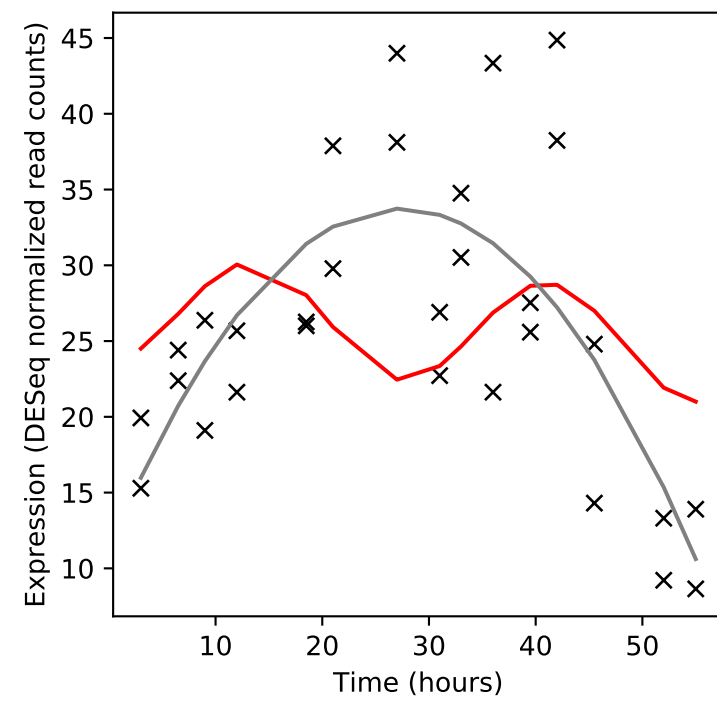

Rv0321/dcd

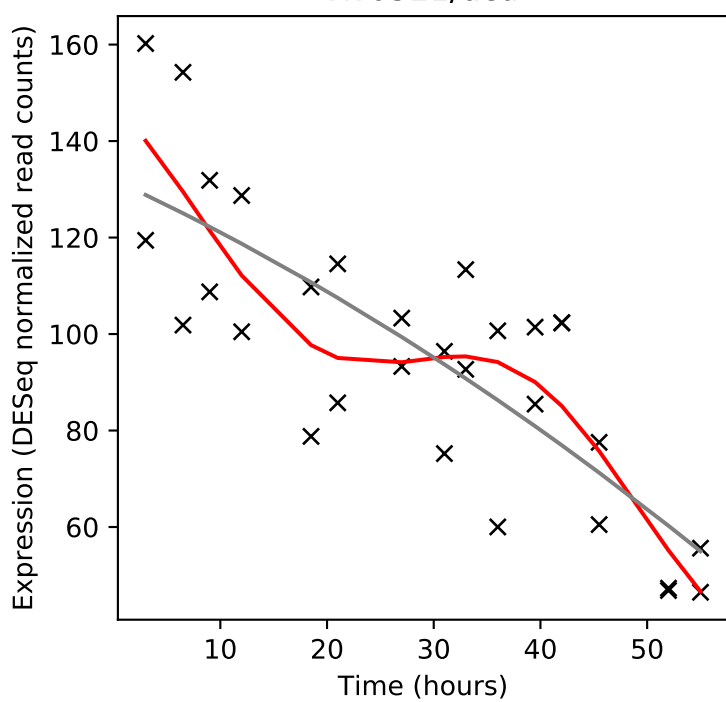

Rv0322/udgA

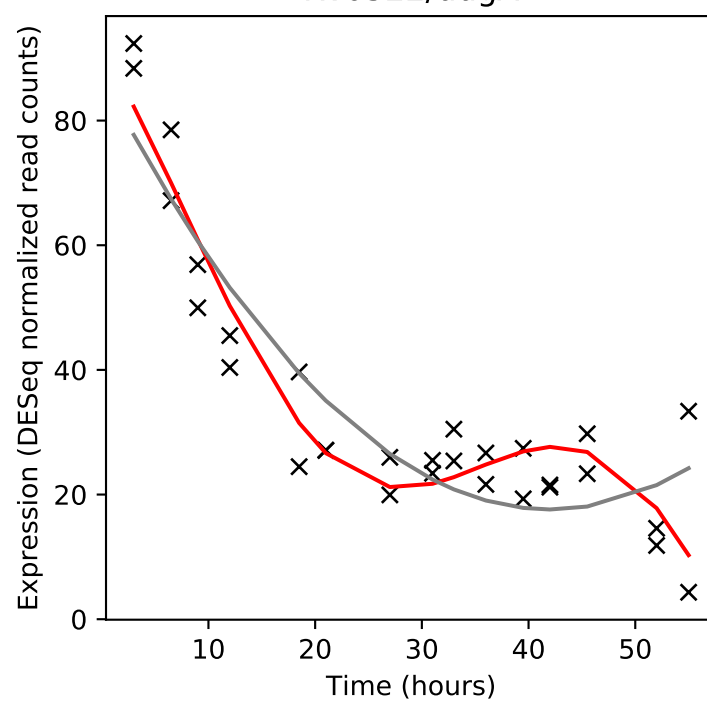

Rv0323c/-

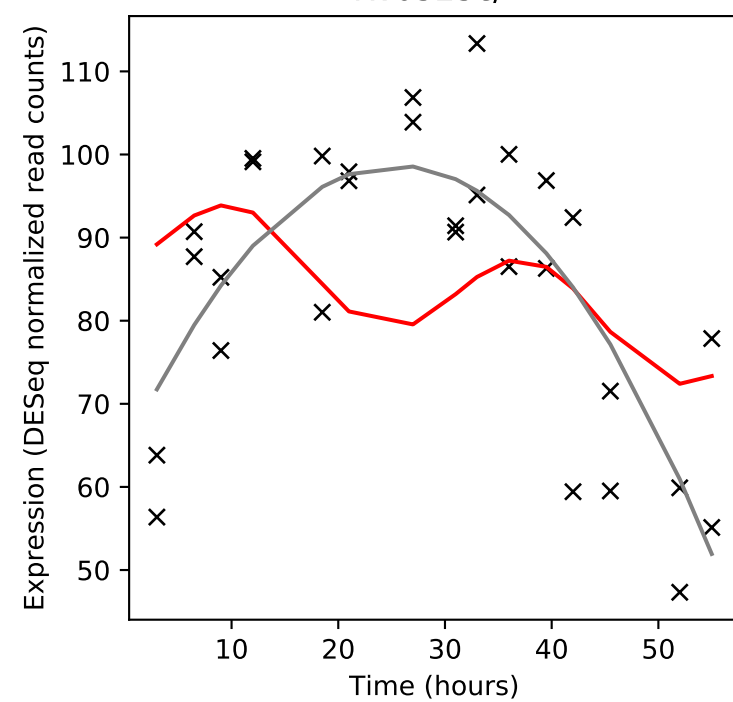

Rv0324/-

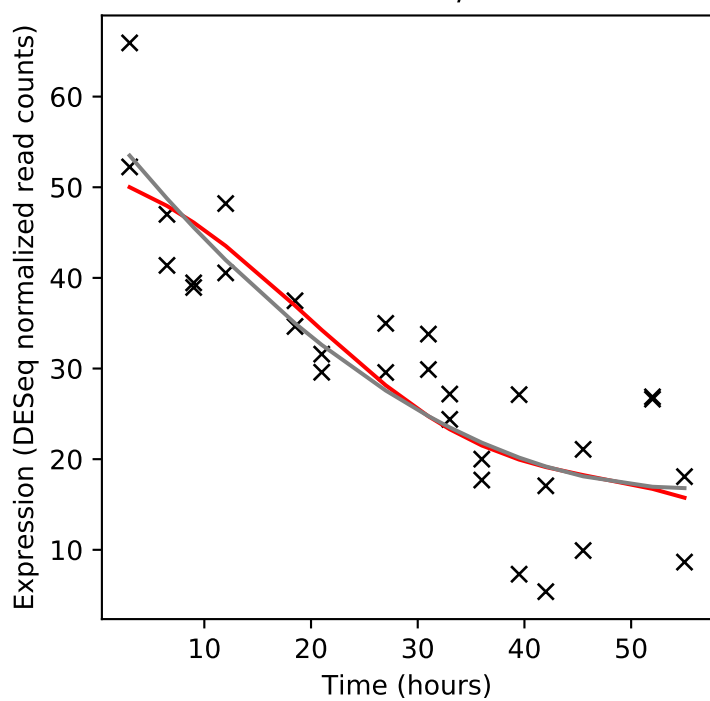

Rv0325/-

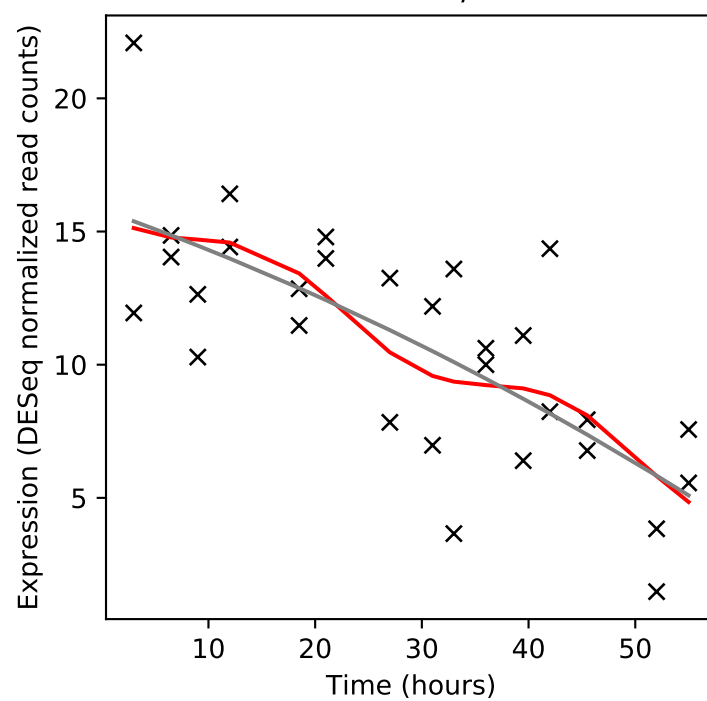

Rv0326/-

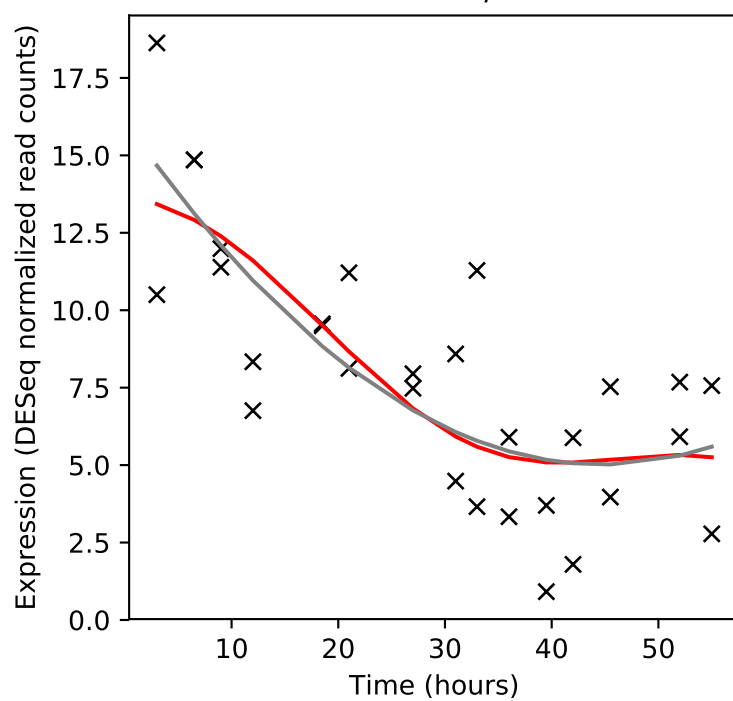



Rv0327c/cyp135A1

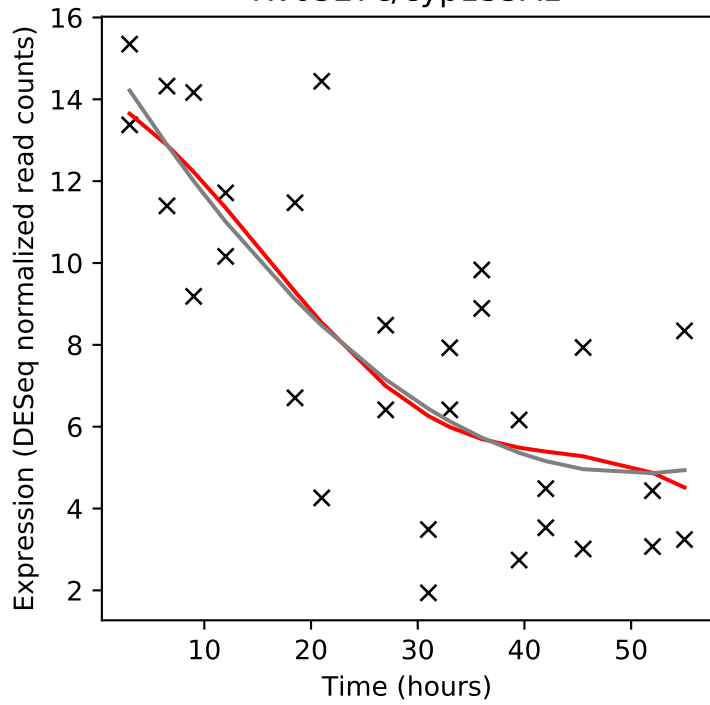

Rv0328/-

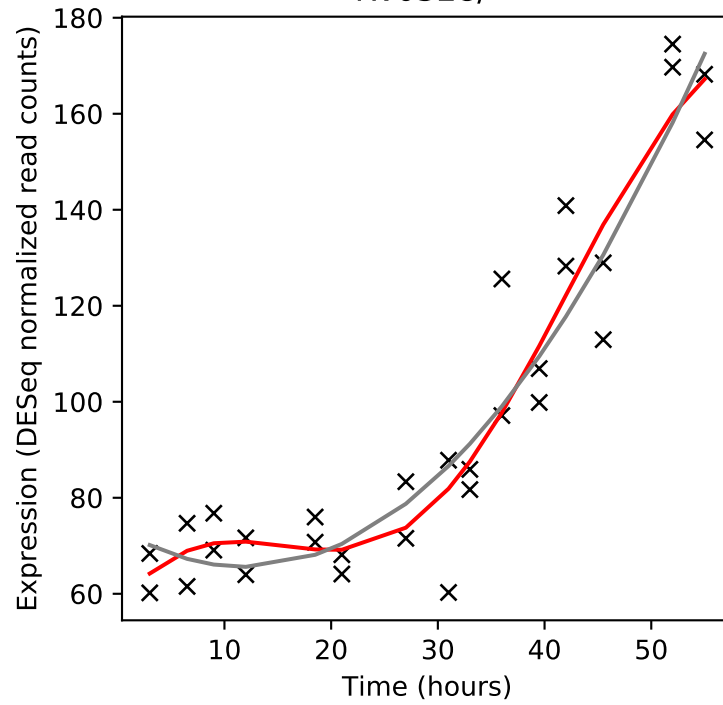

Rv0329c/-

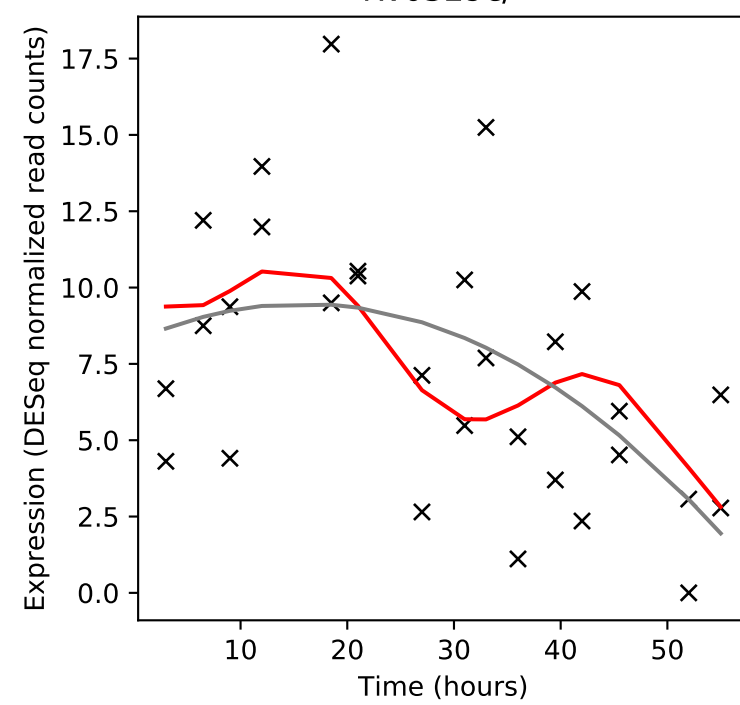

Rv0330c/-

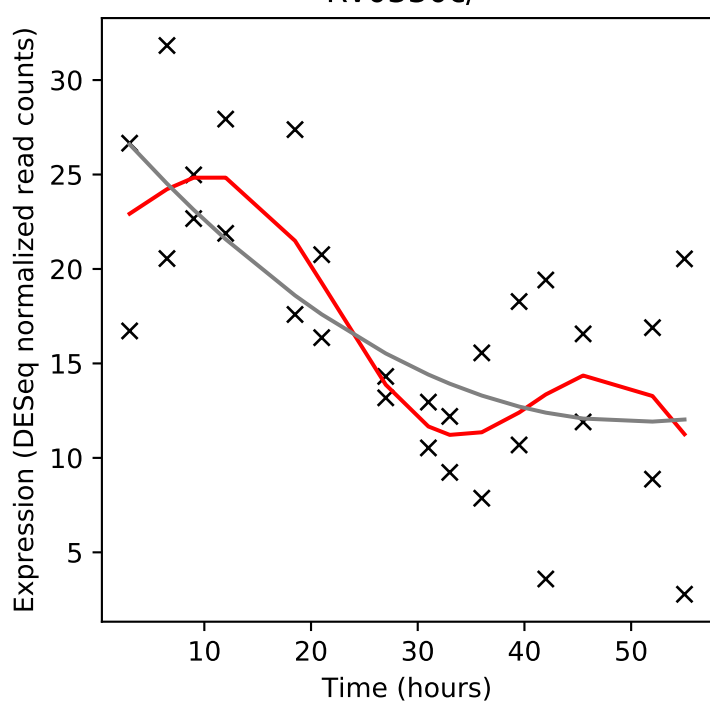

Rv0331/-

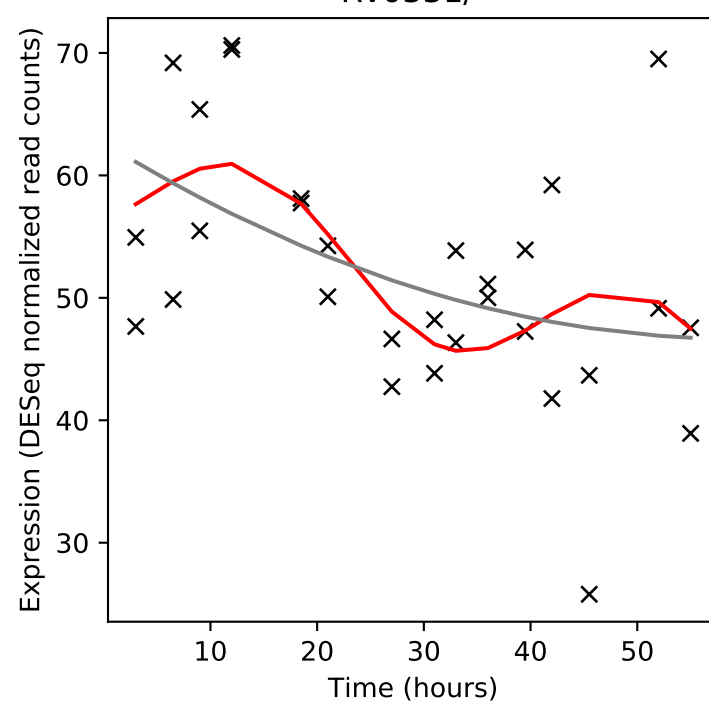

Rv0332/-

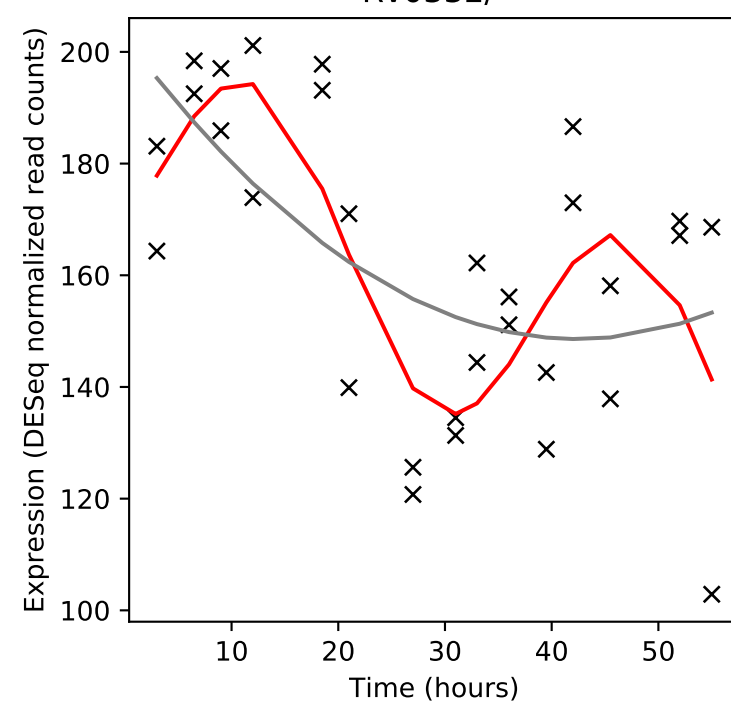

Rv0333/-

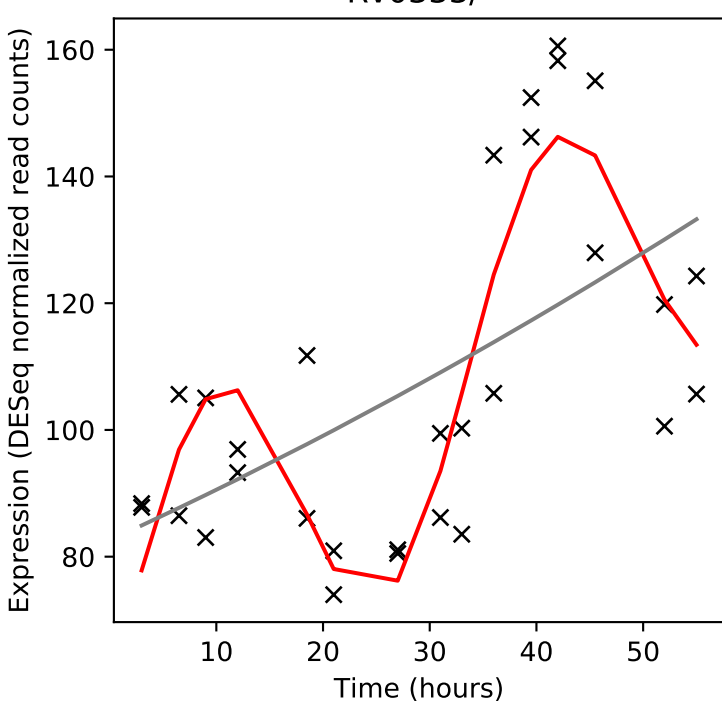

Rv0334/rmlA

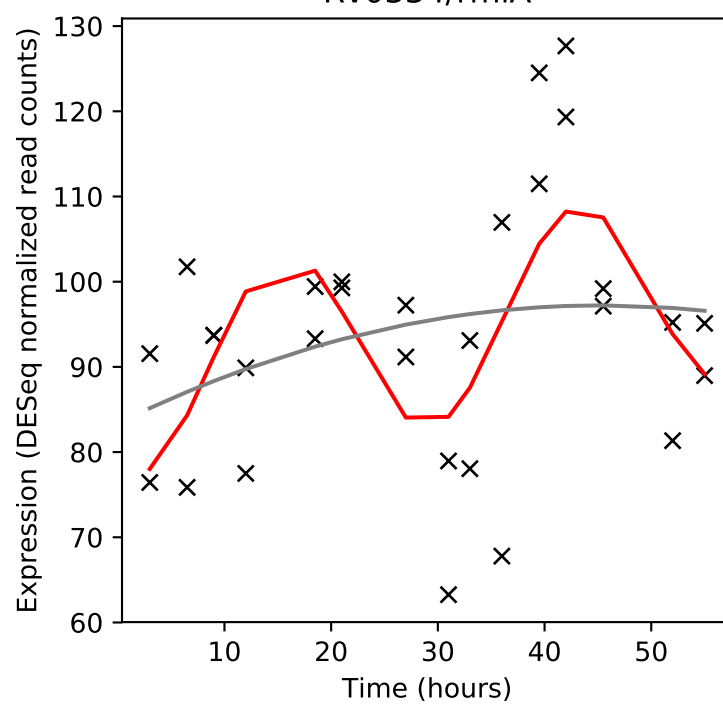

Rv0335c/PE6

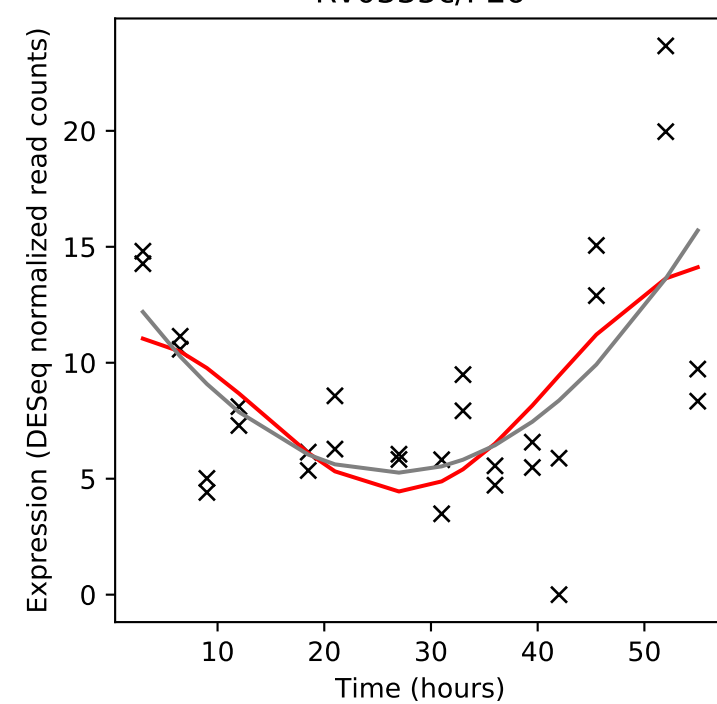

Rv0336/-

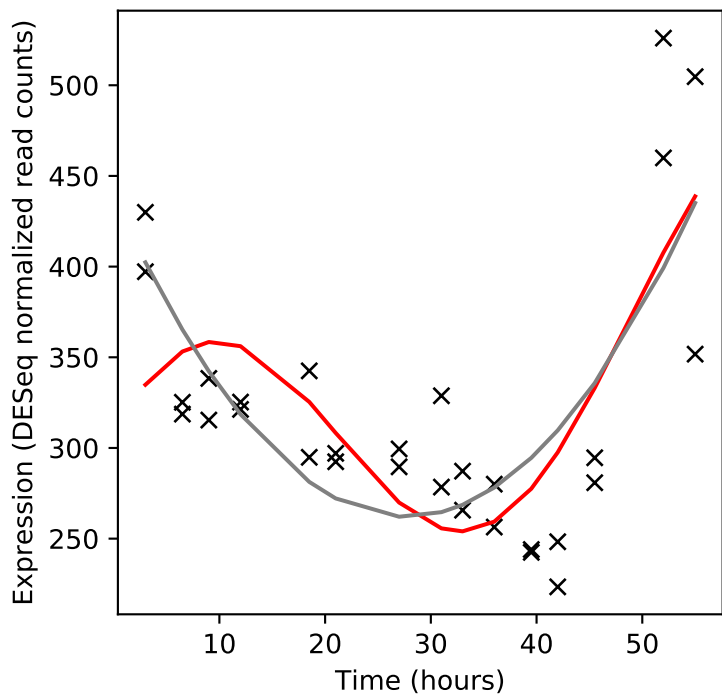

Rv0337c/aspC

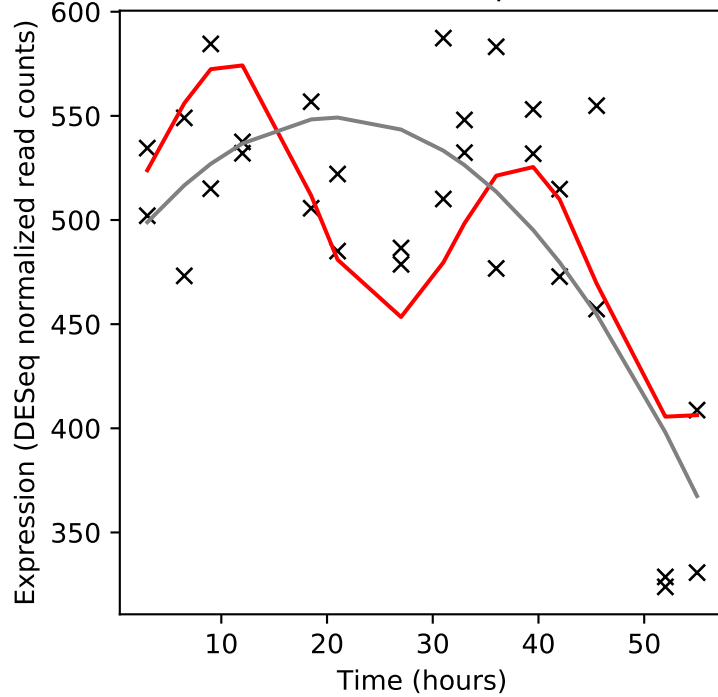

Rv0338c/-

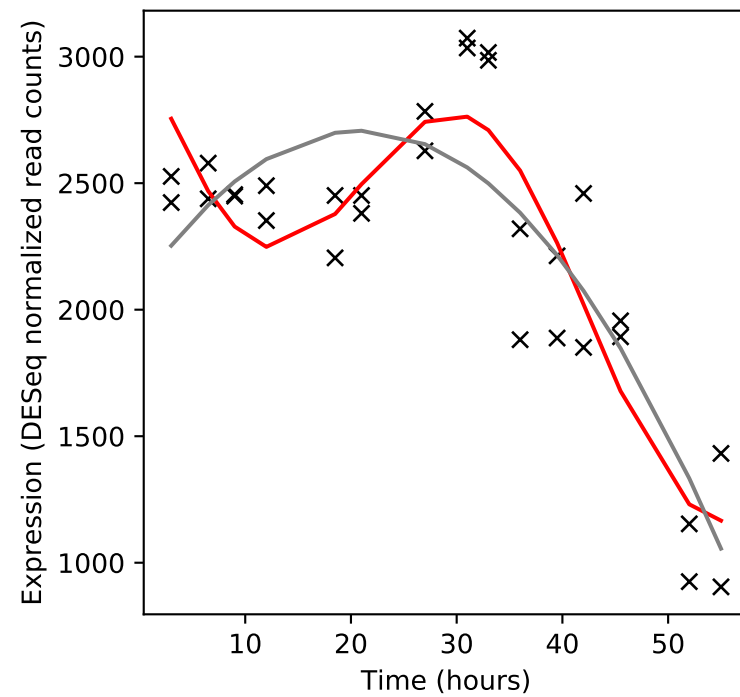

Rv0339c/-

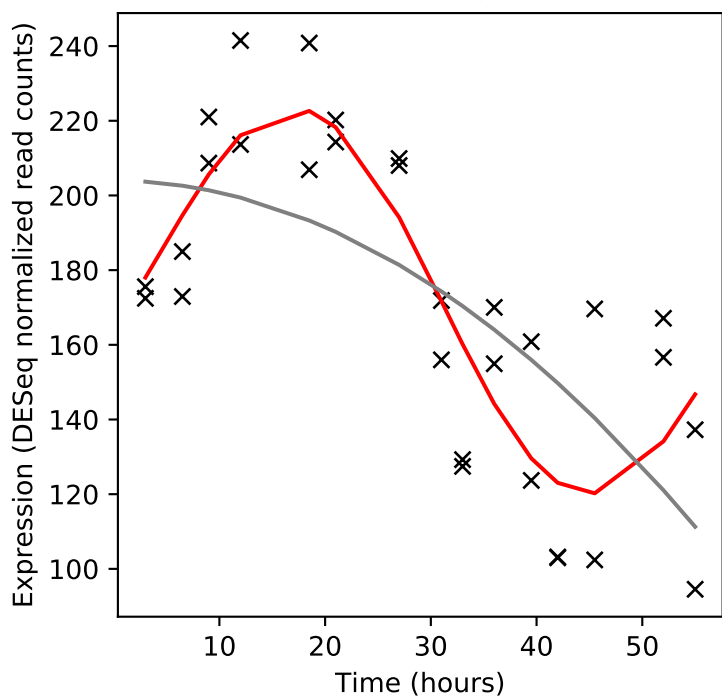

Rv0340/-

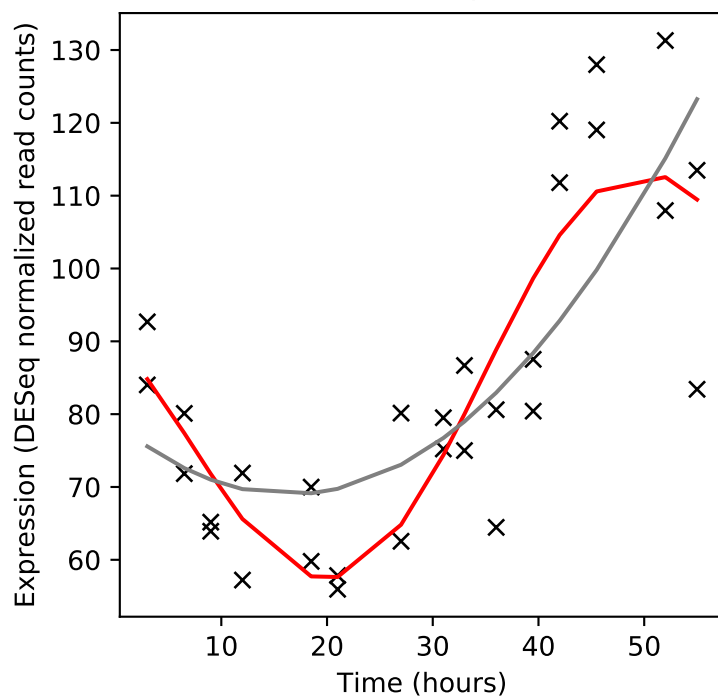

Rv0341/iniB

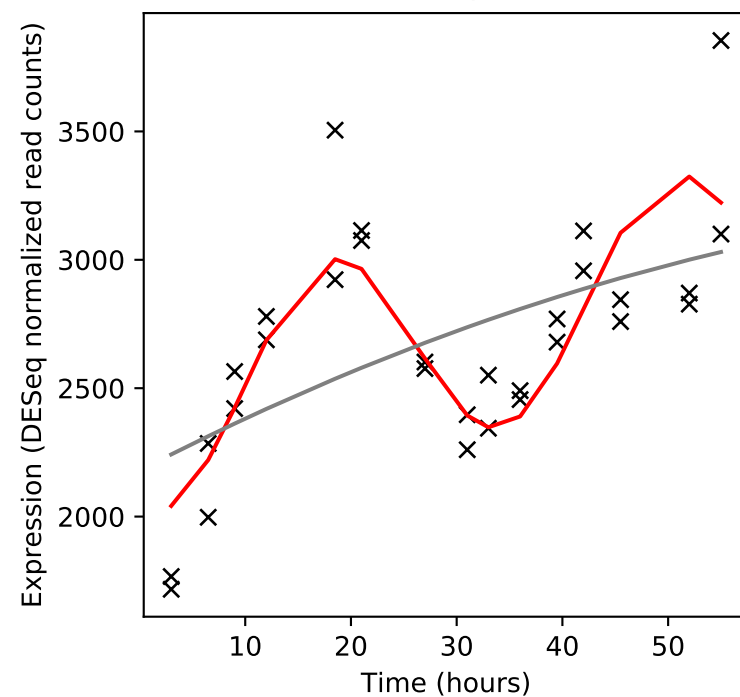

Rv0342/iniA

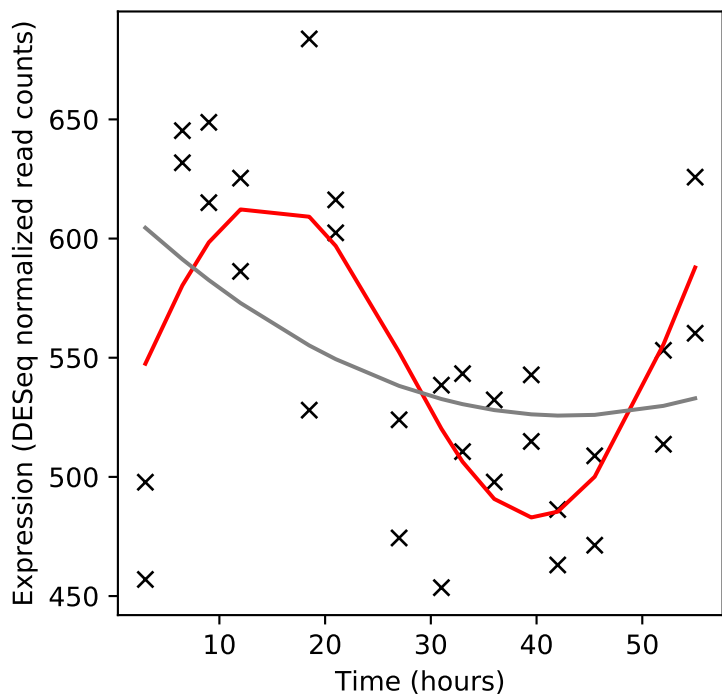

Rv0343/iniC

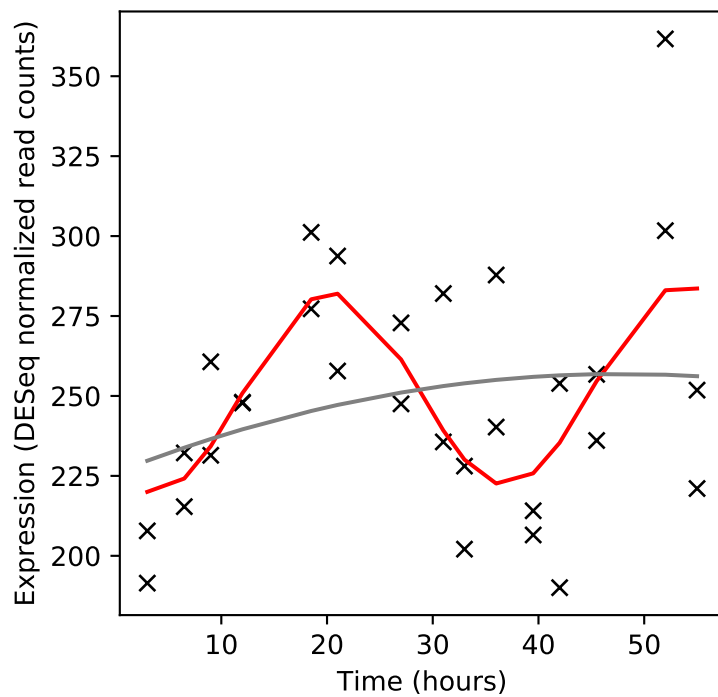

Rv0344c/lpqj

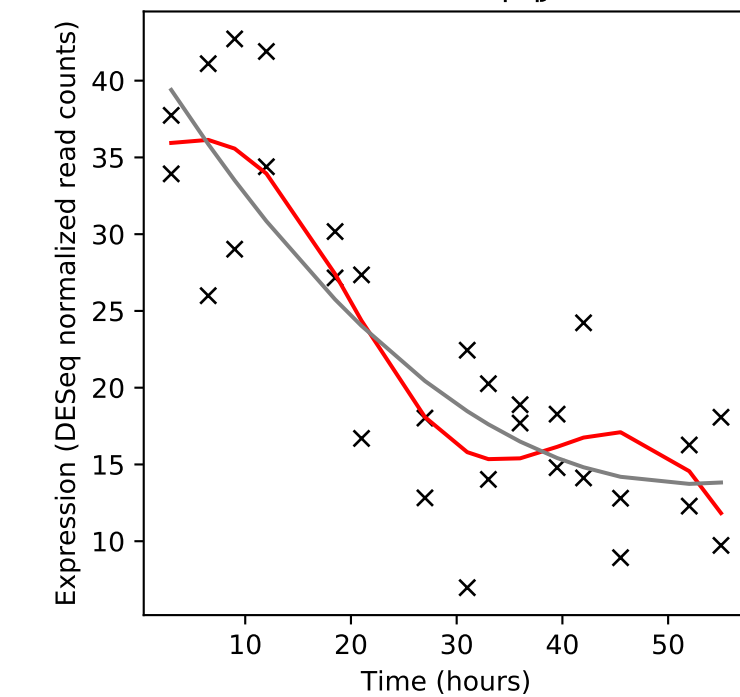

Rv0345/-

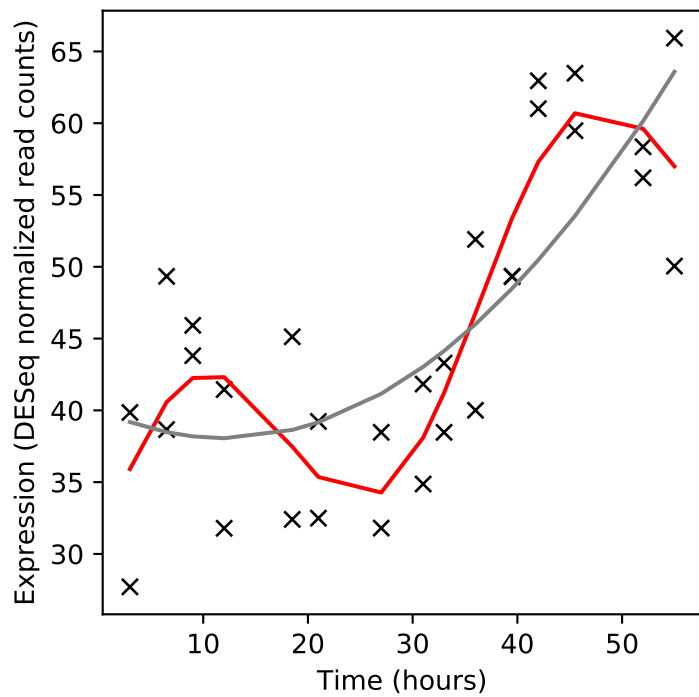

Rv0346c/ansP2

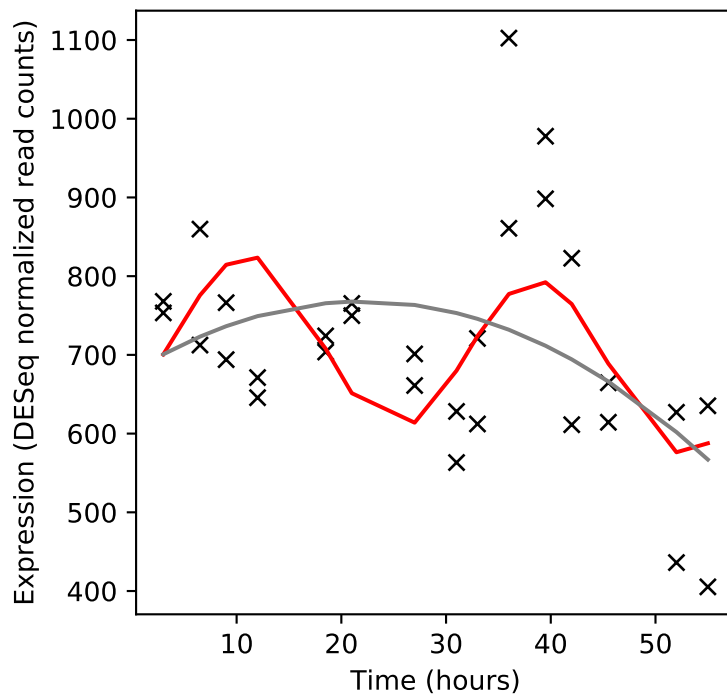

Rv0347/-

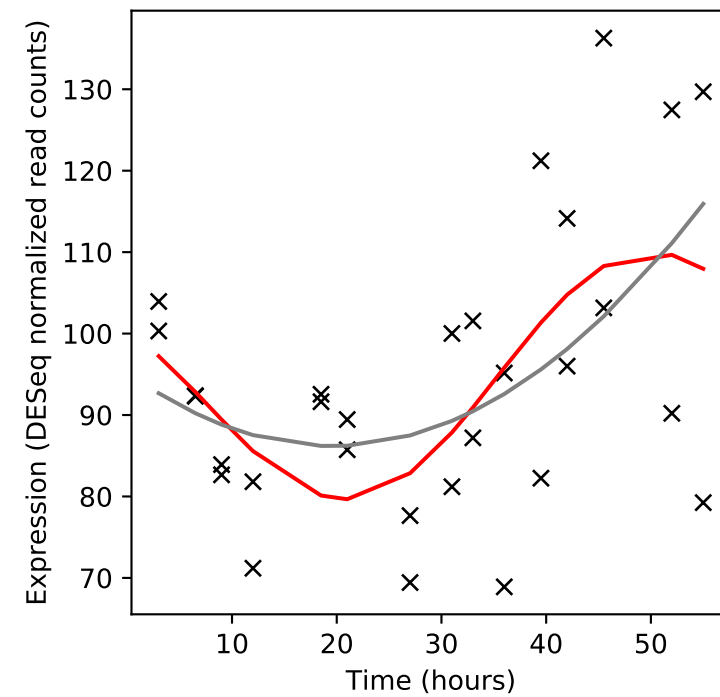

Rv0348/-

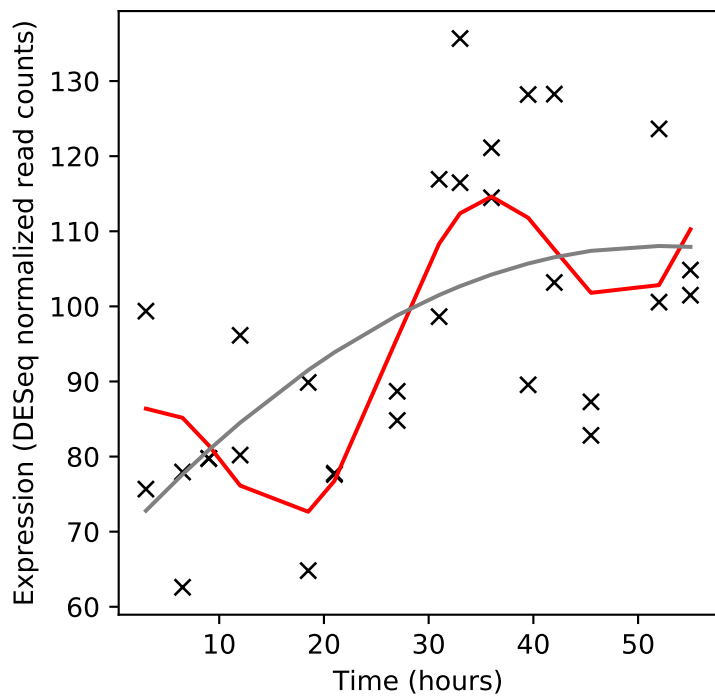

Rv0349/-

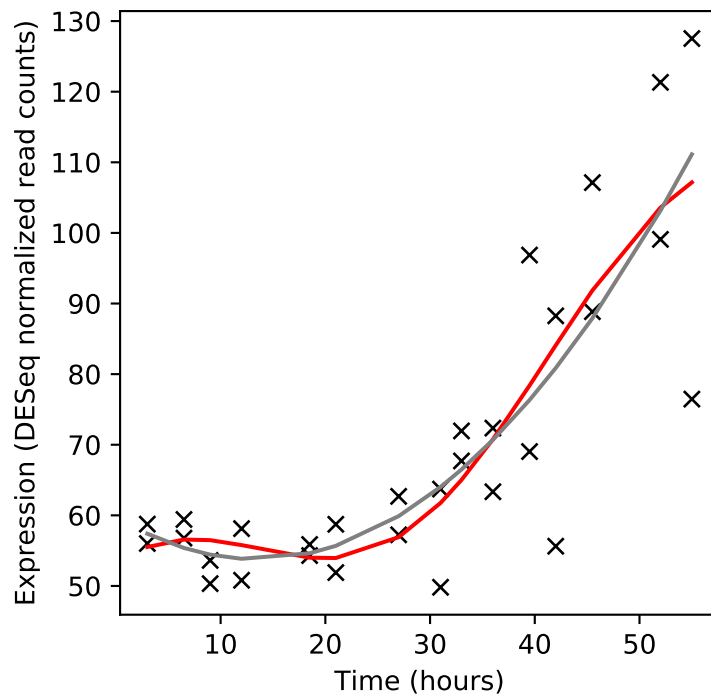

Rv0350/dnaK

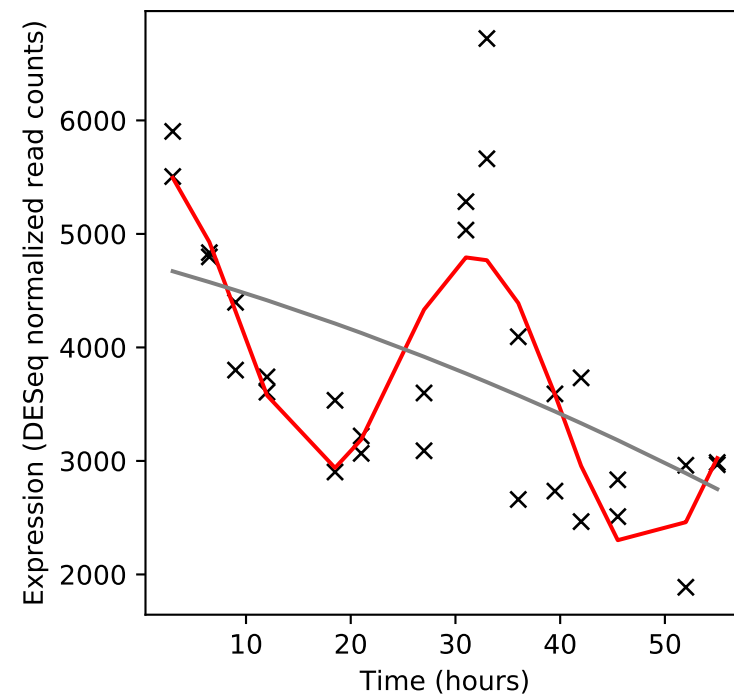

Rv0351/grpE

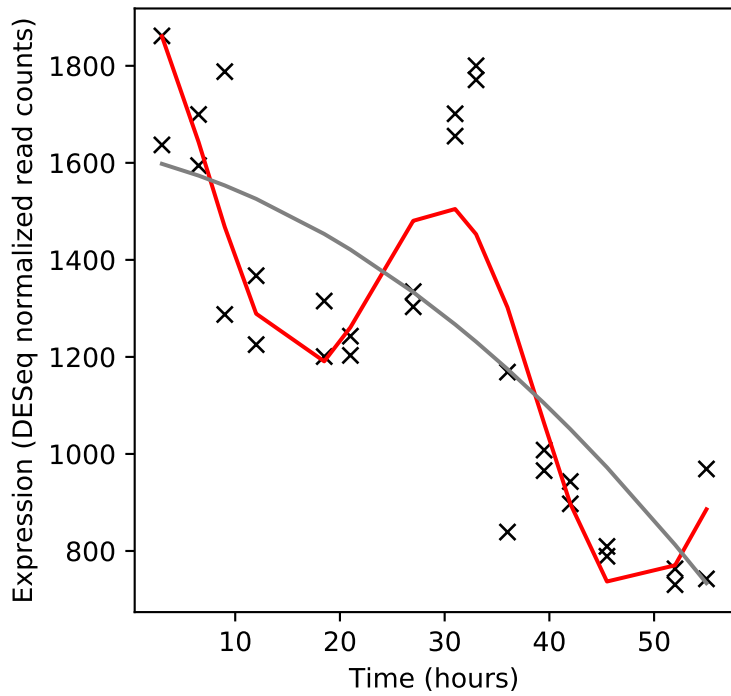

Rv0352/dnaJ1

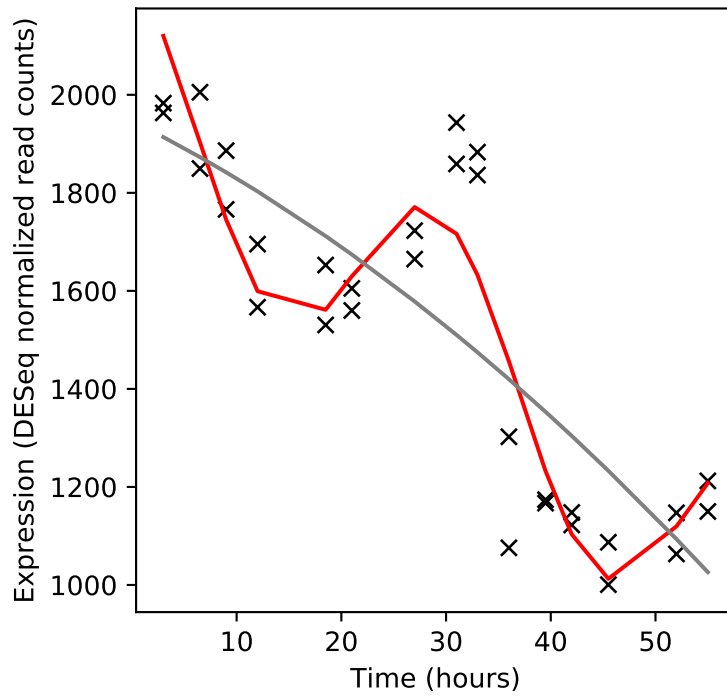

Rv0353/hspR

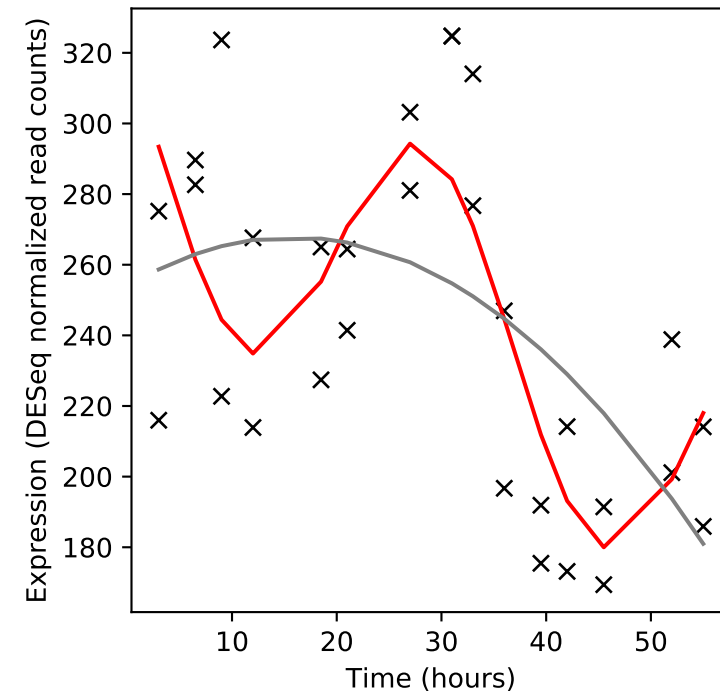

Rv0354c/PPE7

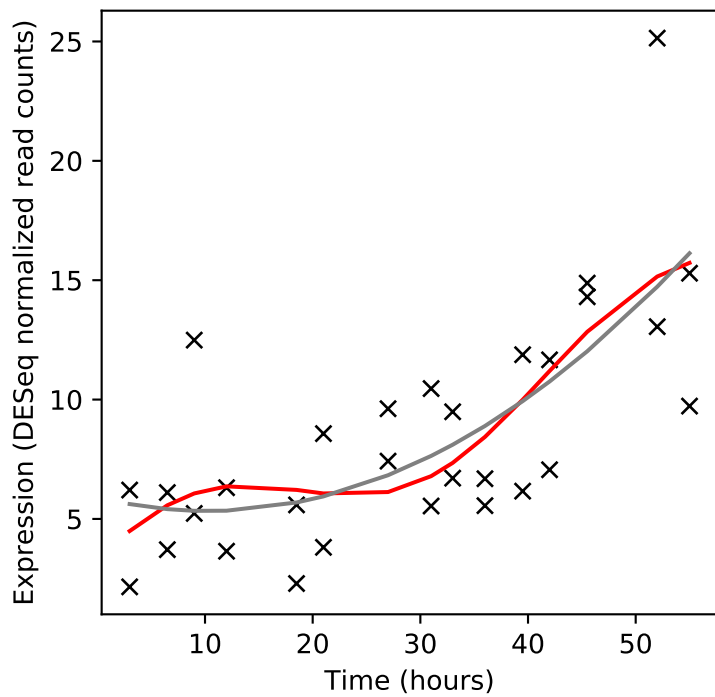

Rv0355c/PPE8

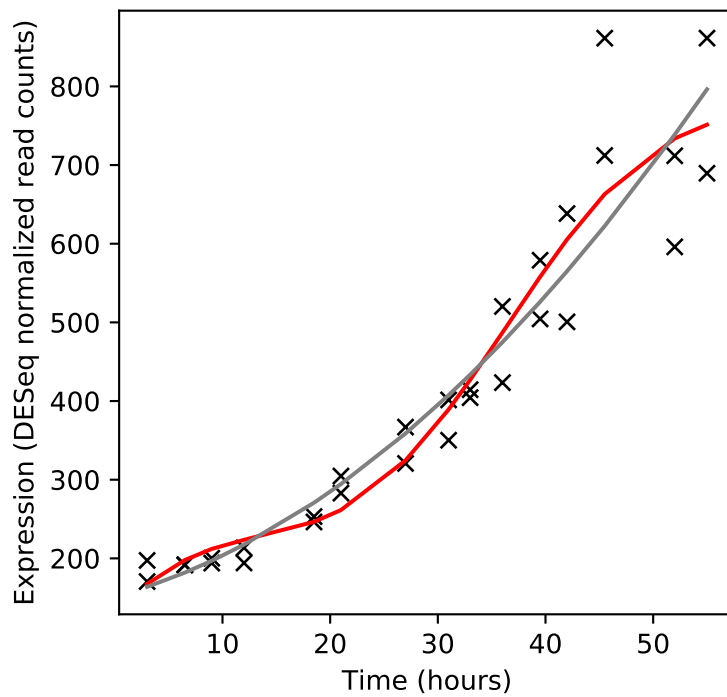

Rv0356c/-

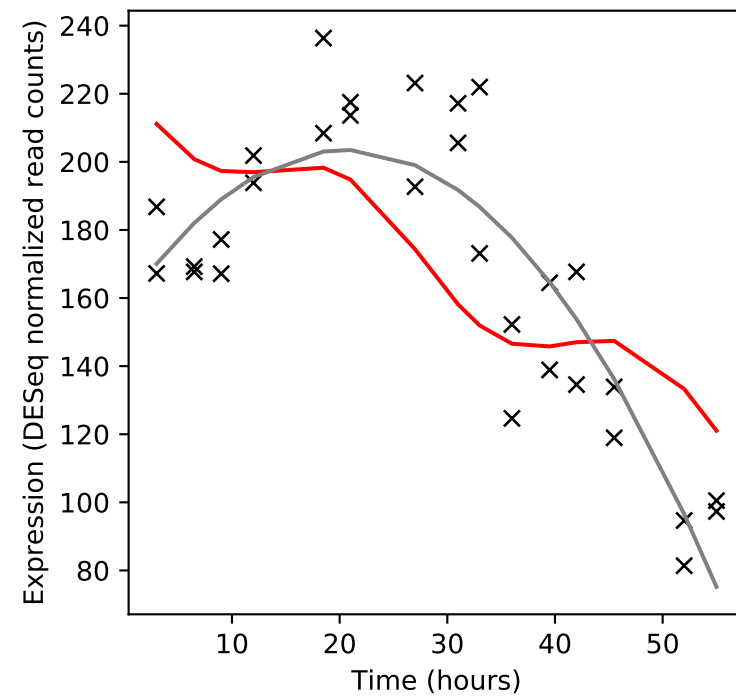

Rv0357c/purA

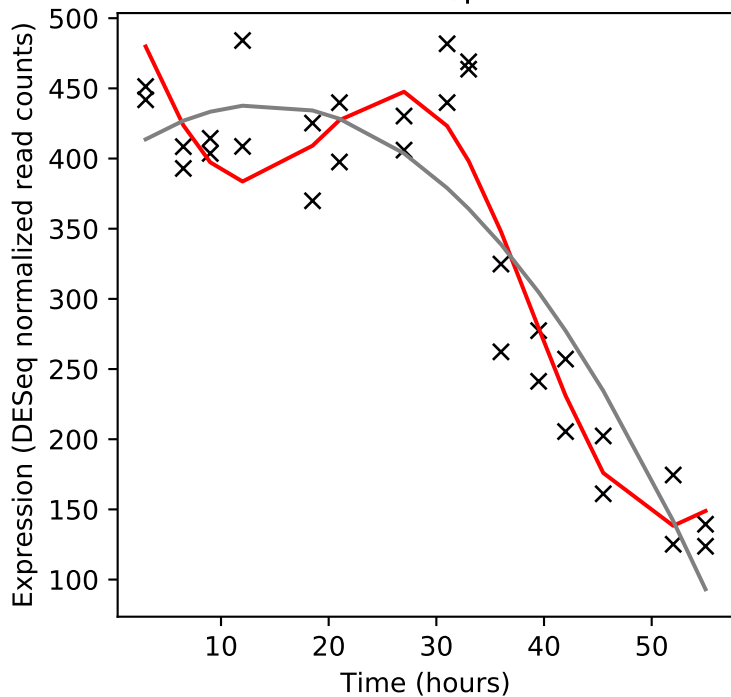

Rv0358/-

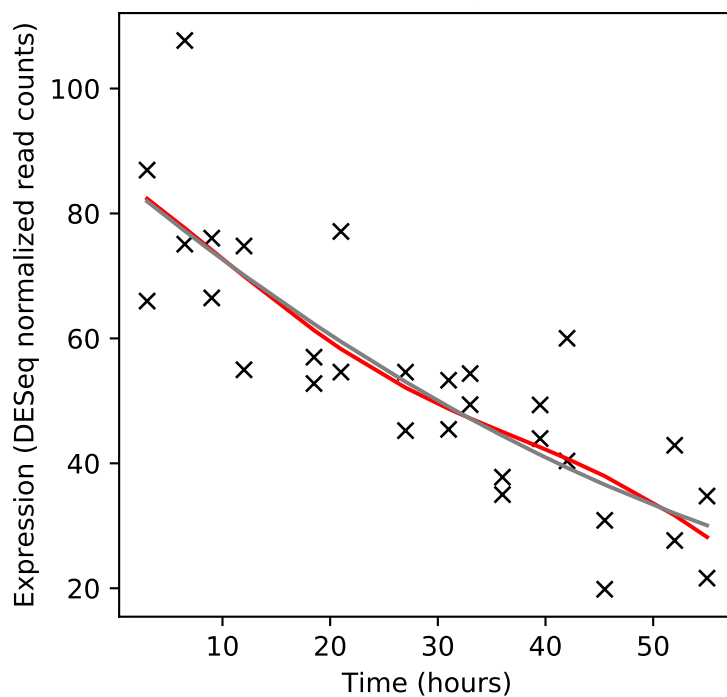

Rv0359/-

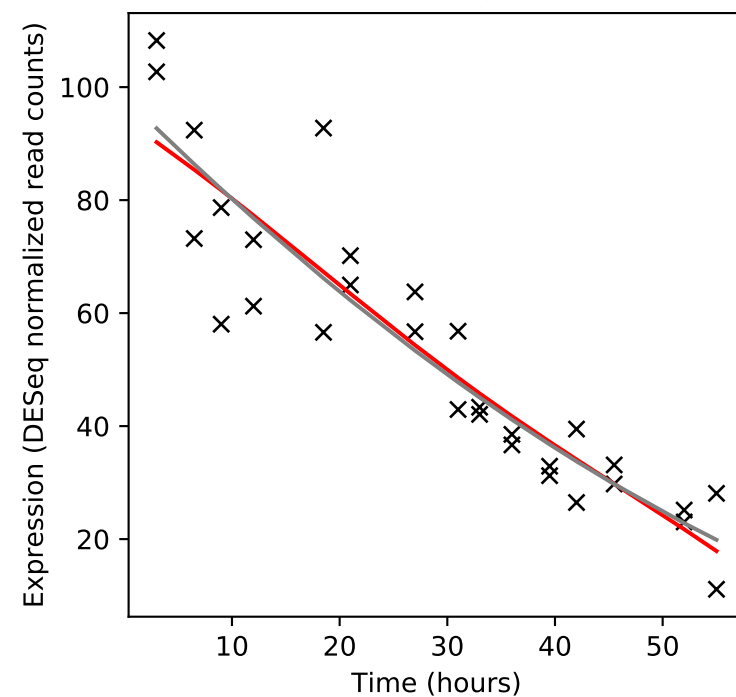

Rv0360c/-

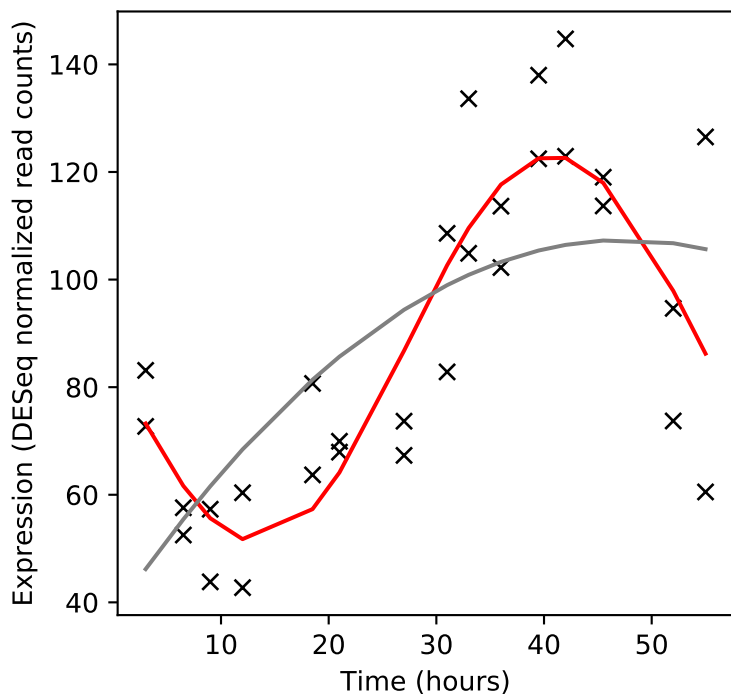

Rv0361/-

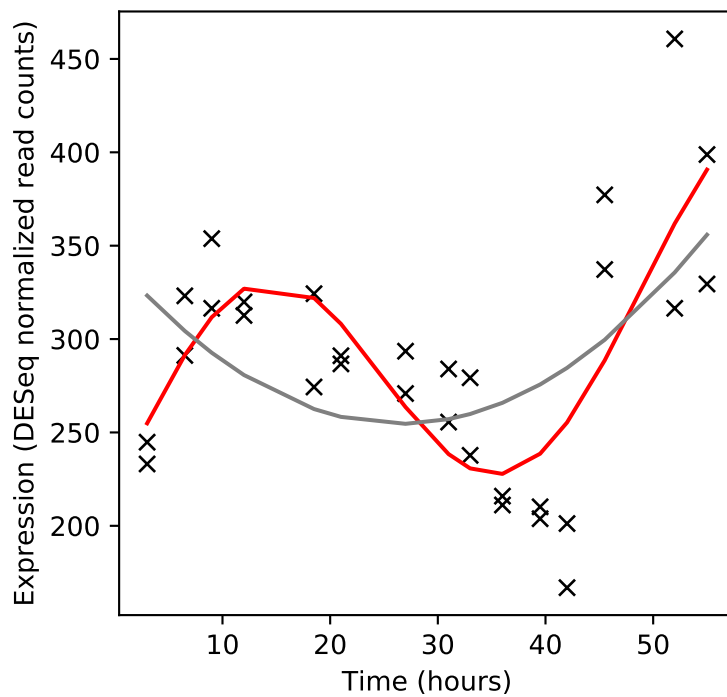

Rv0362/mgtE

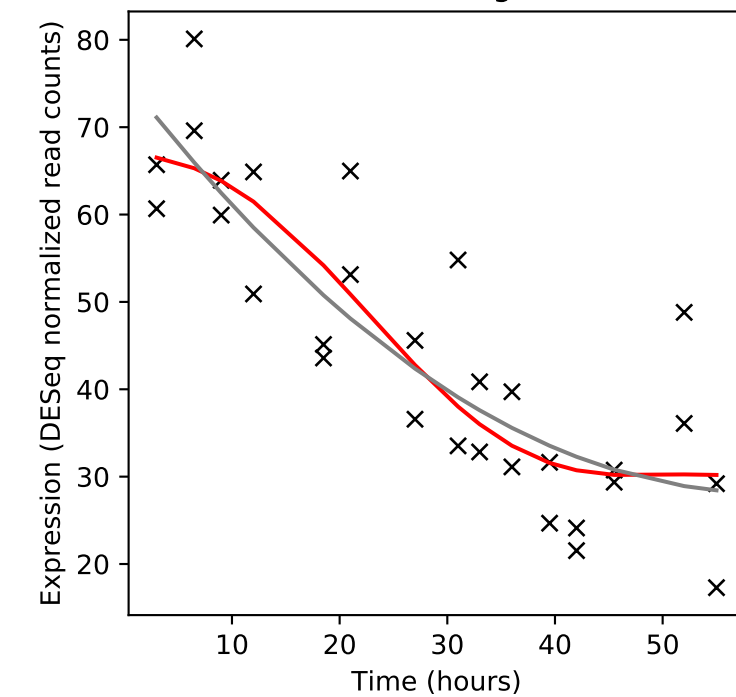

Rv0363c/fba

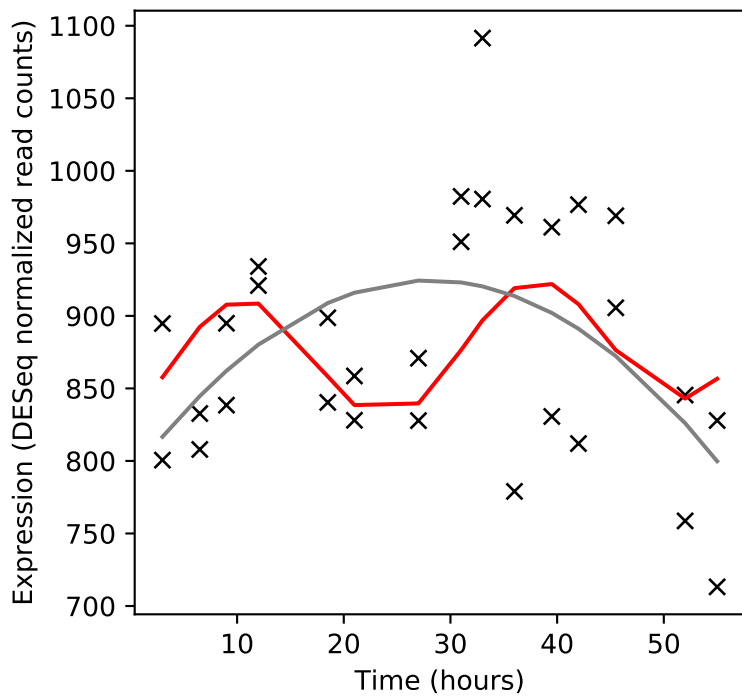

Rv0364/-

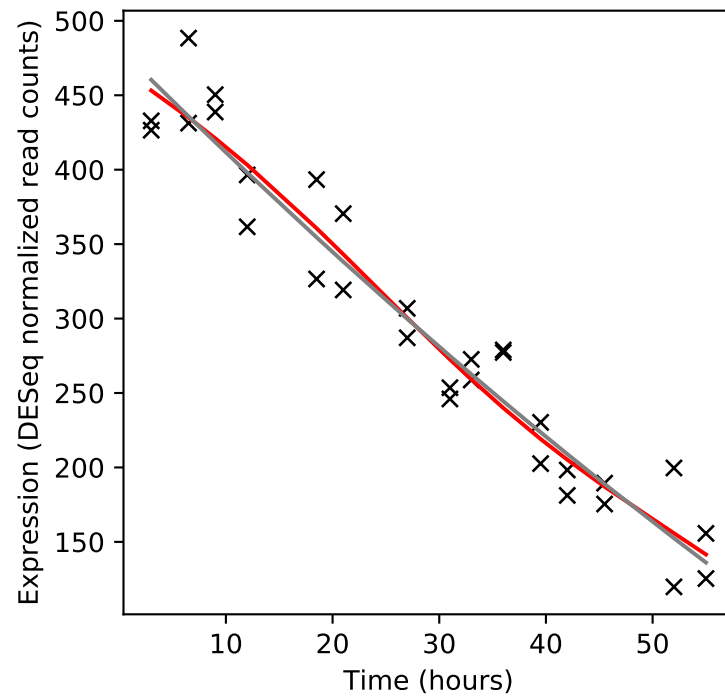

Rv0365c/-

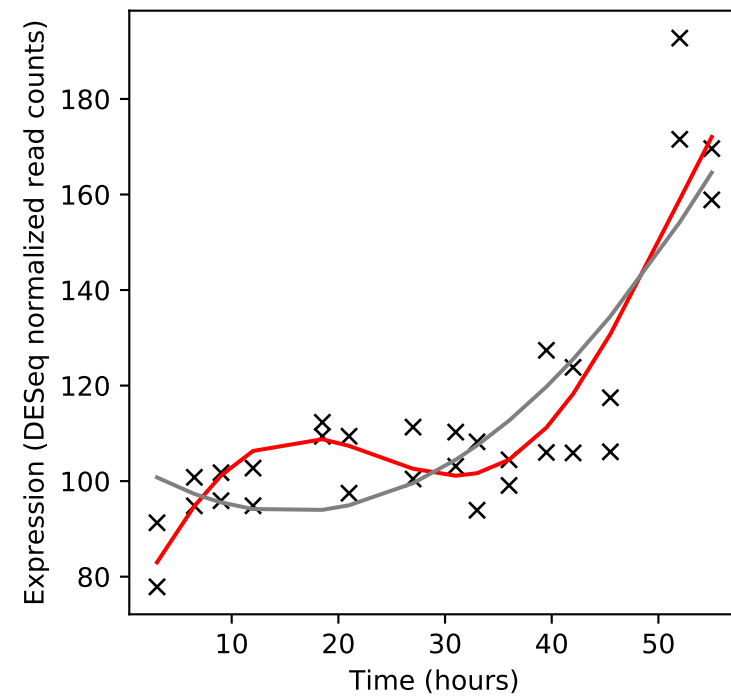

Rv0366c/-

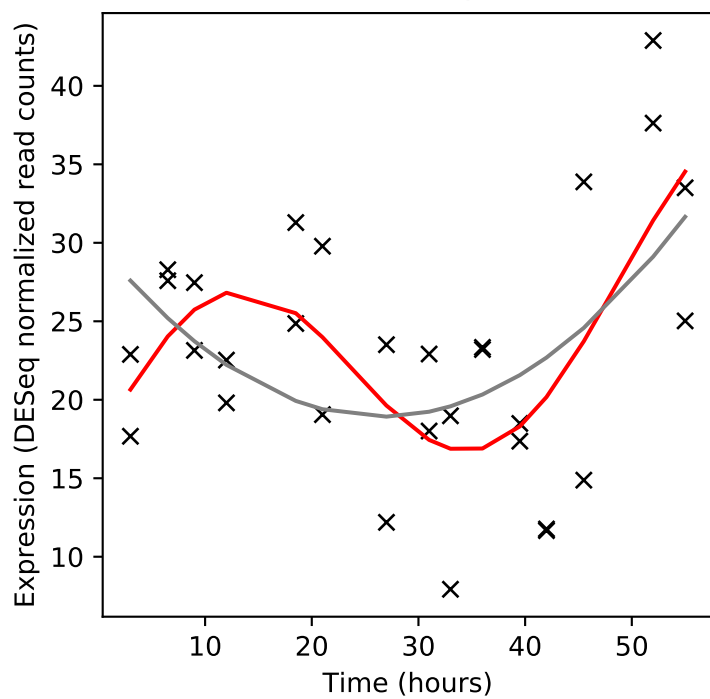

Rv0367c/-

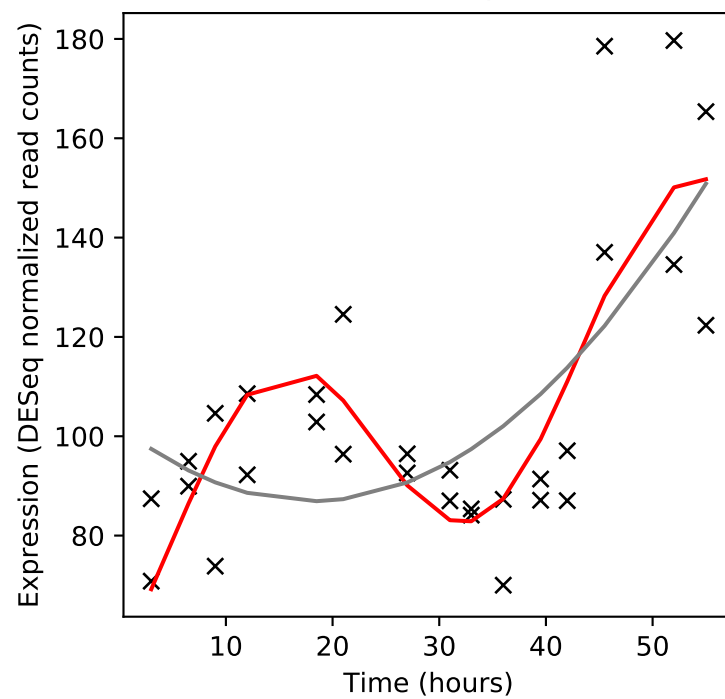

Rv0368c/-

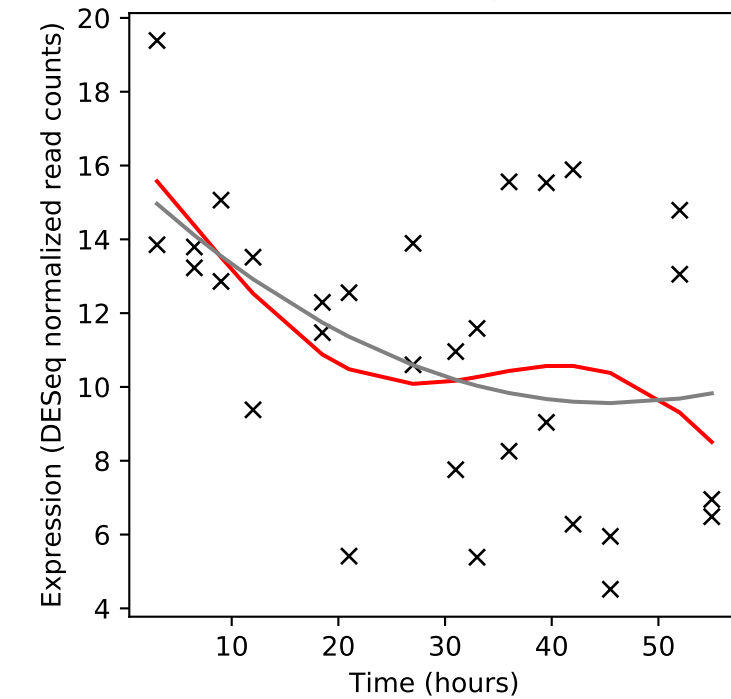

Rv0369c/-

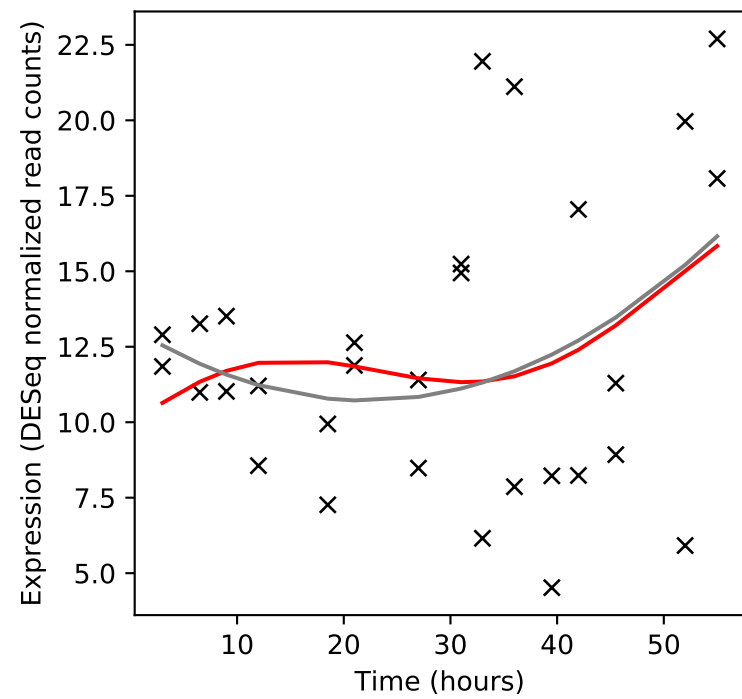

Rv0370c/-

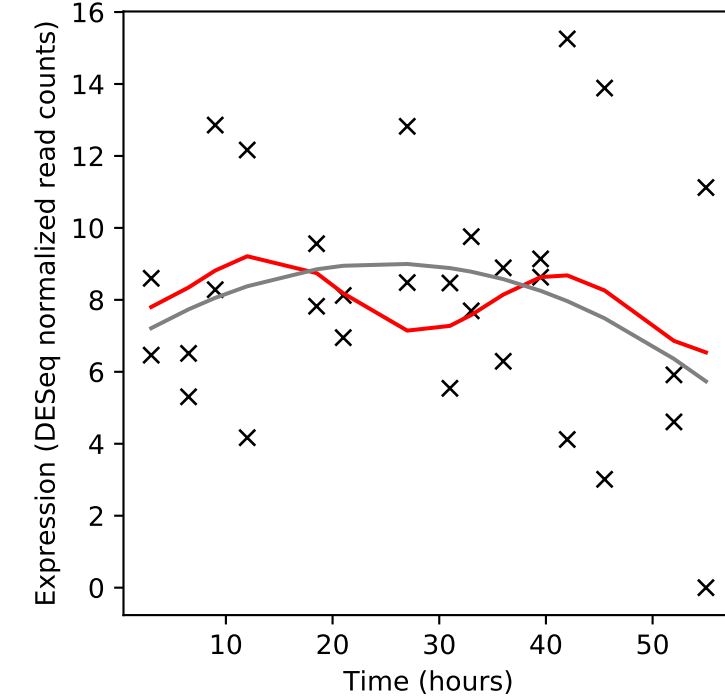

Rv0371c/-

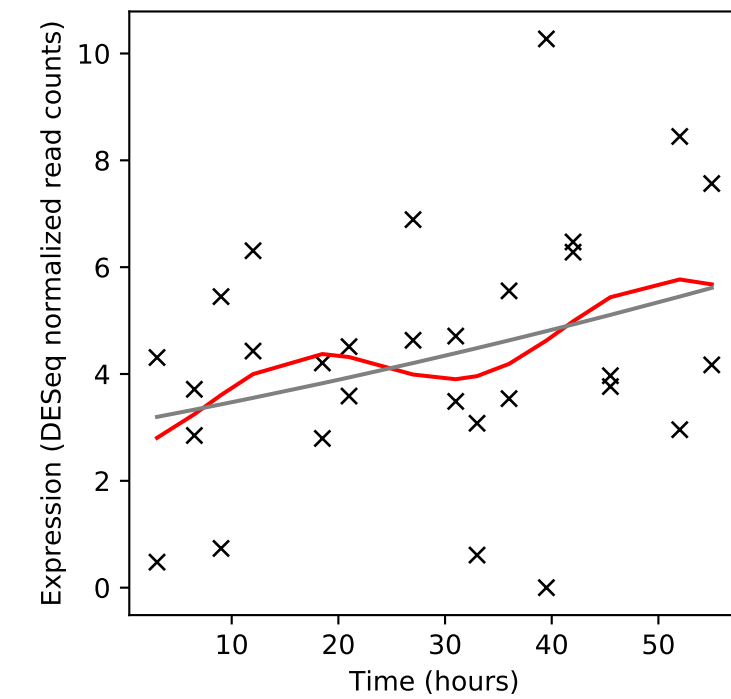

Rv0372c/-

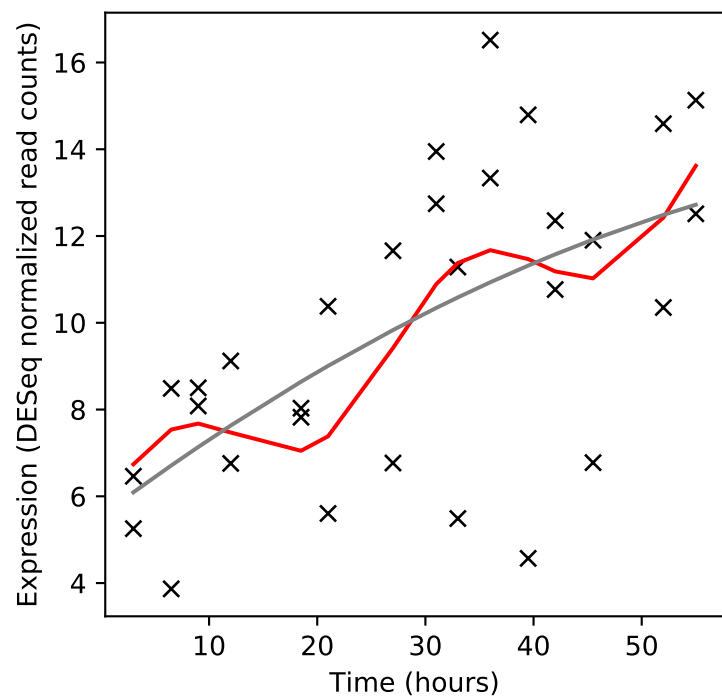

Rv0373c/-

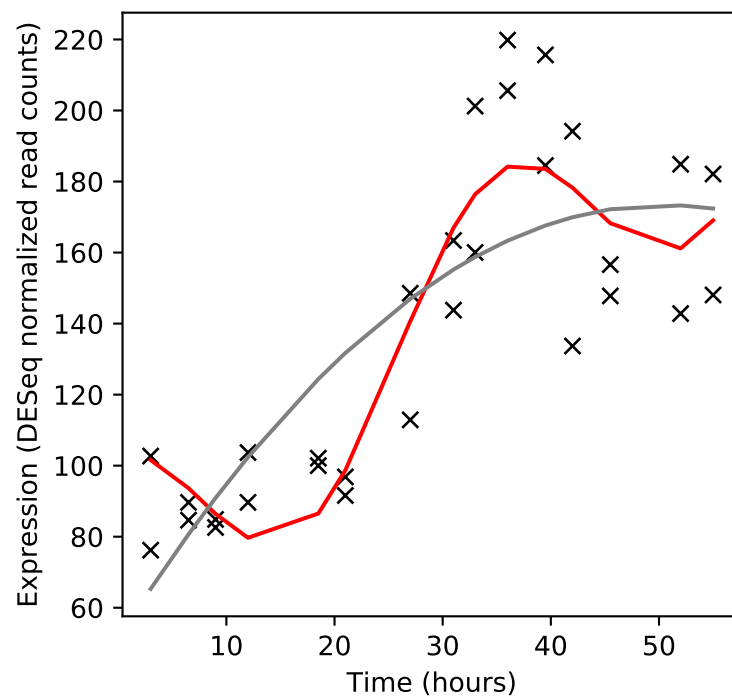

Rv0374c/-

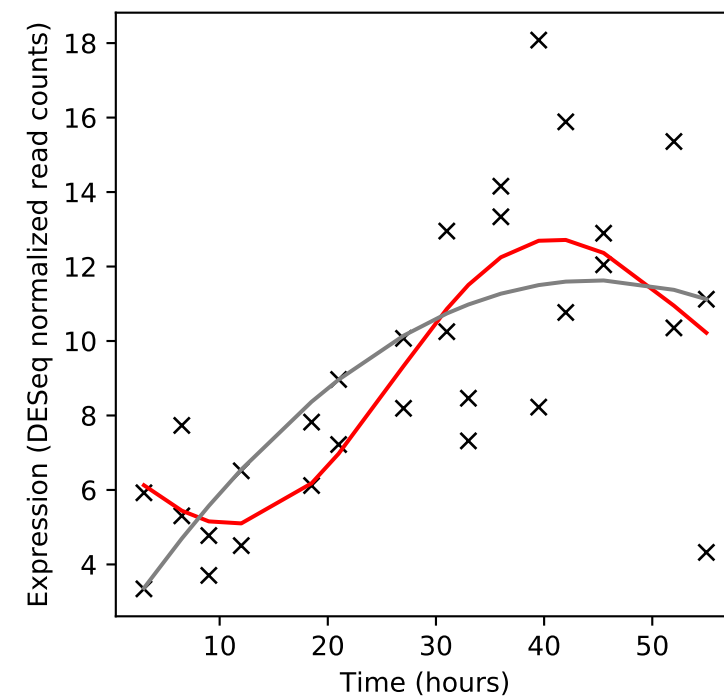

Rv0375c/-

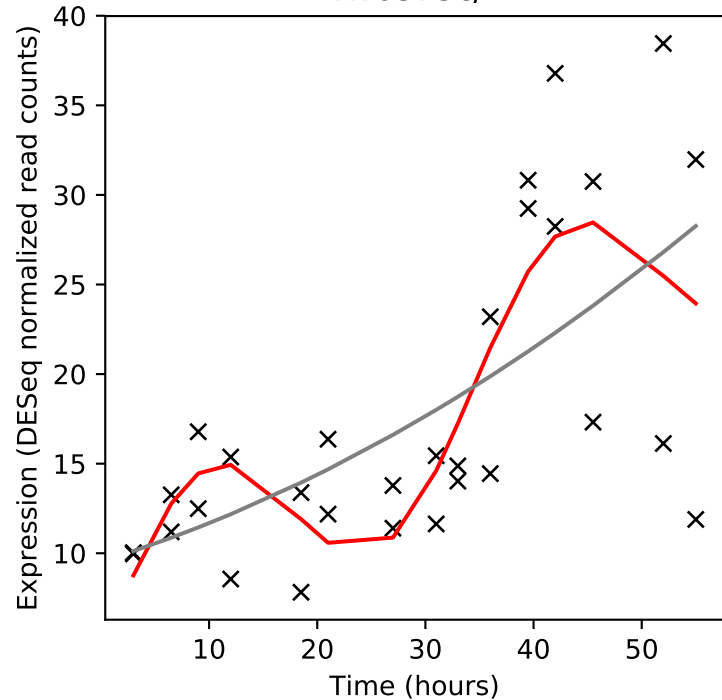

Rv0376c/-

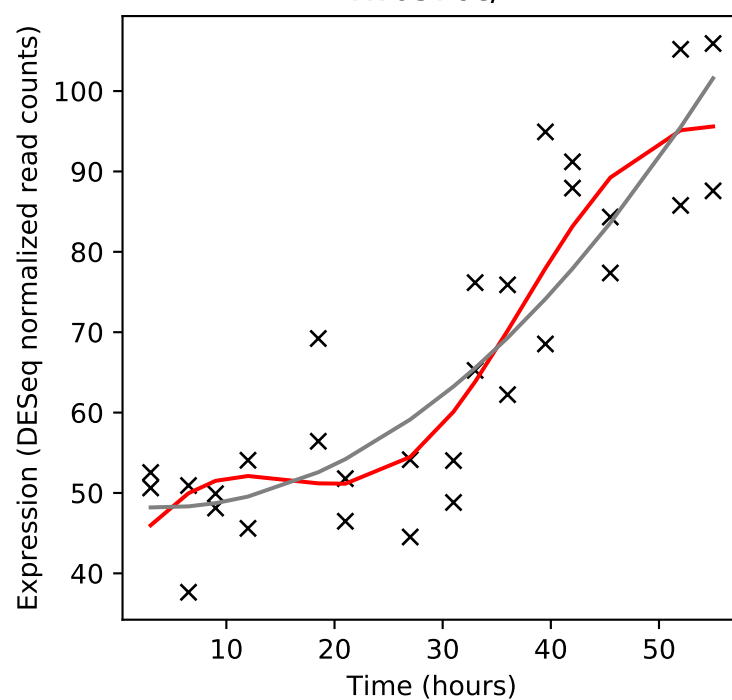

Rv0377/-

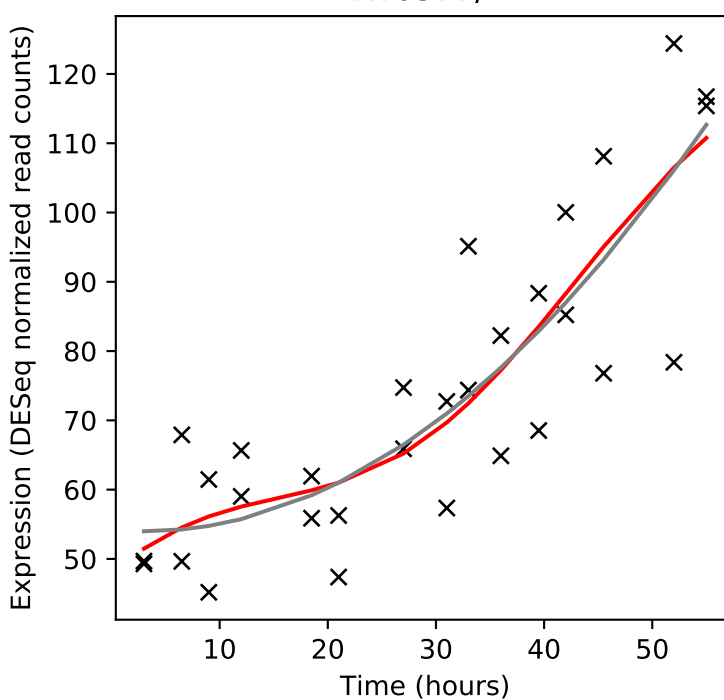

Rv0378/-

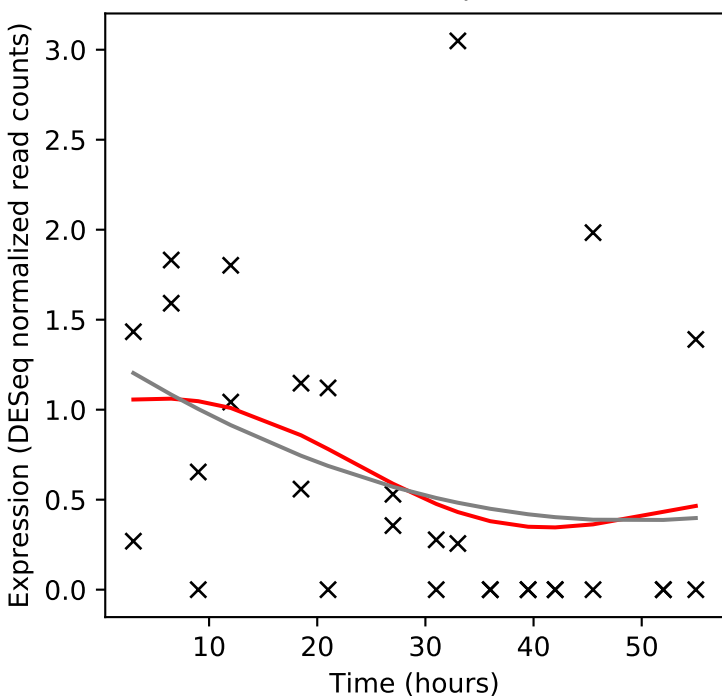

Rv0379/secE2

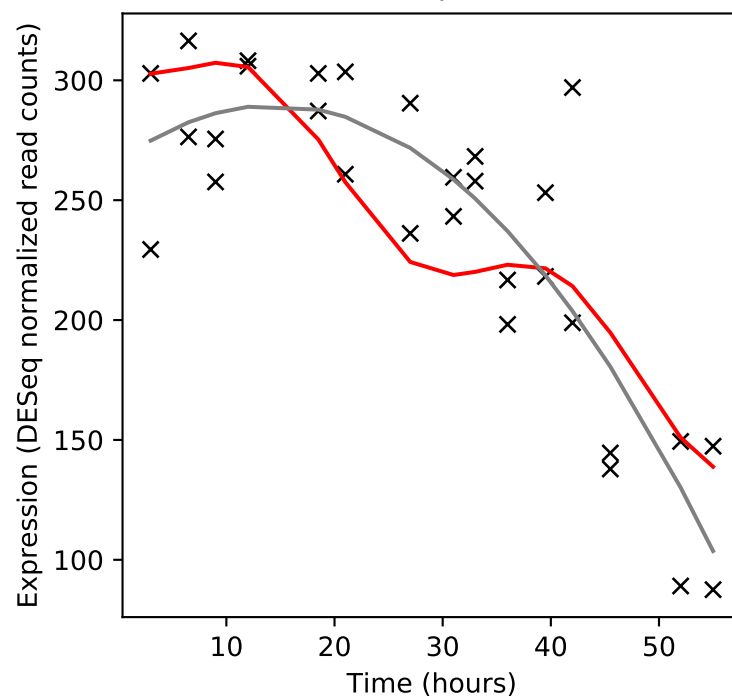

Rv0380c/-

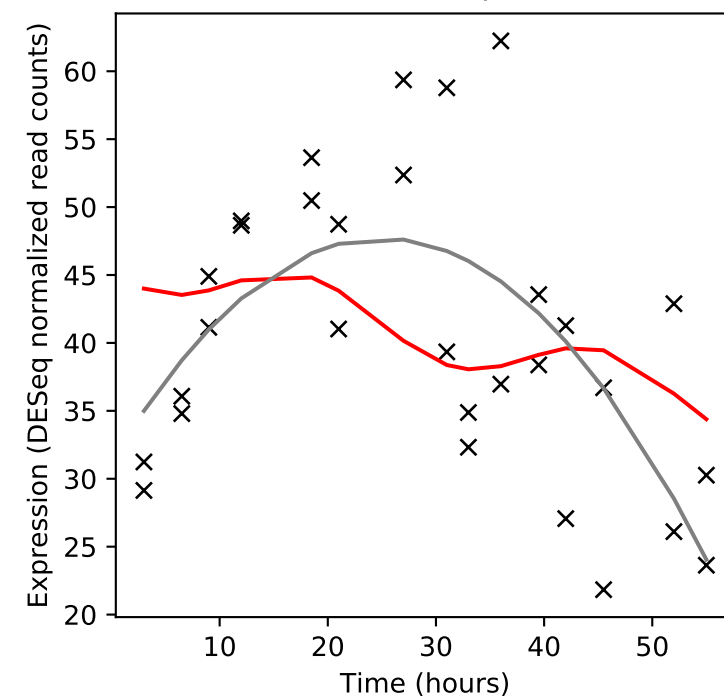

Rv0381c/-

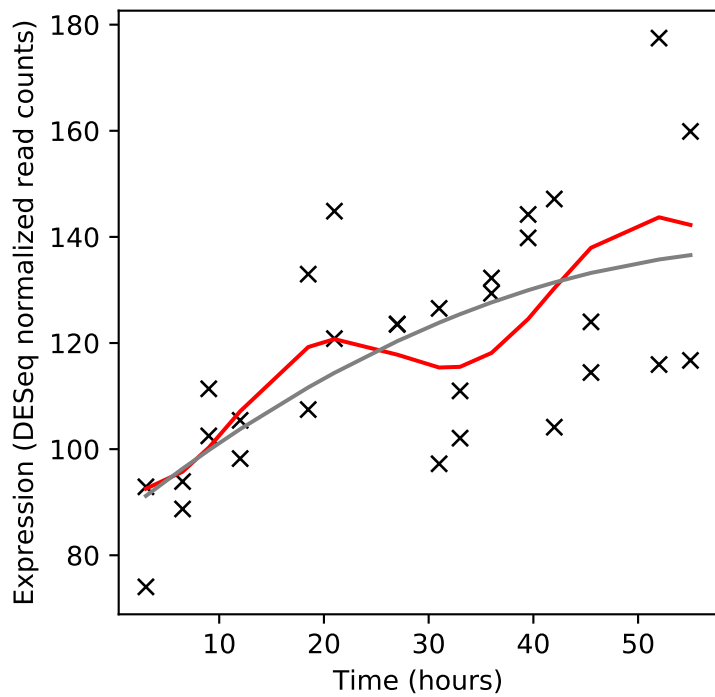

Rv0382c/pyrE

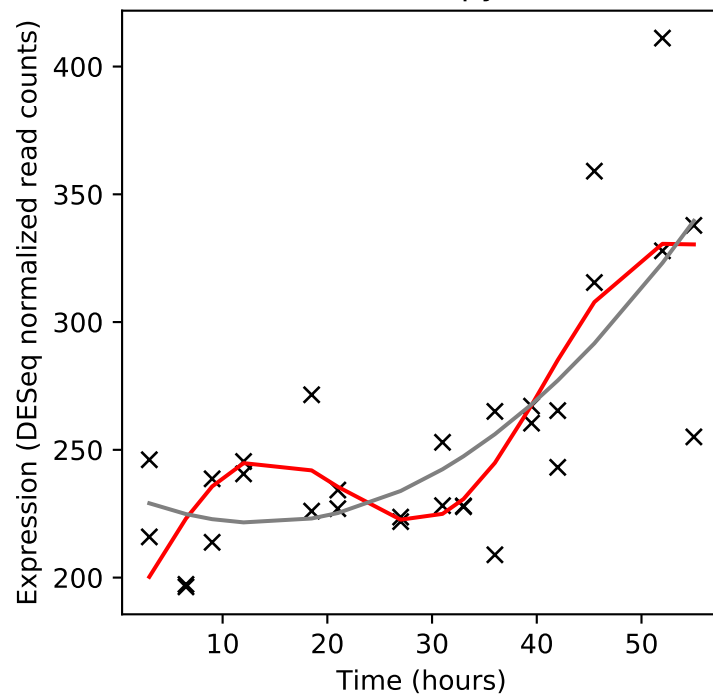

Rv0383c/-

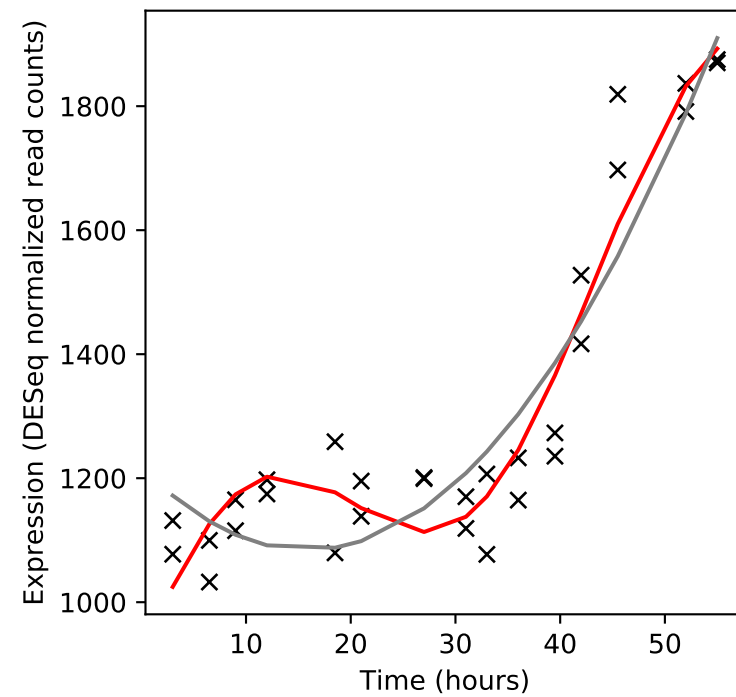

Rv0384c/clpB

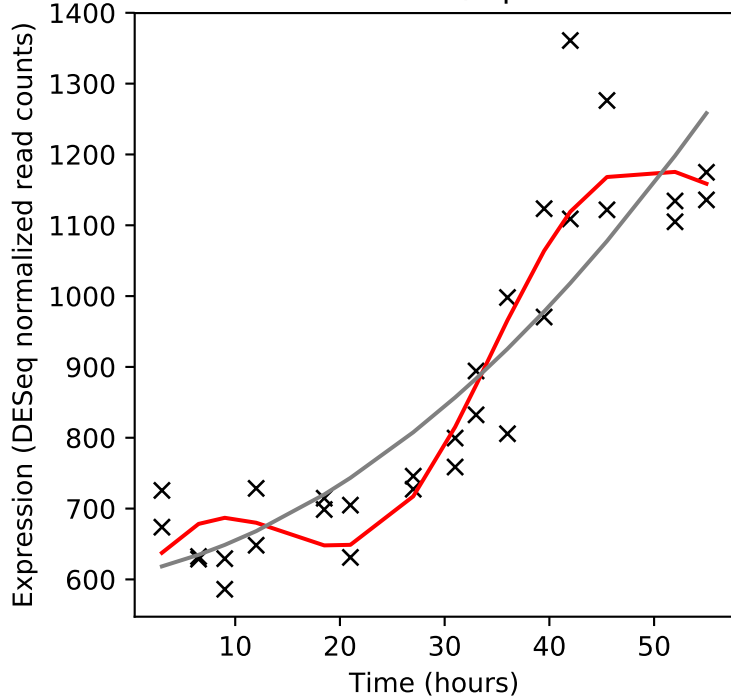

Rv0385/-

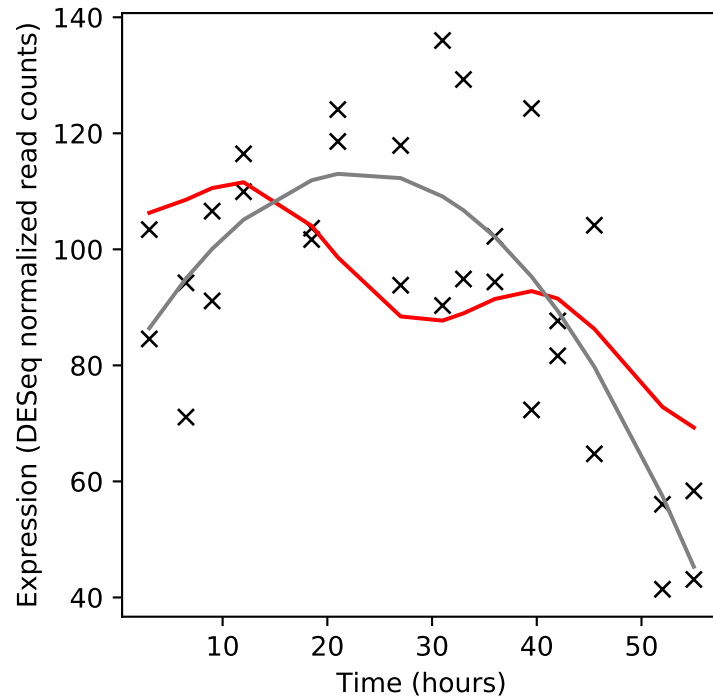

Rv0386/-

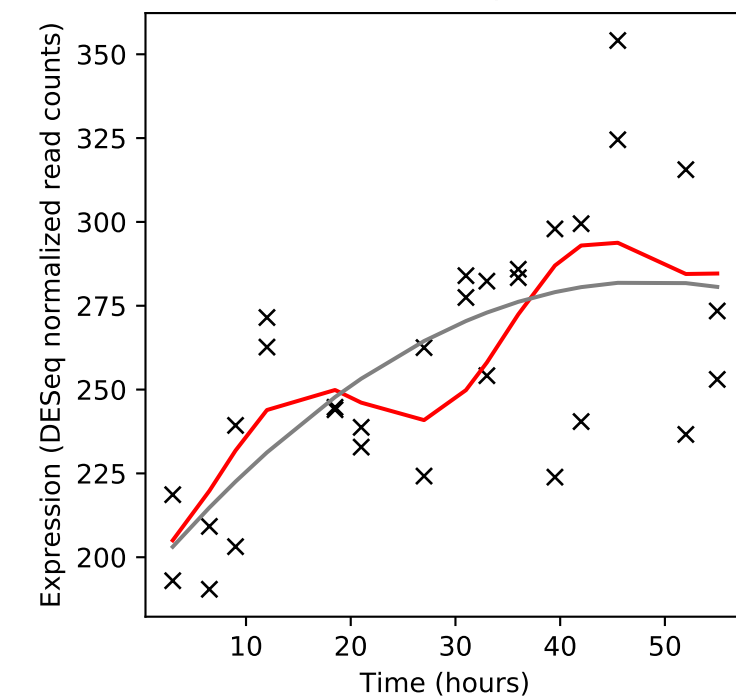

Rv0387c/-

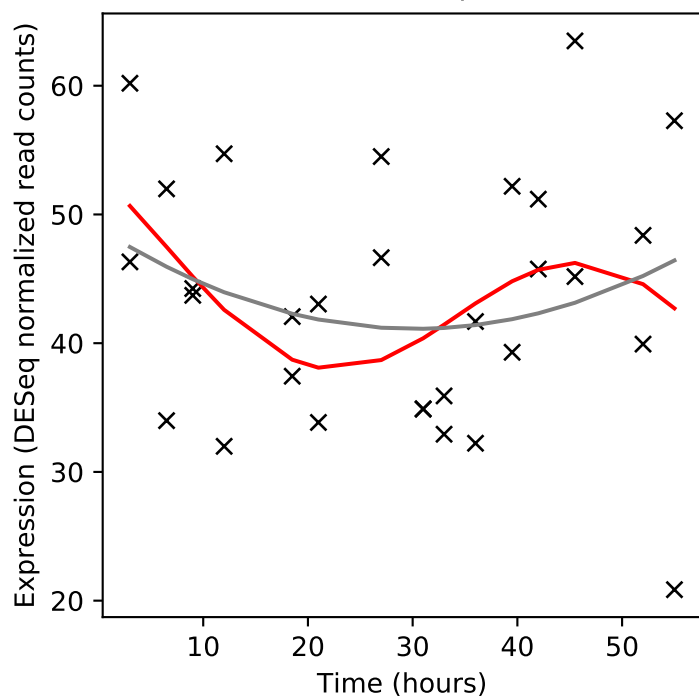

Rv0388c/PPE9

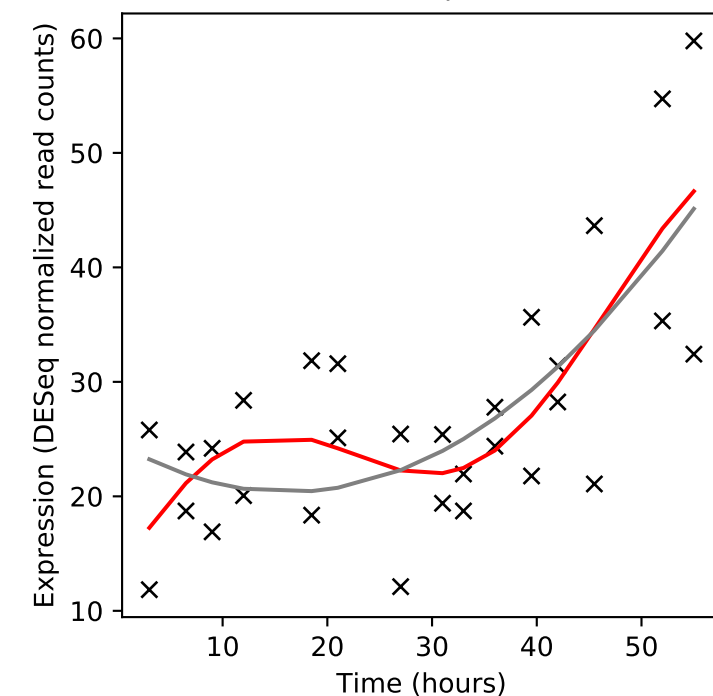

Rv0389/purT

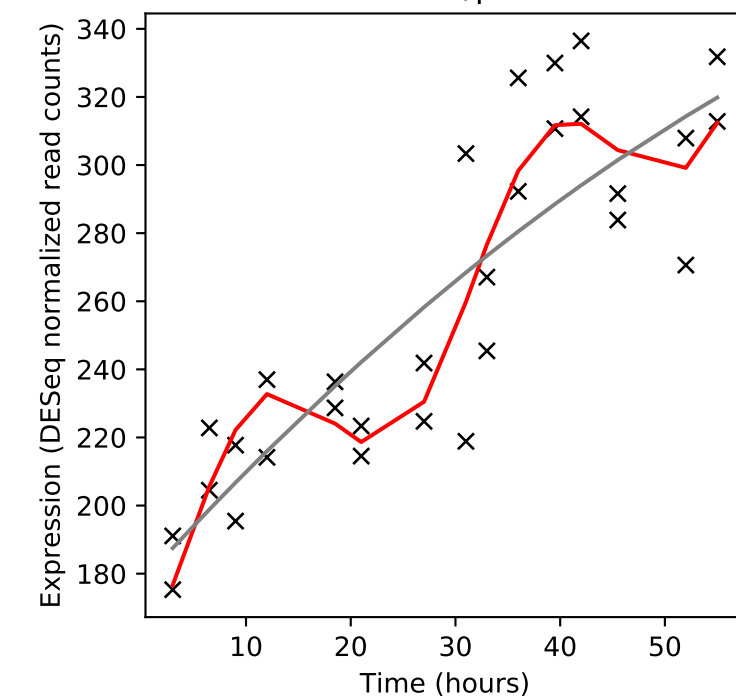



Rv0390/-

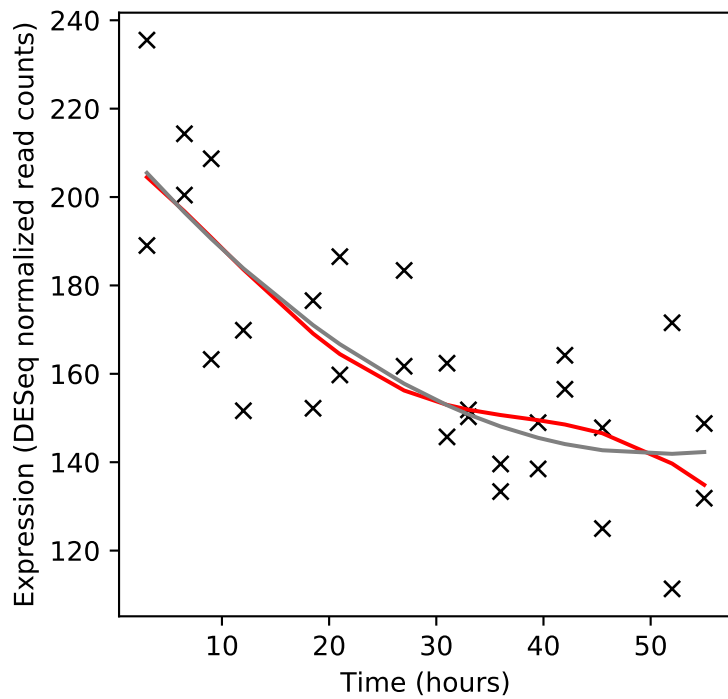

Rv0391/metZ

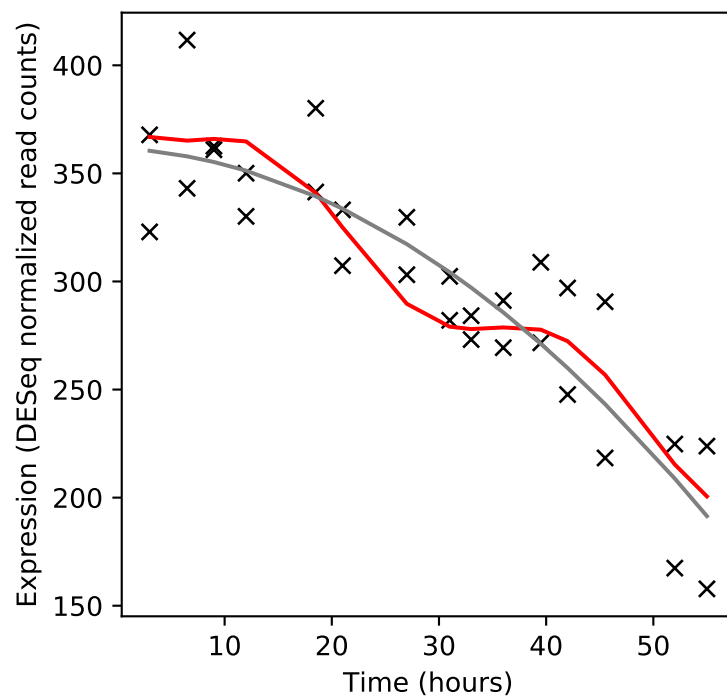

Rv0392c/ndhA

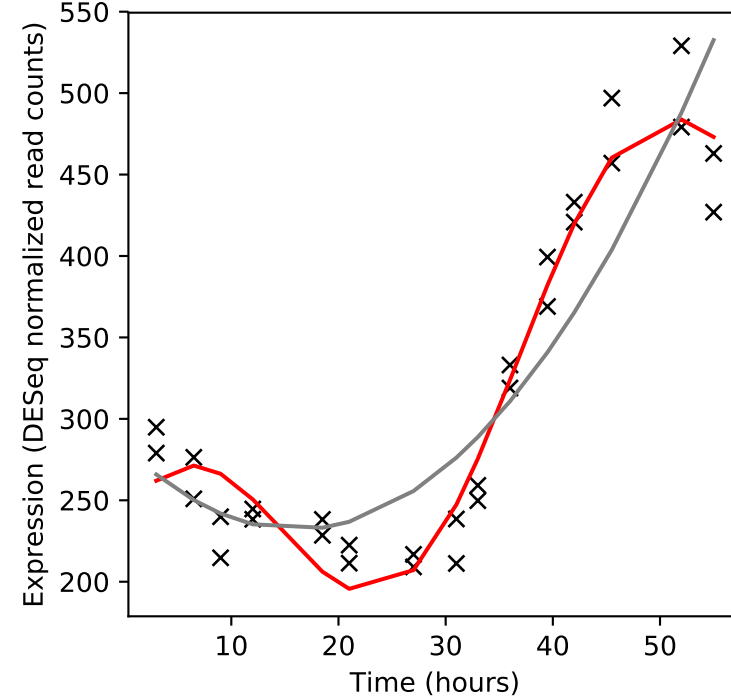

Rv0393/-

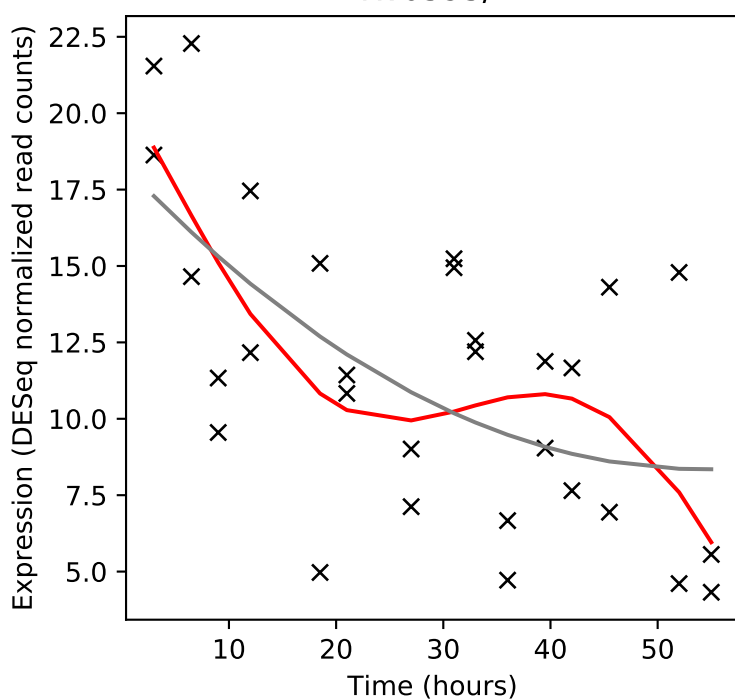

Rv0394c/-

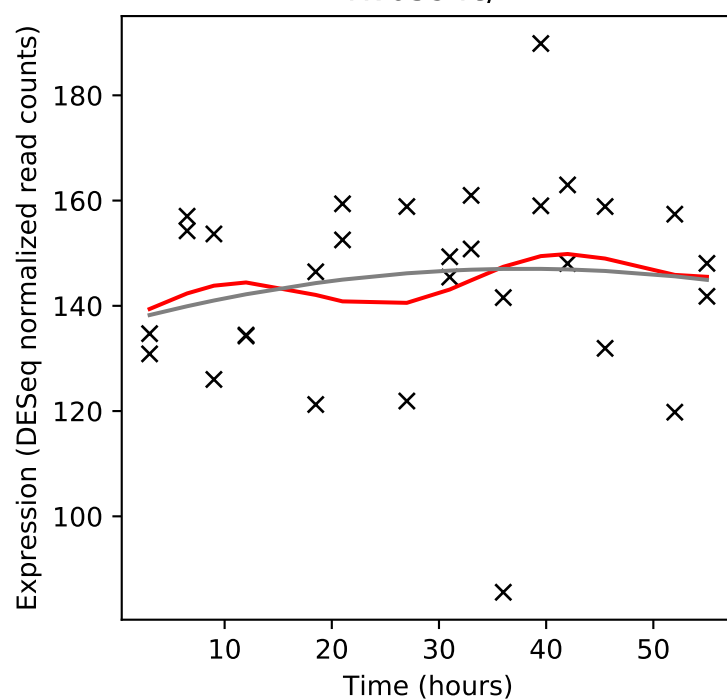

Rv0395/-

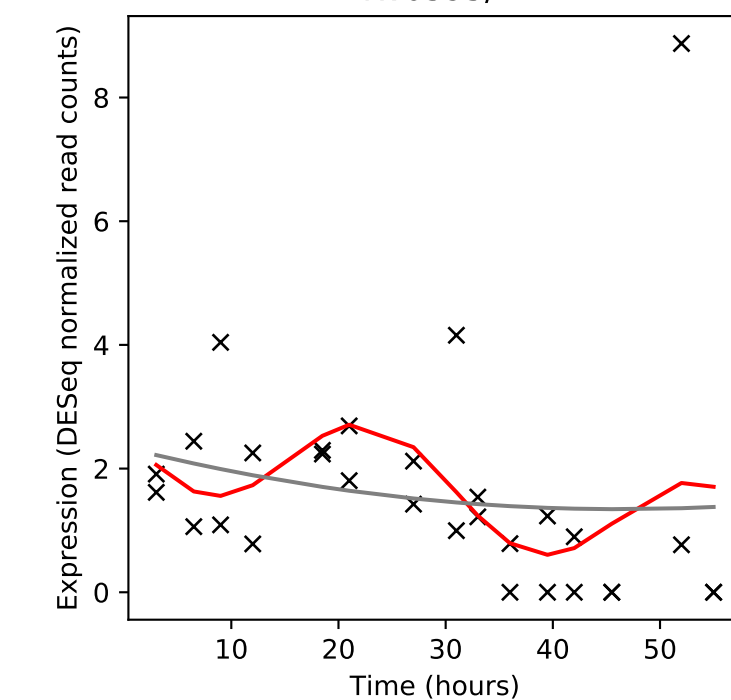

Rv0396/-

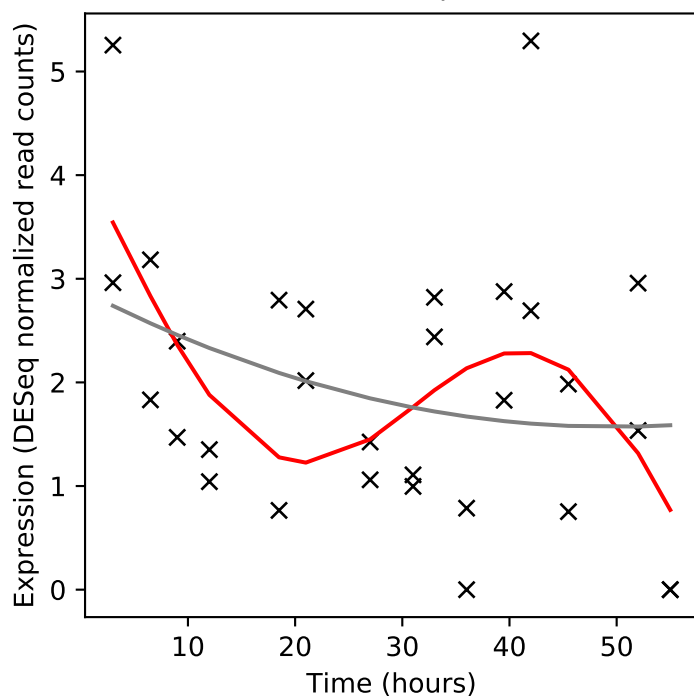

Rv0397/-

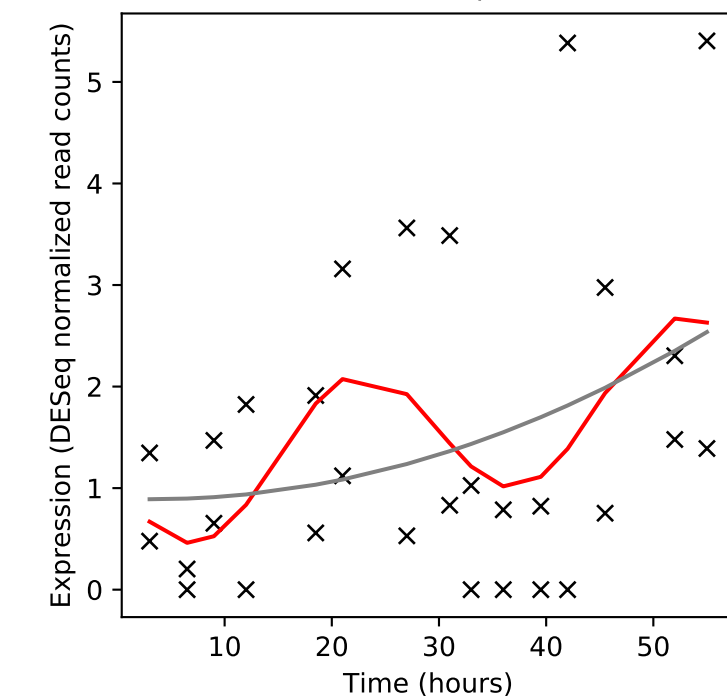

Rv0397A/-

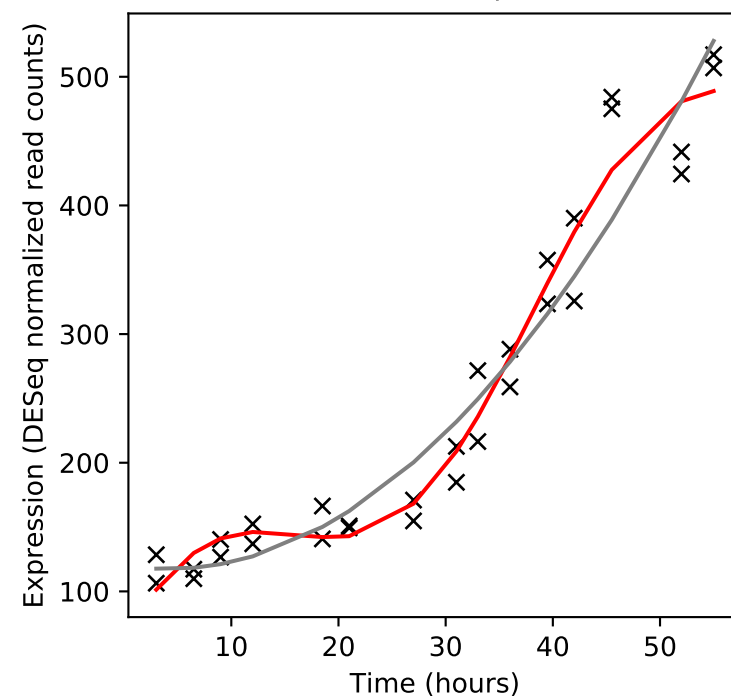

Rv0398c/-

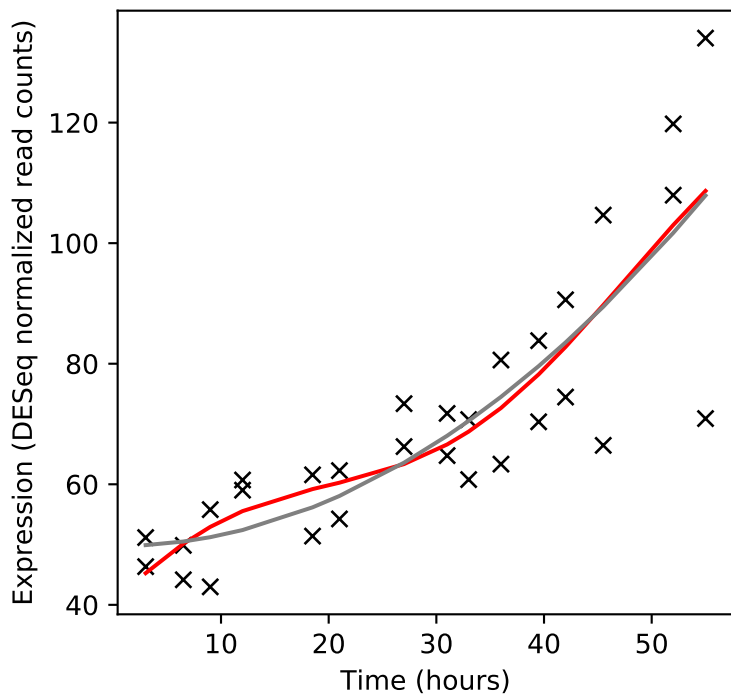

Rv0399c/lpqK

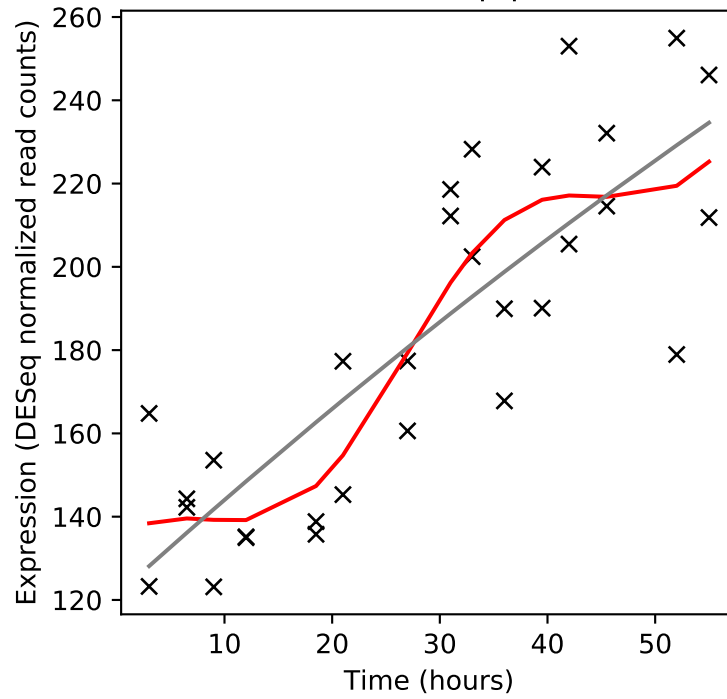

Rv0400c/fadE7

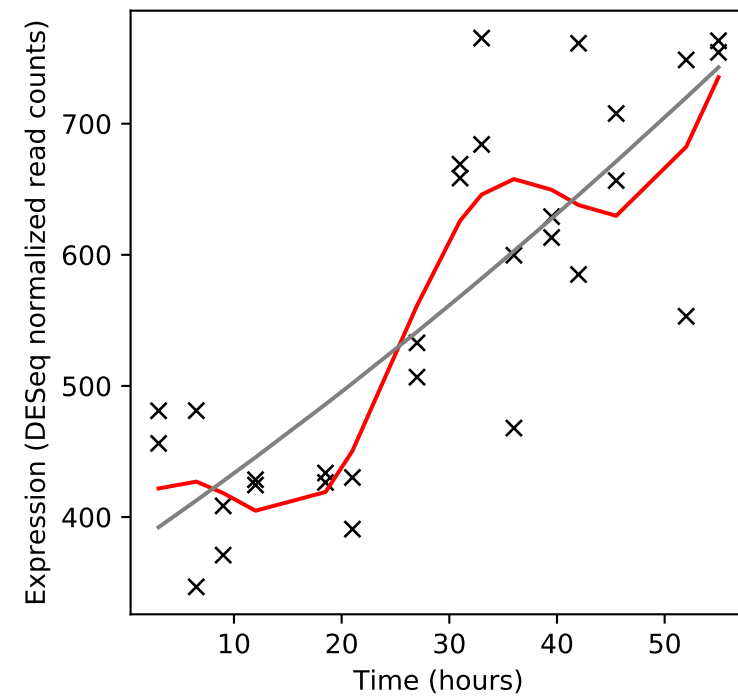

Rv0401/-

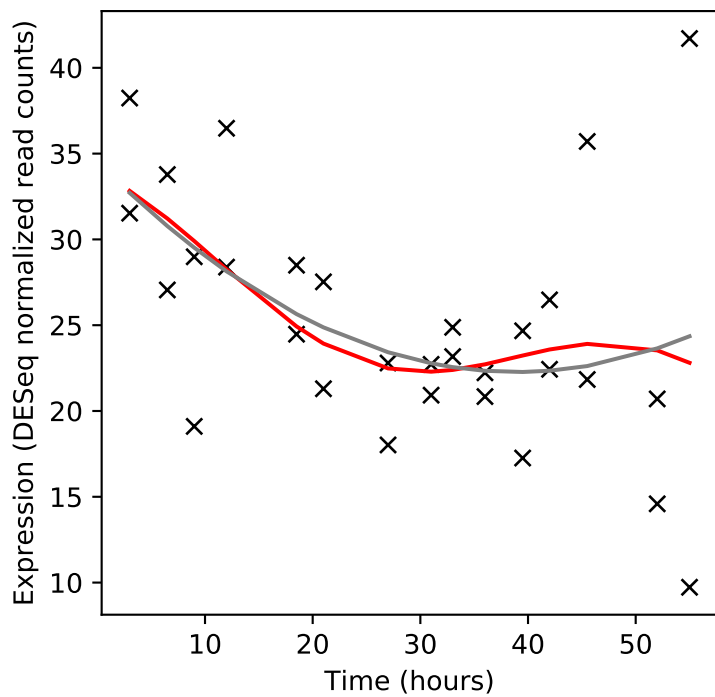

Rv0402c/mmpL1

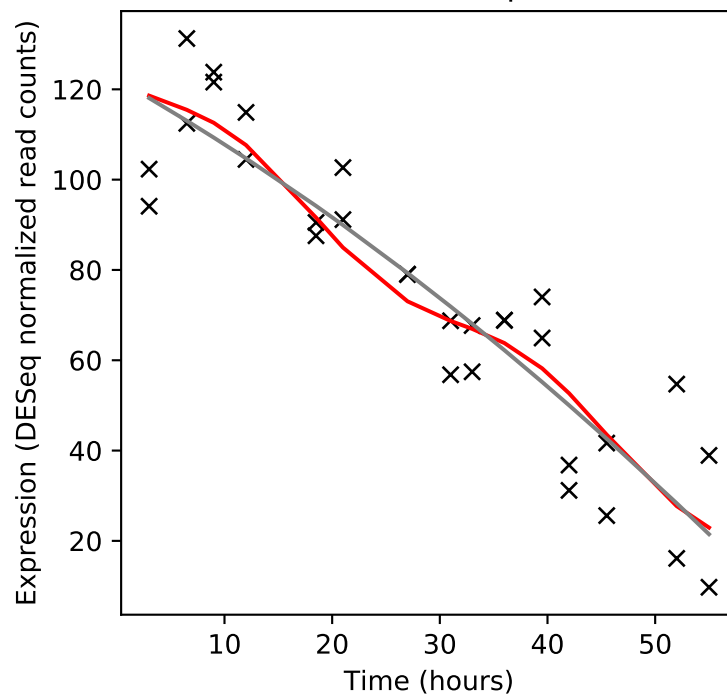

Rv0403c/mmpS1

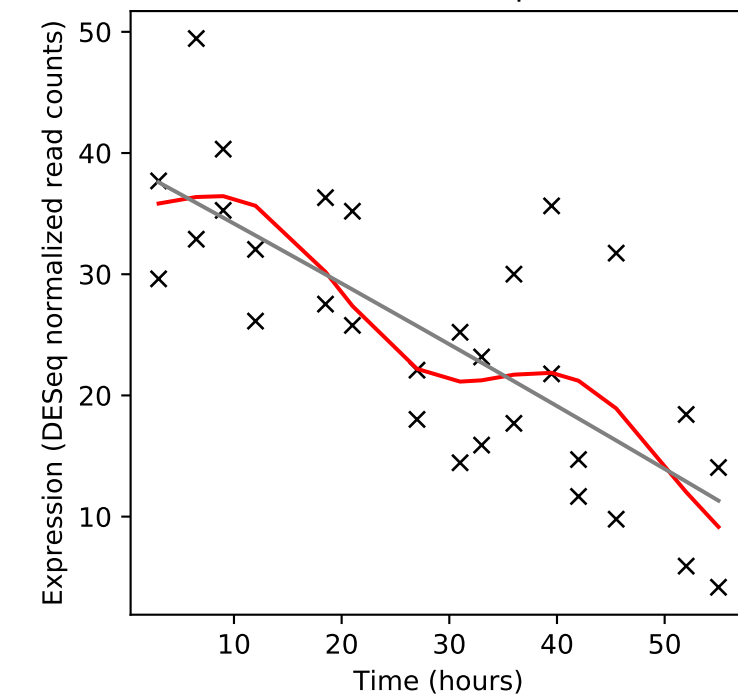

Rv0404/fadD30

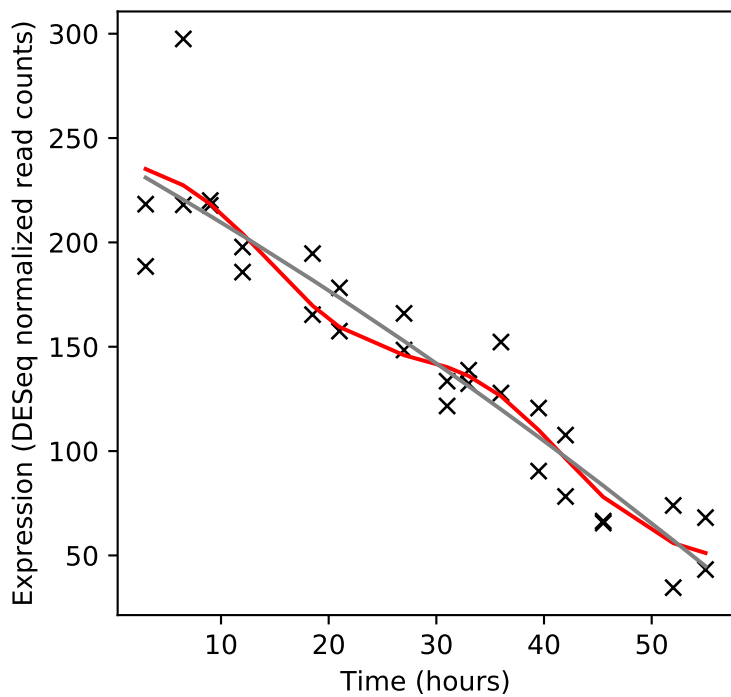

Rv0405/pks6

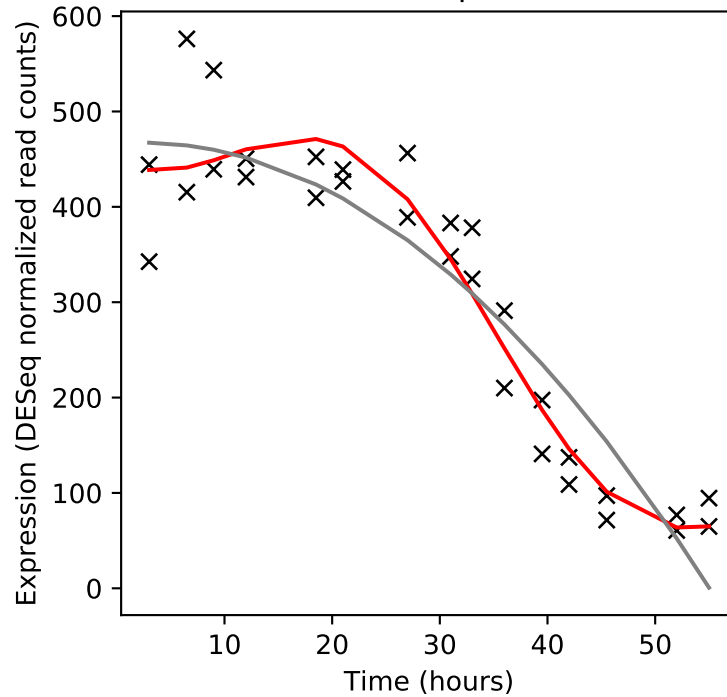

Rv0406c/-

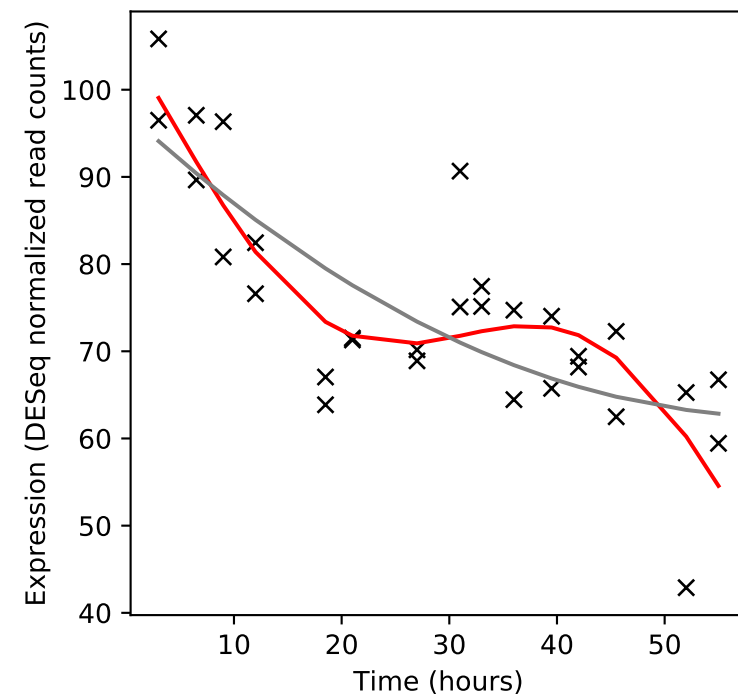

Rv0407/fgd1

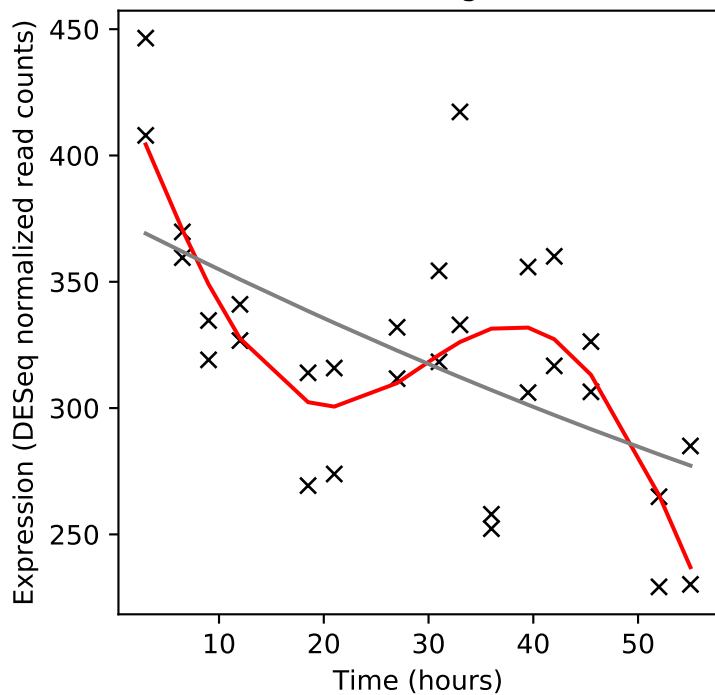

Rv0408/pta

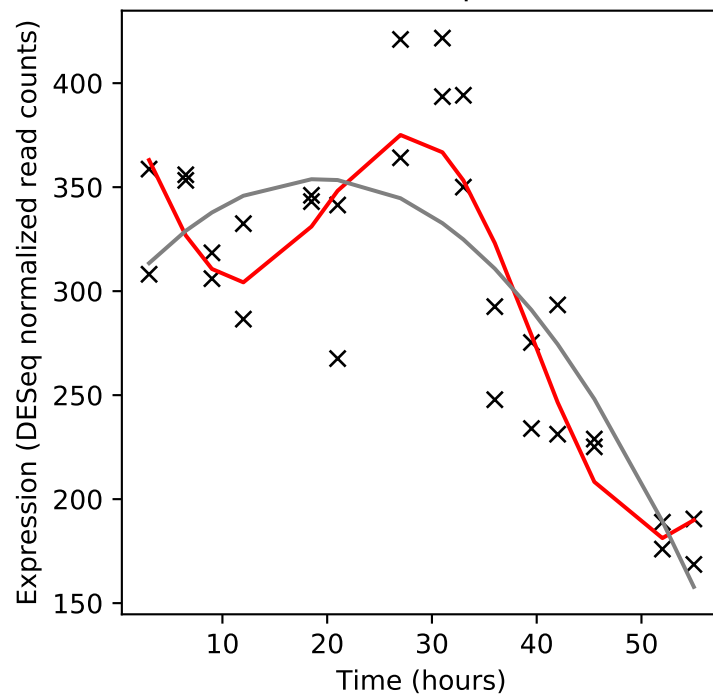

Rv0409/ackA

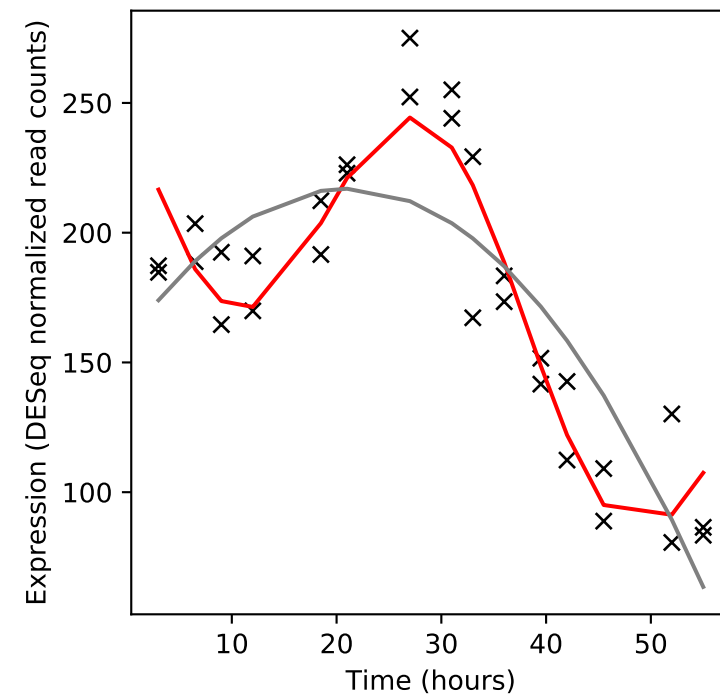

Rv0410c/pknG

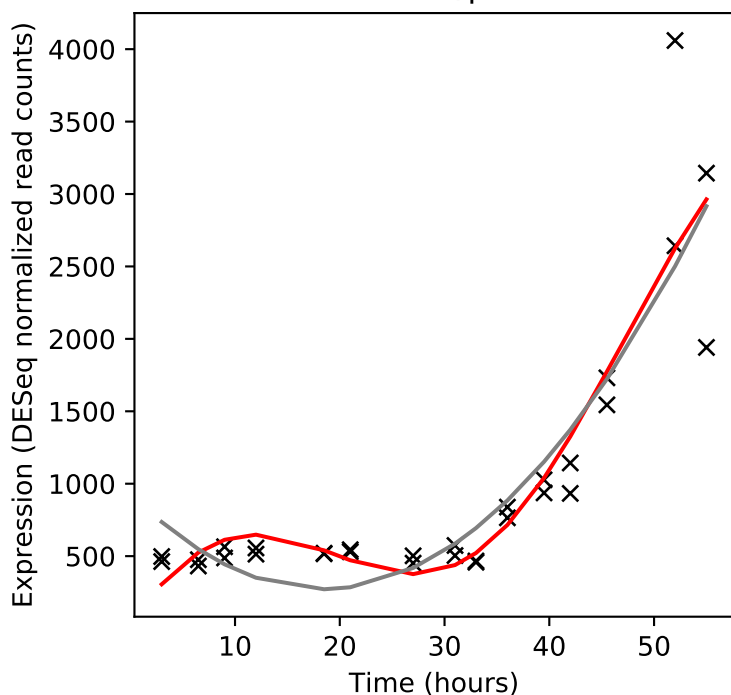

Rv0411c/glnH

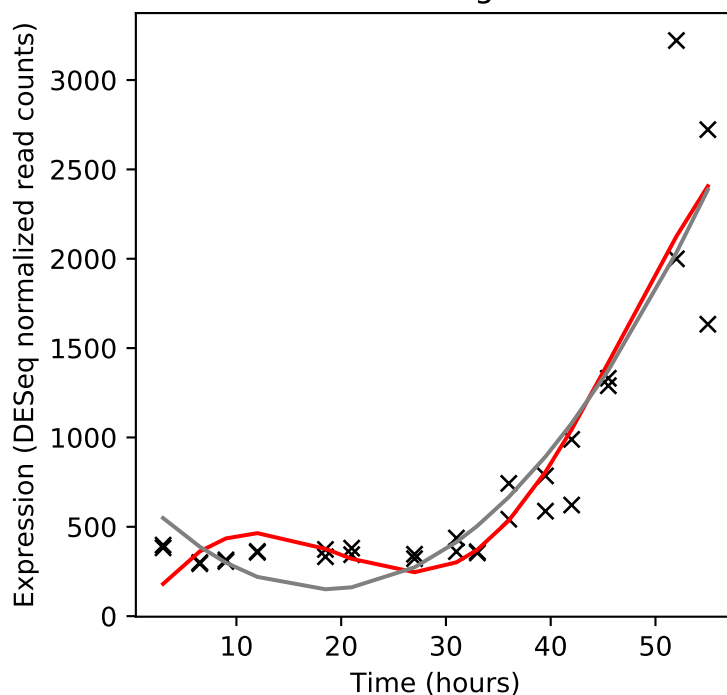

Rv0412c/-

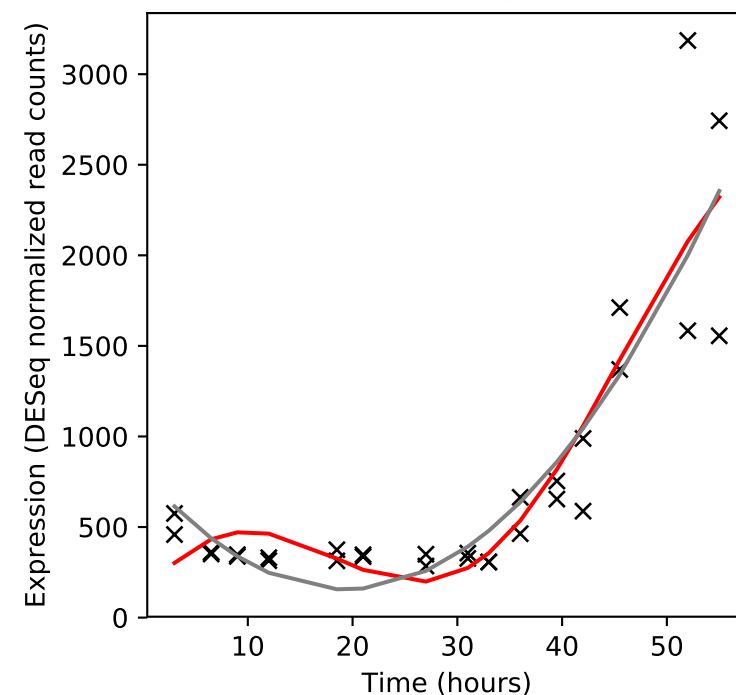

Rv0413/mutT3

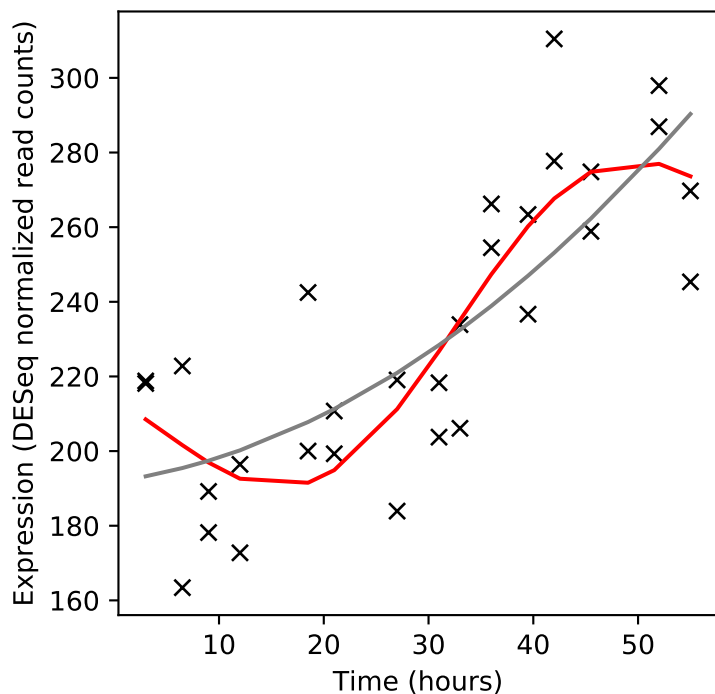

Rv0414c/thiE

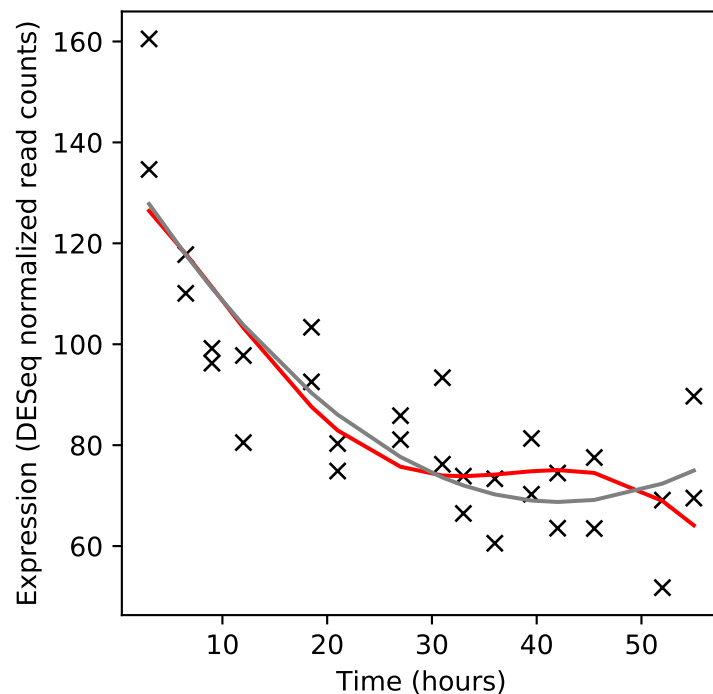

Rv0415/thiO

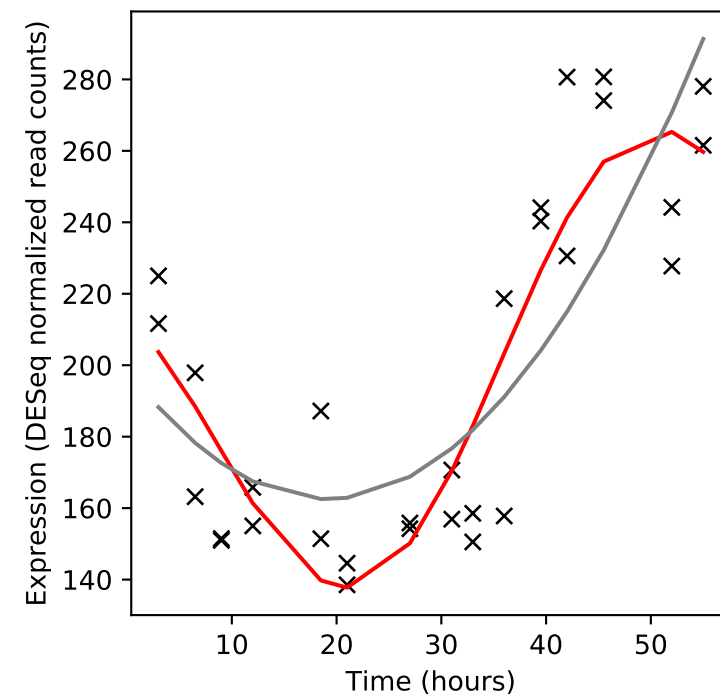

Rv0416/thiS

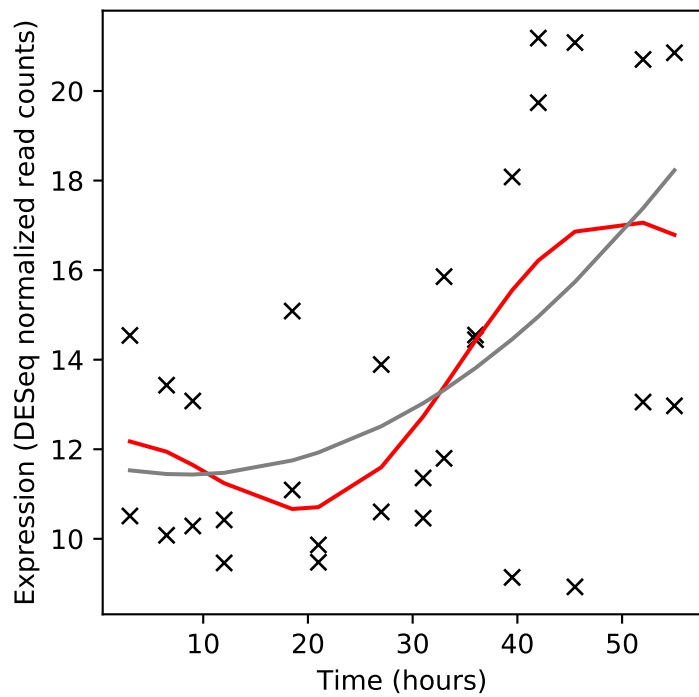

Rv0417/thiG

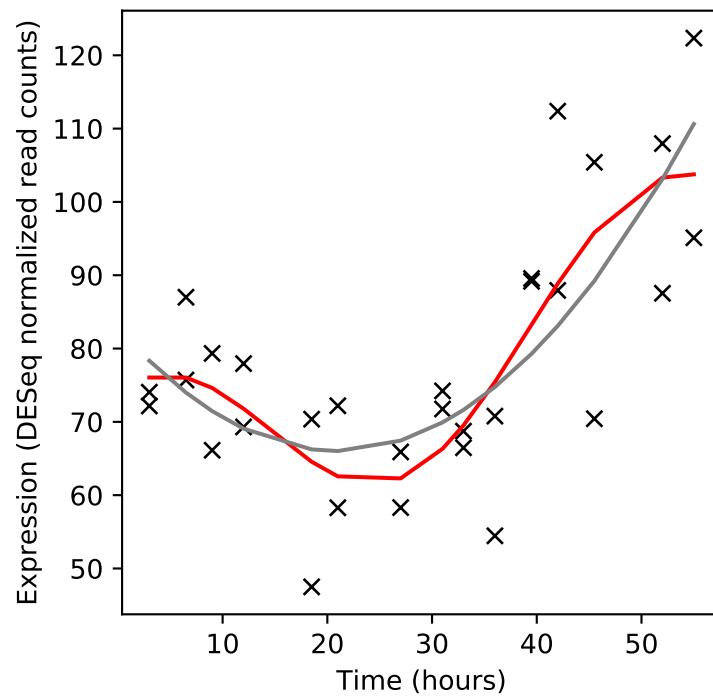

Rv0418/lpqL

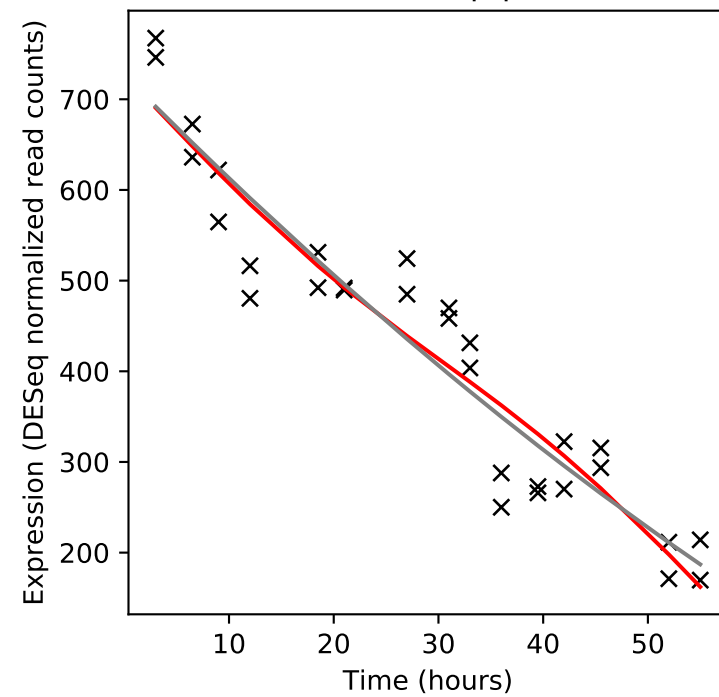

Rv0419/lpqM

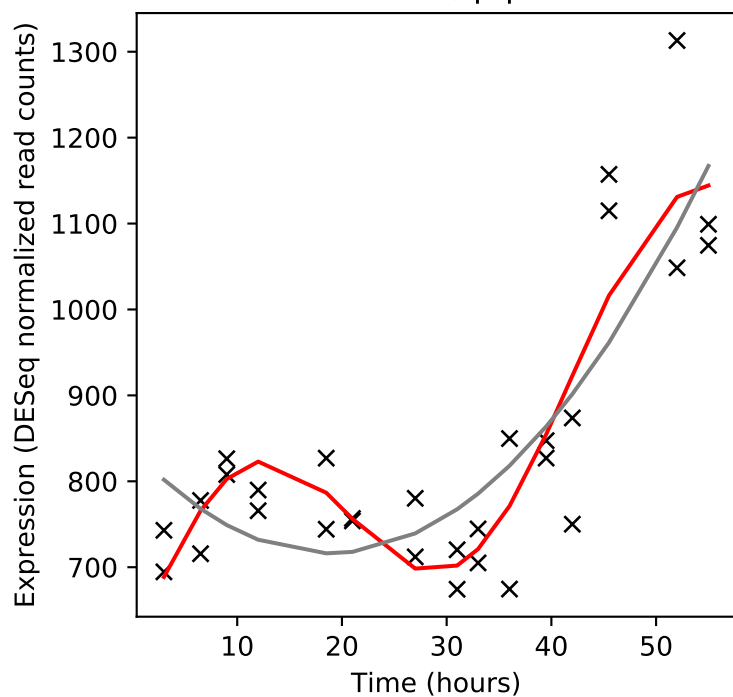

Rv0420c/-

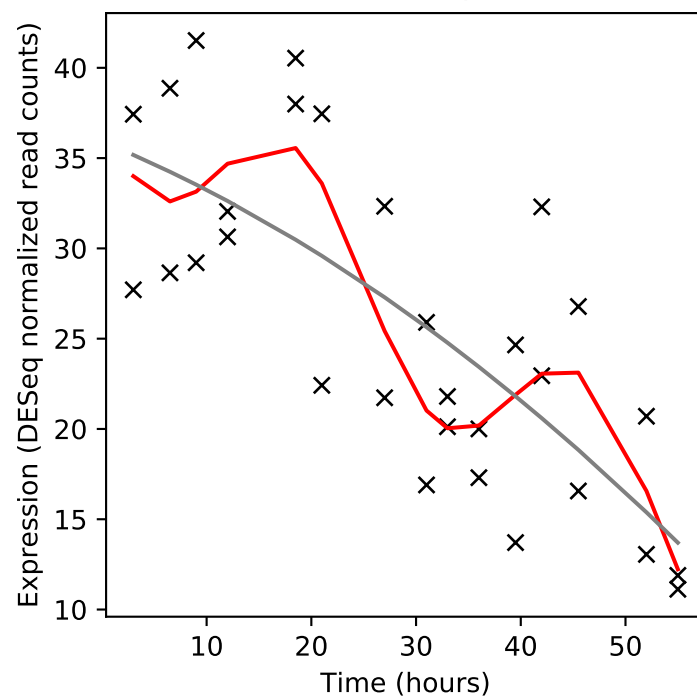

Rv0421c/-

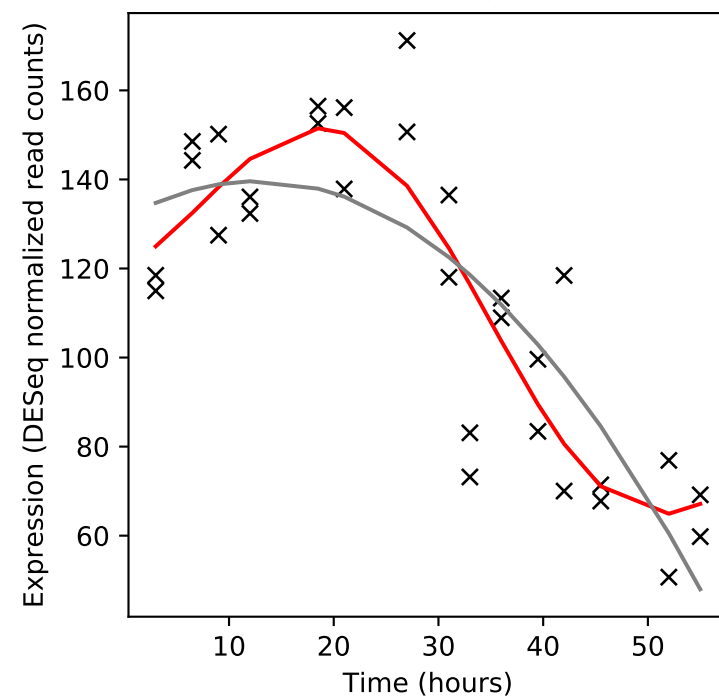

Rv0422c/thiD

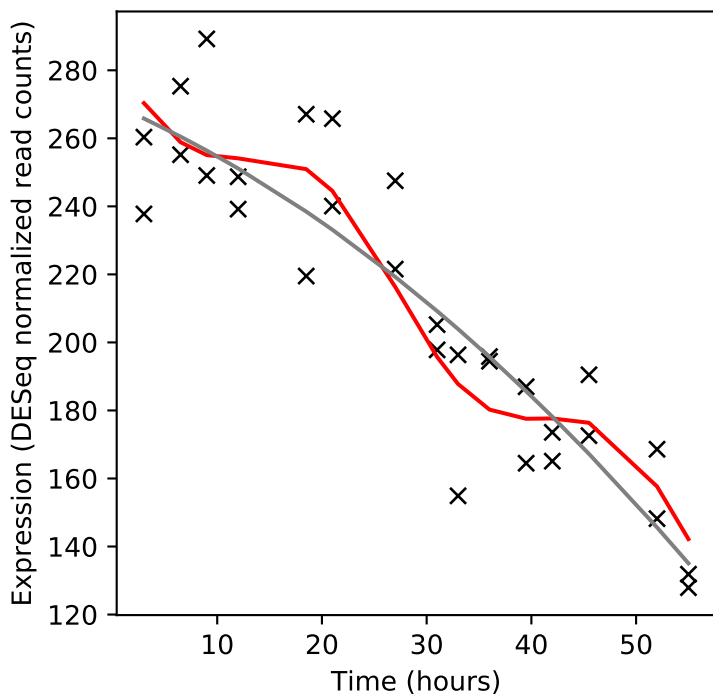

Rv0423c/thiC

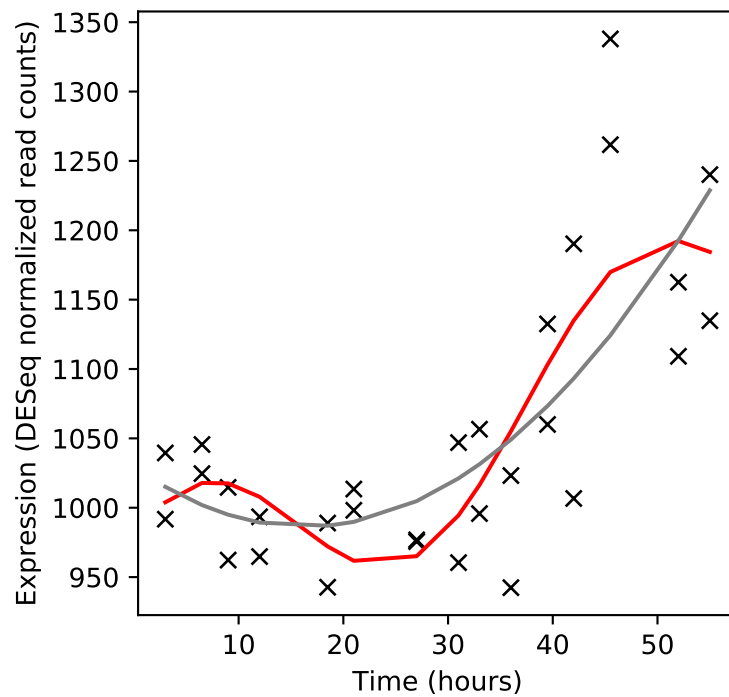

Rv0424c/-

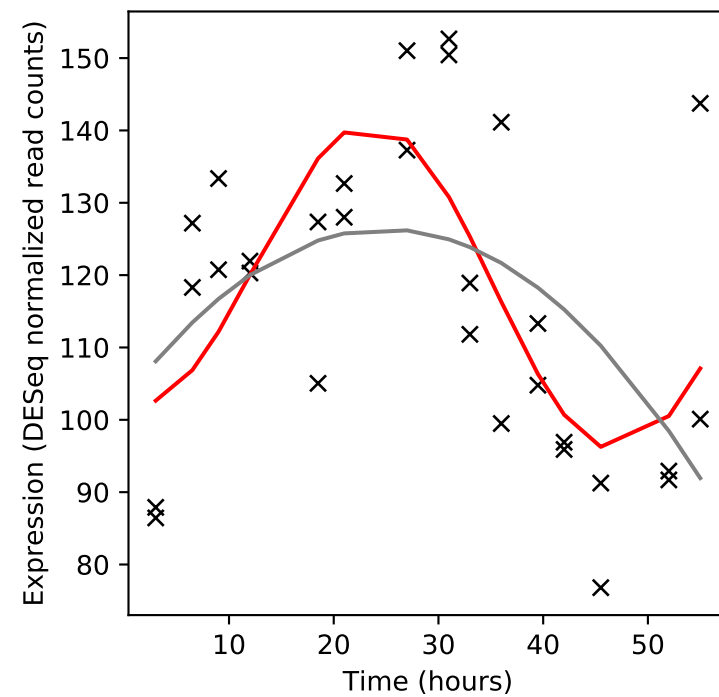

Rv0425c/ctpH

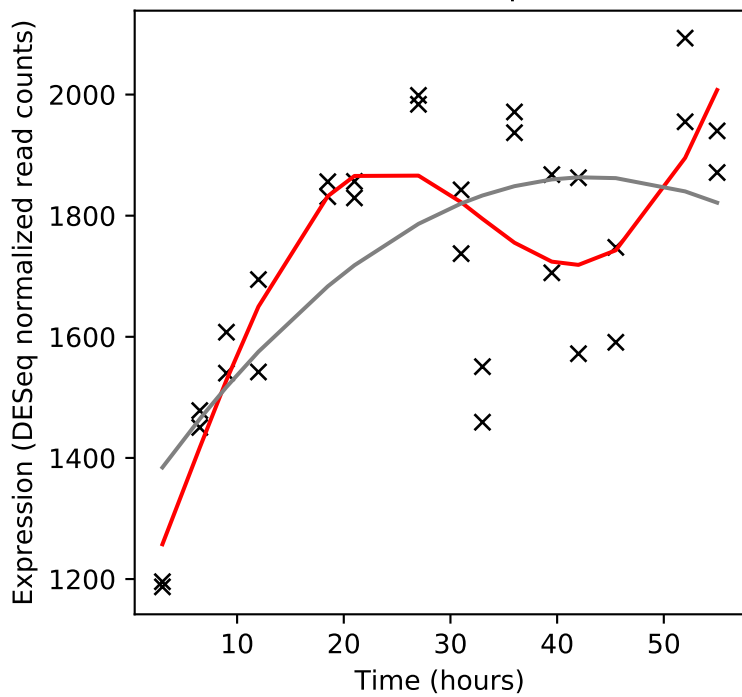

Rv0426c/-

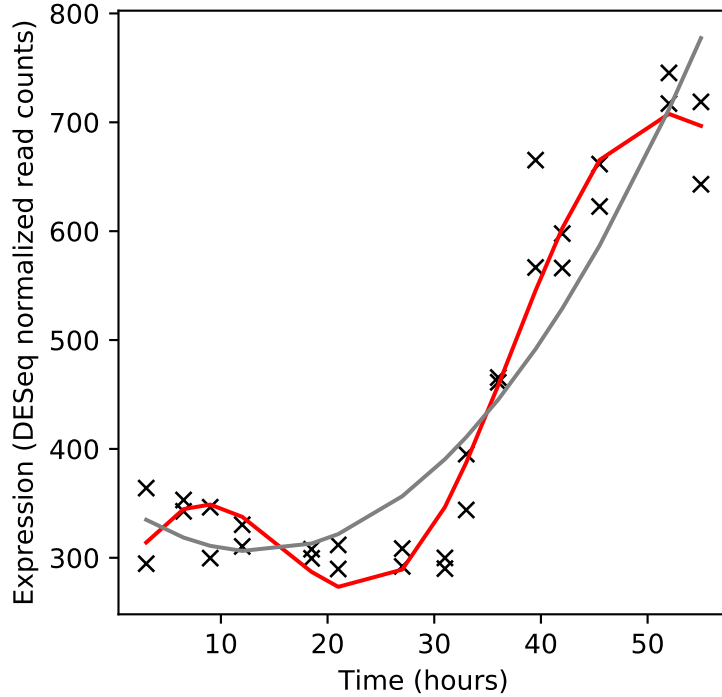

Rv0427c/xthA

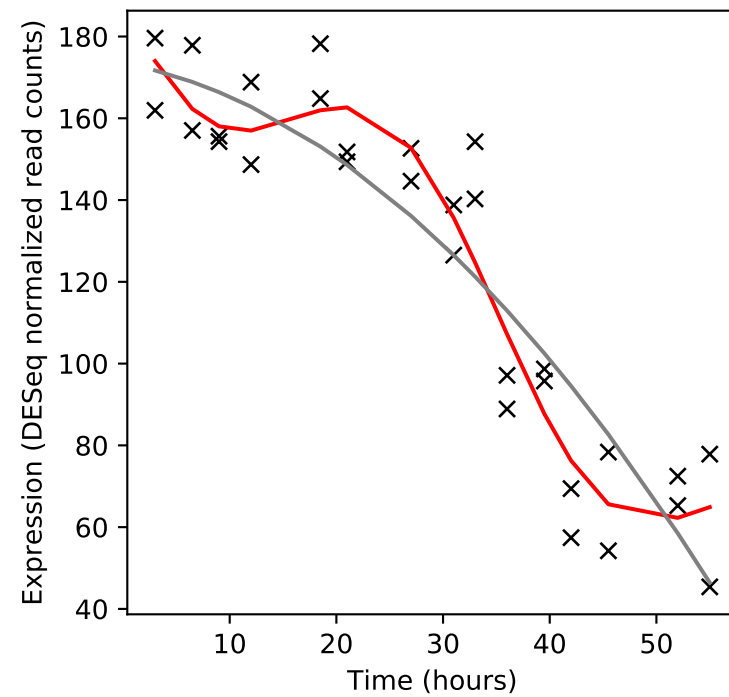

Rv0428c/-

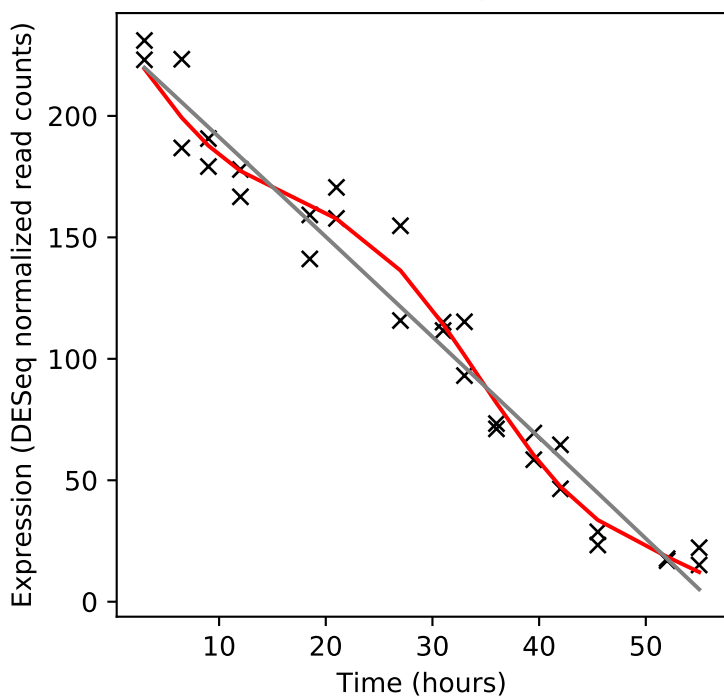

Rv0429c/def

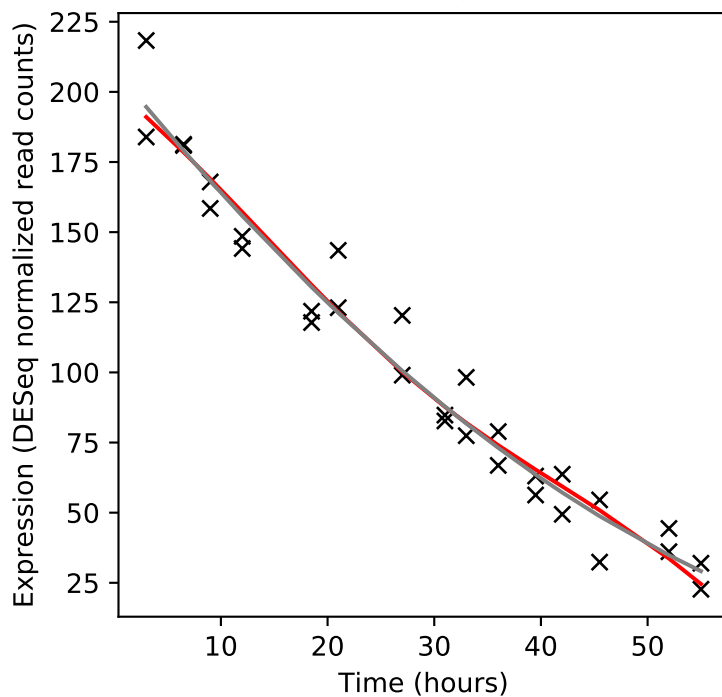

Rv0430/-

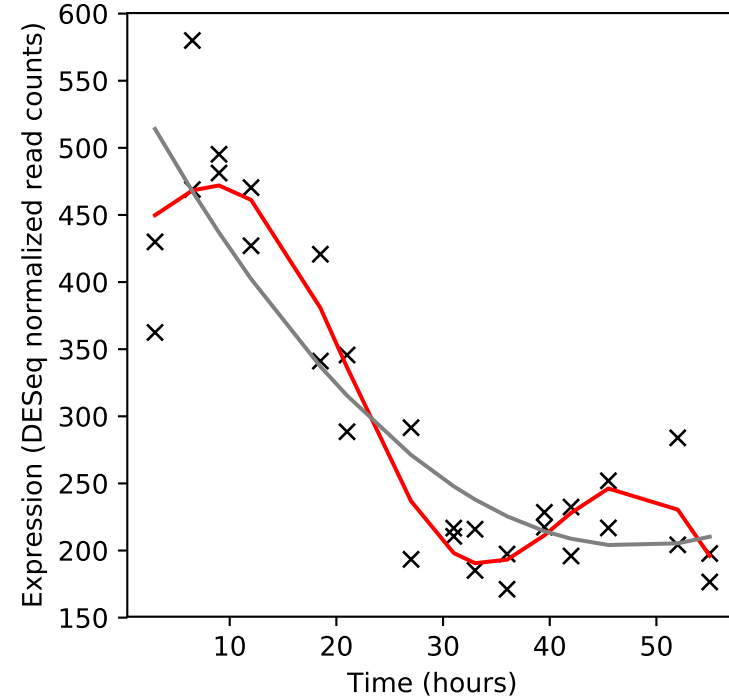

Rv0431/-

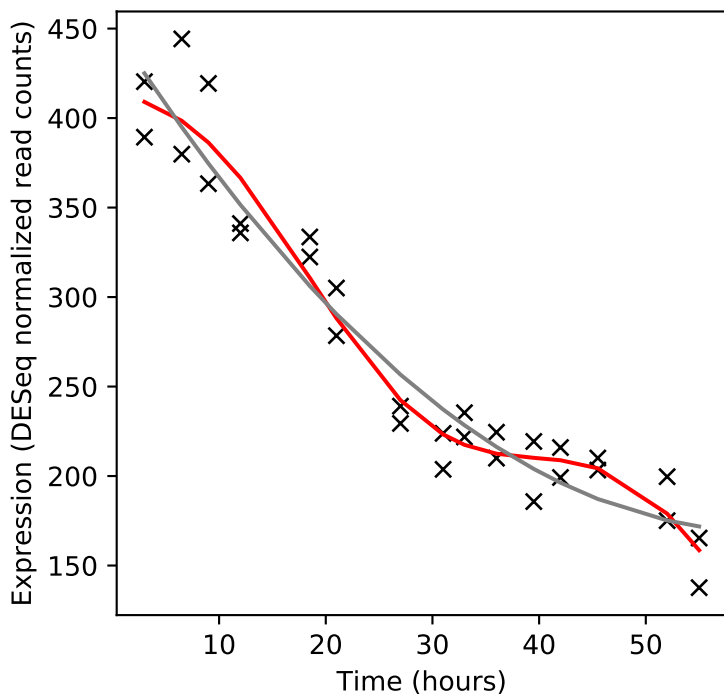

Rv0432/sodC

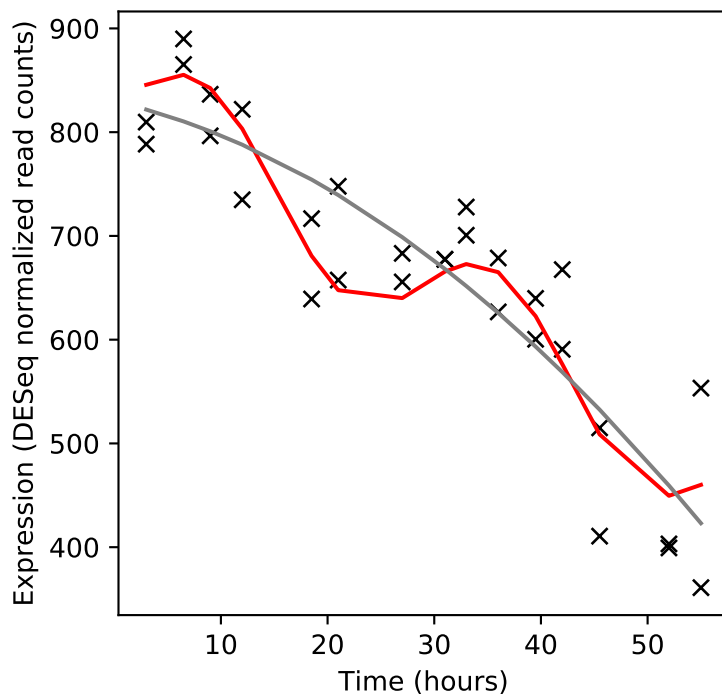

Rv0433/-

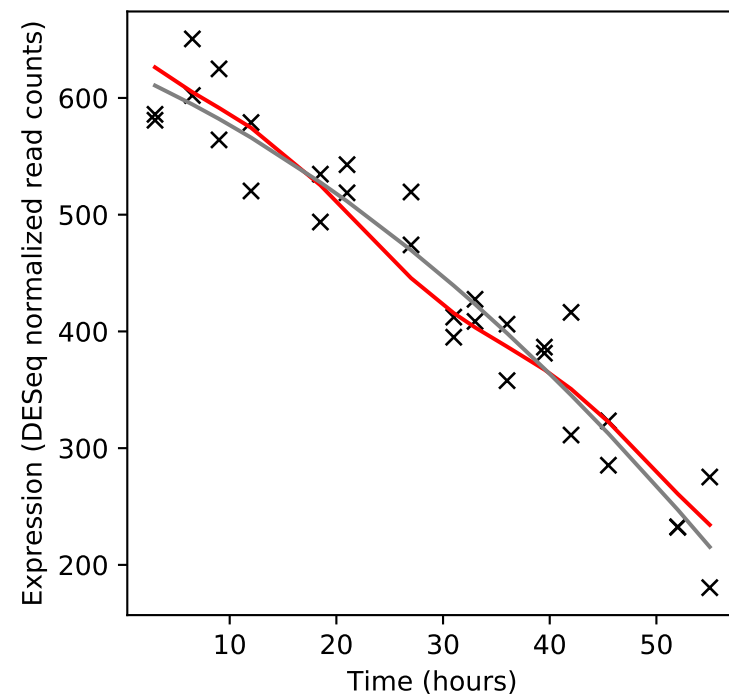

Rv0434/-

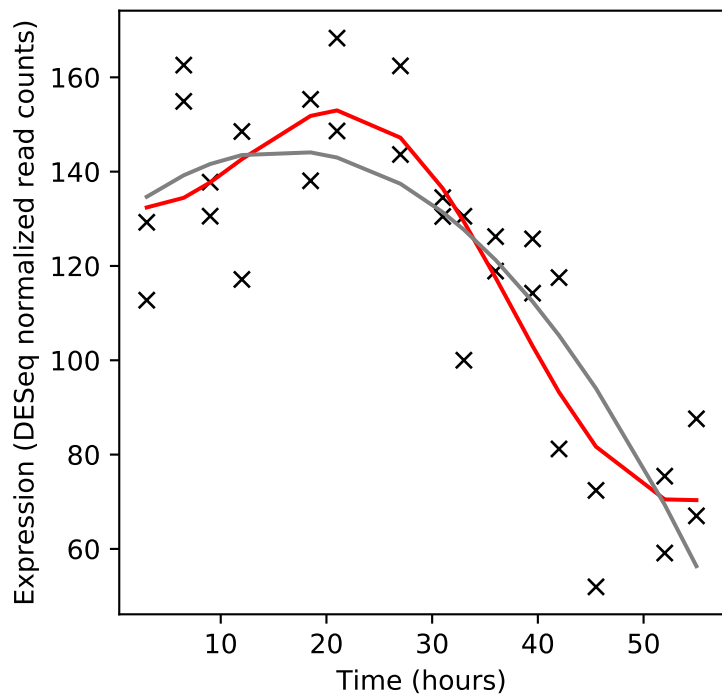

Rv0435c/-

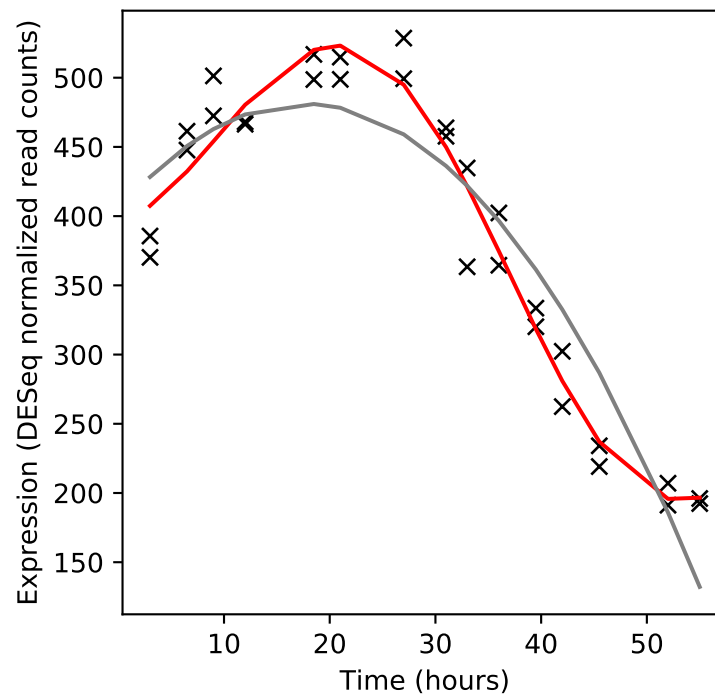

Rv0436c/pssA

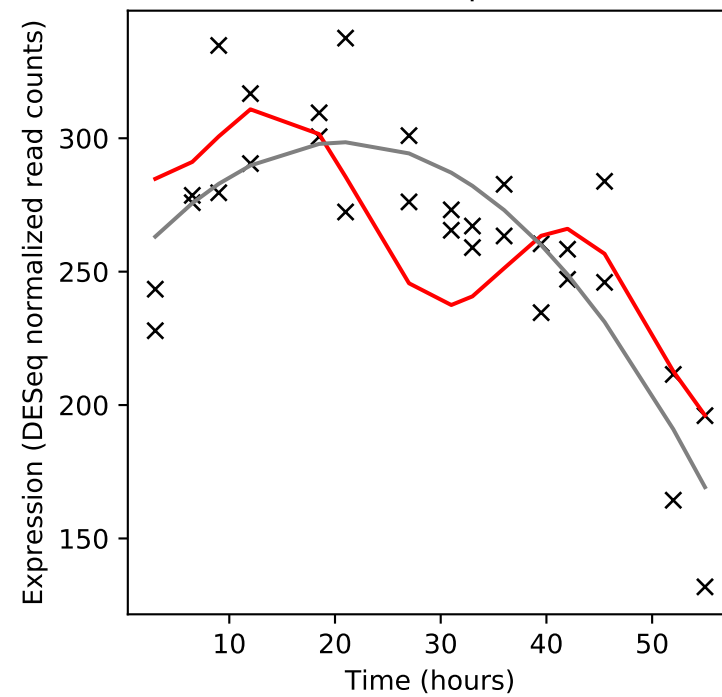

Rv0437c/psd

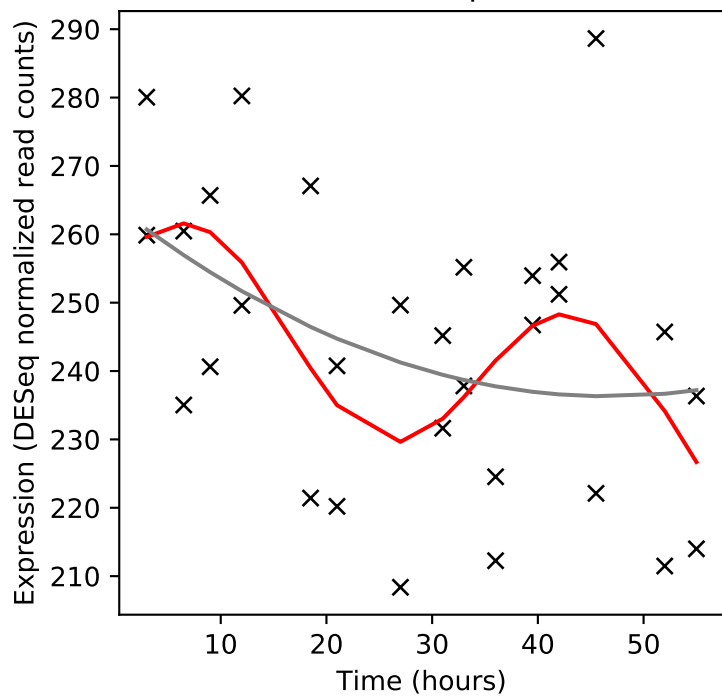

Rv0438c/moeA2

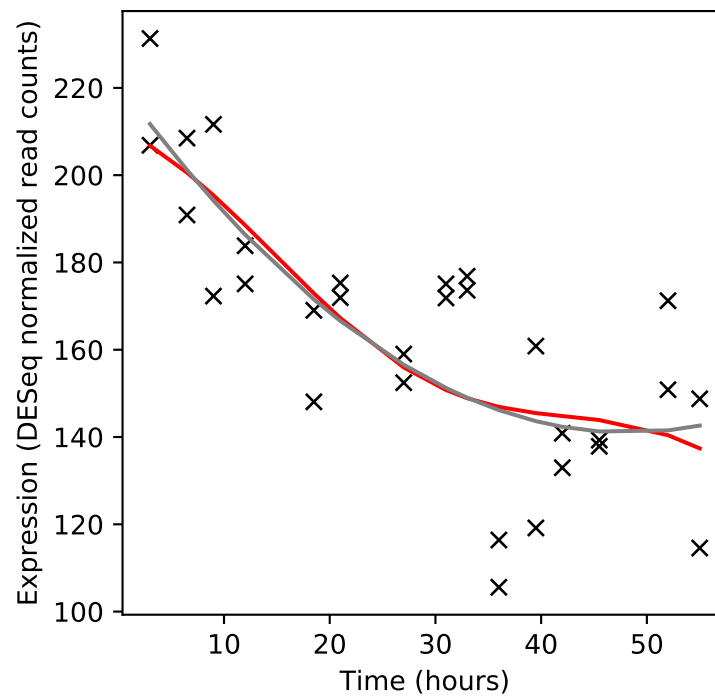

Rv0439c/-

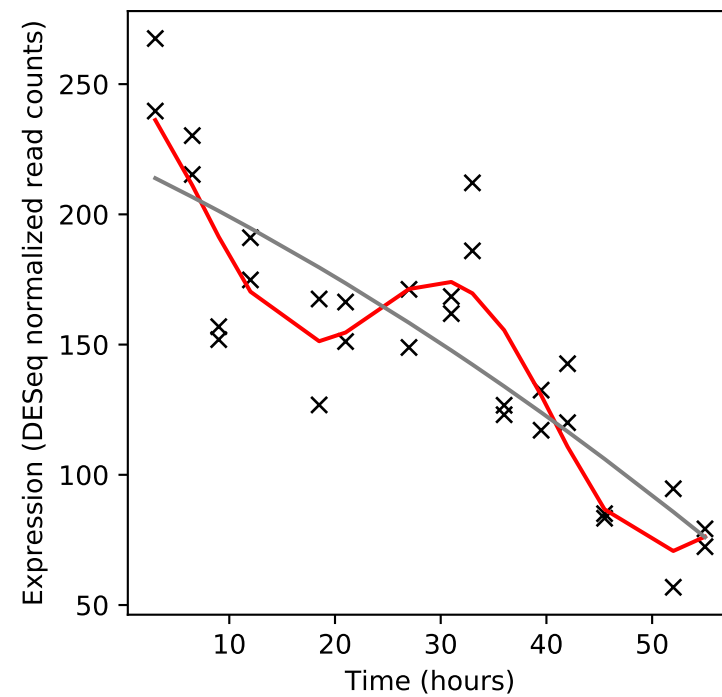

Rv0440/groEL2

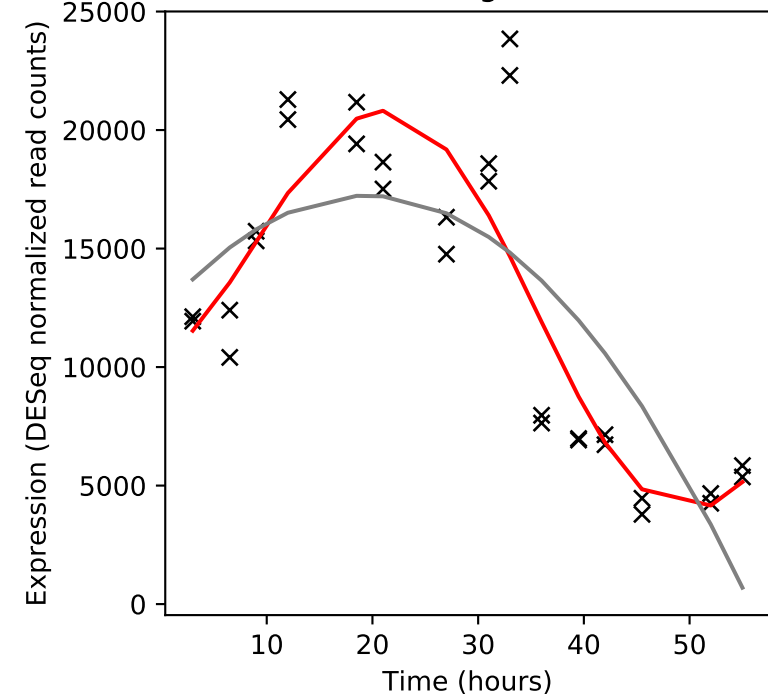

Rv0441c/-

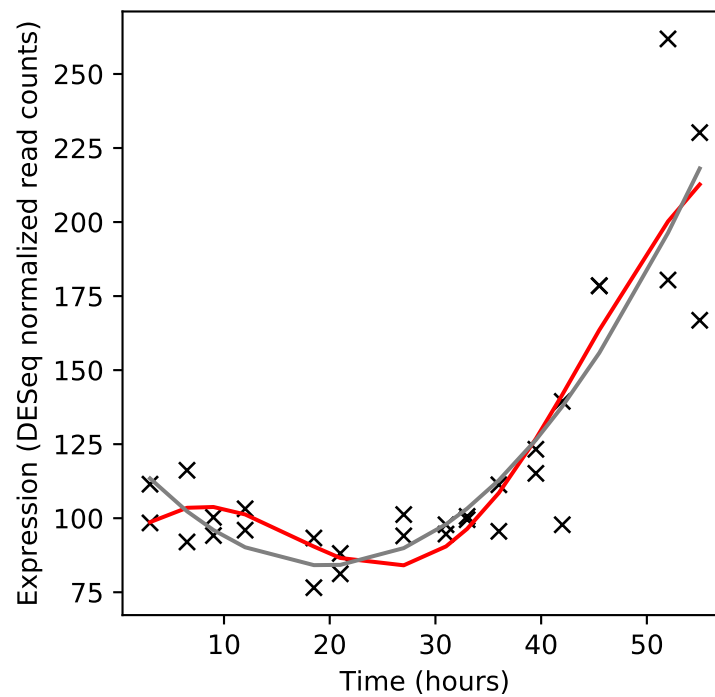

Rv0442c/PPE10

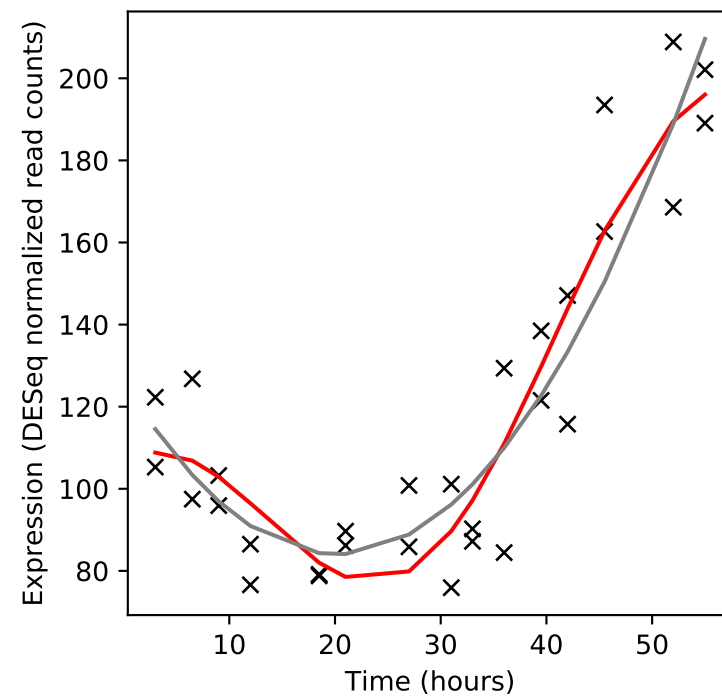

Rv0443/-

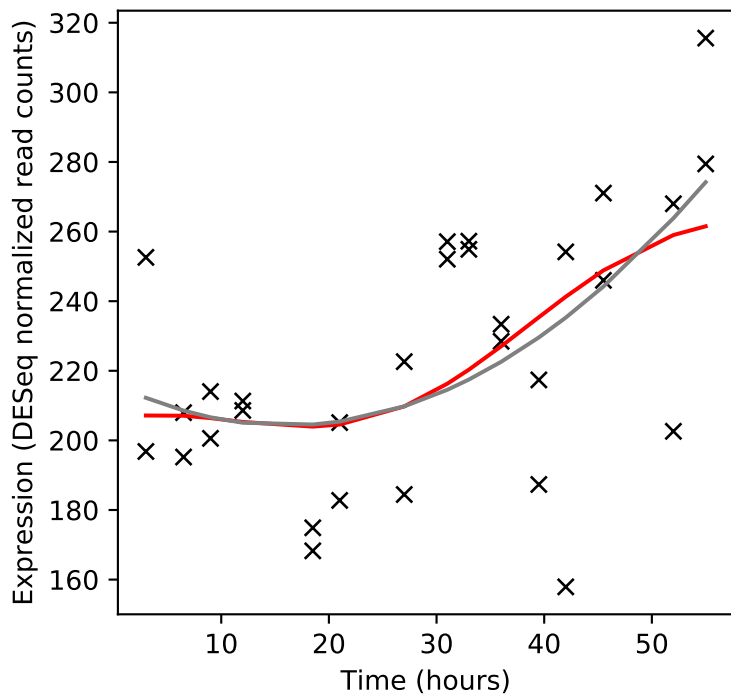

Rv0444c/rskA

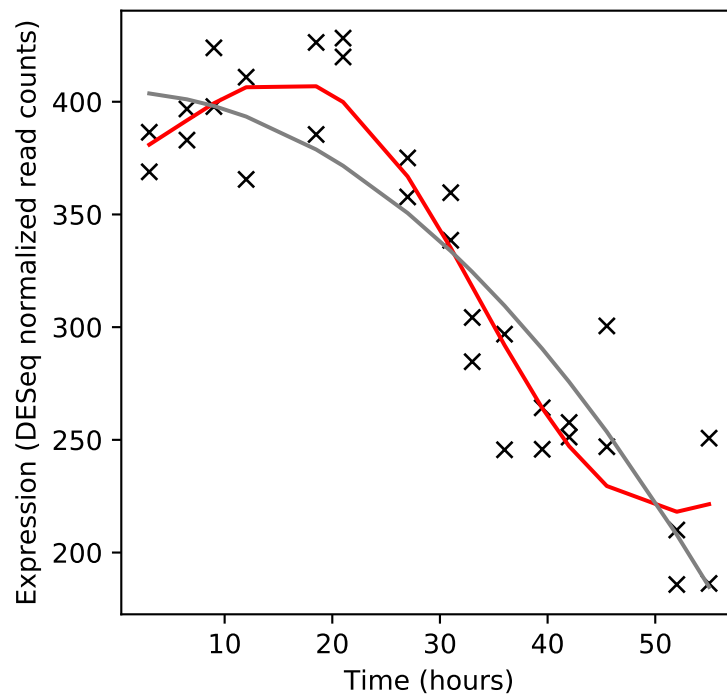

Rv0445c/sigK

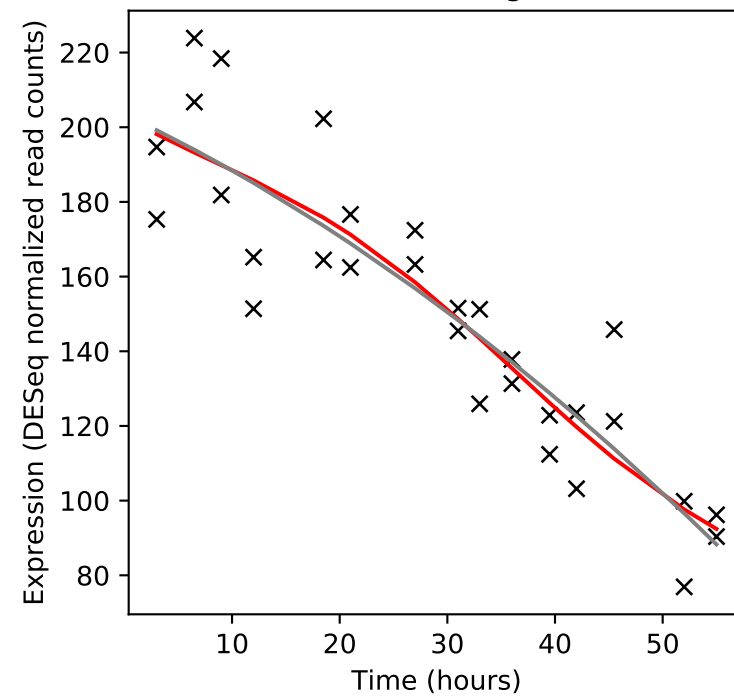

Rv0446c/-

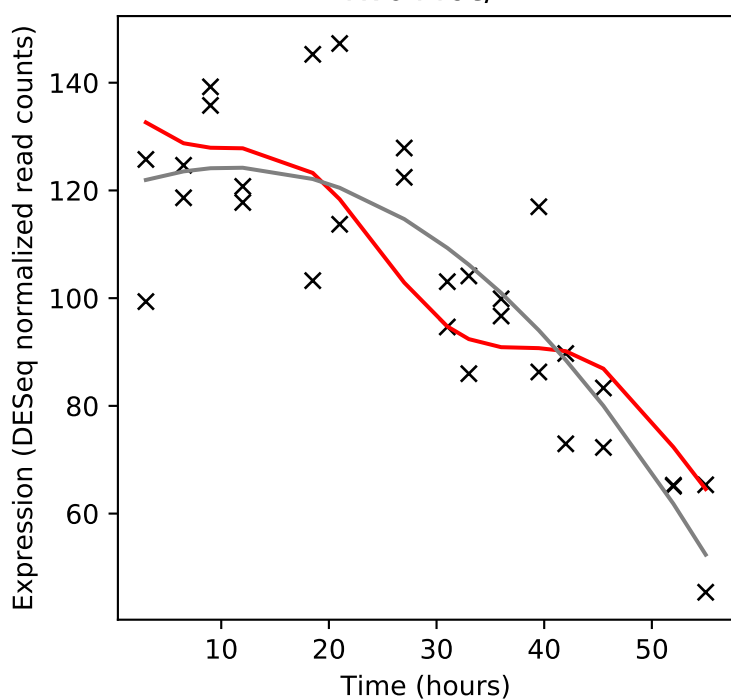

Rv0447c/ufaA1

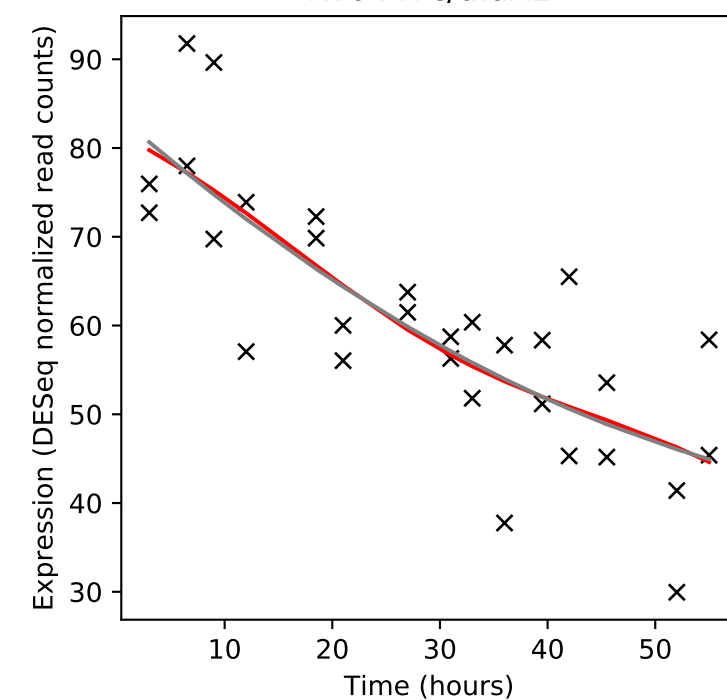

Rv0448c/-

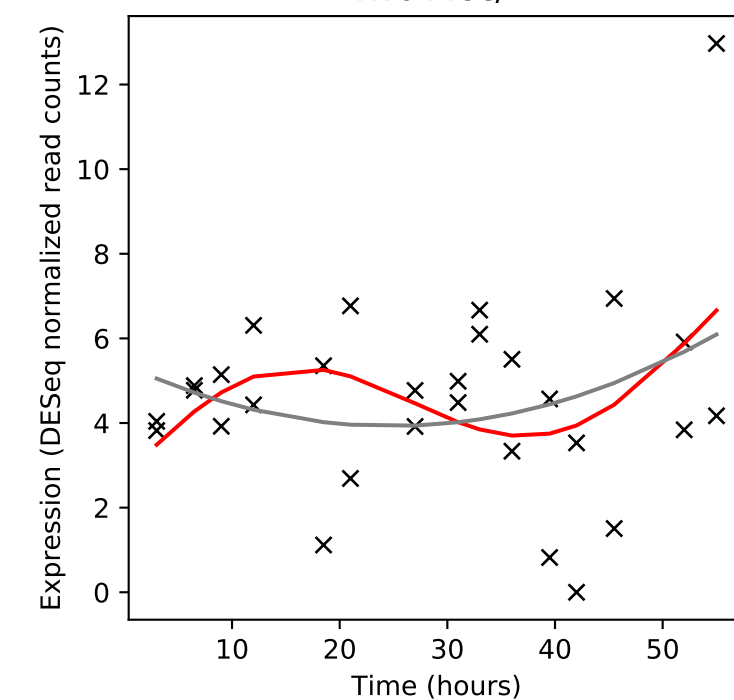

Rv0449c/-

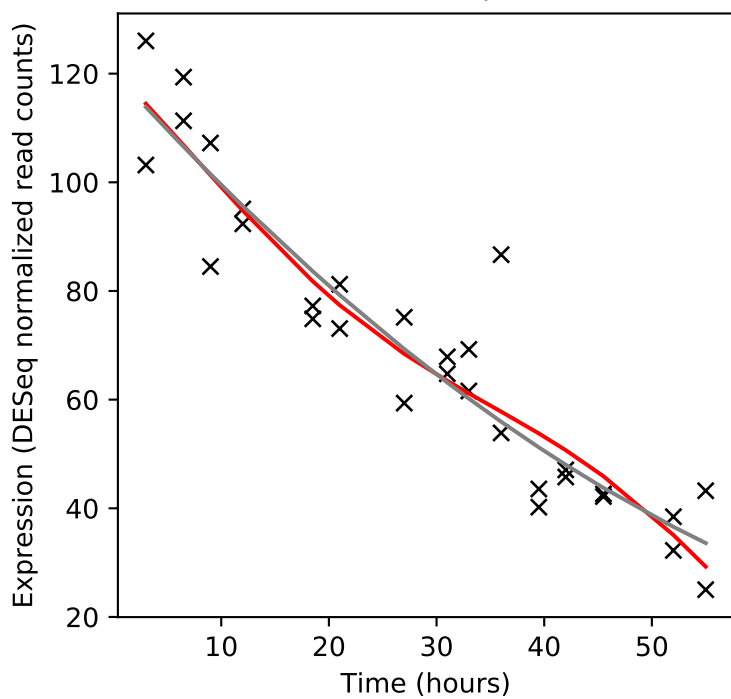

Rv0450c/mmpL4

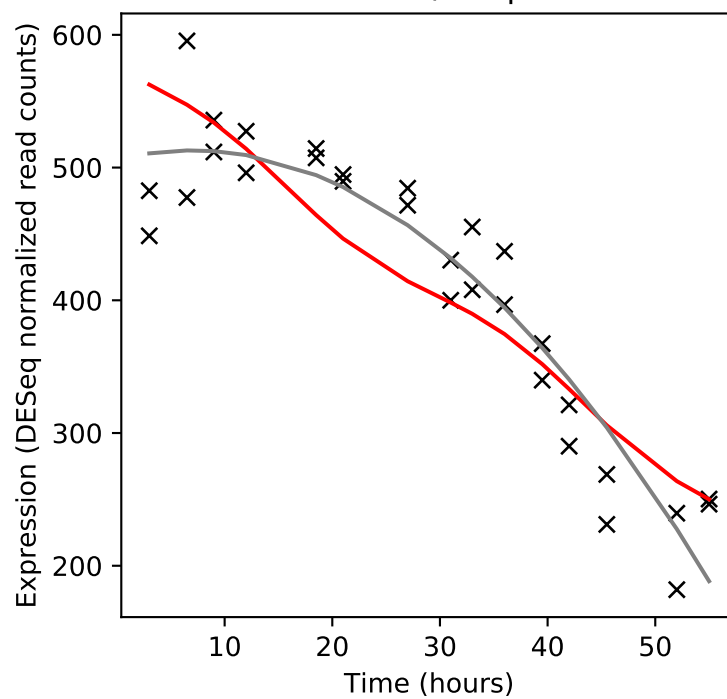

Rv0451c/mmpS4

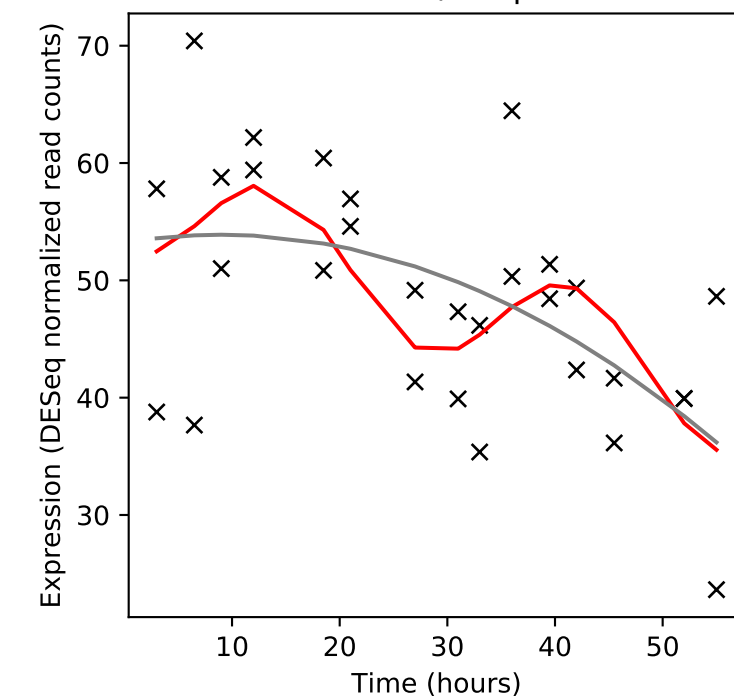



Rv0452/-

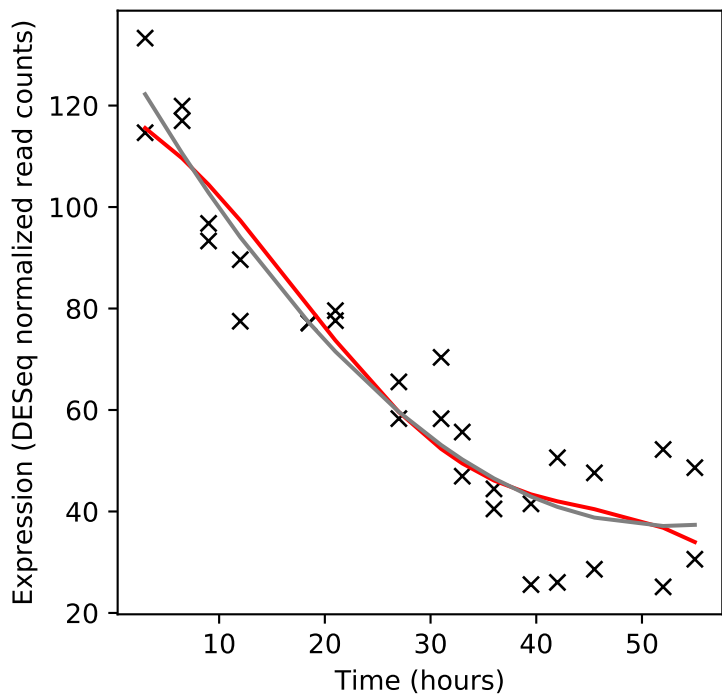

Rv0453/PPE11

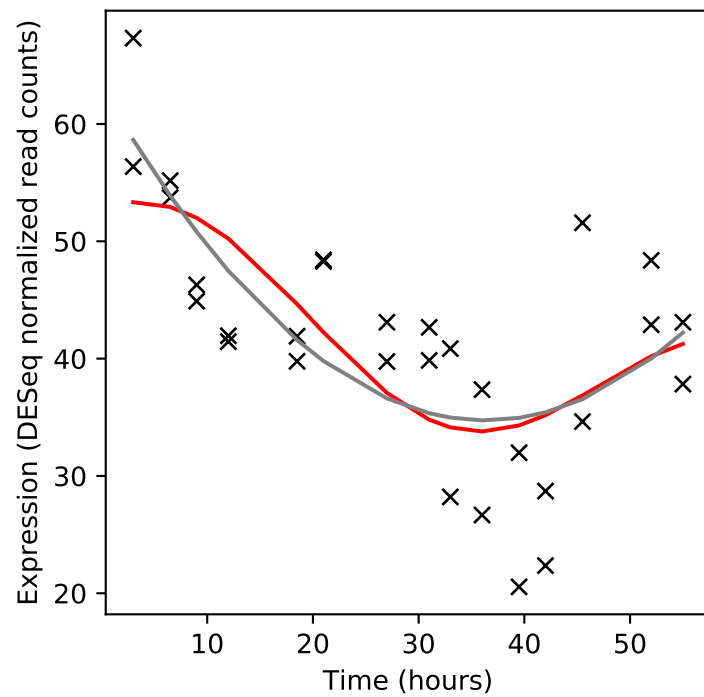

Rv0454/-

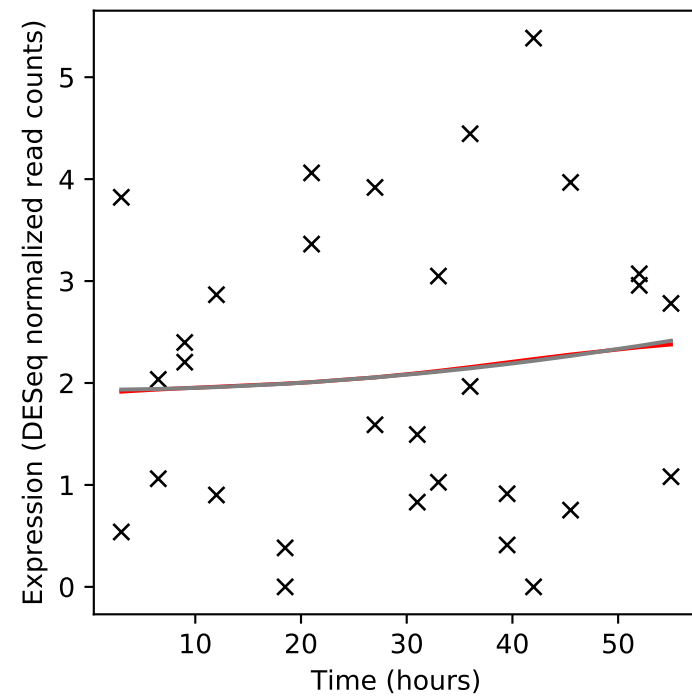

Rv0455c/-

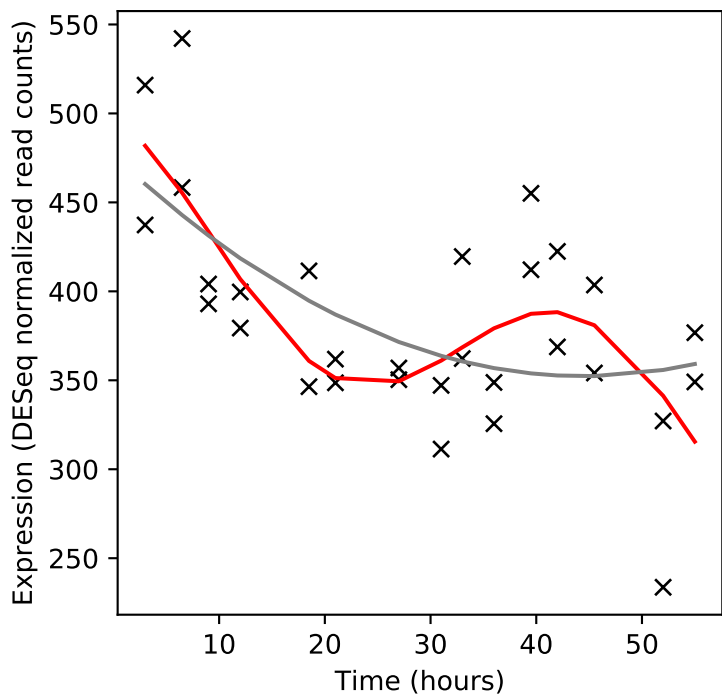

Rv0456c/echA2

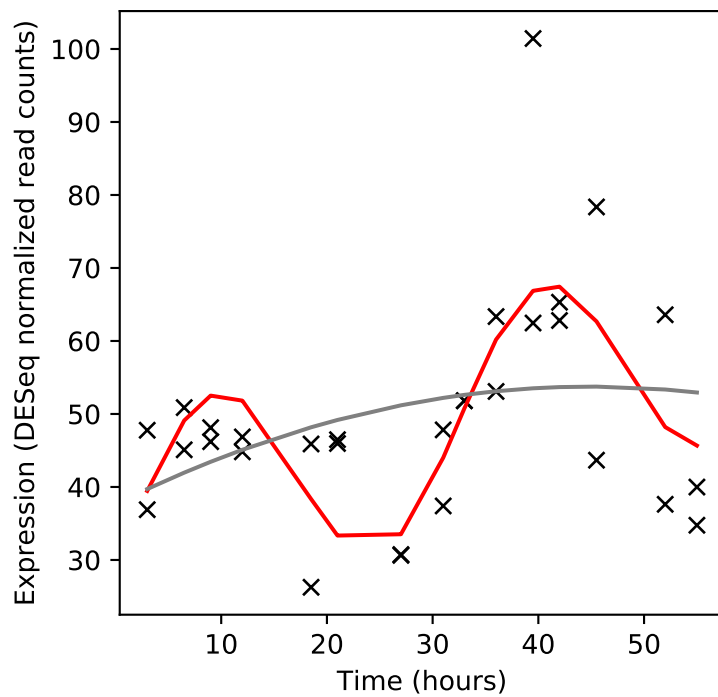

Rv0456A/mazF1

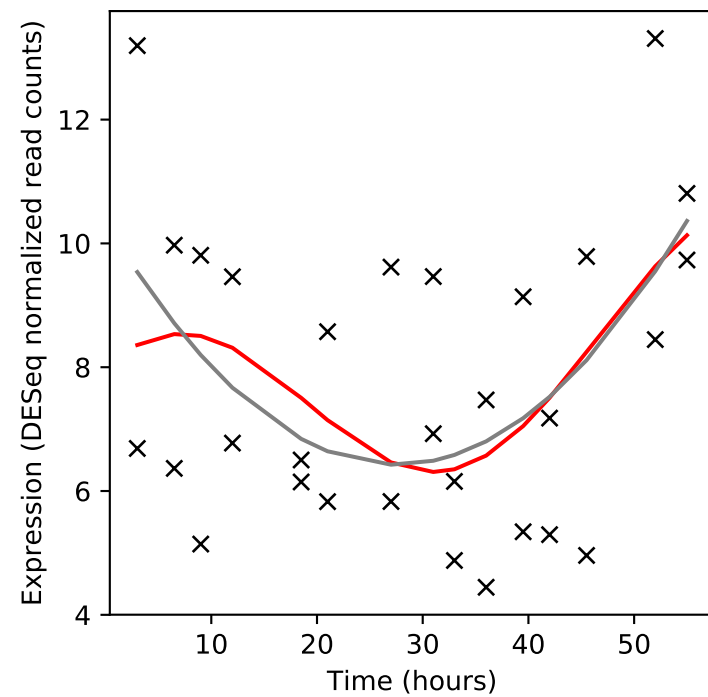

Rv0456B/mazE1

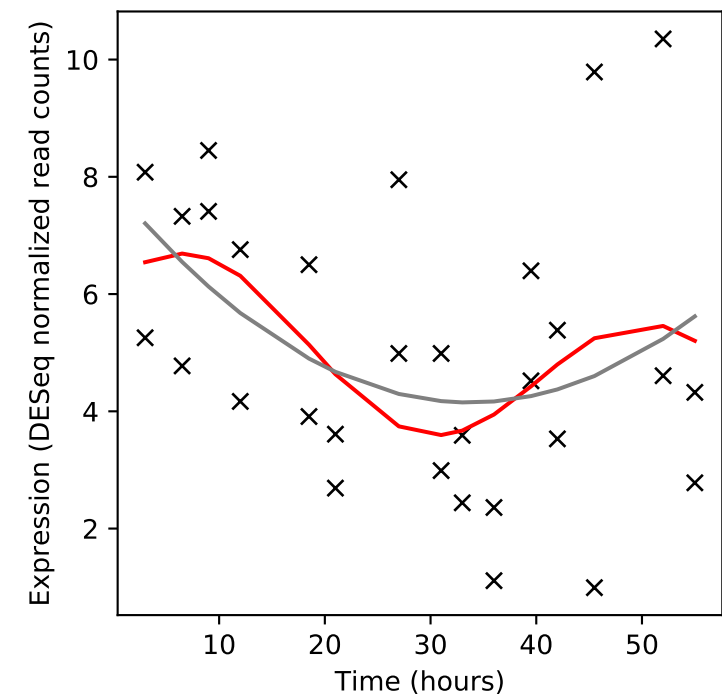

Rv0457c/-

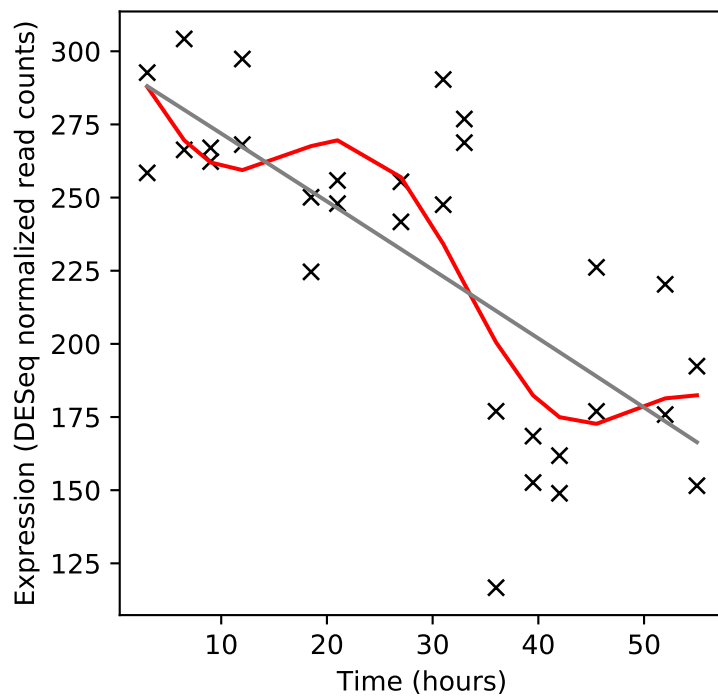

Rv0458/-

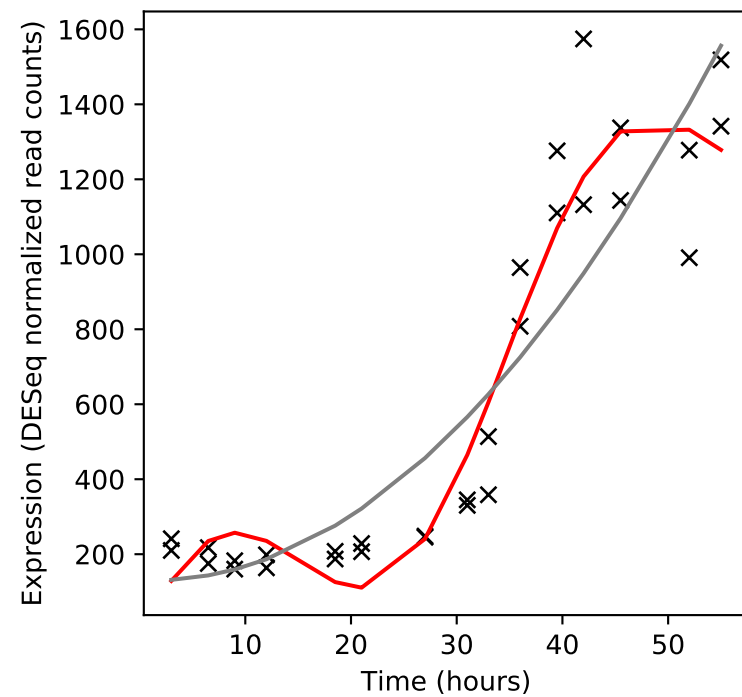

Rv0459/-

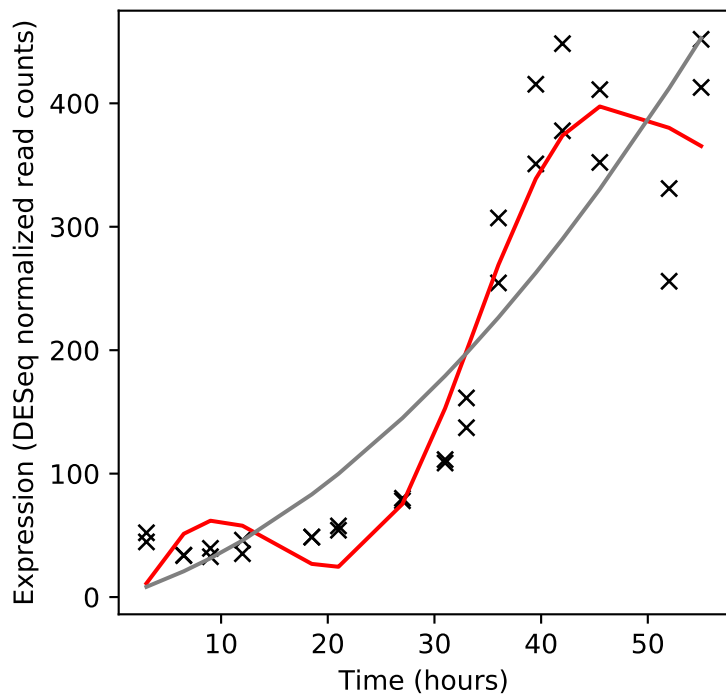

Rv0460/-

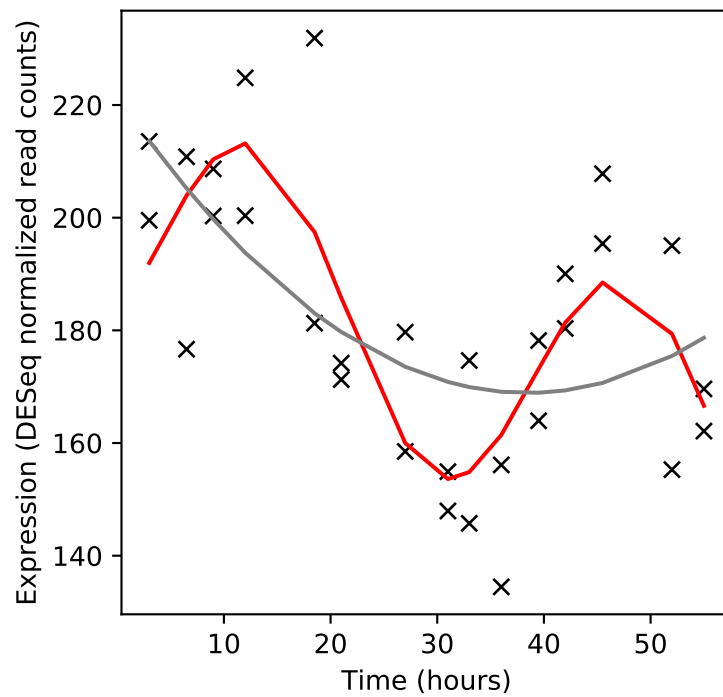

Rv0461/-

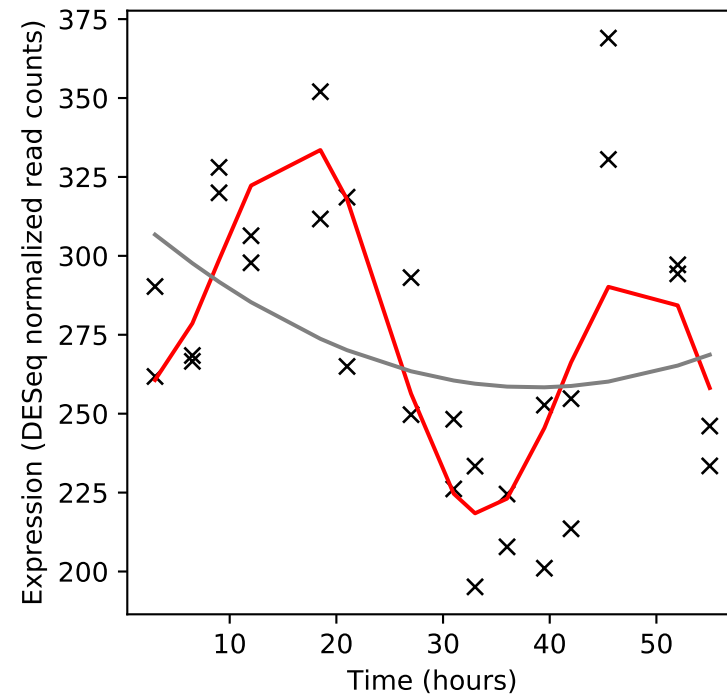

Rv0462/lpdC

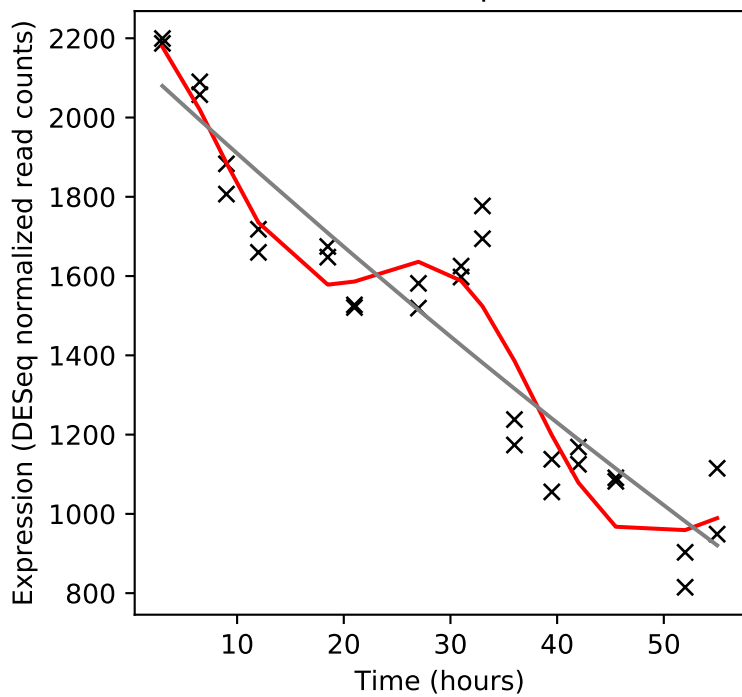

Rv0463/-

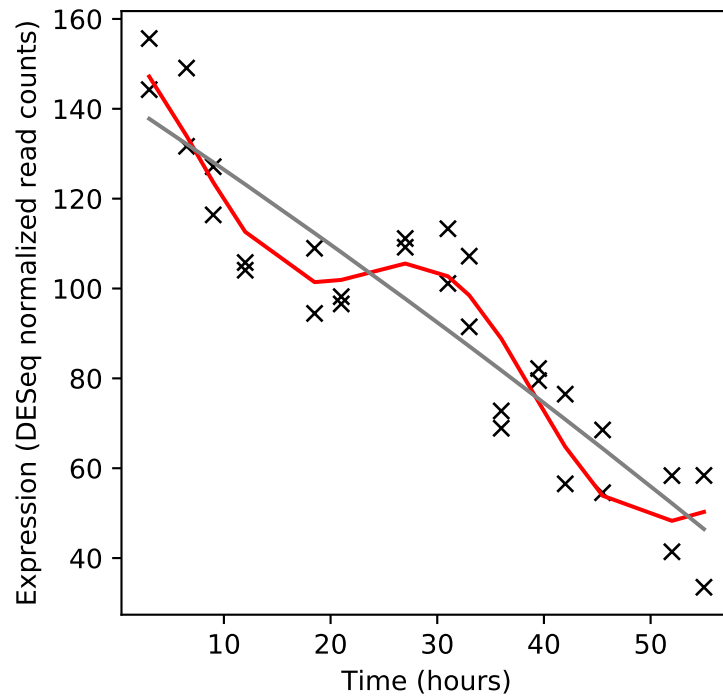

Rv0464c/-

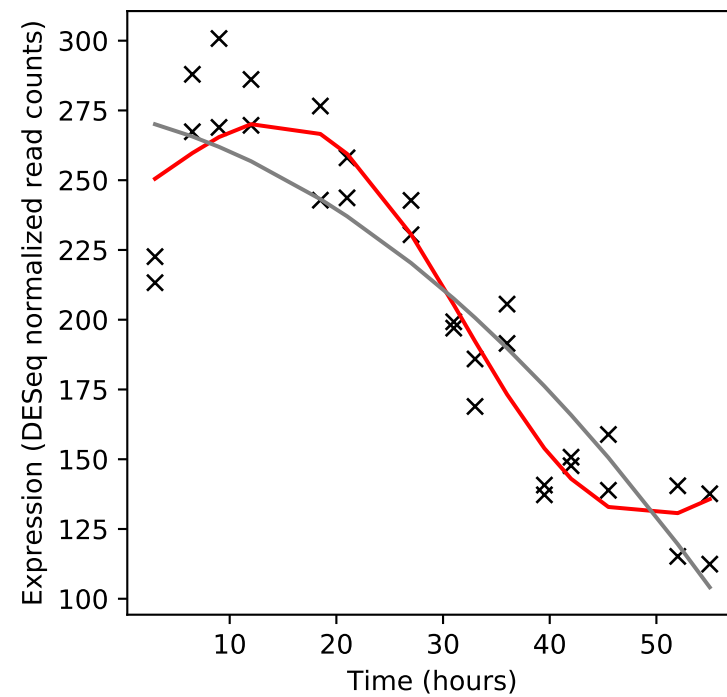

Rv0465c/-

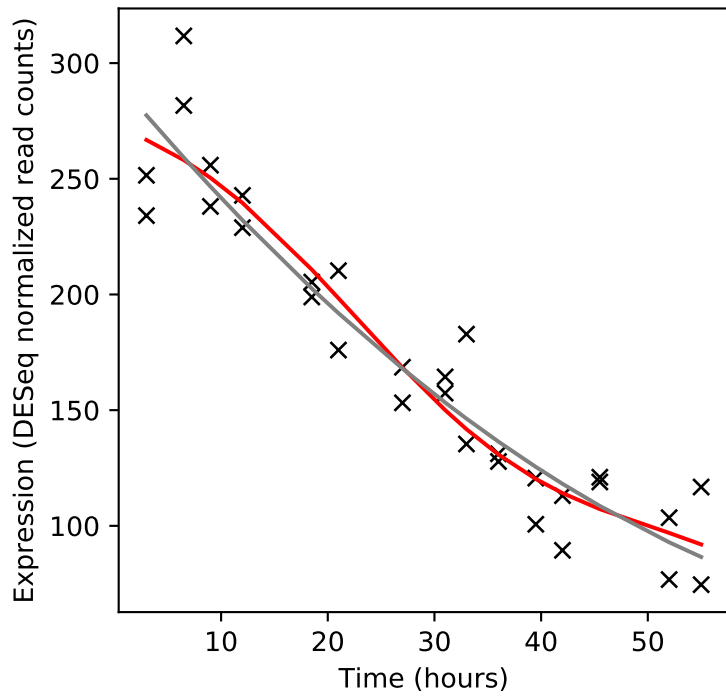

Rv0466/-

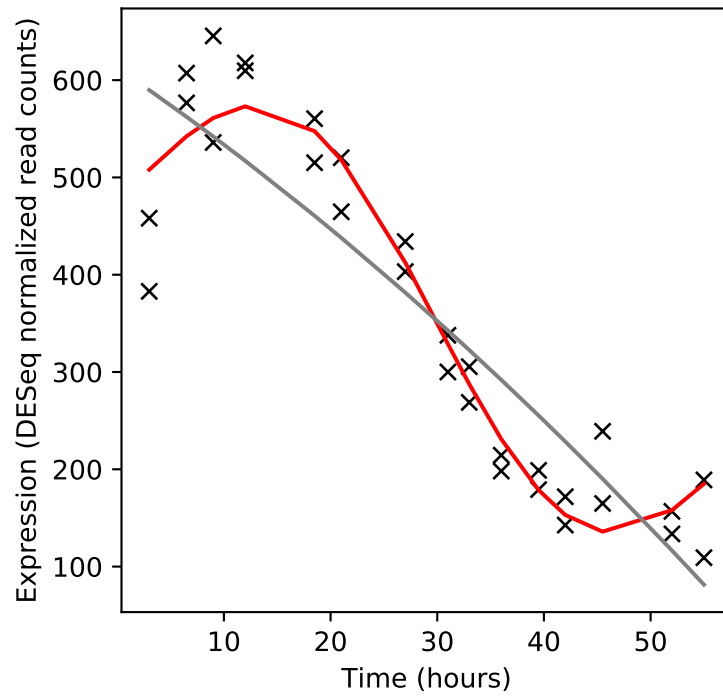

Rv0467/icl1

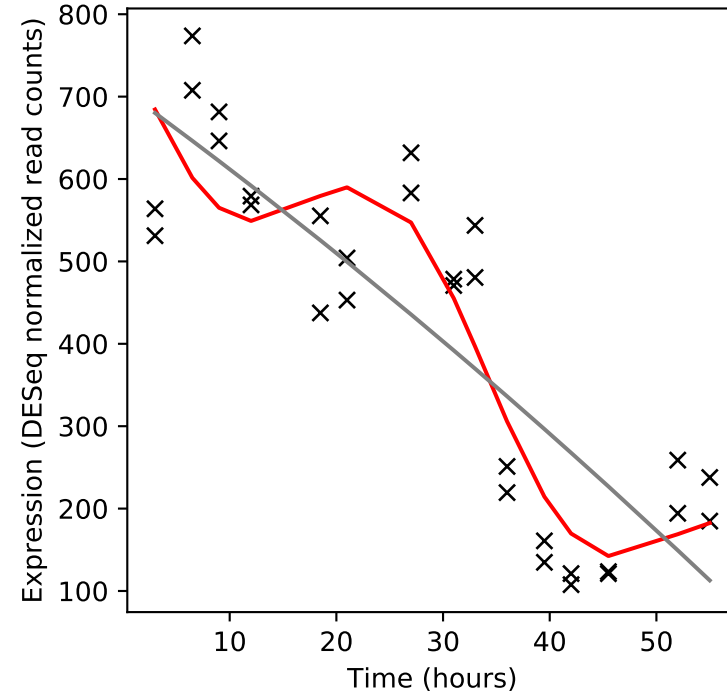

Rv0468/fadB2

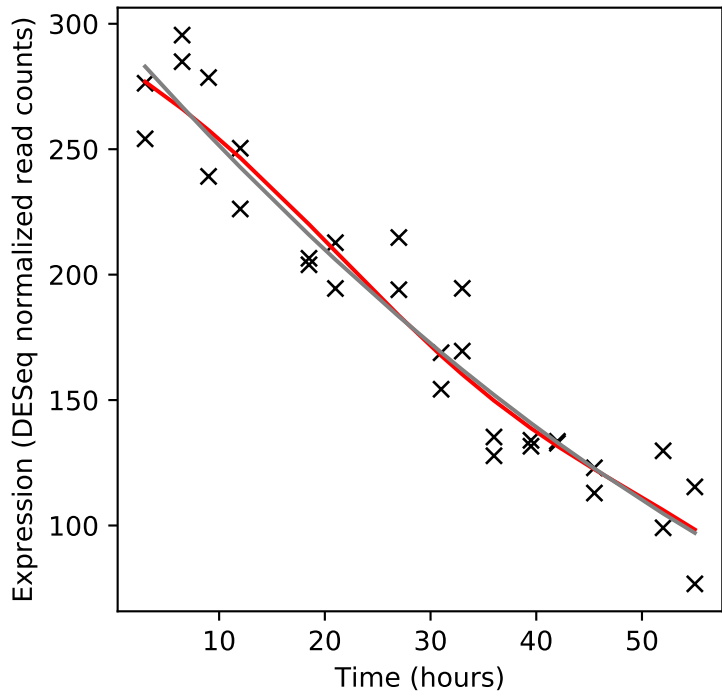

Rv0469/umaA

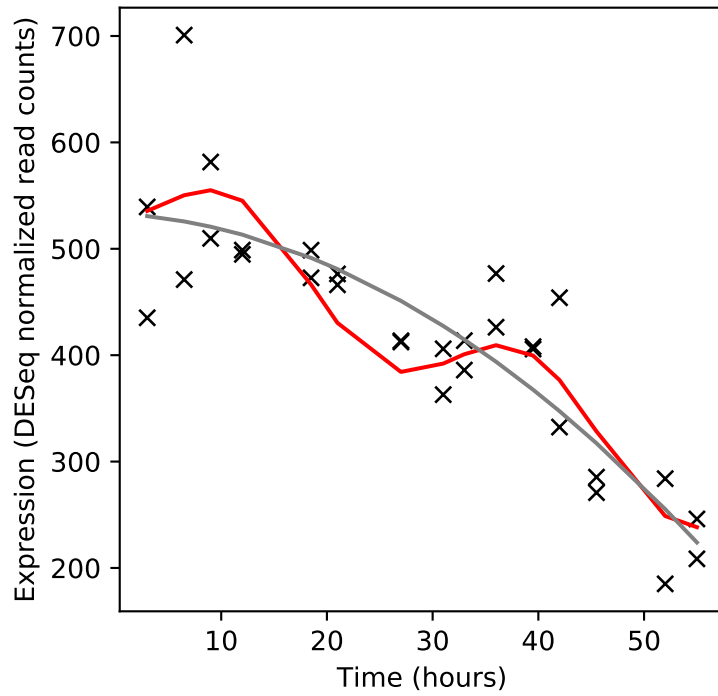

Rv0470c/pcaA

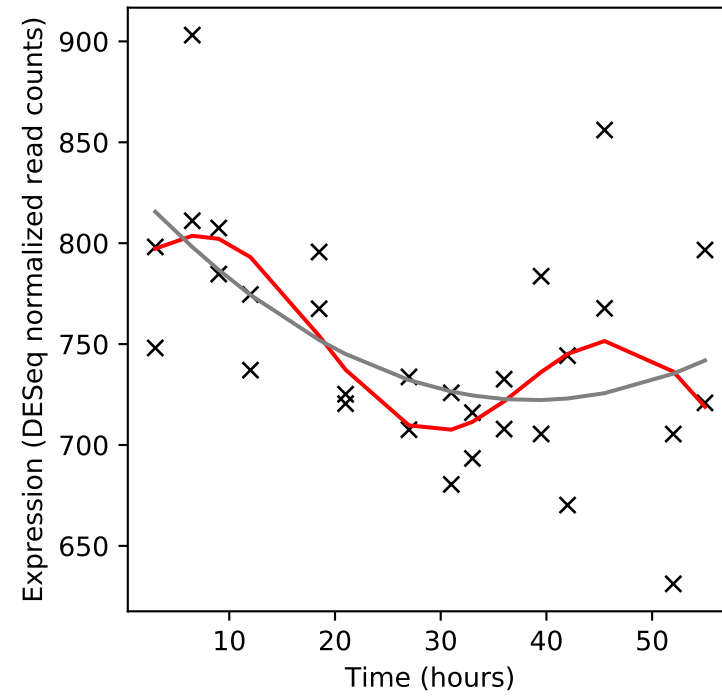

Rv0470A/-

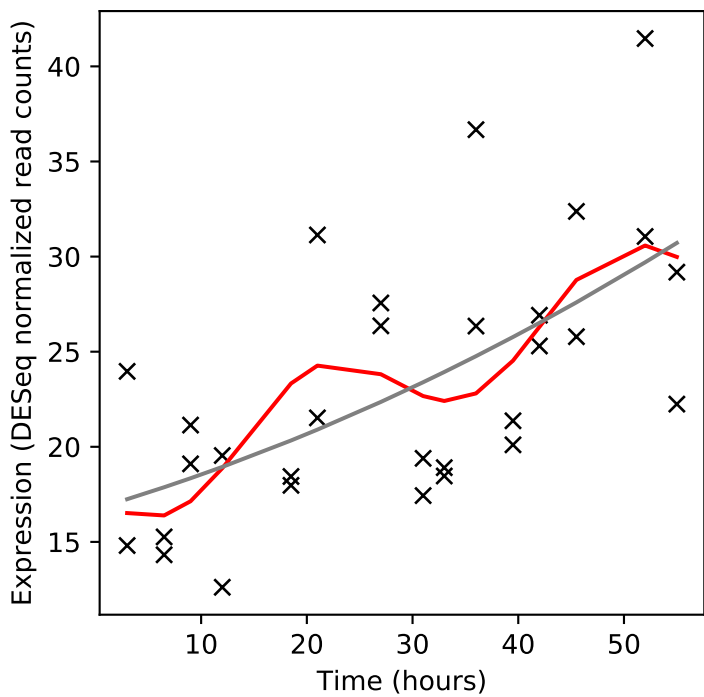

Rv0471c/-

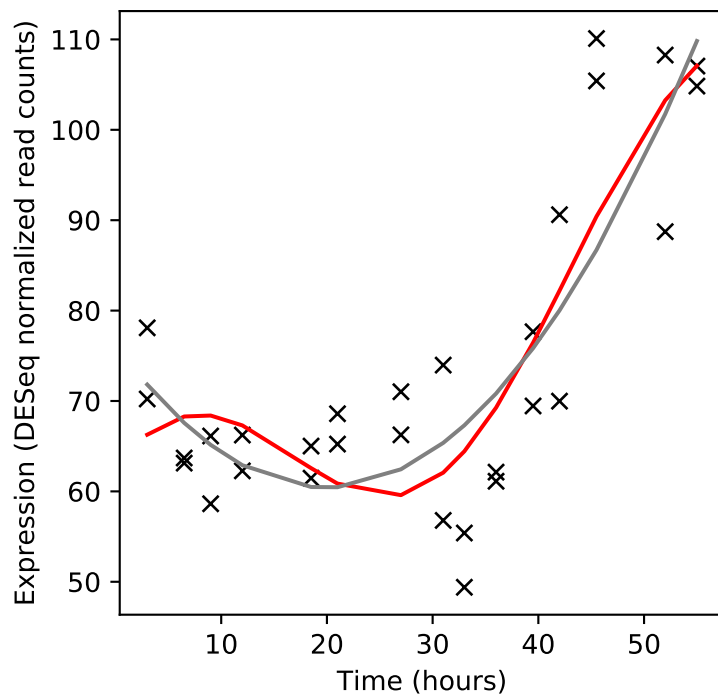

Rv0472c/-

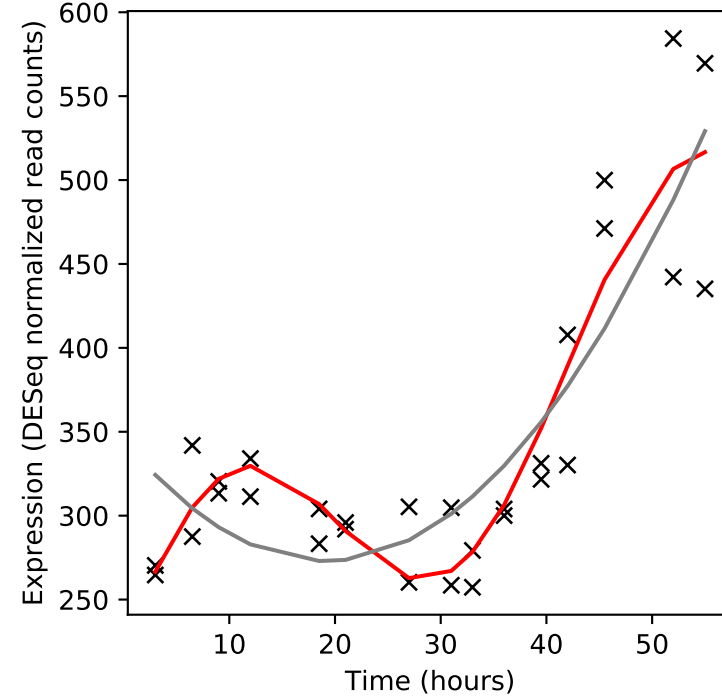

Rv0473/-

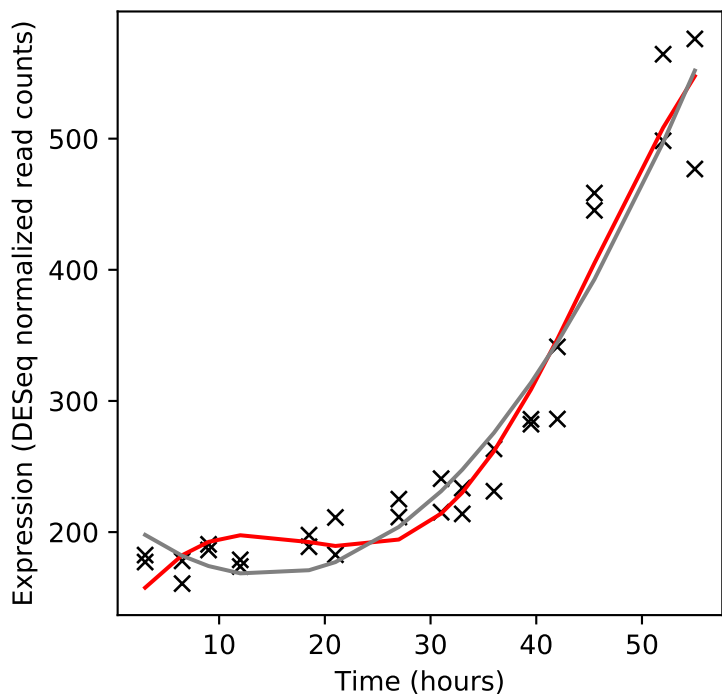

Rv0474/-

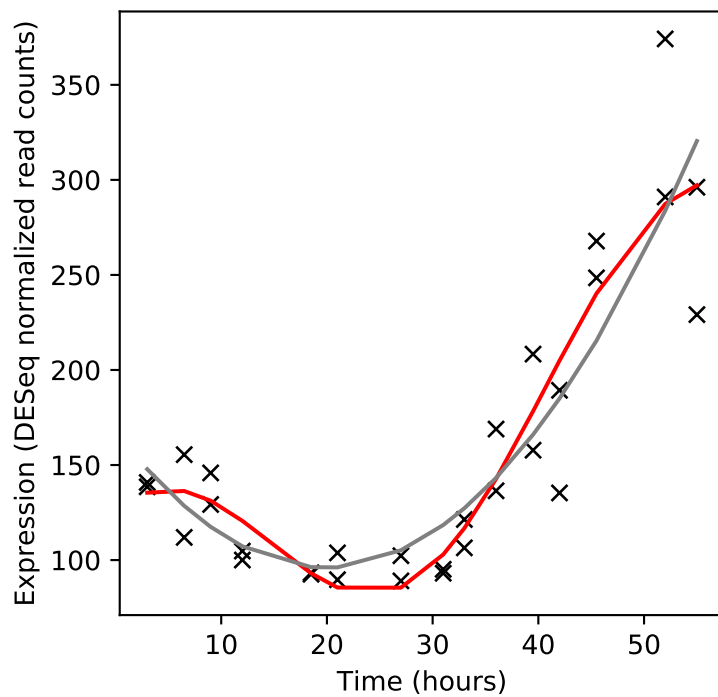

Rv0475/hbhA

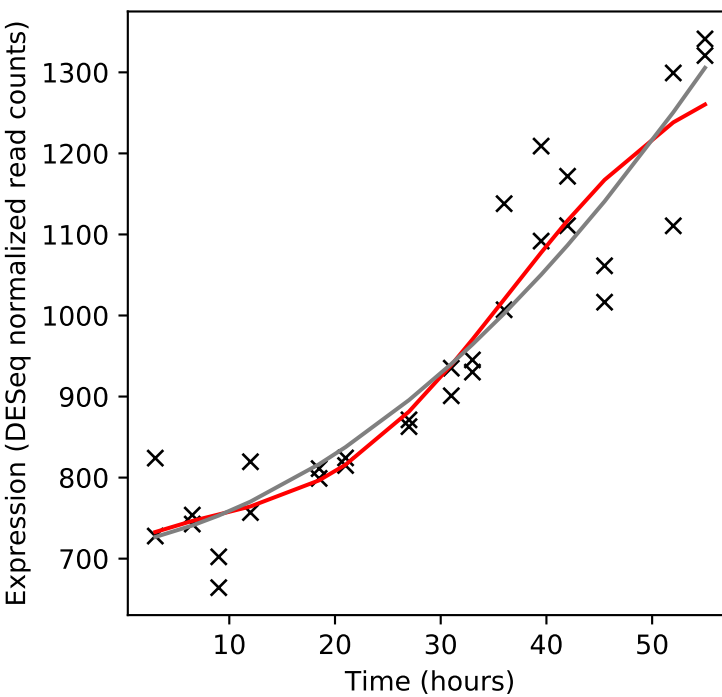

Rv0476/-

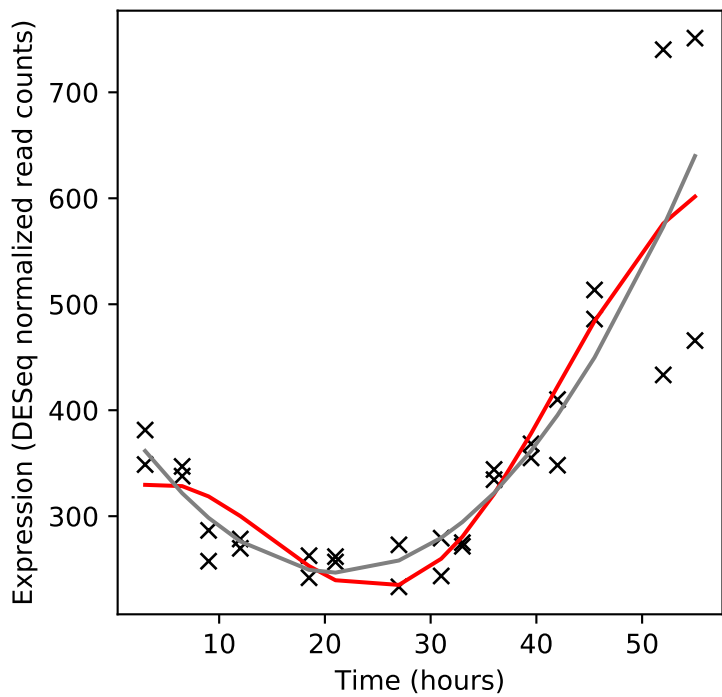

Rv0477/-

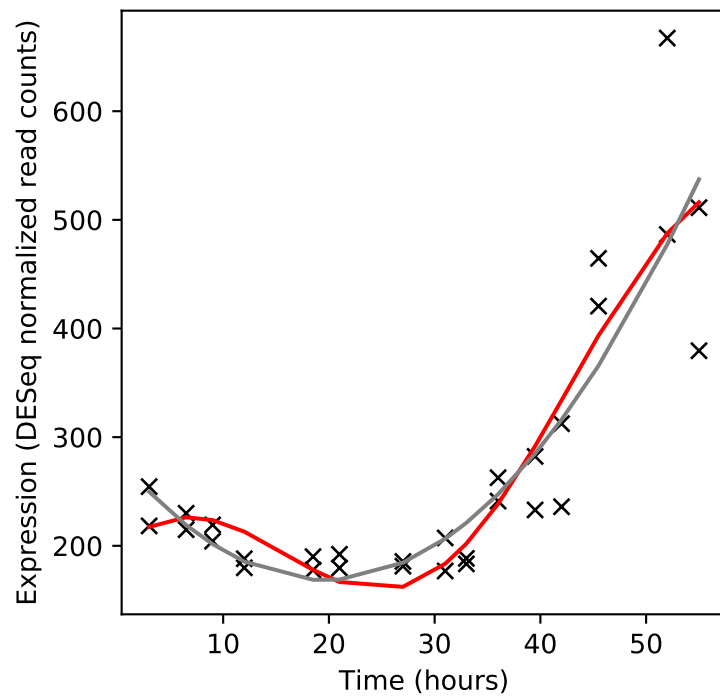

Rv0478/deoC

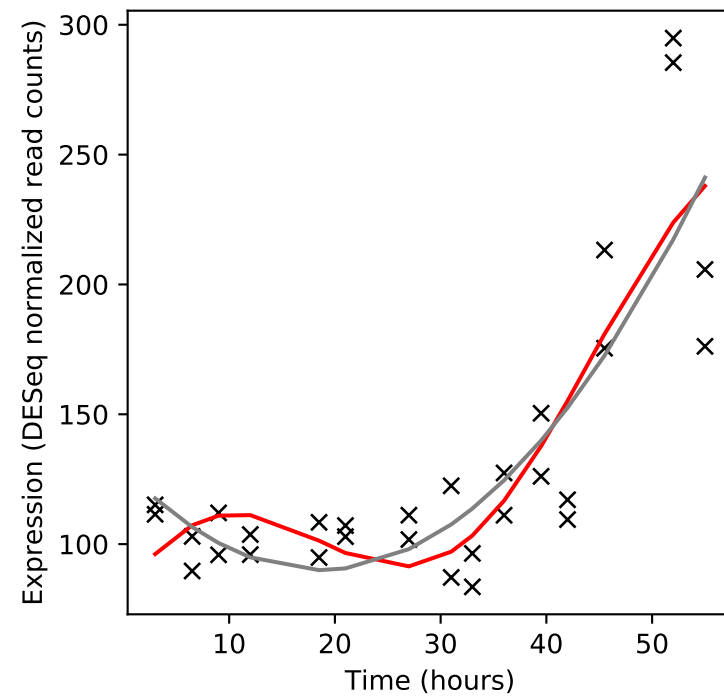

Rv0479c/-

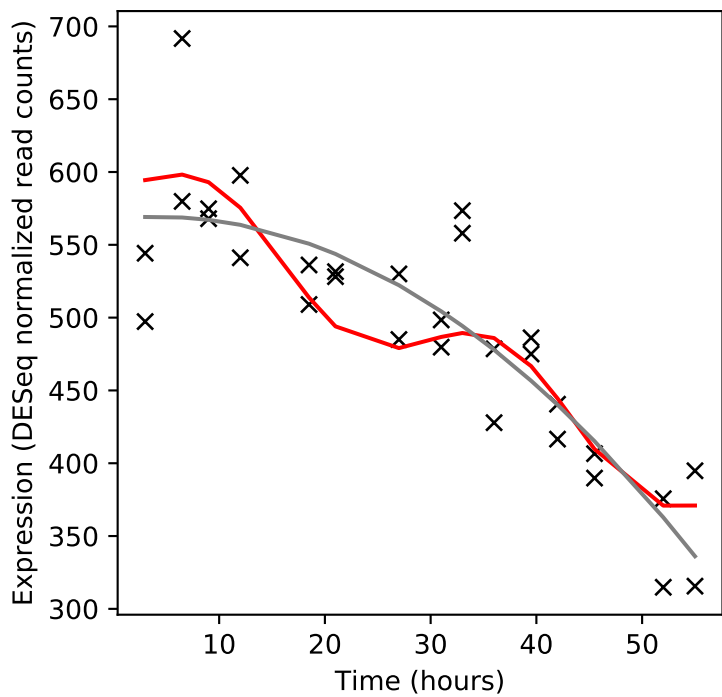

Rv0480c/-

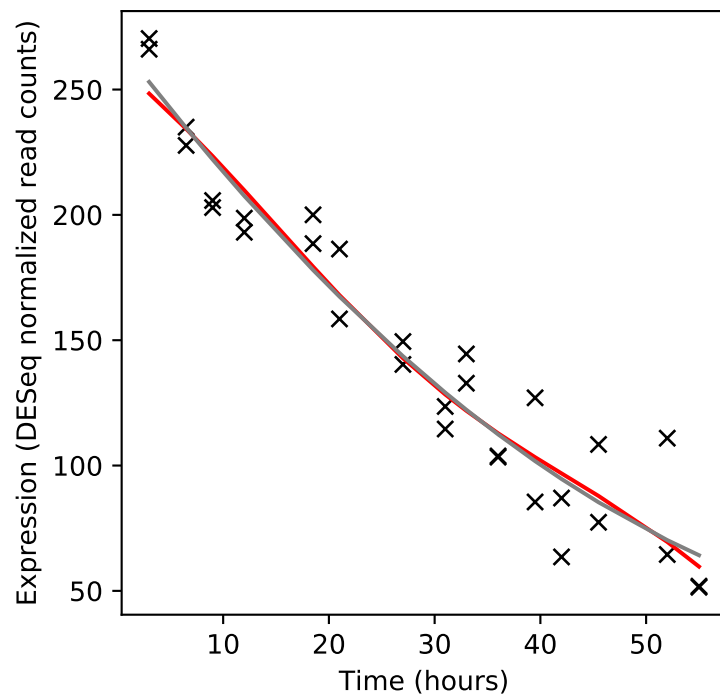

Rv0481c/-

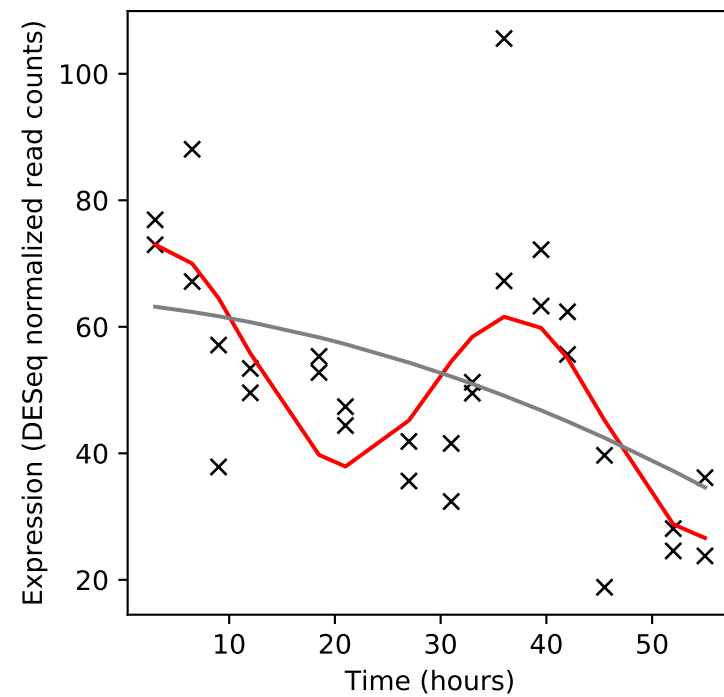

Rv0482/murB

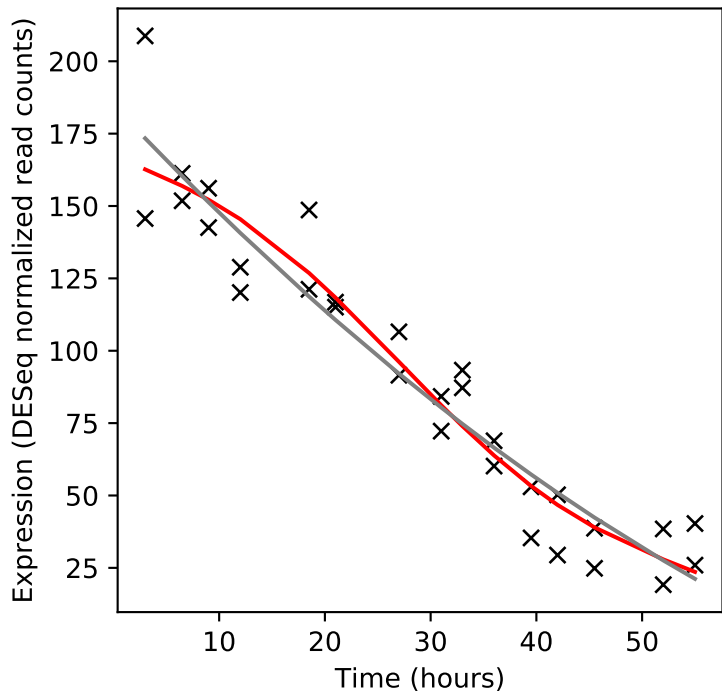

Rv0483/lprQ

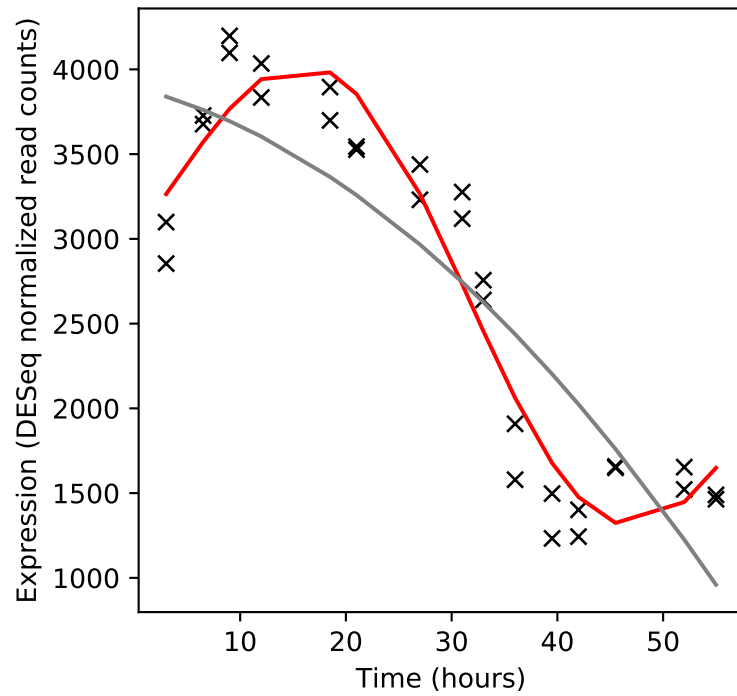

Rv0484c/-

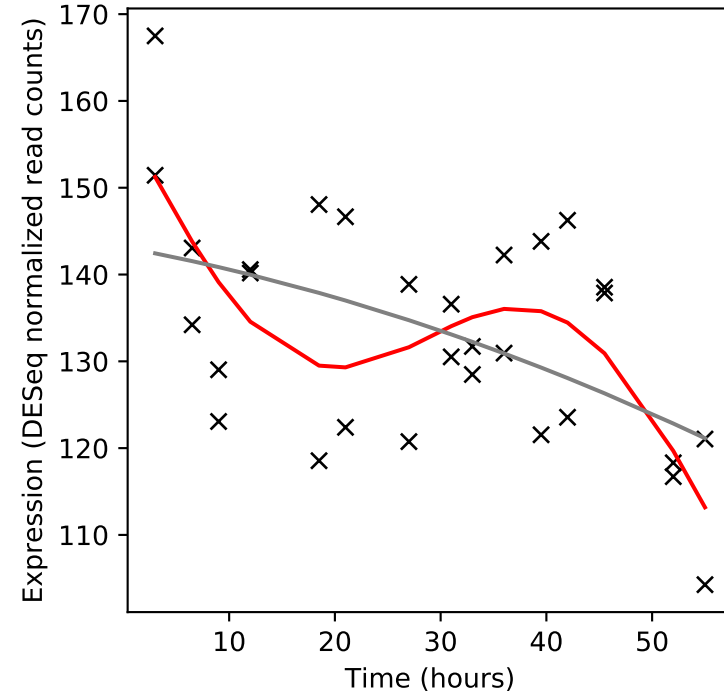

Rv0485/-

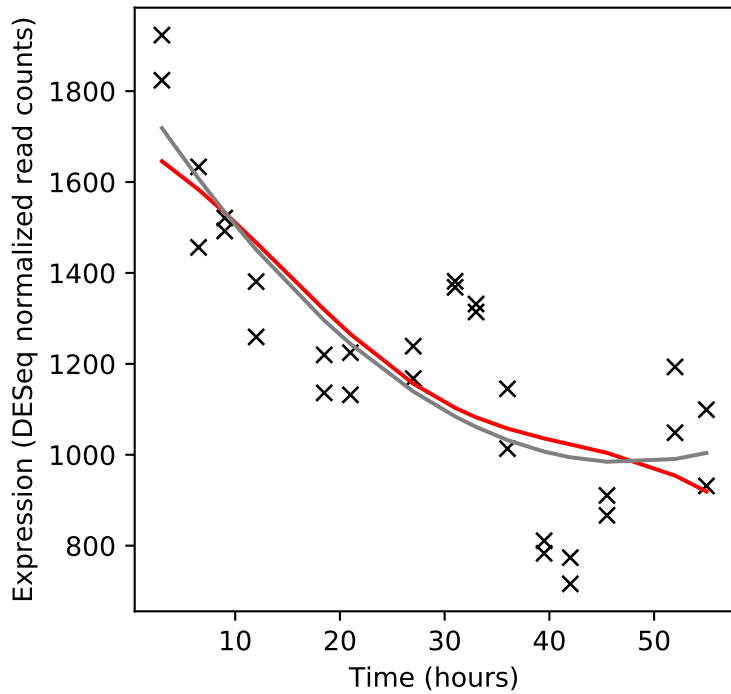

Rv0486/mshA

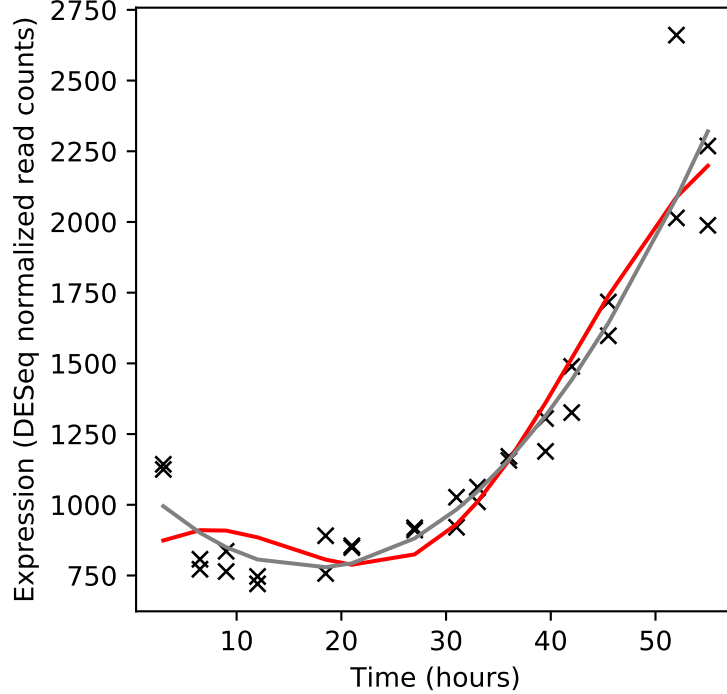

Rv0487/-

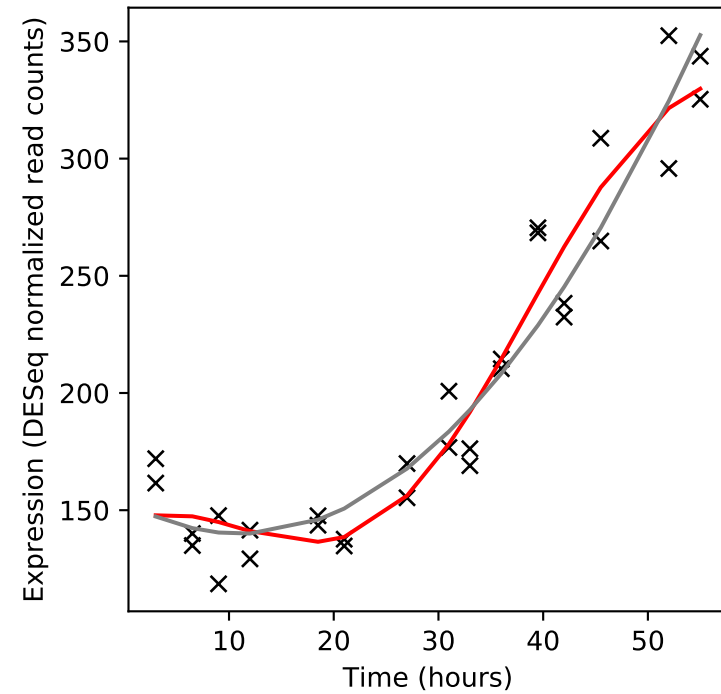

Rv0488/-

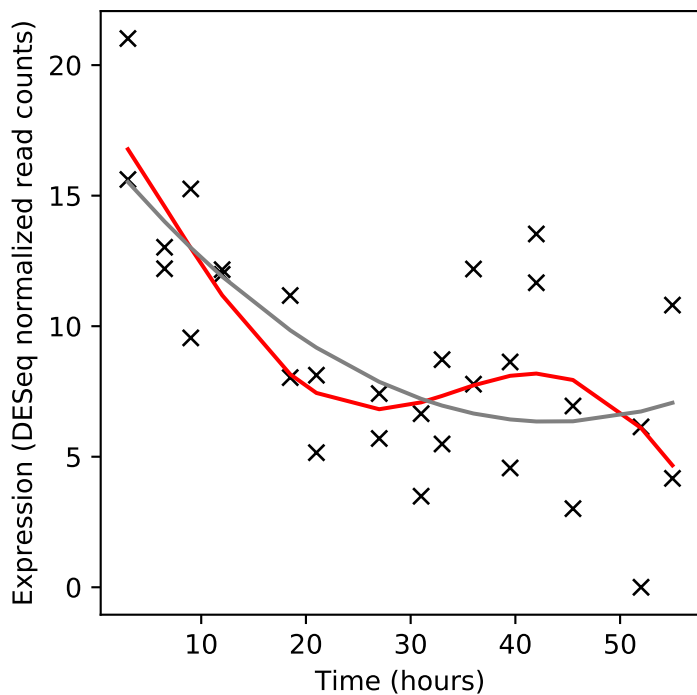

Rv0489/gpm1

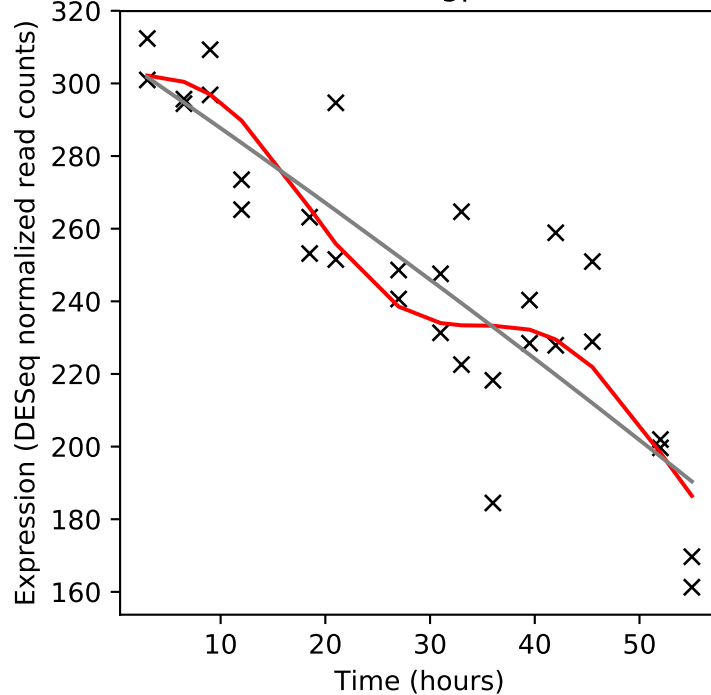

Rv0490/senX3

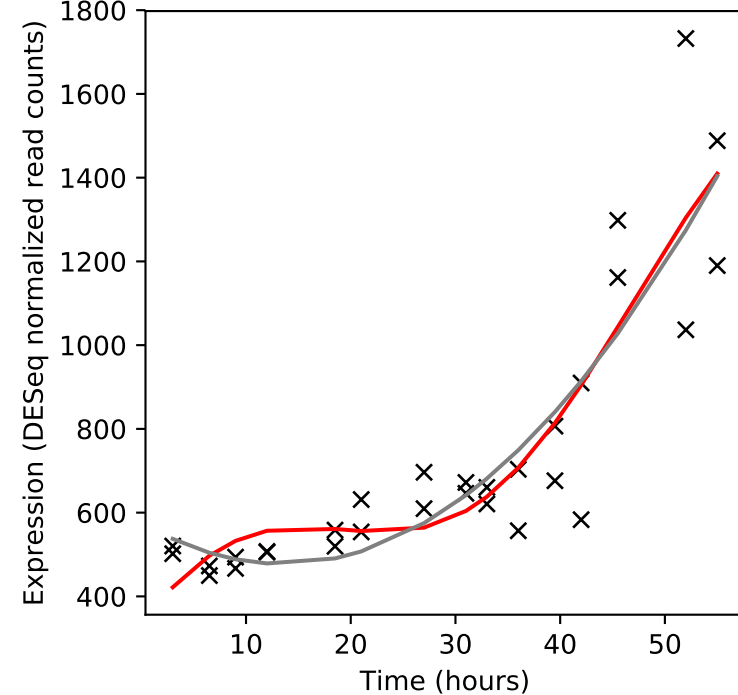

Rv0491/regX3

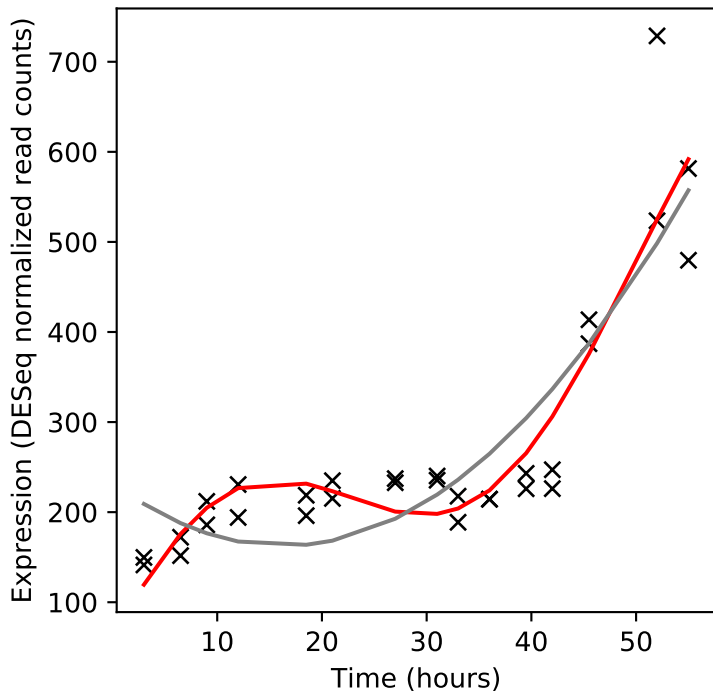

Rv0492c/-

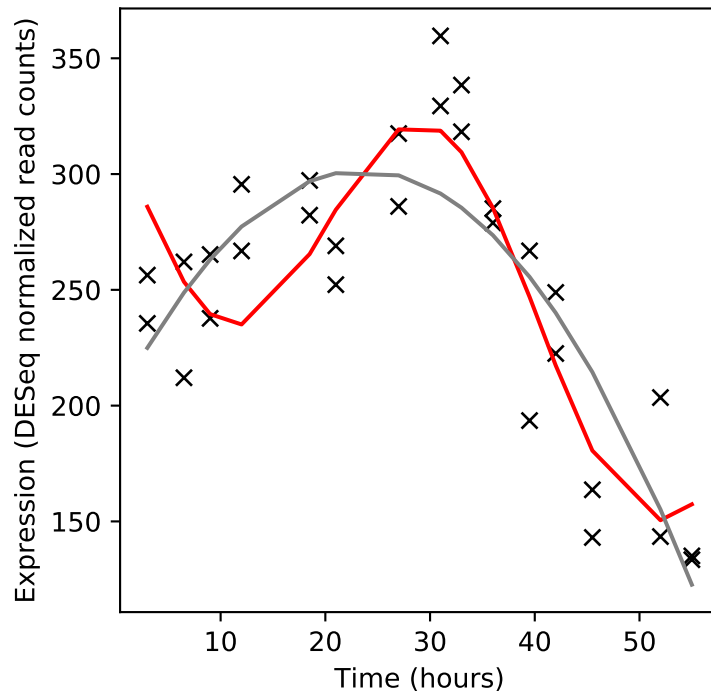

Rv0492A/-

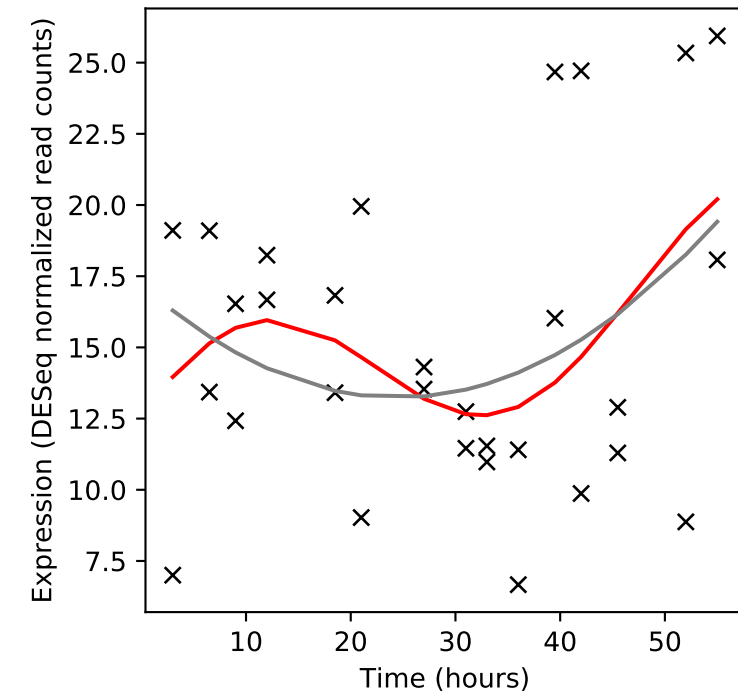

Rv0493c/-

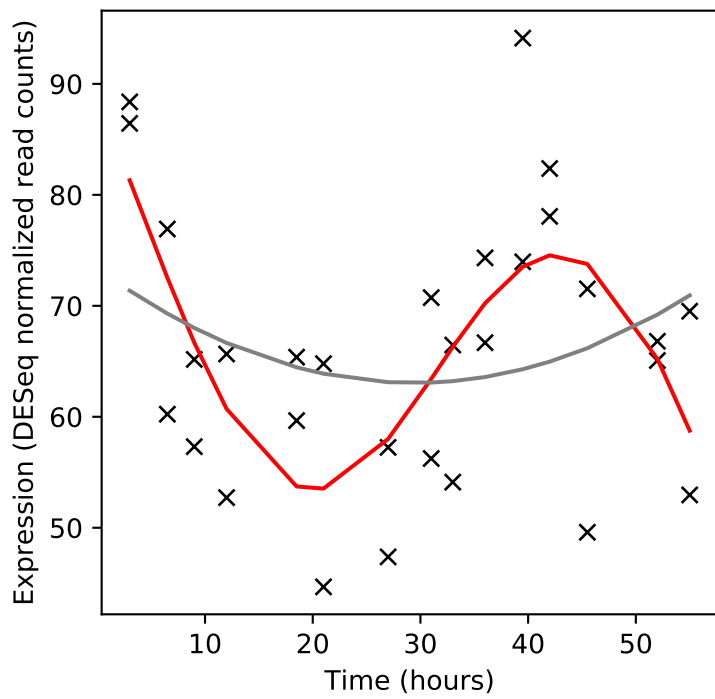

Rv0494/-

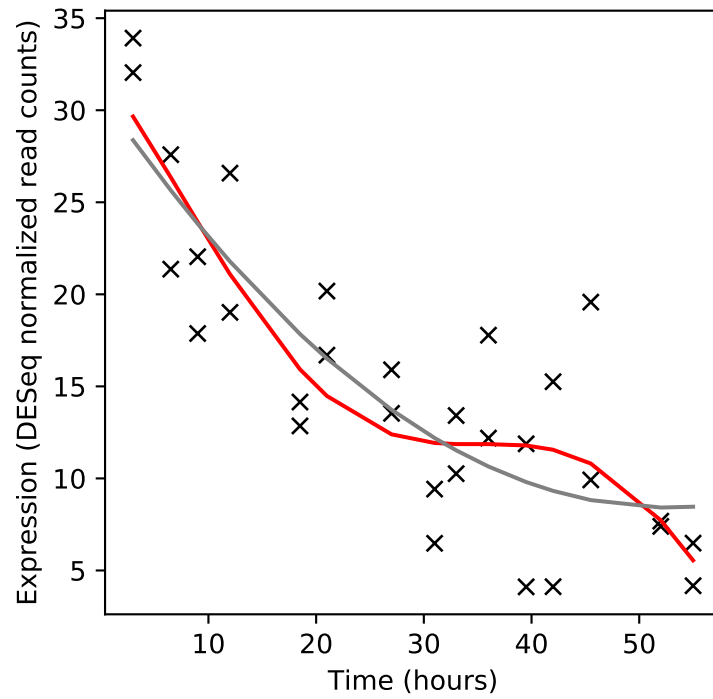

Rv0495c/-

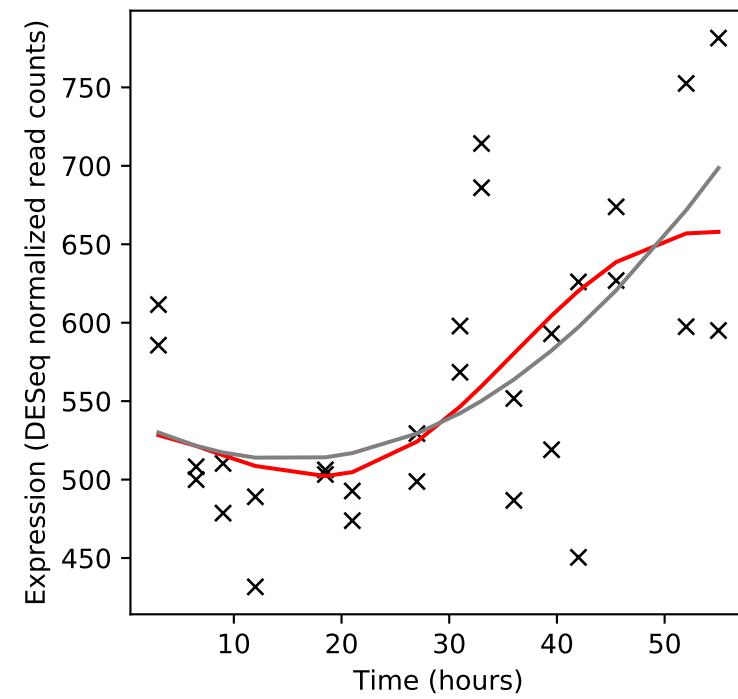

Rv0496/-

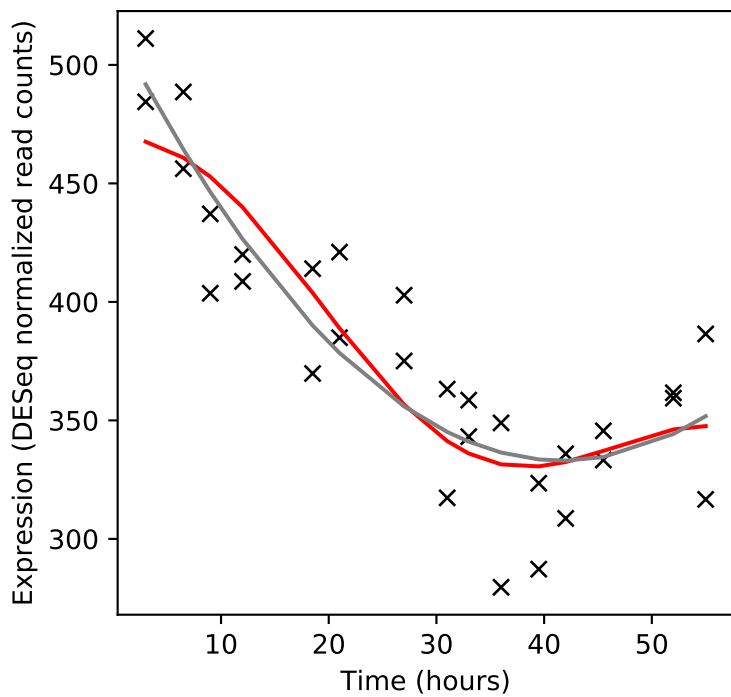

Rv0497/-

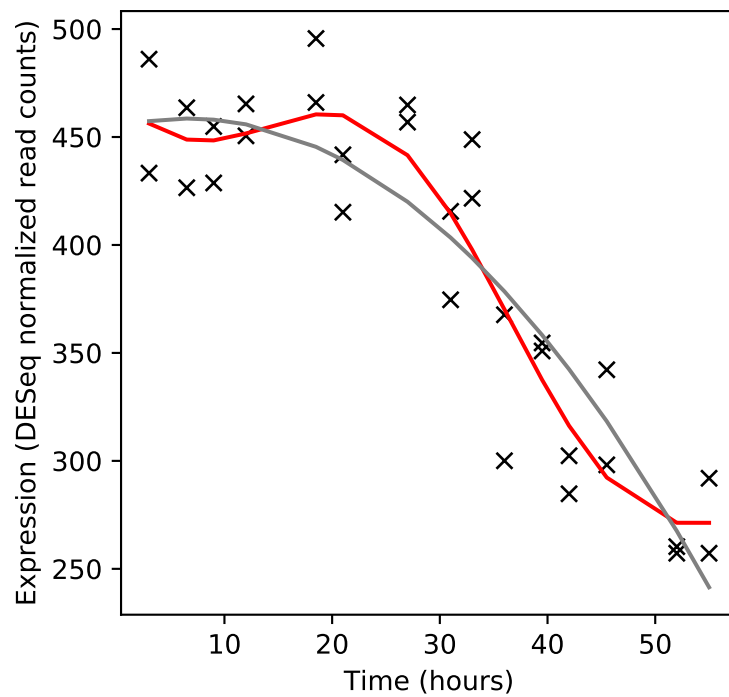

Rv0498/-

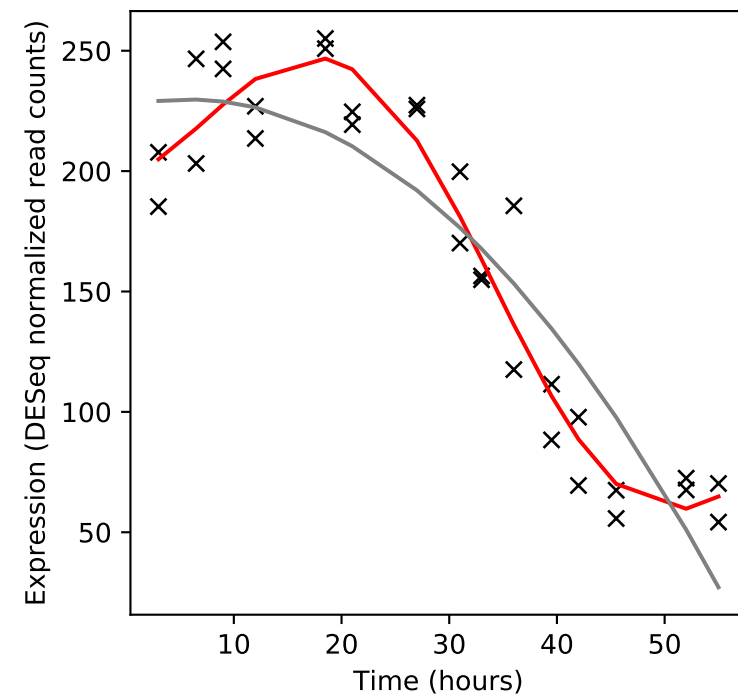

Rv0499/-

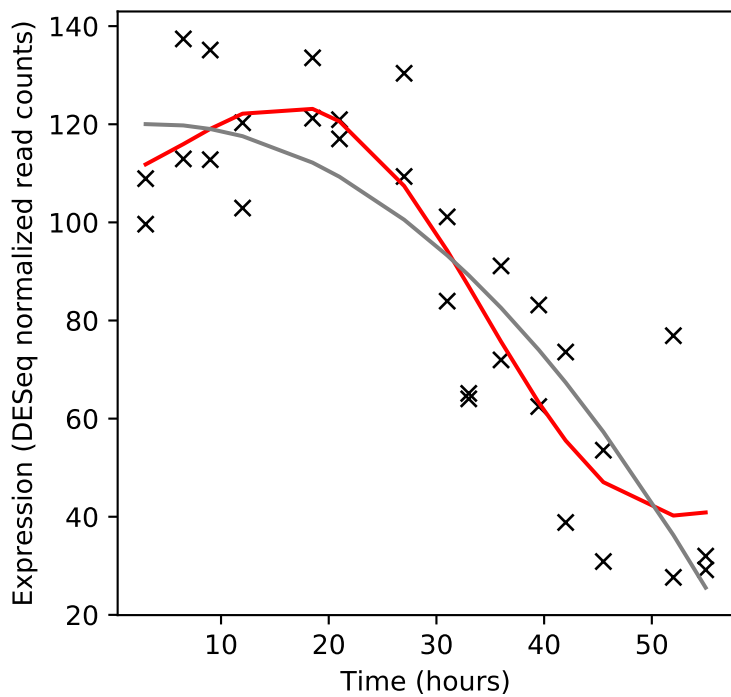

Rv0500/proC

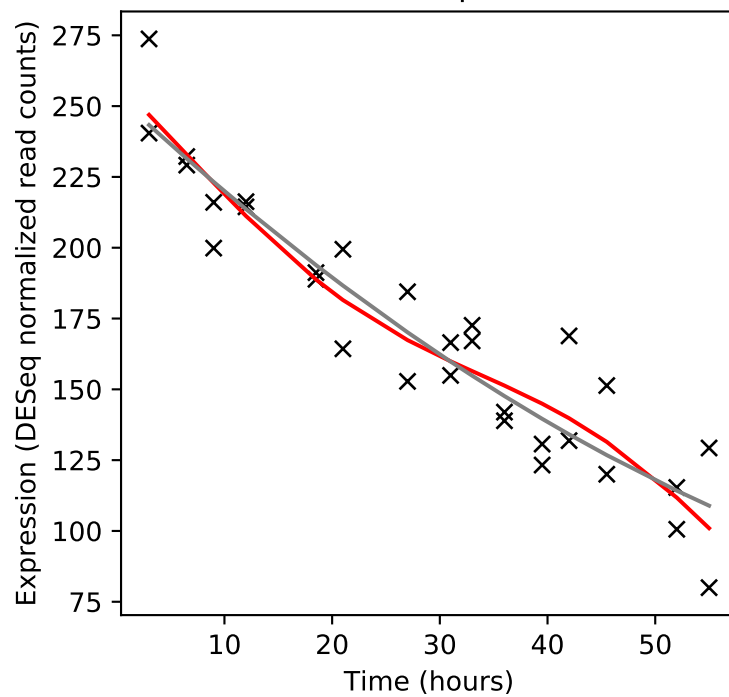

Rv0500A/-

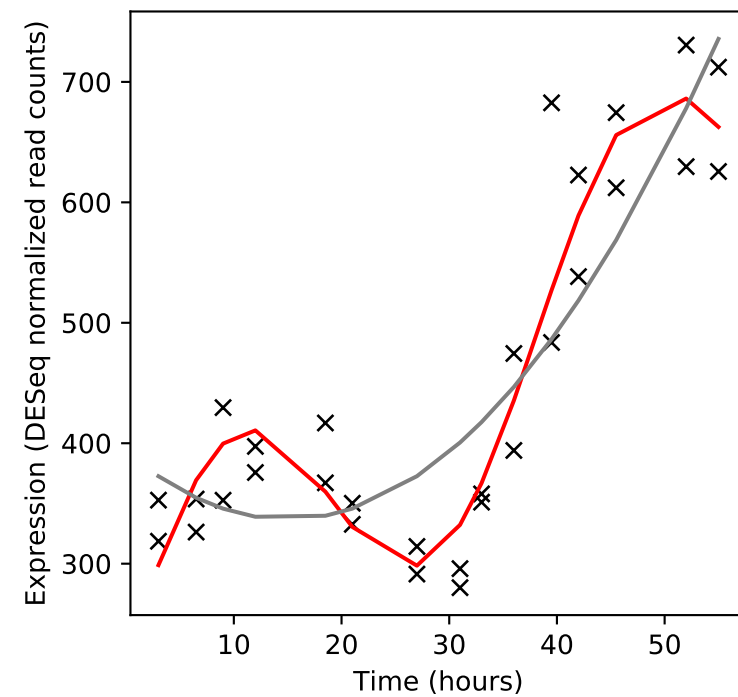

Rv0500B/-

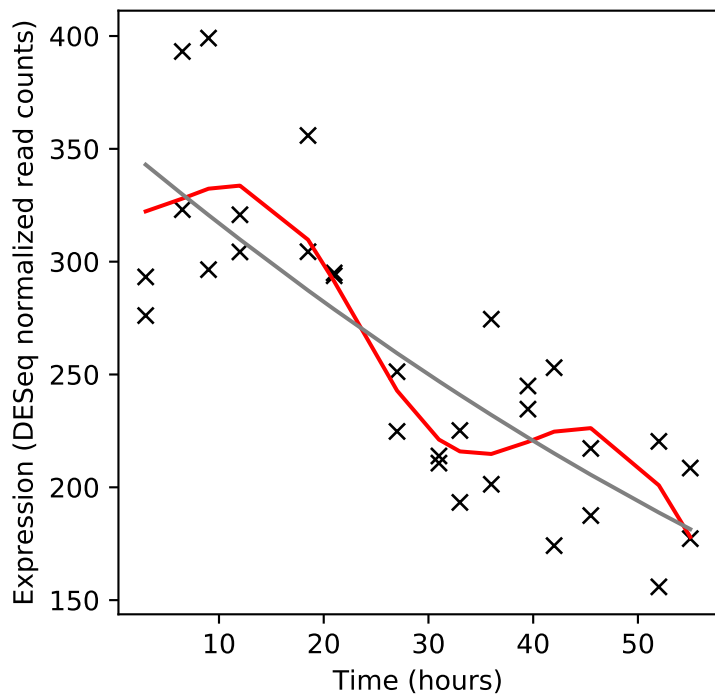

Rv0501/galE2

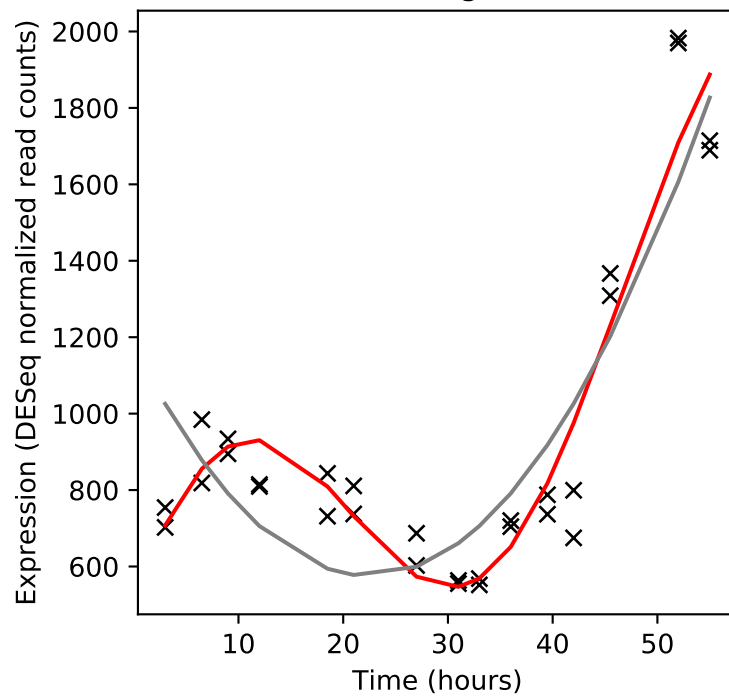

Rv0502/-

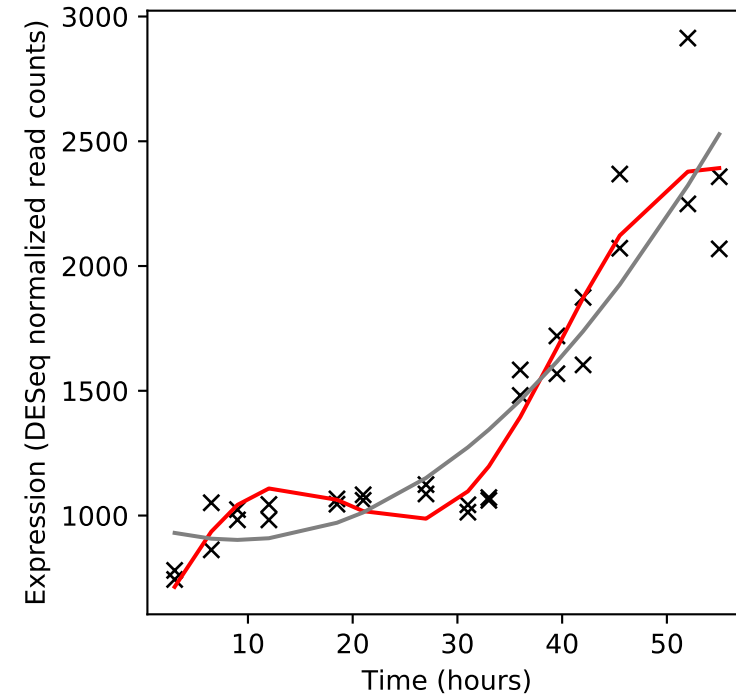

Rv0503c/cmaA2

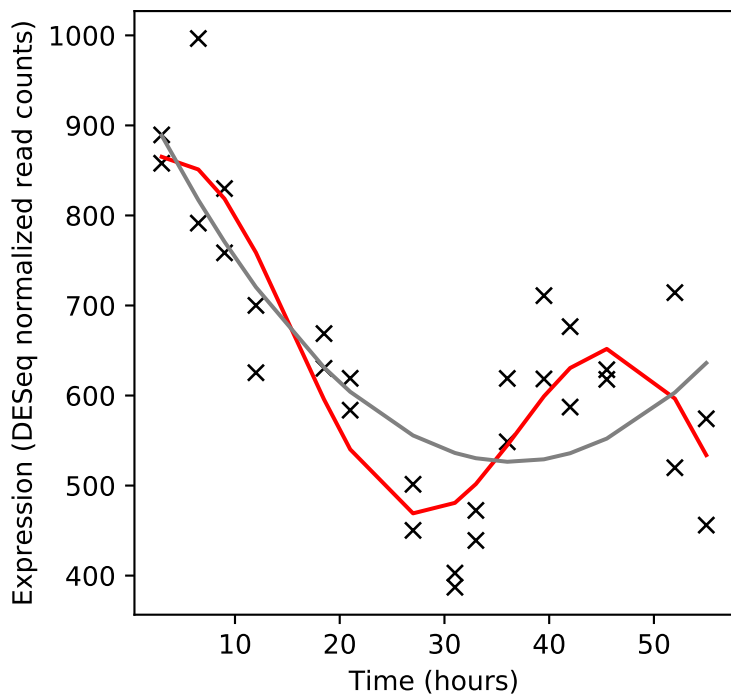

Rv0504c/-

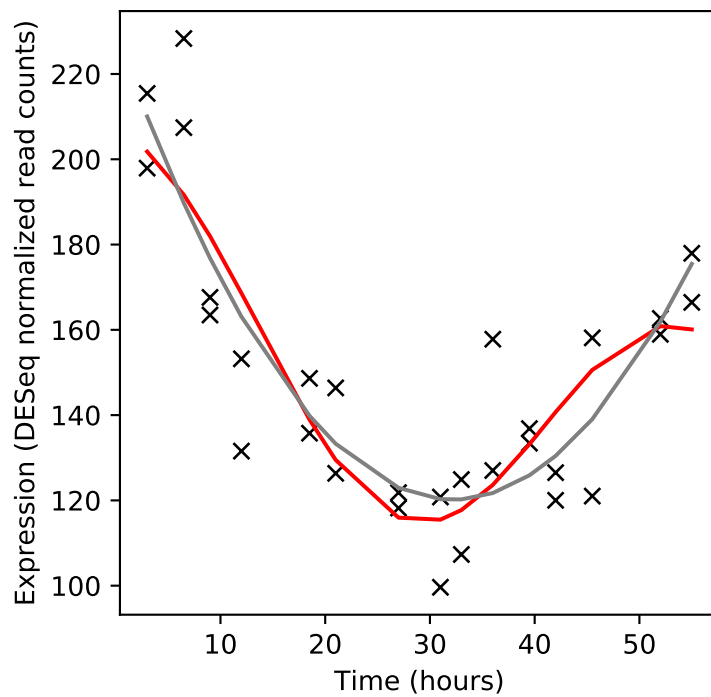

Rv0505c/serB1

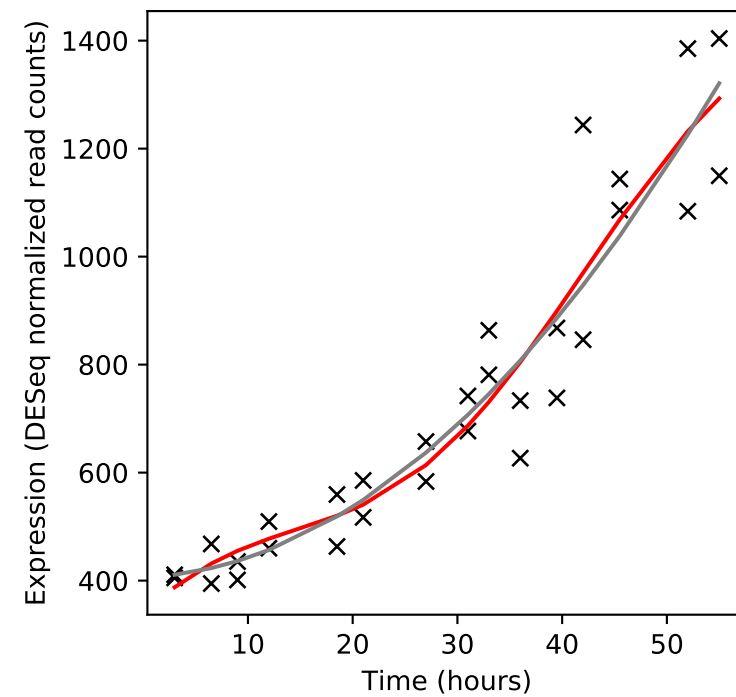

Rv0506/mmpS2

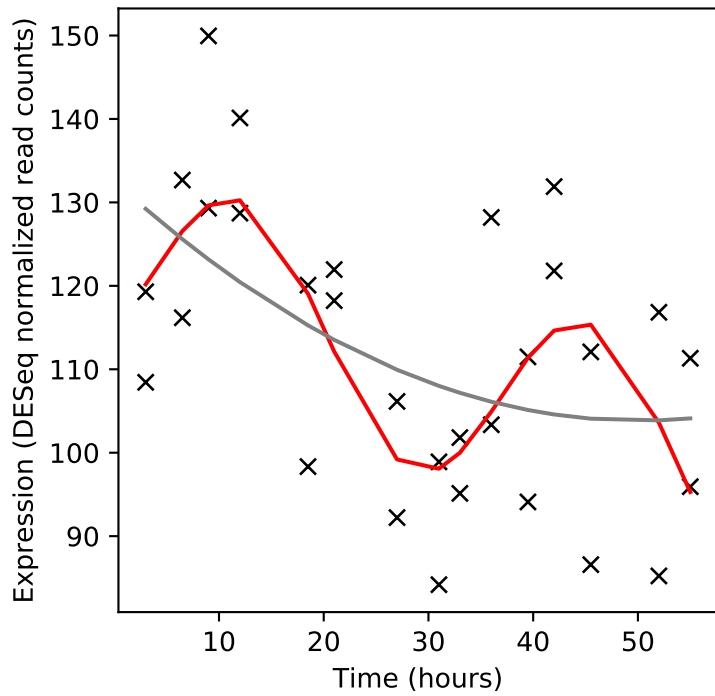

Rv0507/mmpL2

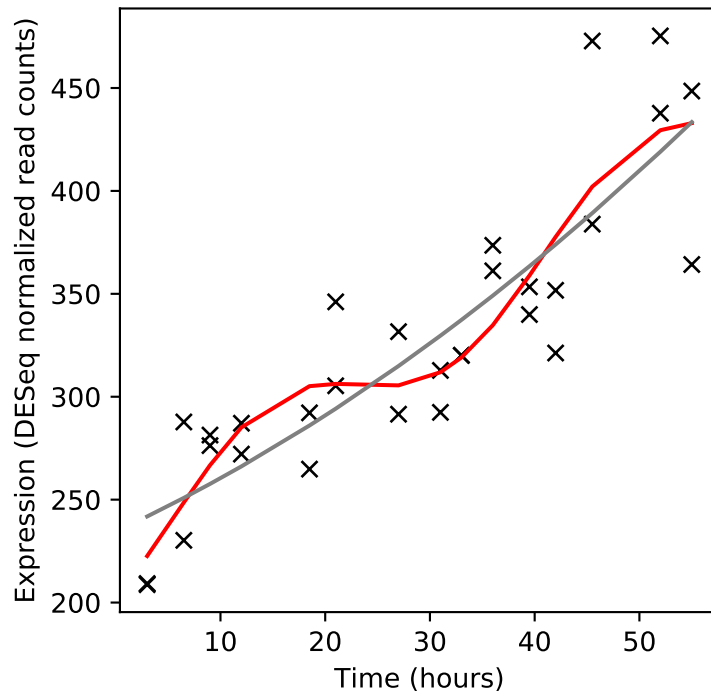

Rv0508/-

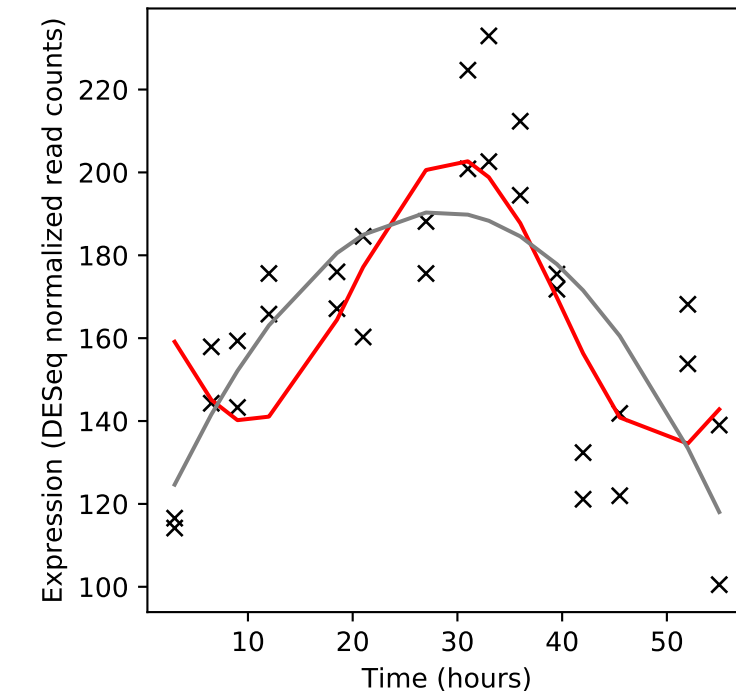



Rv0509/hemA

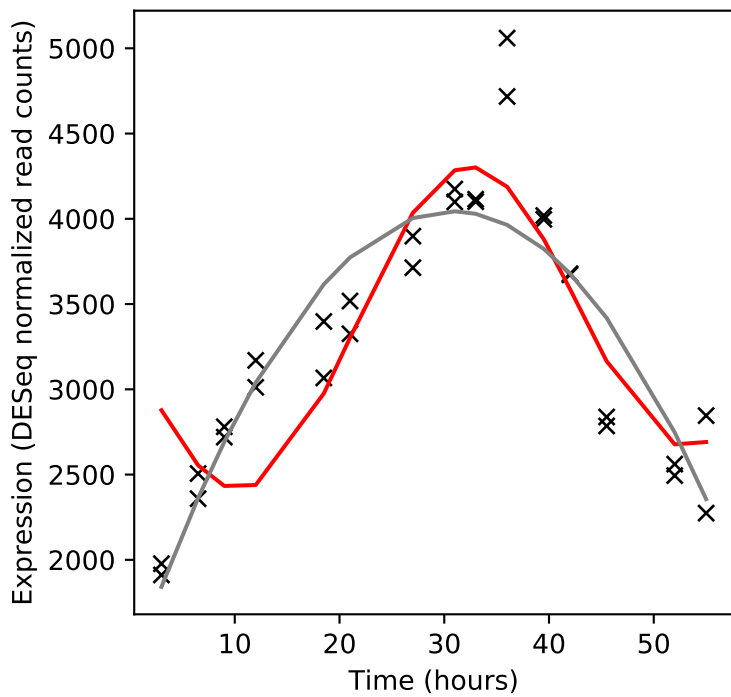

Rv0510/hemC

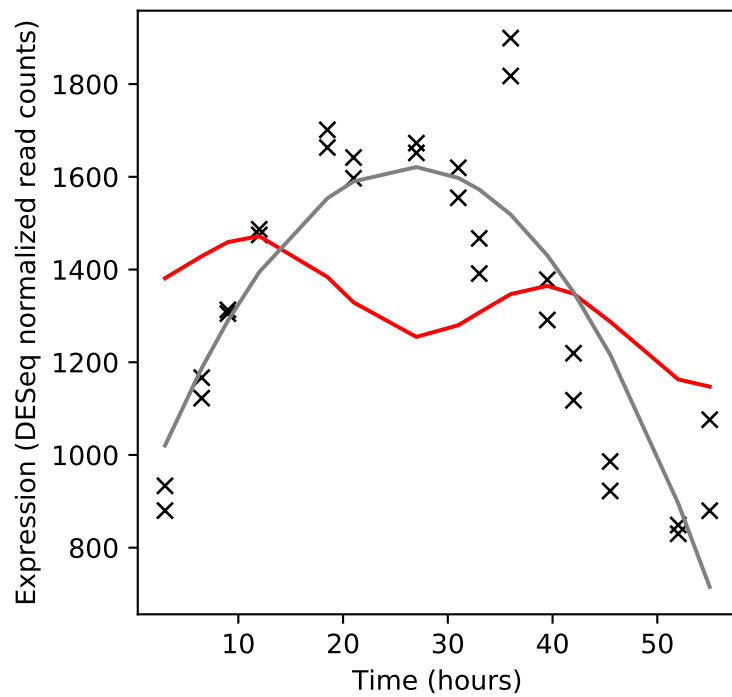

Rv0511/hemD

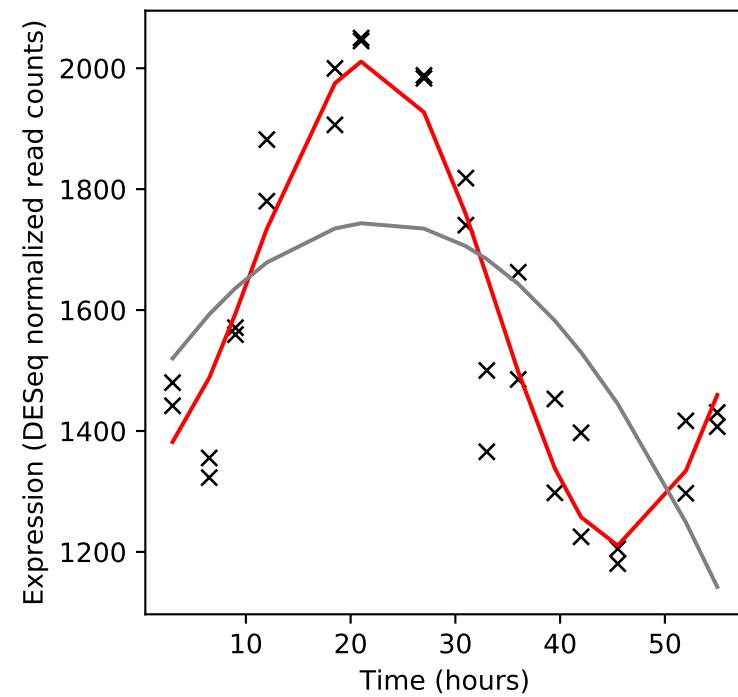

Rv0512/hemB

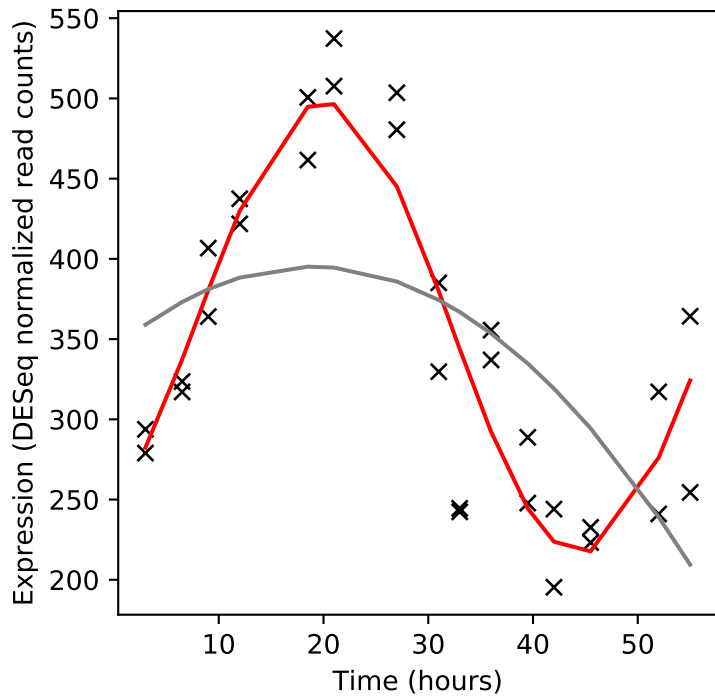

Rv0513/-

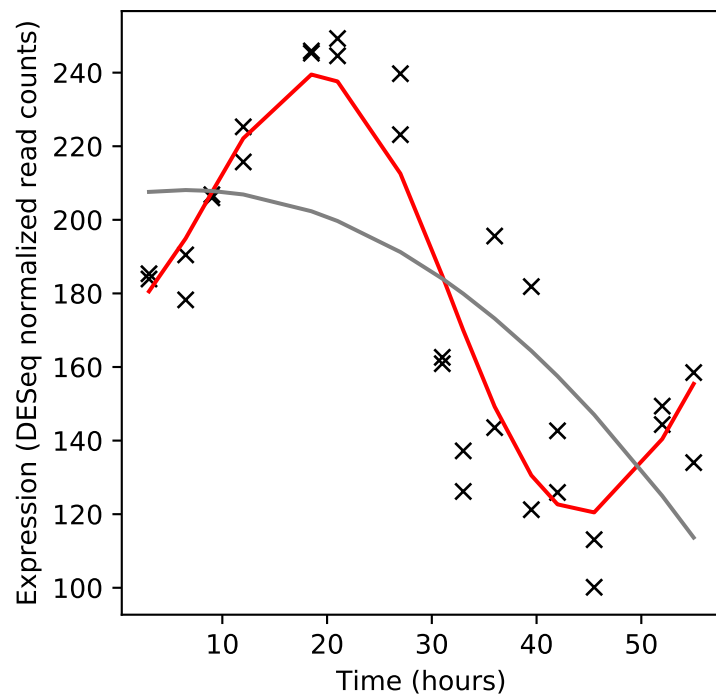

Rv0514/-

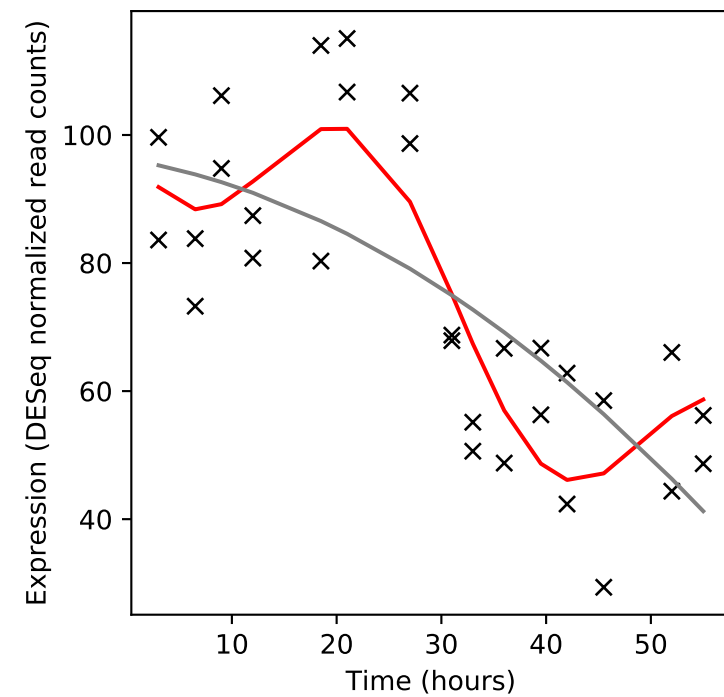

Rv0515/-

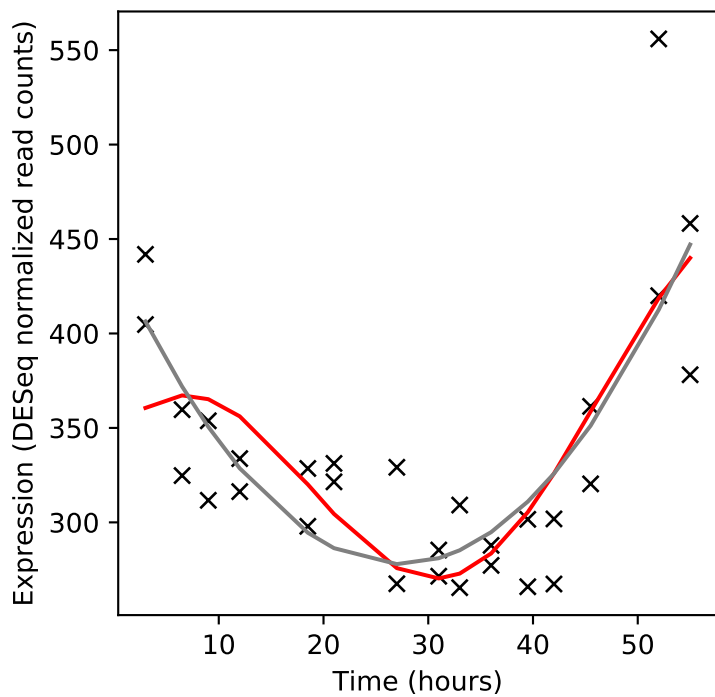

Rv0516c/-

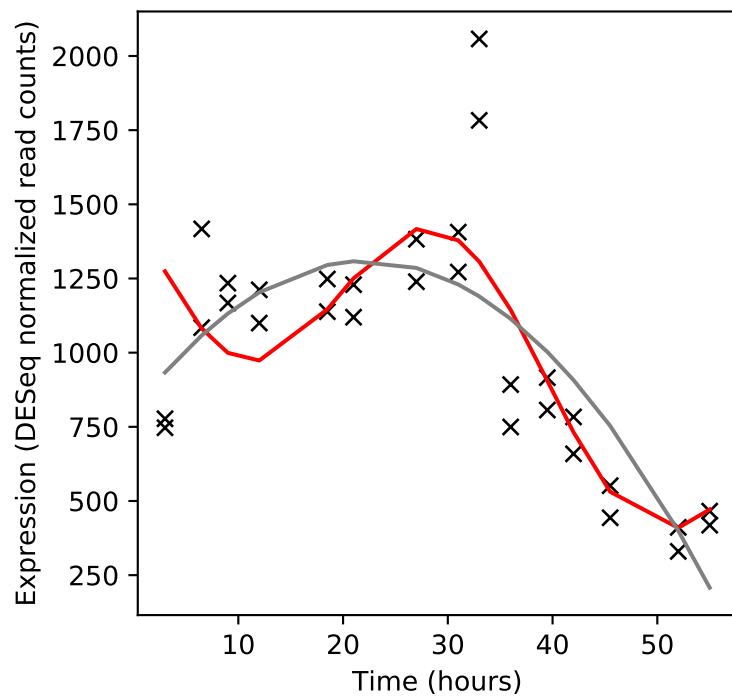

Rv0517/-

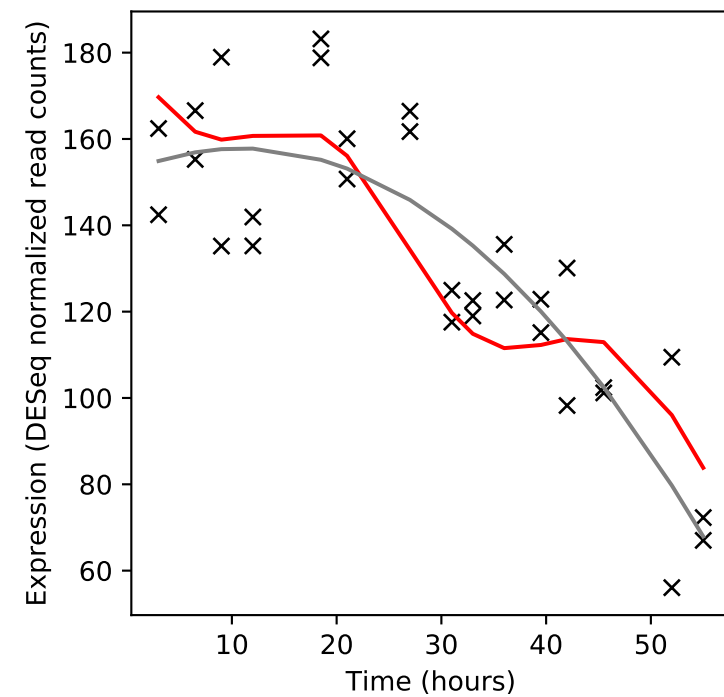

Rv0518/-

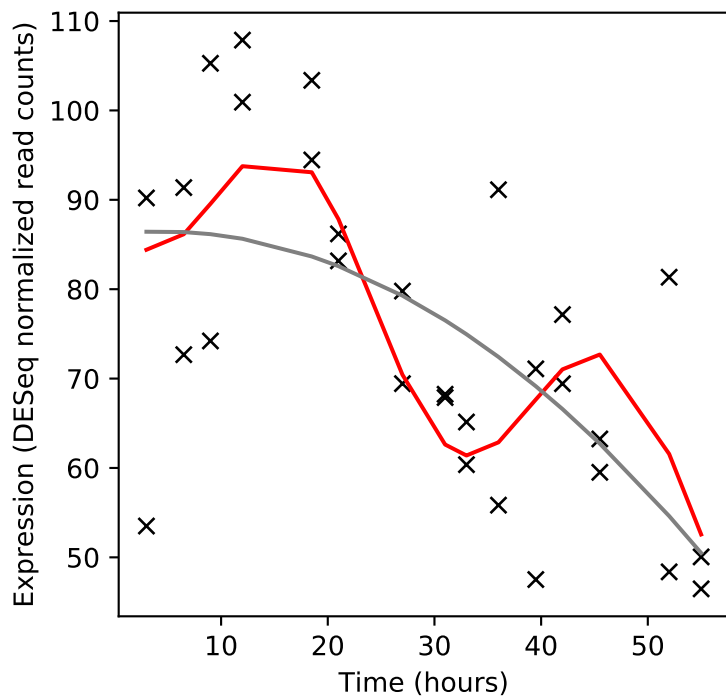

Rv0519c/-

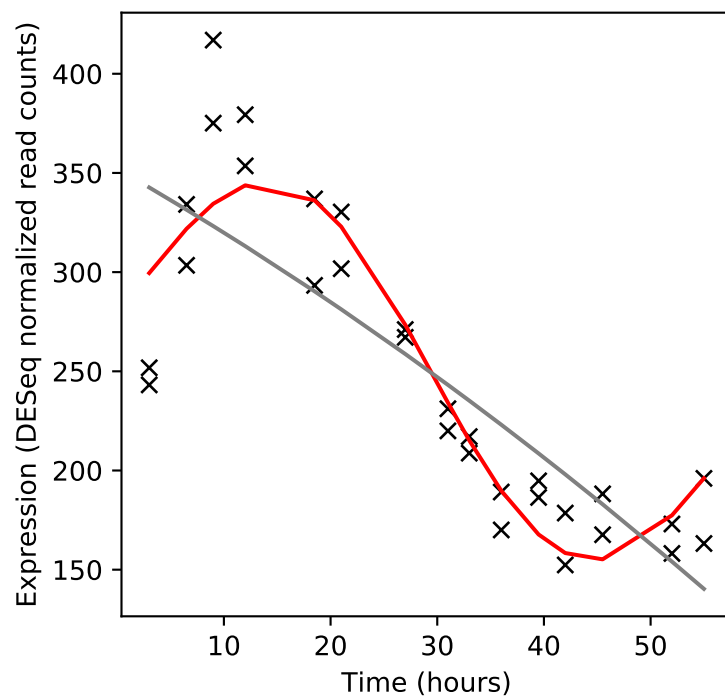

Rv0520/-

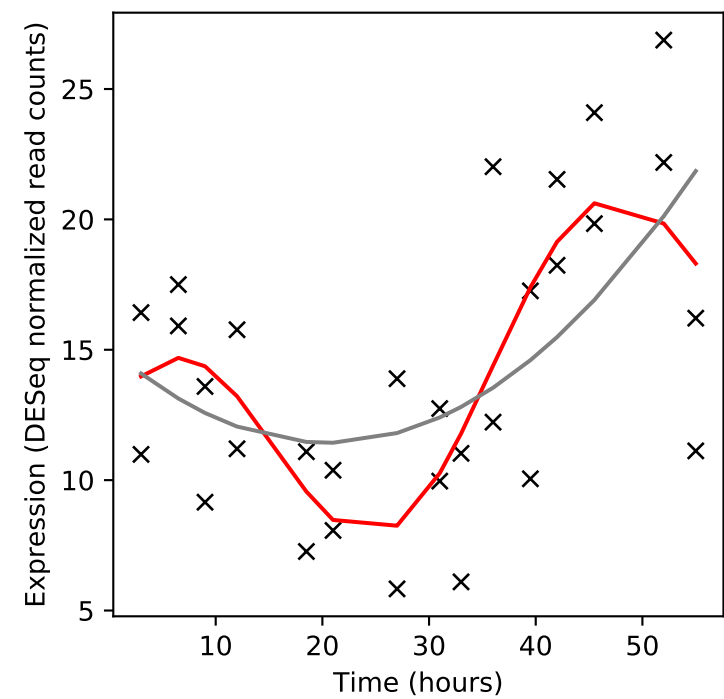

Rv0521/-

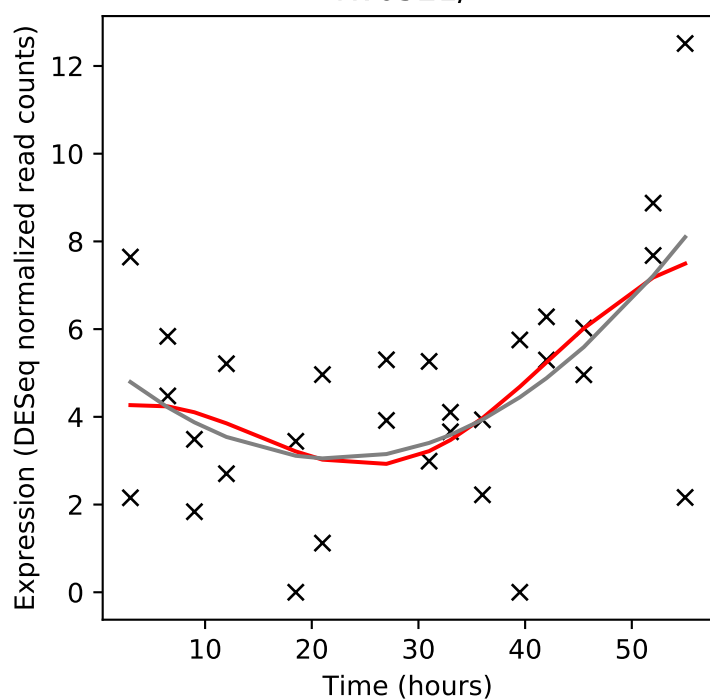

Rv0522/gabP

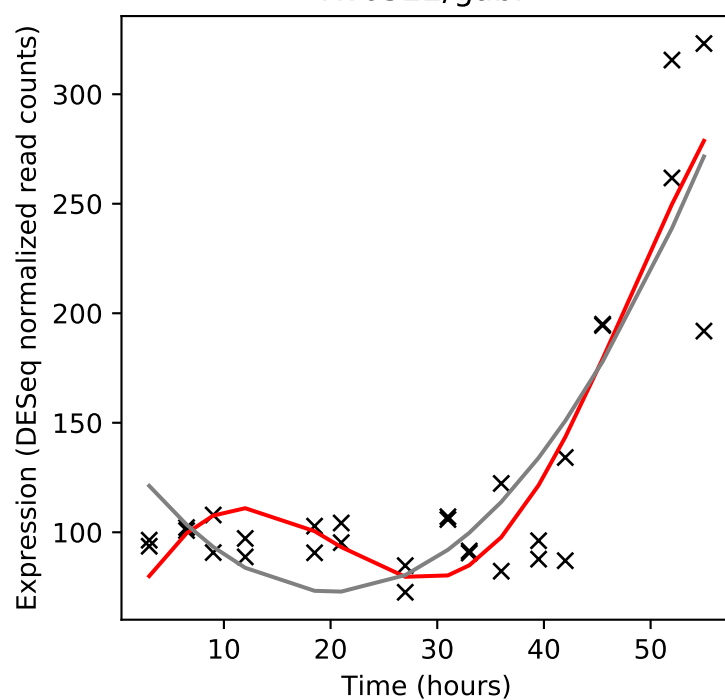

Rv0523c/-

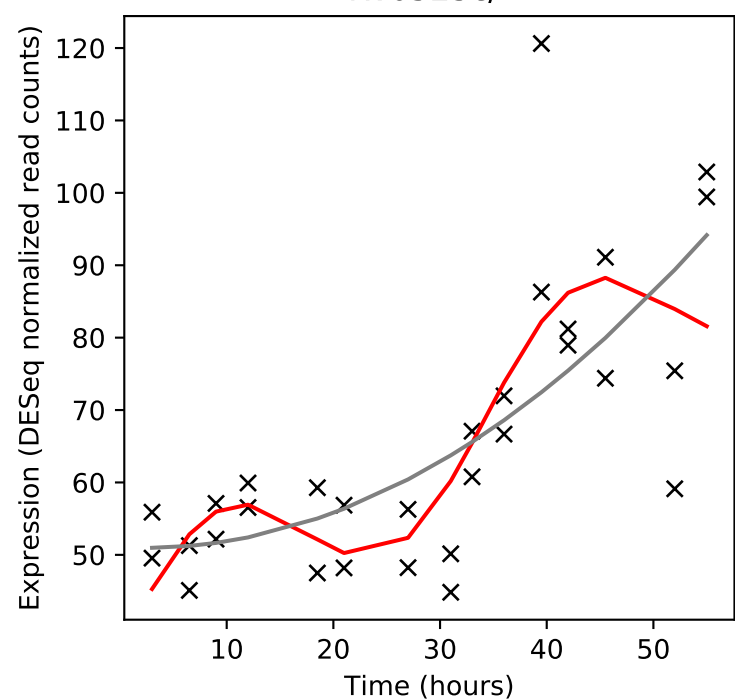

Rv0524/hemL

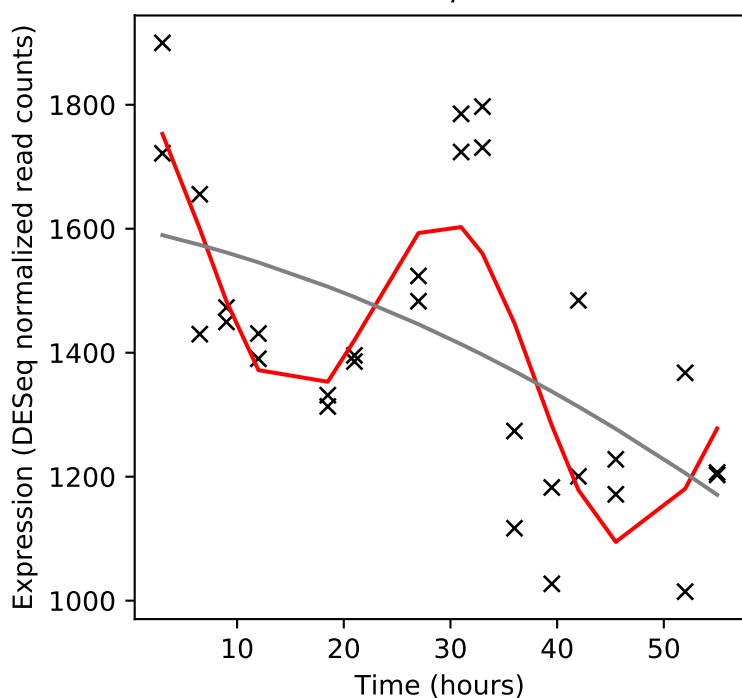

Rv0525/-

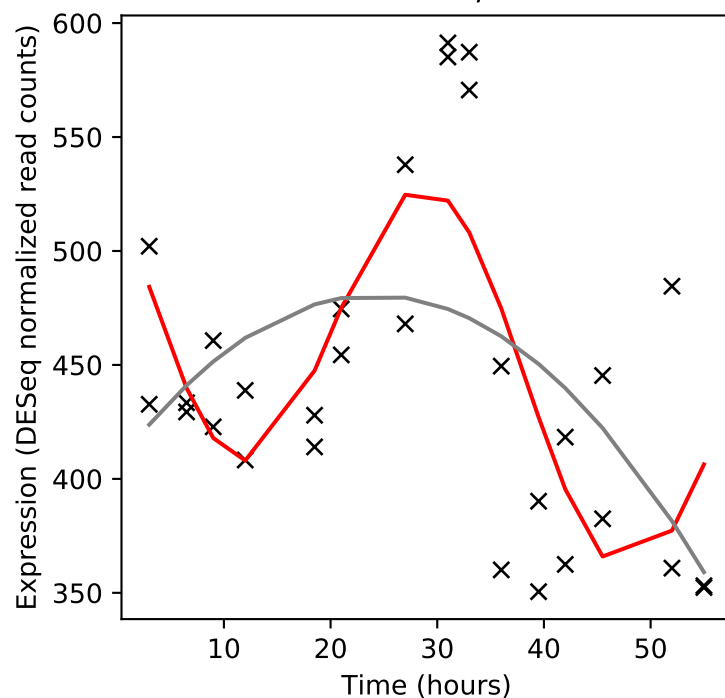

Rv0526/-

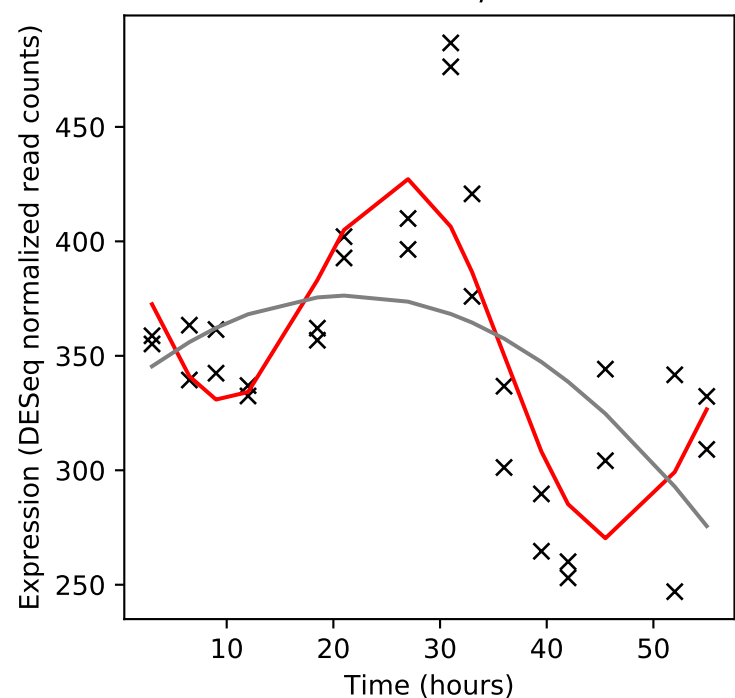

Rv0527/ccdA

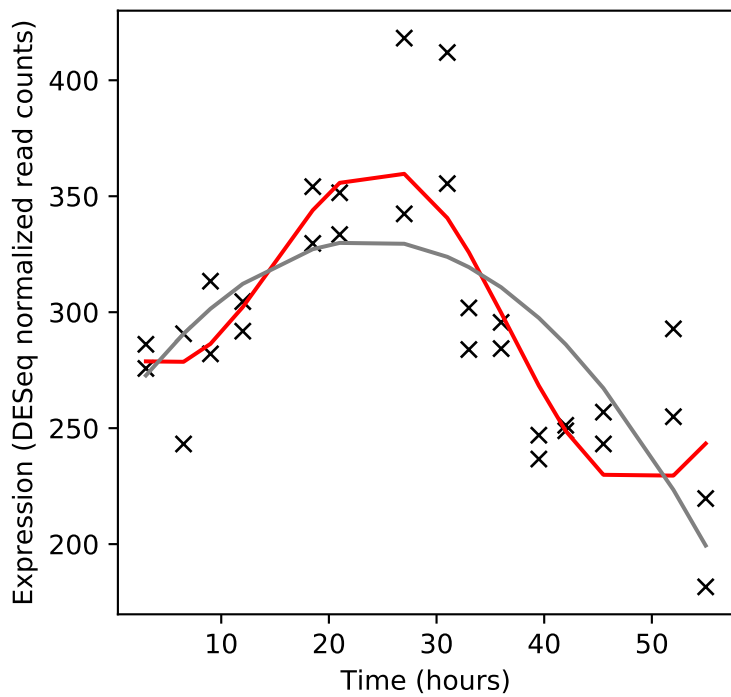

Rv0528/-

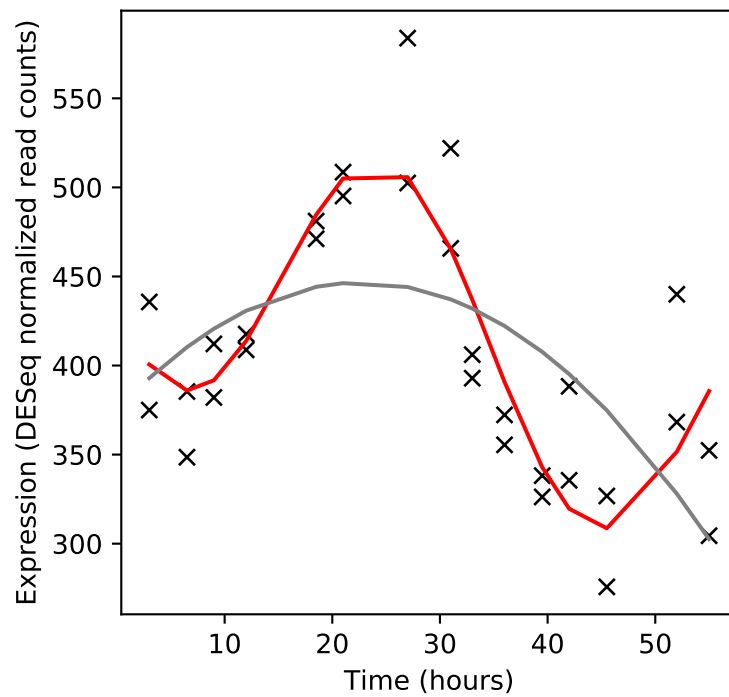

Rv0529/ccsA

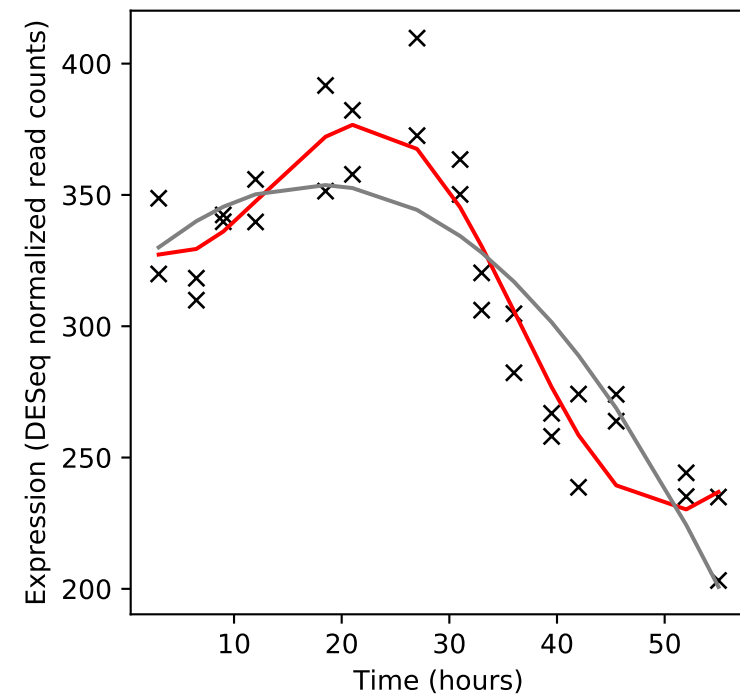

Rv0530/-

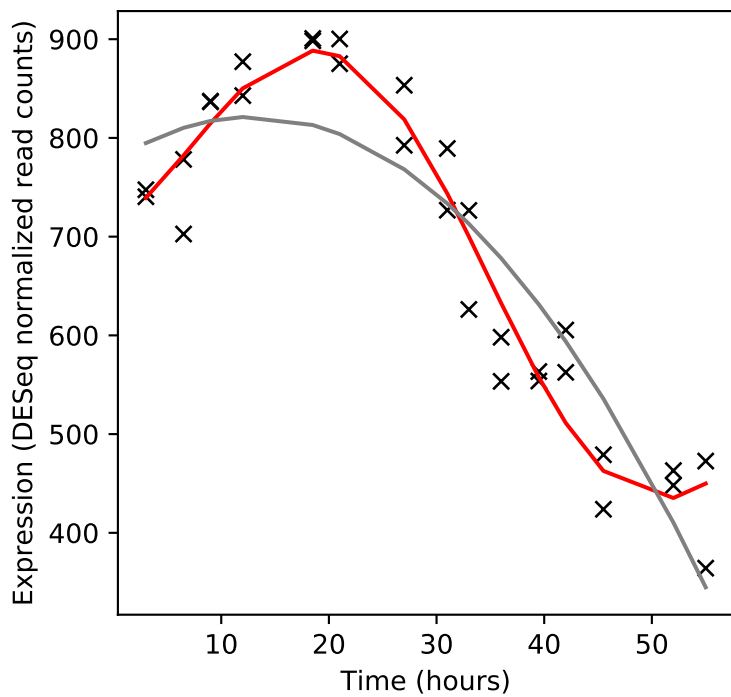

Rv0530A/-

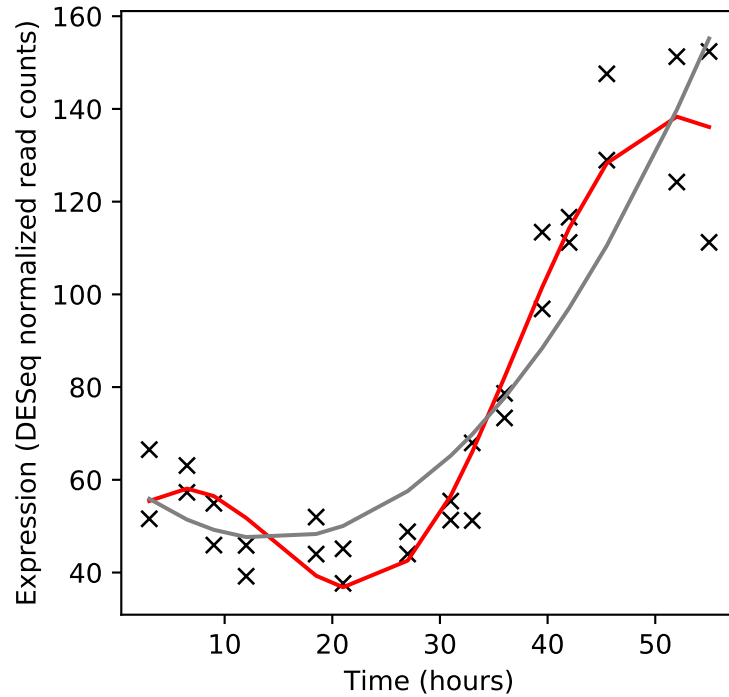

Rv0531/-

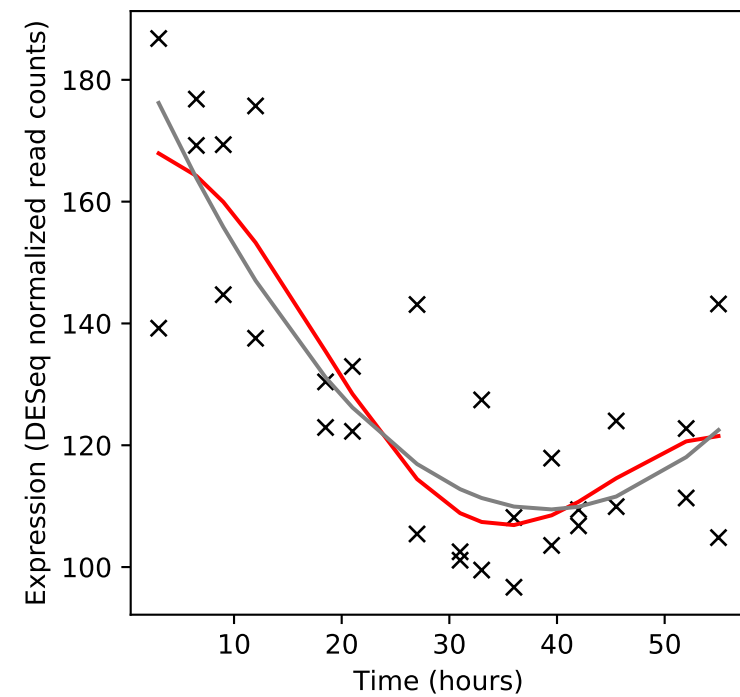

Rv0532/PE\_PGRS6

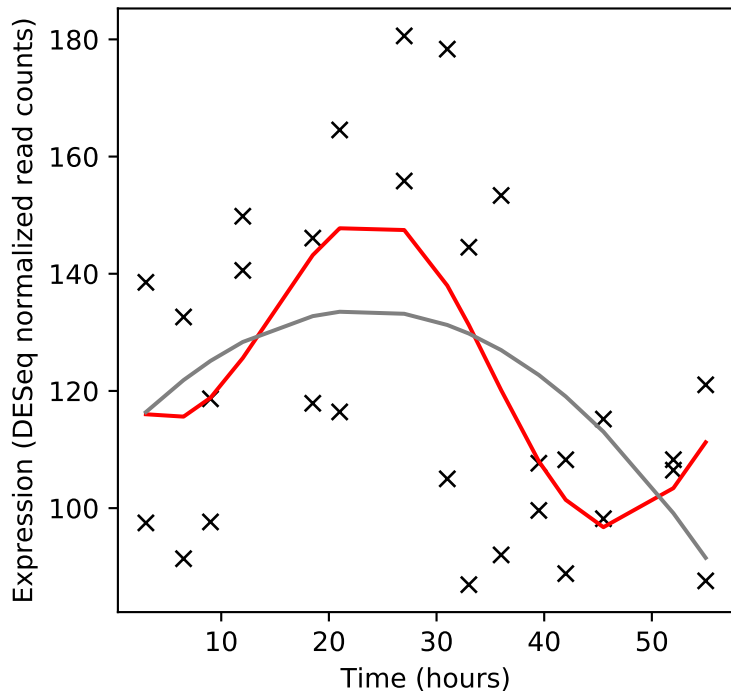

Rv0533c/fabH

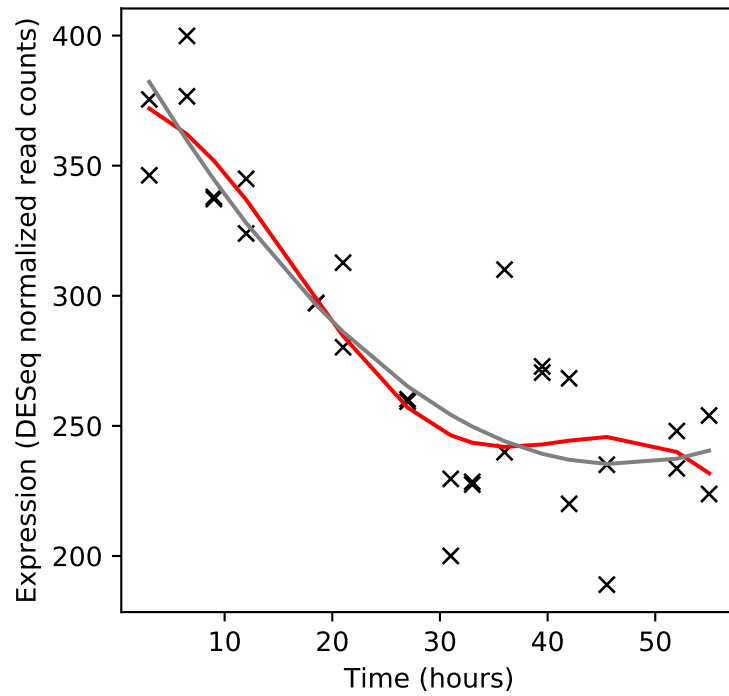

Rv0534c/menA

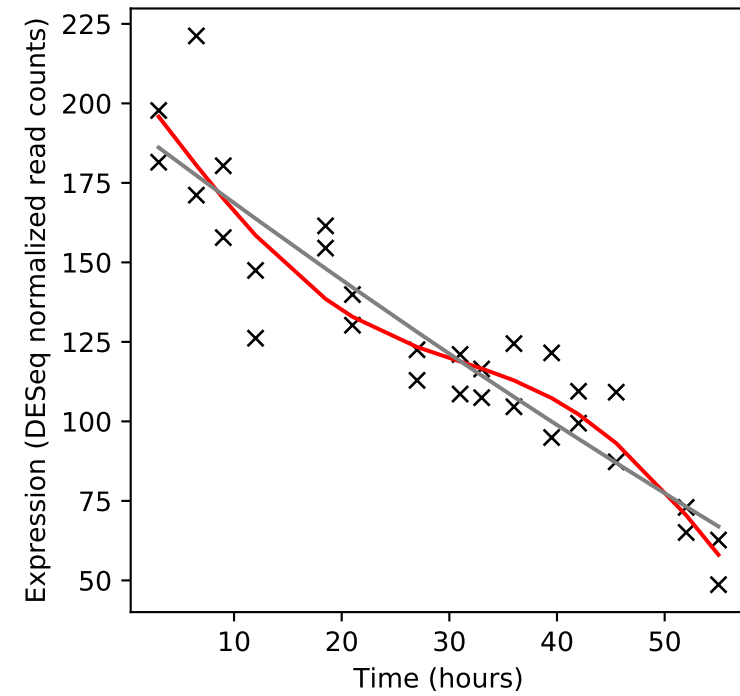

Rv0535/pnp

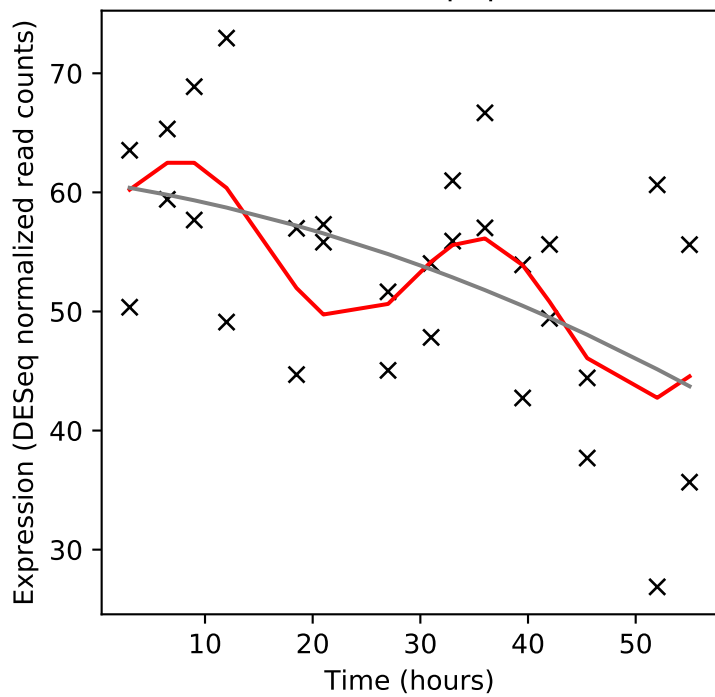

Rv0536/galE3

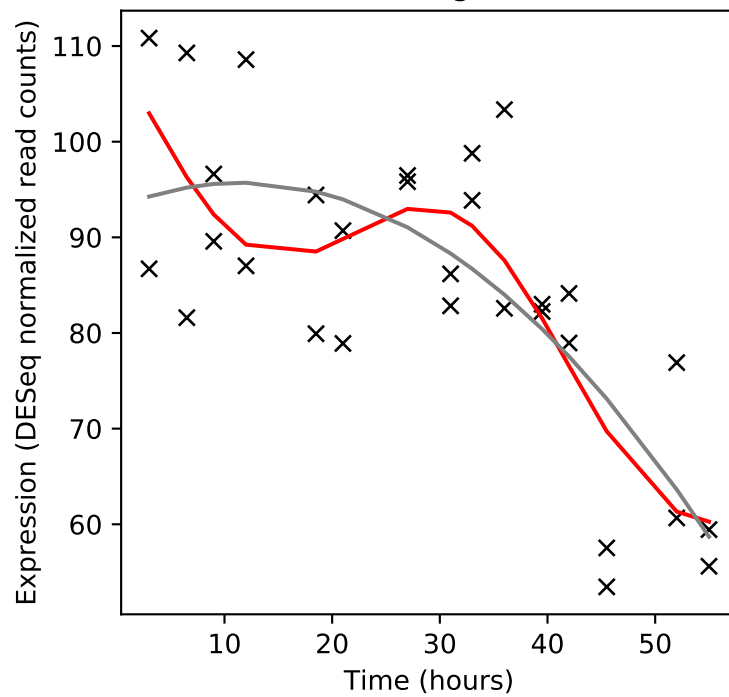

Rv0537c/-

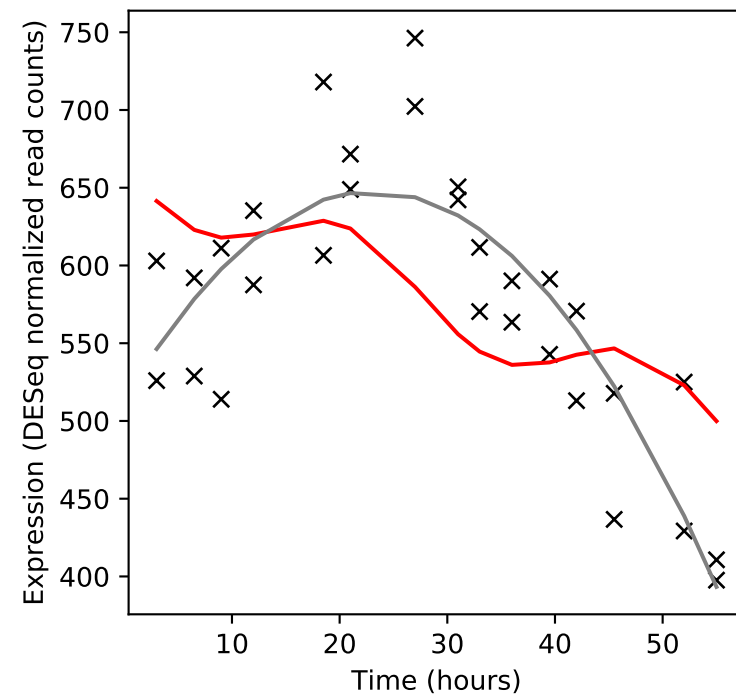

Rv0538/-

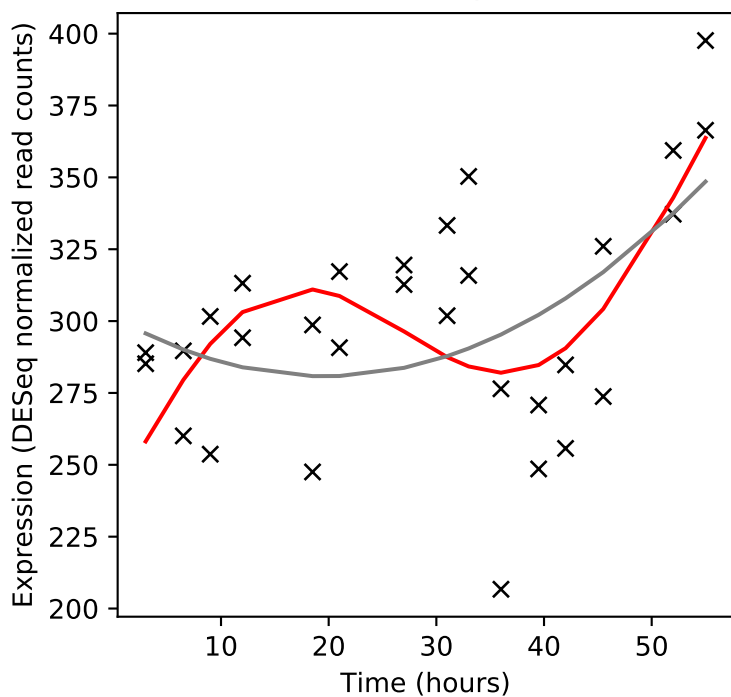

Rv0539/-

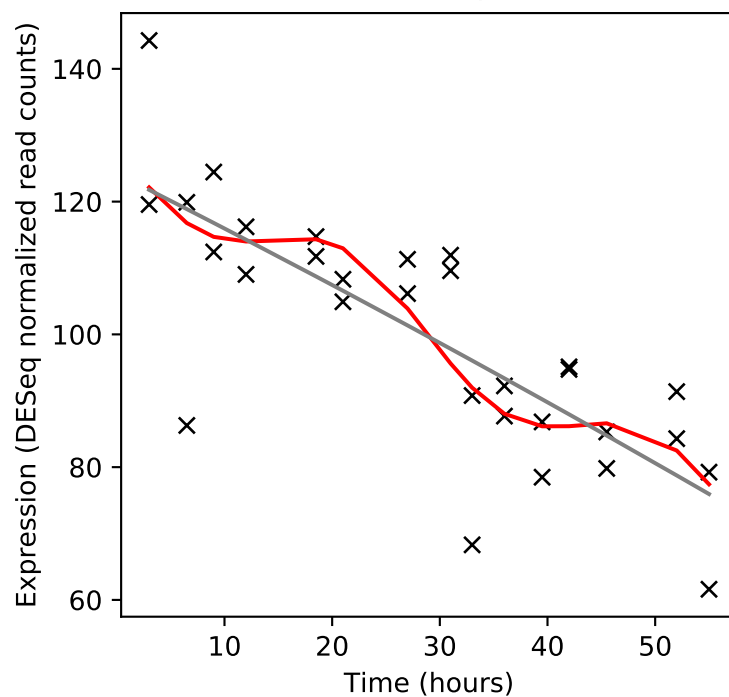

Rv0540/-

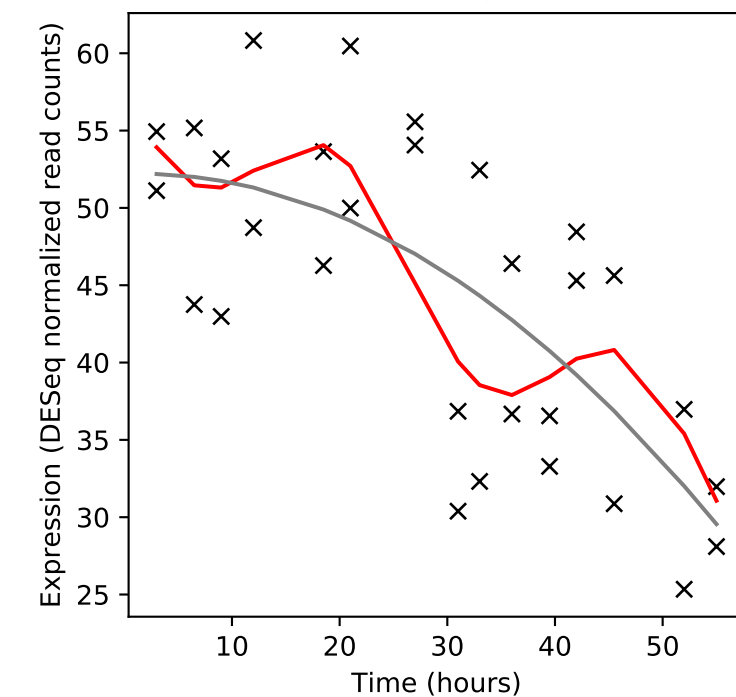

Rv0541c/-

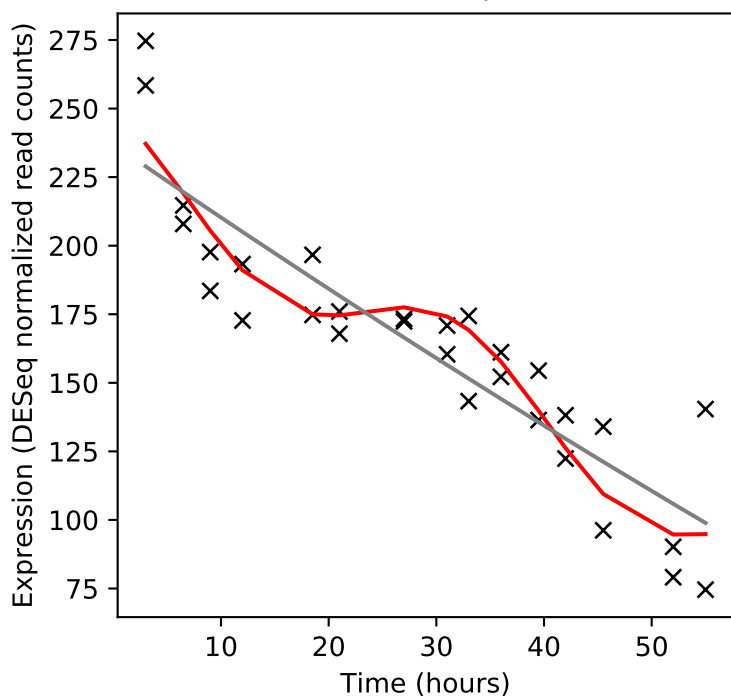

Rv0542c/menE

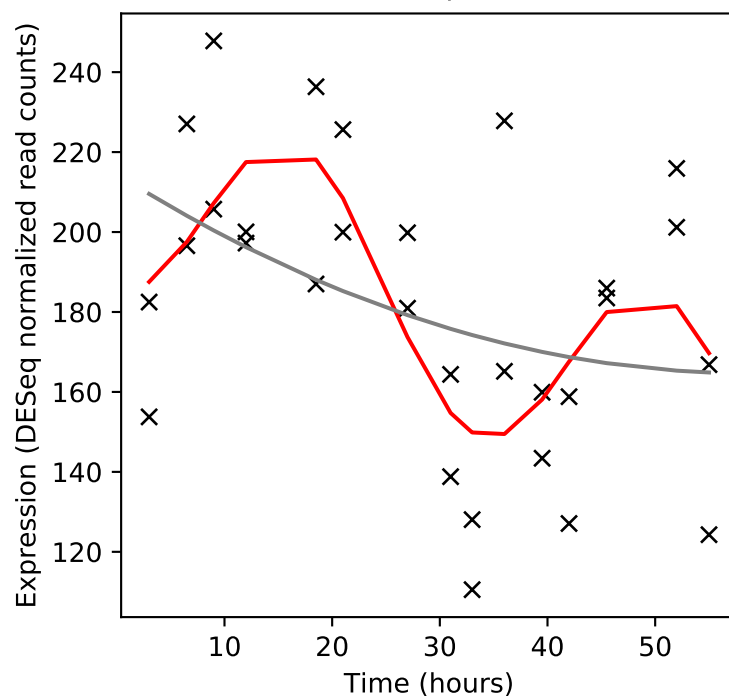

Rv0543c/-

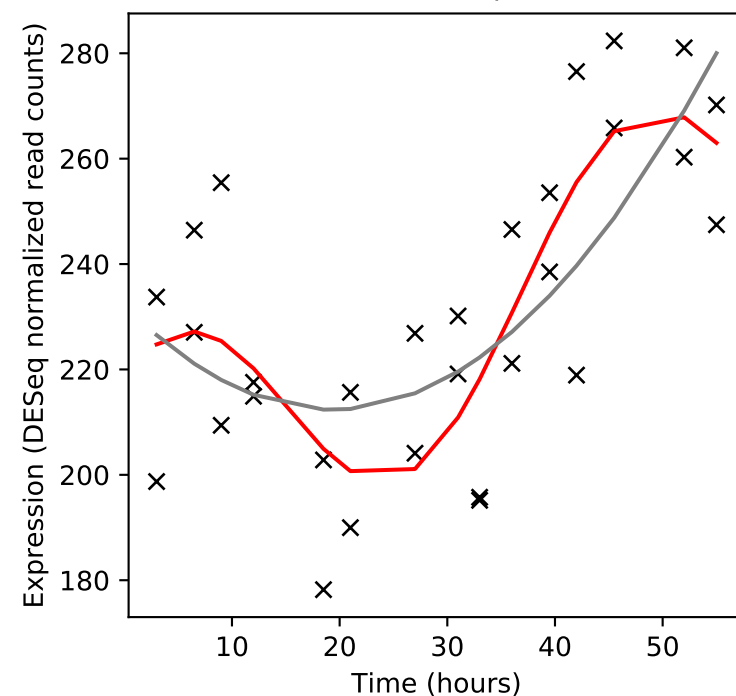

Rv0544c/-

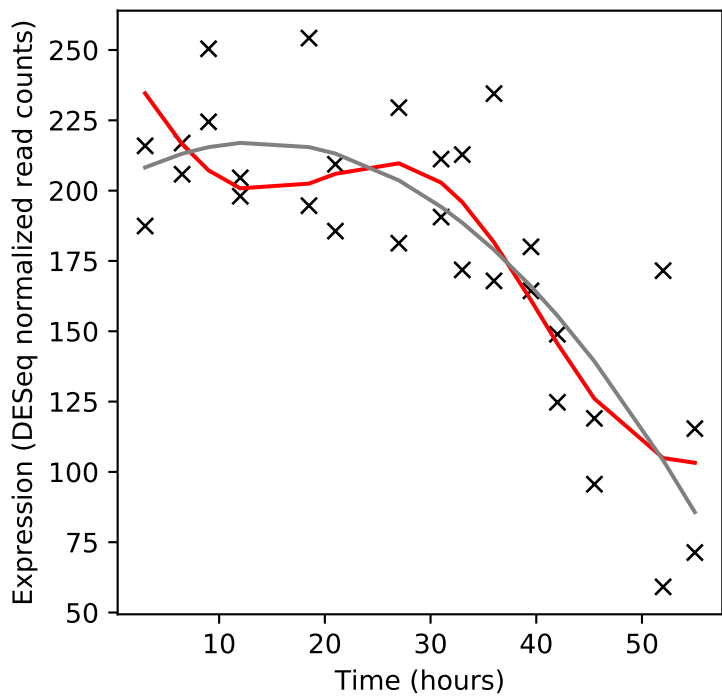

Rv0545c/pitA

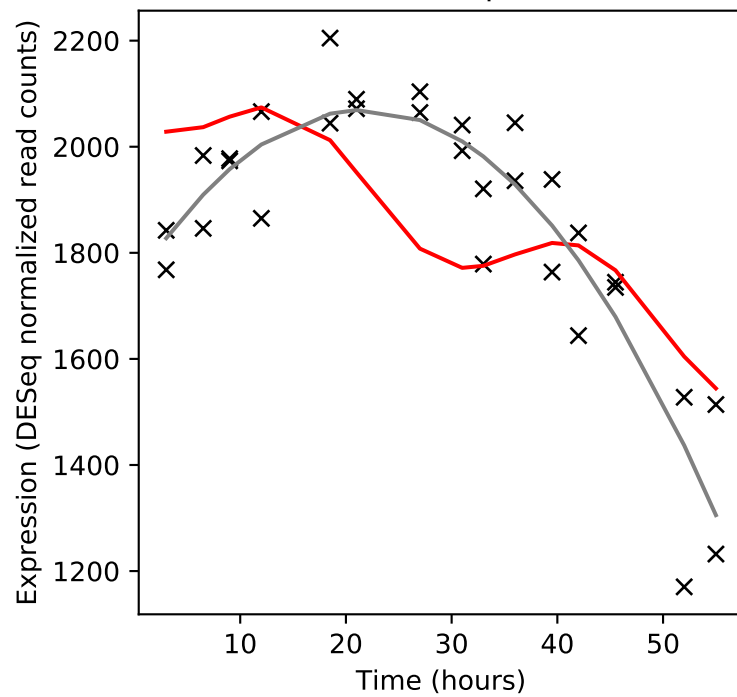

Rv0546c/-

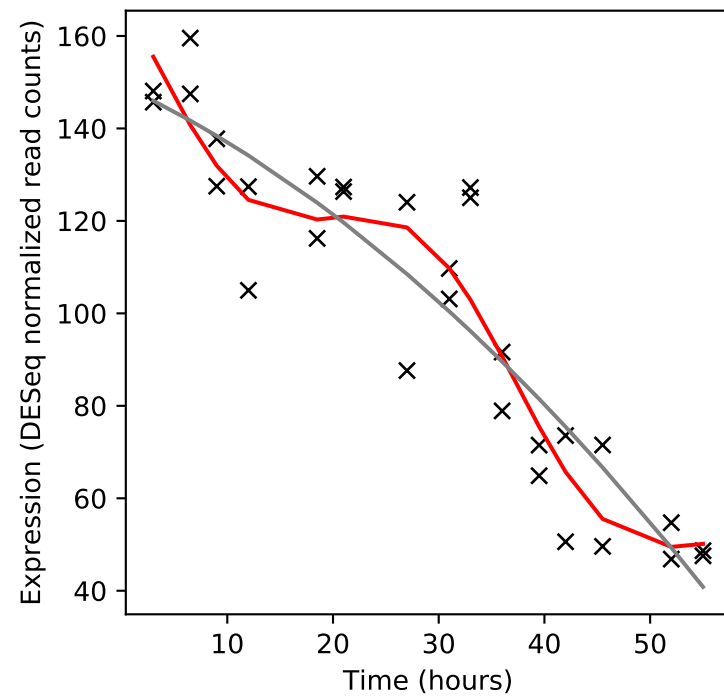

Rv0547c/-

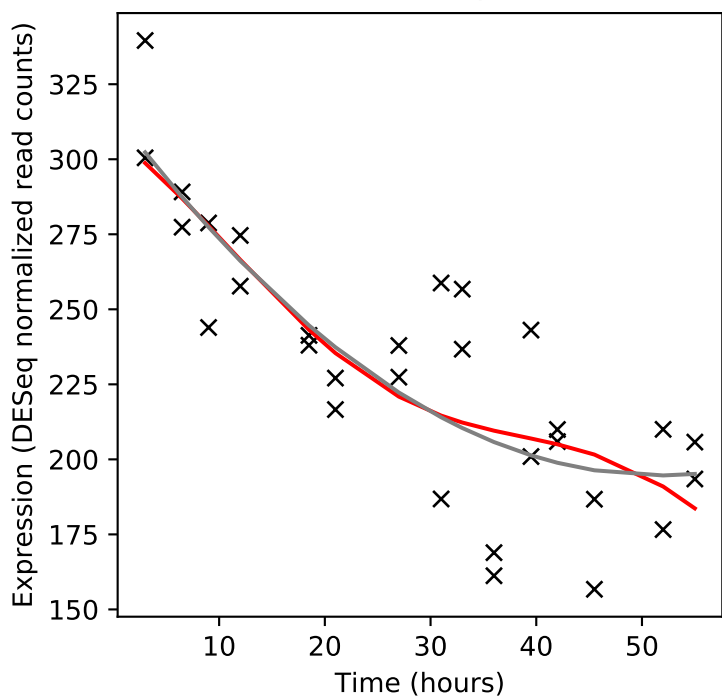

Rv0548c/menB

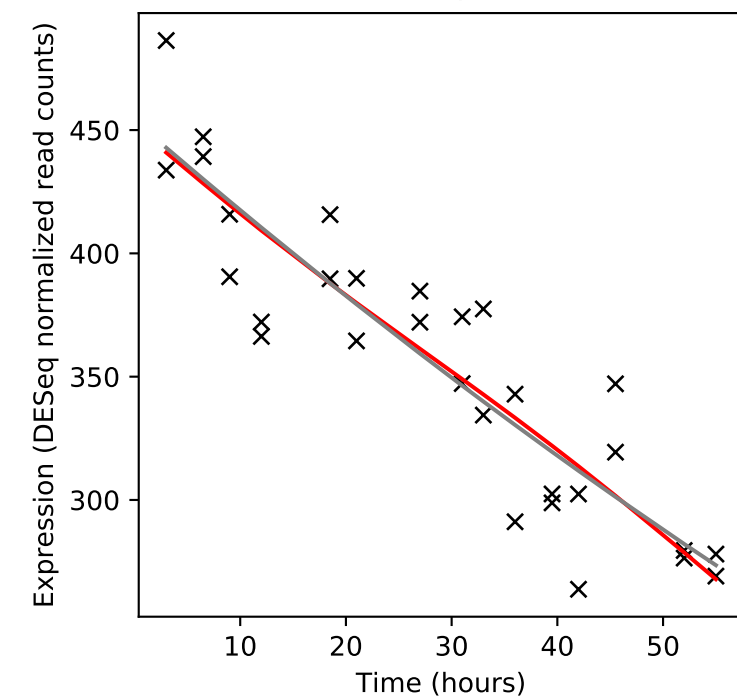

Rv0549c/vapC3

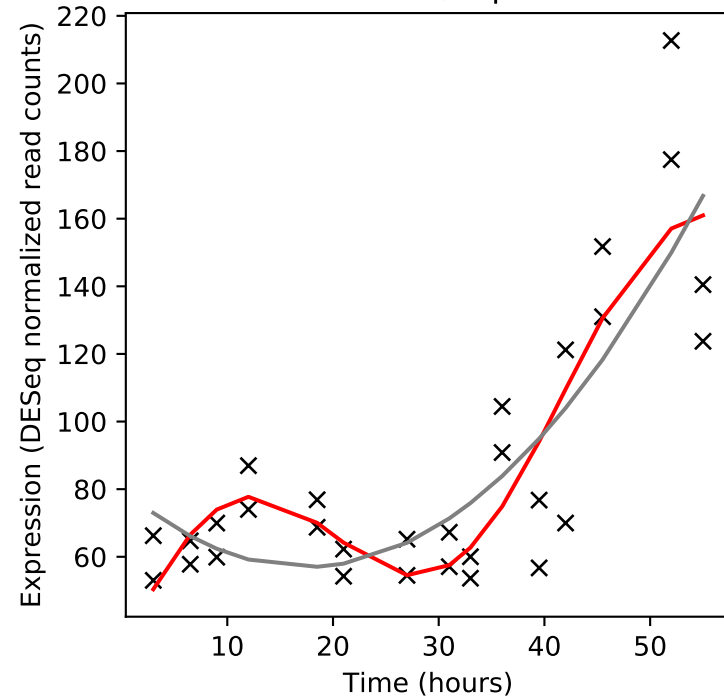

Rv0550c/vapB3

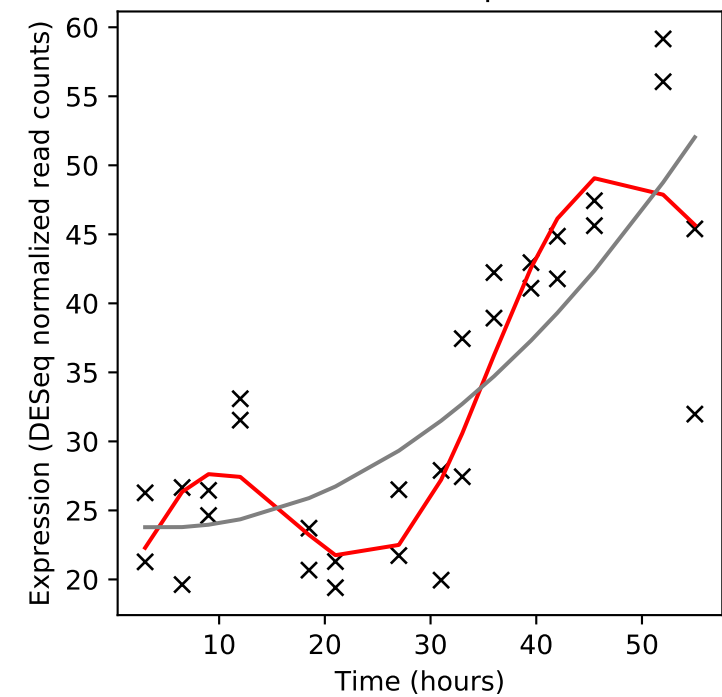

Rv0551c/fadD8

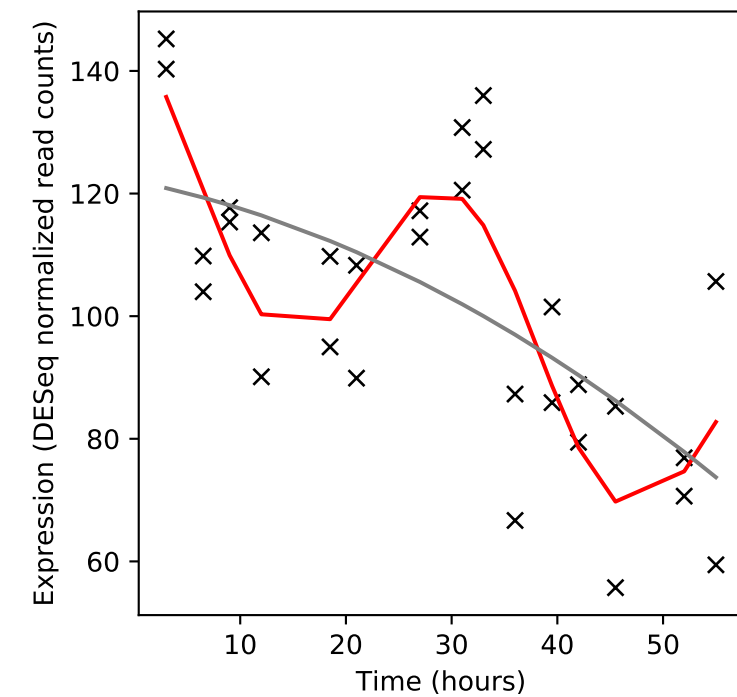

Rv0552c/-

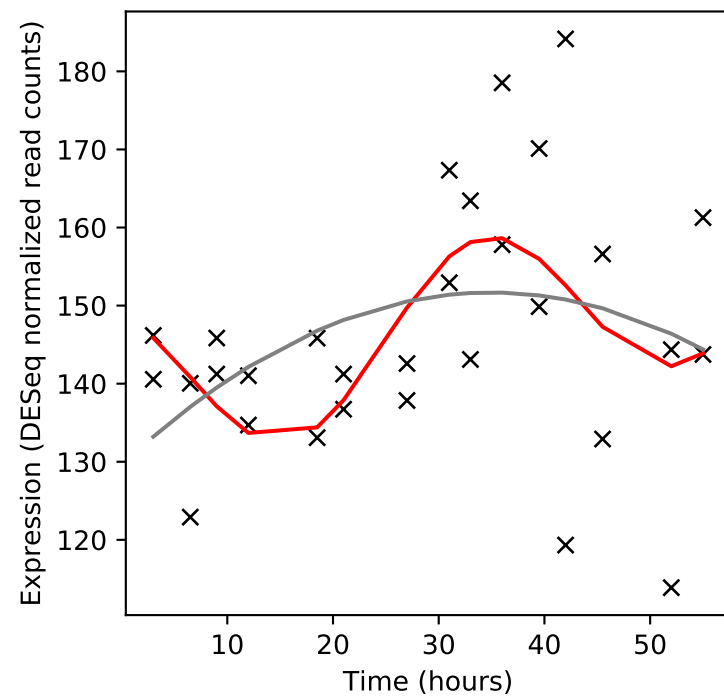

Rv0553/menC

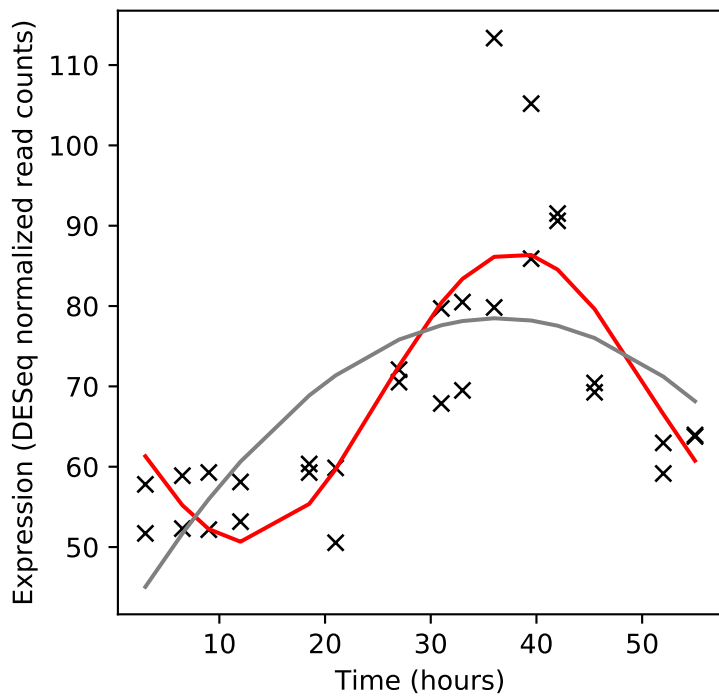

Rv0554/bpoC

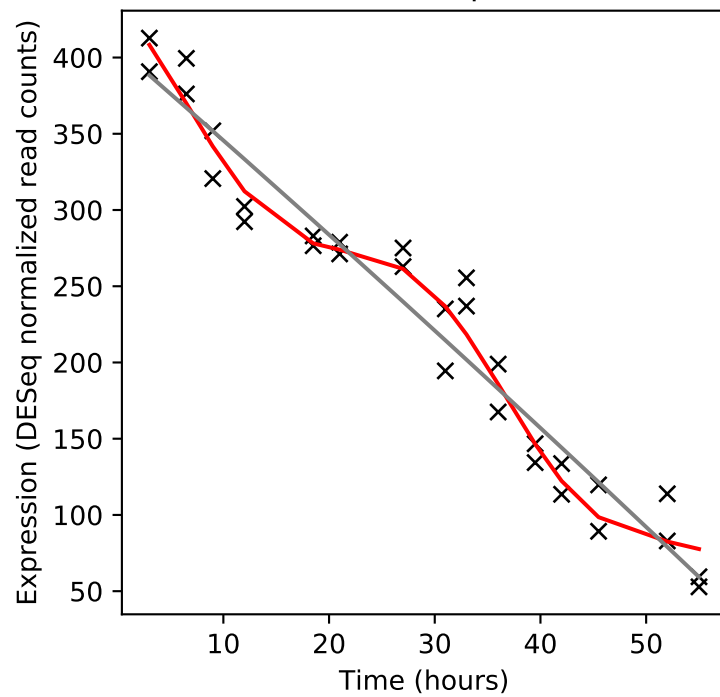

Rv0555/menD

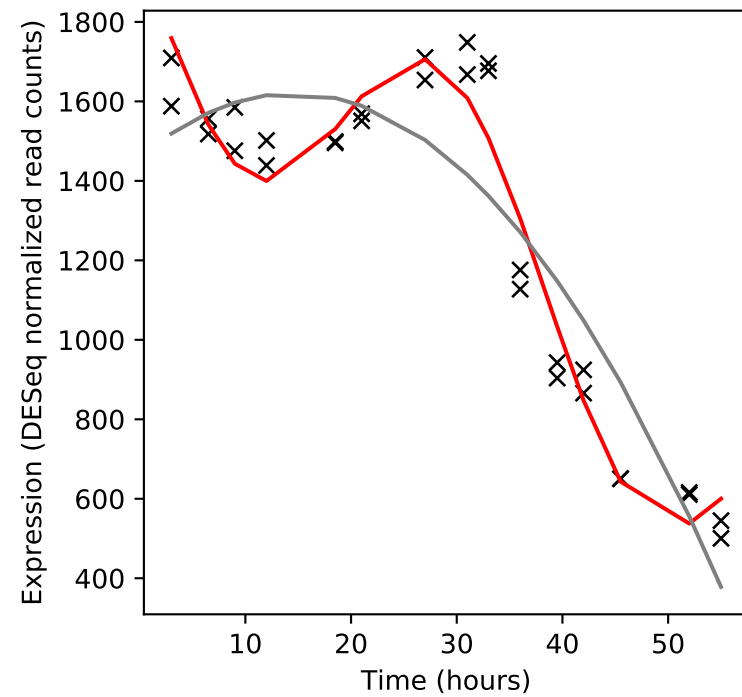

Rv0556/-

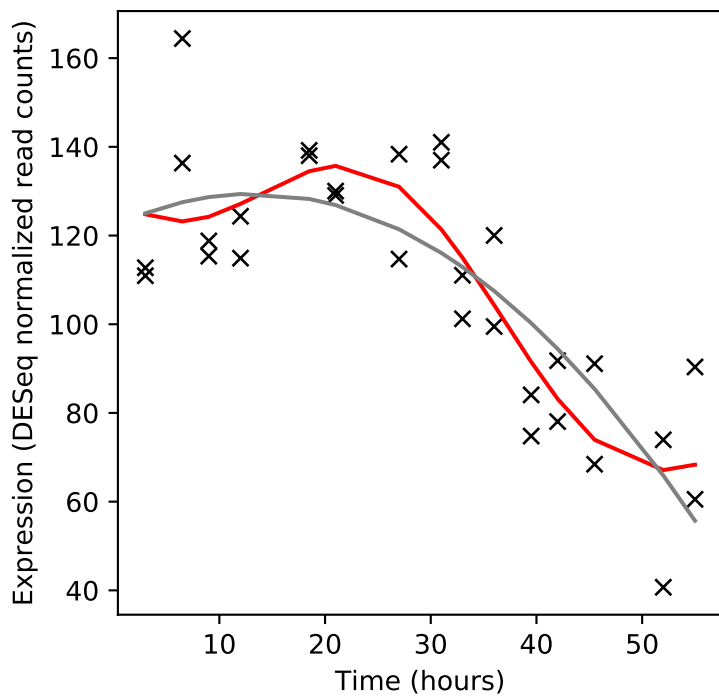

Rv0557/mgtA

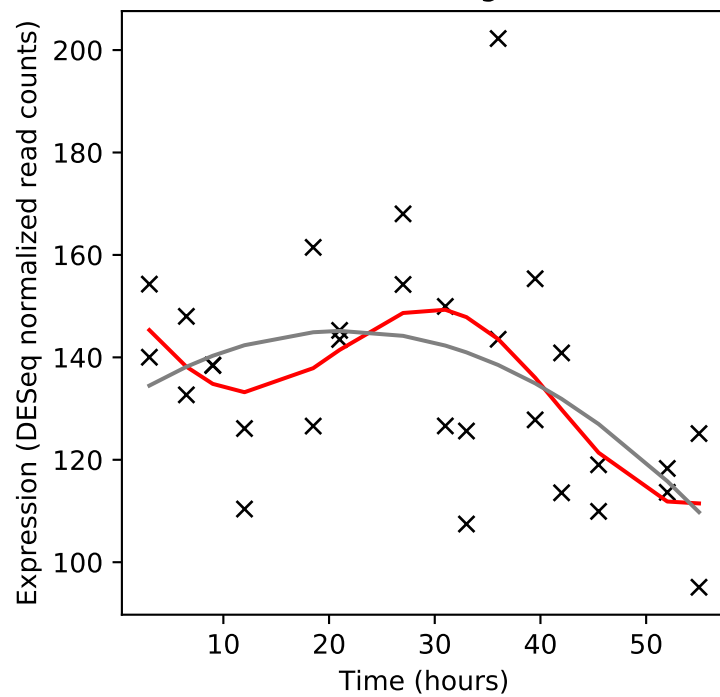

Rv0558/menH

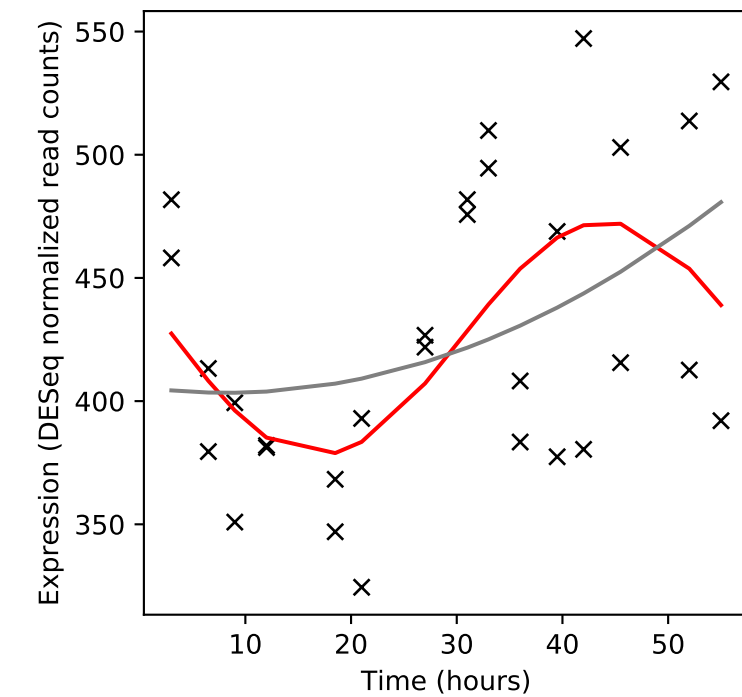

Rv0559c/-

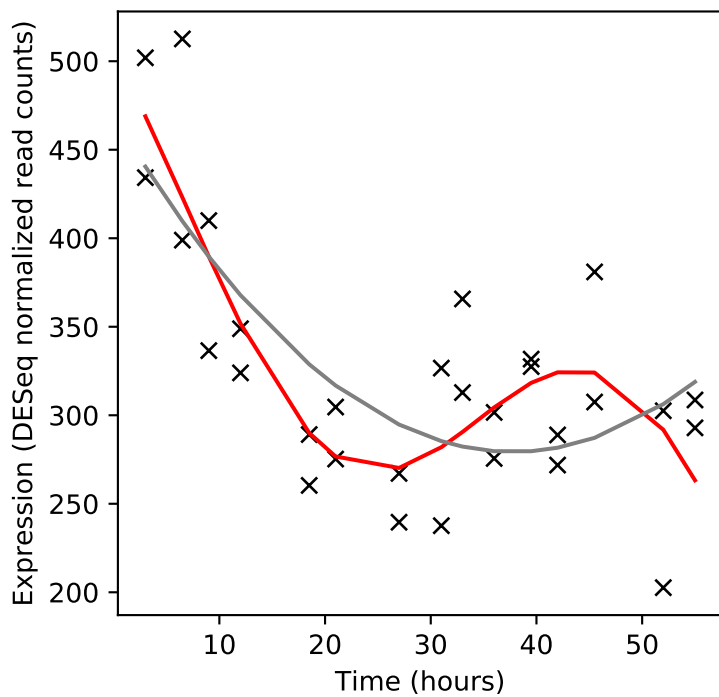

Rv0560c/-

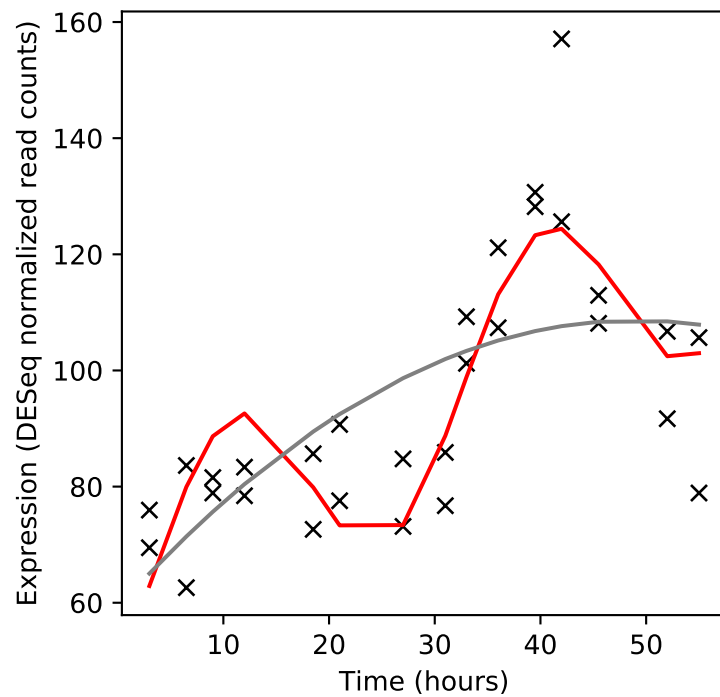

Rv0561c/-

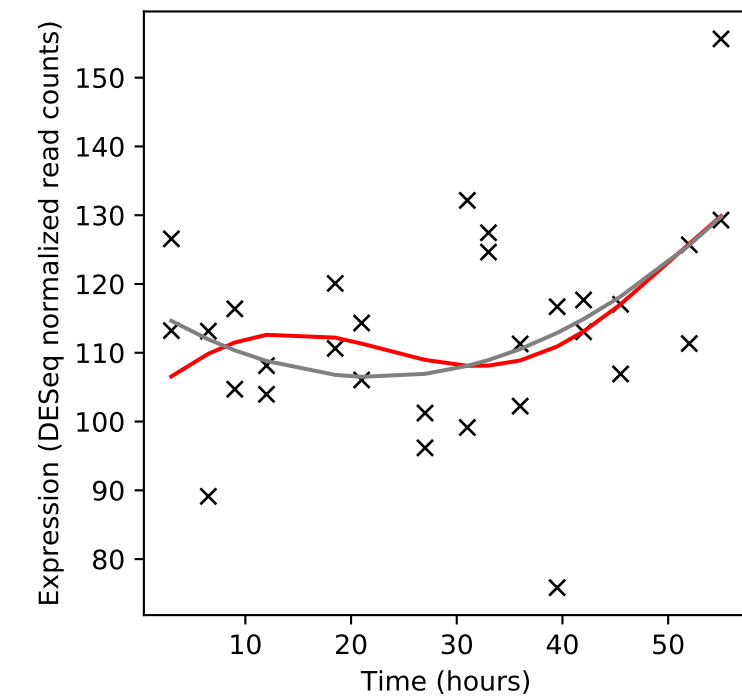

Rv0562/grcC1

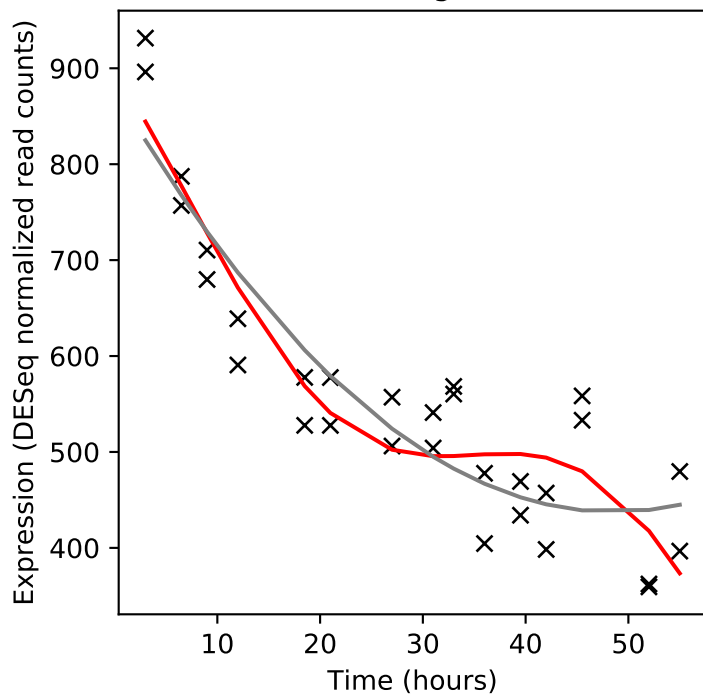

Rv0563/htpX

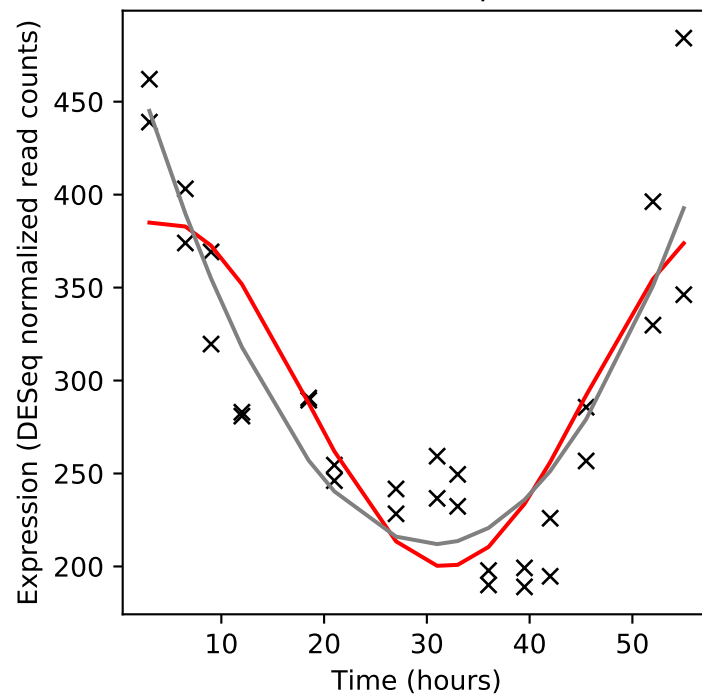

Rv0564c/gpdA1

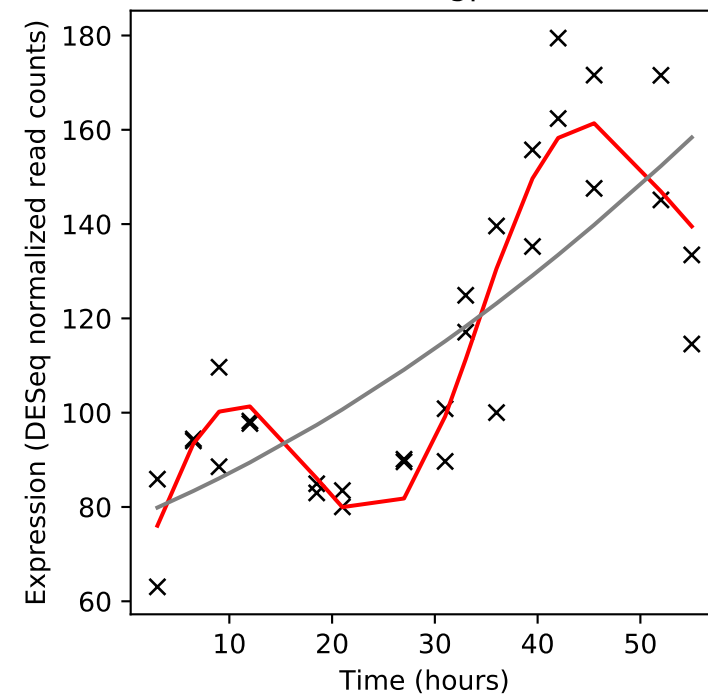

Rv0565c/-

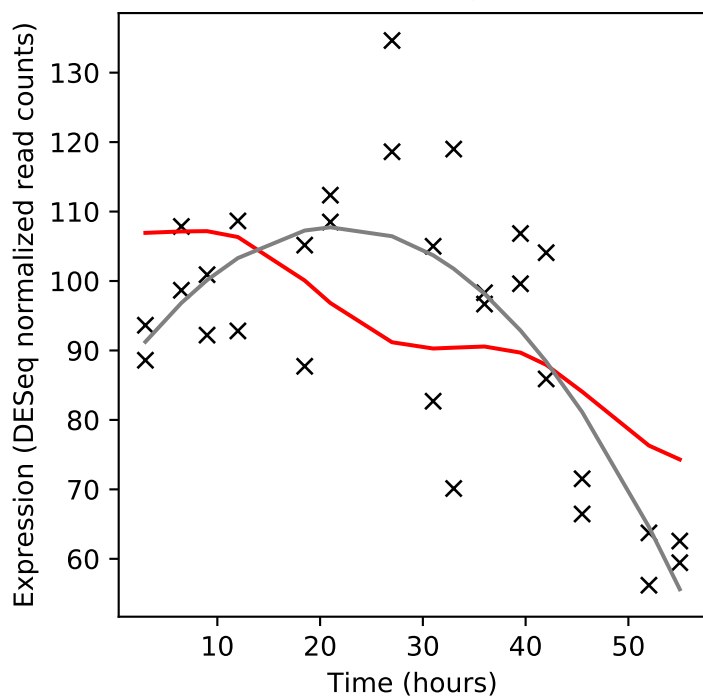

Rv0566c/-

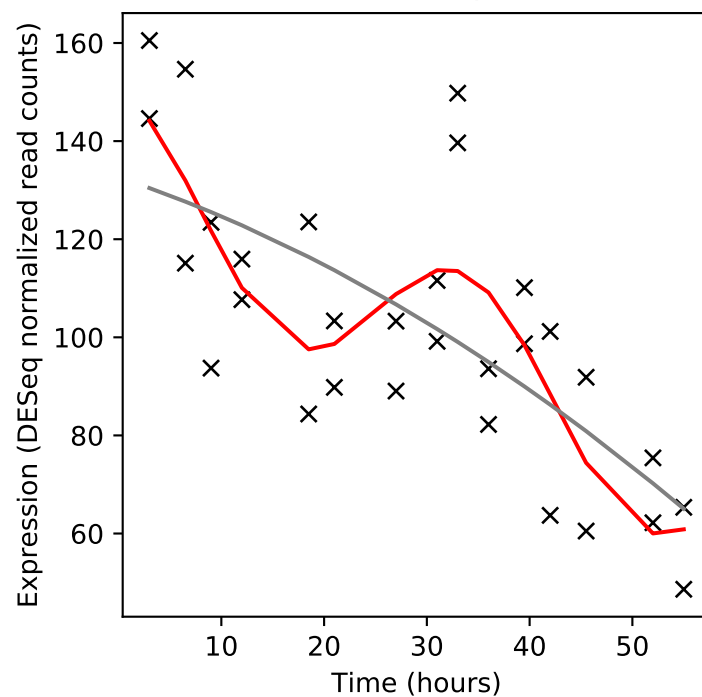

Rv0567/-

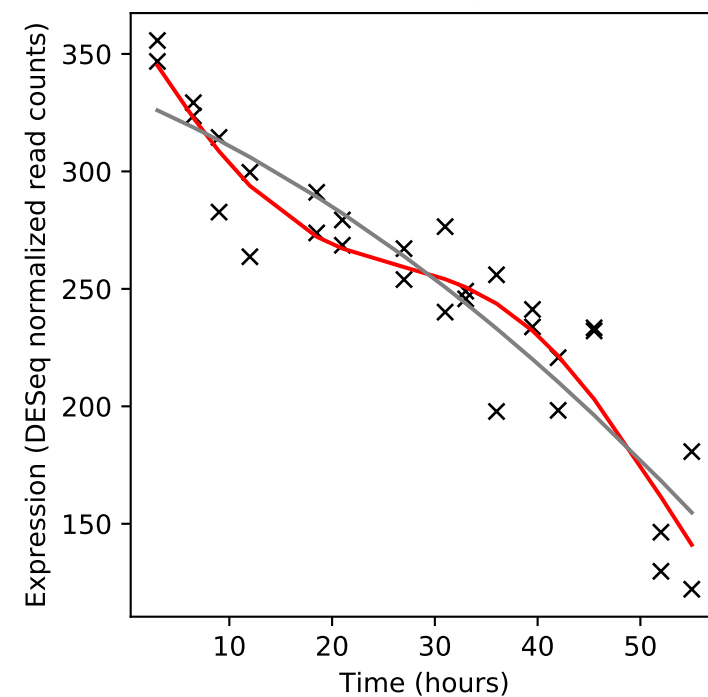

Rv0568/cyp135B1

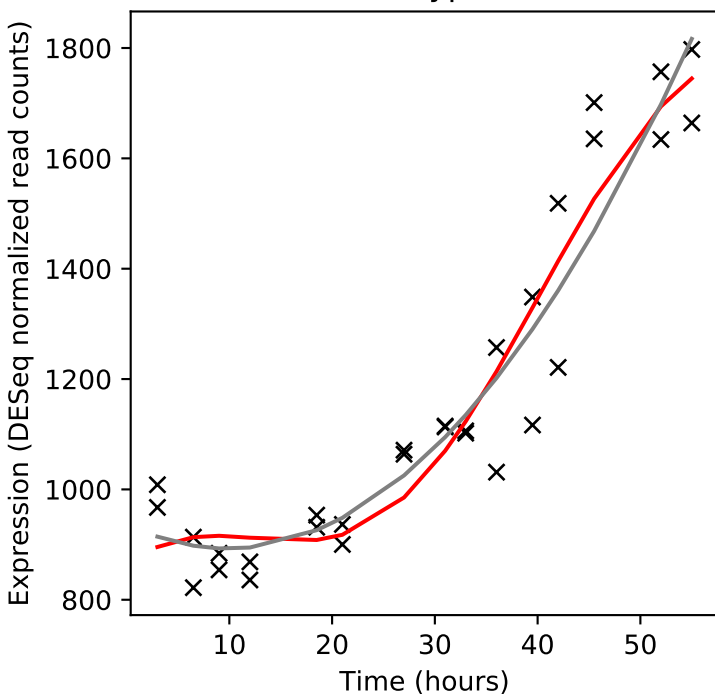

Rv0569/-

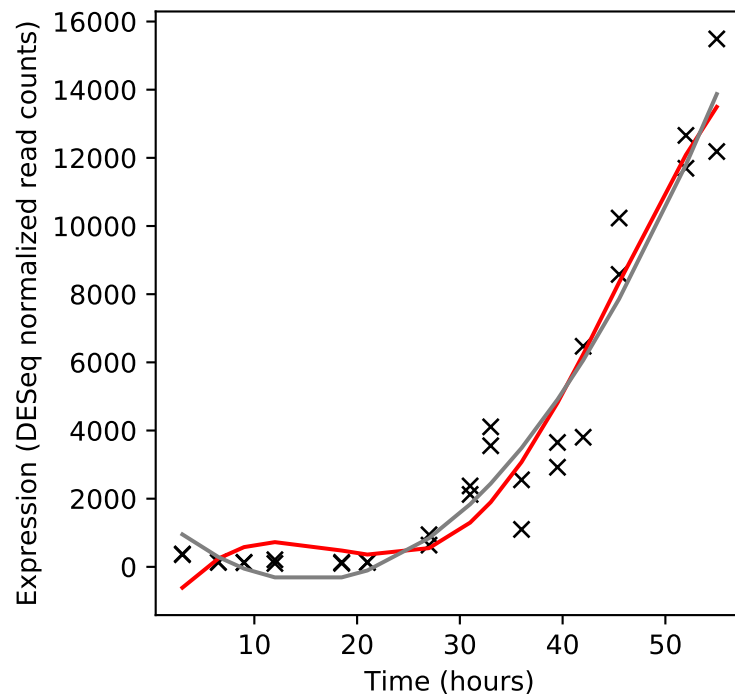

Rv0570/nrdZ

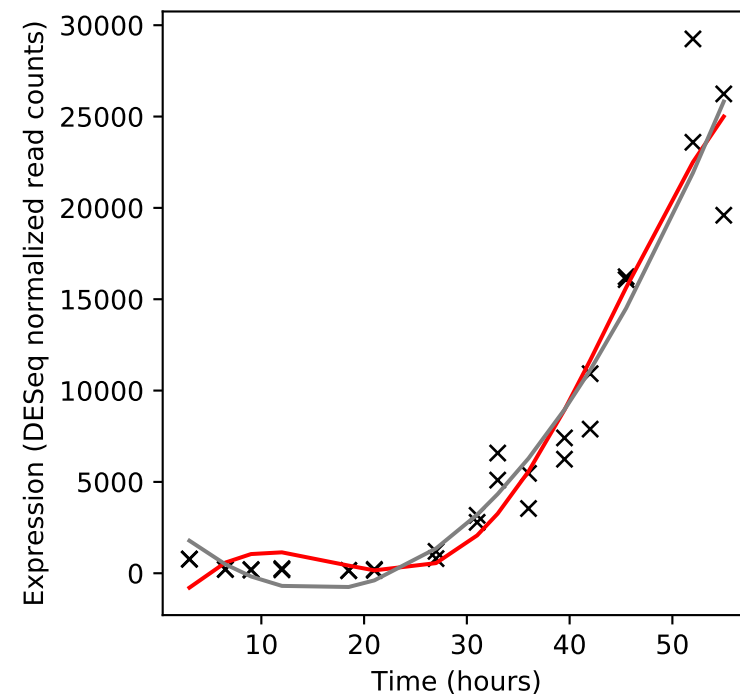



Rv0571c/-

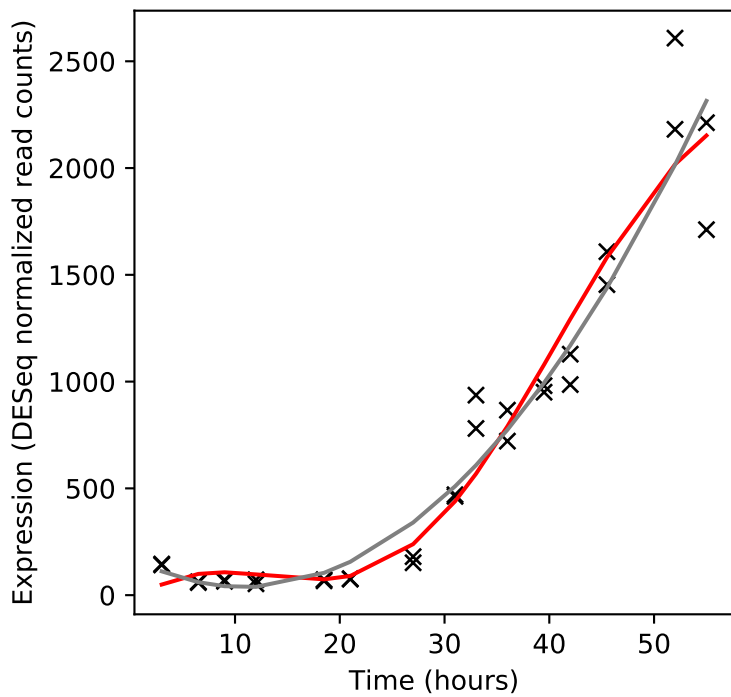

Rv0572c/-

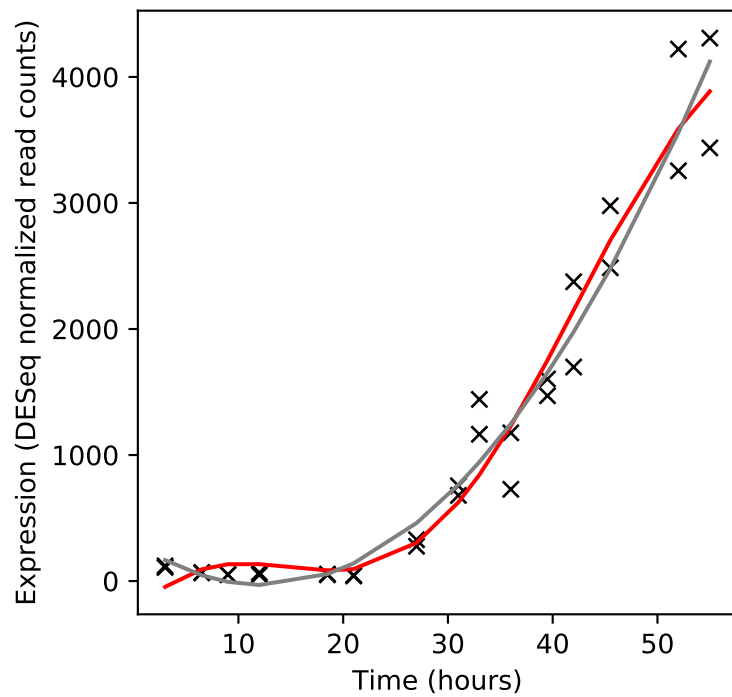

Rv0573c/pncB2

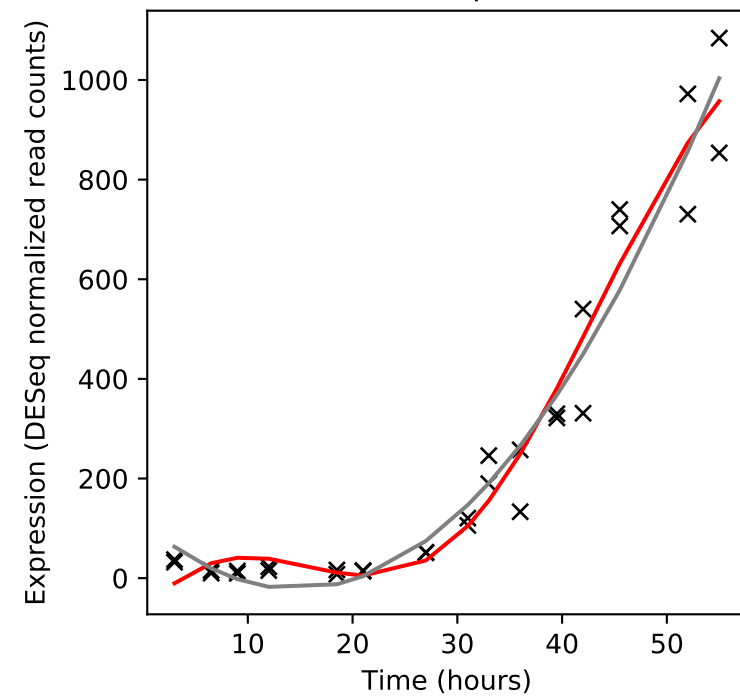

Rv0574c/-

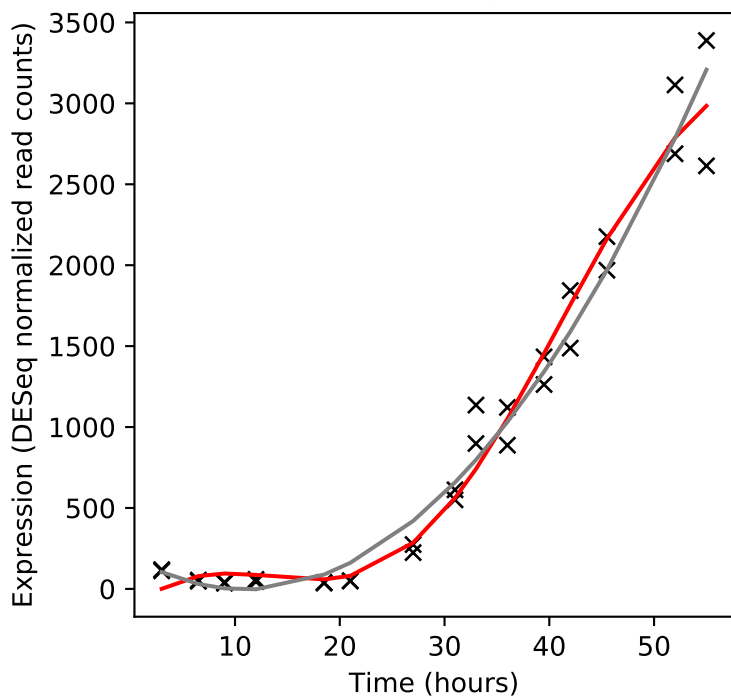

Rv0575c/-

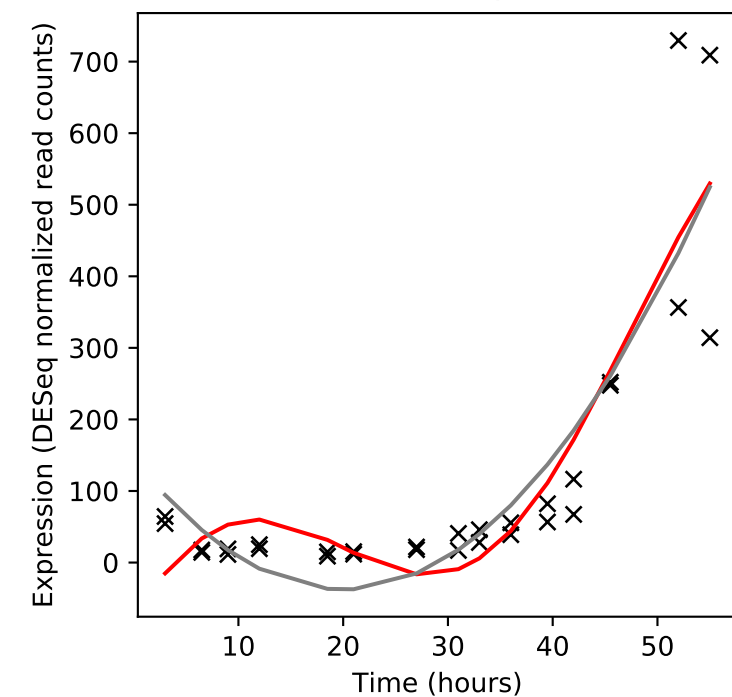

Rv0576/-

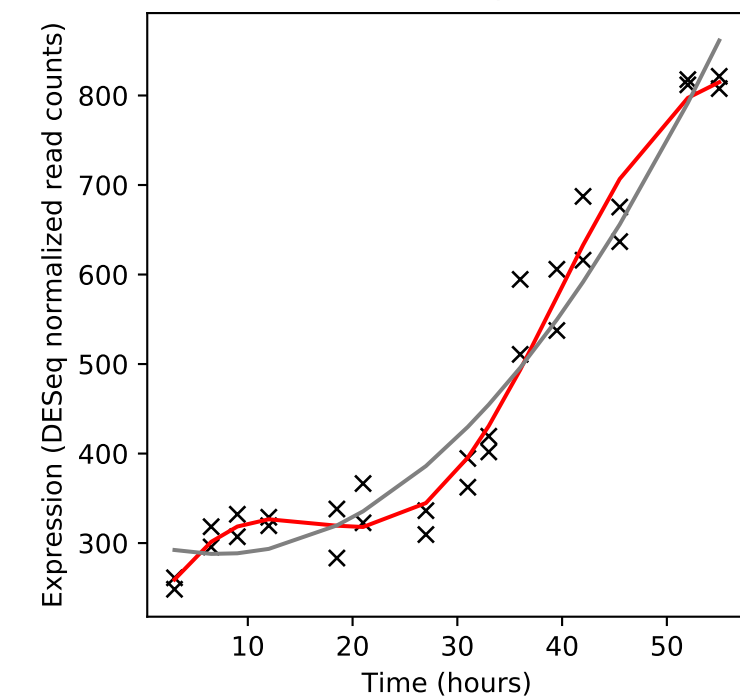

Rv0577/TB27.3

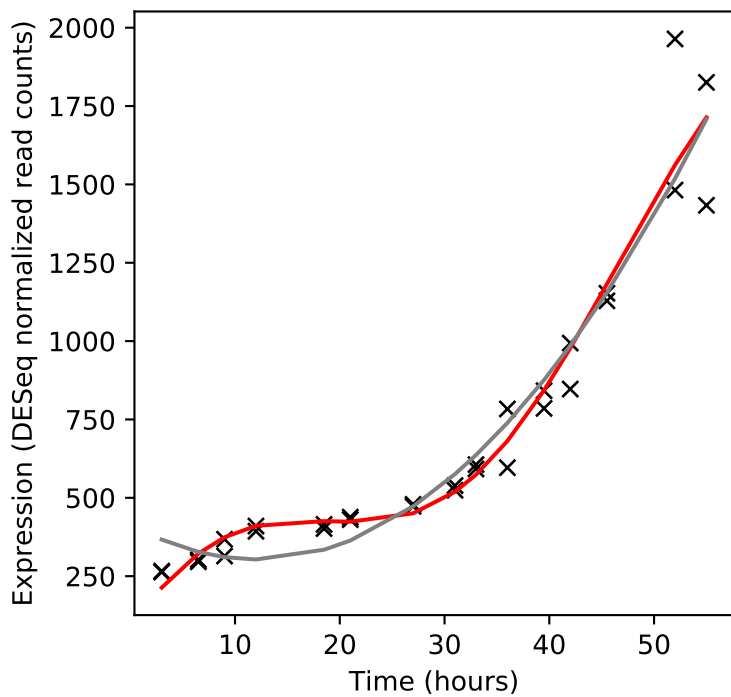

Rv0578c/PE\_PGRS7

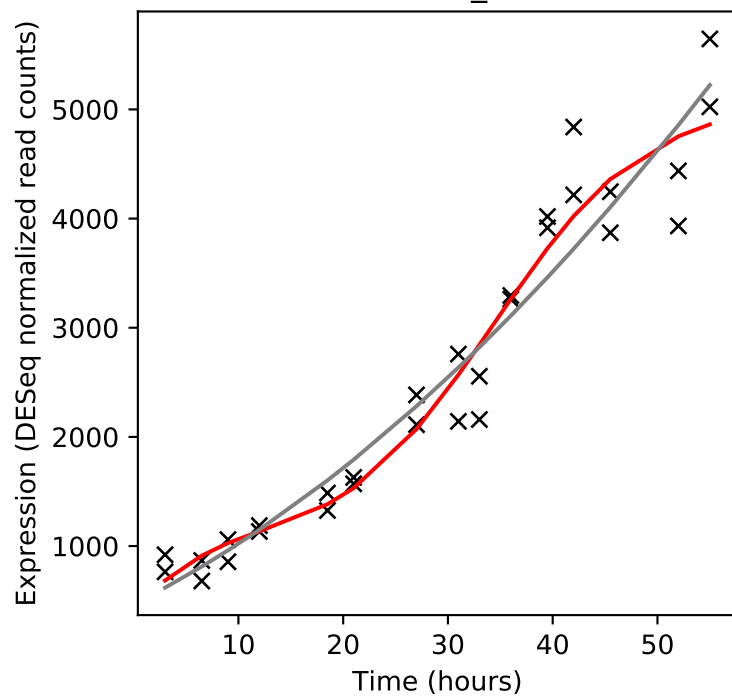

Rv0579/-

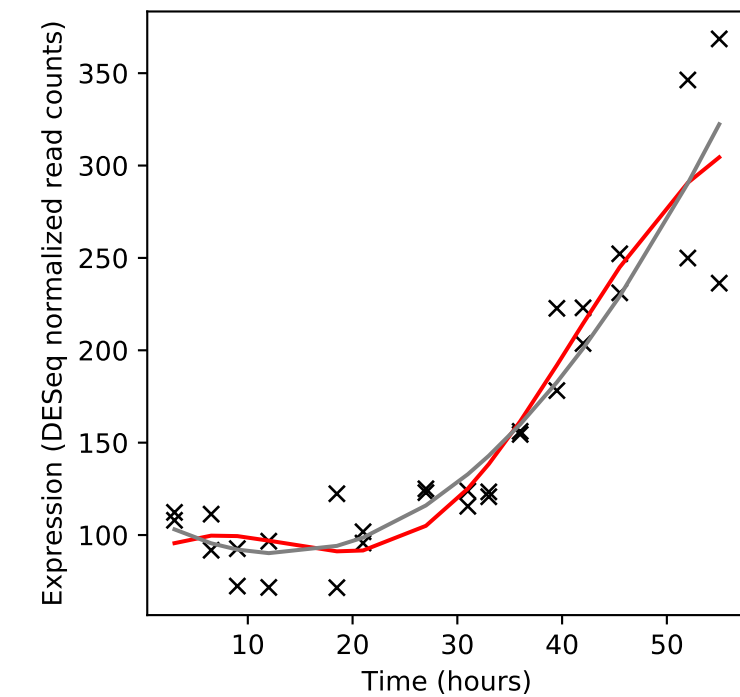

Rv0580c/-

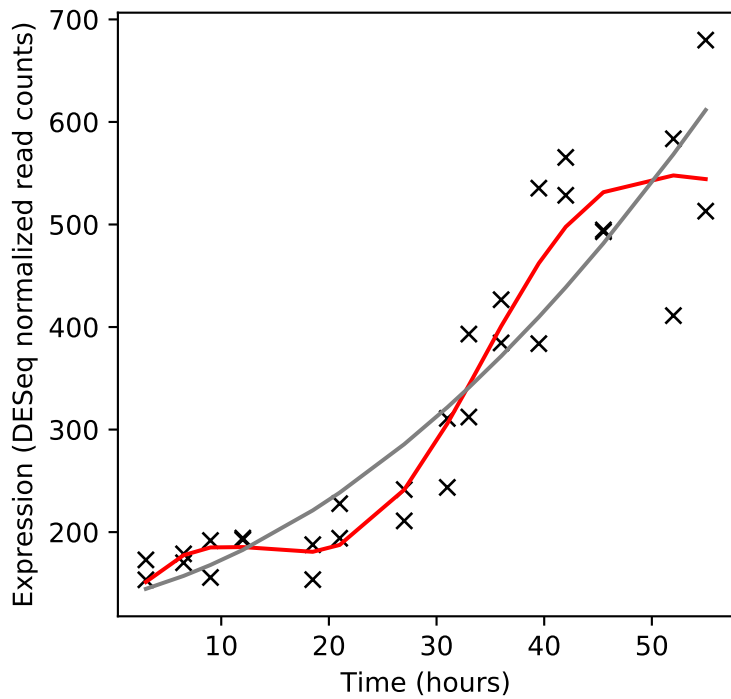

Rv0581/vapB26

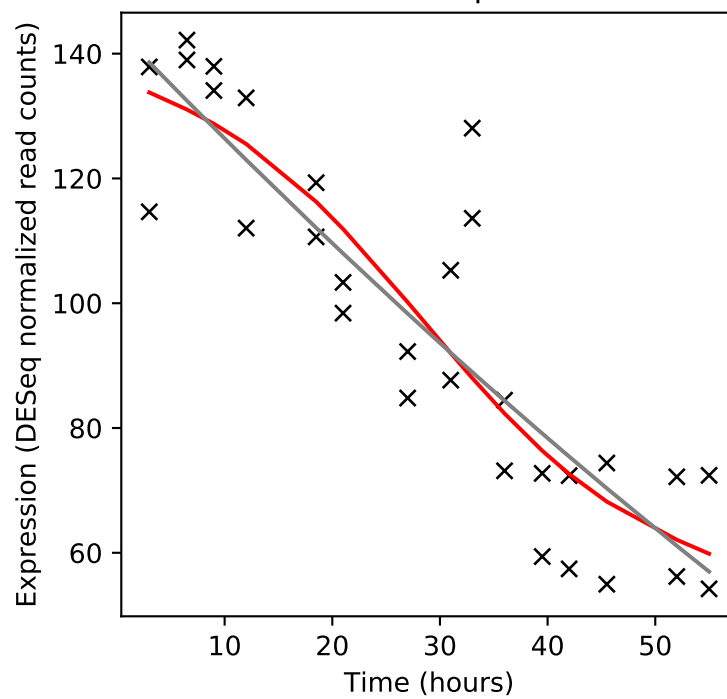

Rv0582/vapC26

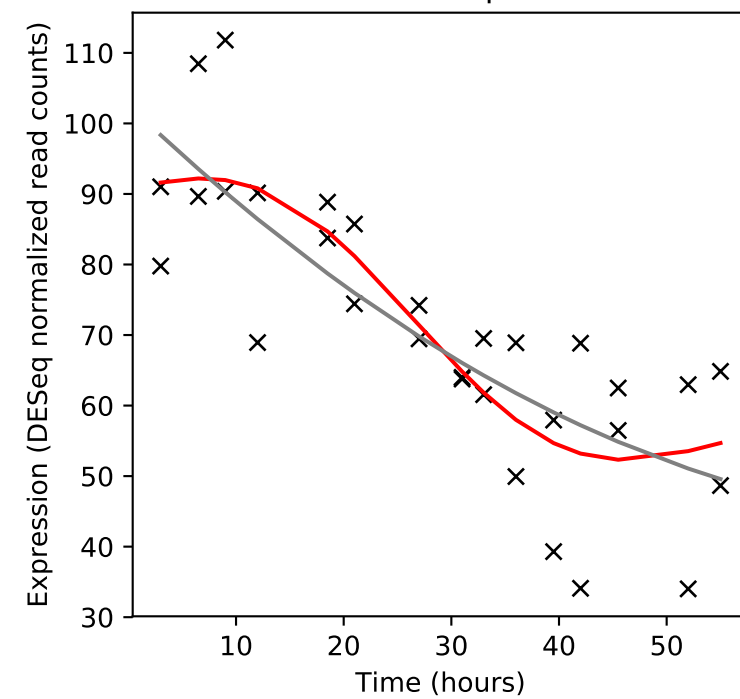

Rv0583c/lpqN

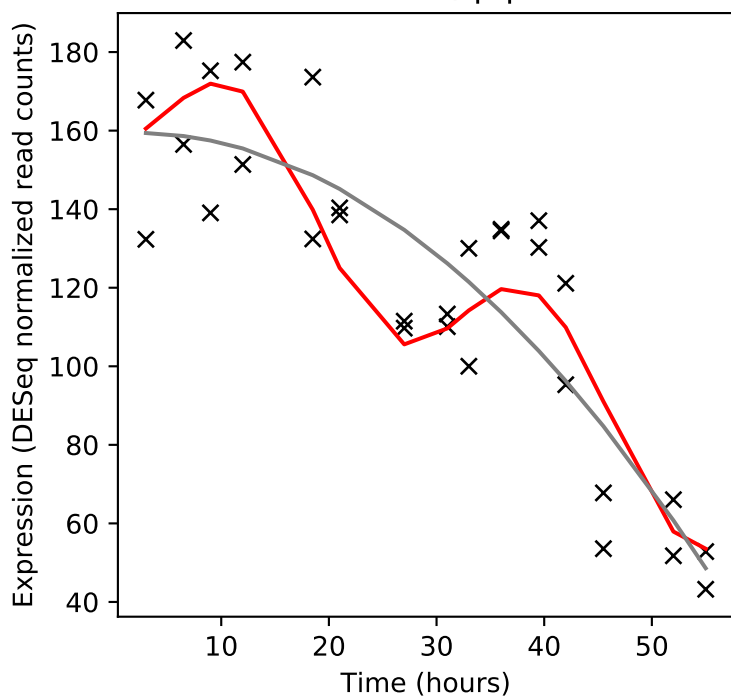

Rv0584/-

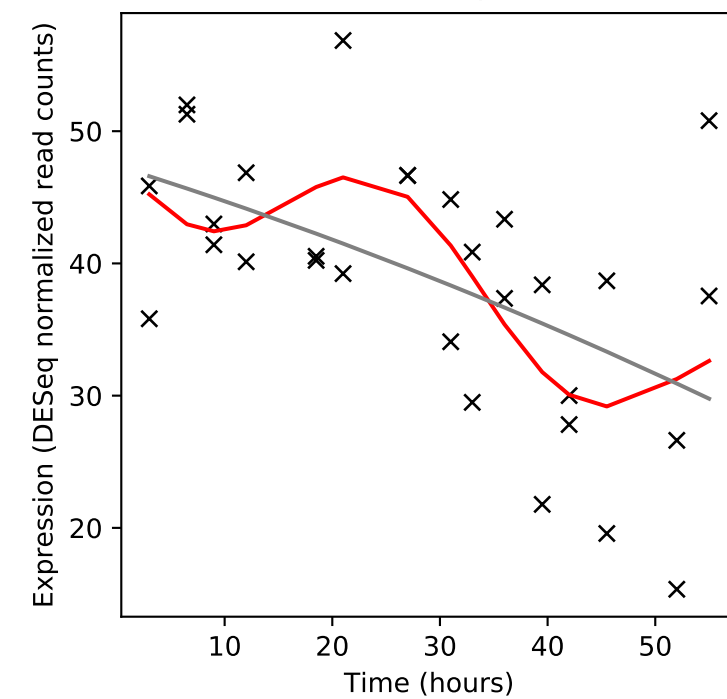

Rv0585c/-

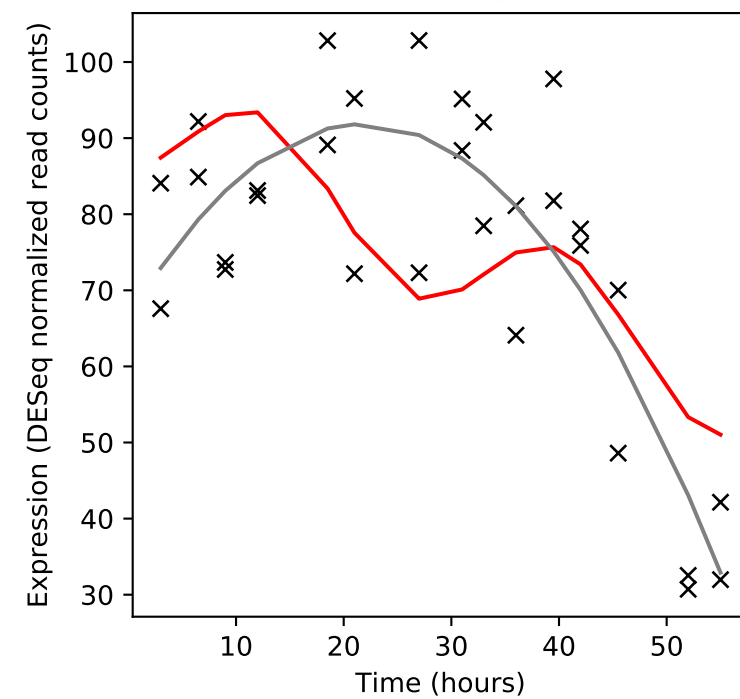

Rv0586/mce2R

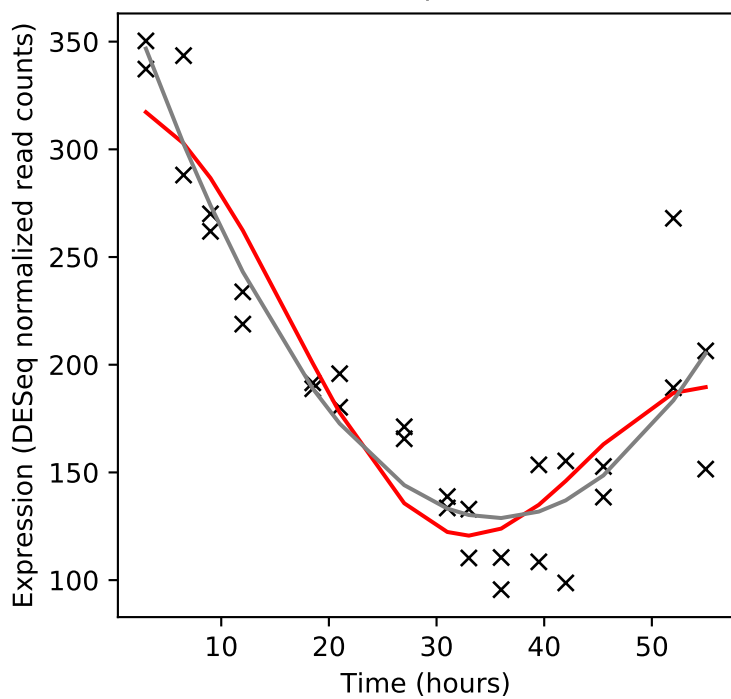

Rv0587/yrbE2A

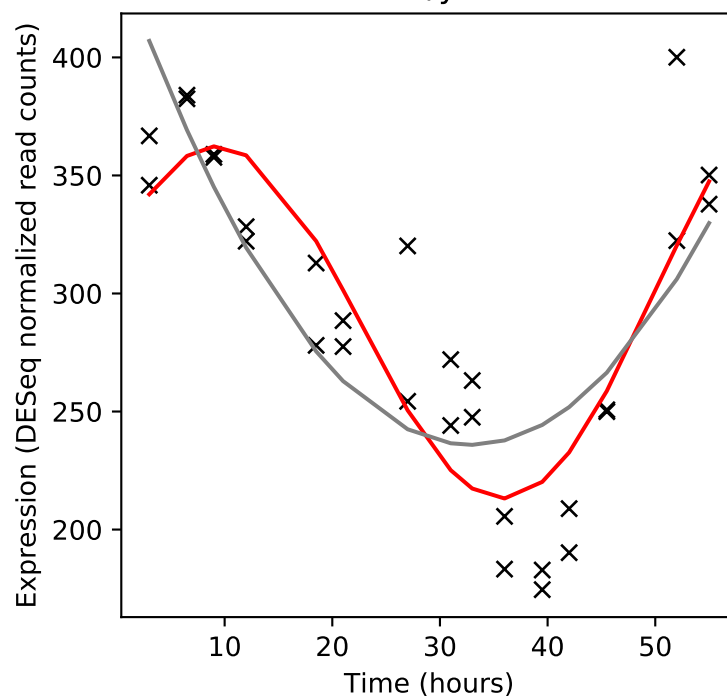

Rv0588/yrbE2B

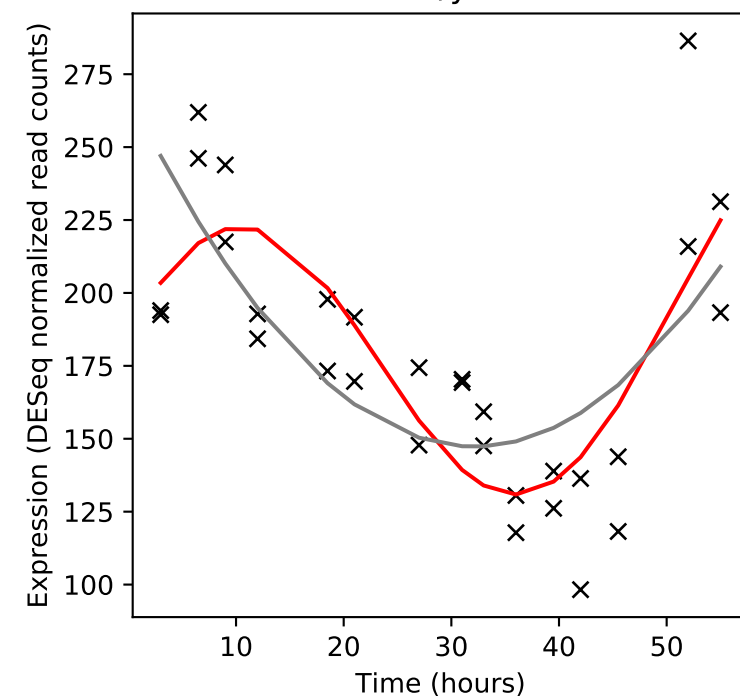

Rv0589/mce2A

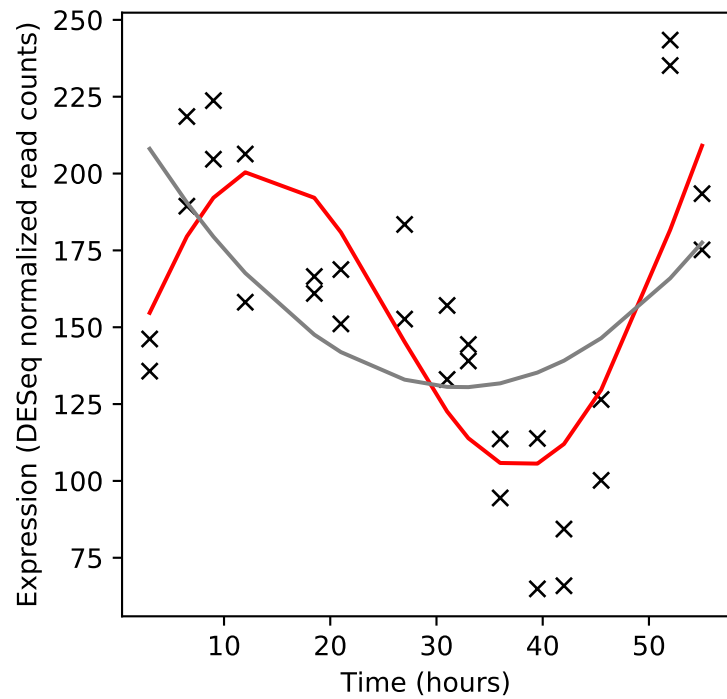

Rv0590/mce2B

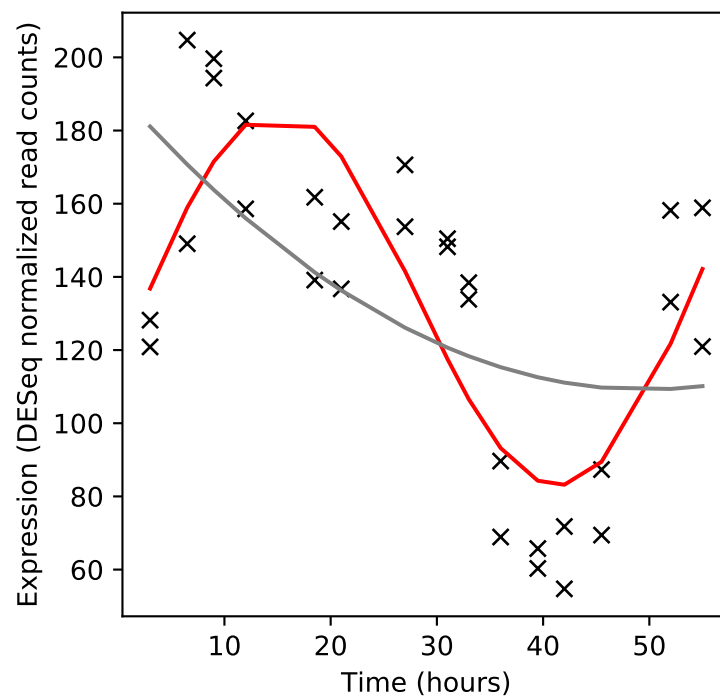

Rv0590A/-

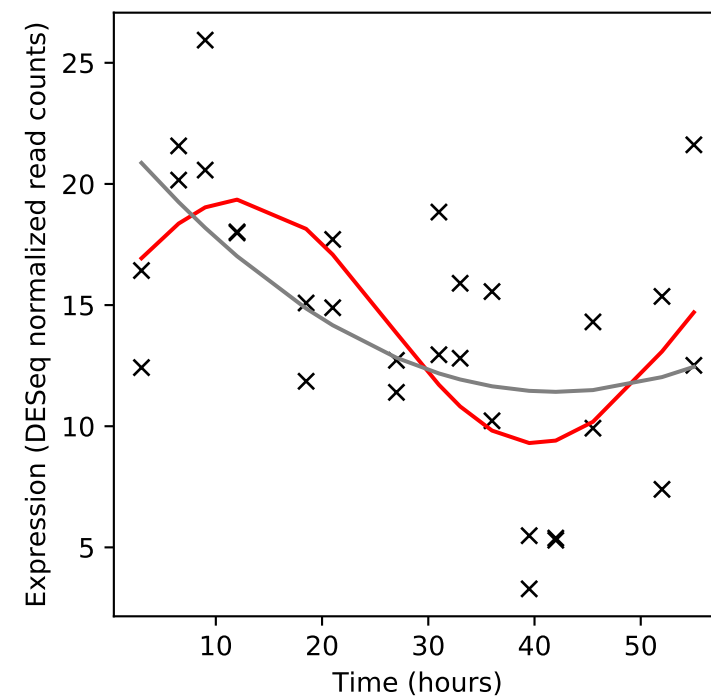

Rv0591/mce2C

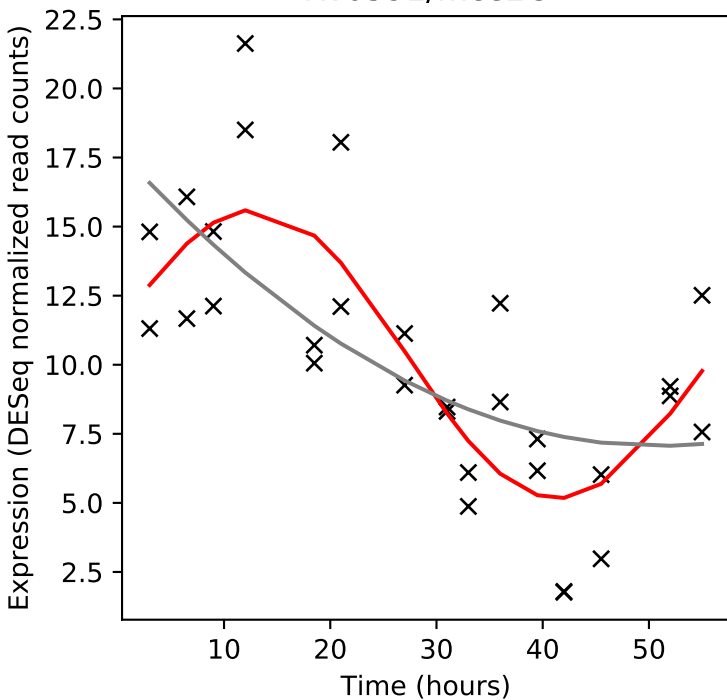

Rv0592/mce2D

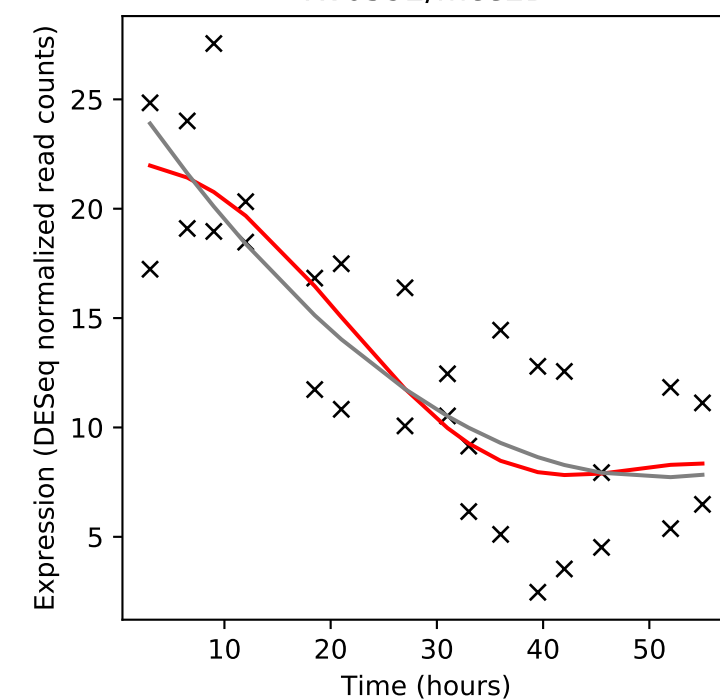

Rv0593/lprL

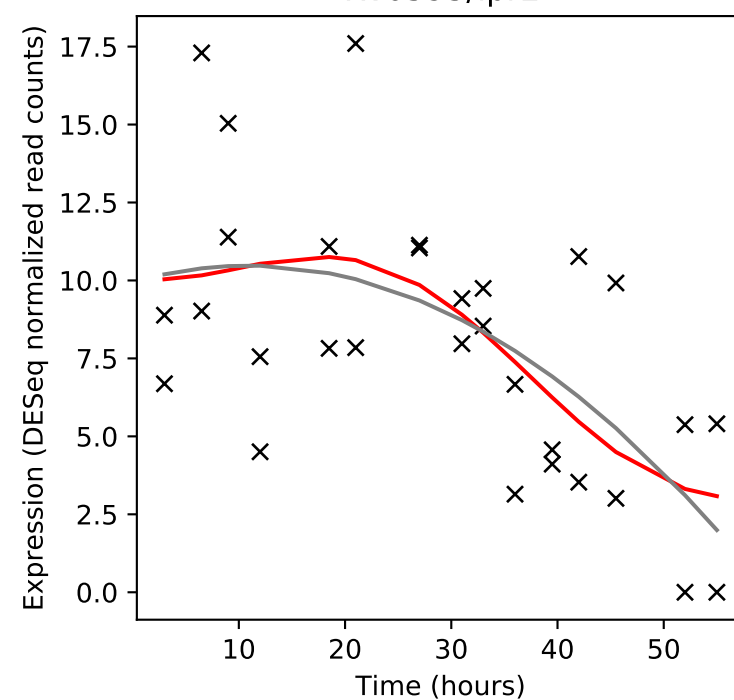

Rv0594/mce2F

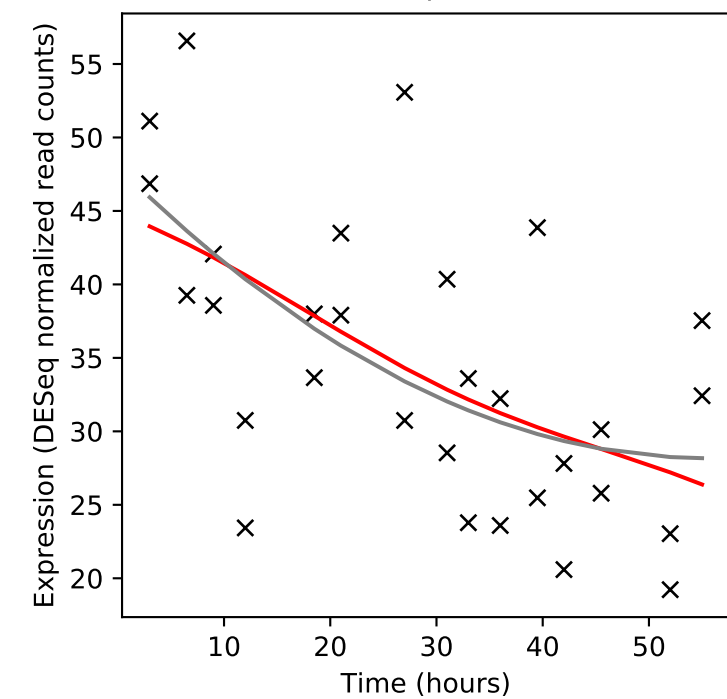

Rv0595c/vapC4

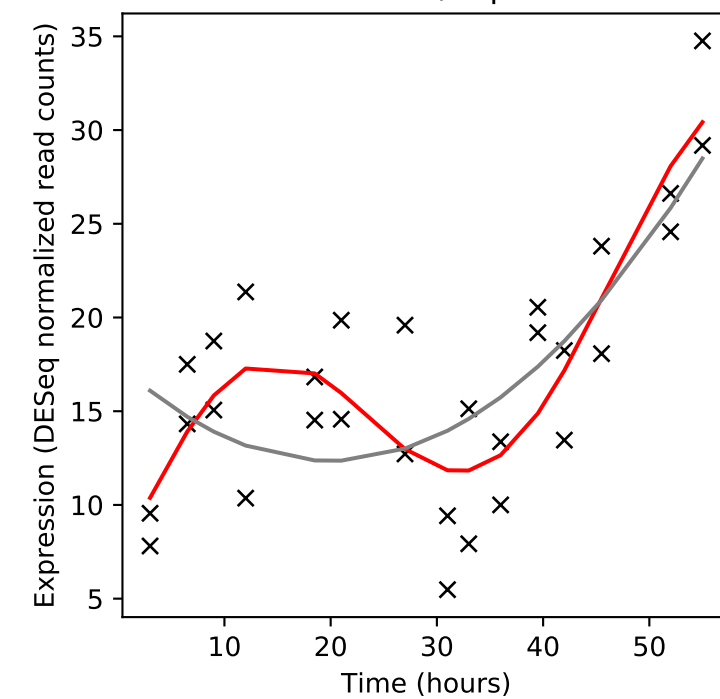

Rv0596c/vapB4

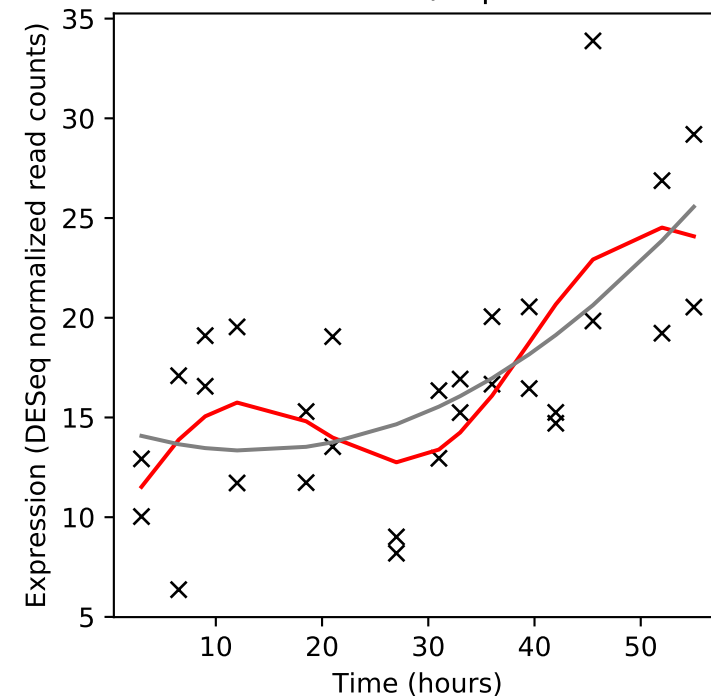

Rv0597c/-

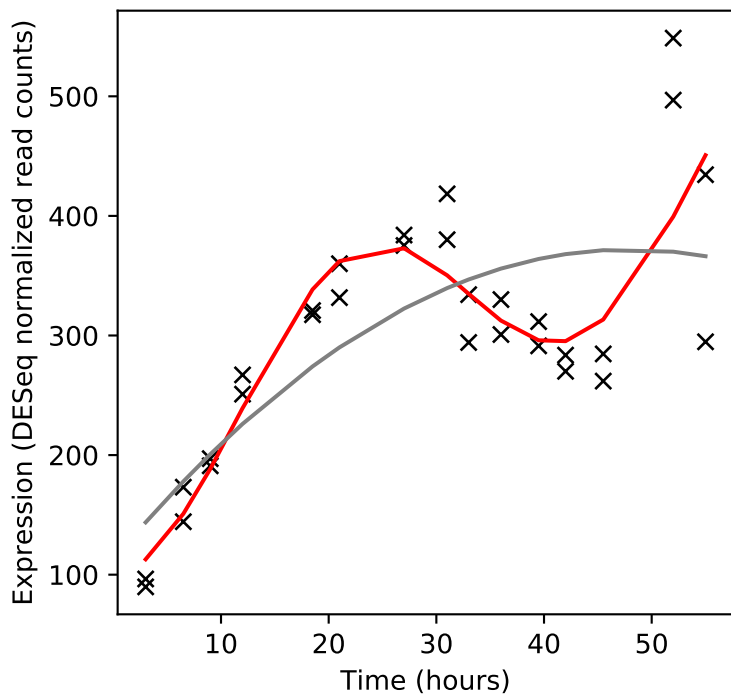

Rv0598c/vapC27

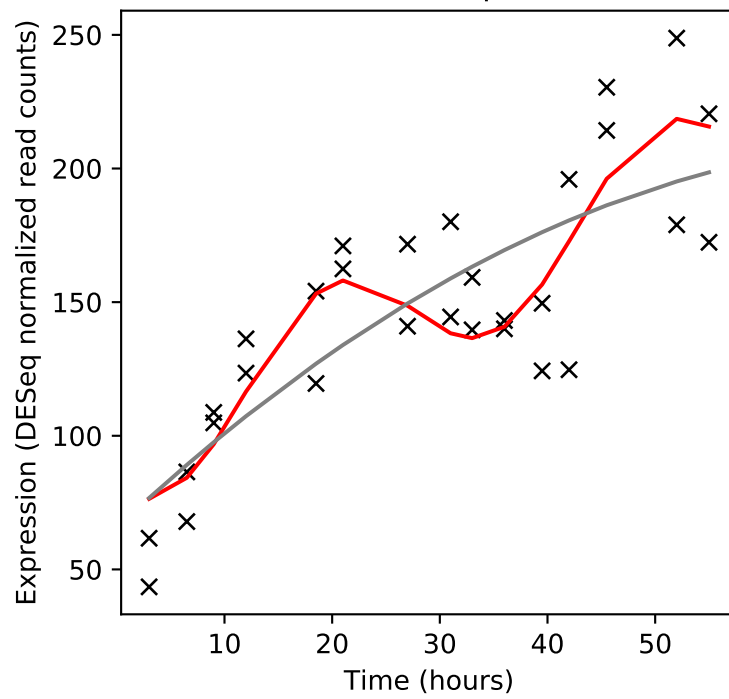

Rv0599c/vapB27

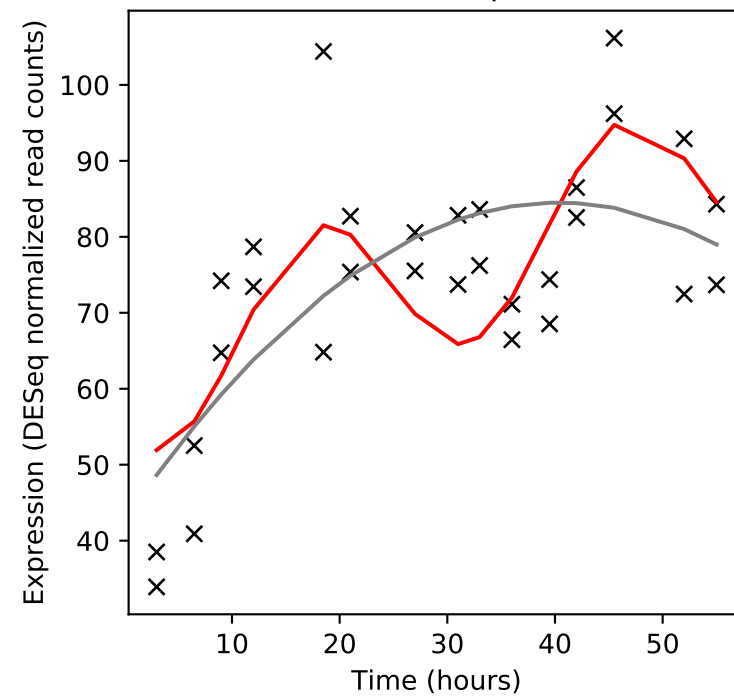

Rv0600c/-

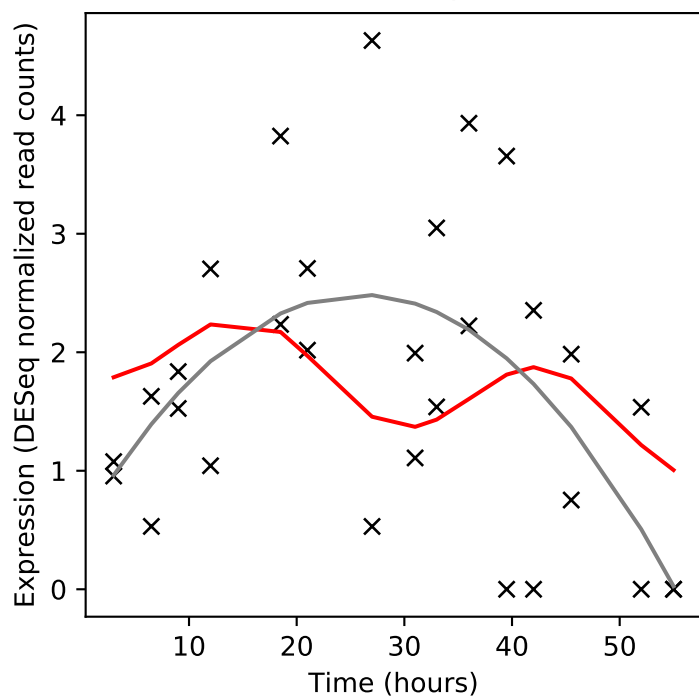

Rv0601c/-

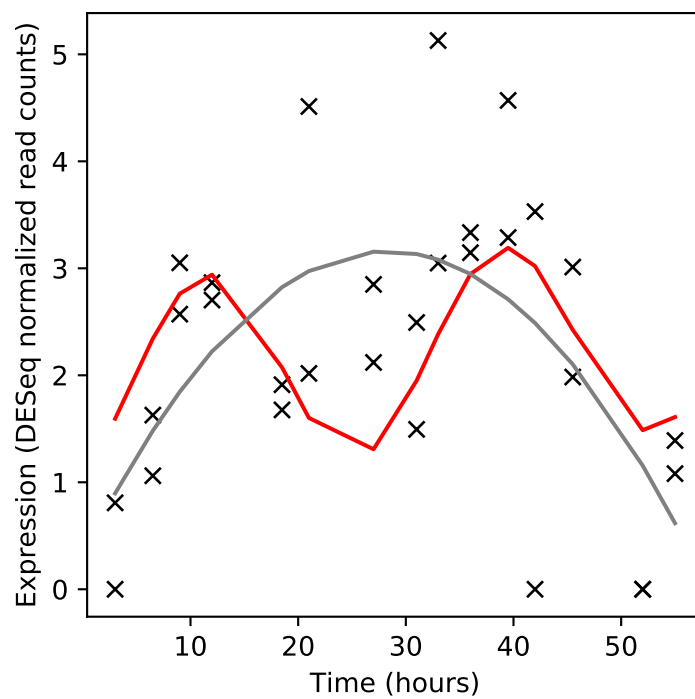

Rv0602c/tcrA

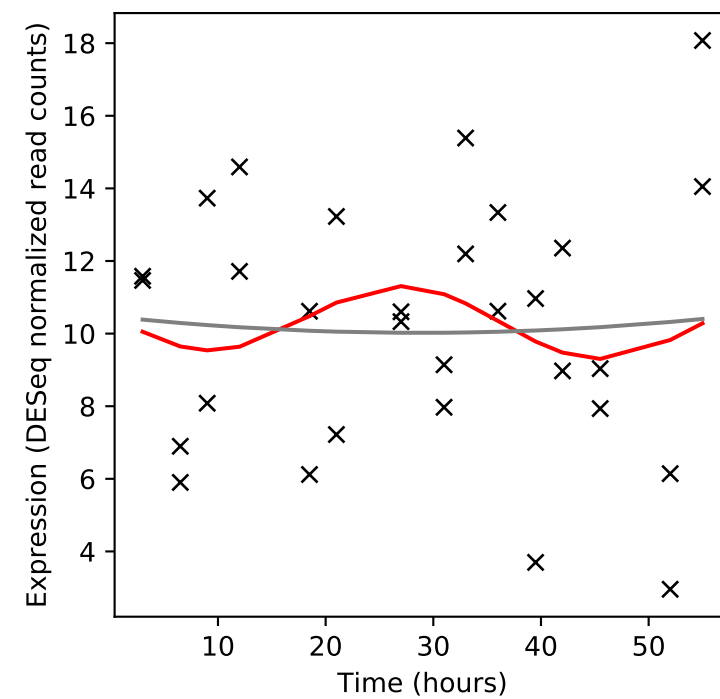

Rv0603c/-

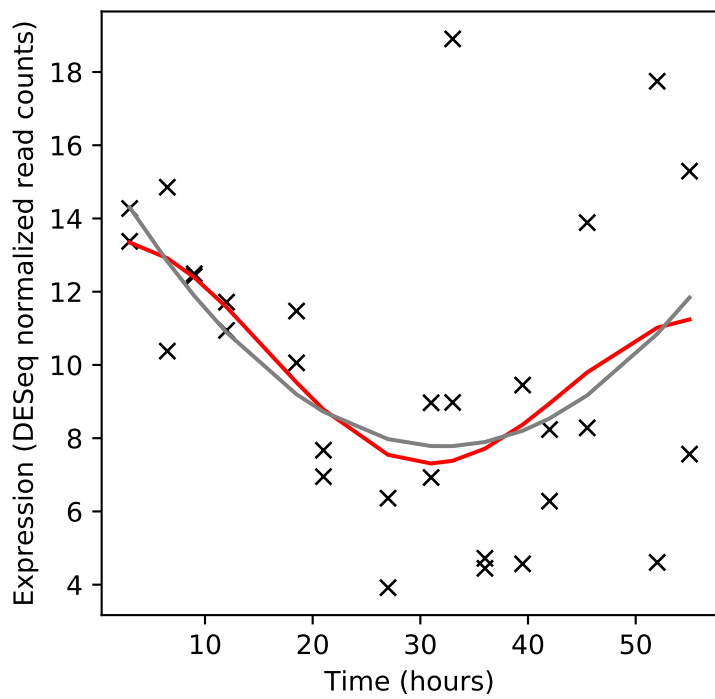

Rv0604c/lpqO

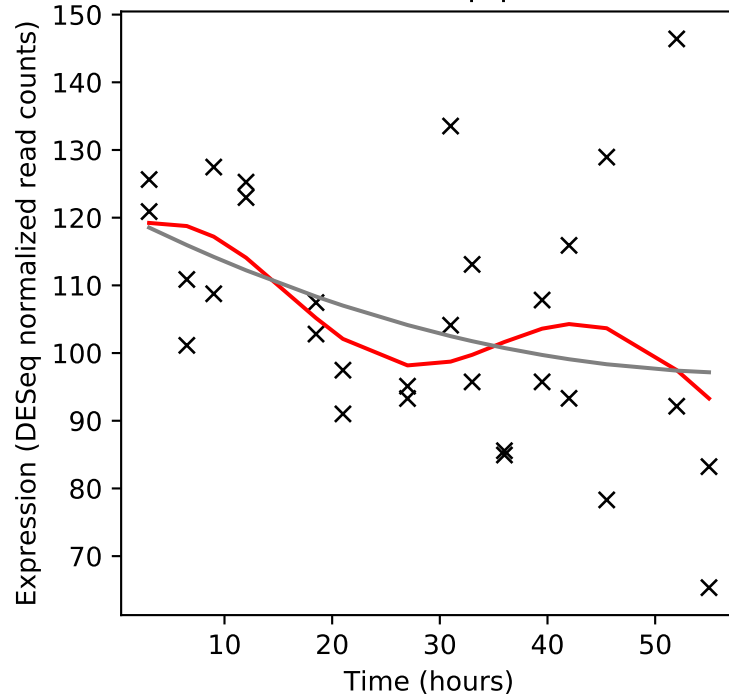

Rv0605c/-

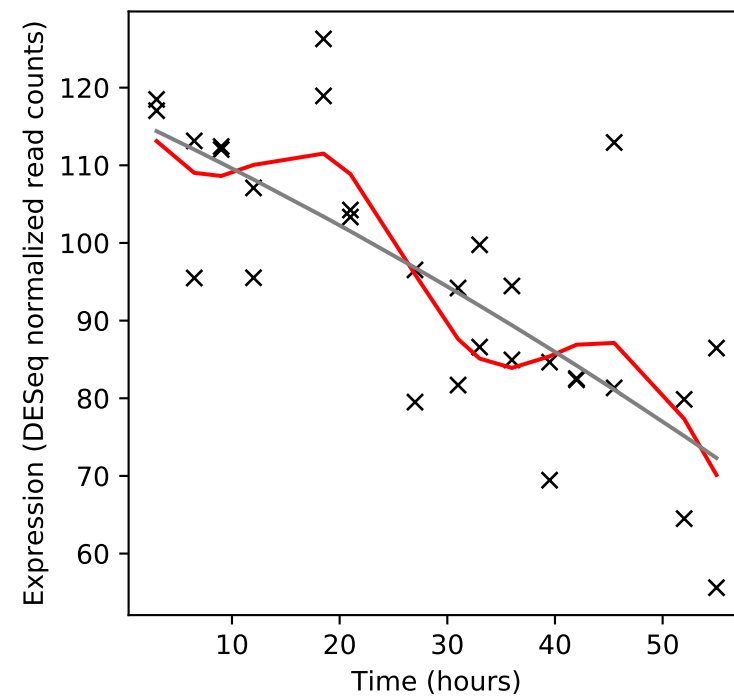

Rv0606/-

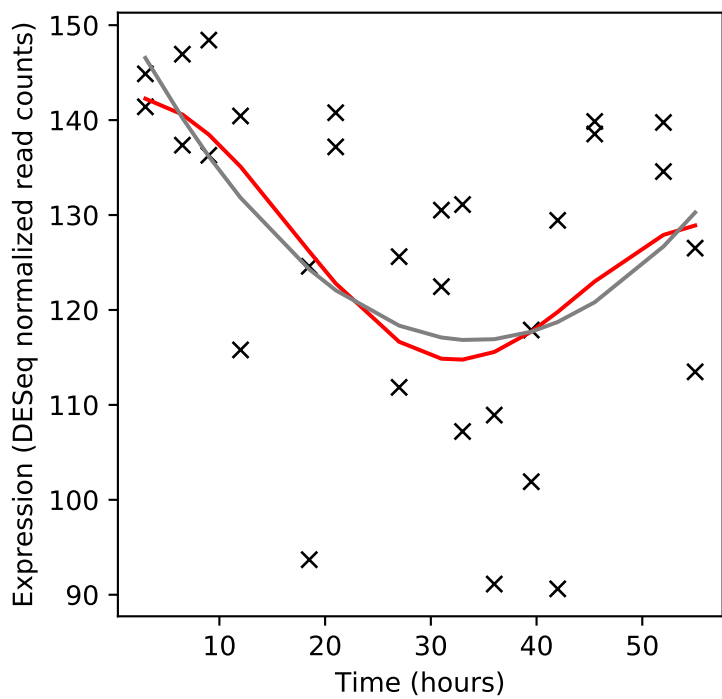

Rv0607/-

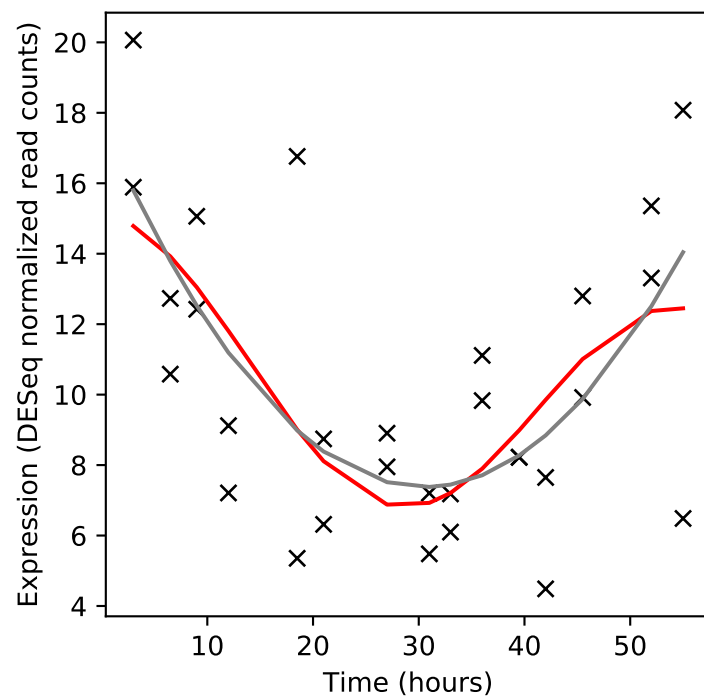

Rv0608/vapB28

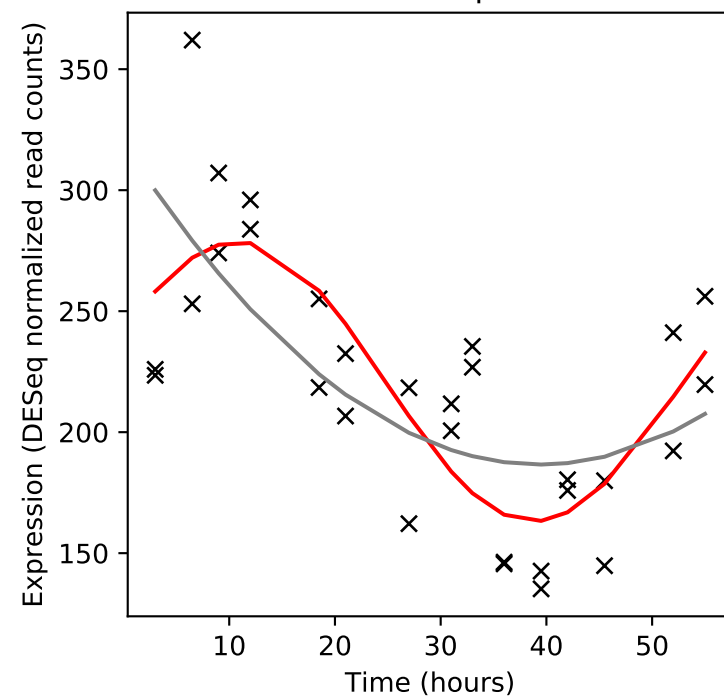

Rv0609/vapC28

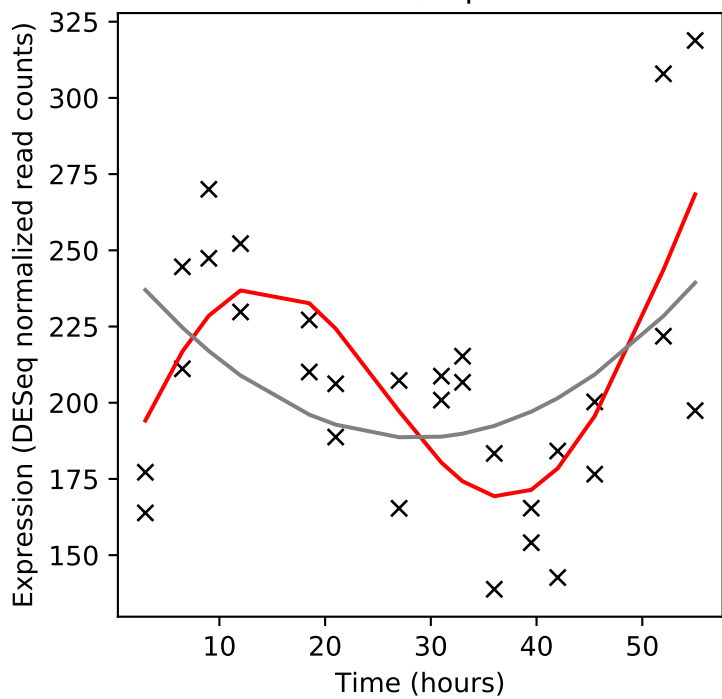

Rv0609A/-

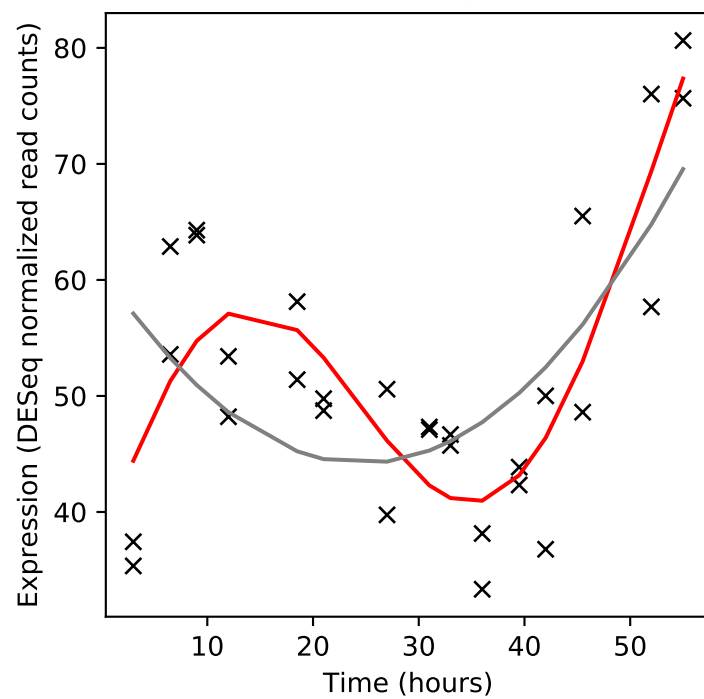

Rv0610c/-

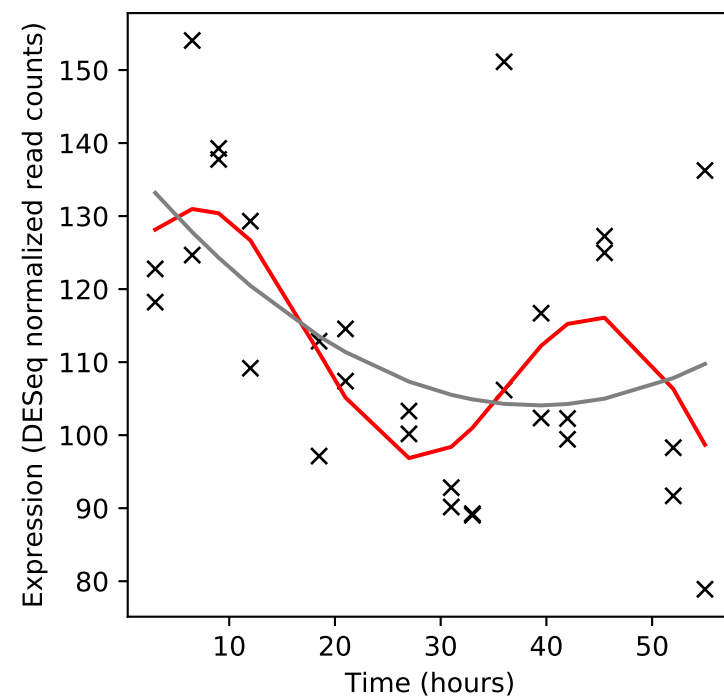

Rv0611c/-

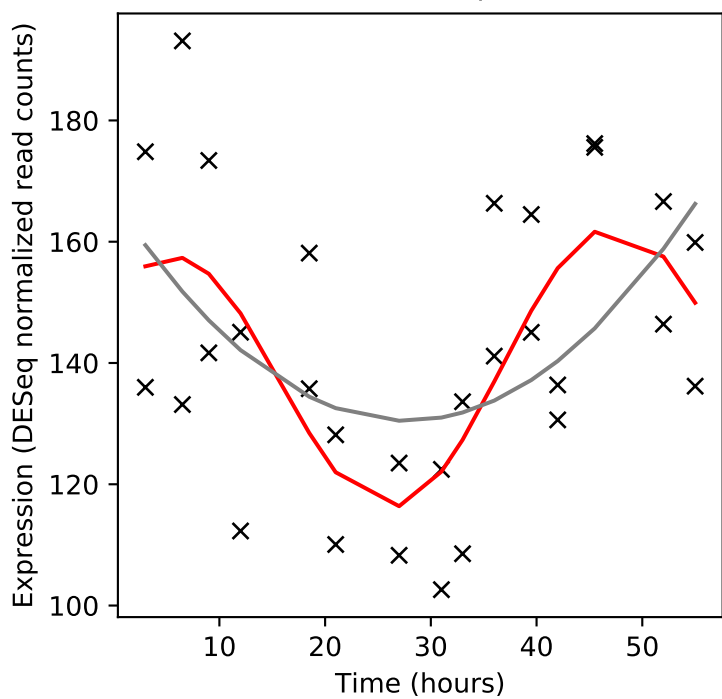

Rv0612/-

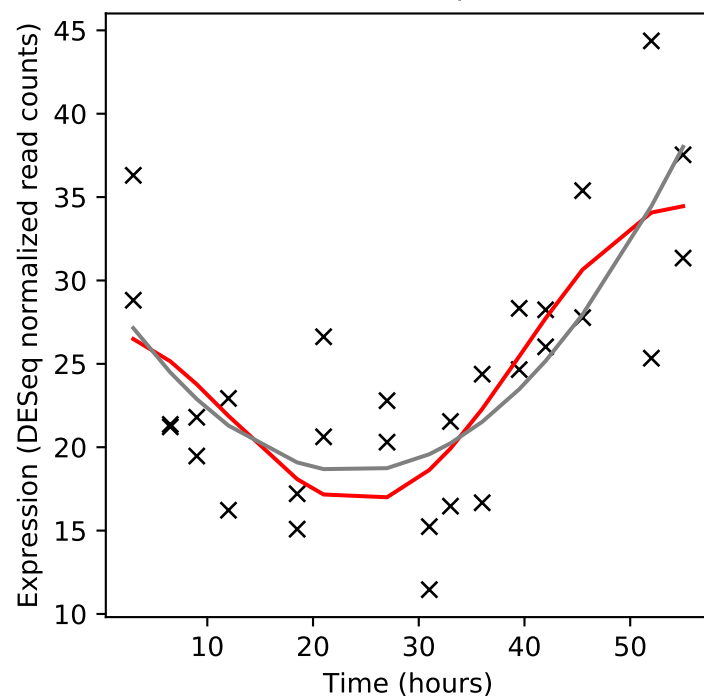

Rv0613c/-

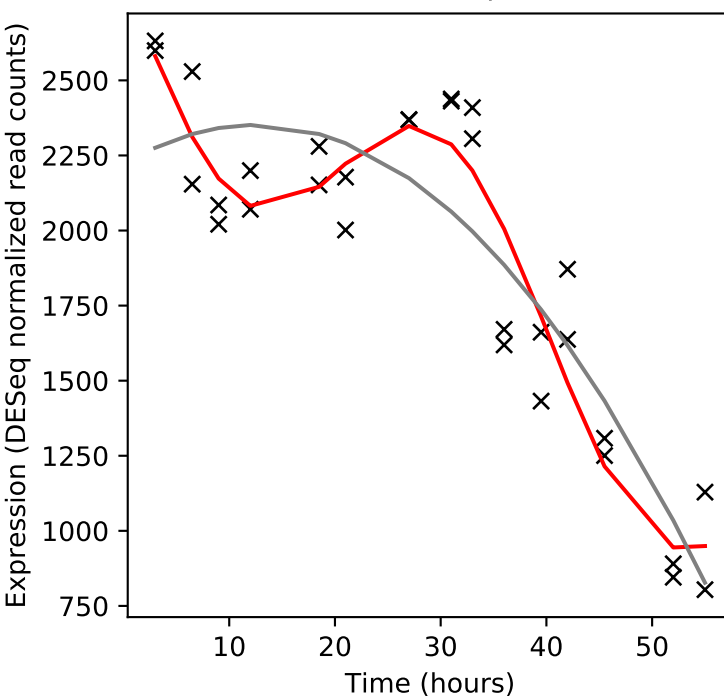

Rv0614/-

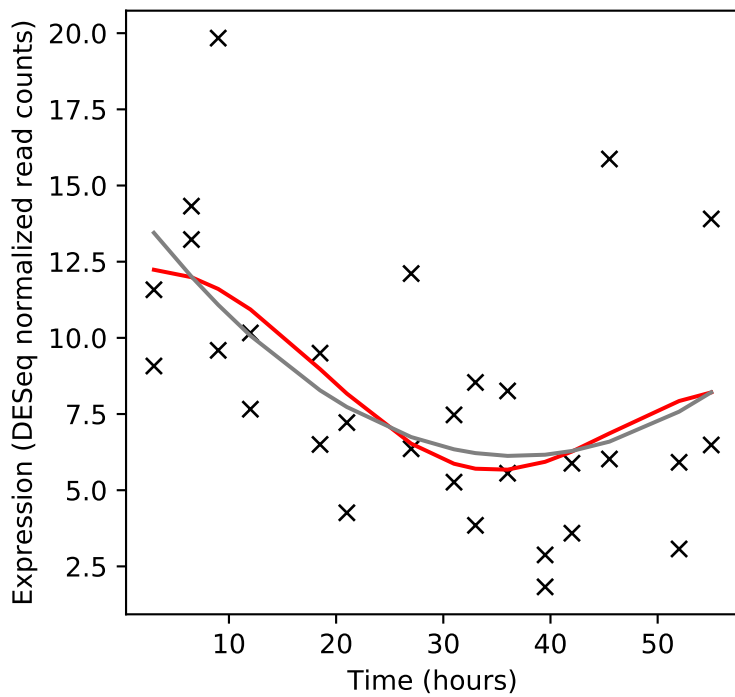

Rv0615/-

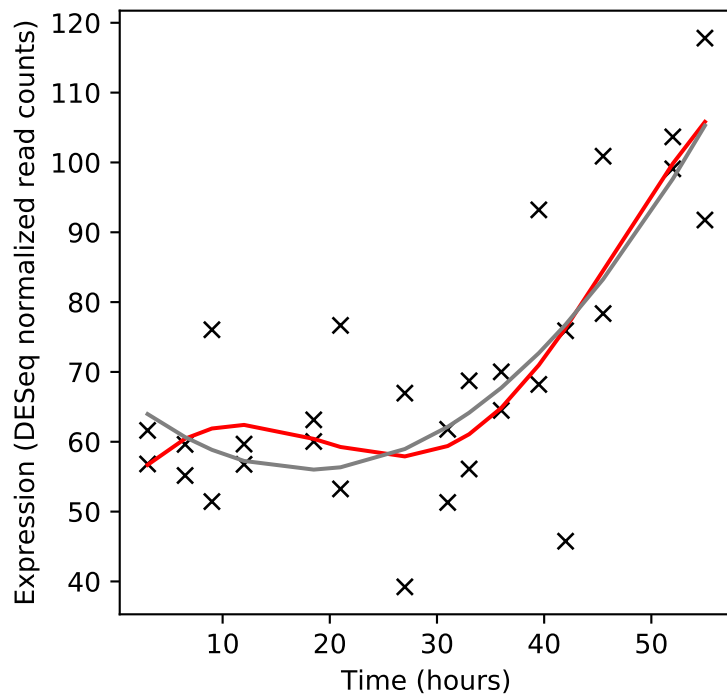

Rv0616c/-

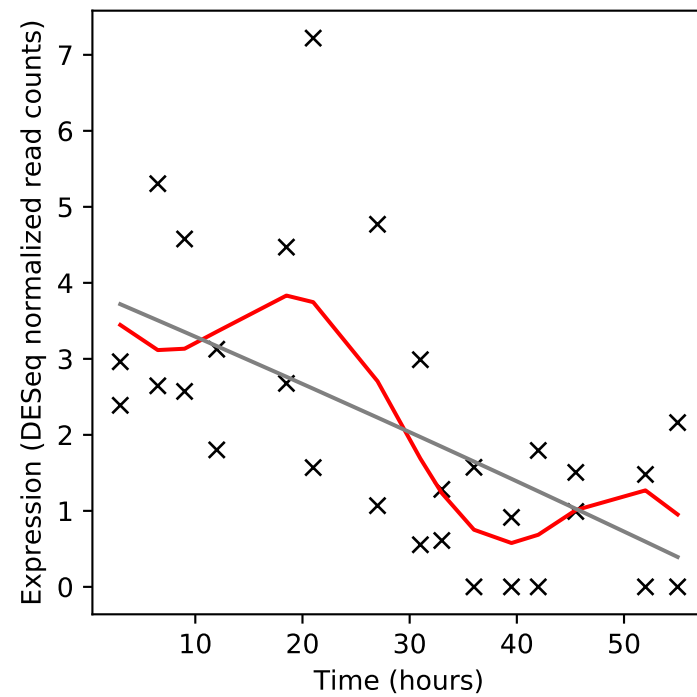

Rv0616A/vapB29

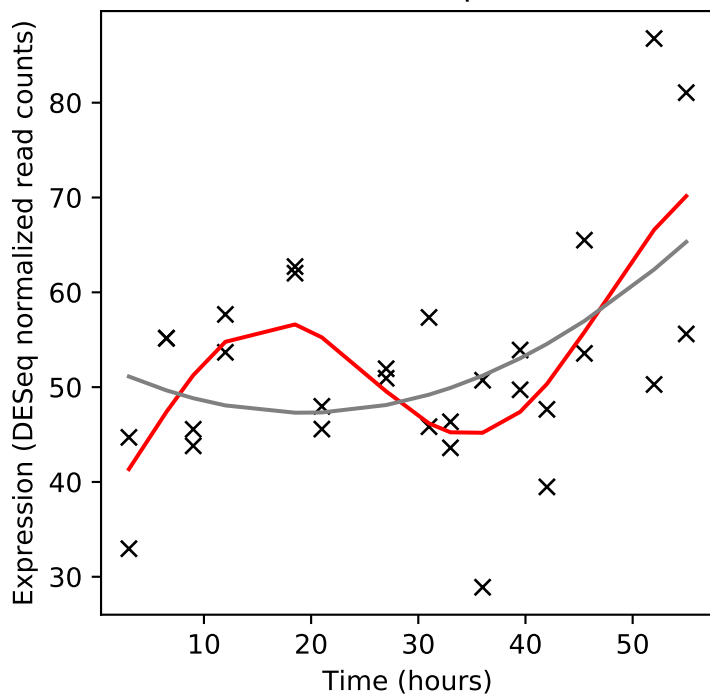

Rv0617/vapC29

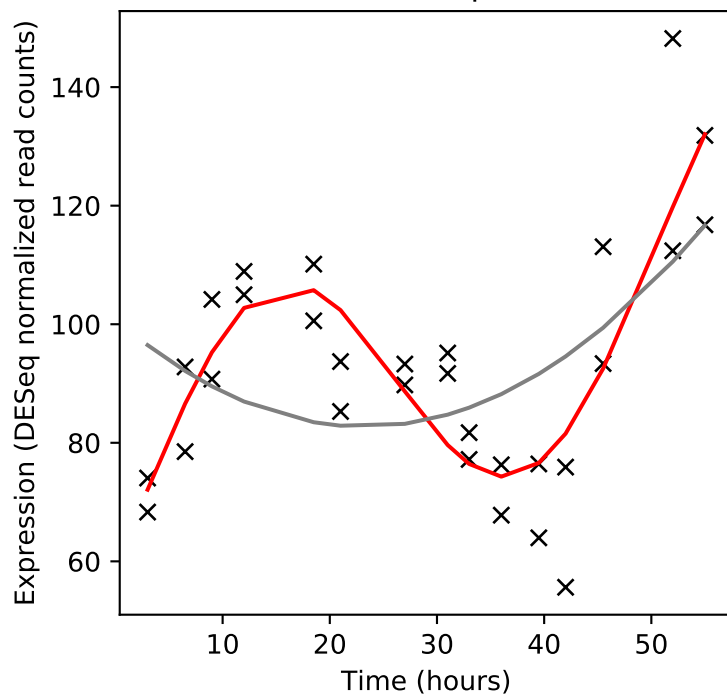

Rv0618/galTa

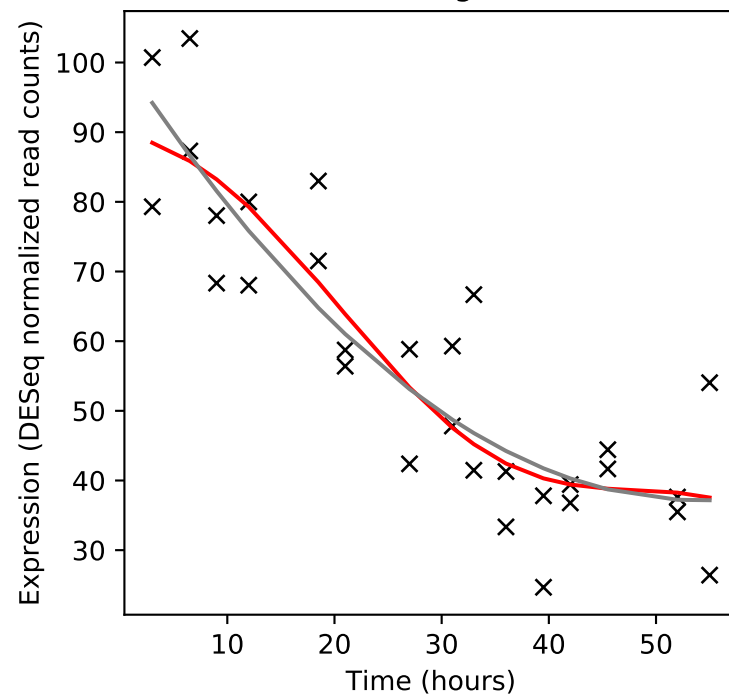

Rv0619/galTb

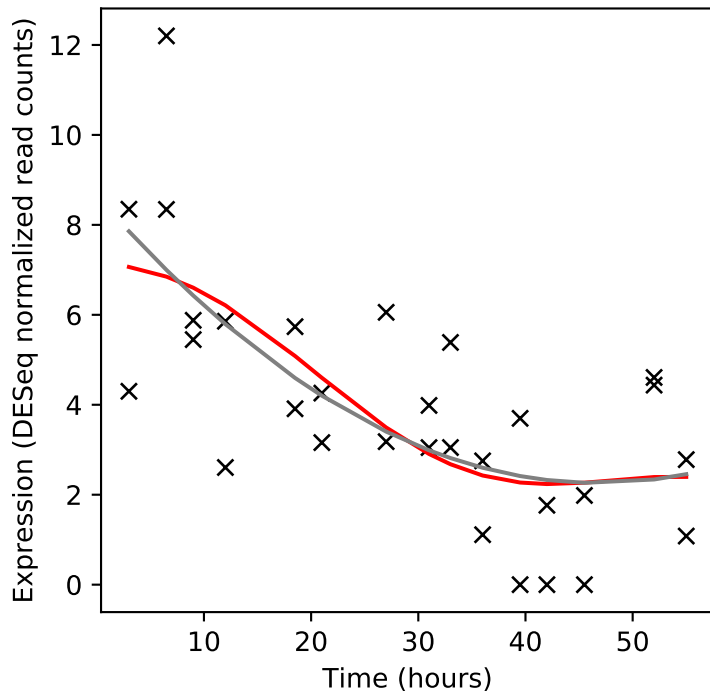

Rv0620/galK

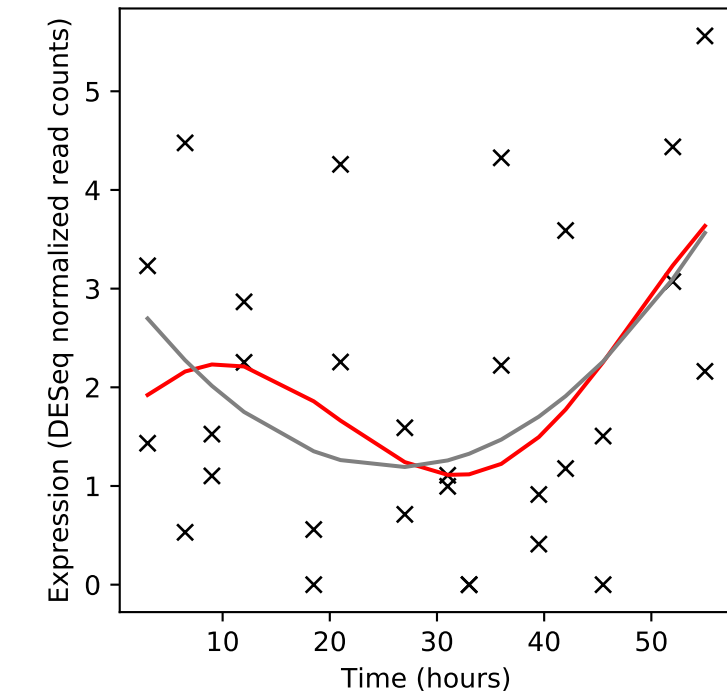

Rv0621/-

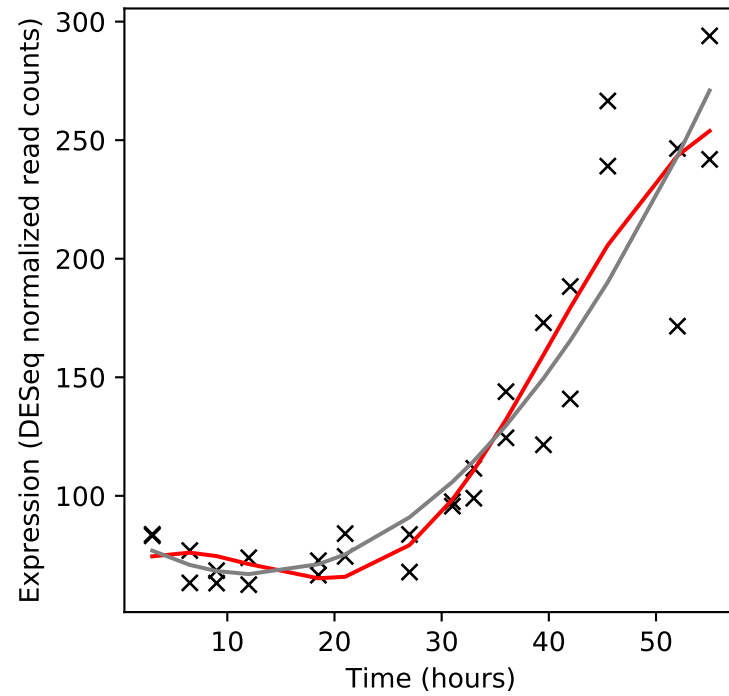

Rv0622/-

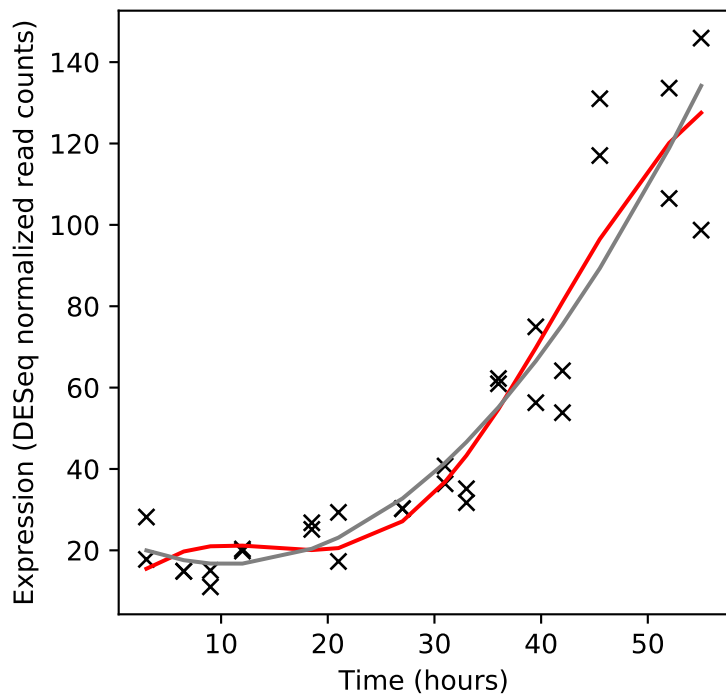

Rv0623/vapB30

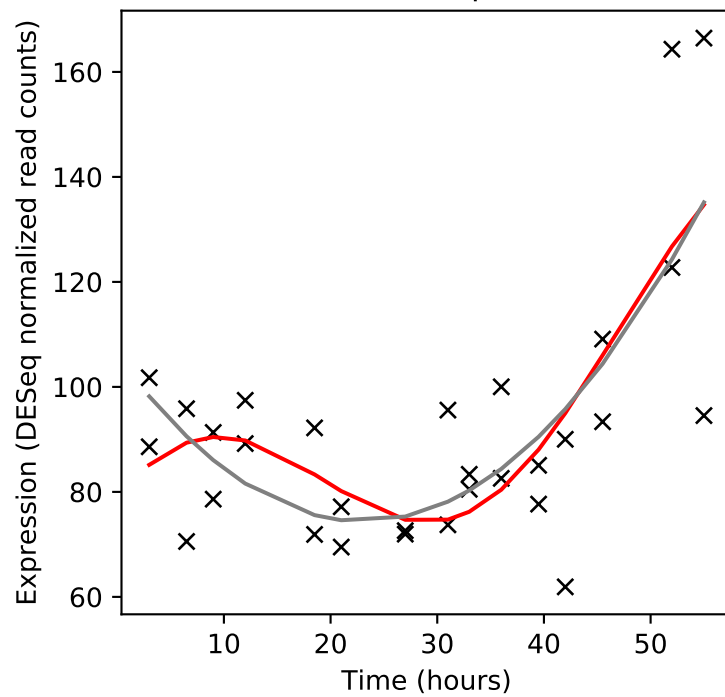

Rv0624/vapC30

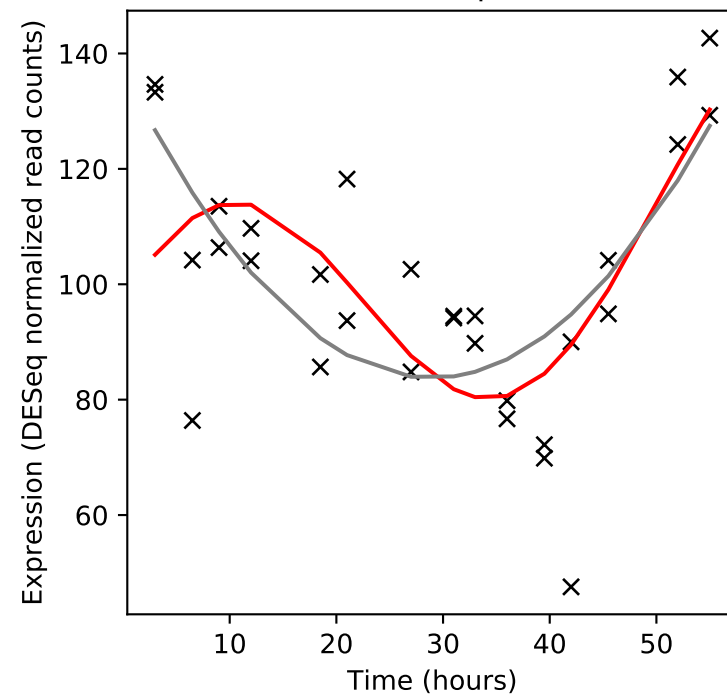

Rv0625c/-

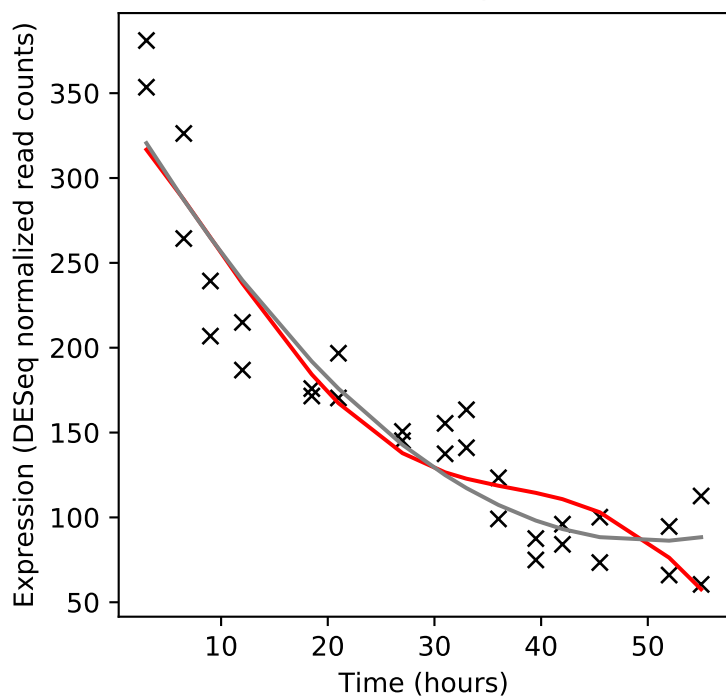

Rv0626/vapB5

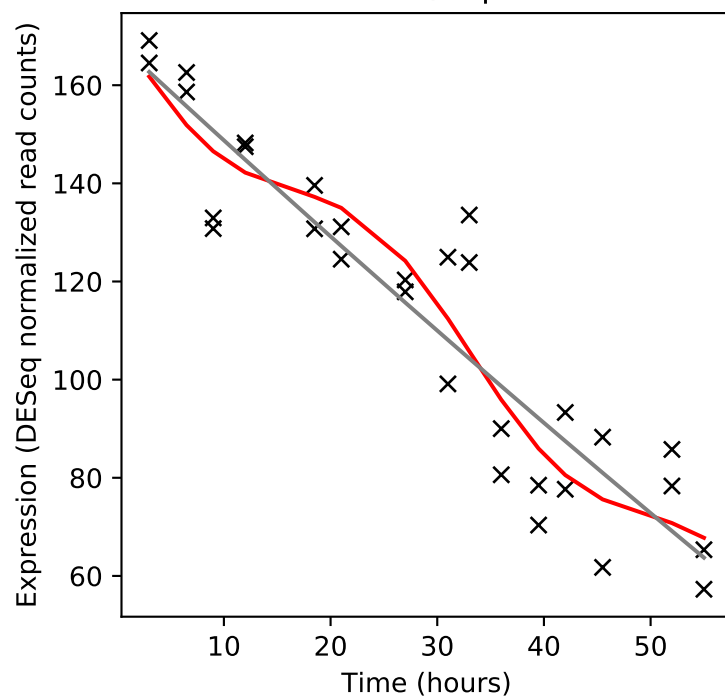

Rv0627/vapC5

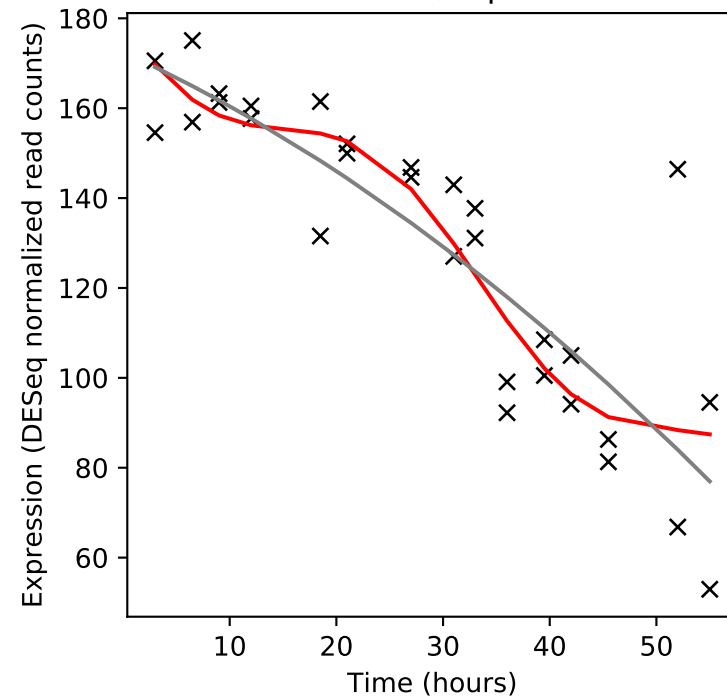

Rv0628c/-

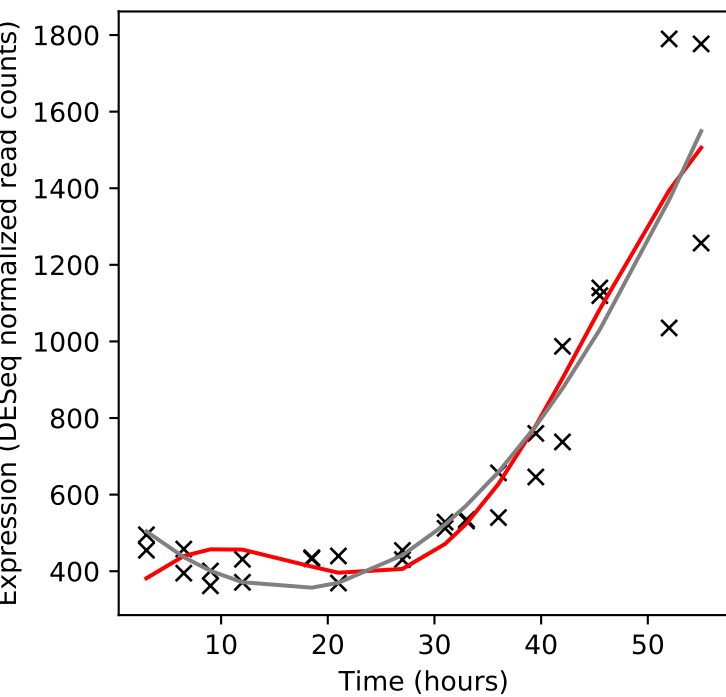

Rv0629c/recD

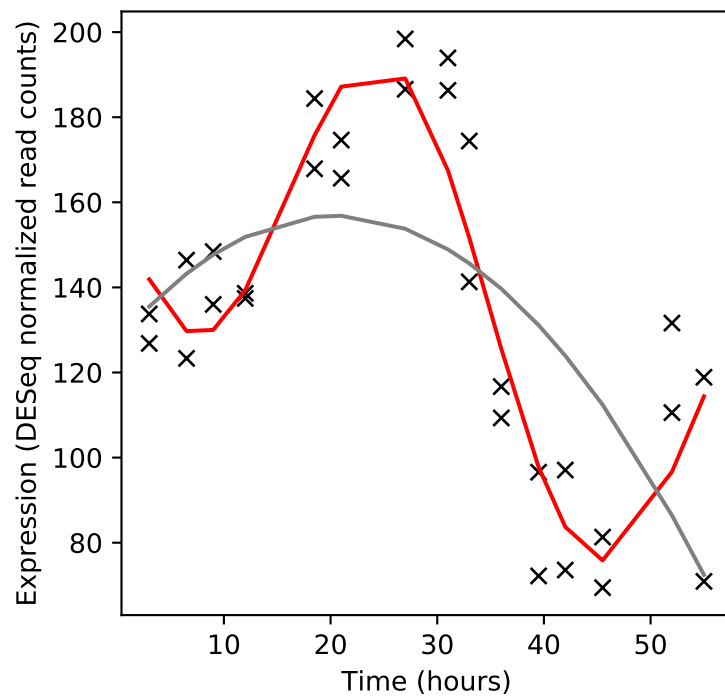

Rv0630c/recB

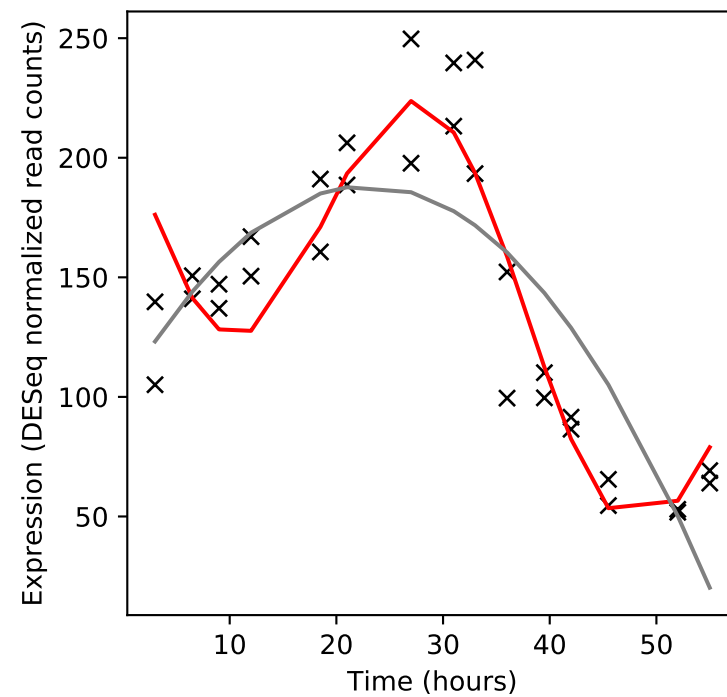



Rv0631c/recC

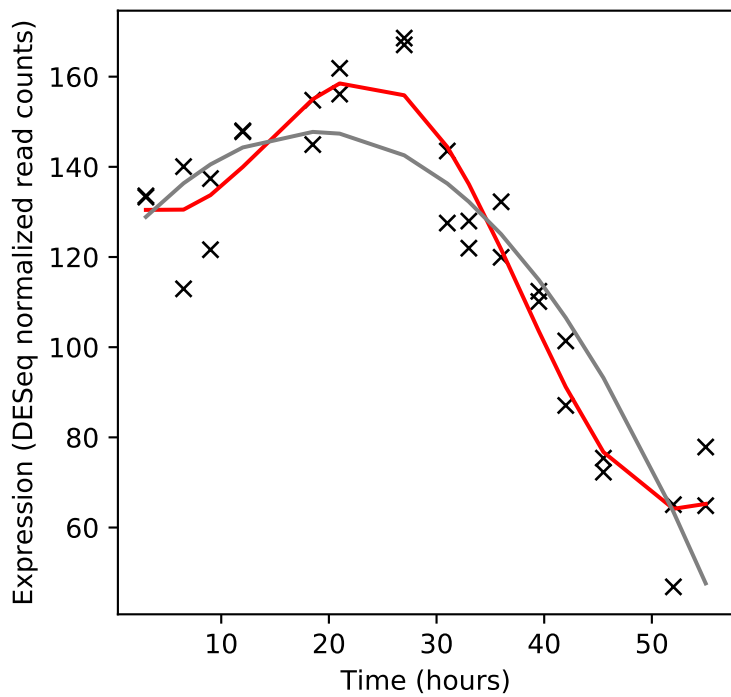

Rv0632c/echA3

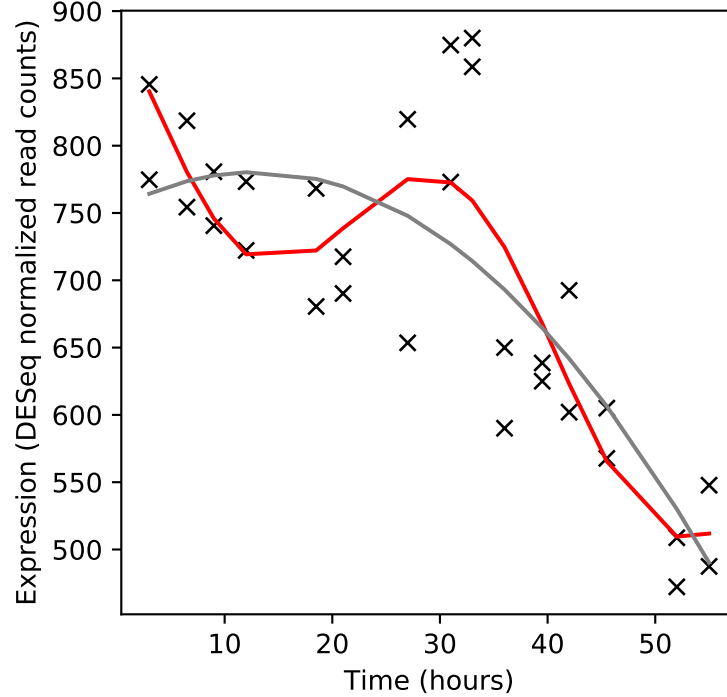

Rv0633c/-

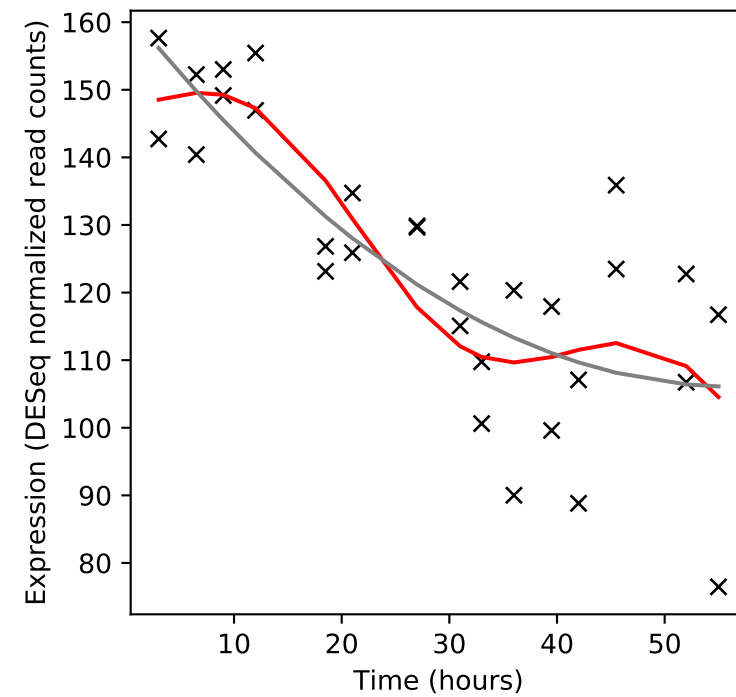

Rv0634c/-

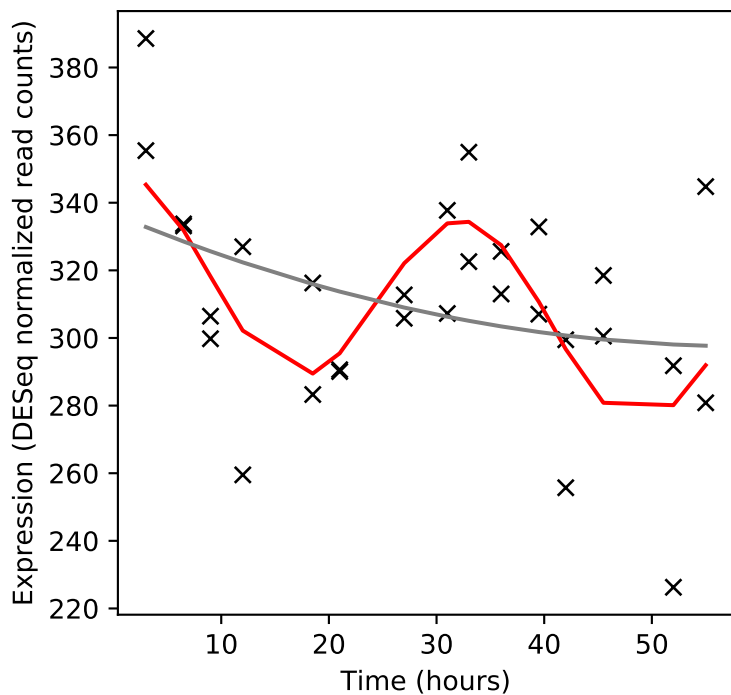

Rv0634A/-

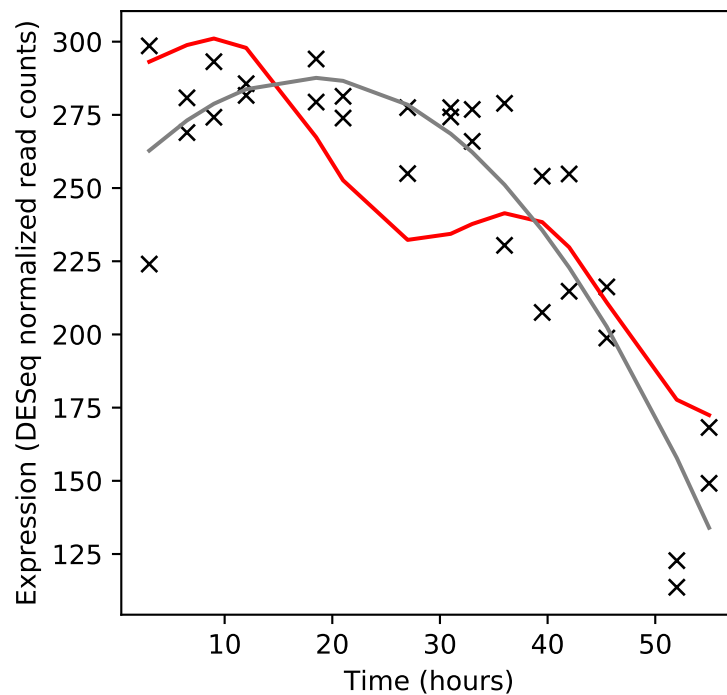

Rv0634B/rpmG2

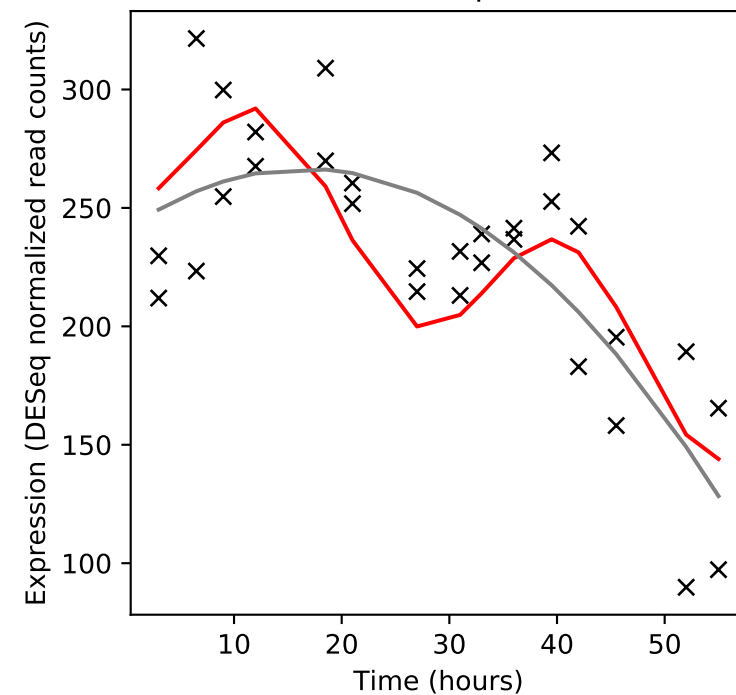

Rv0635/hadA

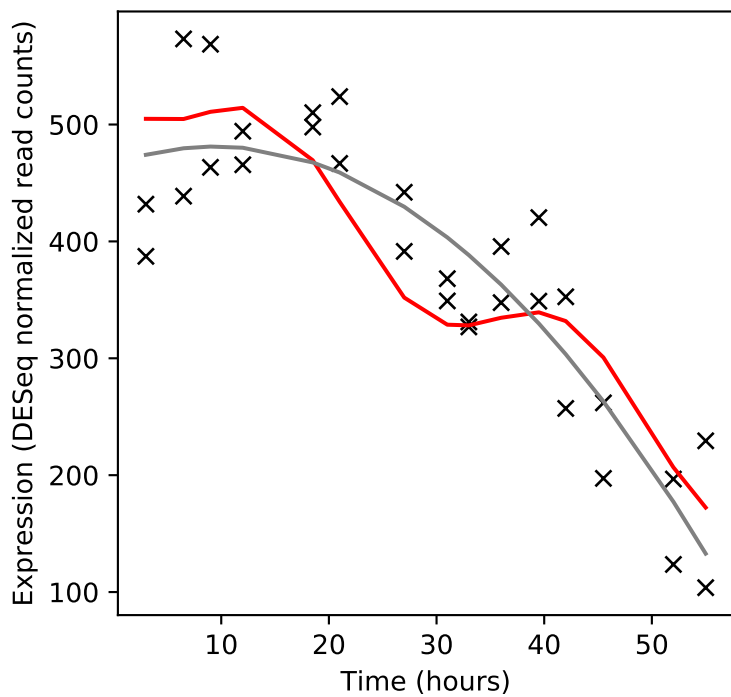

Rv0636/hadB

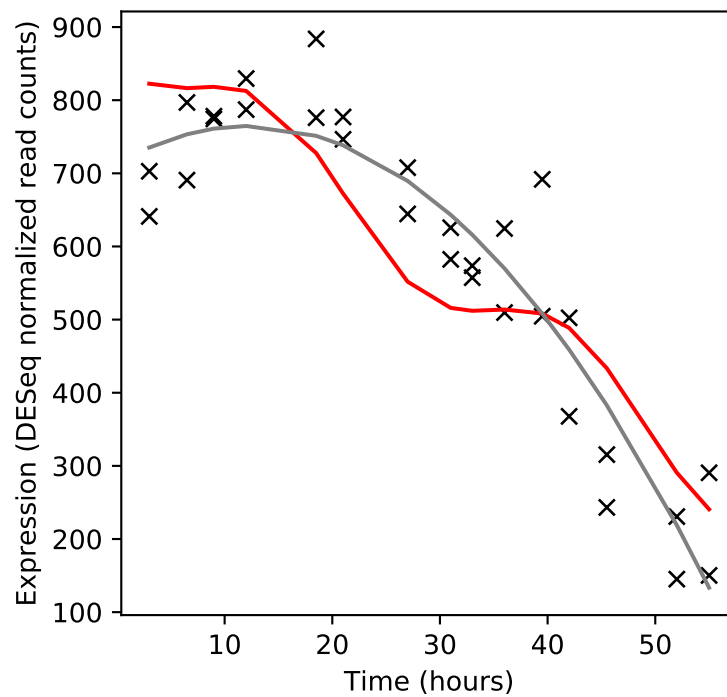

Rv0637/hadC

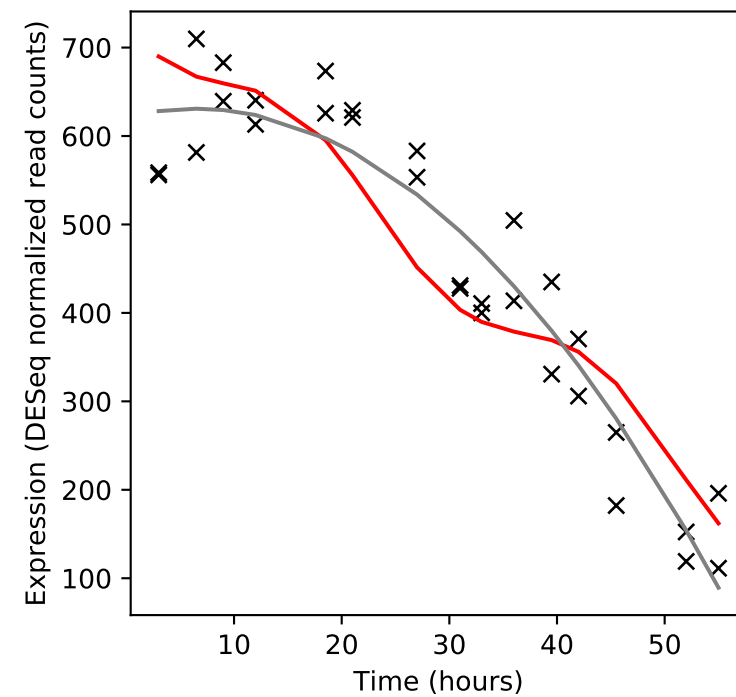

Rv0638/secE1

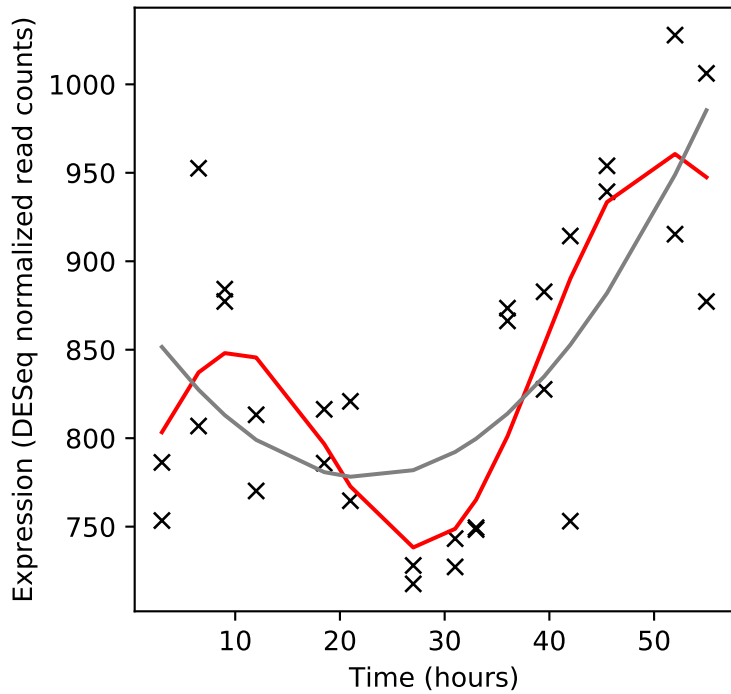

Rv0639/nusG

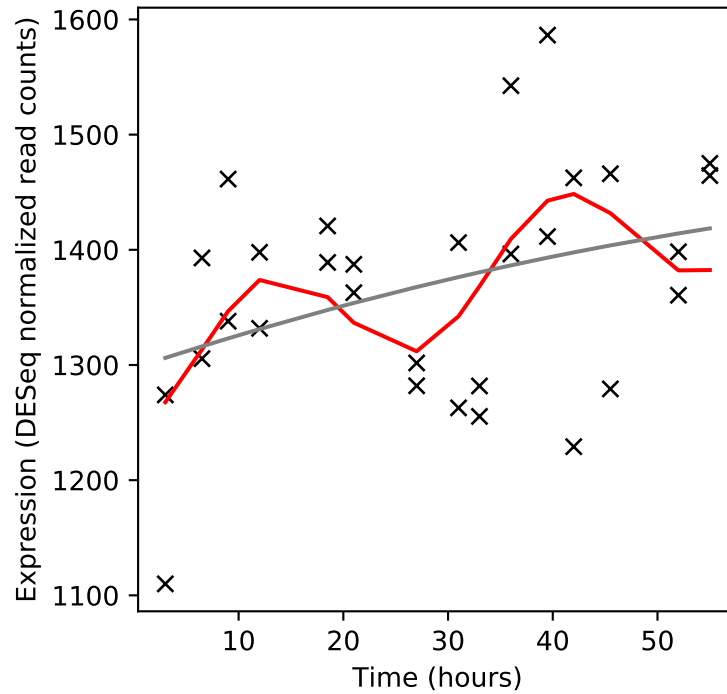

Rv0640/rplK

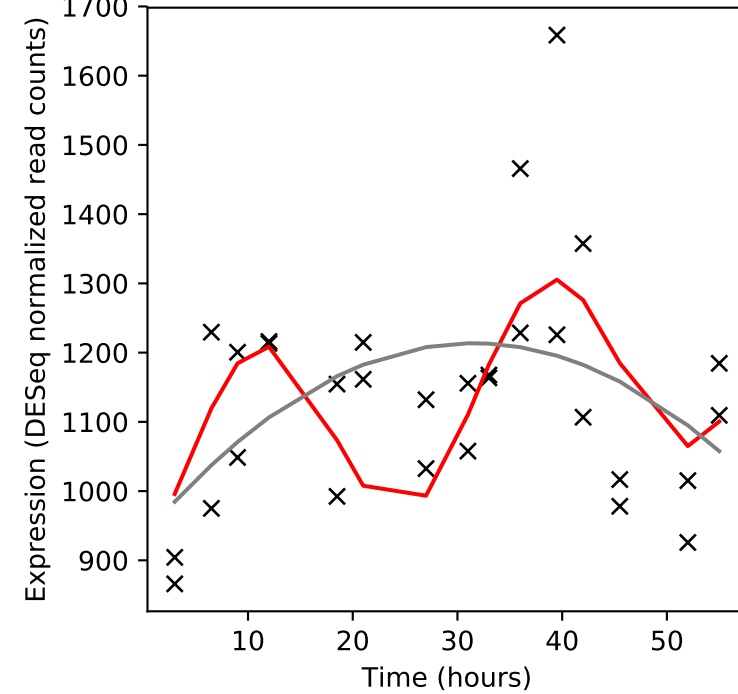

Rv0641/rplA

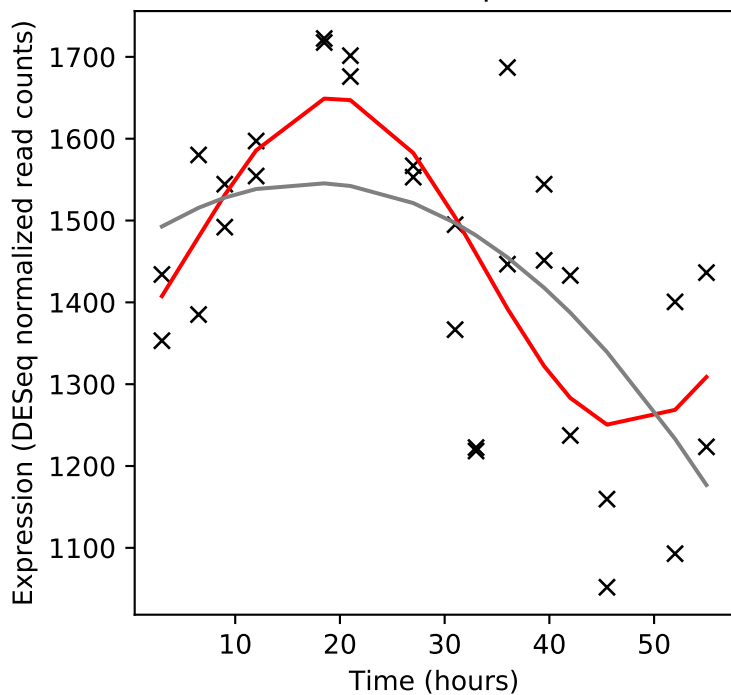

Rv0642c/mmaA4

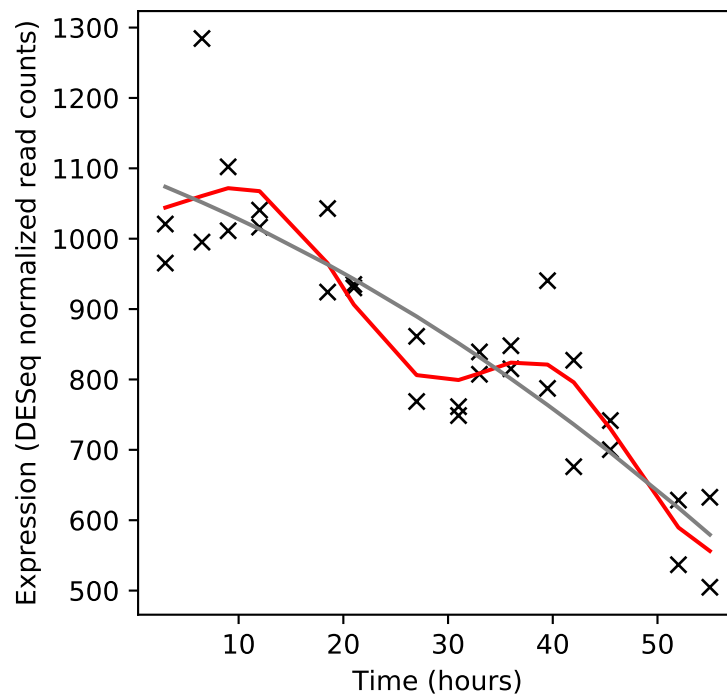

Rv0643c/mmaA3

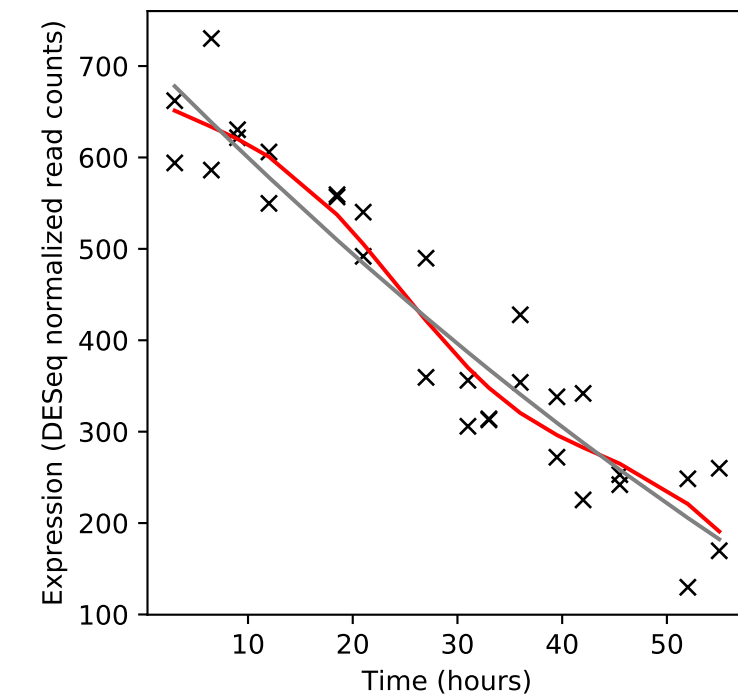

Rv0644c/mmaA2

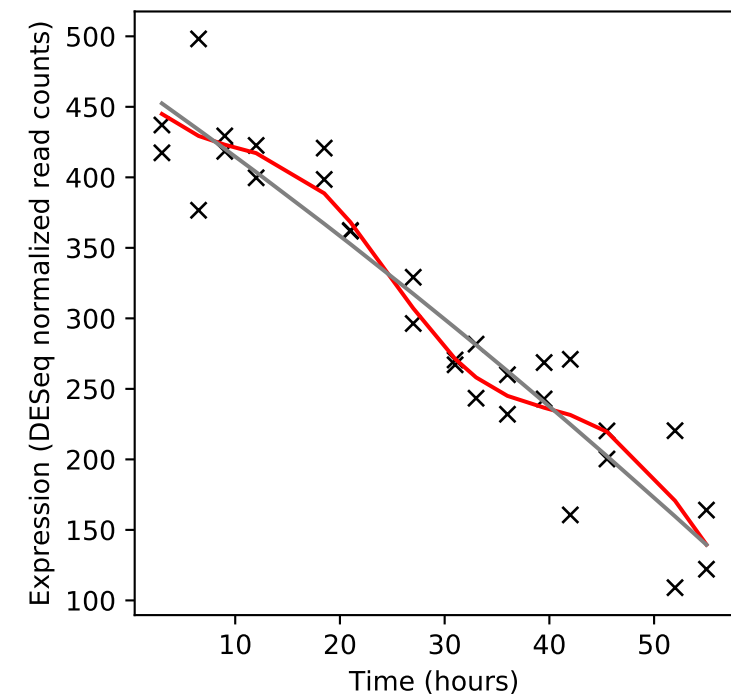

Rv0645c/mmaA1

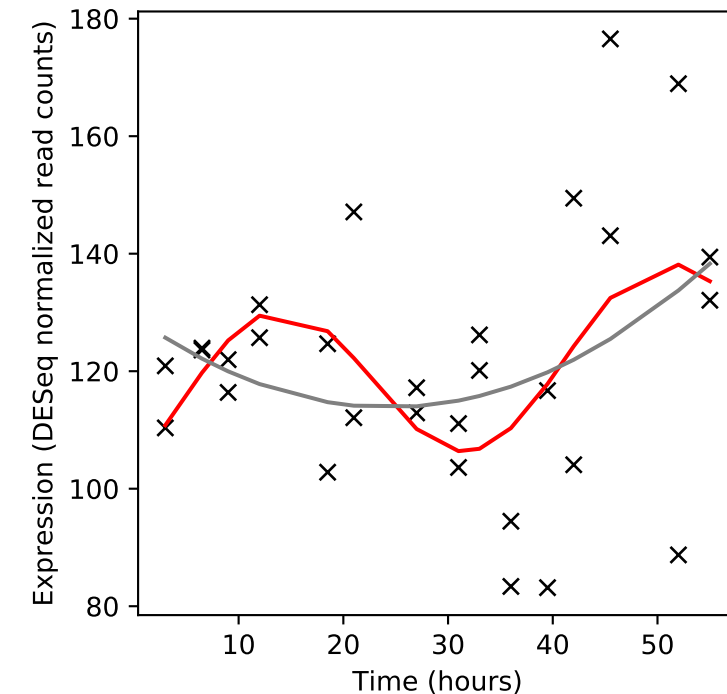

Rv0646c/lipG

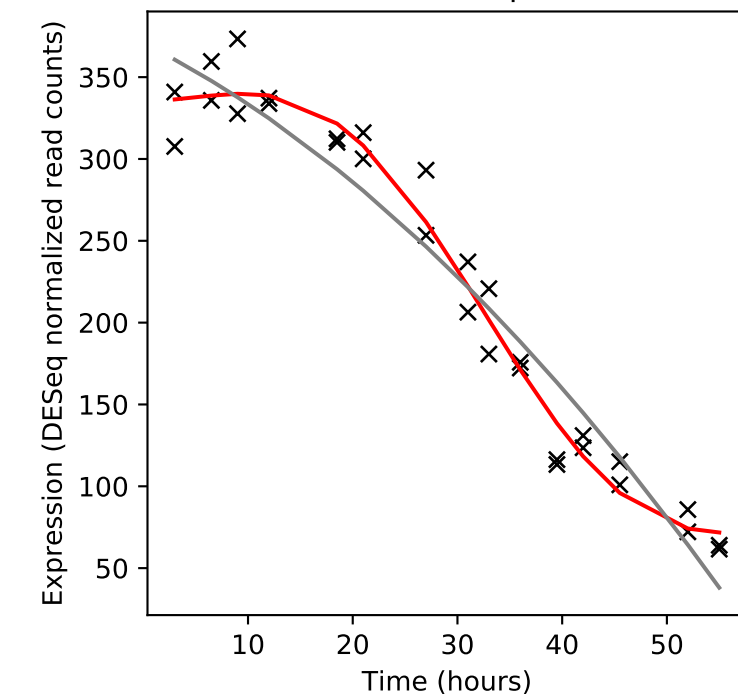

Rv0647c/-

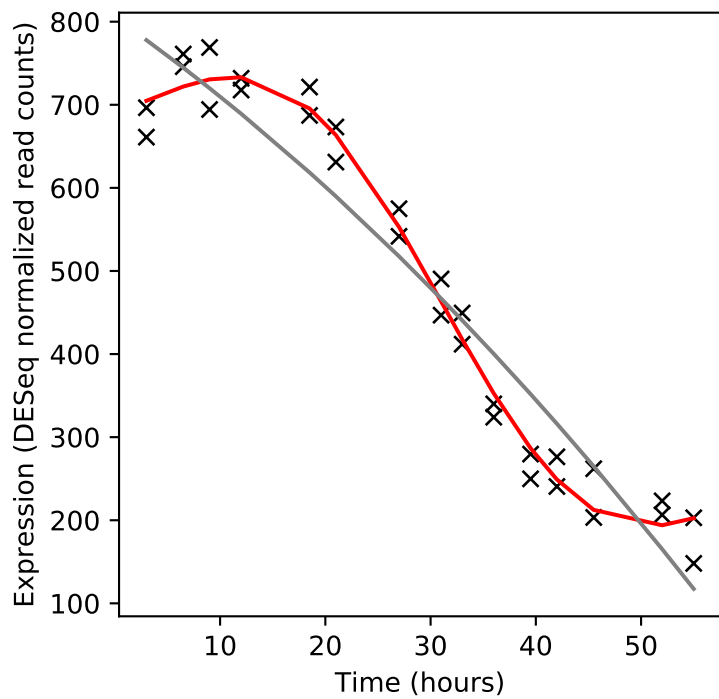

Rv0648/-

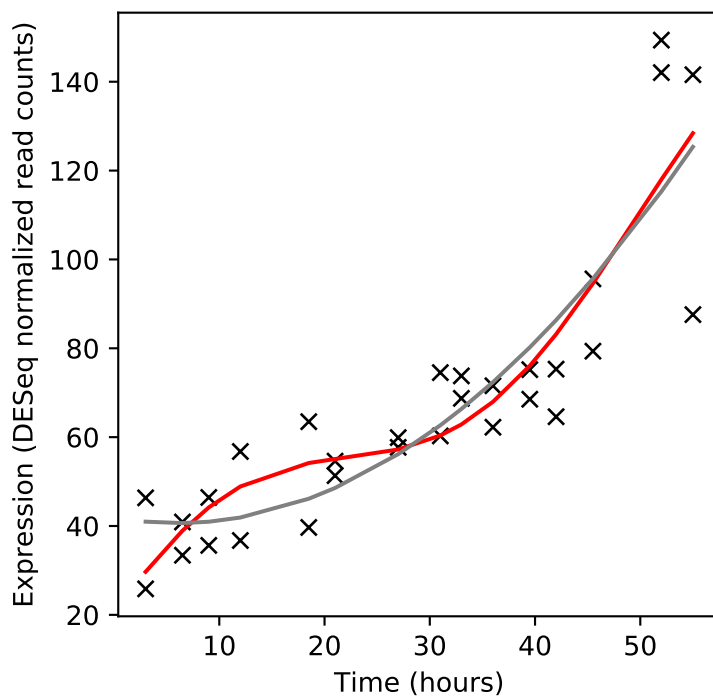

Rv0649/fabD2

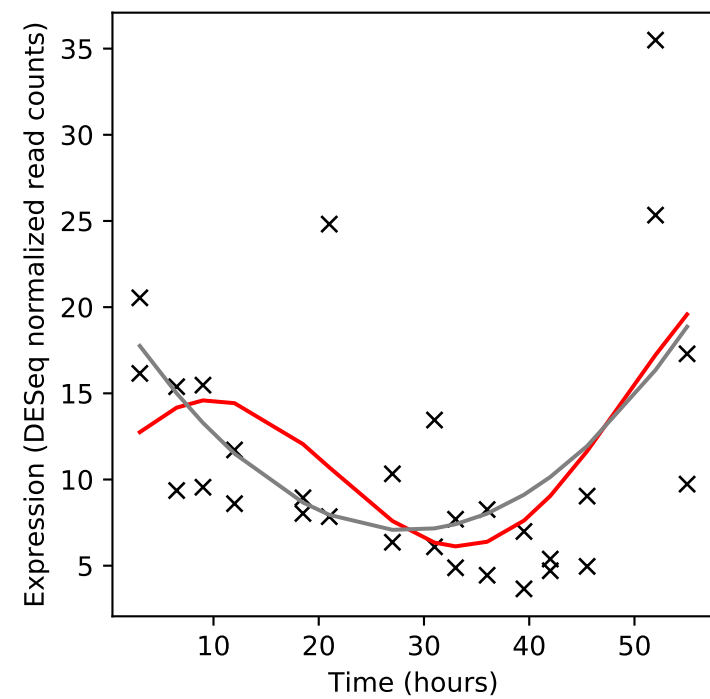

Rv0650/-

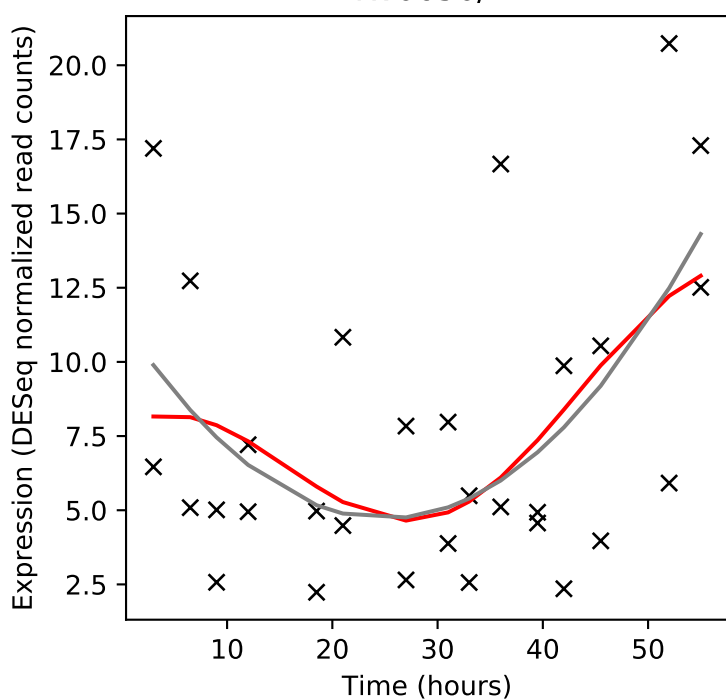

Rv0651/rplJ

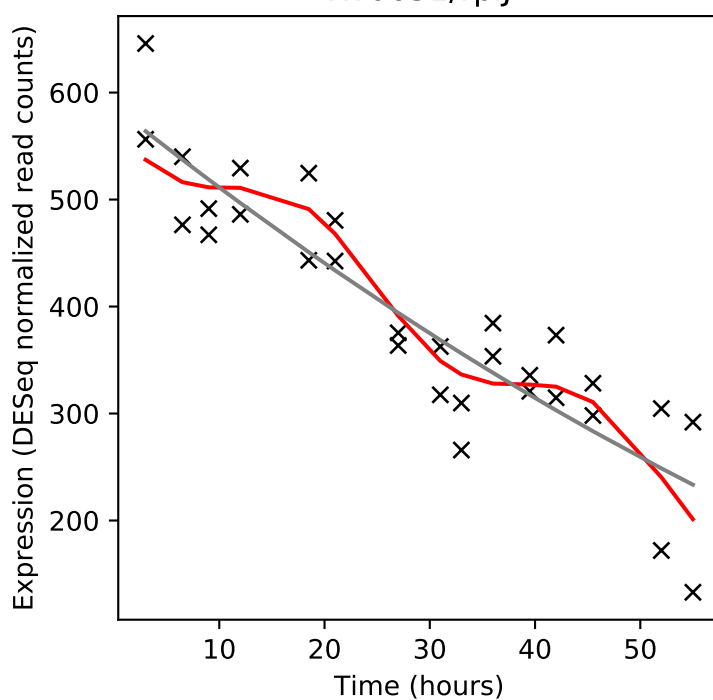

Rv0652/rplL

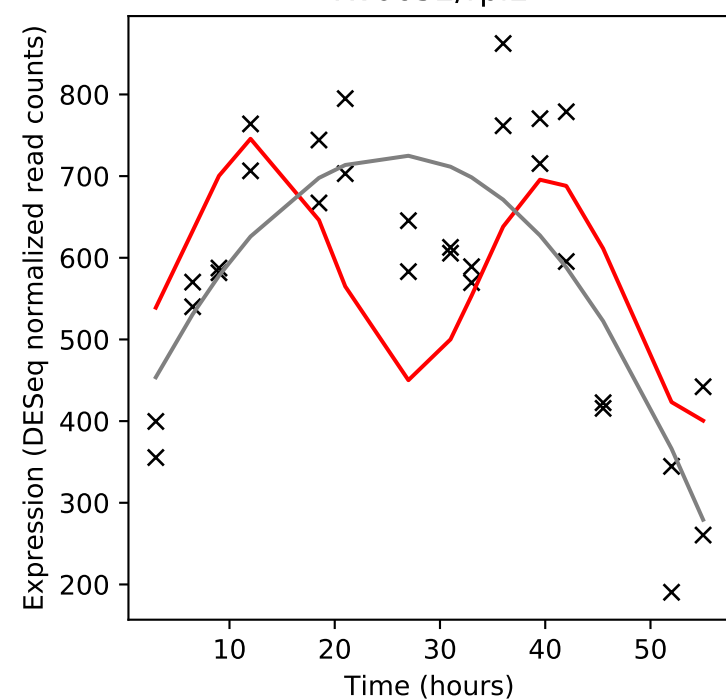

Rv0653c/-

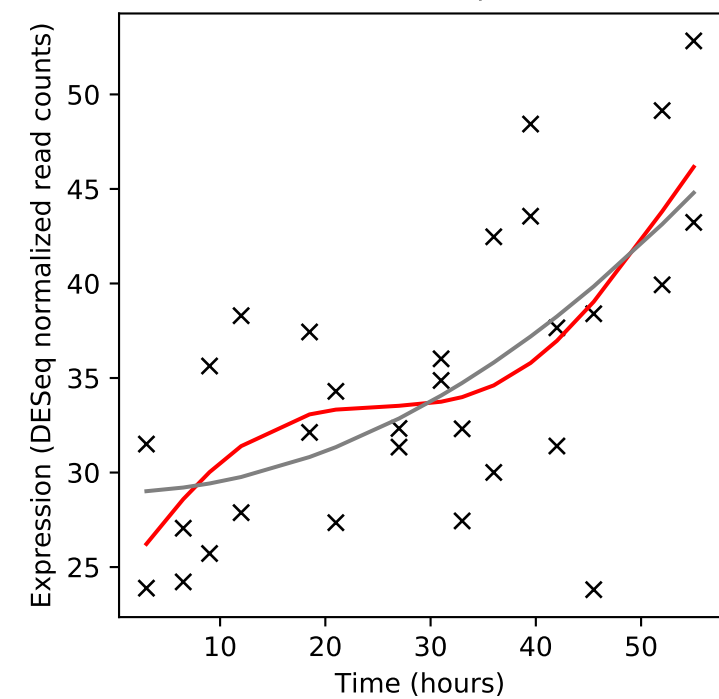

Rv0654/-

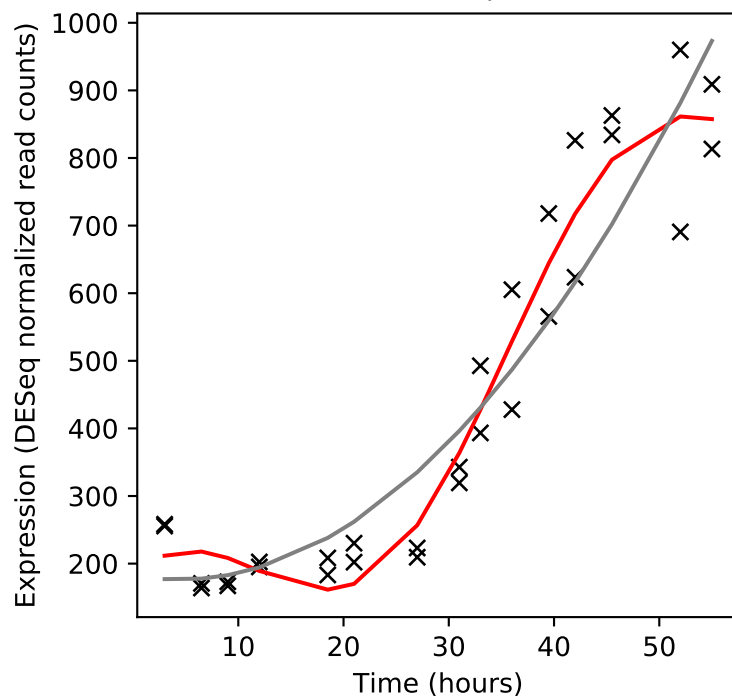

Rv0655/mkl

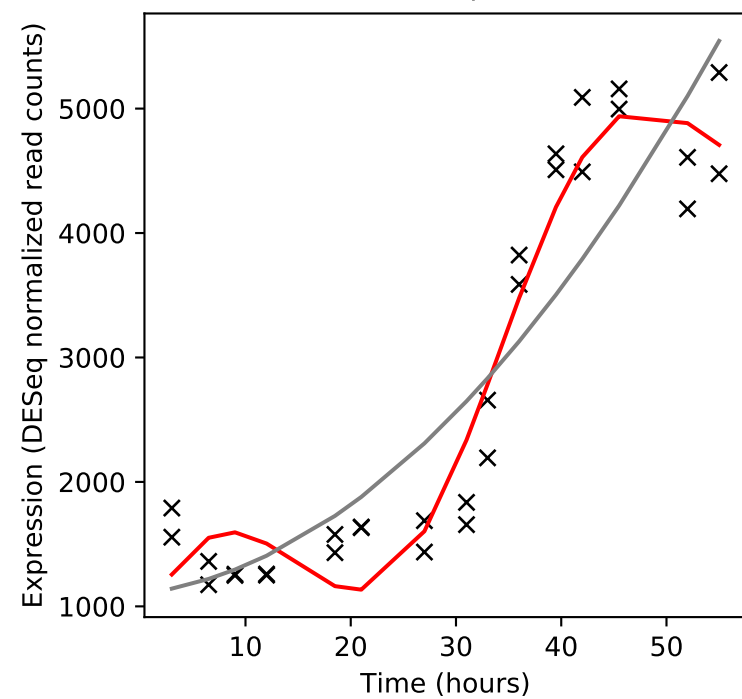

Rv0656c/vapC6

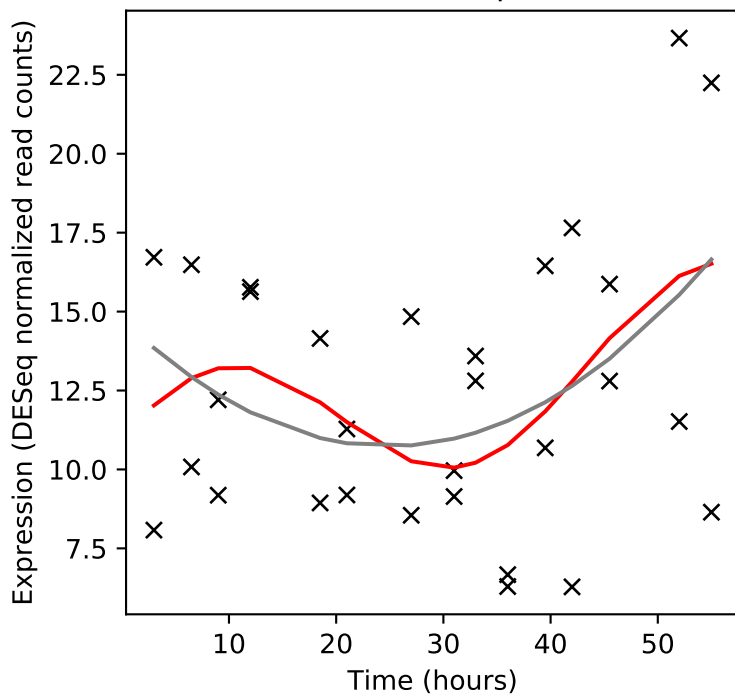

Rv0657c/vapB6

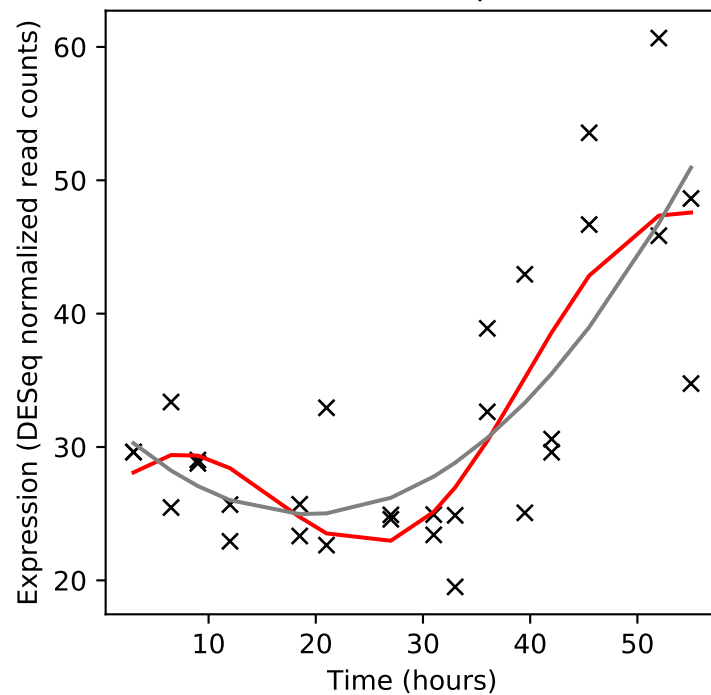

Rv0658c/-

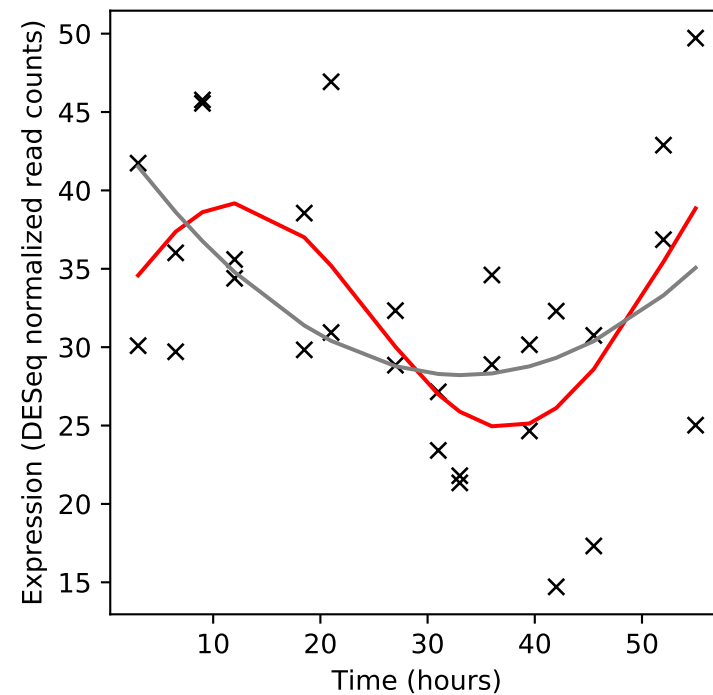

Rv0659c/mazF2

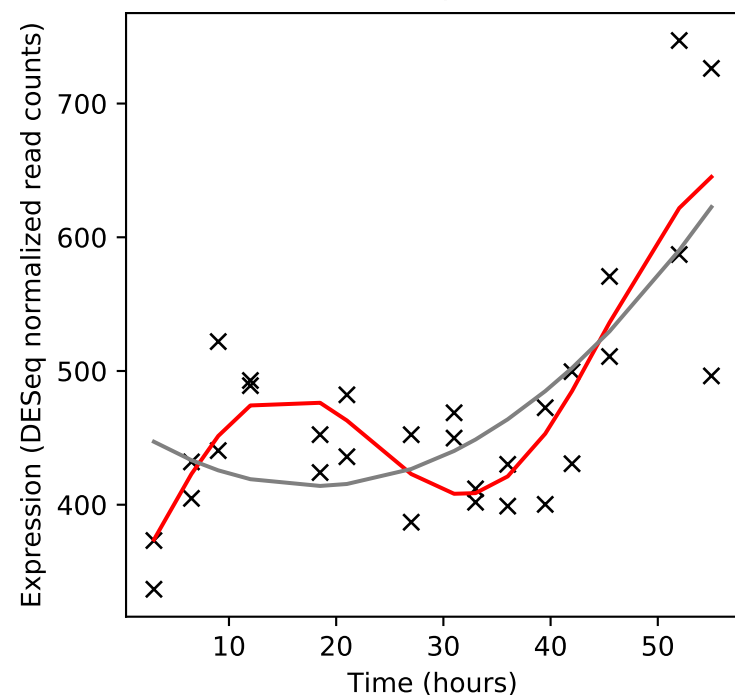

Rv0660c/mazE2

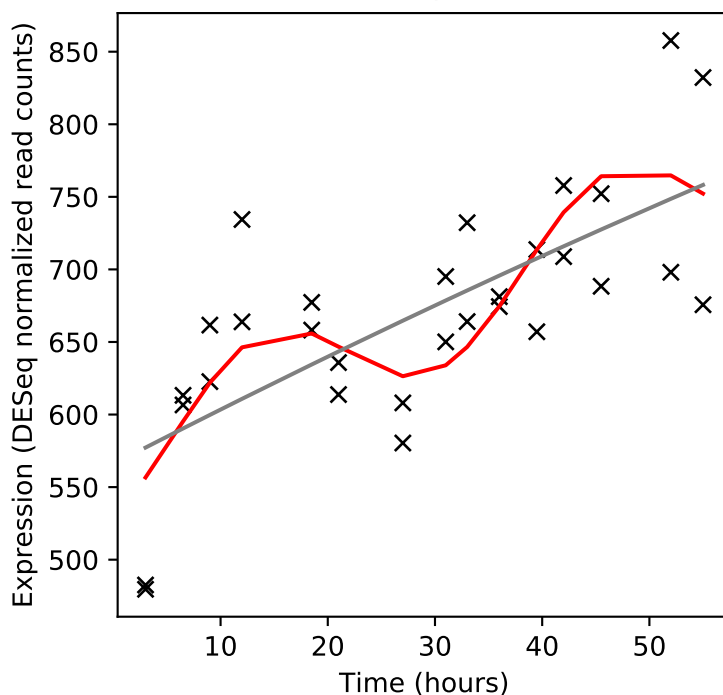

Rv0661c/vapC7

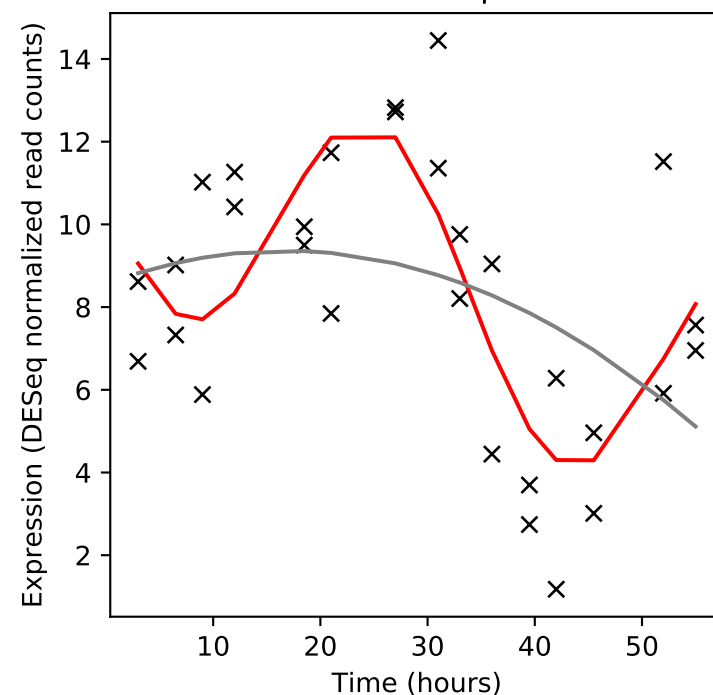

Rv0662c/vapB7

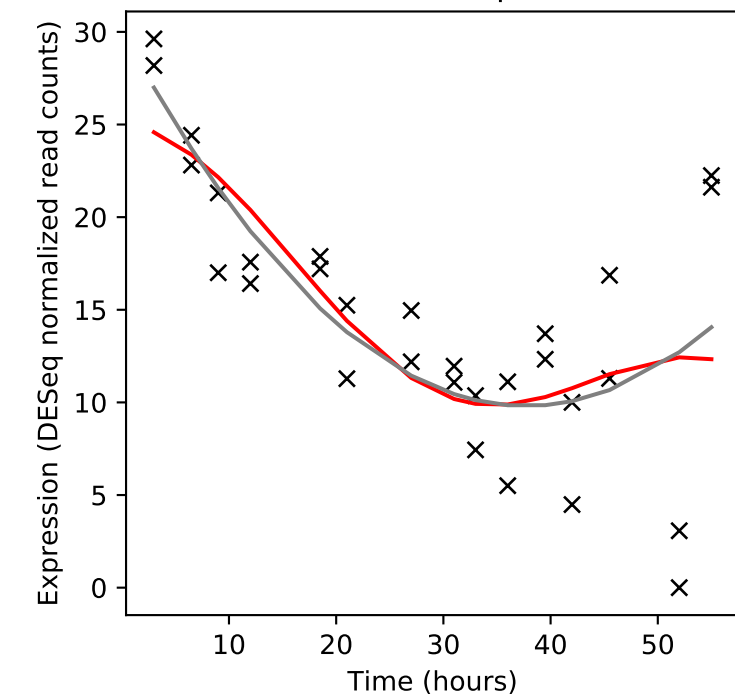

Rv0663/atsD

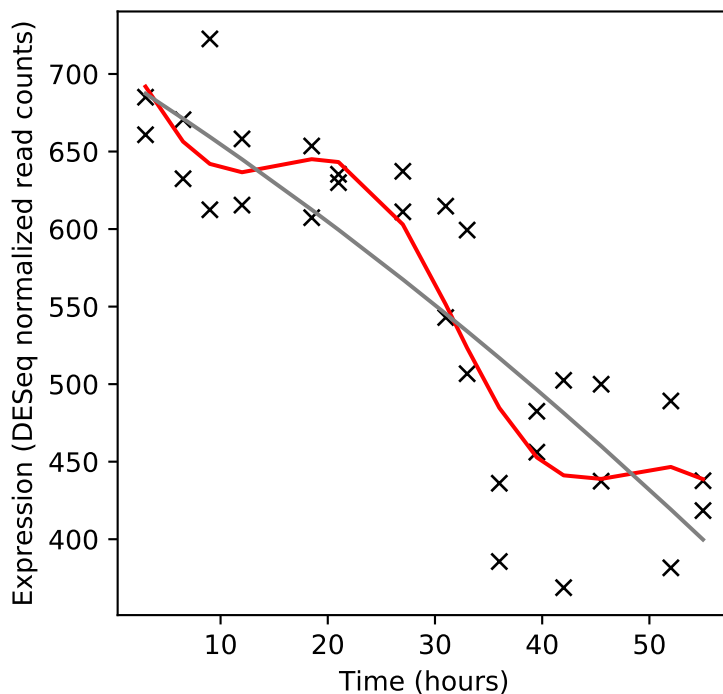

Rv0664/vapB8

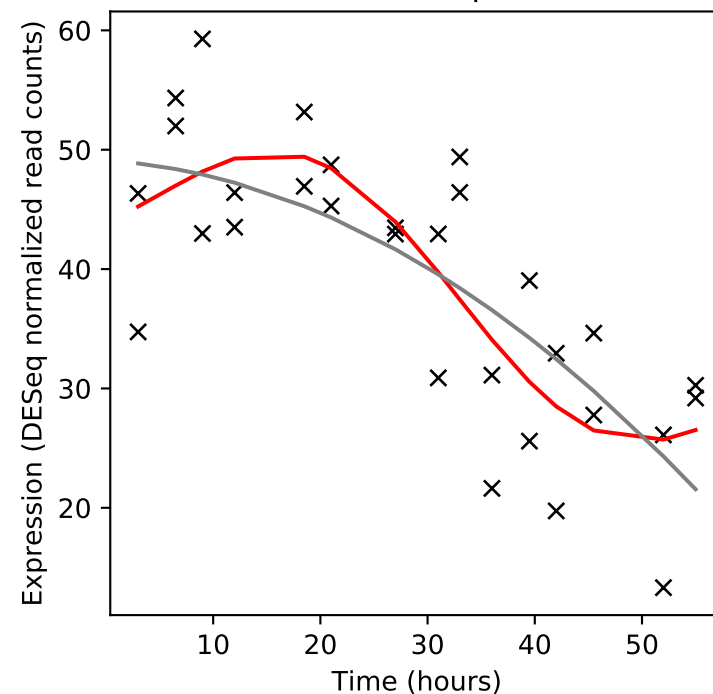

Rv0665/vapC8

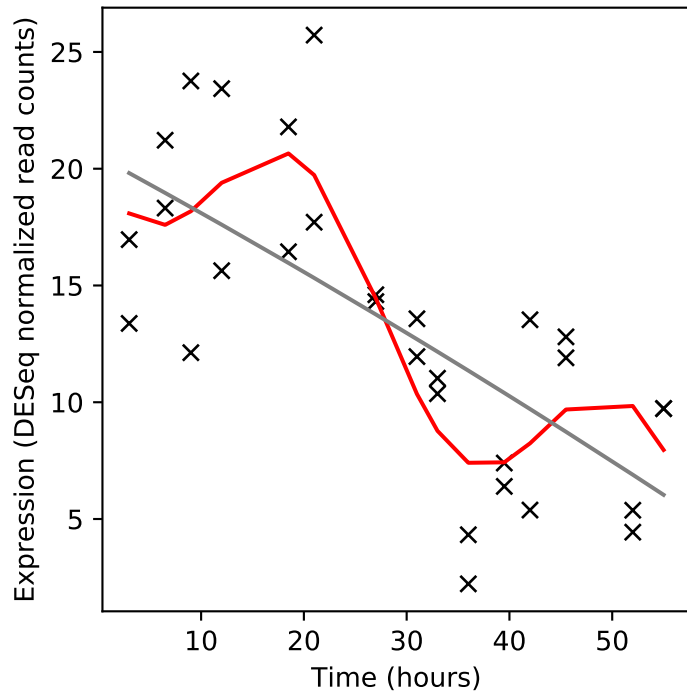

Rv0666/-

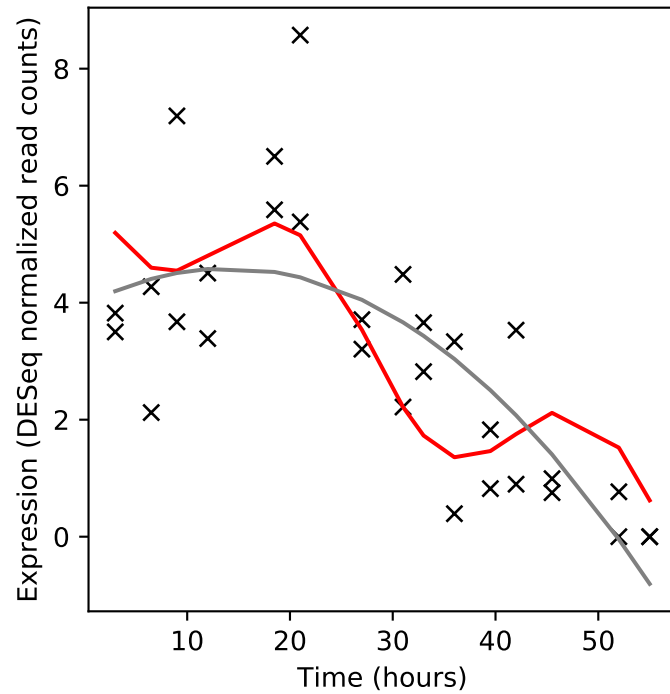

Rv0667/rpoB

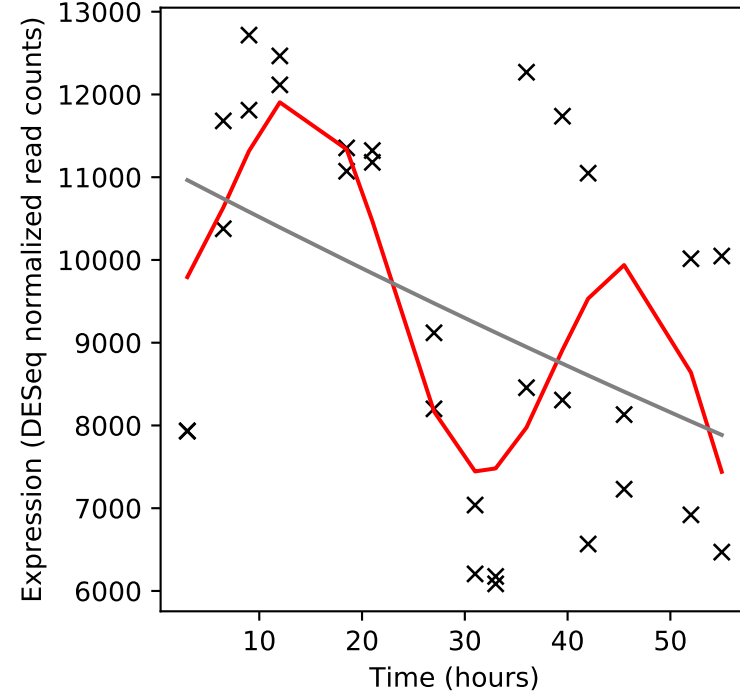

Rv0668/rpoC

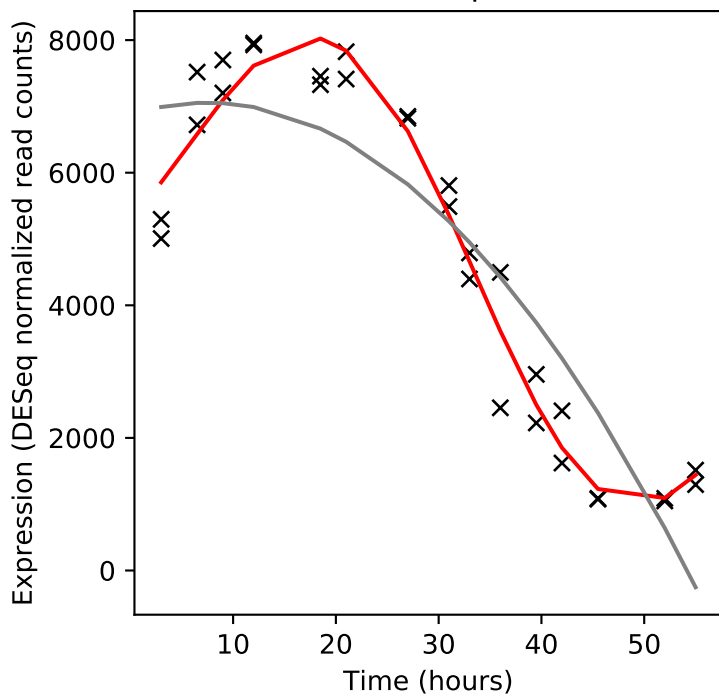

Rv0669c/-

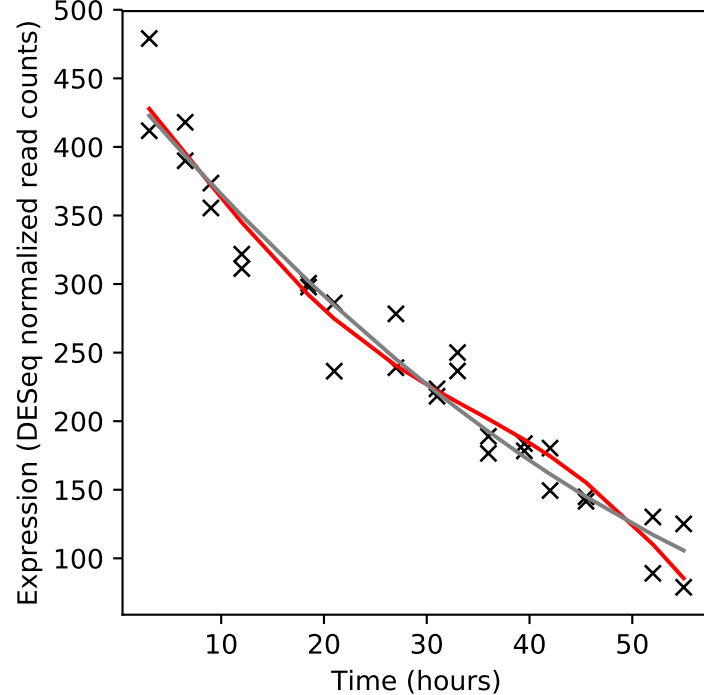

Rv0670/end

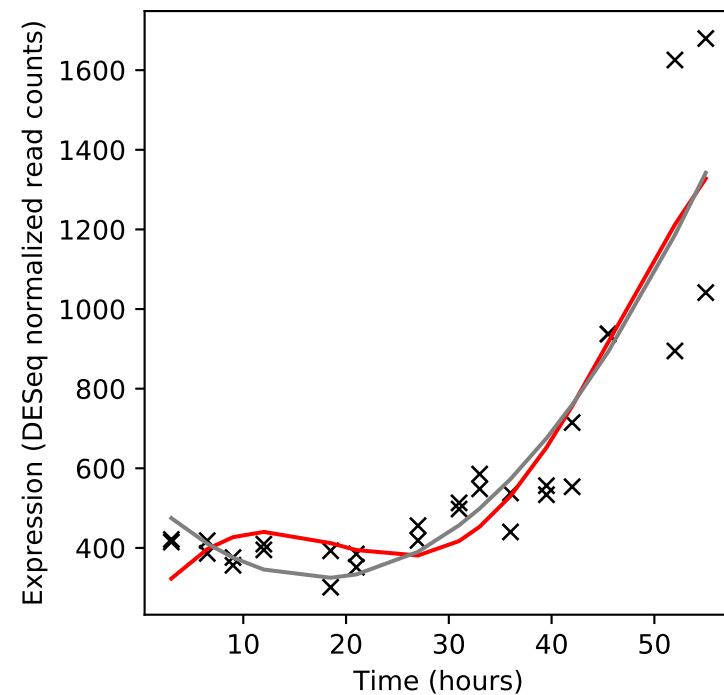

Rv0671/lpqP

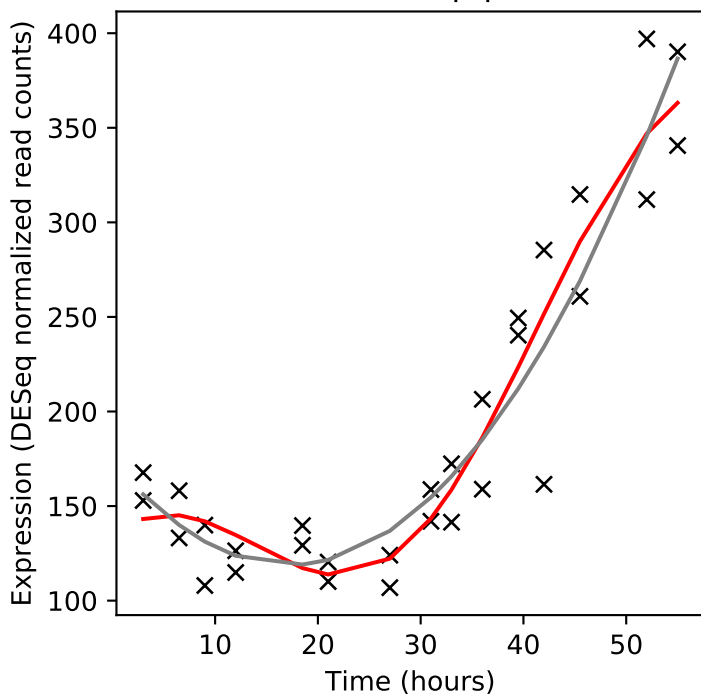

Rv0672/fadE8

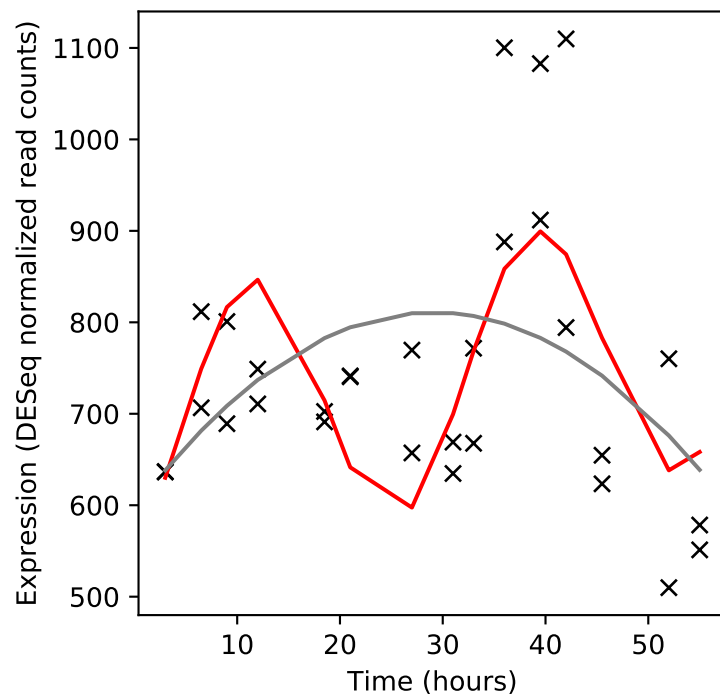

Rv0673/echA4

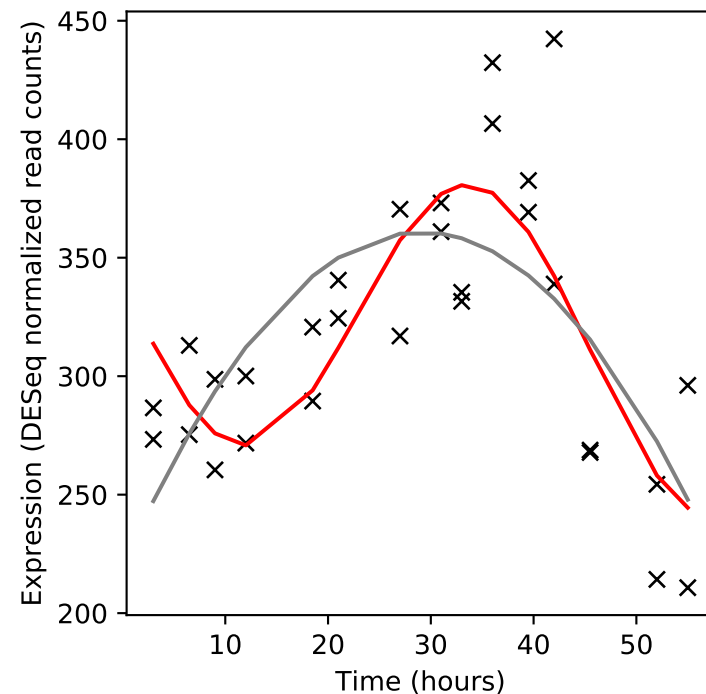

Rv0674/-

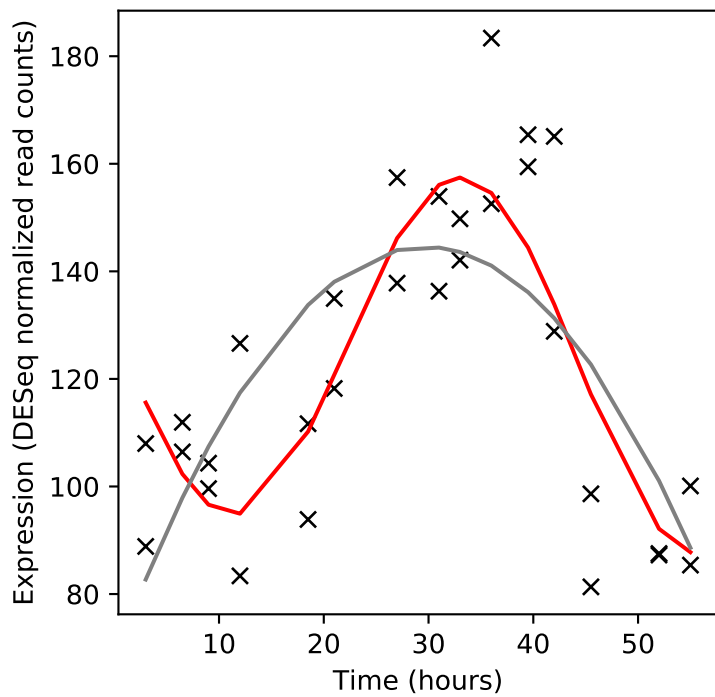

Rv0675/echA5

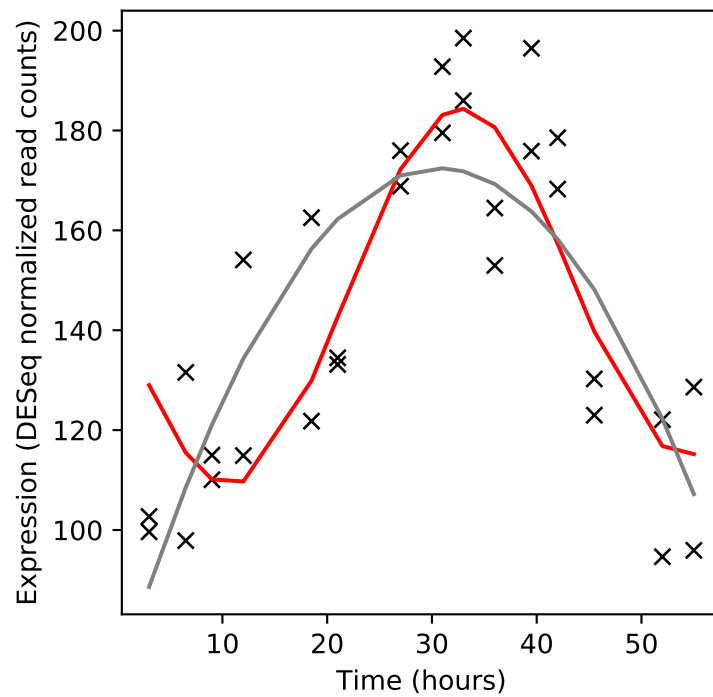

Rv0676c/mmpL5

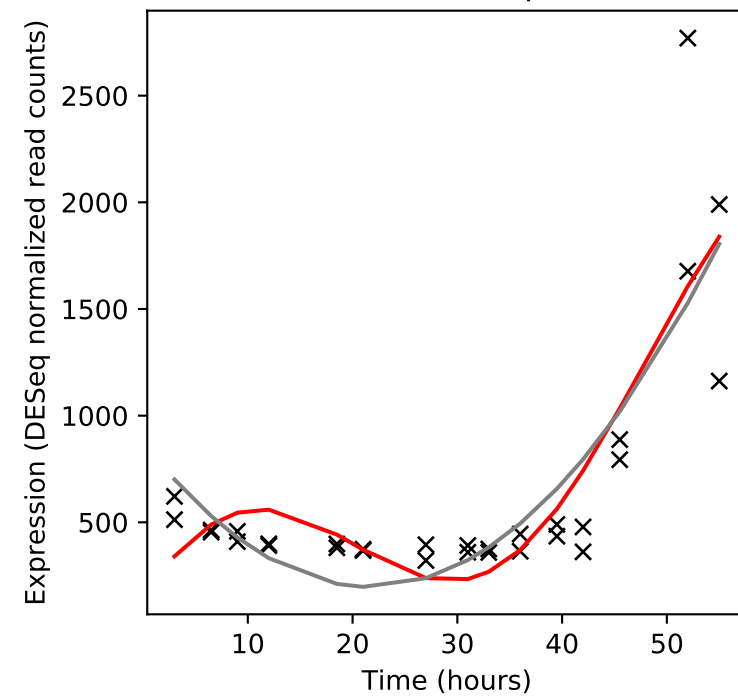

Rv0677c/mmpS5

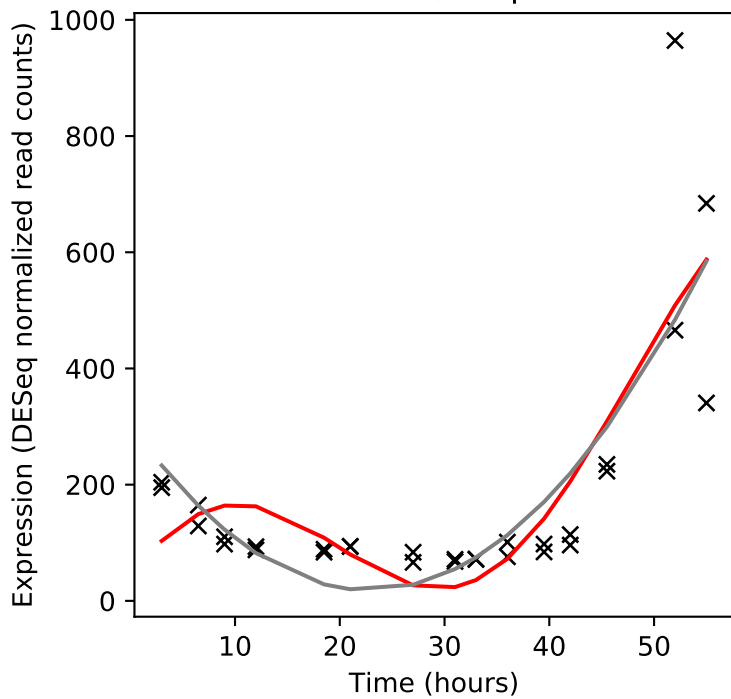

Rv0678/-

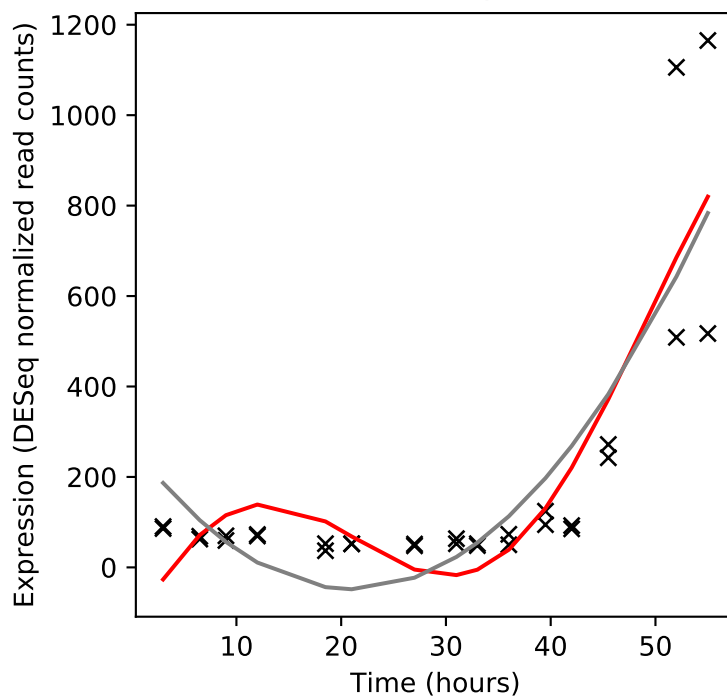

Rv0679c/-

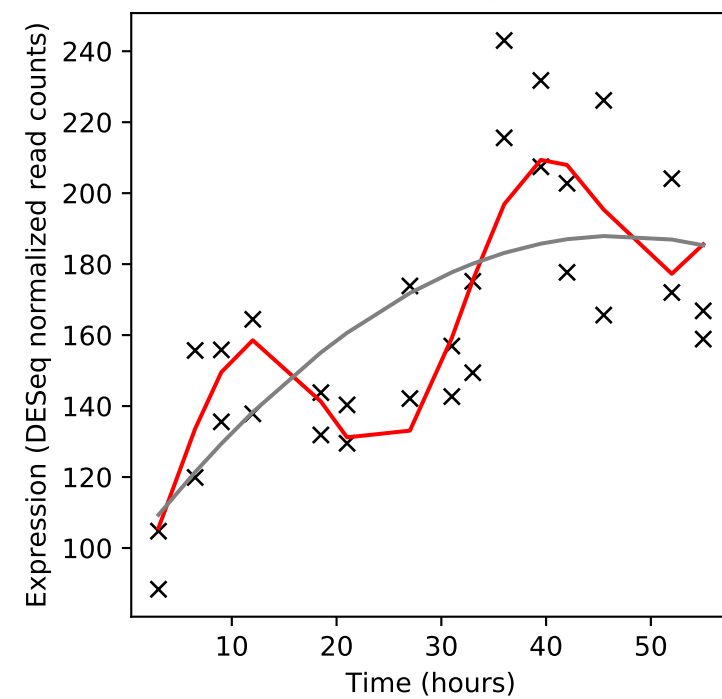

Rv0680c/-

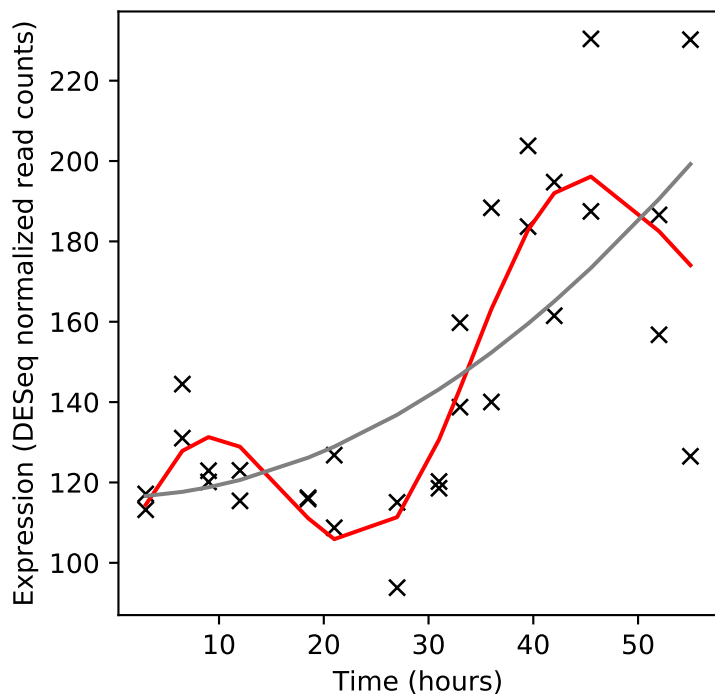

Rv0681/-

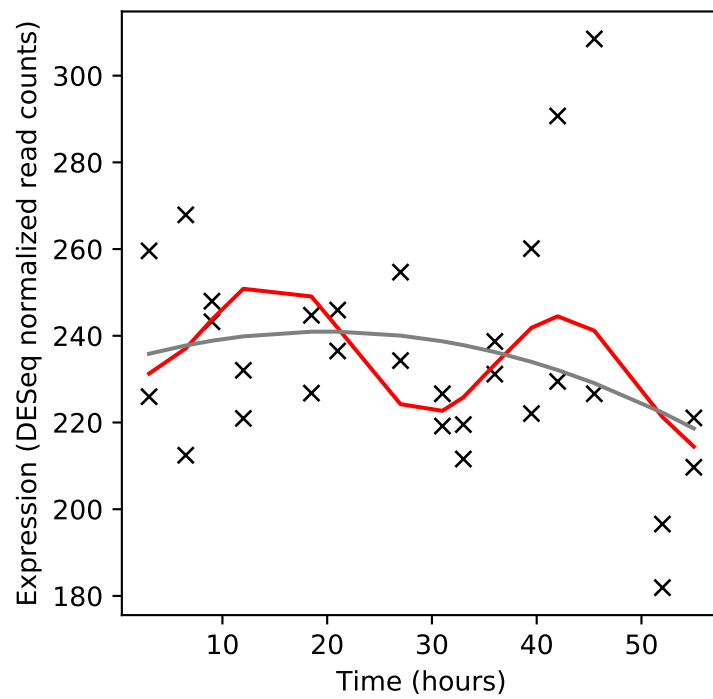

Rv0682/rpsL

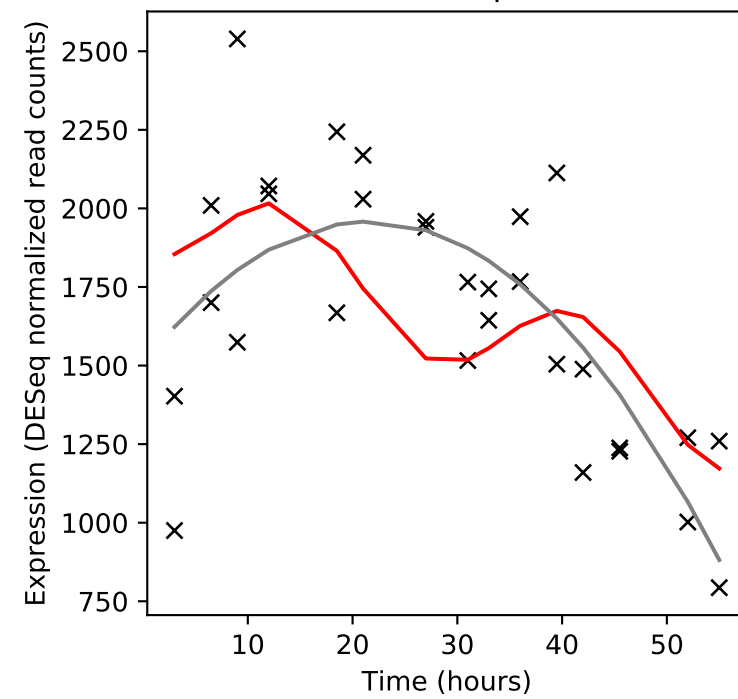

Rv0683/rpsG

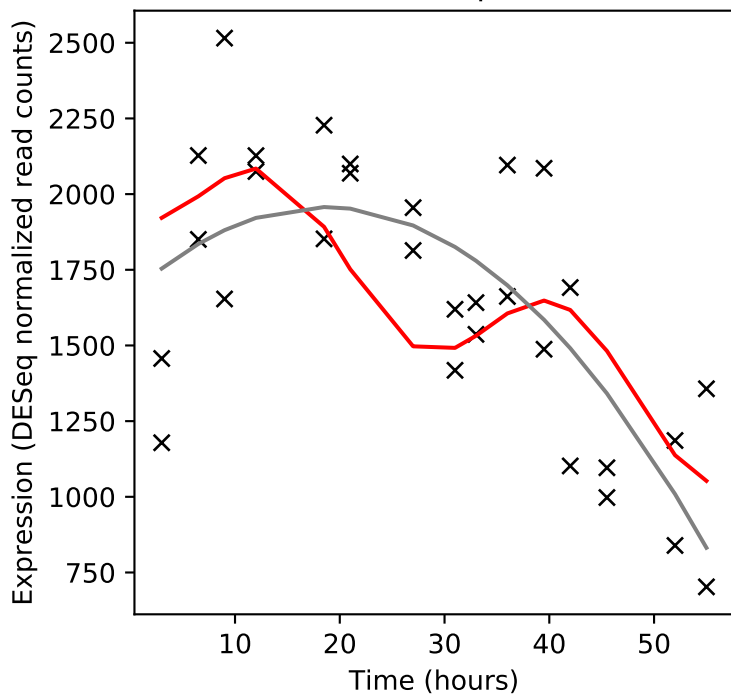

Rv0684/fusA1

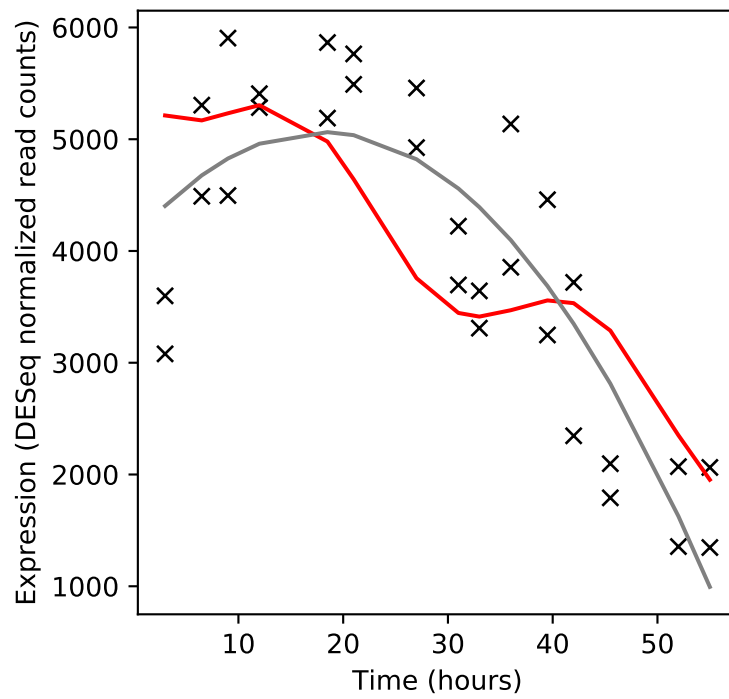

Rv0685/tuf

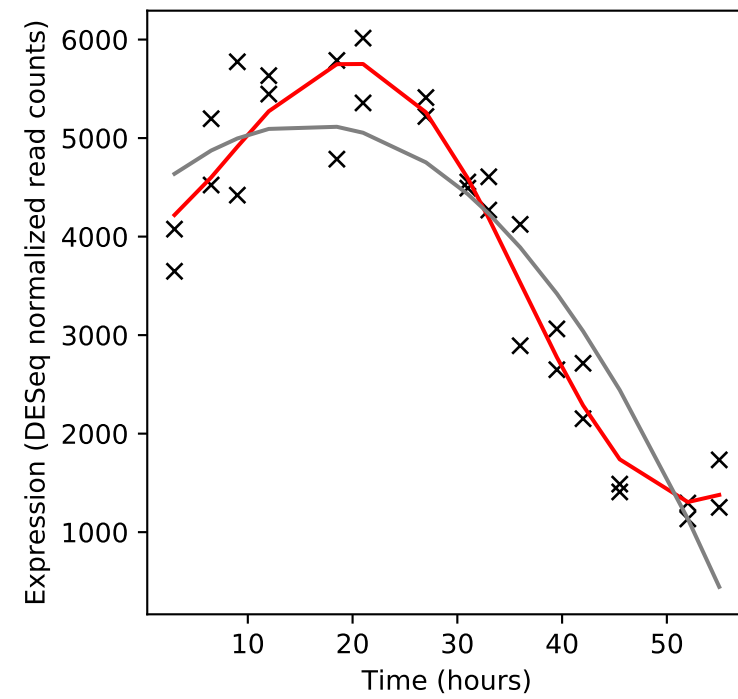

Rv0686/-

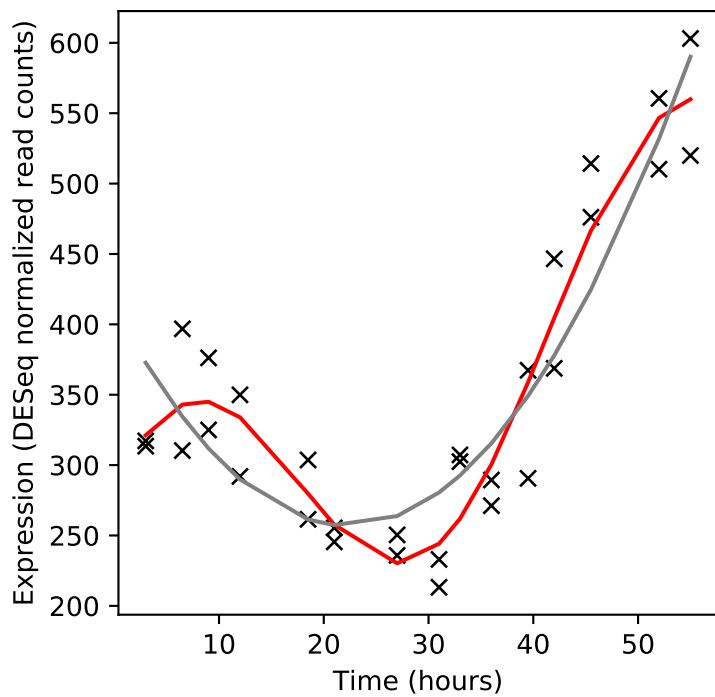

Rv0687/-

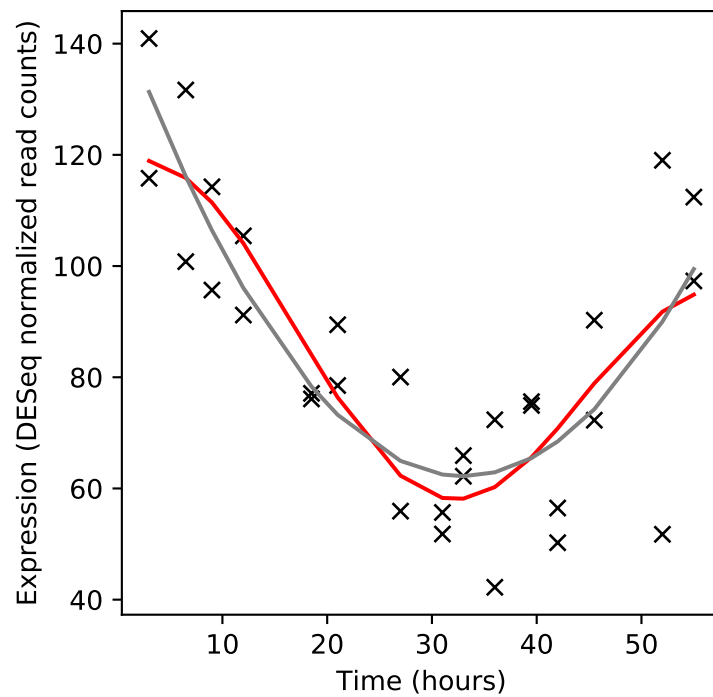

Rv0688/-

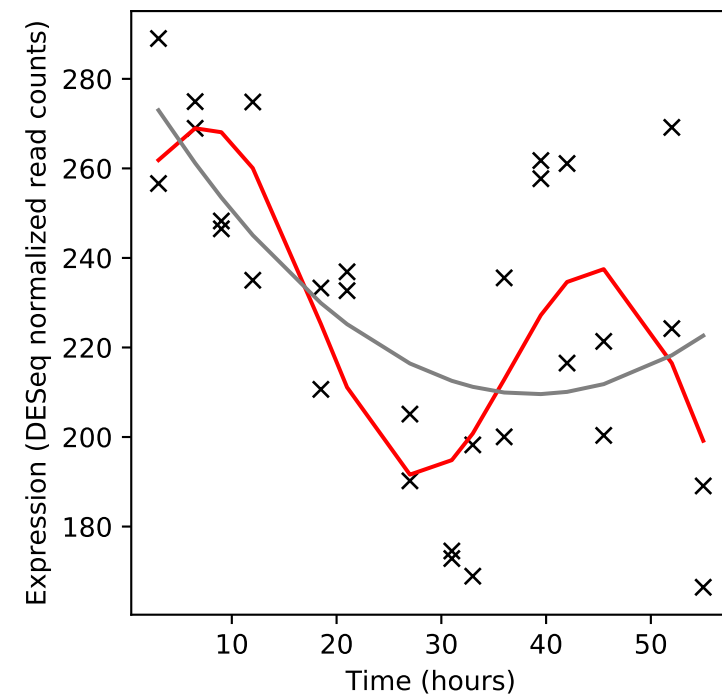

Rv0689c/-

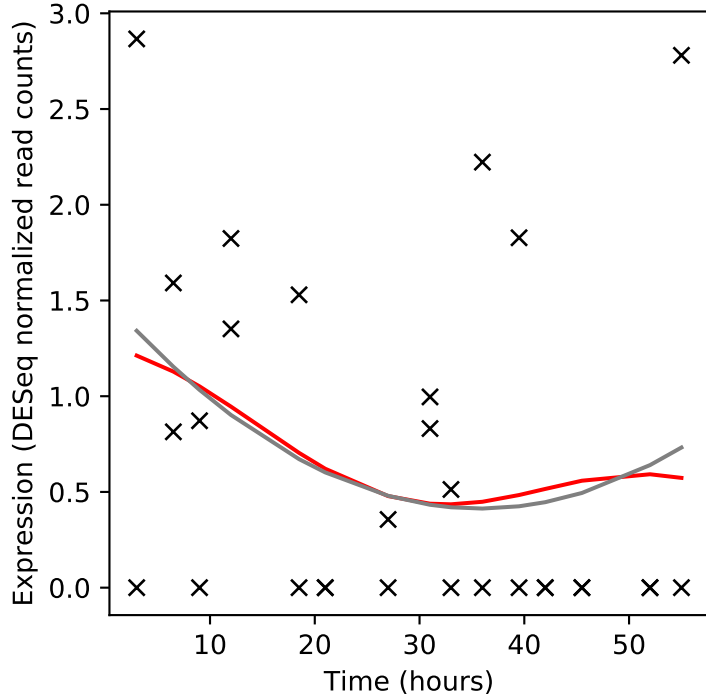

Rv0690c/-

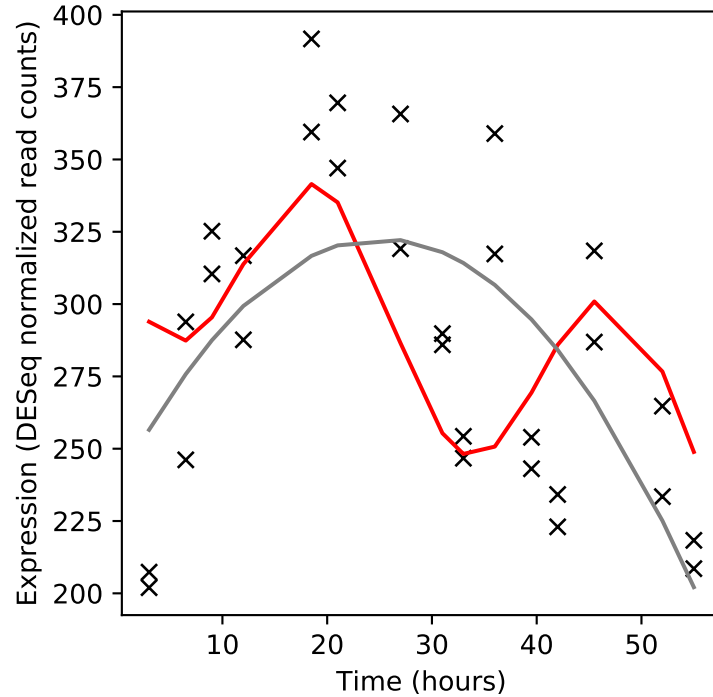

Rv0691c/-

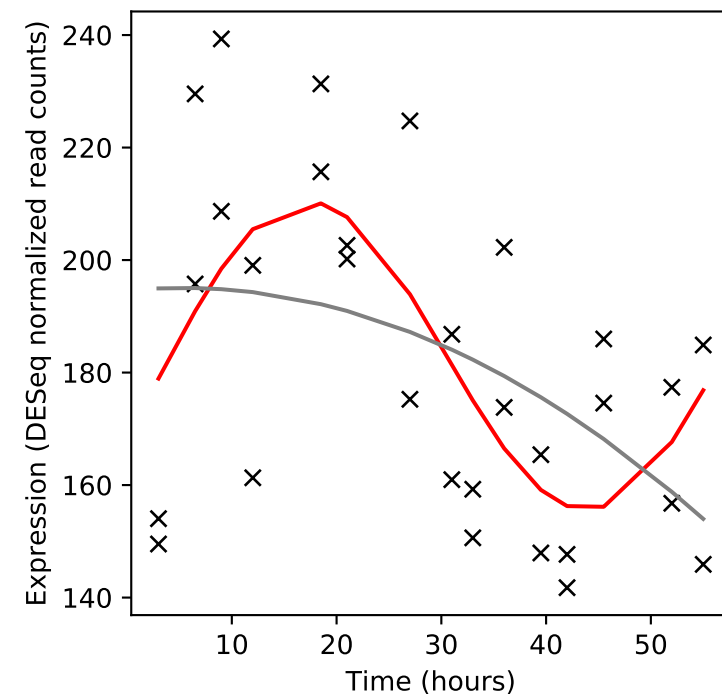



Rv0691A/-

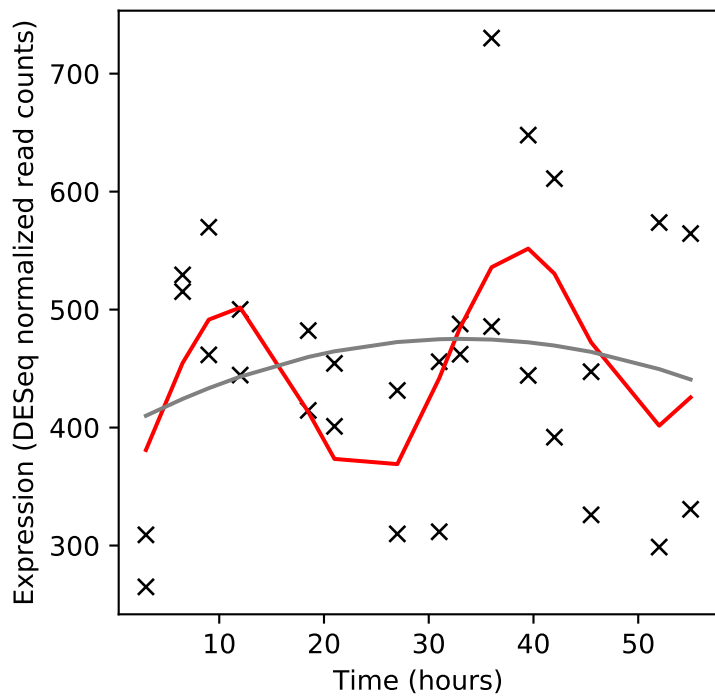

Rv0692/-

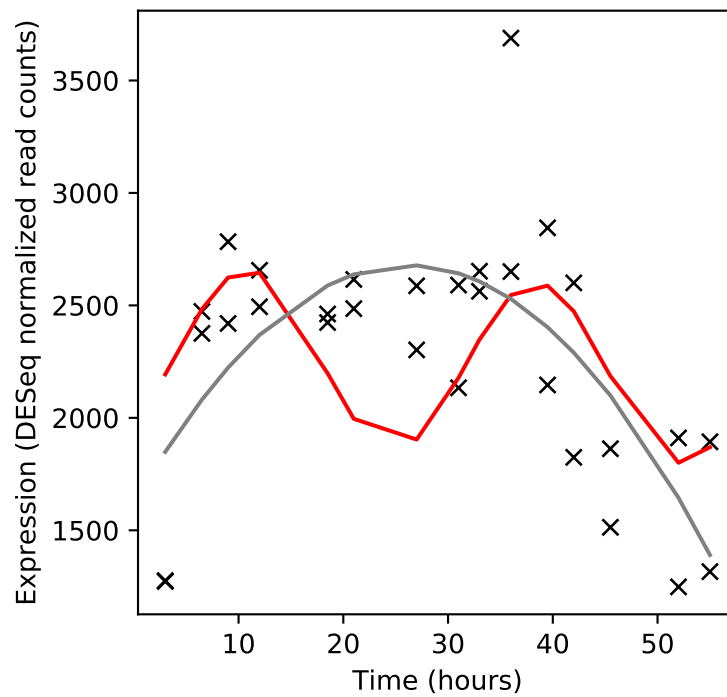

Rv0693/pqqE

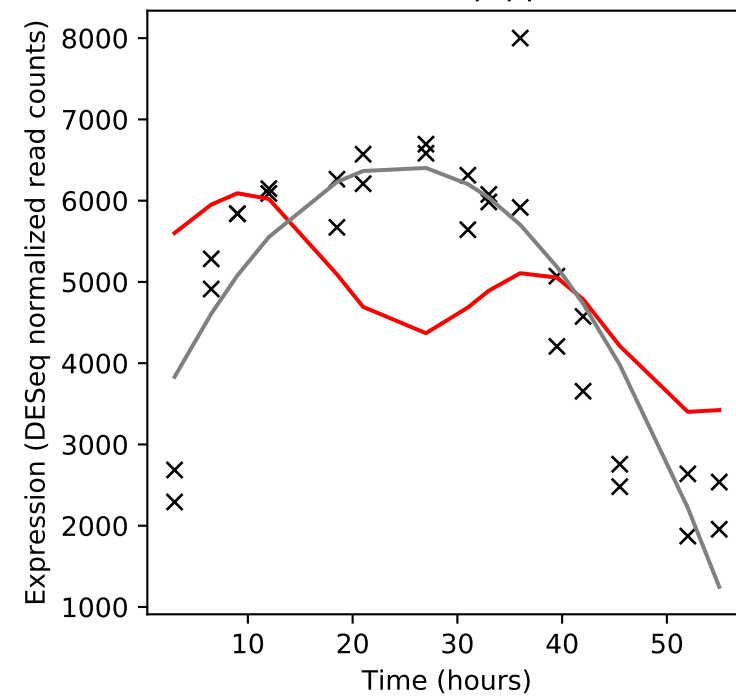

Rv0694/IldD1

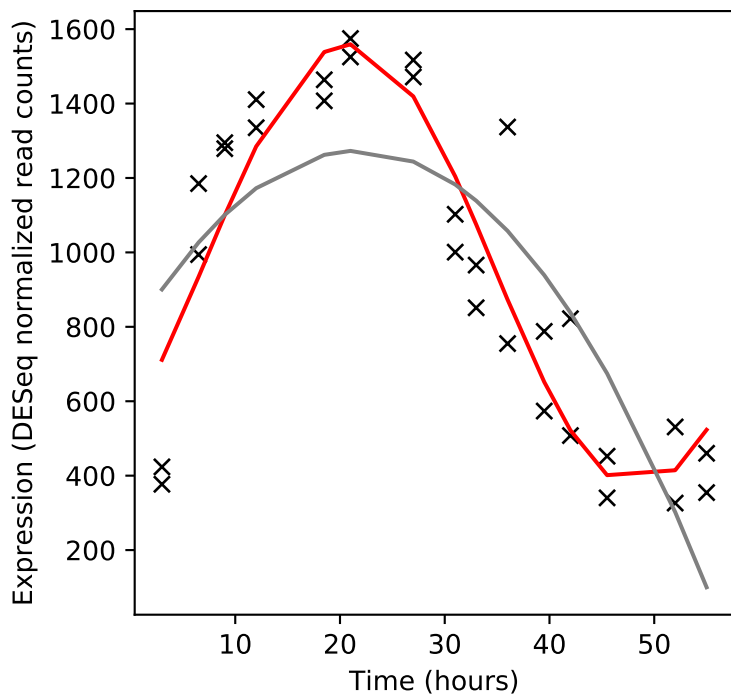

Rv0695/-

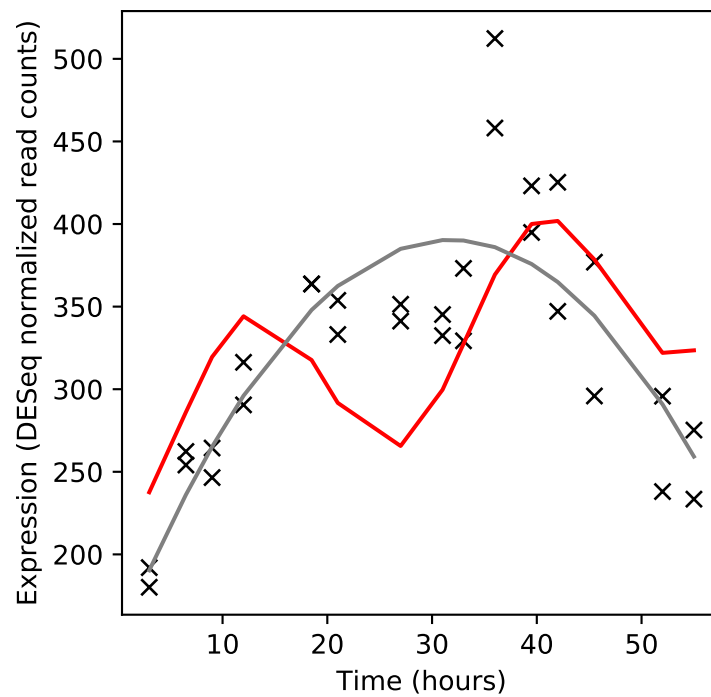

Rv0696/-

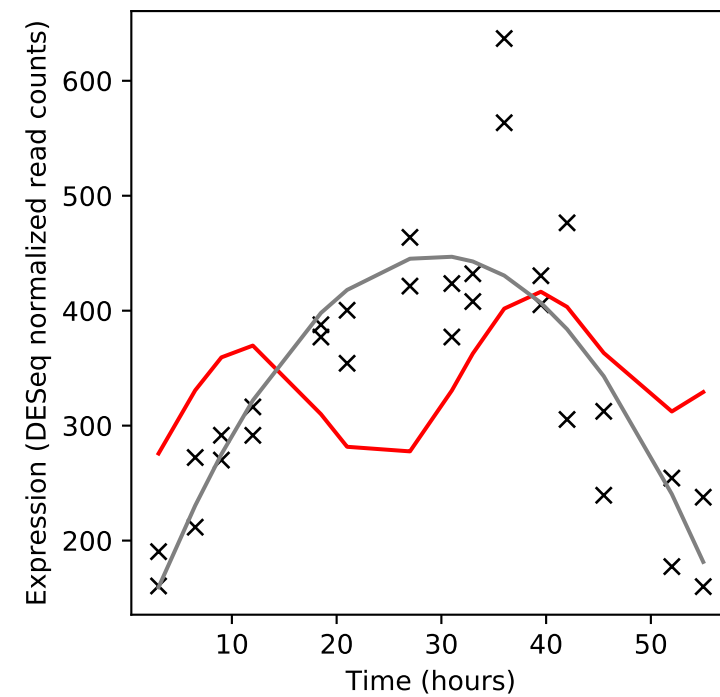

Rv0697/-

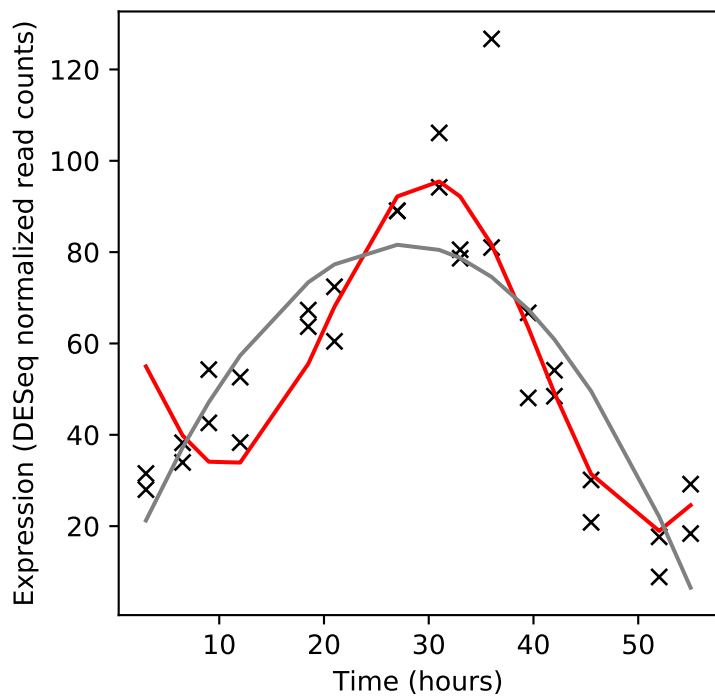

Rv0698/-

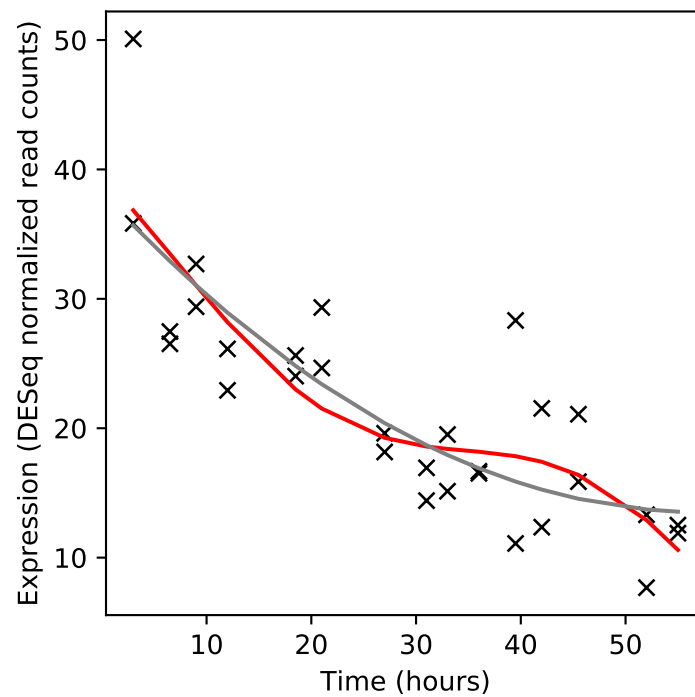

Rv0699/-

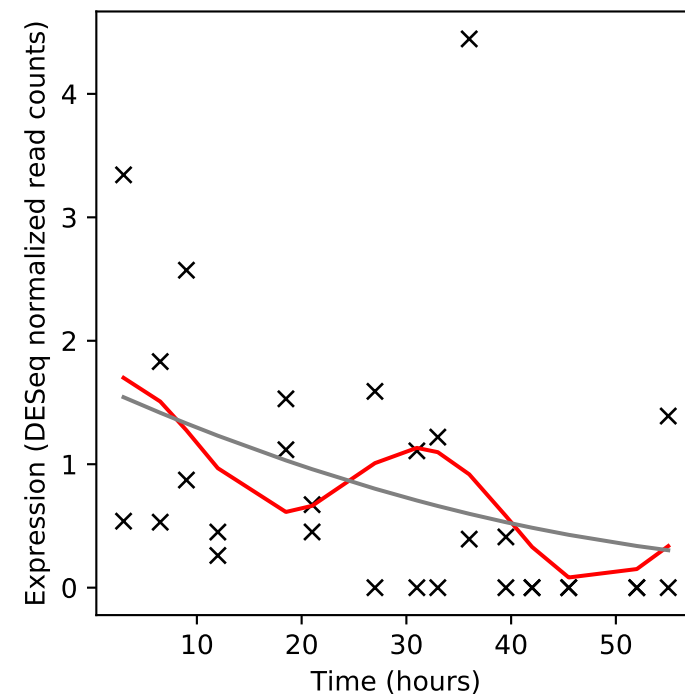

Rv0700/rpsJ

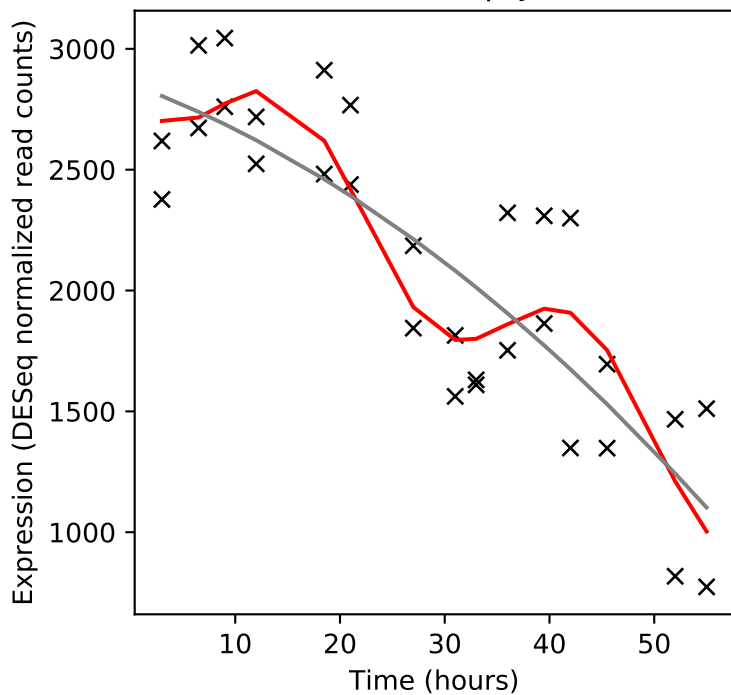

Rv0701/rplC

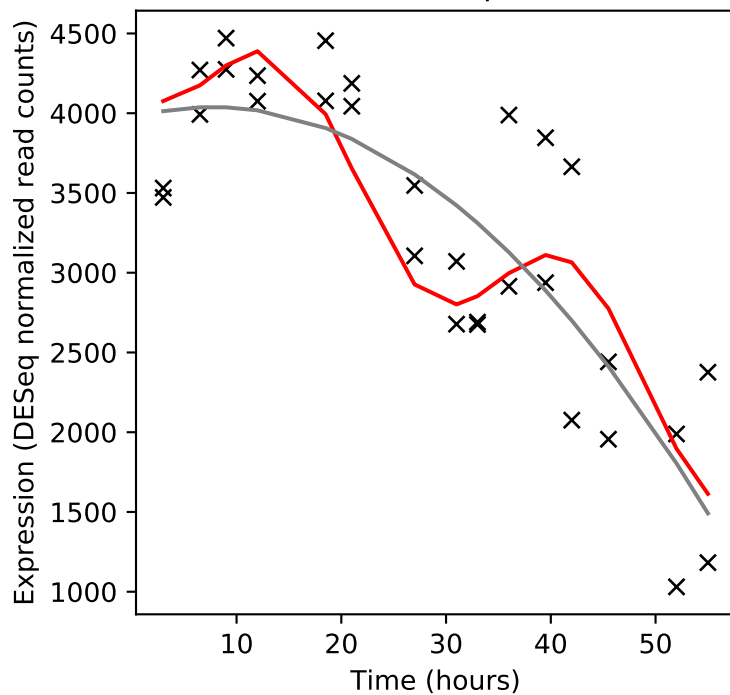

Rv0702/rplD

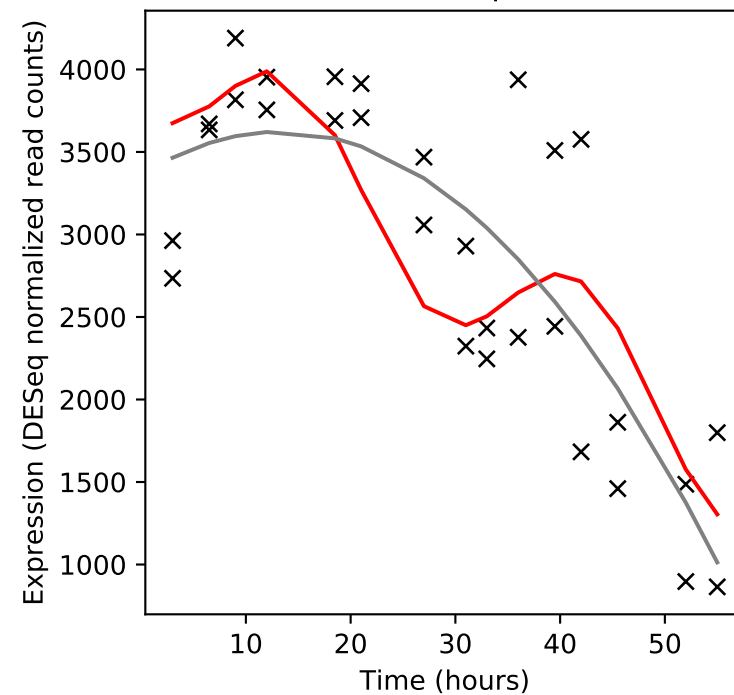

Rv0703/rplW

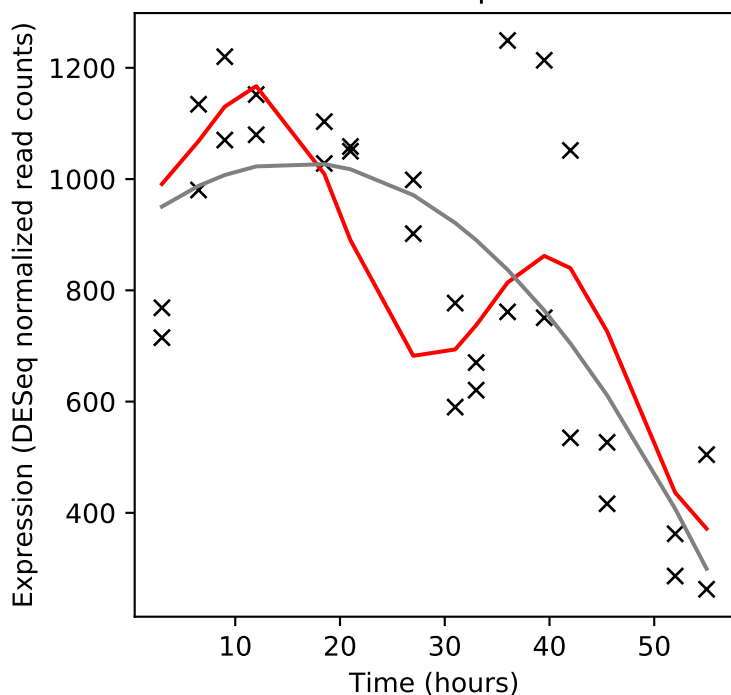

Rv0704/rplB

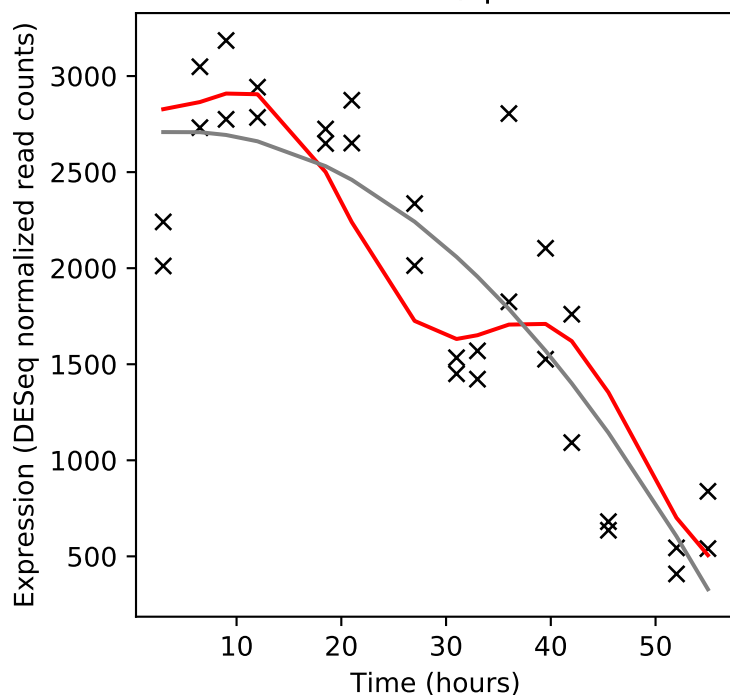

Rv0705/rpsS

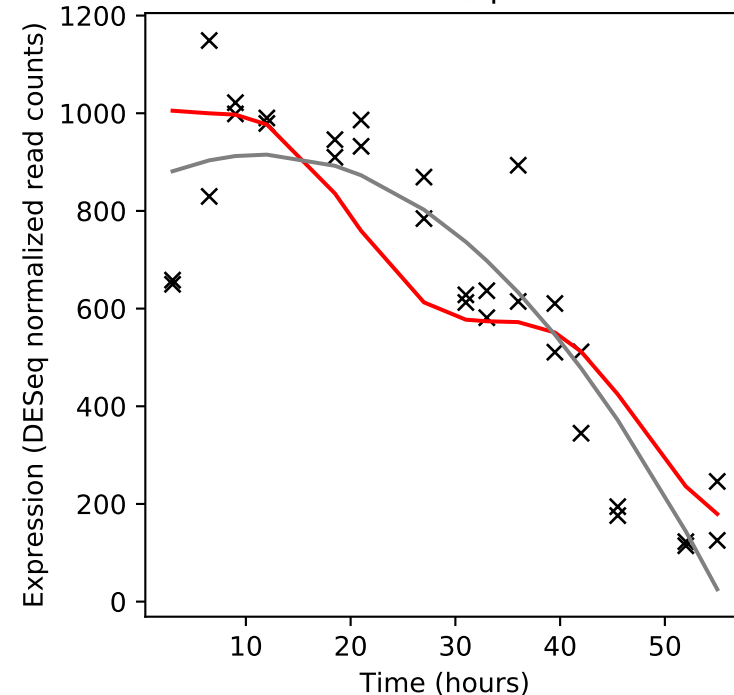

Rv0706/rplV

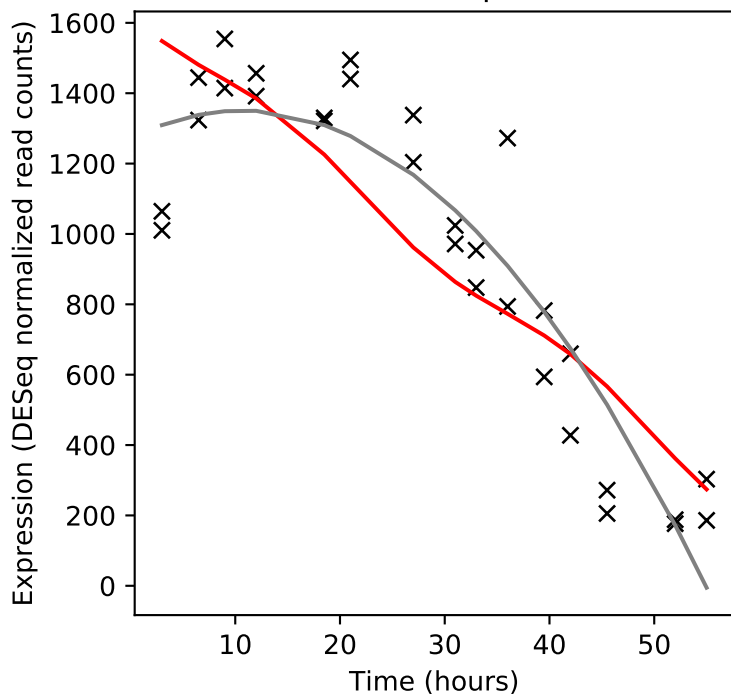

Rv0707/rpsC

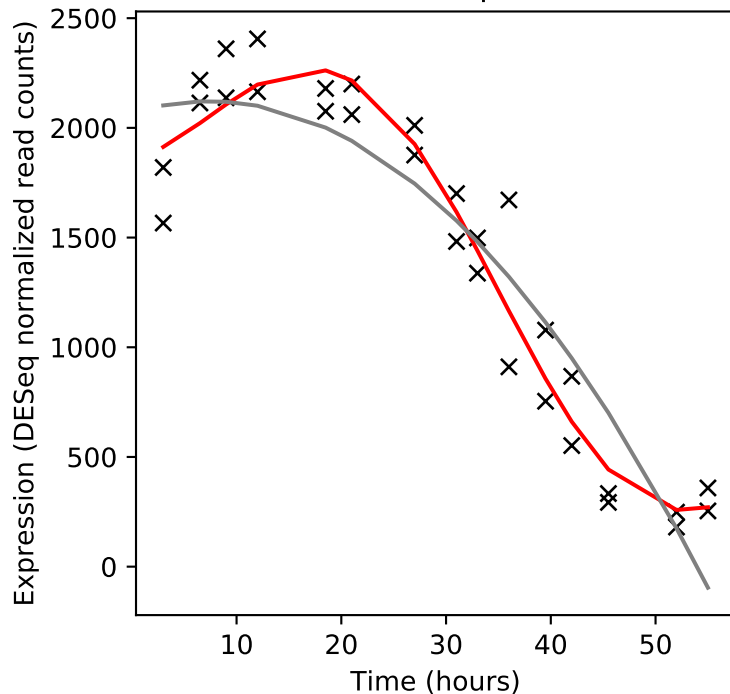

Rv0708/rplP

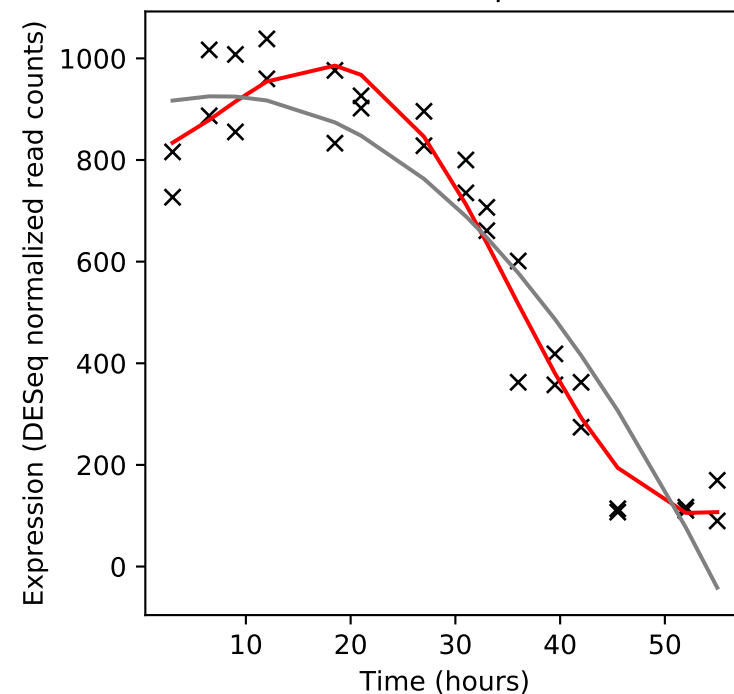

Rv0709/rpmC

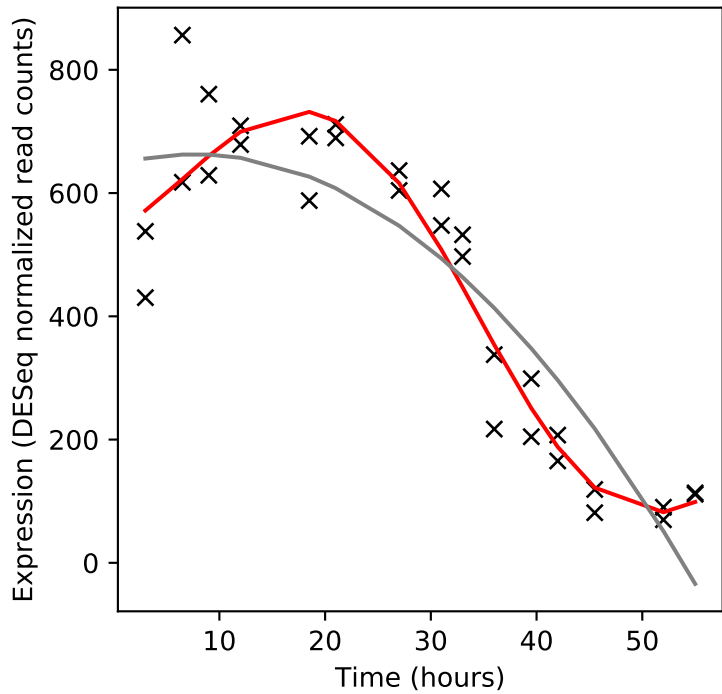

Rv0710/rpsQ

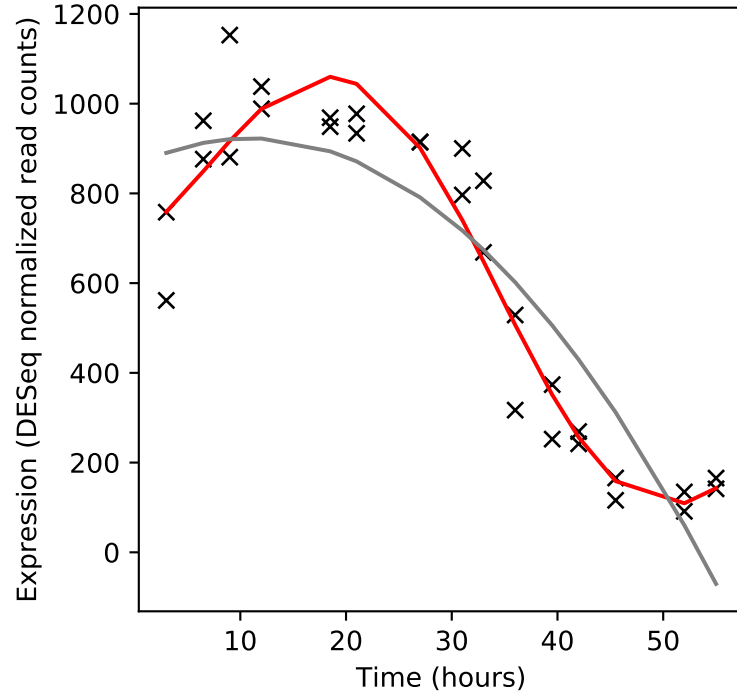

Rv0711/atsA

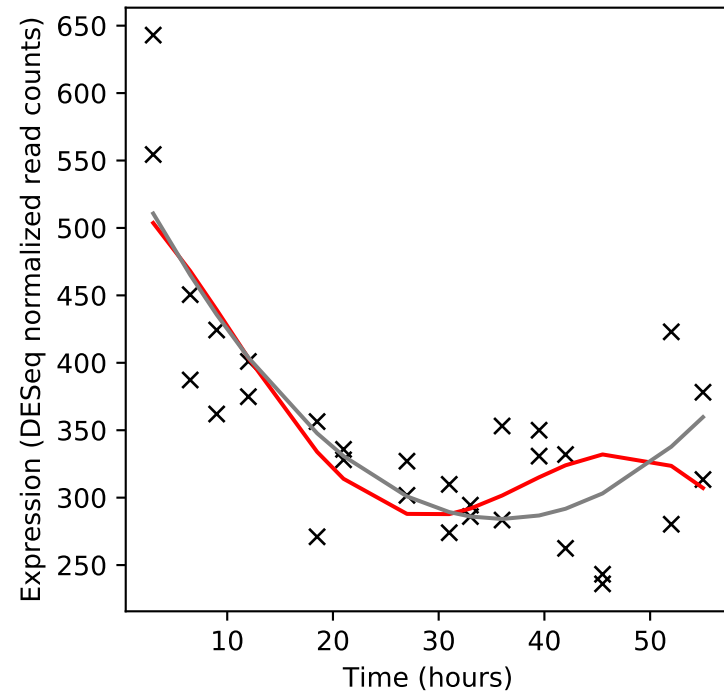

Rv0712/-

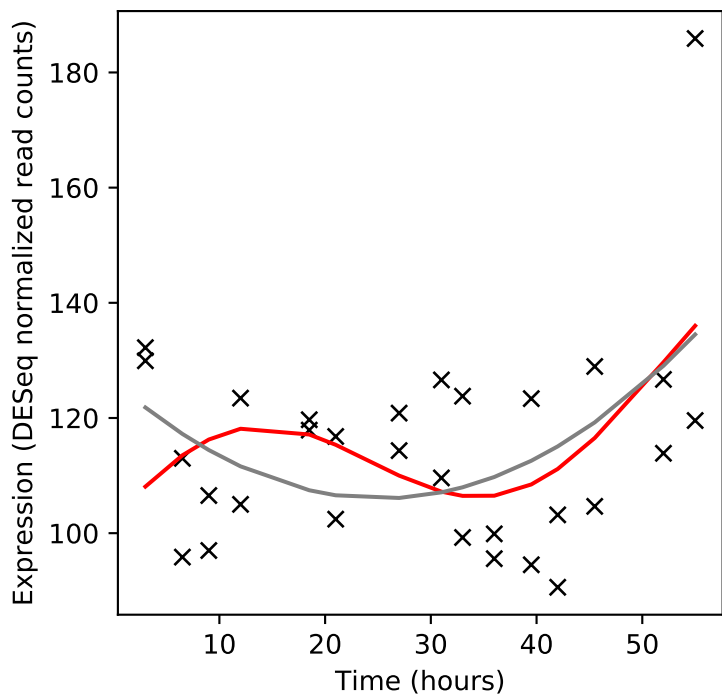

Rv0713/-

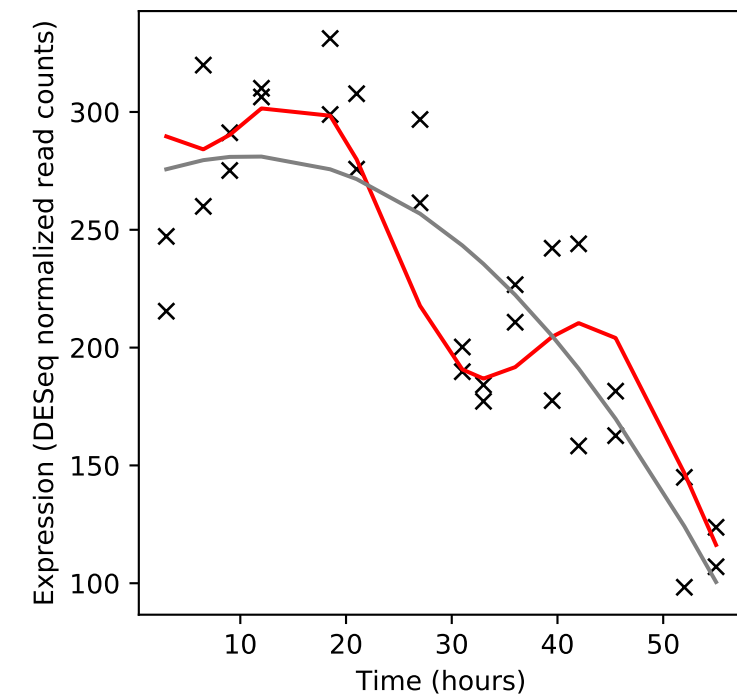

Rv0714/rplN

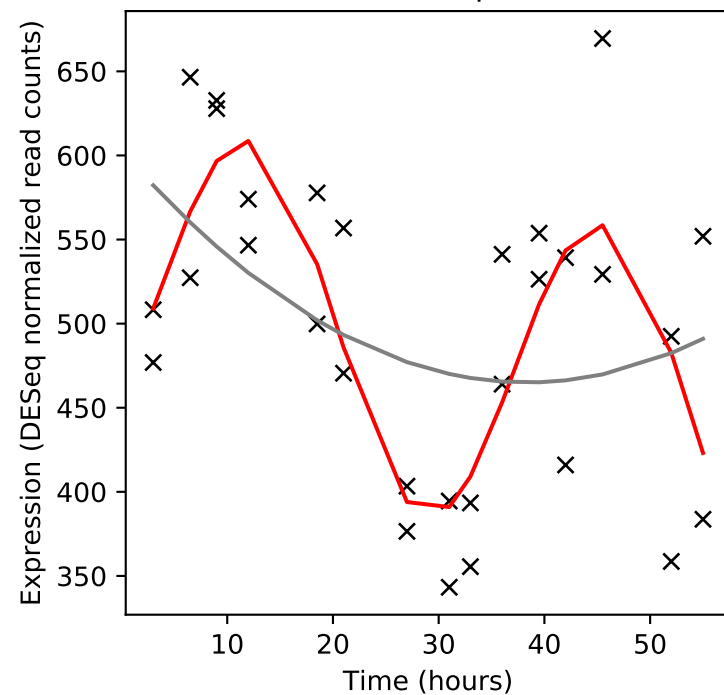

Rv0715/rplX

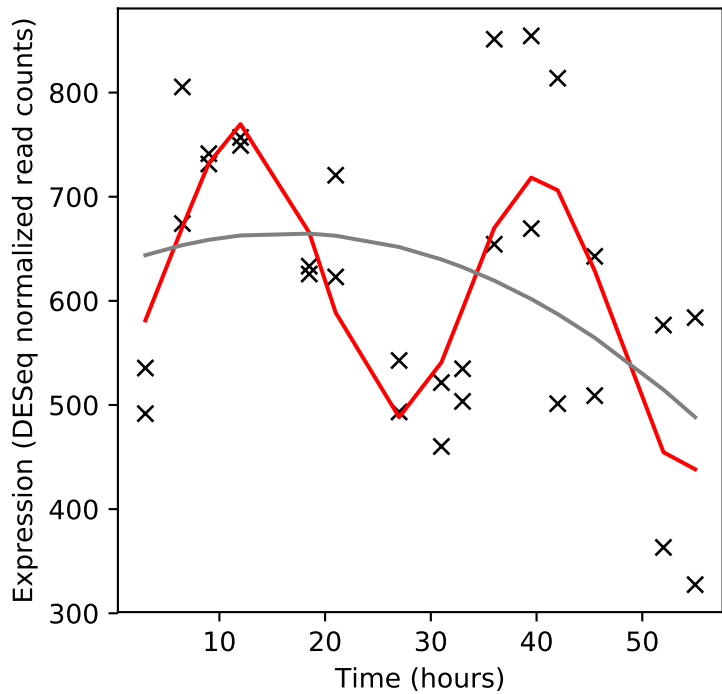

Rv0716/rplE

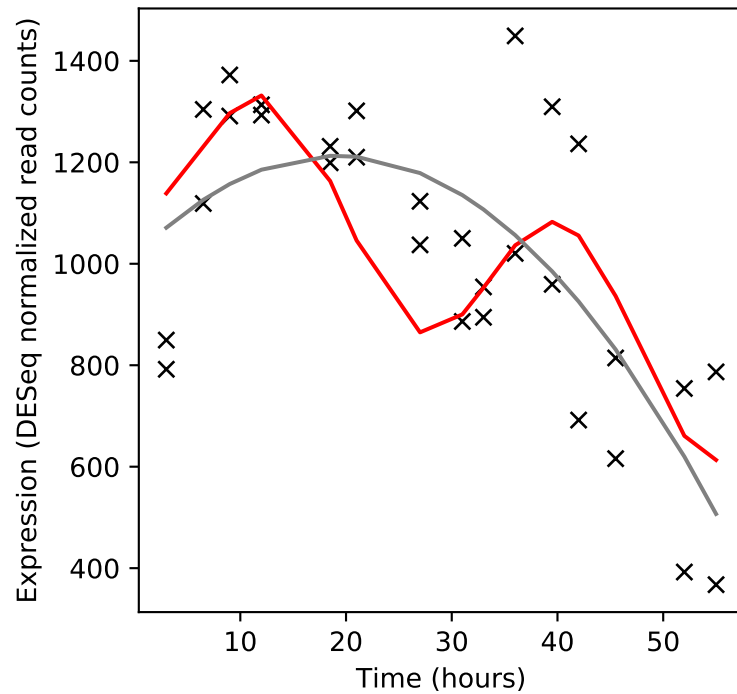

Rv0717/rpsN1

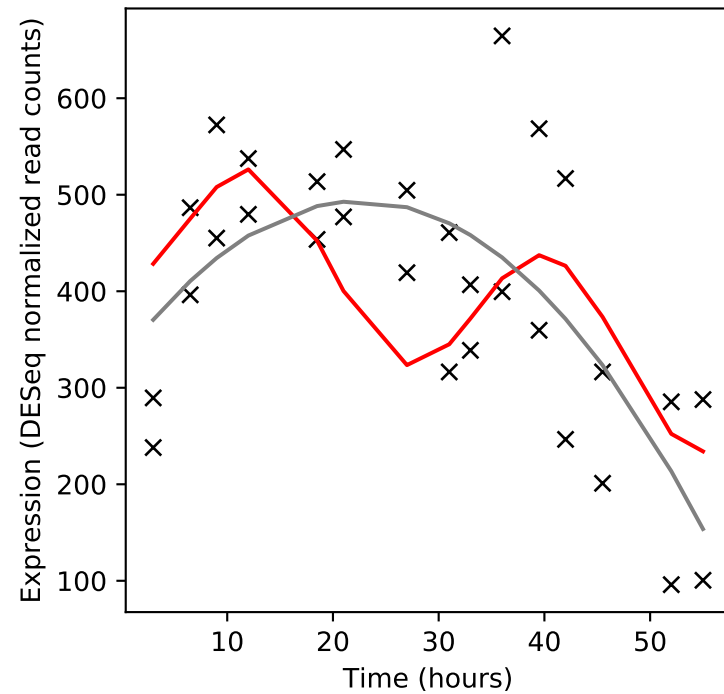

Rv0718/rpsH

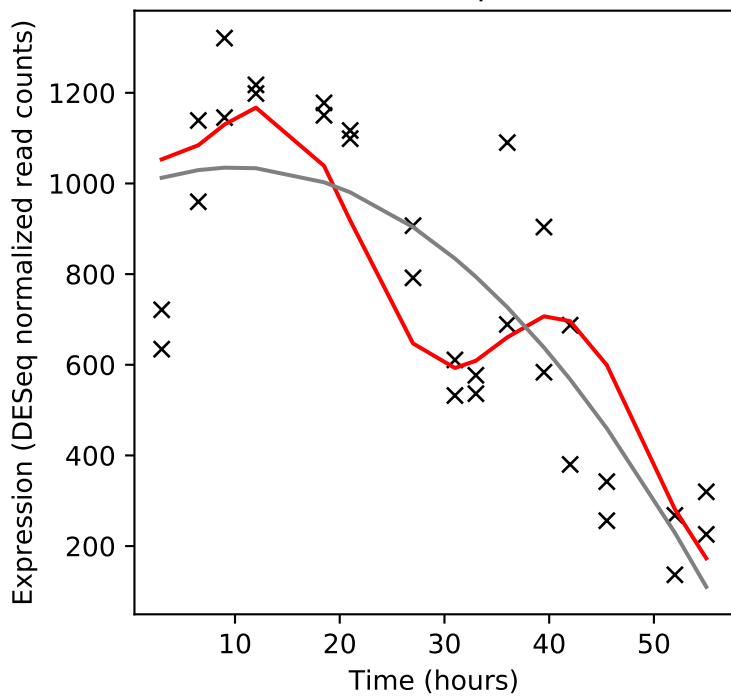

Rv0719/rplF

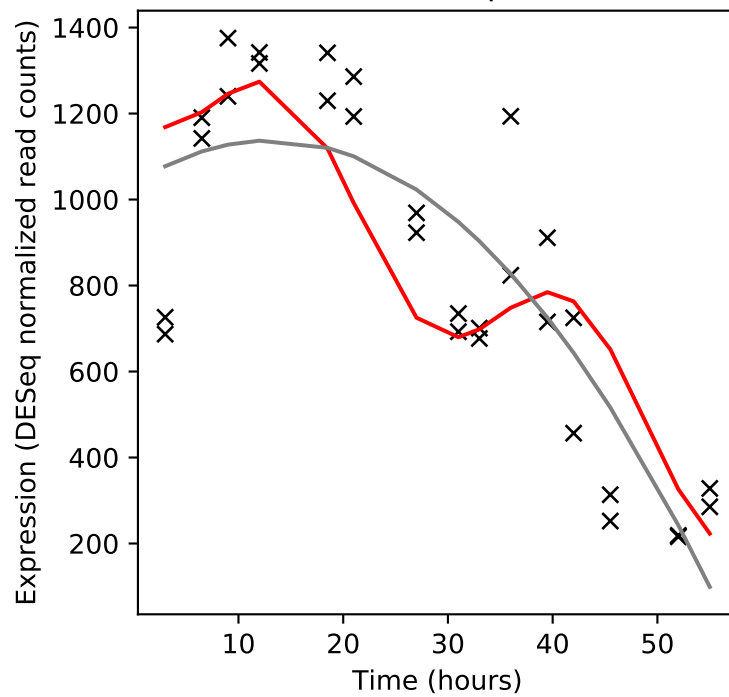

Rv0720/rplR

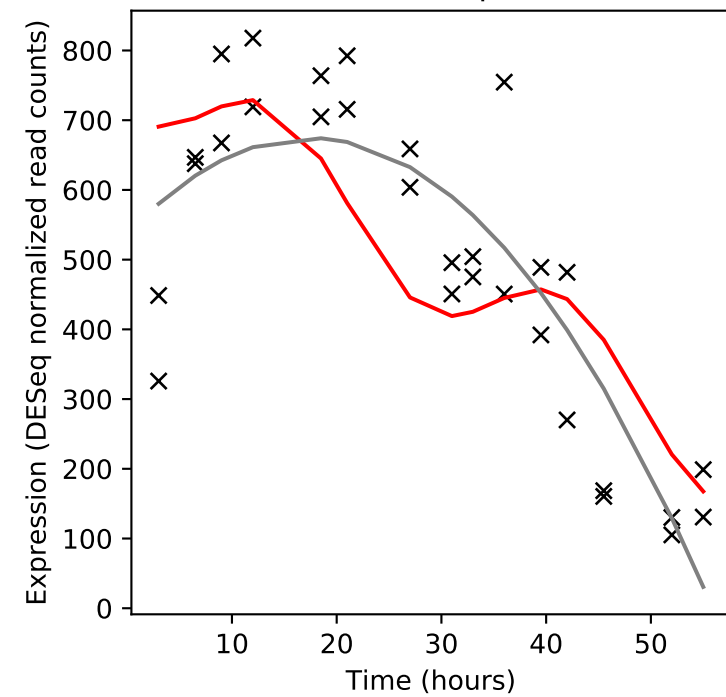

Rv0721/rpsE

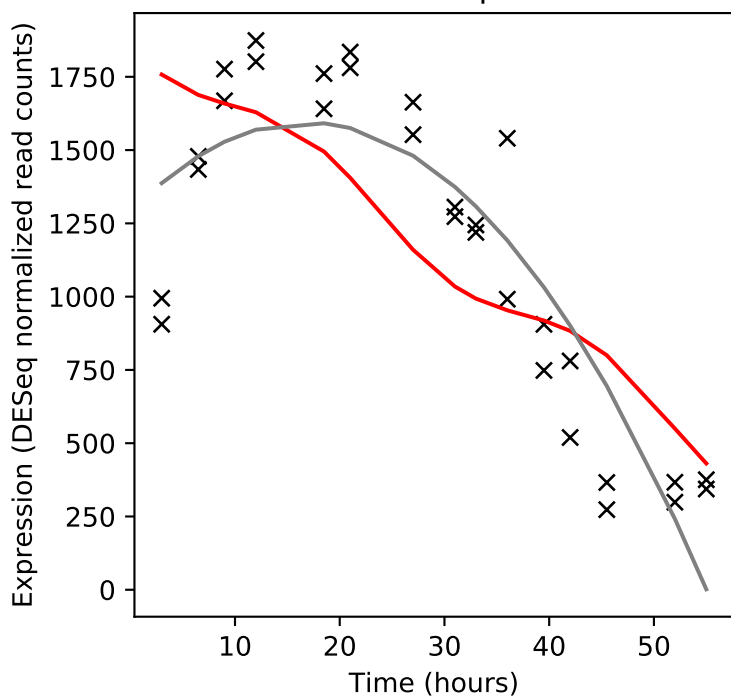

Rv0722/rpmD

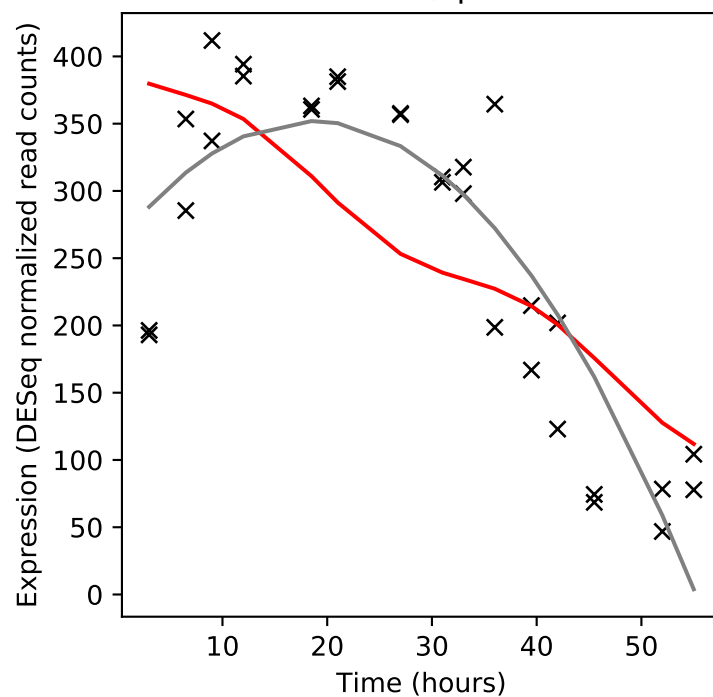

Rv0723/rplO

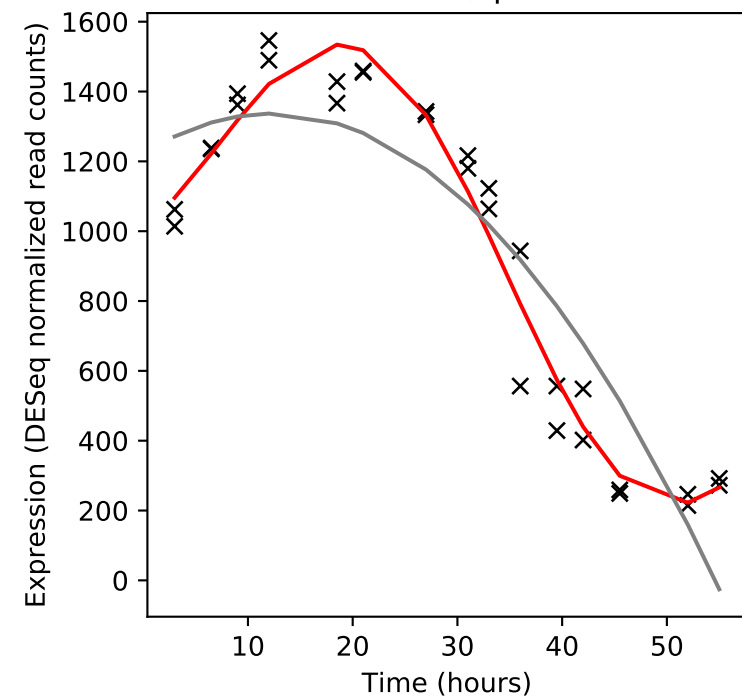

Rv0724/sppA

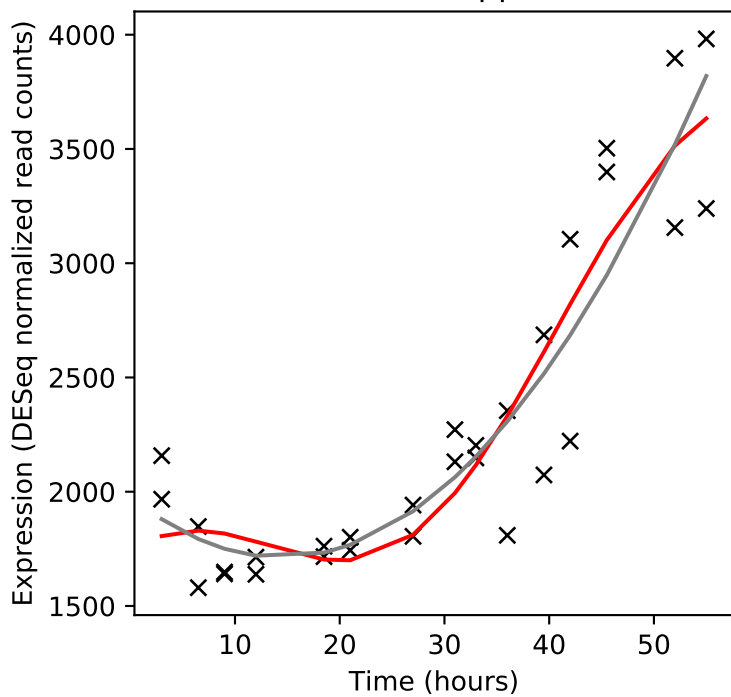

Rv0724A/-

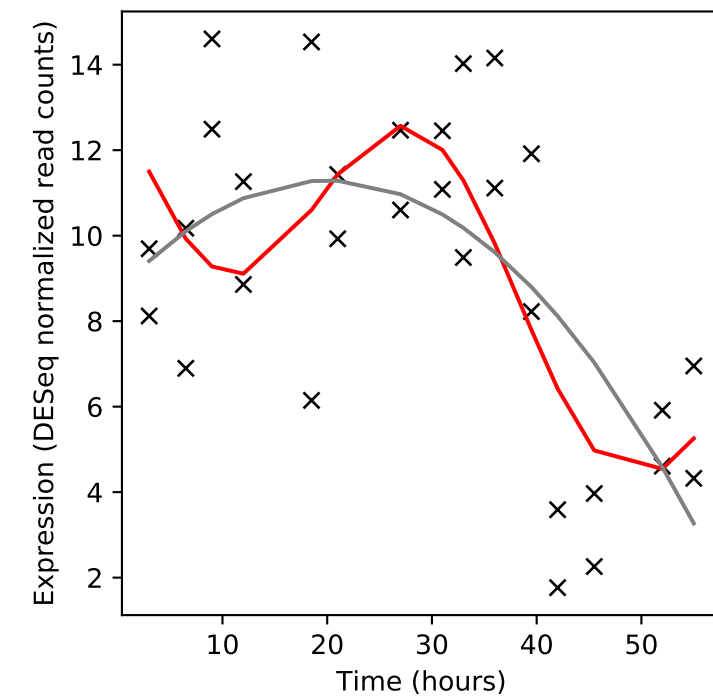

Rv0725c/-

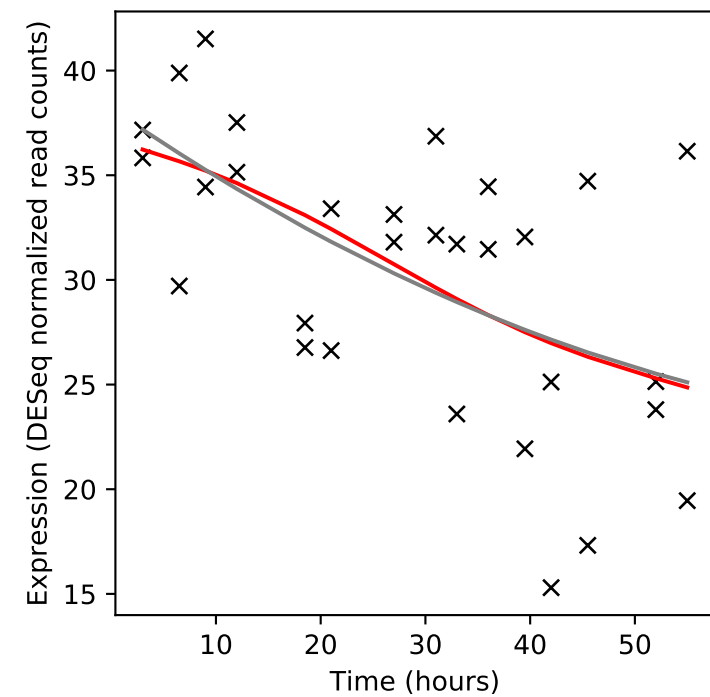

Rv0726c/-

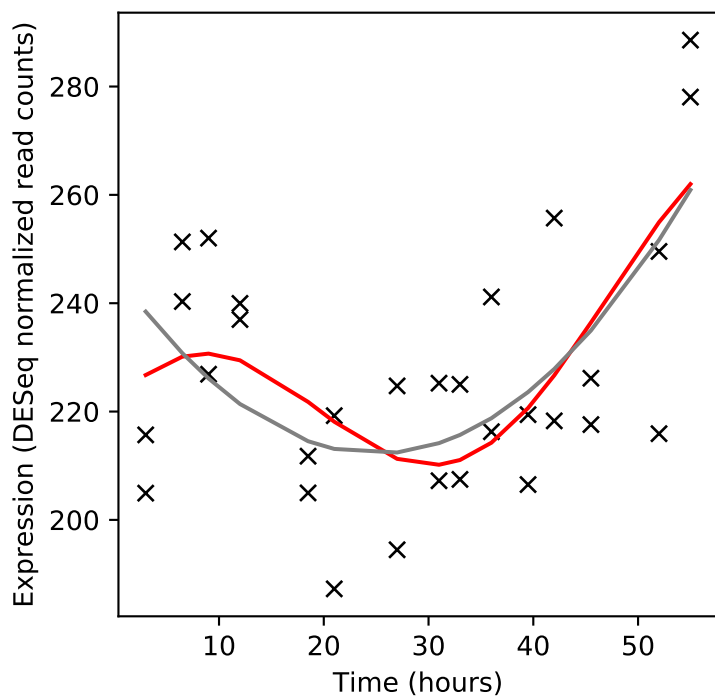

Rv0727c/fucA

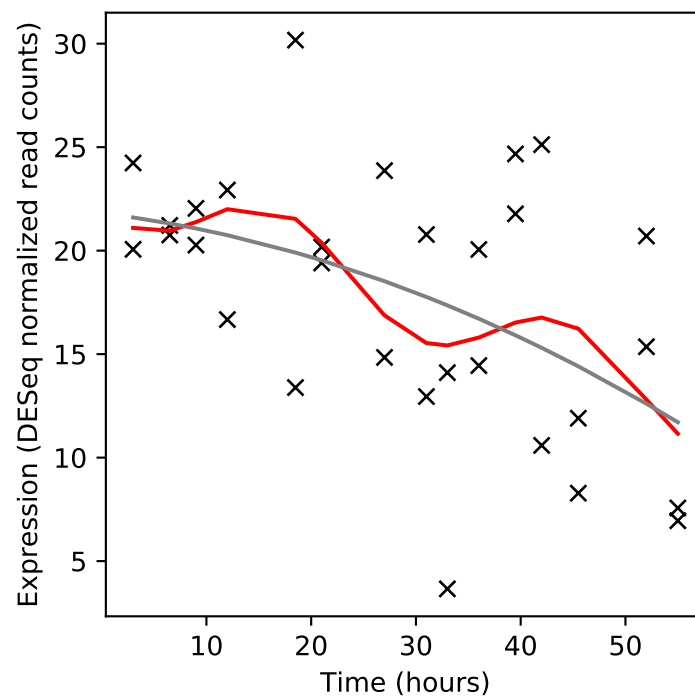

Rv0728c/serA2

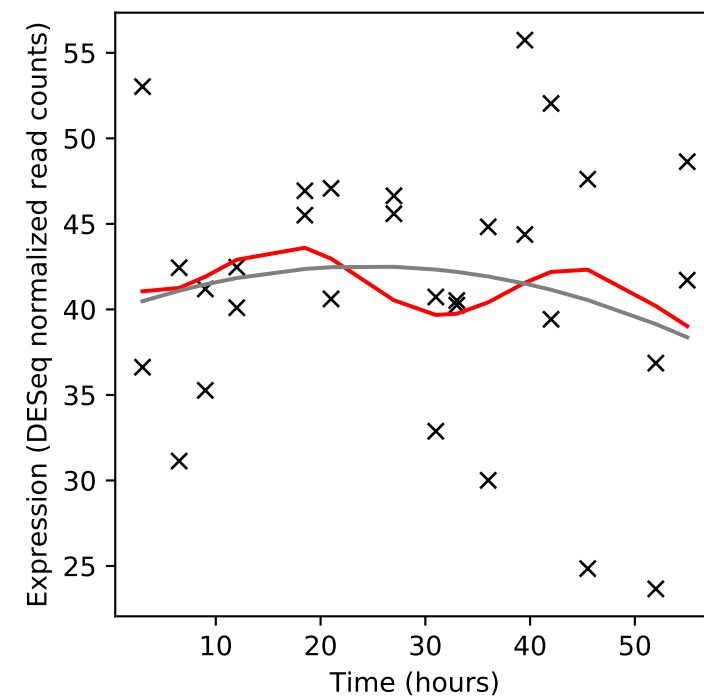

Rv0729/xylB

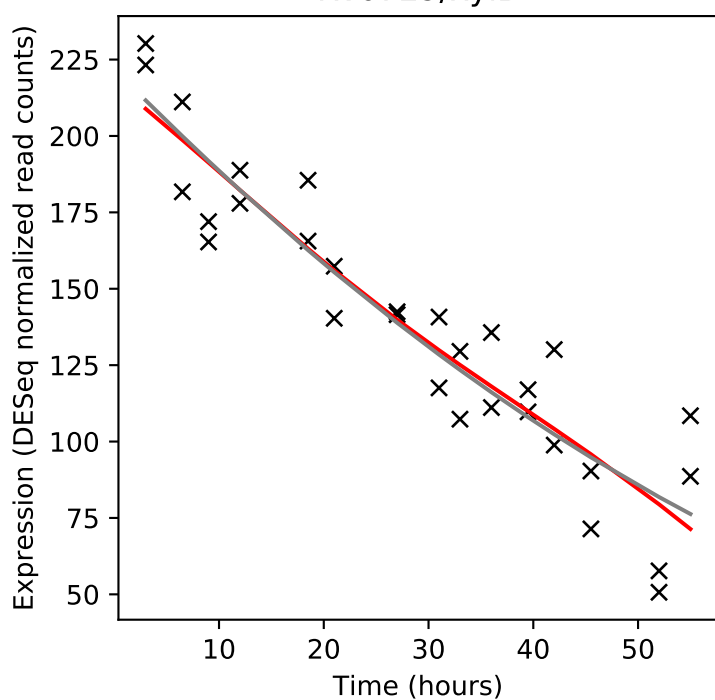

Rv0730/-

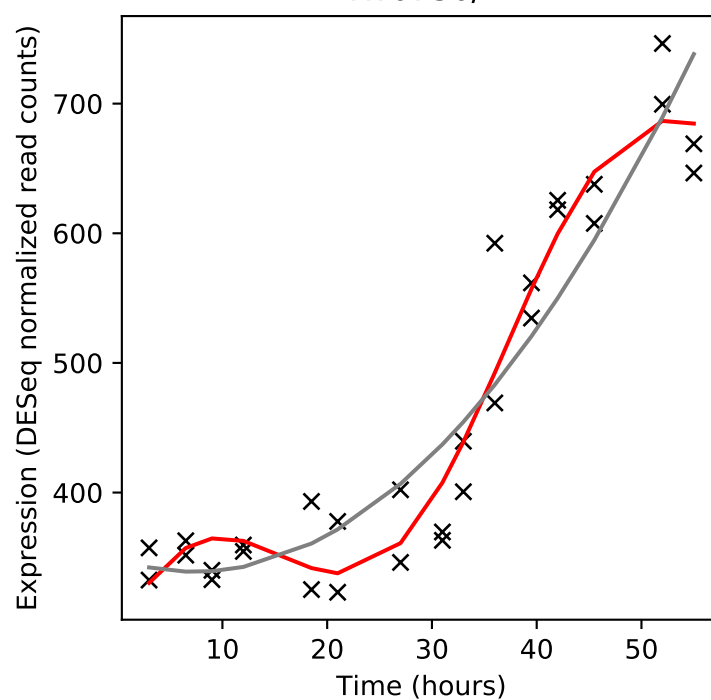

Rv0731c/-

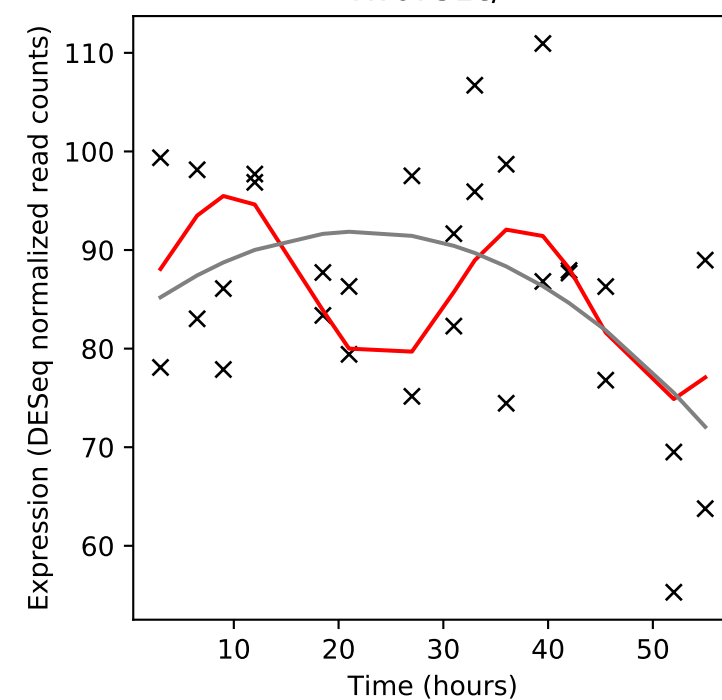

Rv0732/secY

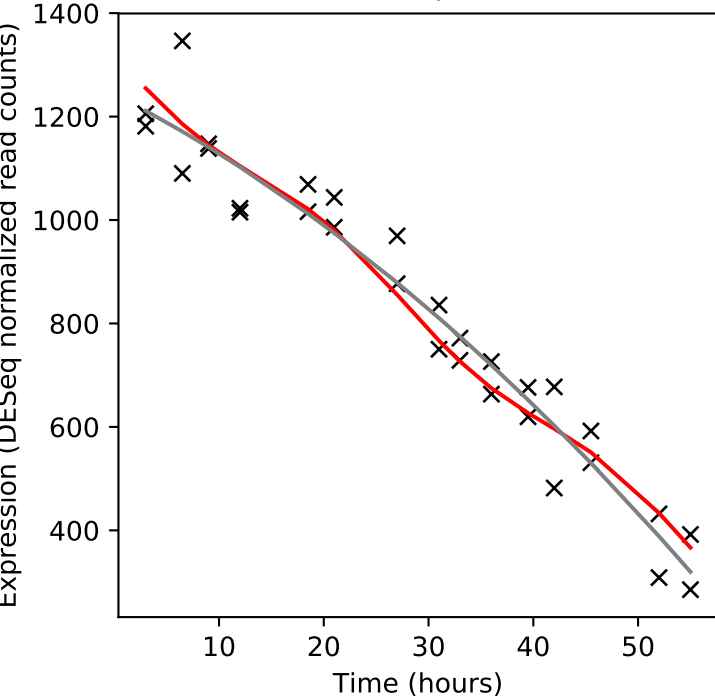

Rv0733/adk

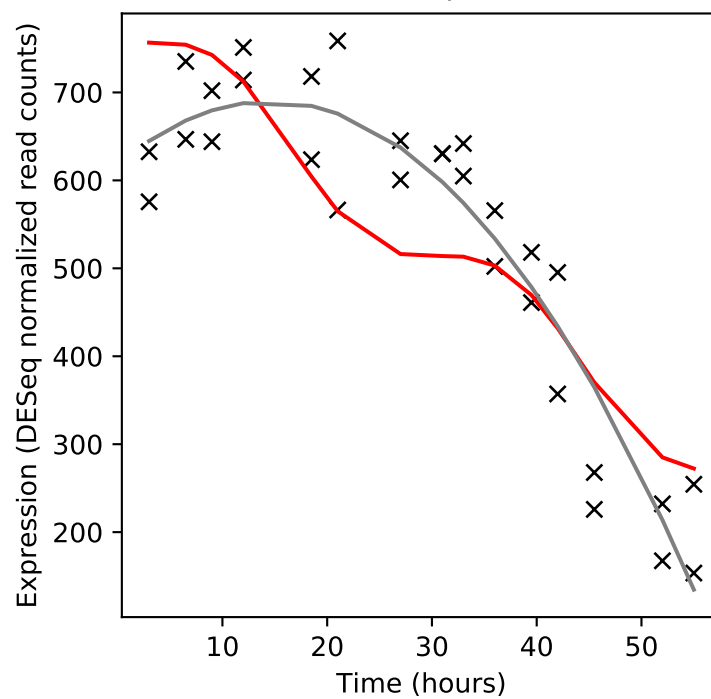

Rv0734/mapA

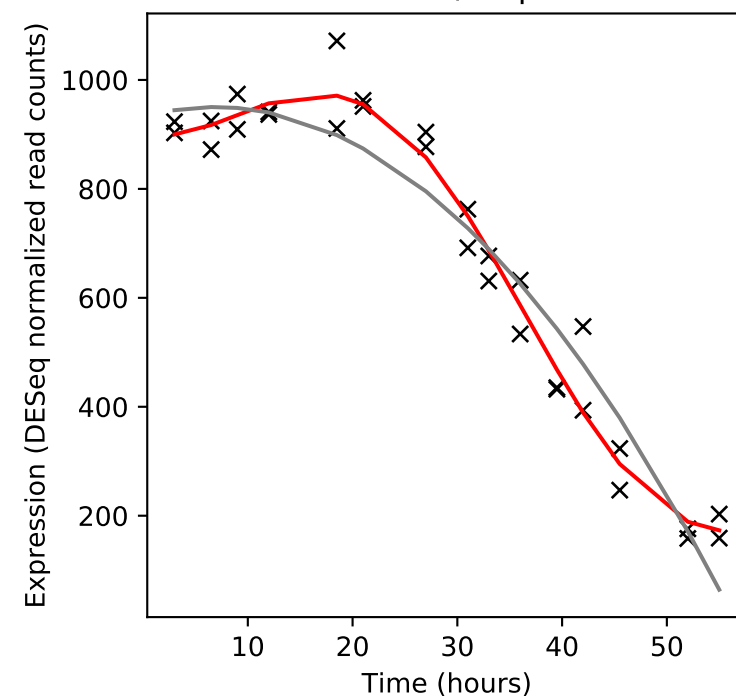

Rv0735/sigL

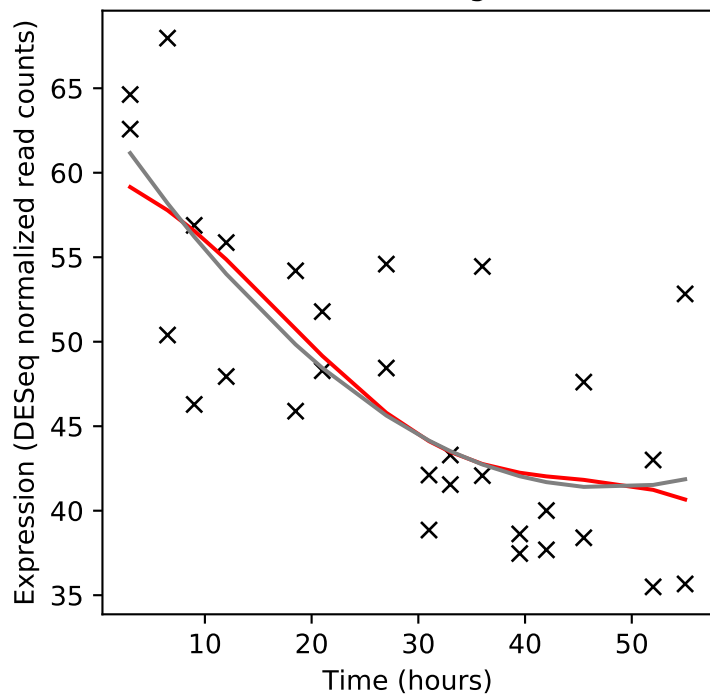

Rv0736/rsIA

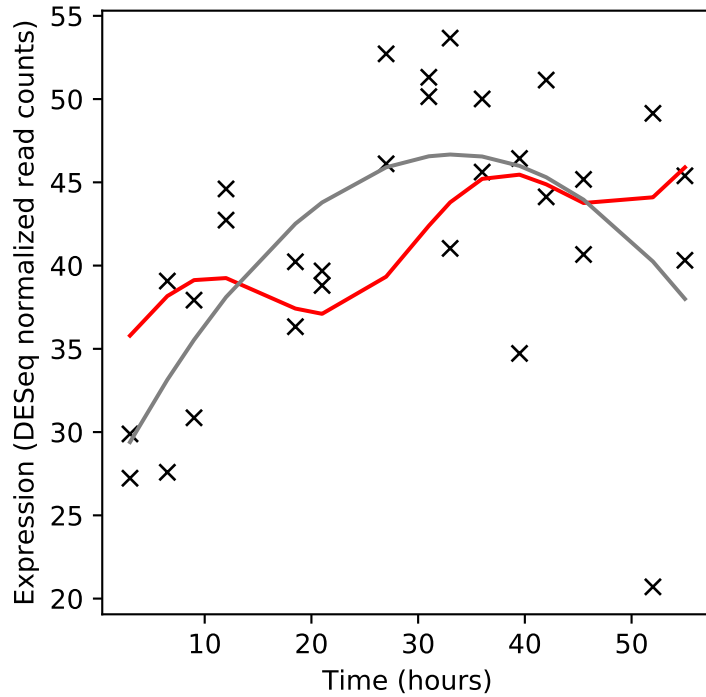

Rv0737/-

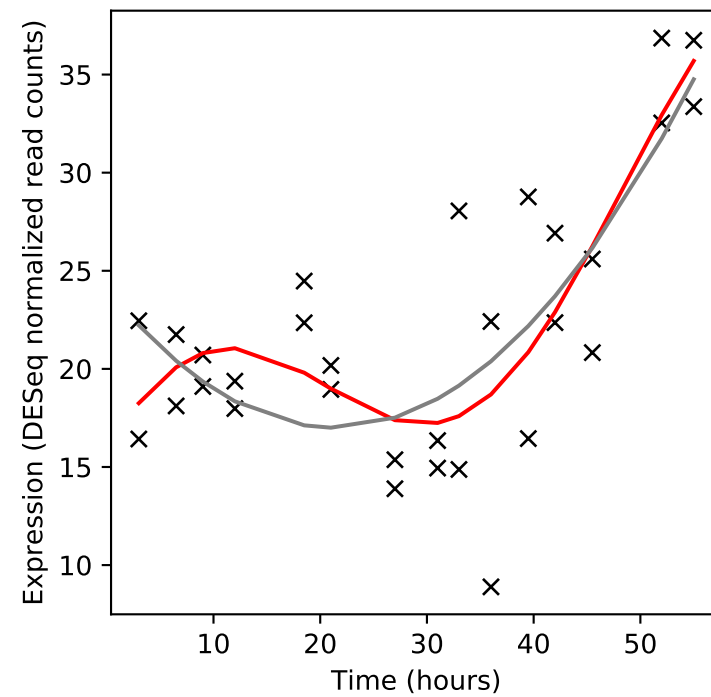

Rv0738/-

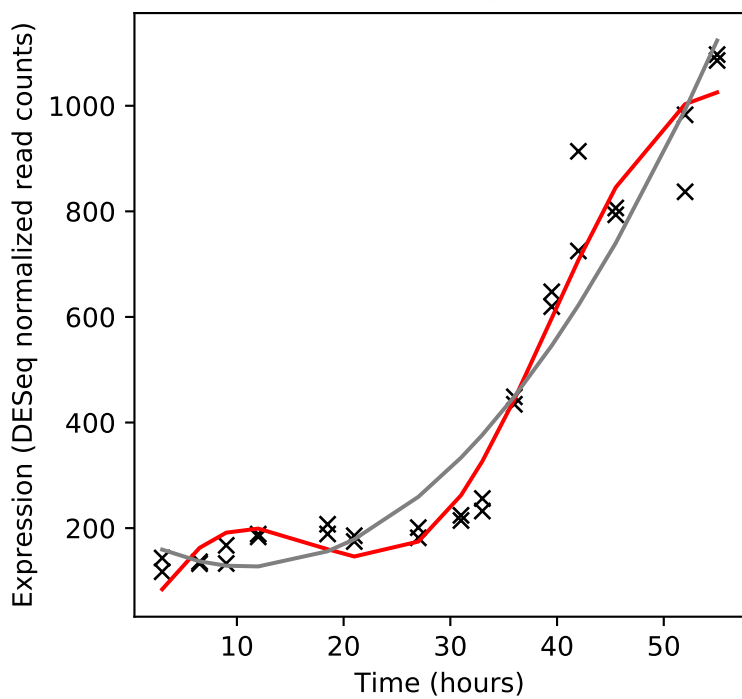

Rv0739/-

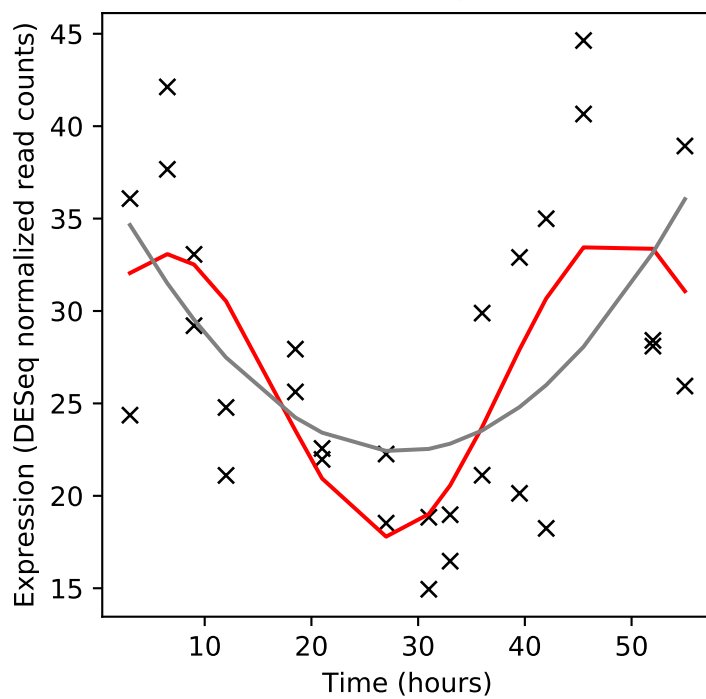

Rv0740/-

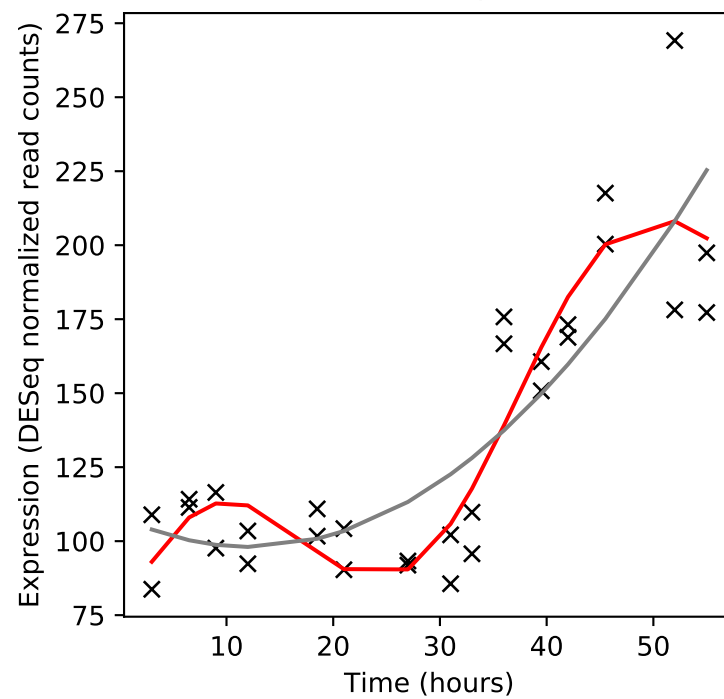

Rv0741/-

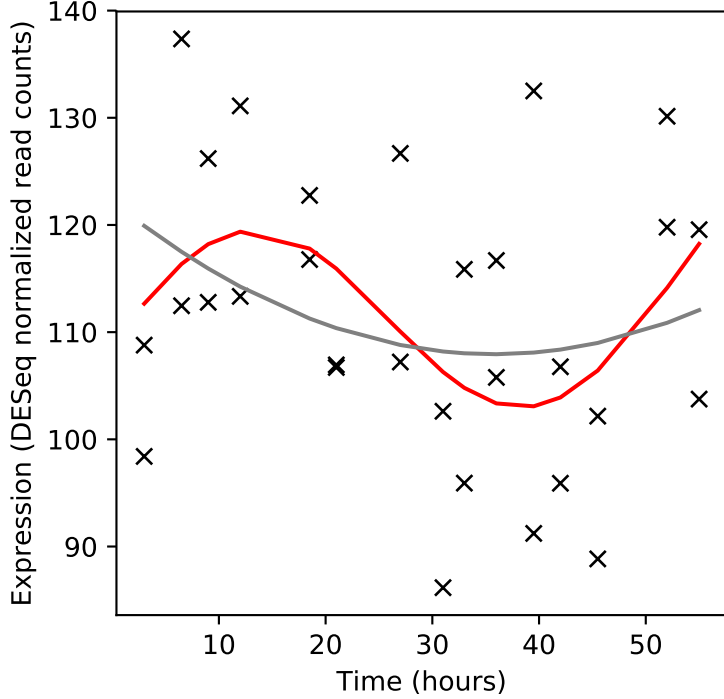

Rv0742/PE\_PGRS8

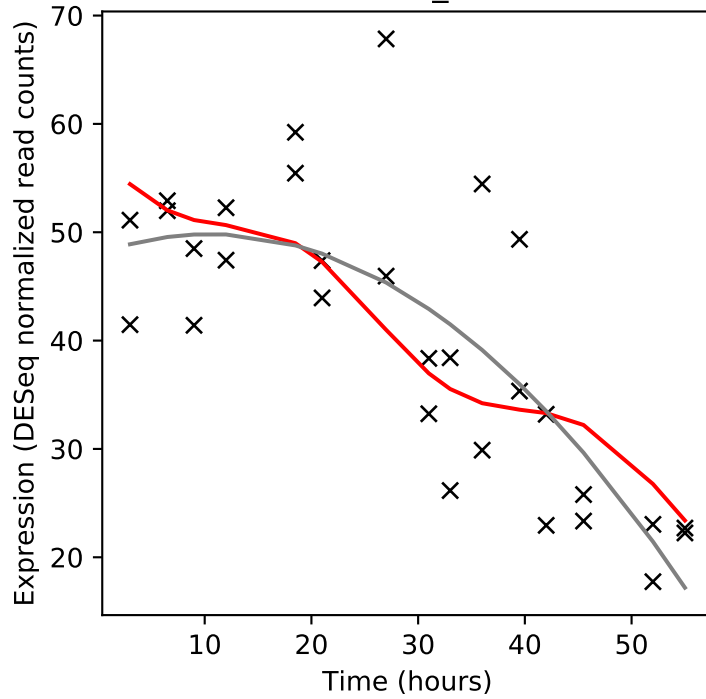

Rv0743c/-

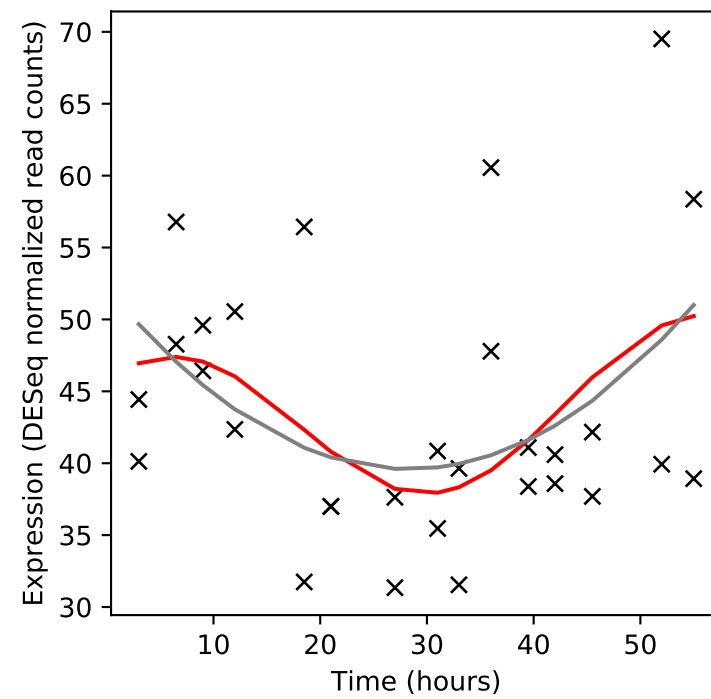

Rv0744c/-

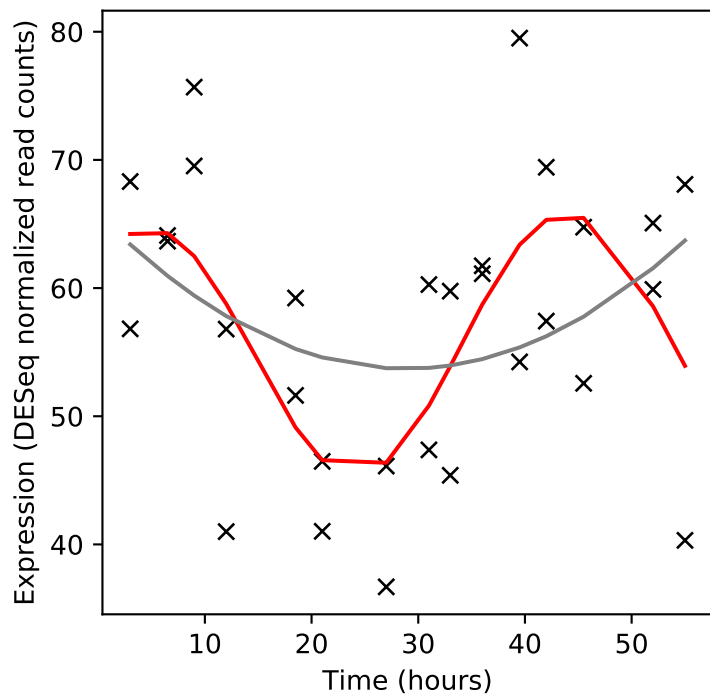

Rv0745/-

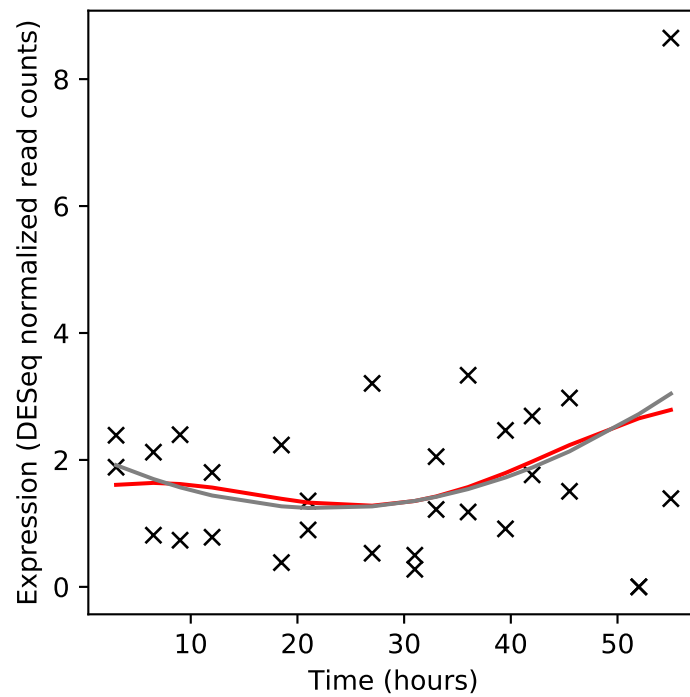

Rv0746/PE\_PGRS9

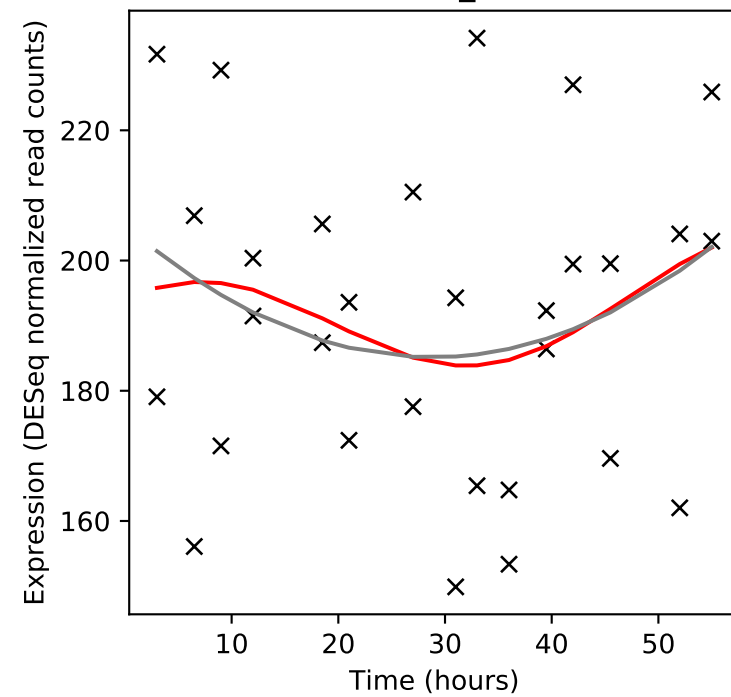

Rv0747/PE\_PGRS10

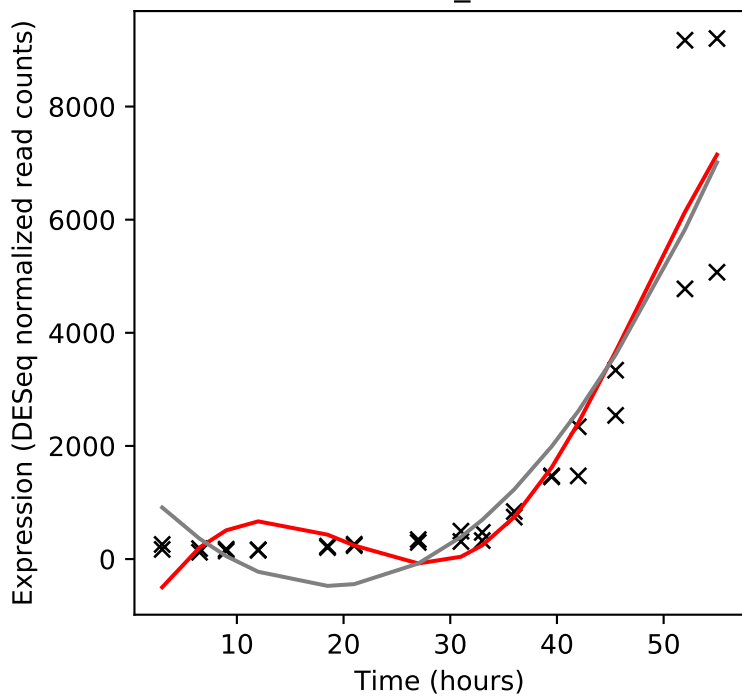

Rv0748/vapB31

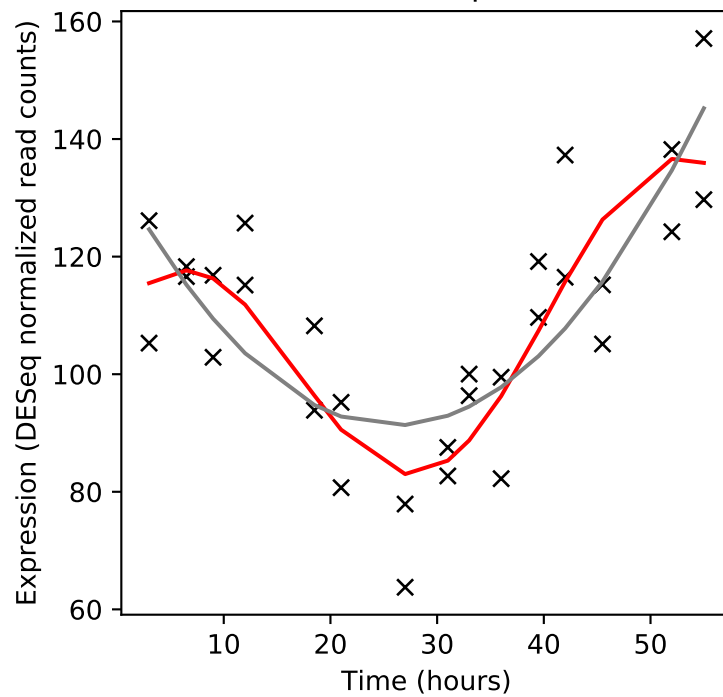

Rv0749/vapC31

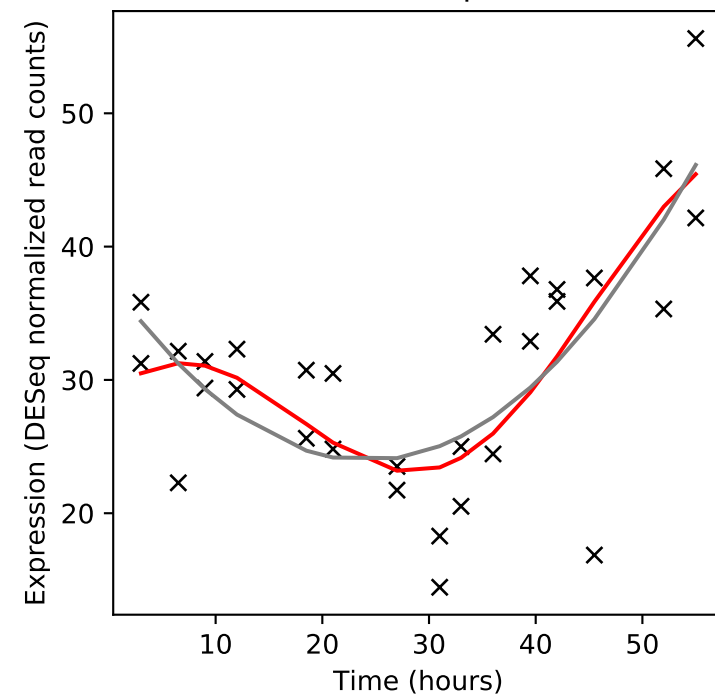

Rv0749A/-

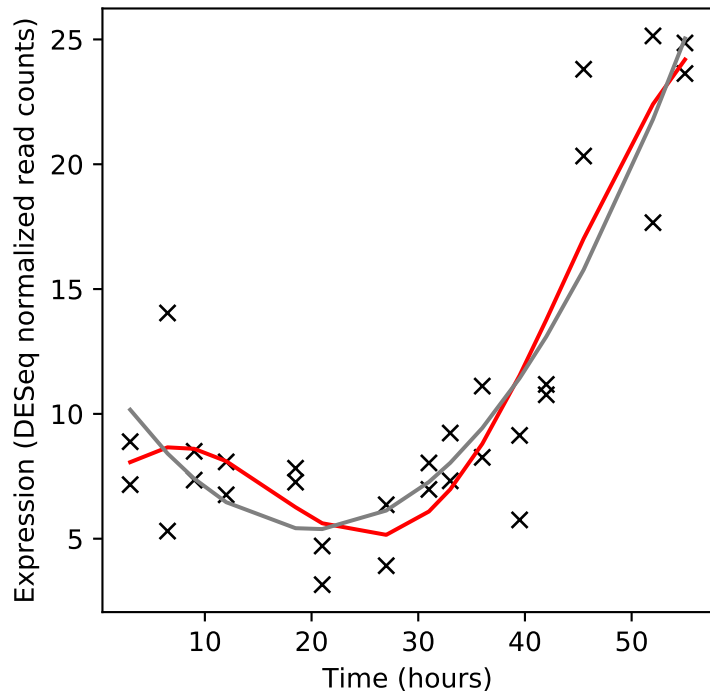

Rv0750/-

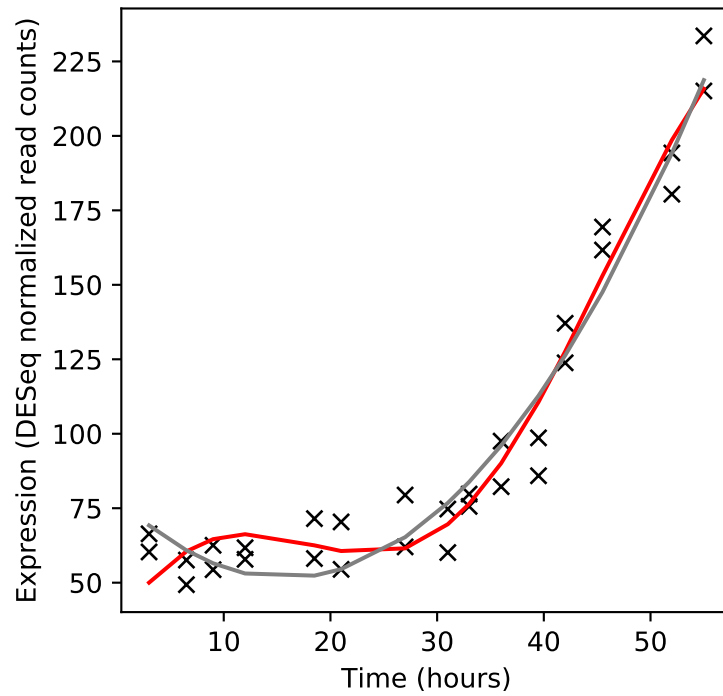

Rv0751c/mmsB

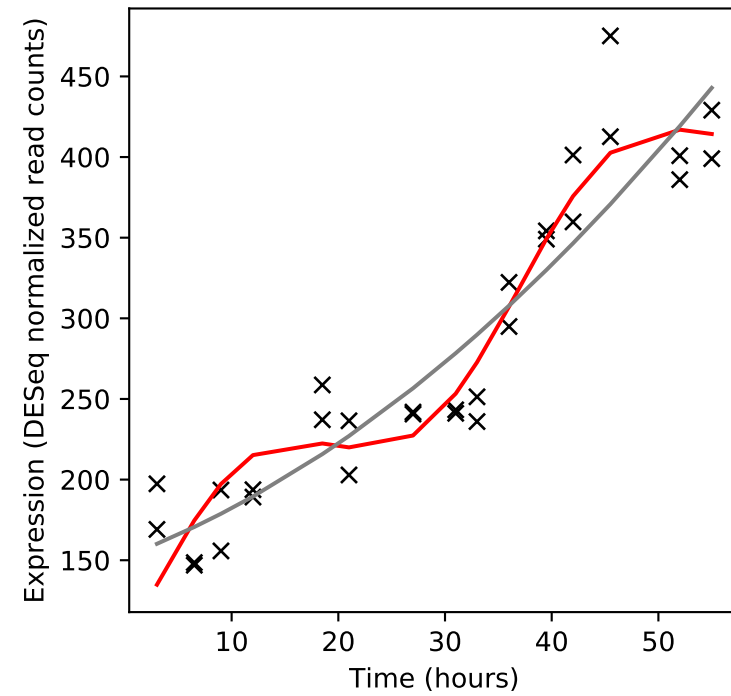



Rv0752c/fadE9

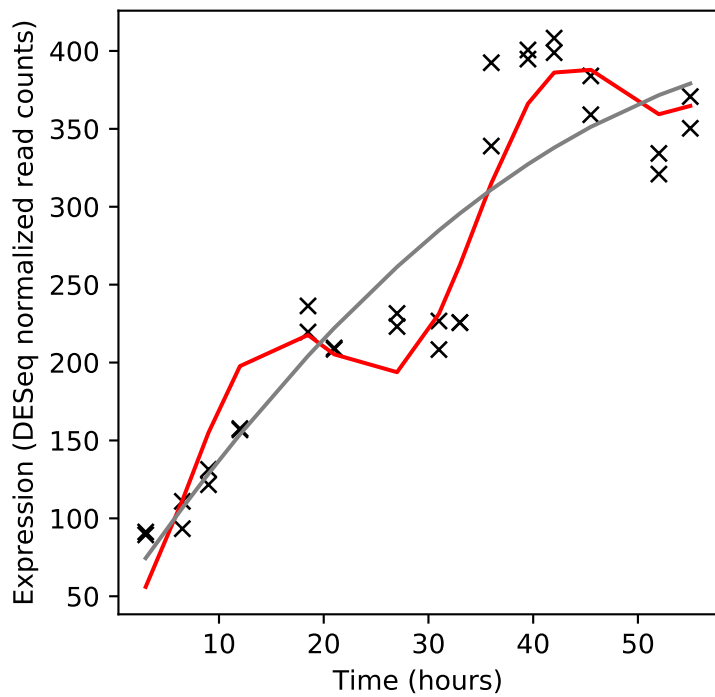

Rv0753c/mmsA

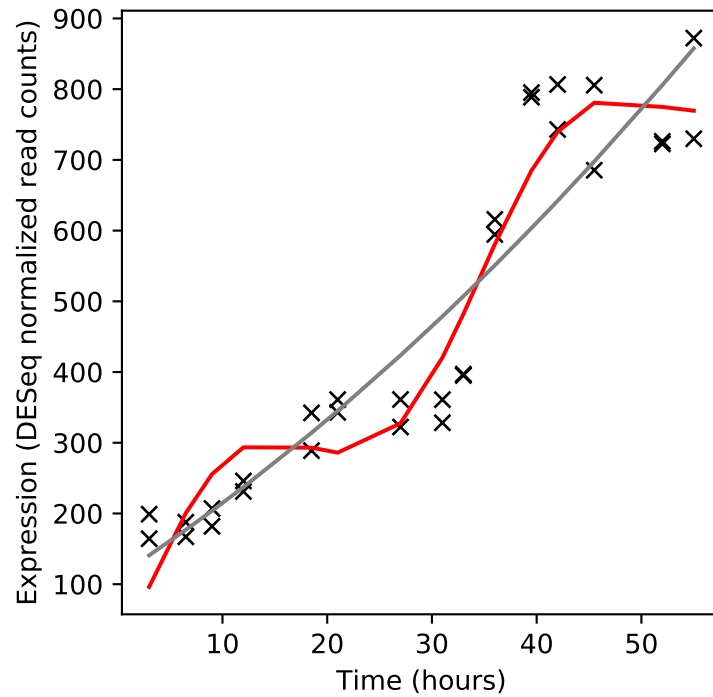

Rv0754/PE\_PGRS11

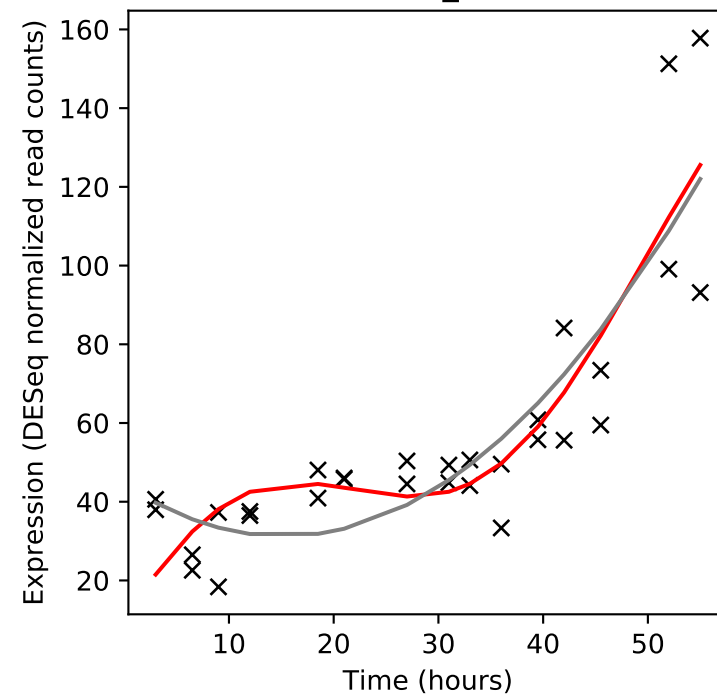

Rv0755c/PPE12

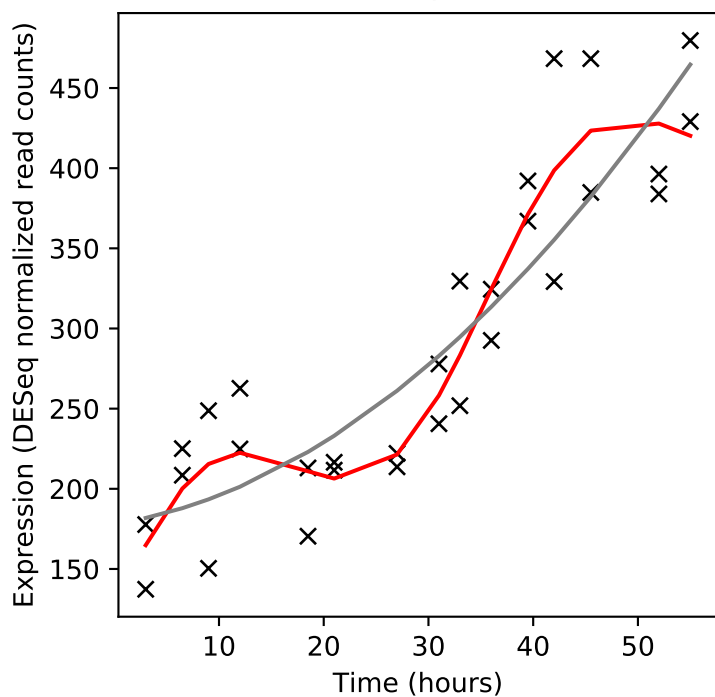

Rv0755A/-

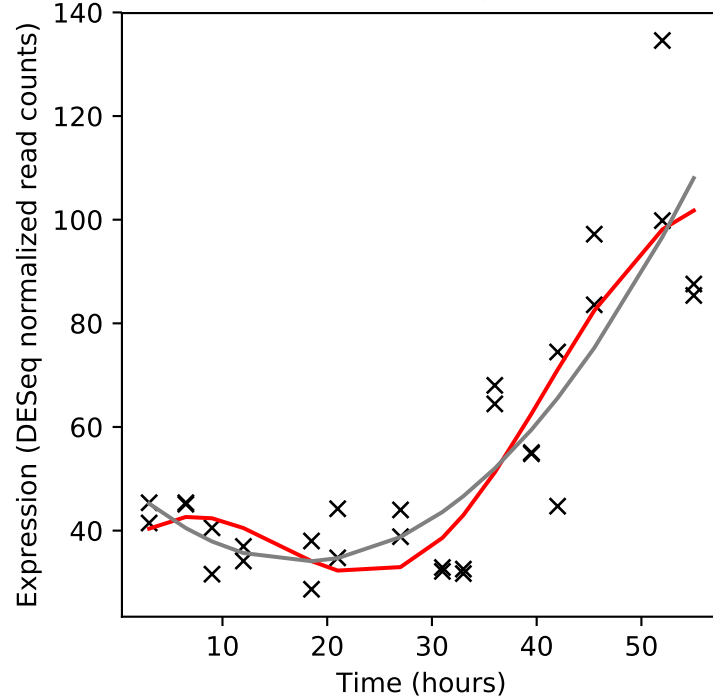

Rv0756c/-

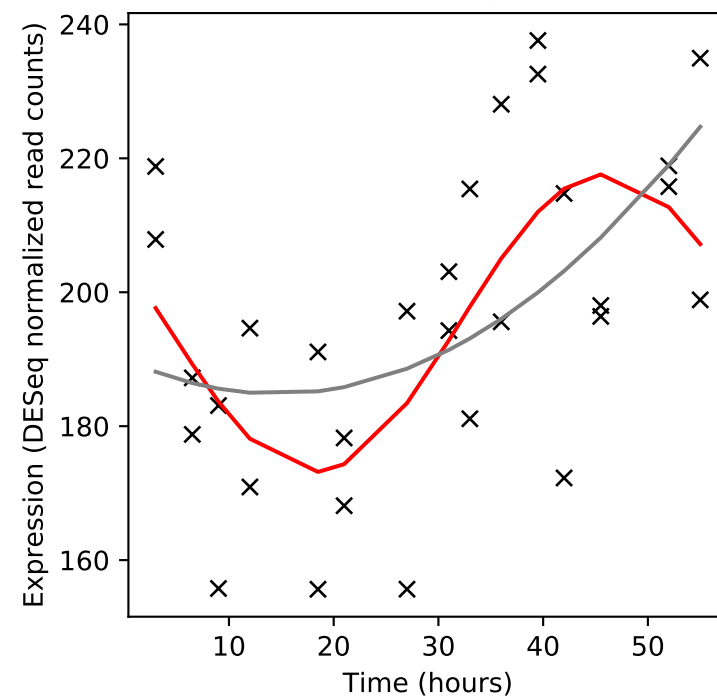

Rv0757/phoP

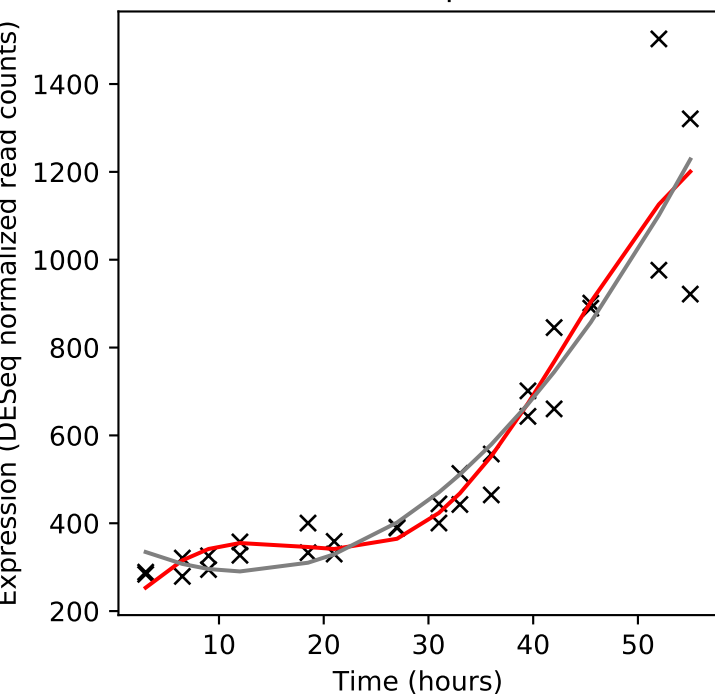

Rv0758/phoR

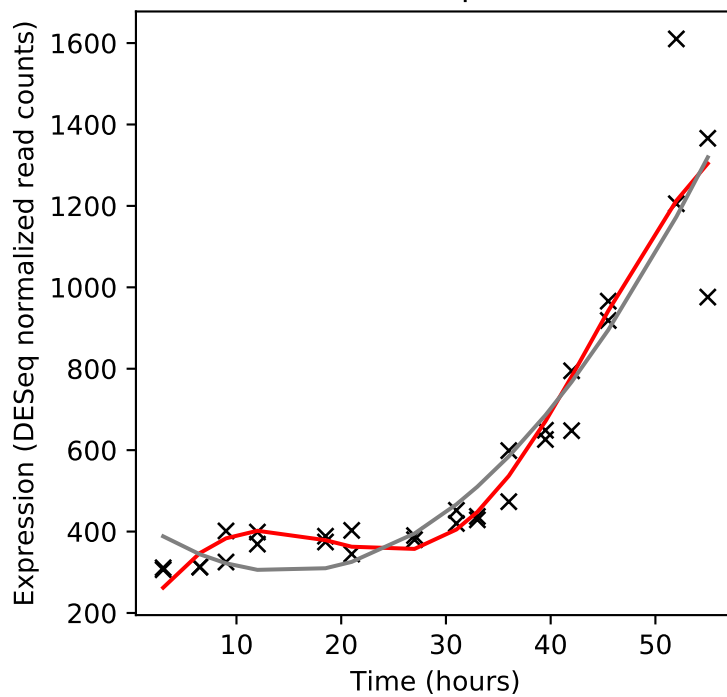

Rv0759c/-

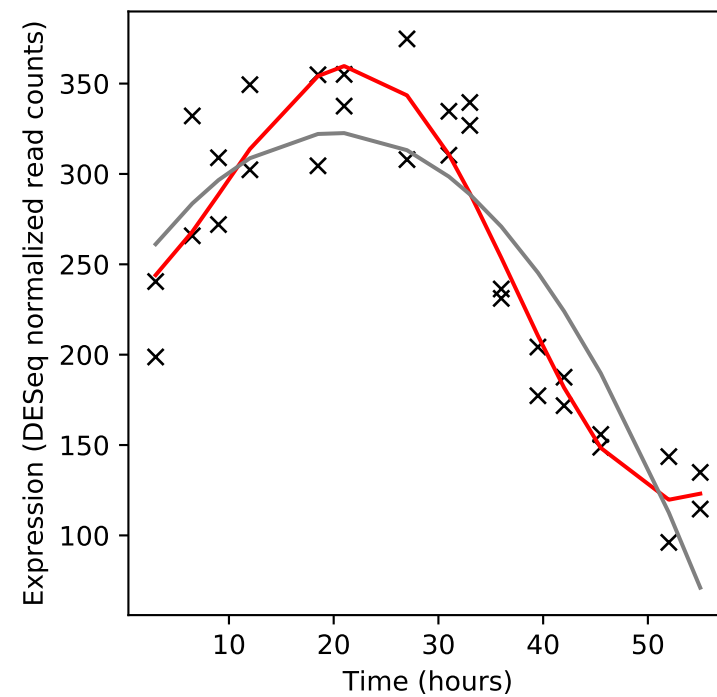

Rv0760c/-

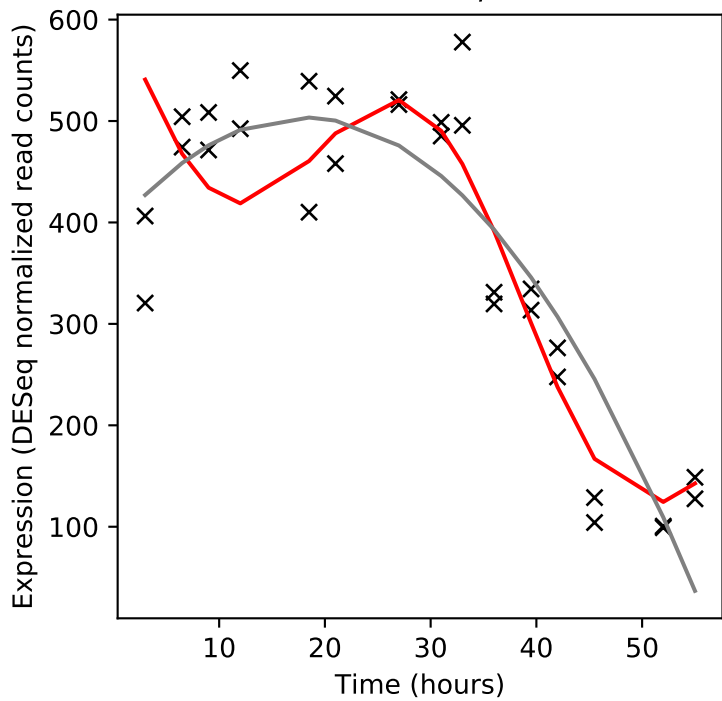

Rv0761c/adhB

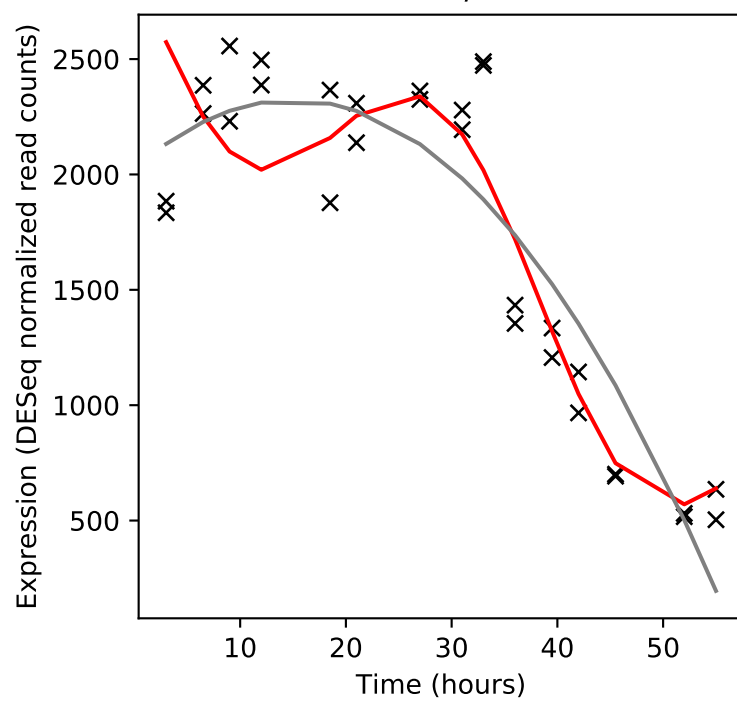

Rv0762c/-

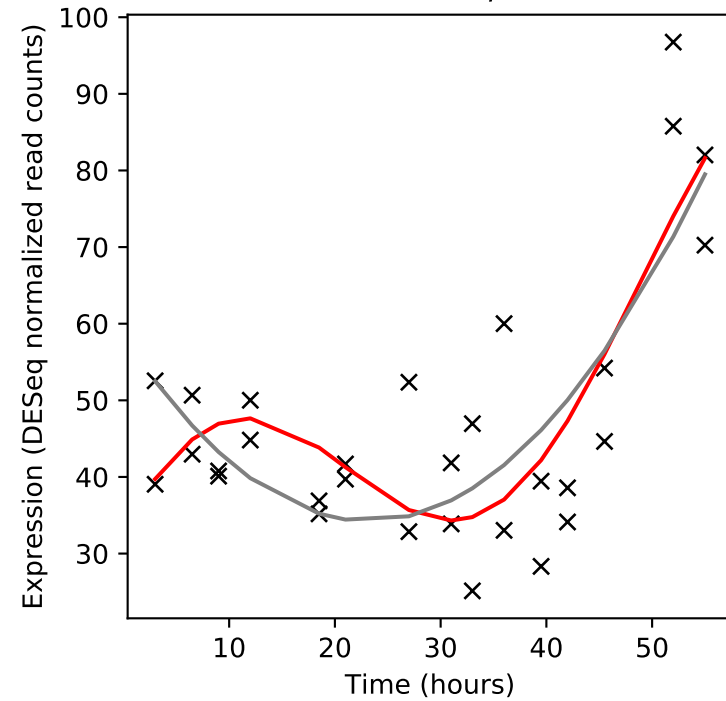

Rv0763c/-

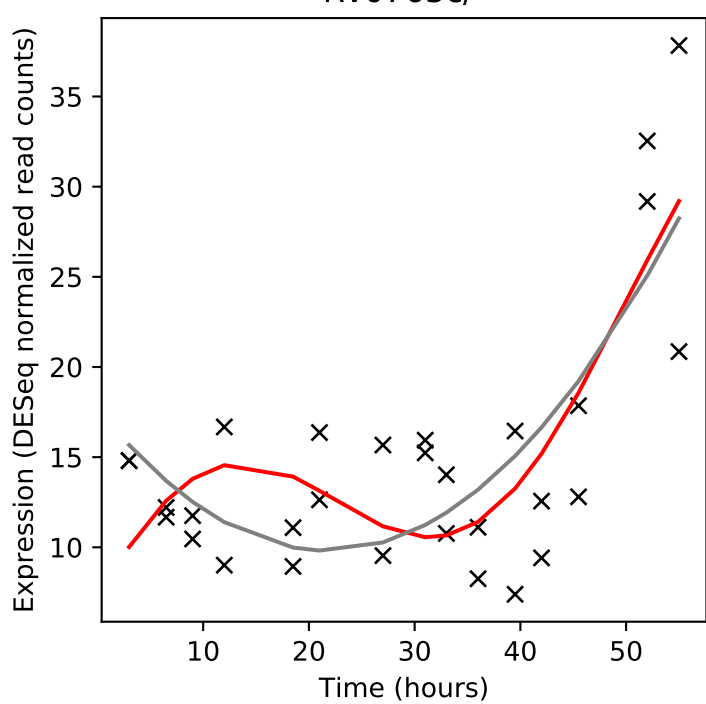

Rv0764c/cyp51

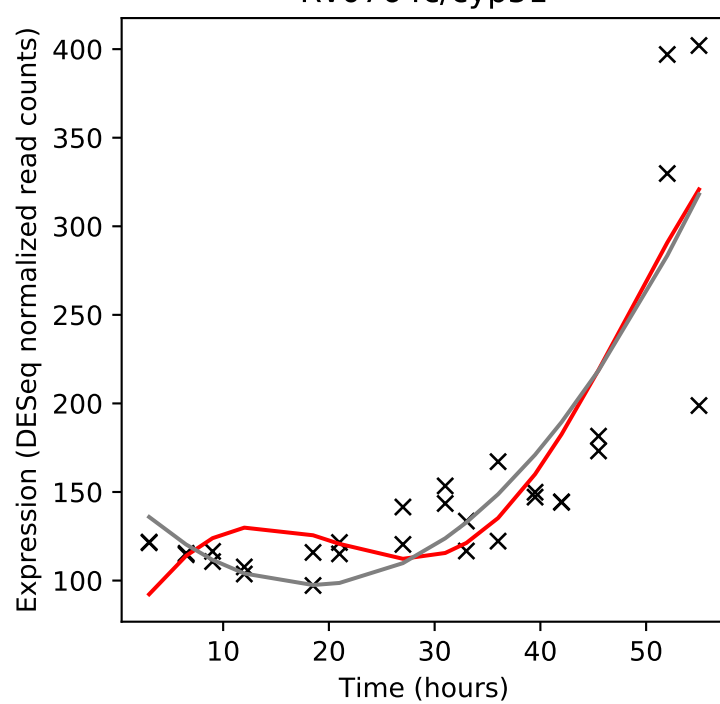

Rv0765c/-

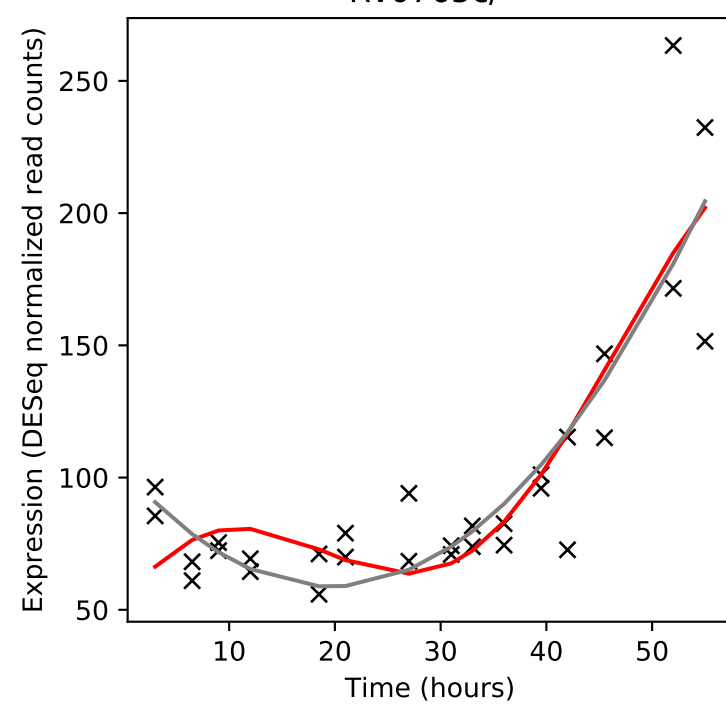

Rv0766c/cyp123

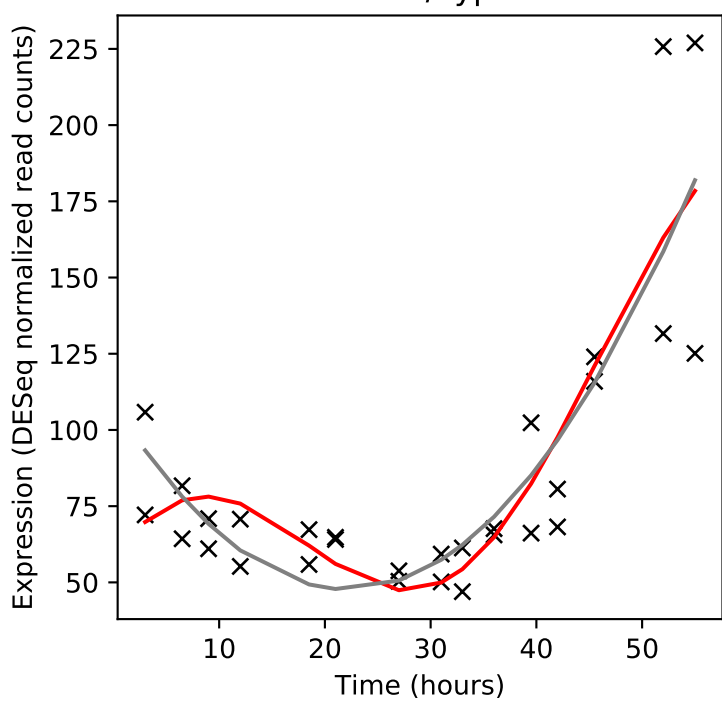

Rv0767c/-

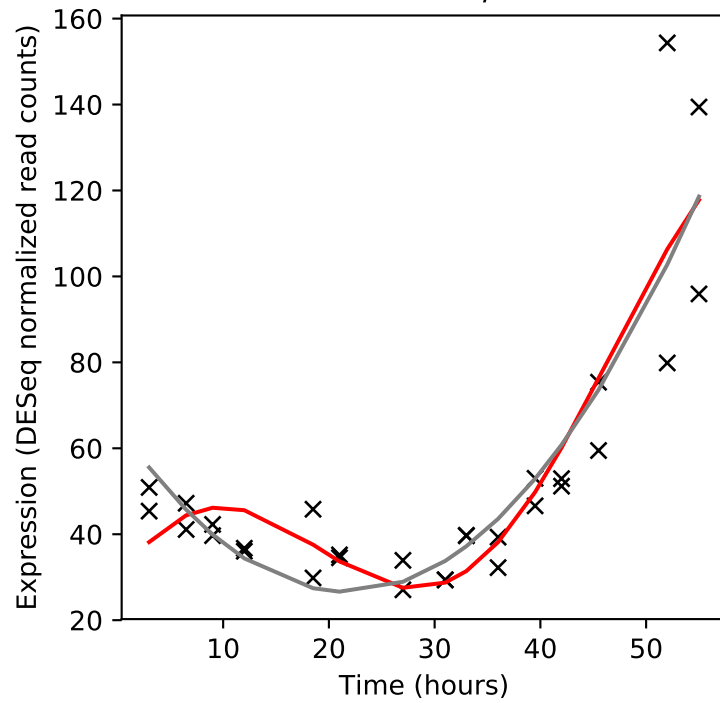

Rv0768/aldA

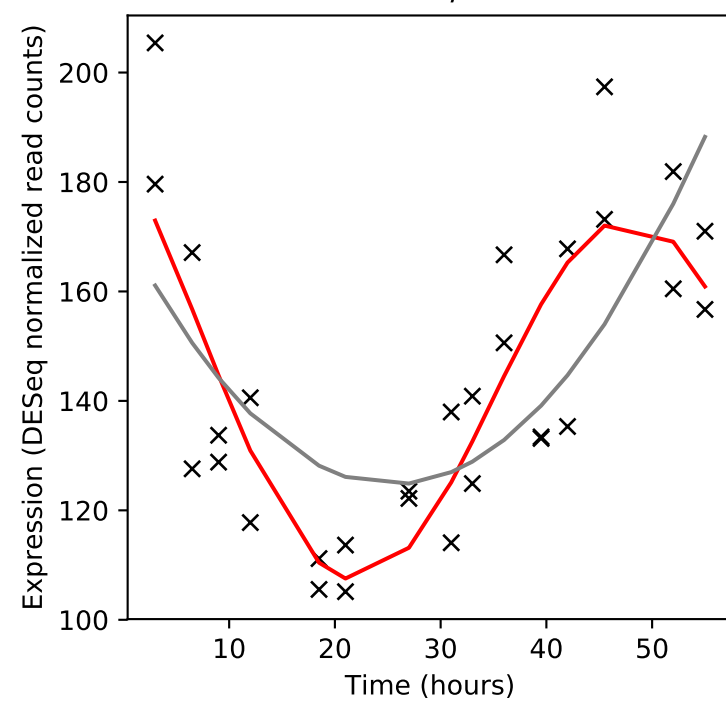

Rv0769/-

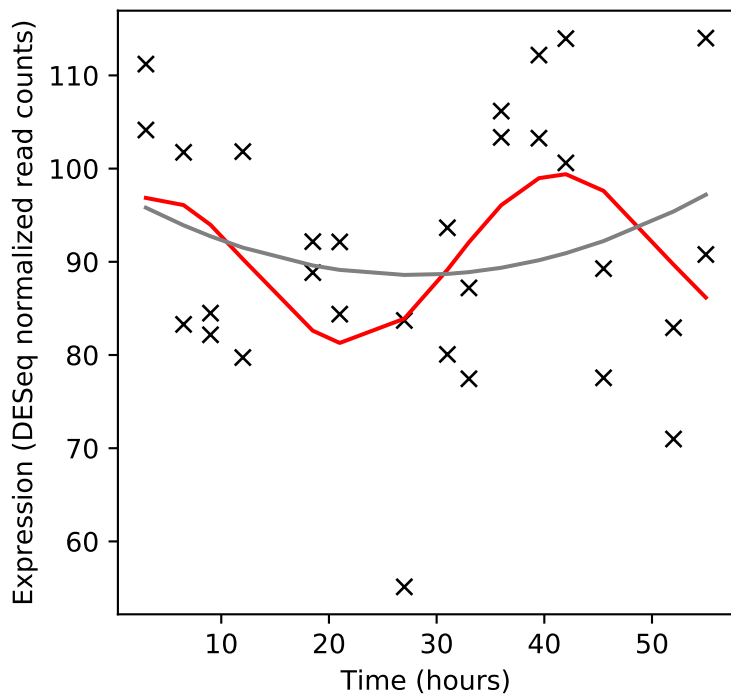

Rv0770/-

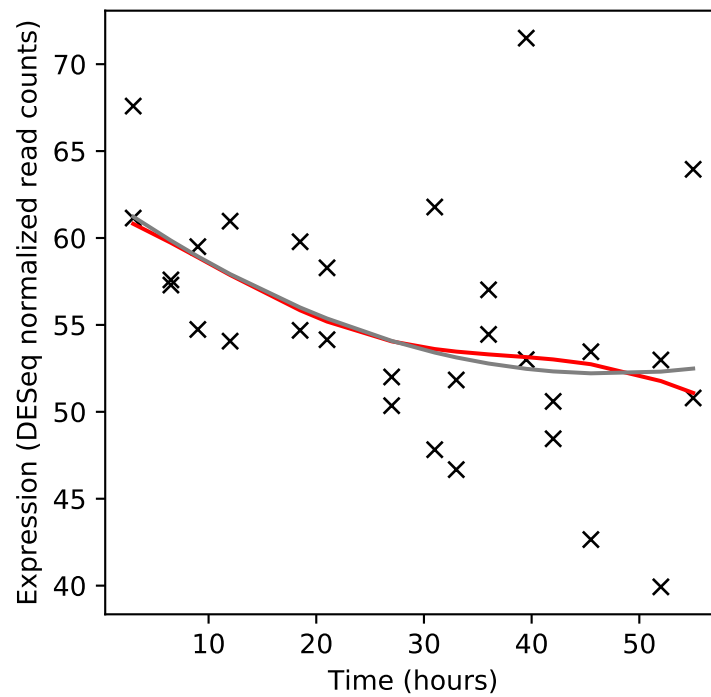

Rv0771/-

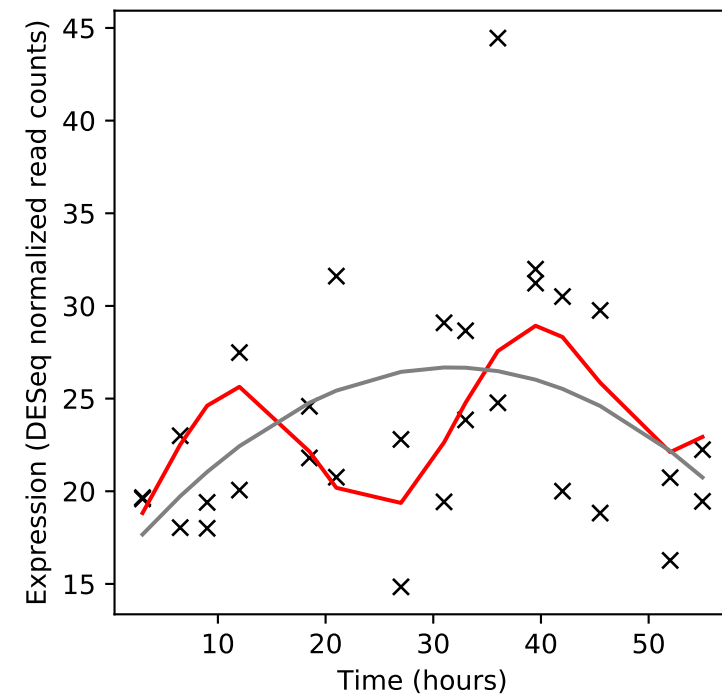

Rv0772/purD

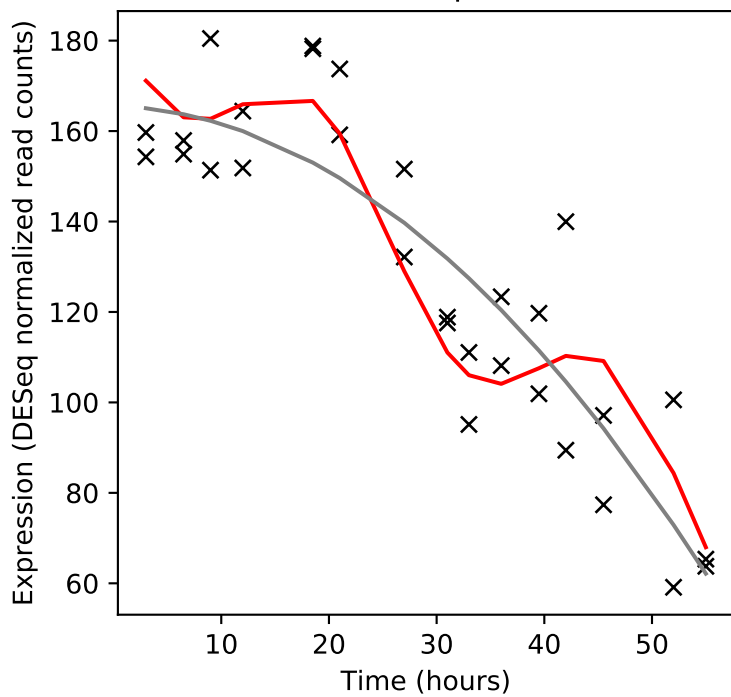

Rv0773c/ggtA

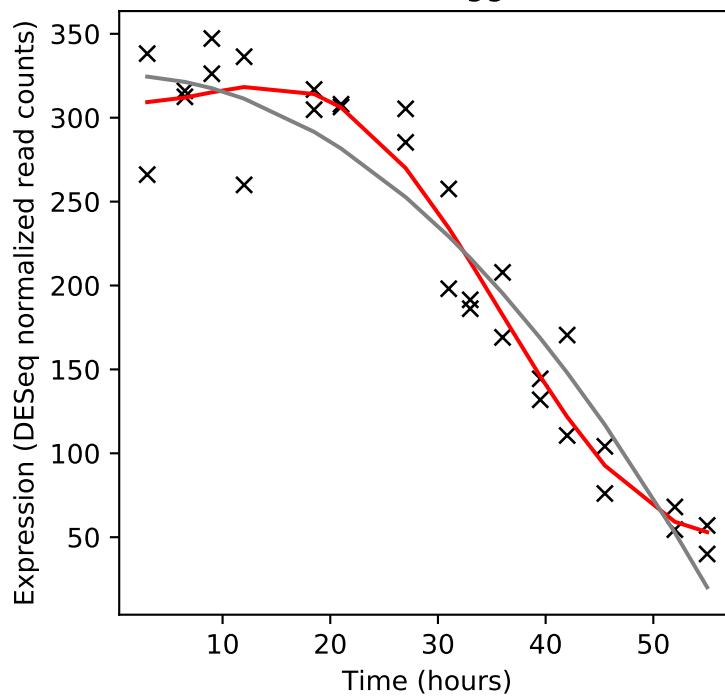

Rv0774c/-

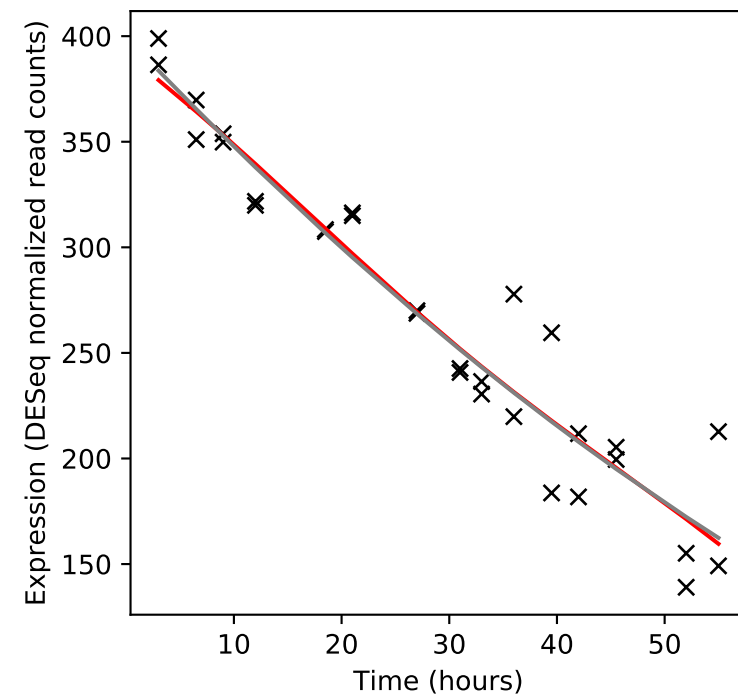

Rv0775/-

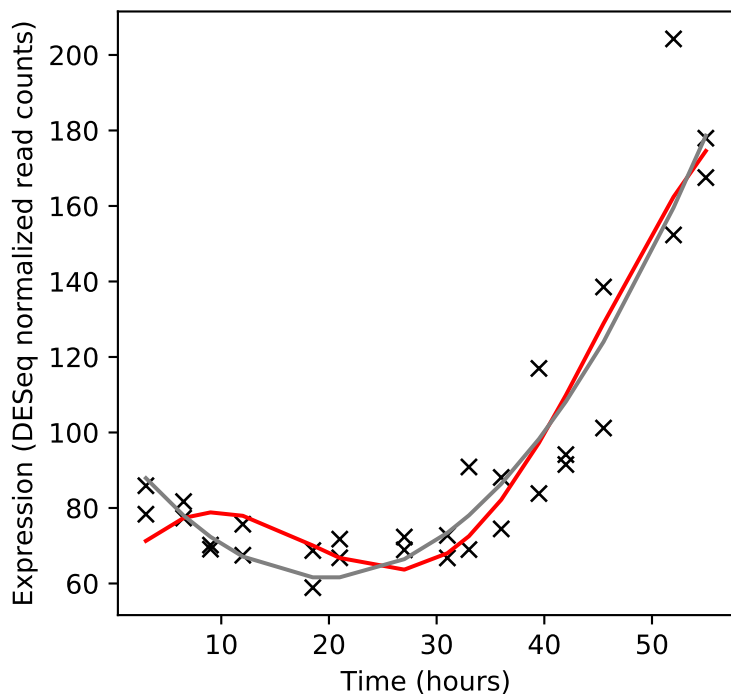

Rv0776c/-

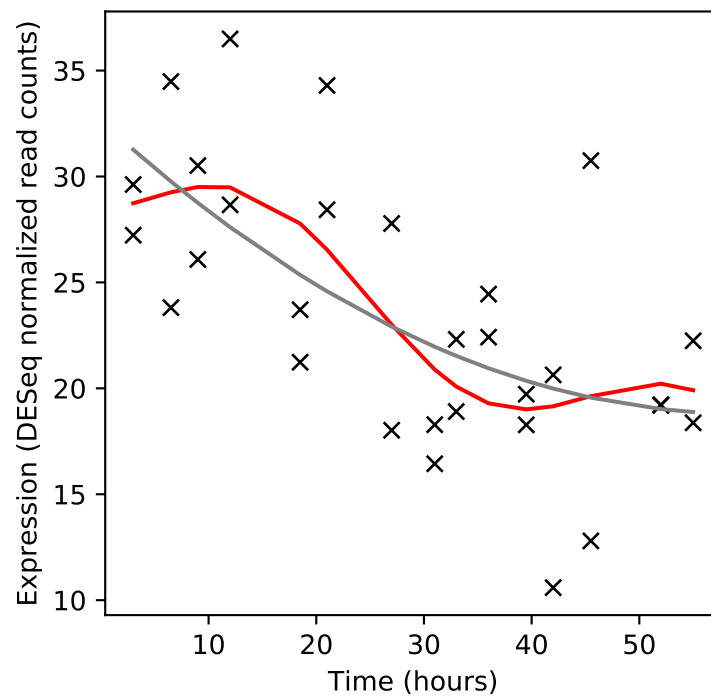

Rv0777/purB

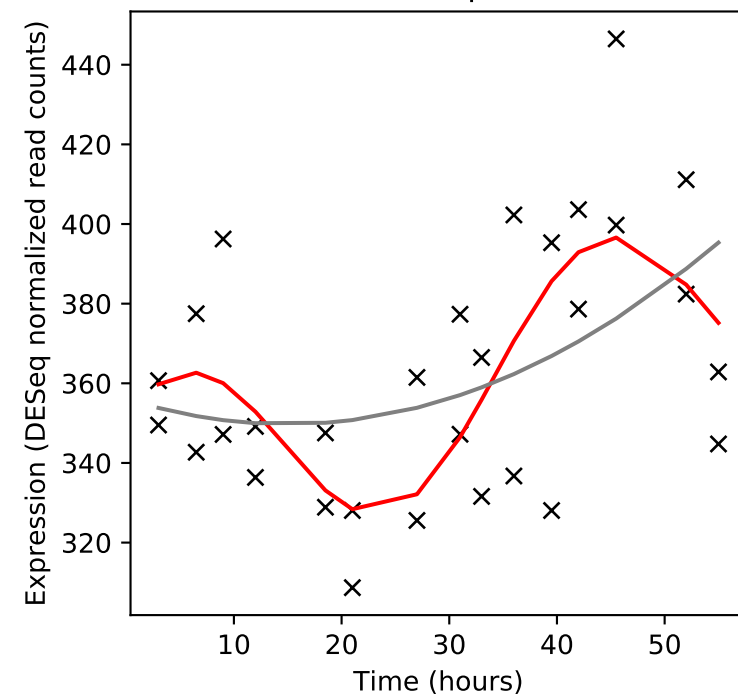

Rv0778/cyp126

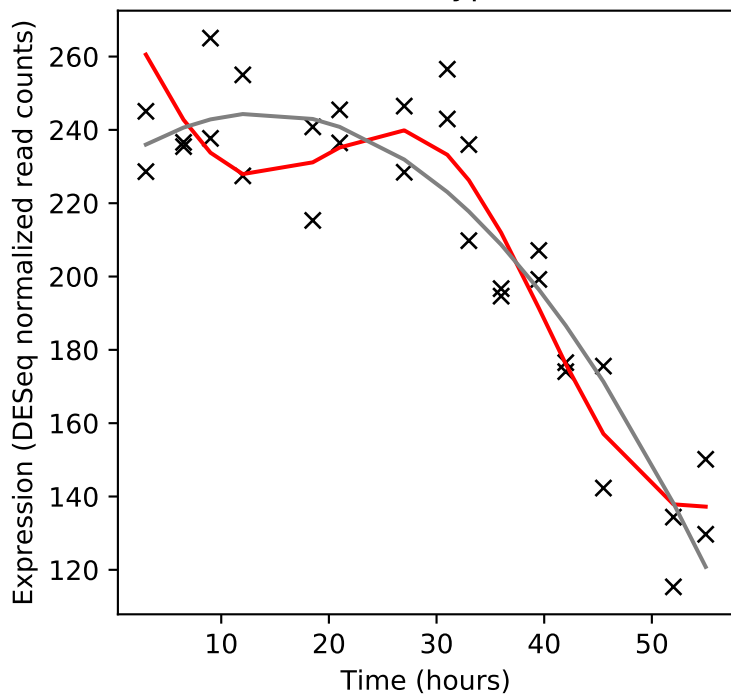

Rv0779c/-

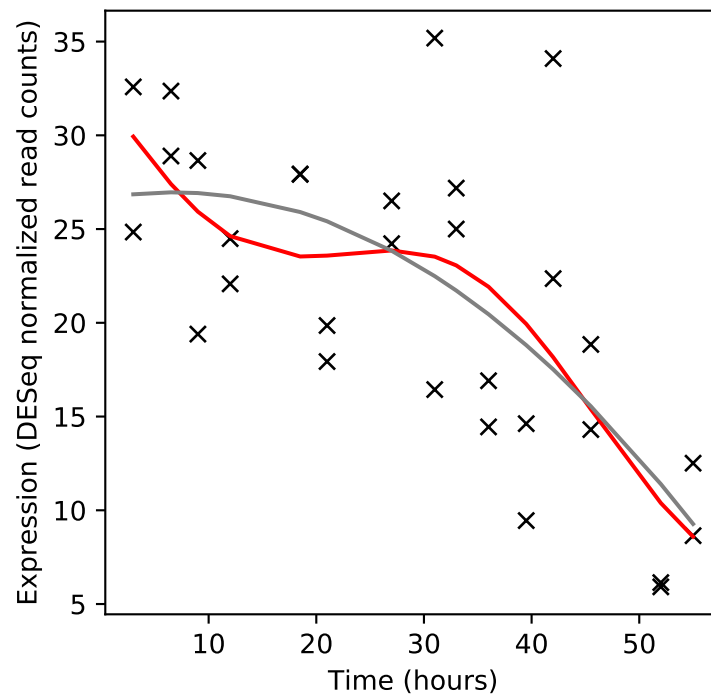

Rv0780/purC

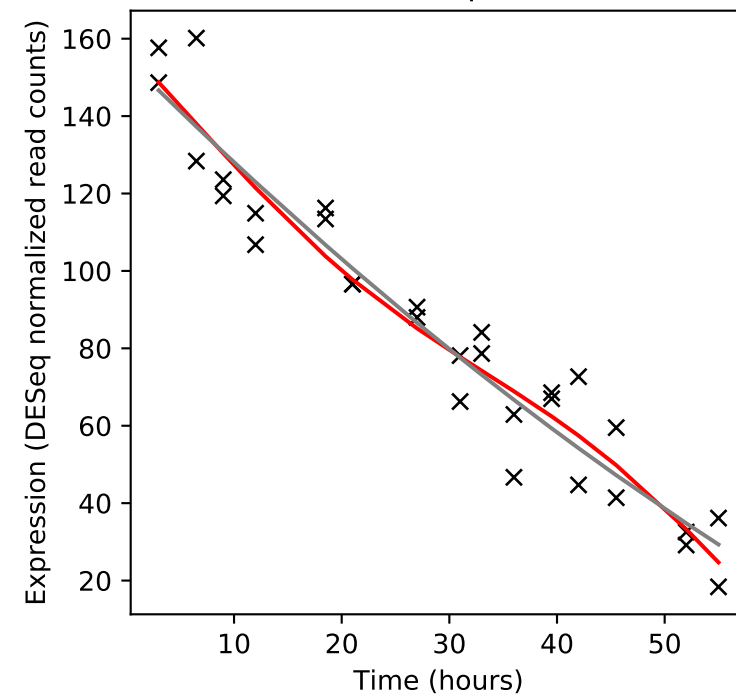

Rv0781/ptrBa

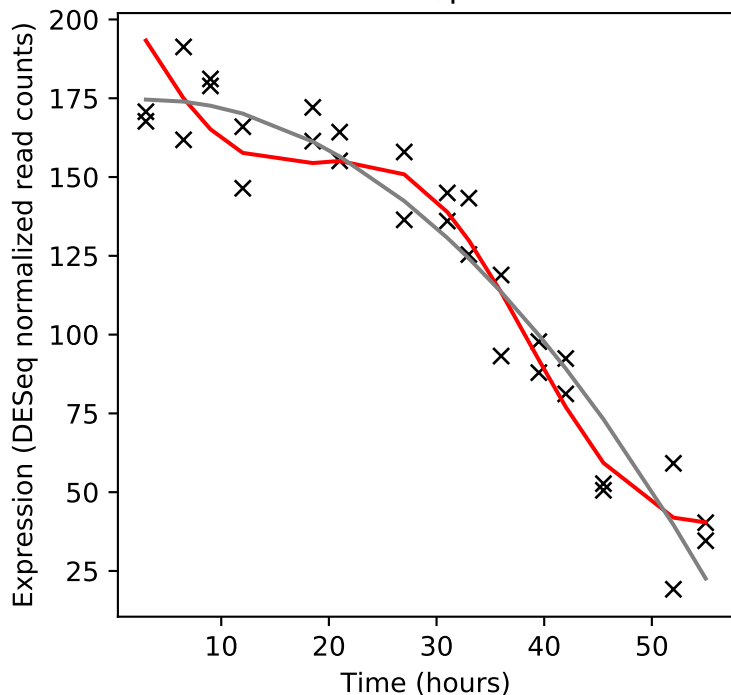

Rv0782/ptrBb

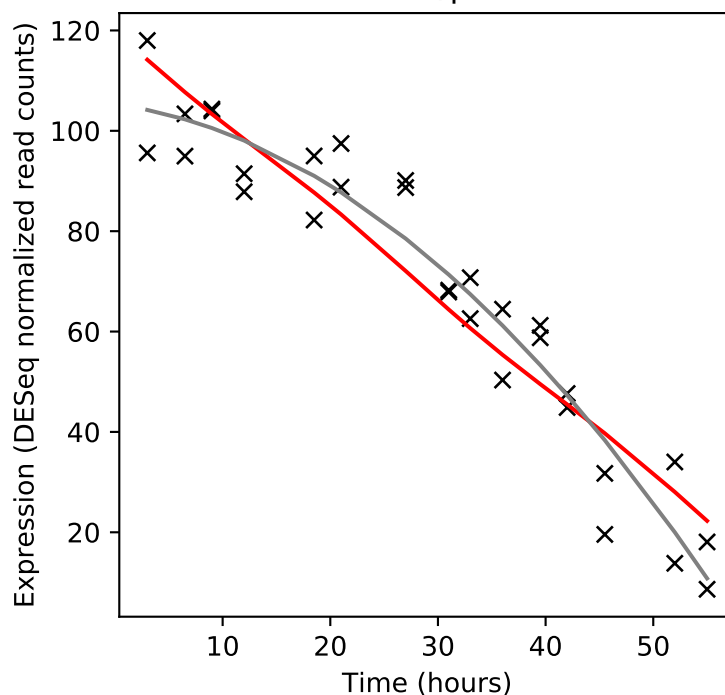

Rv0783c/emrB

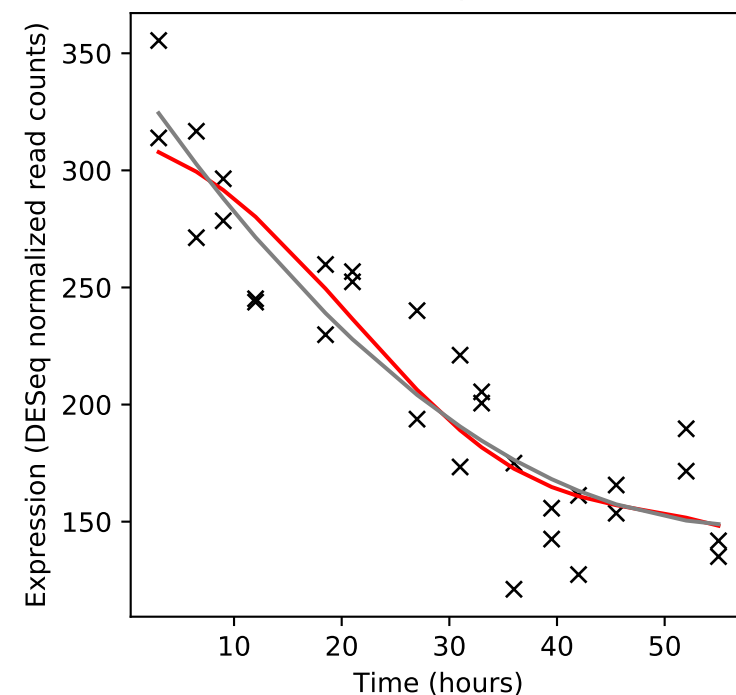

Rv0784/-

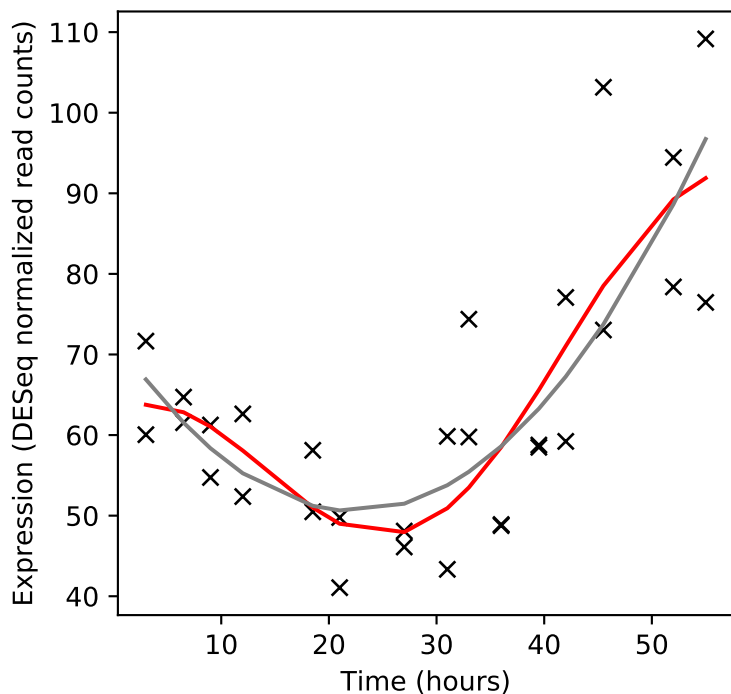

Rv0785/-

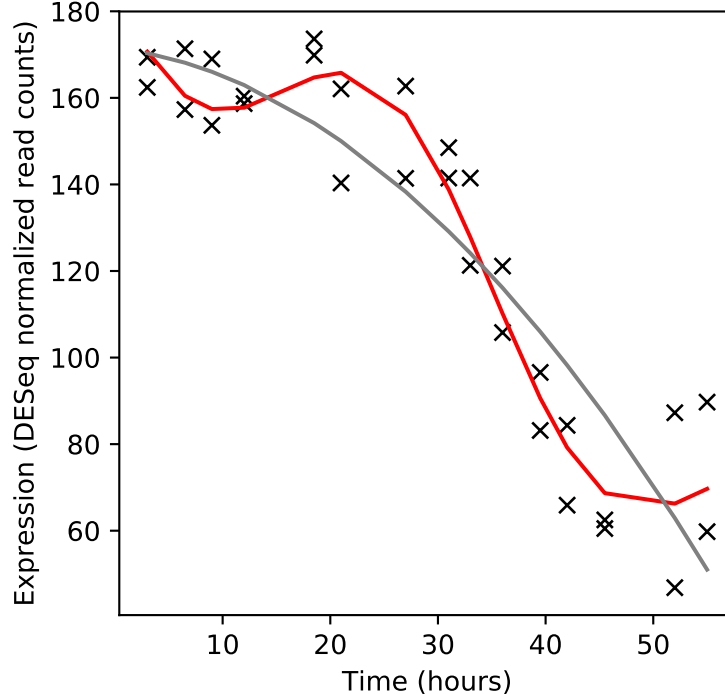

Rv0786c/-

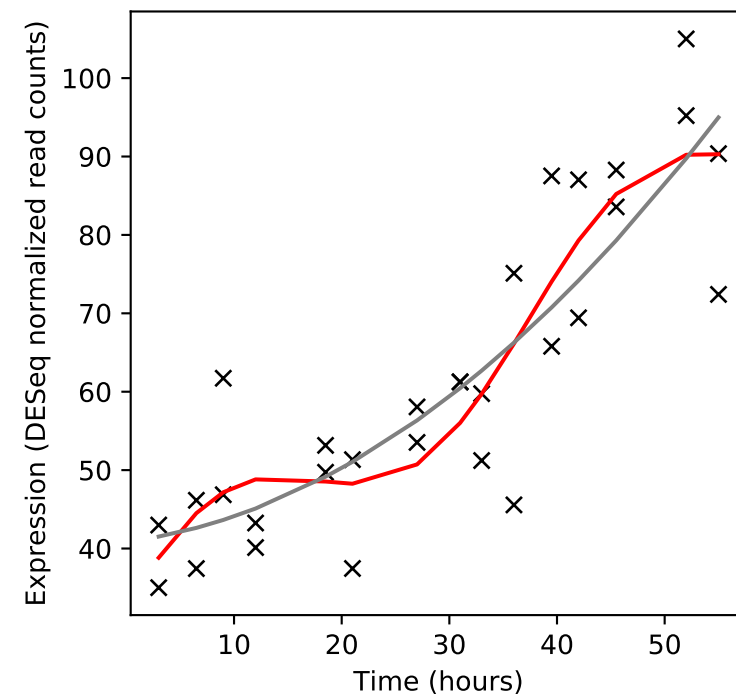

Rv0787/-

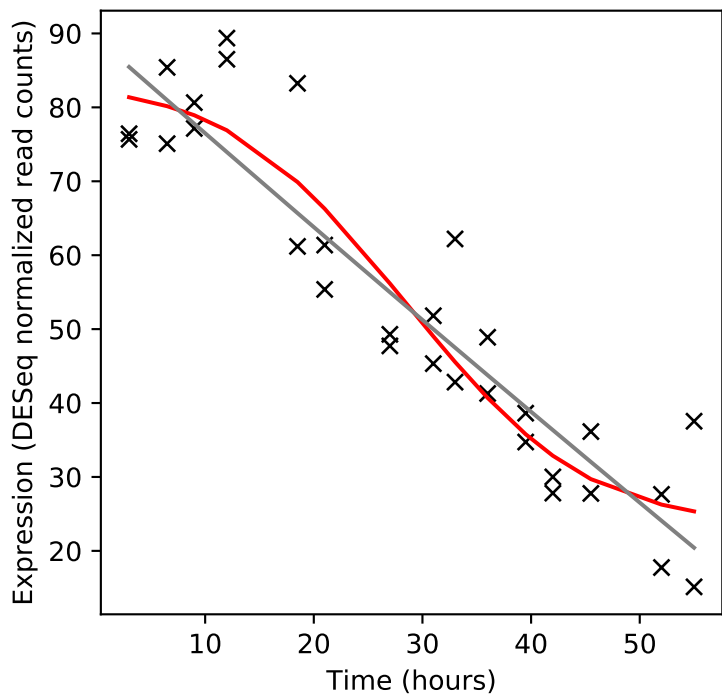

Rv0787A/-

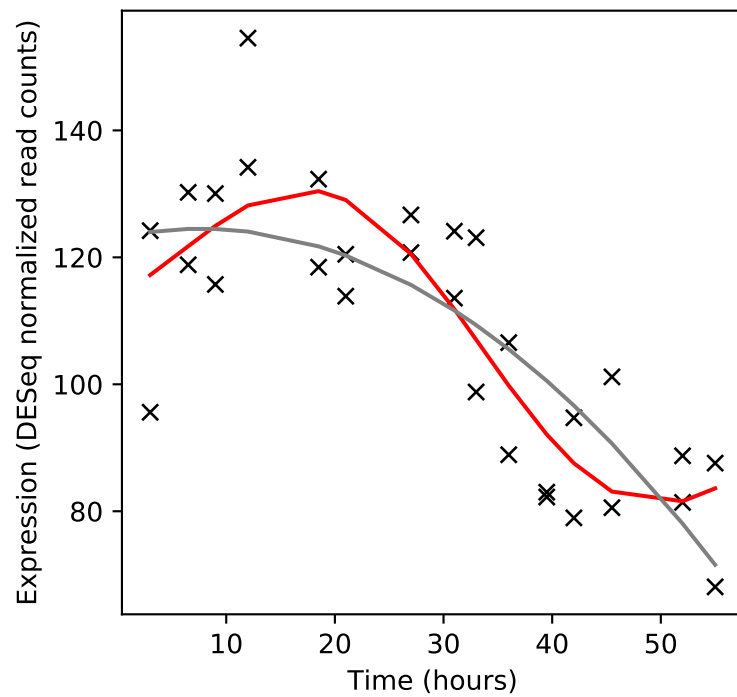

Rv0788/purQ

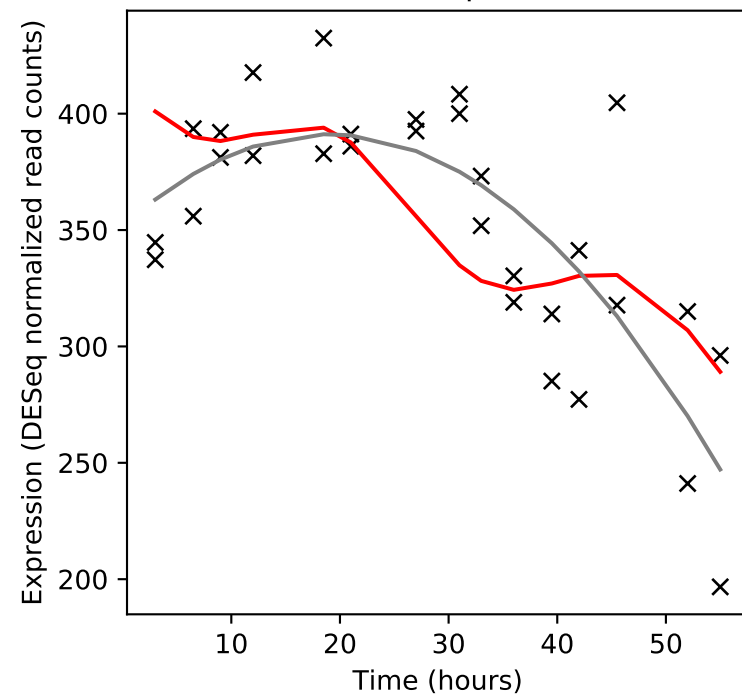

Rv0789c/-

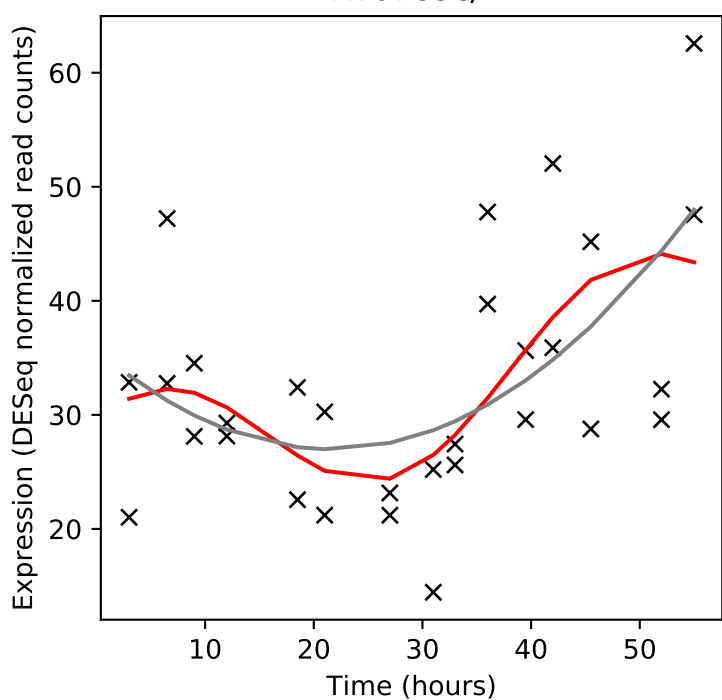

Rv0790c/-

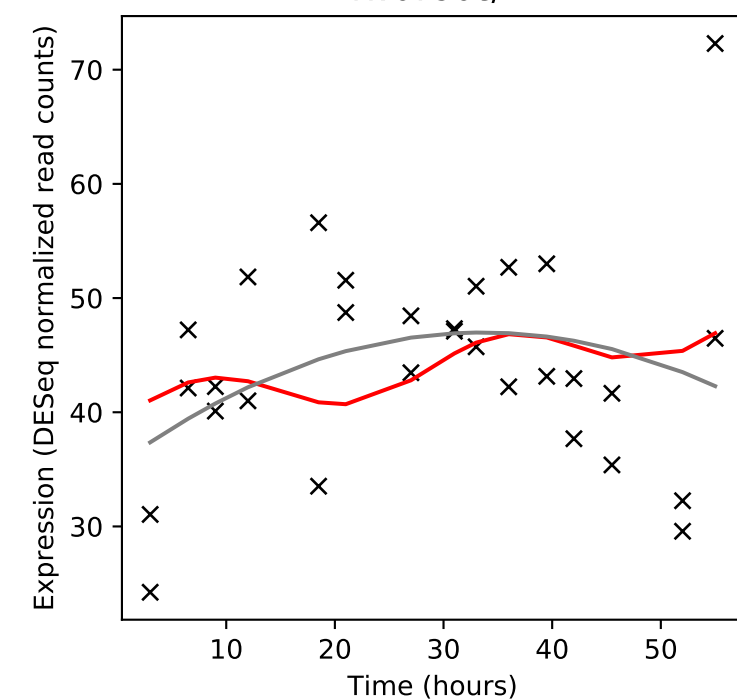

Rv0791c/-

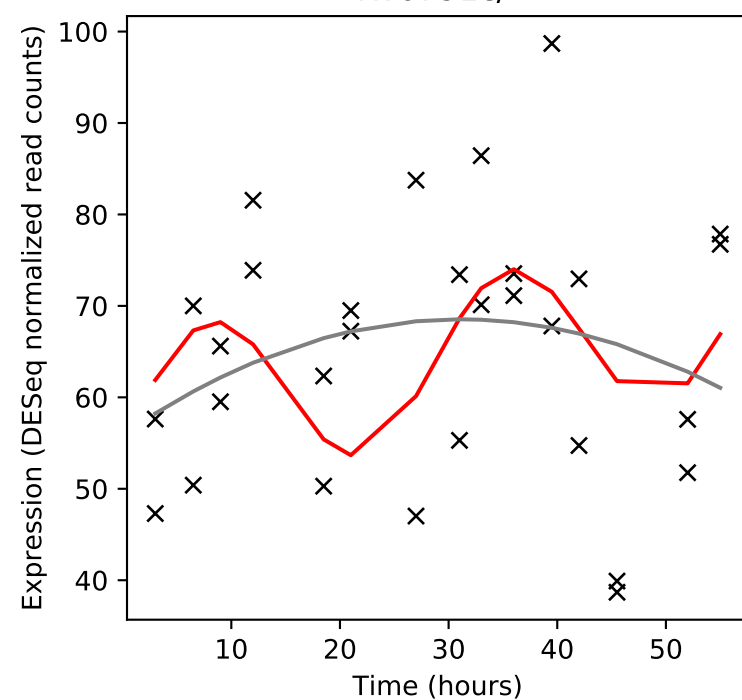

Rv0792c/-

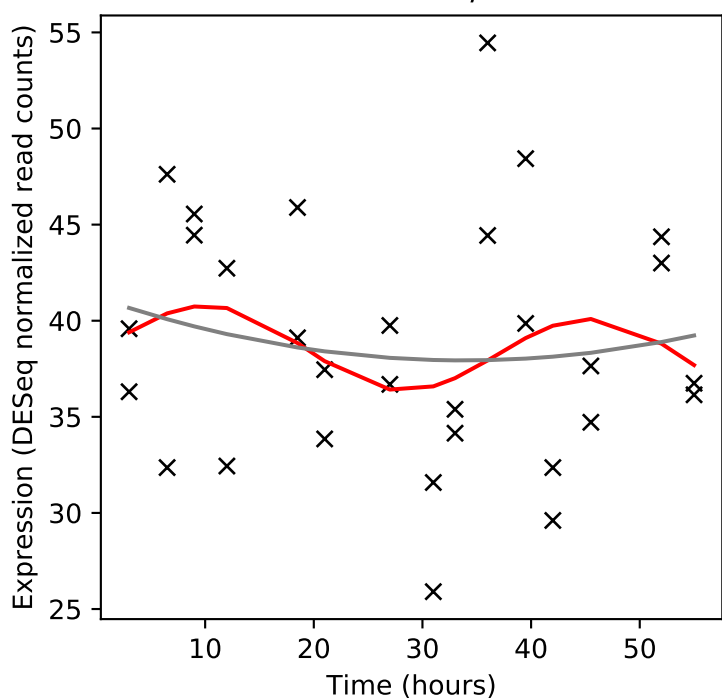

Rv0793/-

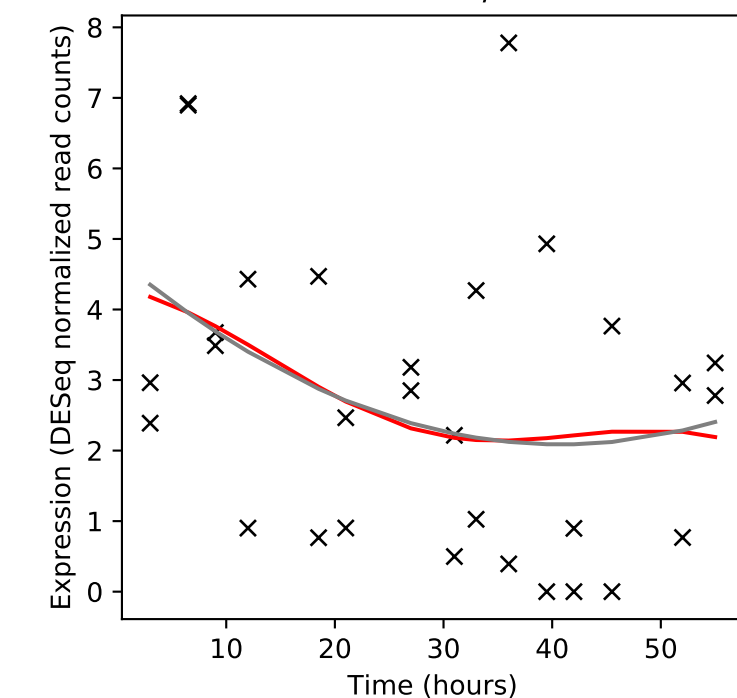

Rv0794c/-

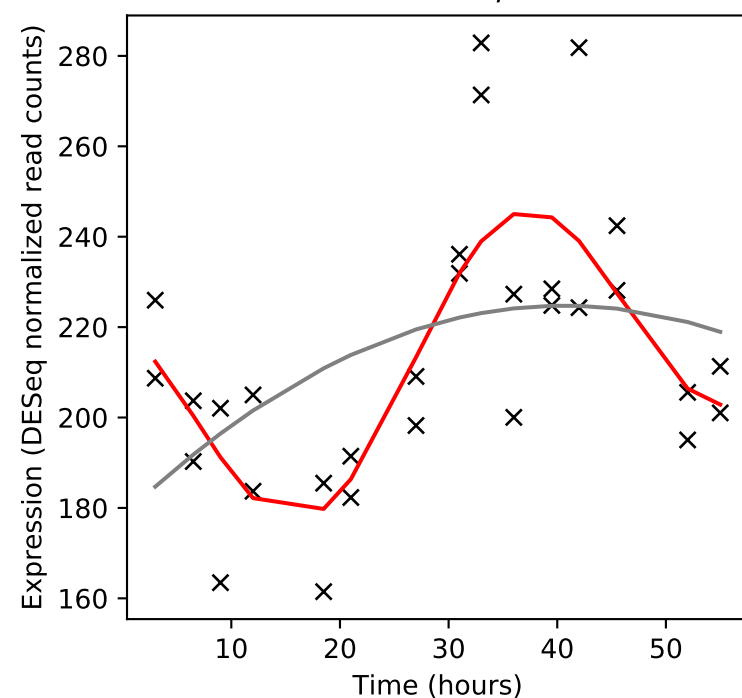

Rv0795/-

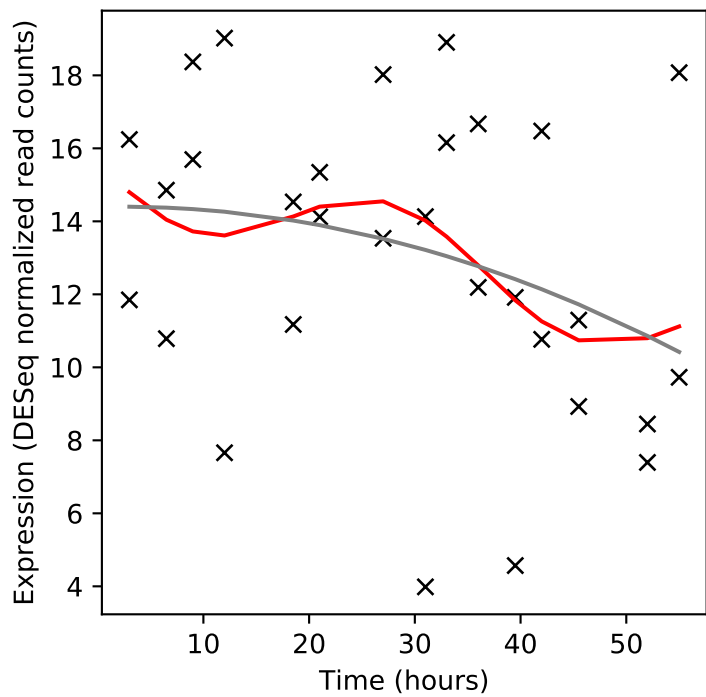

Rv0796/-

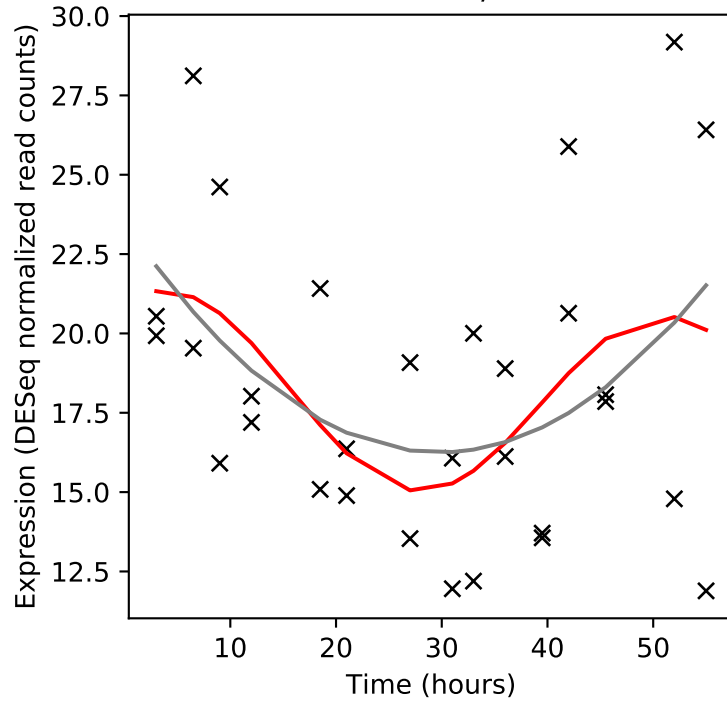

Rv0797/-

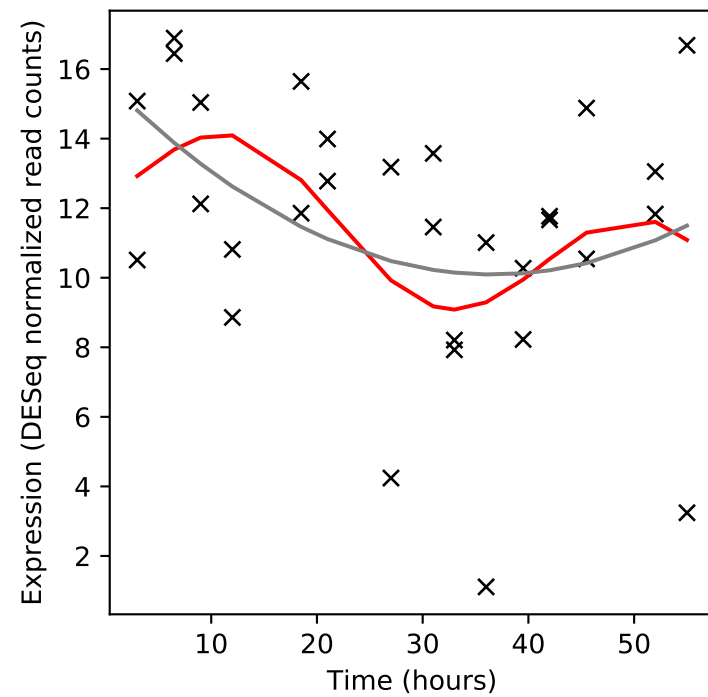

Rv0798c/cfp29

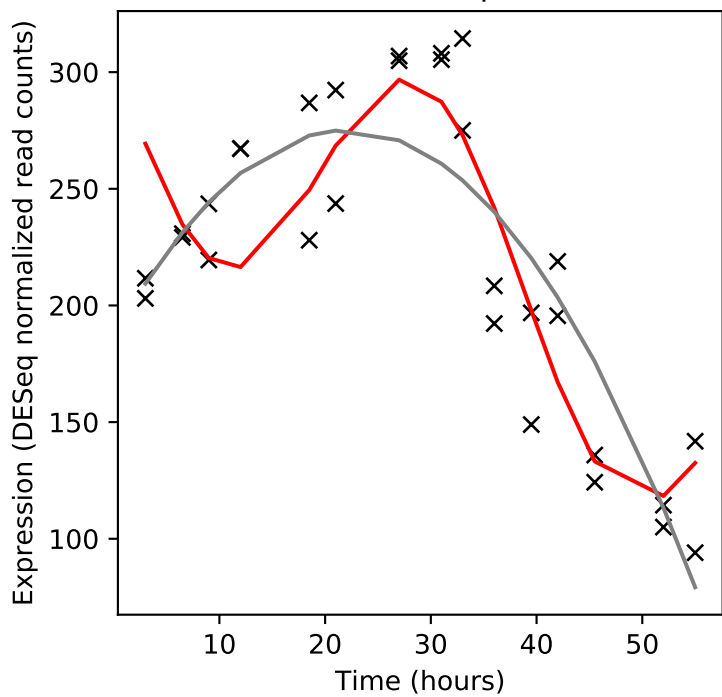

Rv0799c/-

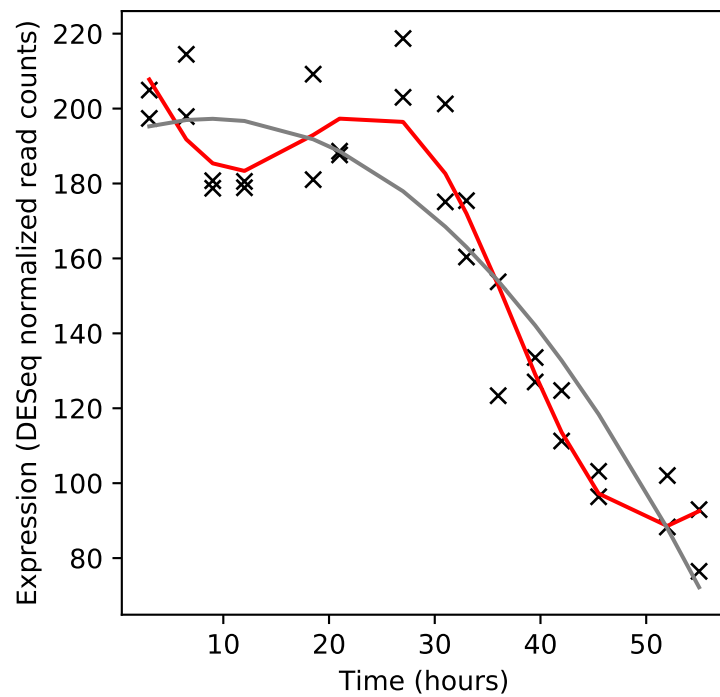

Rv0800/pepC

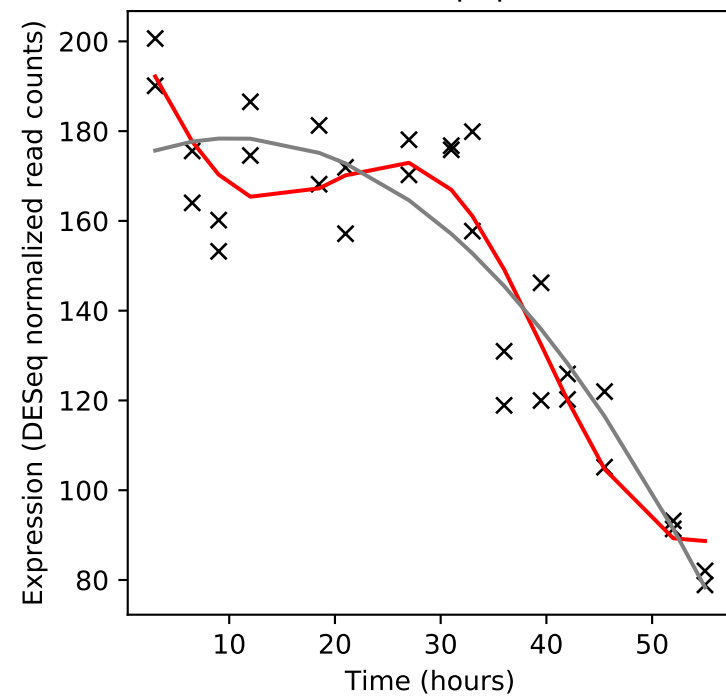

Rv0801/-

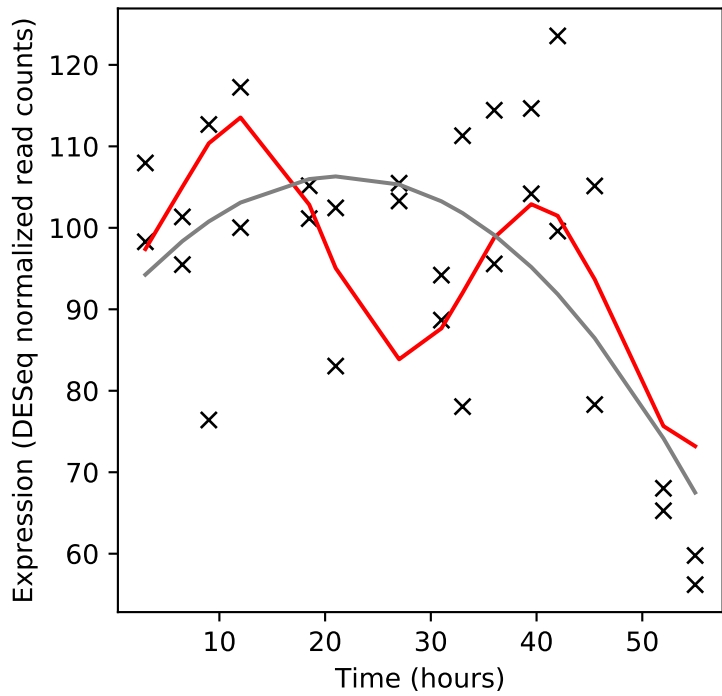

Rv0802c/-

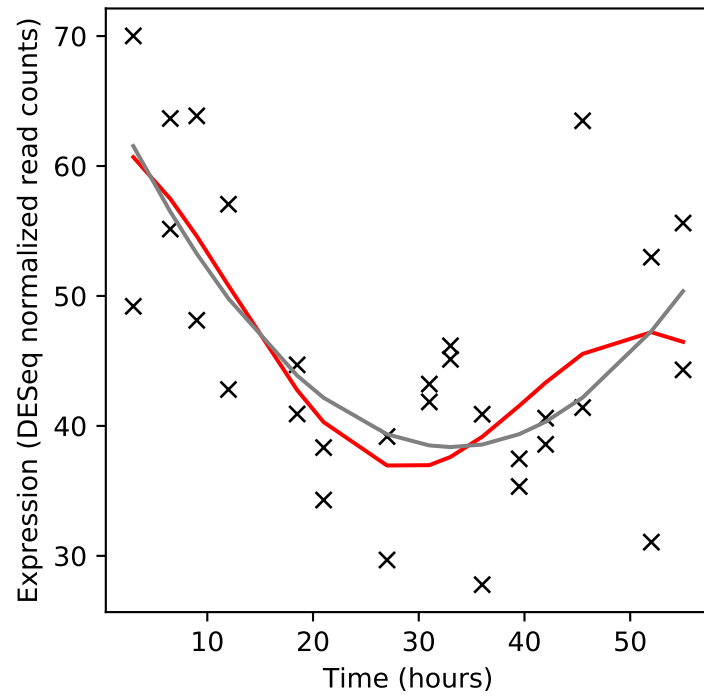

Rv0803/purL

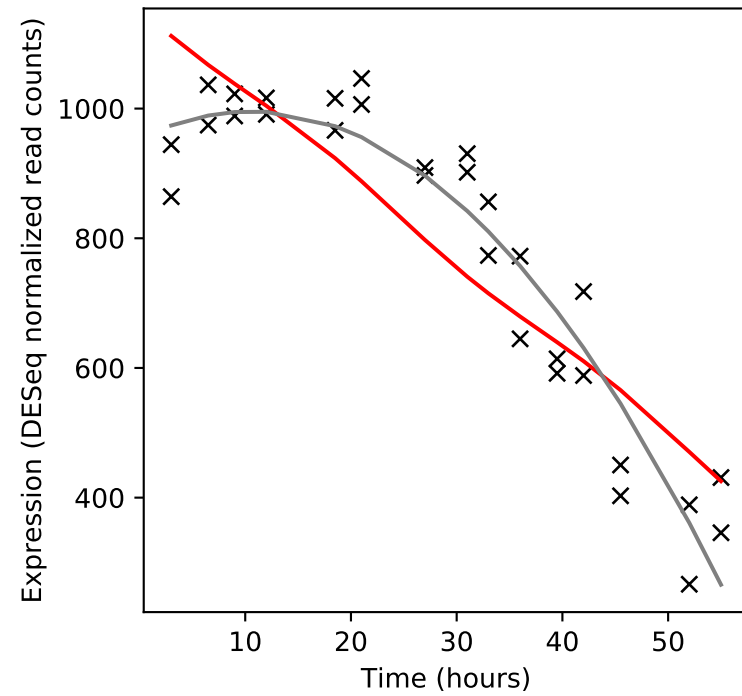

Rv0804/-

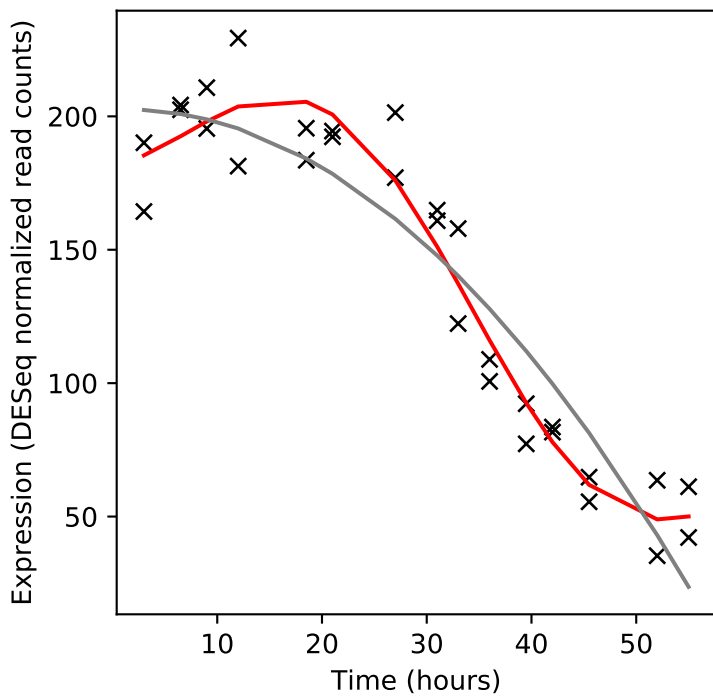

Rv0805/-

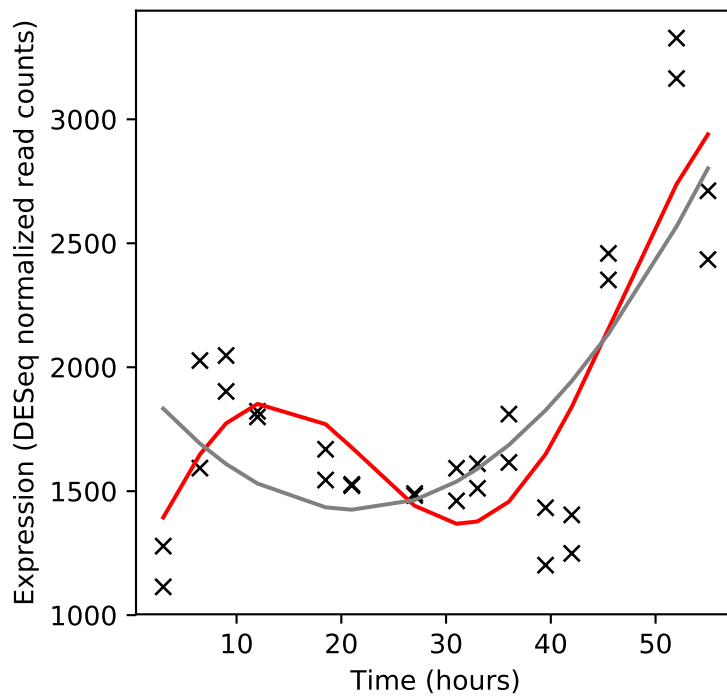

Rv0806c/cpsY

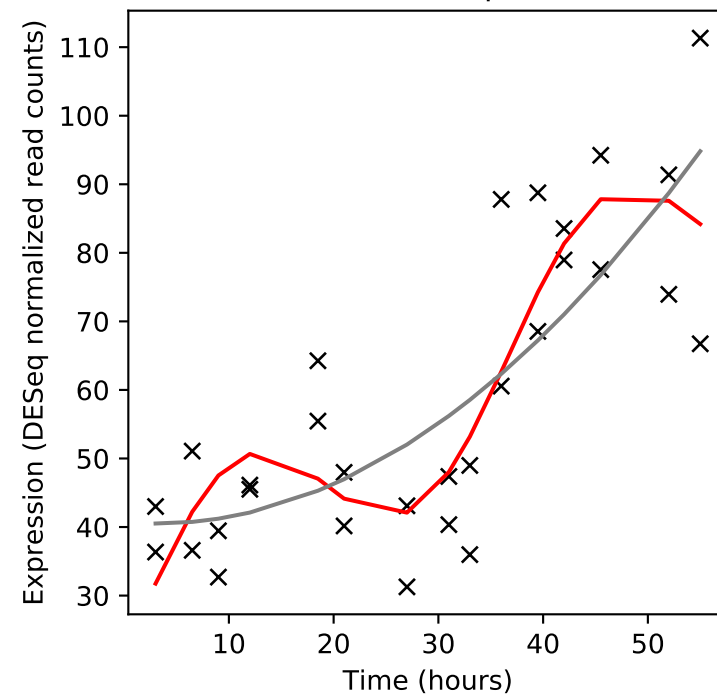

Rv0807/-

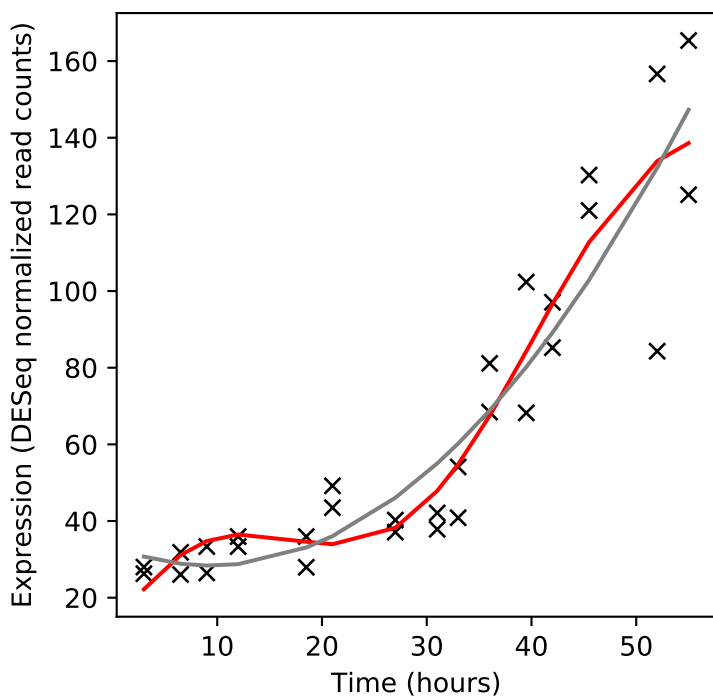

Rv0808/purF

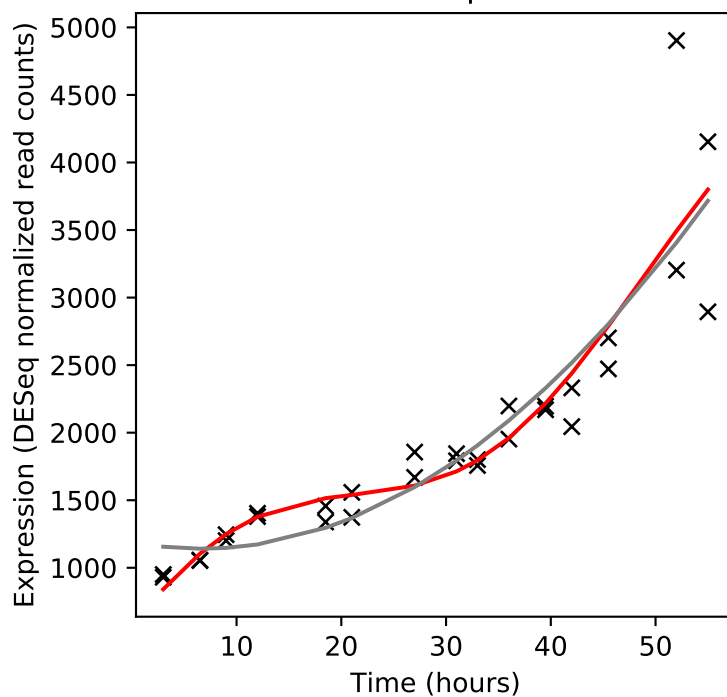

Rv0809/purM

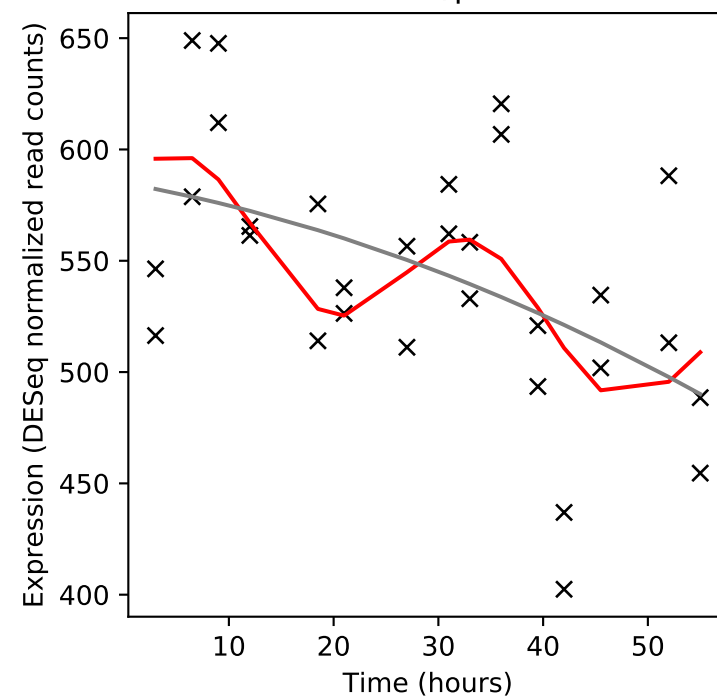

Rv0810c/-

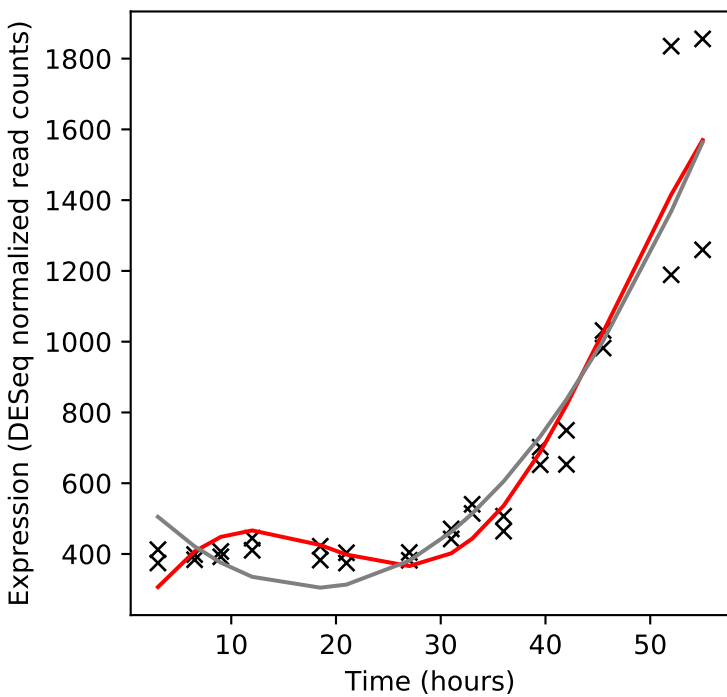

Rv0811c/-

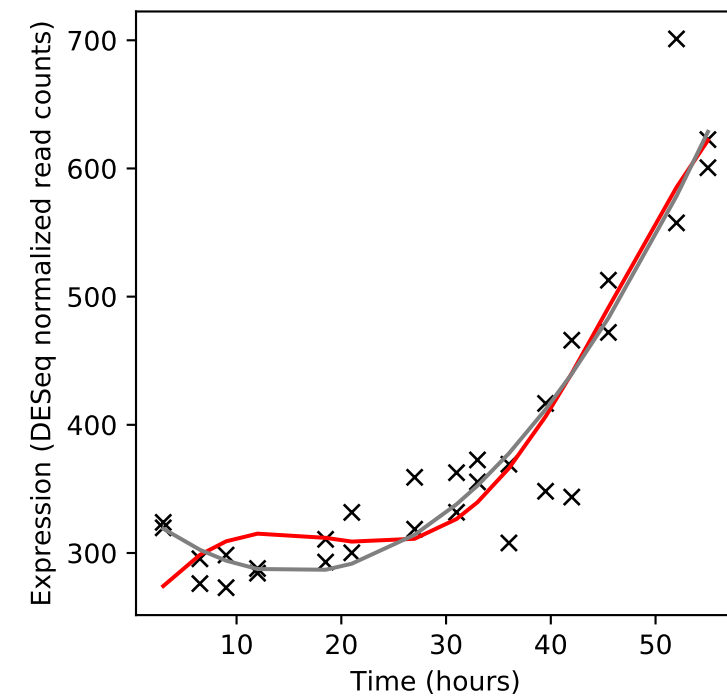

Rv0812/-

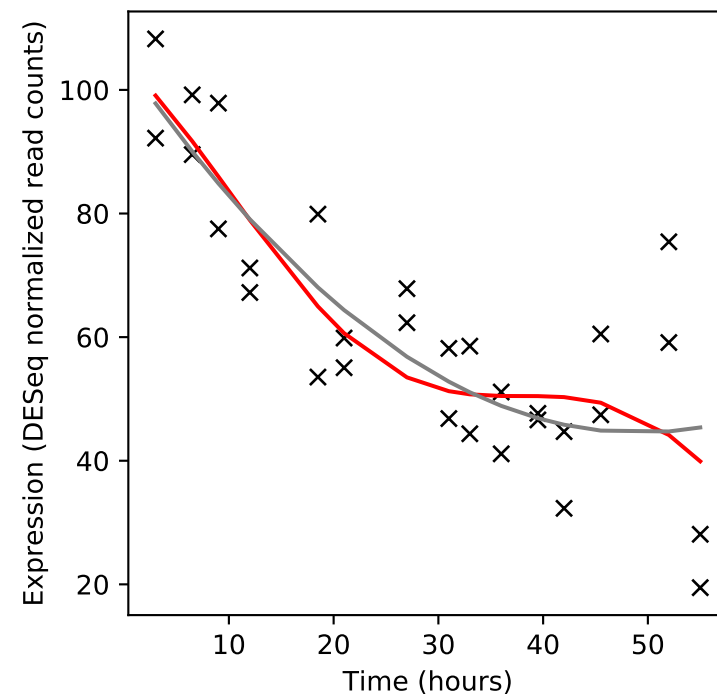



Rv0813c/-

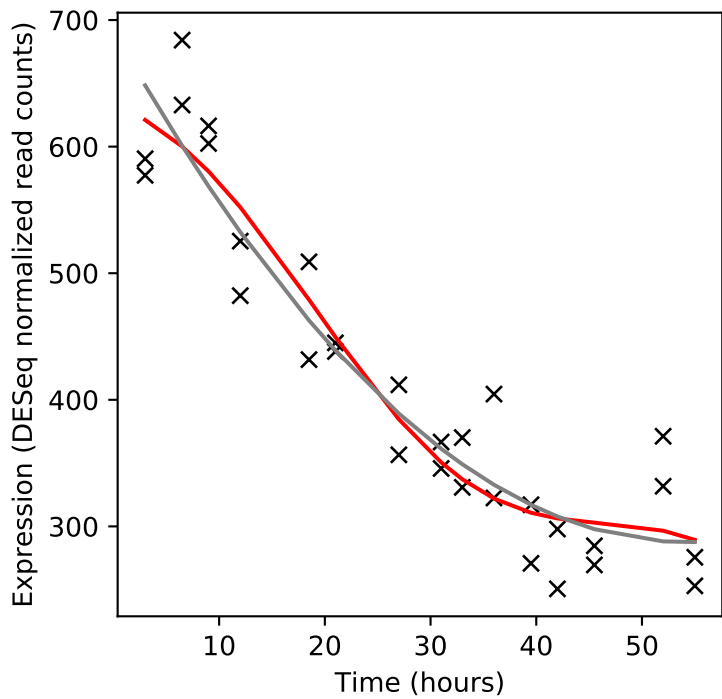

Rv0814c/sseC2

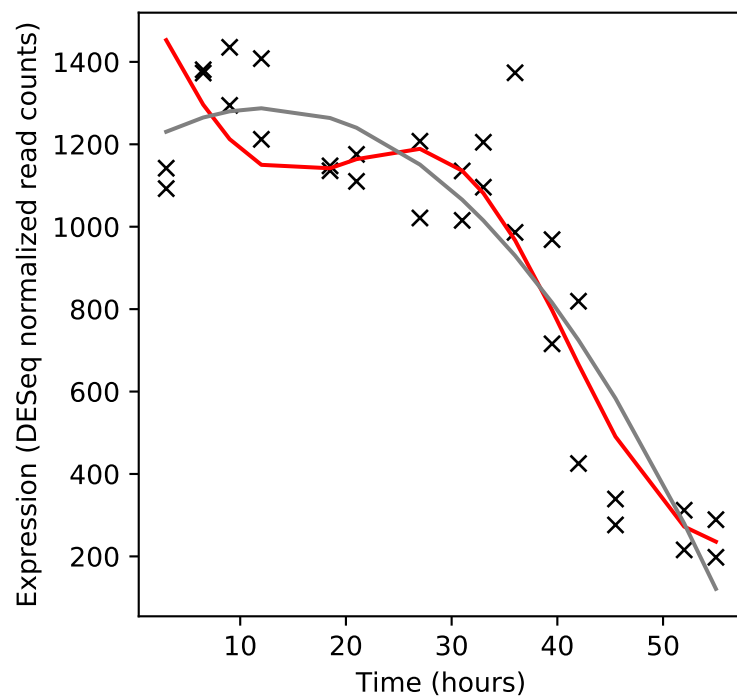

Rv0815c/cysA2

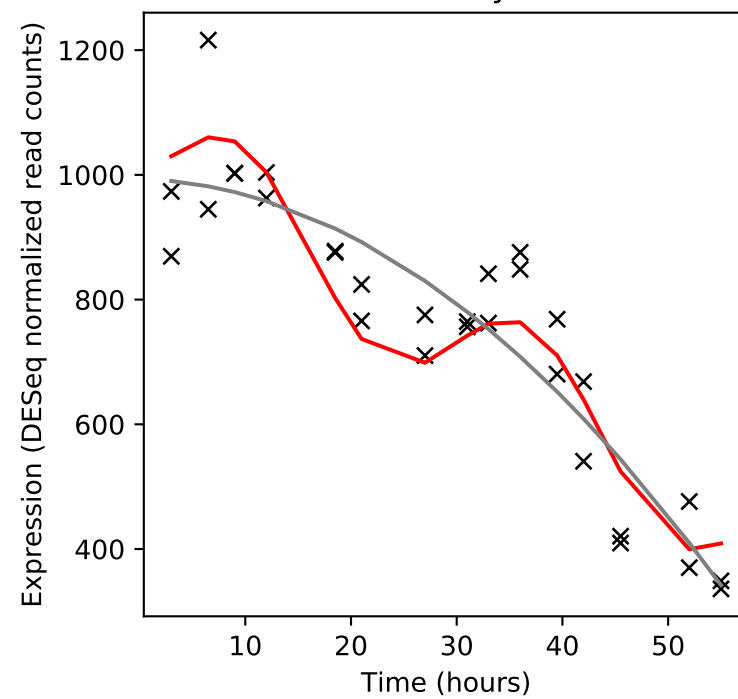

Rv0816c/thiX

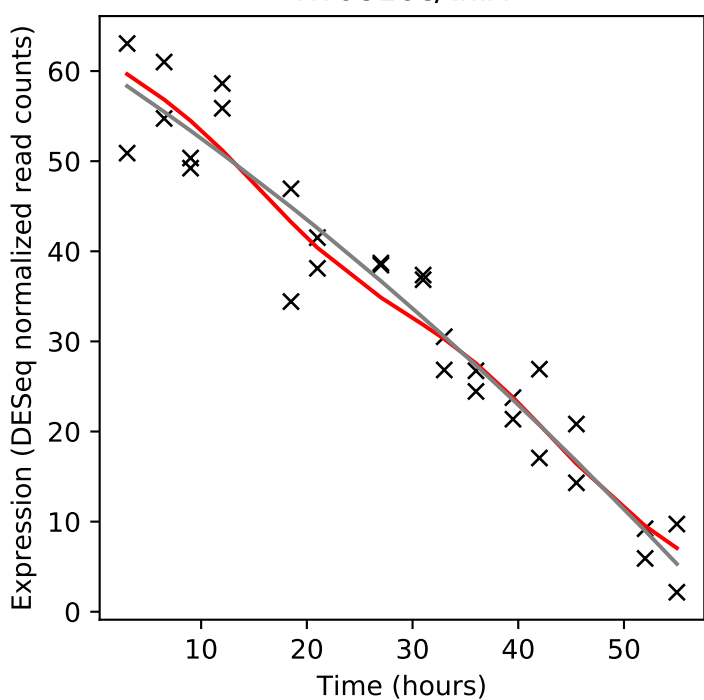

Rv0817c/-

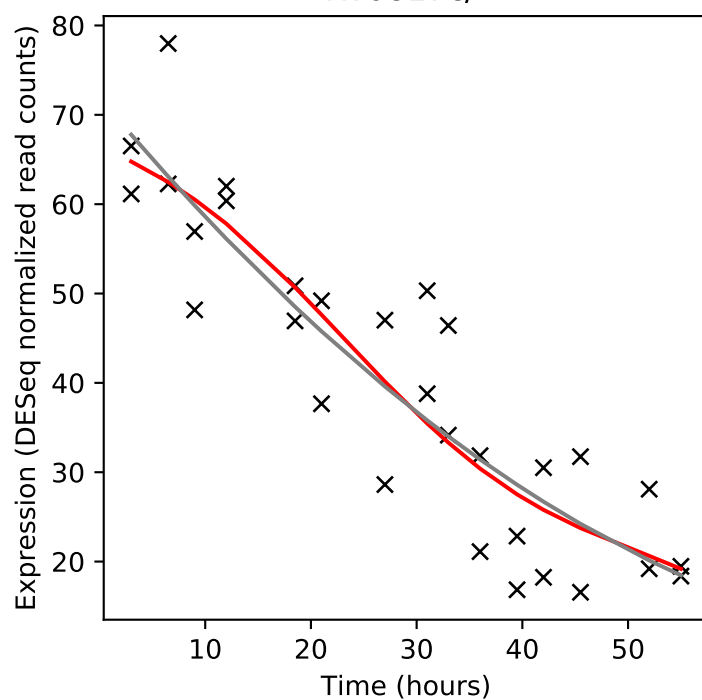

Rv0818/-

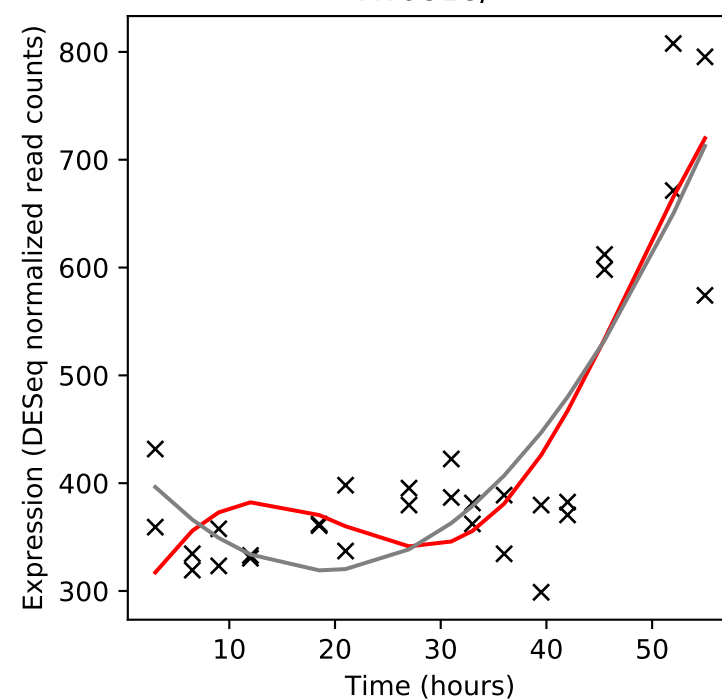

Rv0819/mshD

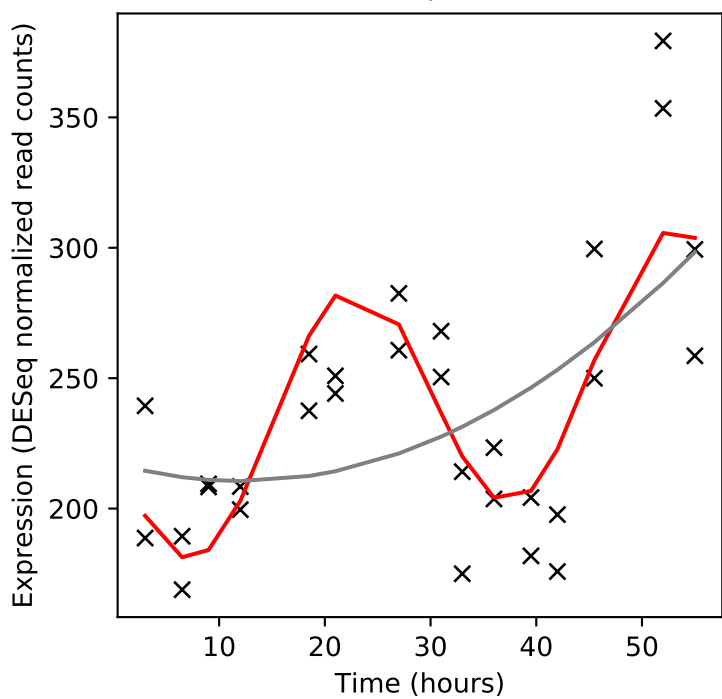

Rv0820/phoT

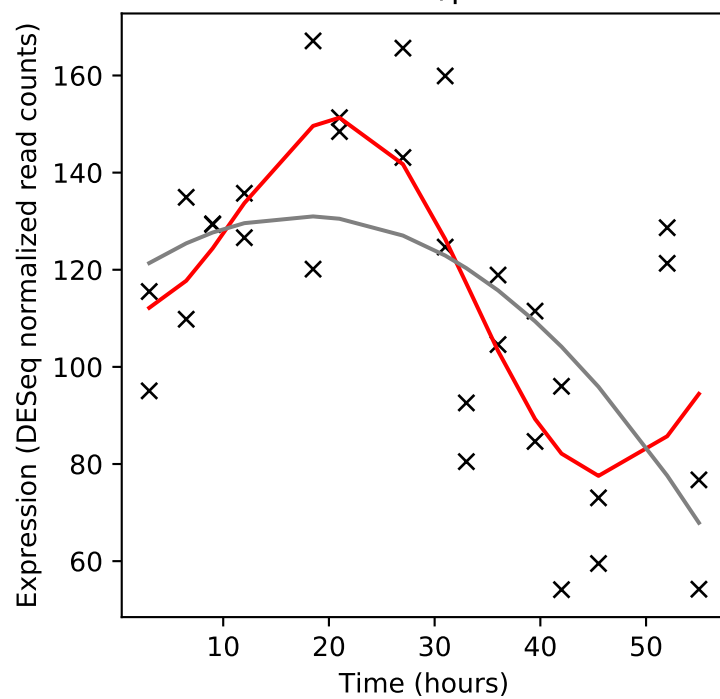

Rv0821c/phoY2

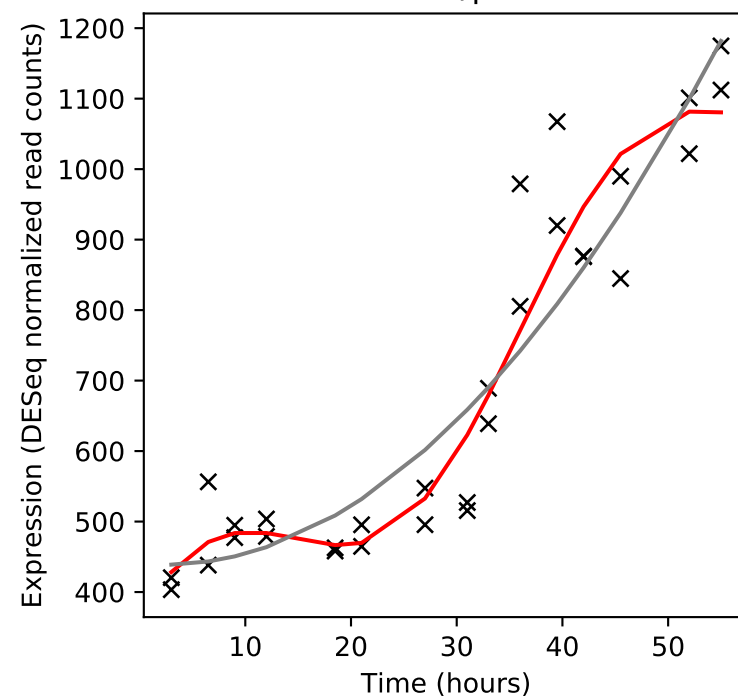

Rv0822c/-

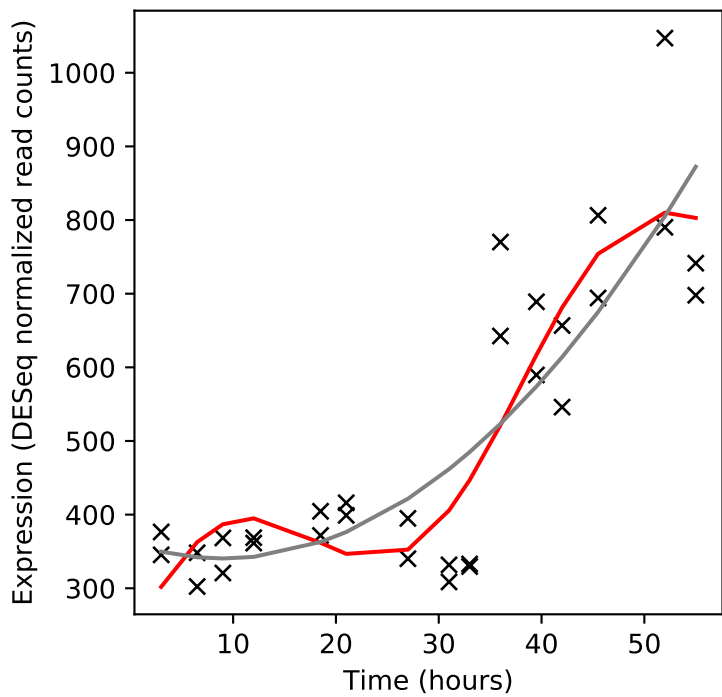

Rv0823c/-

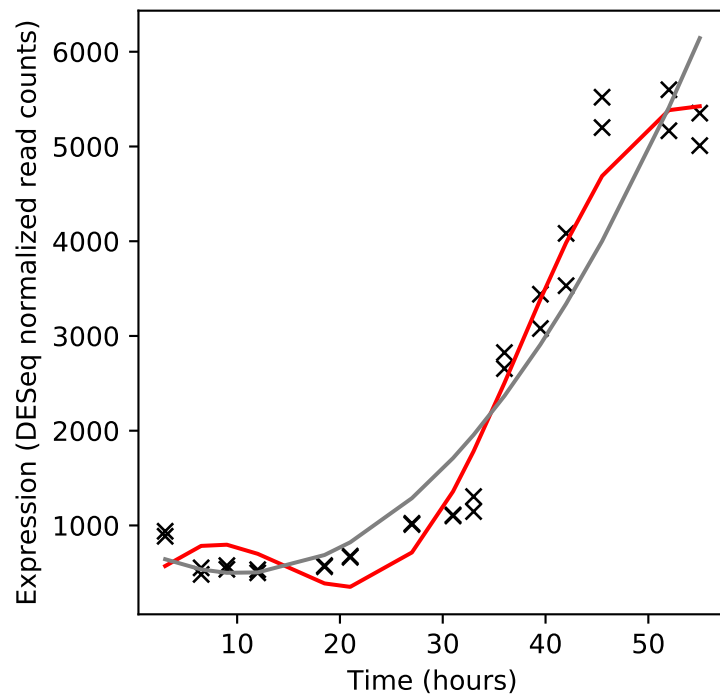

Rv0824c/desA1

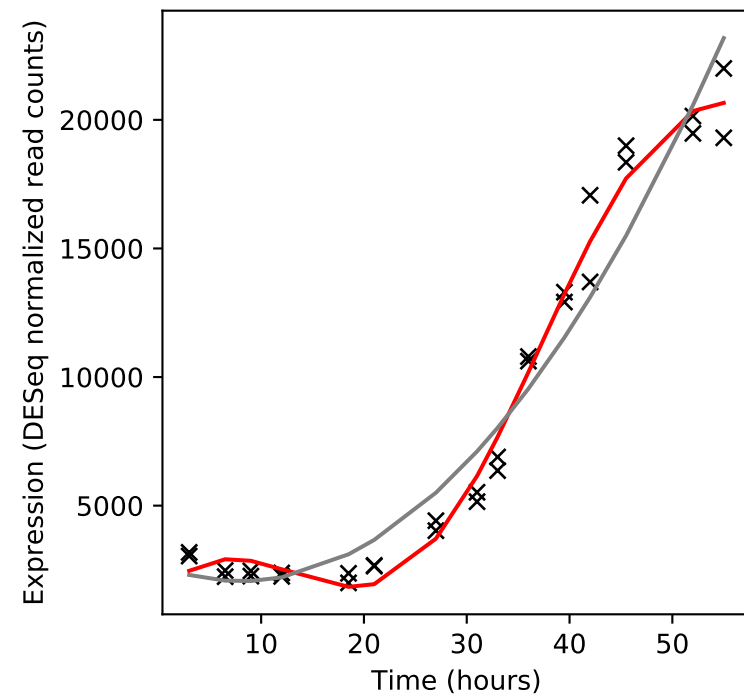

Rv0825c/-

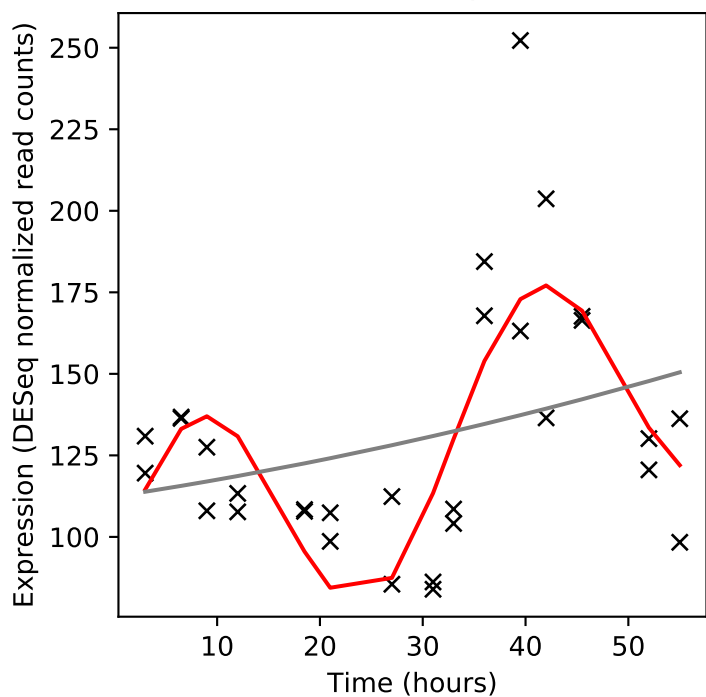

Rv0826c/-

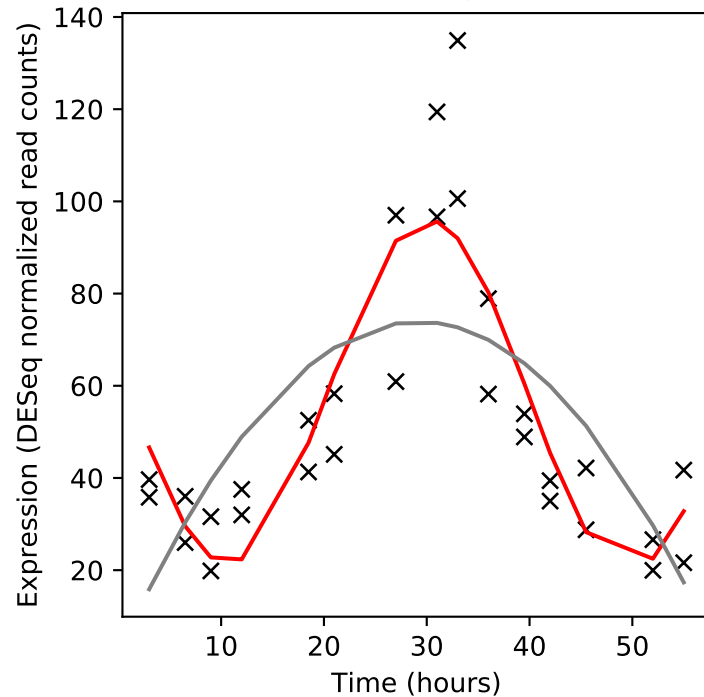

Rv0827c/kmtR

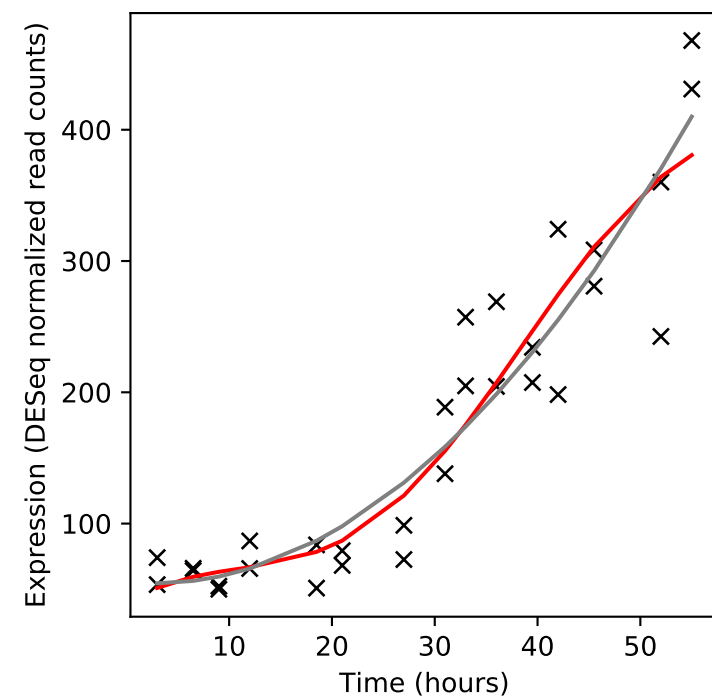

Rv0828c/-

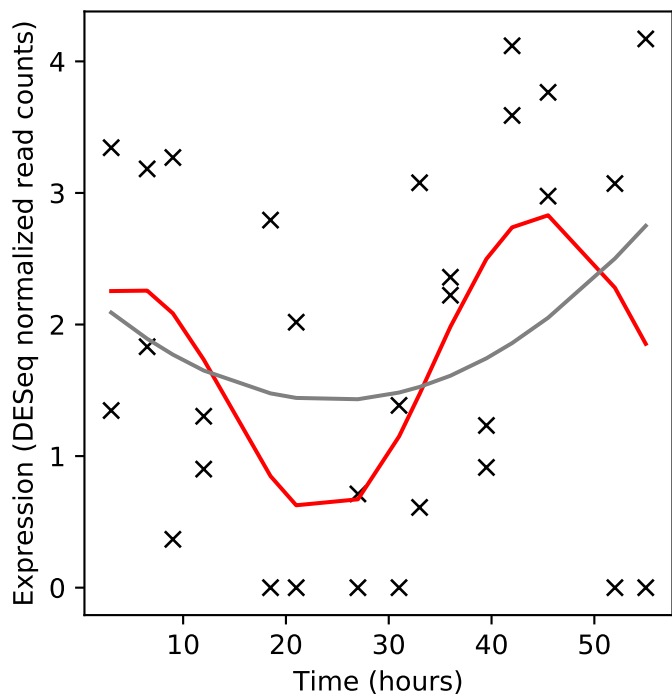

Rv0829c/-

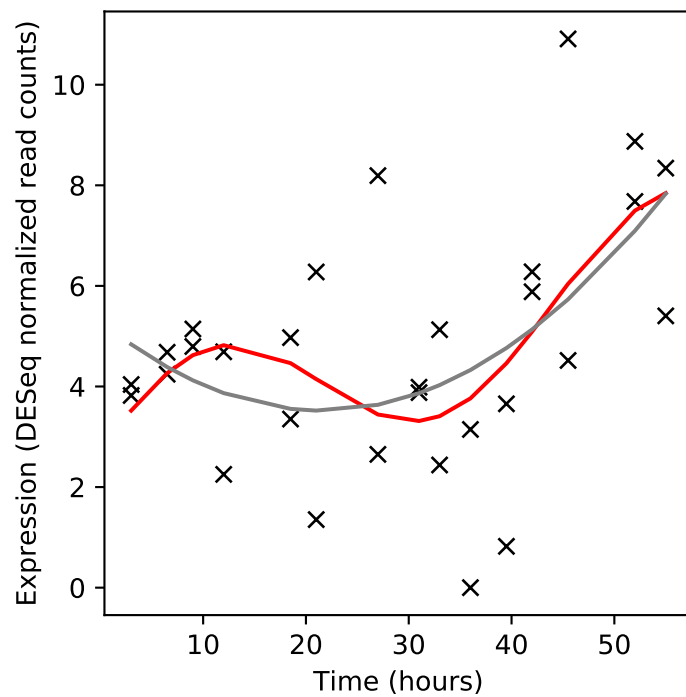

Rv0830c/-

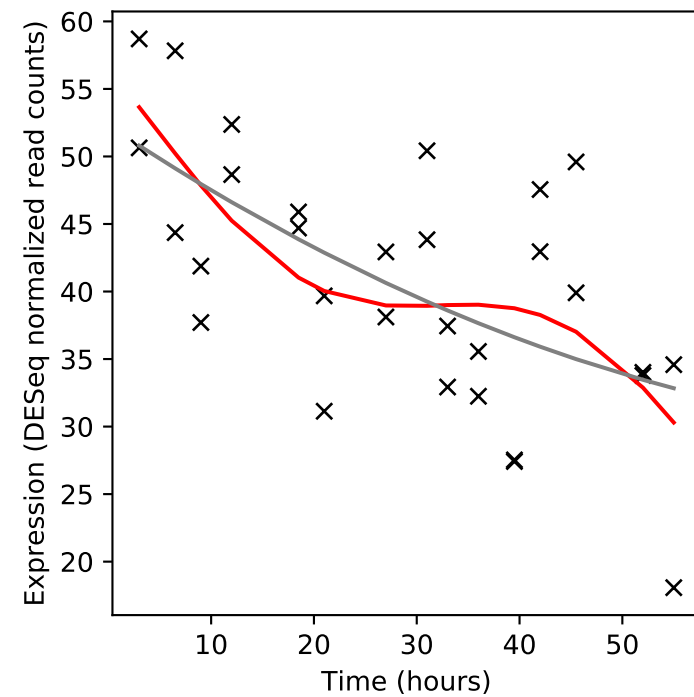

Rv0831c/-

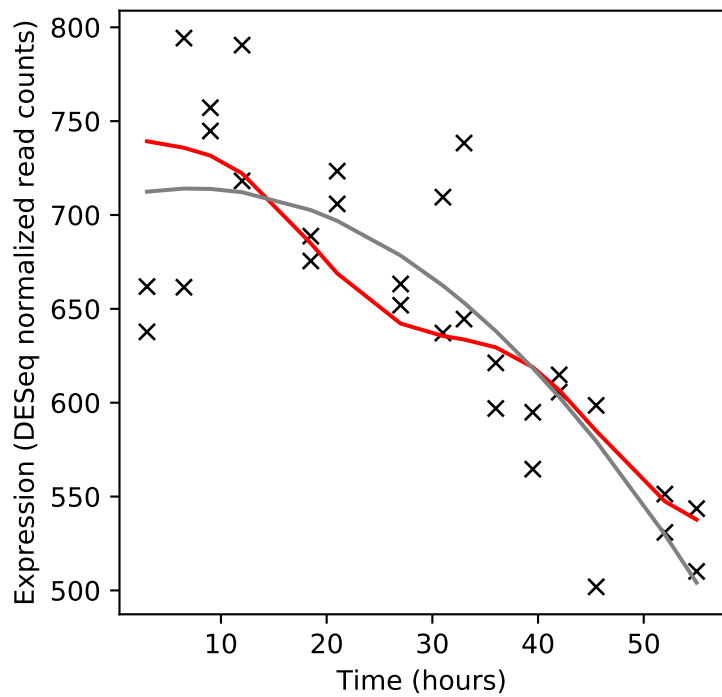

Rv0832/PE\_PGRS12

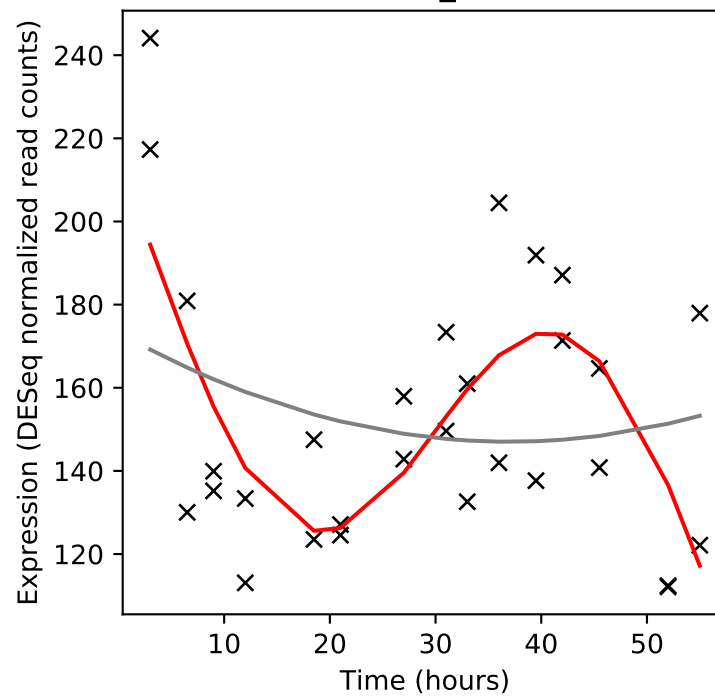

Rv0833/PE\_PGRS13

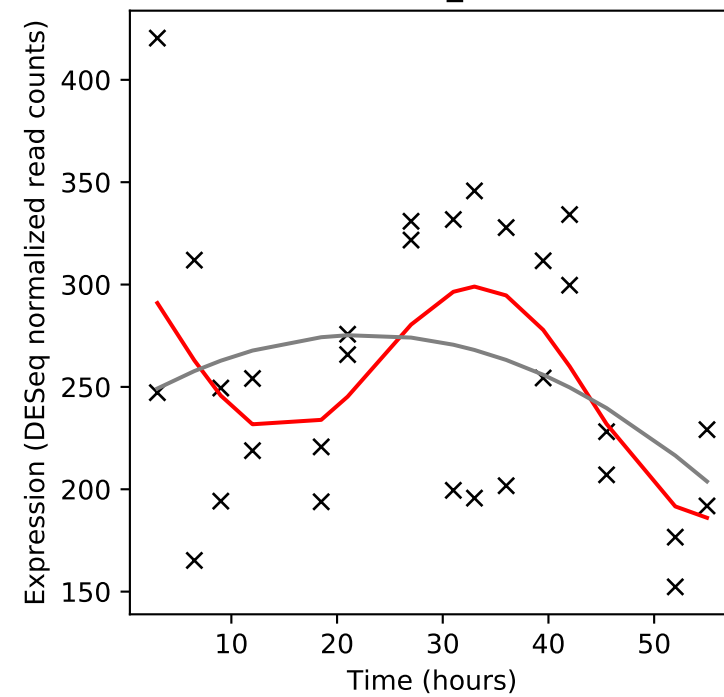

Rv0834c/PE\_PGRS14

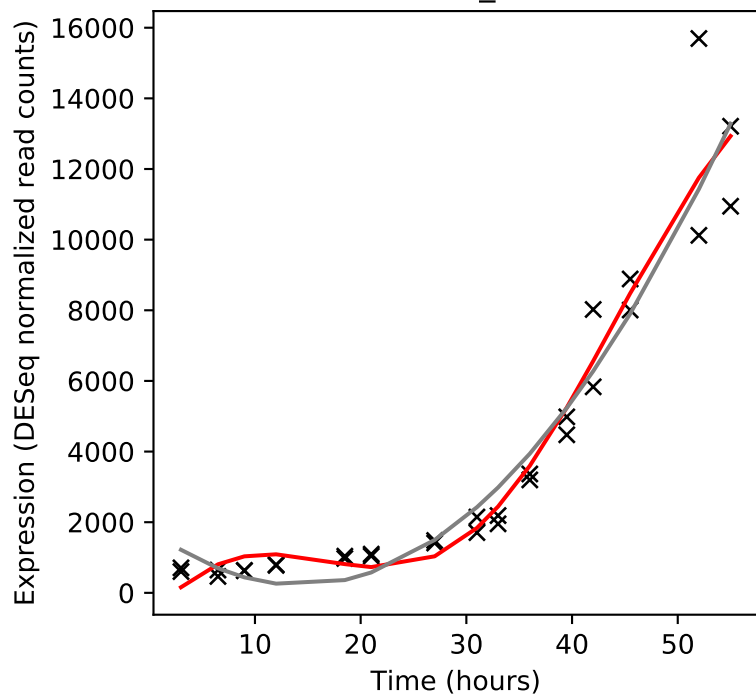

Rv0835/lpqQ

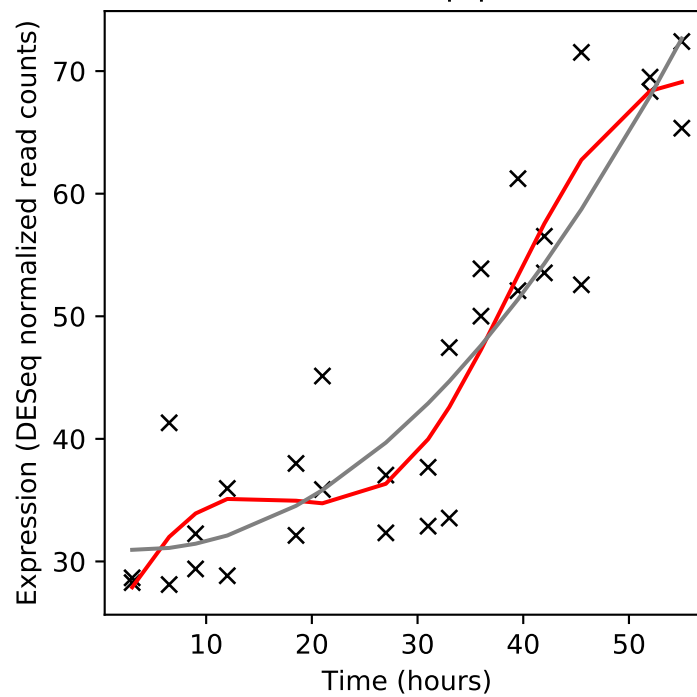

Rv0836c/-

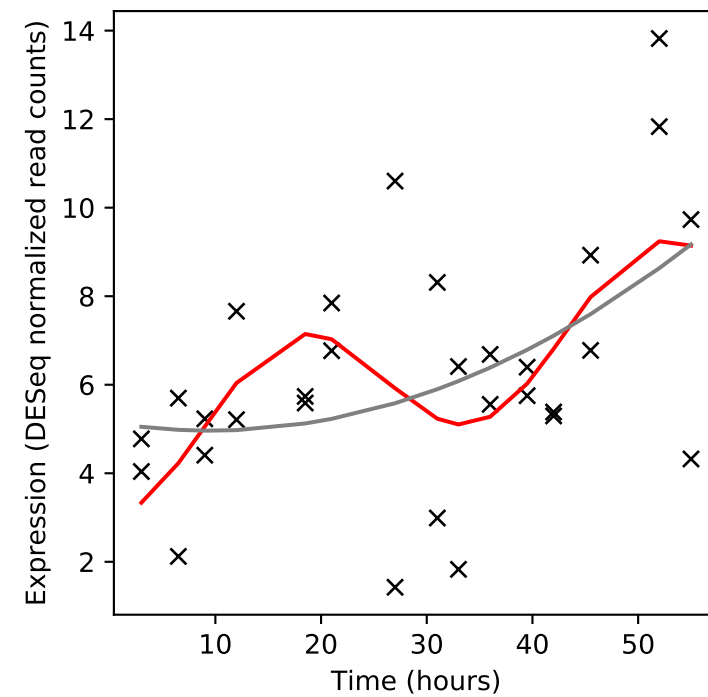

Rv0837c/-

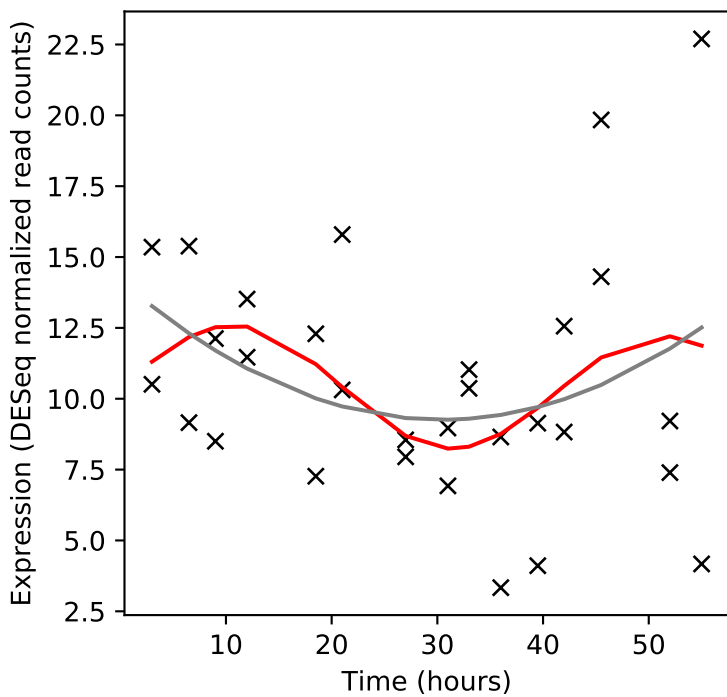

Rv0838/lpqR

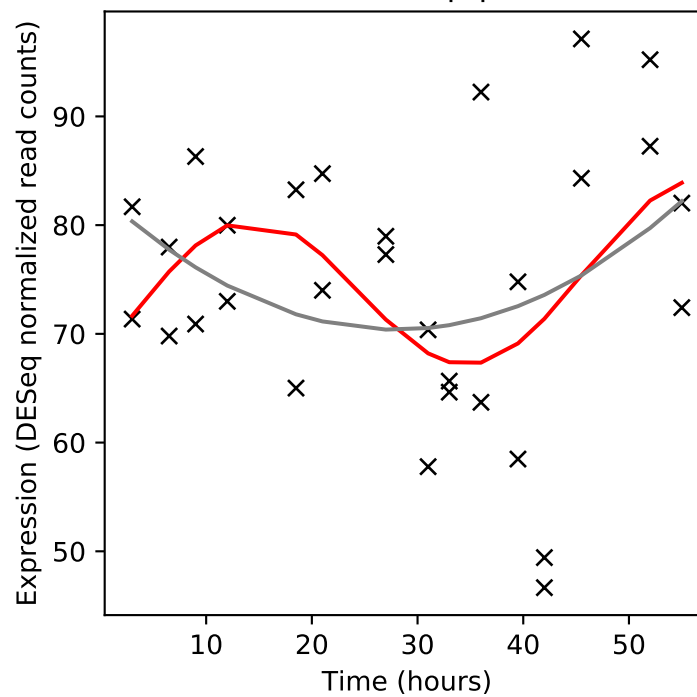

Rv0839/-

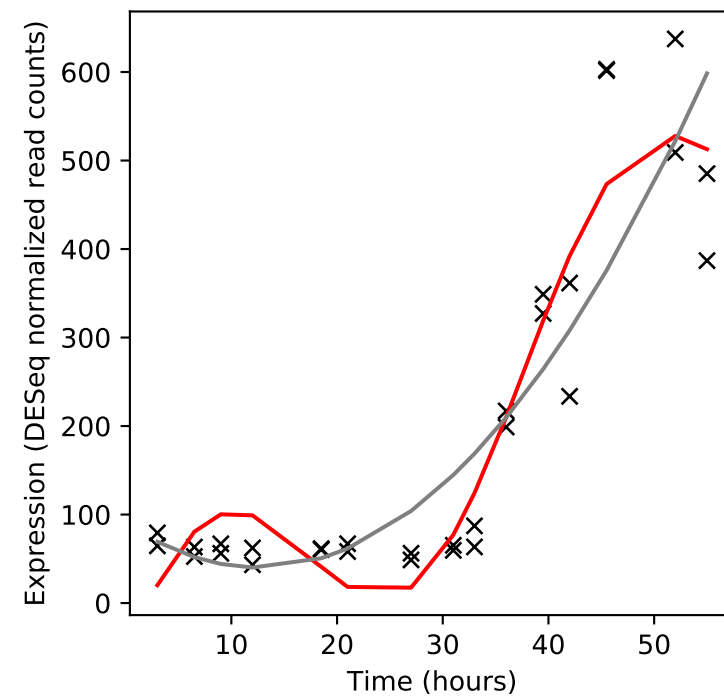

Rv0840c/pip

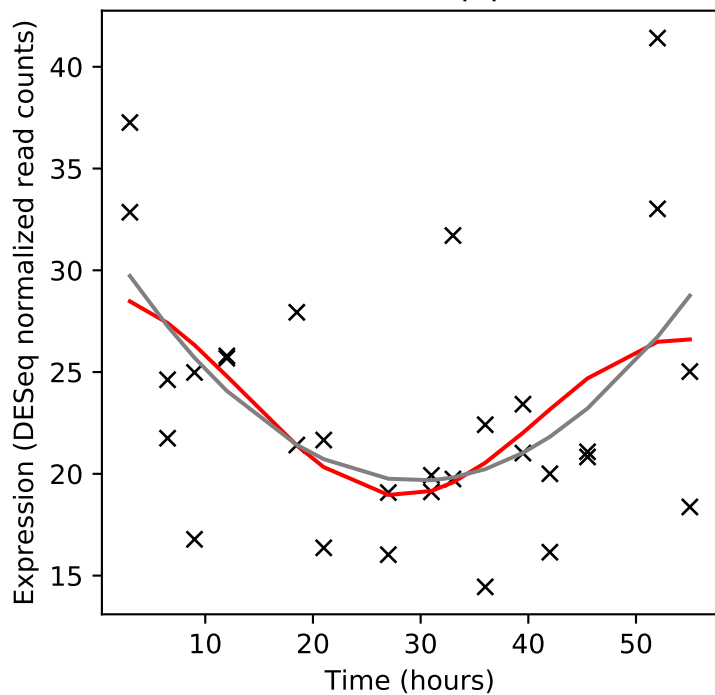

Rv0841/-

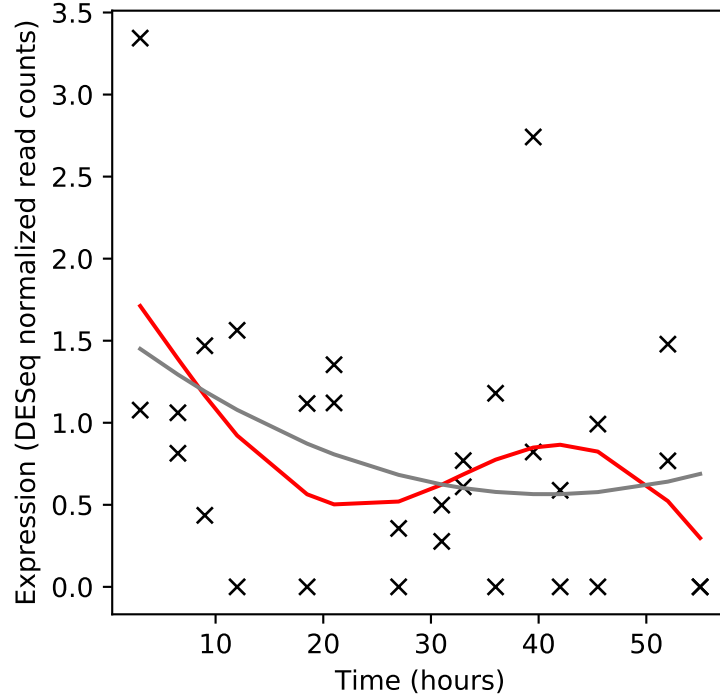

Rv0842/-

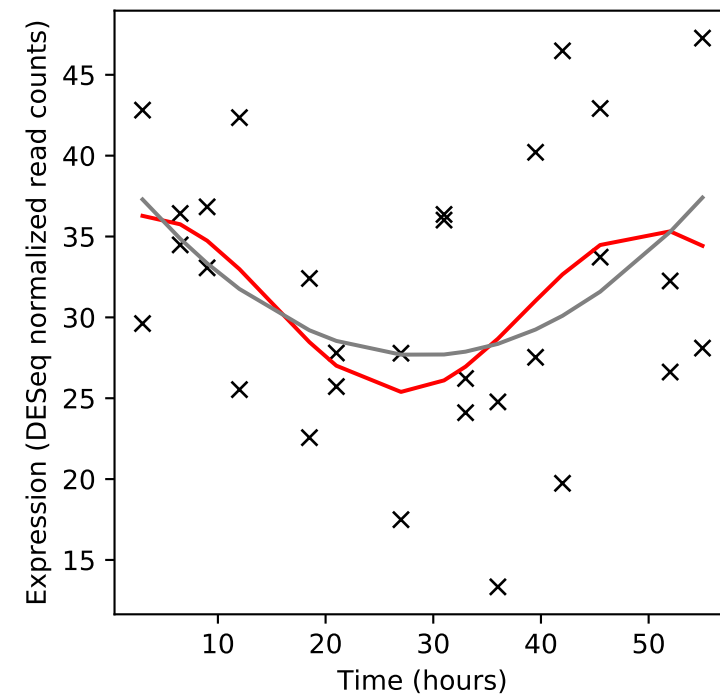

Rv0843/-

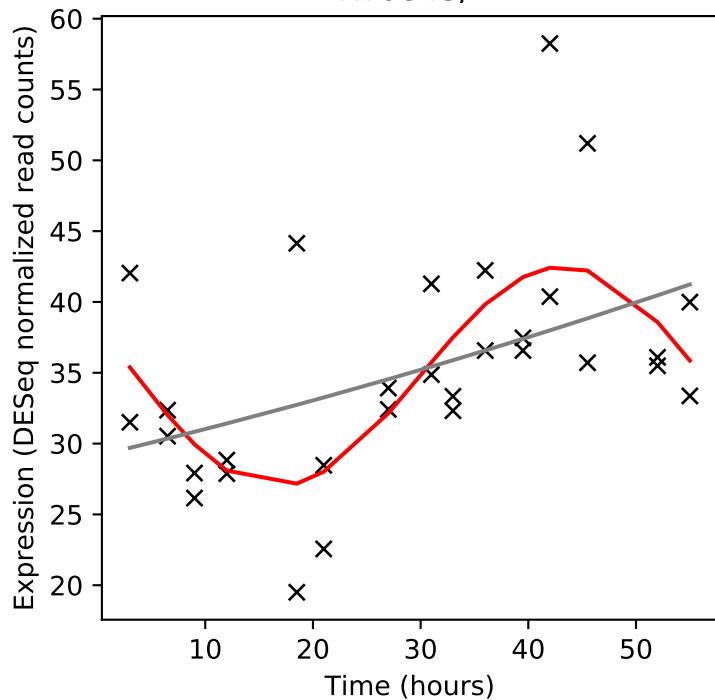

Rv0844c/narL

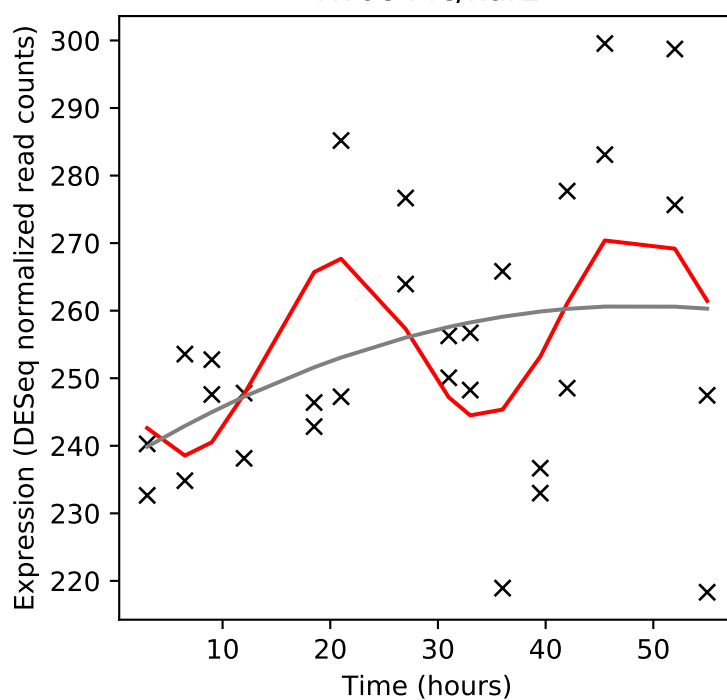

Rv0845/-

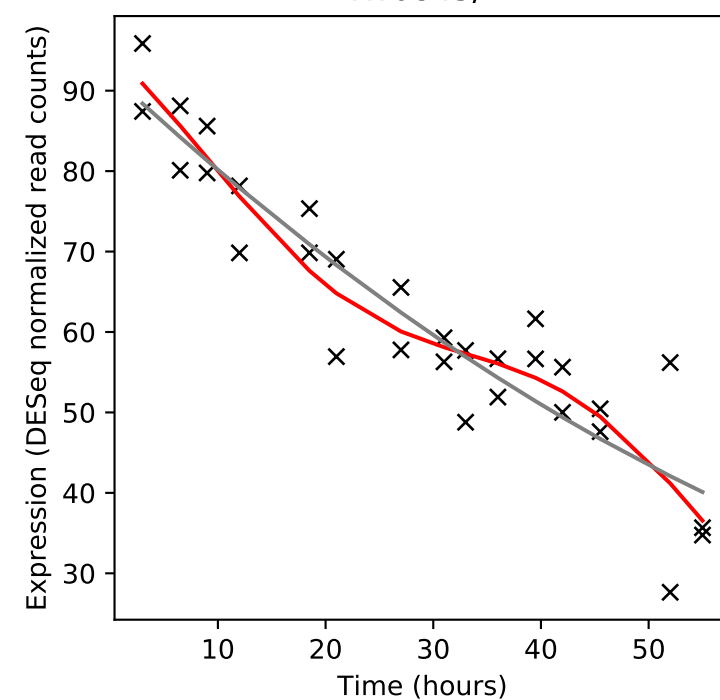

Rv0846c/-

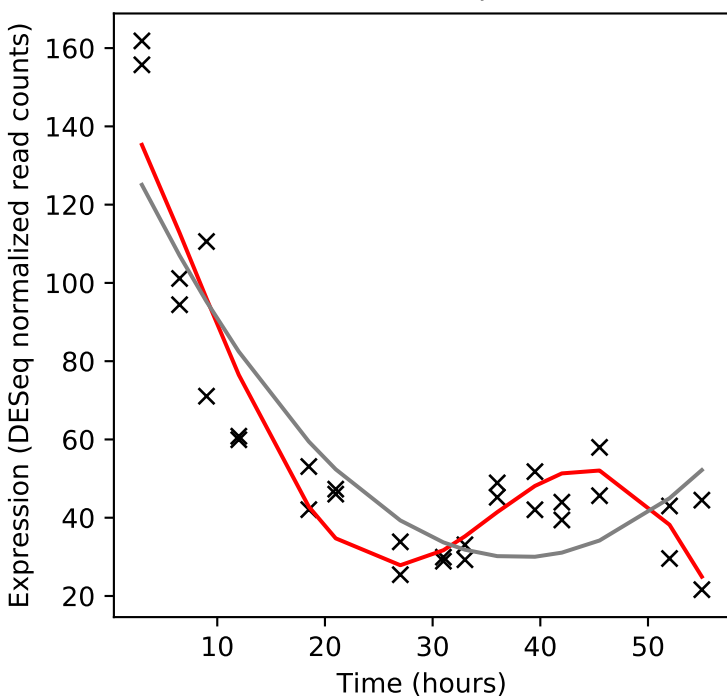

Rv0847/lpqS

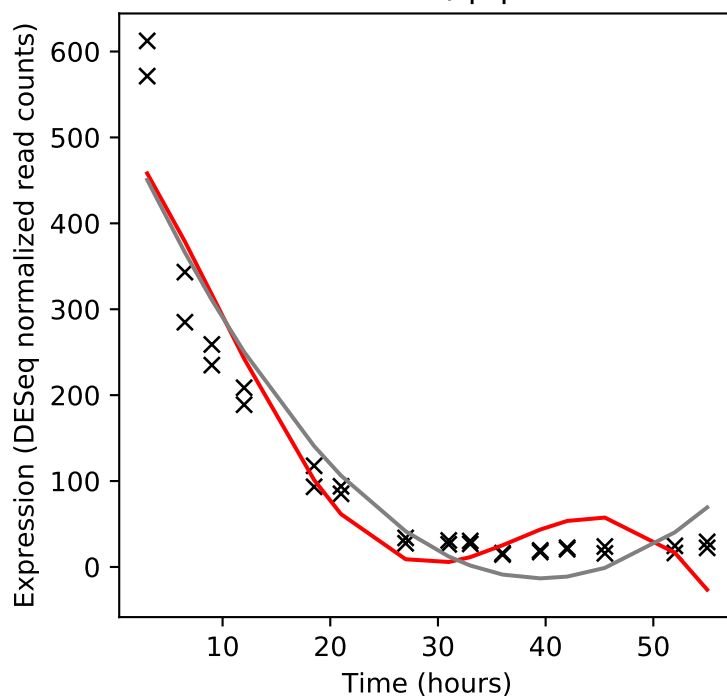

Rv0848/cysK2

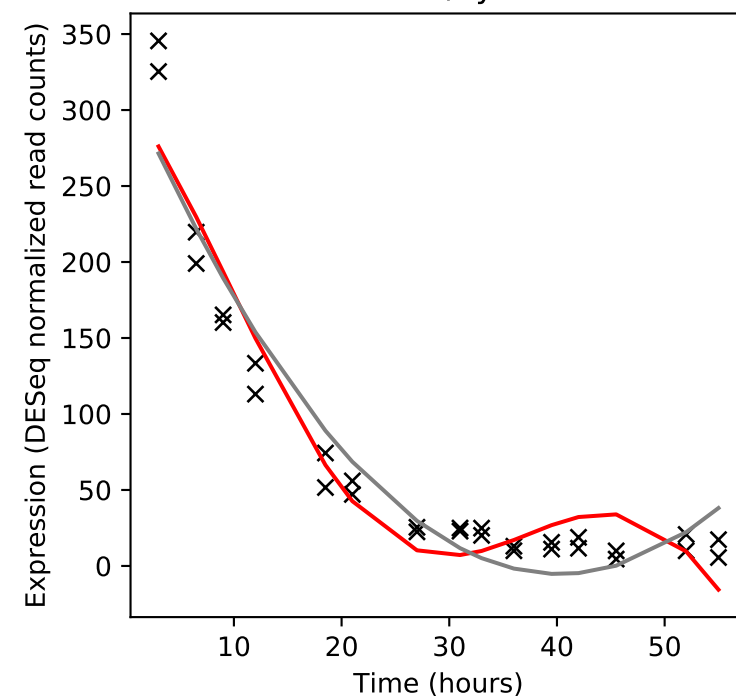

Rv0849/-

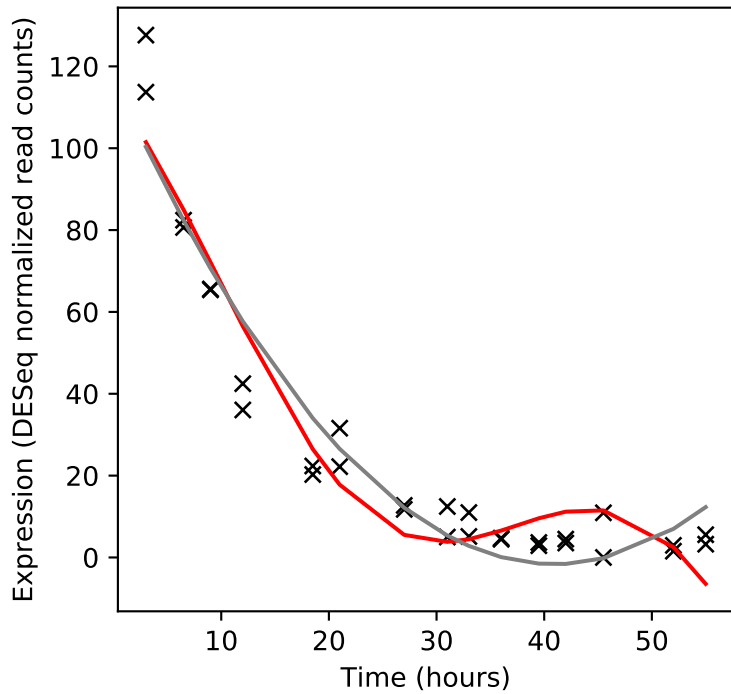

Rv0850/-

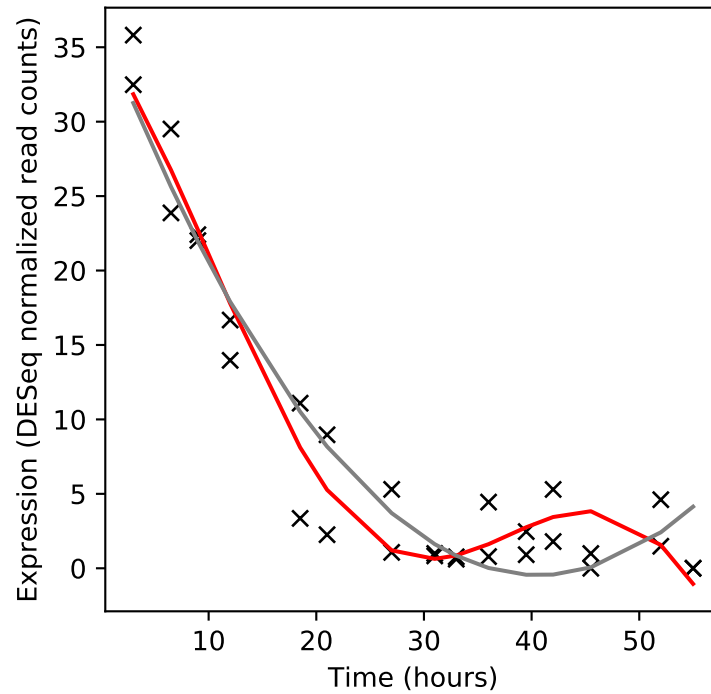

Rv0851c/-

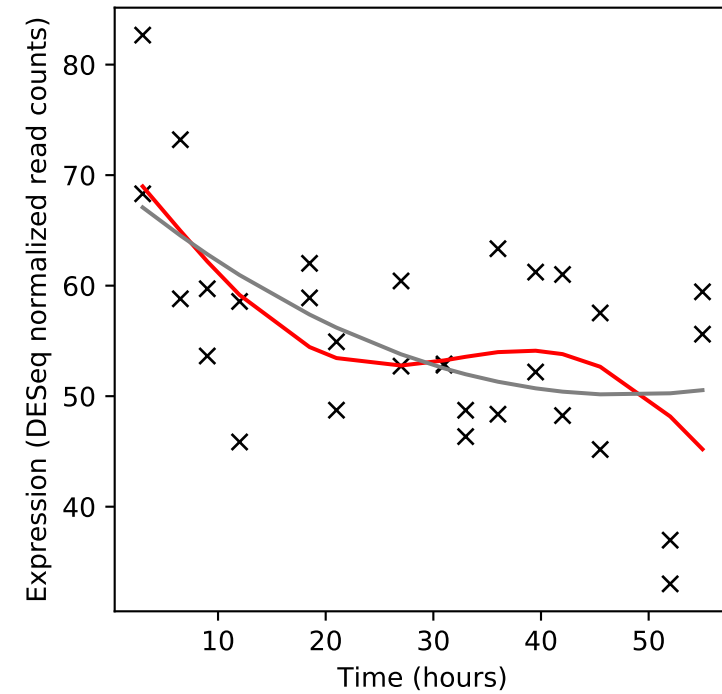

Rv0852/fadD16

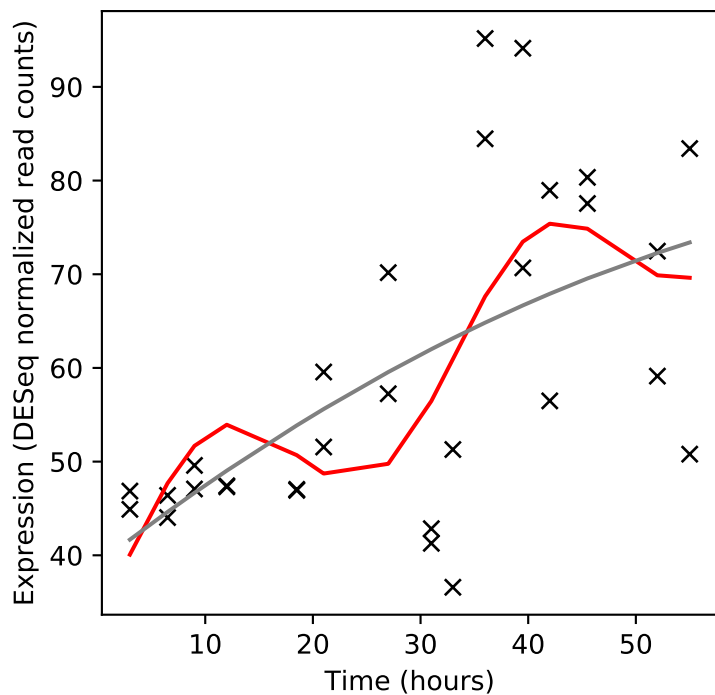

Rv0853c/pdc

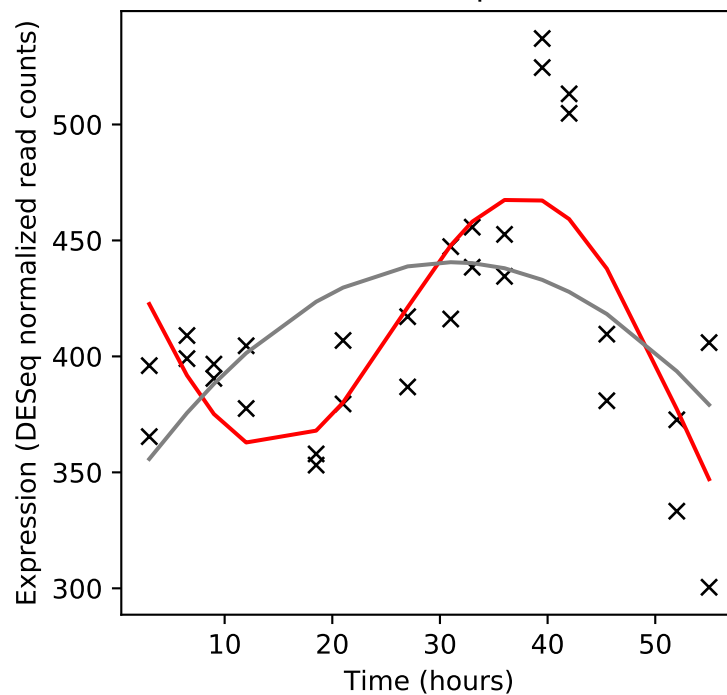

Rv0854/-

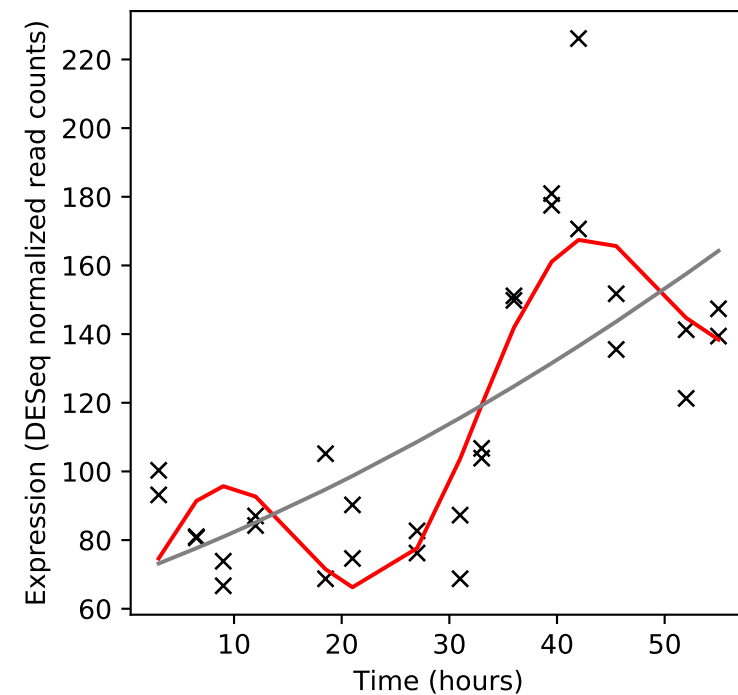

Rv0855/far

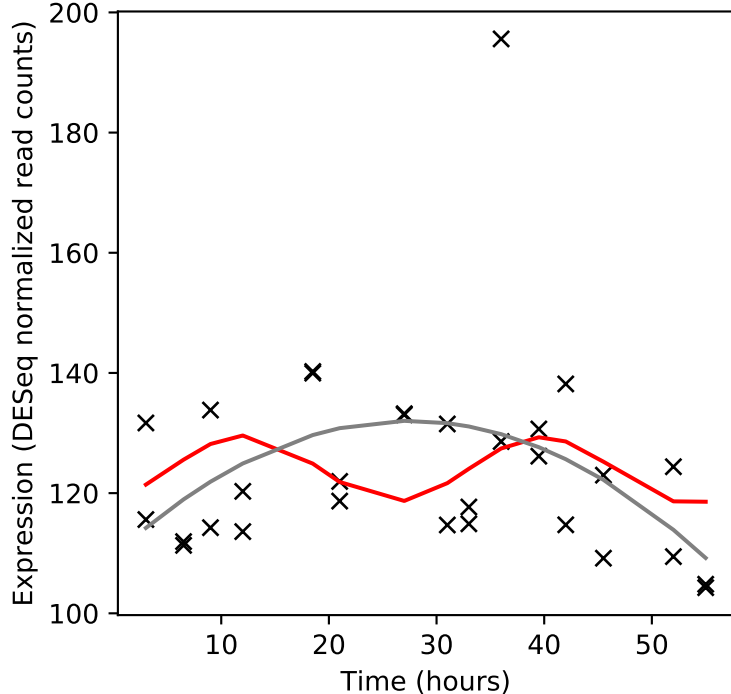

Rv0856/-

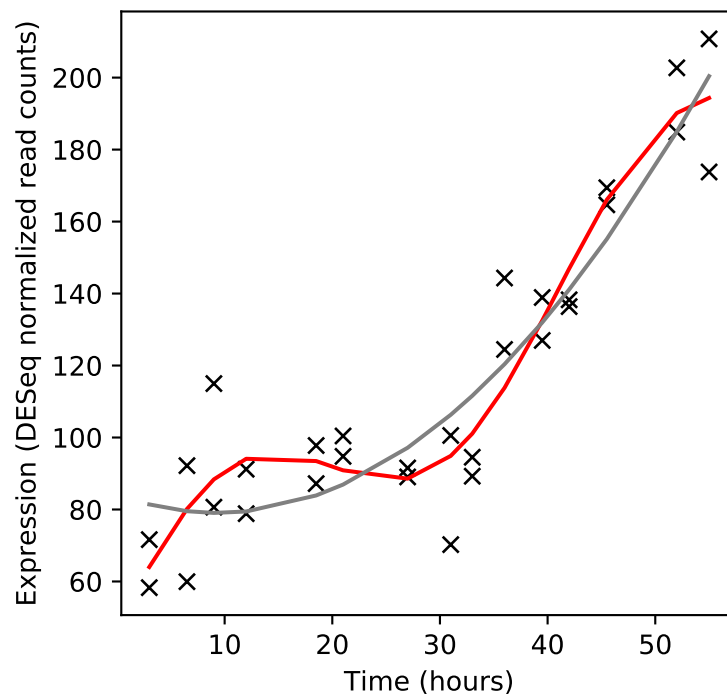

Rv0857/-

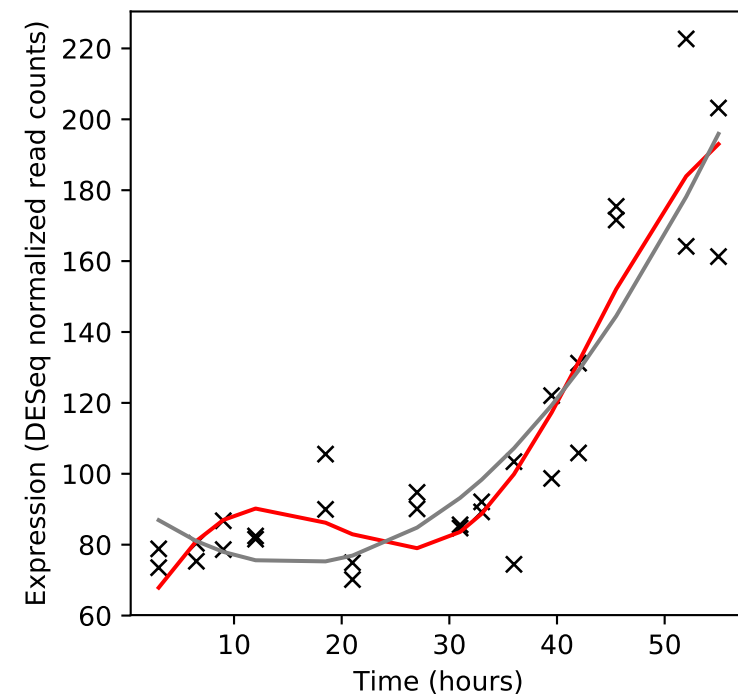

Rv0858c/dapC

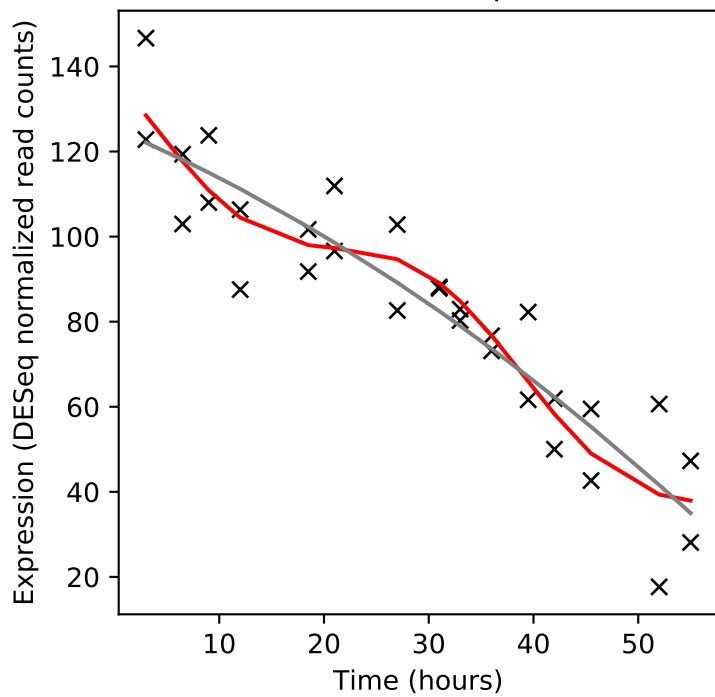

Rv0859/fadA

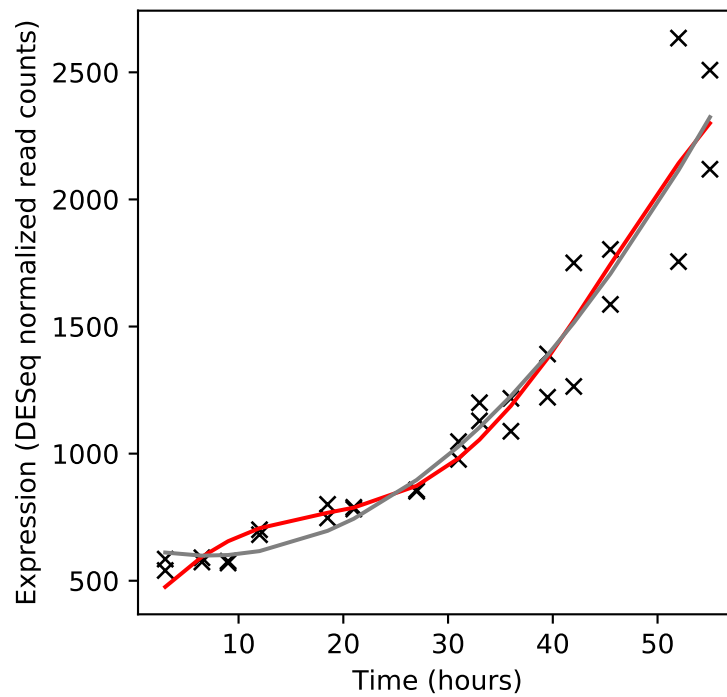

Rv0860/fadB

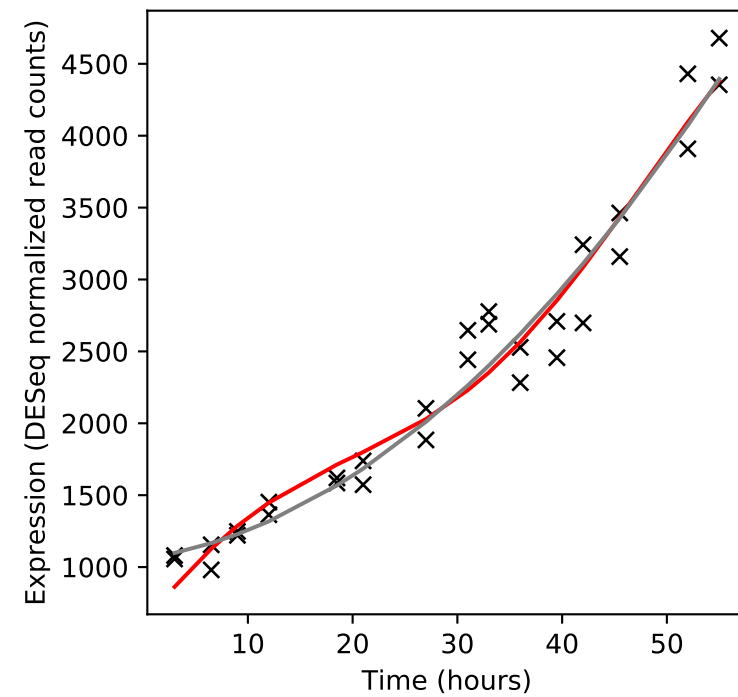

Rv0861c/ercc3

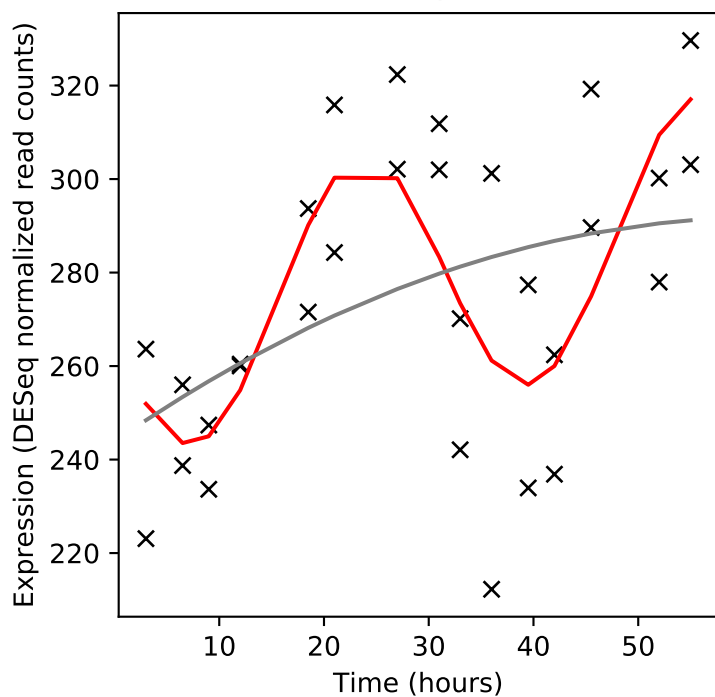

Rv0862c/-

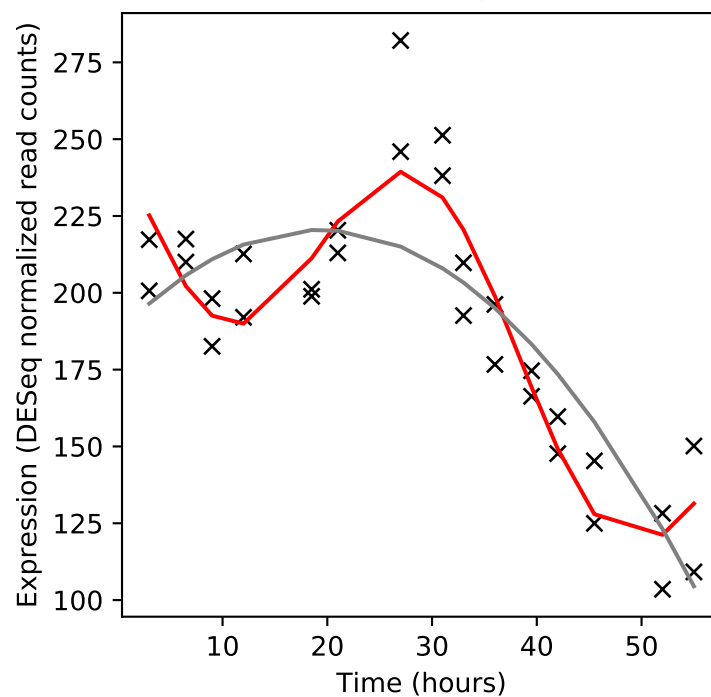

Rv0863/-

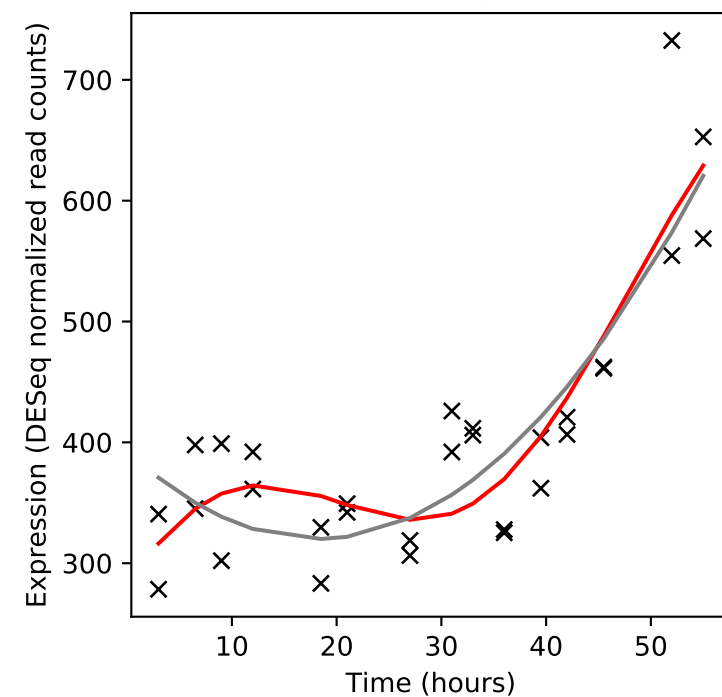

Rv0864/moaC2

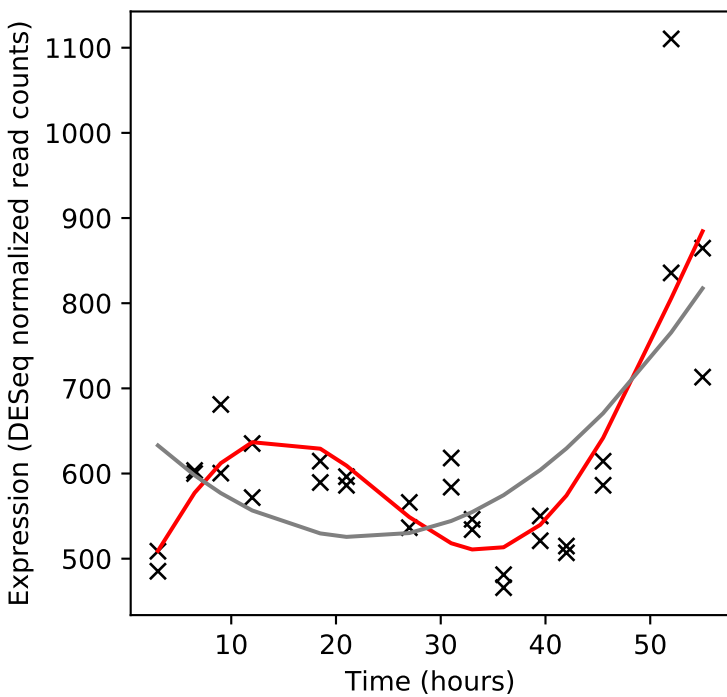

Rv0865/mog

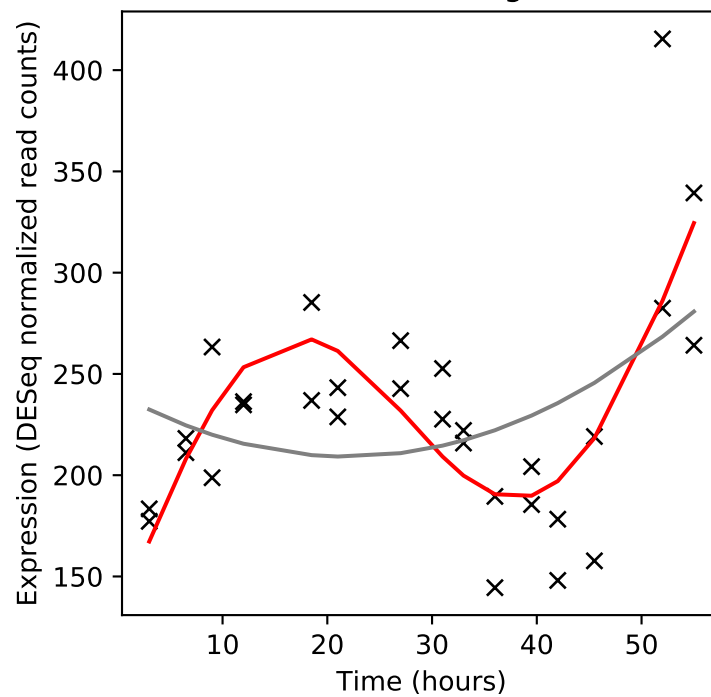

Rv0866/moaE2

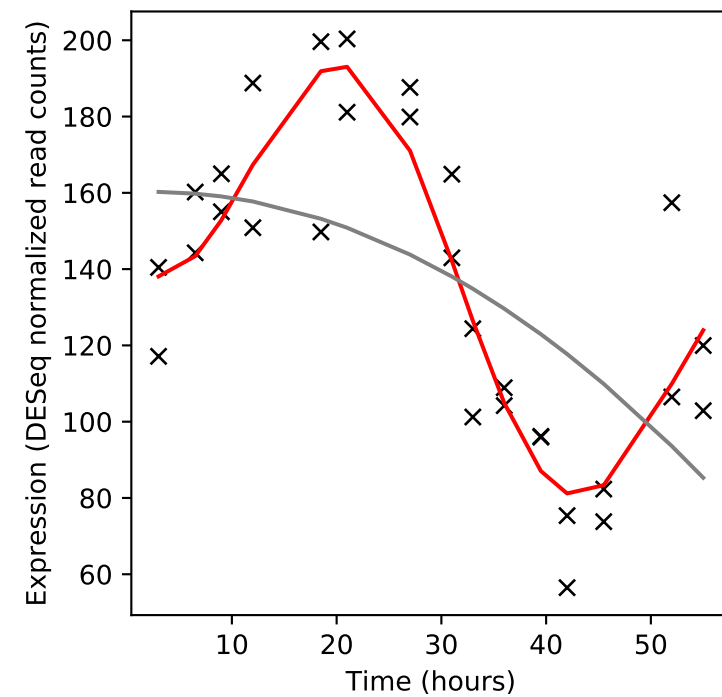

Rv0867c/rpfA

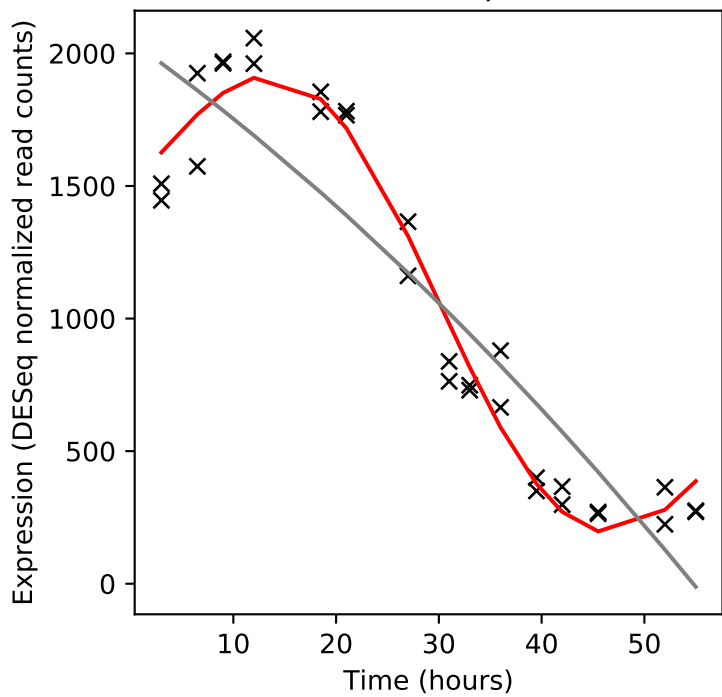

Rv0868c/moaD2

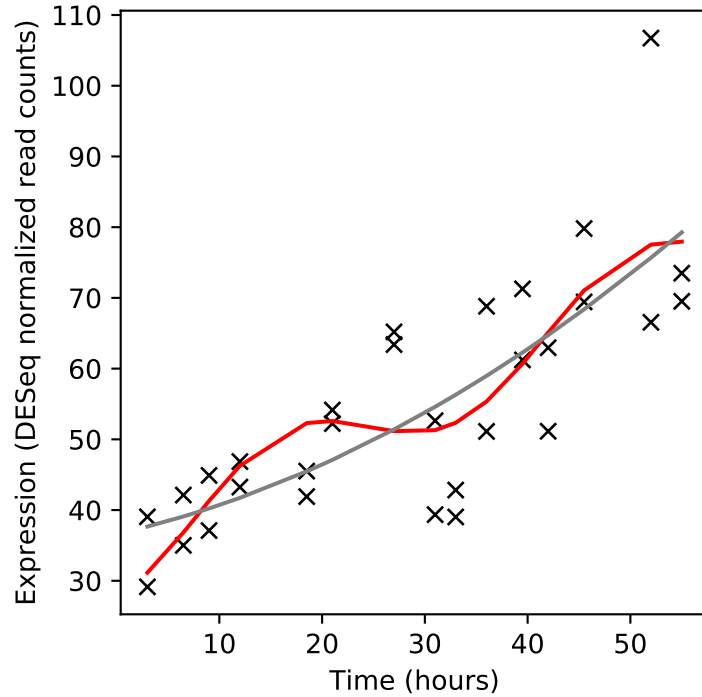

Rv0869c/moaA2

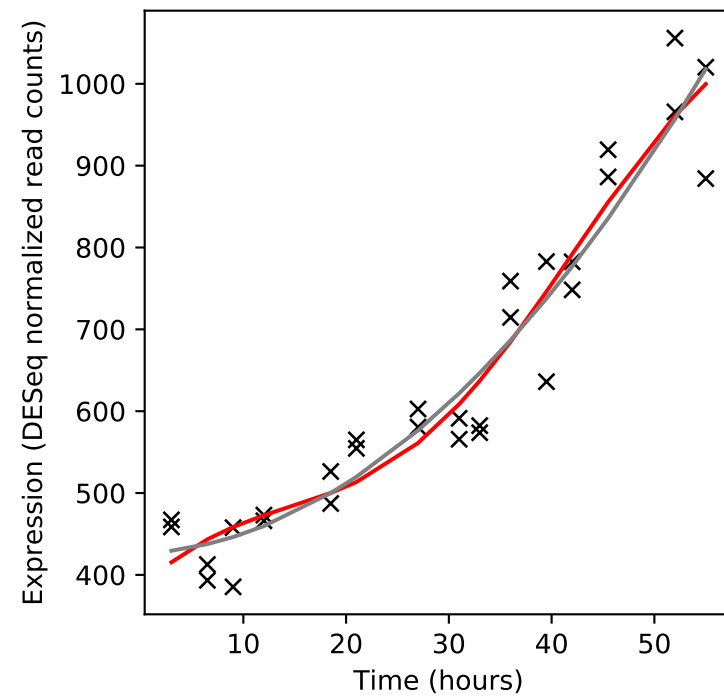

Rv0870c/-

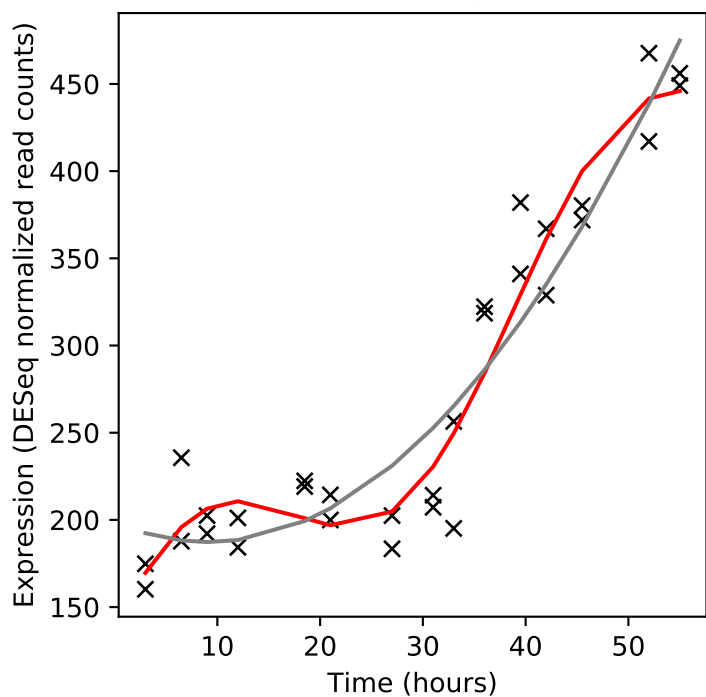

Rv0871c/cspB

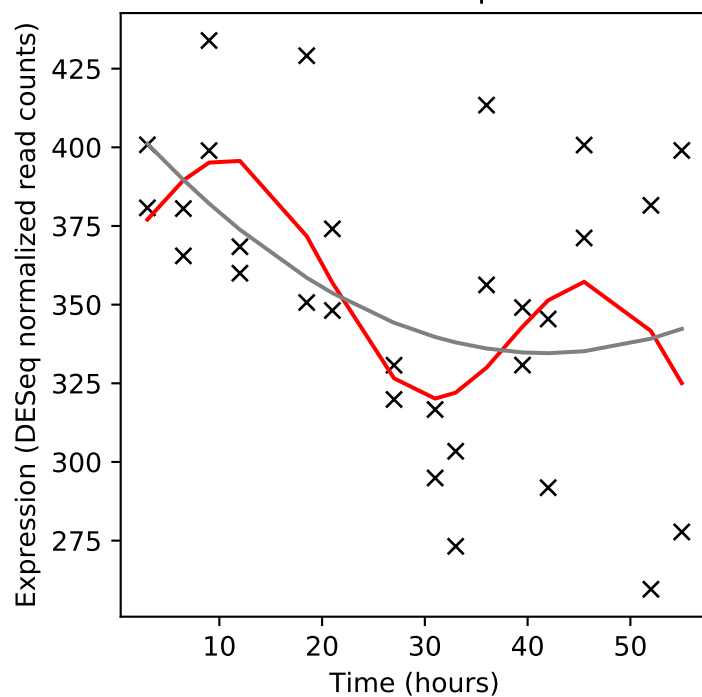

Rv0872c/PE\_PGRS15

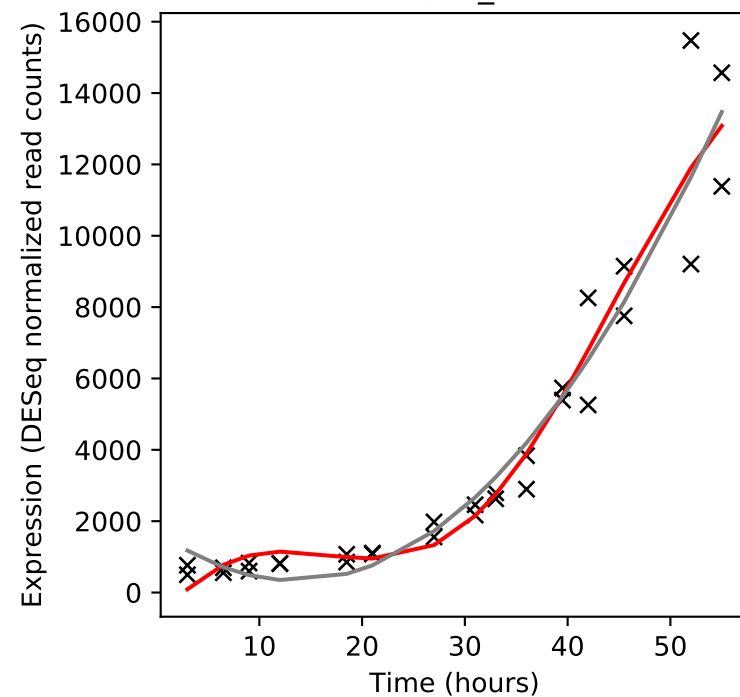

Rv0873c/fadE10

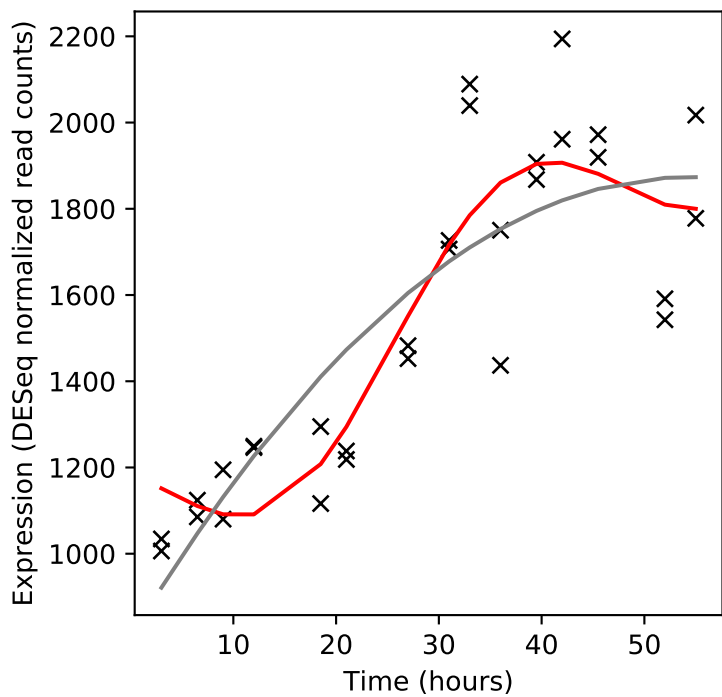

Rv0874c/-

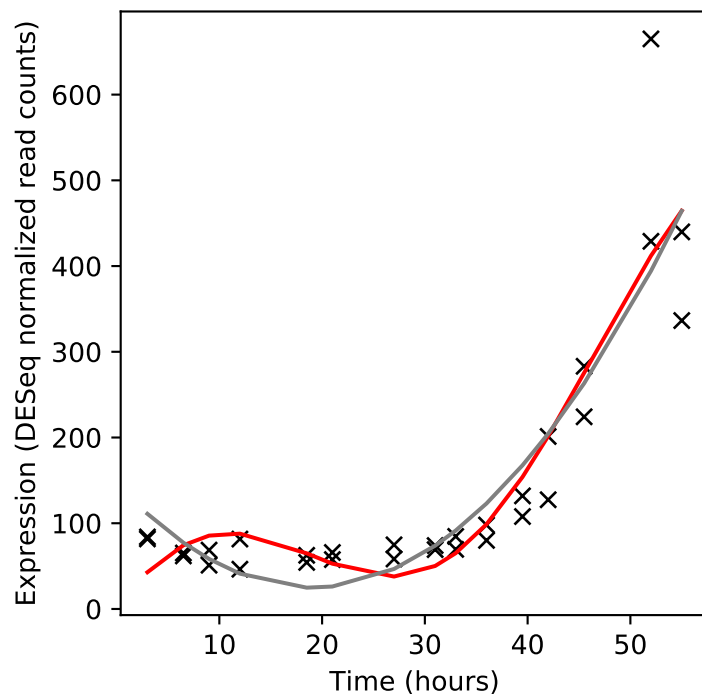

Rv0875c/-

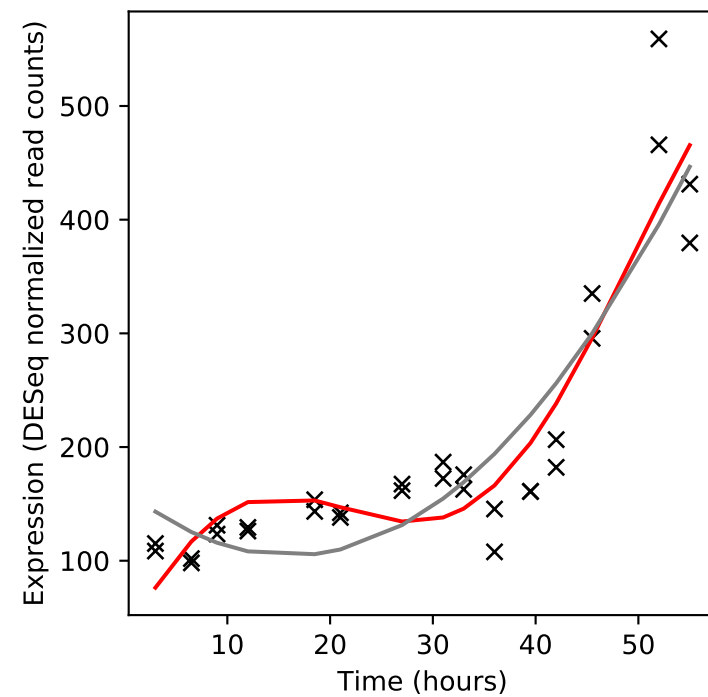



Rv0876c/-

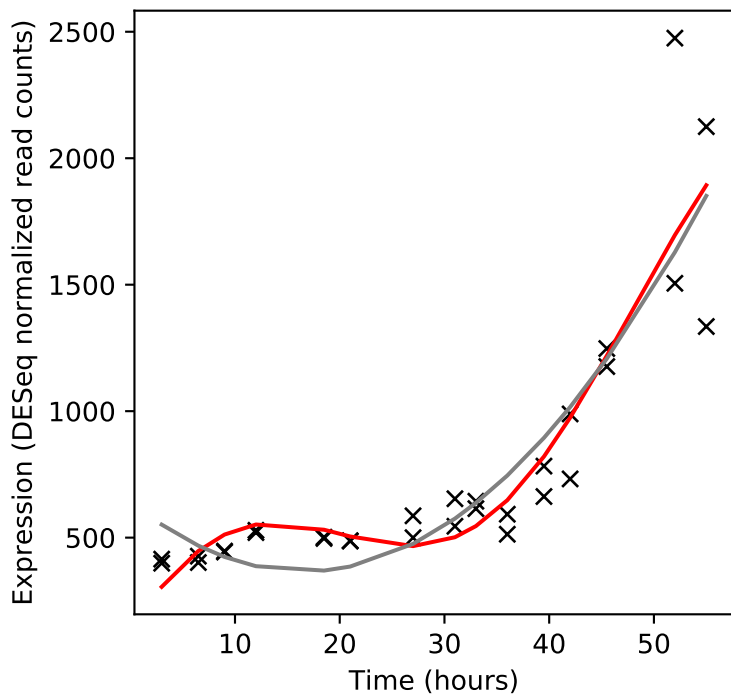

Rv0877/-

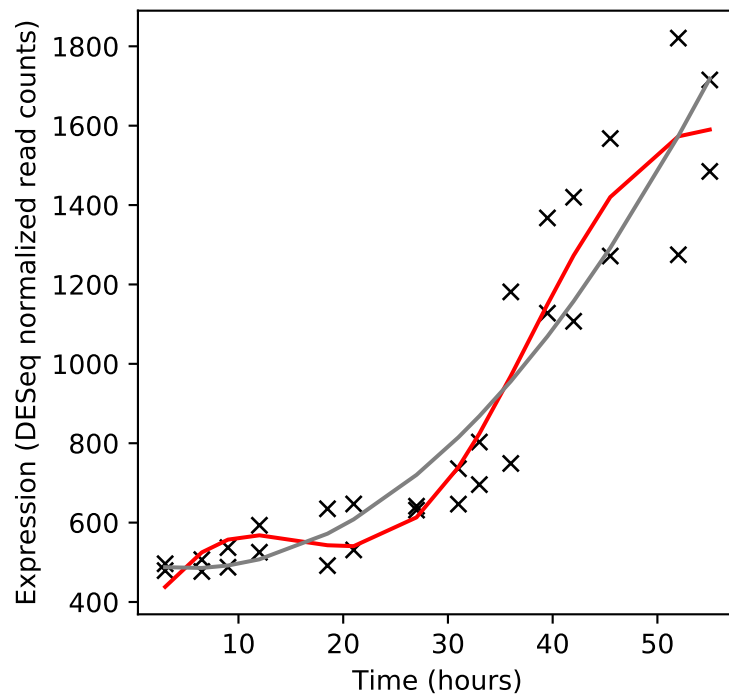

Rv0878c/PPE13

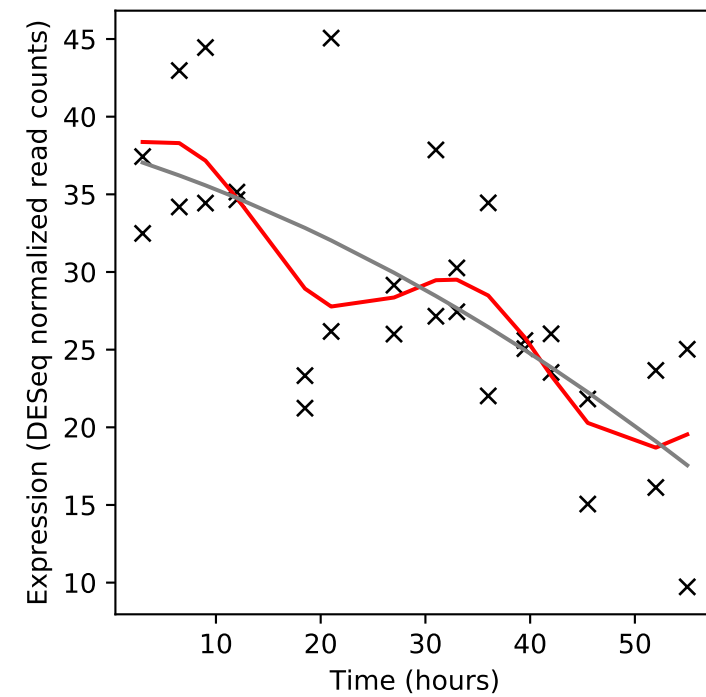

Rv0879c/-

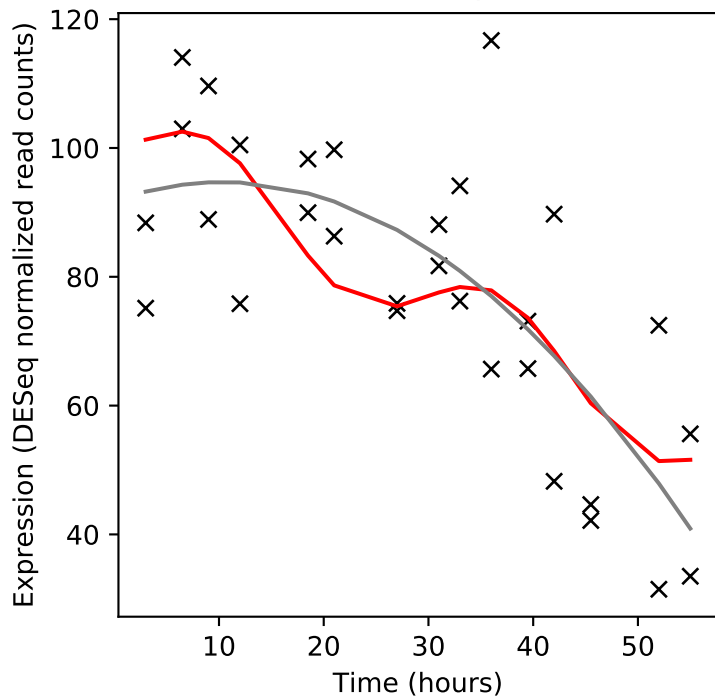

Rv0880/-

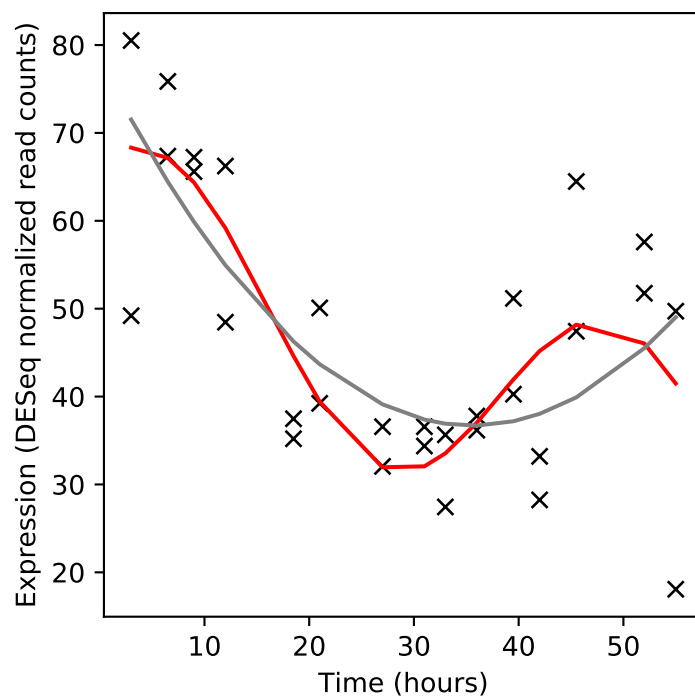

Rv0881/-

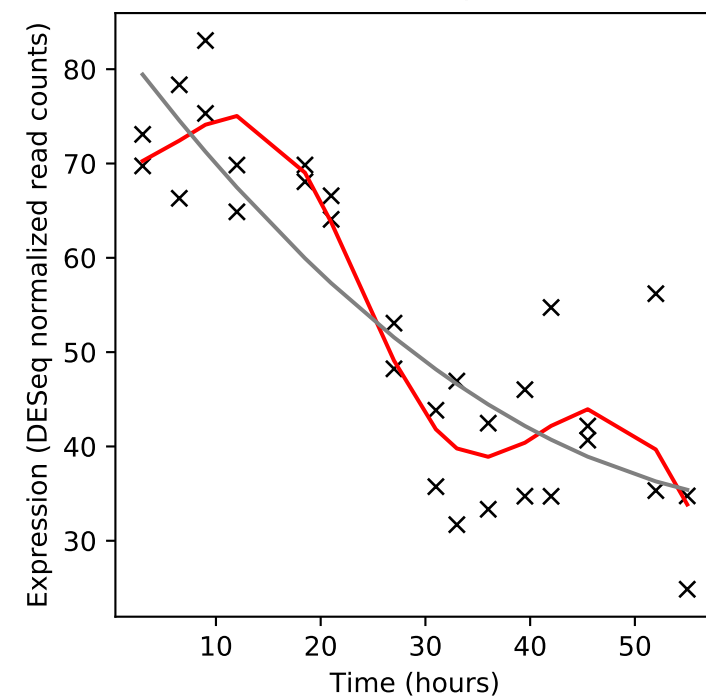

Rv0882/-

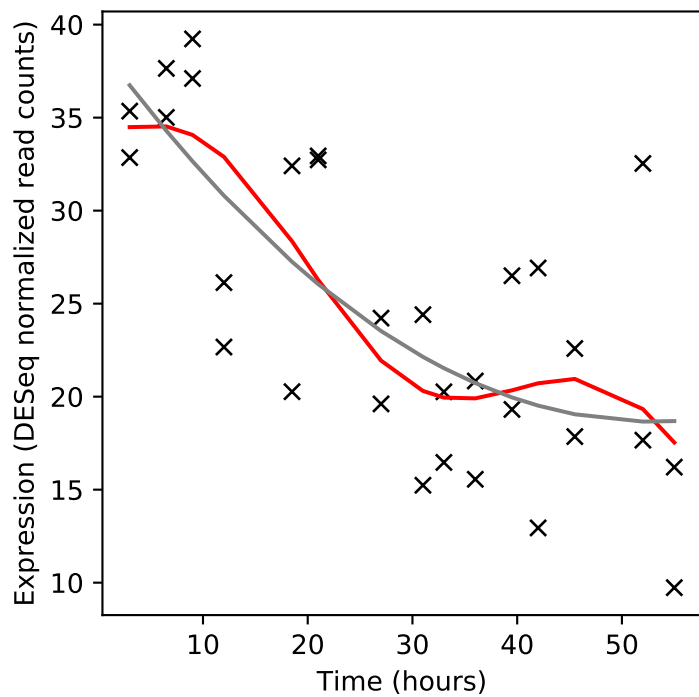

Rv0883c/-

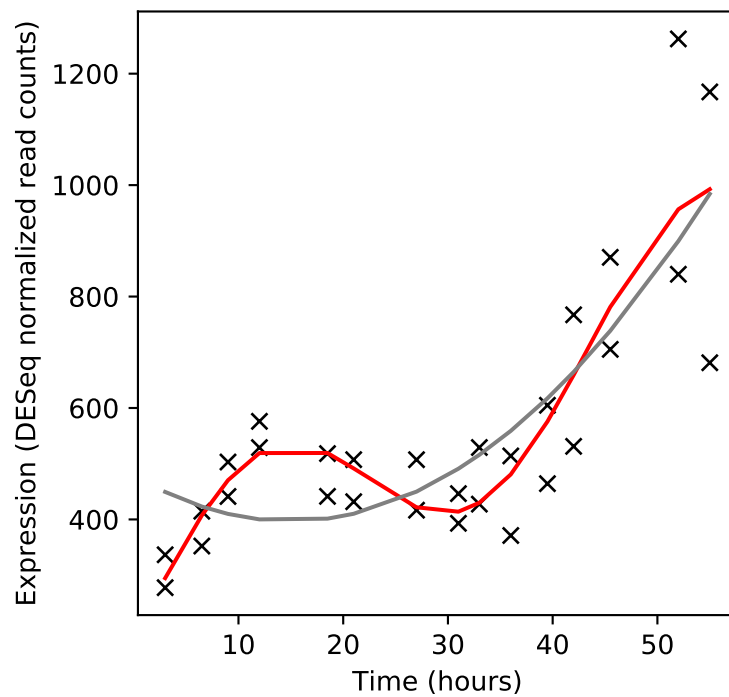

Rv0884c/serC

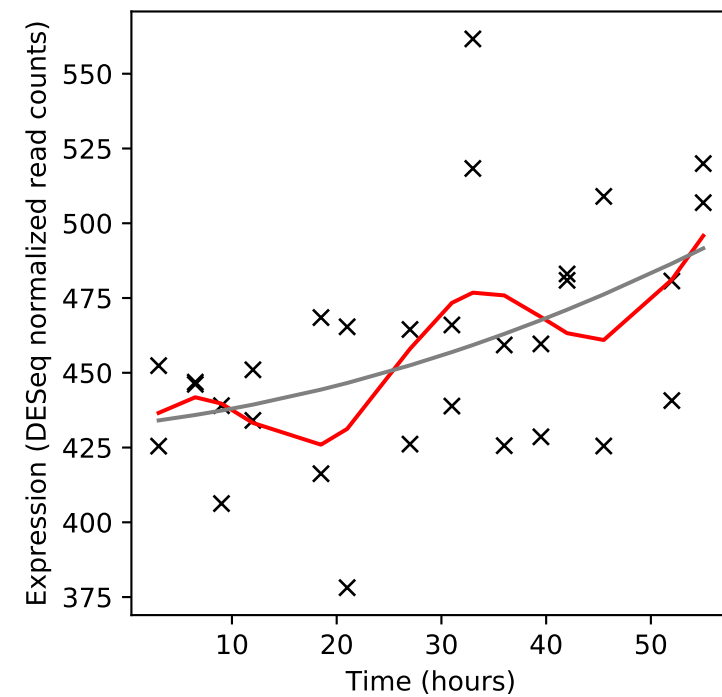

Rv0885/-

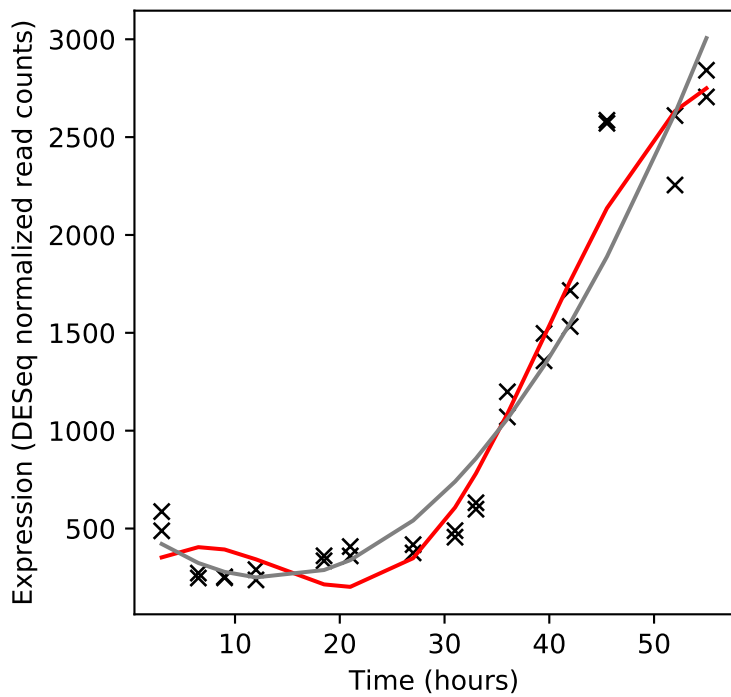

Rv0886/fprB

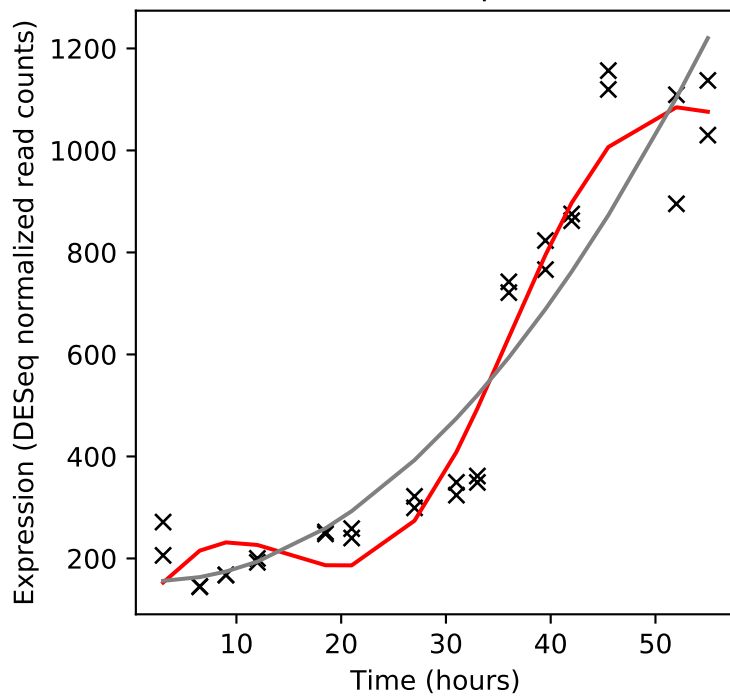

Rv0887c/-

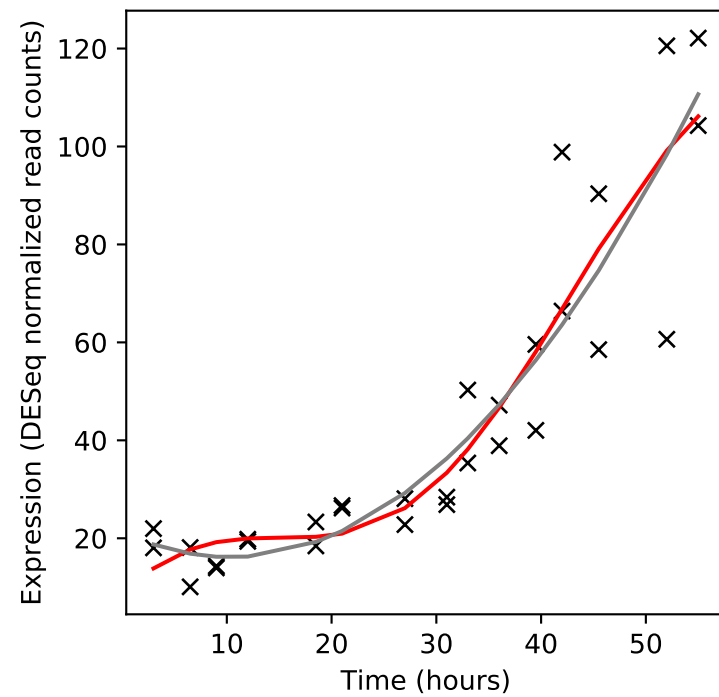

Rv0888/-

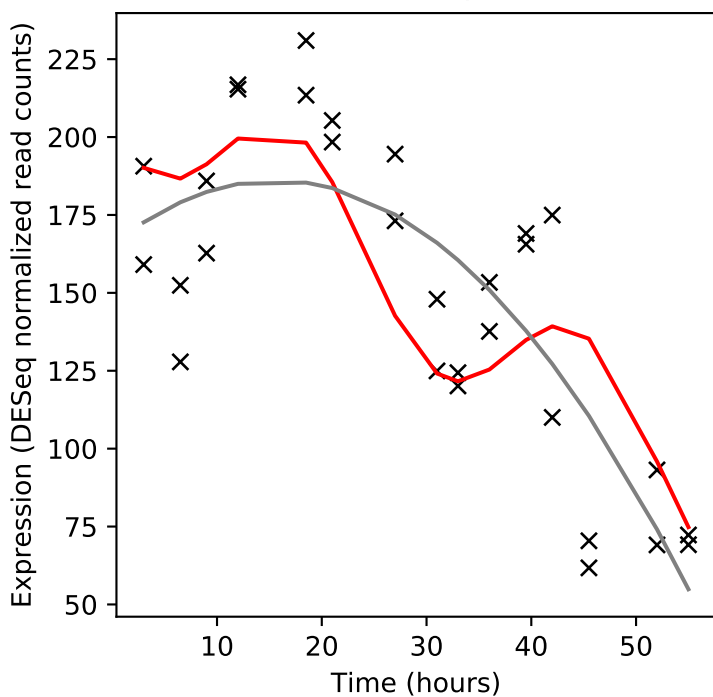

Rv0889c/citA

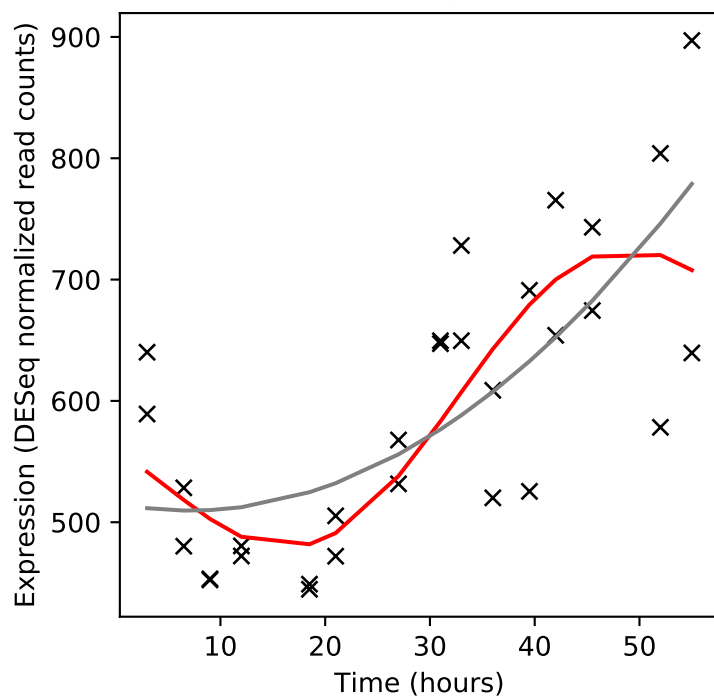

Rv0890c/-

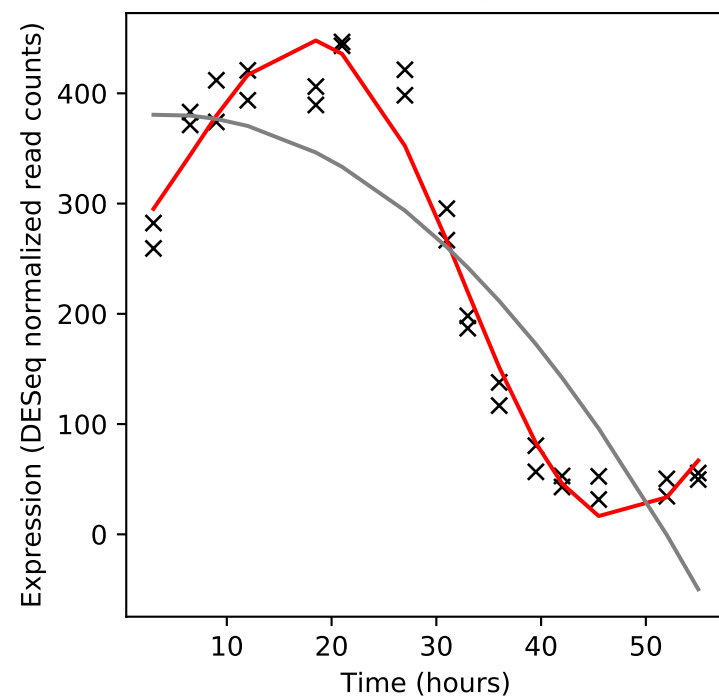

Rv0891c/-

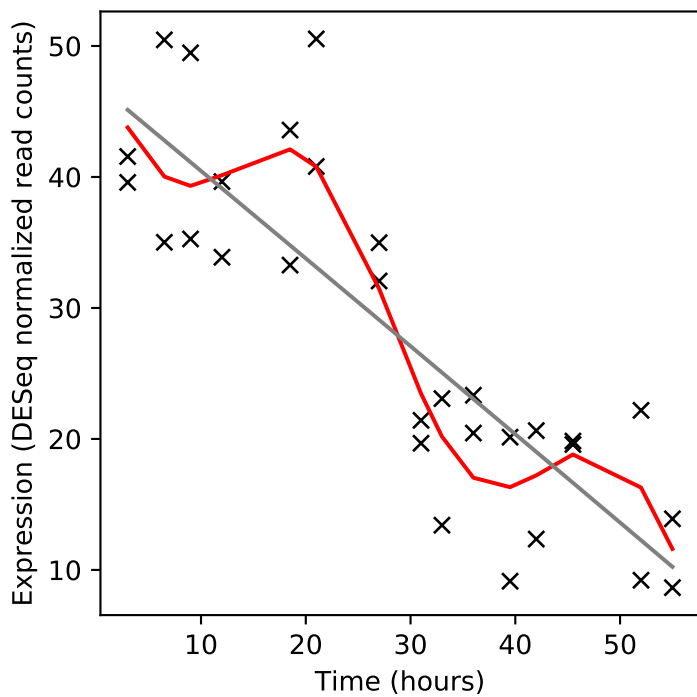

Rv0892/-

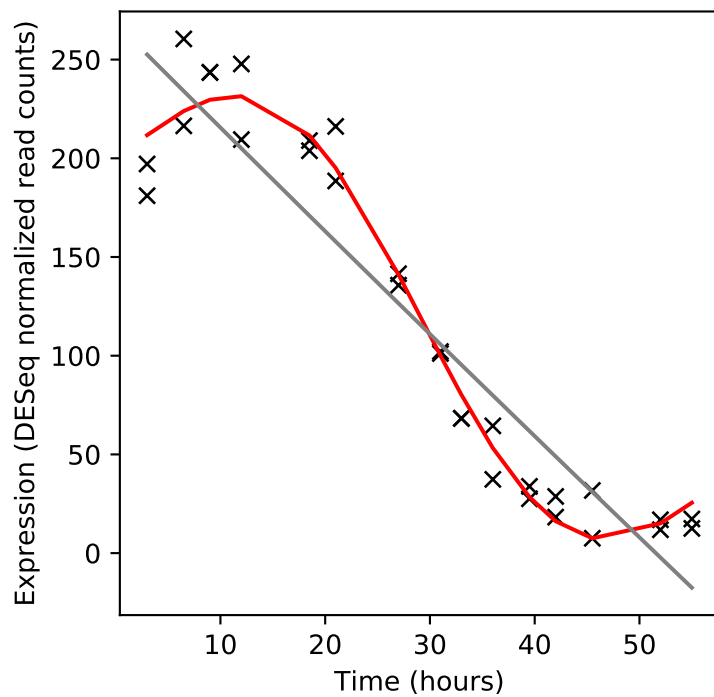

Rv0893c/-

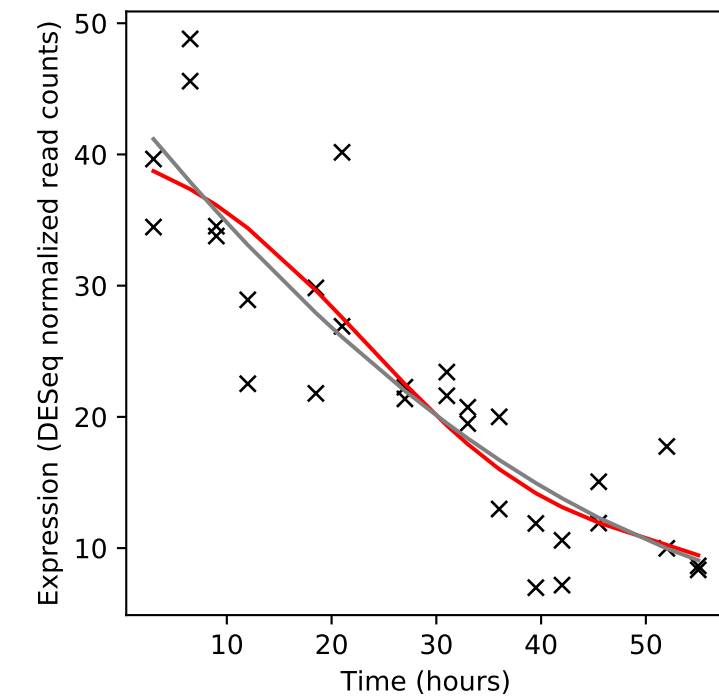

Rv0894/-

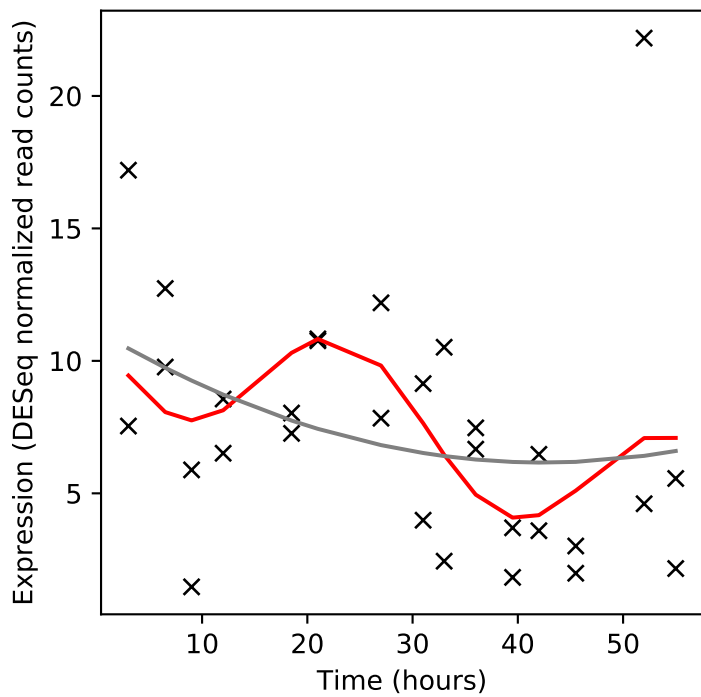

Rv0895/-

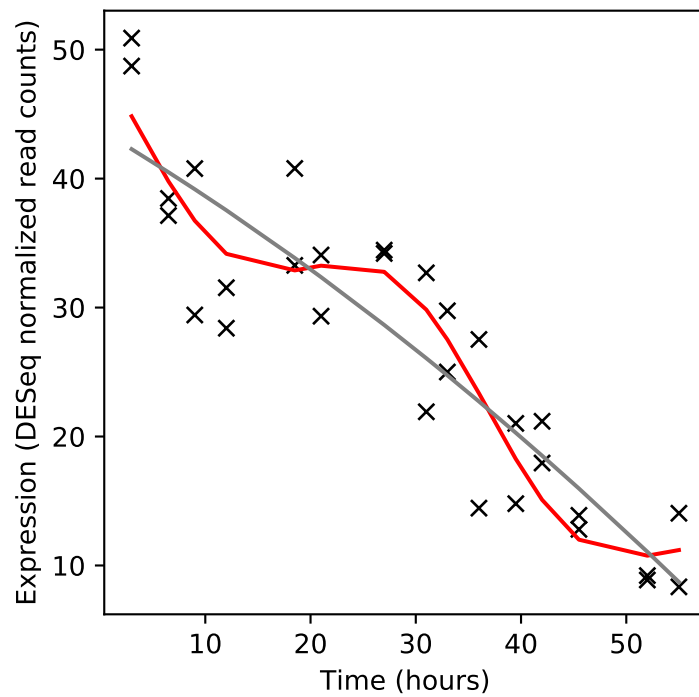

Rv0896/gltA2

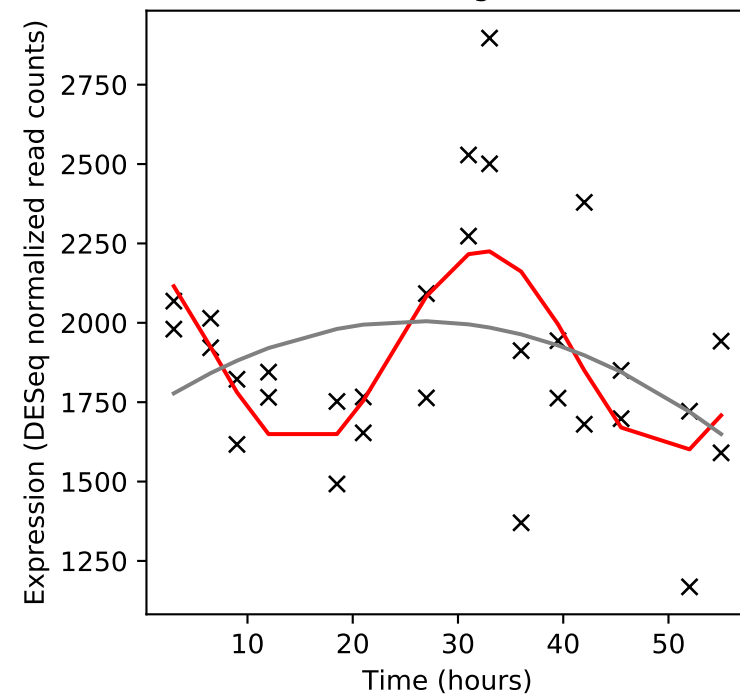

Rv0897c/-

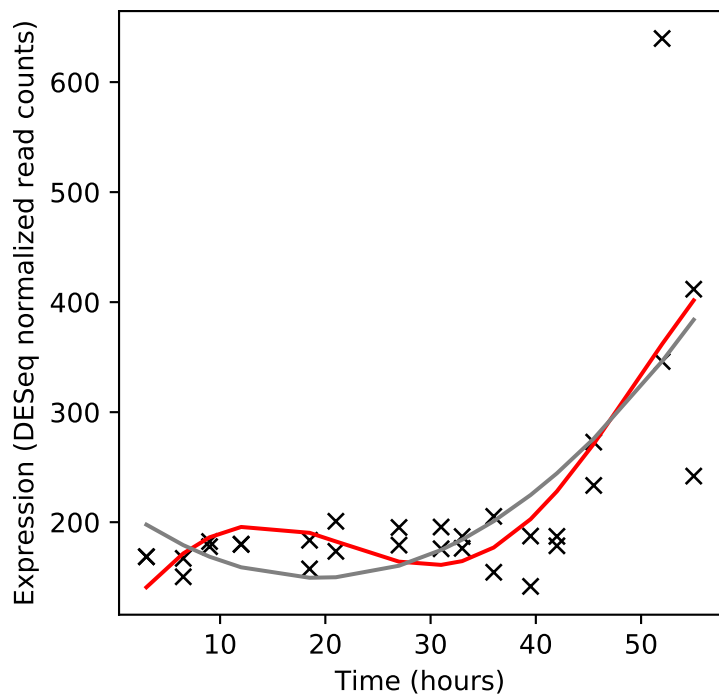

Rv0898c/-

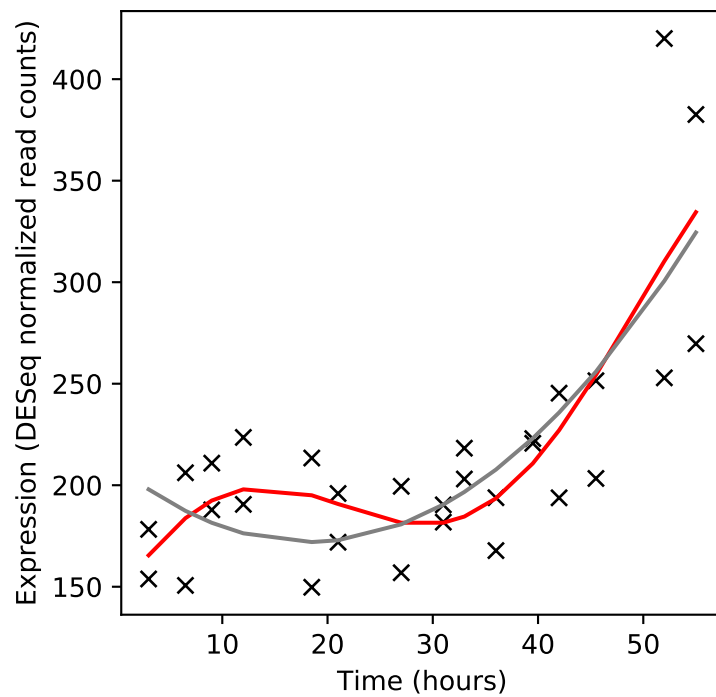

Rv0899/ompA

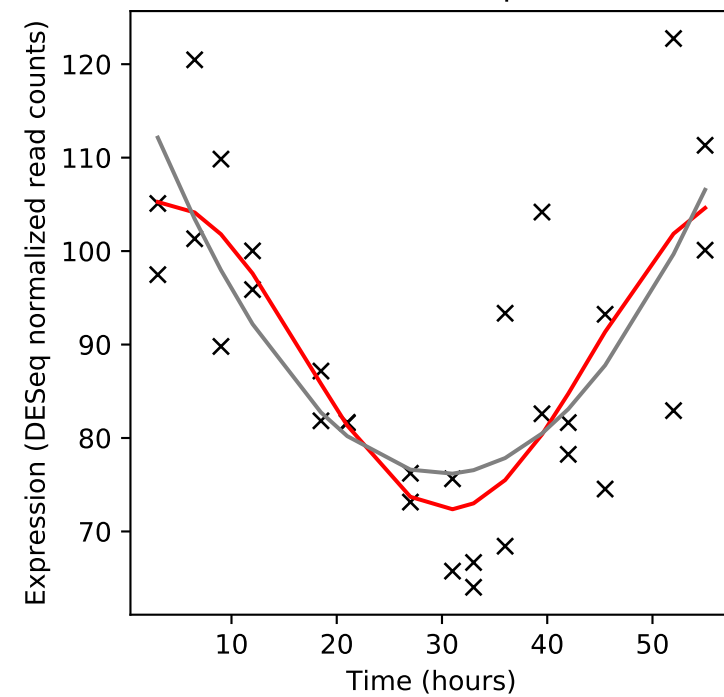

Rv0900/-

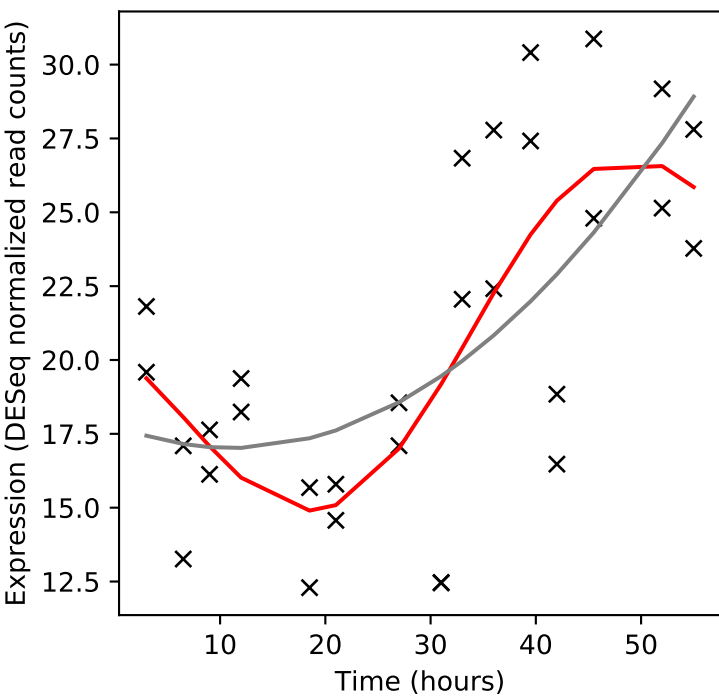

Rv0901/-

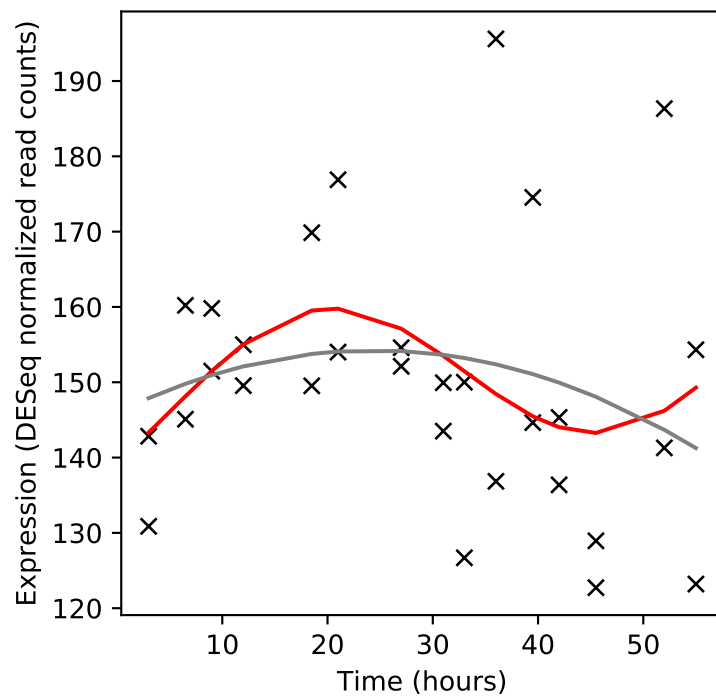

Rv0902c/prrB

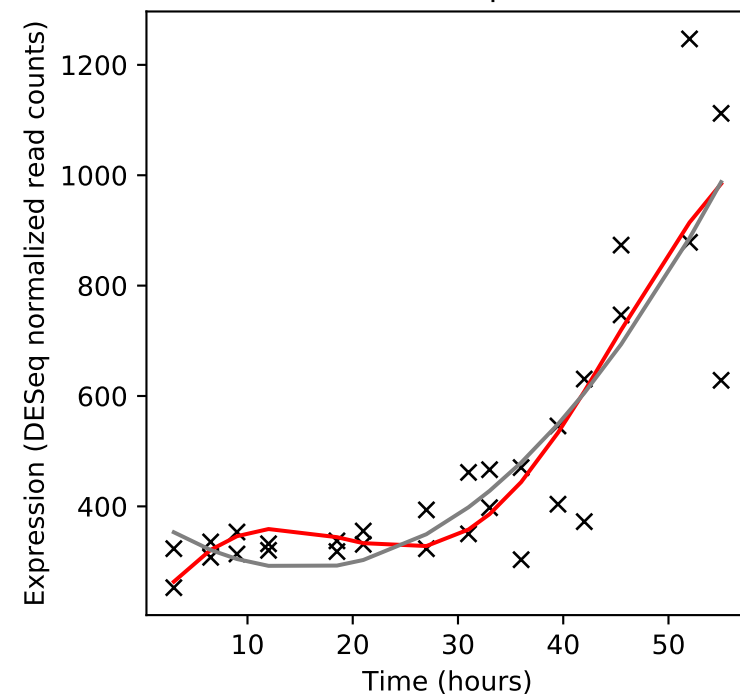

Rv0903c/prrA

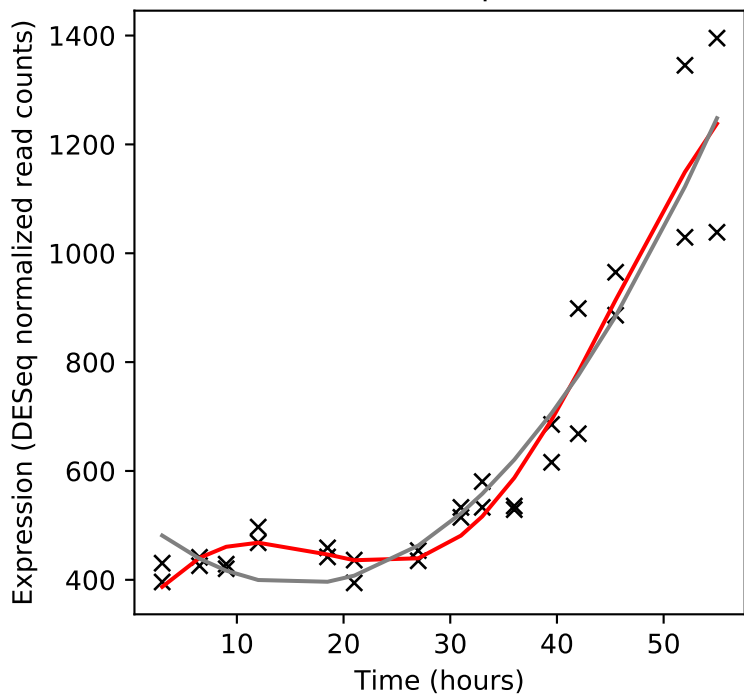

Rv0904c/accD3

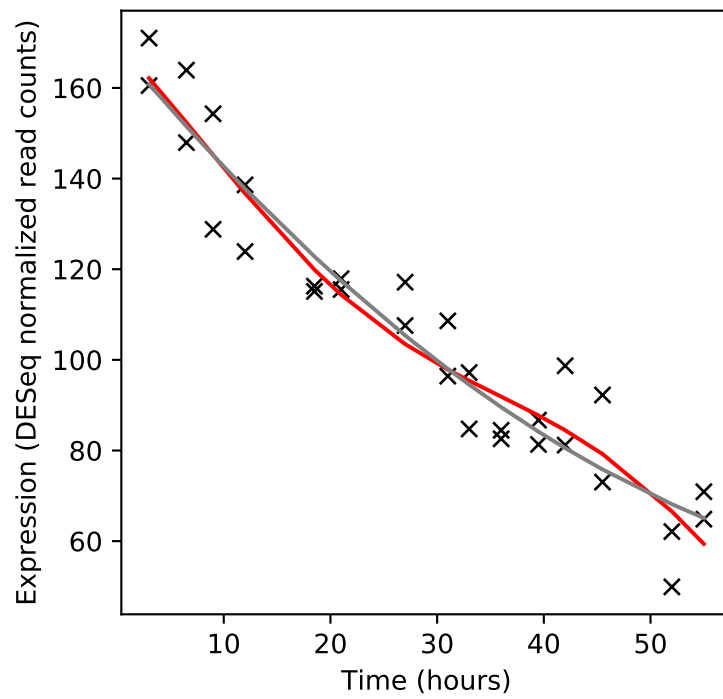

Rv0905/echA6

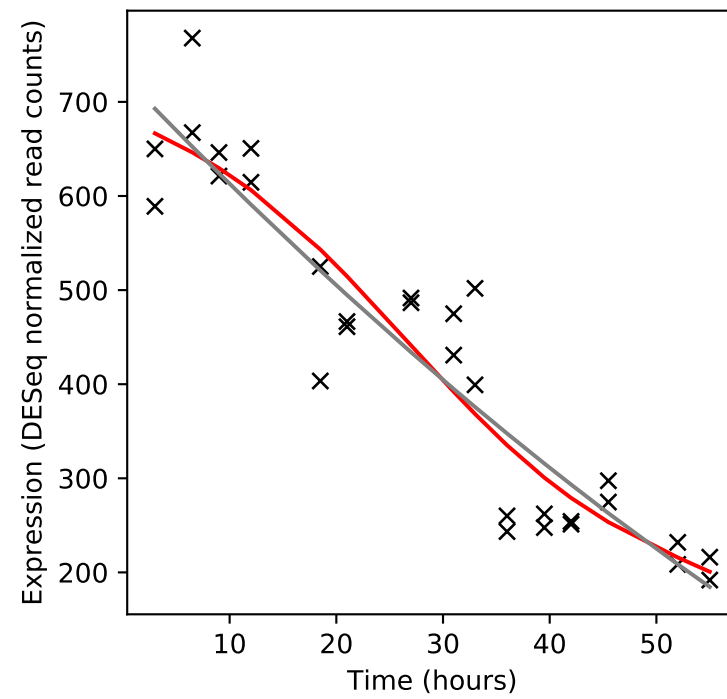

Rv0906/-

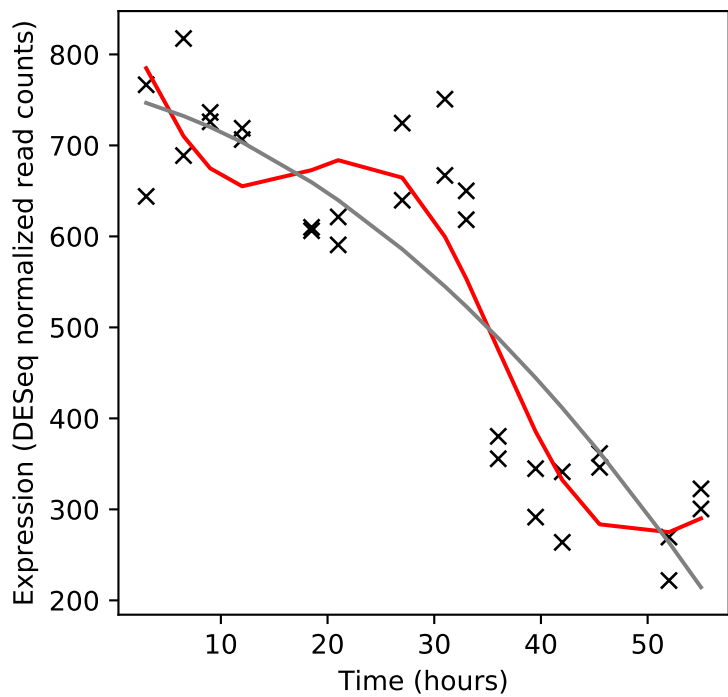

Rv0907/-

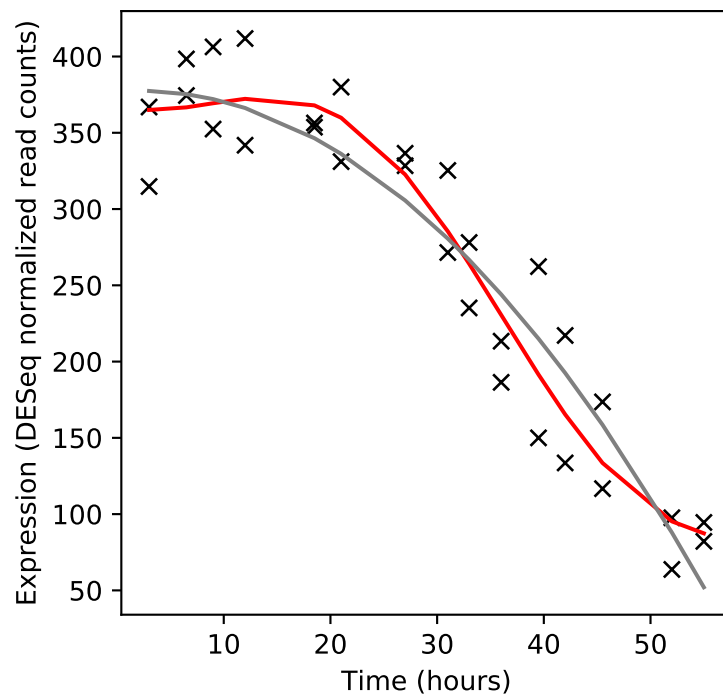

Rv0908/ctpE

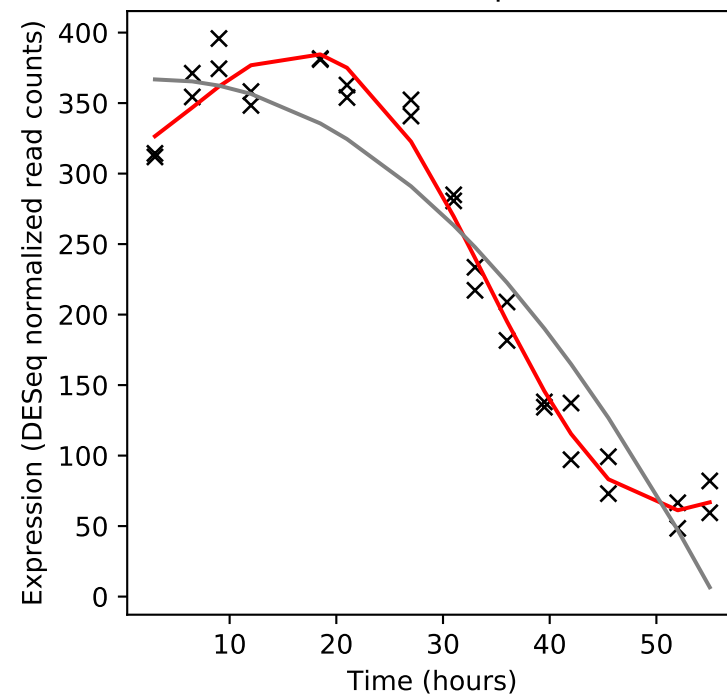

Rv0909/-

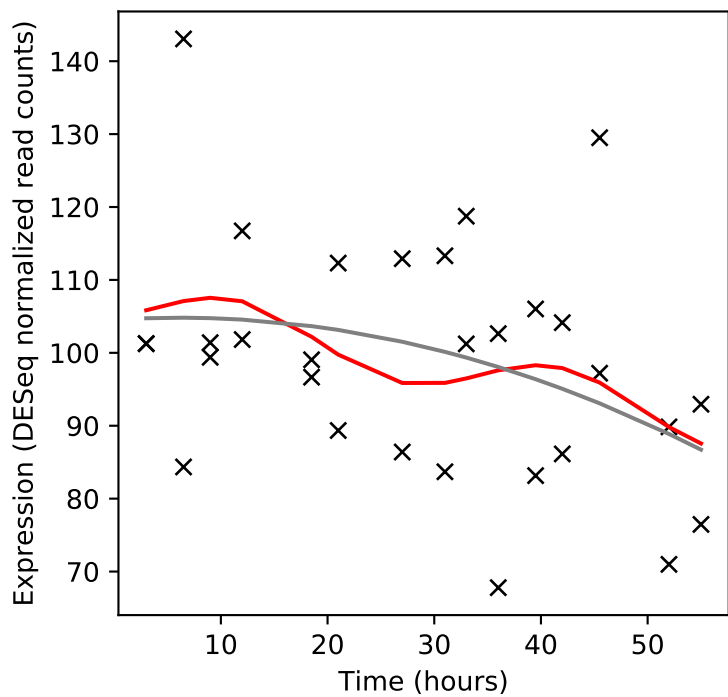

Rv0910/-

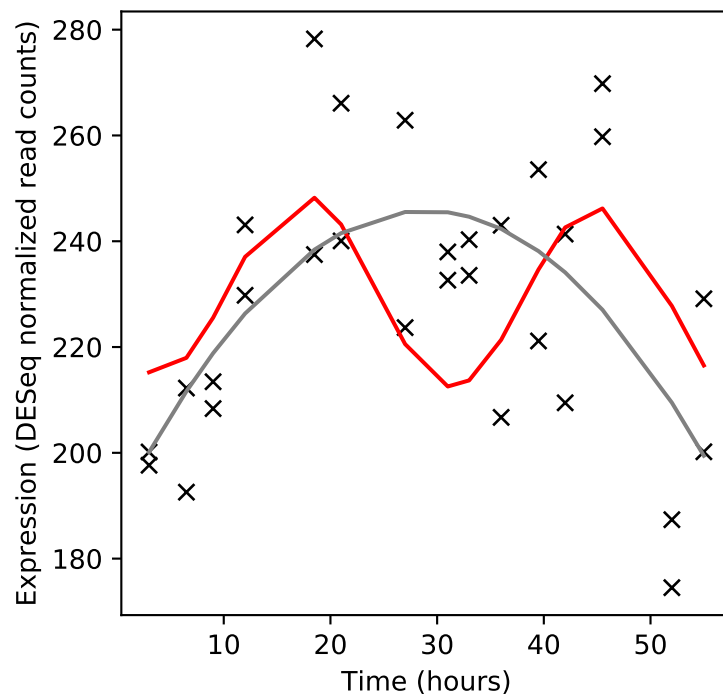

Rv0911/-

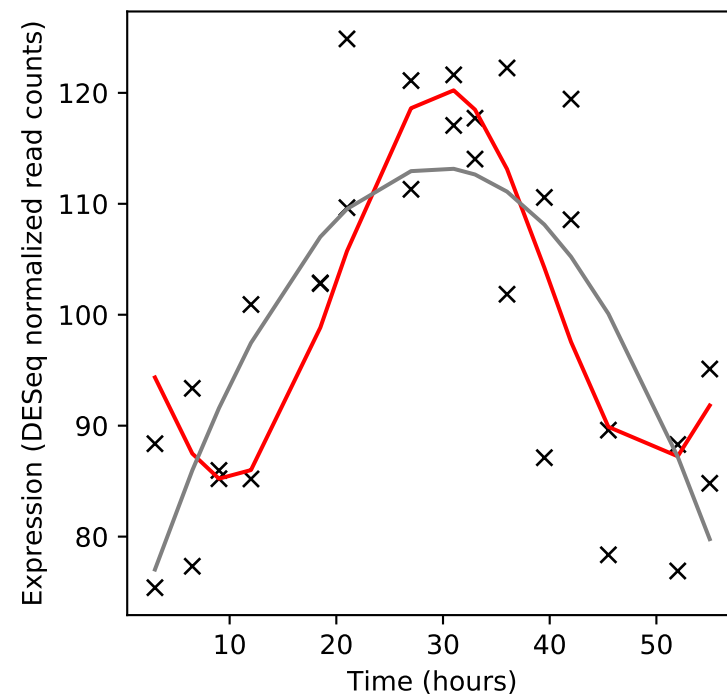

Rv0912/-

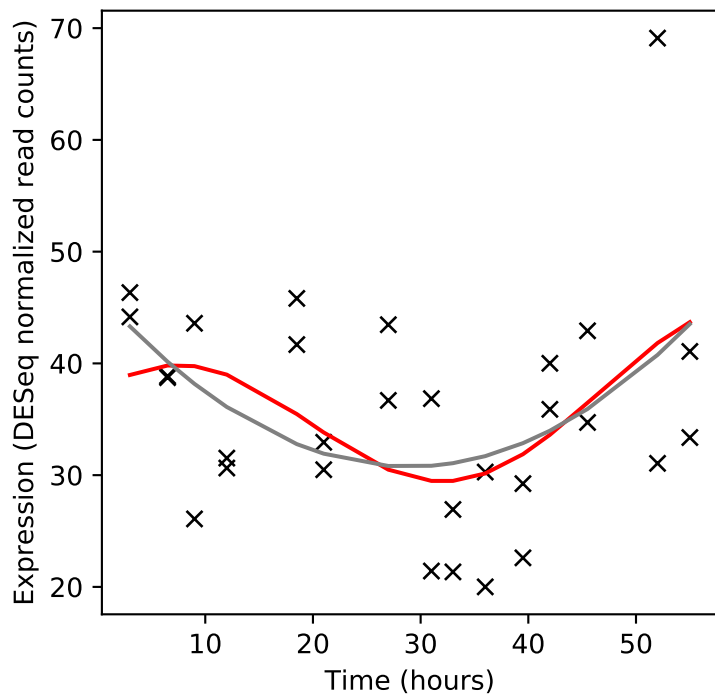

Rv0913c/-

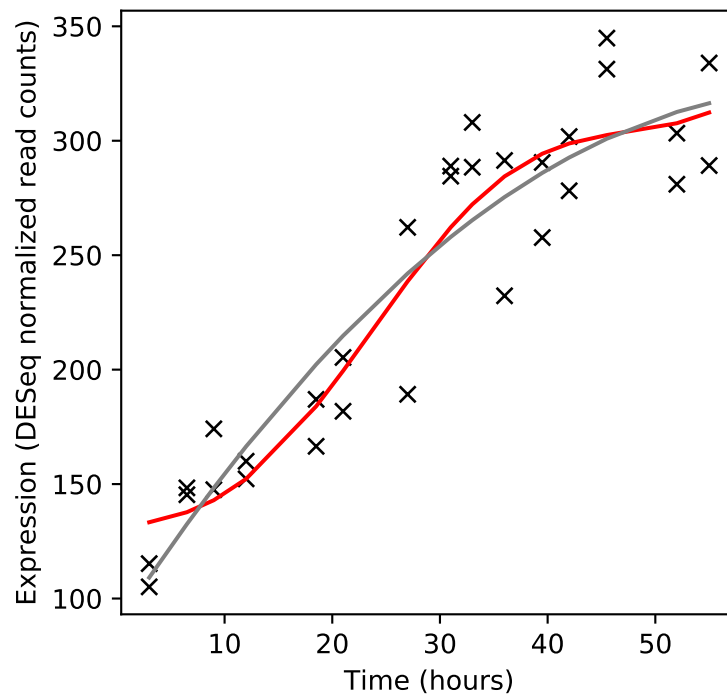

Rv0914c/-

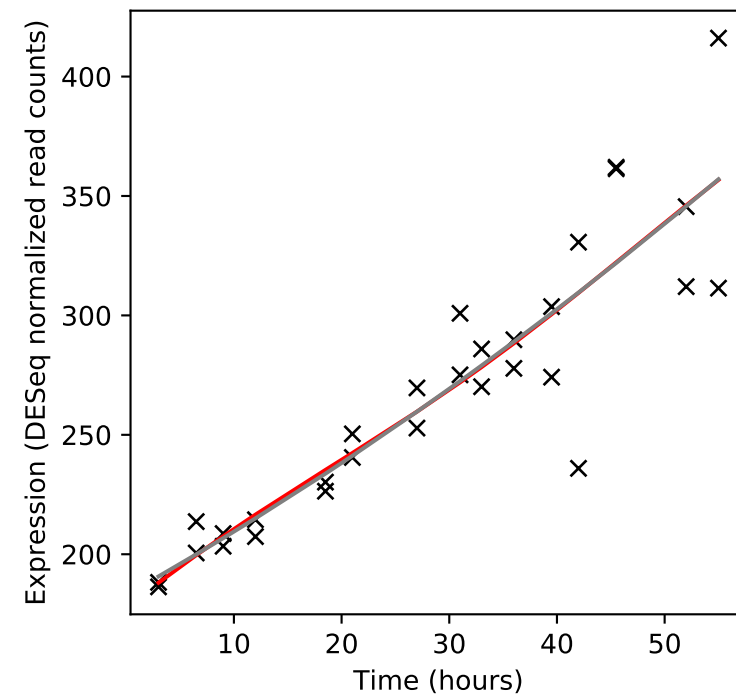

Rv0915c/PPE14

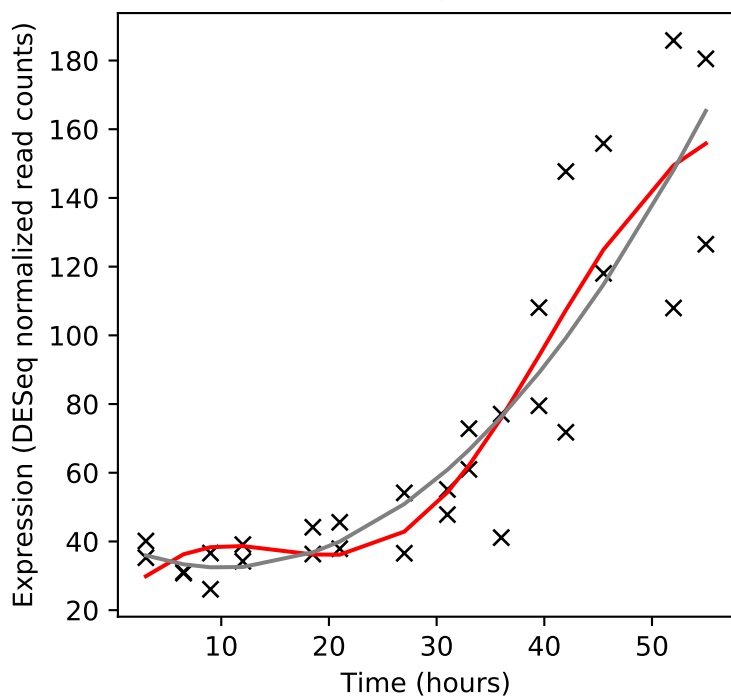

Rv0916c/PE7

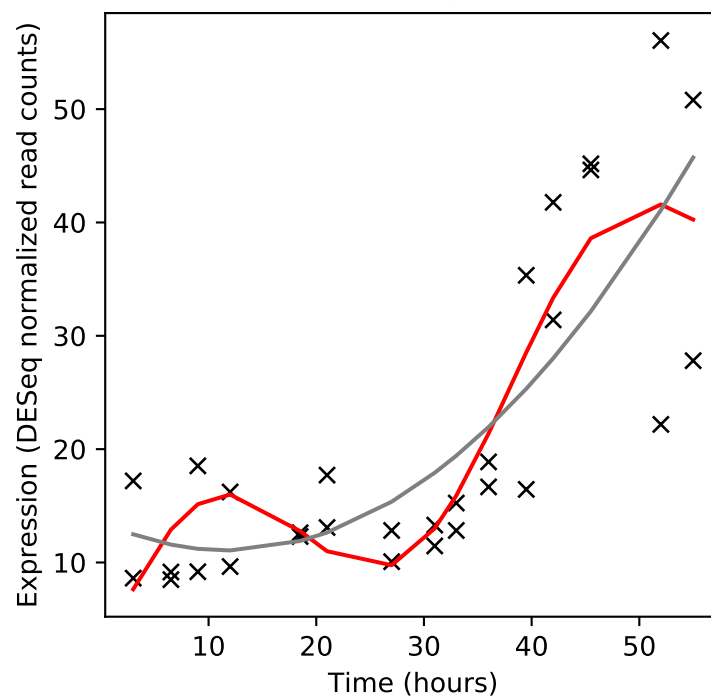

Rv0917/betP

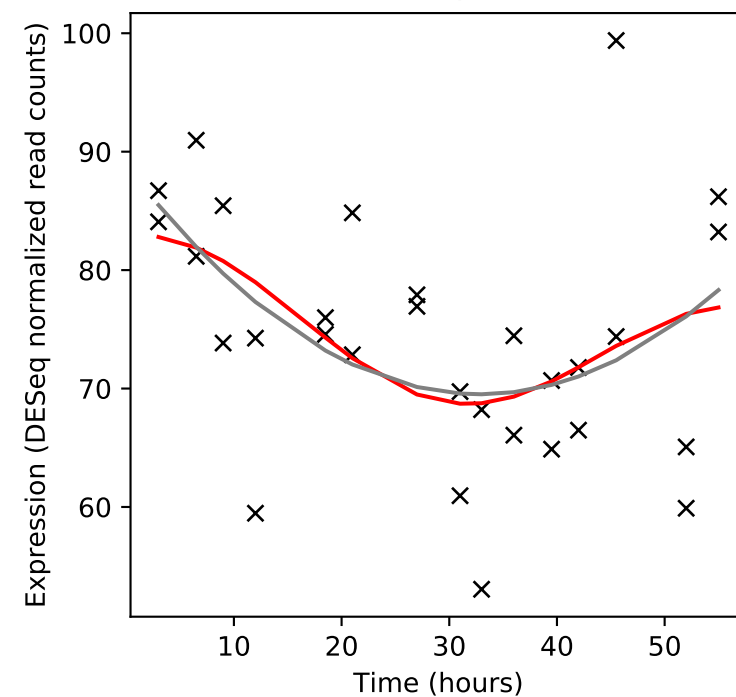

Rv0918/-

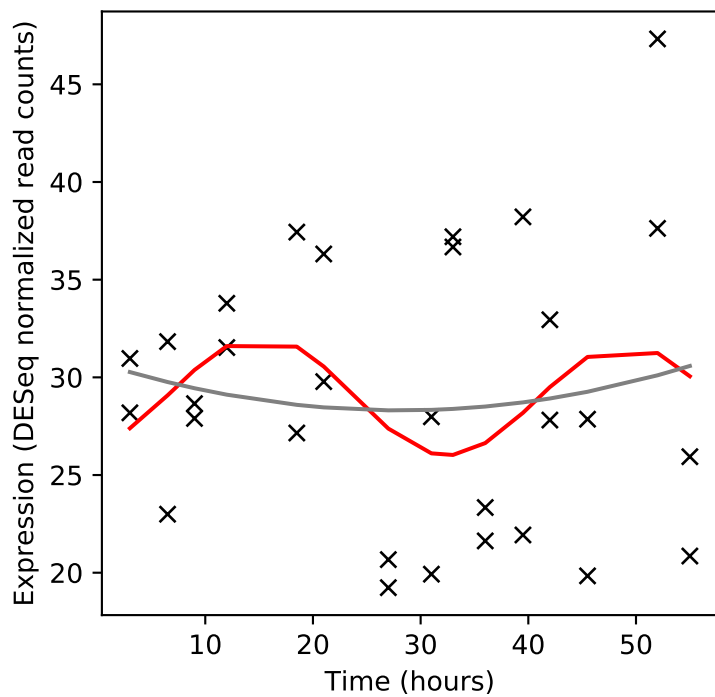

Rv0919/-

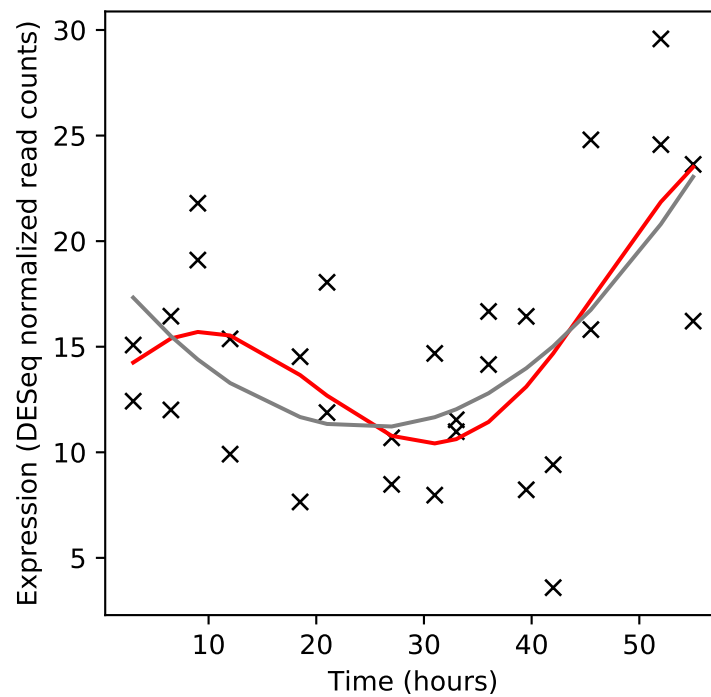

Rv0920c/-

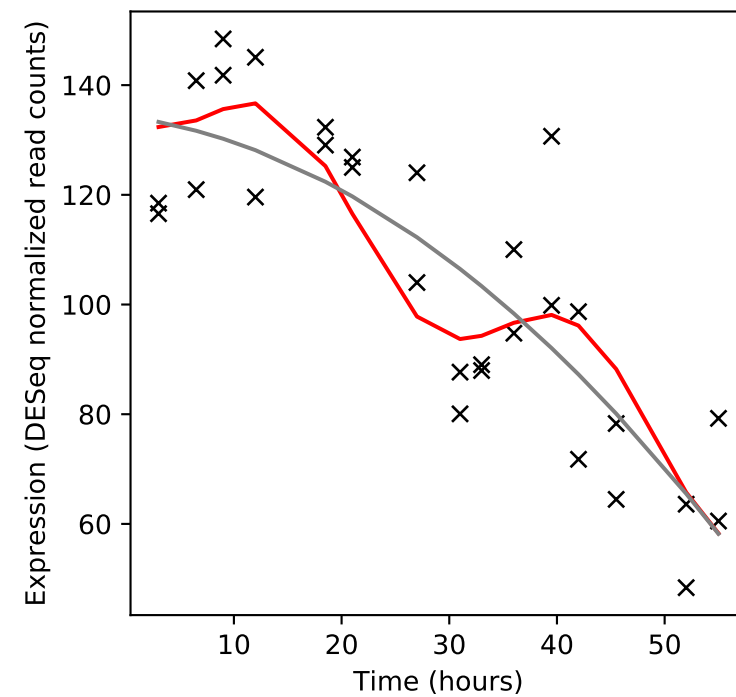

Rv0921/-

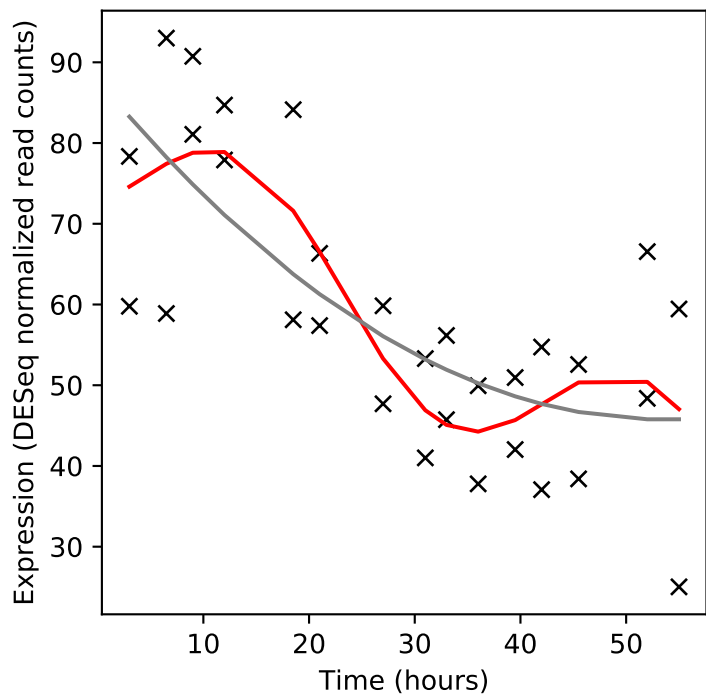

Rv0922/-

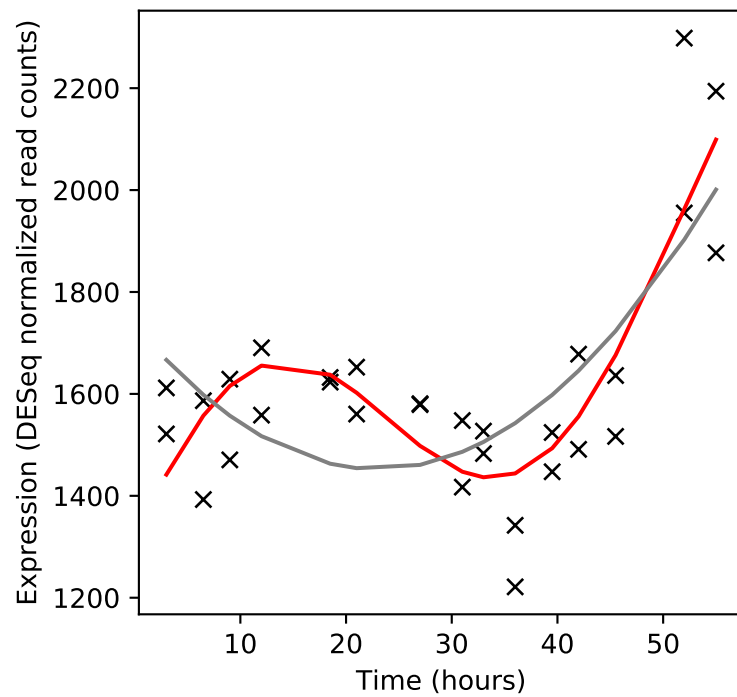

Rv0923c/-

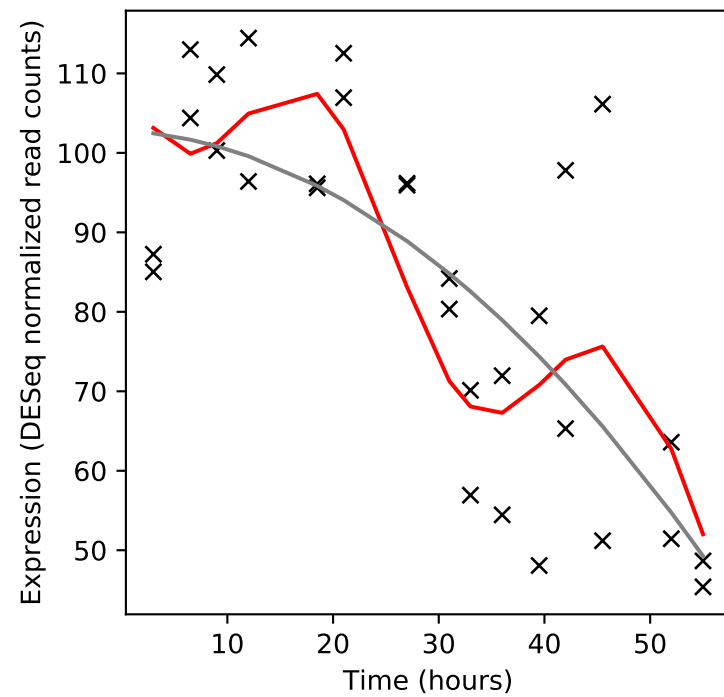

Rv0924c/mntH

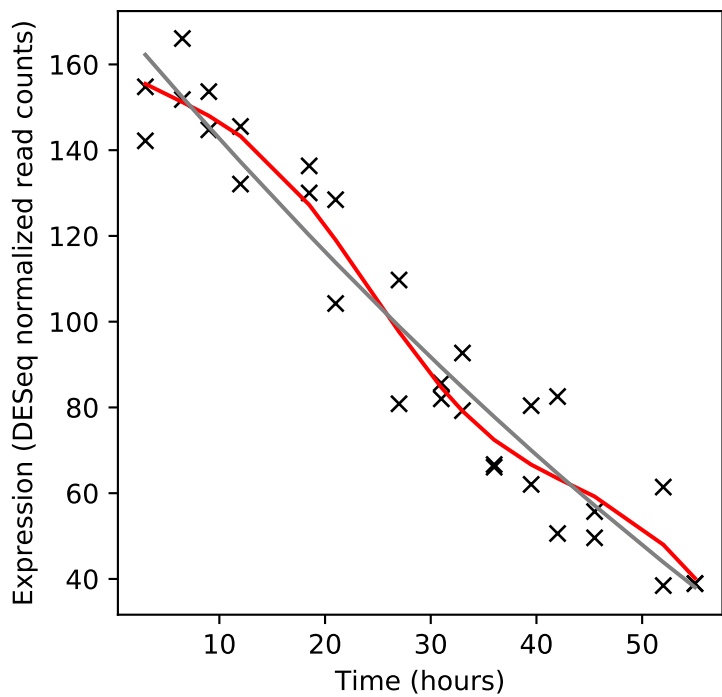

Rv0925c/-

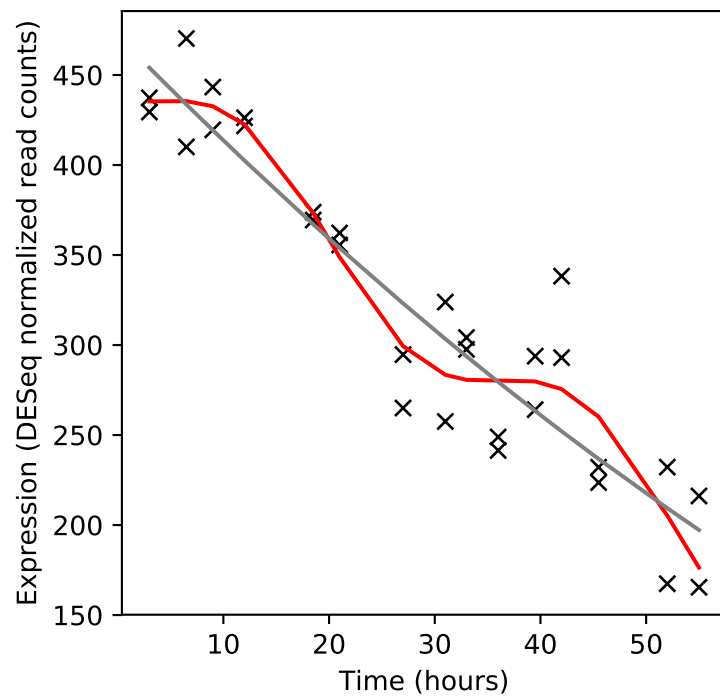

Rv0926c/-

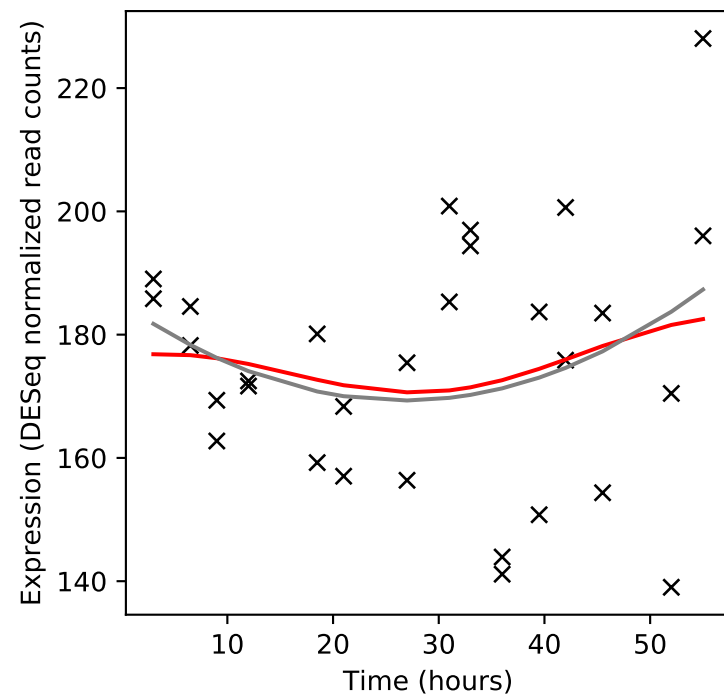

Rv0927c/-

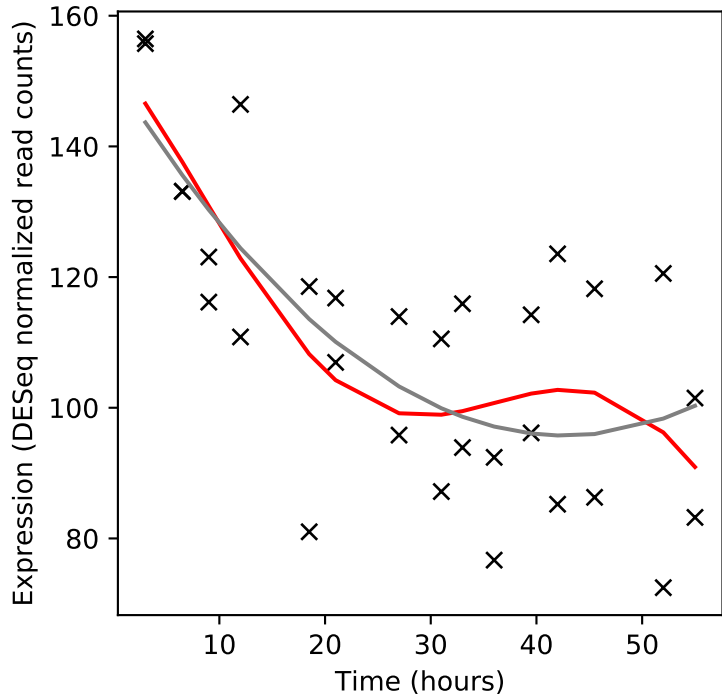

Rv0928/pstS3

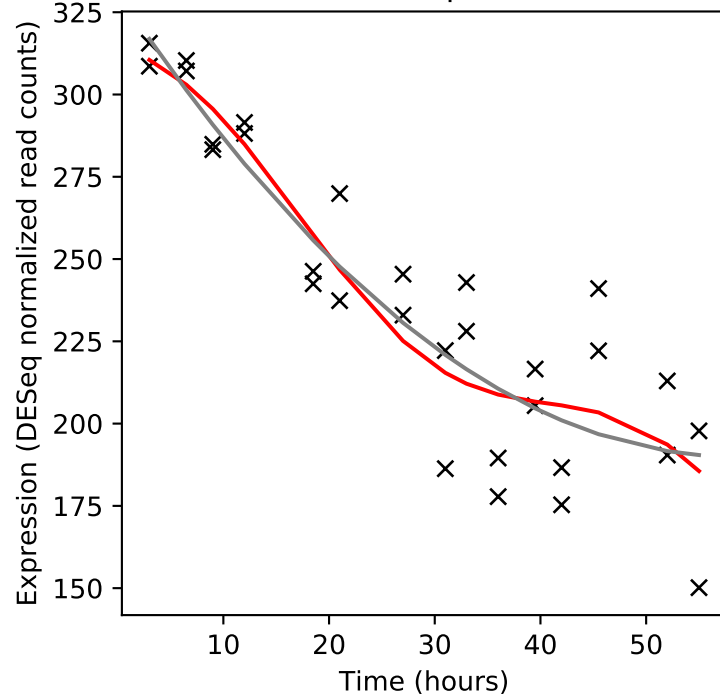

Rv0929/pstC2

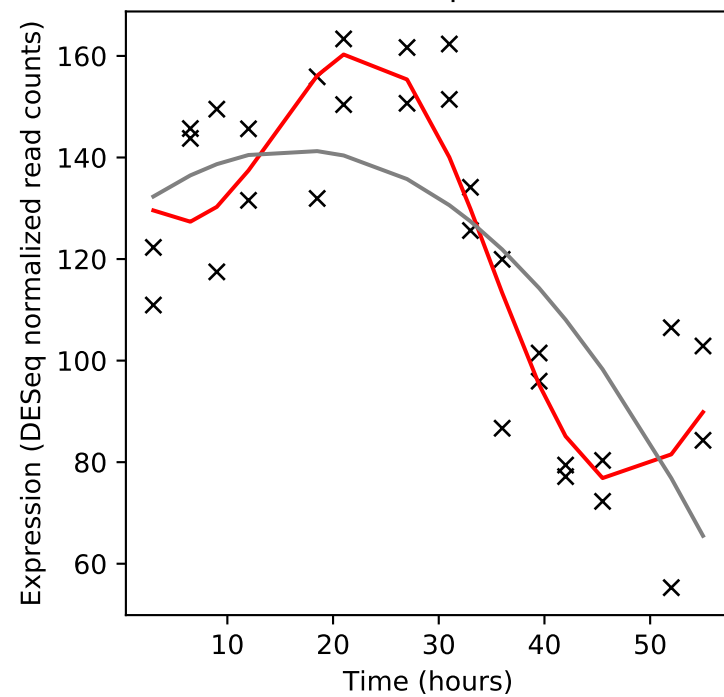

Rv0930/pstA1

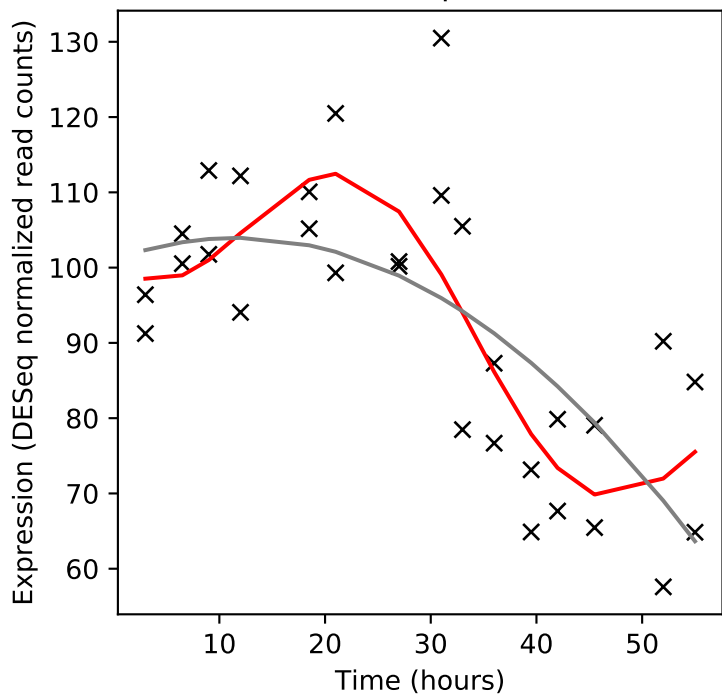

Rv0931c/pknD

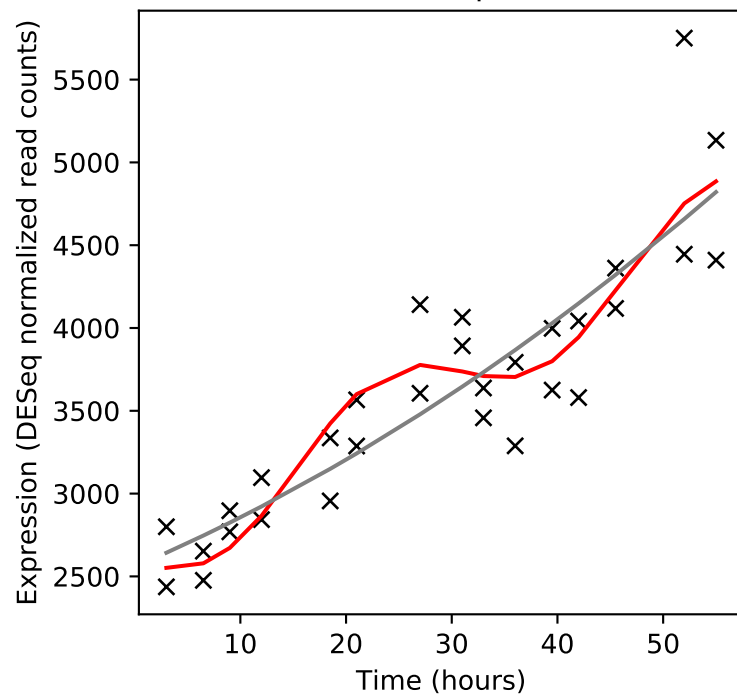

Rv0932c/pstS2

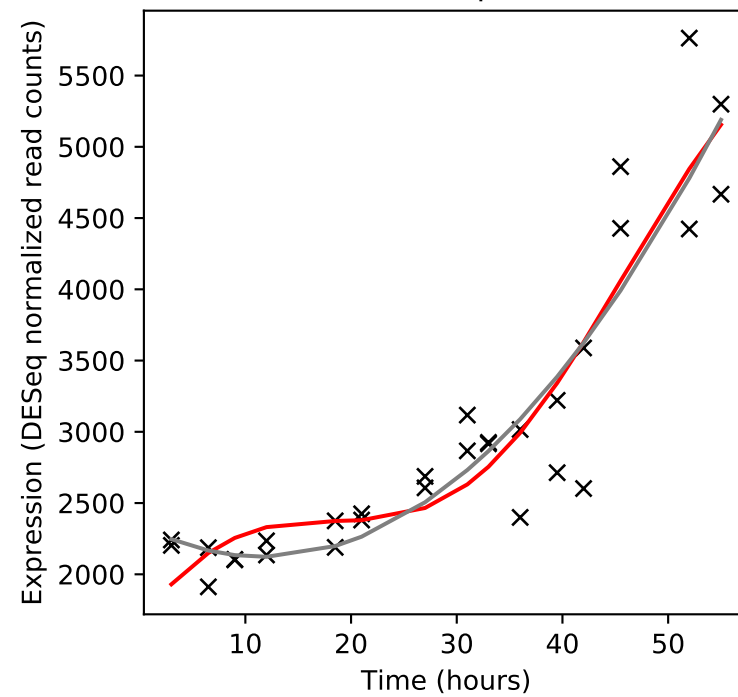

Rv0933/pstB

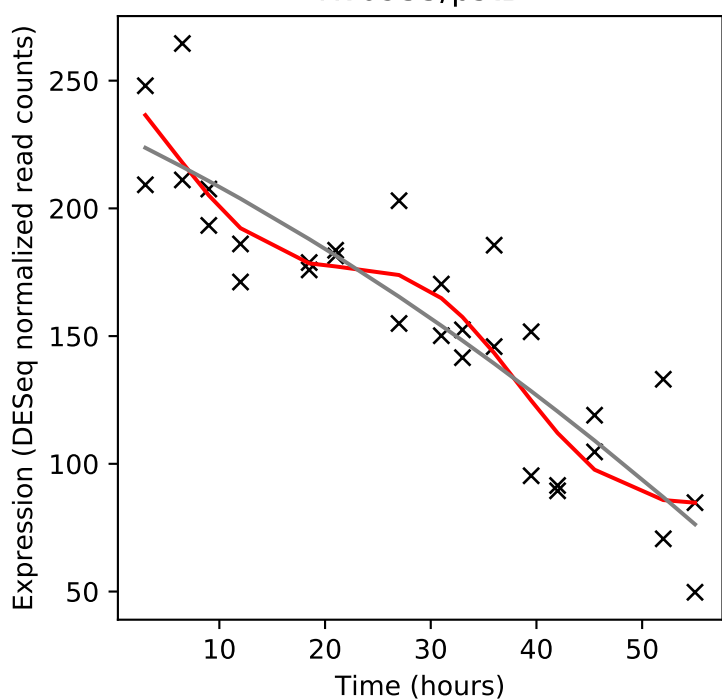

Rv0934/pstS1

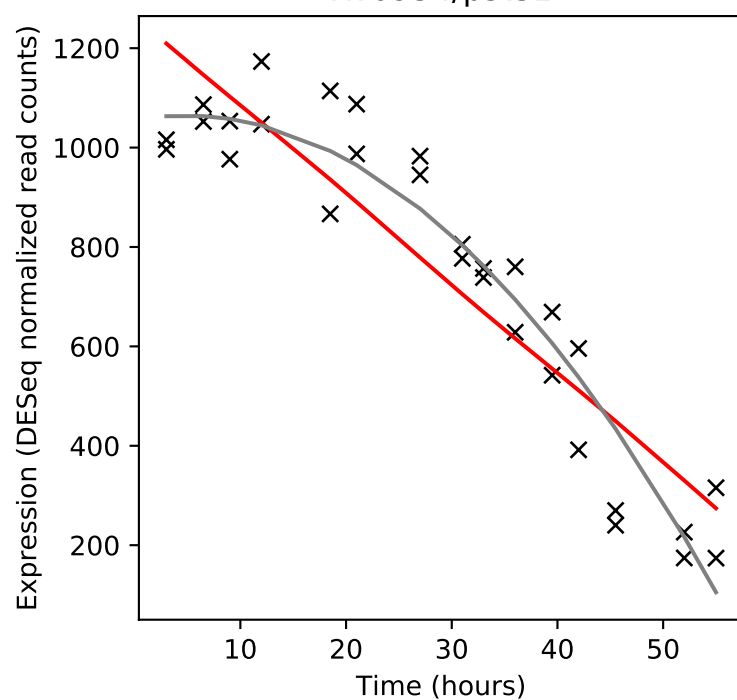

Rv0935/pstC1

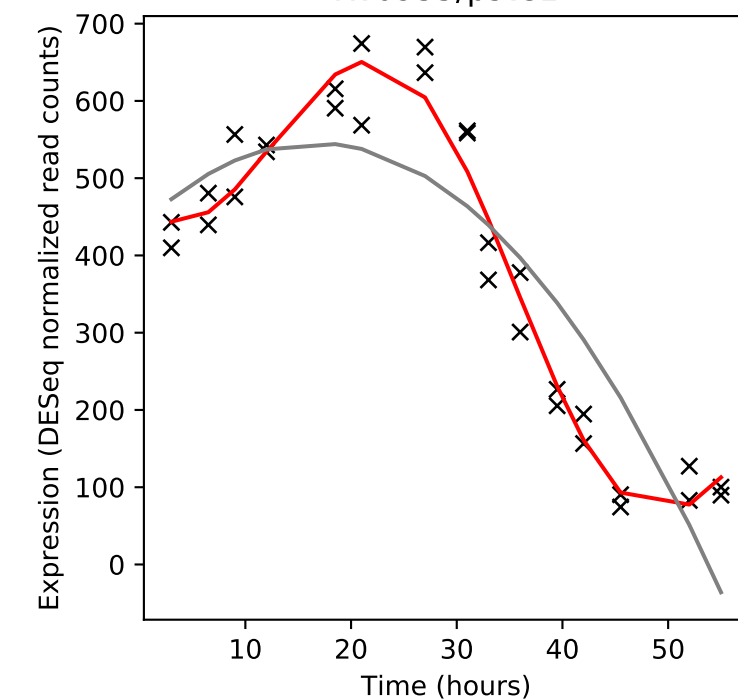

Rv0936/pstA2

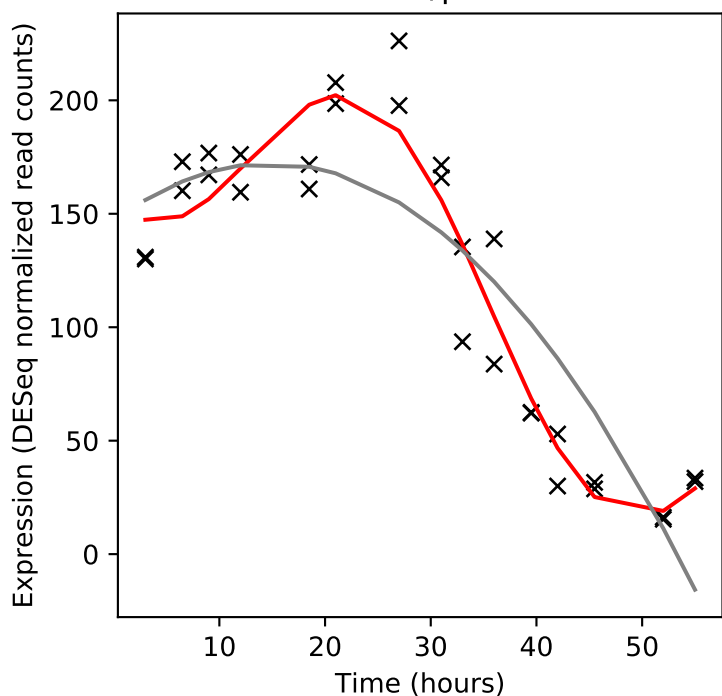

Rv0937c/mku

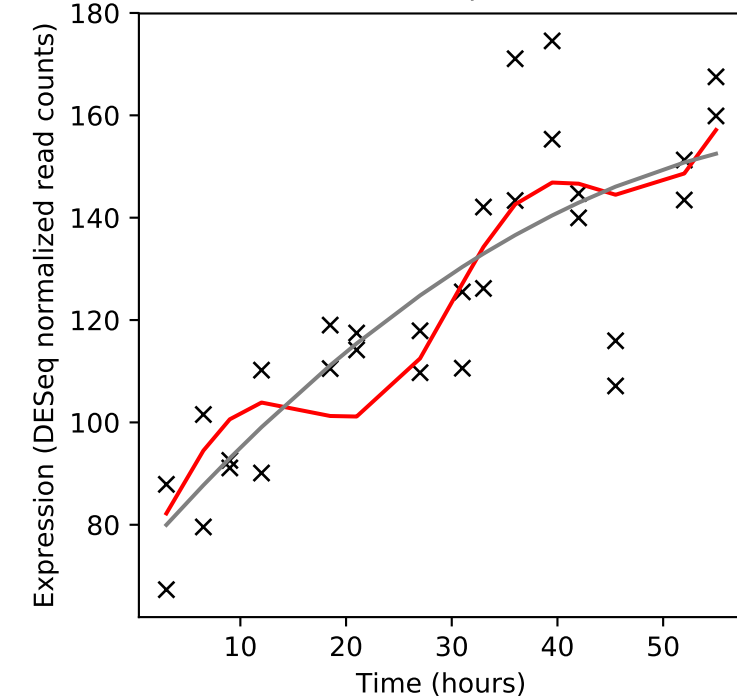

Rv0938/ligD

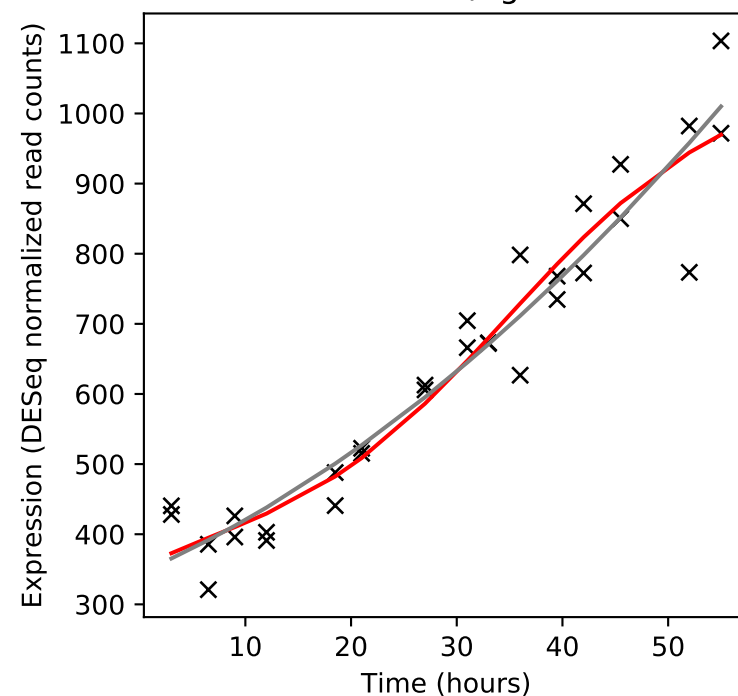



Rv0939/-

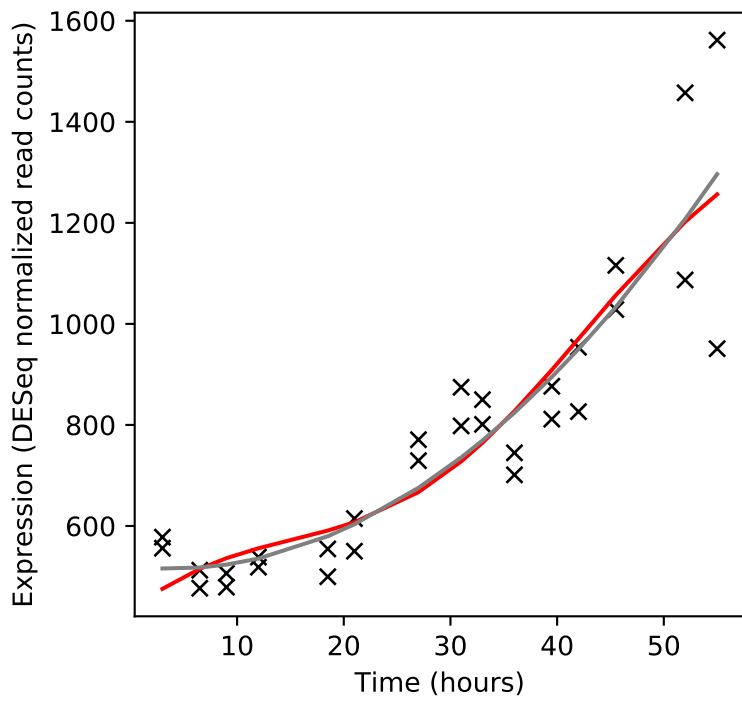

Rv0940c/-

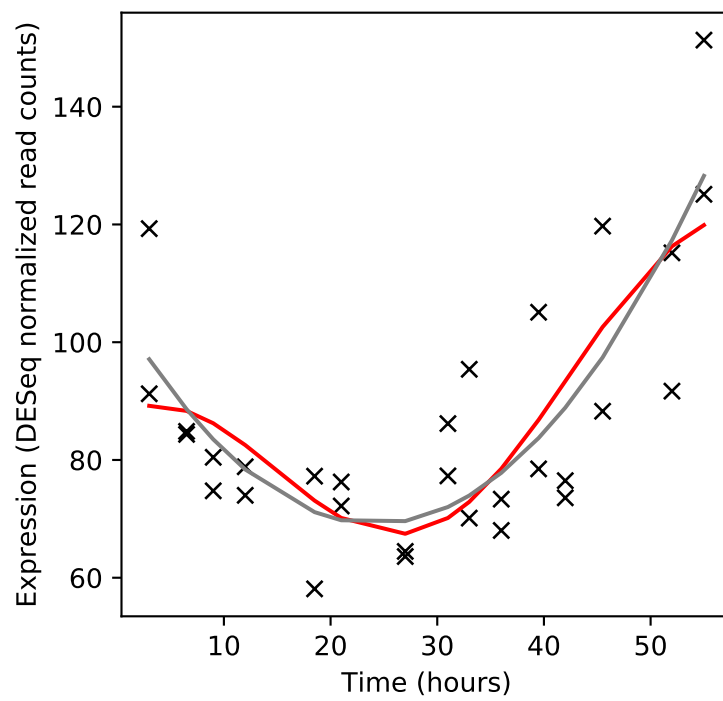

Rv0941c/-

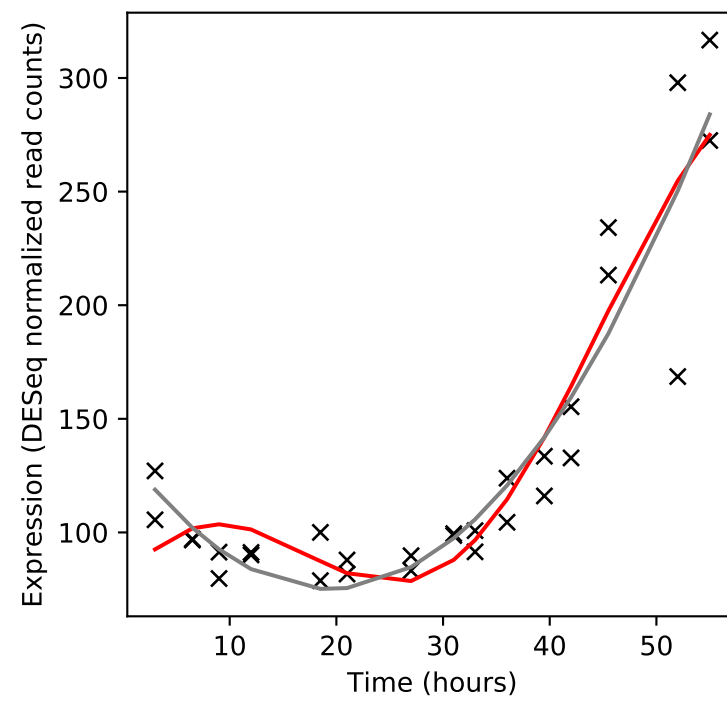

Rv0942/-

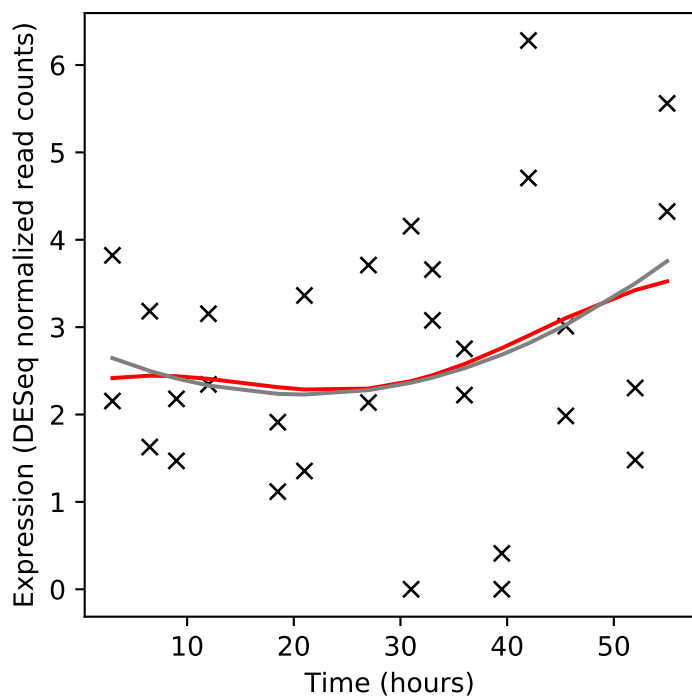

Rv0943c/-

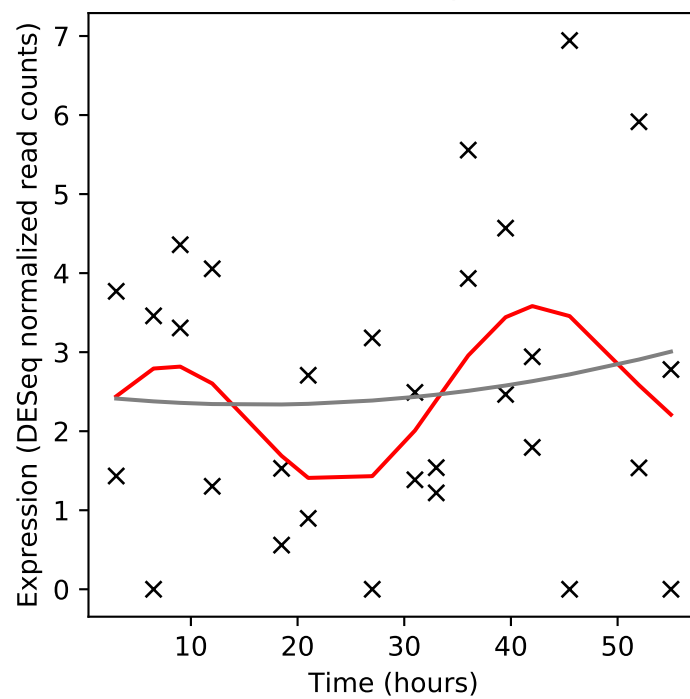

Rv0944/-

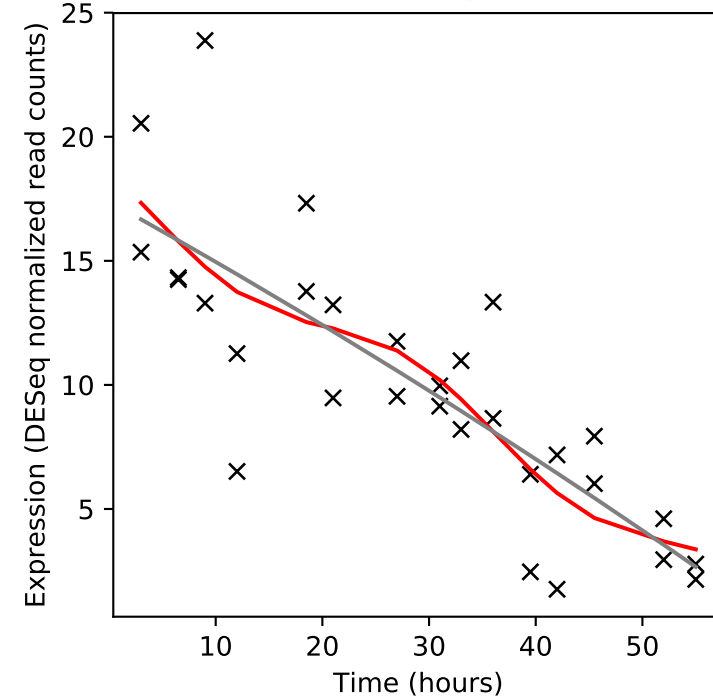

Rv0945/-

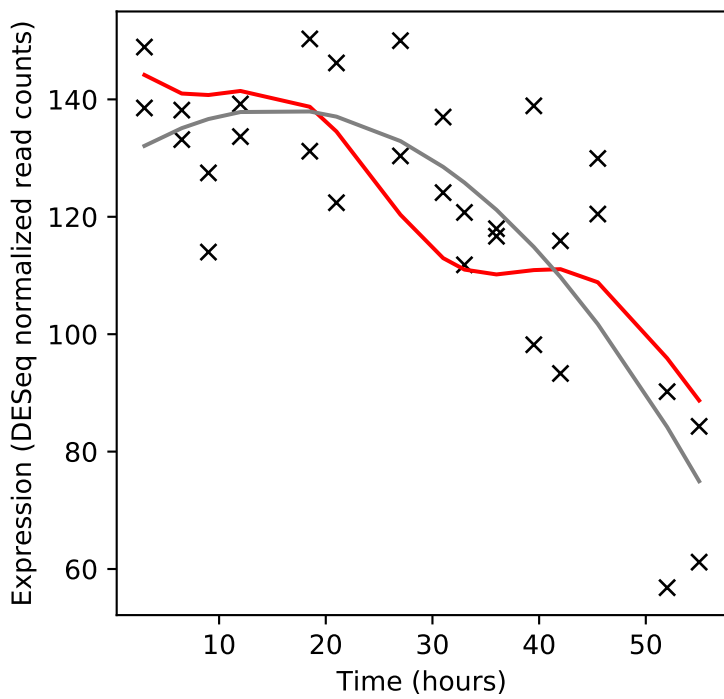

Rv0946c/pgi

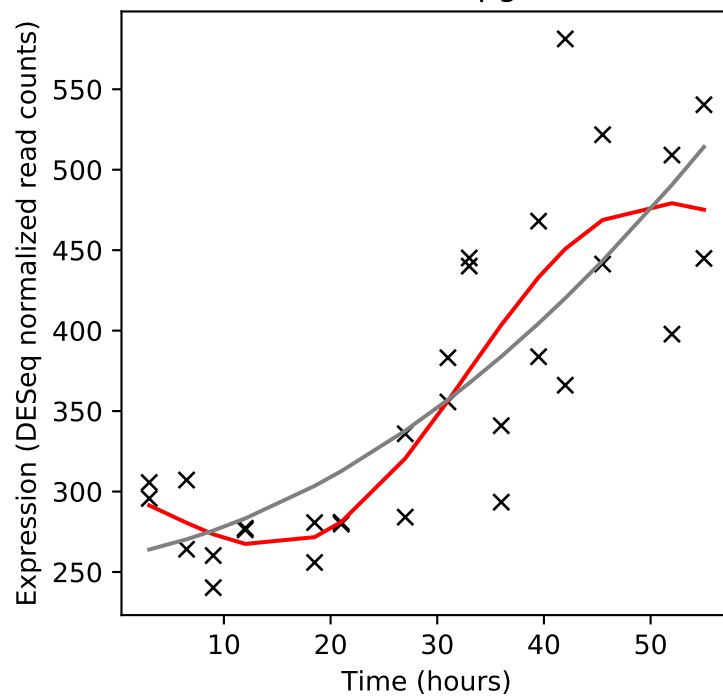

Rv0948c/-

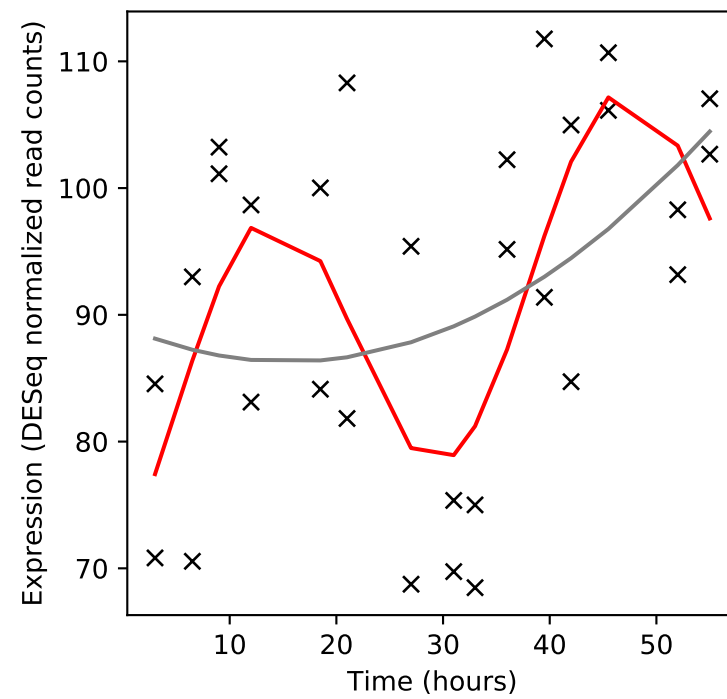

Rv0949/uvrD1

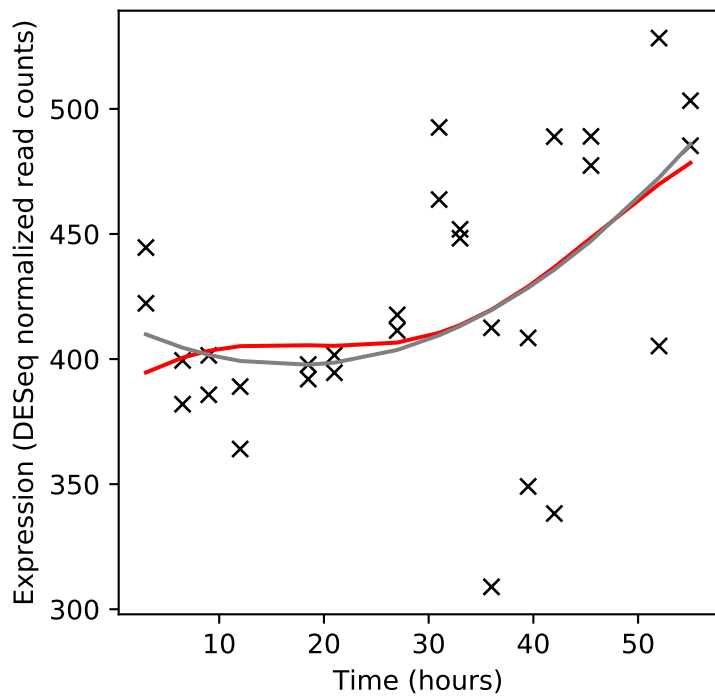

Rv0950c/-

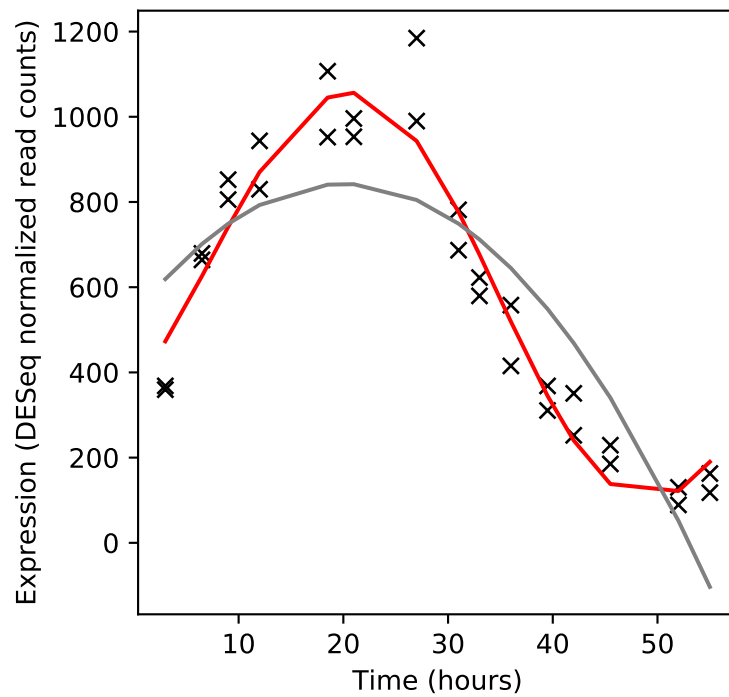

Rv0951/sucC

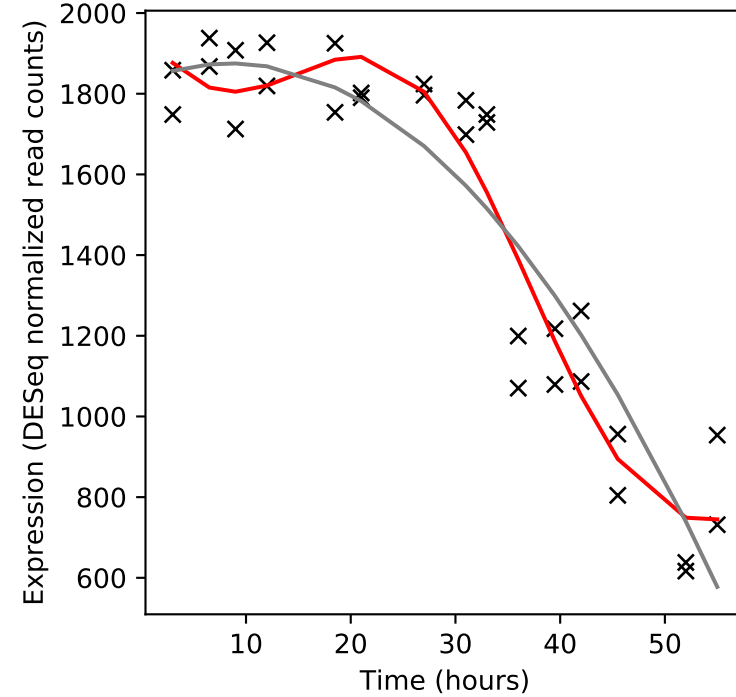

Rv0952/sucD

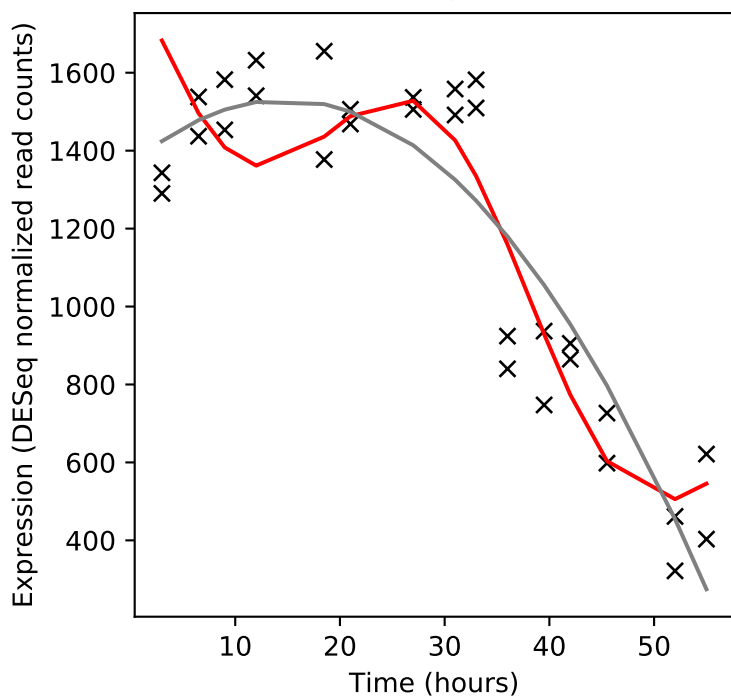

Rv0953c/-

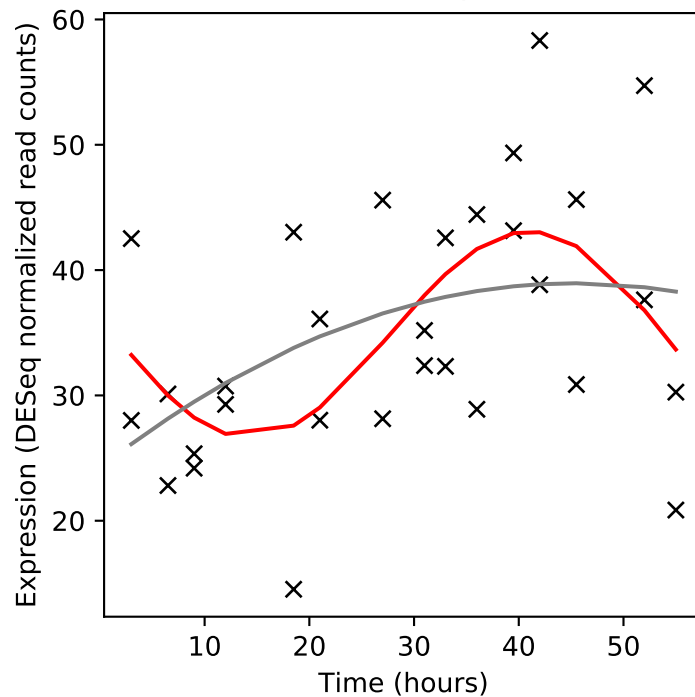

Rv0954/-

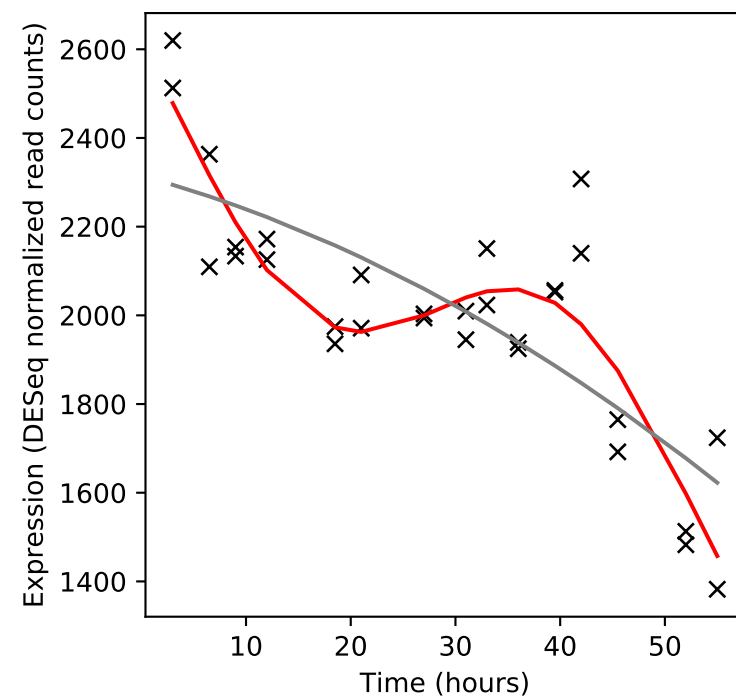

Rv0955/-

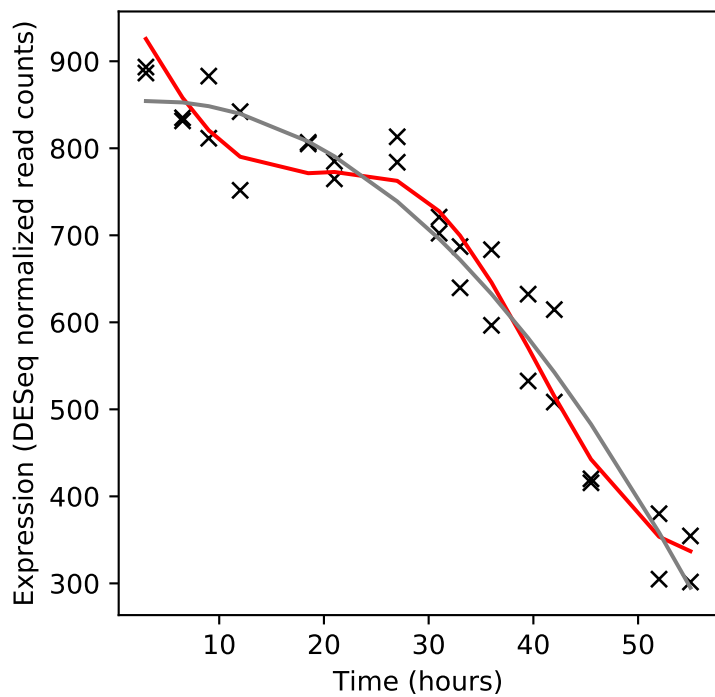

Rv0956/purN

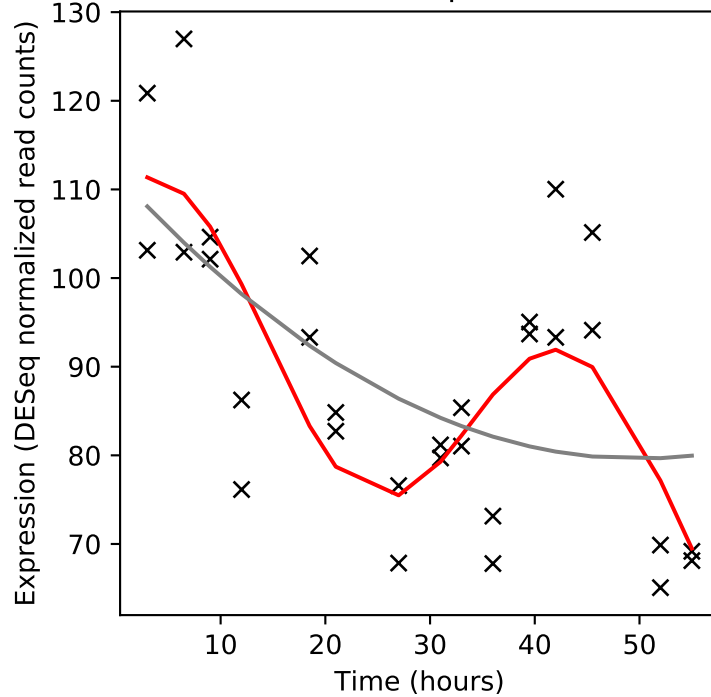

Rv0957/purH

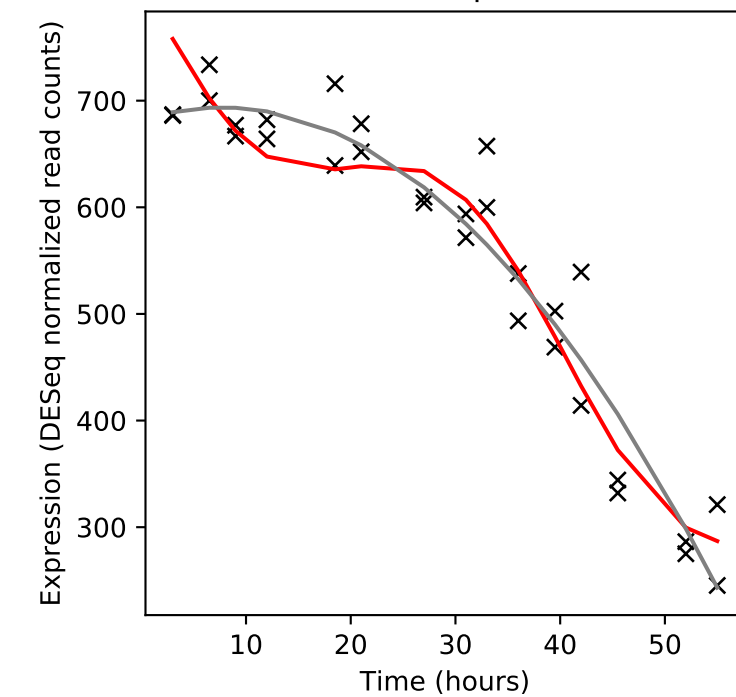

Rv0958/-

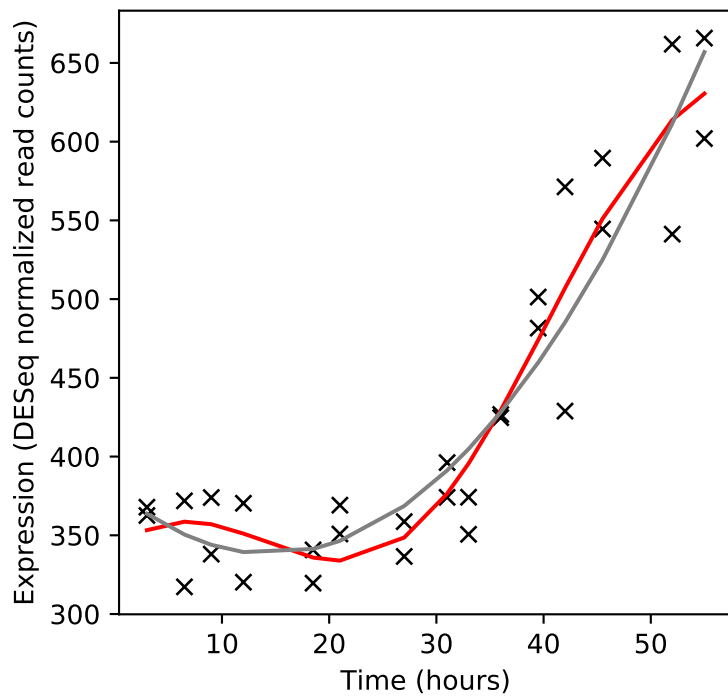

Rv0959/-

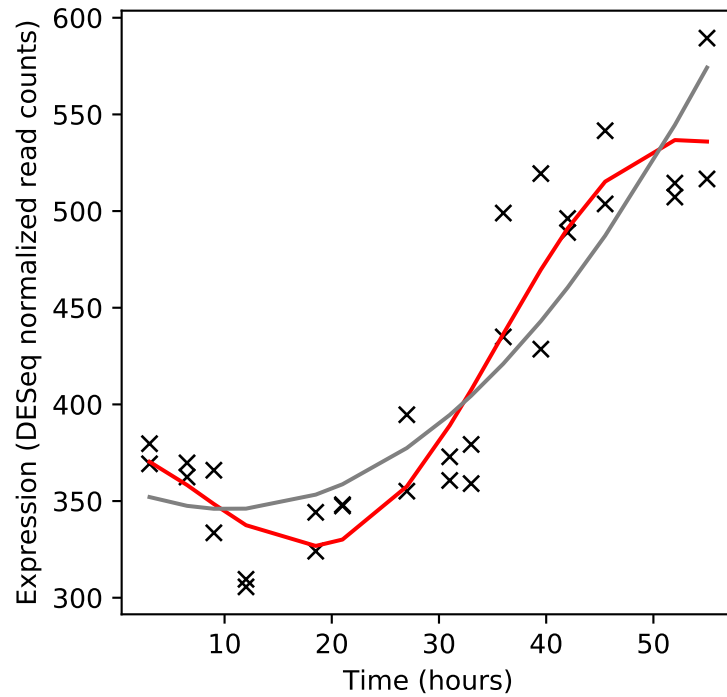

Rv0959A/vapB9

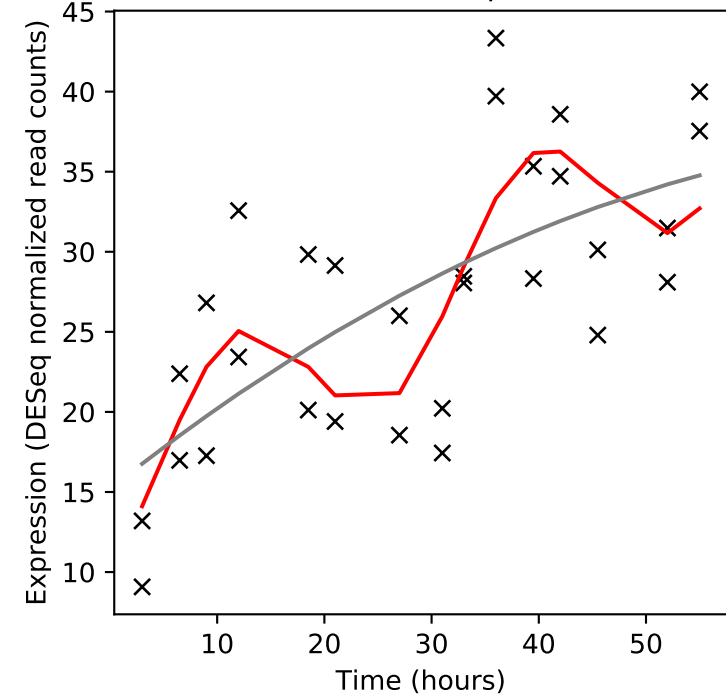

Rv0960/vapC9

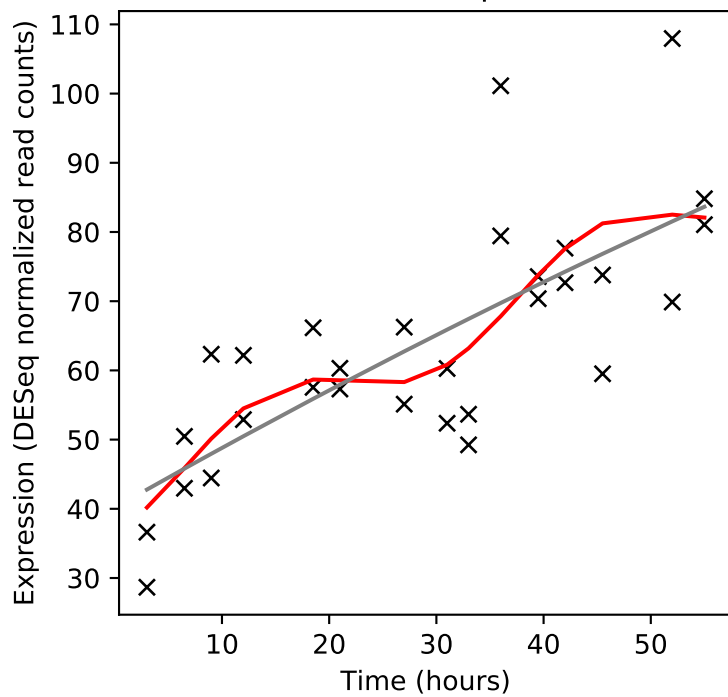

Rv0961/-

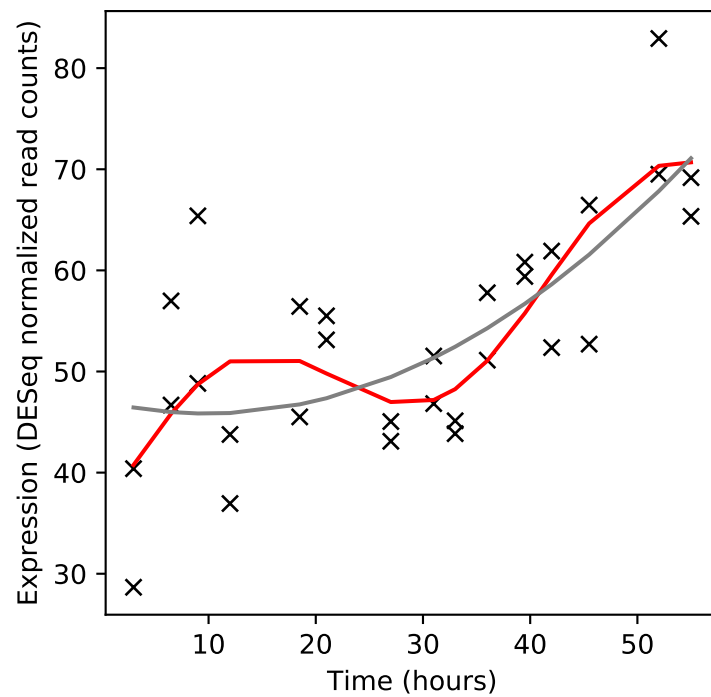

Rv0962c/lprP

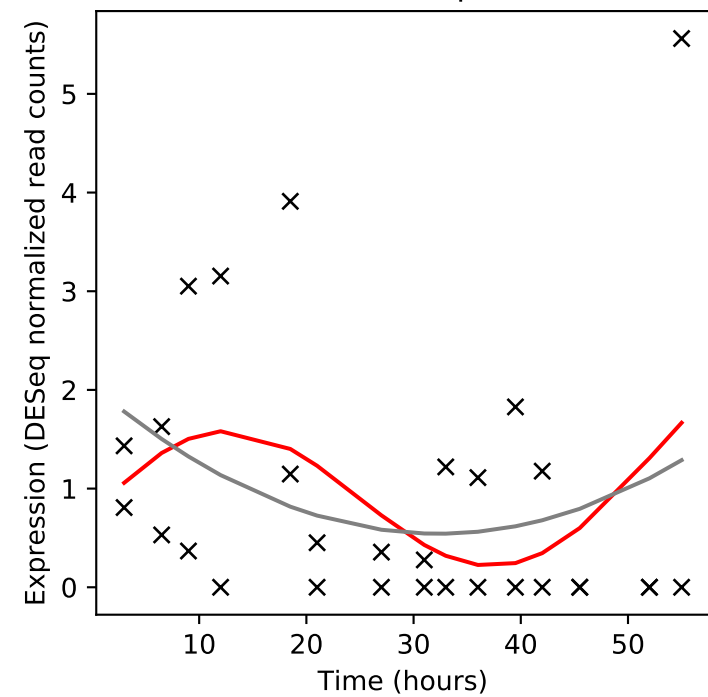

Rv0963c/-

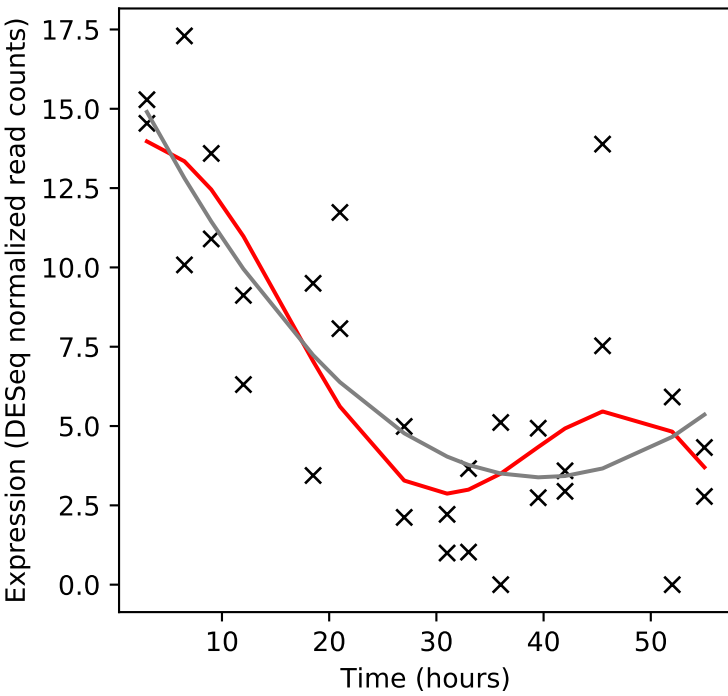

Rv0964c/-

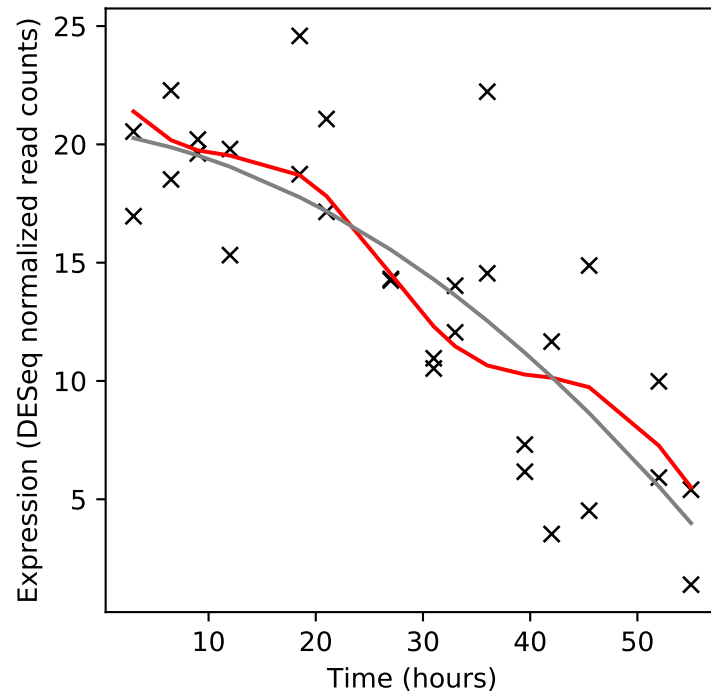

Rv0965c/-

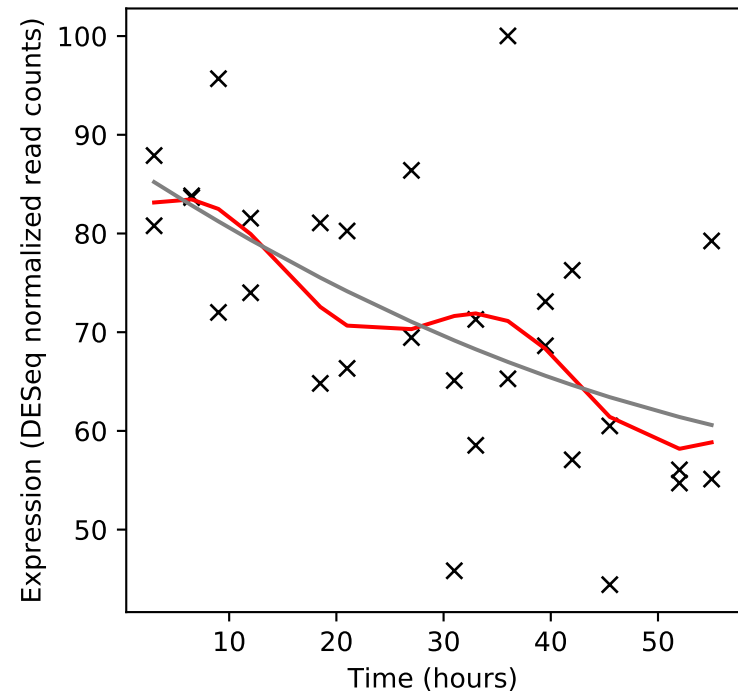

Rv0966c/-

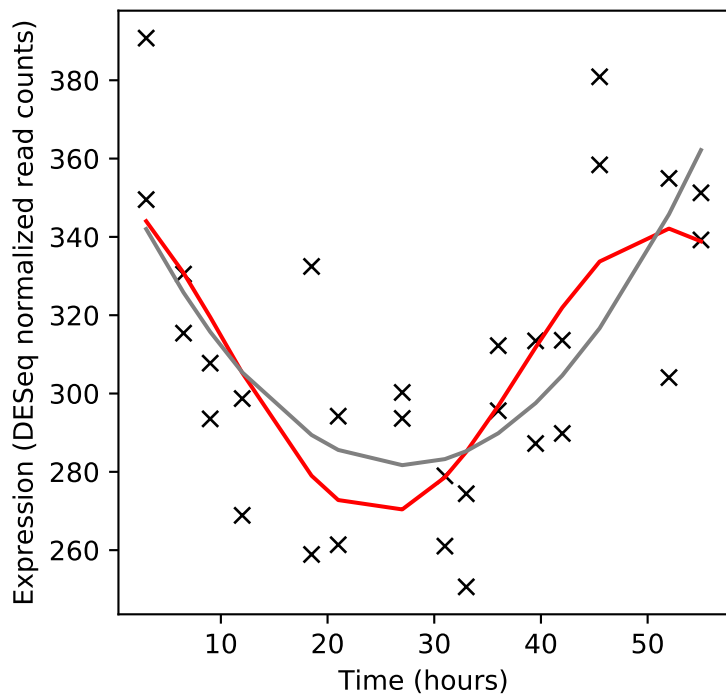

Rv0967/csoR

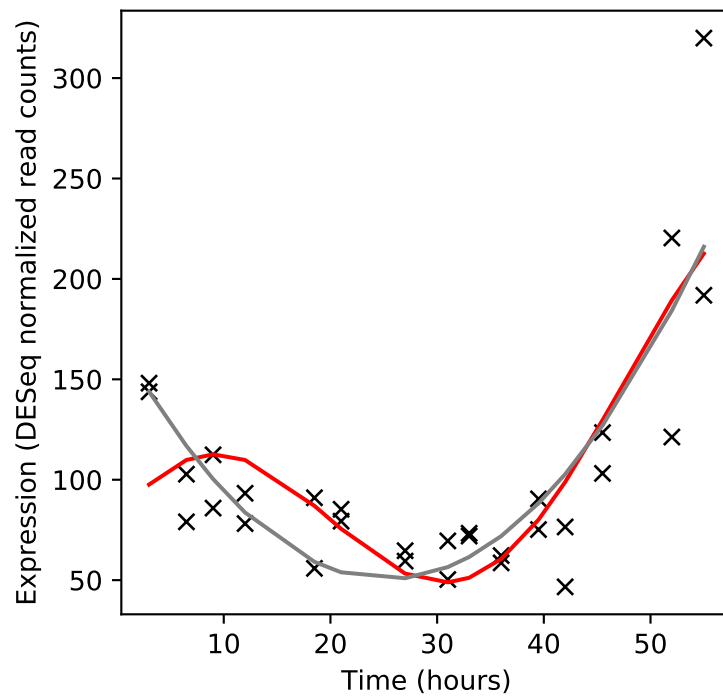

Rv0968/-

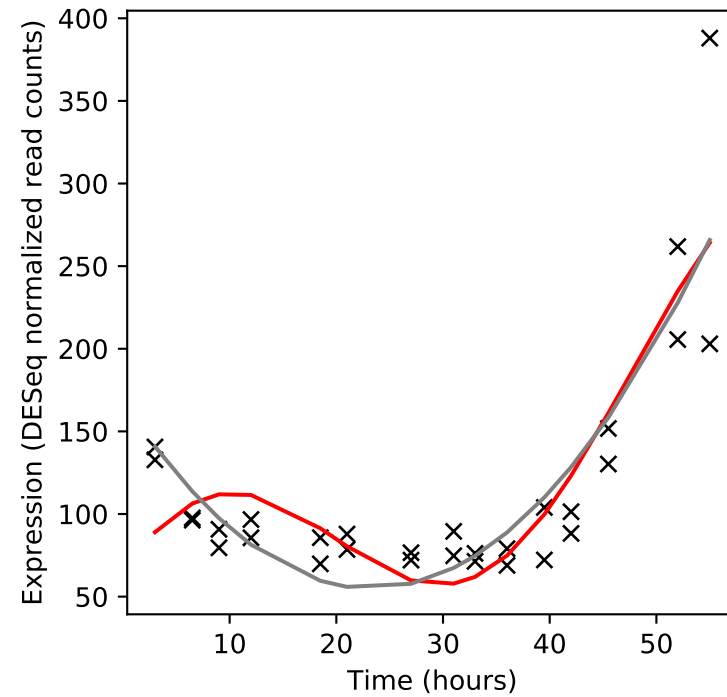

Rv0969/ctpV

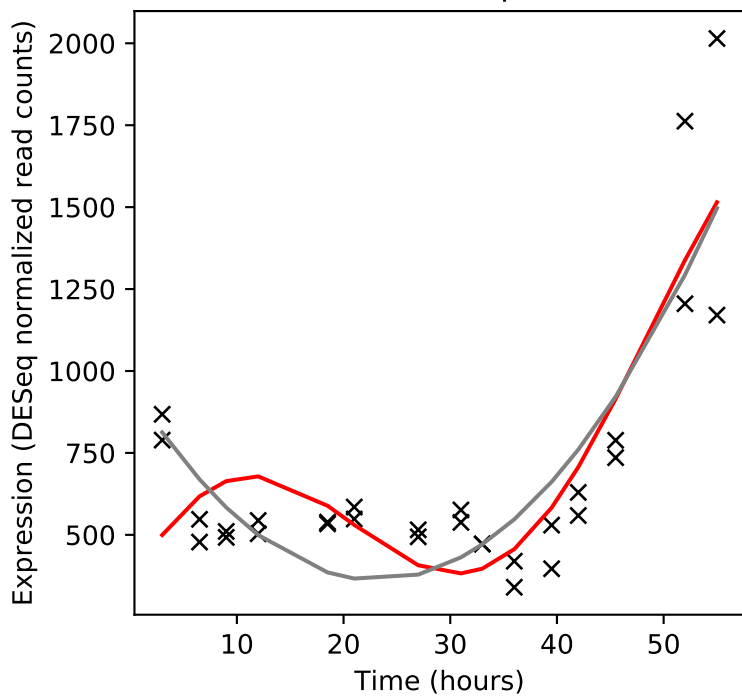

Rv0970/-

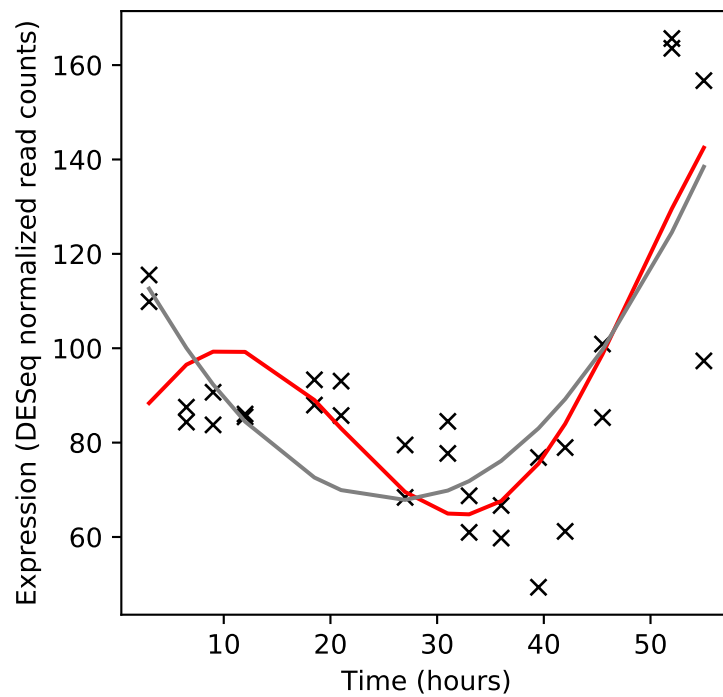

Rv0971c/echA7

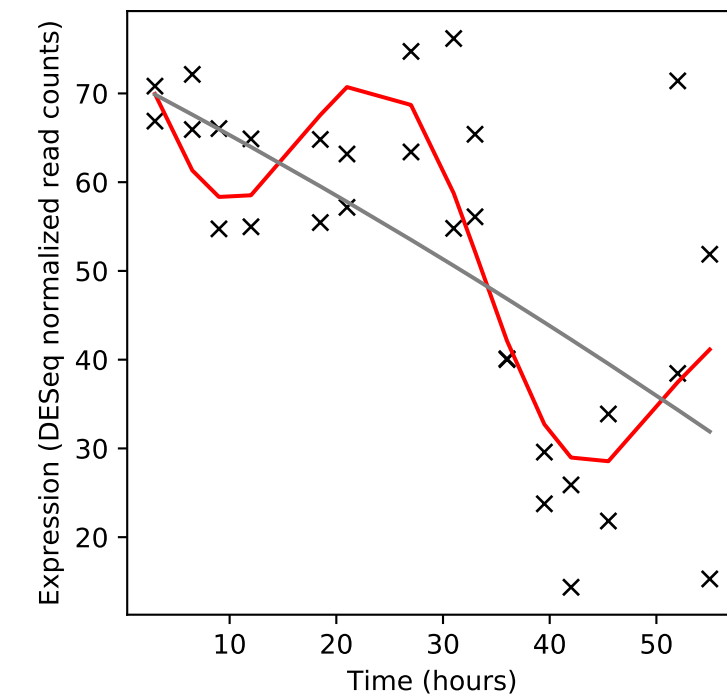

Rv0972c/fadE12

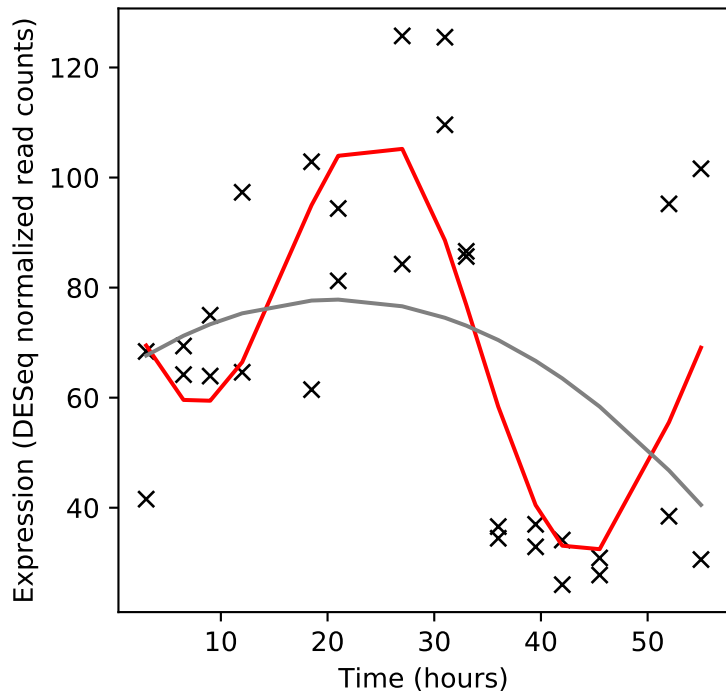

Rv0973c/accA2

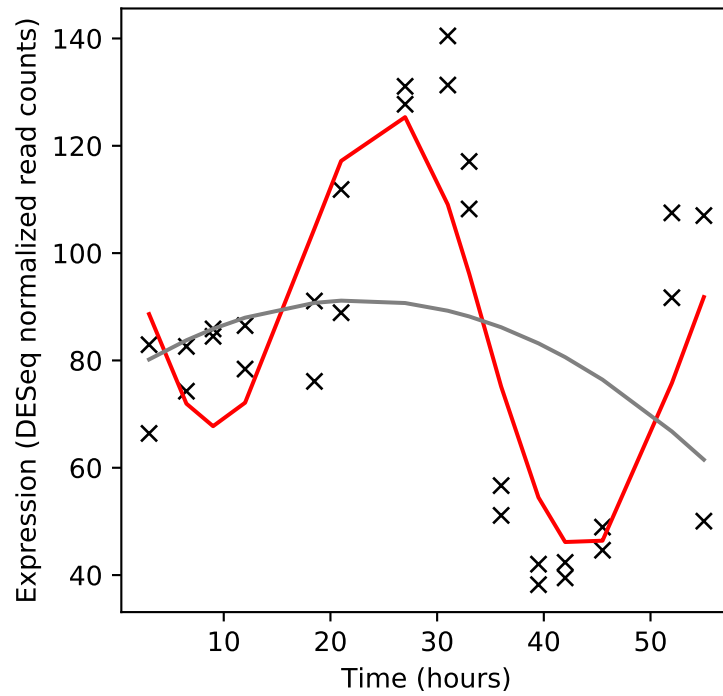

Rv0974c/accD2

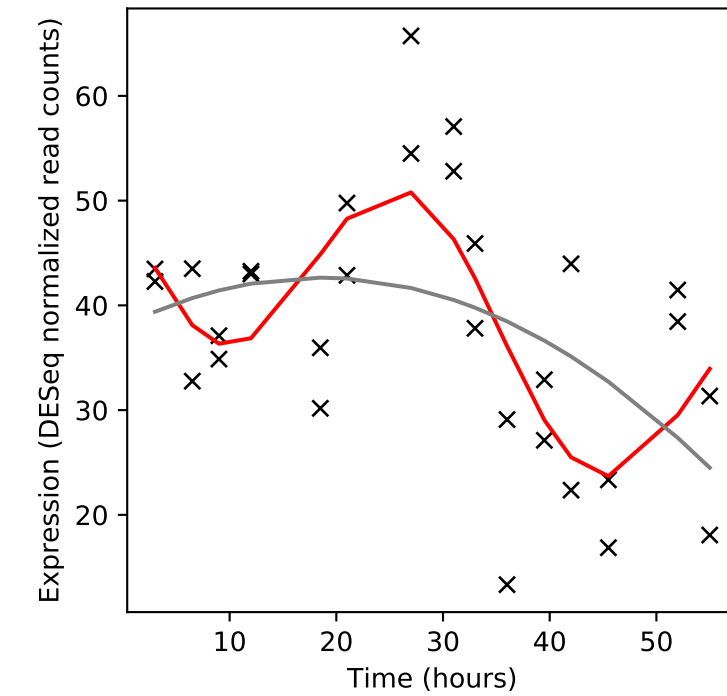

Rv0975c/fadE13

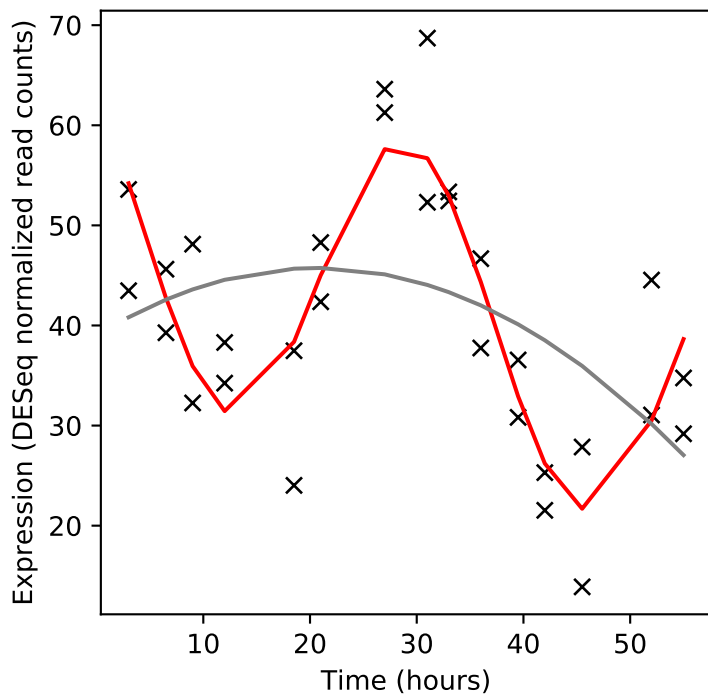

Rv0976c/-

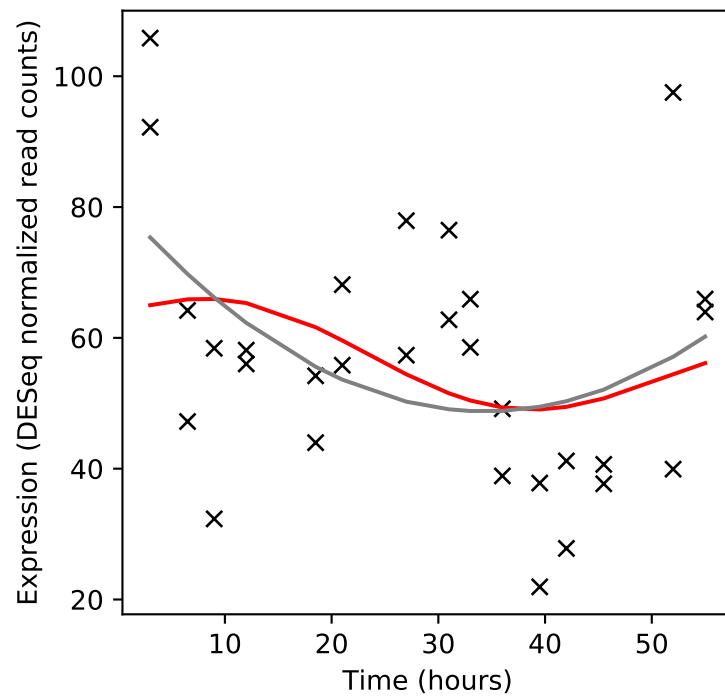

Rv0977/PE\_PGRS16

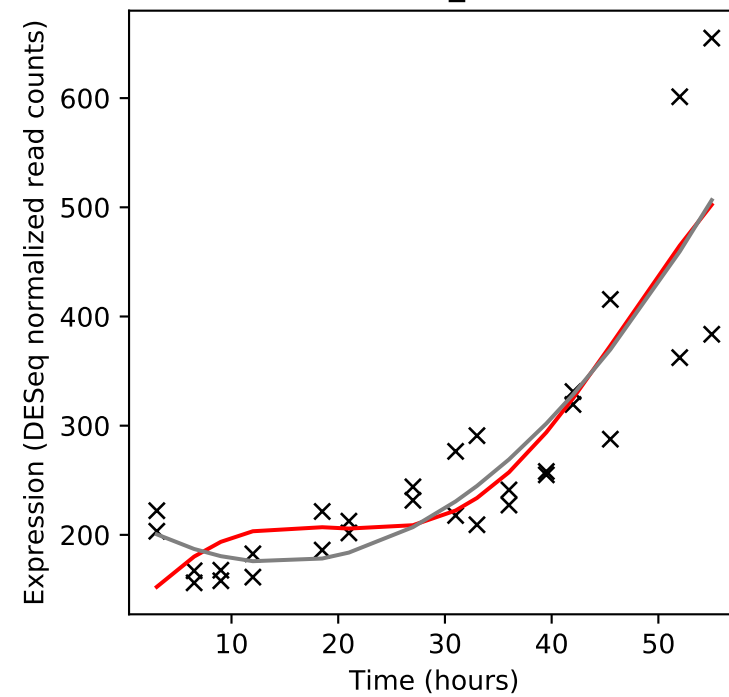

Rv0978c/PE\_PGRS17

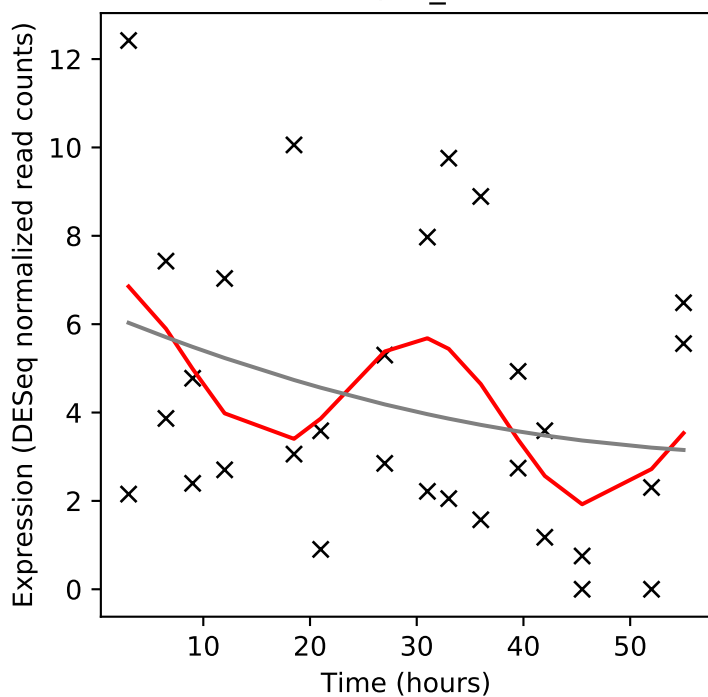

Rv0979c/-

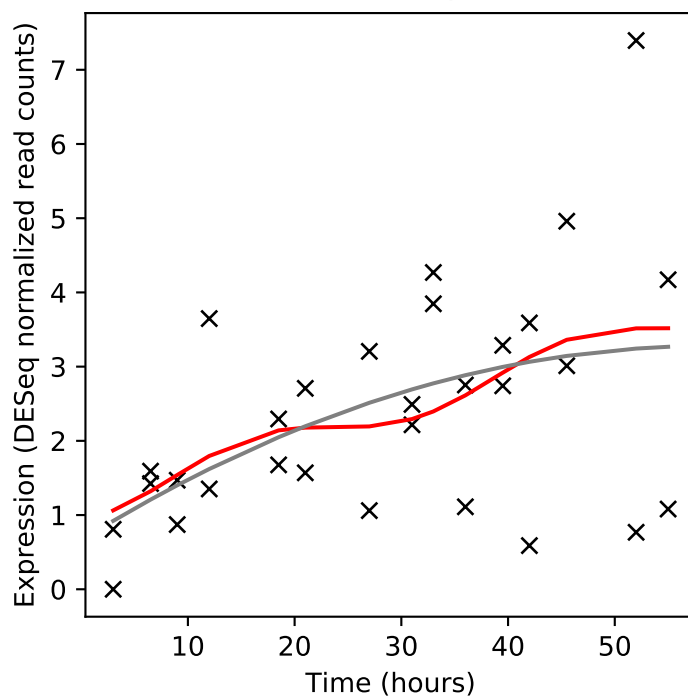

Rv0979A/rpmF

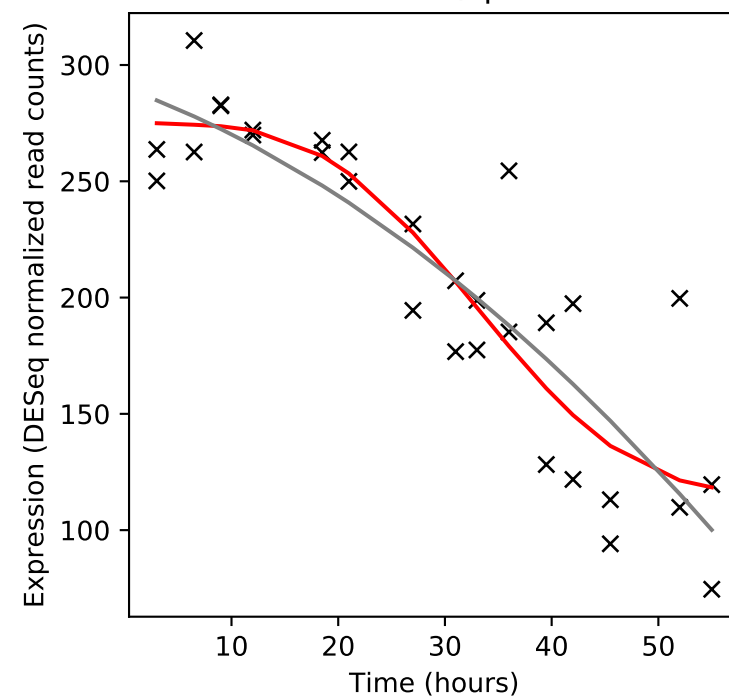

Rv0980c/PE\_PGRS18

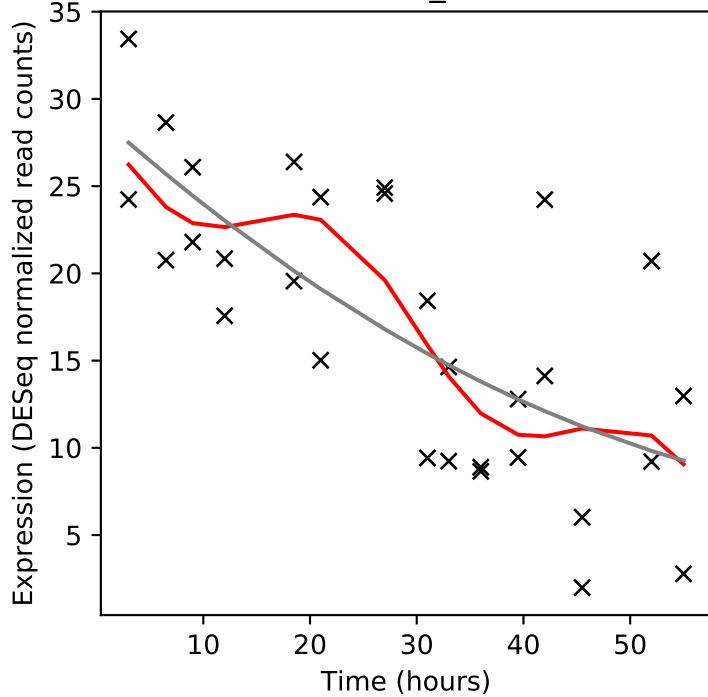

Rv0981/mprA

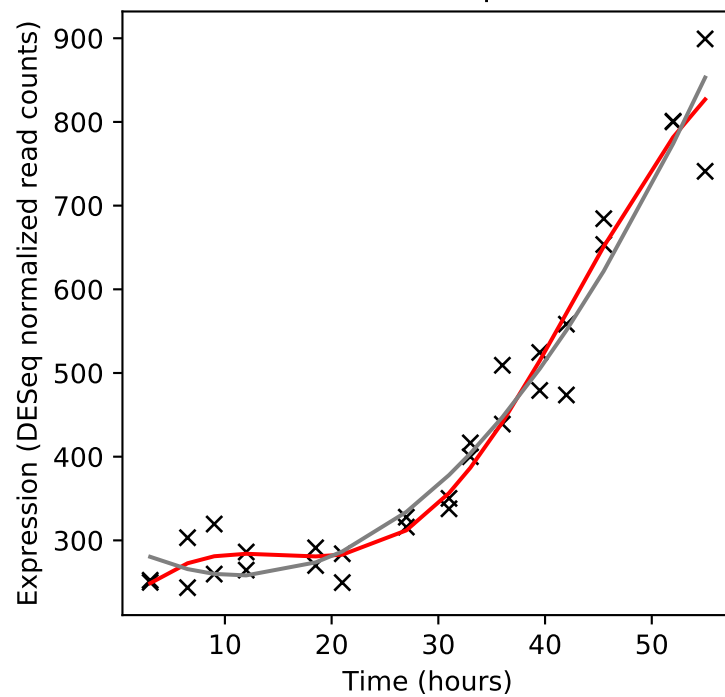

Rv0982/mprB

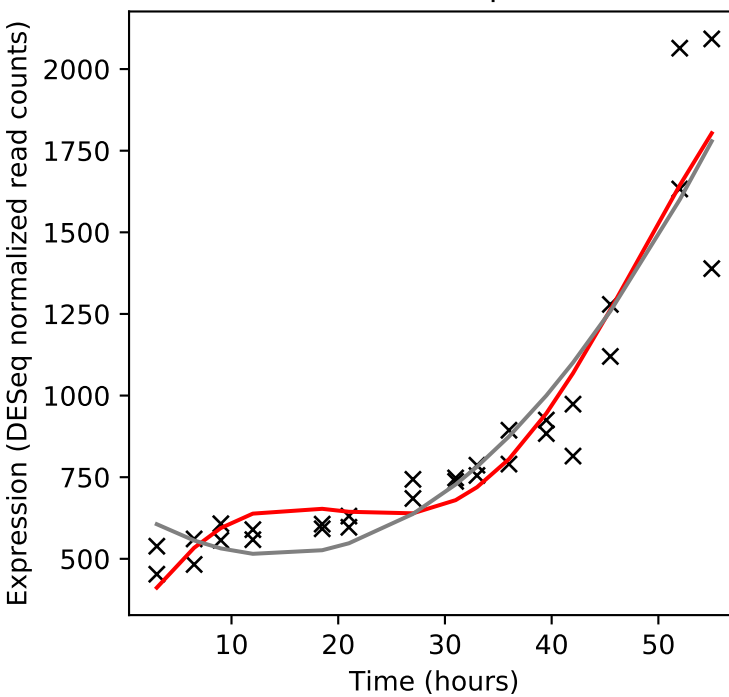

Rv0983/pepD

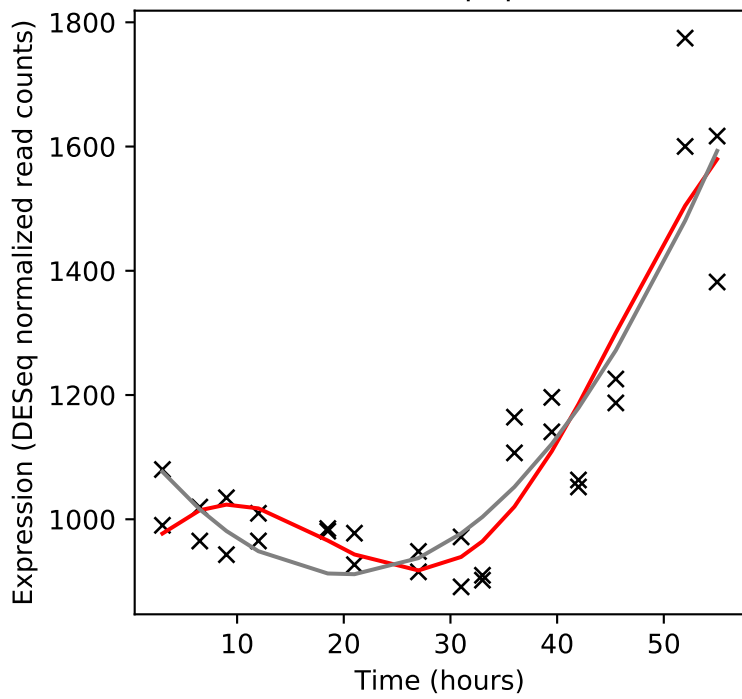

Rv0984/moaB2

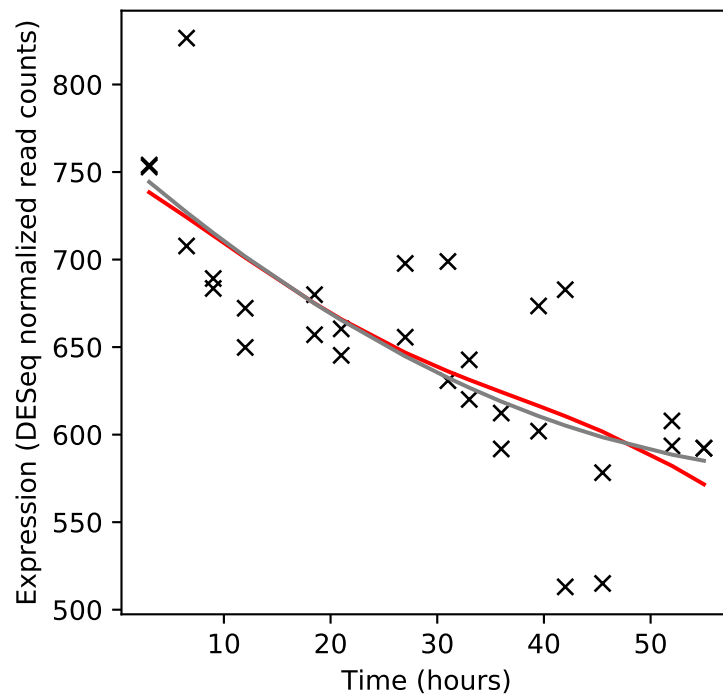

Rv0985c/mscL

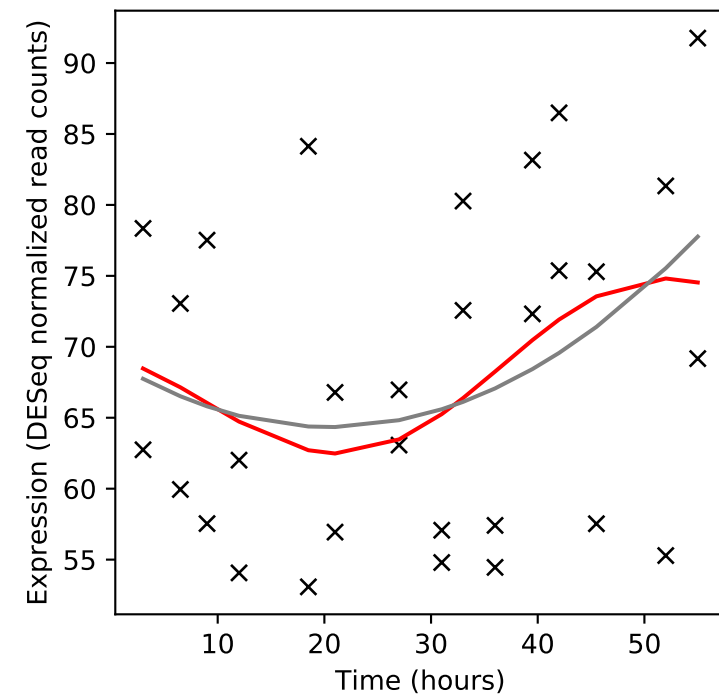

Rv0986/-

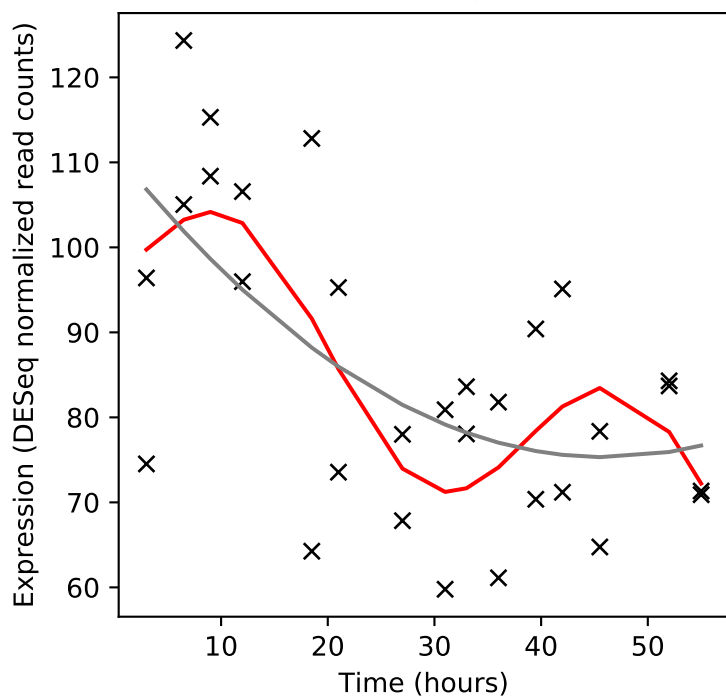

Rv0987/-

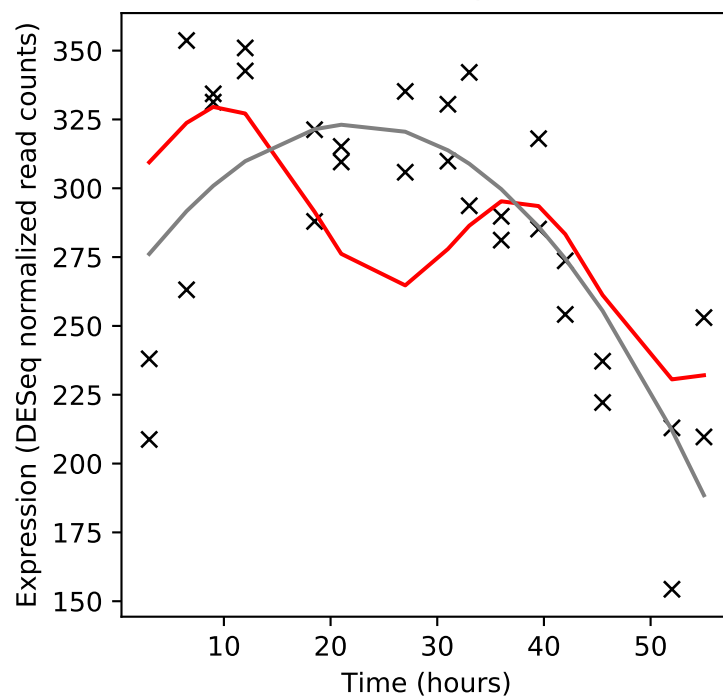

Rv0988/-

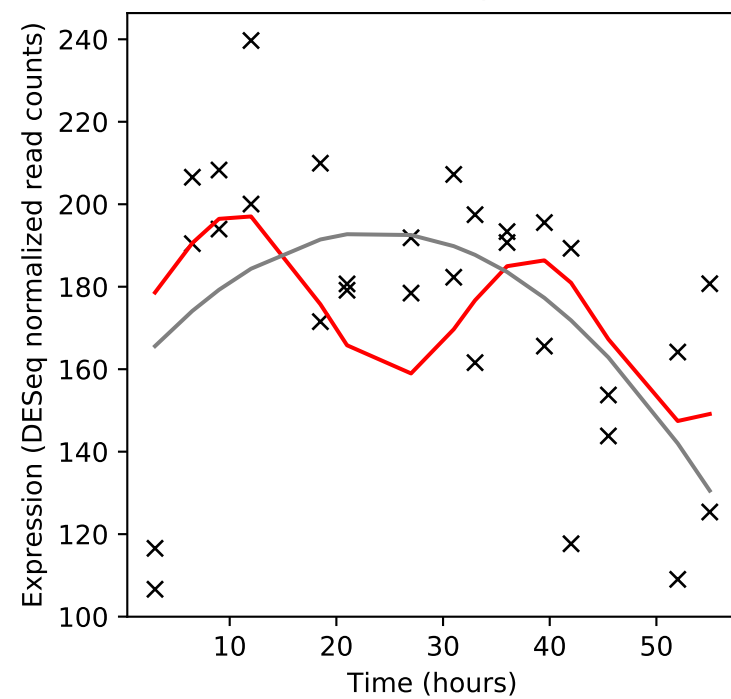

Rv0989c/grcC2

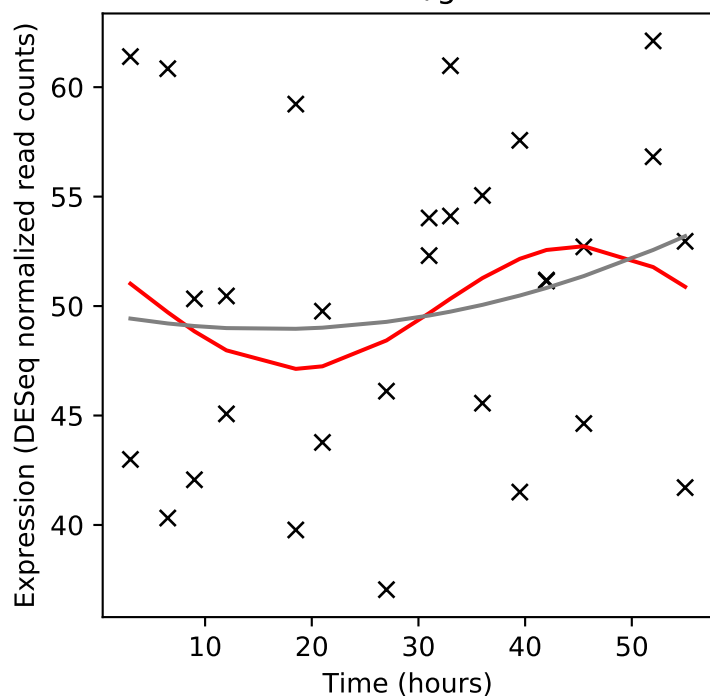

Rv0990c/-

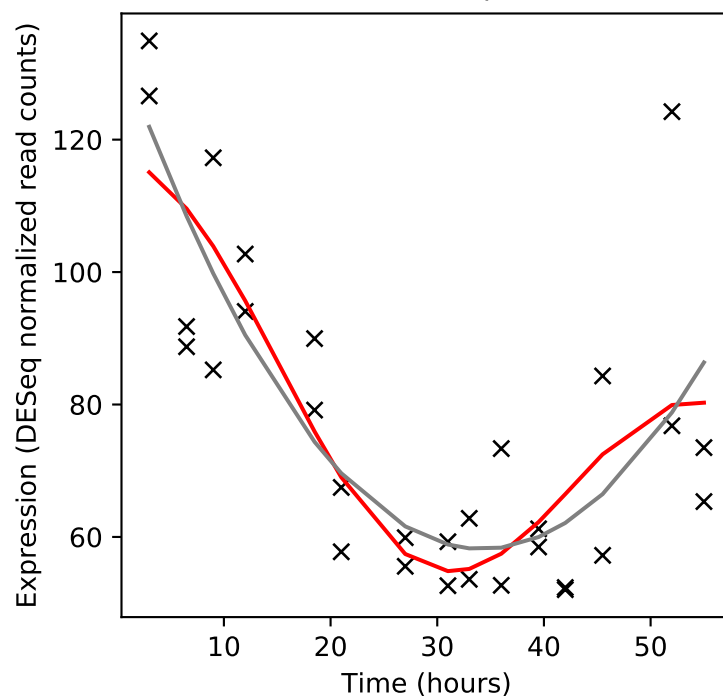

Rv0991c/-

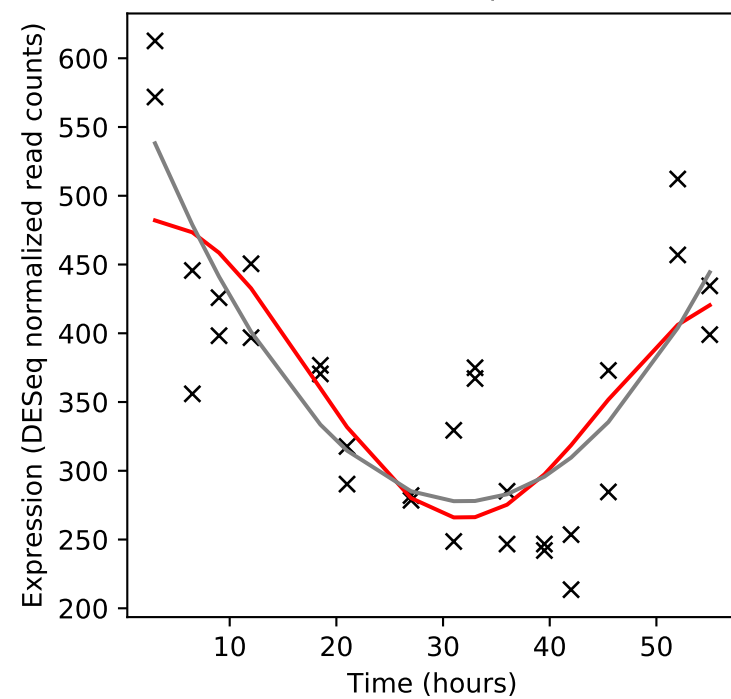

Rv0992c/-

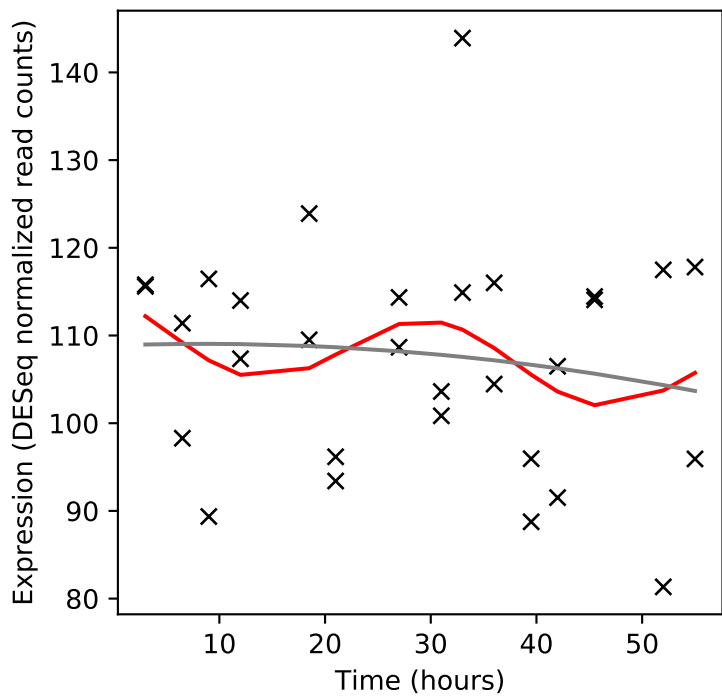

Rv0993/galU

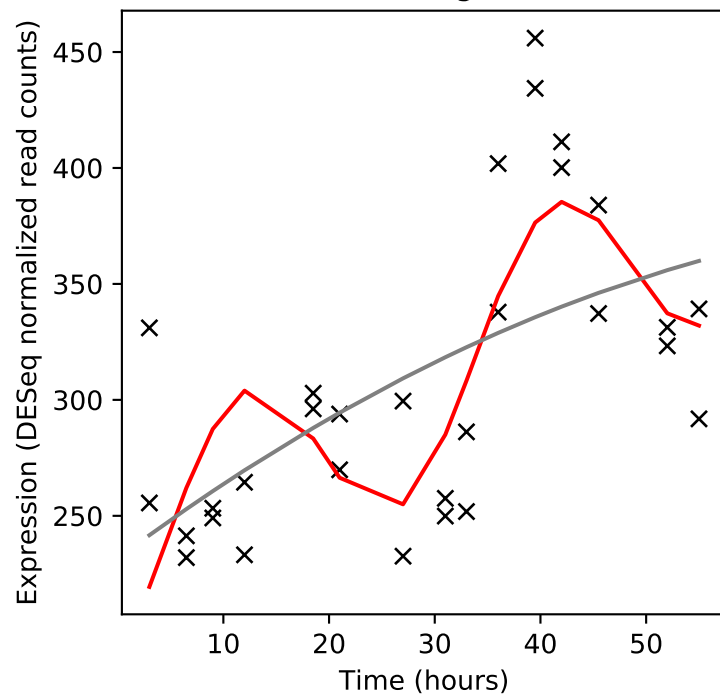

Rv0994/moeA1

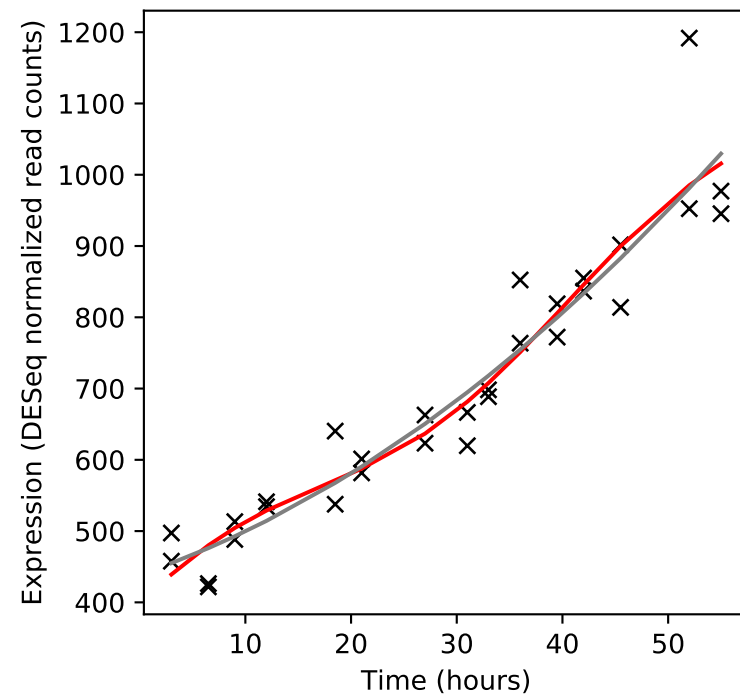

Rv0995/rimJ

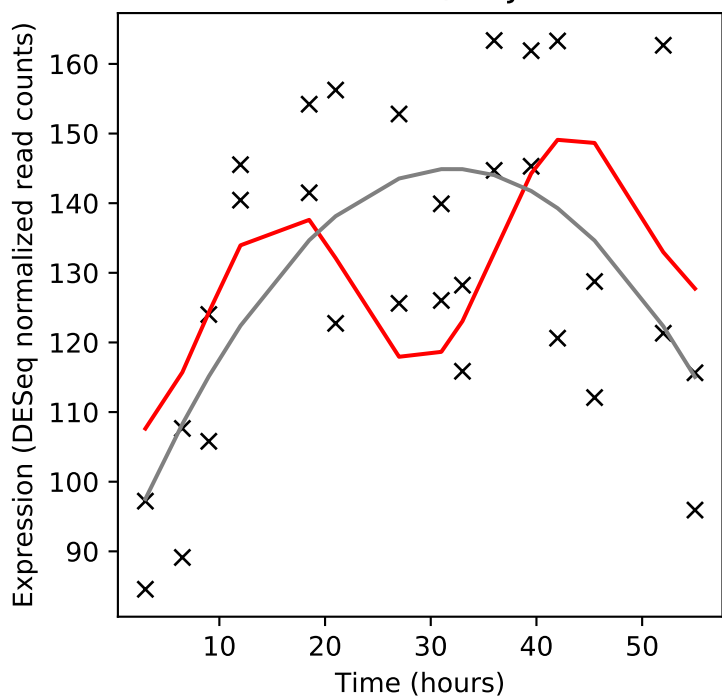

Rv0996/-

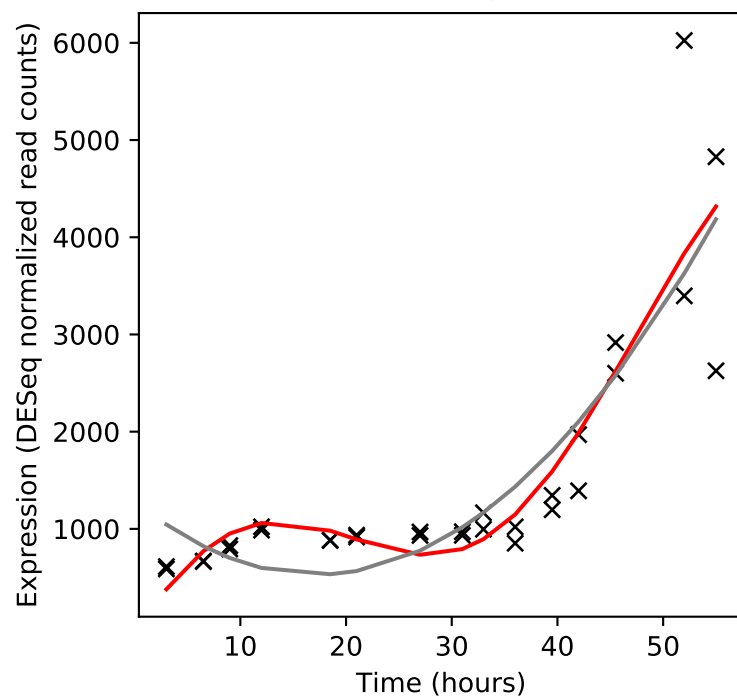

Rv0997/-

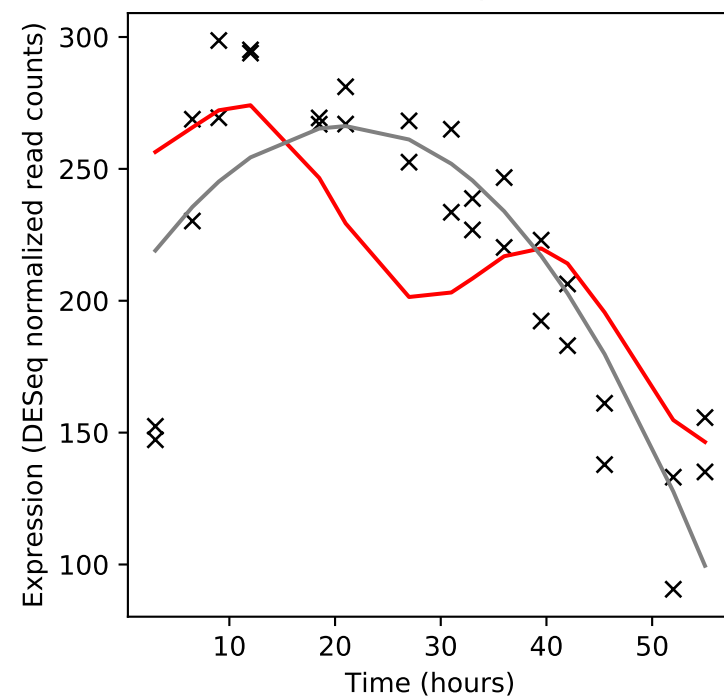

Rv0998/-

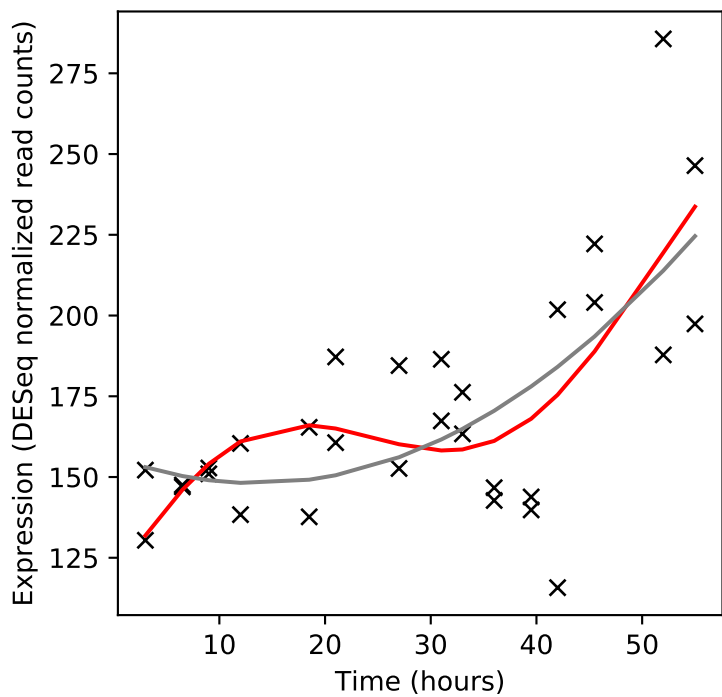

Rv0999/-

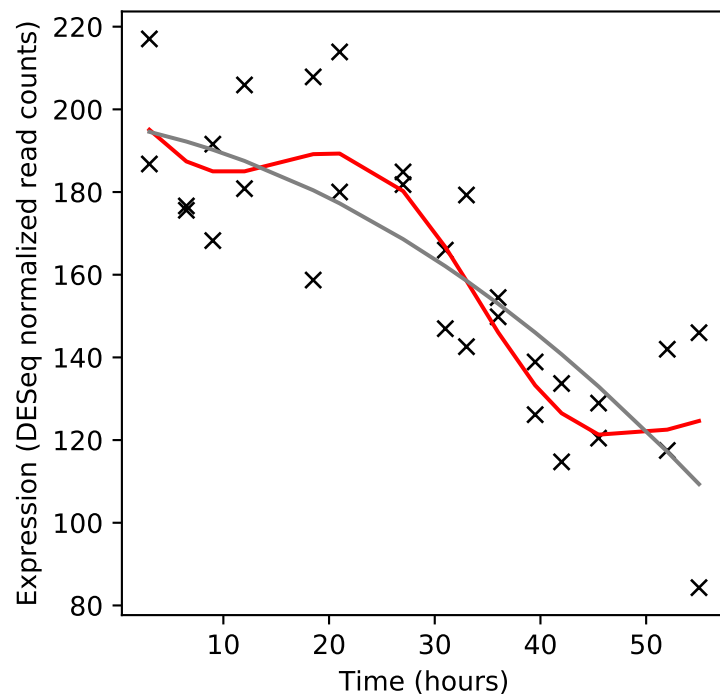

Rv1000c/-

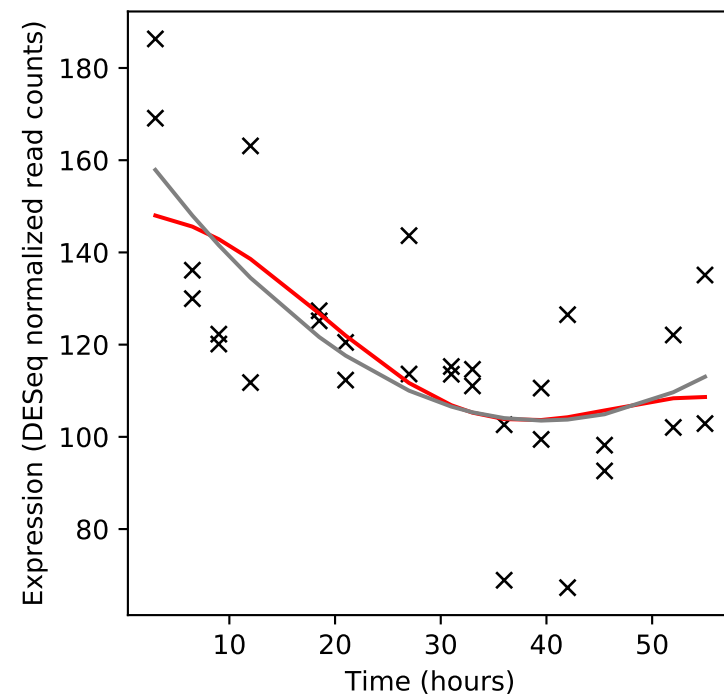



Rv1001/arcA

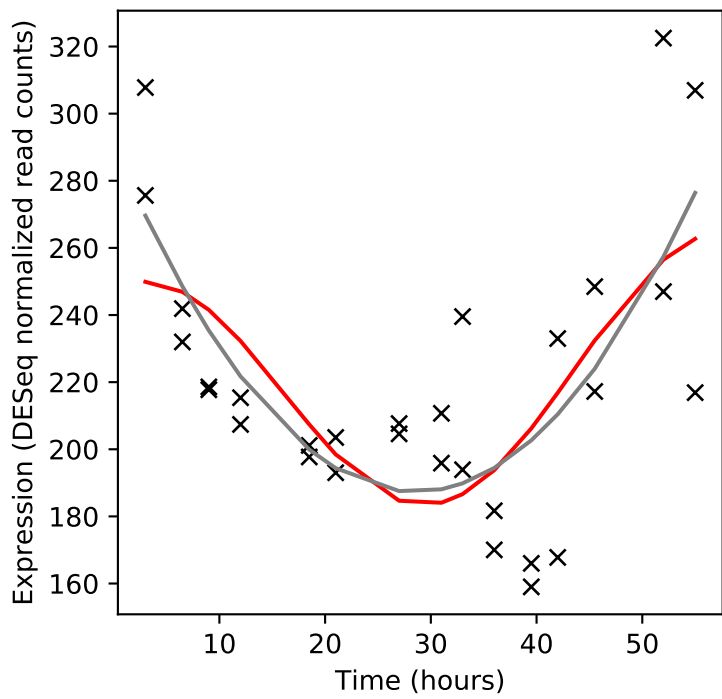

Rv1002c/-

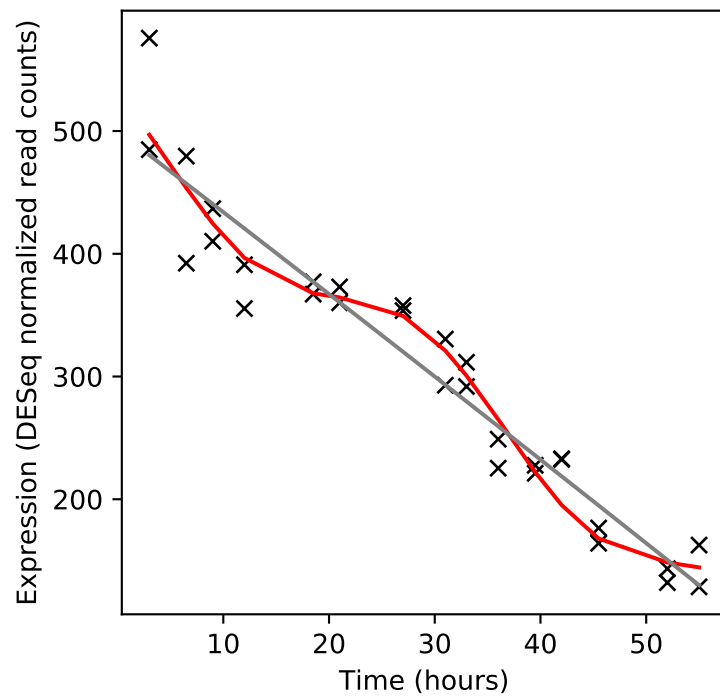

Rv1003/-

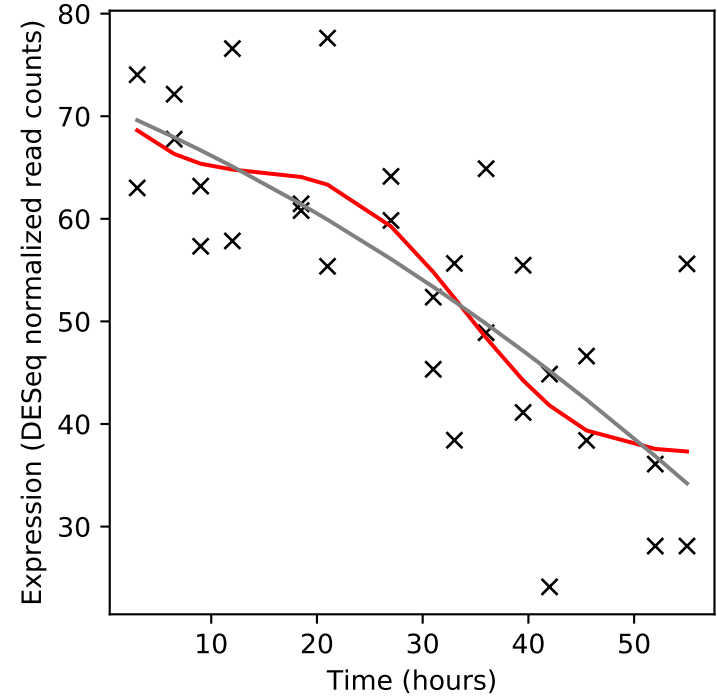

Rv1004c/-

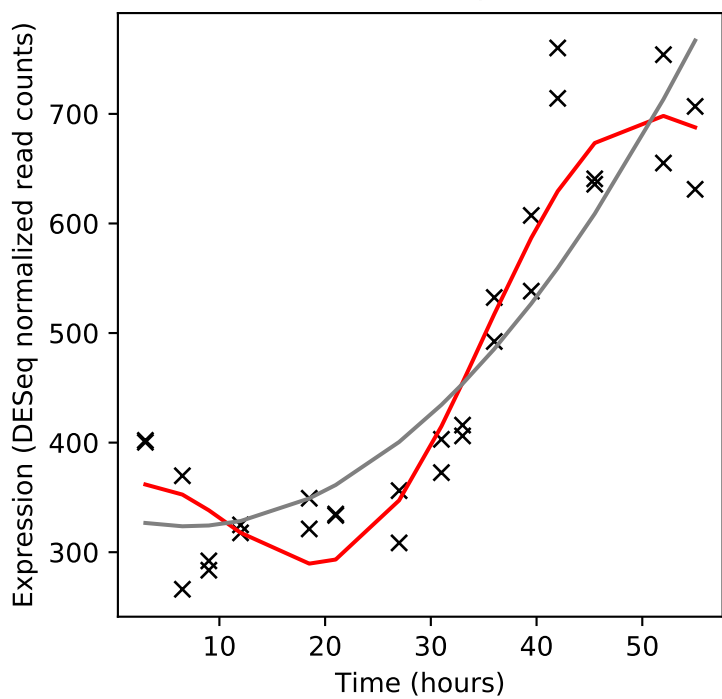

Rv1005c/pabB

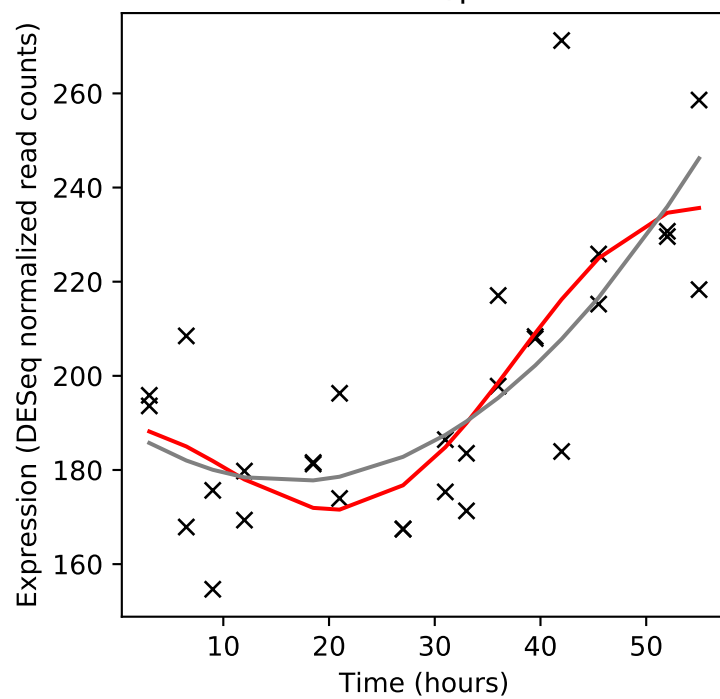

Rv1006/-

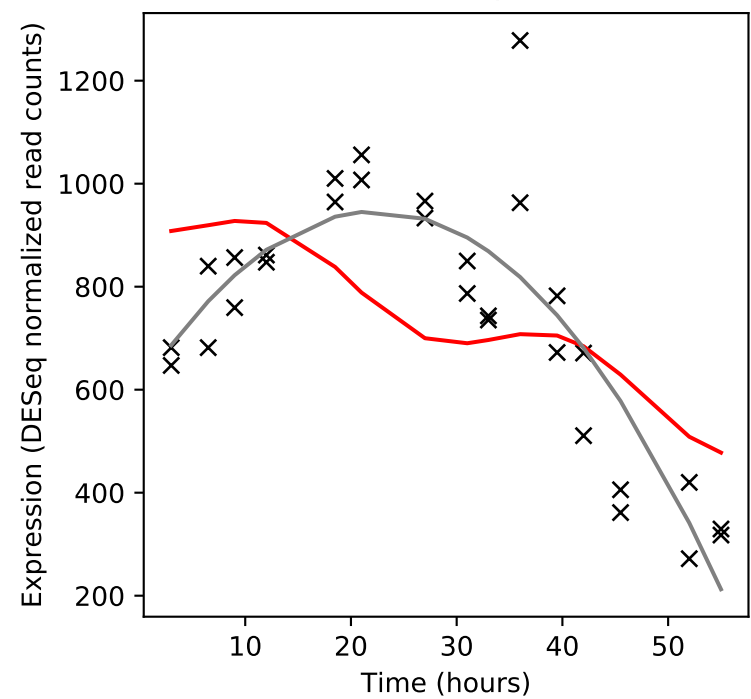

Rv1007c/metS

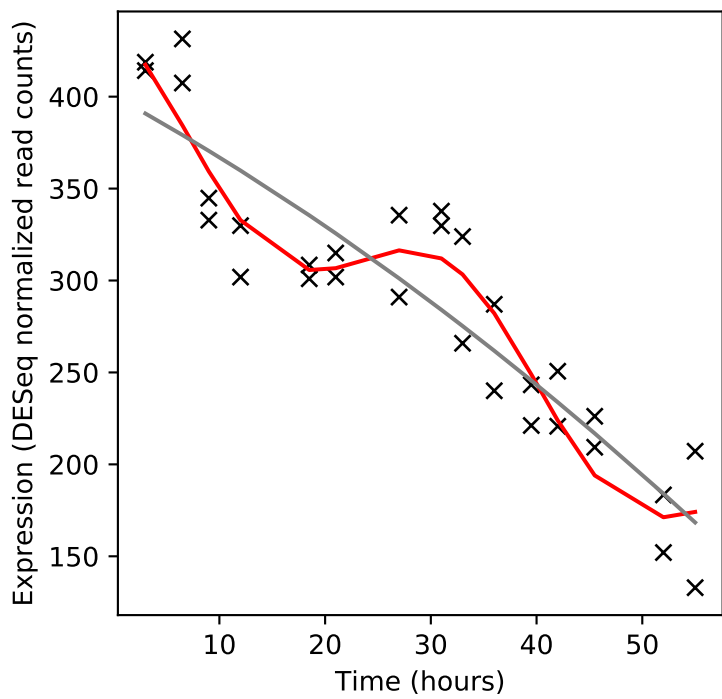

Rv1008/tatD

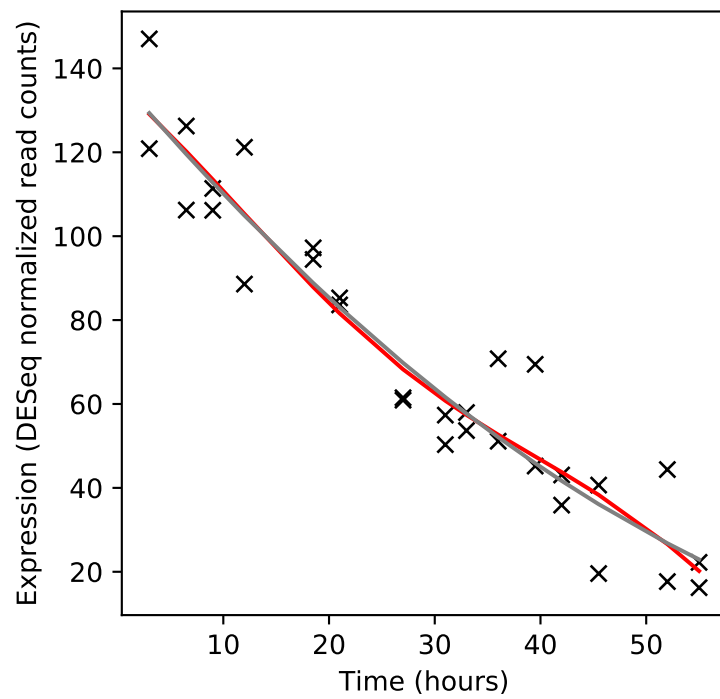

Rv1009/rpfB

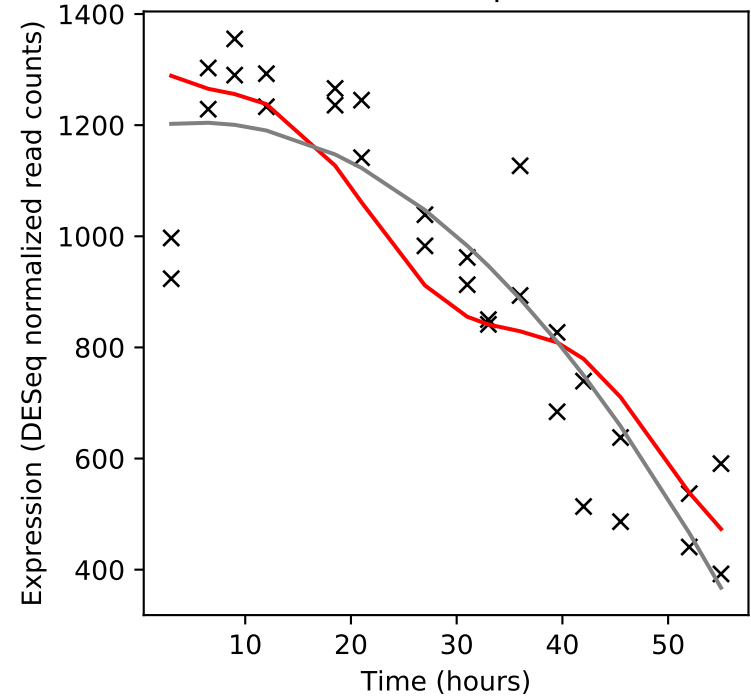

Rv1010/ksgA

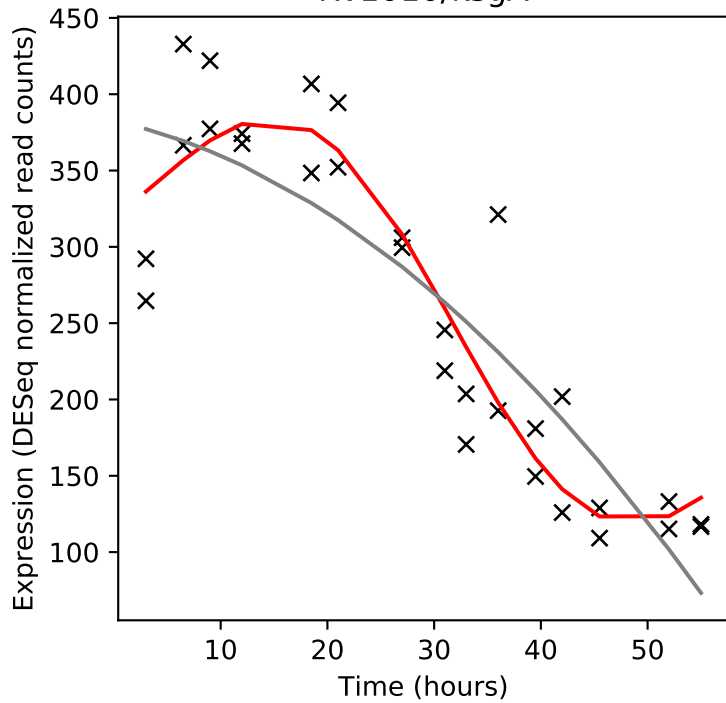

Rv1011/ispE

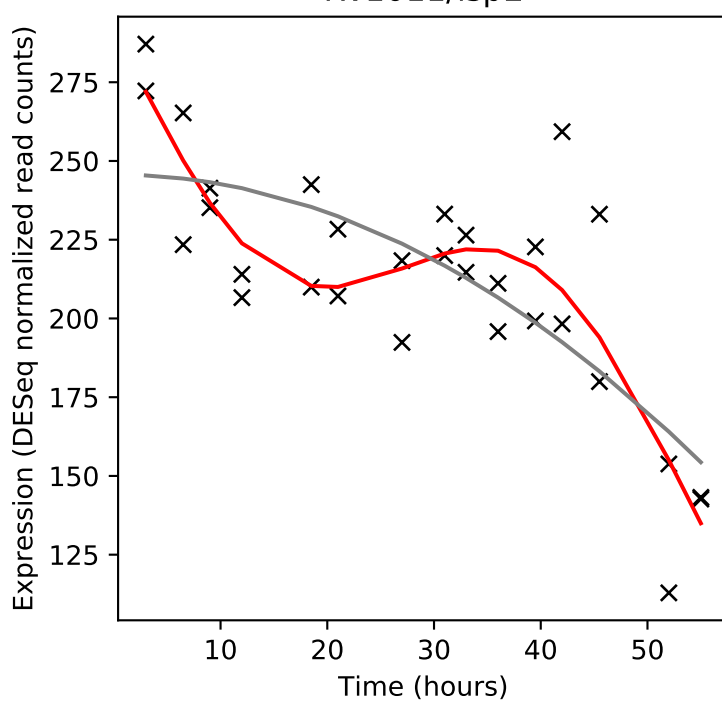

Rv1012/-

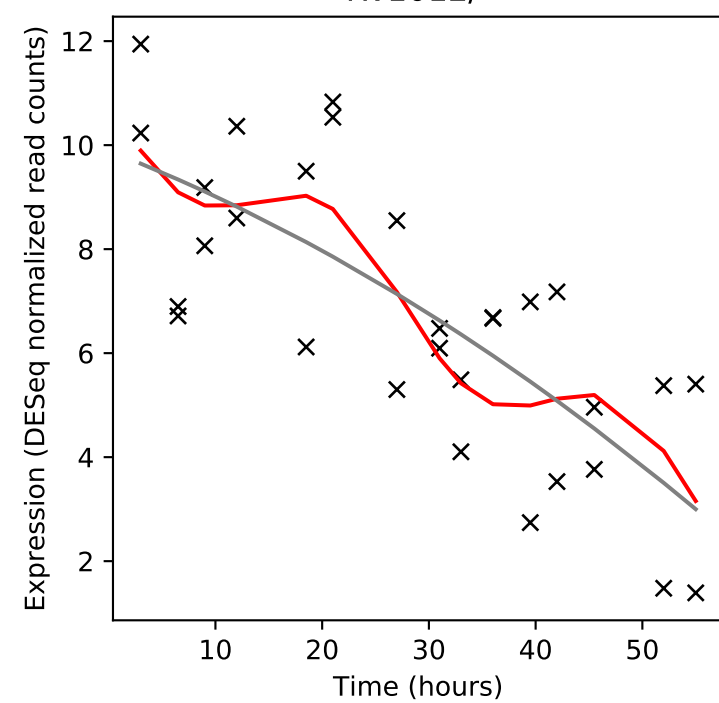

Rv1013/pks16

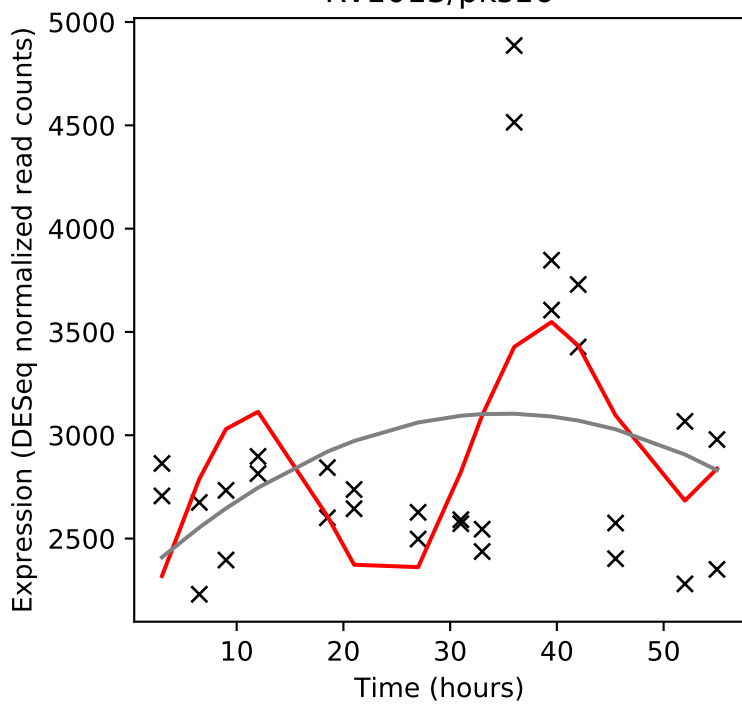

Rv1014c/pth

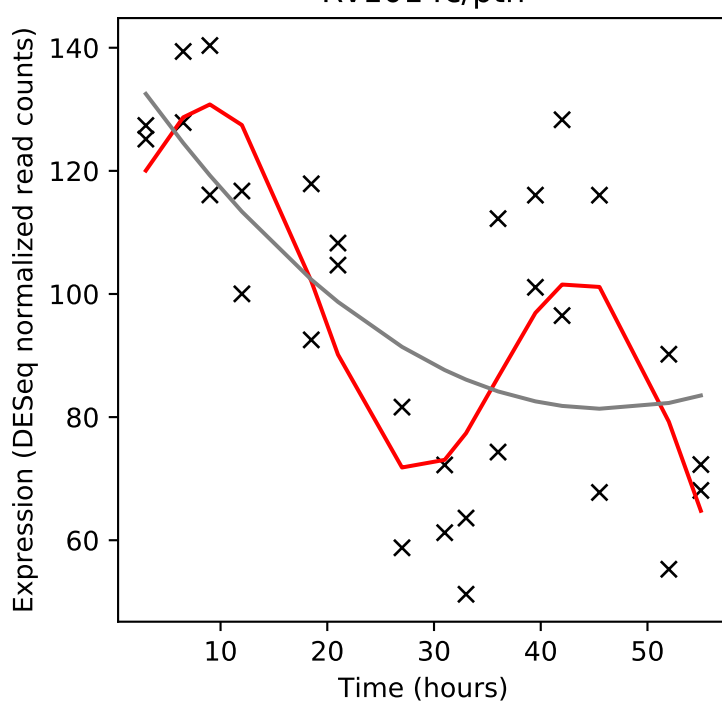

Rv1015c/rplY

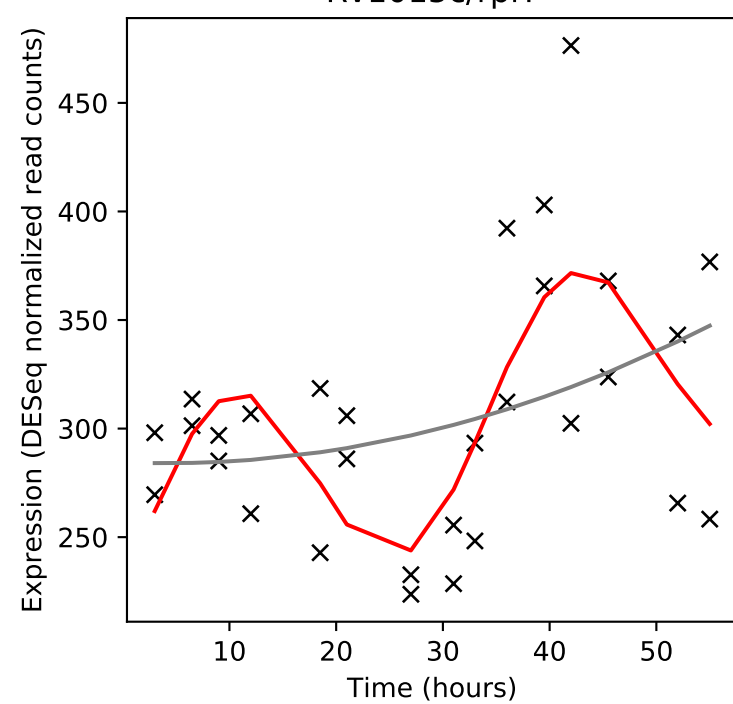

Rv1016c/lpqT

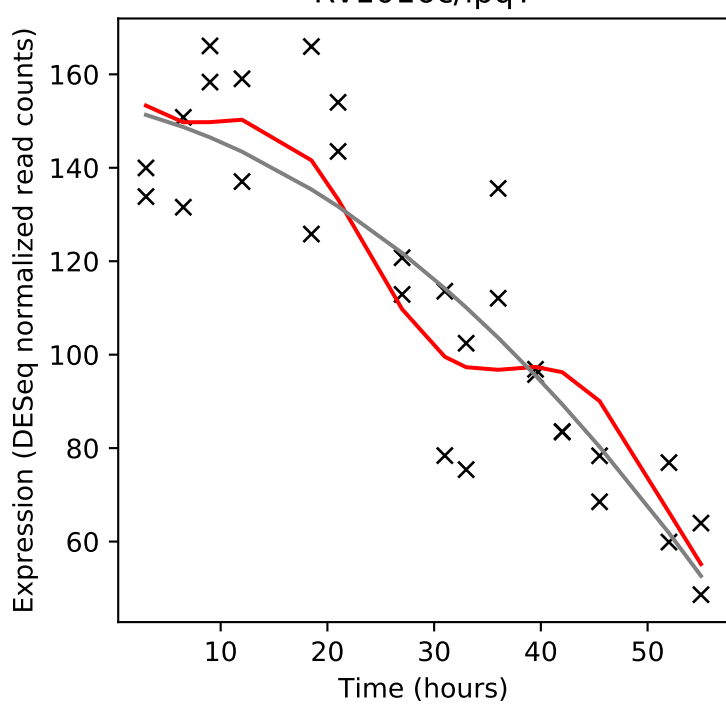

Rv1017c/prsA

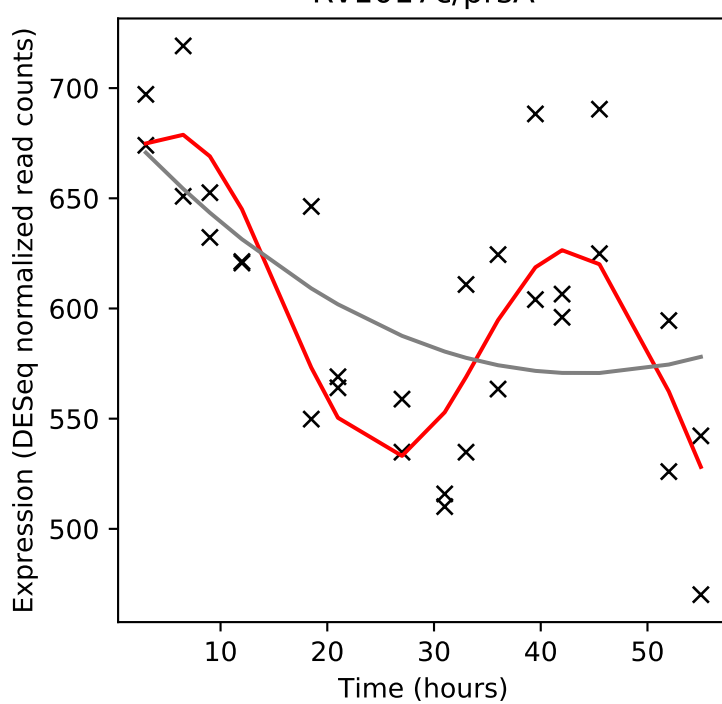

Rv1018c/glmU

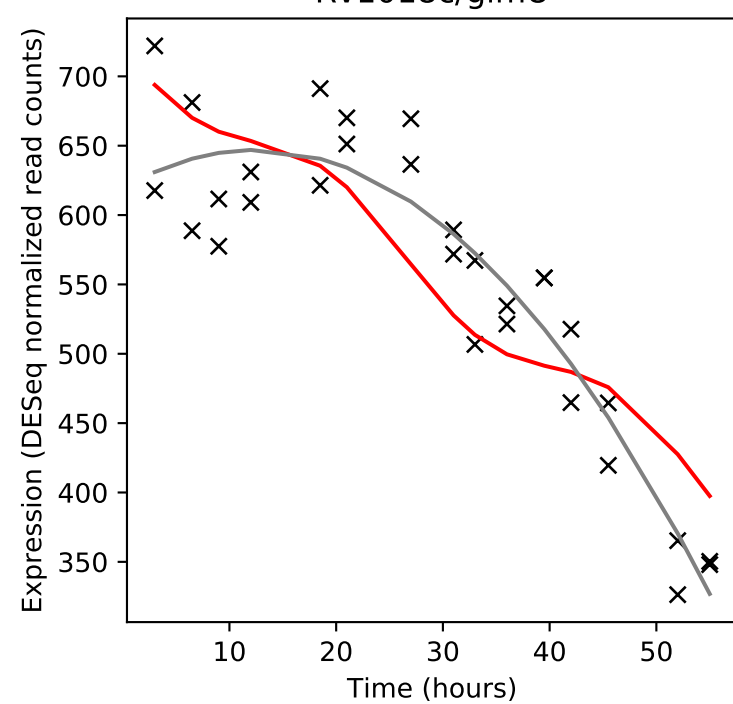

Rv1019/-

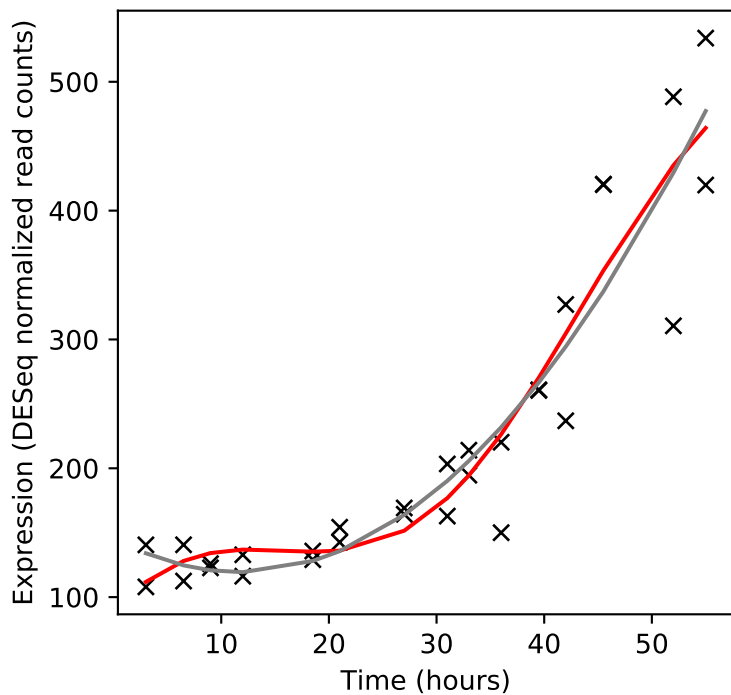

Rv1020/mfd

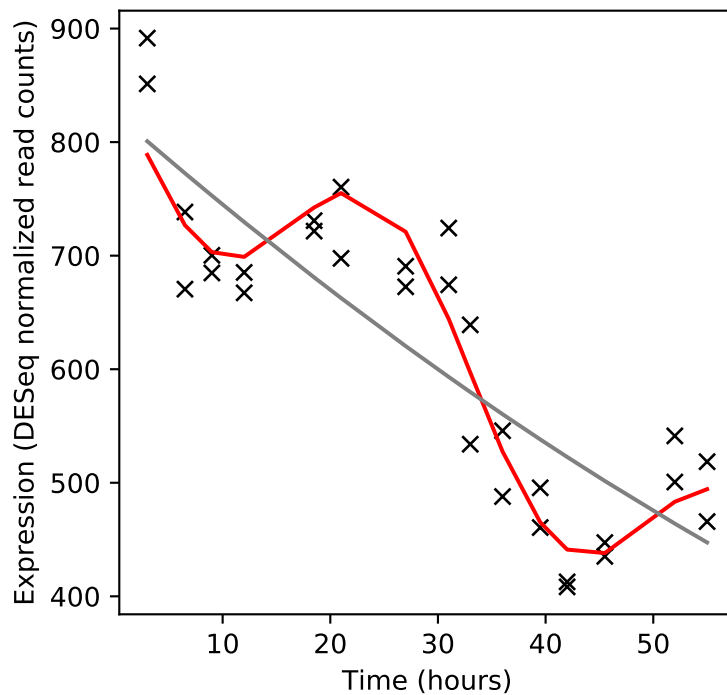

Rv1021/-

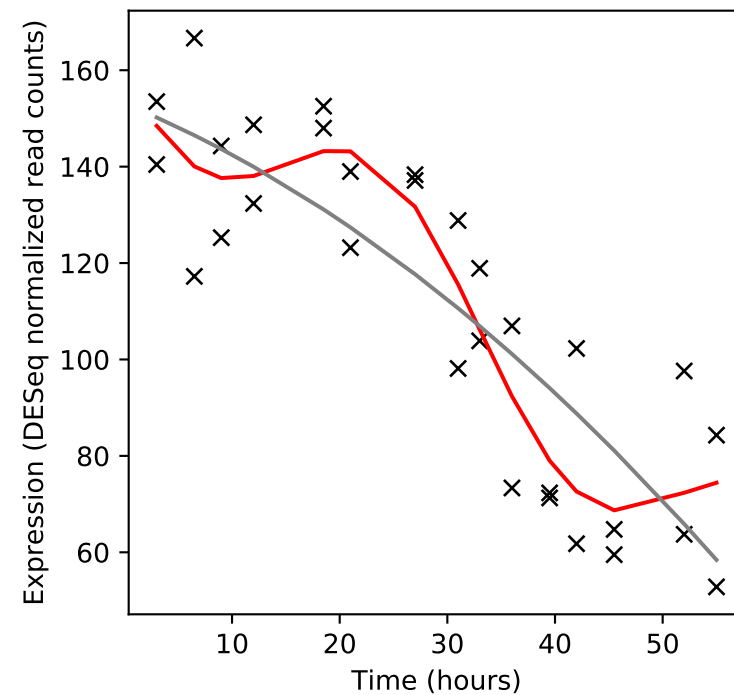

Rv1022/lpqU

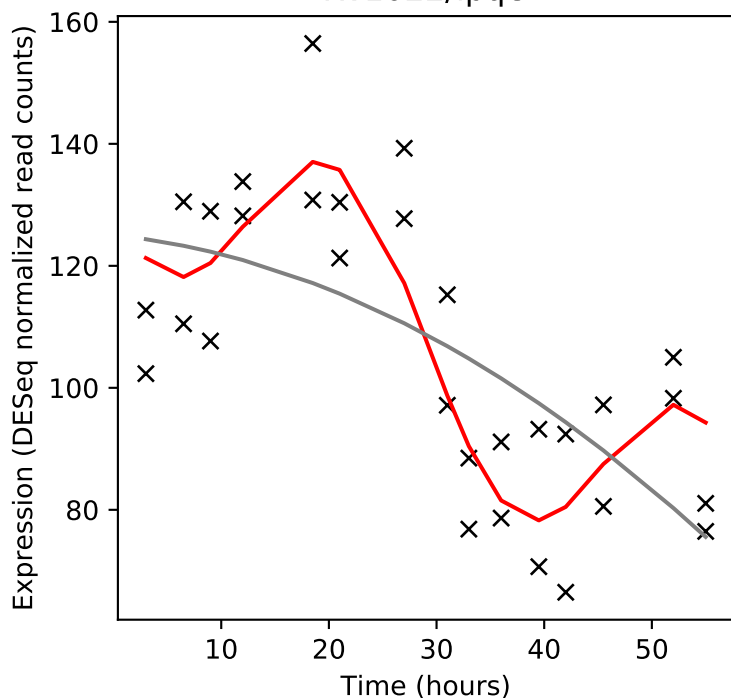

Rv1023/eno

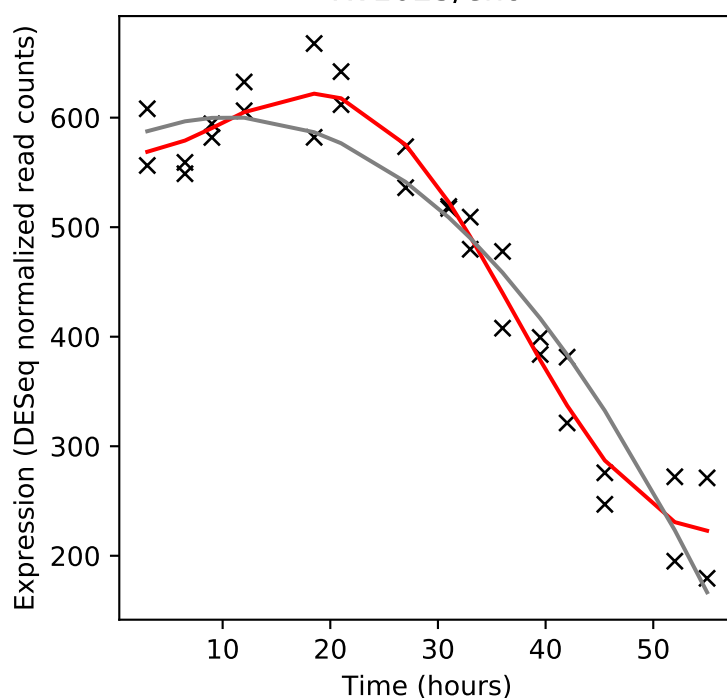

Rv1024/-

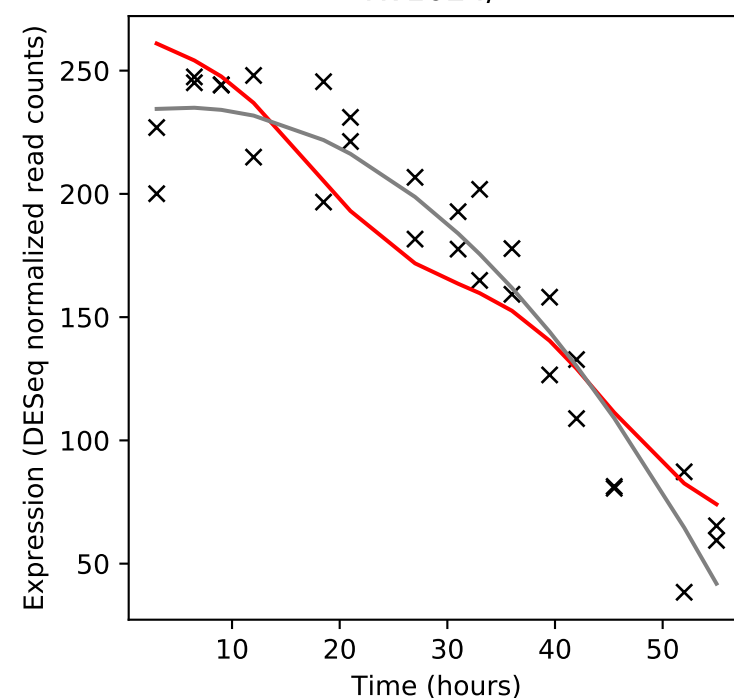

Rv1025/-

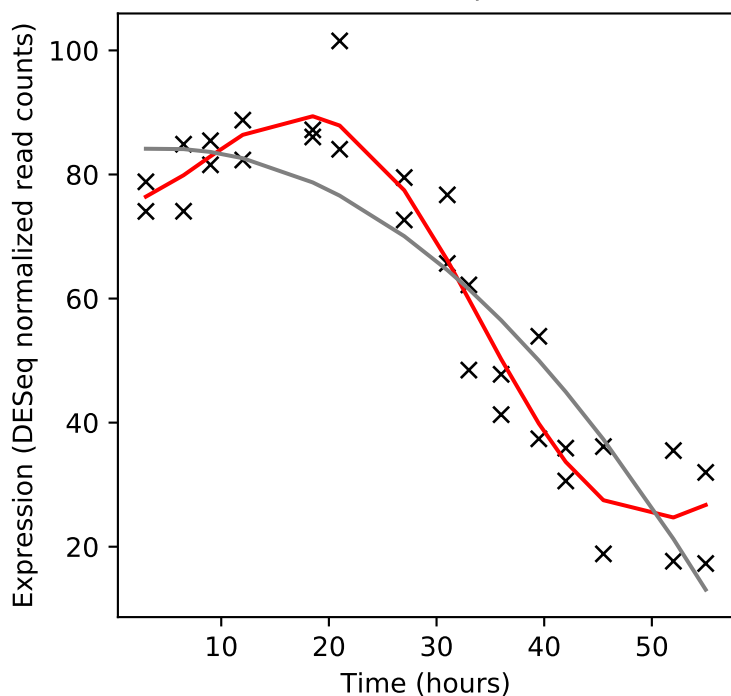

Rv1026/-

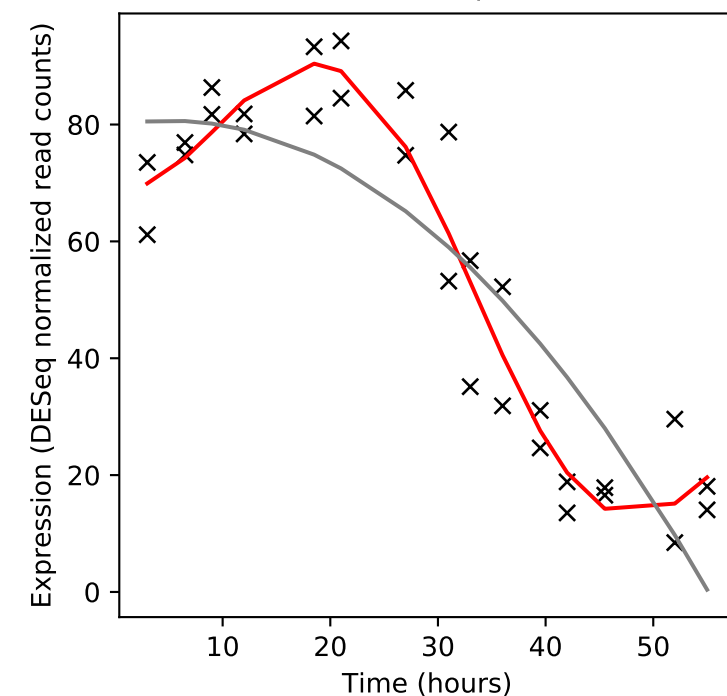

Rv1027c/kdpE

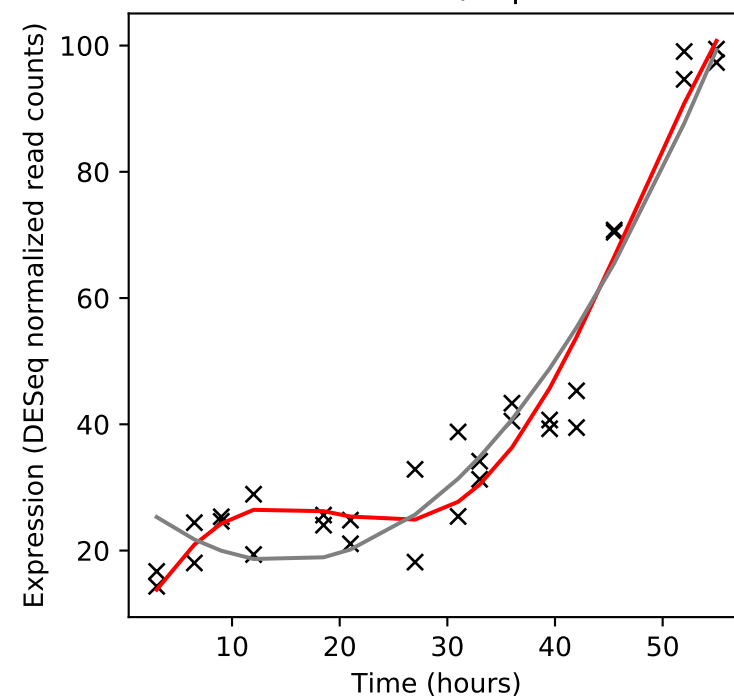

Rv1028c/kdpD

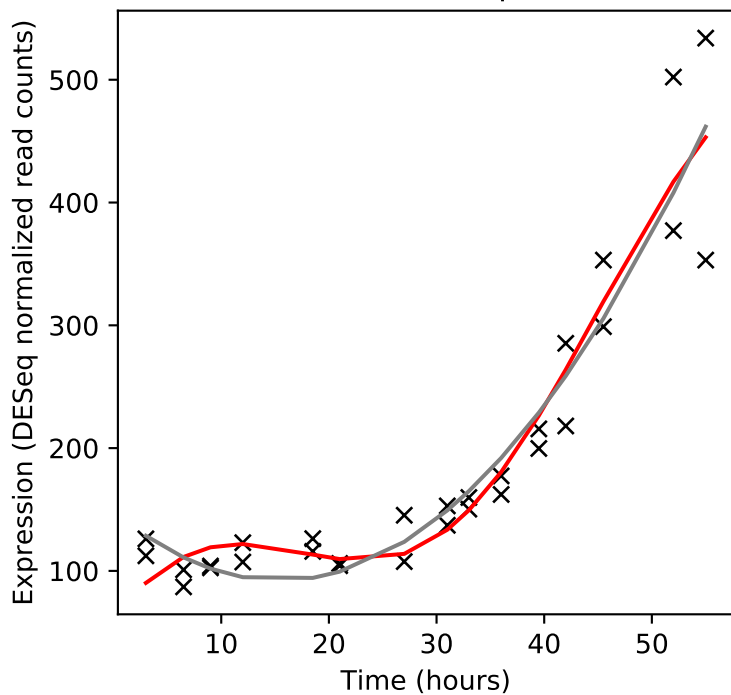

Rv1028A/kdpF

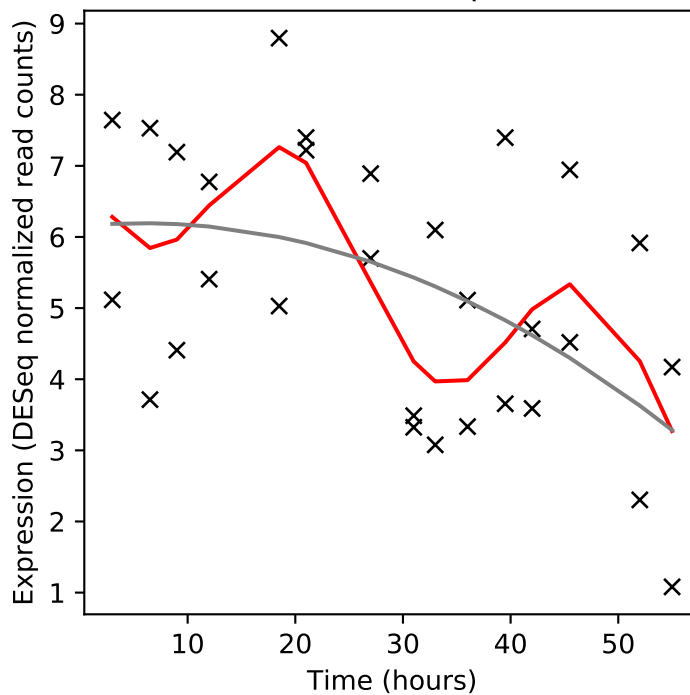

Rv1029/kdpA

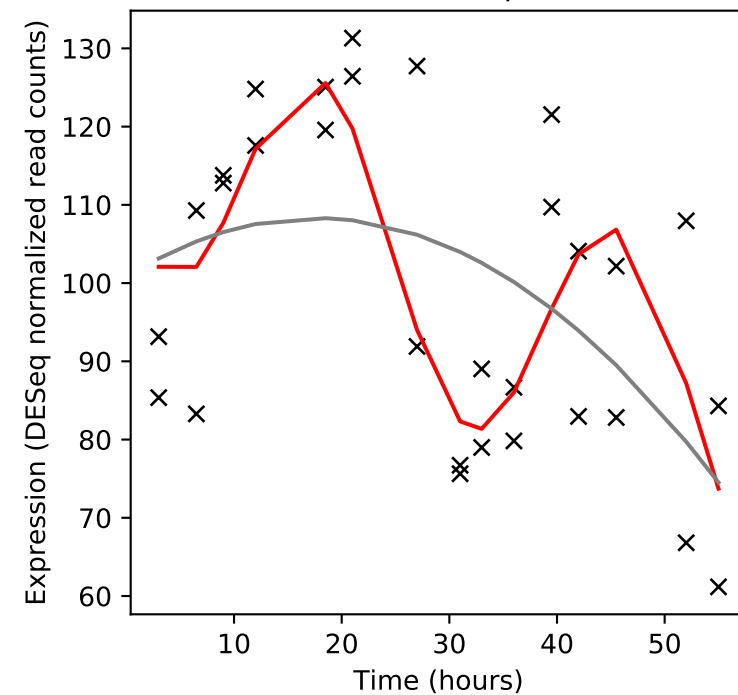

Rv1030/kdpB

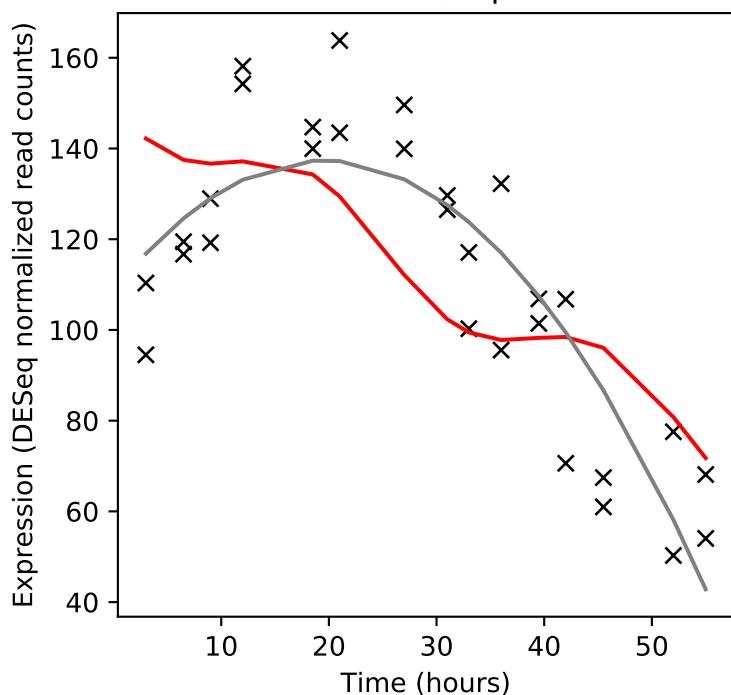

Rv1031/kdpC

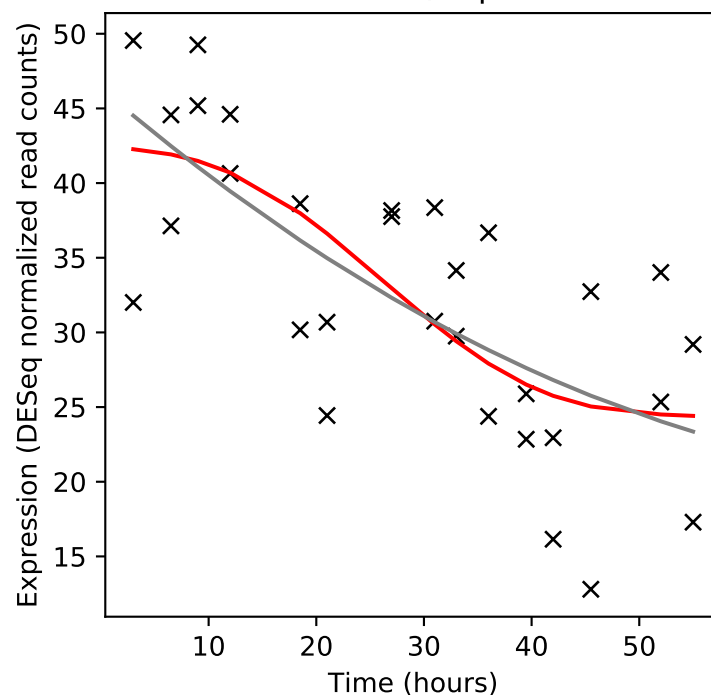

Rv1032c/trcS

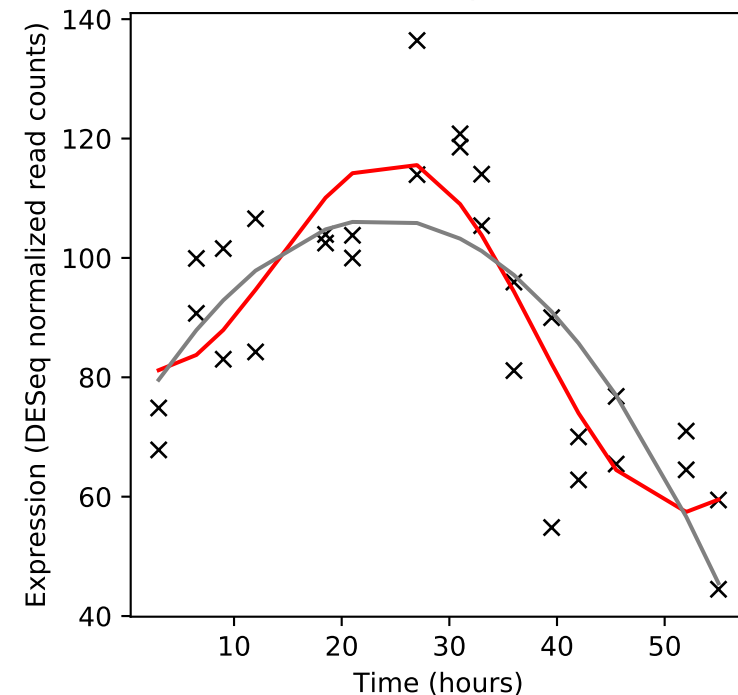

Rv1033c/trcR

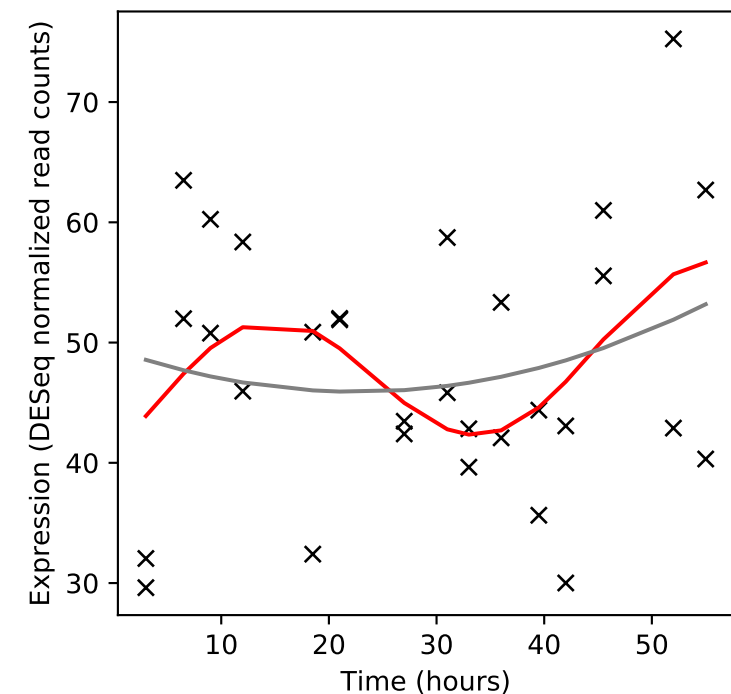

Rv1034c/-

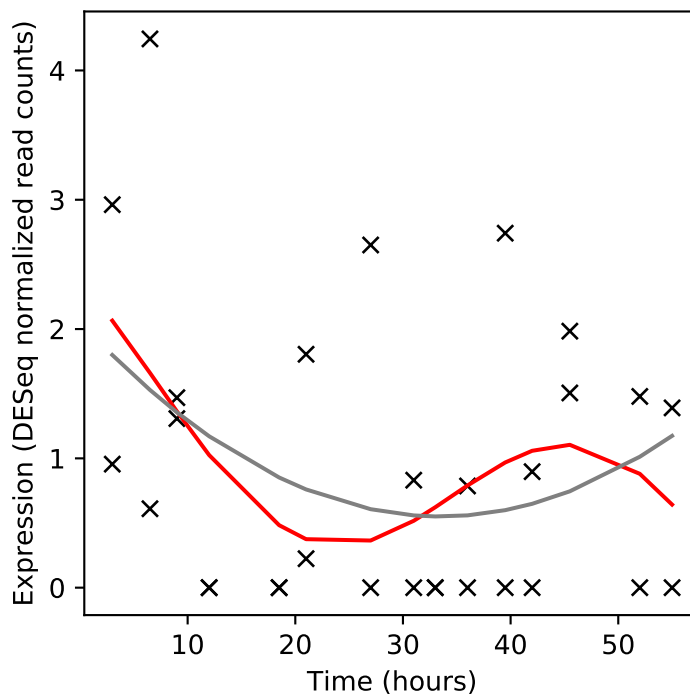

Rv1035c/-

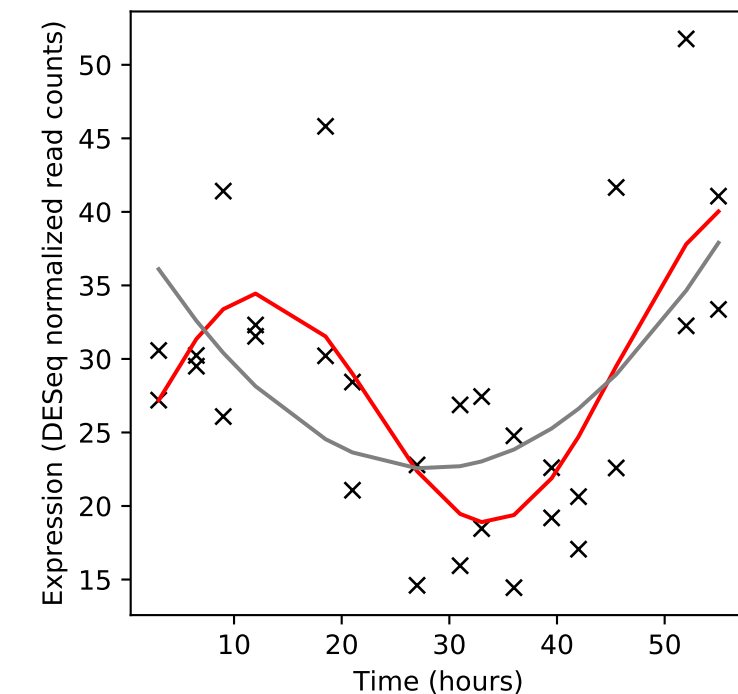

Rv1036c/-

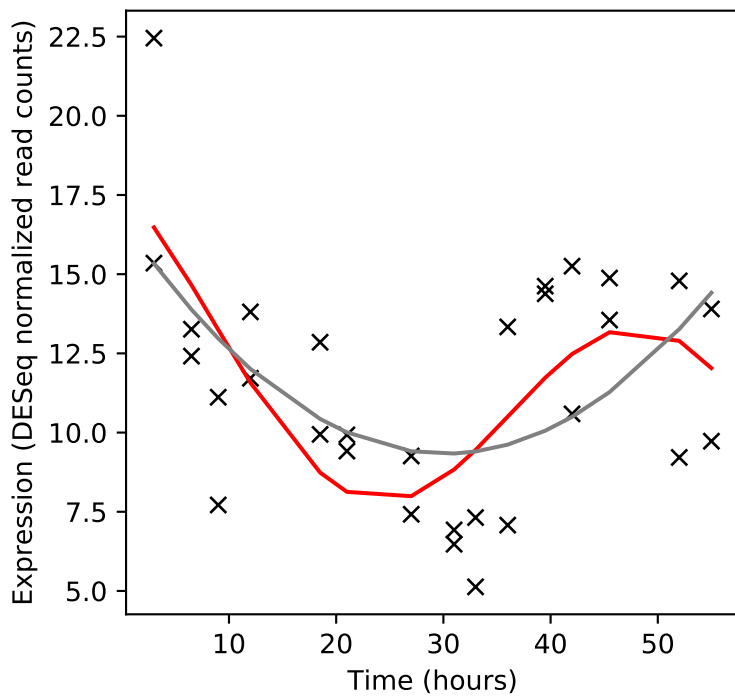

Rv1037c/esxl

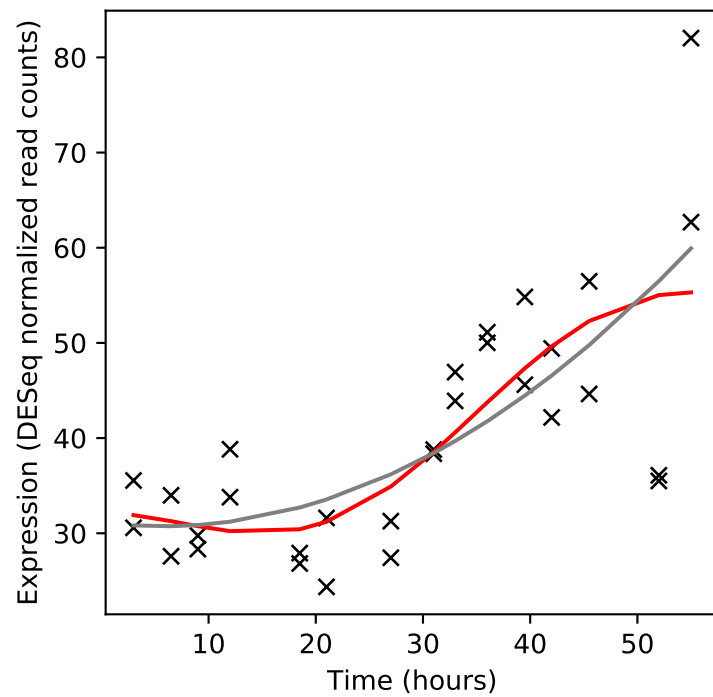

Rv1038c/esxJ

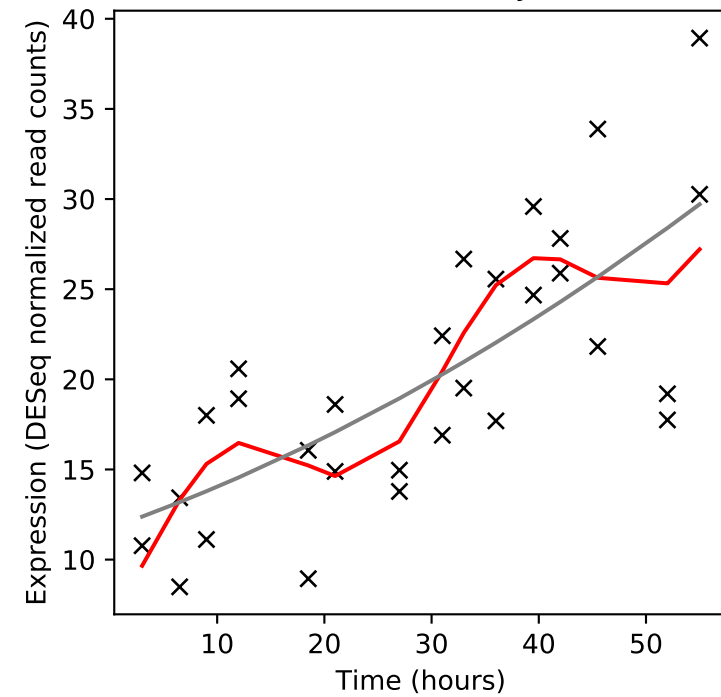

Rv1039c/PPE15

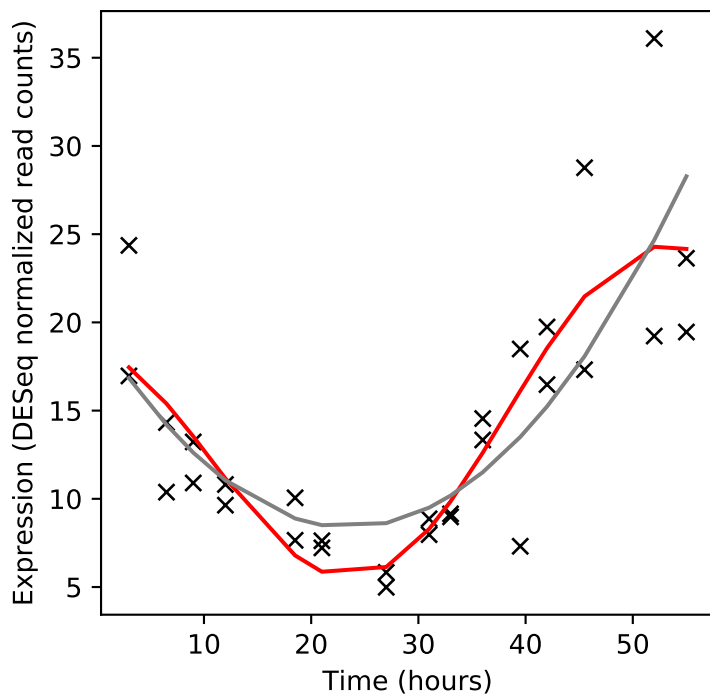

Rv1040c/PE8

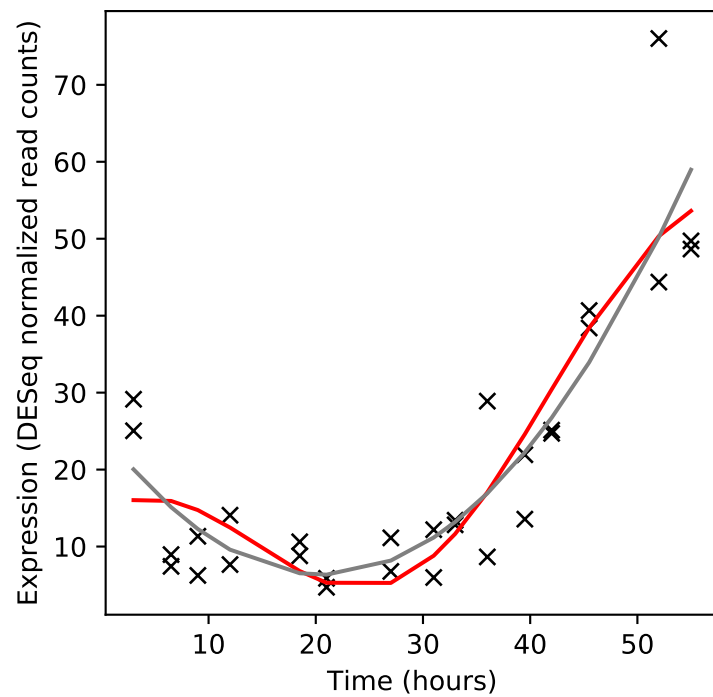

Rv1041c/-

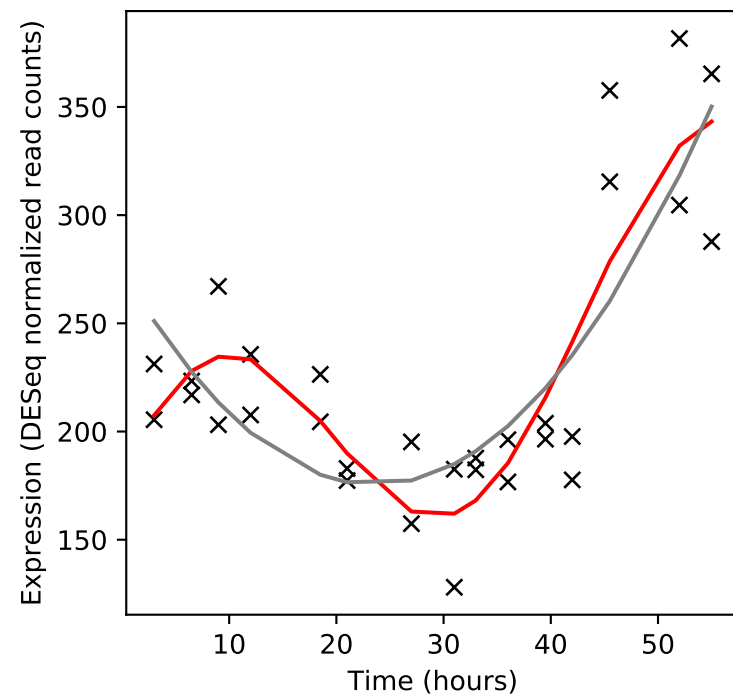

Rv1042c/-

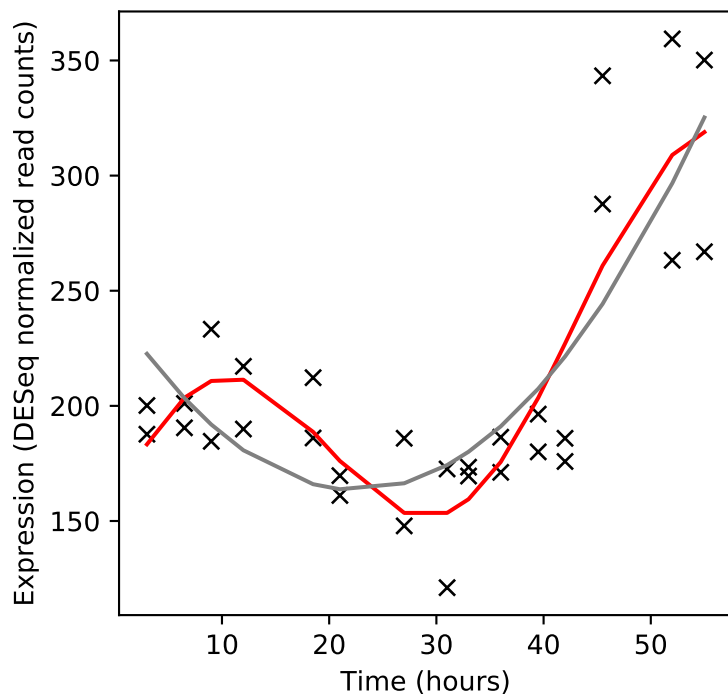

Rv1043c/-

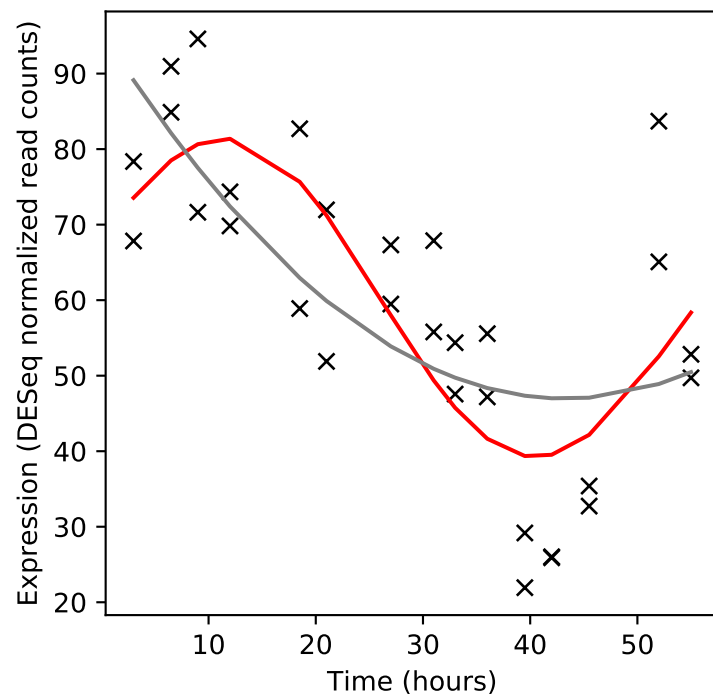

Rv1044c/-

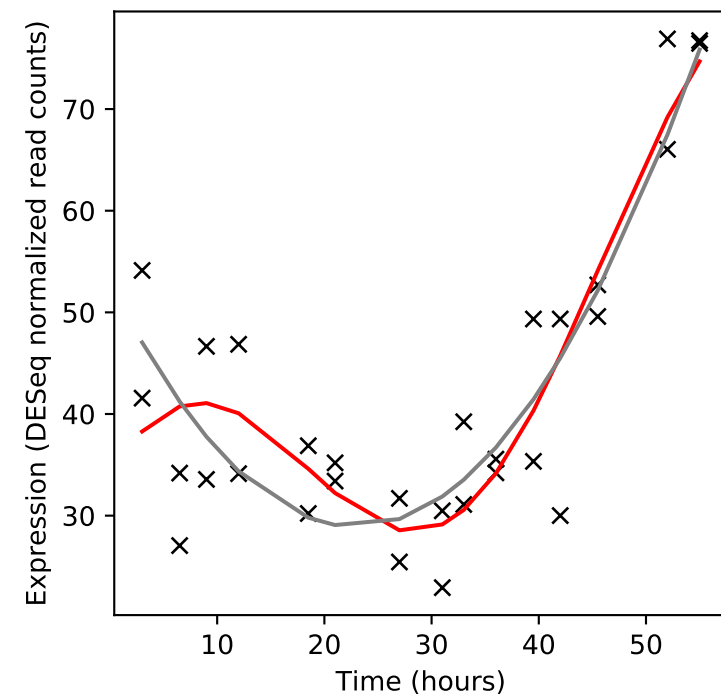

Rv1045/-

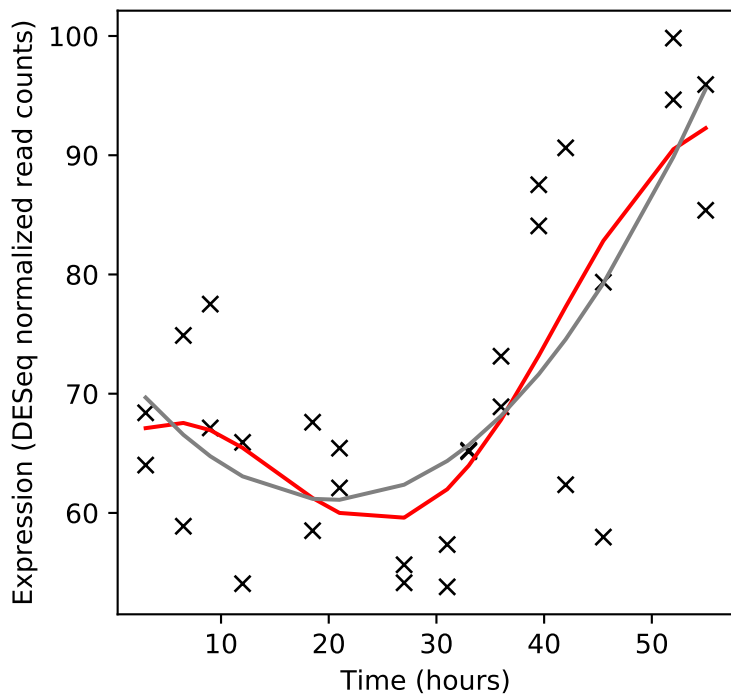

Rv1046c/-

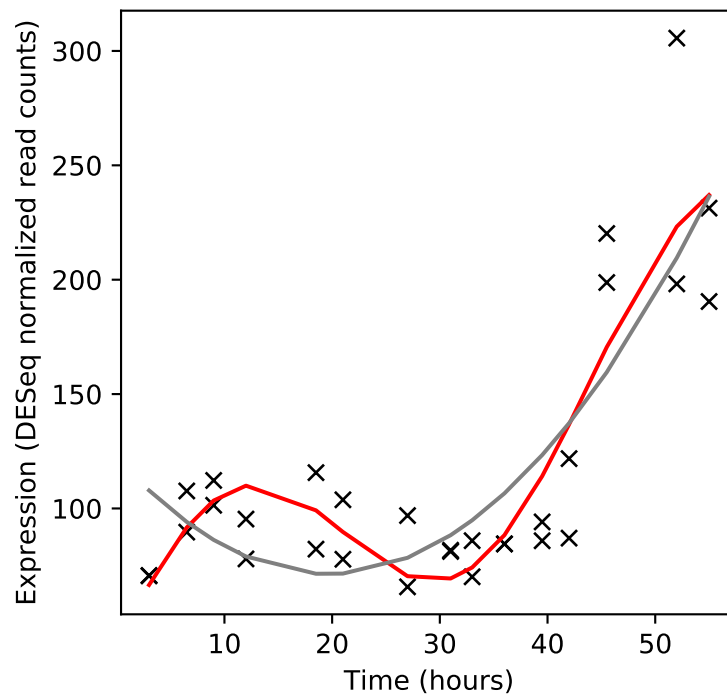

Rv1047/-

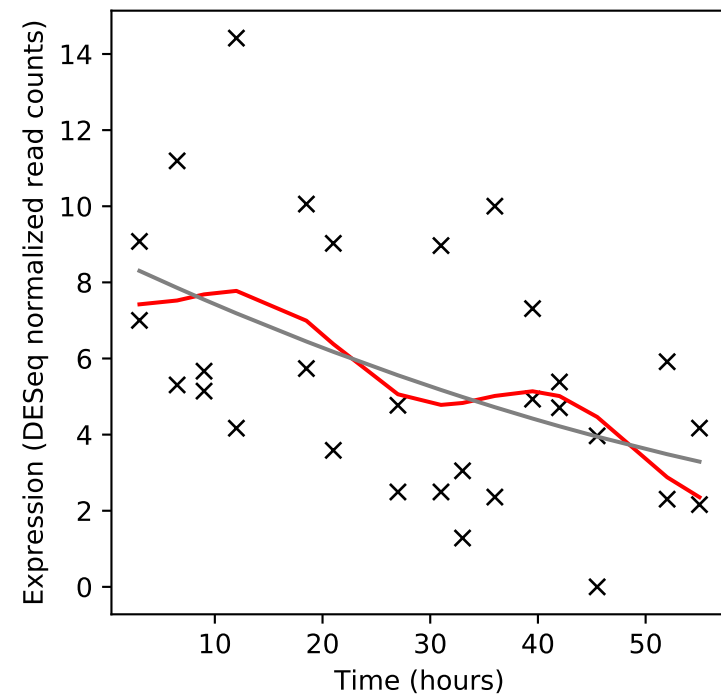

Rv1048c/-

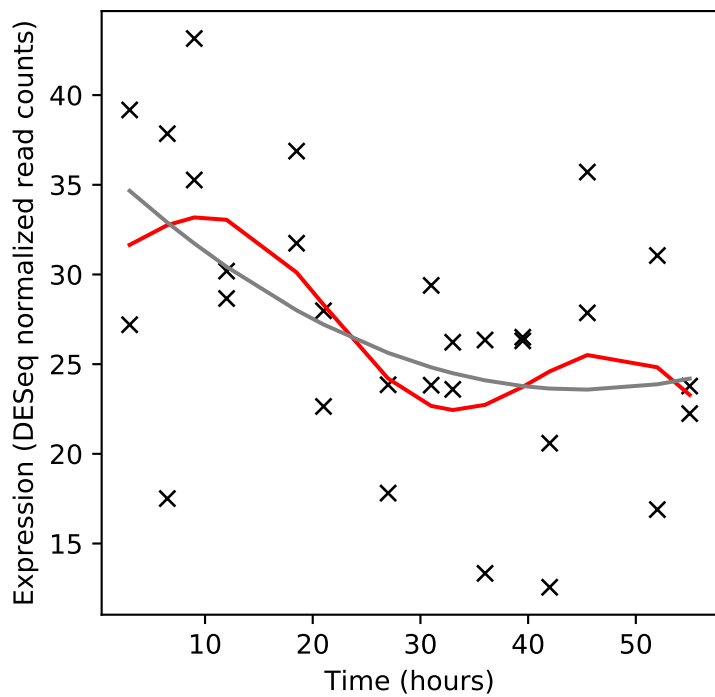

Rv1049/-

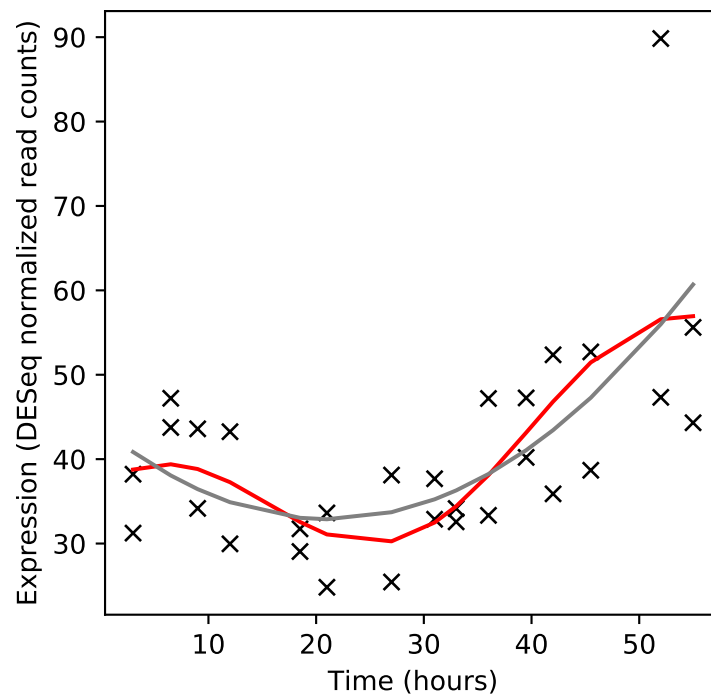

Rv1050/-

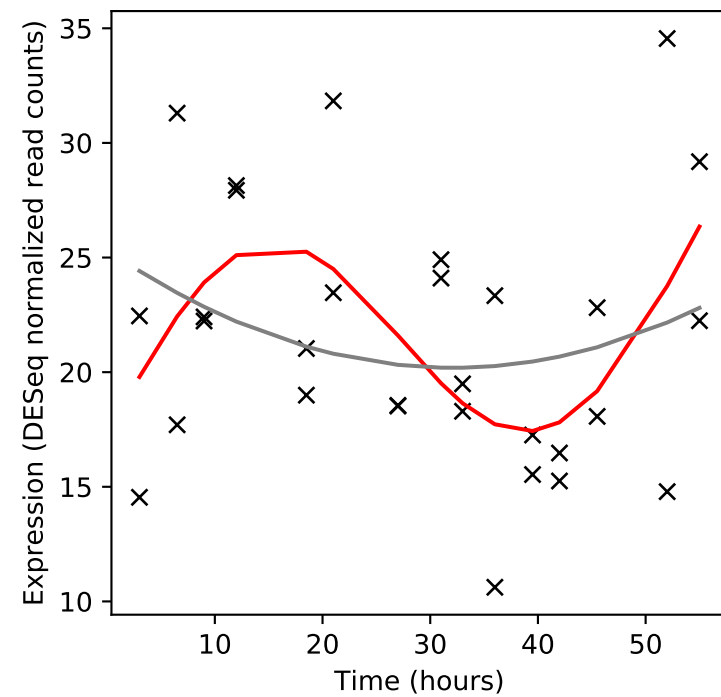

Rv1051c/-

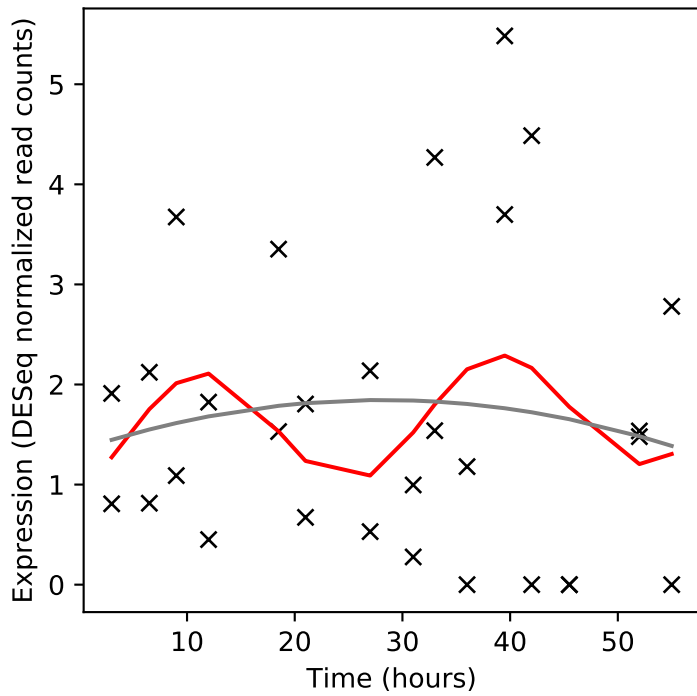

Rv1052/-

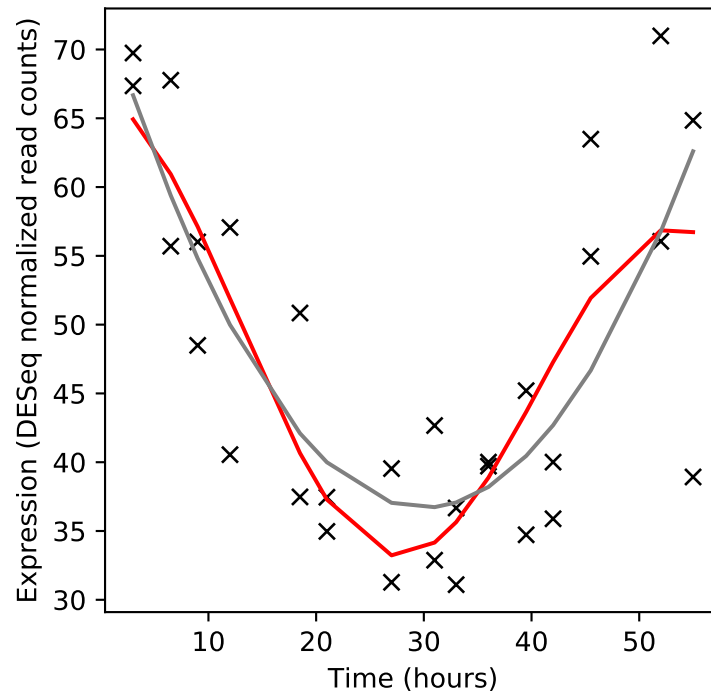

Rv1053c/-

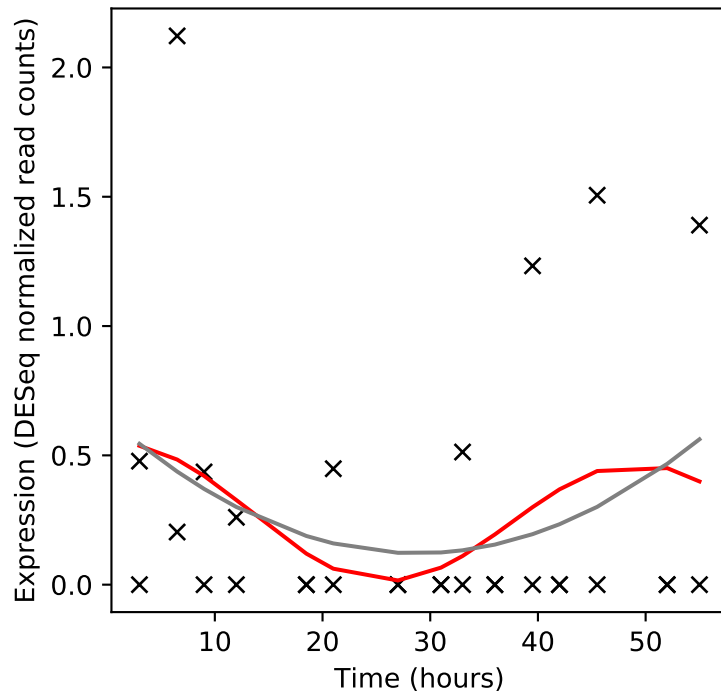

Rv1054/-

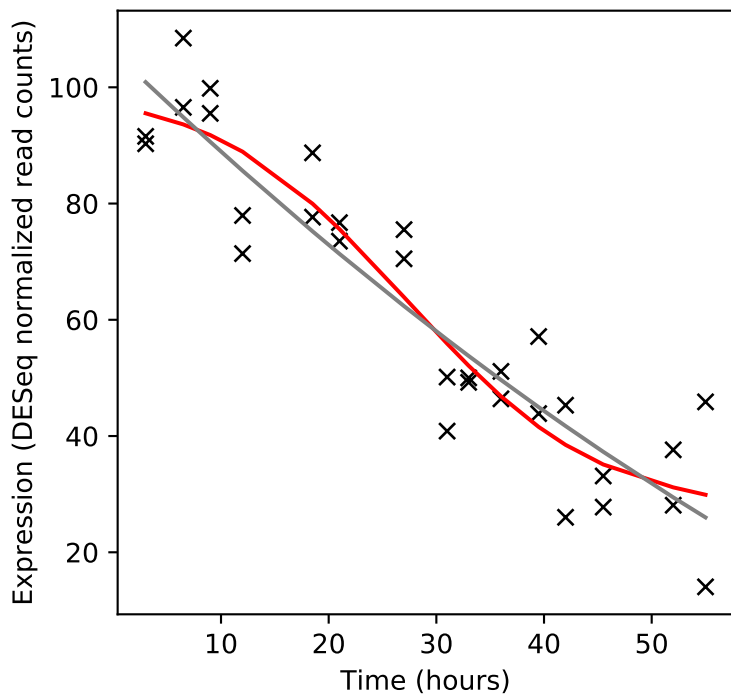

Rv1055/-

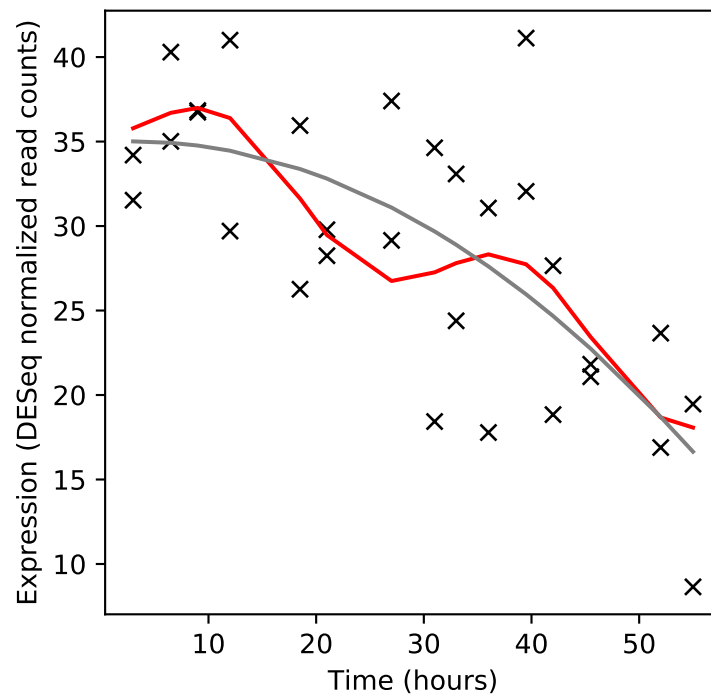

Rv1056/-

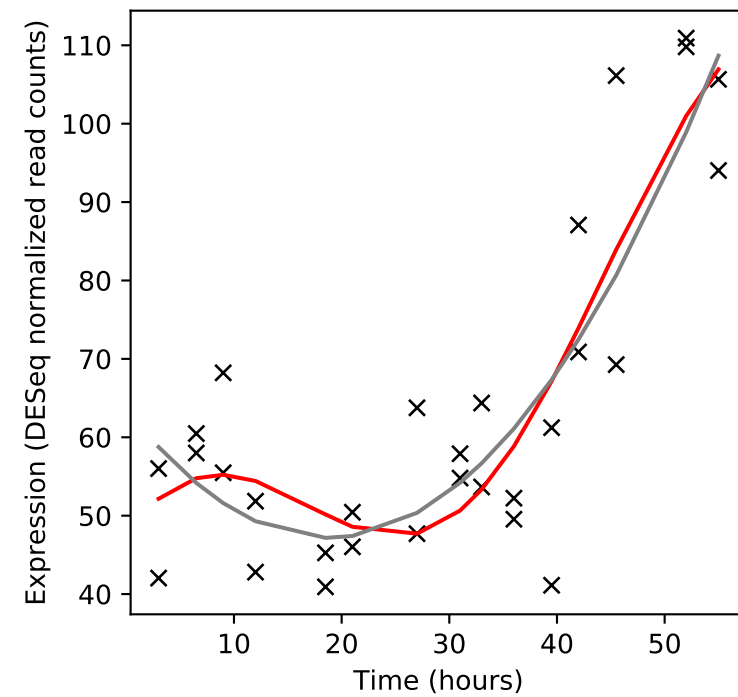

Rv1057/-

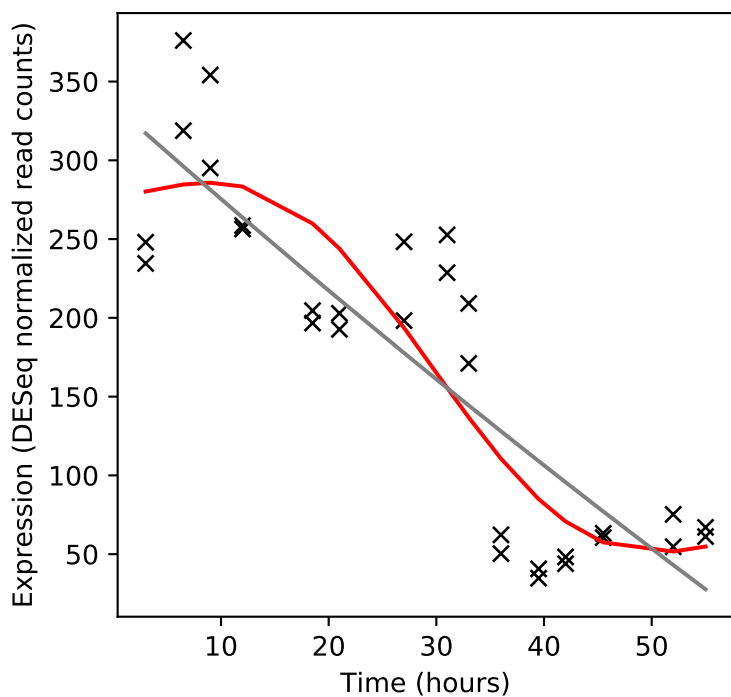

Rv1058/fadD14

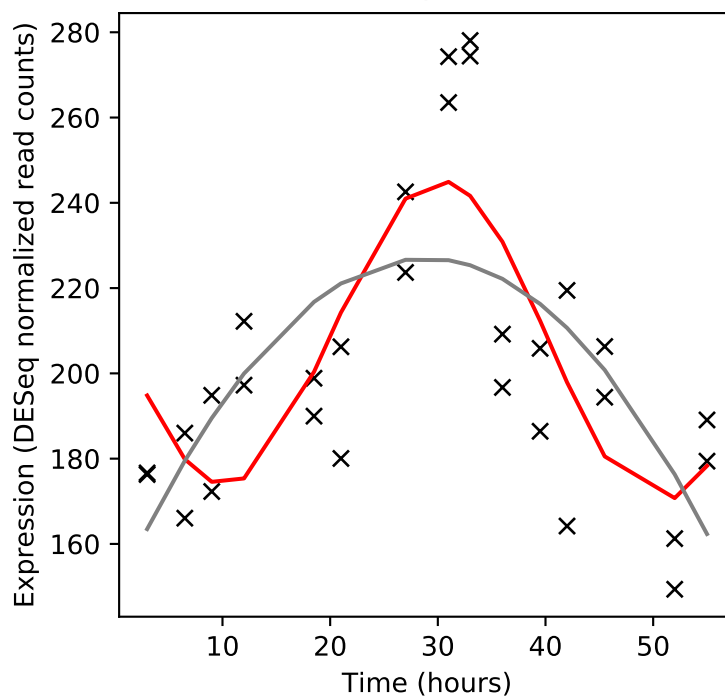

Rv1059/-

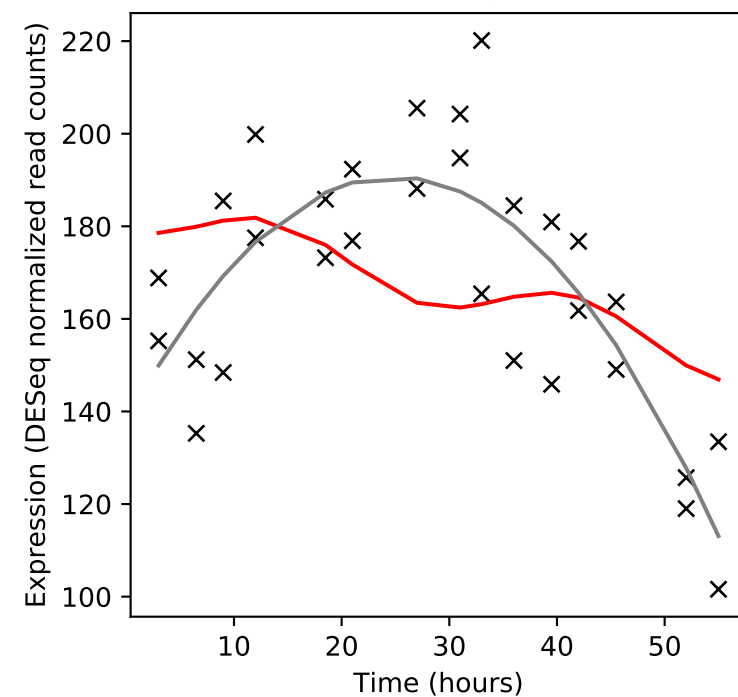

Rv1060/-

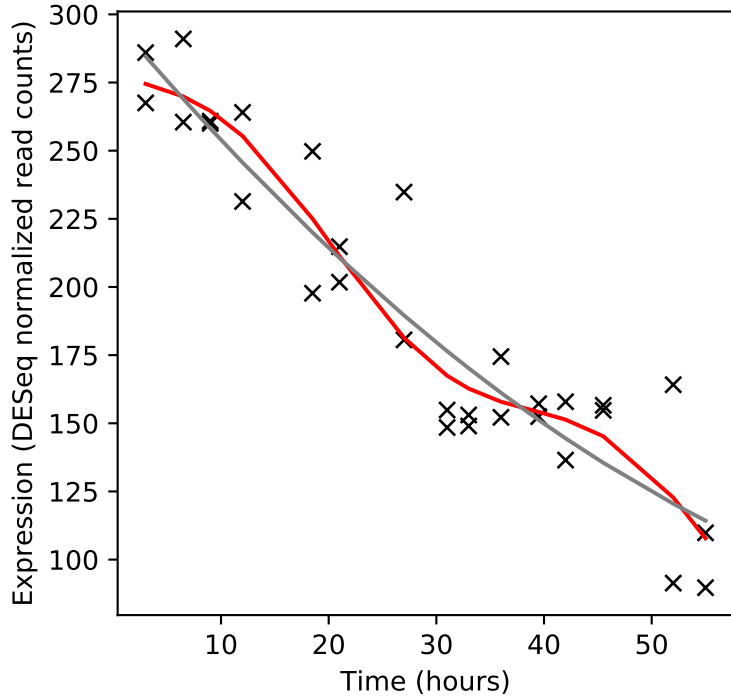

Rv1061/-

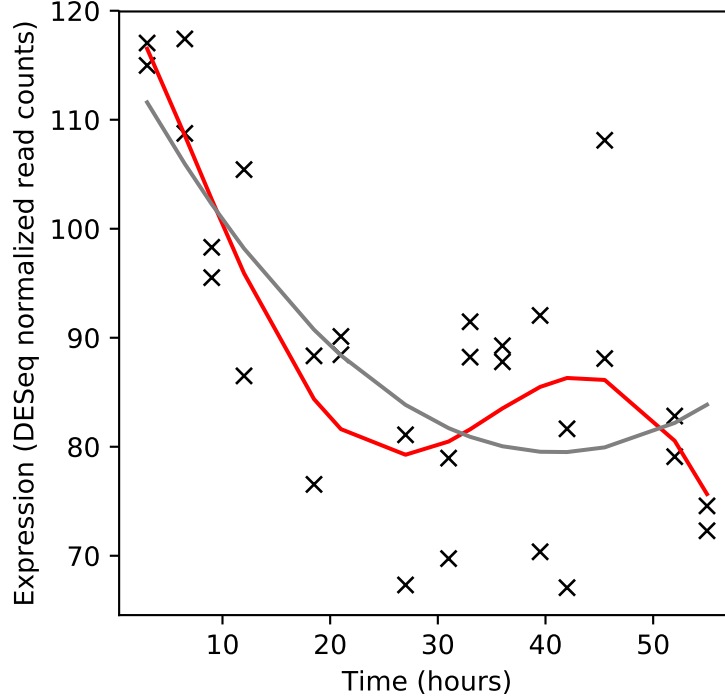

Rv1062/-

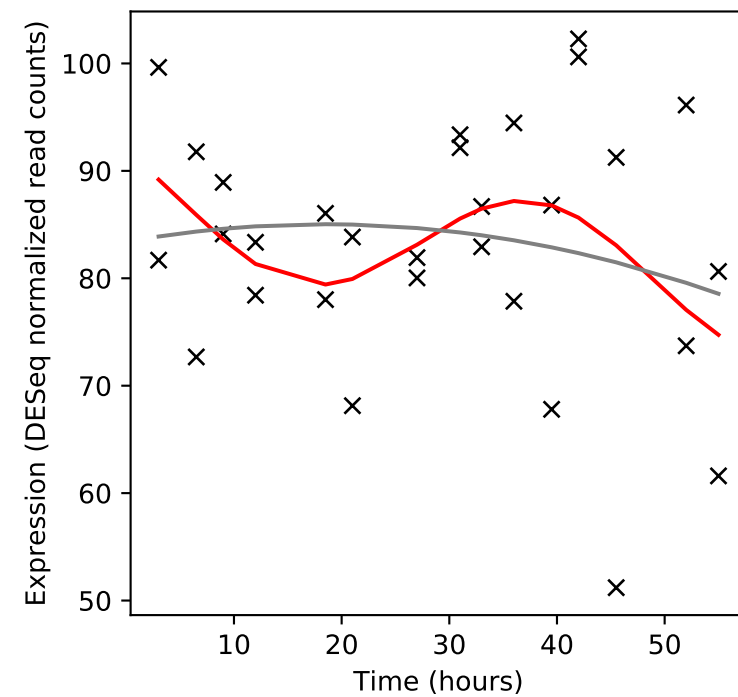



Rv1063c/-

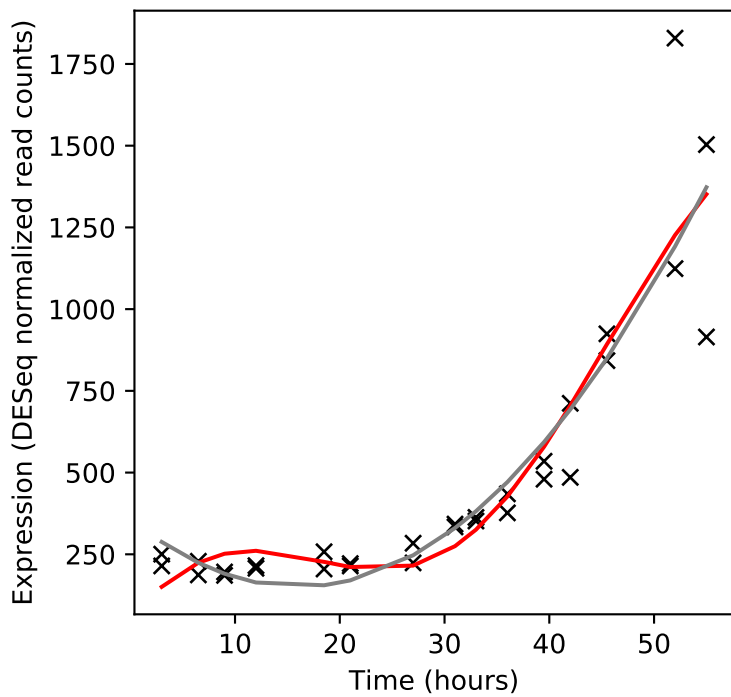

Rv1064c/lpqV

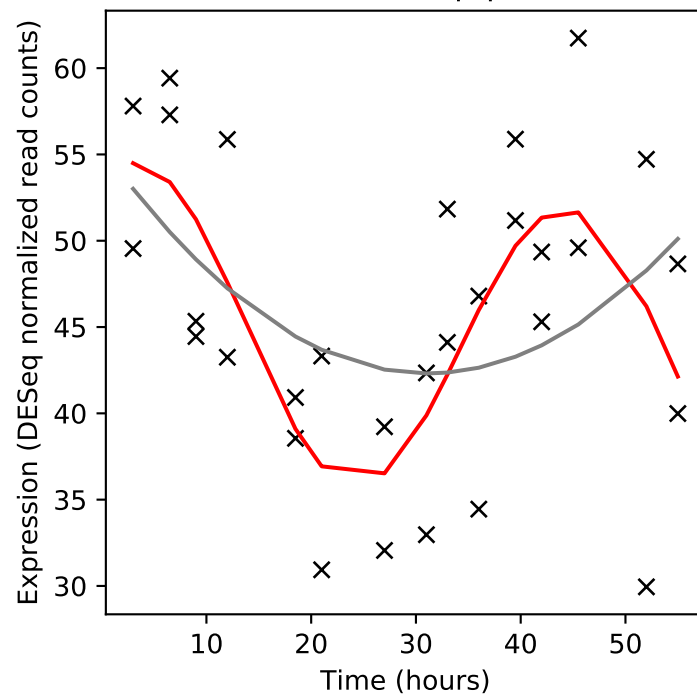

Rv1065/-

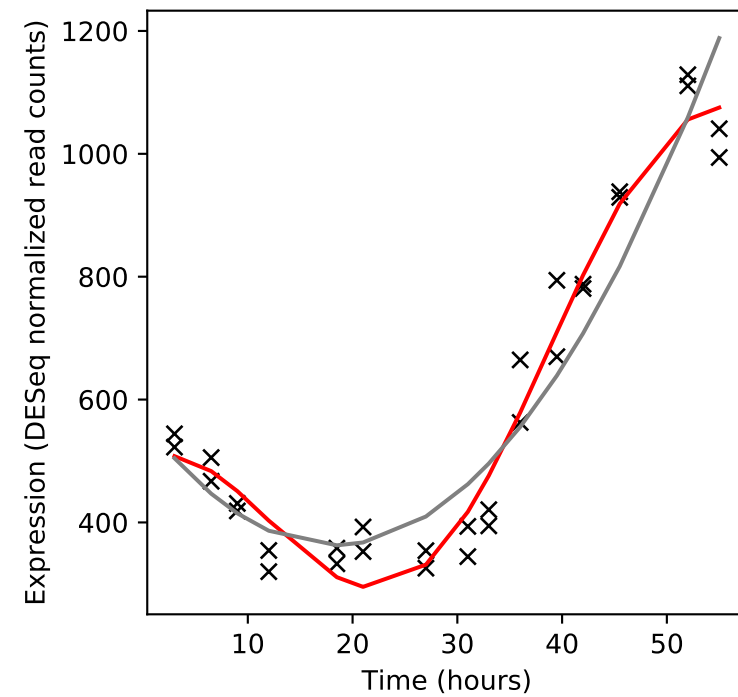

Rv1066/-

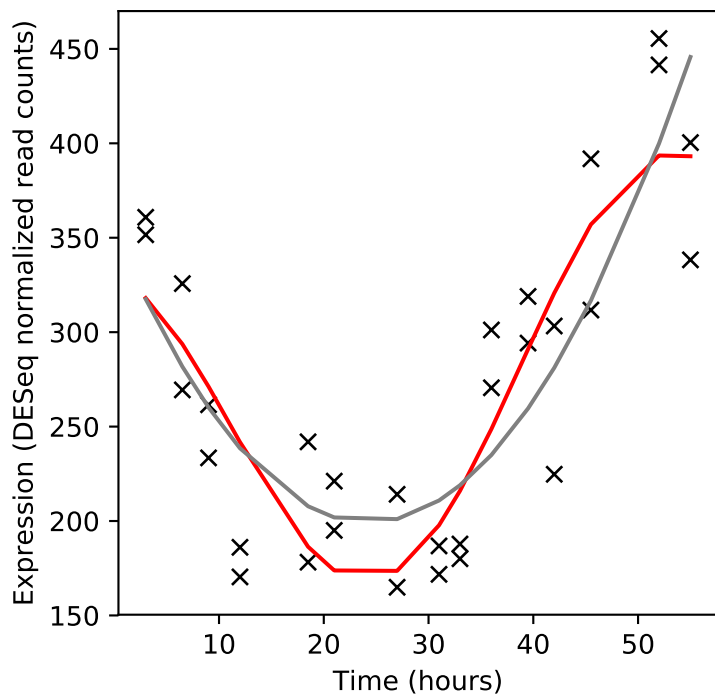

Rv1067c/PE\_PGRS19

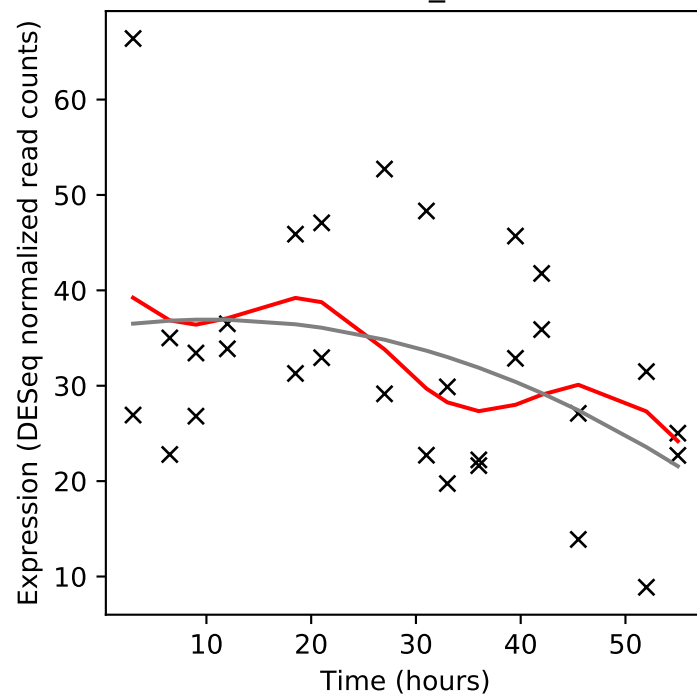

Rv1068c/PE\_PGRS20

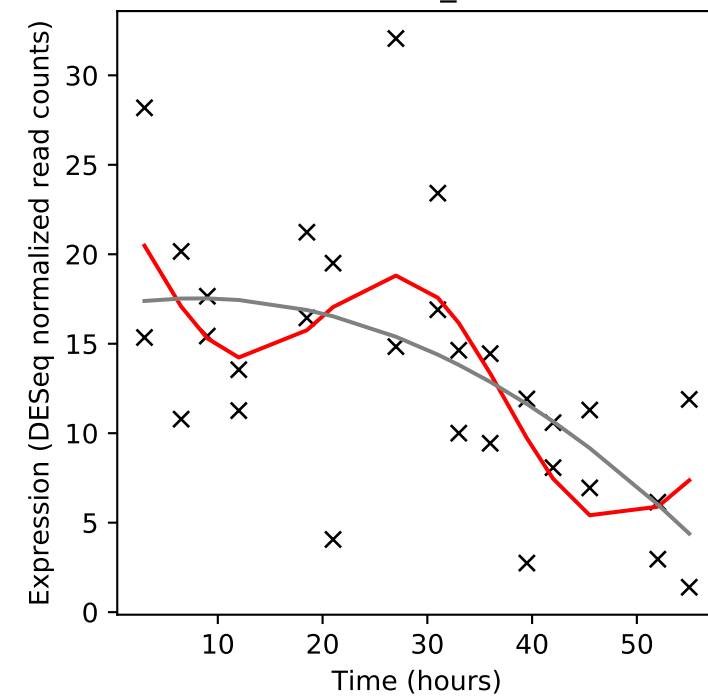

Rv1069c/-

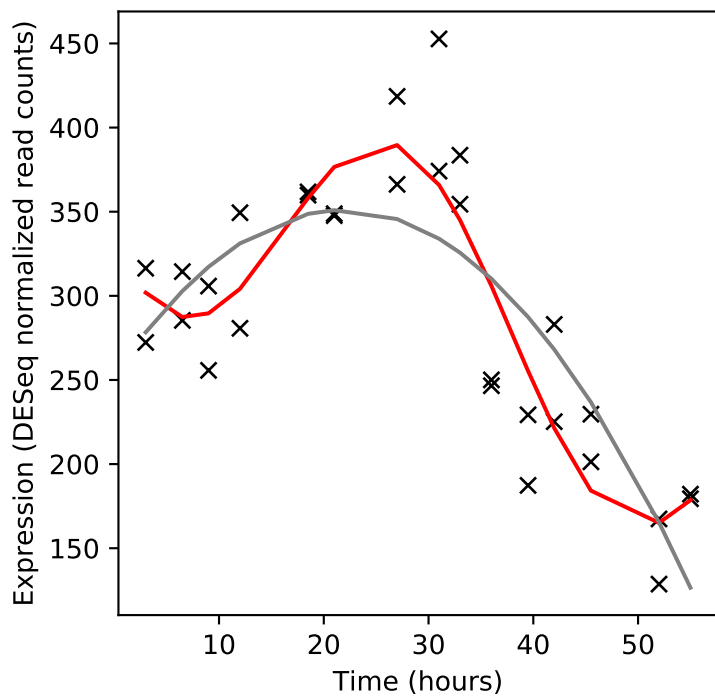

Rv1070c/echA8

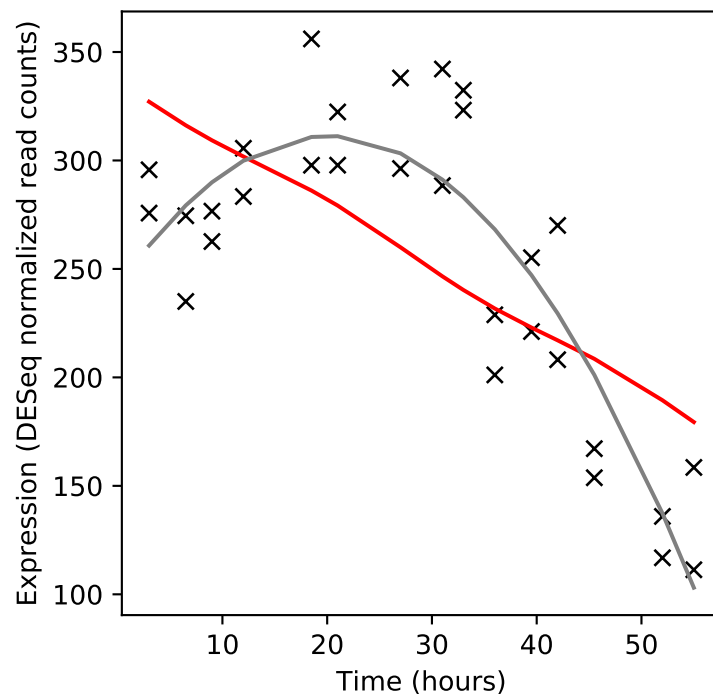

Rv1071c/echA9

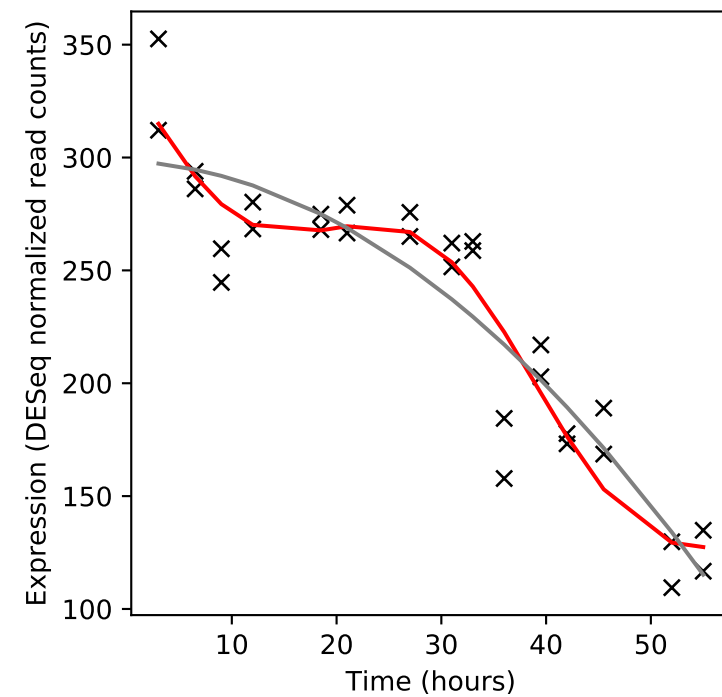

Rv1072/-

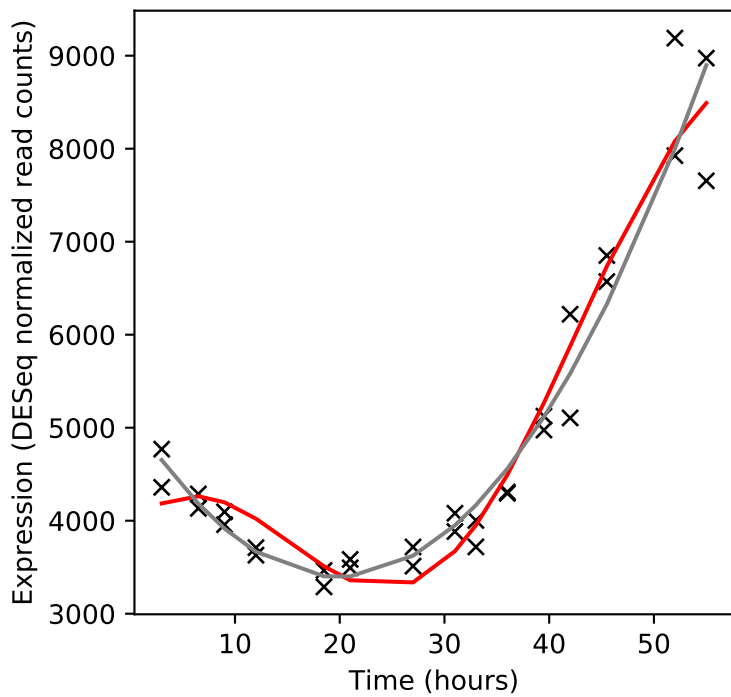

Rv1073/-

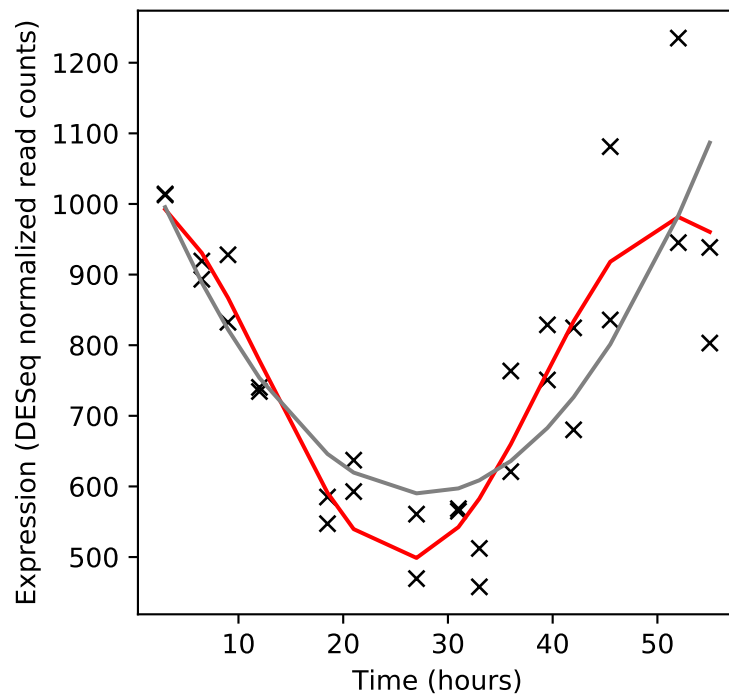

Rv1074c/fadA3

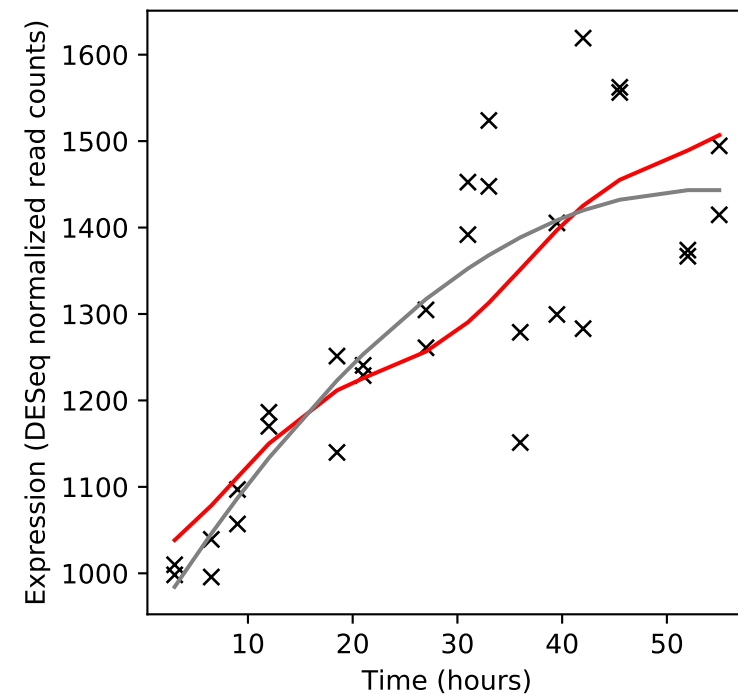

Rv1075c/-

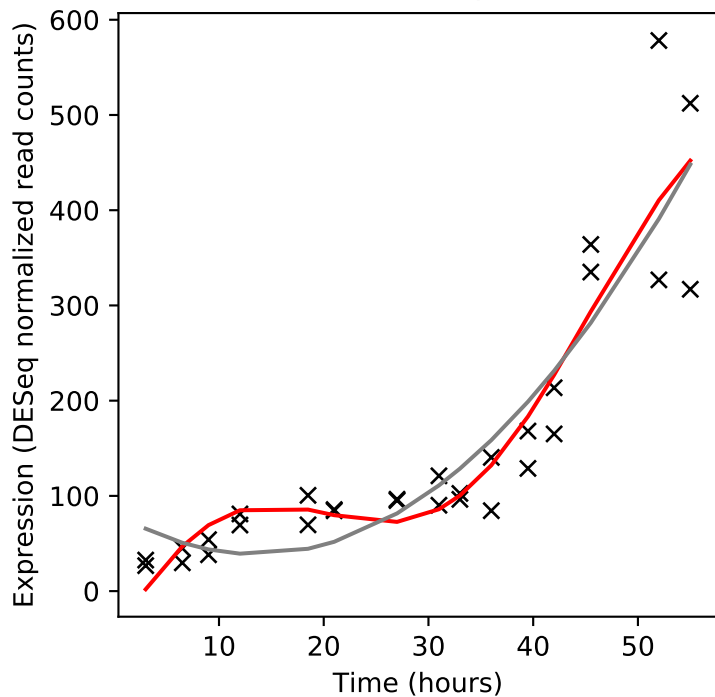

Rv1076/lipU

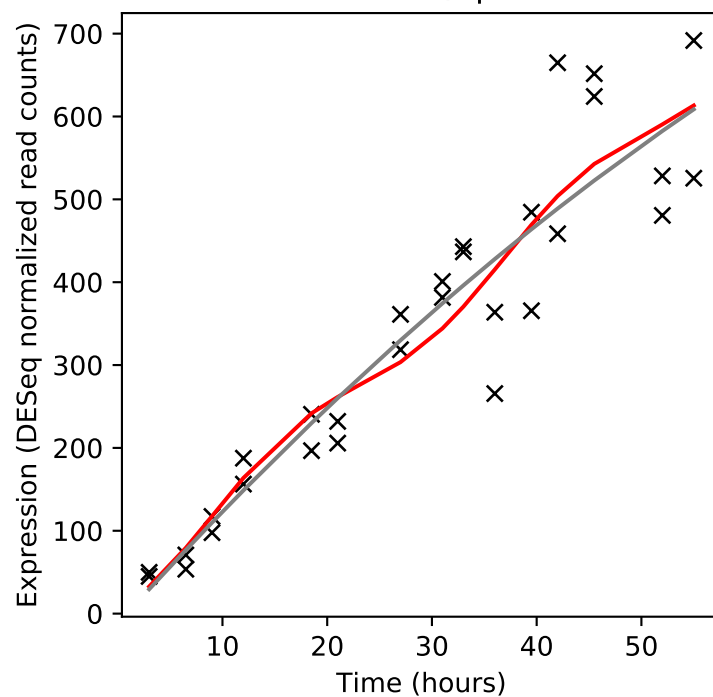

Rv1077/cbs

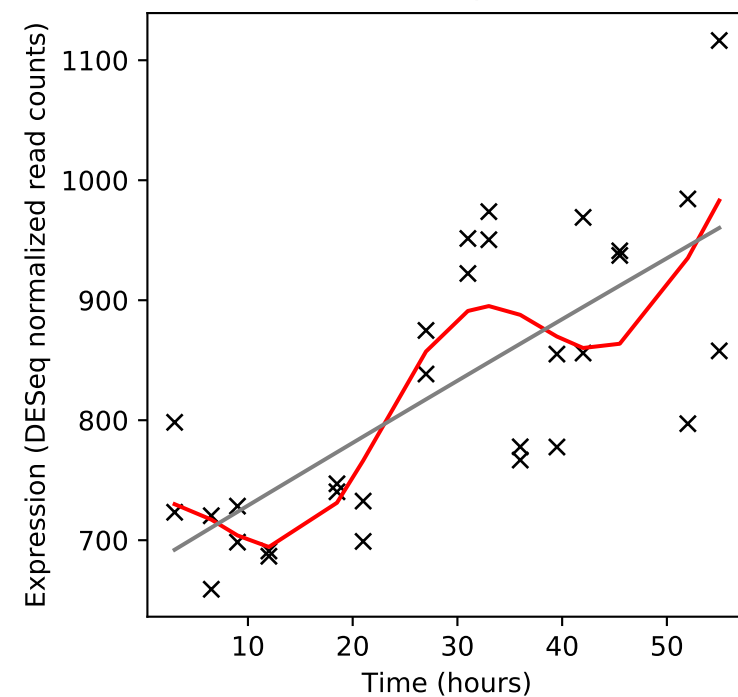

Rv1078/pra

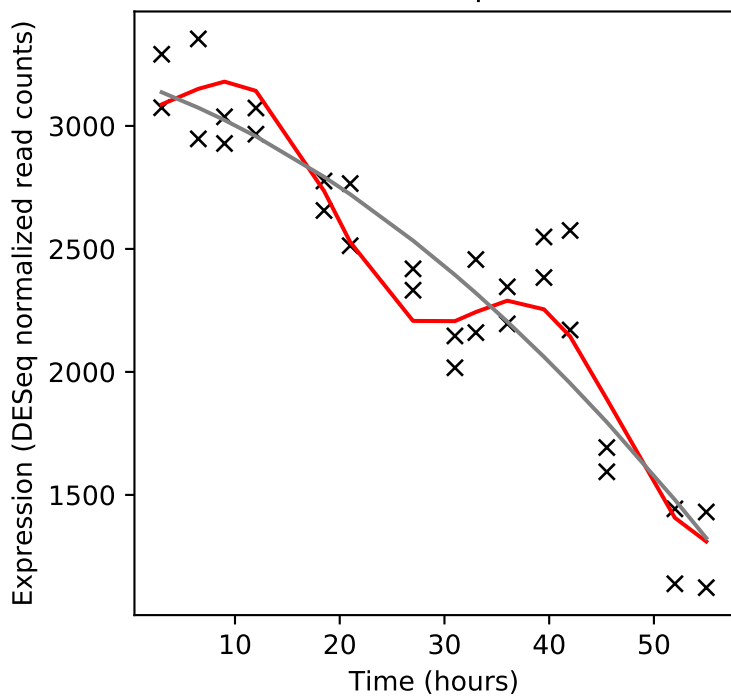

Rv1079/metB

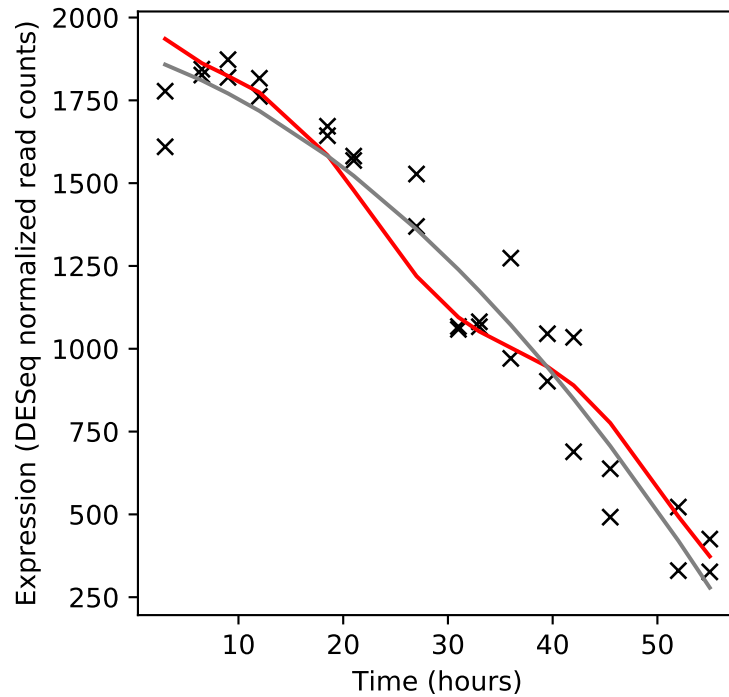

Rv1080c/greA

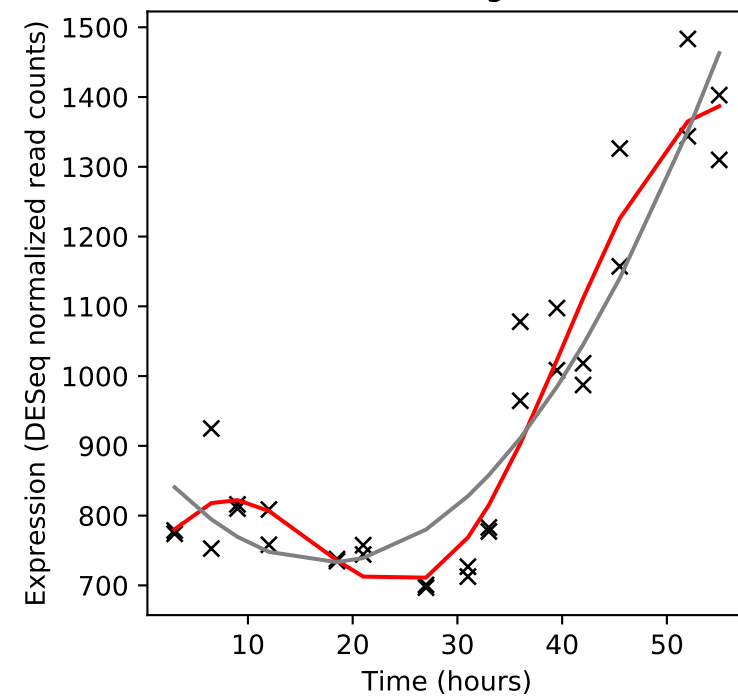

Rv1081c/-

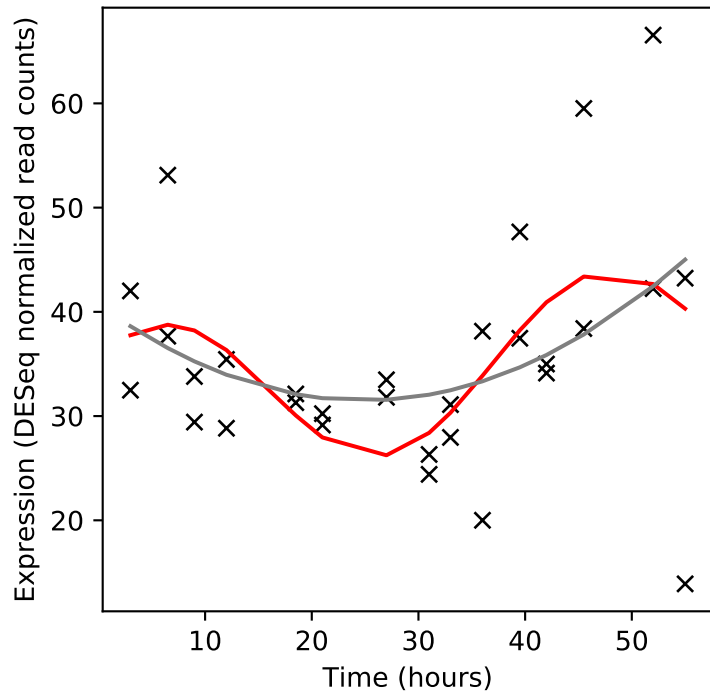

Rv1082/mca

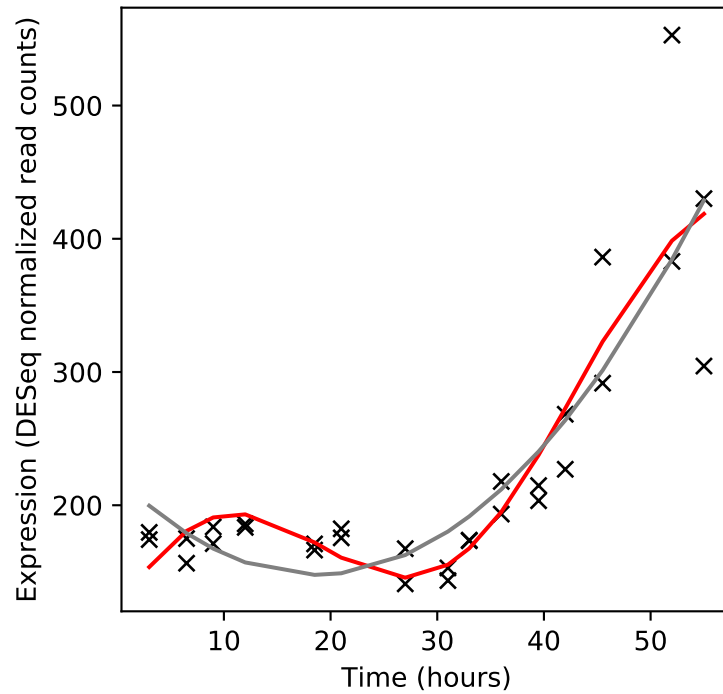

Rv1083/-

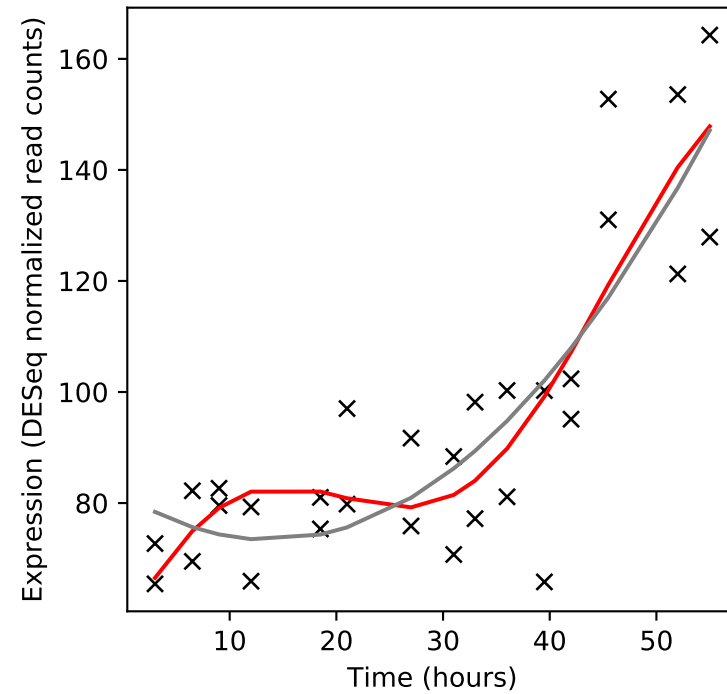

Rv1084/-

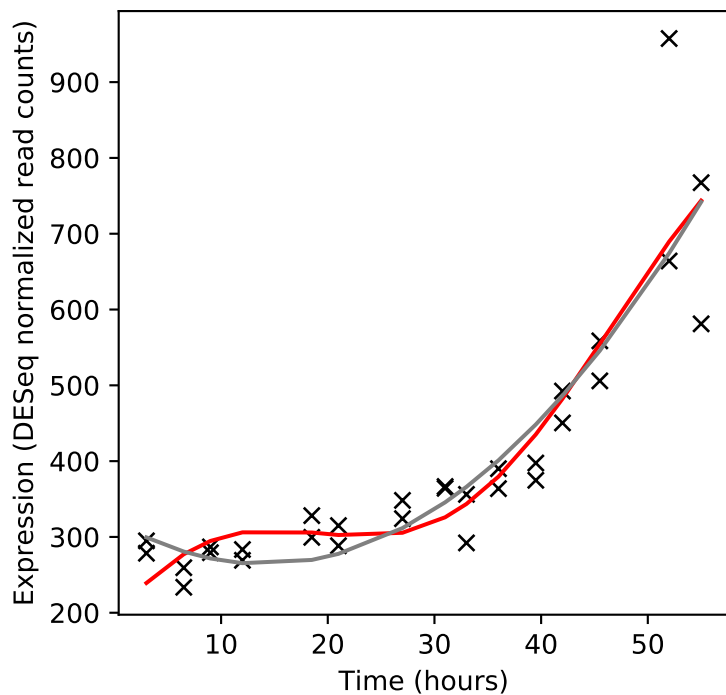

Rv1085c/-

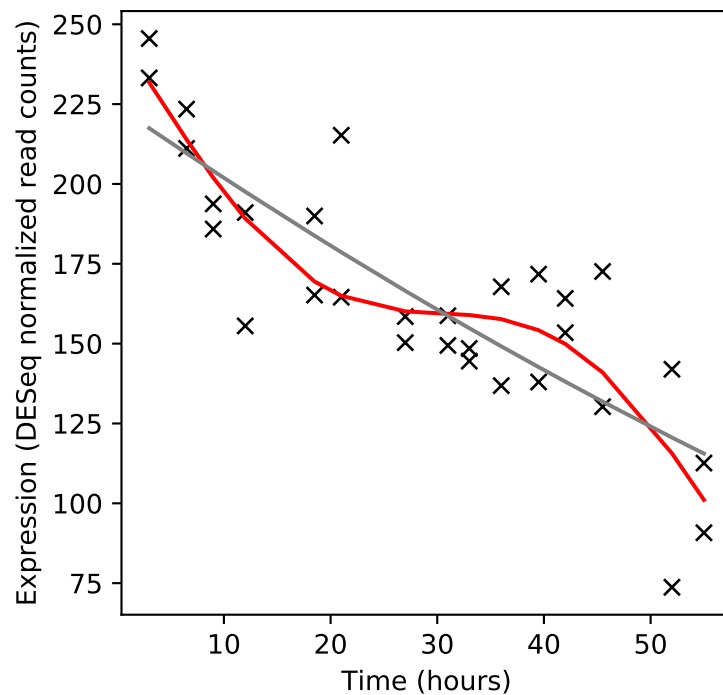

Rv1086/-

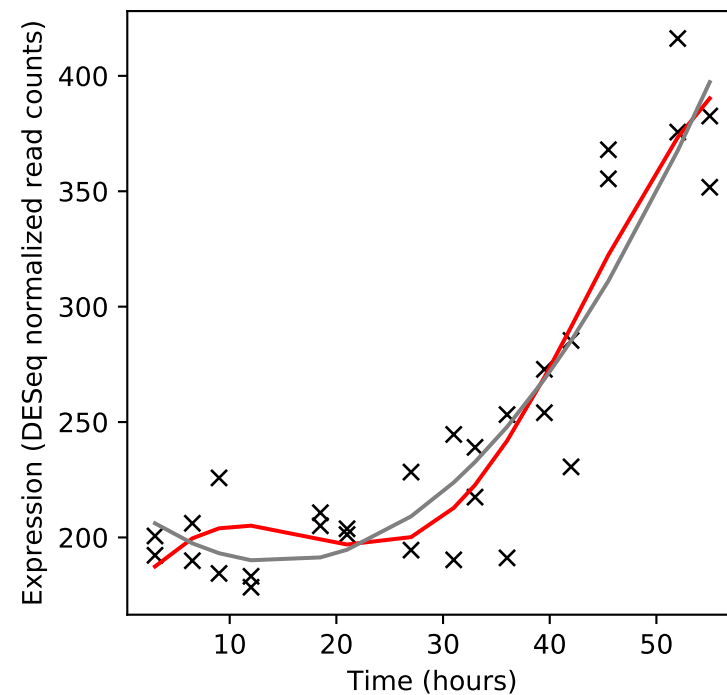

Rv1087/PE\_PGRS21

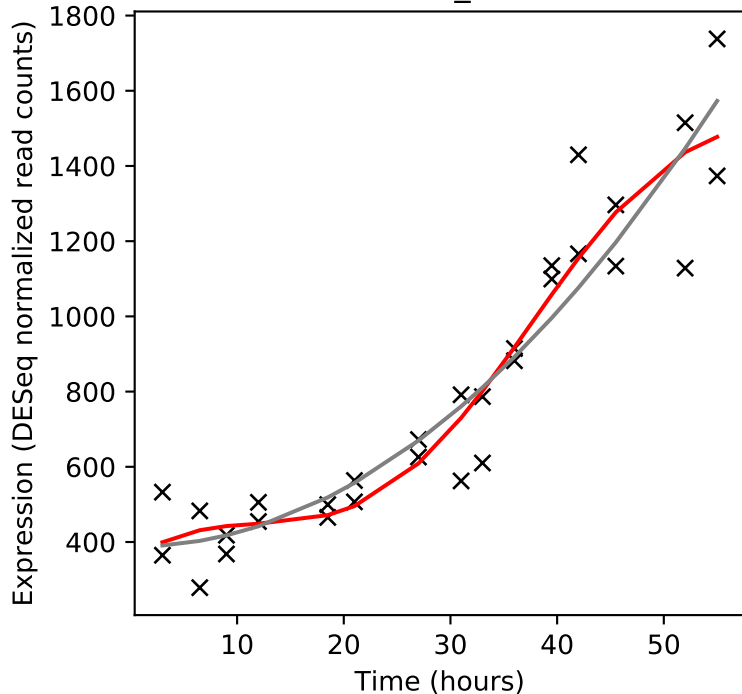

Rv1087A/-

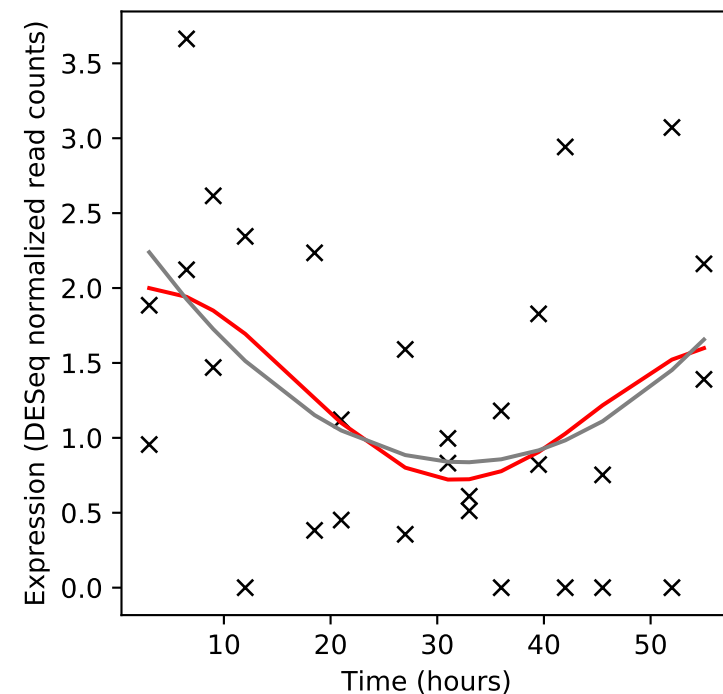

Rv1088/PE9

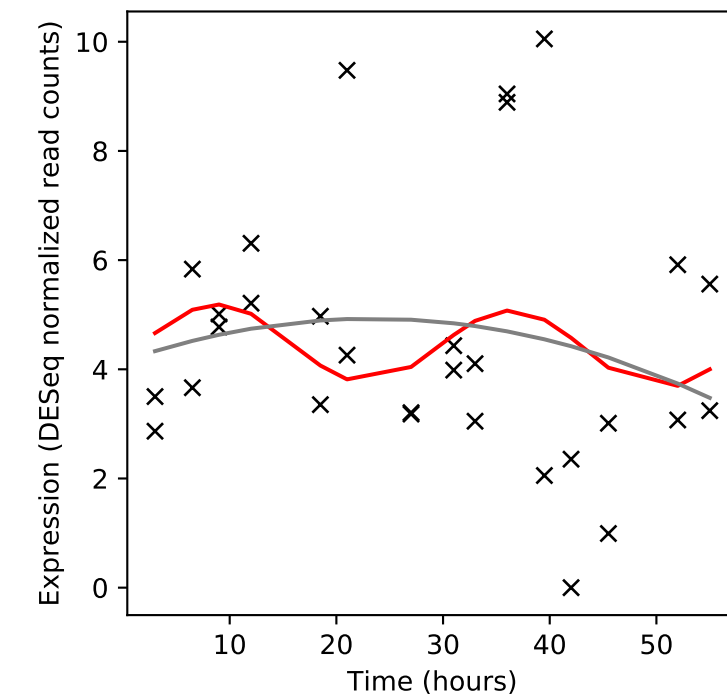

Rv1089/PE10

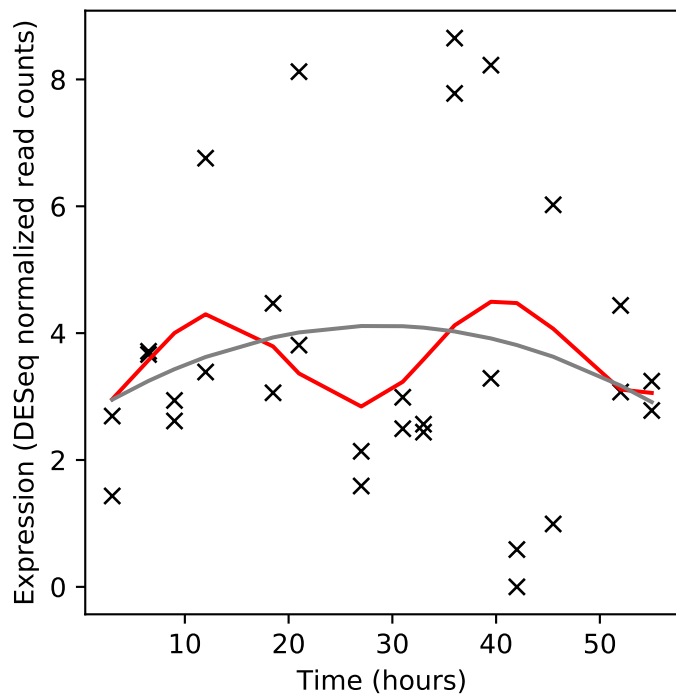

Rv1089A/celA2a

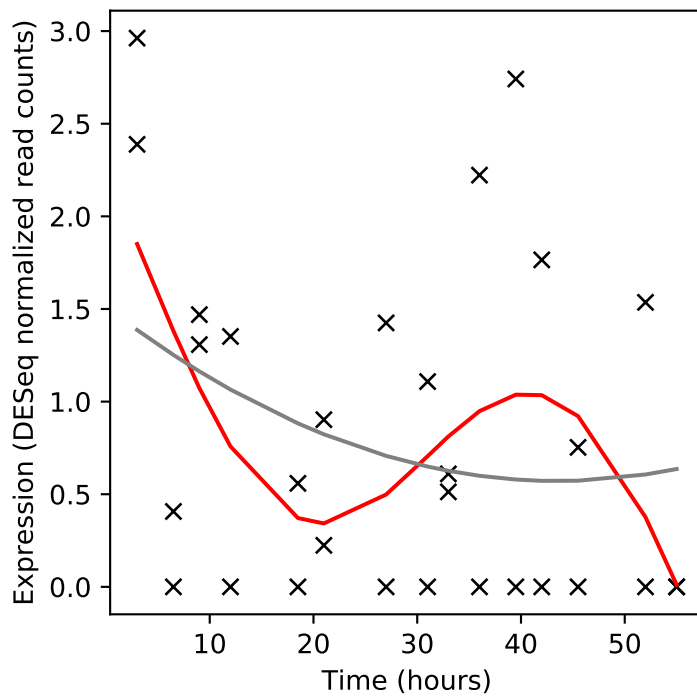

Rv1090/celA2b

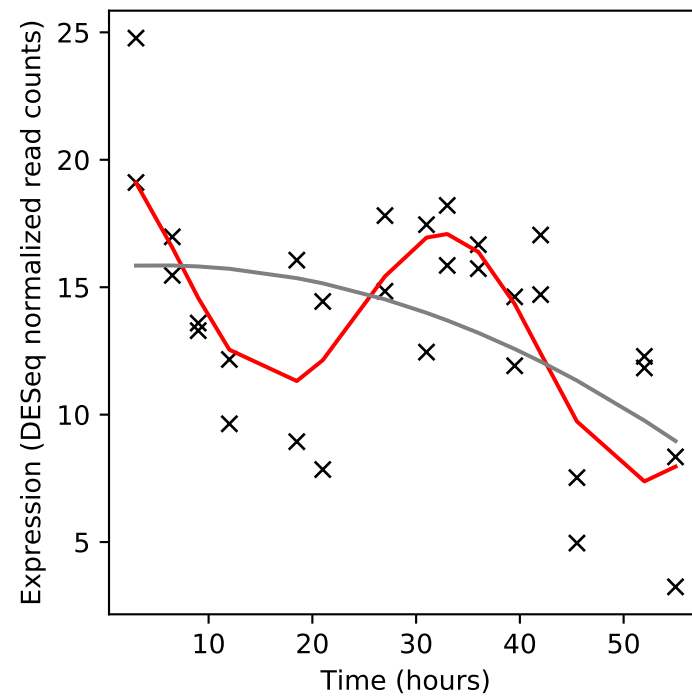

Rv1091/PE\_PGRS22

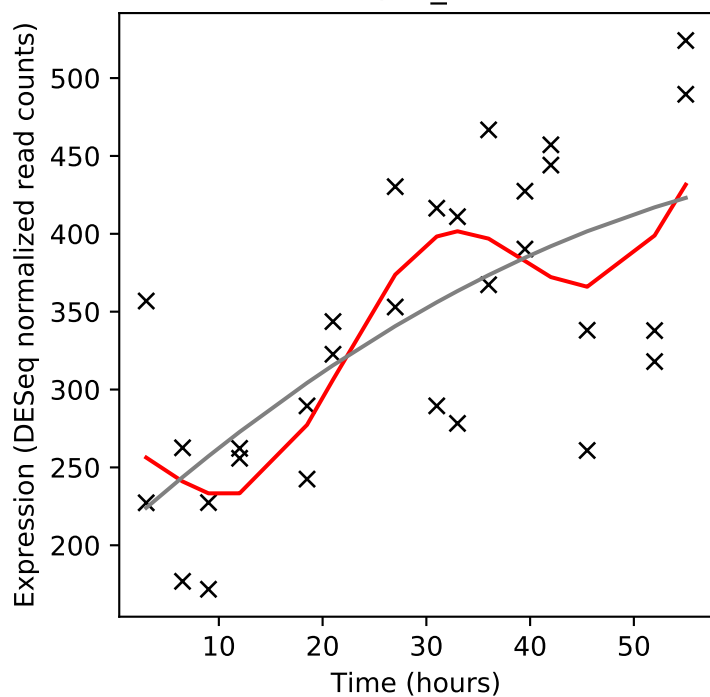

Rv1092c/coaA

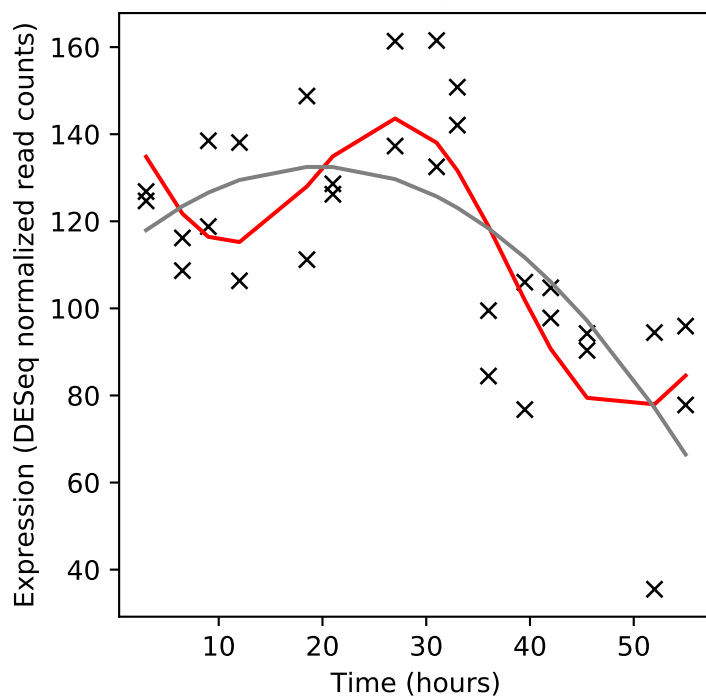

Rv1093/glyA1

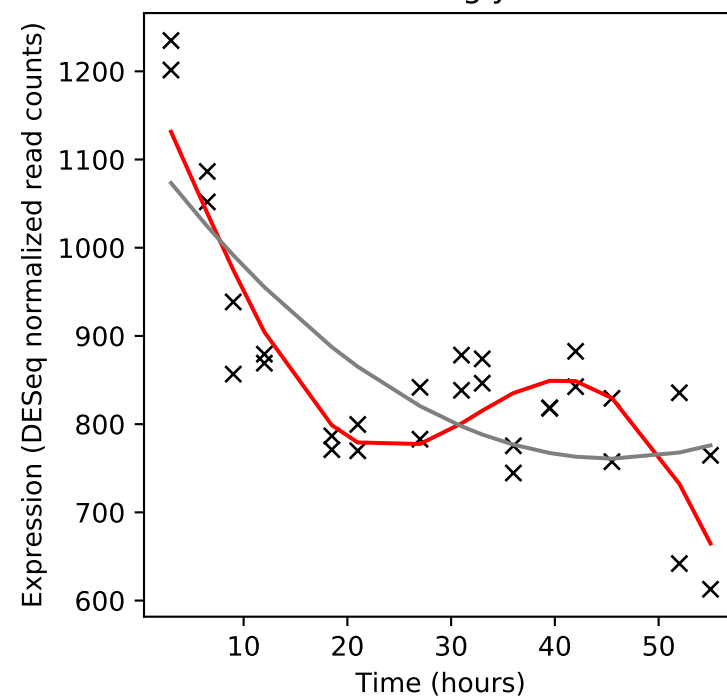

Rv1094/desA2

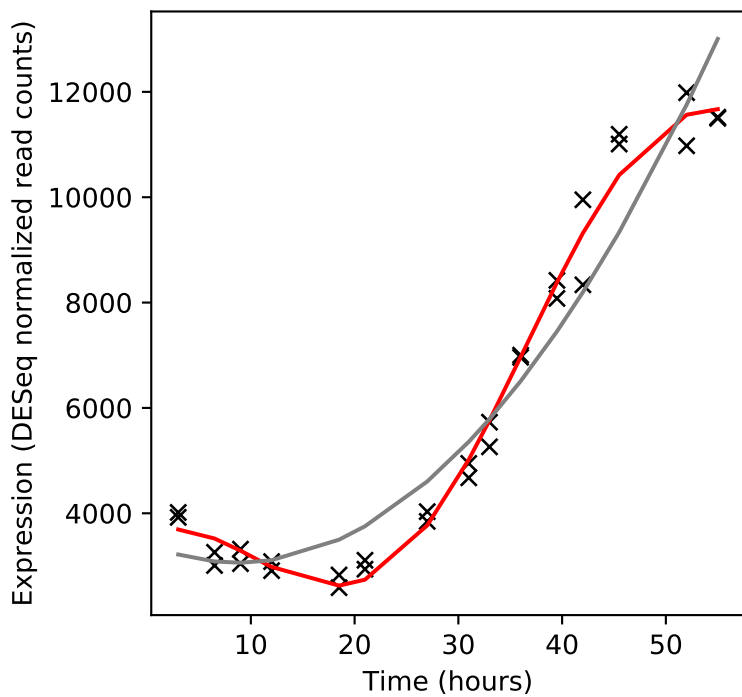

Rv1095/phoH2

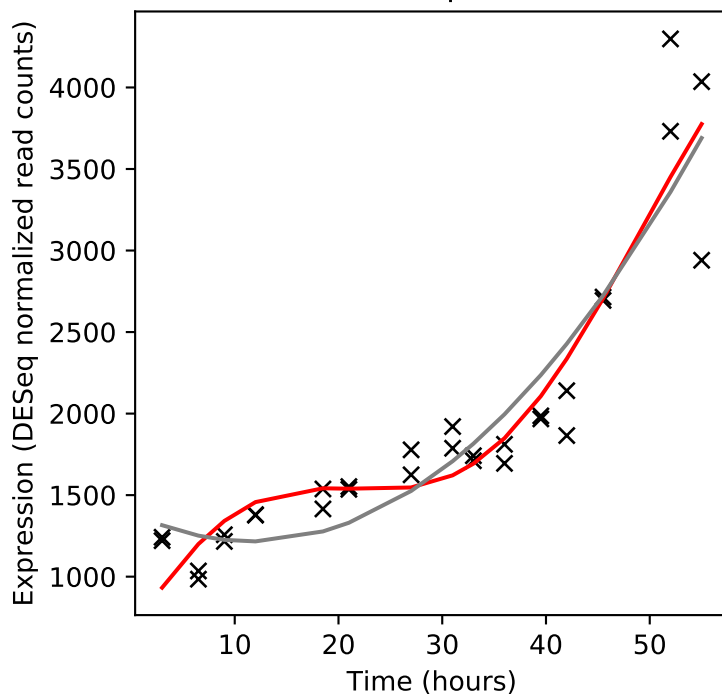

Rv1096/-

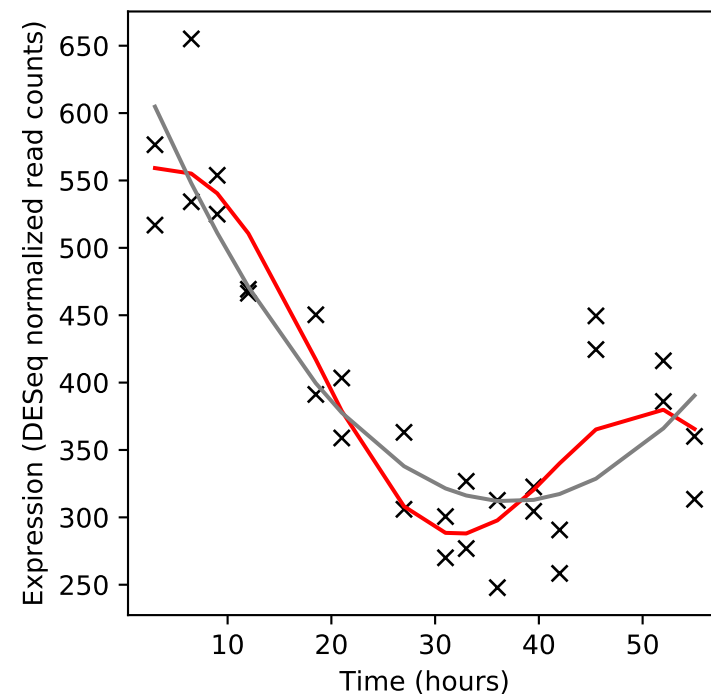

Rv1097c/-

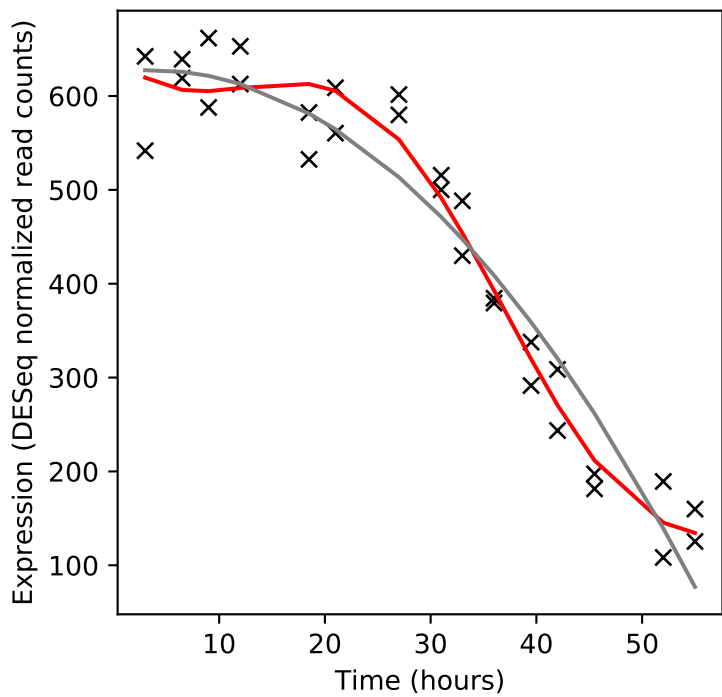

Rv1098c/fum

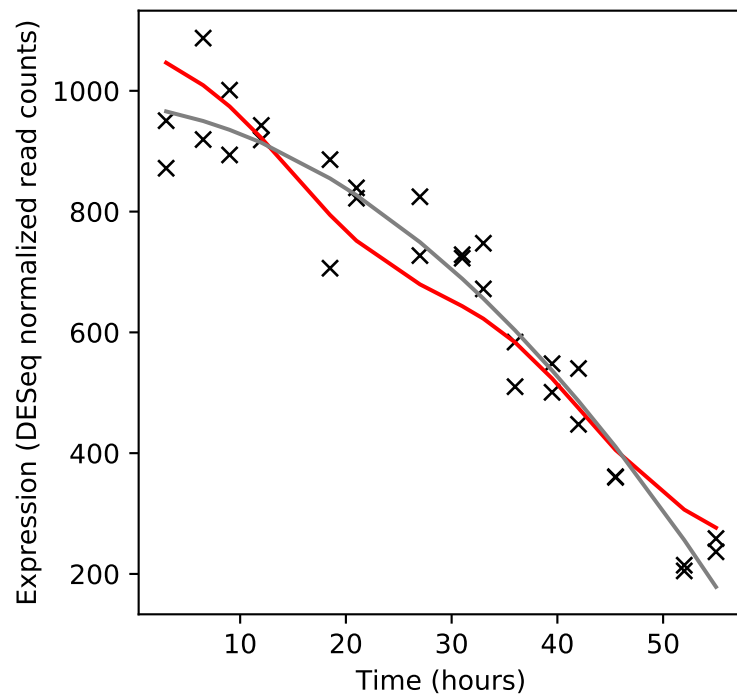

Rv1099c/glpX

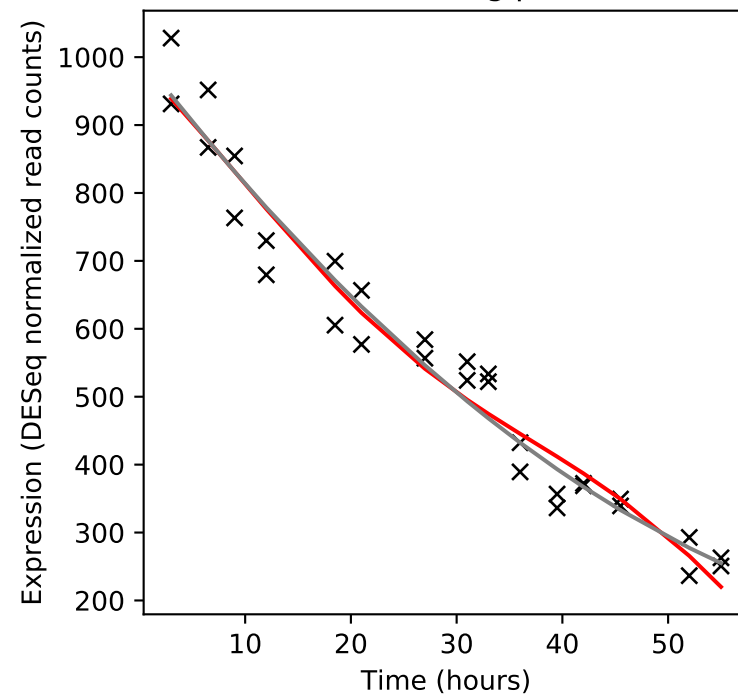

Rv1100c/-

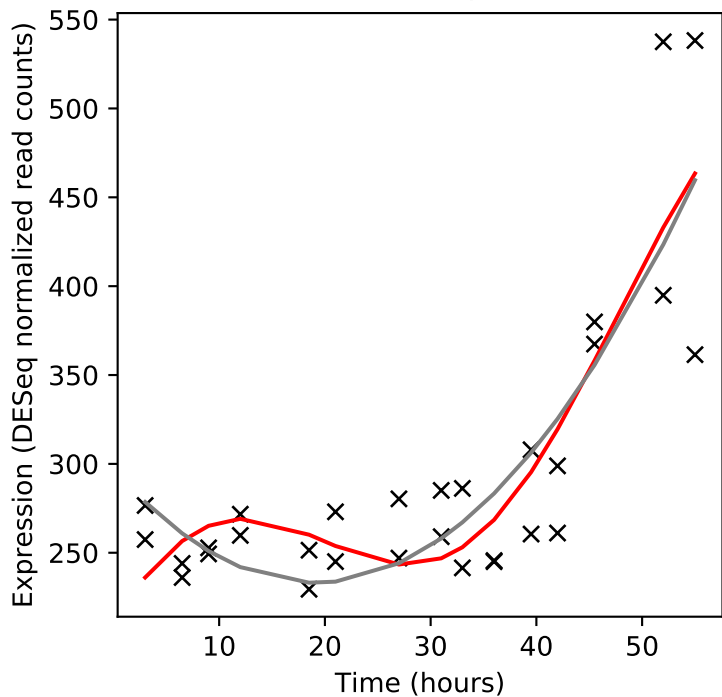

Rv1101c/-

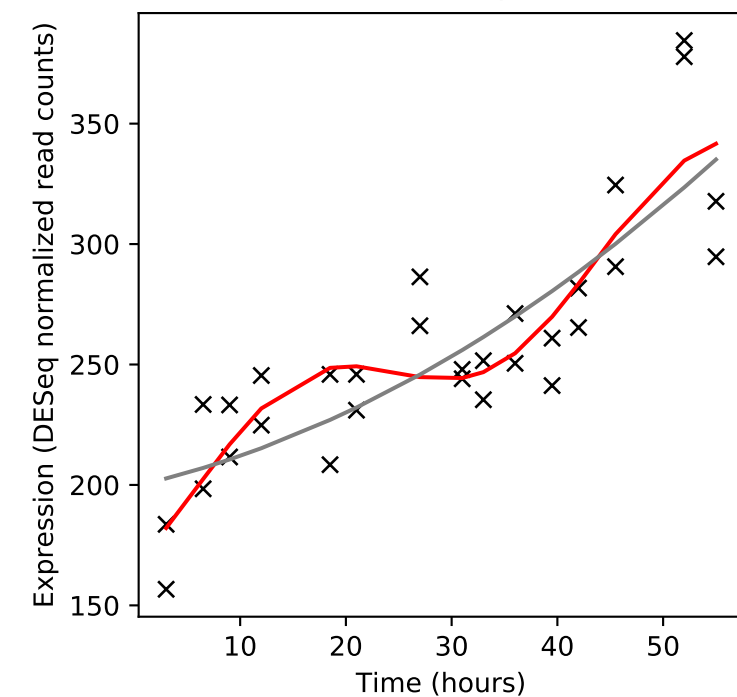

Rv1102c/mazF3

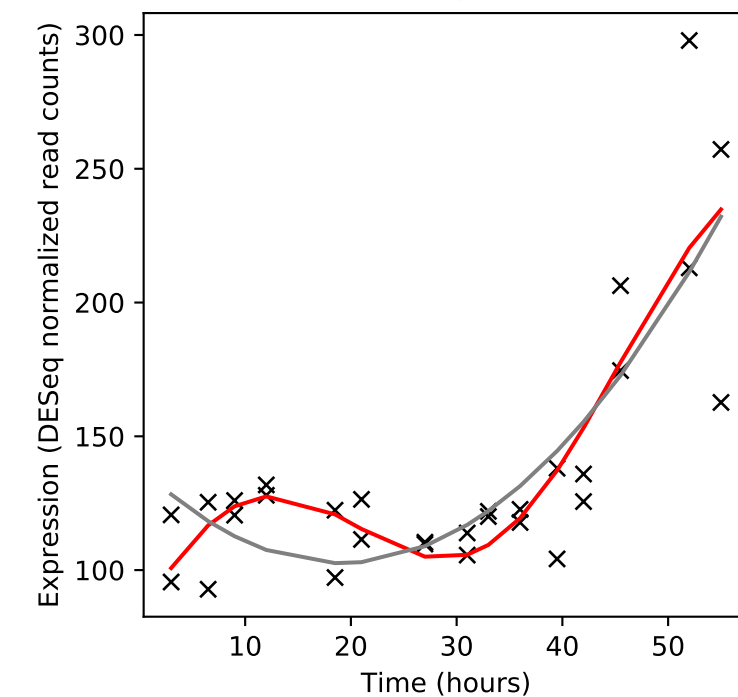

Rv1103c/mazE3

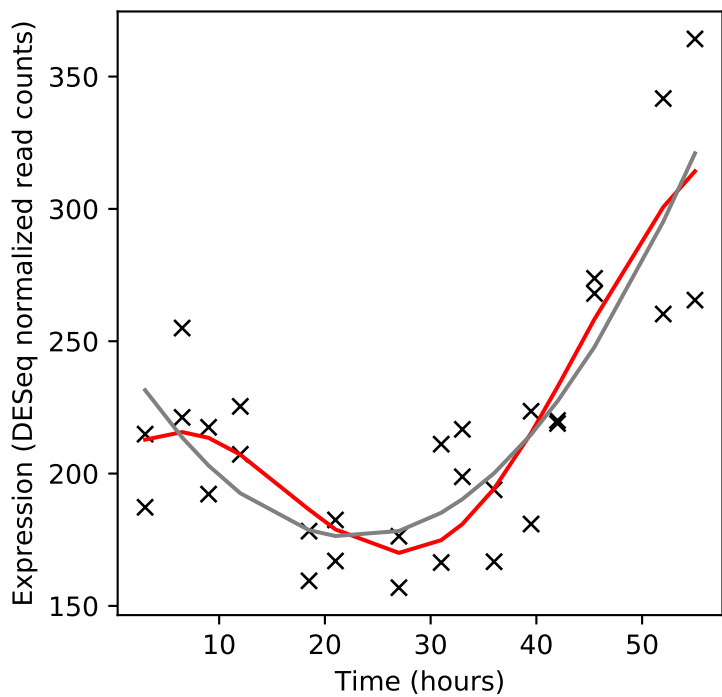

Rv1104c/-

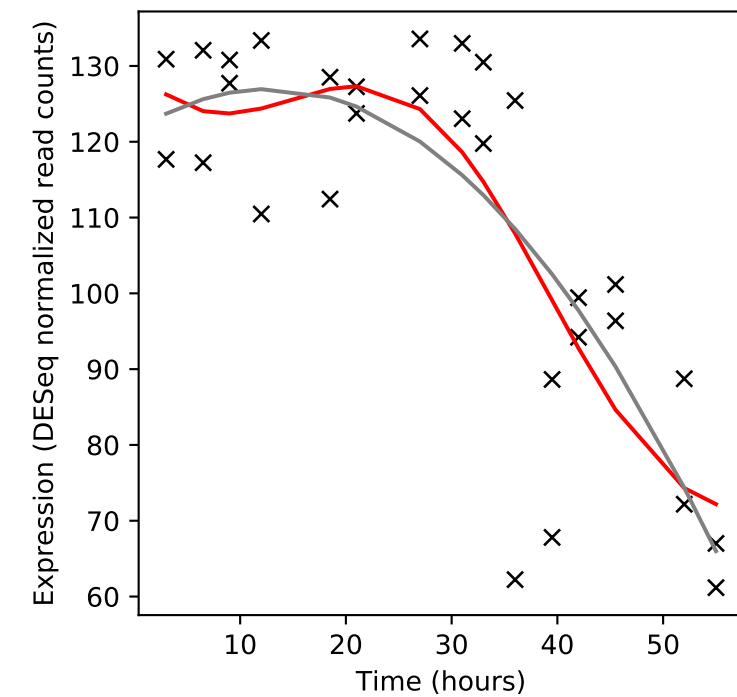

Rv1105c/-

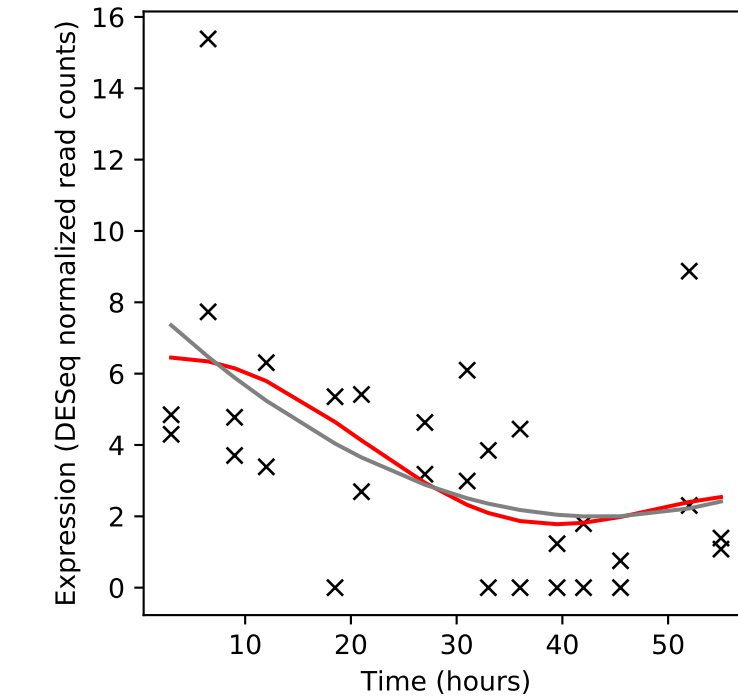

Rv1106c/-

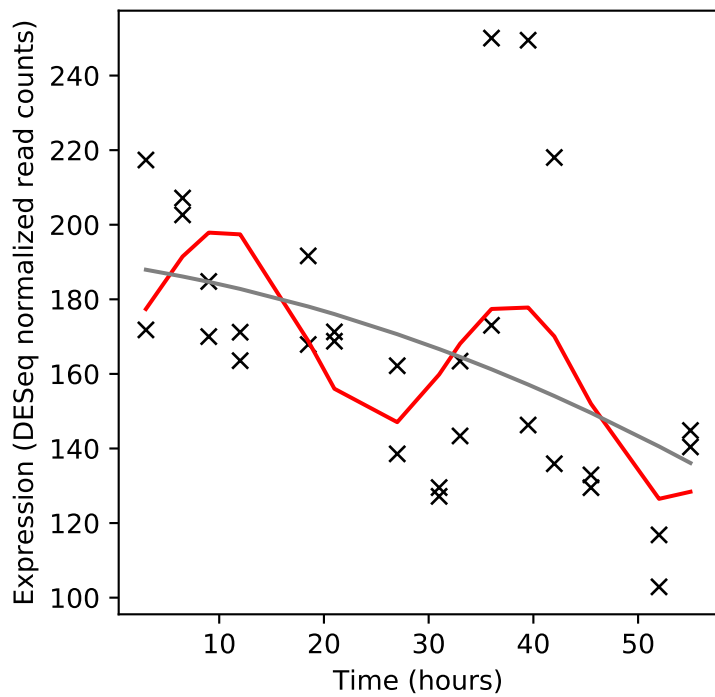

Rv1107c/xseB

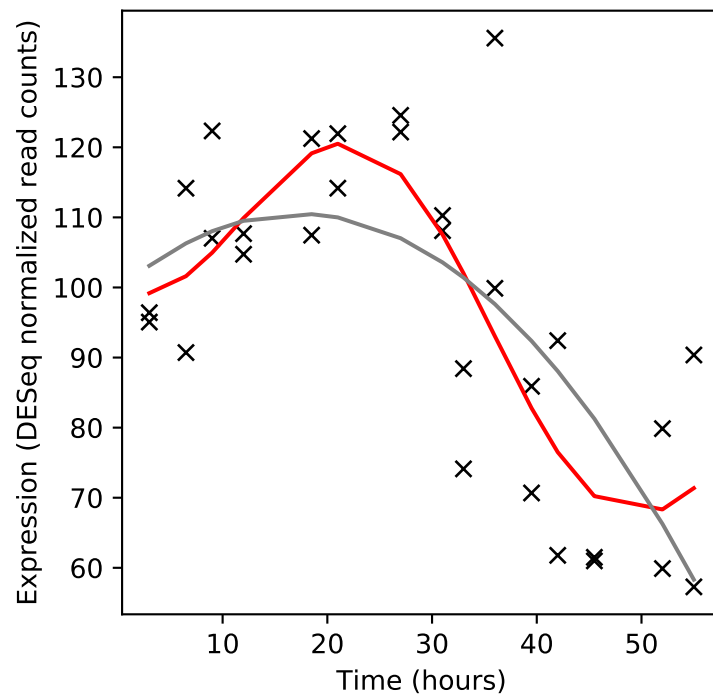

Rv1108c/xseA

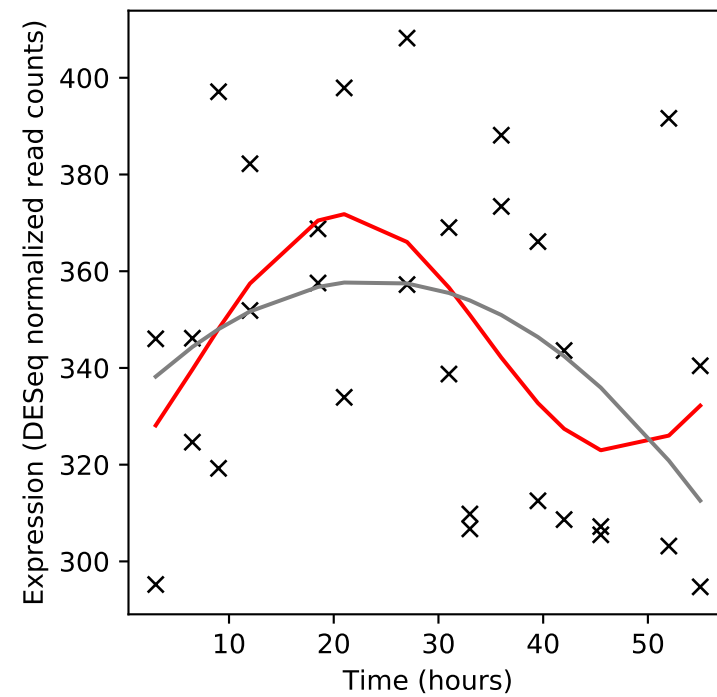

Rv1109c/-

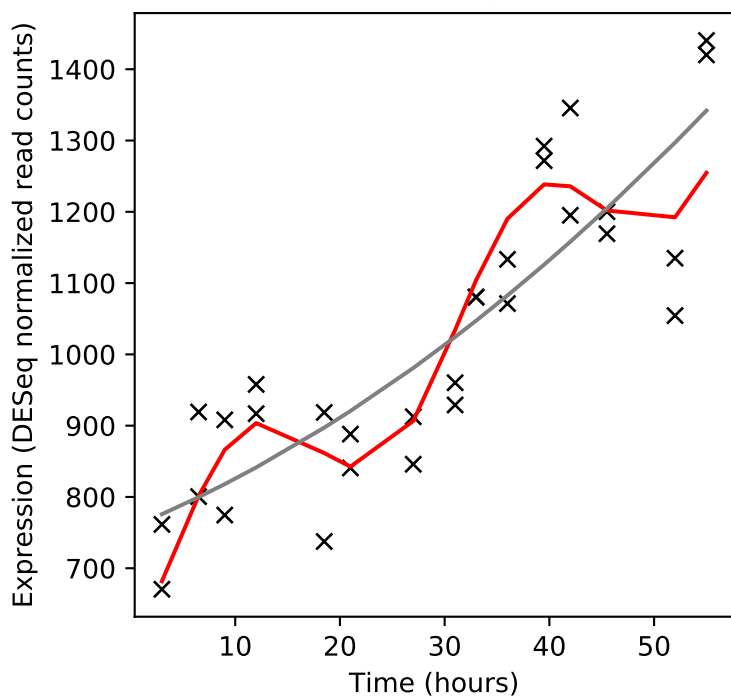

Rv1110/lytB2

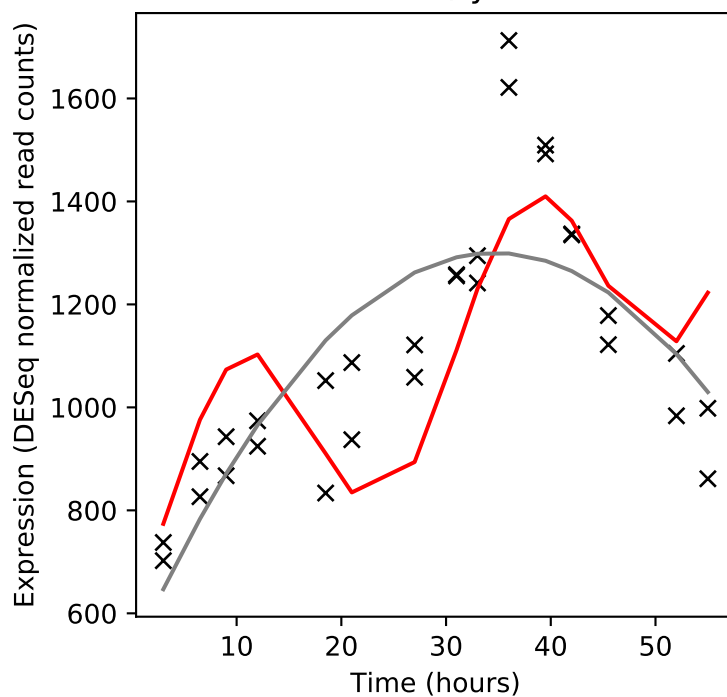

Rv1111c/-

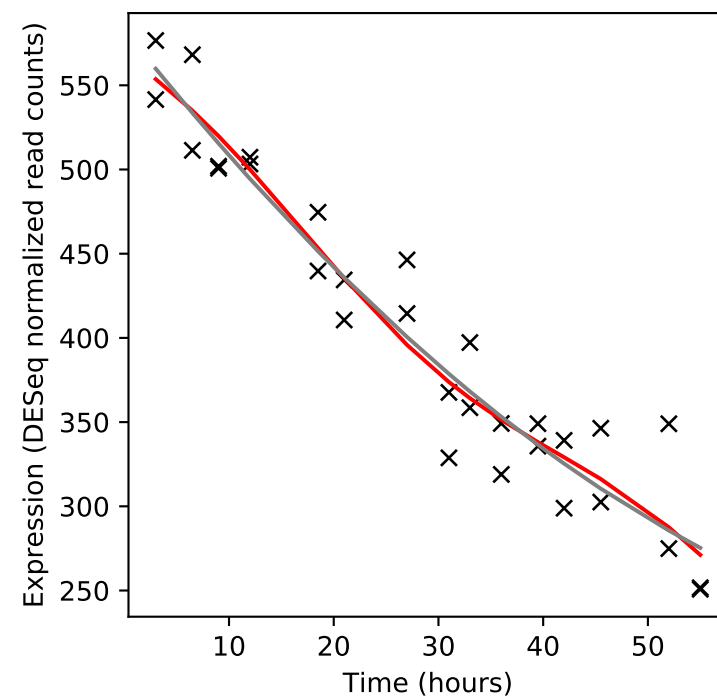

Rv1112/-

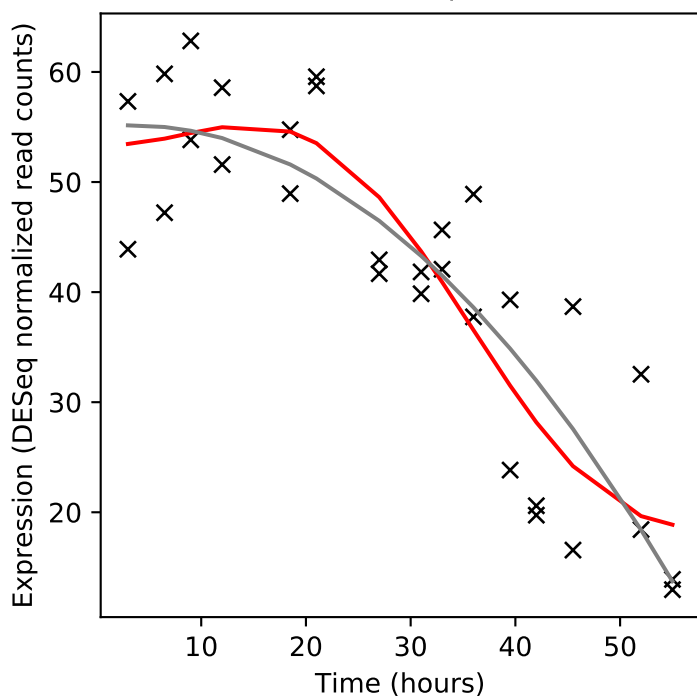

Rv1113/vapB32

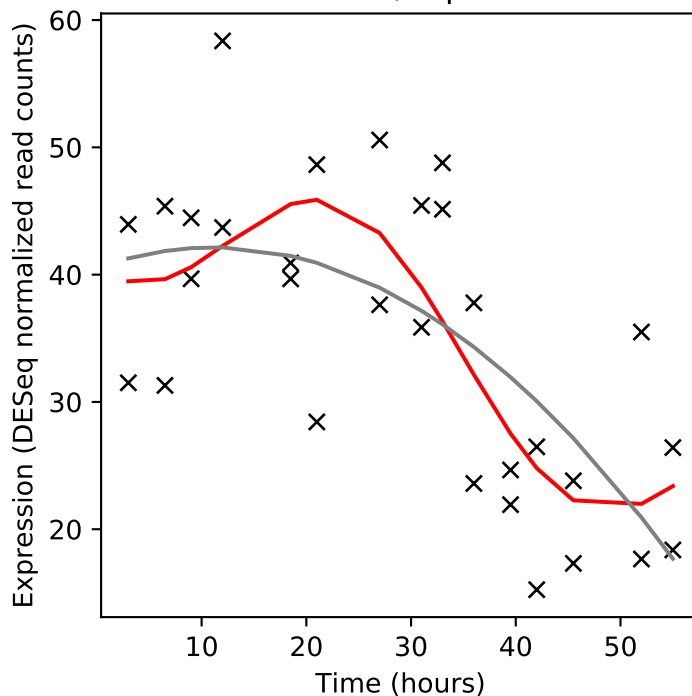

Rv1114/vapC32

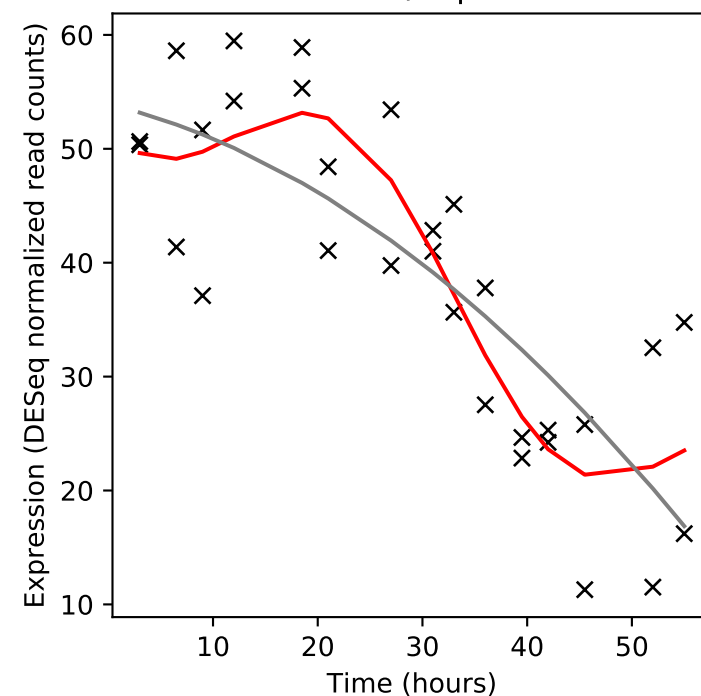

Rv1115/-

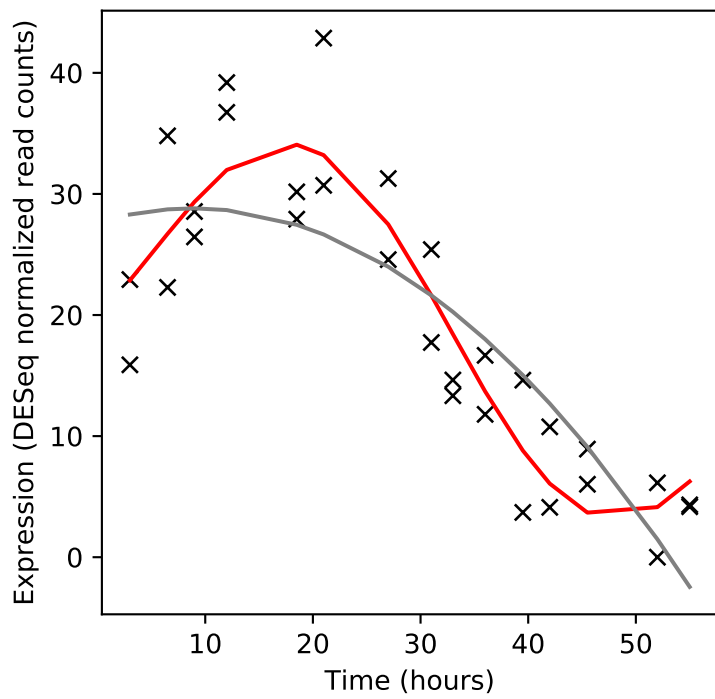

Rv1116/-

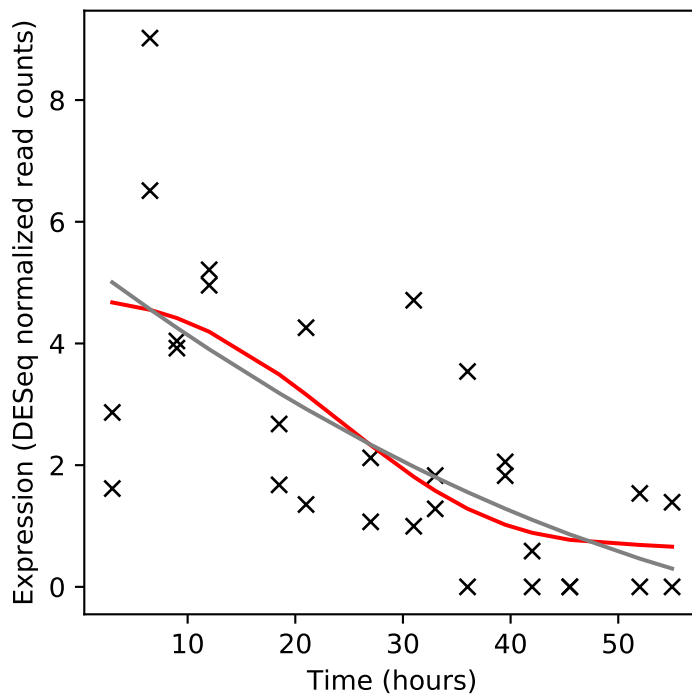

Rv1116A/-

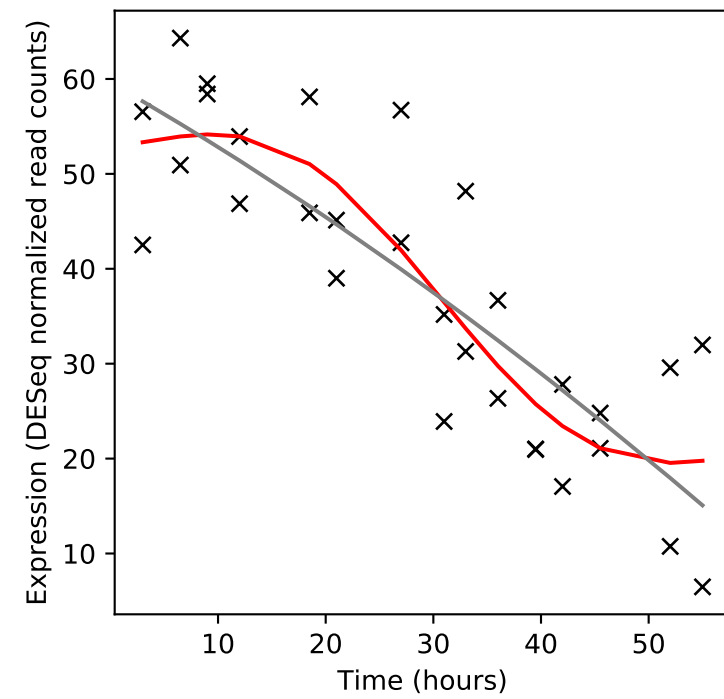

Rv1117/-

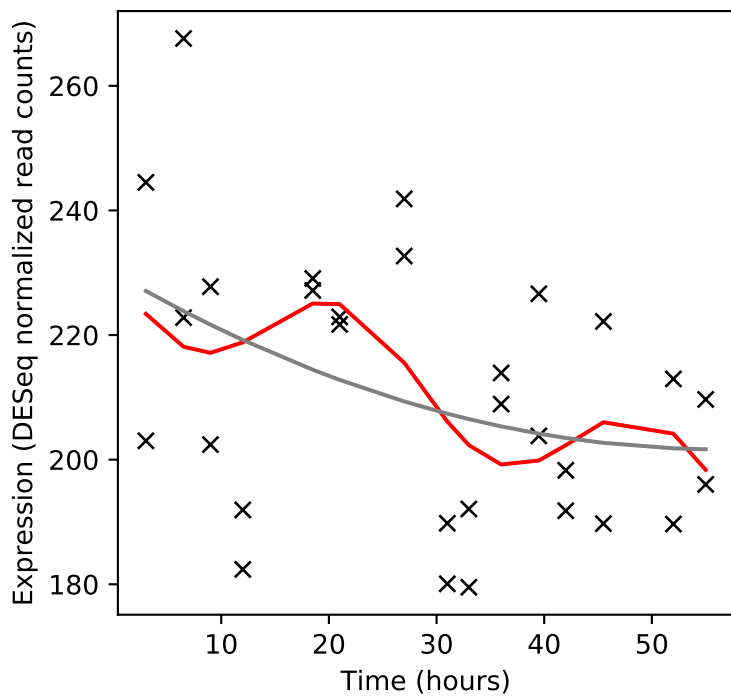

Rv1118c/-

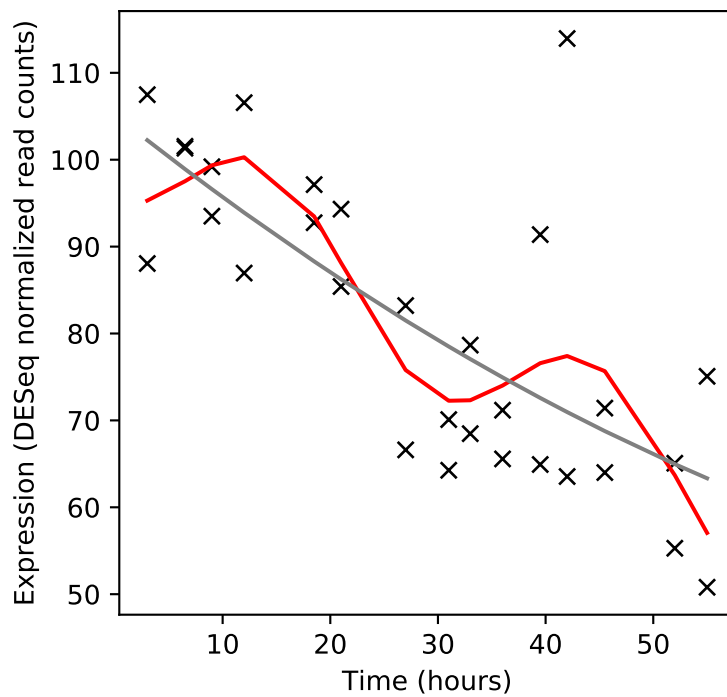

Rv1119c/-

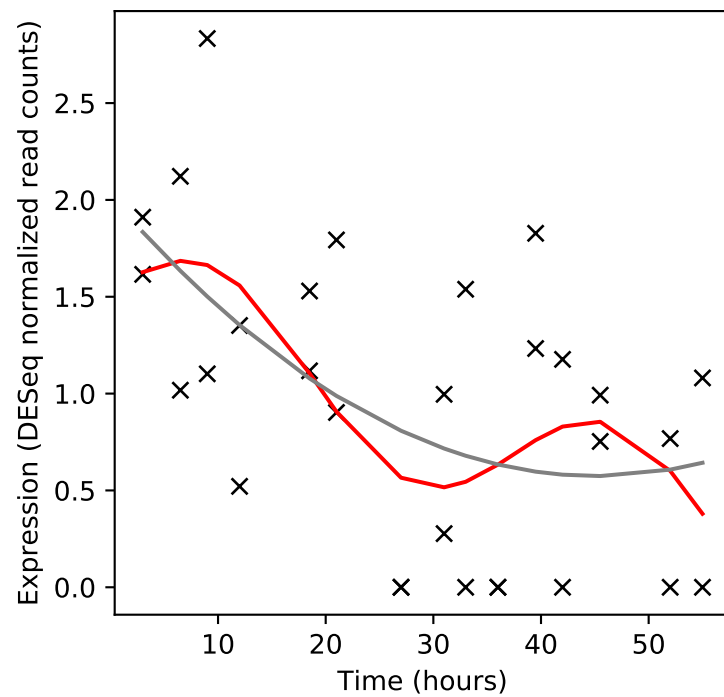

Rv1120c/-

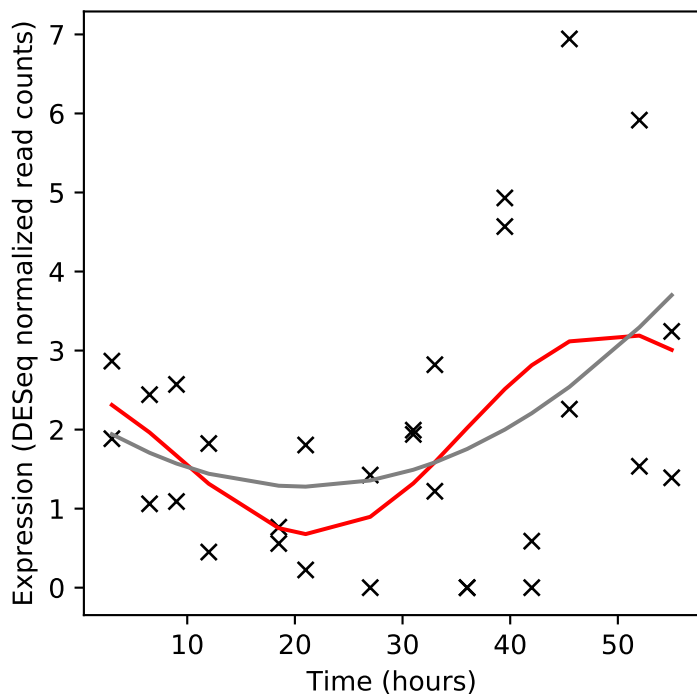

Rv1121/zwf1

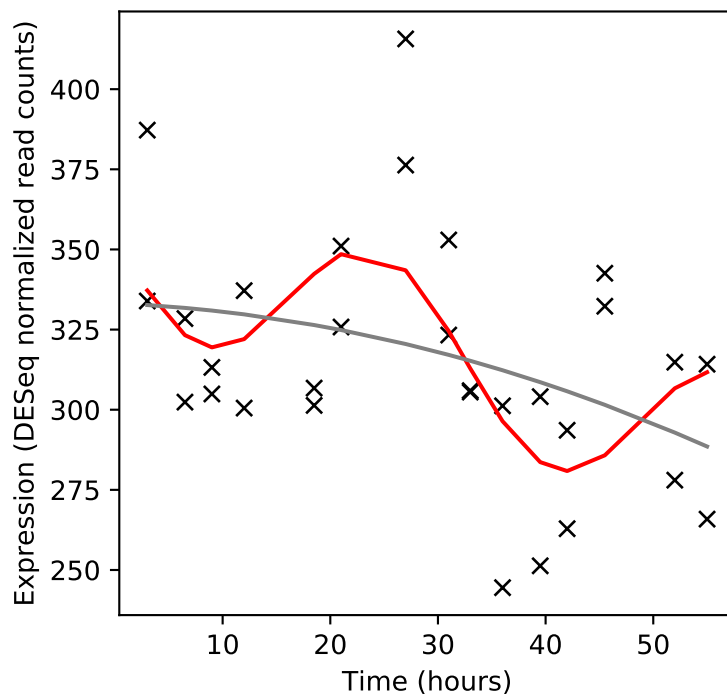

Rv1122/gnd2

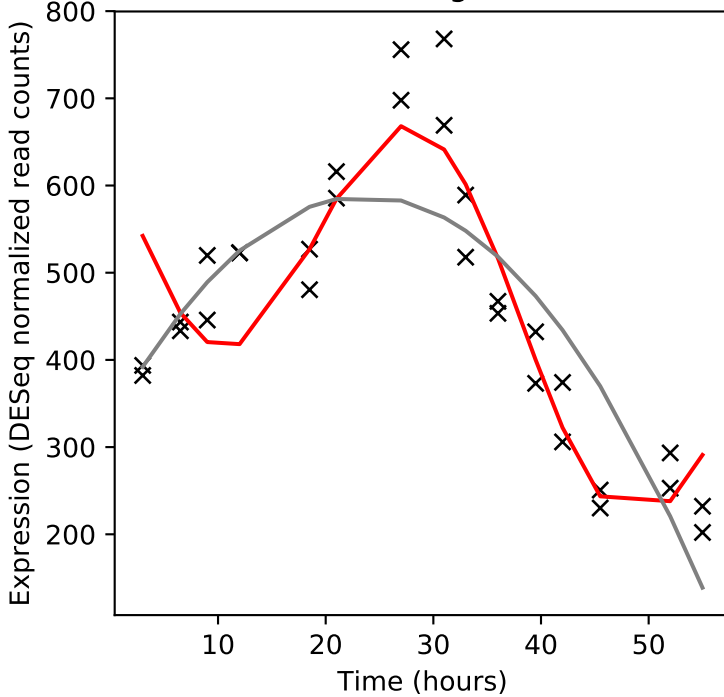



Rv1123c/bpoB

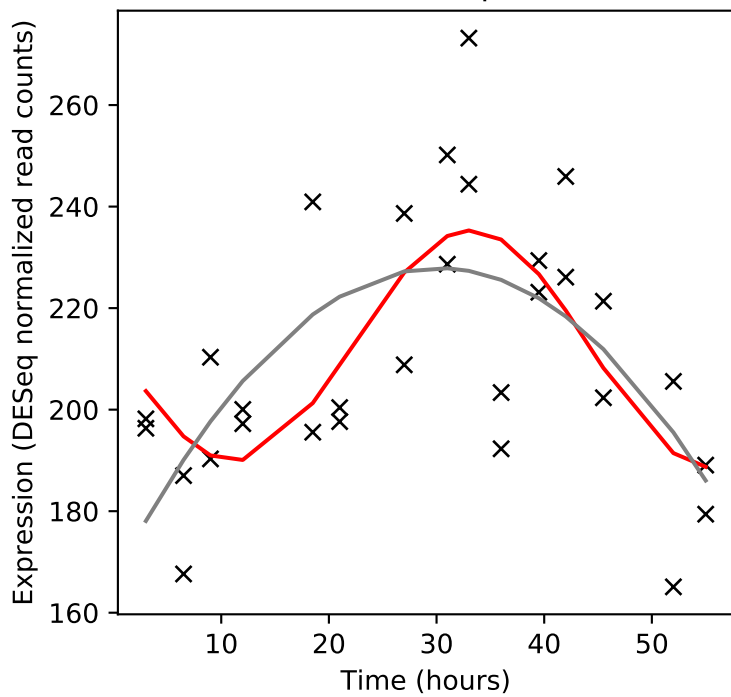

Rv1124/ephC

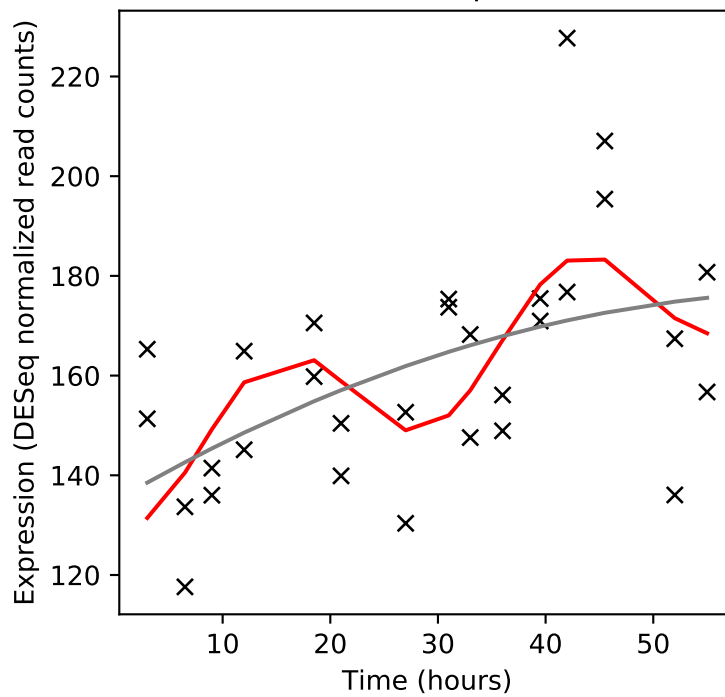

Rv1125/-

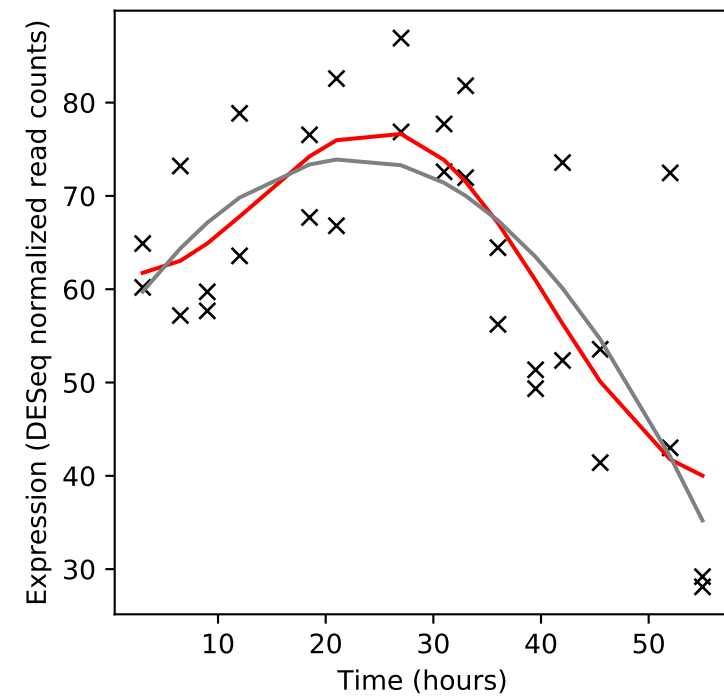

Rv1126c/-

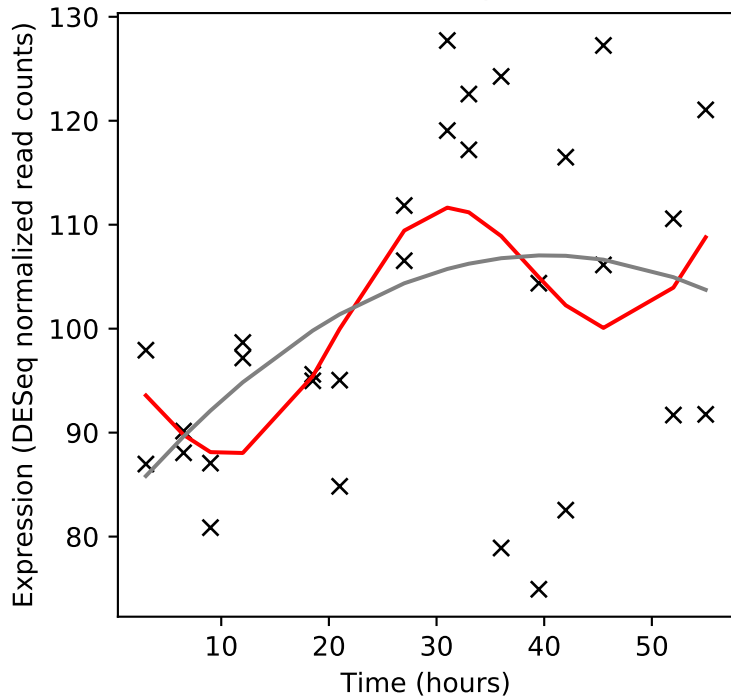

Rv1127c/ppdK

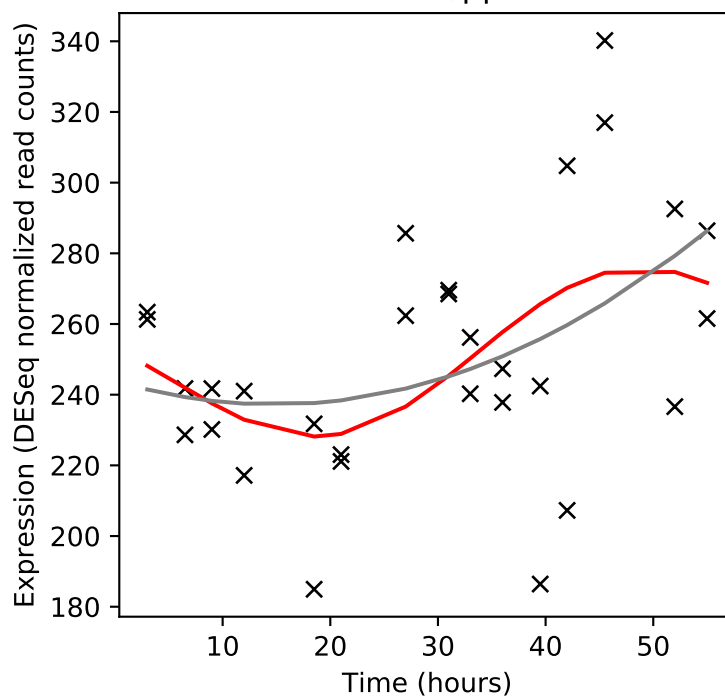

Rv1128c/-

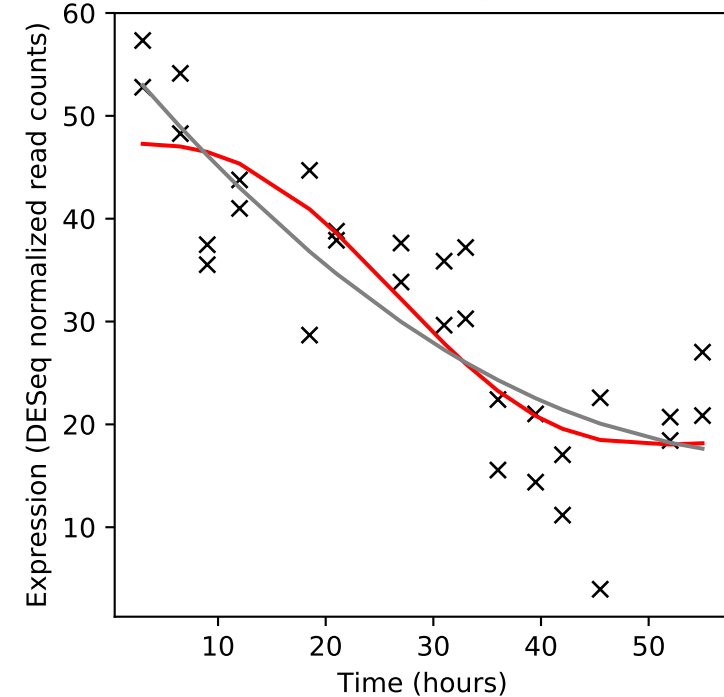

Rv1129c/-

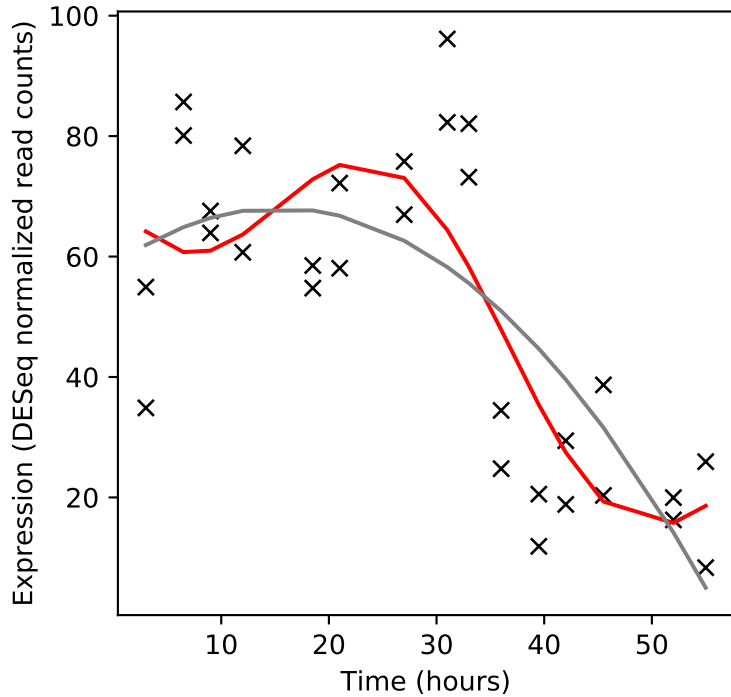

Rv1130/prpD

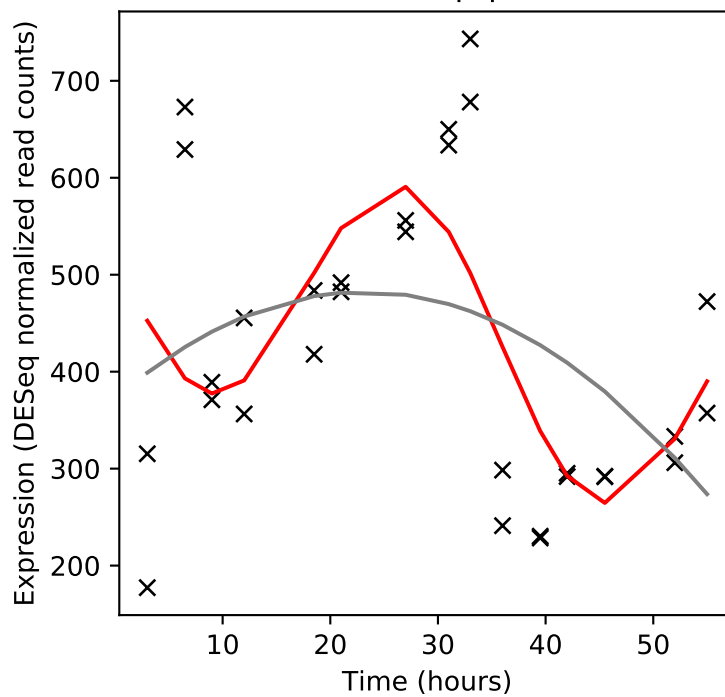

Rv1131/prpC

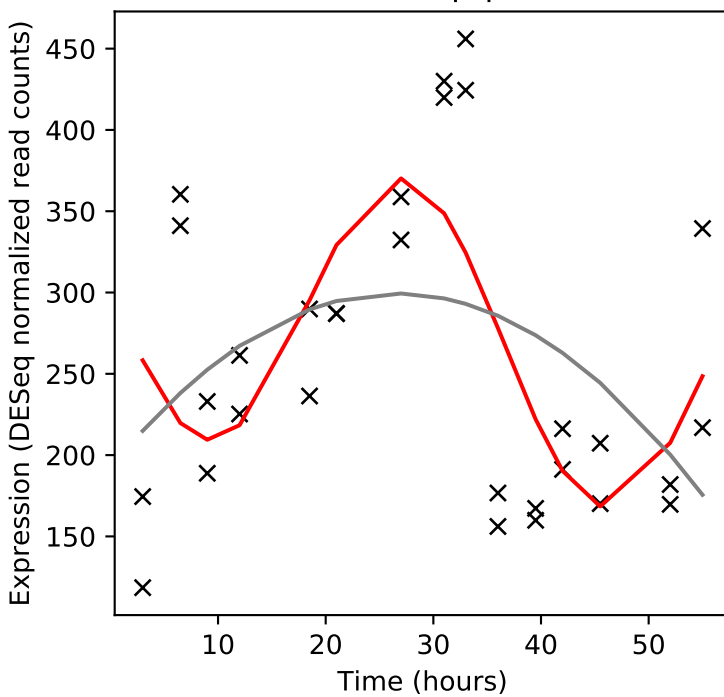

Rv1132/-

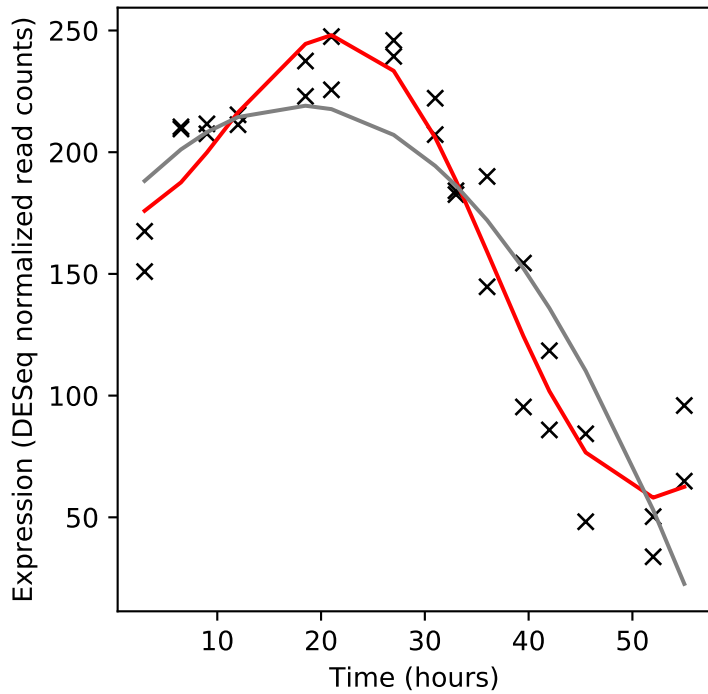

Rv1133c/metE

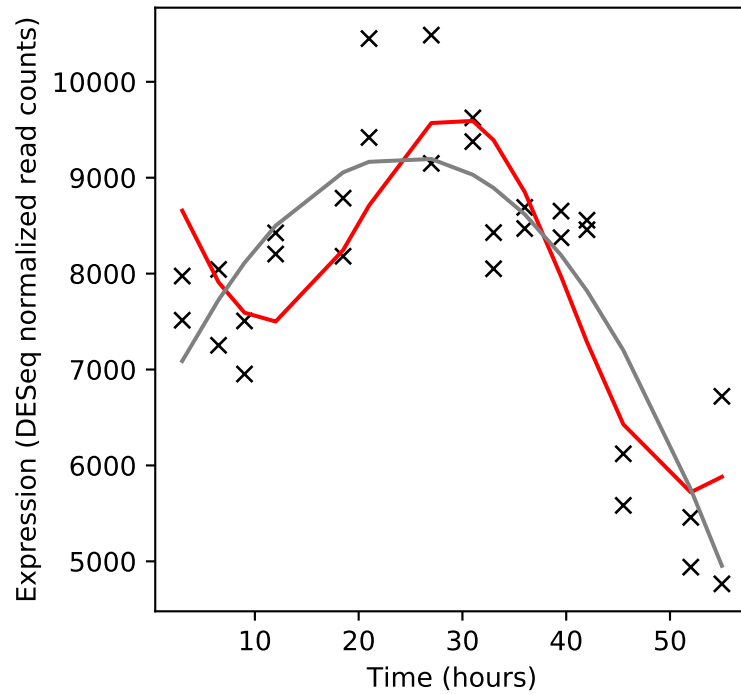

Rv1134/-

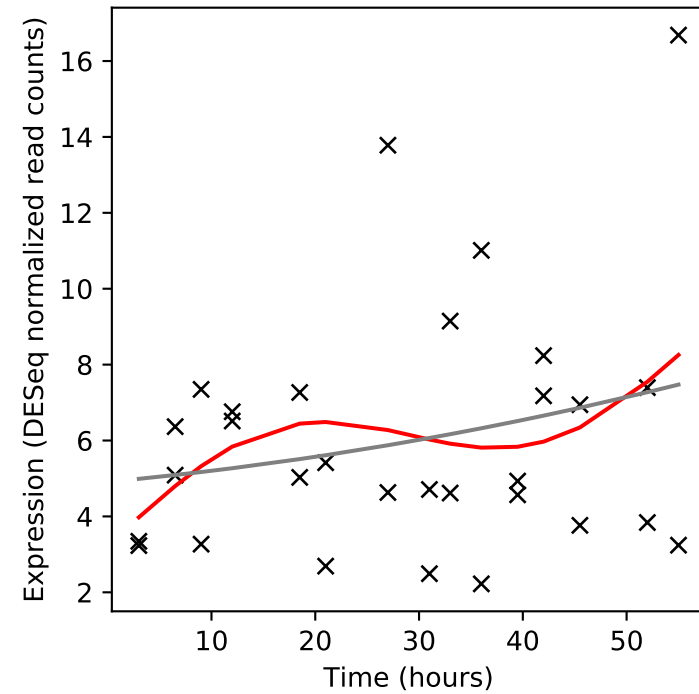

Rv1135c/PPE16

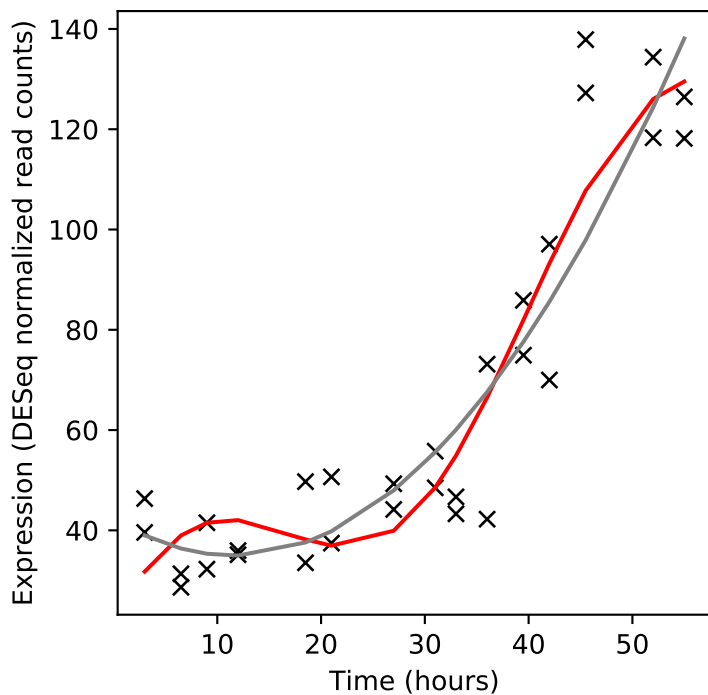

Rv1135A/-

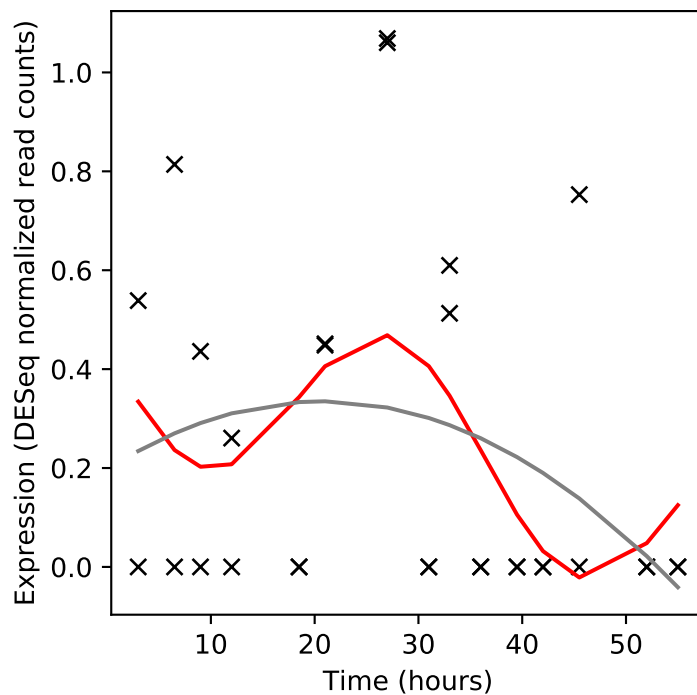

Rv1136/-

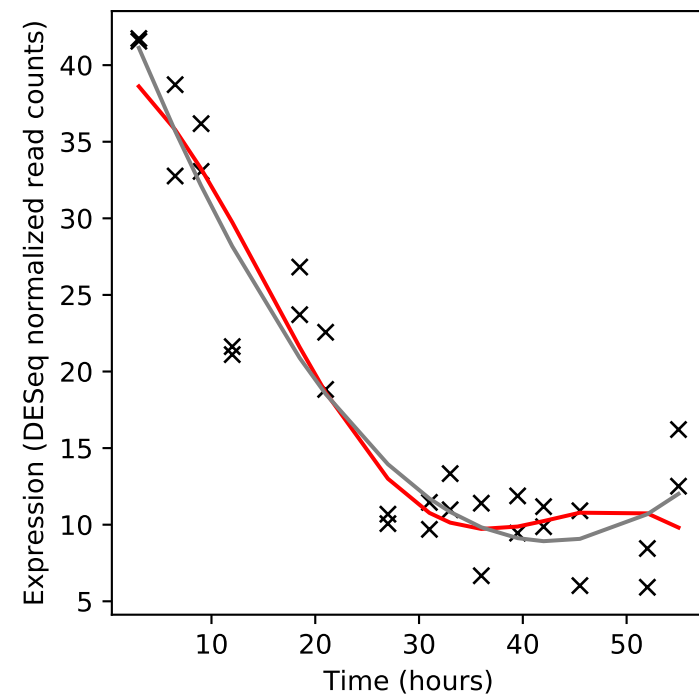

Rv1137c/-

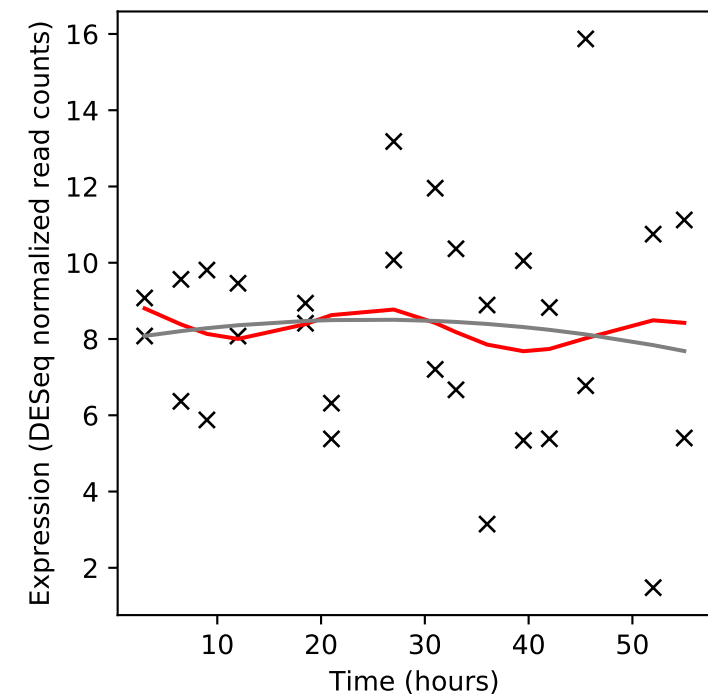

Rv1138c/-

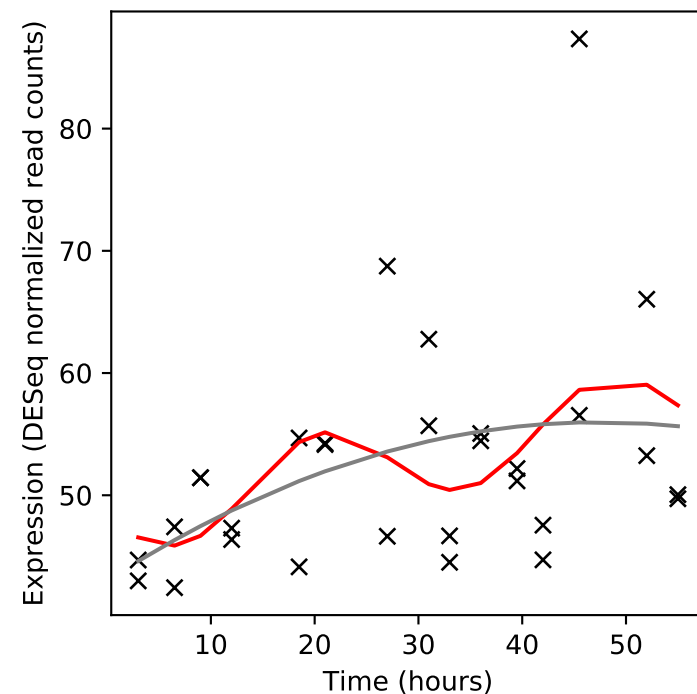

Rv1139c/-

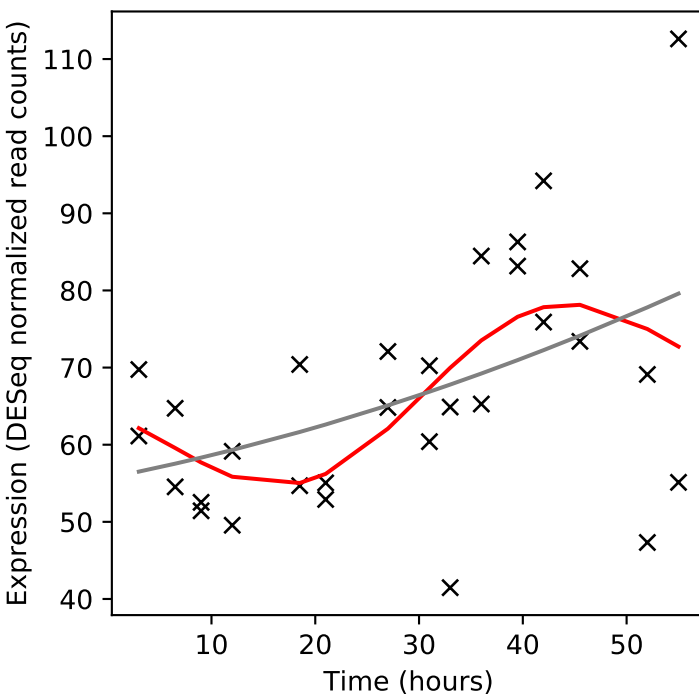

Rv1140/-

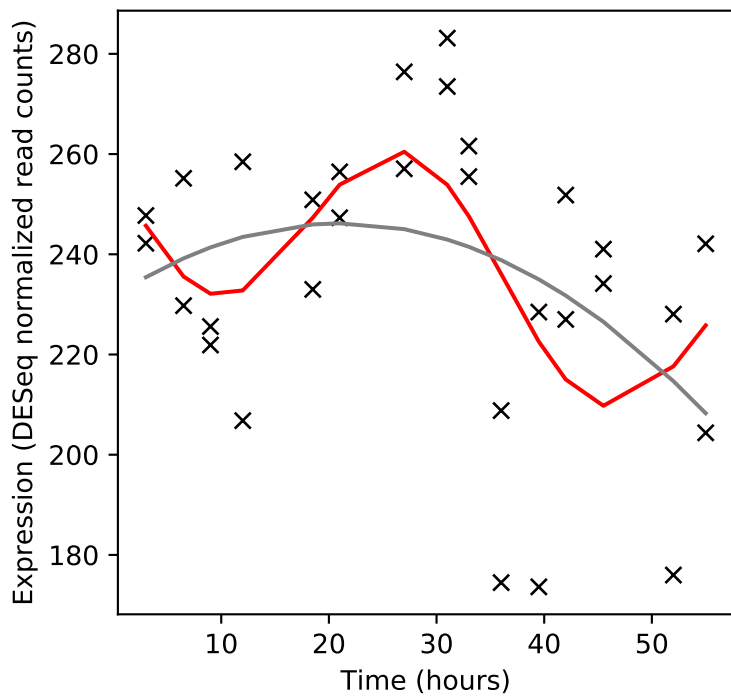

Rv1141c/echA11

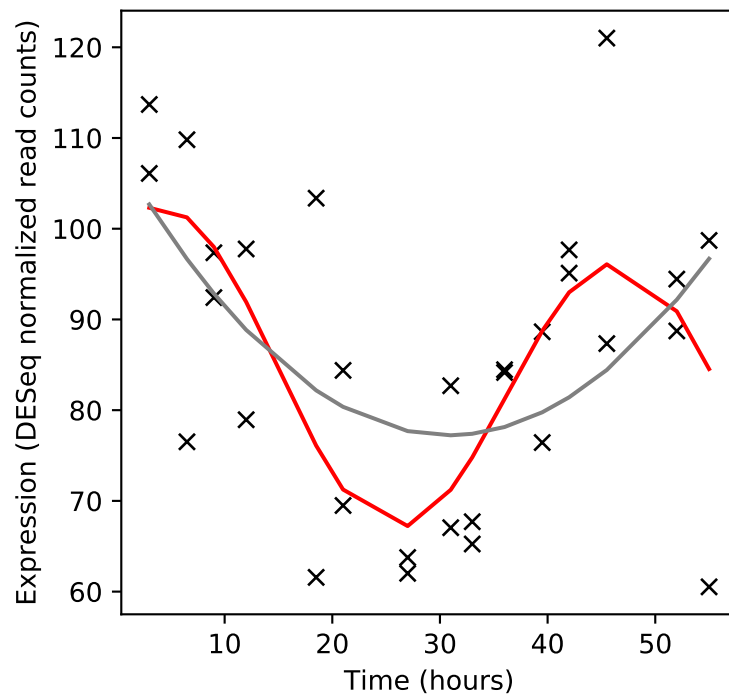

Rv1142c/echA10

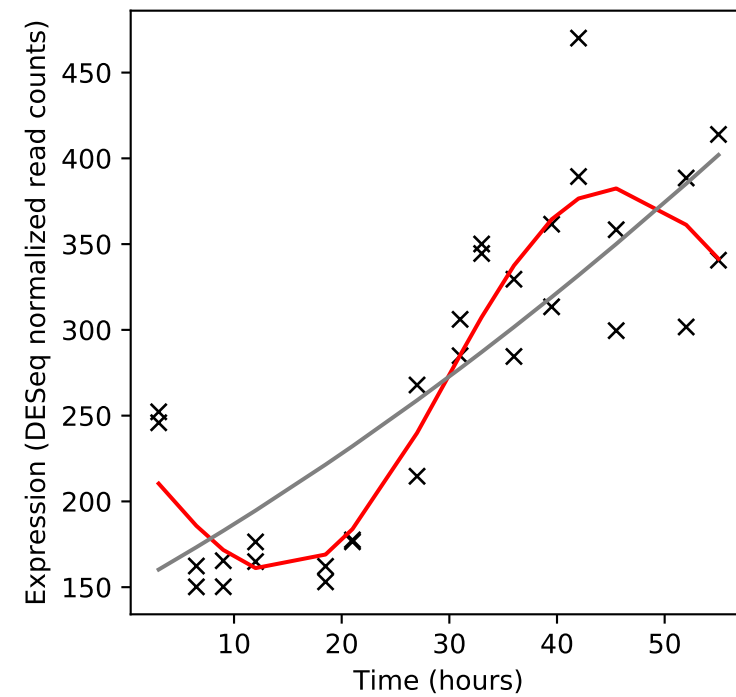

Rv1143/mcr

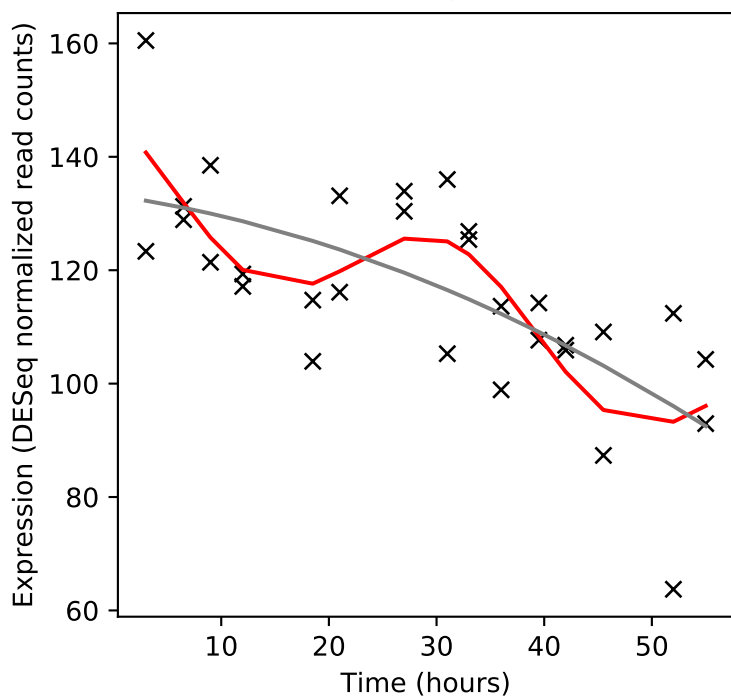

Rv1144/-

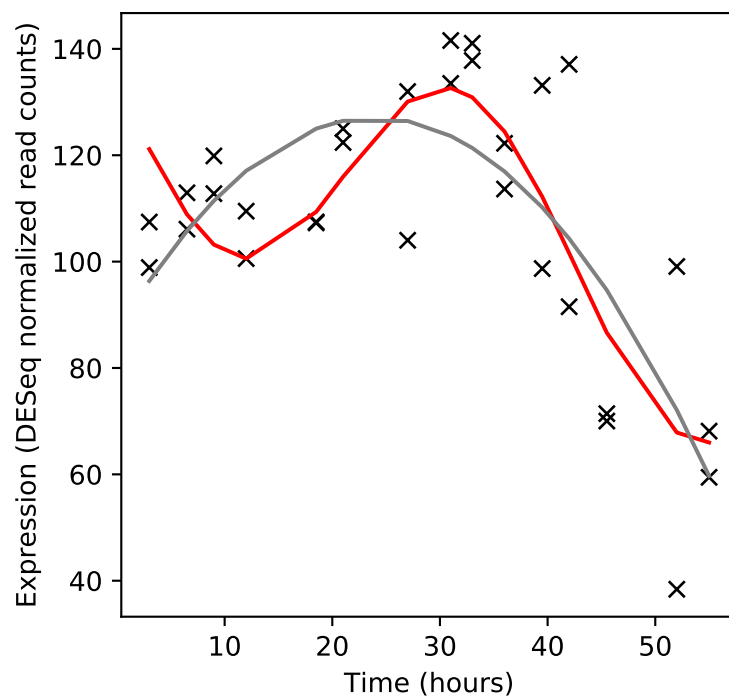

Rv1145/mmpL13a

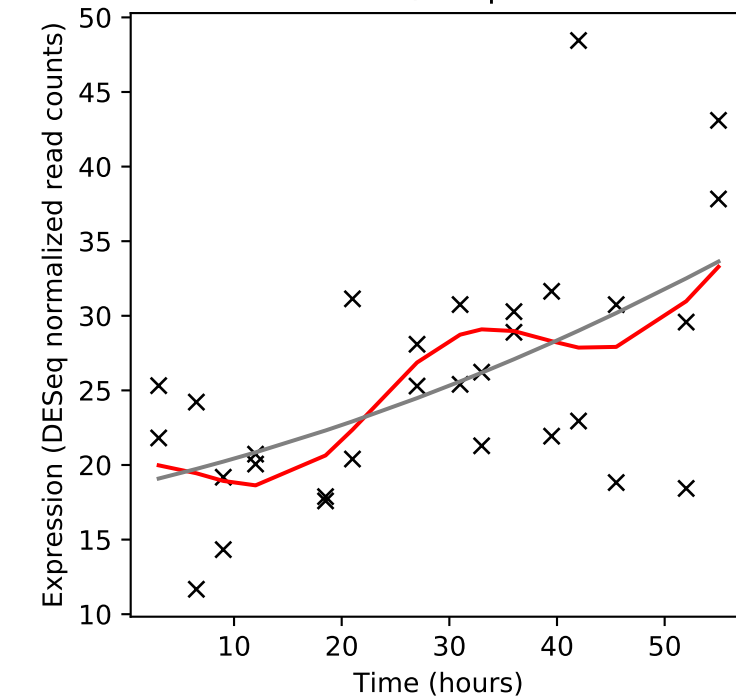

Rv1146/mmpL13b

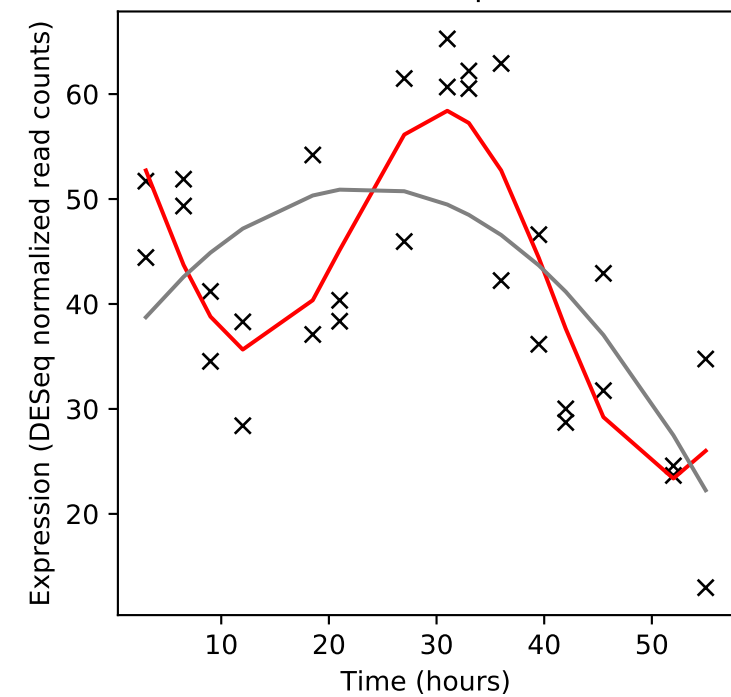

Rv1147/-

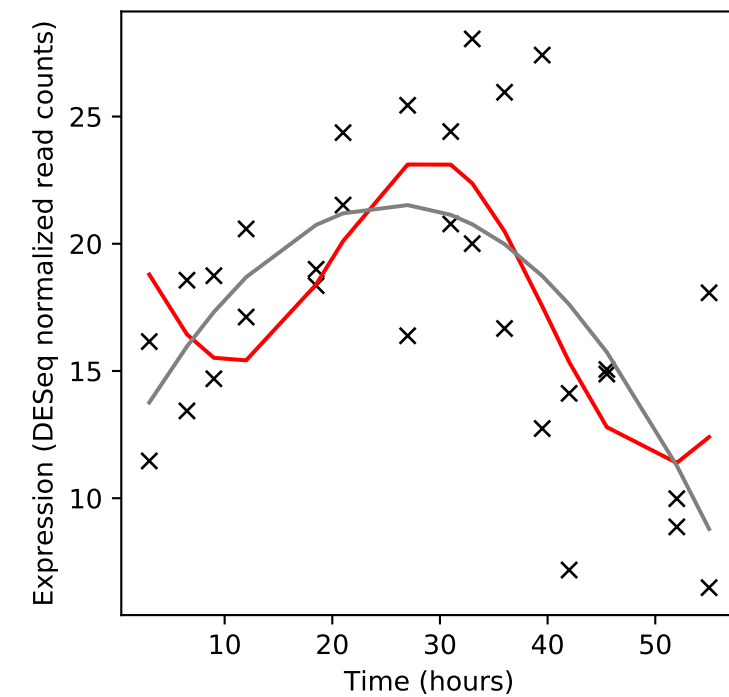

Rv1148c/-

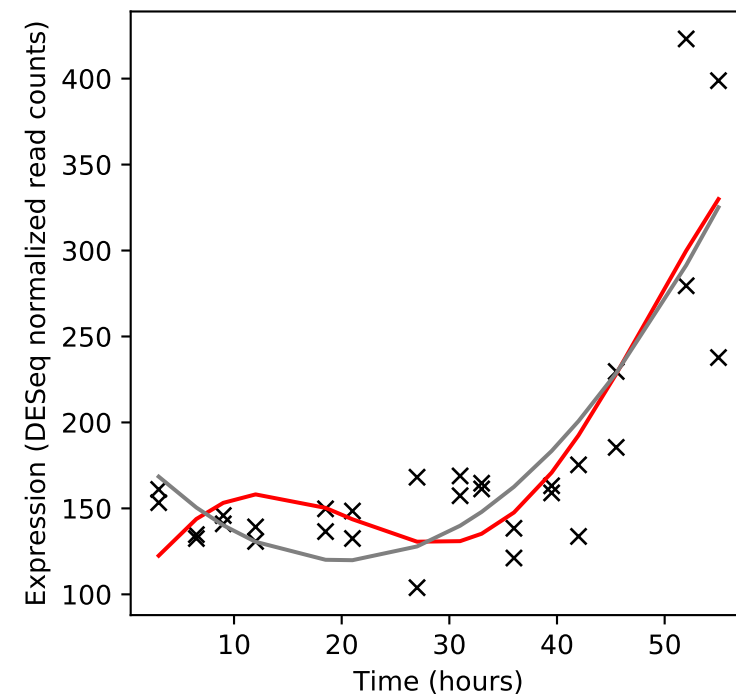

Rv1149/-

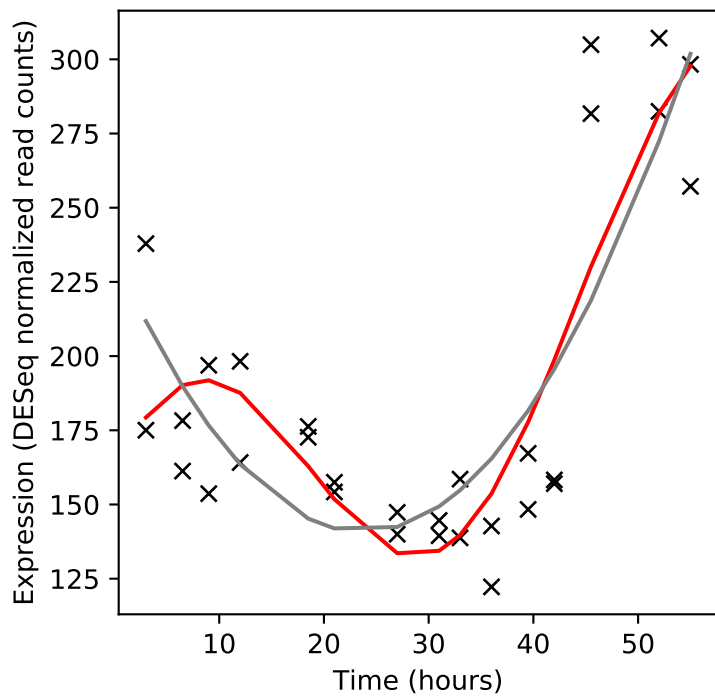

Rv1151c/-

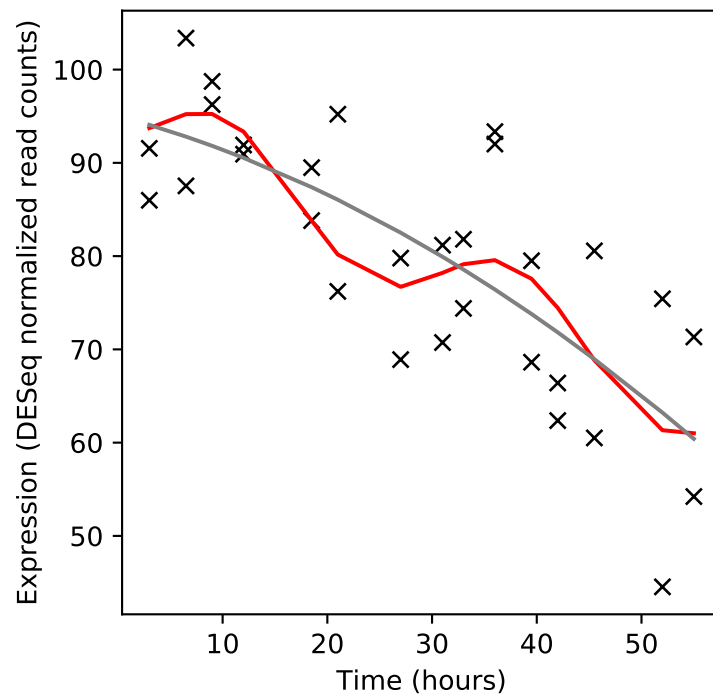

Rv1152/-

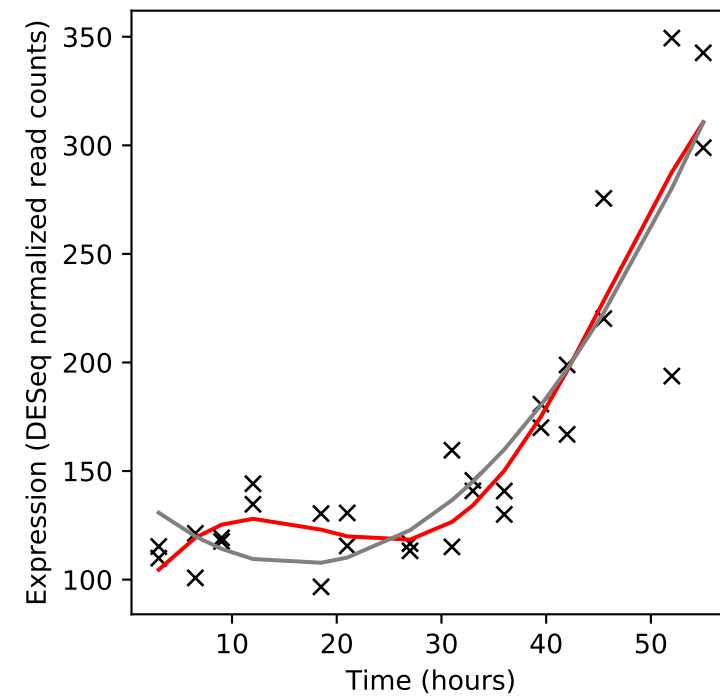

Rv1153c/omt

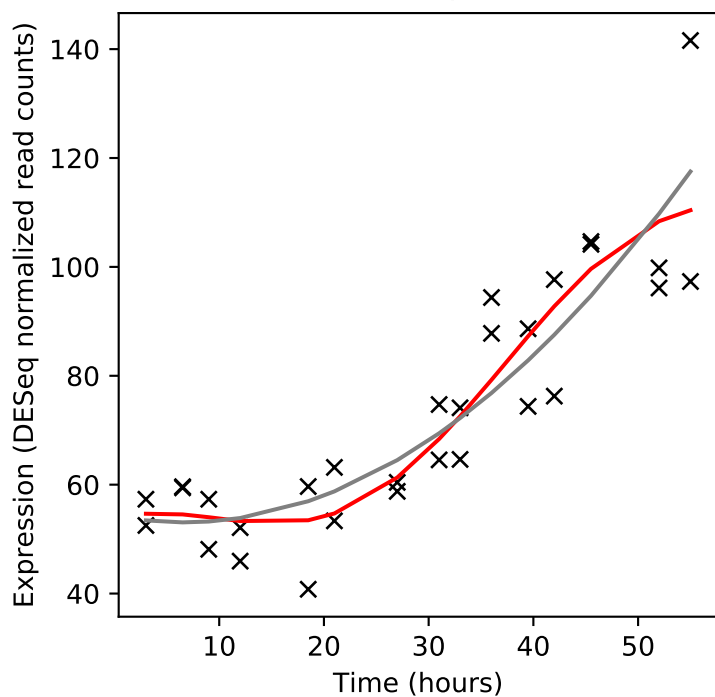

Rv1154c/-

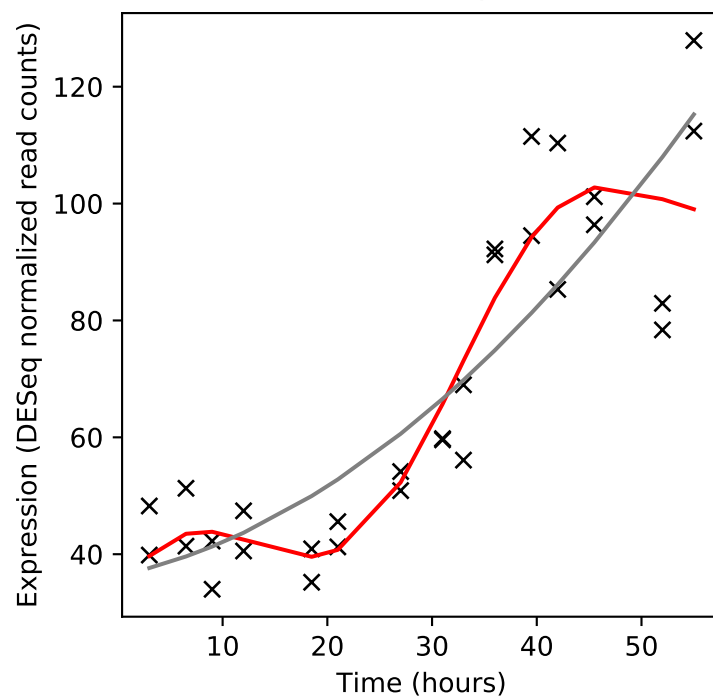

Rv1155/-

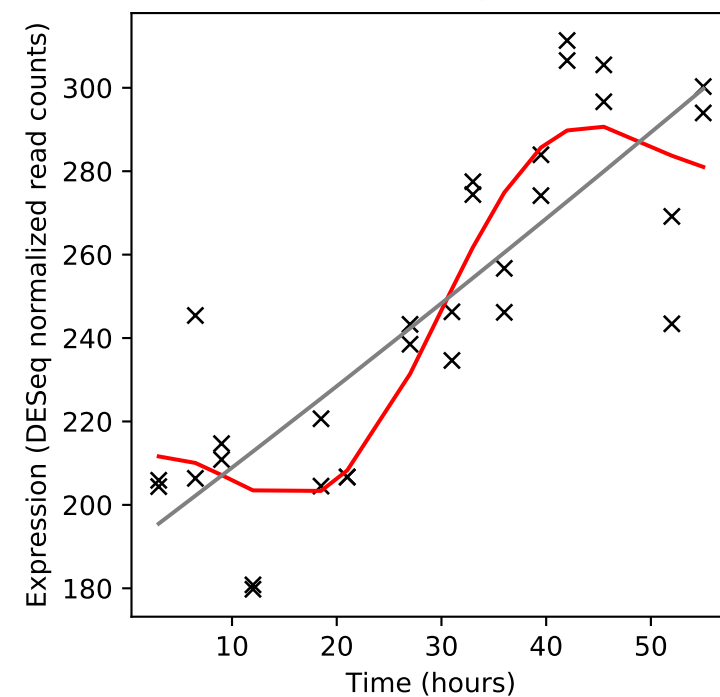

Rv1156/-

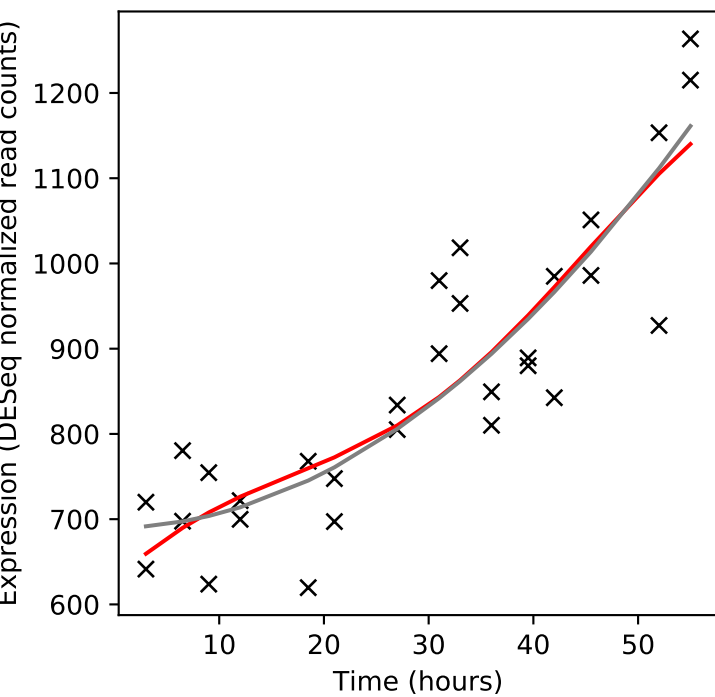

Rv1157c/-

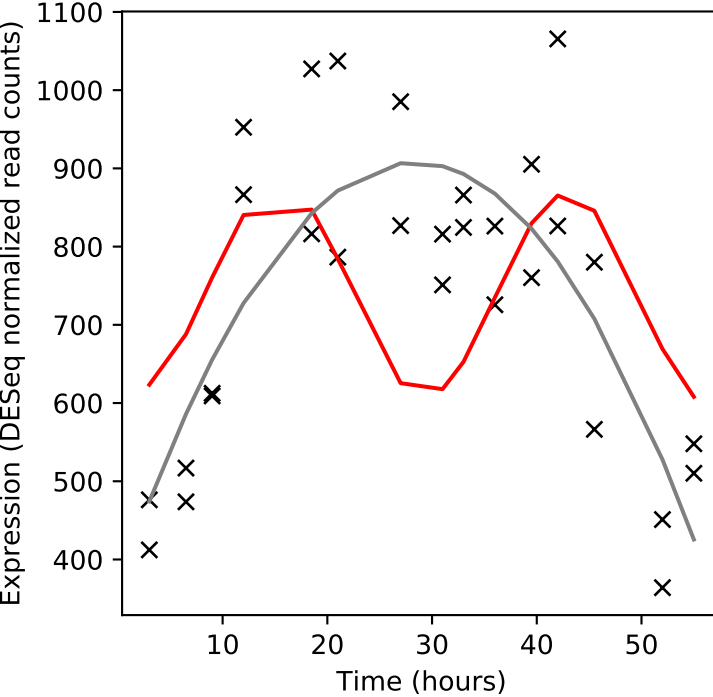

Rv1158c/-

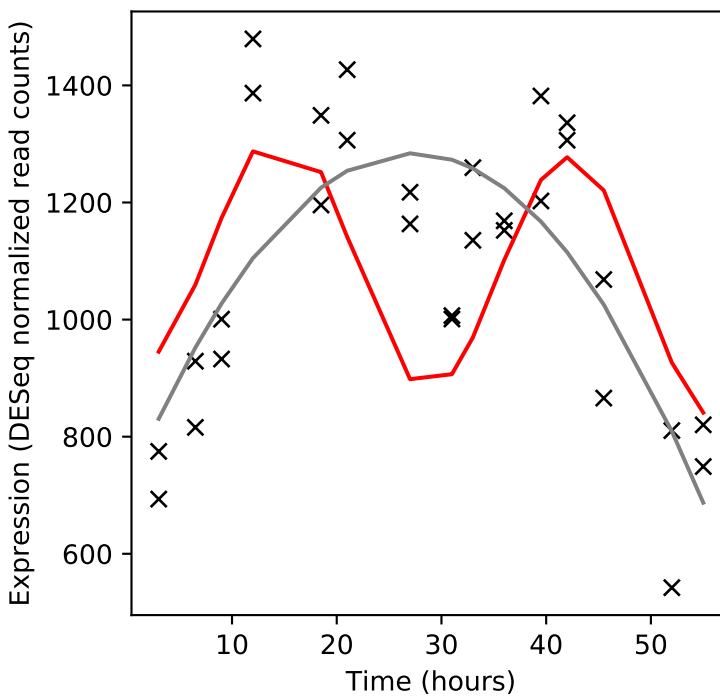

Rv1159/pimE

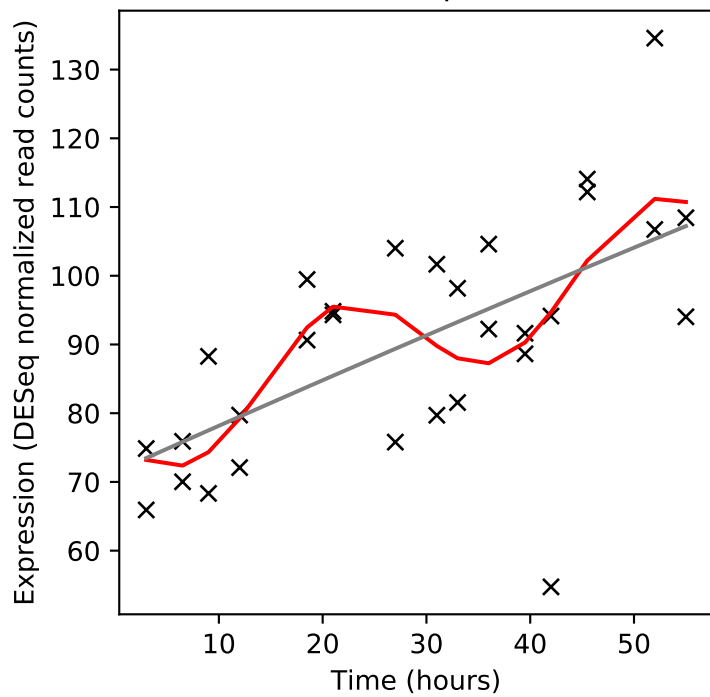

Rv1159A/-

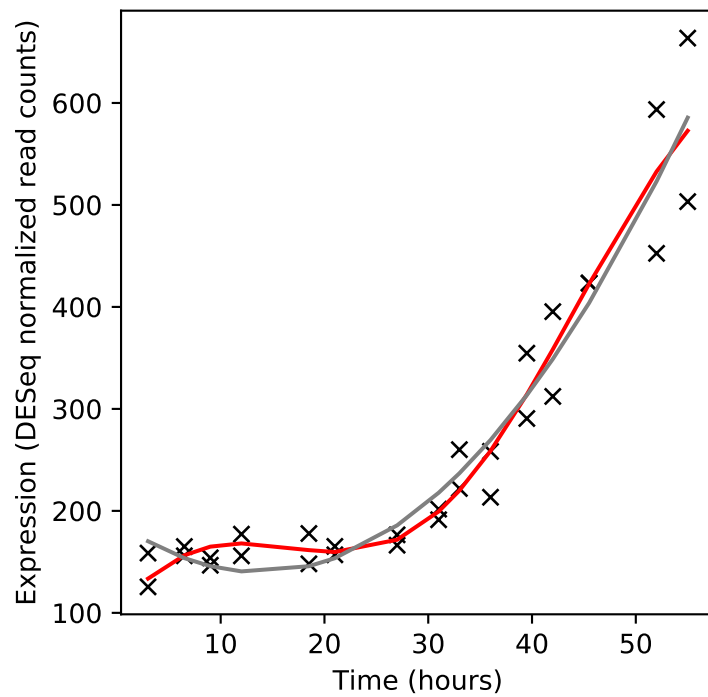

Rv1160/mutT2

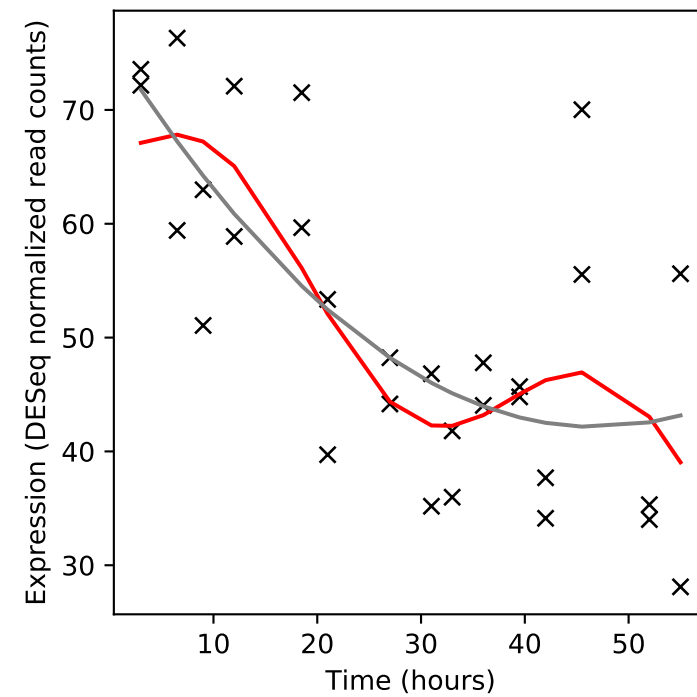

Rv1161/narG

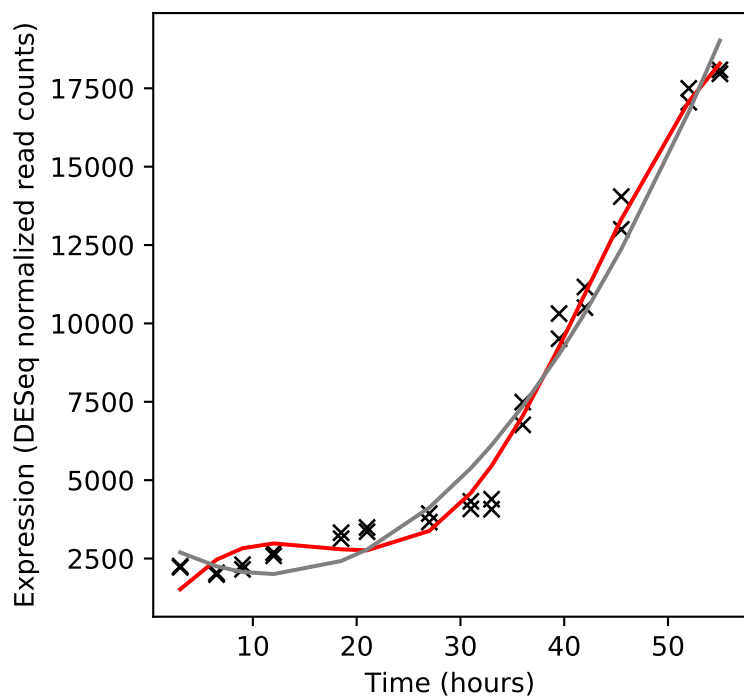

Rv1162/narH

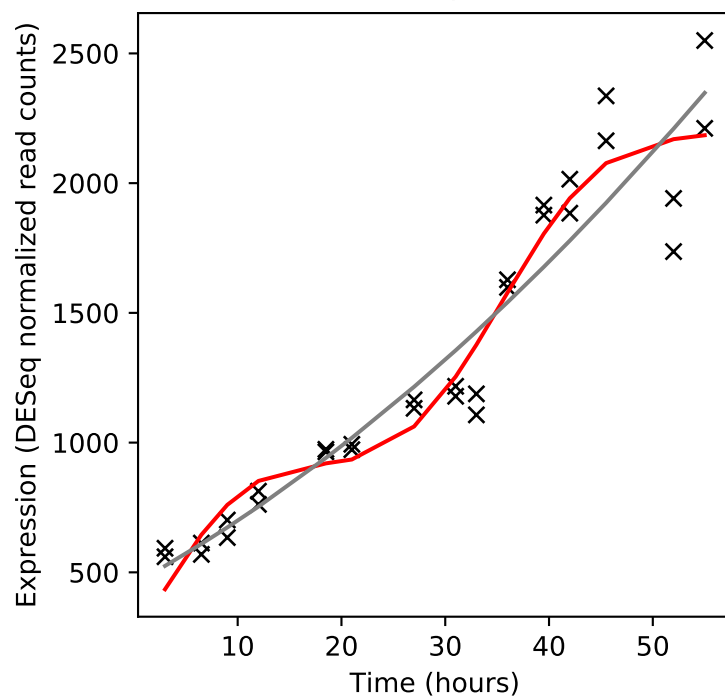

Rv1163/narJ

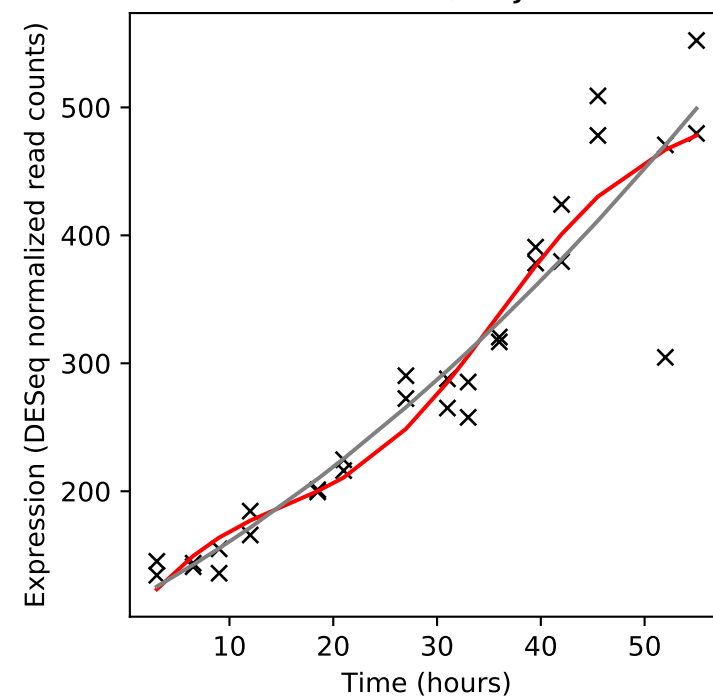

Rv1164/narI

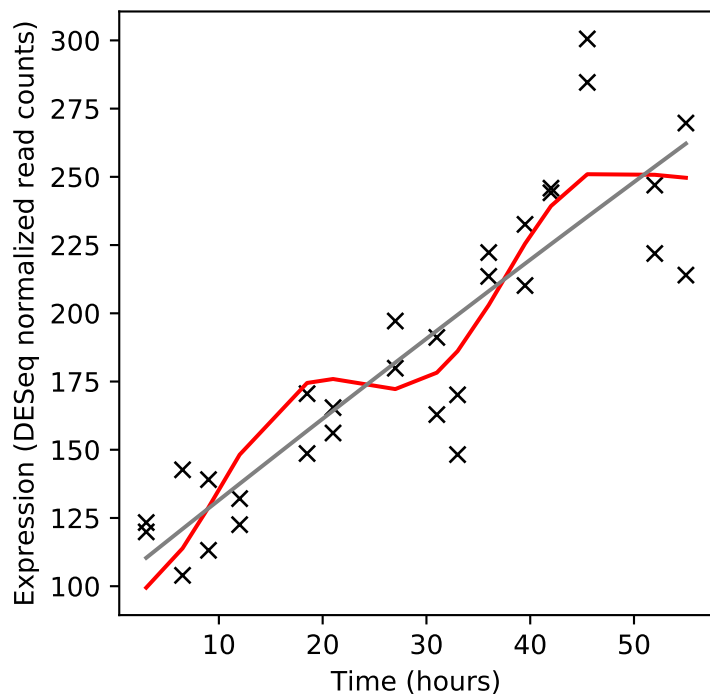

Rv1165/typA

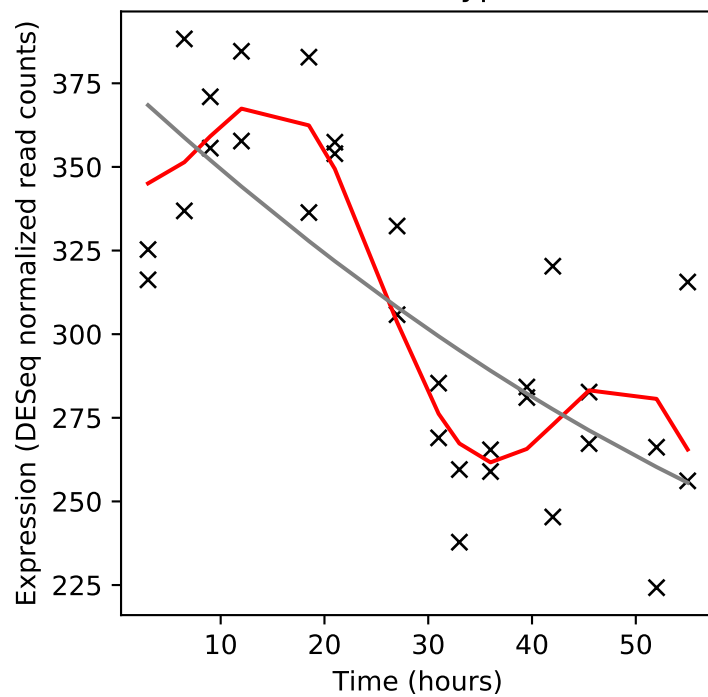

Rv1166/lpqW

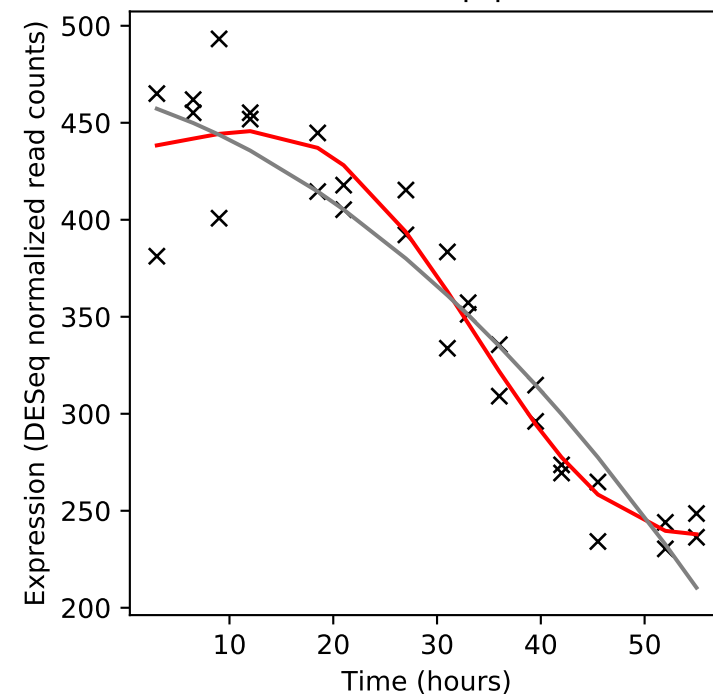

Rv1167c/-

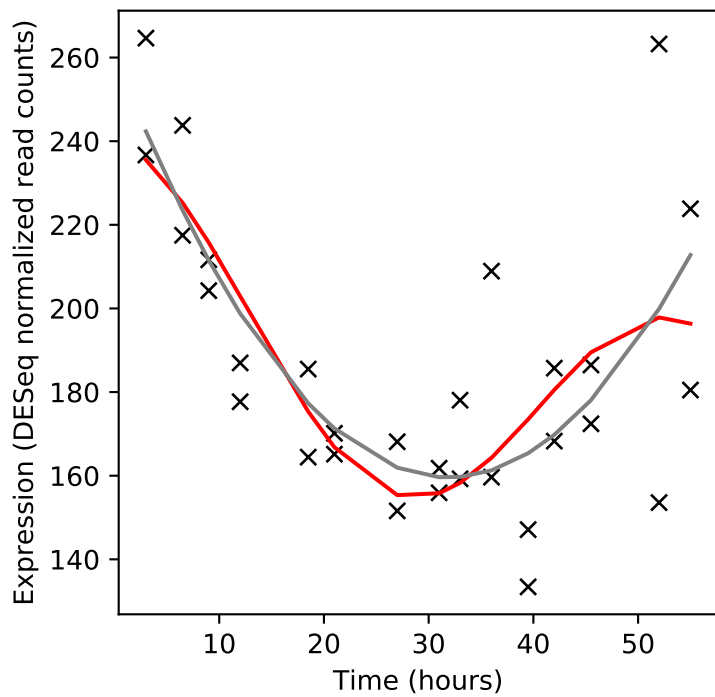

Rv1168c/PPE17

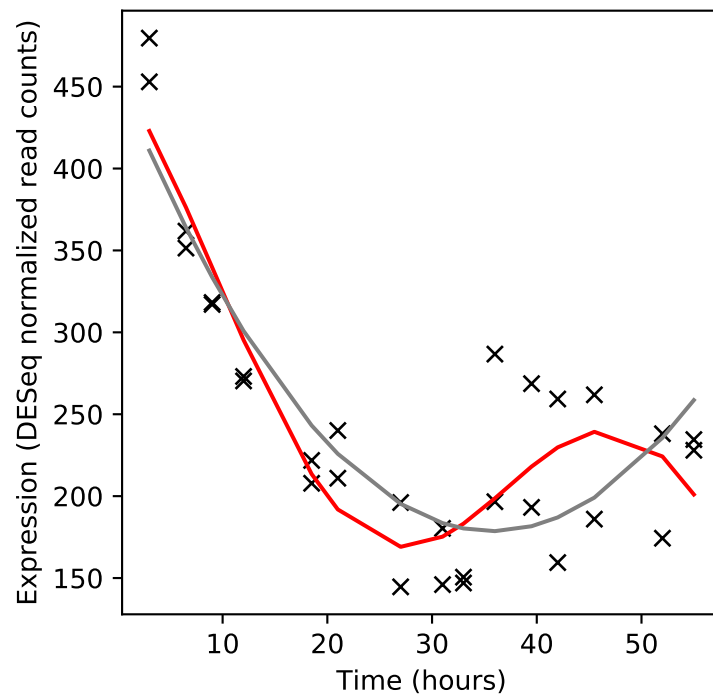

Rv1169c/lipX

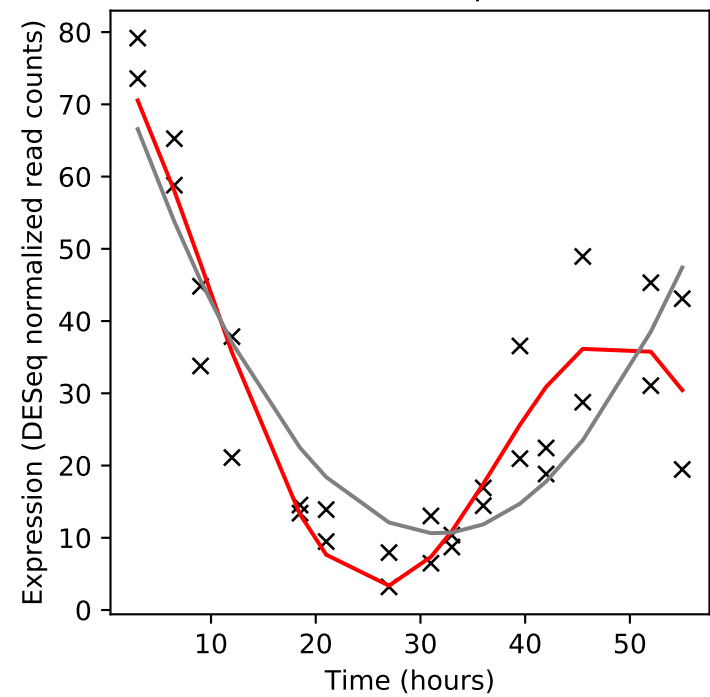

Rv1170/mshB

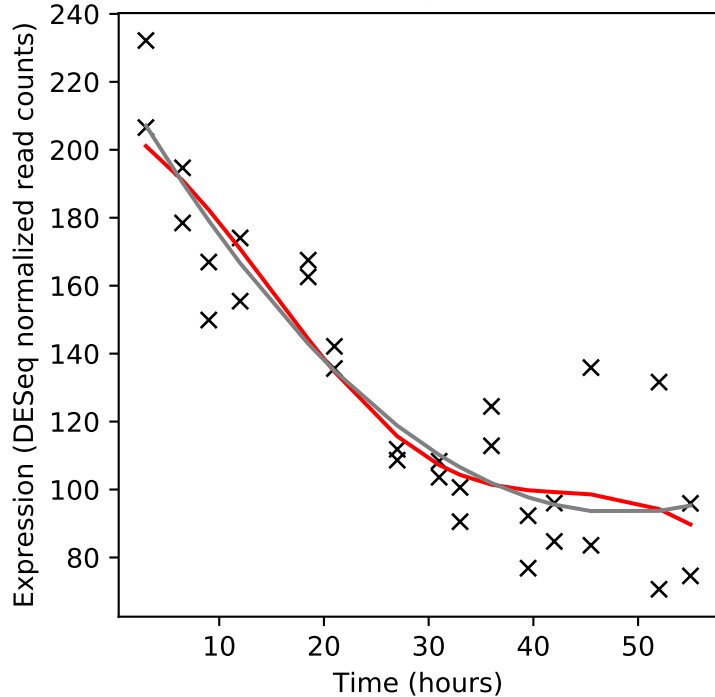

Rv1171/-

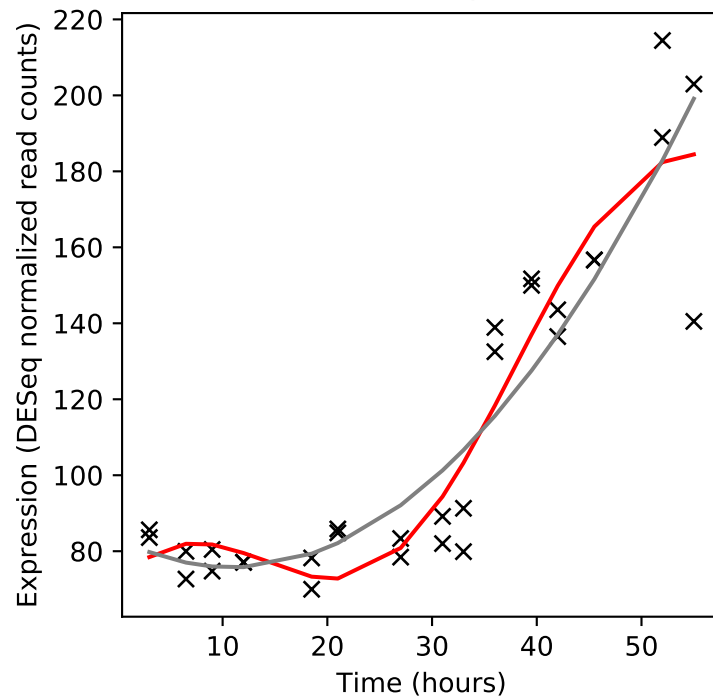

Rv1172c/PE12

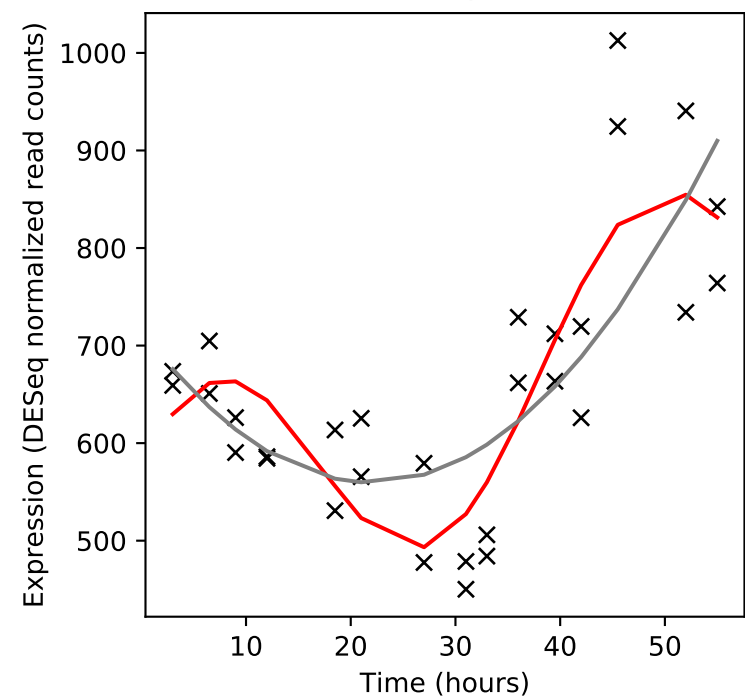

Rv1173/fbiC

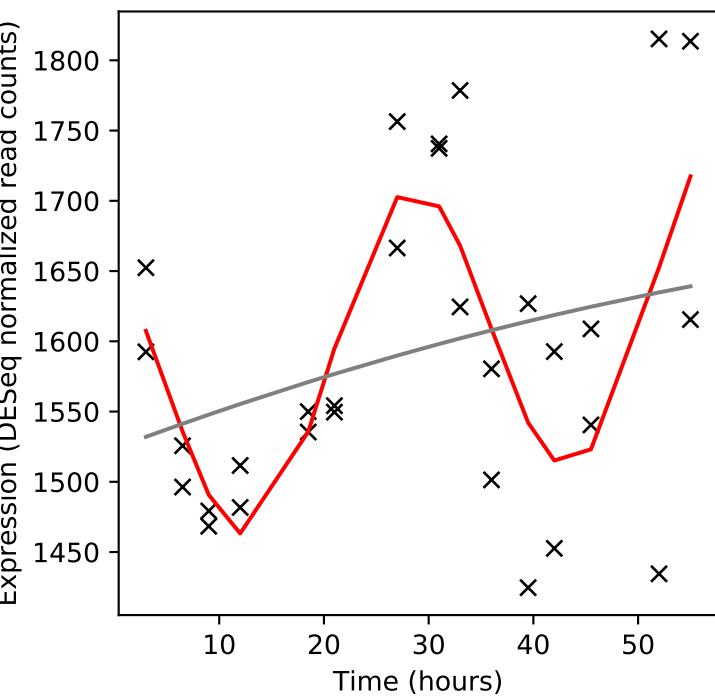

Rv1174c/TB8.4

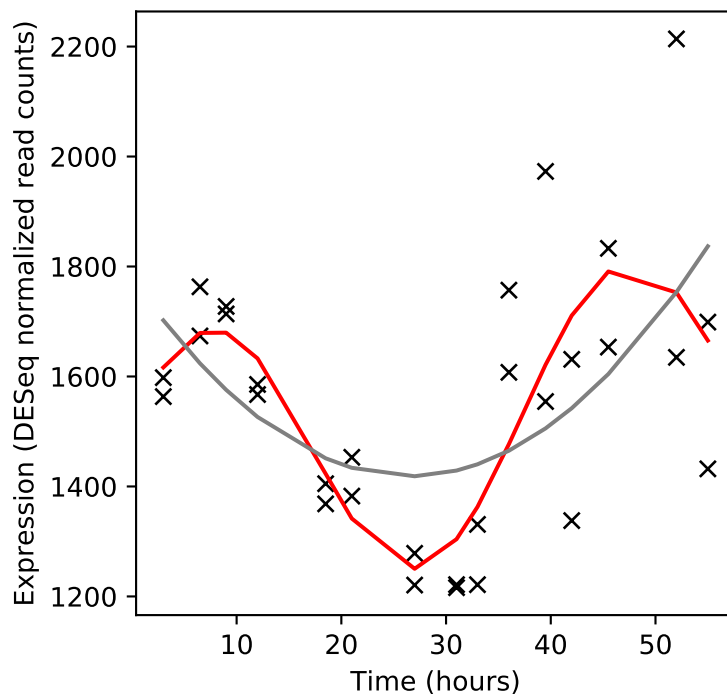

Rv1175c/fadH

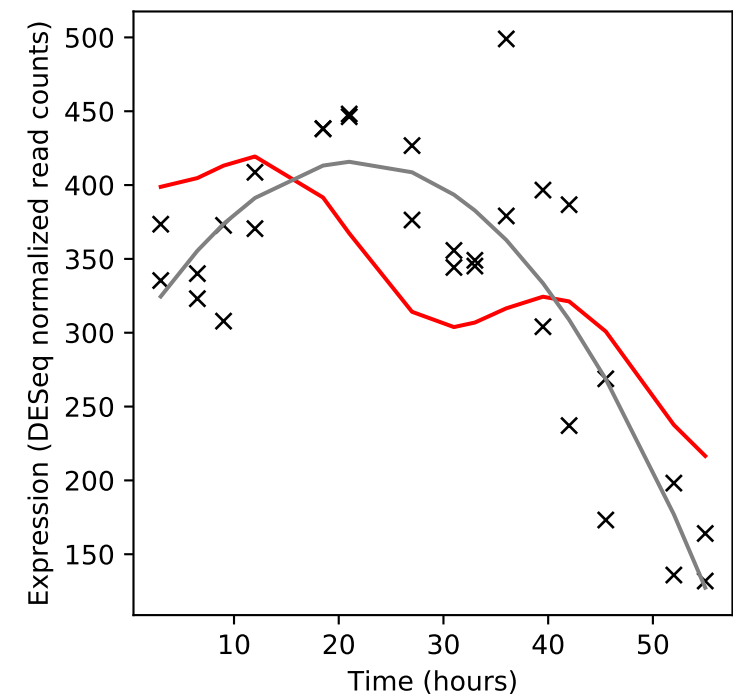

Rv1176c/-

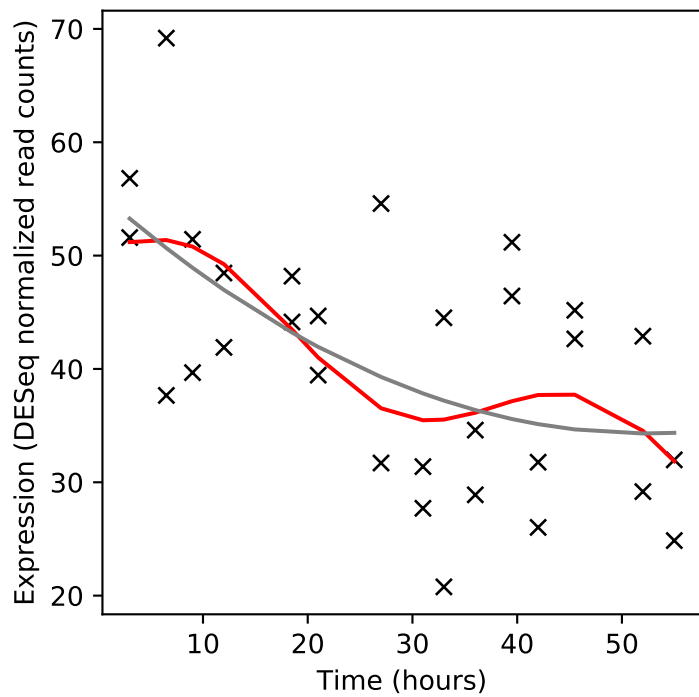

Rv1177/fdxC

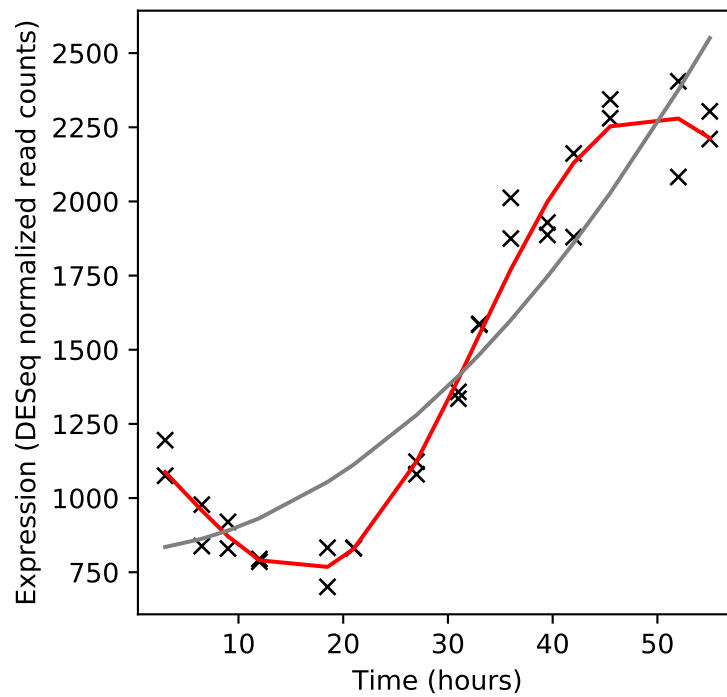

Rv1178/-

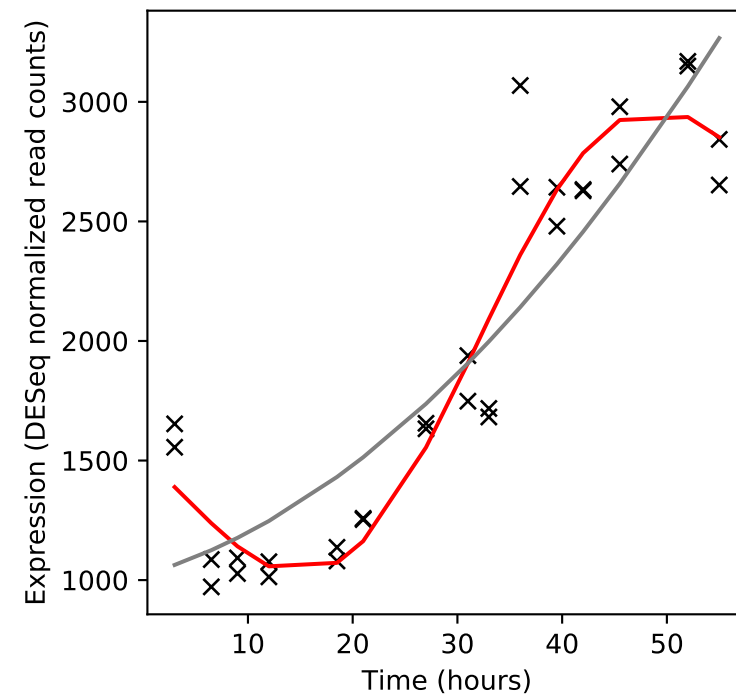

Rv1179c/-

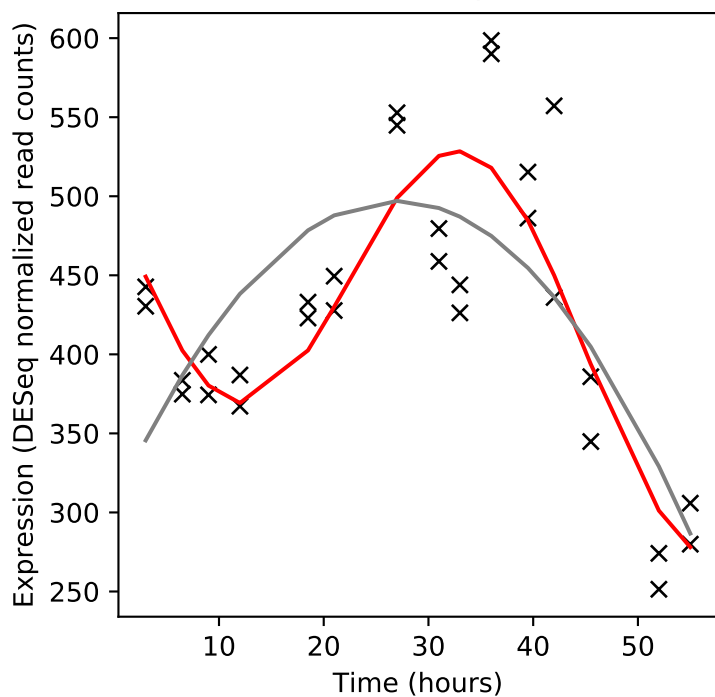

Rv1180/pks3

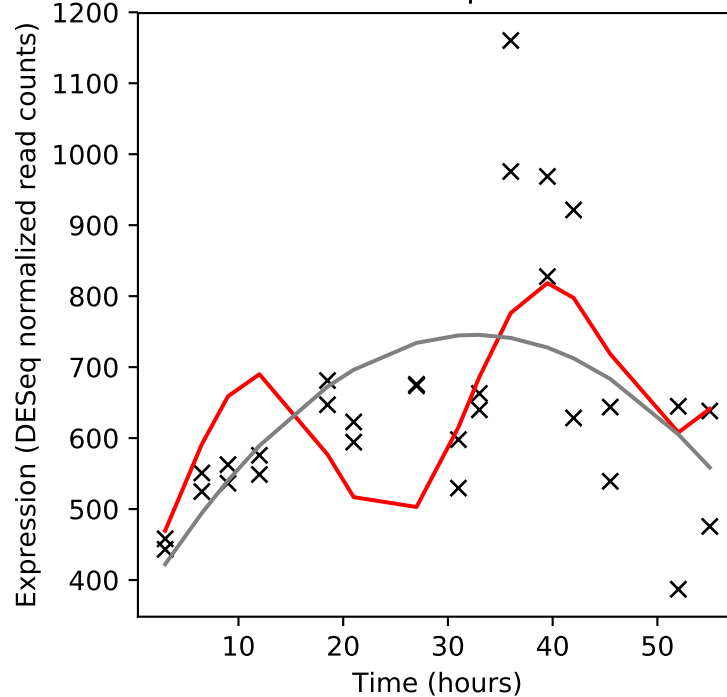

Rv1181/pks4

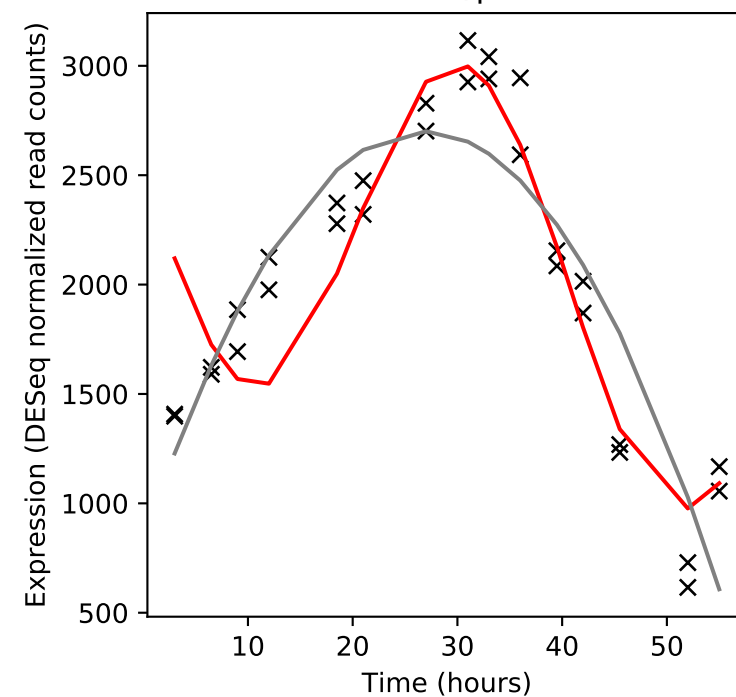

Rv1182/papA3

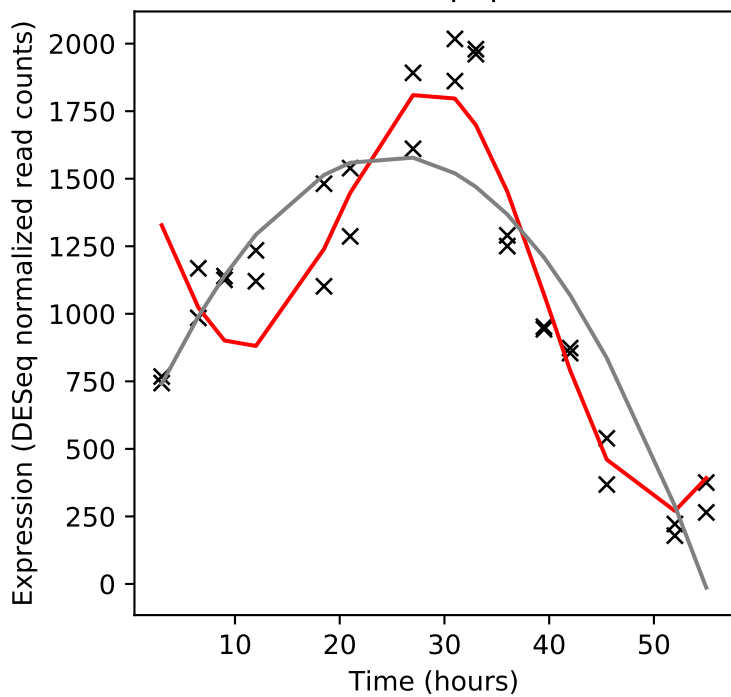

Rv1183/mmpL10

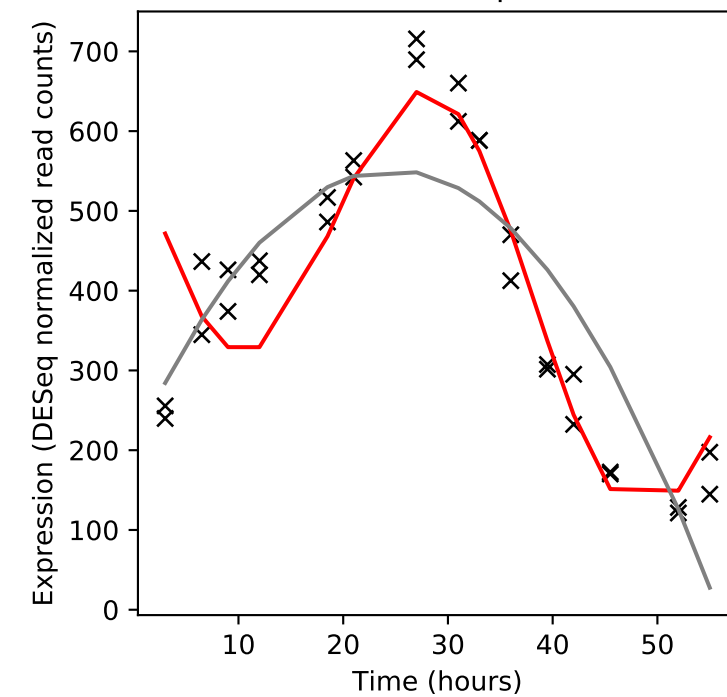

Rv1184c/-

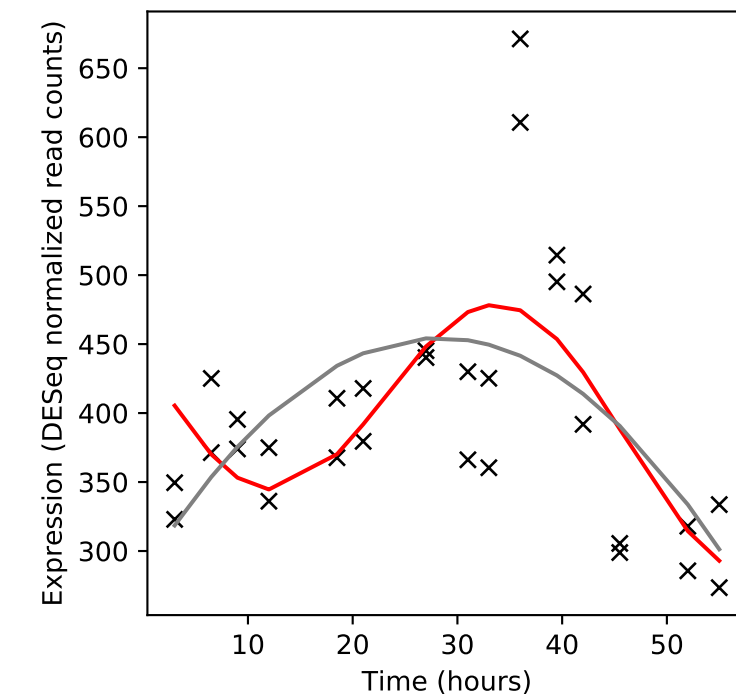



Rv1185c/fadD21

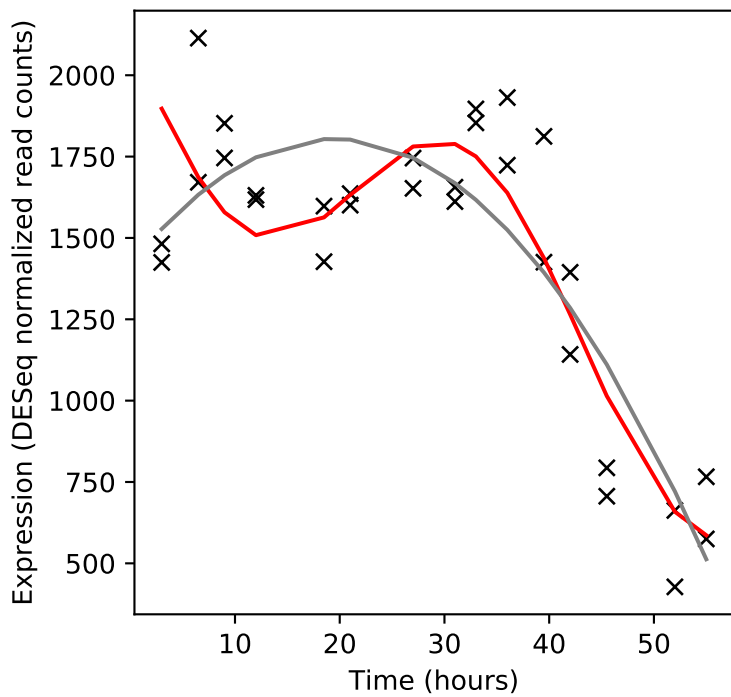

Rv1186c/-

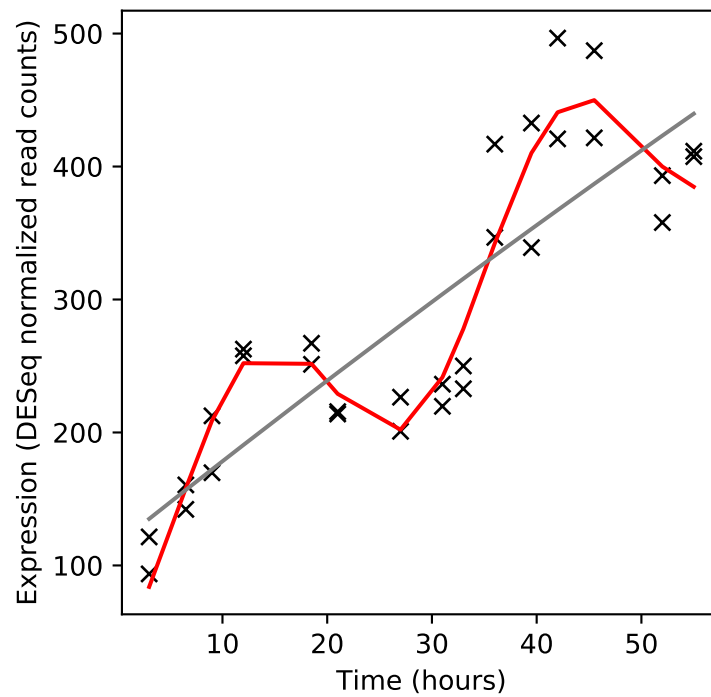

Rv1187/rocA

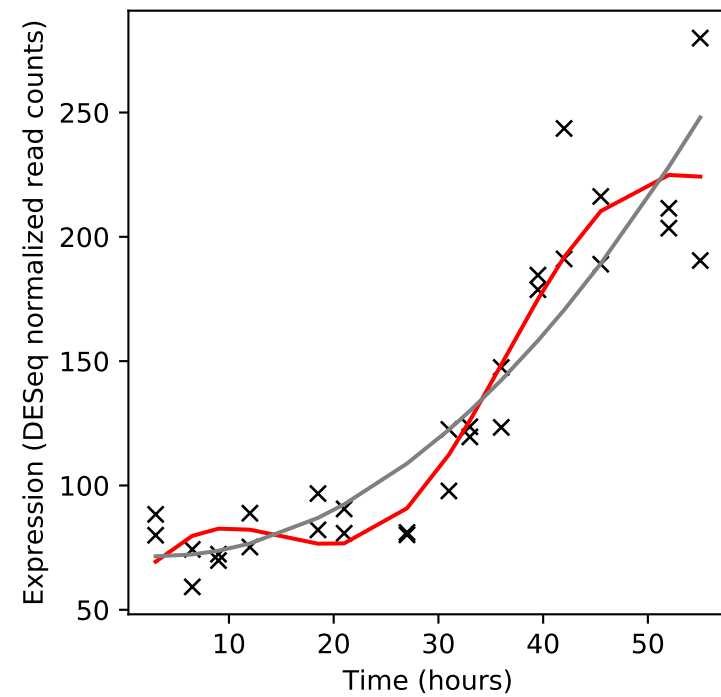

Rv1188/-

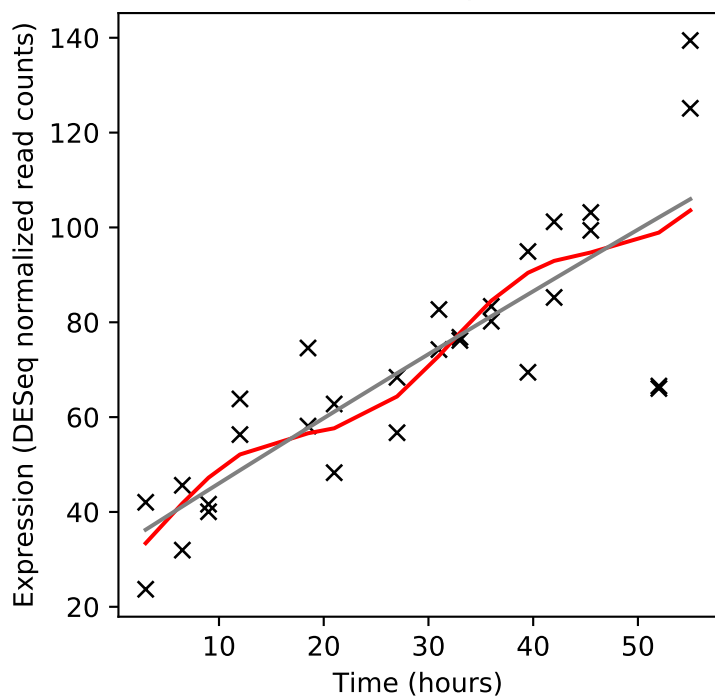

Rv1189/sigl

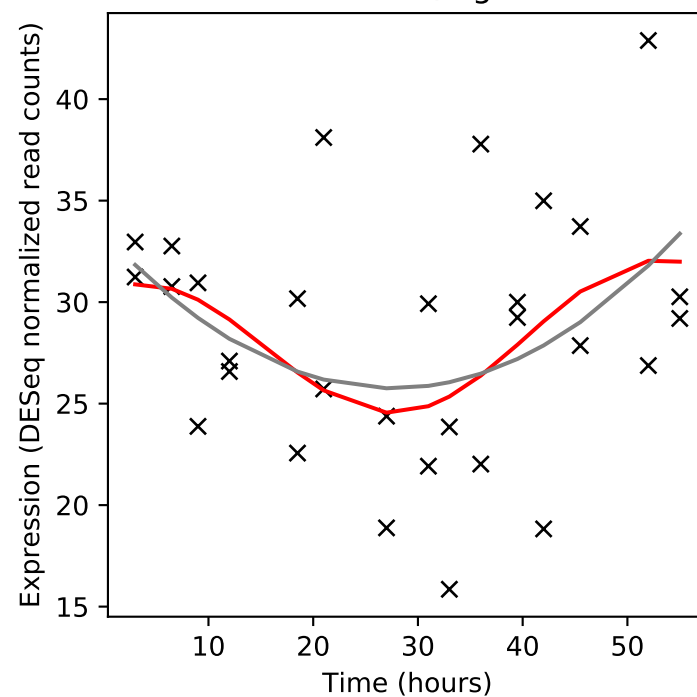

Rv1190/-

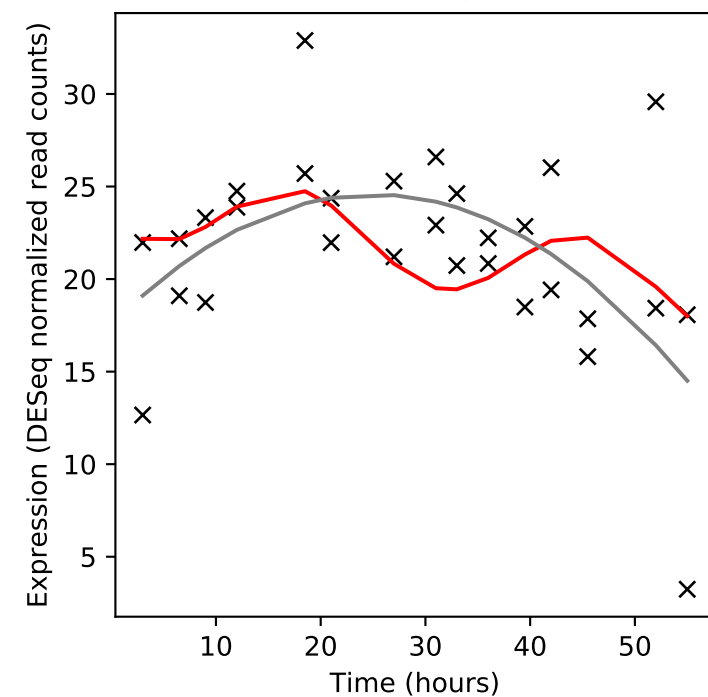

Rv1191/-

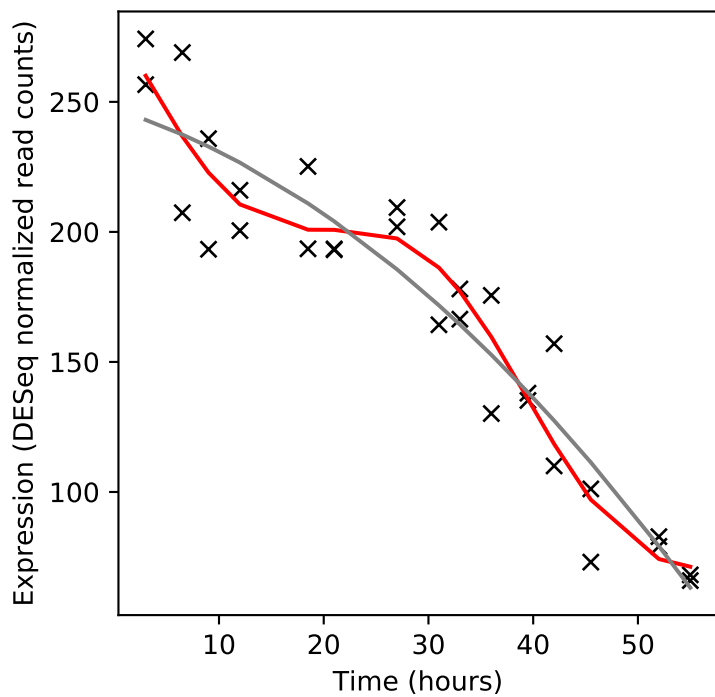

Rv1192/-

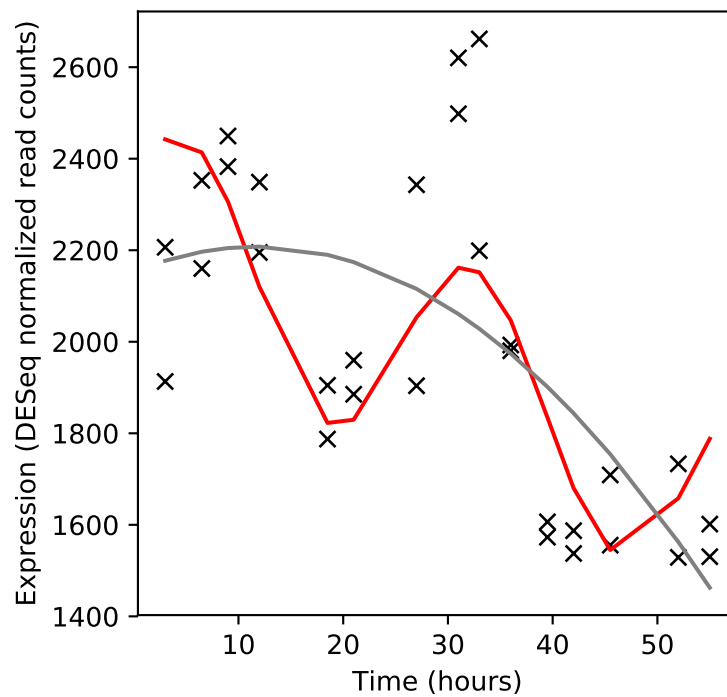

Rv1193/fadD36

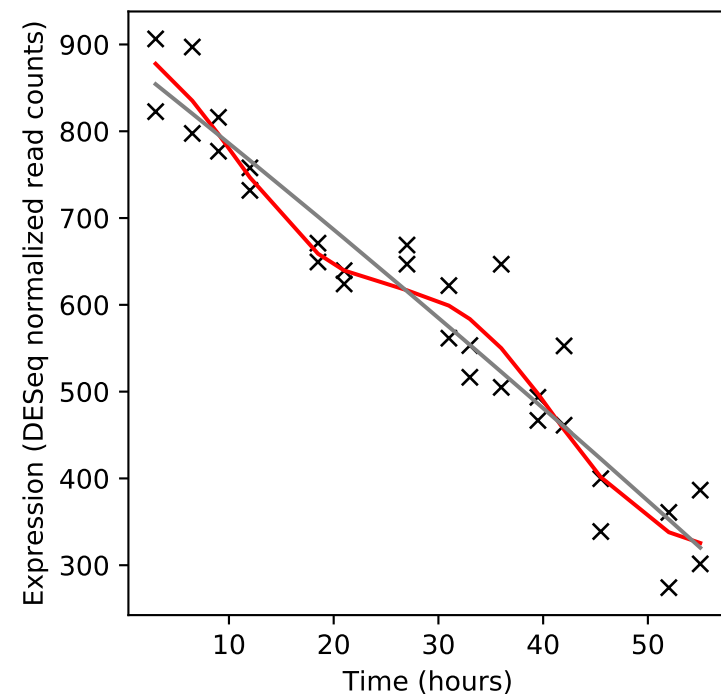

Rv1194c/-

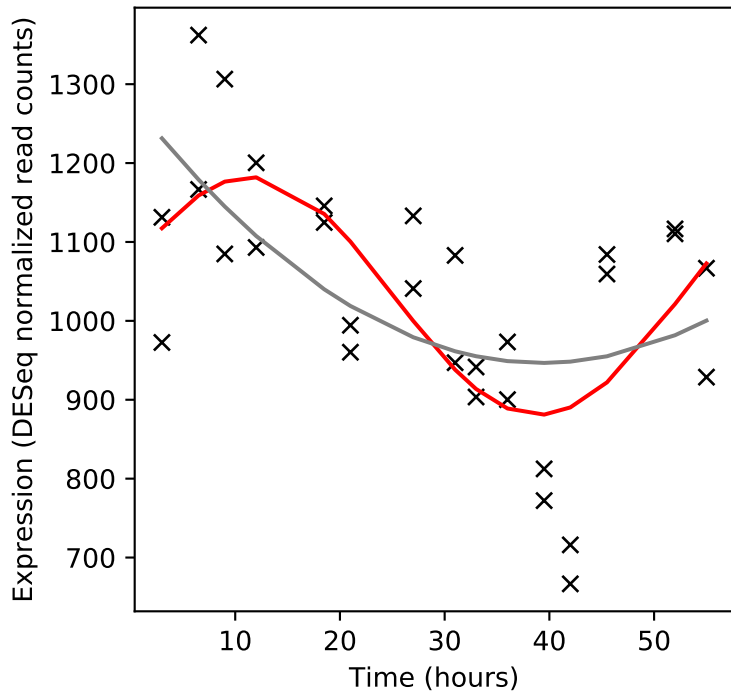

Rv1195/PE13

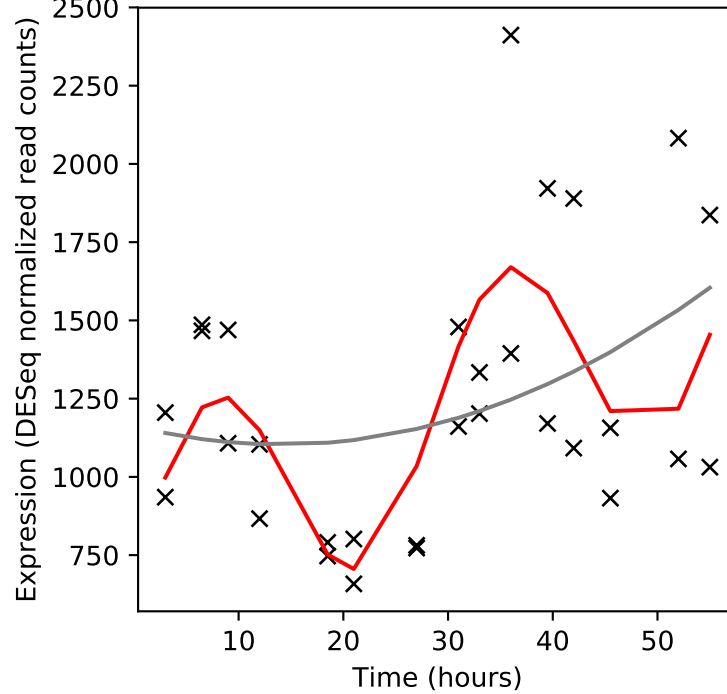

Rv1196/PPE18

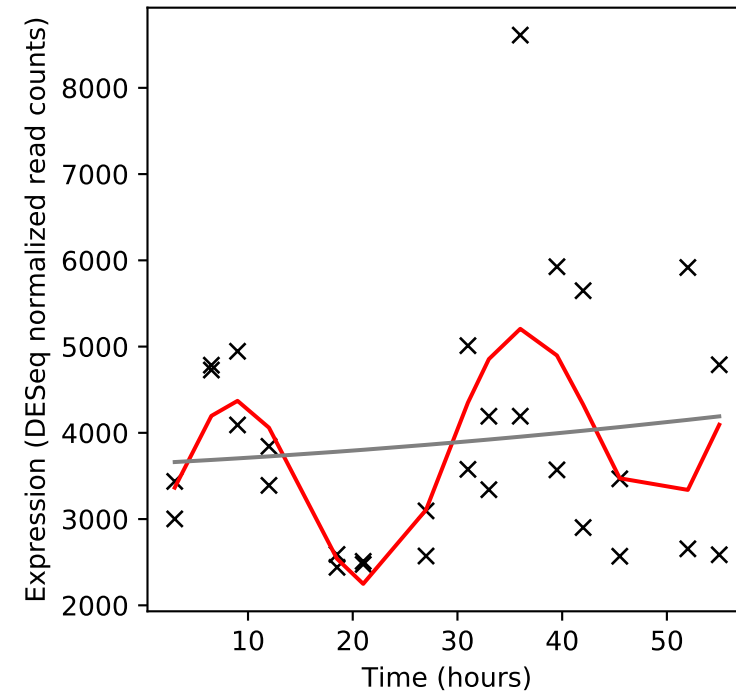

Rv1197/esxK

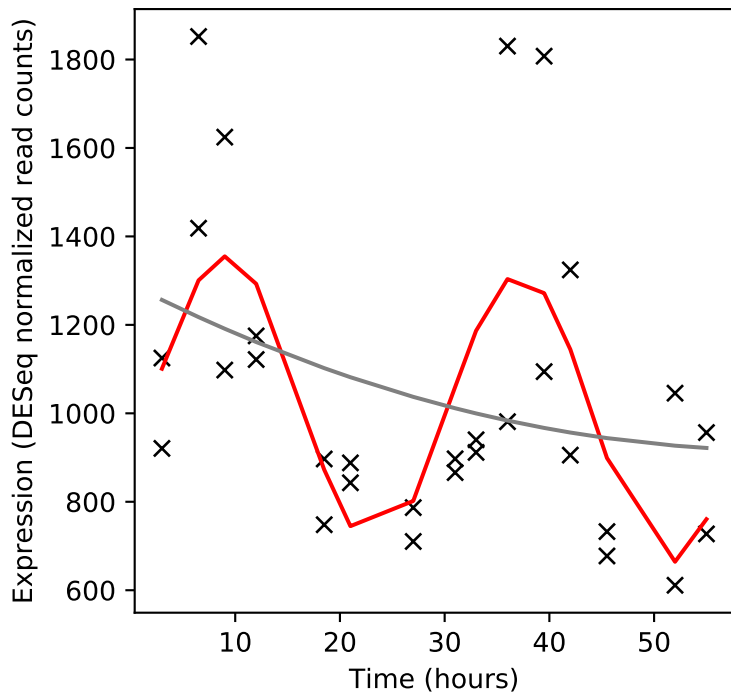

Rv1198/esxL

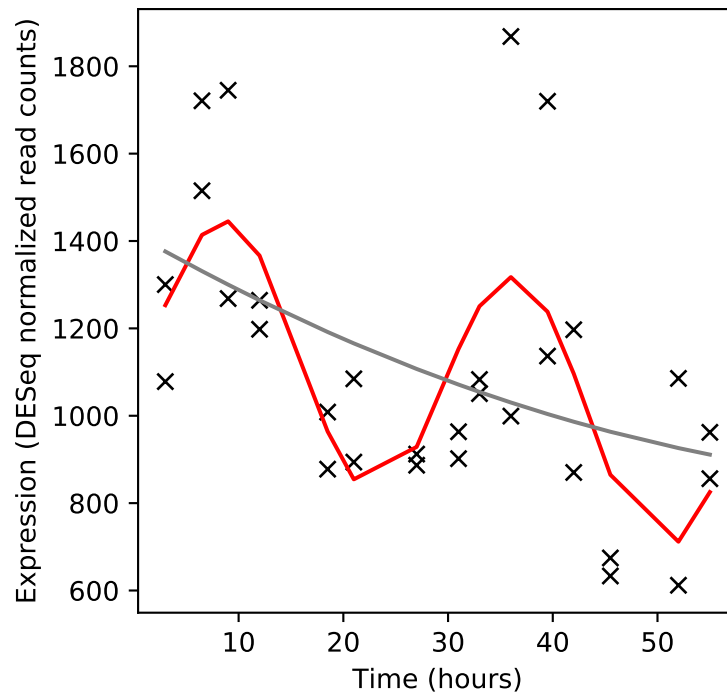

Rv1199c/-

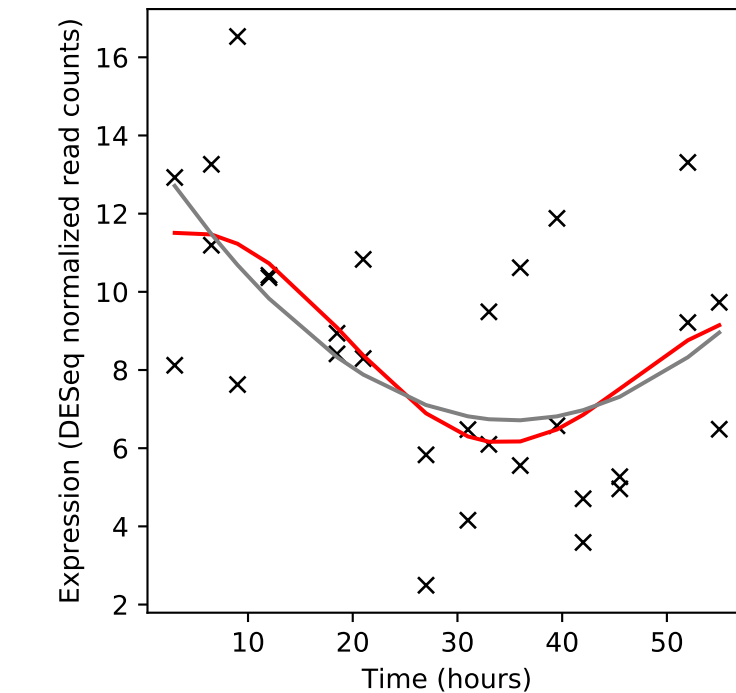

Rv1200/-

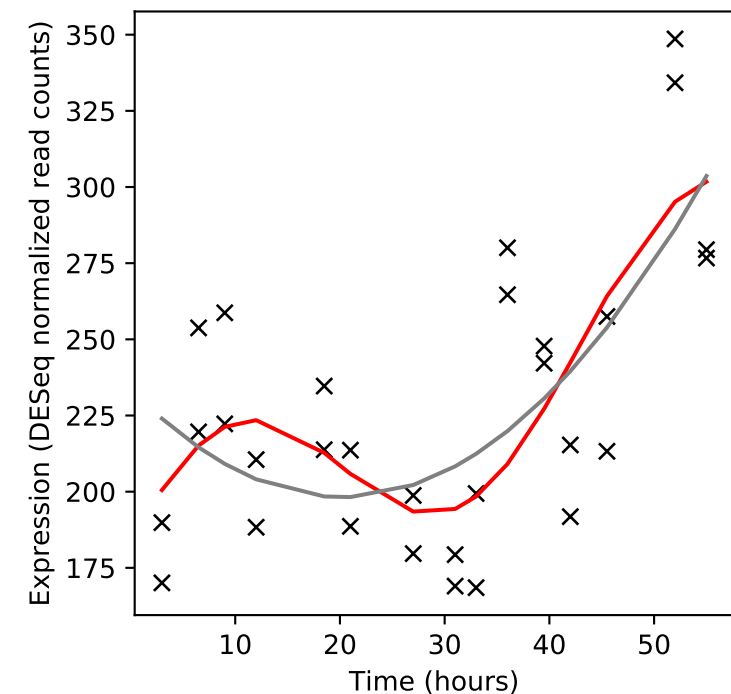

Rv1201c/dapD

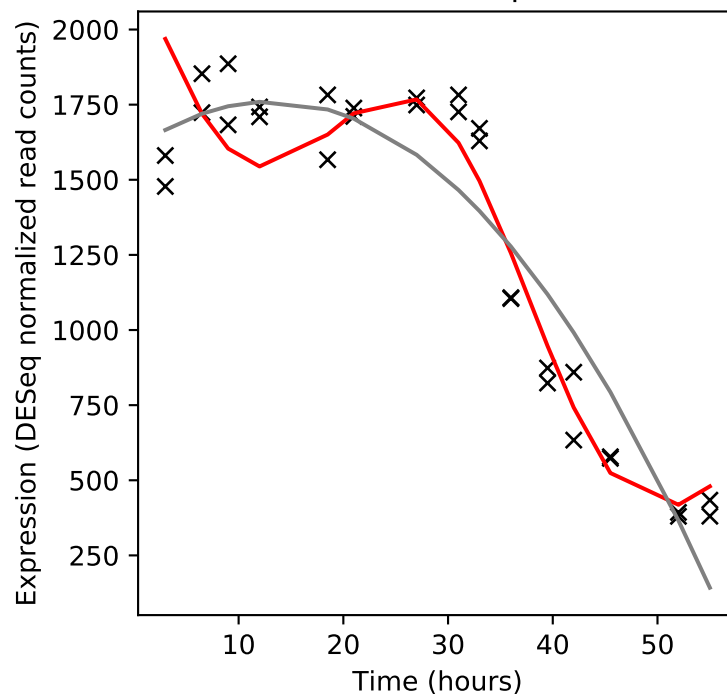

Rv1202/dapE

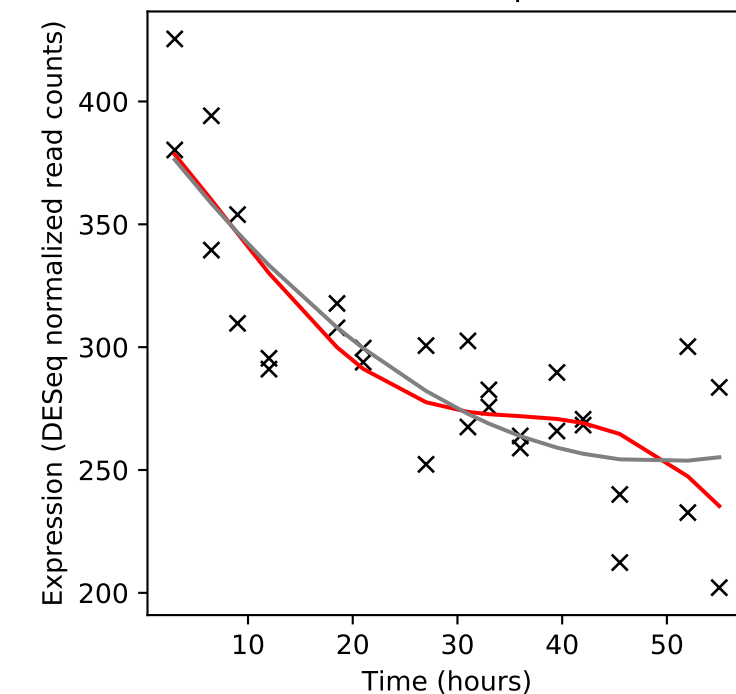

Rv1203c/-

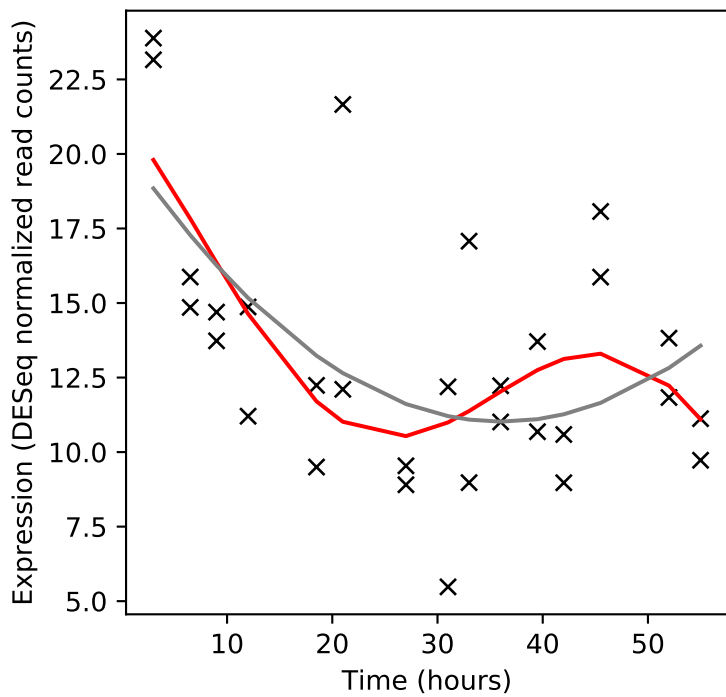

Rv1204c/-

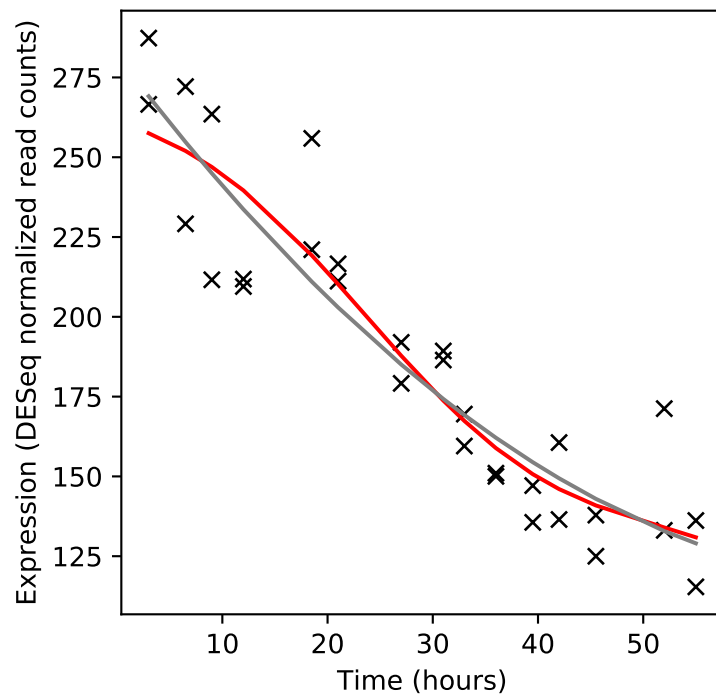

Rv1205/-

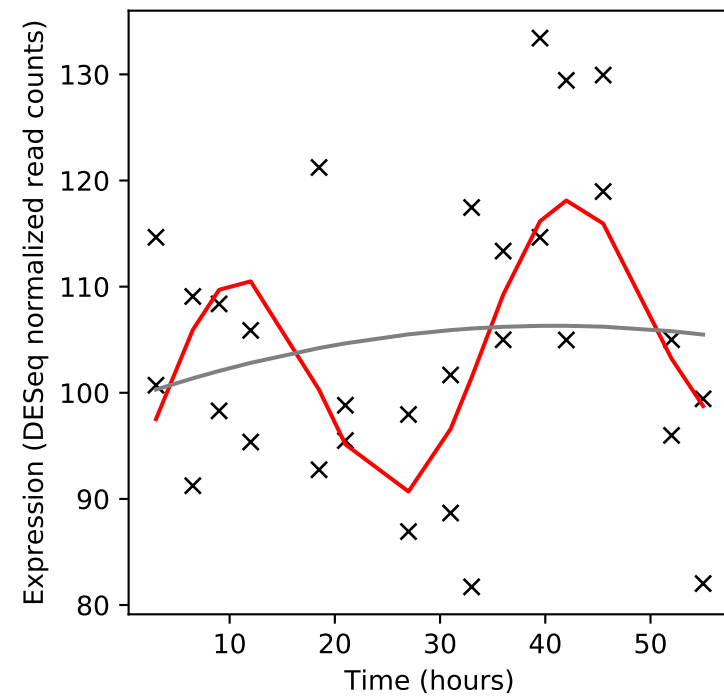

Rv1206/fadD6

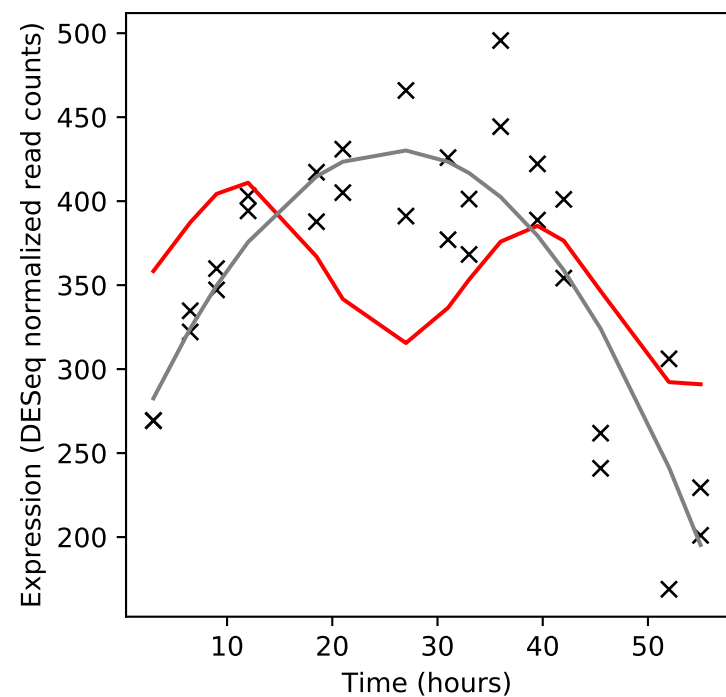

Rv1207/foIP2

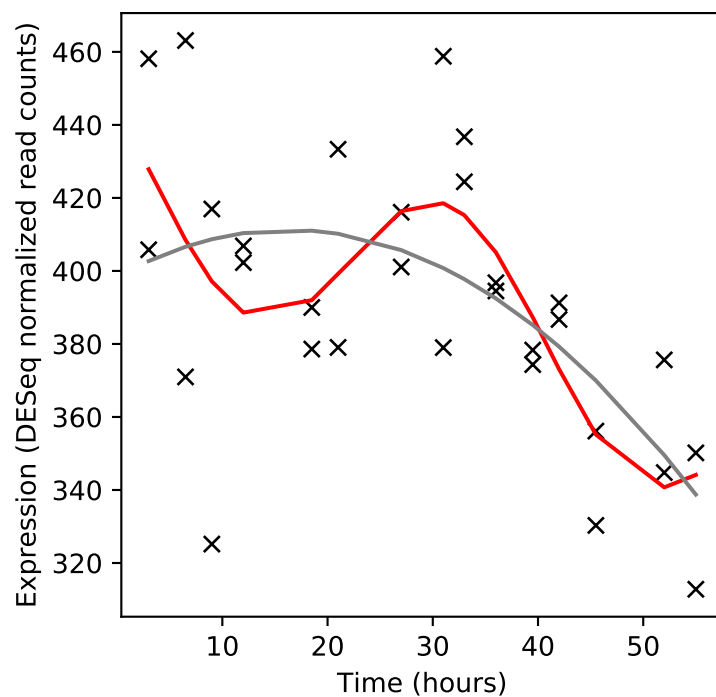

Rv1208/gpgS

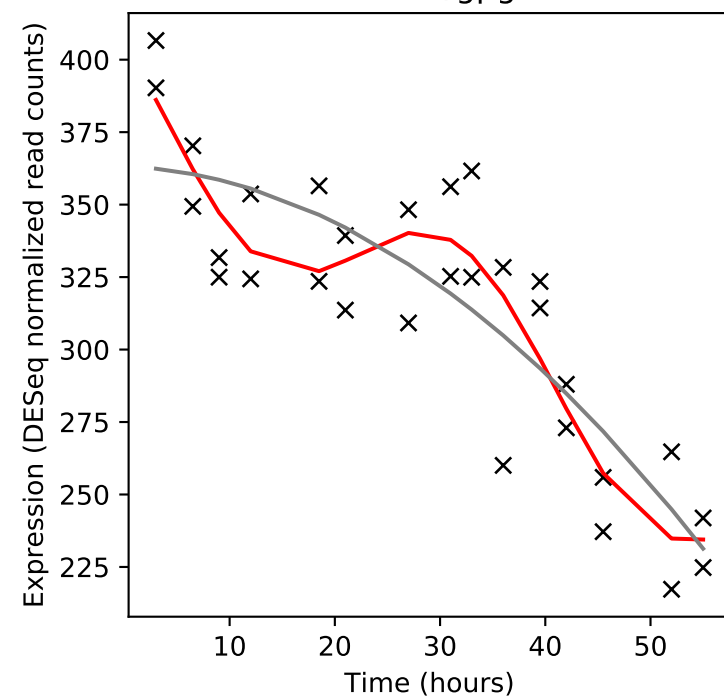

Rv1209/-

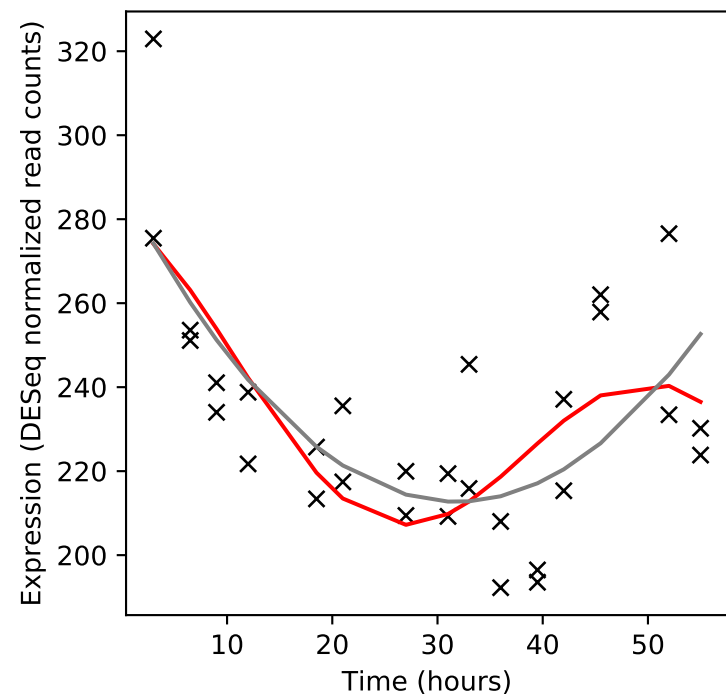

Rv1210/tagA

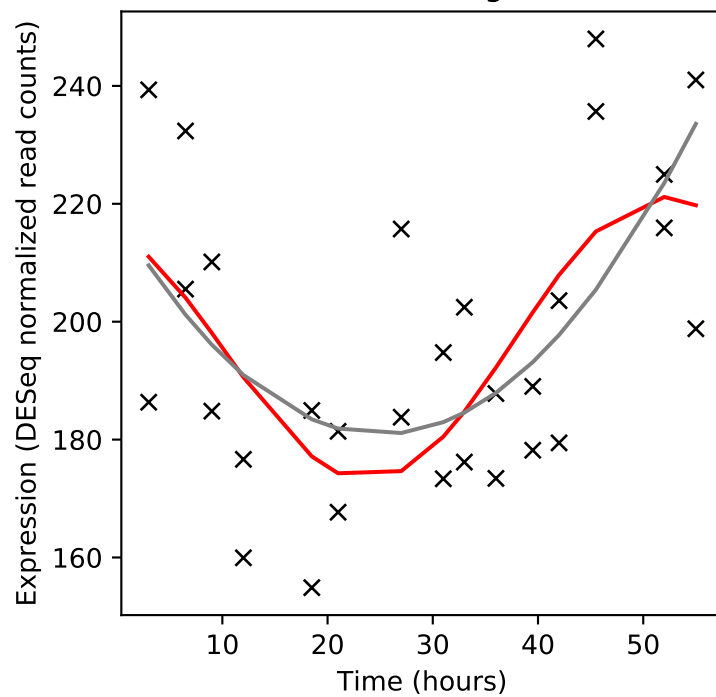

Rv1211/-

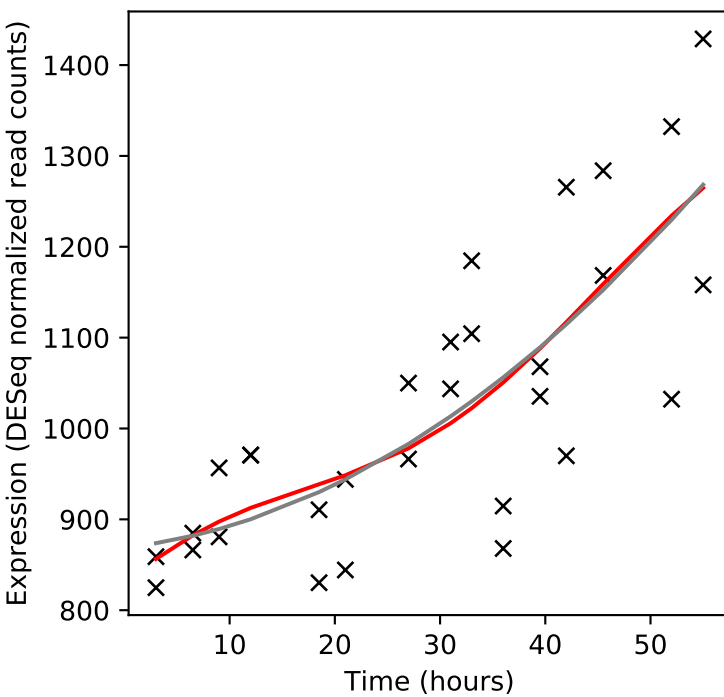

Rv1212c/glgA

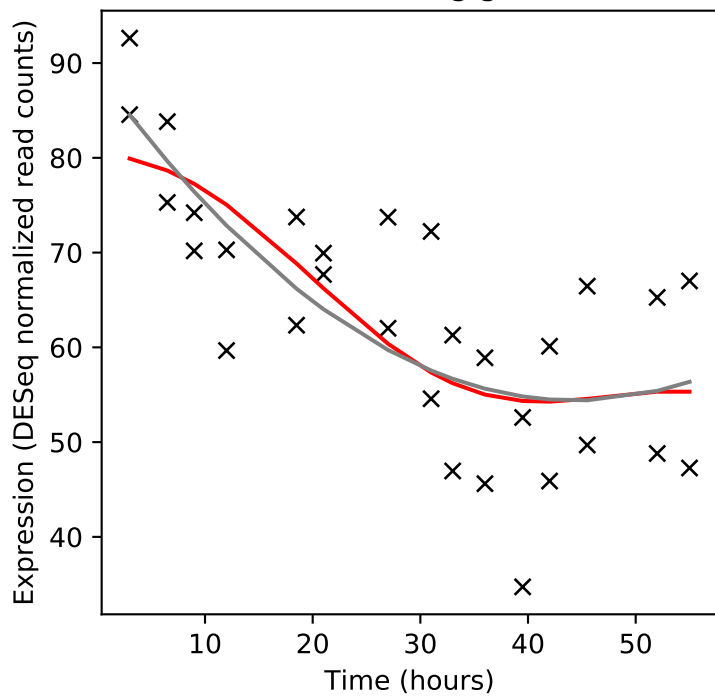

Rv1213c/glgC

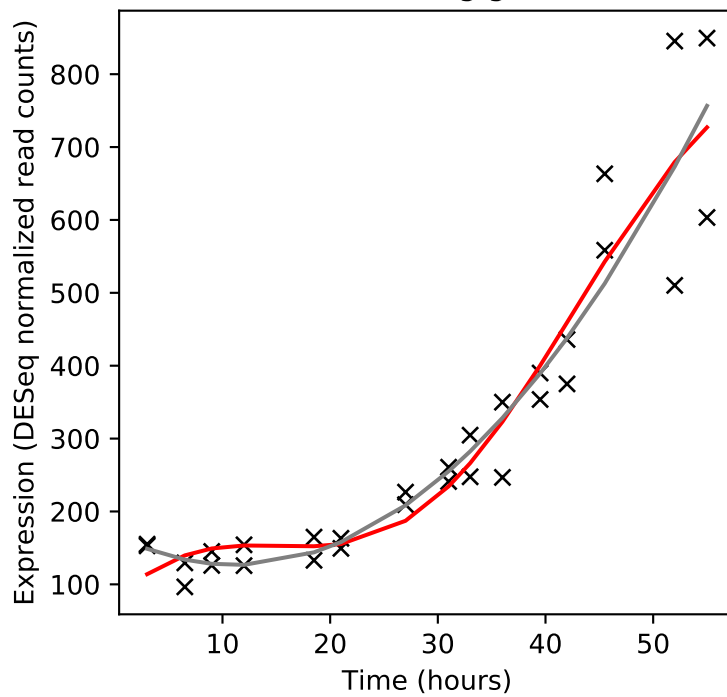

Rv1214c/PE14

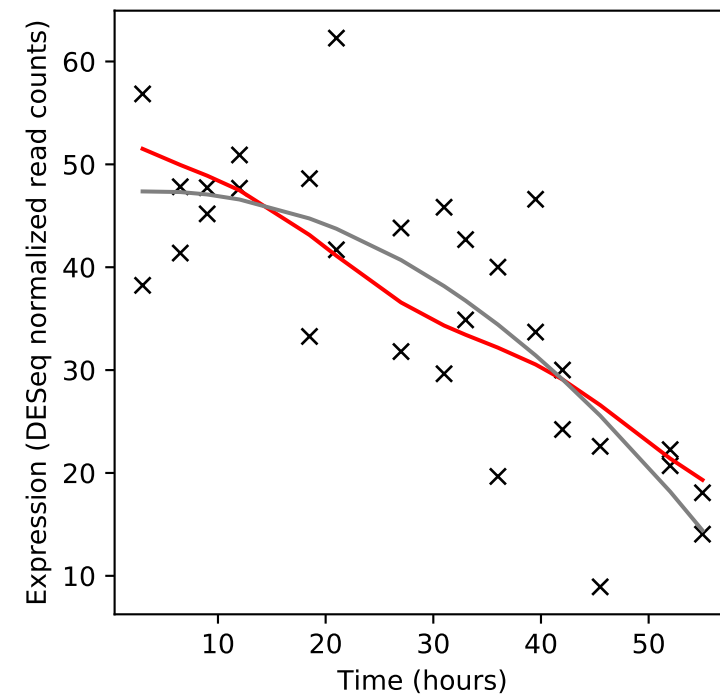

Rv1215c/-

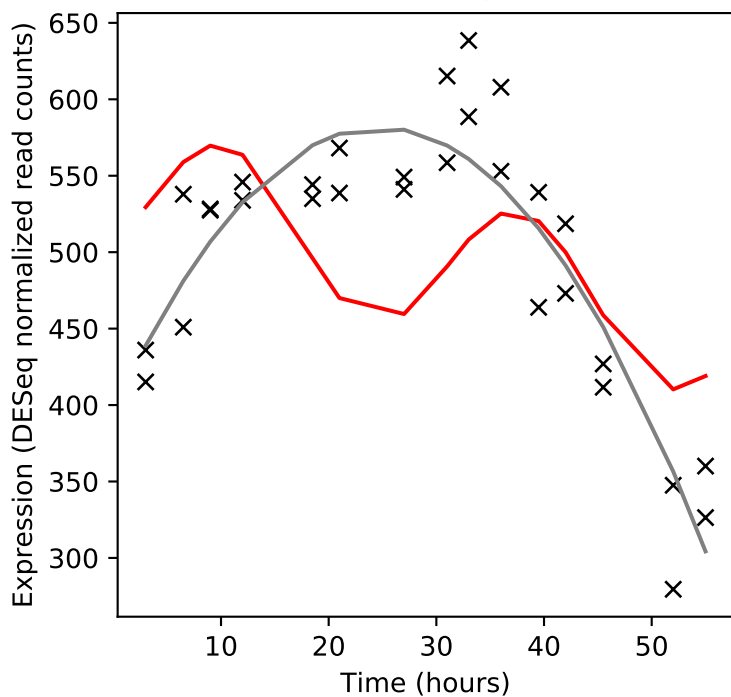

Rv1216c/-

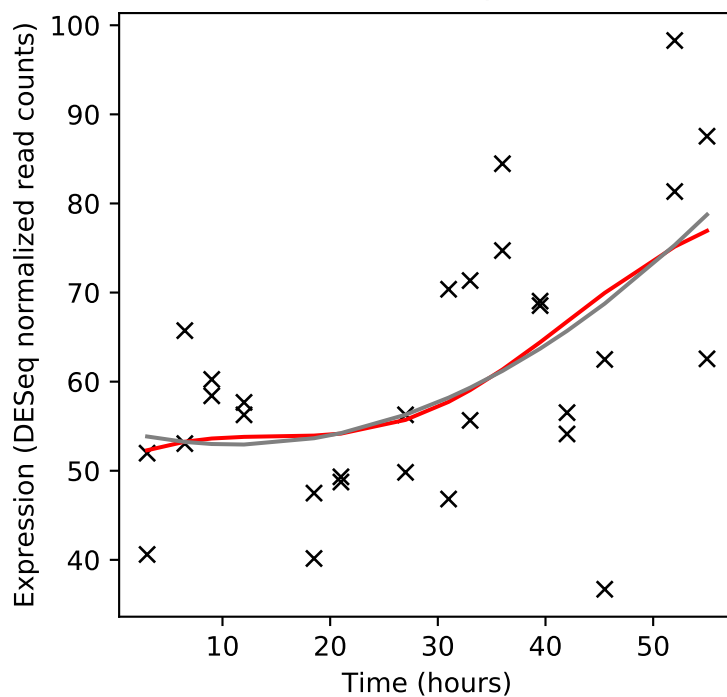

Rv1217c/-

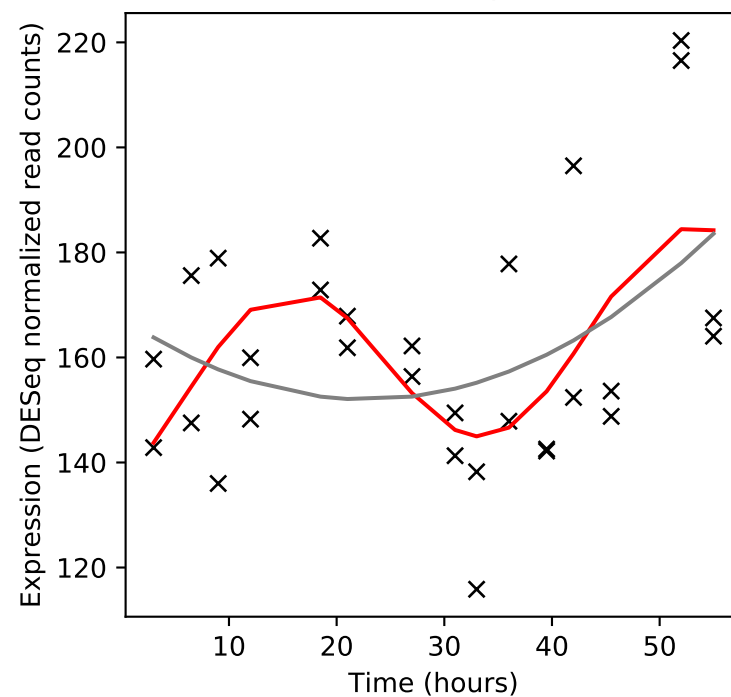

Rv1218c/-

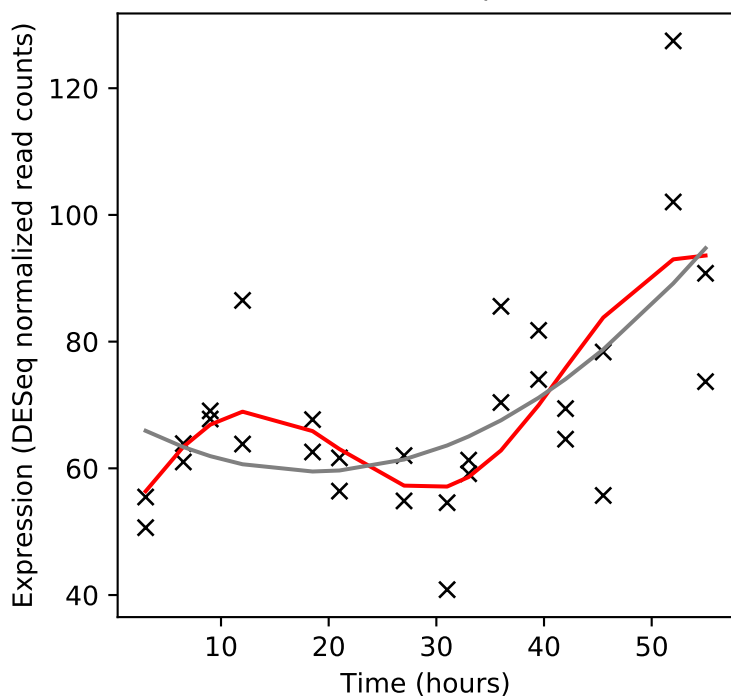

Rv1219c/-

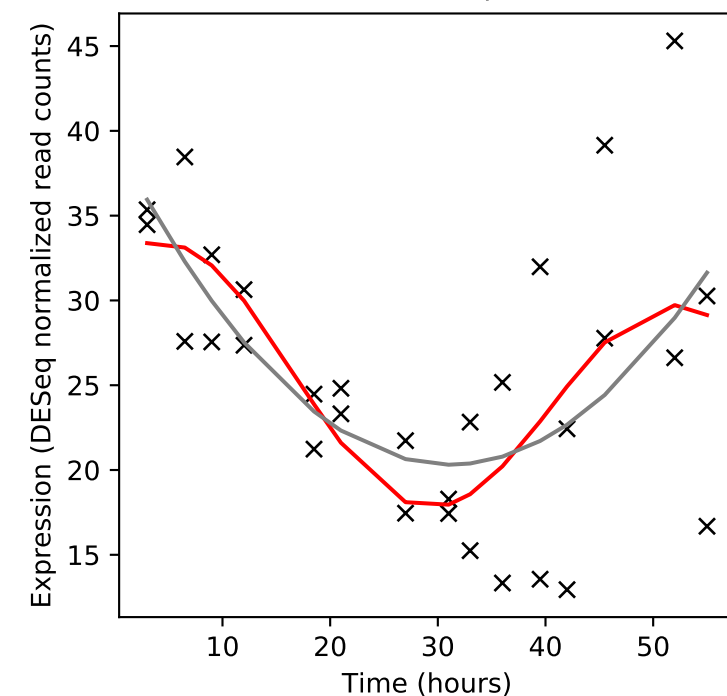

Rv1220c/-

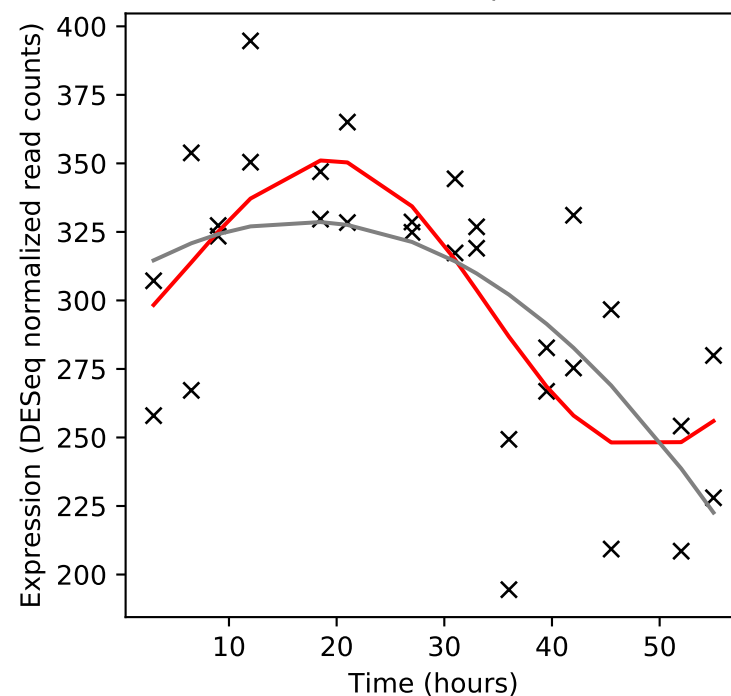

Rv1221/sigE

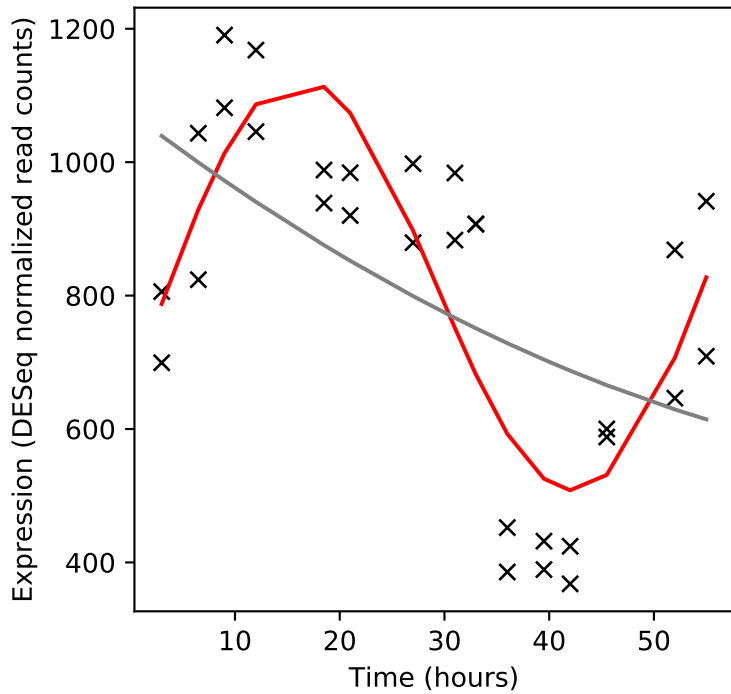

Rv1222/rseA

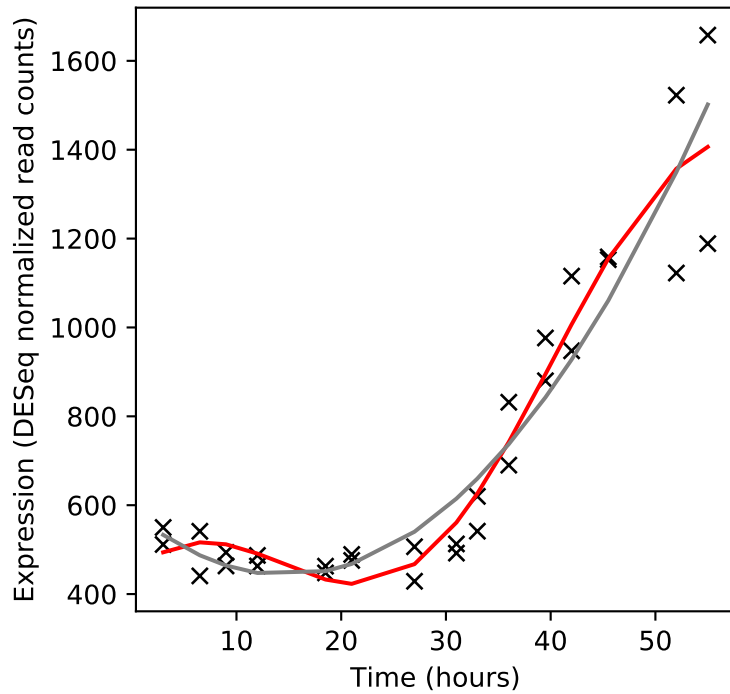

Rv1223/htrA

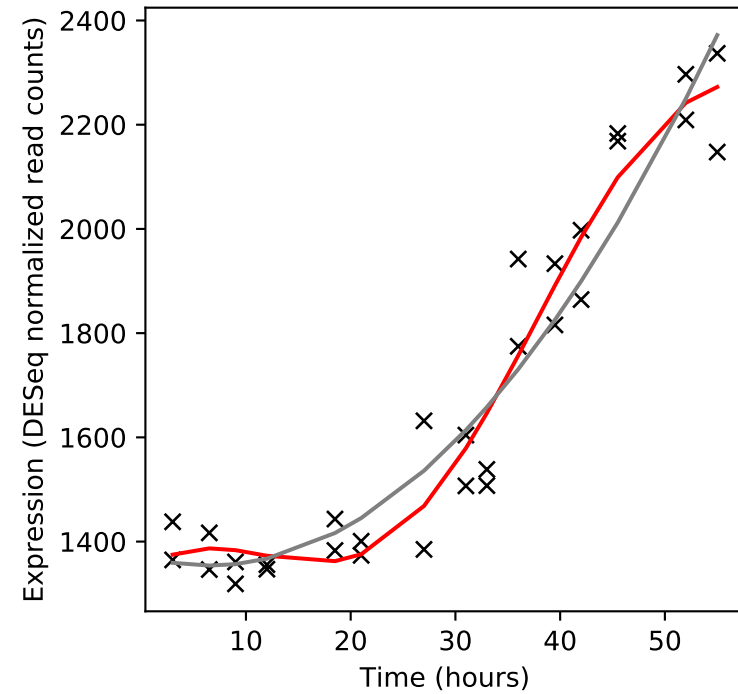

Rv1224/tatB

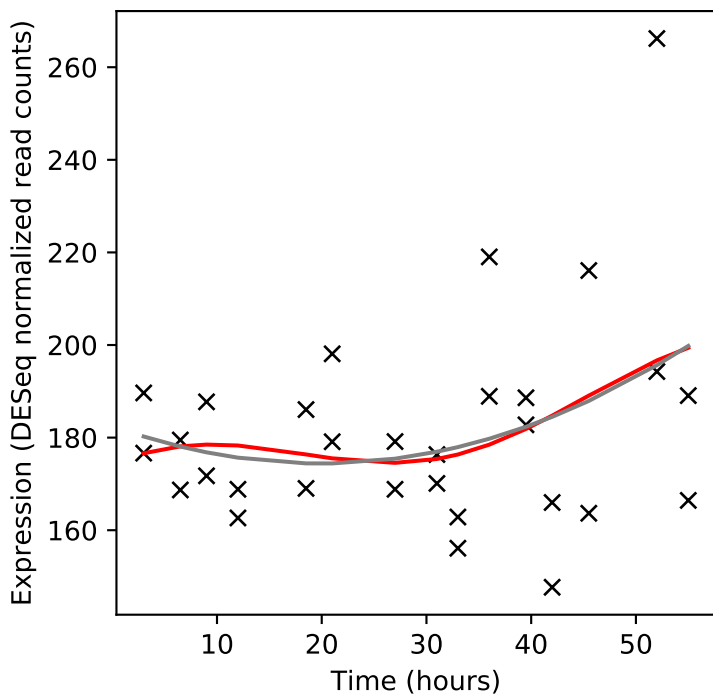

Rv1225c/-

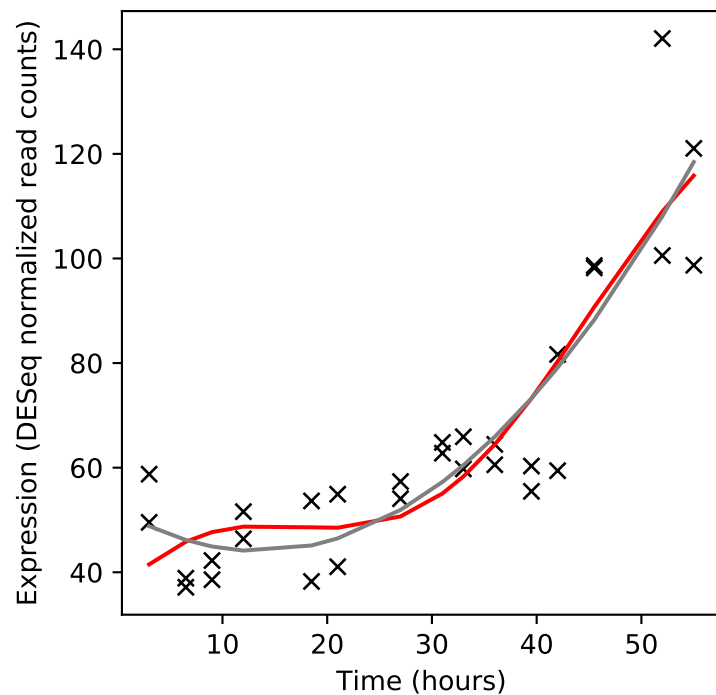

Rv1226c/-

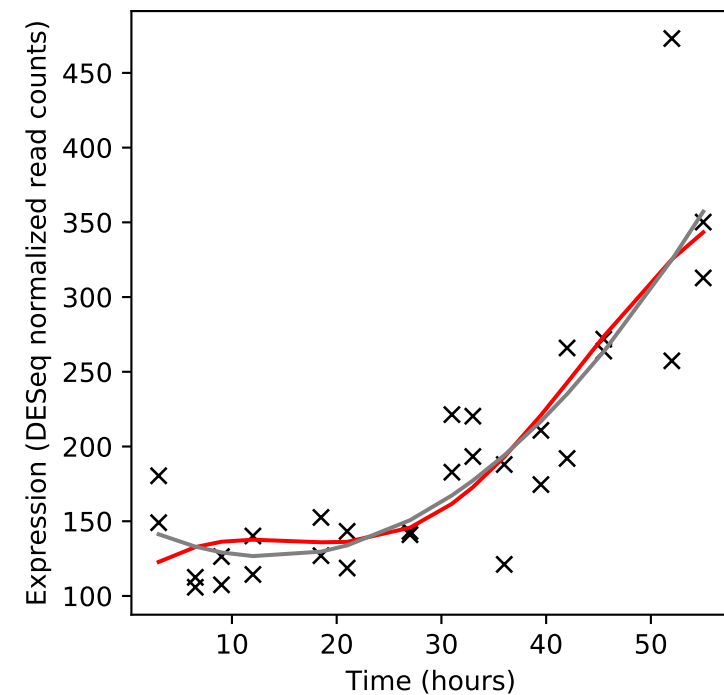

Rv1227c/-

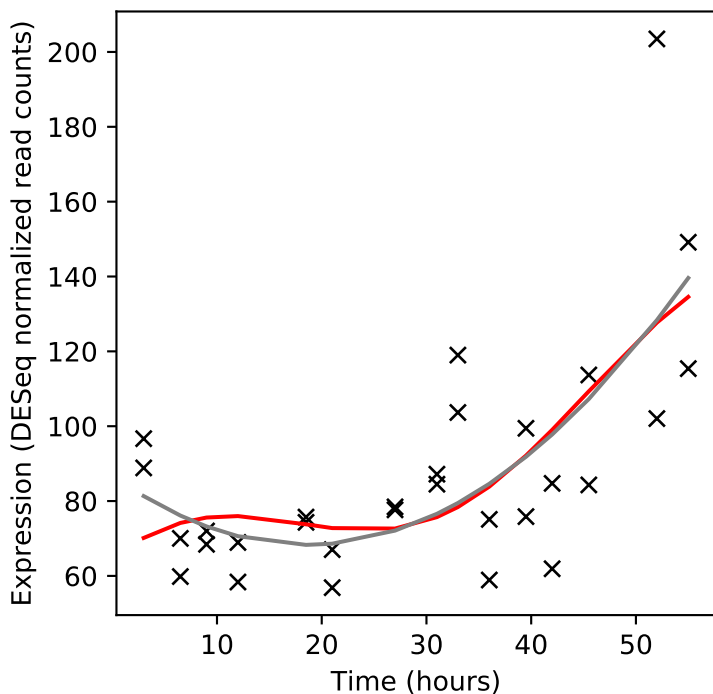

Rv1228/lpqX

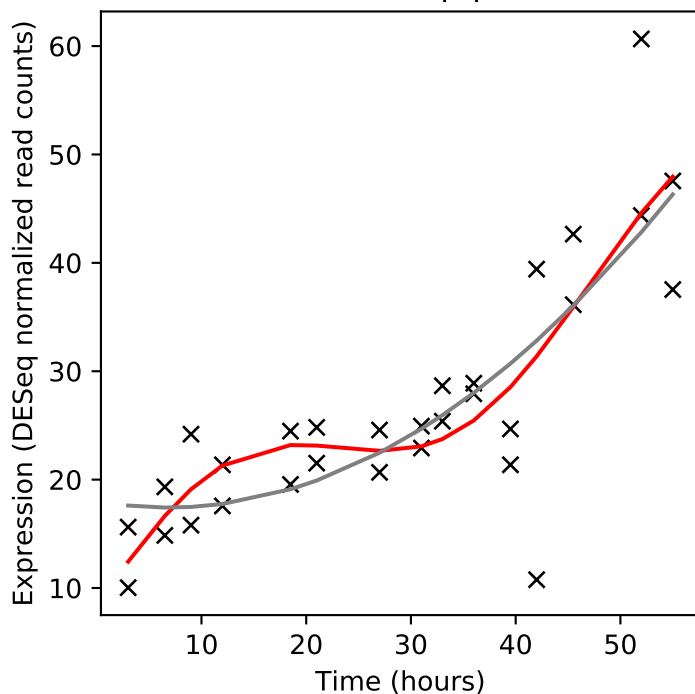

Rv1229c/mrp

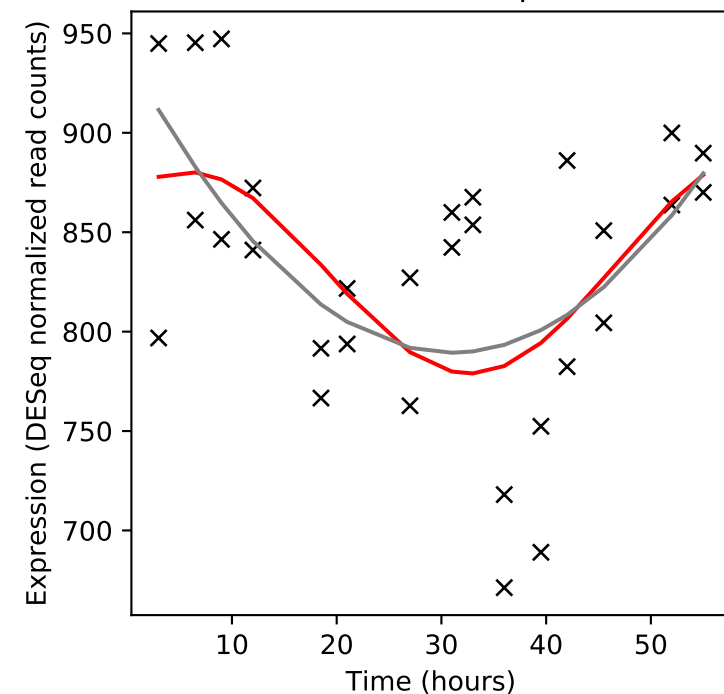

Rv1230c/-

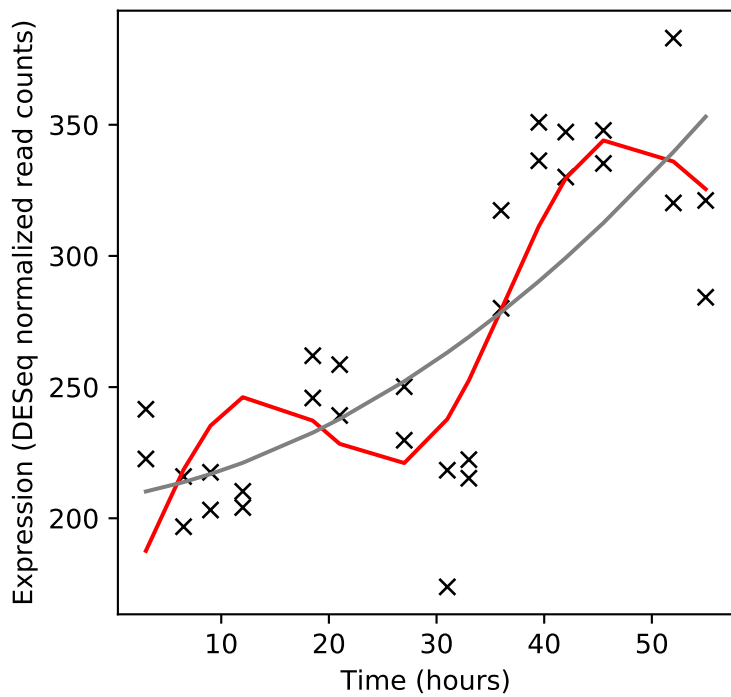

Rv1231c/-

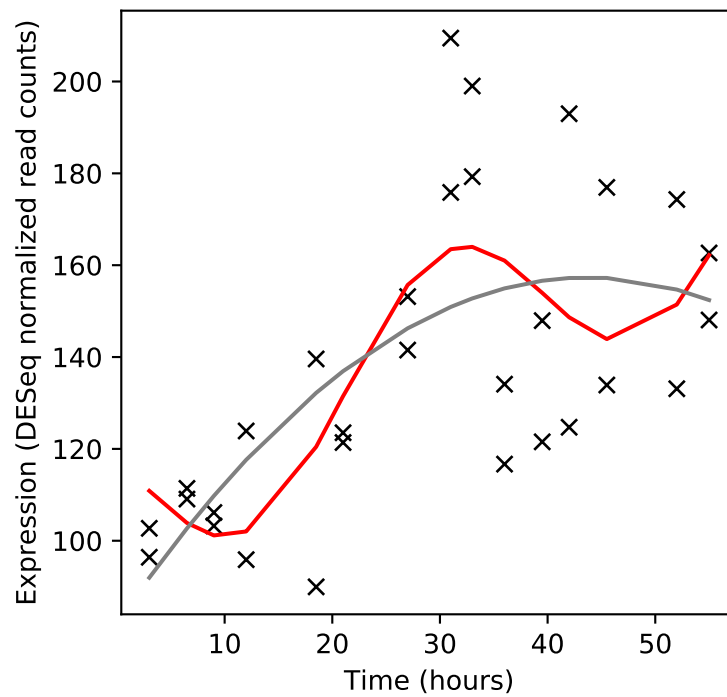

Rv1232c/-

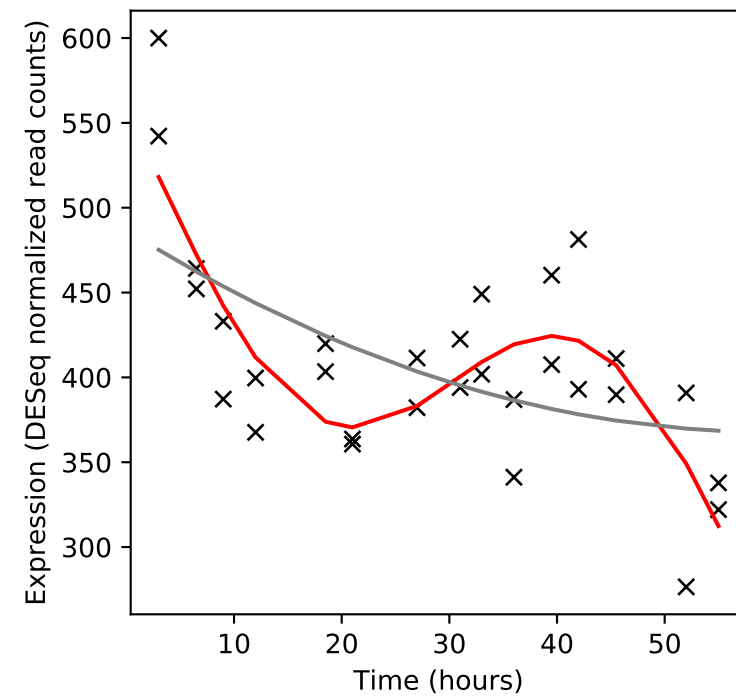

Rv1233c/-

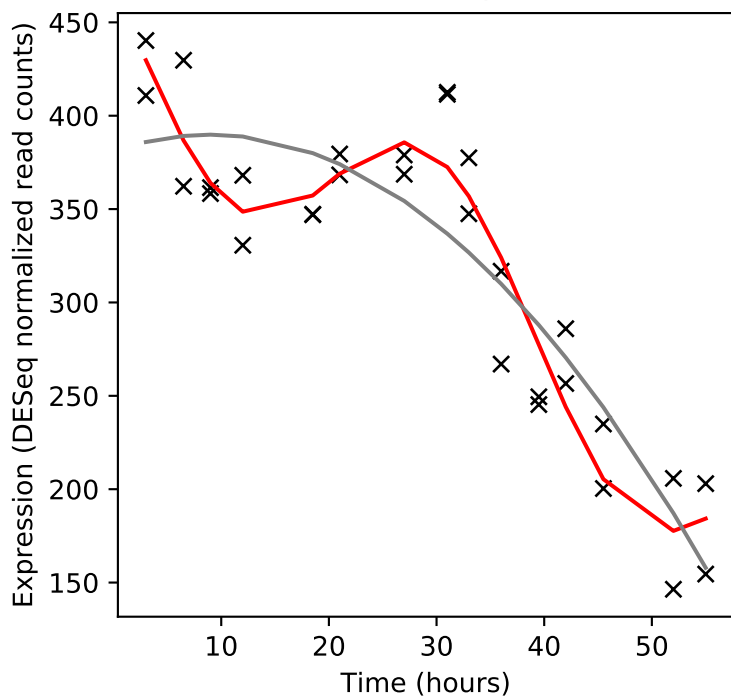

Rv1234/-

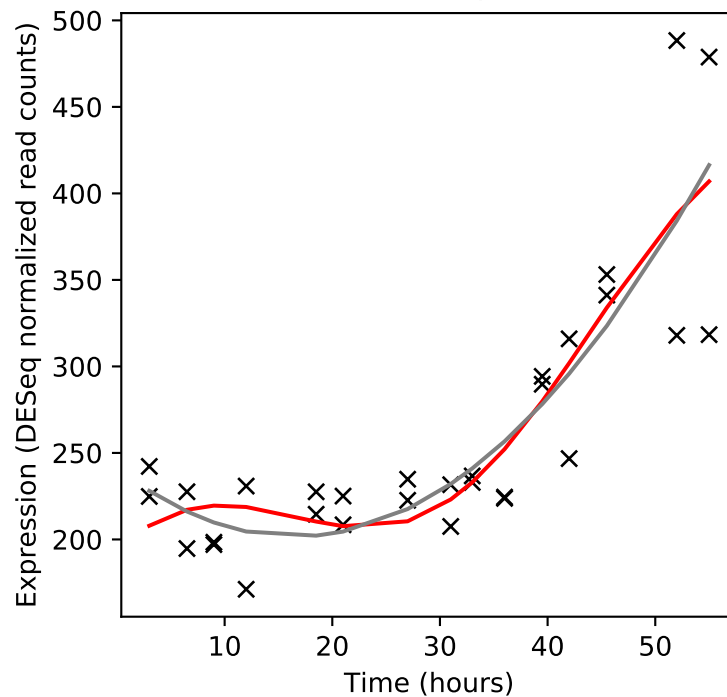

Rv1235/lpqY

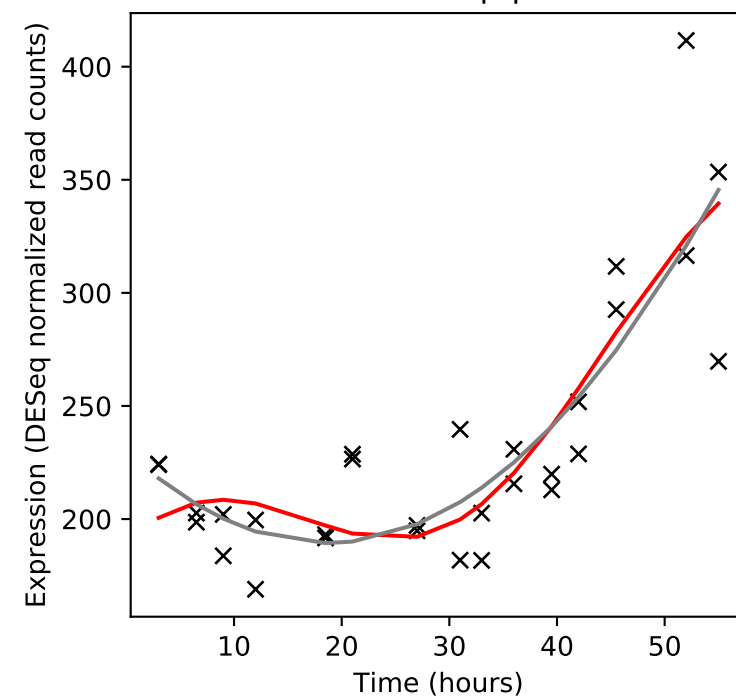

Rv1236/sugA

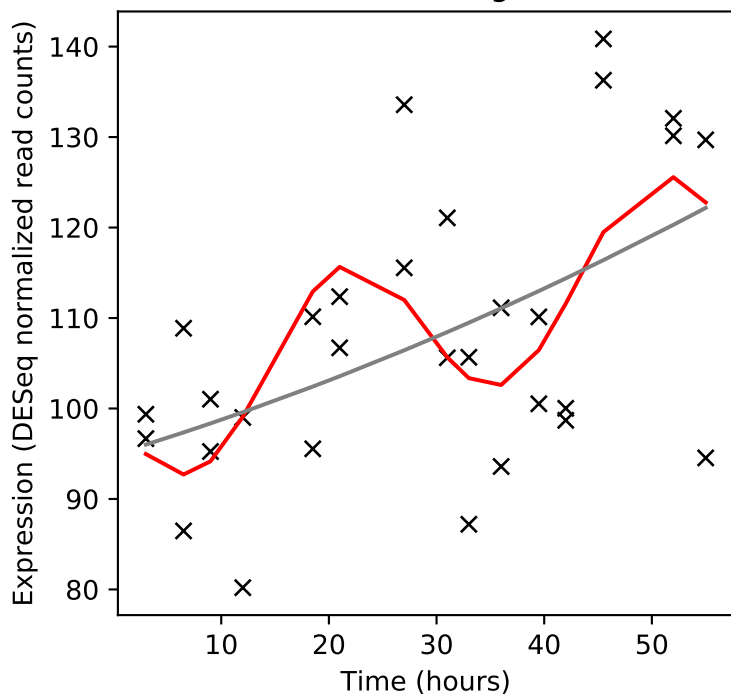

Rv1237/sugB

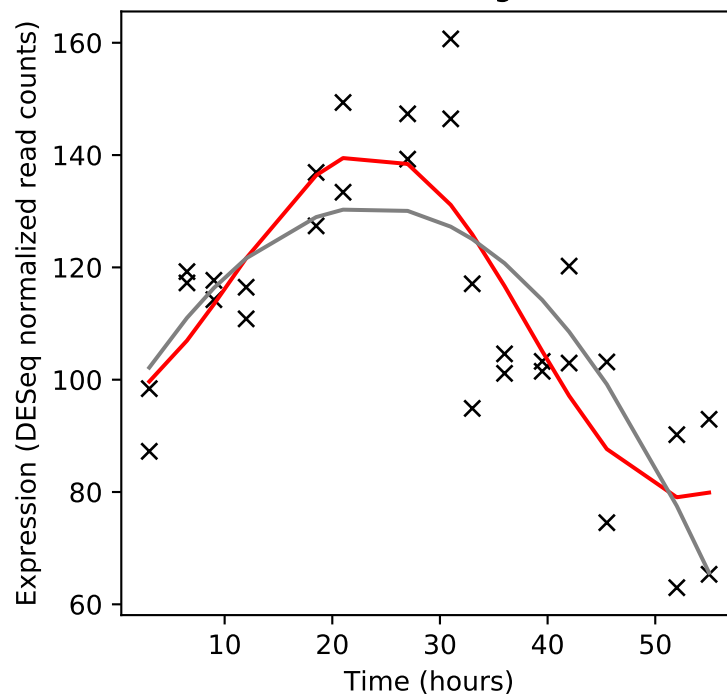

Rv1238/sugC

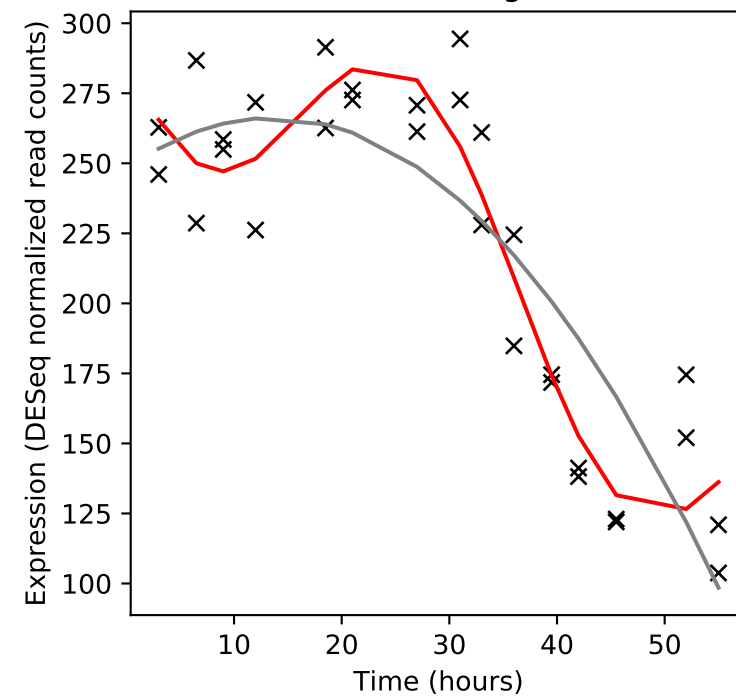

Rv1239c/corA

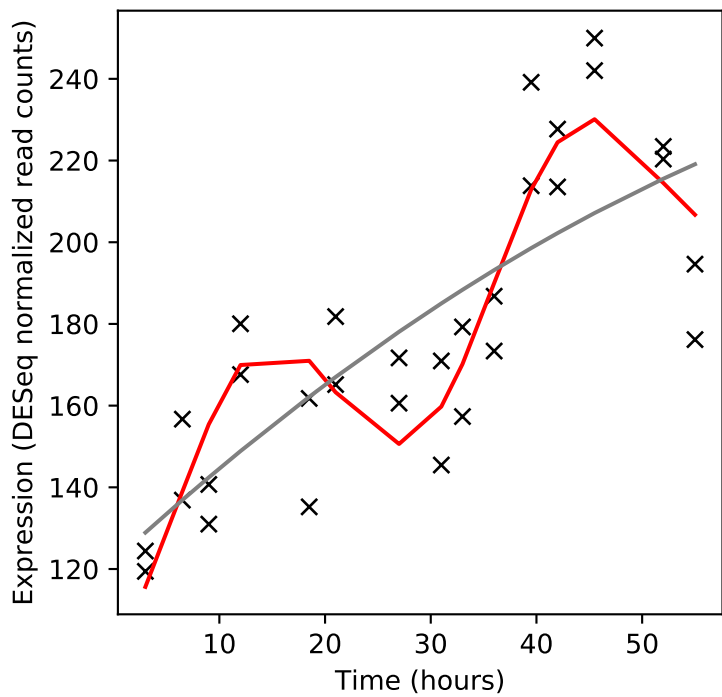

Rv1240/mdh

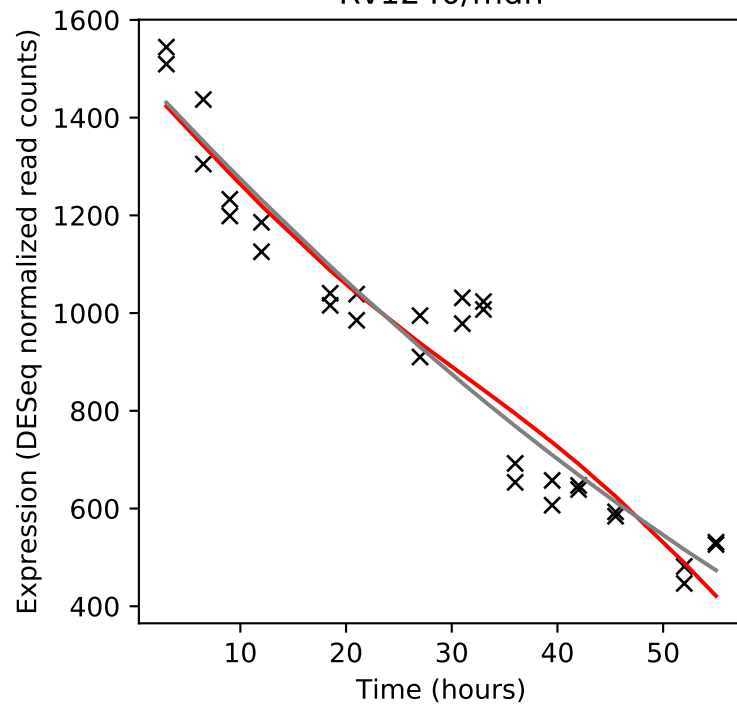

Rv1241/vapB33

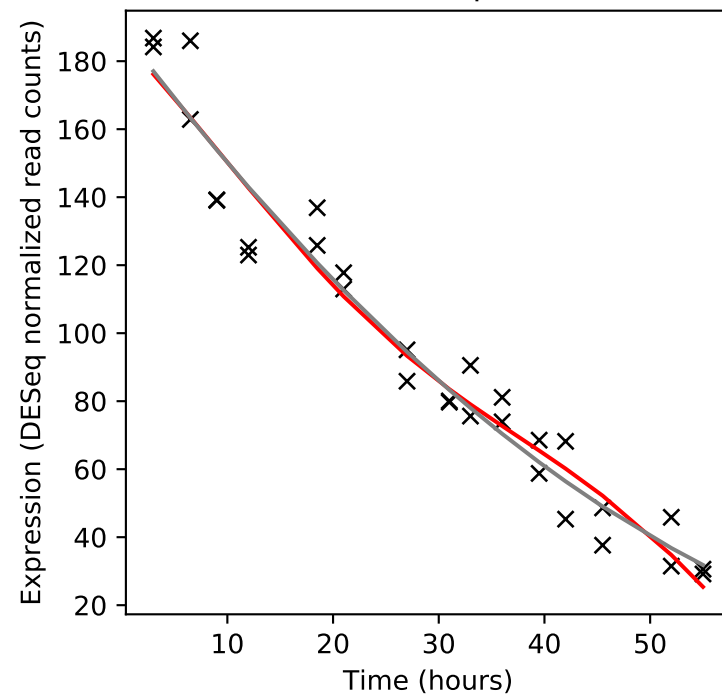

Rv1242/vapC33

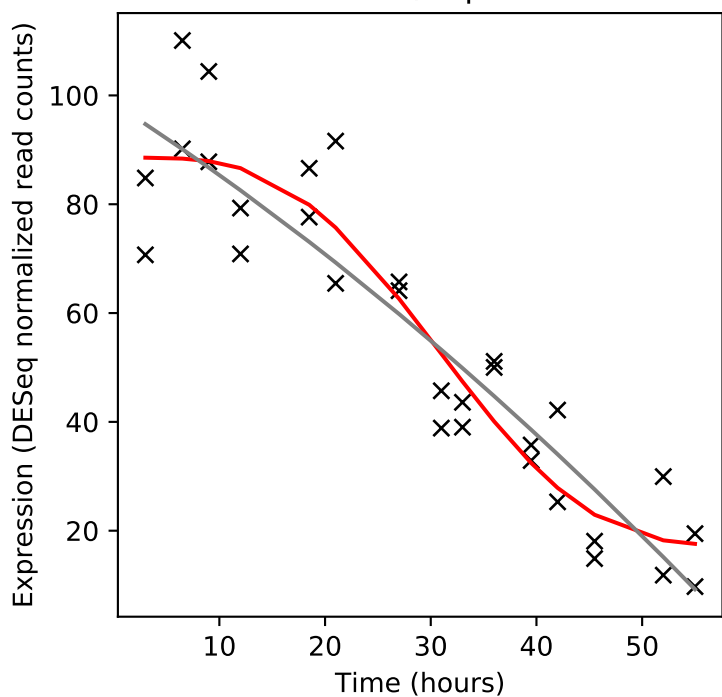

Rv1243c/PE\_PGRS23

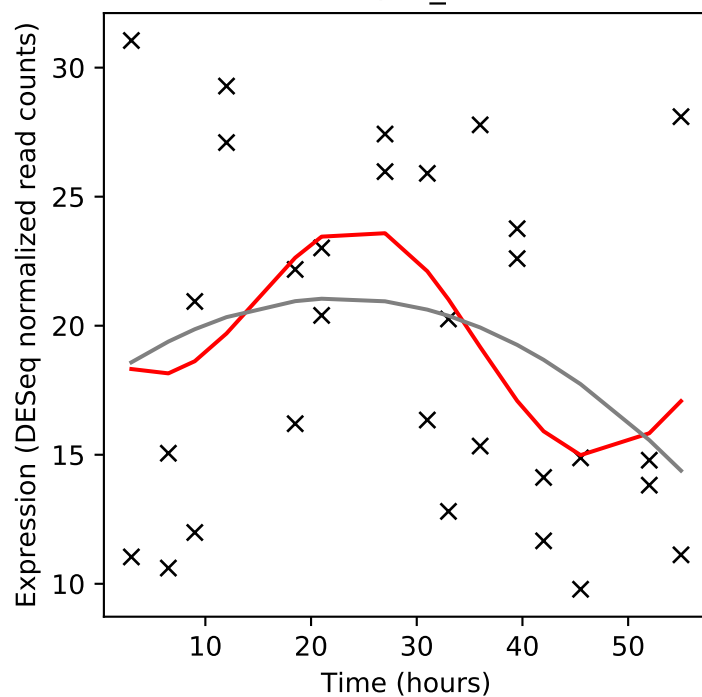

Rv1244/lpqZ

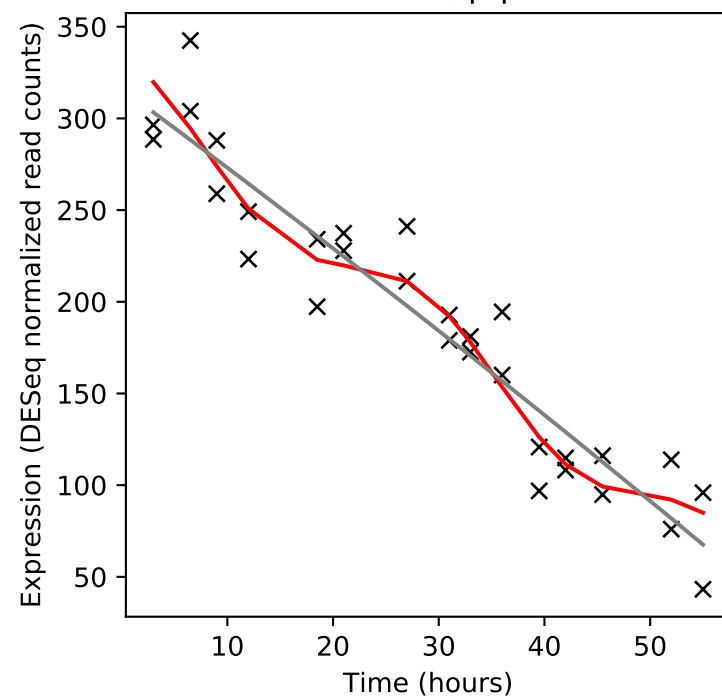

Rv1245c/-

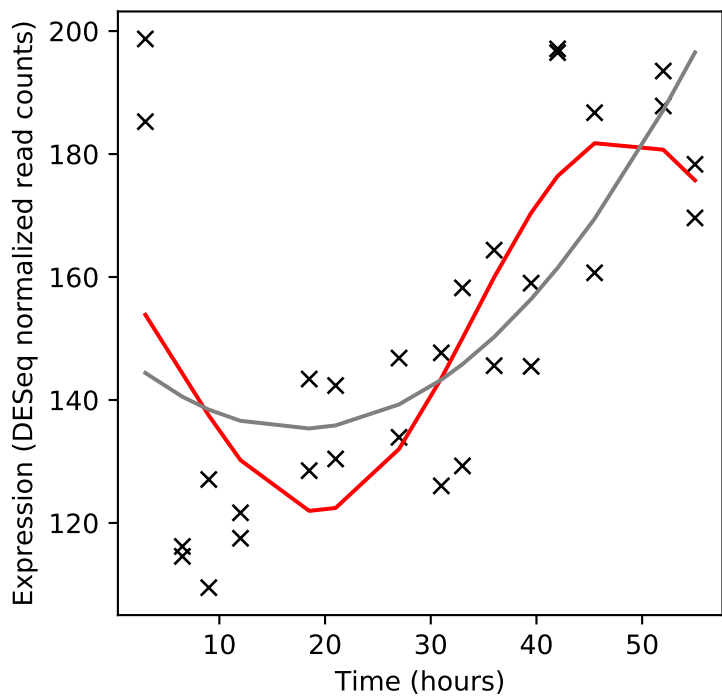

Rv1246c/reIE

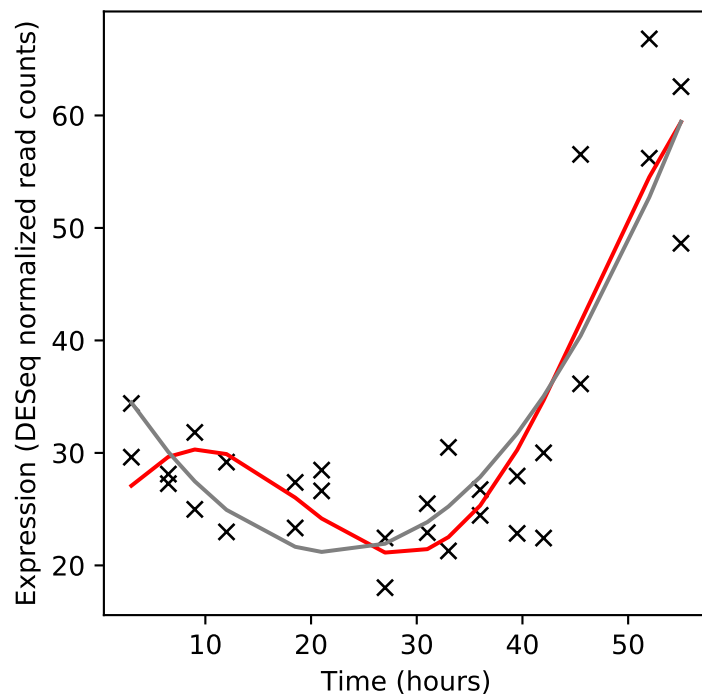

Rv1247c/reIB

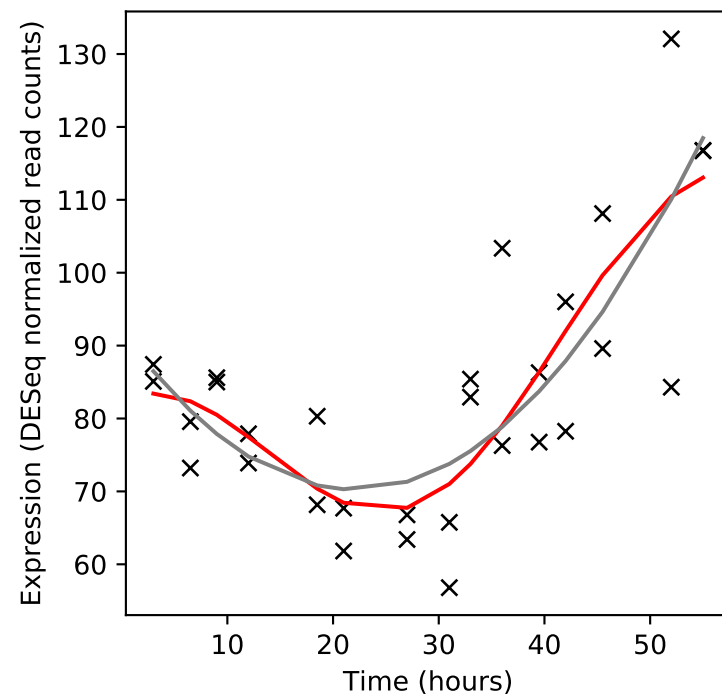



Rv1248c/-

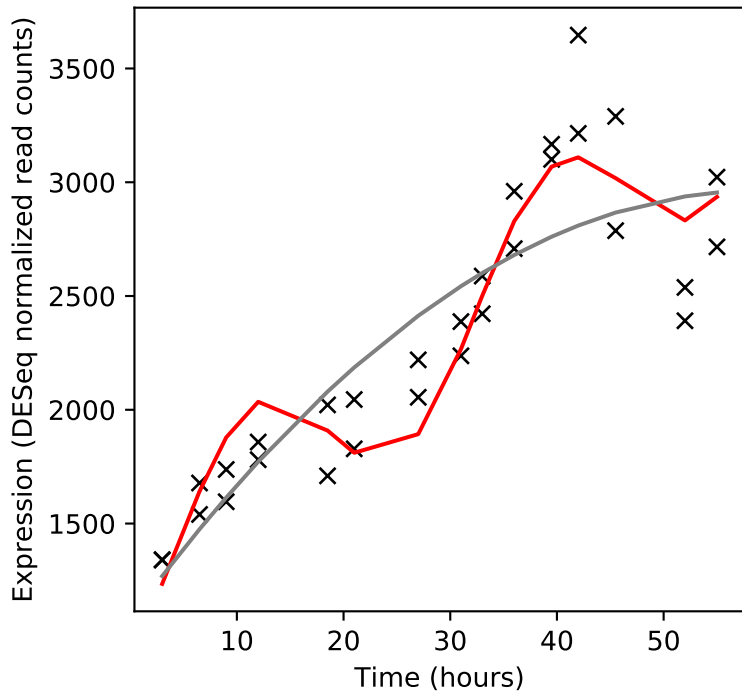

Rv1249c/-

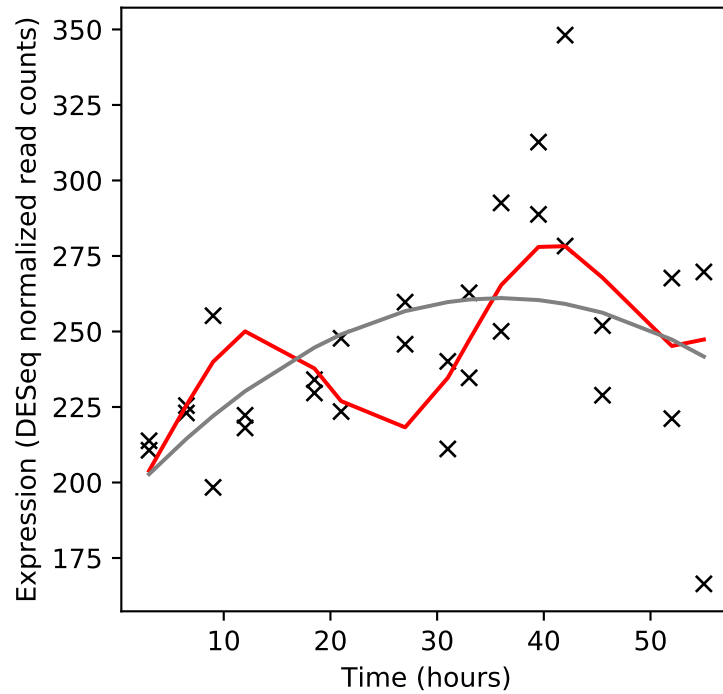

Rv1250/-

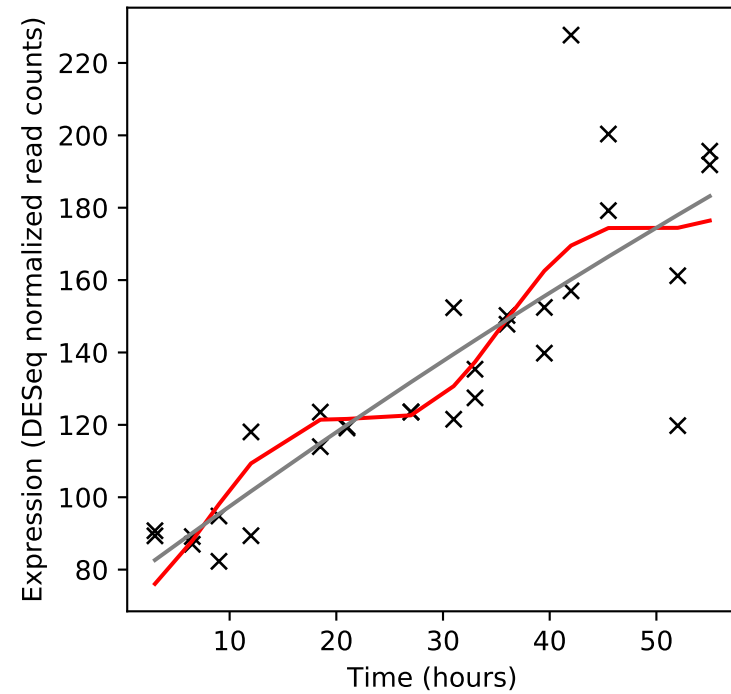

Rv1251c/-

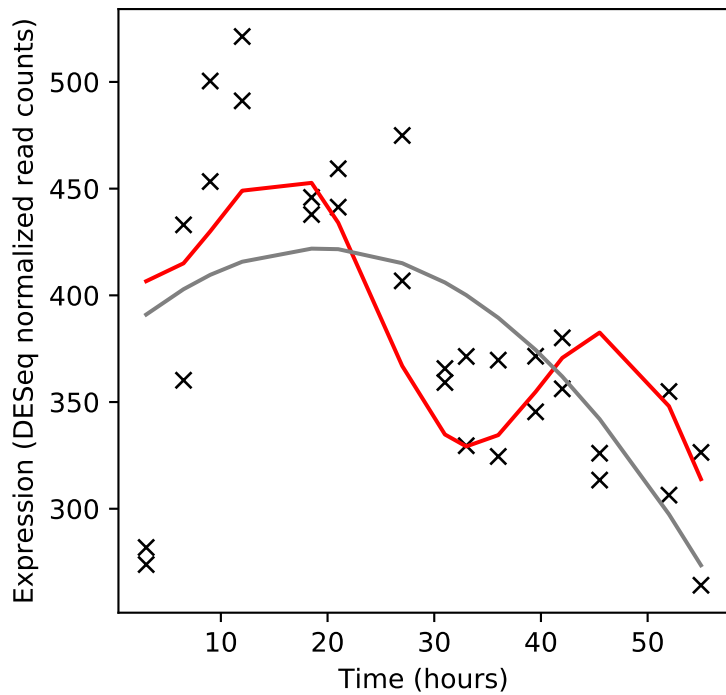

Rv1252c/lprE

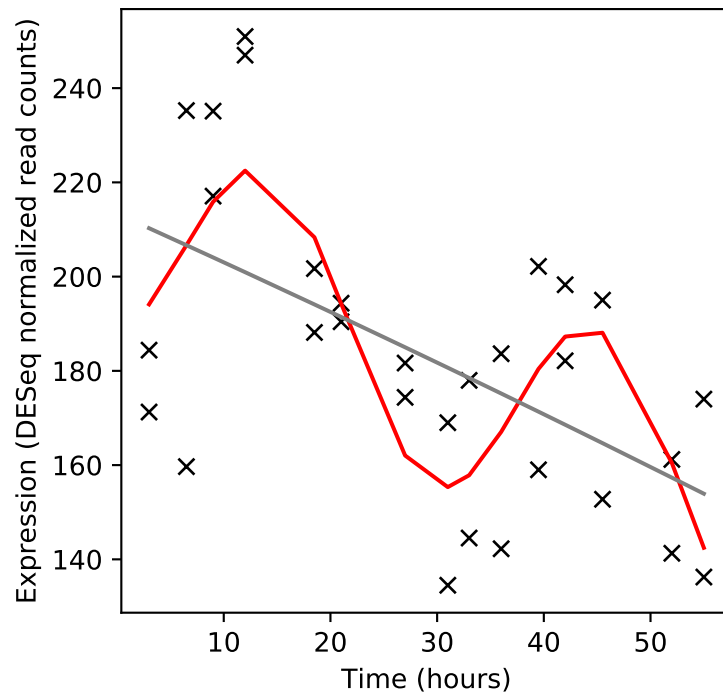

Rv1253/deaD

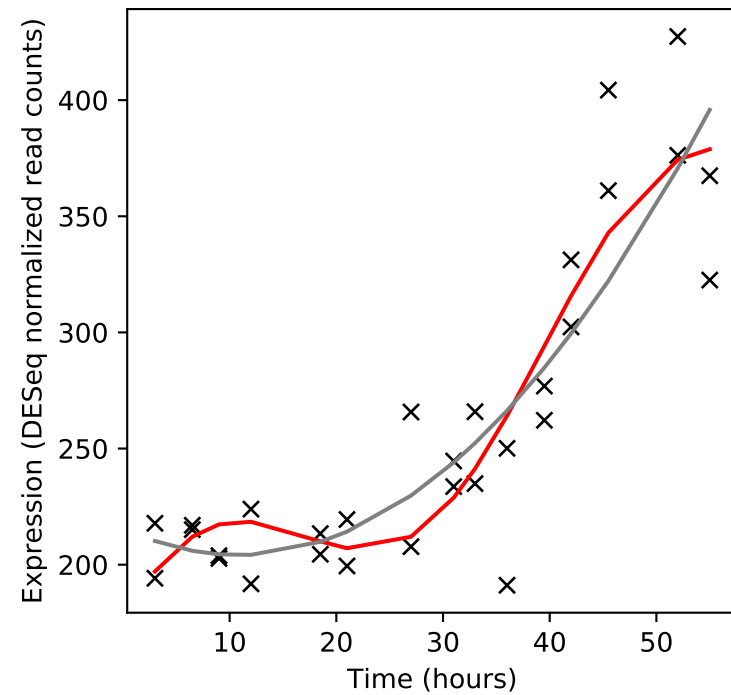

Rv1254/-

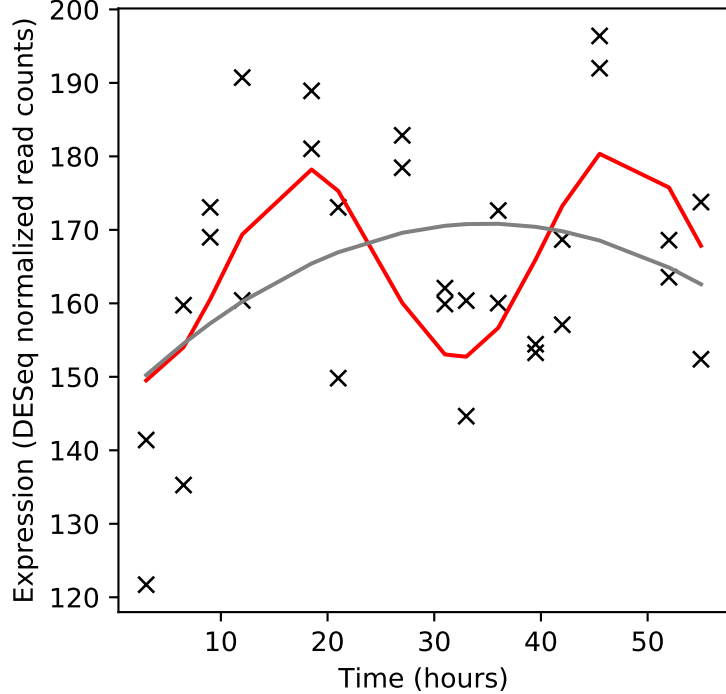

Rv1255c/-

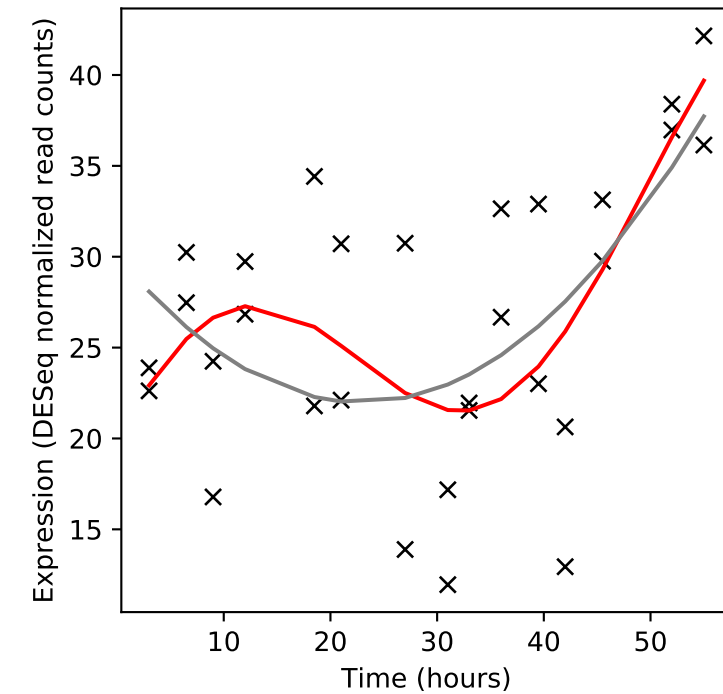

Rv1256c/cyp130

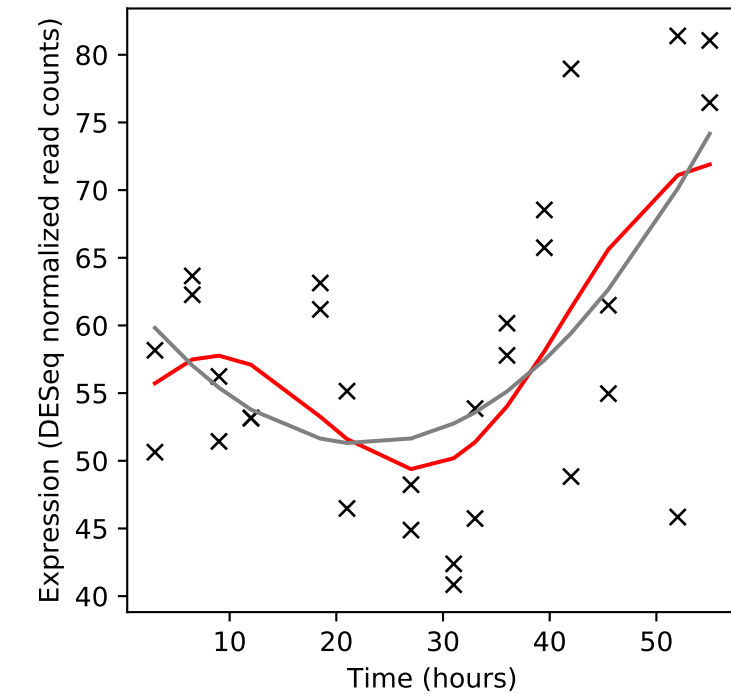

Rv1257c/-

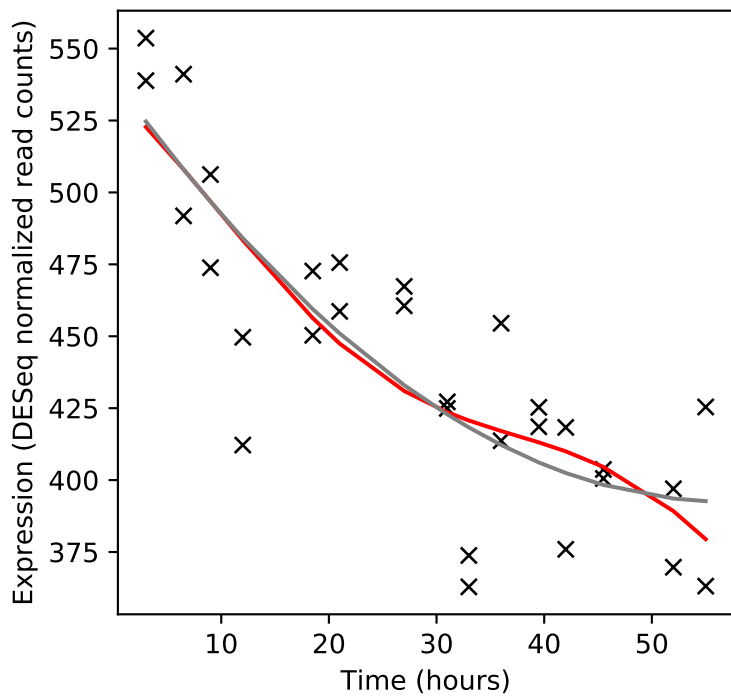

Rv1258c/-

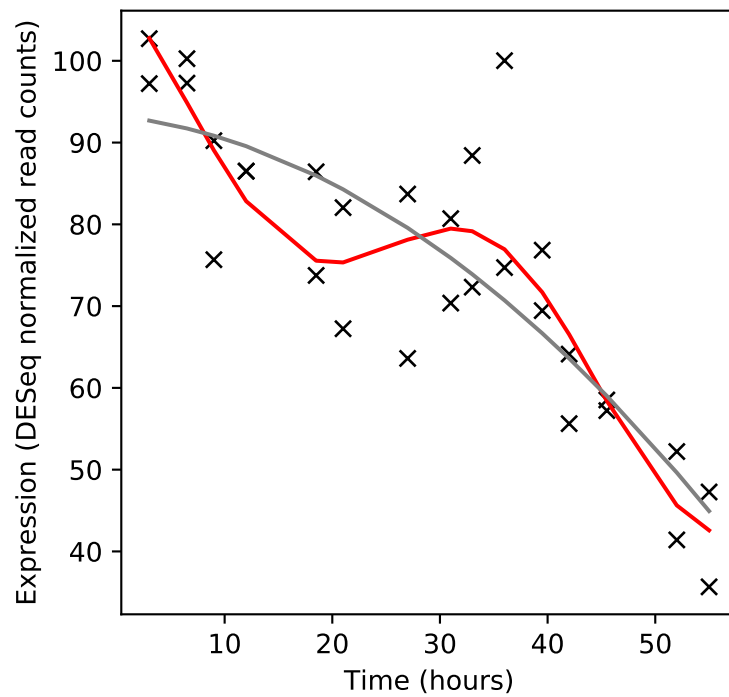

Rv1259/udgB

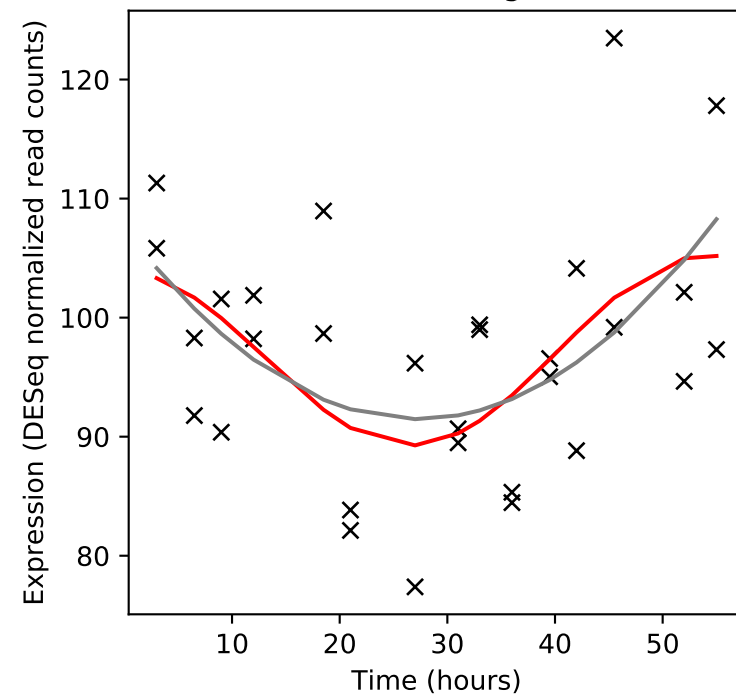

Rv1260/-

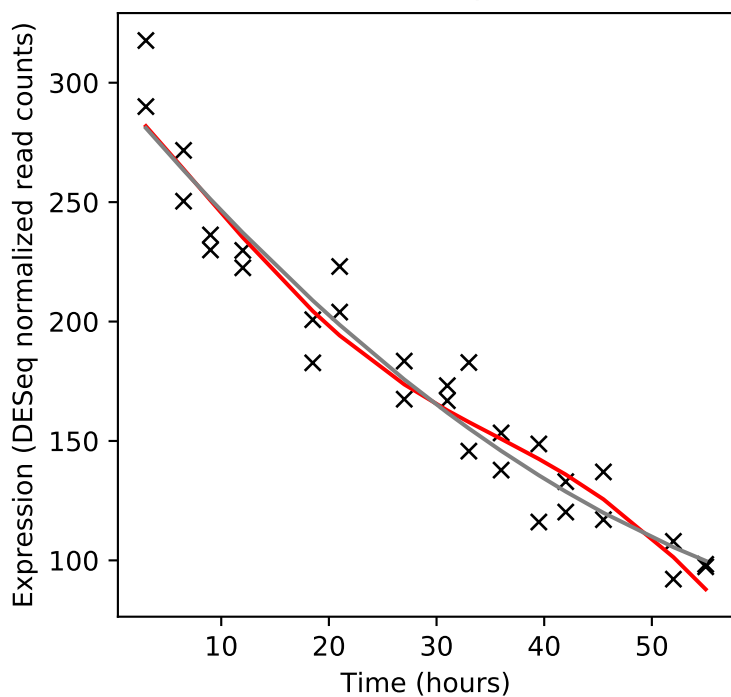

Rv1261c/-

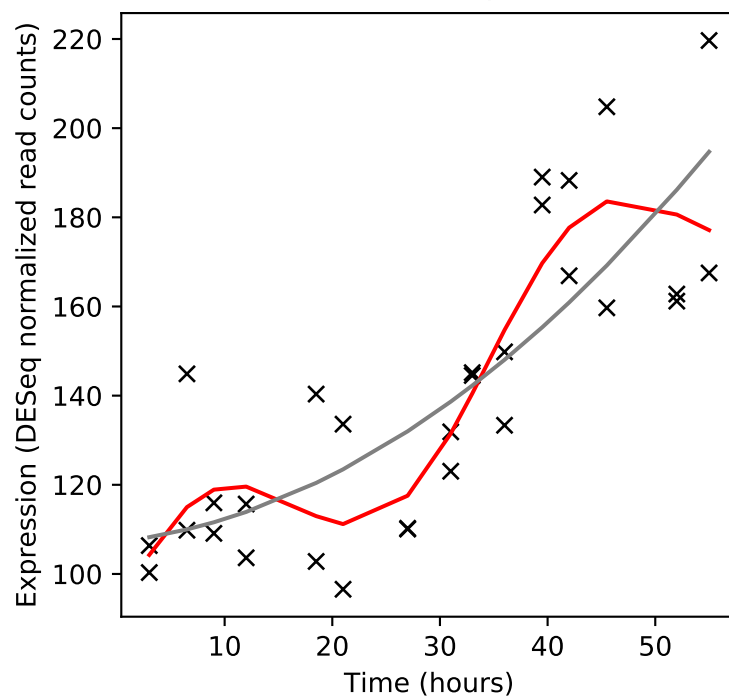

Rv1262c/-

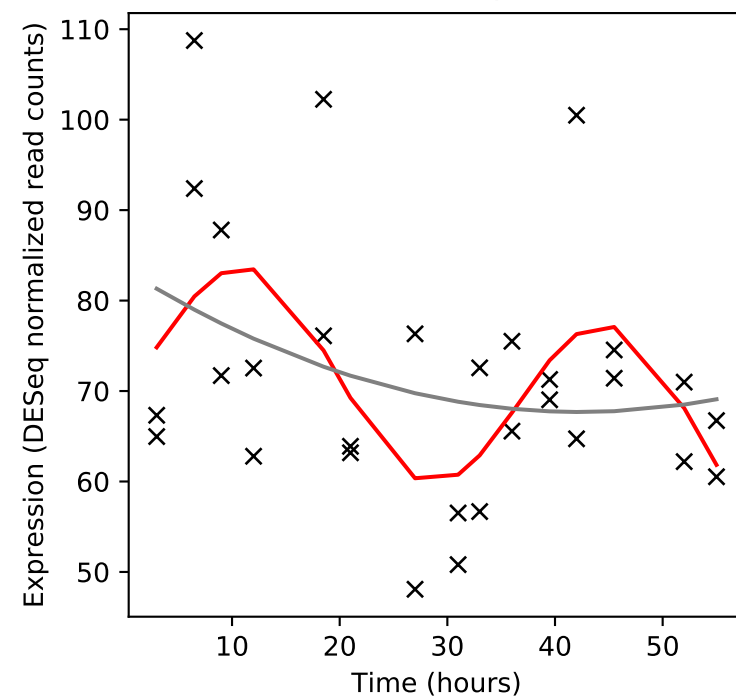

Rv1263/amiB2

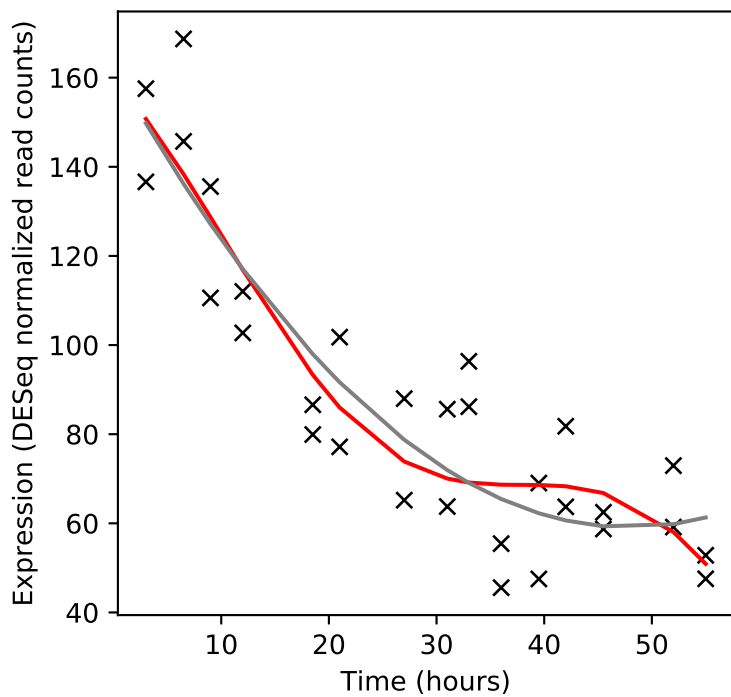

Rv1264/-

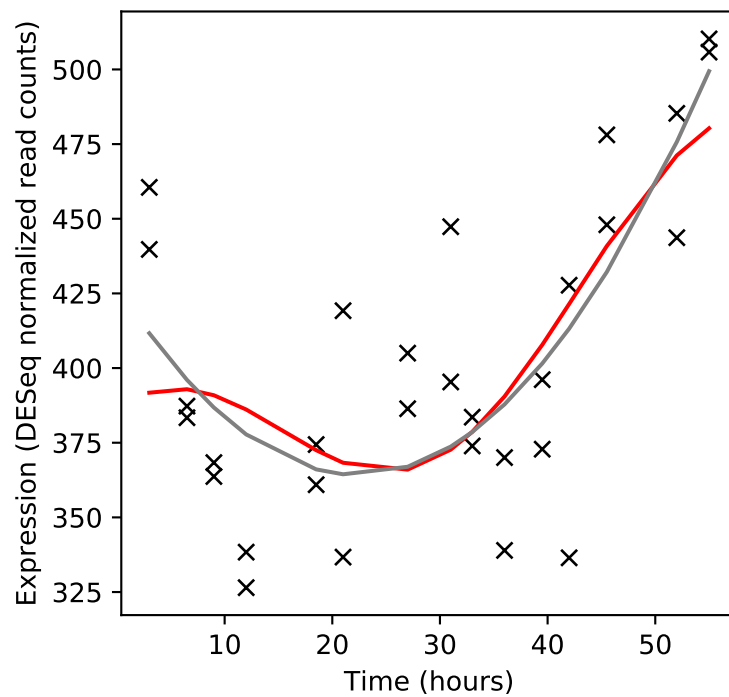

Rv1265/-

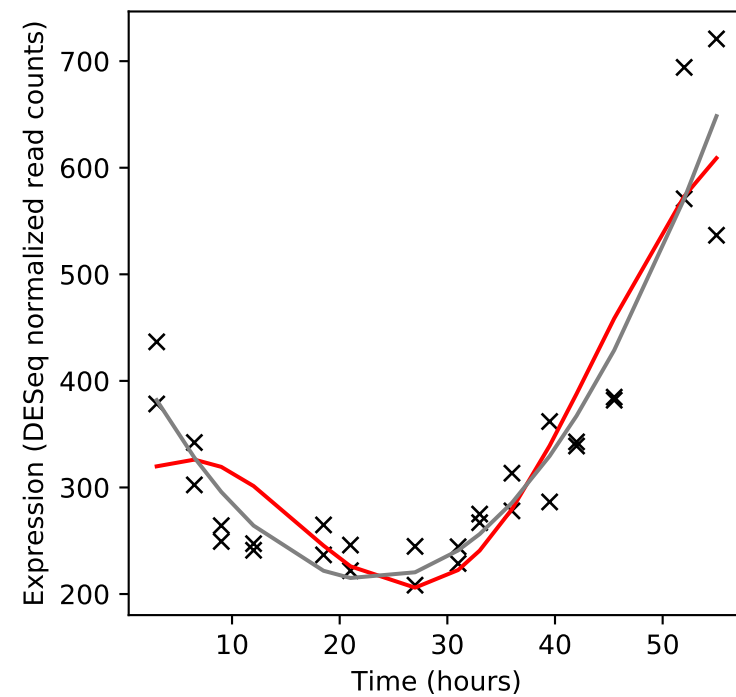

Rv1266c/pknH

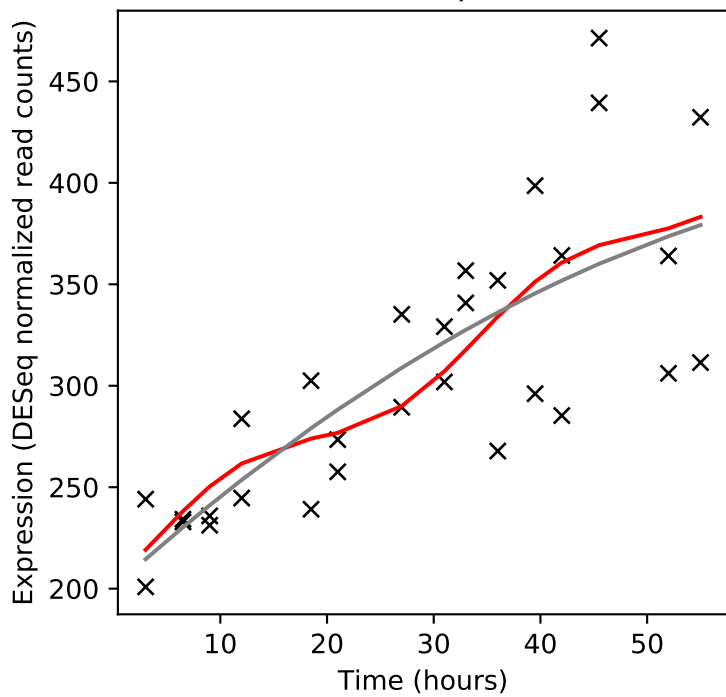

Rv1267c/embR

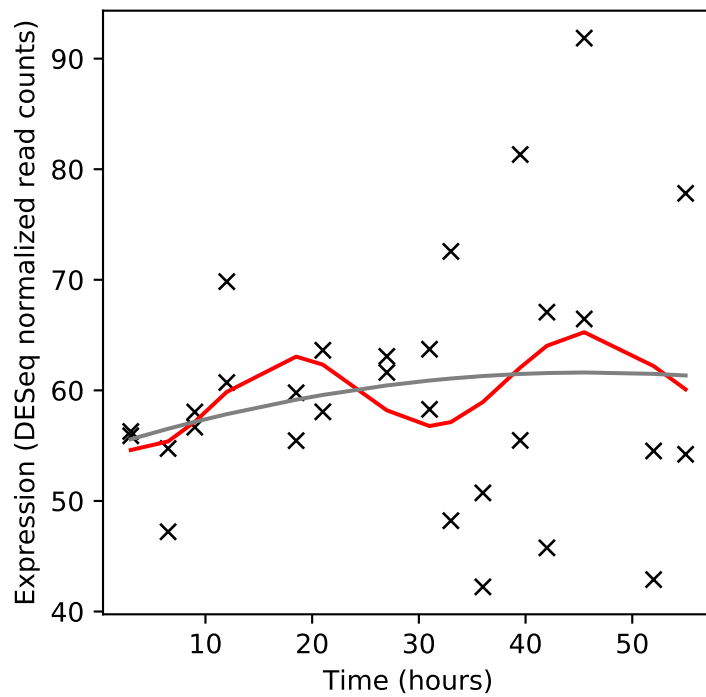

Rv1268c/-

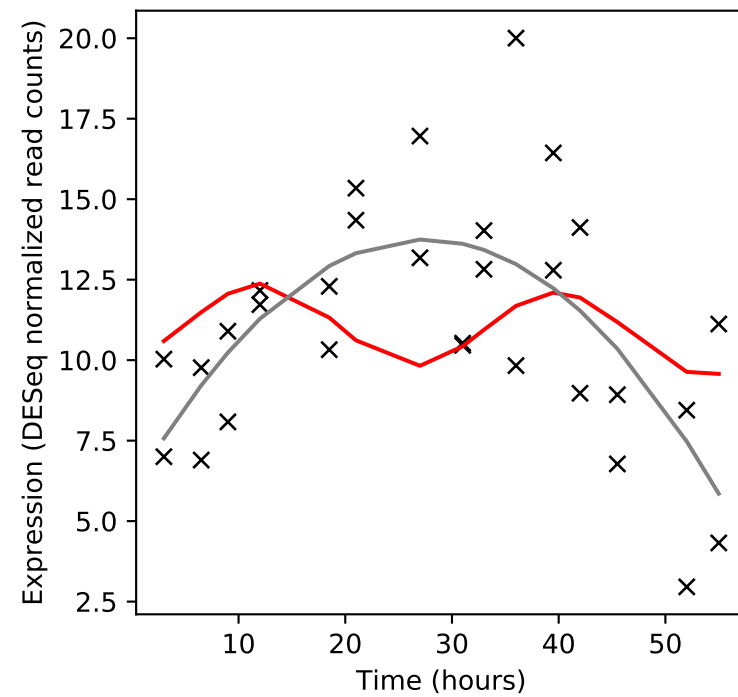

Rv1269c/-

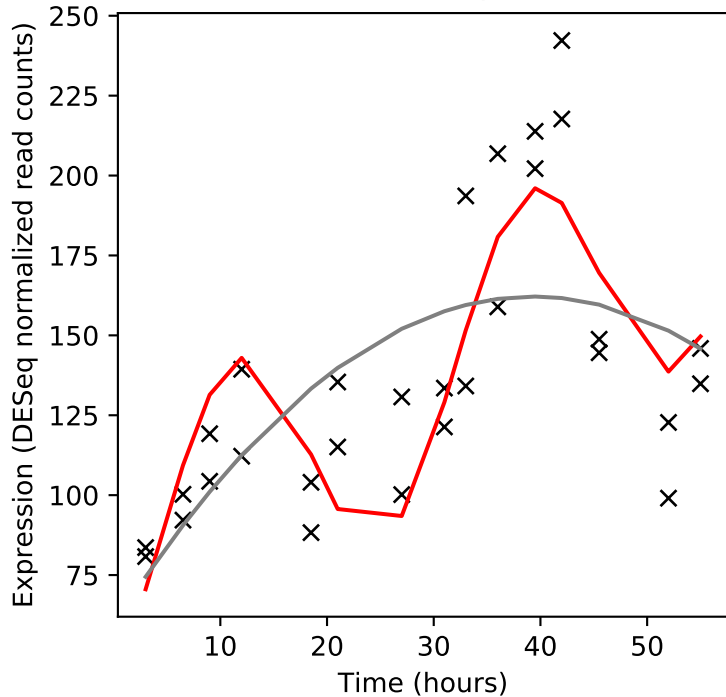

Rv1270c/lprA

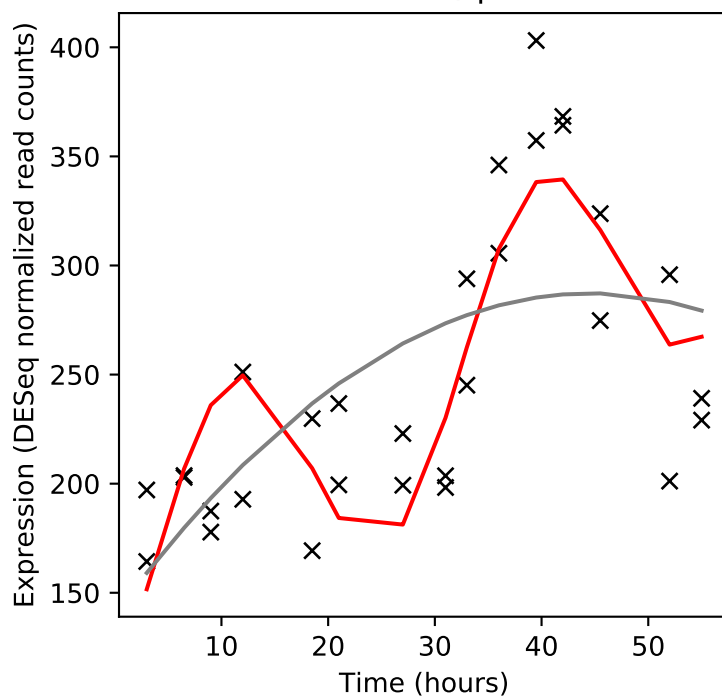

Rv1271c/-

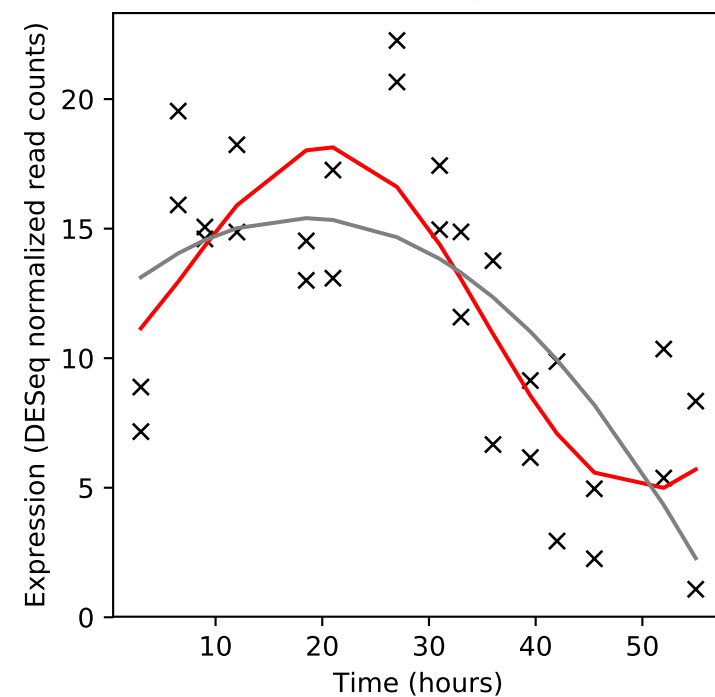

Rv1272c/-

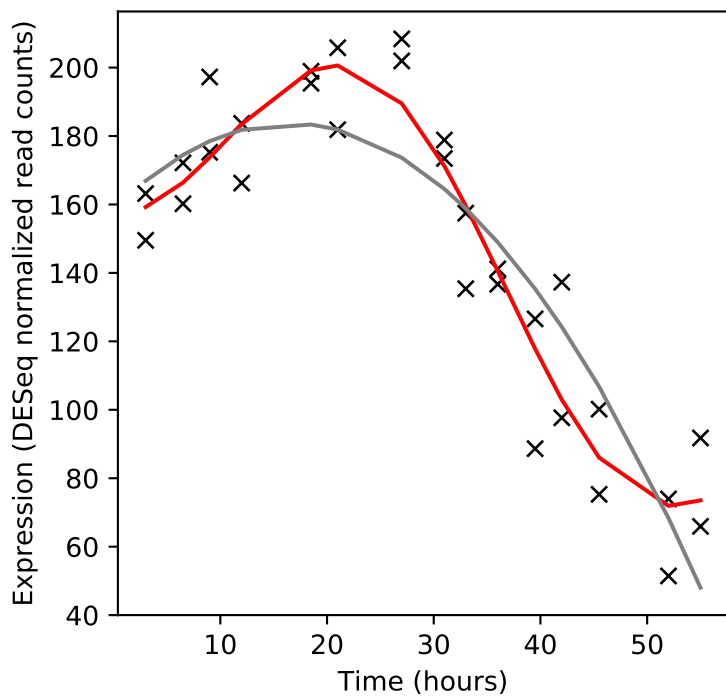

Rv1273c/-

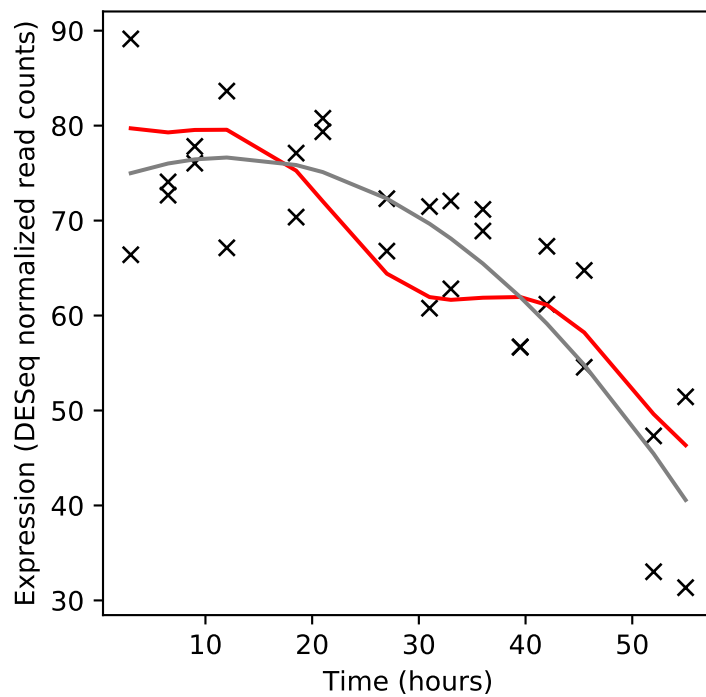

Rv1274/lprB

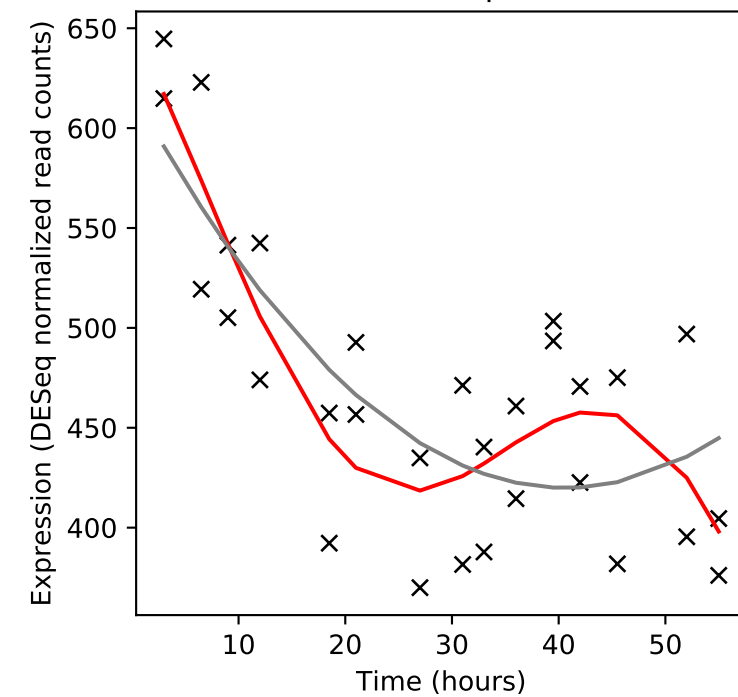

Rv1275/lprC

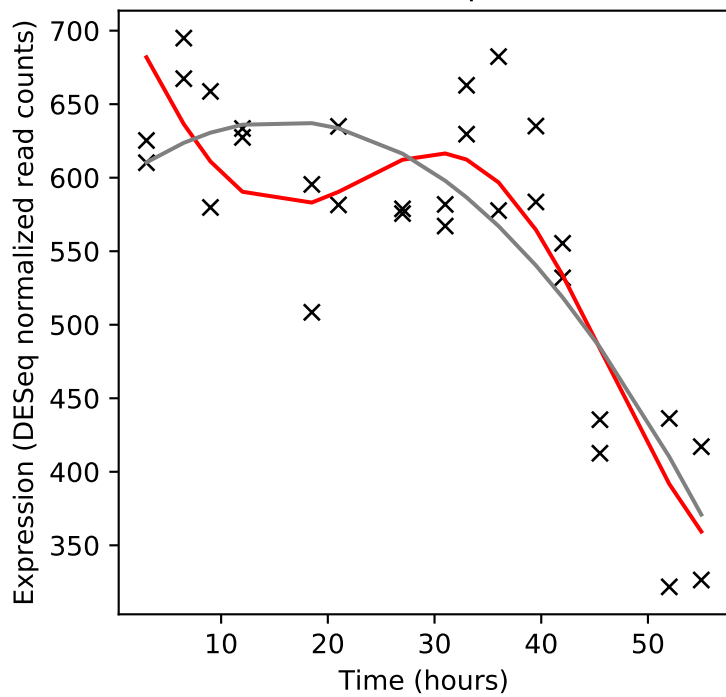

Rv1276c/-

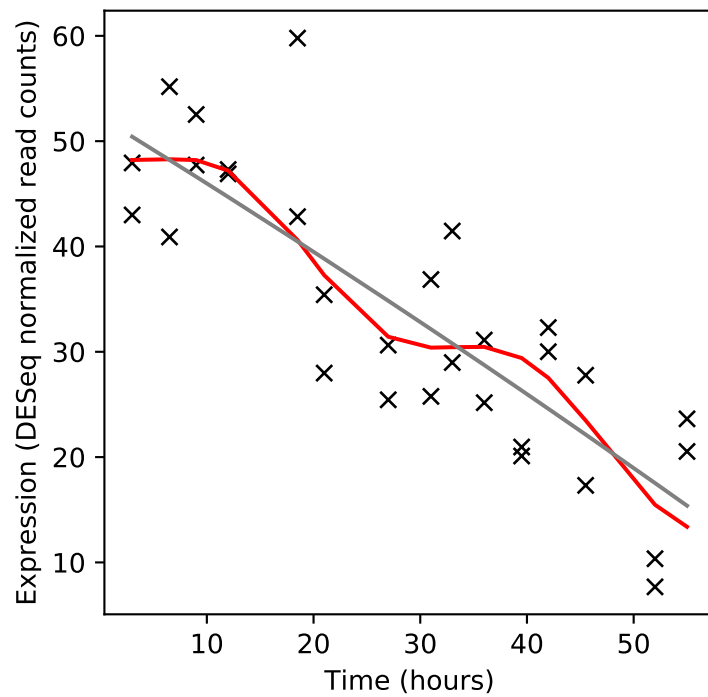

Rv1277/-

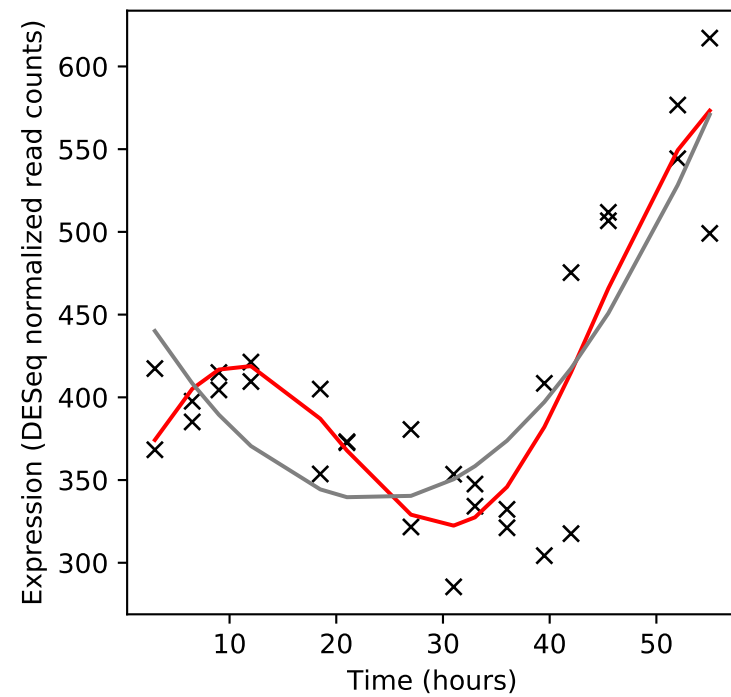

Rv1278/-

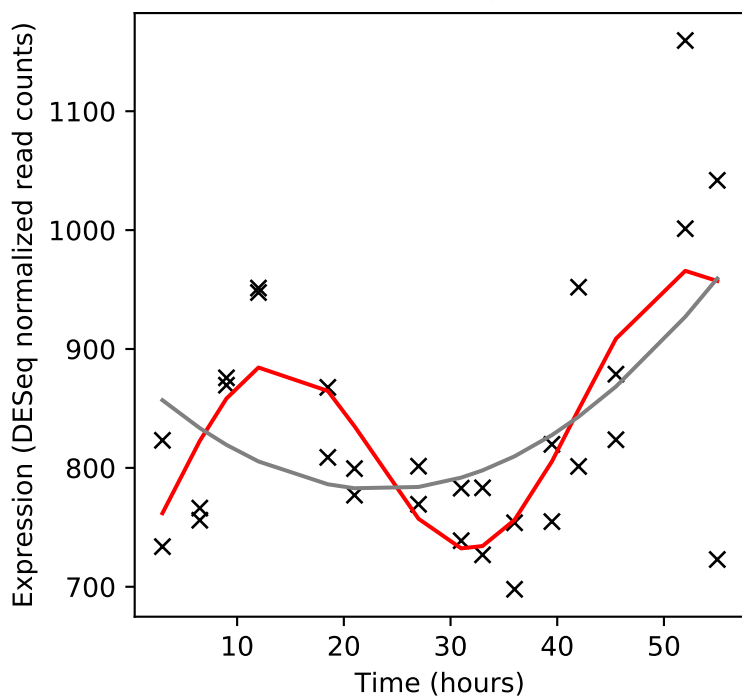

Rv1279/-

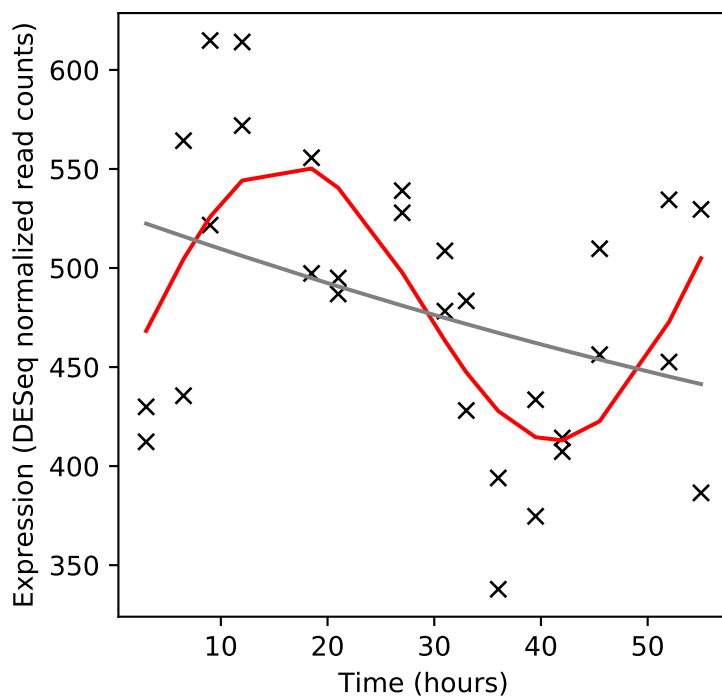

Rv1280c/oppA

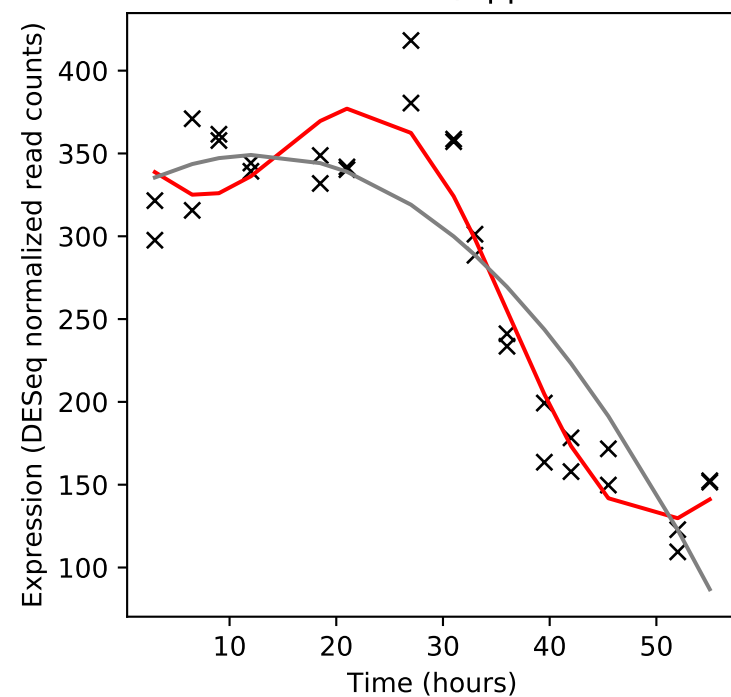

Rv1281c/oppD

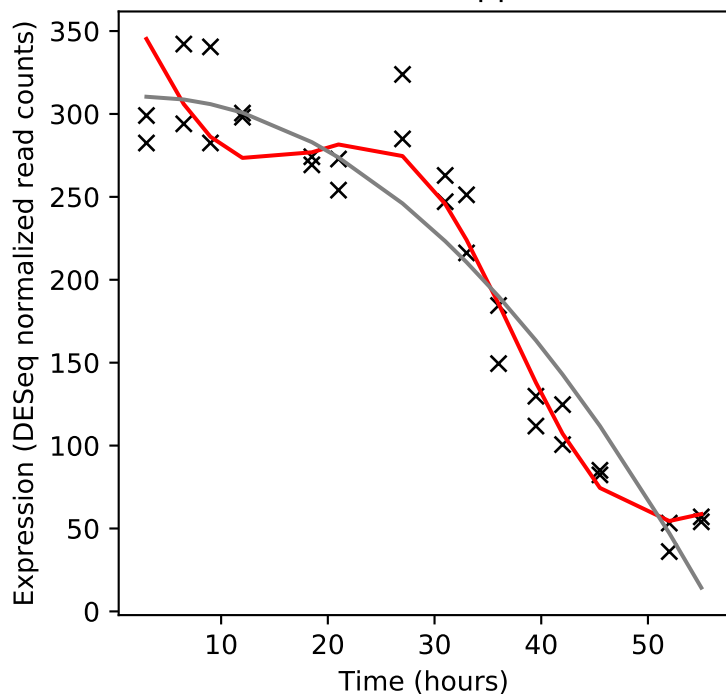

Rv1282c/oppC

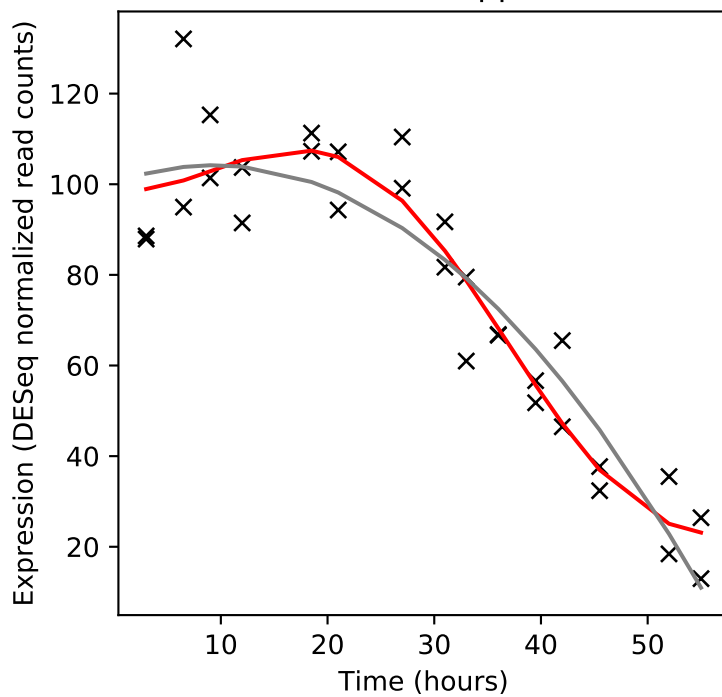

Rv1283c/oppB

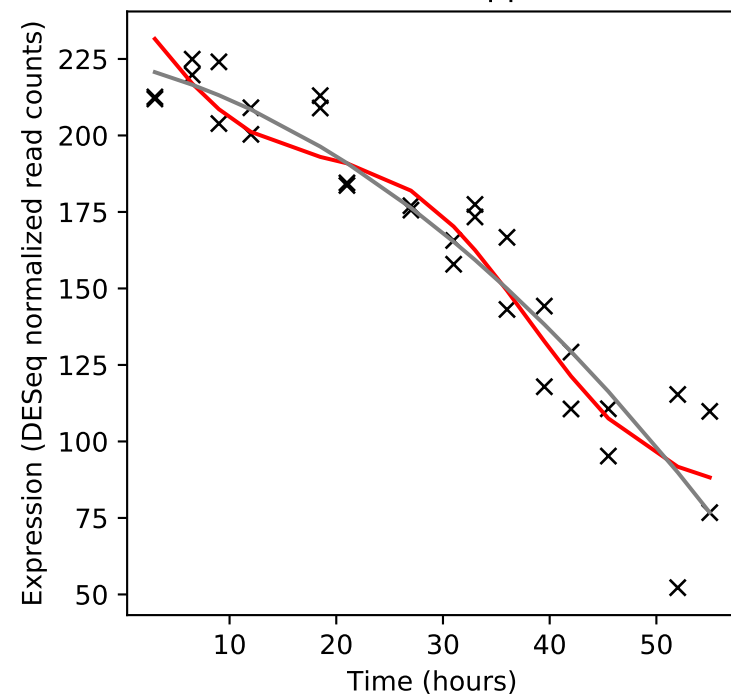

Rv1284/canA

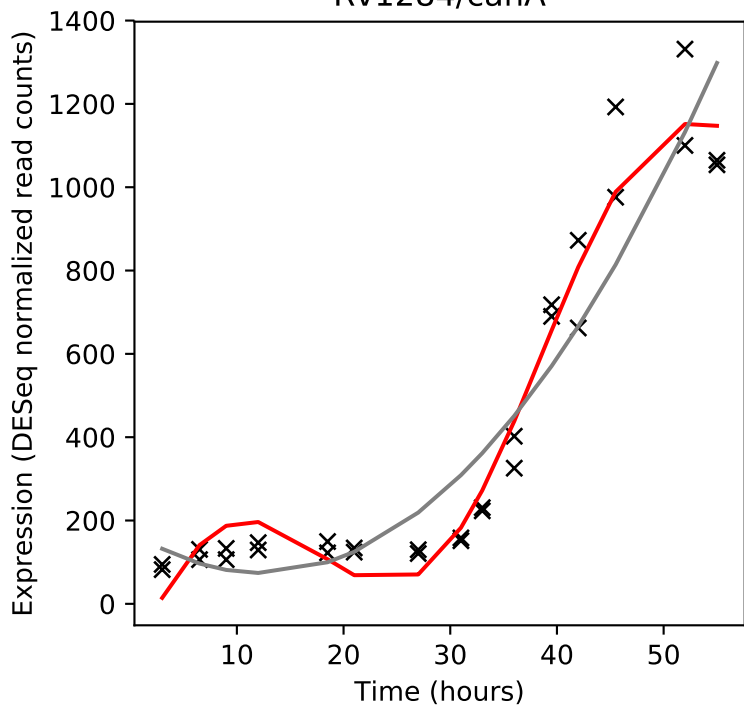

Rv1285/cysD

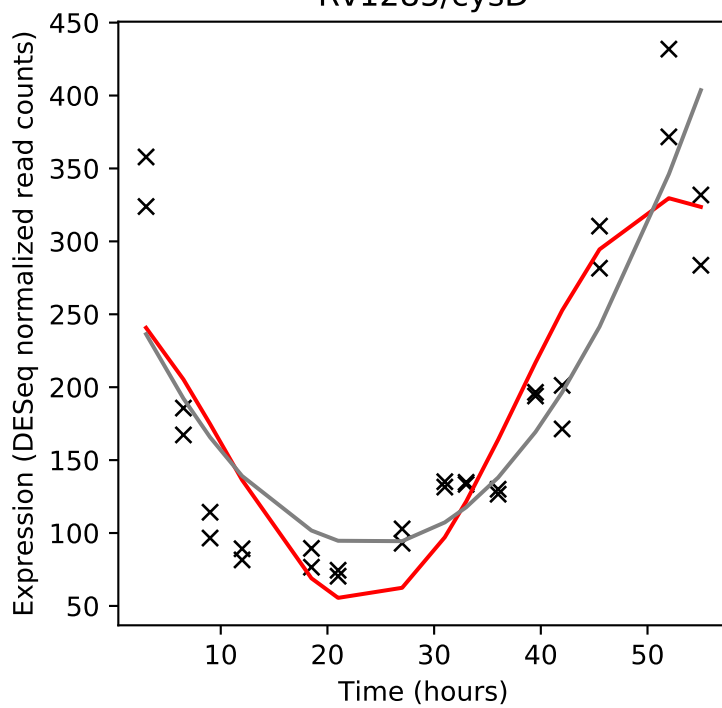

Rv1286/cysN

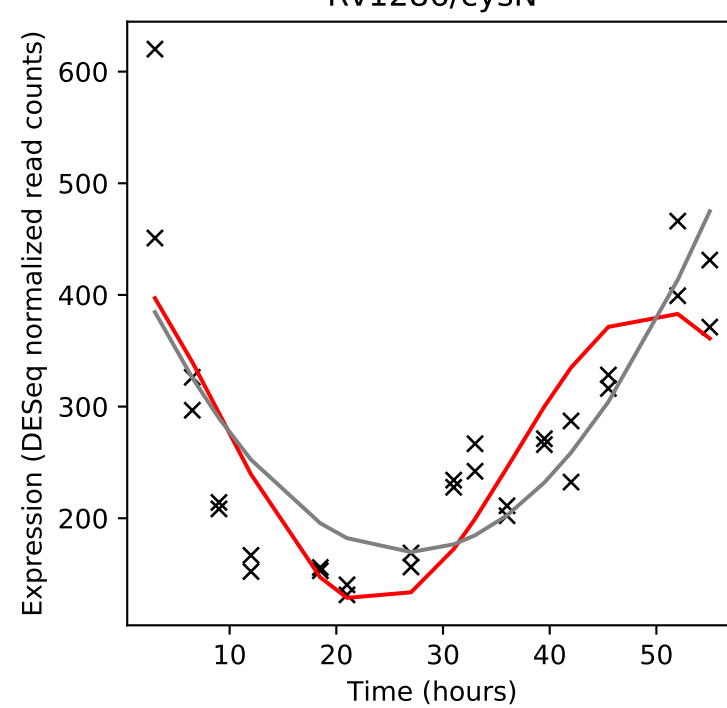

Rv1287/-

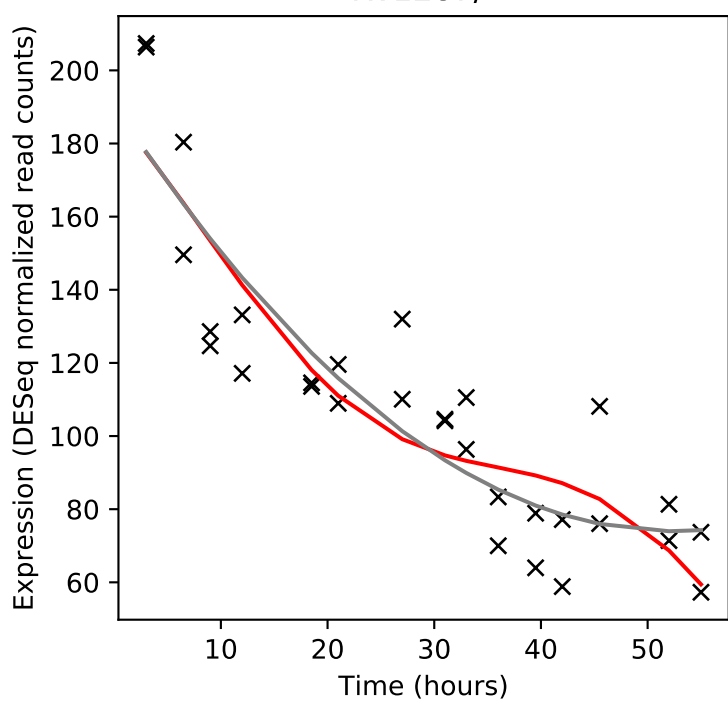

Rv1288/-

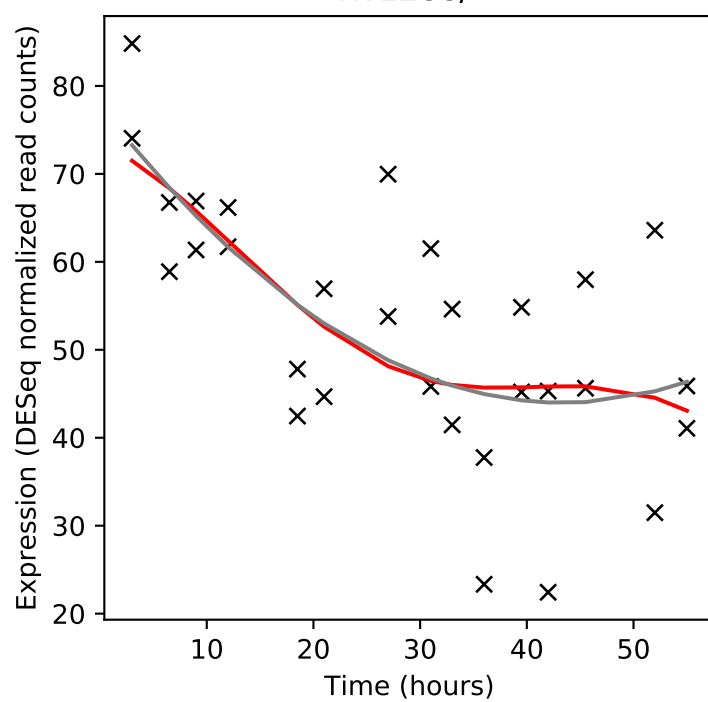

Rv1289/-

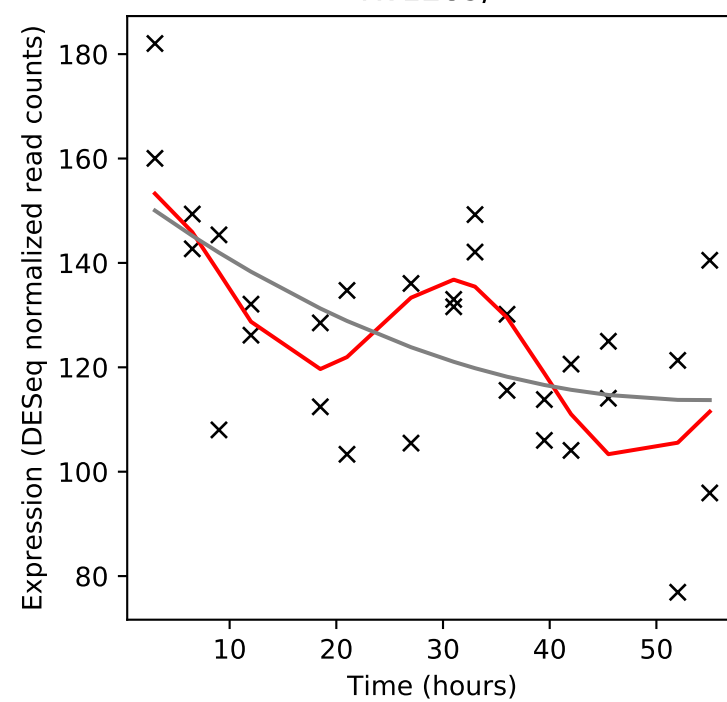

Rv1290c/-

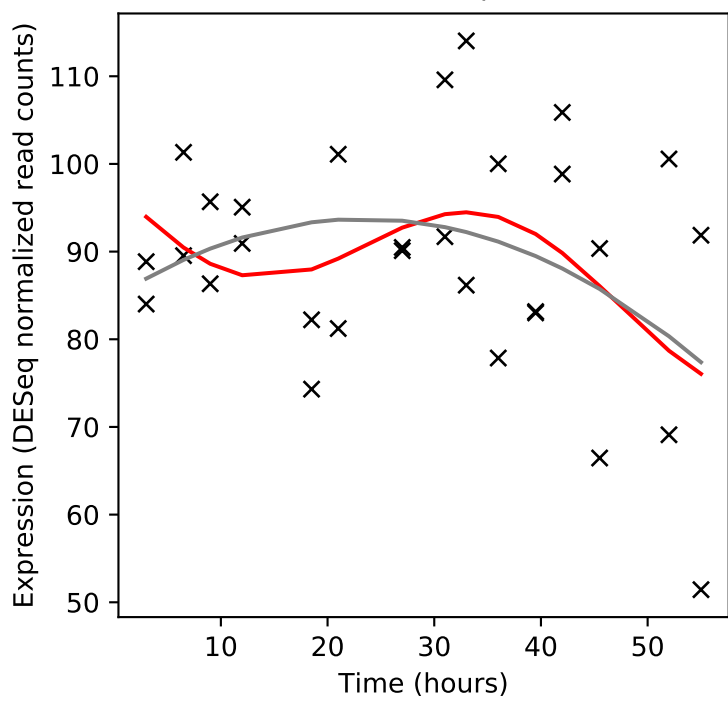

Rv1290A/-

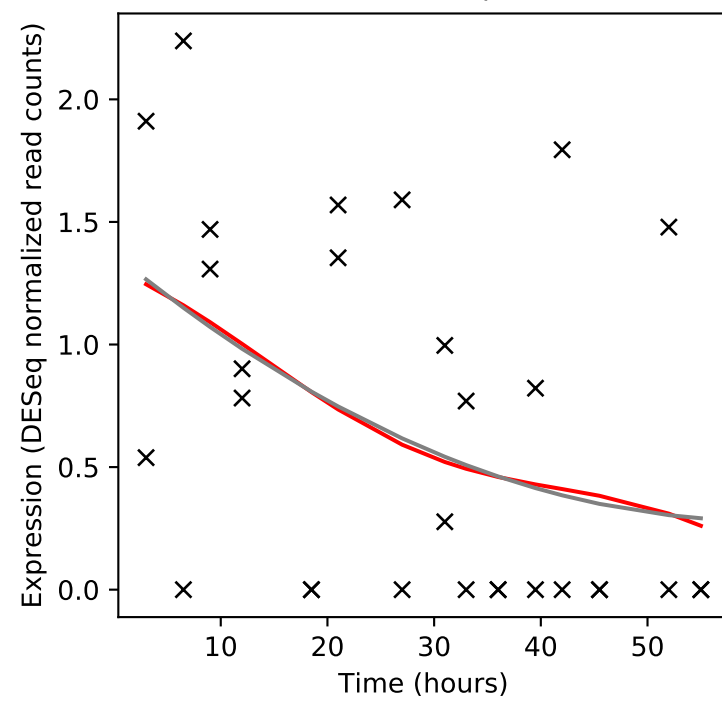

Rv1291c/-

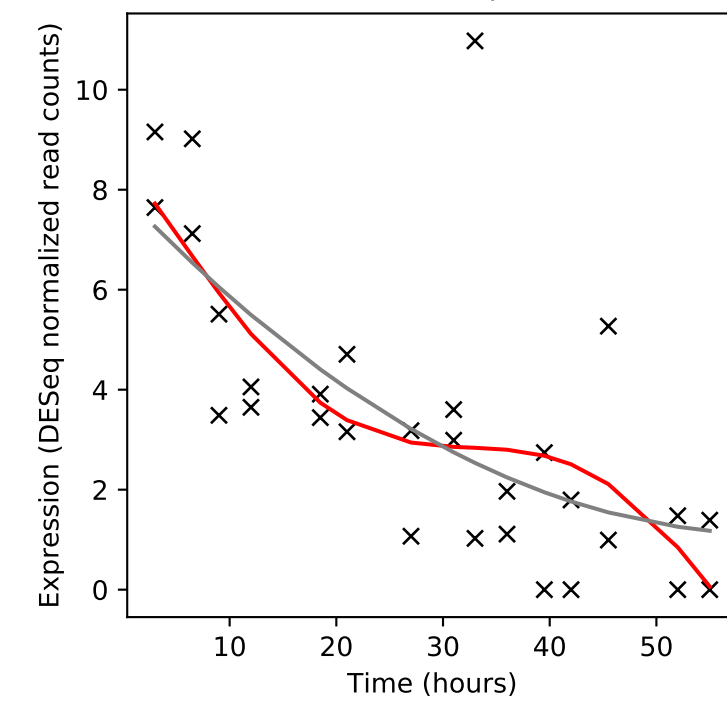

Rv1292/argS

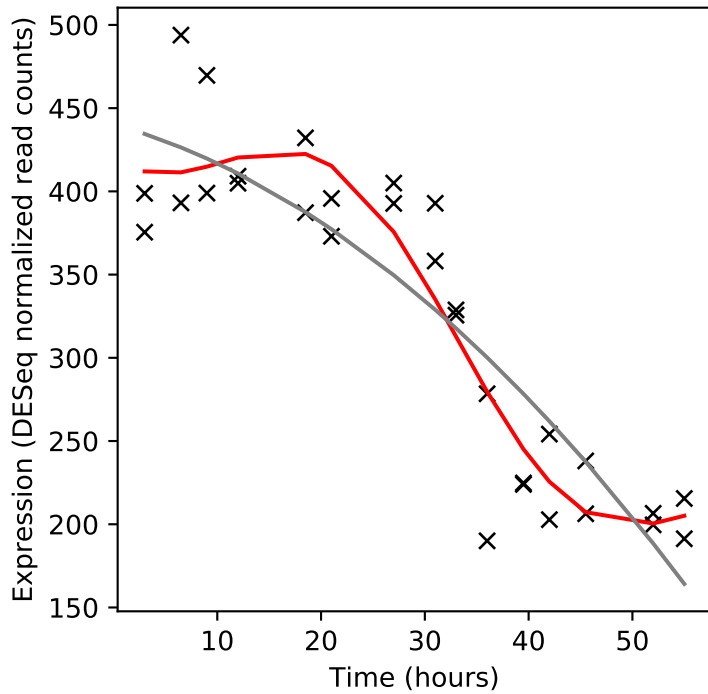

Rv1293/lysA

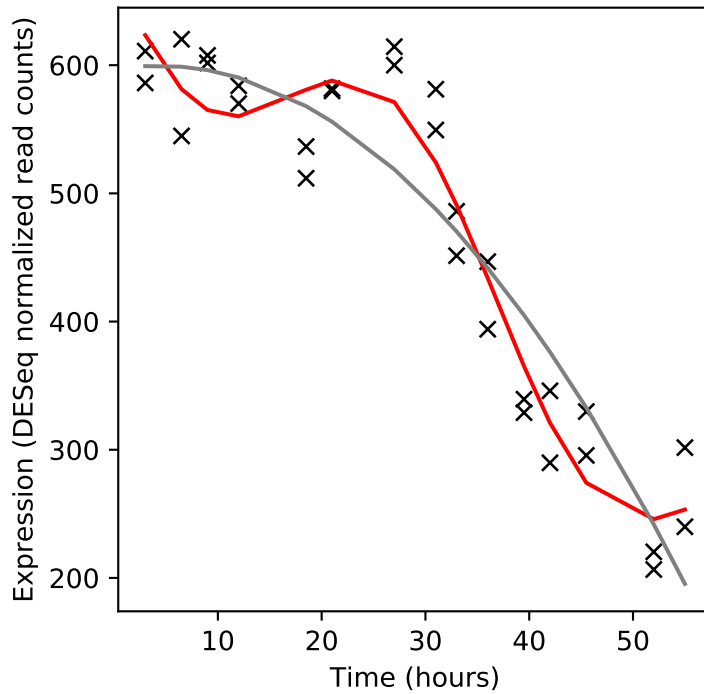

Rv1294/thrA

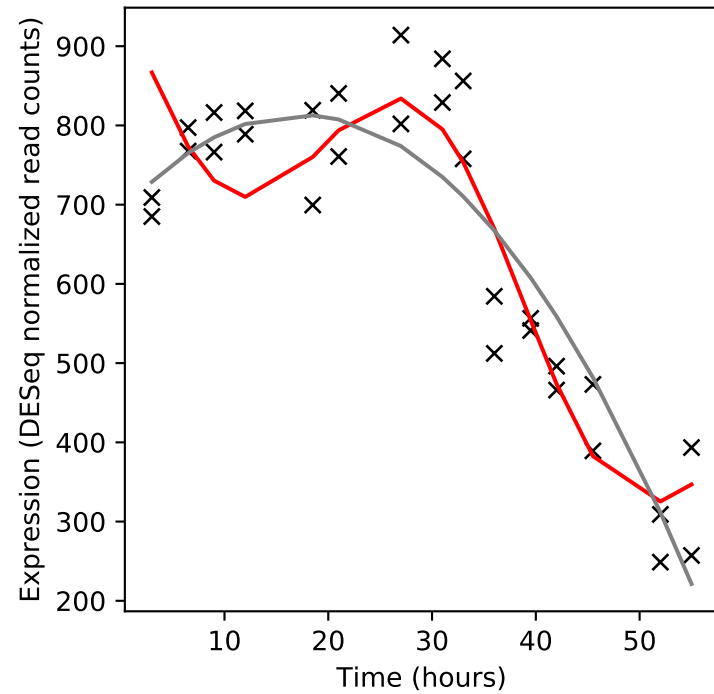

Rv1295/thrC

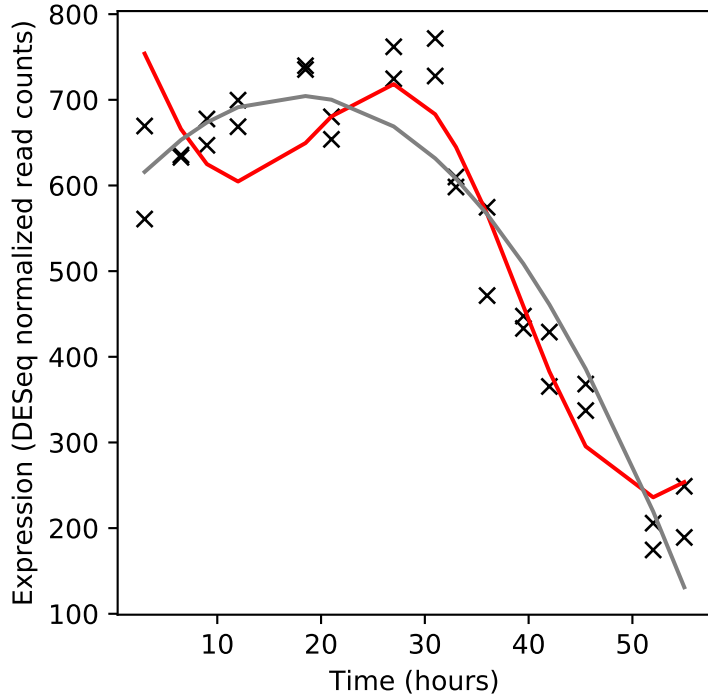

Rv1296/thrB

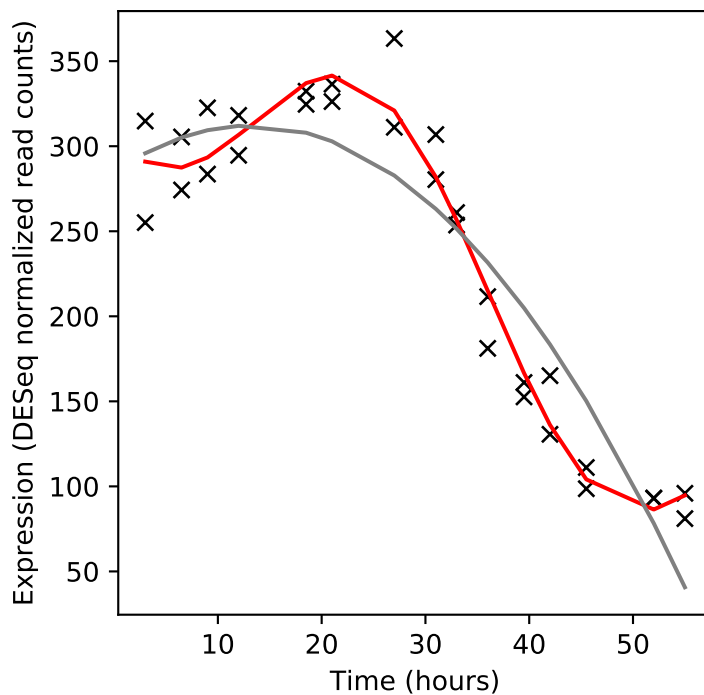

Rv1297/rho

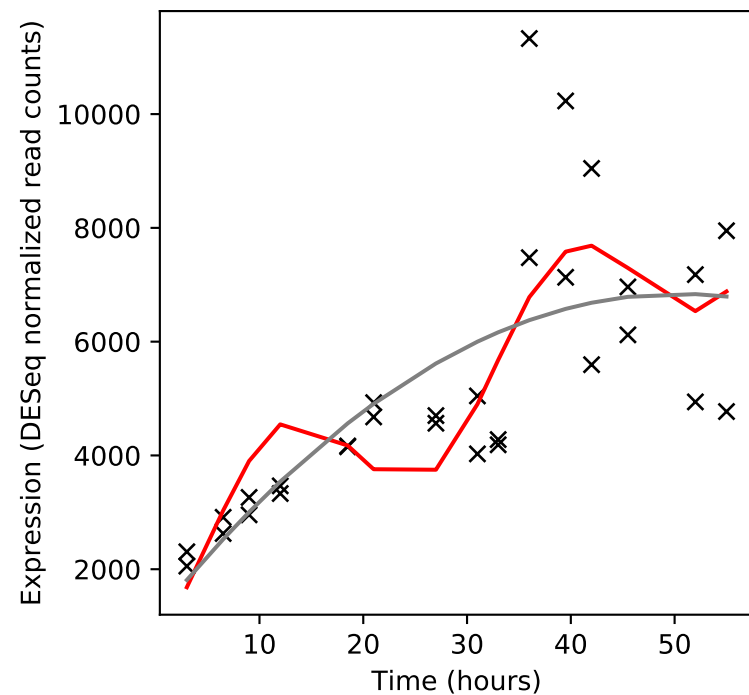

Rv1298/rpmE

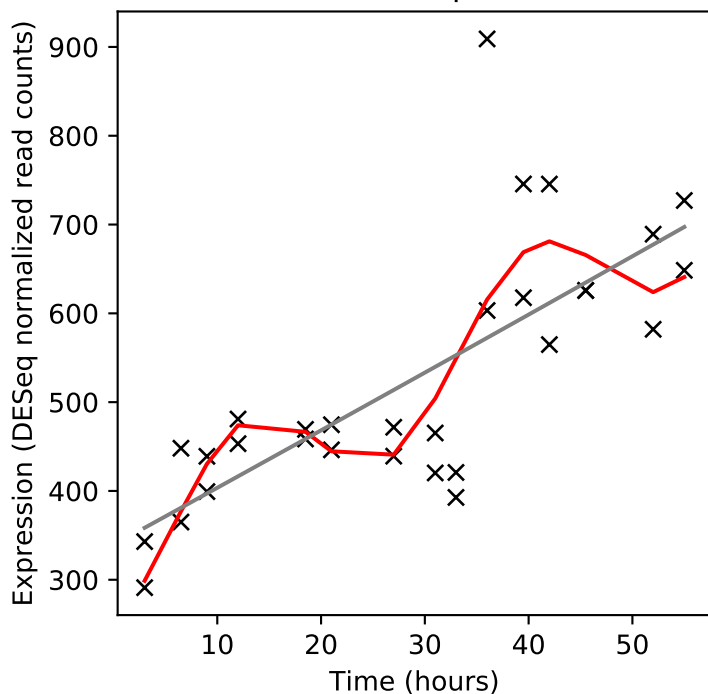

Rv1299/prfA

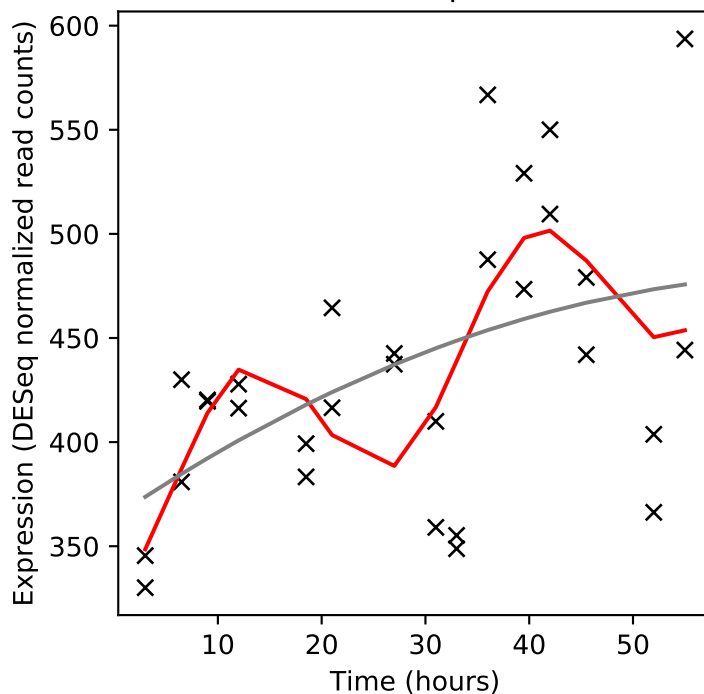

Rv1300/hemK

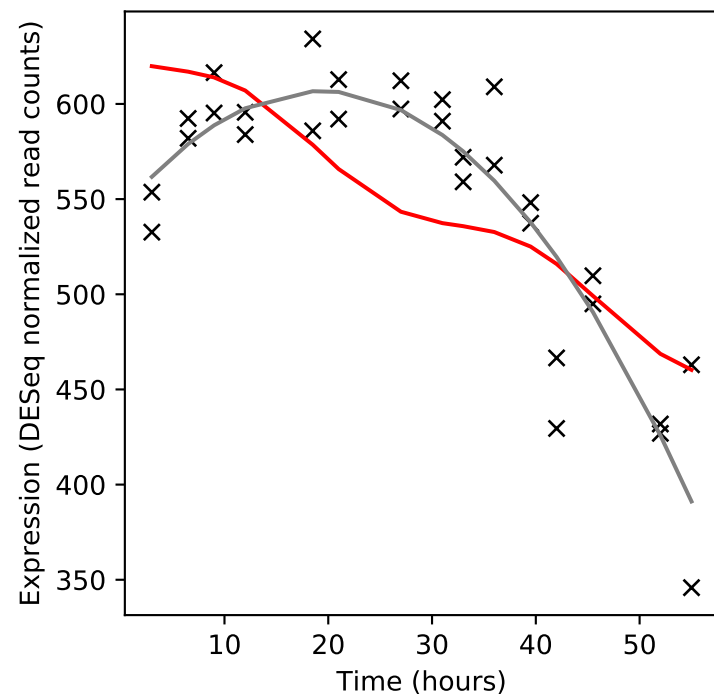

Rv1301/-

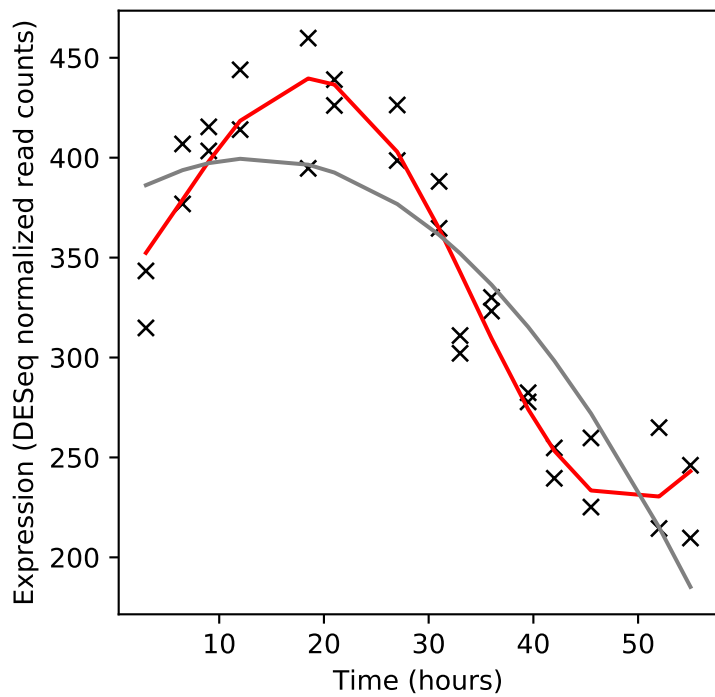

Rv1302/rfe

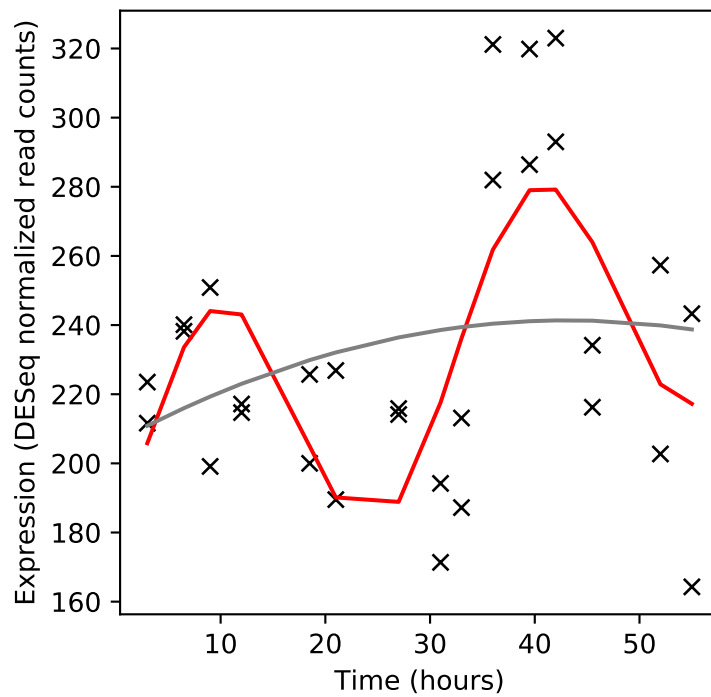

Rv1303/-

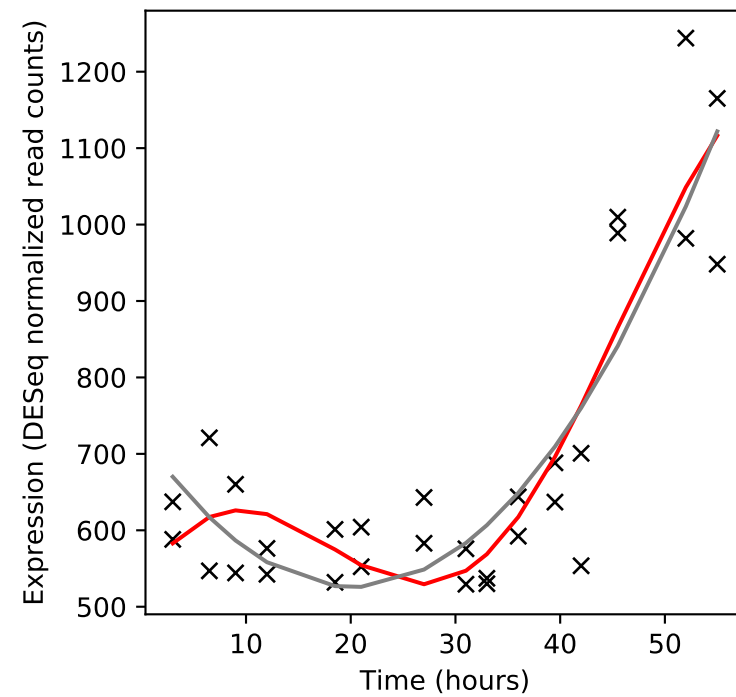

Rv1304/atpB

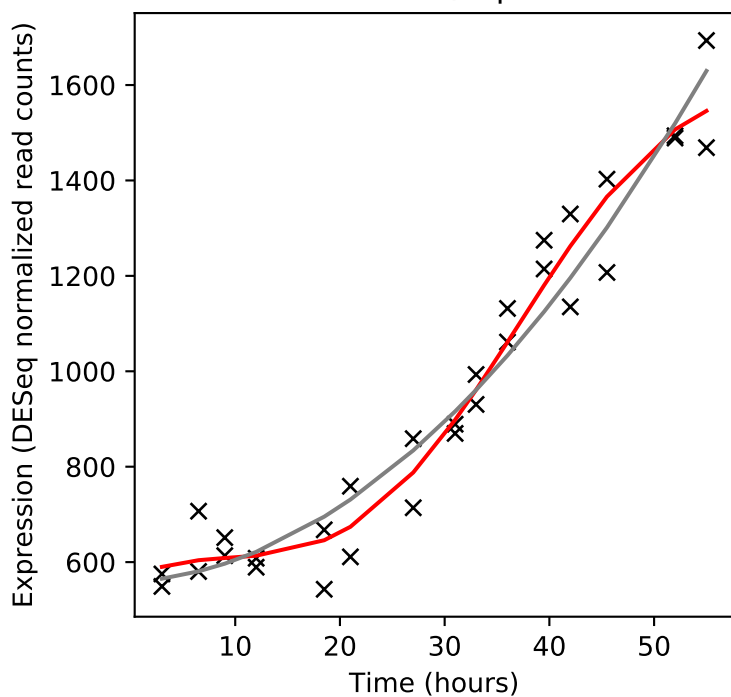

Rv1305/atpE

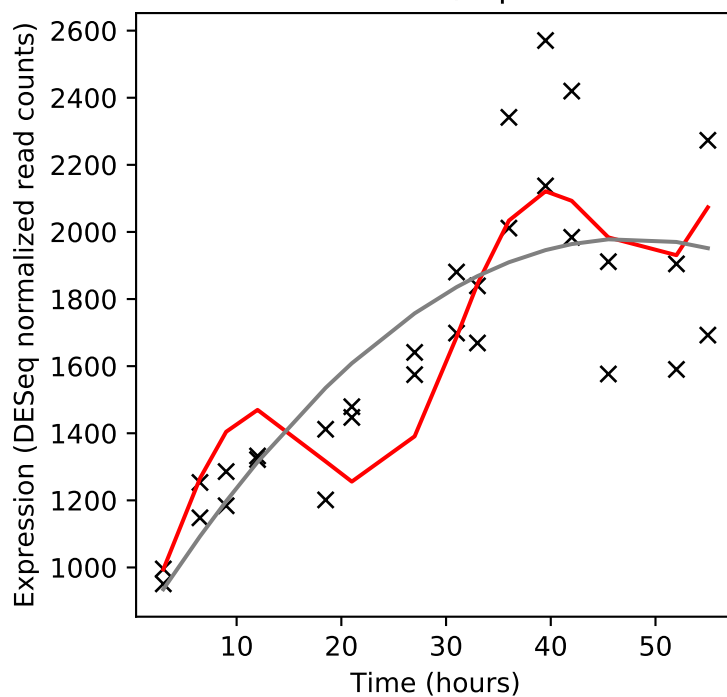

Rv1306/atpF

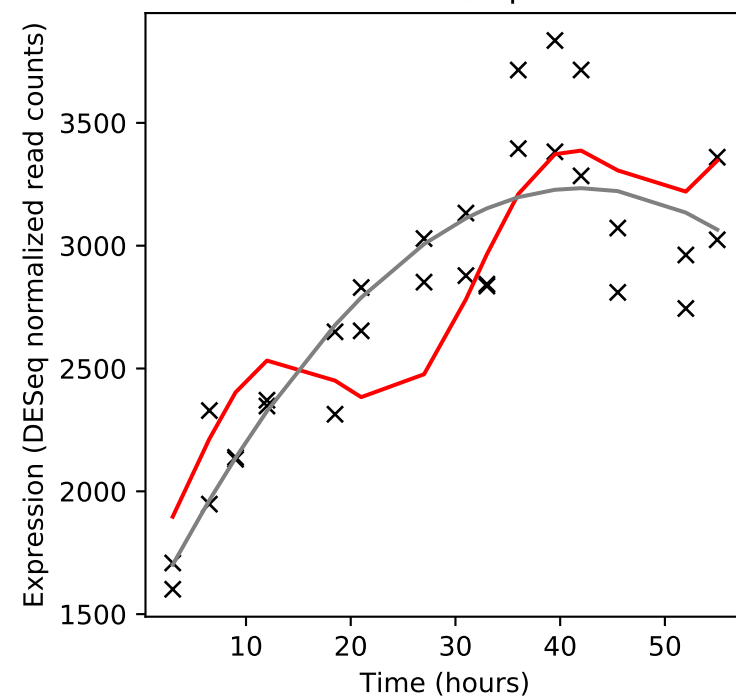

Rv1307/atpH

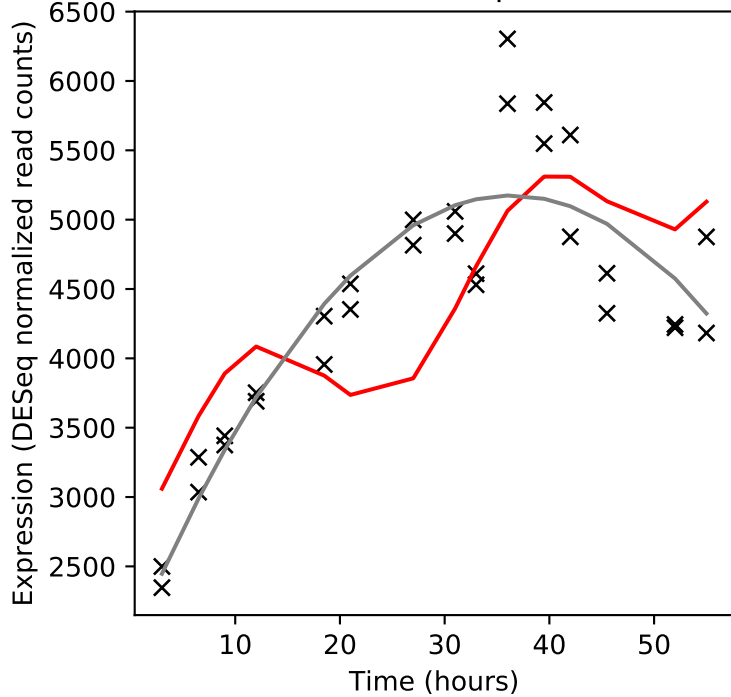

Rv1308/atpA

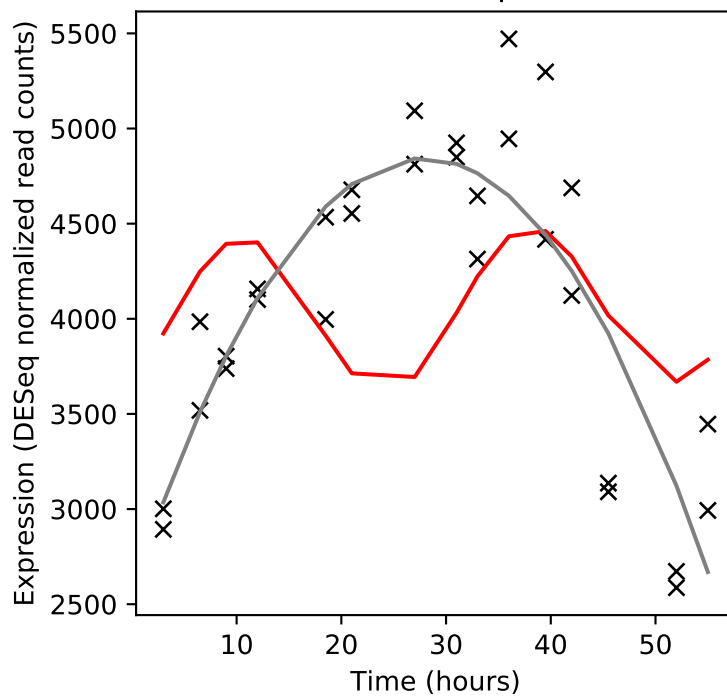

Rv1309/atpG

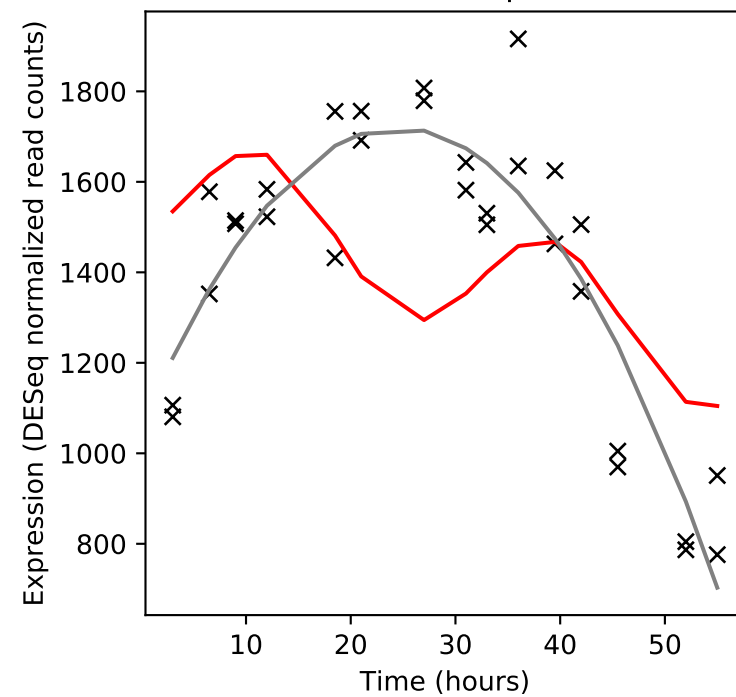



Rv1310/atpD

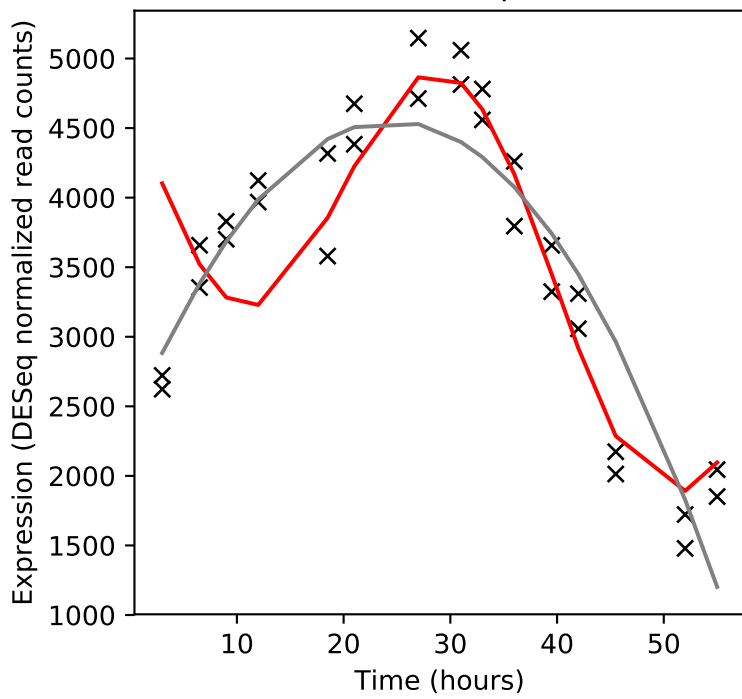

Rv1311/atpC

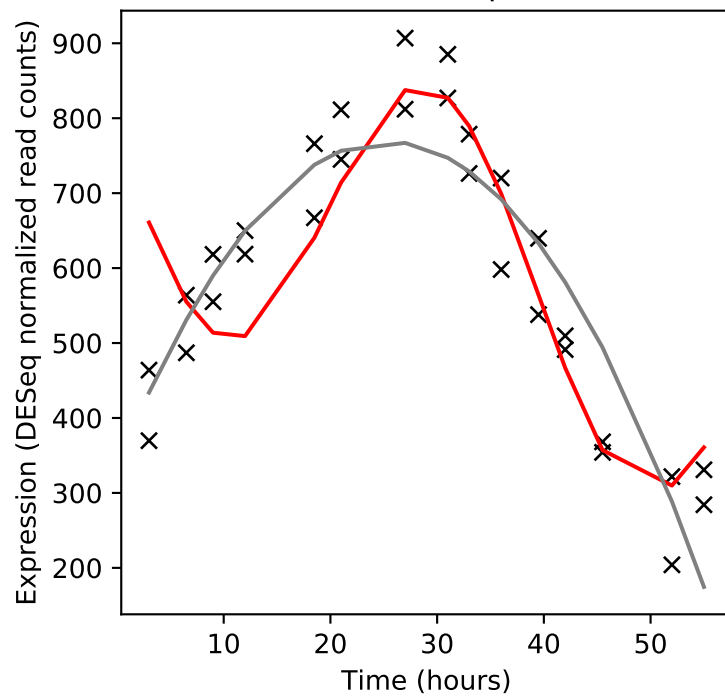

Rv1312/-

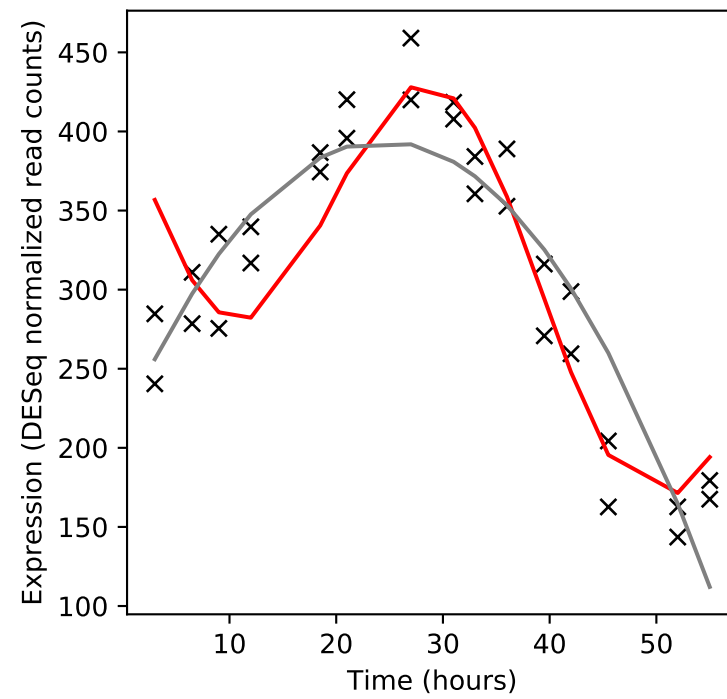

Rv1313c/-

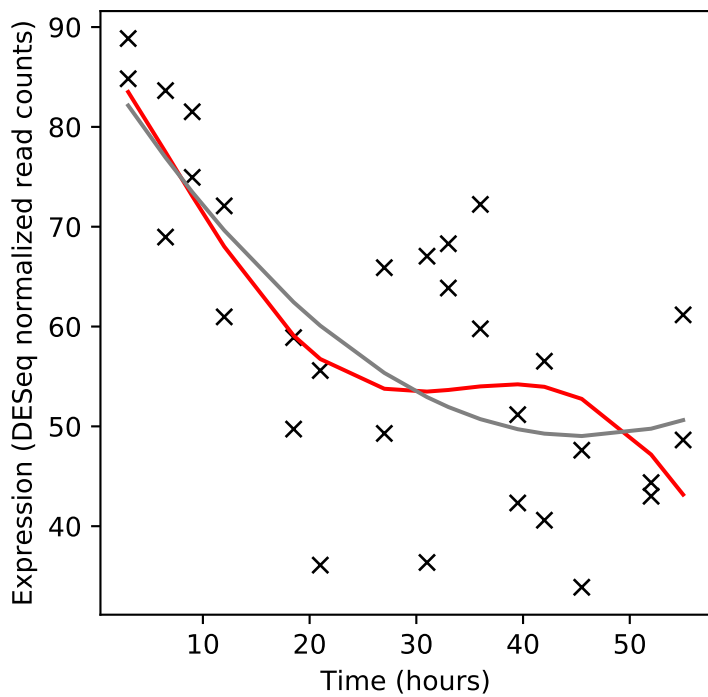

Rv1314c/-

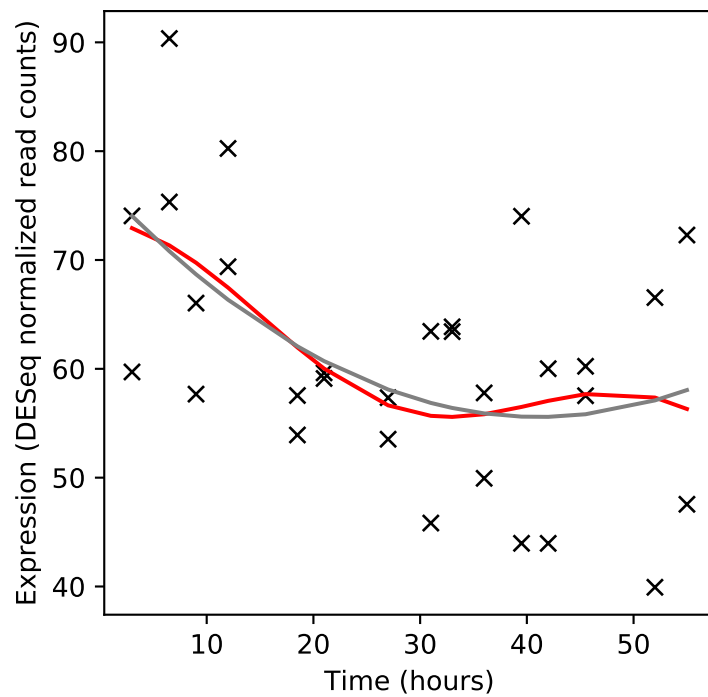

Rv1315/murA

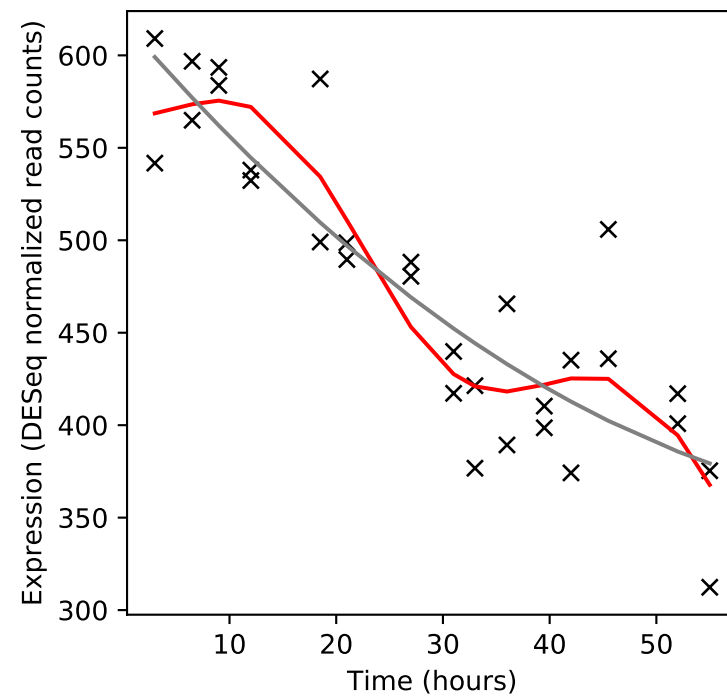

Rvnr01/rrs

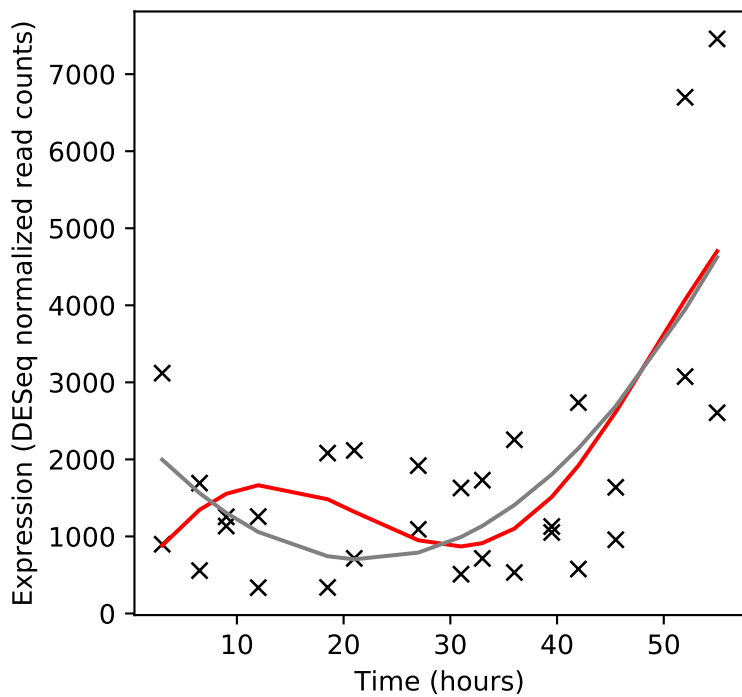

Rv1316c/ogt

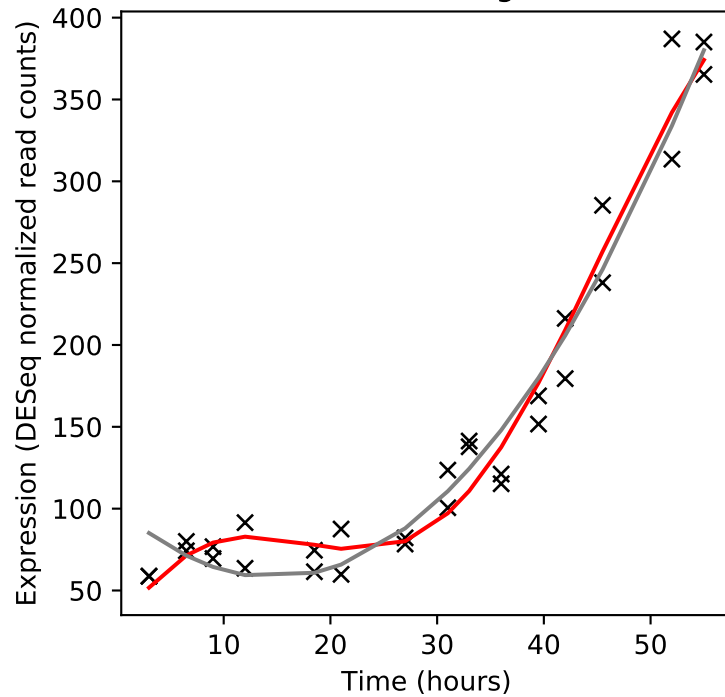

Rv1317c/alkA

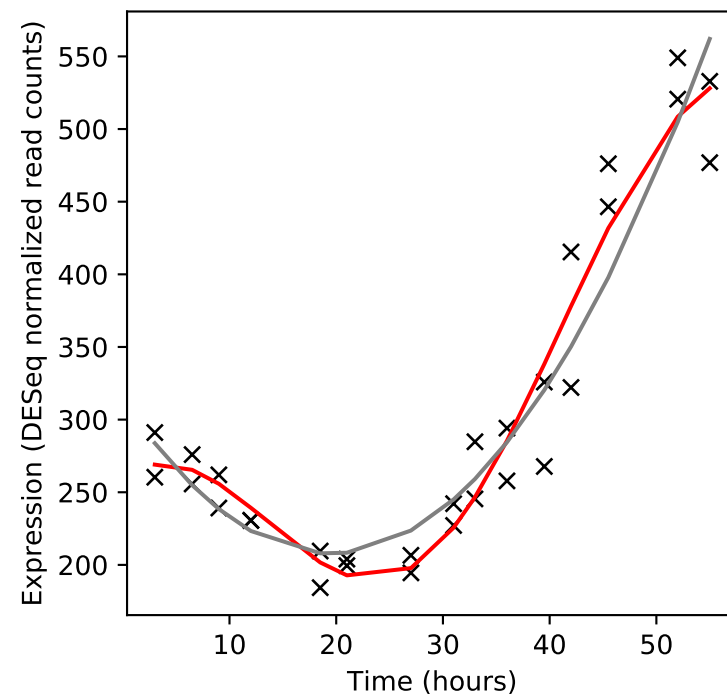

Rv1318c/-

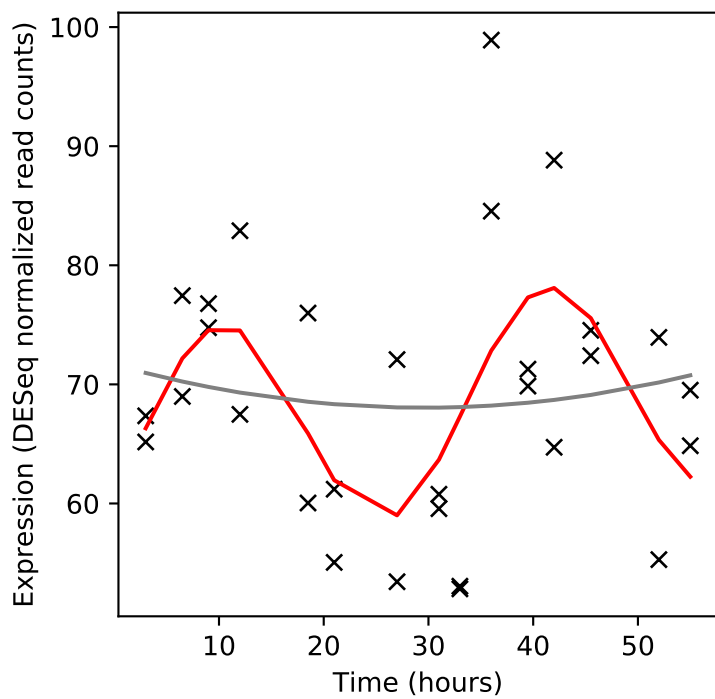

Rv1319c/-

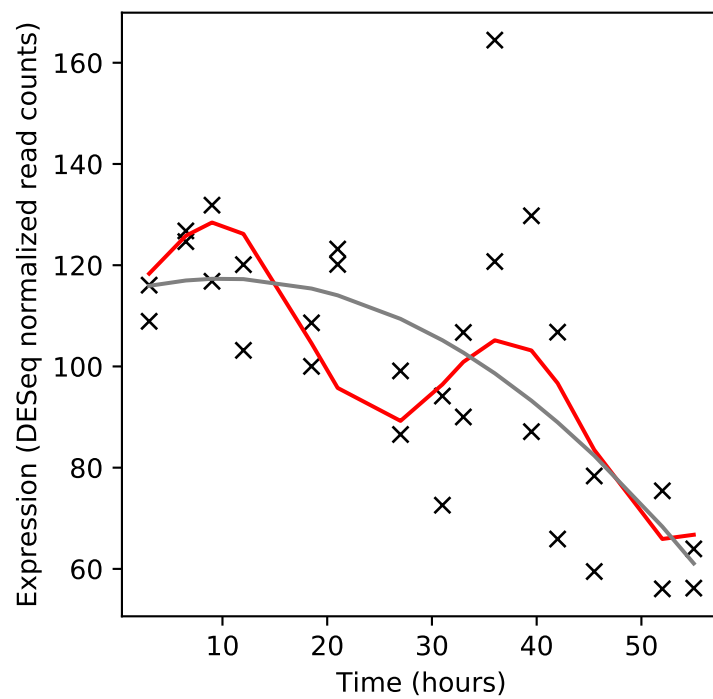

Rv1320c/-

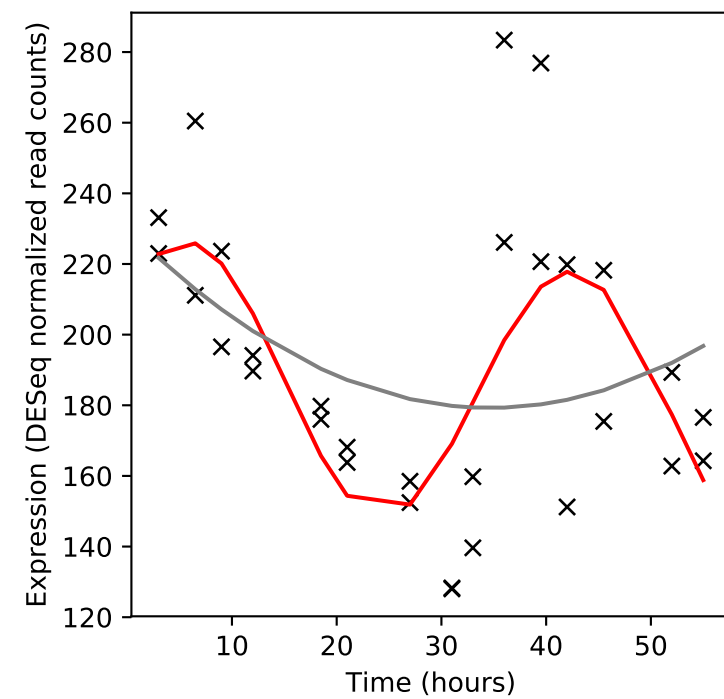

Rv1321/-

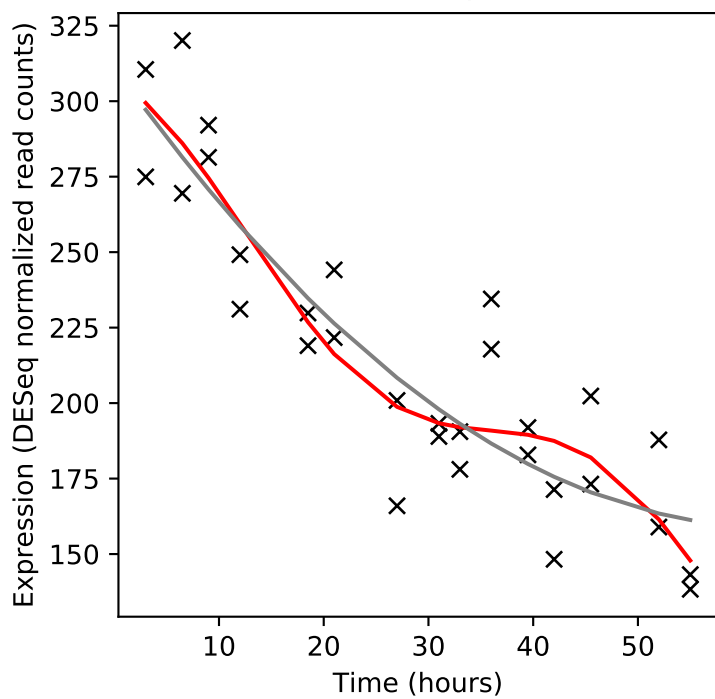

Rv1322/-

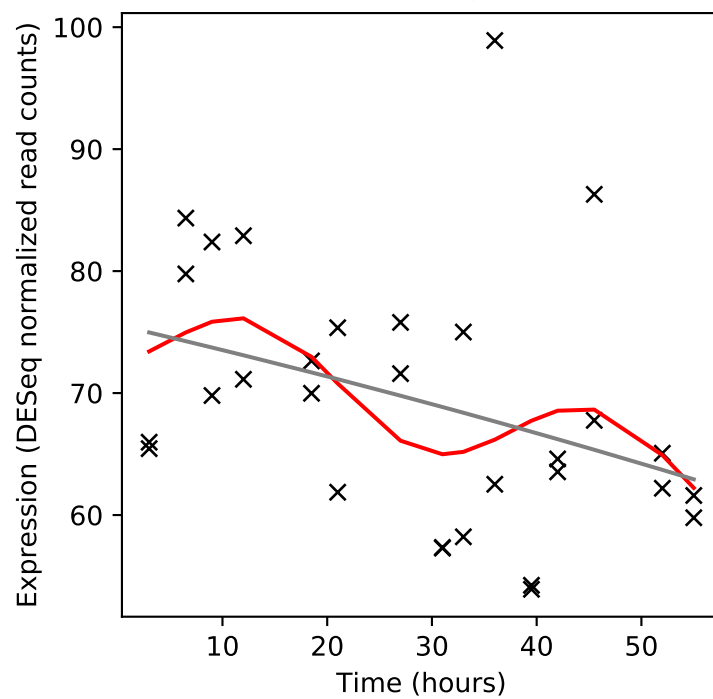

Rv1322A/-

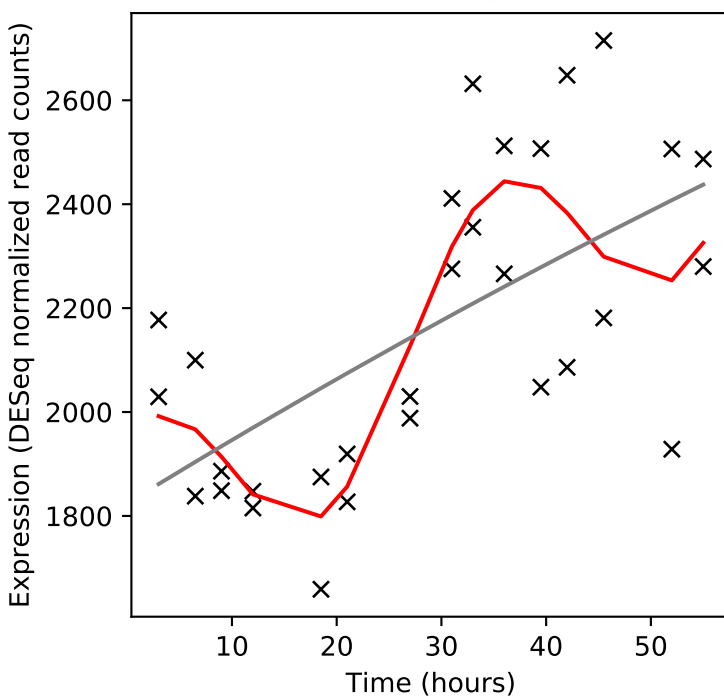

Rv1323/fadA4

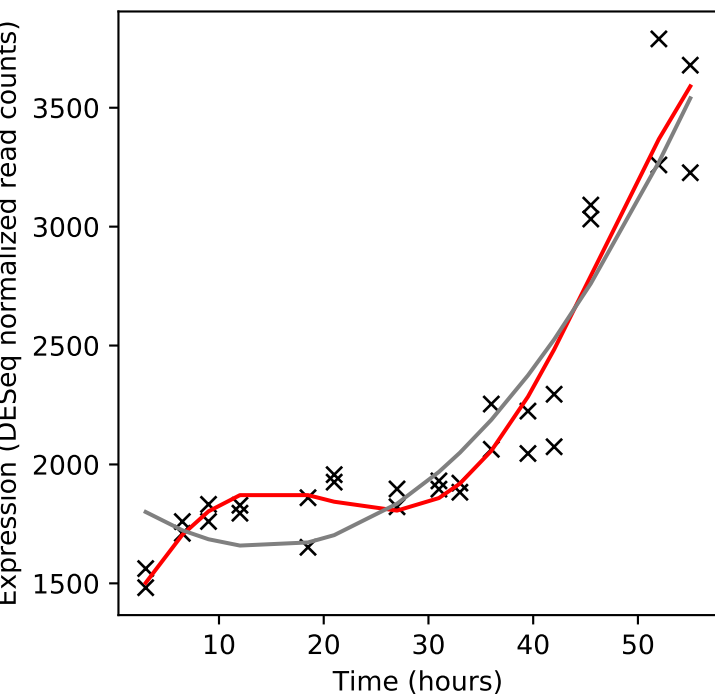

Rv1324/-

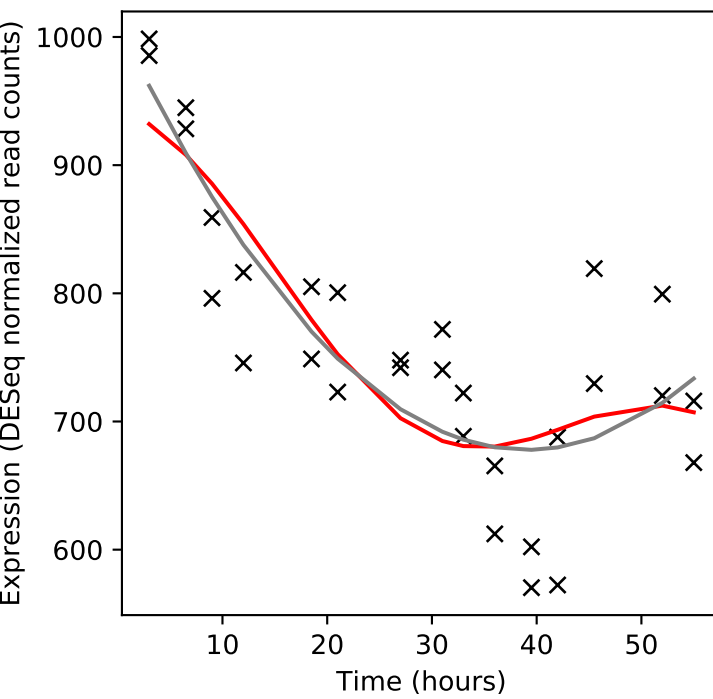

Rv1325c/PE\_PGRS24

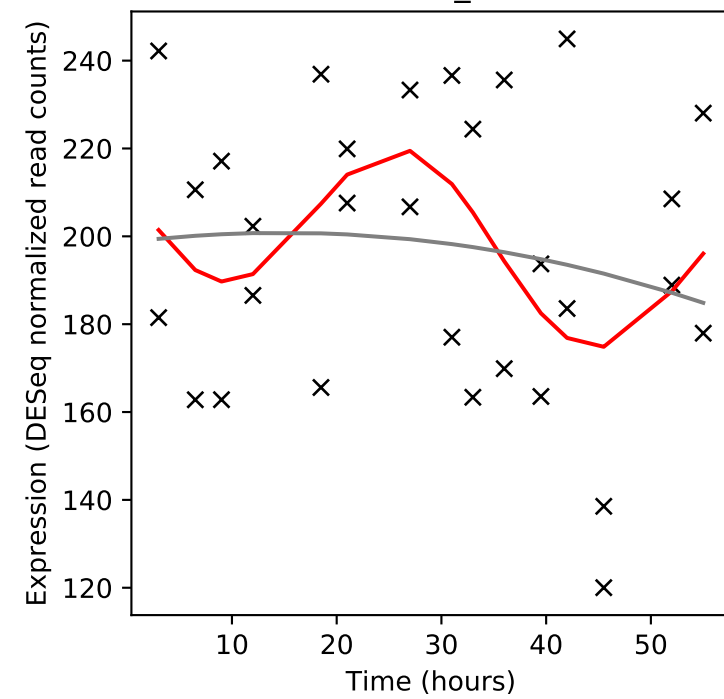

Rv1326c/glgB

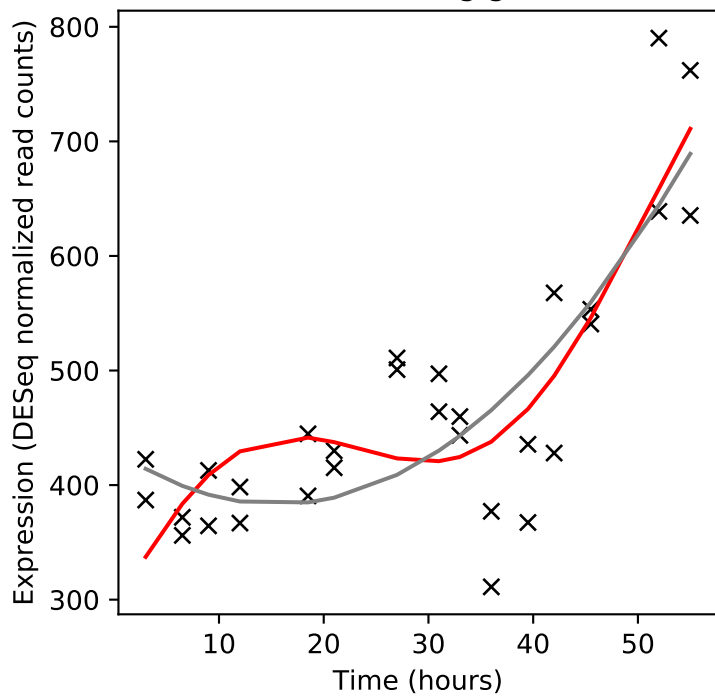

Rv1327c/glgE

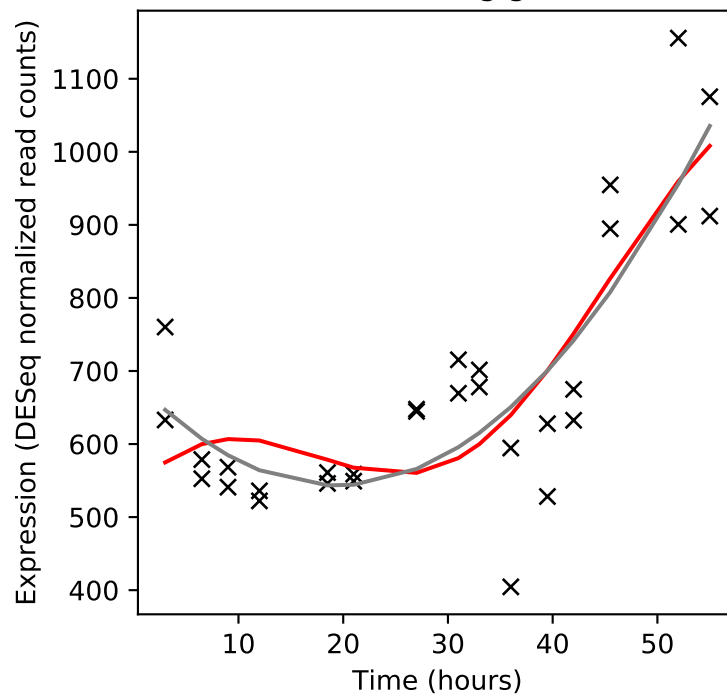

Rv1328c/glgP

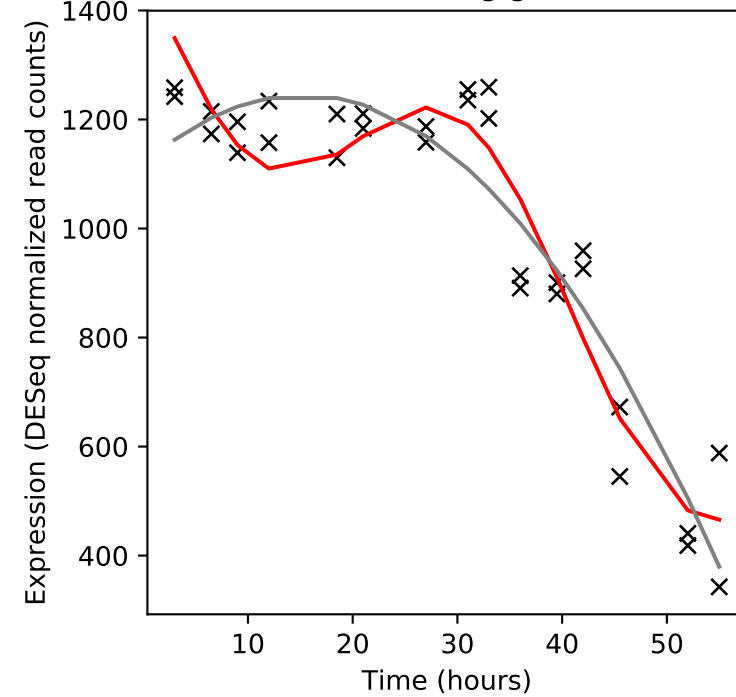

Rv1329c/dinG

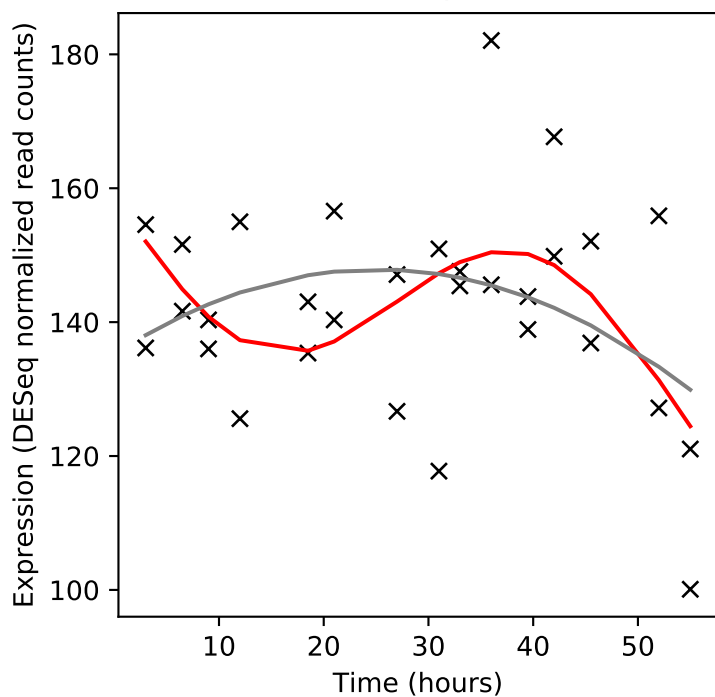

Rv1330c/pncB1

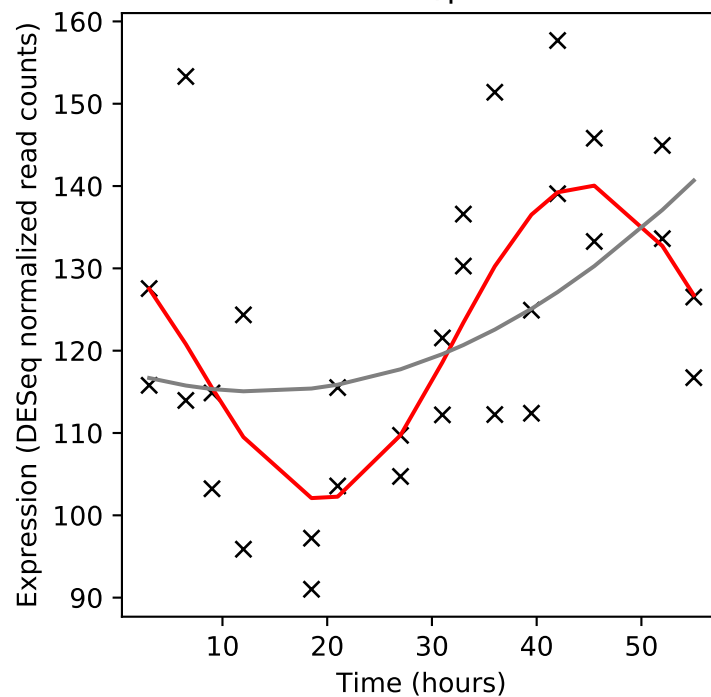

Rv1331/-

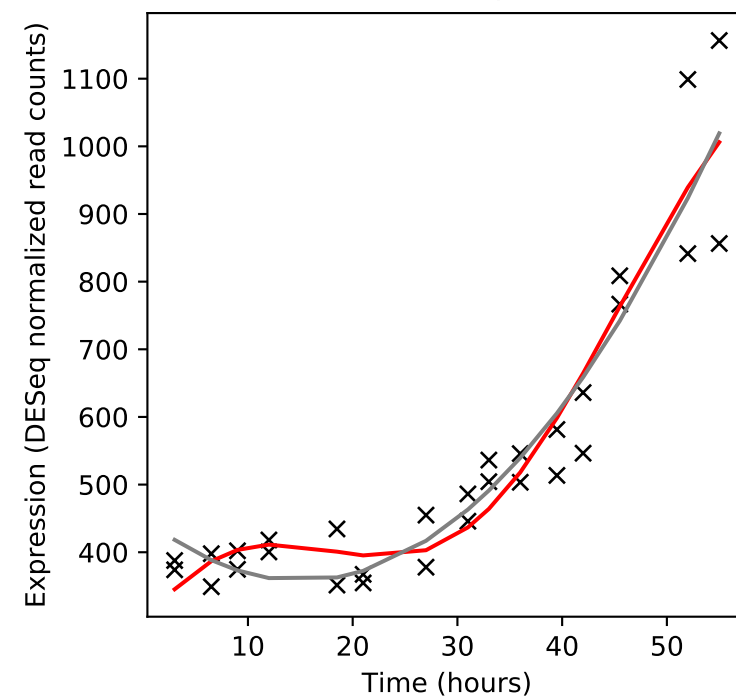

Rv1332/-

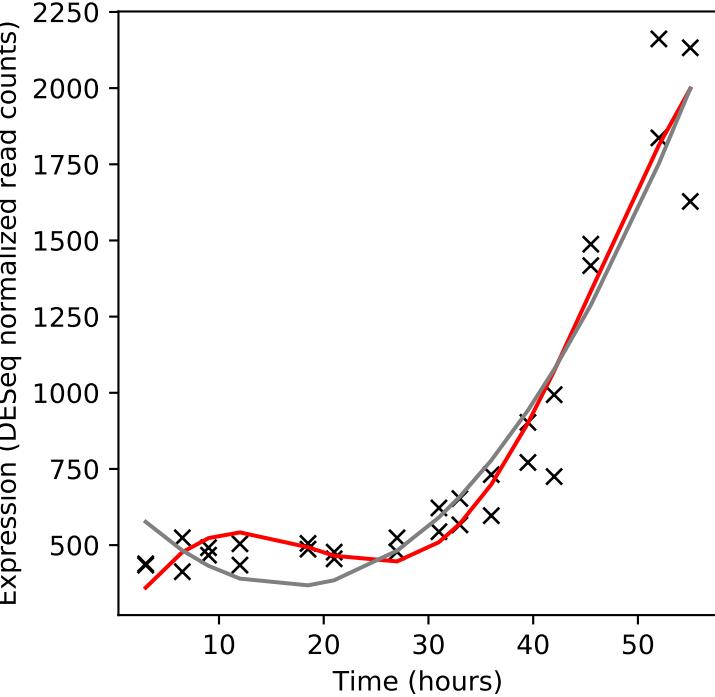

Rv1333/-

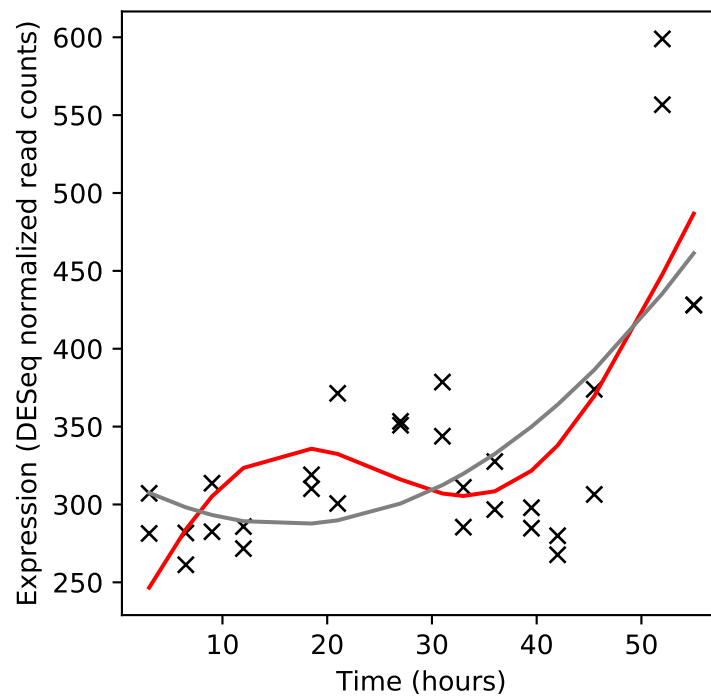

Rv1334/mec

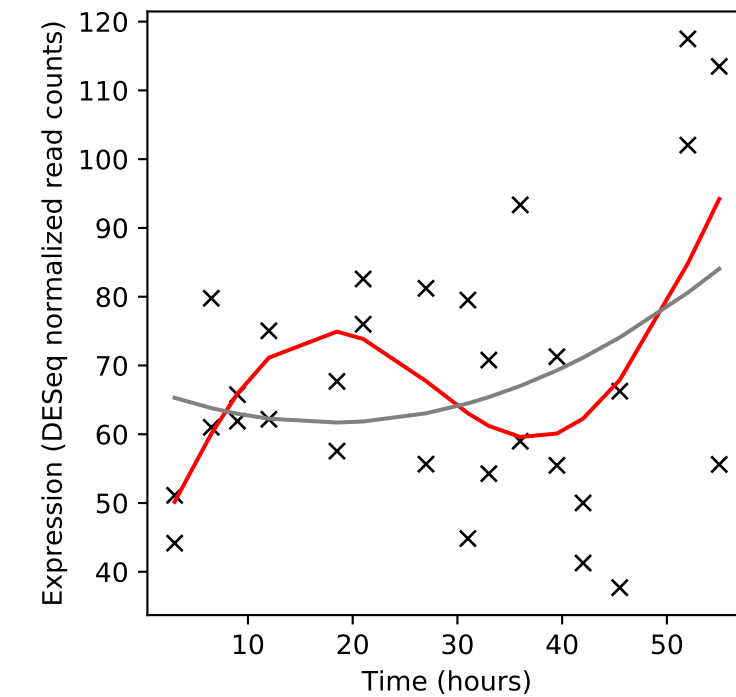

Rv1335/cysO

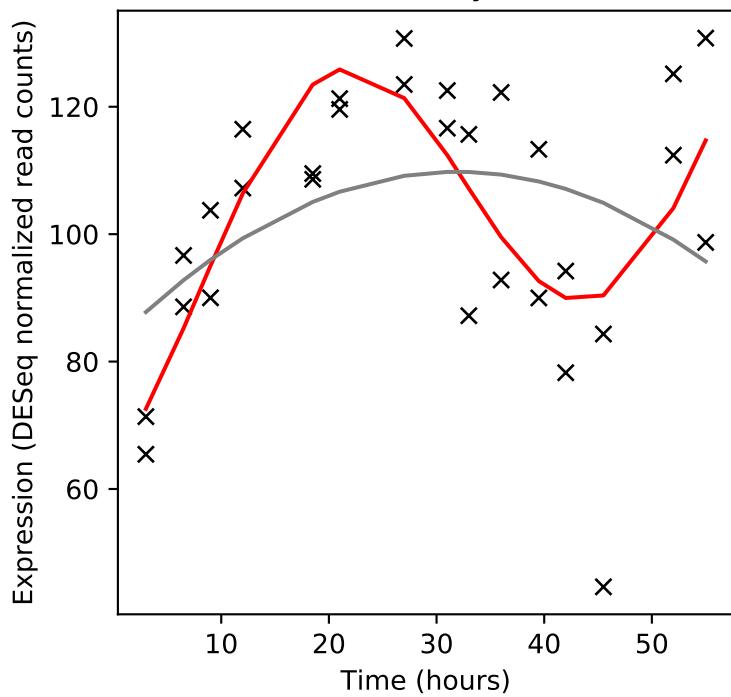

Rv1336/cysM

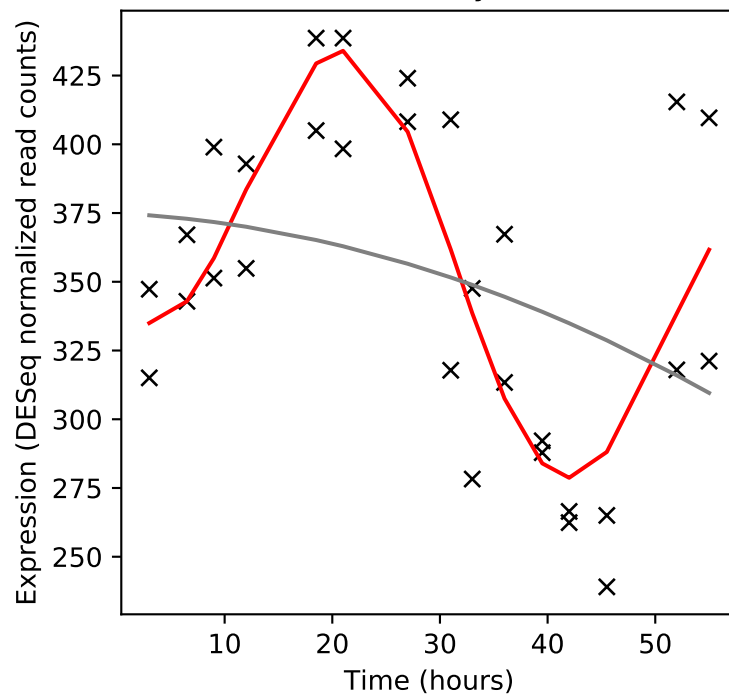

Rv1337/-

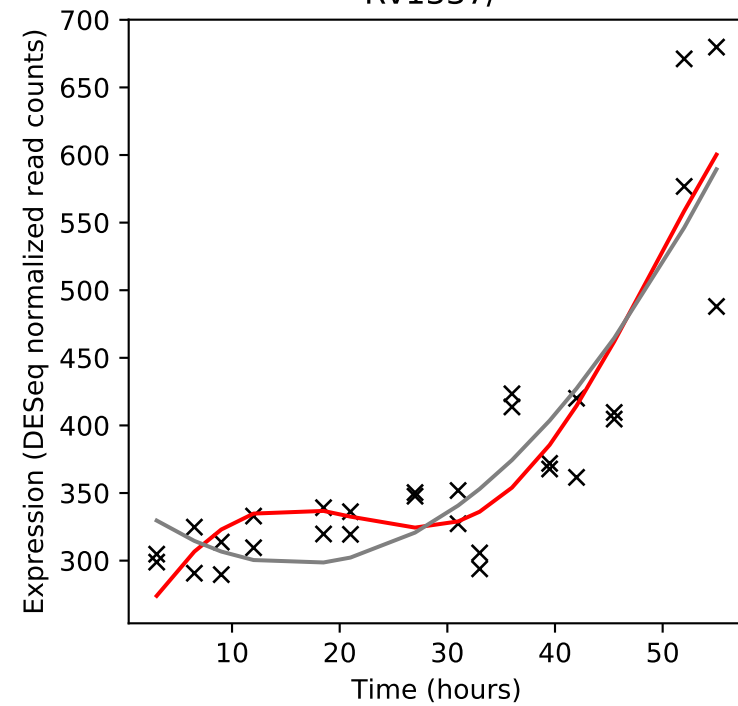

Rv1338/murl

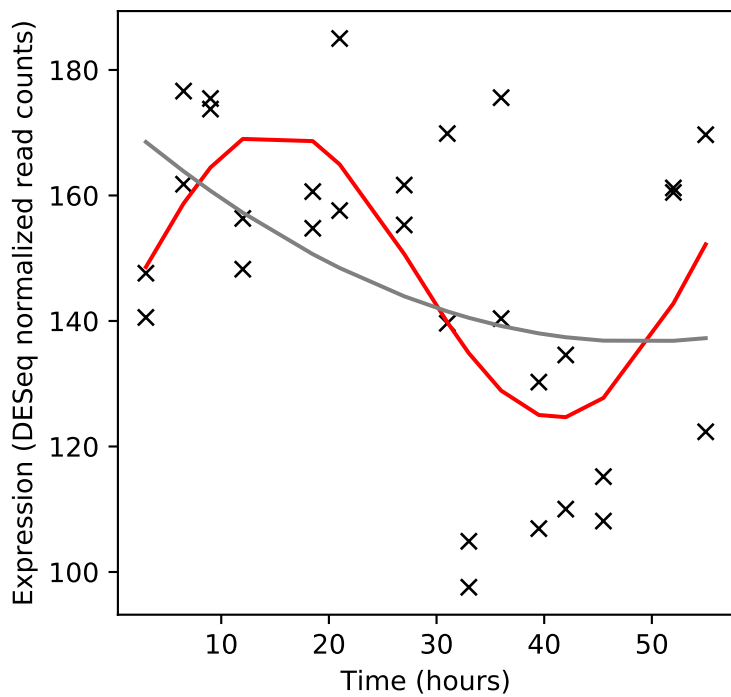

Rv1339/-

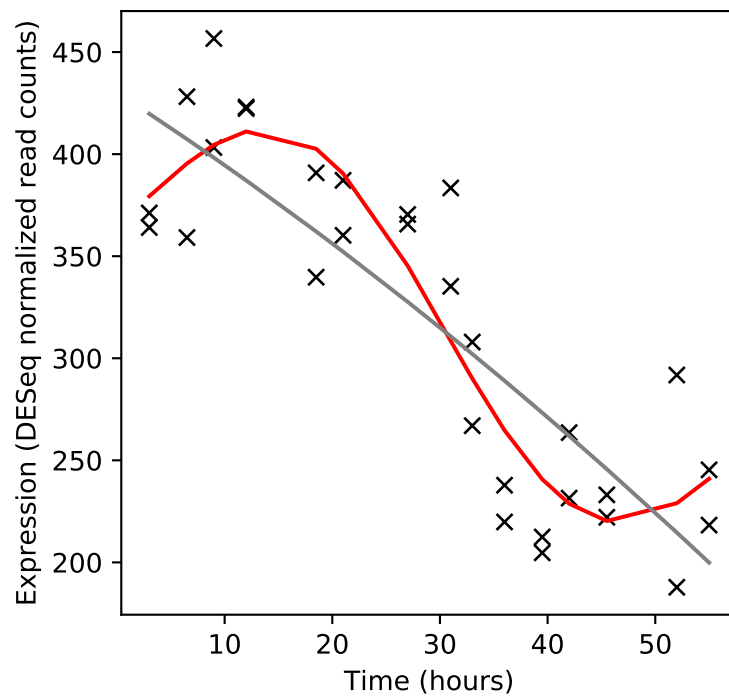

Rv1340/rphA

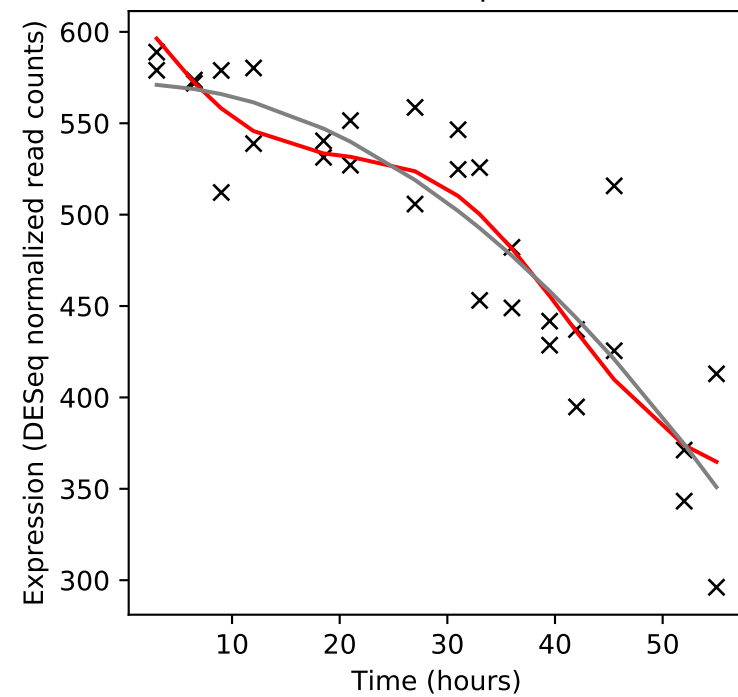

Rv1341/-

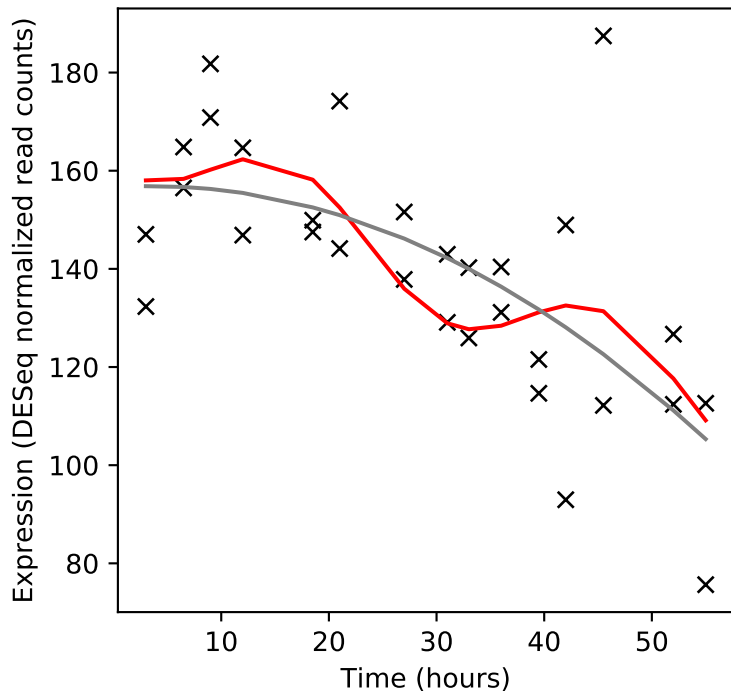

Rv1342c/-

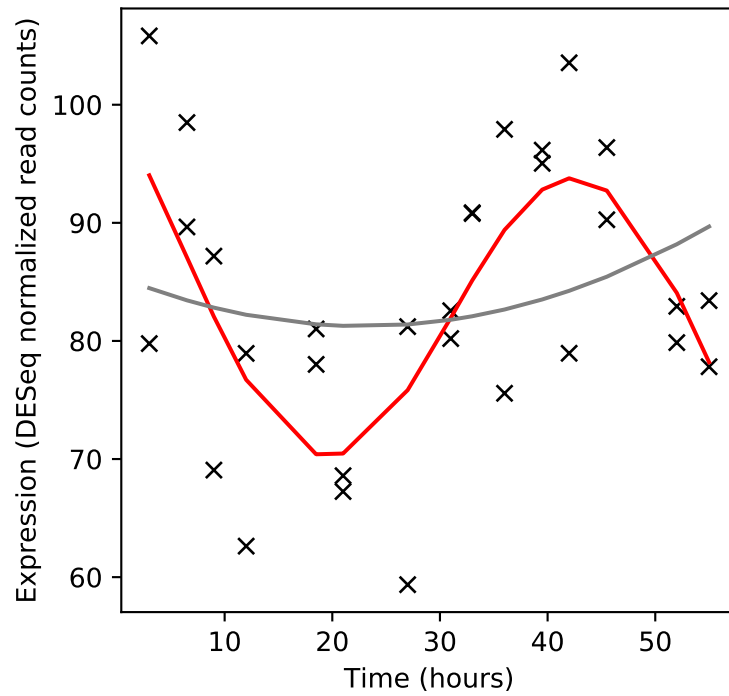

Rv1343c/lprD

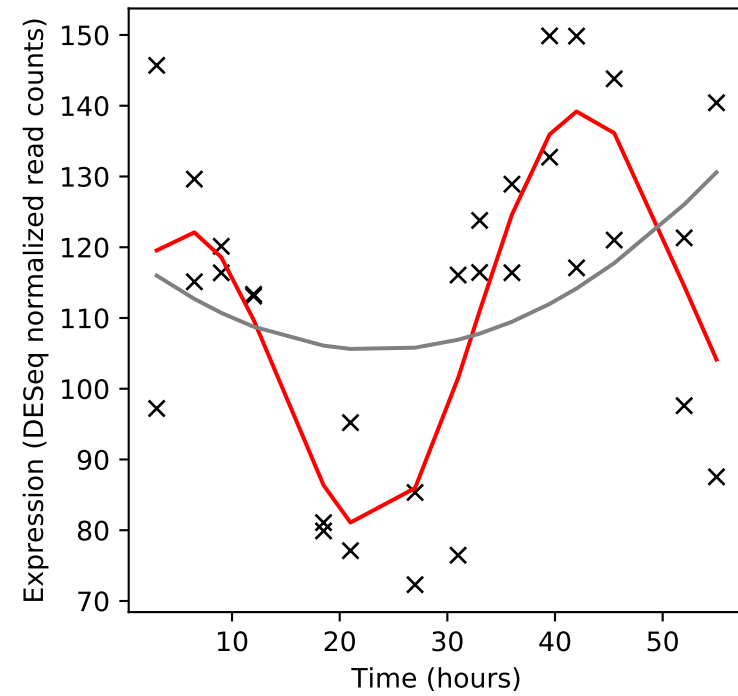

Rv1344/mbtL

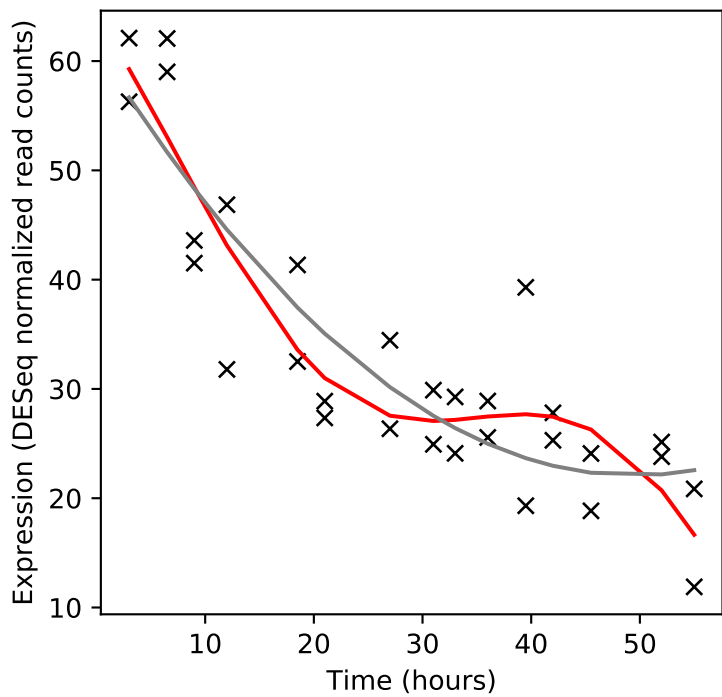

Rv1345/mbtM

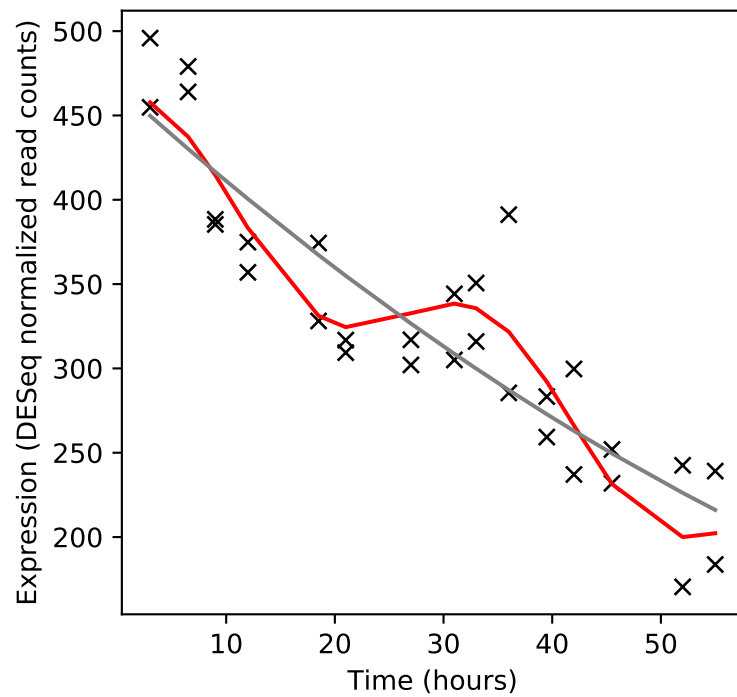

Rv1346/mbtN

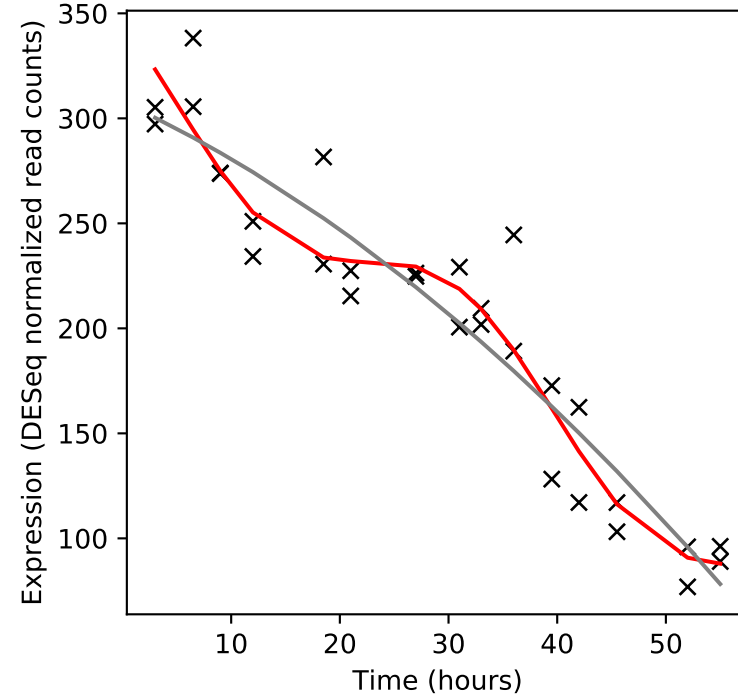

Rv1347c/mbtK

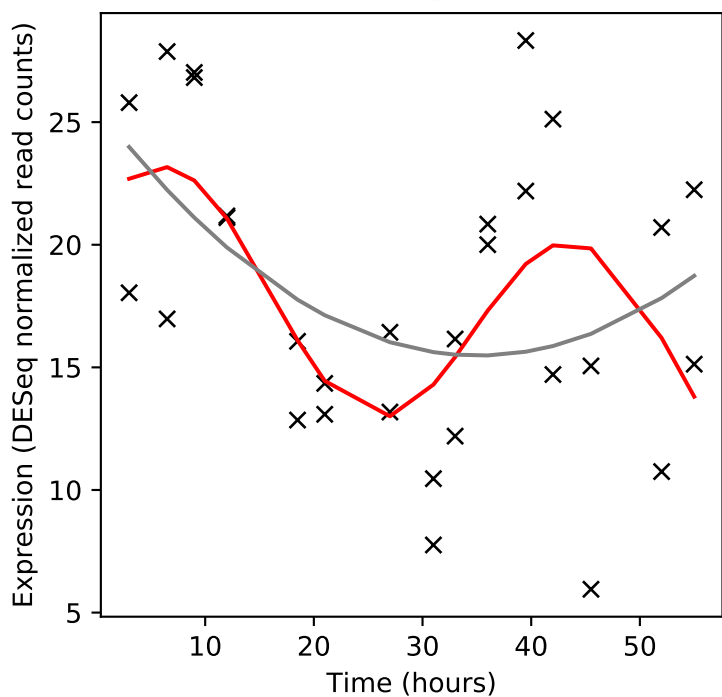

Rv1348/irtA

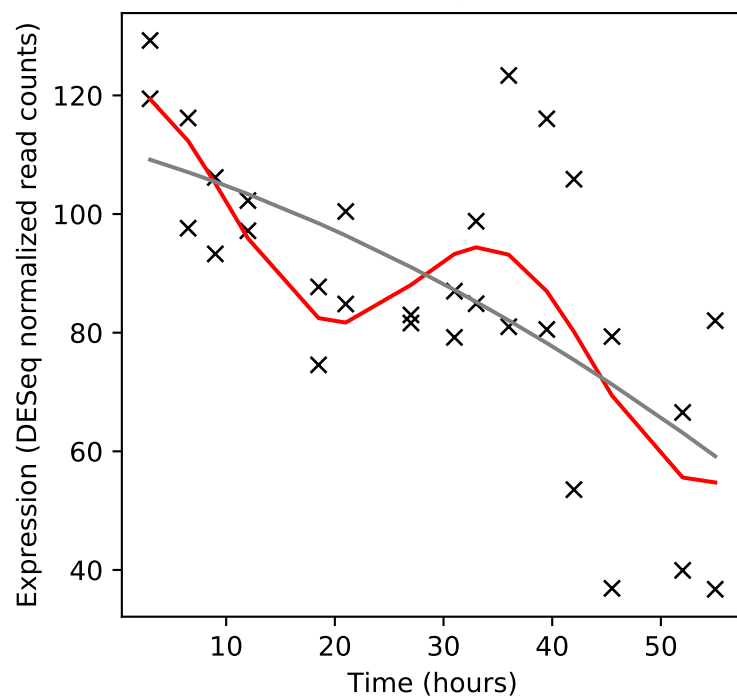

Rv1349/irtB

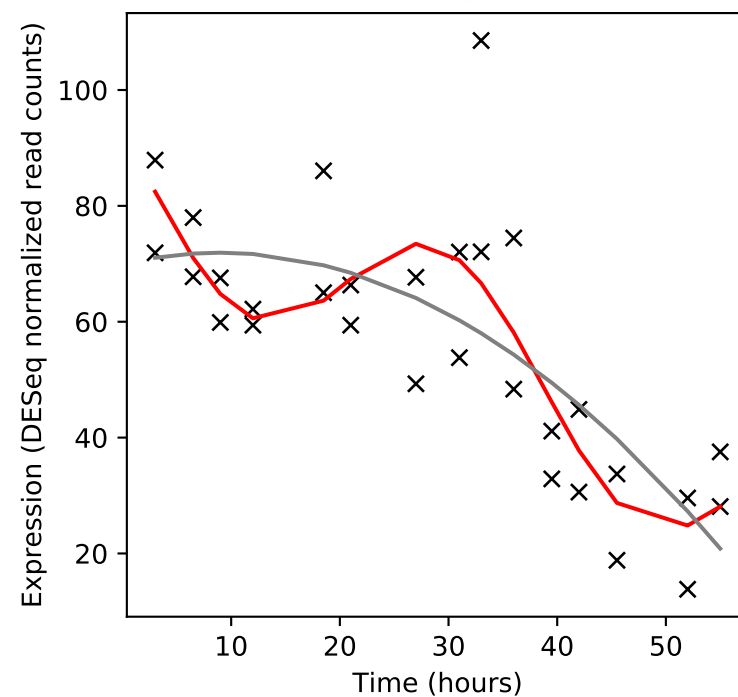

Rv1350/fabG2

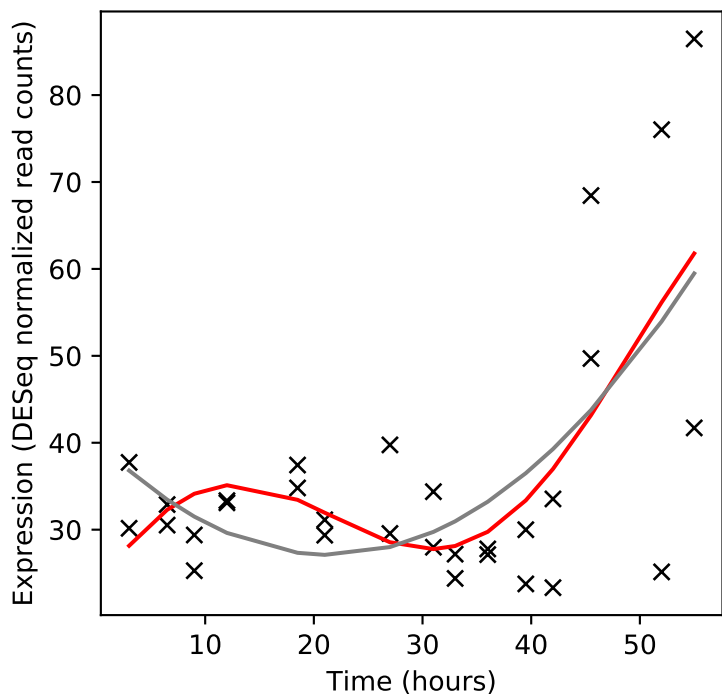

Rv1351/-

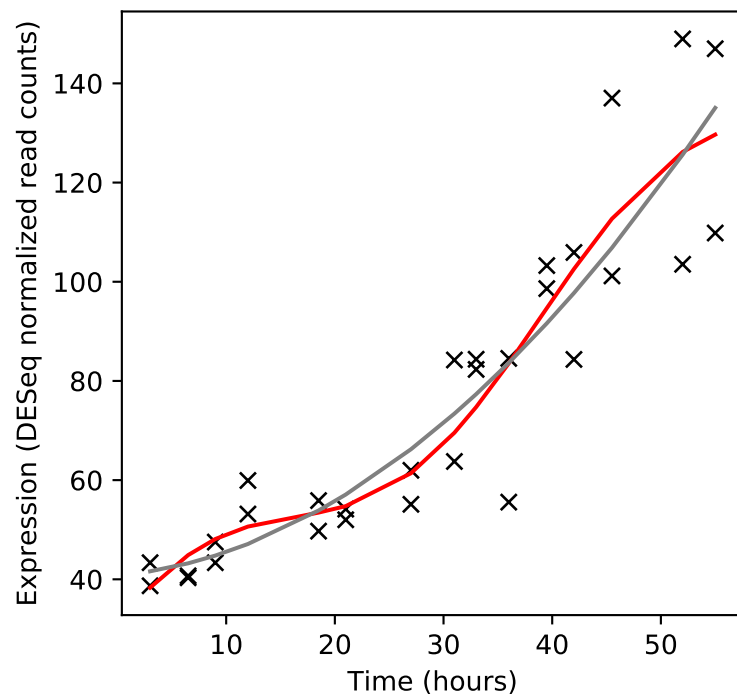

Rv1352/-

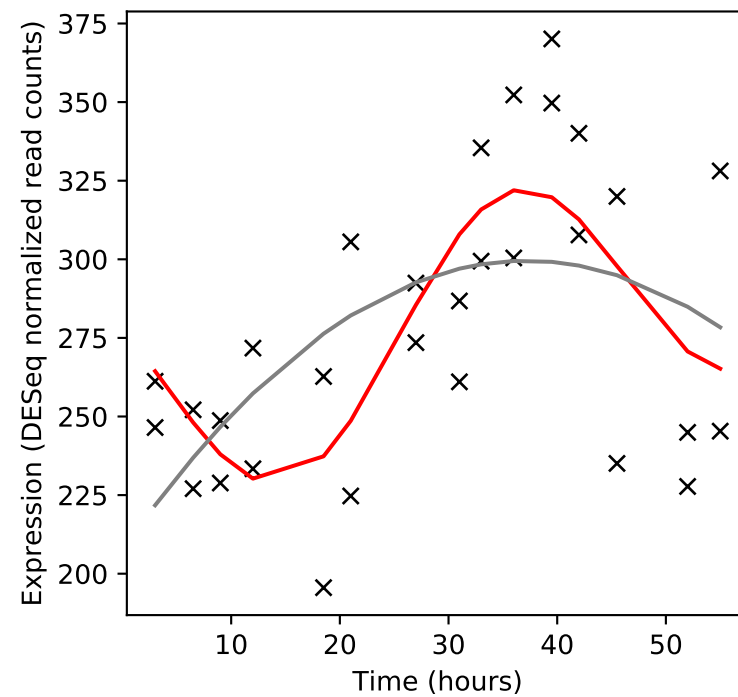

Rv1353c/-

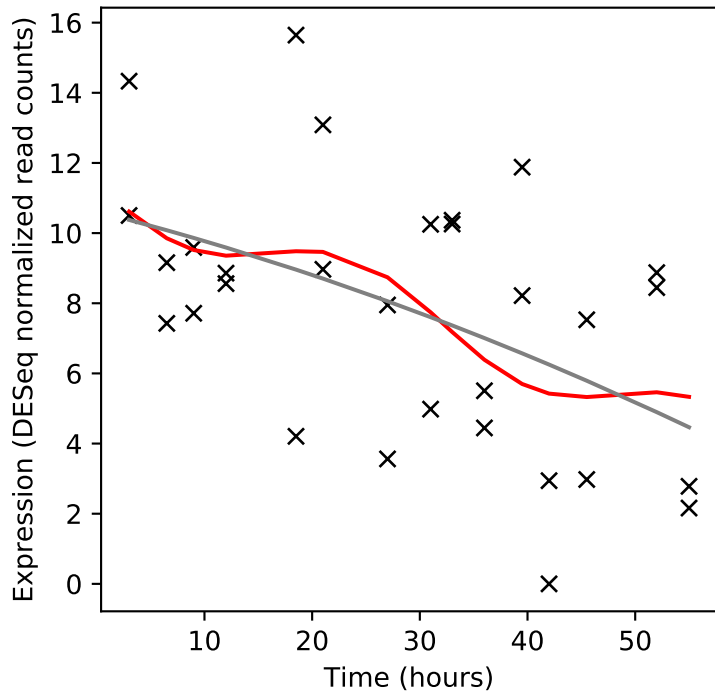

Rv1354c/-

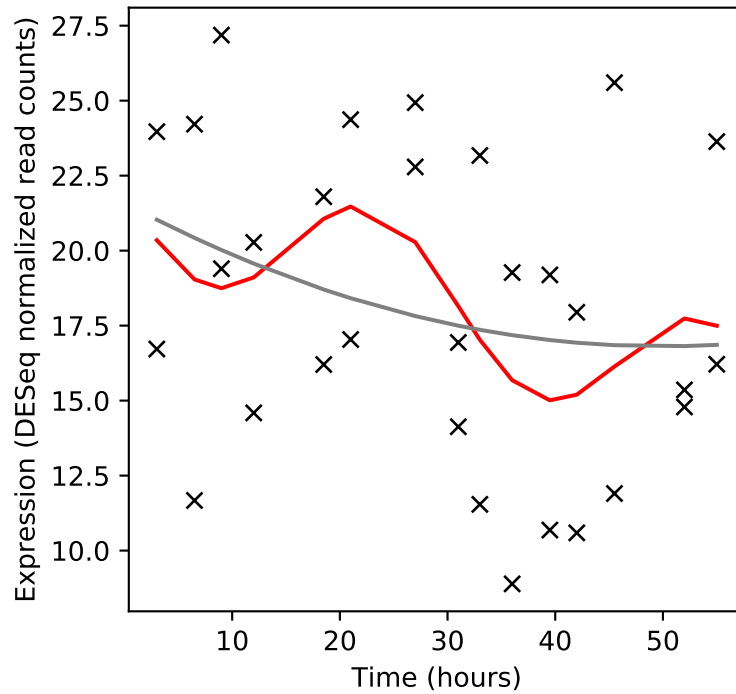

Rv1355c/moeY

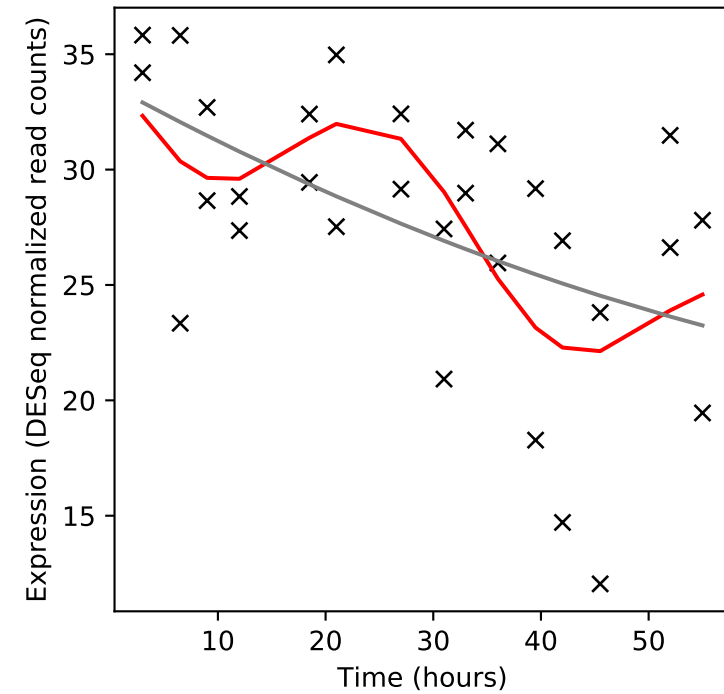

Rv1356c/-

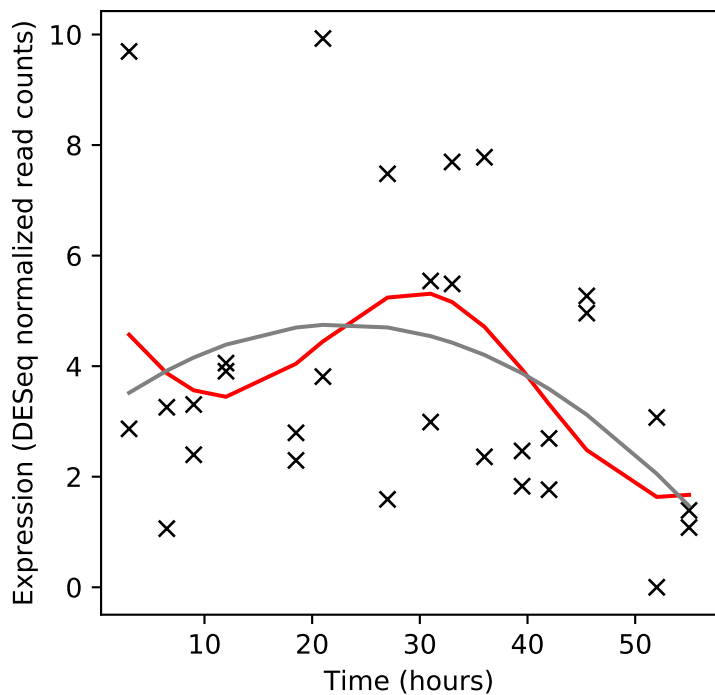

Rv1357c/-

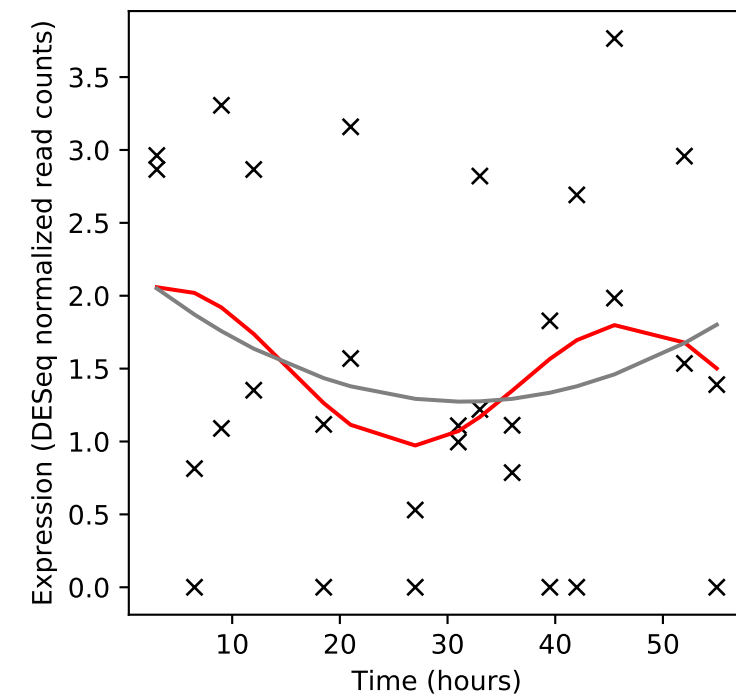

Rv1358/-

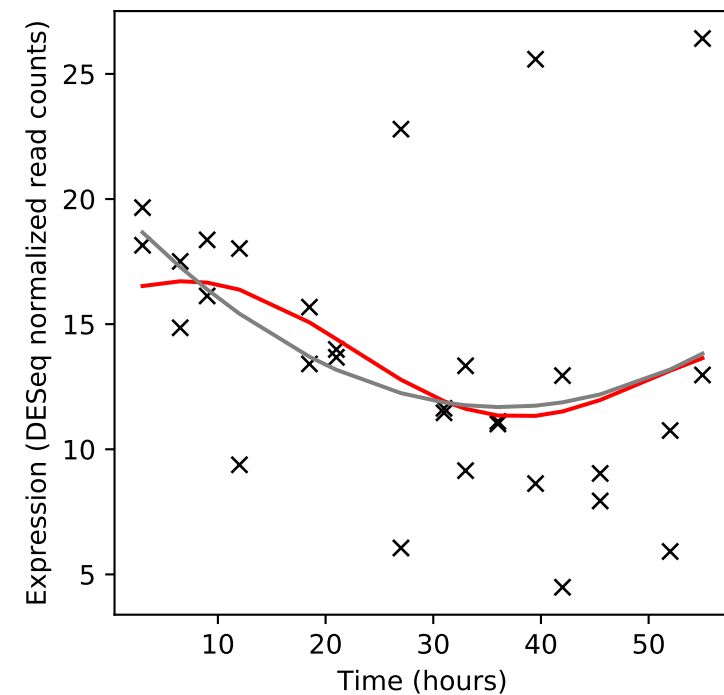

Rv1359/-

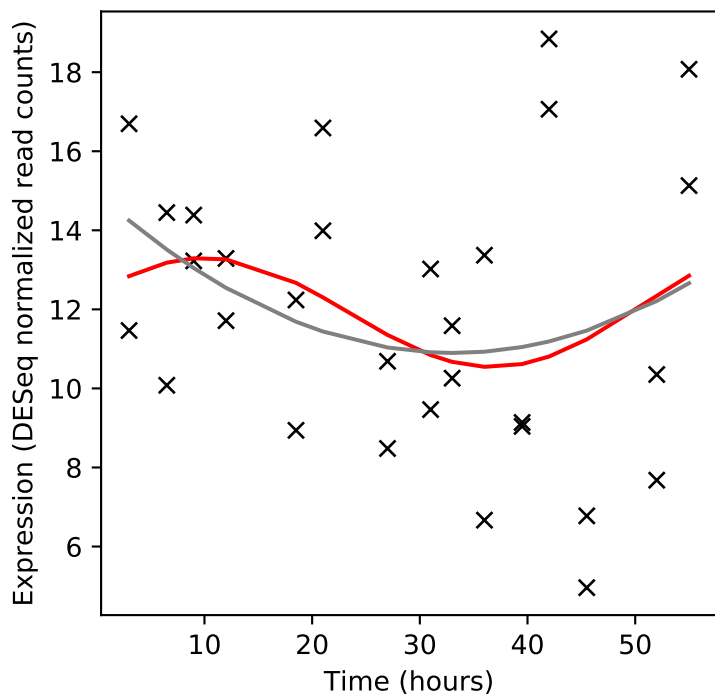

Rv1360/-

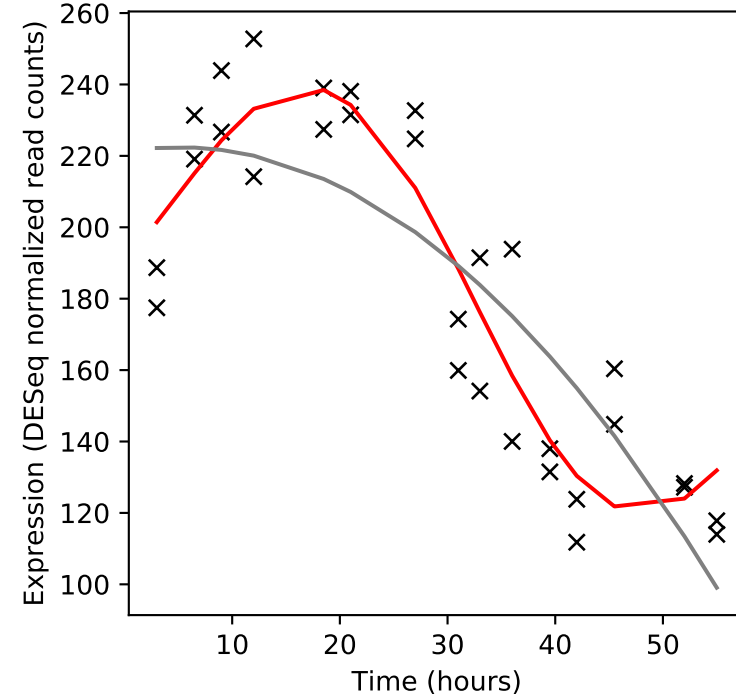

Rv1361c/PPE19

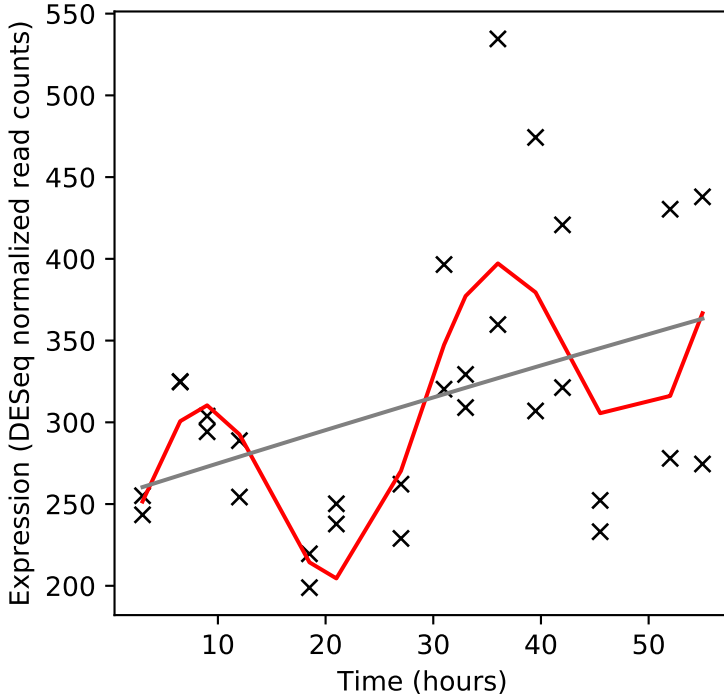

Rv1362c/-

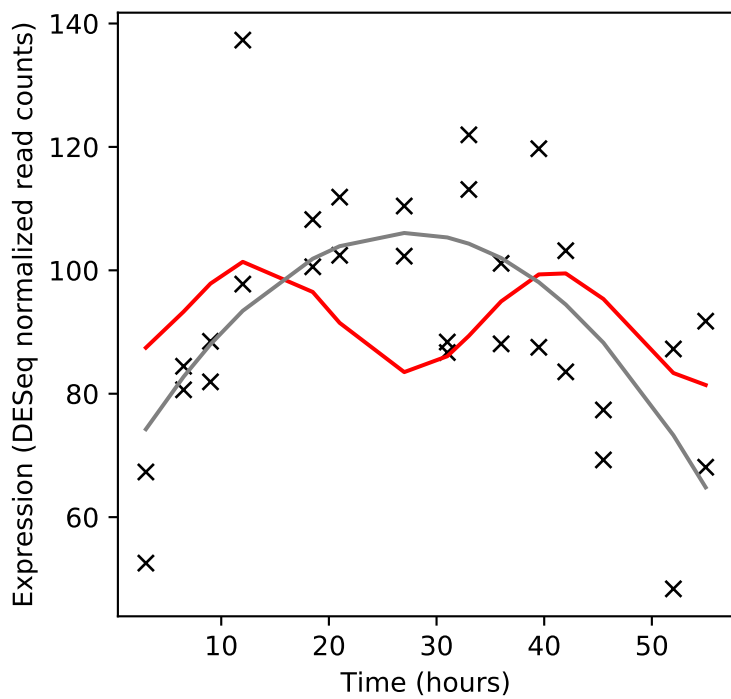

Rv1363c/-

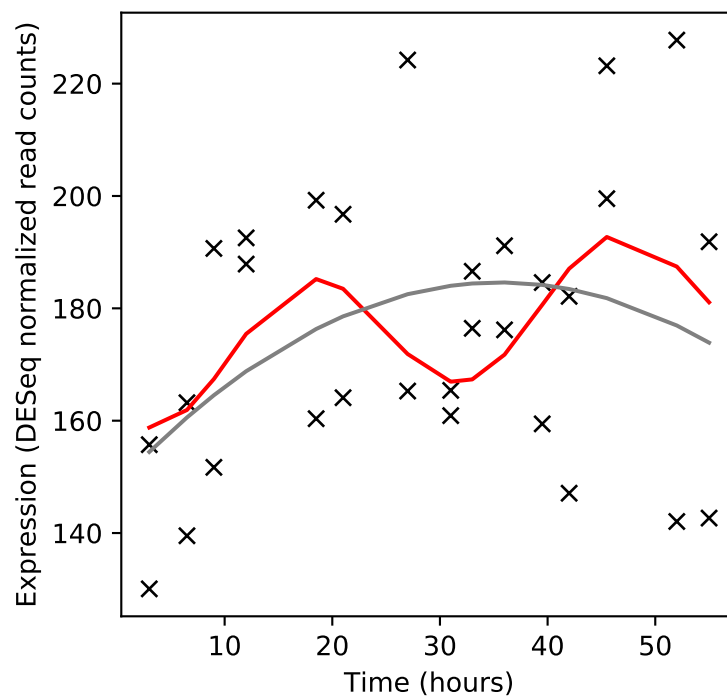

Rv1364c/-

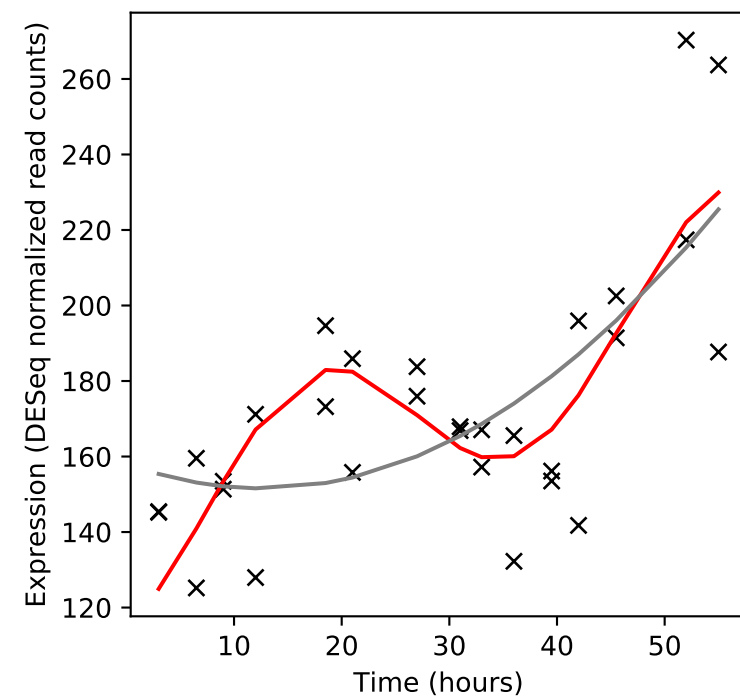

Rv1365c/rsfA

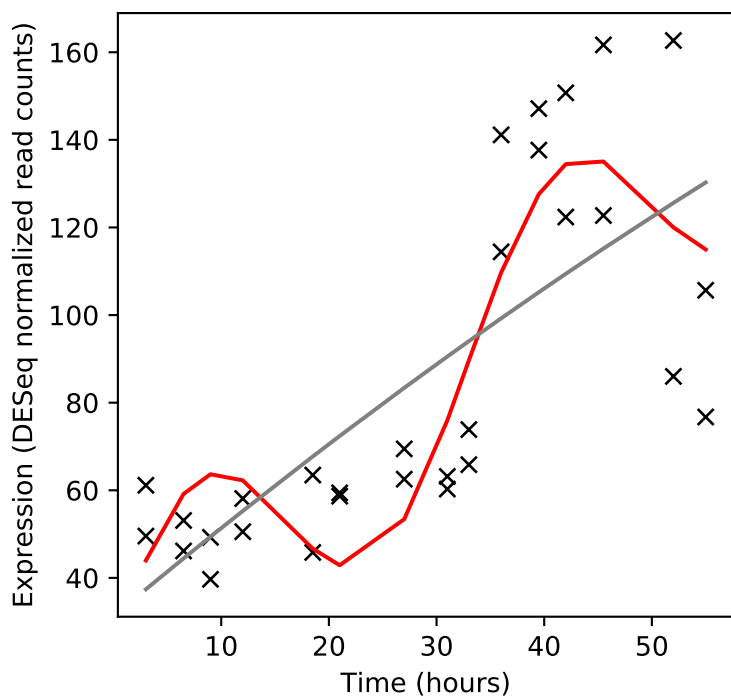

Rv1366/-

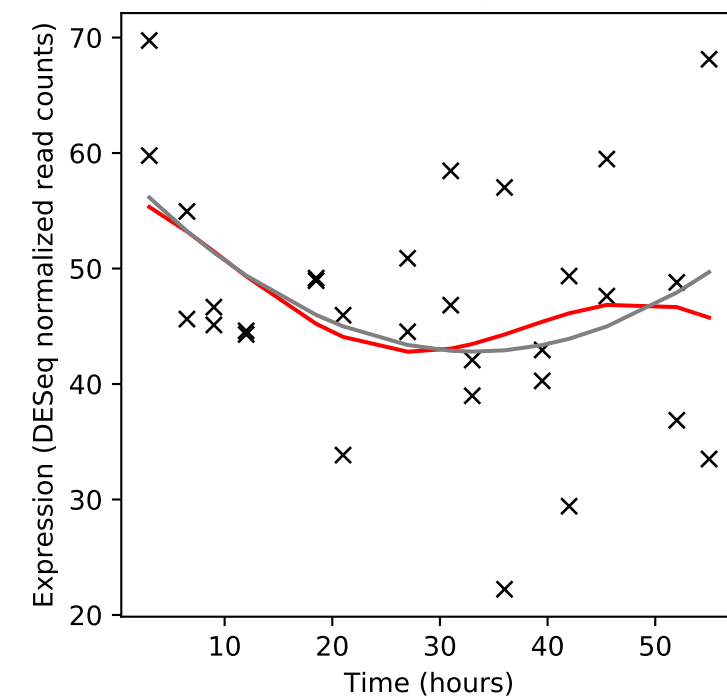

Rv1366A/-

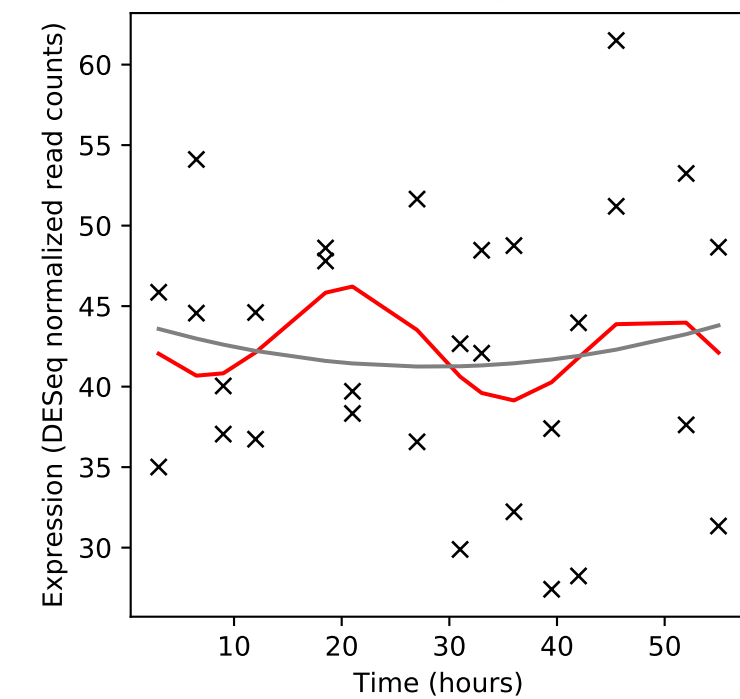

Rv1367c/-

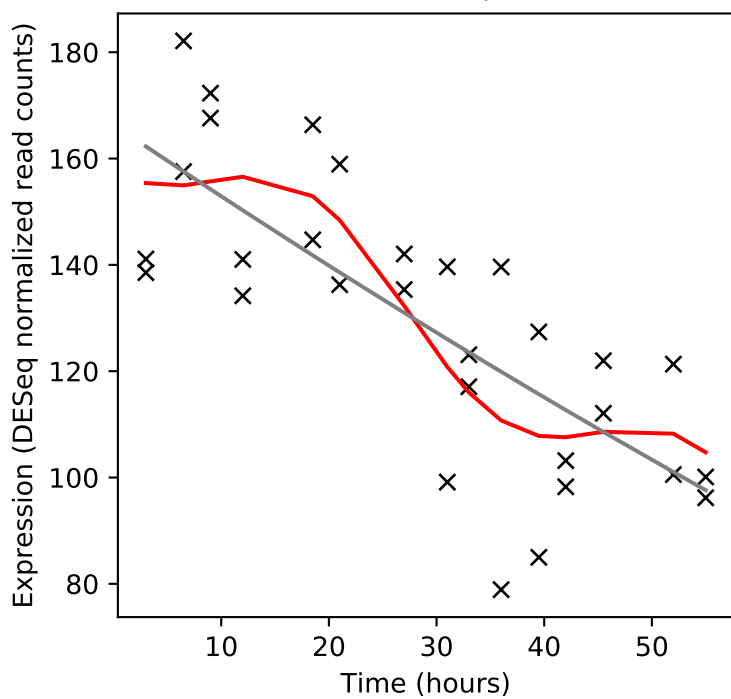

Rv1368/lprF

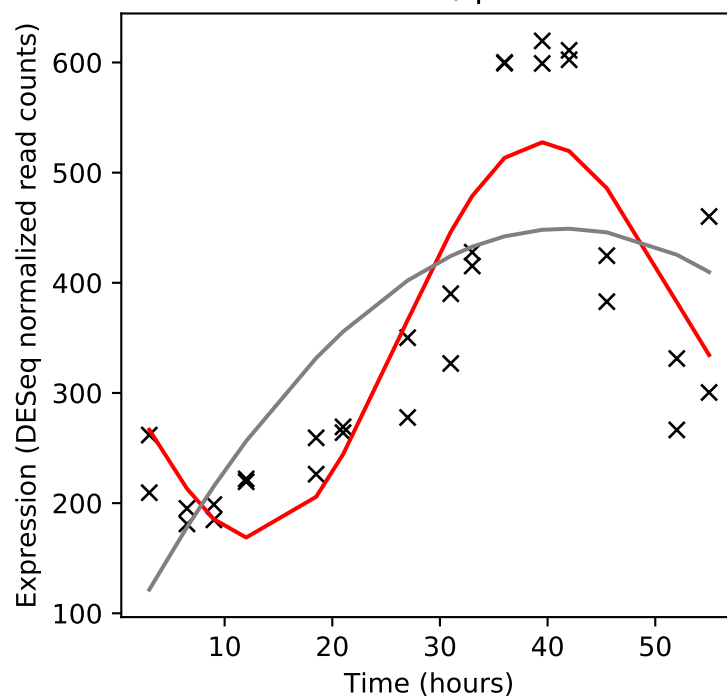

Rv1369c/-

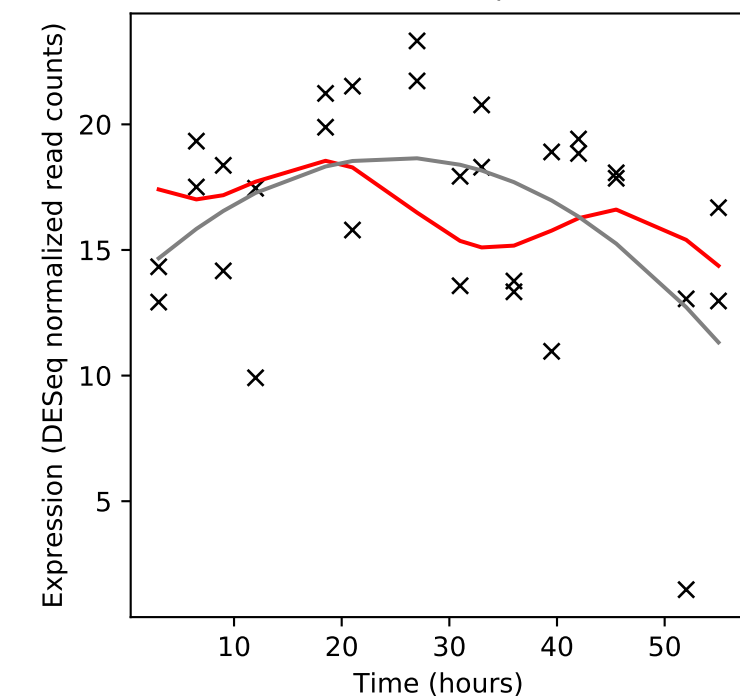



Rv1370c/-

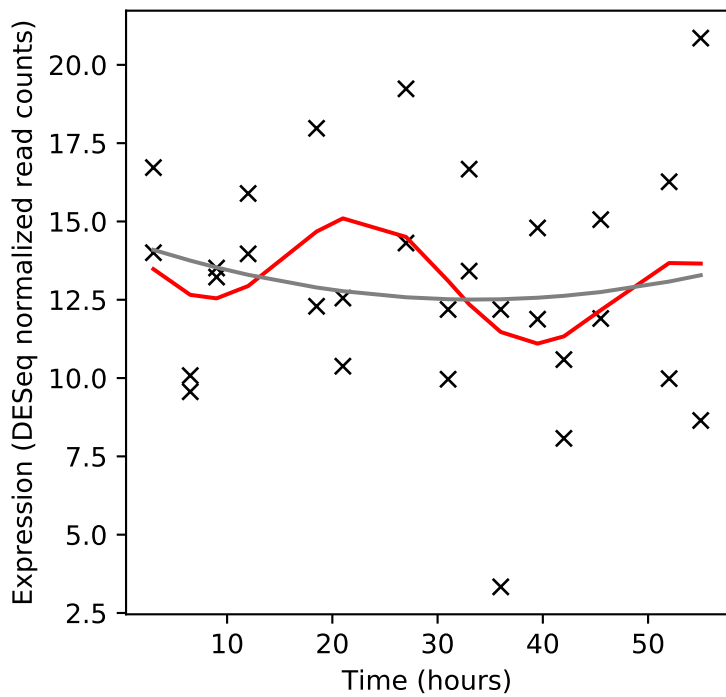

Rv1371/-

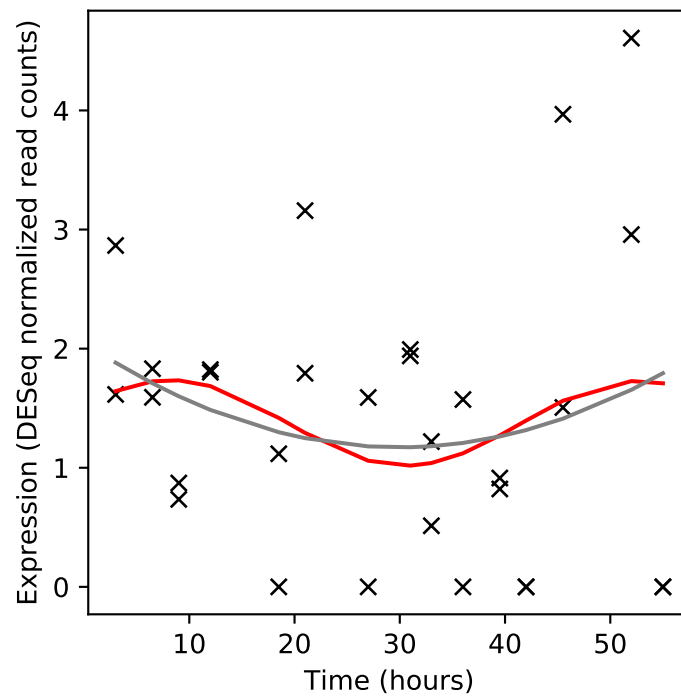

Rv1372/-

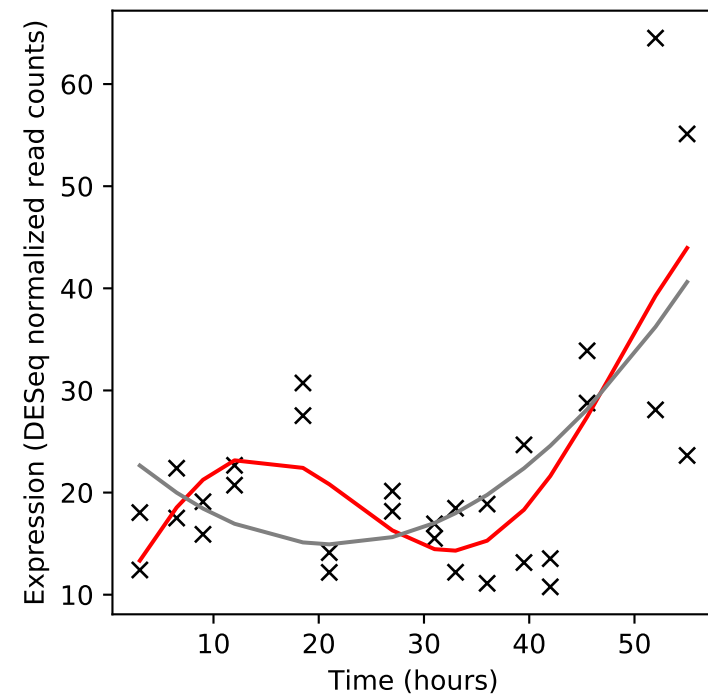

Rv1373/-

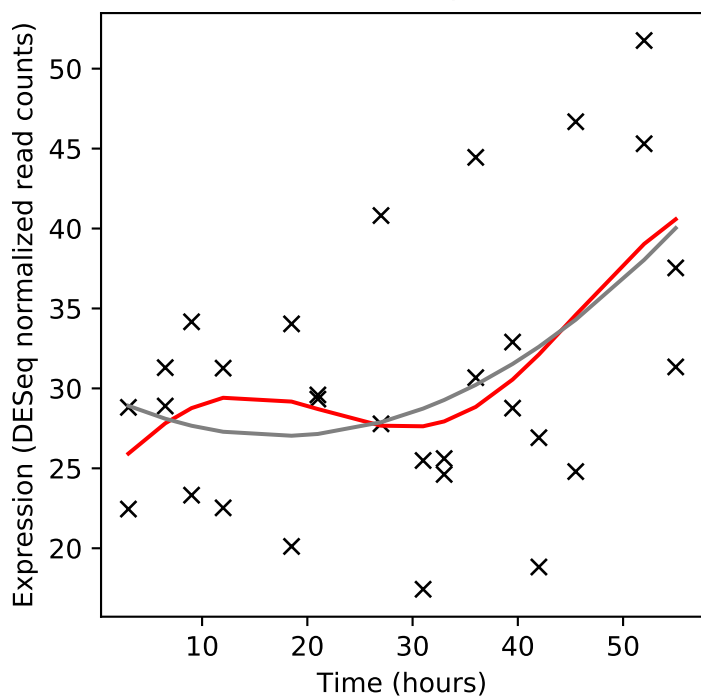

Rv1374c/-

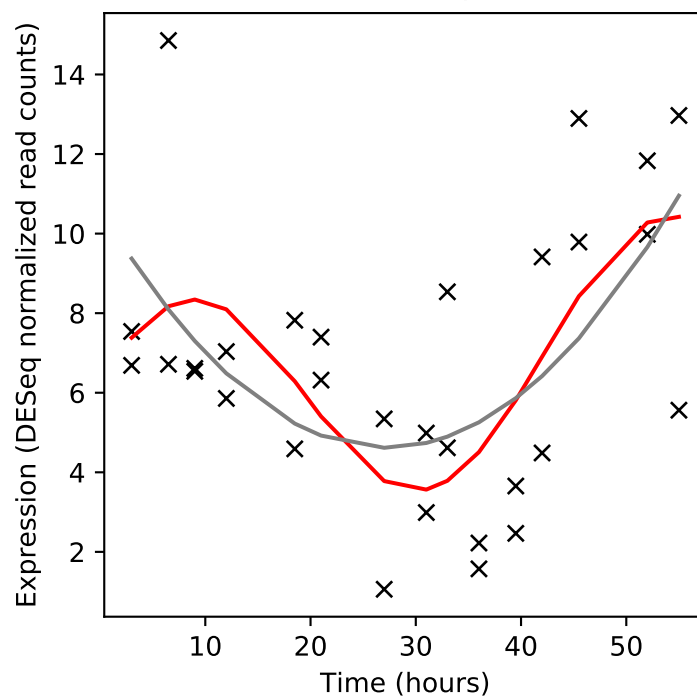

Rv1375/-

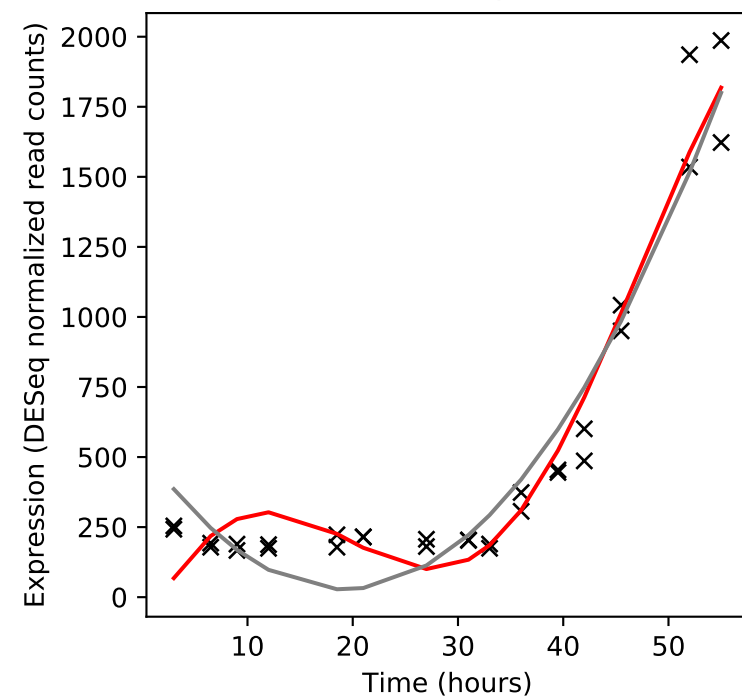

Rv1376/-

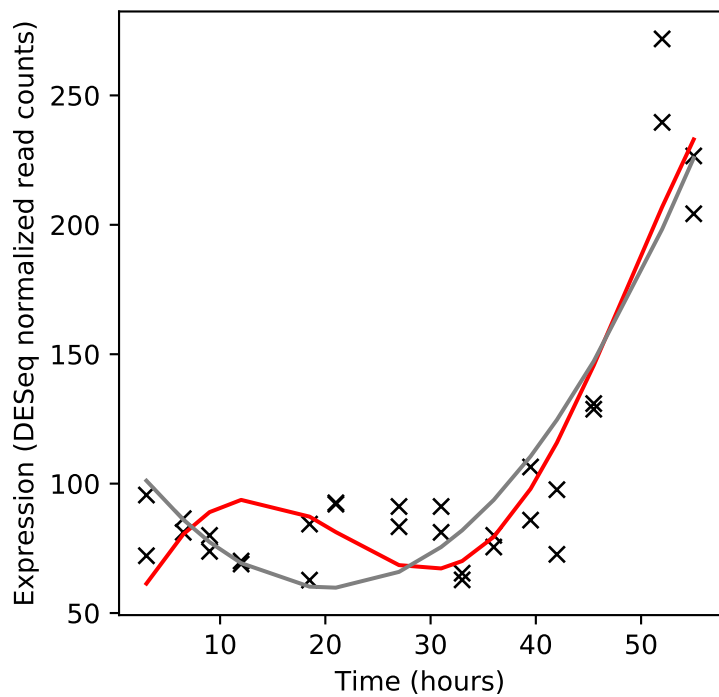

Rv1377c/-

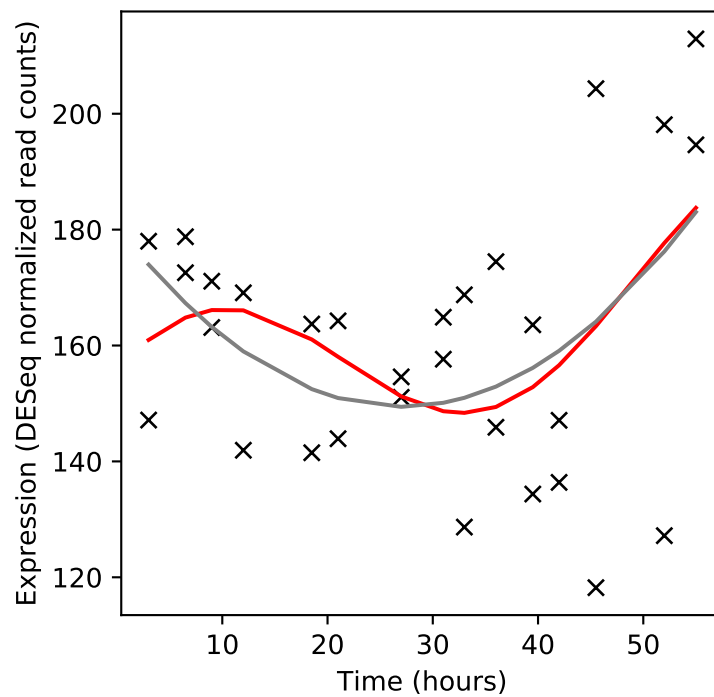

Rv1378c/-

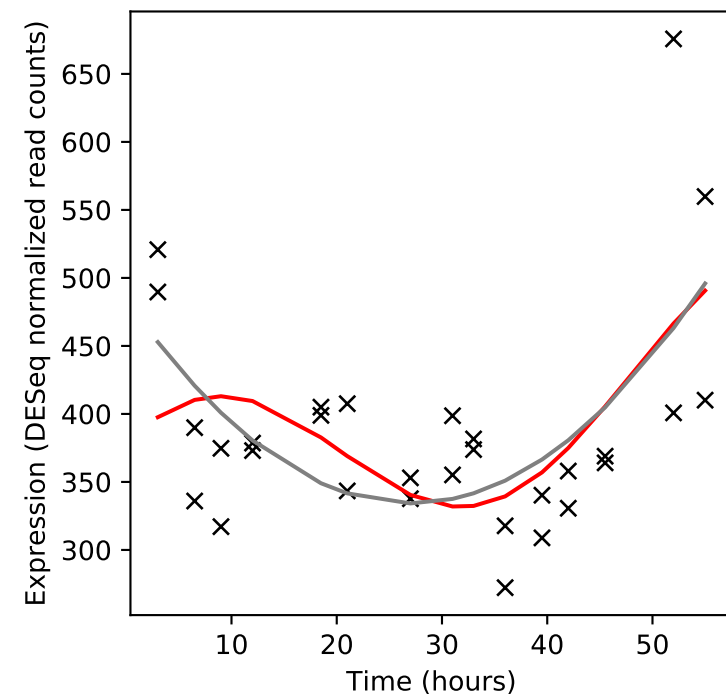

Rv1379/pyrR

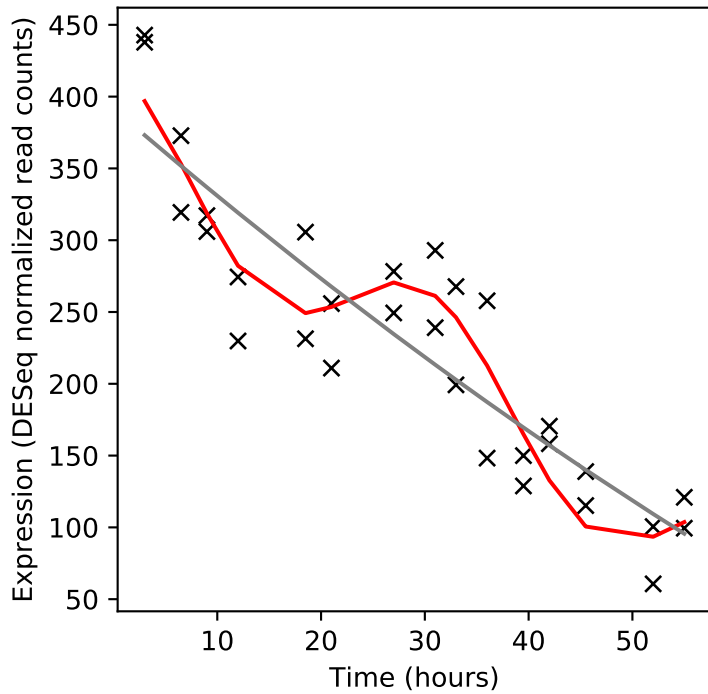

Rv1380/pyrB

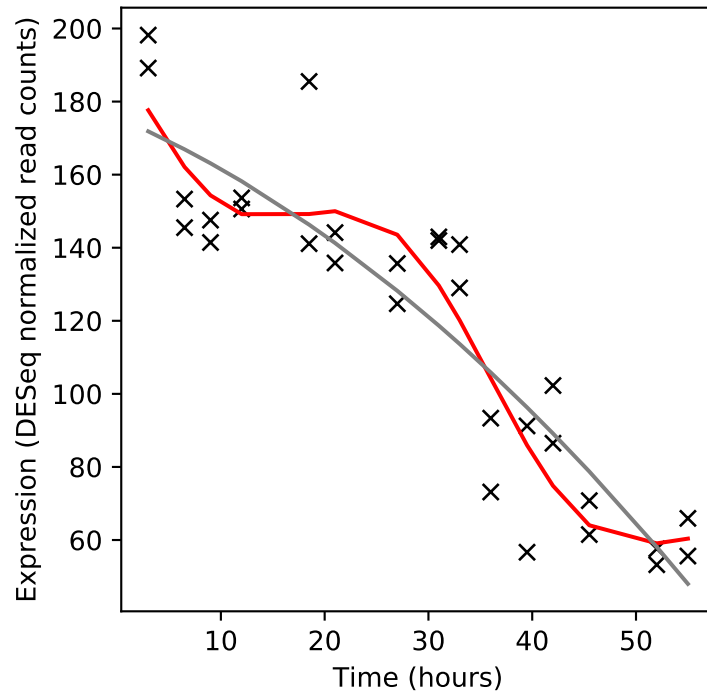

Rv1381/pyrC

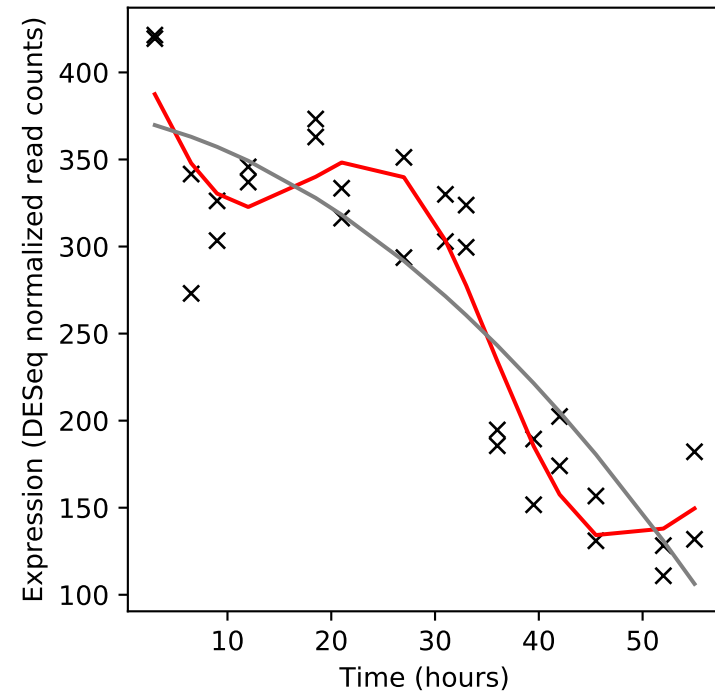

Rv1382/-

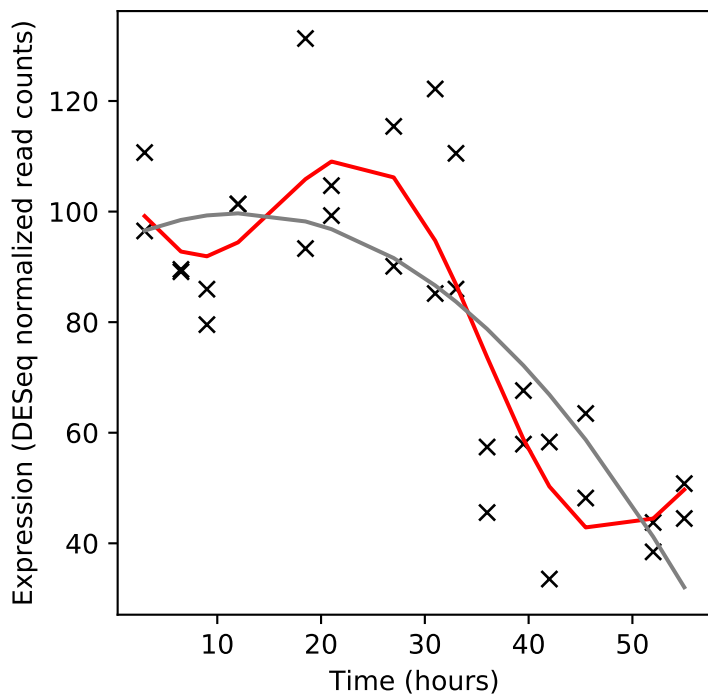

Rv1383/carA

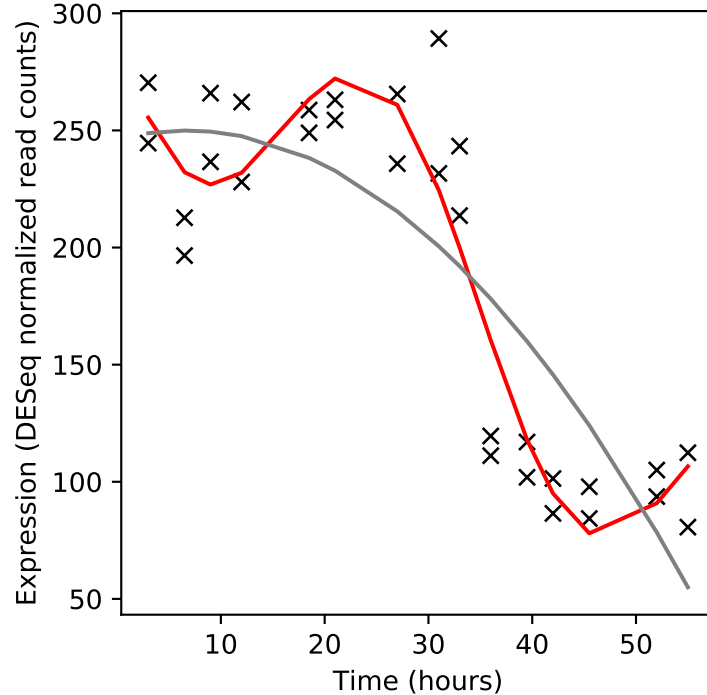

Rv1384/carB

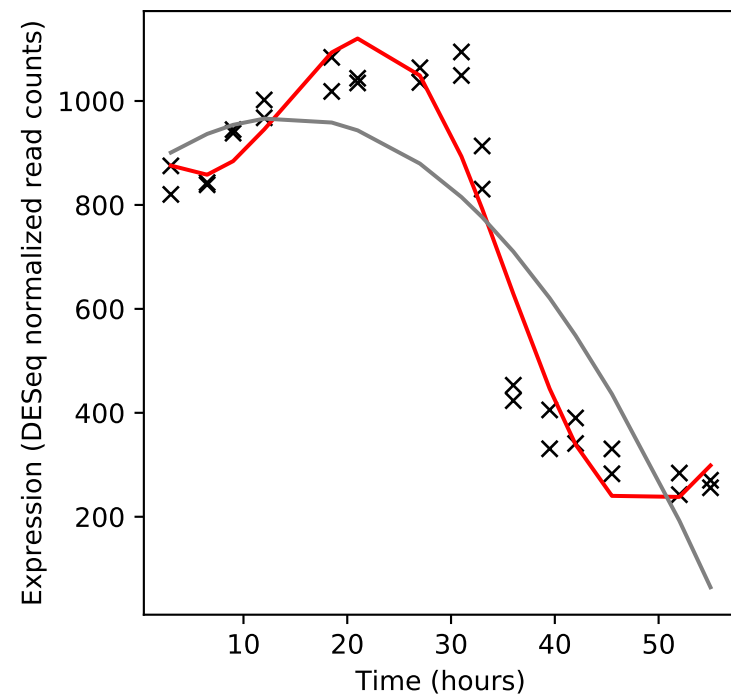

Rv1385/pyrF

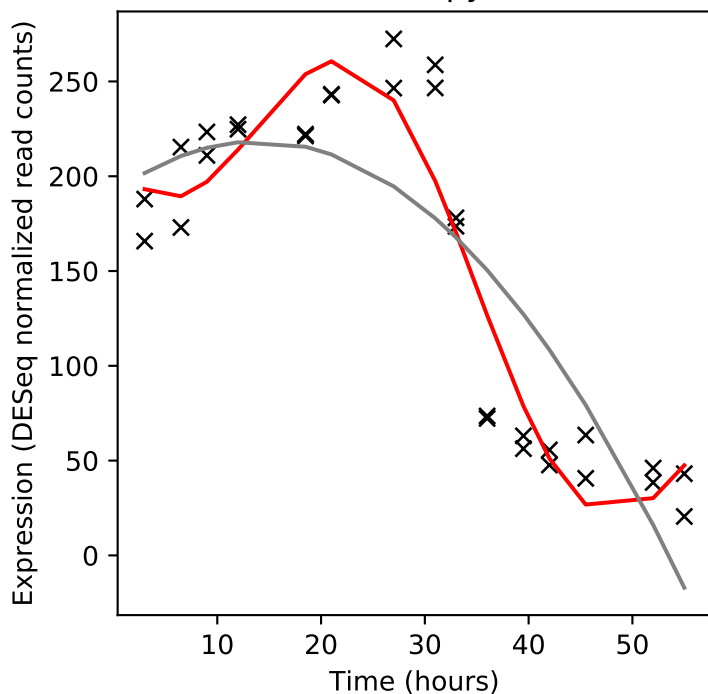

Rv1386/PE15

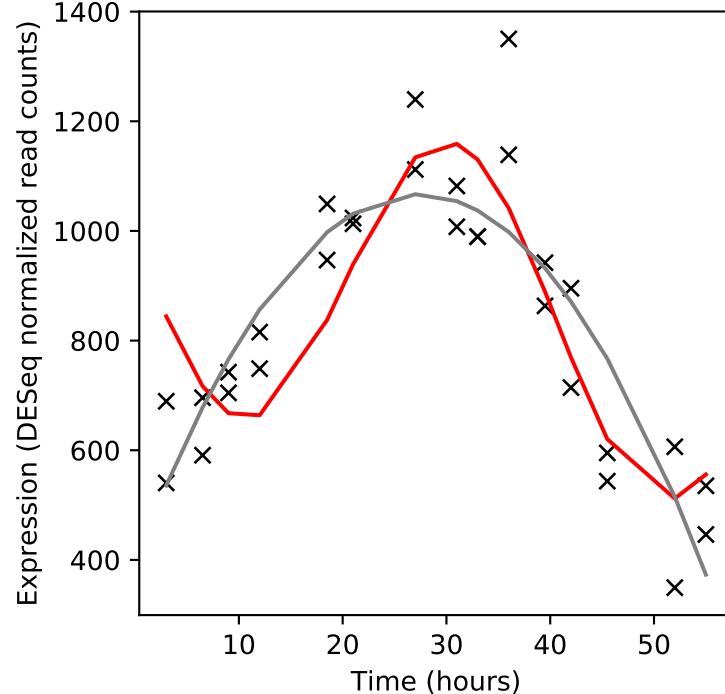

Rv1387/PPE20

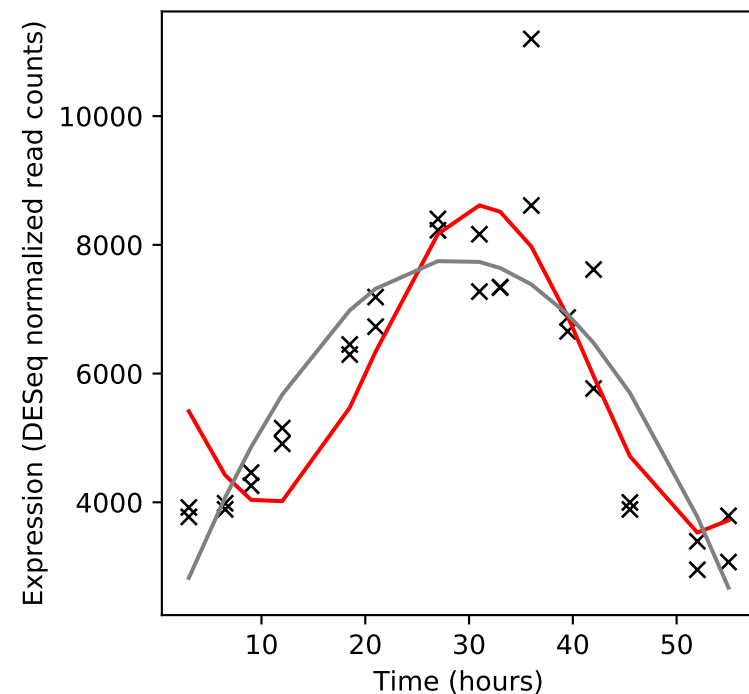

Rv1388/mihF

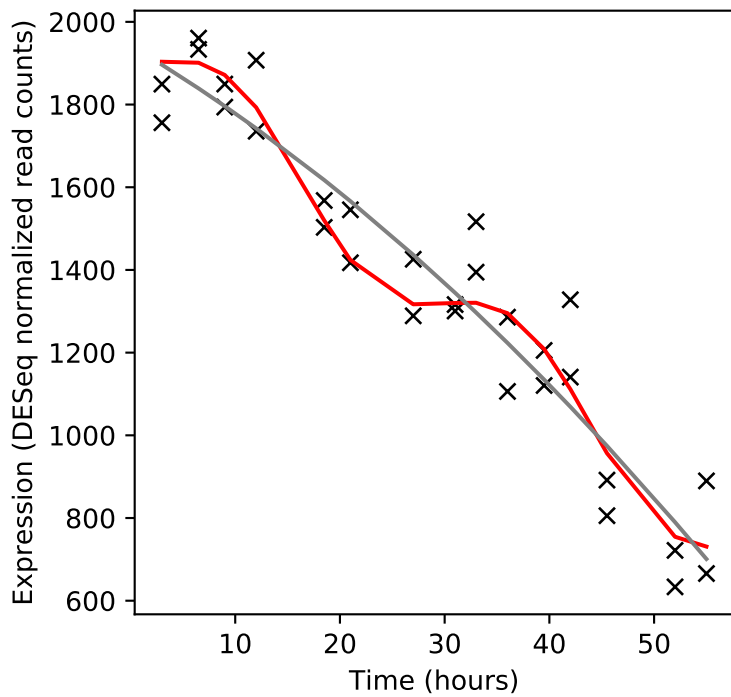

Rv1389/gmk

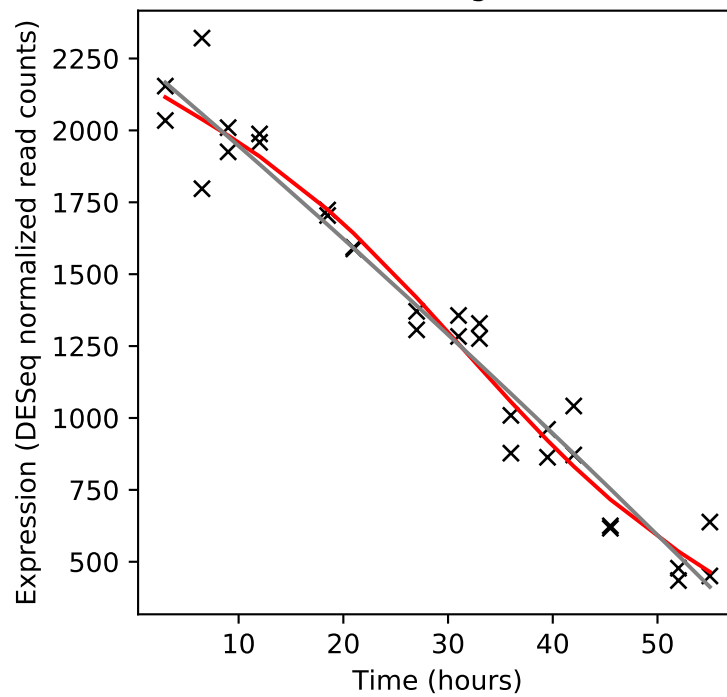

Rv1390/rpoZ

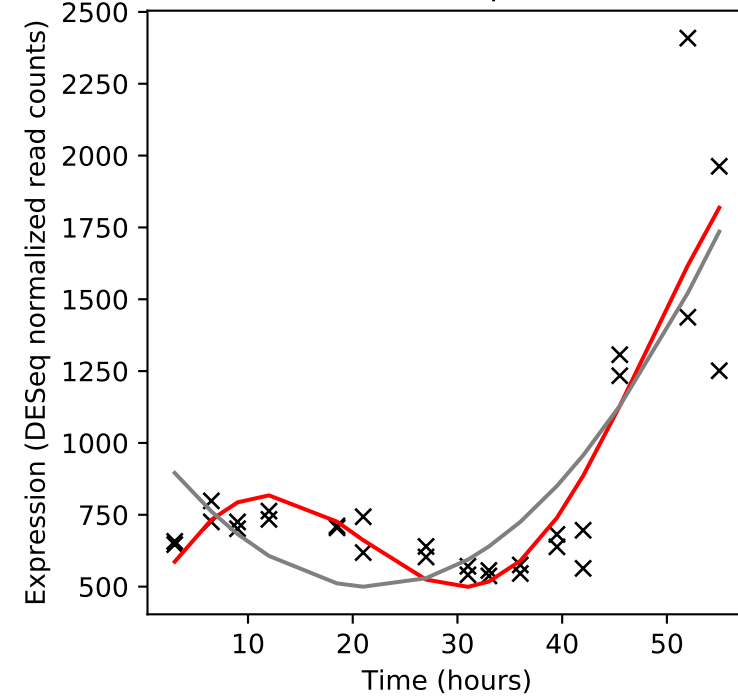

Rv1391/dfp

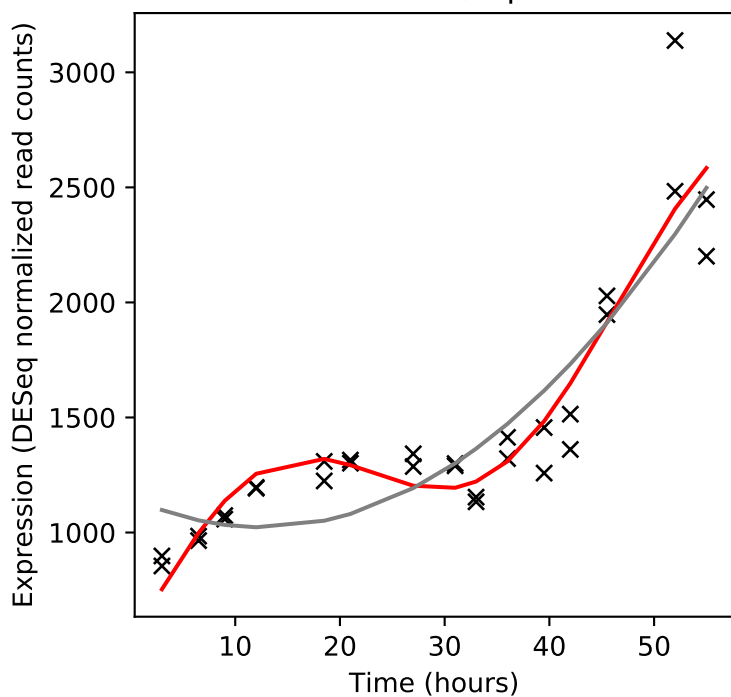

Rv1392/metK

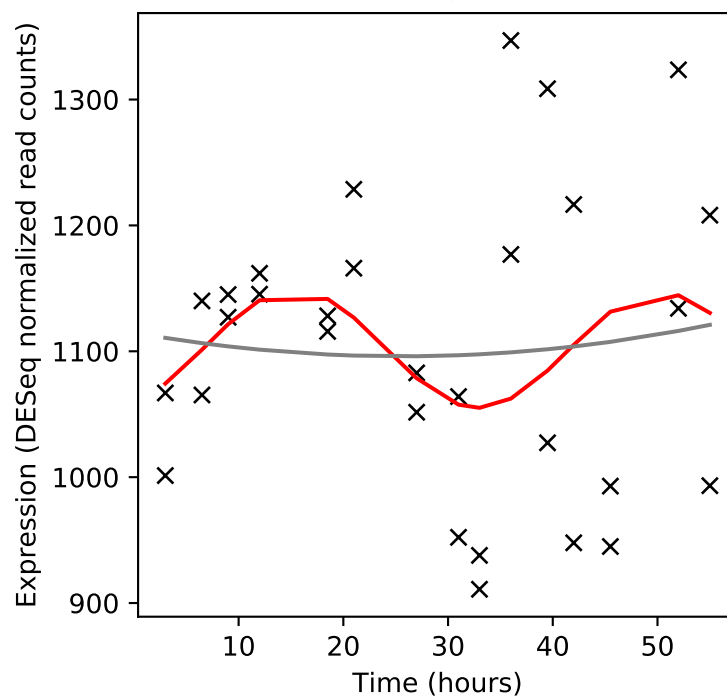

Rv1393c/-

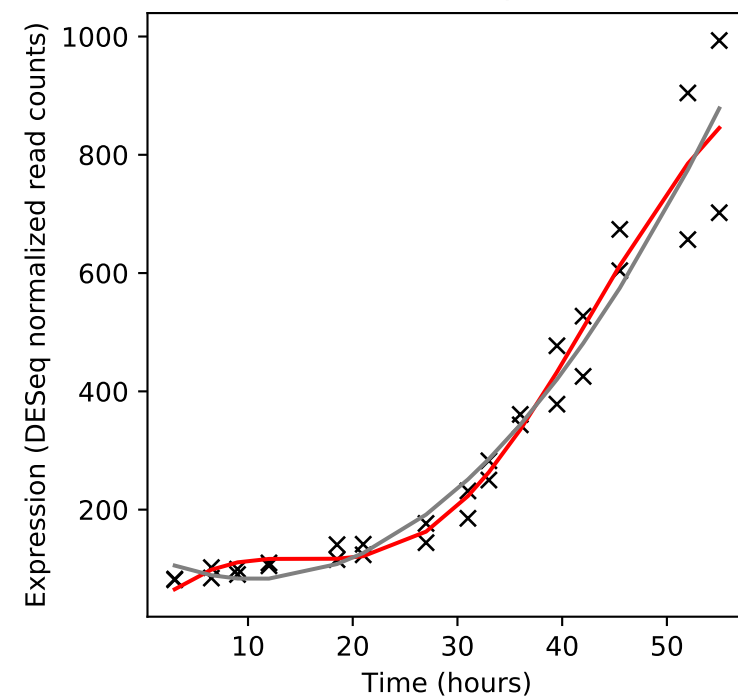

Rv1394c/cyp132

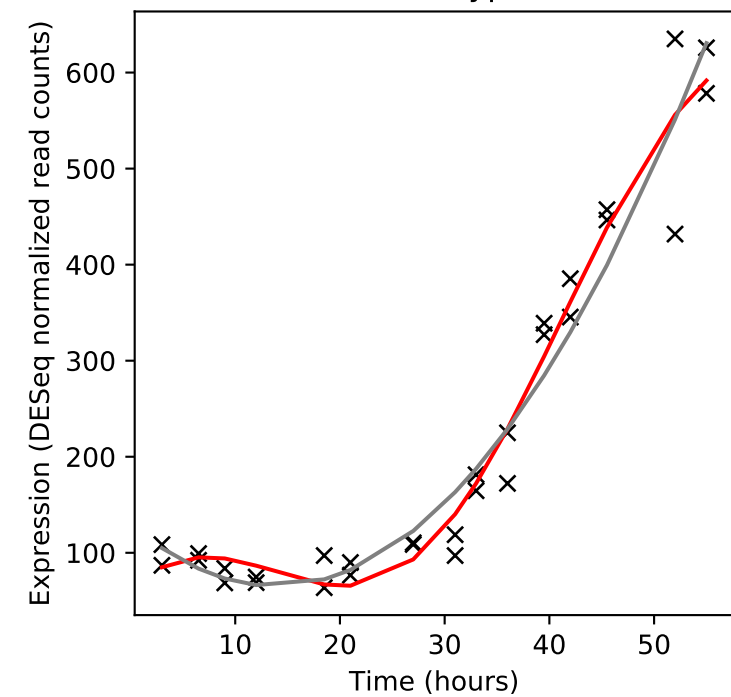

Rv1395/-

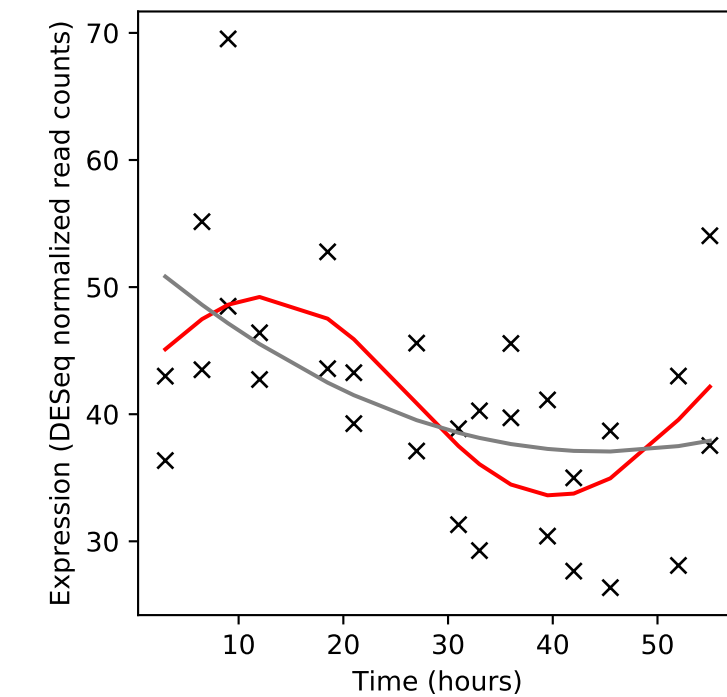

Rv1396c/PE\_PGRS25

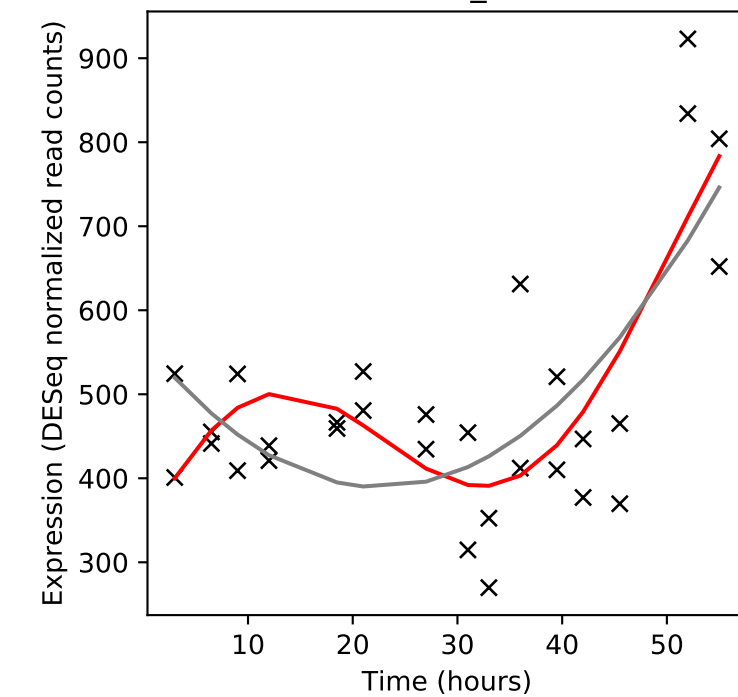

Rv1397c/vapC10

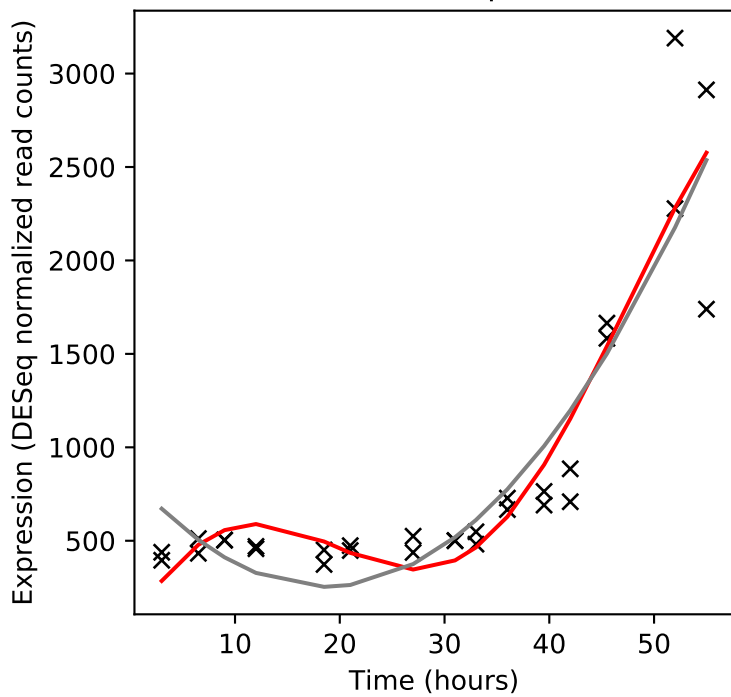

Rv1398c/vapB10

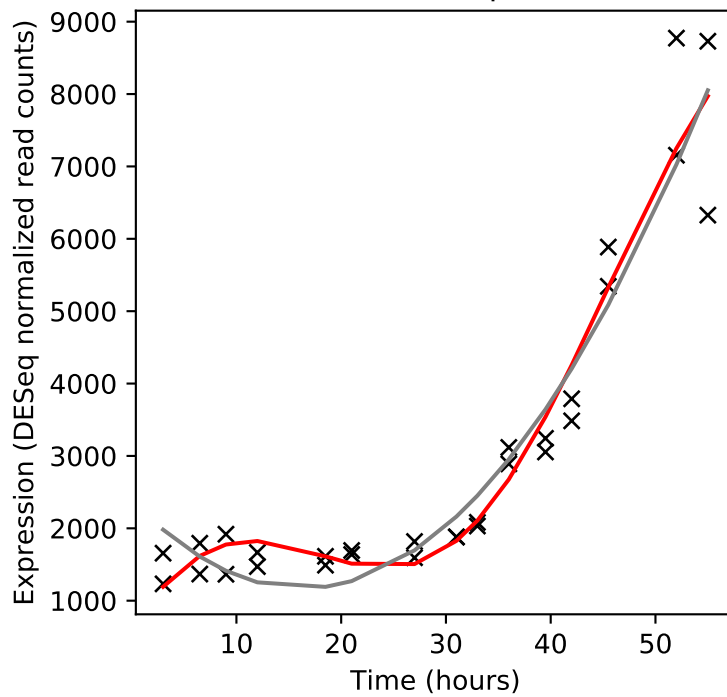

Rv1399c/nlhH

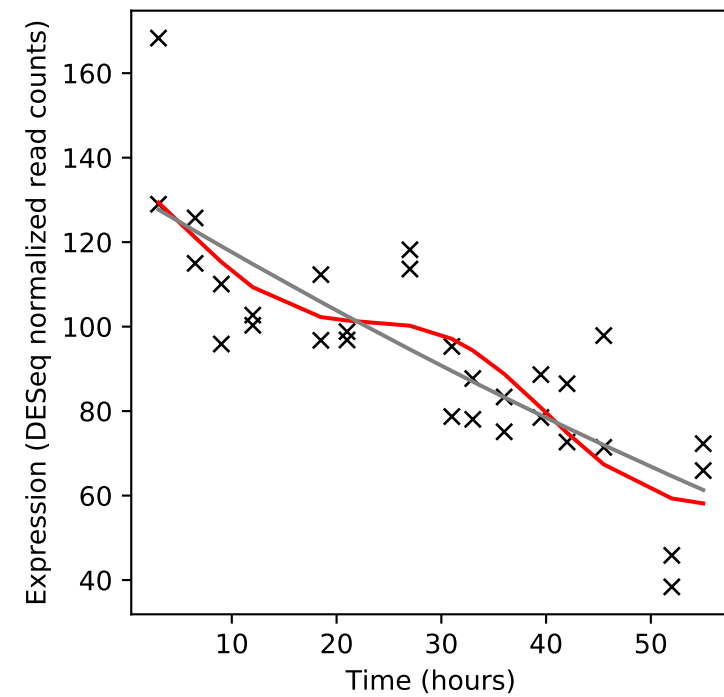

Rv1400c/lipl

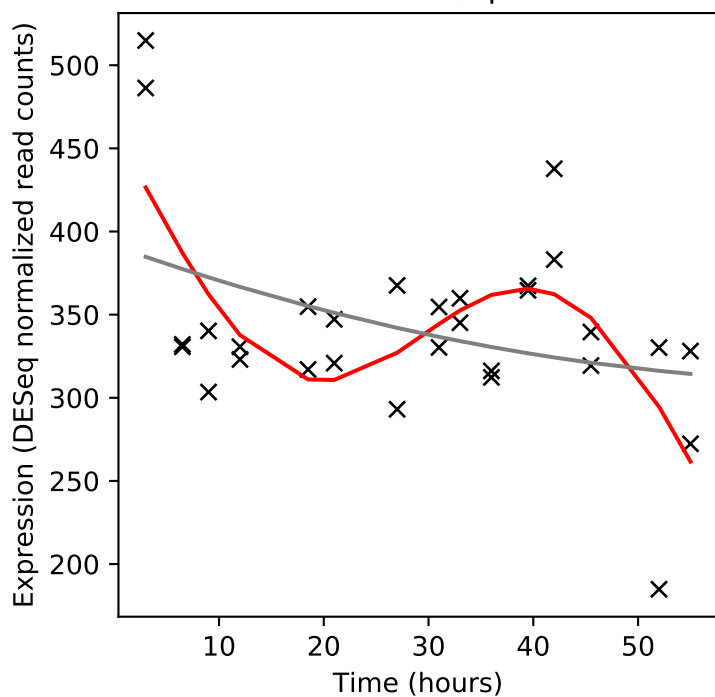

Rv1401/-

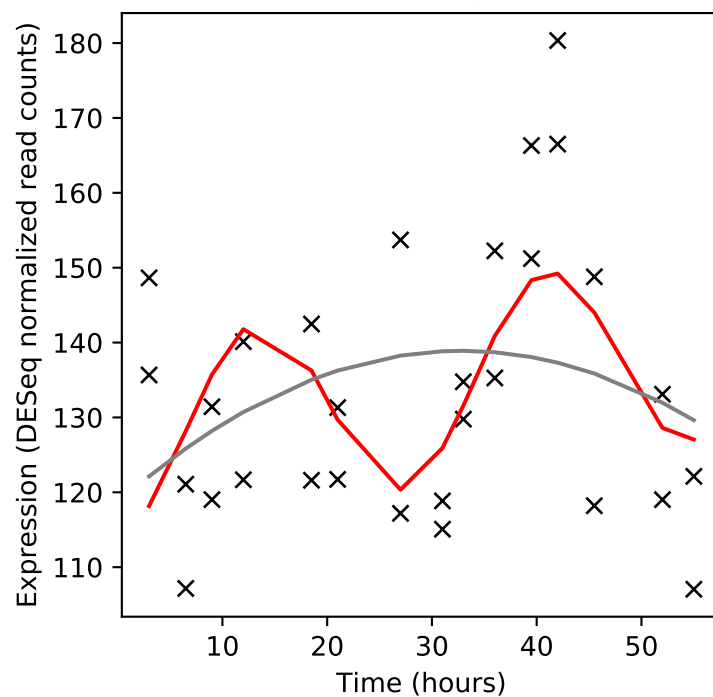

Rv1402/priA

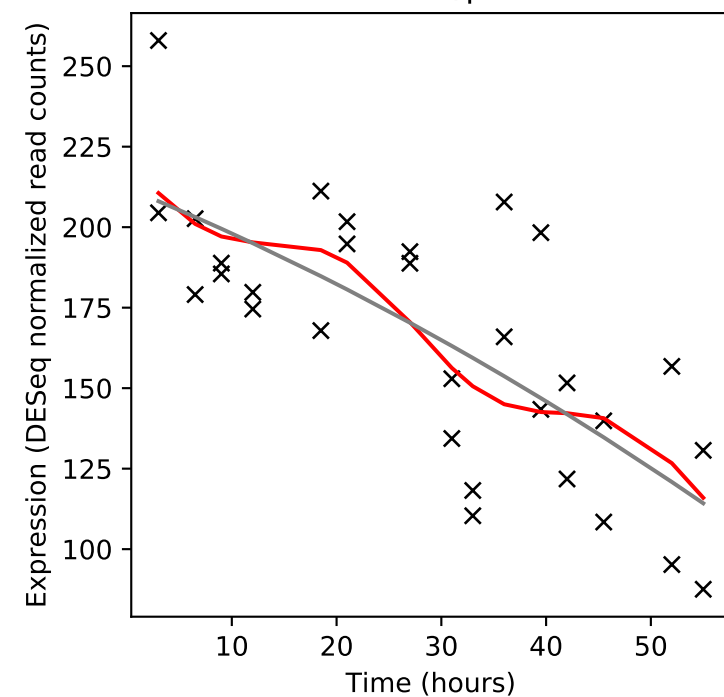

Rv1403c/-

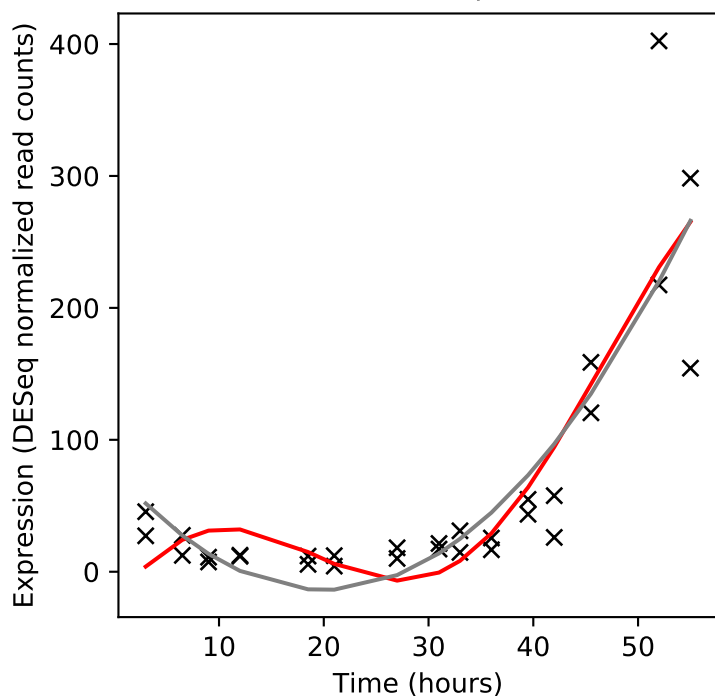

Rv1404/-

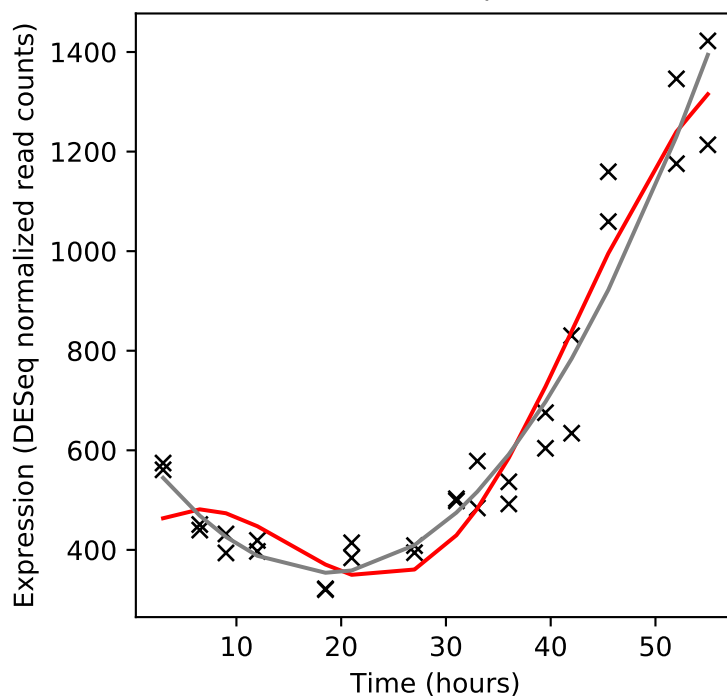

Rv1405c/-

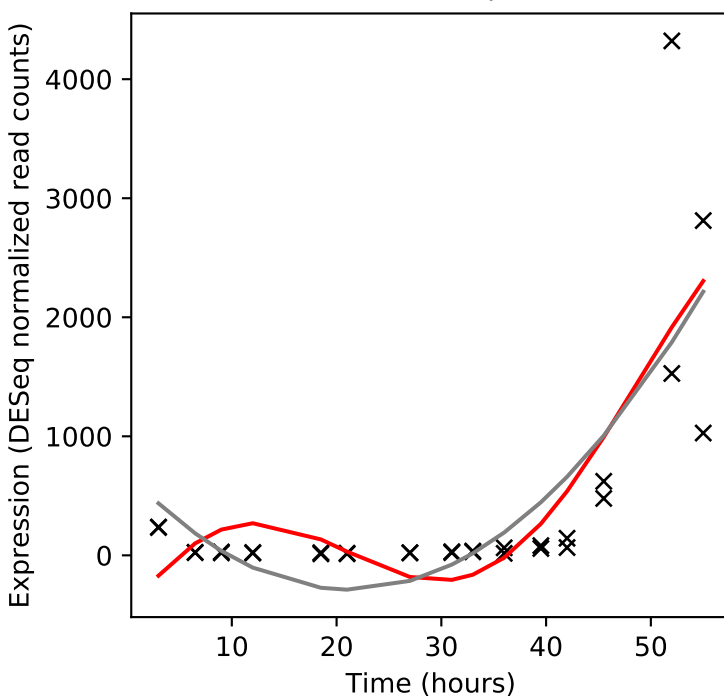

Rv1406/fmt

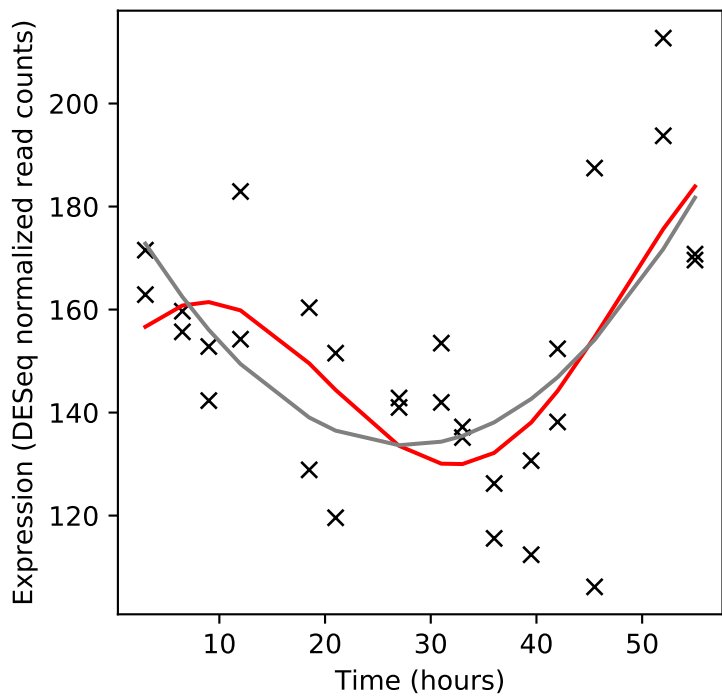

Rv1407/fmu

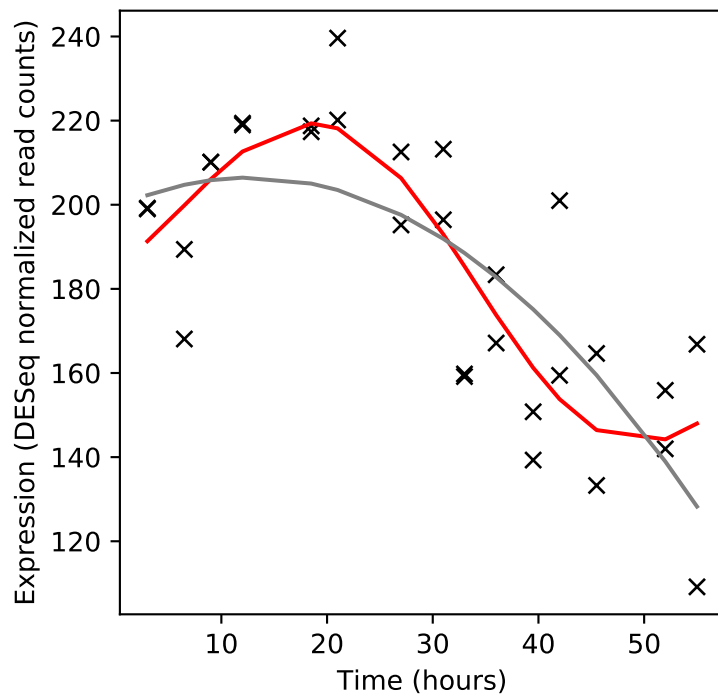

Rv1408/rpe

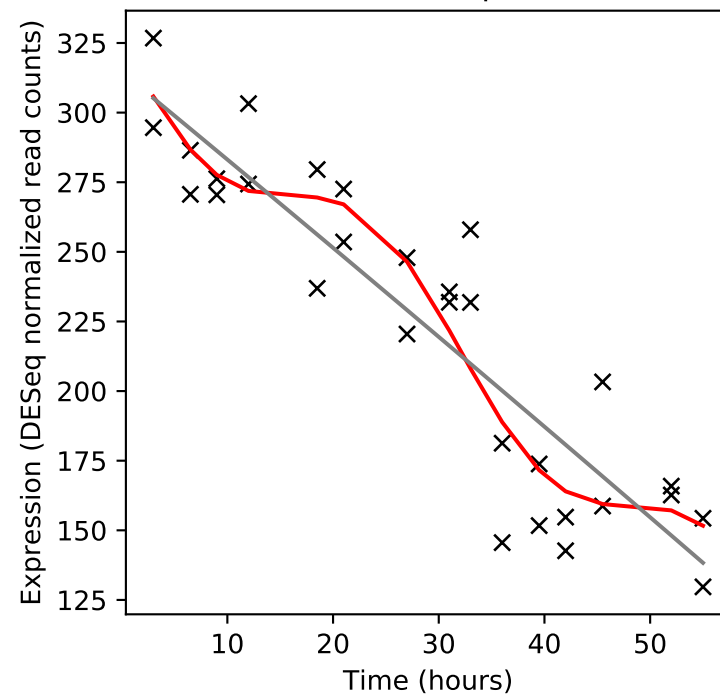

Rv1409/ribG

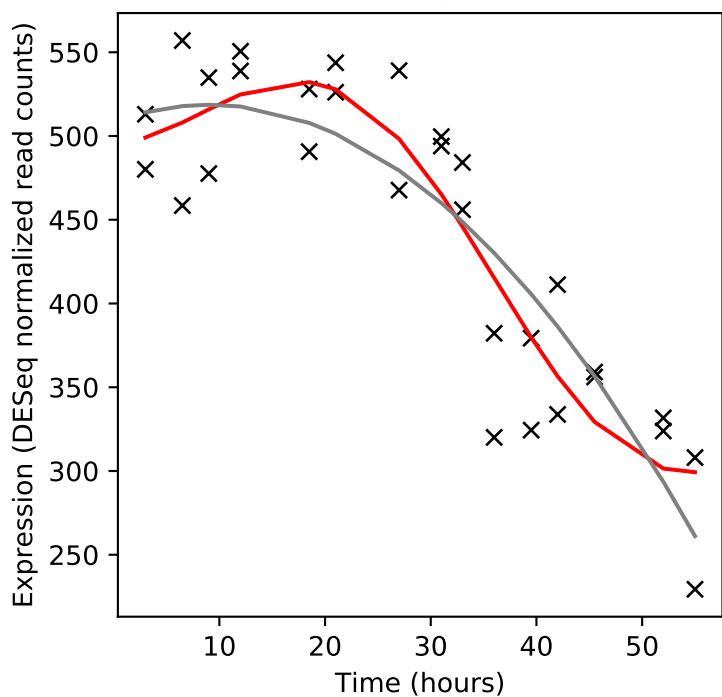

Rv1410c/-

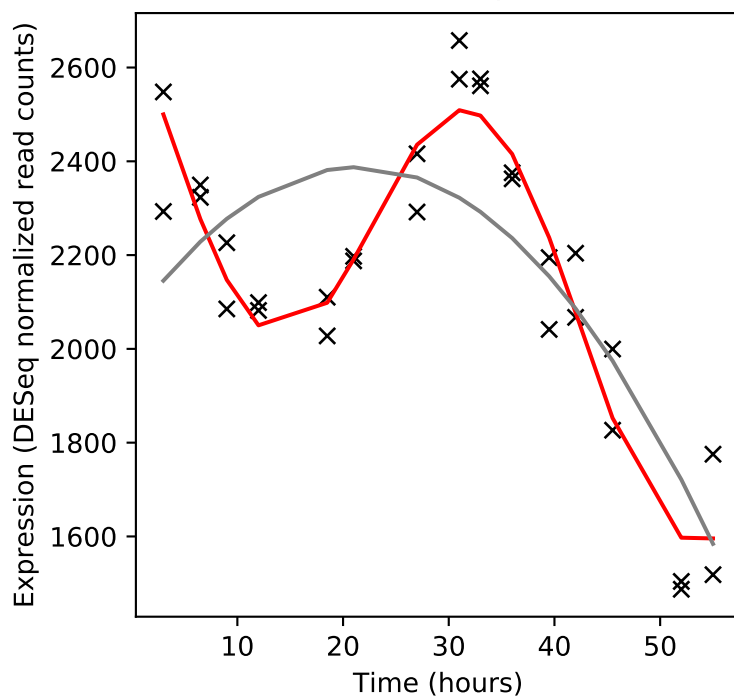

Rv1411c/lprG

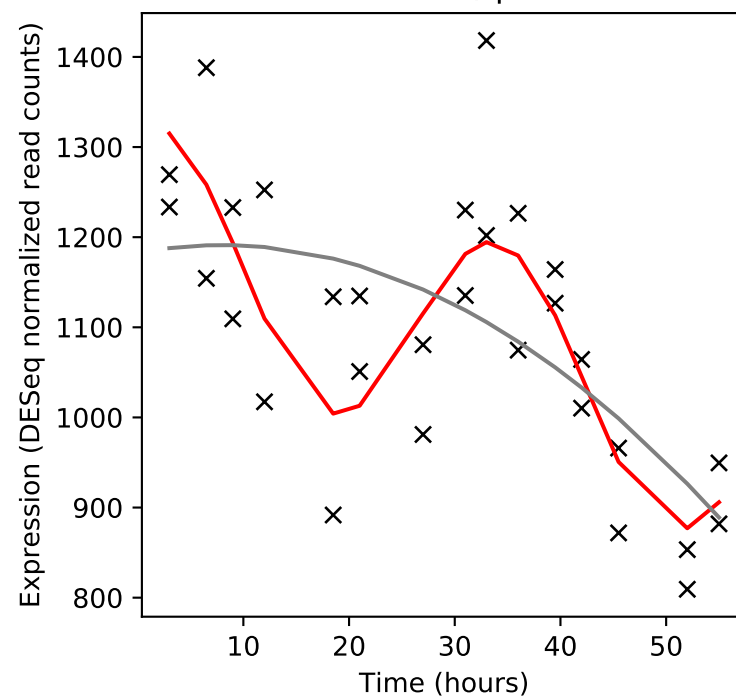

Rv1412/ribC

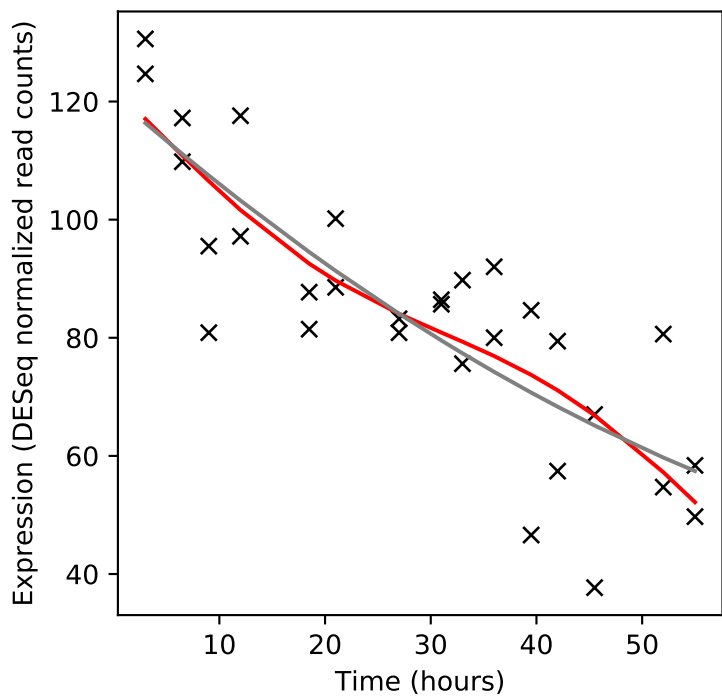

Rv1413/-

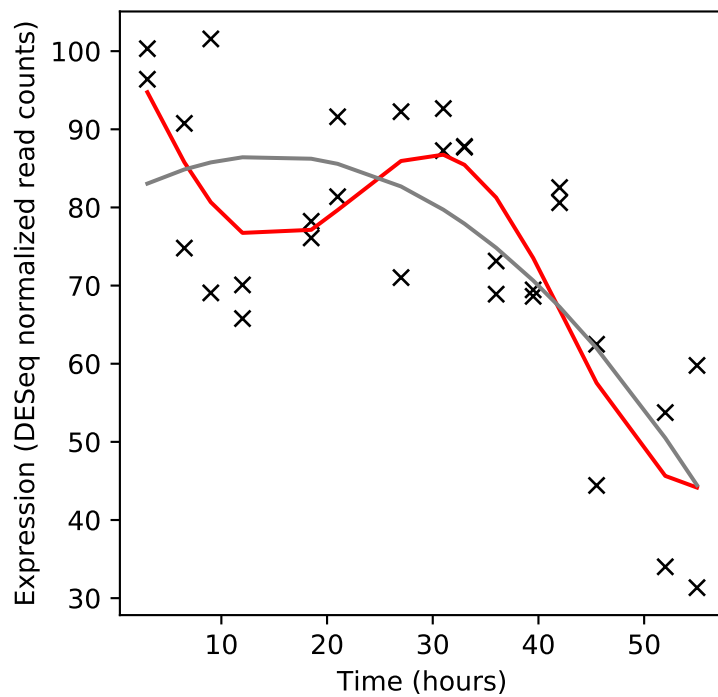

Rv1414/-

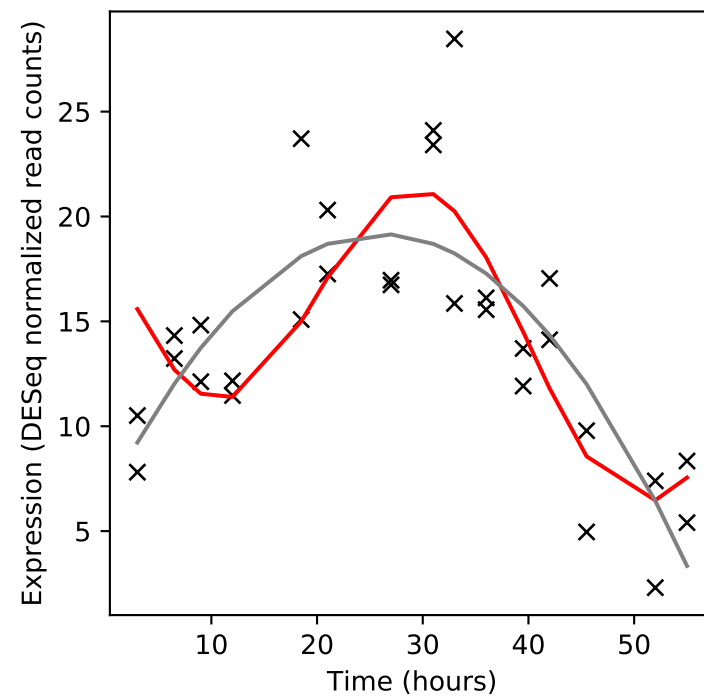

Rv1415/ribA2

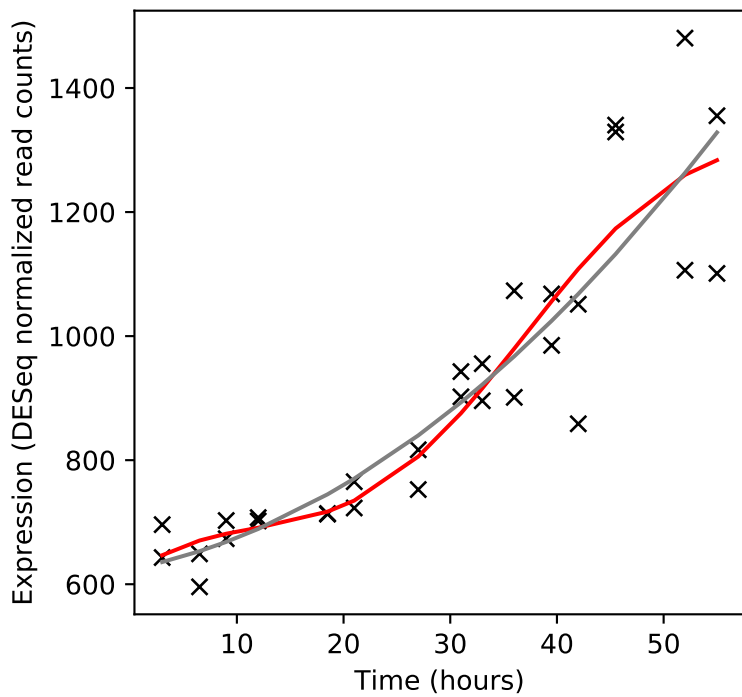

Rv1416/ribH

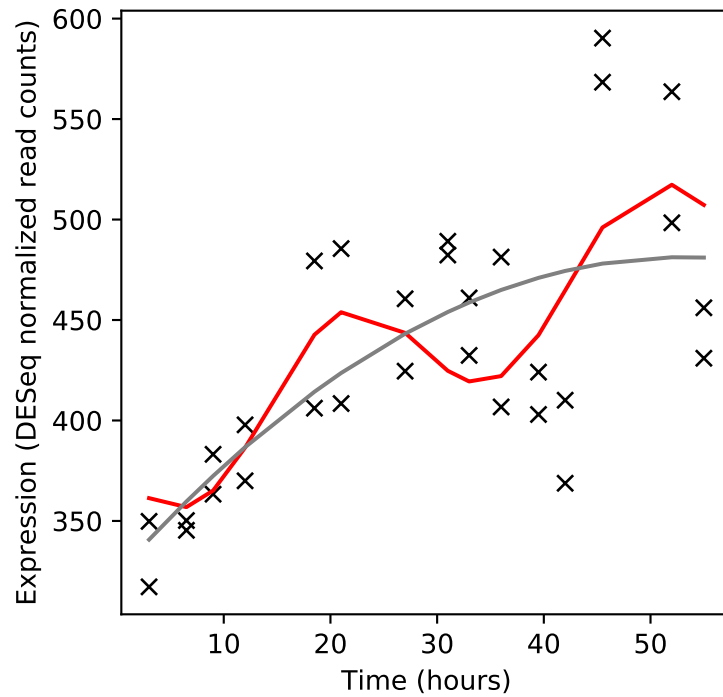

Rv1417/-

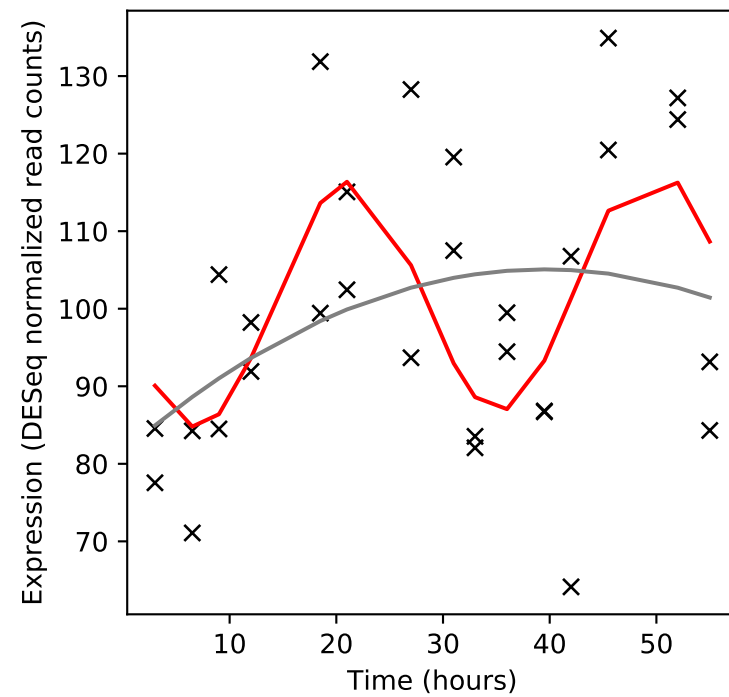

Rv1418/lprH

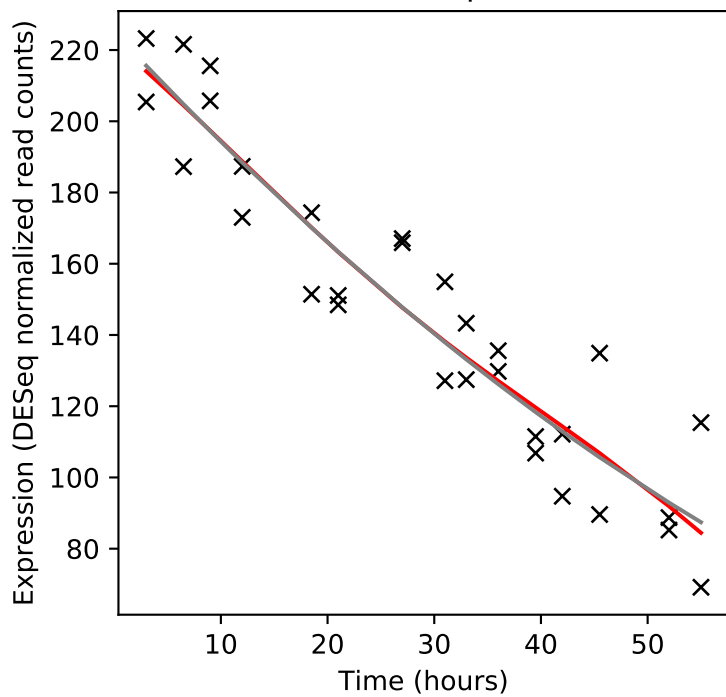

Rv1419/-

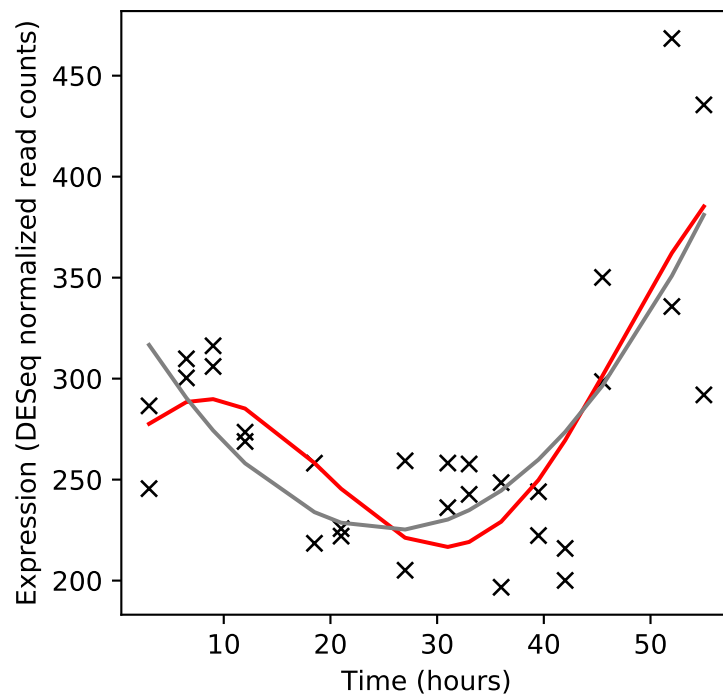

Rv1420/uvrC

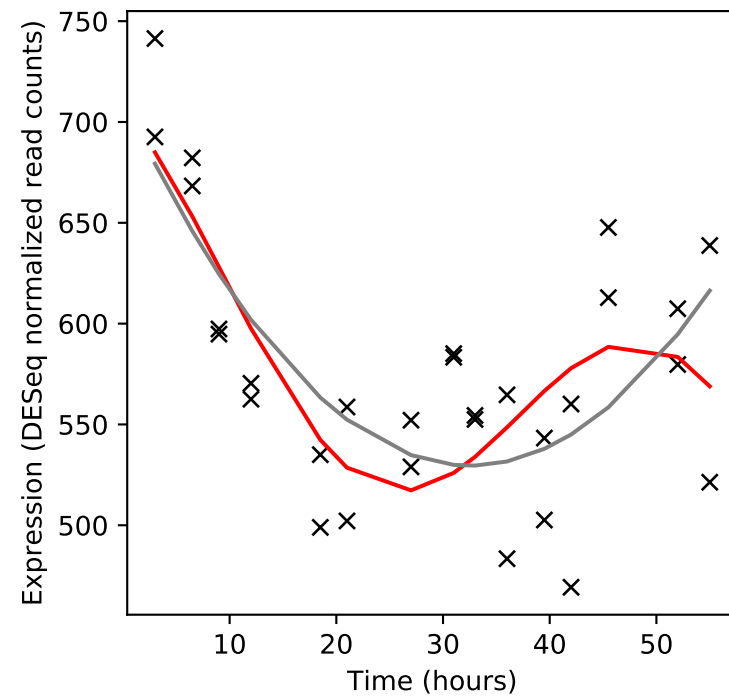

Rv1421/-

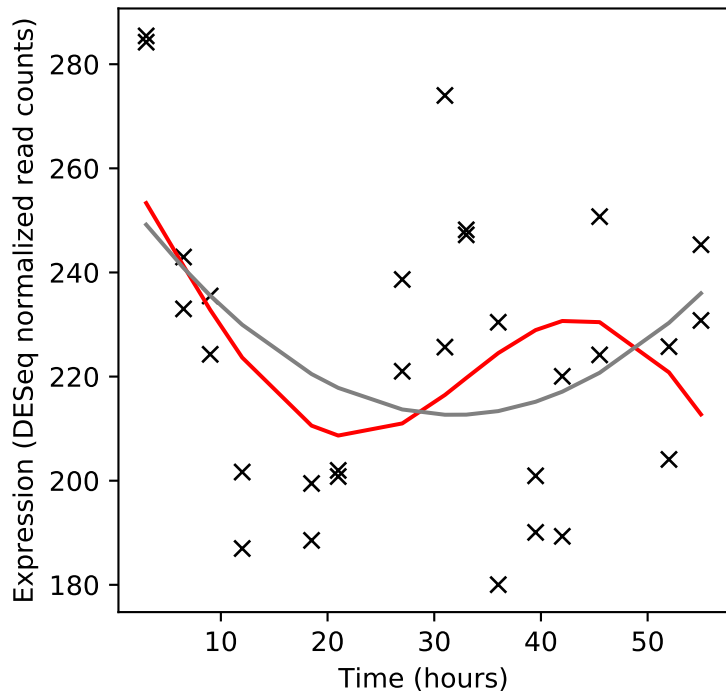

Rv1422/-

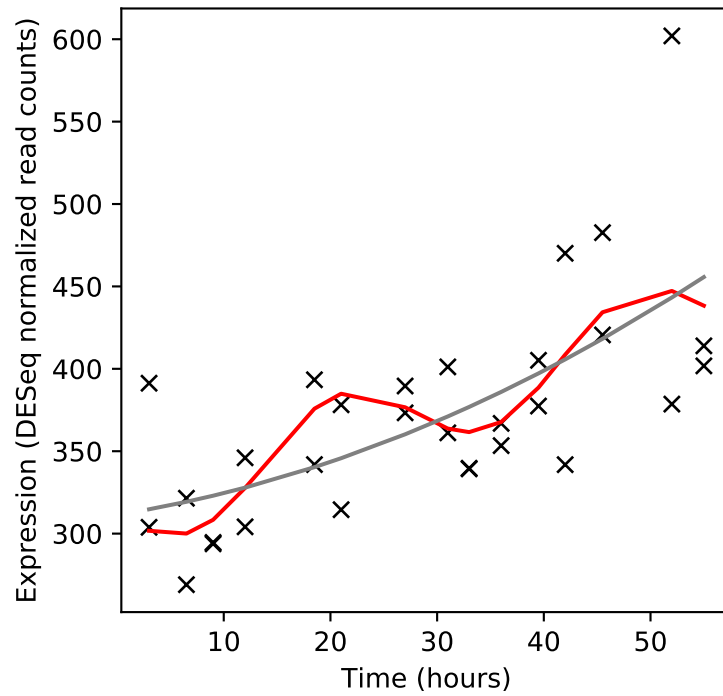

Rv1423/whiA

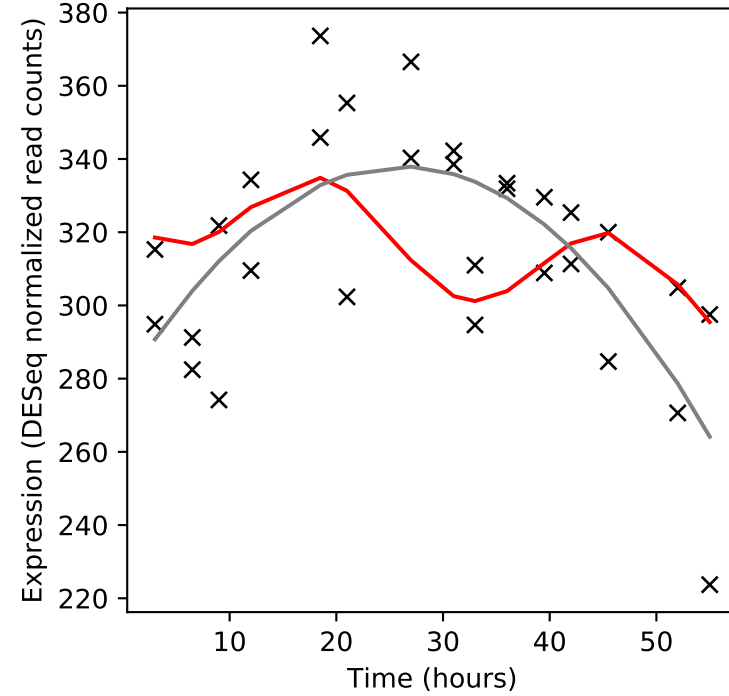

Rv1424c/-

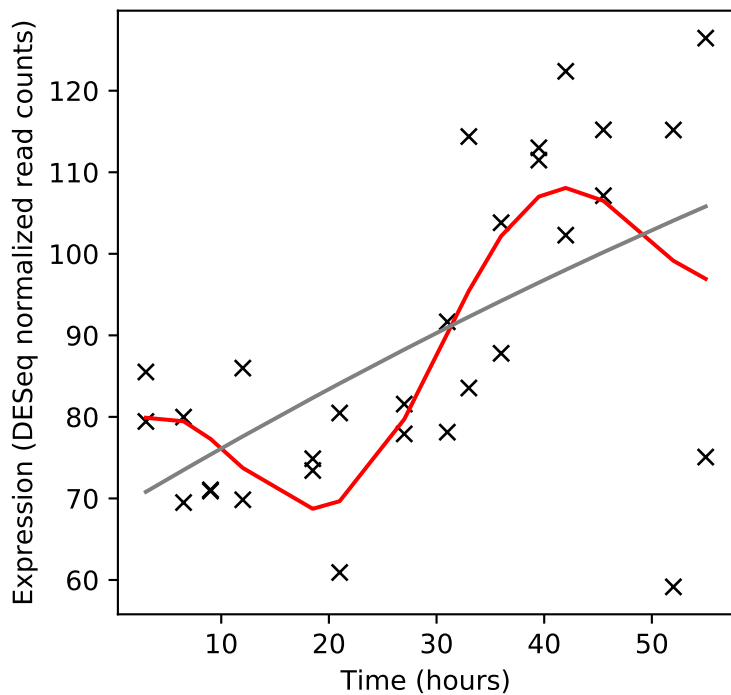

Rv1425/-

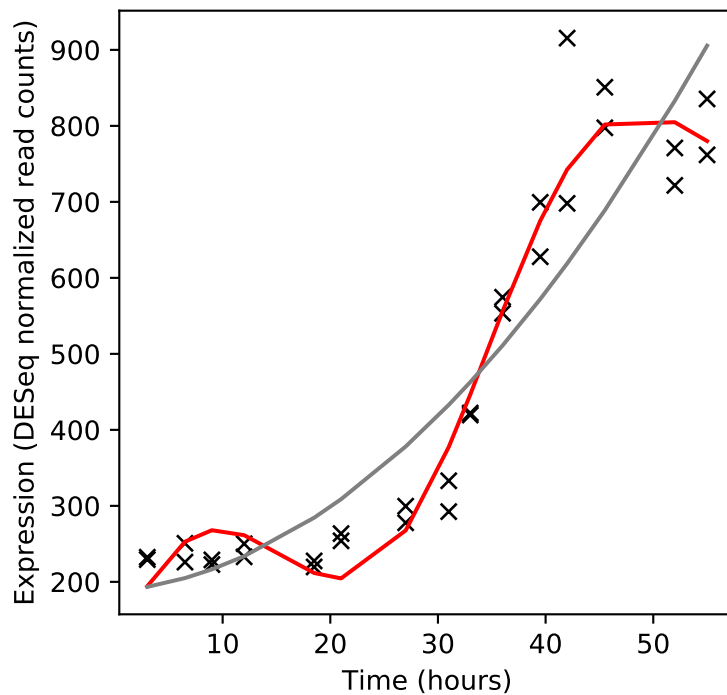

Rv1426c/lipO

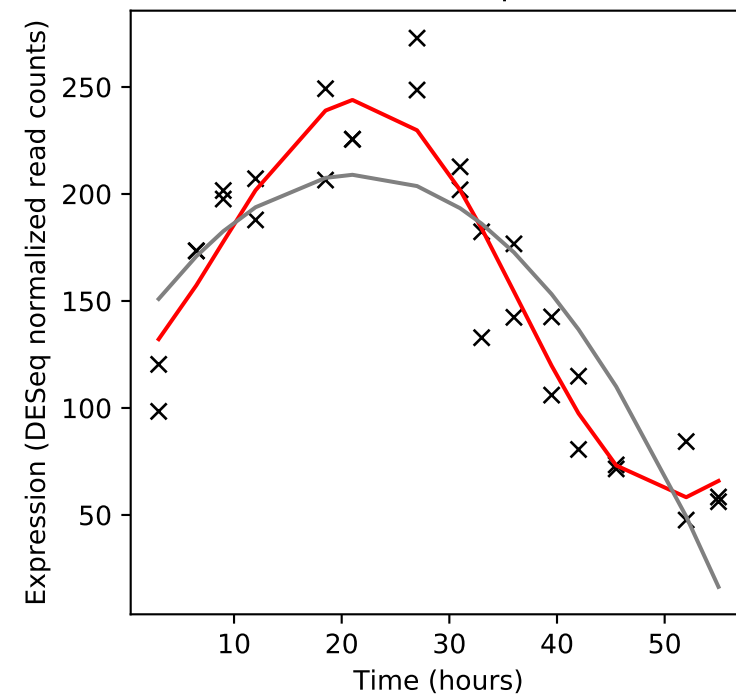

Rv1427c/fadD12

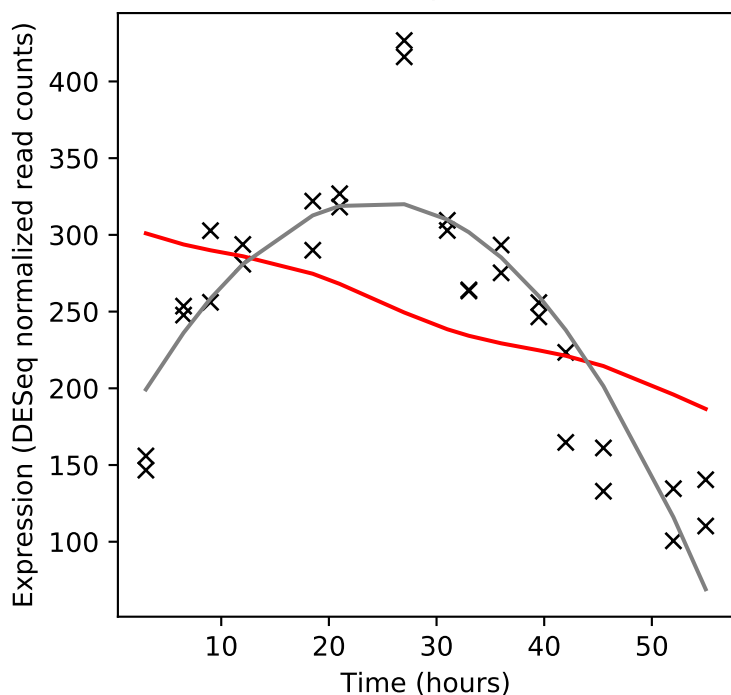

Rv1428c/-

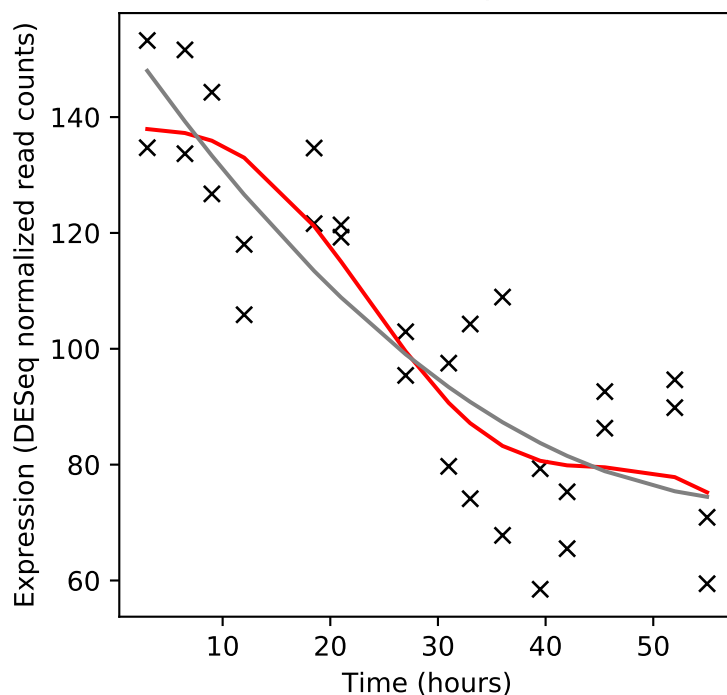

Rv1429/-

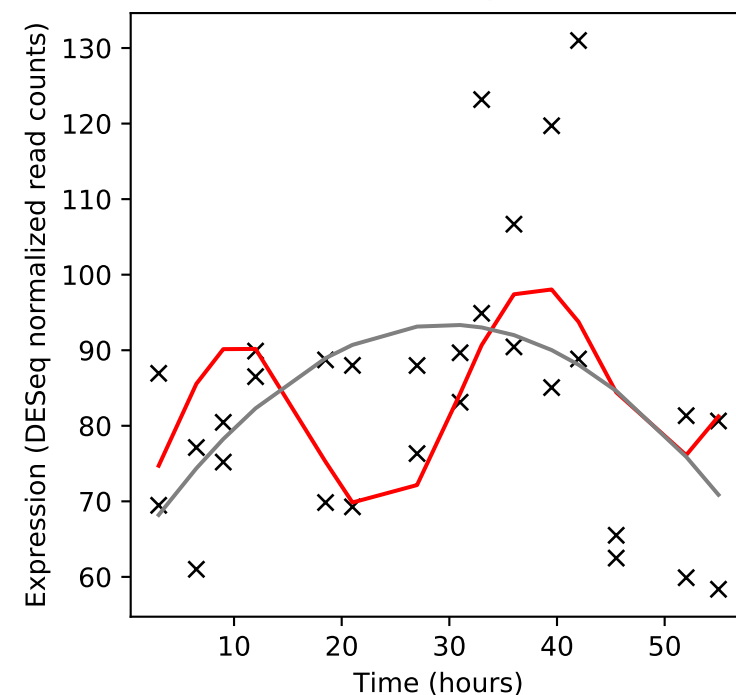

Rv1430/PE16

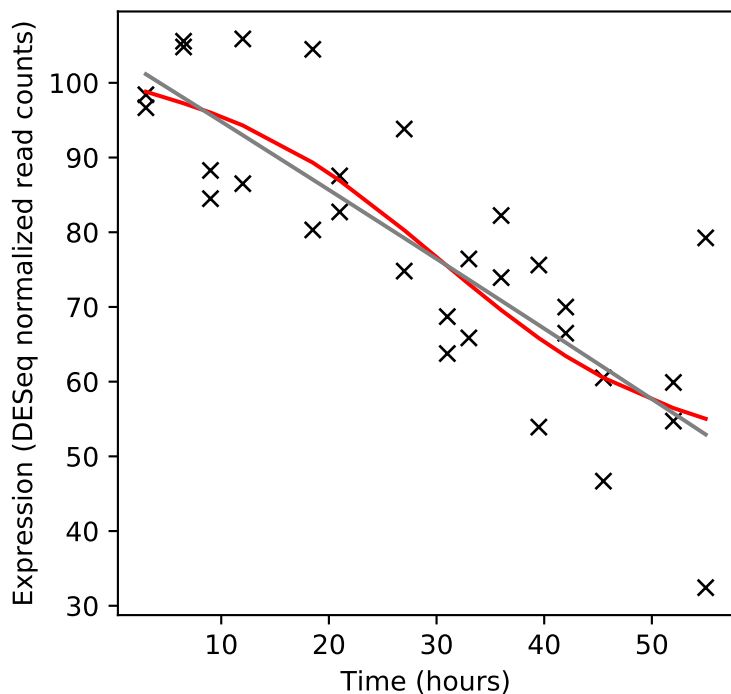

Rv1431/-

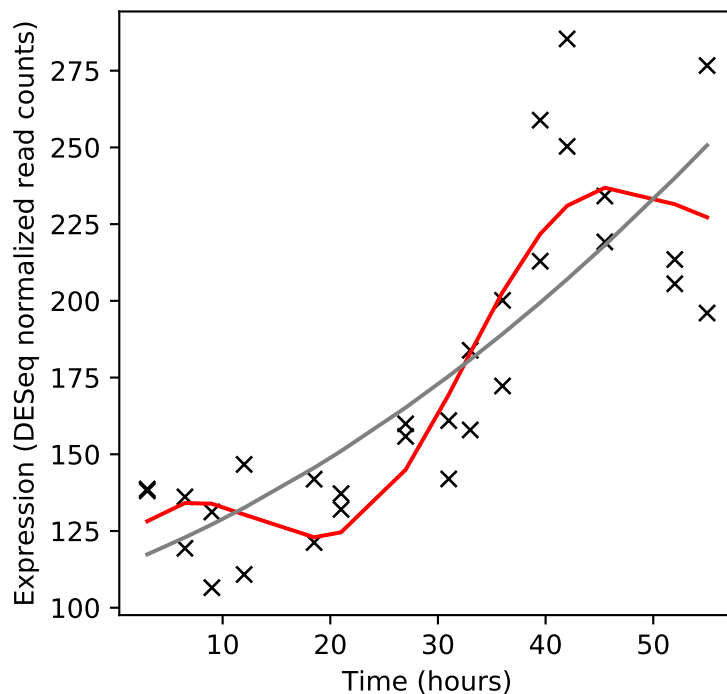

Rv1432/-

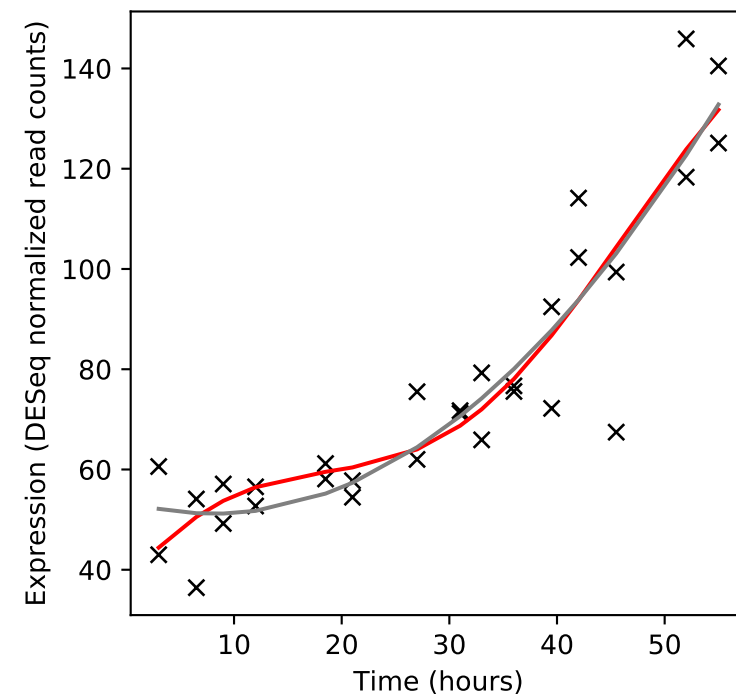



Rv1433/-

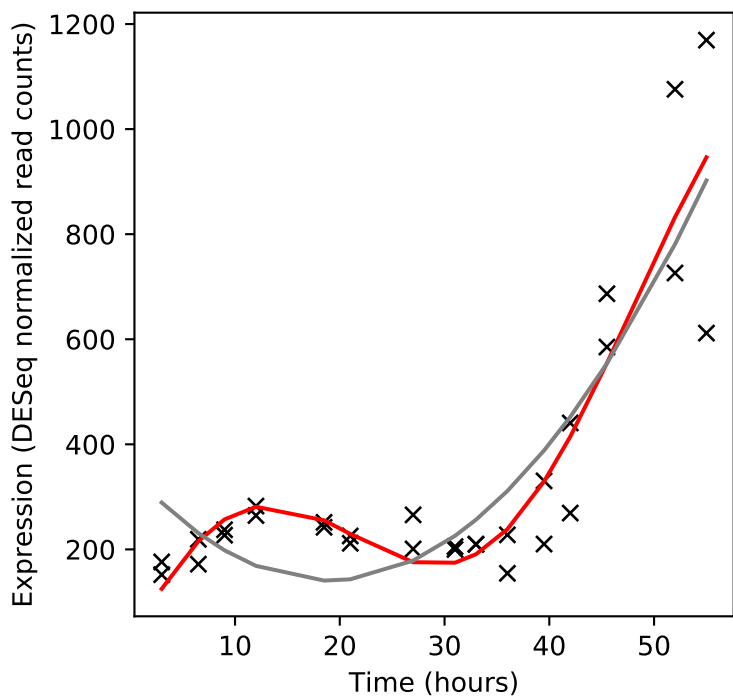

Rv1434/-

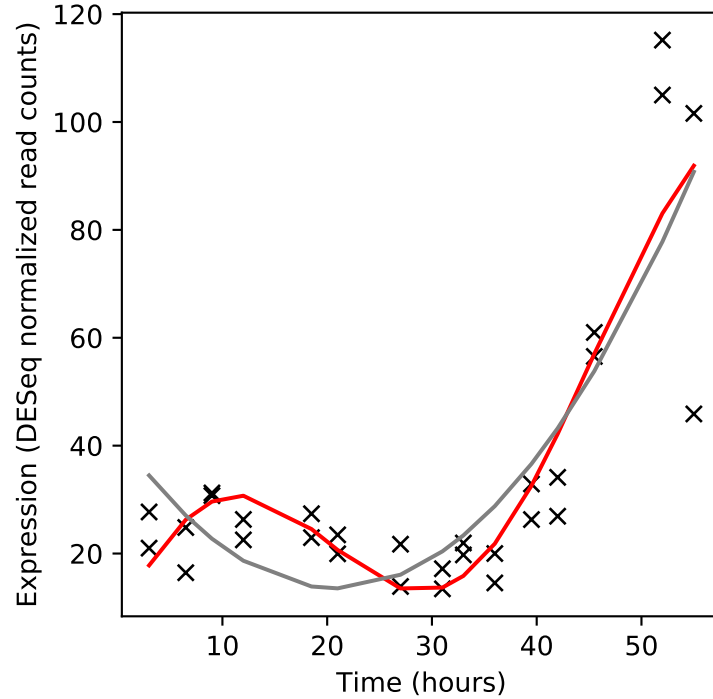

Rv1435c/-

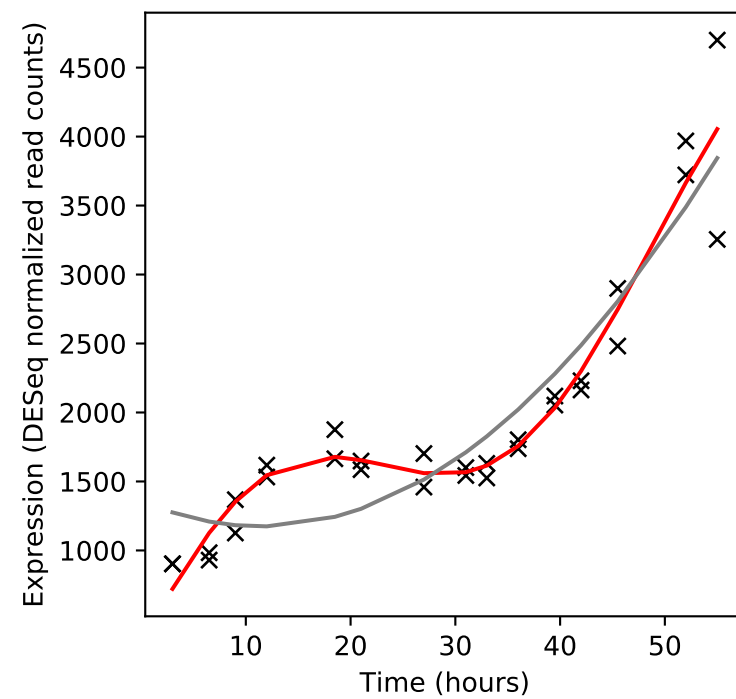

Rv1436/gap

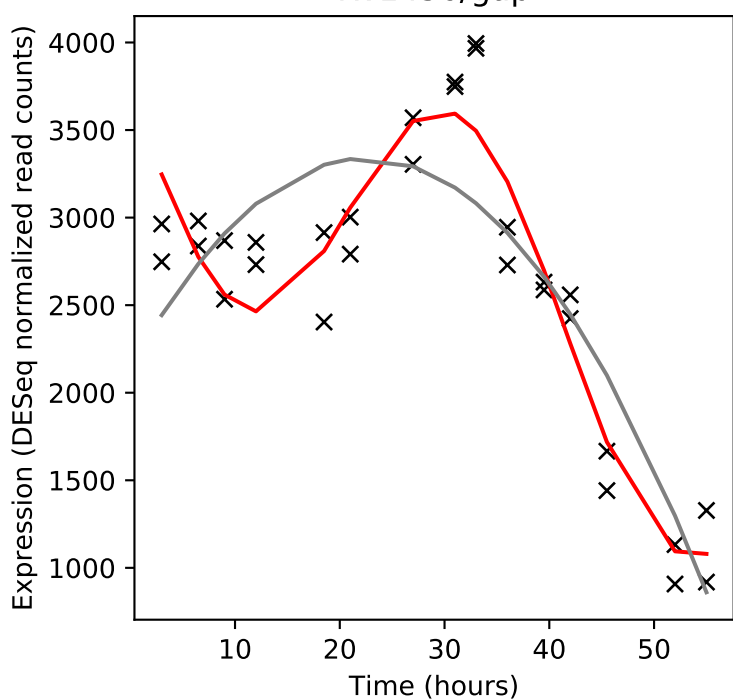

Rv1437/pgk

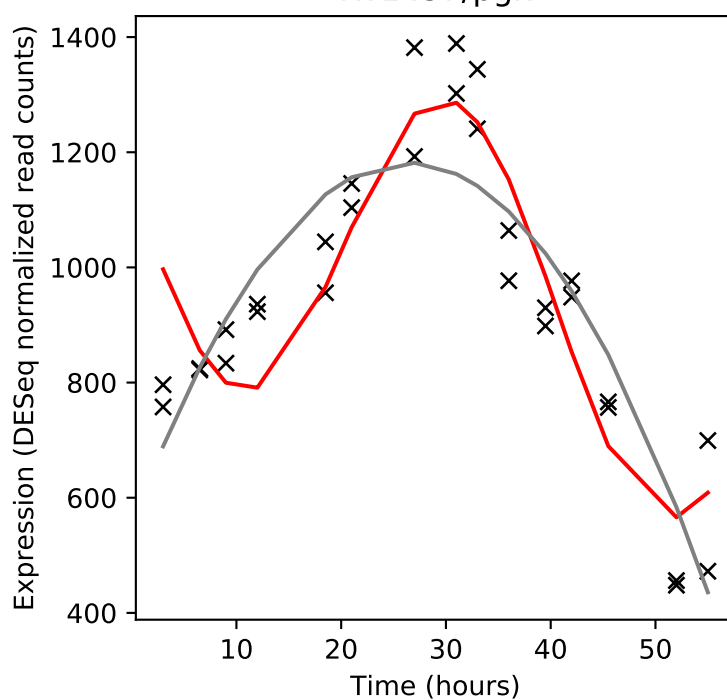

Rv1438/tpi

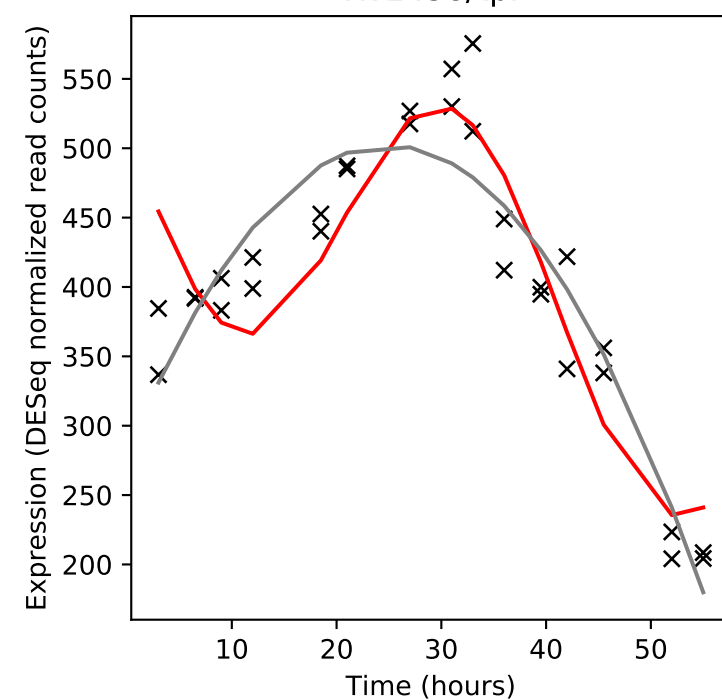

Rv1439c/-

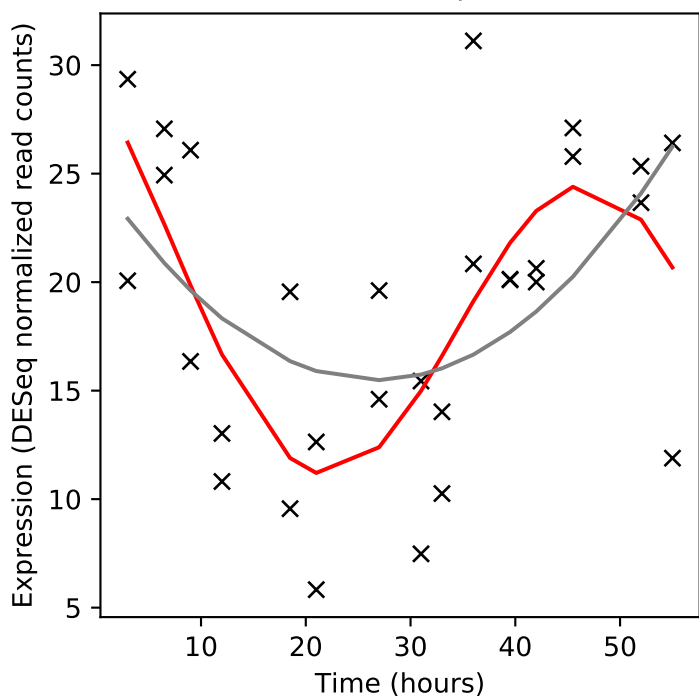

Rv1440/secG

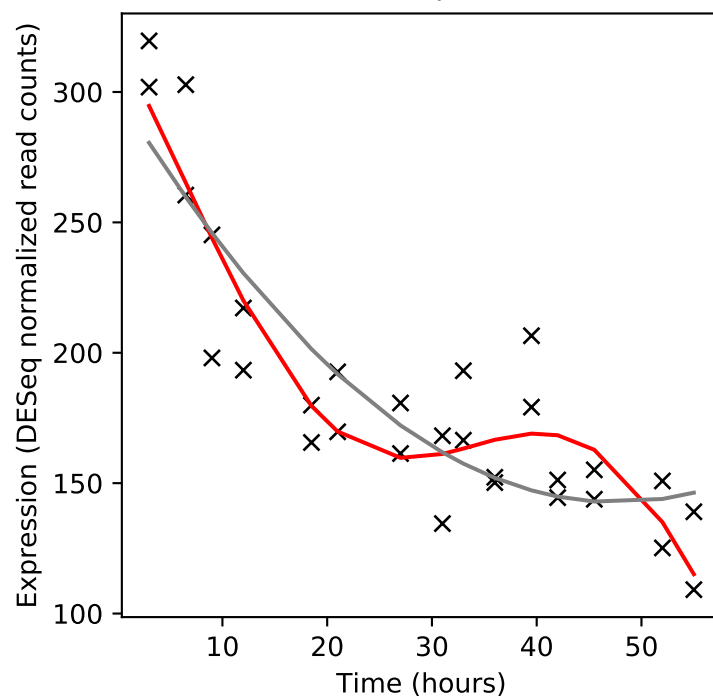

Rv1441c/PE\_PGRS26

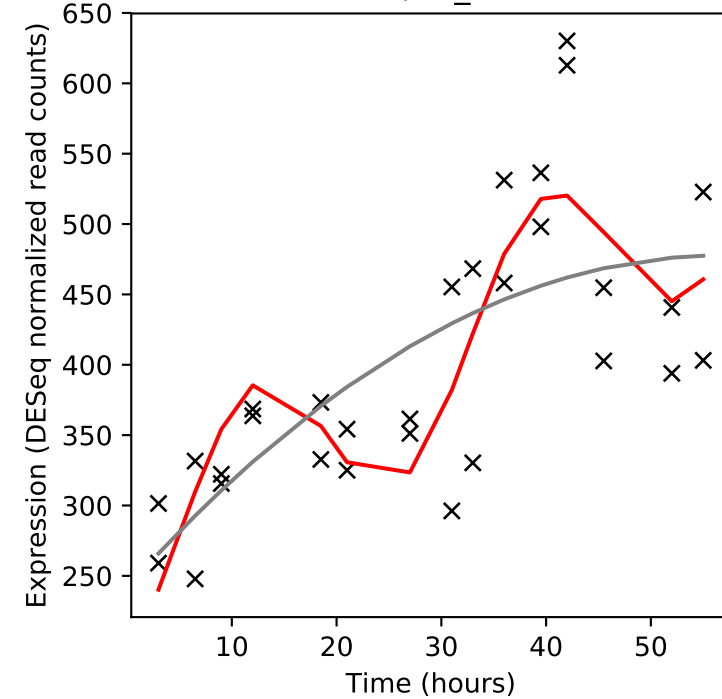

Rv1442/bisC

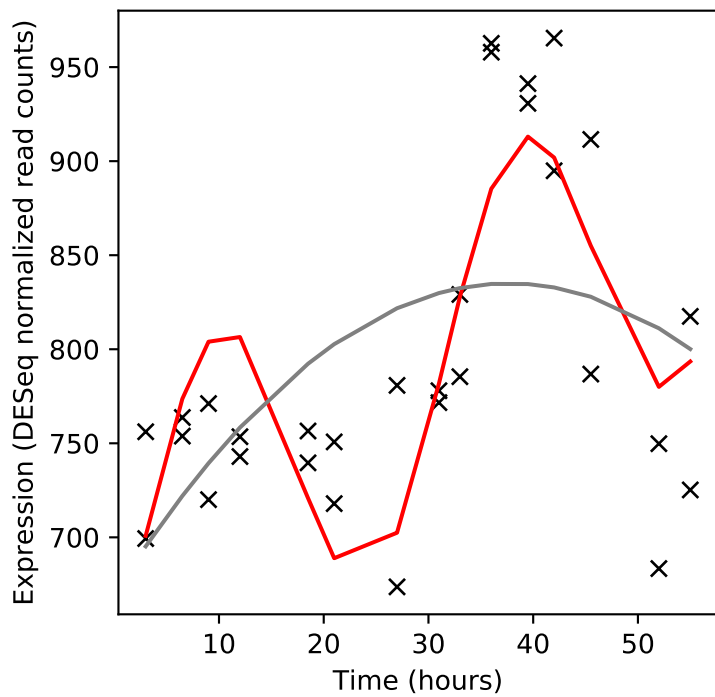

Rv1443c/-

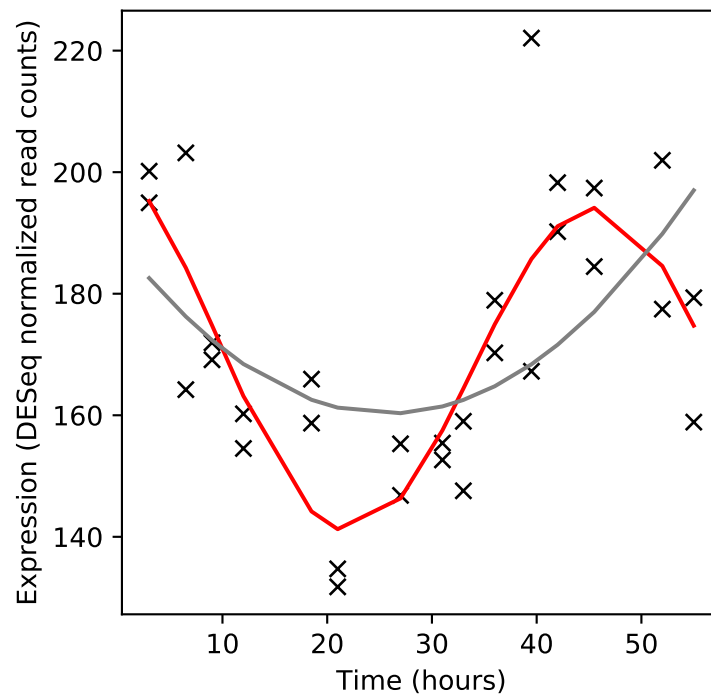

Rv1444c/-

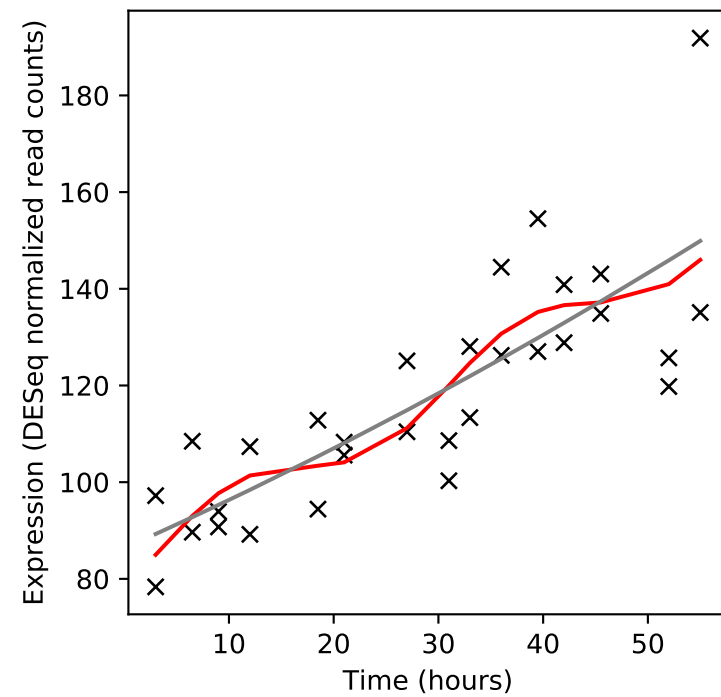

Rv1445c/devB

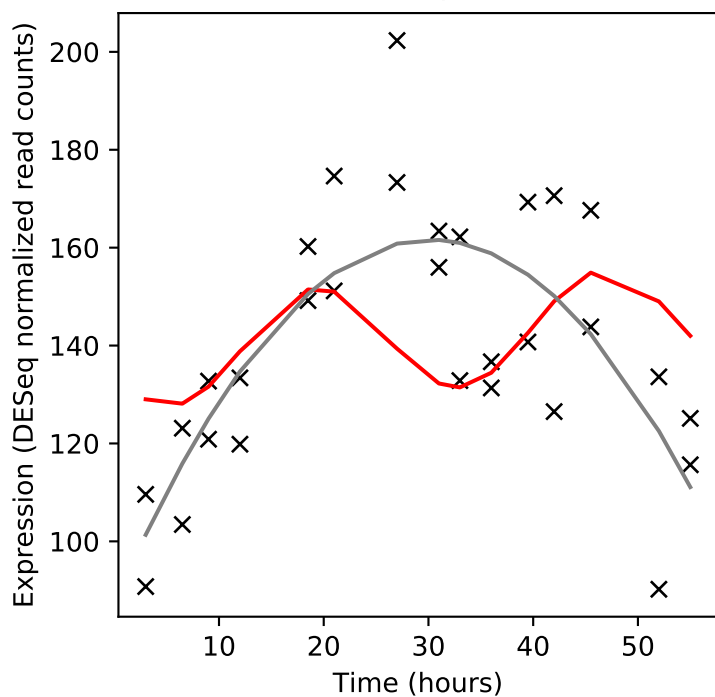

Rv1446c/opcA

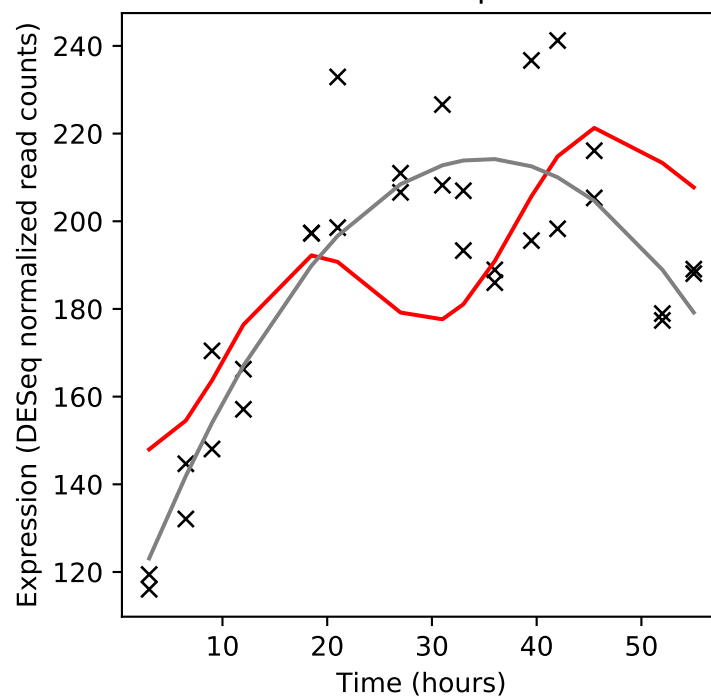

Rv1447c/zwf2

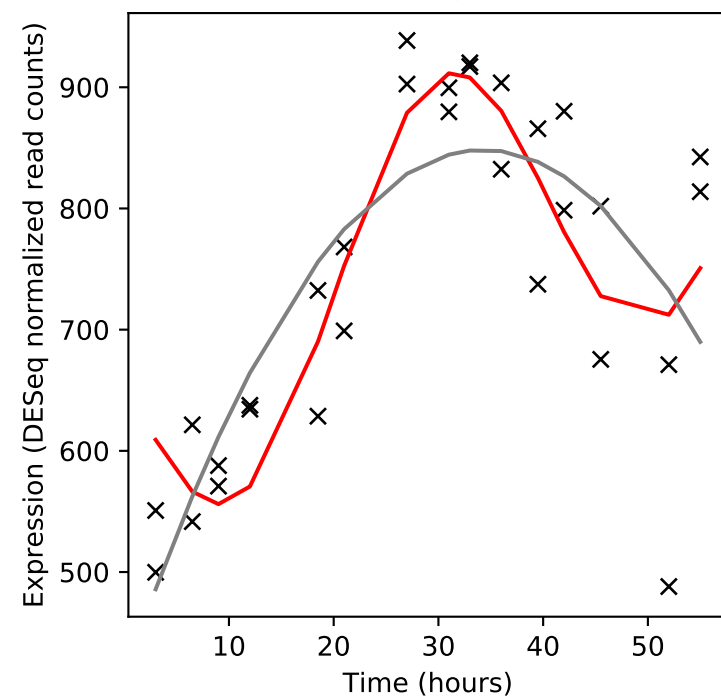

Rv1448c/tal

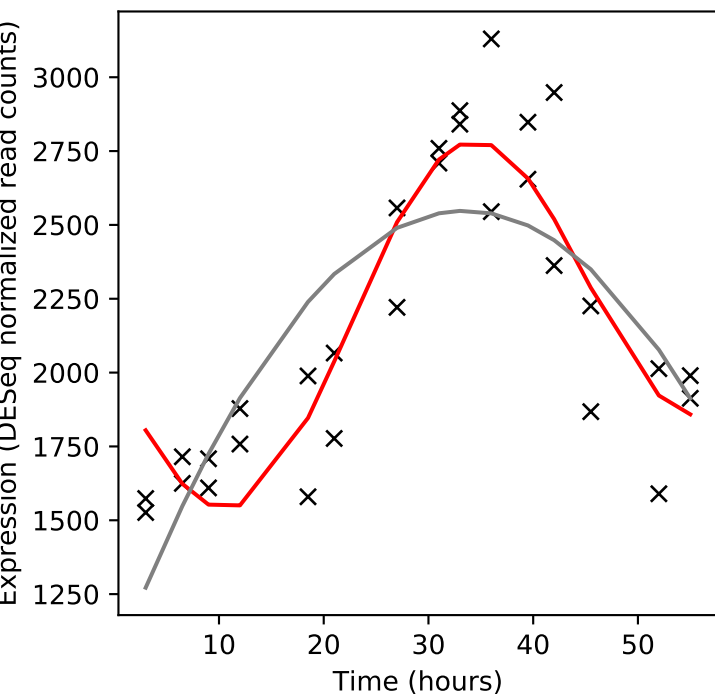

Rv1449c/tkt

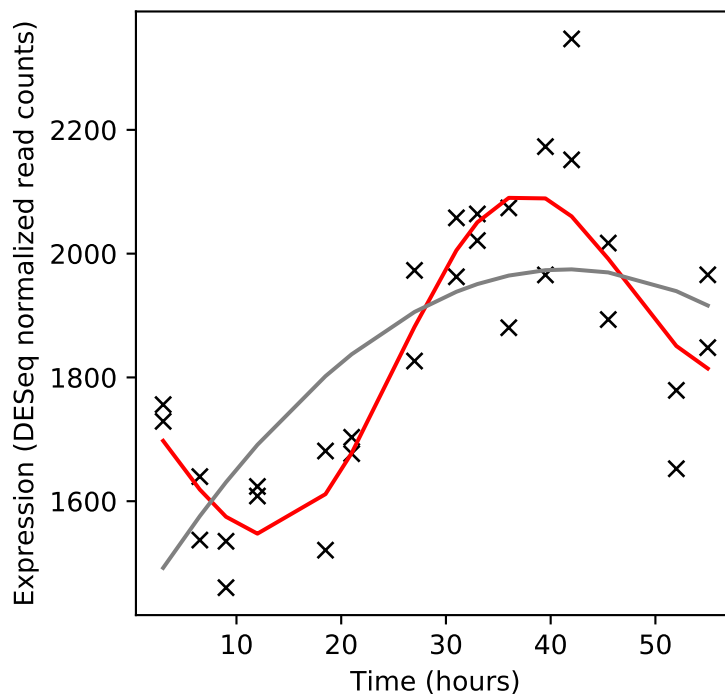

Rv1450c/PE\_PGRS27

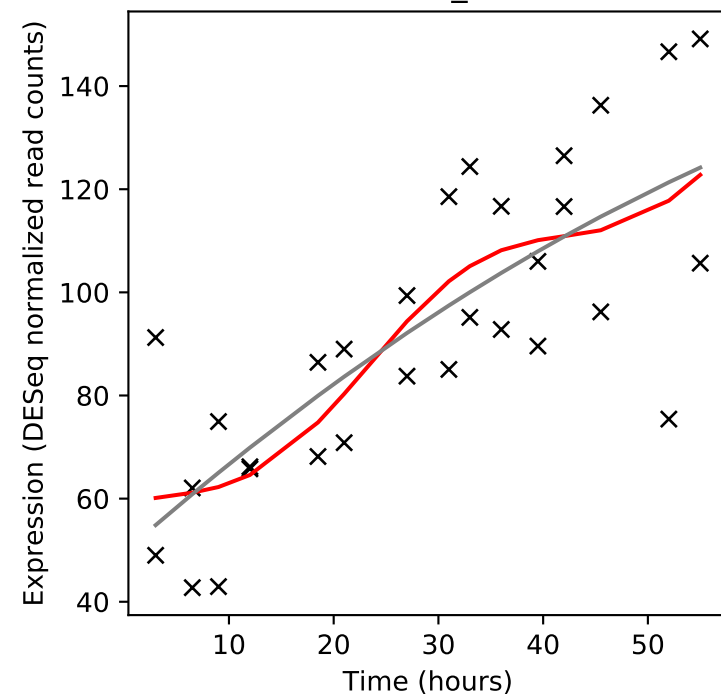

Rv1451/ctaB

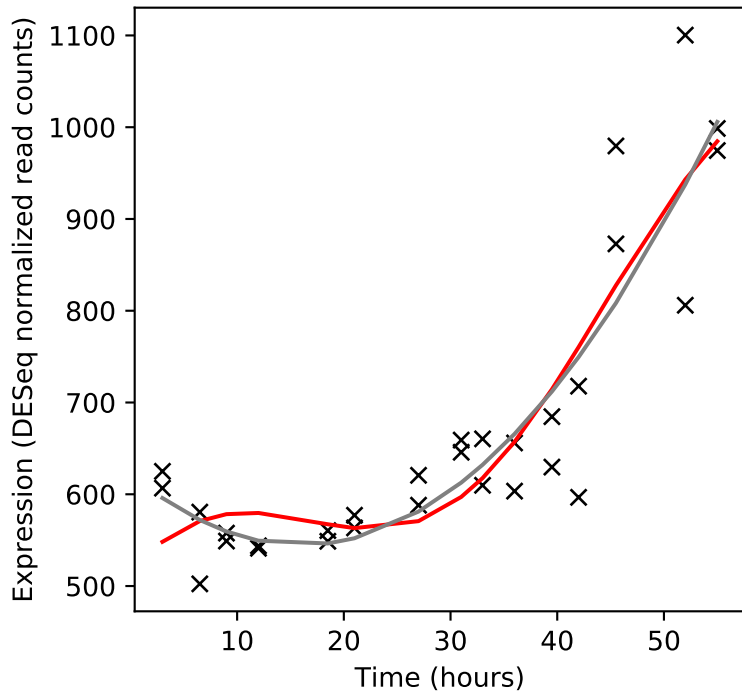

Rv1452c/PE\_PGRS28

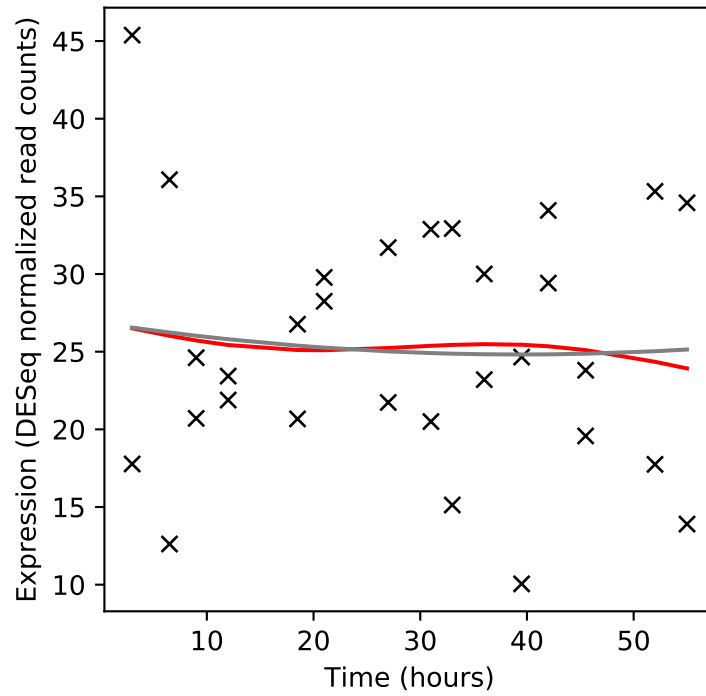

Rv1453/-

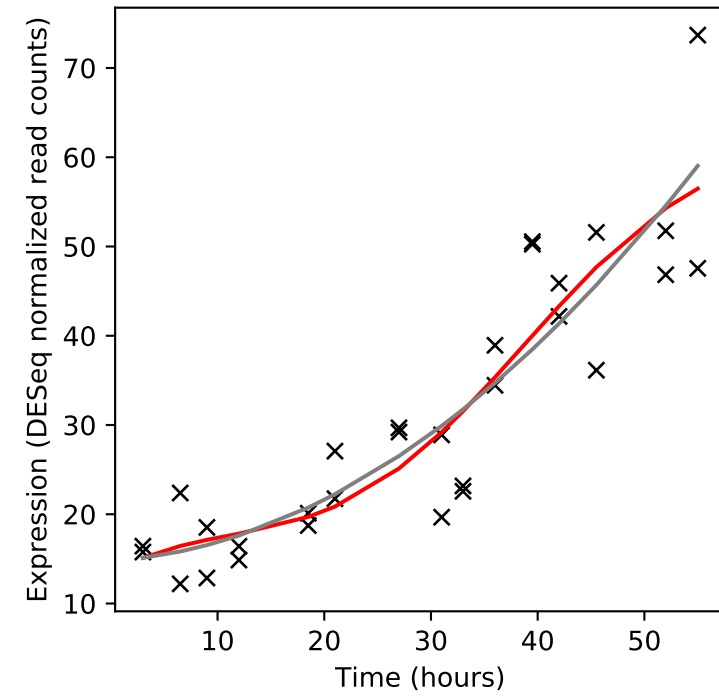

Rv1454c/qor

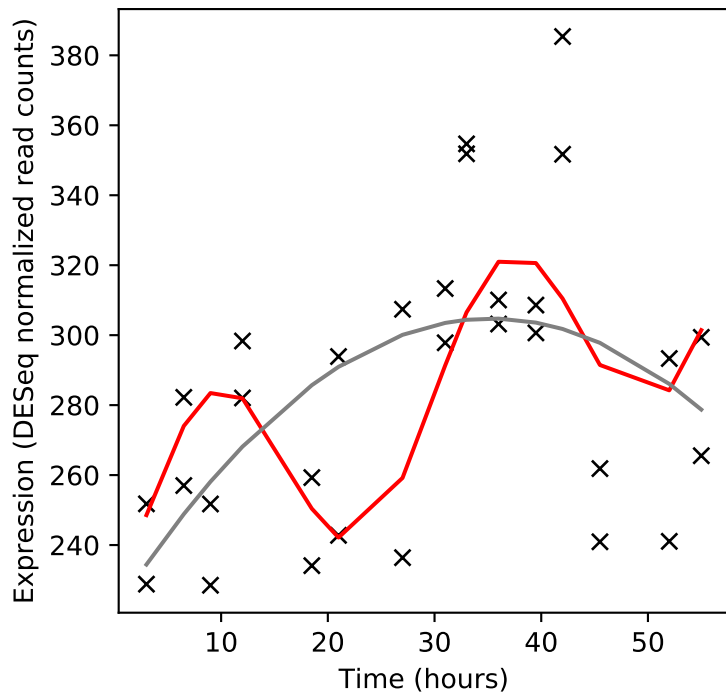

Rv1455/-

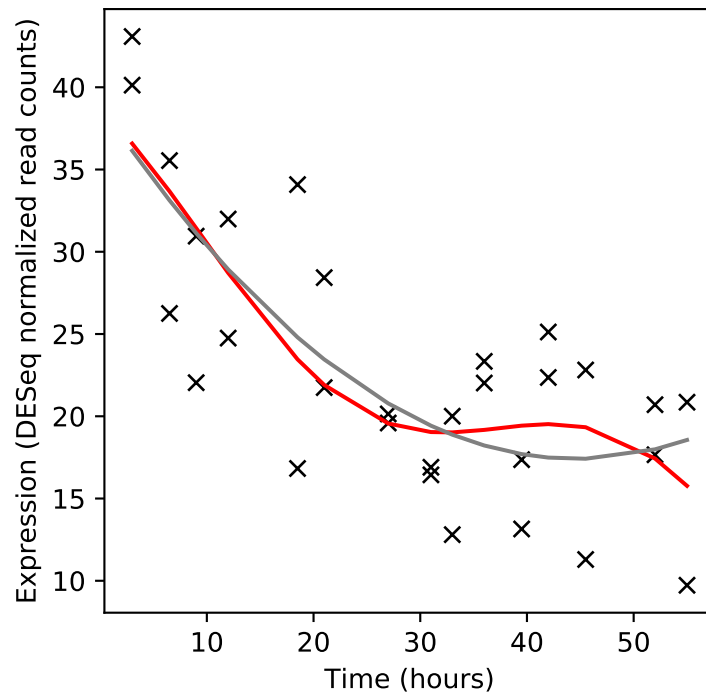

Rv1456c/-

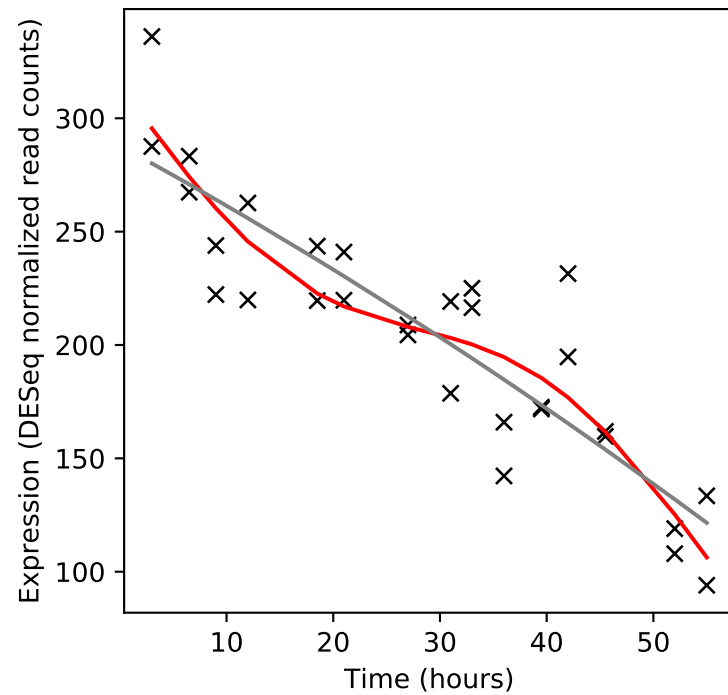

Rv1457c/-

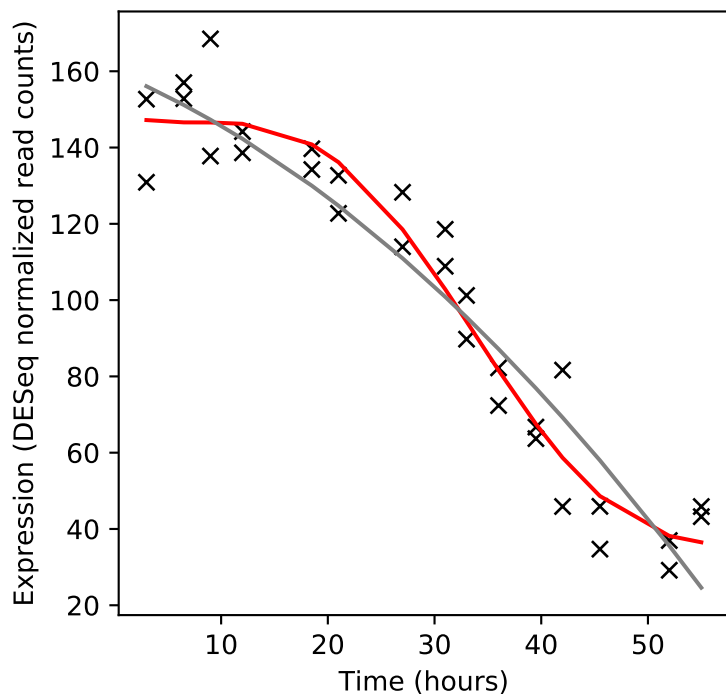

Rv1458c/-

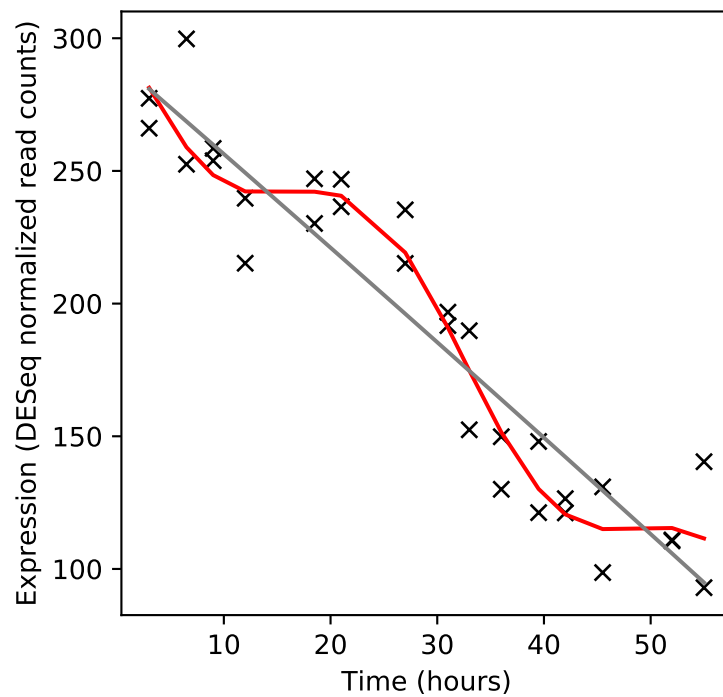

Rv1459c/-

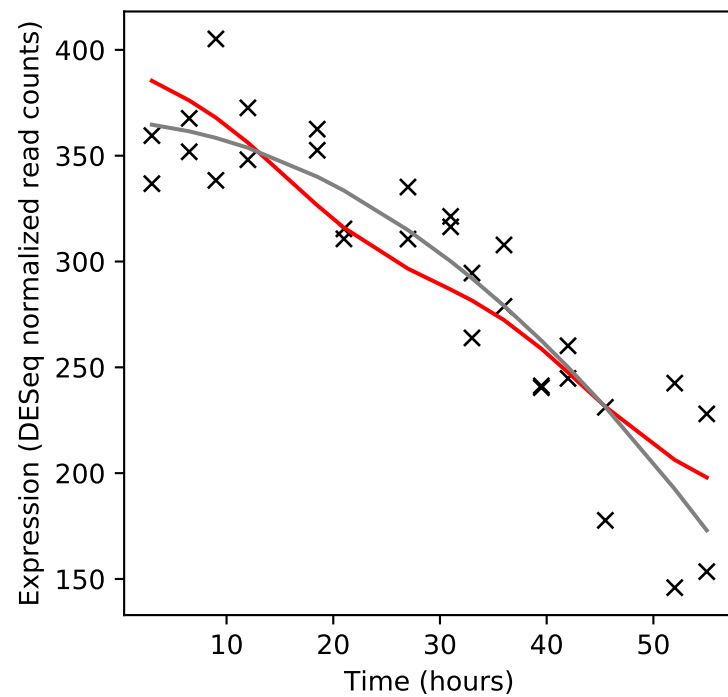

Rv1460/-

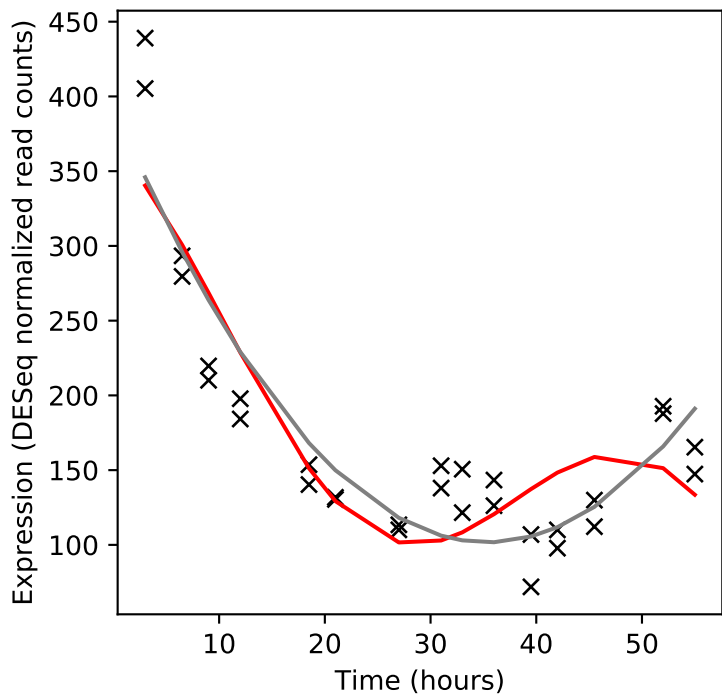

Rv1461/-

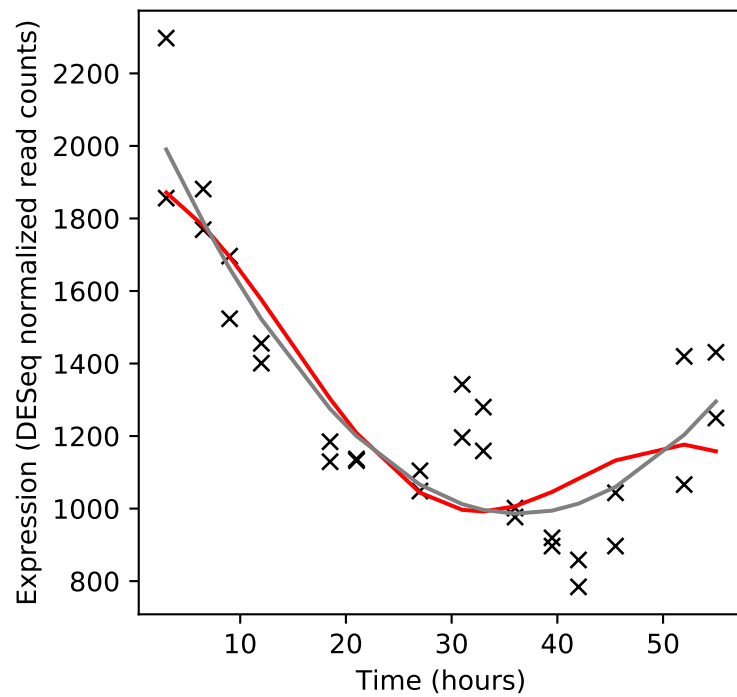

Rv1462/-

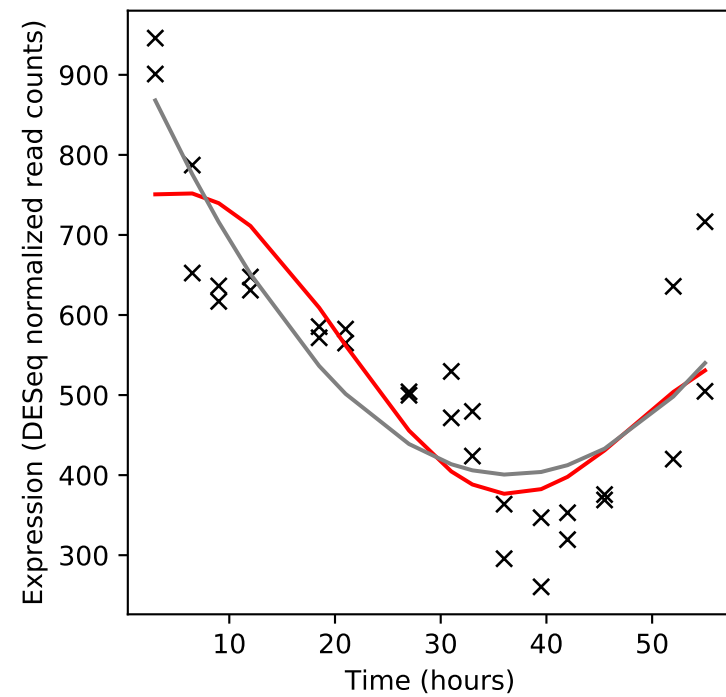

Rv1463/-

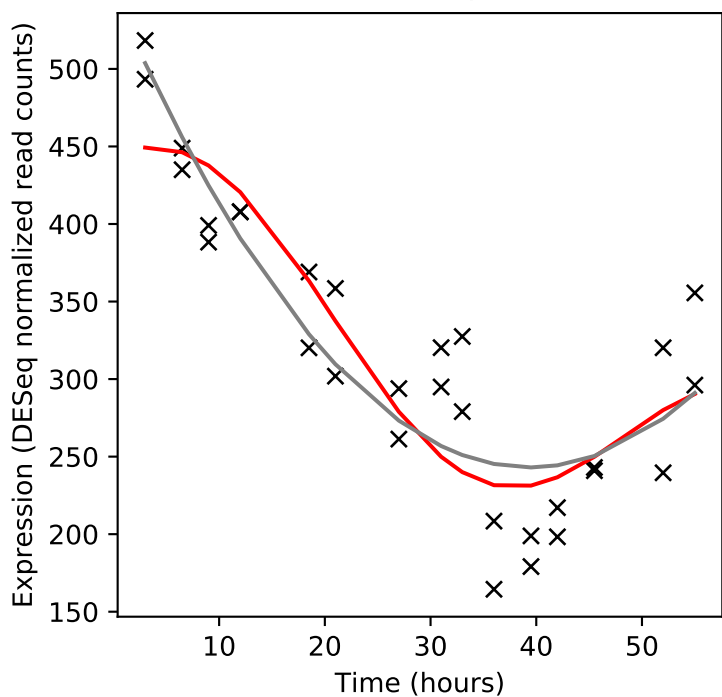

Rv1464/csd

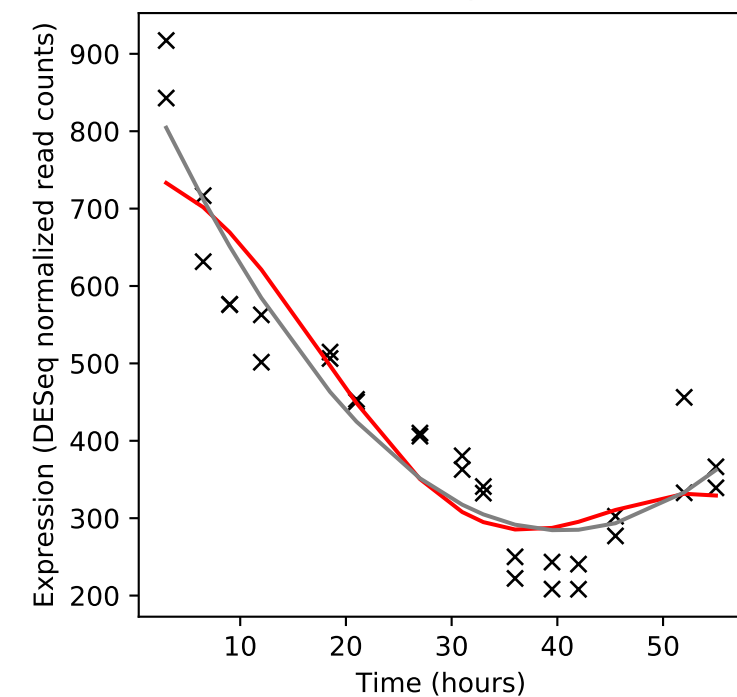

Rv1465/-

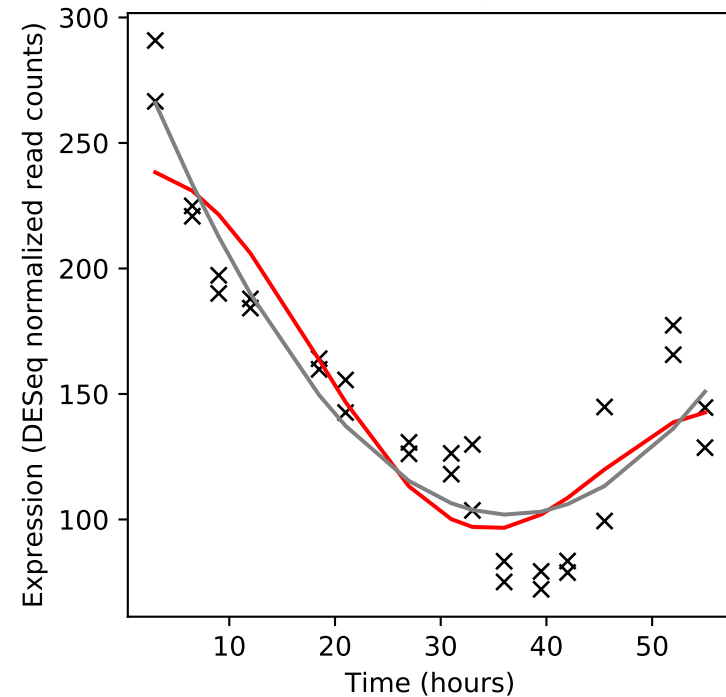

Rv1466/-

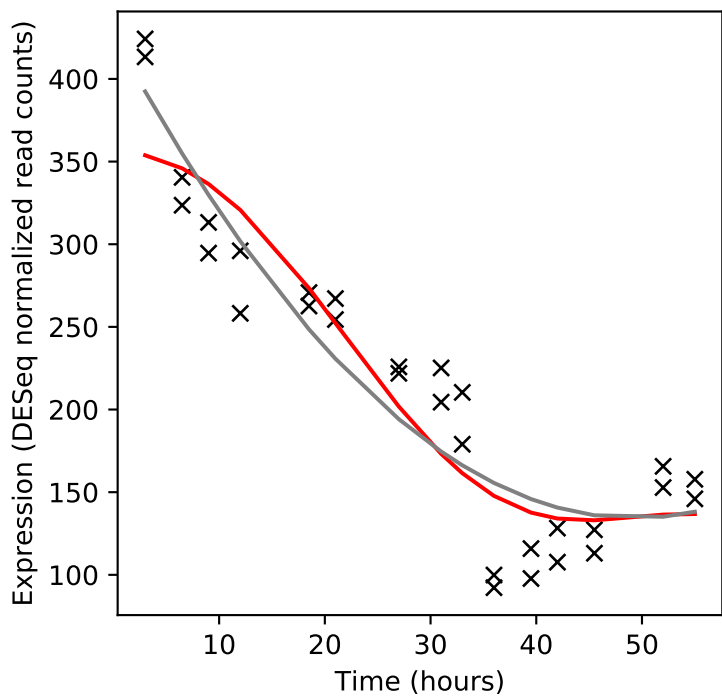

Rv1467c/fadE15

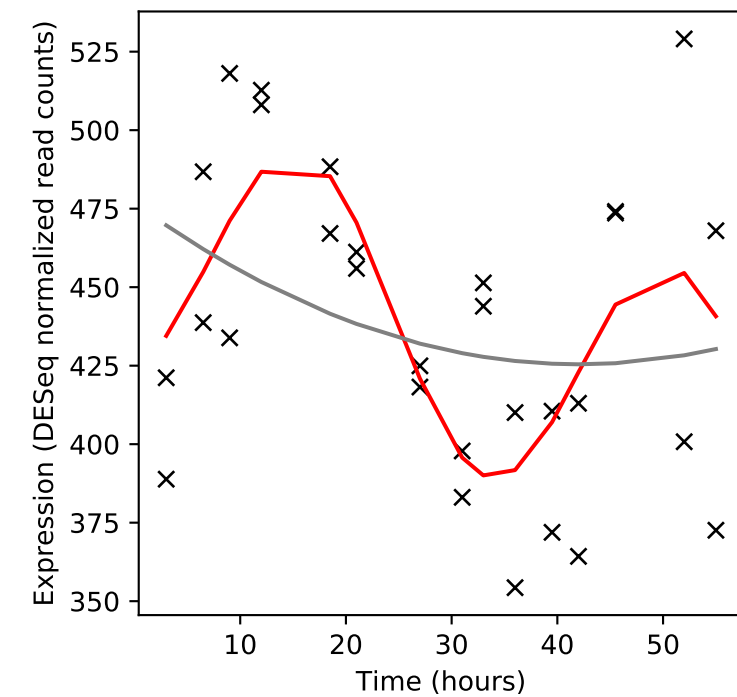

Rv1468c/PE\_PGRS29

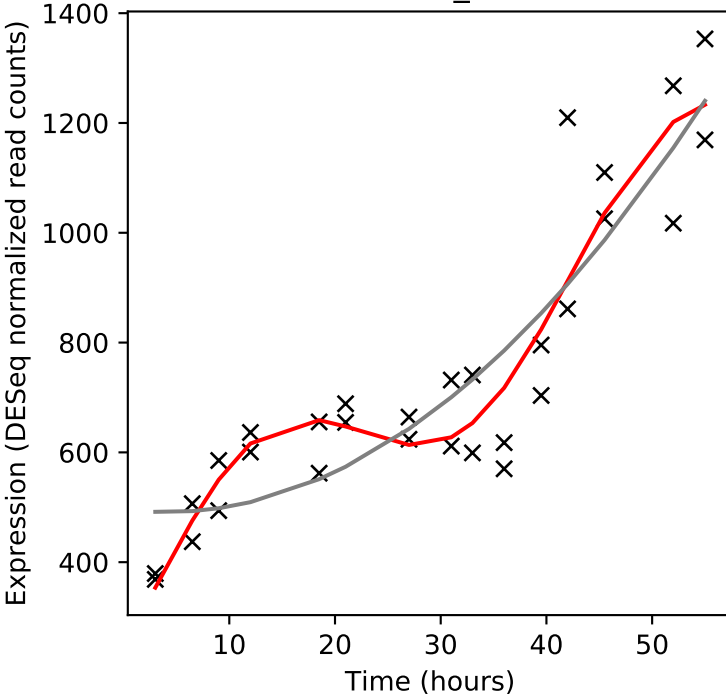

Rv1469/ctpD

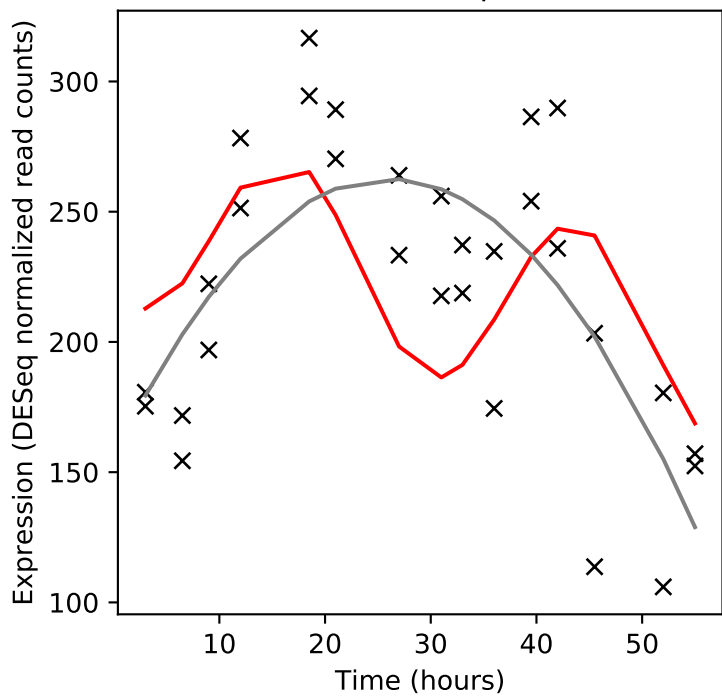

Rv1470/trxA

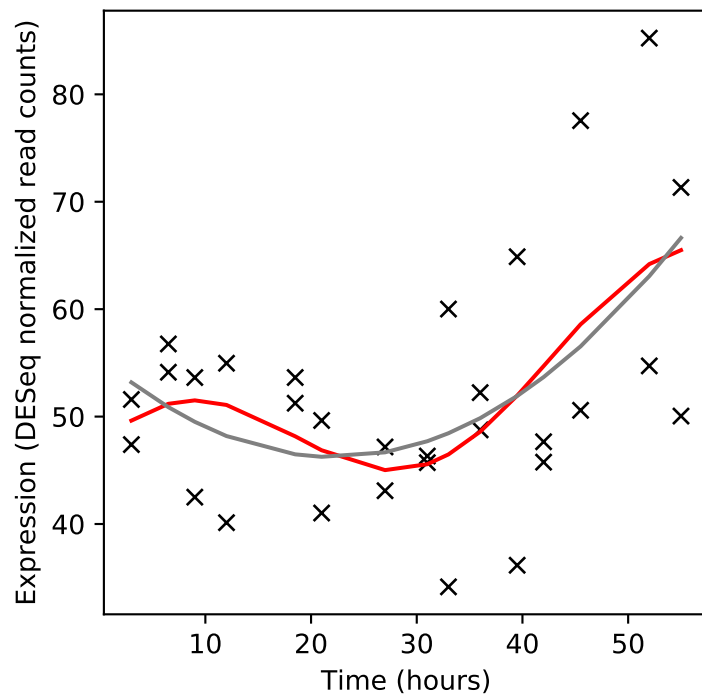

Rv1471/trxB1

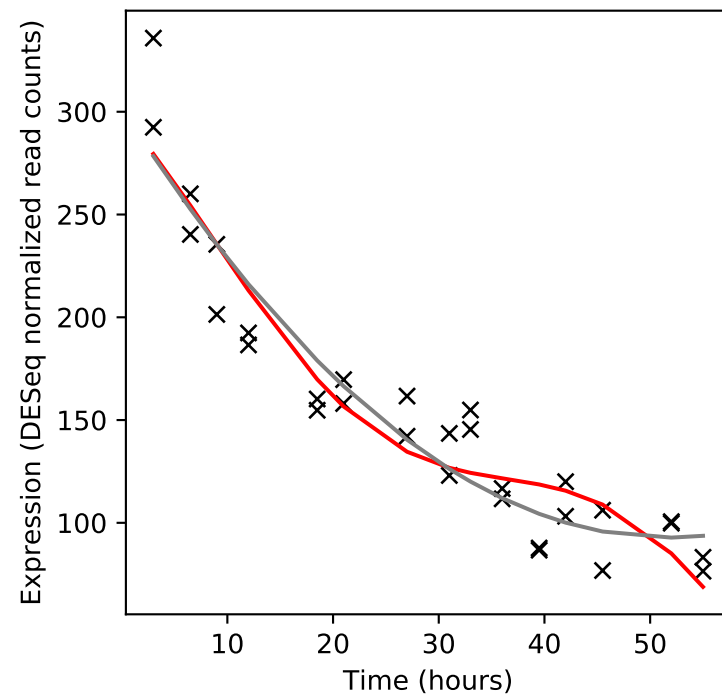

Rv1472/echA12

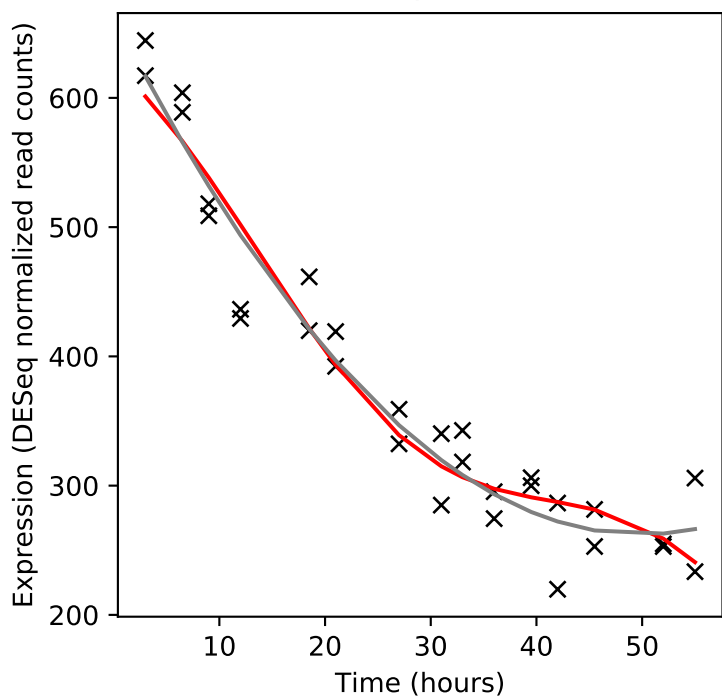

Rv1473/-

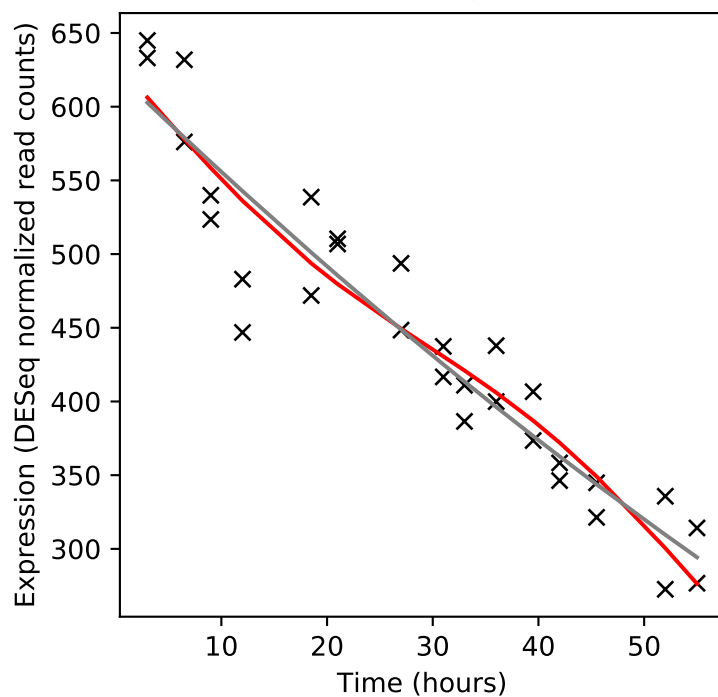

Rv1473A/-

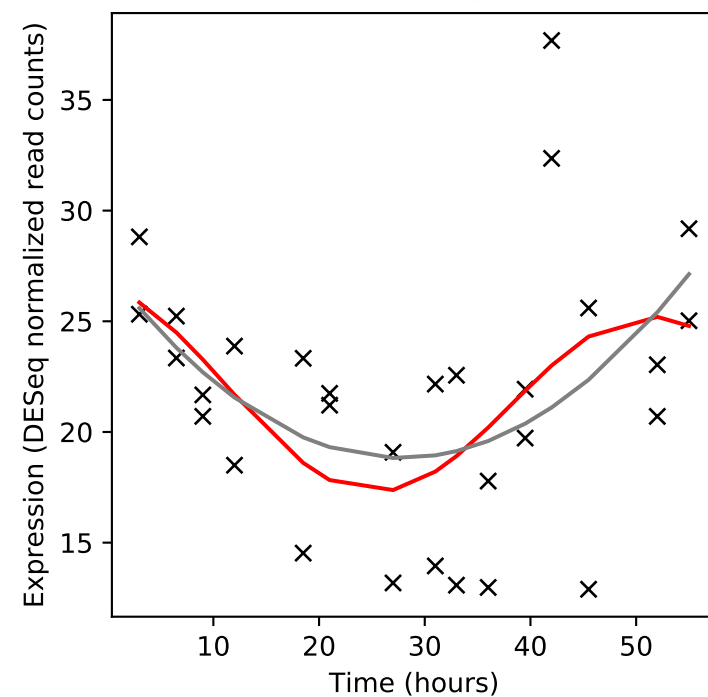

Rv1474c/-

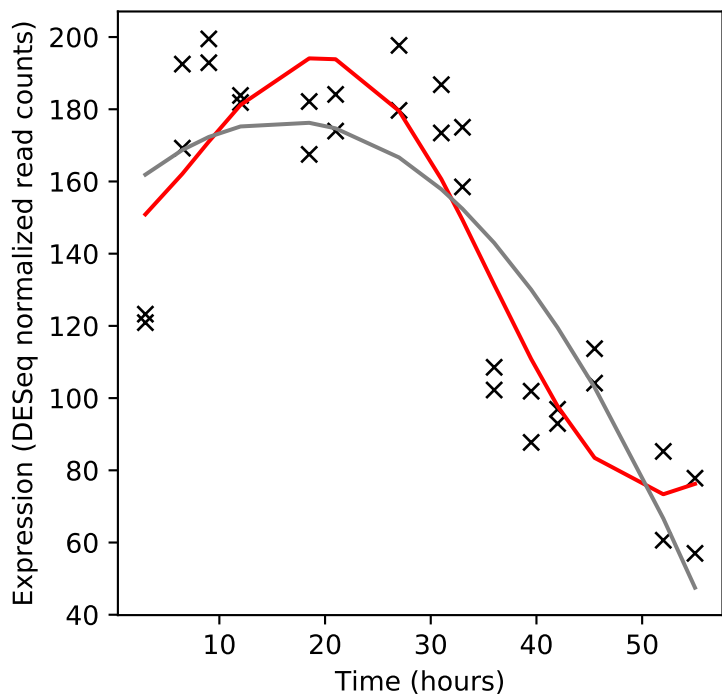

Rv1475c/acn

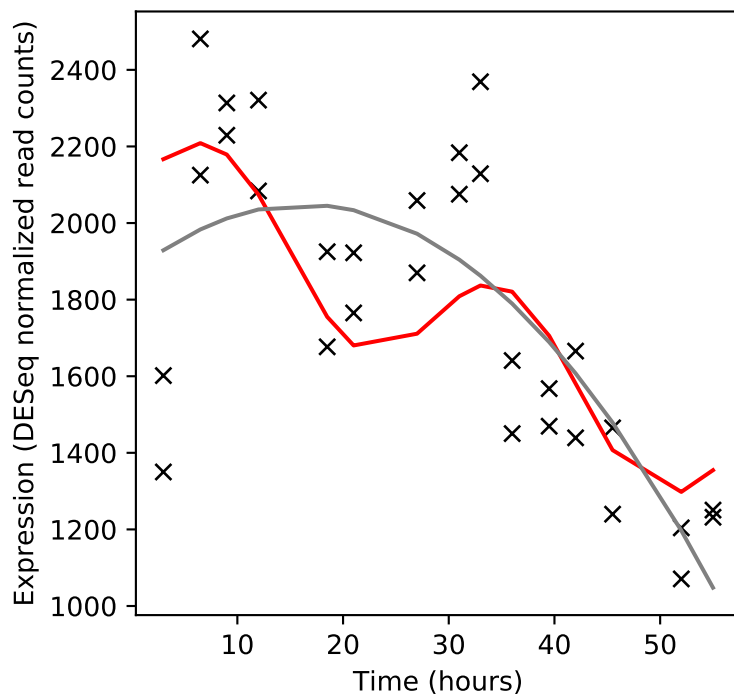

Rv1476/-

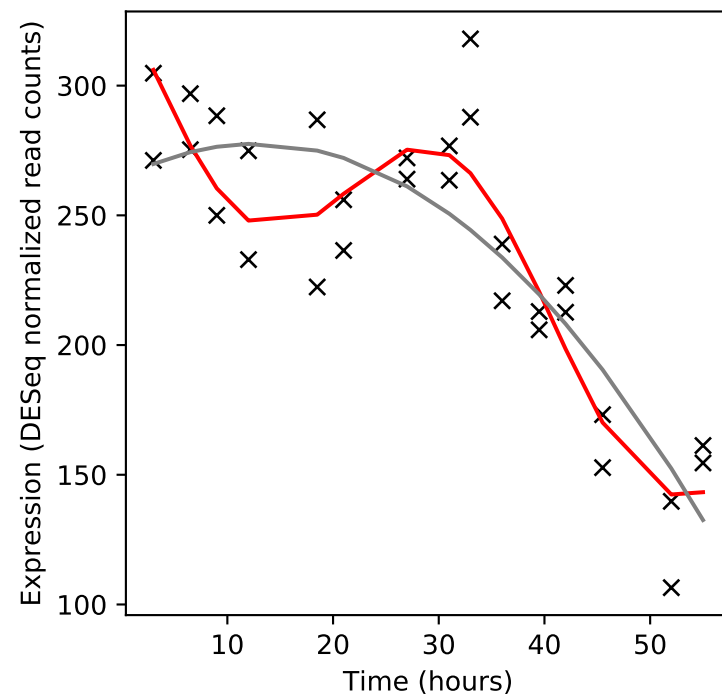

Rv1477/ripA

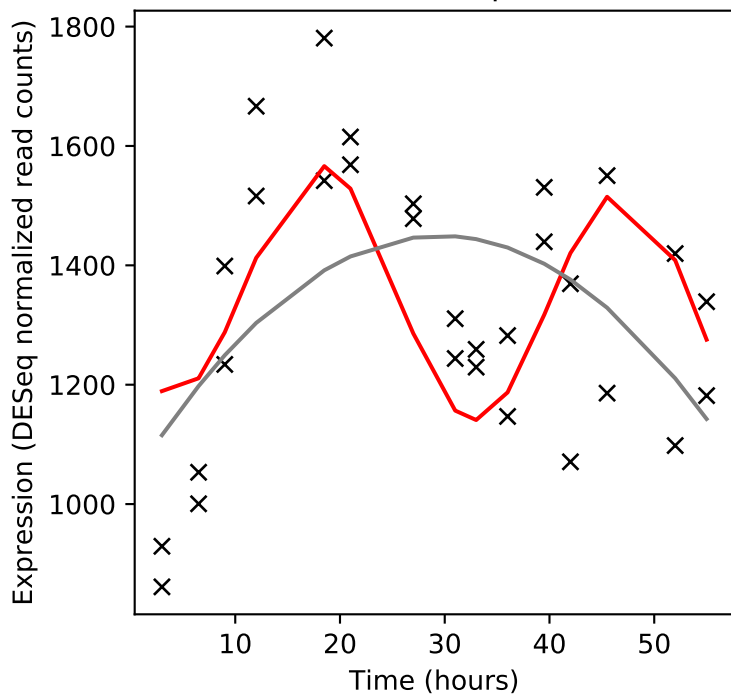

Rv1478/-

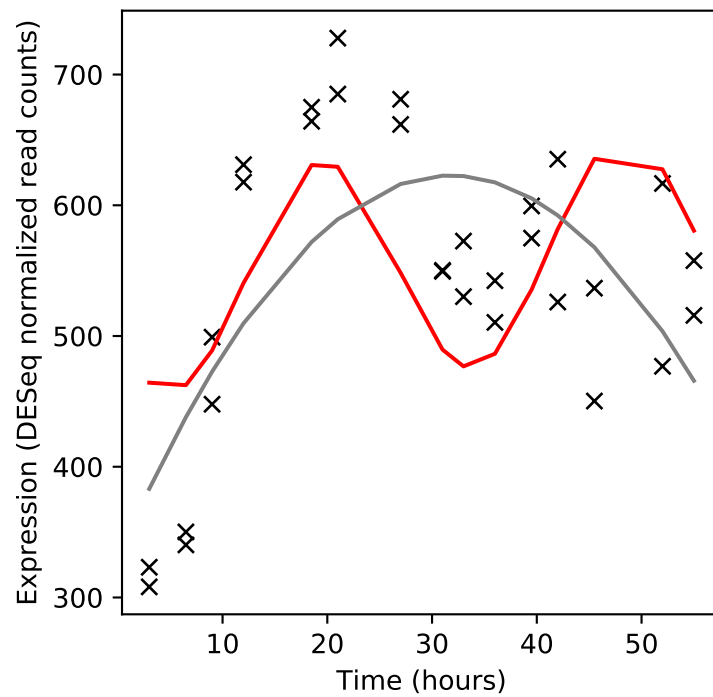

Rv1479/moxR1

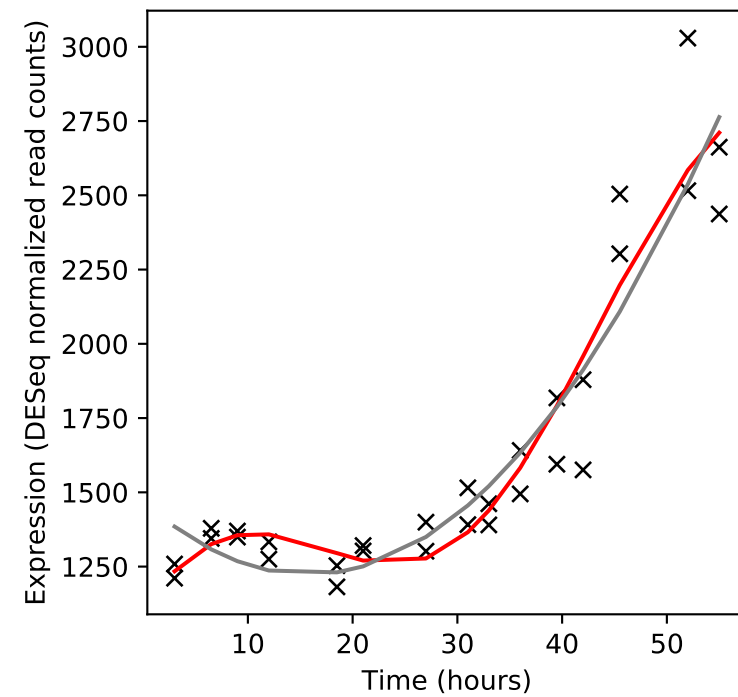

Rv1480/-

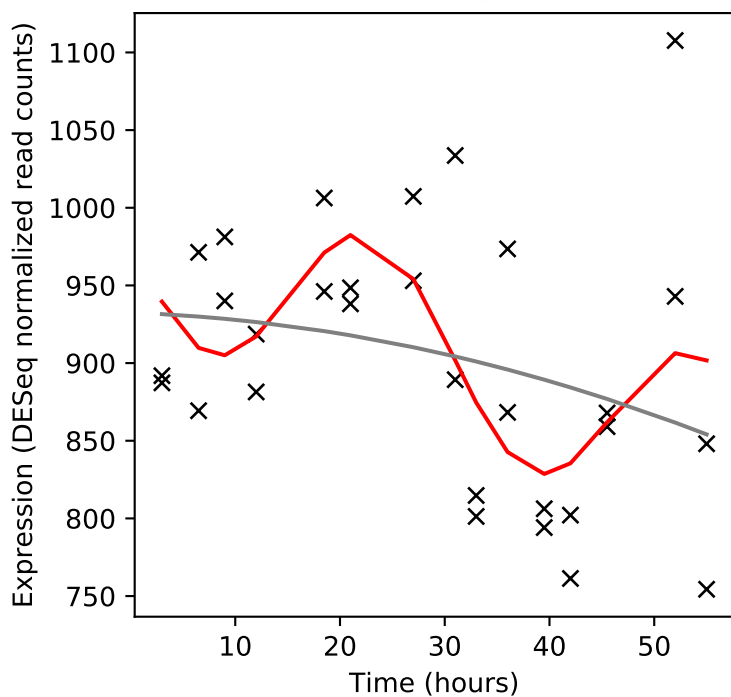

Rv1481/-

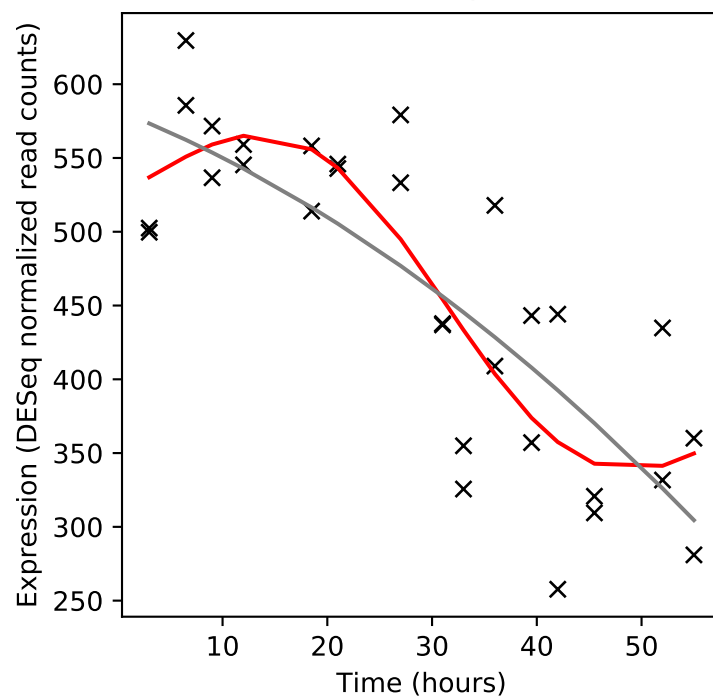

Rv1482c/-

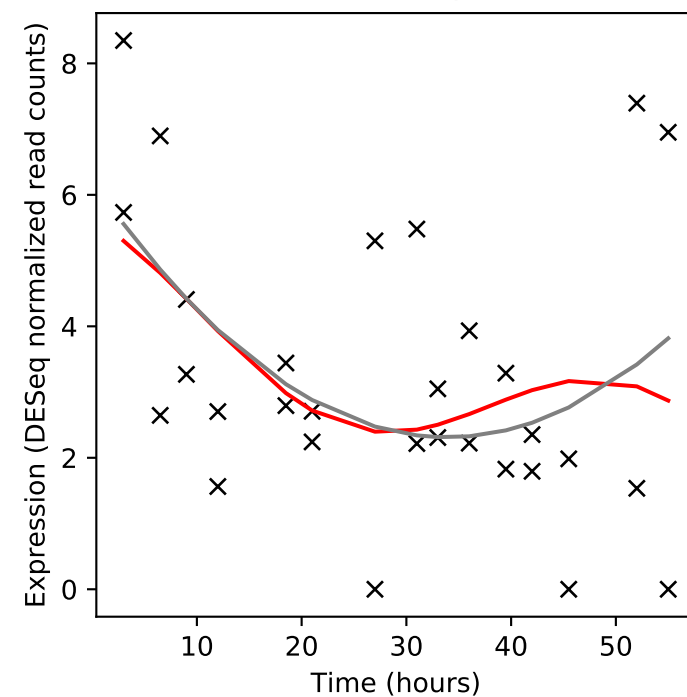

Rv1483/fabG1

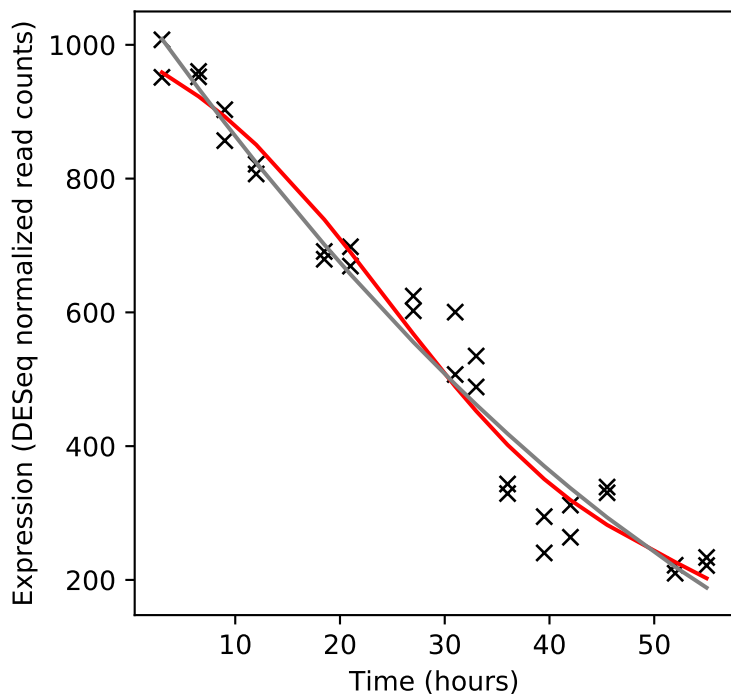

Rv1484/inhA

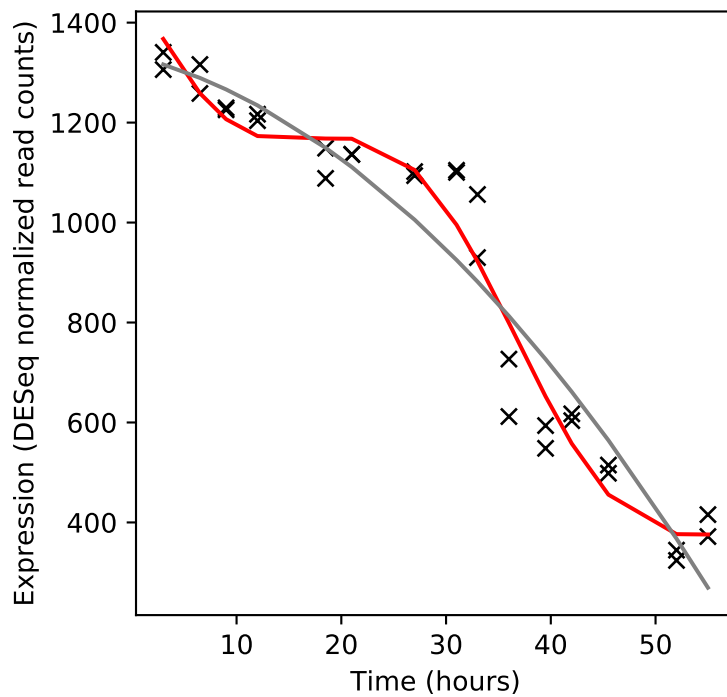

Rv1485/hemZ

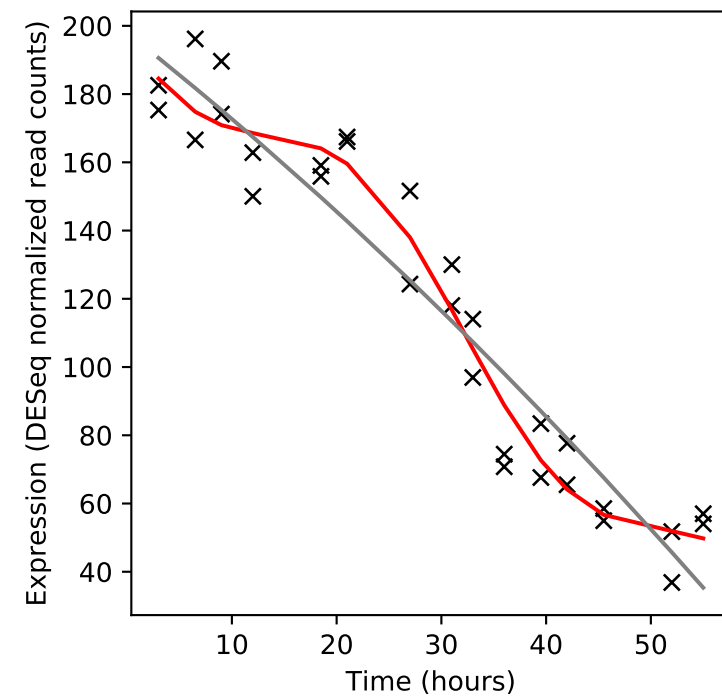

Rv1486c/-

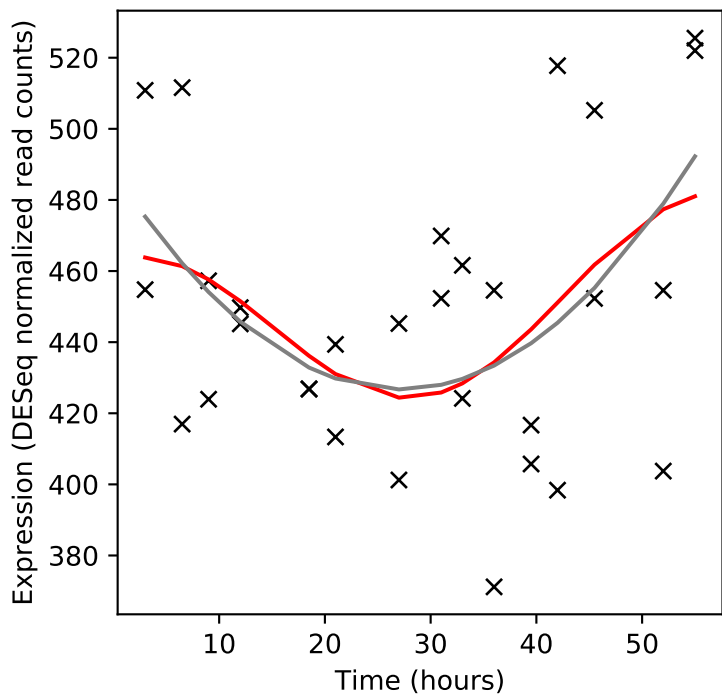

Rv1487/-

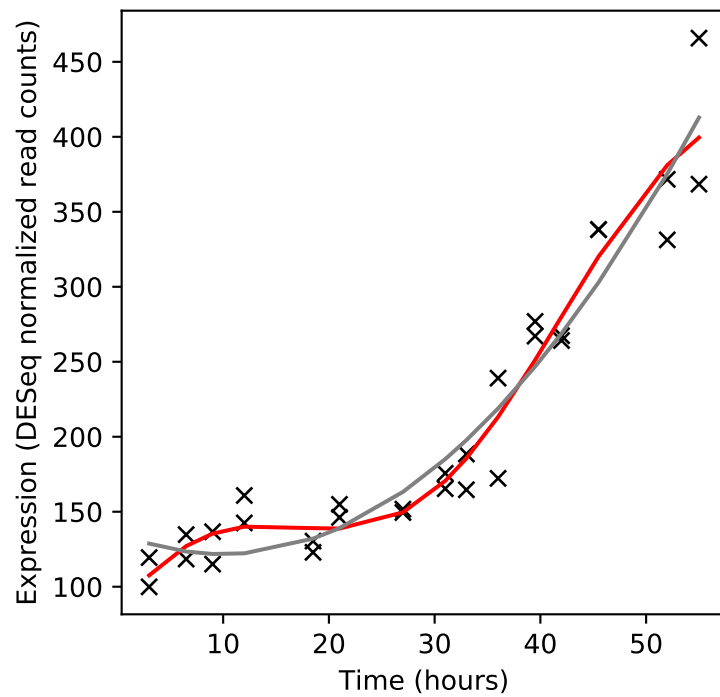

Rv1488/-

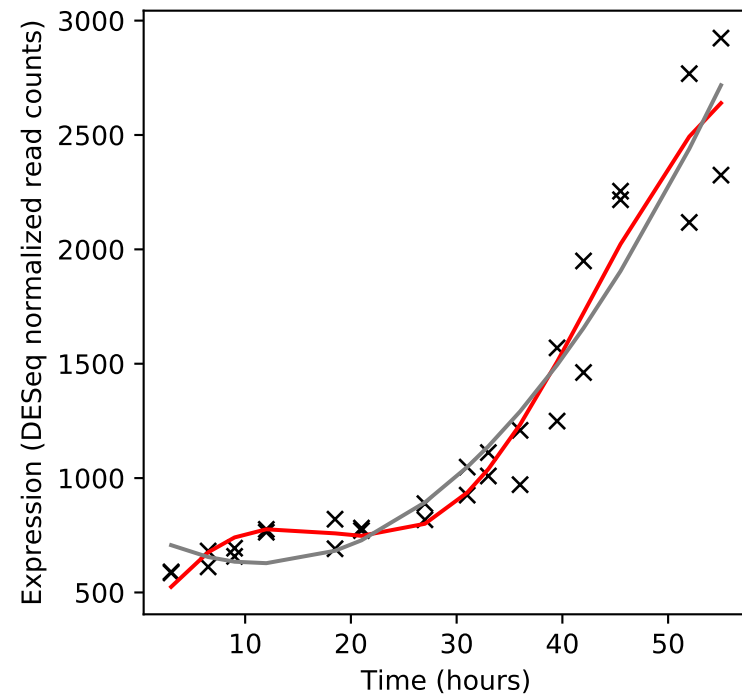

Rv1489/-

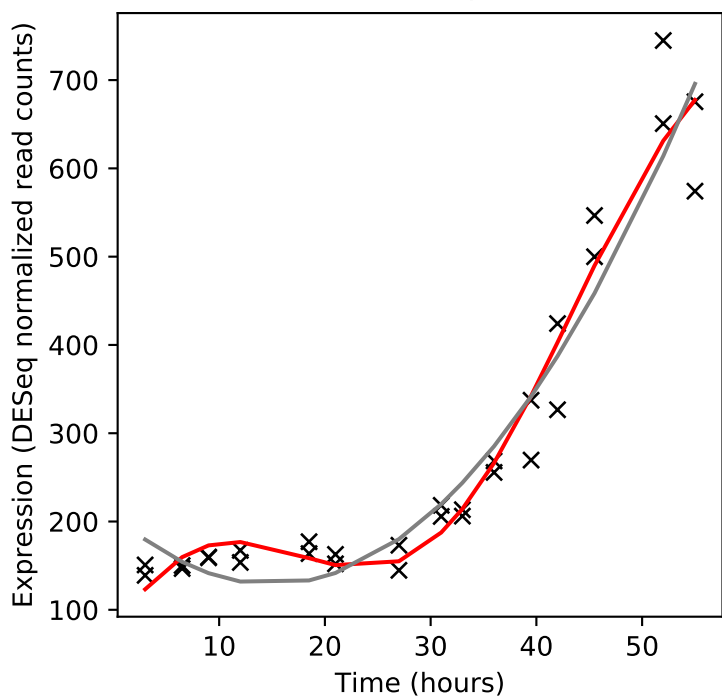

Rv1489A/-

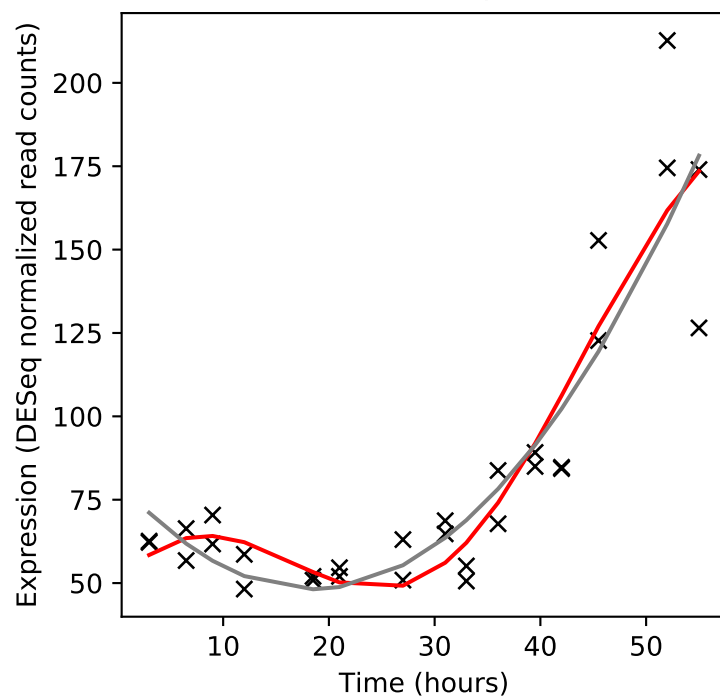

Rv1490/-

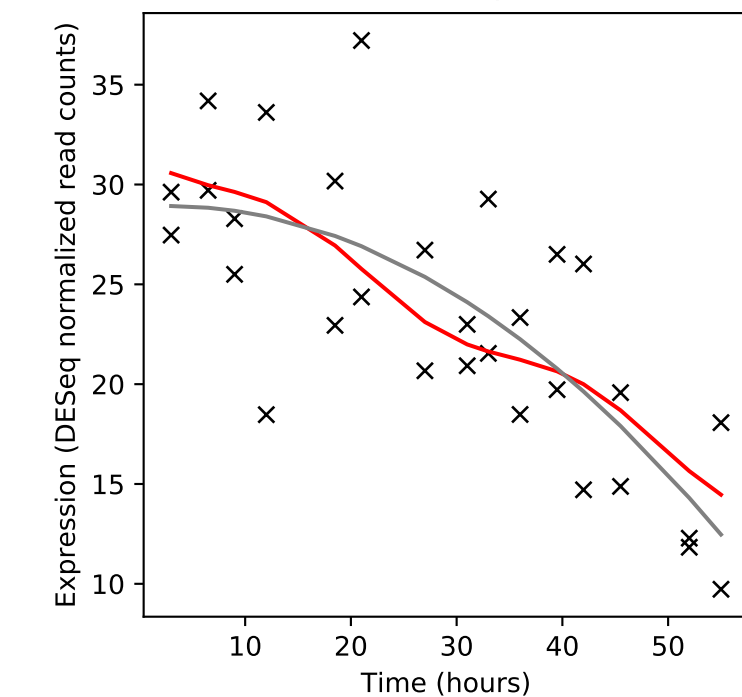

Rv1491c/-

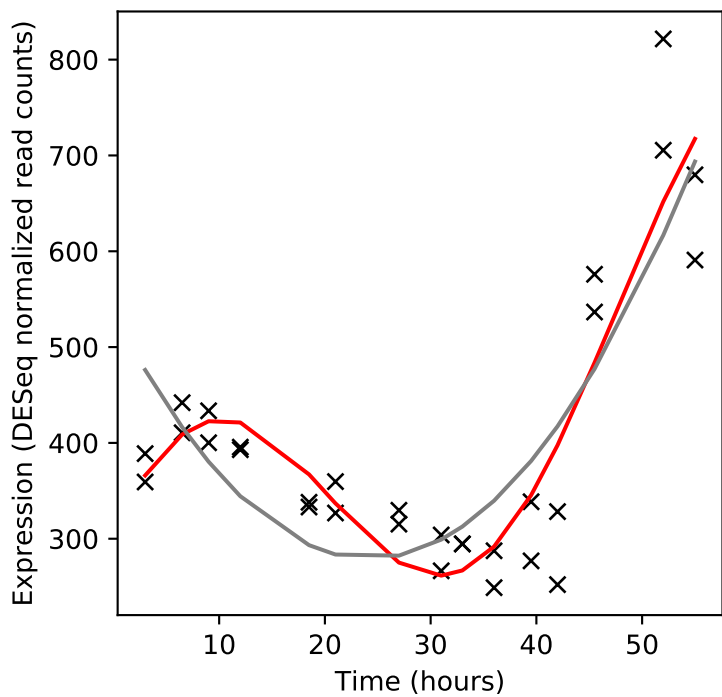

Rv1492/mutA

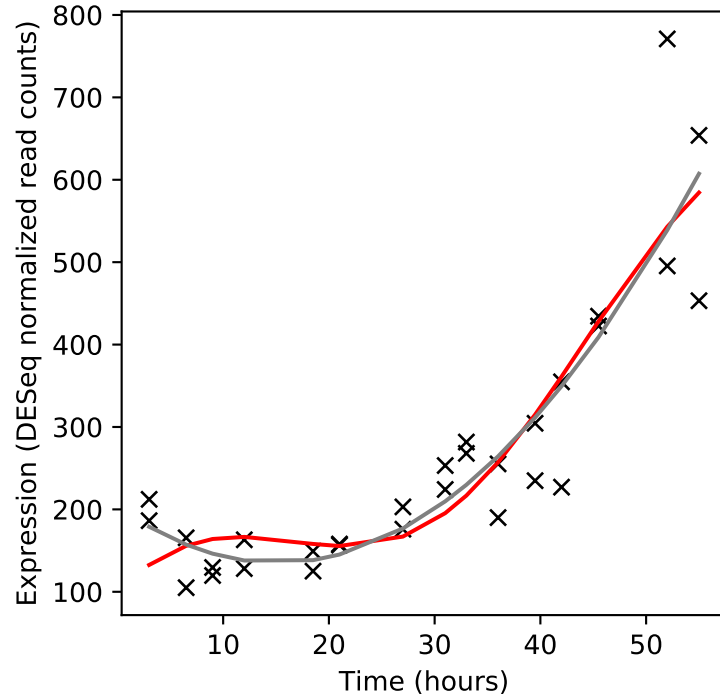

Rv1493/mutB

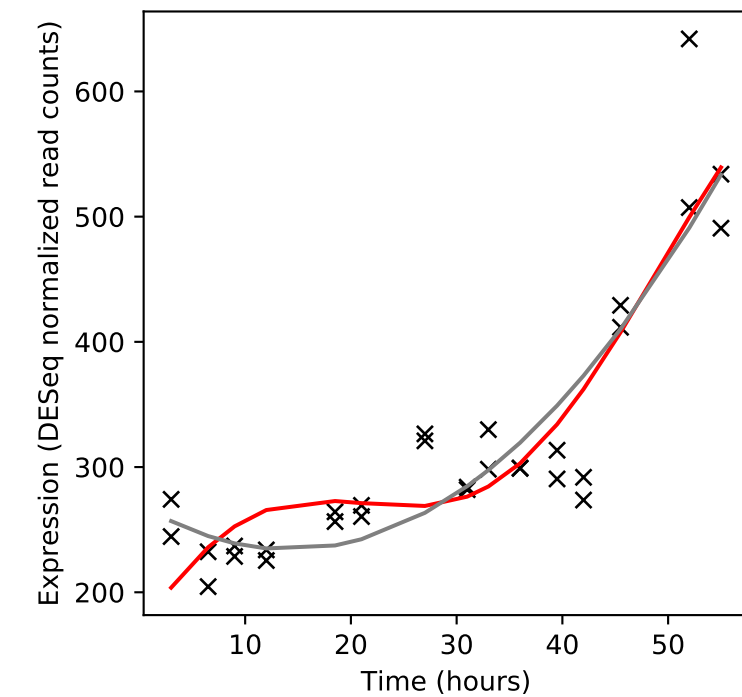



Rv1494/mazE4

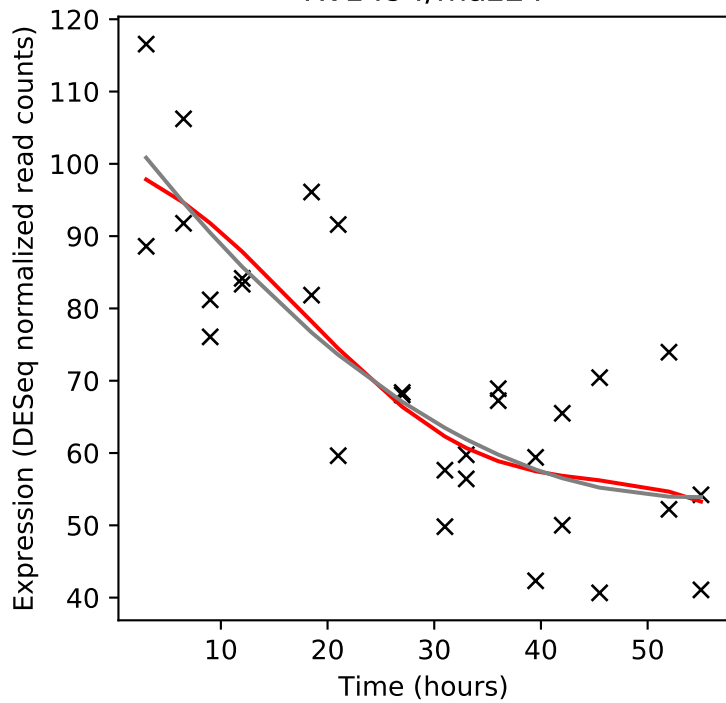

Rv1495/mazF4

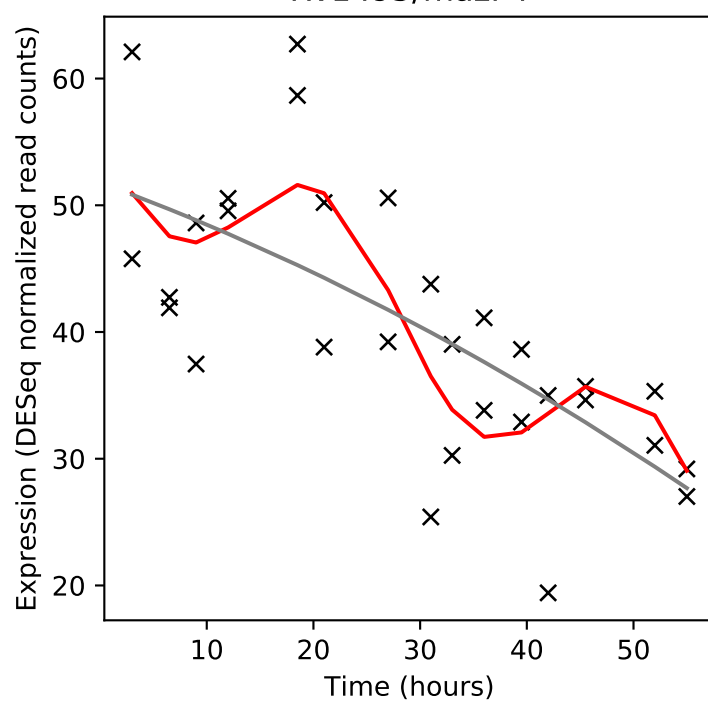

Rv1496/-

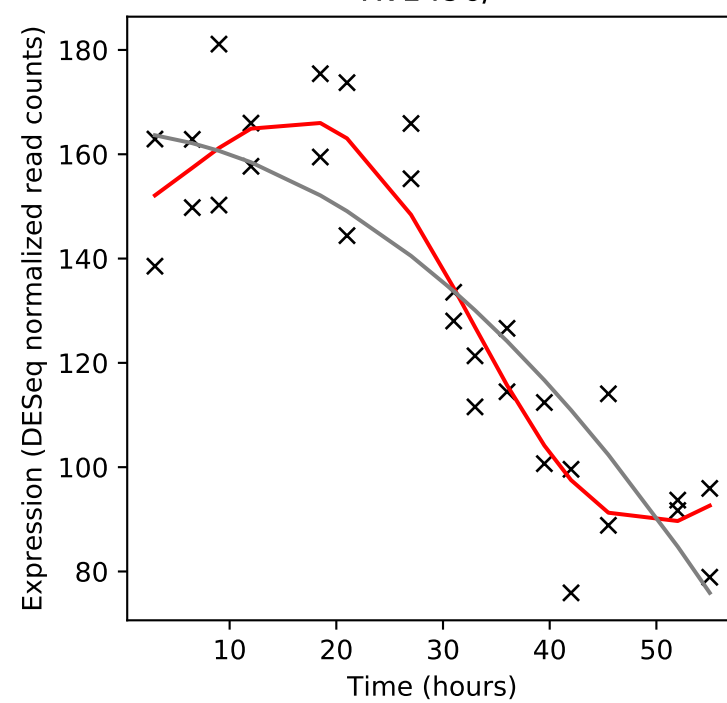

Rv1497/lipL

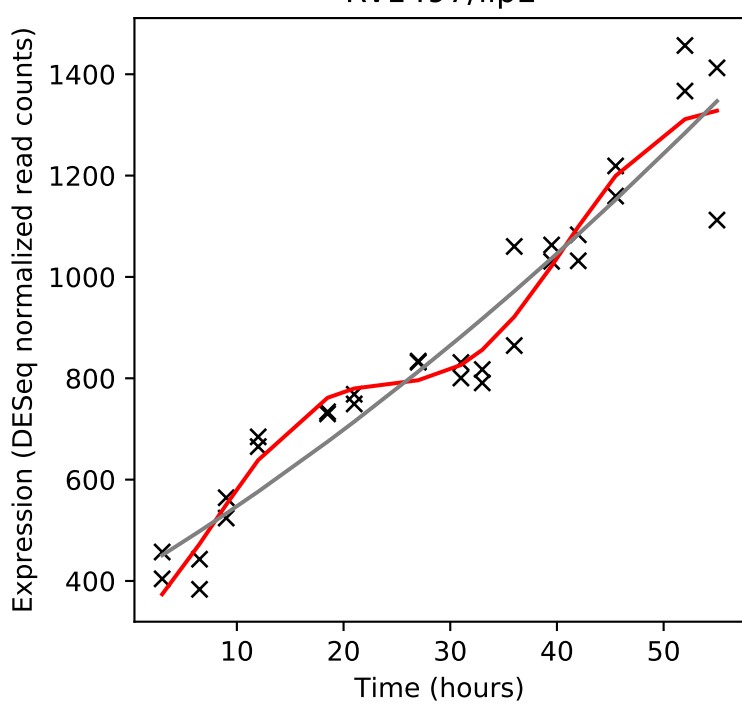

Rv1498c/-

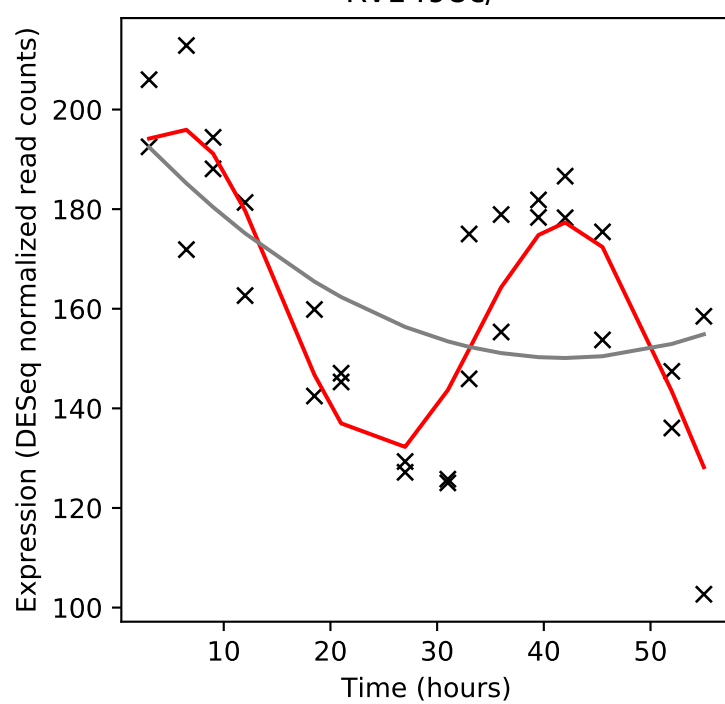

Rv1498A/-

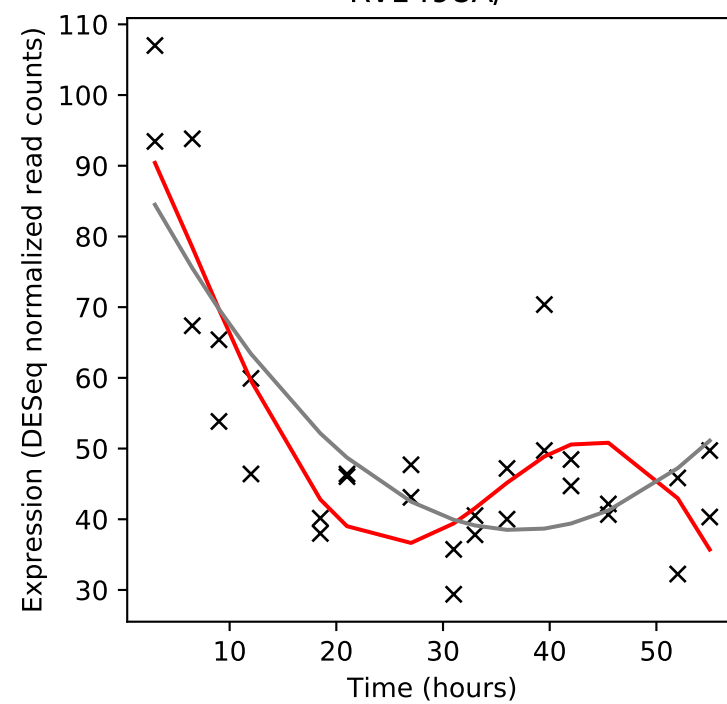

Rv1499/-

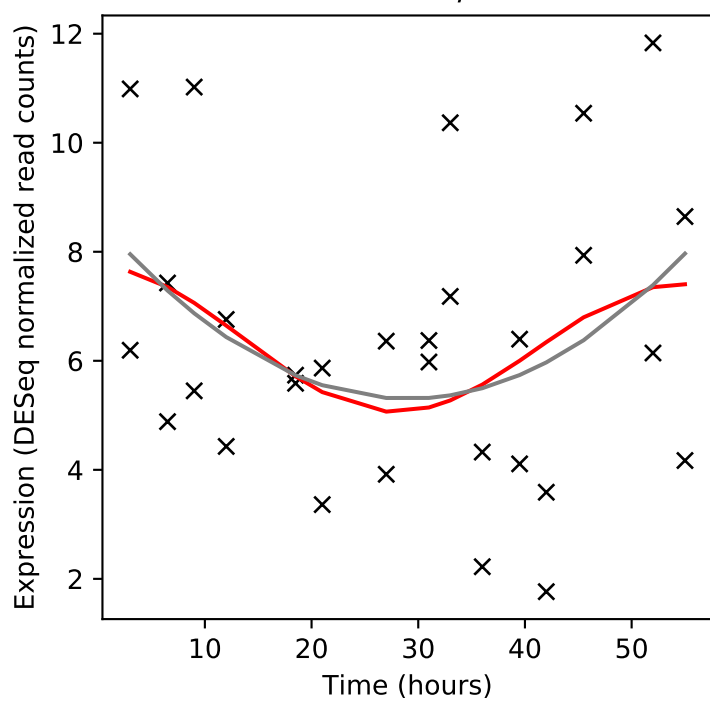

Rv1500/-

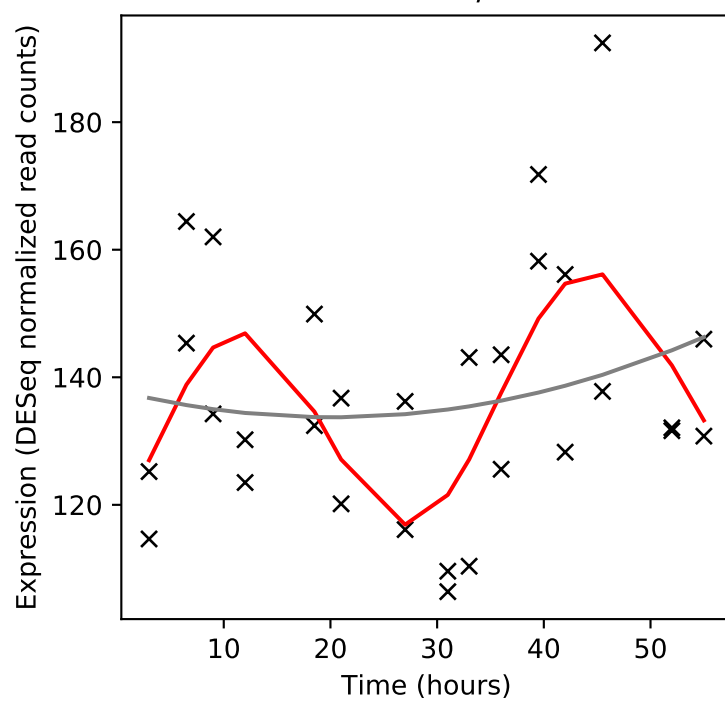

Rv1501/-

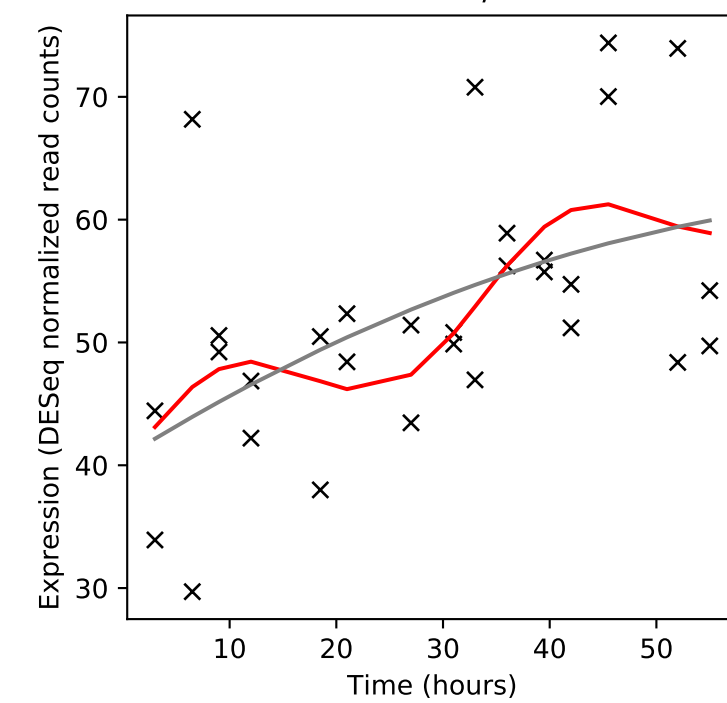

Rv1502/-

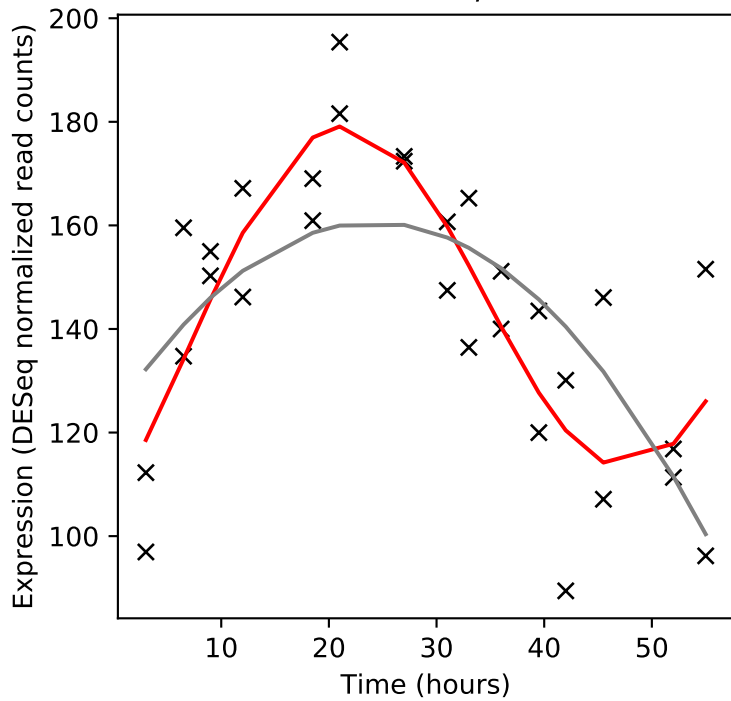

Rv1503c/-

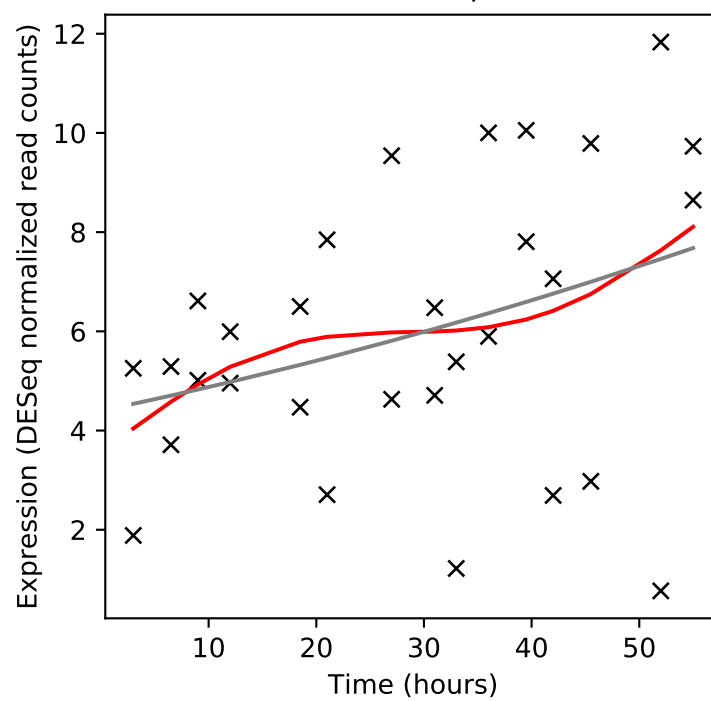

Rv1504c/-

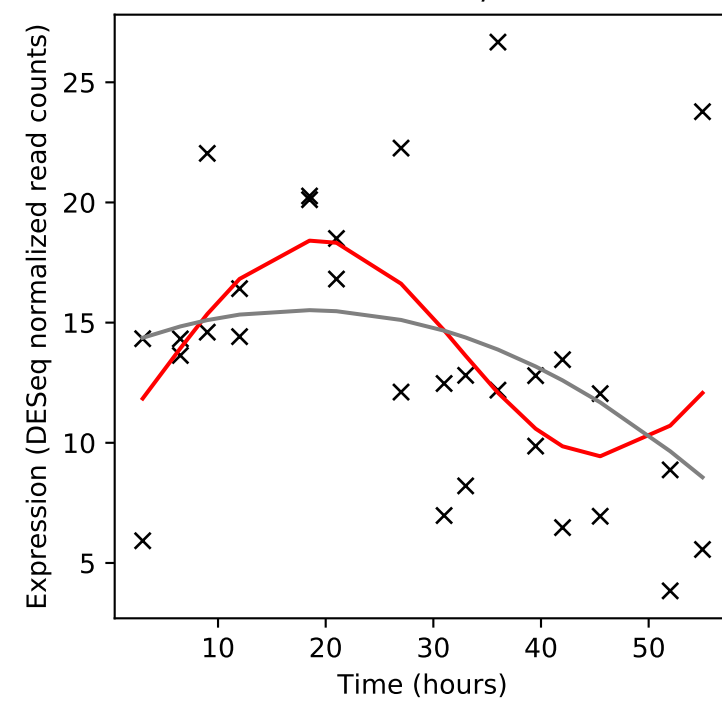

Rv1505c/-

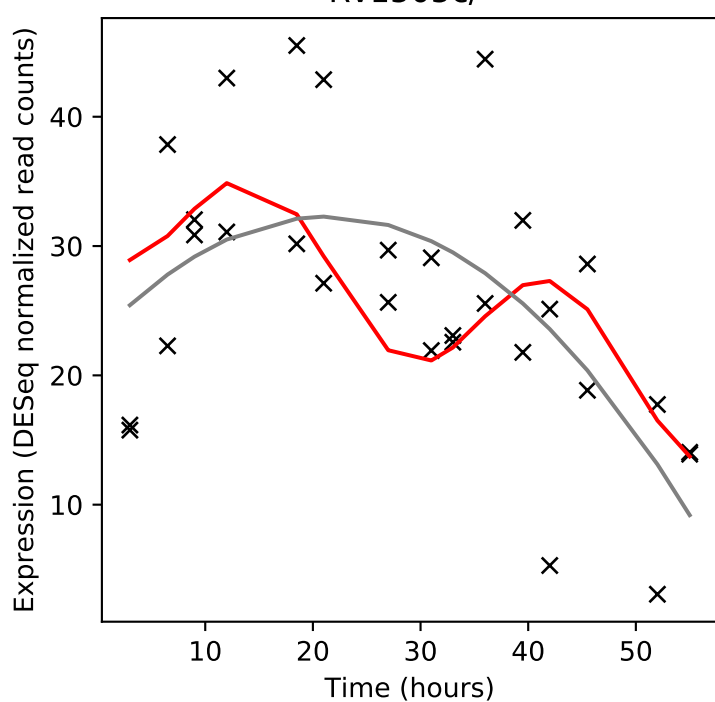

Rv1506c/-

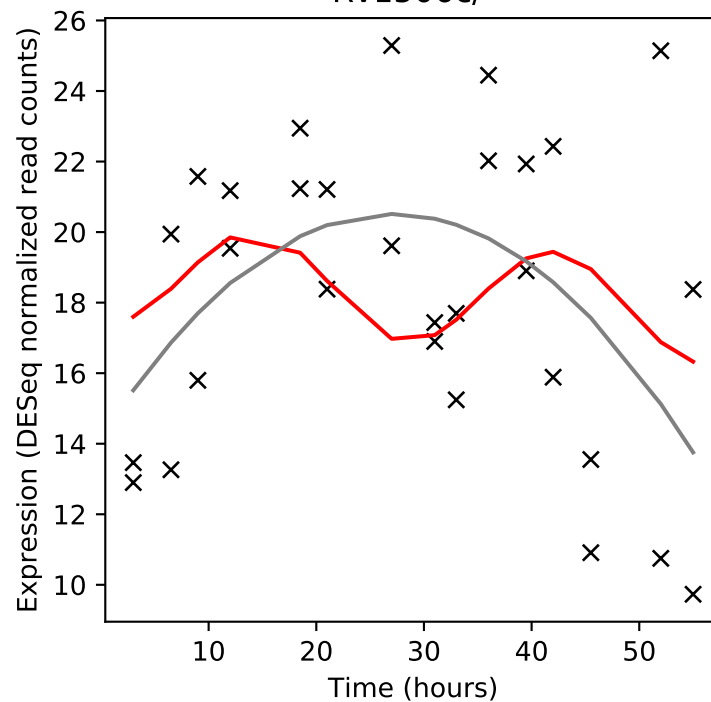

Rv1507c/-

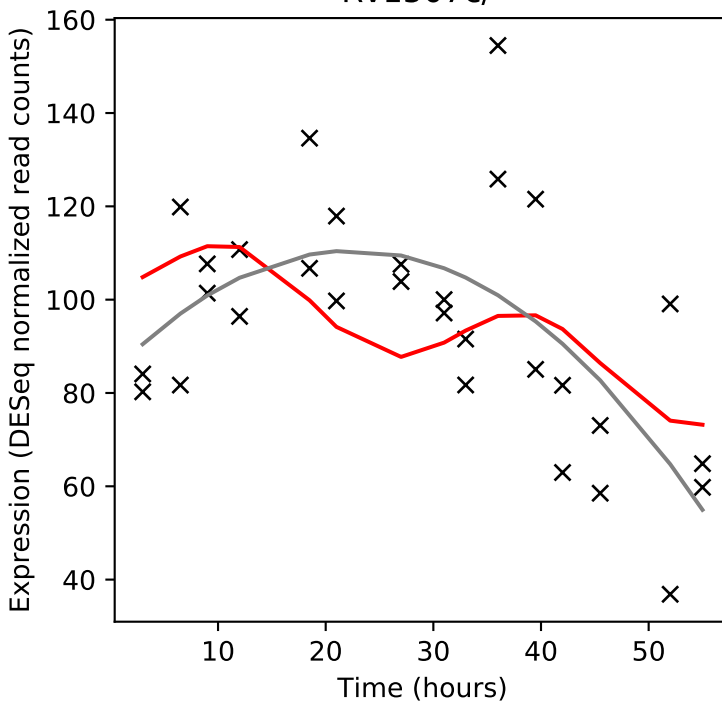

Rv1507A/-

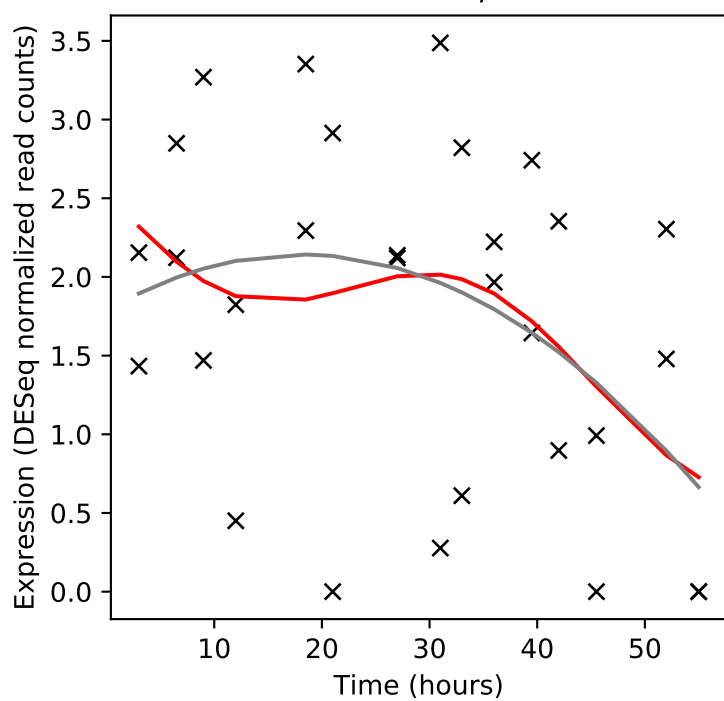

Rv1508c/-

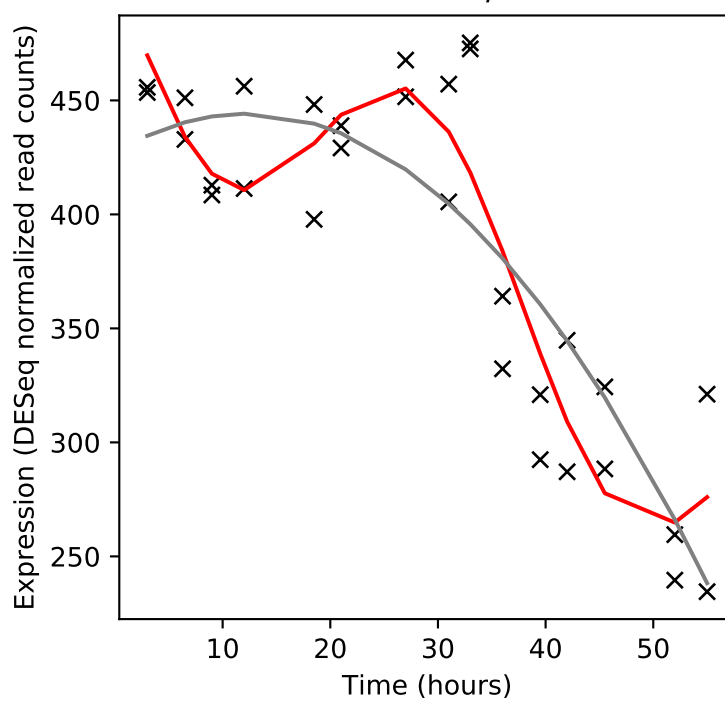

Rv1508A/-

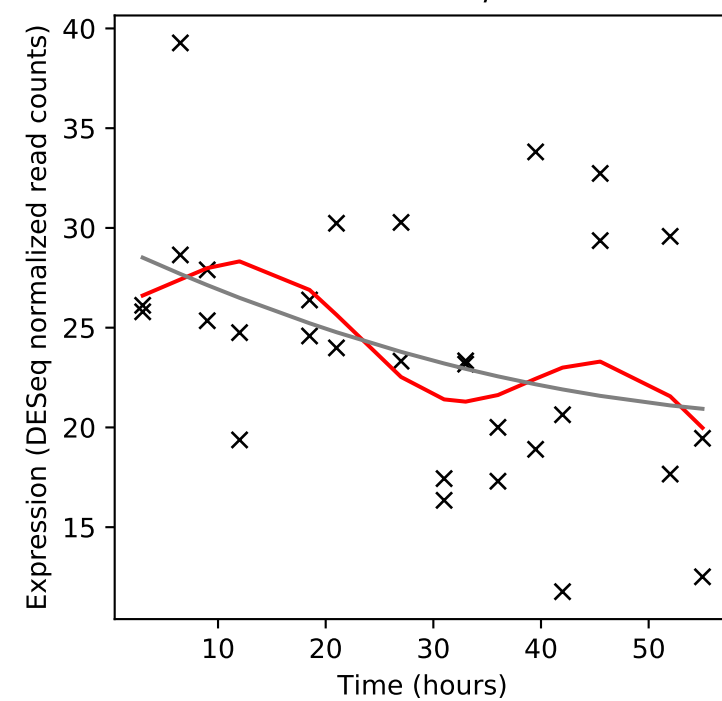

Rv1509/-

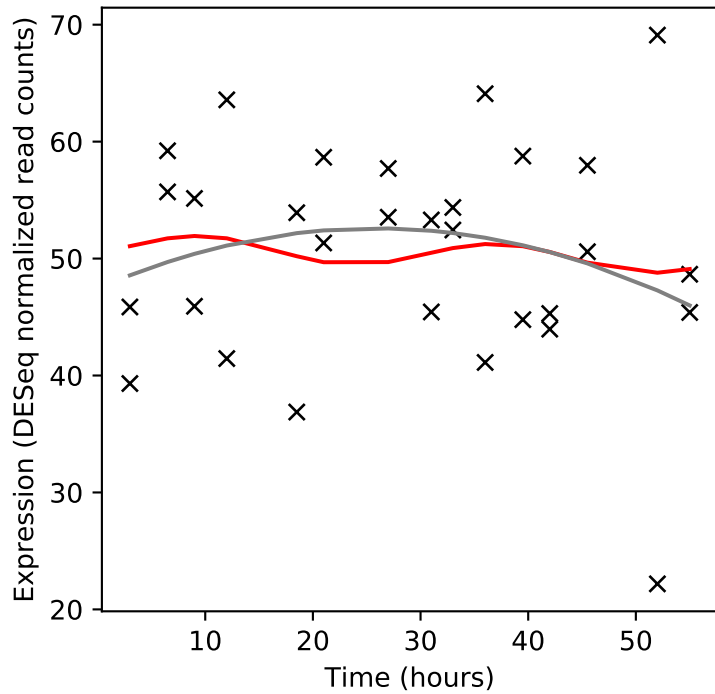

Rv1510/-

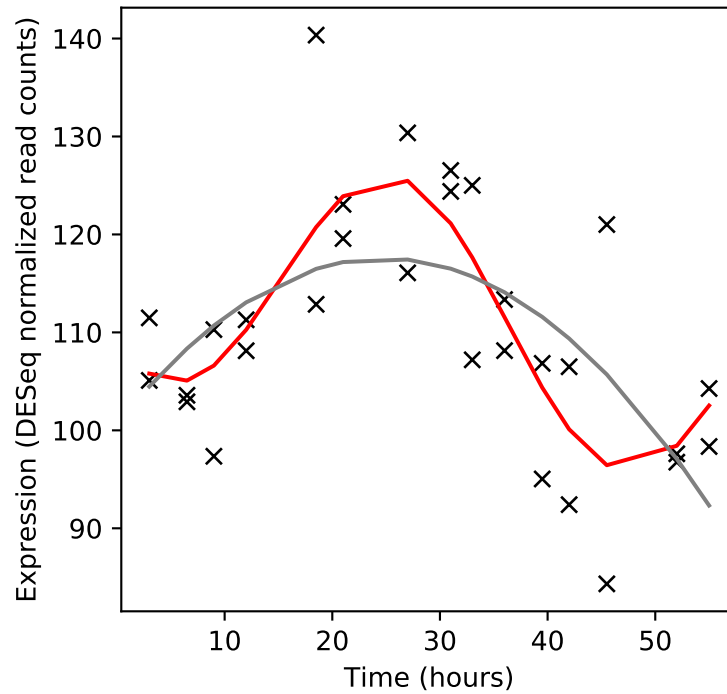

Rv1511/gmdA

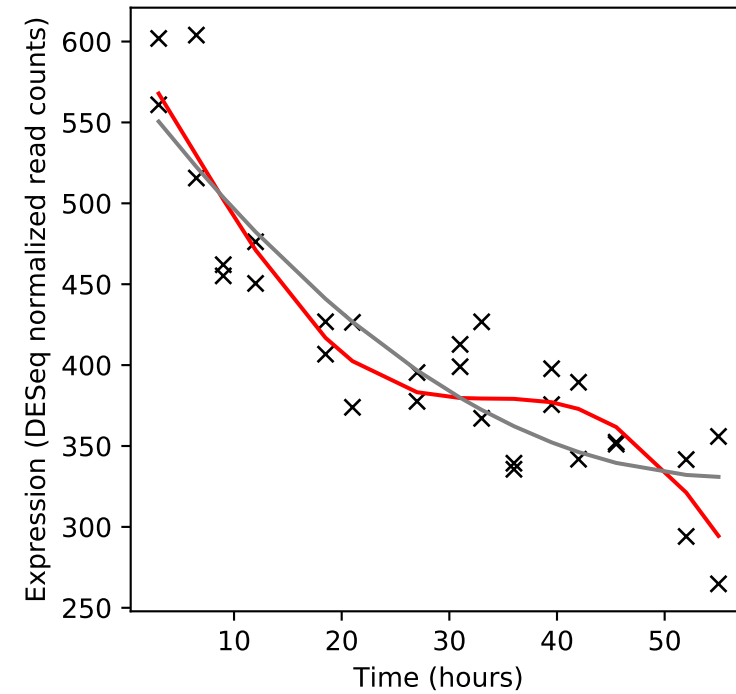

Rv1512/epiA

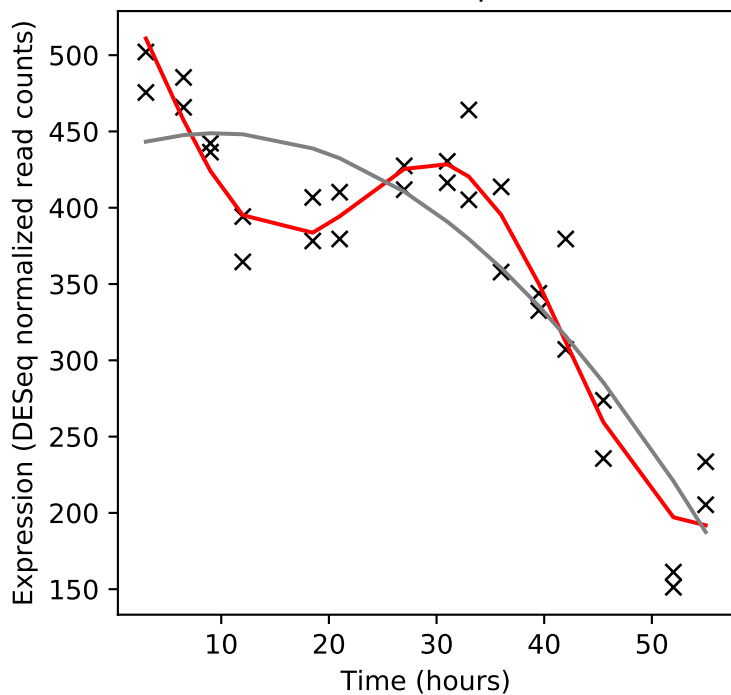

Rv1513/-

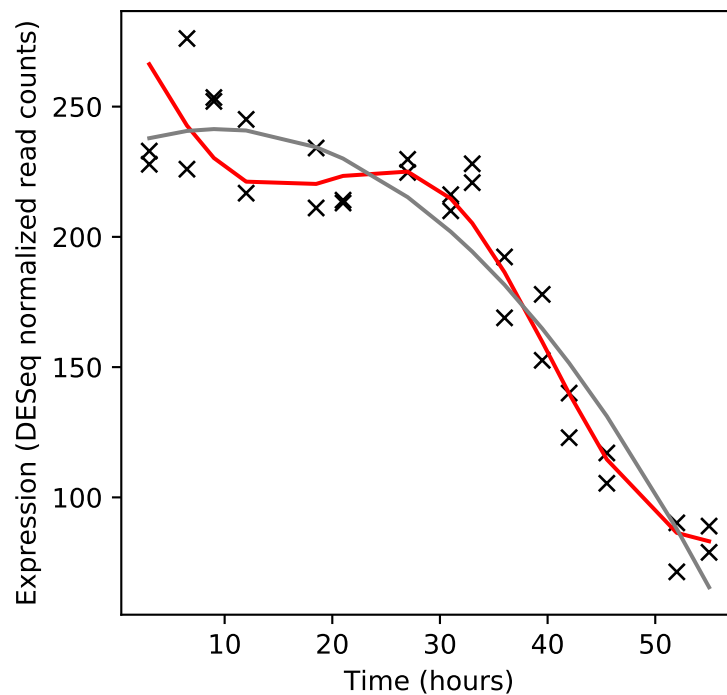

Rv1514c/-

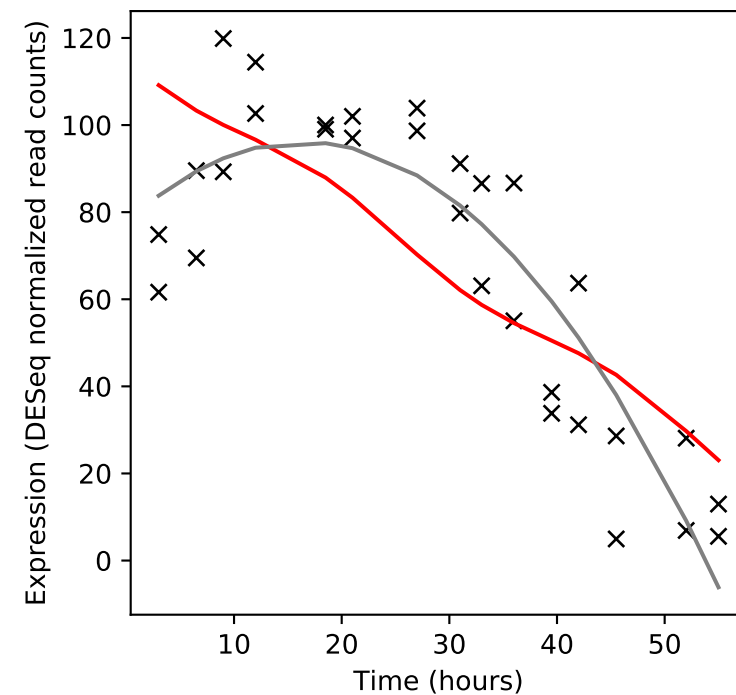

Rv1515c/-

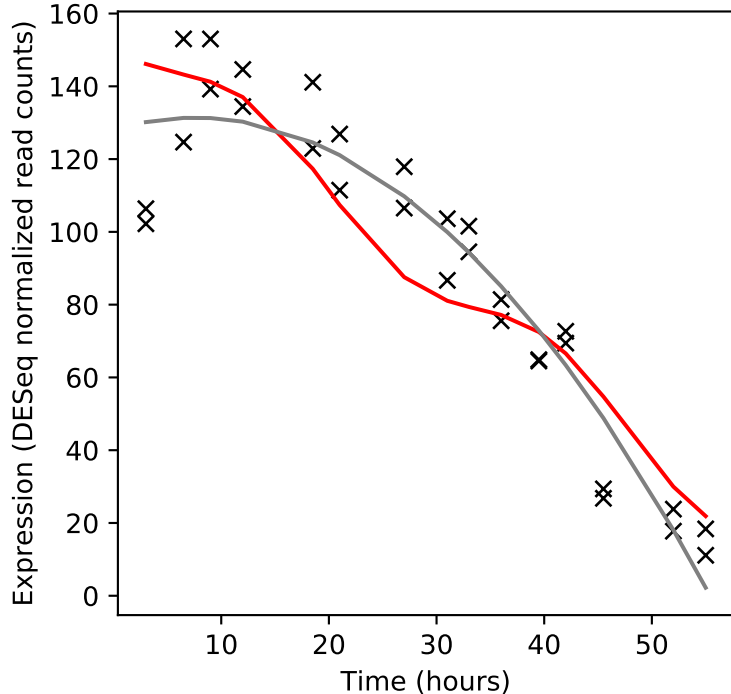

Rv1516c/-

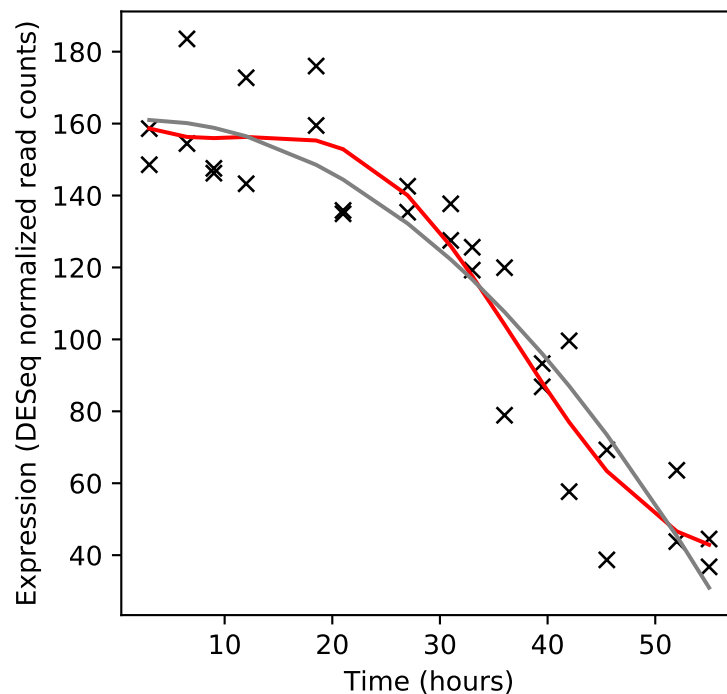

Rv1517/-

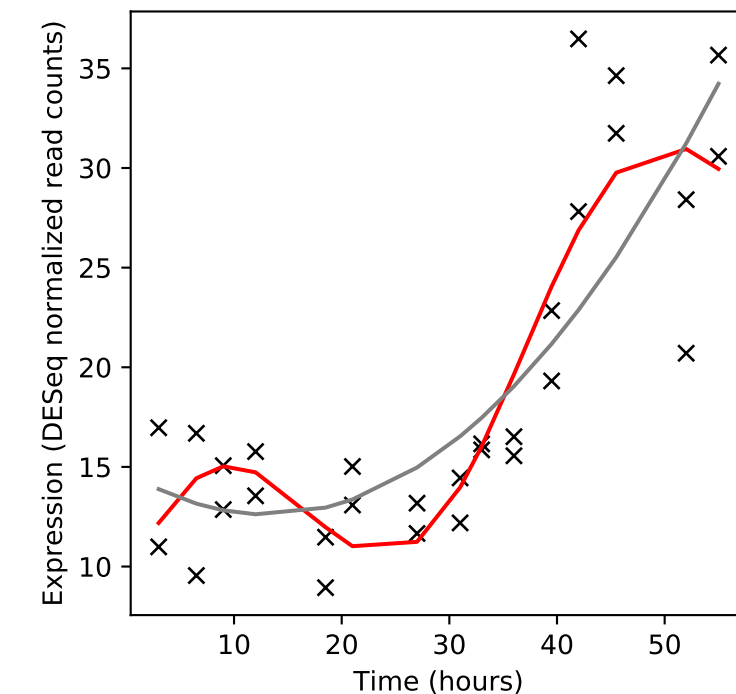

Rv1518/-

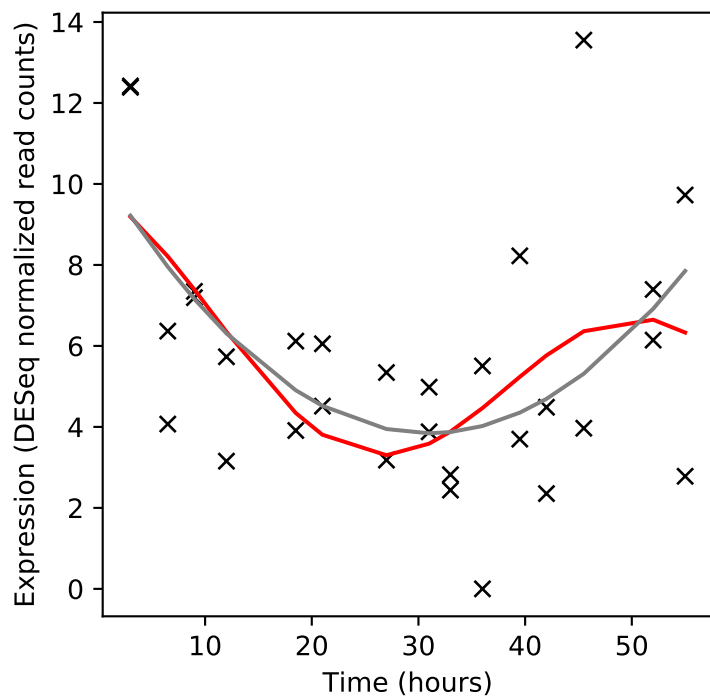

Rv1519/-

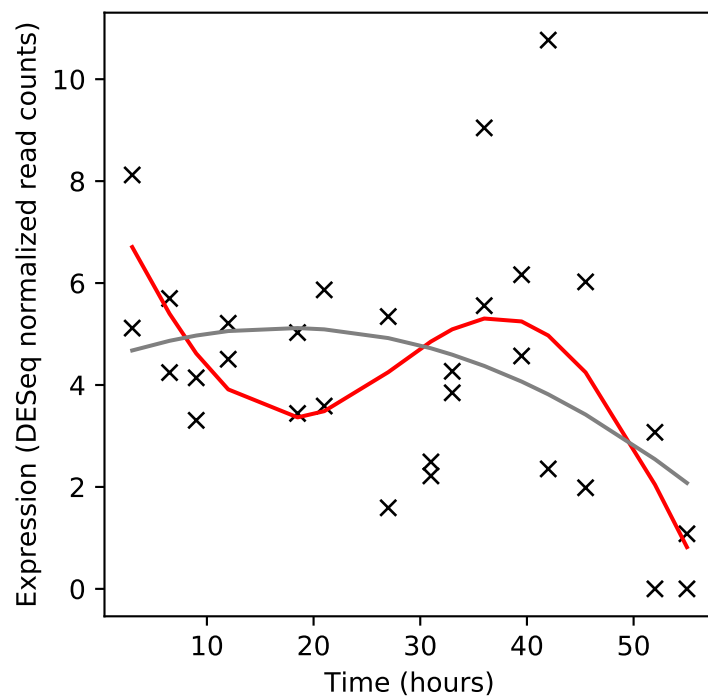

Rv1520/-

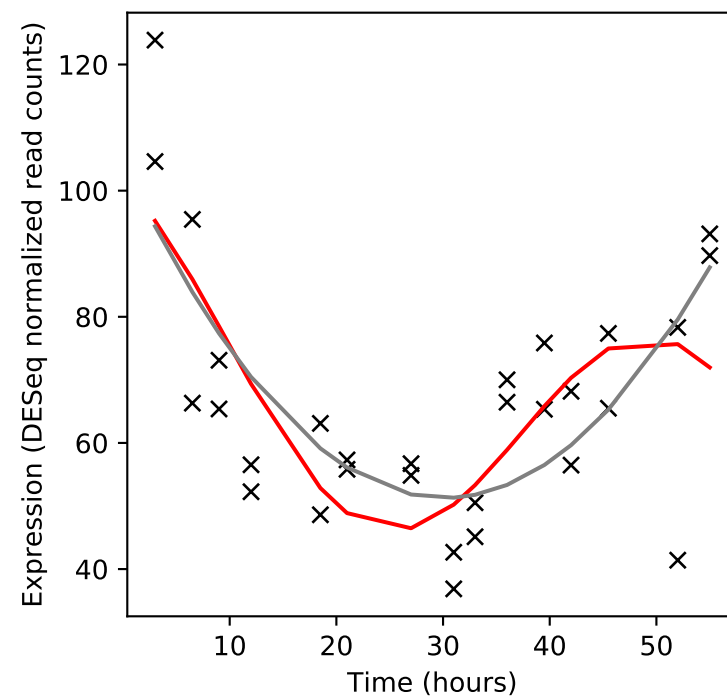

Rv1521/fadD25

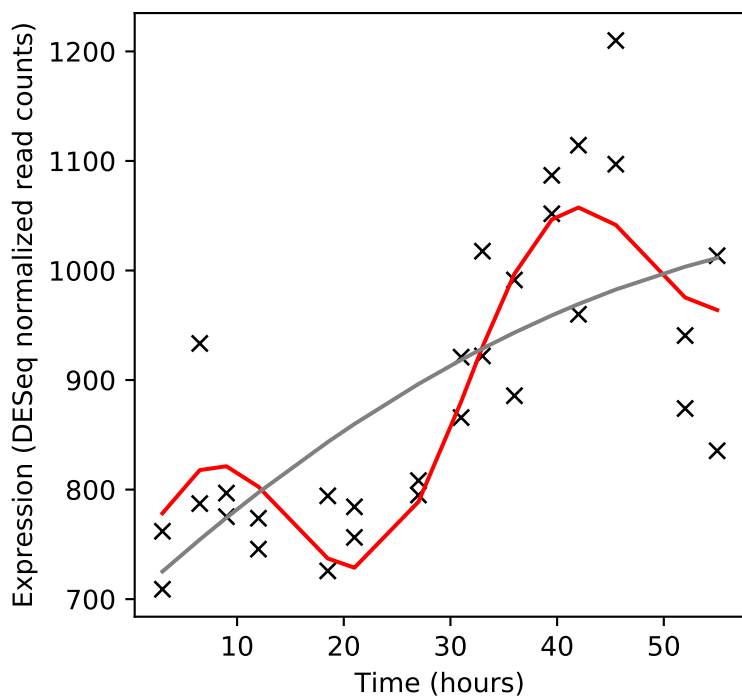

Rv1522c/mmpL12

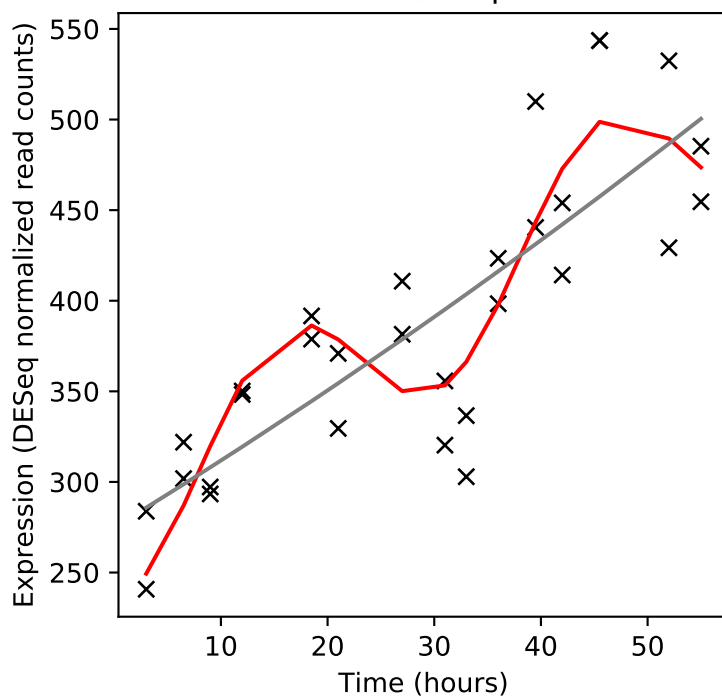

Rv1523/-

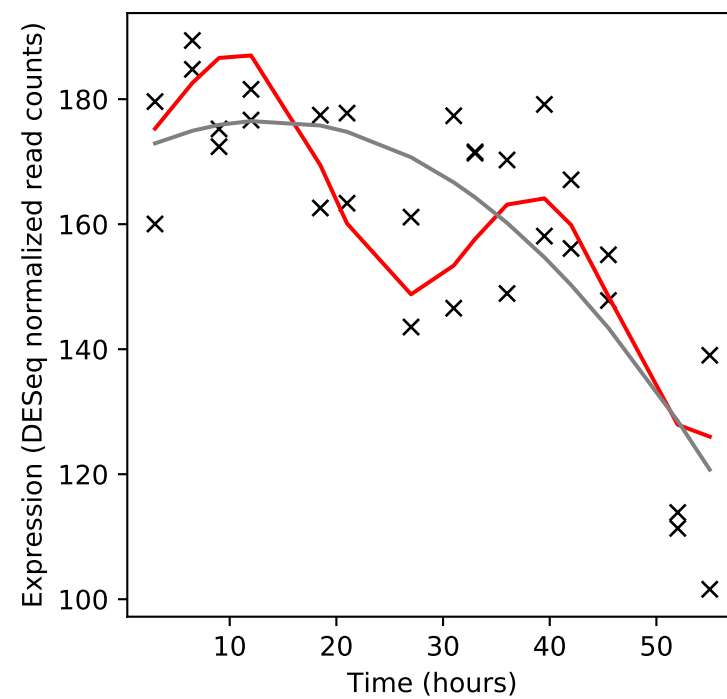

Rv1524/-

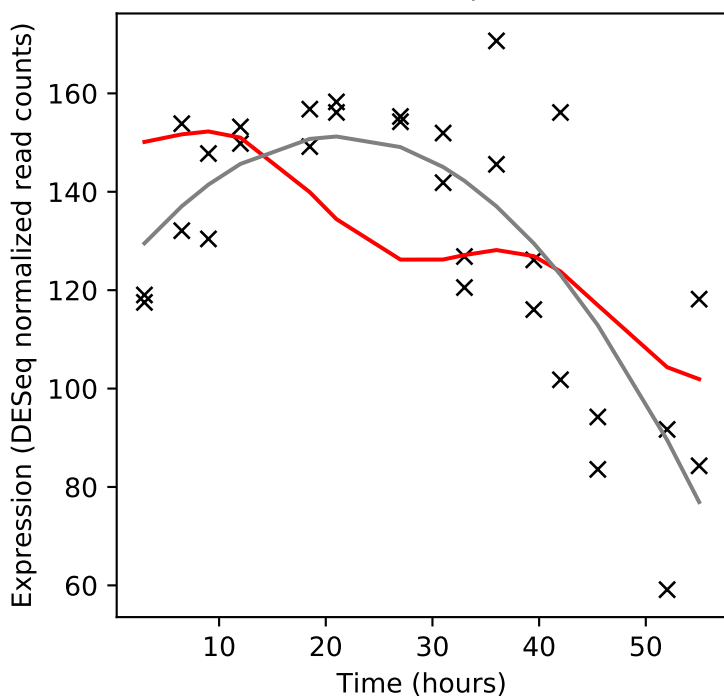

Rv1525/wbbL2

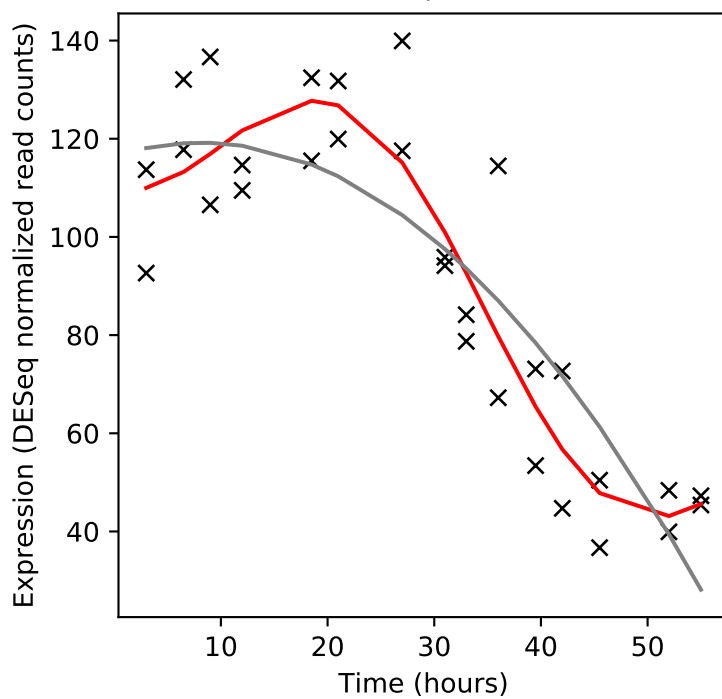

Rv1526c/-

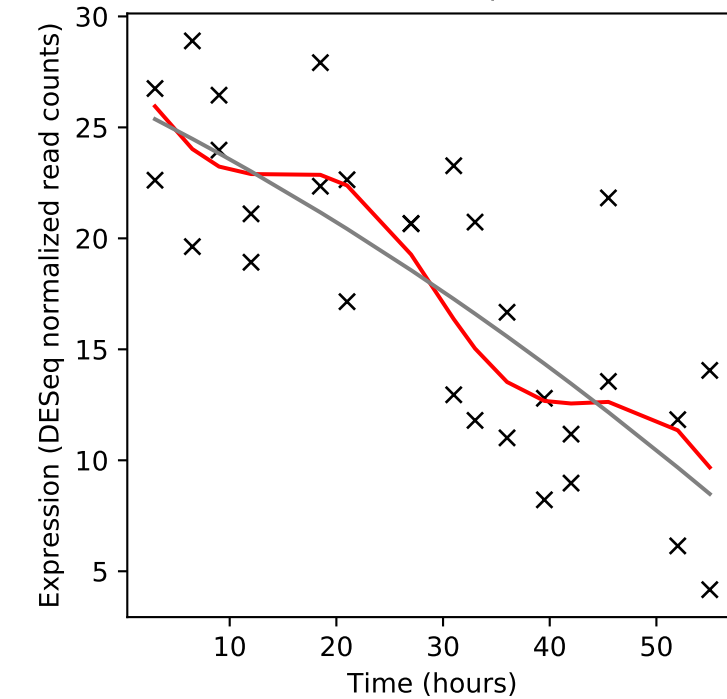

Rv1527c/pks5

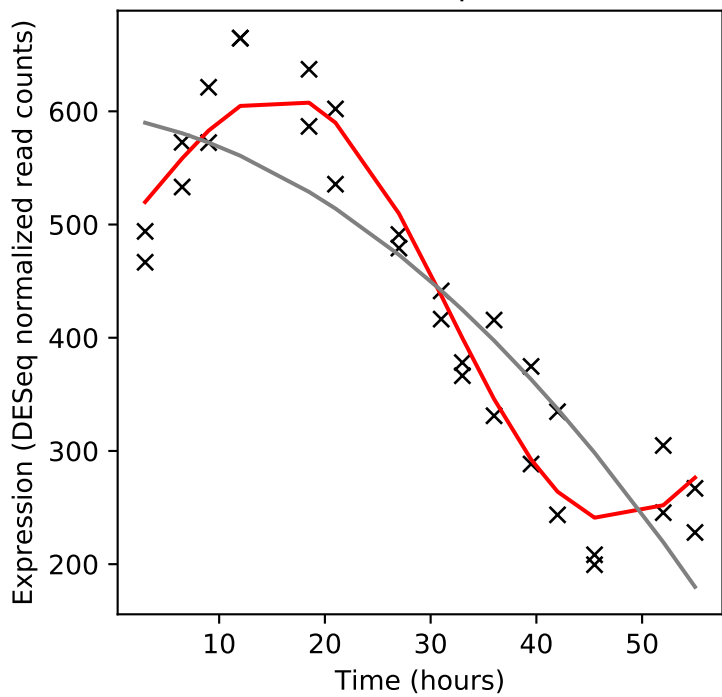

Rv1528c/papA4

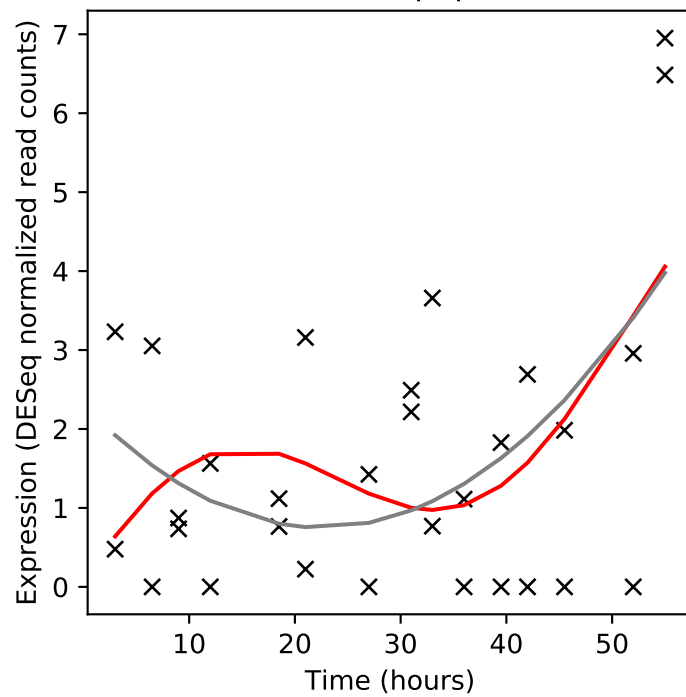

Rv1529/fadD24

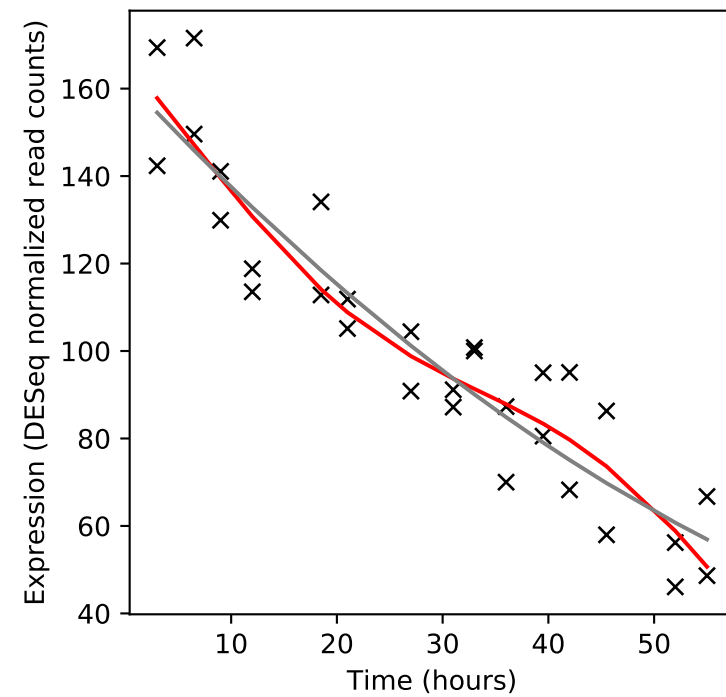

Rv1530/adh

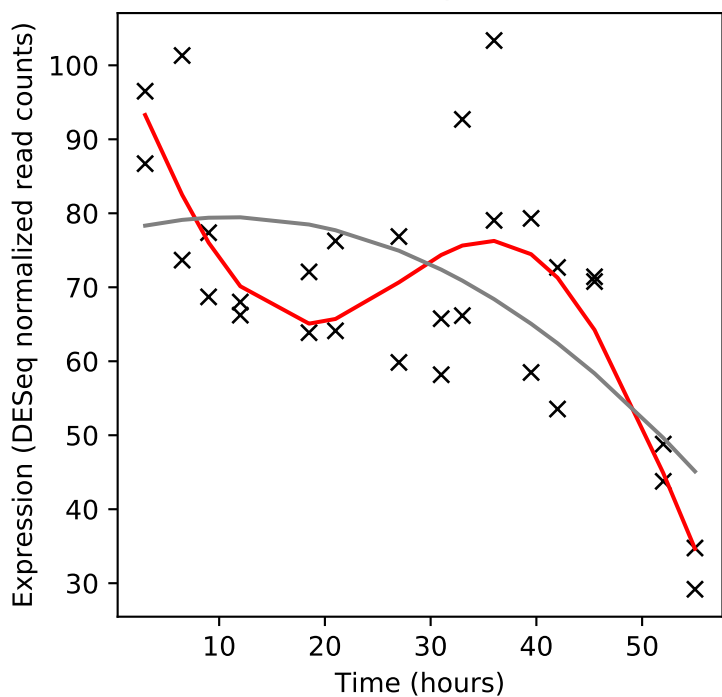

Rv1531/-

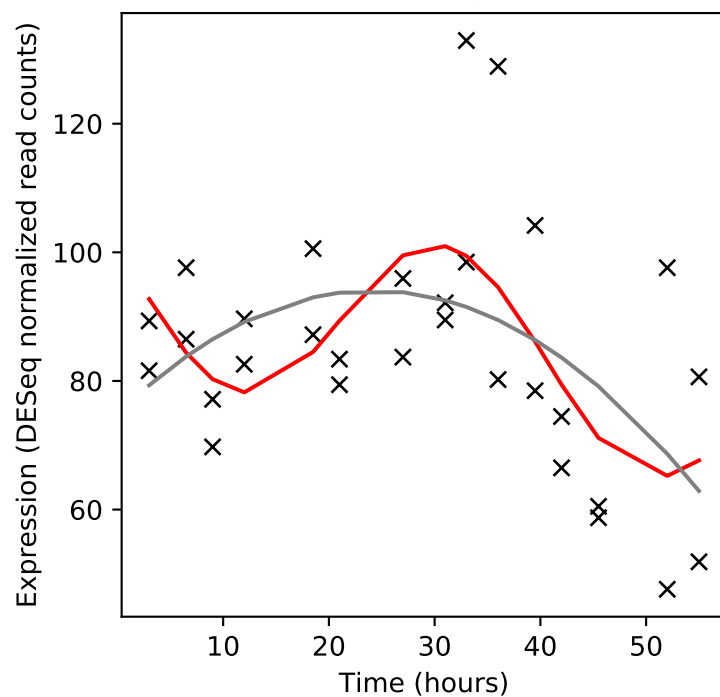

Rv1532c/-

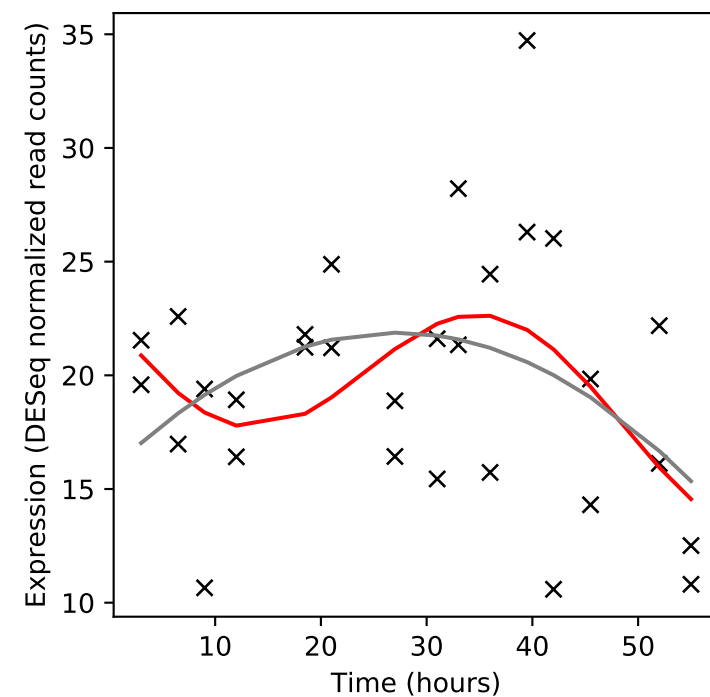

Rv1533/-

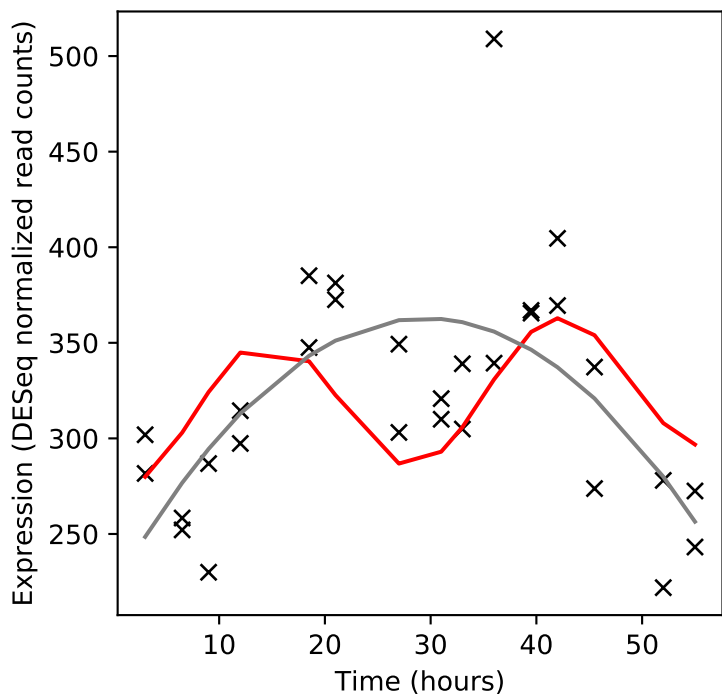

Rv1534/-

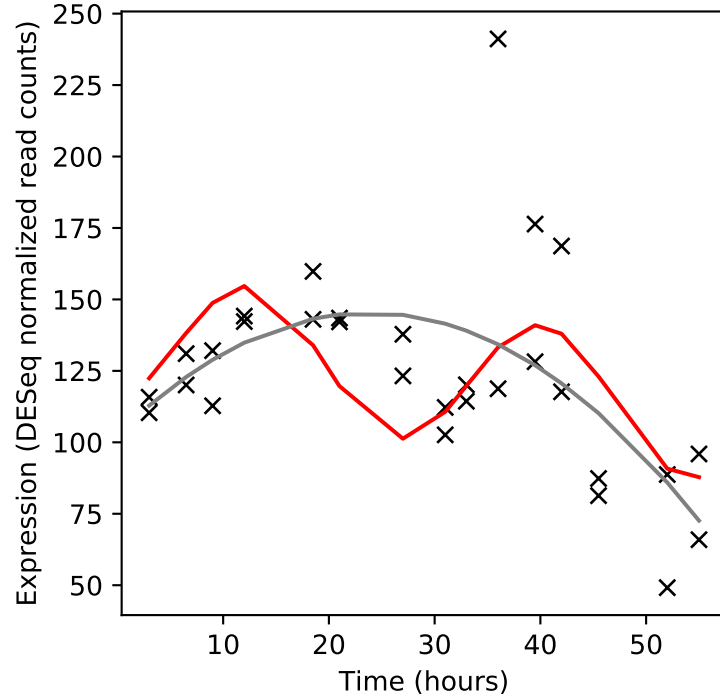

Rv1535/-

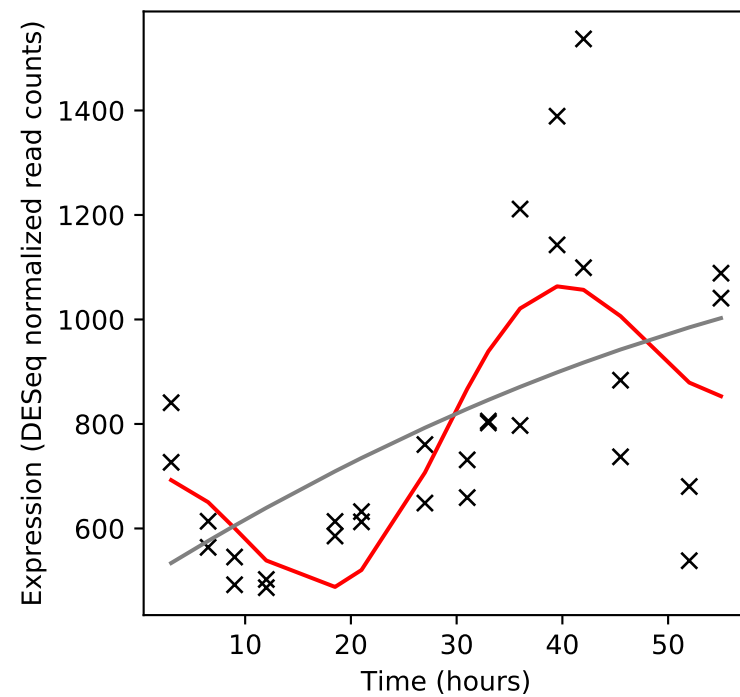

Rv1536/ileS

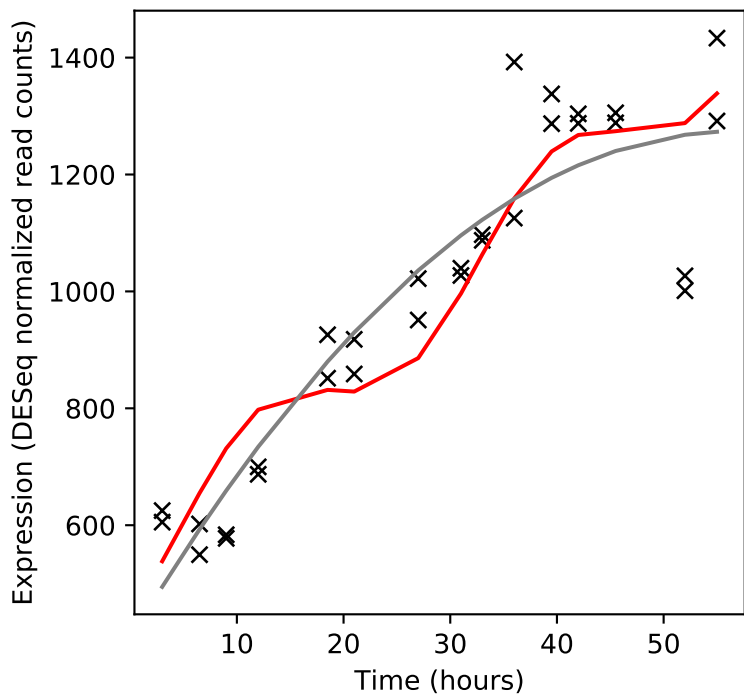

Rv1537/dinX

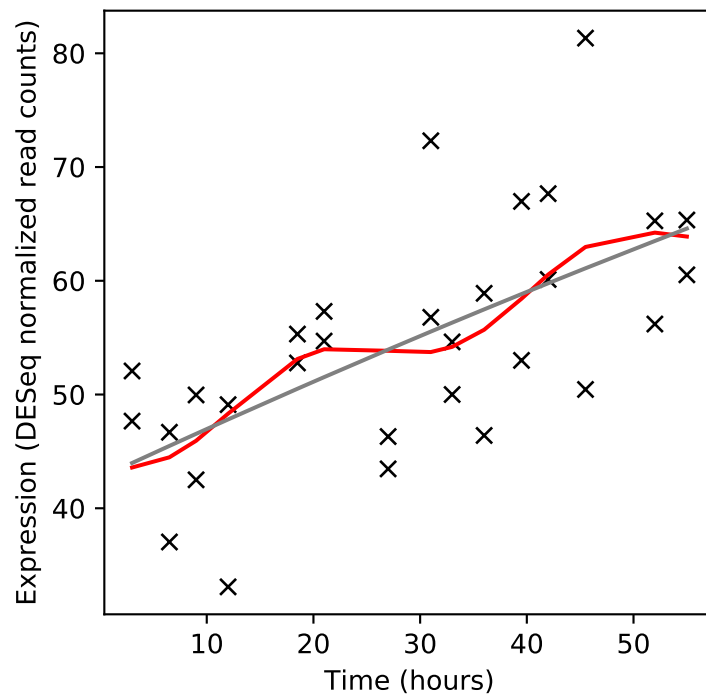

Rv1538c/ansA

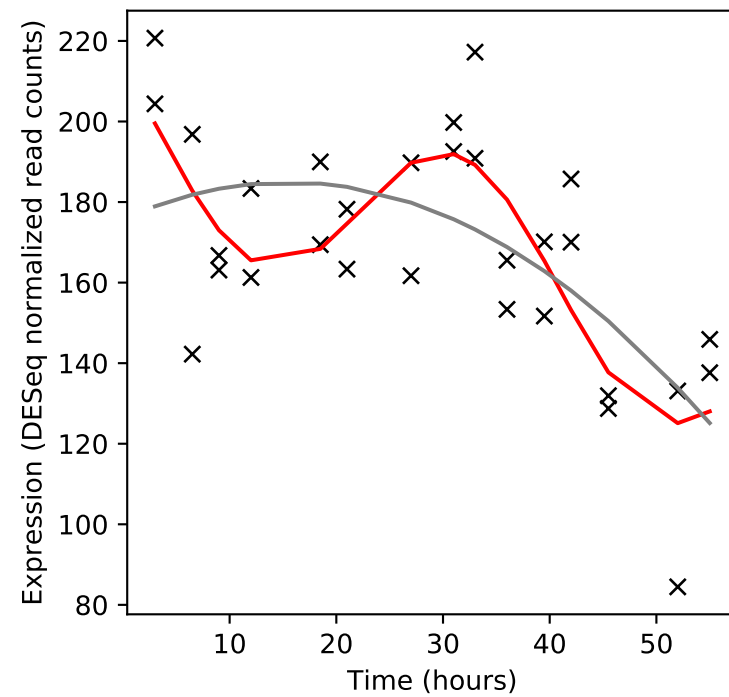

Rv1539/lspA

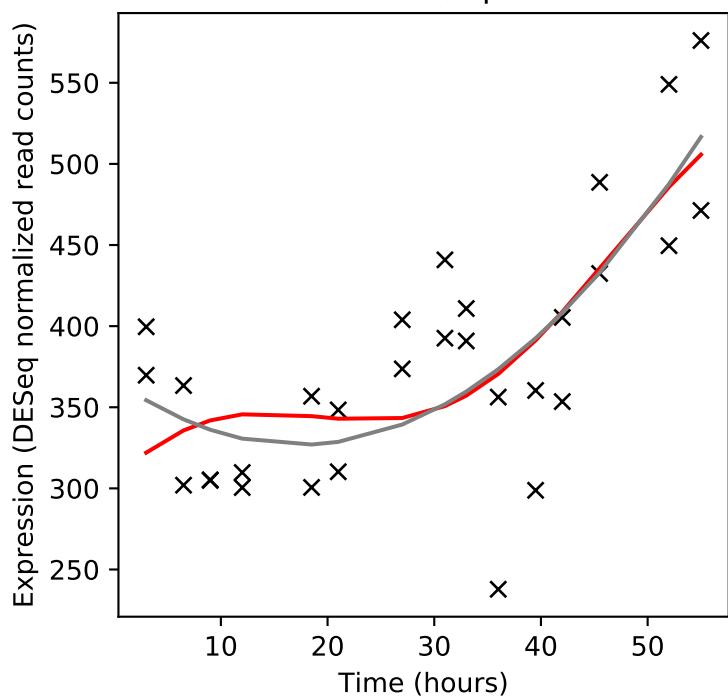

Rv1540/-

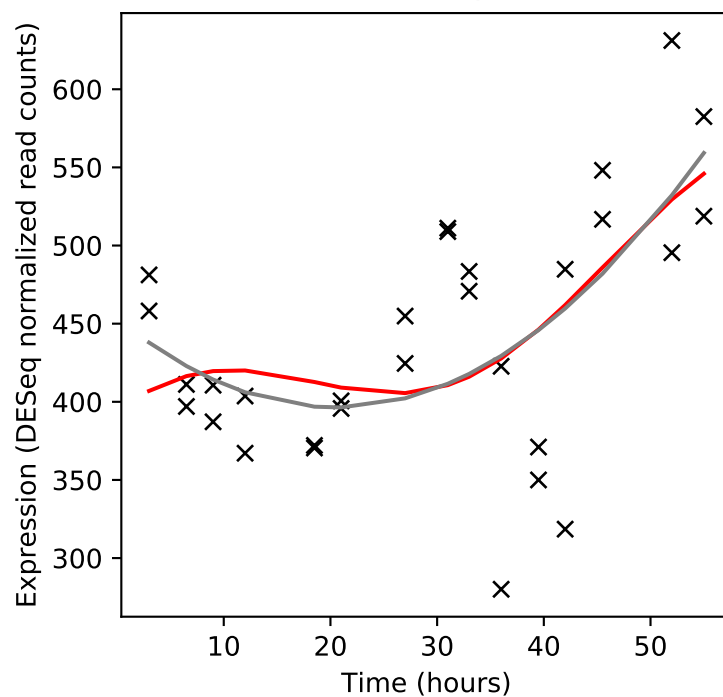

Rv1541c/lprI

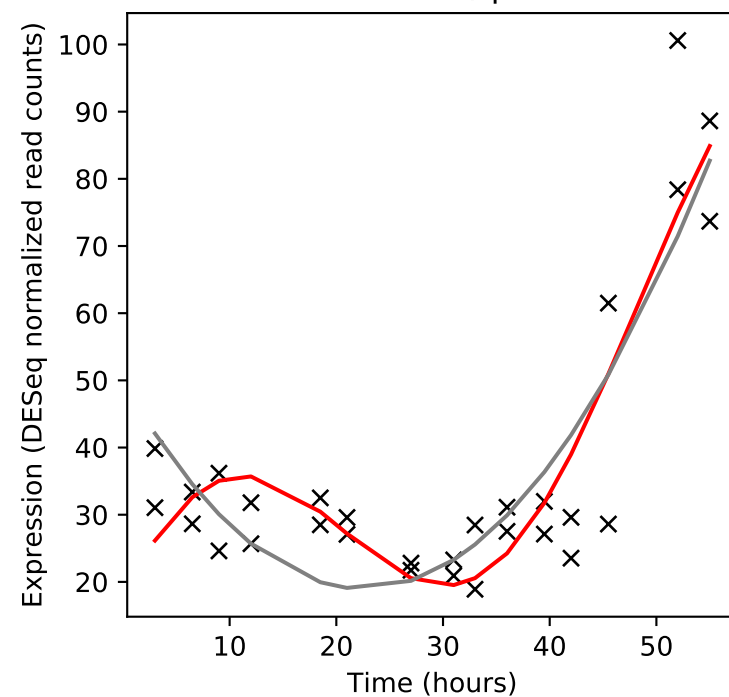

Rv1542c/glbN

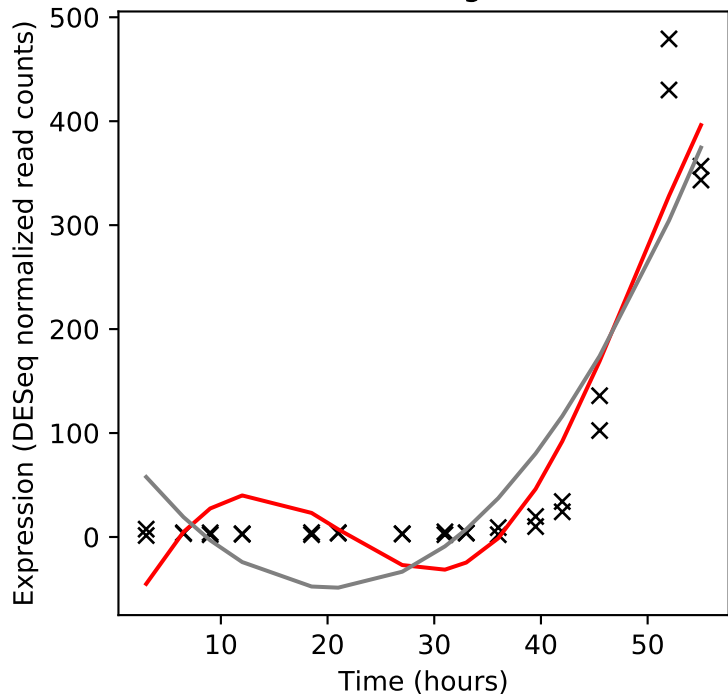

Rv1543/-

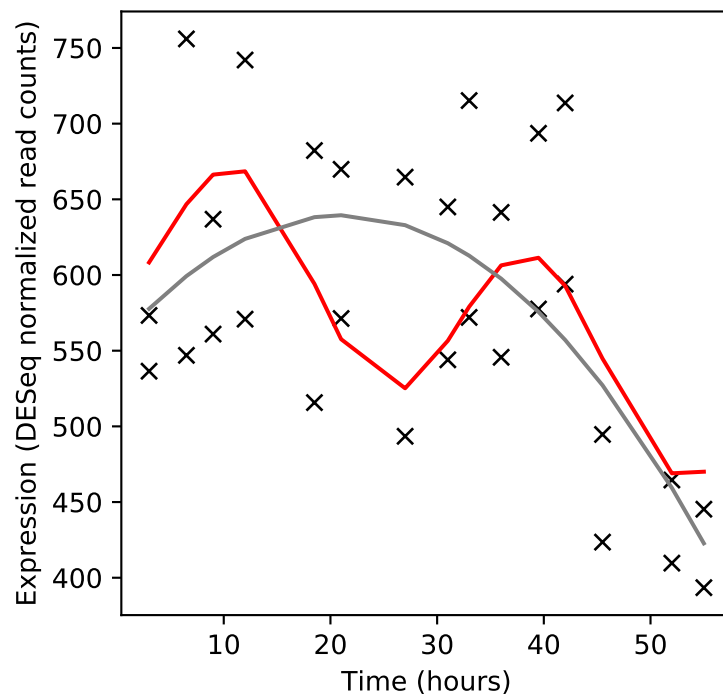

Rv1544/-

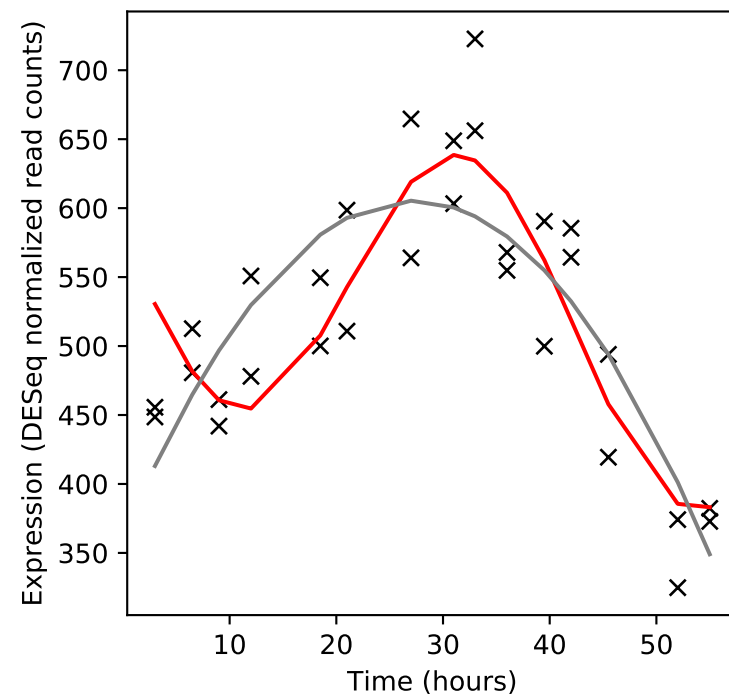

Rv1545/-

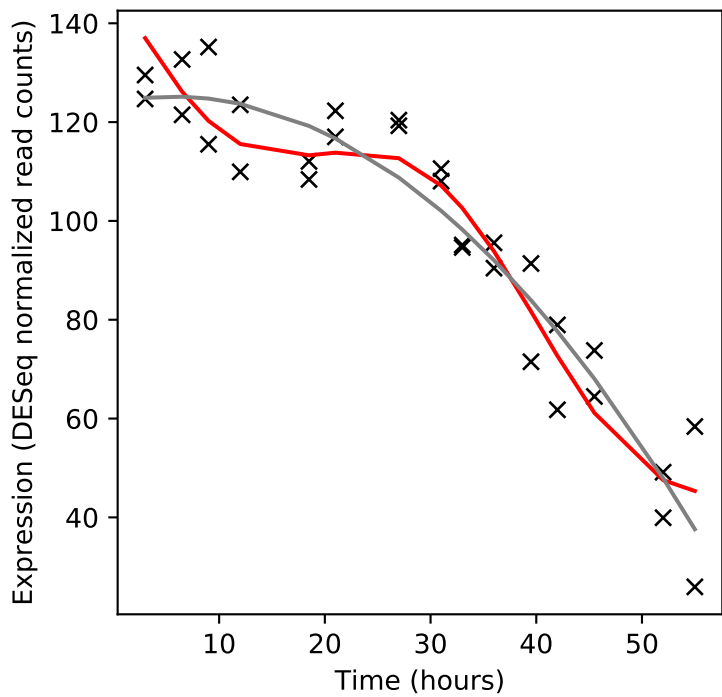

Rv1546/-

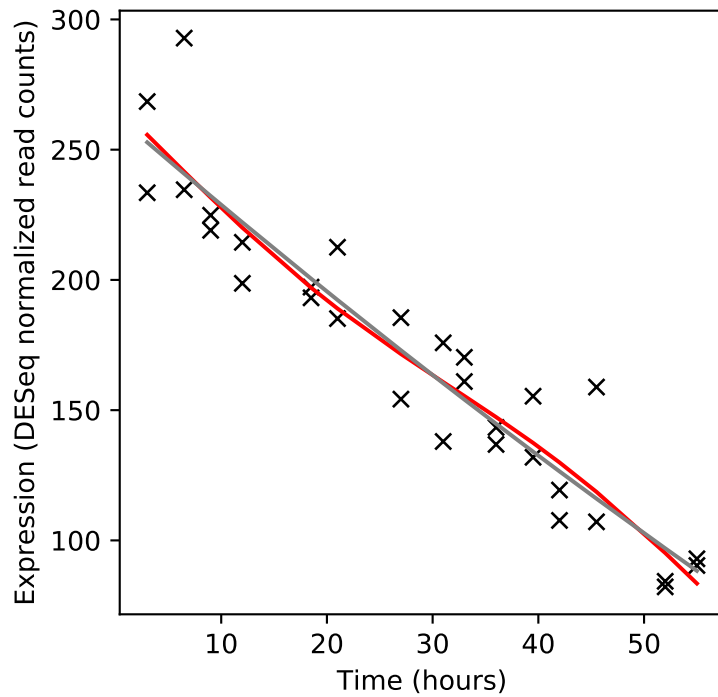

Rv1547/dnaE1

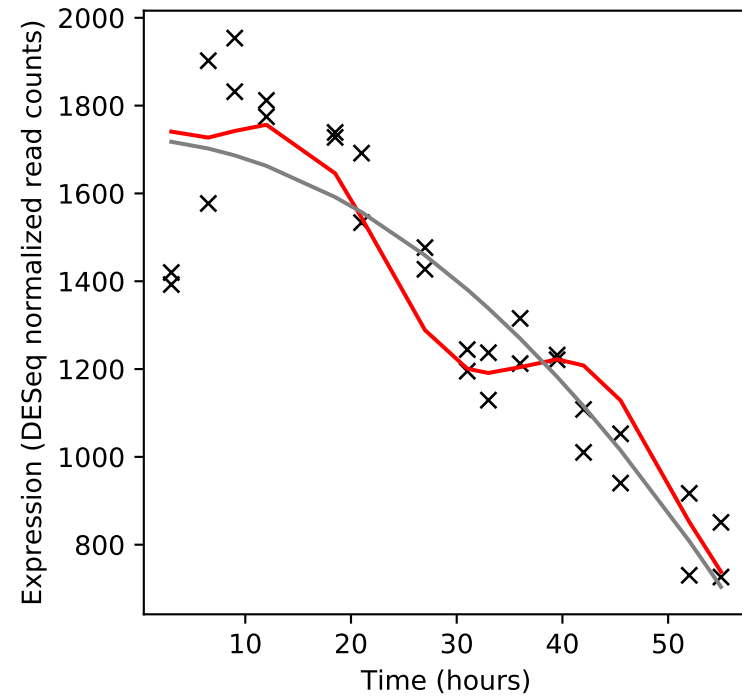

Rv1548c/PPE21

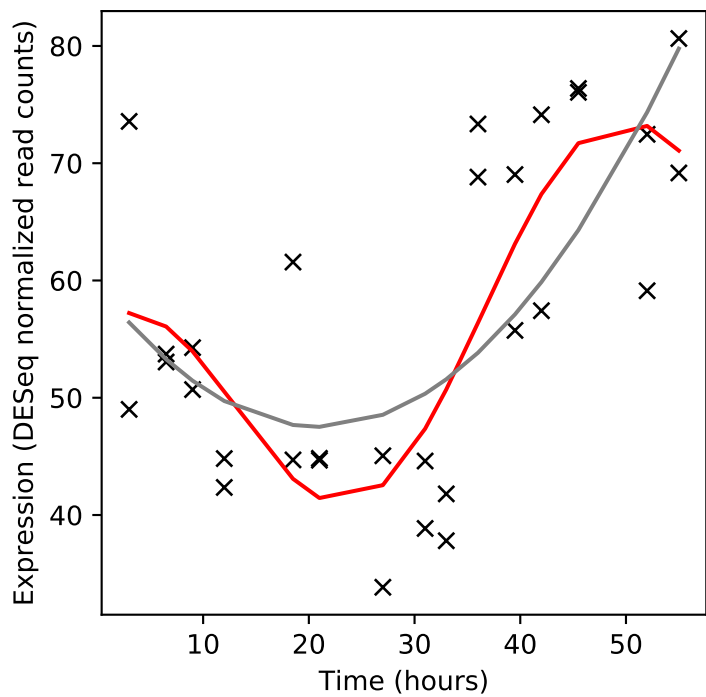

Rv1549/fadD11.1

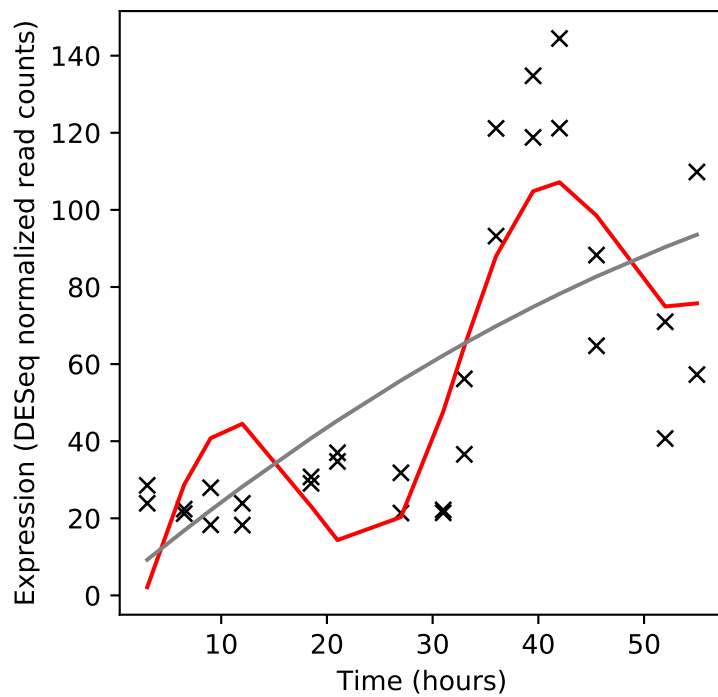

Rv1550/fadD11

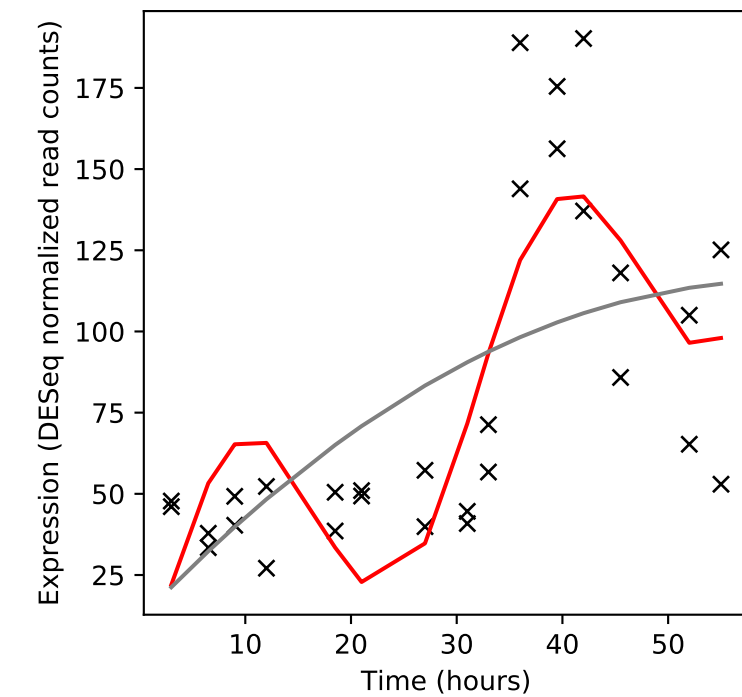

Rv1551/plsB1

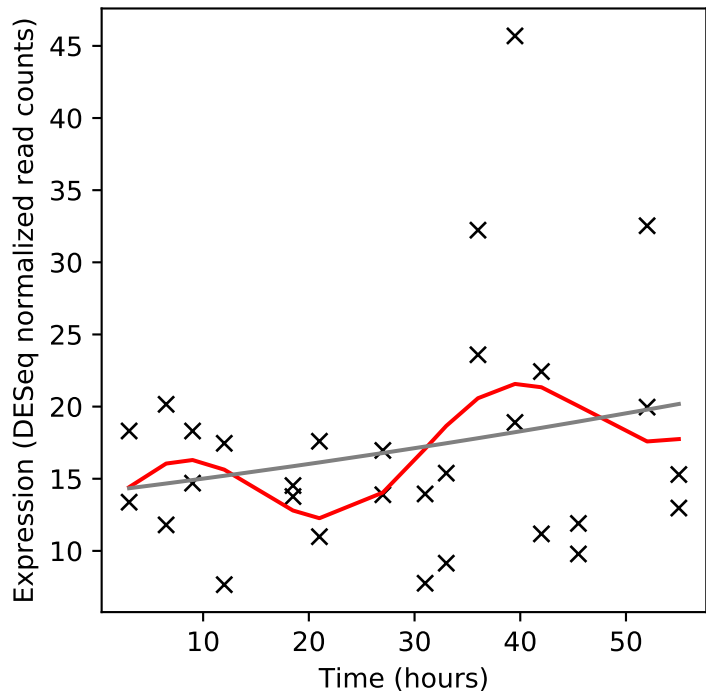

Rv1552/frdA

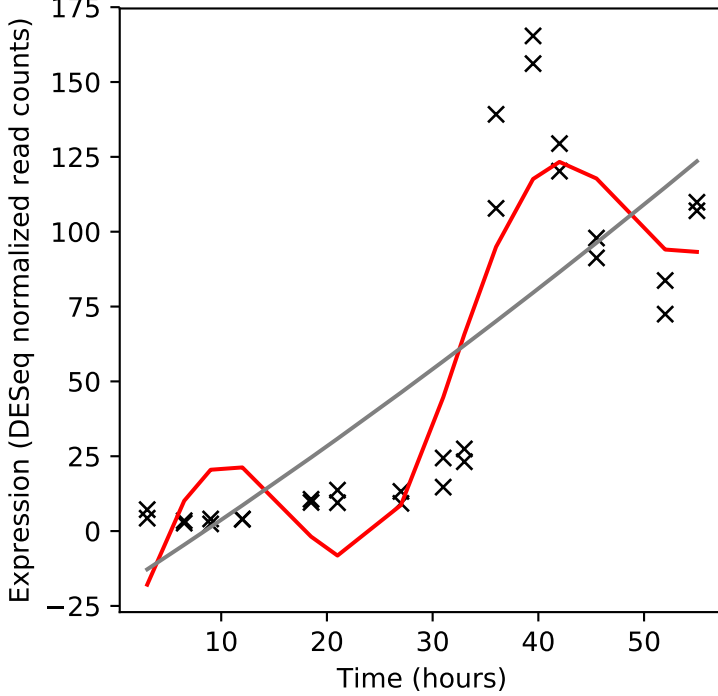

Rv1553/frdB

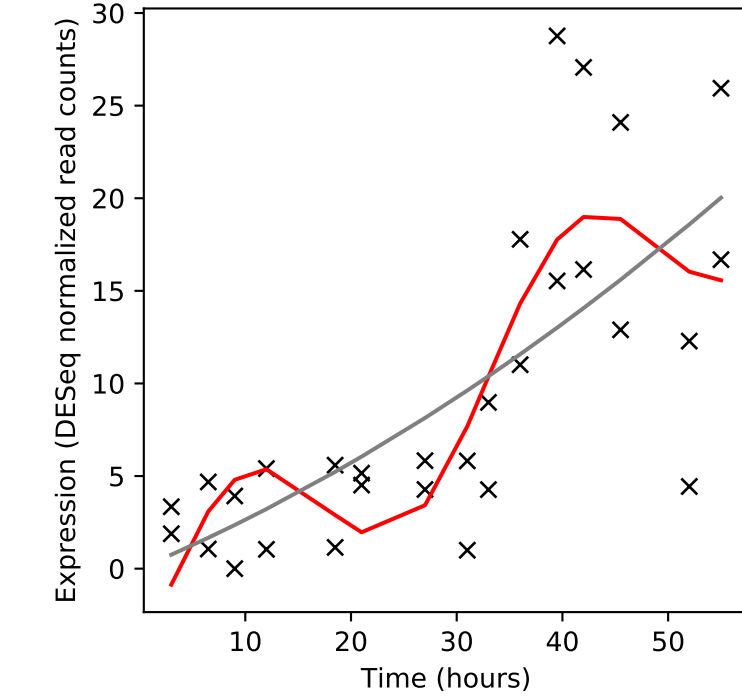



Rv1554/frdC

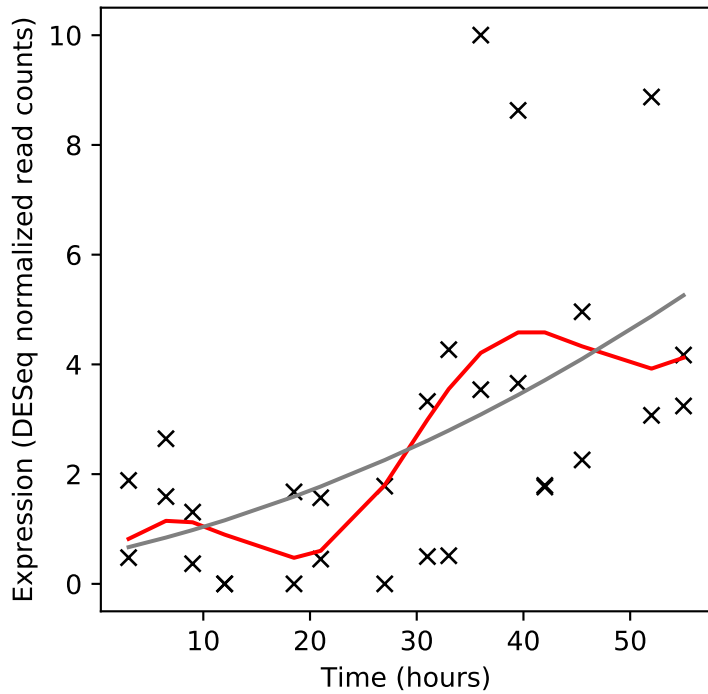

Rv1555/frdD

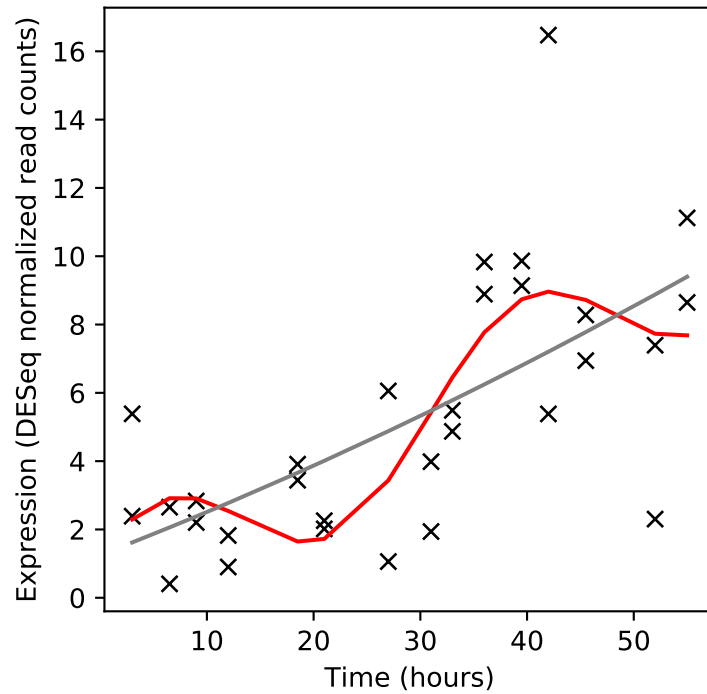

Rv1556/-

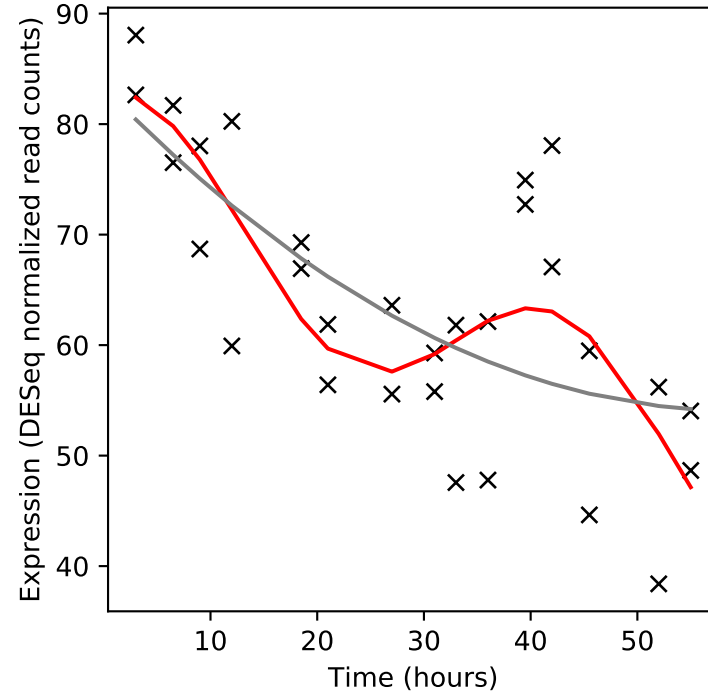

Rv1557/mmpL6

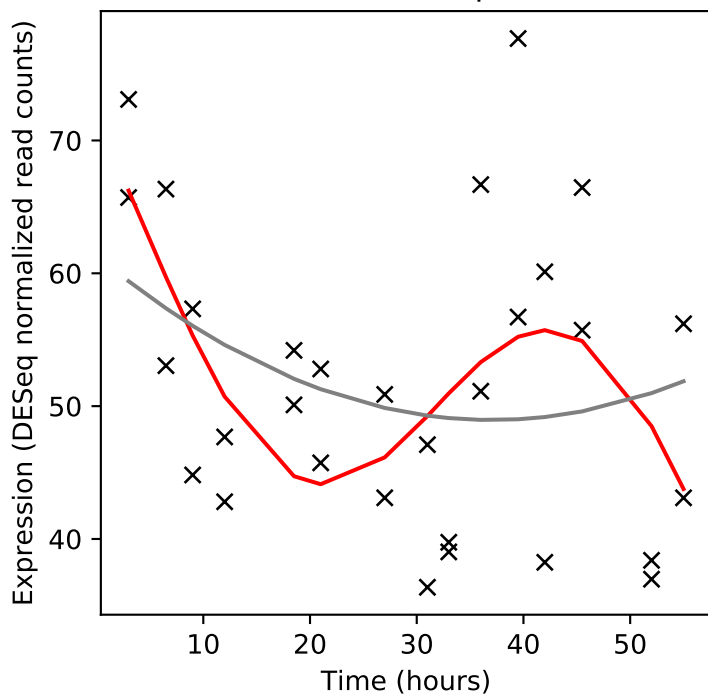

Rv1558/-

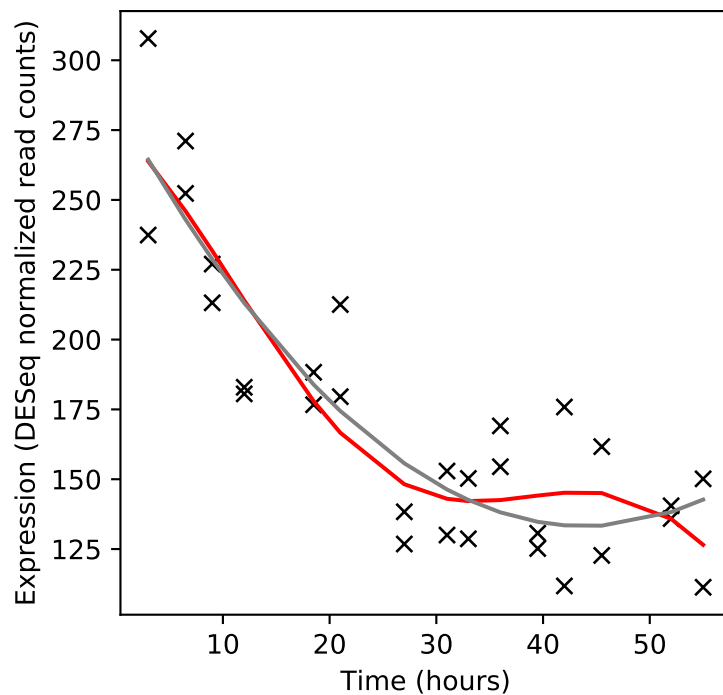

Rv1559/ilvA

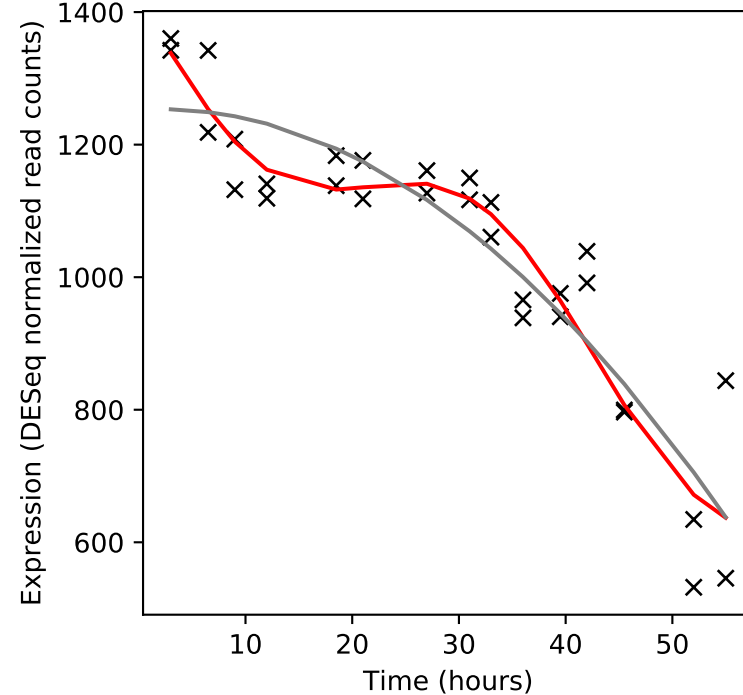

Rv1560/vapB11

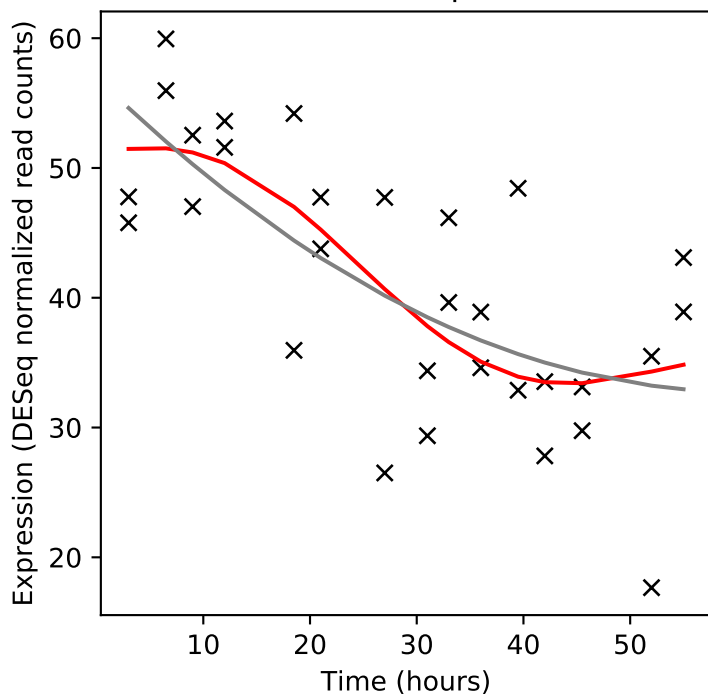

Rv1561/vapC11

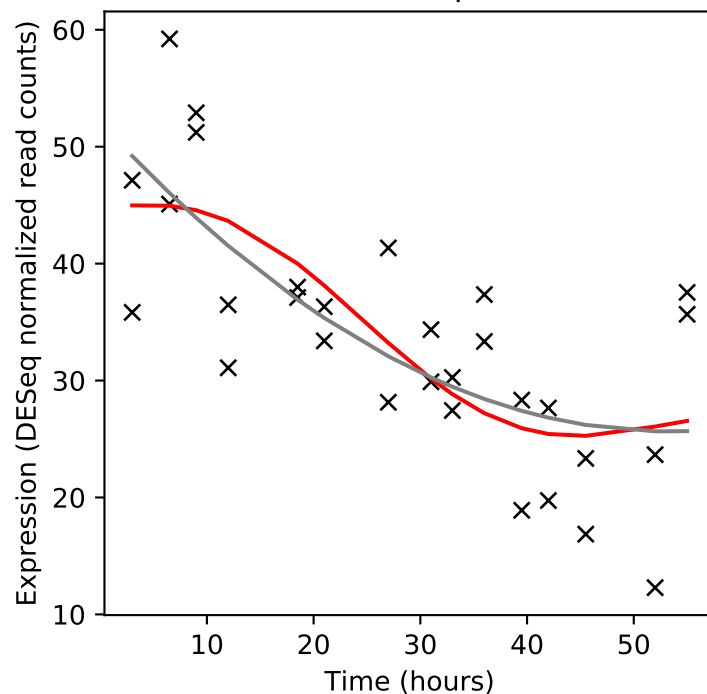

Rv1562c/treZ

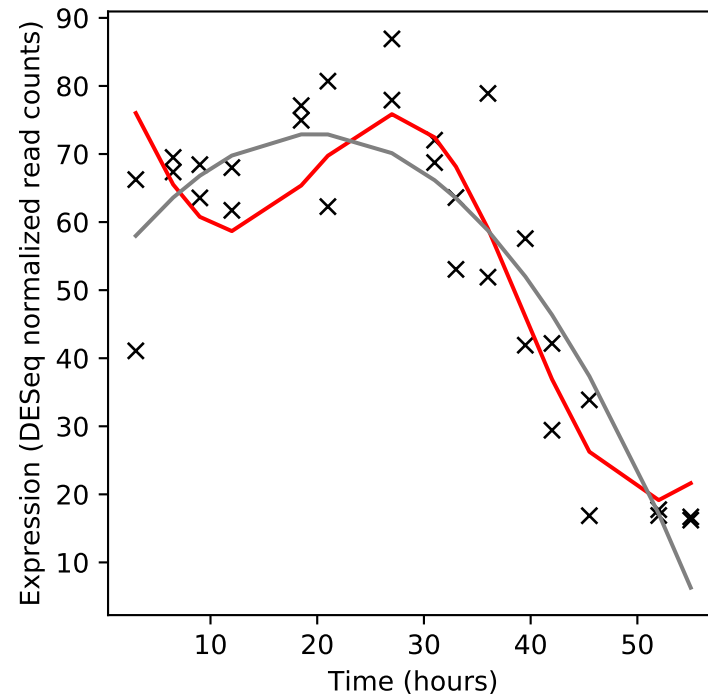

Rv1563c/treY

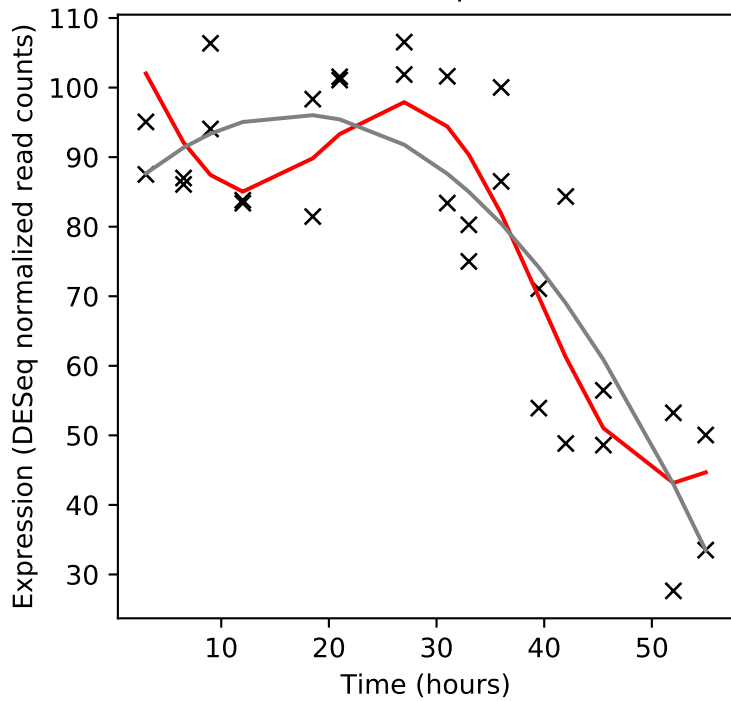

Rv1564c/treX

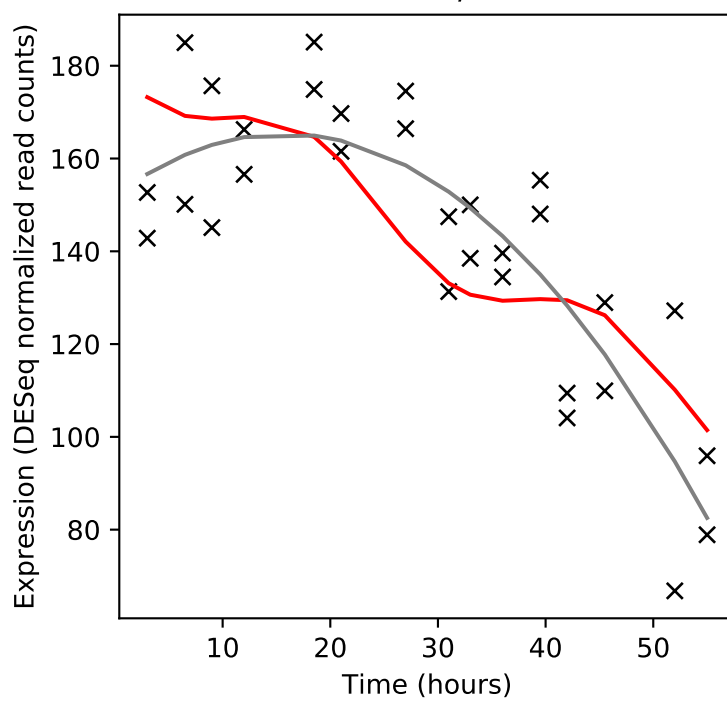

Rv1565c/-

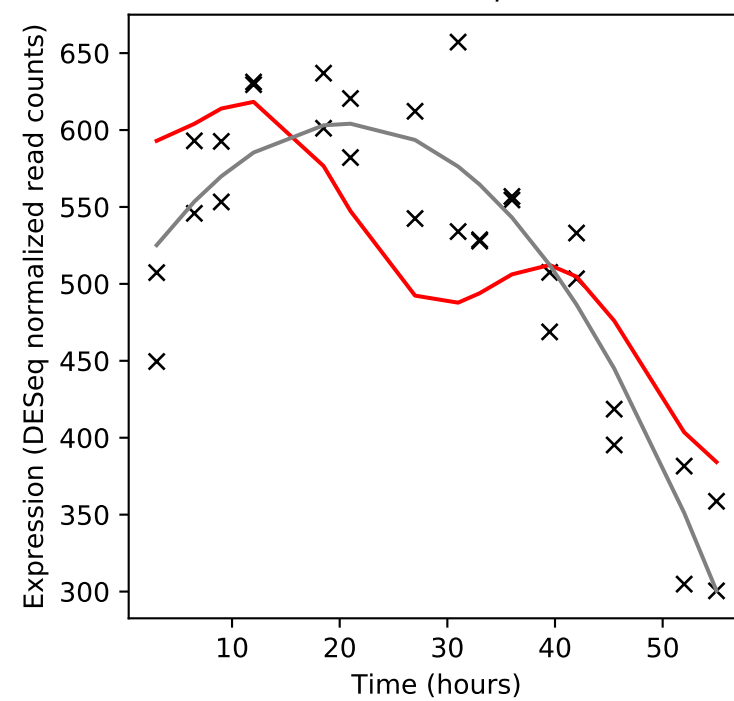

Rv1566c/-

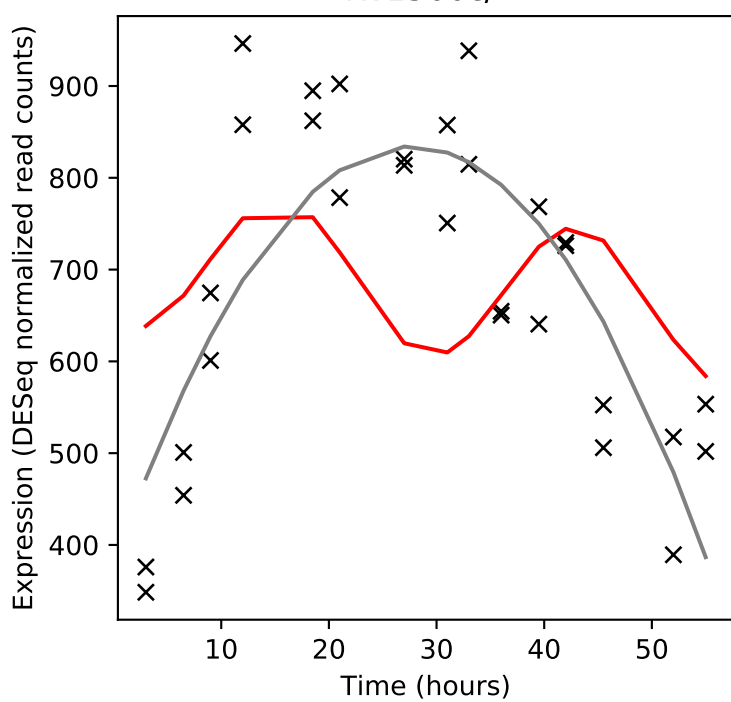

Rv1567c/-

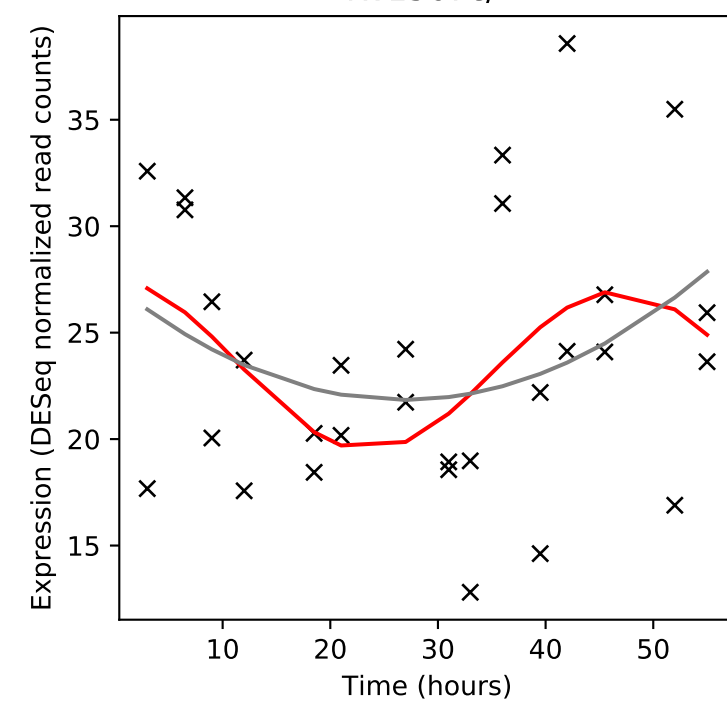

Rv1568/bioA

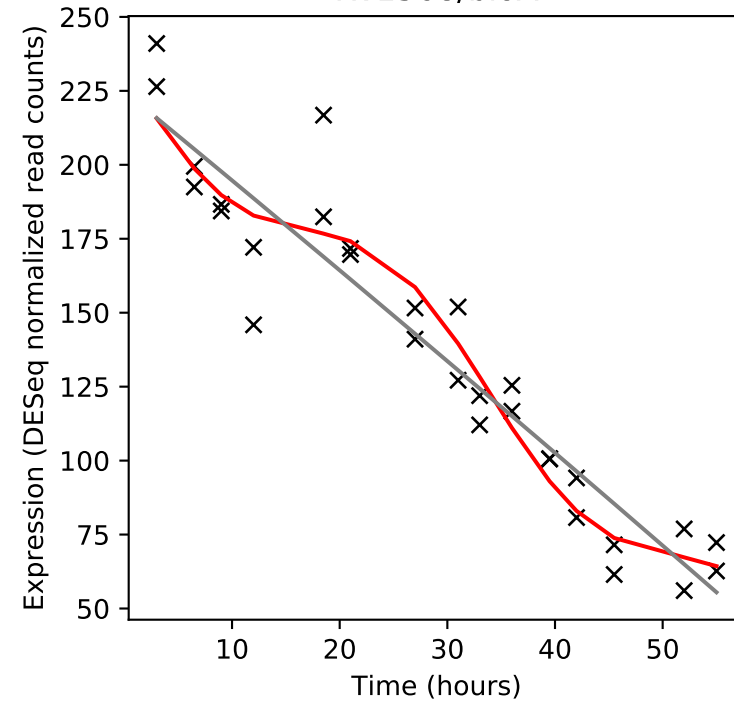

Rv1569/bioF1

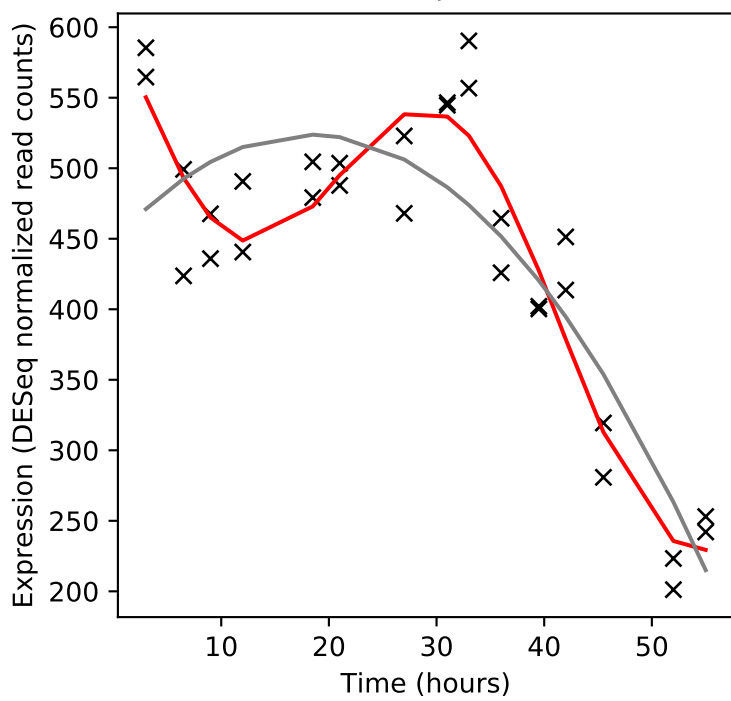

Rv1570/bioD

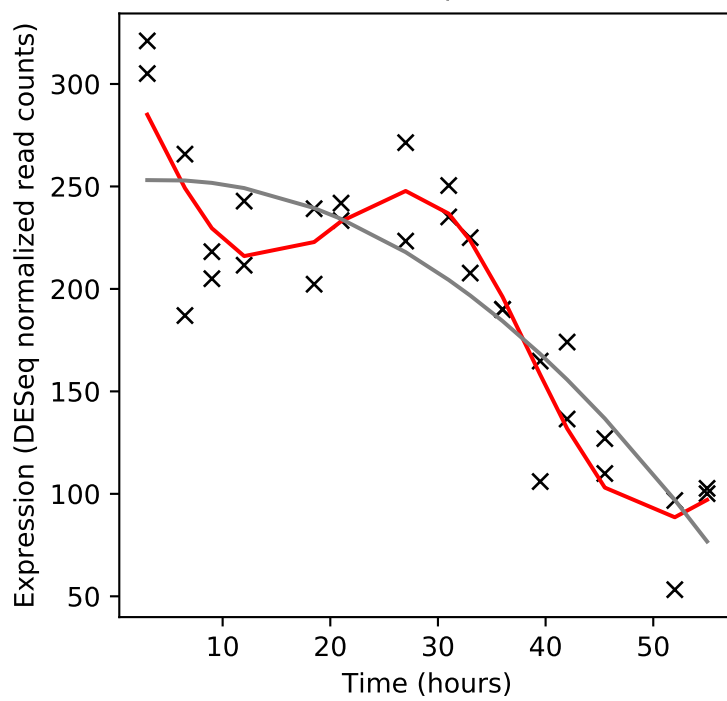

Rv1571/-

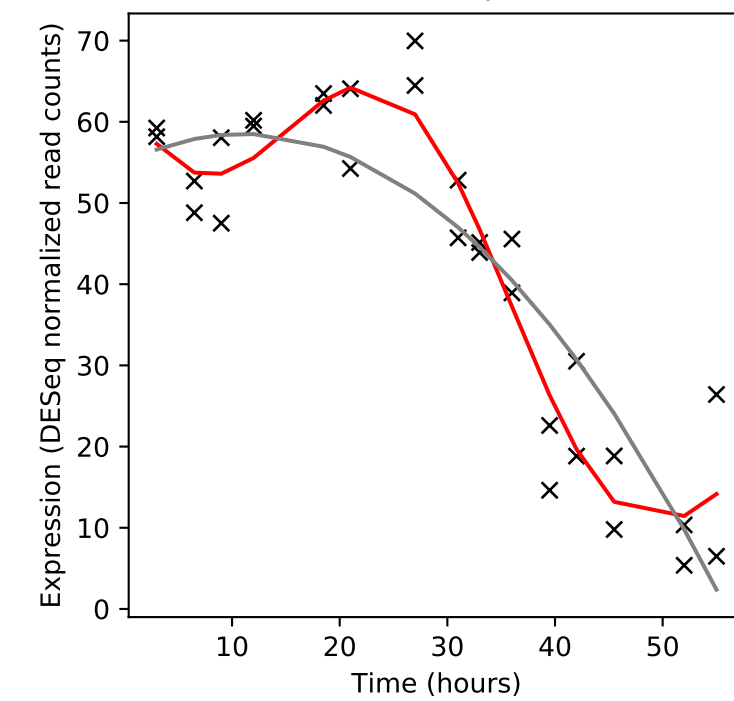

Rv1572c/-

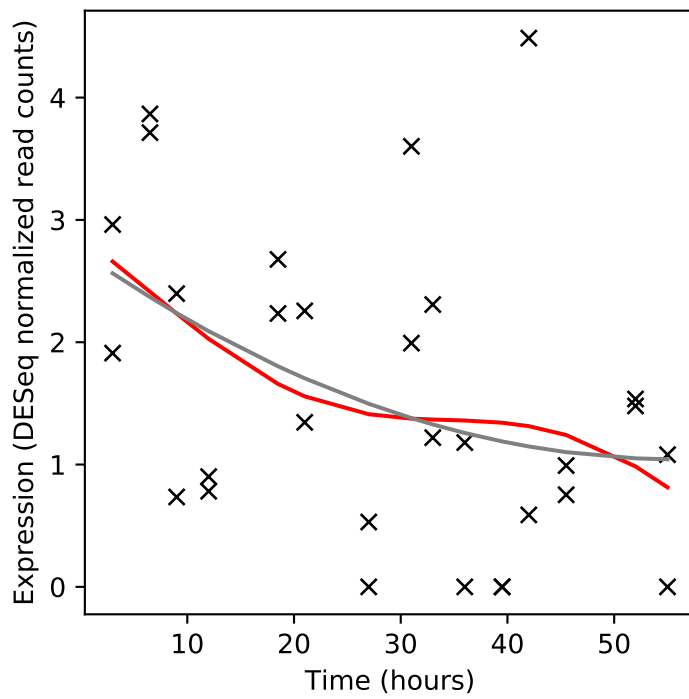

Rv1573/-

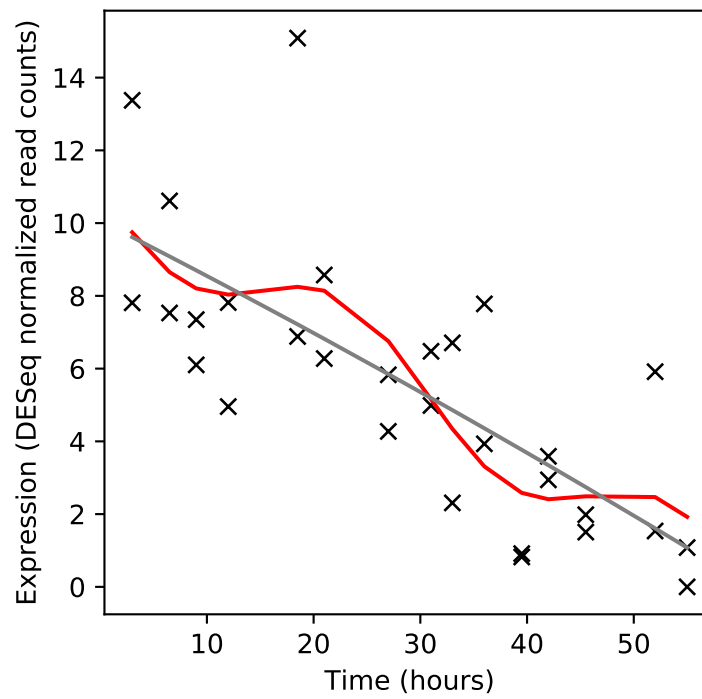

Rv1574/-

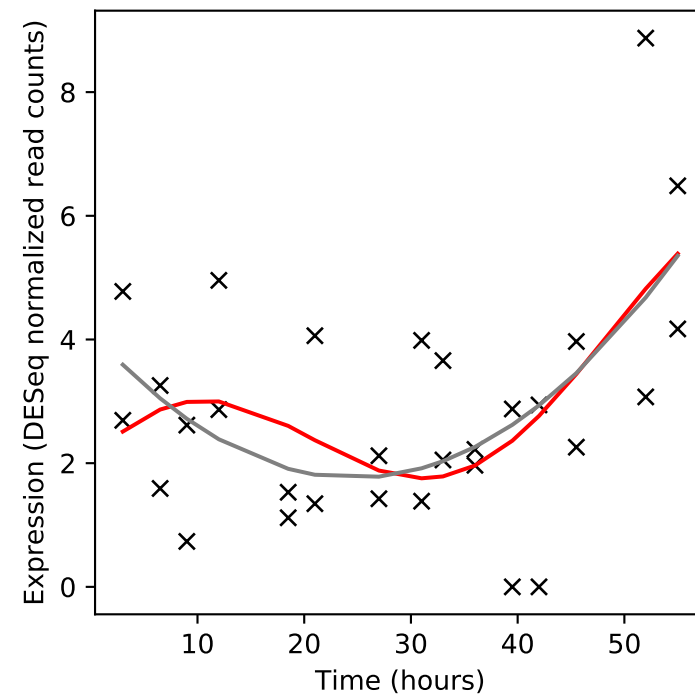

Rv1575/-

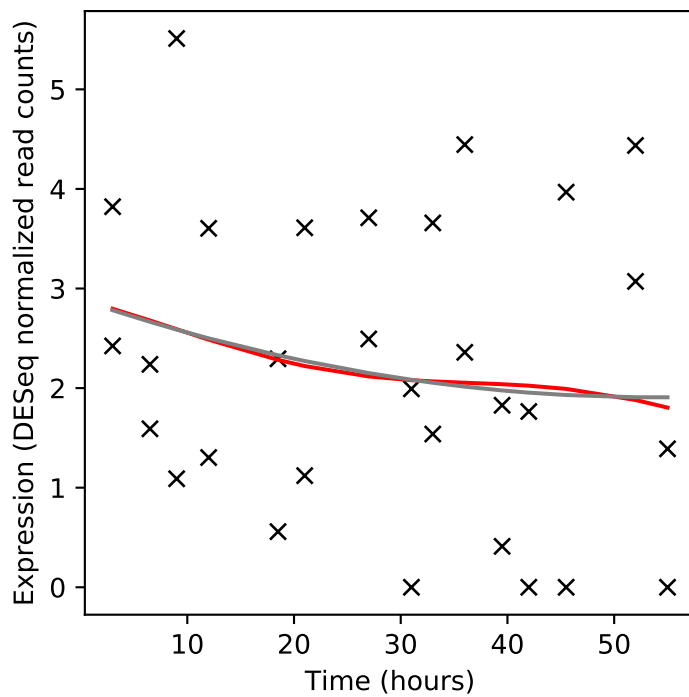

Rv1576c/-

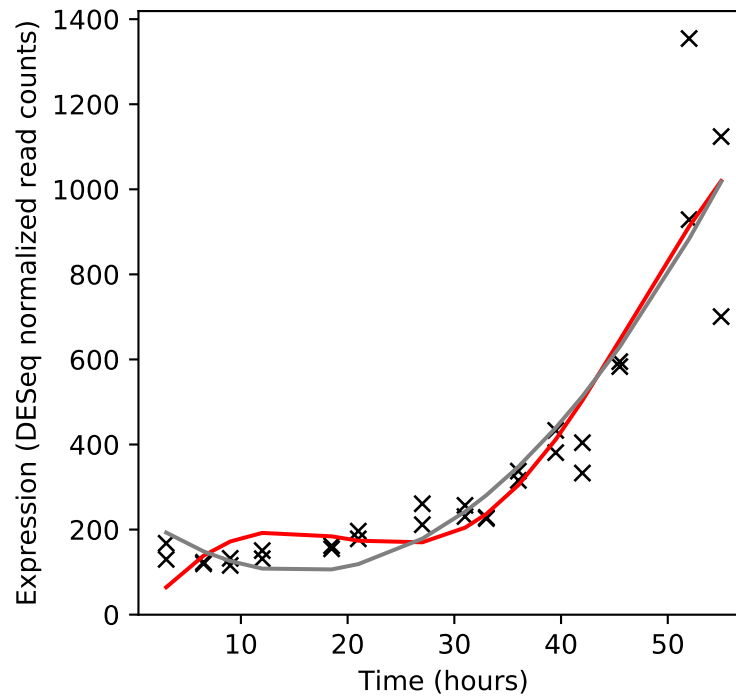

Rv1577c/-

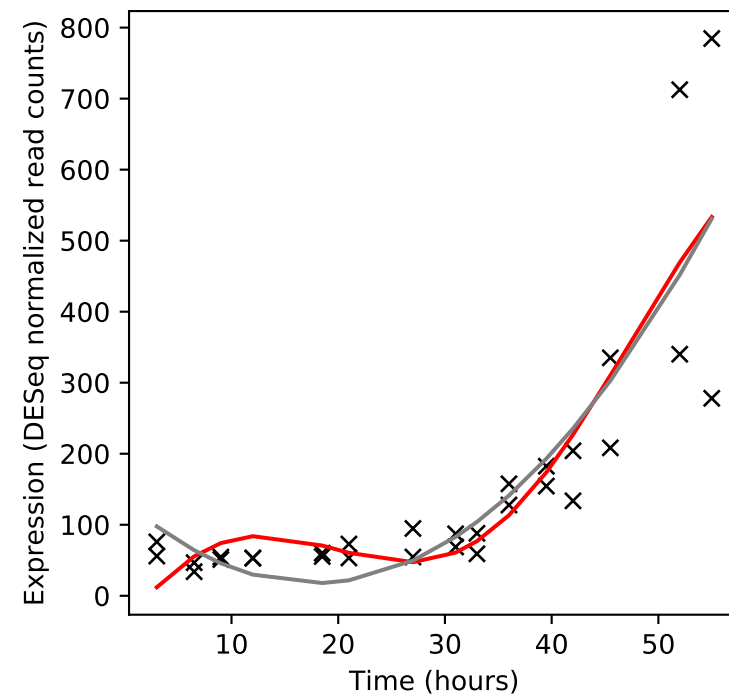

Rv1578c/-

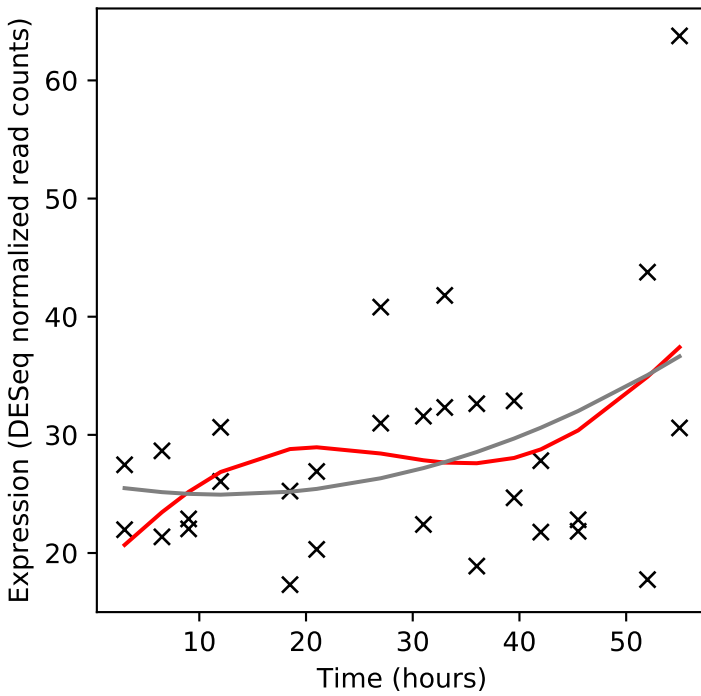

Rv1579c/-

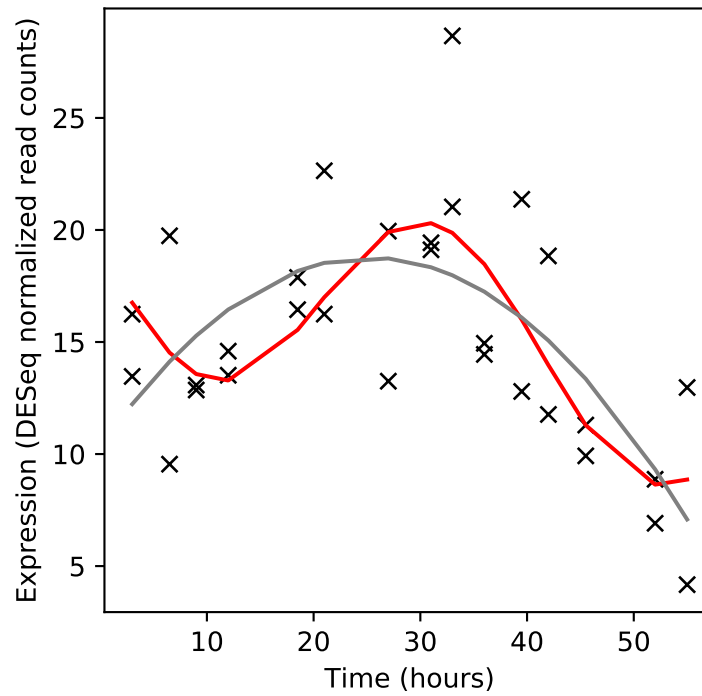

Rv1580c/-

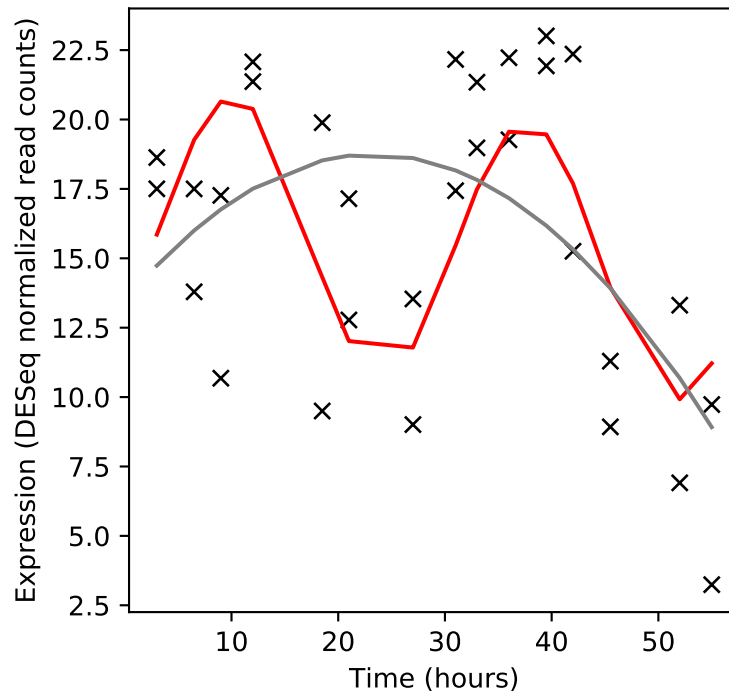

Rv1581c/-

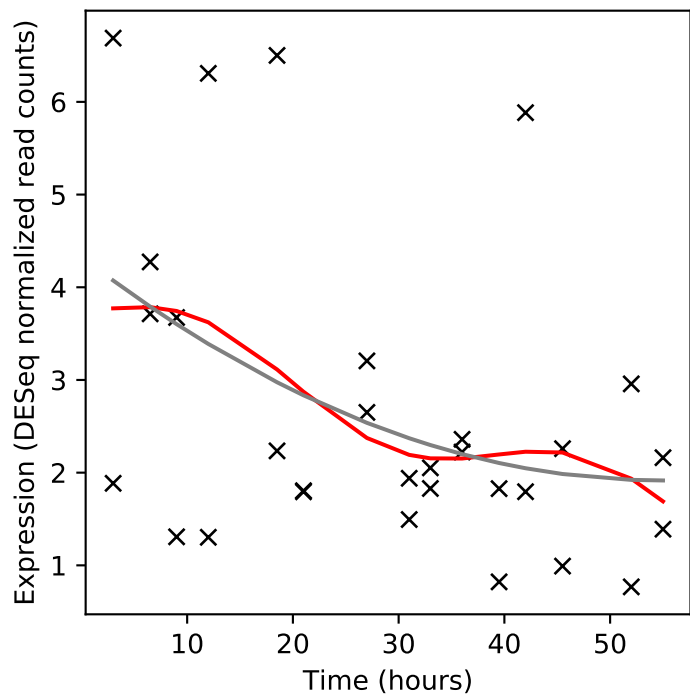

Rv1582c/-

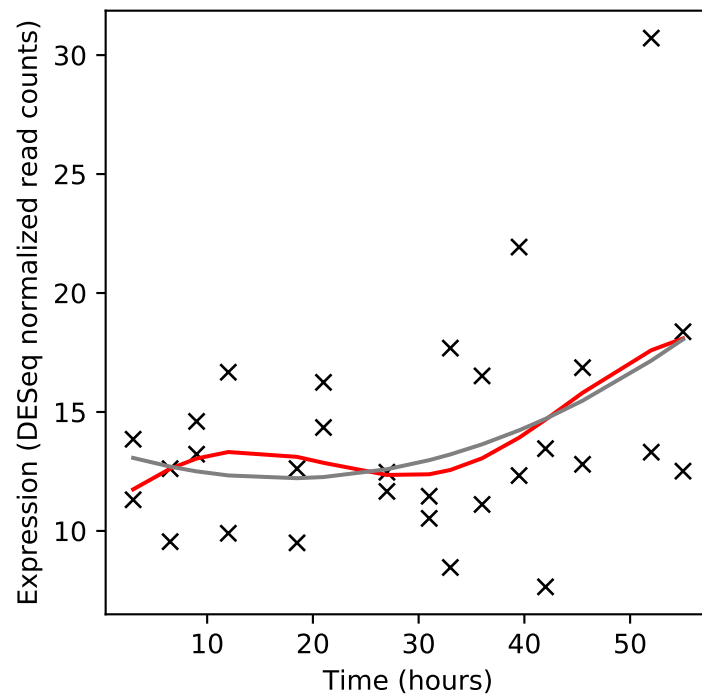

Rv1583c/-

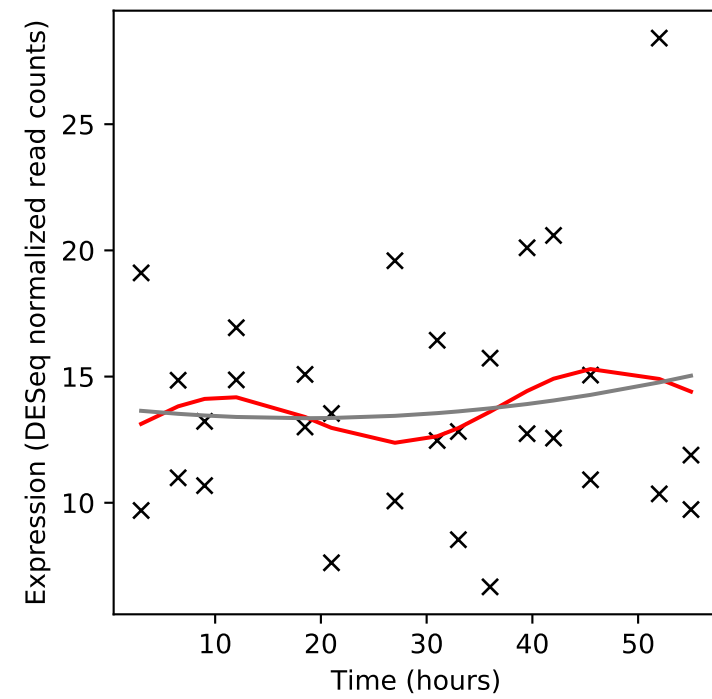

Rv1584c/-

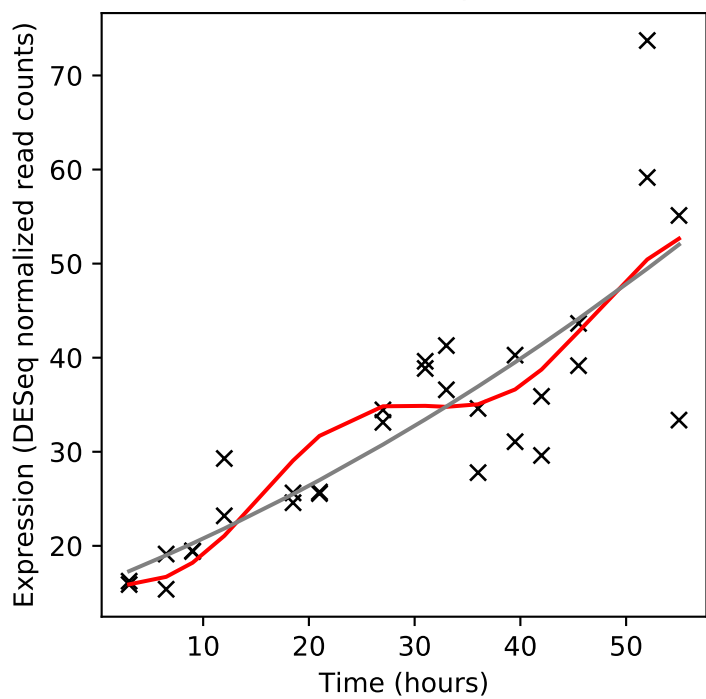

Rv1585c/-

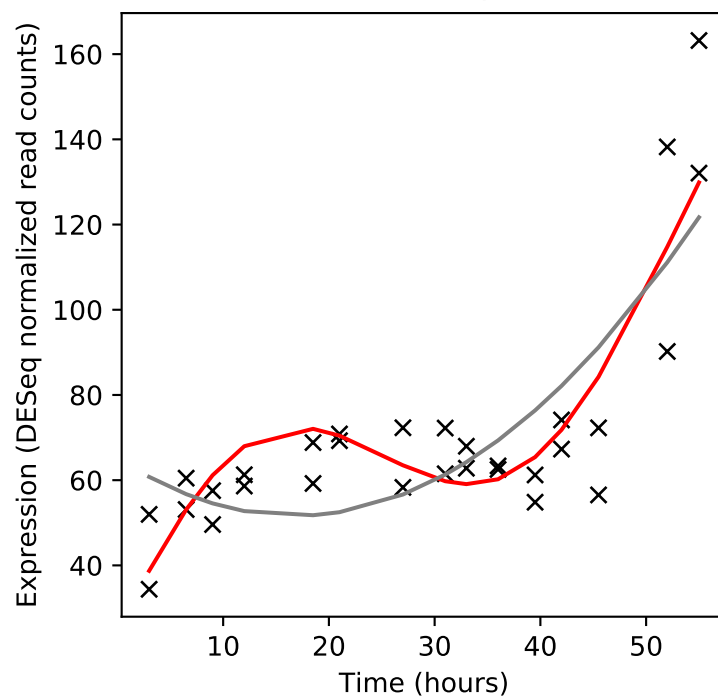

Rv1586c/-

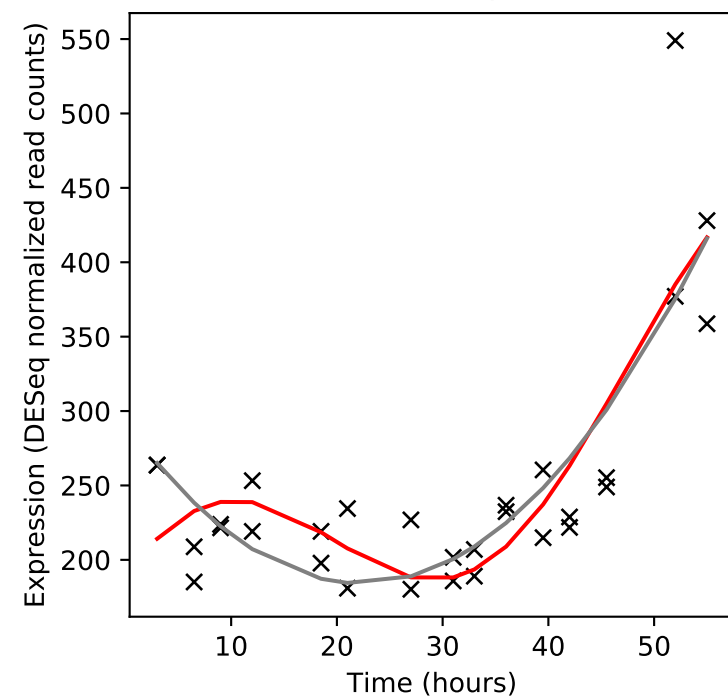

Rv1587c/-

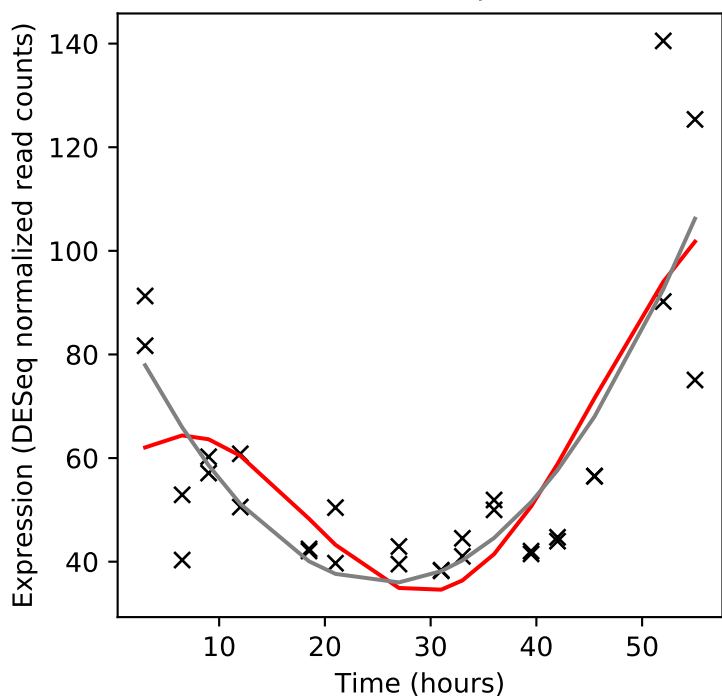

Rv1588c/-

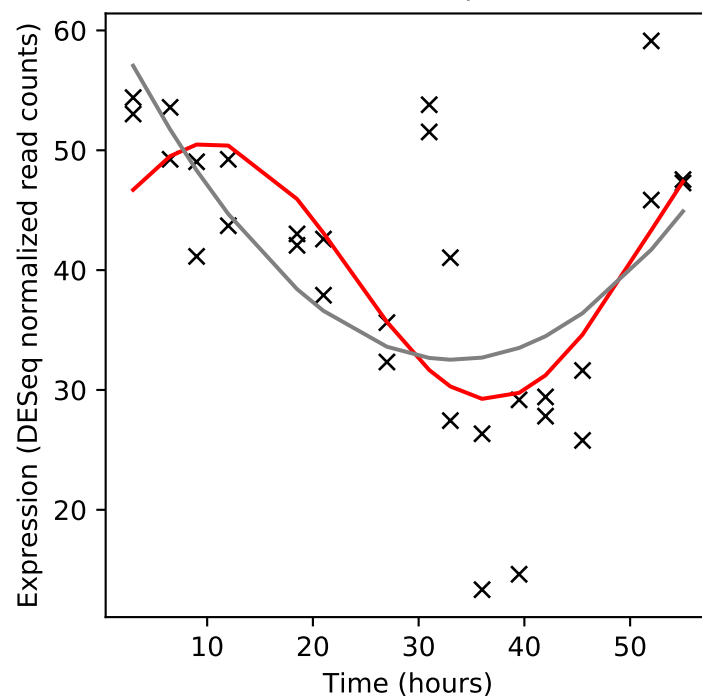

Rv1589/bioB

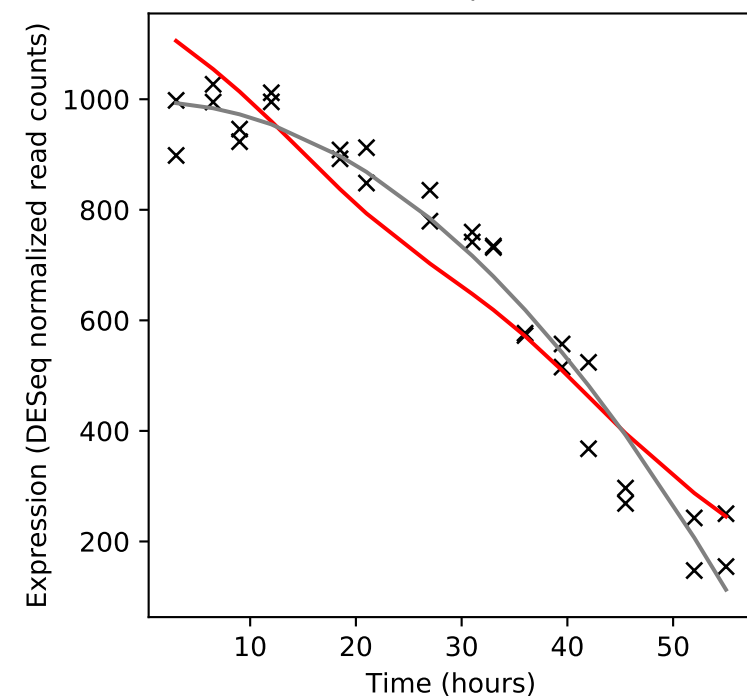

Rv1590/-

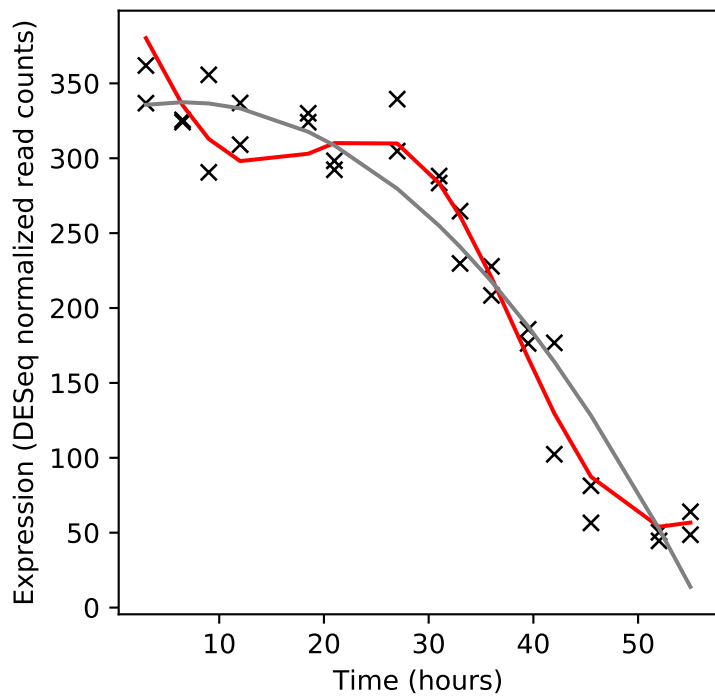

Rv1591/-

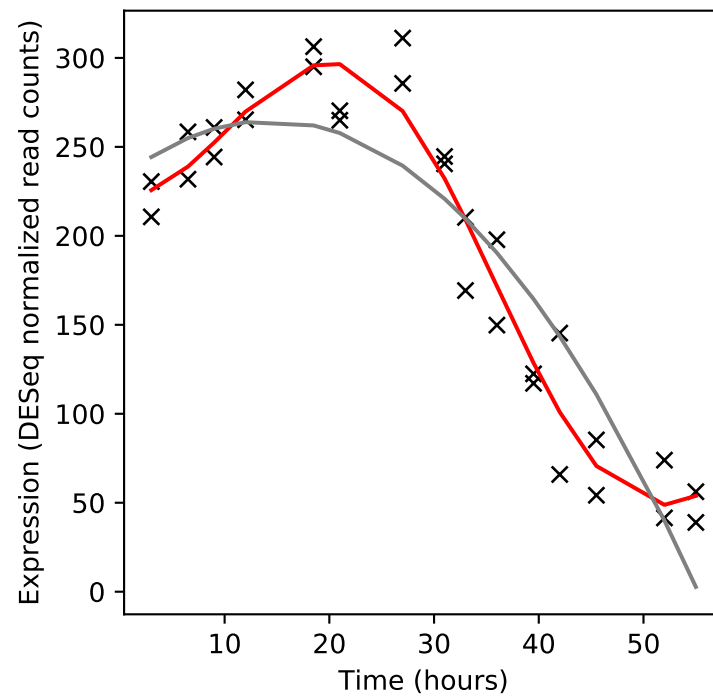

Rv1592c/-

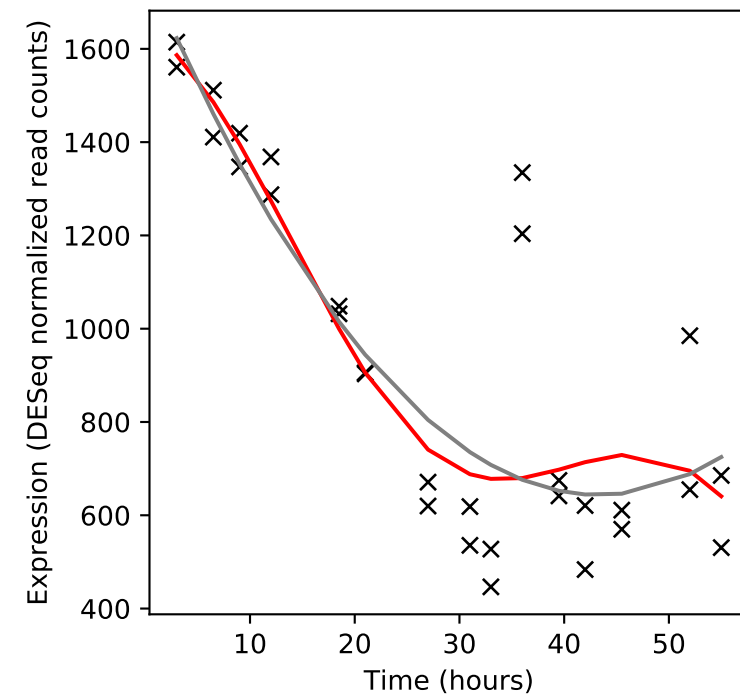

Rv1593c/-

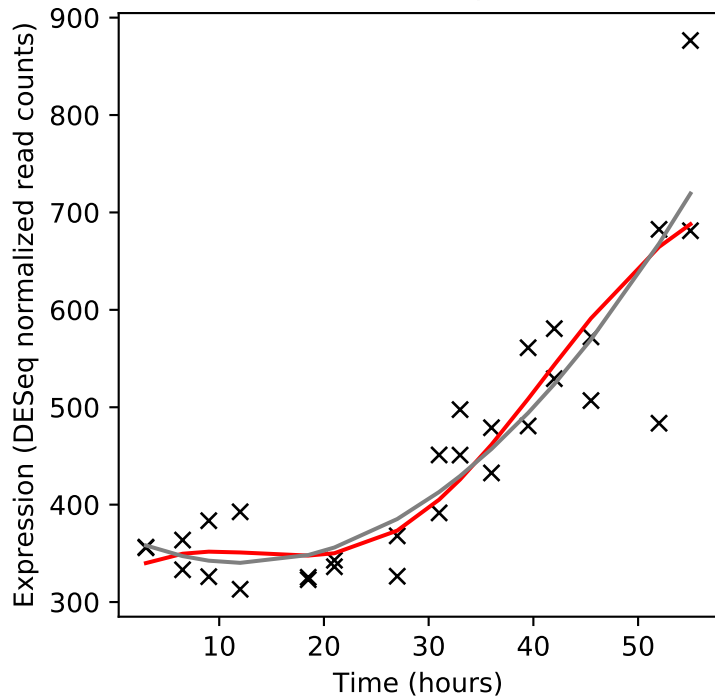

Rv1594/nadA

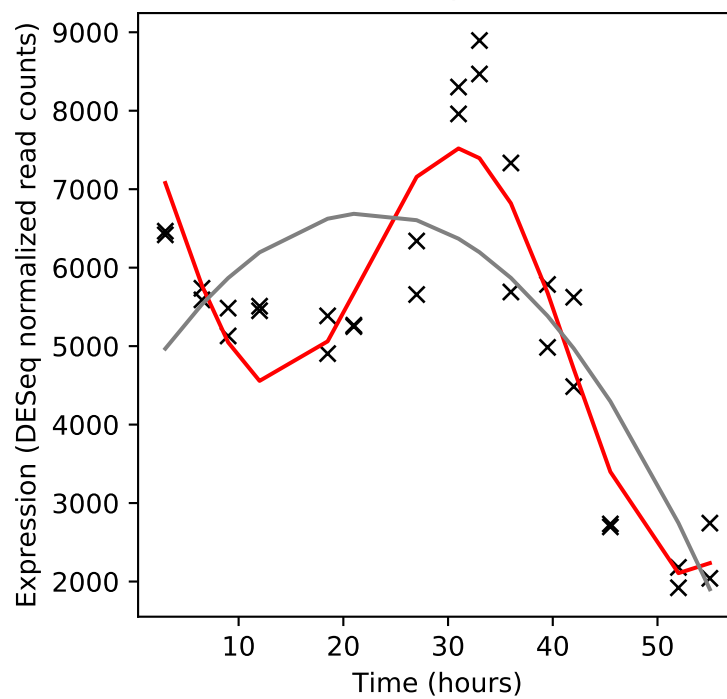

Rv1595/nadB

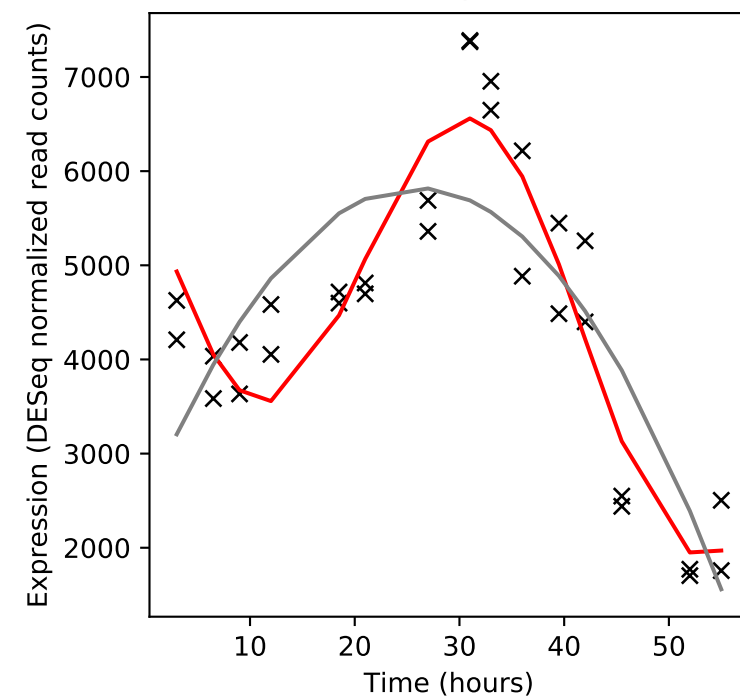

Rv1596/nadC

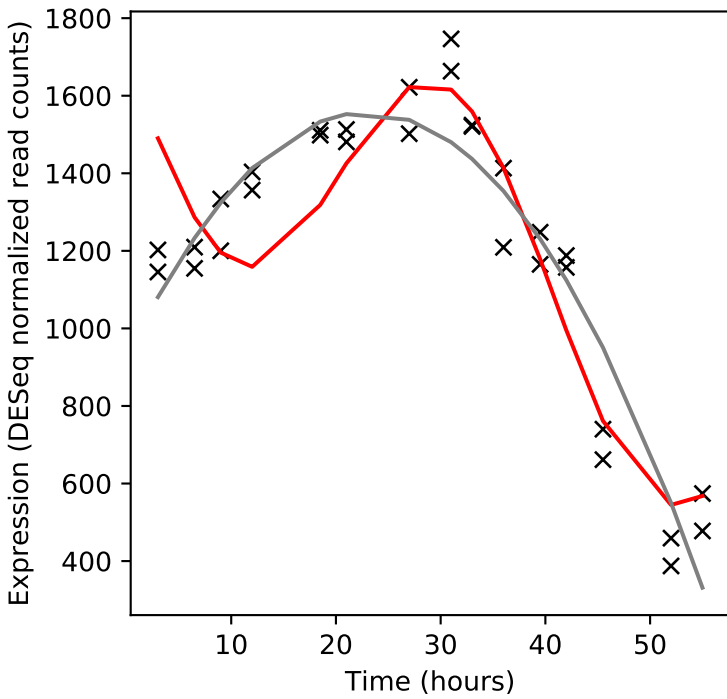

Rv1597/-

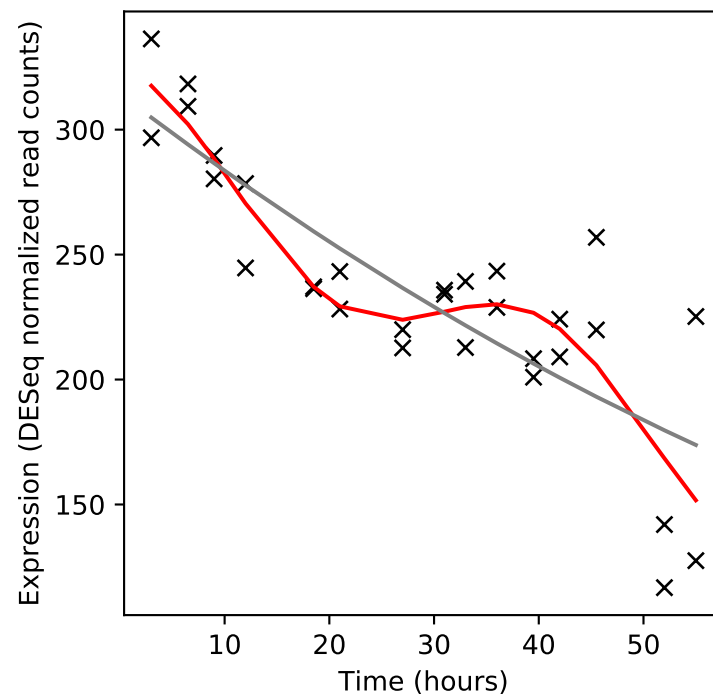

Rv1598c/-

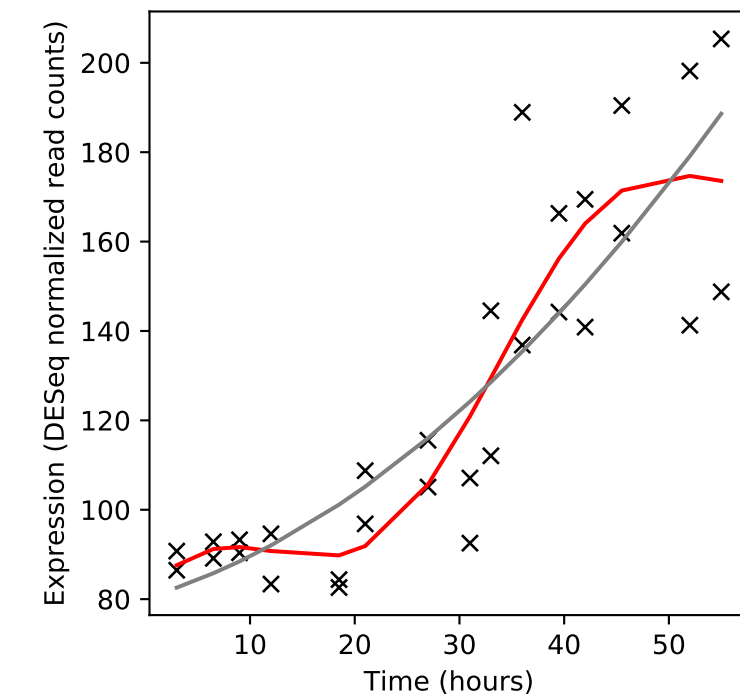

Rv1599/hisD

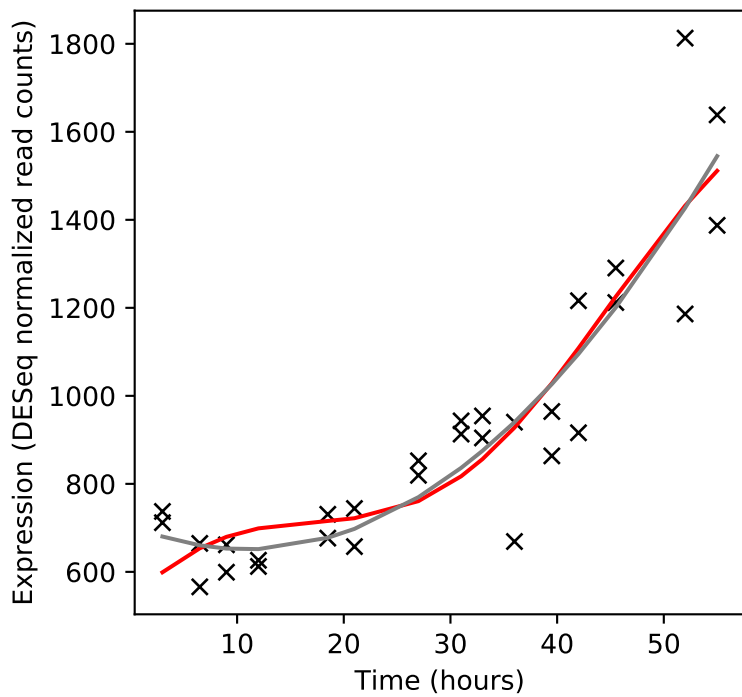

Rv1600/hisC1

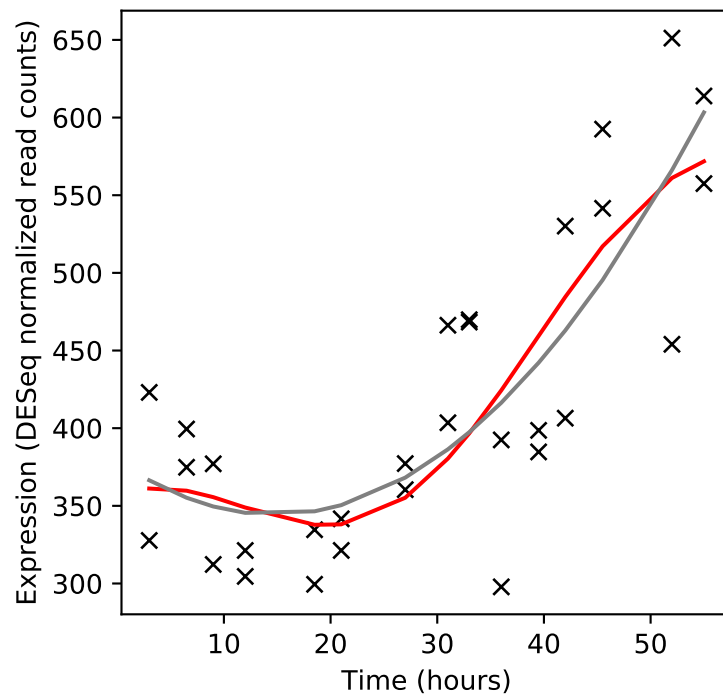

Rv1601/hisB

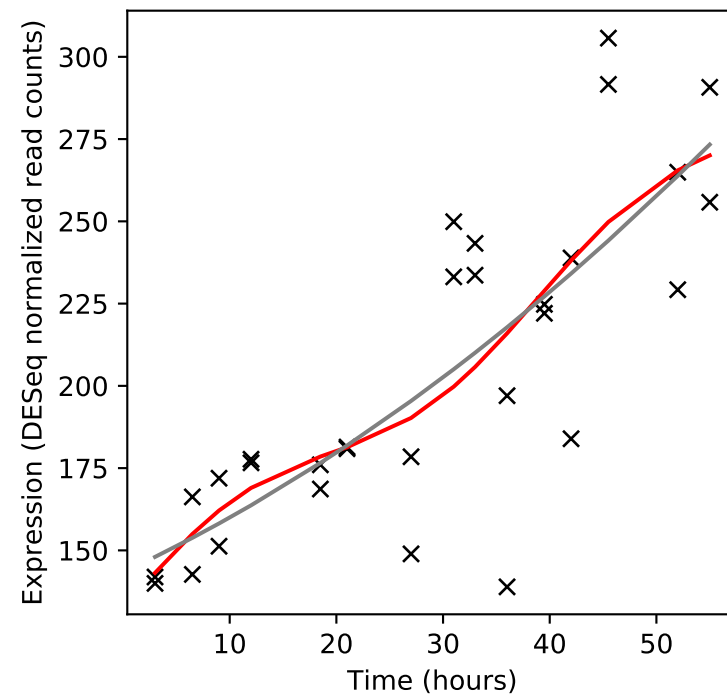

Rv1602/hisH

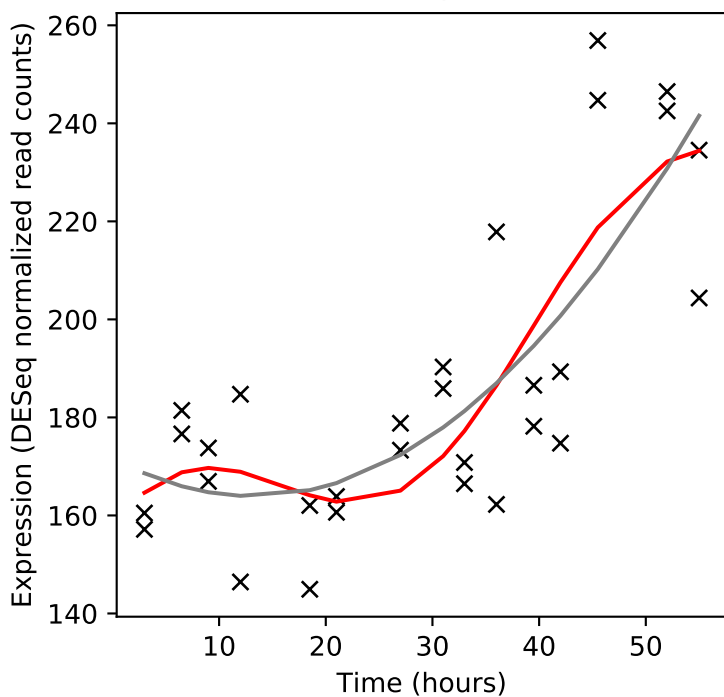

Rv1603/hisA

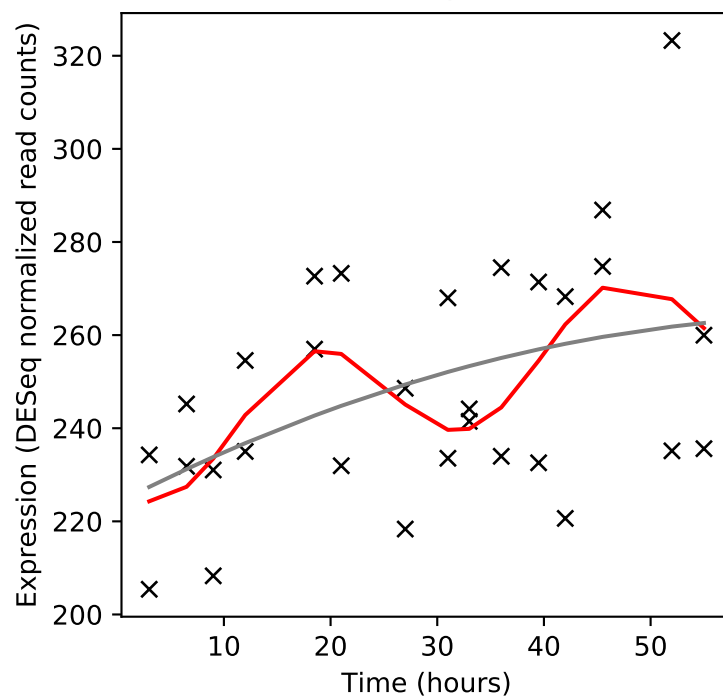

Rv1604/impA

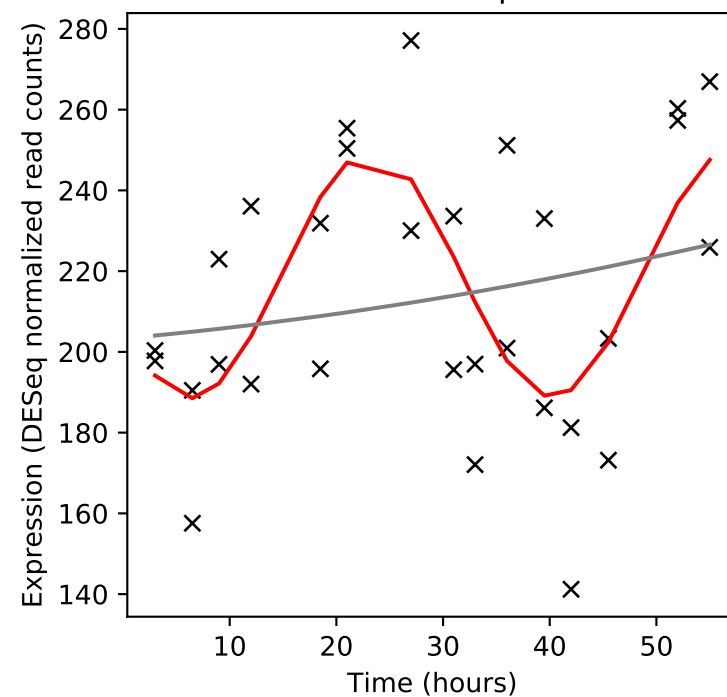

Rv1605/hisF

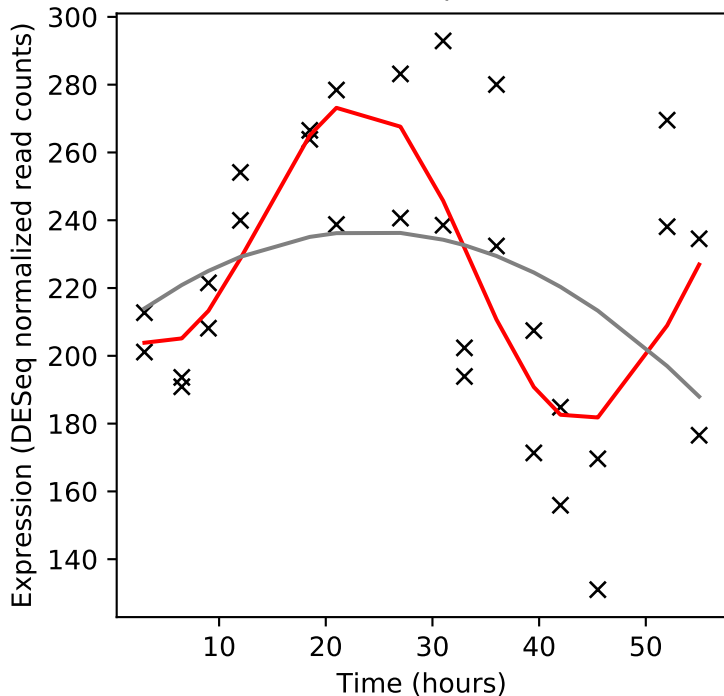

Rv1606/hisI

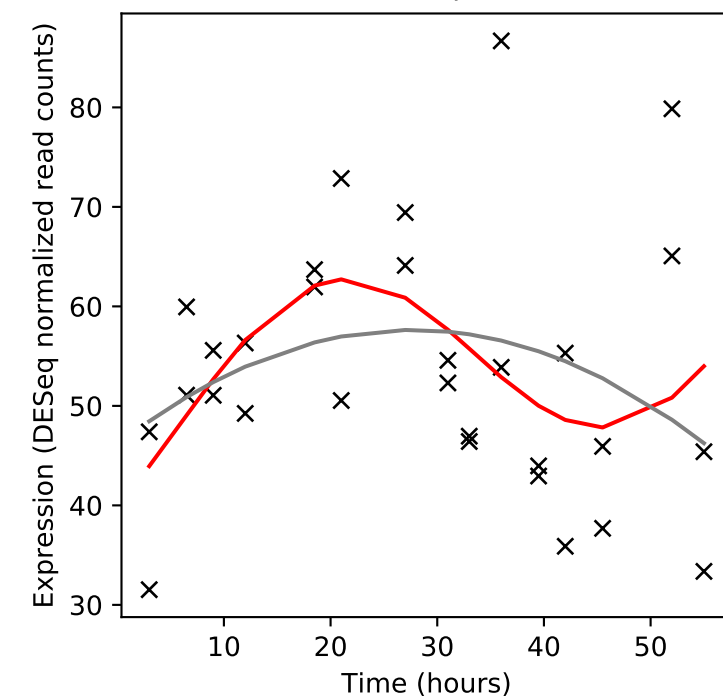

Rv1607/chaA

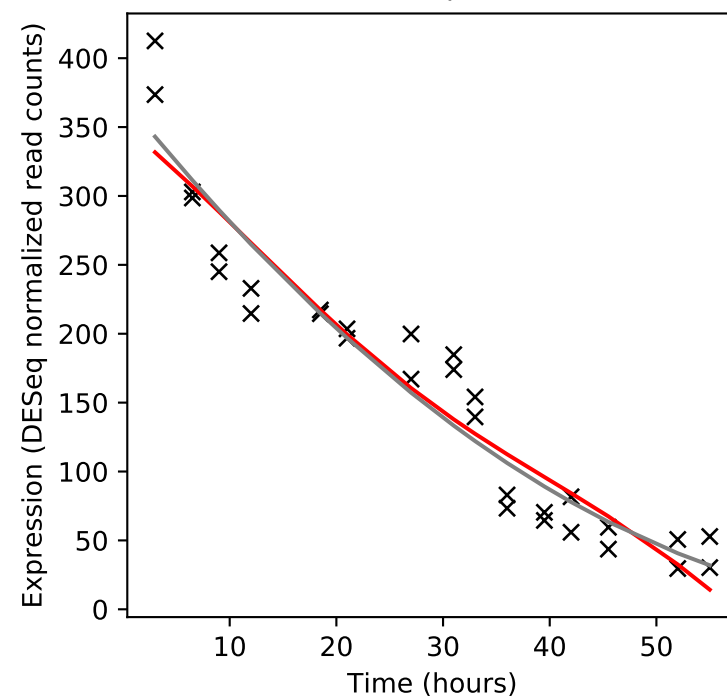

Rv1608c/bcpB

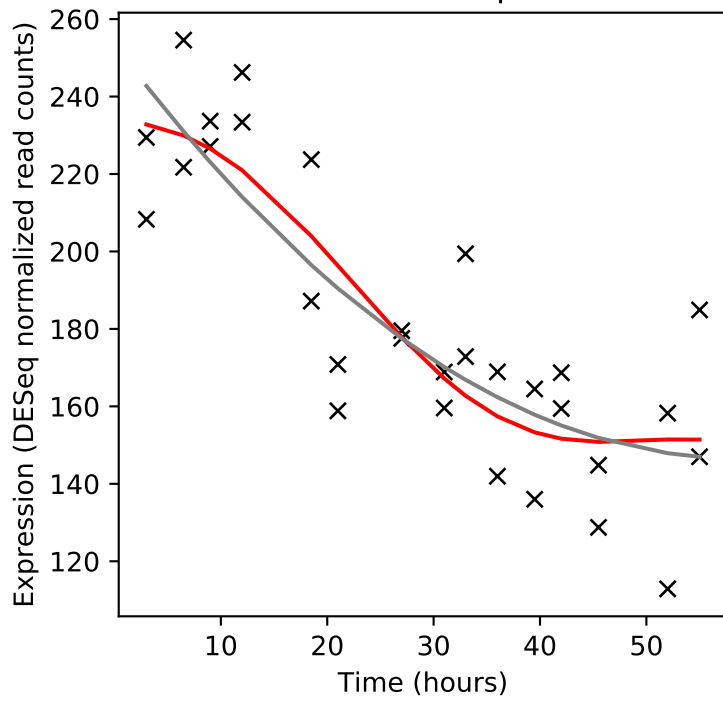

Rv1609/trpE

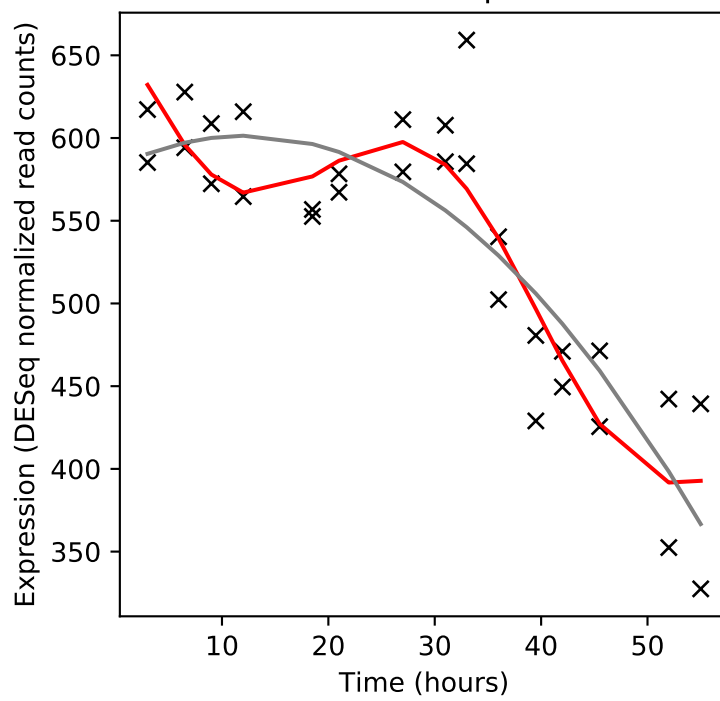

Rv1610/-

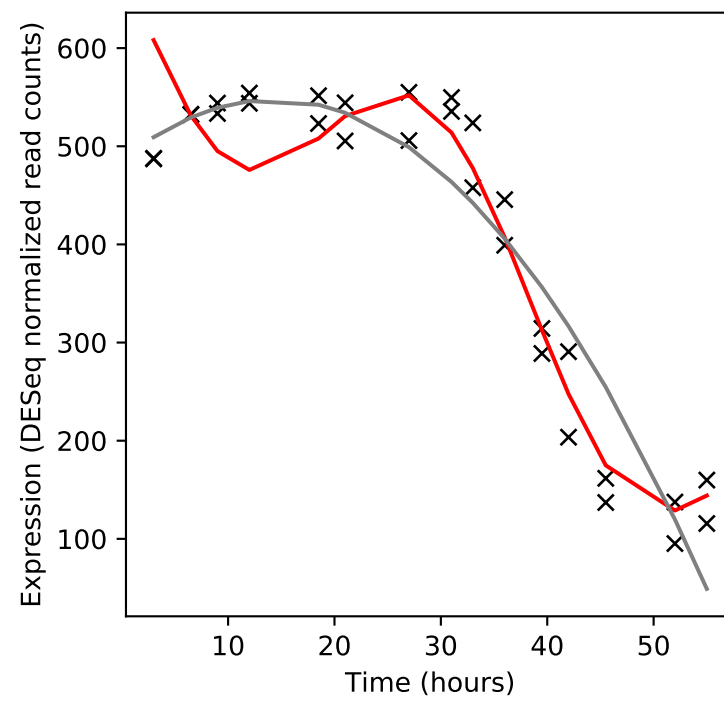

Rv1611/trpC

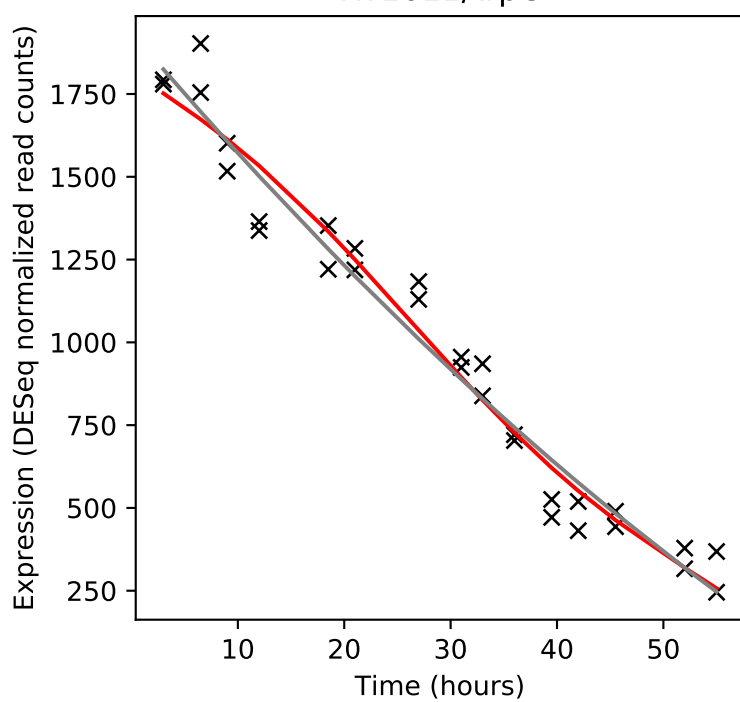

Rv1612/trpB

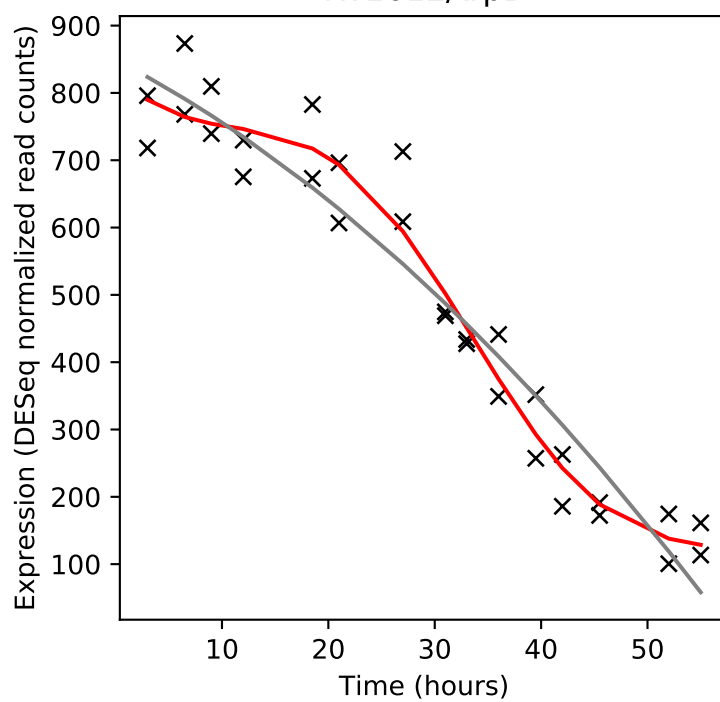

Rv1613/trpA

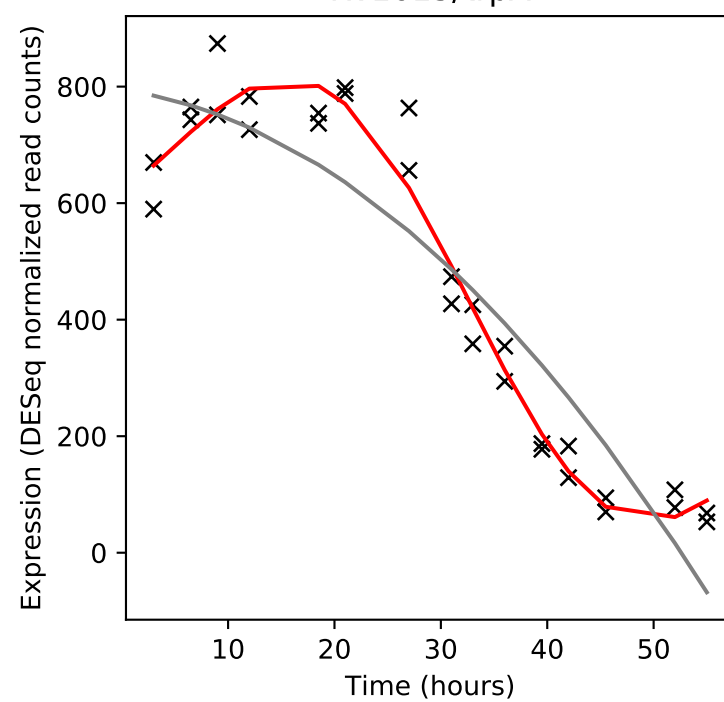

Rv1614/lgt

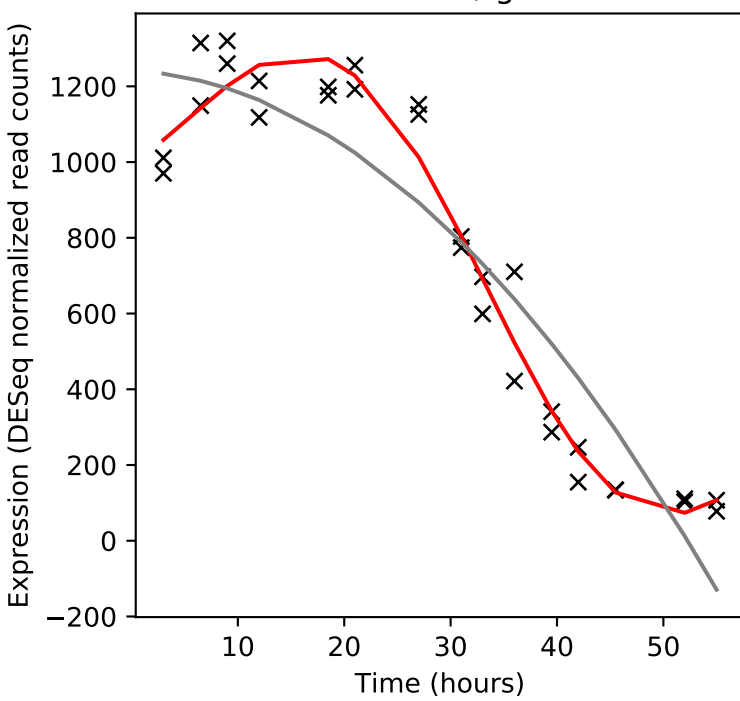

Rv1615/-

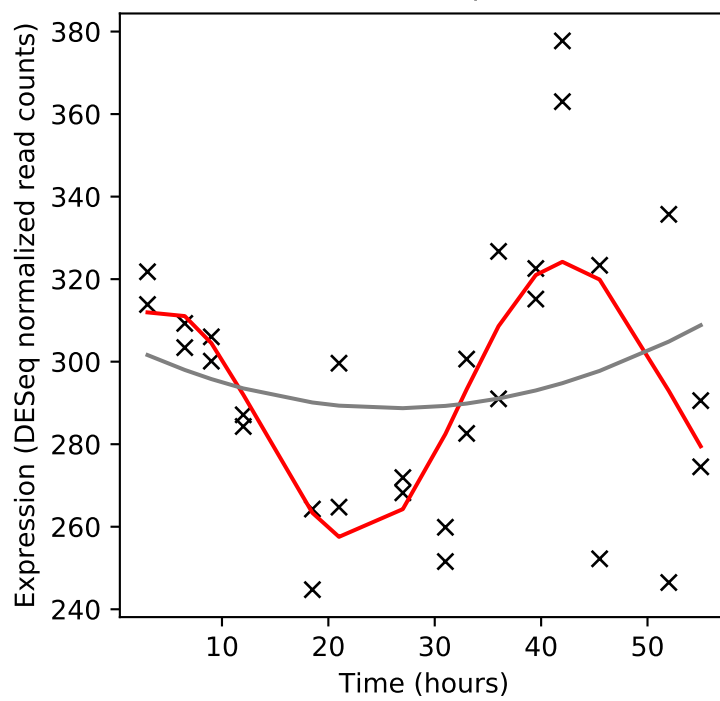

Rv1616/-

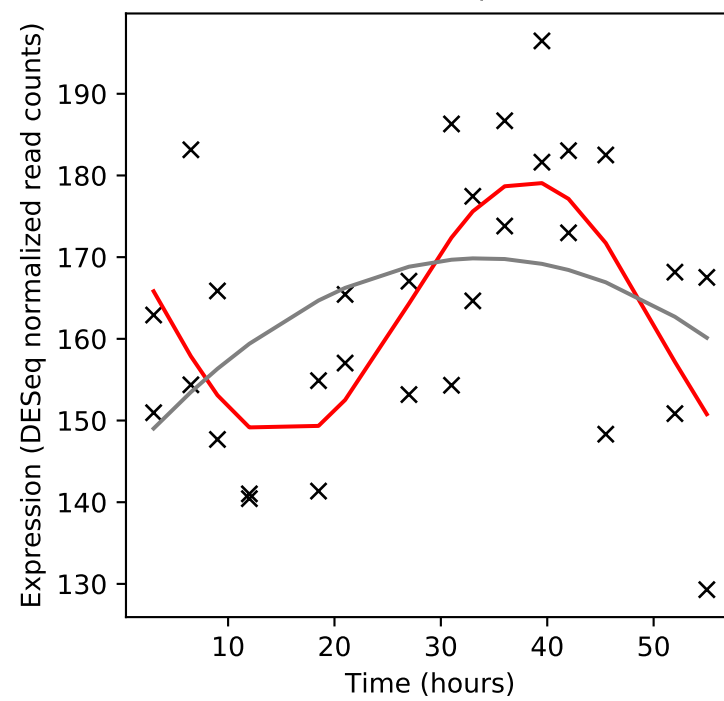



Rv1617/pykA

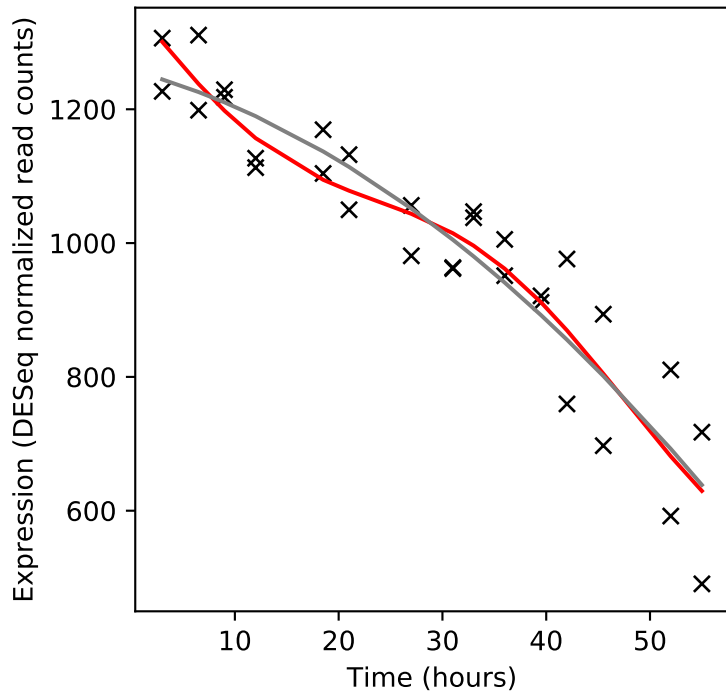

Rv1618/tesB1

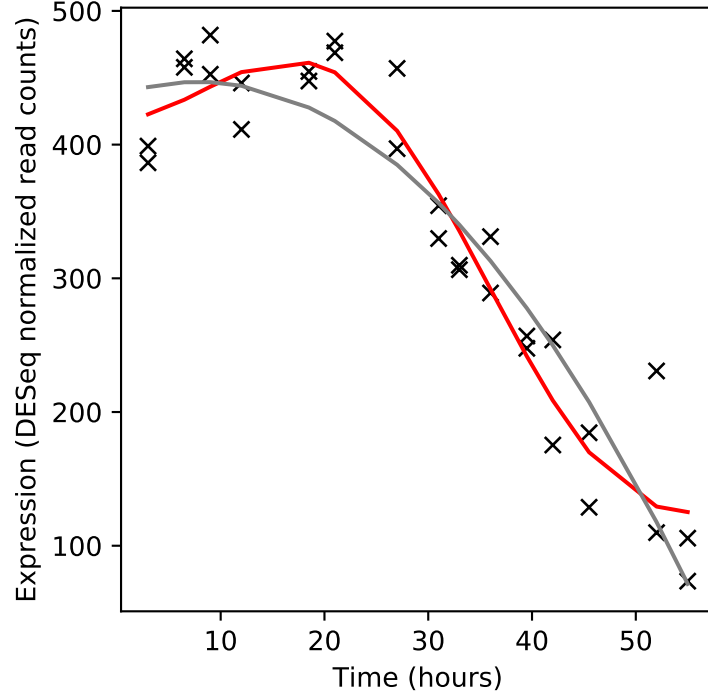

Rv1619/-

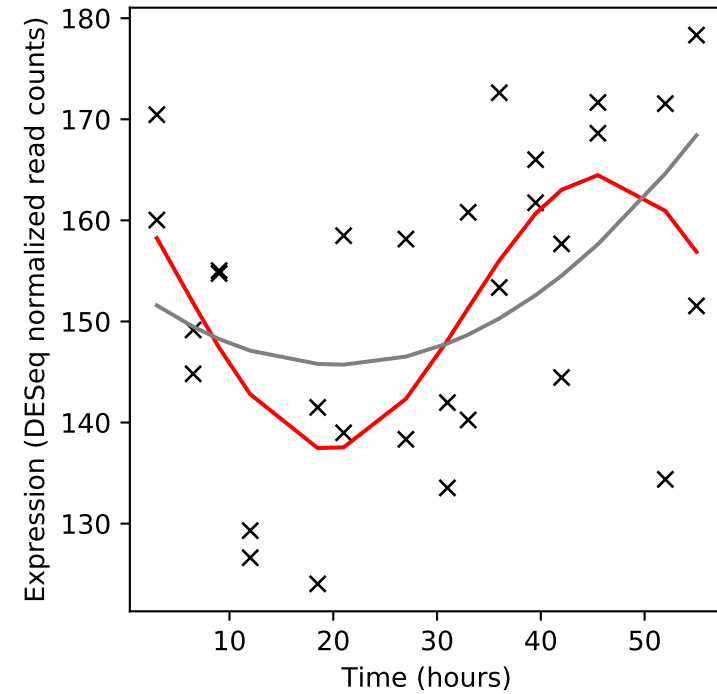

Rv1620c/cydC

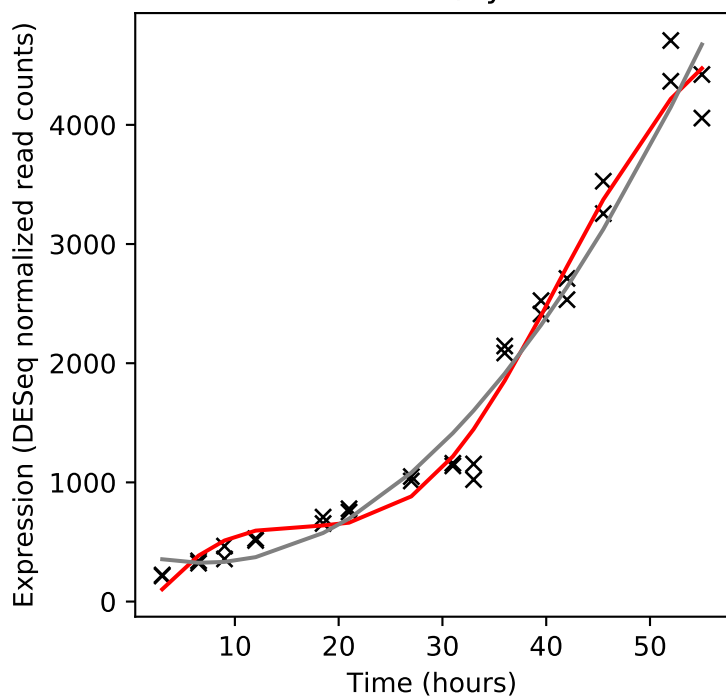

Rv1621c/cydD

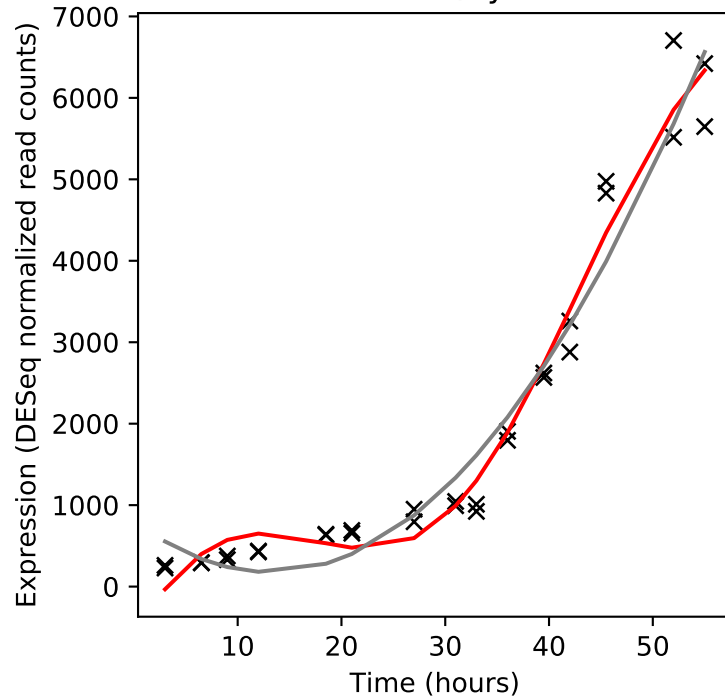

Rv1622c/cydB

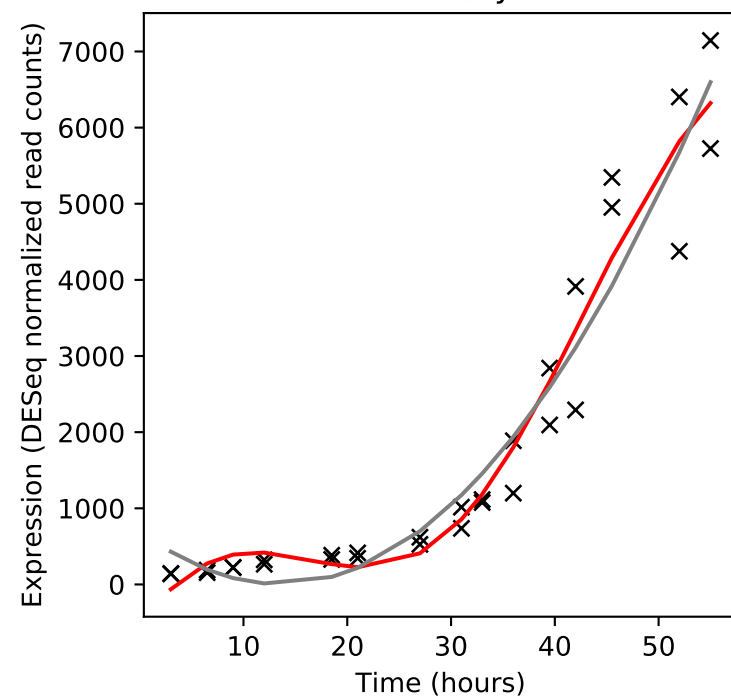

Rv1623c/cydA

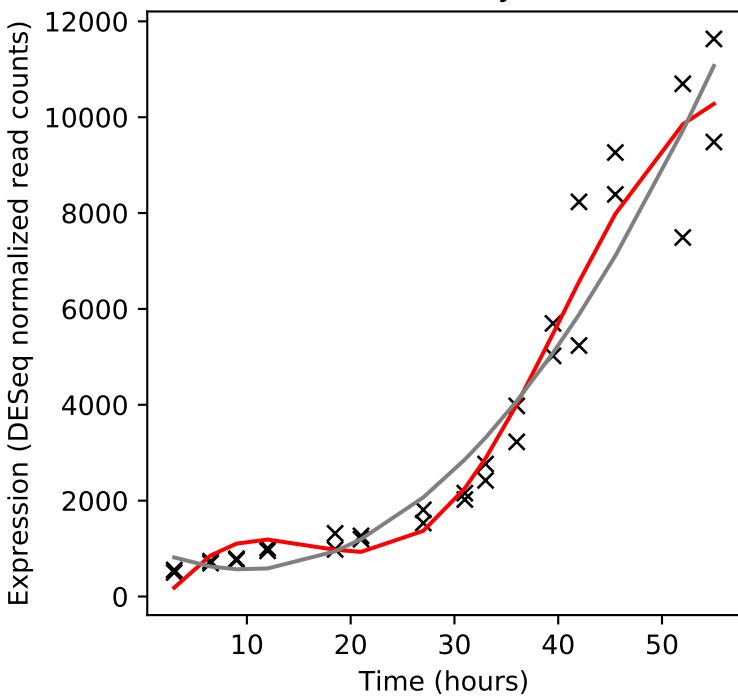

Rv1624c/-

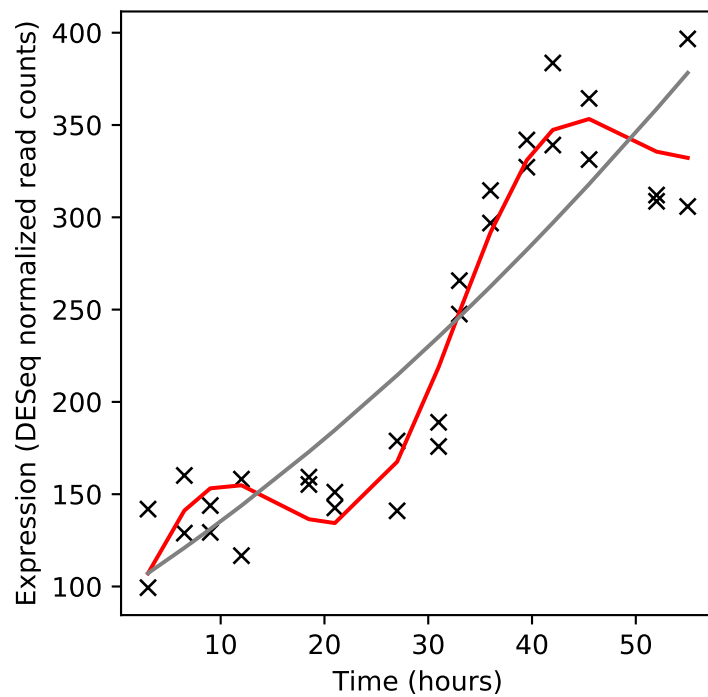

Rv1625c/cya

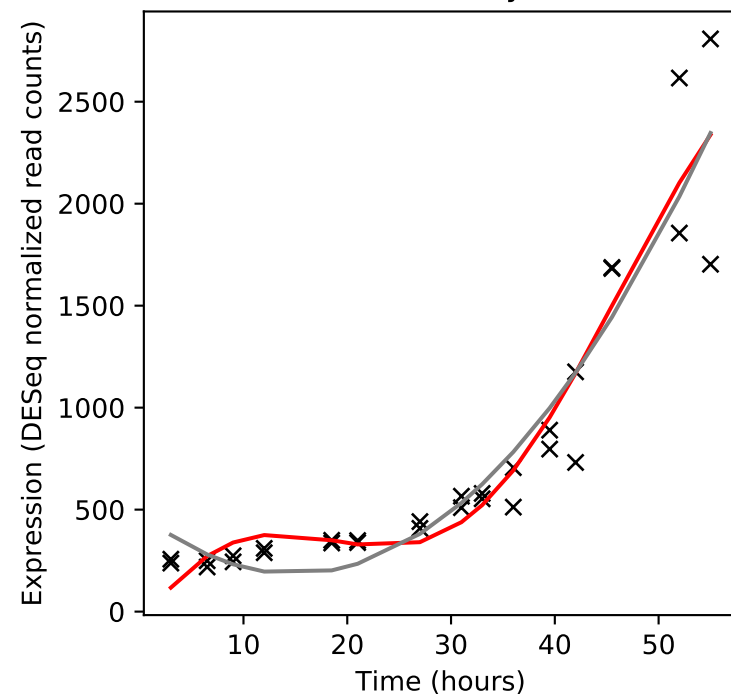

Rv1626/-

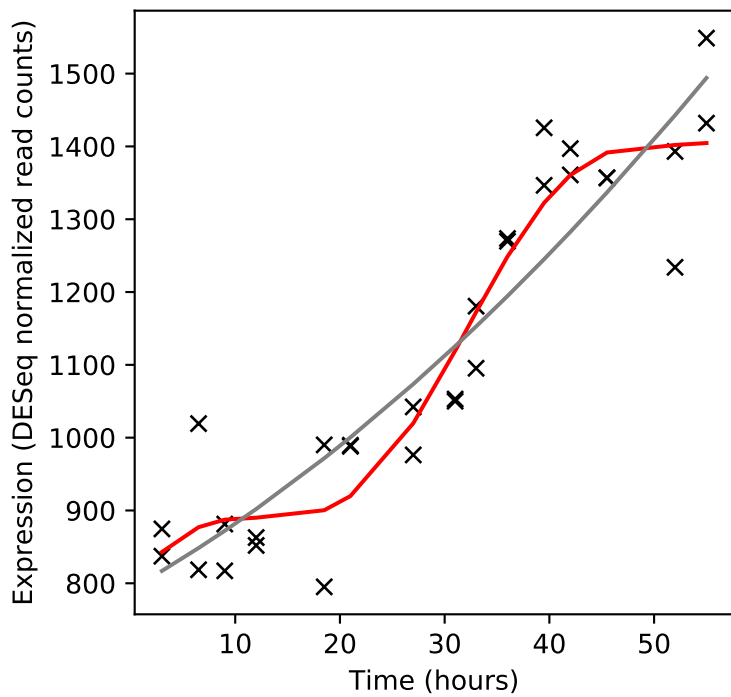

Rv1627c/-

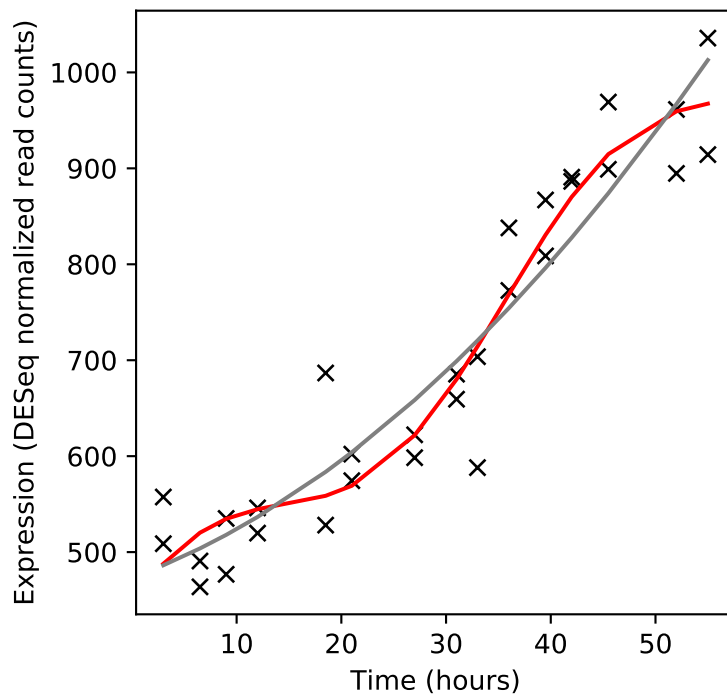

Rv1628c/-

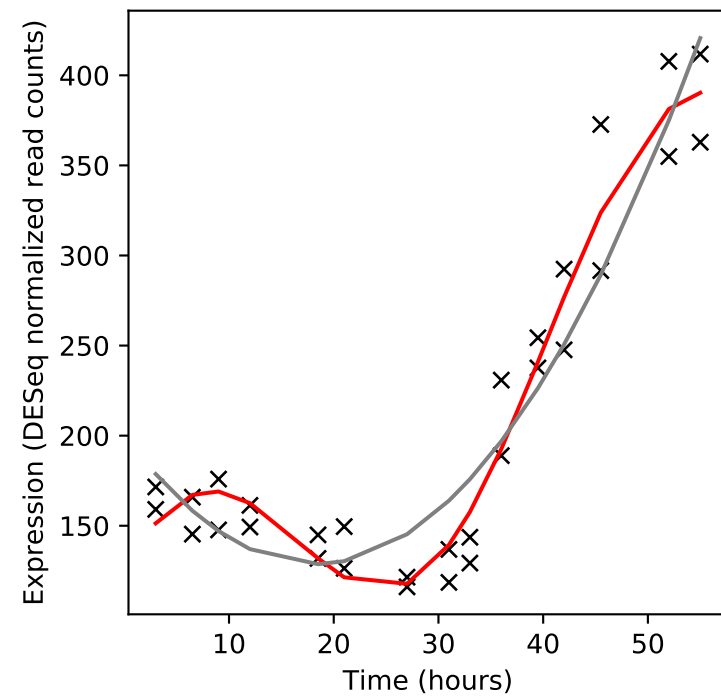

Rv1629/polA

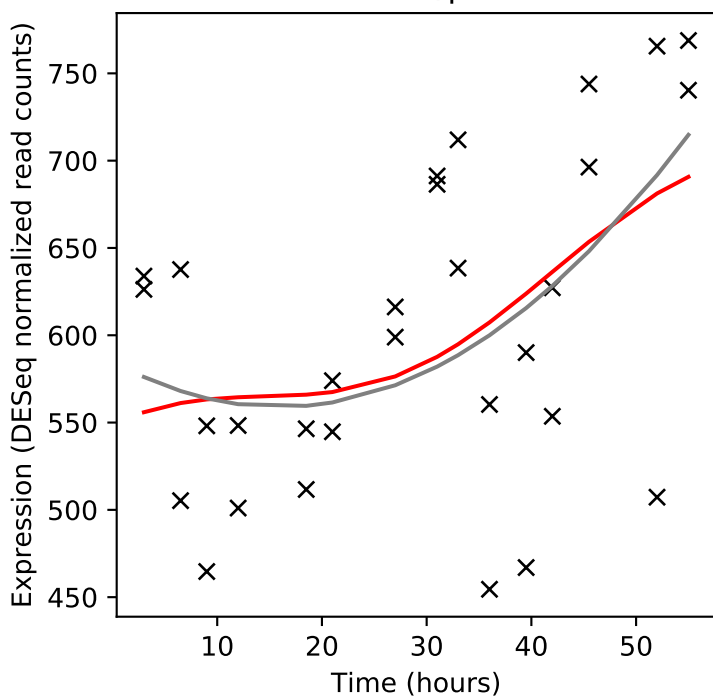

Rv1630/rpsA

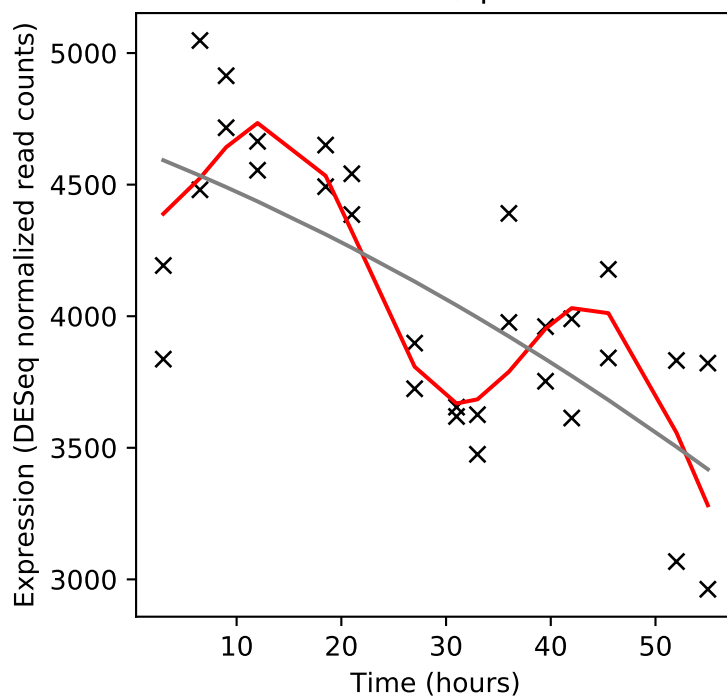

Rv1631/coaE

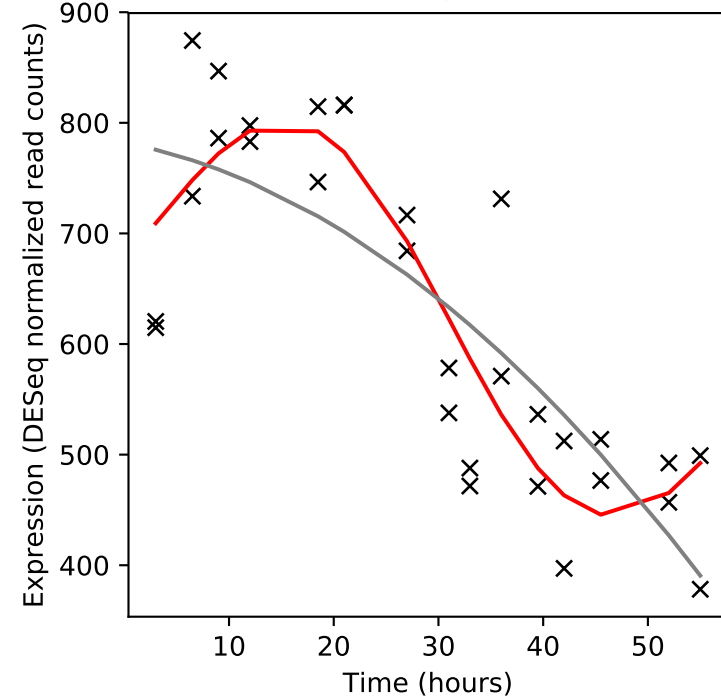

Rv1632c/-

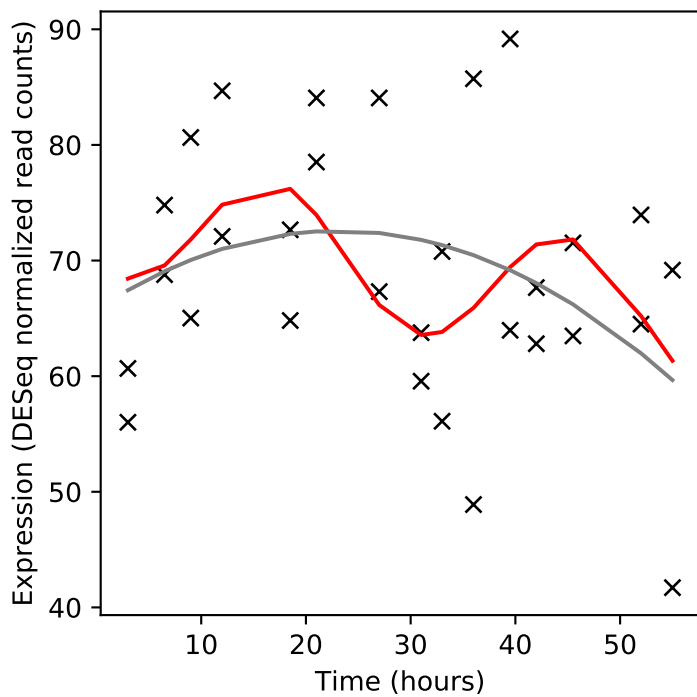

Rv1633/uvrB

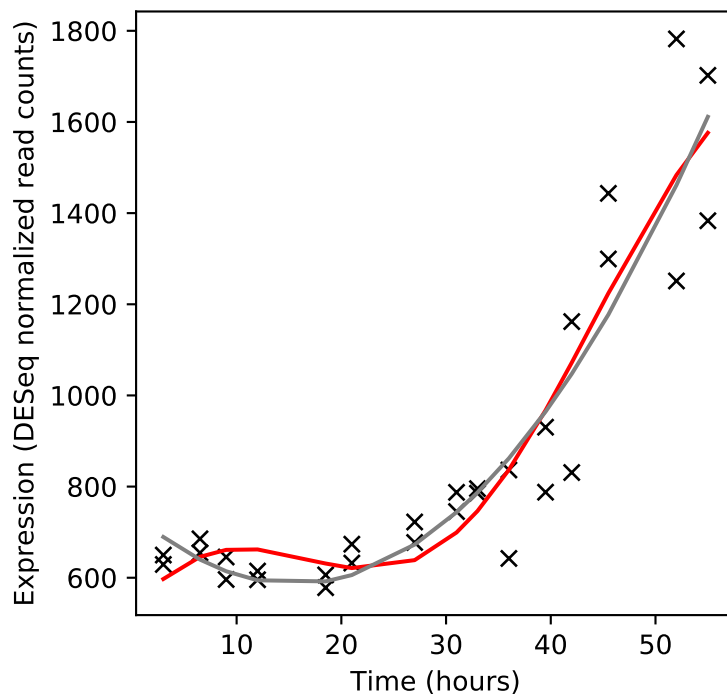

Rv1634/-

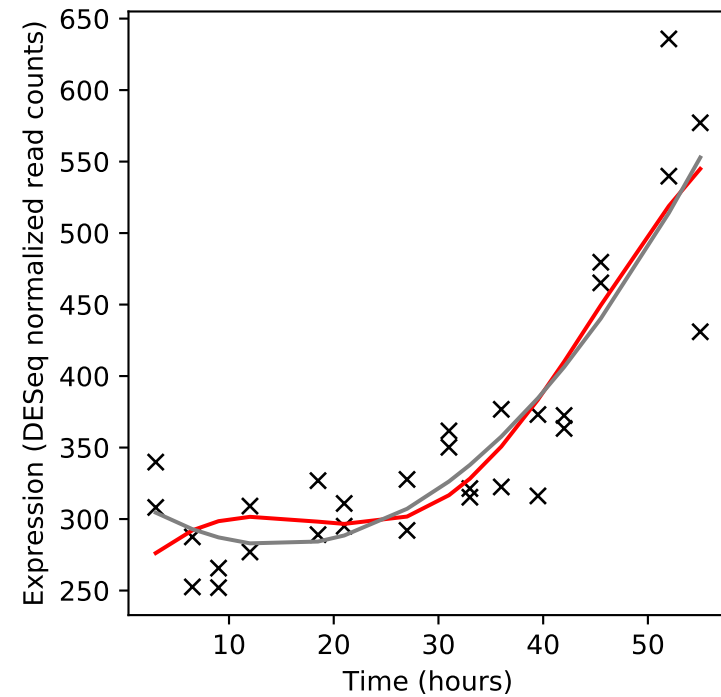

Rv1635c/-

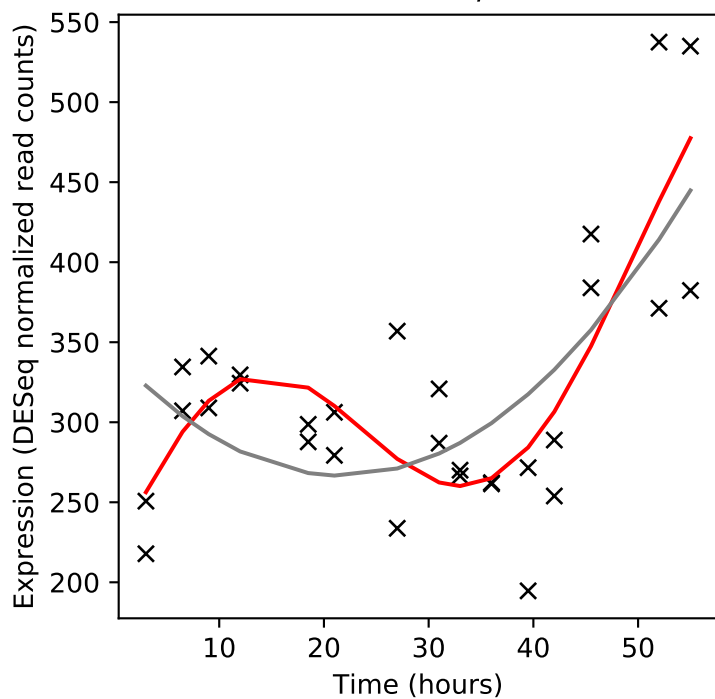

Rv1636/TB15.3

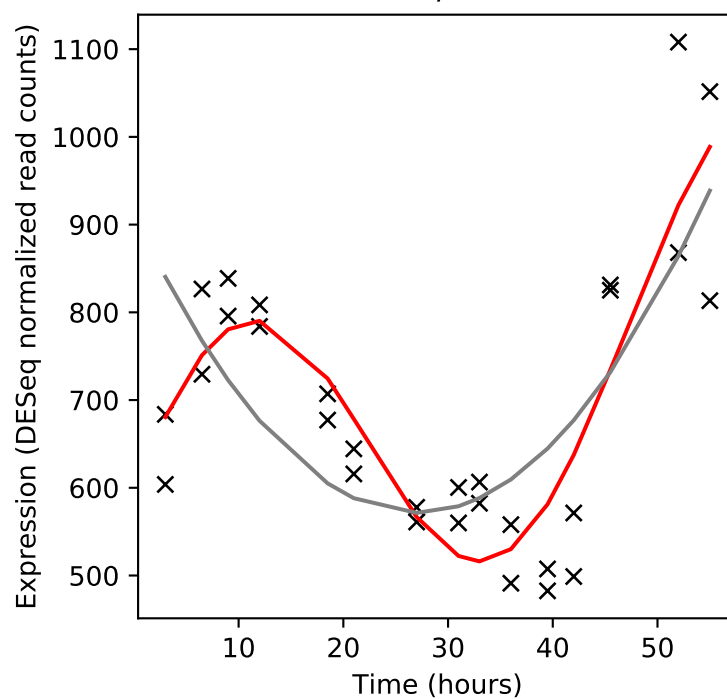

Rv1637c/-

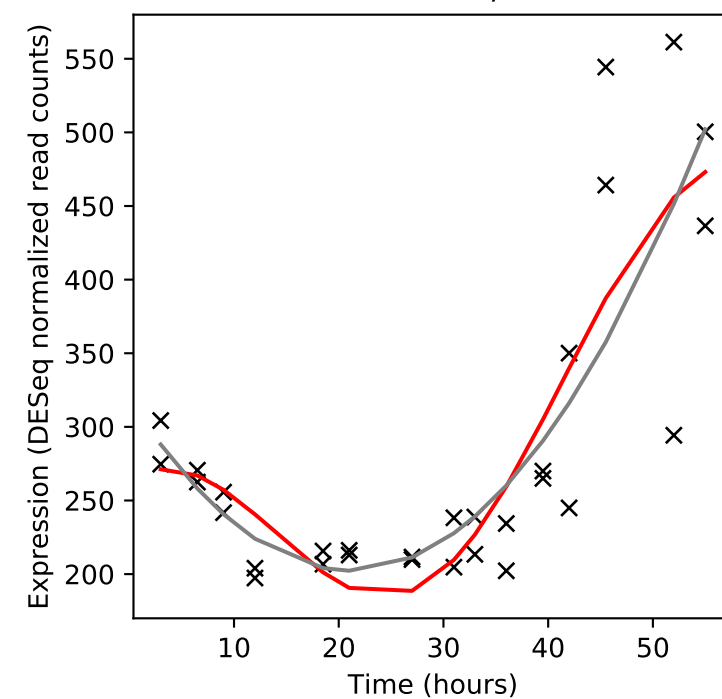

Rv1638/uvrA

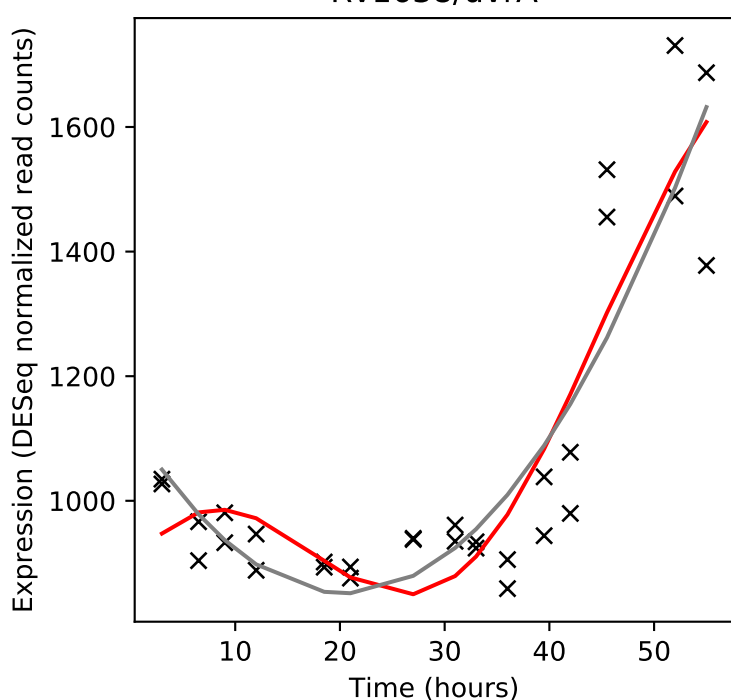

Rv1638A/-

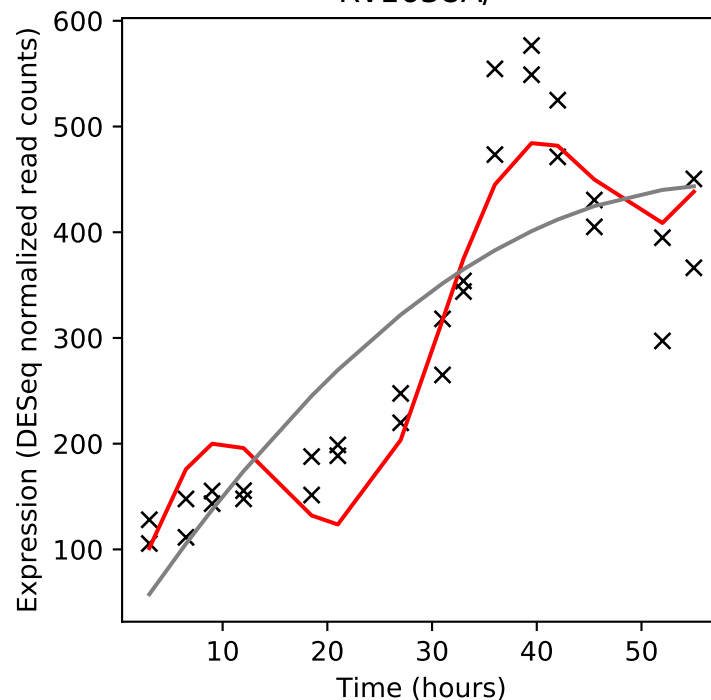

Rv1639c/-

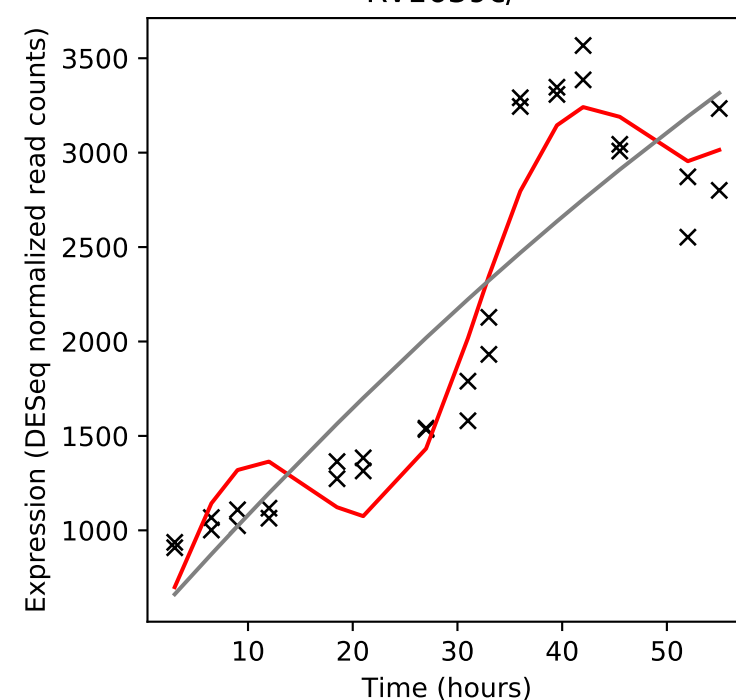

Rv1640c/lysX

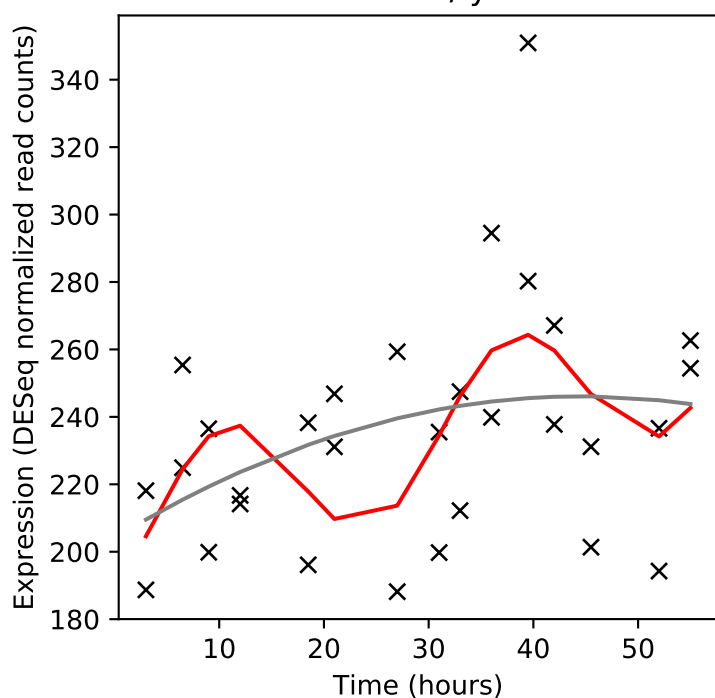

Rv1641/infC

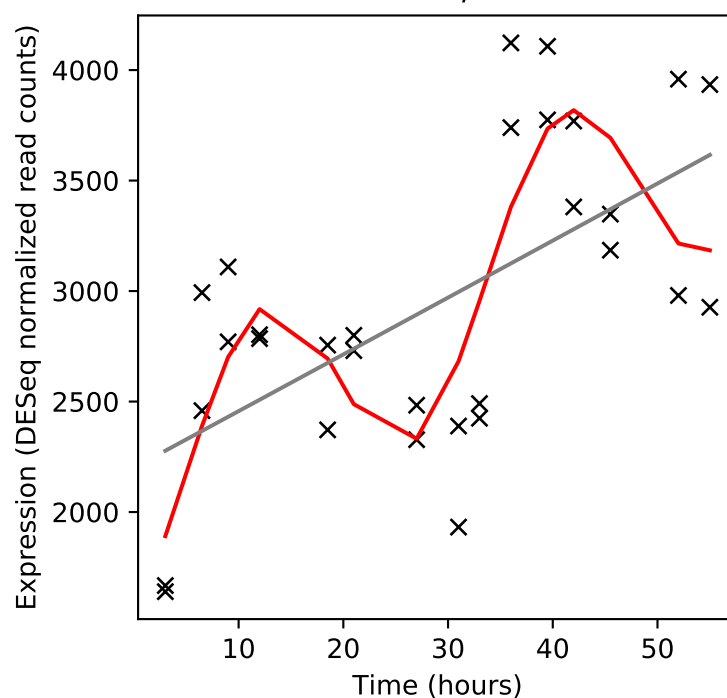

Rv1642/rpmI

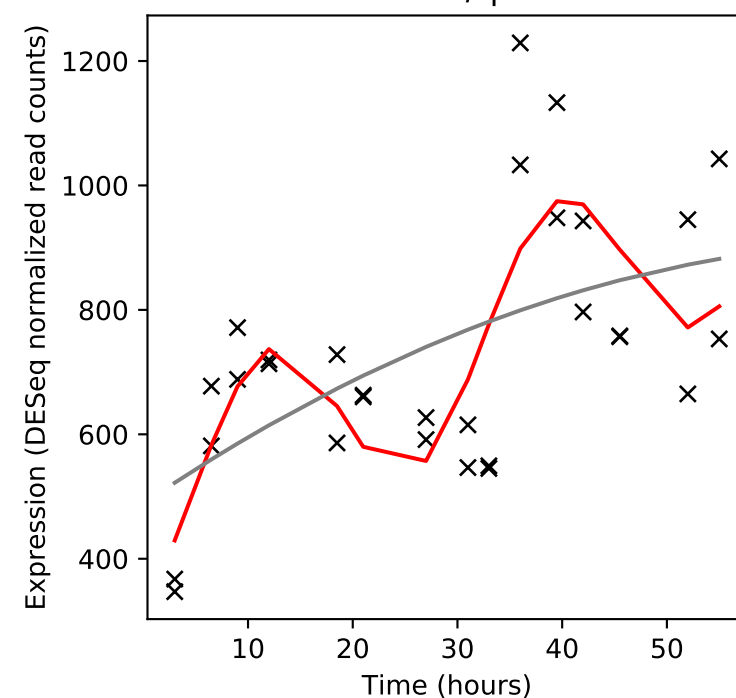

Rv1643/rpIT

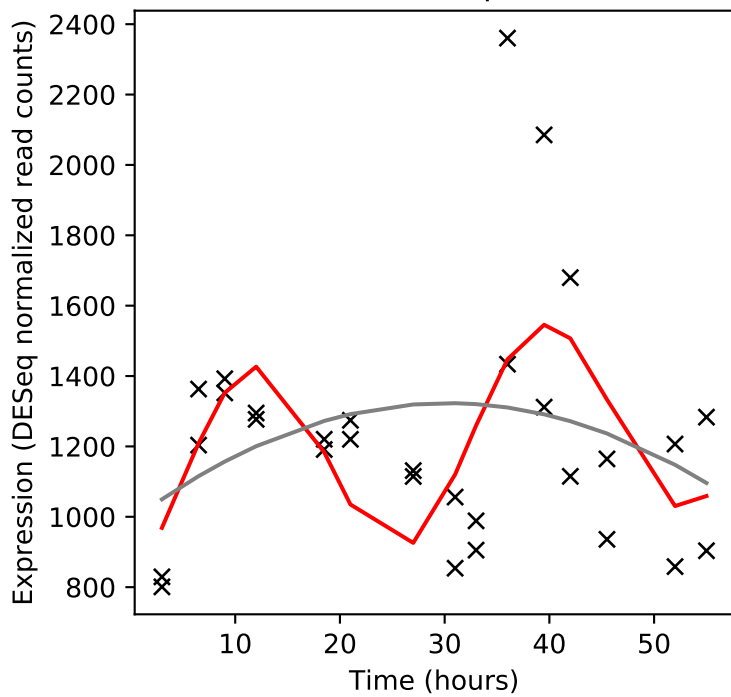

Rv1644/tsnR

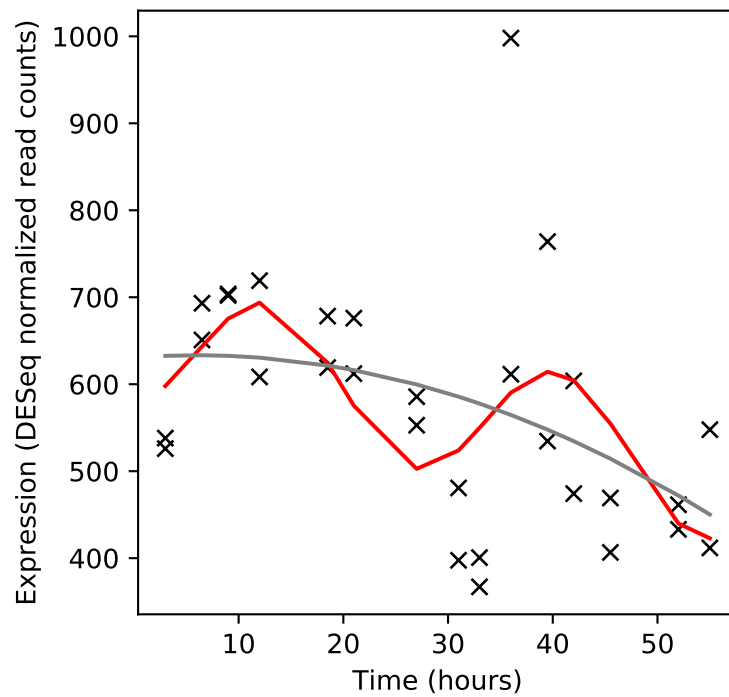

Rv1645c/-

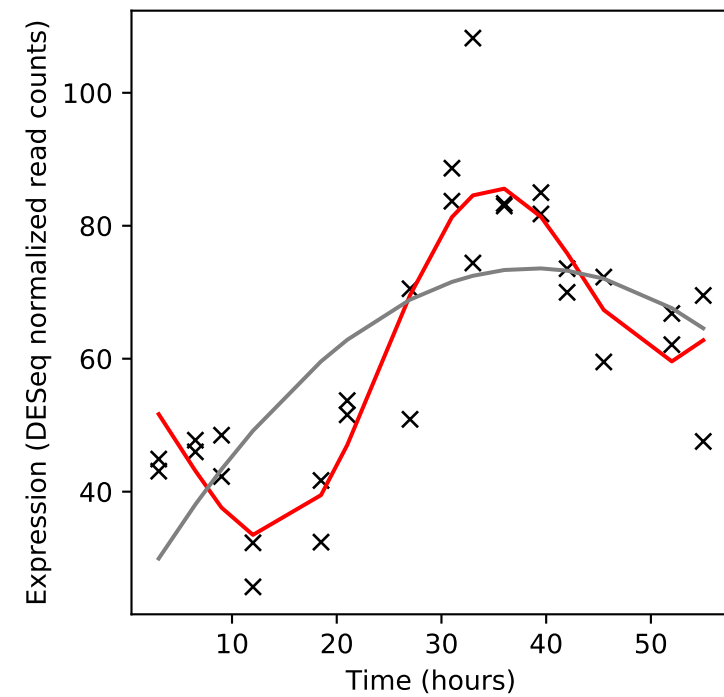

Rv1646/PE17

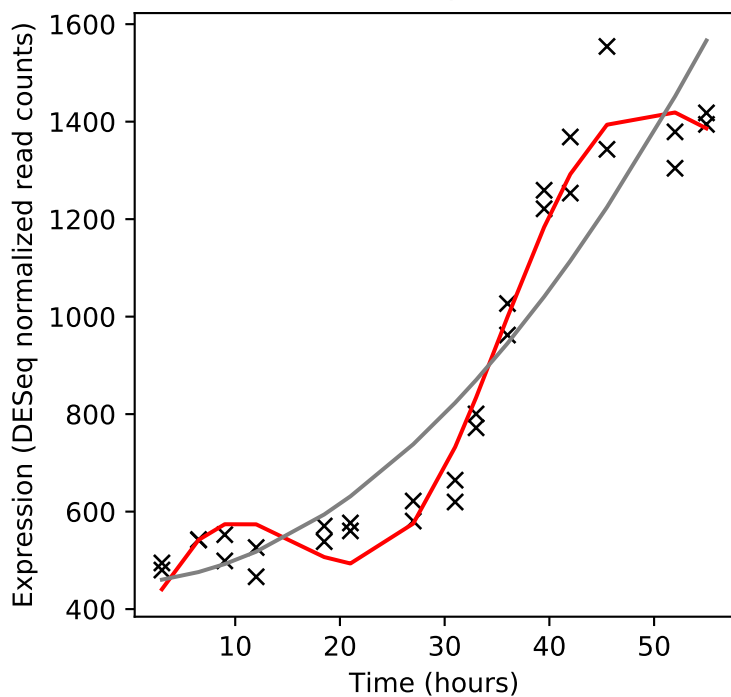

Rv1647/-

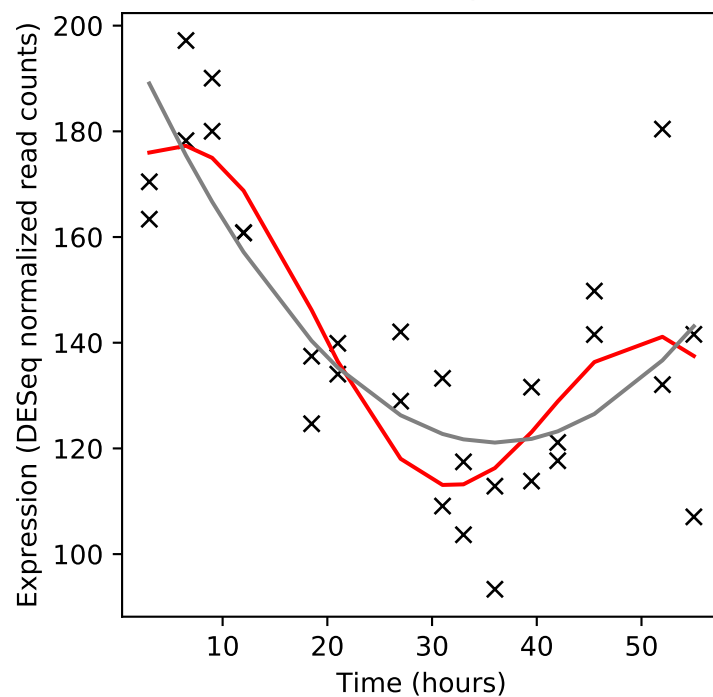

Rv1648/-

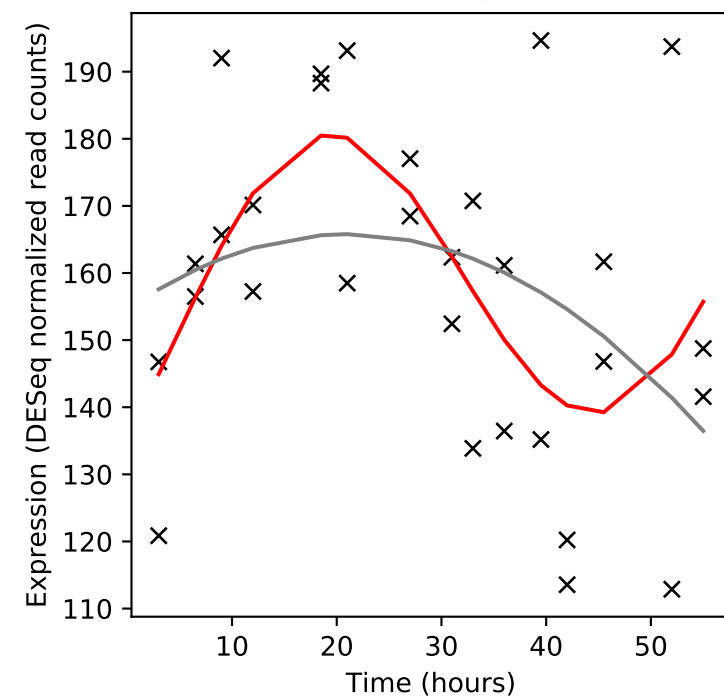

Rv1649/pheS

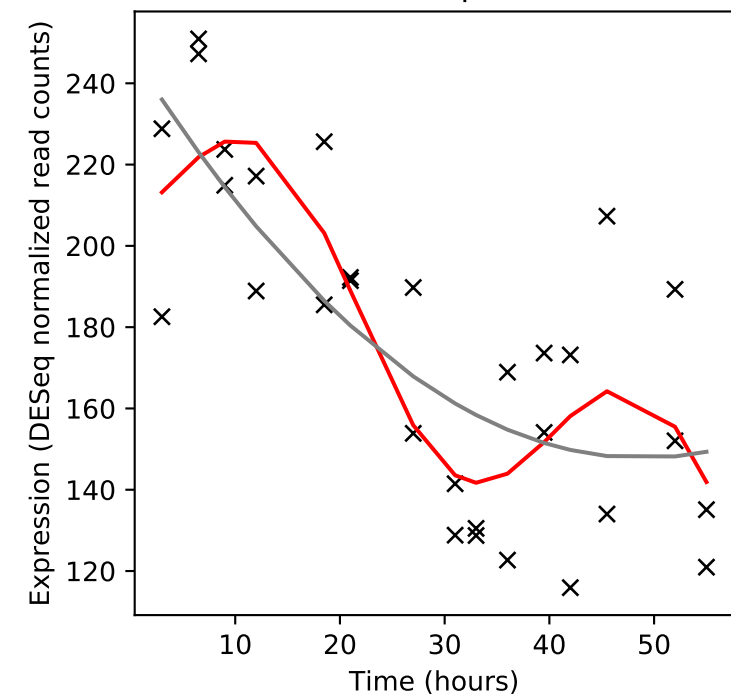

Rv1650/pheT

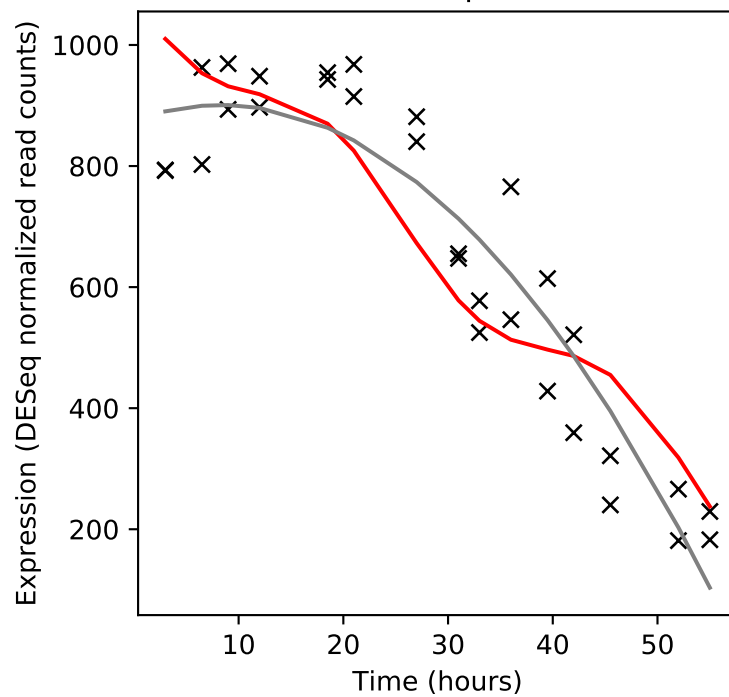

Rv1651c/PE\_PGRS30

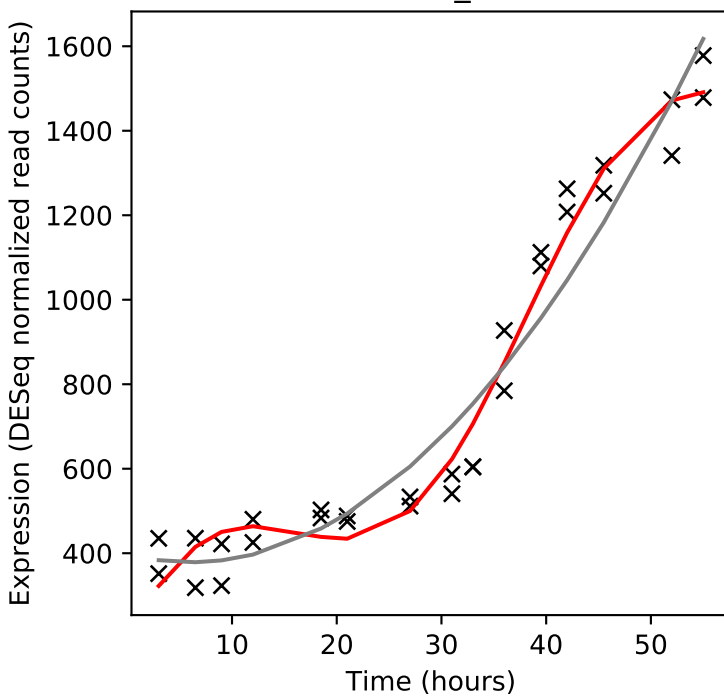

Rv1652/argC

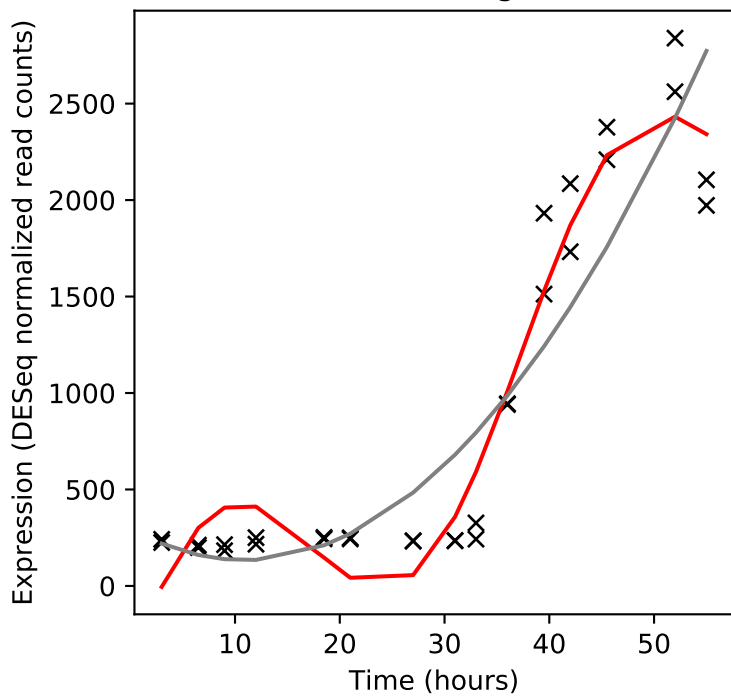

Rv1653/argJ

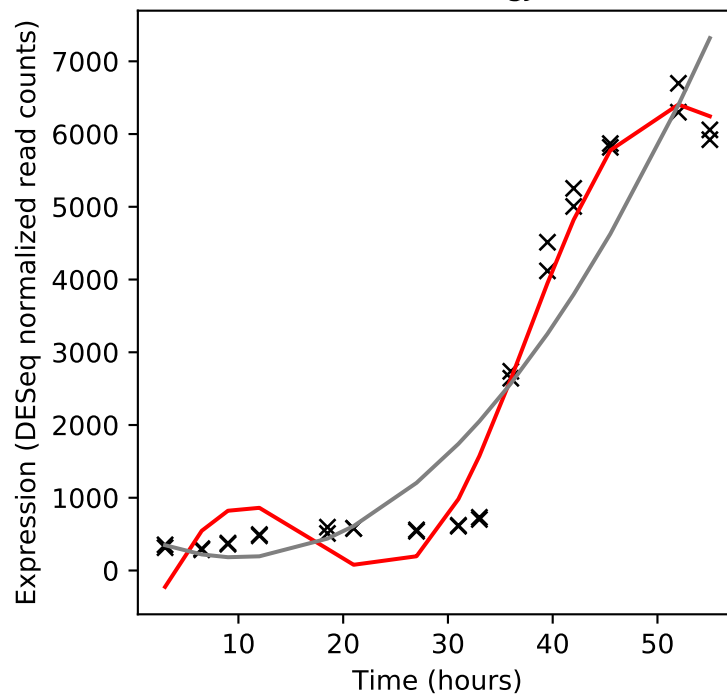

Rv1654/argB

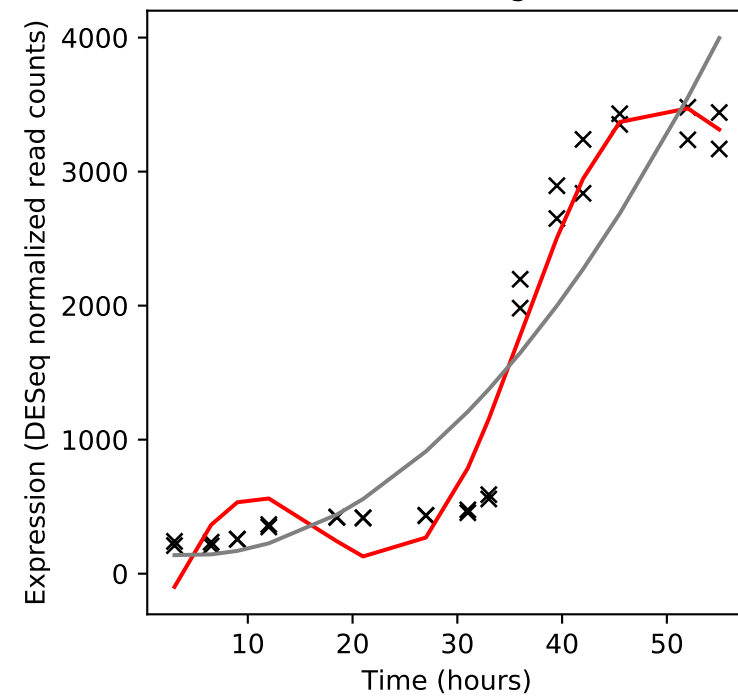

Rv1655/argD

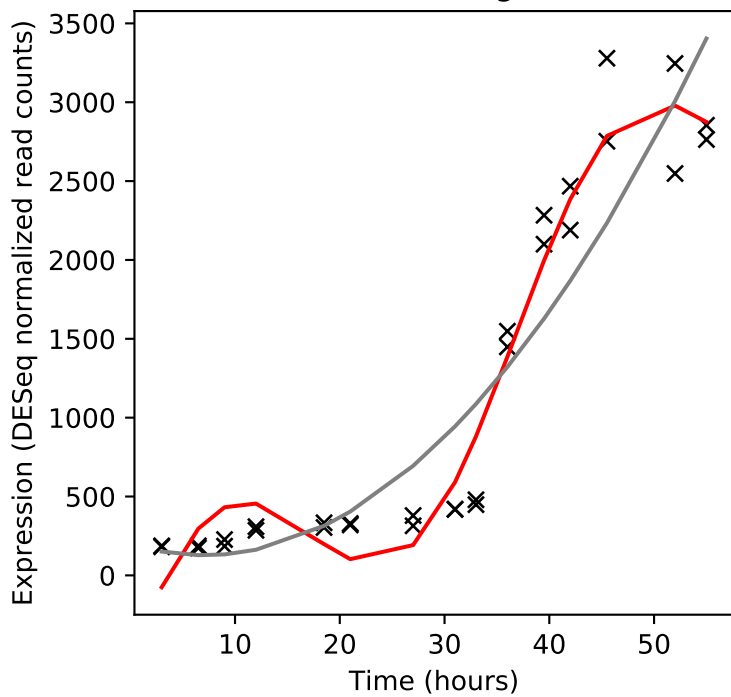

Rv1656/argF

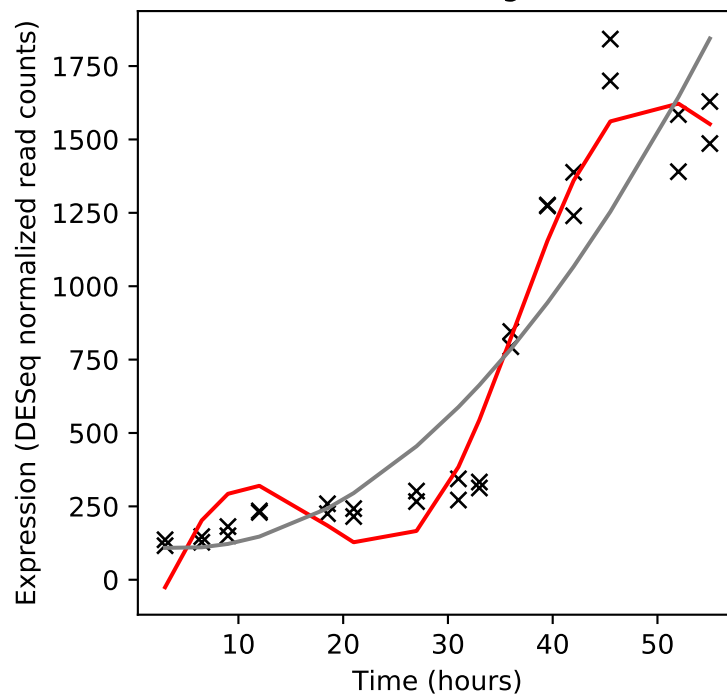

Rv1657/argR

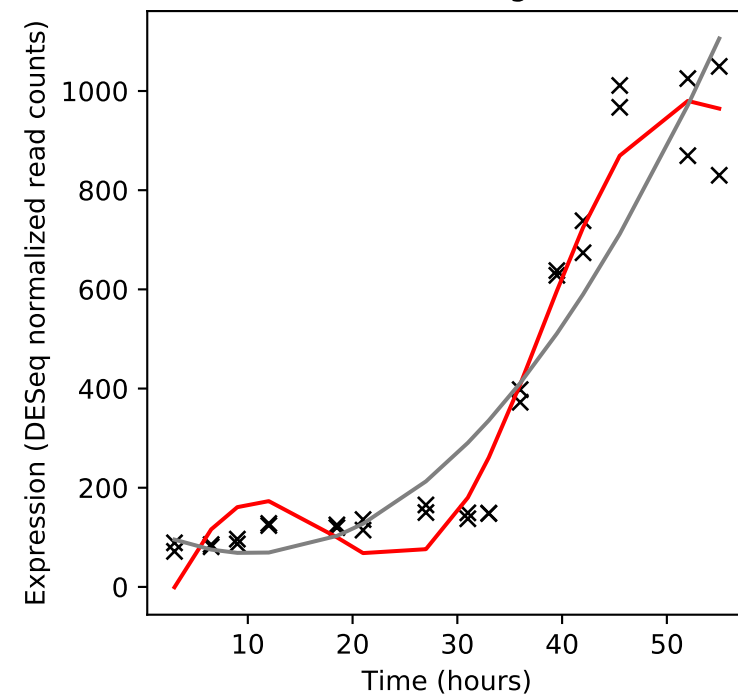

Rv1658/argG

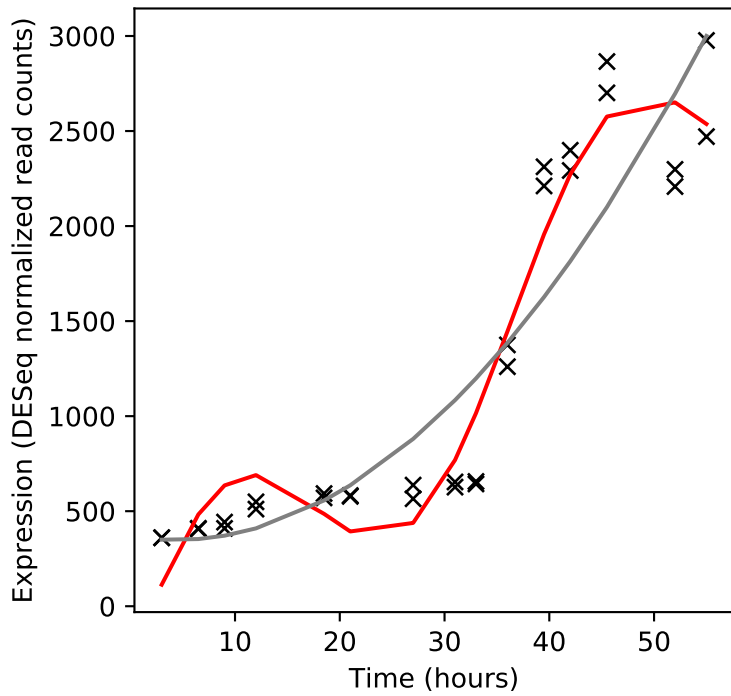

Rv1659/argH

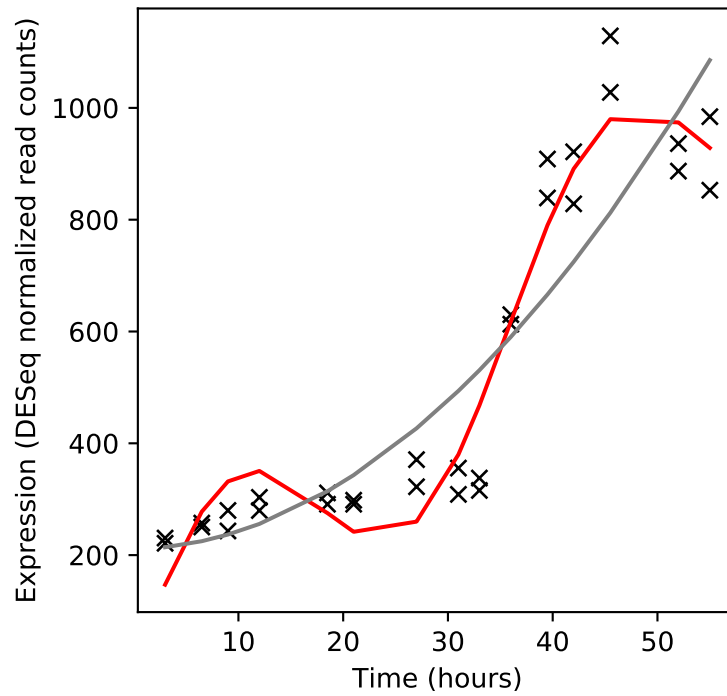

Rv1660/pks10

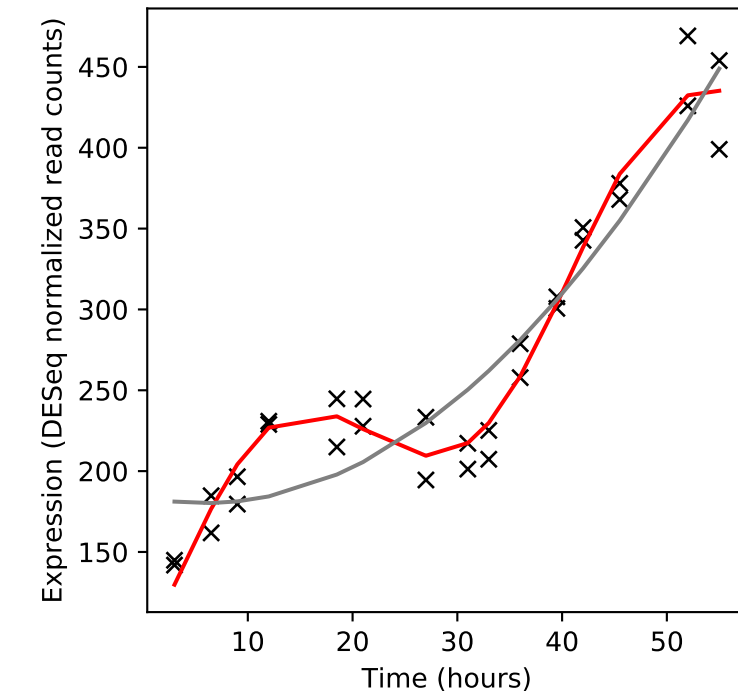

Rv1661/pks7

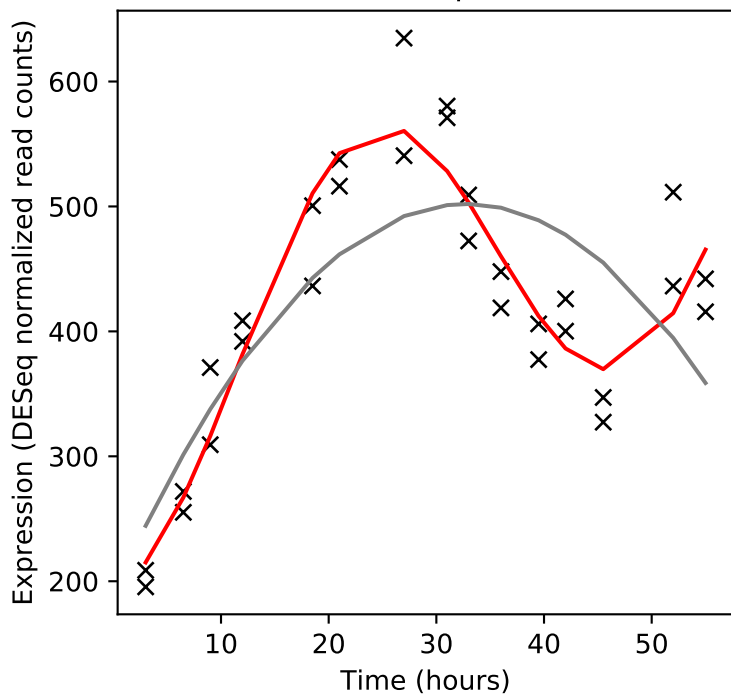

Rv1662/pks8

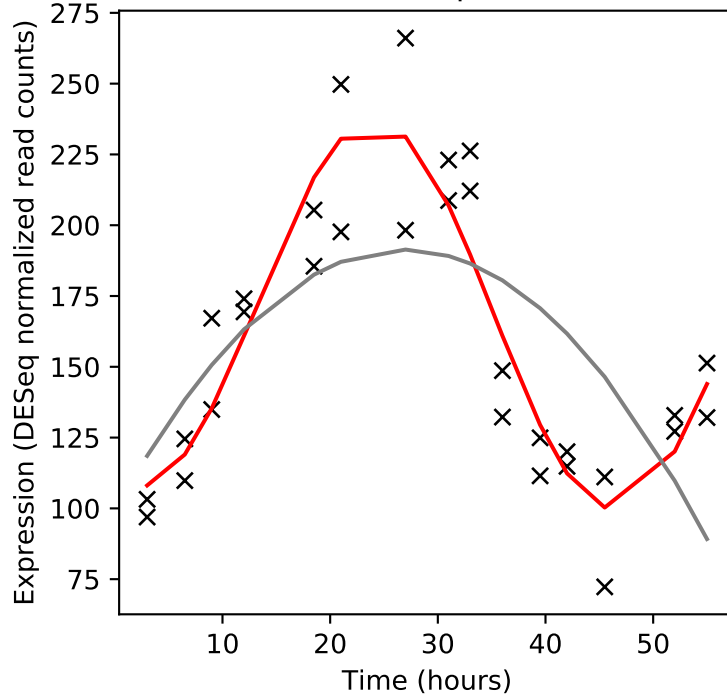

Rv1663/pks17

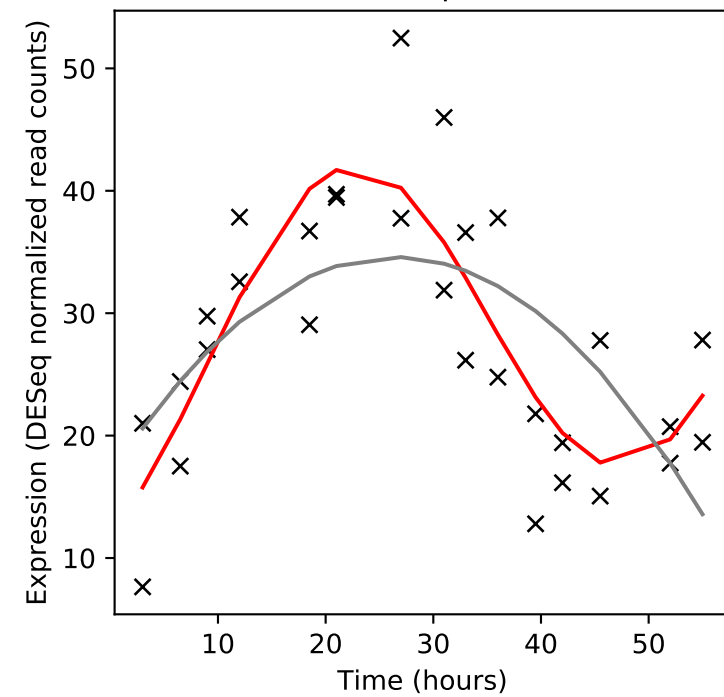

Rv1664/pks9

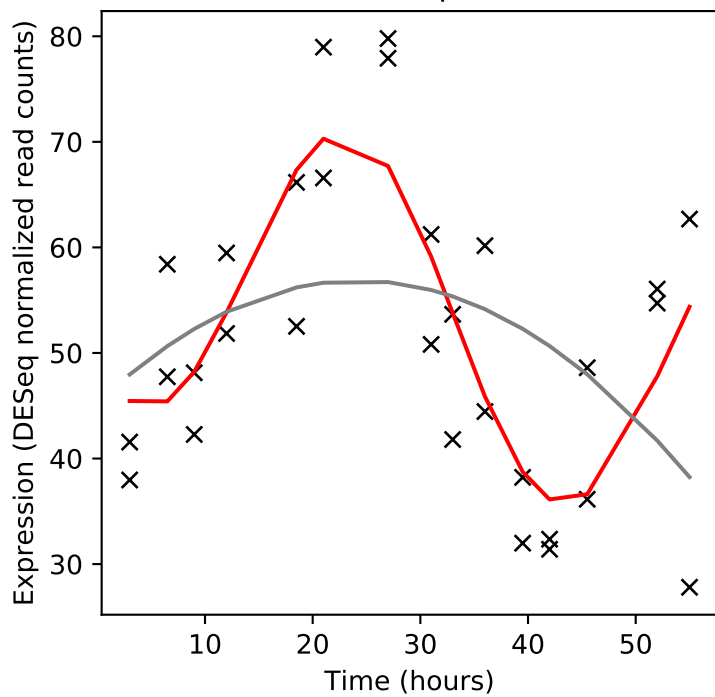

Rv1665/pks11

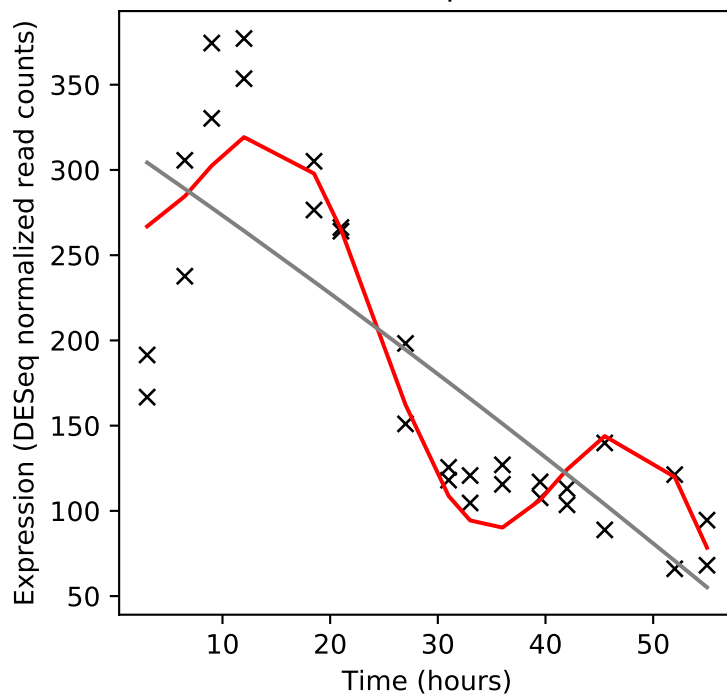

Rv1666c/cyp139

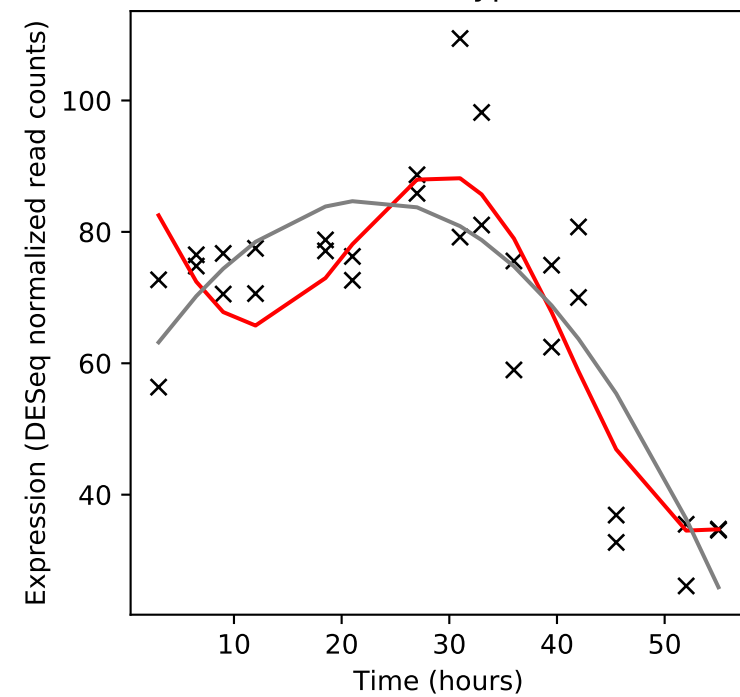

Rv1667c/-

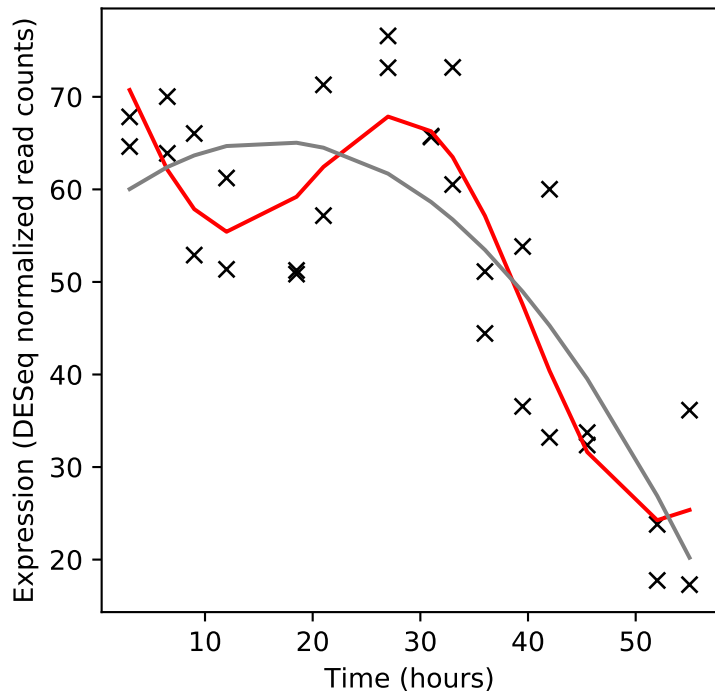

Rv1668c/-

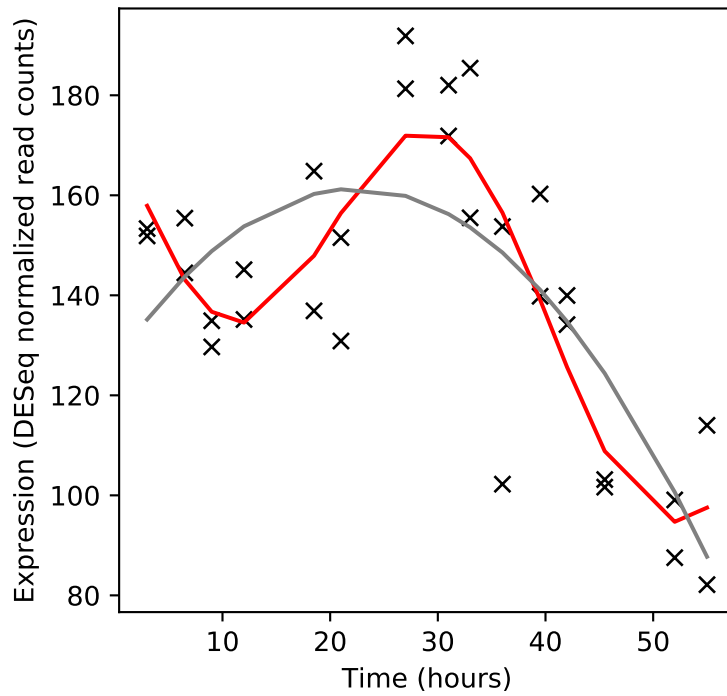

Rv1669/-

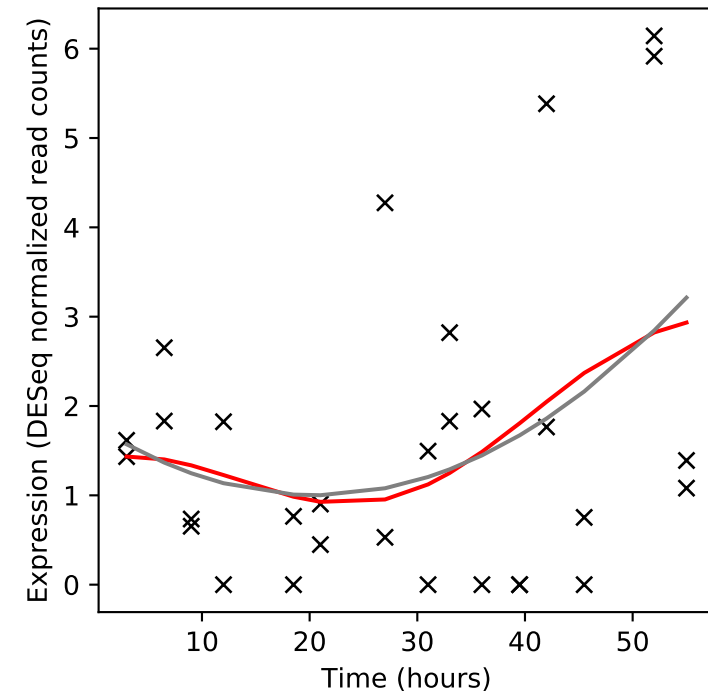

Rv1670/-

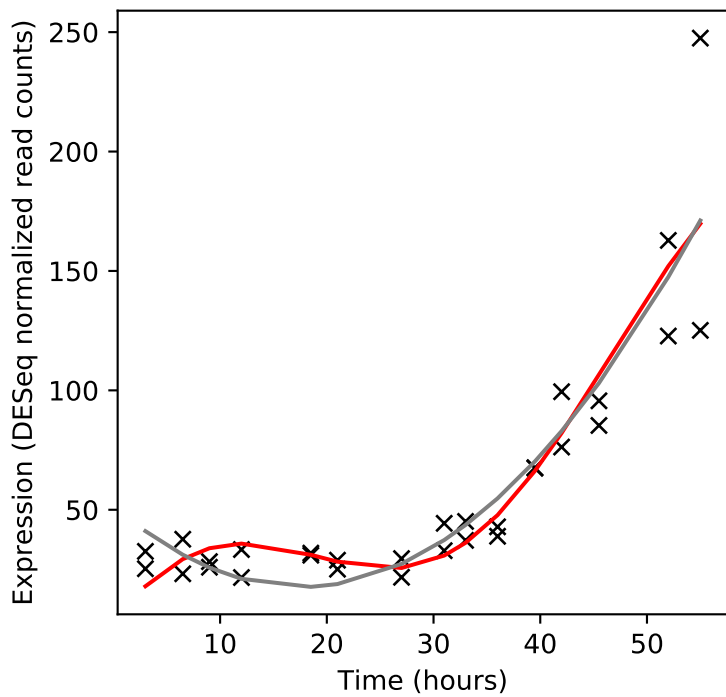

Rv1671/-

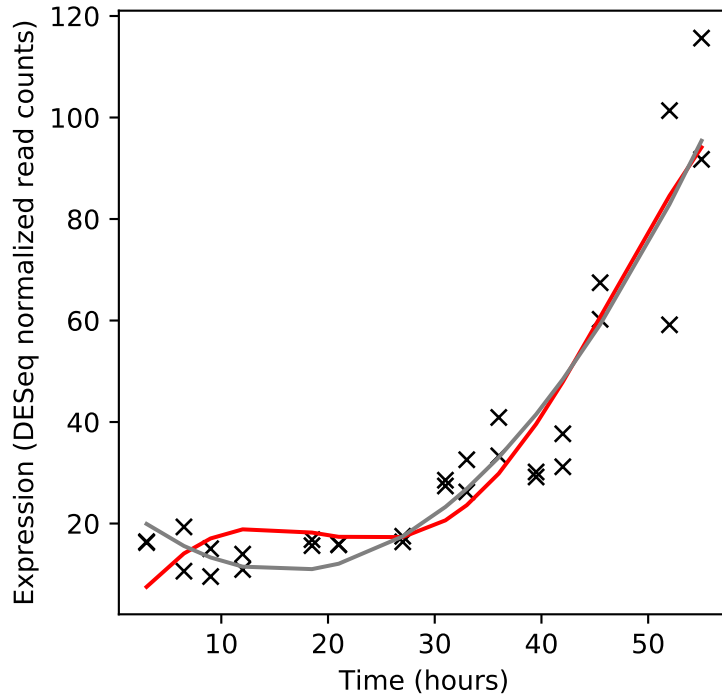

Rv1672c/-

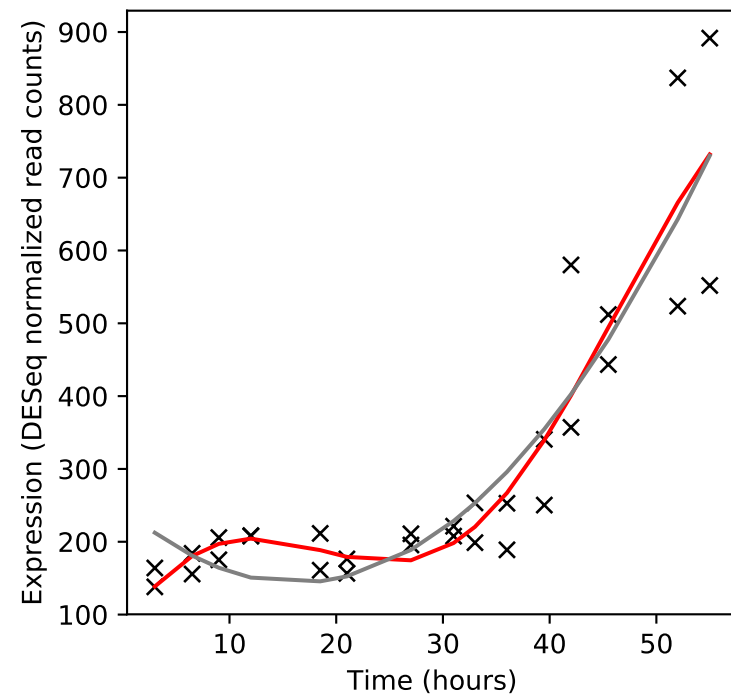

Rv1673c/-

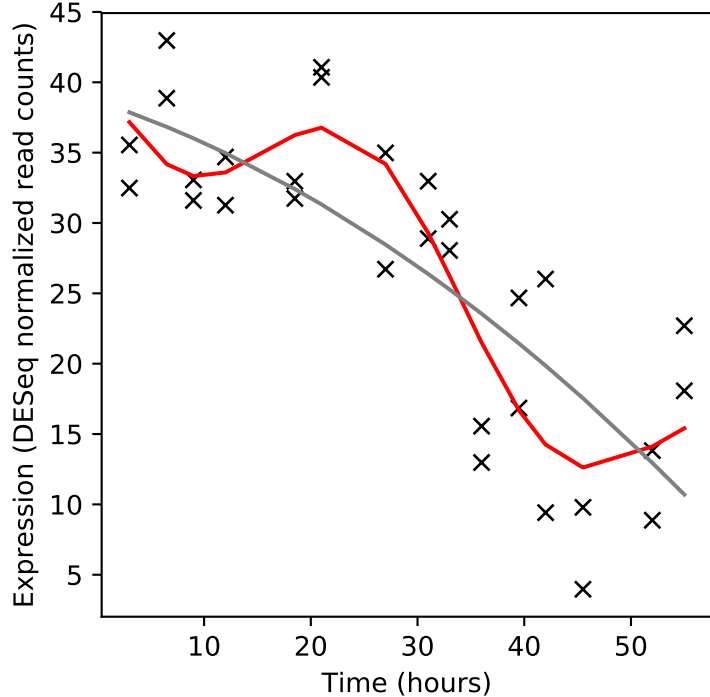

Rv1674c/-

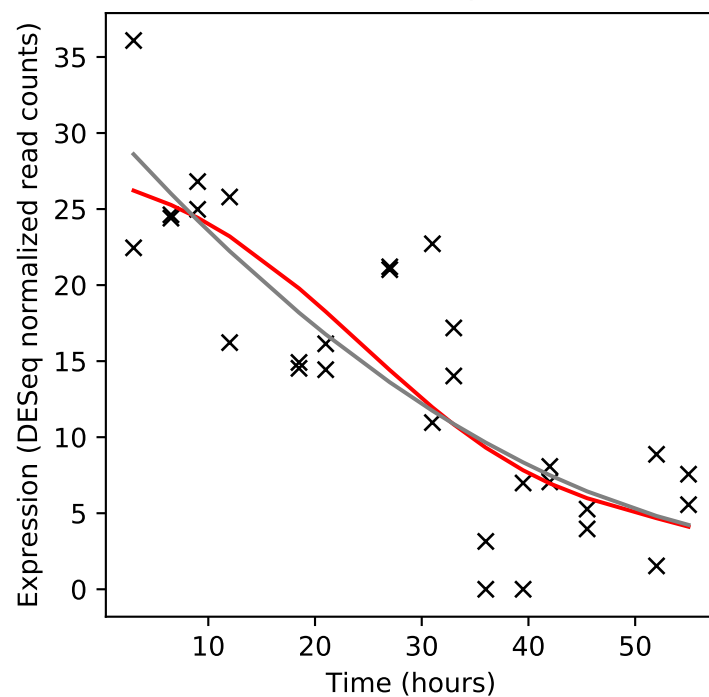

Rv1675c/cmr

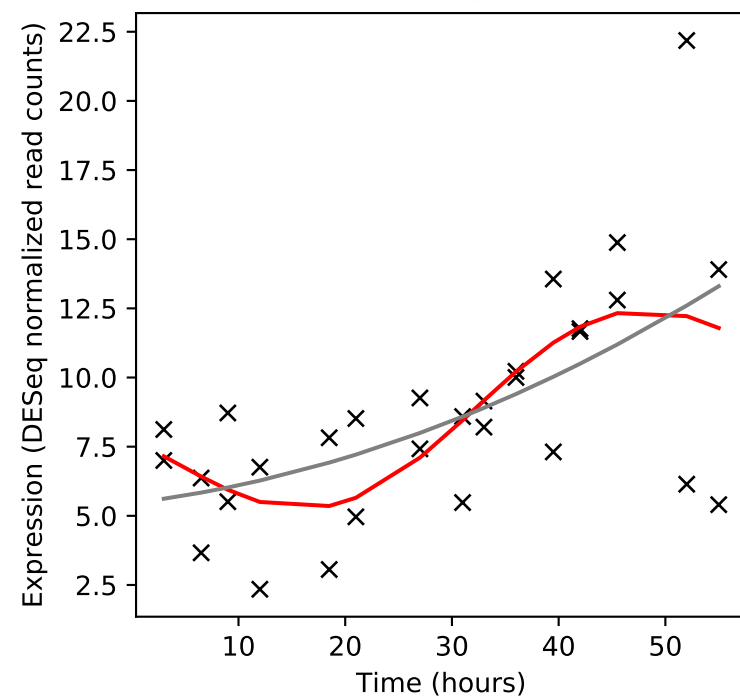

Rv1676/-

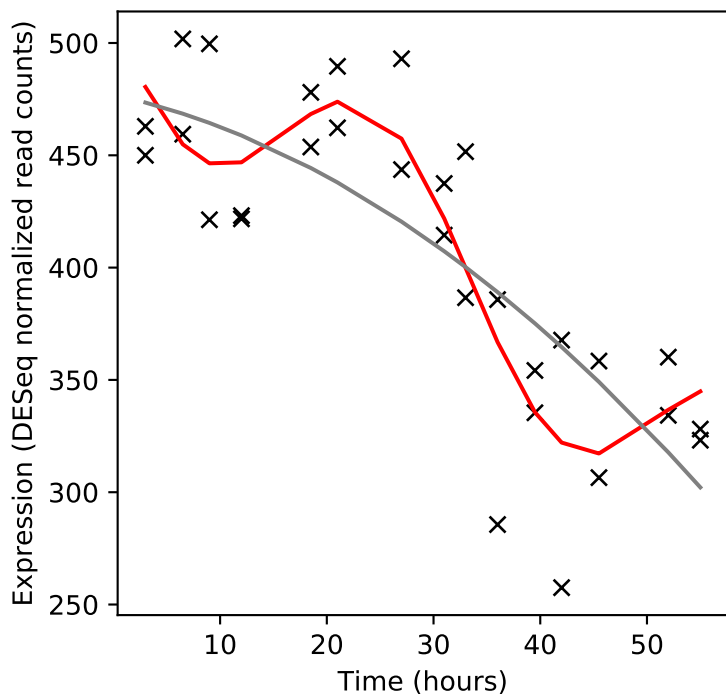

Rv1677/dsbF

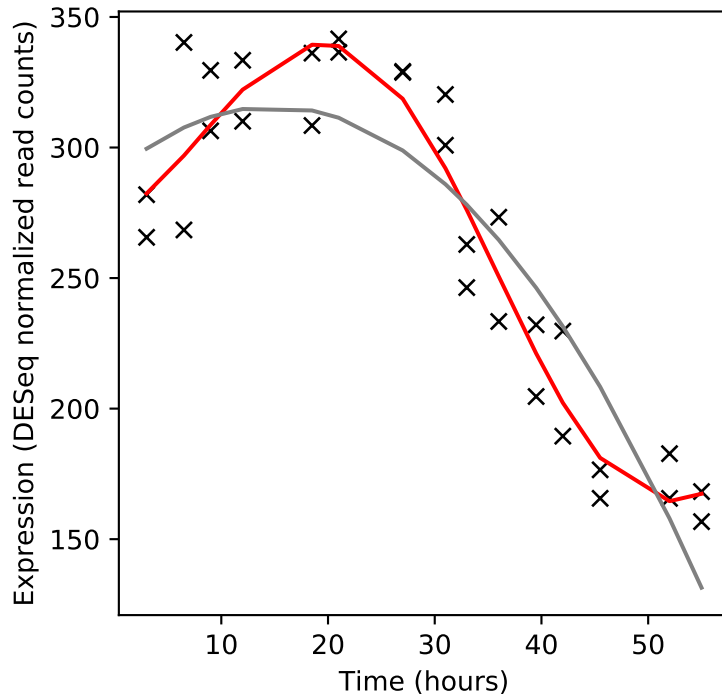

Rv1678/-

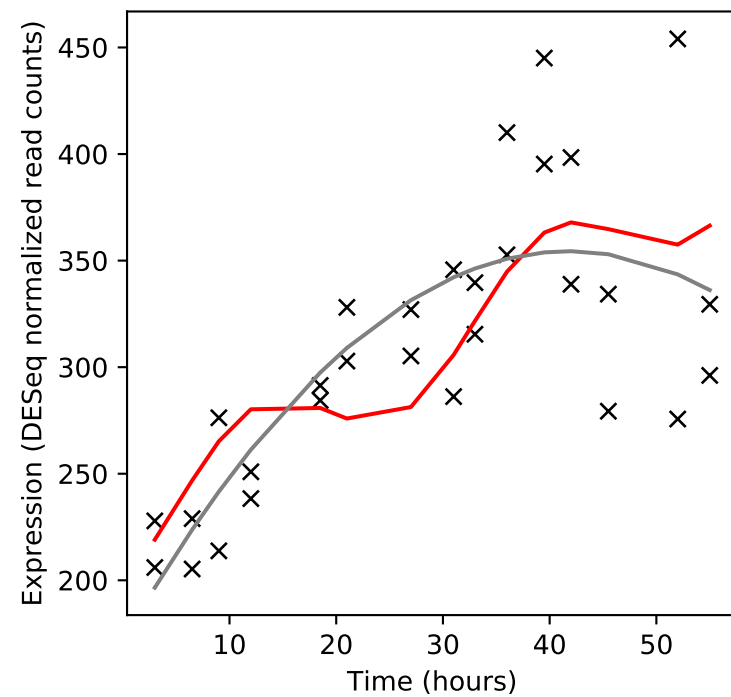



Rv1679/fadE16

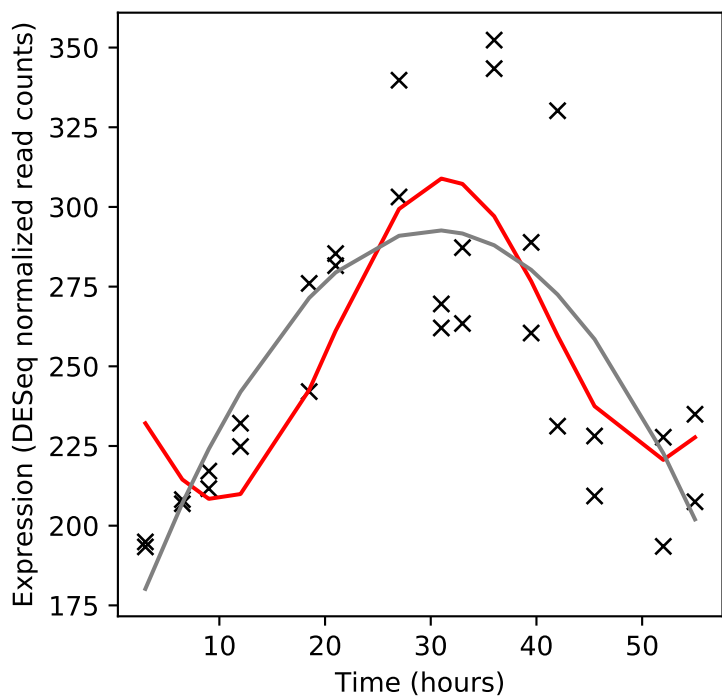

Rv1680/-

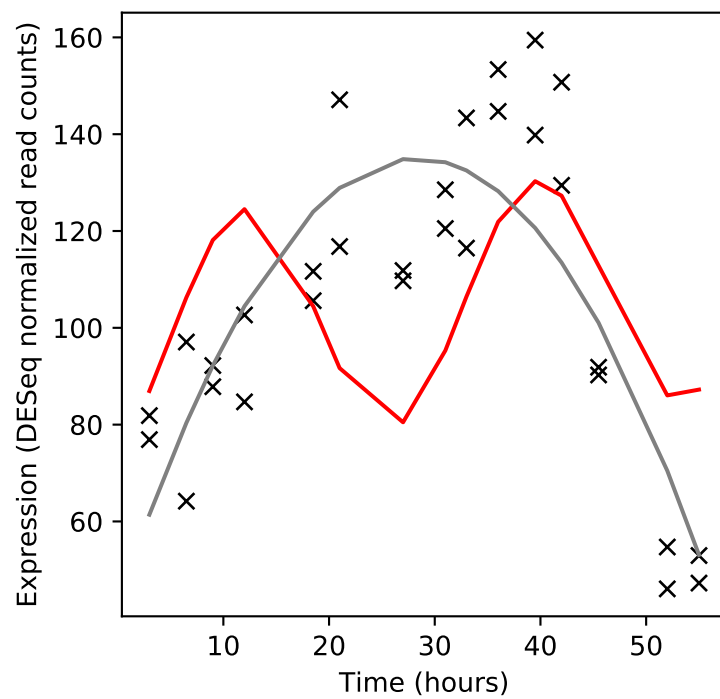

Rv1681/moeX

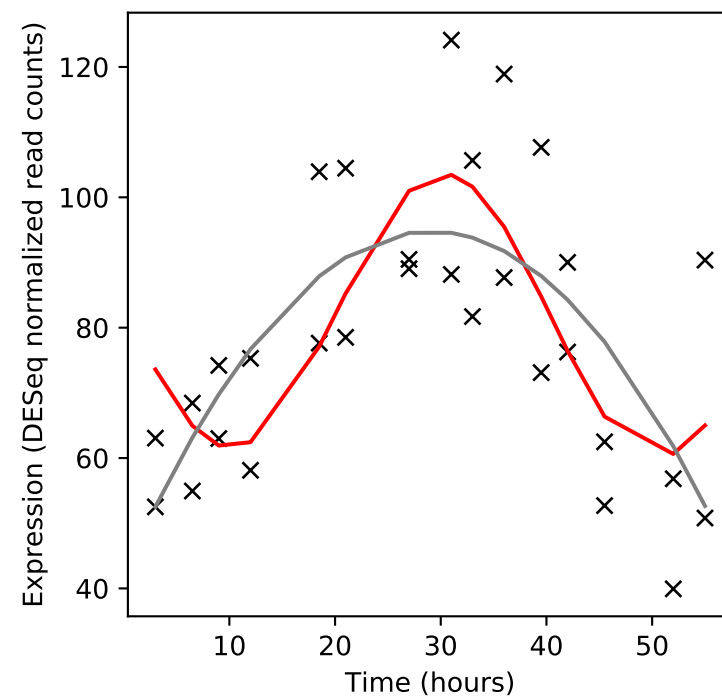

Rv1682/-

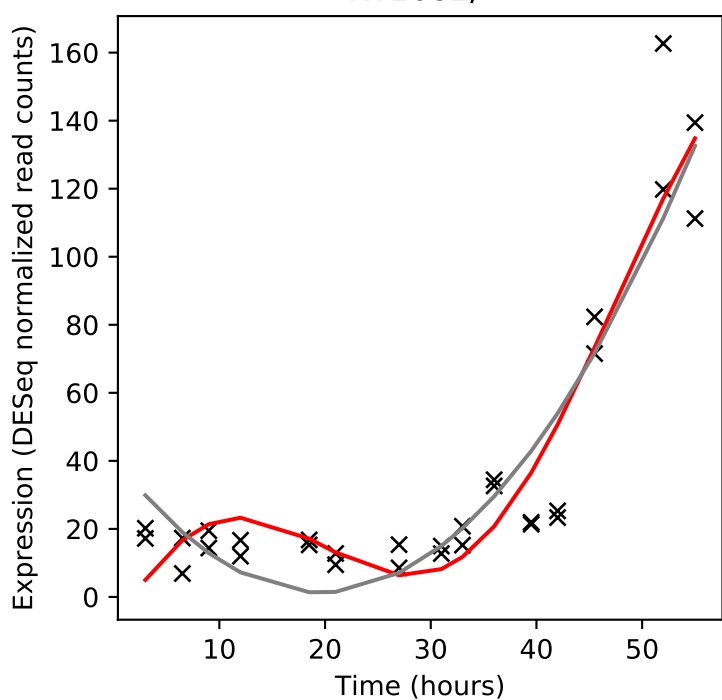

Rv1683/-

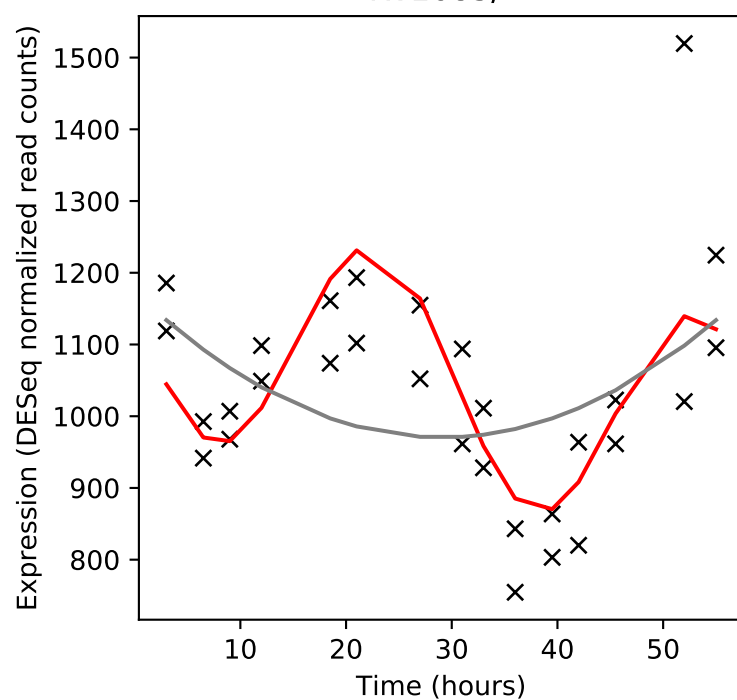

Rv1684/-

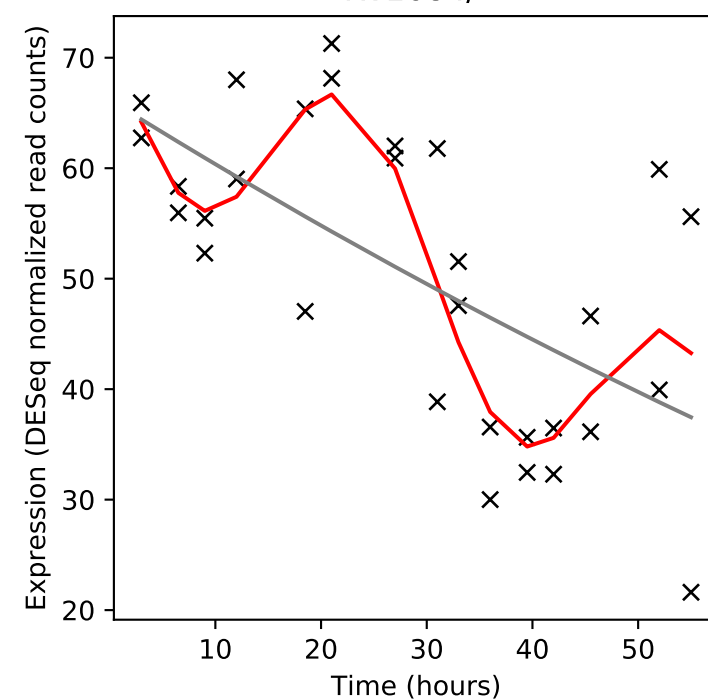

Rv1685c/-

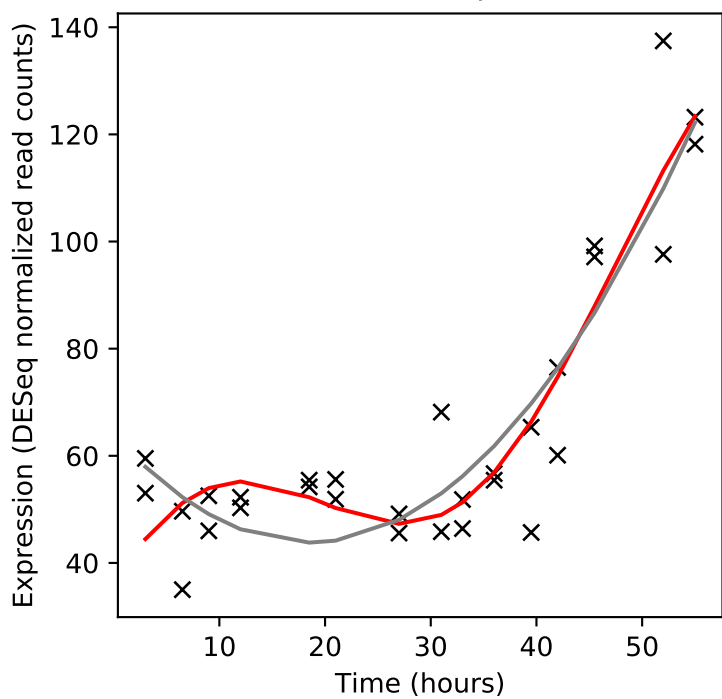

Rv1686c/-

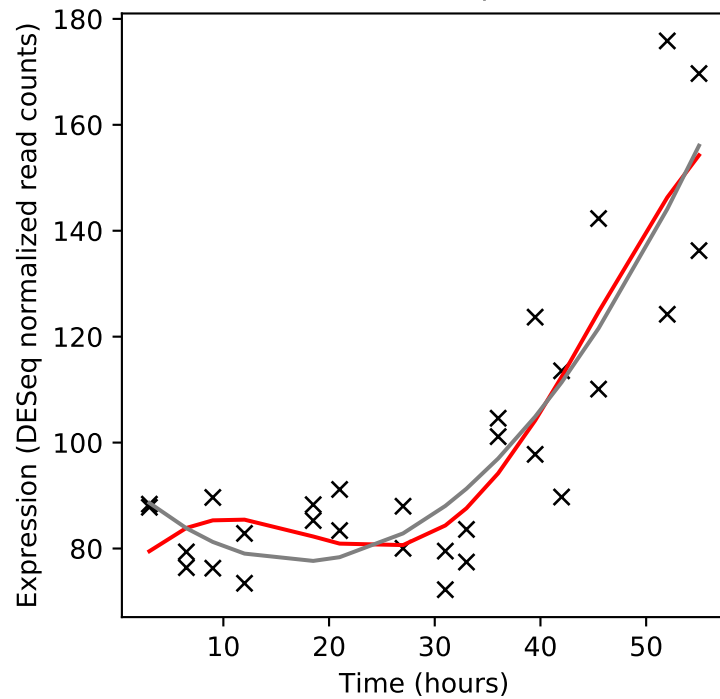

Rv1687c/-

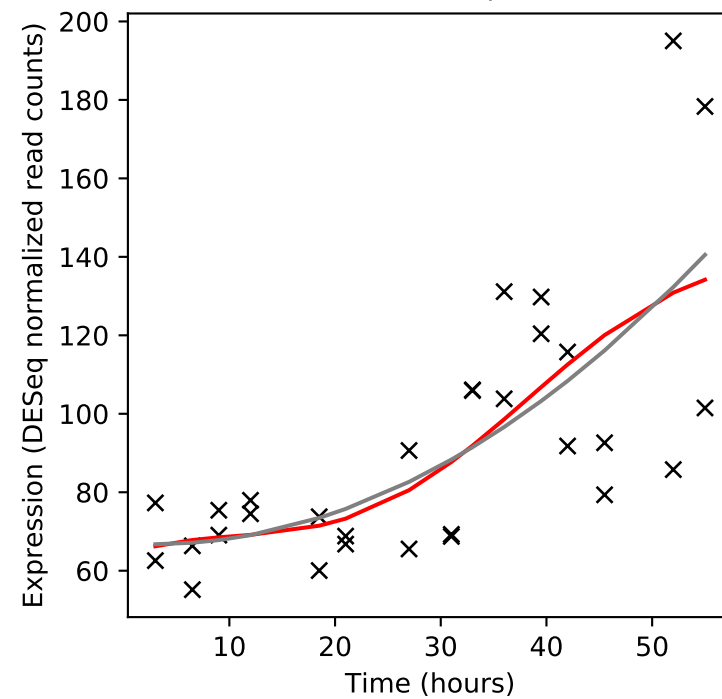

Rv1688/mpg

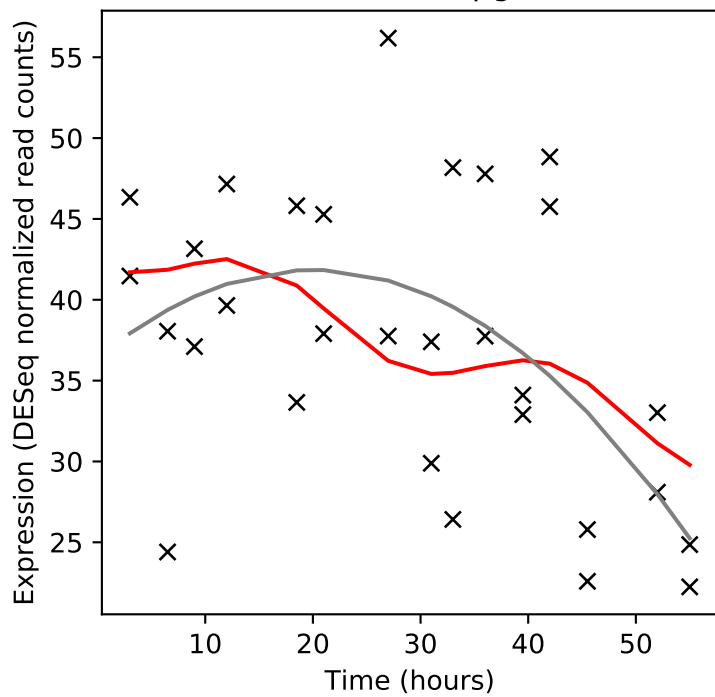

Rv1689/tyrS

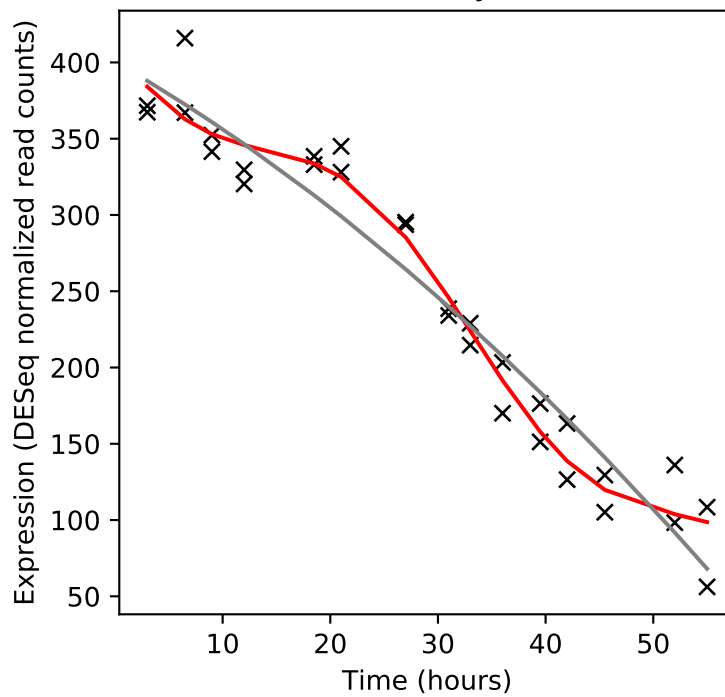

Rv1690/lprJ

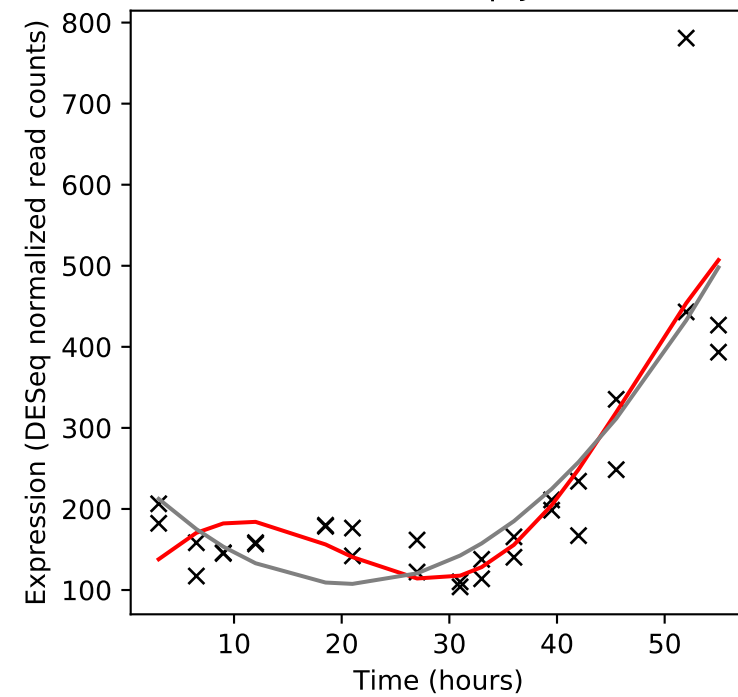

Rv1691/-

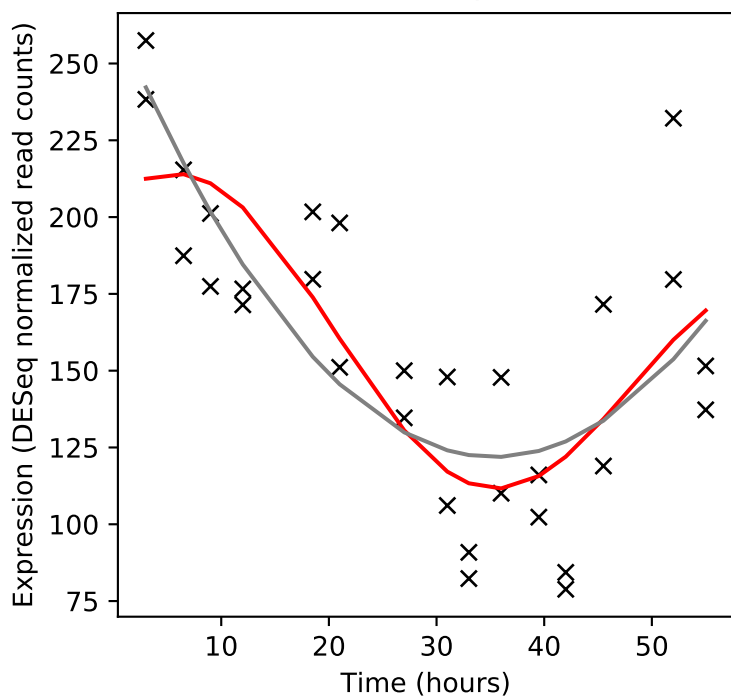

Rv1692/-

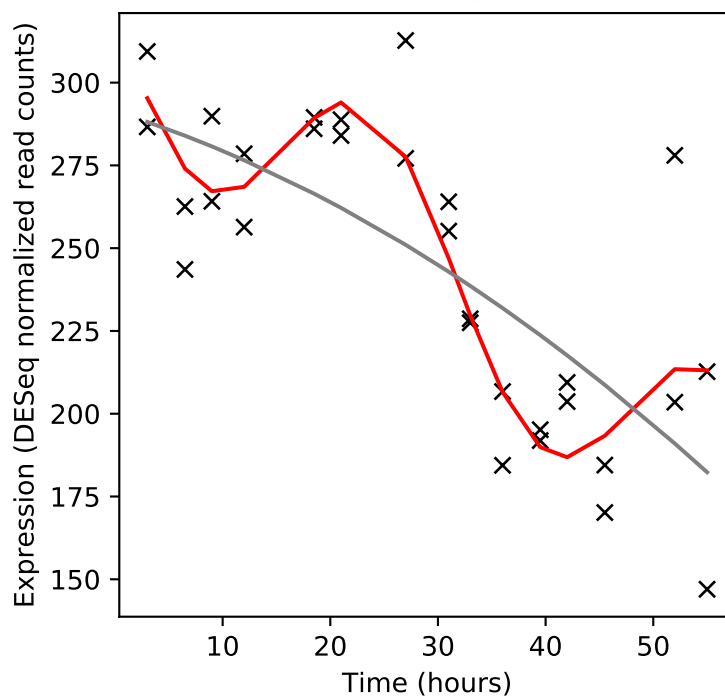

Rv1693/-

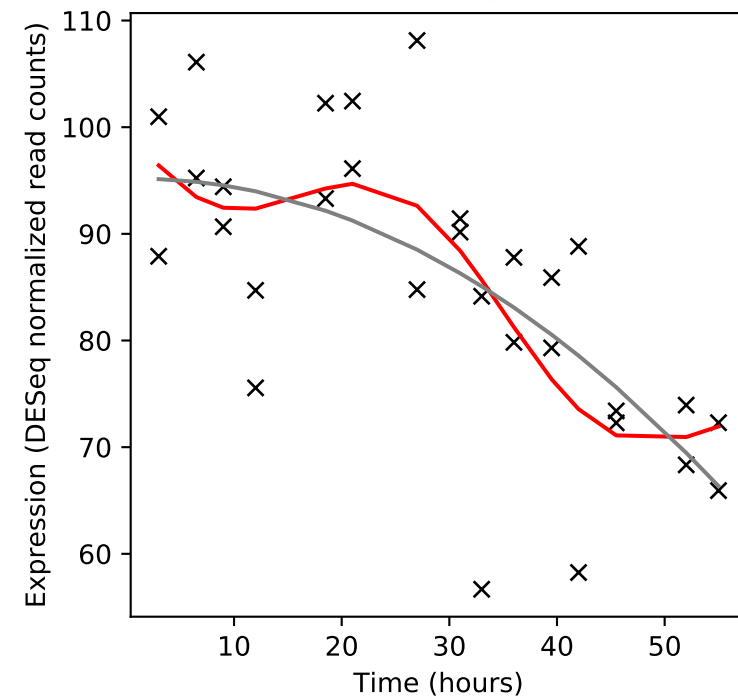

Rv1694/tlyA

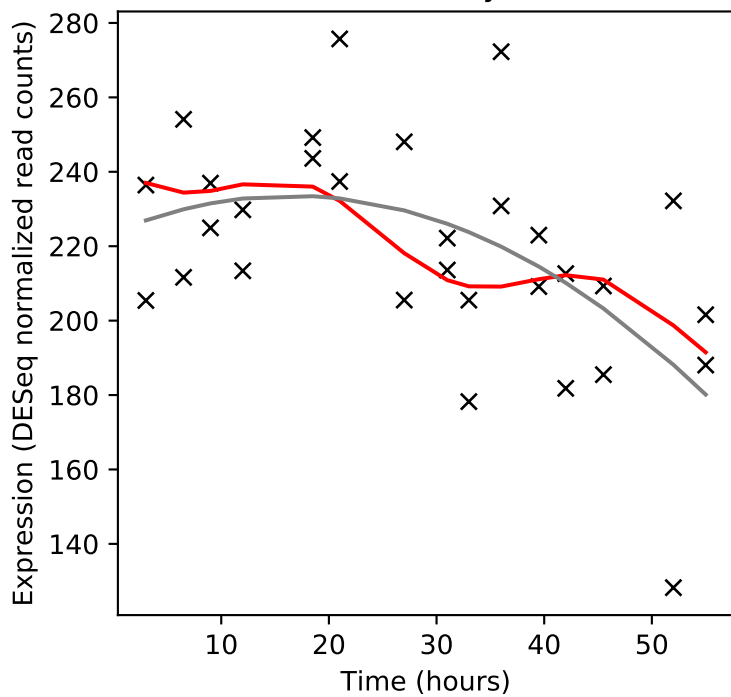

Rv1695/ppnK

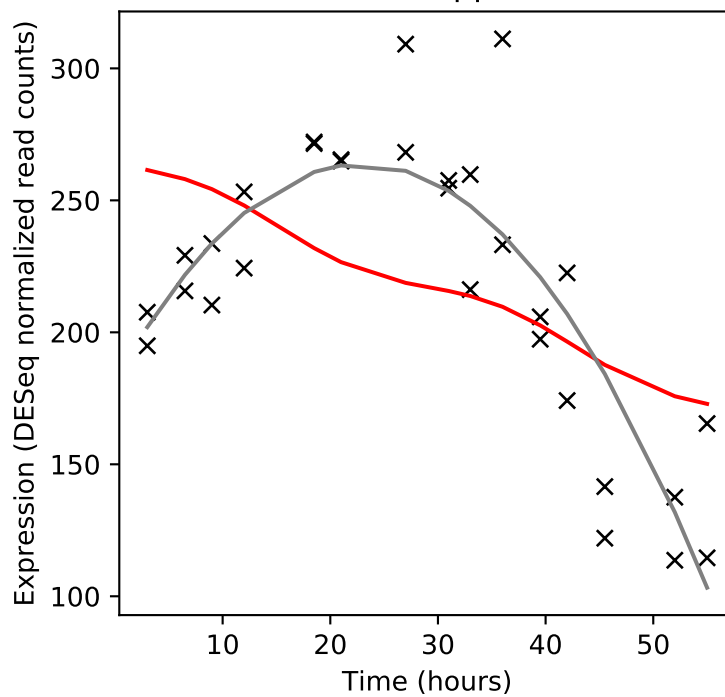

Rv1696/recN

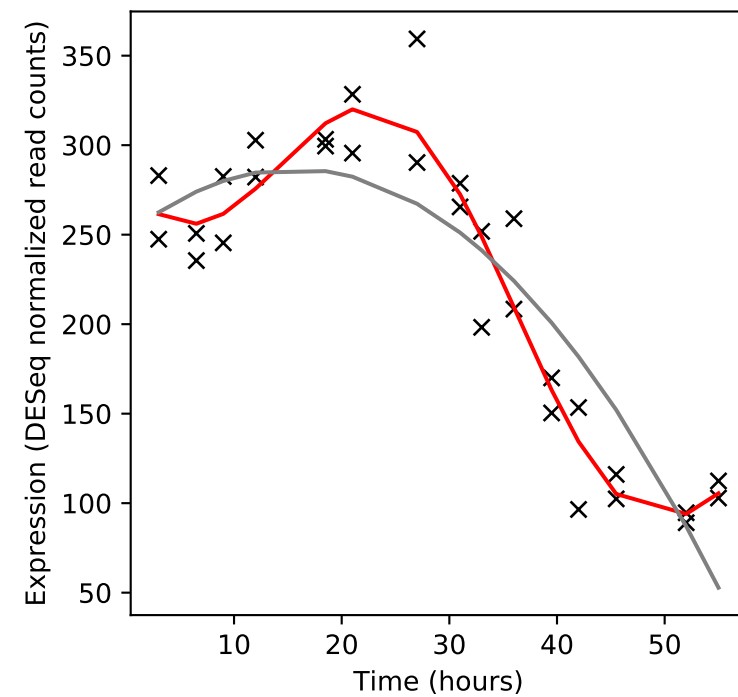

Rv1697/-

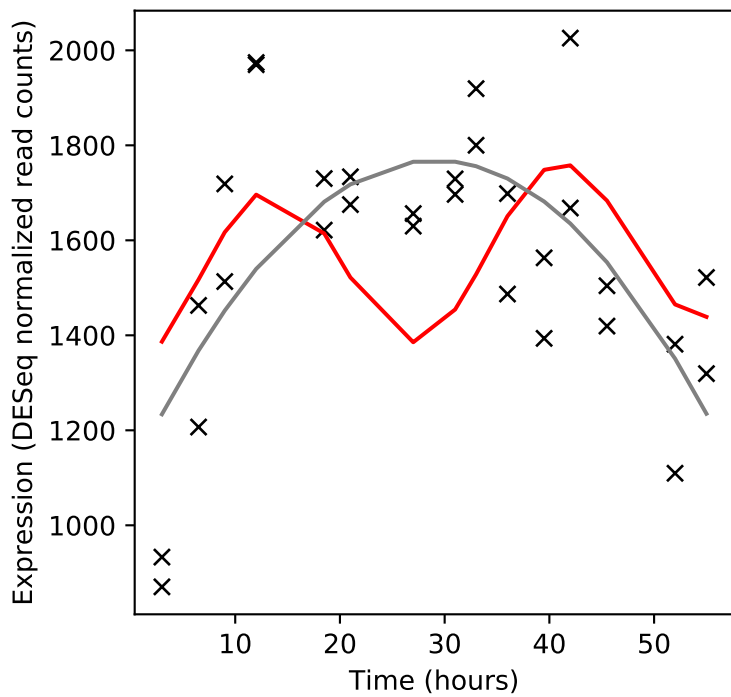

Rv1698/mctB

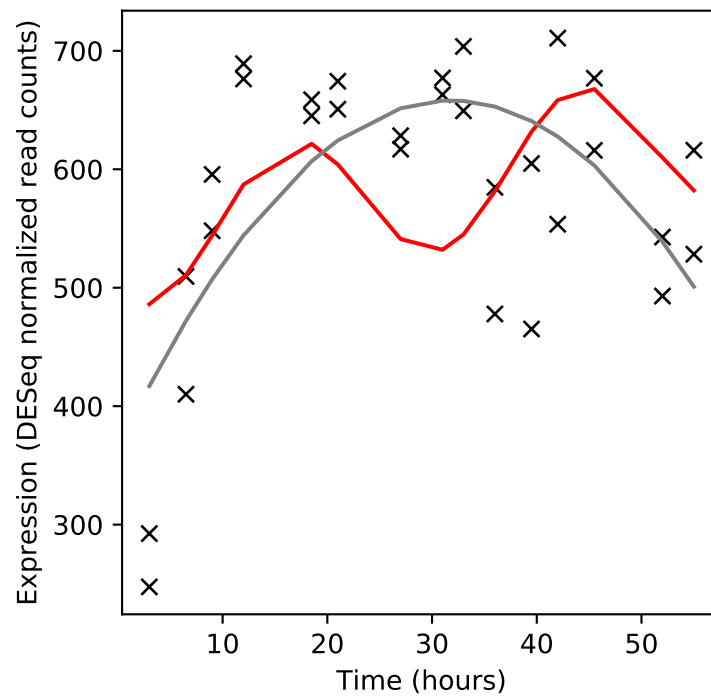

Rv1699/pyrG

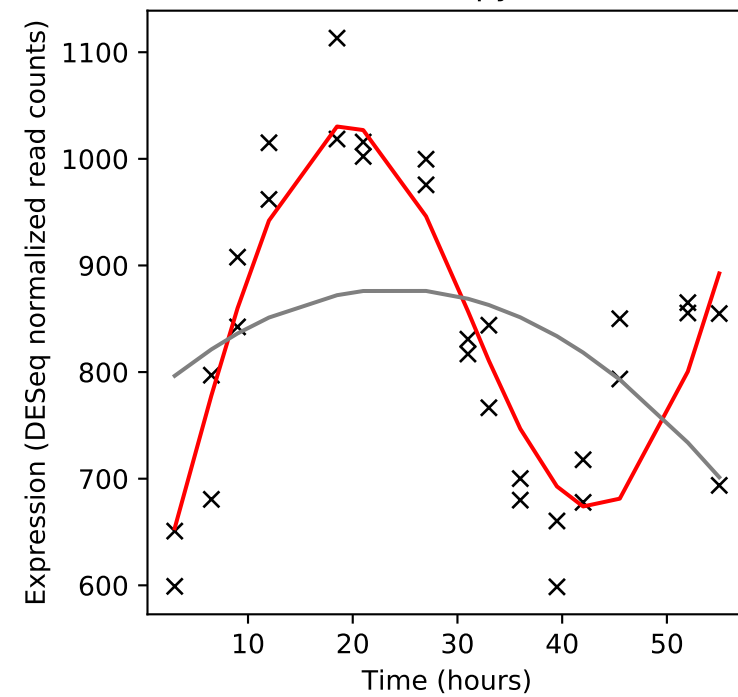

Rv1700/-

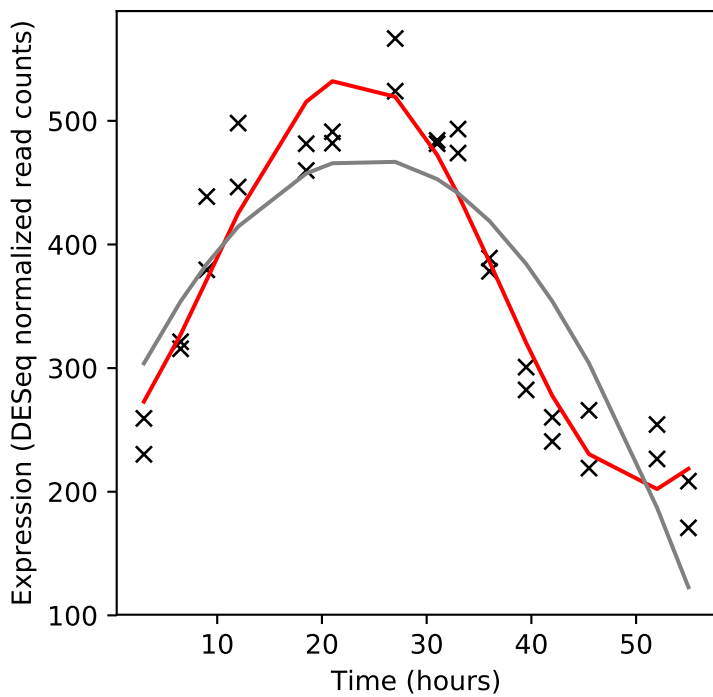

Rv1701/-

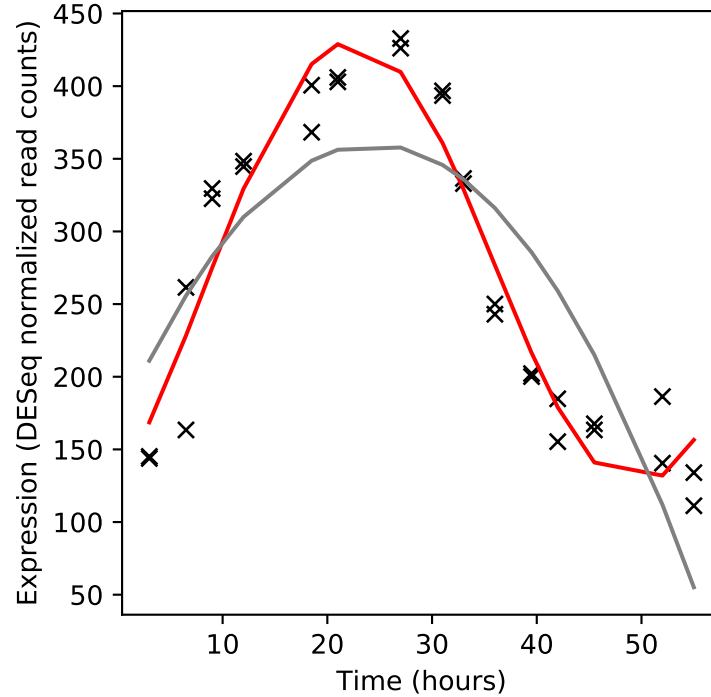

Rv1702c/-

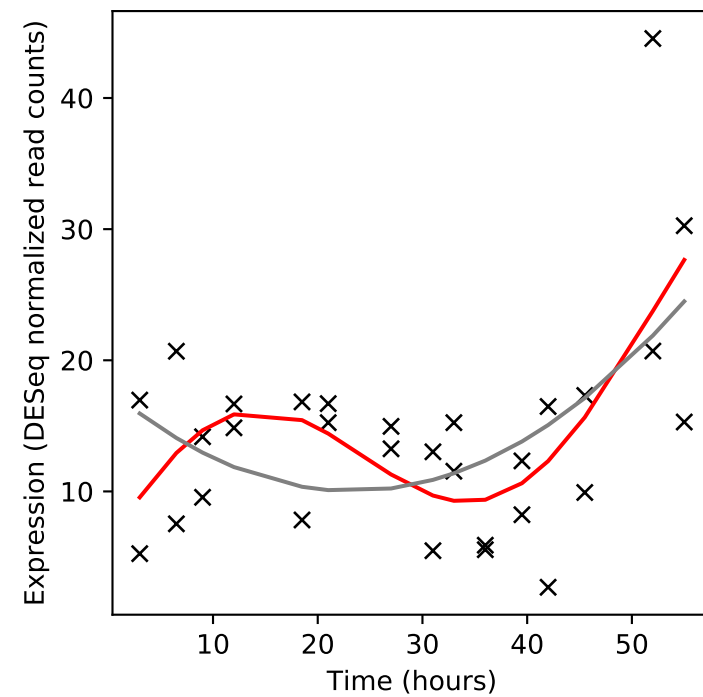

Rv1703c/-

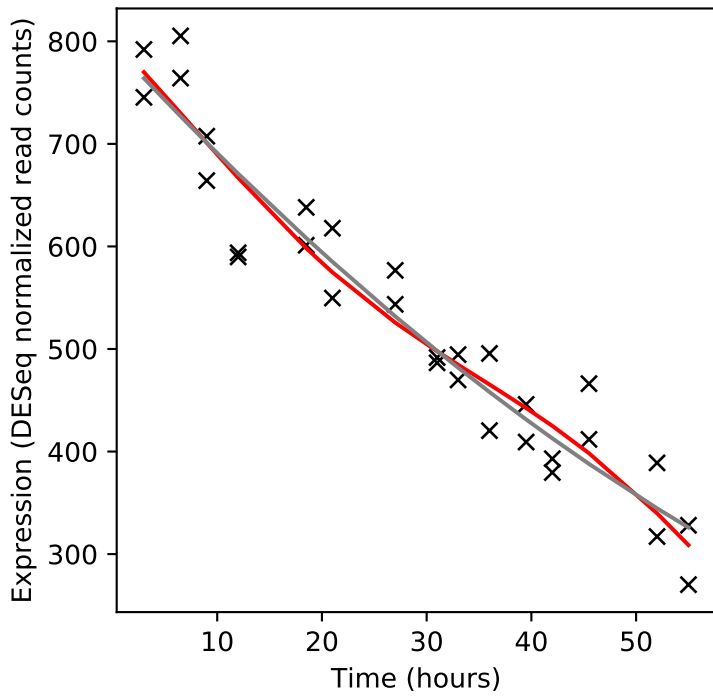

Rv1704c/cycA

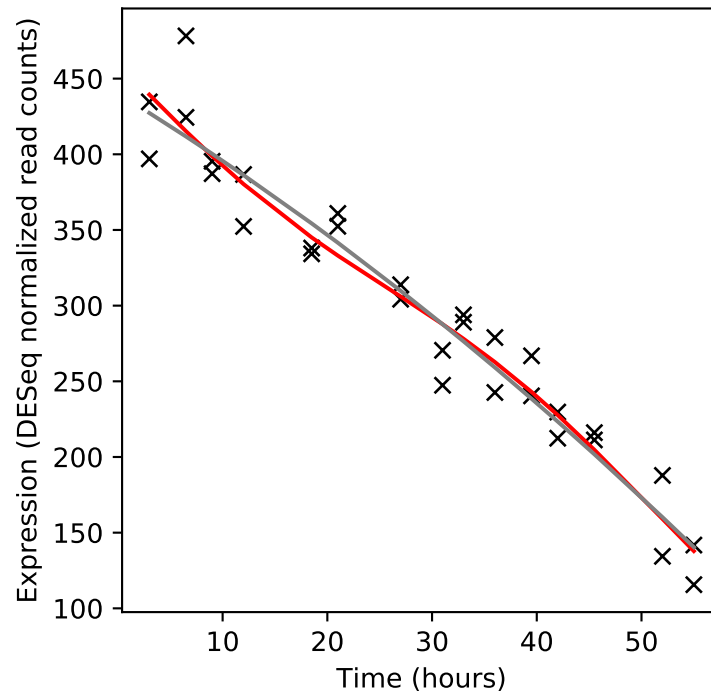

Rv1705c/PPE22

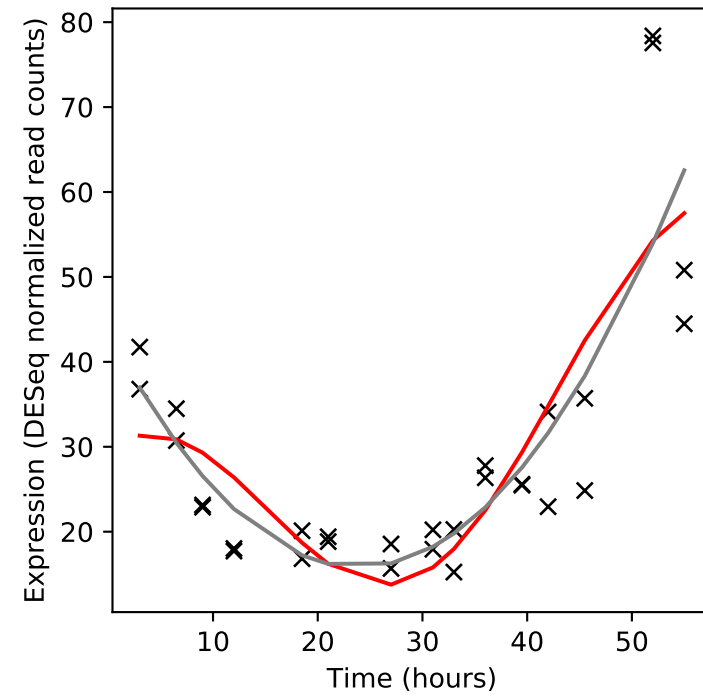

Rv1706c/PPE23

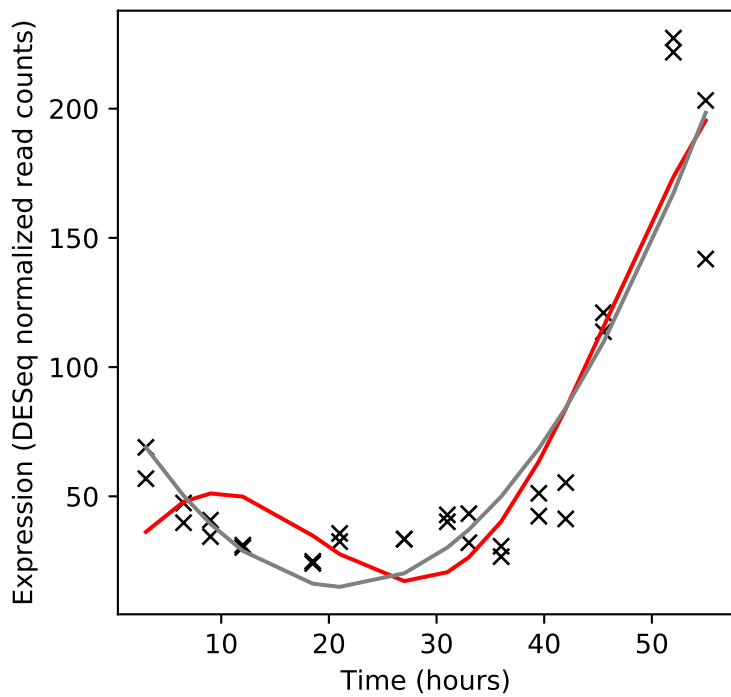

Rv1706A/-

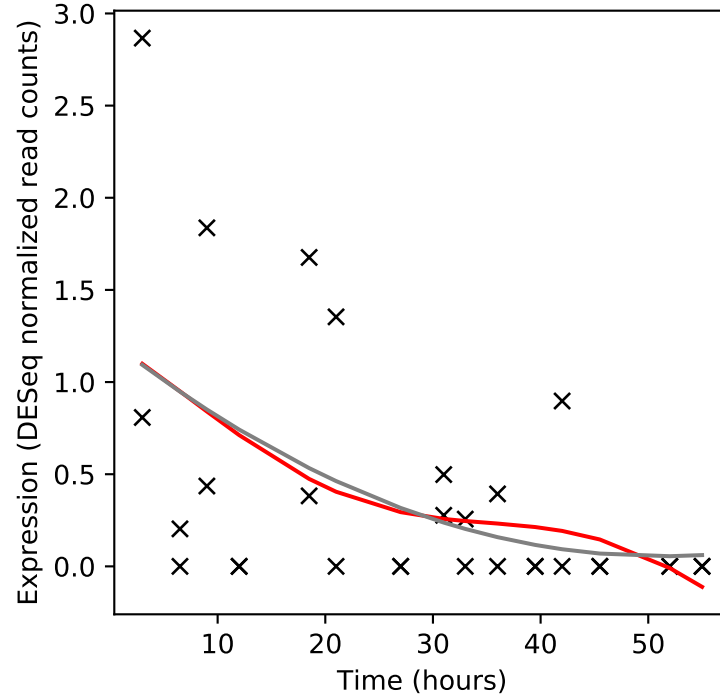

Rv1707/-

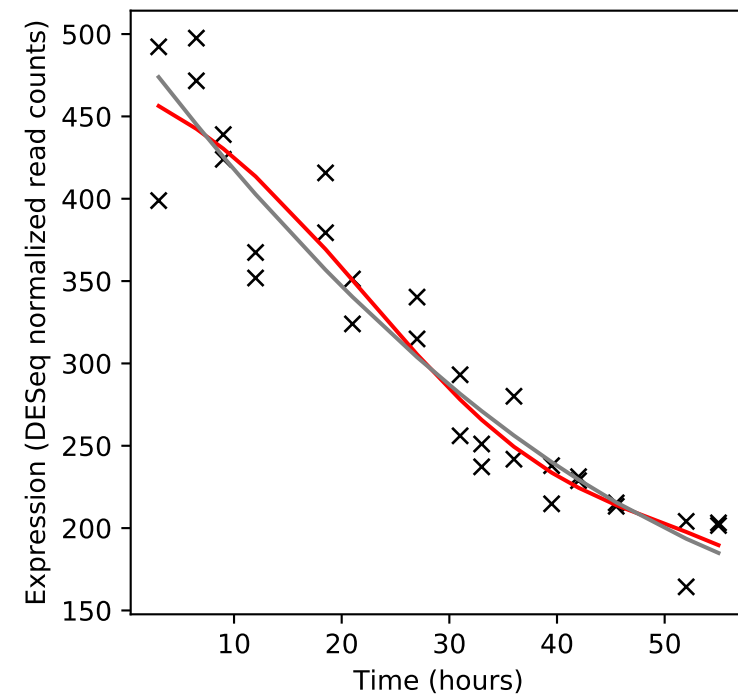

Rv1708/-

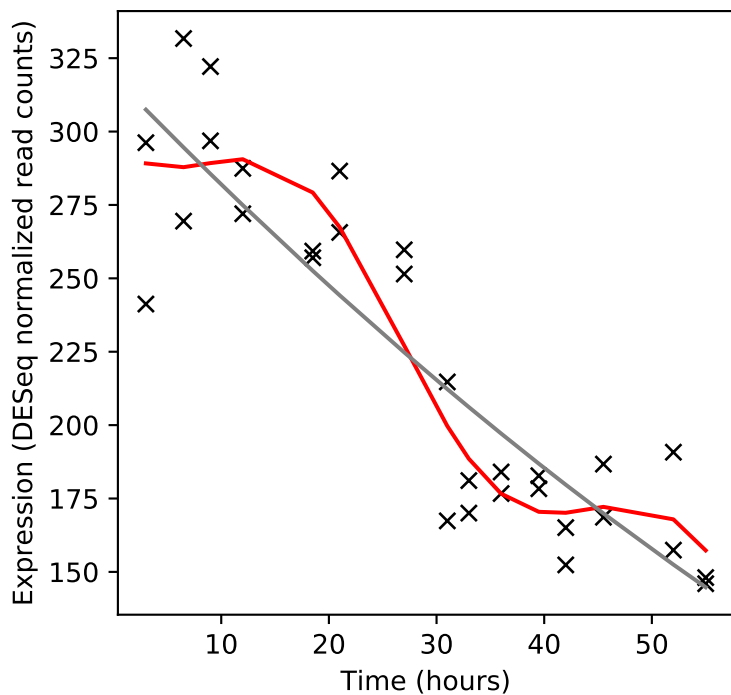

Rv1709/scpA

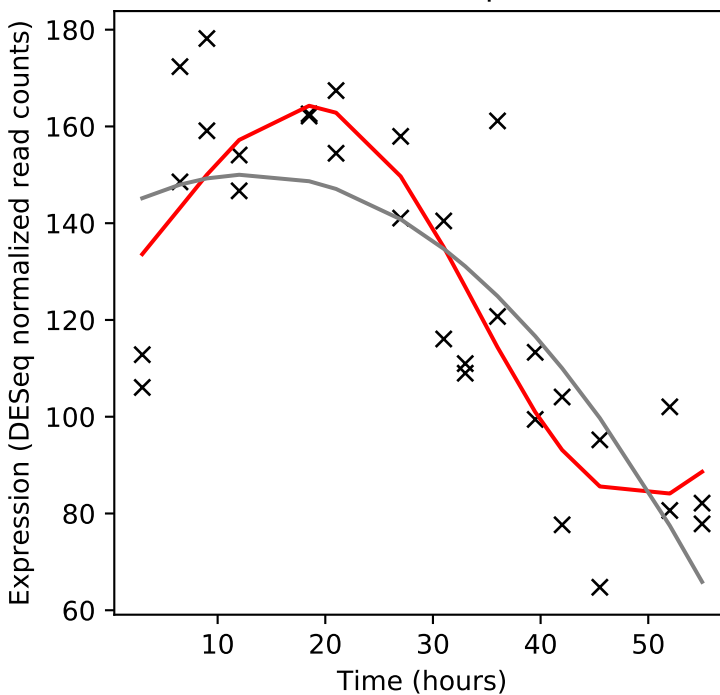

Rv1710/scpB

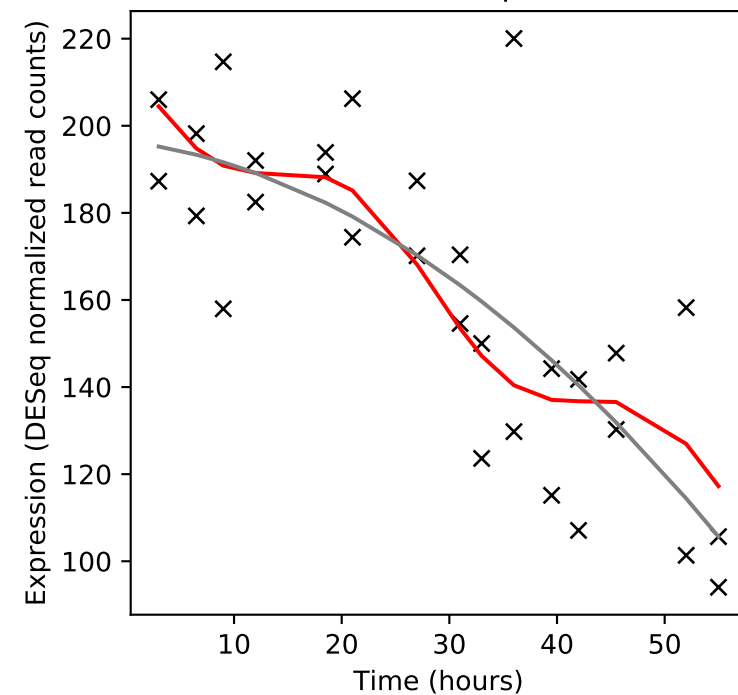

Rv1711/-

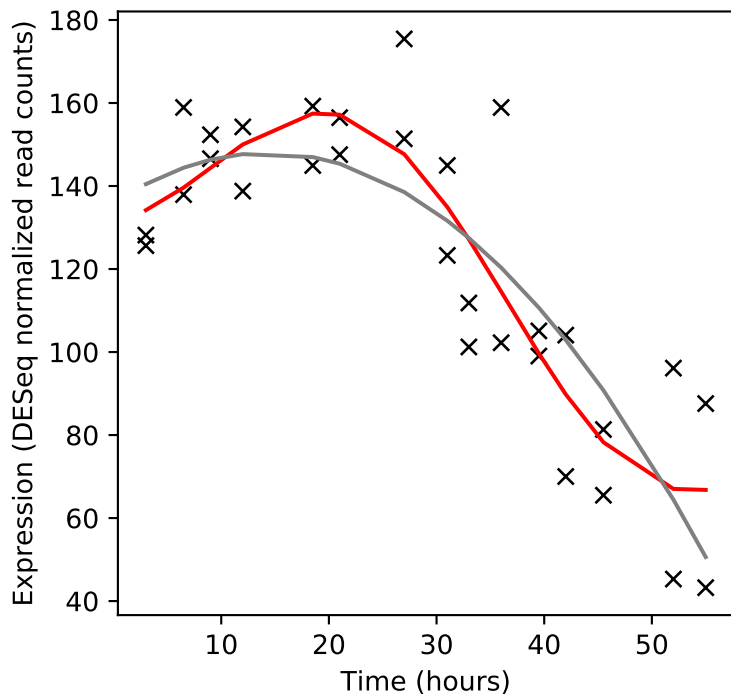

Rv1712/cmK

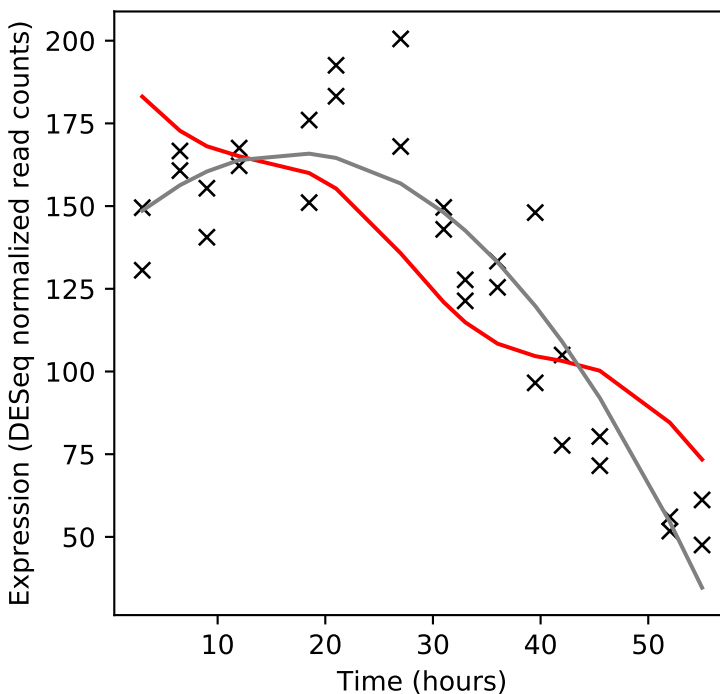

Rv1713/engA

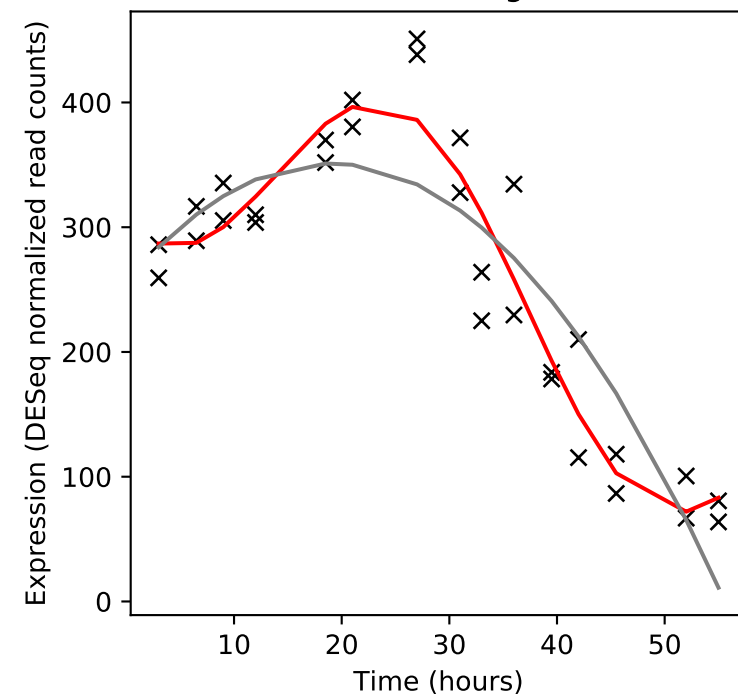

Rv1714/-

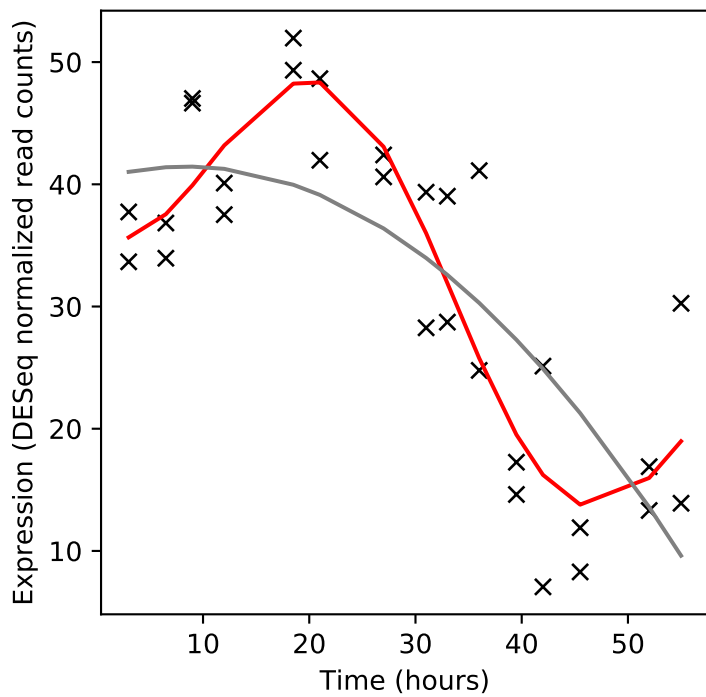

Rv1715/fadB3

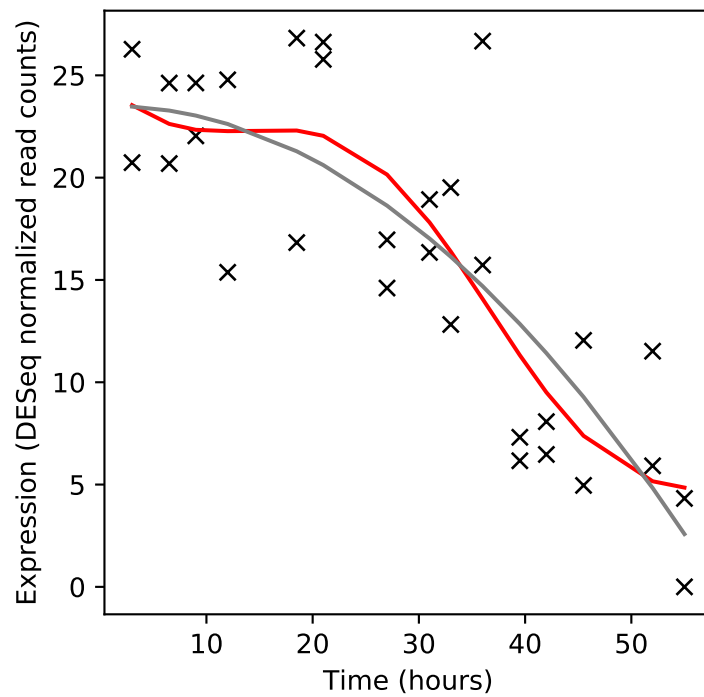

Rv1716/-

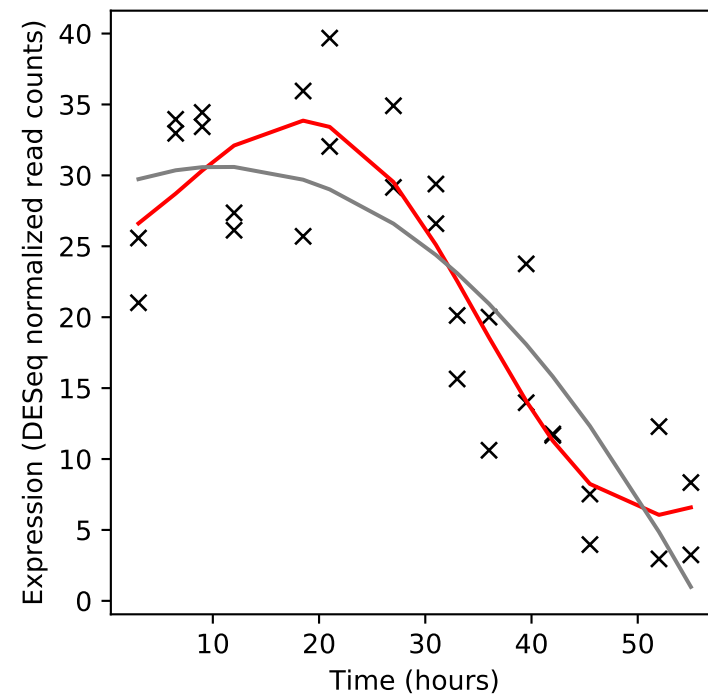

Rv1717/-

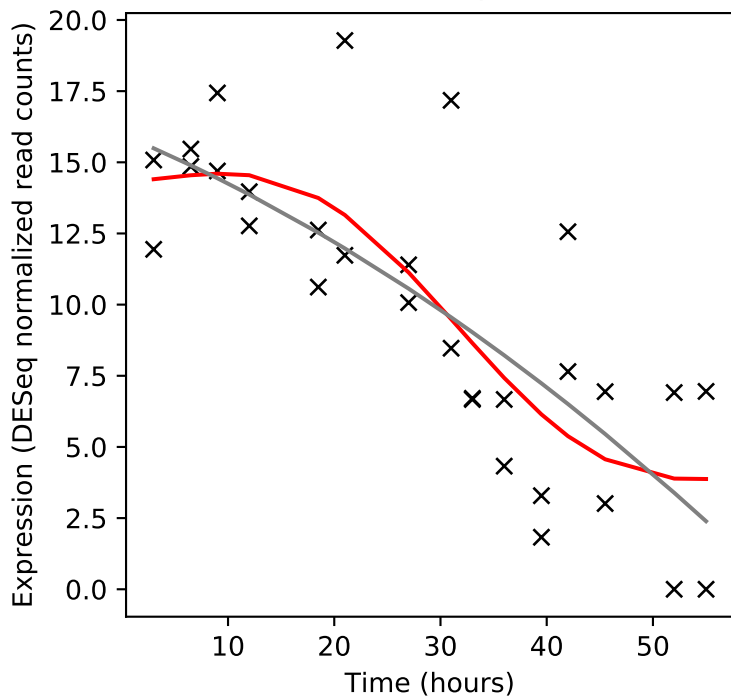

Rv1718/-

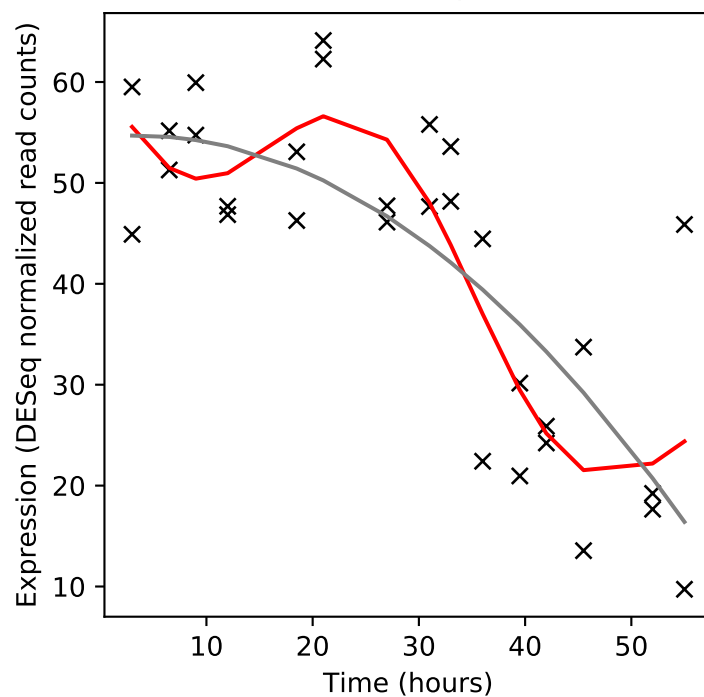

Rv1719/-

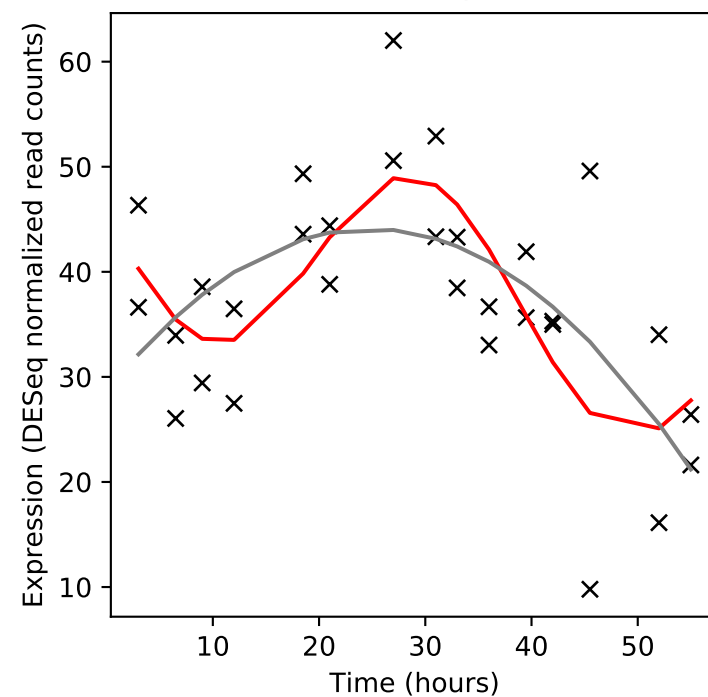

Rv1720c/vapC12

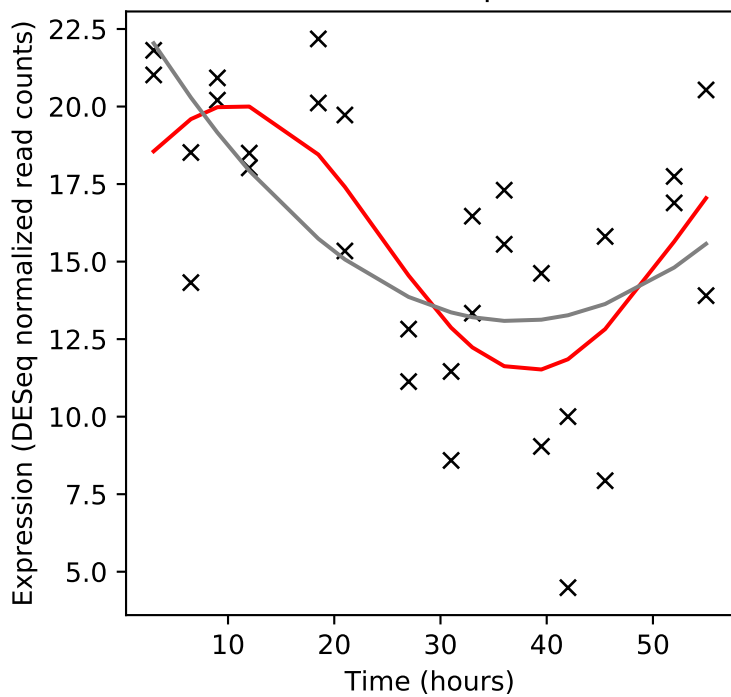

Rv1721c/vapB12

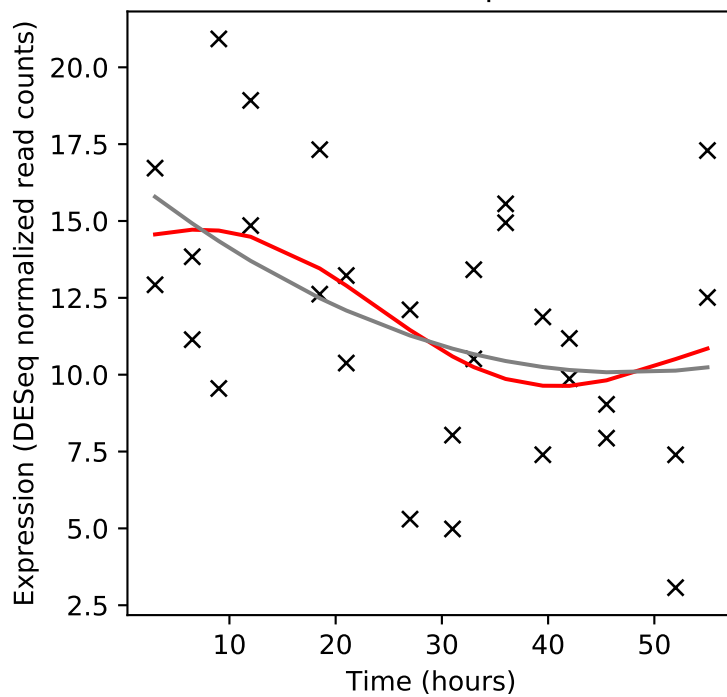

Rv1722/-

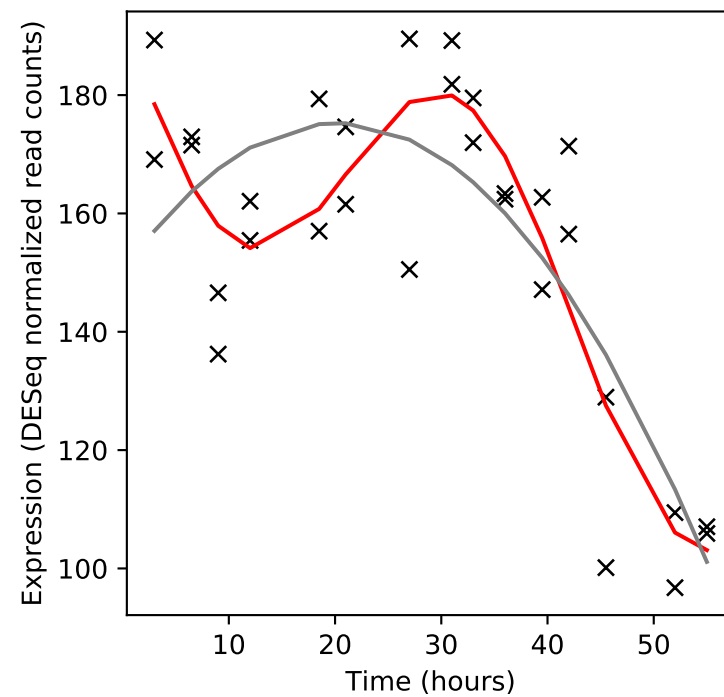

Rv1723/-

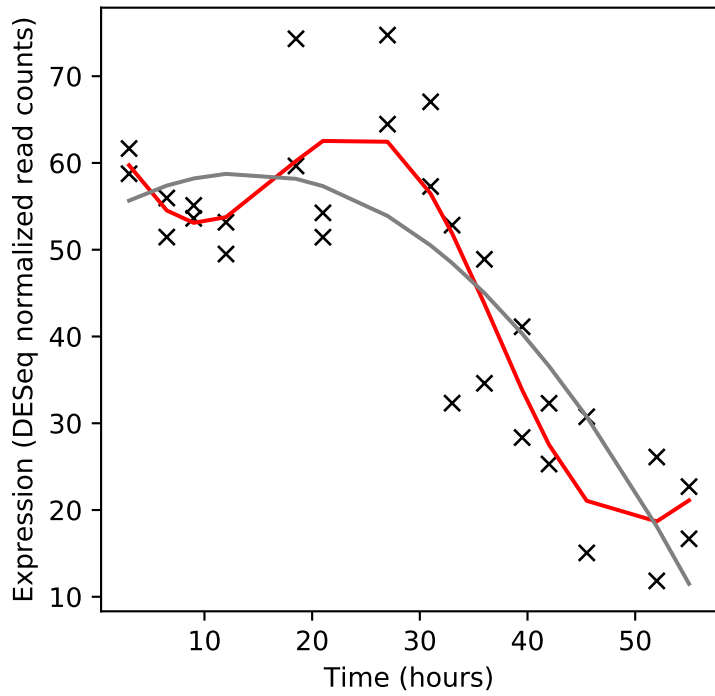

Rv1724c/-

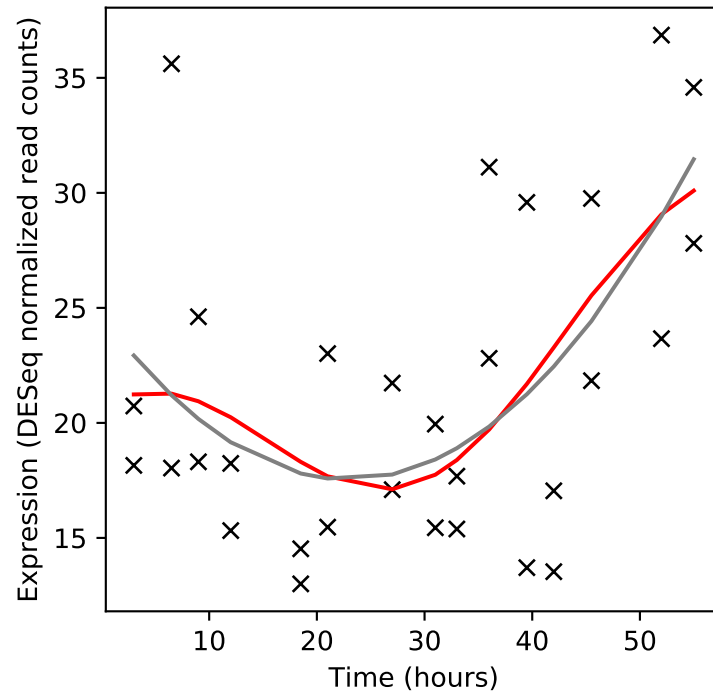

Rv1725c/-

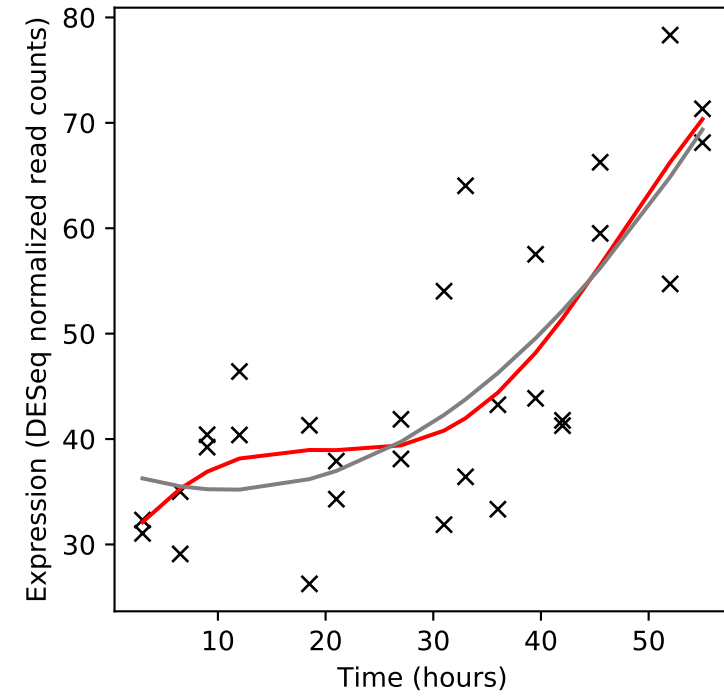

Rv1726/-

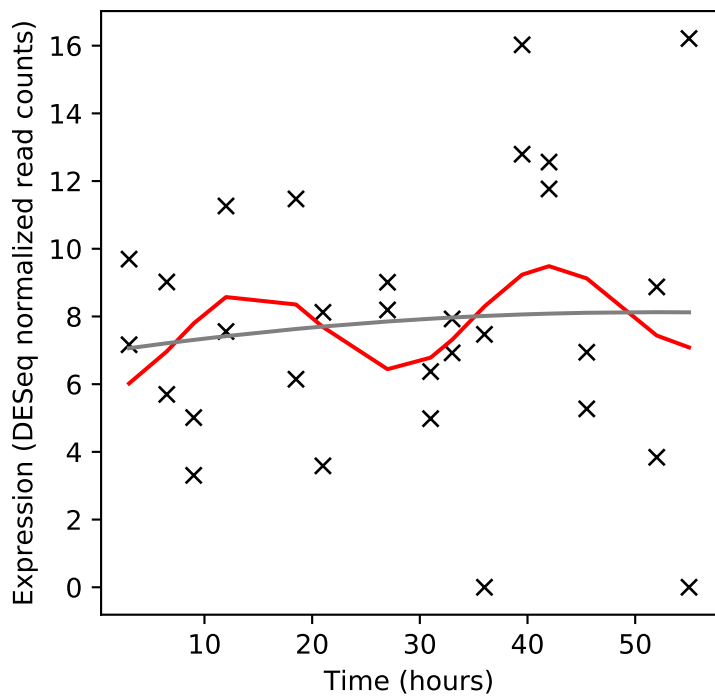

Rv1727/-

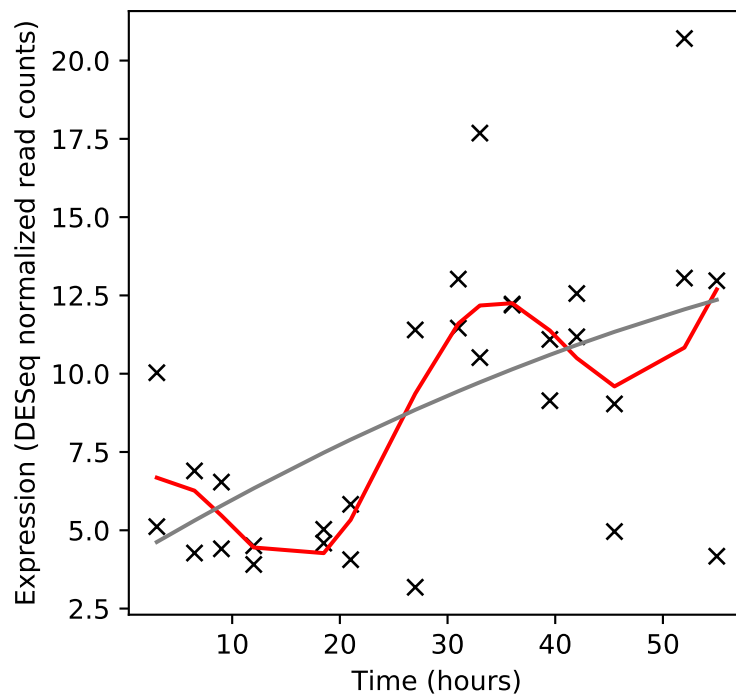

Rv1728c/-

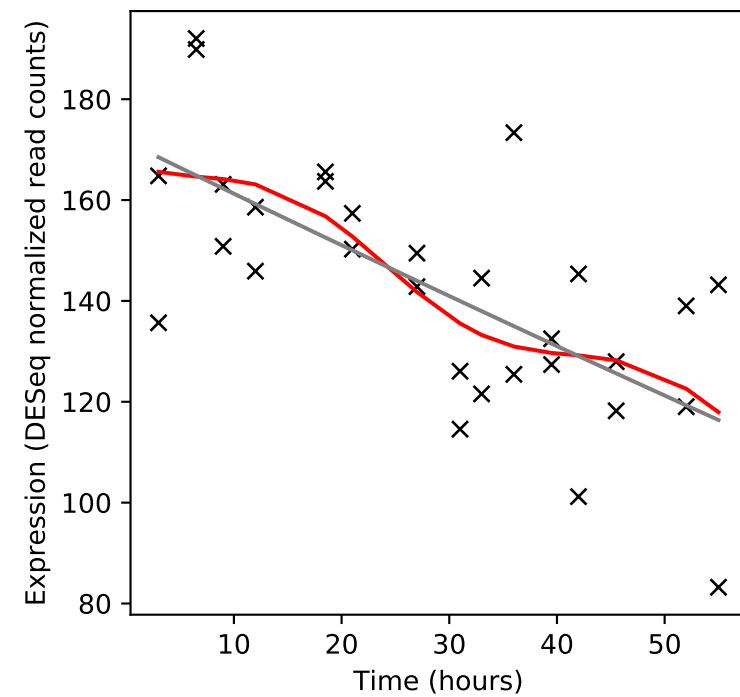

Rv1729c/-

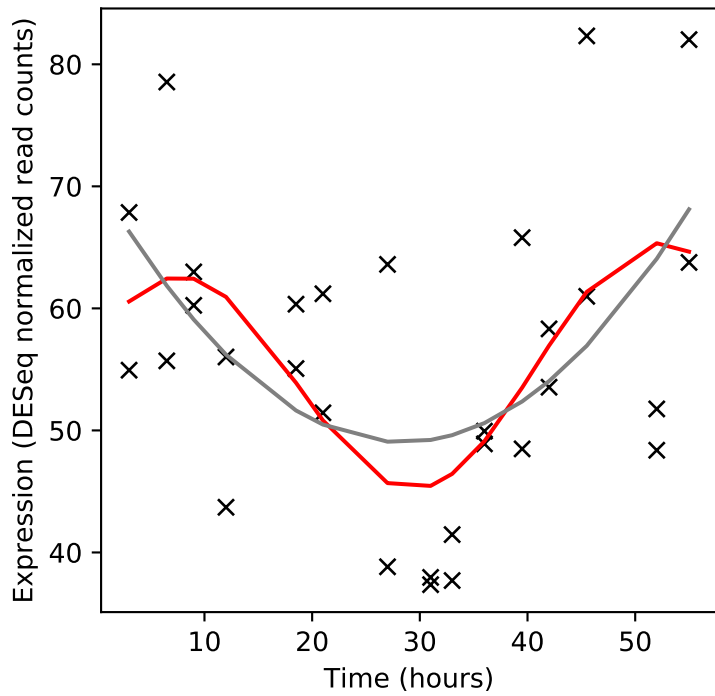

Rv1730c/-

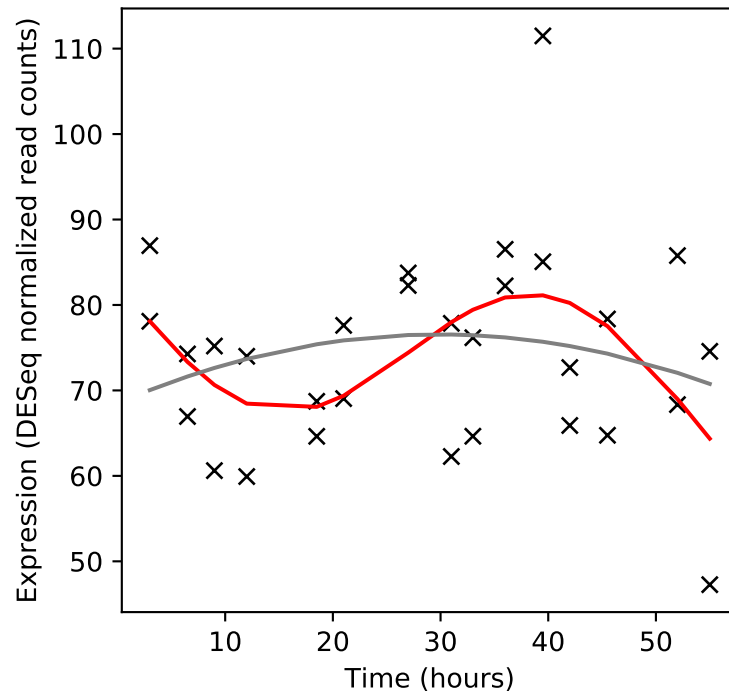

Rv1731/gabD2

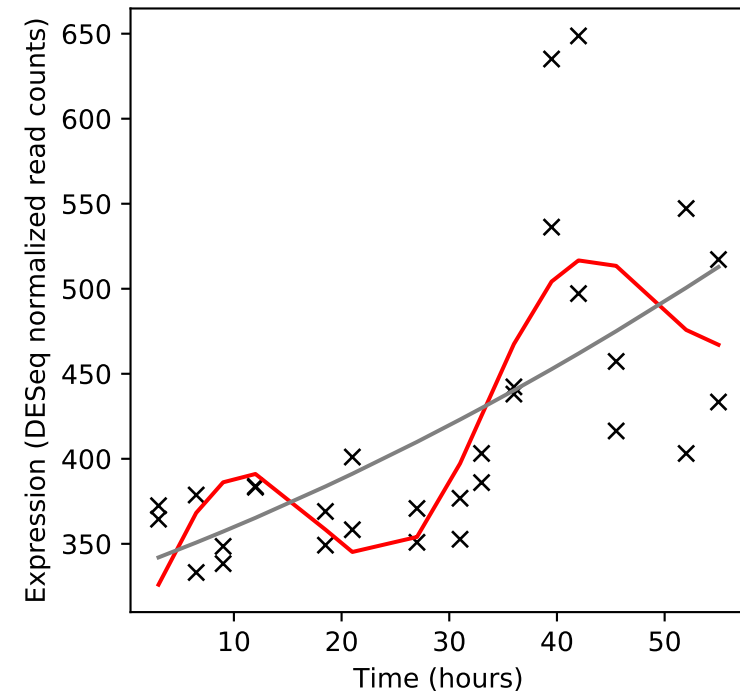

Rv1732c/-

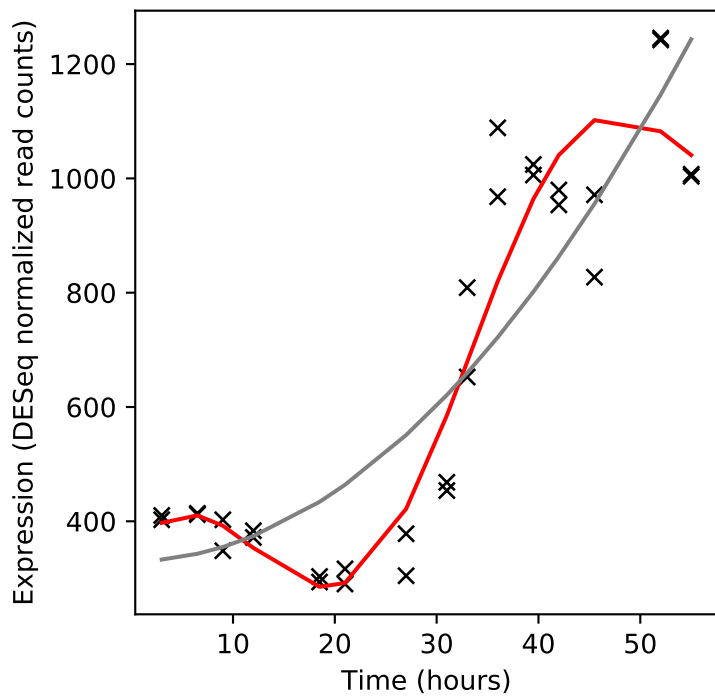

Rv1733c/-

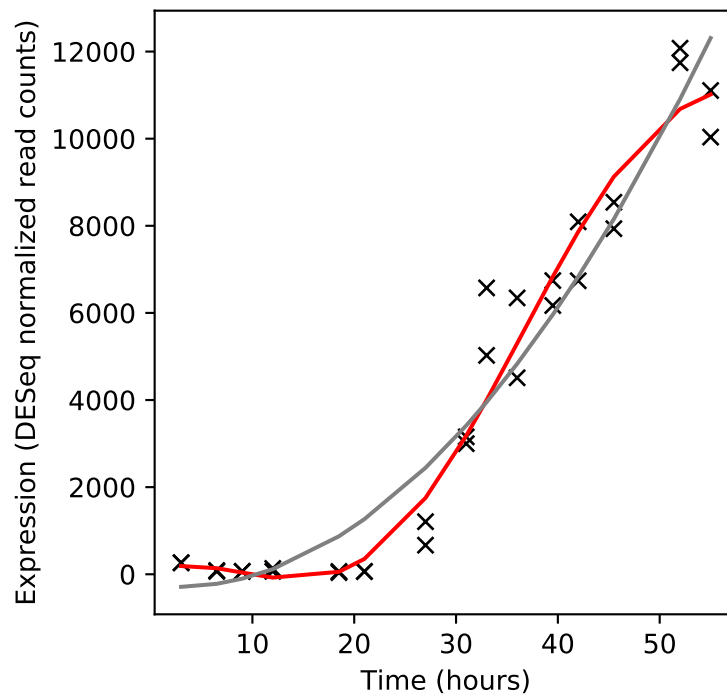

Rv1734c/-

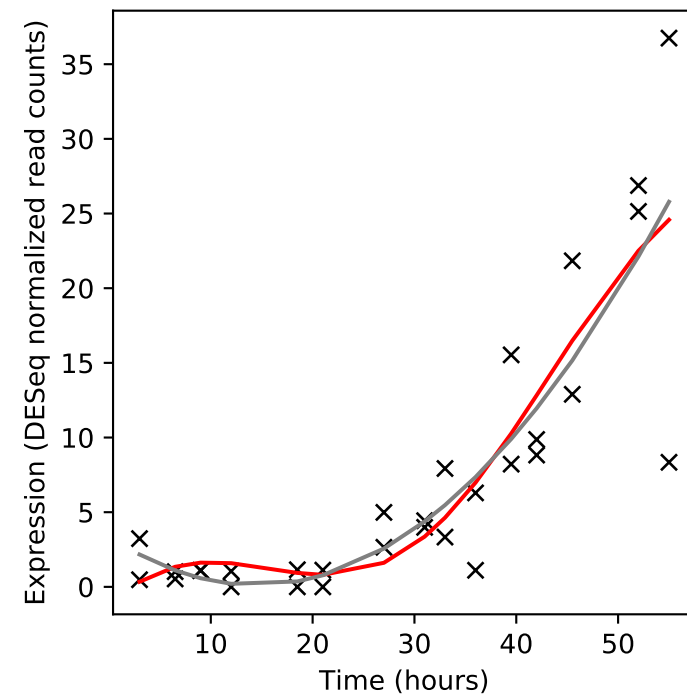

Rv1735c/-

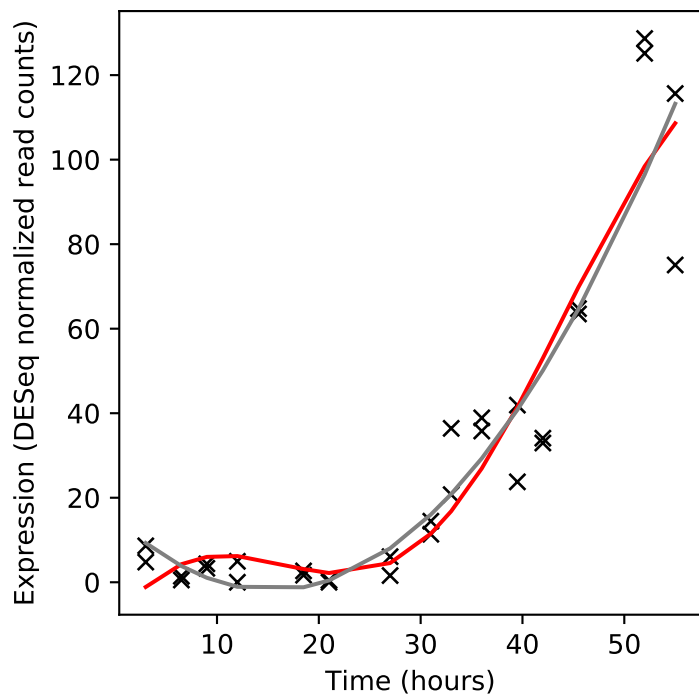

Rv1736c/narX

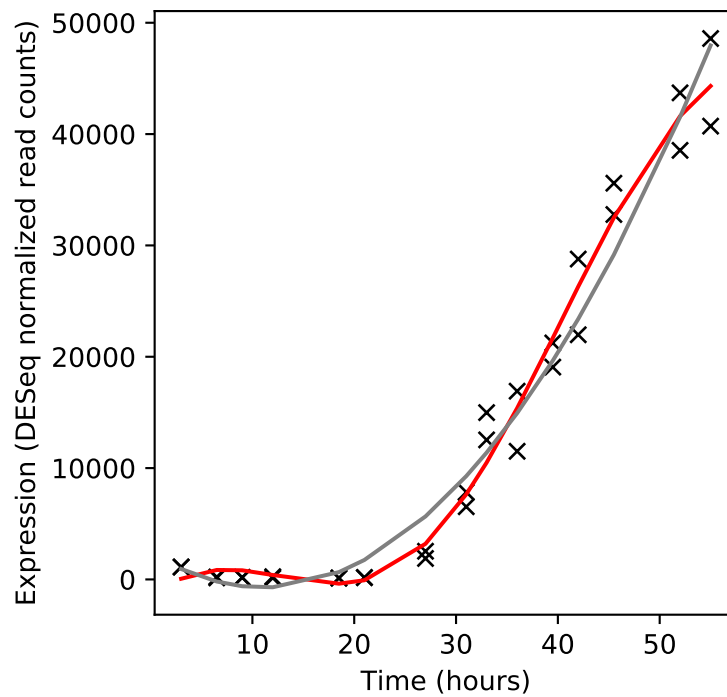

Rv1737c/narK2

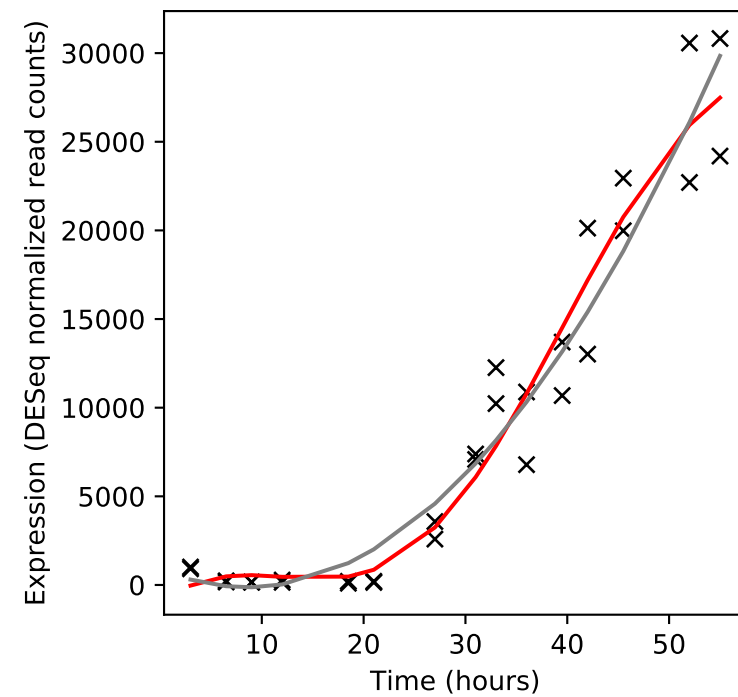

Rv1738/-

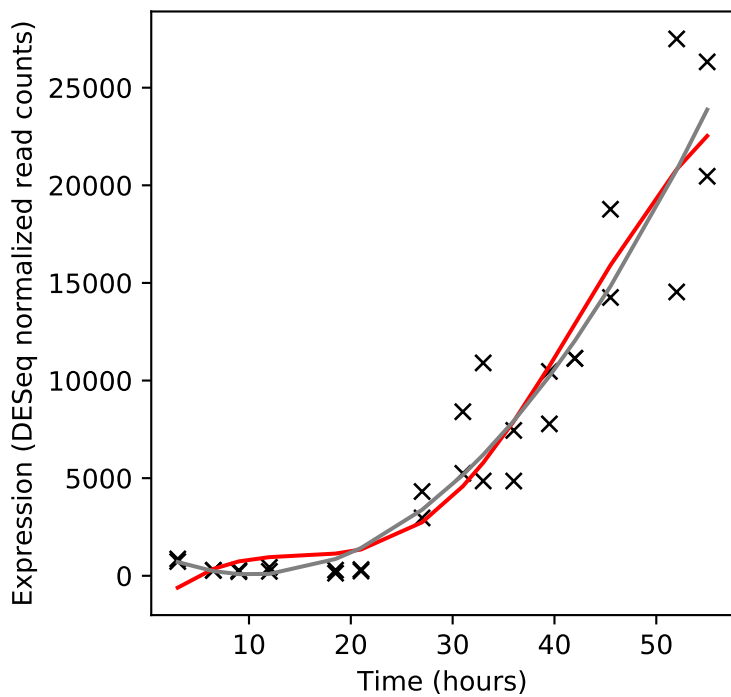

Rv1739c/-

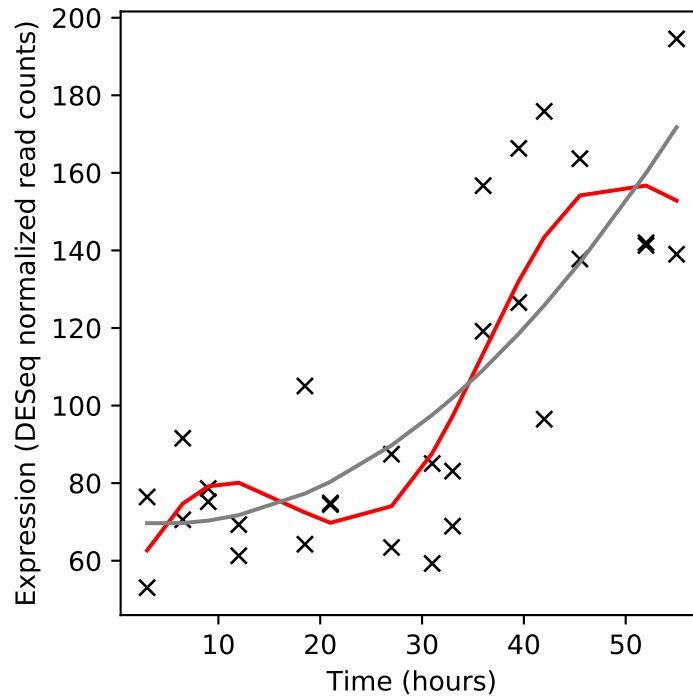

Rv1740/vapB34

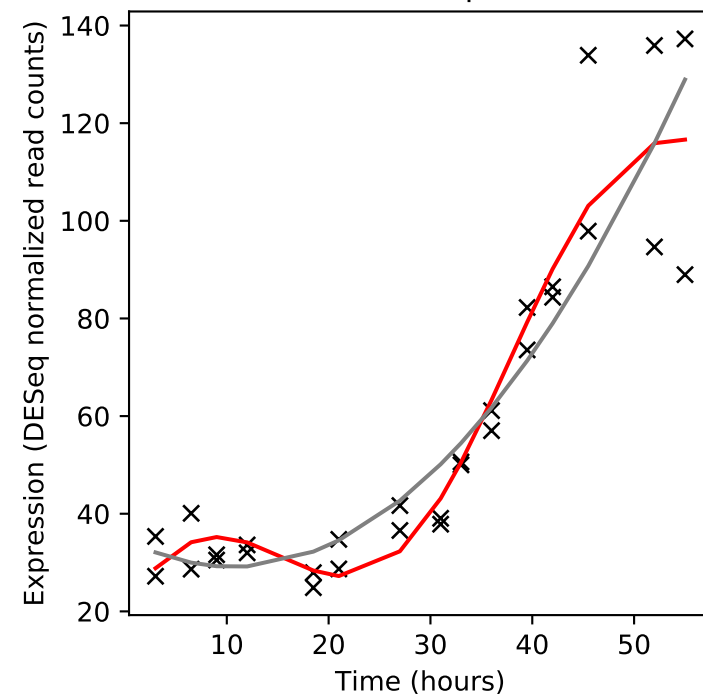



Rv1741/vapC34

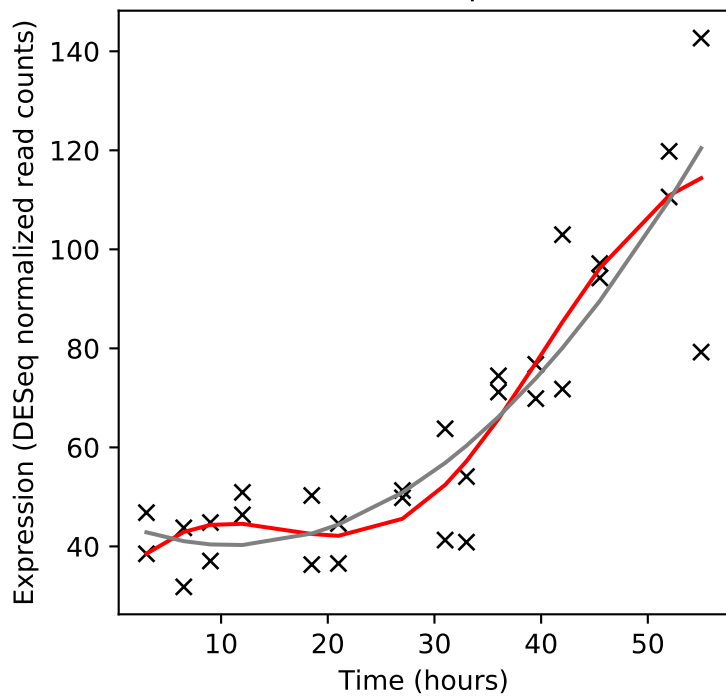

Rv1742/-

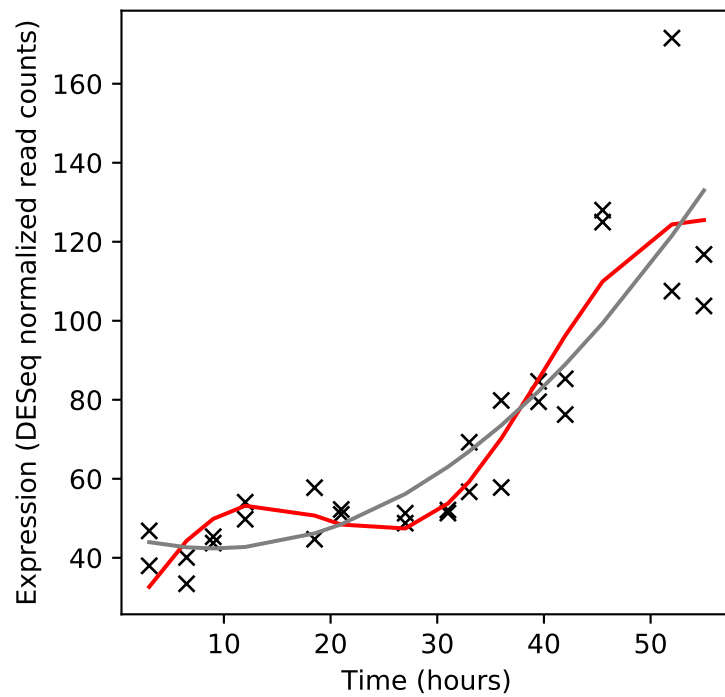

Rv1743/pknE

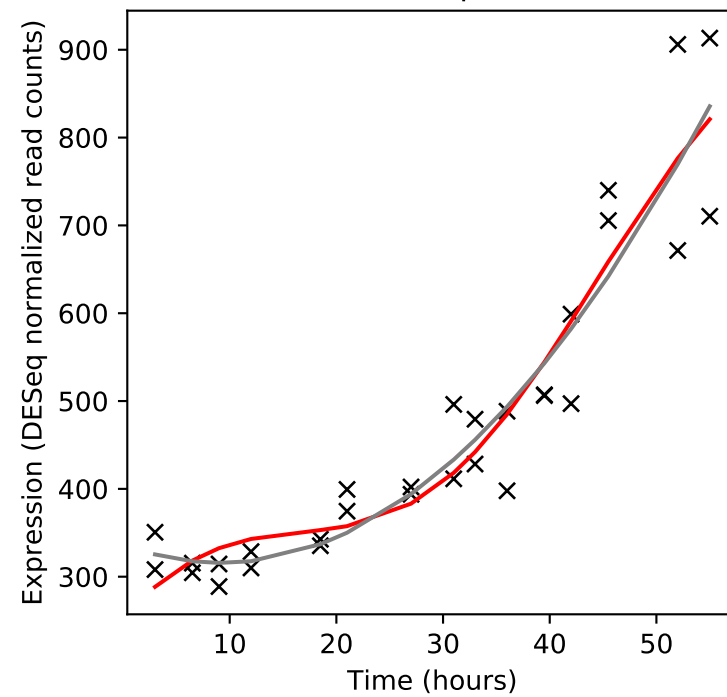

Rv1744c/-

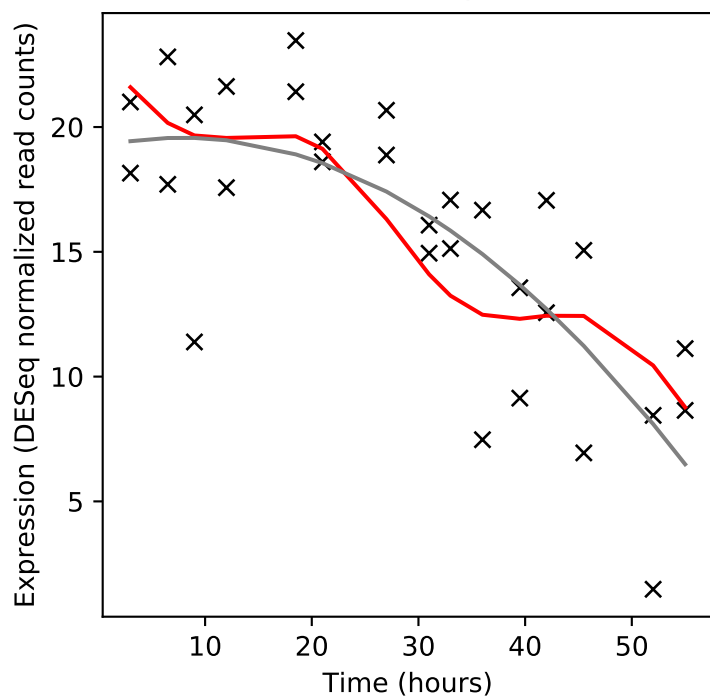

Rv1745c/idi

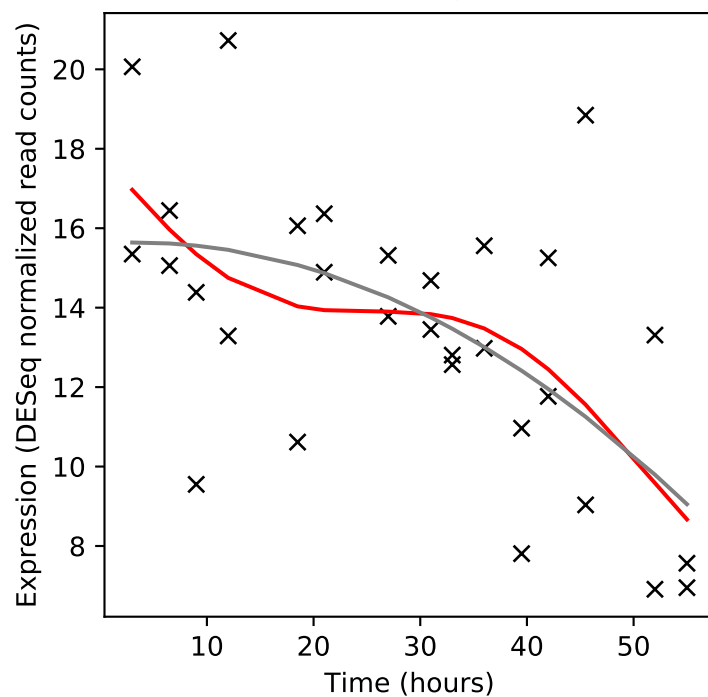

Rv1746/pknF

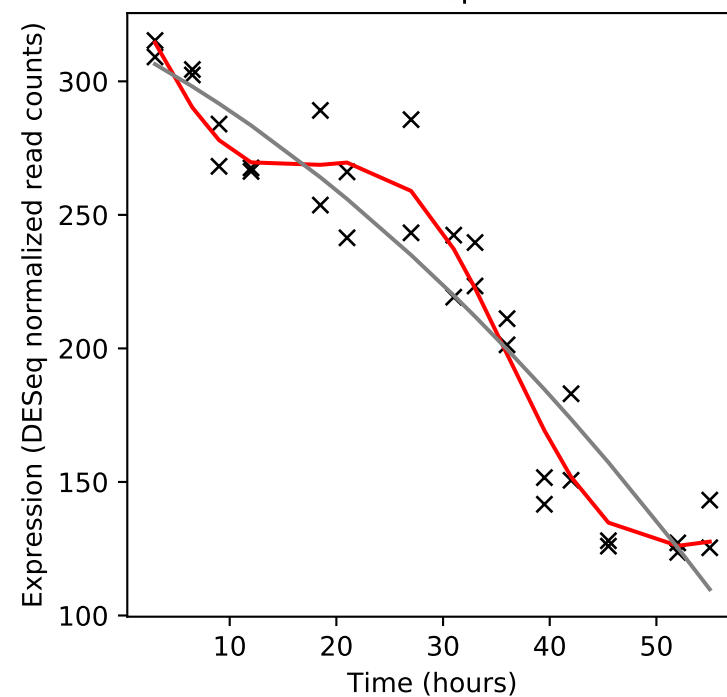

Rv1747/-

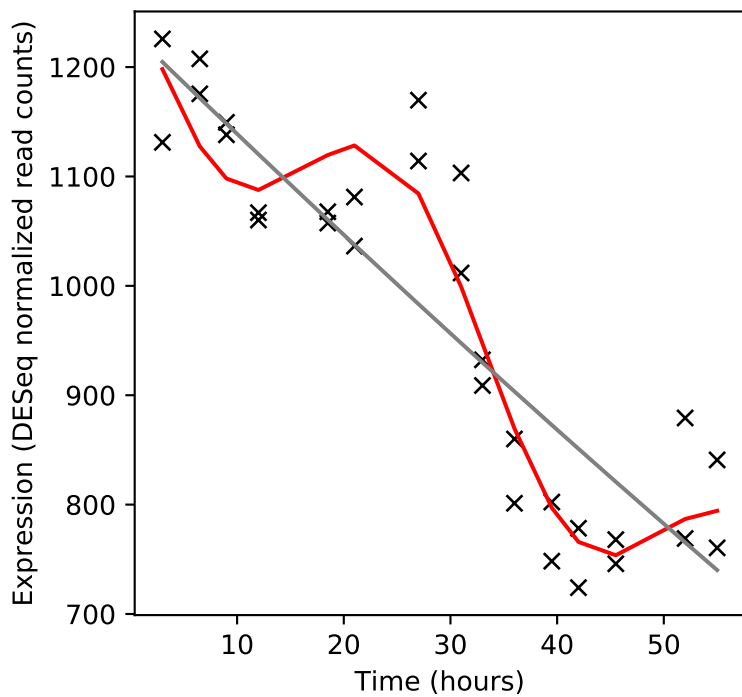

Rv1748/-

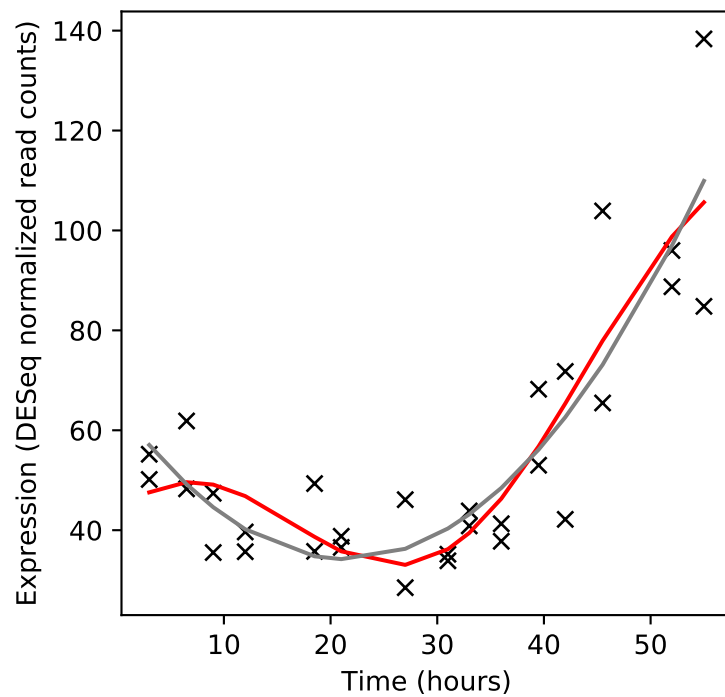

Rv1749c/-

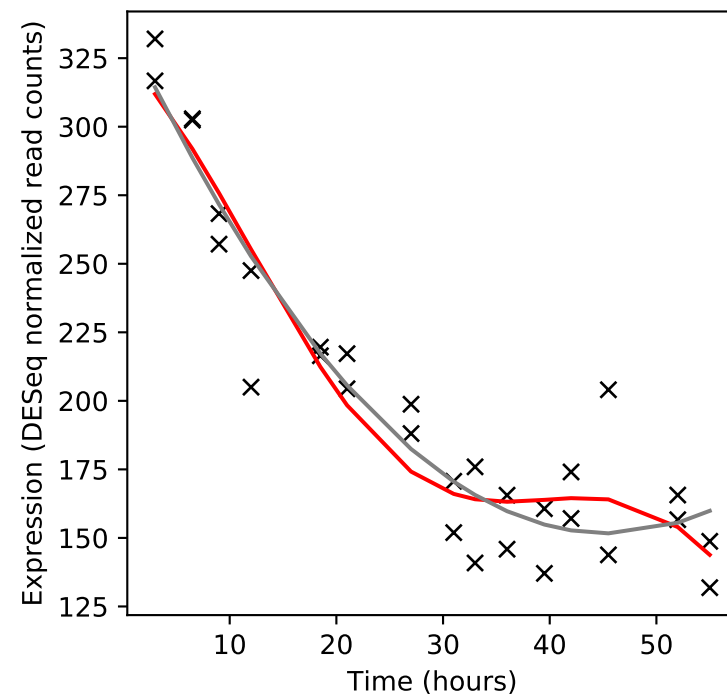

Rv1750c/fadD1

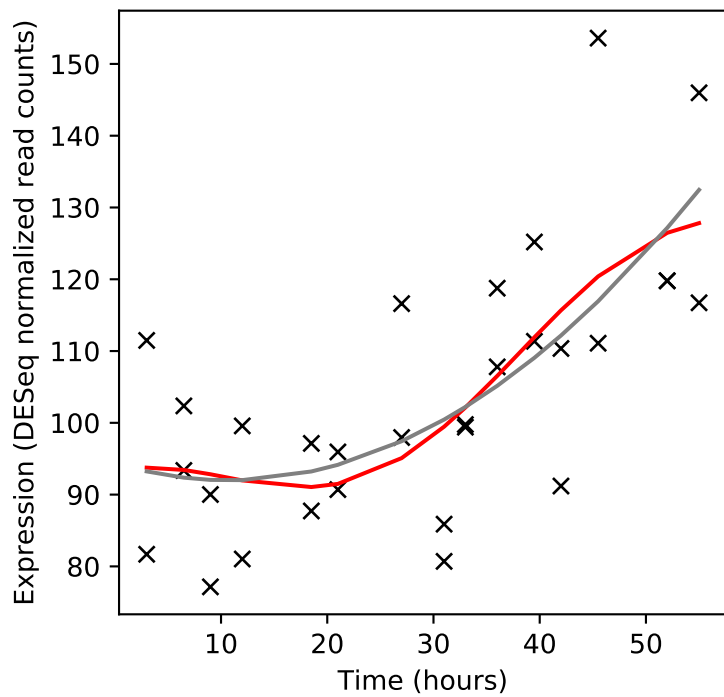

Rv1751/-

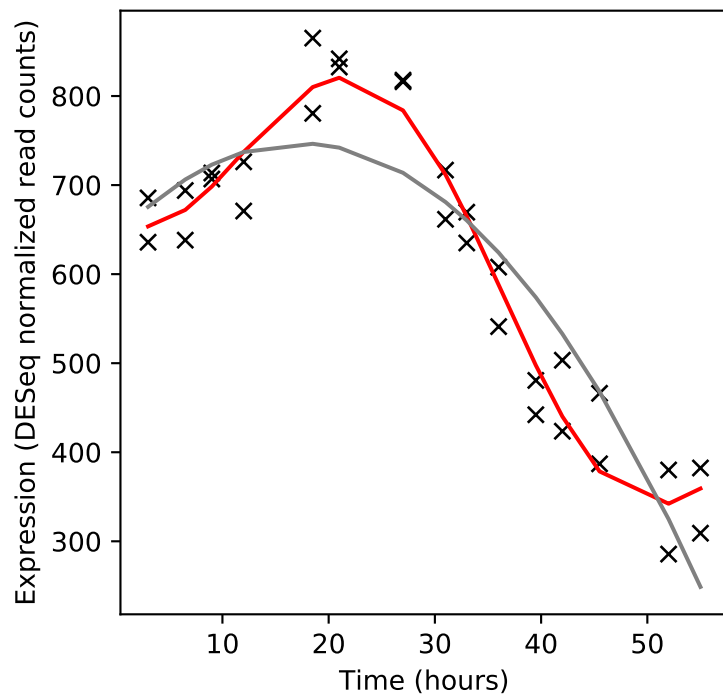

Rv1752/-

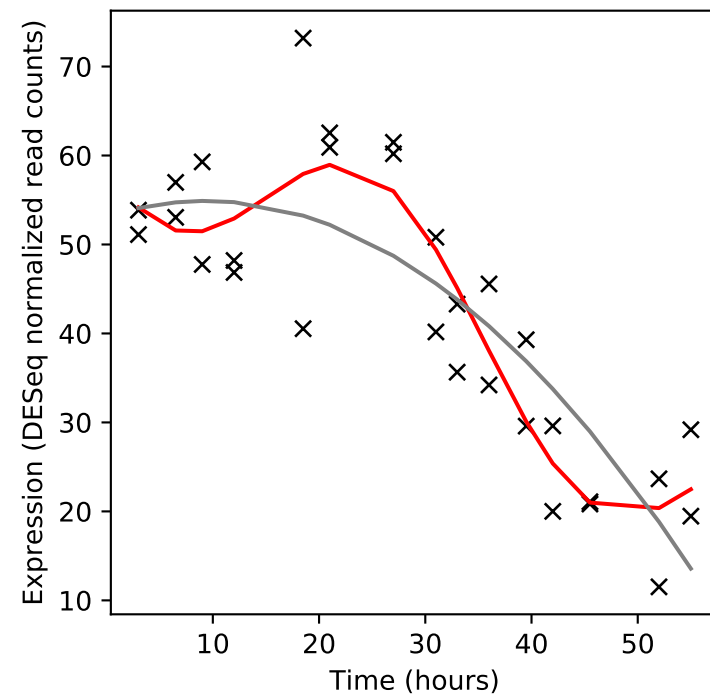

Rv1753c/PPE24

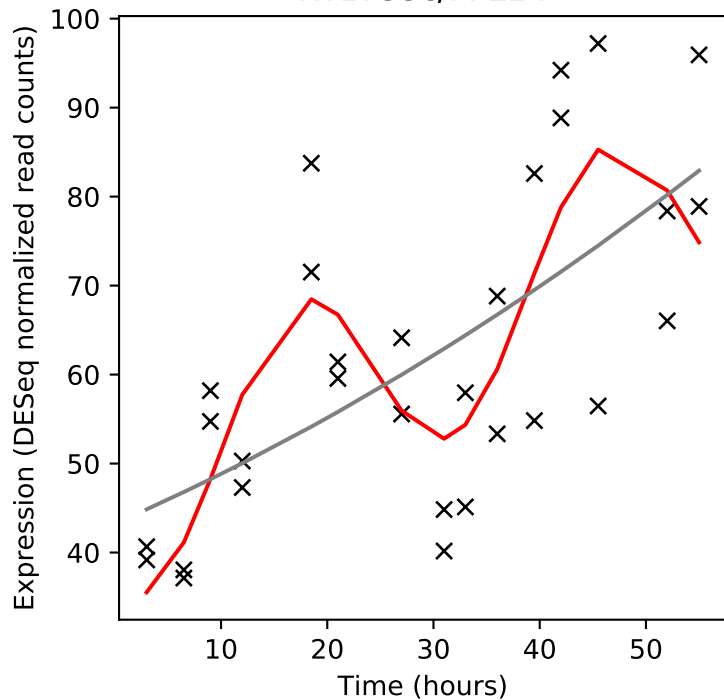

Rv1754c/-

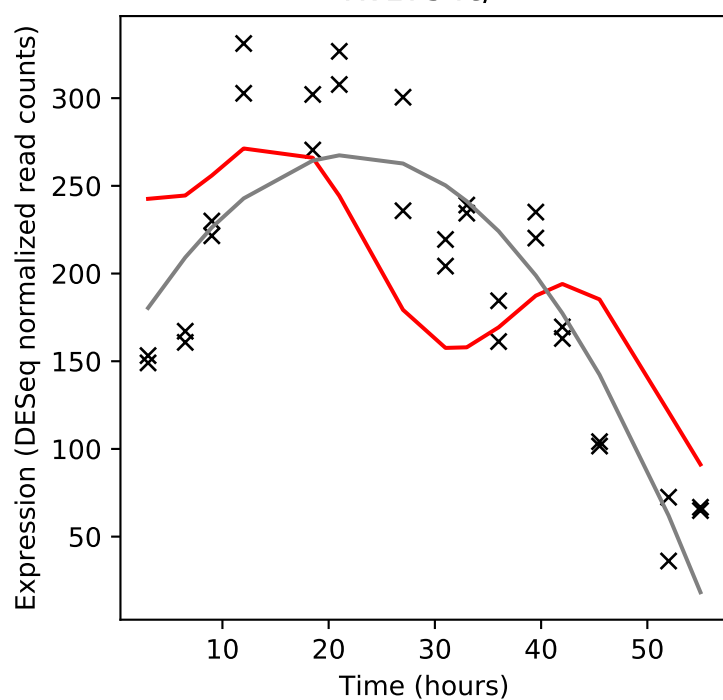

Rv1756c/-

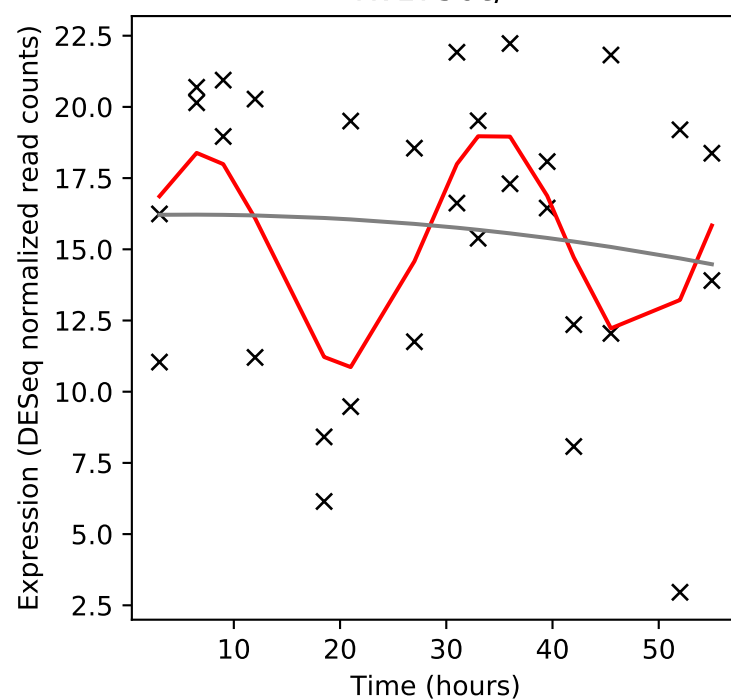

Rv1757c/-

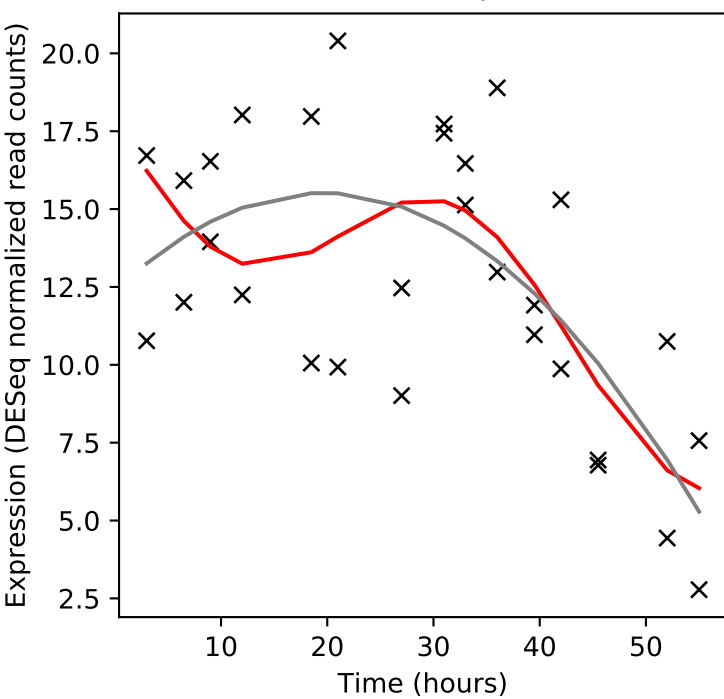

Rv1758/cut1

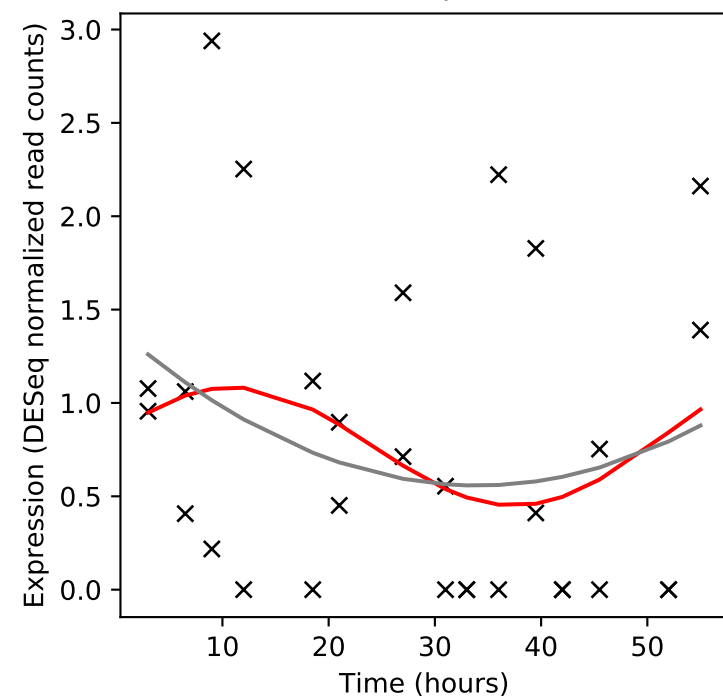

Rv1759c/wag22

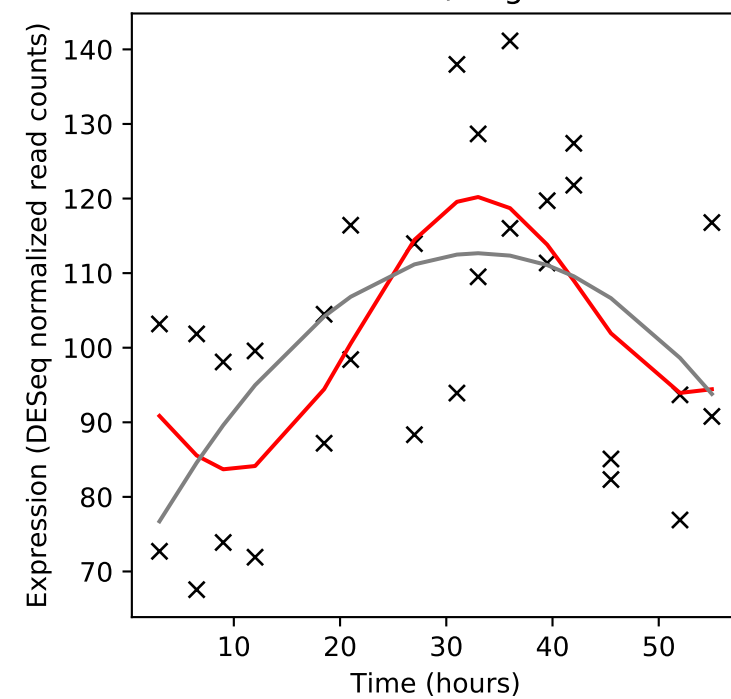

Rv1760/-

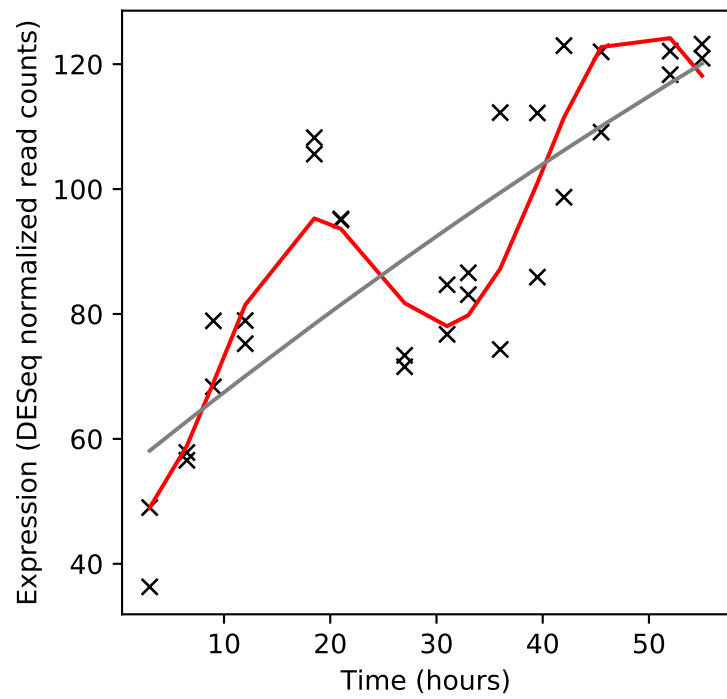

Rv1761c/-

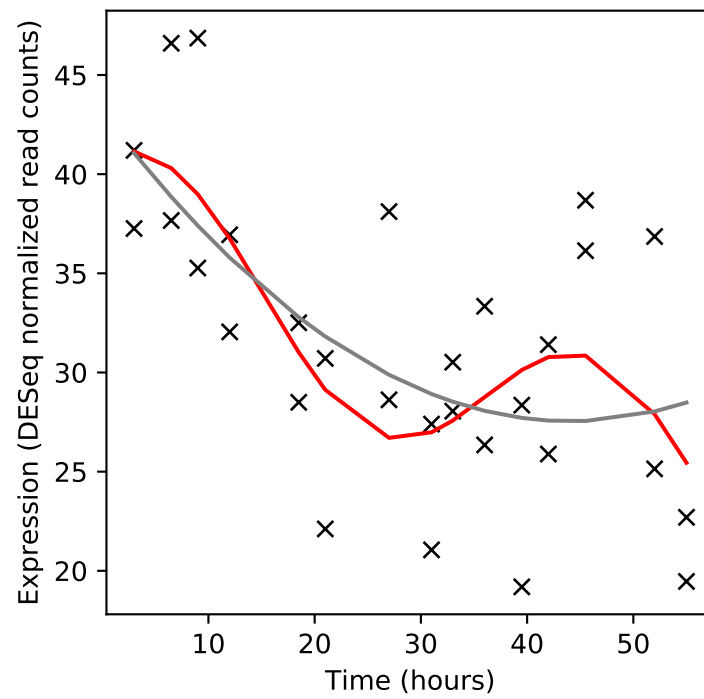

Rv1762c/-

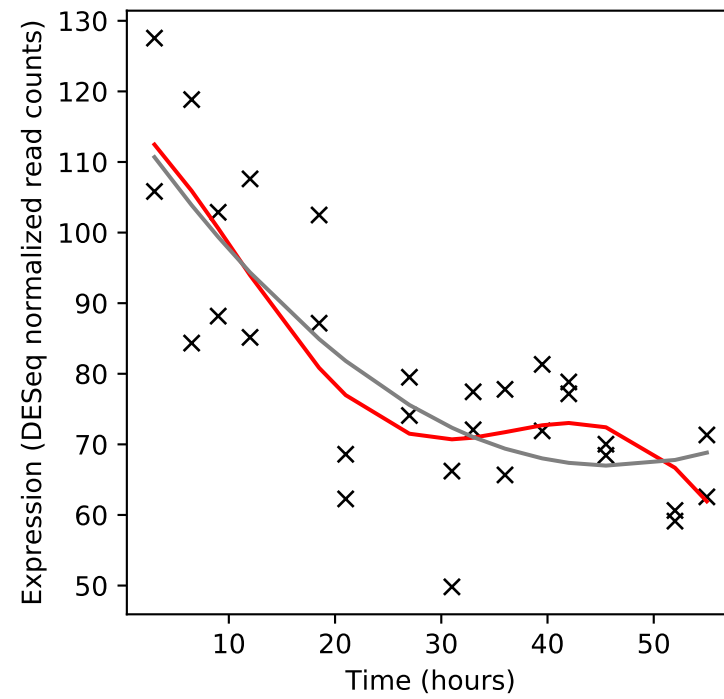

Rv1763/-

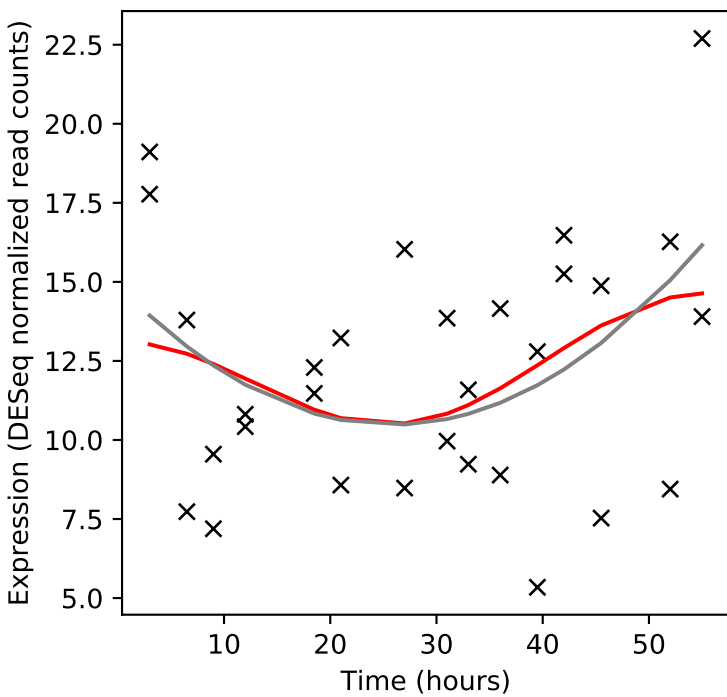

Rv1764/-

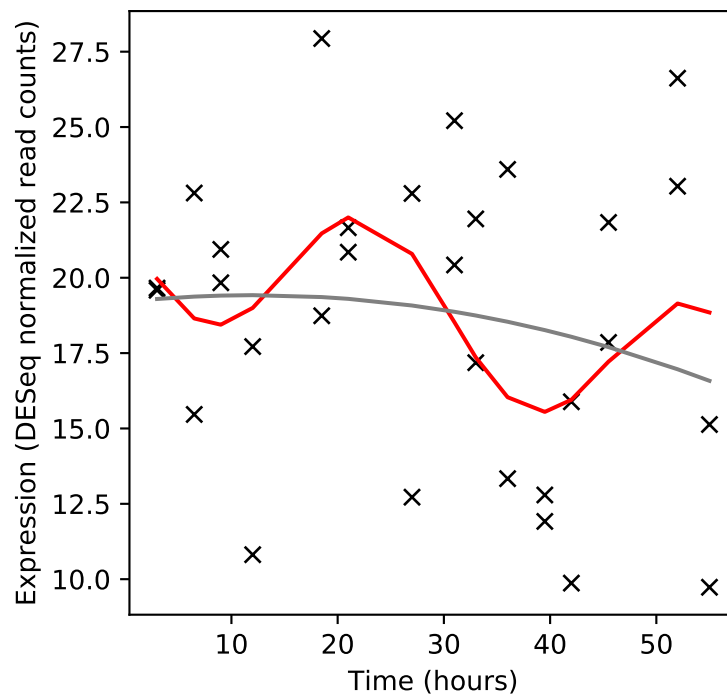

Rv1765c/-

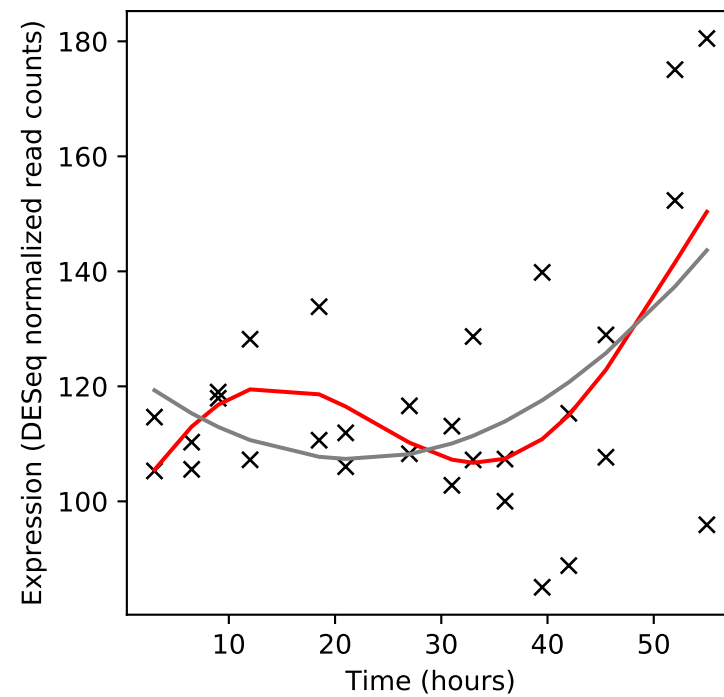

Rv1765A/-

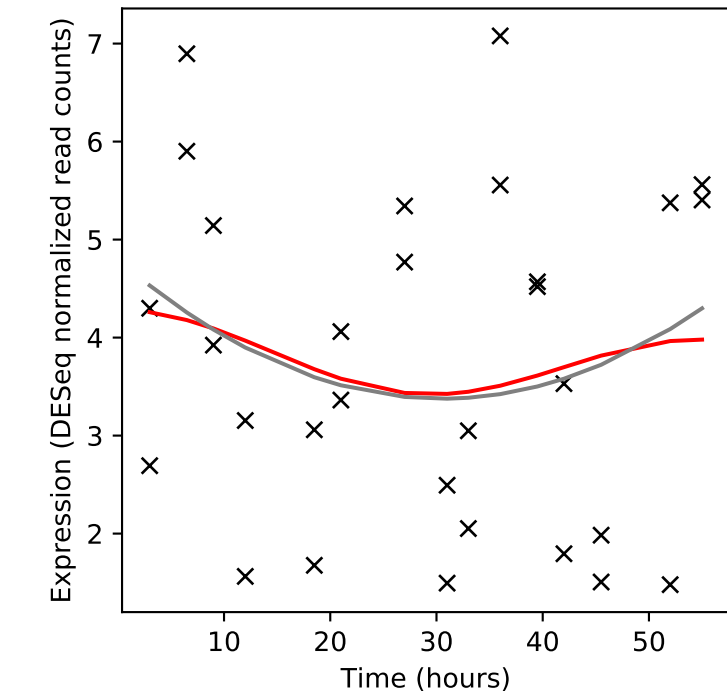

Rv1766/-

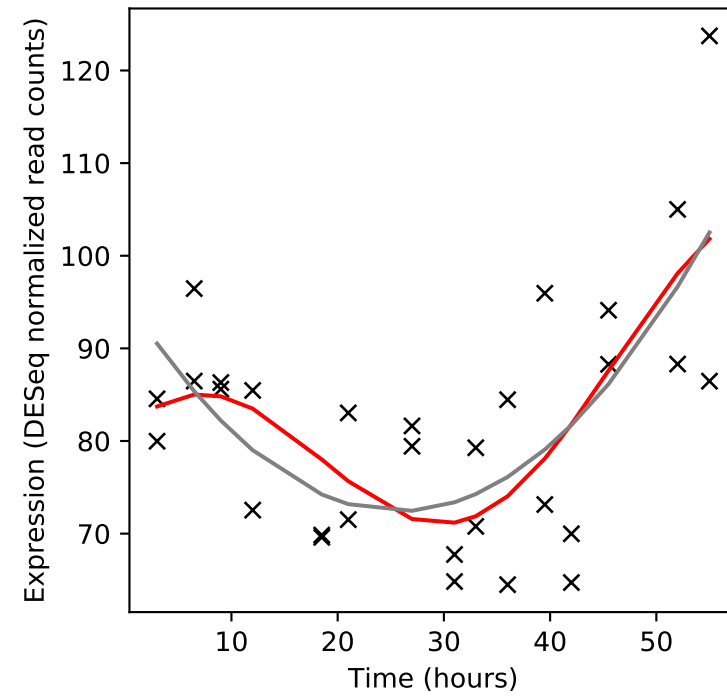

Rv1767/-

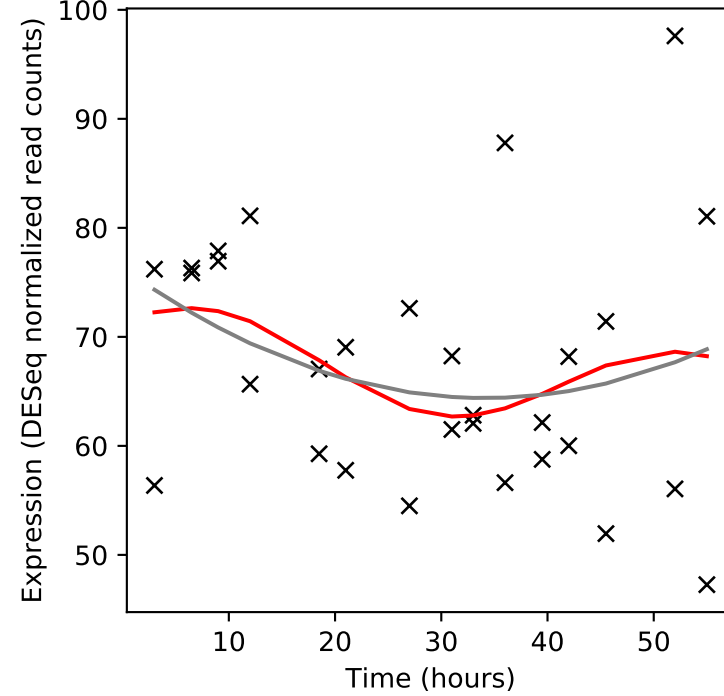

Rv1768/PE\_PGRS31

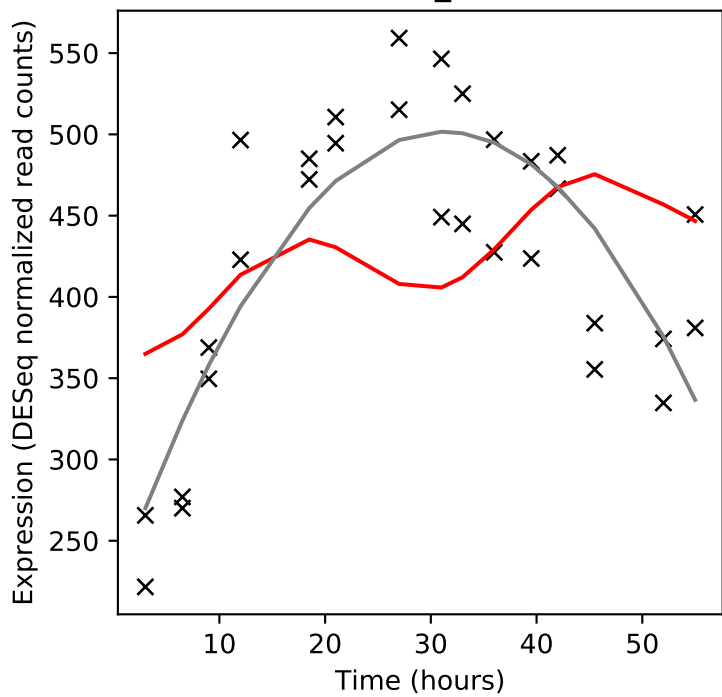

Rv1769/-

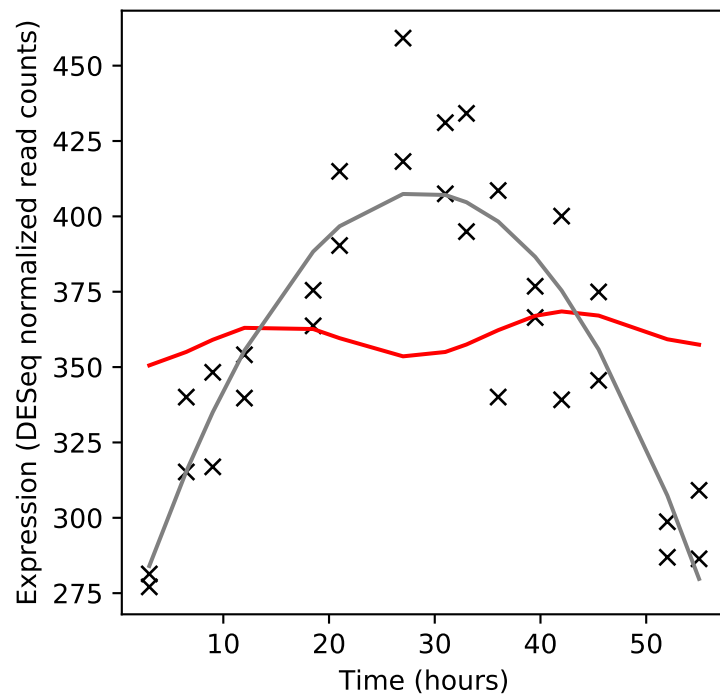

Rv1770/-

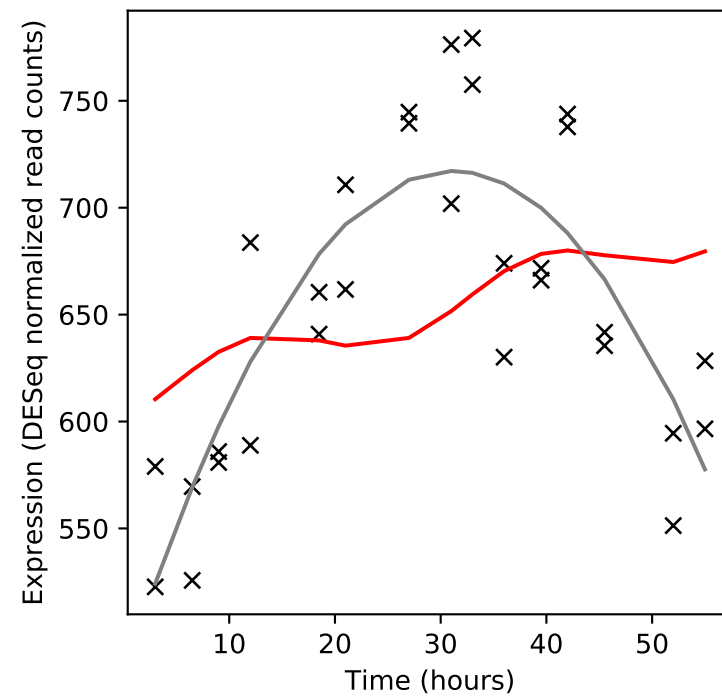

Rv1771/-

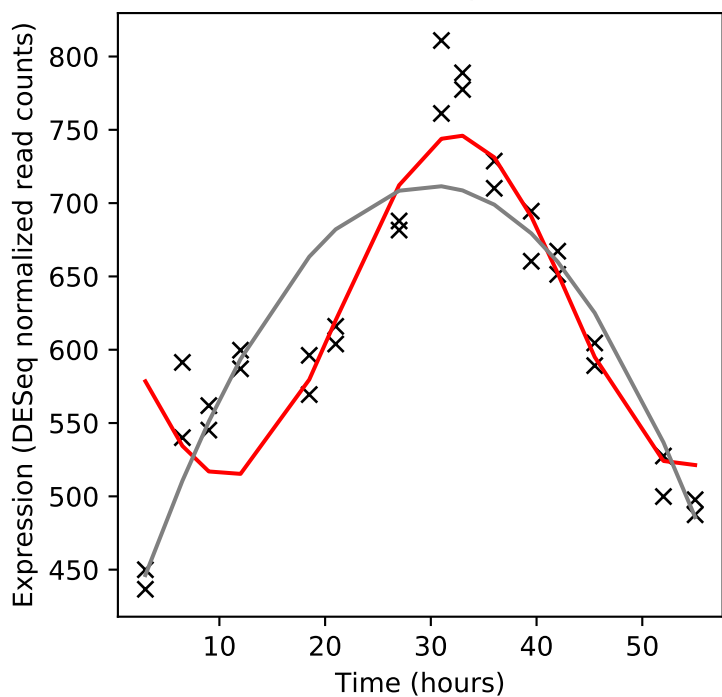

Rv1772/-

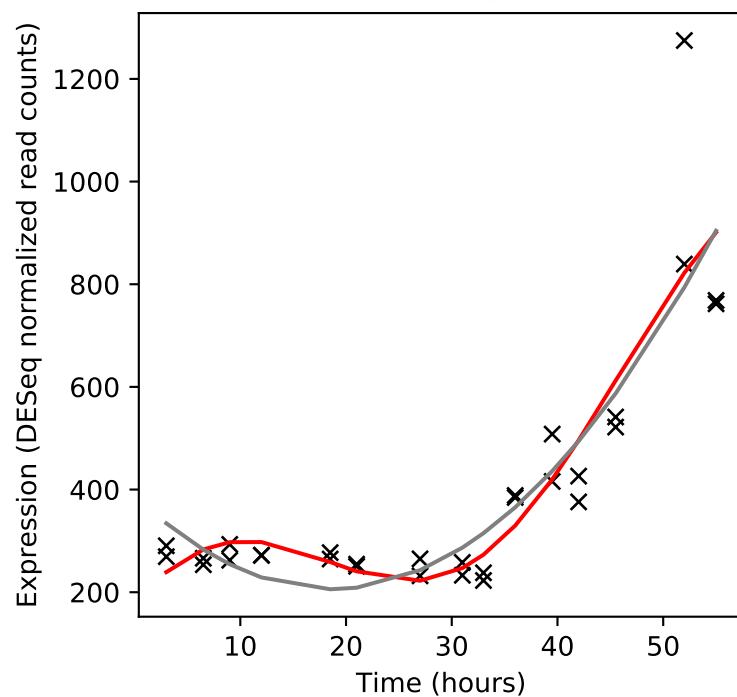

Rv1773c/-

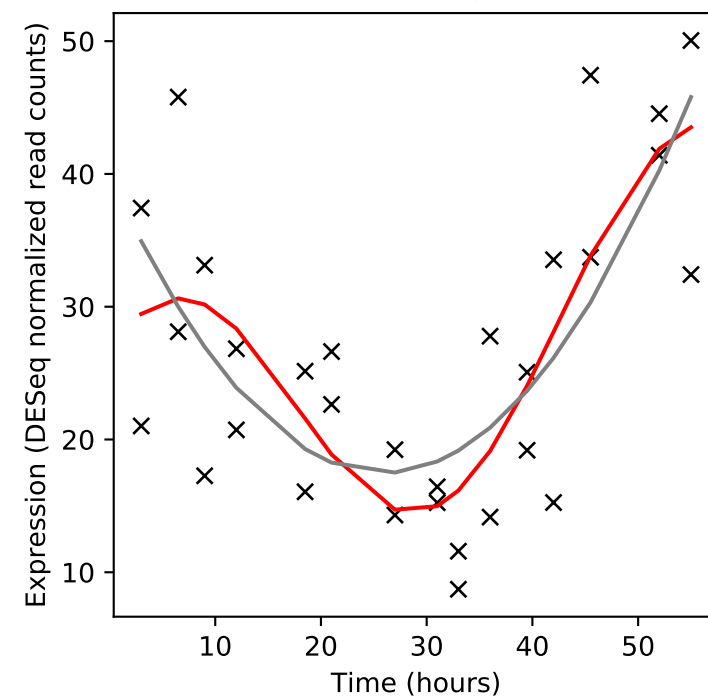

Rv1774/-

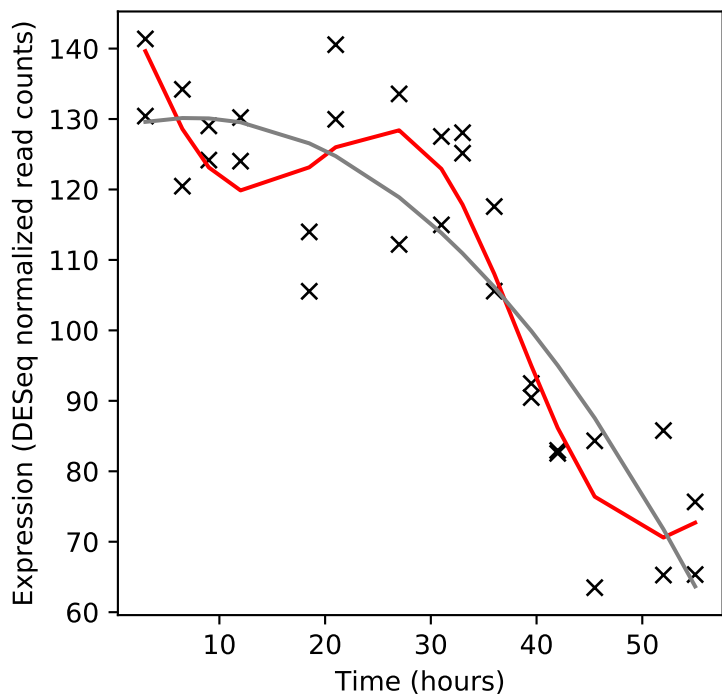

Rv1775/-

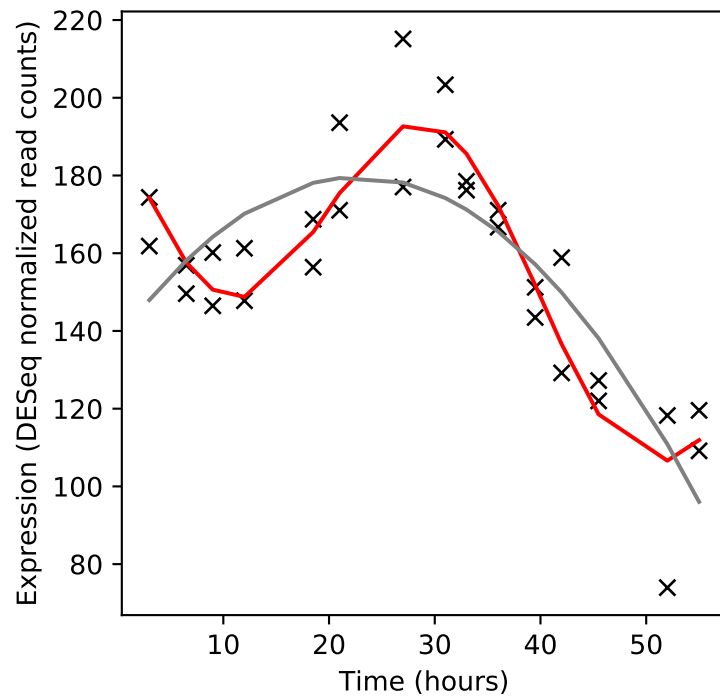

Rv1776c/-

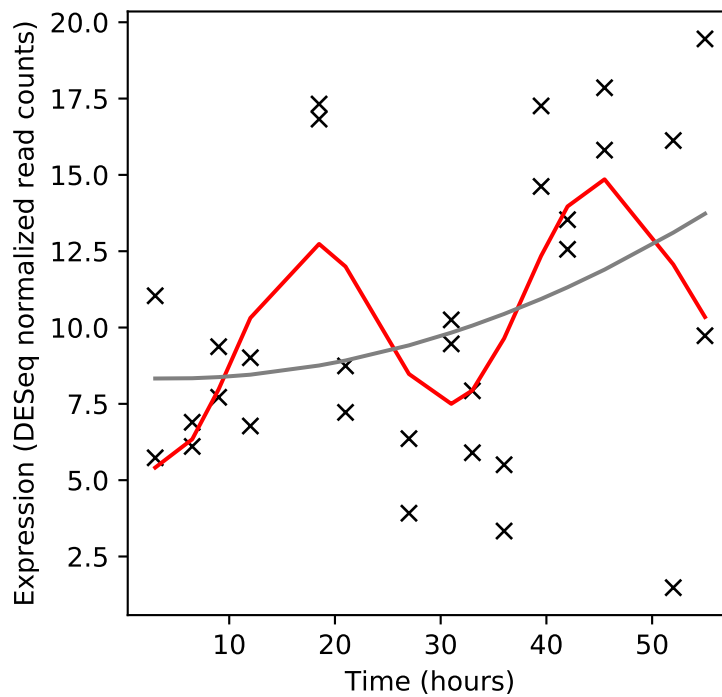

Rv1777/cyp144

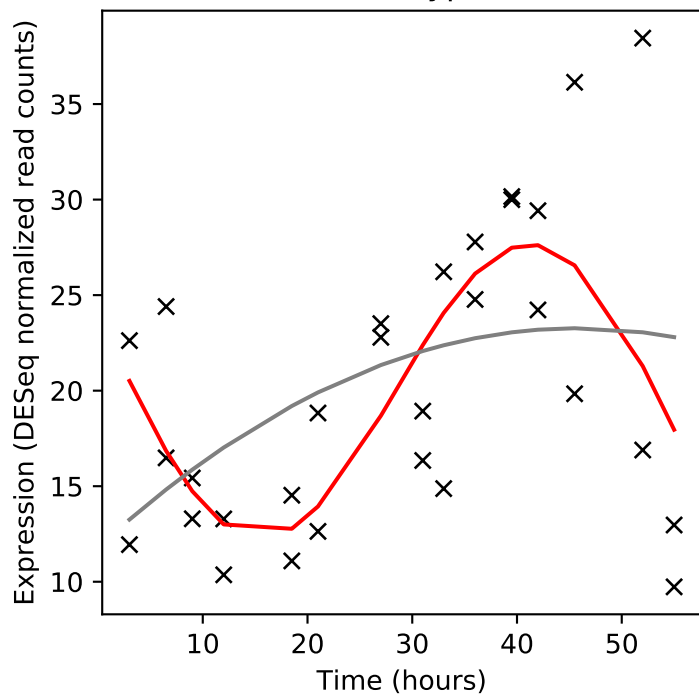

Rv1778c/-

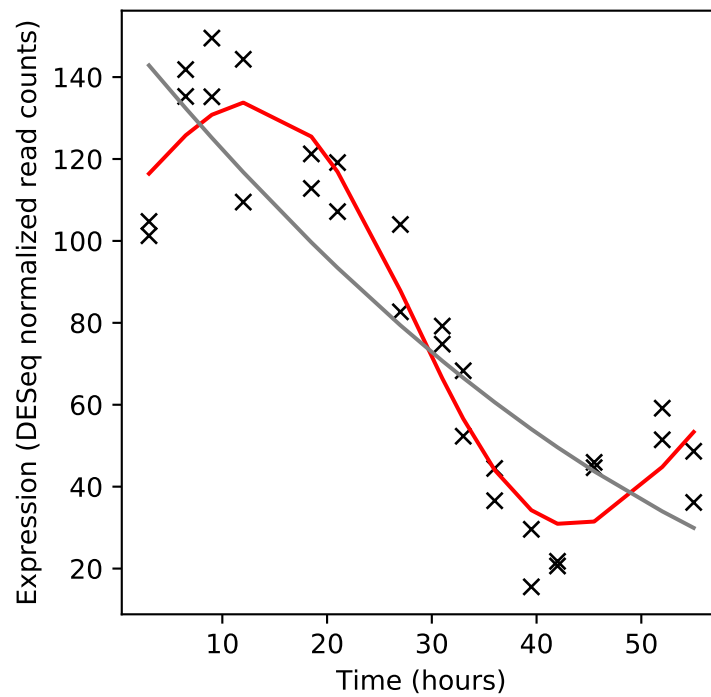

Rv1779c/-

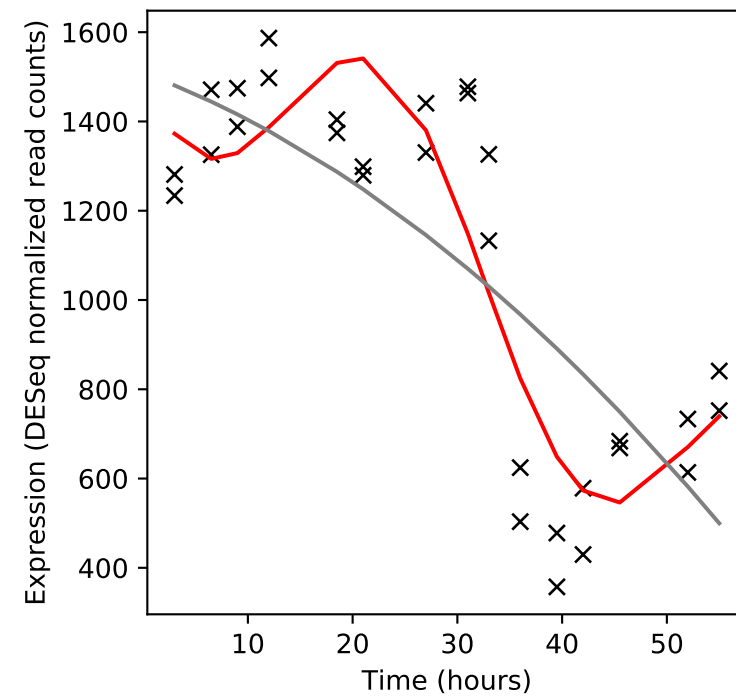

Rv1780/-

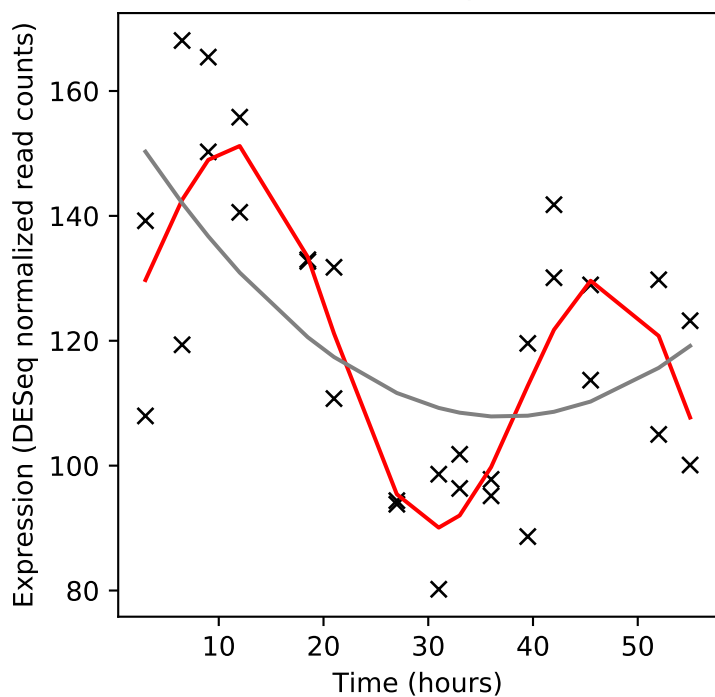

Rv1781c/malQ

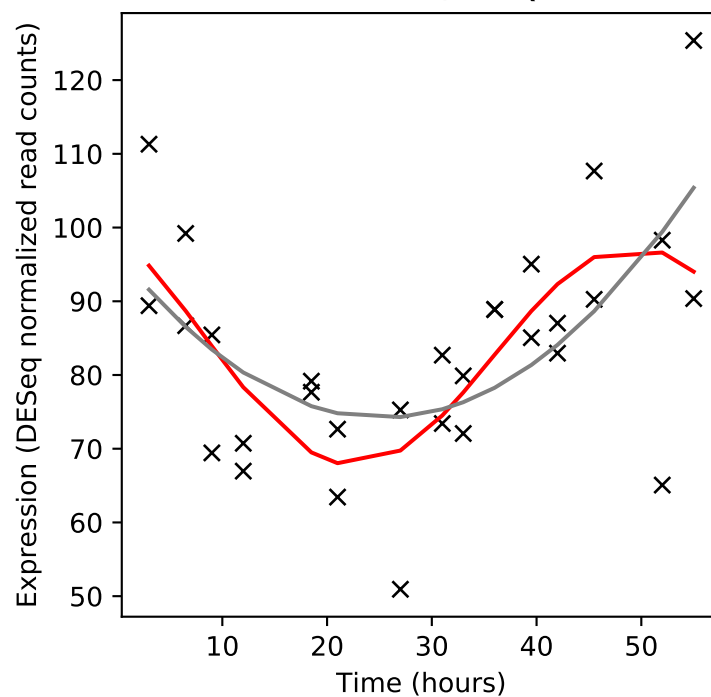

Rv1782/eccB5

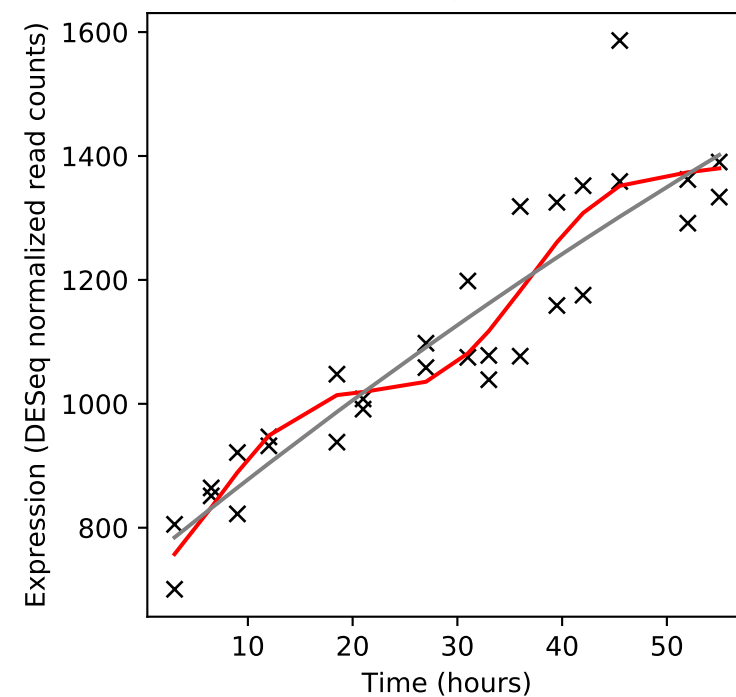

Rv1783/eccC5

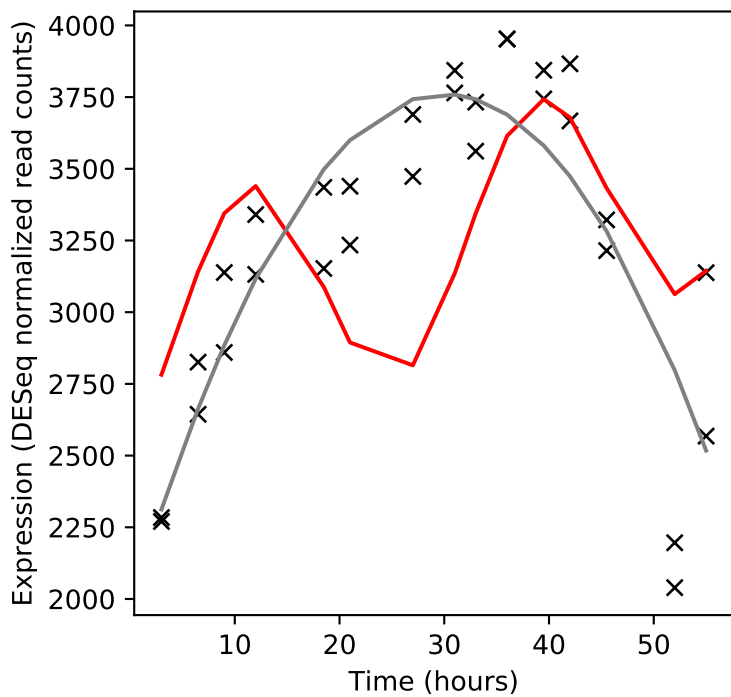

Rv1785c/cyp143

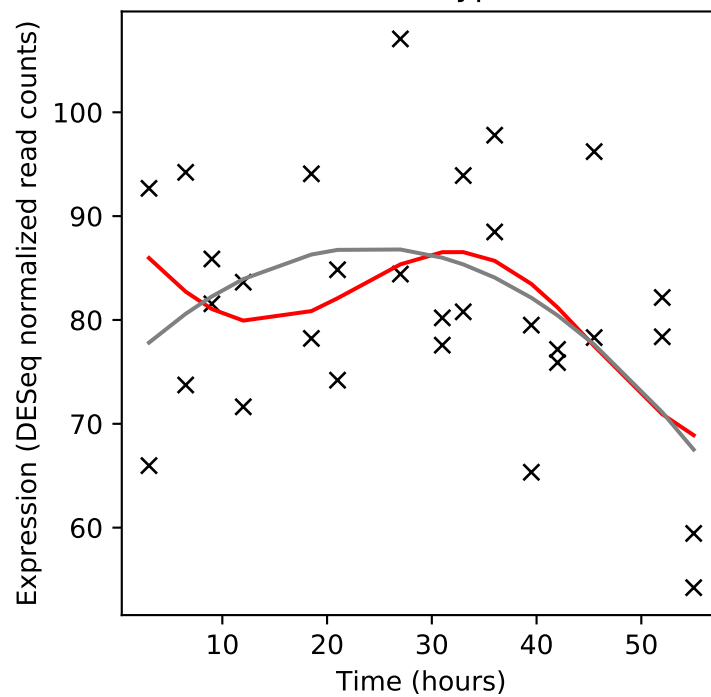

Rv1786/-

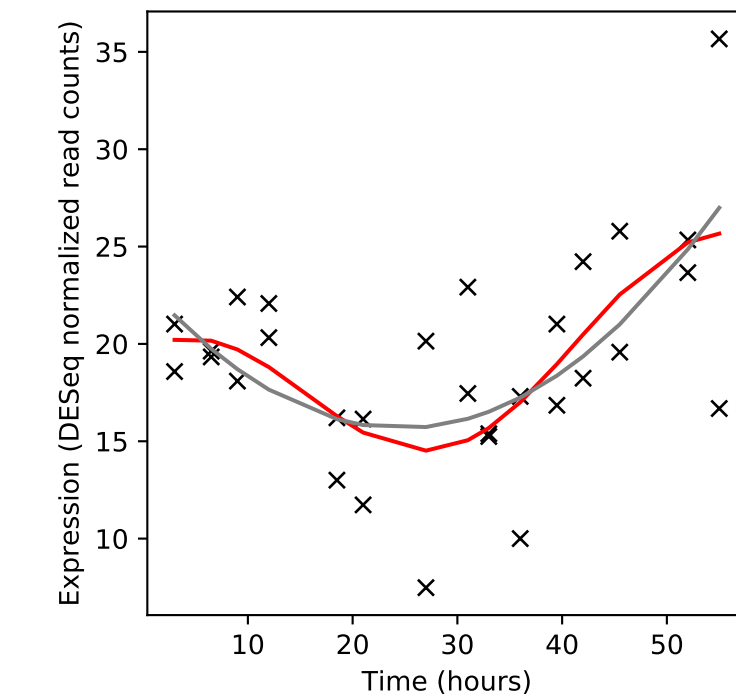

Rv1787/PPE25

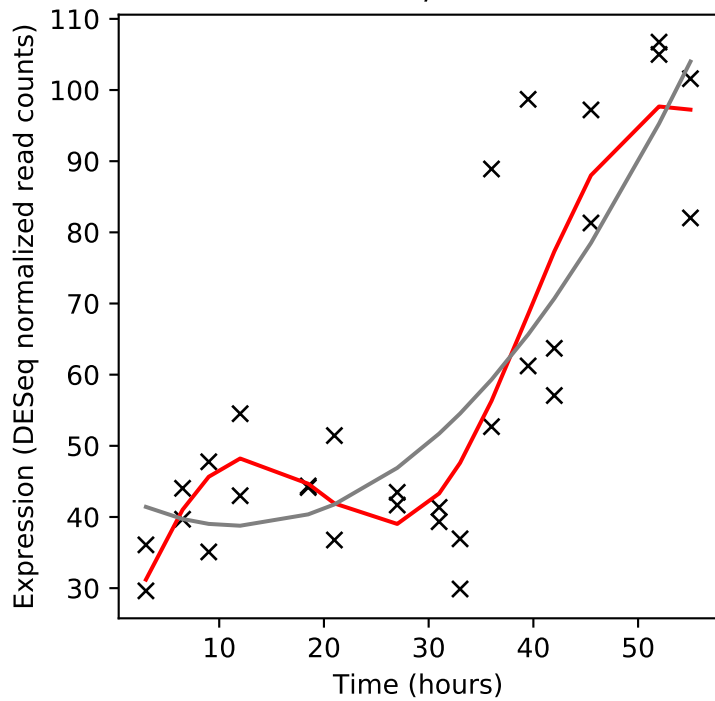

Rv1788/PE18

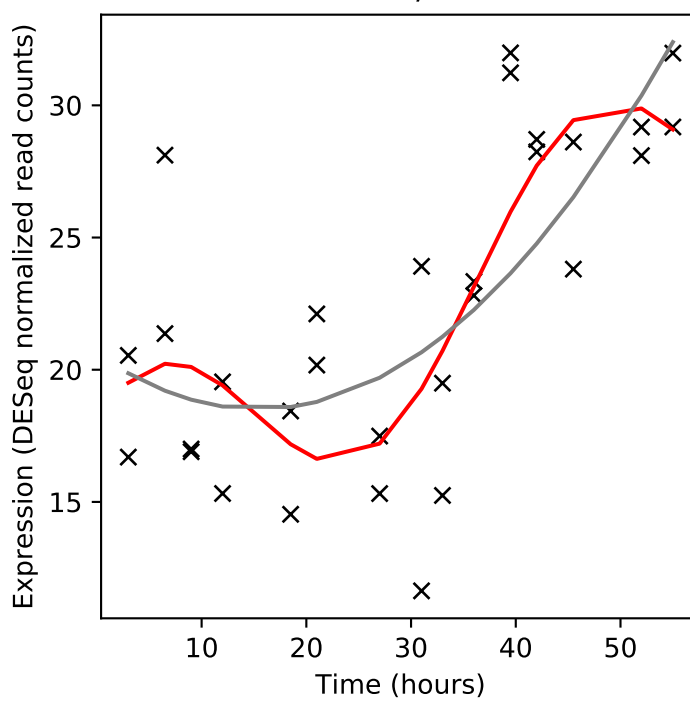

Rv1789/PPE26

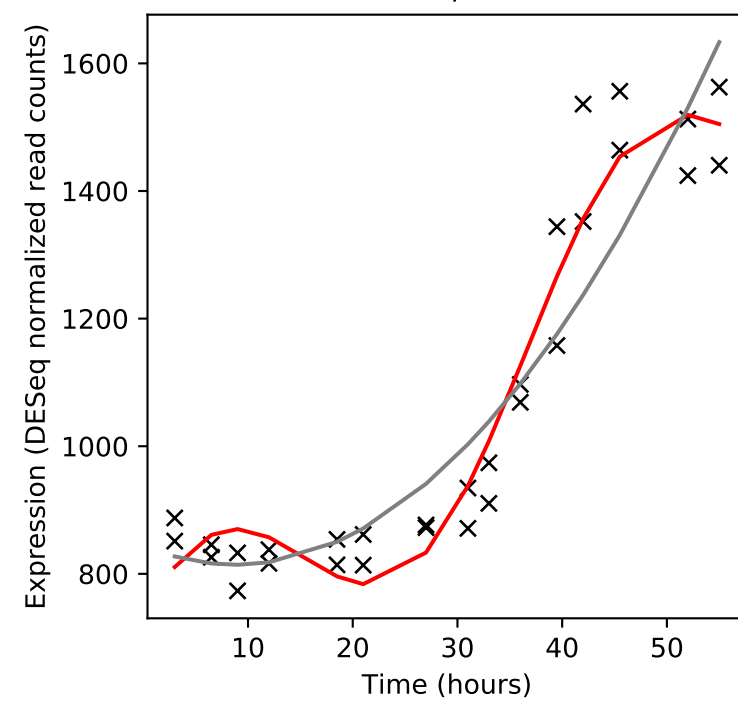

Rv1790/PPE27

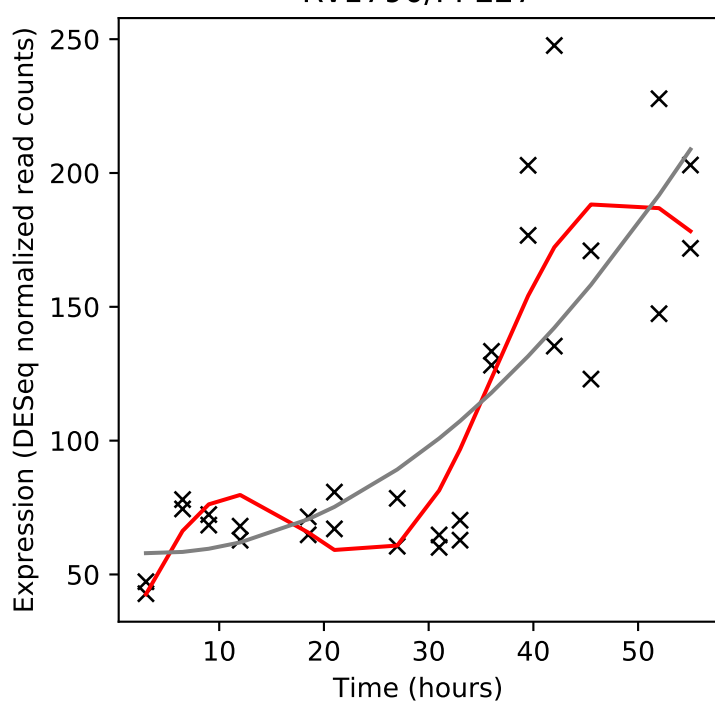

Rv1791/PE19

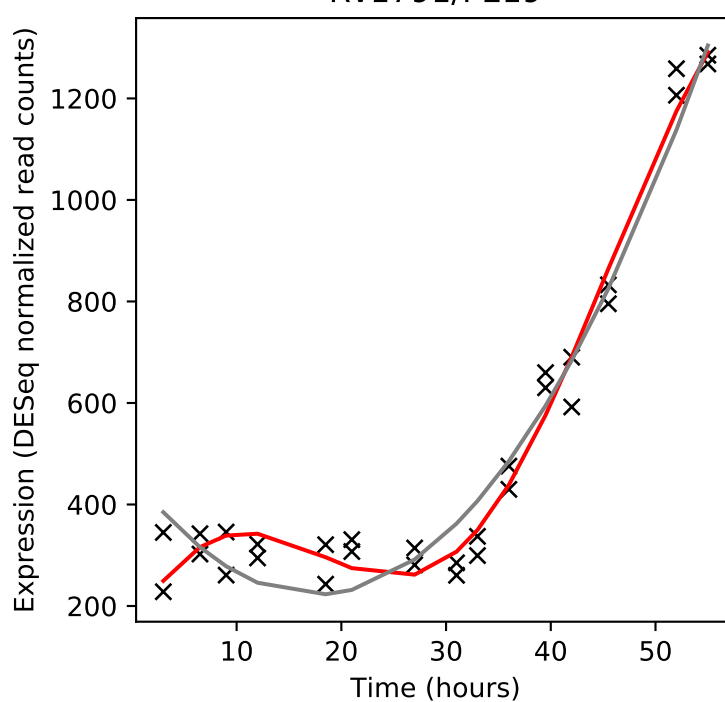

Rv1793/esxN

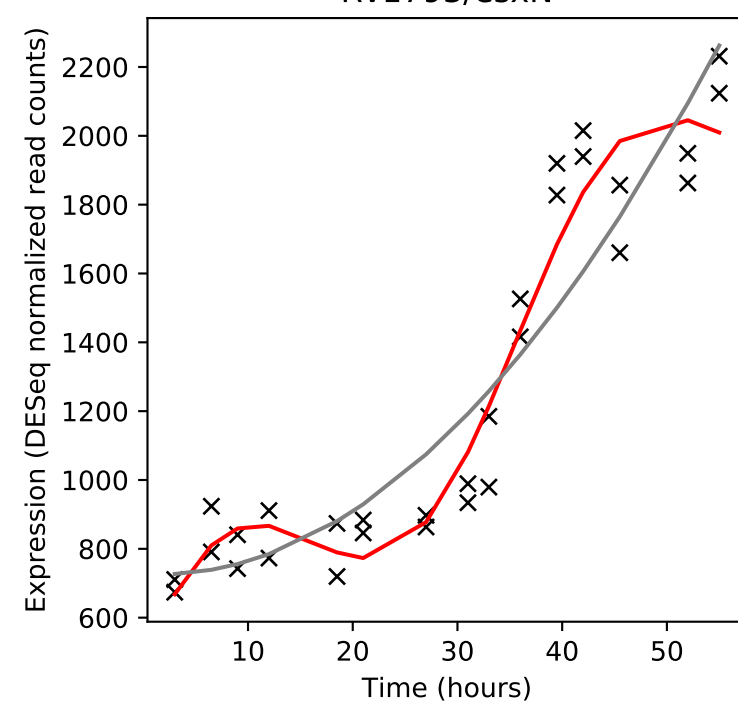

Rv1794/-

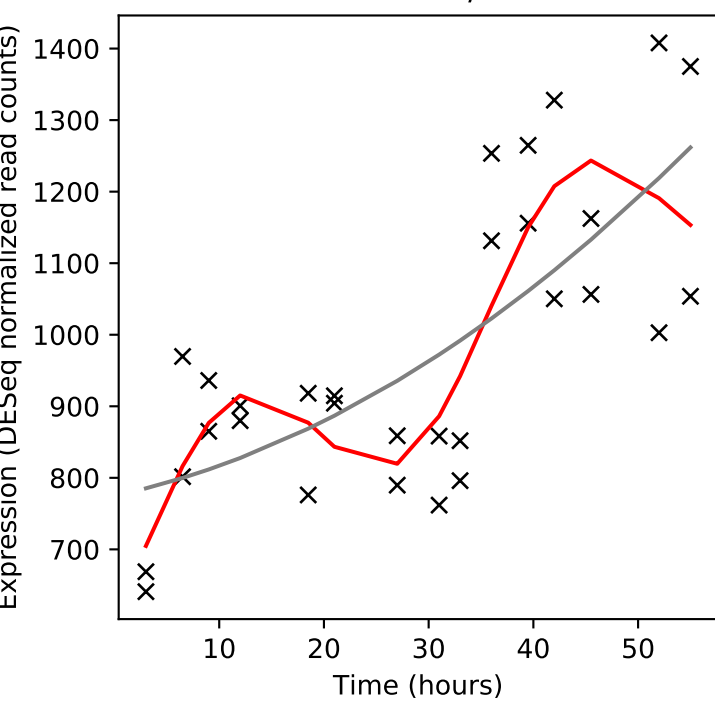

Rv1795/eccD5

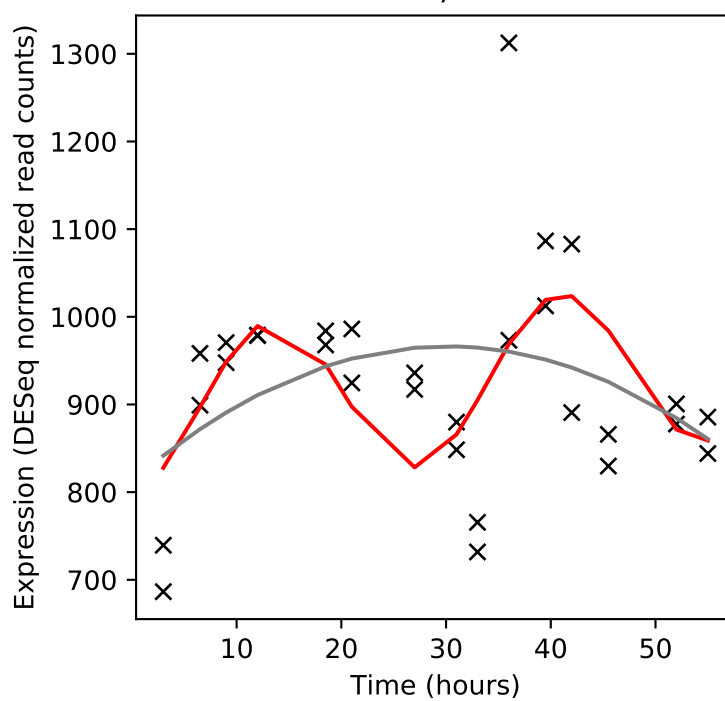

Rv1796/mycP5

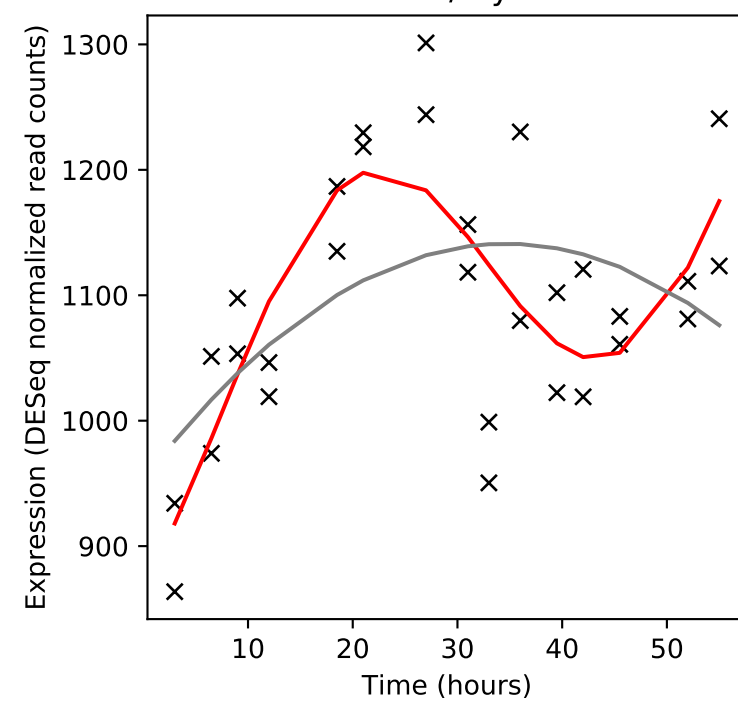

Rv1797/eccE5

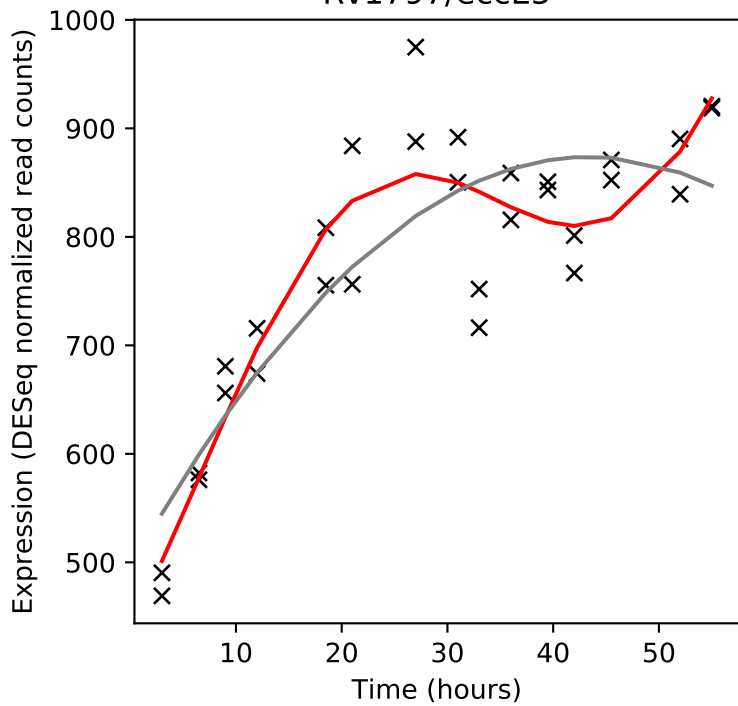

Rv1798/eccA5

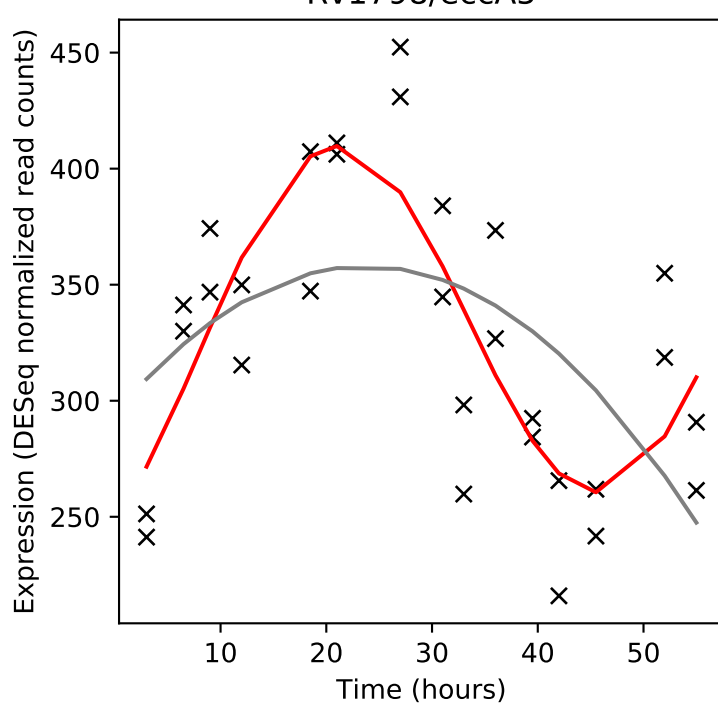

Rv1799/lppT

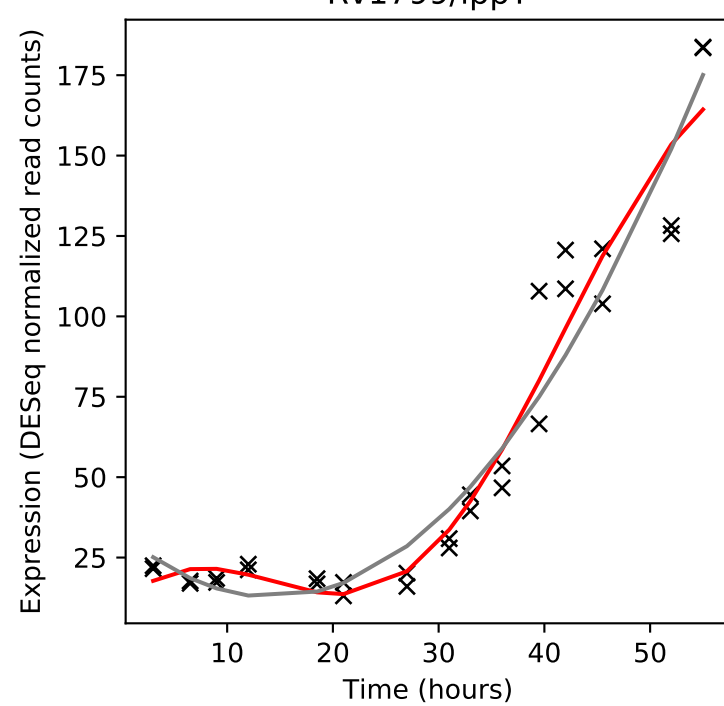

Rv1800/PPE28

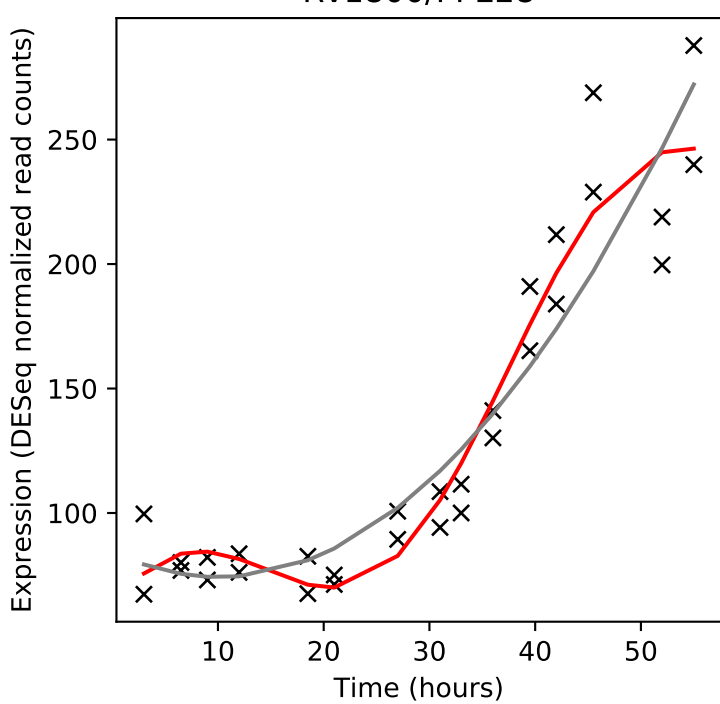

Rv1801/PPE29

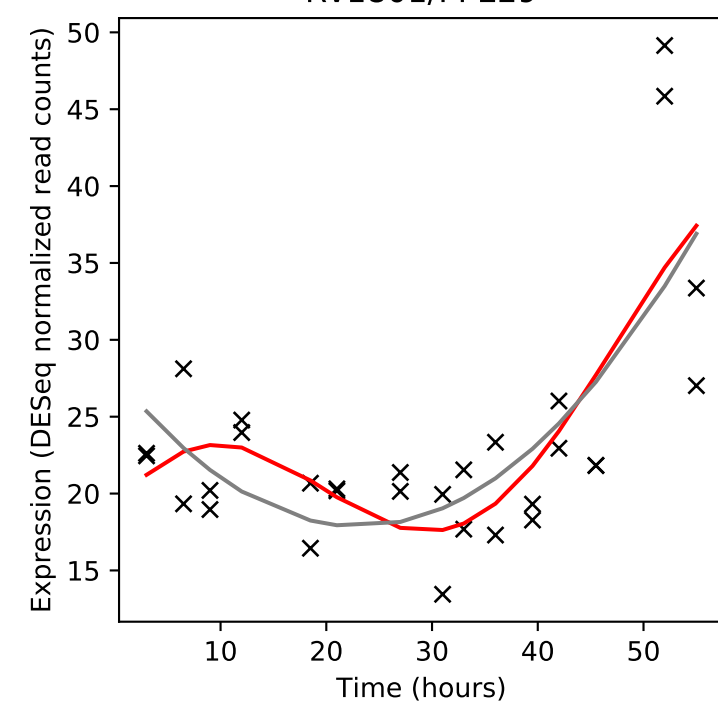

Rv1802/PPE30

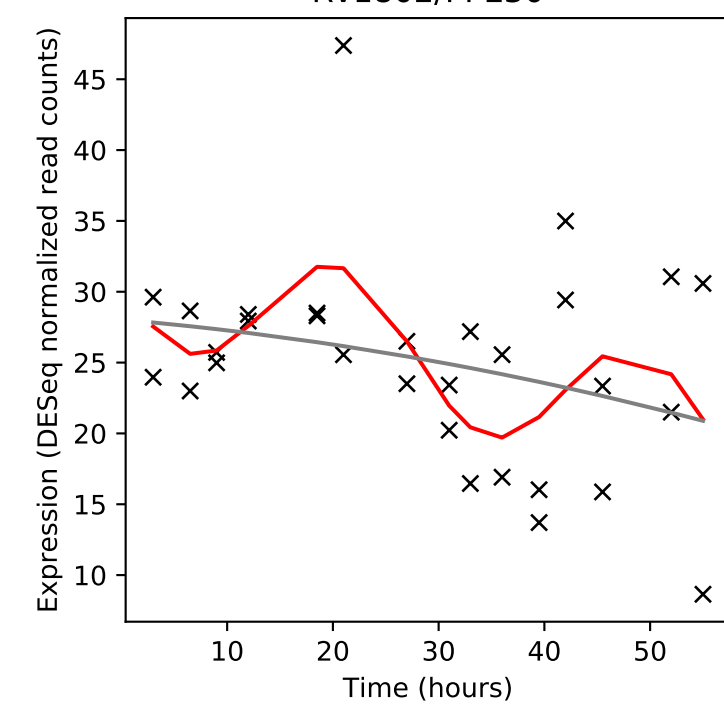

Rv1803c/PE\_PGRS32

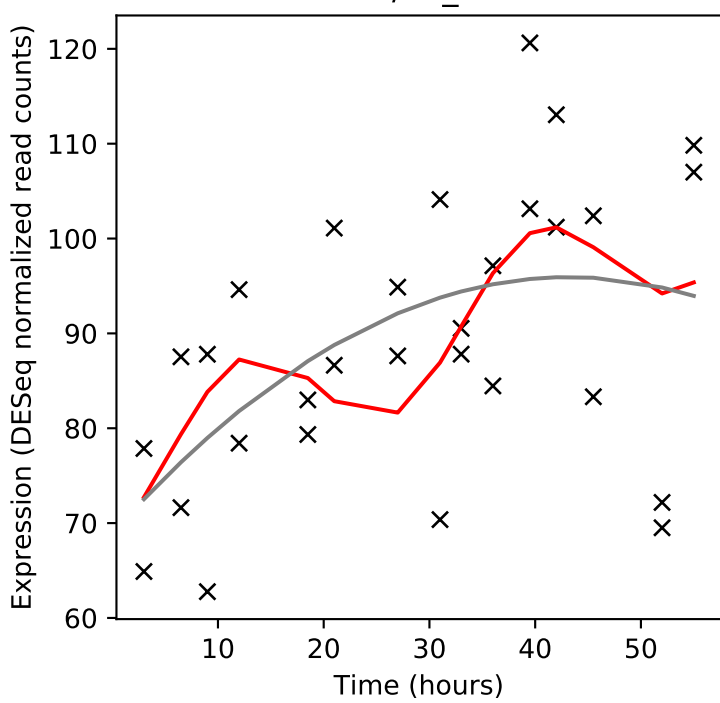

Rv1804c/-

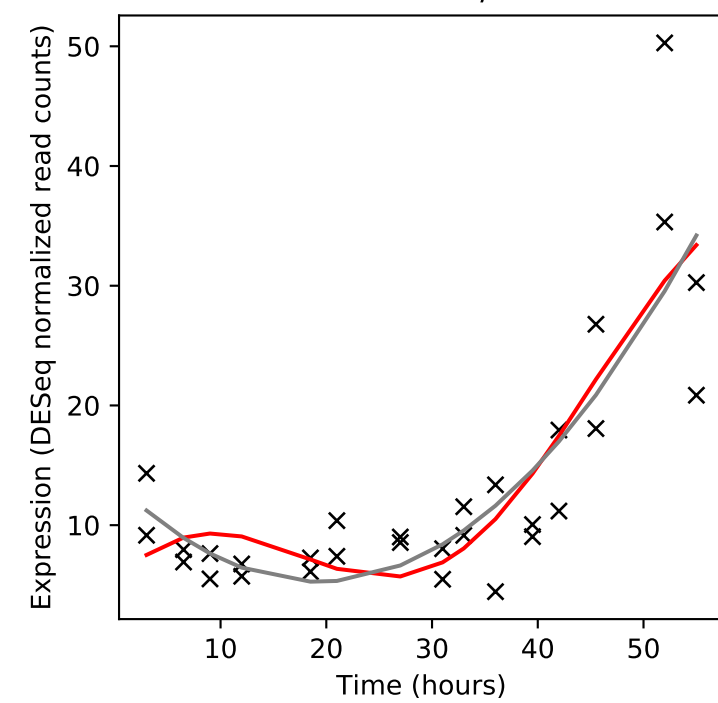

Rv1805c/-

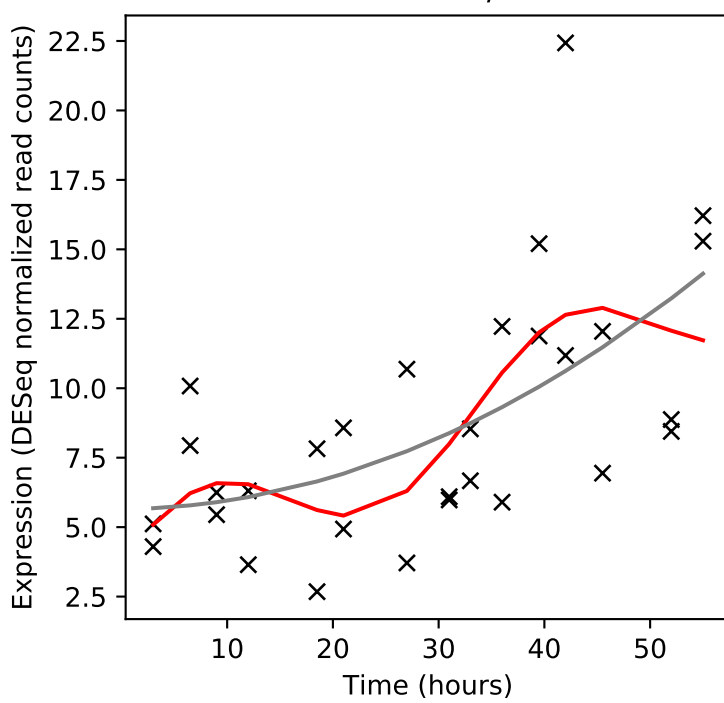



Rv1806/PE20

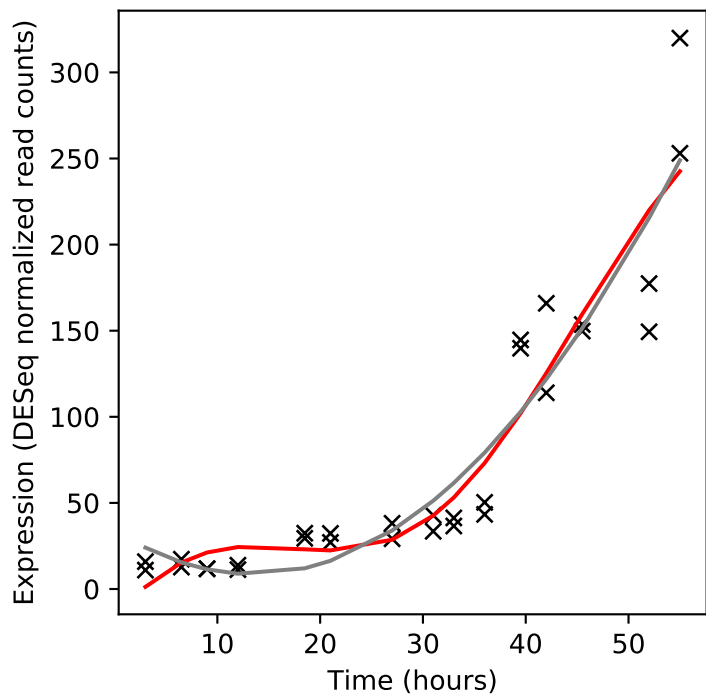

Rv1807/PPE31

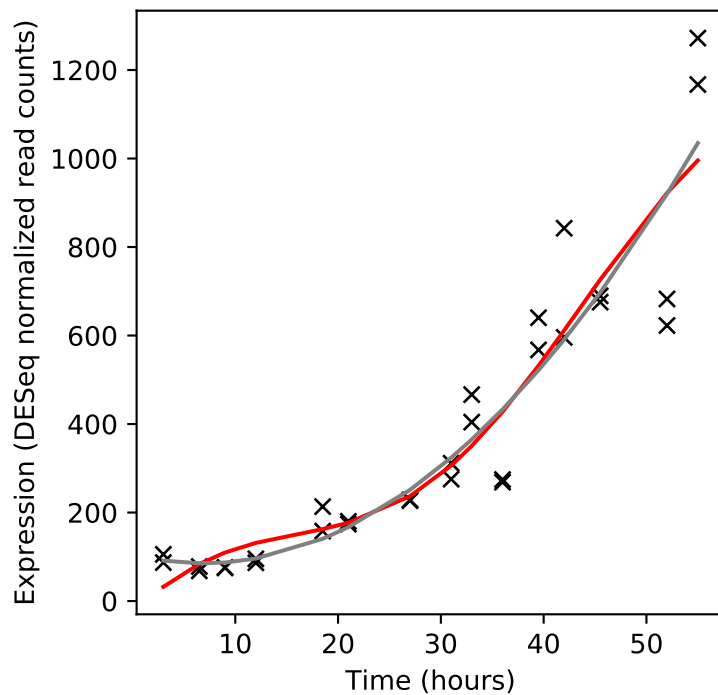

Rv1808/PPE32

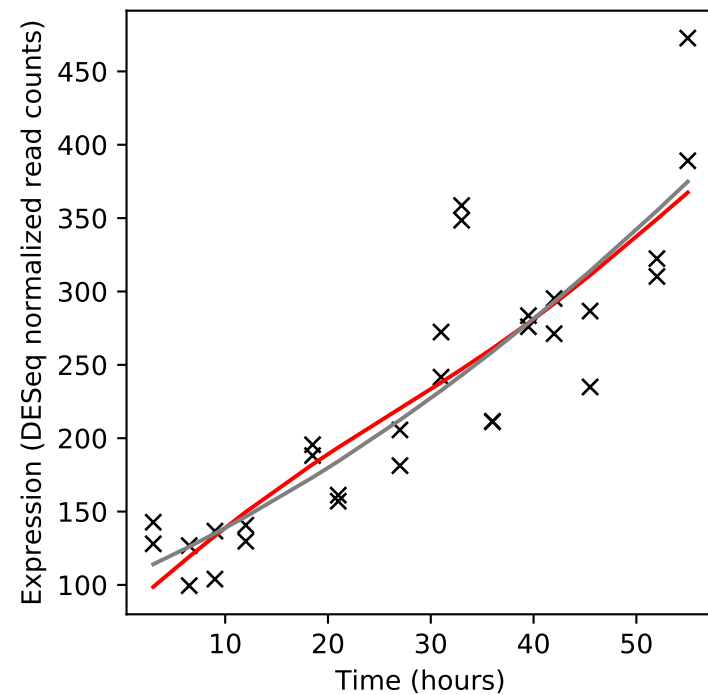

Rv1809/PPE33

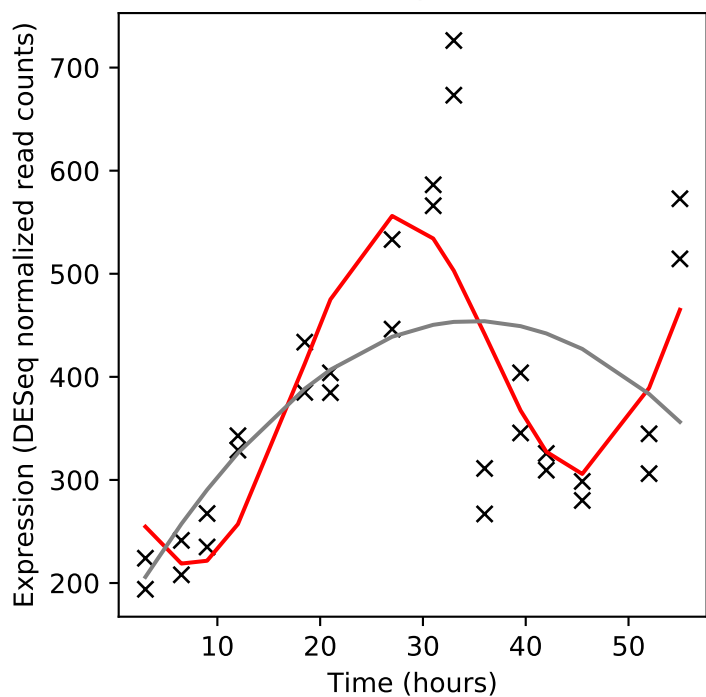

Rv1810/-

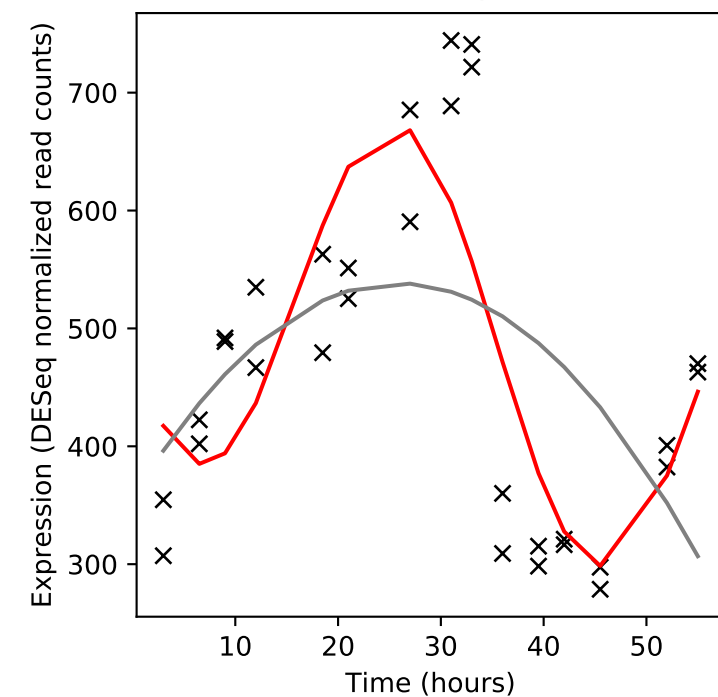

Rv1811/mgtC

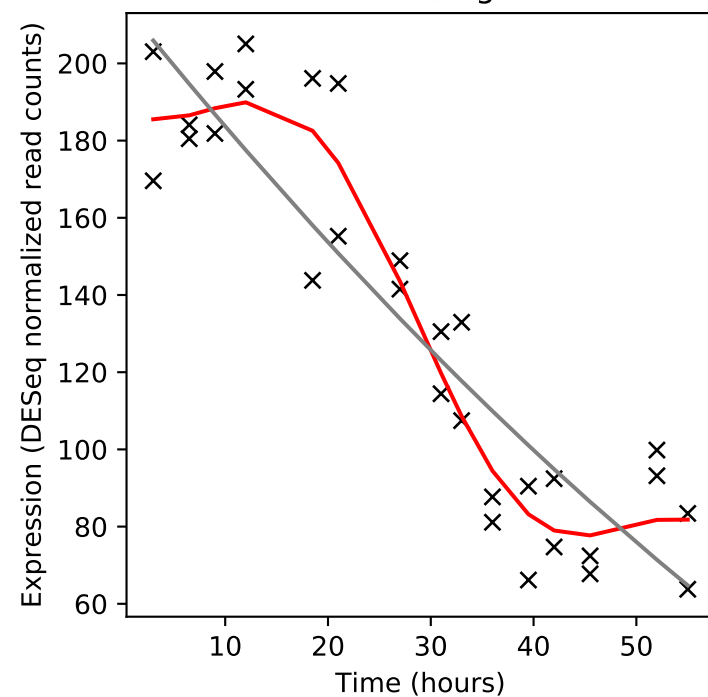

Rv1812c/-

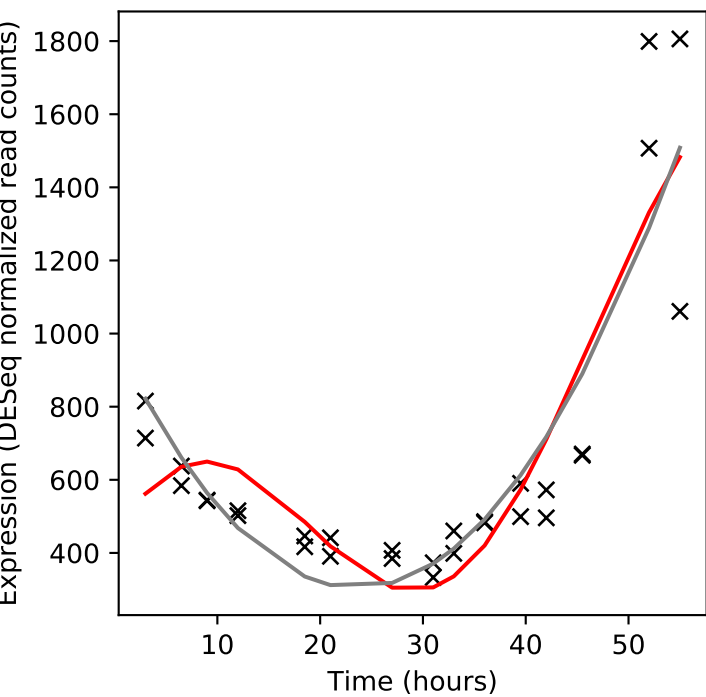

Rv1813c/-

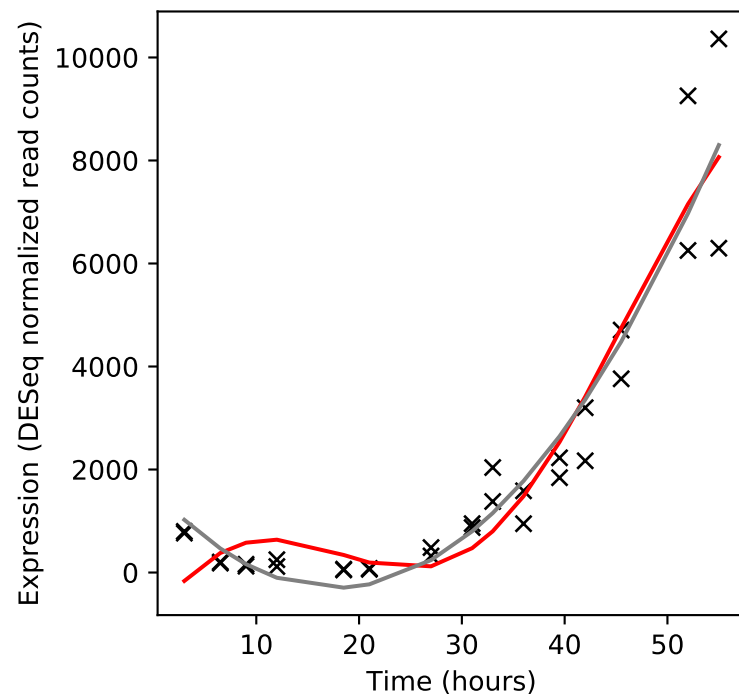

Rv1814/erg3

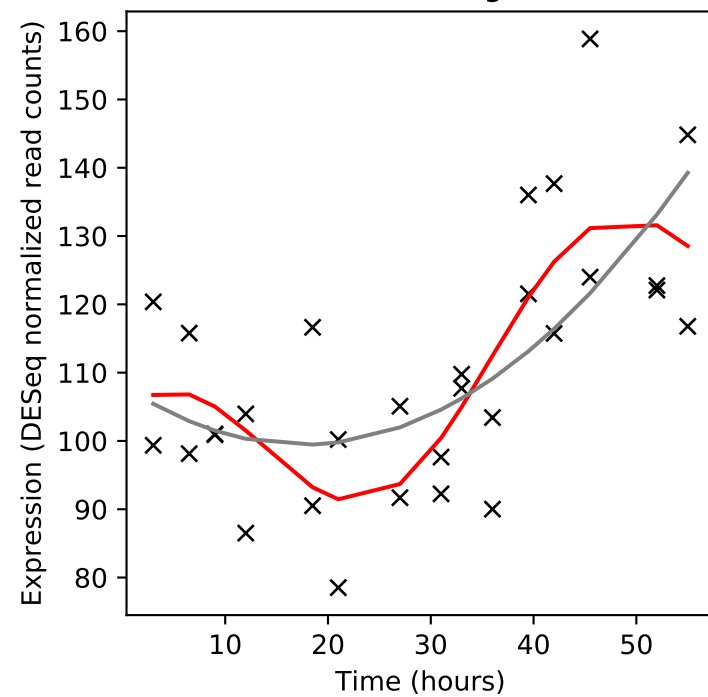

Rv1815/-

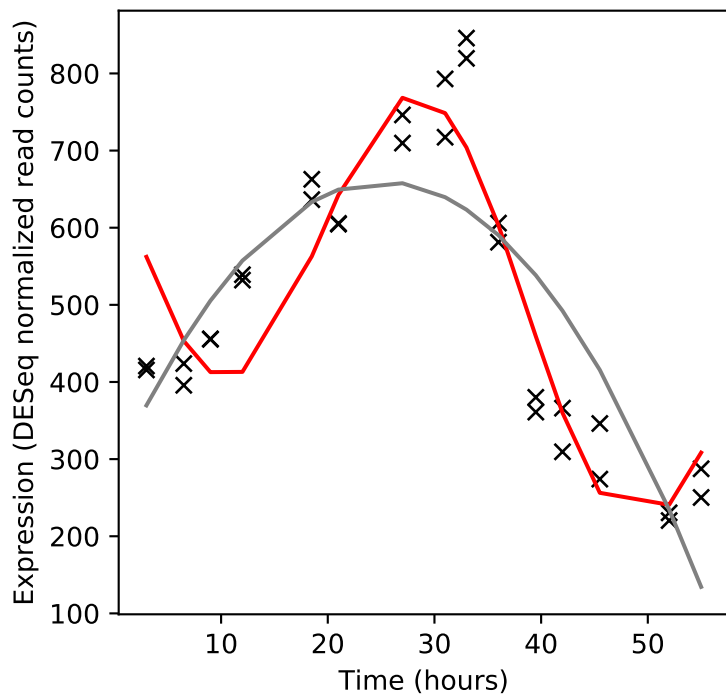

Rv1816/-

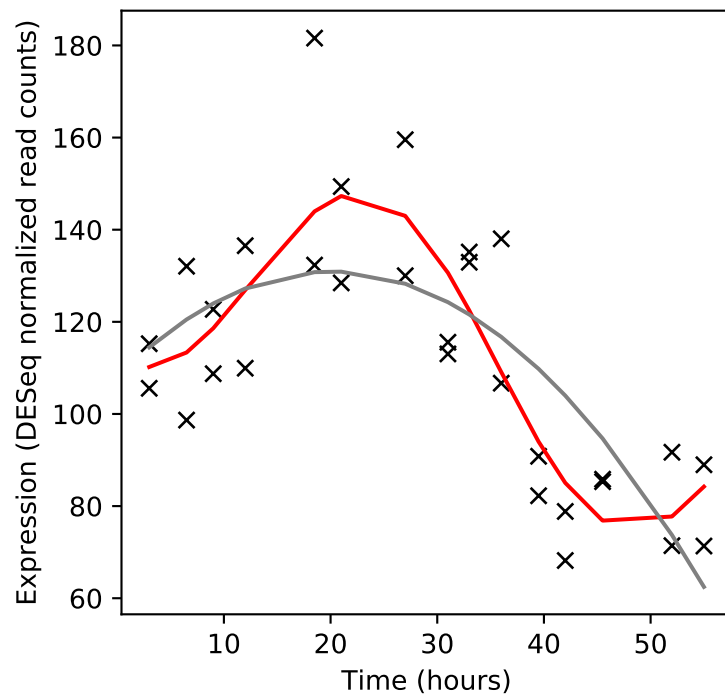

Rv1817/-

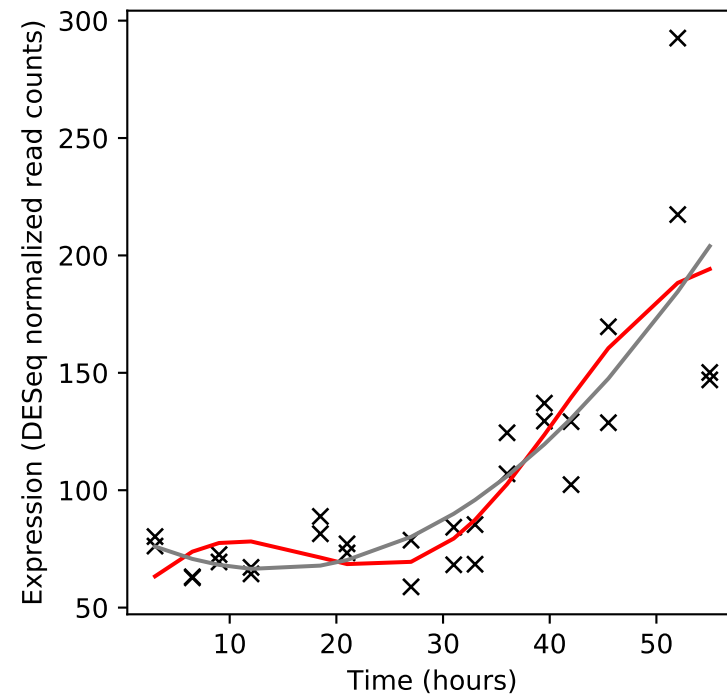

Rv1818c/PE\_PGRS33

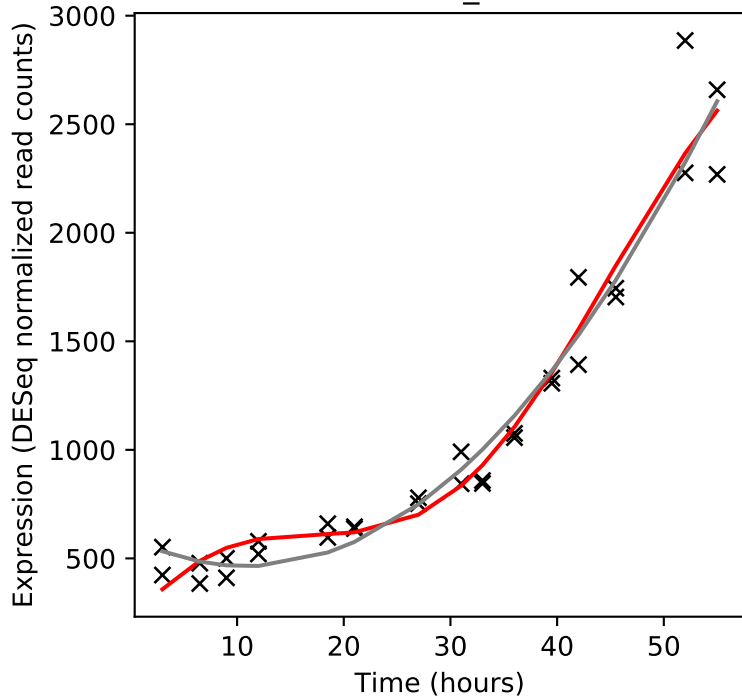

Rv1819c/bacA

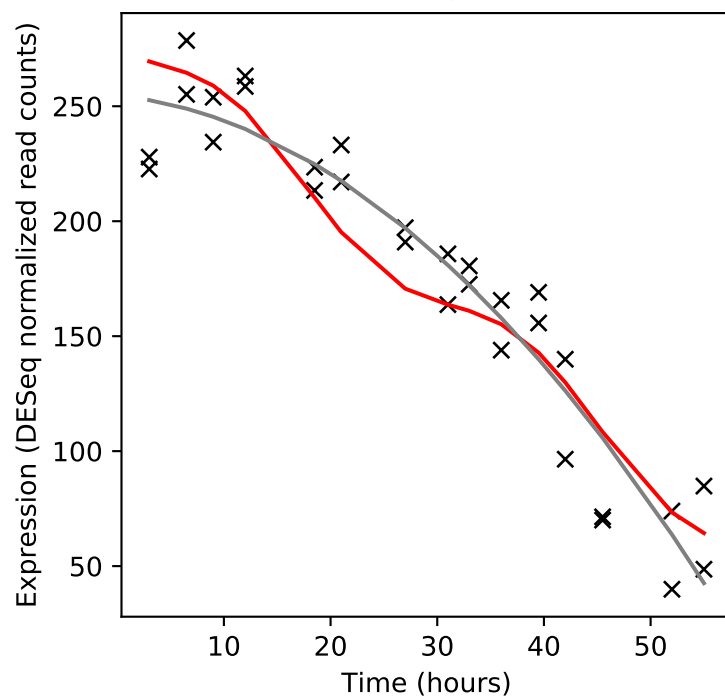

Rv1820/ilvG

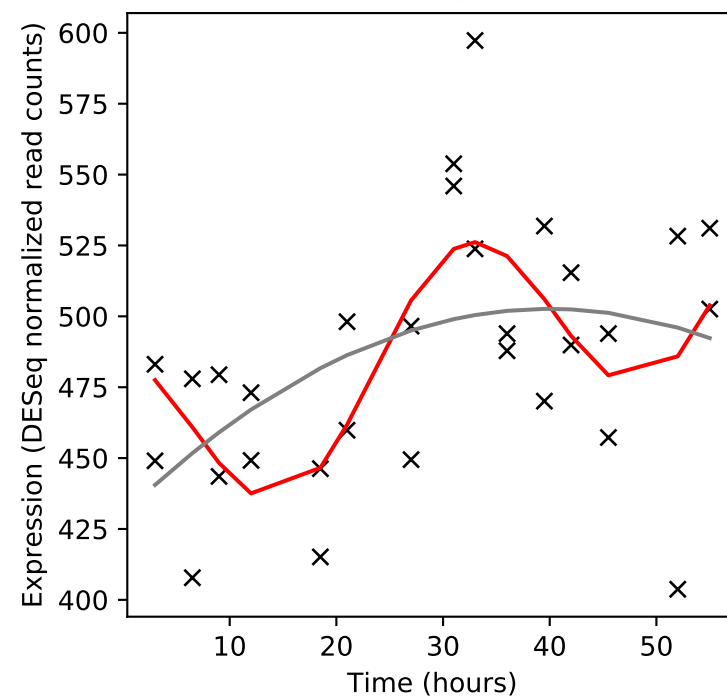

Rv1821/secA2

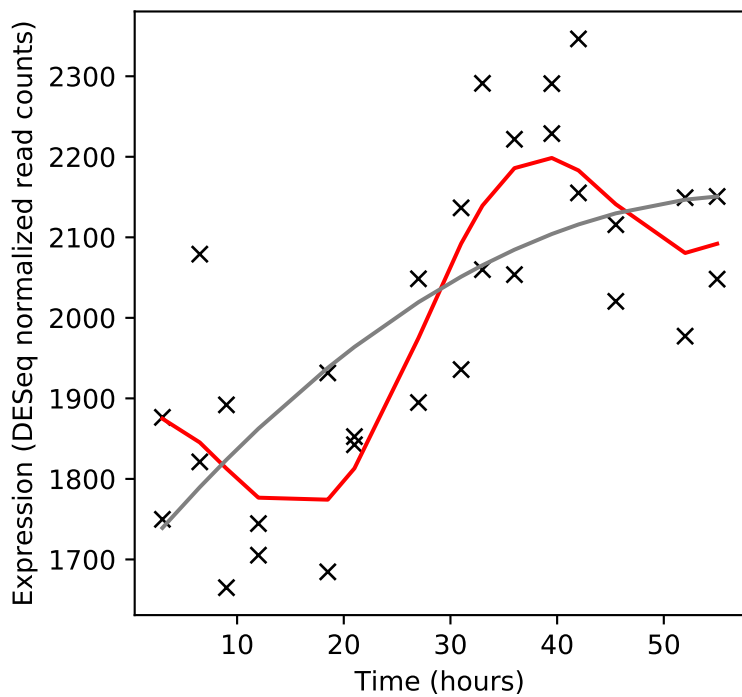

Rv1822/pgsA2

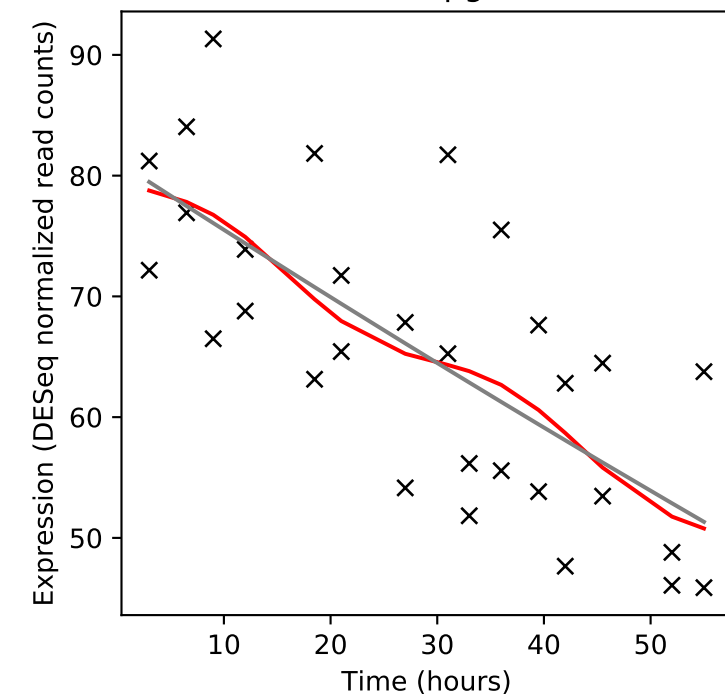

Rv1823/-

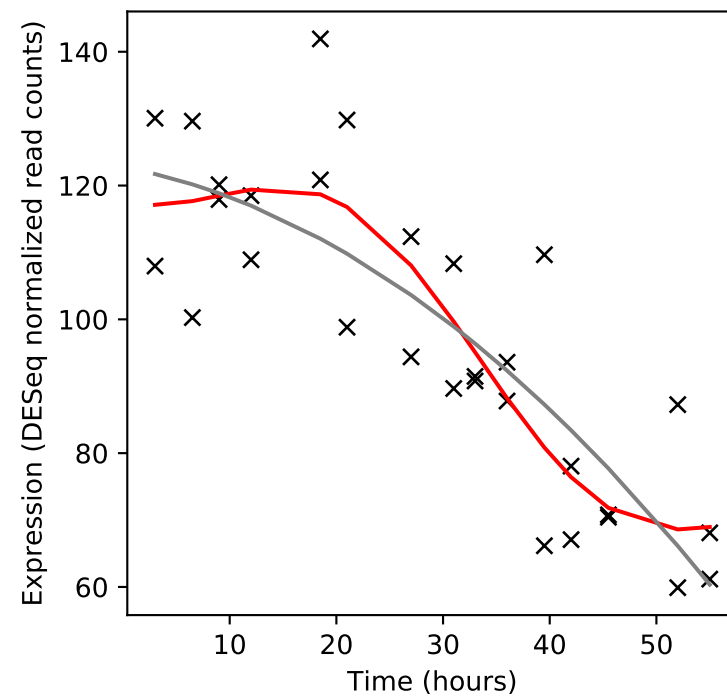

Rv1824/-

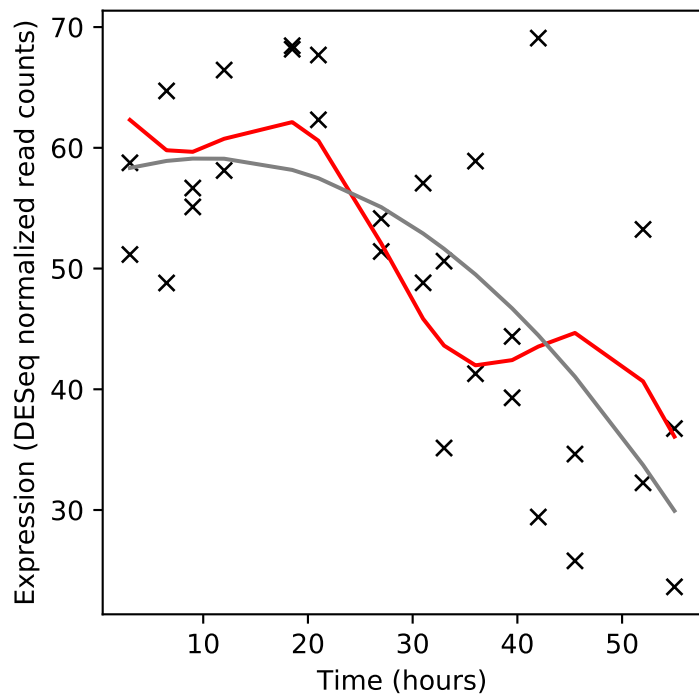

Rv1825/-

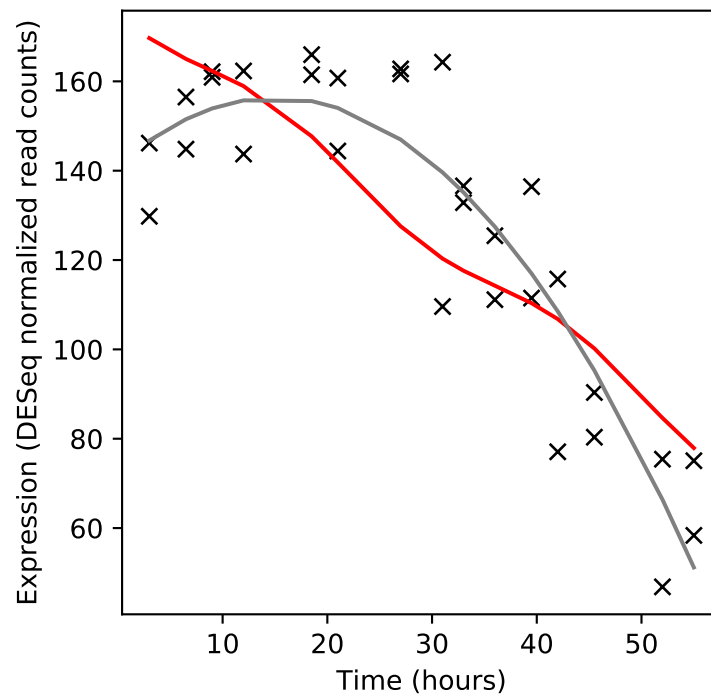

Rv1826/gcvH

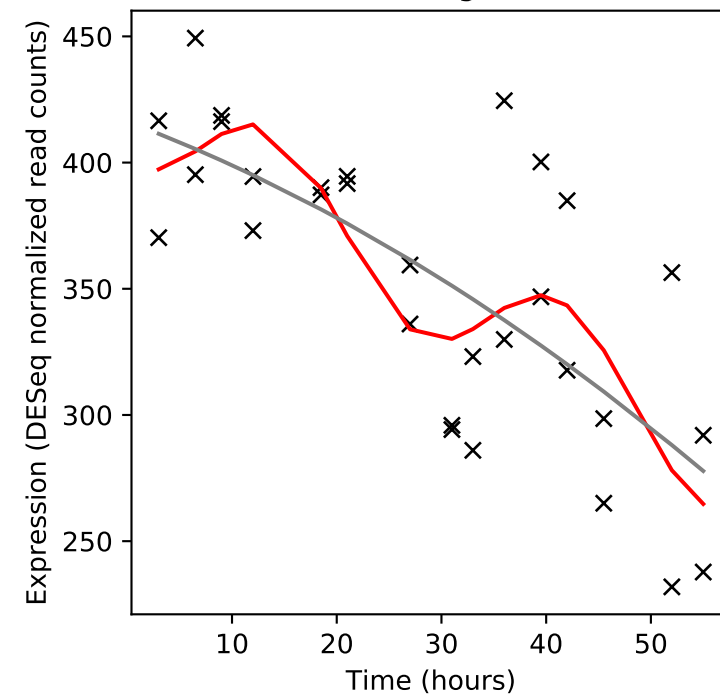

Rv1827/garA

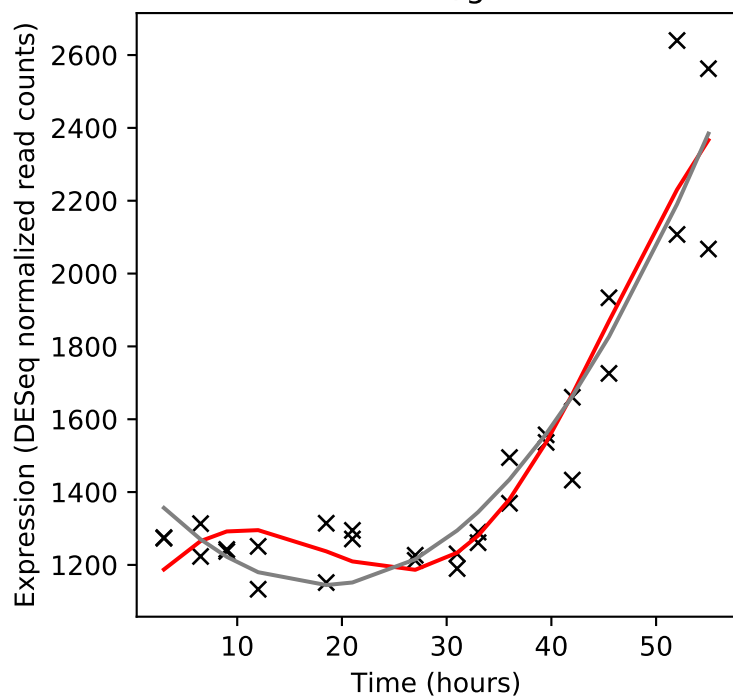

Rv1828/-

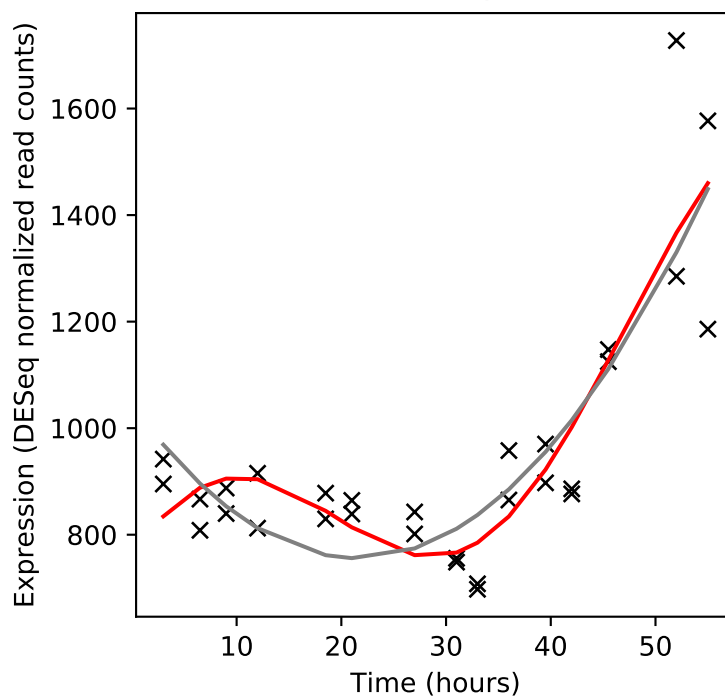

Rv1829/-

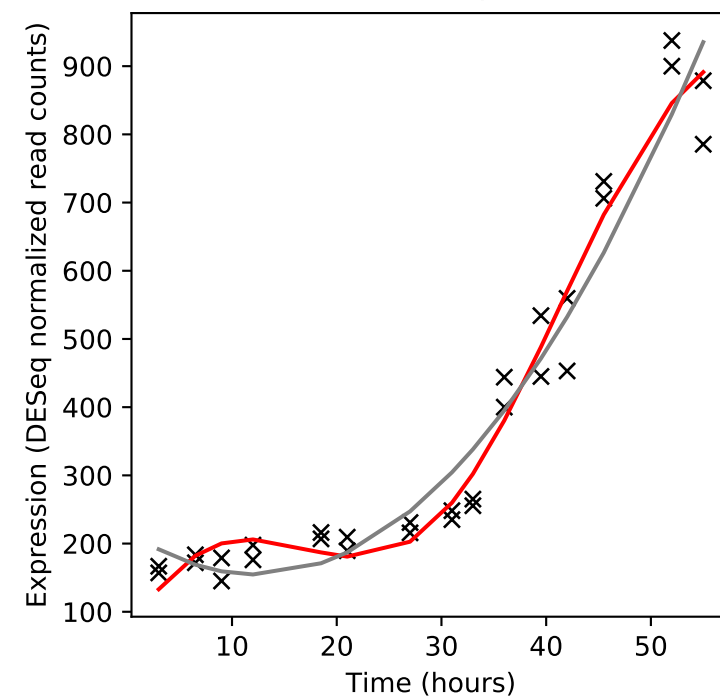

Rv1830/-

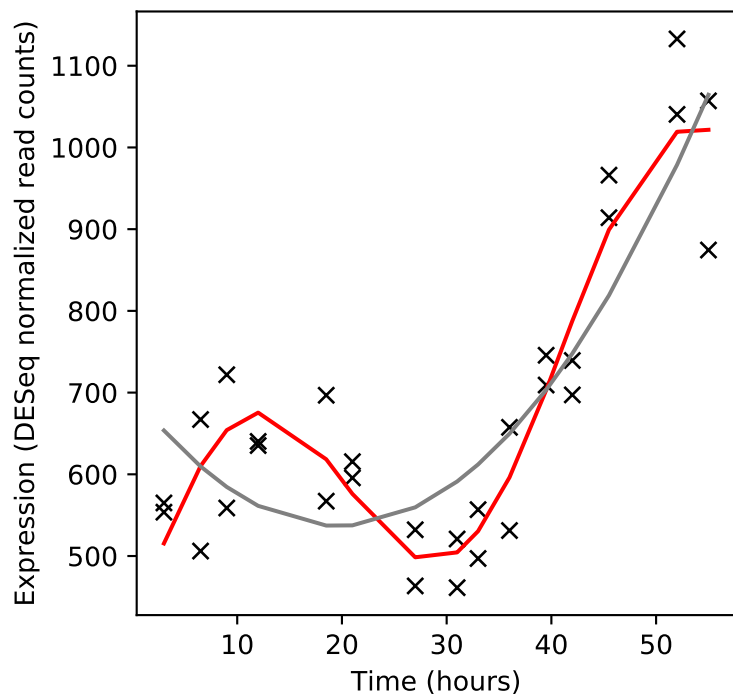

Rv1831/-

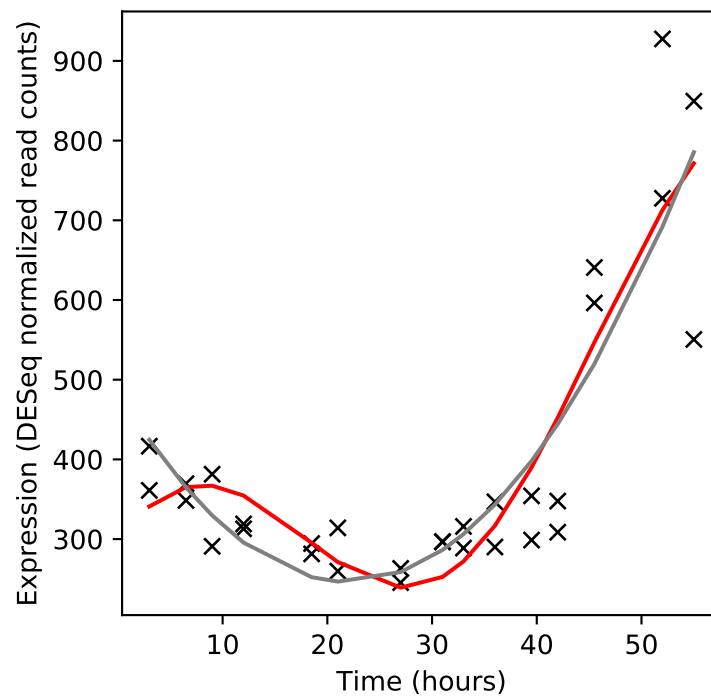

Rv1832/gcvB

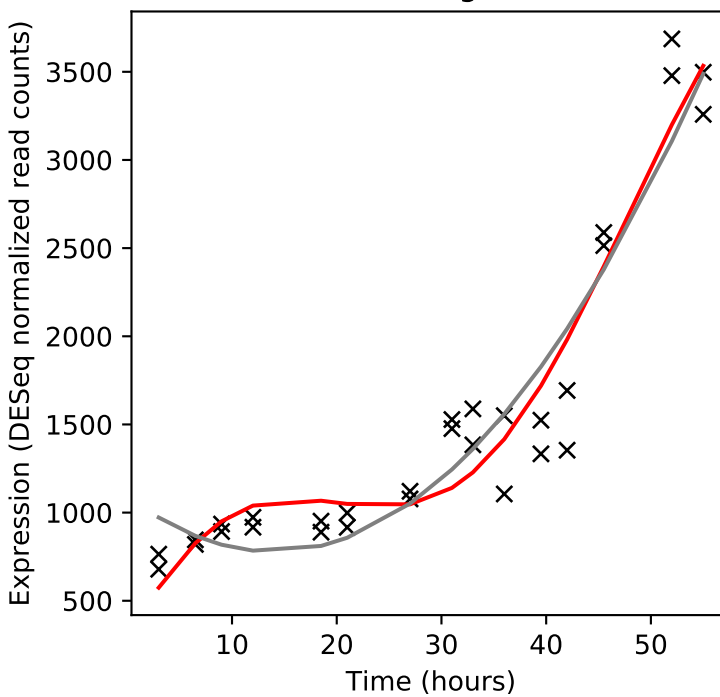

Rv1833c/-

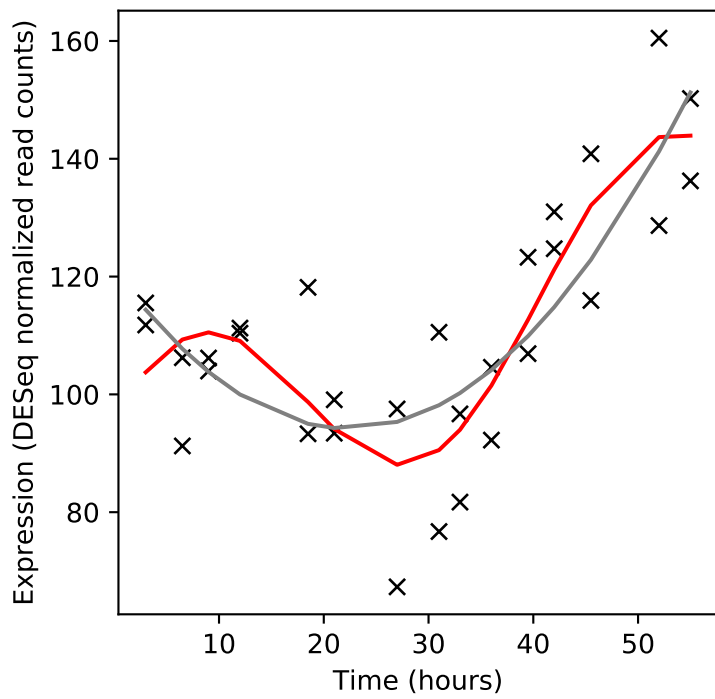

Rv1834/lipZ

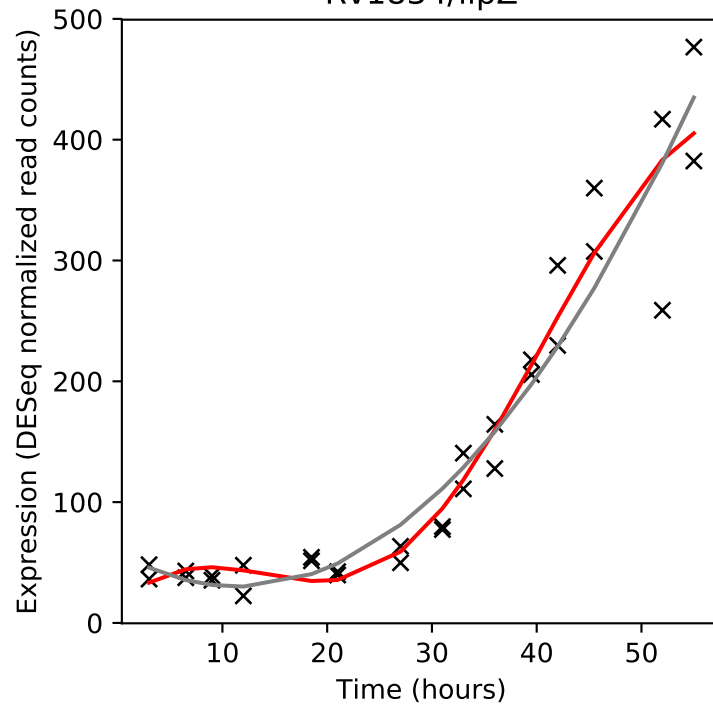

Rv1835c/-

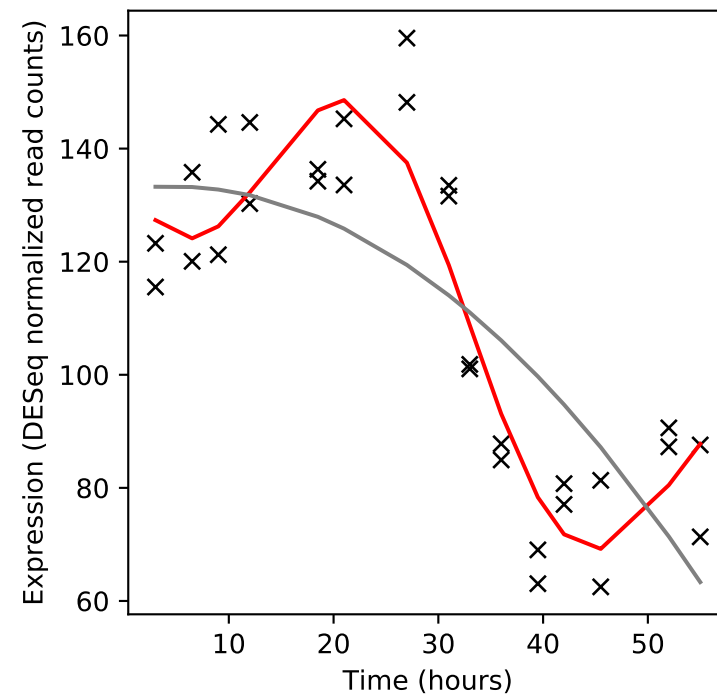

Rv1836c/-

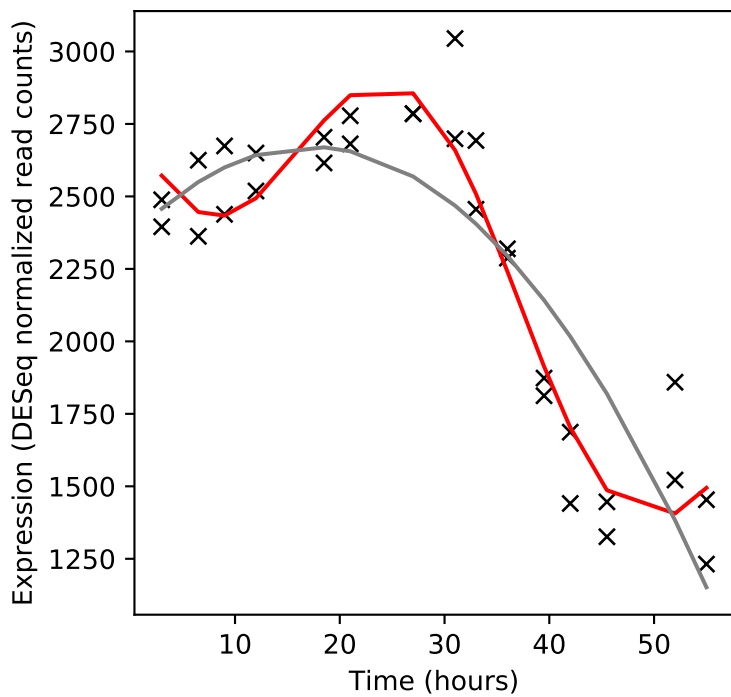

Rv1837c/glcB

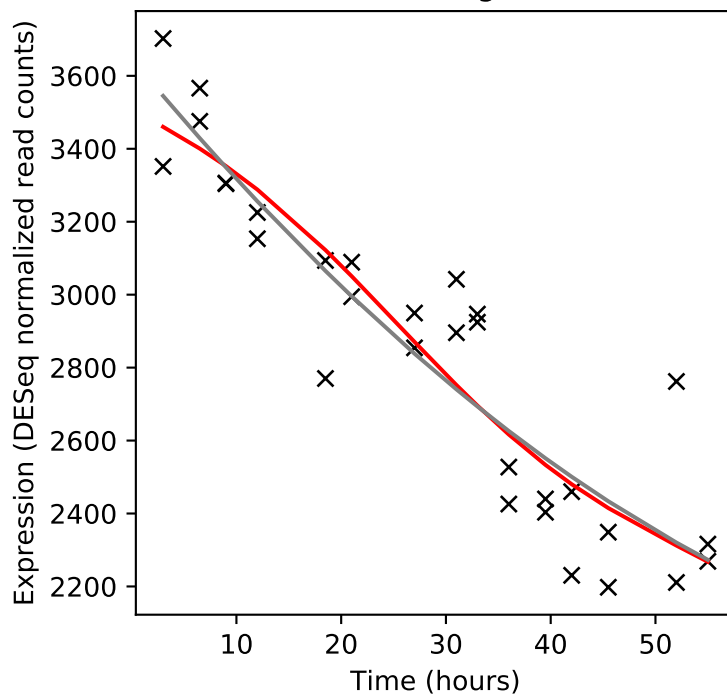

Rv1838c/vapC13

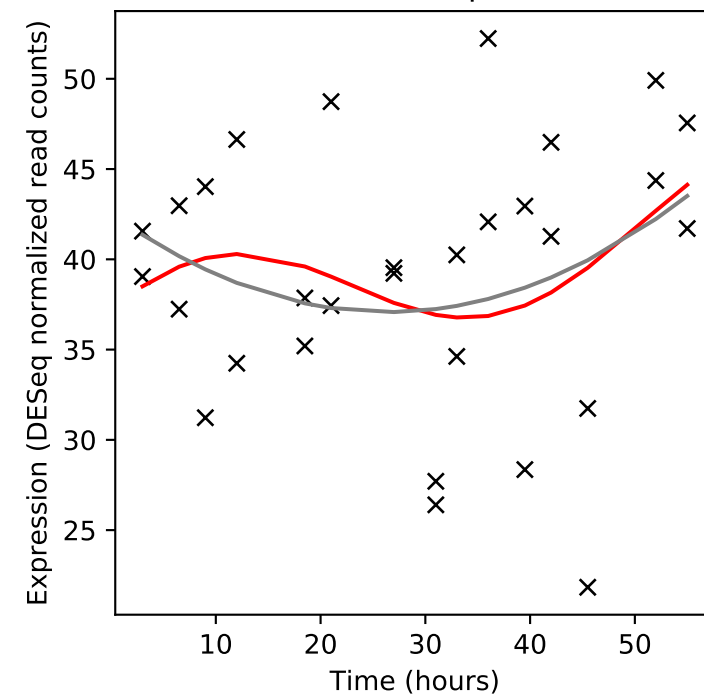

Rv1839c/vapB13

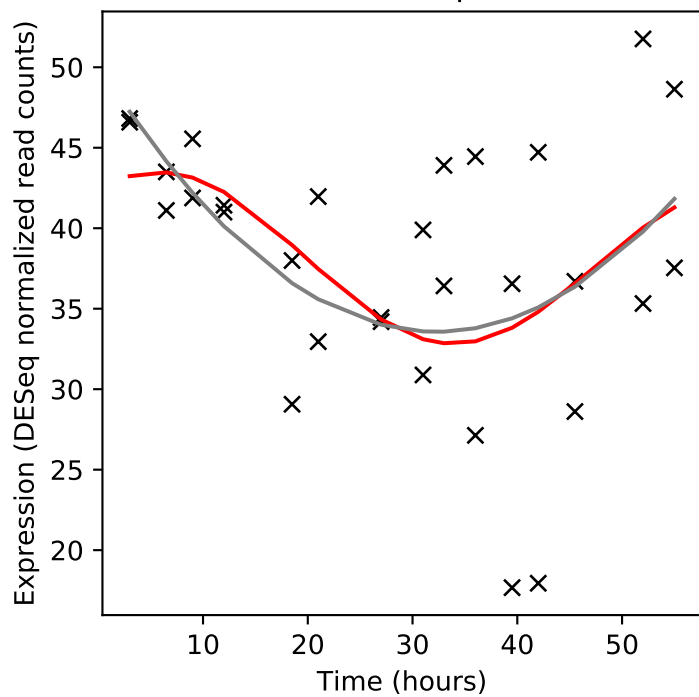

Rv1840c/PE\_PGRS34

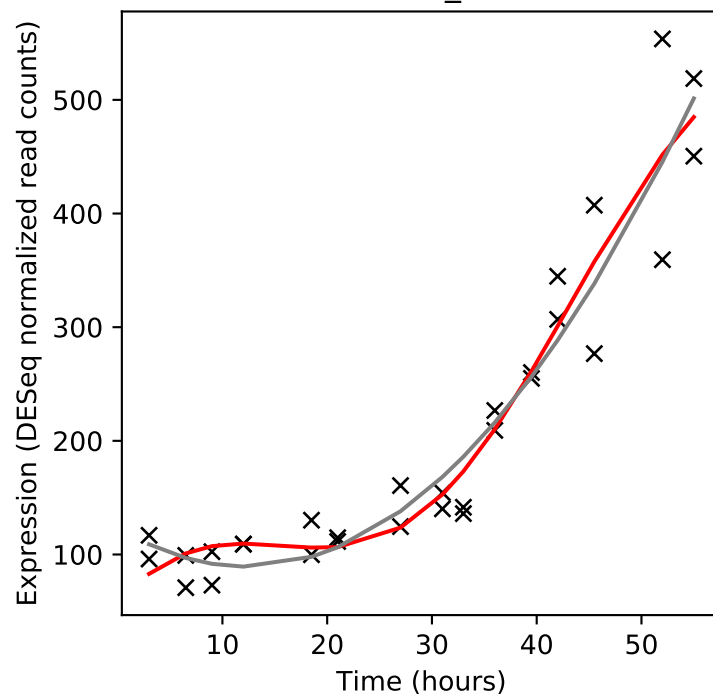

Rv1841c/-

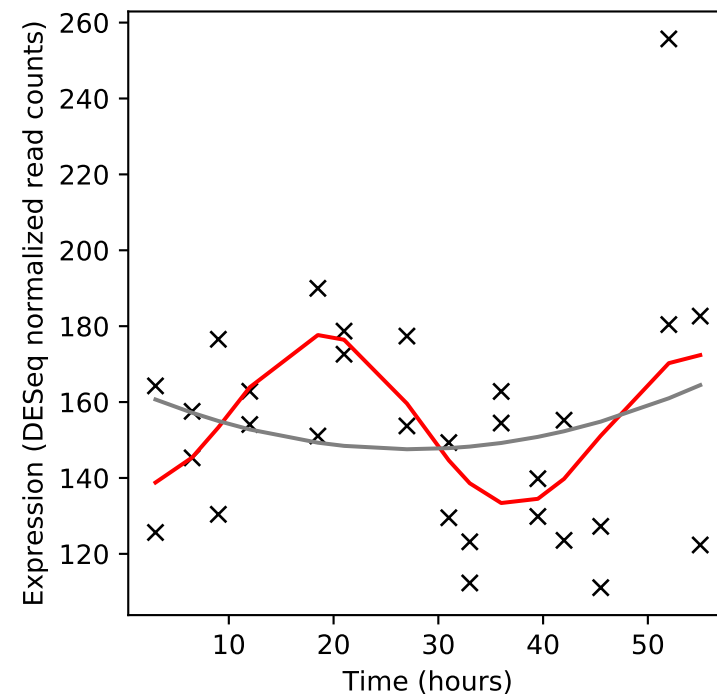

Rv1842c/-

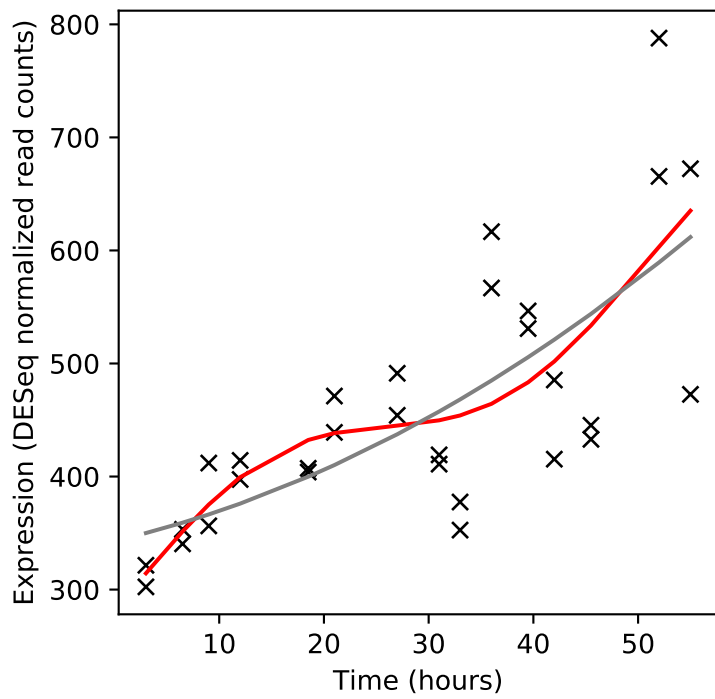

Rv1843c/guaB1

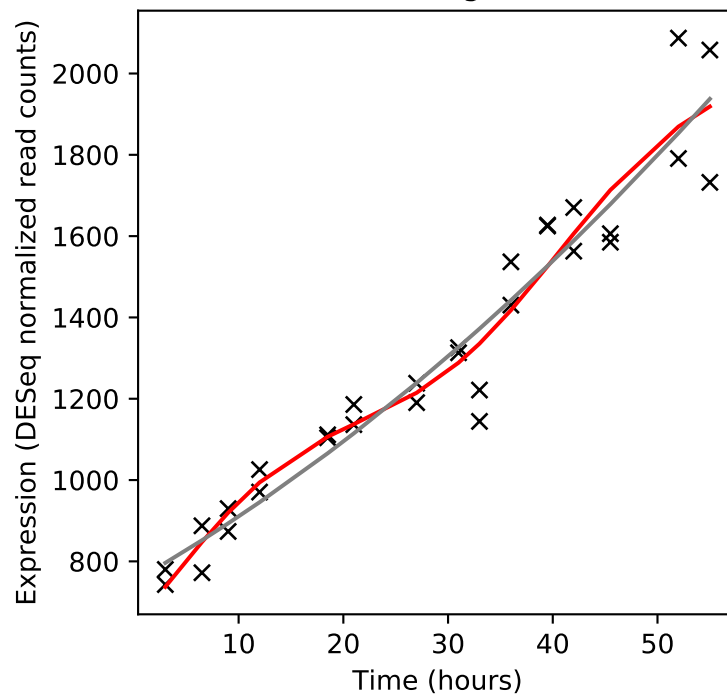

Rv1844c/gnd1

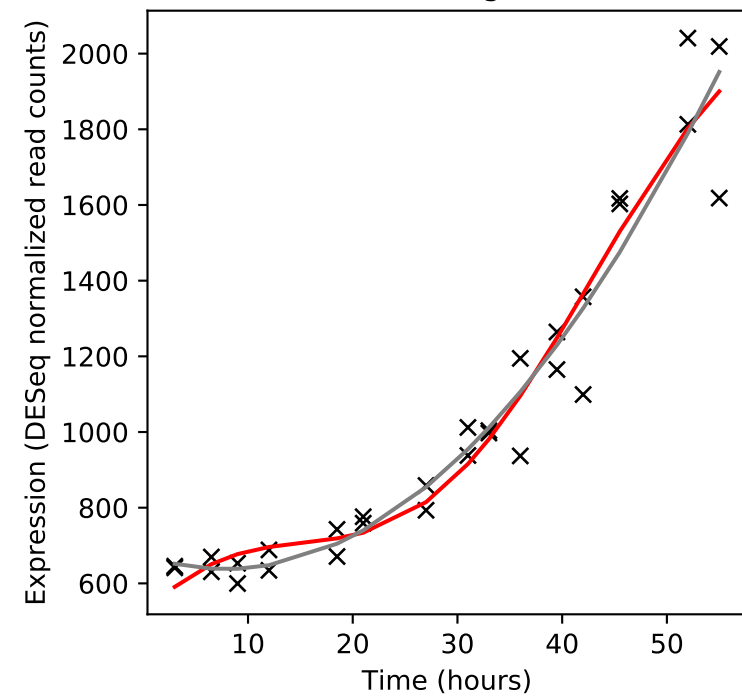

Rv1845c/blaR

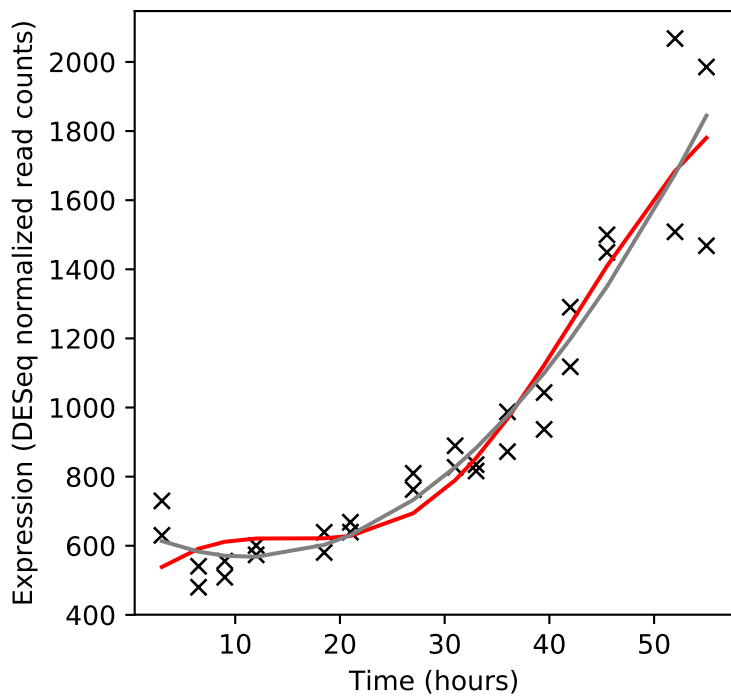

Rv1846c/blaI

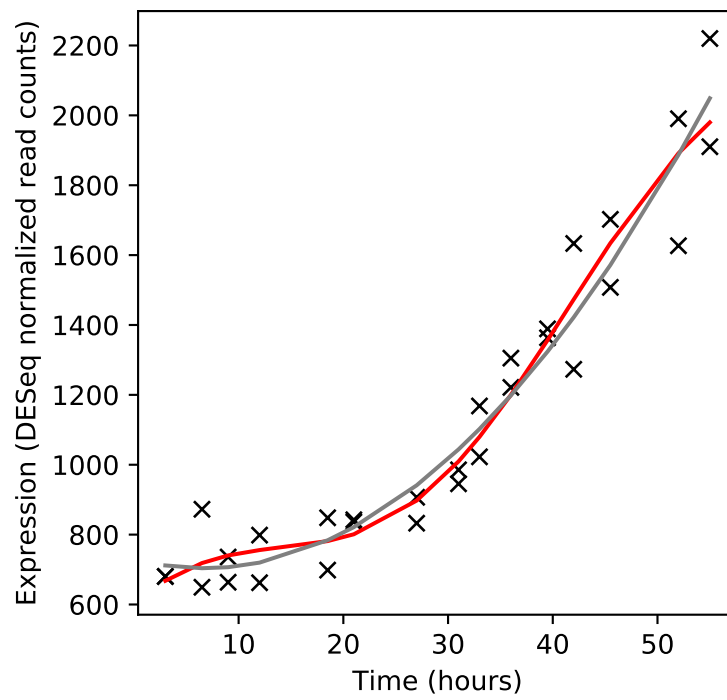

Rv1847/-

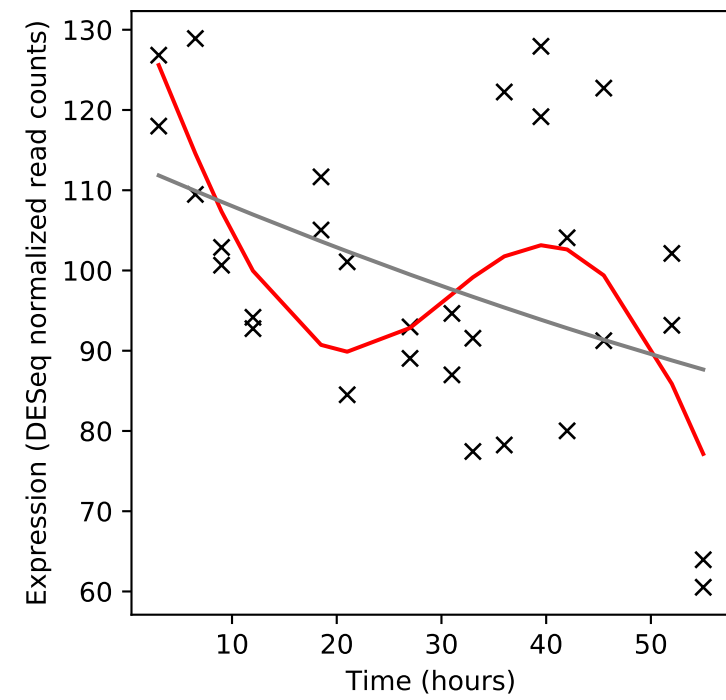

Rv1848/ureA

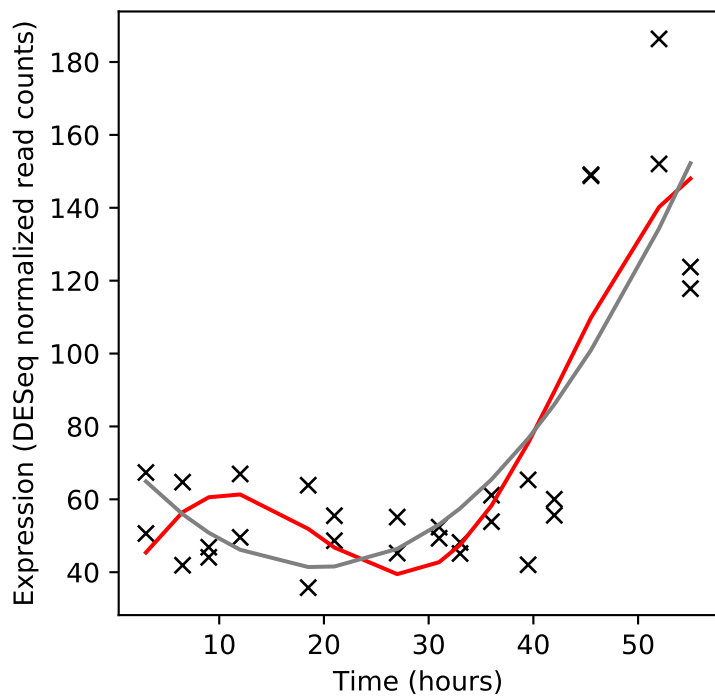

Rv1849/ureB

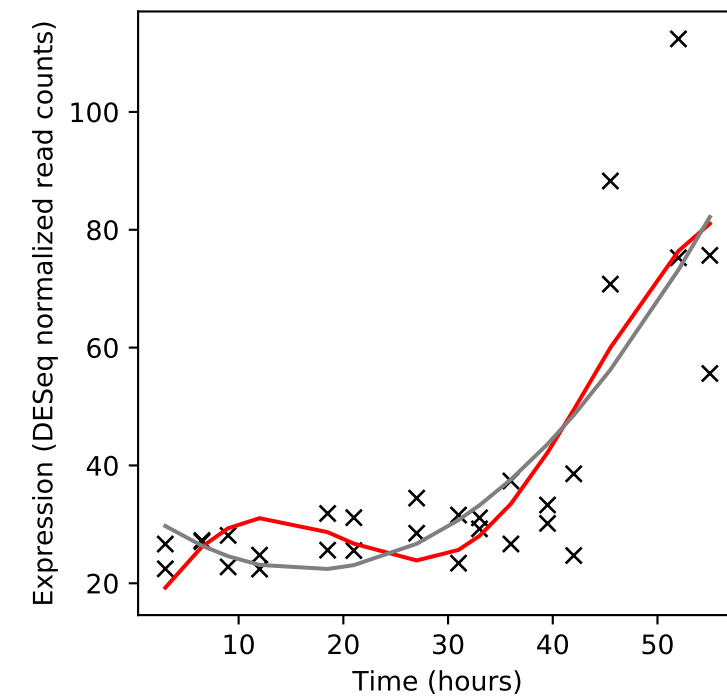

Rv1850/ureC

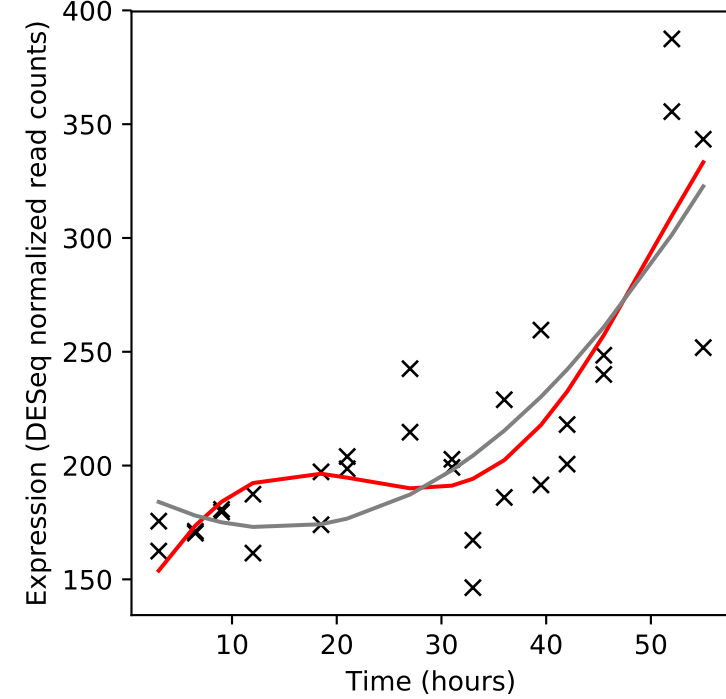

Rv1851/ureF

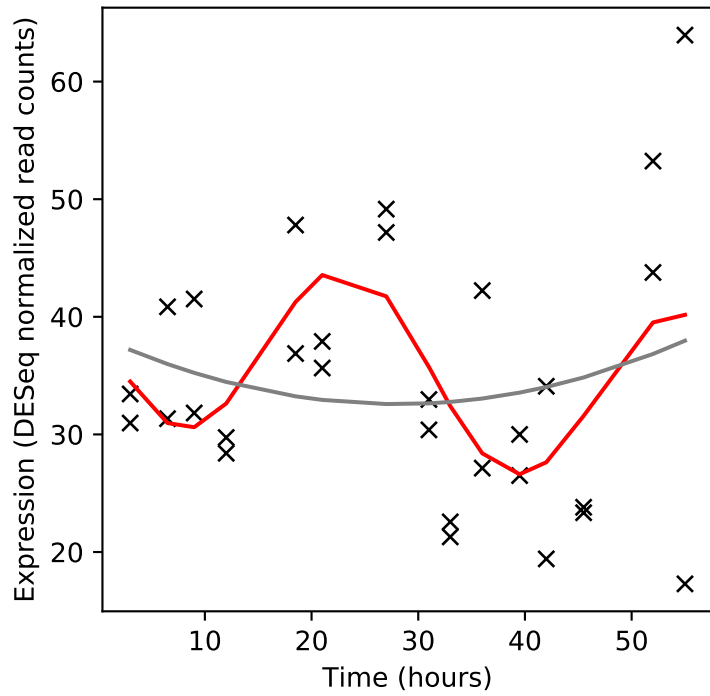

Rv1852/ureG

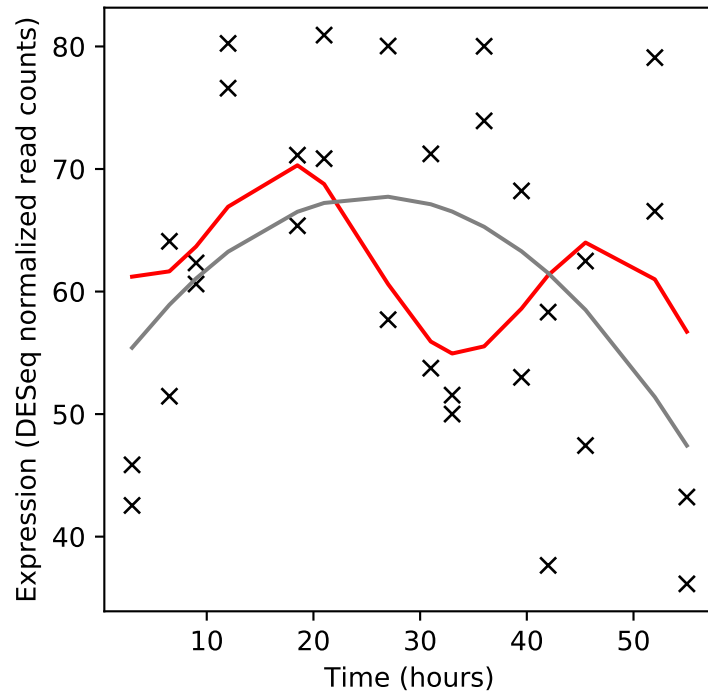

Rv1853/ureD

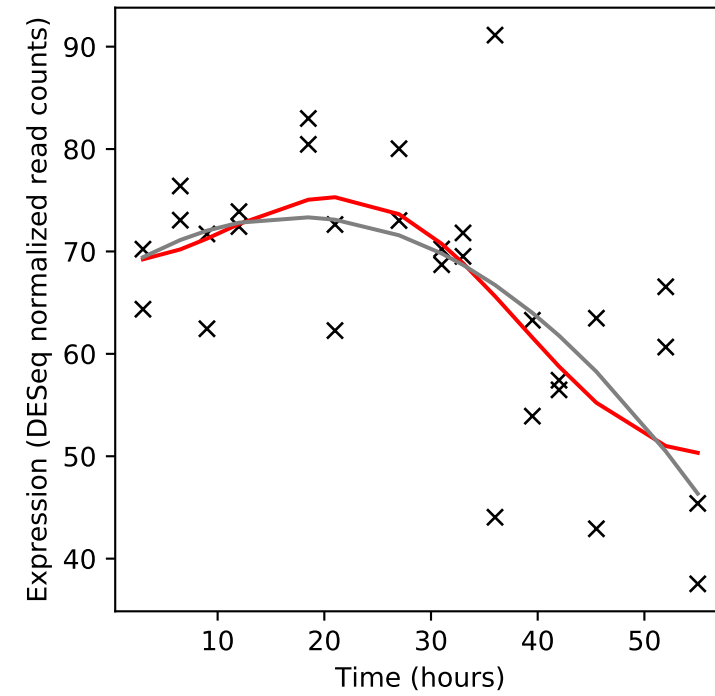

Rv1854c/ndh

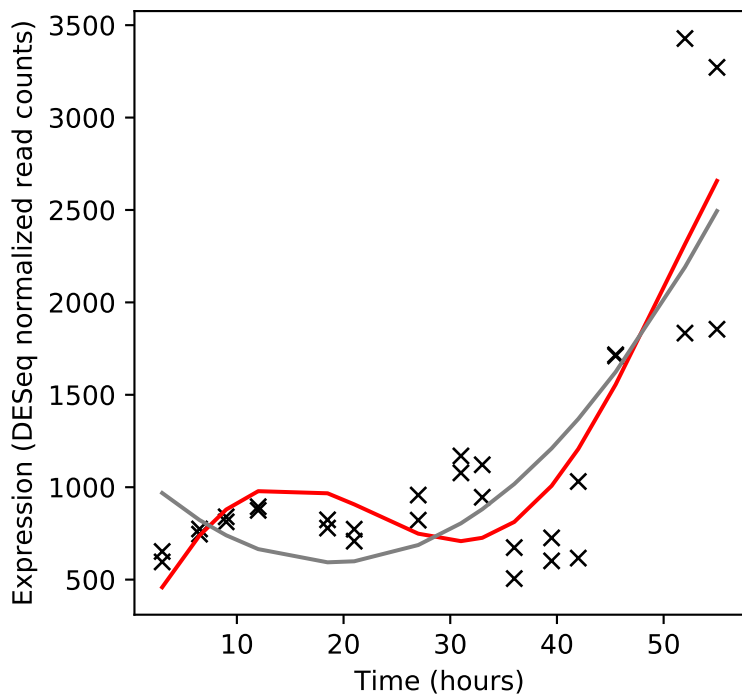

Rv1855c/-

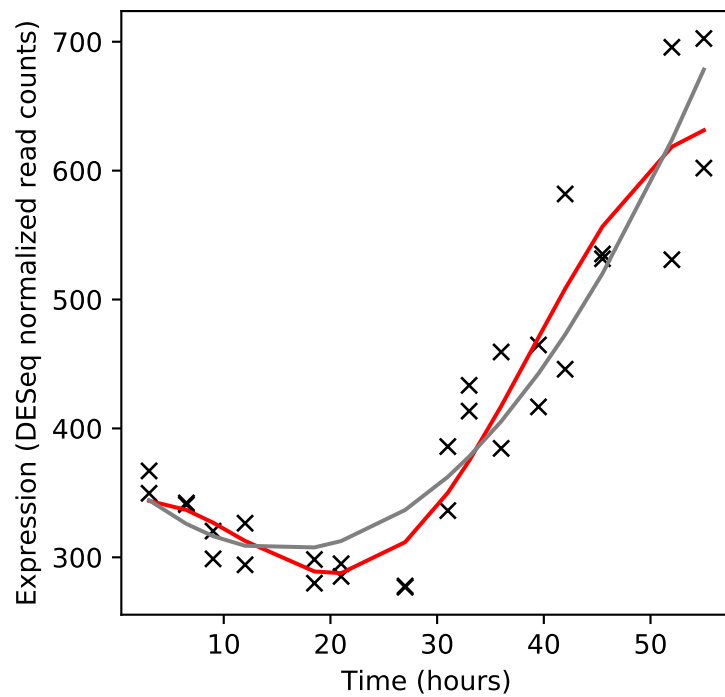

Rv1856c/-

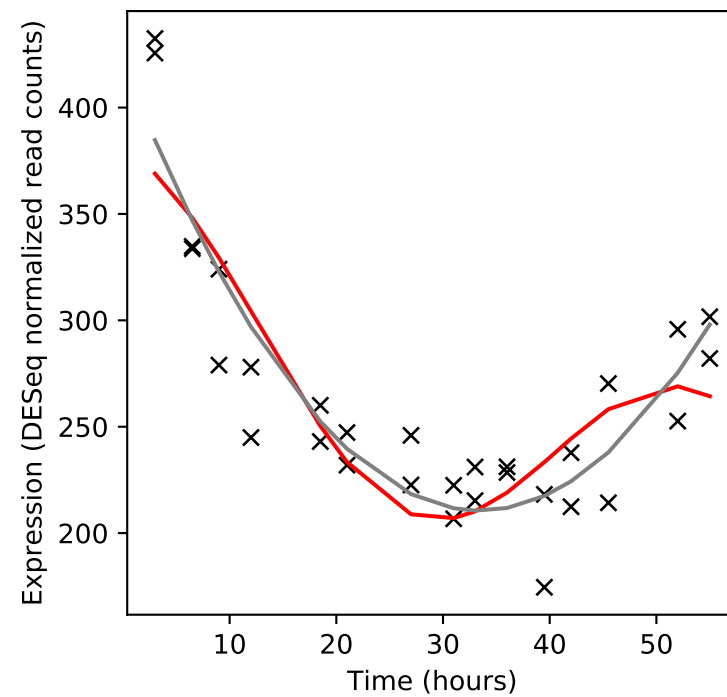

Rv1857/modA

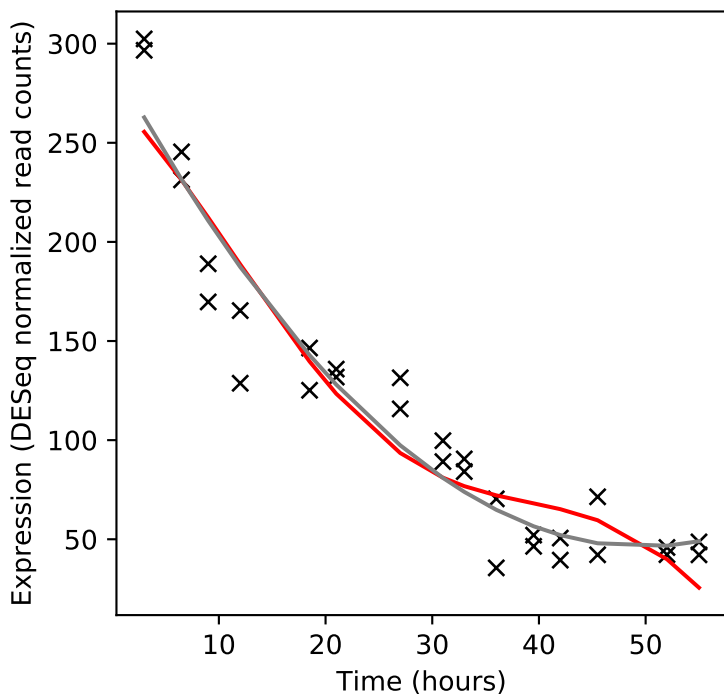

Rv1858/modB

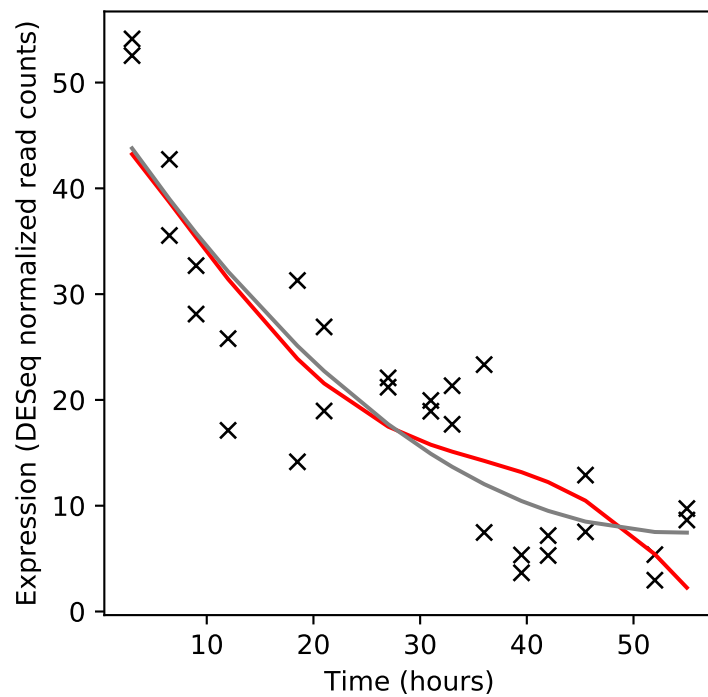

Rv1859/modC

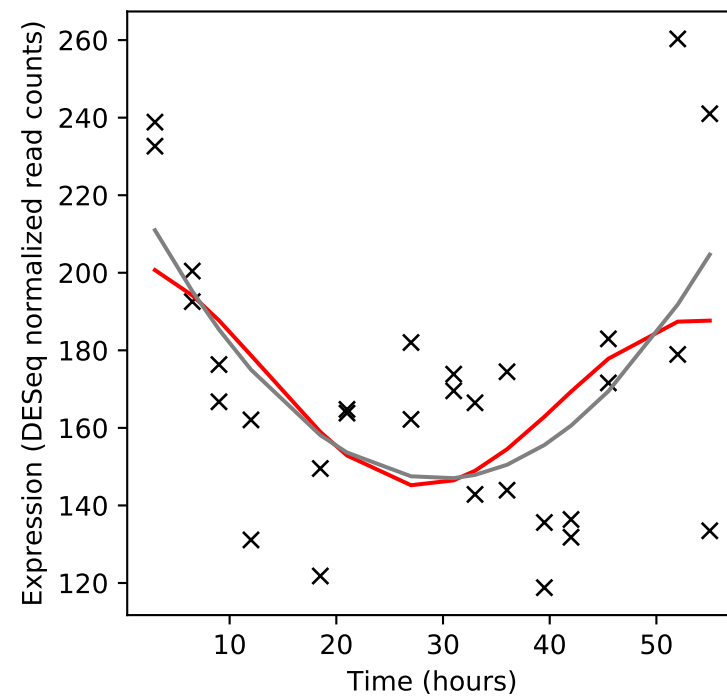

Rv1860/apa

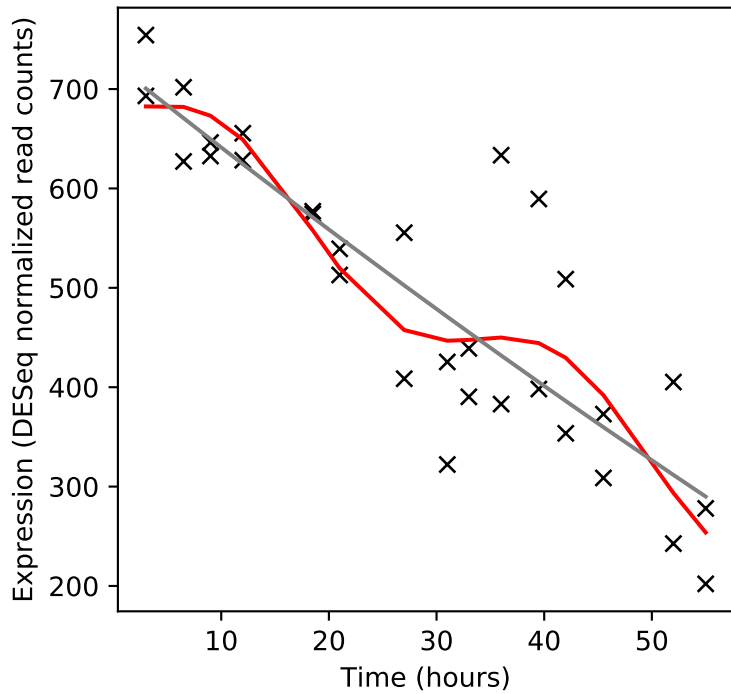

Rv1861/-

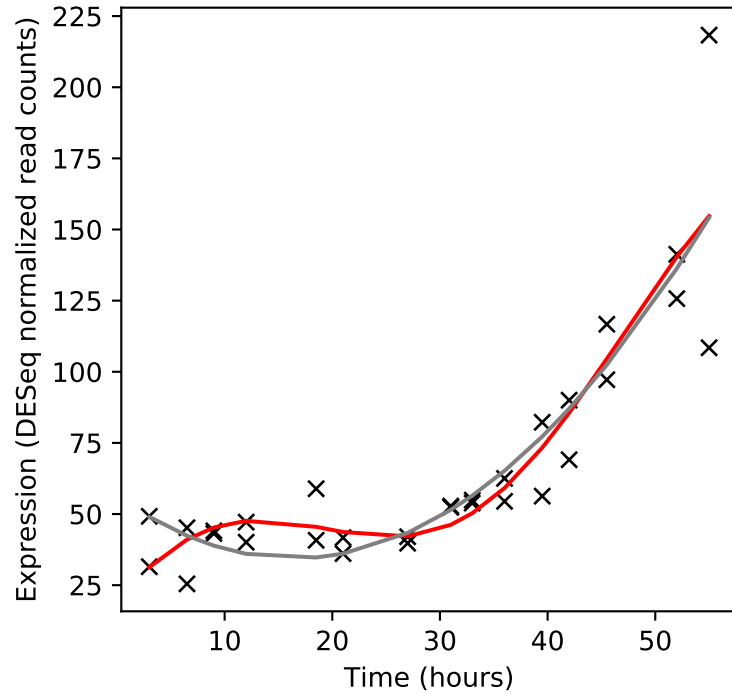

Rv1862/adhA

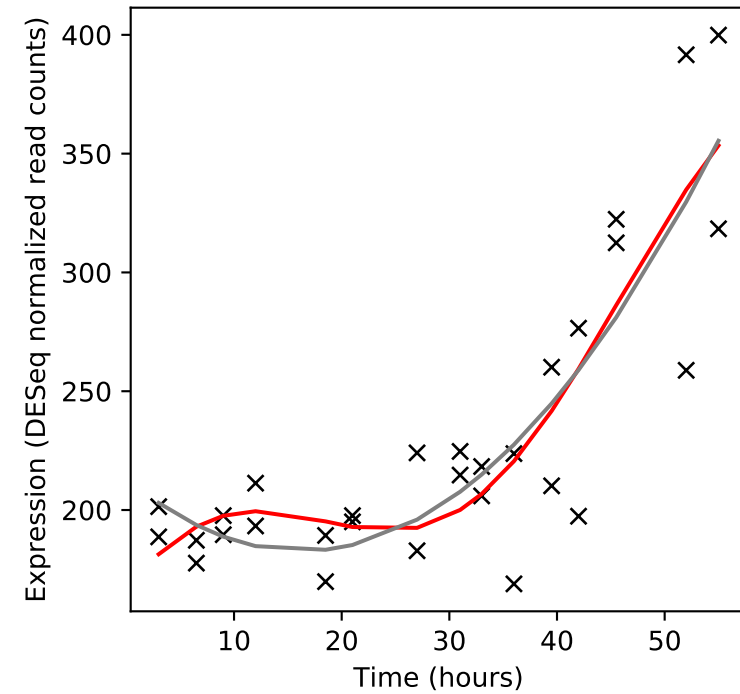

Rv1863c/-

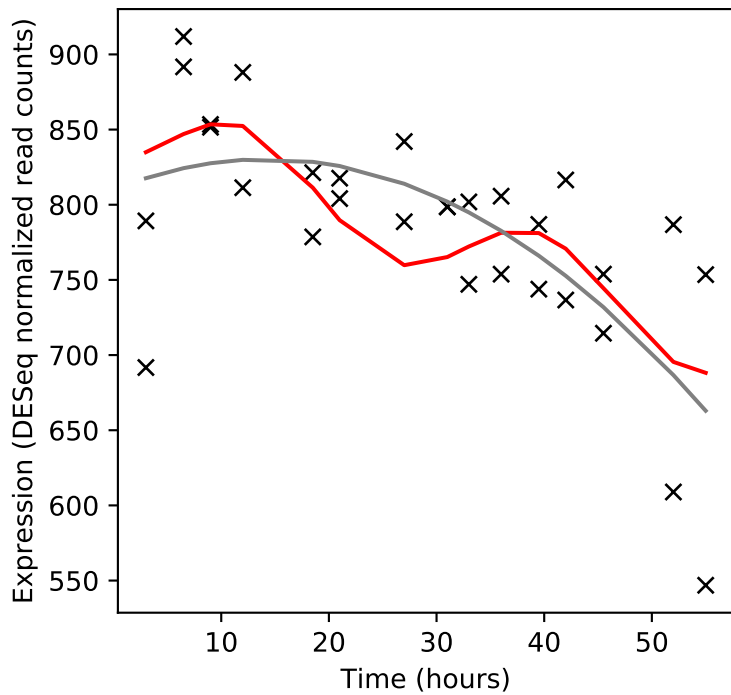

Rv1864c/-

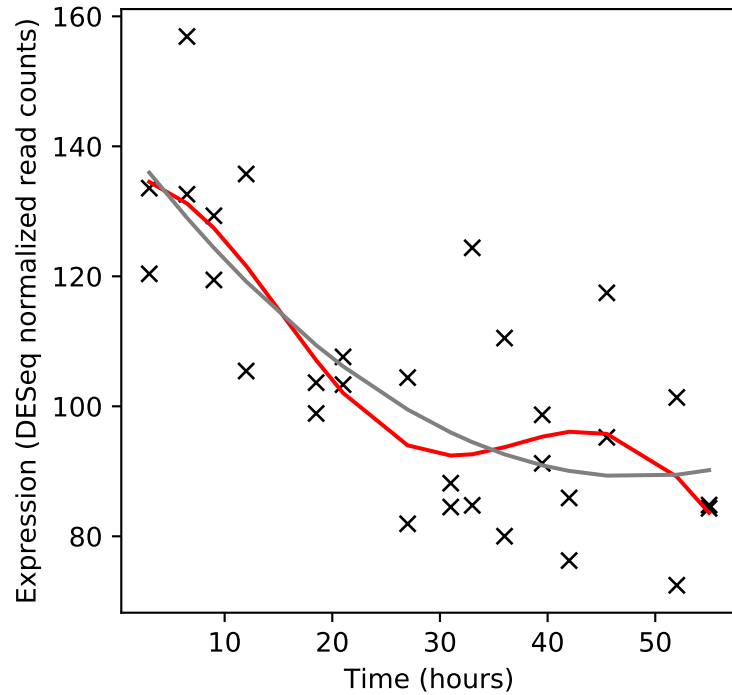

Rv1865c/-

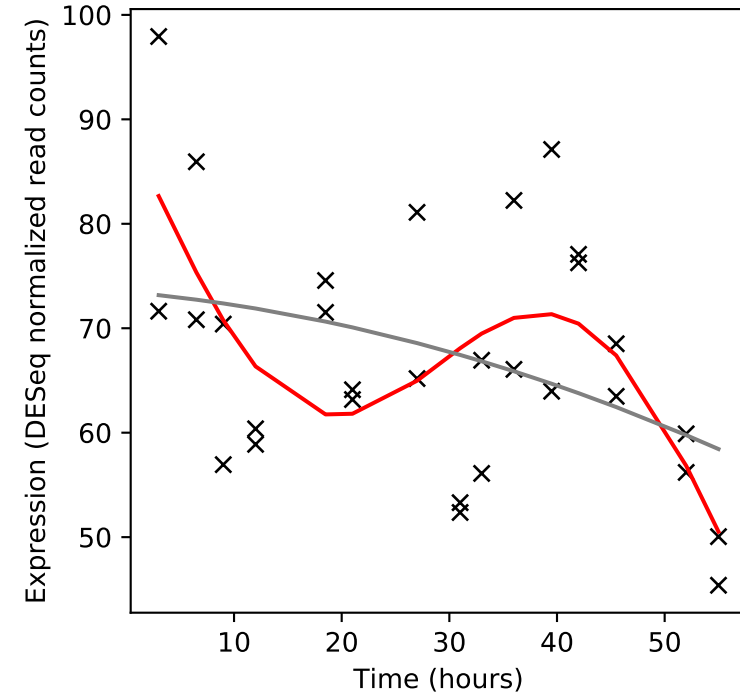

Rv1866/-

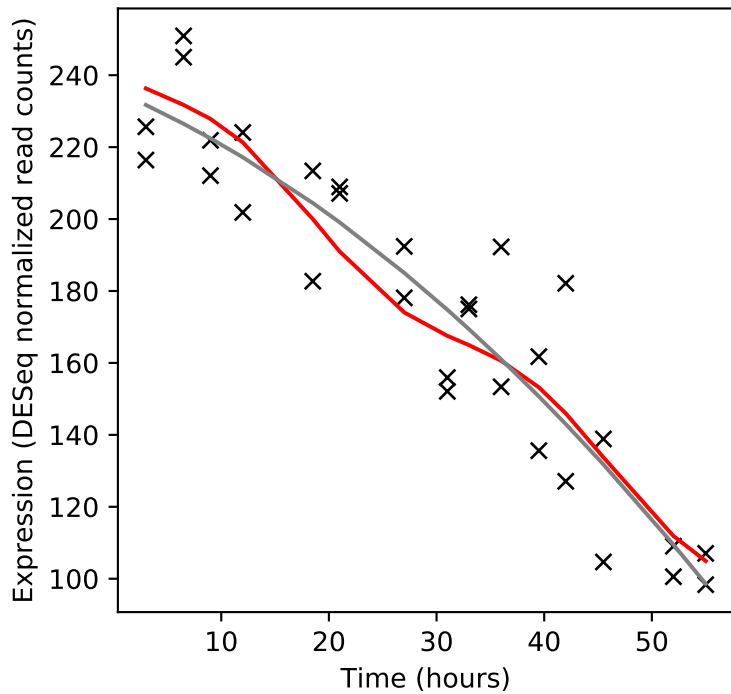

Rv1867/-

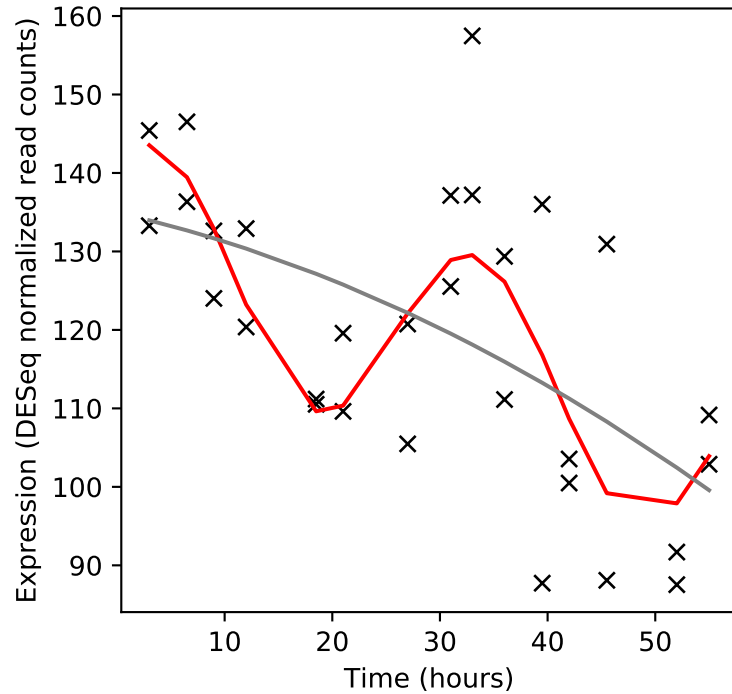

Rv1868/-

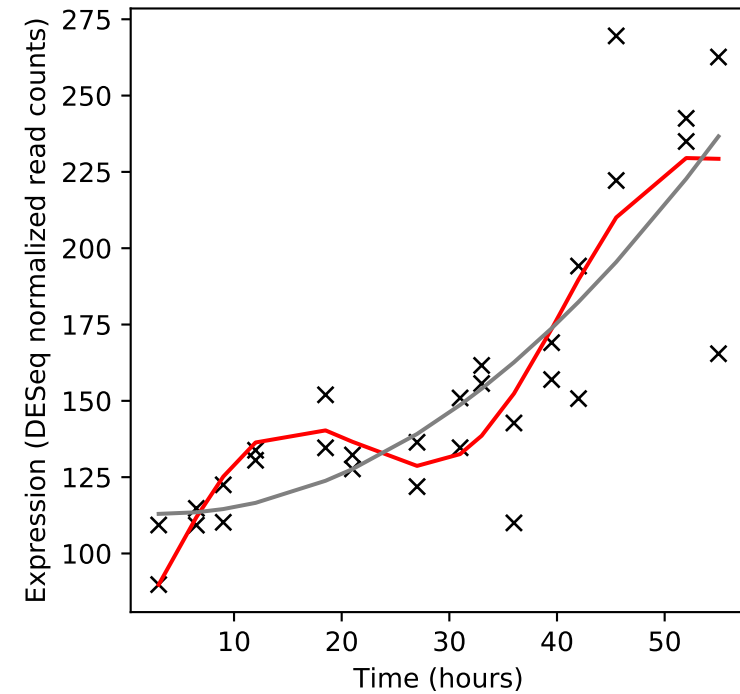



Rv1869c/-

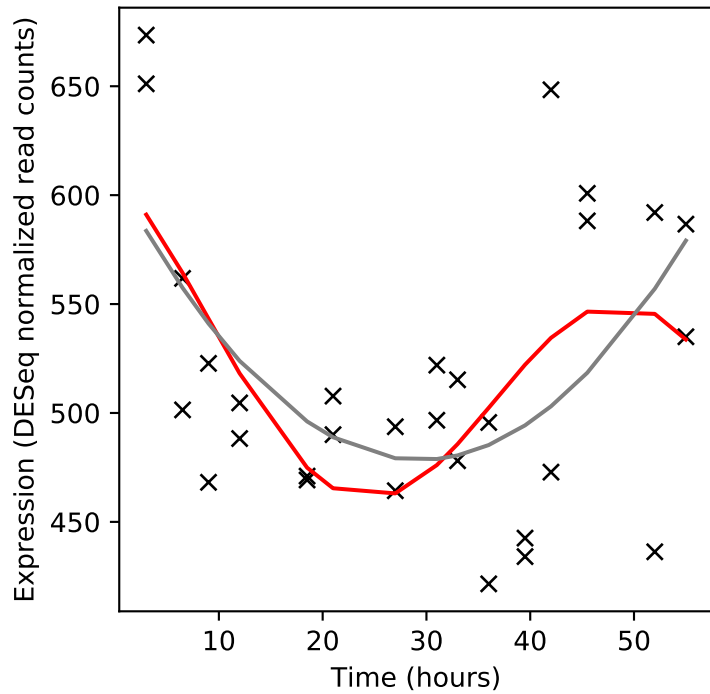

Rv1870c/-

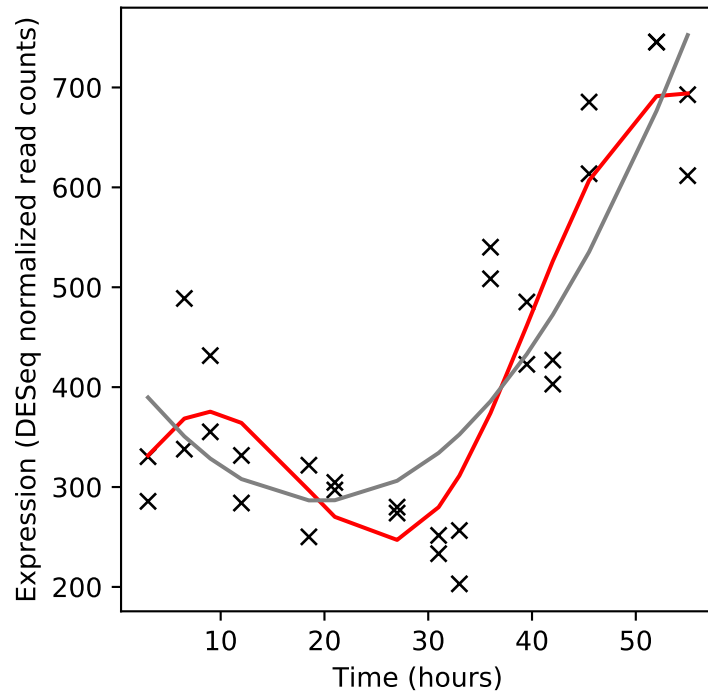

Rv1871c/-

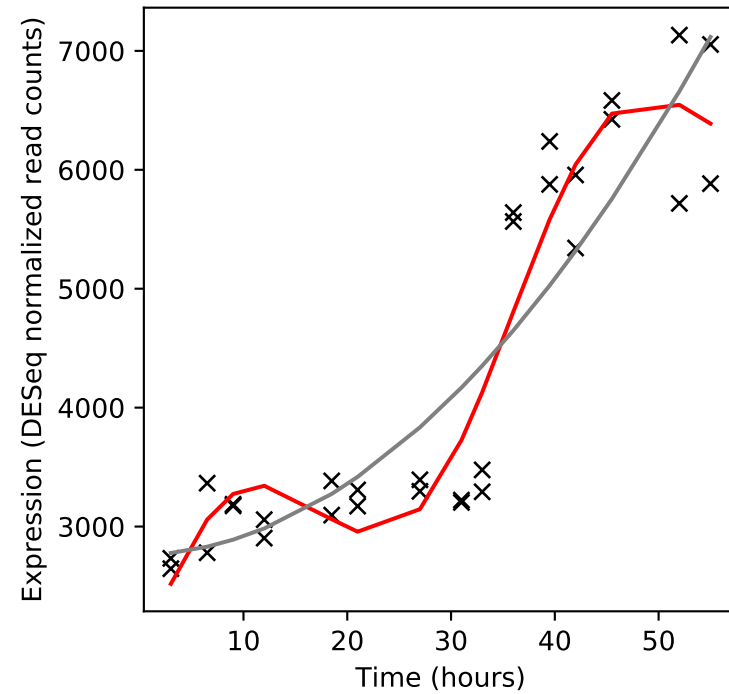

Rv1872c/lldD2

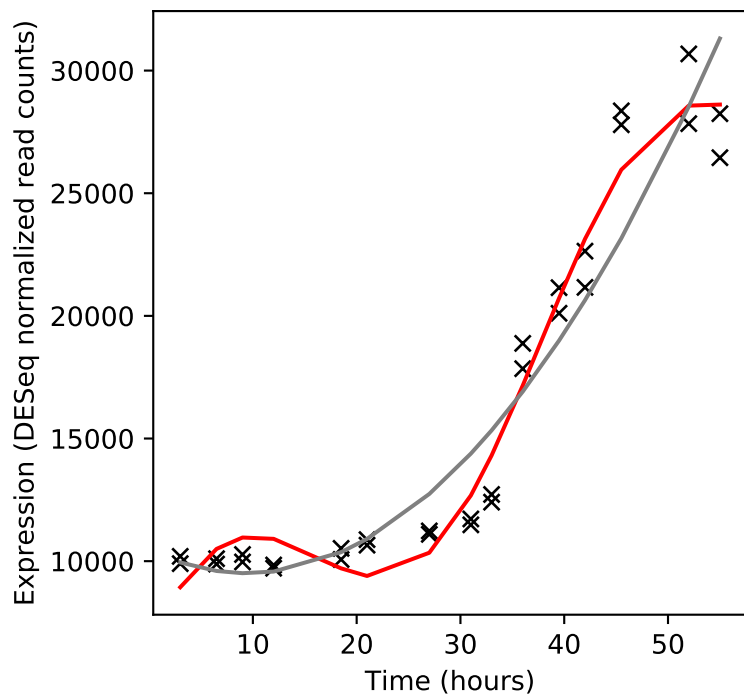

Rv1873/-

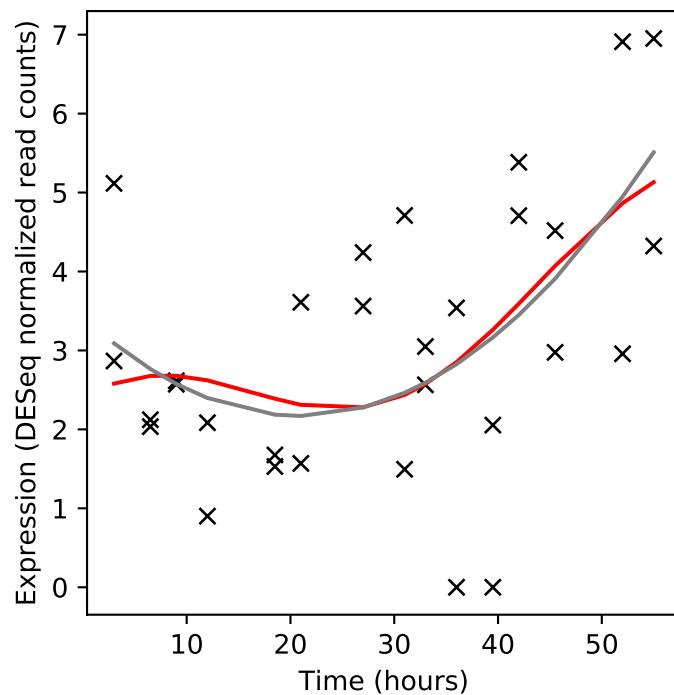

Rv1874/-

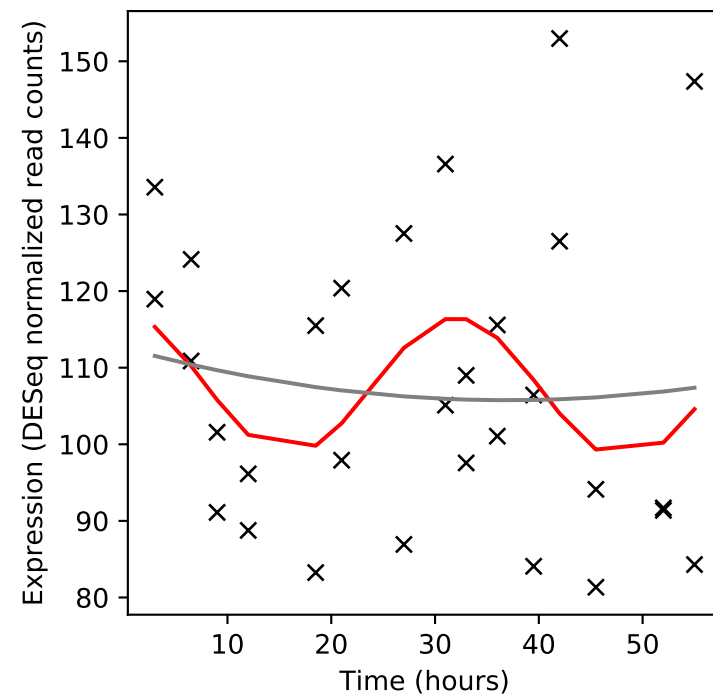

Rv1875/-

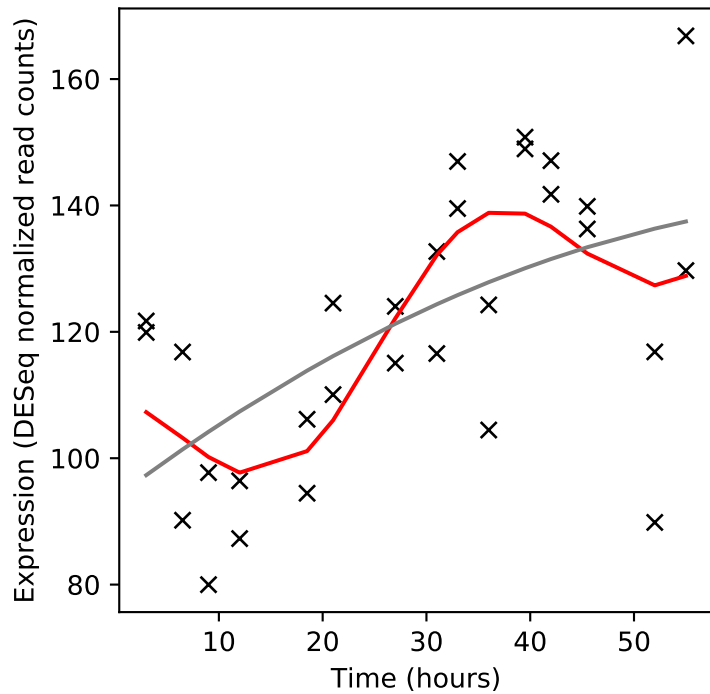

Rv1876/bfrA

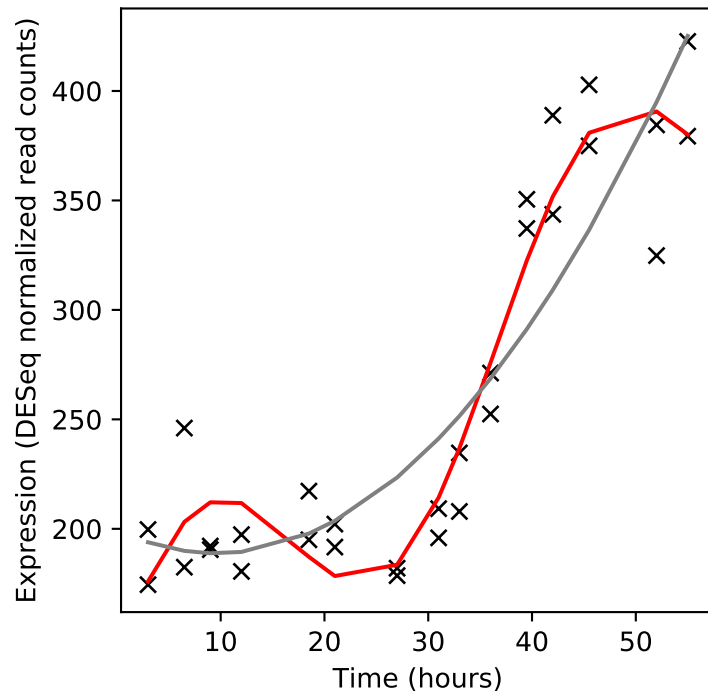

Rv1877/-

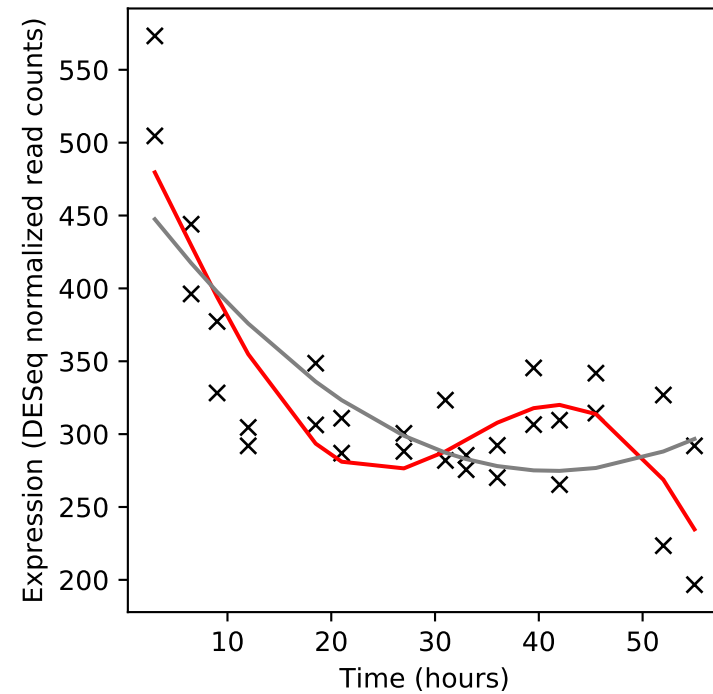

Rv1878/glnA3

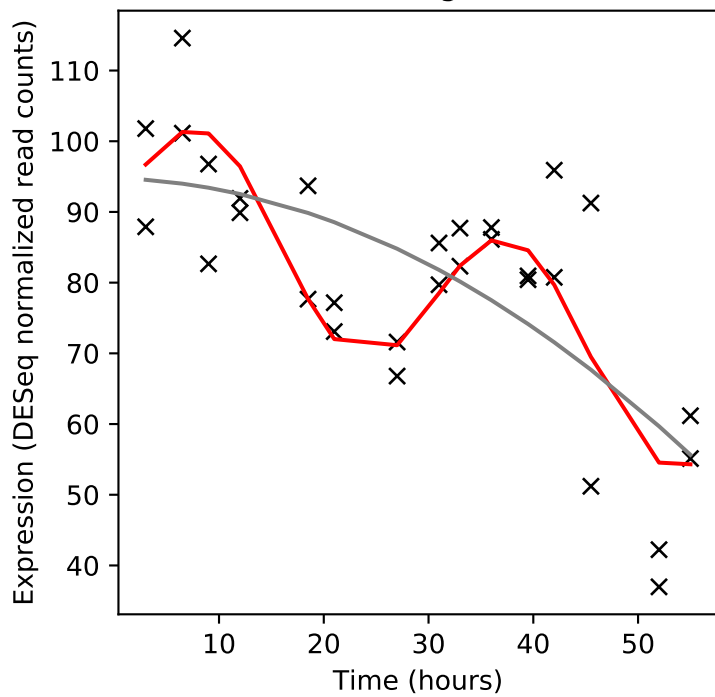

Rv1879/-

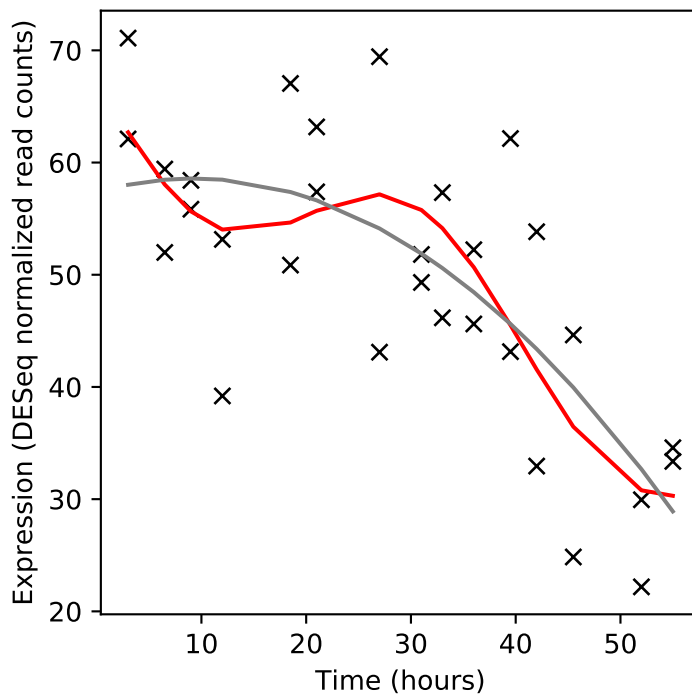

Rv1880c/cyp140

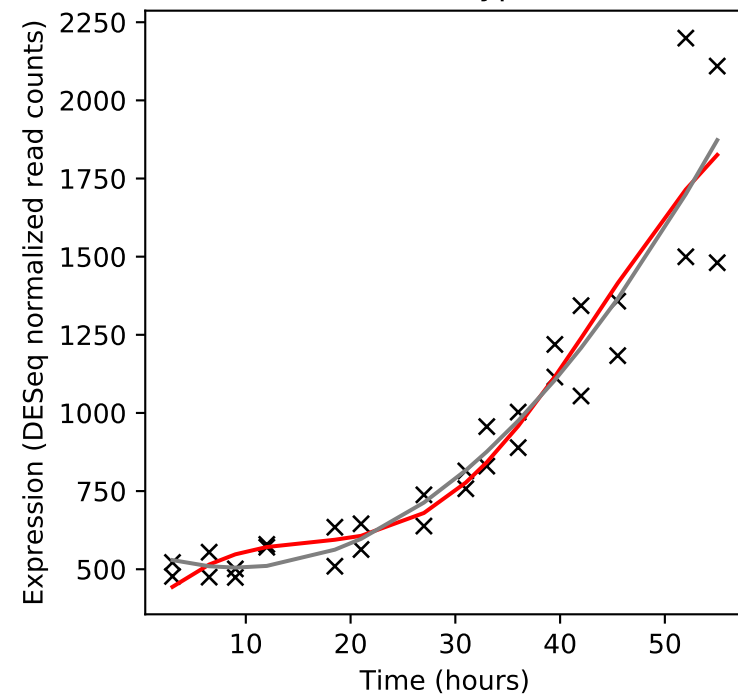

Rv1881c/lppE

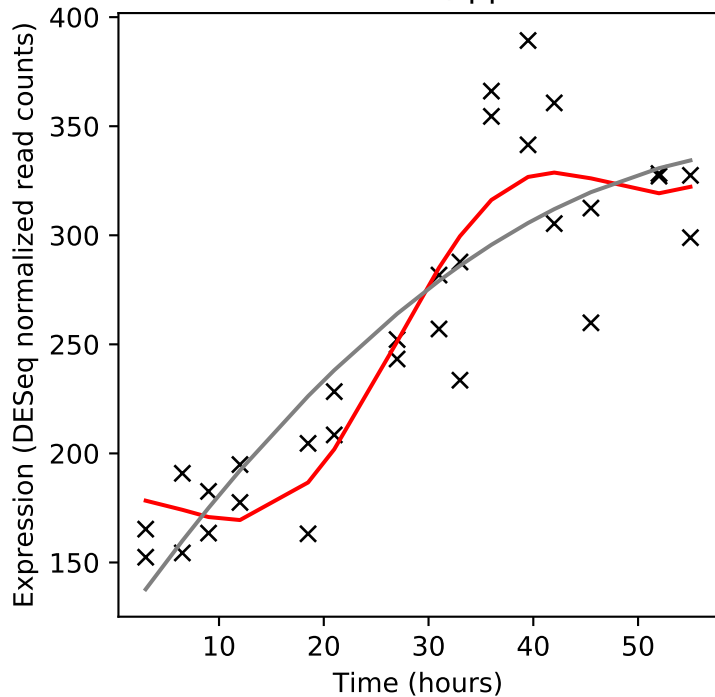

Rv1882c/-

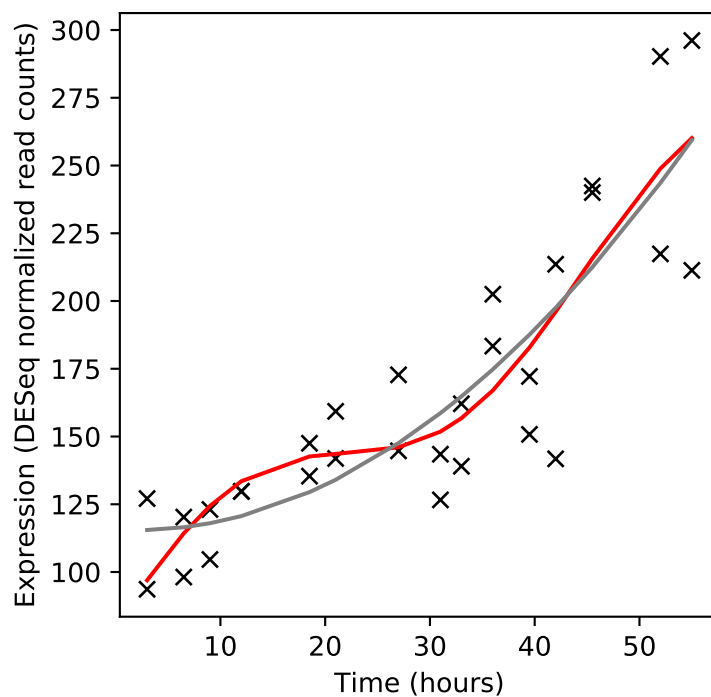

Rv1883c/-

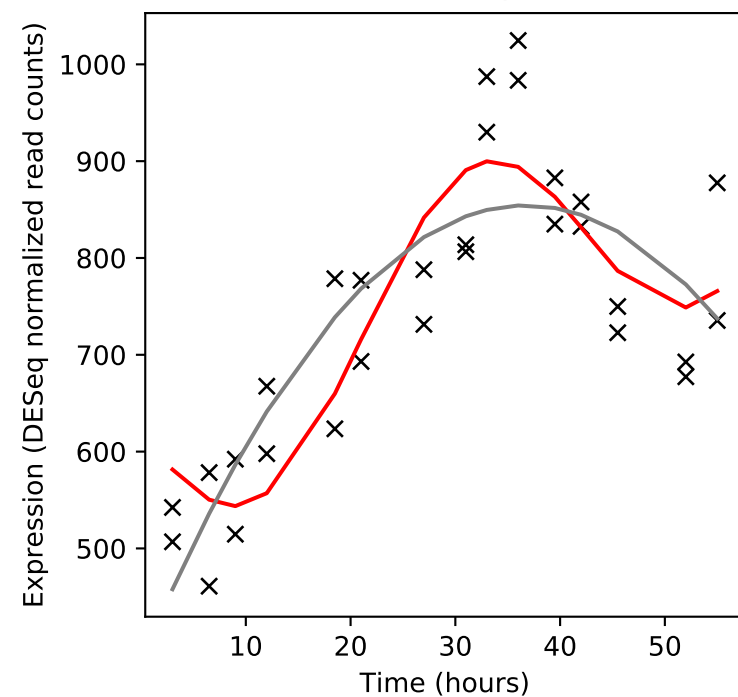

Rv1884c/rpfC

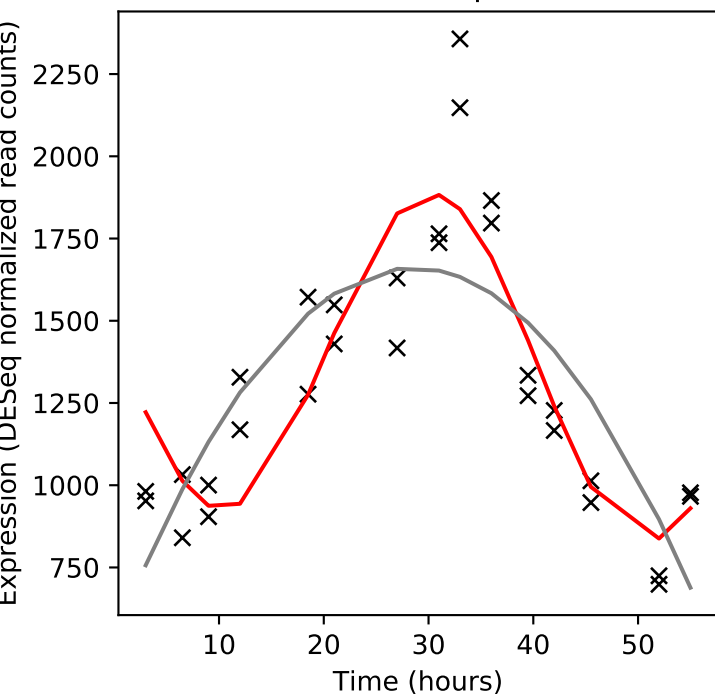

Rv1885c/-

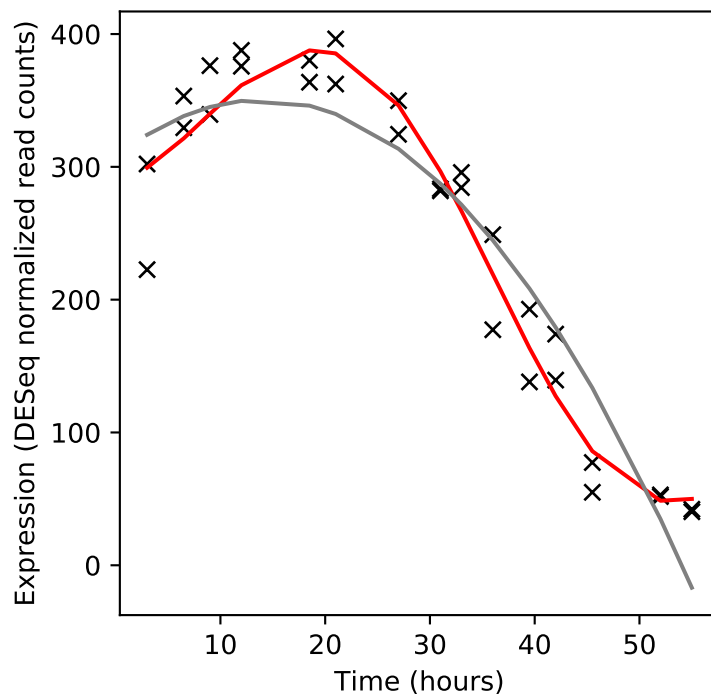

Rv1886c/fbpB

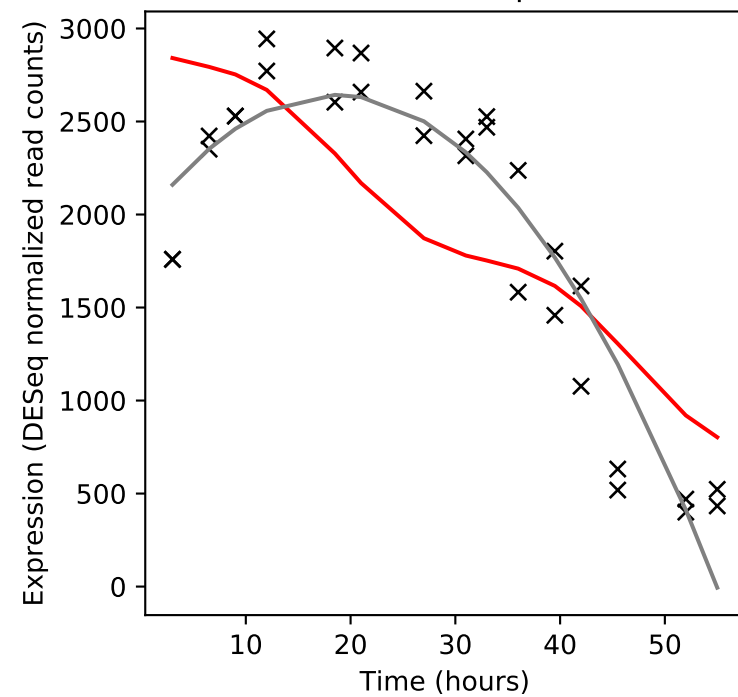

Rv1887/-

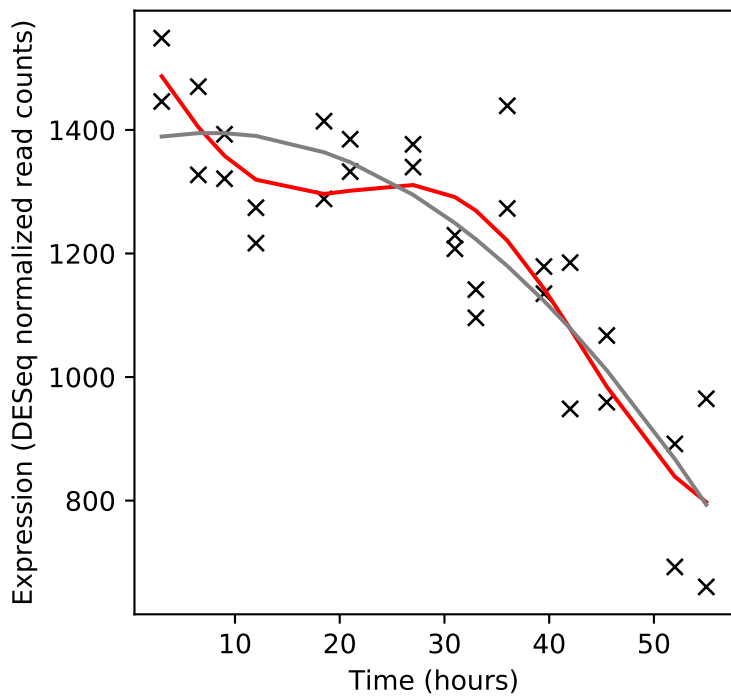

Rv1888c/-

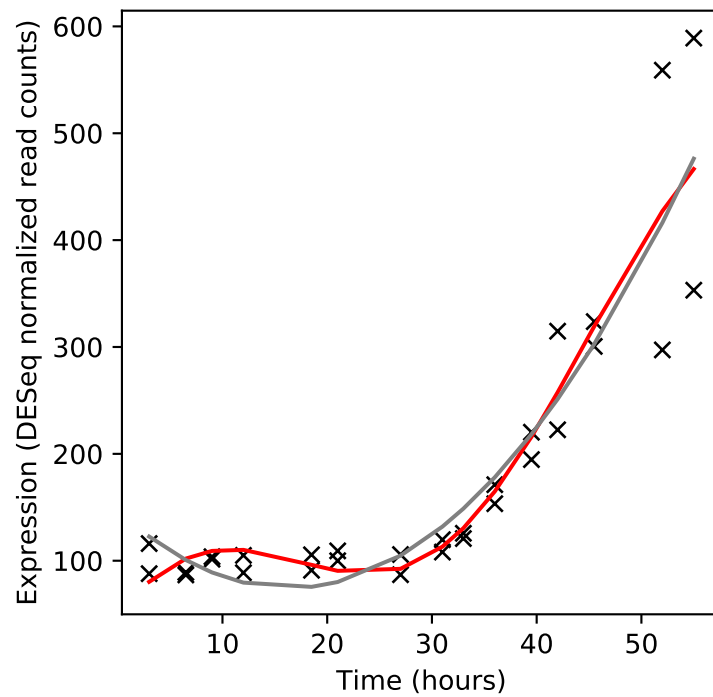

Rv1888A/-

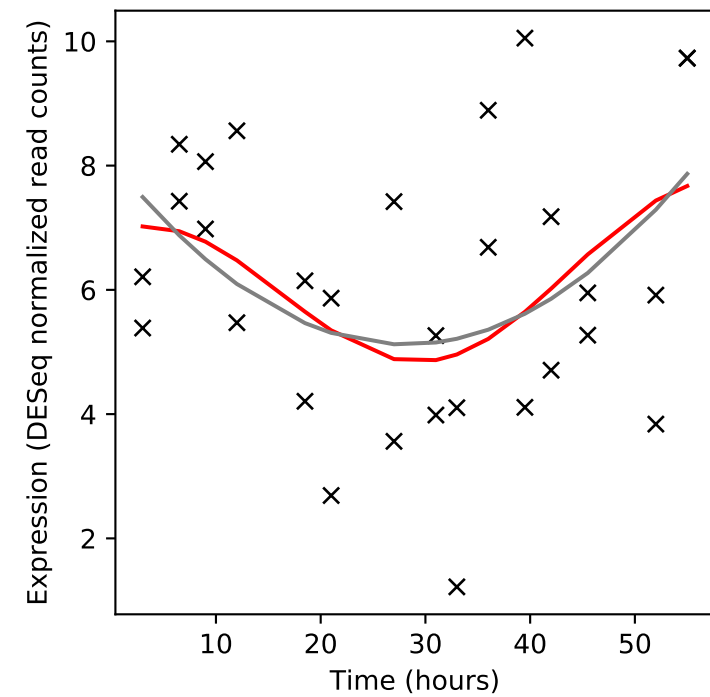

Rv1889c/-

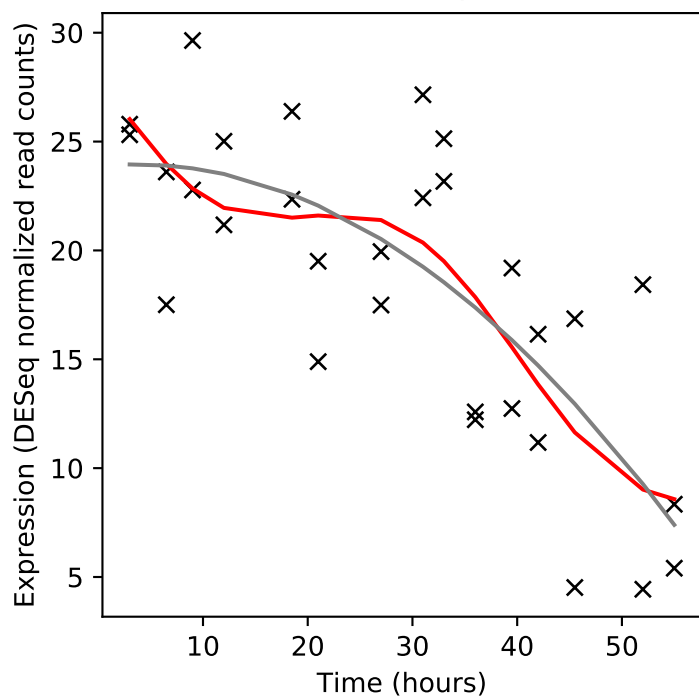

Rv1890c/-

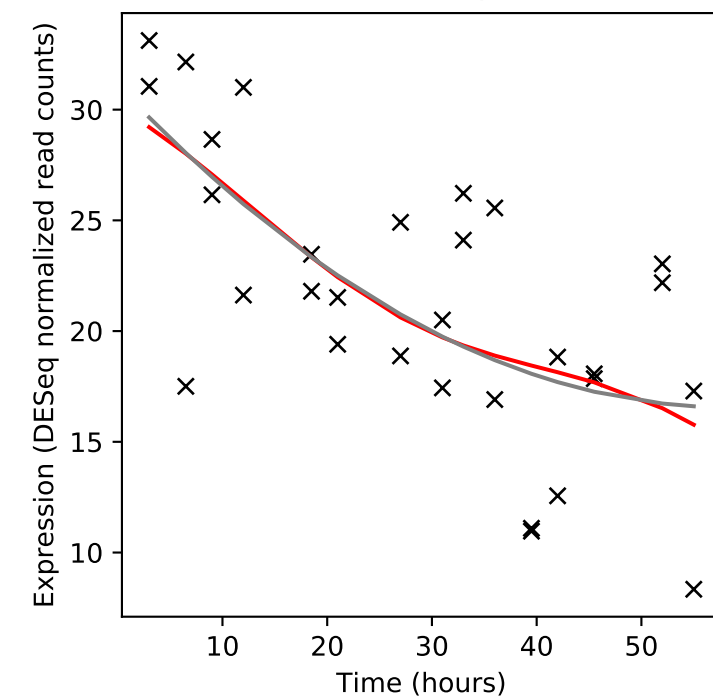

Rv1891/-

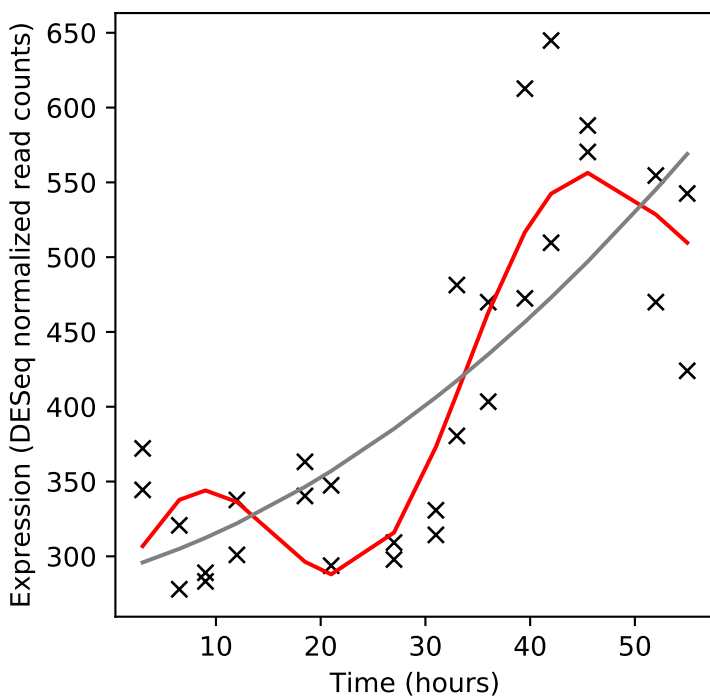

Rv1892/-

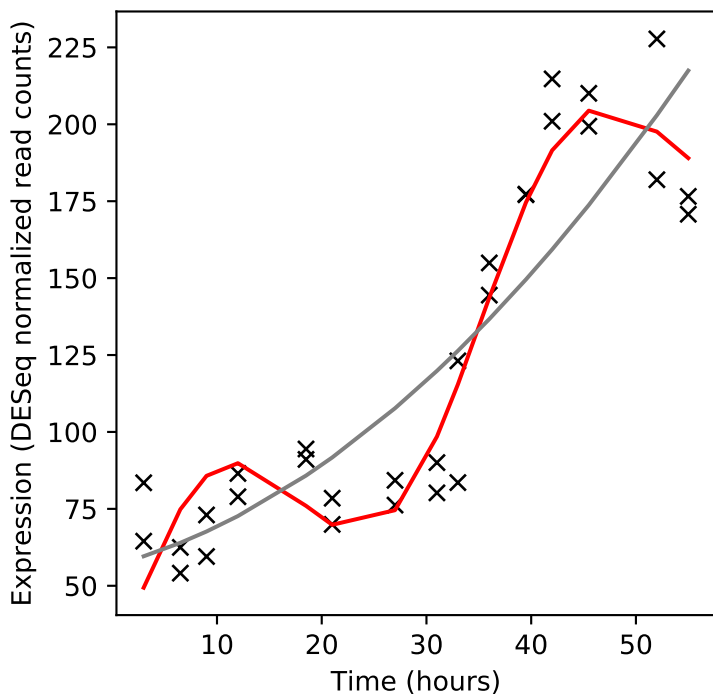

Rv1893/-

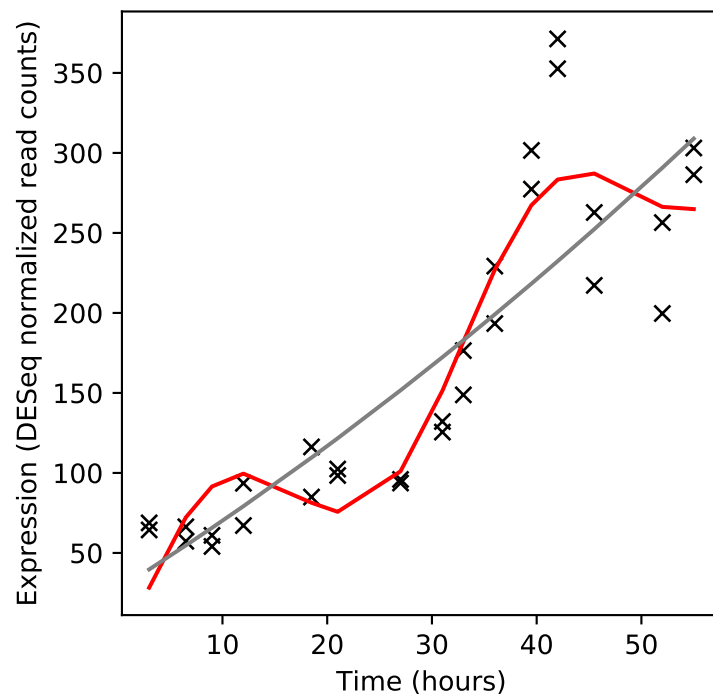

Rv1894c/-

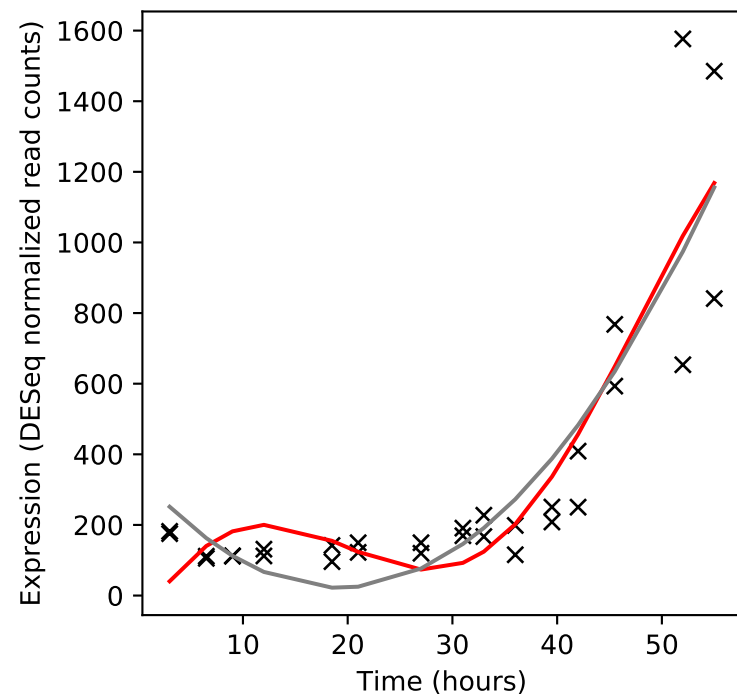

Rv1895/-

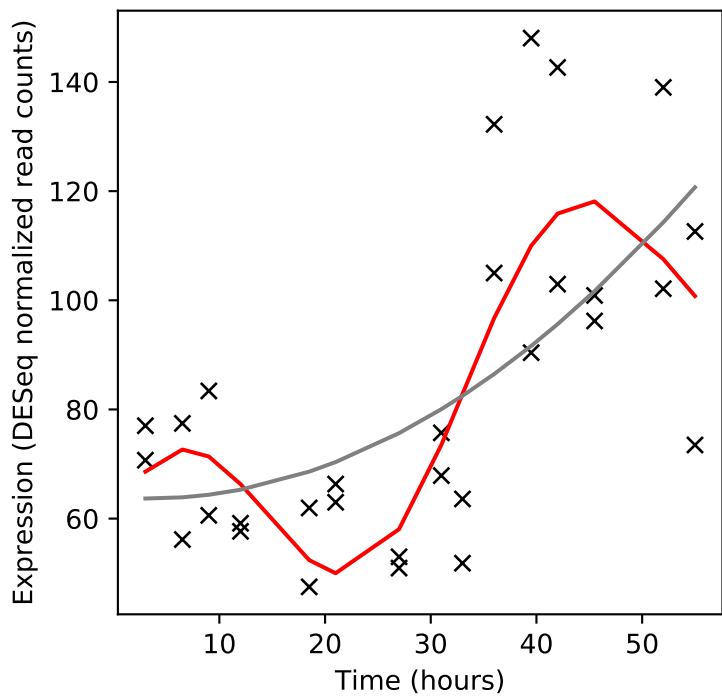

Rv1896c/-

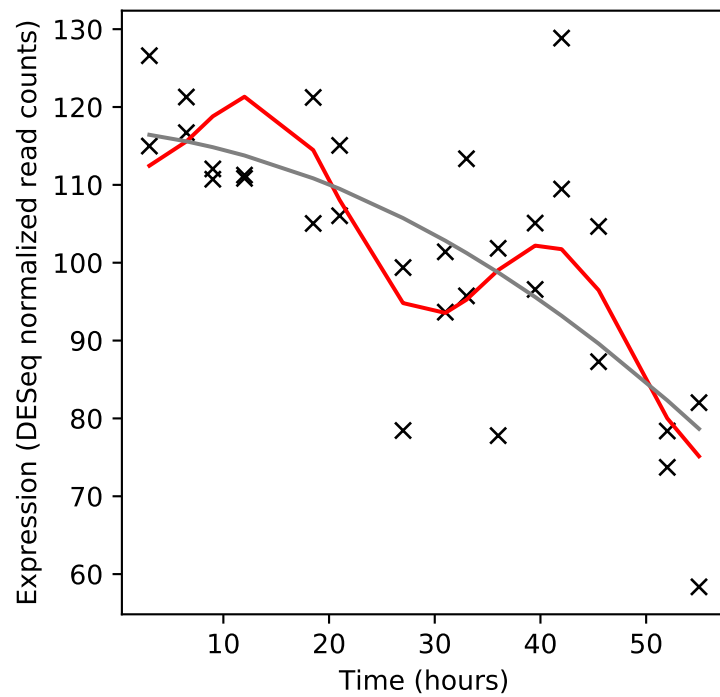

Rv1897c/-

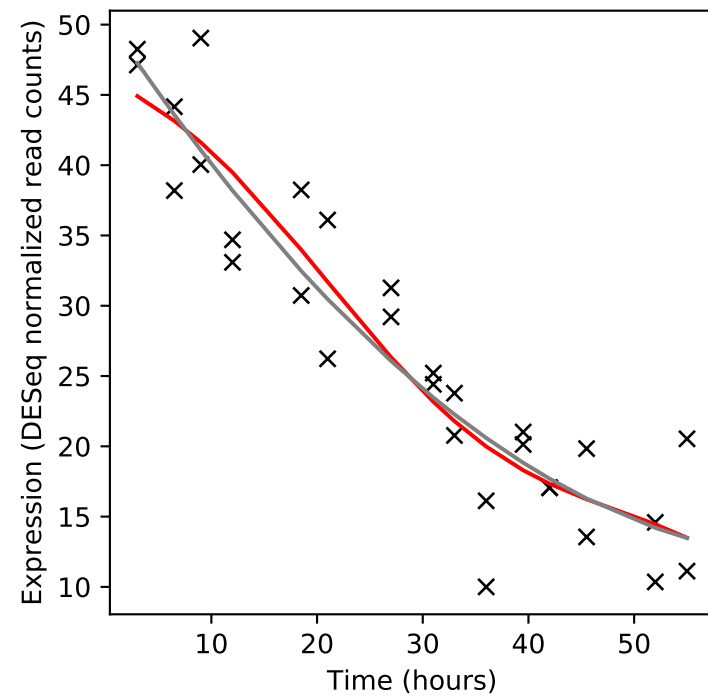

Rv1898/-

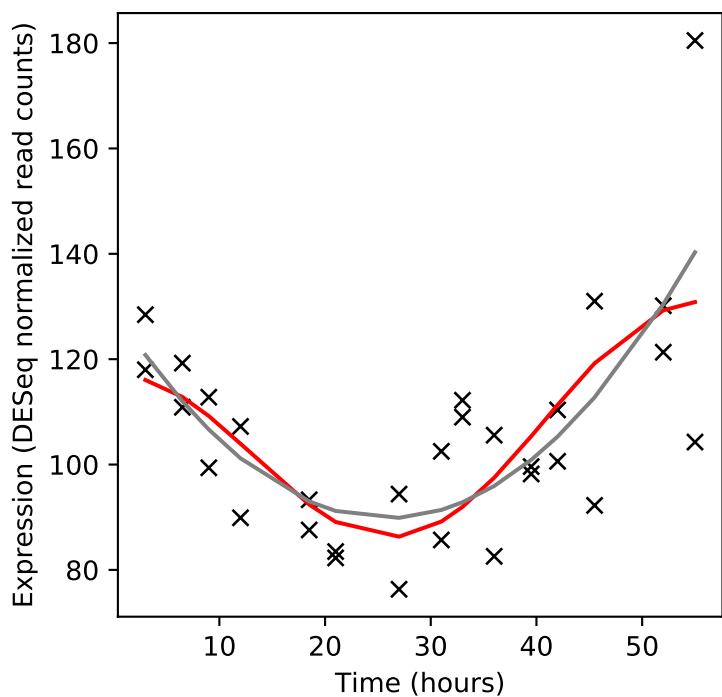

Rv1899c/lppD

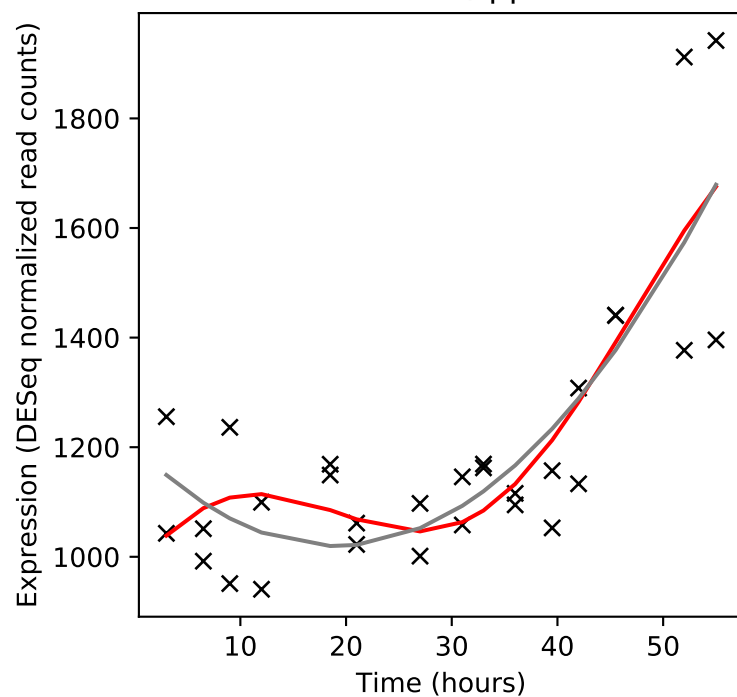

Rv1900c/lipJ

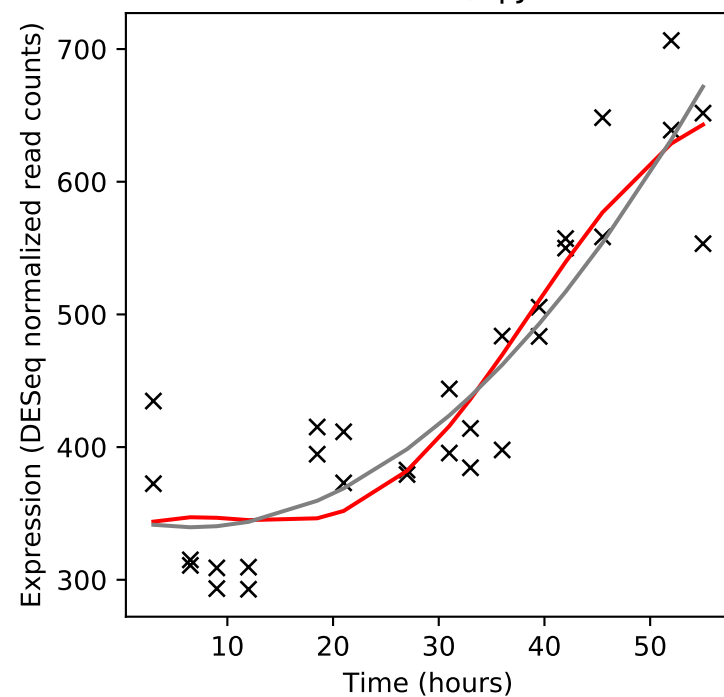

Rv1901/cinA

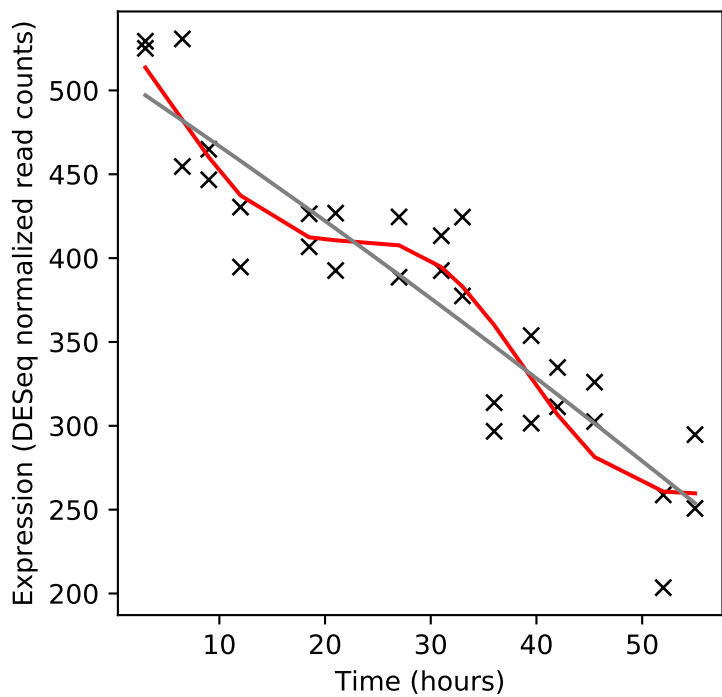

Rv1902c/nanT

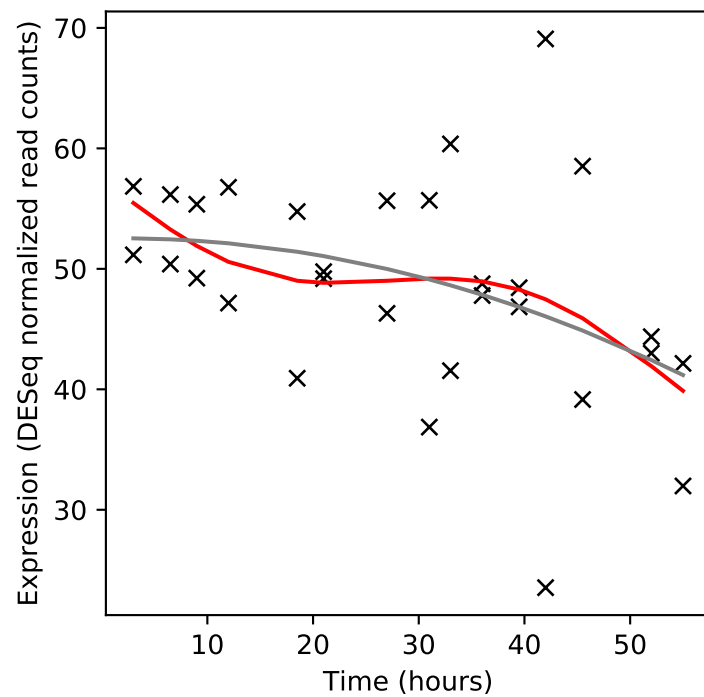

Rv1903/-

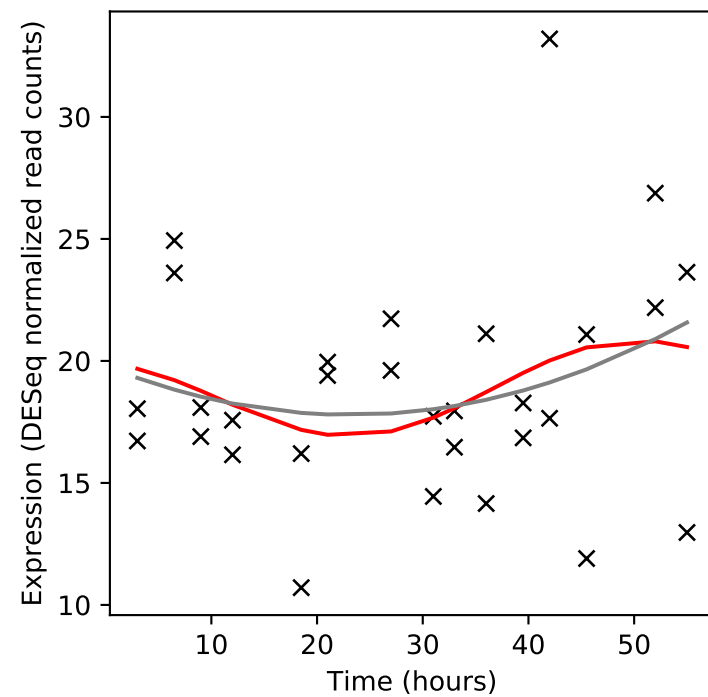

Rv1904/-

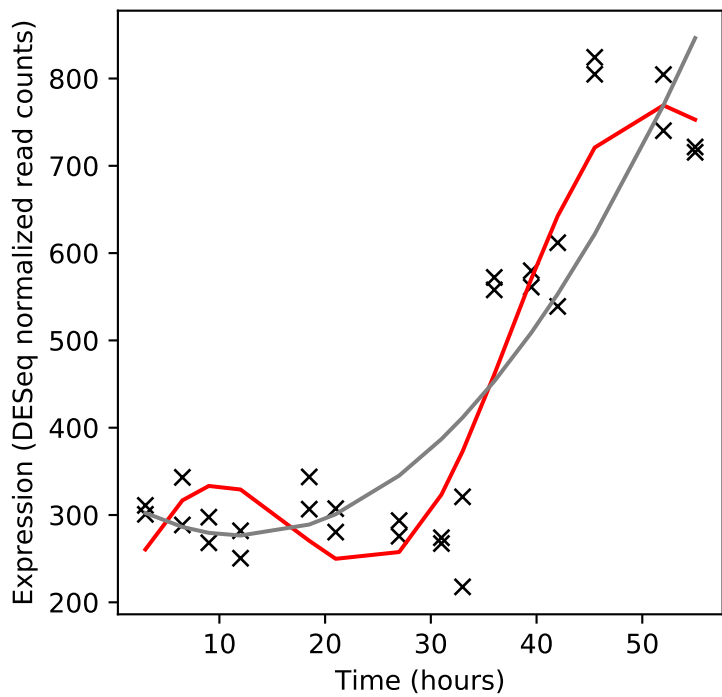

Rv1905c/aoa

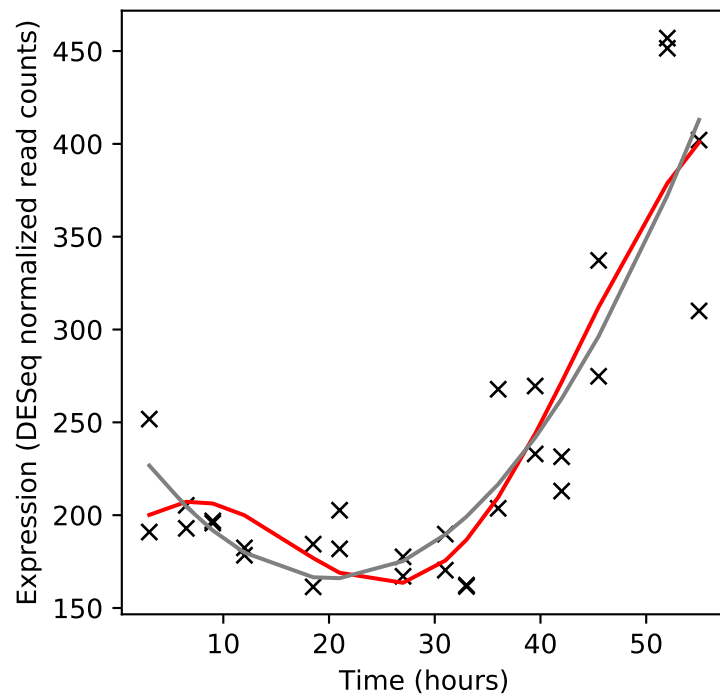

Rv1906c/-

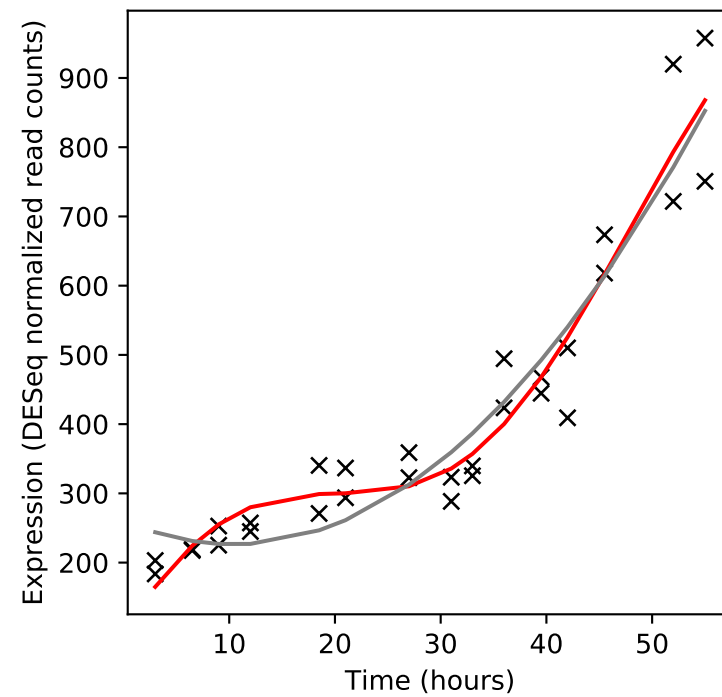

Rv1907c/-

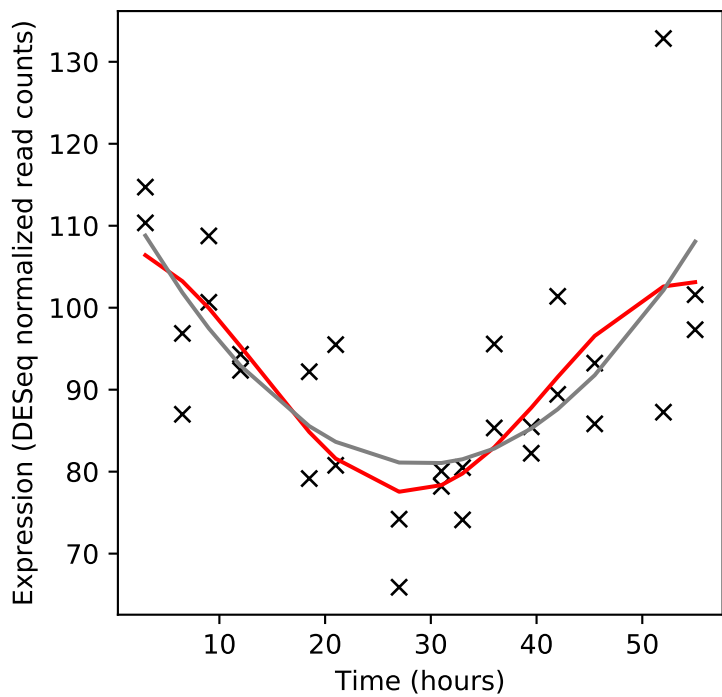

Rv1908c/katG

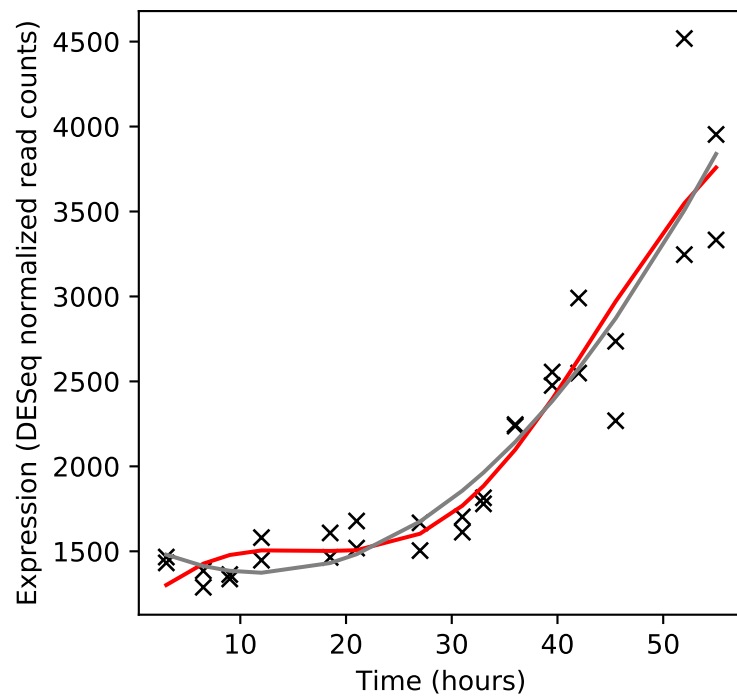

Rv1909c/furA

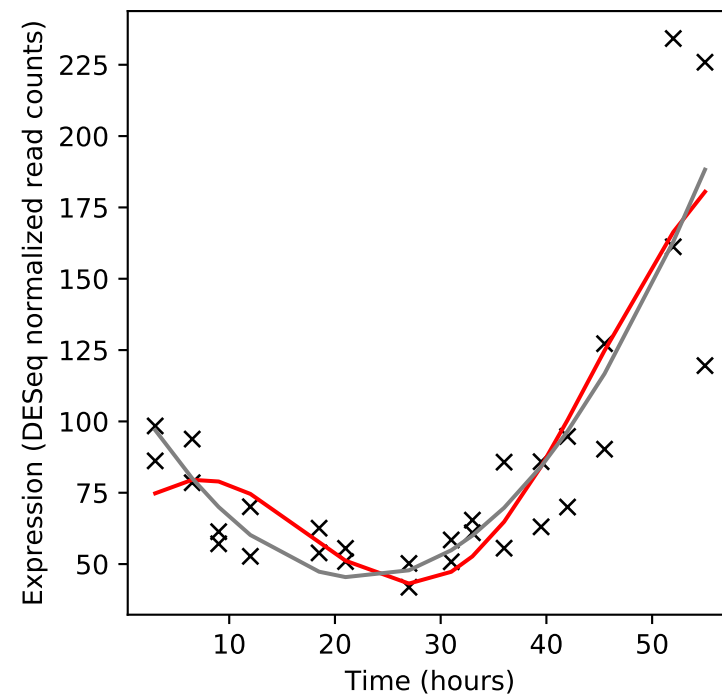

Rv1910c/-

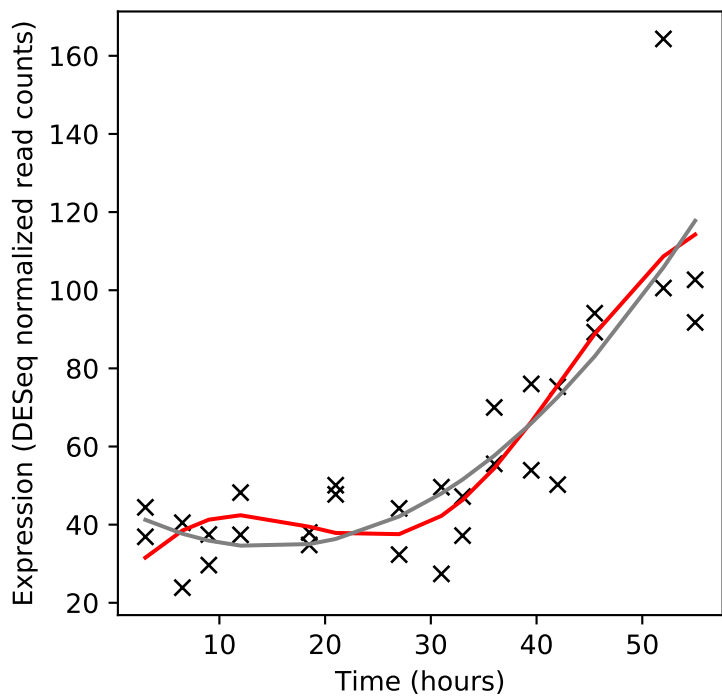

Rv1911c/lppC

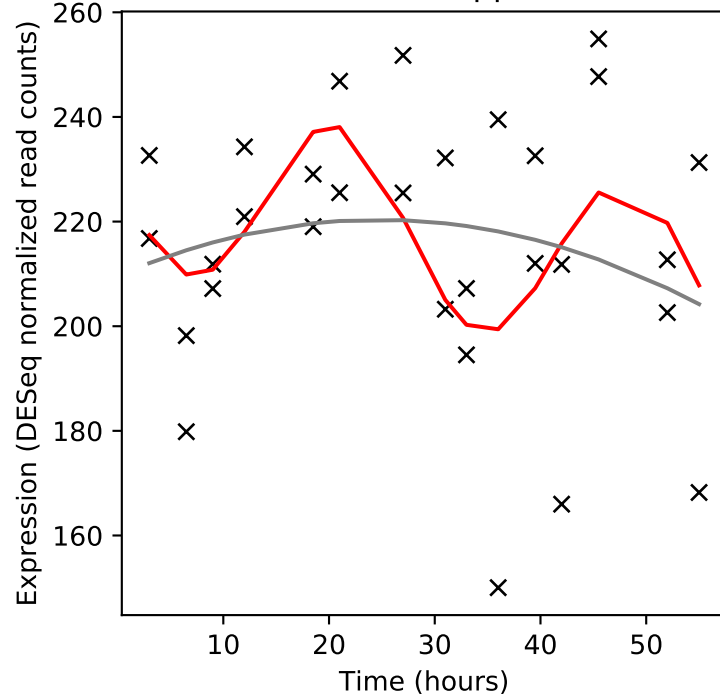

Rv1912c/fadB5

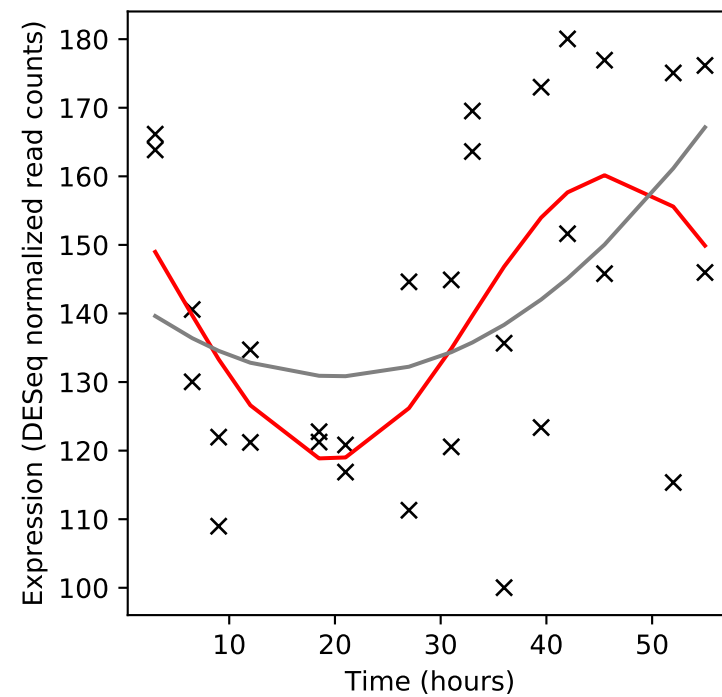

Rv1913/-

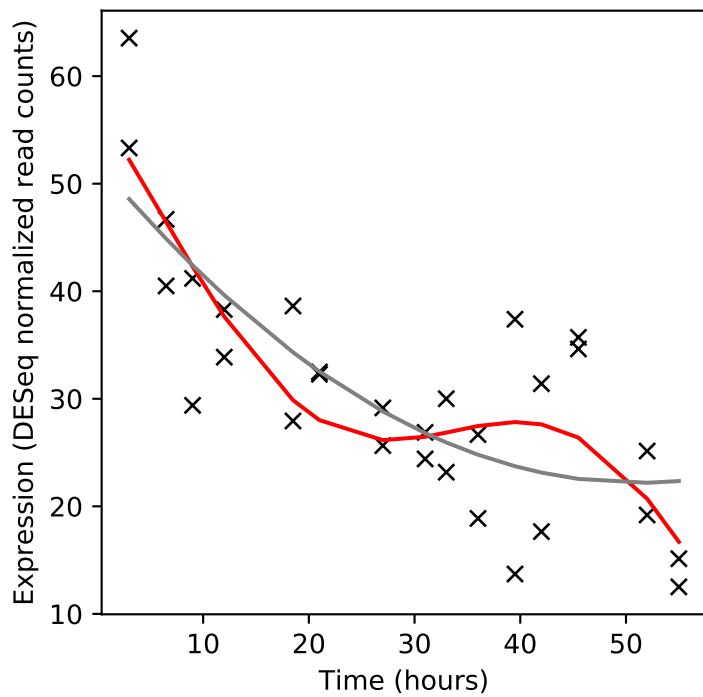

Rv1914c/-

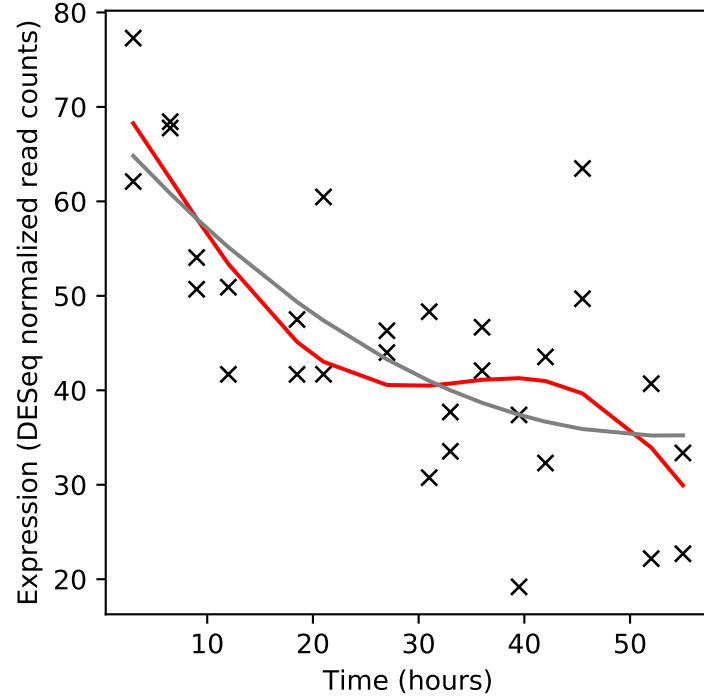

Rv1915/aceAa

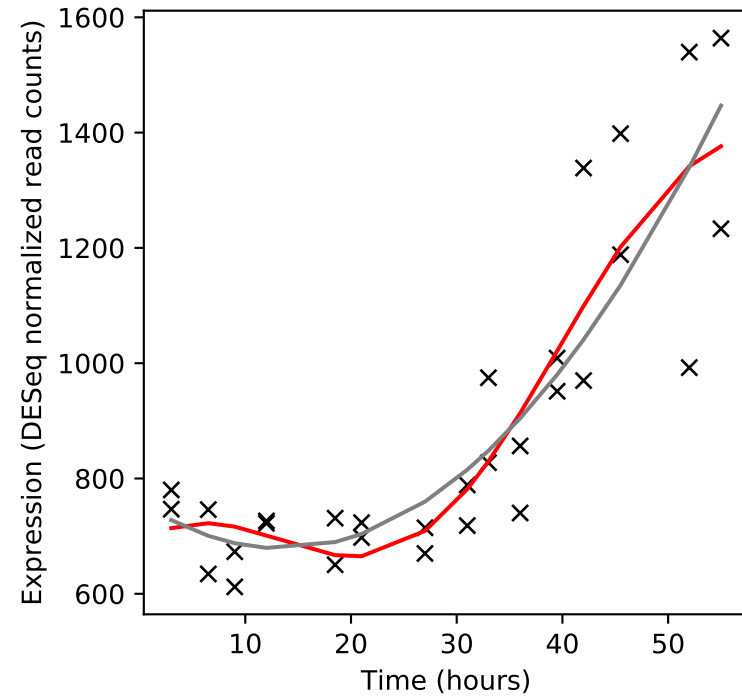

Rv1916/aceAb

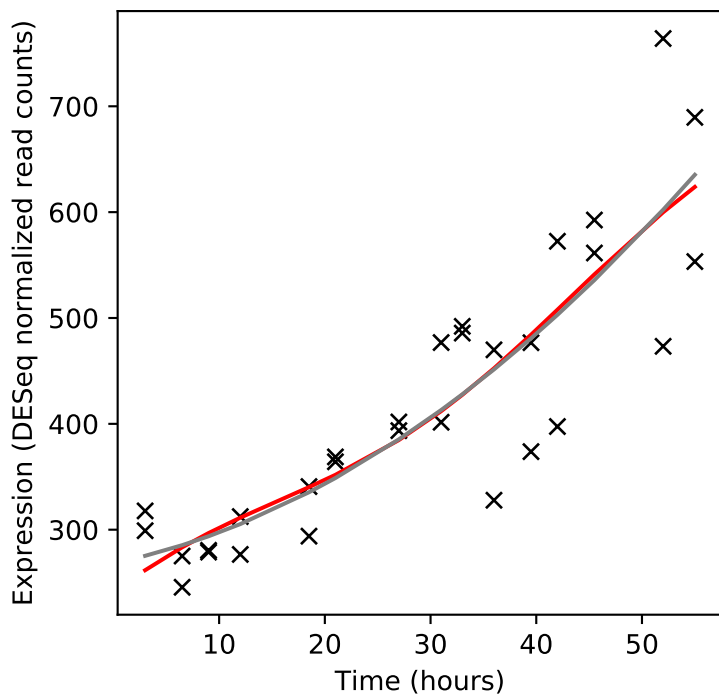

Rv1917c/PPE34

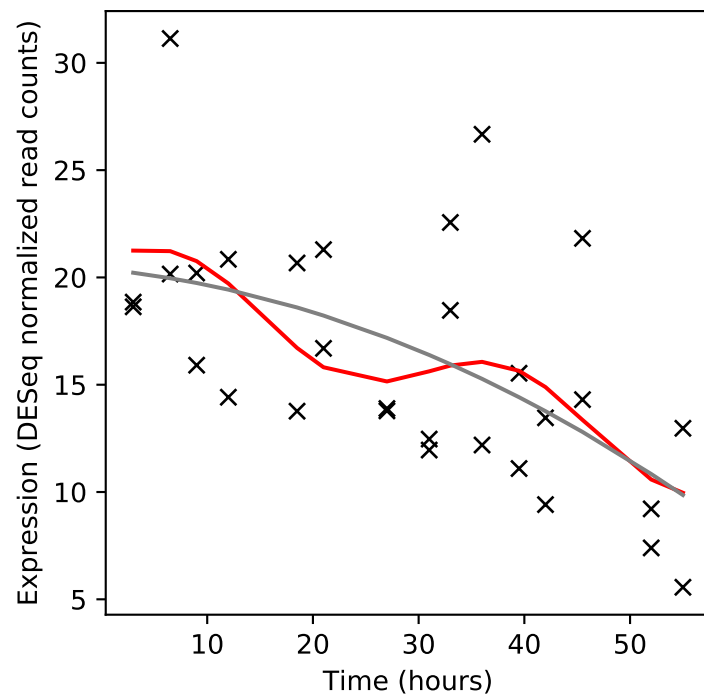

Rv1918c/PPE35

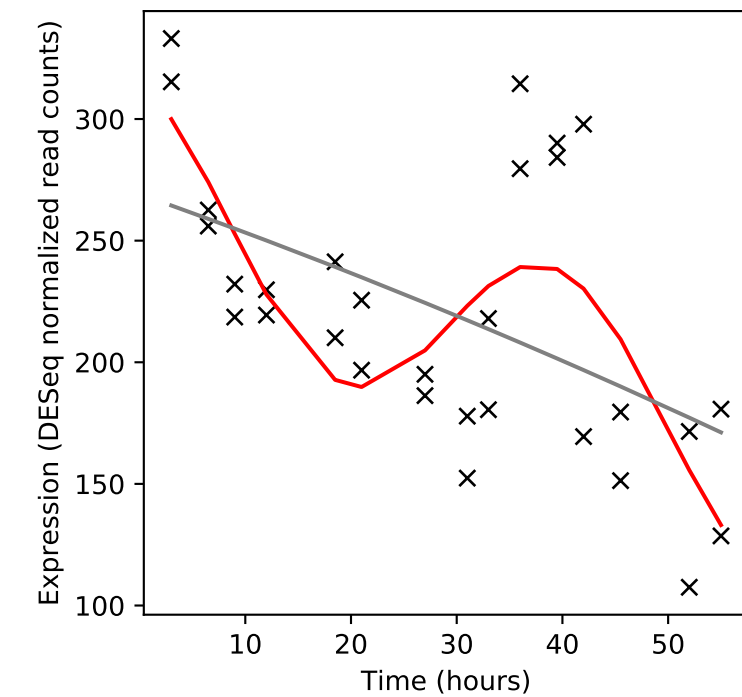

Rv1919c/-

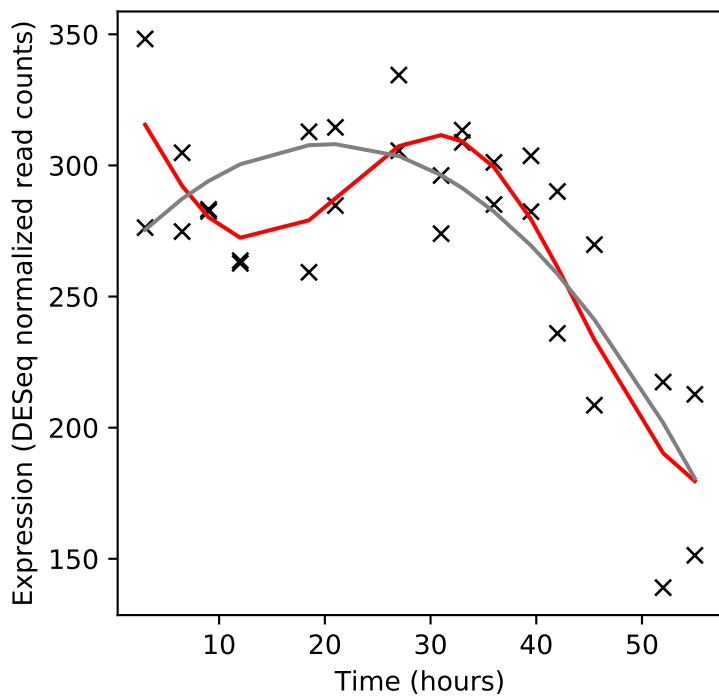

Rv1920/-

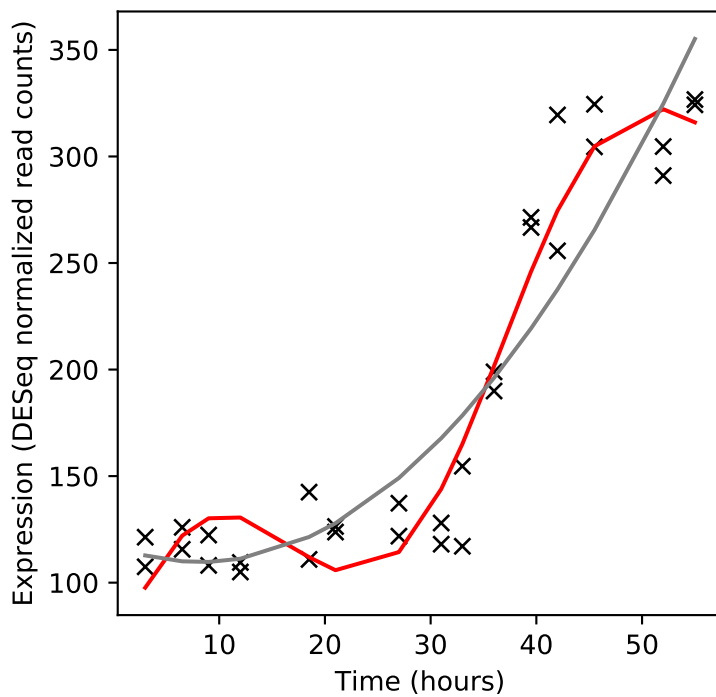

Rv1921c/lppF

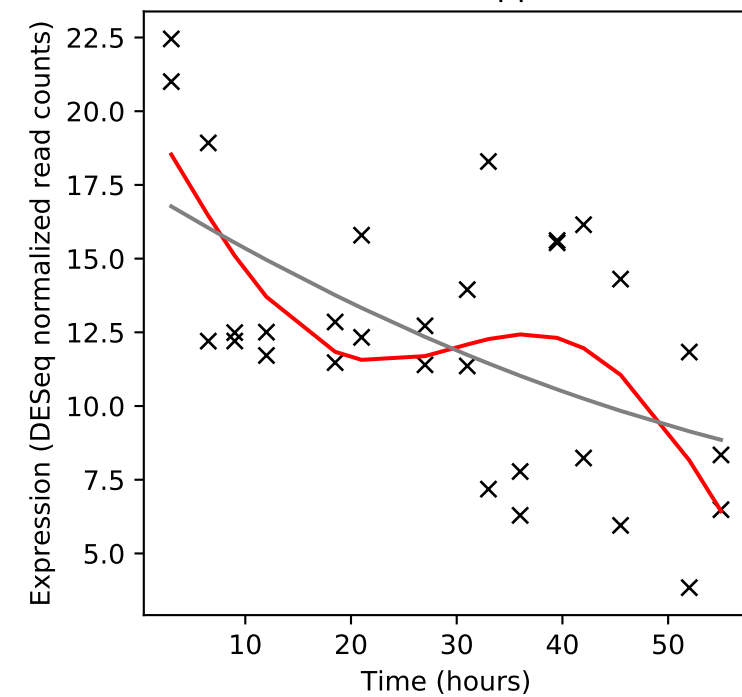

Rv1922/-

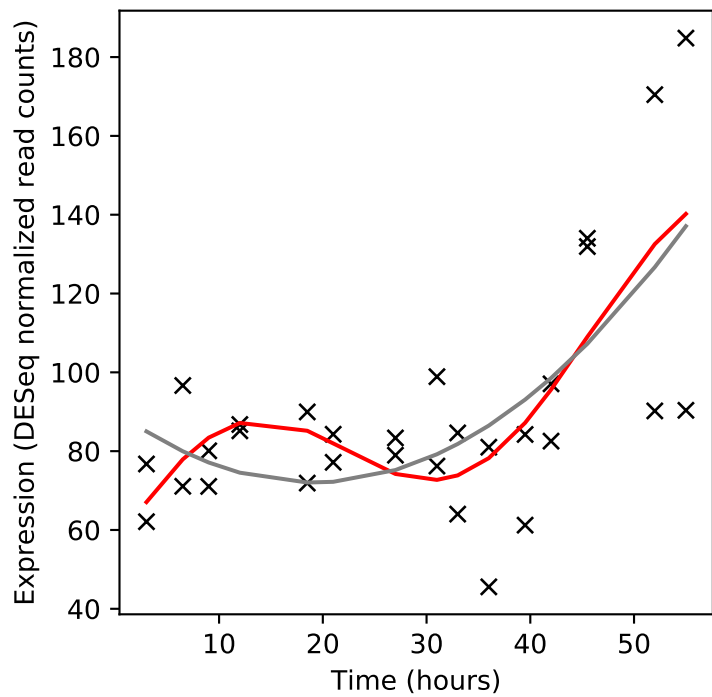

Rv1923/lipD

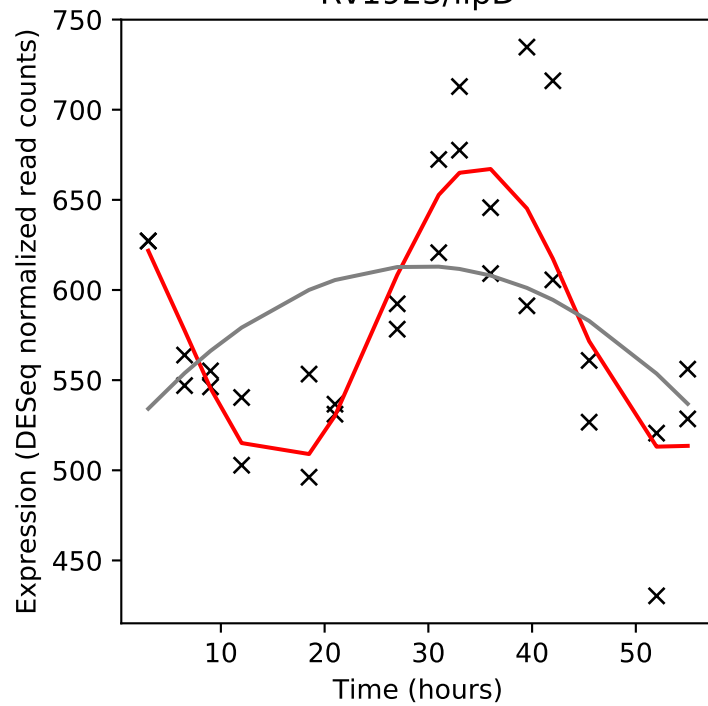

Rv1924c/-

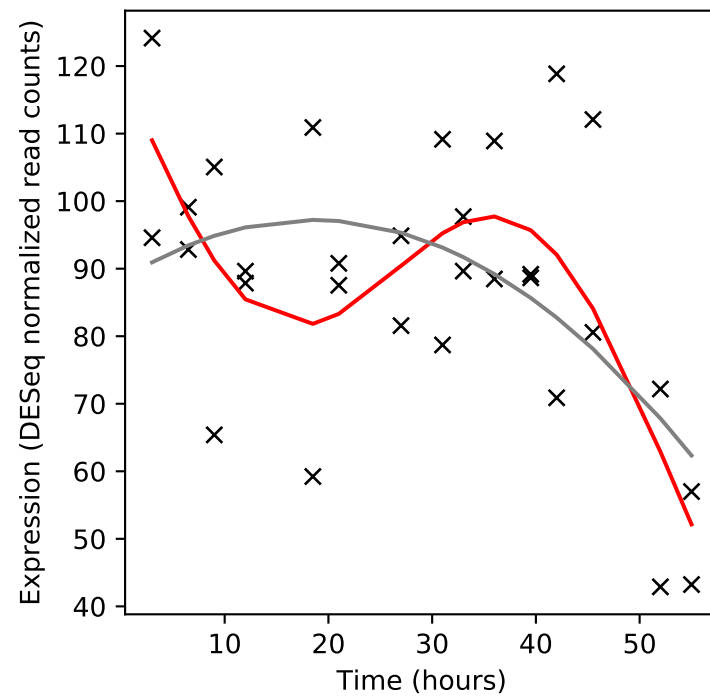

Rv1925/fadD31

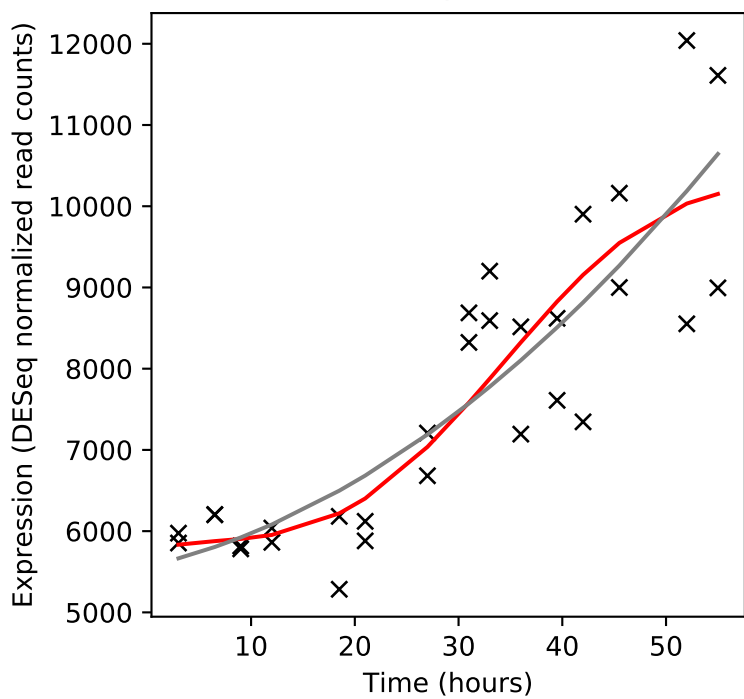

Rv1926c/mpt63

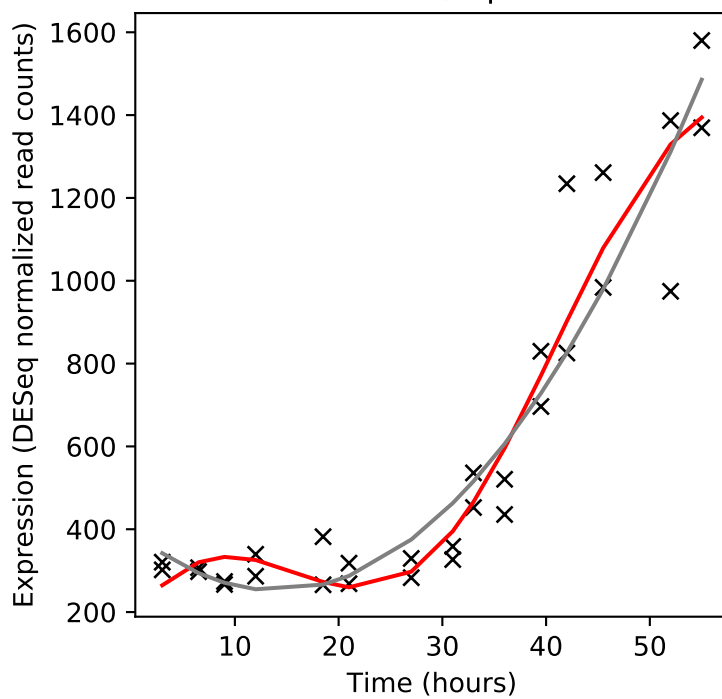

Rv1927/-

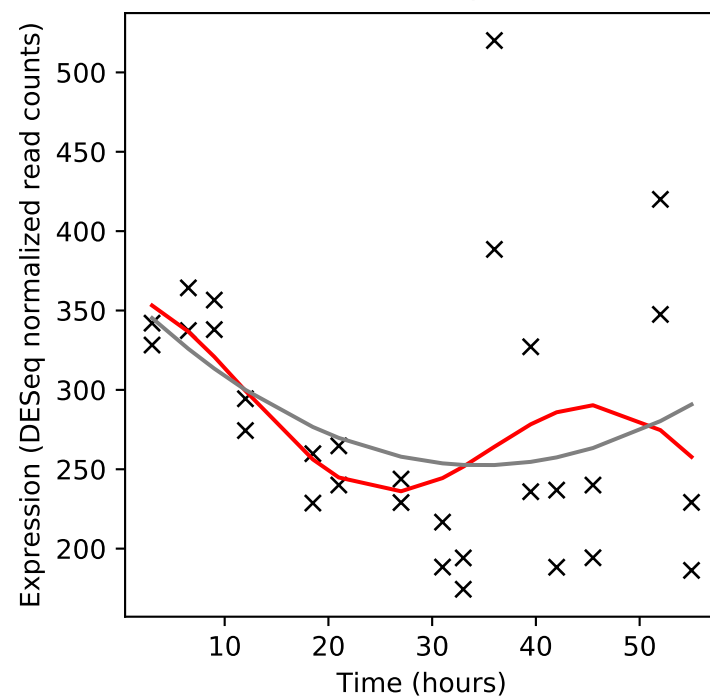

Rv1928c/-

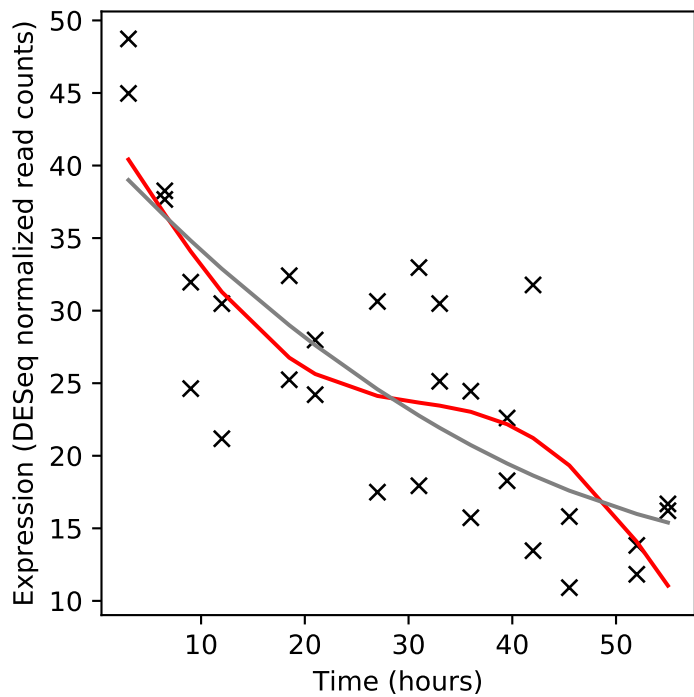

Rv1929c/-

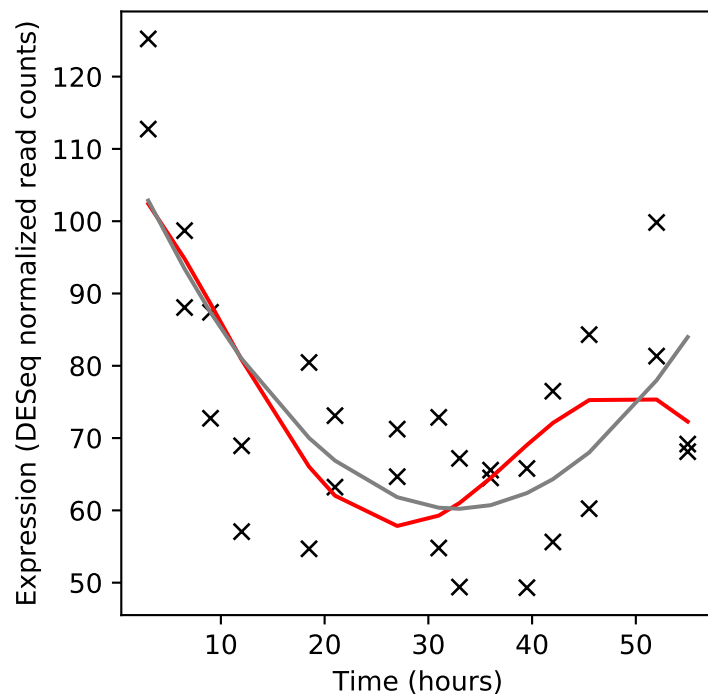

Rv1930c/-

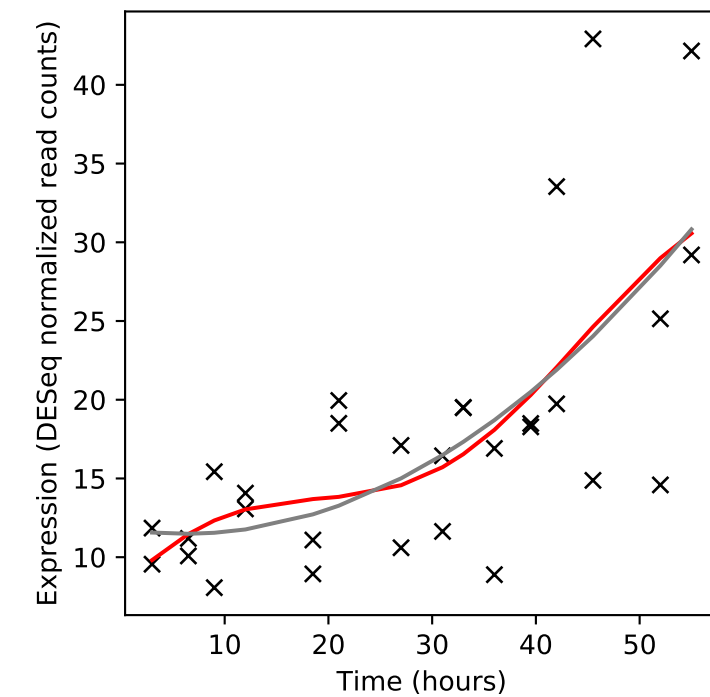



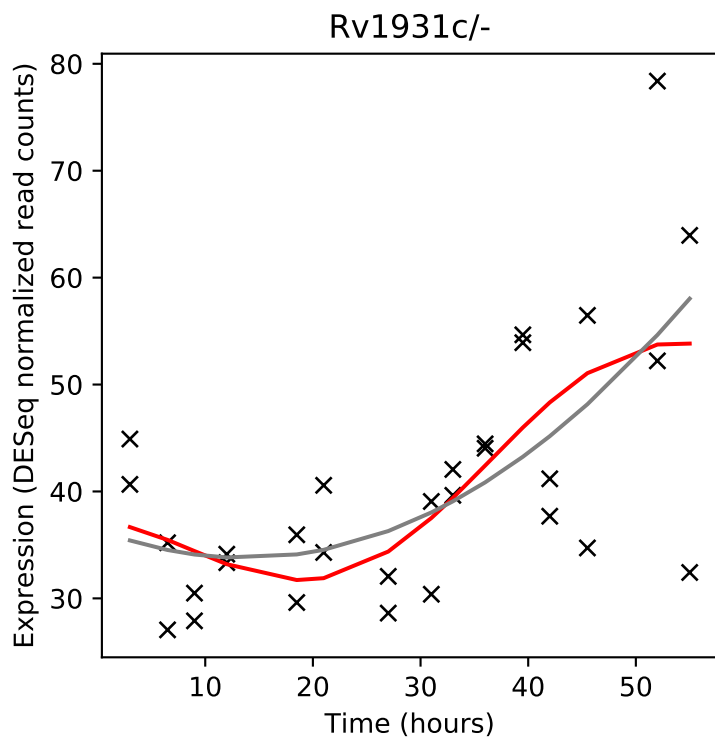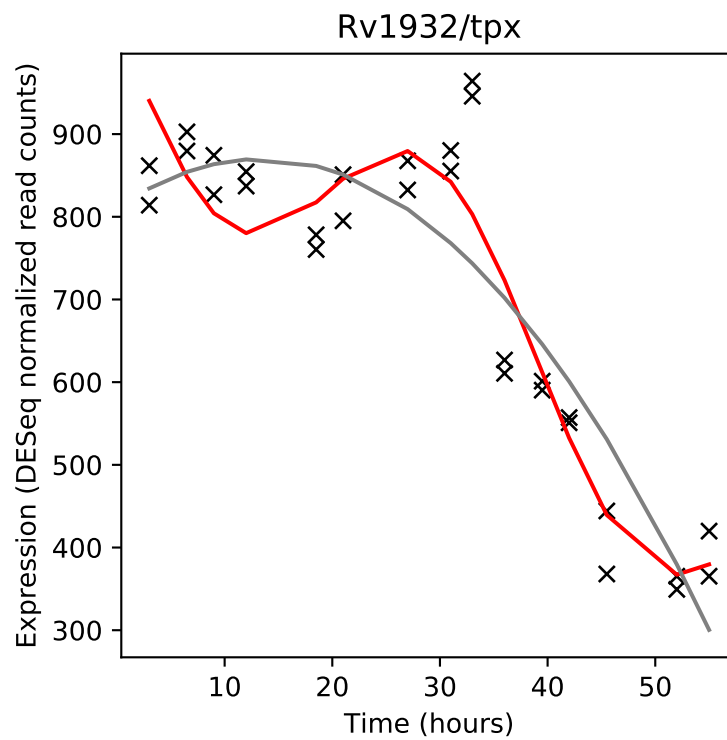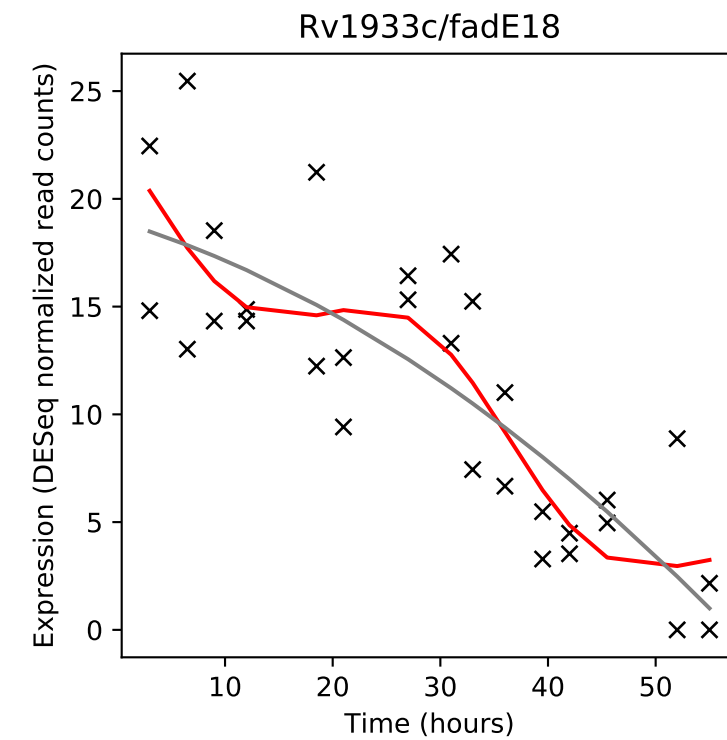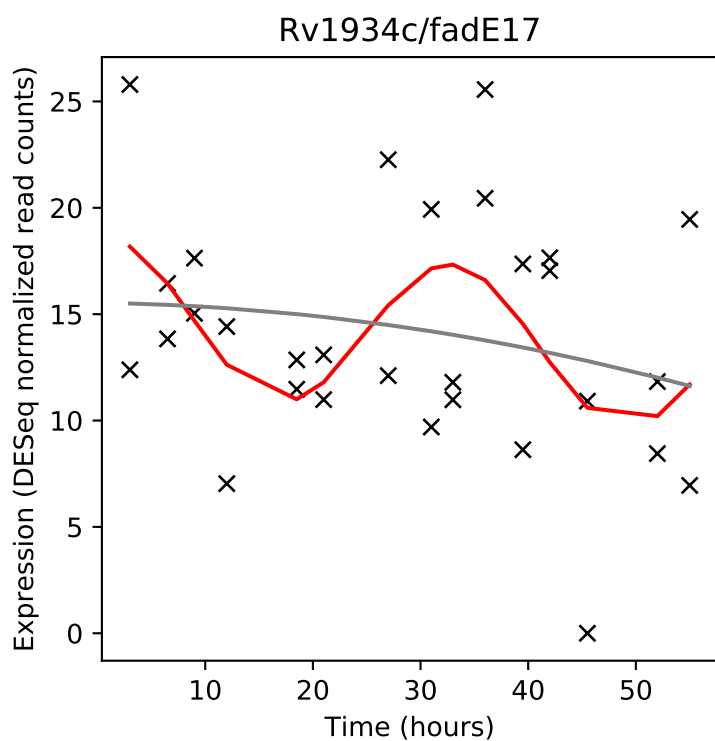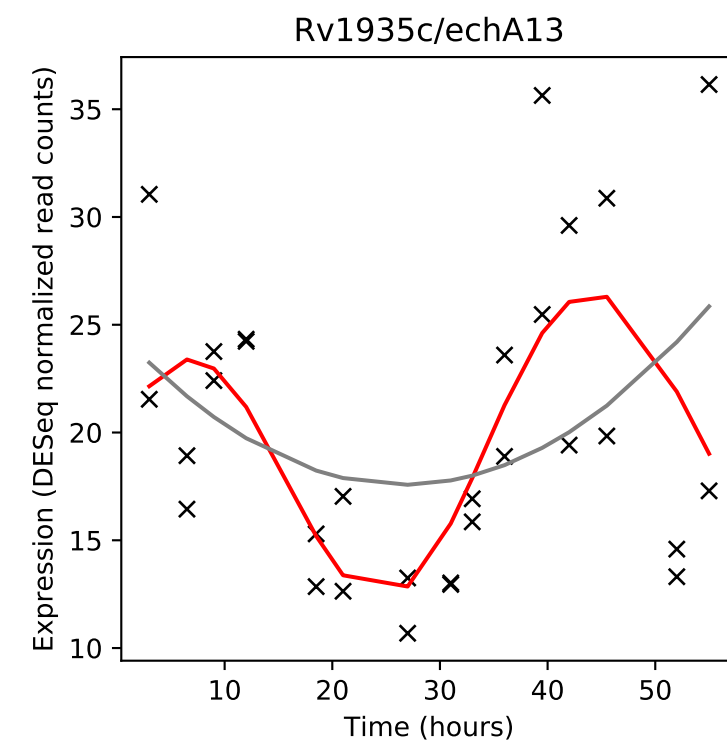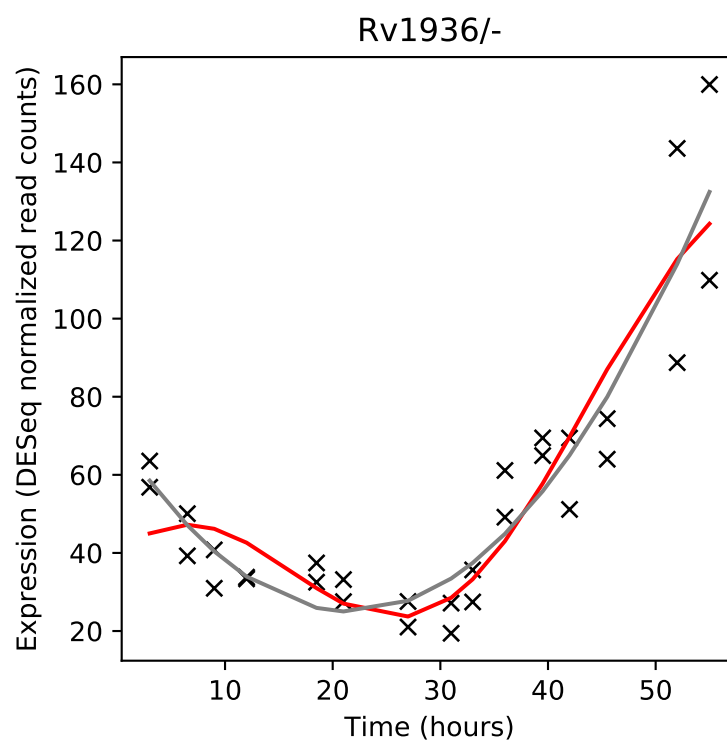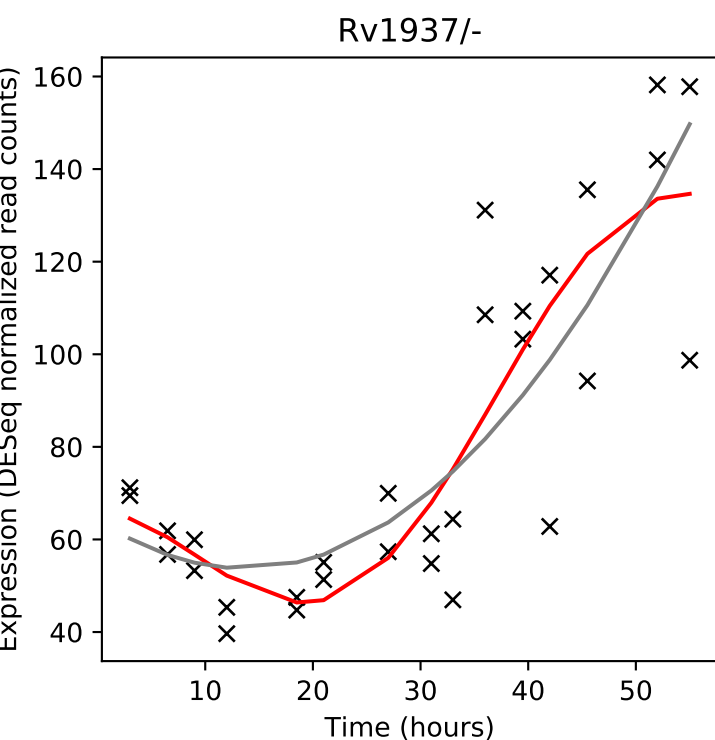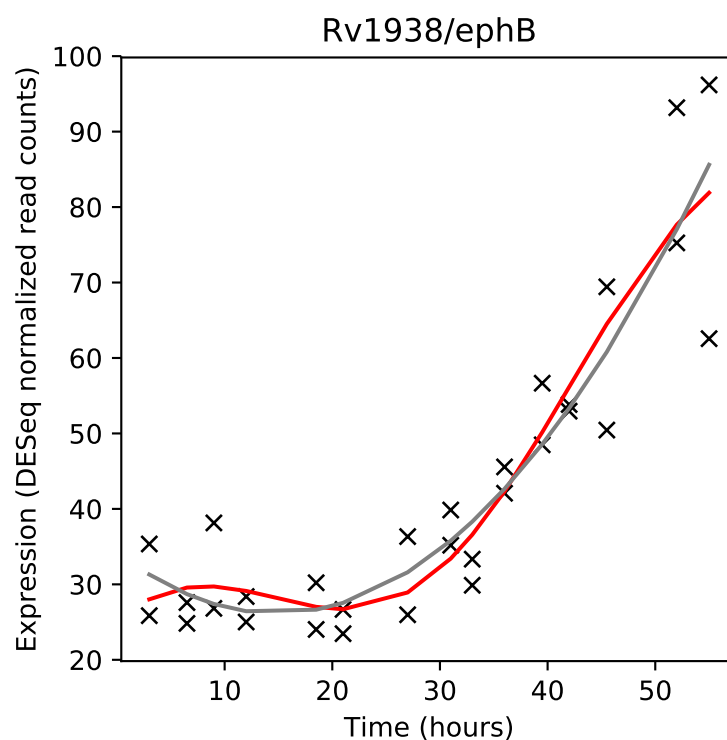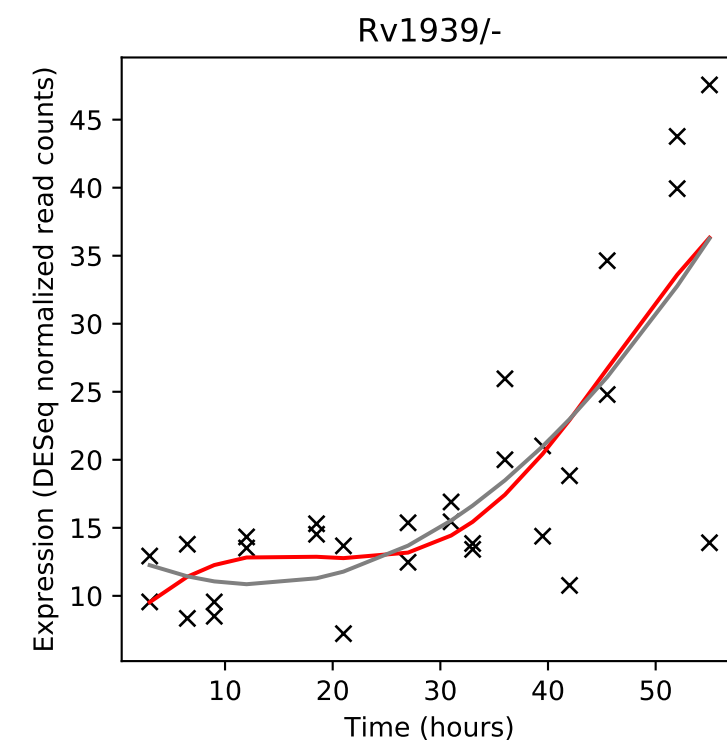

Rv1940/ribA1

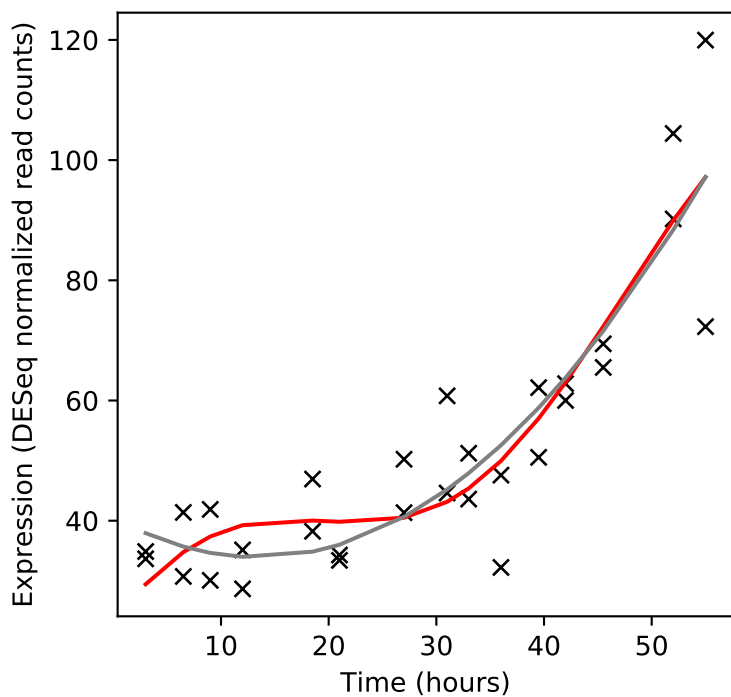

Rv1941/-

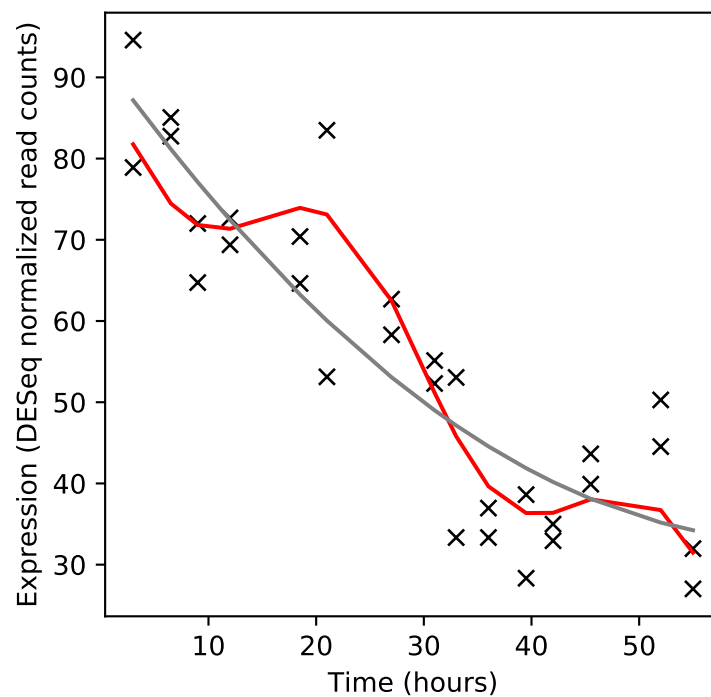

Rv1942c/mazF5

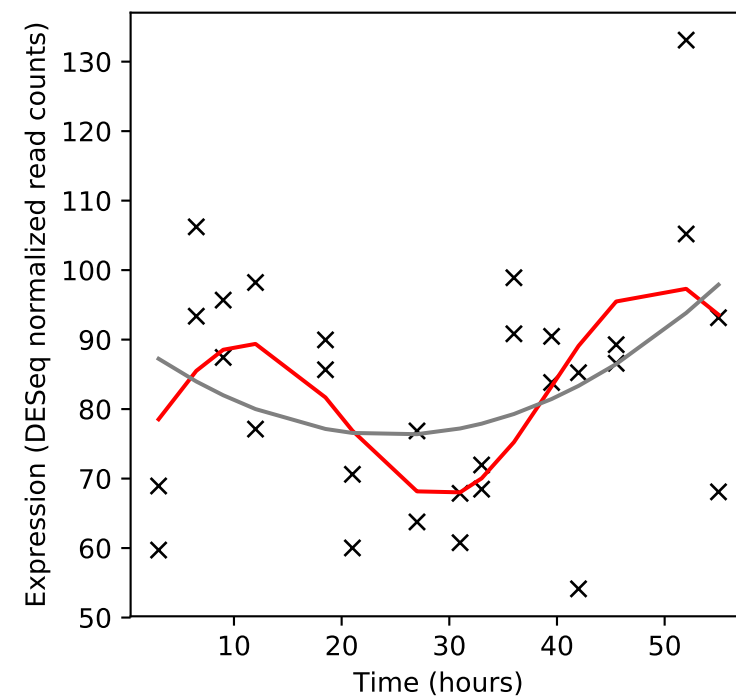

Rv1943c/mazE5

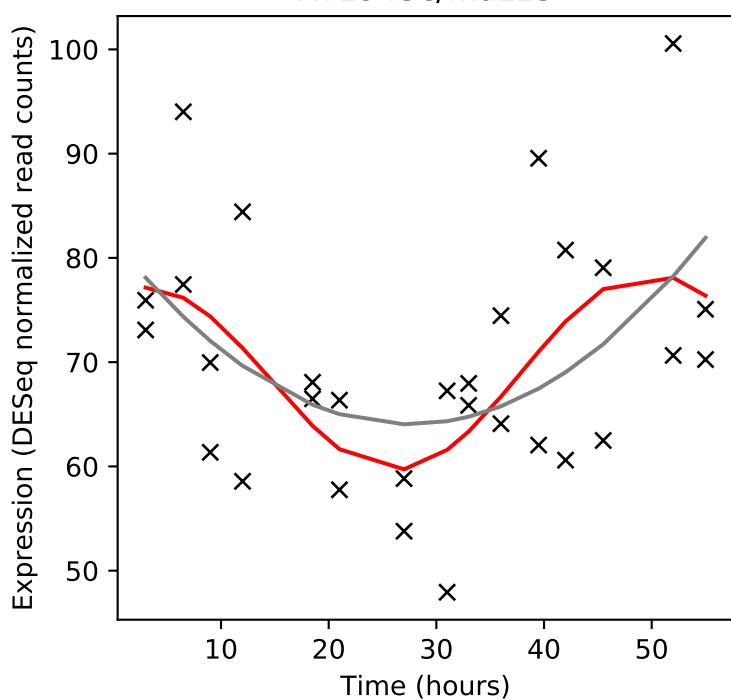

Rv1944c/-

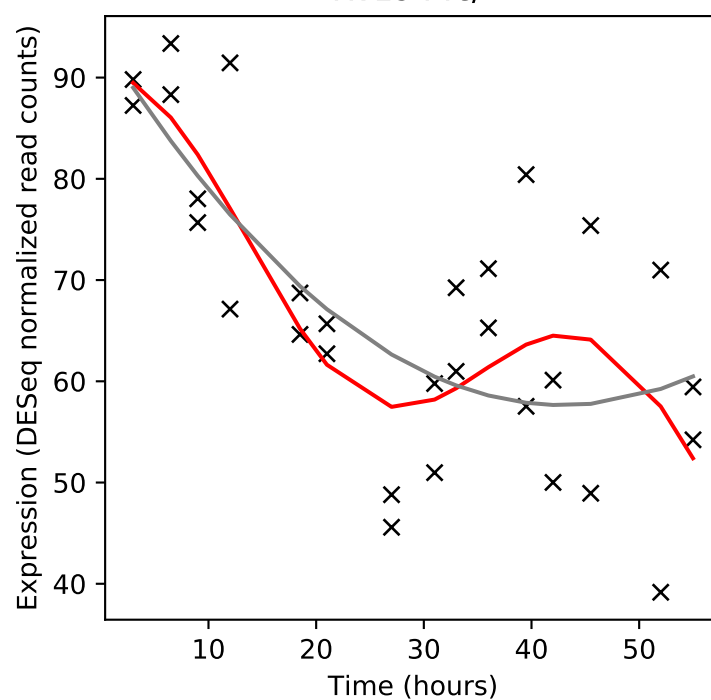

Rv1945/-

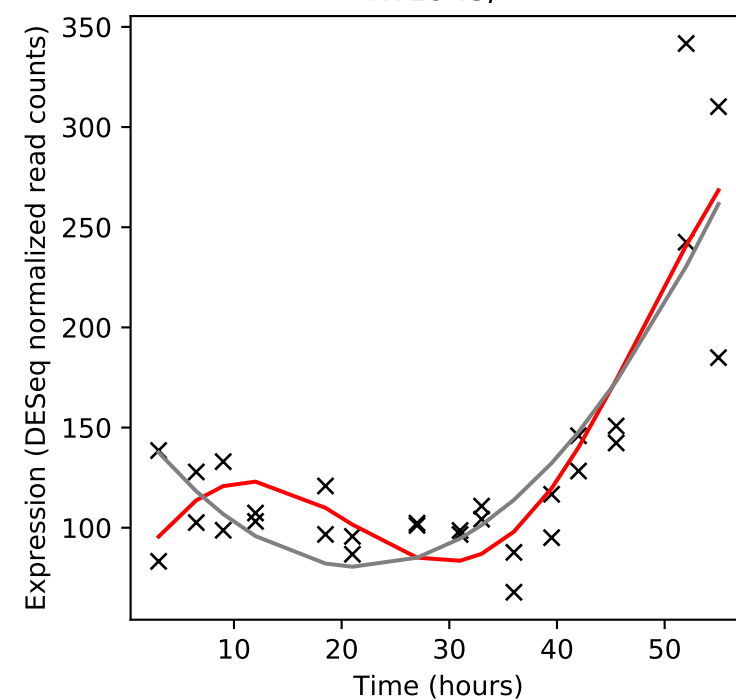

Rv1946c/lppG

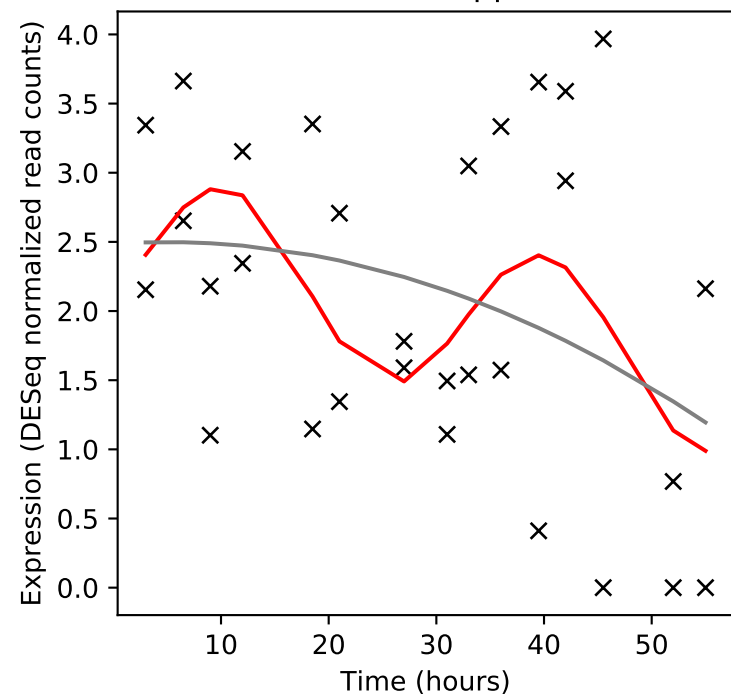

Rv1947/-

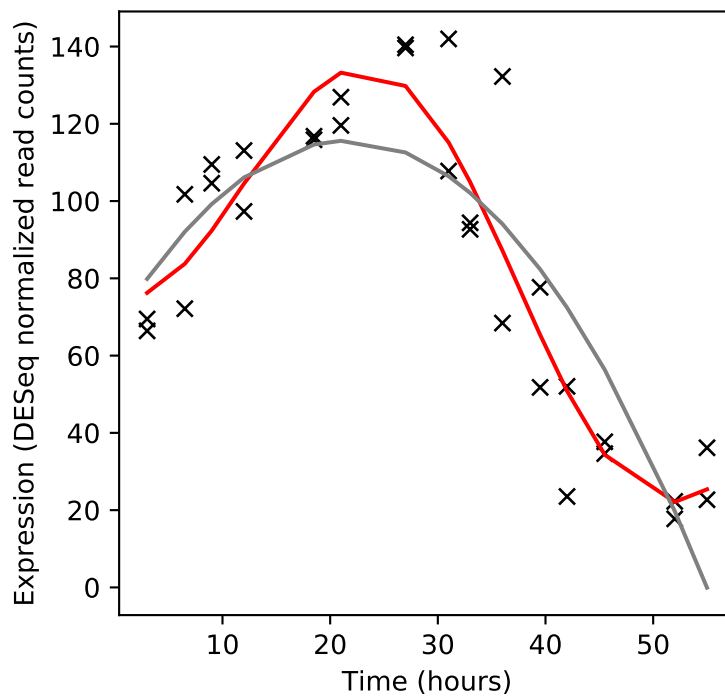

Rv1948c/-

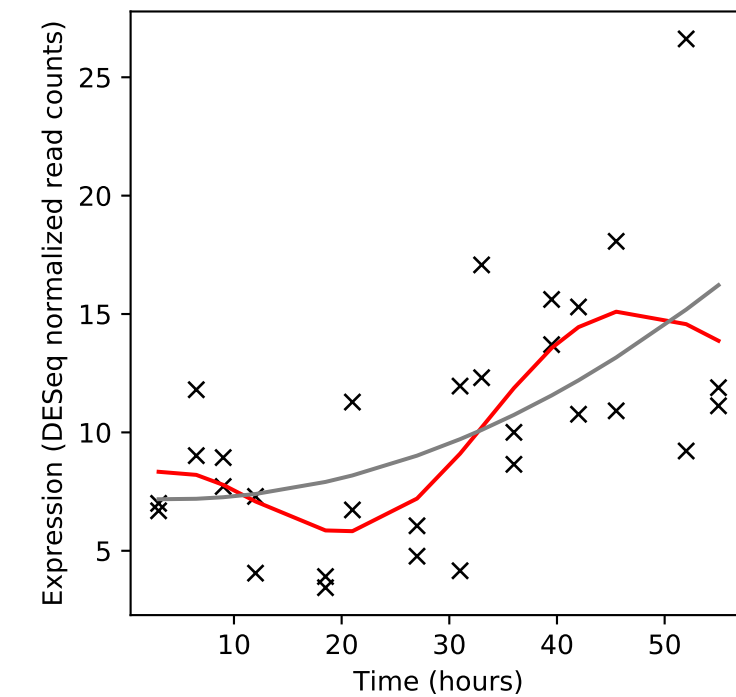

Rv1949c/-

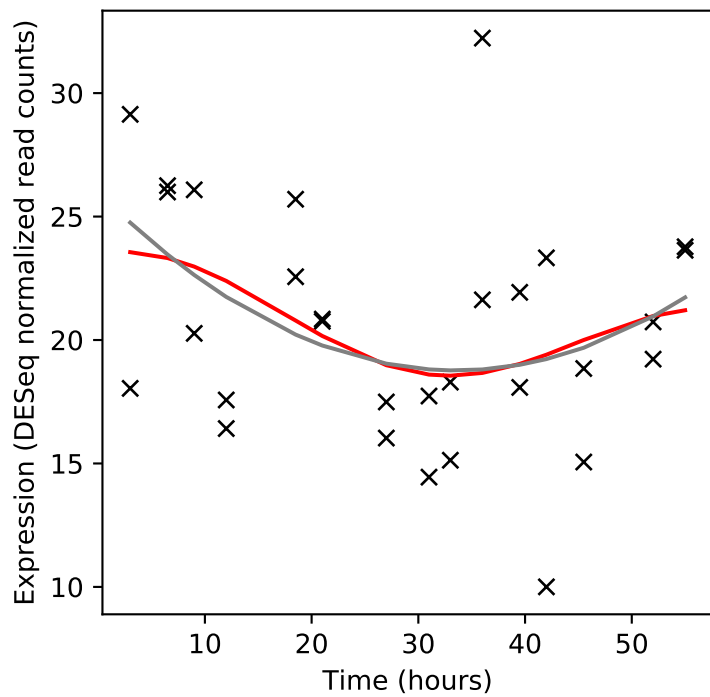

Rv1950c/-

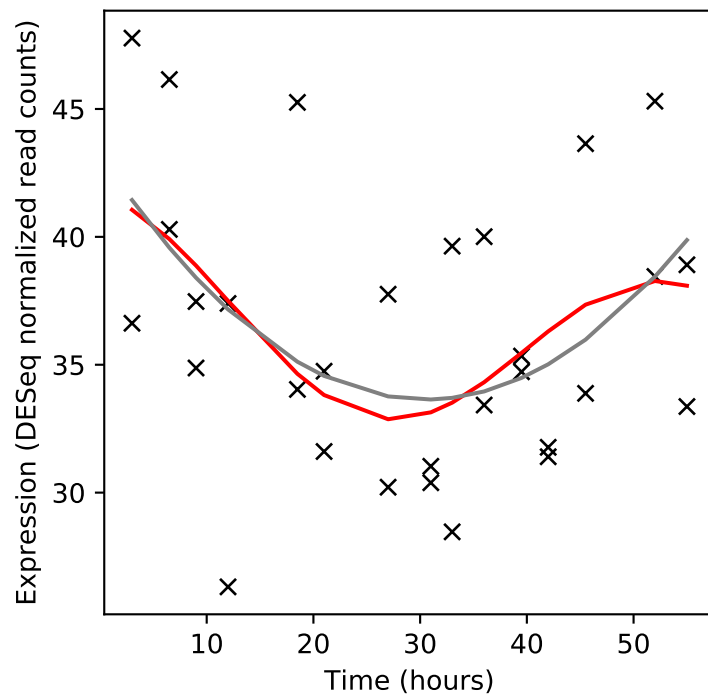

Rv1951c/-

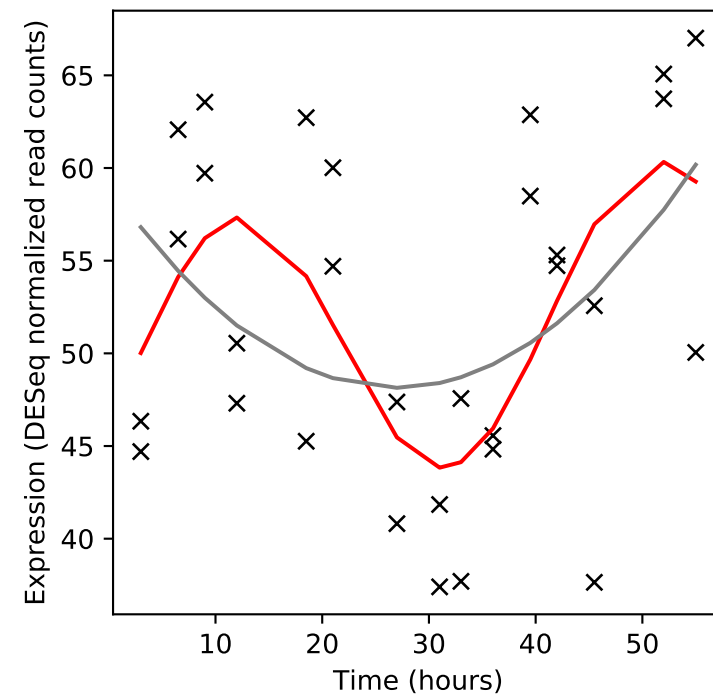

Rv1952/vapB14

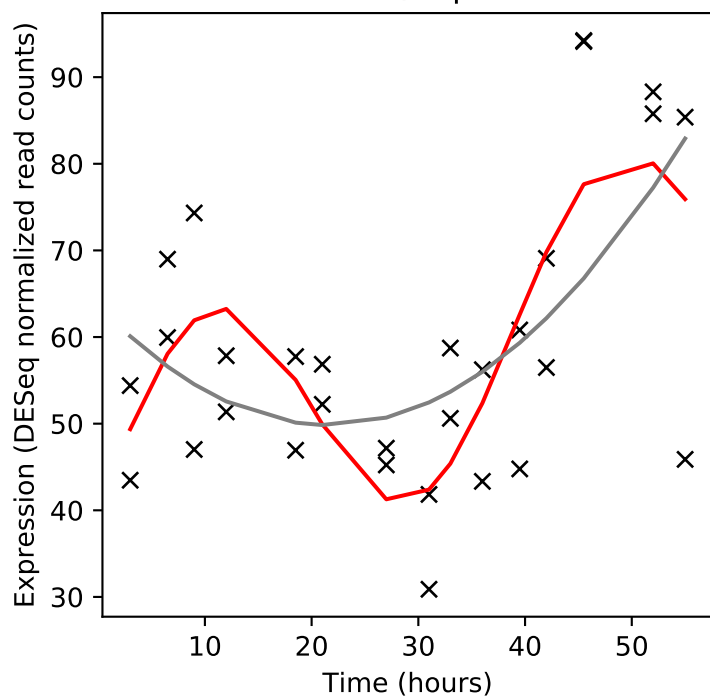

Rv1953/vapC14

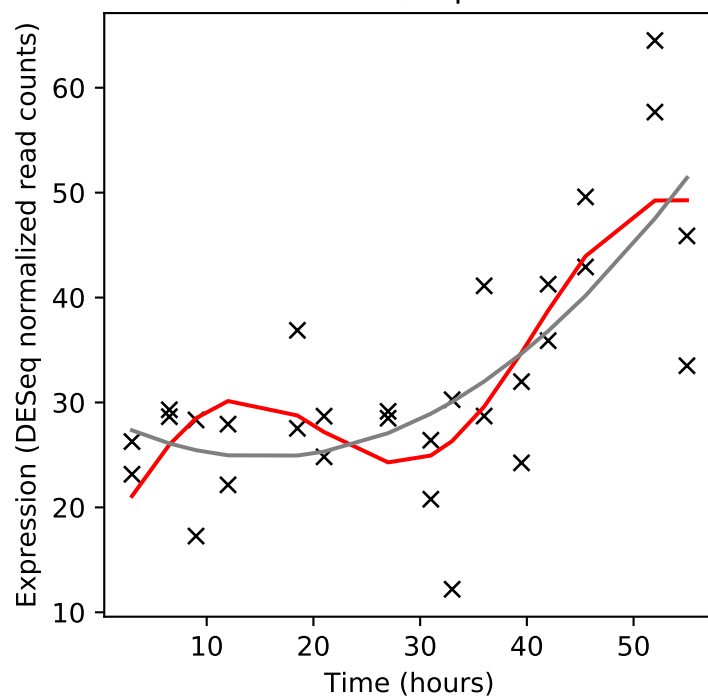

Rv1954c/-

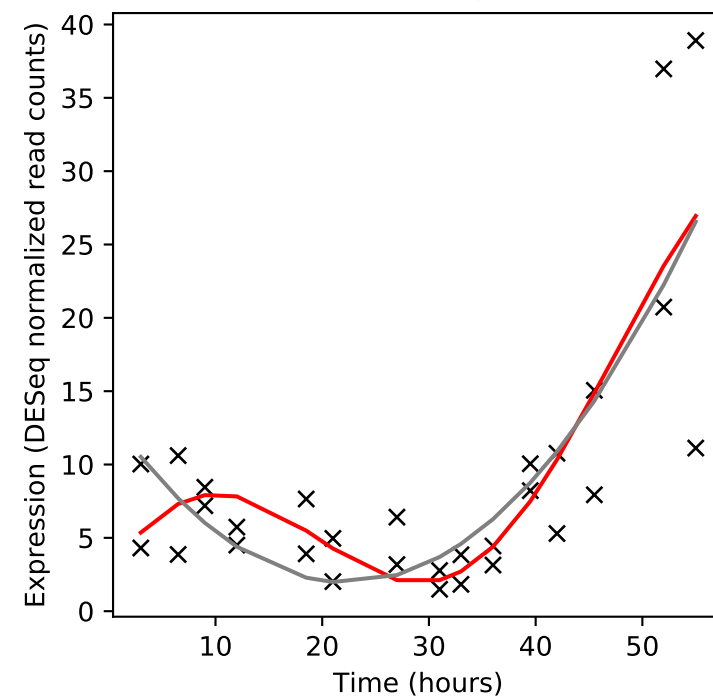

Rv1954A/-

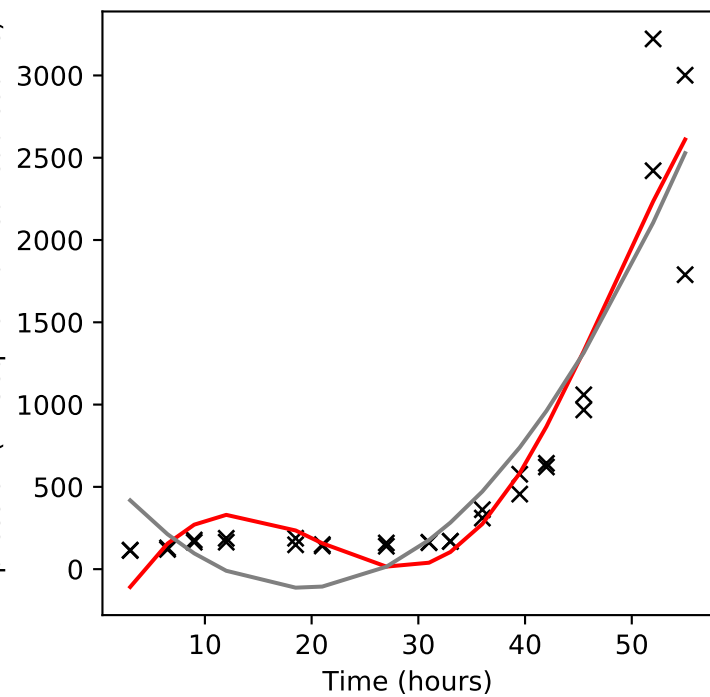

Rv1955/higB

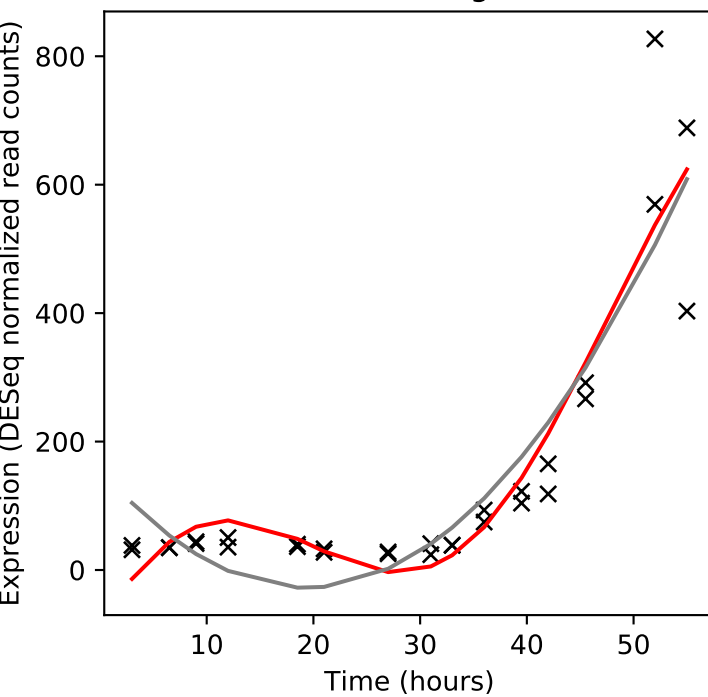

Rv1956/higA

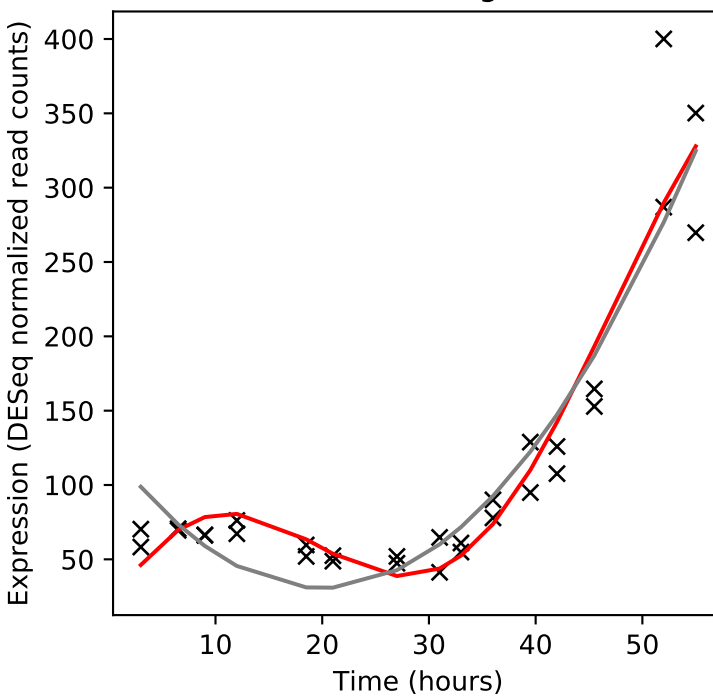

Rv1957/-

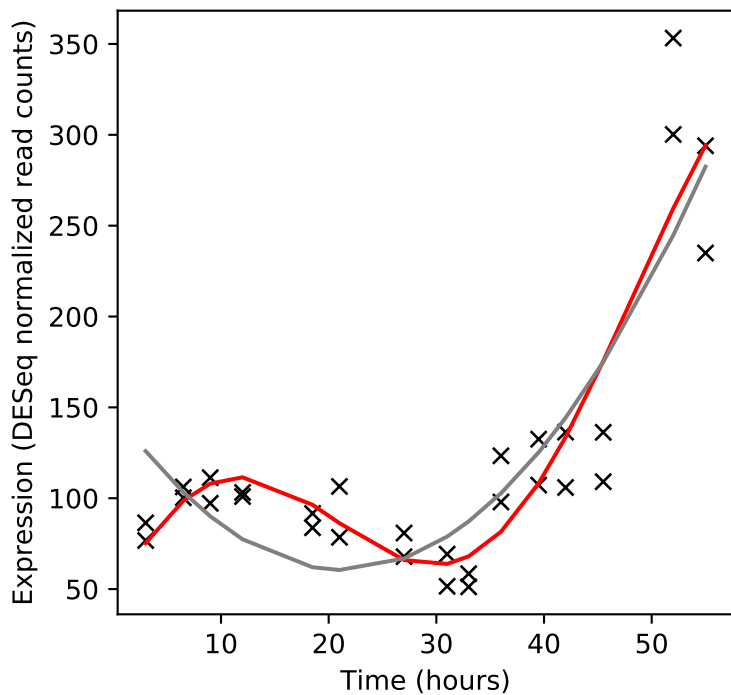

Rv1958c/-

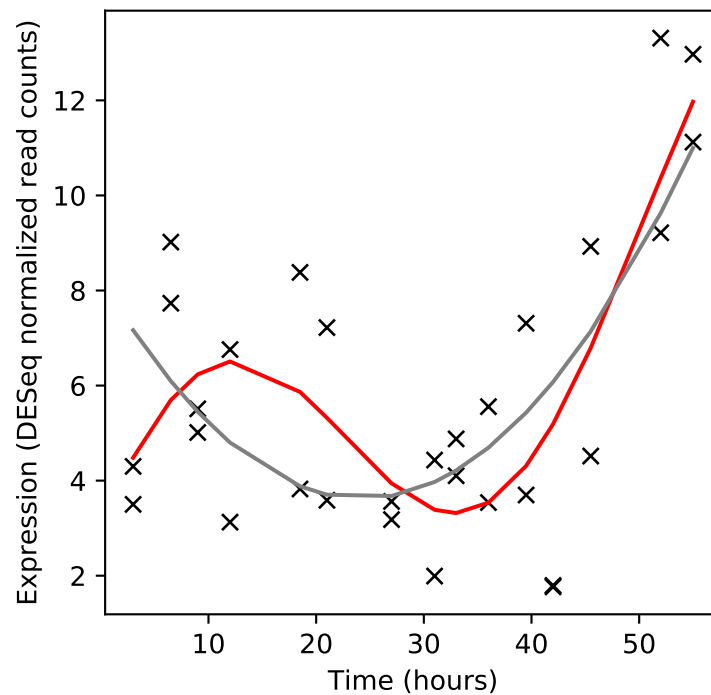

Rv1959c/parE1

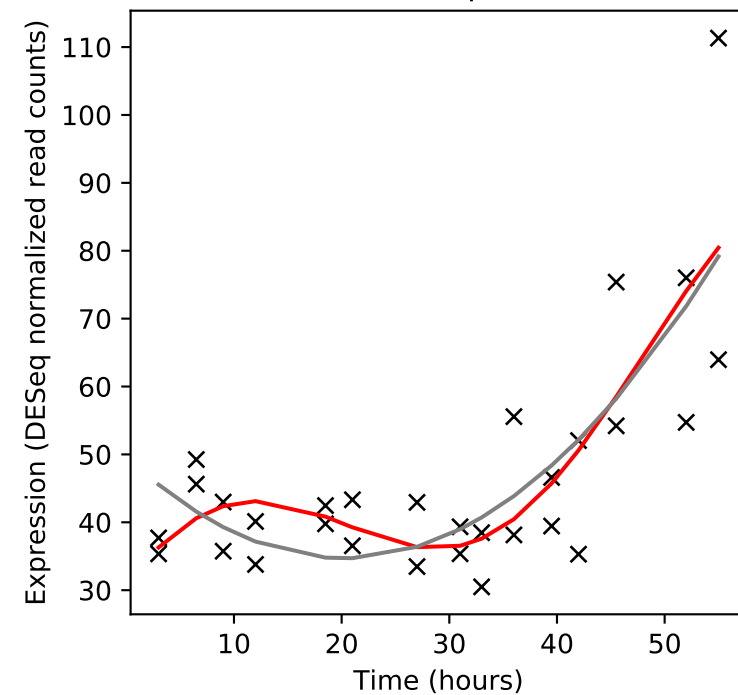

Rv1960c/parD1

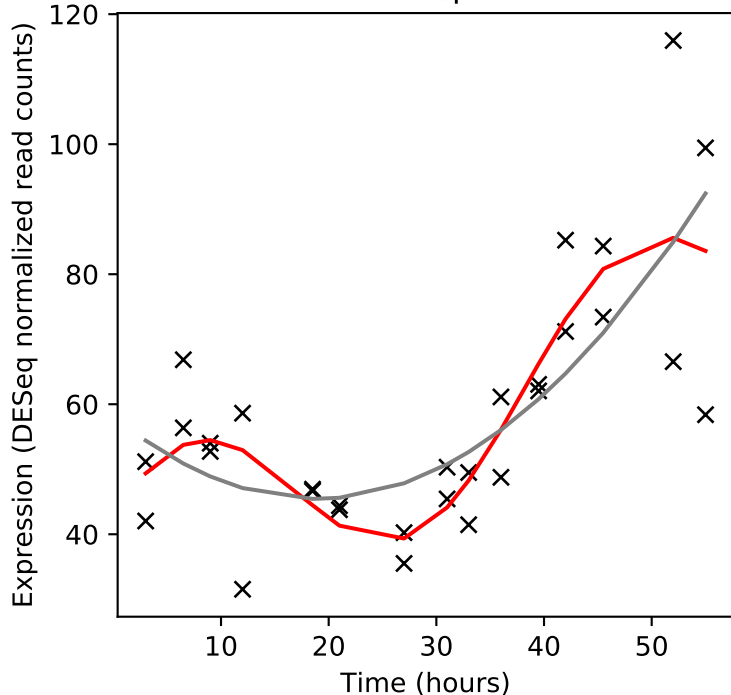

Rv1961/-

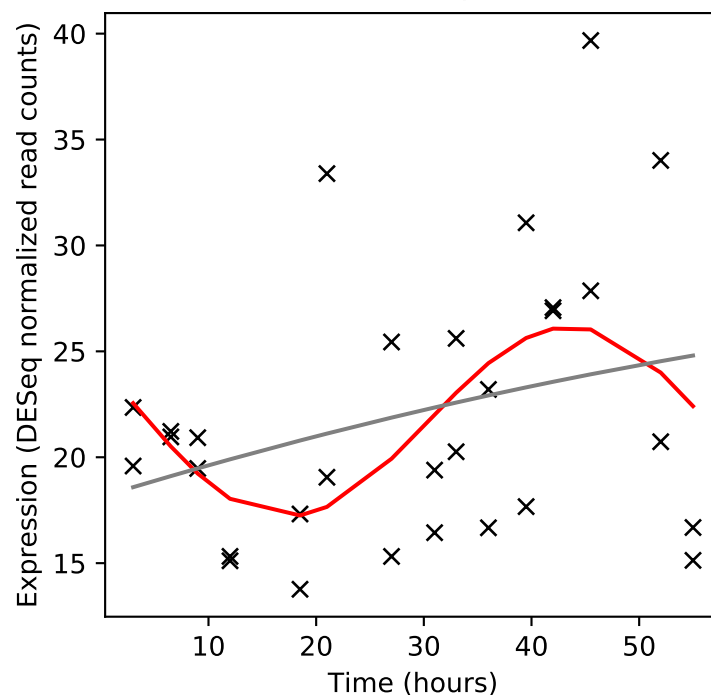

Rv1962c/vapC35

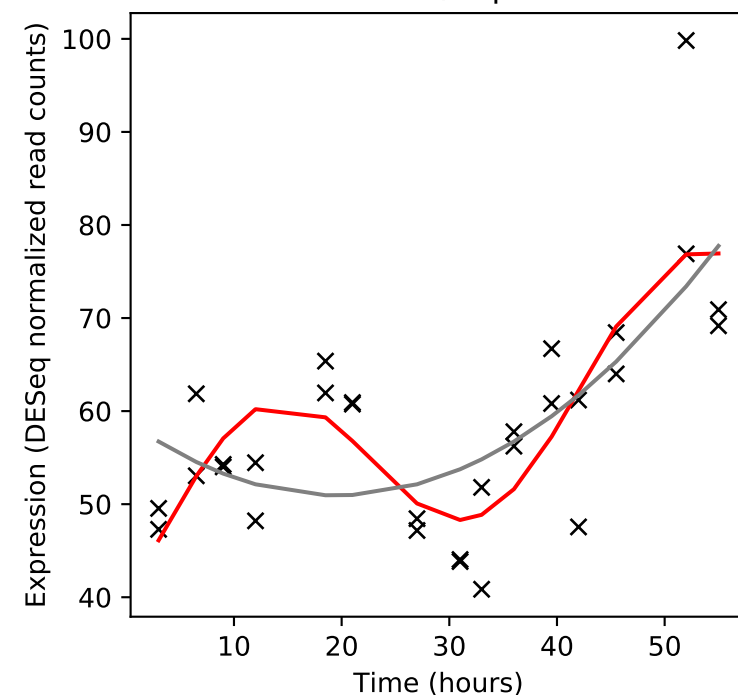

Rv1962A/vapB35

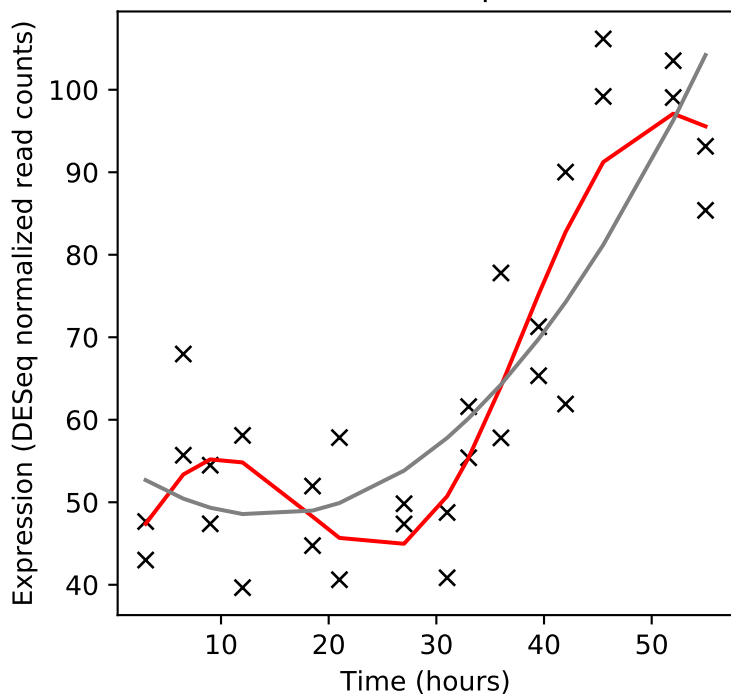

Rv1963c/mce3R

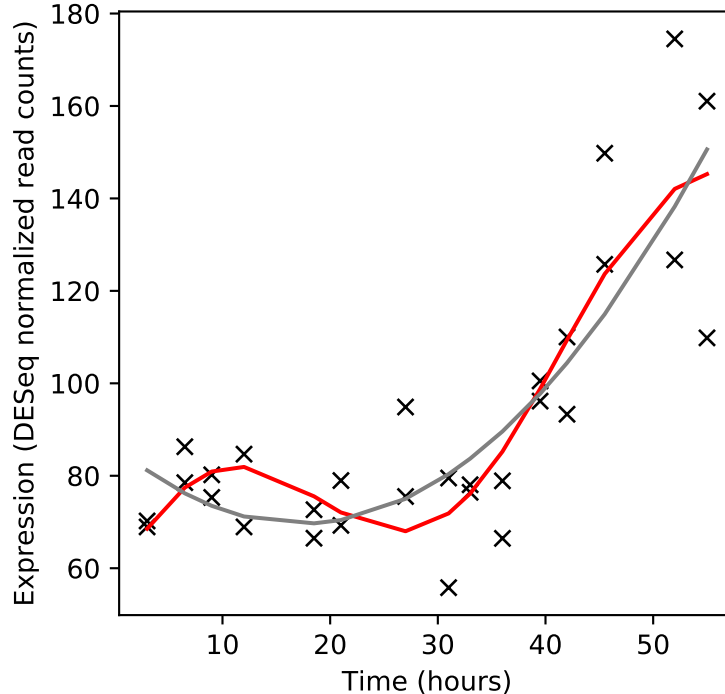

Rv1964/yrbE3A

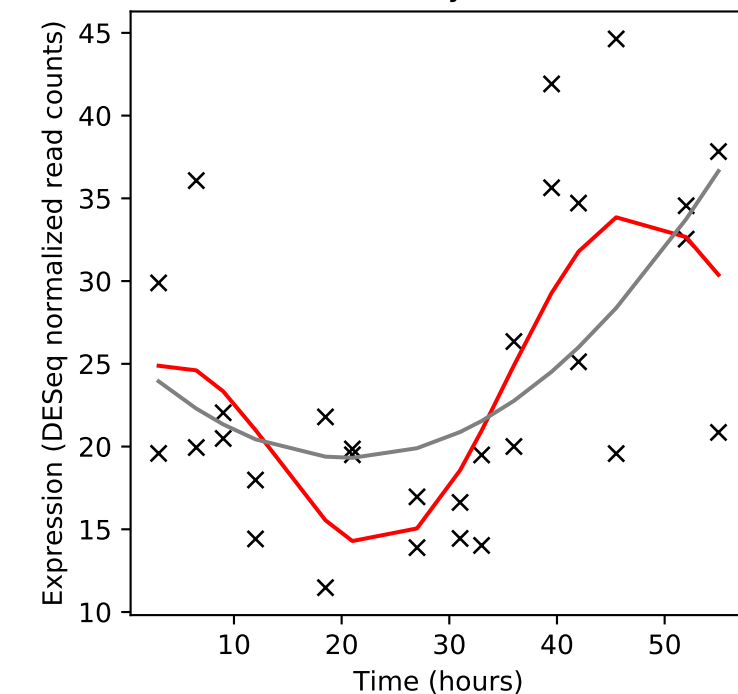

Rv1965/yrbE3B

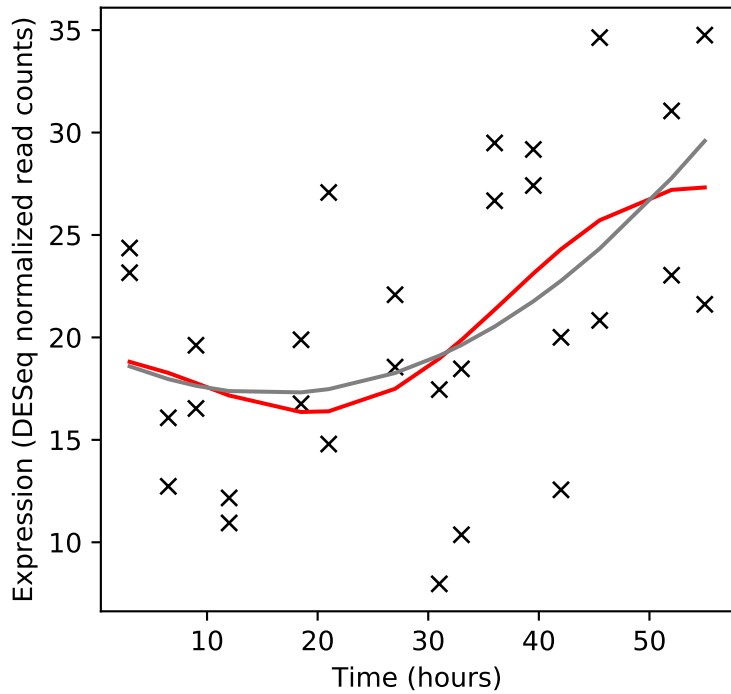

Rv1966/mce3A

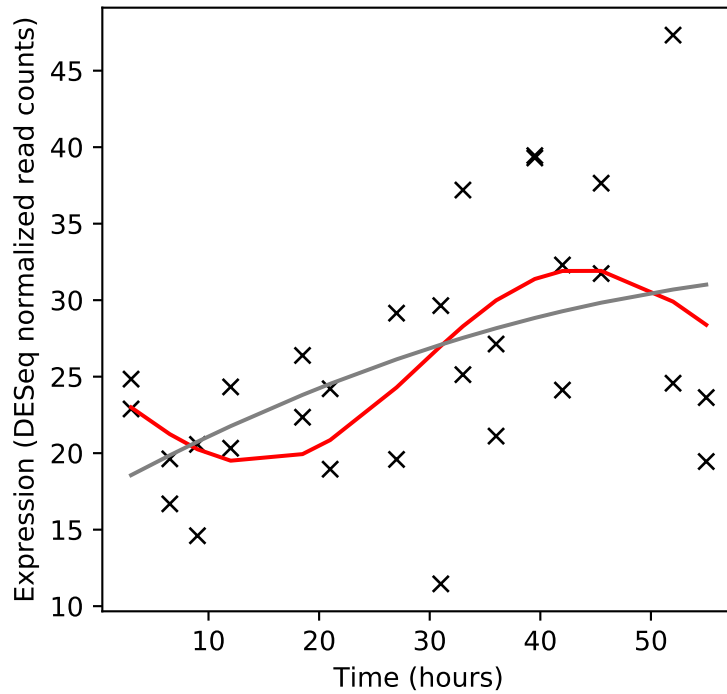

Rv1967/mce3B

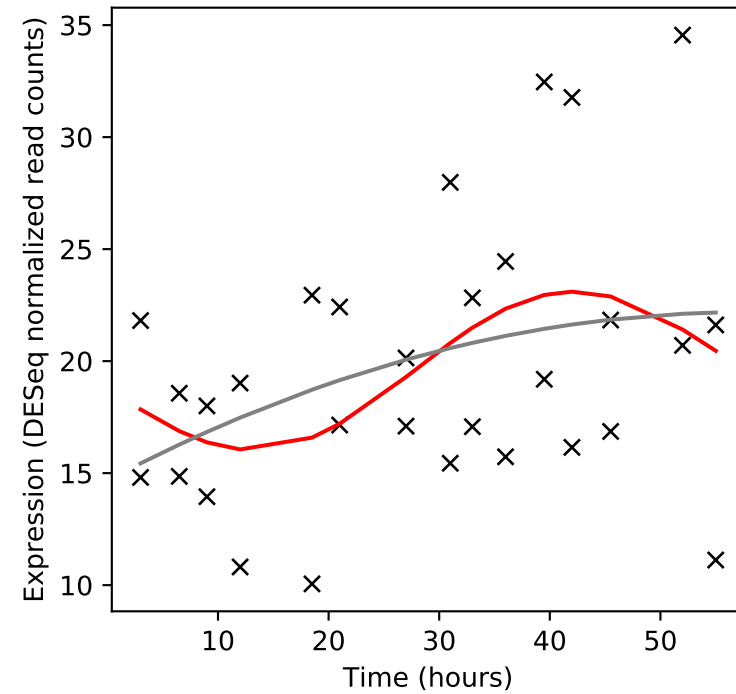

Rv1968/mce3C

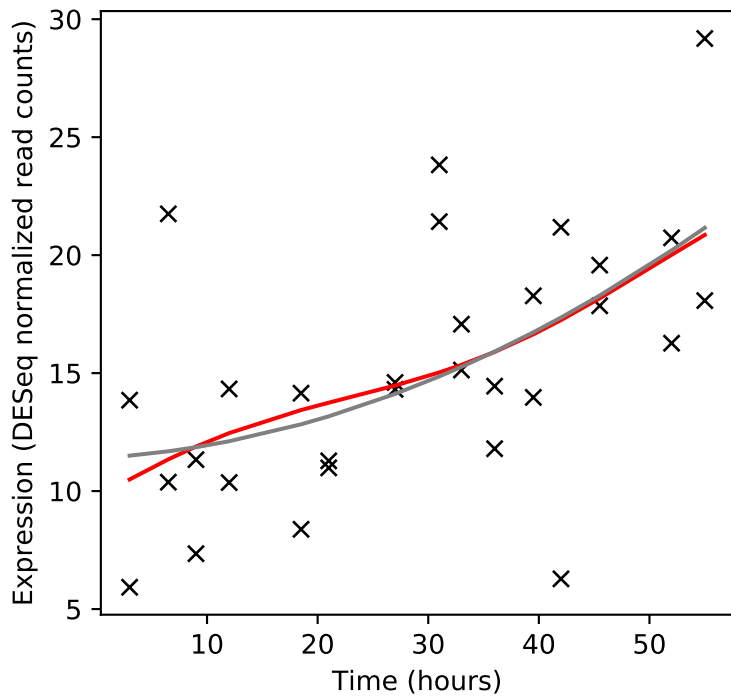

Rv1969/mce3D

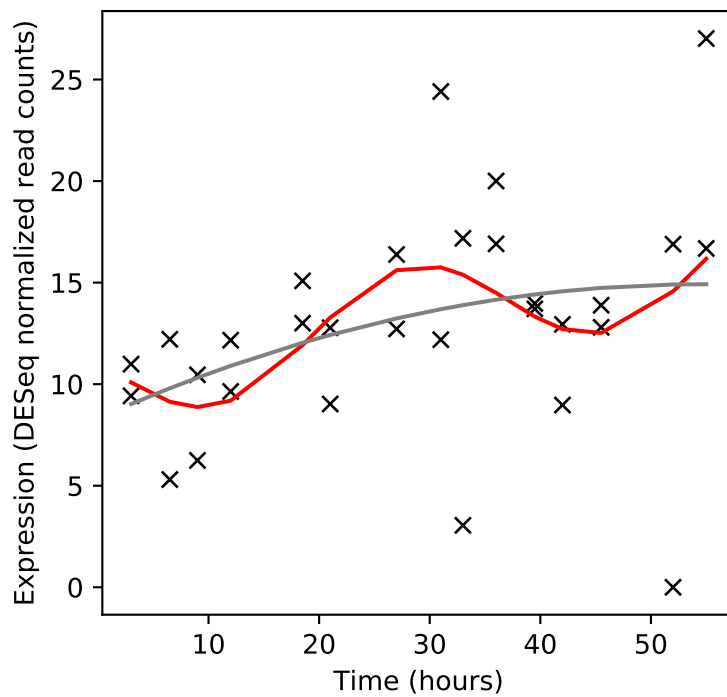

Rv1970/lprM

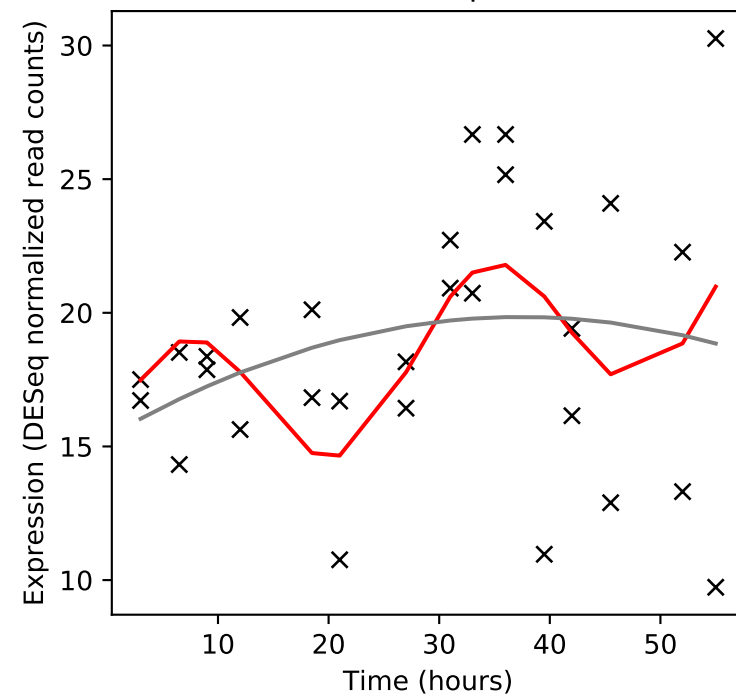

Rv1971/mce3F

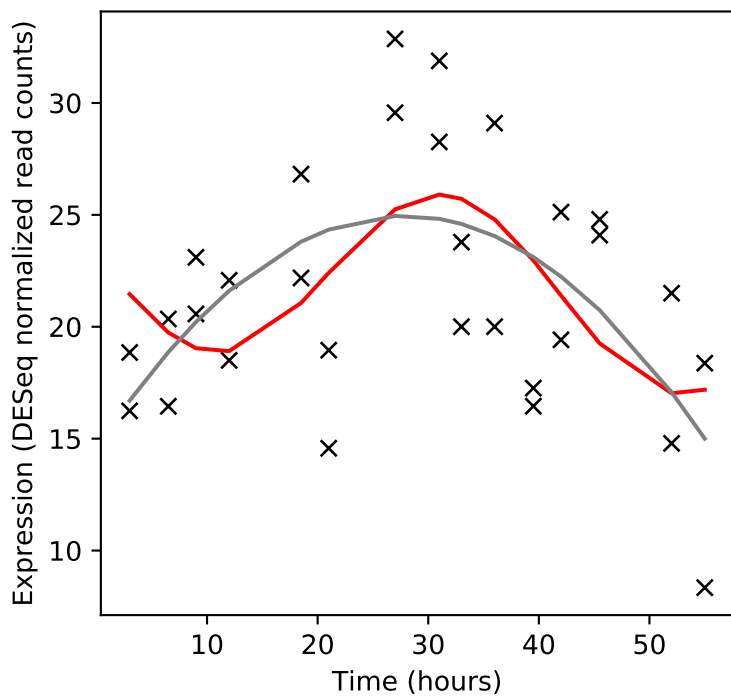

Rv1972/-

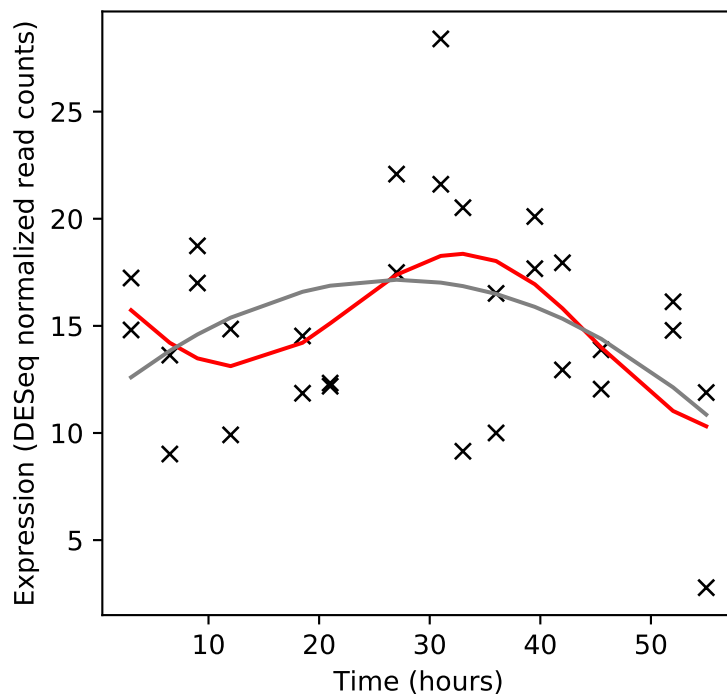

Rv1973/-

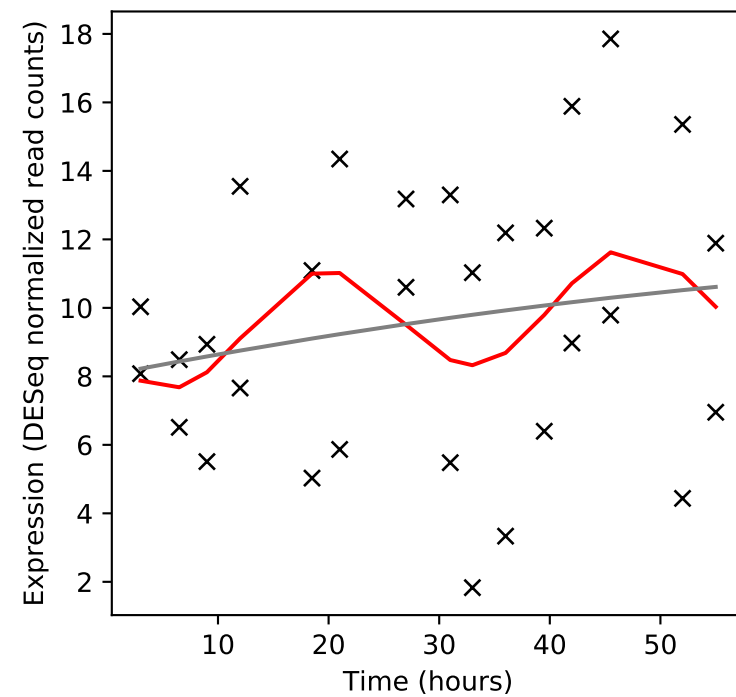

Rv1974/-

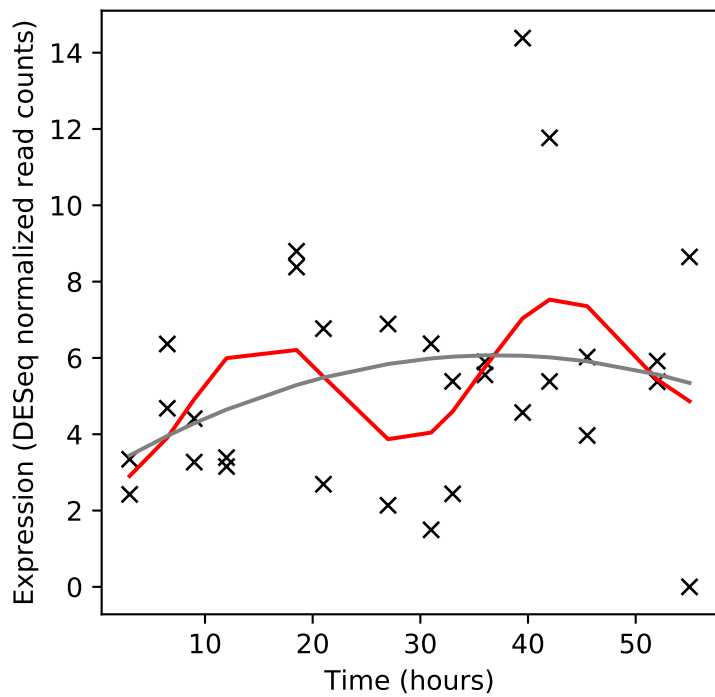

Rv1975/-

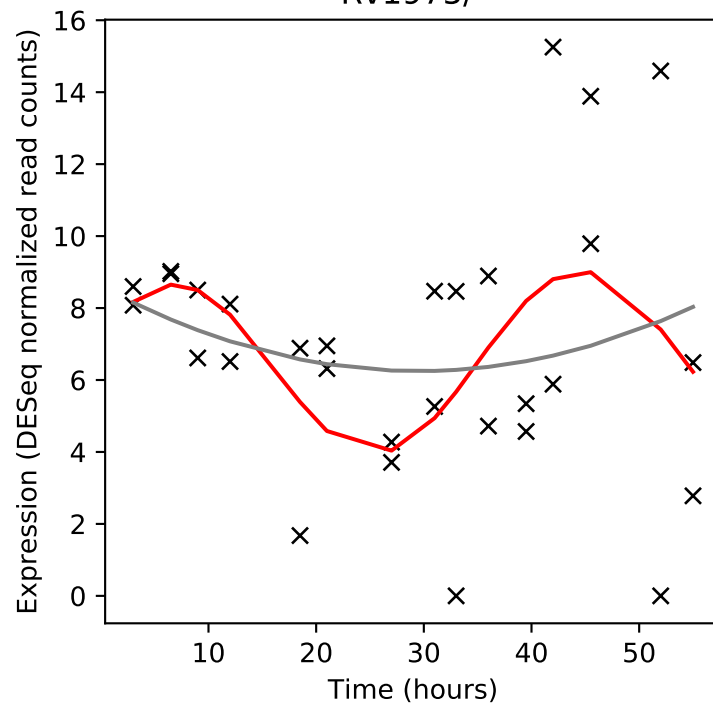

Rv1976c/-

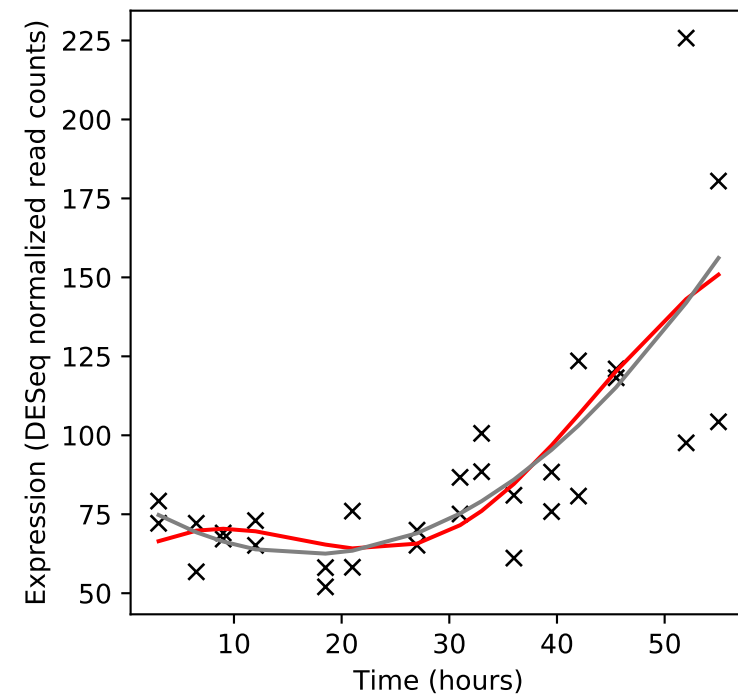

Rv1977/-

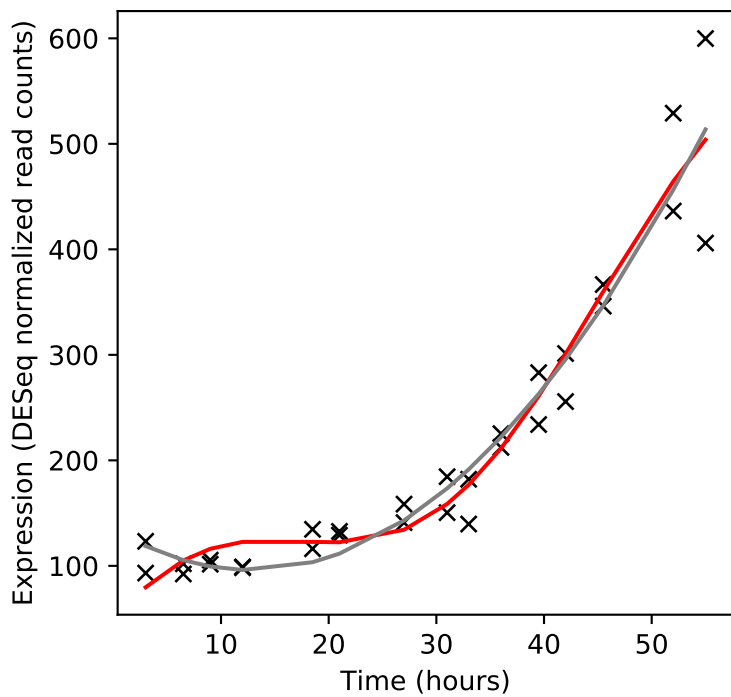

Rv1978/-

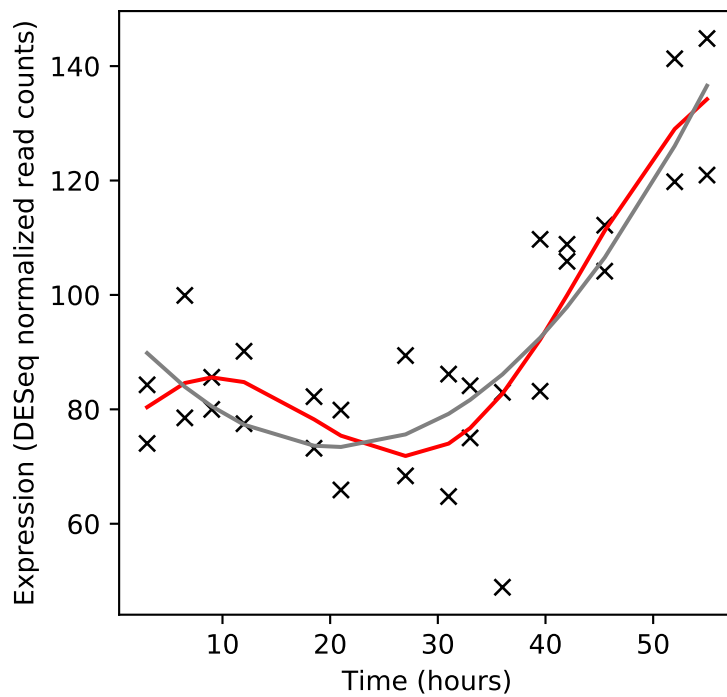

Rv1979c/-

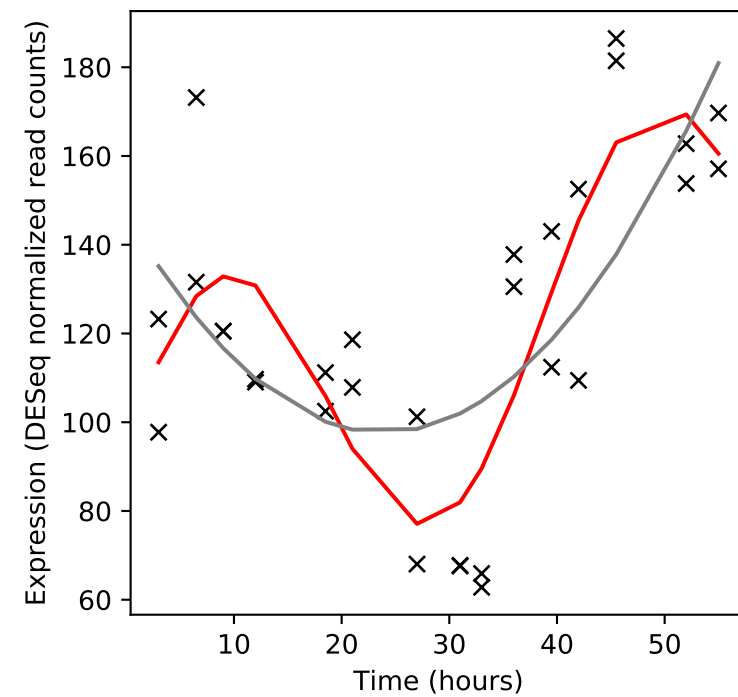

Rv1980c/mpt64

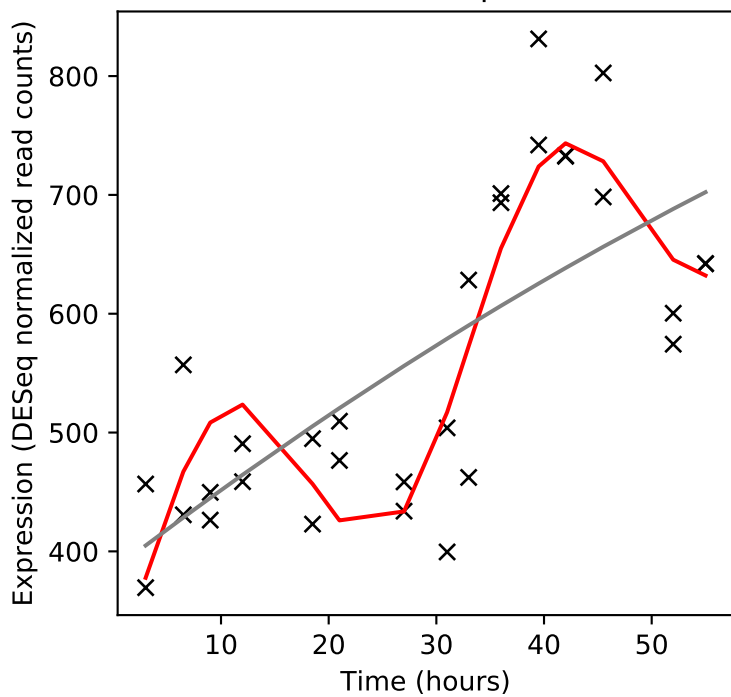

Rv1981c/nrdF1

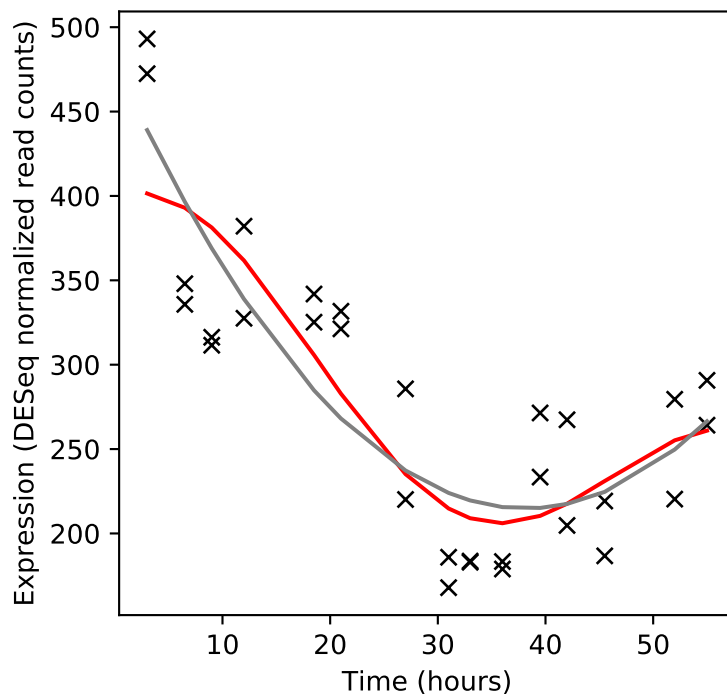

Rv1982c/vapC36

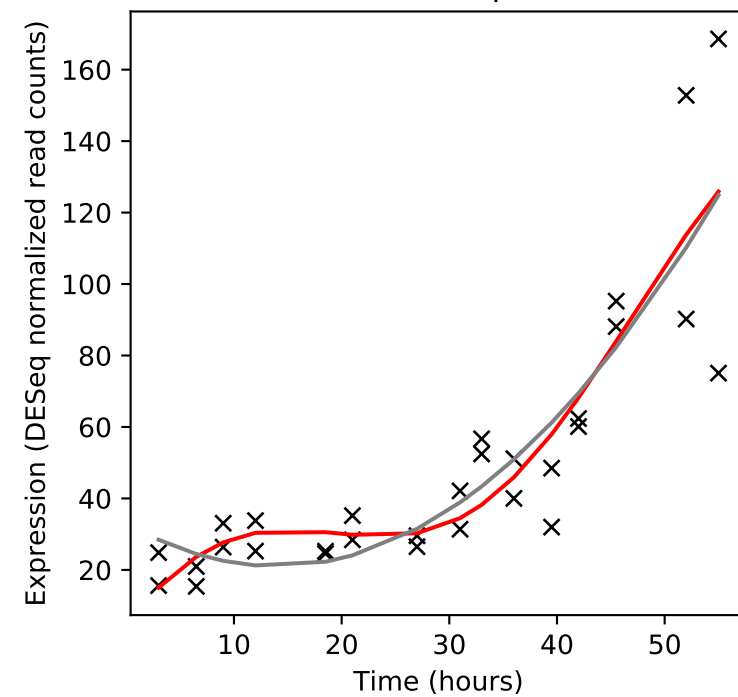

Rv1982A/vapB36

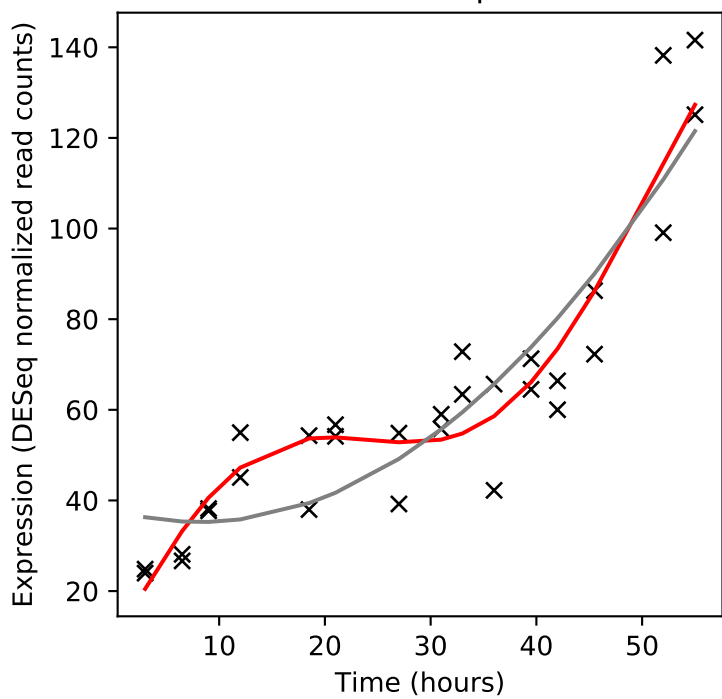

Rv1983/PE\_PGRS35

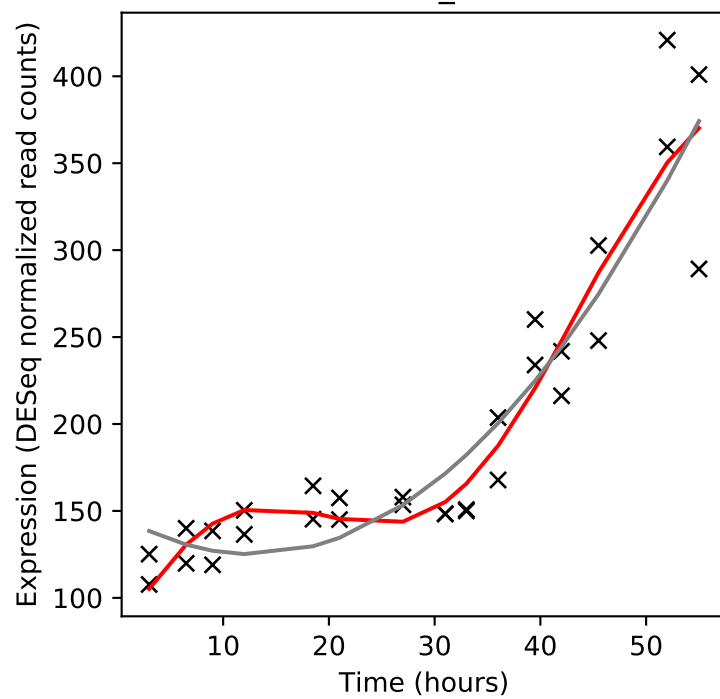

Rv1984c/cfp21

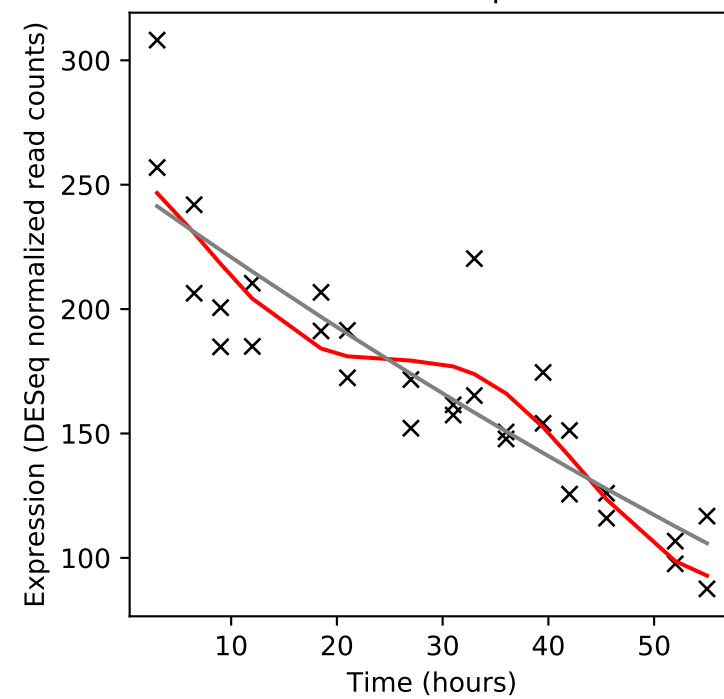

Rv1985c/-

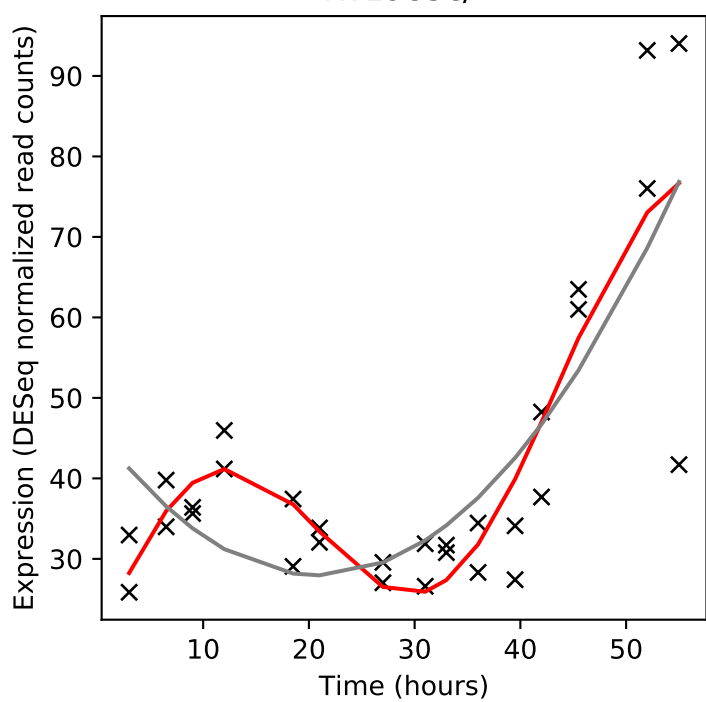

Rv1986/-

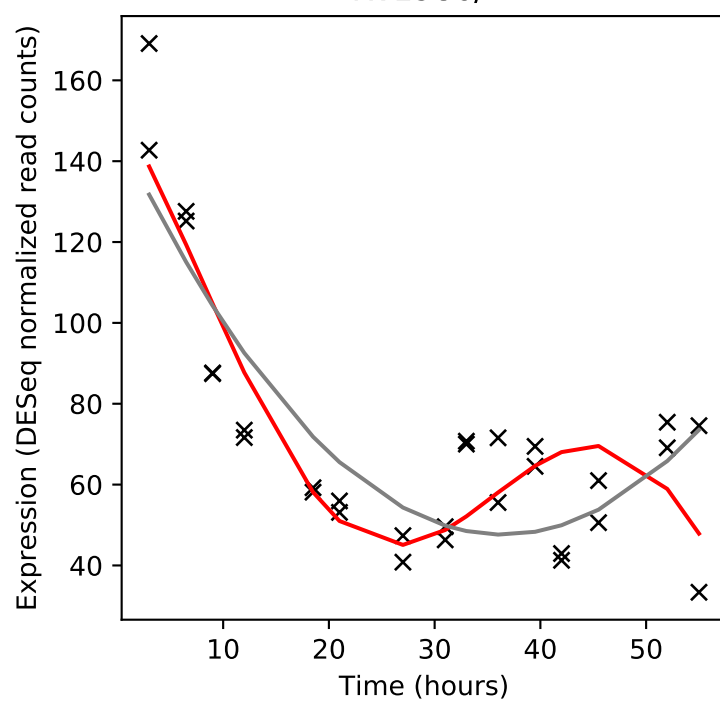

Rv1987/-

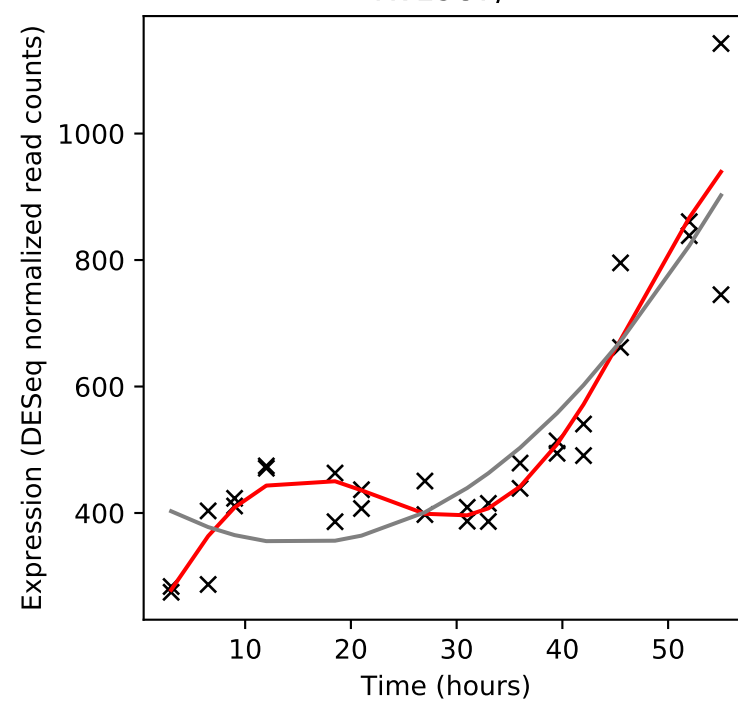

Rv1988/erm(37)

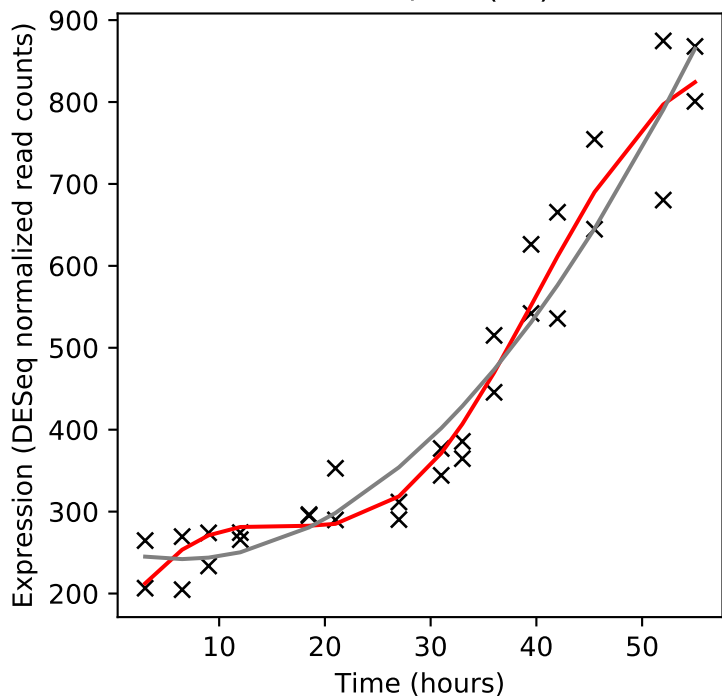

Rv1989c/-

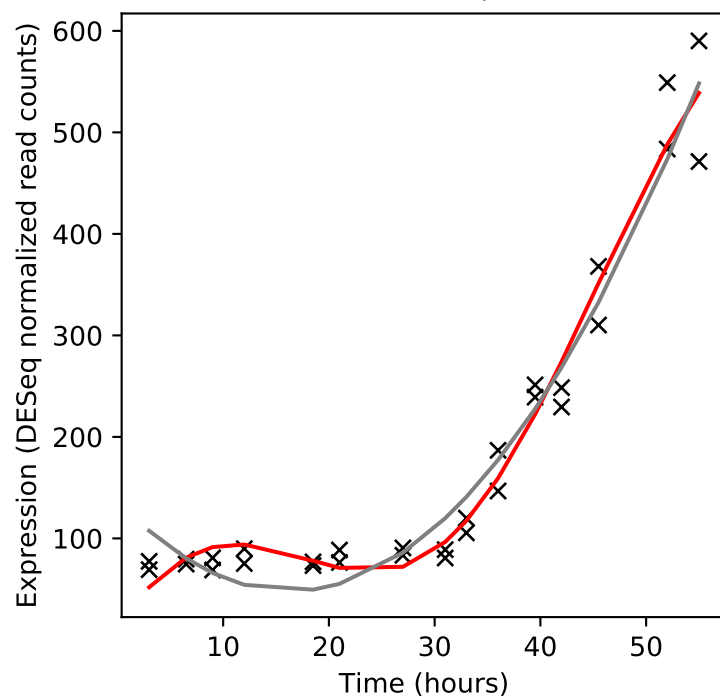

Rv1990c/-

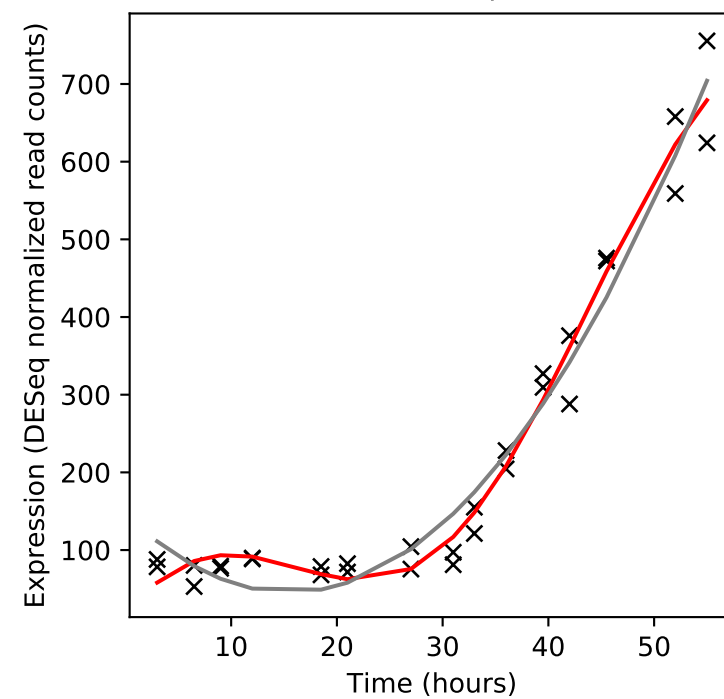



Rv1990A/-

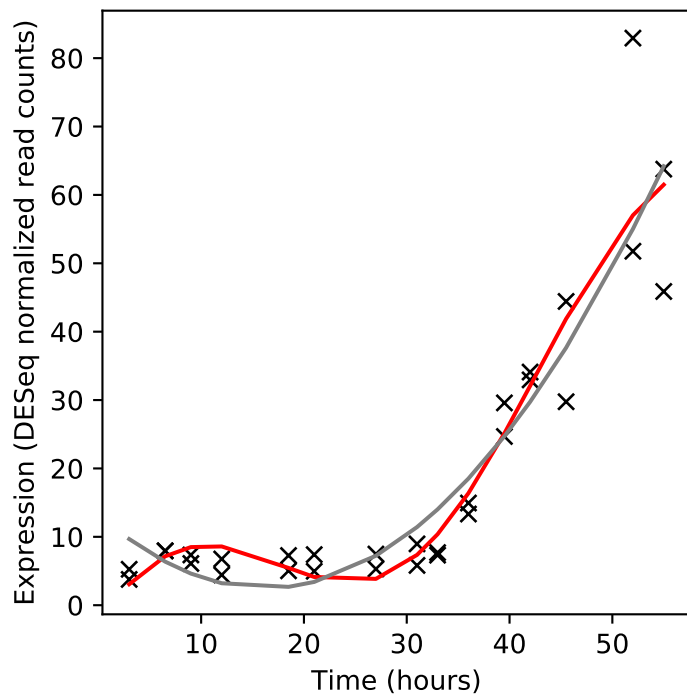

Rv1991c/mazF6

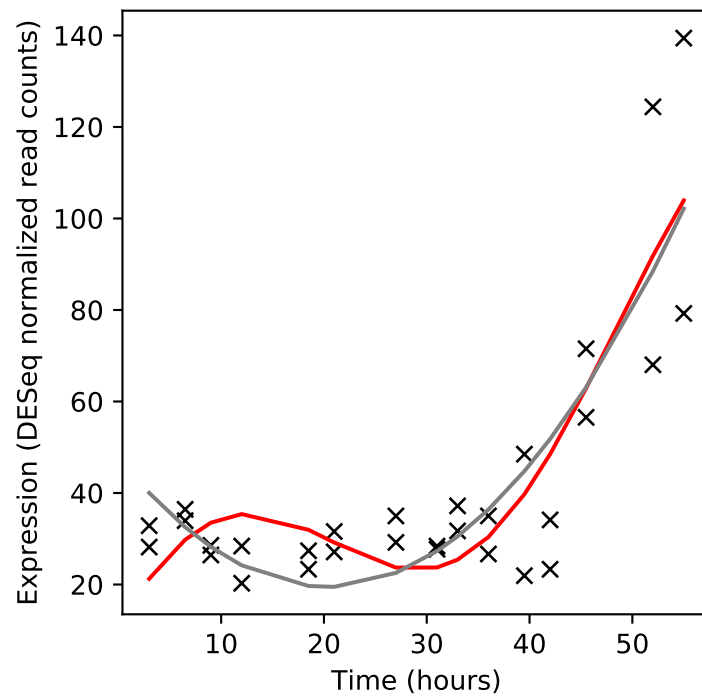

Rv1991A/mazE6

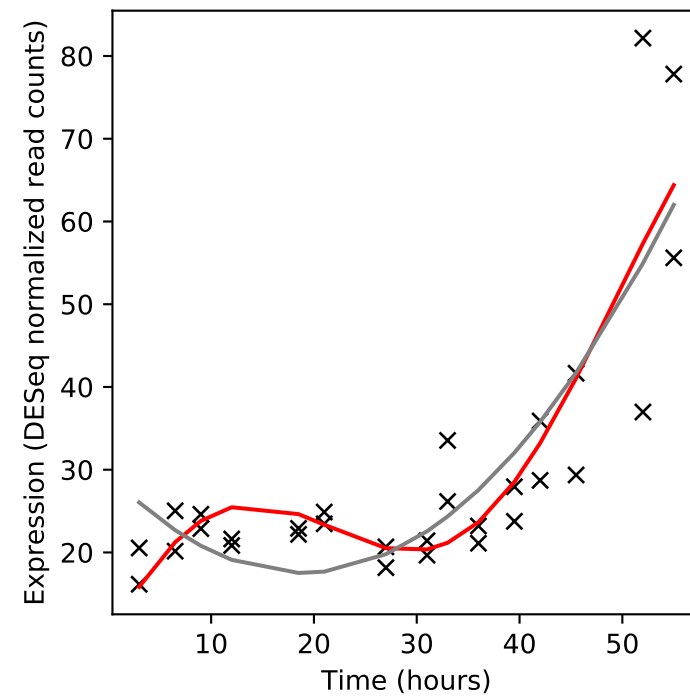

Rv1992c/ctpG

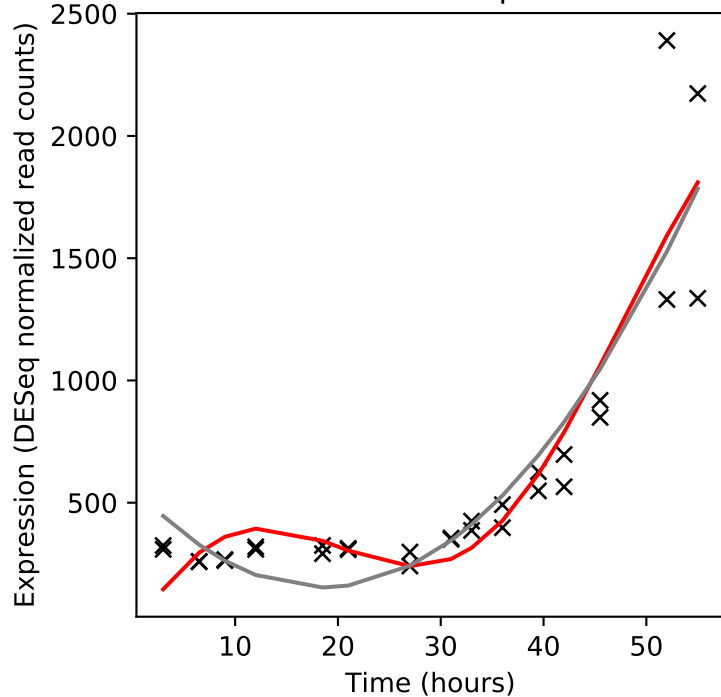

Rv1993c/-

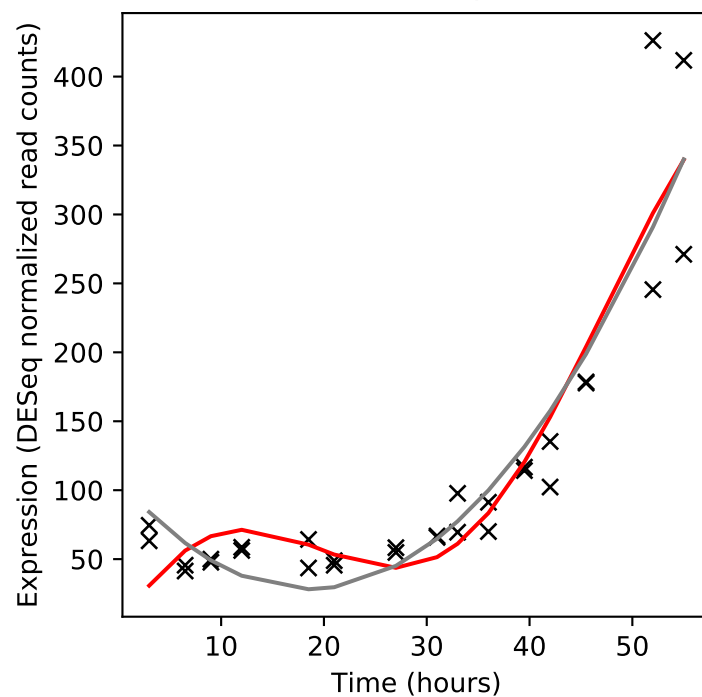

Rv1994c/cmtR

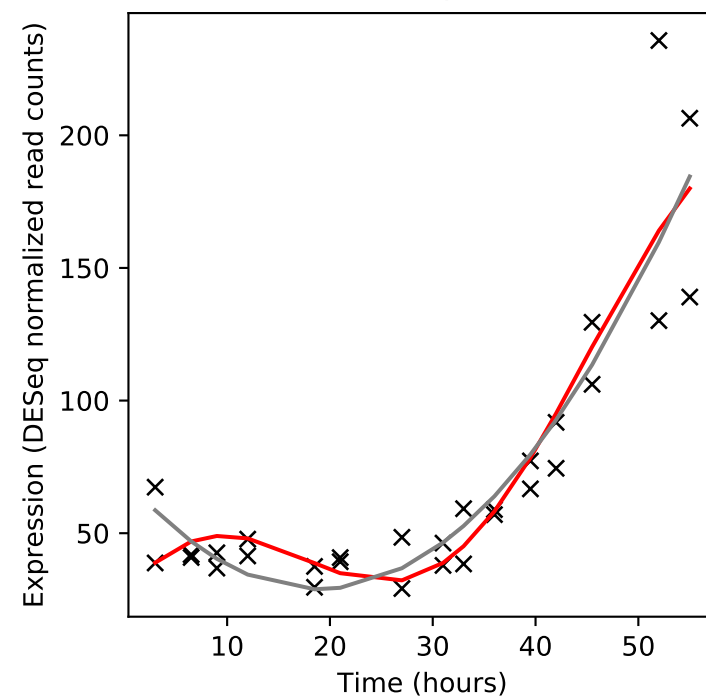

Rv1995/-

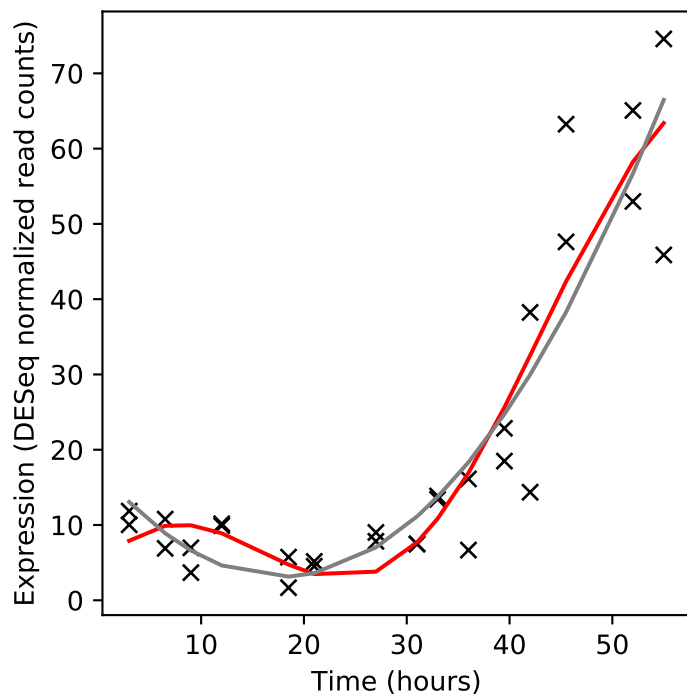

Rv1996/-

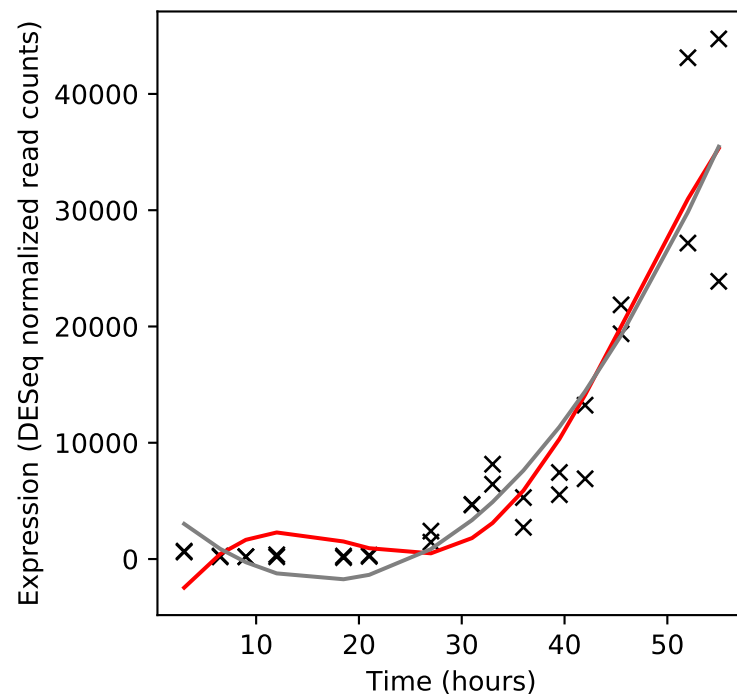

Rv1997/ctpF

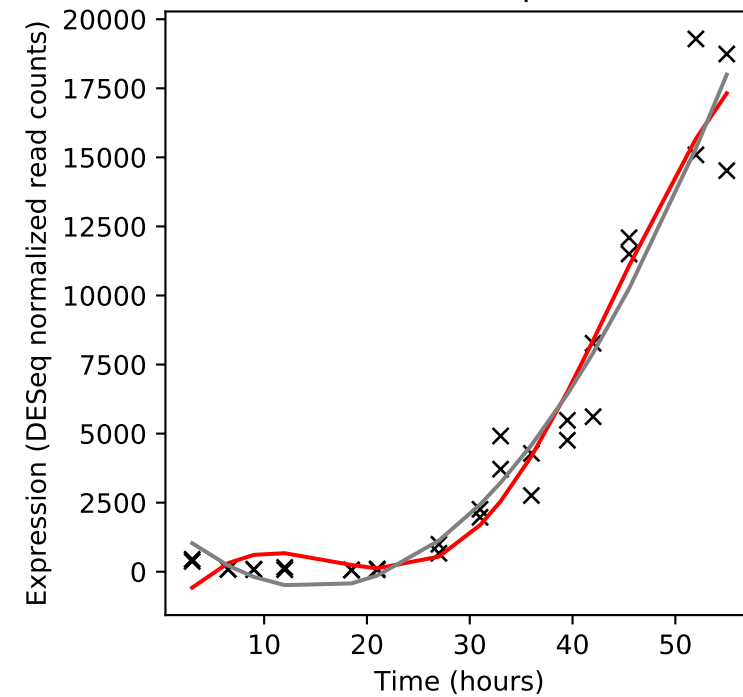

Rv1998c/-

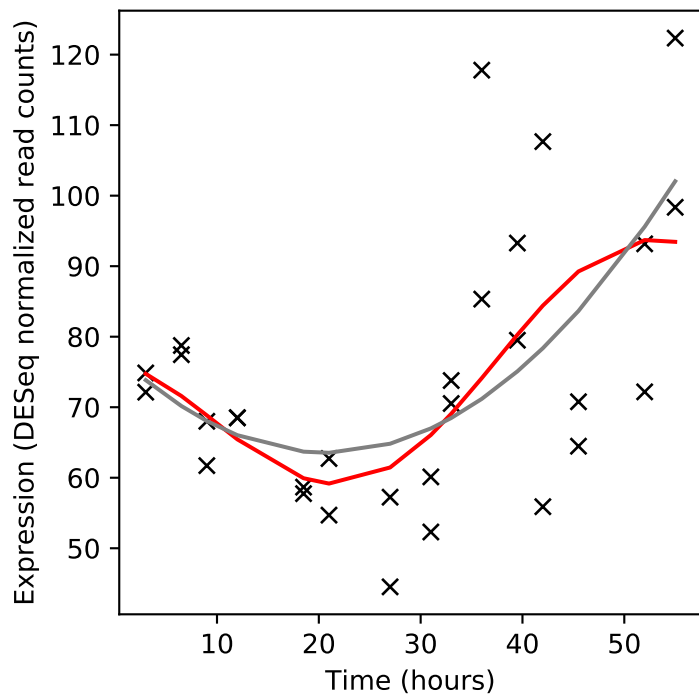

Rv1999c/-

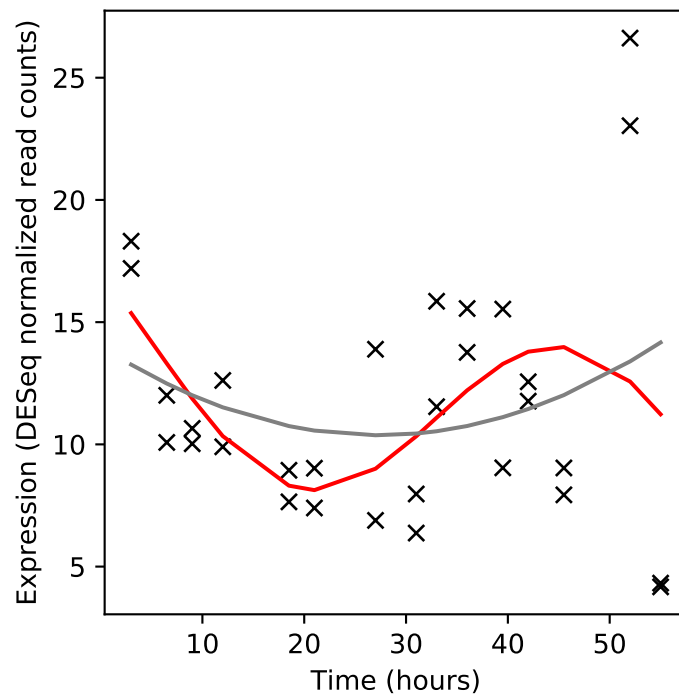

Rv2000/-

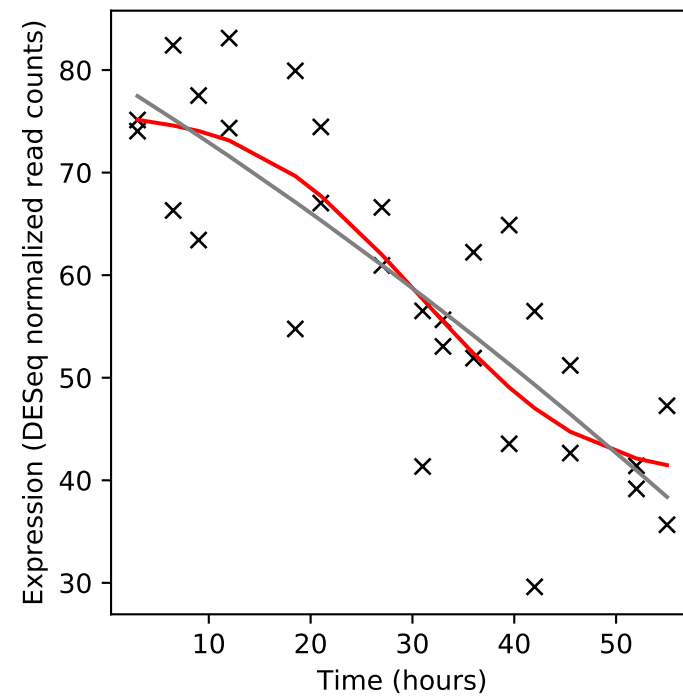

Rv2001/-

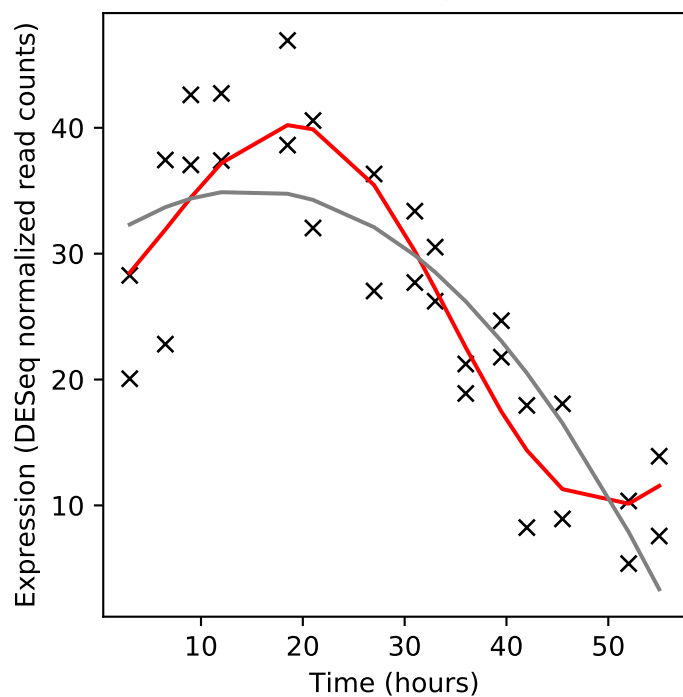

Rv2002/fabG3

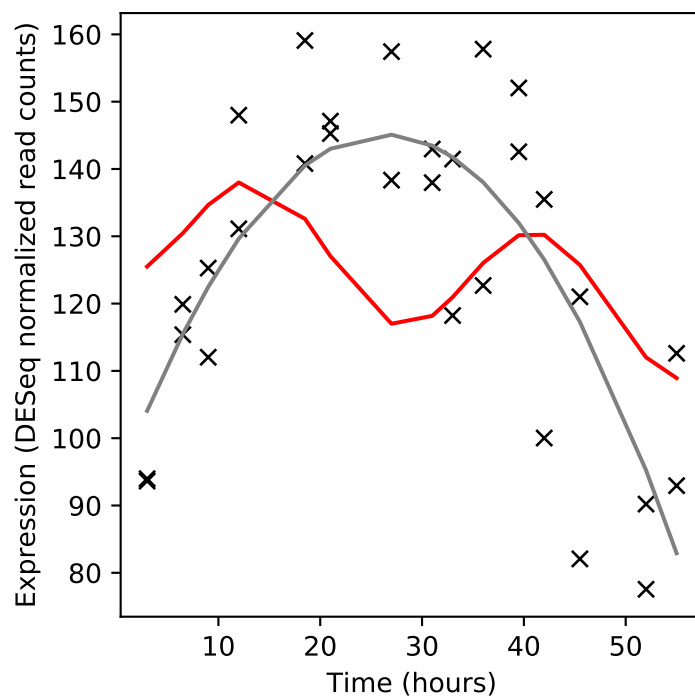

Rv2003c/-

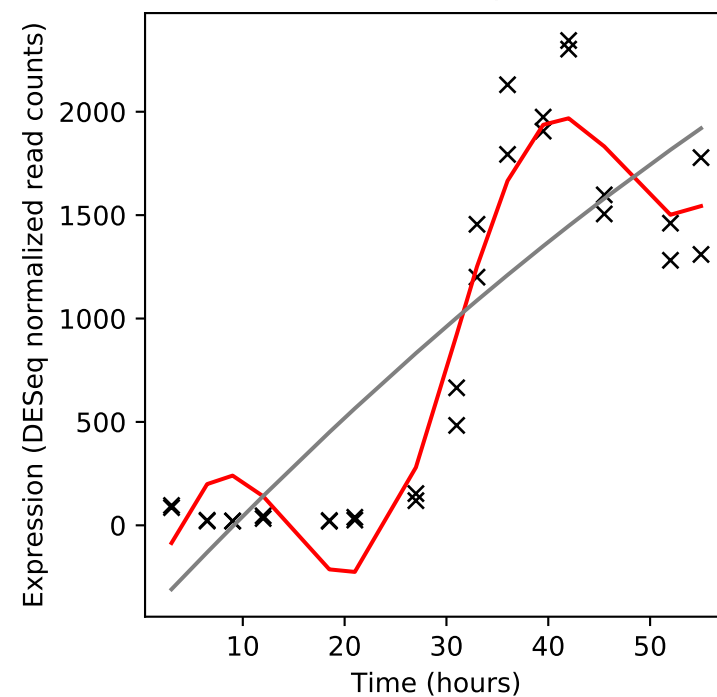

Rv2004c/-

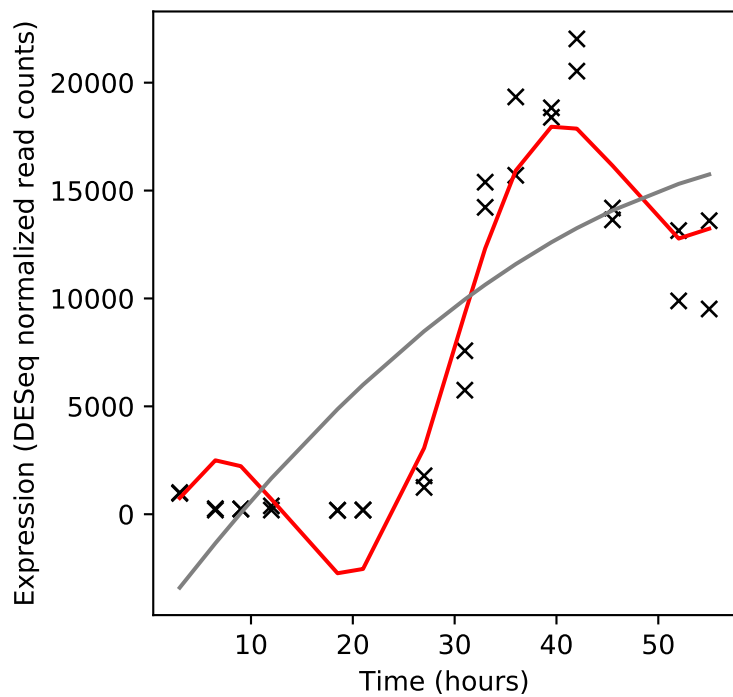

Rv2005c/-

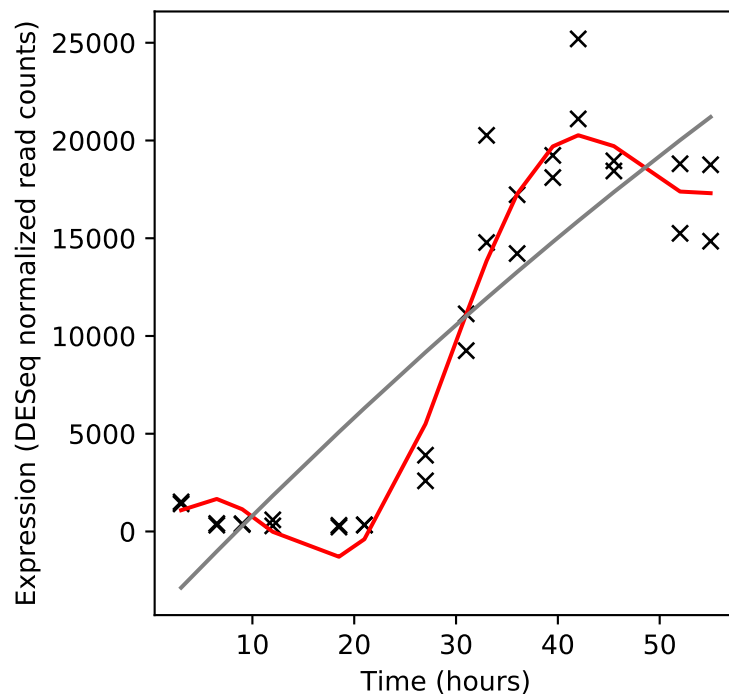

Rv2006/otsB1

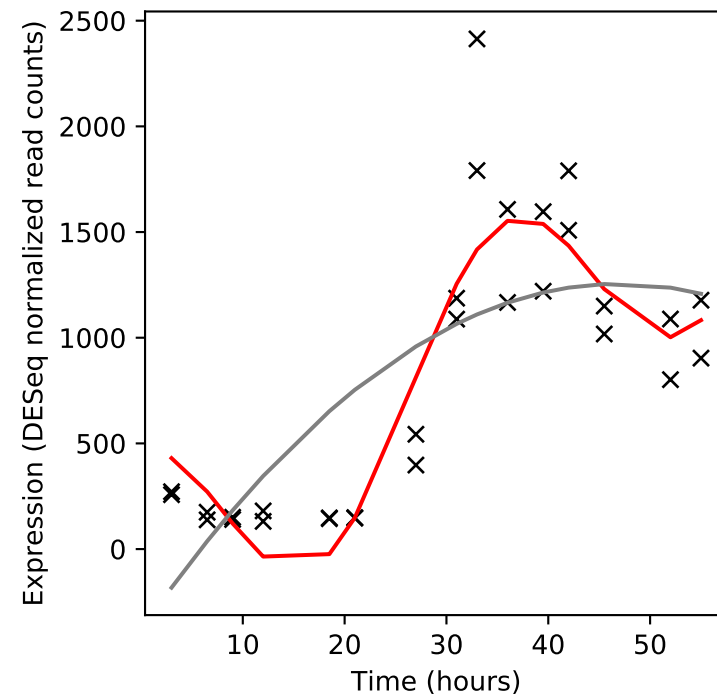

Rv2007c/fdxA

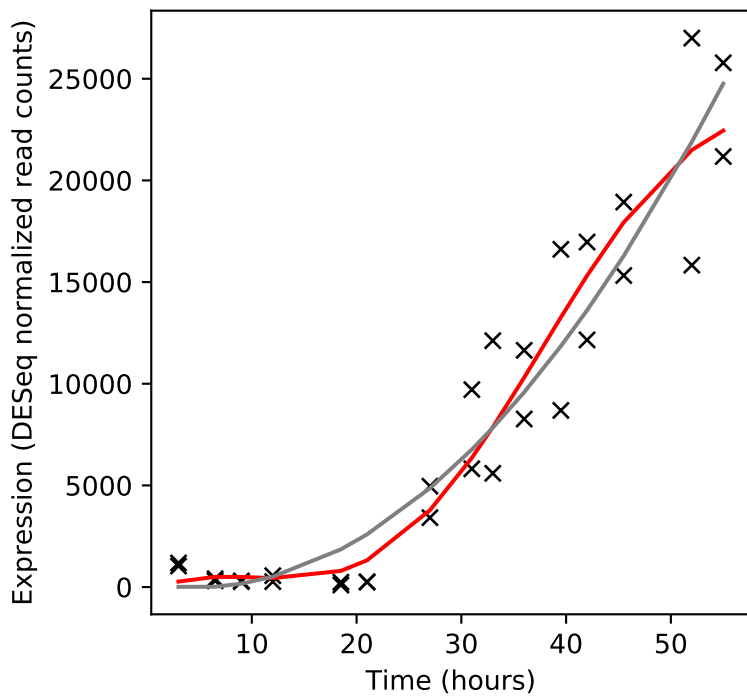

Rv2008c/-

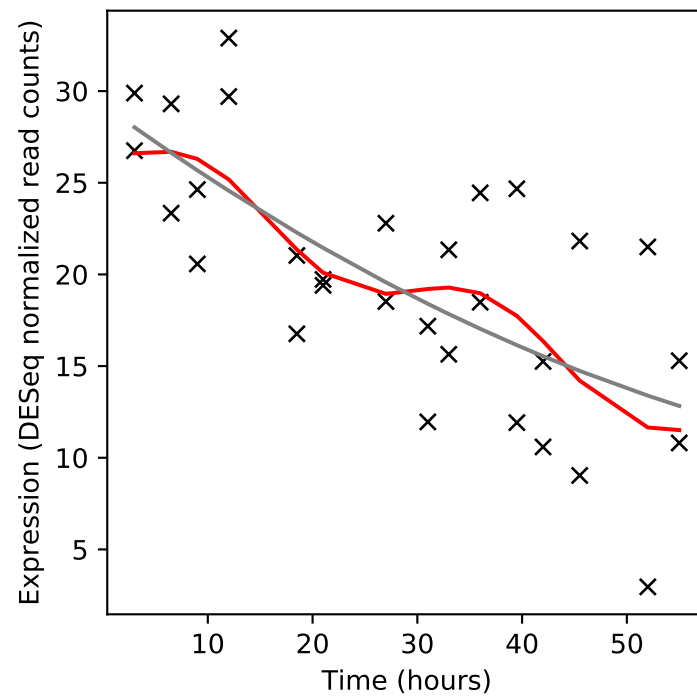

Rv2009/vapB15

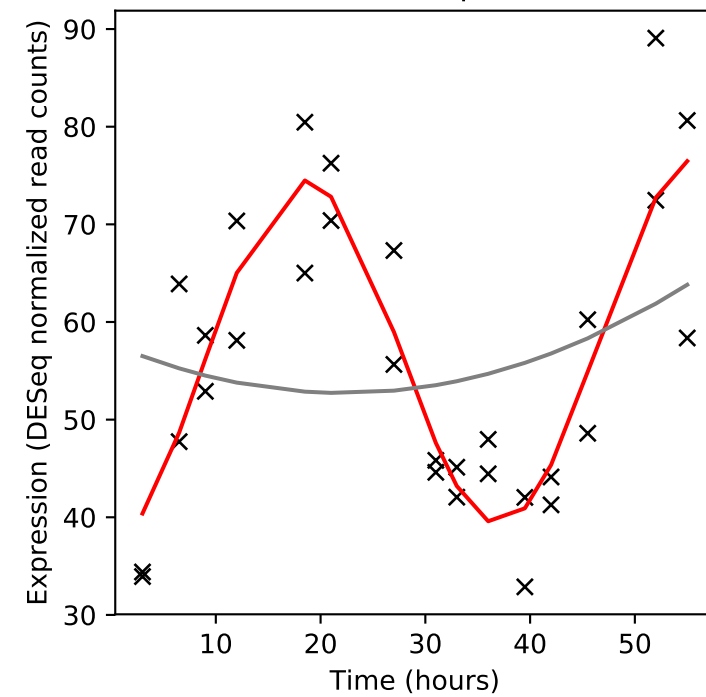

Rv2010/vapC15

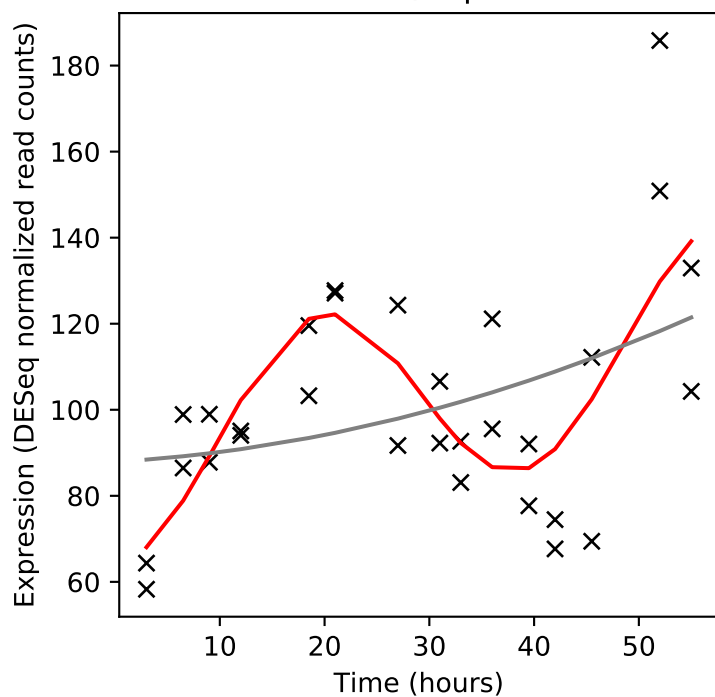

Rv2011c/-

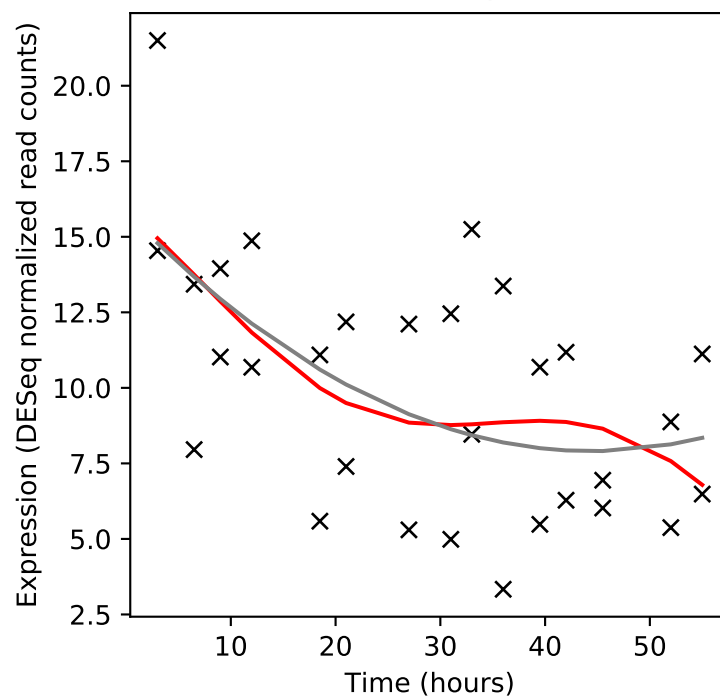

Rv2012/-

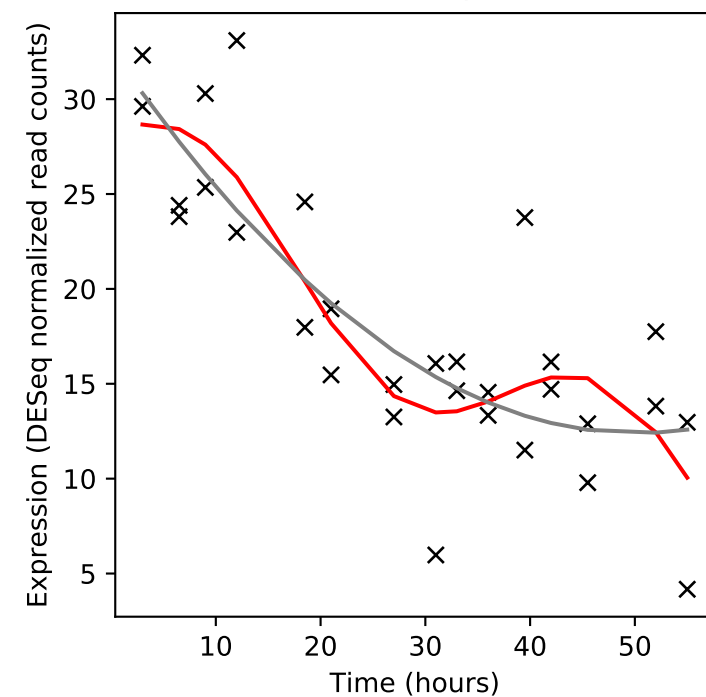

Rv2013/-

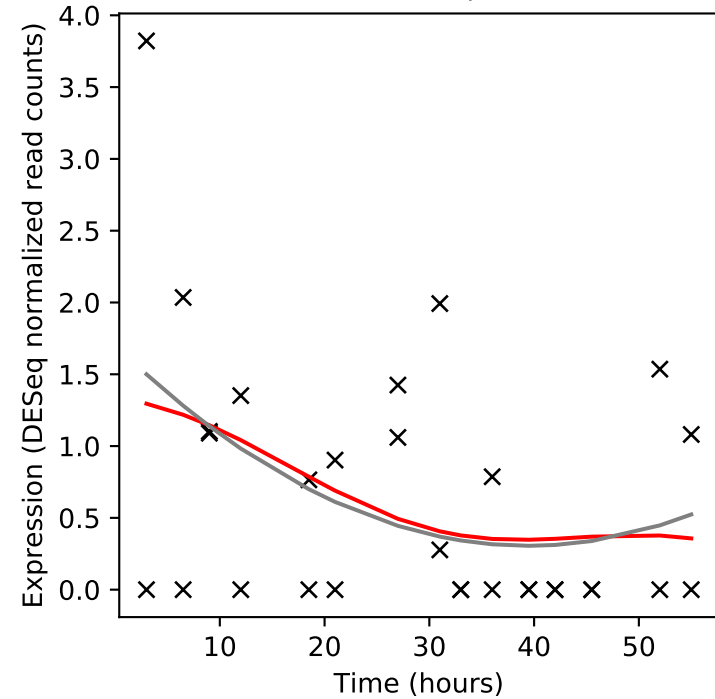

Rv2014/-

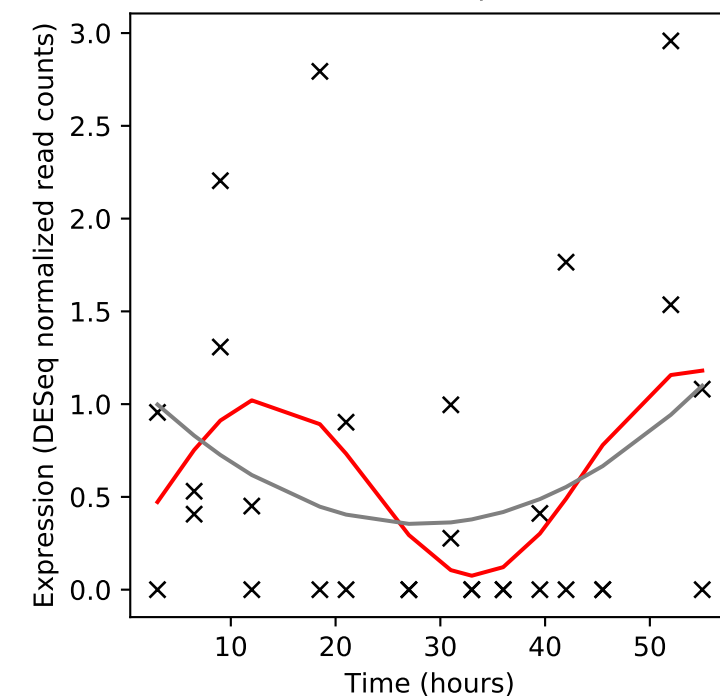

Rv2015c/-

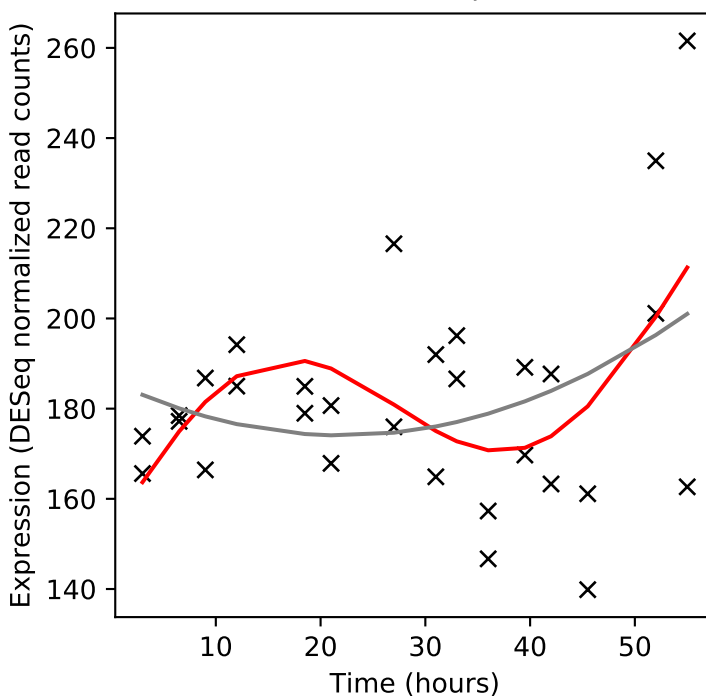

Rv2016/-

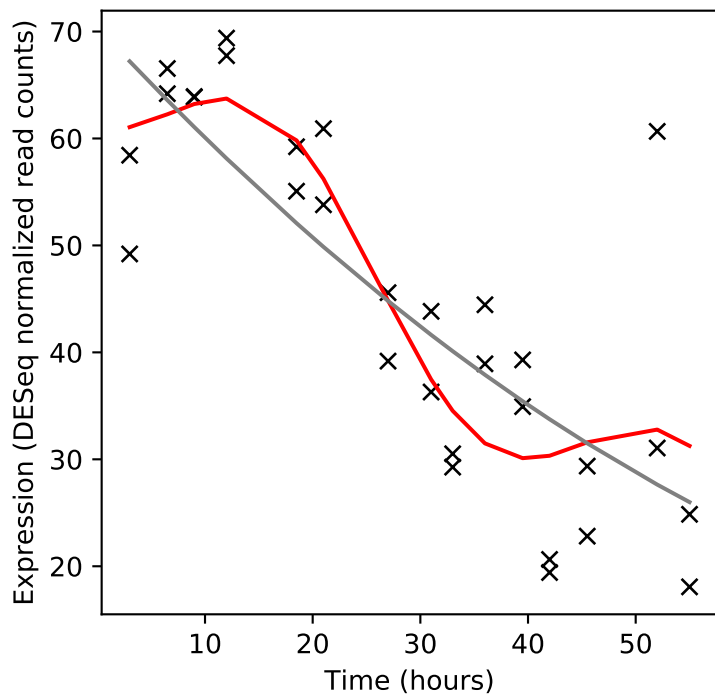

Rv2017/-

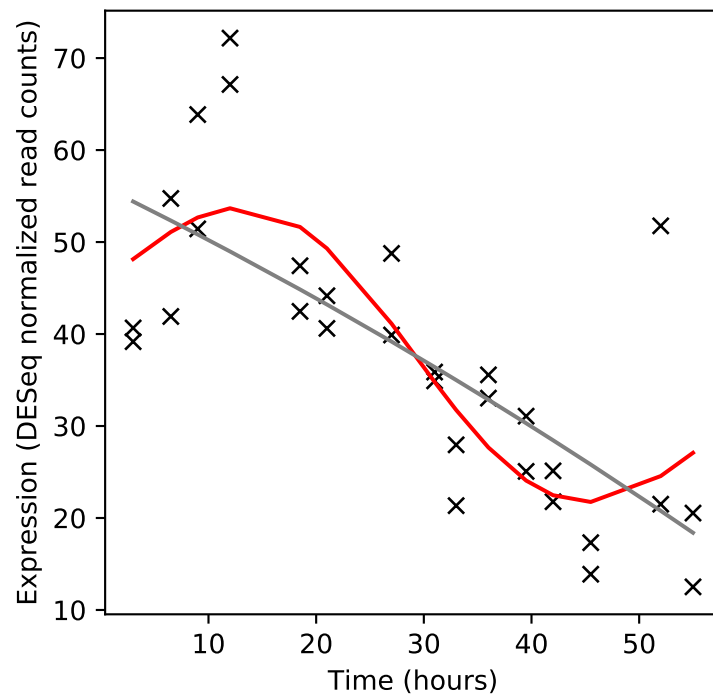

Rv2018/-

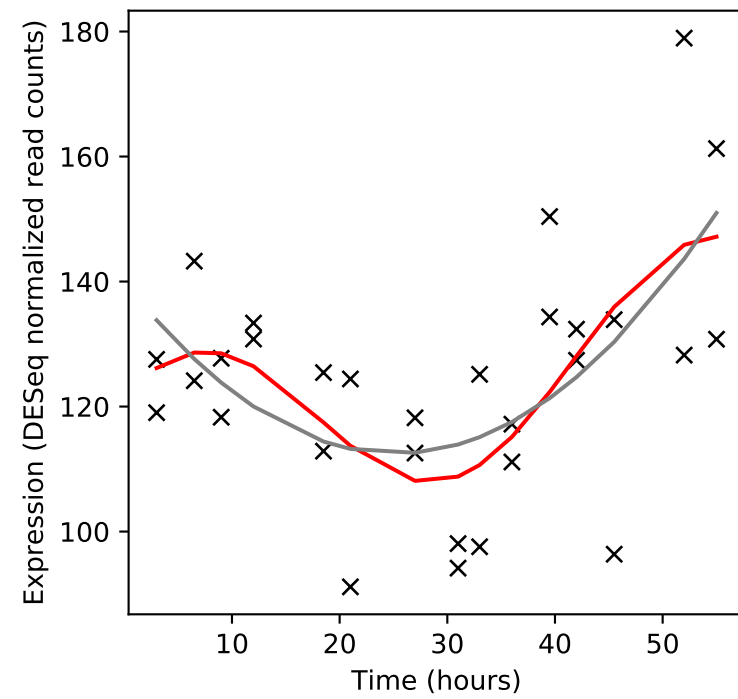

Rv2019/-

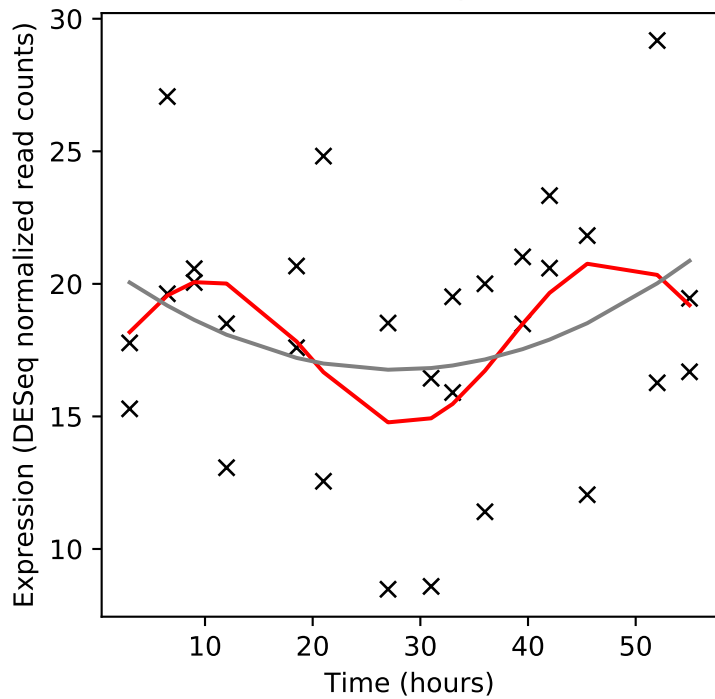

Rv2020c/-

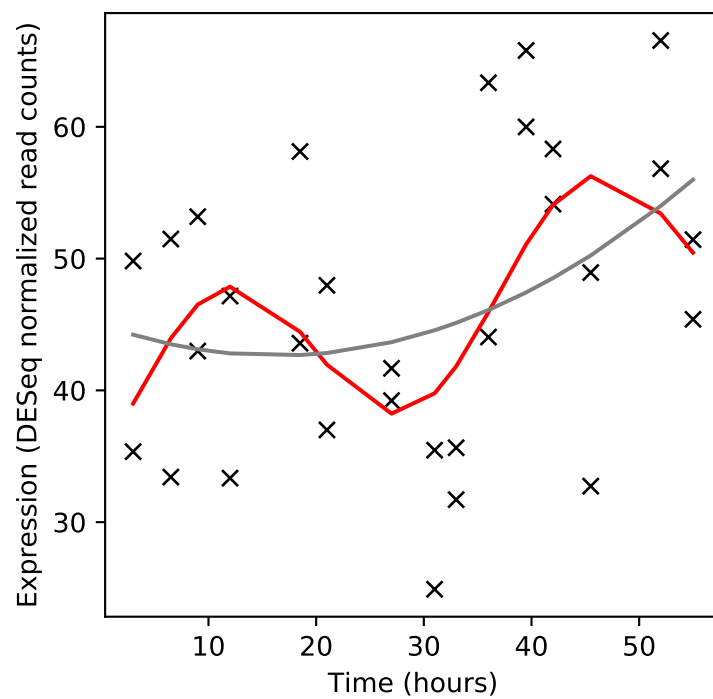

Rv2021c/-

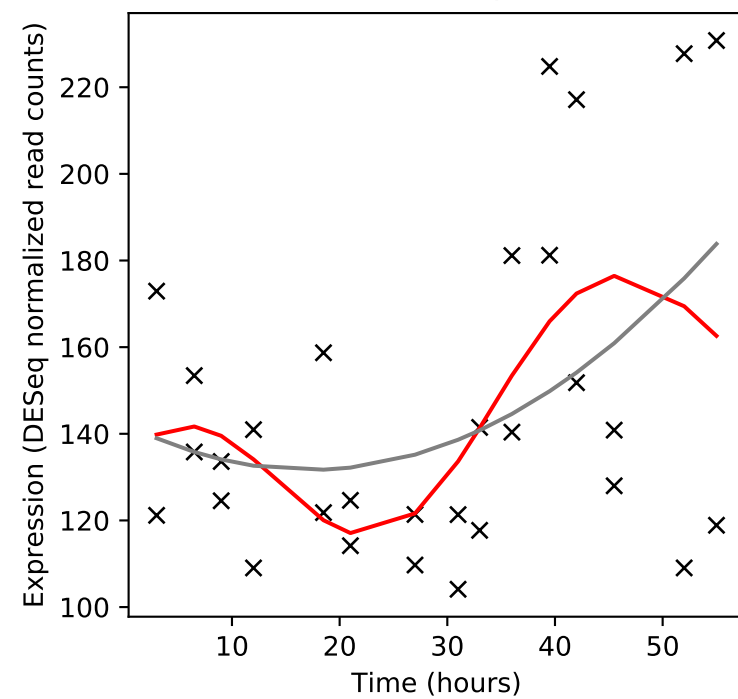

Rv2022c/-

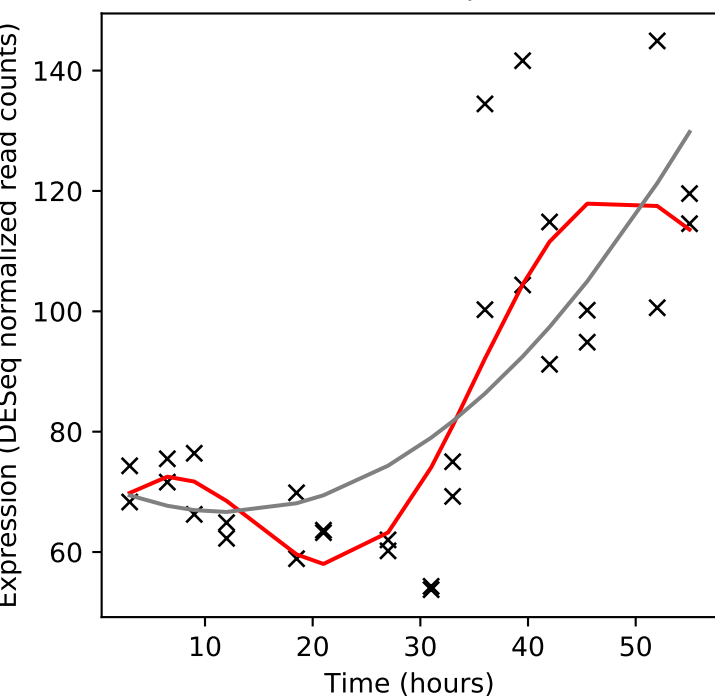

Rv2023c/-

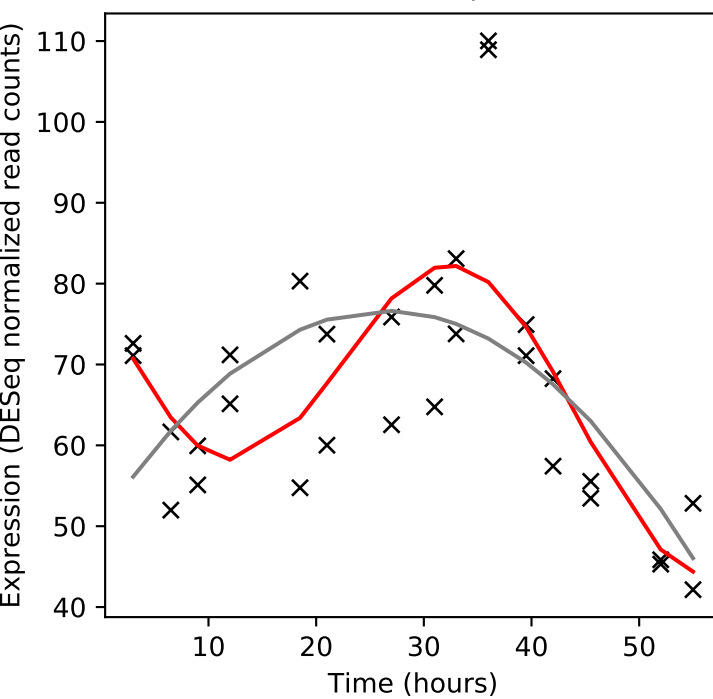

Rv2024c/-

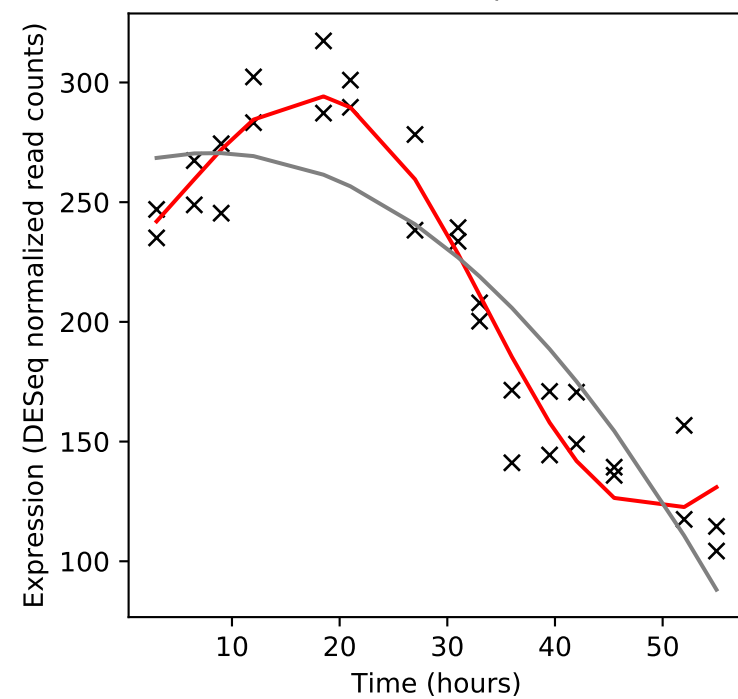

Rv2025c/-

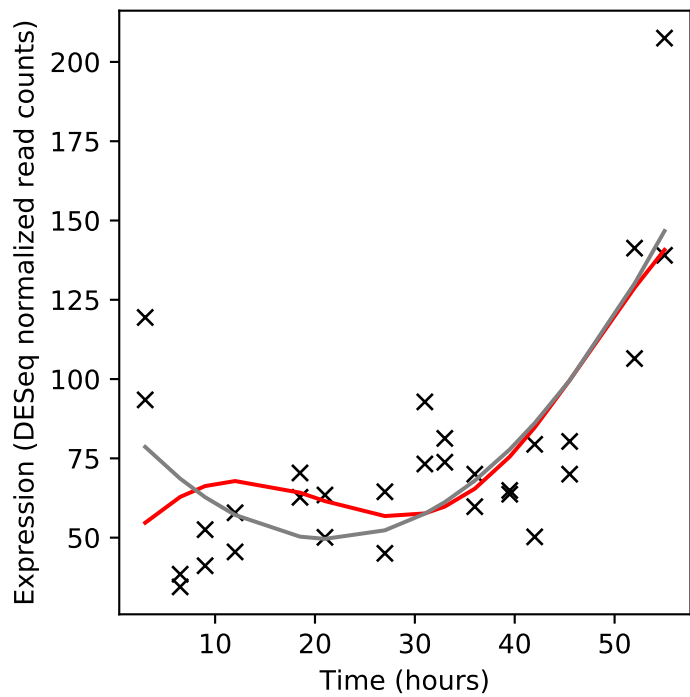

Rv2026c/-

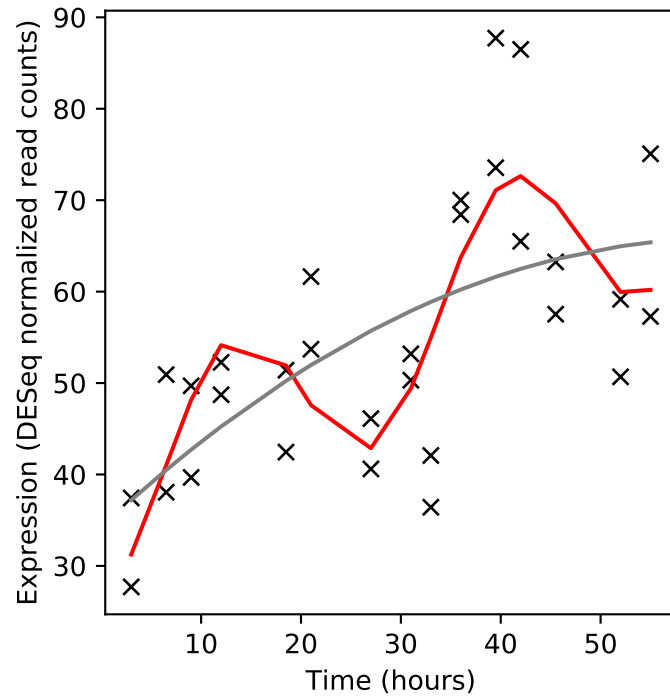

Rv2027c/dosT

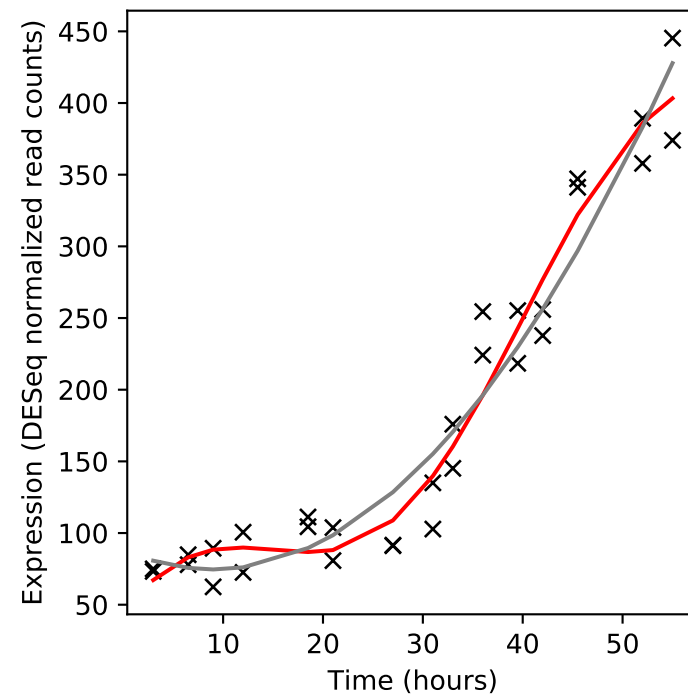

Rv2028c/-

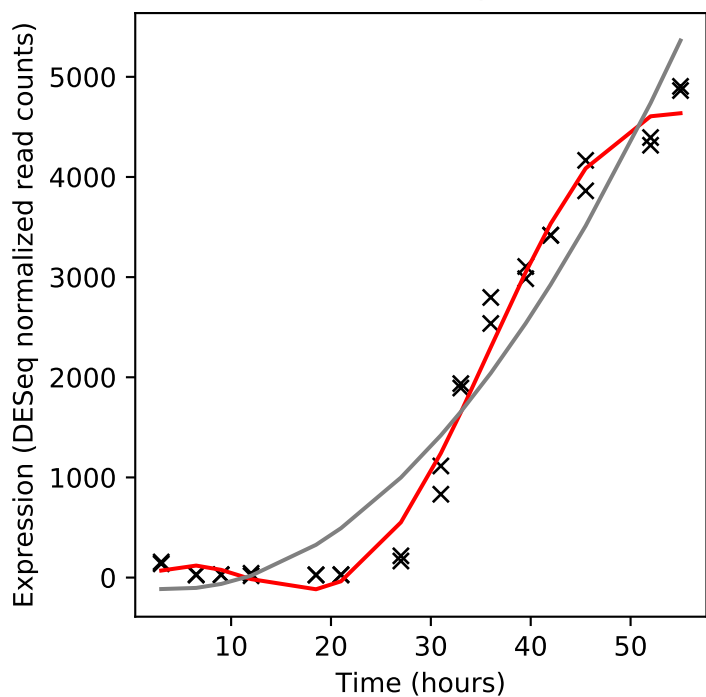

Rv2029c/pfkB

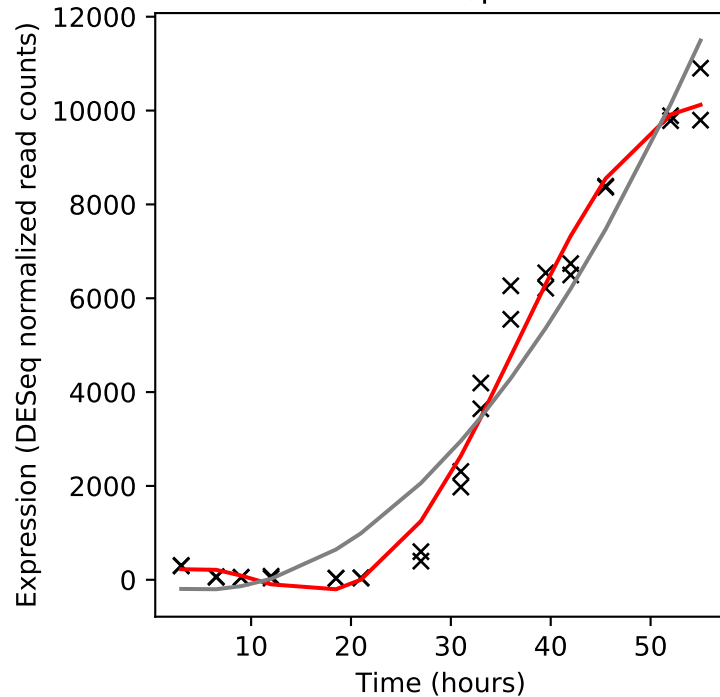

Rv2030c/-

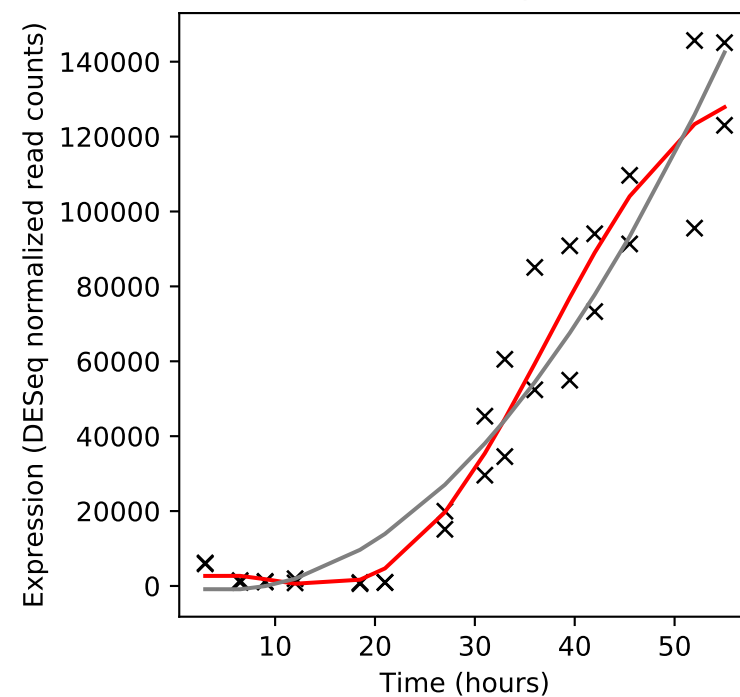

Rv2031c/hspX

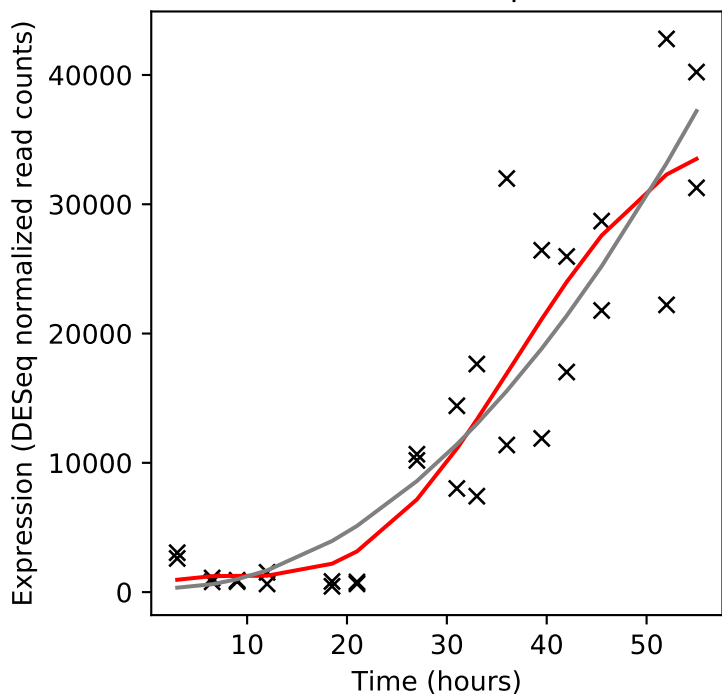

Rv2032/acg

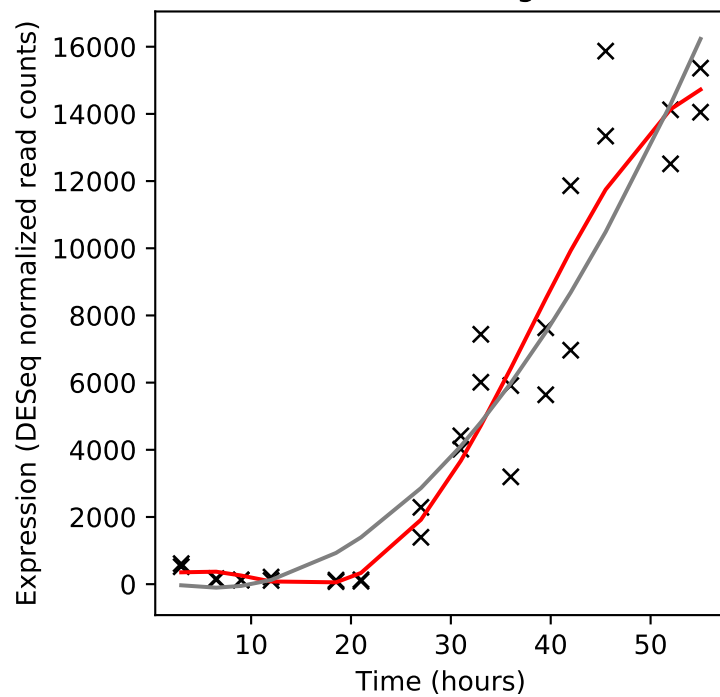

Rv2033c/-

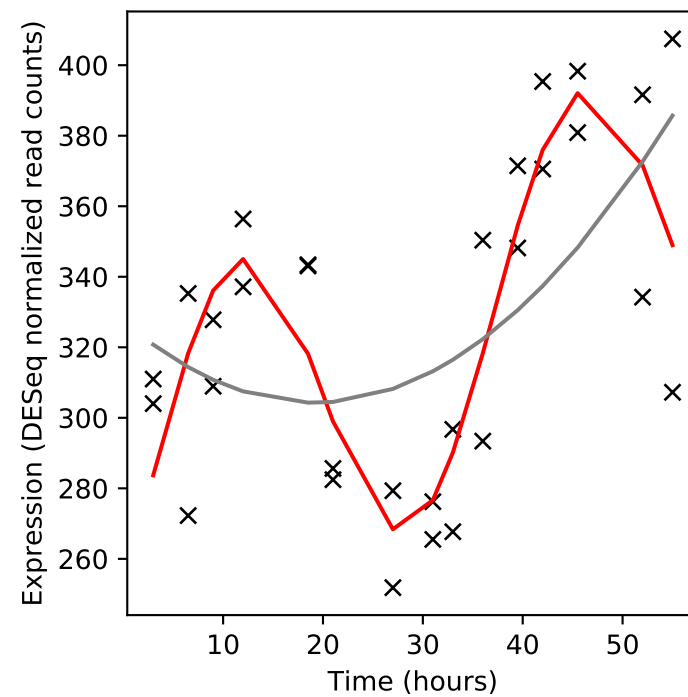

Rv2034/-

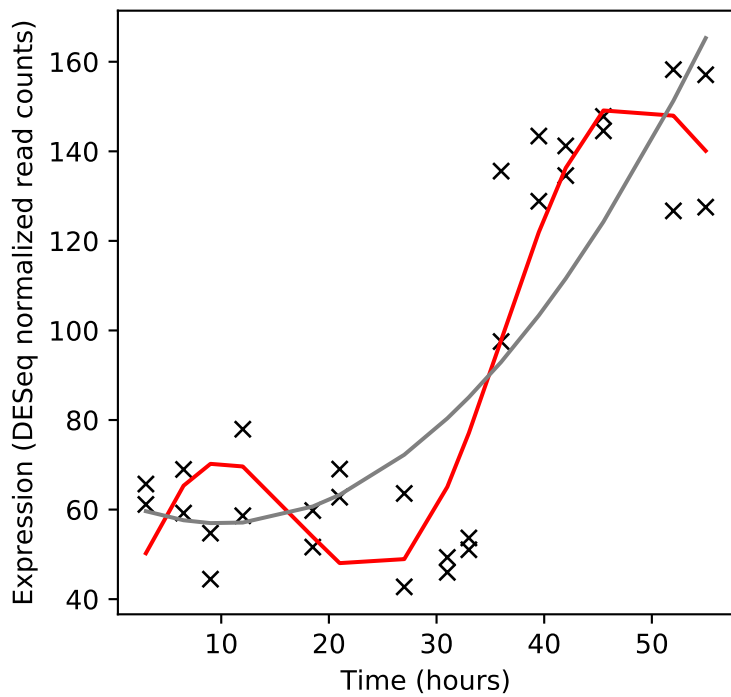

Rv2035/-

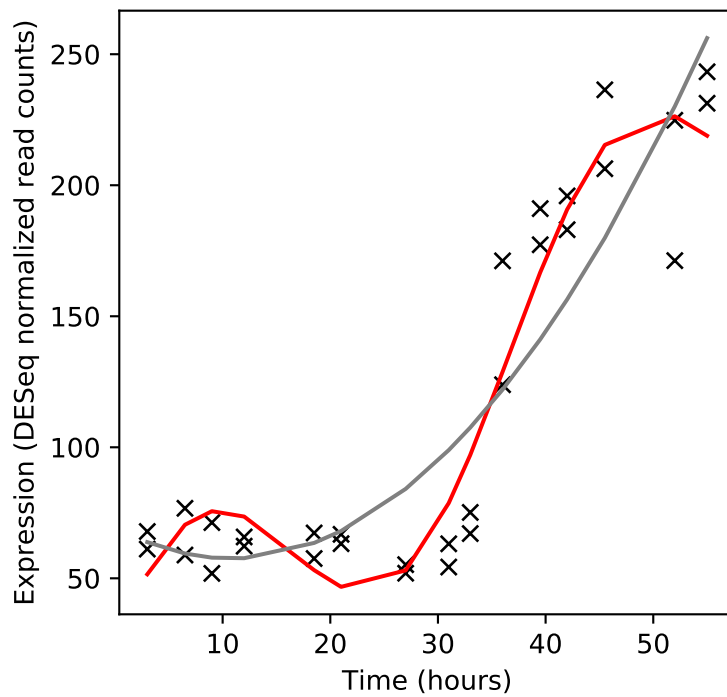

Rv2036/-

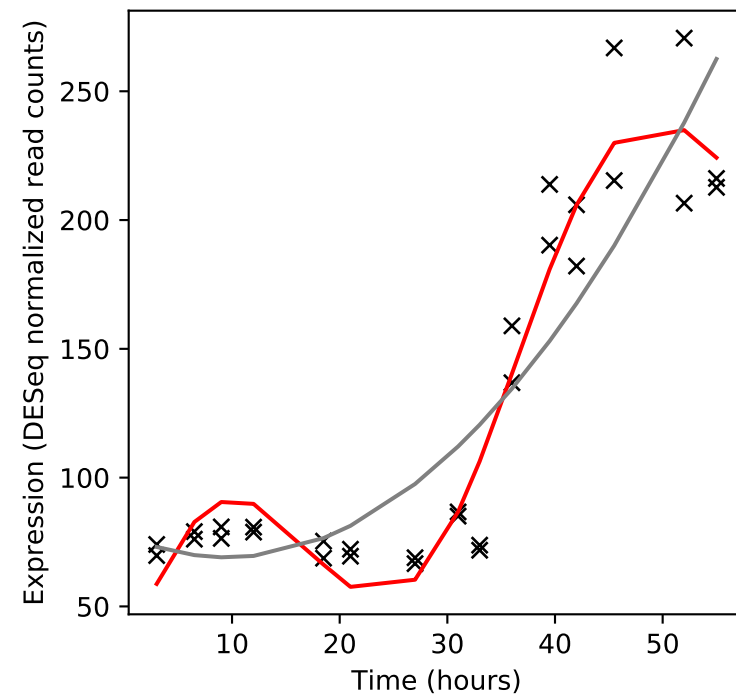

Rv2037c/-

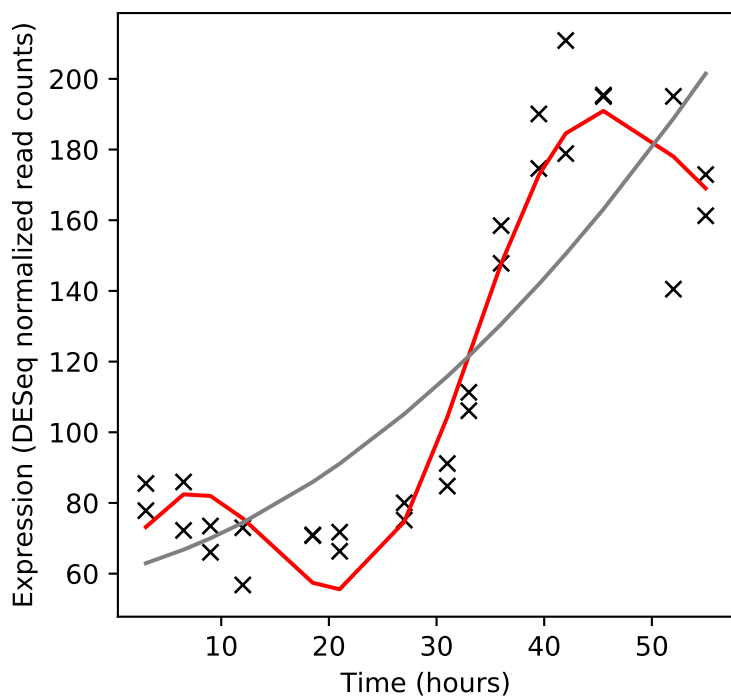

Rv2038c/-

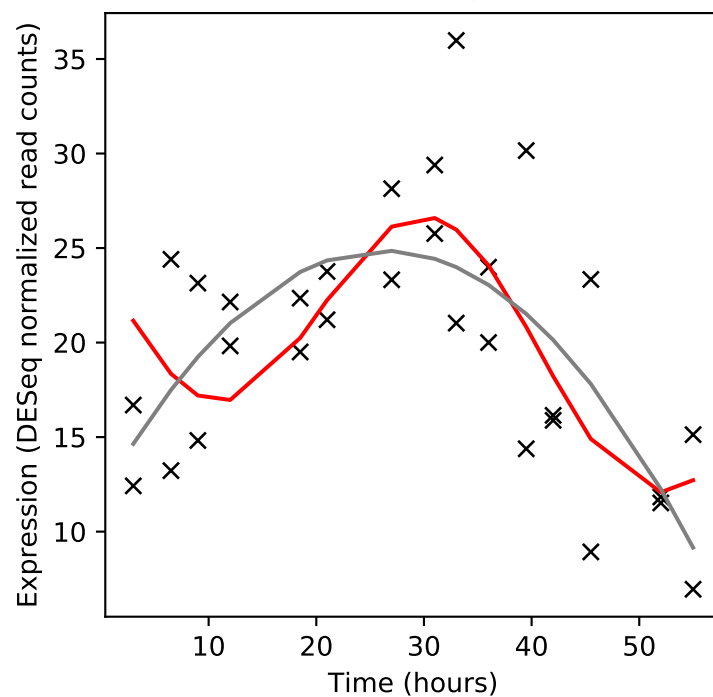

Rv2039c/-

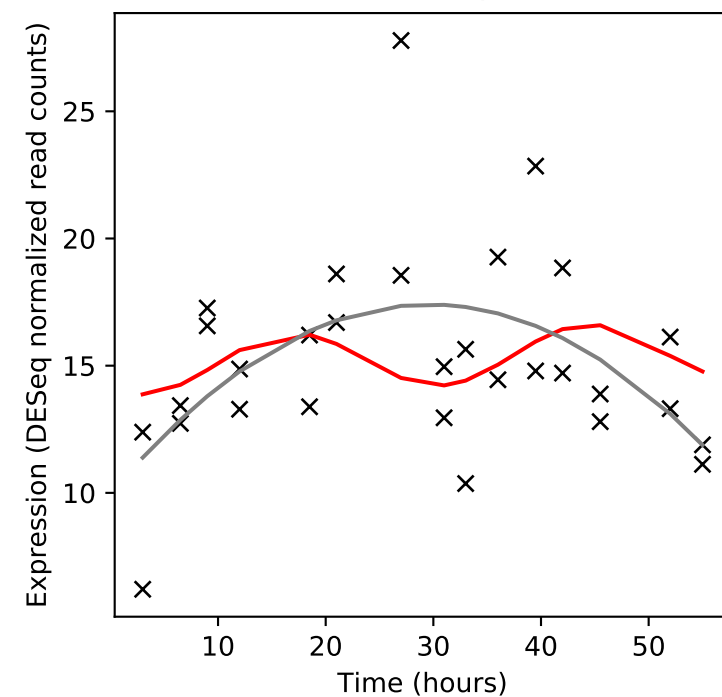

Rv2040c/-

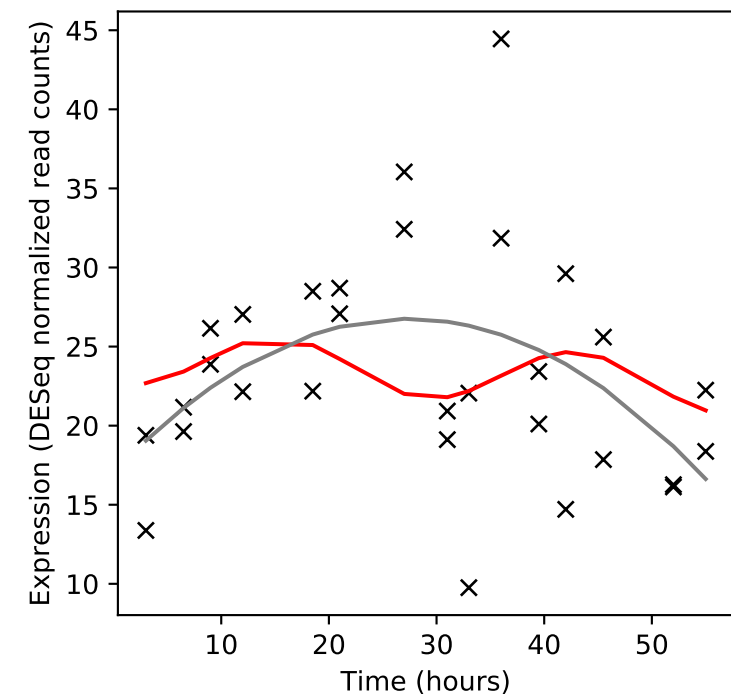

Rv2041c/-

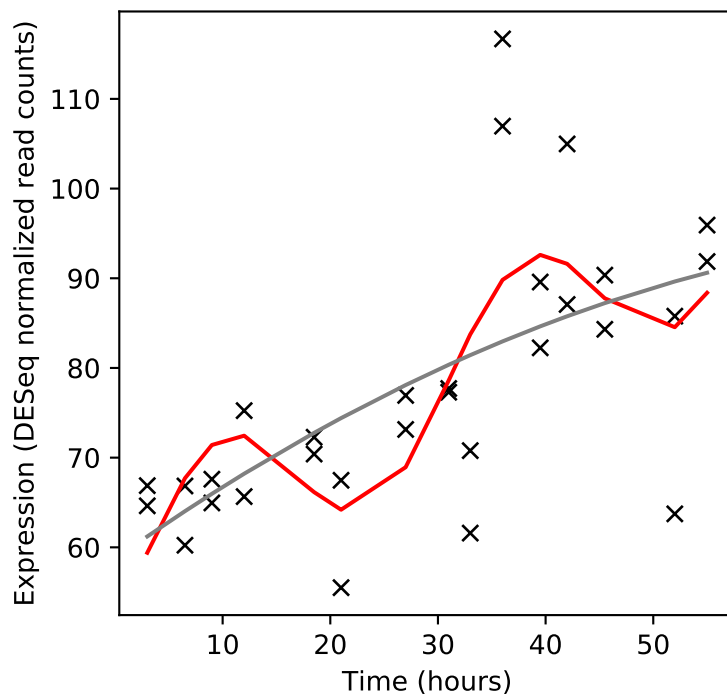

Rv2042c/-

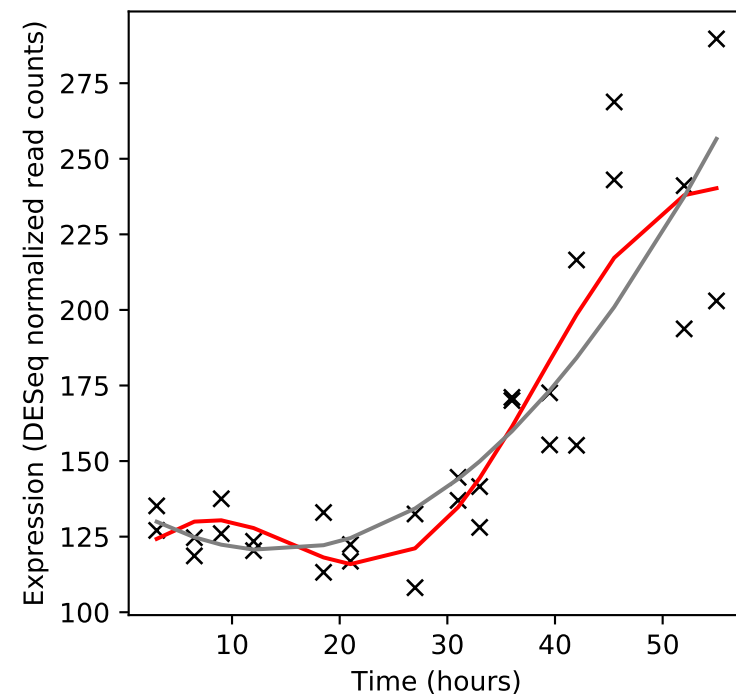

Rv2043c/pncA

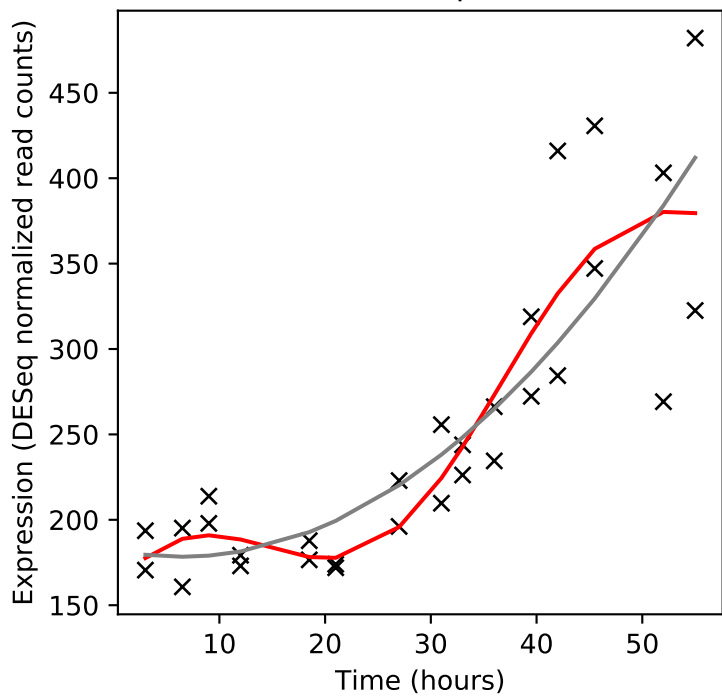

Rv2044c/-

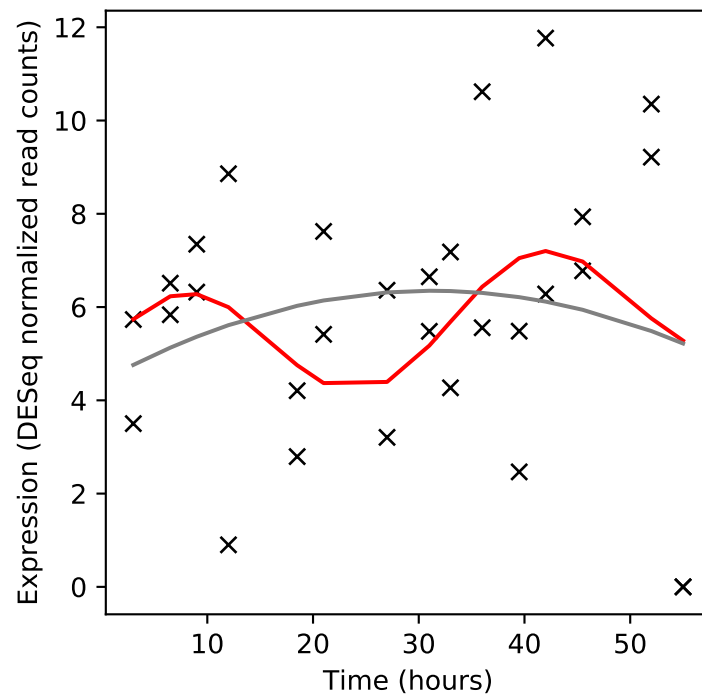

Rv2045c/lipT

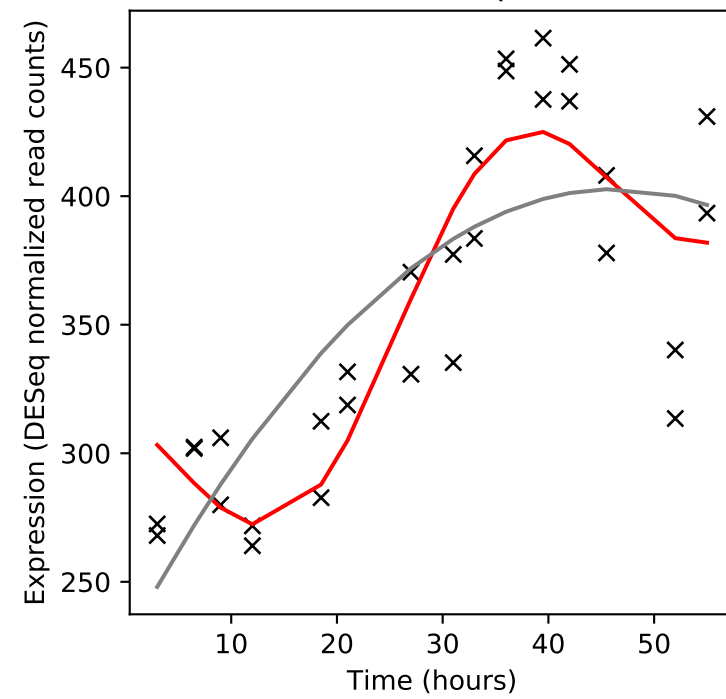

Rv2046/lppl

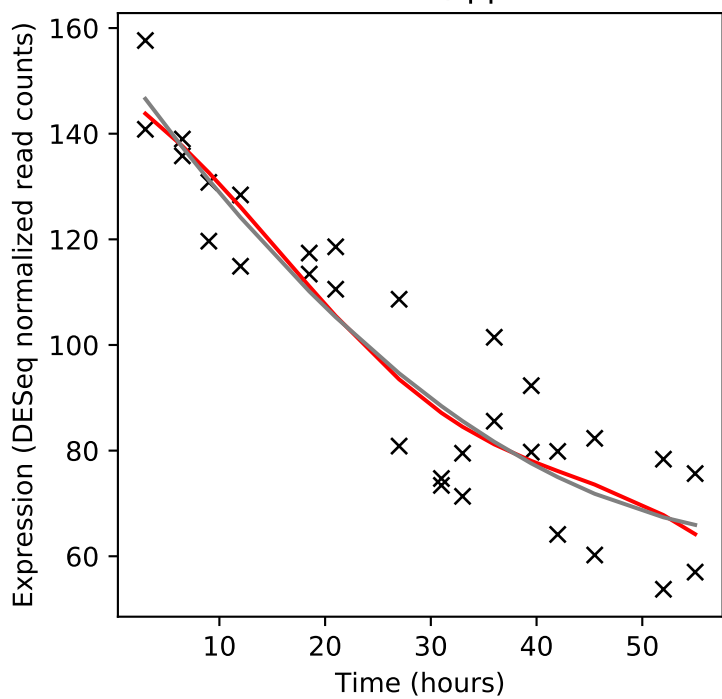

Rv2047c/-

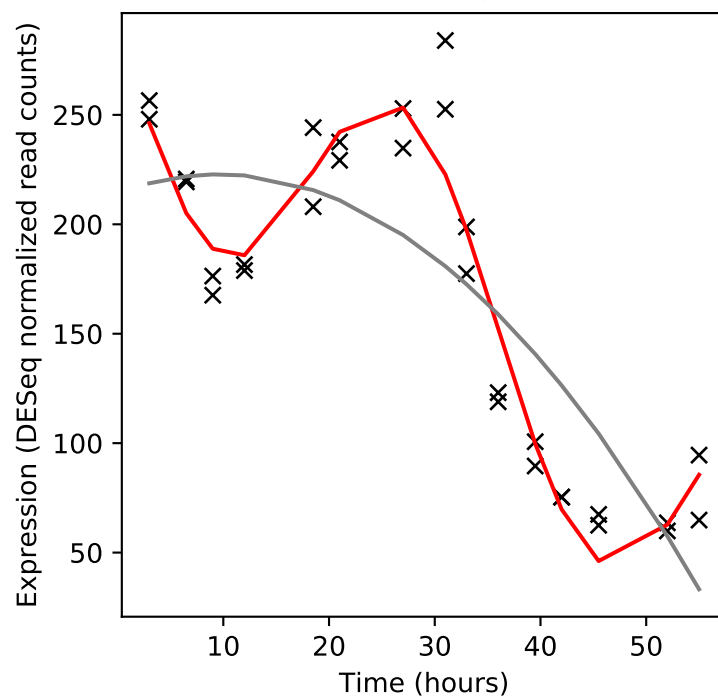

Rv2048c/pks12

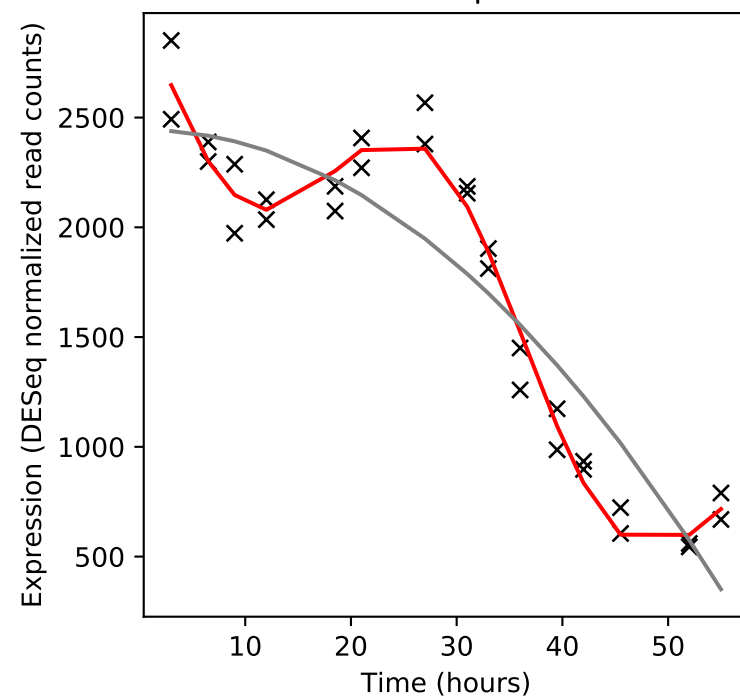

Rv2049c/-

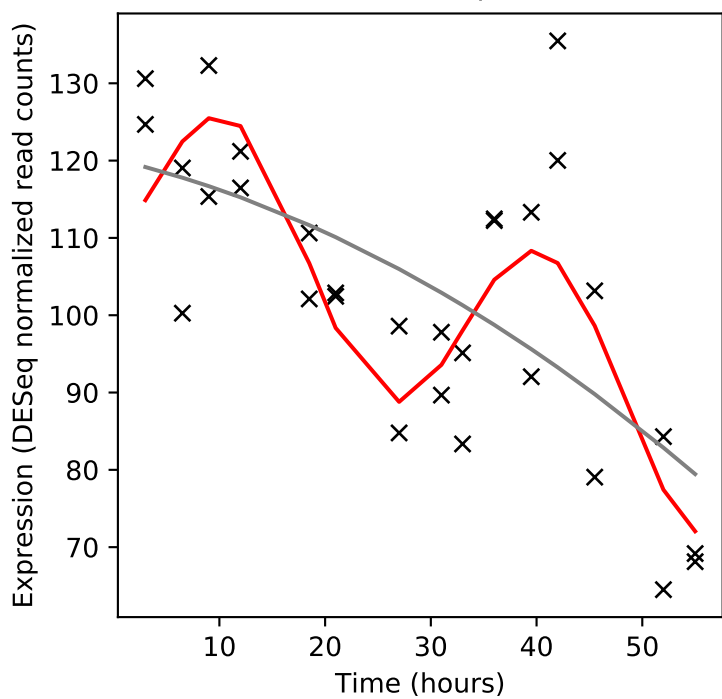

Rv2050c/-

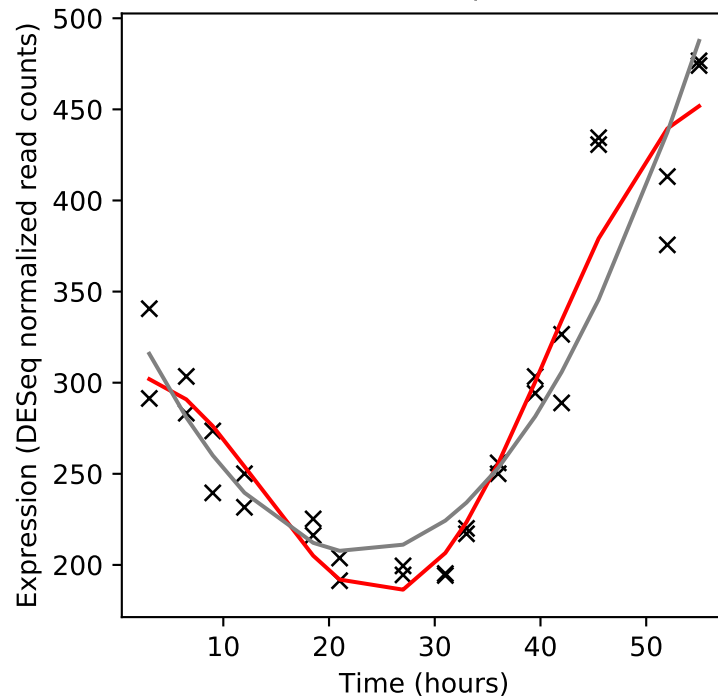

Rv2051c/ppm1

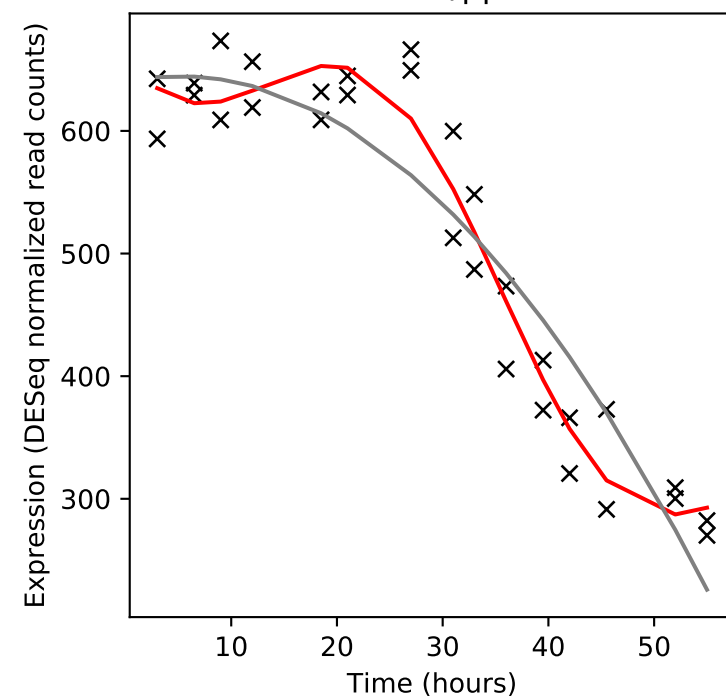



Rv2052c/-

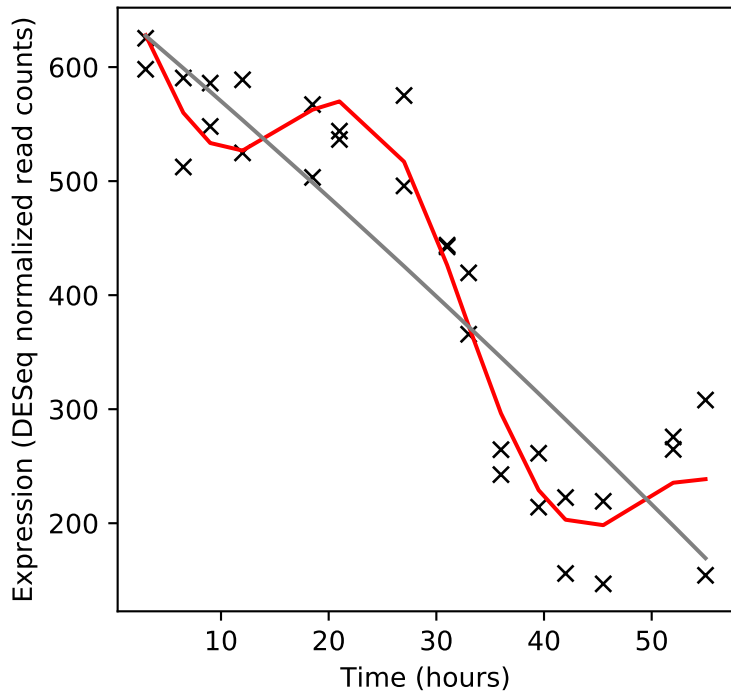

Rv2053c/fxsA

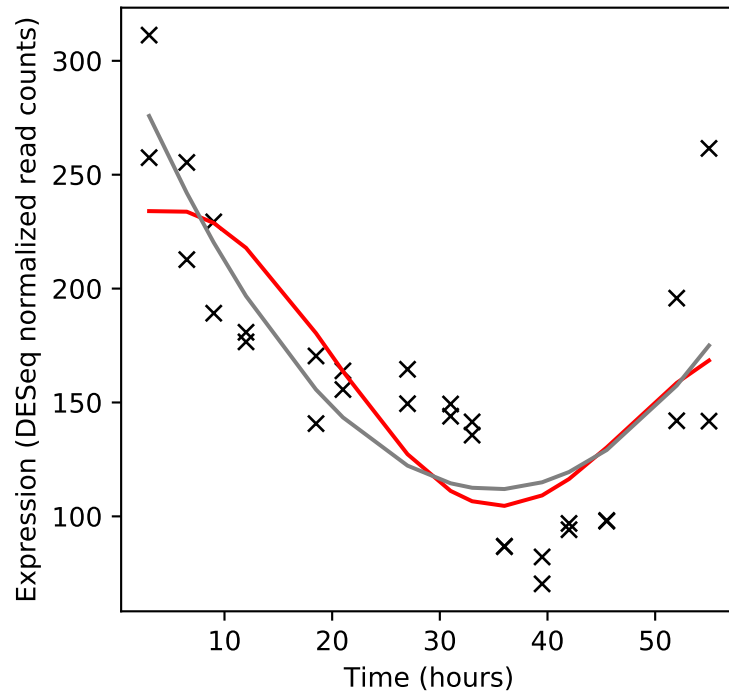

Rv2054/-

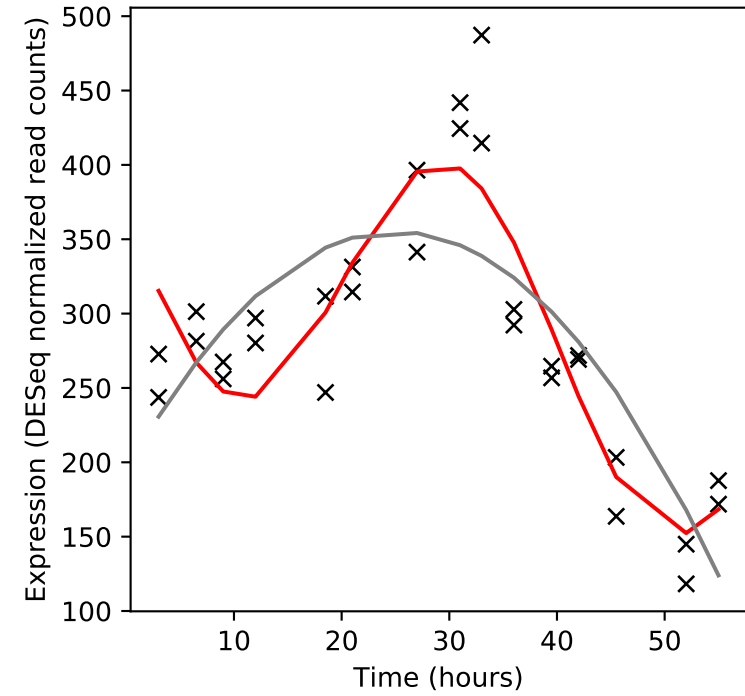

Rv2055c/rpsR2

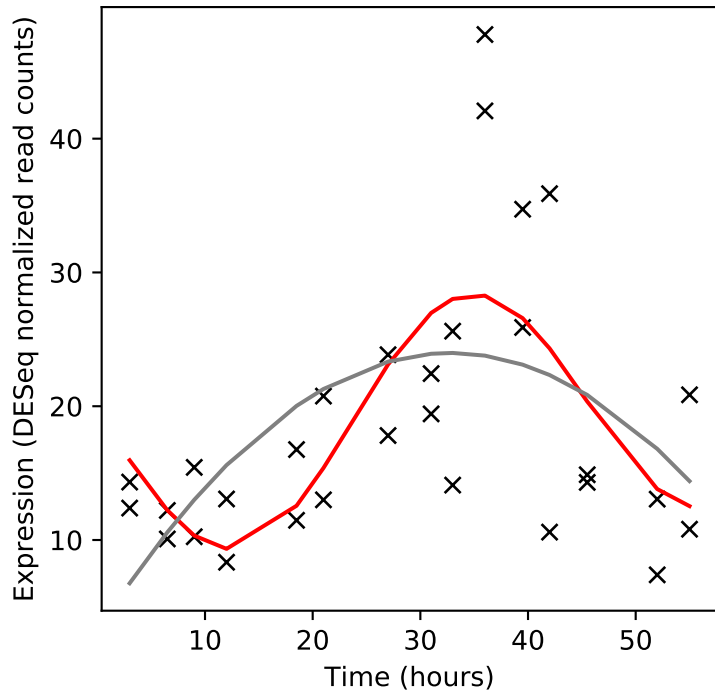

Rv2056c/rpsN2

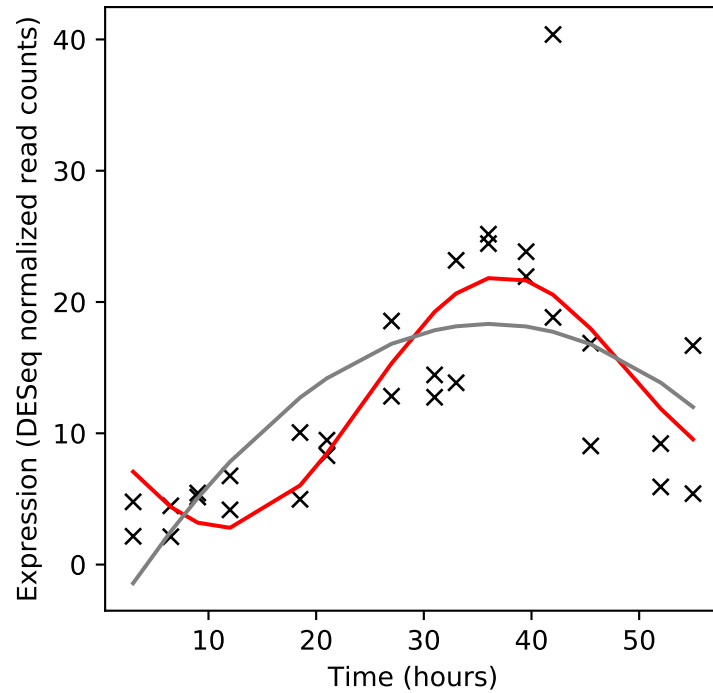

Rv2057c/rpmG1

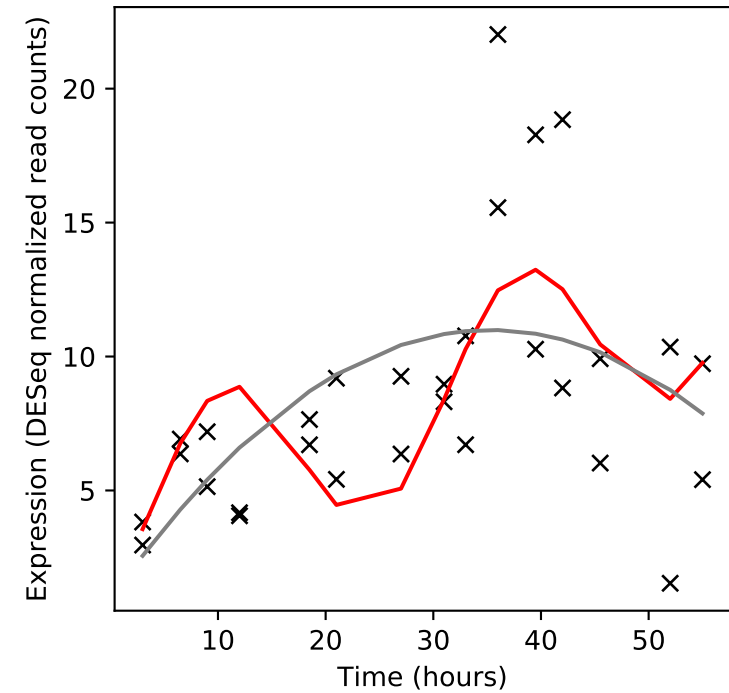

Rv2058c/rpmB2

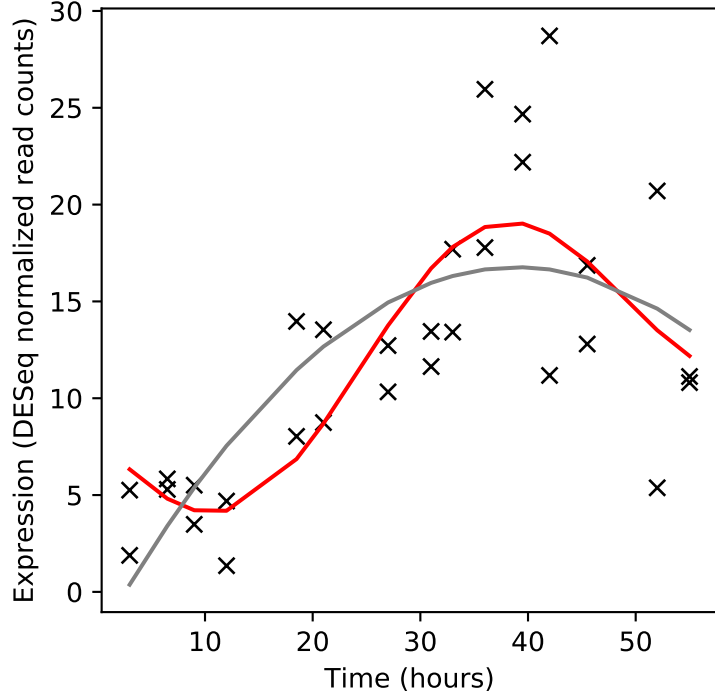

Rv2059/-

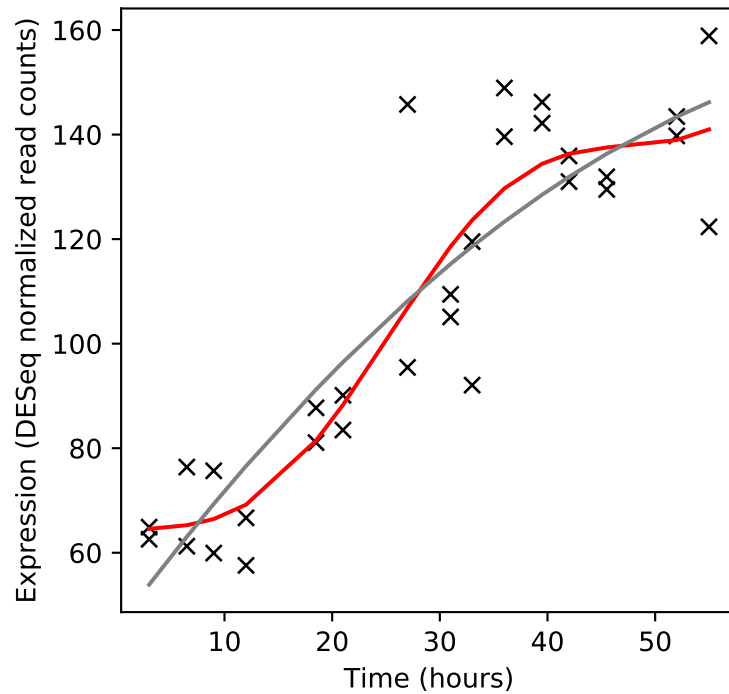

Rv2060/-

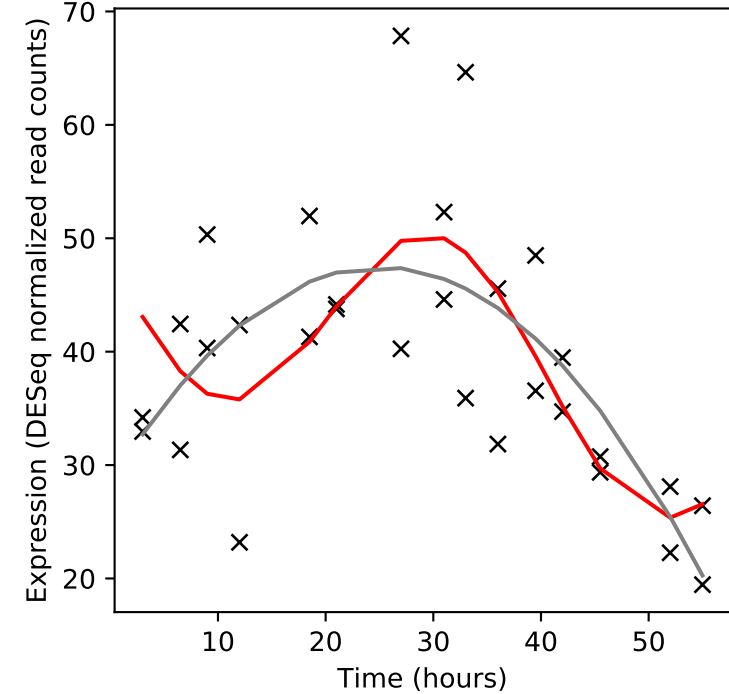

Rv2061c/-

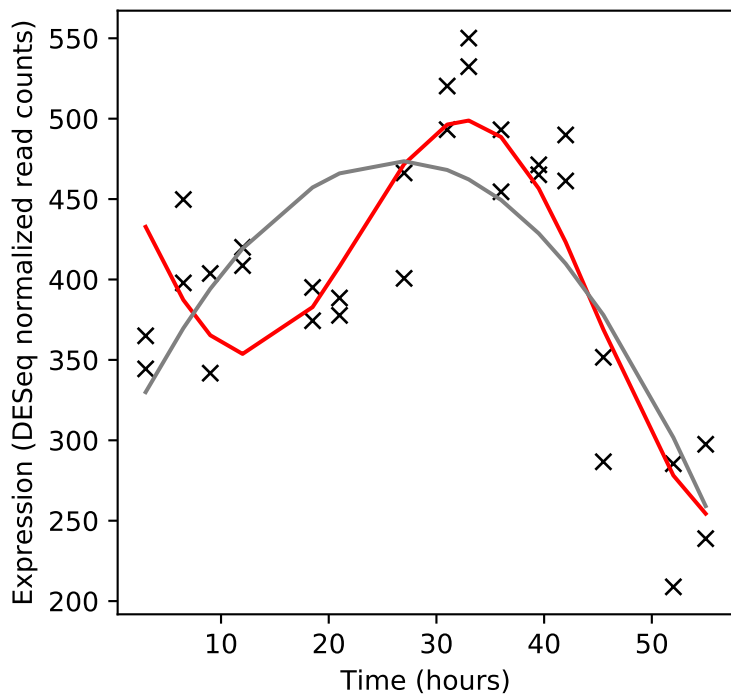

Rv2062c/cobN

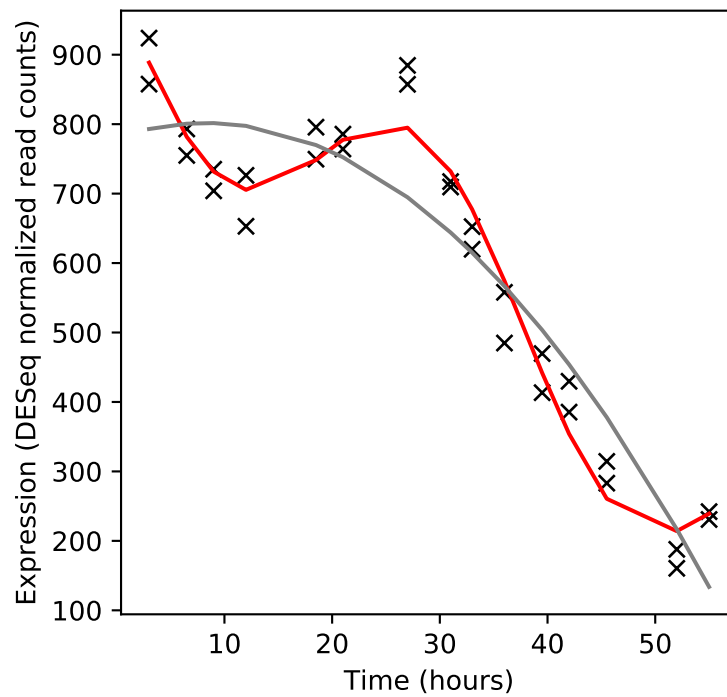

Rv2063/mazE7

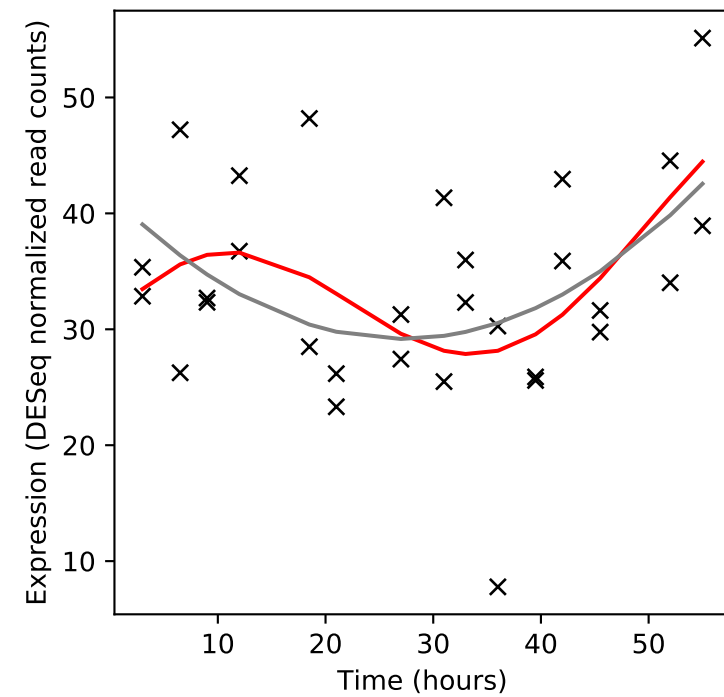

Rv2063A/mazF7

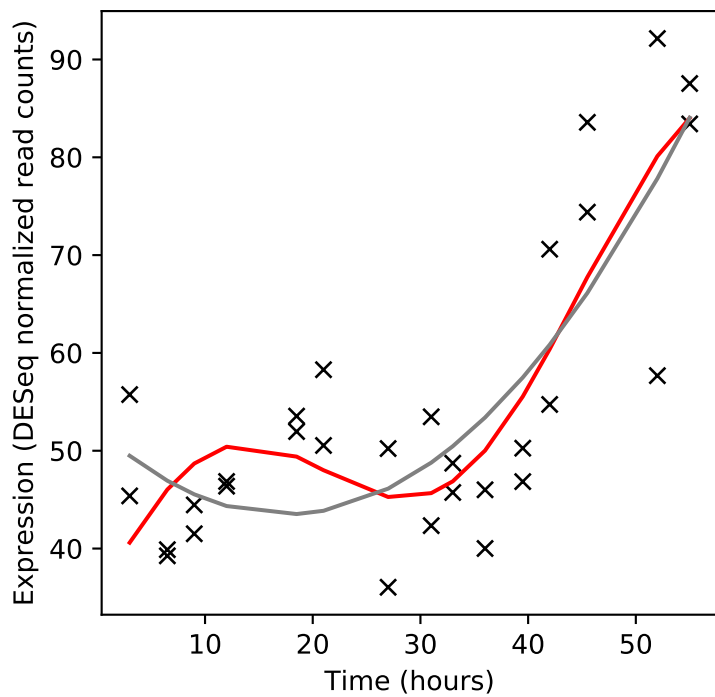

Rv2064/cobG

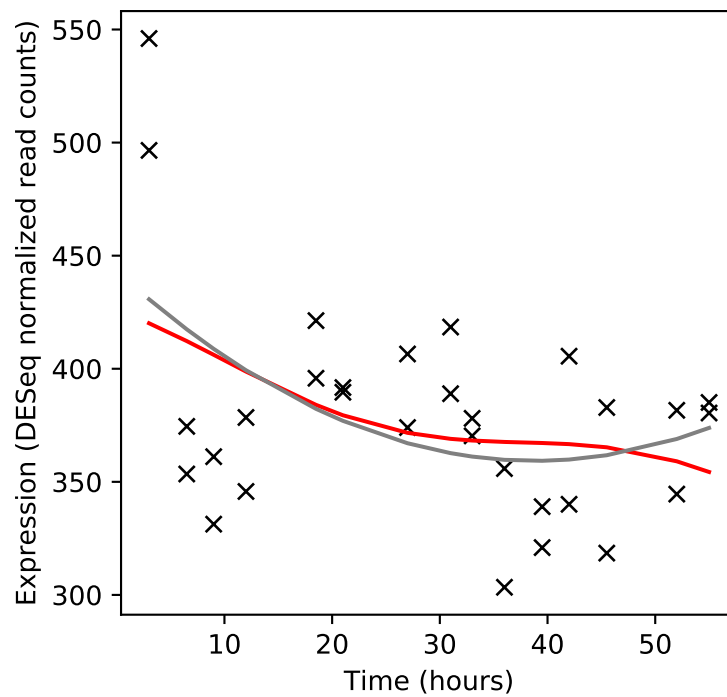

Rv2065/cobH

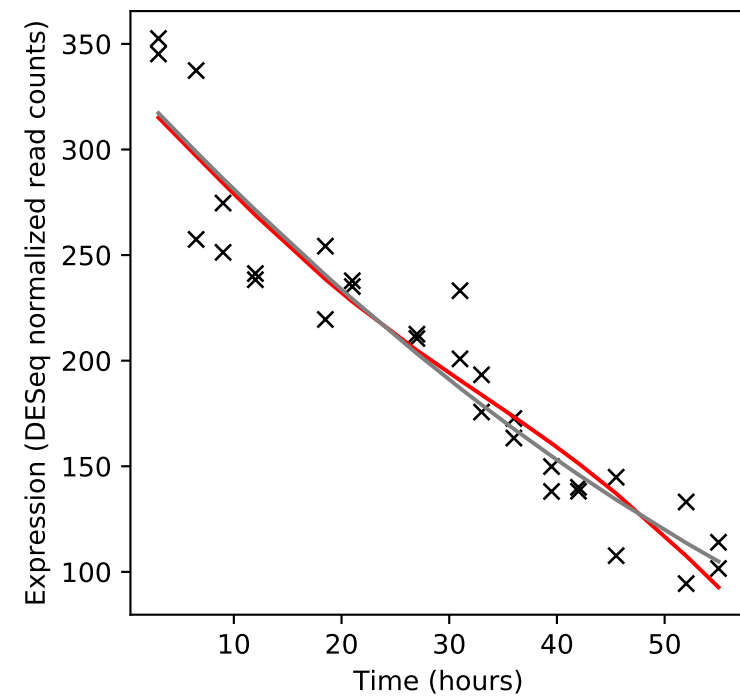

Rv2066/cobI

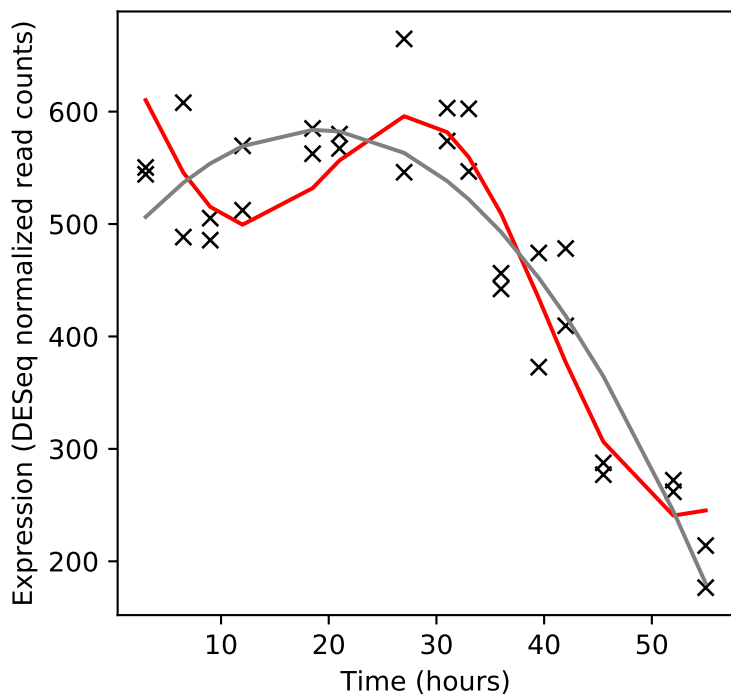

Rv2067c/-

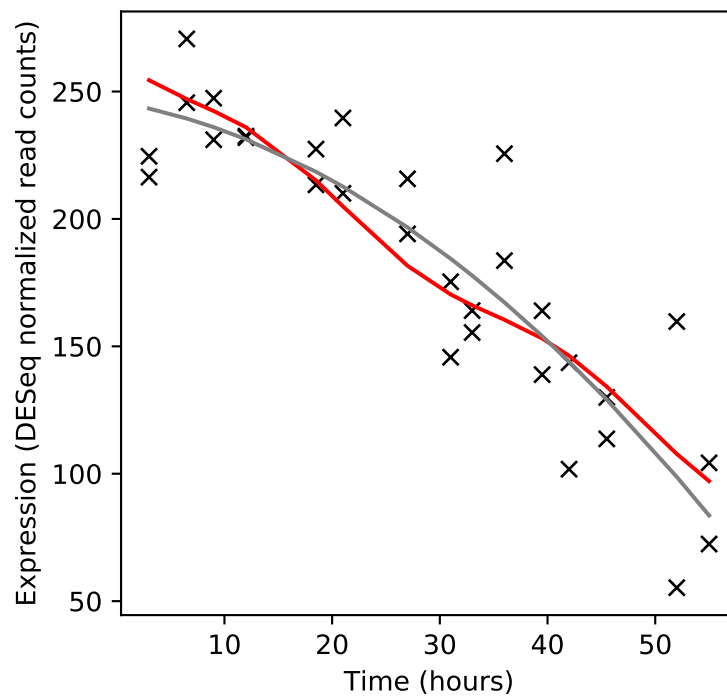

Rv2068c/blaC

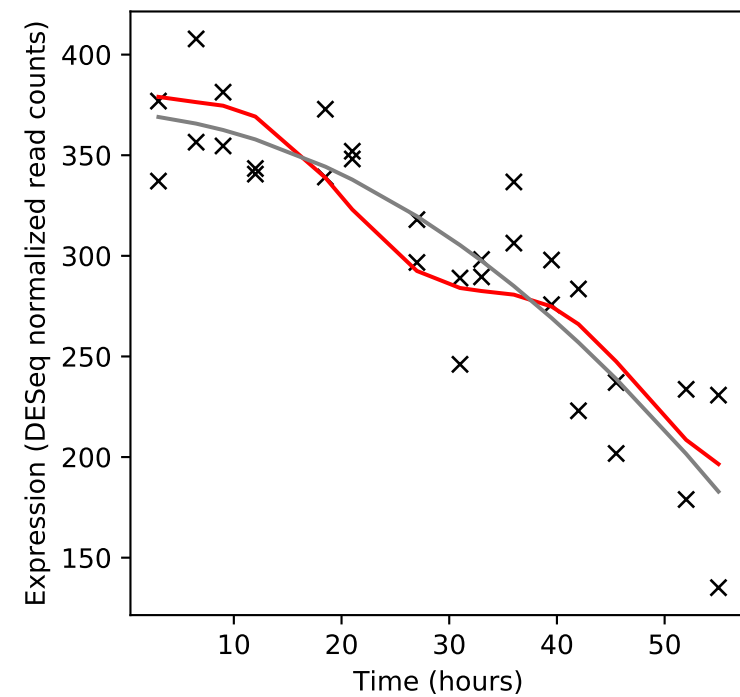

Rv2069/sigC

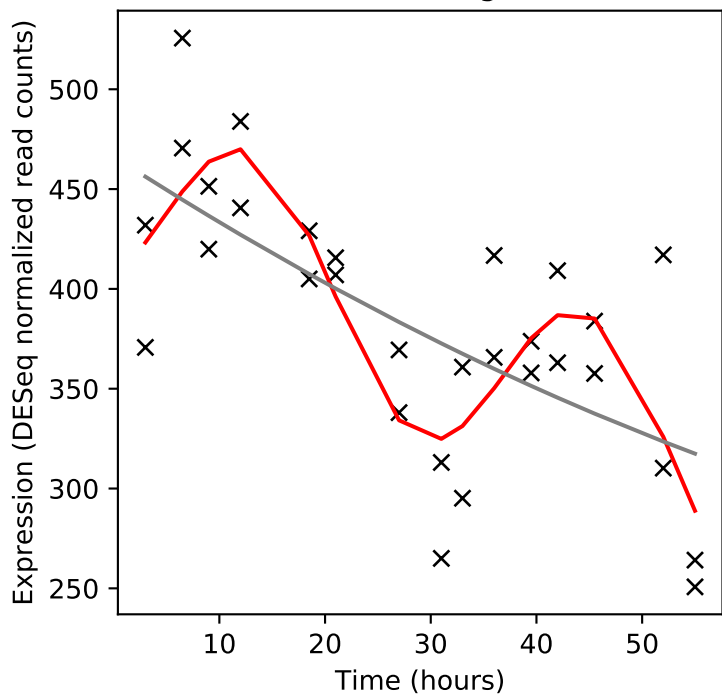

Rv2070c/cobK

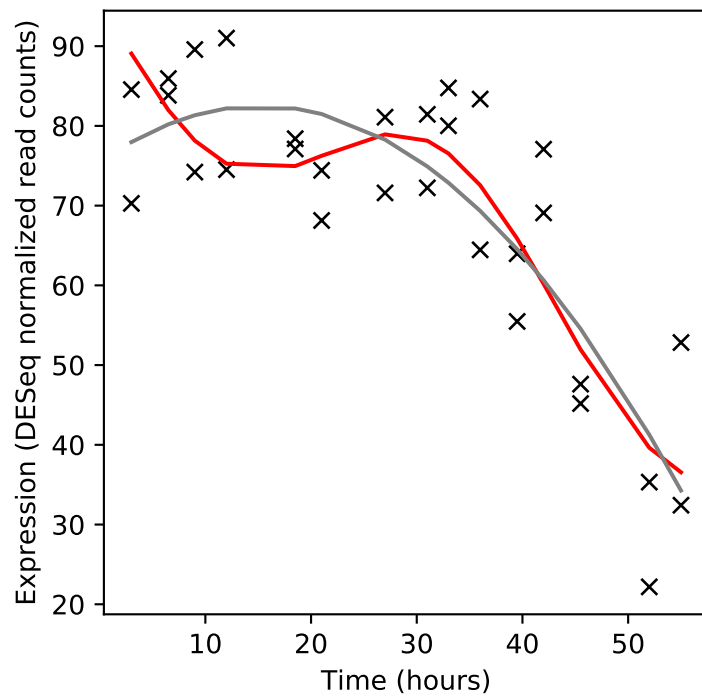

Rv2071c/cobM

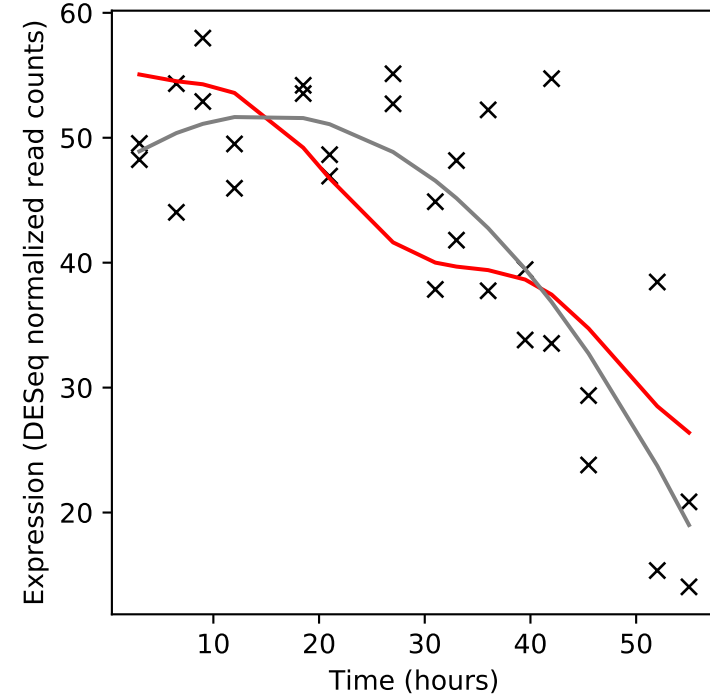

Rv2072c/cobL

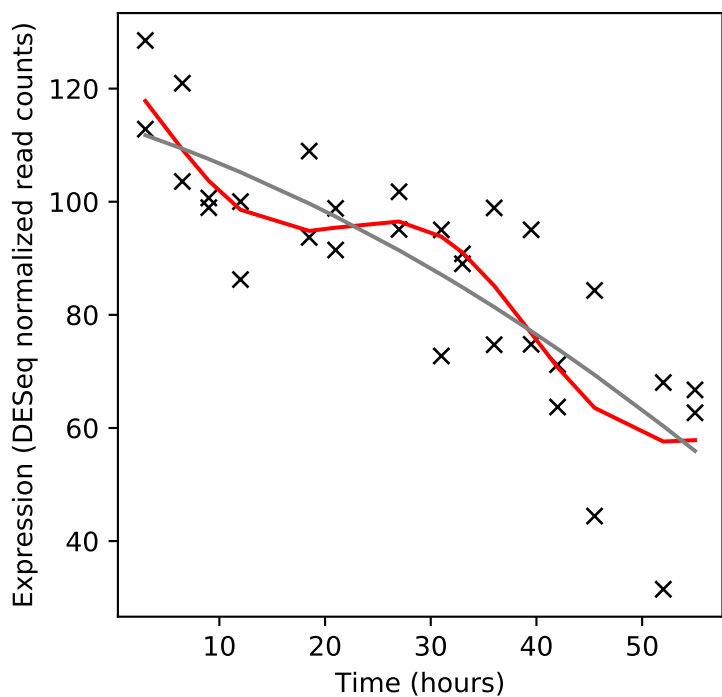

Rv2073c/-

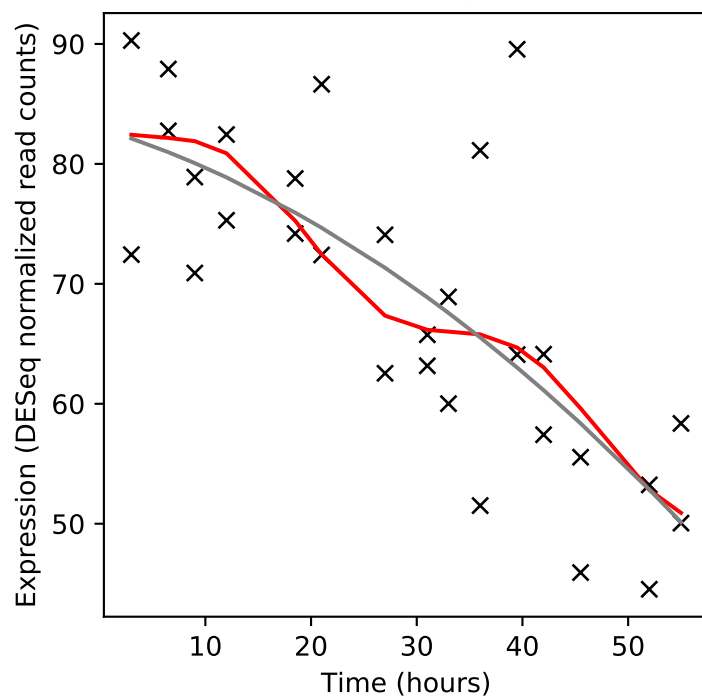

Rv2074/-

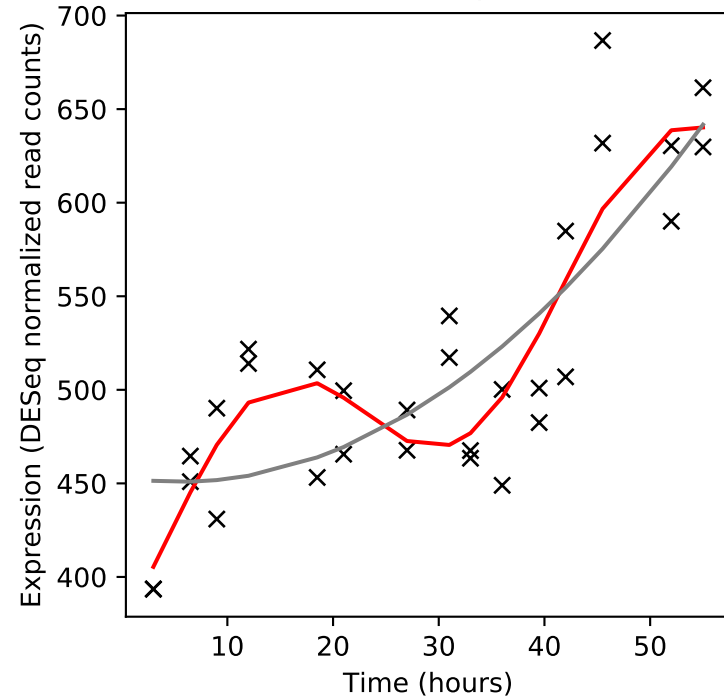

Rv2075c/-

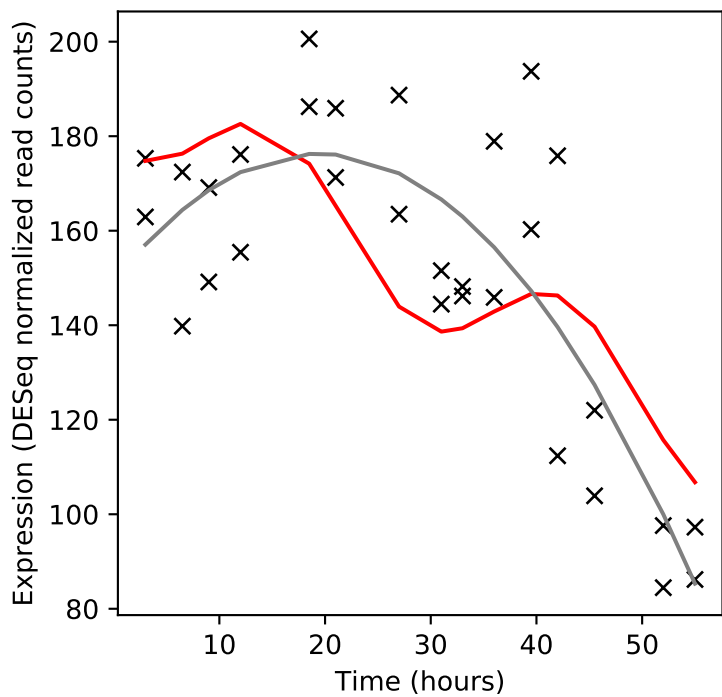

Rv2076c/-

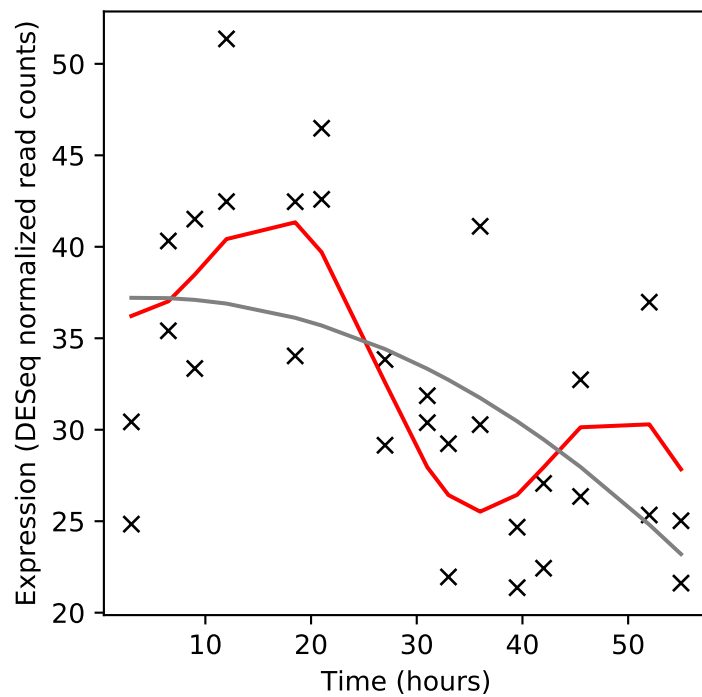

Rv2077c/-

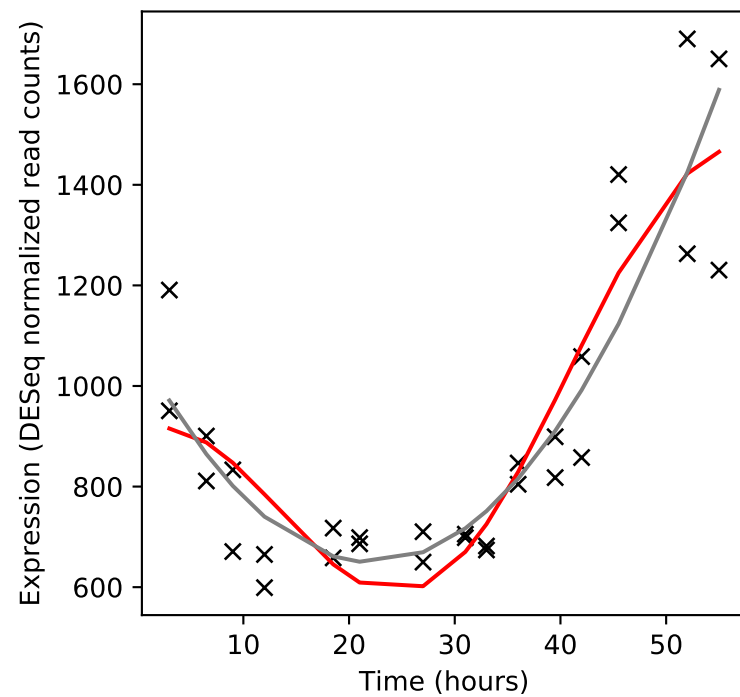

Rv2077A/-

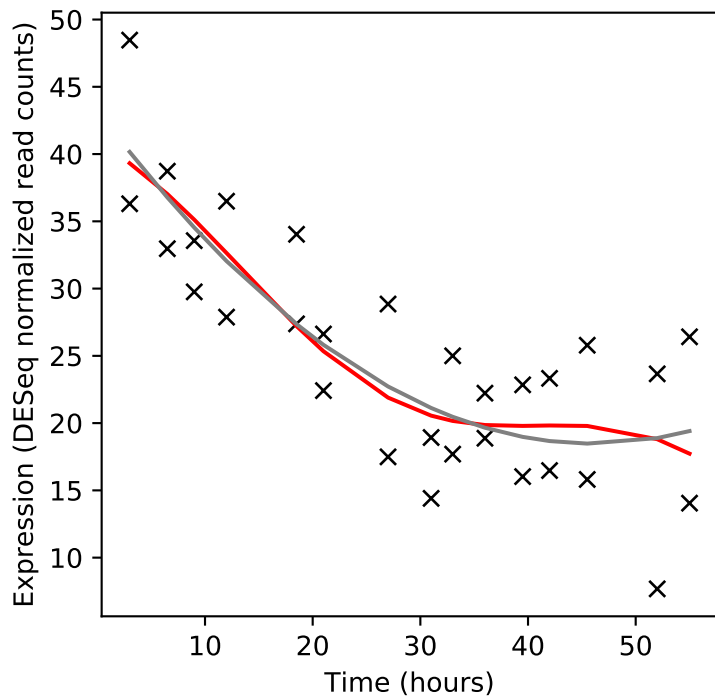

Rv2078/-

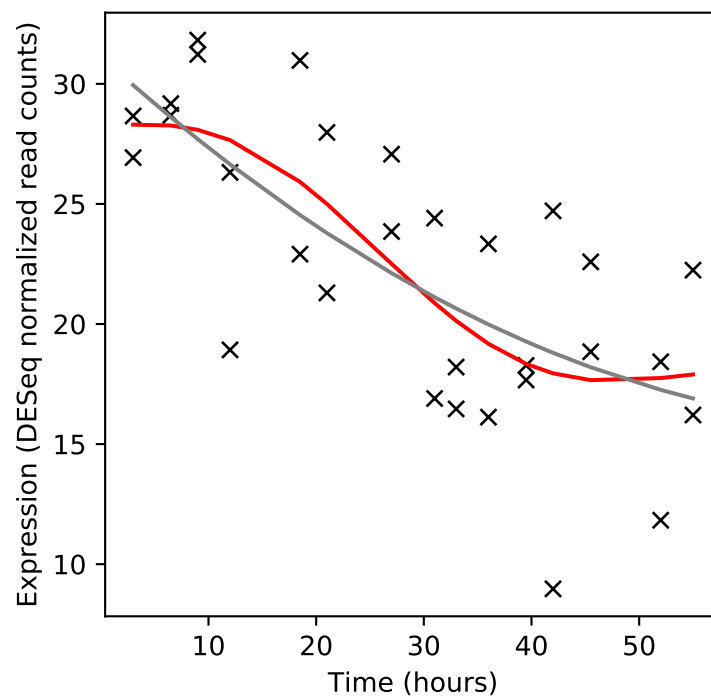

Rv2079/-

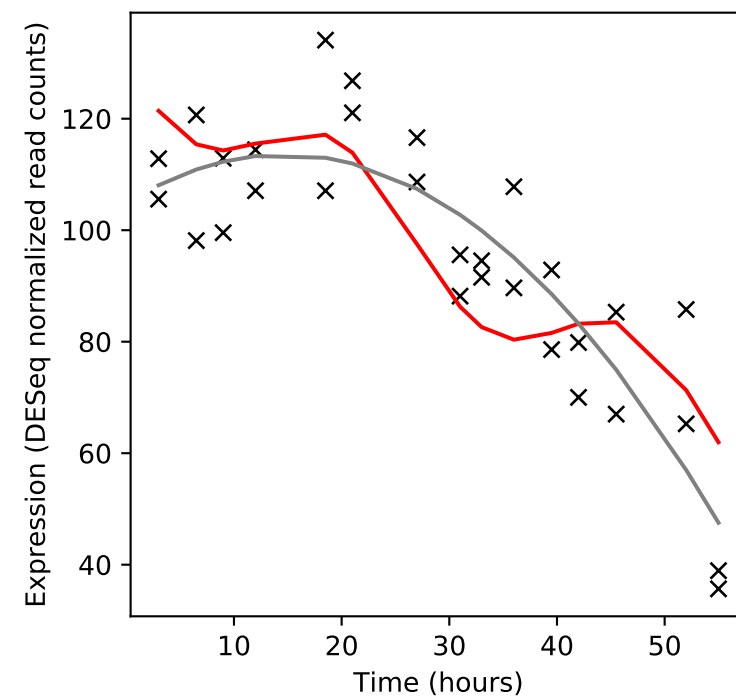

Rv2080/lppJ

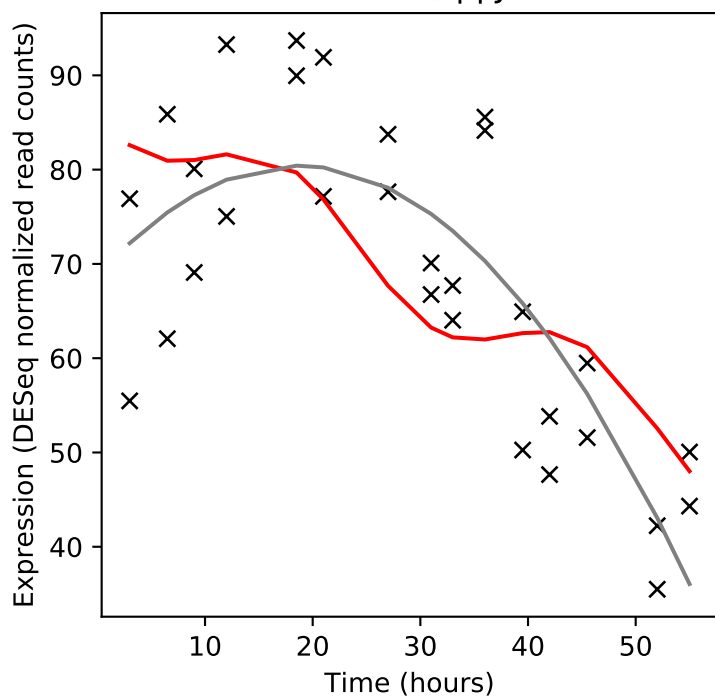

Rv2081c/-

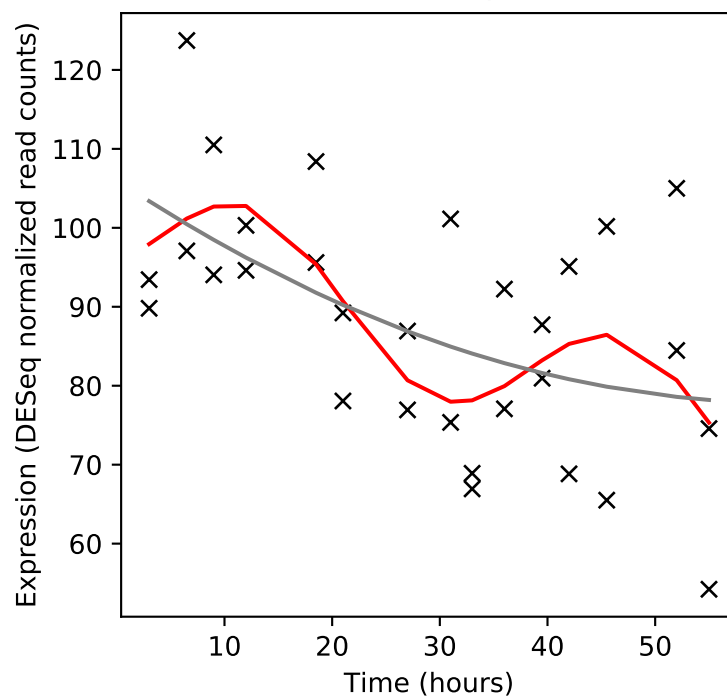

Rv2082/-

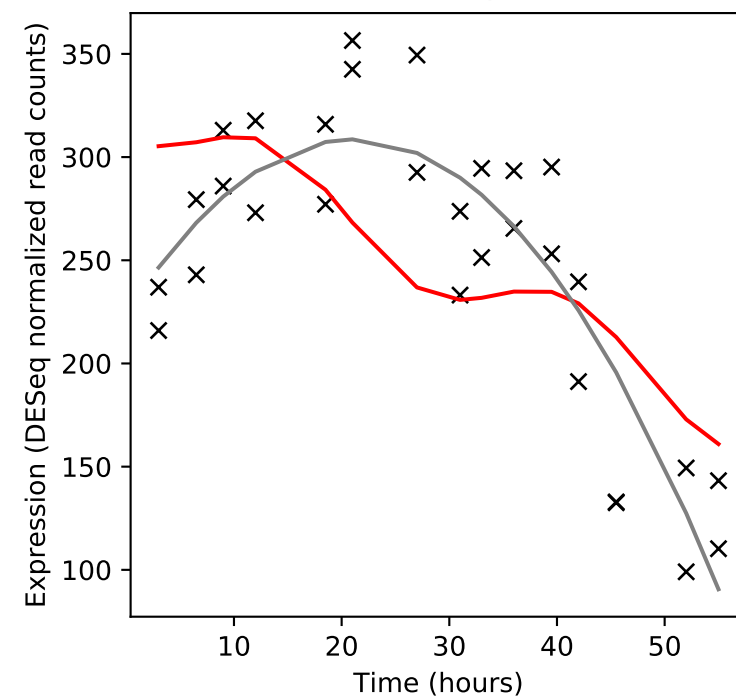

Rv2083/-

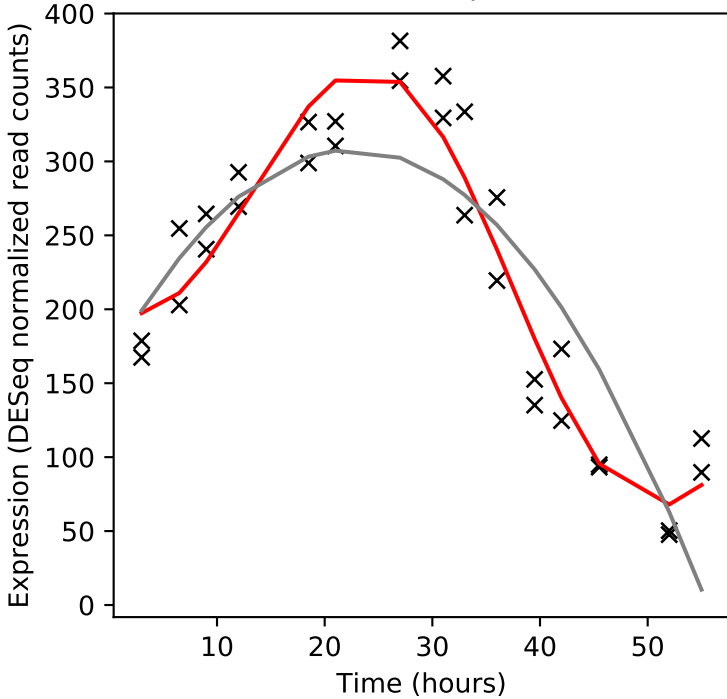

Rv2084/-

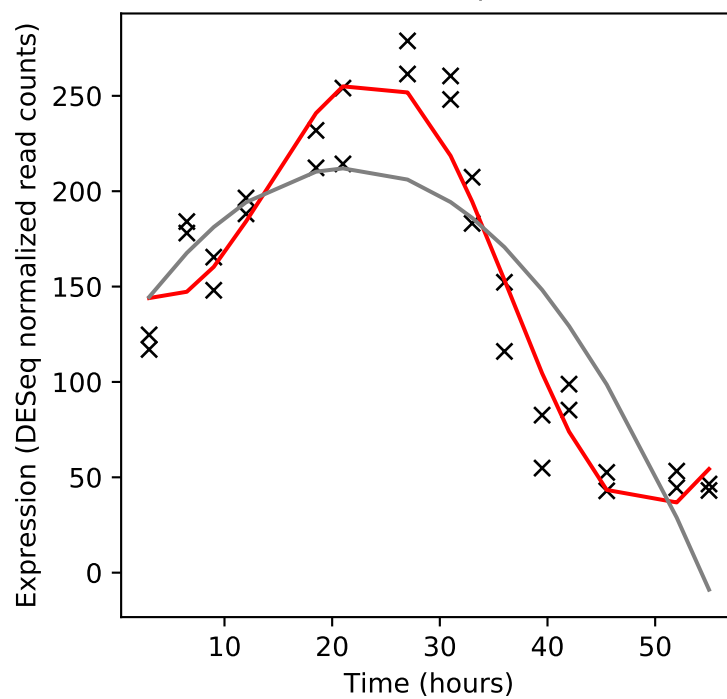

Rv2085/-

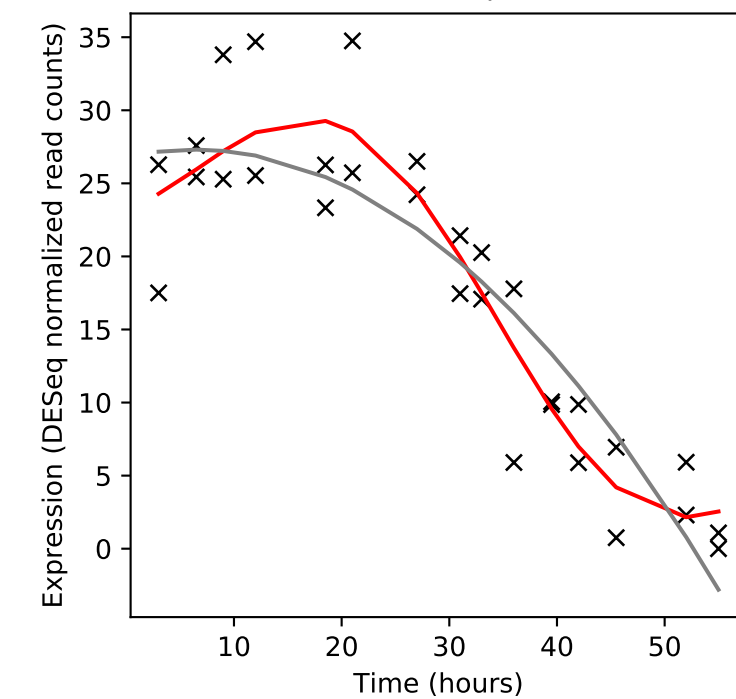

Rv2086/-

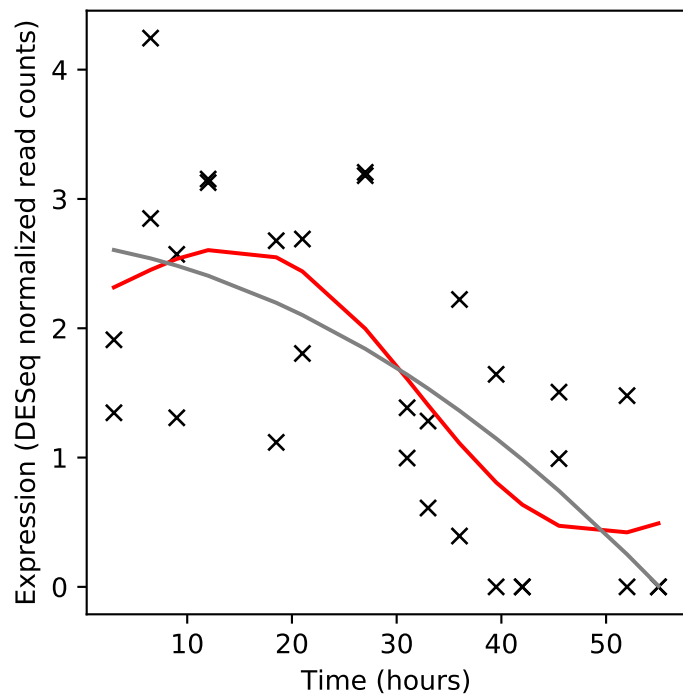

Rv2087/-

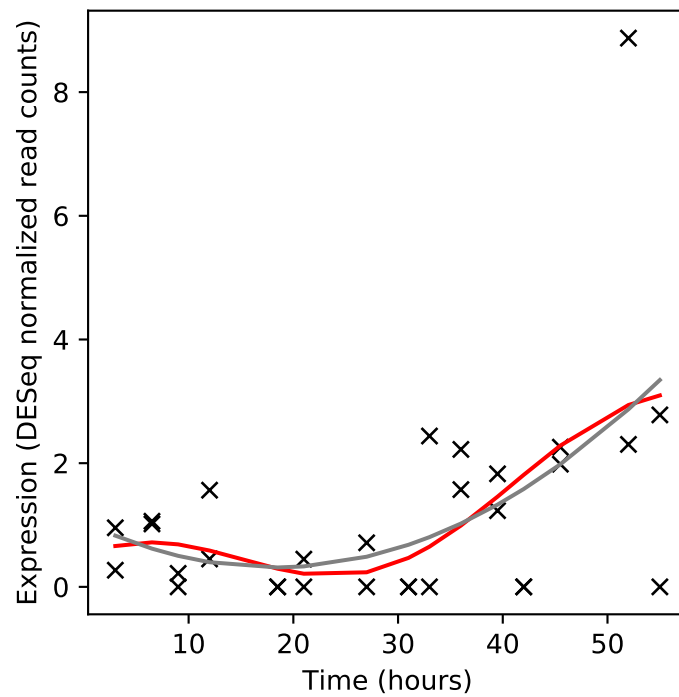

Rv2088/pknJ

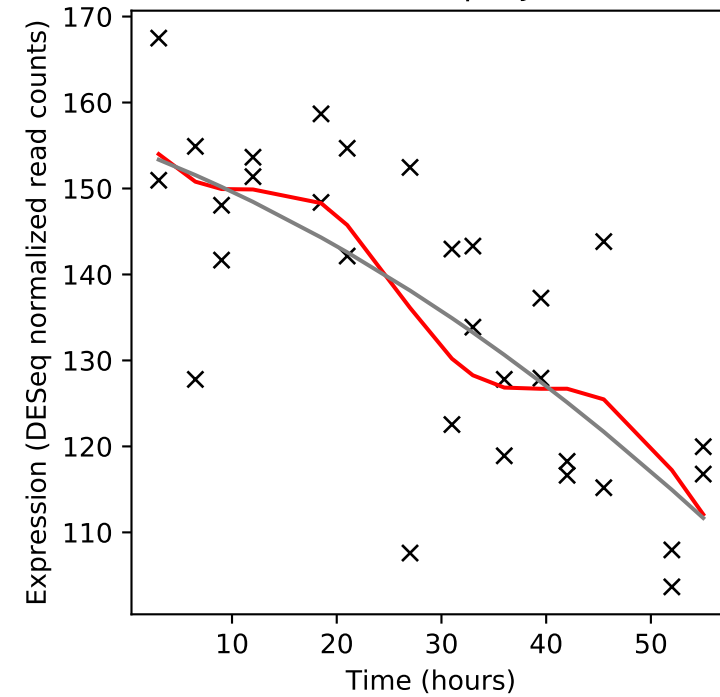

Rv2089c/pepE

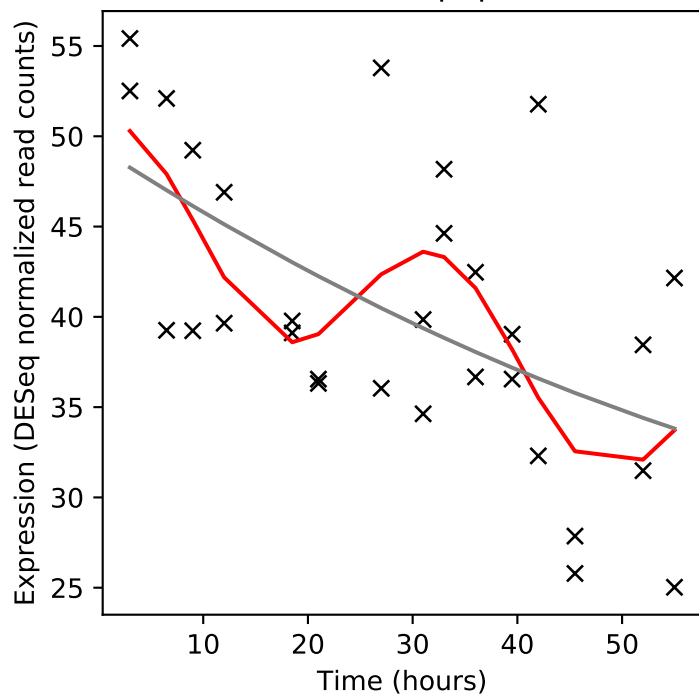

Rv2090/-

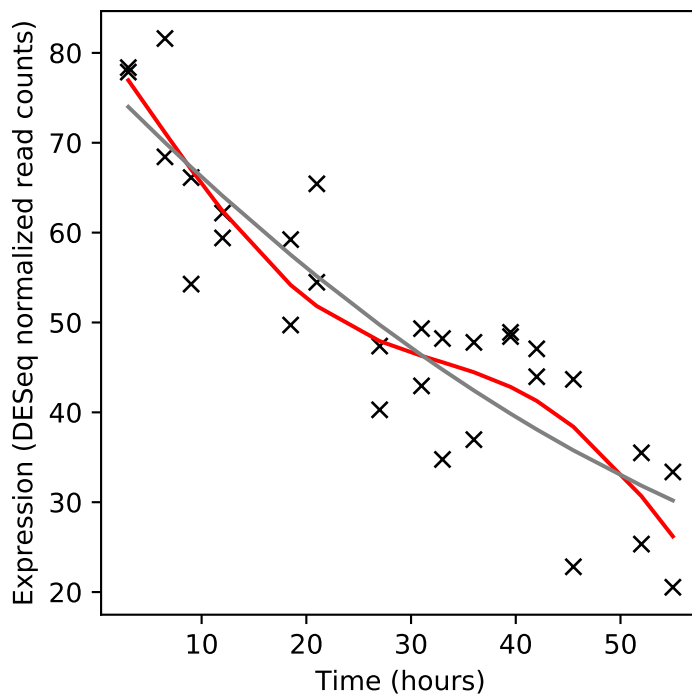

Rv2091c/-

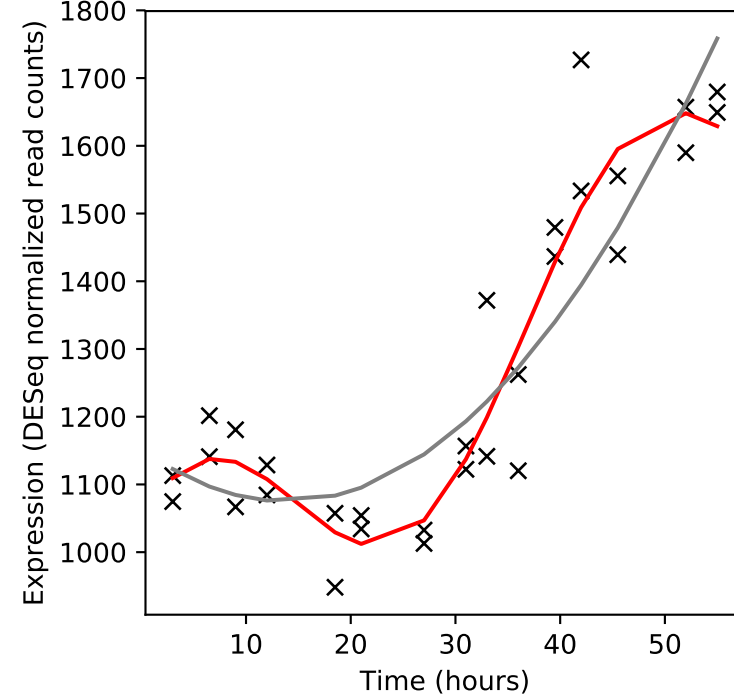

Rv2092c/helY

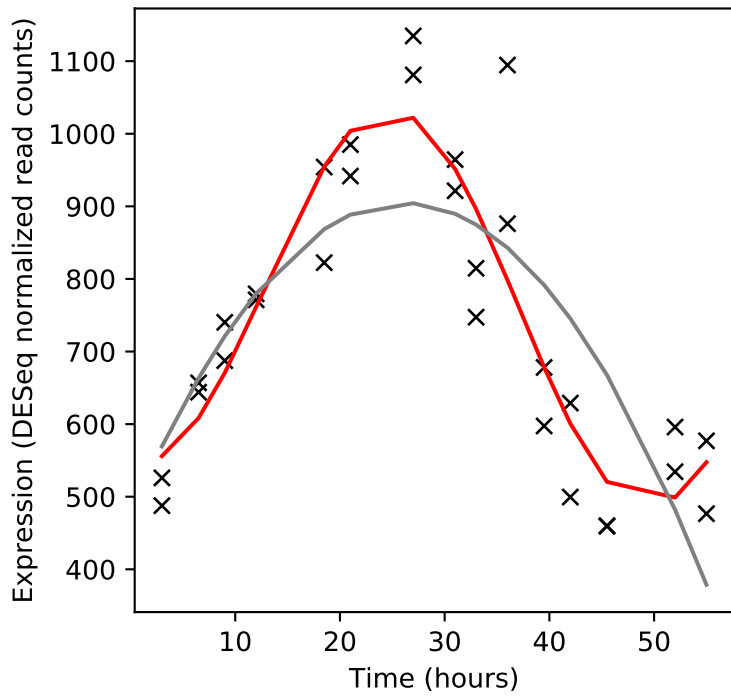

Rv2093c/tatC

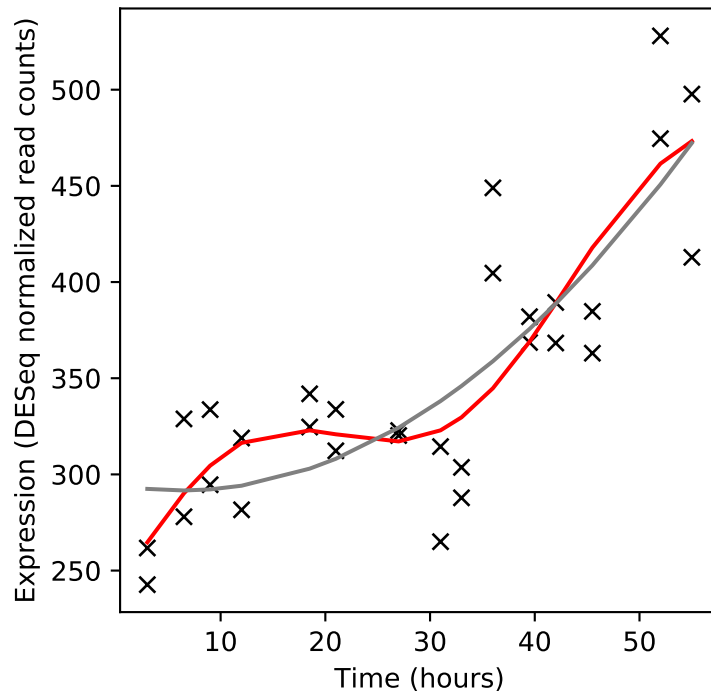

Rv2094c/tatA

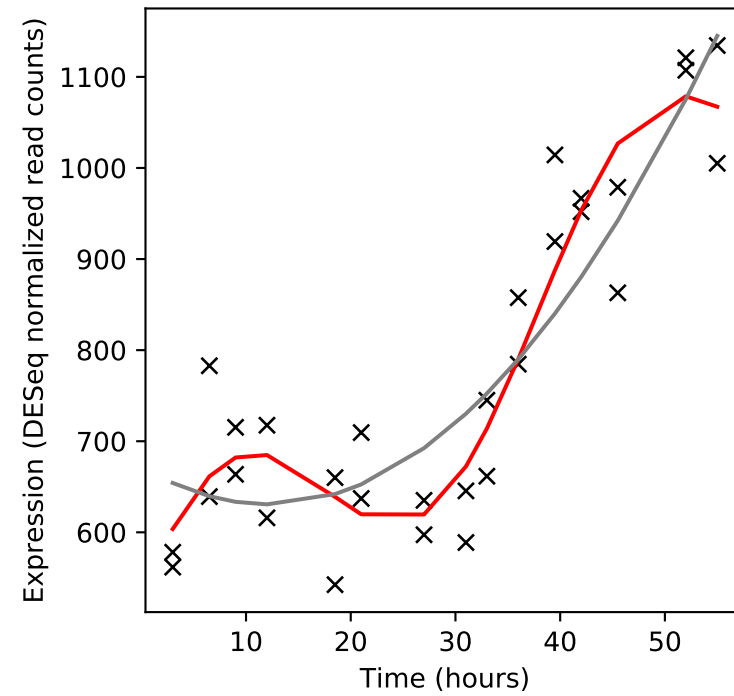

Rv2095c/pafC

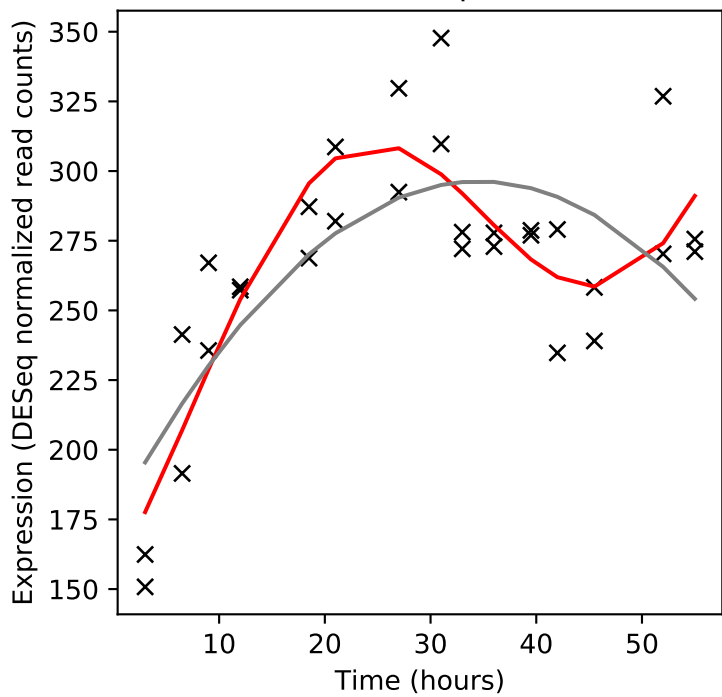

Rv2096c/pafB

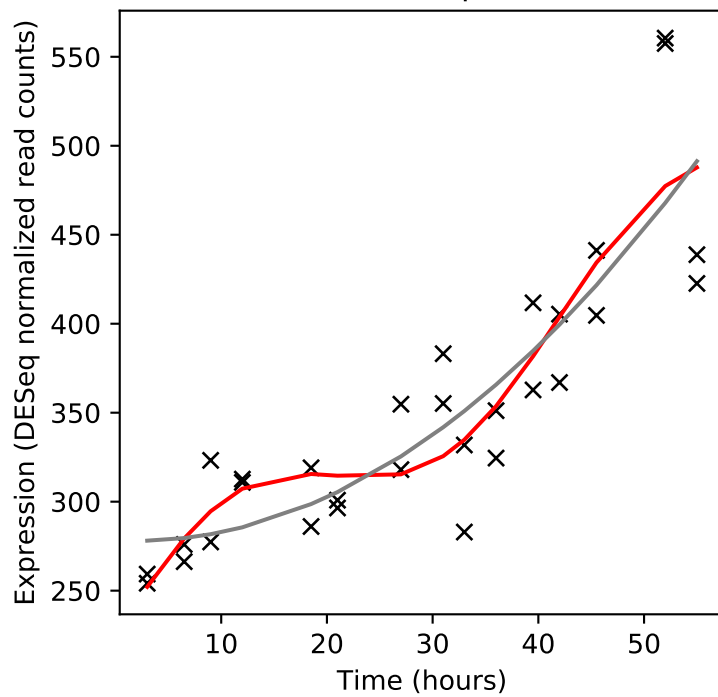

Rv2097c/pafA

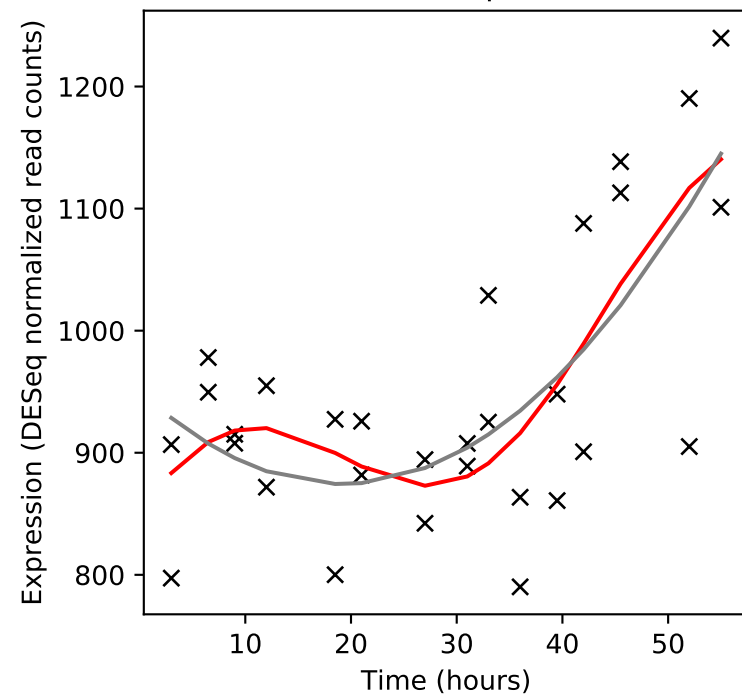

Rv2100/-

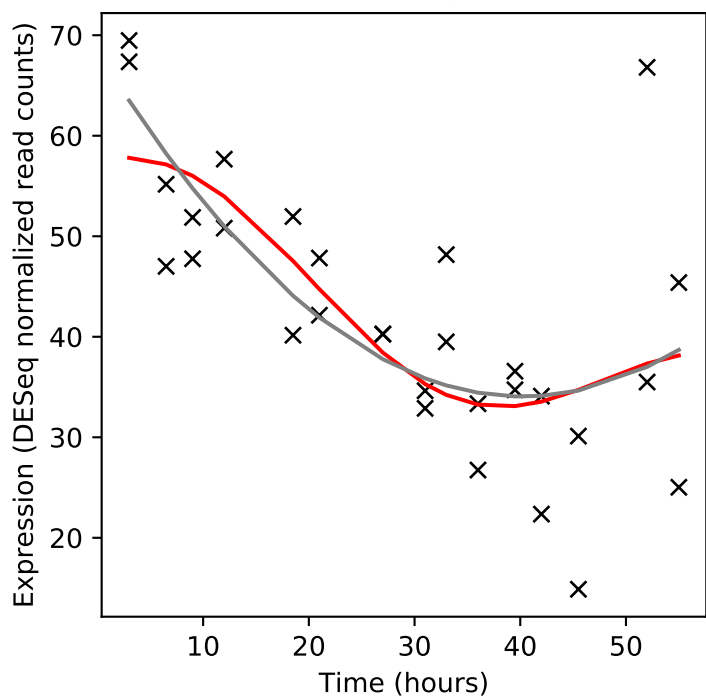

Rv2101/helZ

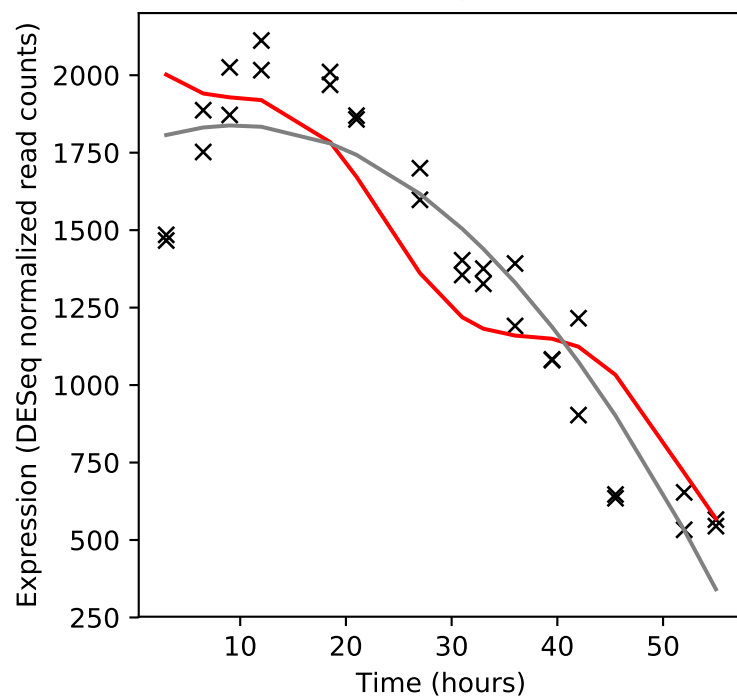

Rv2102/-

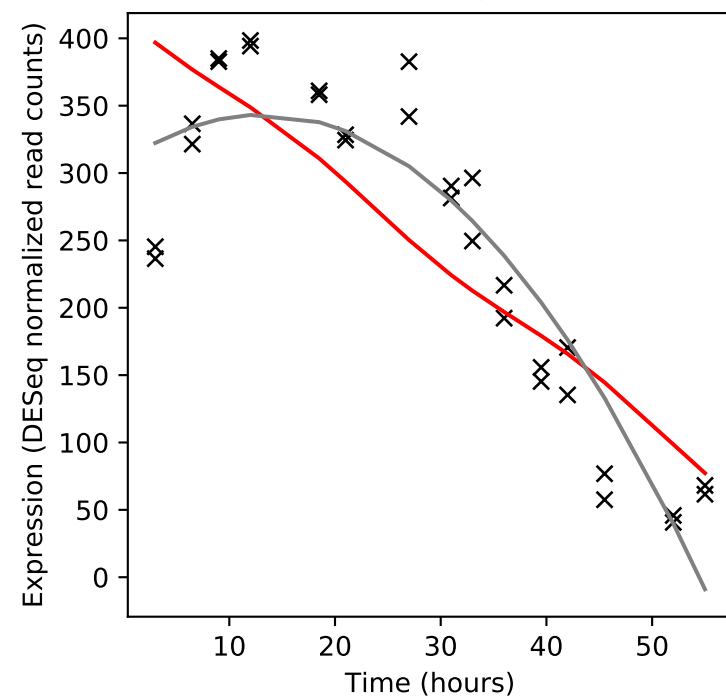

Rv2103c/vapC37

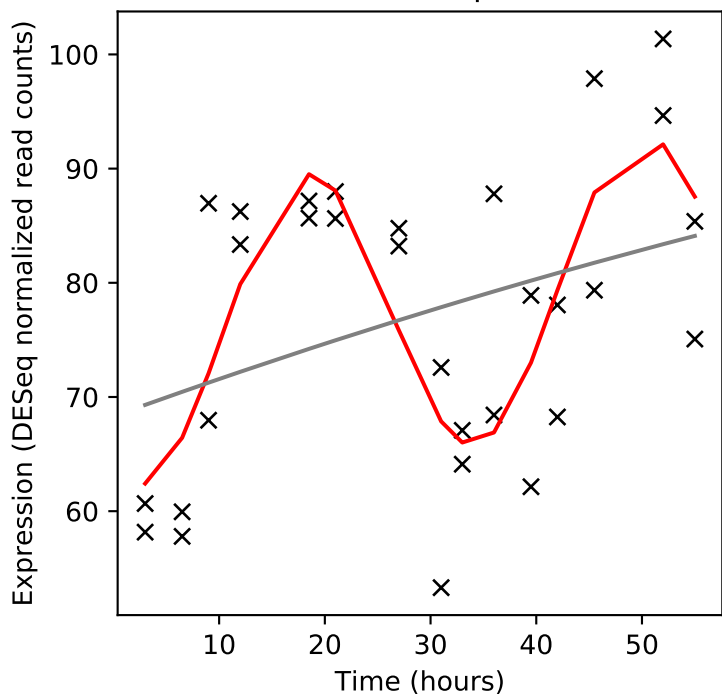

Rv2104c/vapB37

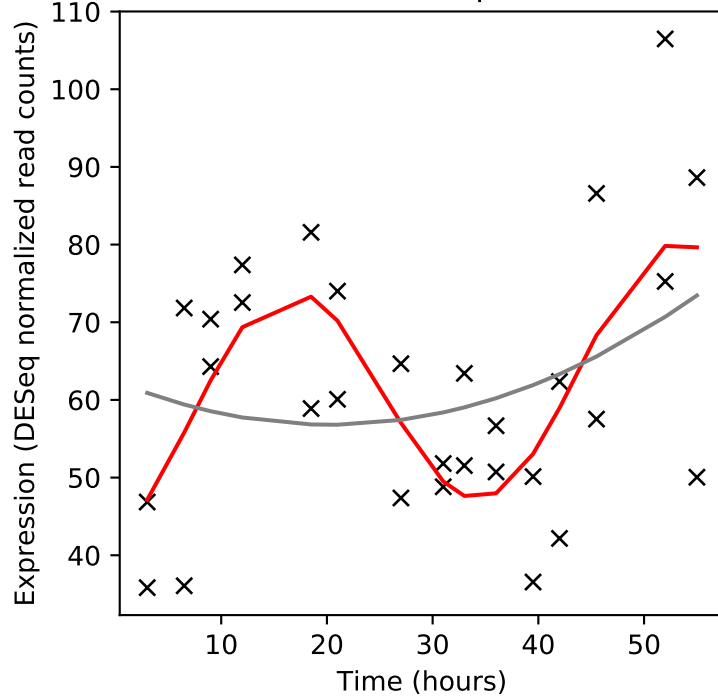

Rv2105/-

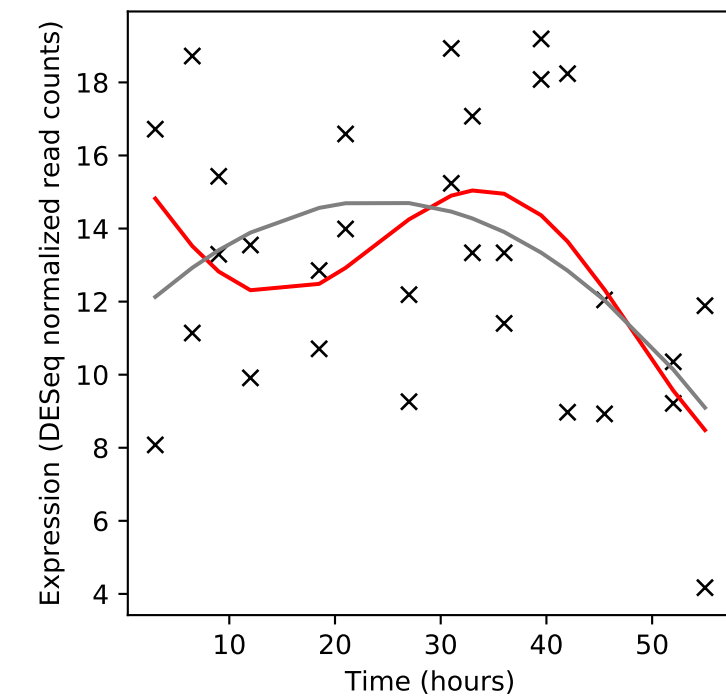

Rv2106/-

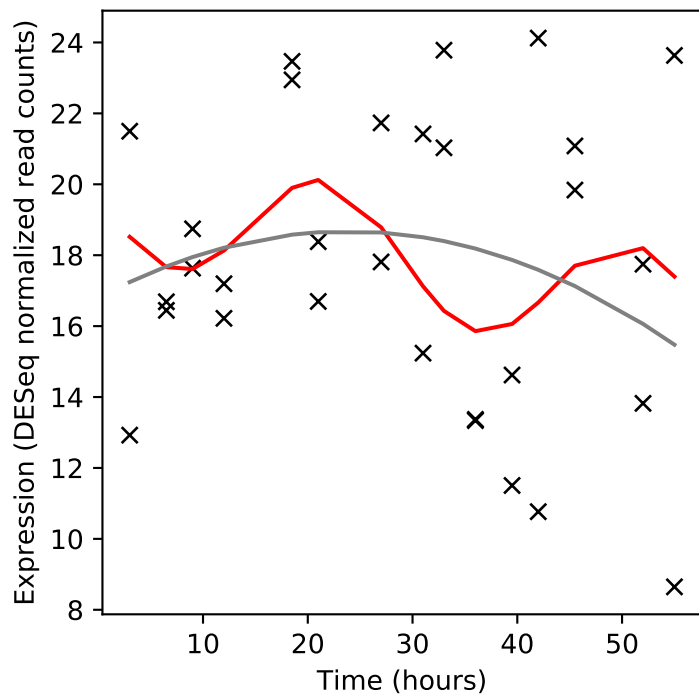

Rv2107/PE22

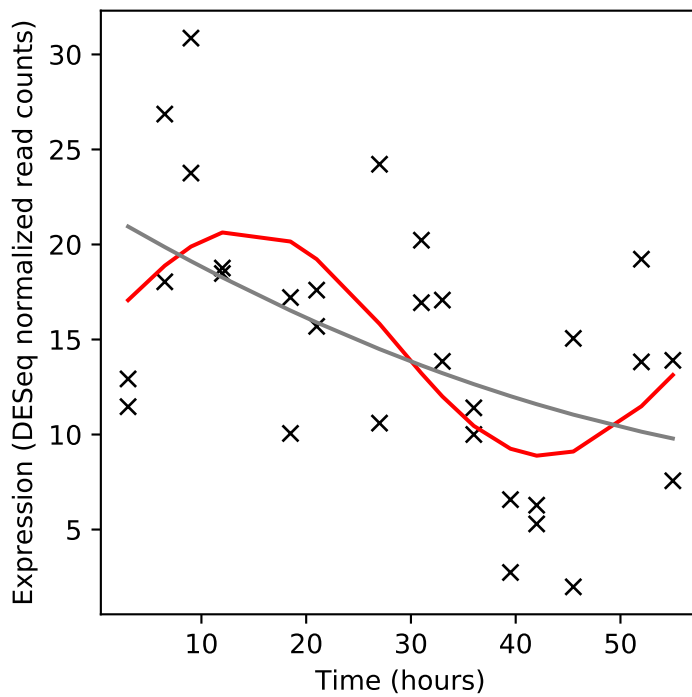

Rv2108/PPE36

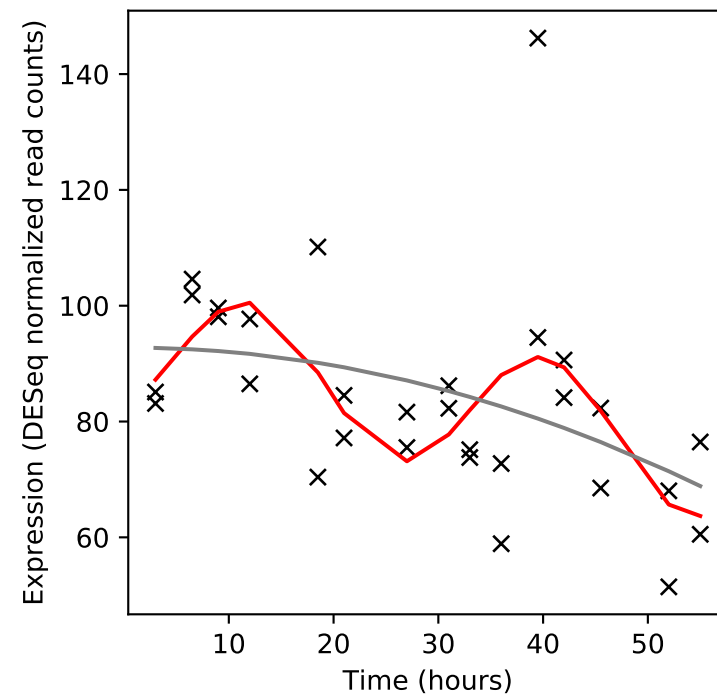

Rv2109c/prcA

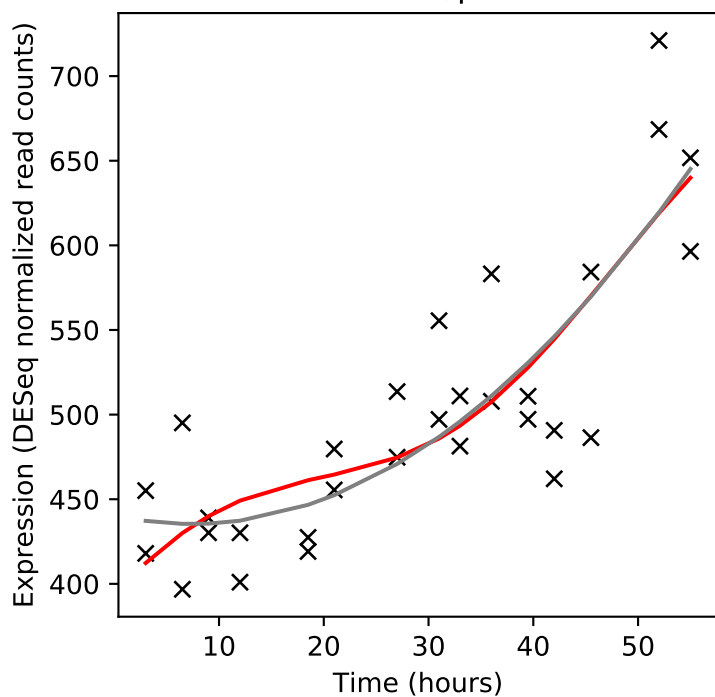

Rv2110c/prcB

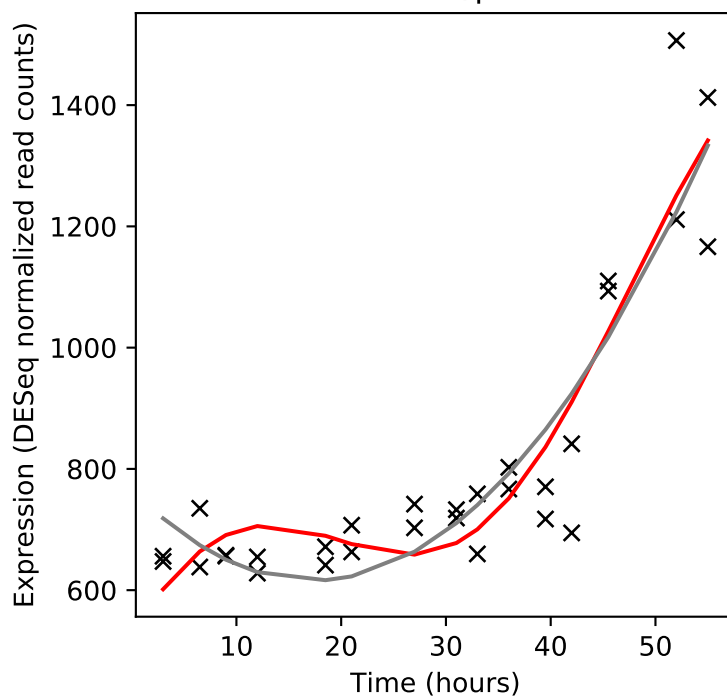

Rv2111c/pup

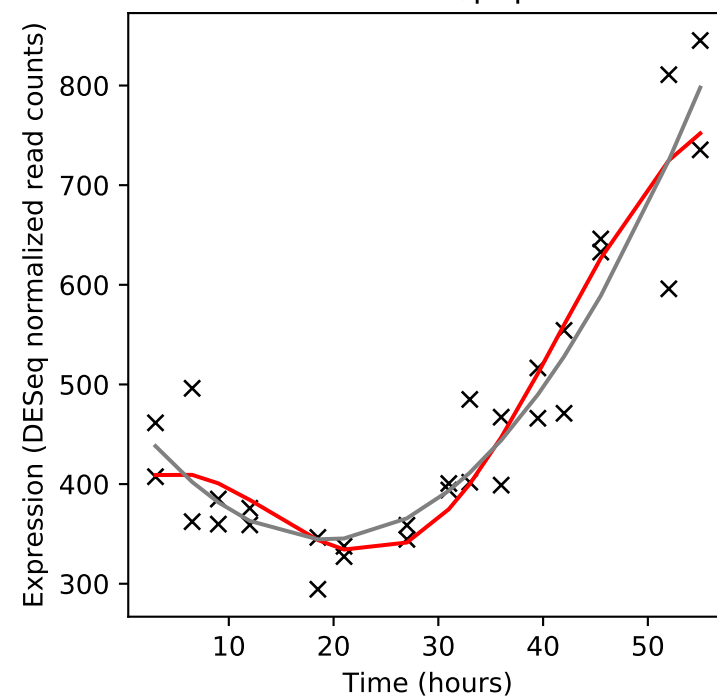

Rv2112c/dop

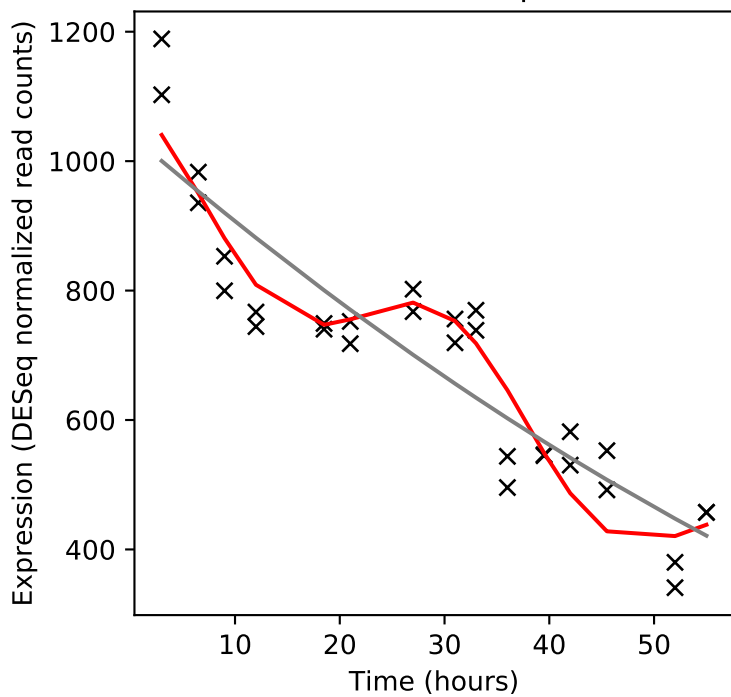

Rv2113/-

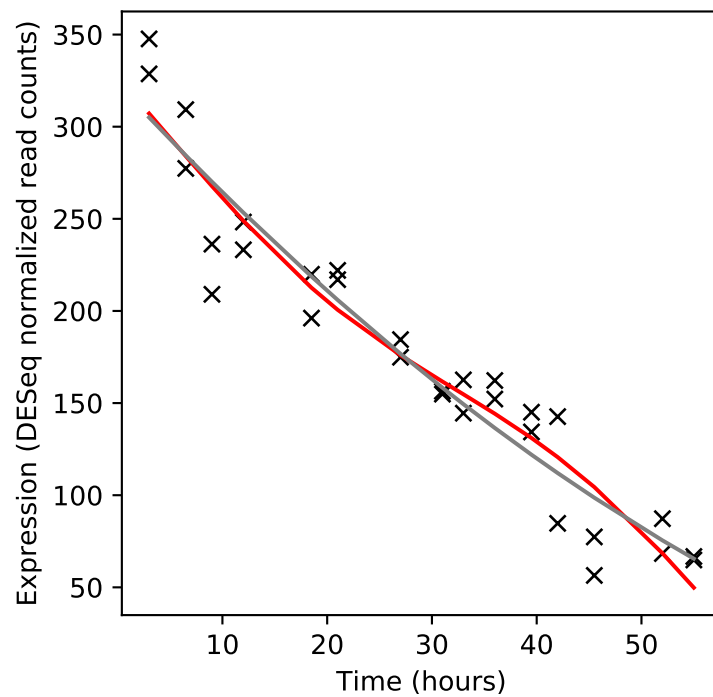

Rv2114/-

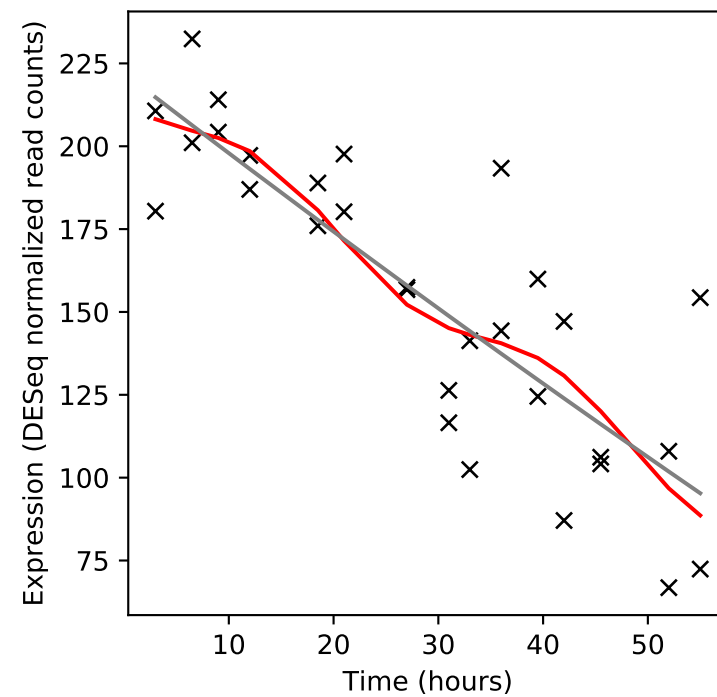



Rv2115c/mpa

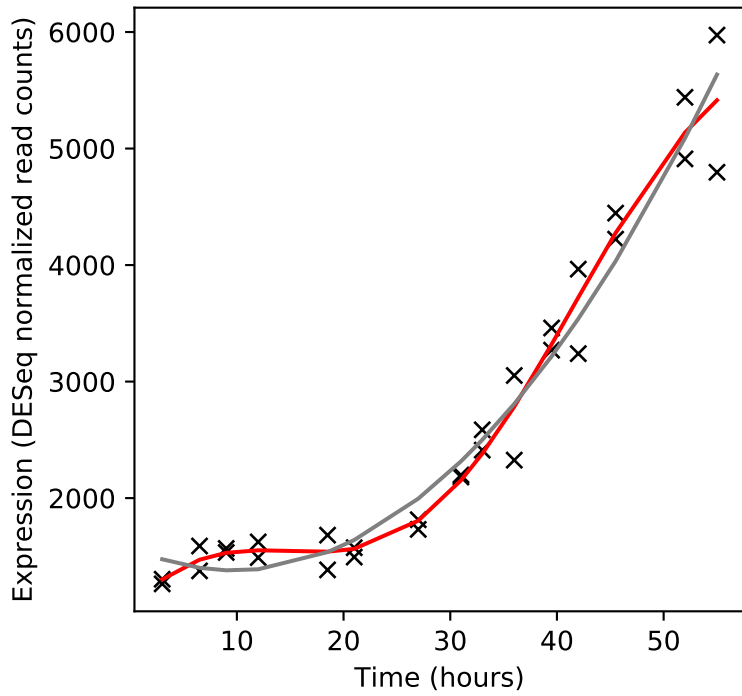

Rv2116/lppK

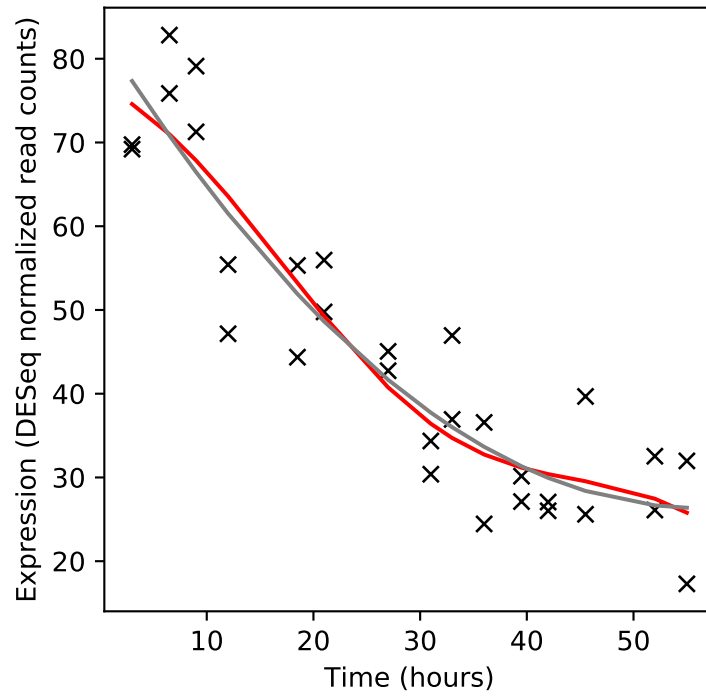

Rv2117/-

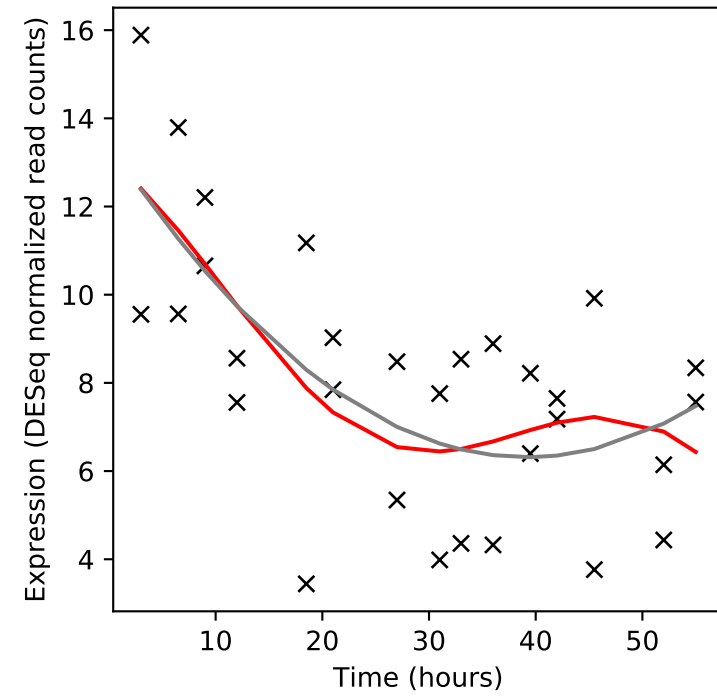

Rv2118c/-

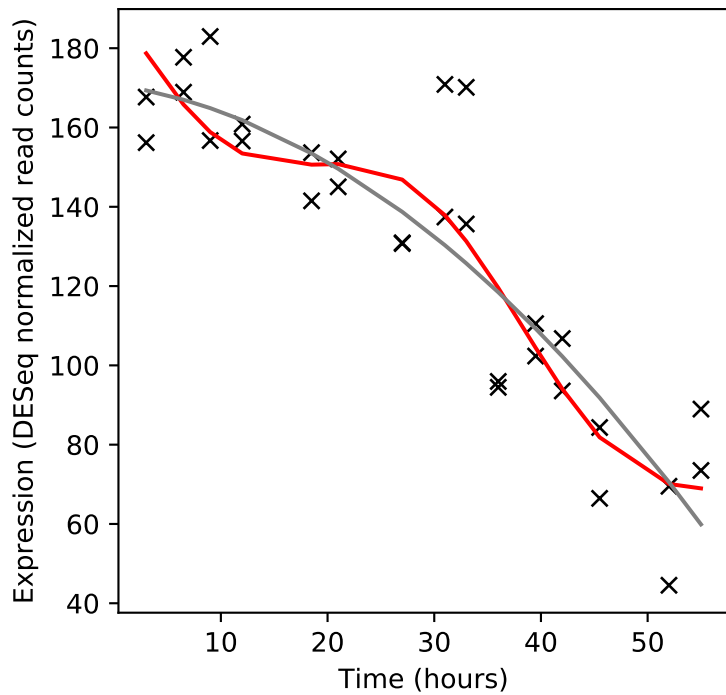

Rv2119/-

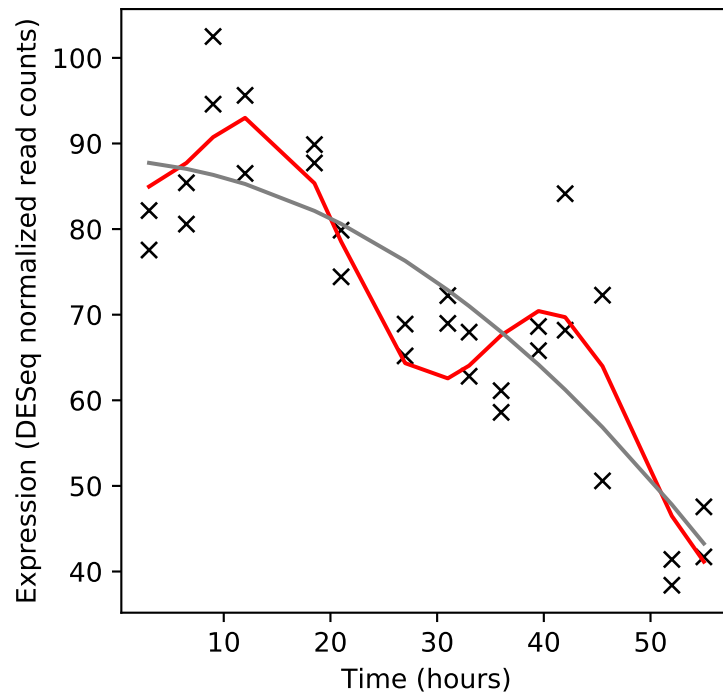

Rv2120c/-

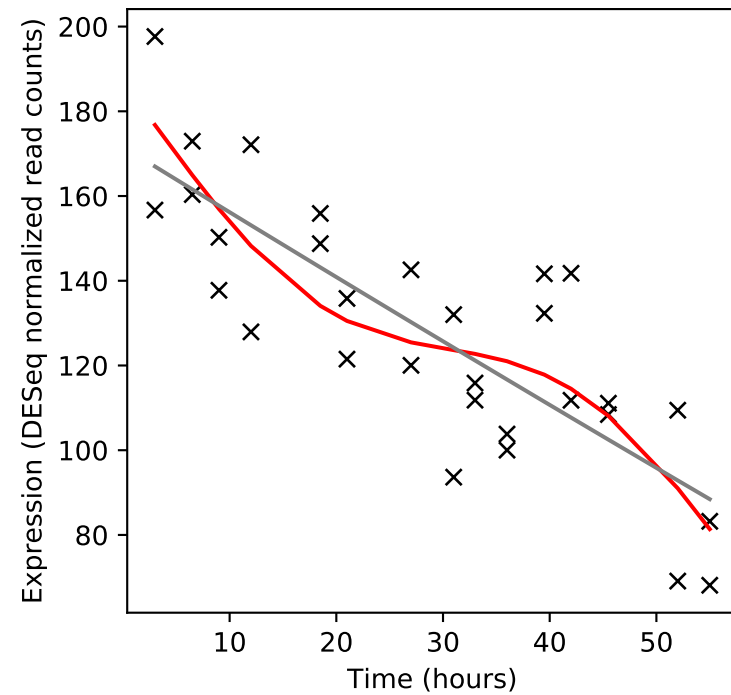

Rv2121c/hisG

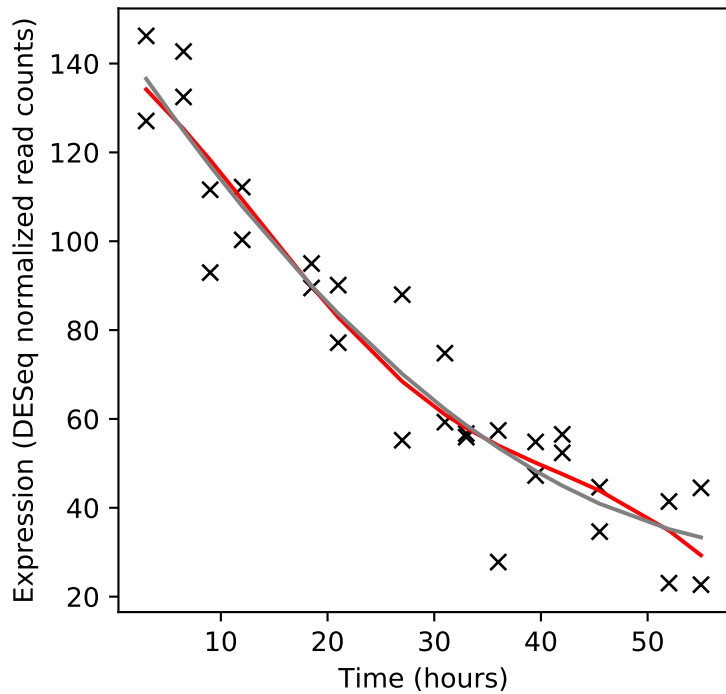

Rv2122c/hisE

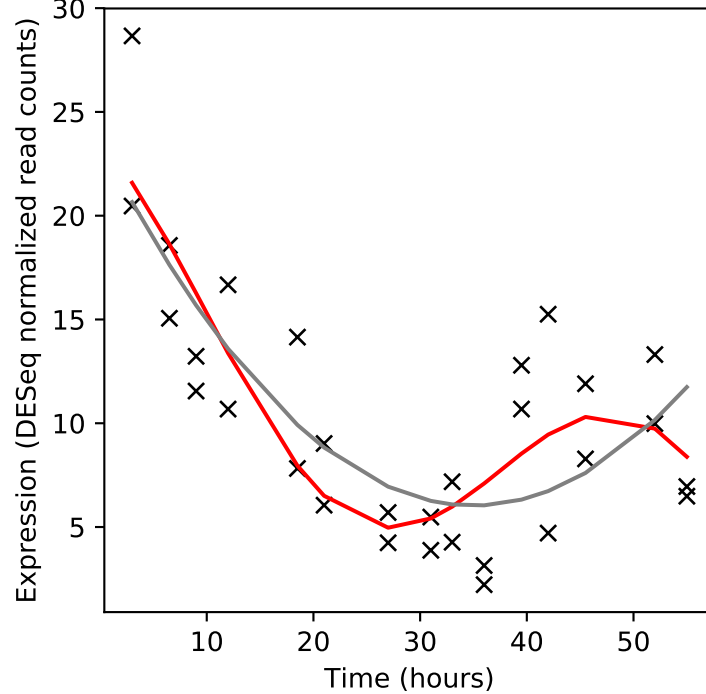

Rv2123/PPE37

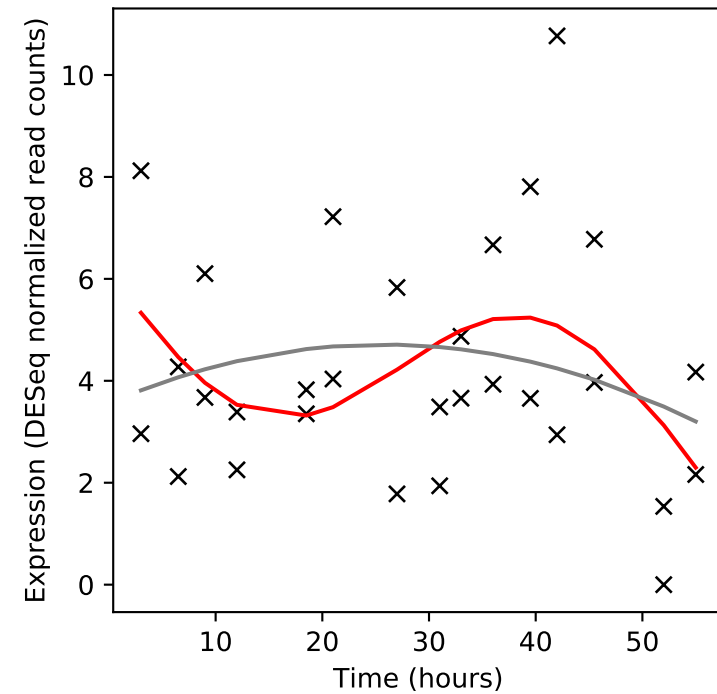

Rv2124c/methH

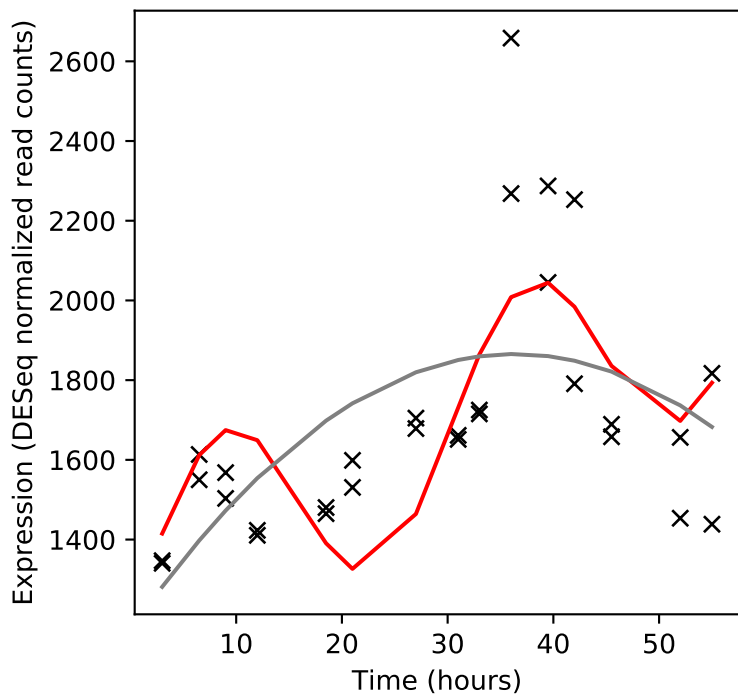

Rv2125/-

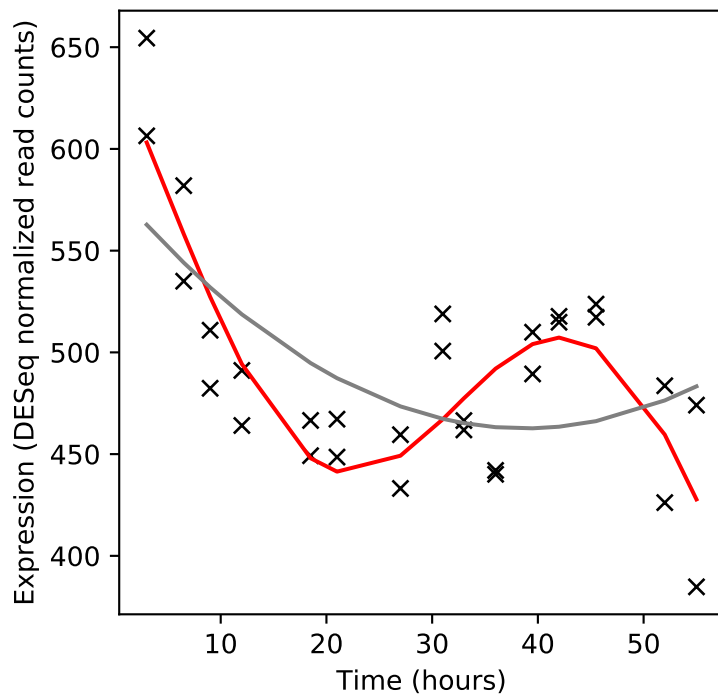

Rv2126c/PE\_PGRS37

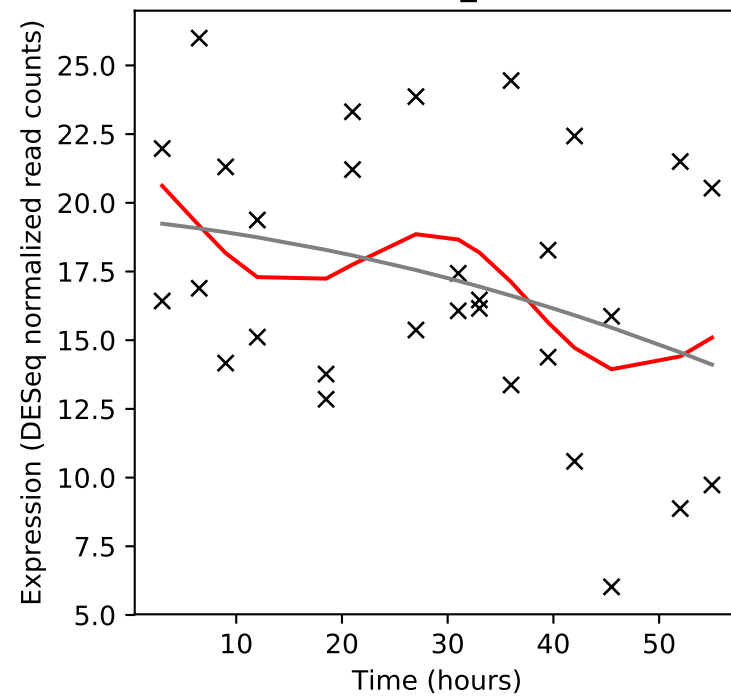

Rv2127/ansP1

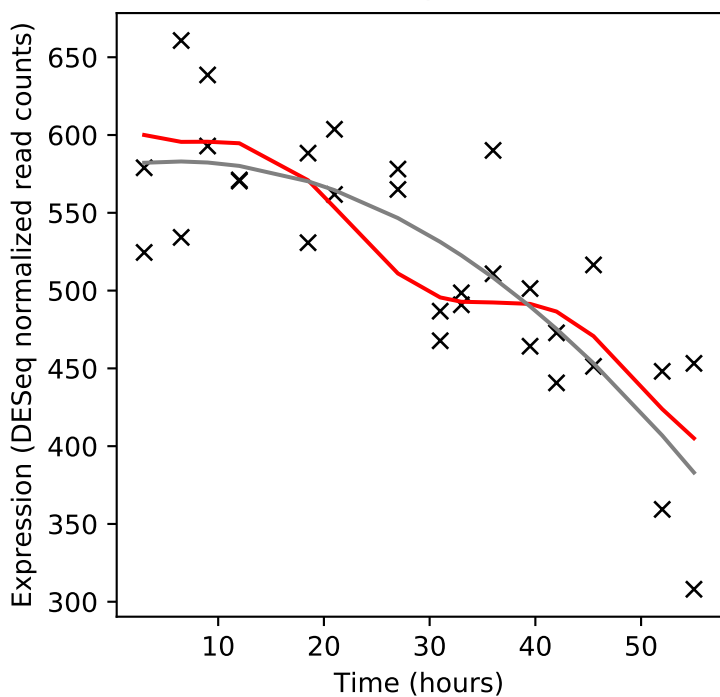

Rv2128/-

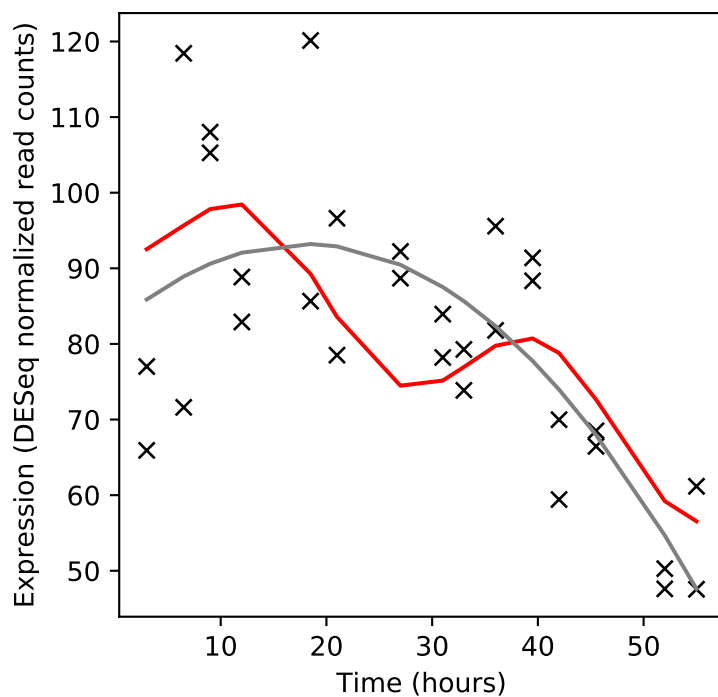

Rv2129c/-

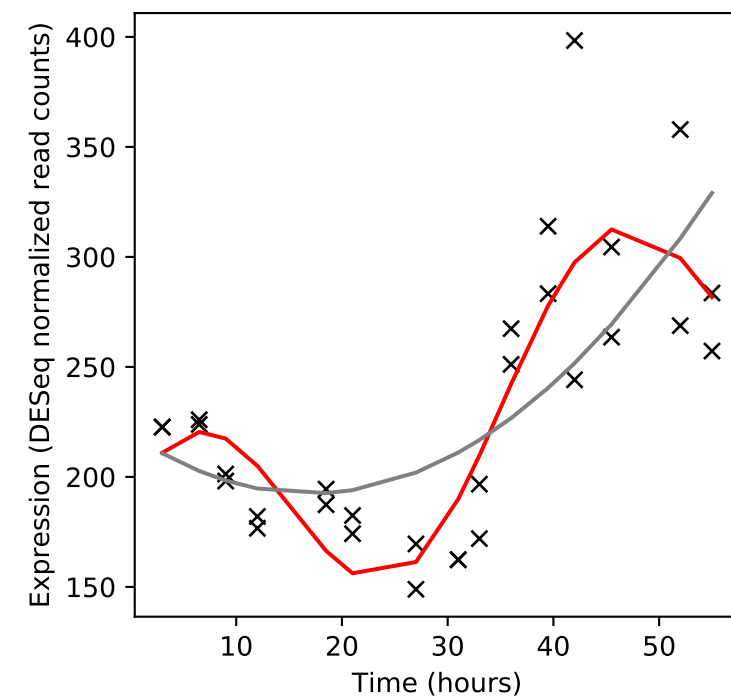

Rv2130c/mshC

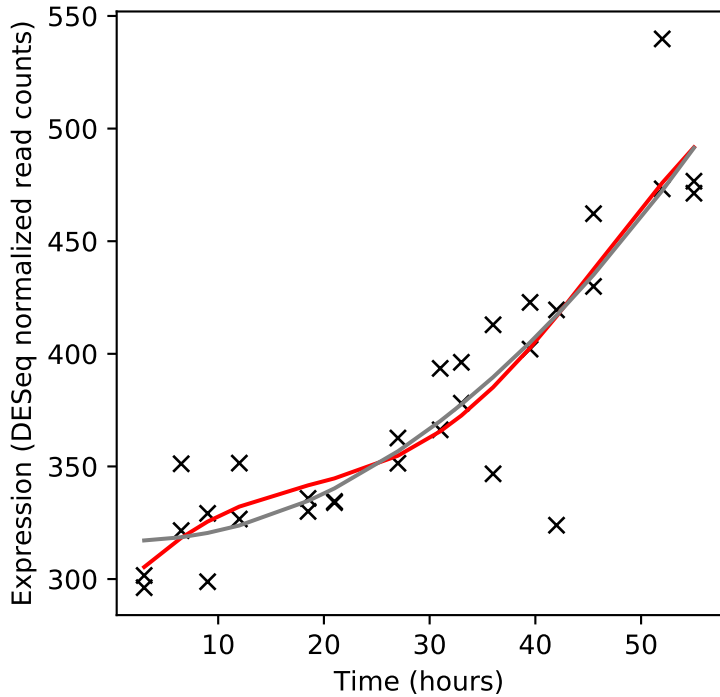

Rv2131c/cysQ

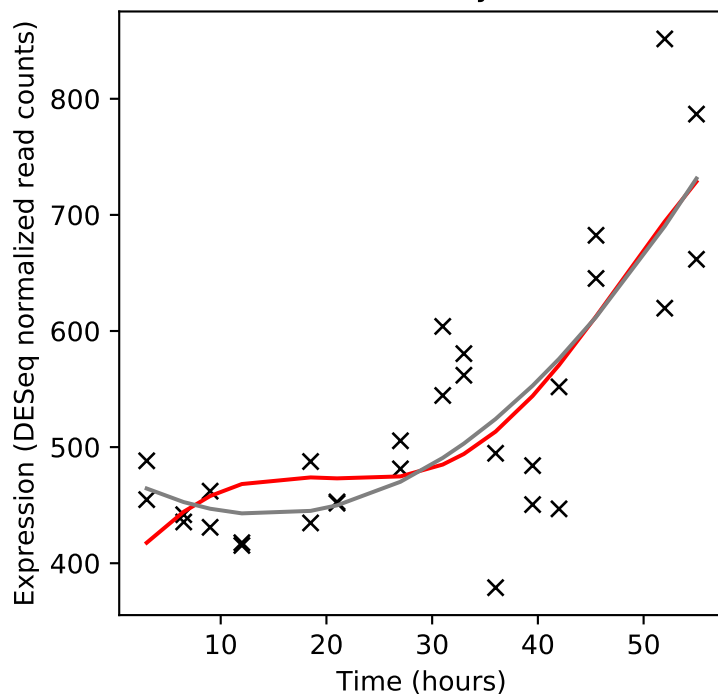

Rv2132/-

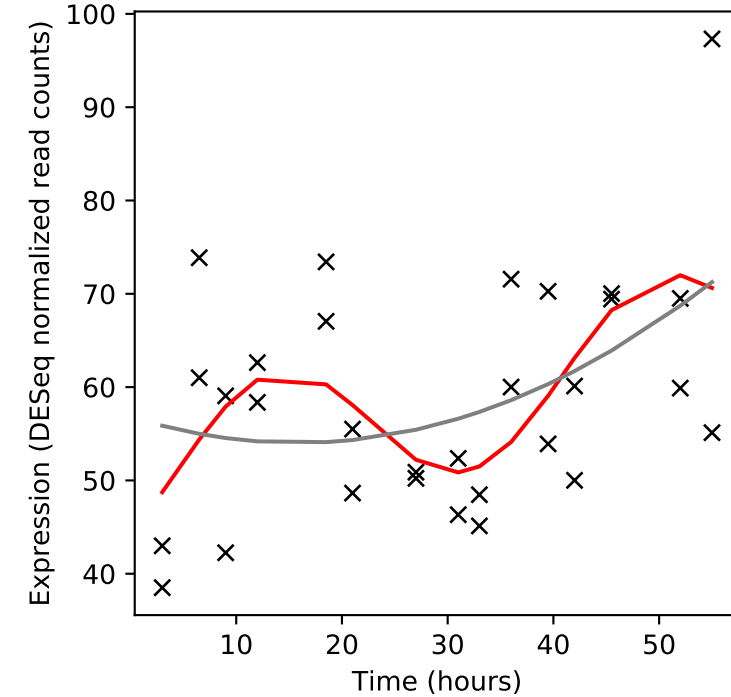

Rv2133c/-

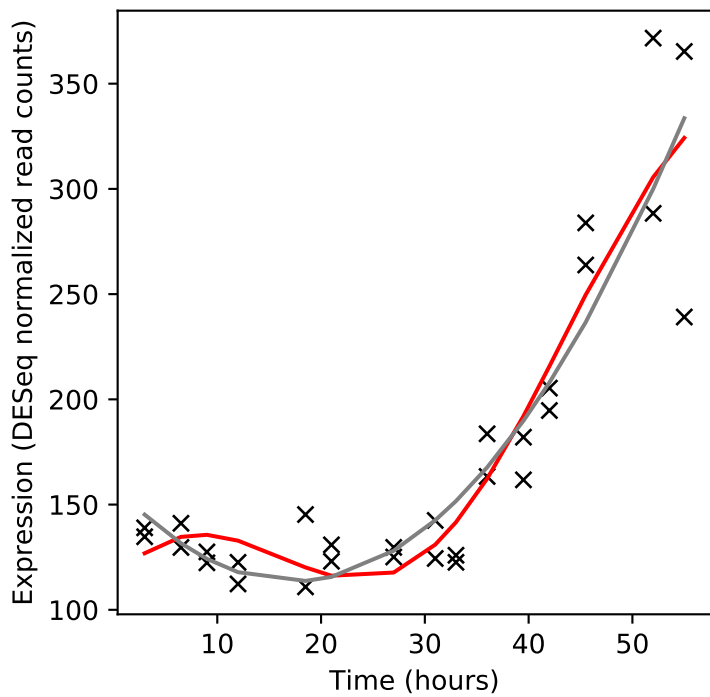

Rv2134c/-

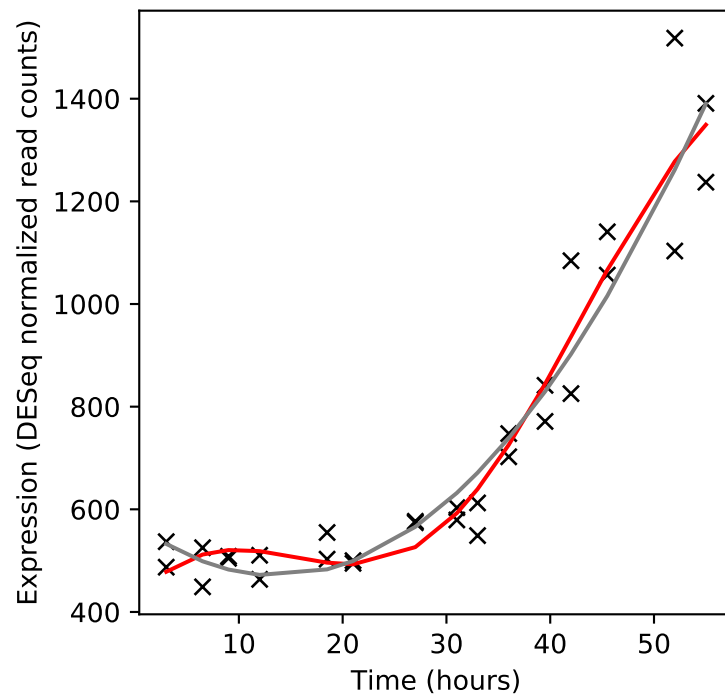

Rv2135c/-

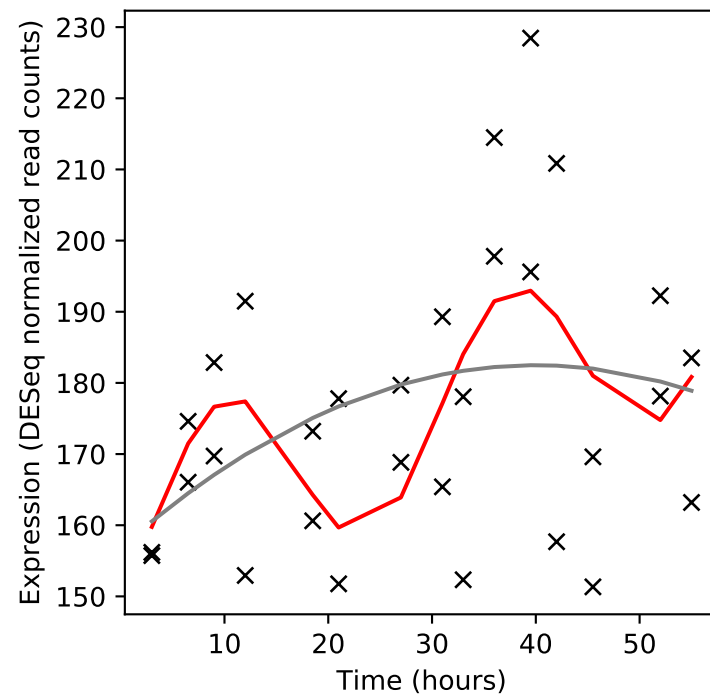

Rv2136c/-

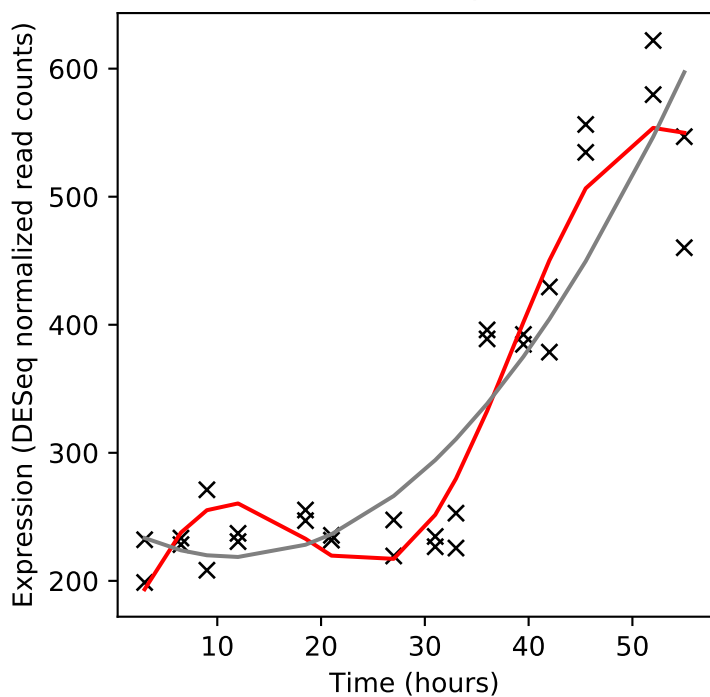

Rv2137c/-

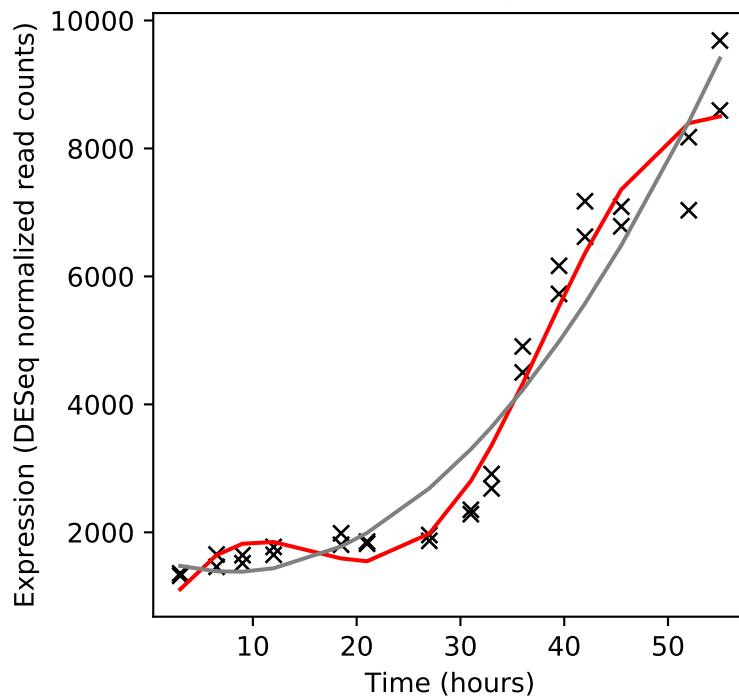

Rv2138/lppL

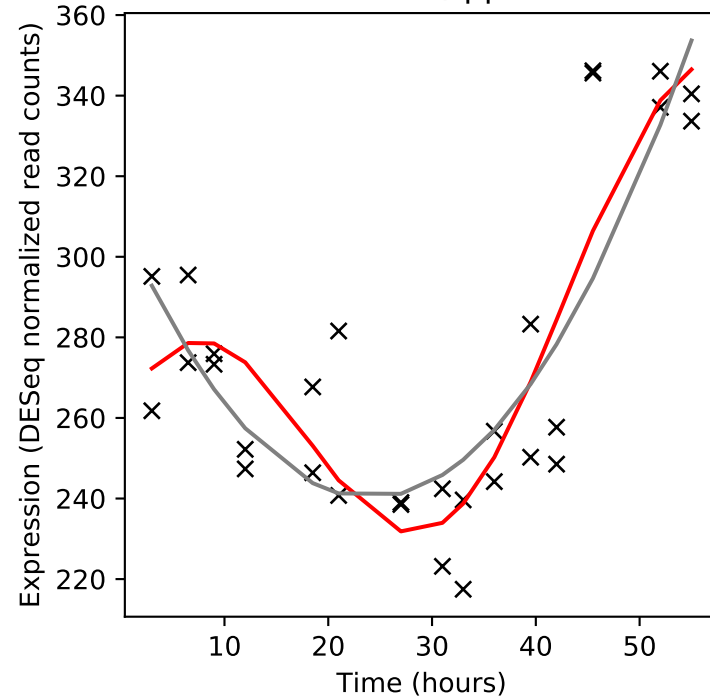

Rv2139/pyrD

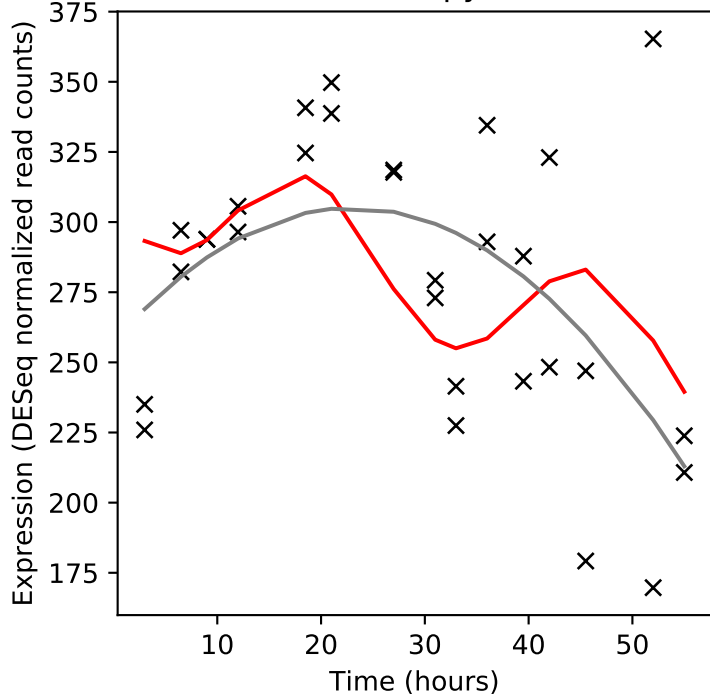

Rv2140c/TB18.6

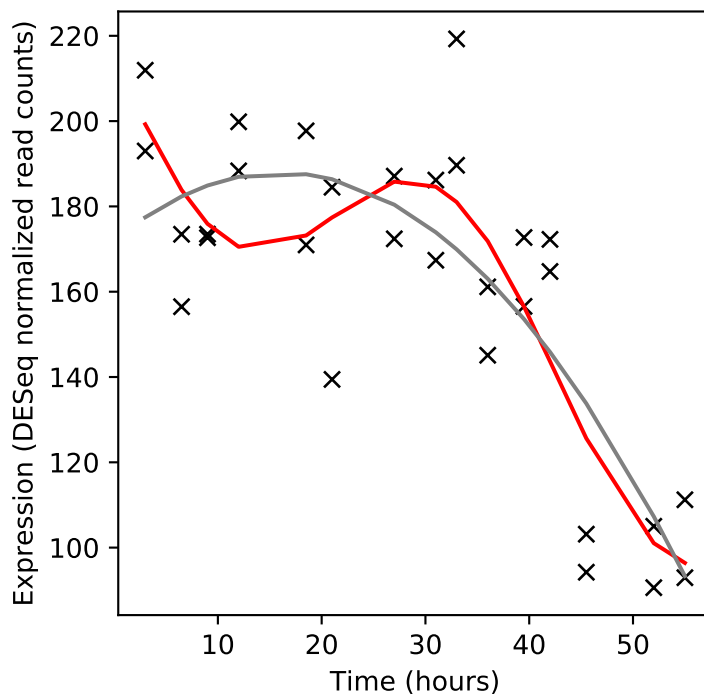

Rv2141c/-

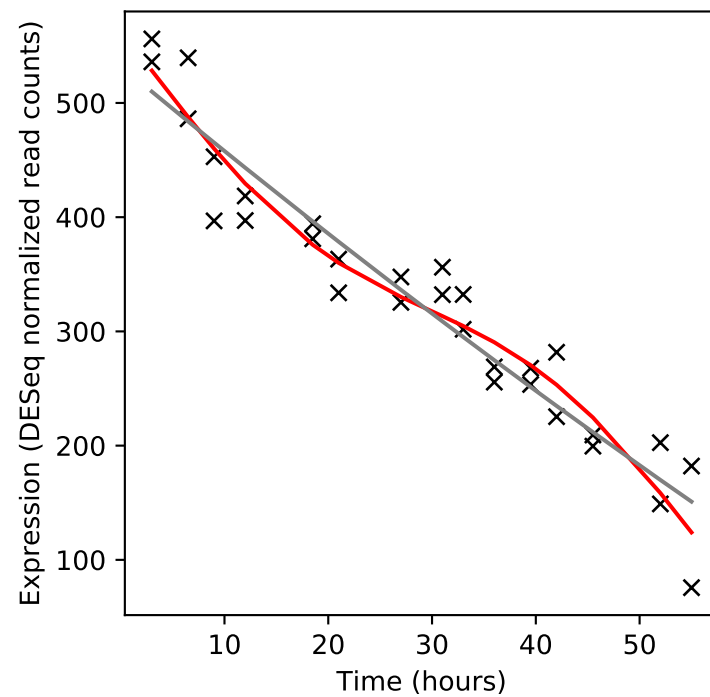

Rv2142c/parE2

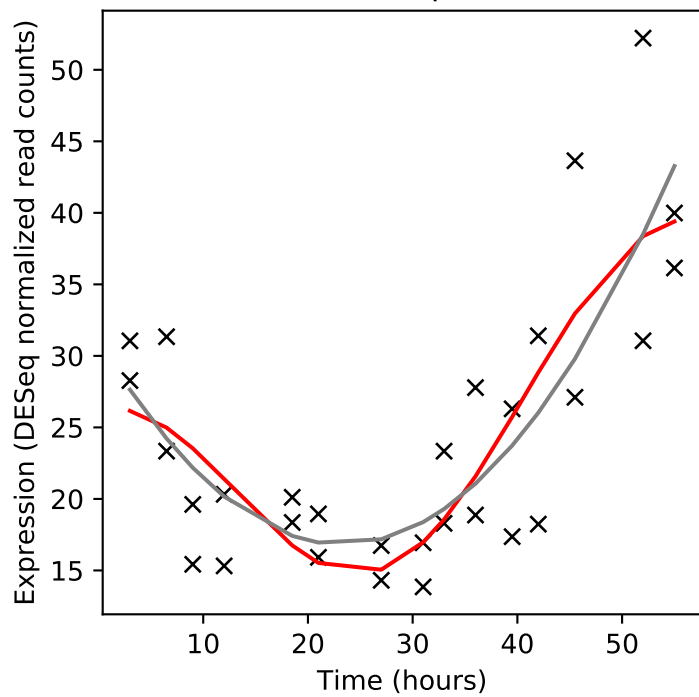

Rv2142A/parD2

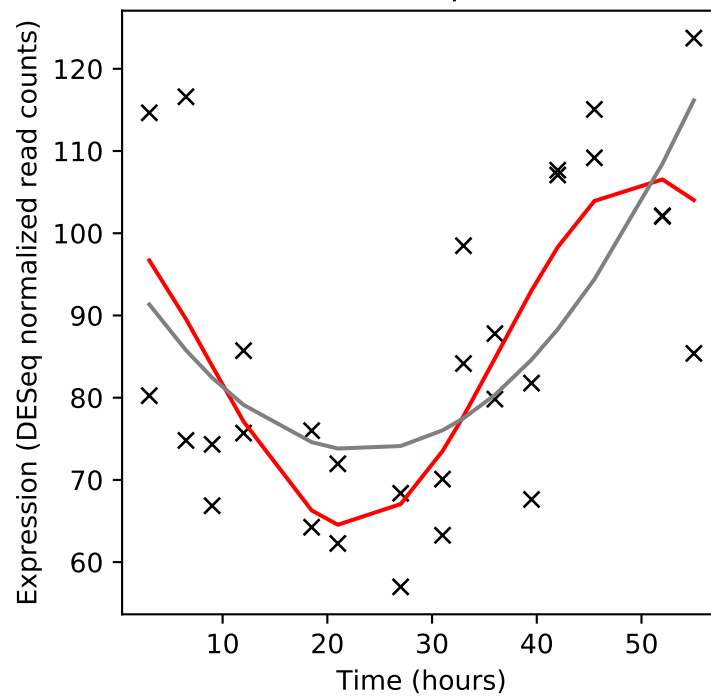

Rv2143/-

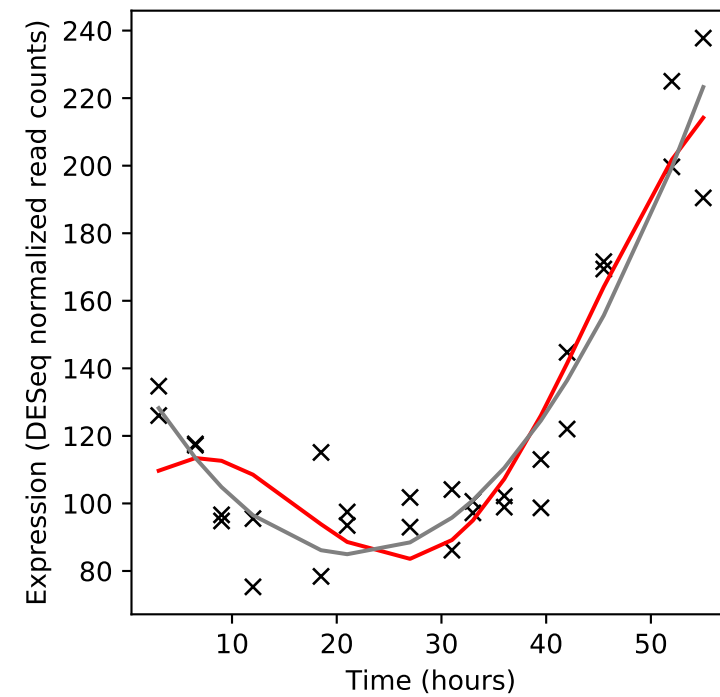

Rv2144c/-

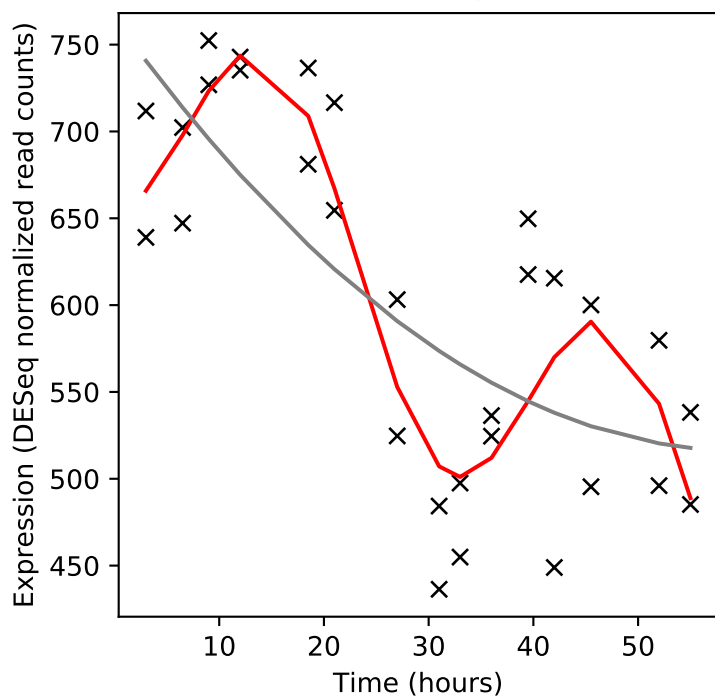

Rv2145c/wag31

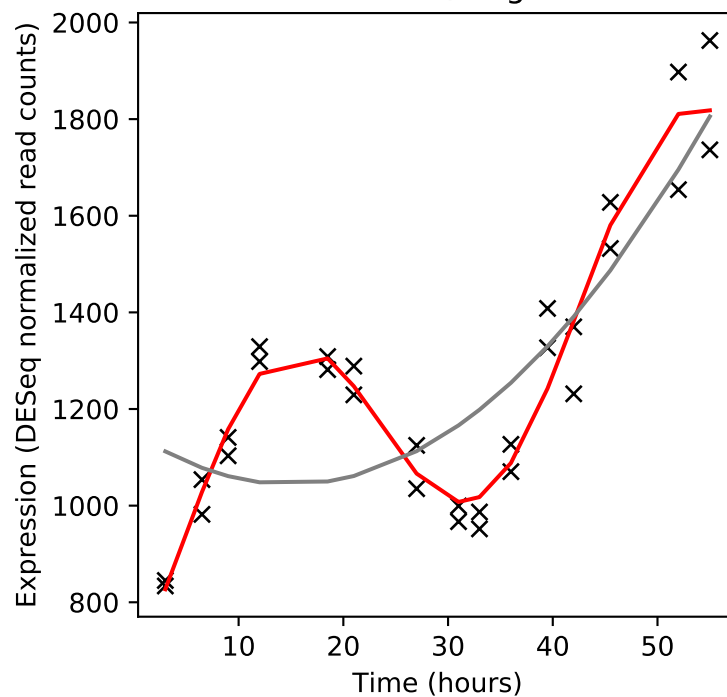

Rv2146c/-

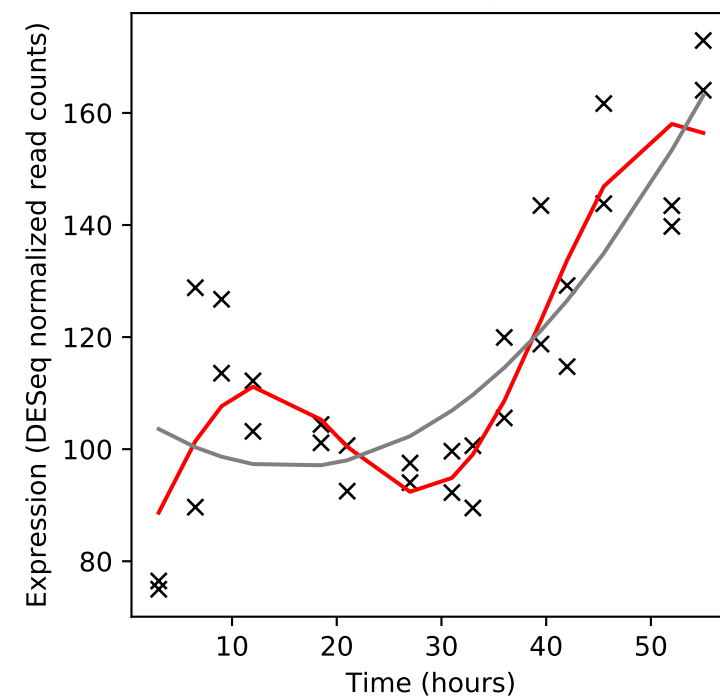

Rv2147c/-

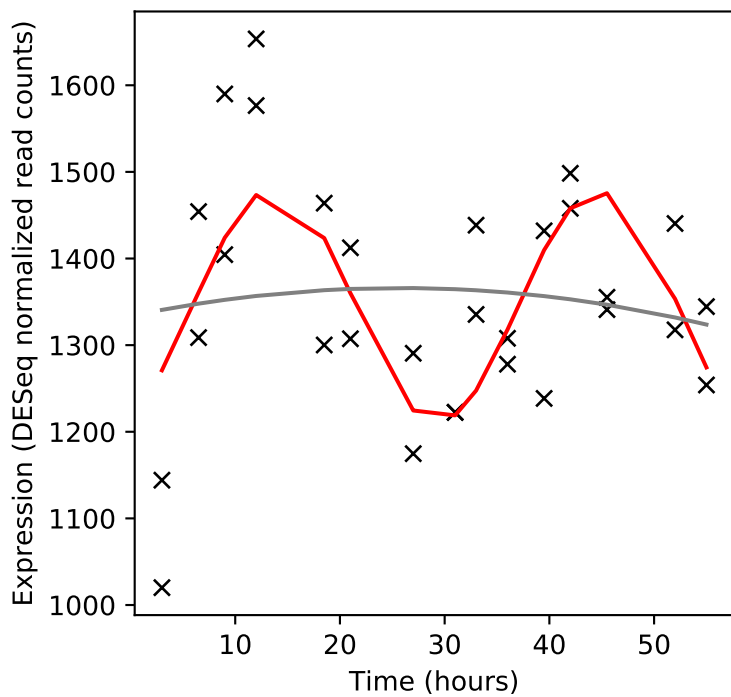

Rv2148c/-

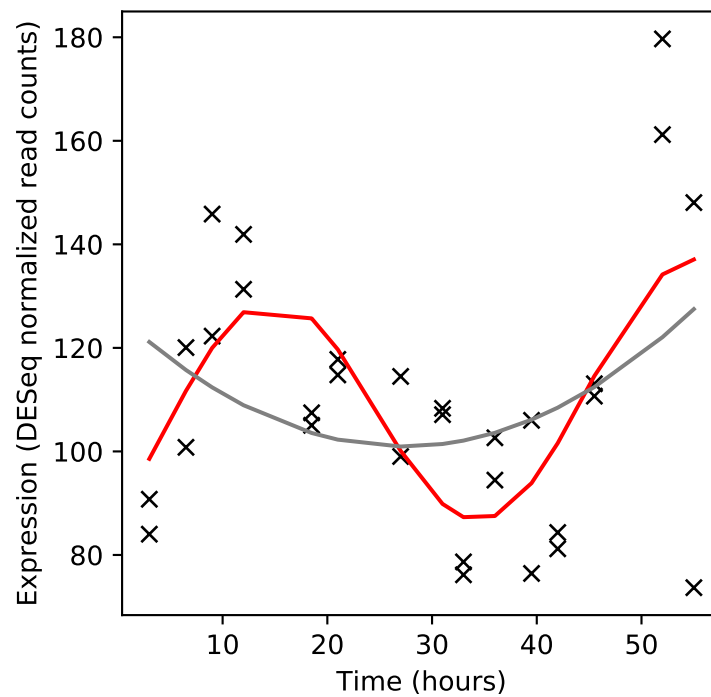

Rv2149c/yfiH

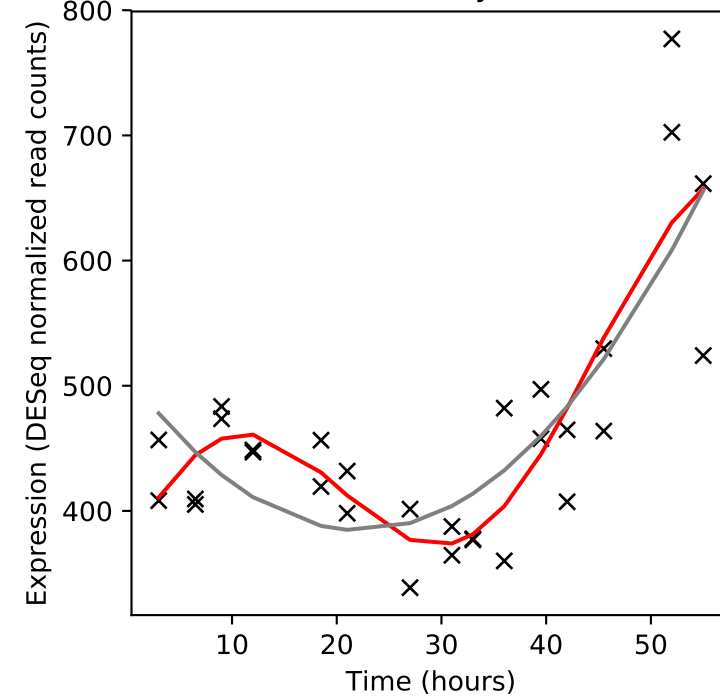

Rv2150c/ftsZ

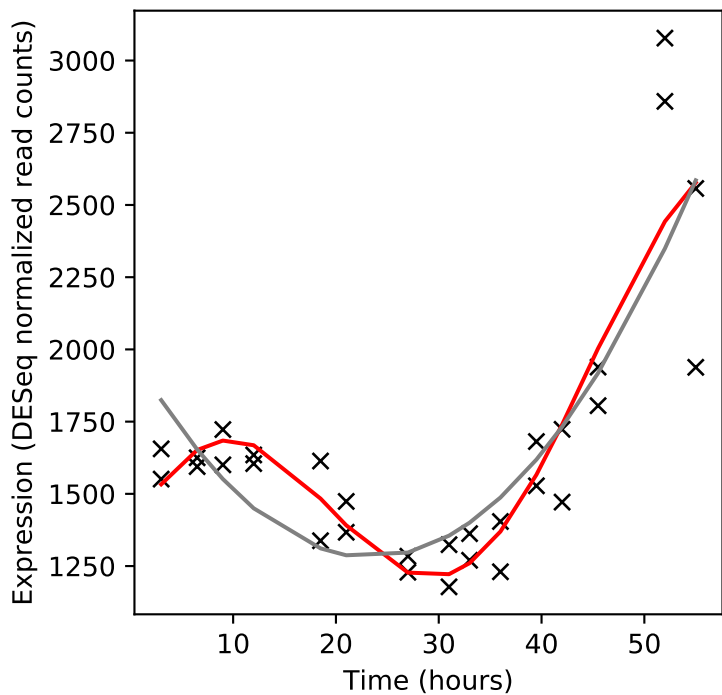

Rv2151c/ftsQ

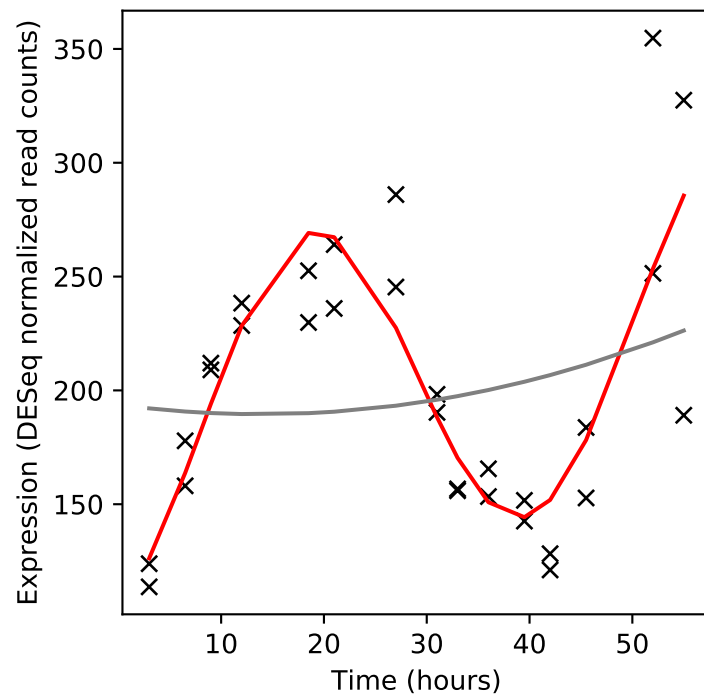

Rv2152c/murC

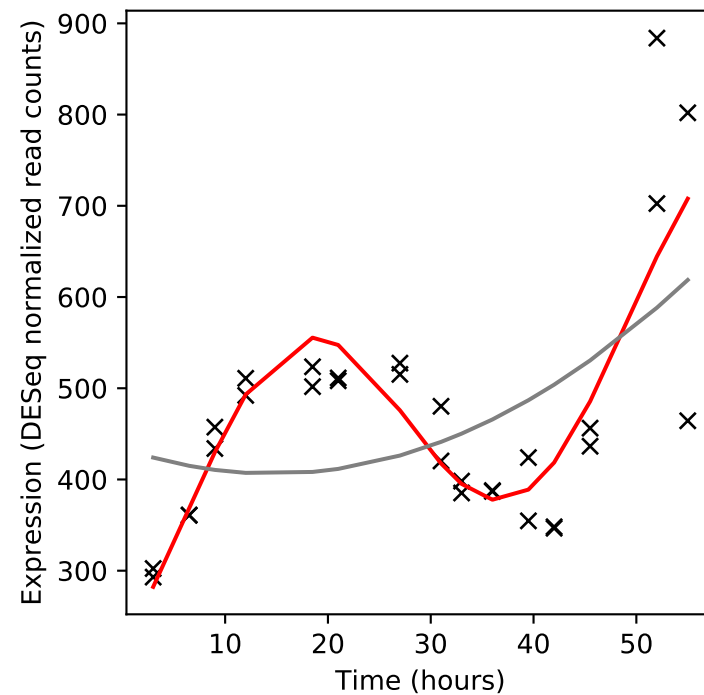

Rv2153c/murG

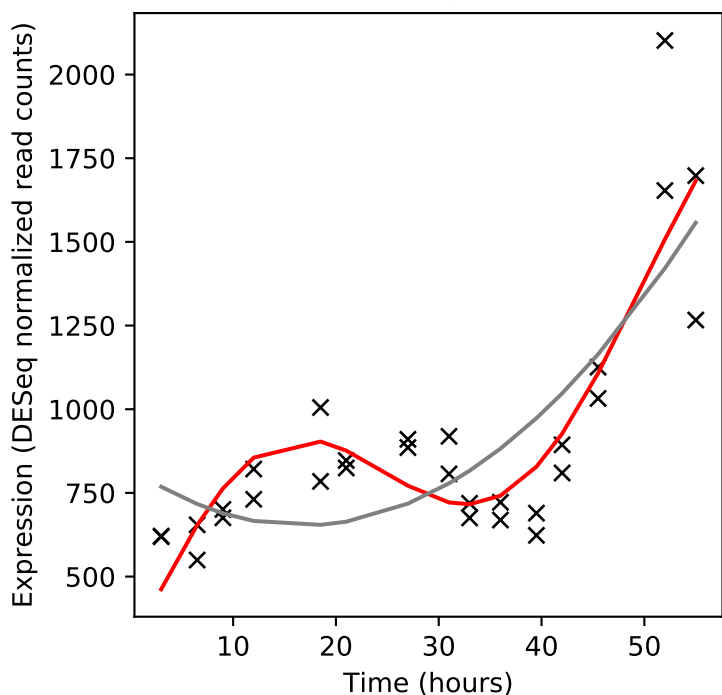

Rv2154c/ftsW

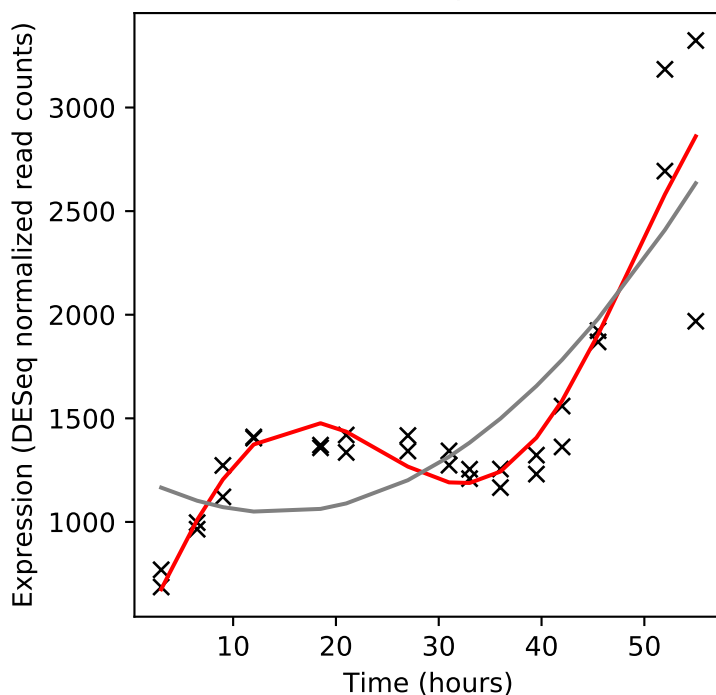

Rv2155c/murD

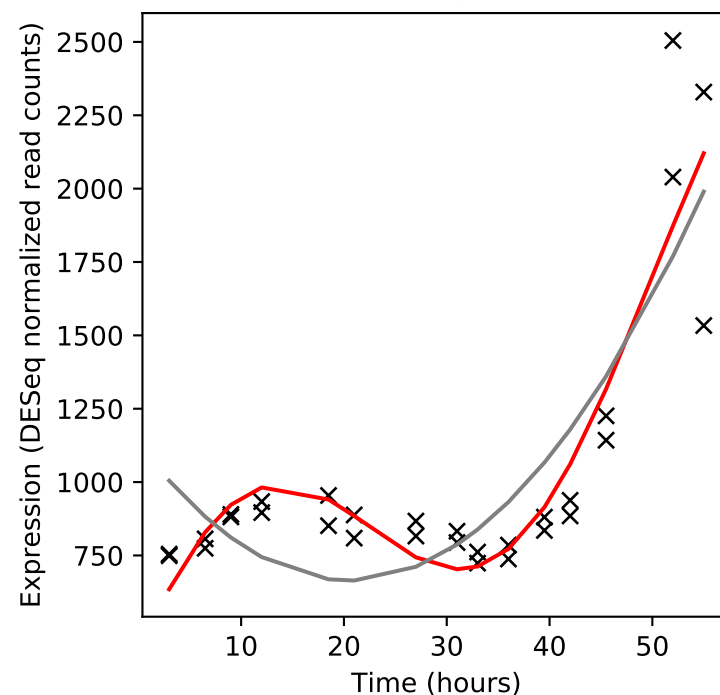

Rv2156c/murX

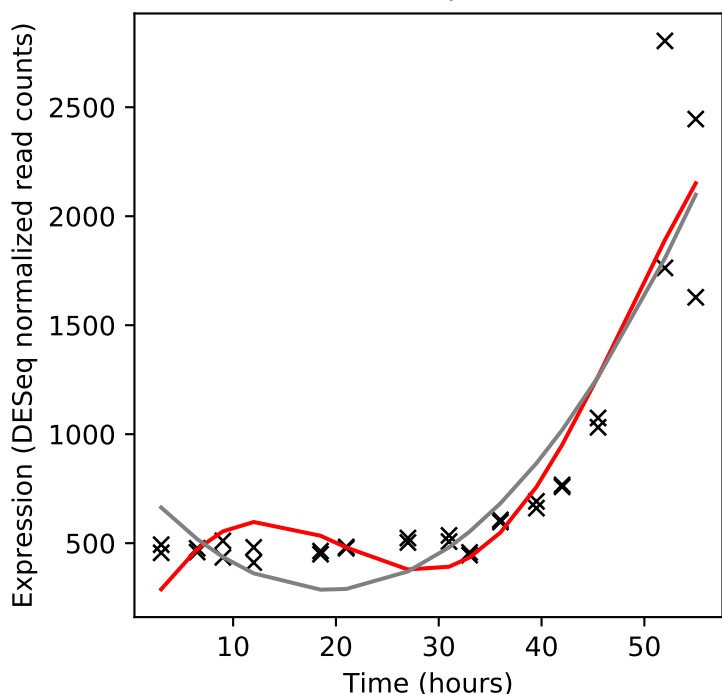

Rv2157c/murF

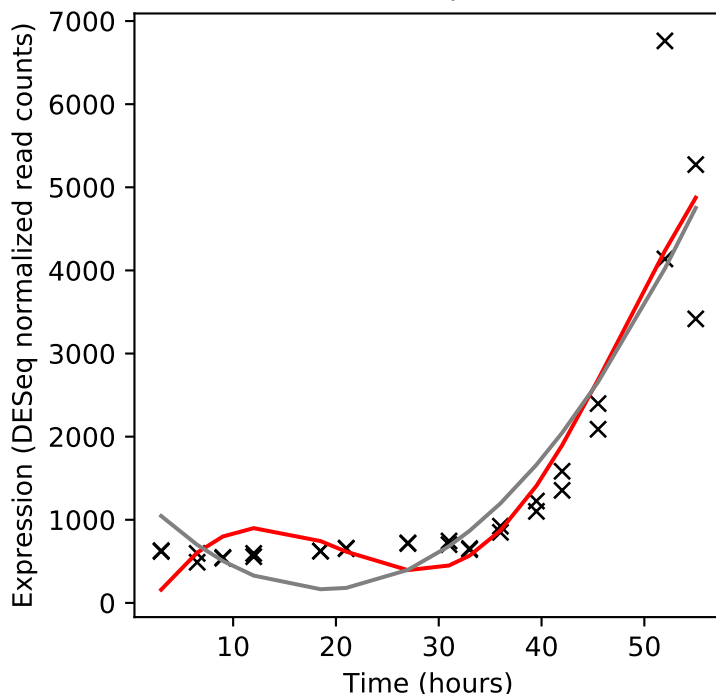

Rv2158c/murE

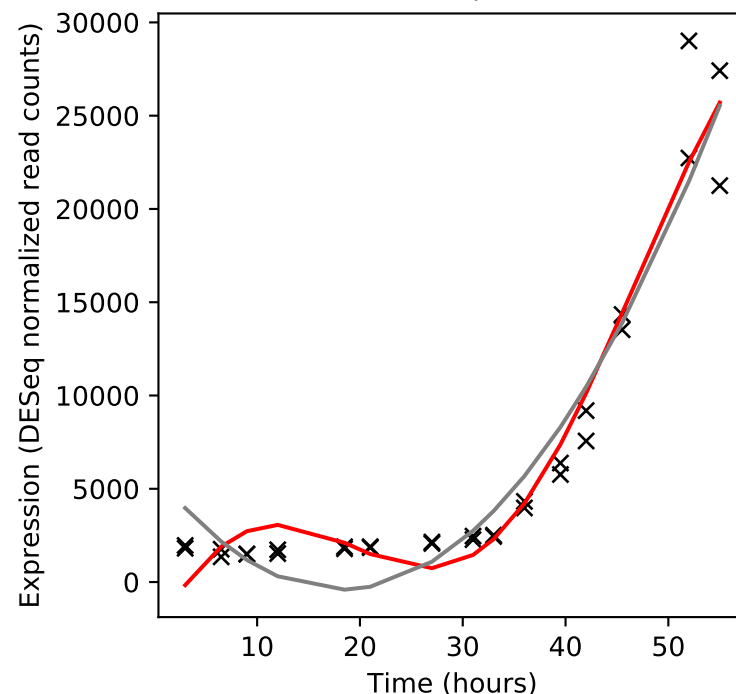

Rv2159c/-

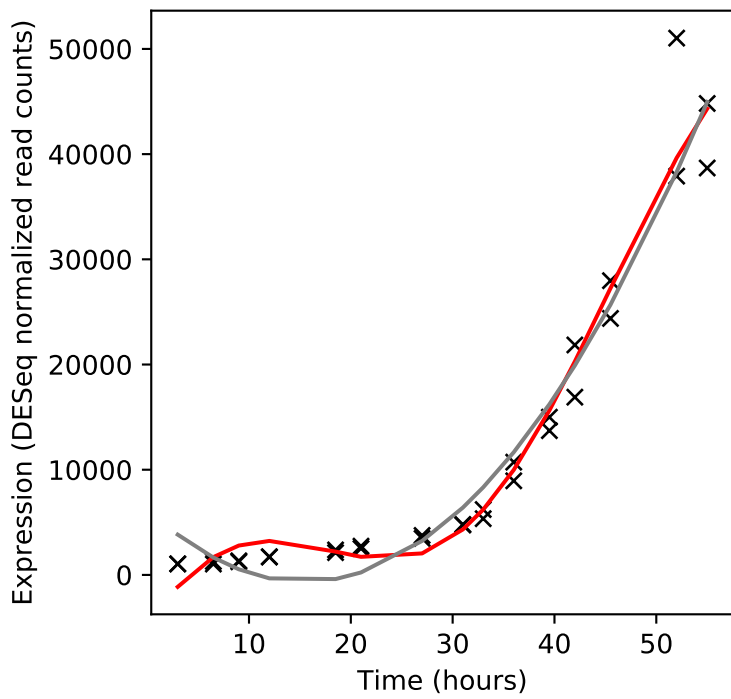

Rv2160A/-

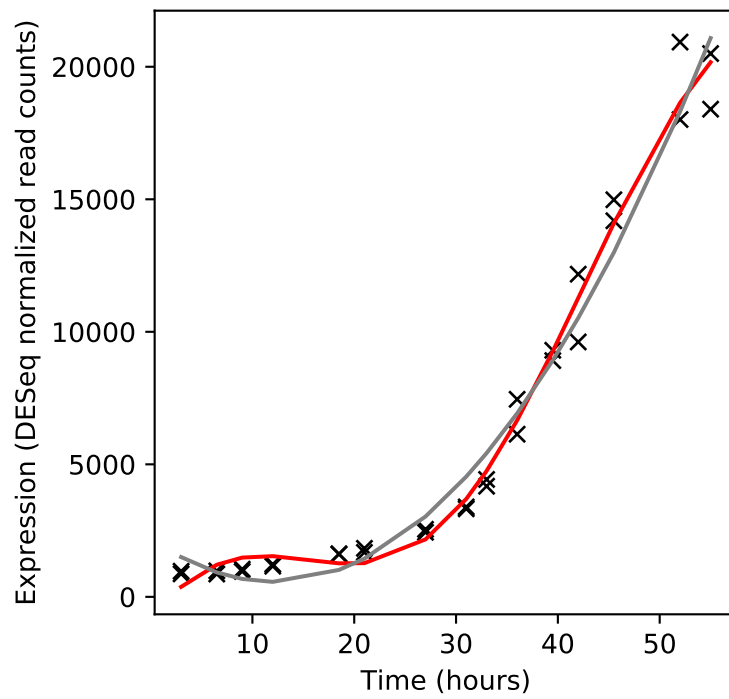

Rv2160c/-

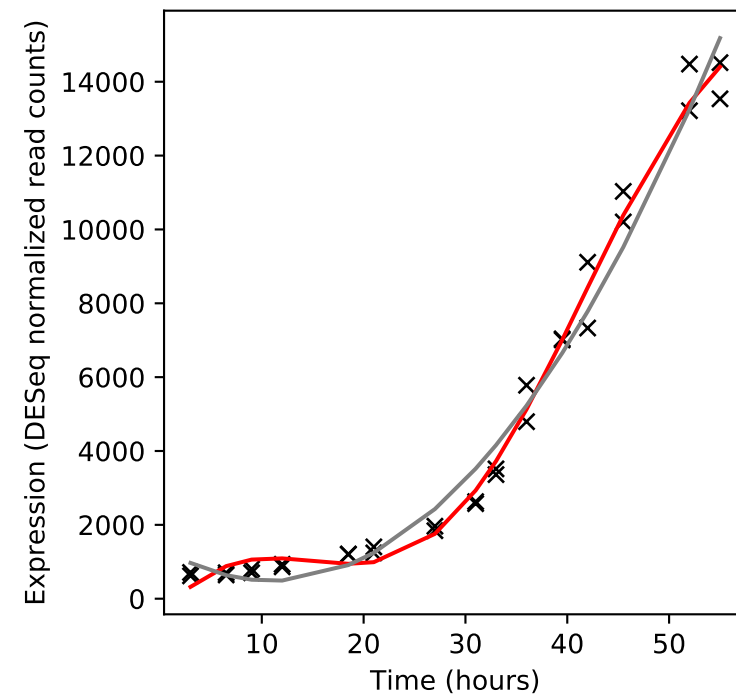

Rv2161c/-

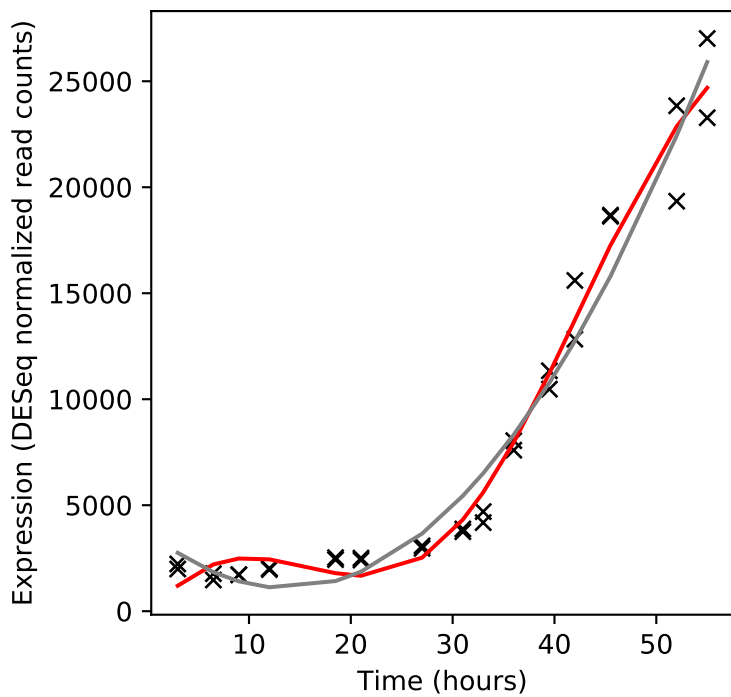

Rv2162c/PE\_PGRS38

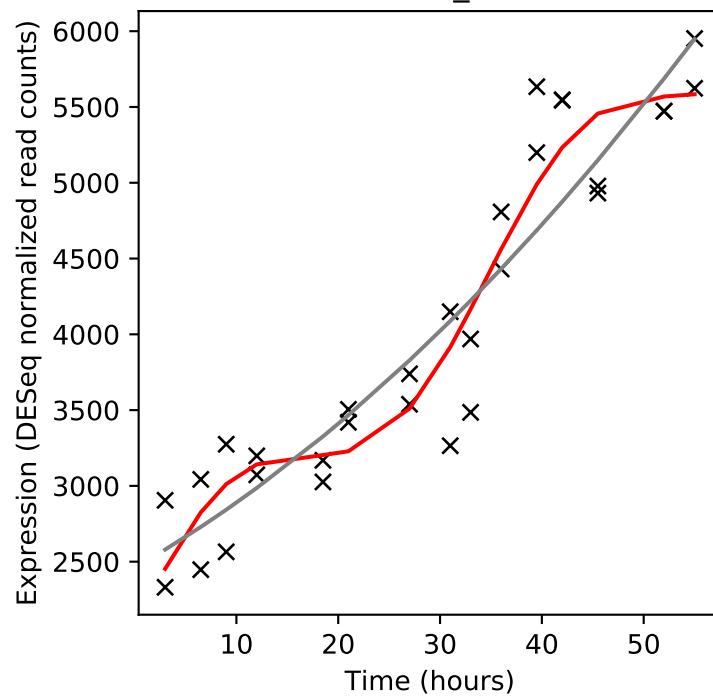

Rv2163c/pbpB

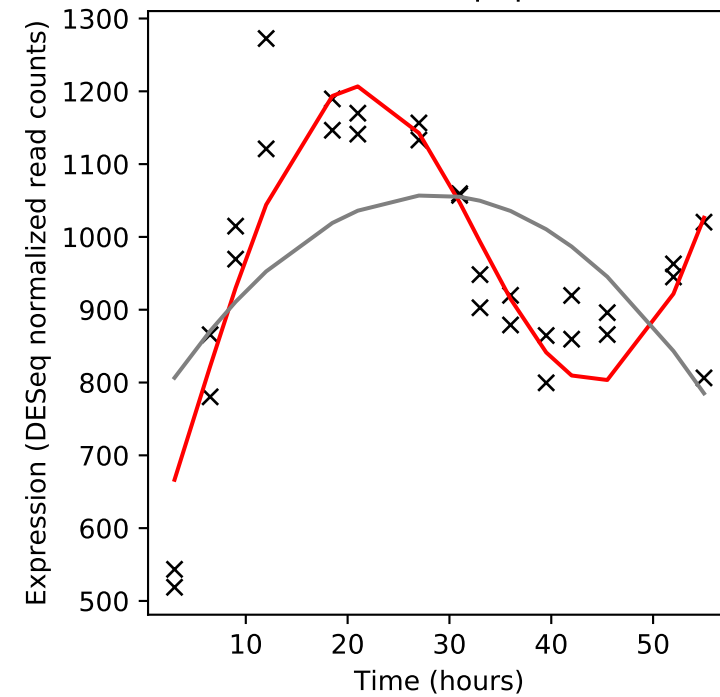

Rv2164c/-

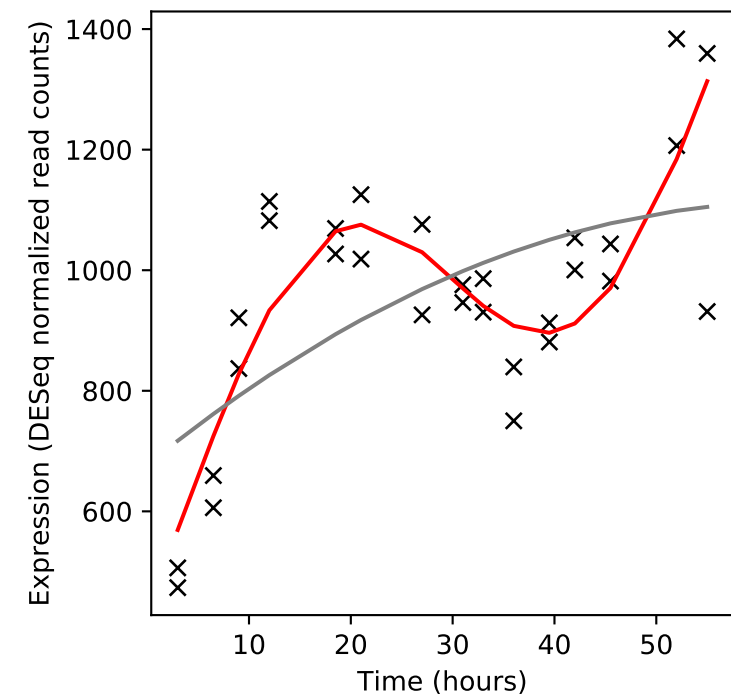

Rv2165c/-

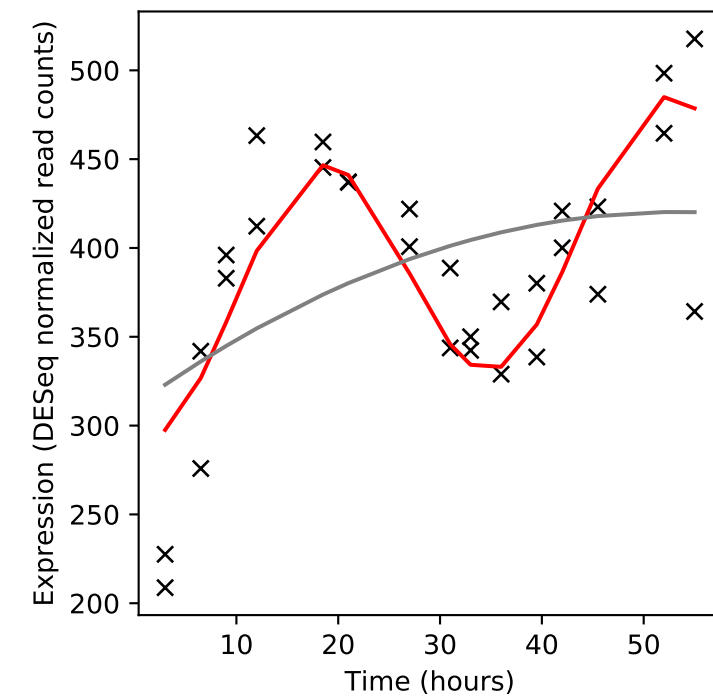

Rv2166c/-

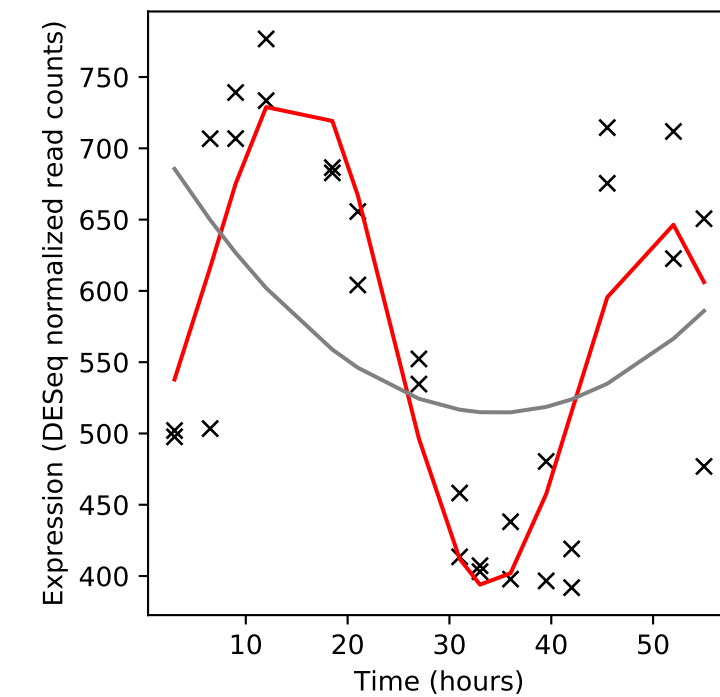

Rv2167c/-

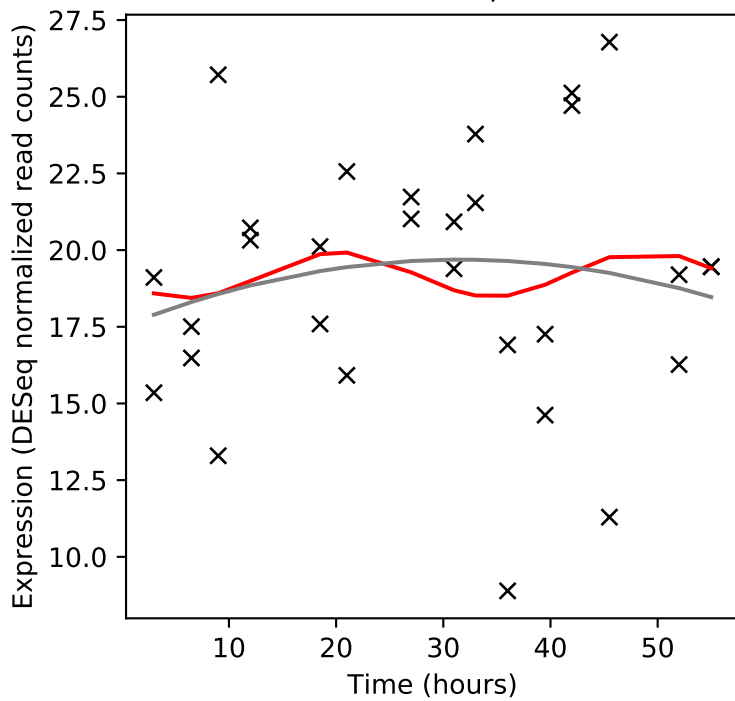

Rv2168c/-

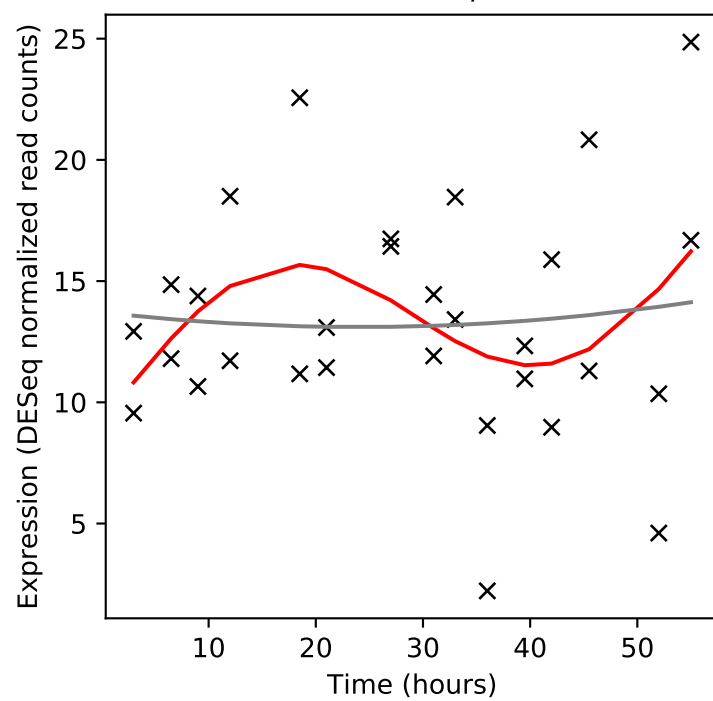

Rv2169c/-

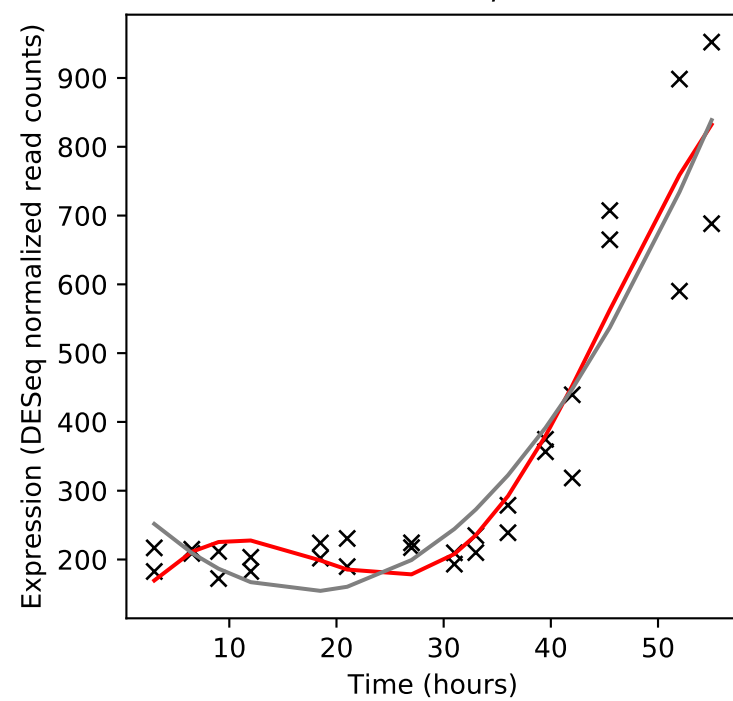

Rv2170/-

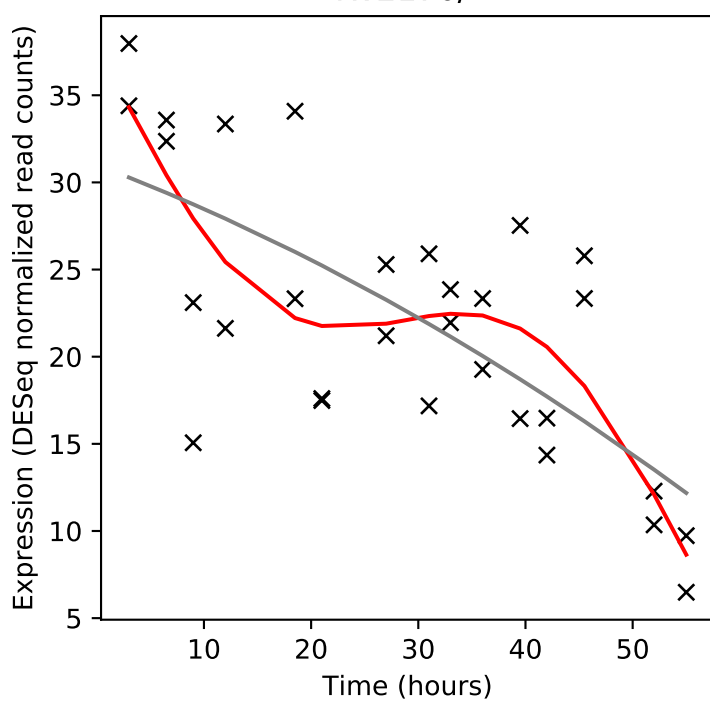

Rv2171/lppM

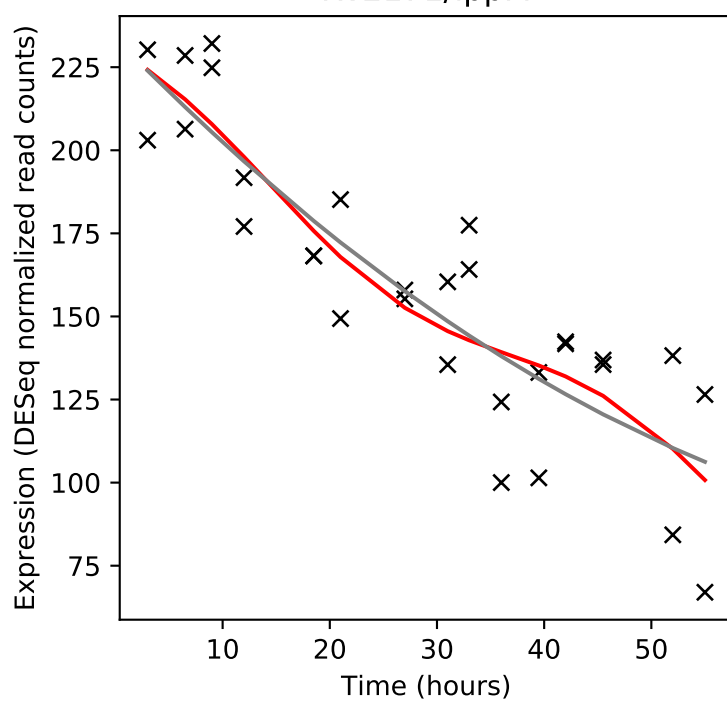

Rv2172c/-

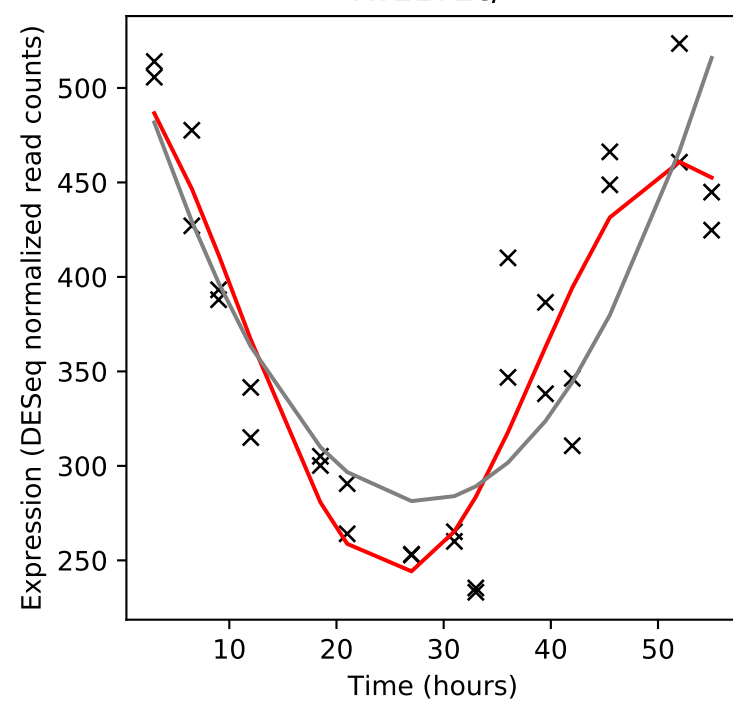

Rv2173/idsA2

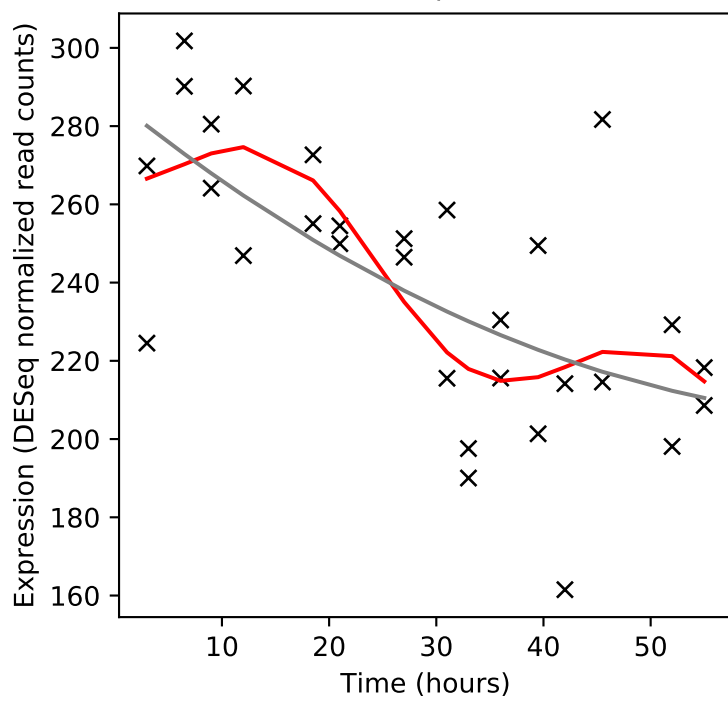

Rv2174/mptA

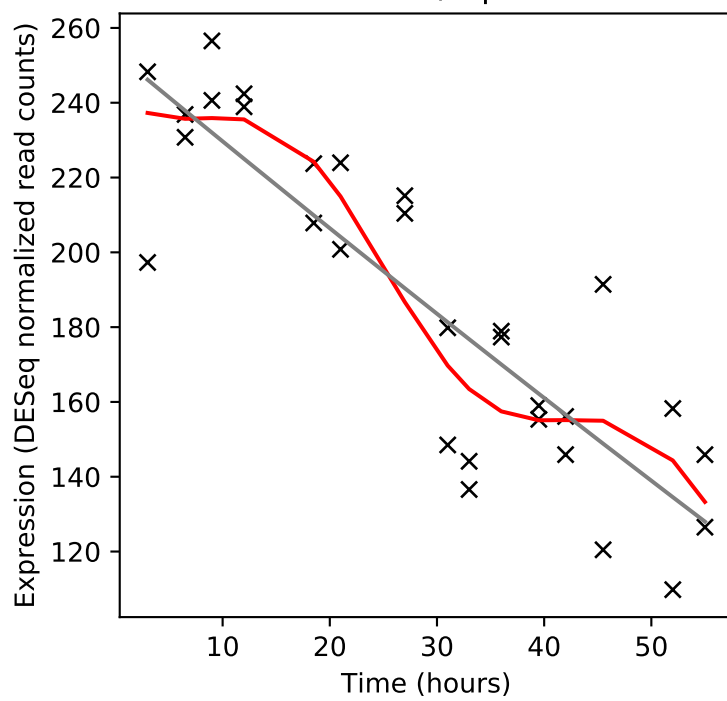

Rv2175c/-

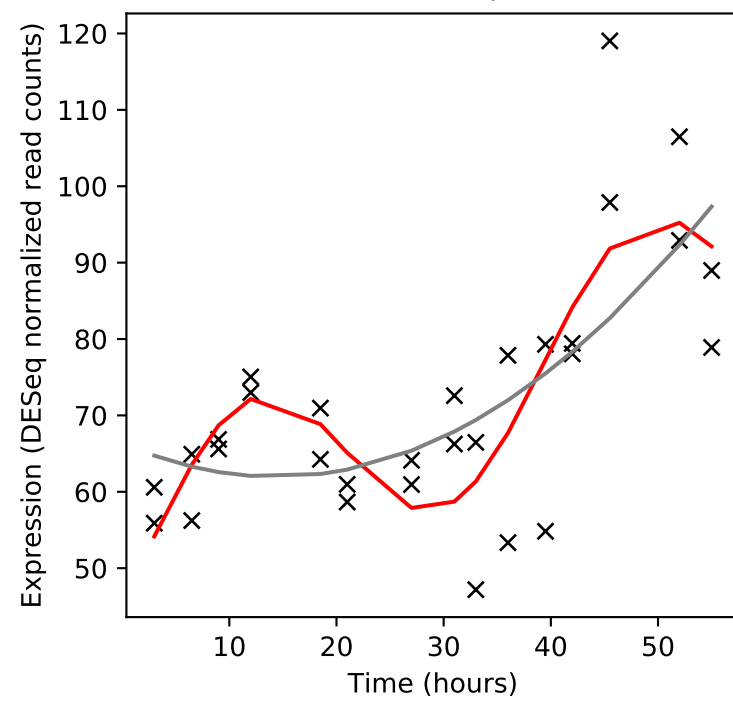



Rv2176/pknL

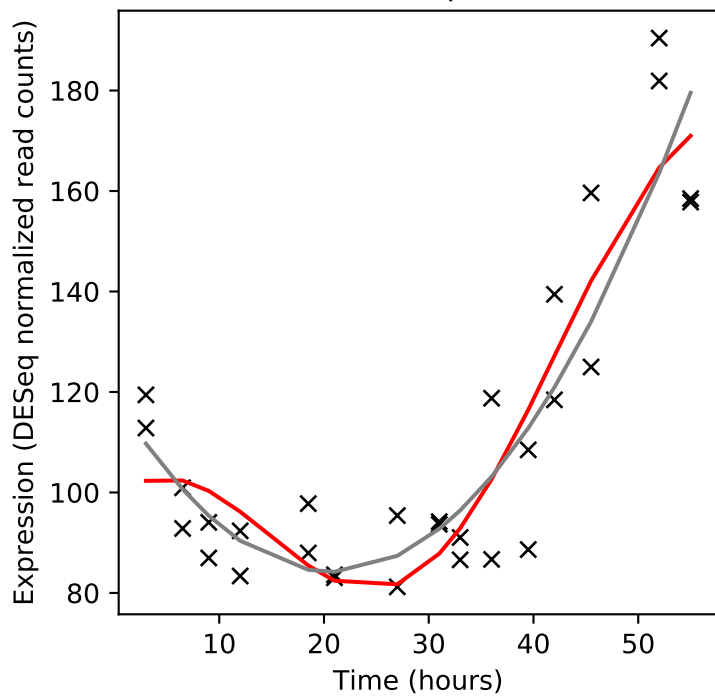

Rv2177c/-

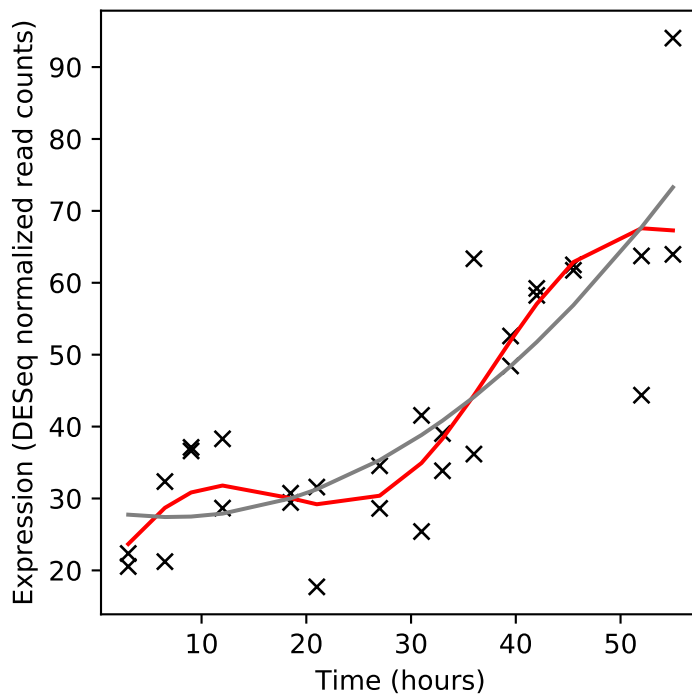

Rv2178c/aroG

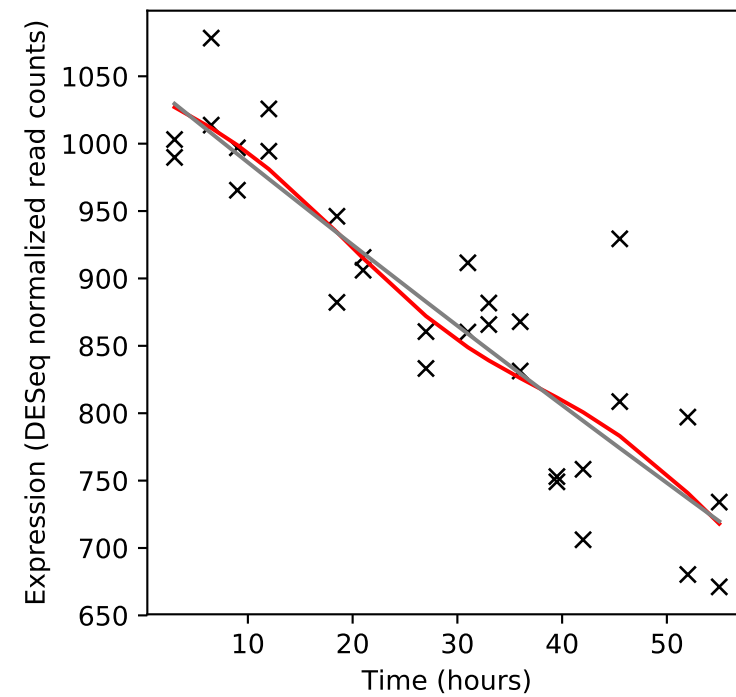

Rv2179c/-

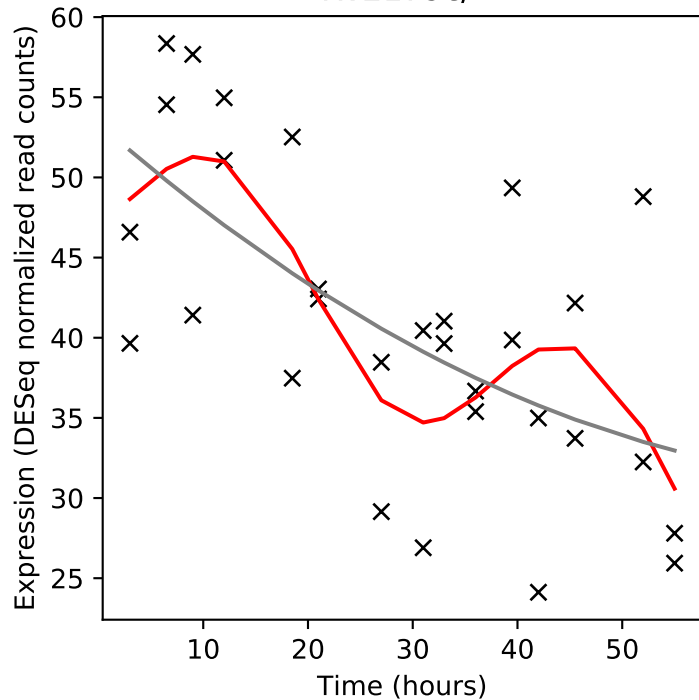

Rv2180c/-

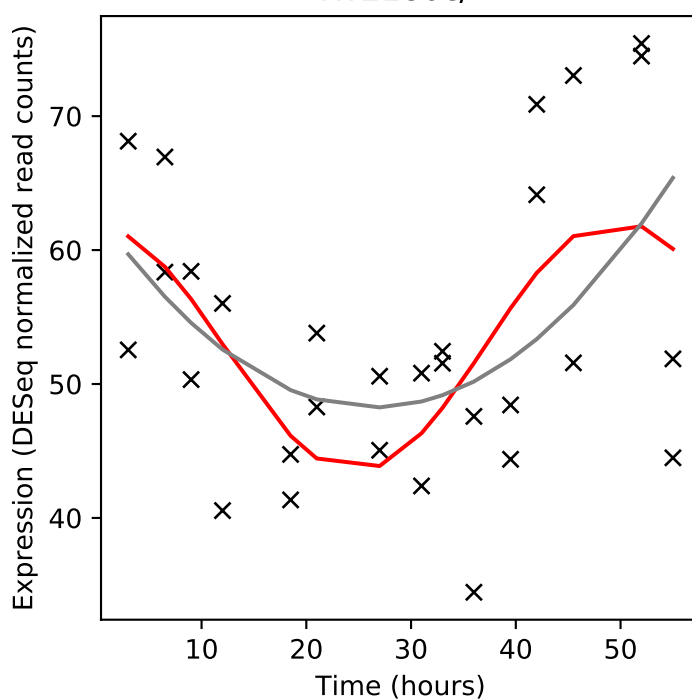

Rv2181/-

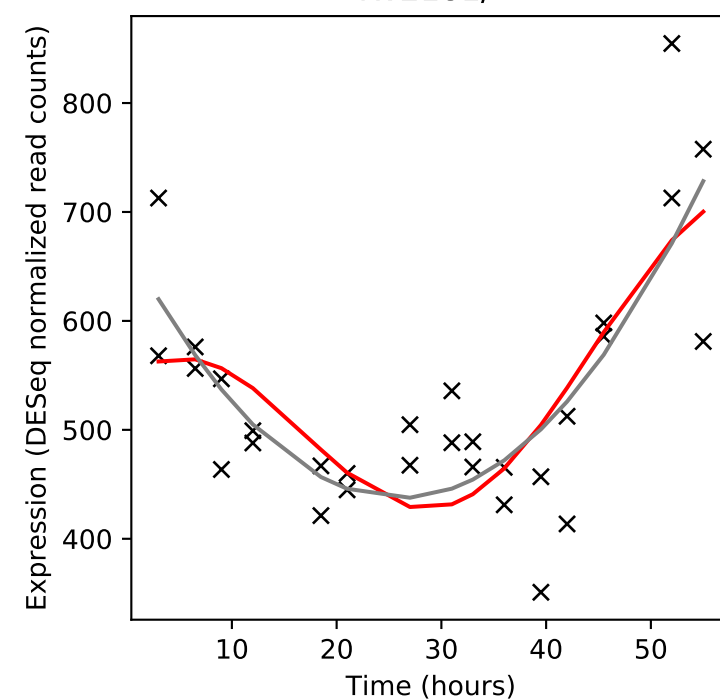

Rv2182c/-

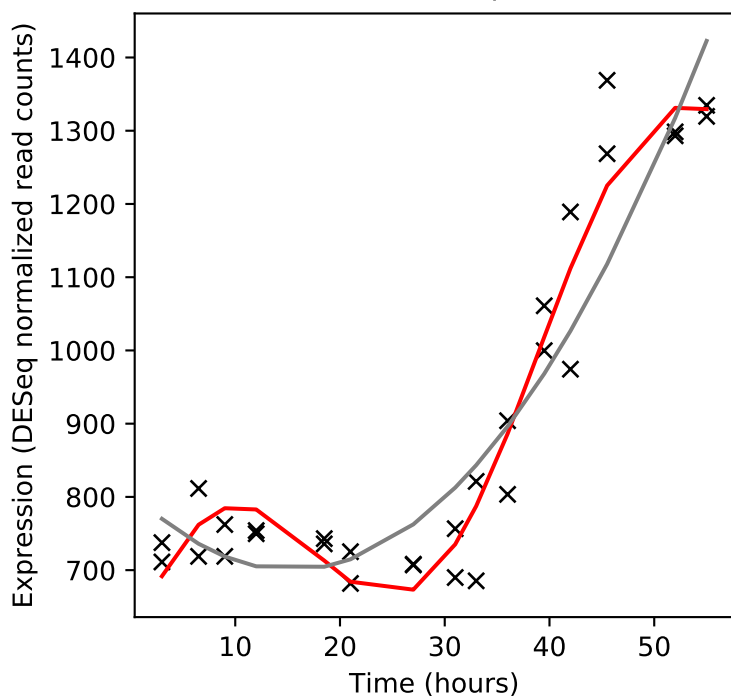

Rv2183c/-

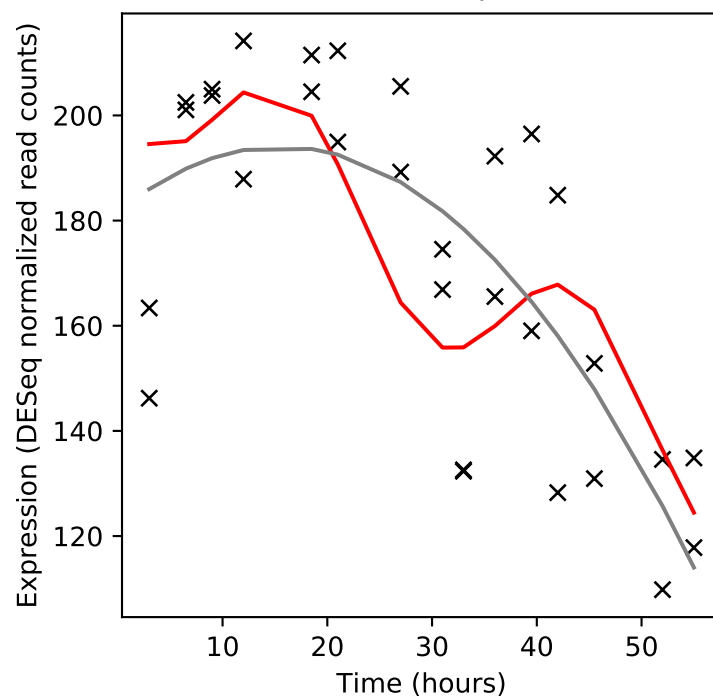

Rv2184c/-

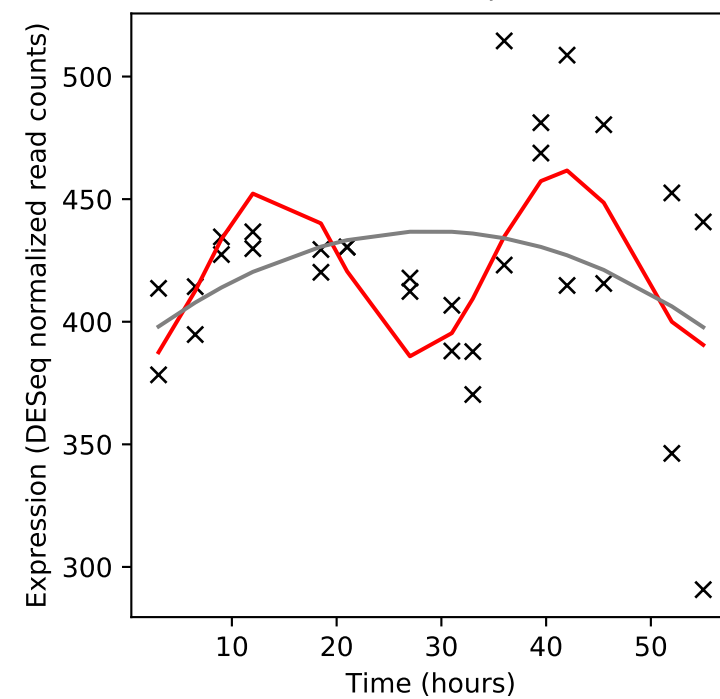

Rv2185c/TB16.3

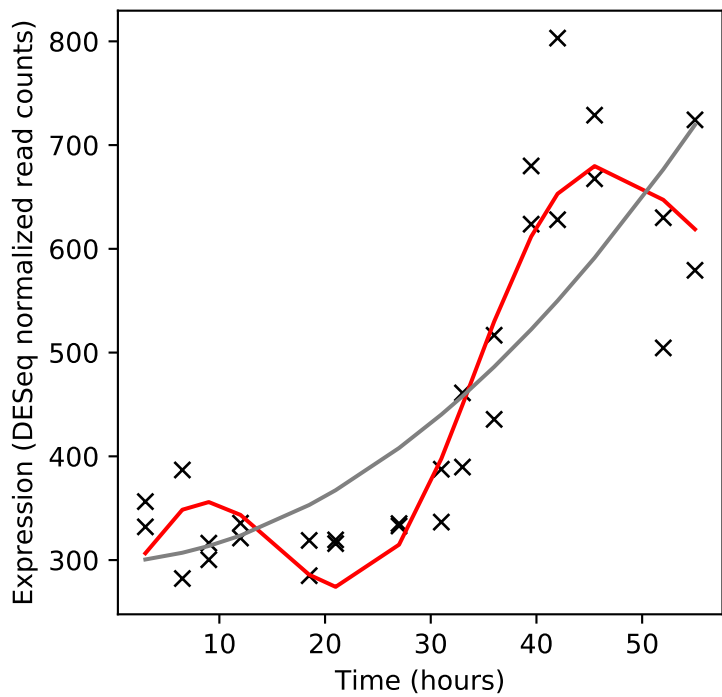

Rv2186c/-

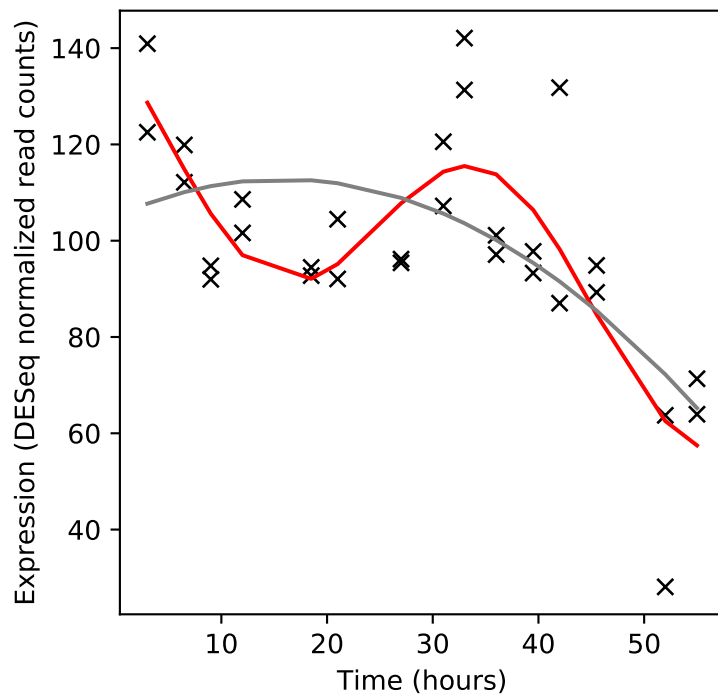

Rv2187/fadD15

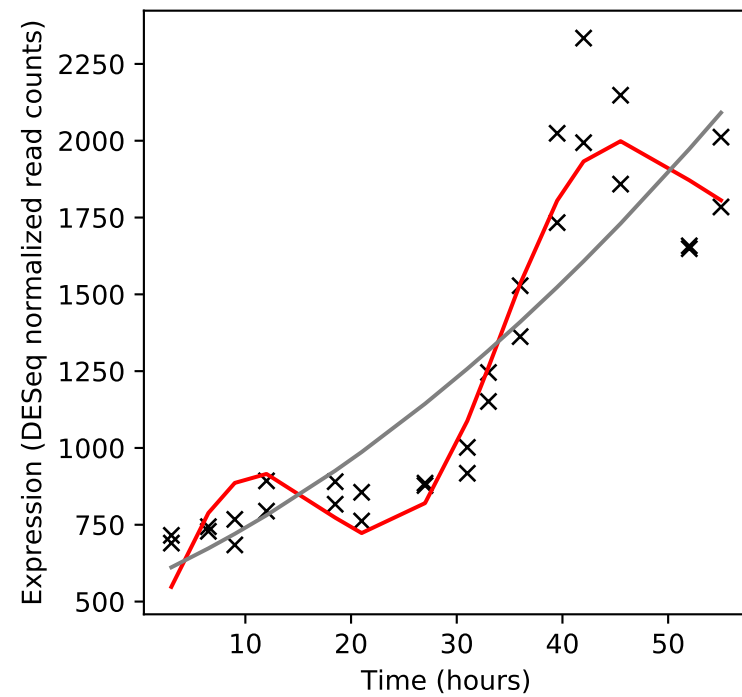

Rv2188c/pimB

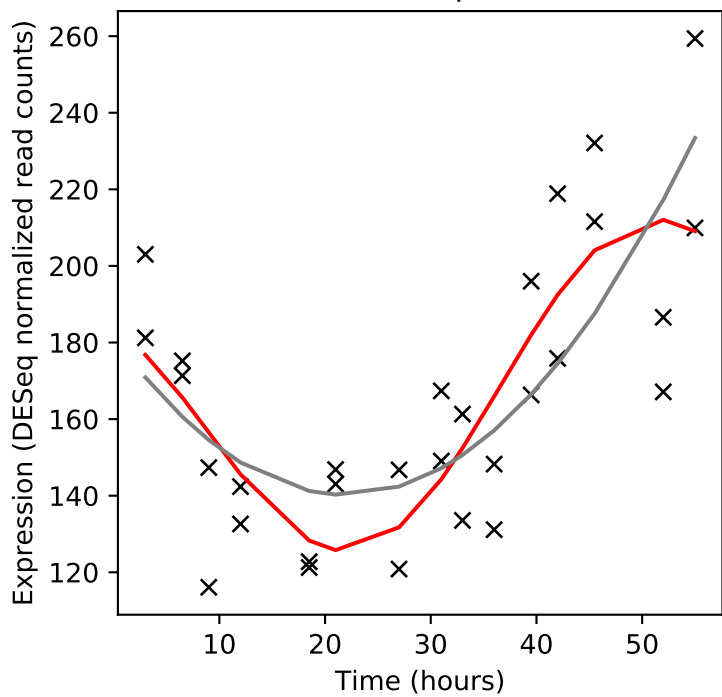

Rv2189c/-

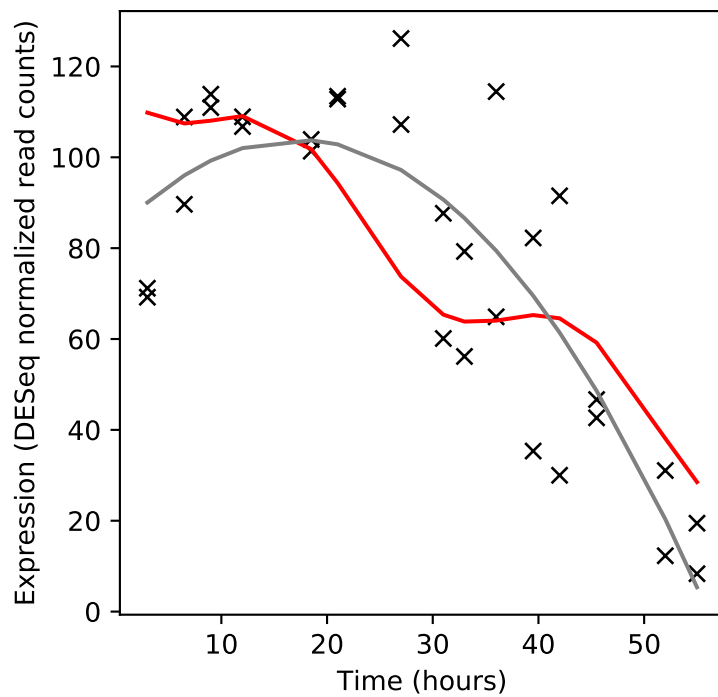

Rv2190c/-

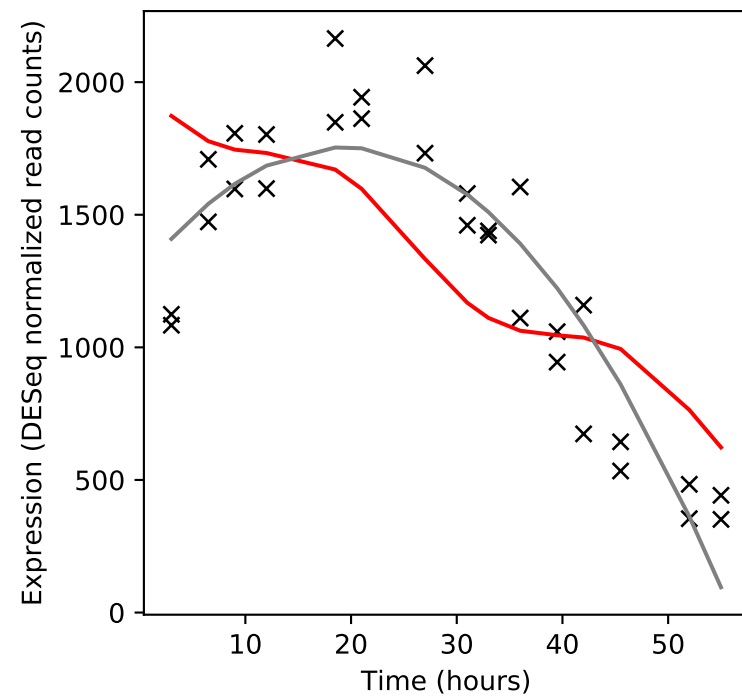

Rv2191c/-

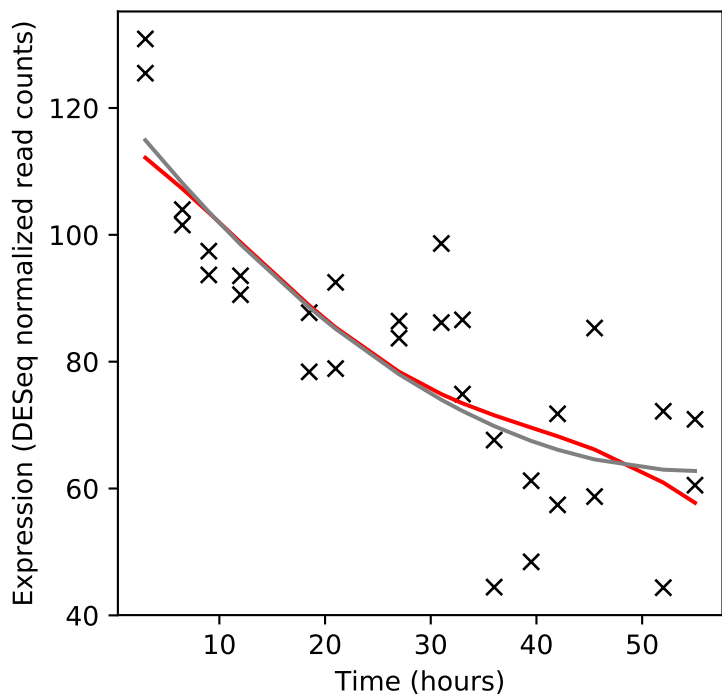

Rv2192c/trpD

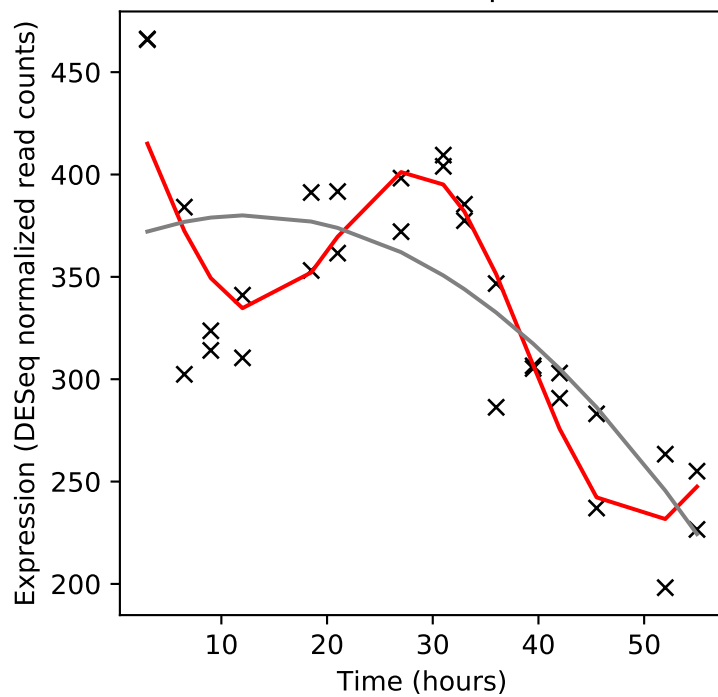

Rv2193/ctaE

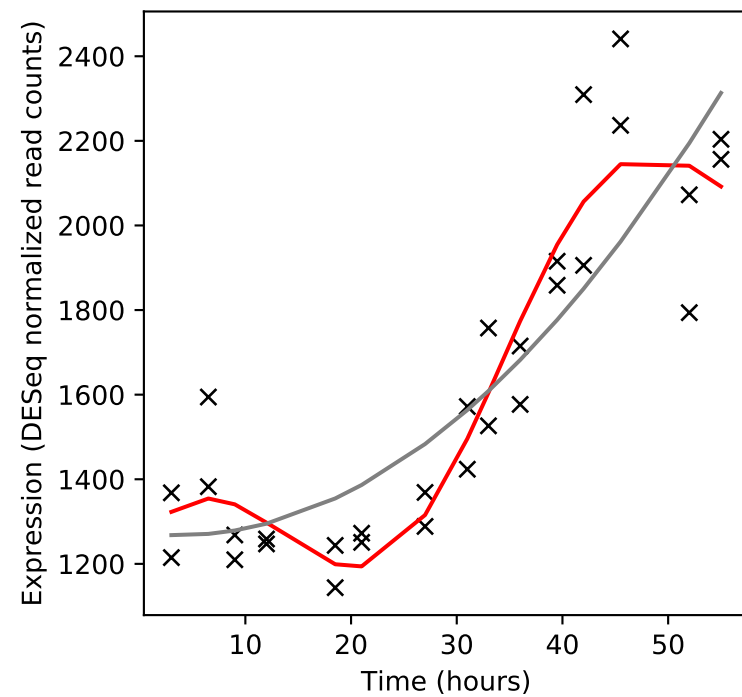

Rv2194/qcrC

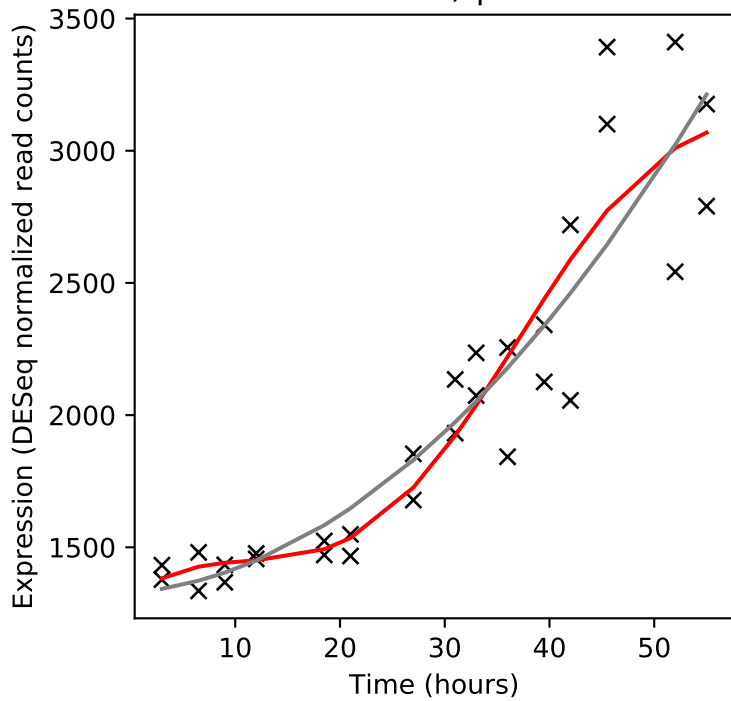

Rv2195/qcrA

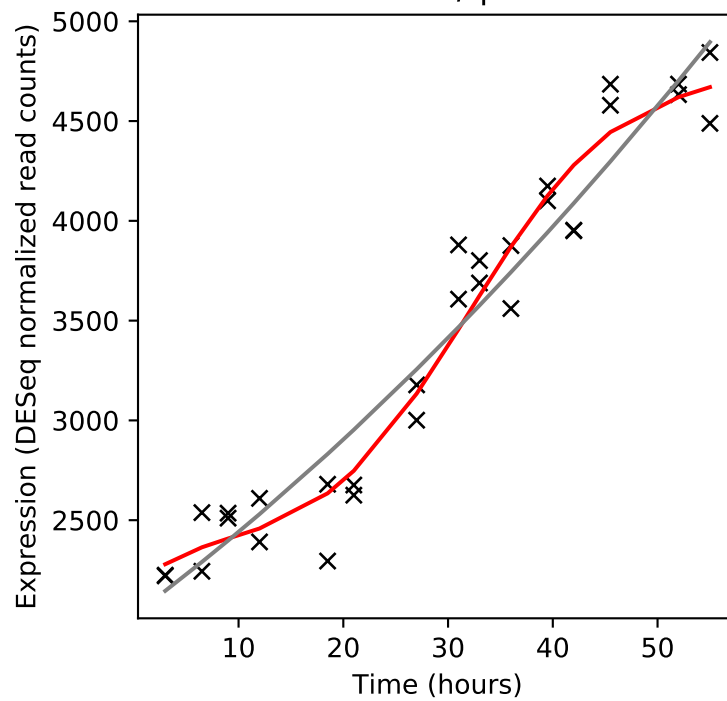

Rv2196/qcrB

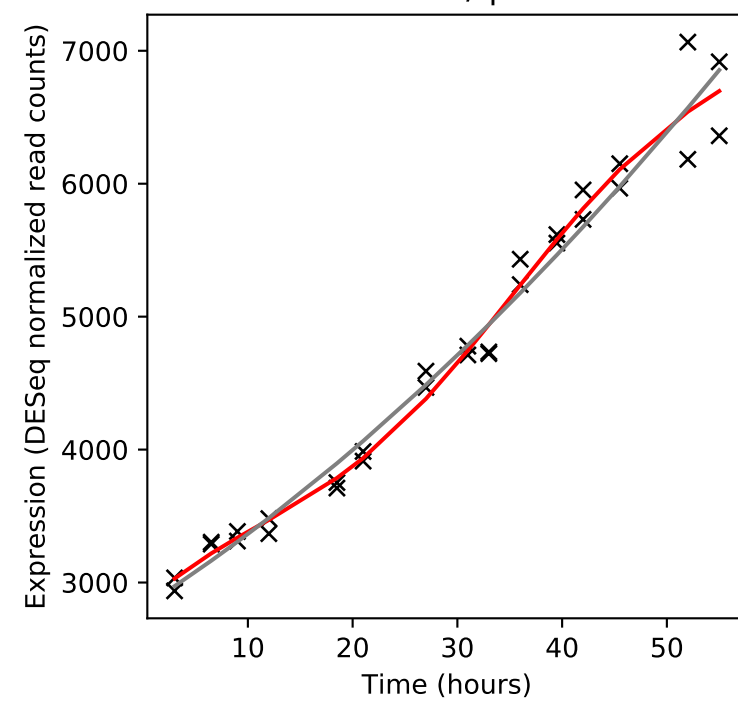

Rv2197c/-

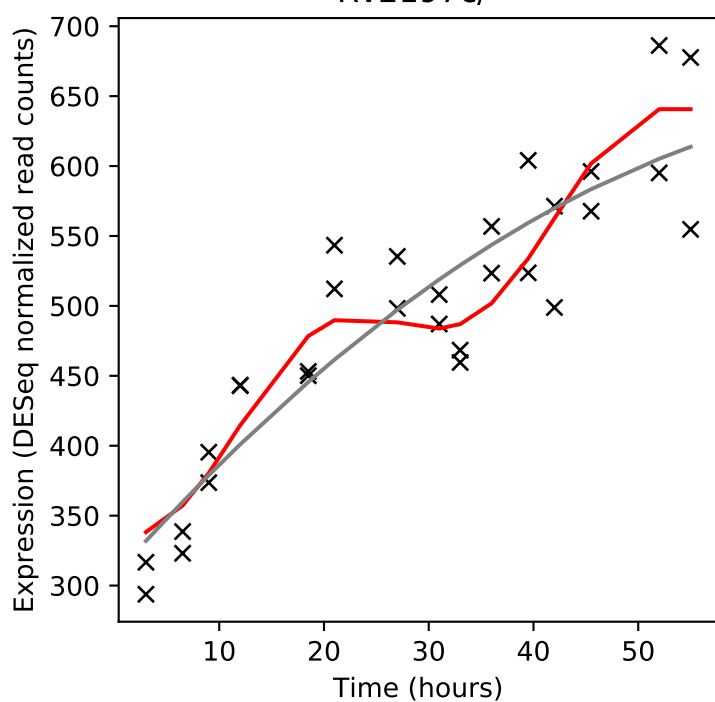

Rv2198c/mmpS3

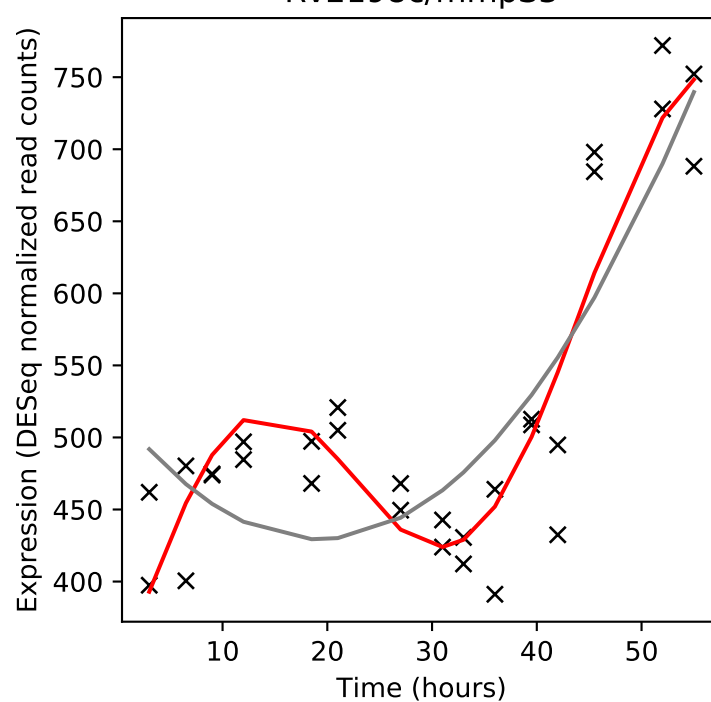

Rv2199c/-

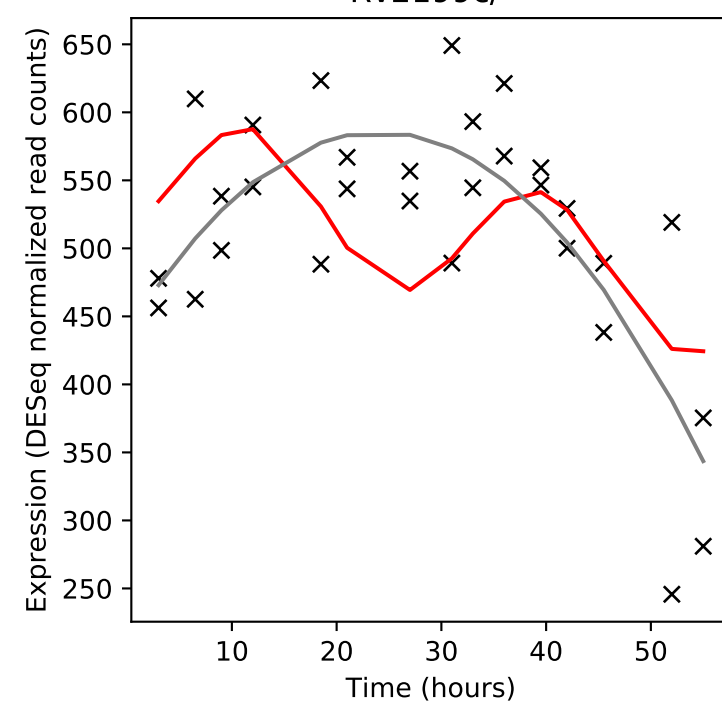

Rv2200c/ctaC

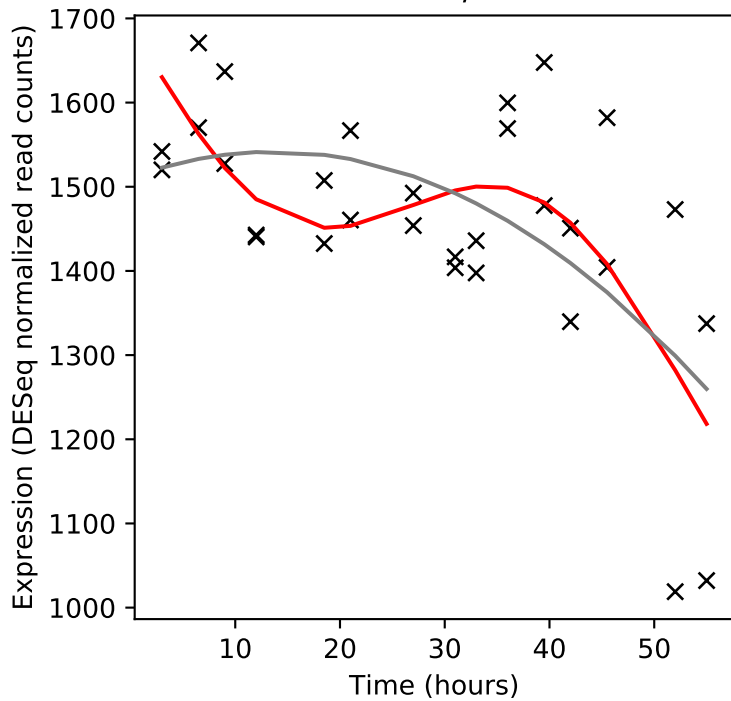

Rv2201/asnB

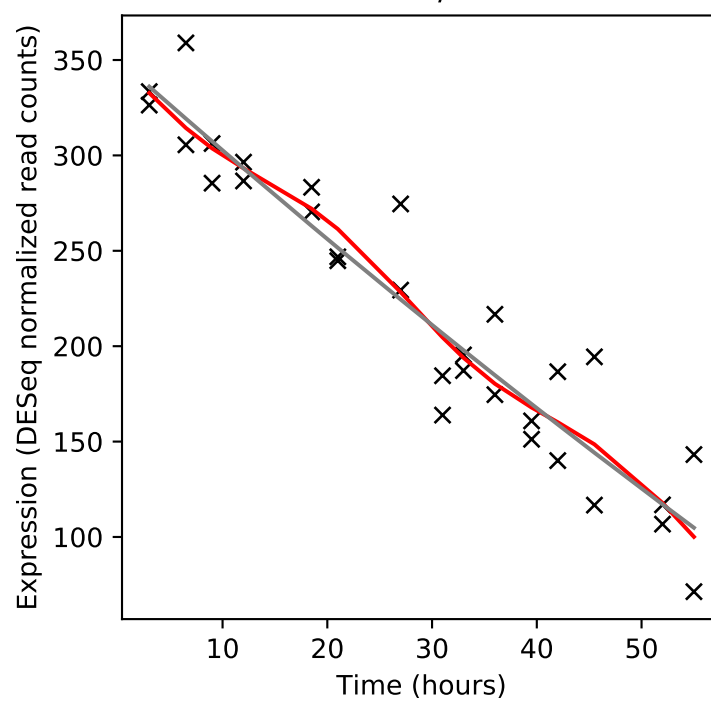

Rv2202c/adoK

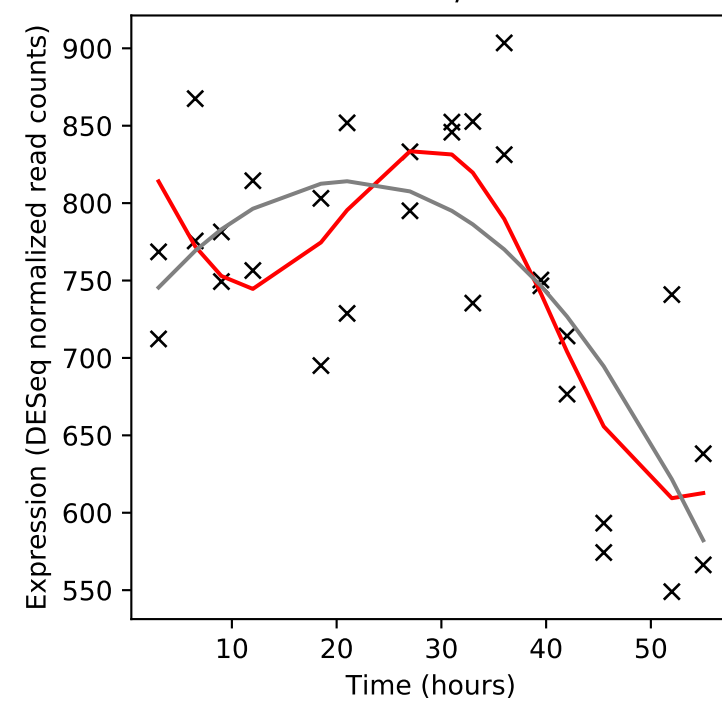

Rv2203/-

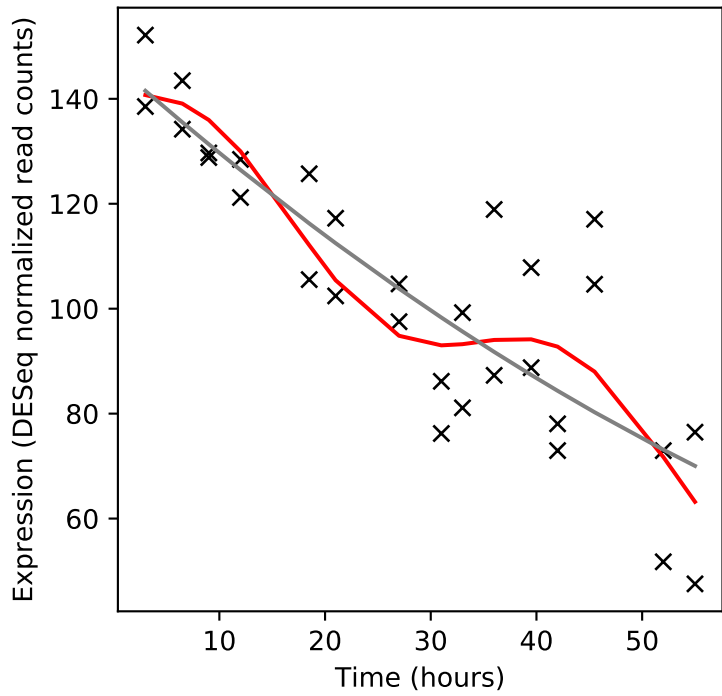

Rv2204c/-

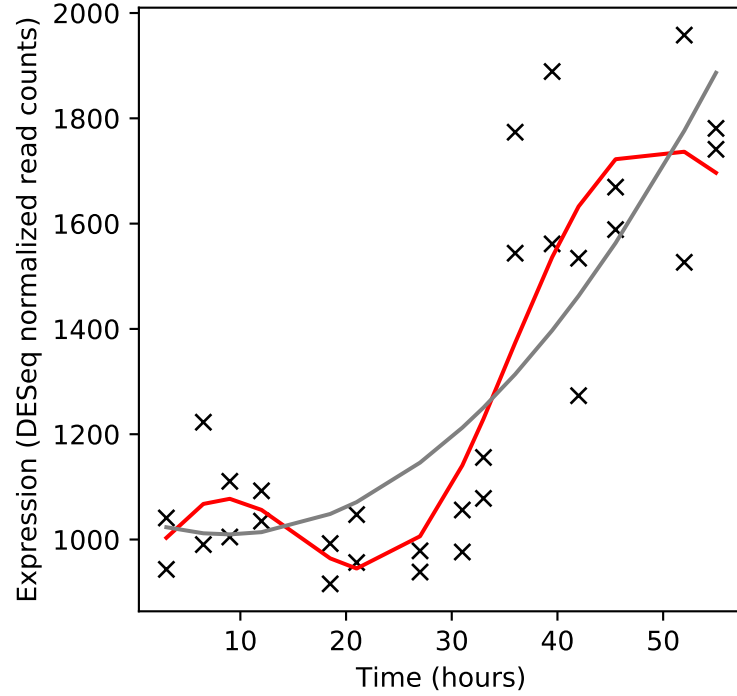

Rv2205c/-

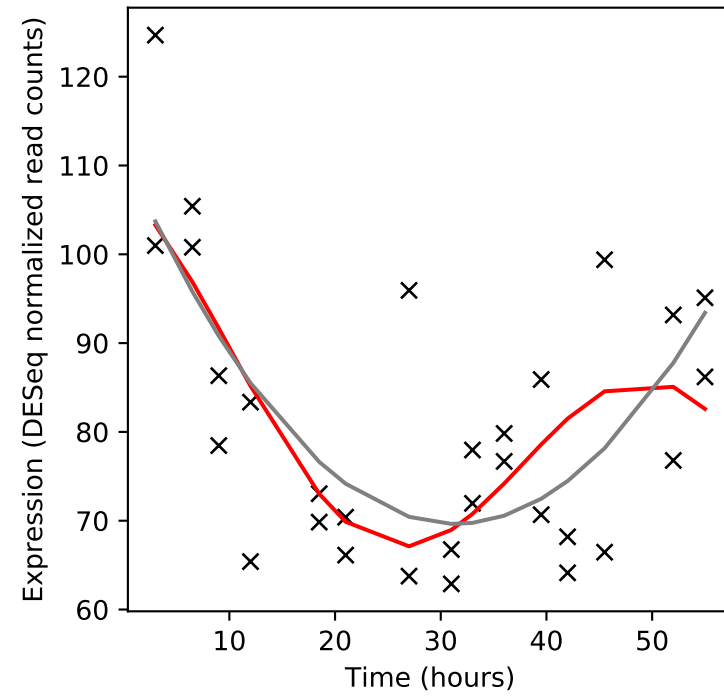

Rv2206/-

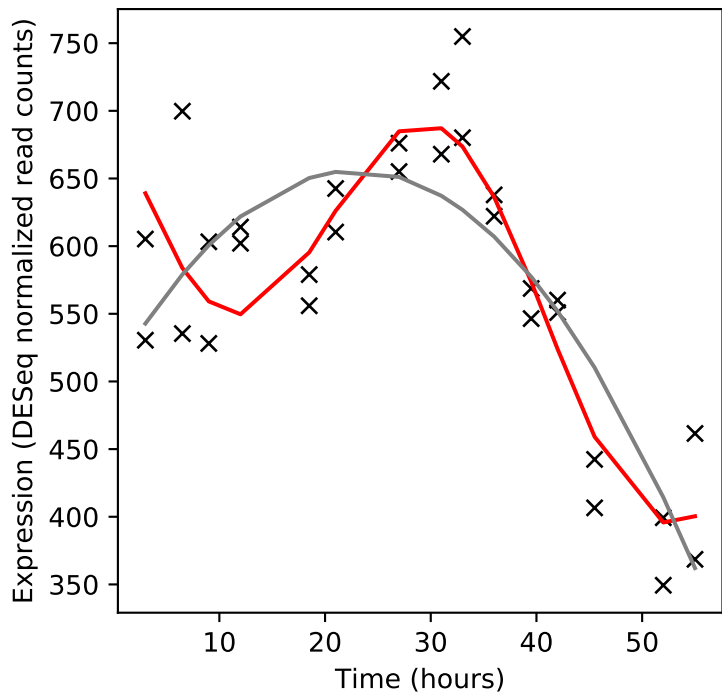

Rv2207/cobT

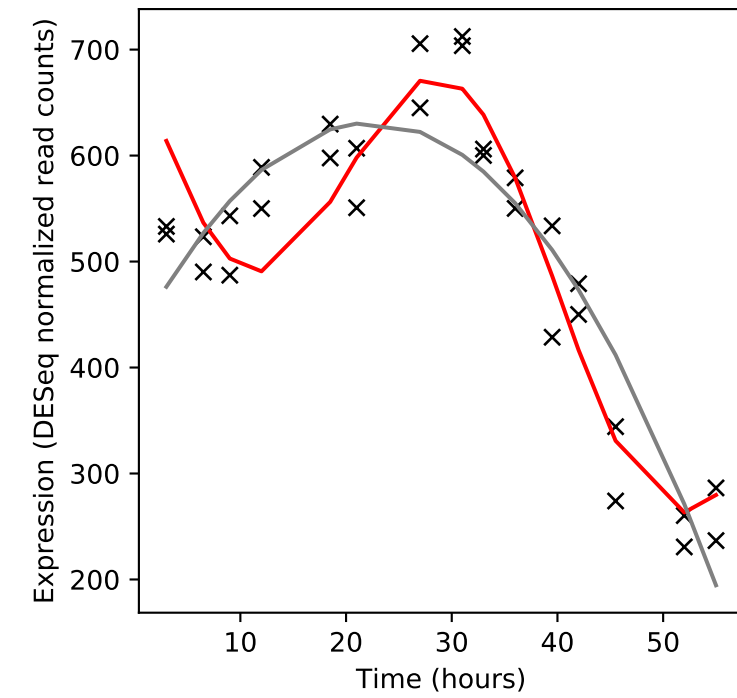

Rv2208/cobS

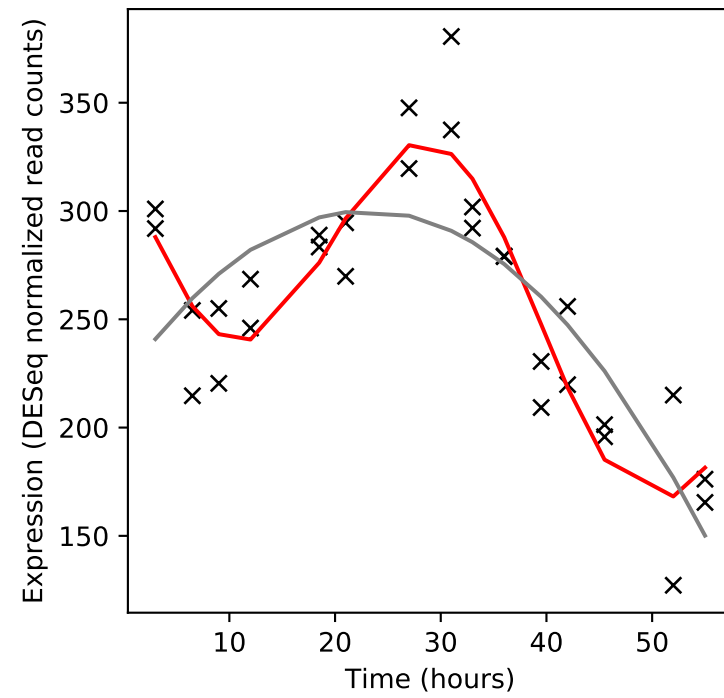

Rv2209/-

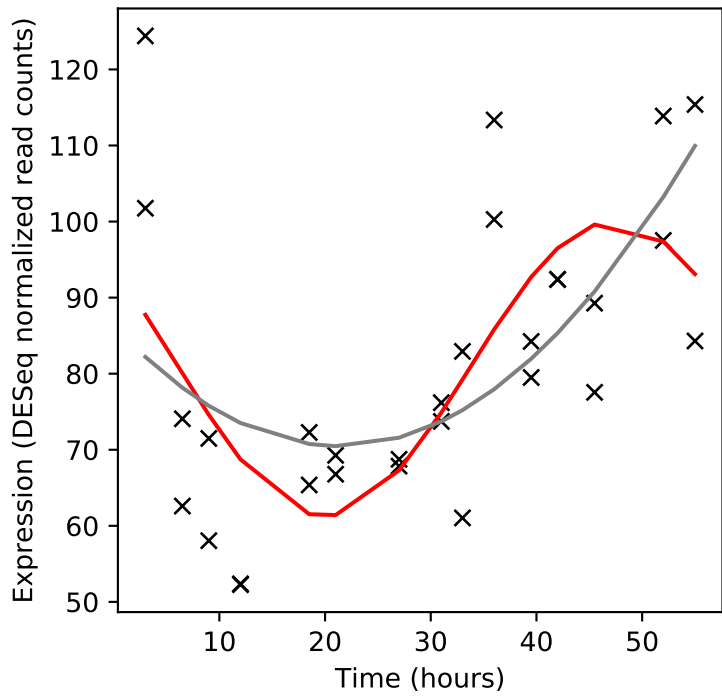

Rv2210c/ilvE

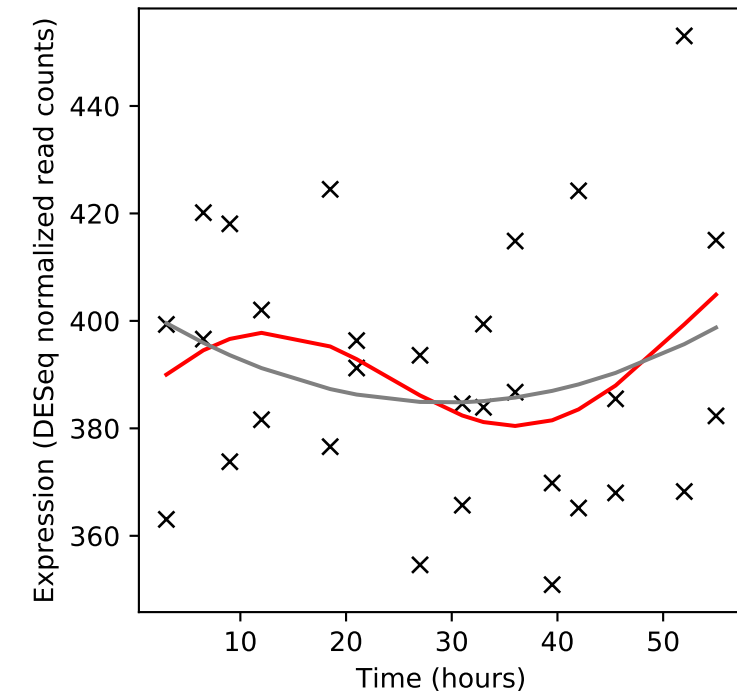

Rv2211c/gcvT

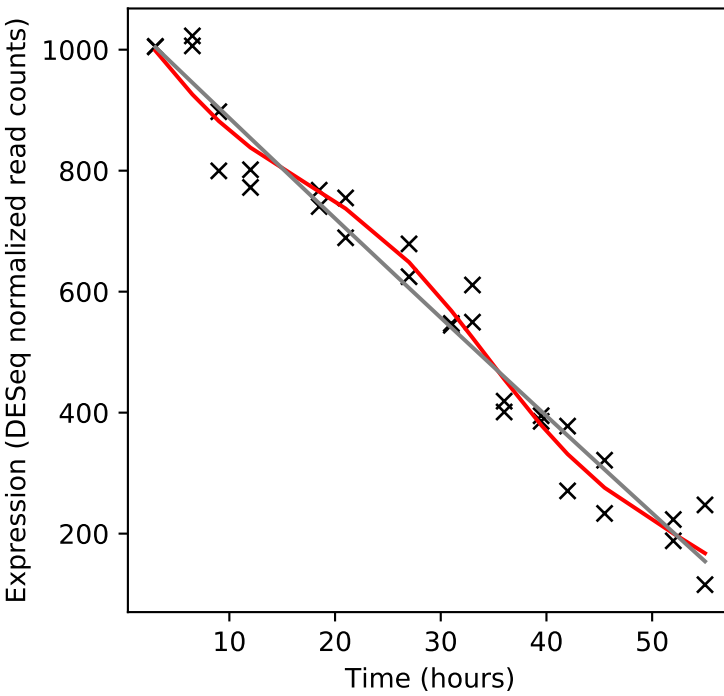

Rv2212/-

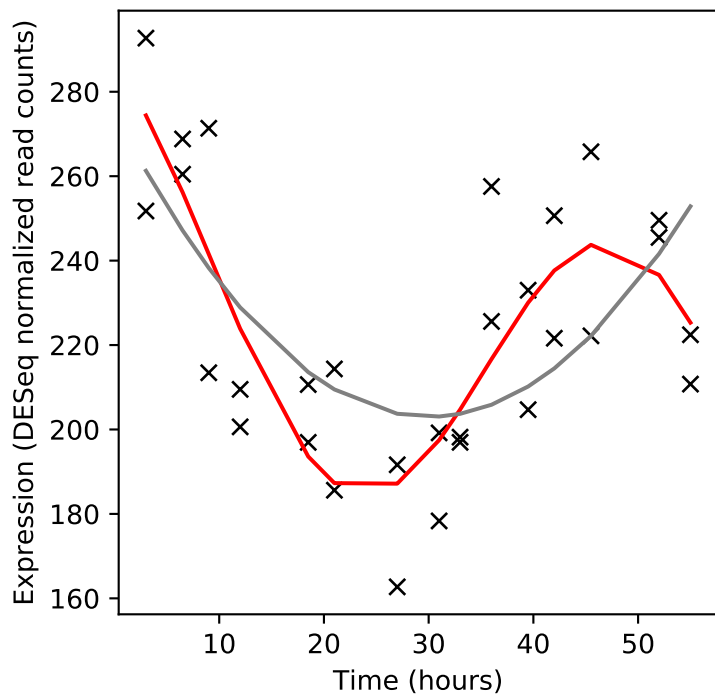

Rv2213/pepB

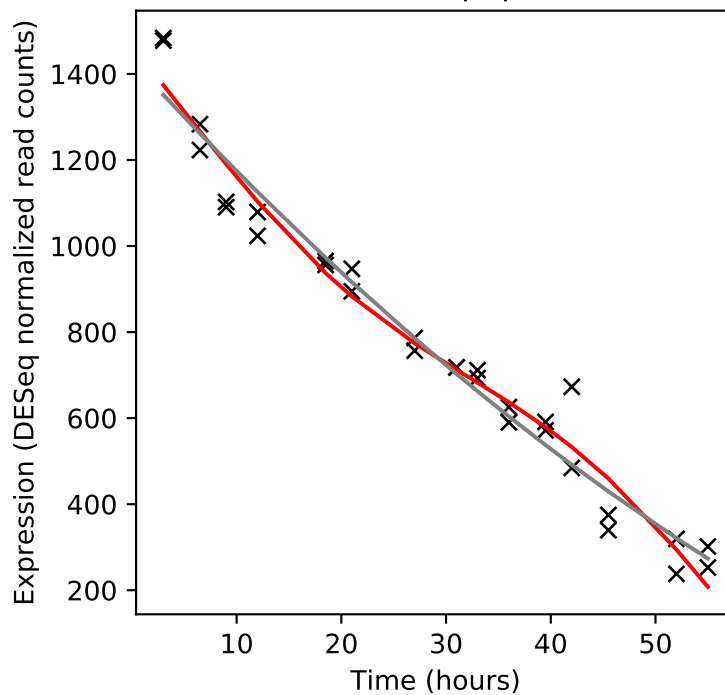

Rv2214c/ephD

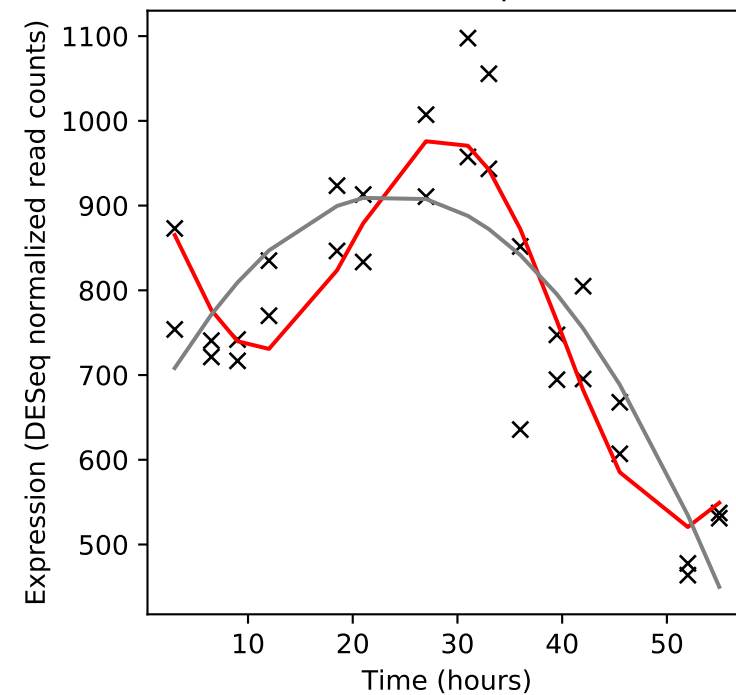

Rv2215/dlaT

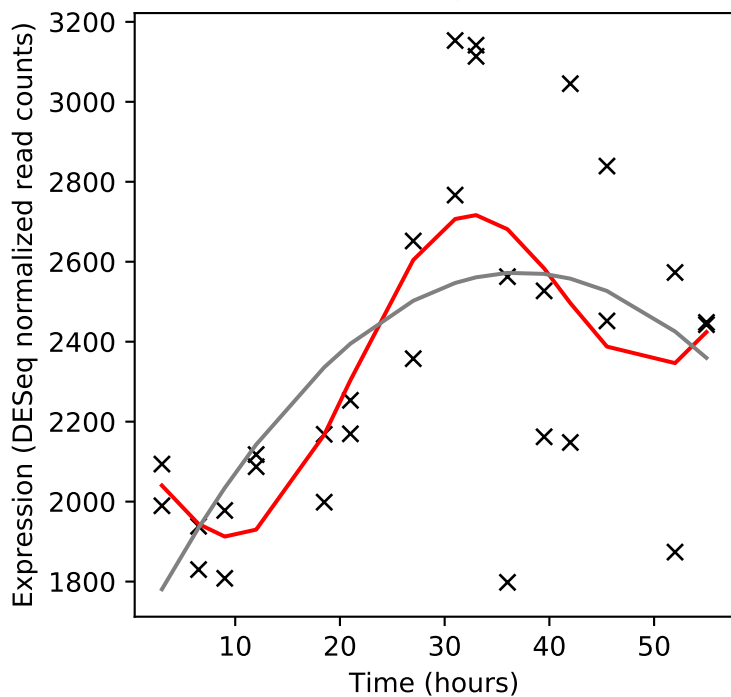

Rv2216/-

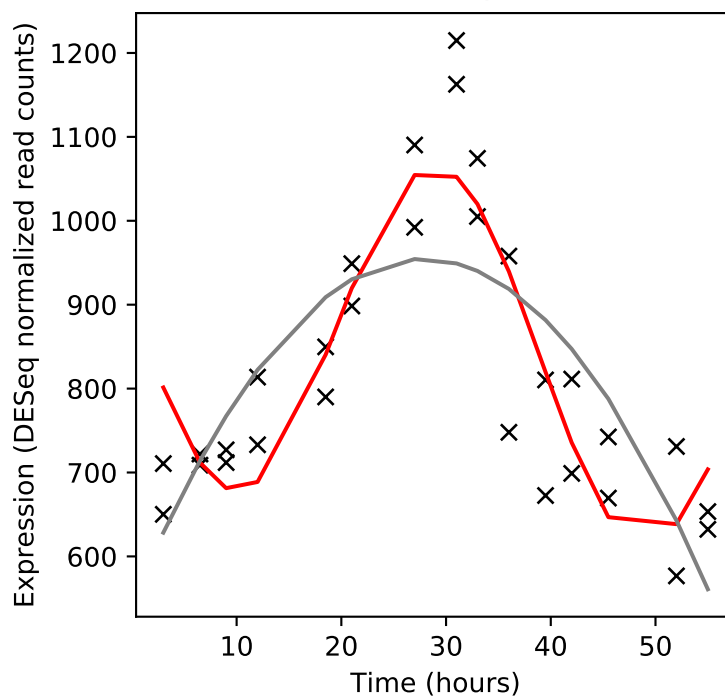

Rv2217/lipB

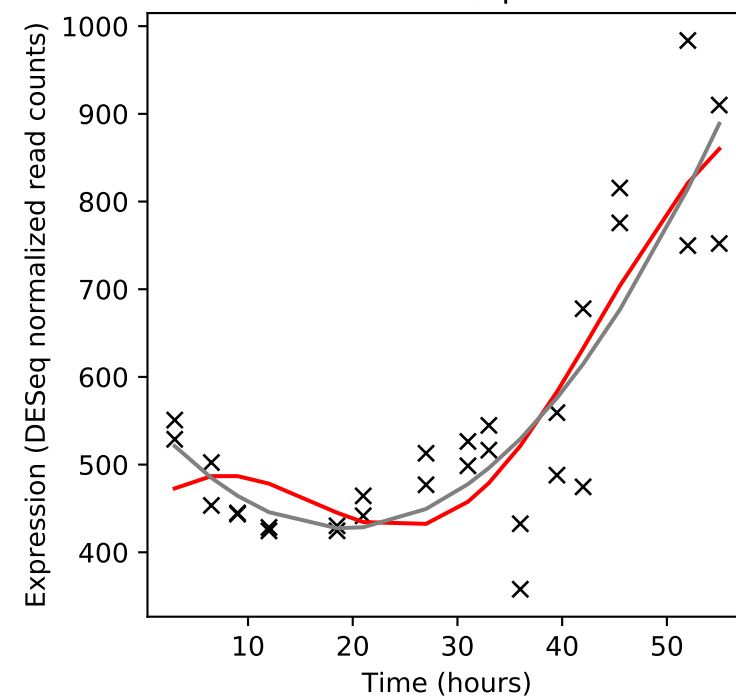

Rv2218/lipA

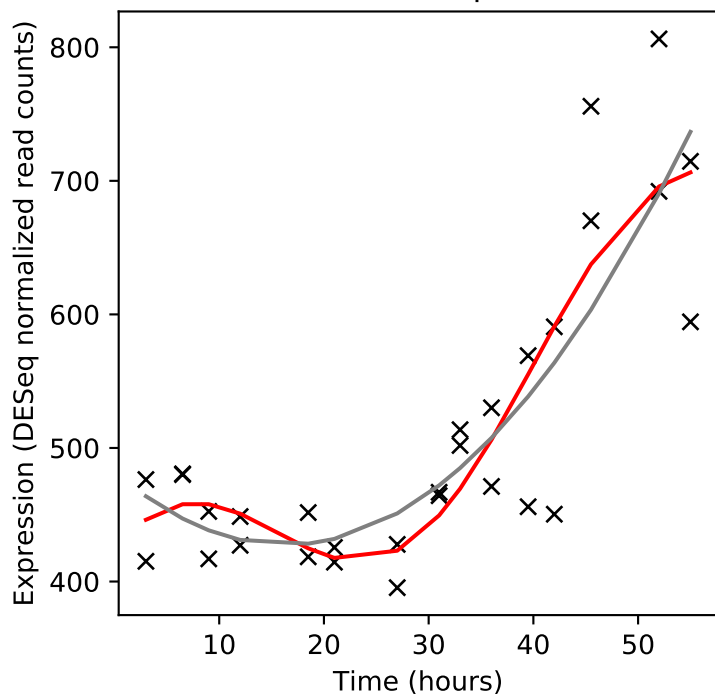

Rv2219/-

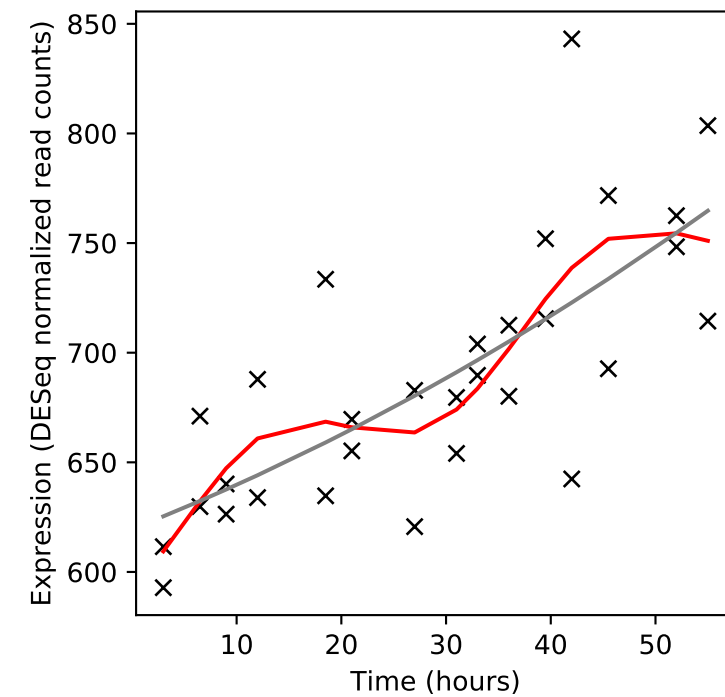

Rv2219A/-

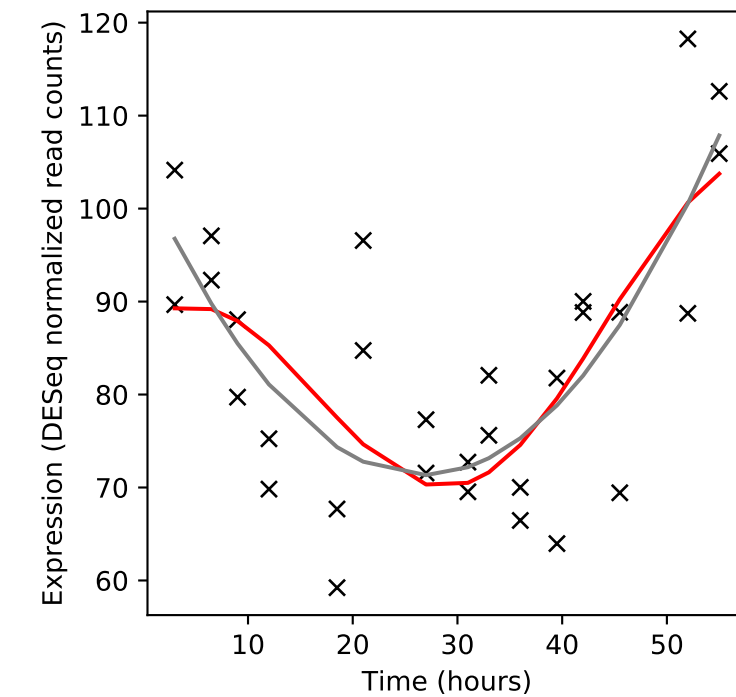

Rv2220/glnA1

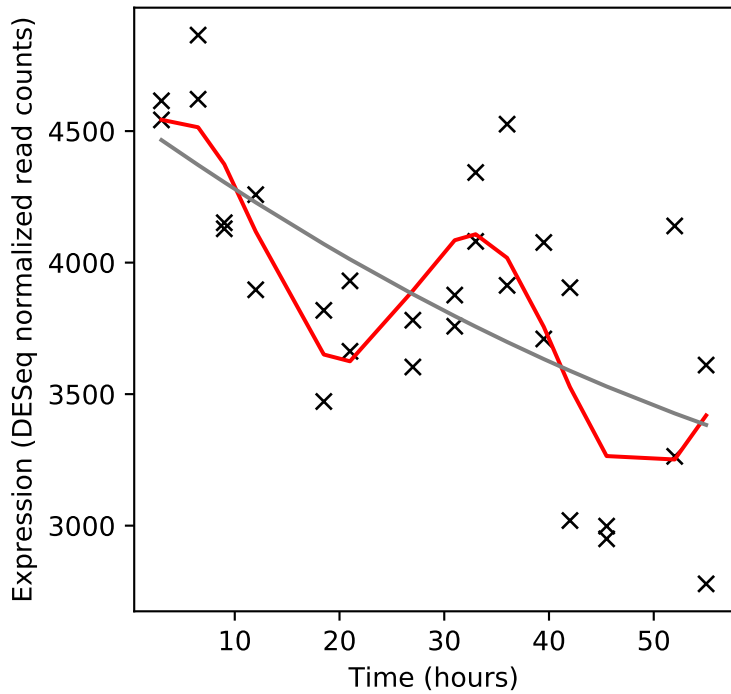

Rv2221c/glnE

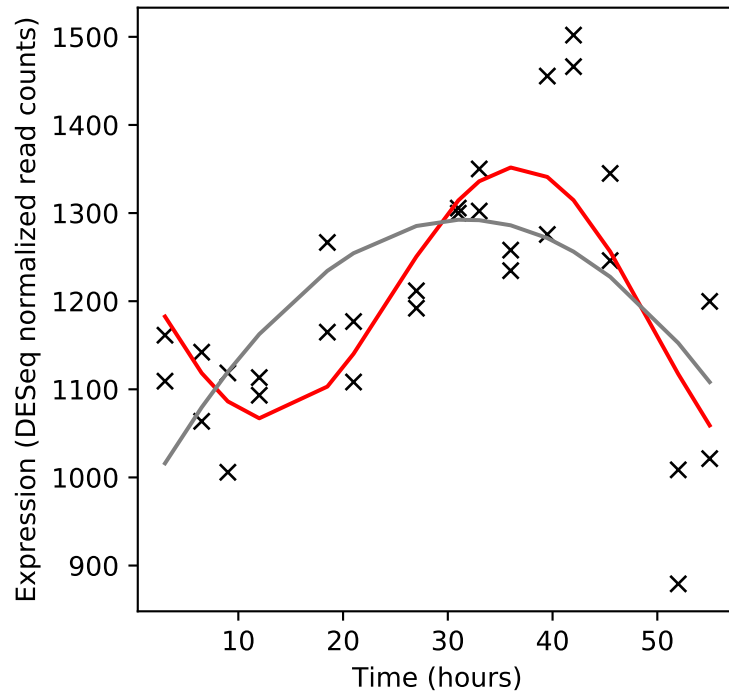

Rv2222c/glnA2

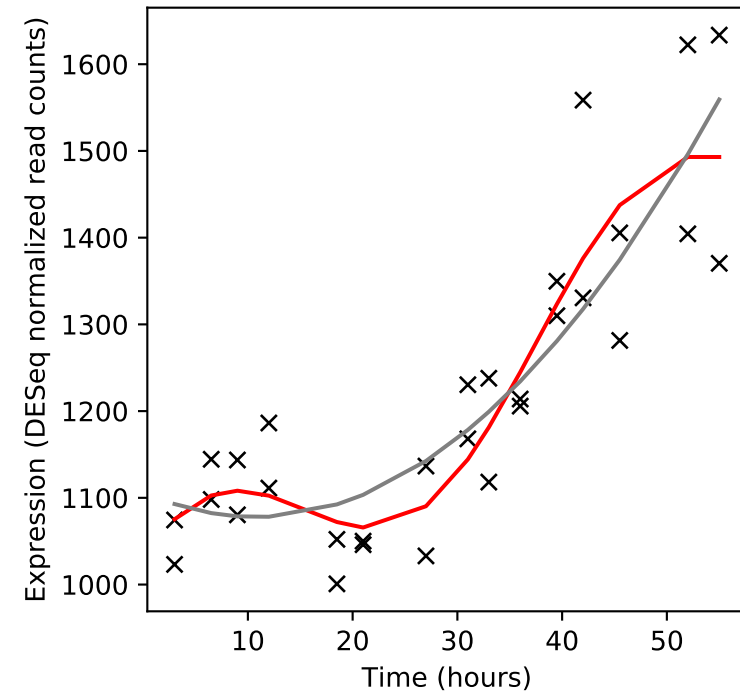

Rv2223c/-

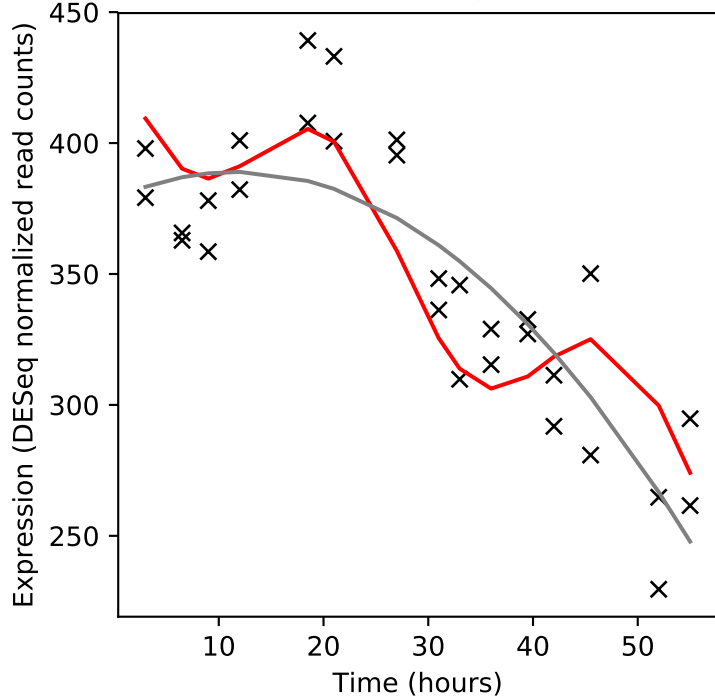

Rv2224c/caeA

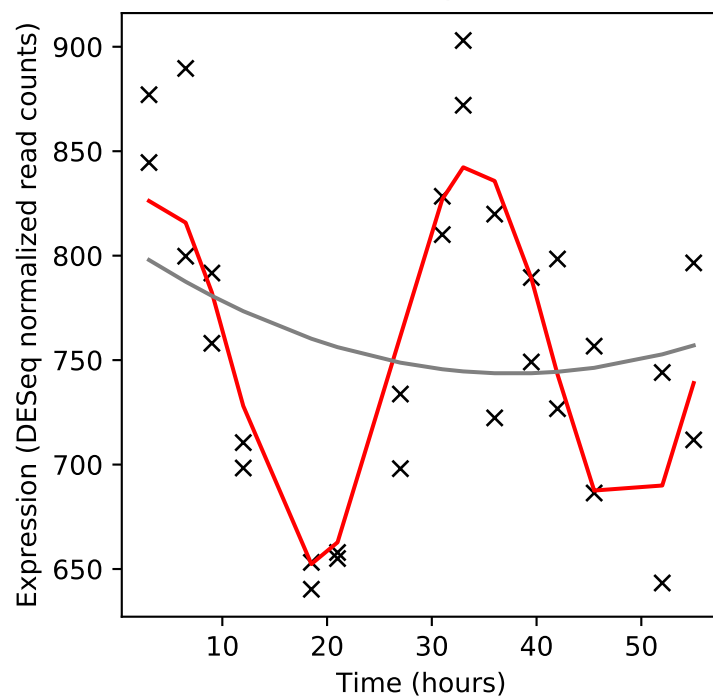

Rv2225/panB

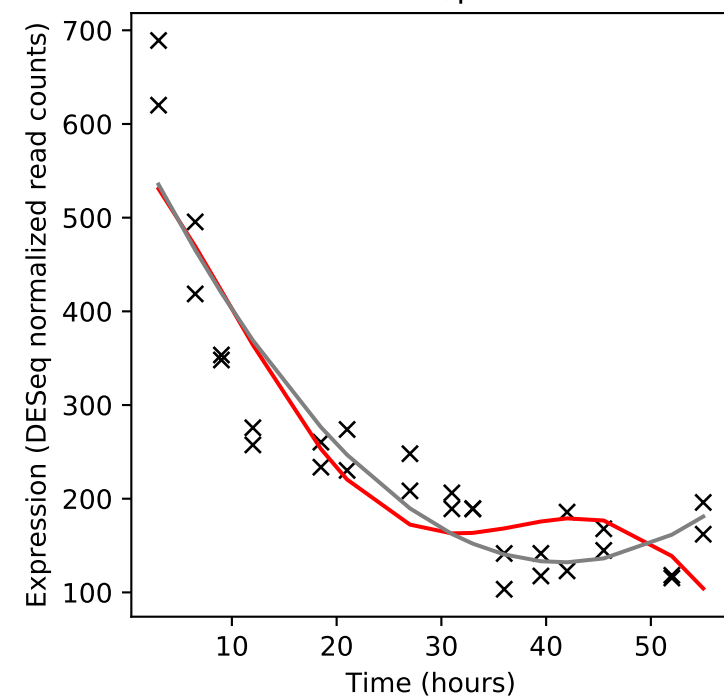

Rv2226/-

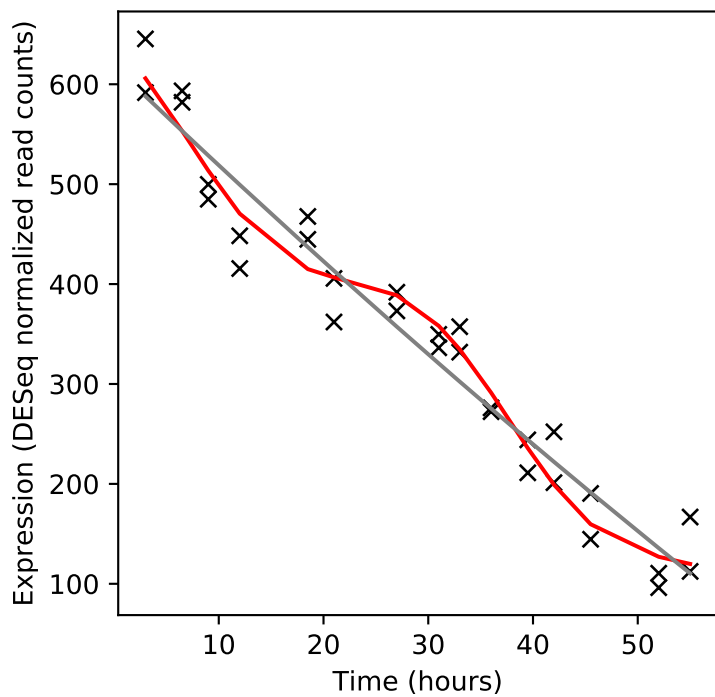

Rv2227/-

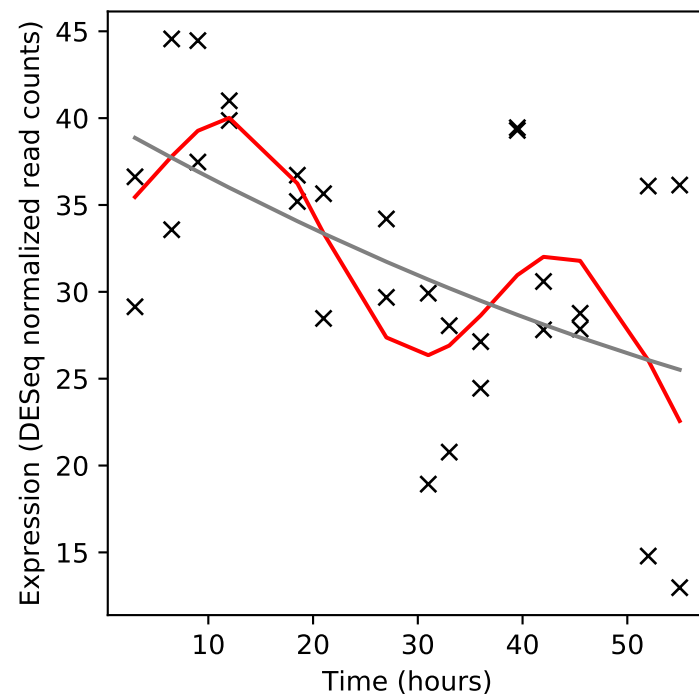

Rv2228c/-

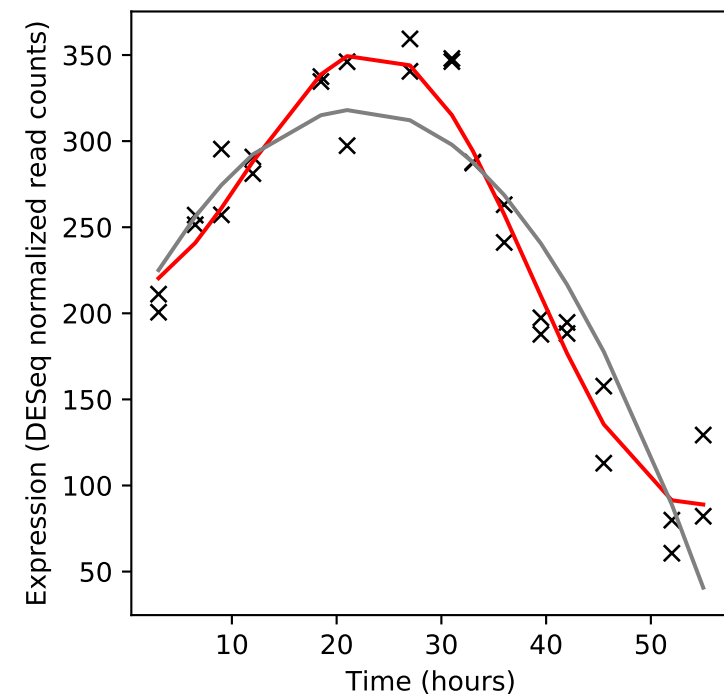

Rv2229c/-

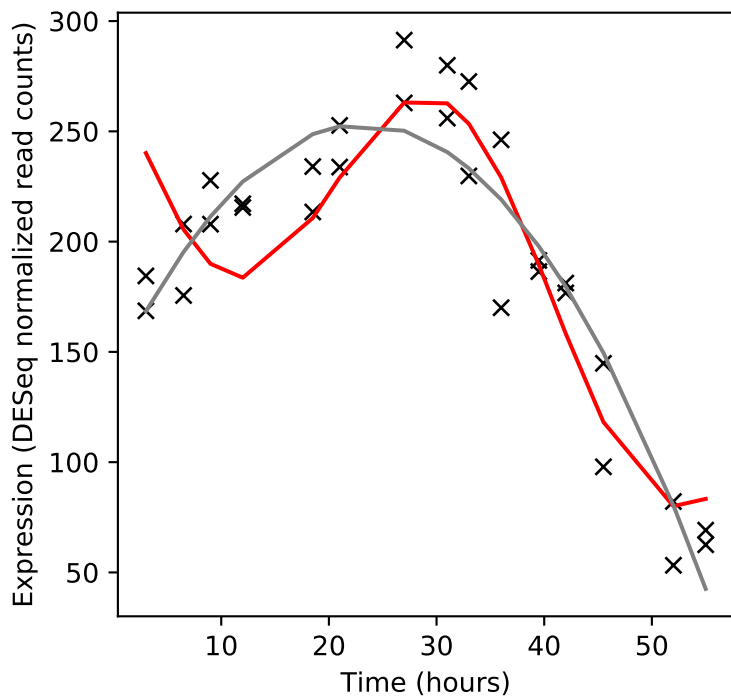

Rv2230c/-

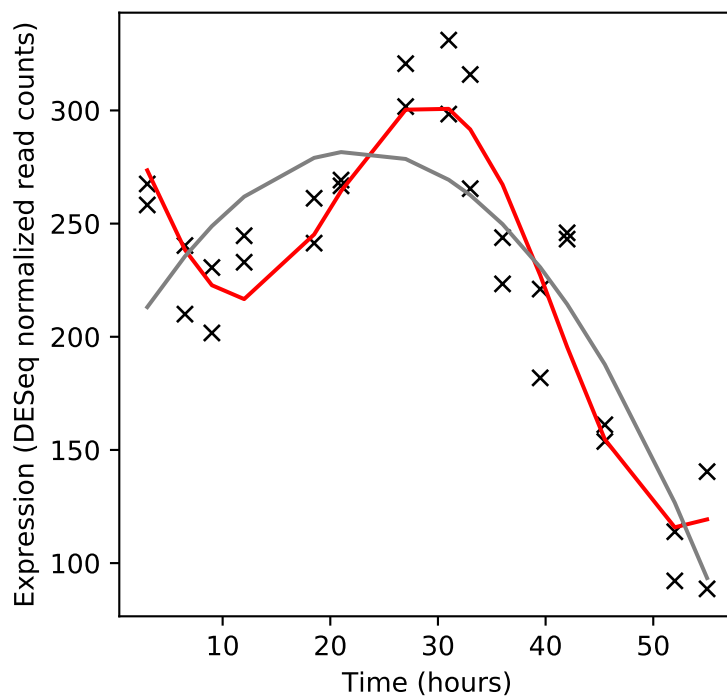

Rv2231c/cobC

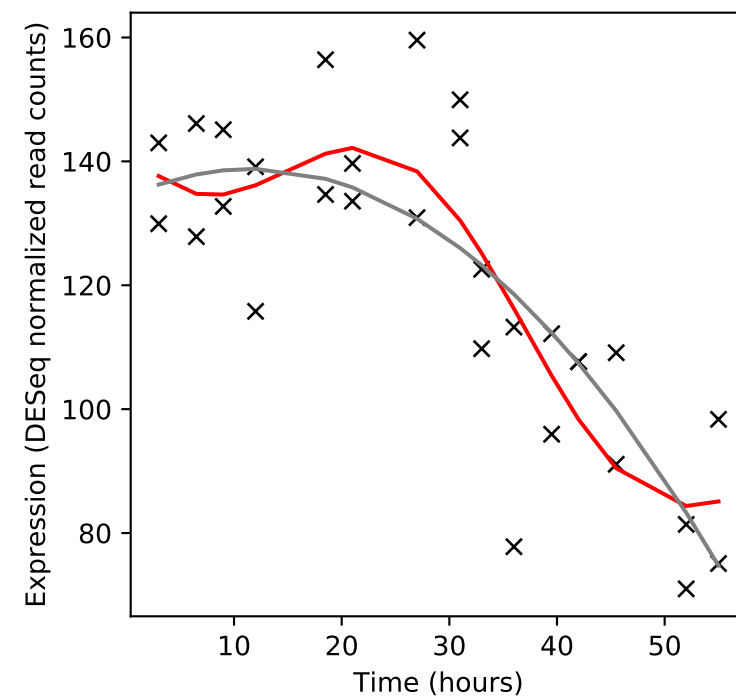

Rv2231A/vapC16

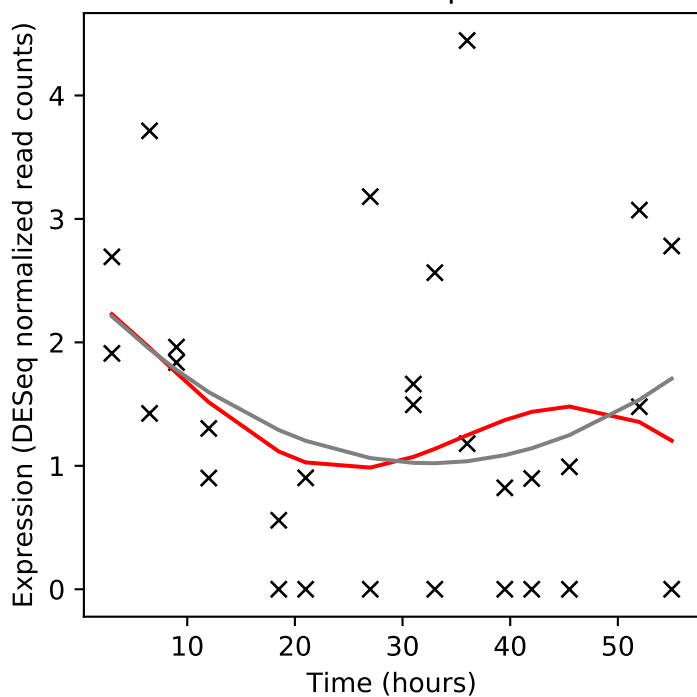

Rv2231B/vapB16

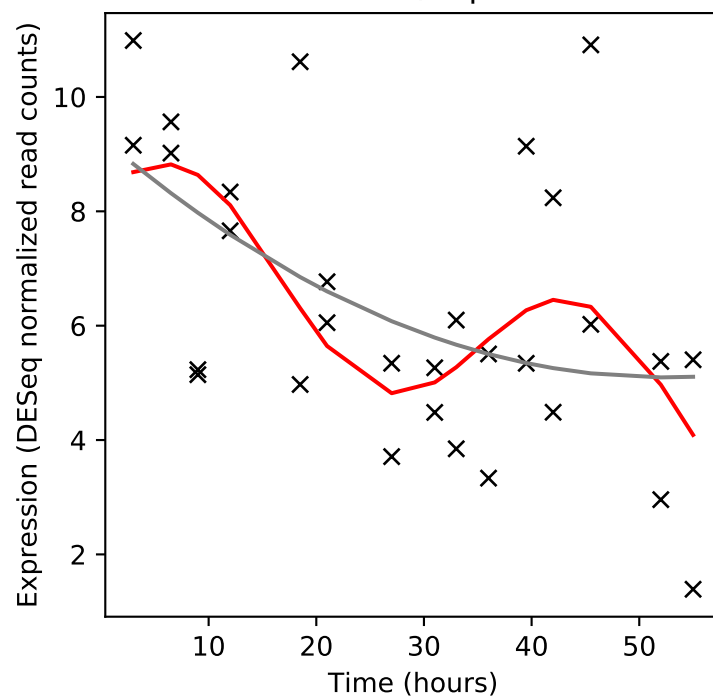

Rv2232/ptkA

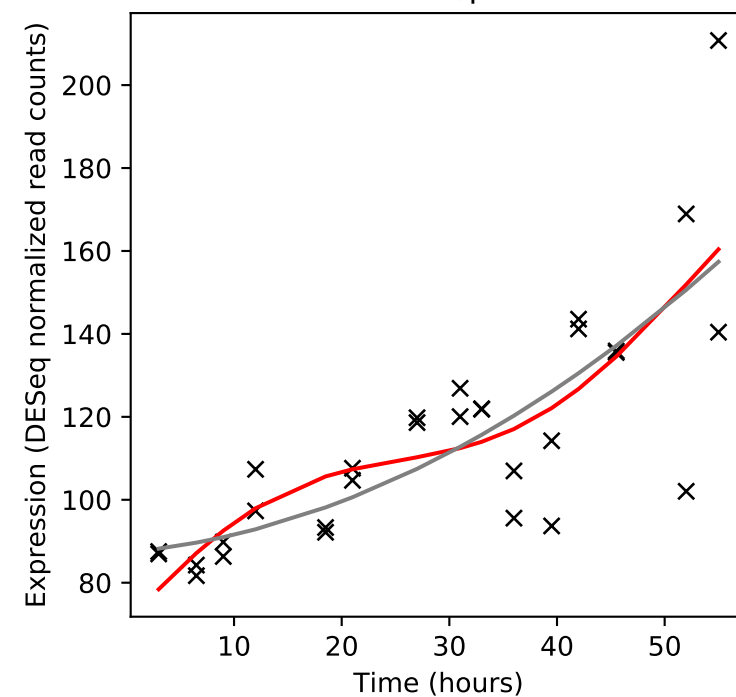

Rv2234/ptpA

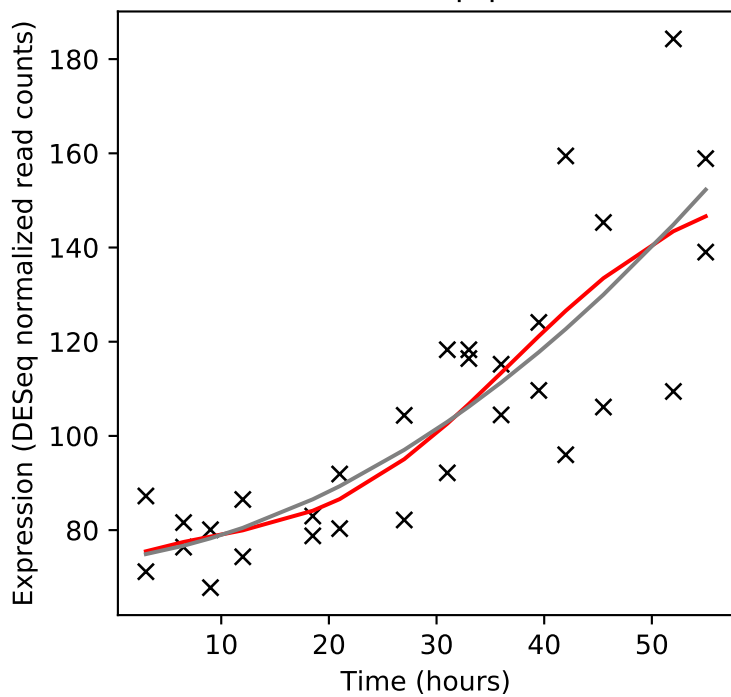

Rv2235/-

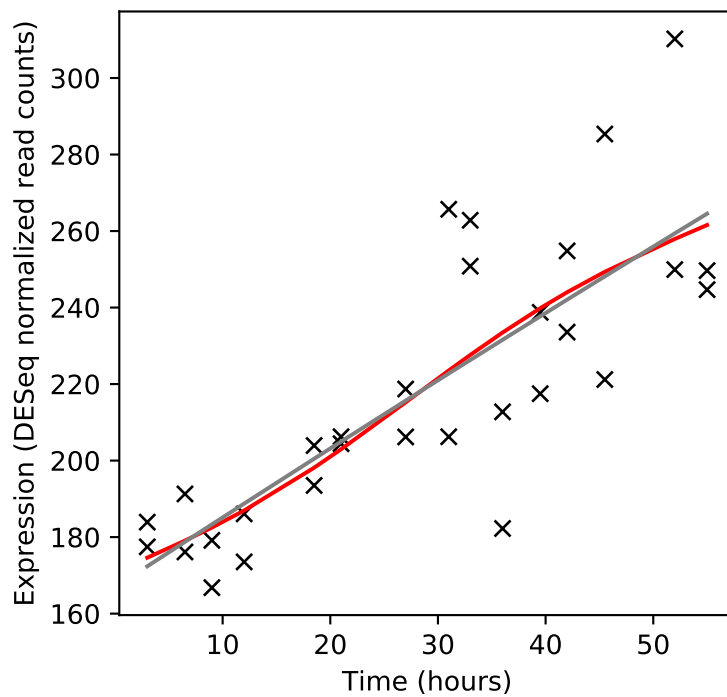

Rv2236c/cobD

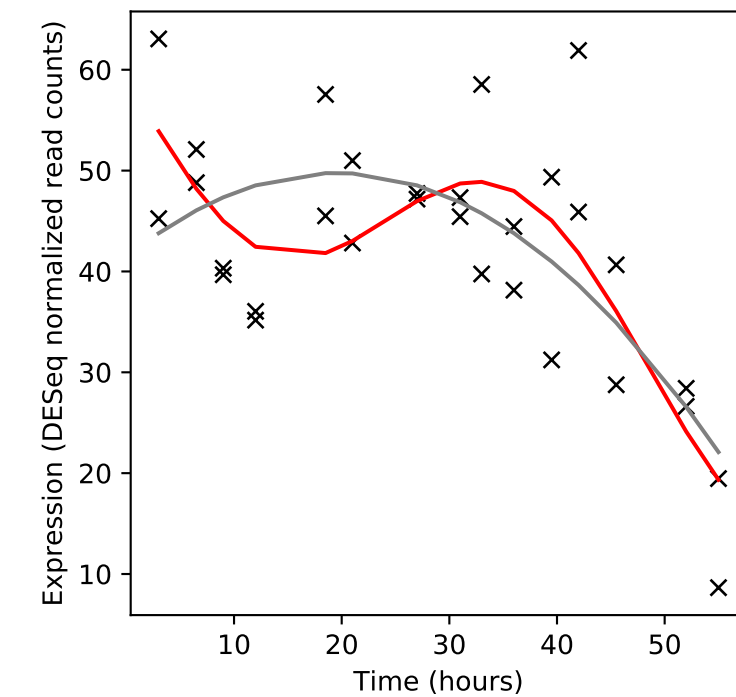



Rv2237/-

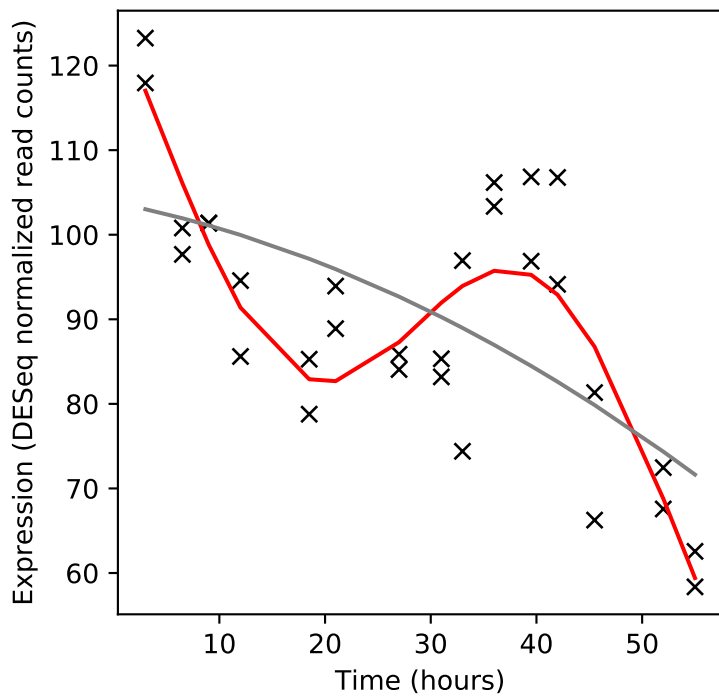

Rv2237A/-

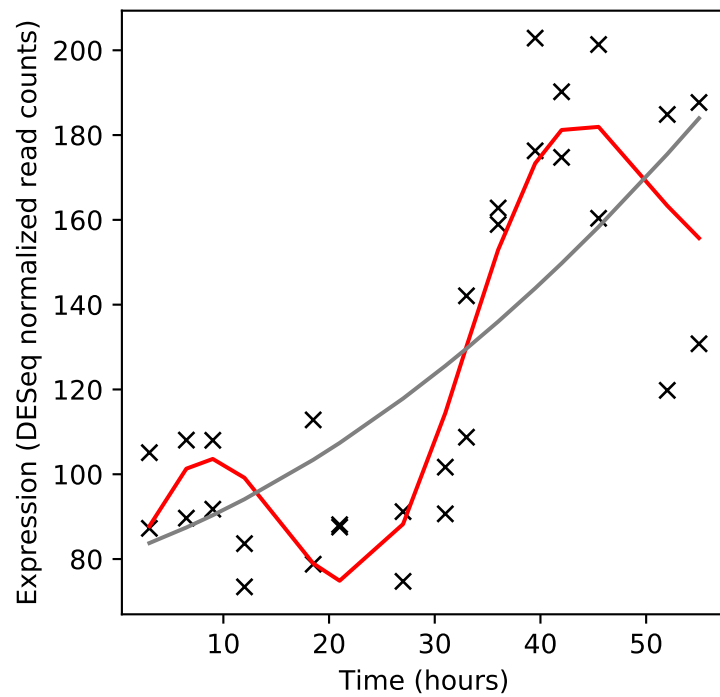

Rv2238c/ahpE

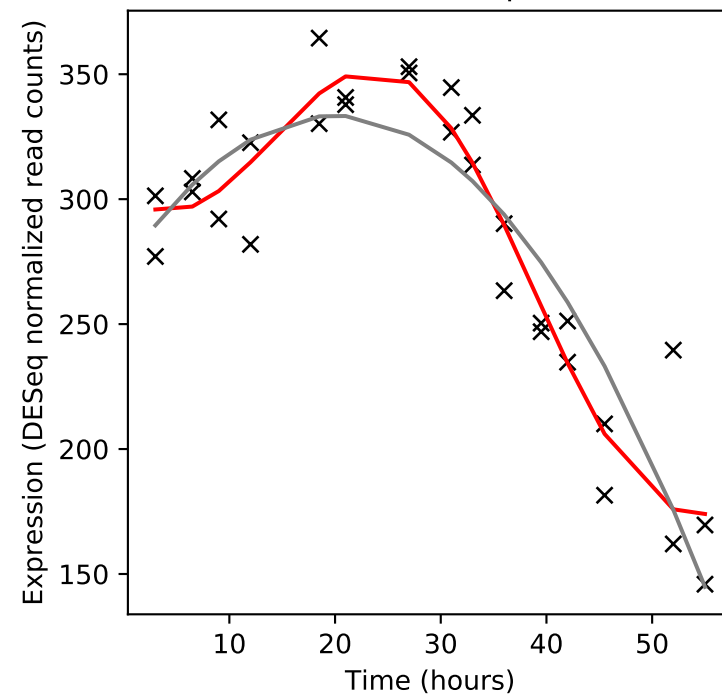

Rv2239c/-

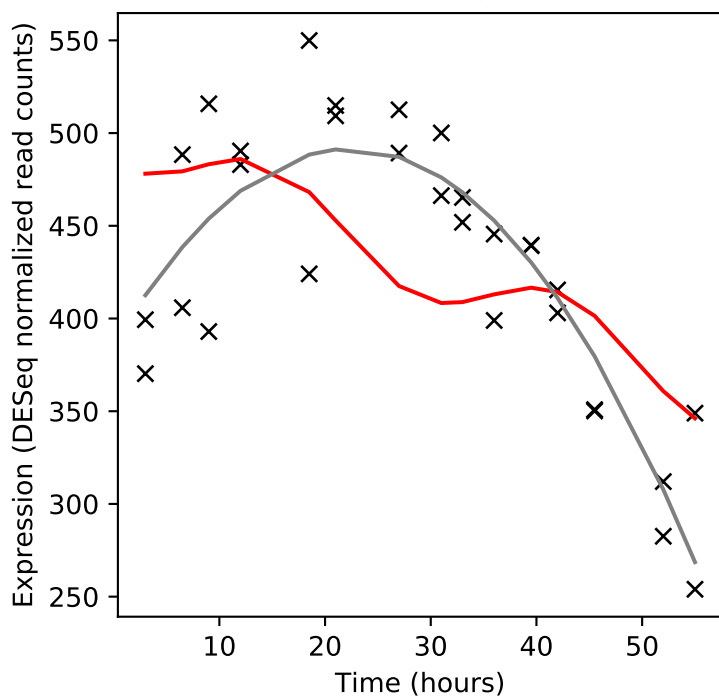

Rv2240c/-

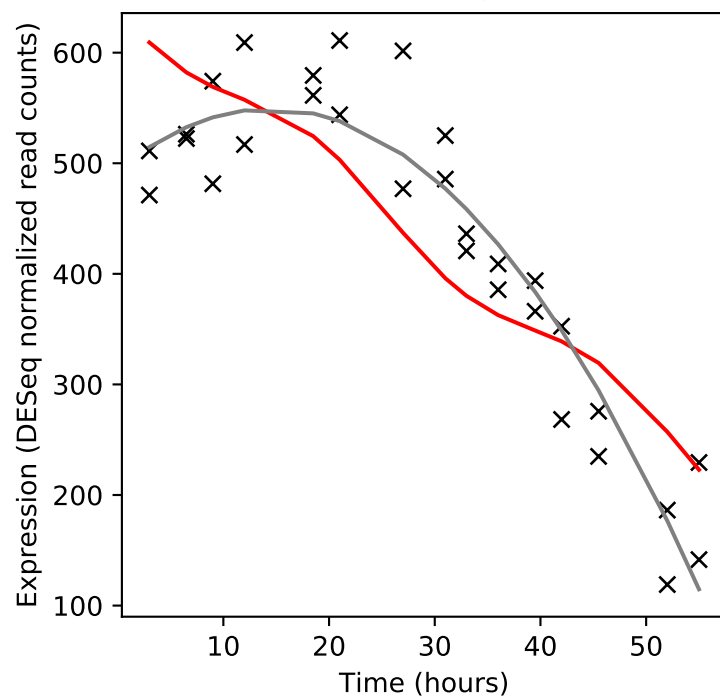

Rv2241/aceE

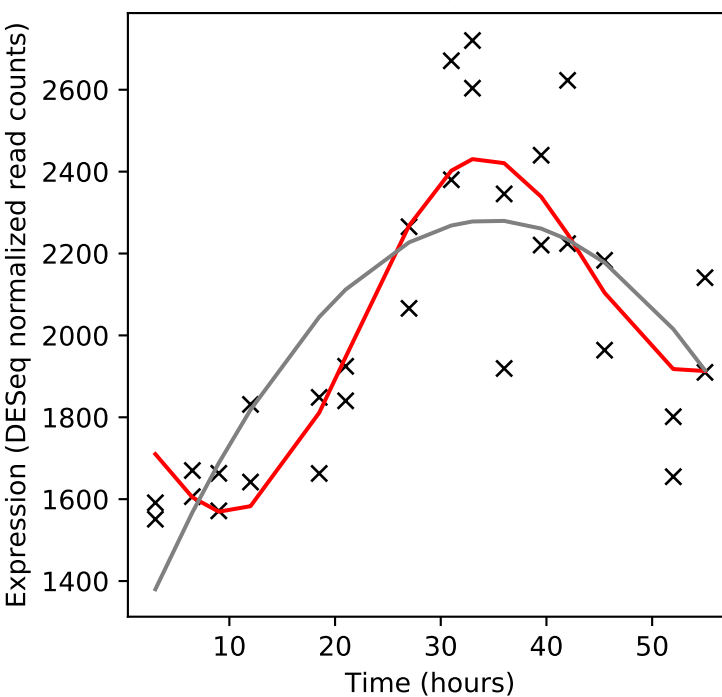

Rv2242/-

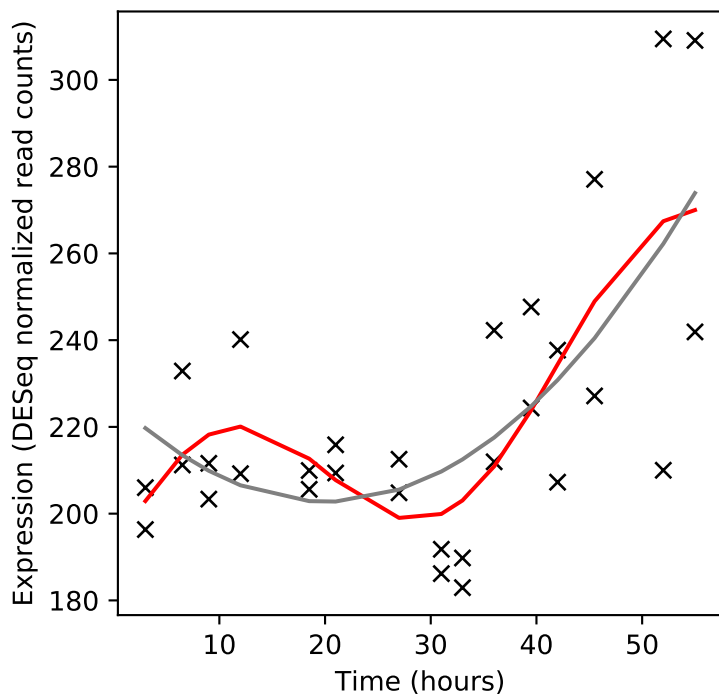

Rv2243/fabD

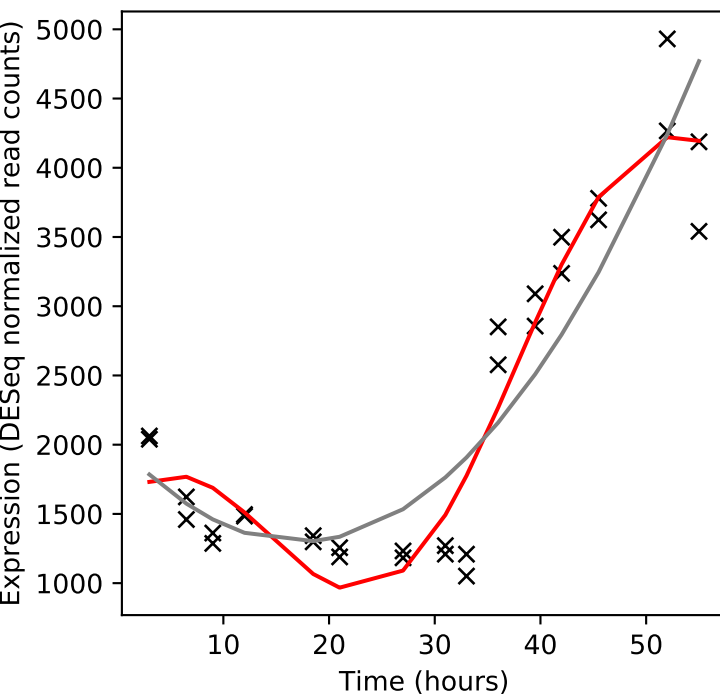

Rv2244/acpM

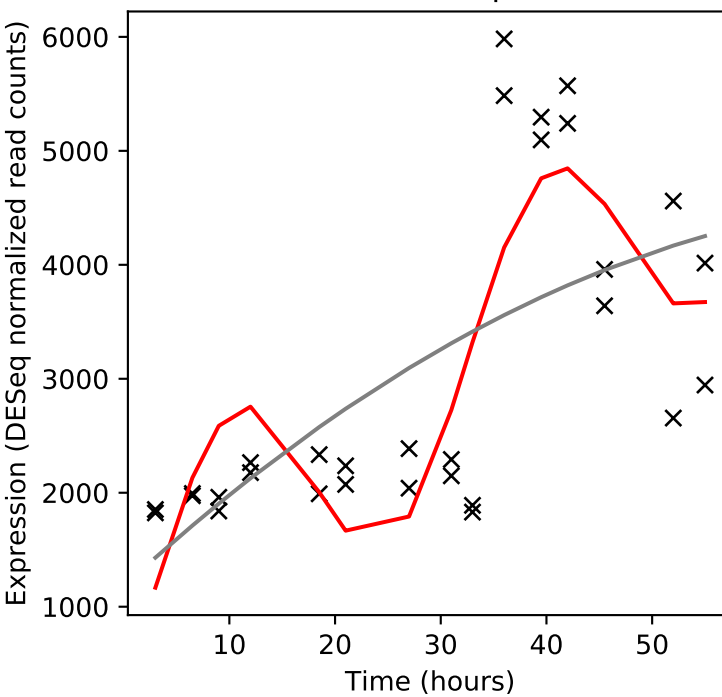

Rv2245/kasA

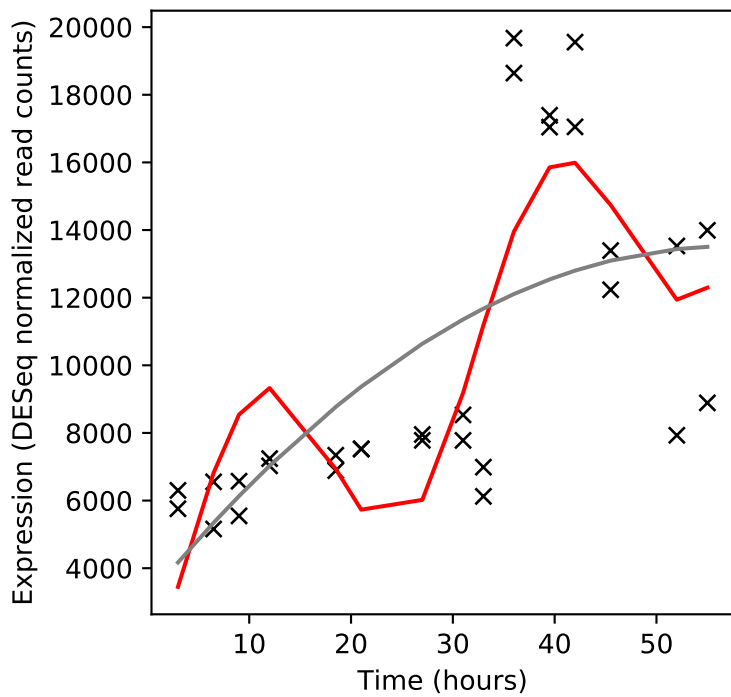

Rv2246/kasB

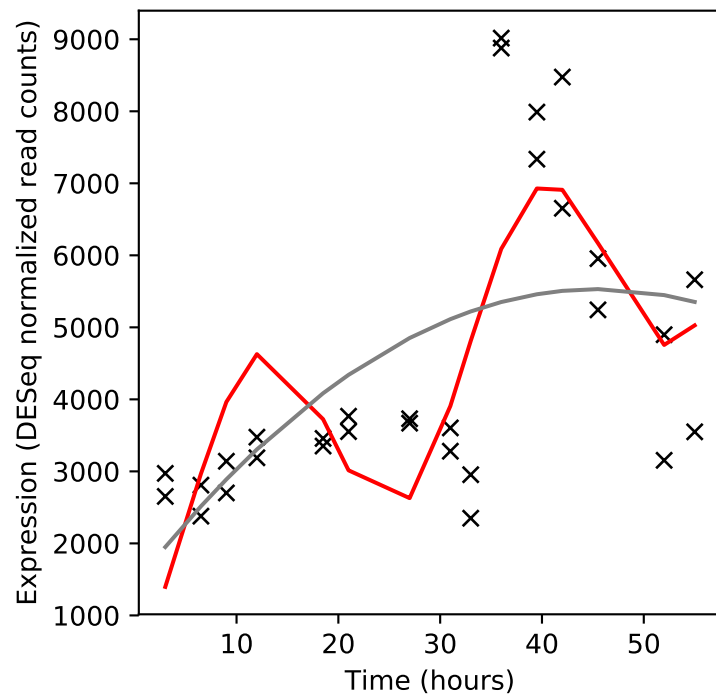

Rv2247/accD6

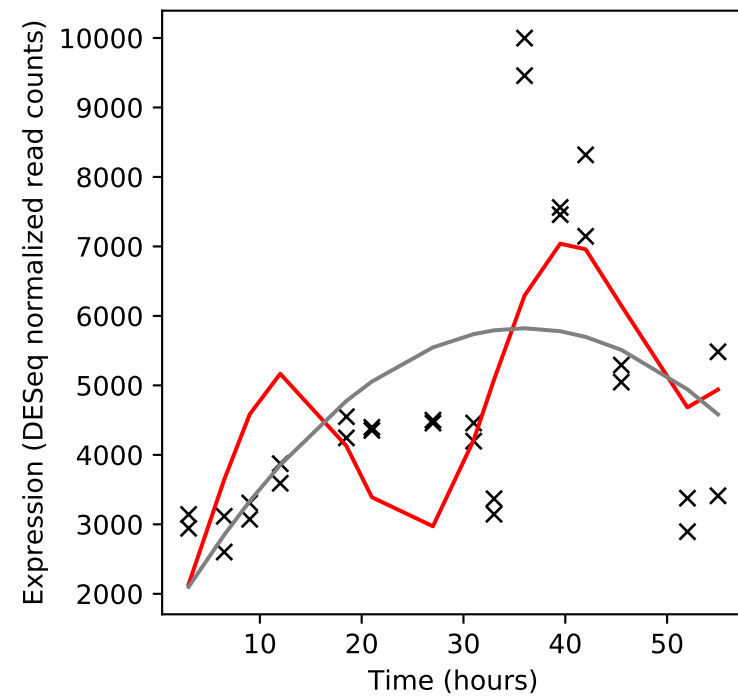

Rv2248/-

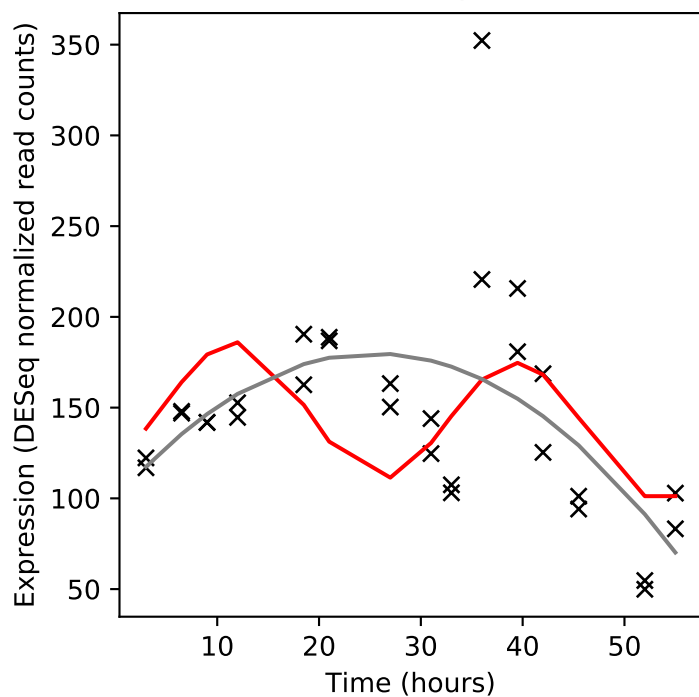

Rv2249c/glpD1

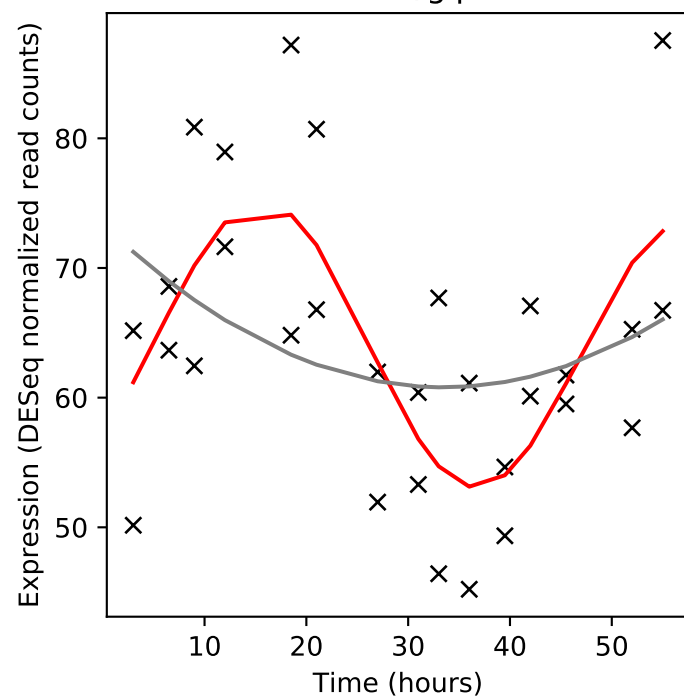

Rv2250c/-

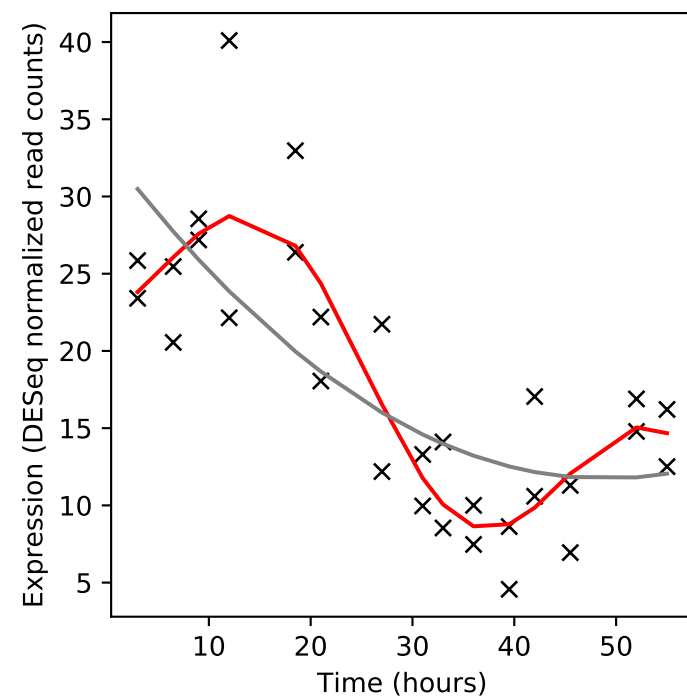

Rv2250A/-

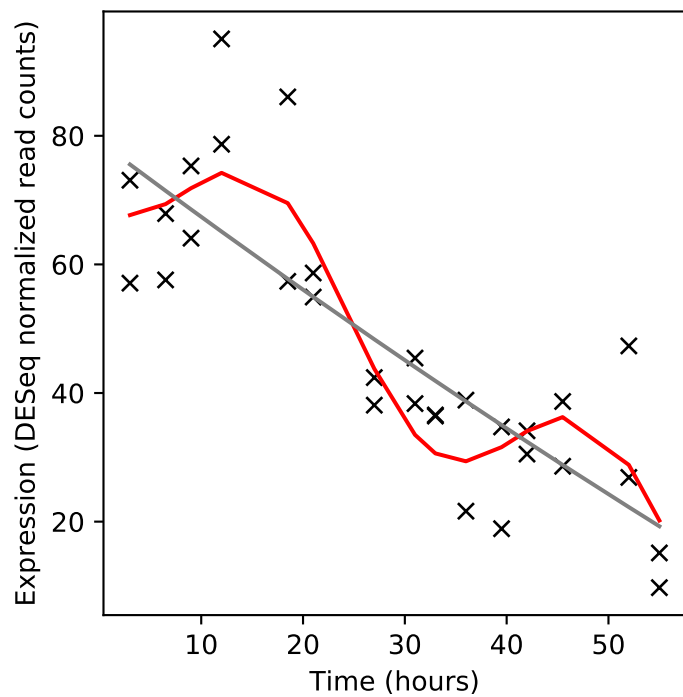

Rv2251/-

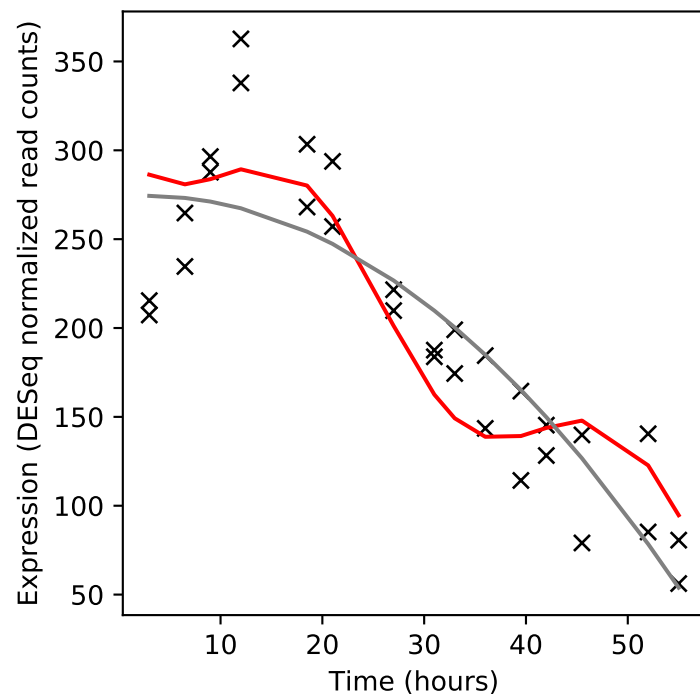

Rv2252/-

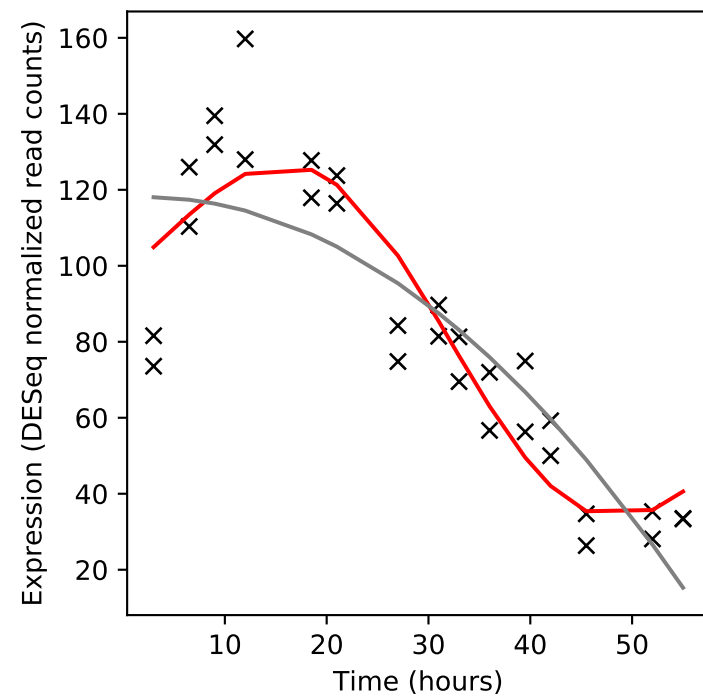

Rv2253/-

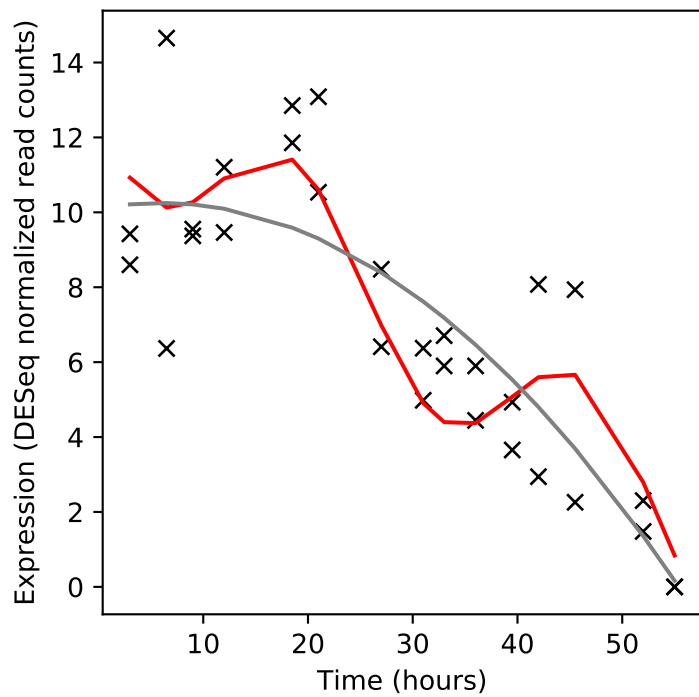

Rv2254c/-

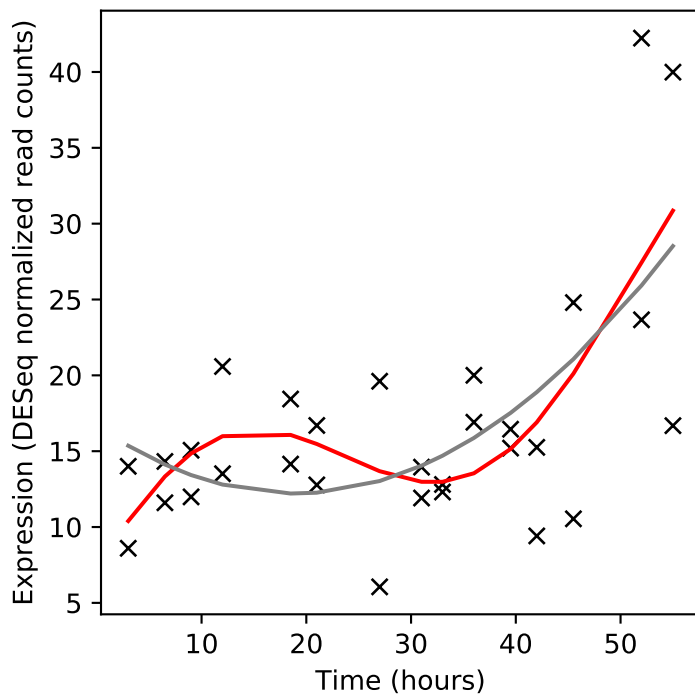

Rv2255c/-

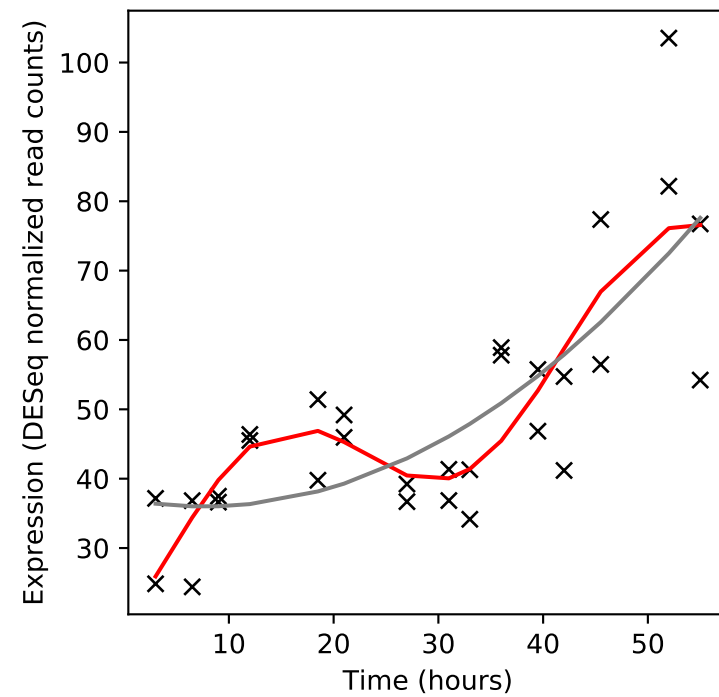

Rv2256c/-

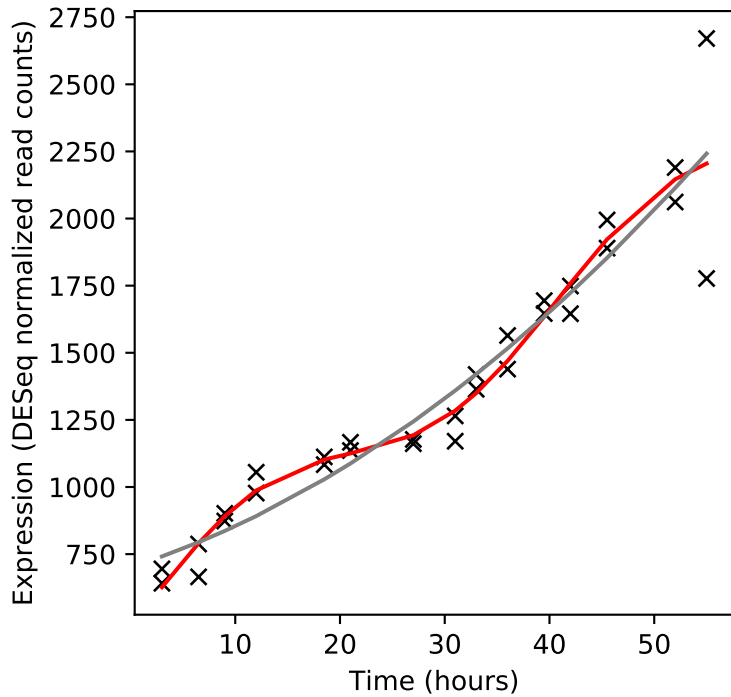

Rv2257c/-

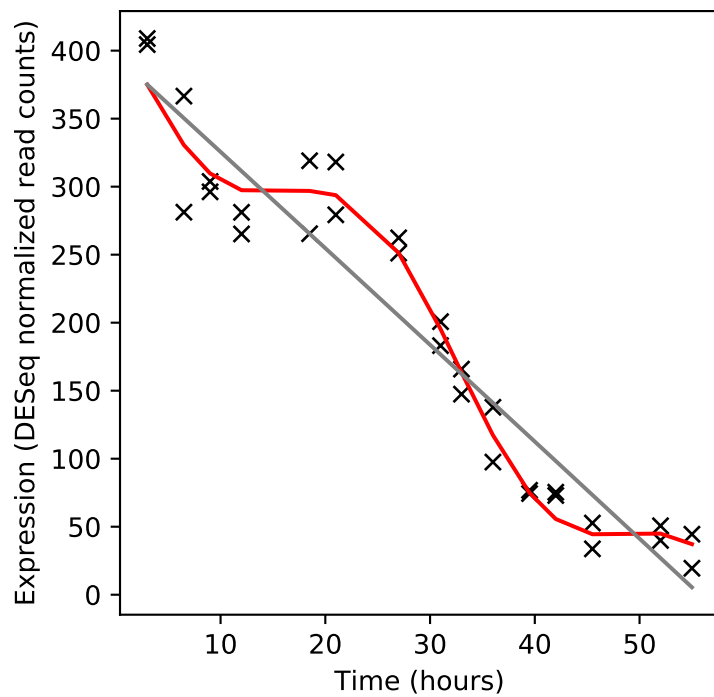

Rv2258c/-

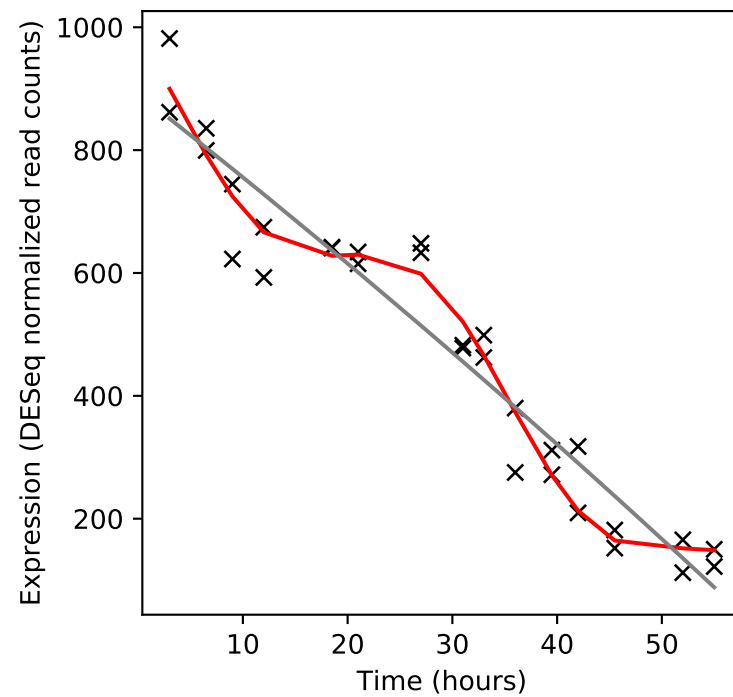

Rv2259/mscR

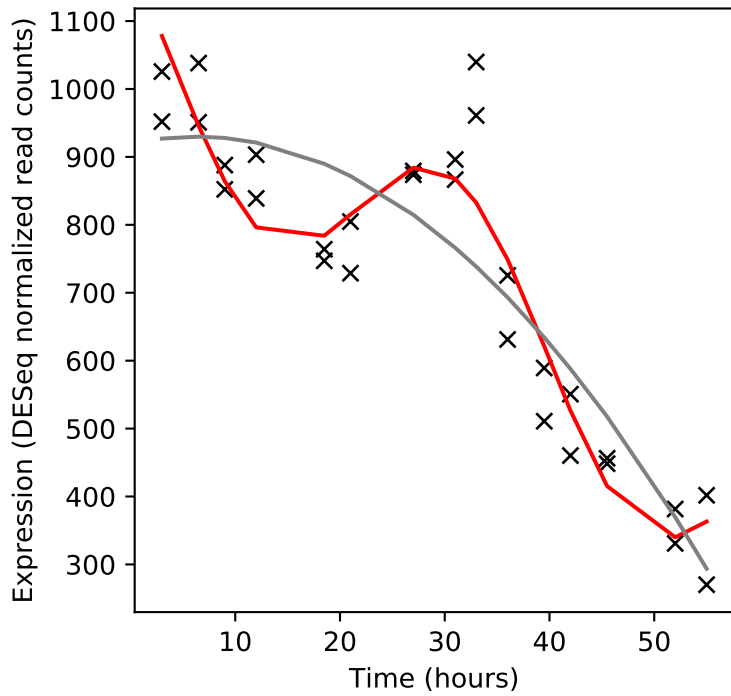

Rv2260/-

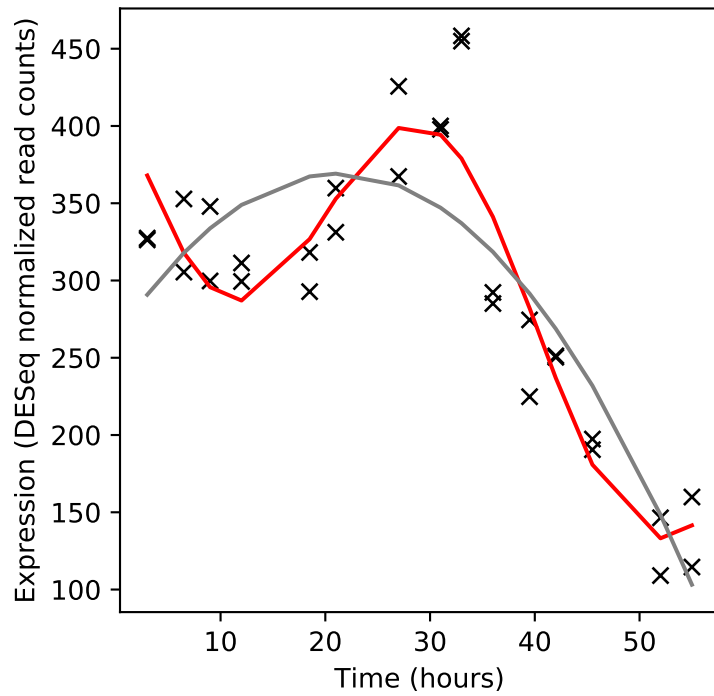

Rv2261c/-

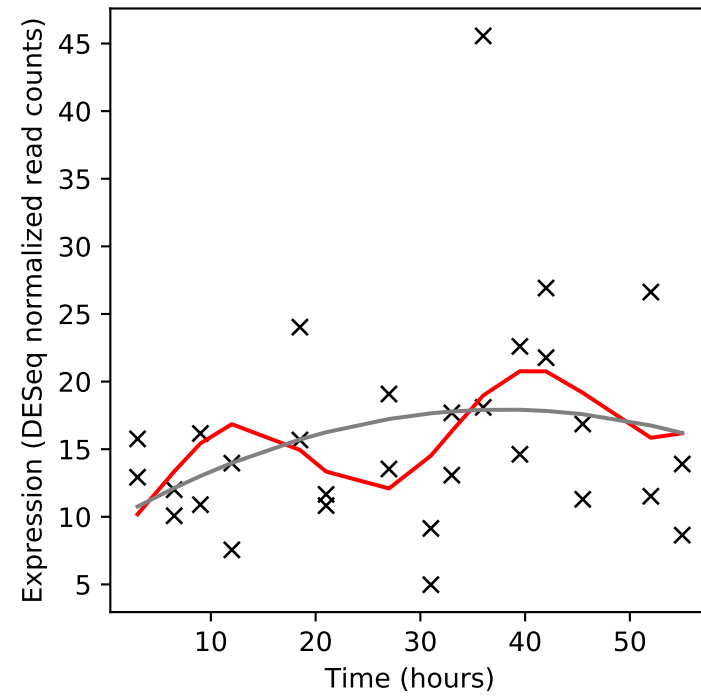

Rv2262c/-

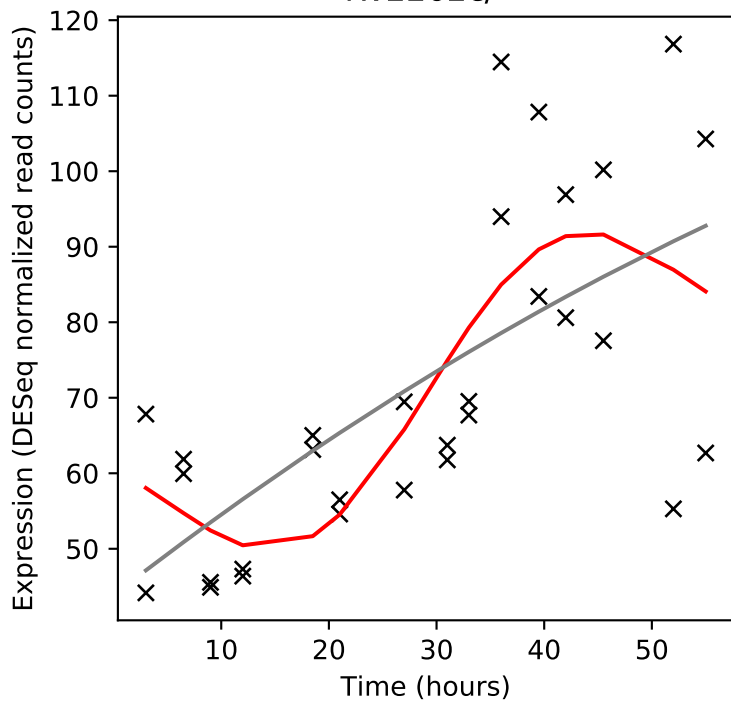

Rv2263/-

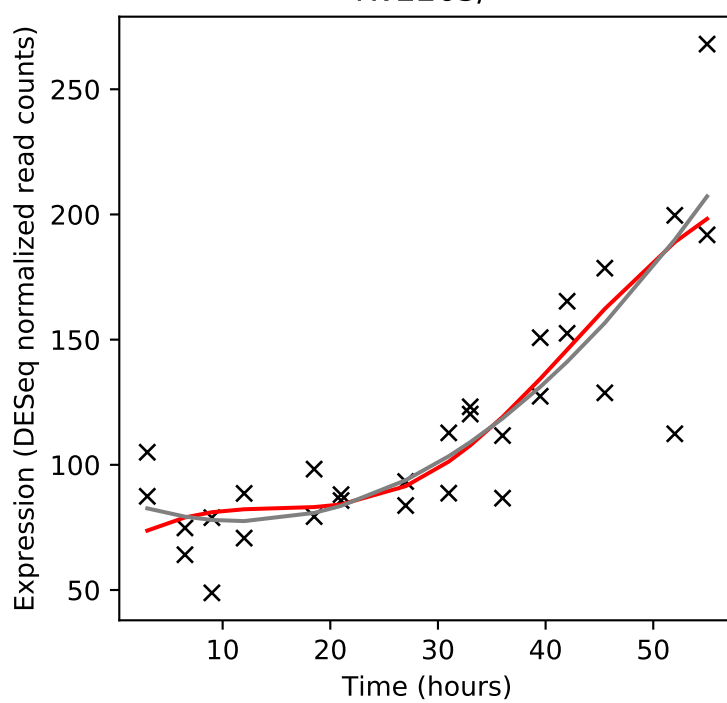

Rv2264c/-

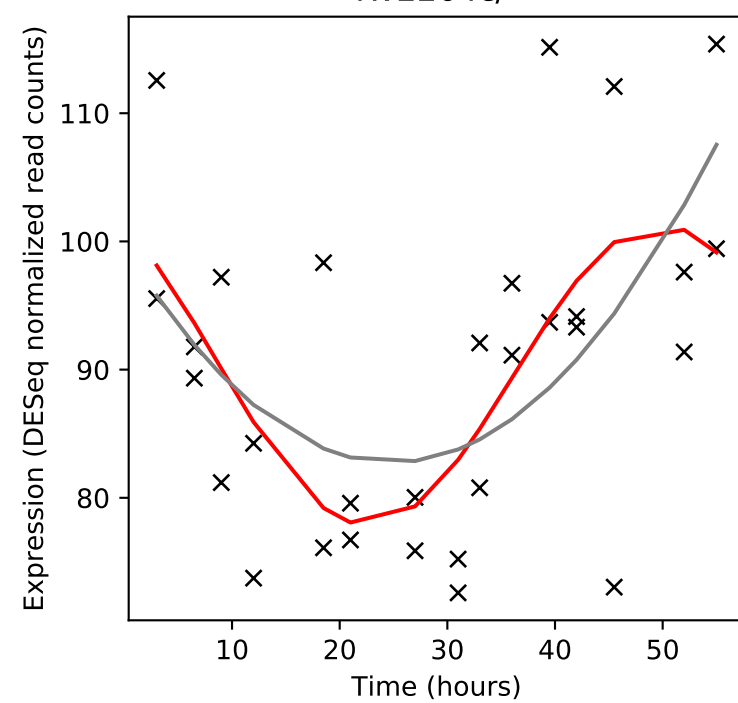

Rv2265/-

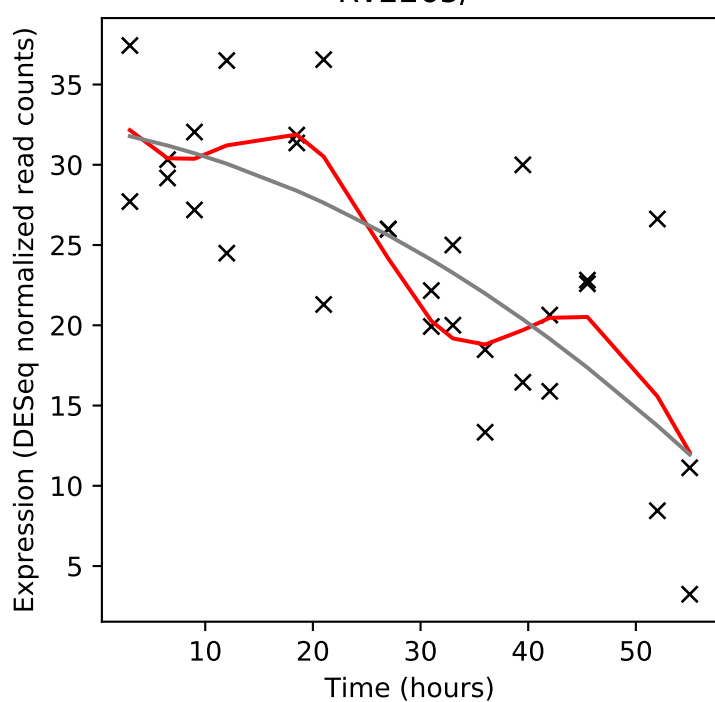

Rv2266/cyp124

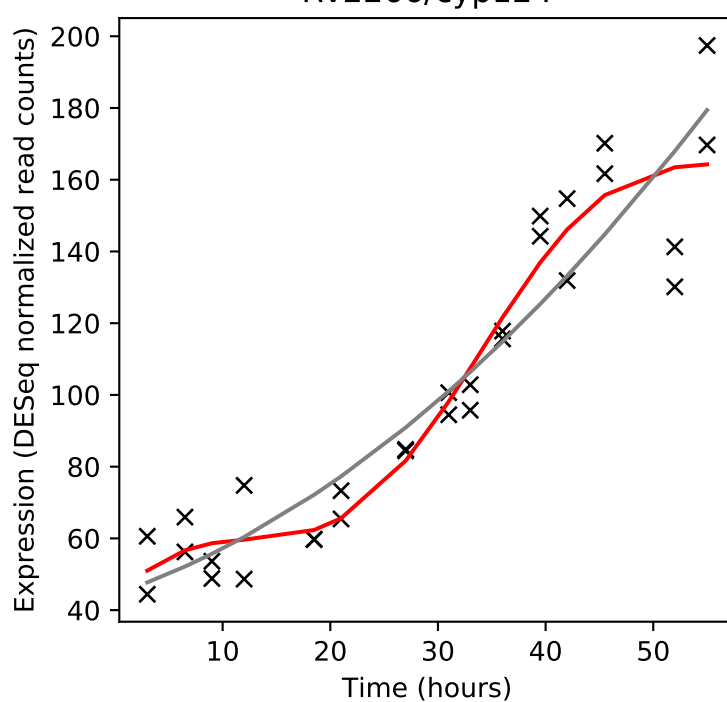

Rv2267c/-

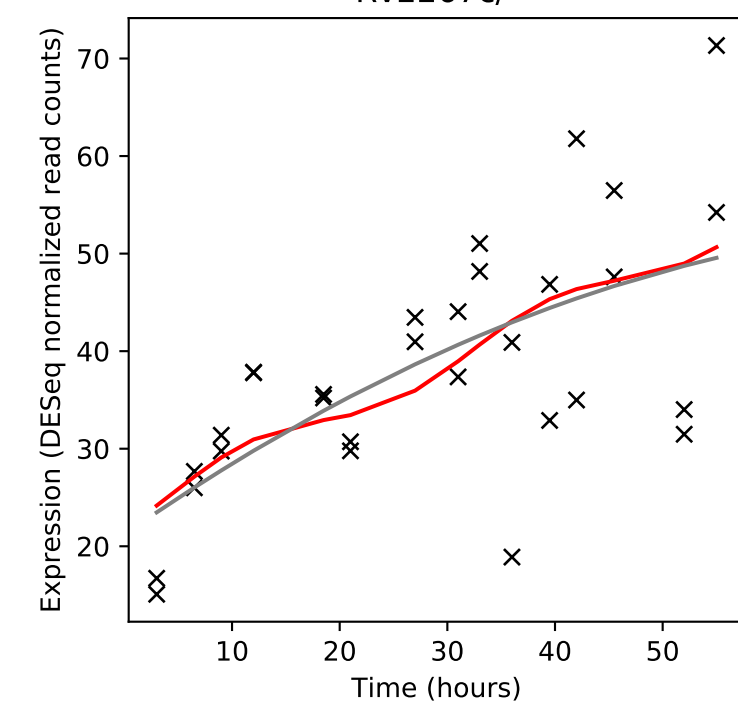

Rv2268c/cyp128

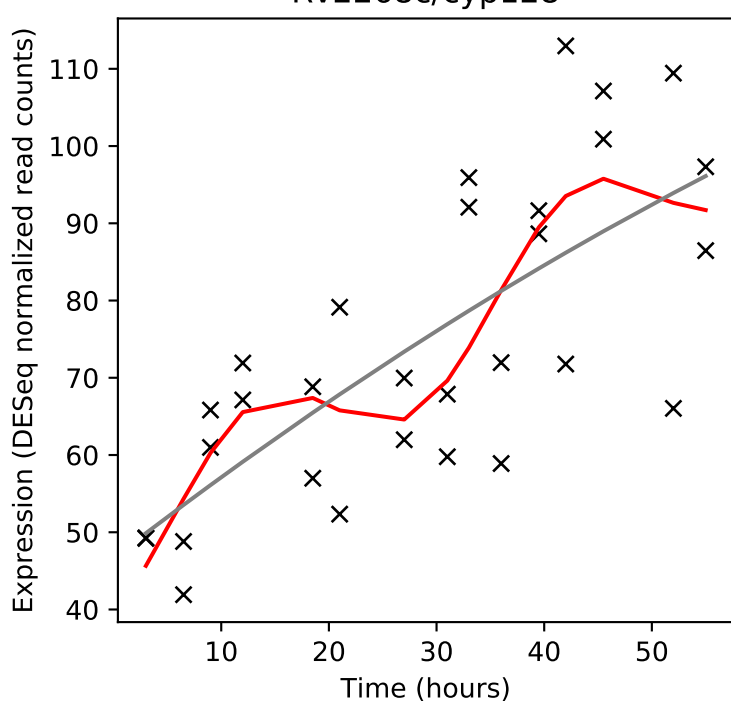

Rv2269c/-

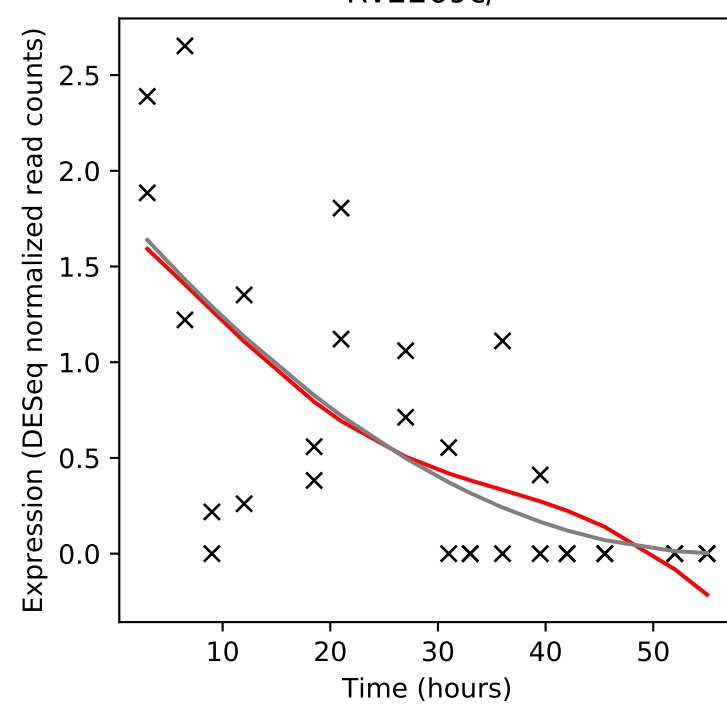

Rv2270/lppN

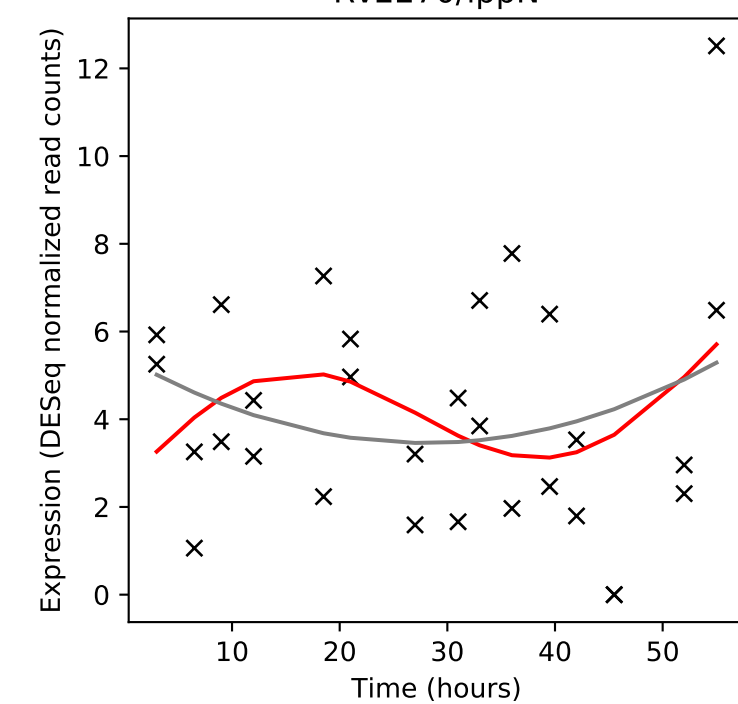

Rv2271/-

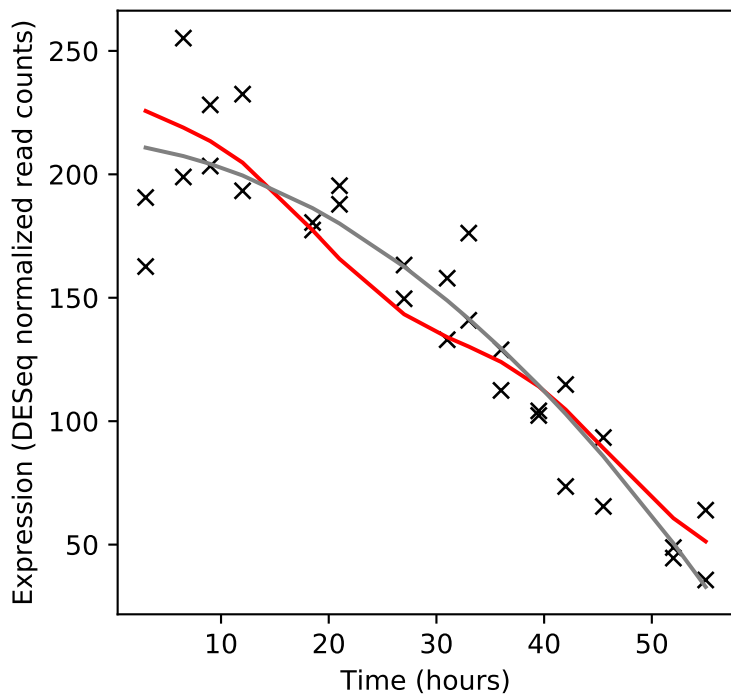

Rv2272/-

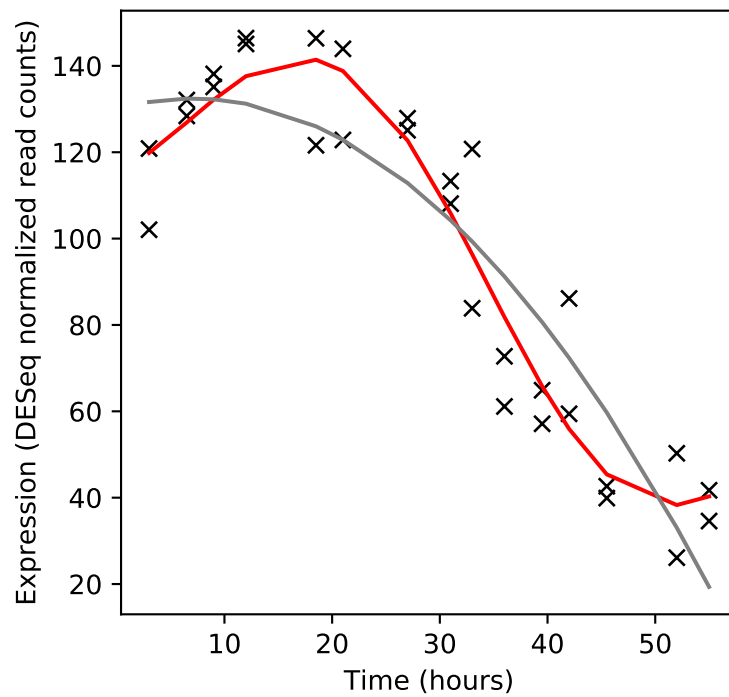

Rv2273/-

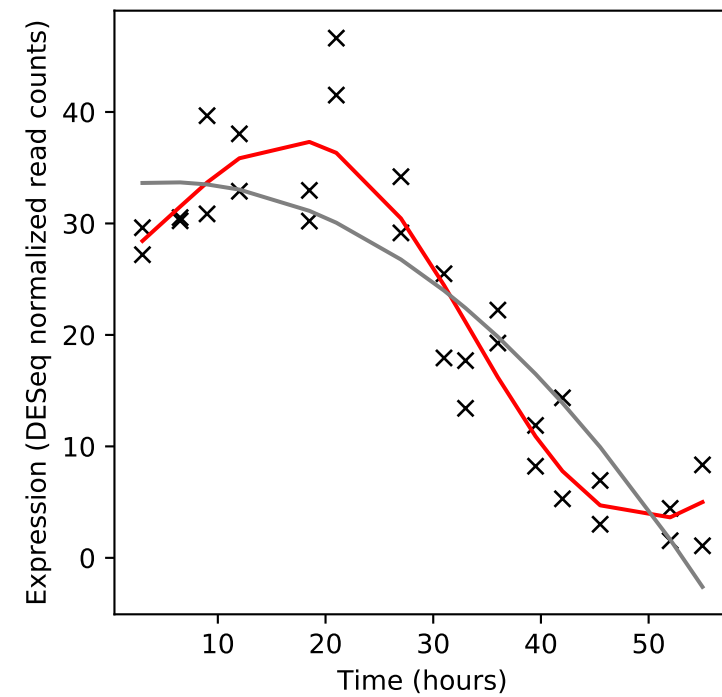

Rv2274c/mazF8

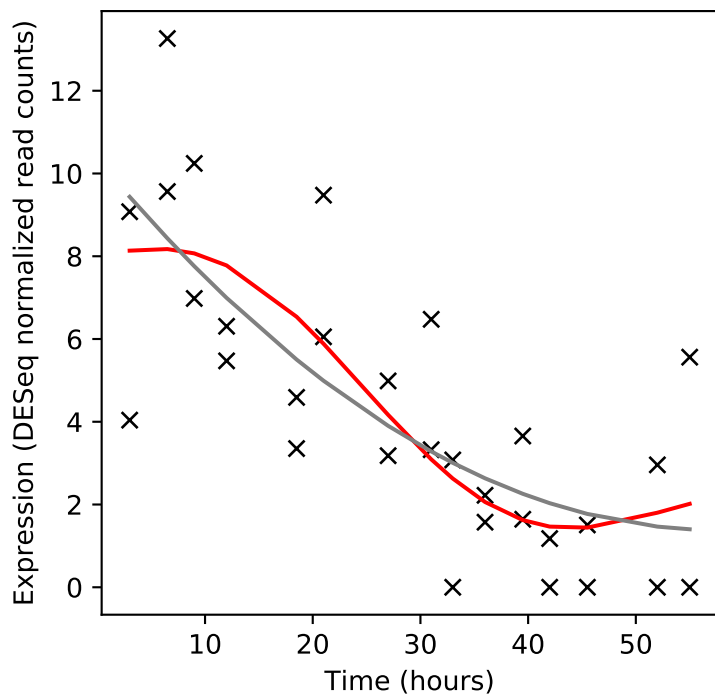

Rv2274A/mazE8

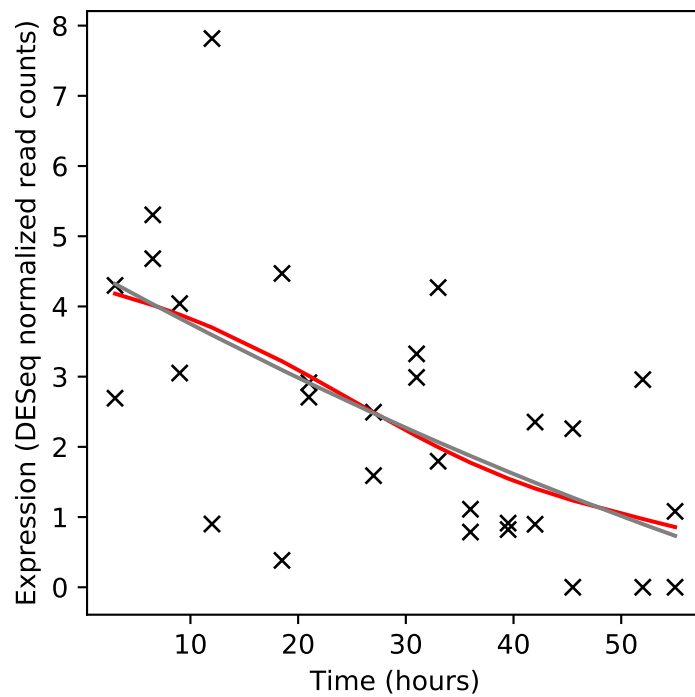

Rv2275/-

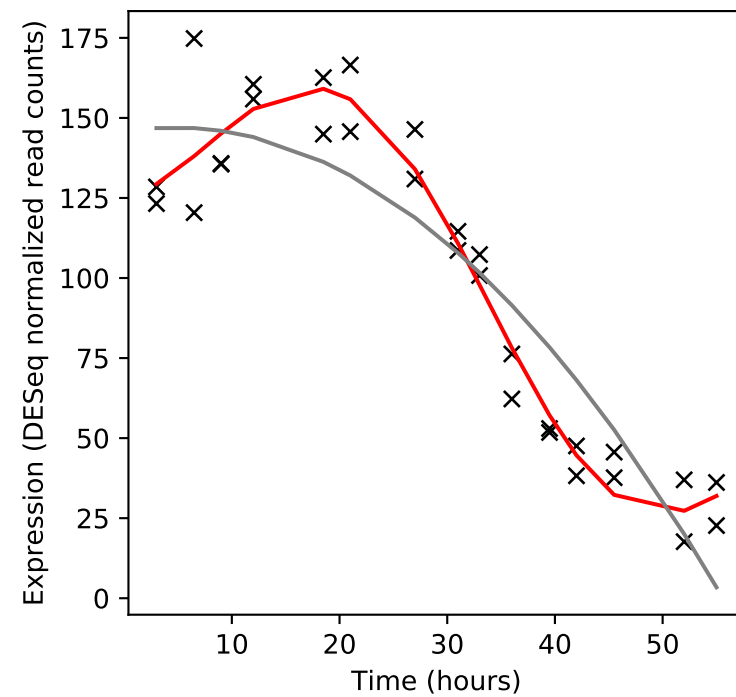

Rv2276/cyp121

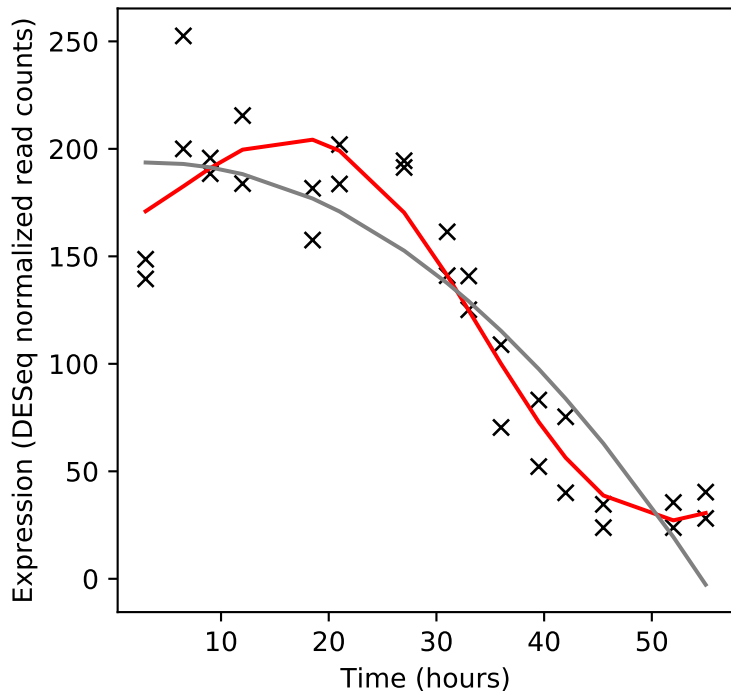

Rv2277c/-

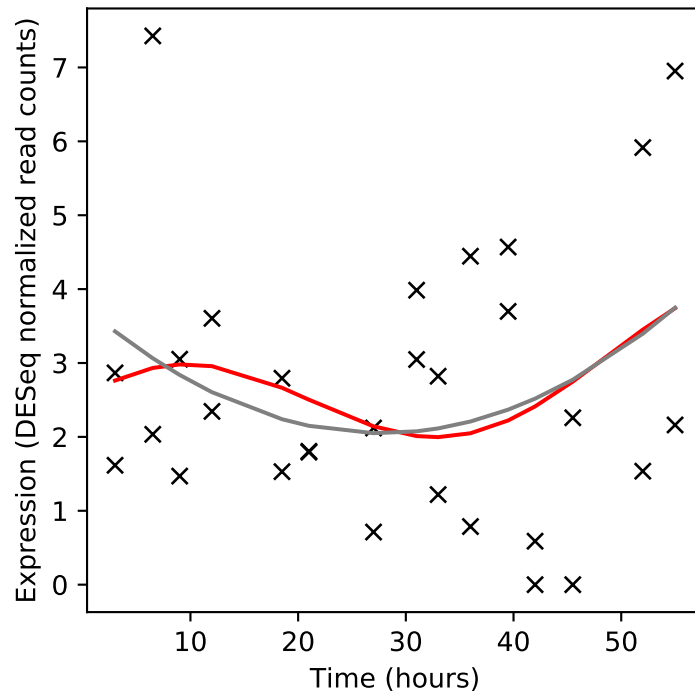

Rv2278/-

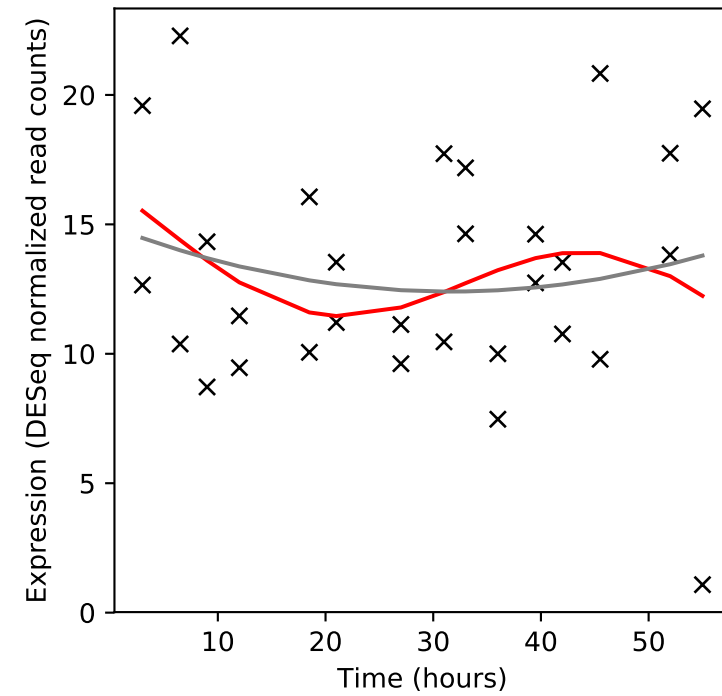

Rv2279/-

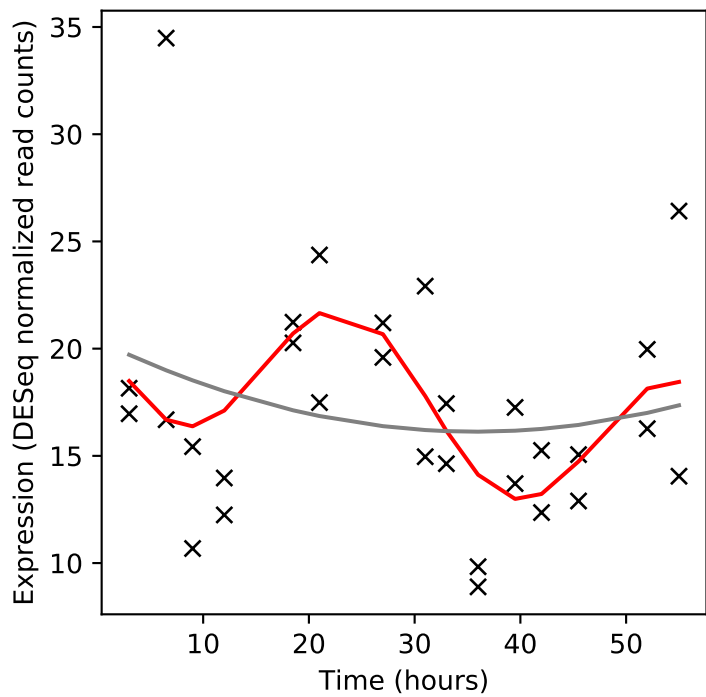

Rv2280/-

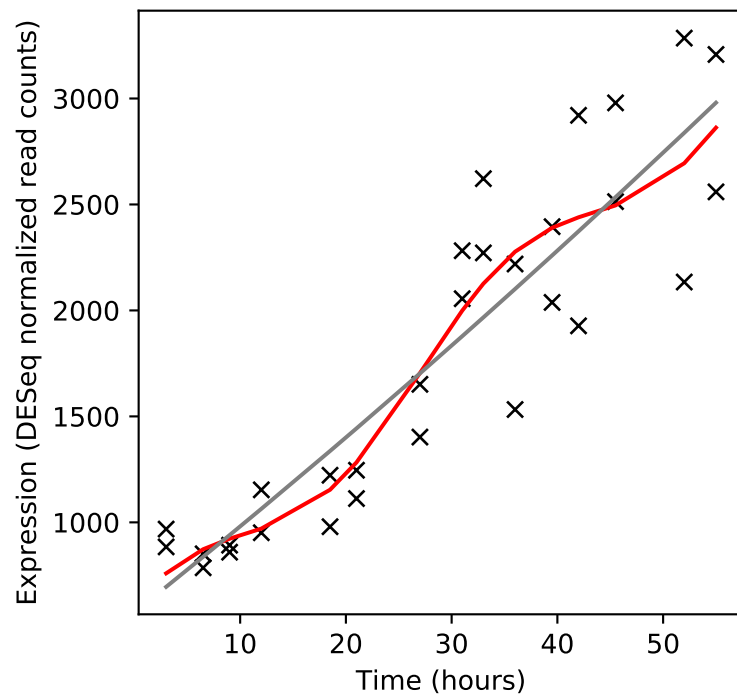

Rv2281/pitB

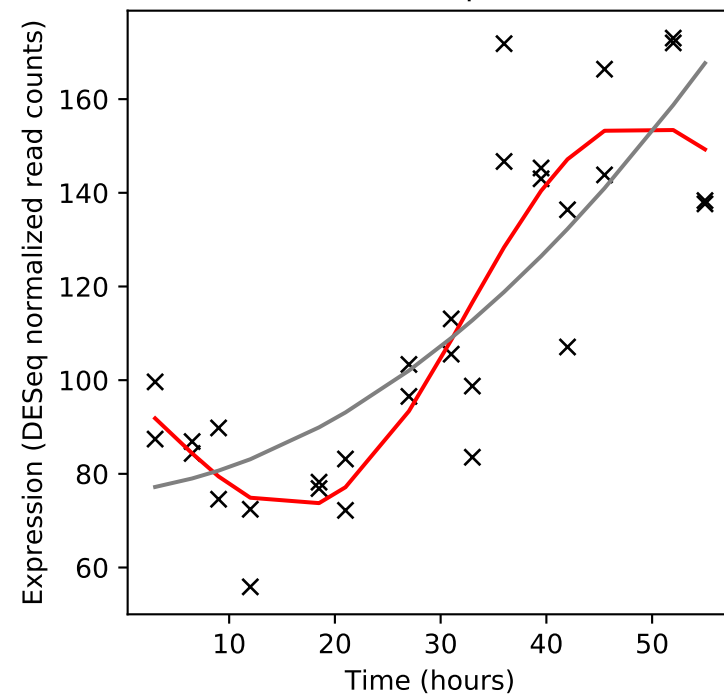

Rv2282c/-

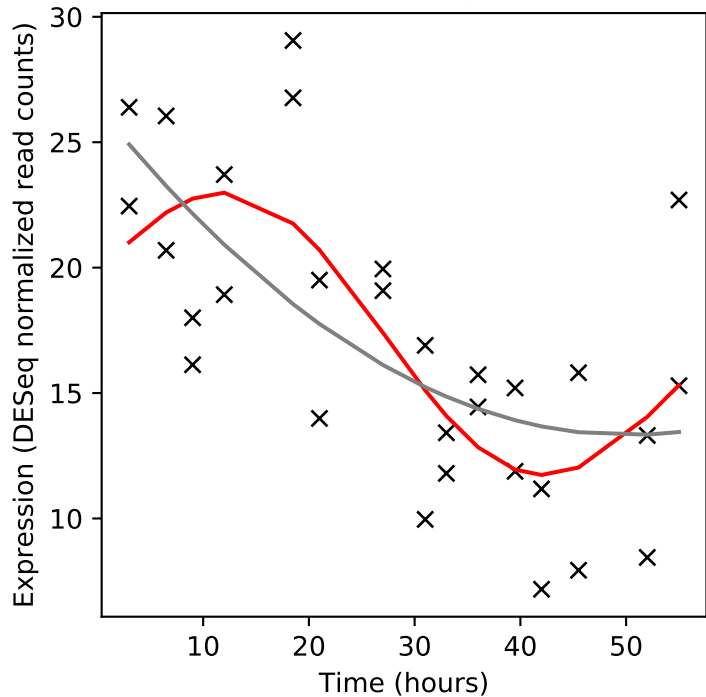

Rv2283/-

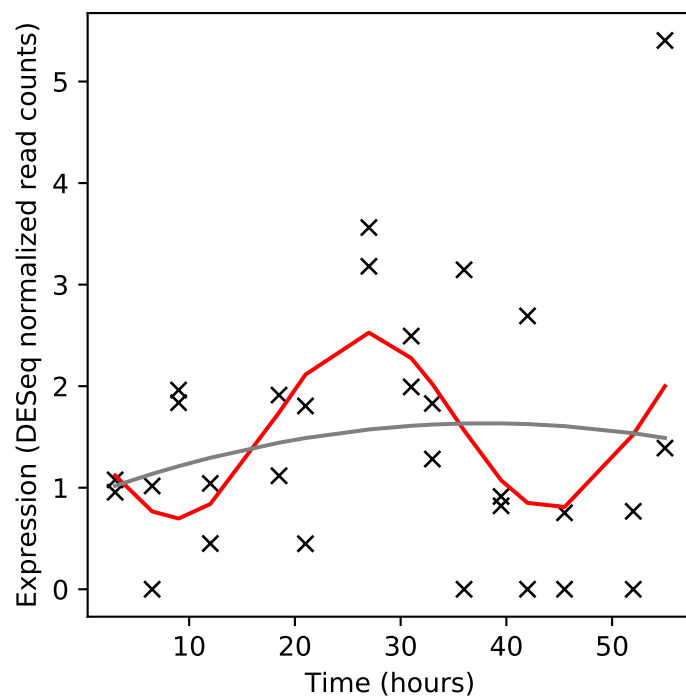

Rv2284/lipM

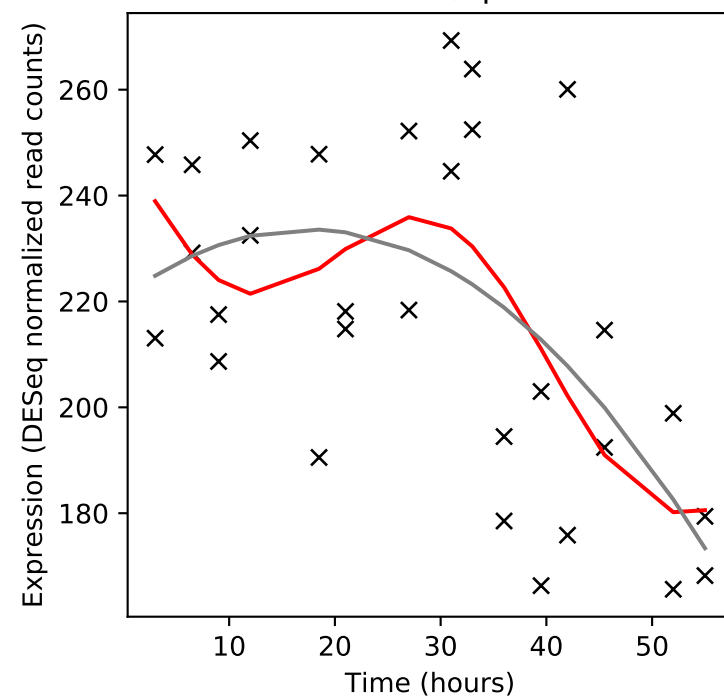

Rv2285/-

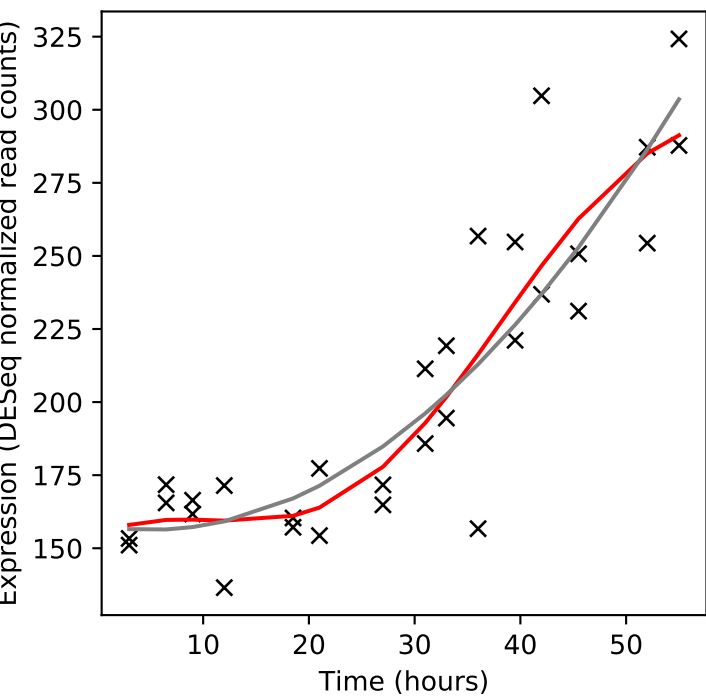

Rv2286c/-

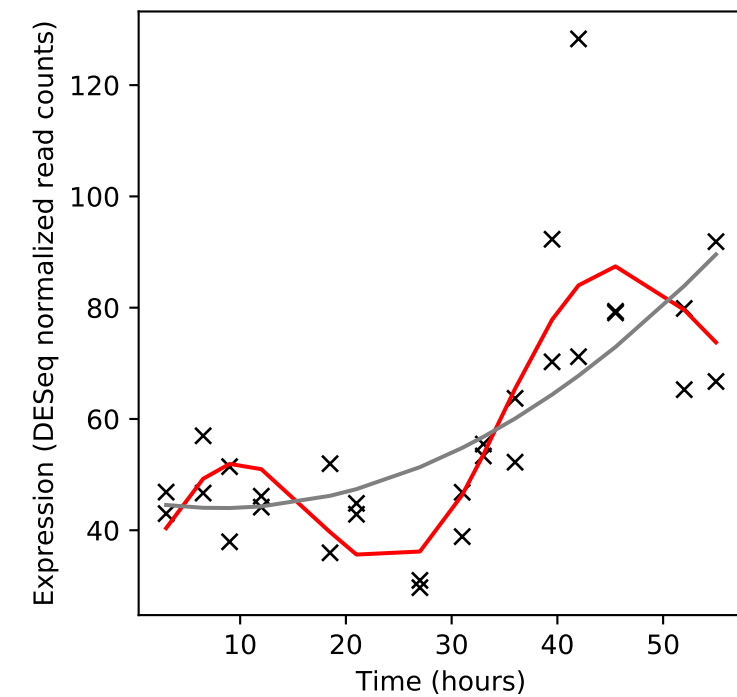

Rv2287/yjcE

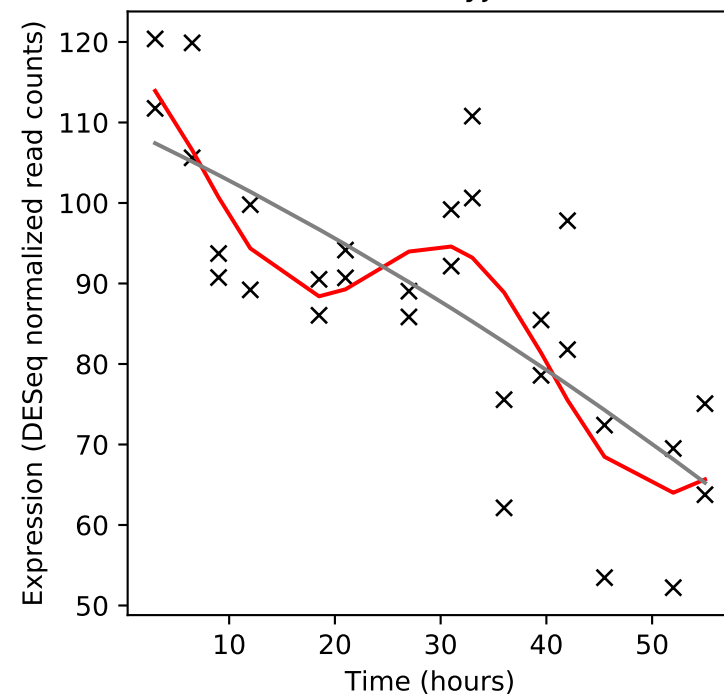

Rv2288/-

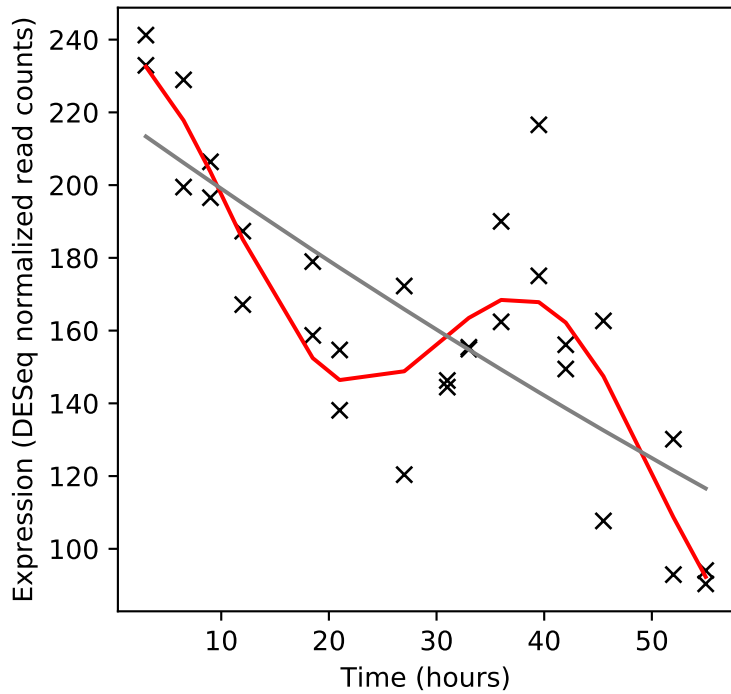

Rv2289/cdh

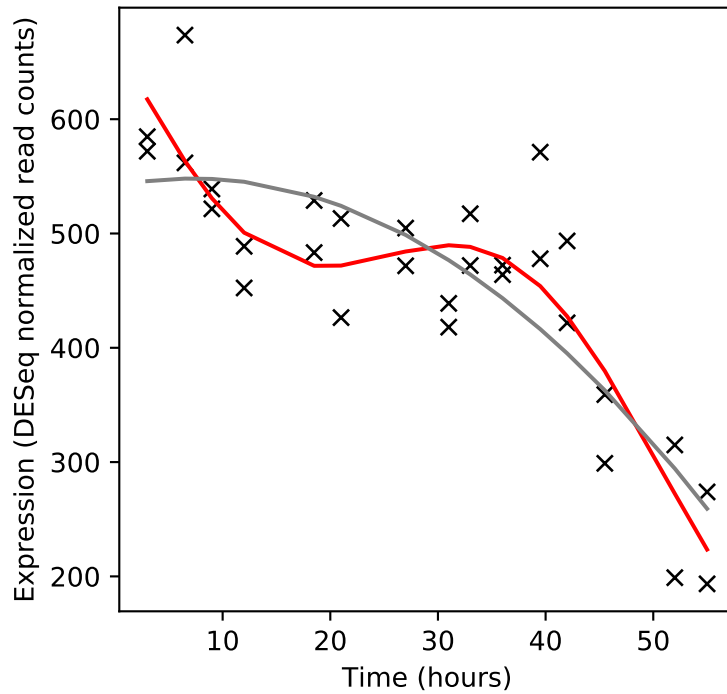

Rv2290/lppO

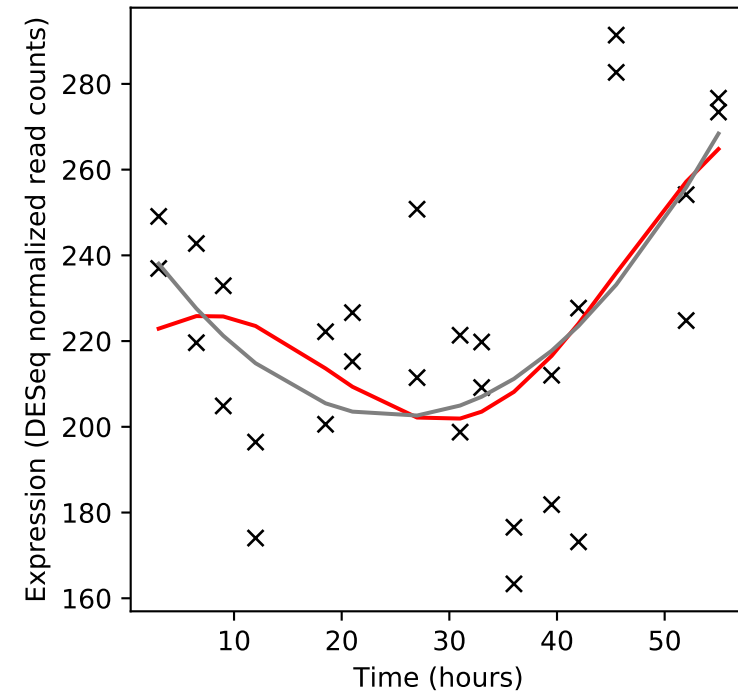

Rv2291/sseB

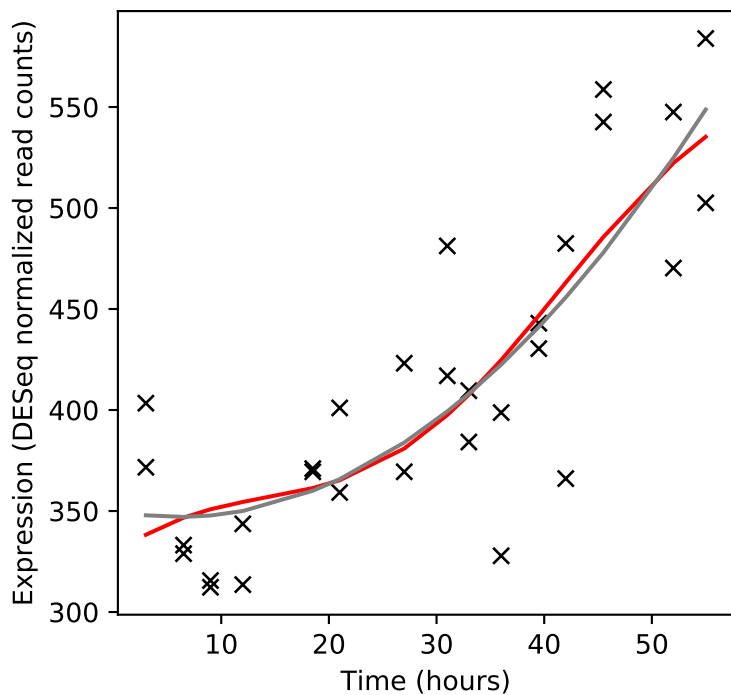

Rv2292c/-

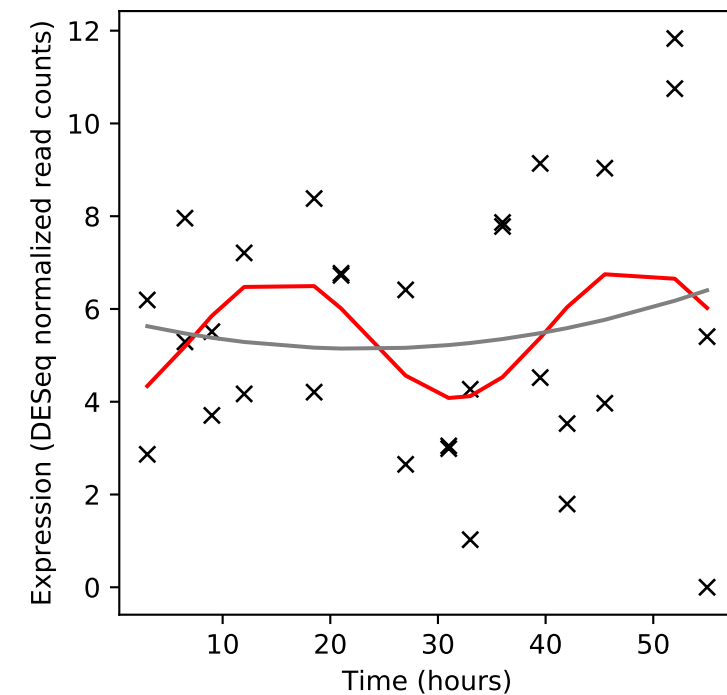

Rv2293c/-

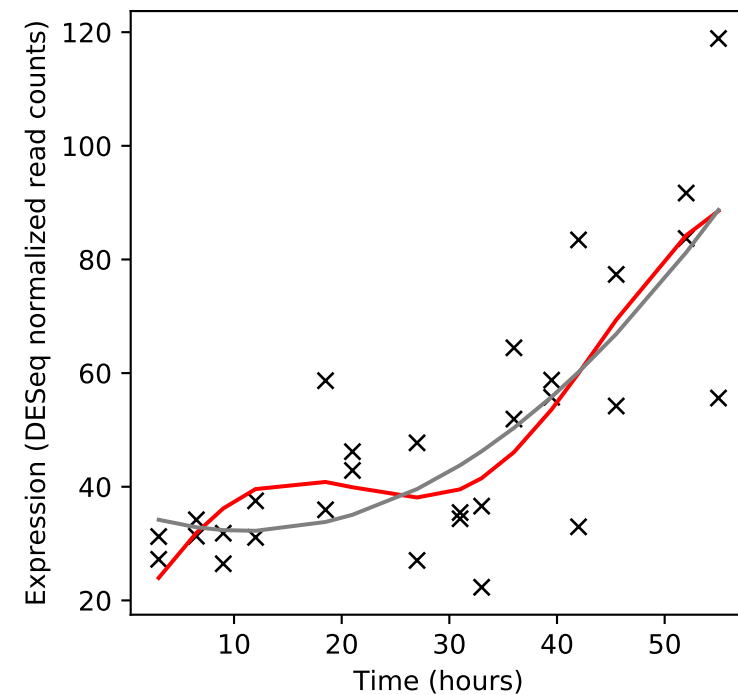

Rv2294/-

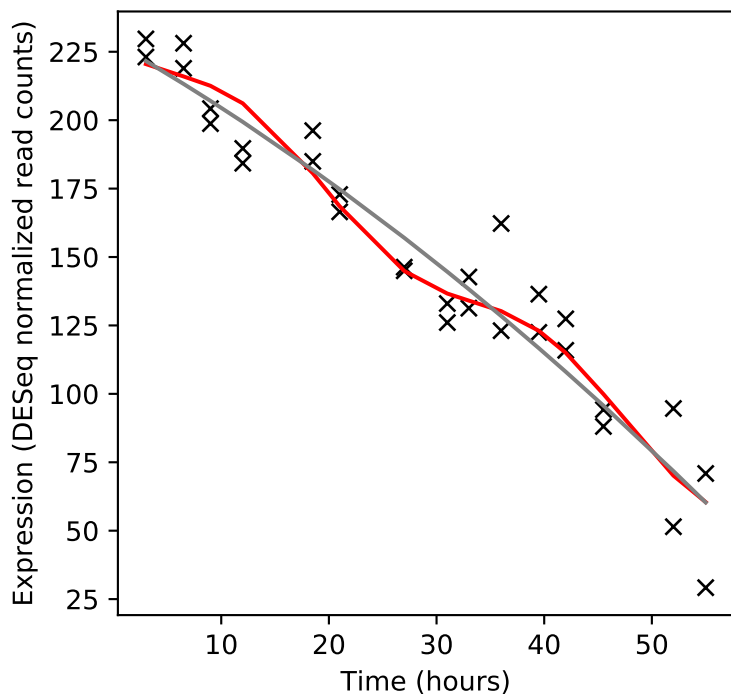

Rv2295/-

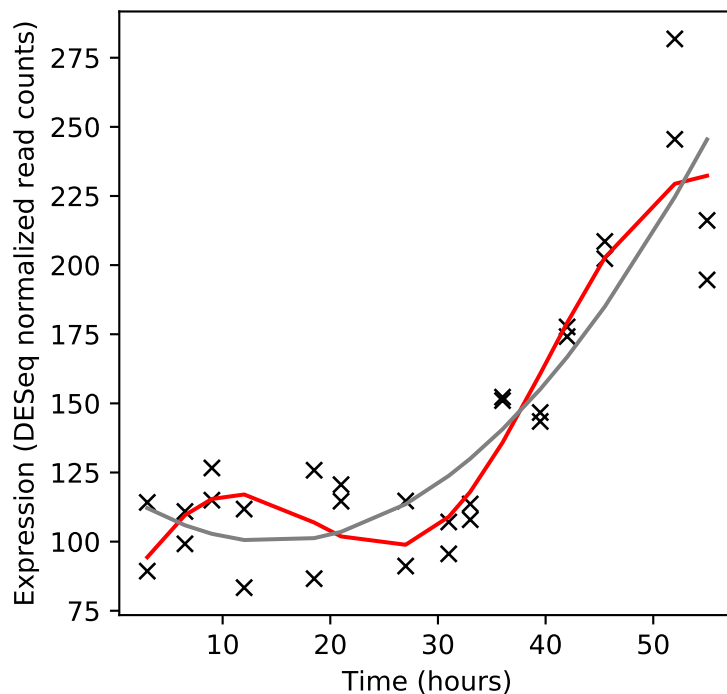

Rv2296/-

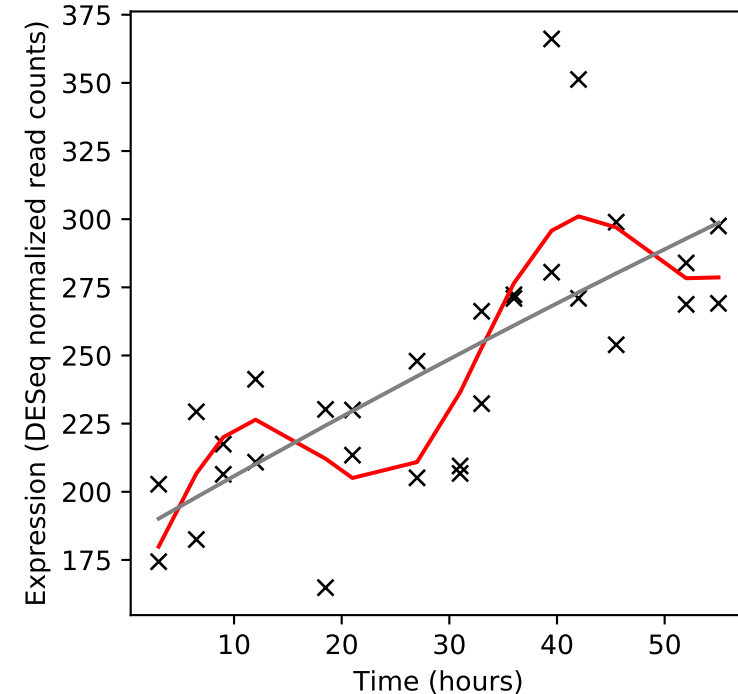



Rv2297/-

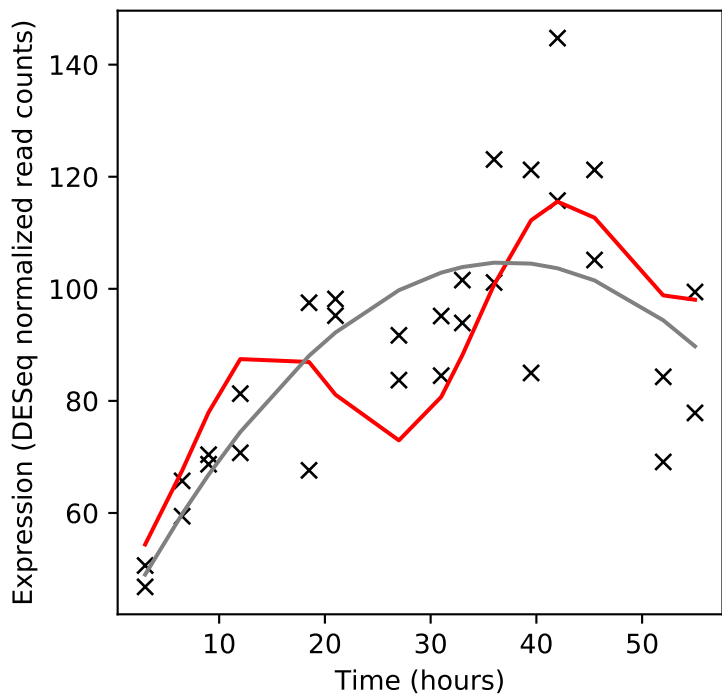

Rv2298/-

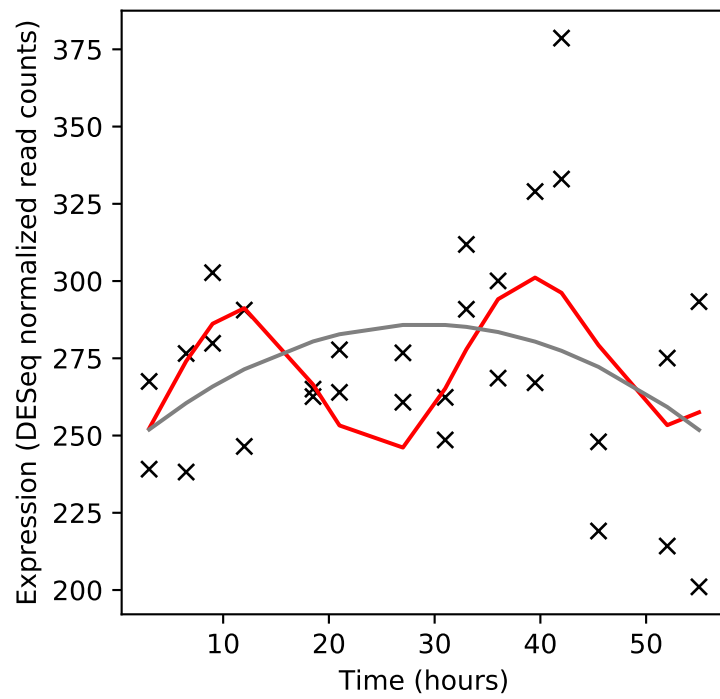

Rv2299c/htpG

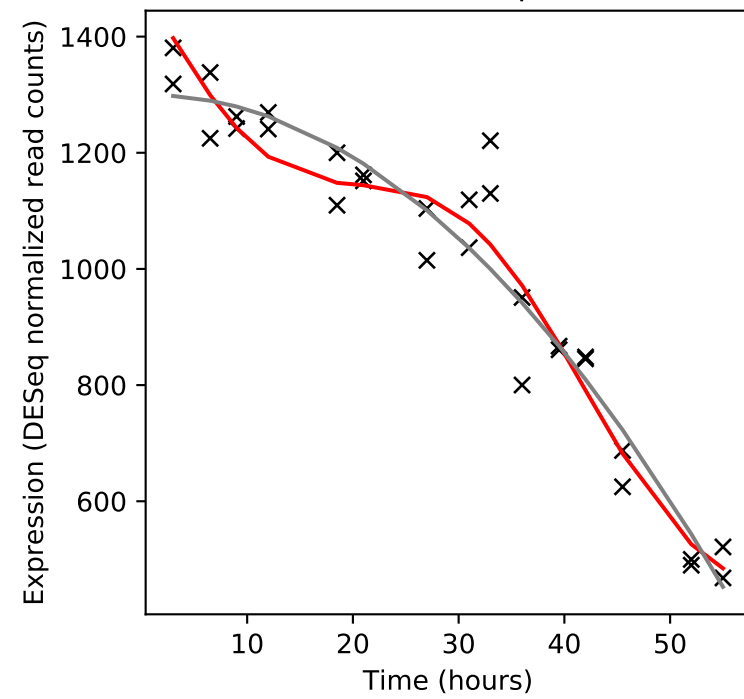

Rv2300c/-

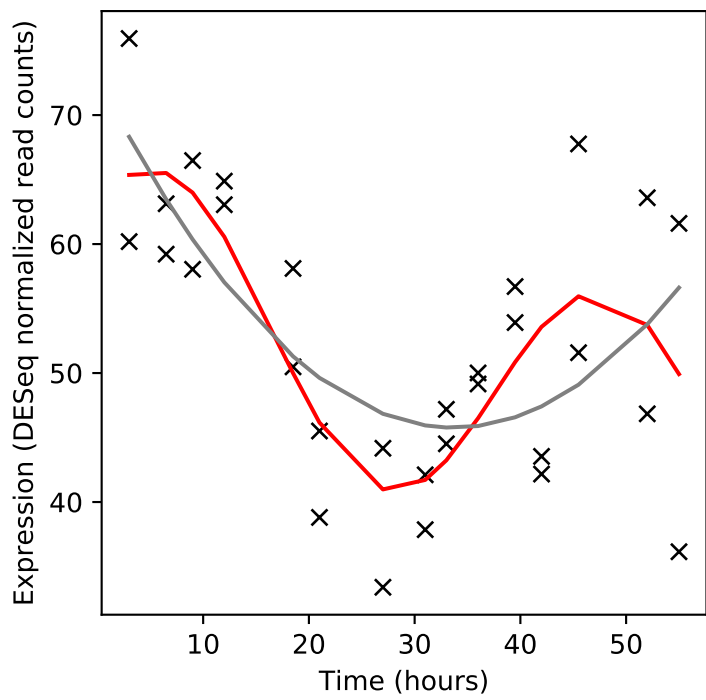

Rv2301/cut2

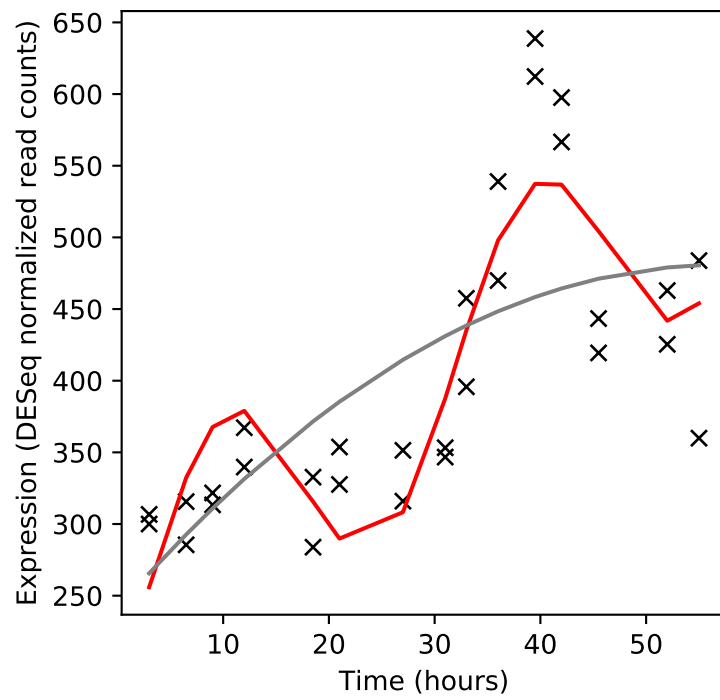

Rv2302/-

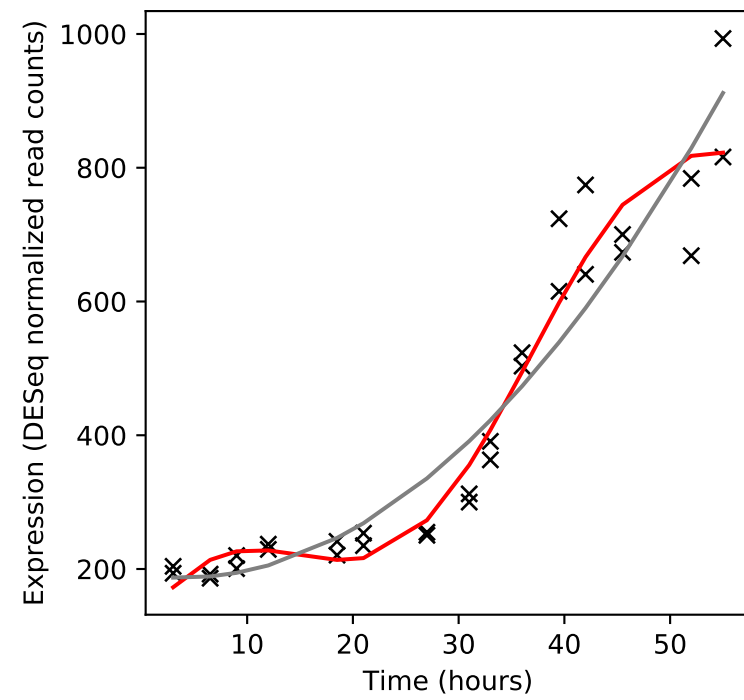

Rv2303c/-

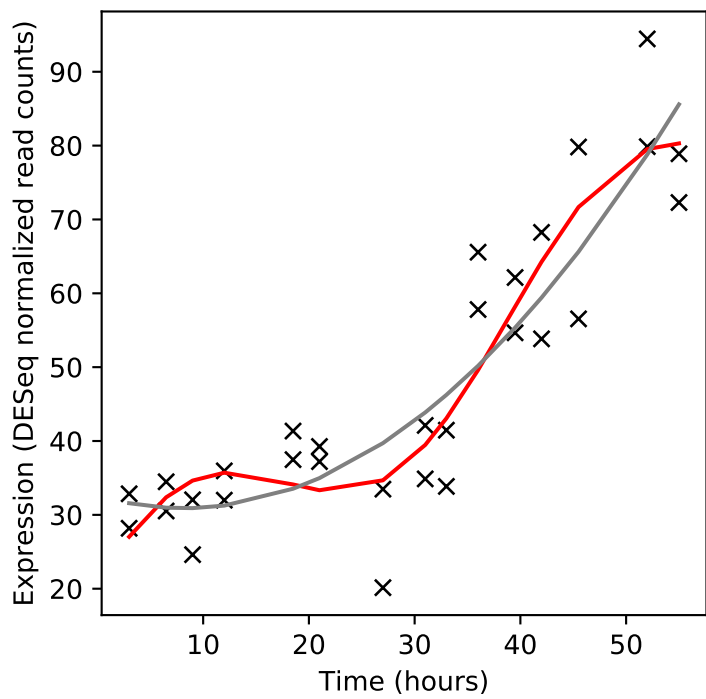

Rv2304c/-

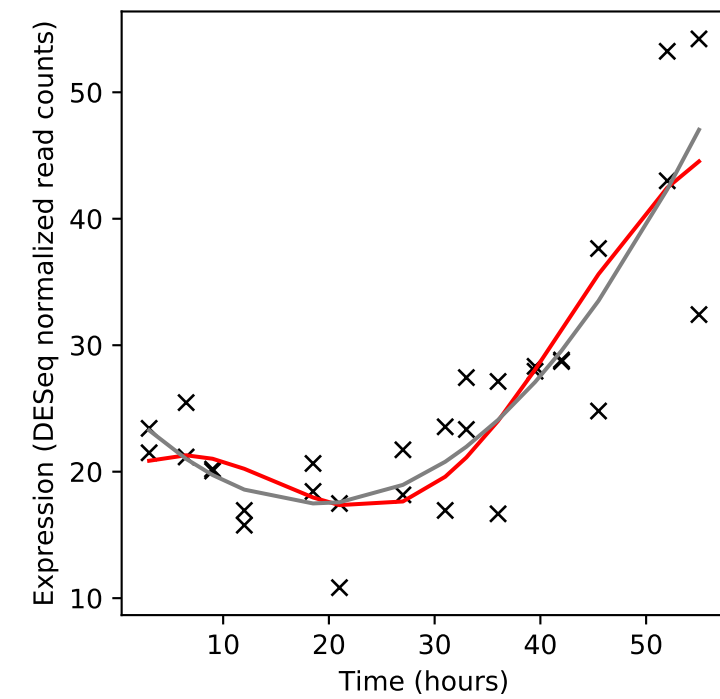

Rv2305/-

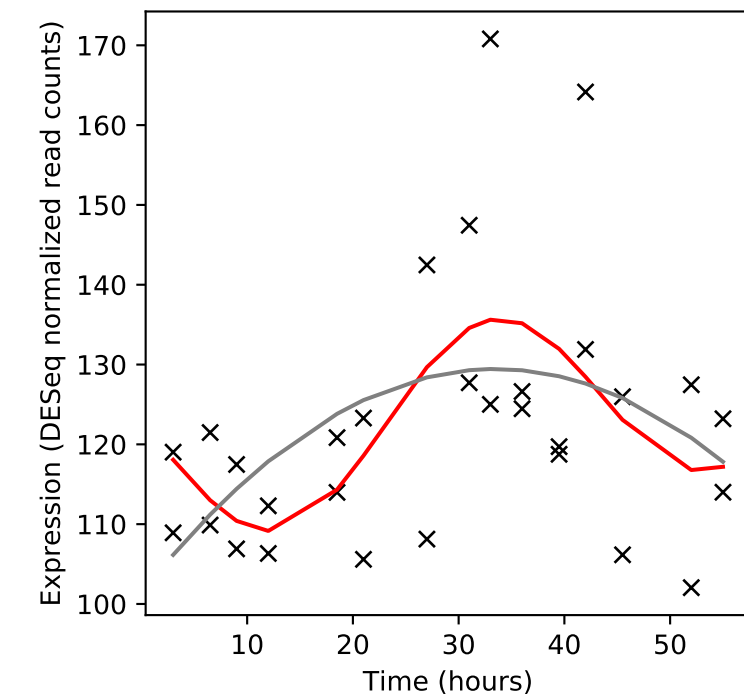

Rv2306A/-

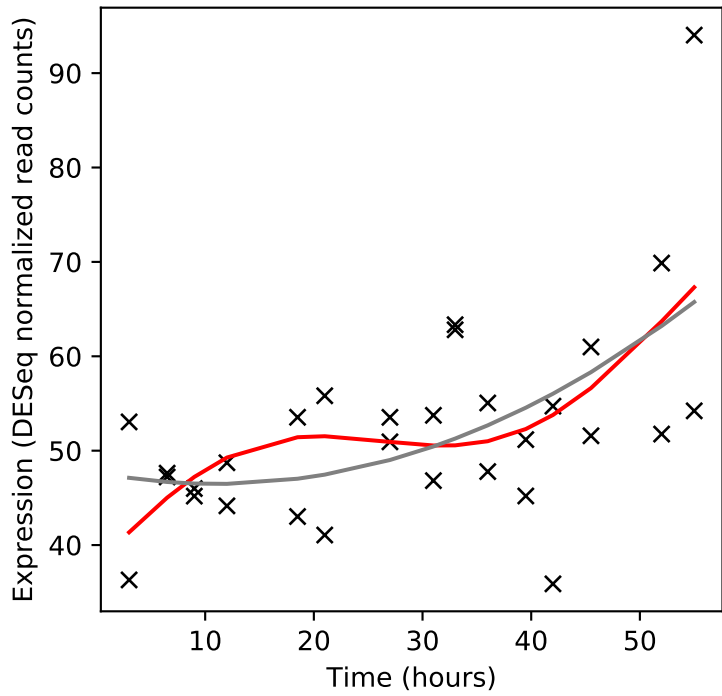

Rv2306B/-

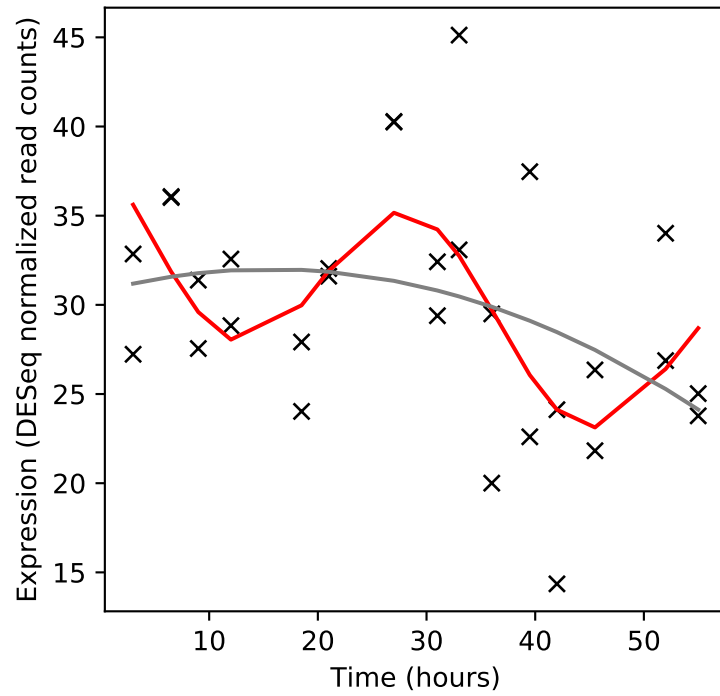

Rv2307c/-

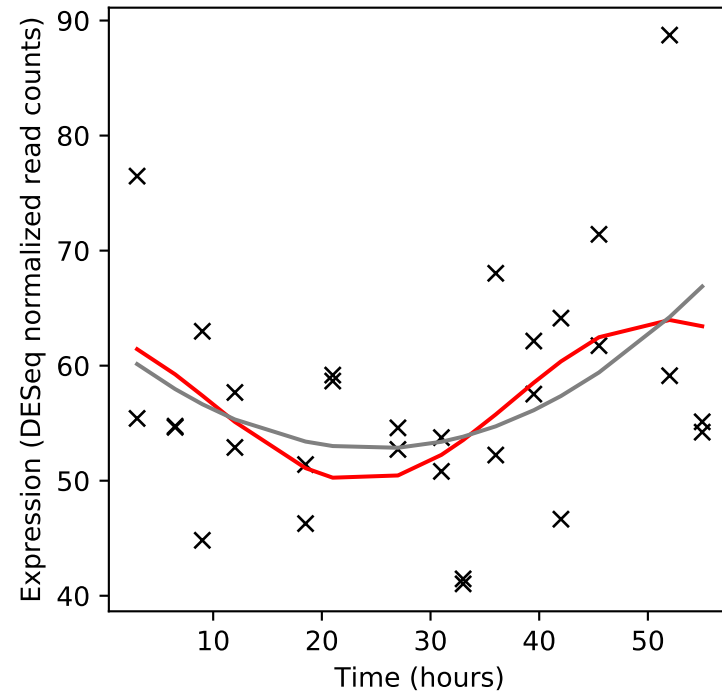

Rv2307A/-

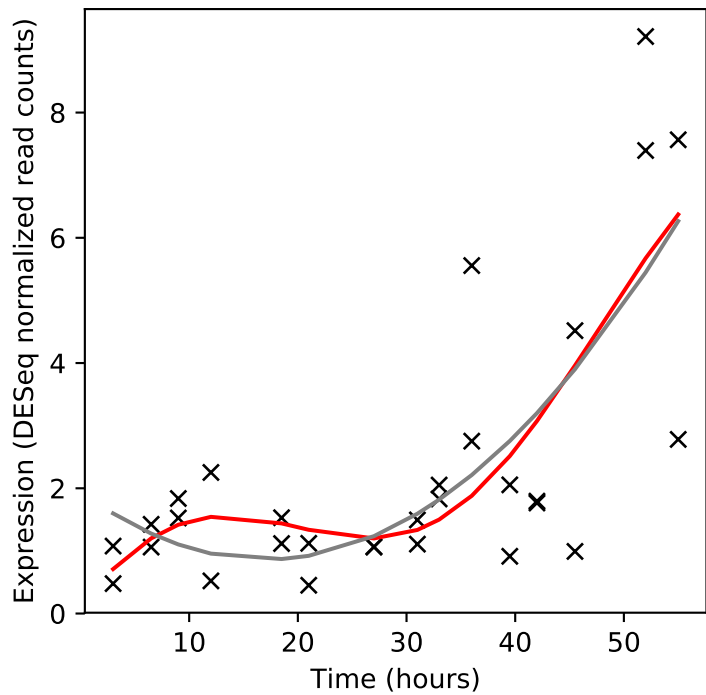

Rv2307B/-

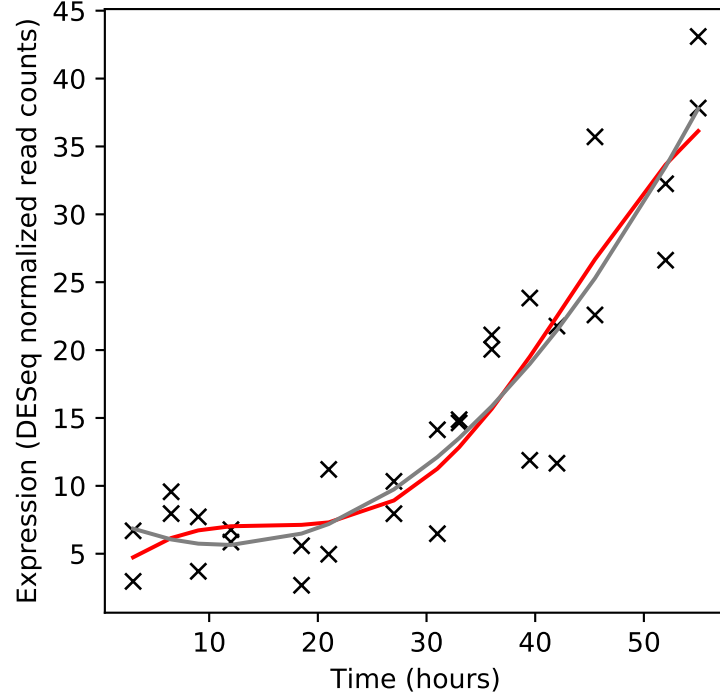

Rv2307D/-

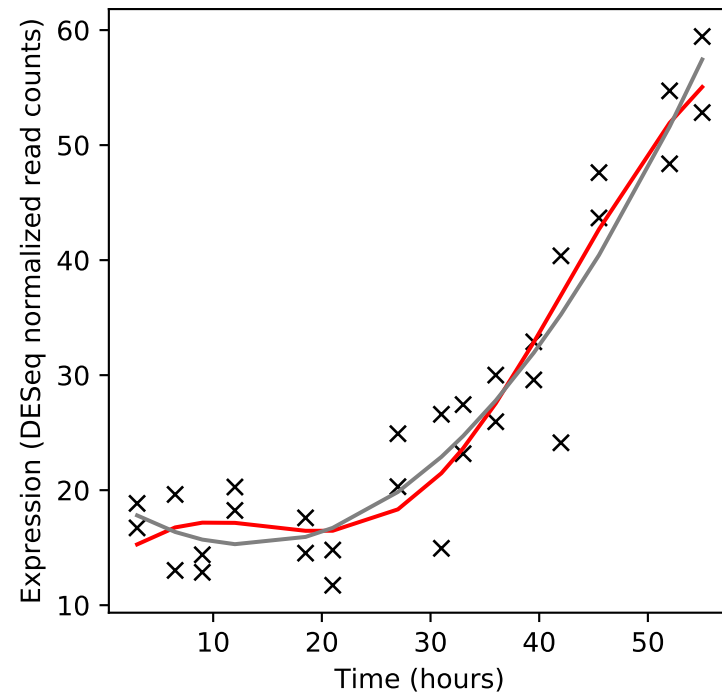

Rv2308/-

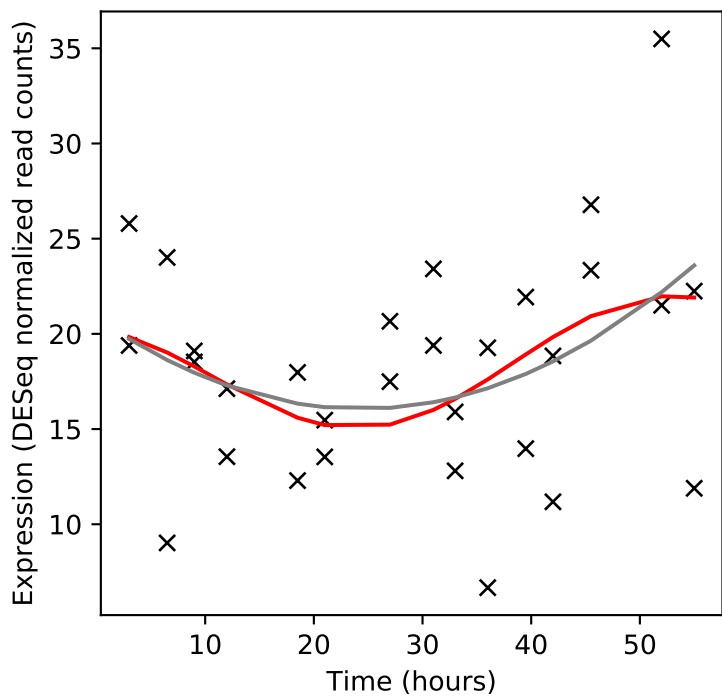

Rv2309c/-

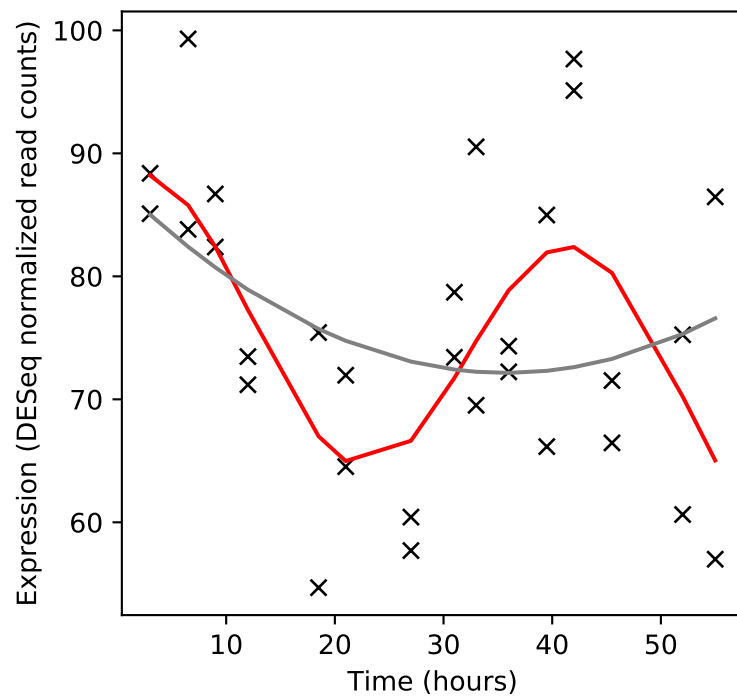

Rv2309A/-

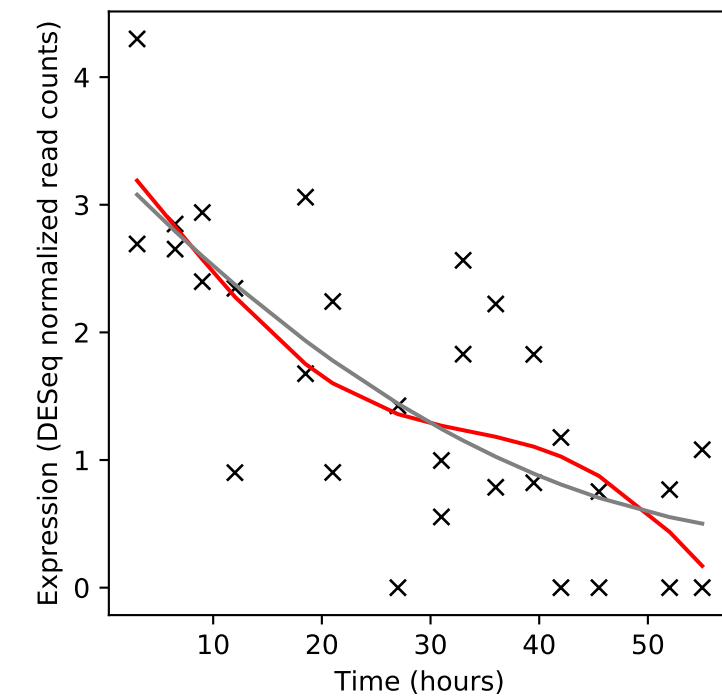

Rv2310/-

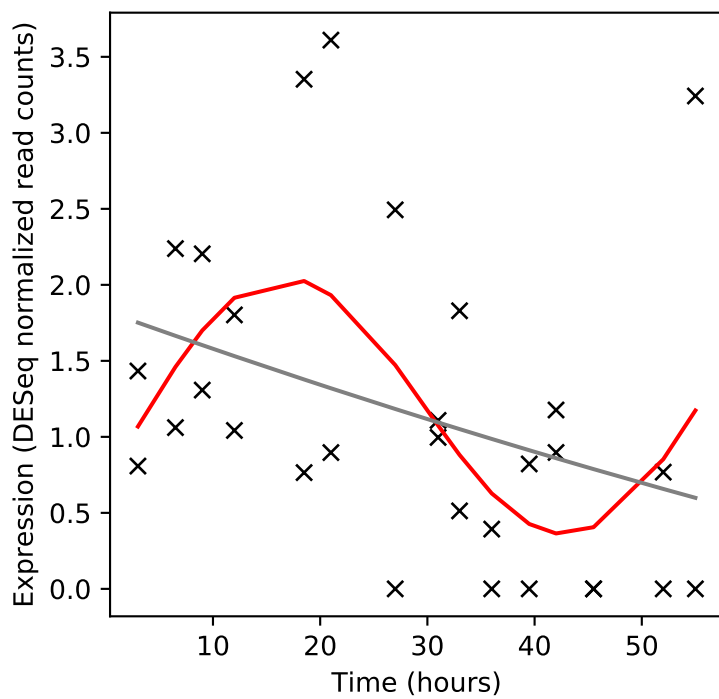

Rv2311/-

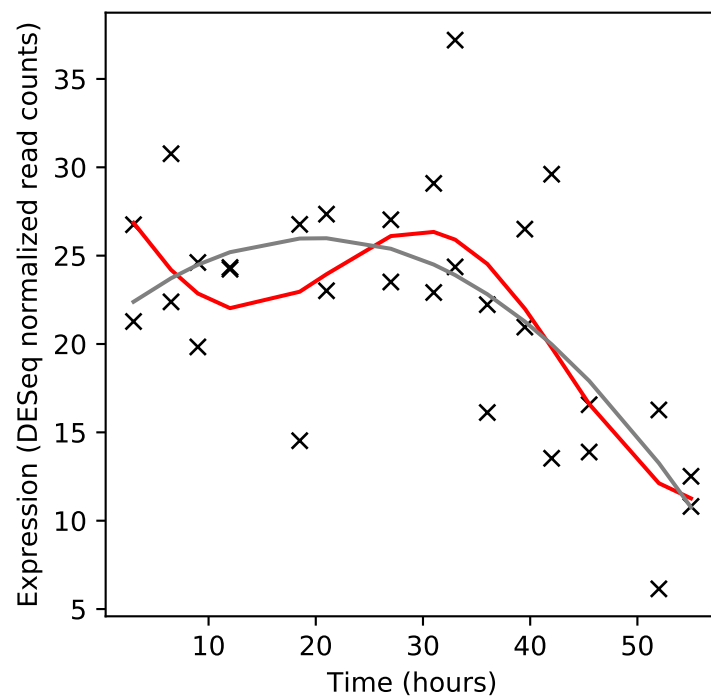

Rv2312/-

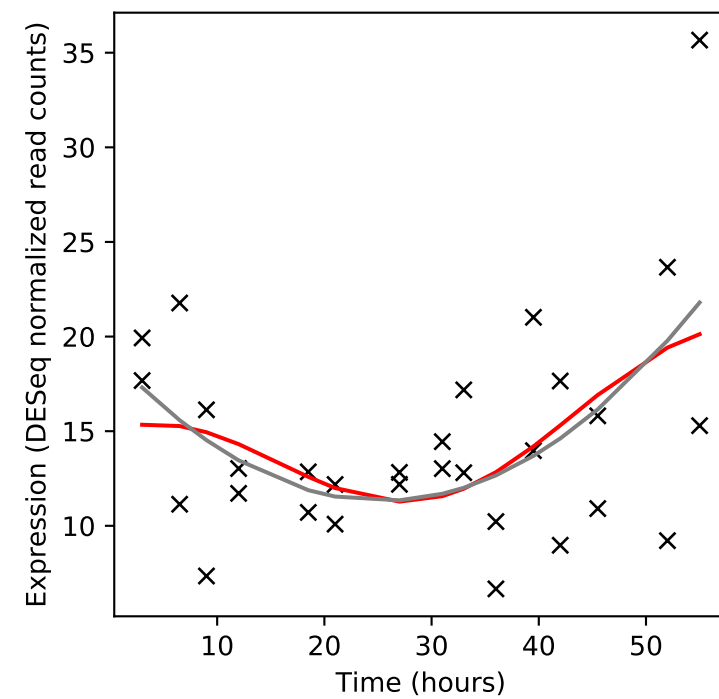

Rv2313c/-

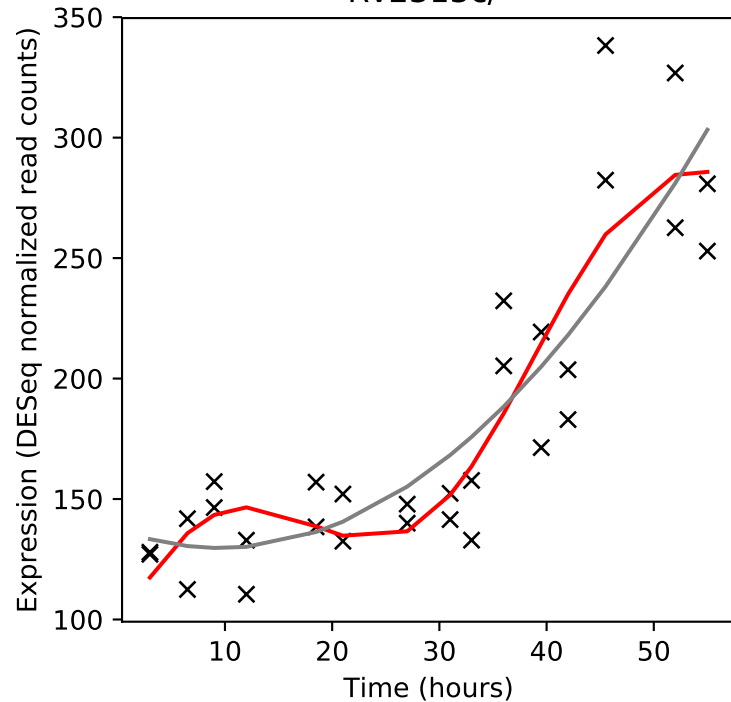

Rv2314c/-

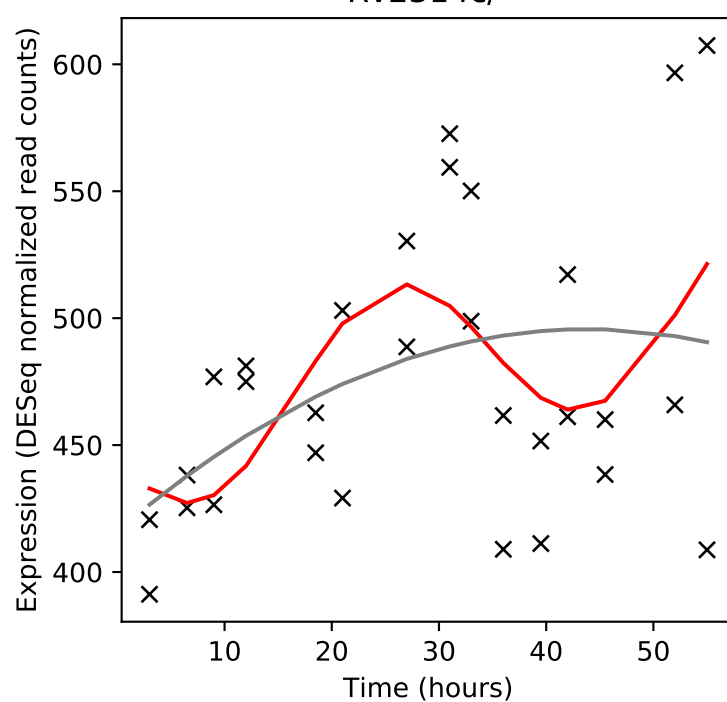

Rv2315c/-

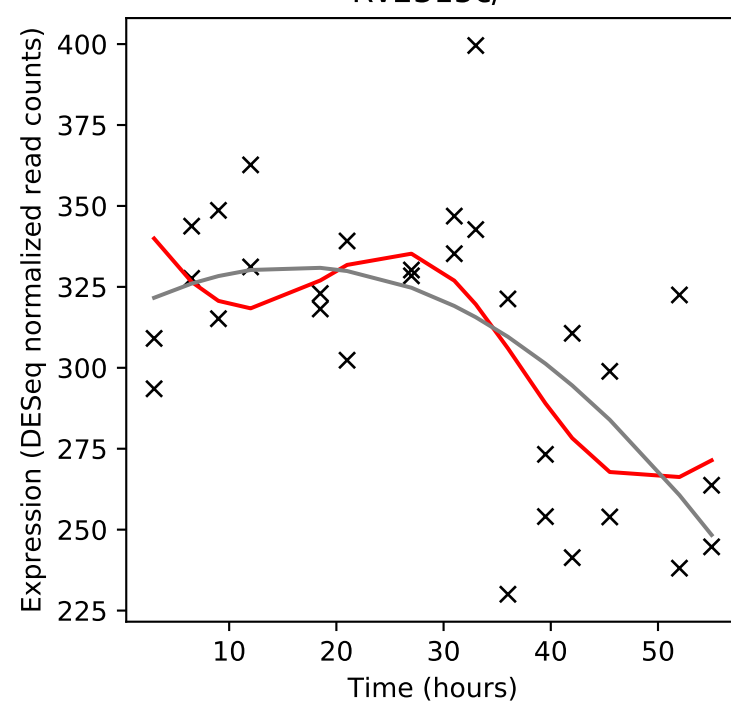

Rv2316/uspA

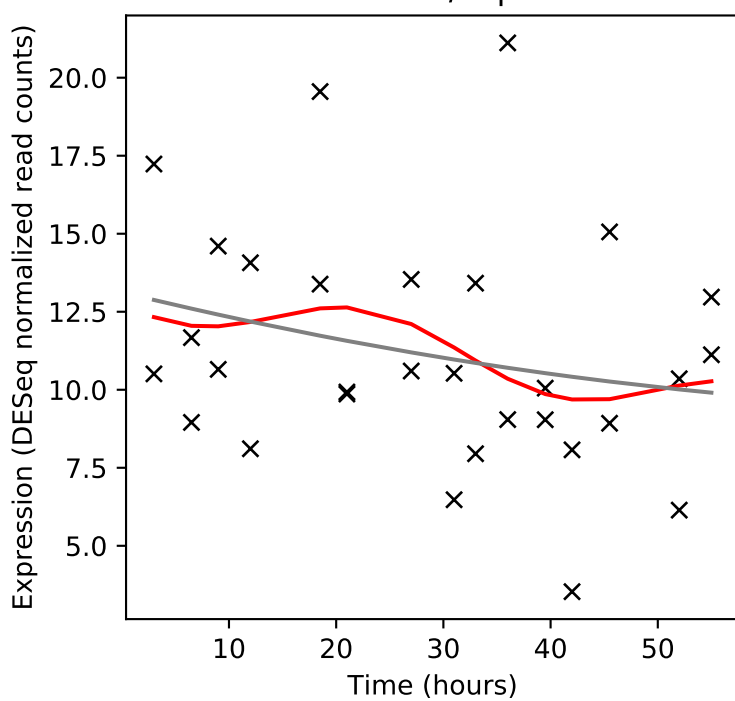

Rv2317/uspB

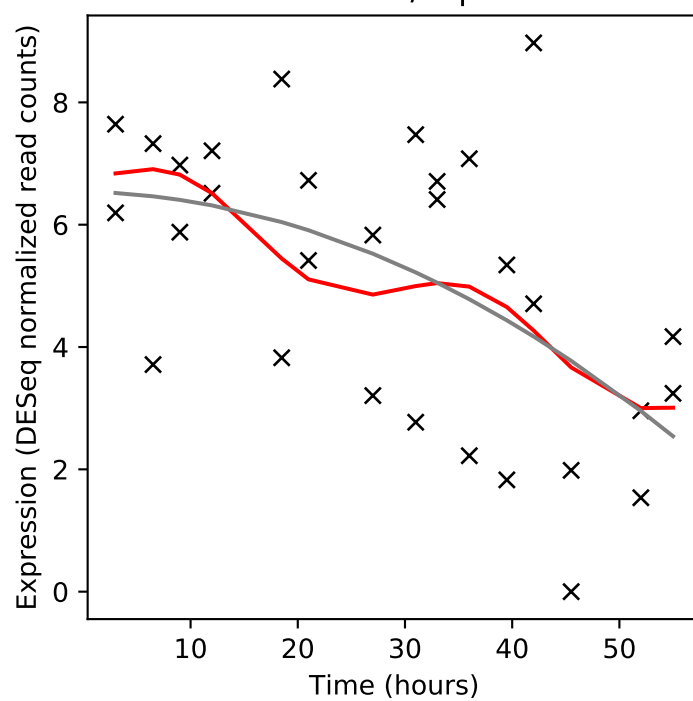

Rv2318/uspC

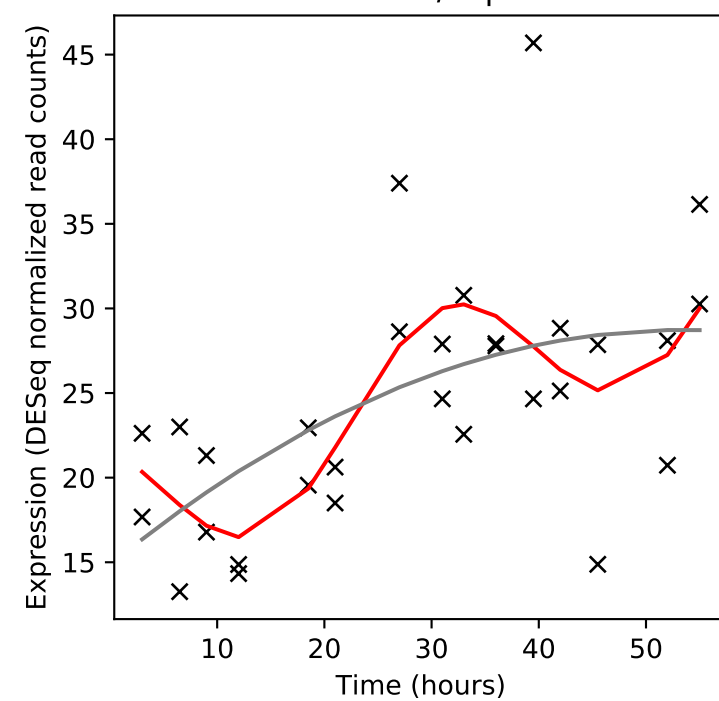

Rv2319c/-

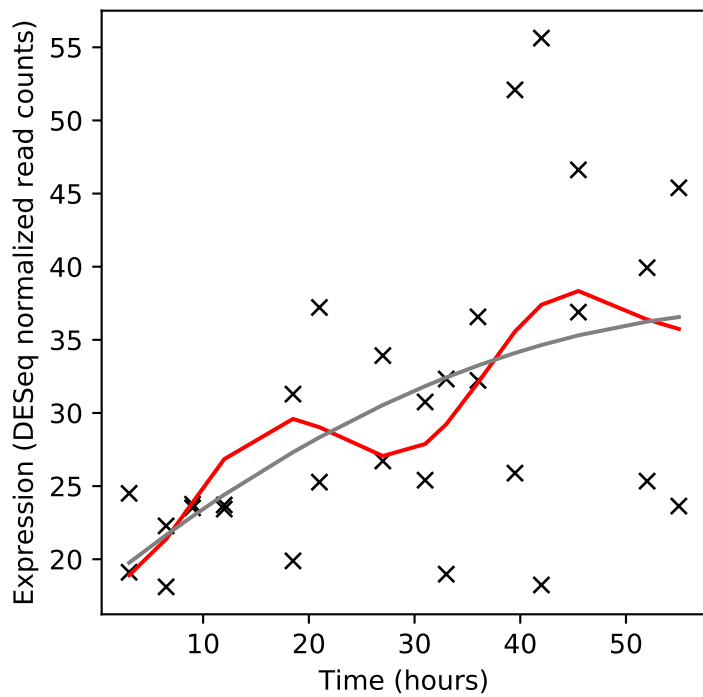

Rv2320c/rocE

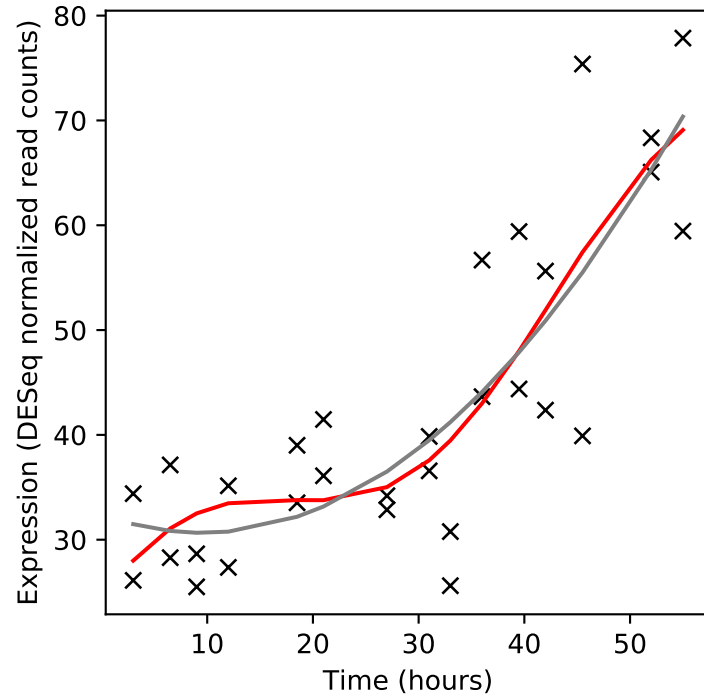

Rv2321c/rocD2

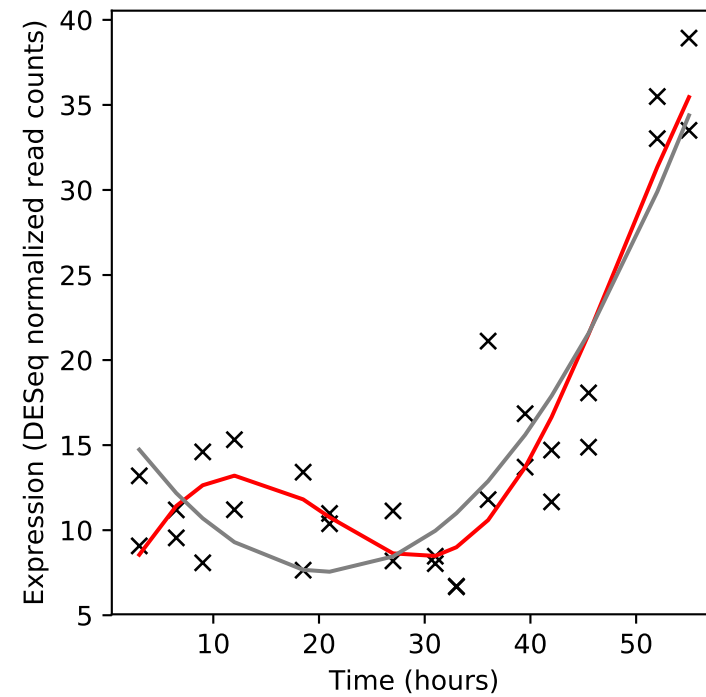

Rv2322c/rocD1

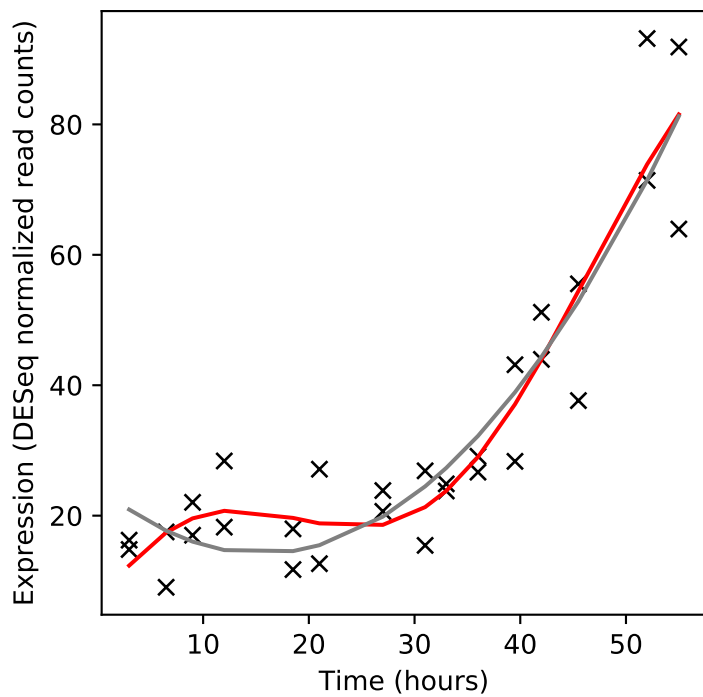

Rv2323c/-

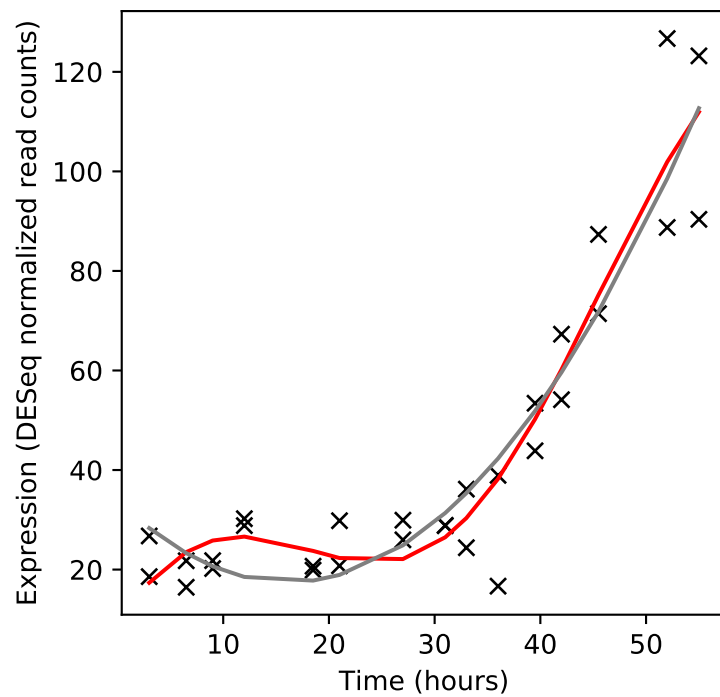

Rv2324c/-

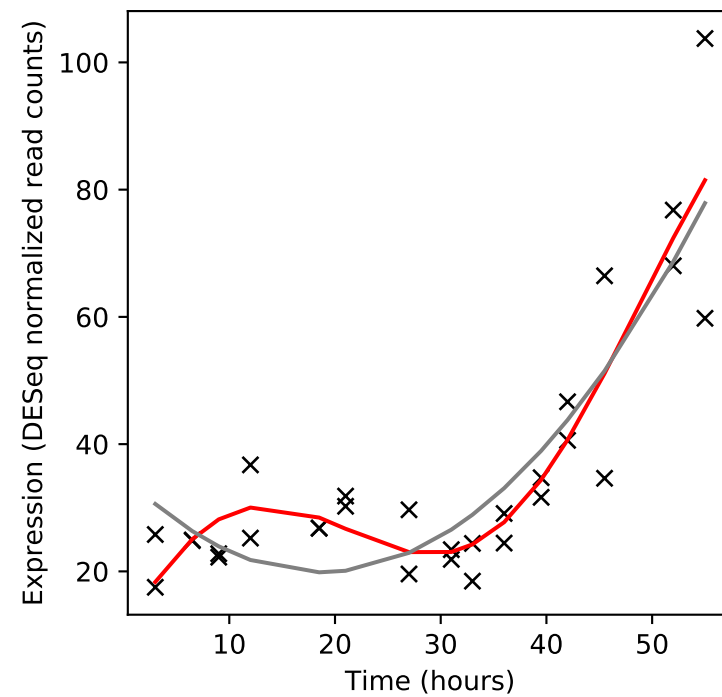

Rv2325c/-

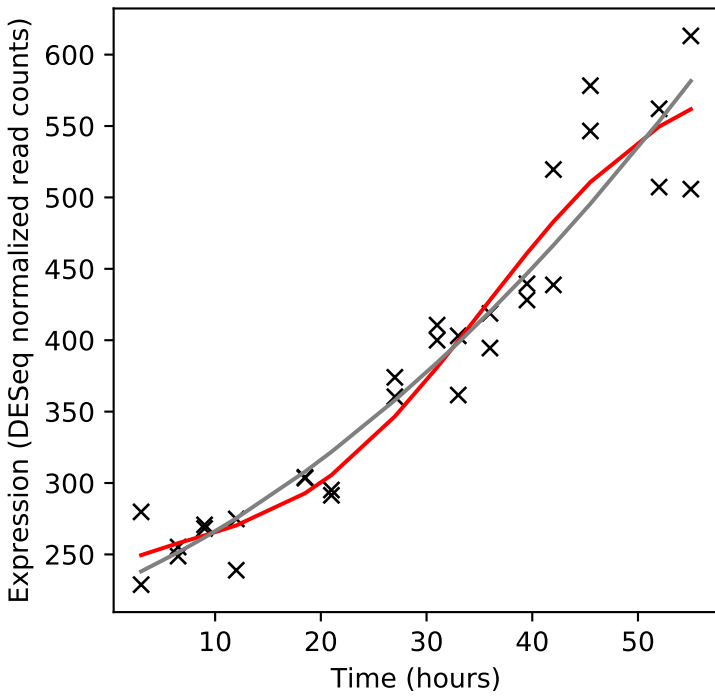

Rv2326c/-

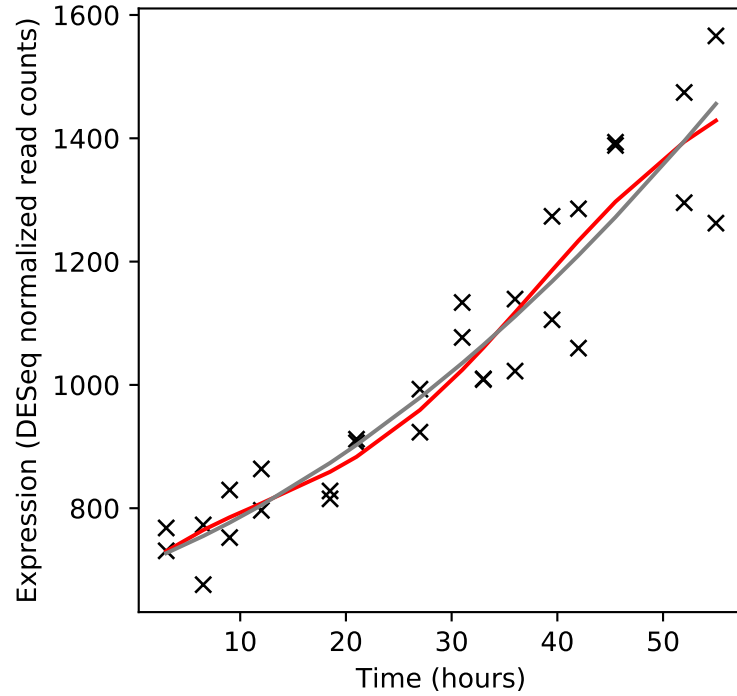

Rv2327c/-

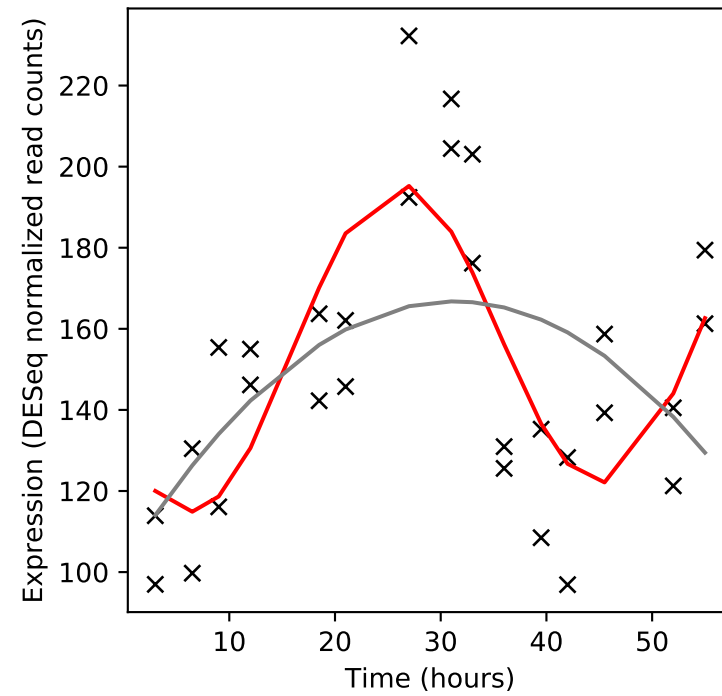

Rv2328/PE23

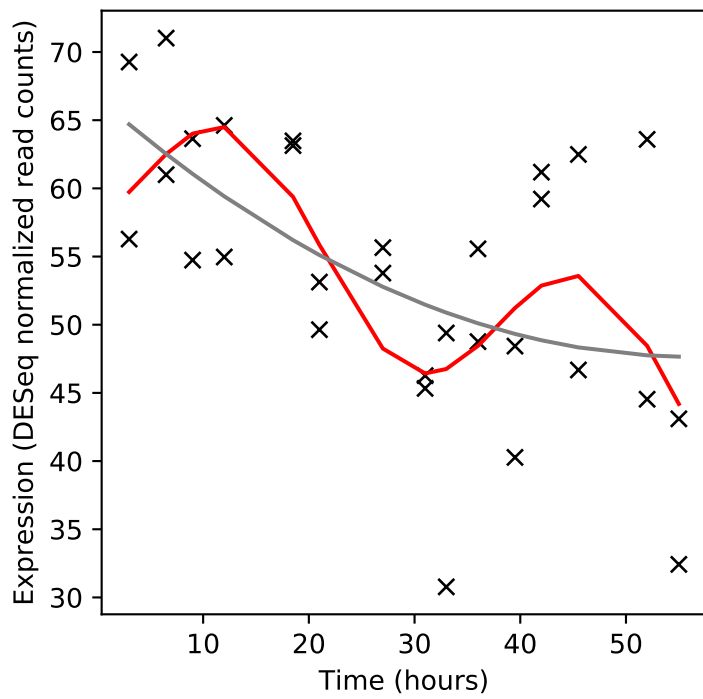

Rv2329c/narK1

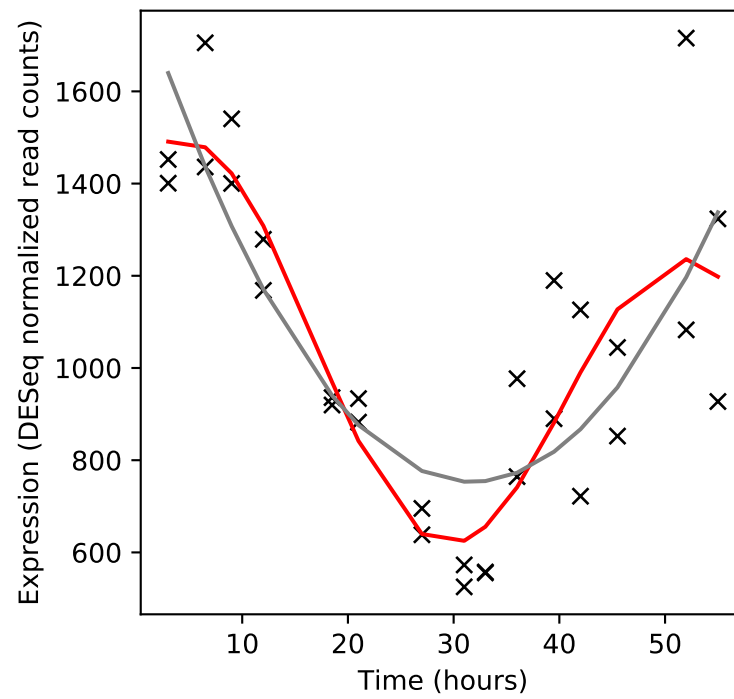

Rv2330c/lppP

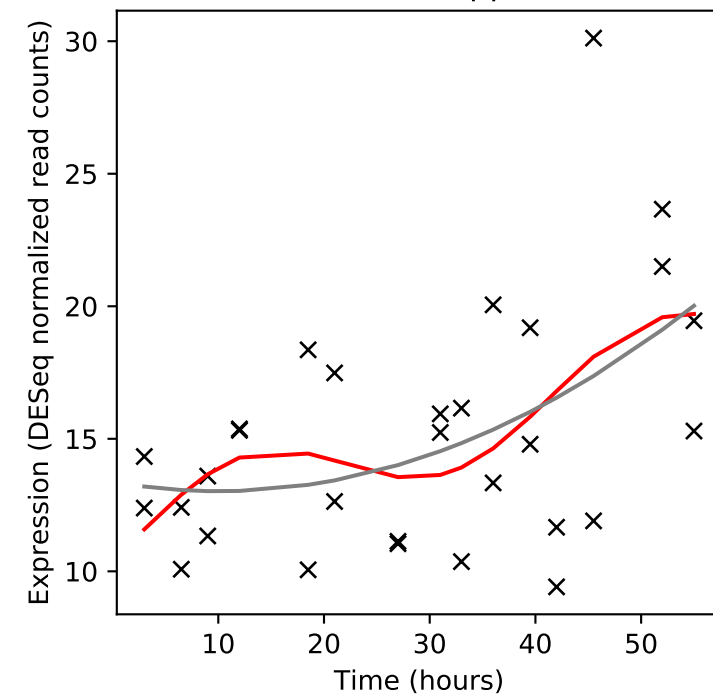

Rv2331/-

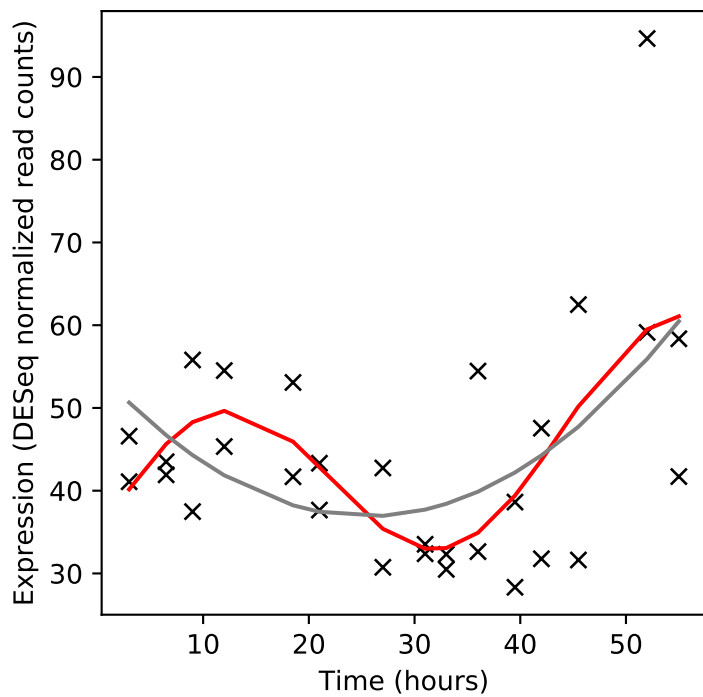

Rv2331A/-

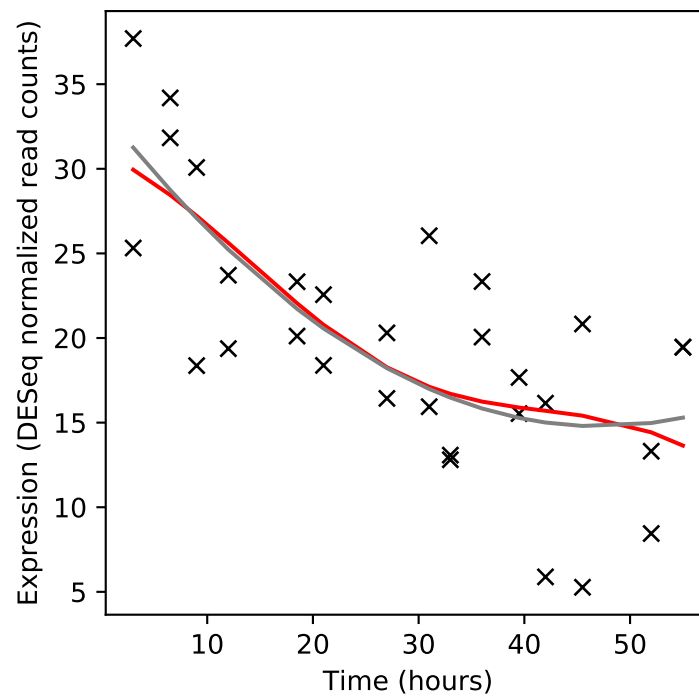

Rv2332/mez

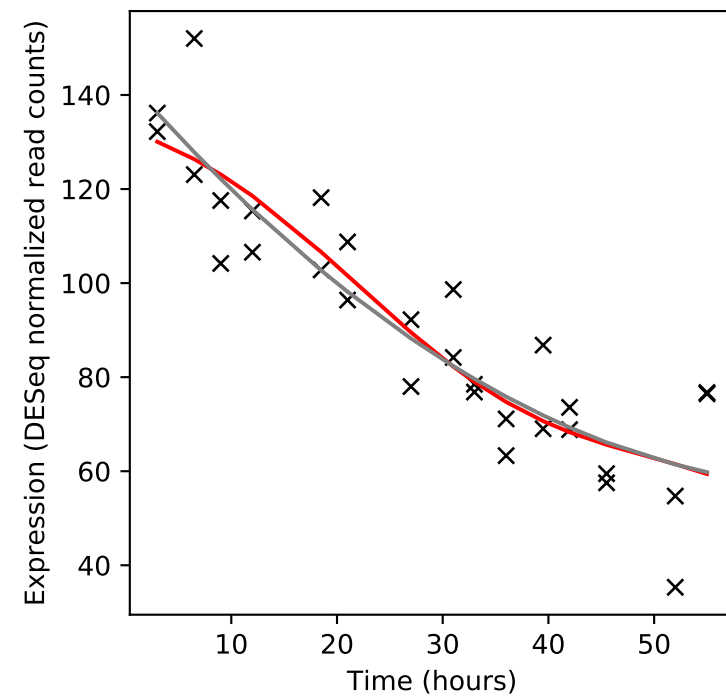

Rv2333c/stp

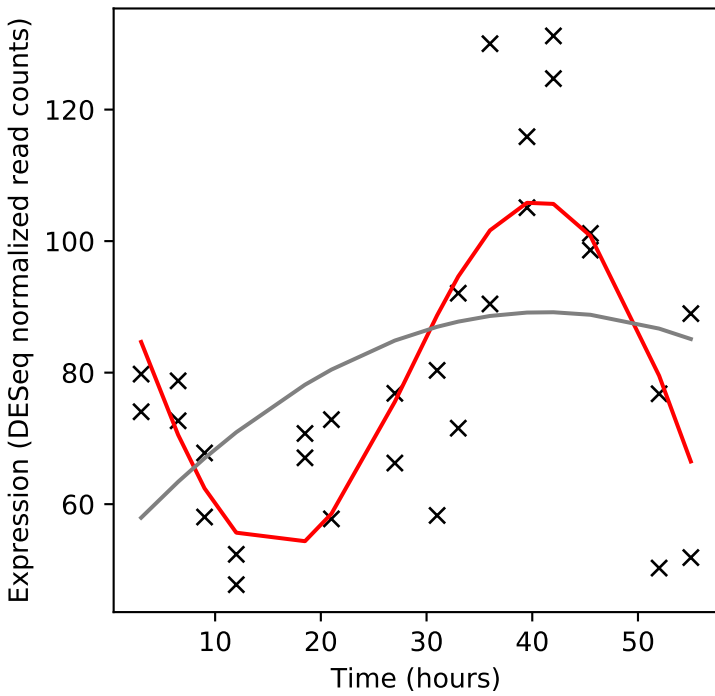

Rv2334/cysK1

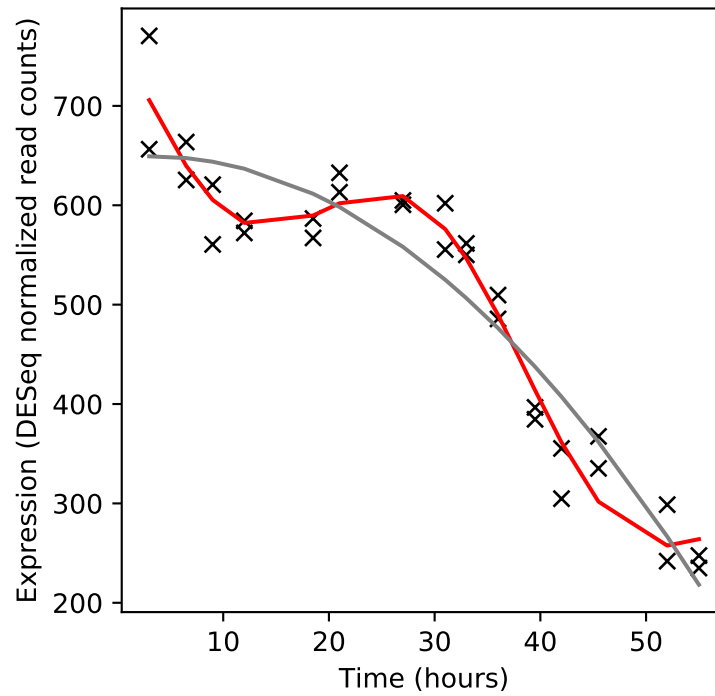

Rv2335/cysE

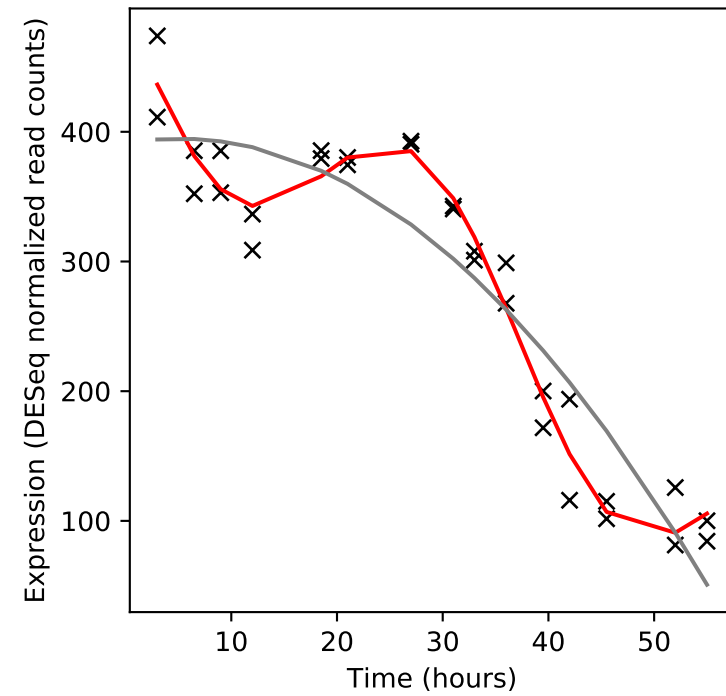

Rv2336/-

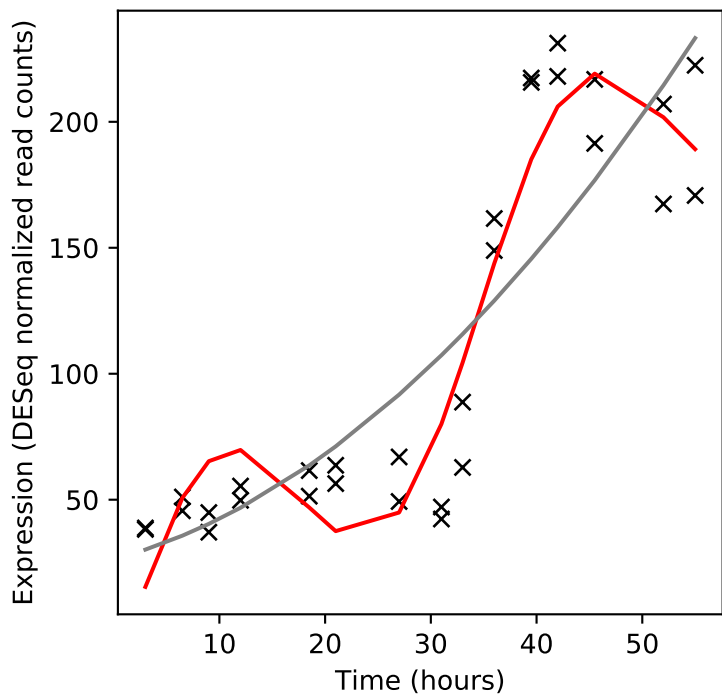

Rv2337c/-

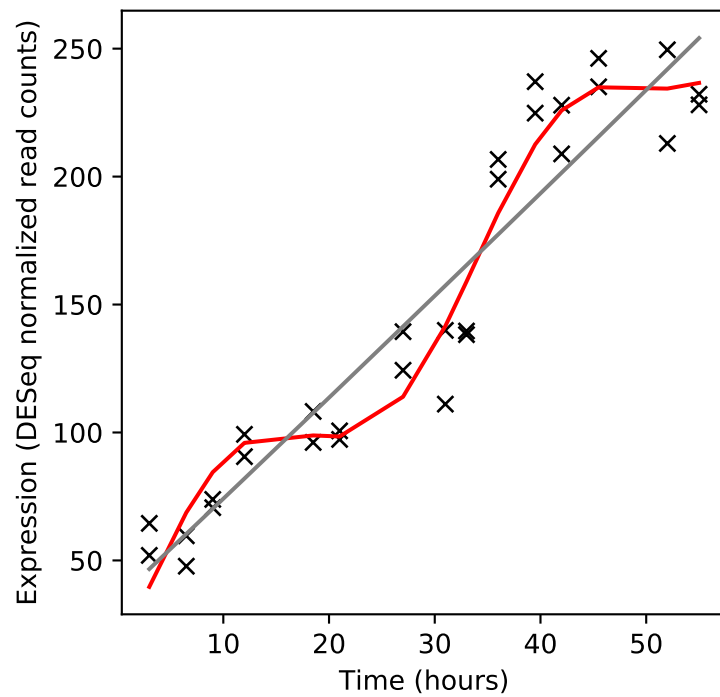

Rv2338c/moeW

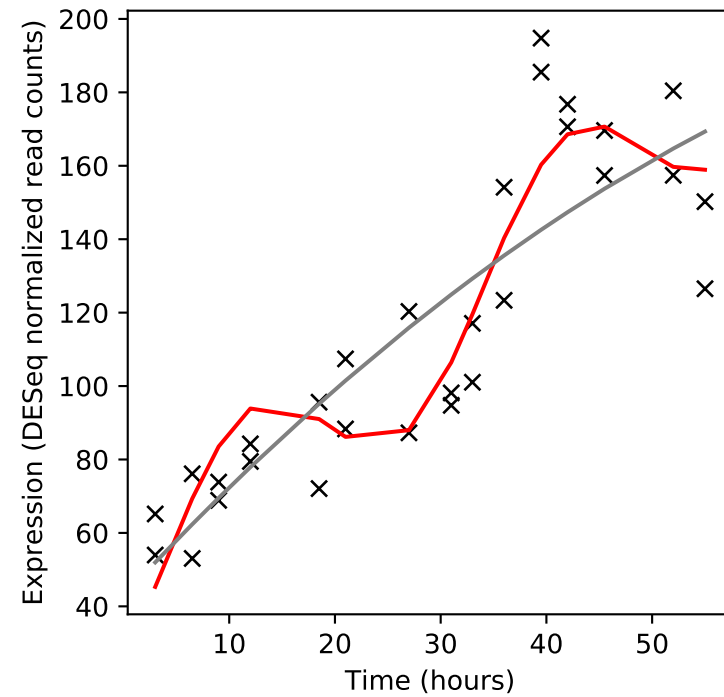

Rv2339/mmpL9

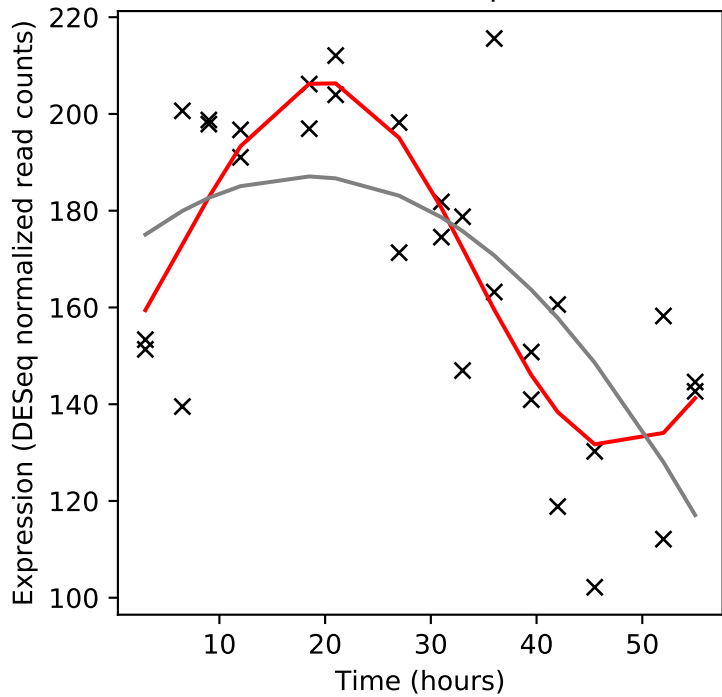

Rv2340c/PE\_PGRS39

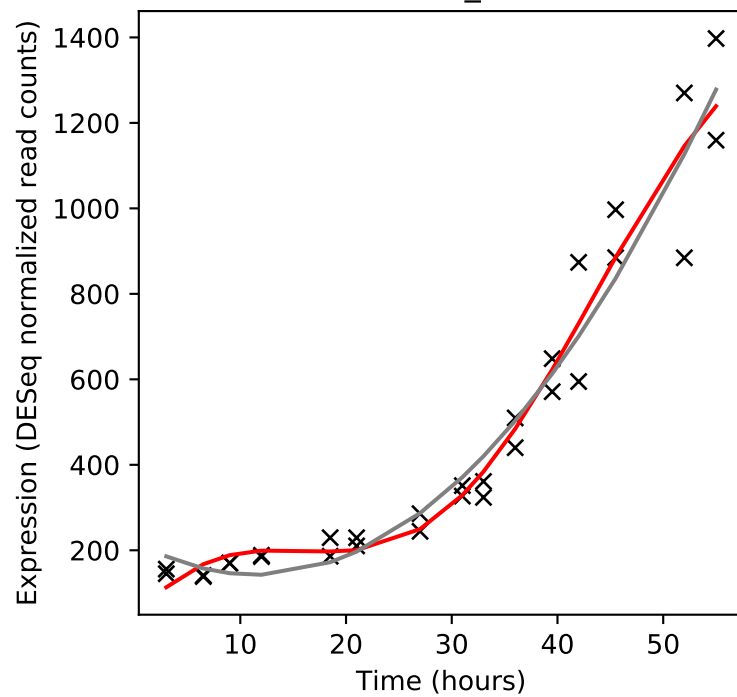

Rv2341/lppQ

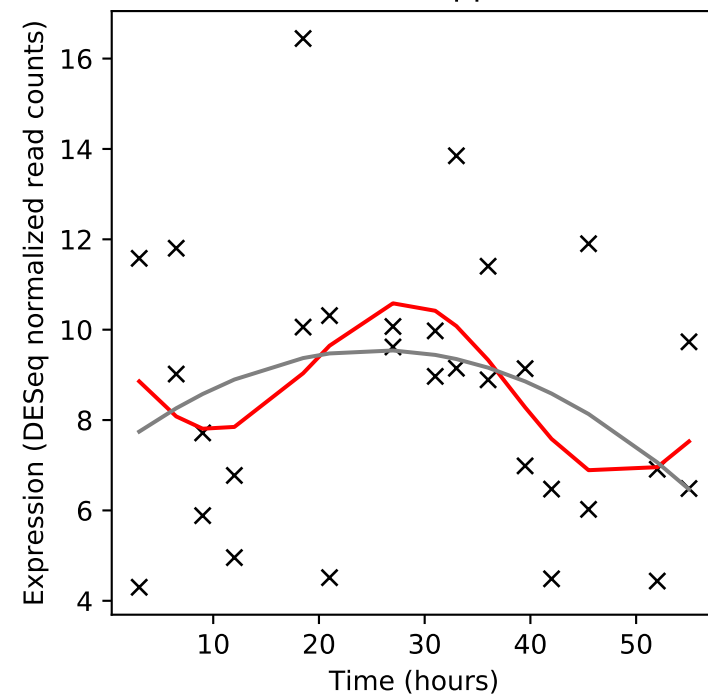

Rv2342/-

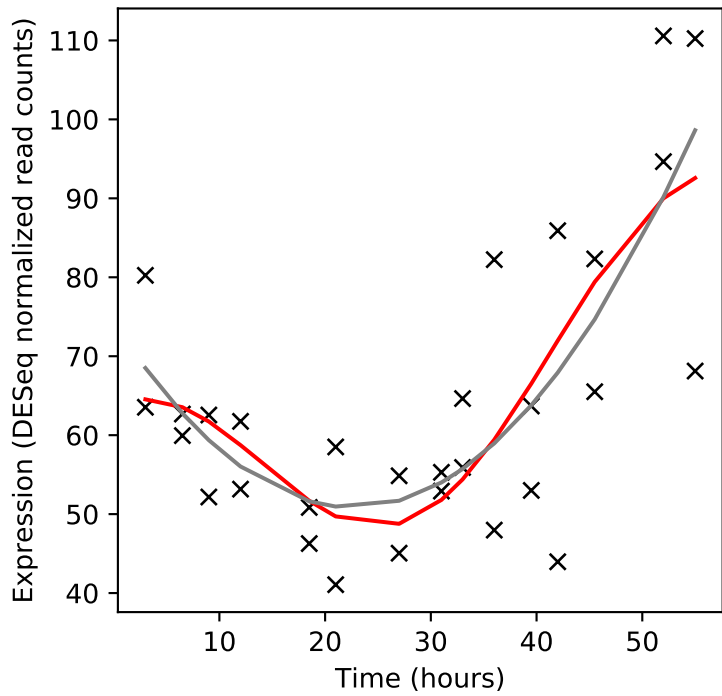

Rv2343c/dnaG

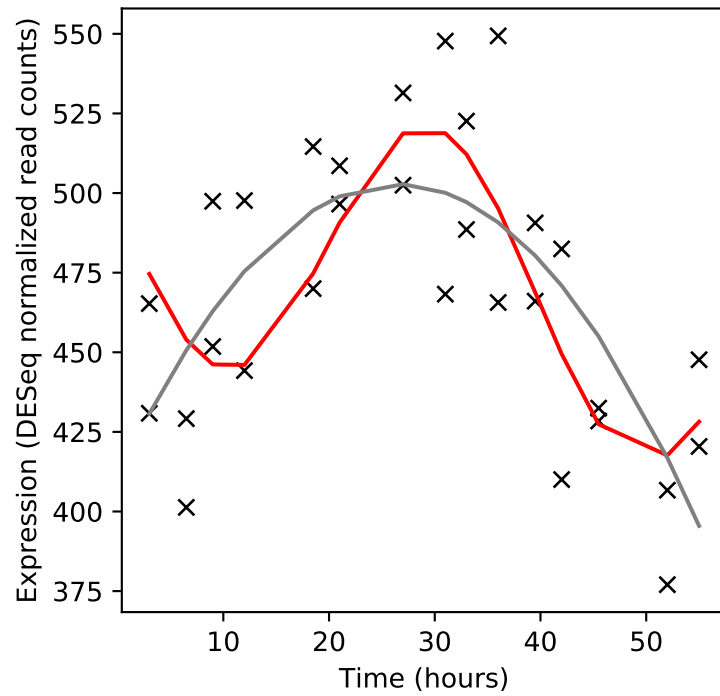

Rv2344c/dgt

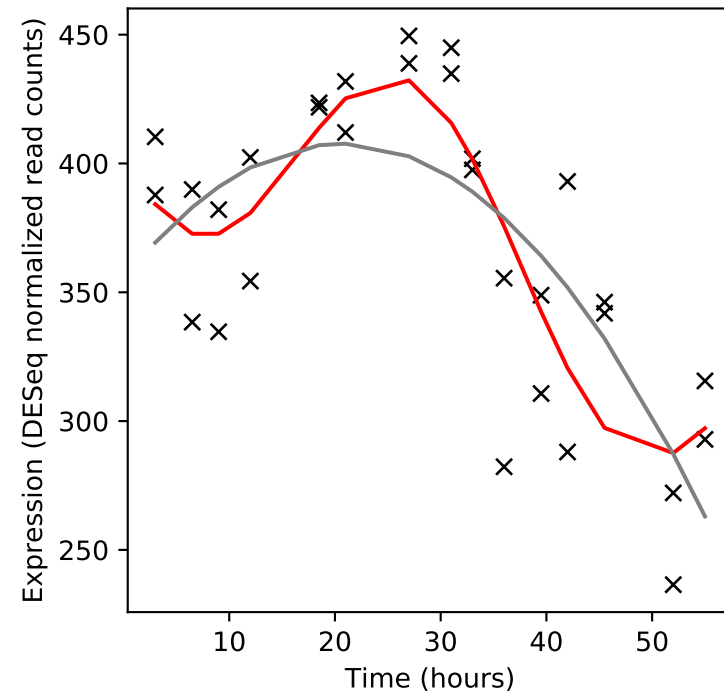

Rv2345/-

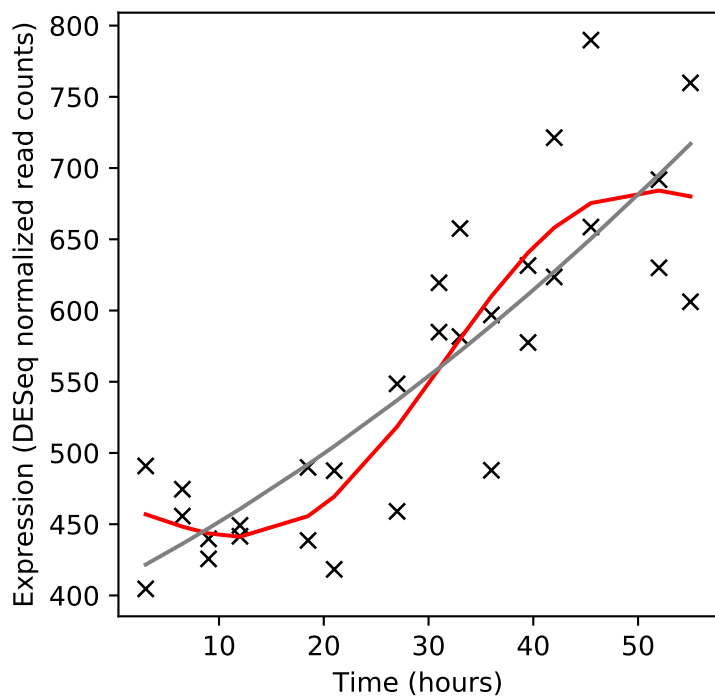

Rv2346c/esxO

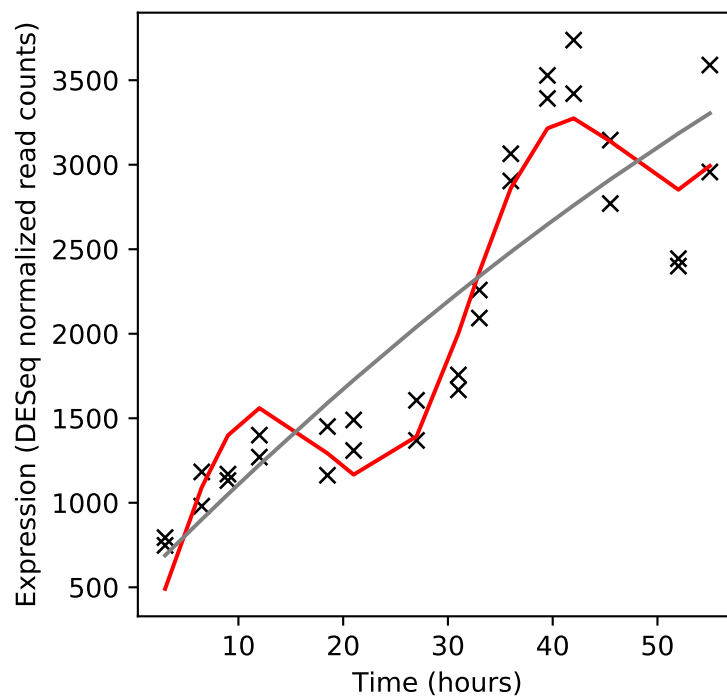

Rv2347c/esxP

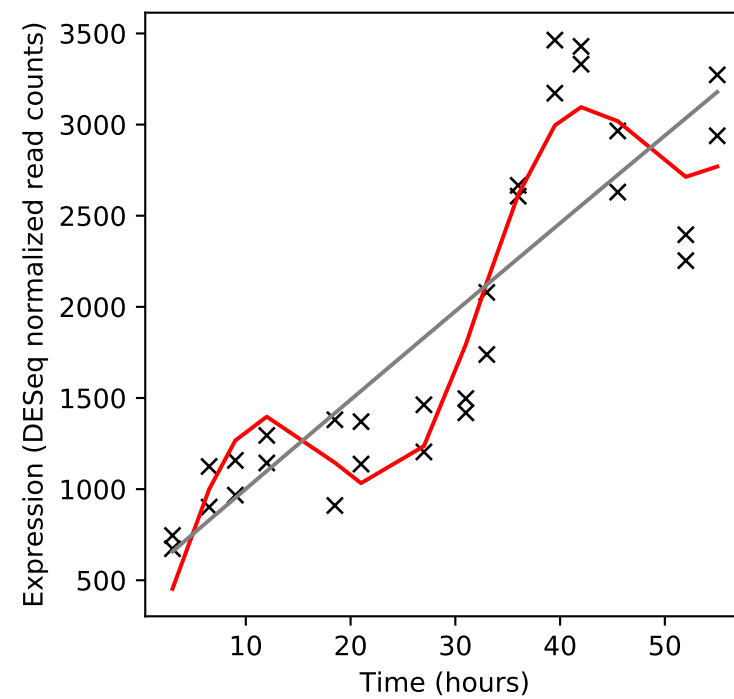

Rv2348c/-

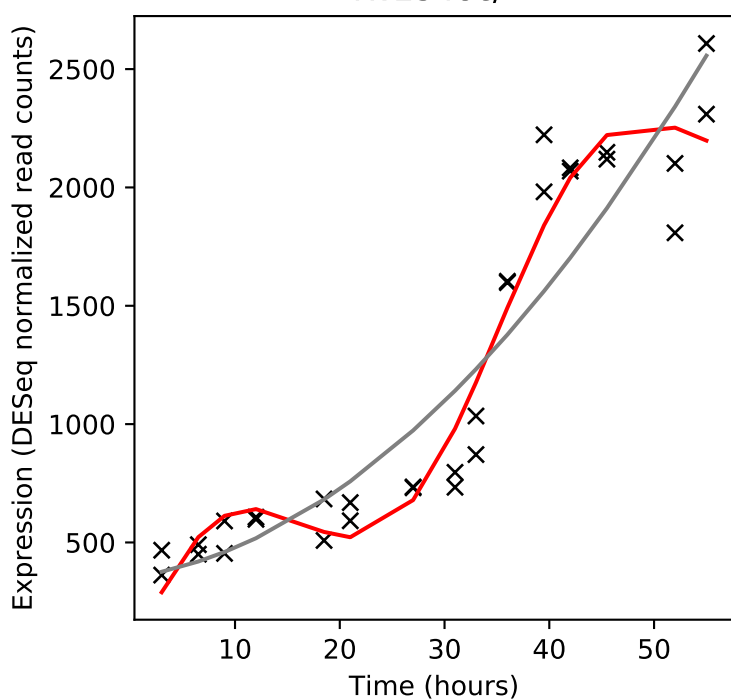

Rv2349c/plcC

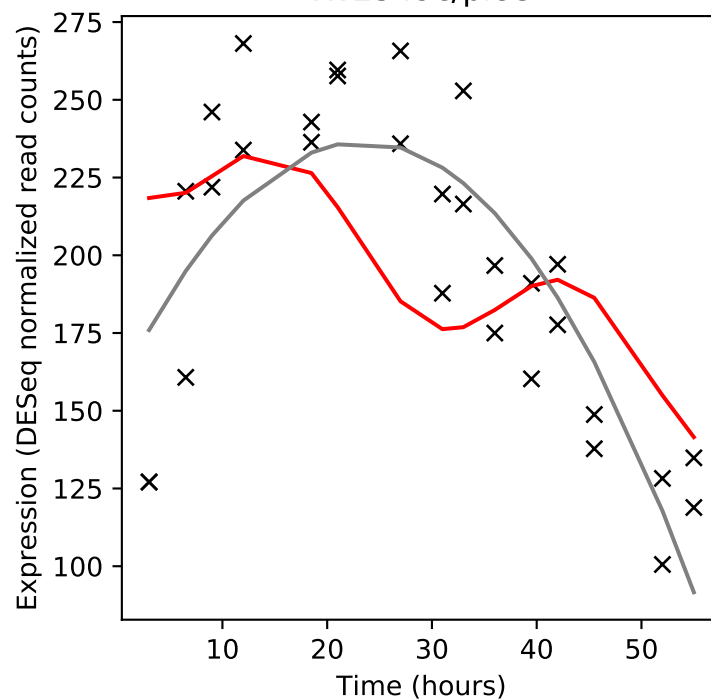

Rv2350c/plcB

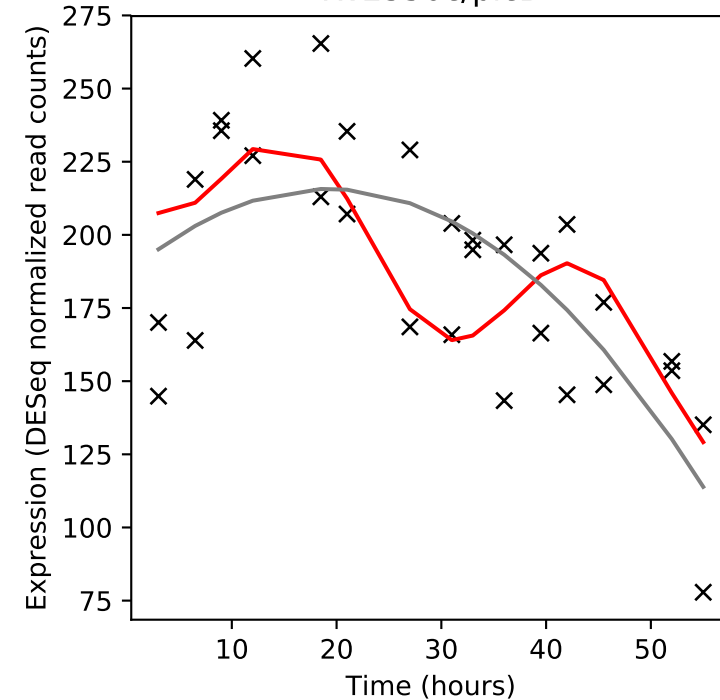

Rv2351c/plcA

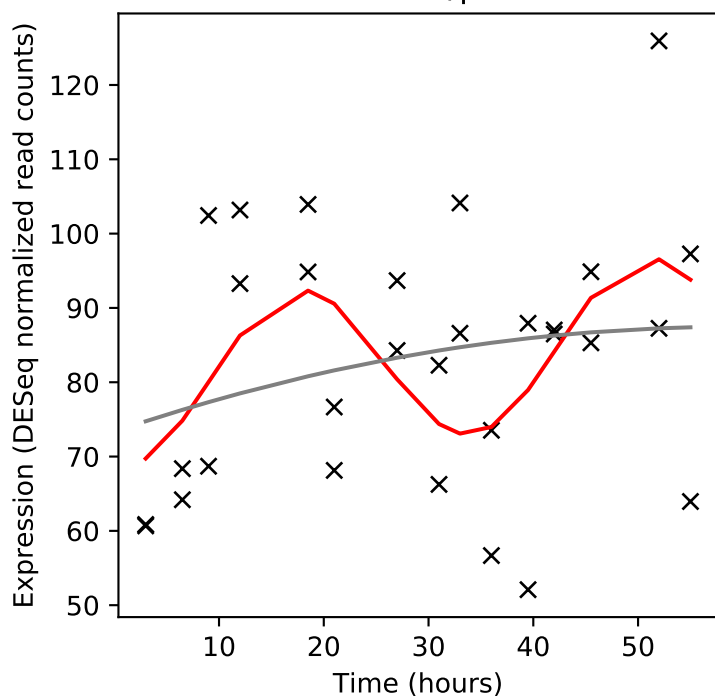

Rv2352c/PPE38

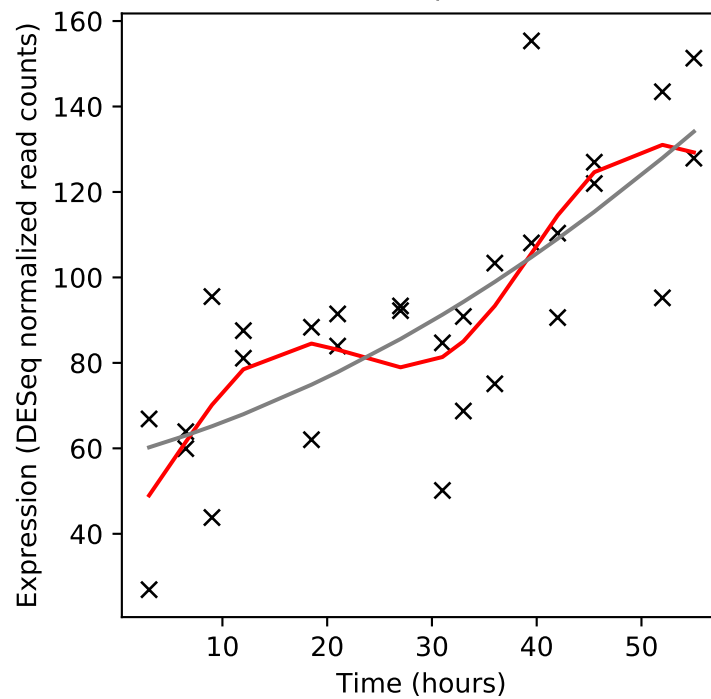

Rv2353c/PPE39

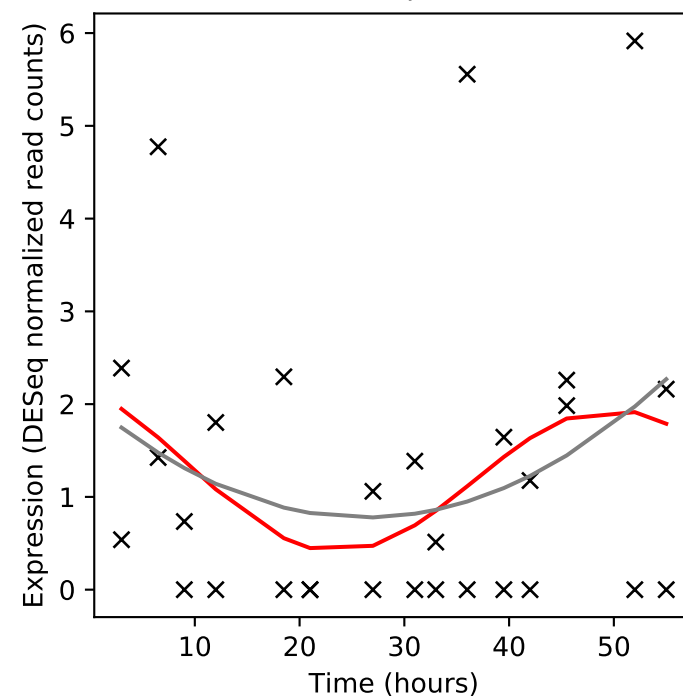



Rv2354/-

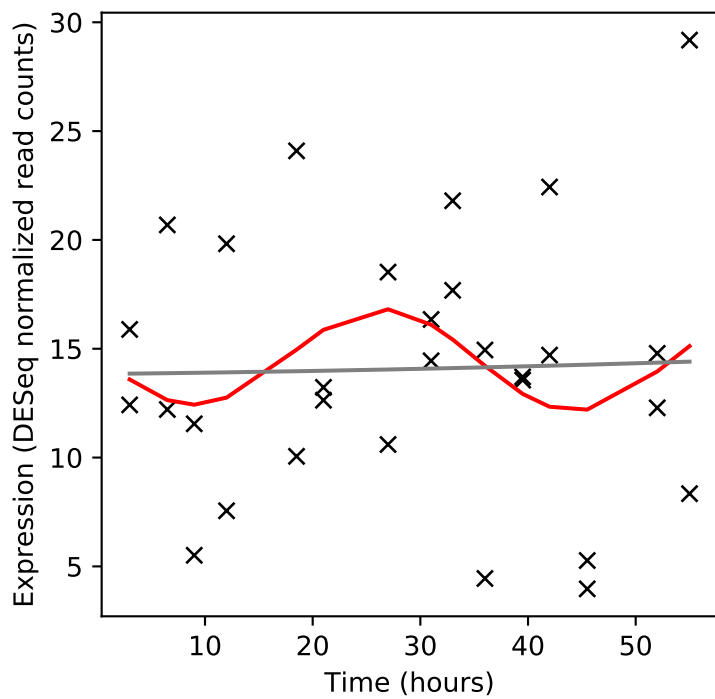

Rv2355/-

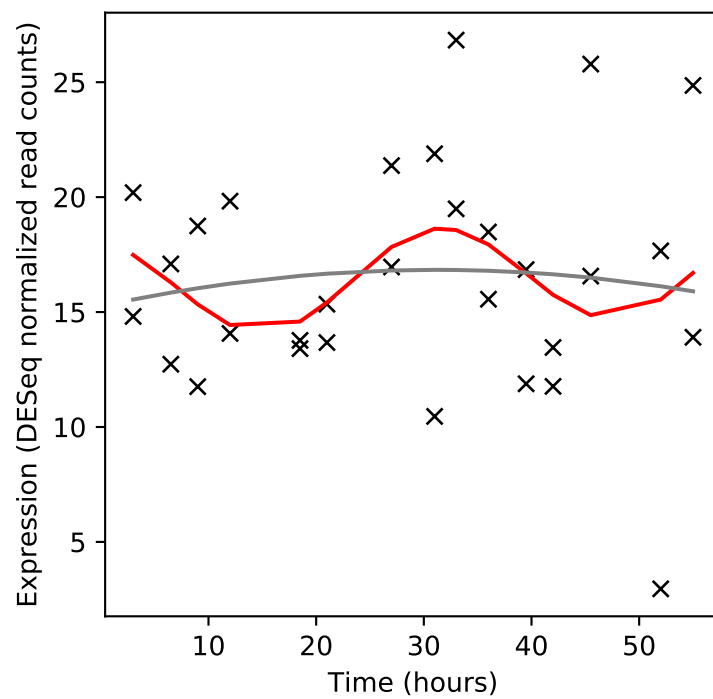

Rv2356c/PPE40

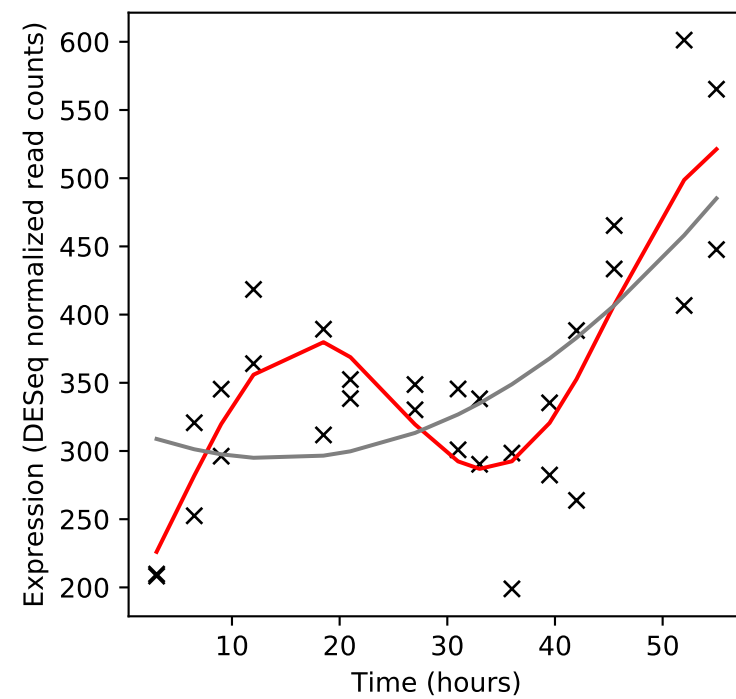

Rv2357c/glyS

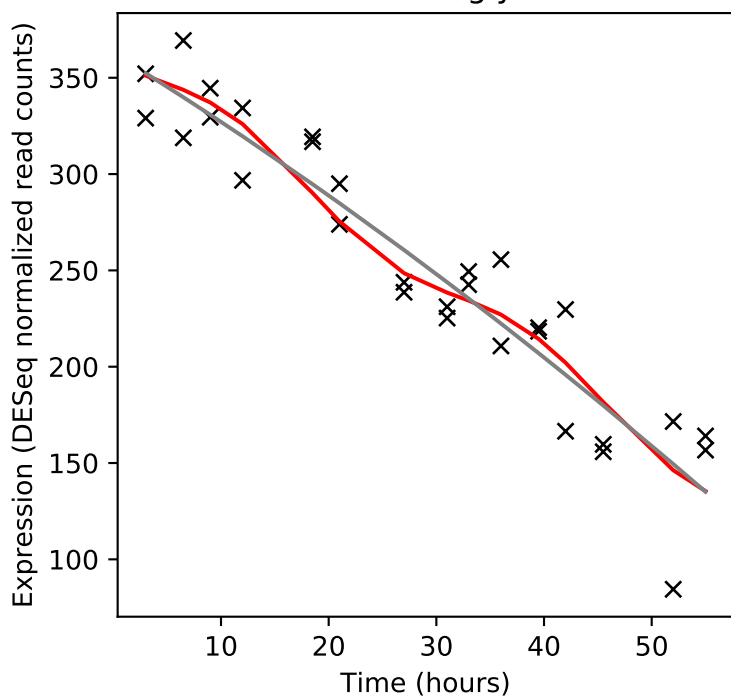

Rv2358/smtB

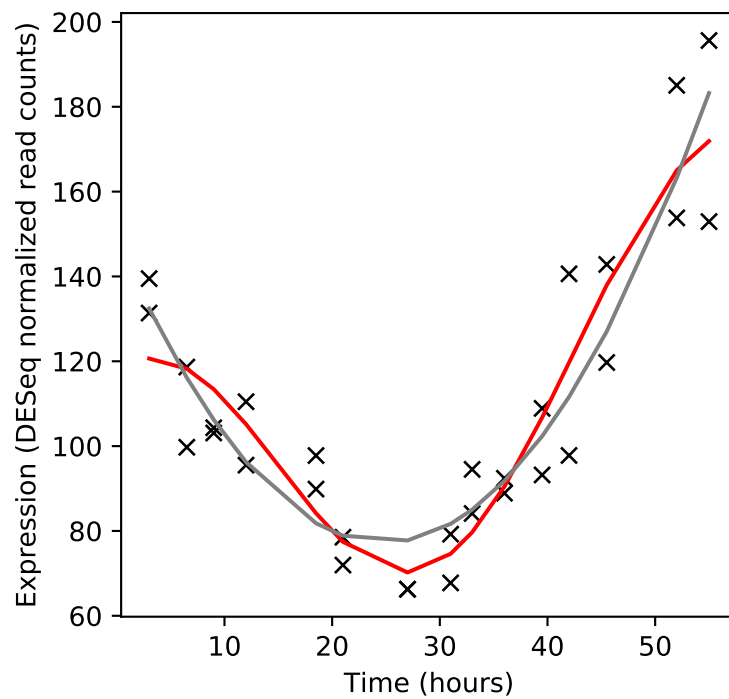

Rv2359/zur

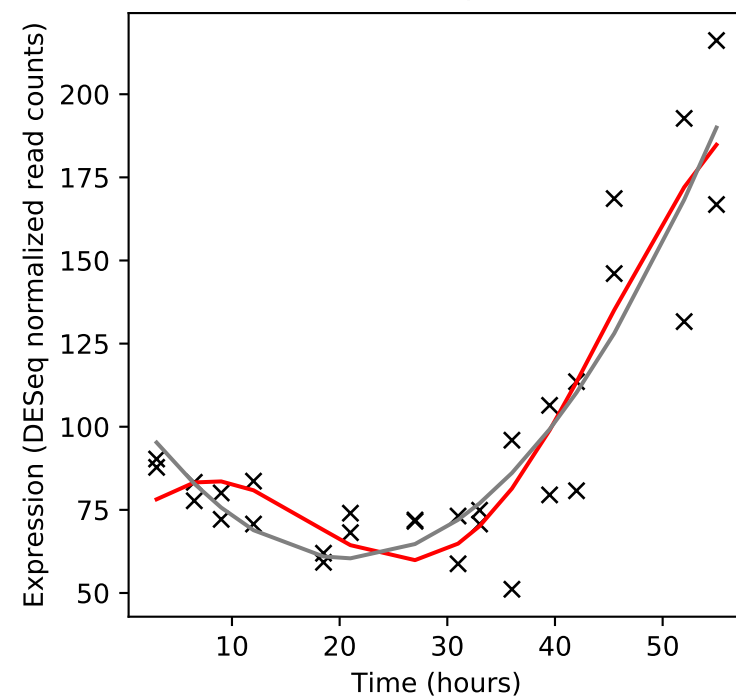

Rv2360c/-

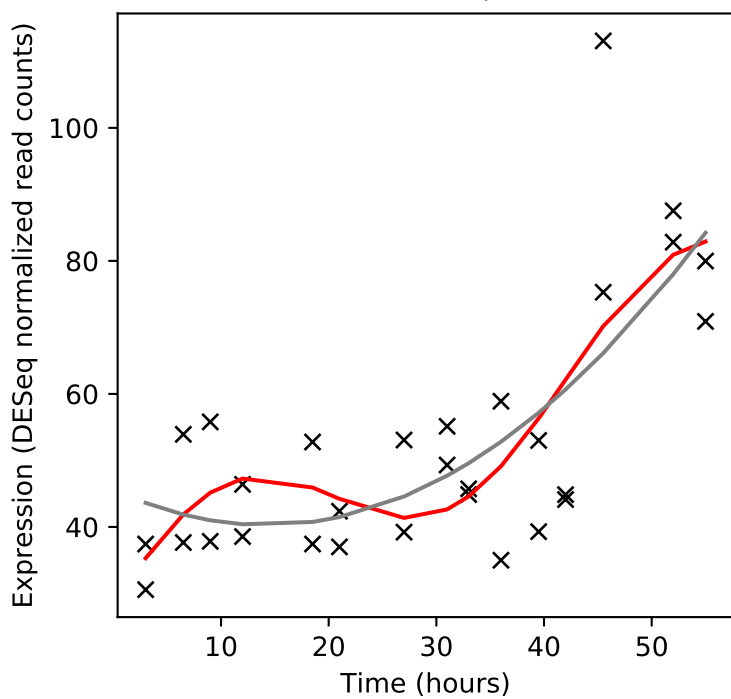

Rv2361c/-

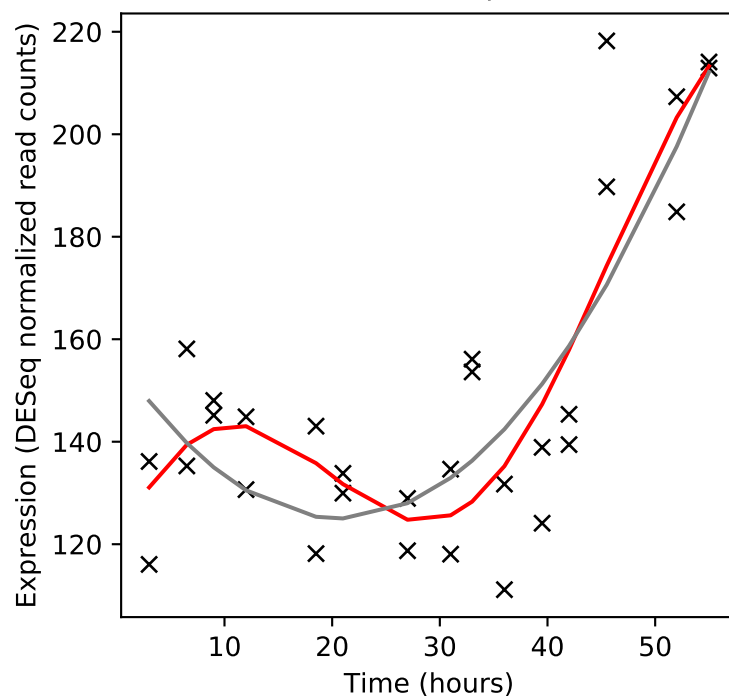

Rv2362c/recO

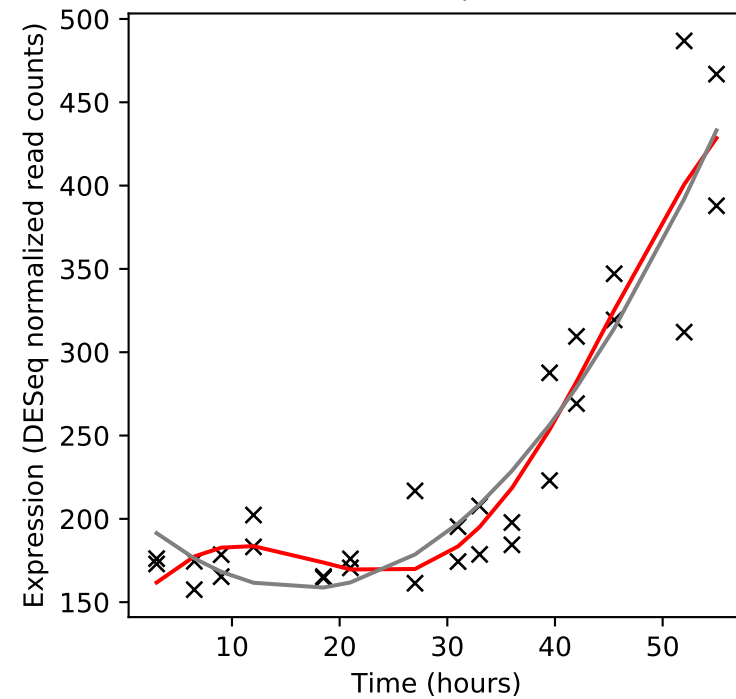

Rv2363/amiA2

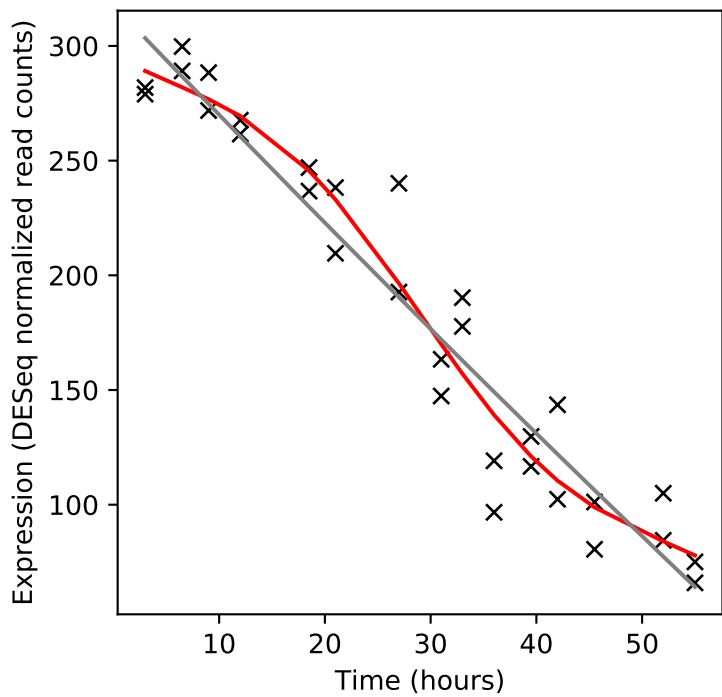

Rv2364c/era

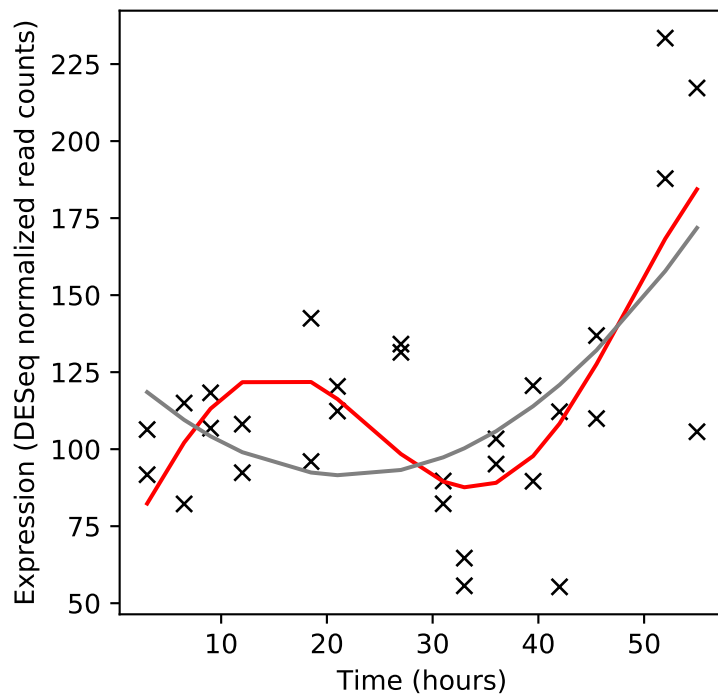

Rv2365c/-

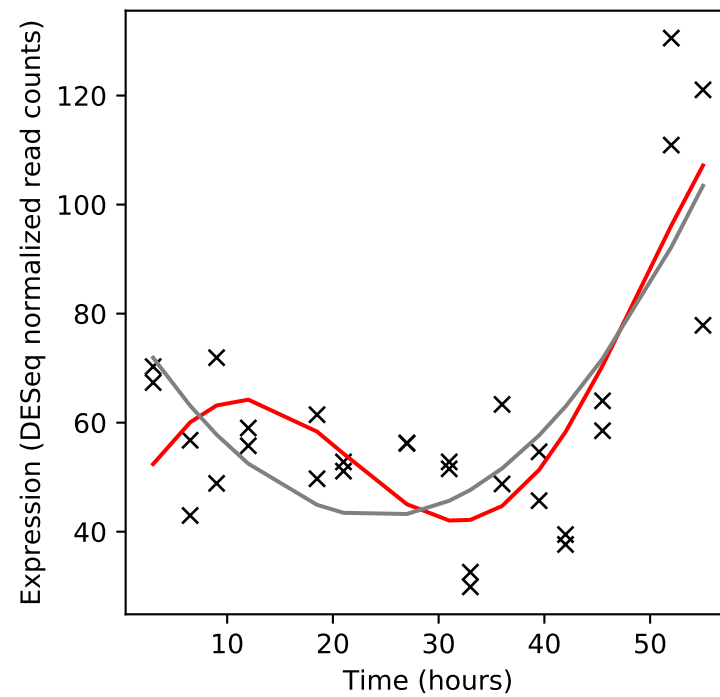

Rv2366c/-

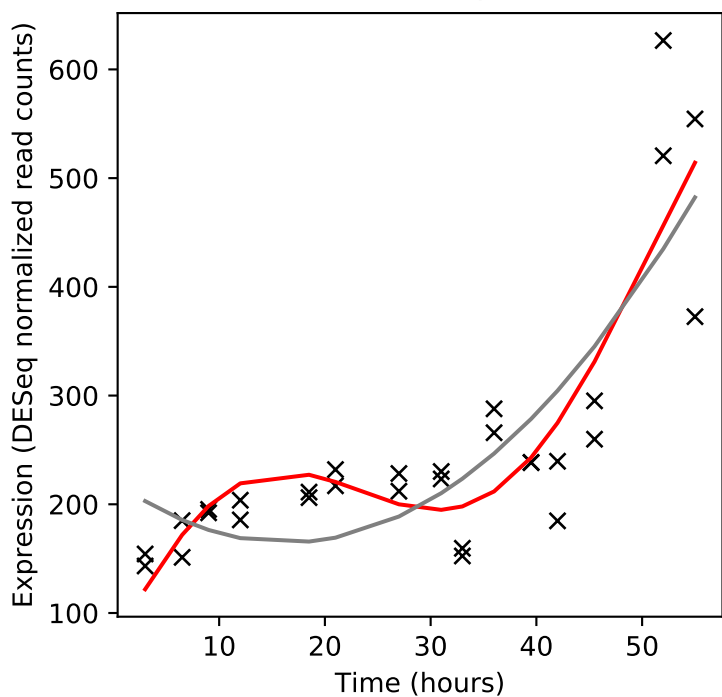

Rv2367c/-

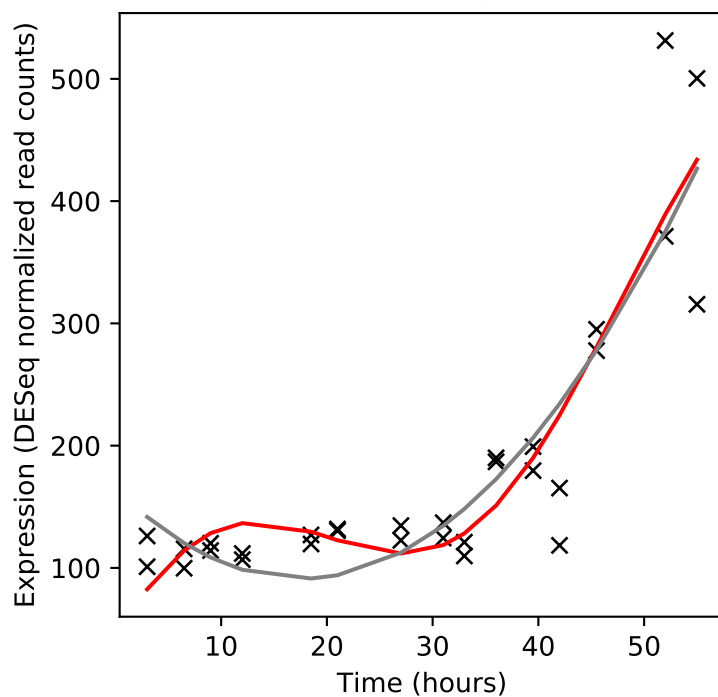

Rv2368c/phoH1

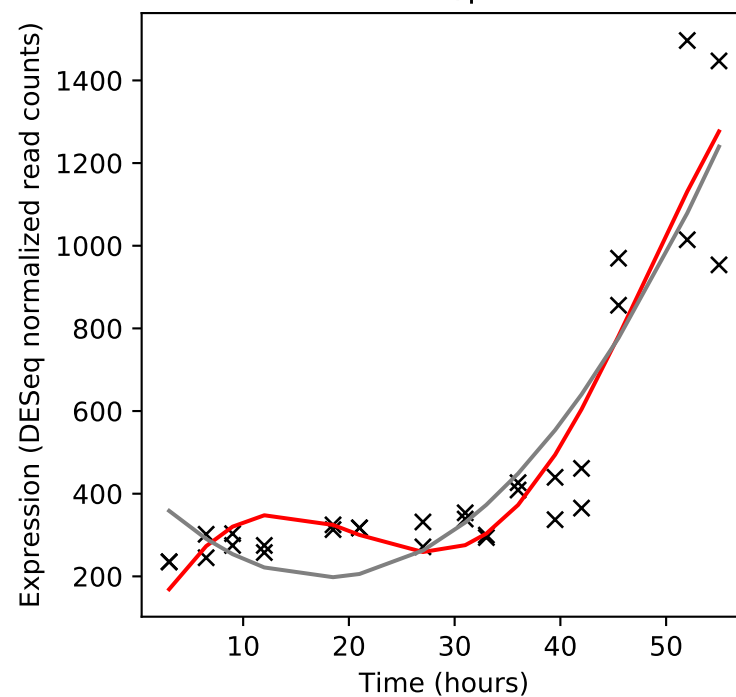

Rv2369c/-

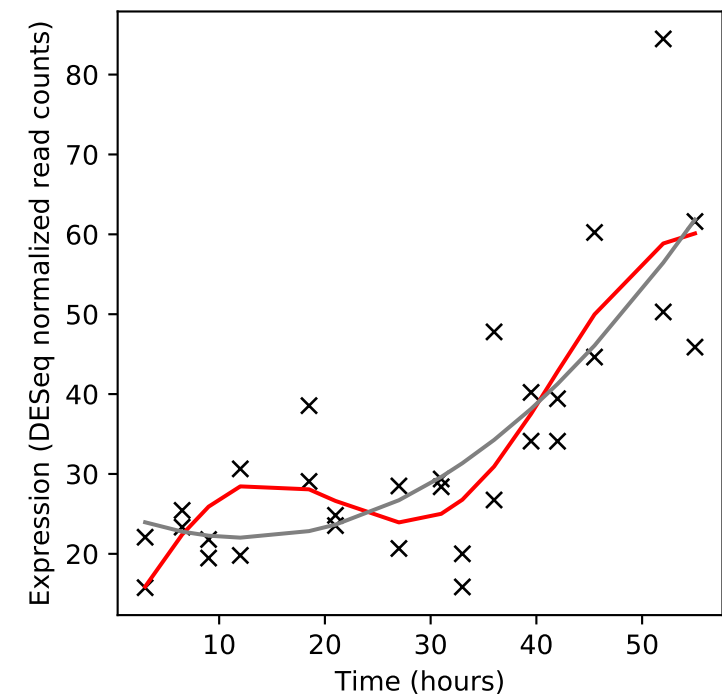

Rv2370c/-

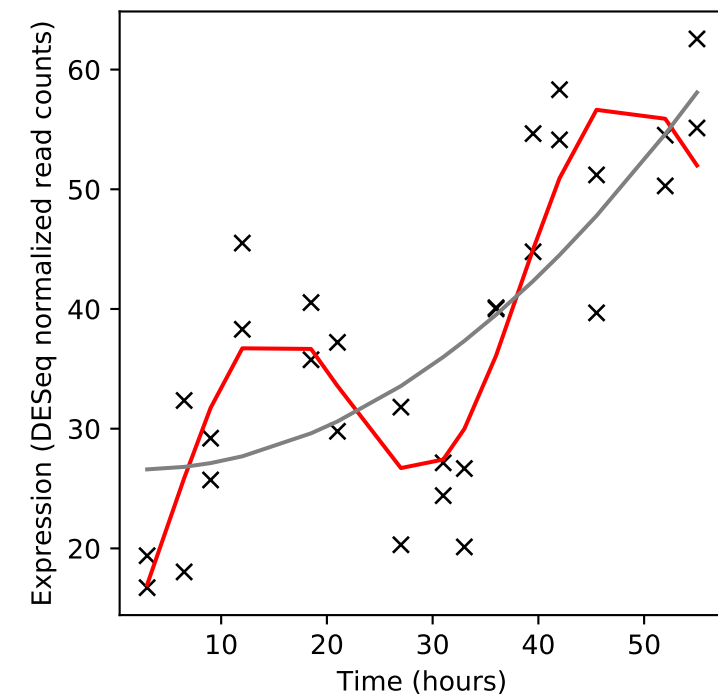

Rv2371/PE\_PGRS40

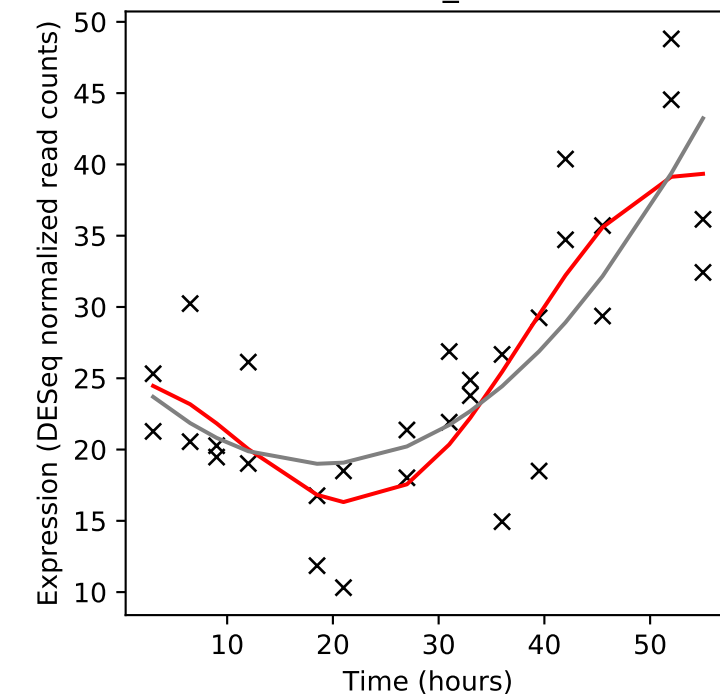

Rv2372c/-

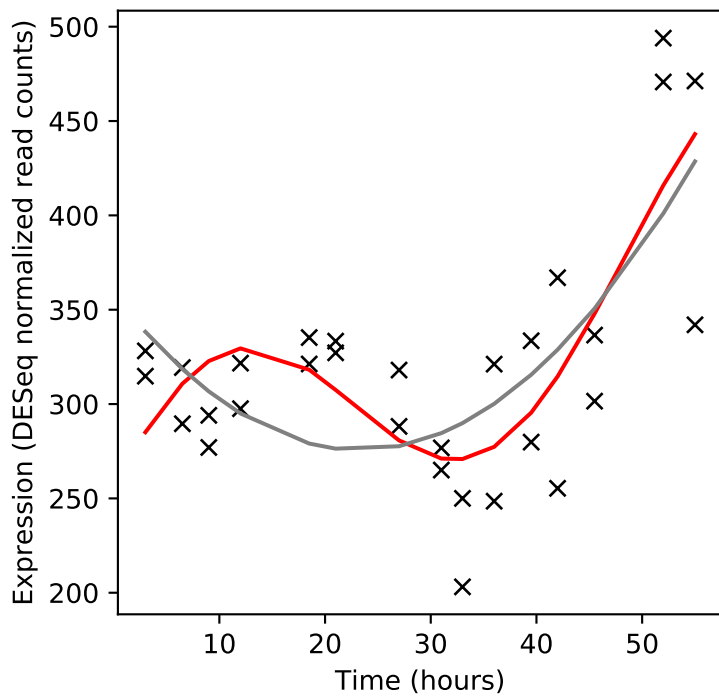

Rv2373c/dnaJ2

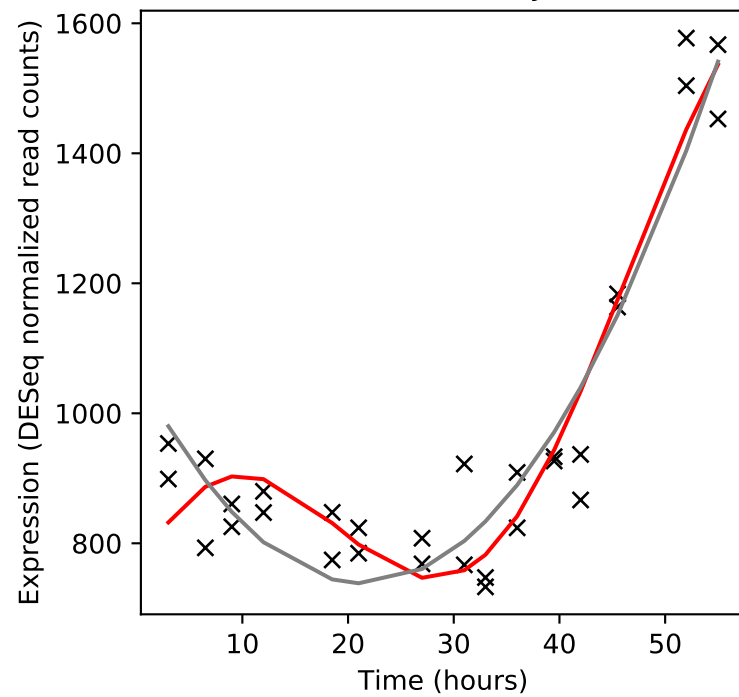

Rv2374c/hrcA

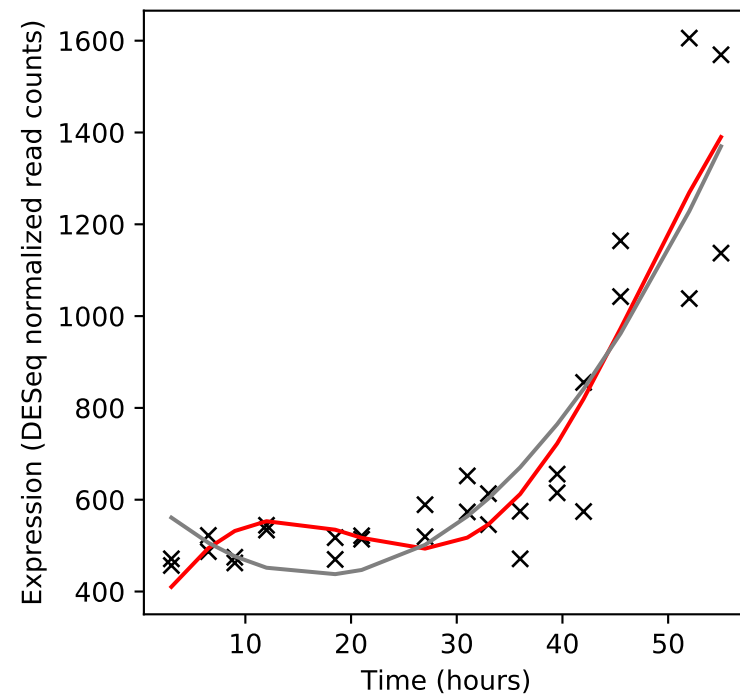

Rv2375/-

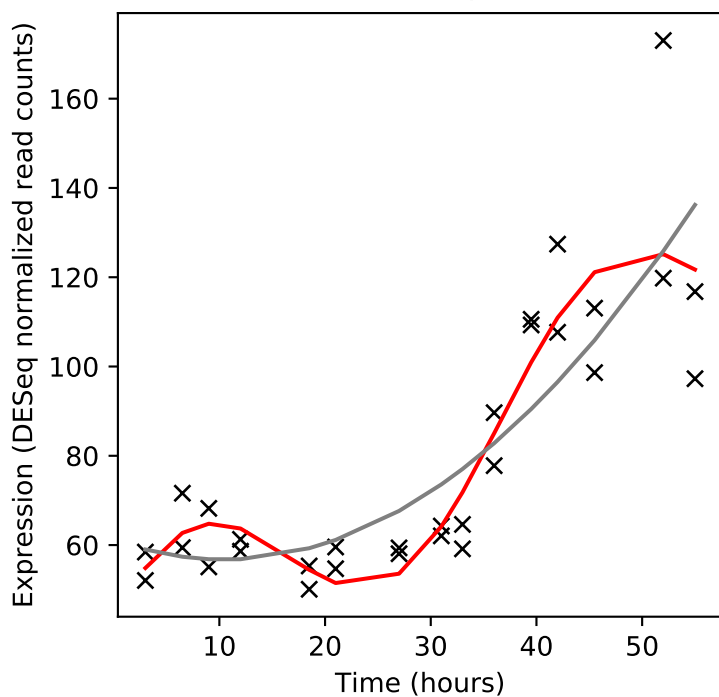

Rv2376c/cfp2

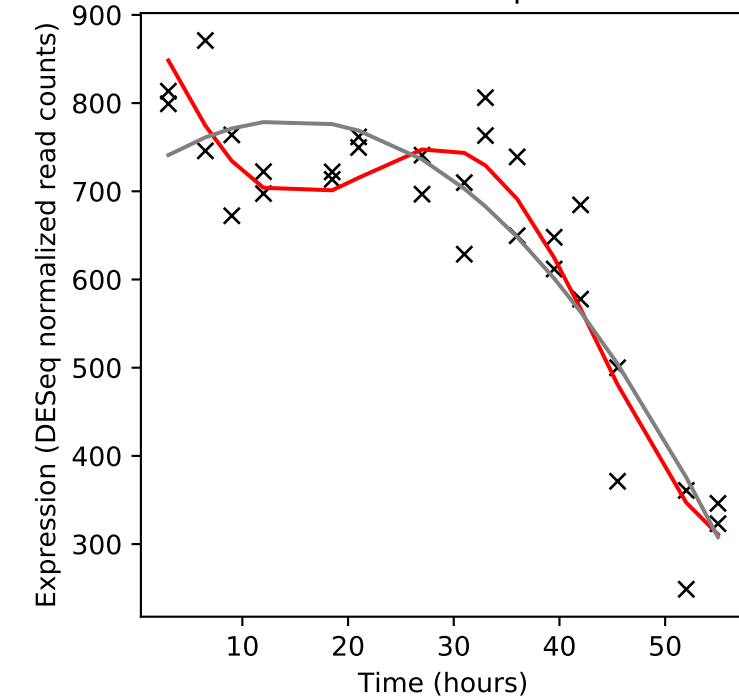

Rv2377c/mbtH

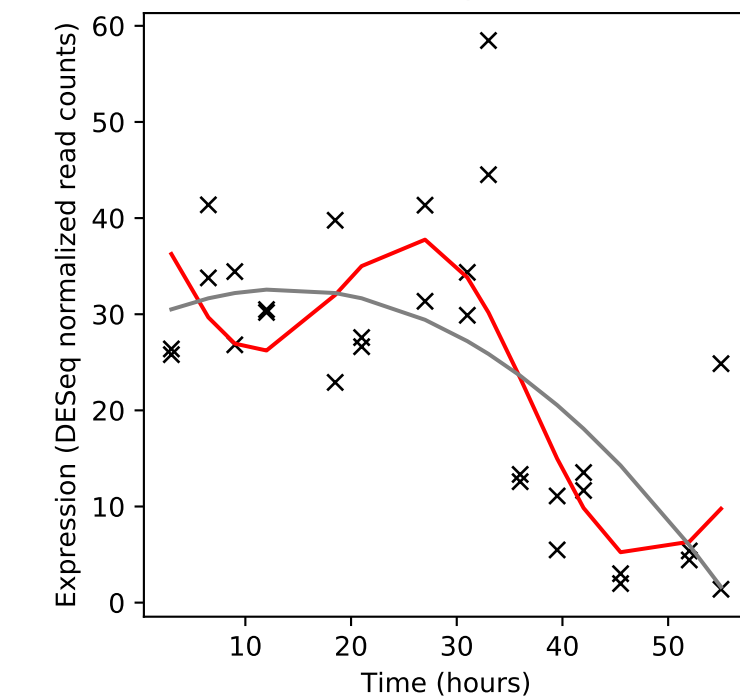

Rv2378c/mbtG

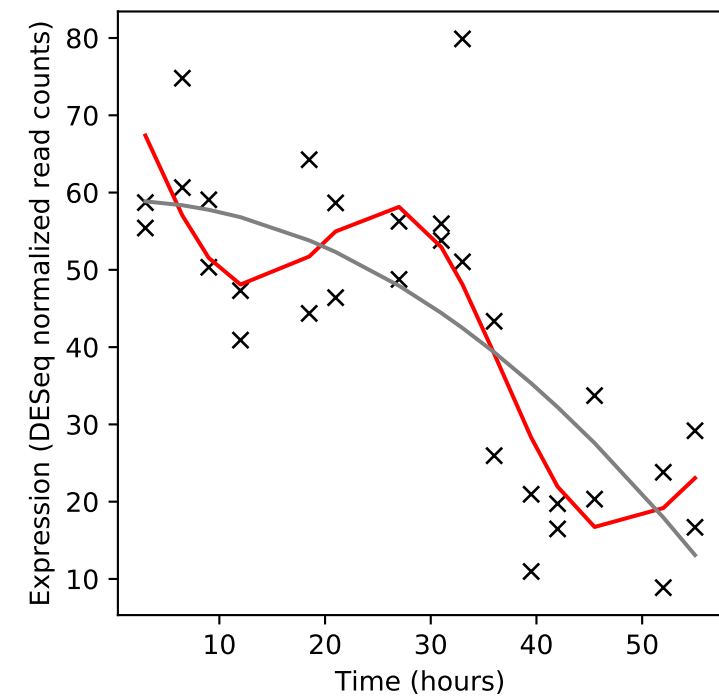

Rv2379c/mbtF

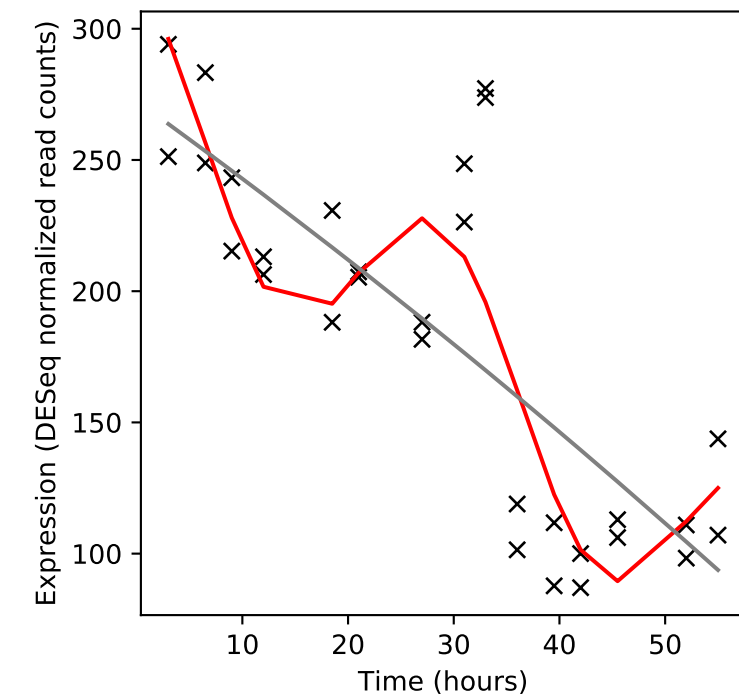

Rv2380c/mbtE

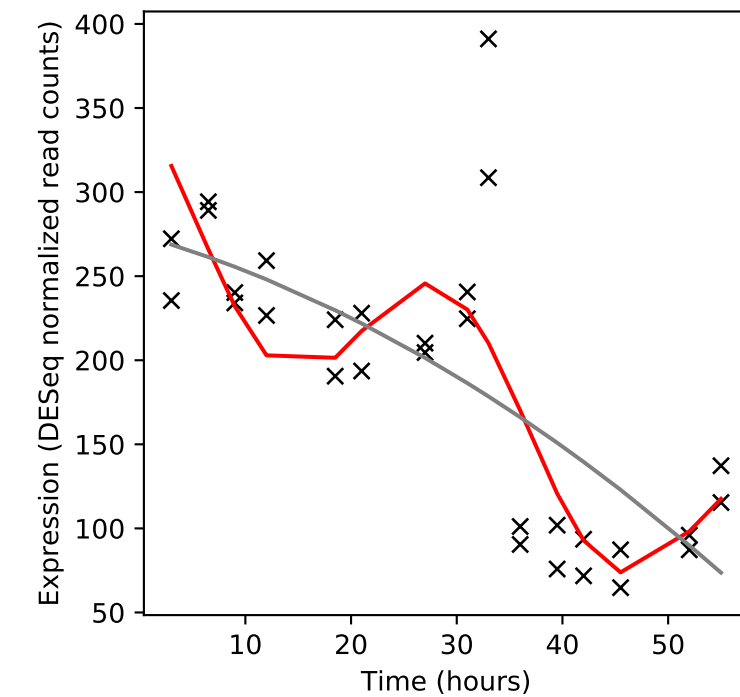

Rv2381c/mbtD

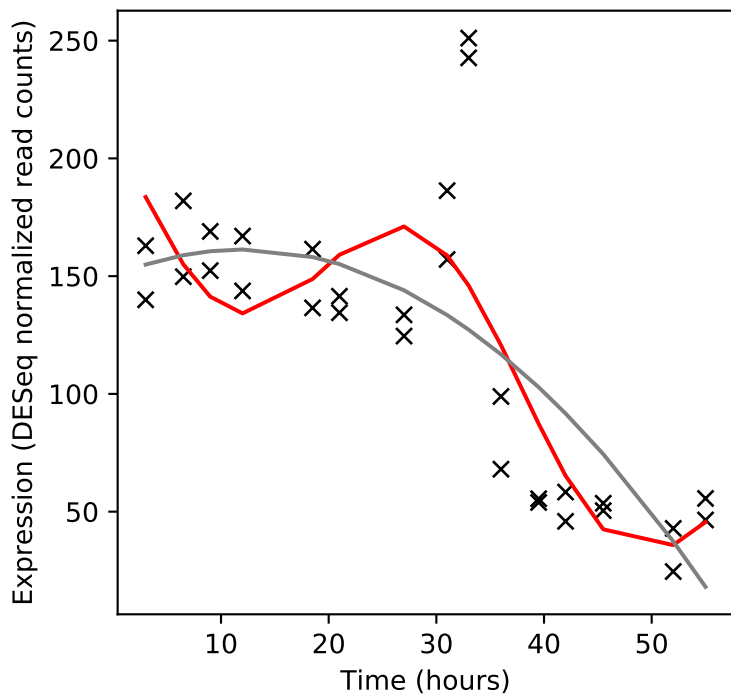

Rv2382c/mbtC

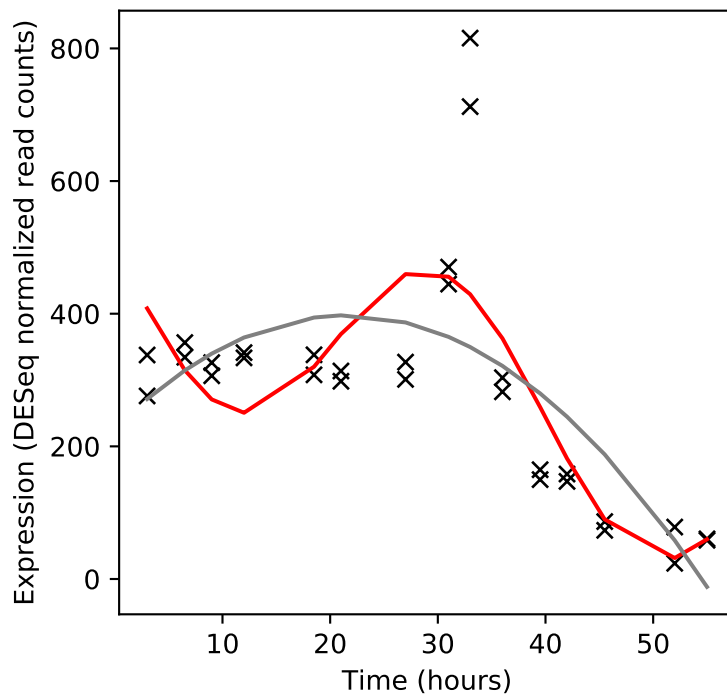

Rv2383c/mbtB

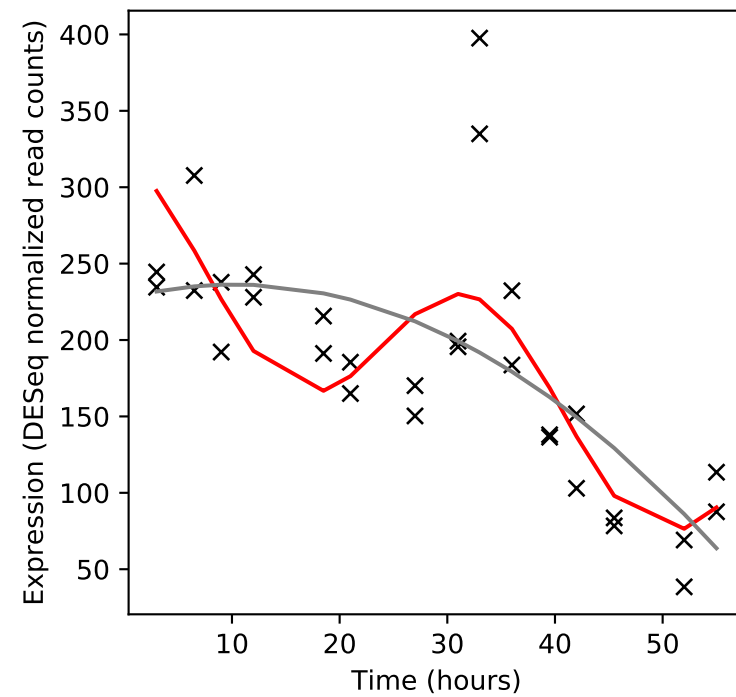

Rv2384/mbtA

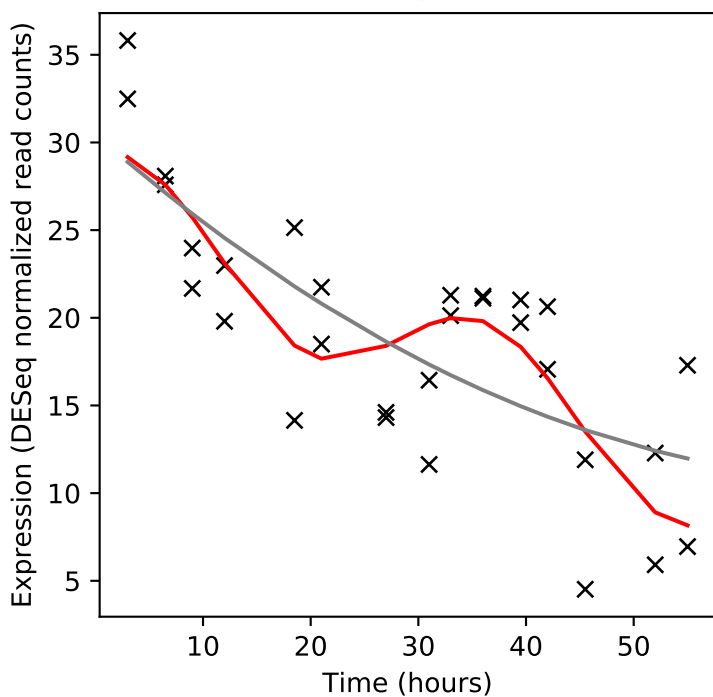

Rv2385/mbtJ

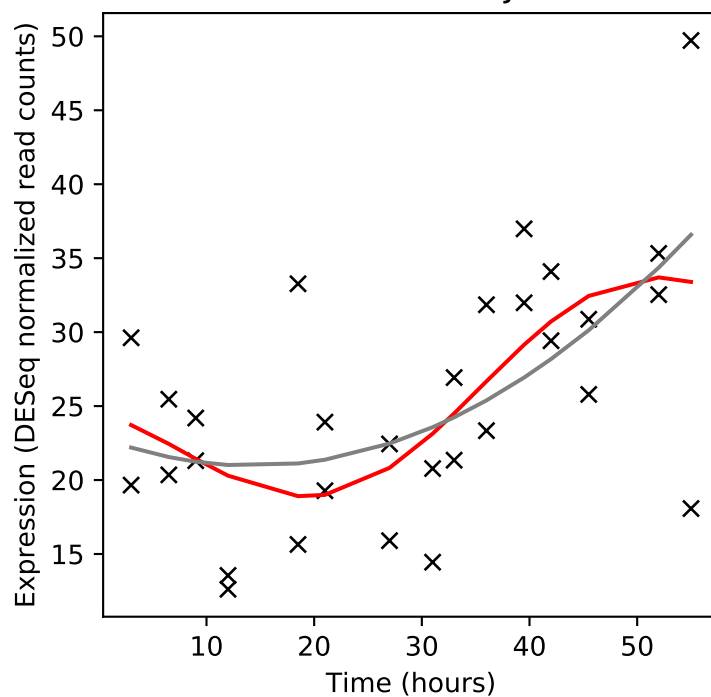

Rv2386c/mbtI

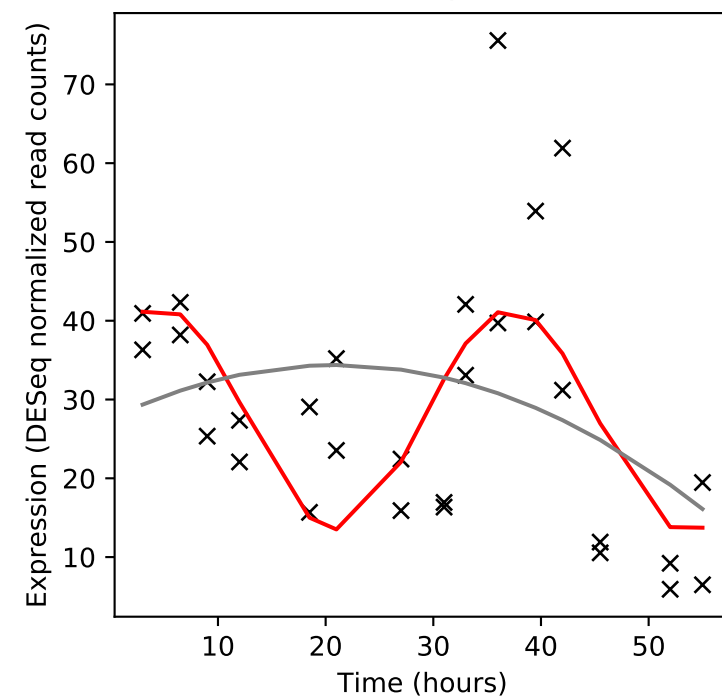

Rv2387/-

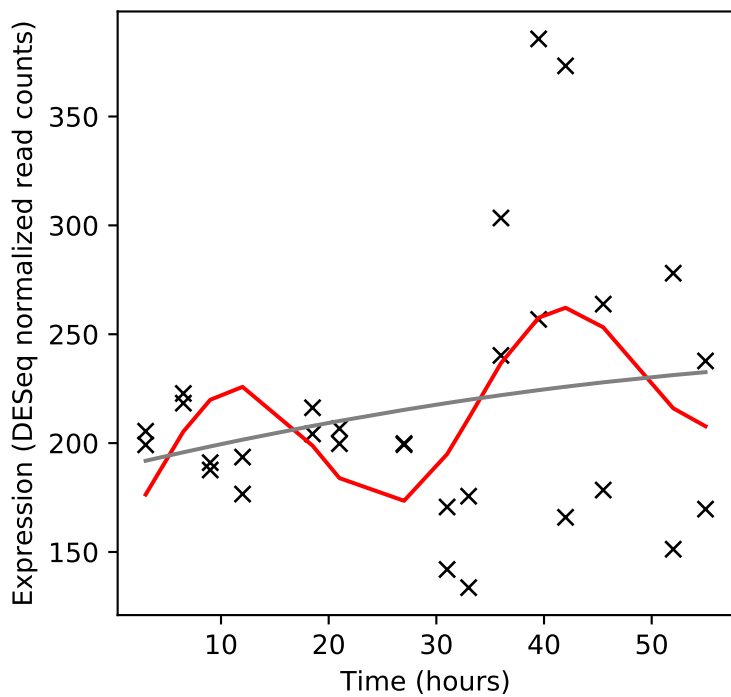

Rv2388c/hemN

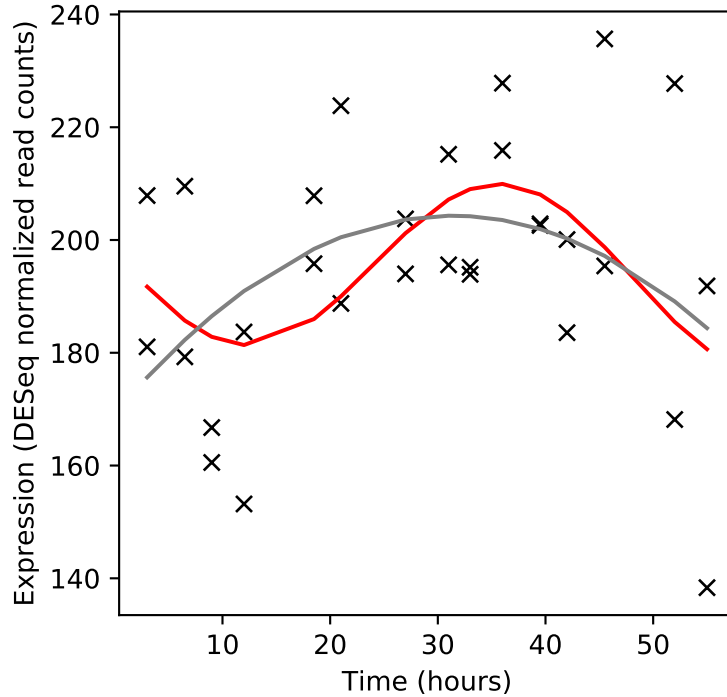

Rv2389c/rpfD

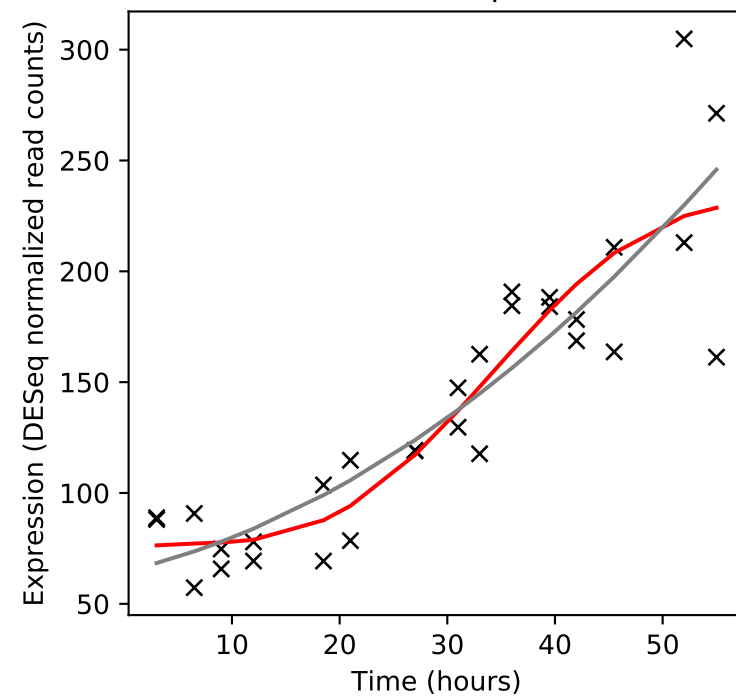

Rv2390c/-

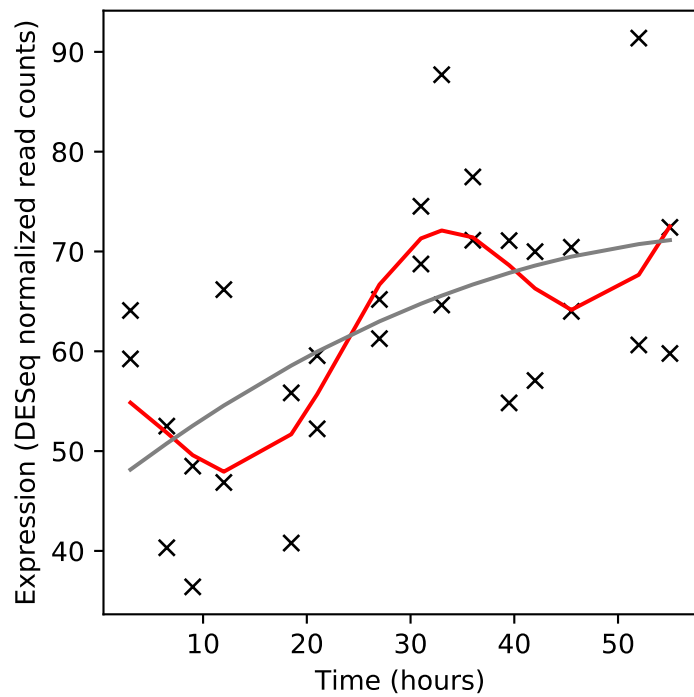

Rv2391/sirA

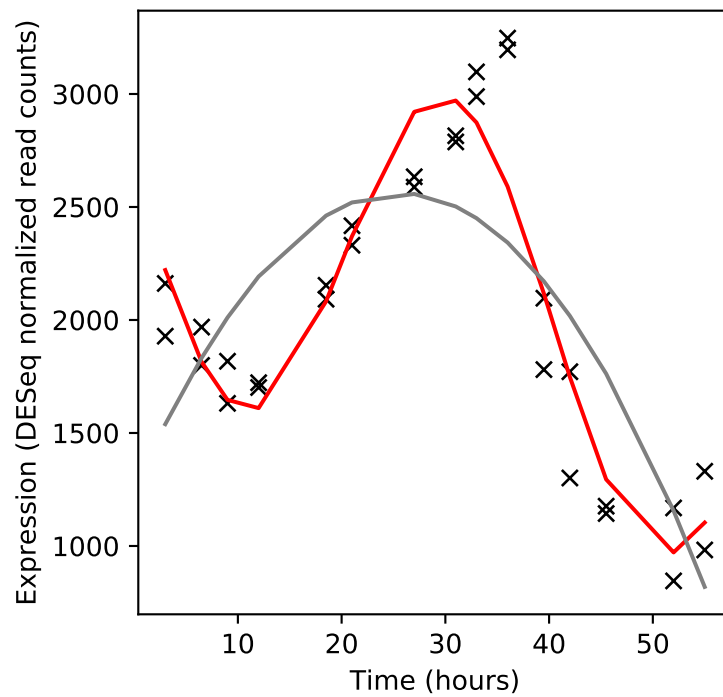

Rv2392/cysH

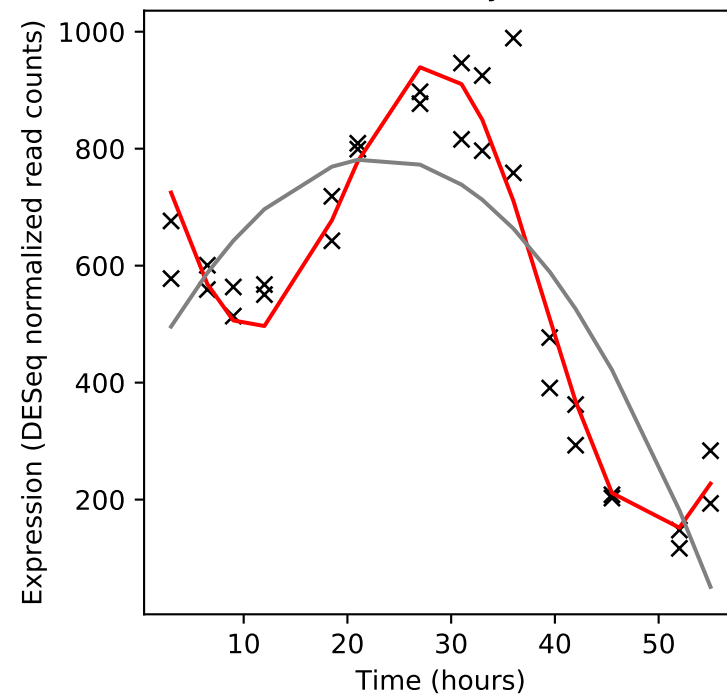

Rv2393/che1

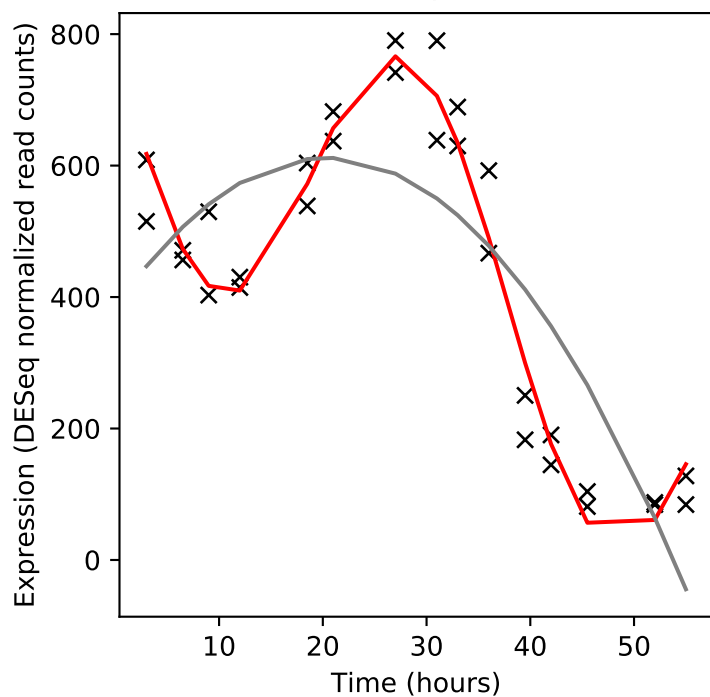

Rv2394/ggtB

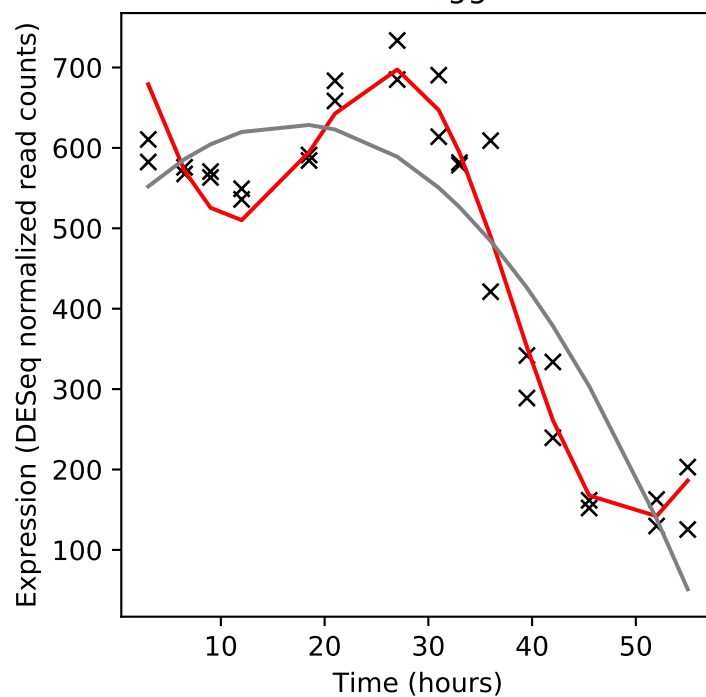

Rv2395/-

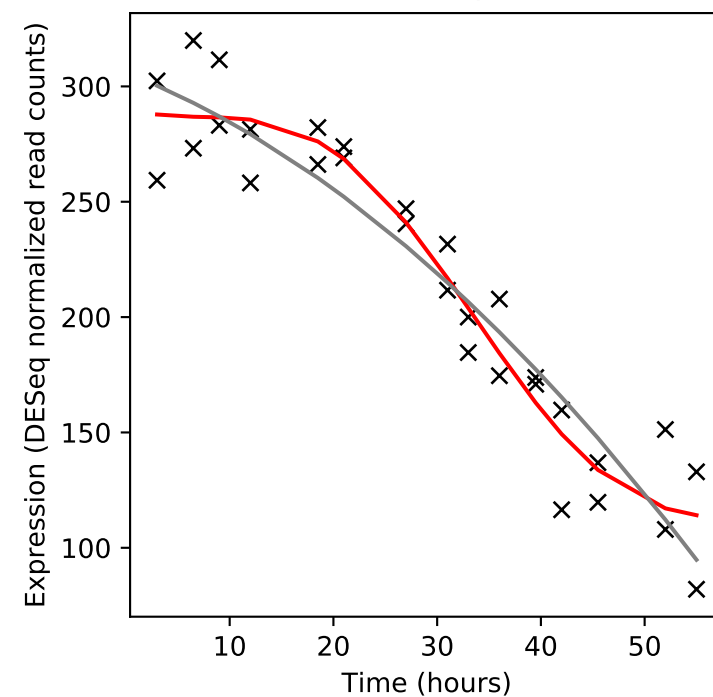

Rv2395A/aprA

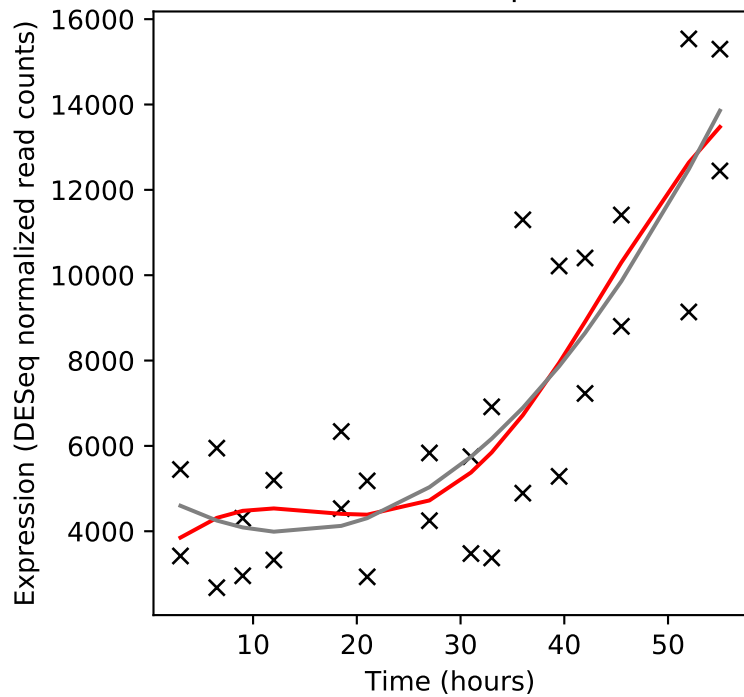

Rv2395B/aprB

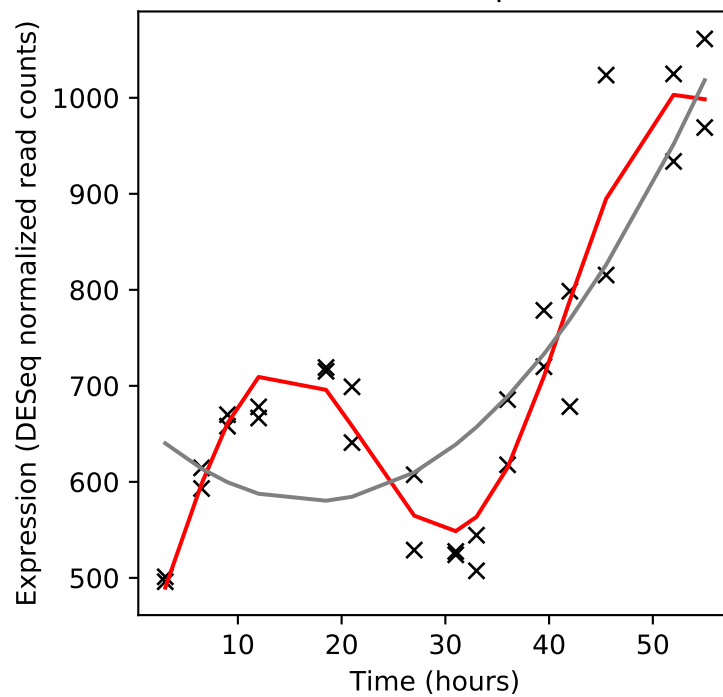

Rv2396/PE\_PGRS41

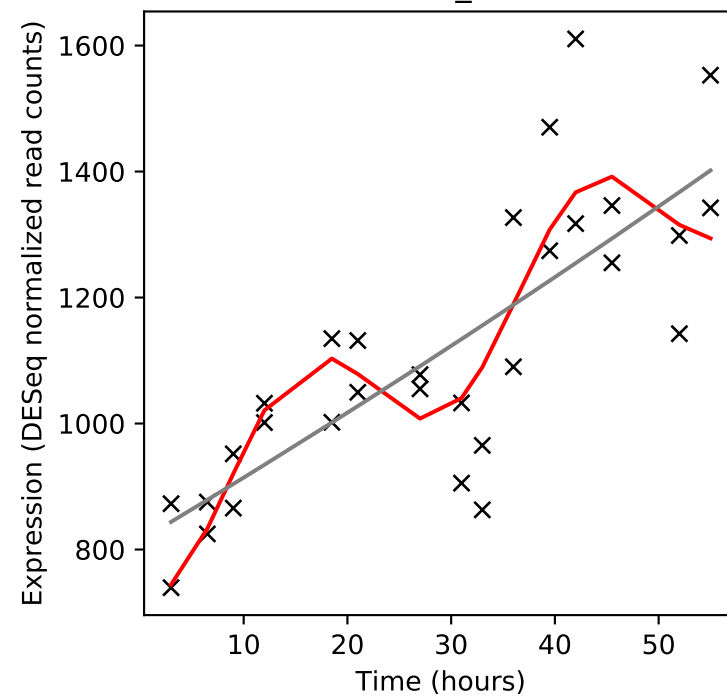

Rv2397c/cysA1

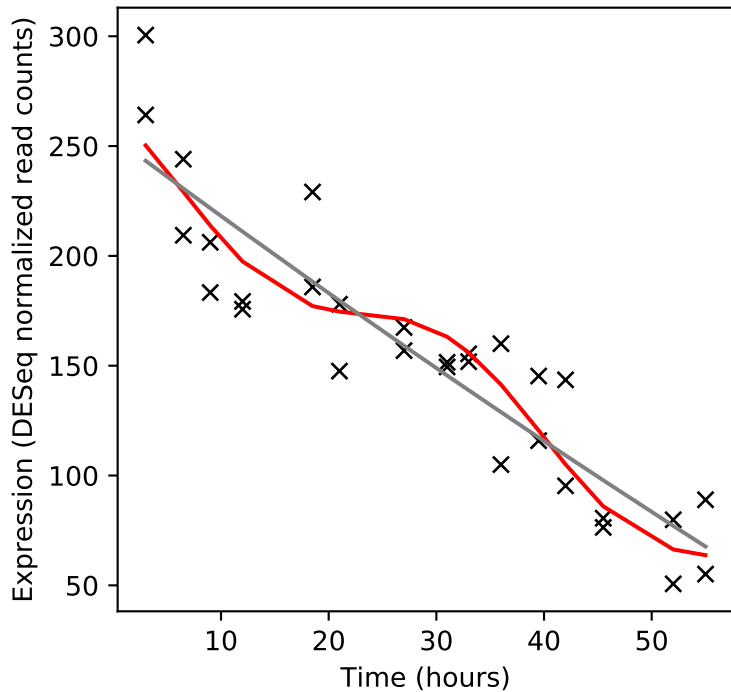

Rv2398c/cysW

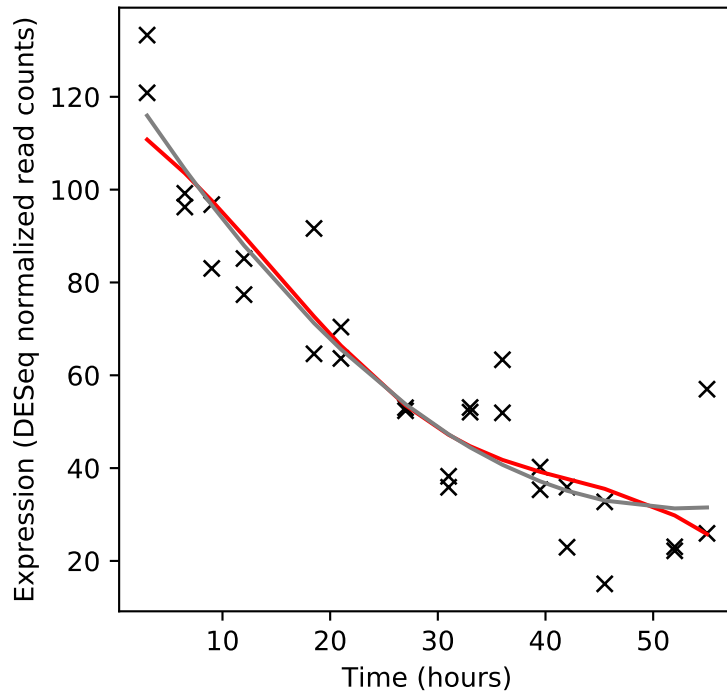

Rv2399c/cysT

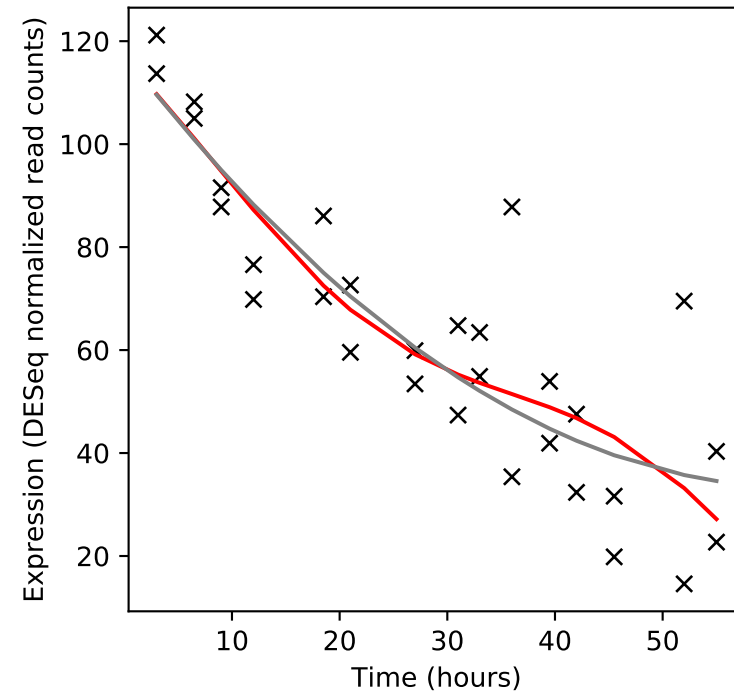

Rv2400c/subI

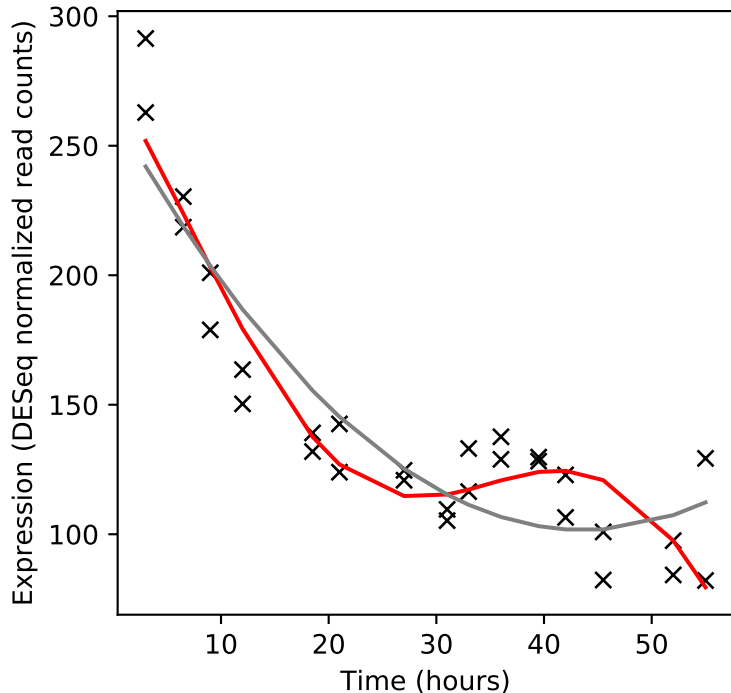

Rv2401/-

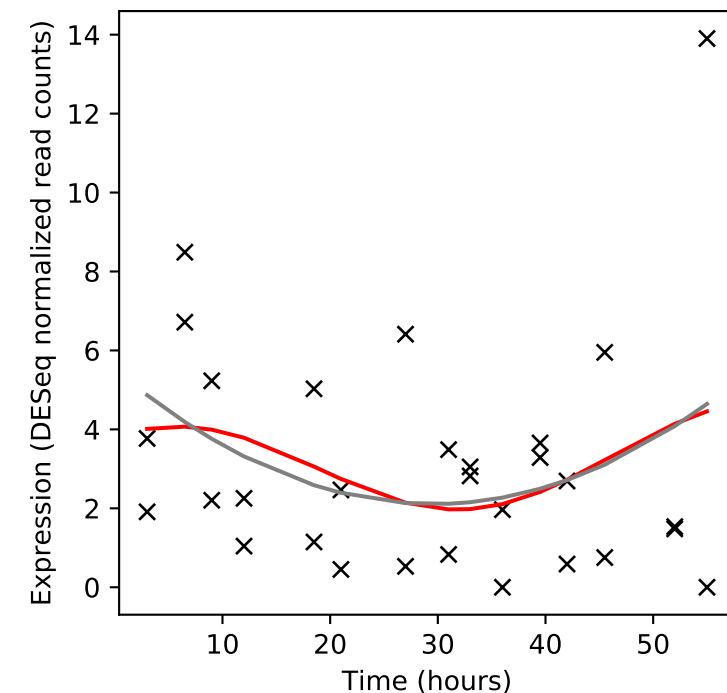

Rv2401A/-

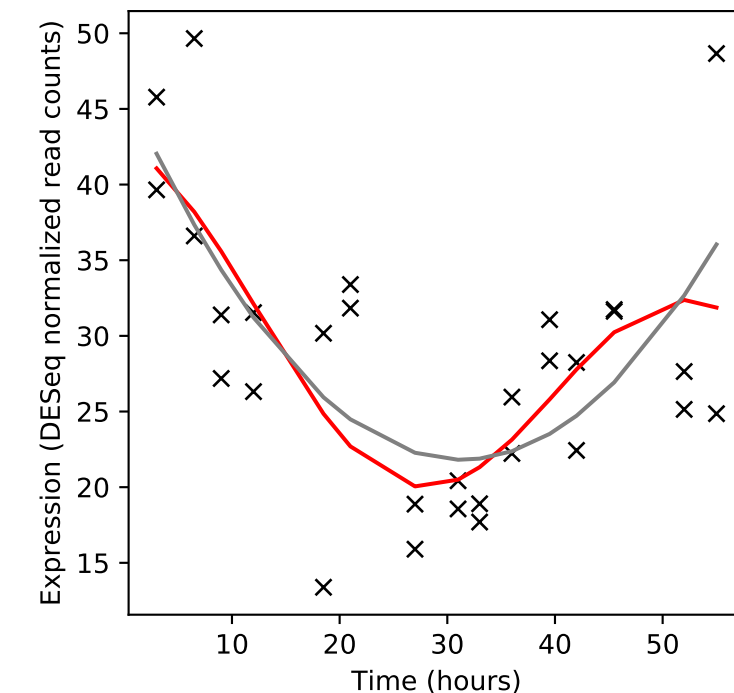

Rv2402/-

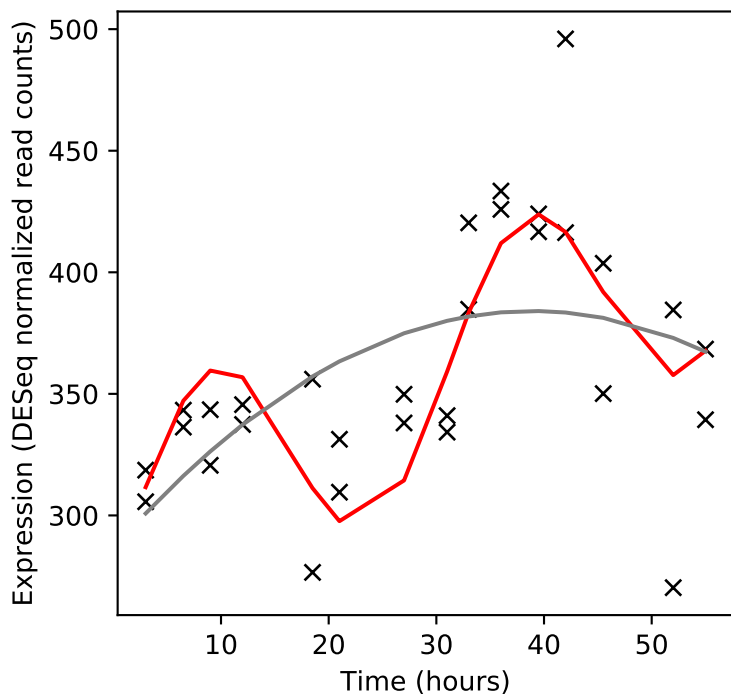

Rv2403c/lppR

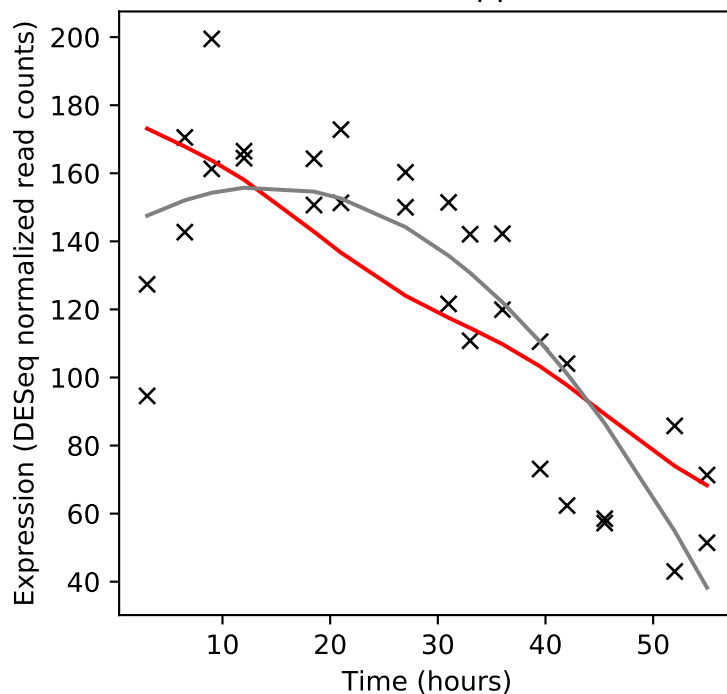

Rv2404c/lepA

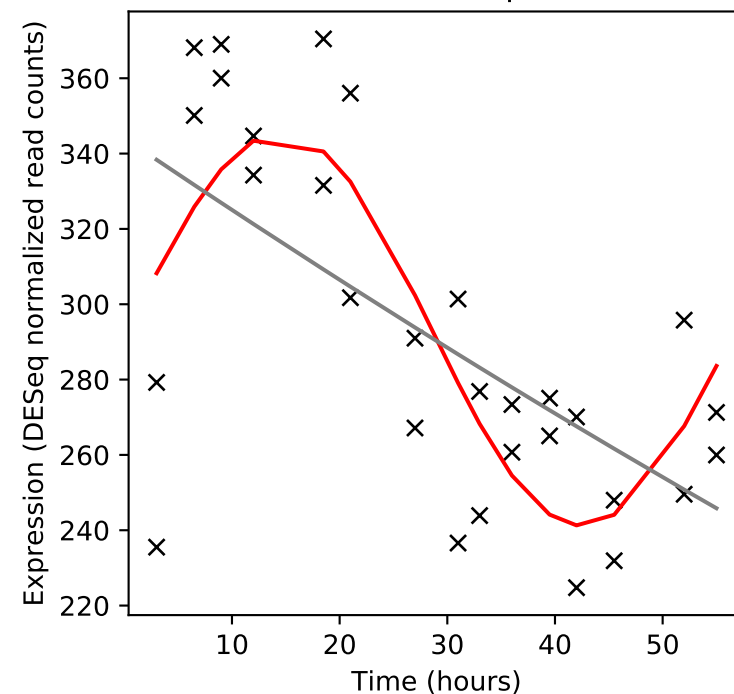

Rv2405/-

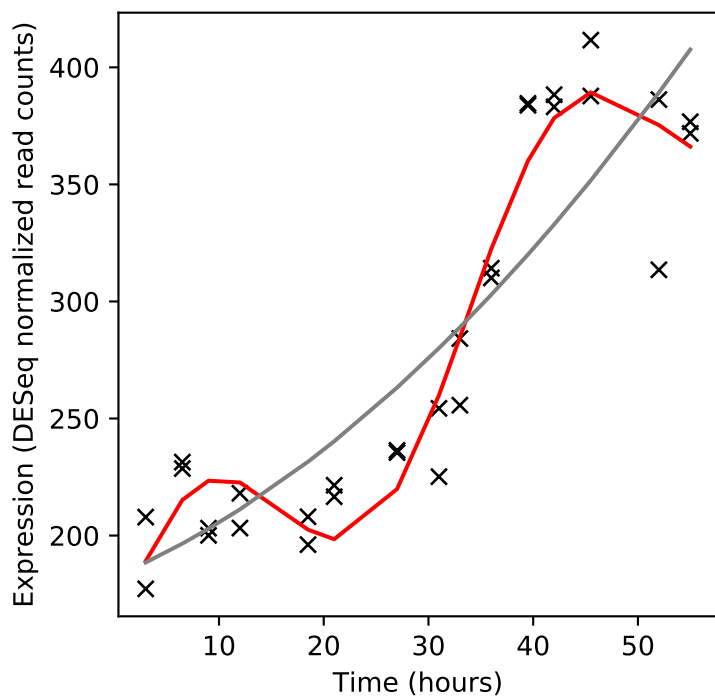

Rv2406c/-

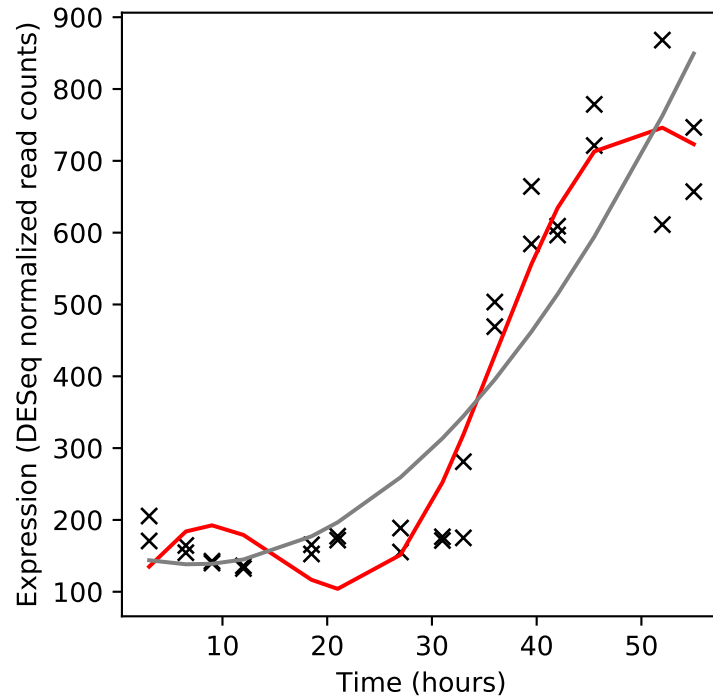

Rv2407/-

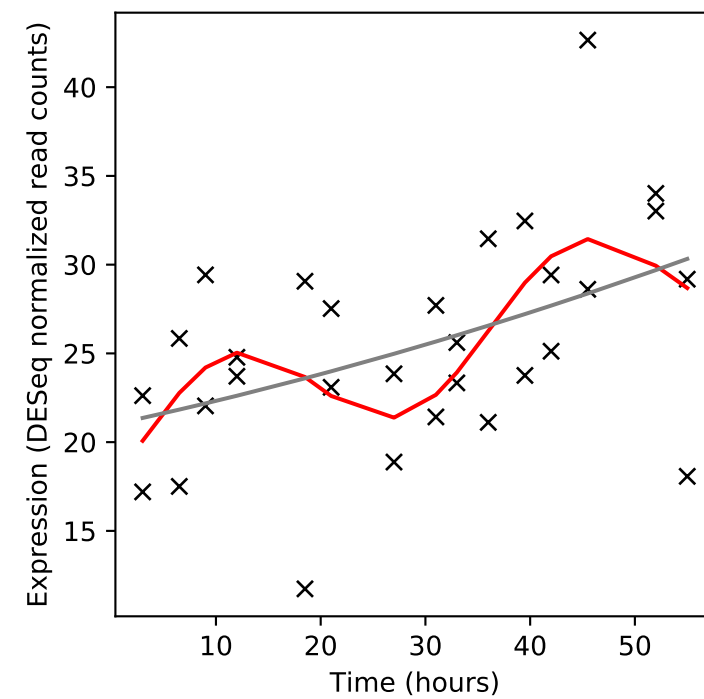

Rv2408/PE24

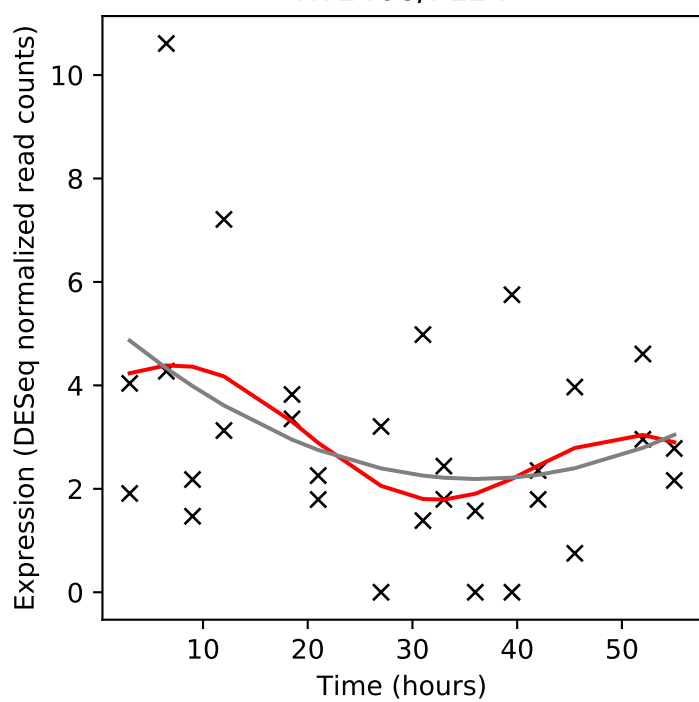

Rv2409c/-

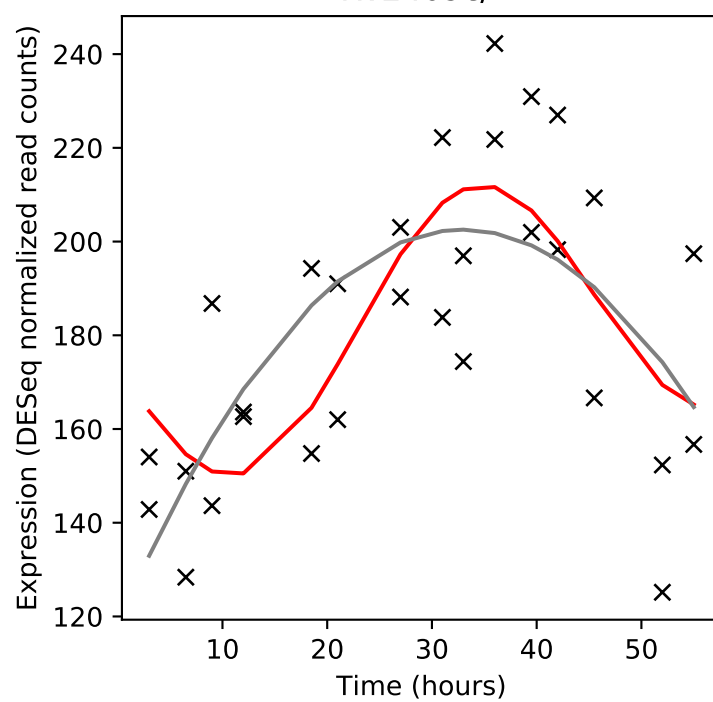

Rv2410c/-

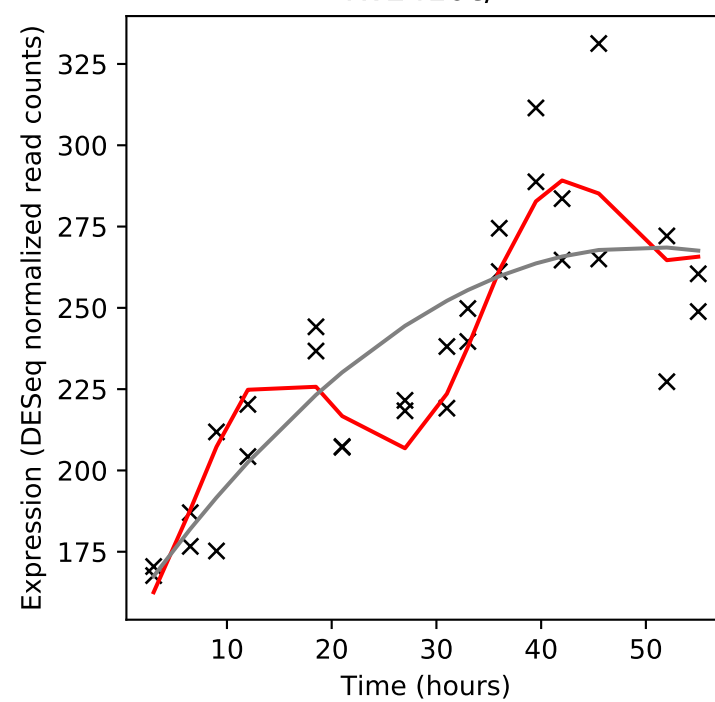

Rv2411c/-

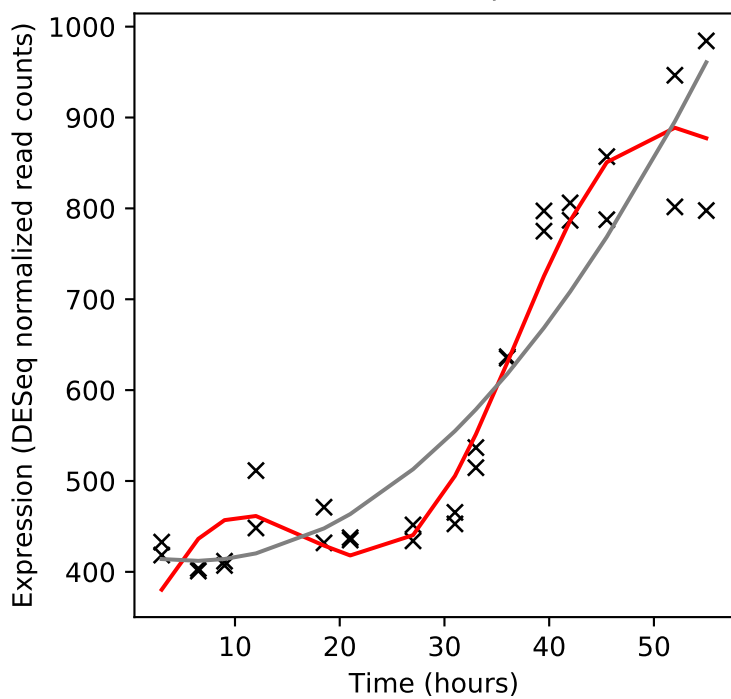

Rv2412/rpsT

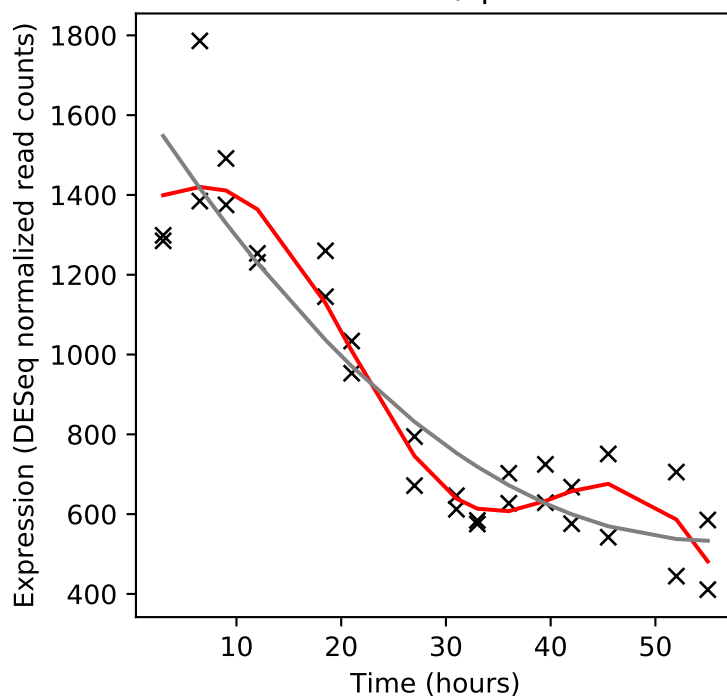

Rv2413c/-

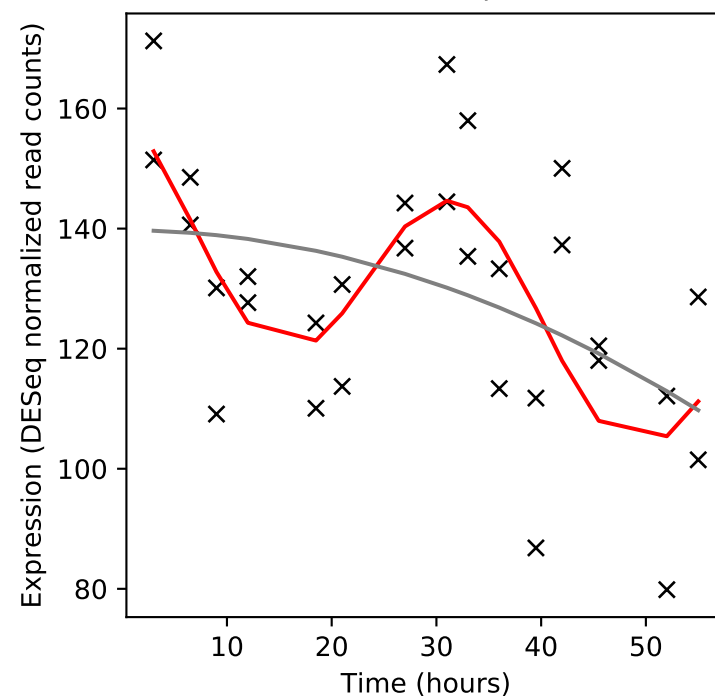



Rv2414c/-

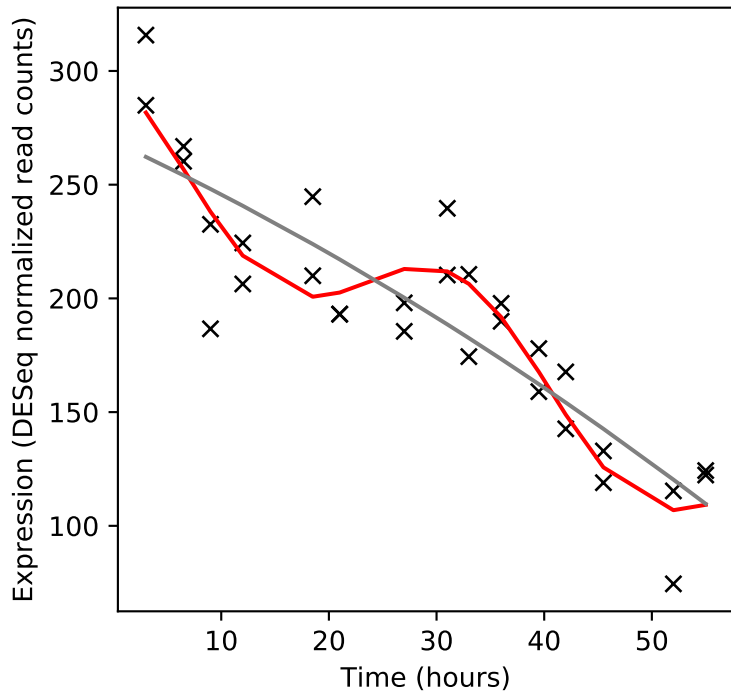

Rv2415c/-

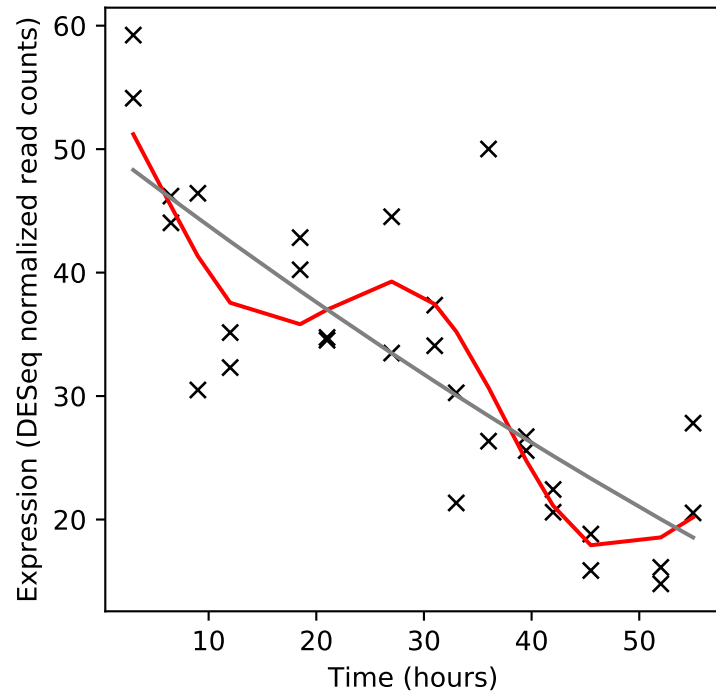

Rv2416c/eis

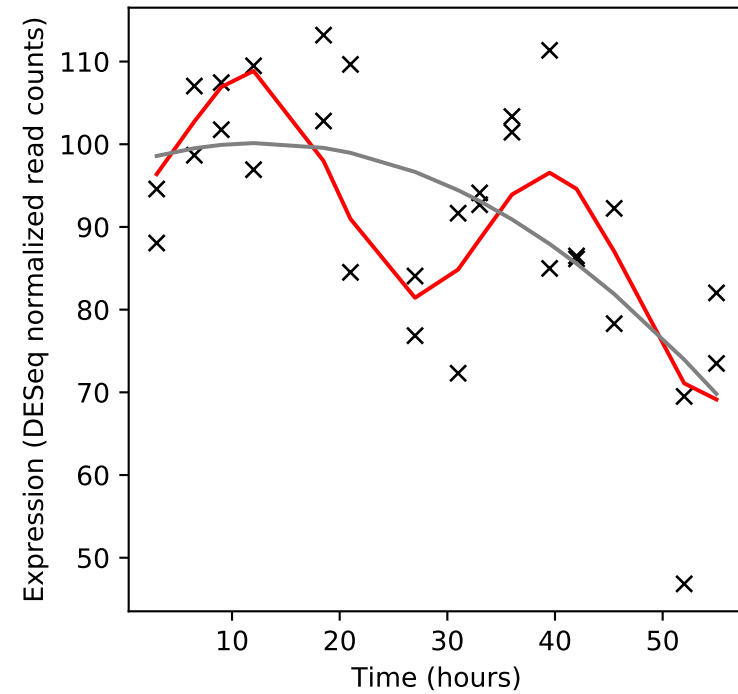

Rv2417c/-

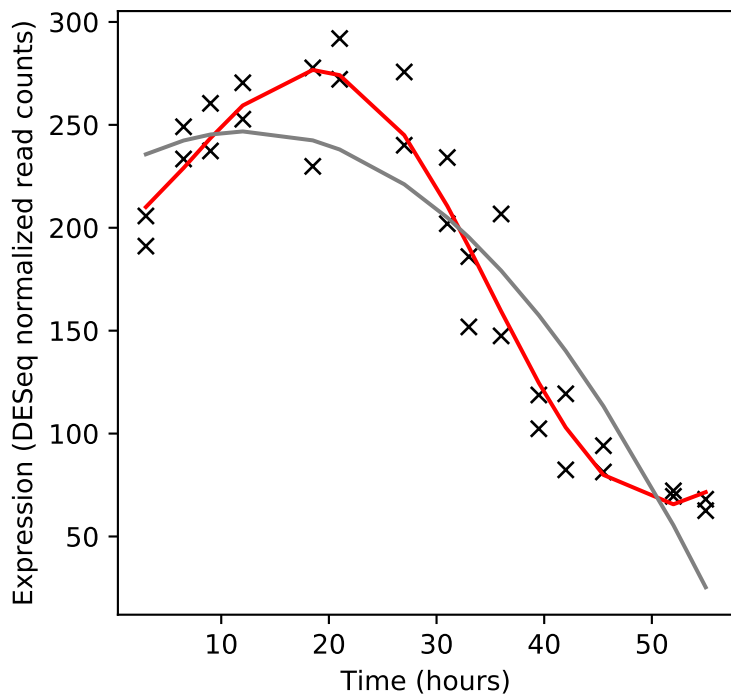

Rv2418c/-

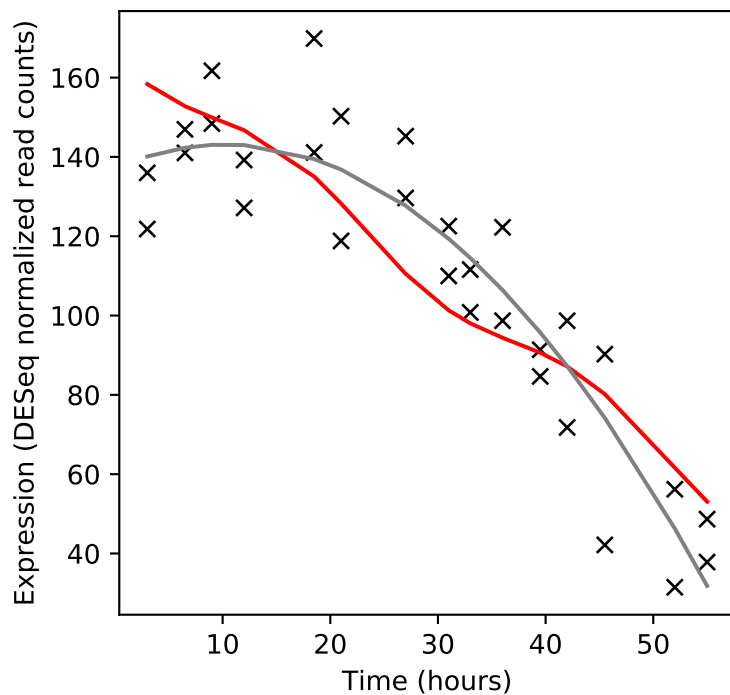

Rv2419c/gpgP

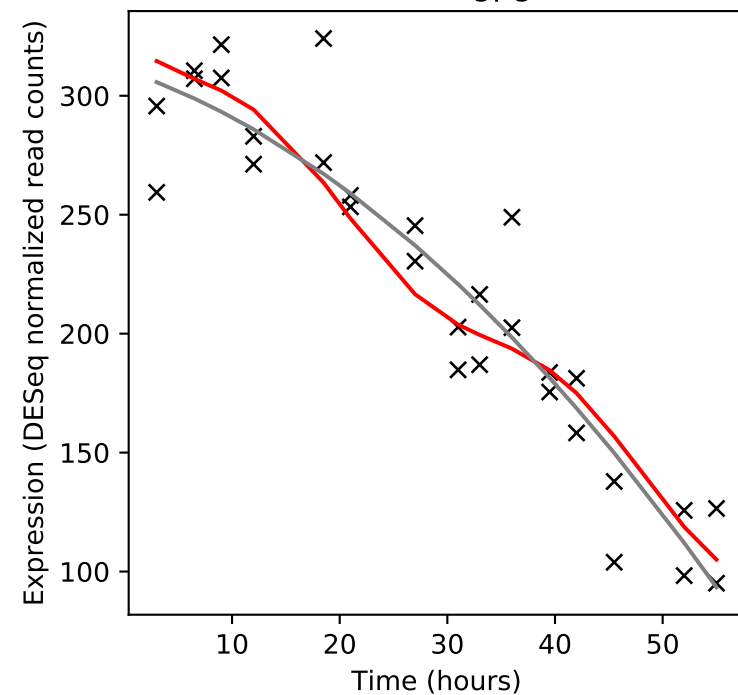

Rv2420c/-

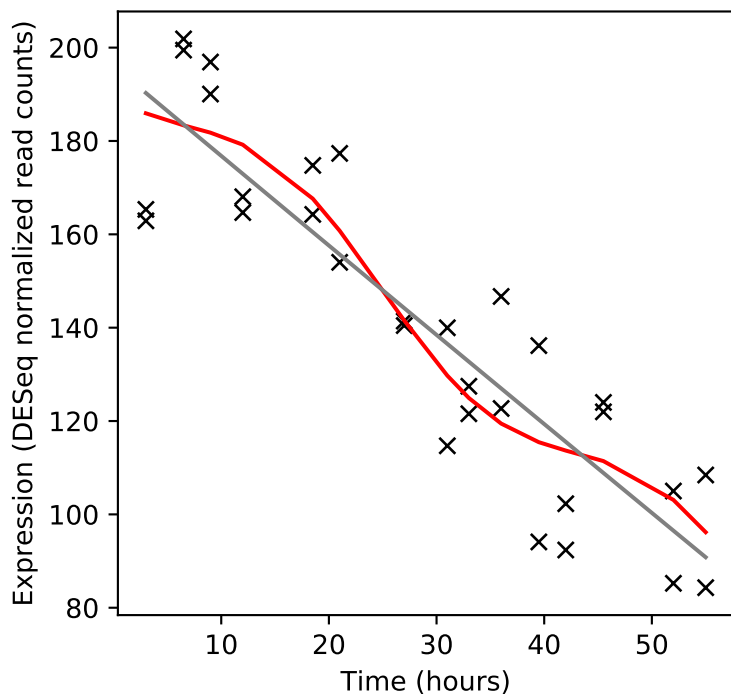

Rv2421c/nadD

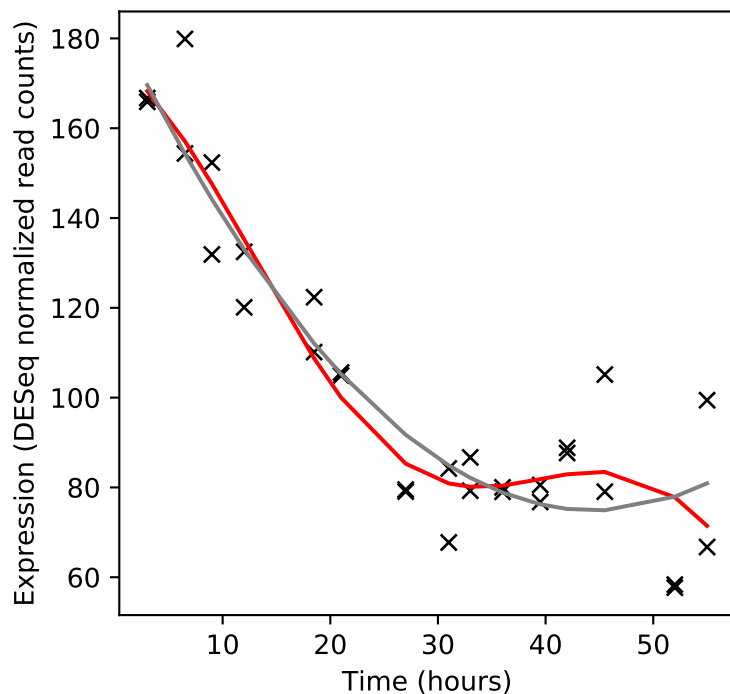

Rv2422/-

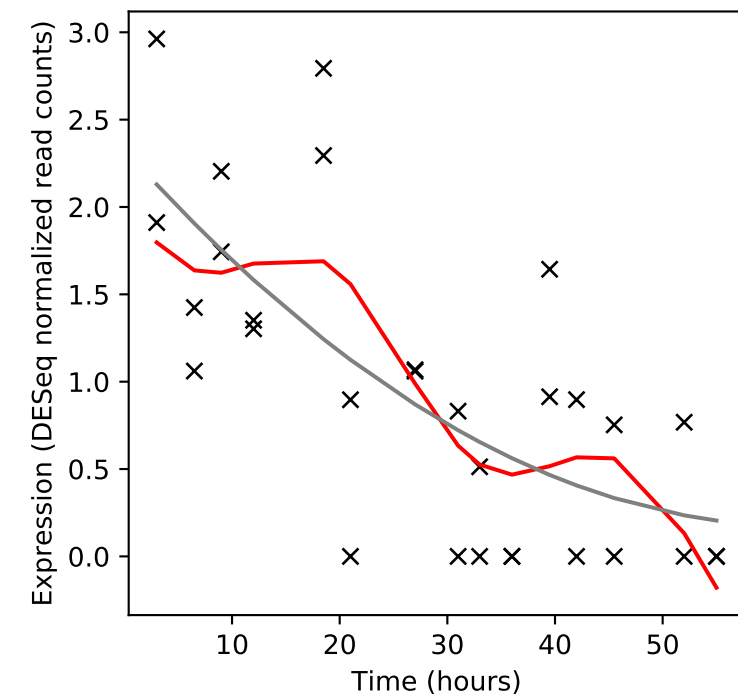

Rv2423/-

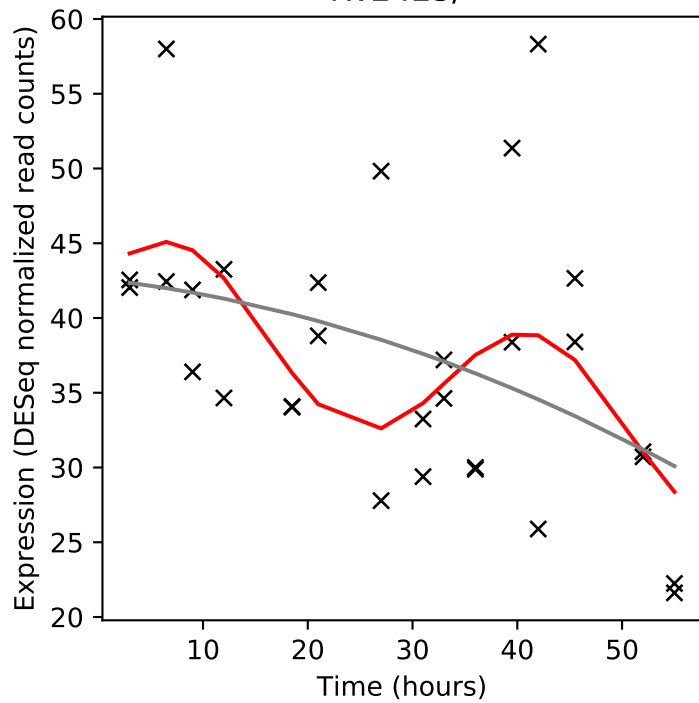

Rv2424c/-

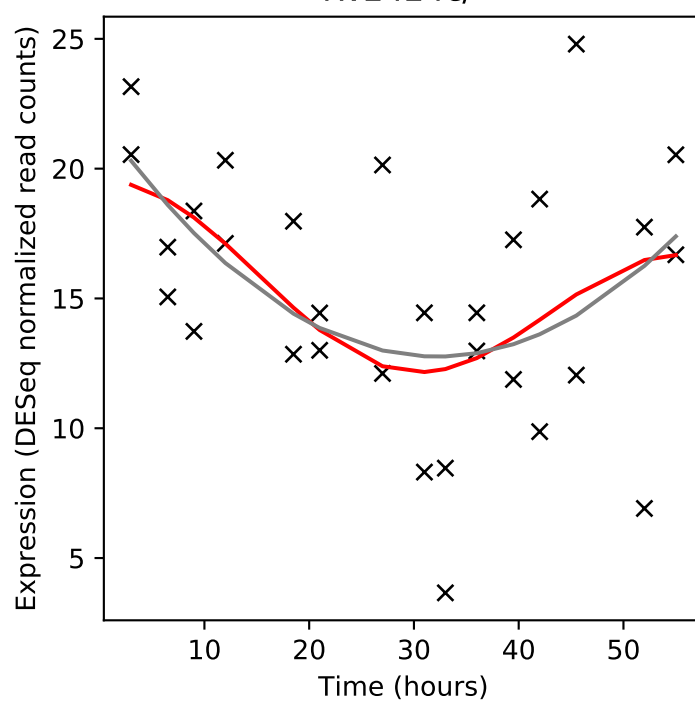

Rv2425c/-

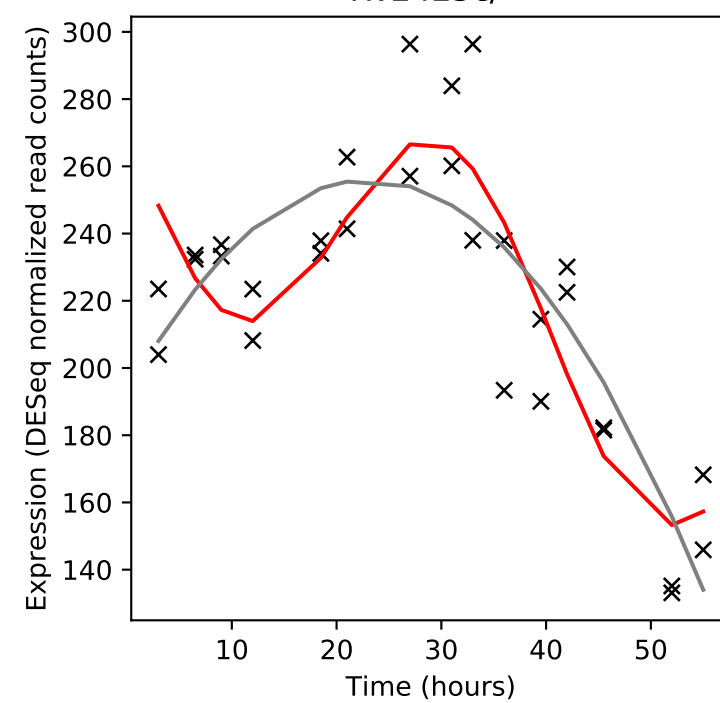

Rv2426c/-

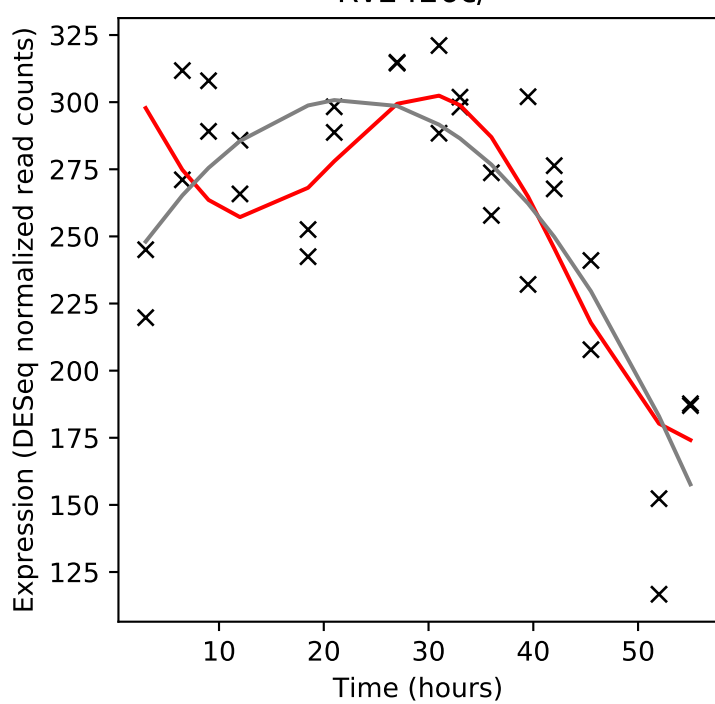

Rv2427c/proA

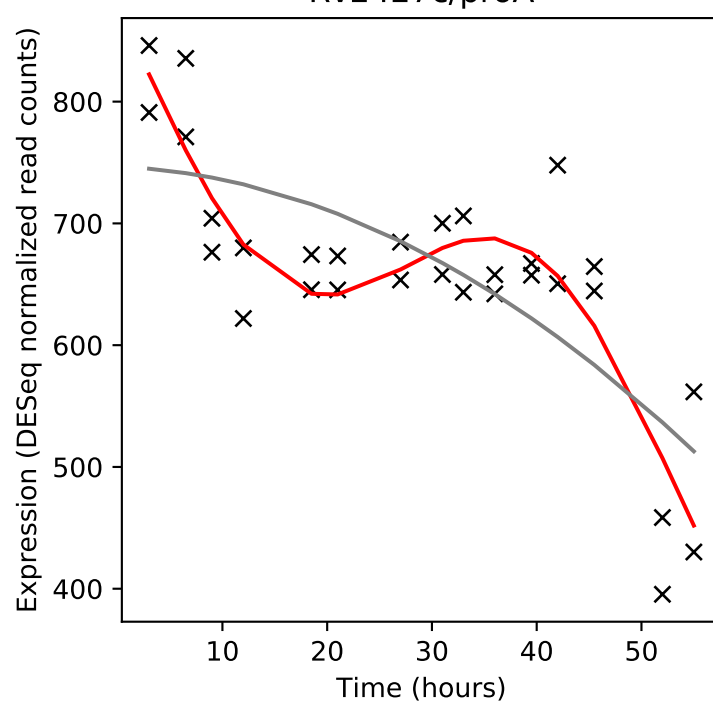

Rv2428/ahpC

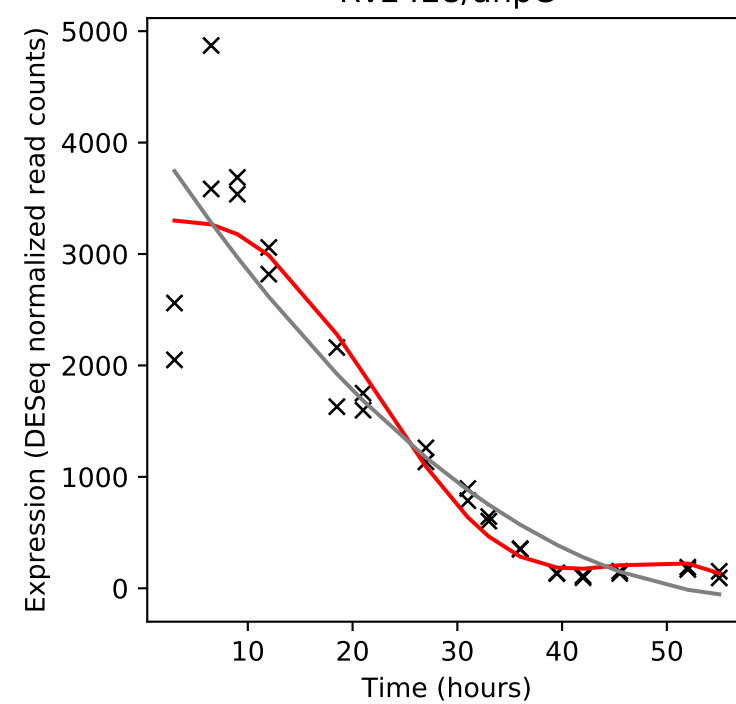

Rv2429/ahpD

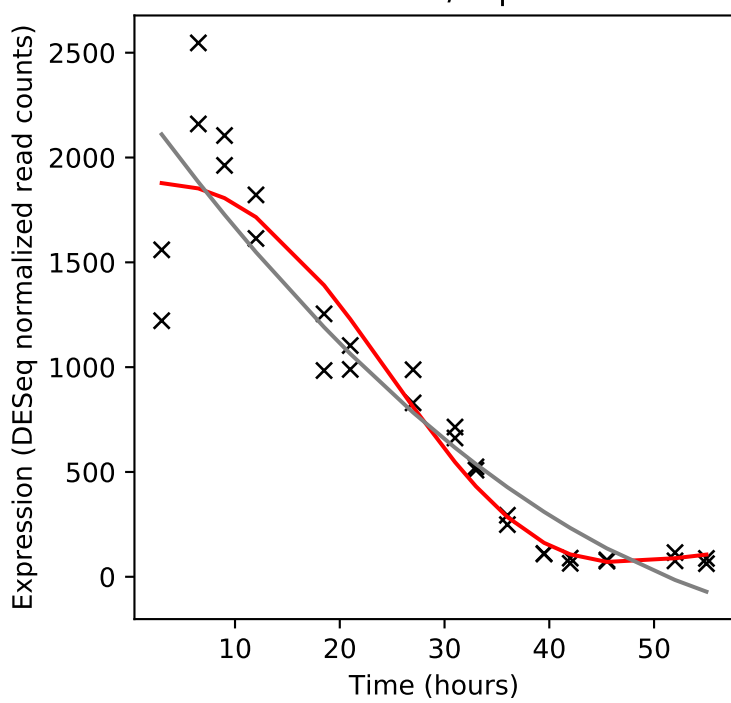

Rv2430c/PPE41

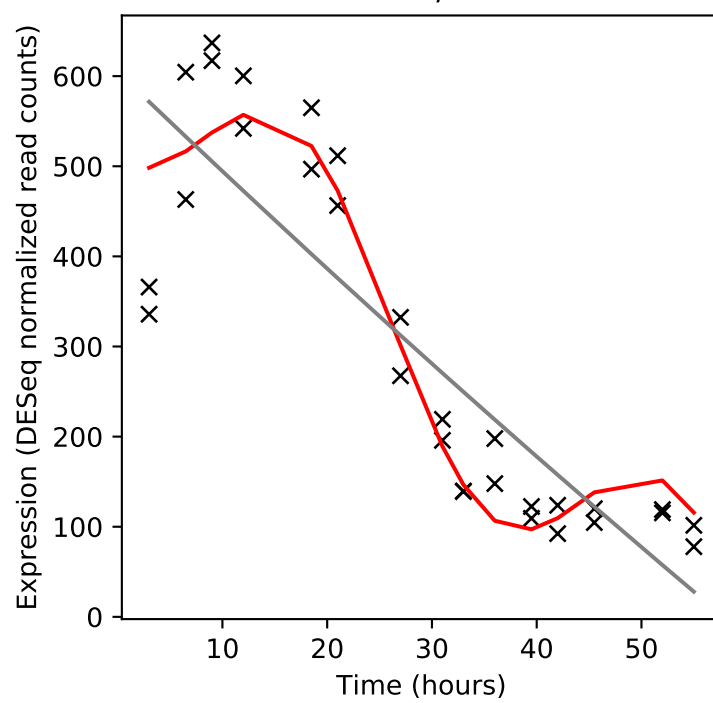

Rv2431c/PE25

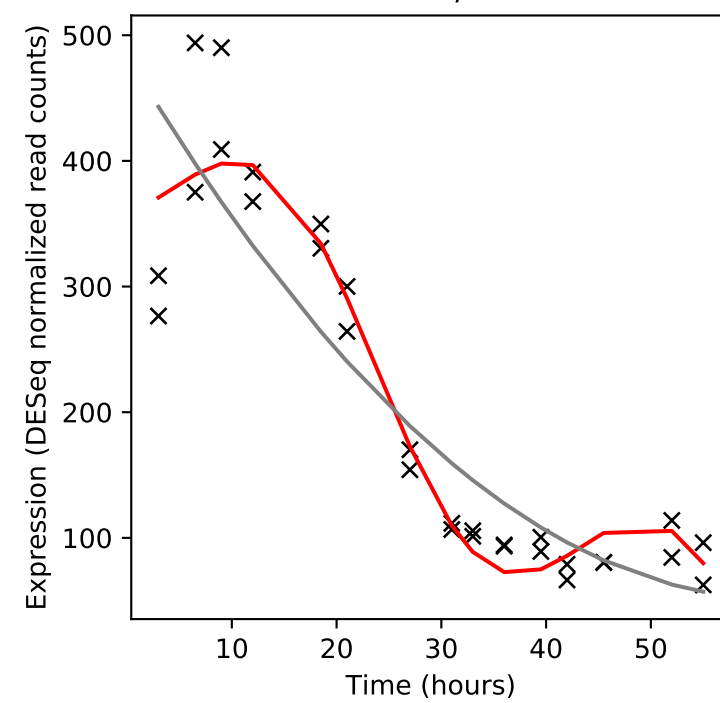

Rv2432c/-

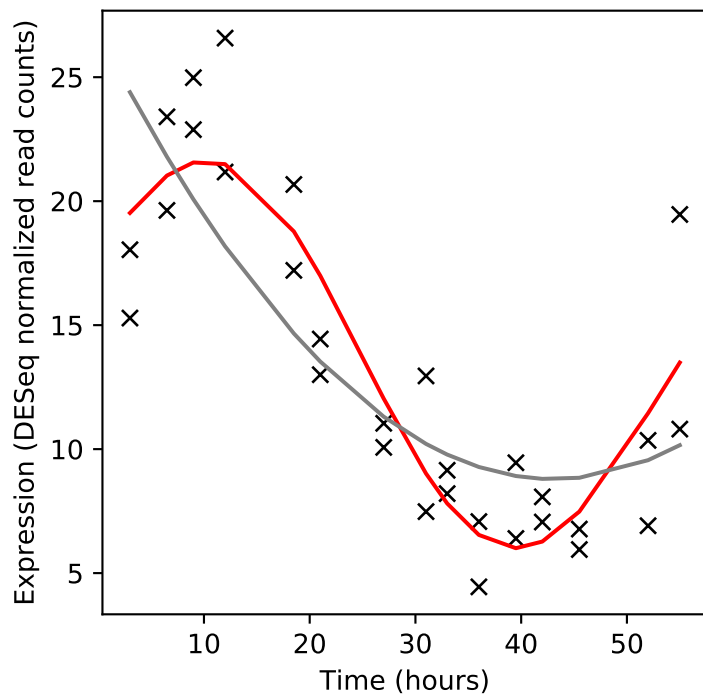

Rv2433c/-

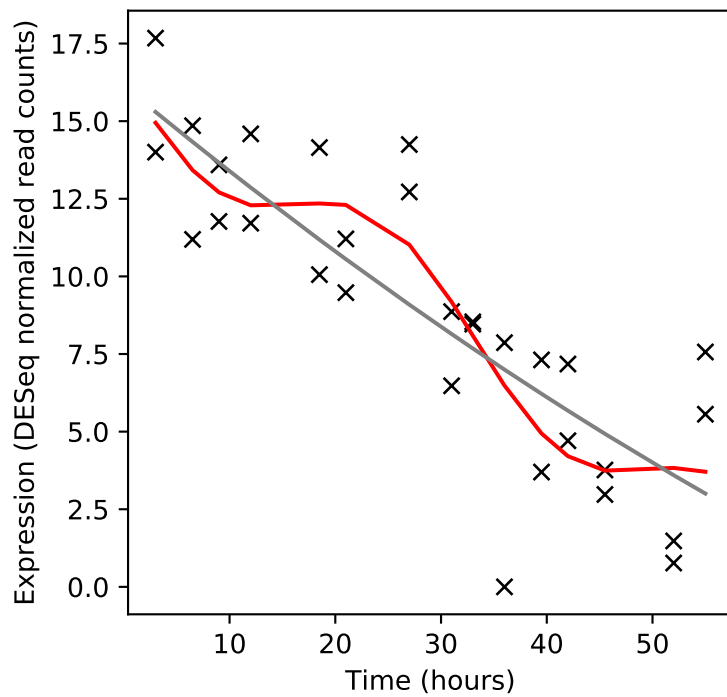

Rv2434c/-

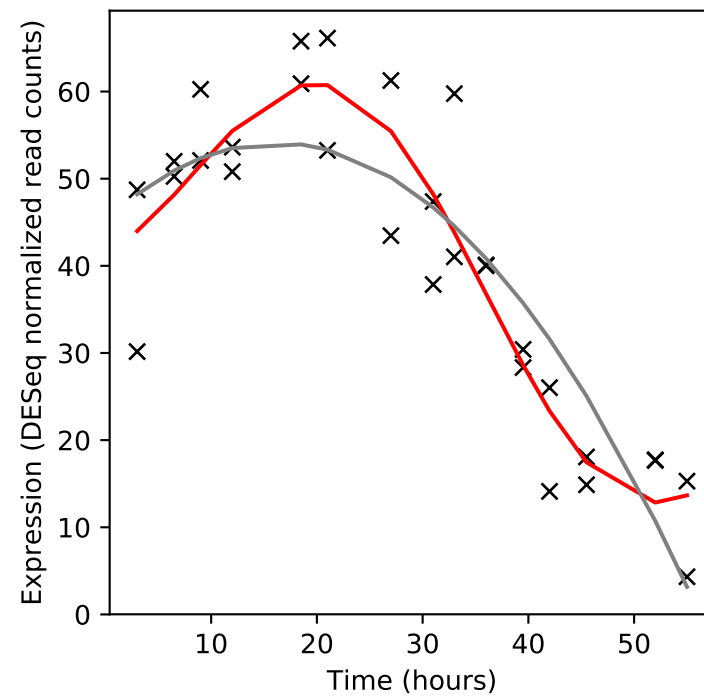

Rv2435c/-

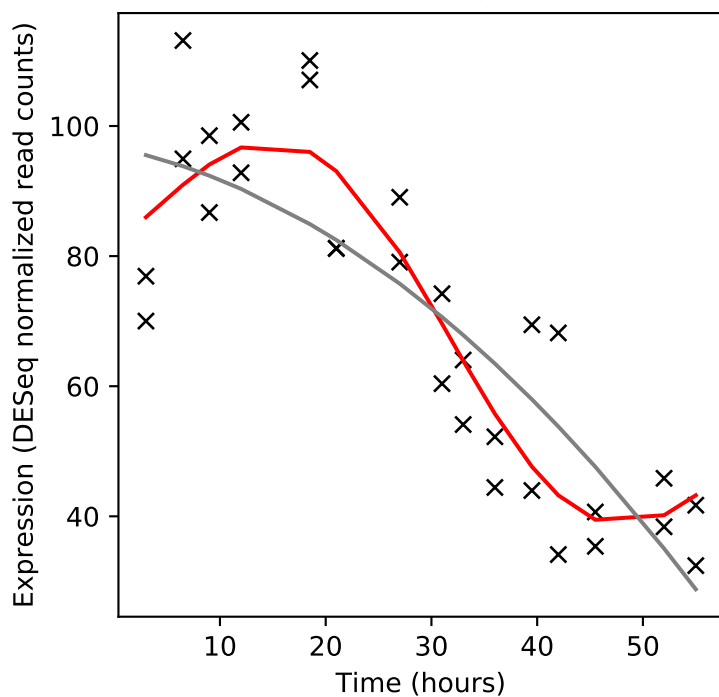

Rv2436/rbsK

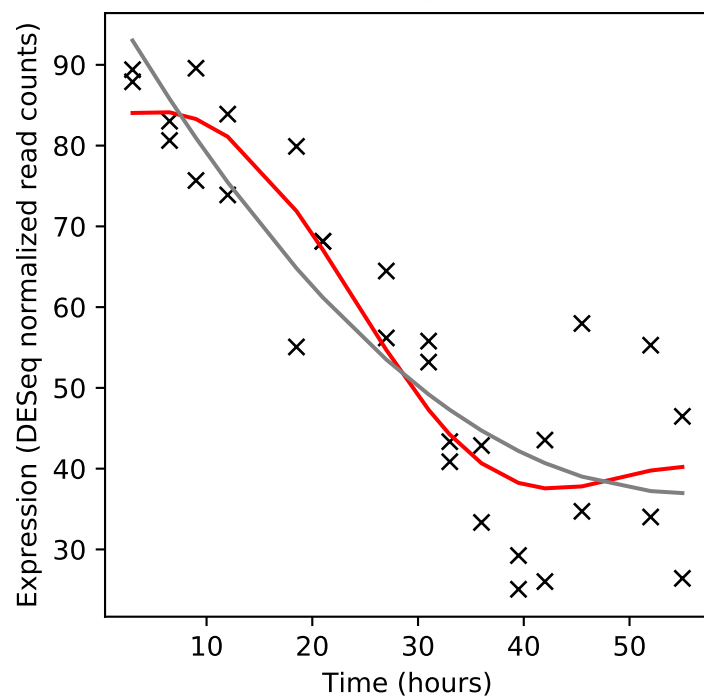

Rv2437/-

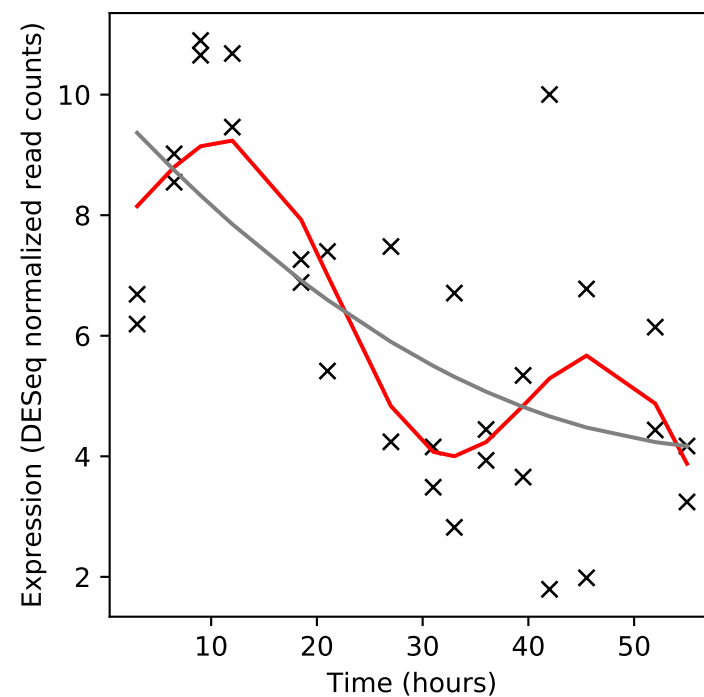

Rv2438c/nadE

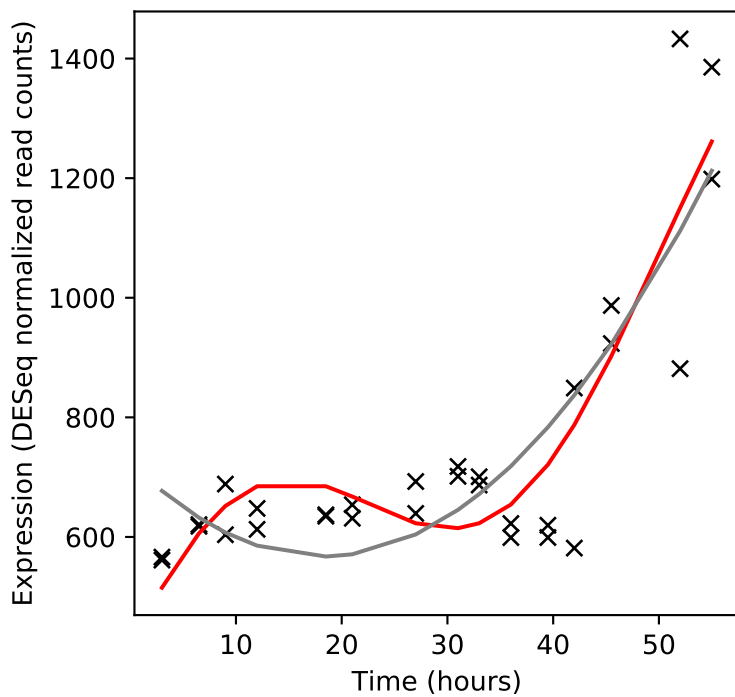

Rv2438A/-

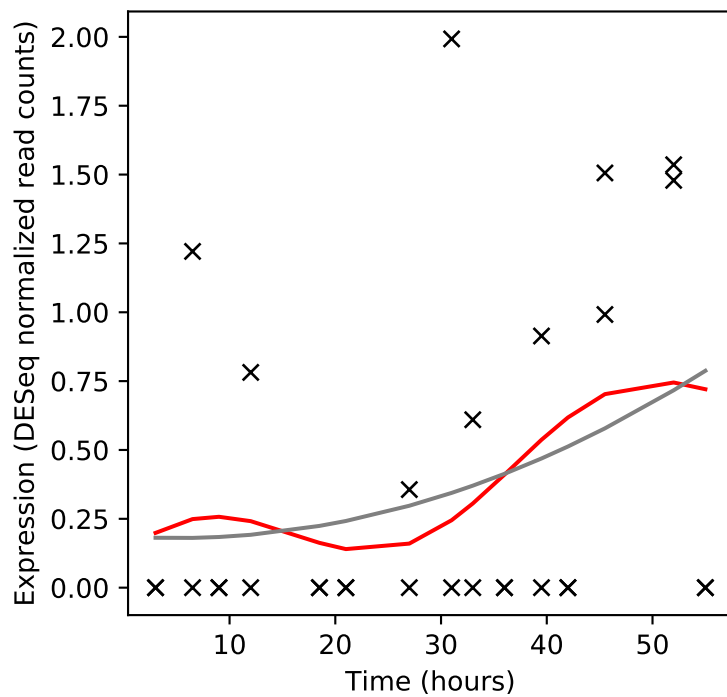

Rv2439c/proB

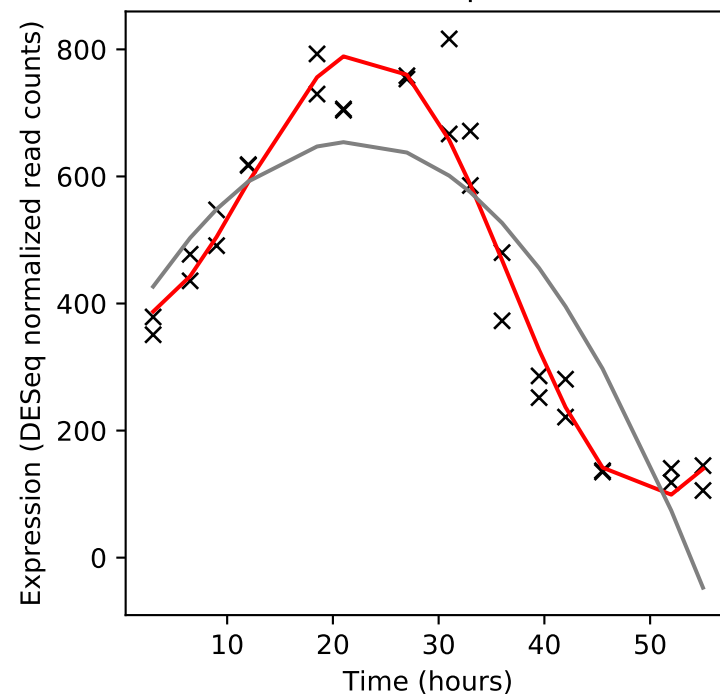

Rv2440c/obg

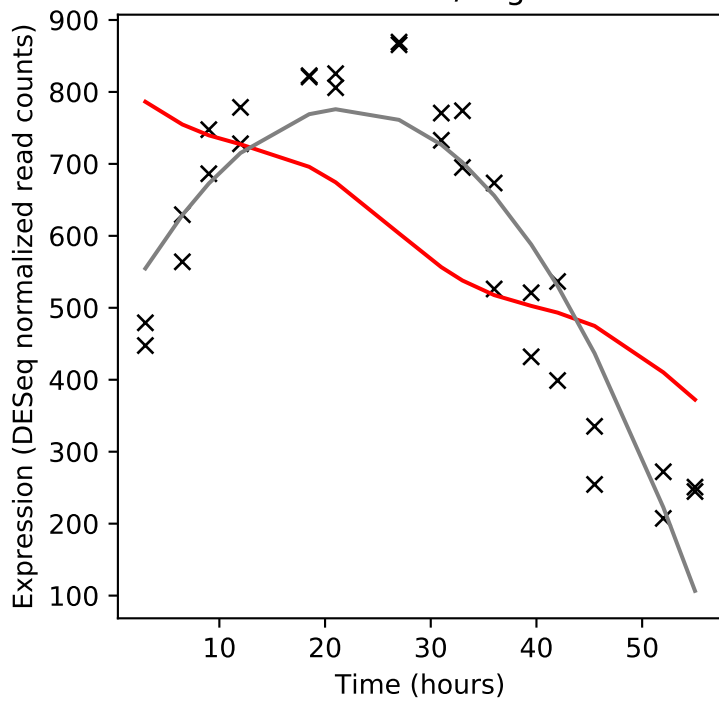

Rv2441c/rpmA

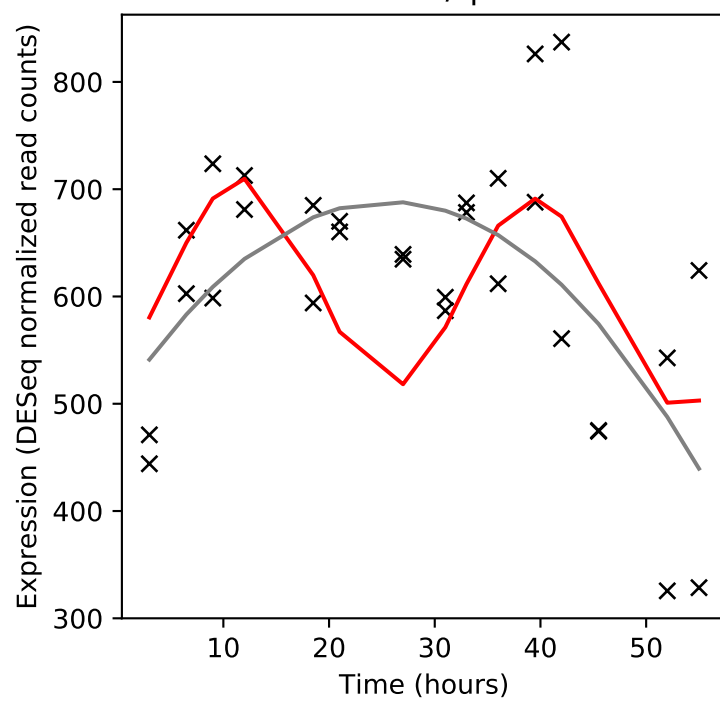

Rv2442c/rplU

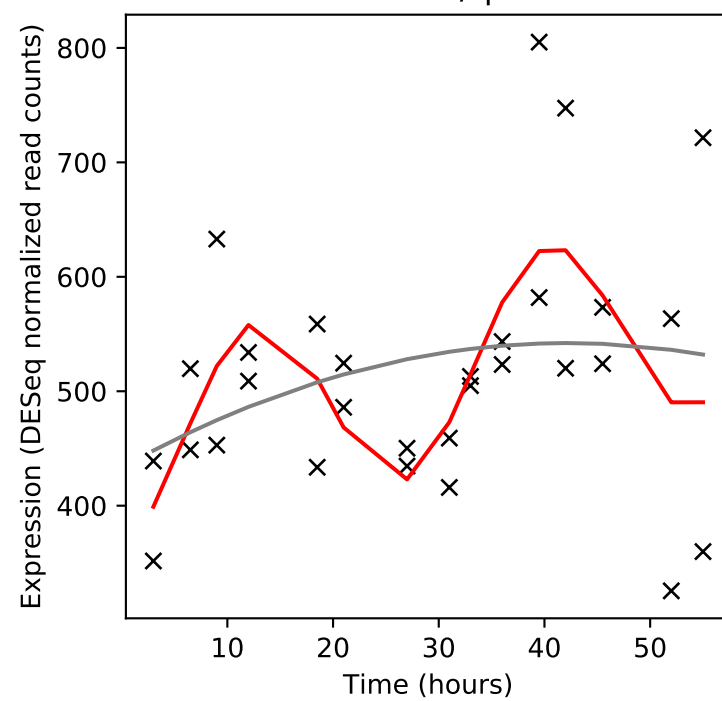

Rv2443/dctA

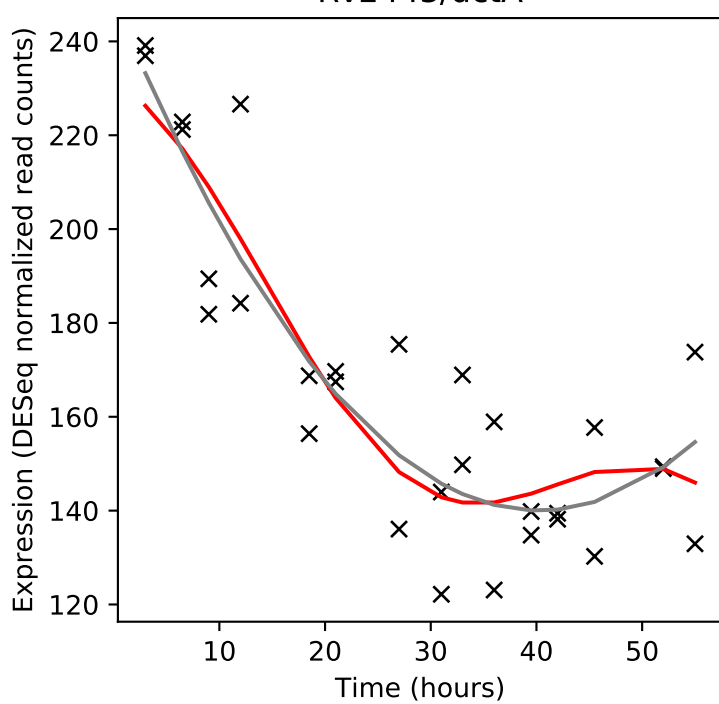

Rv2444c/rne

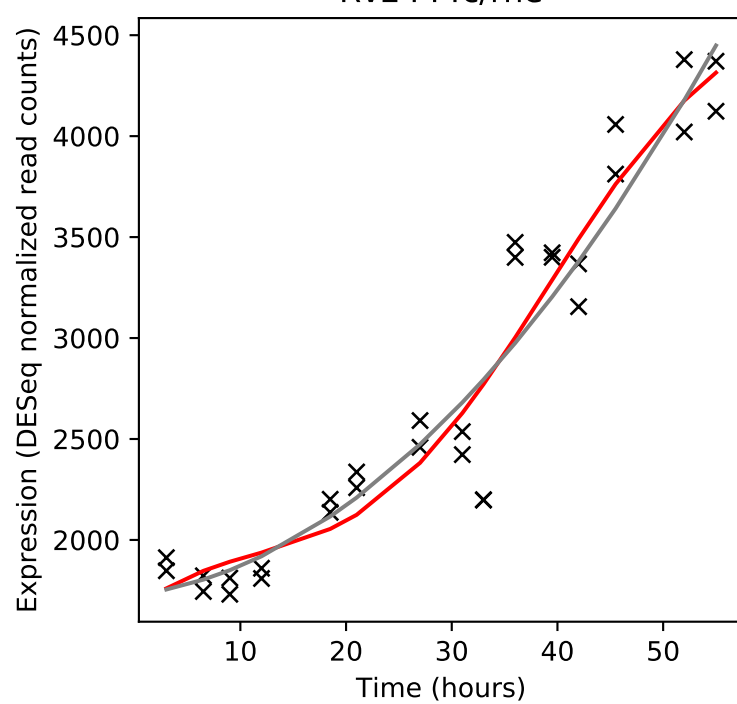

Rv2445c/ndkA

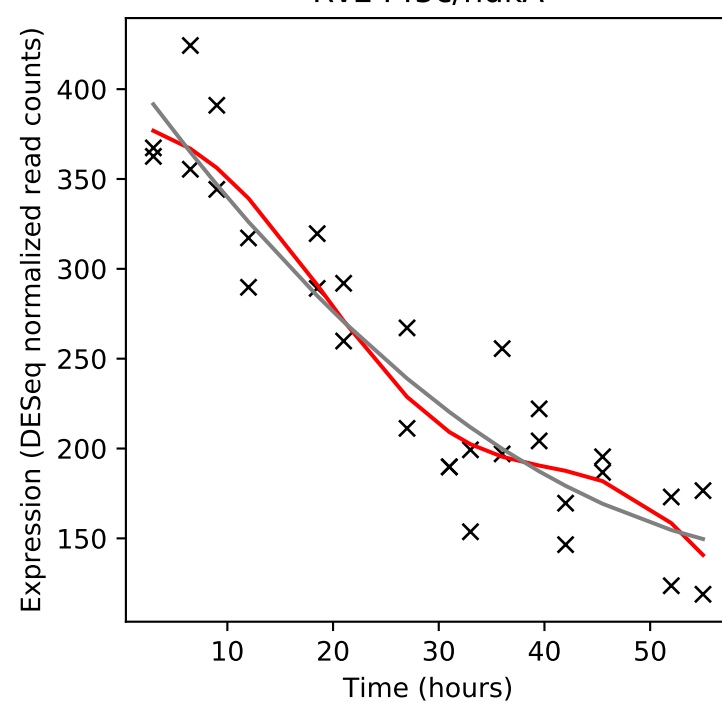

Rv2446c/-

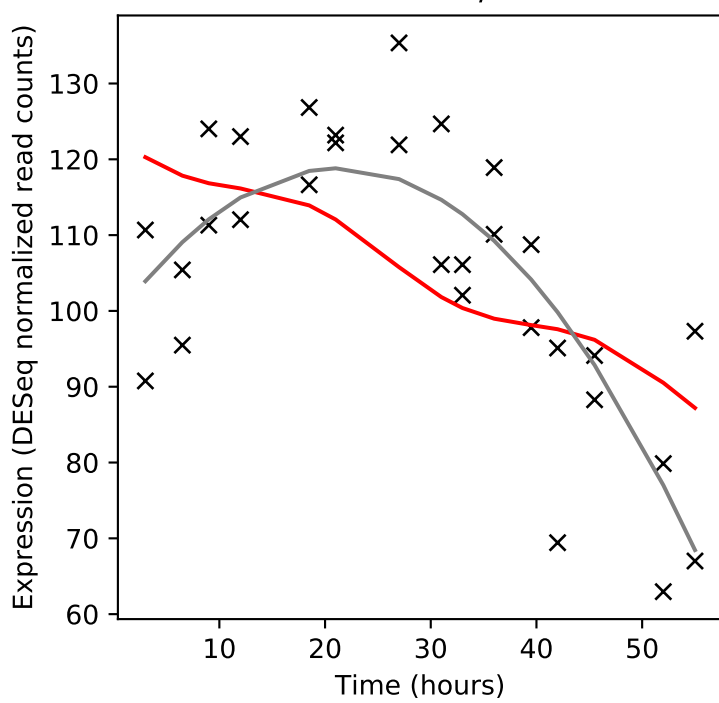

Rv2447c/folC

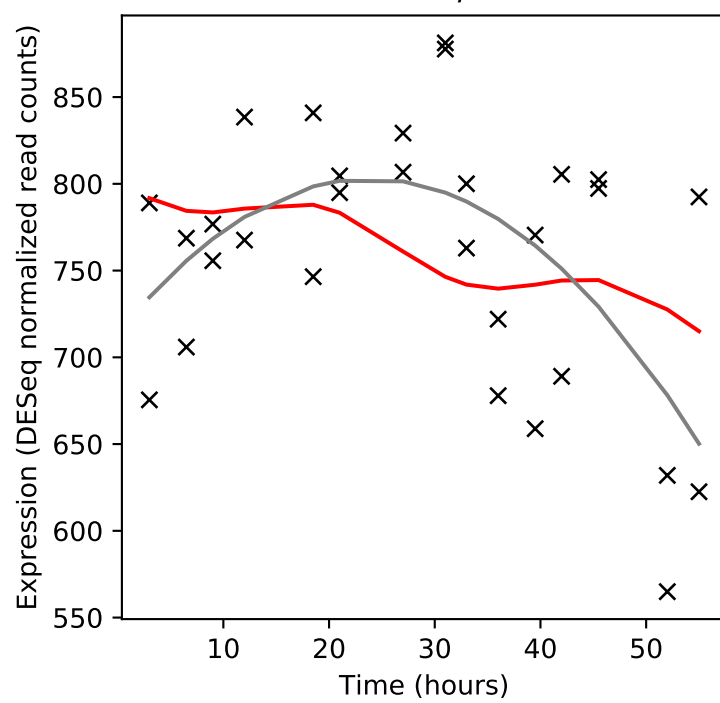

Rv2448c/valS

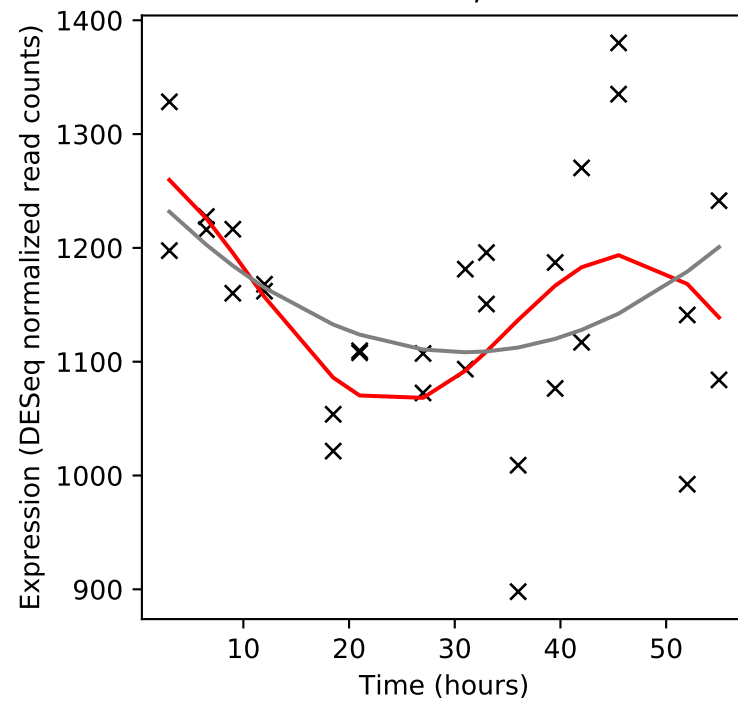

Rv2449c/-

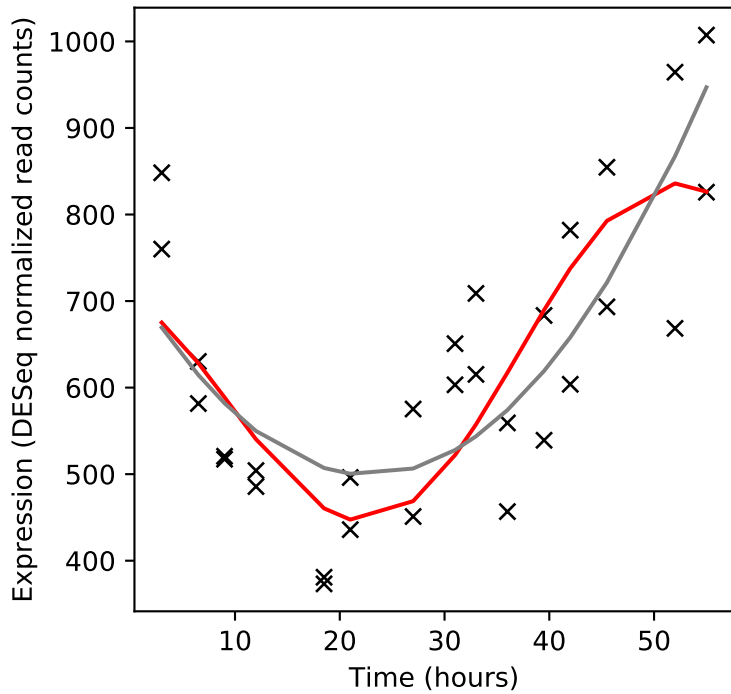

Rv2450c/rpfE

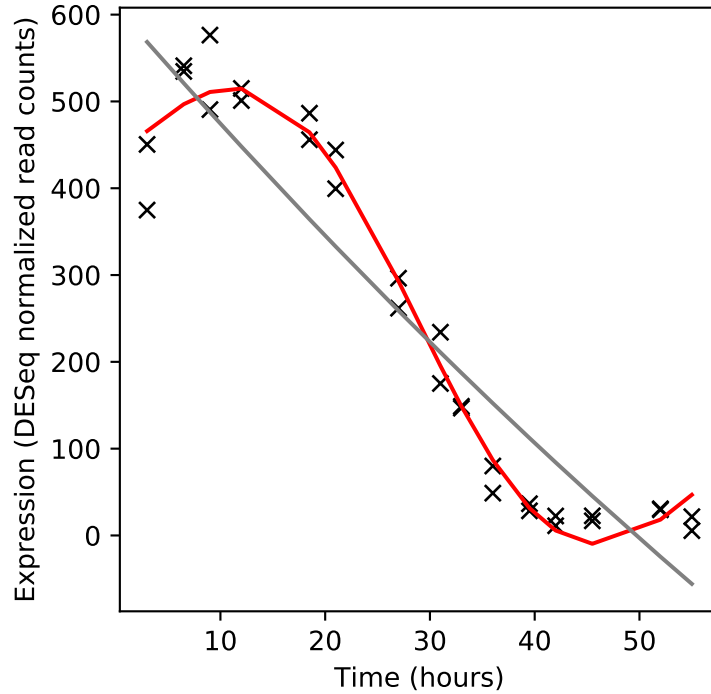

Rv2451/-

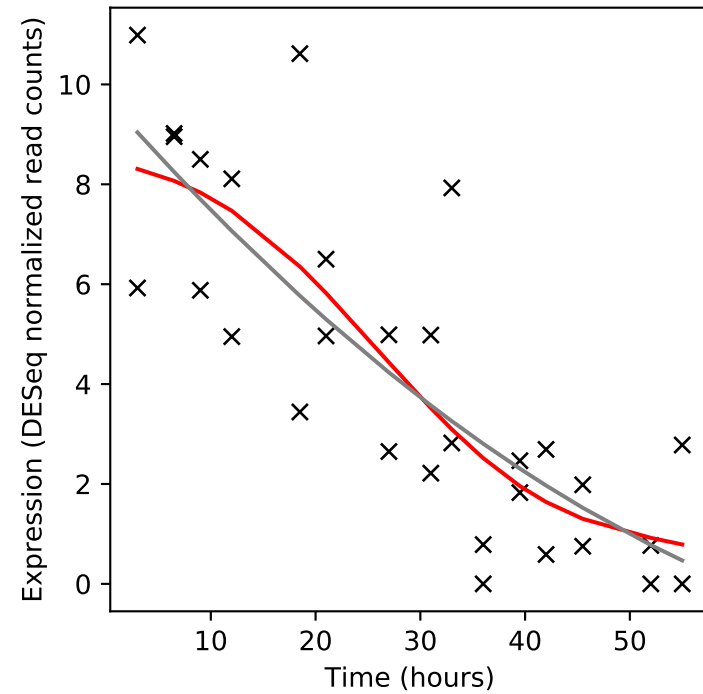

Rv2452c/-

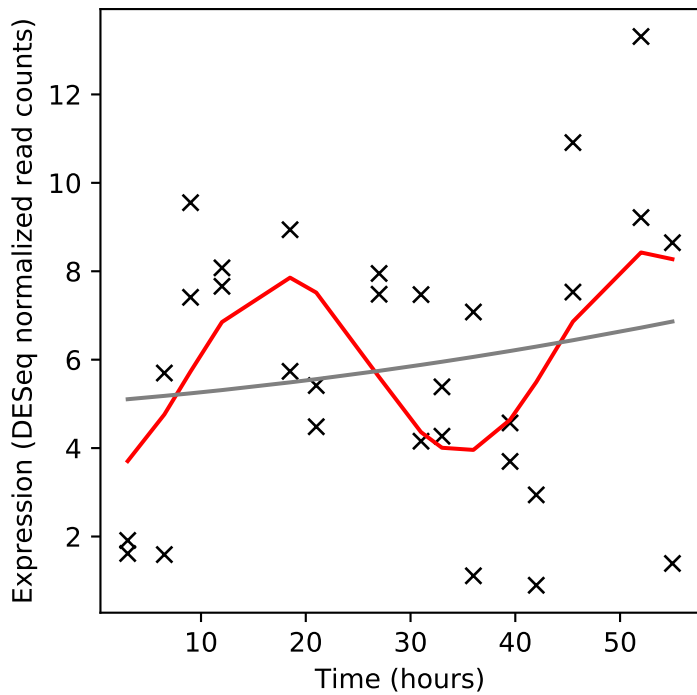

Rv2453c/mobA

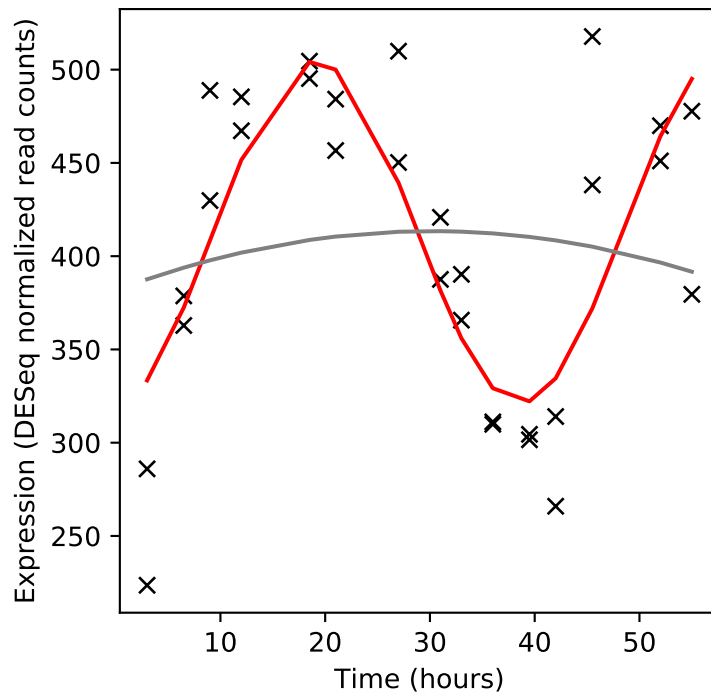

Rv2454c/-

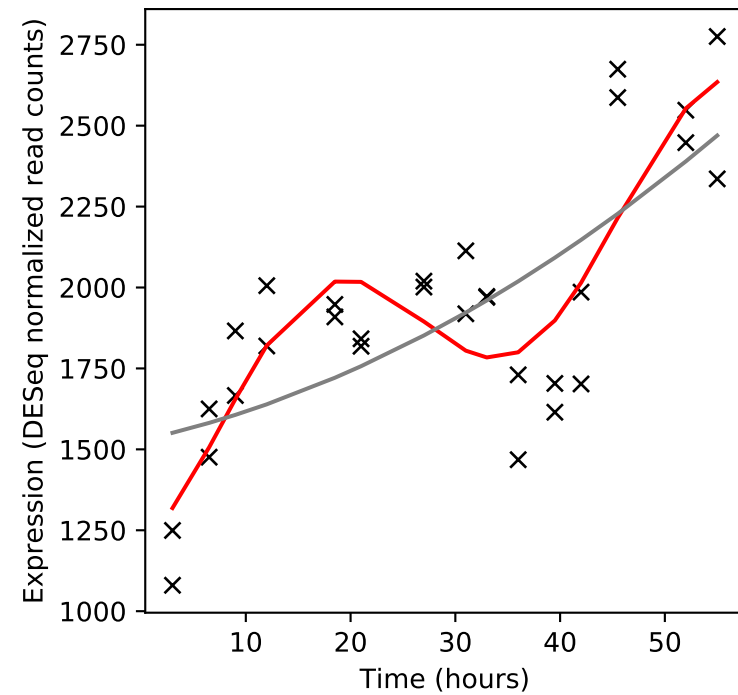

Rv2455c/-

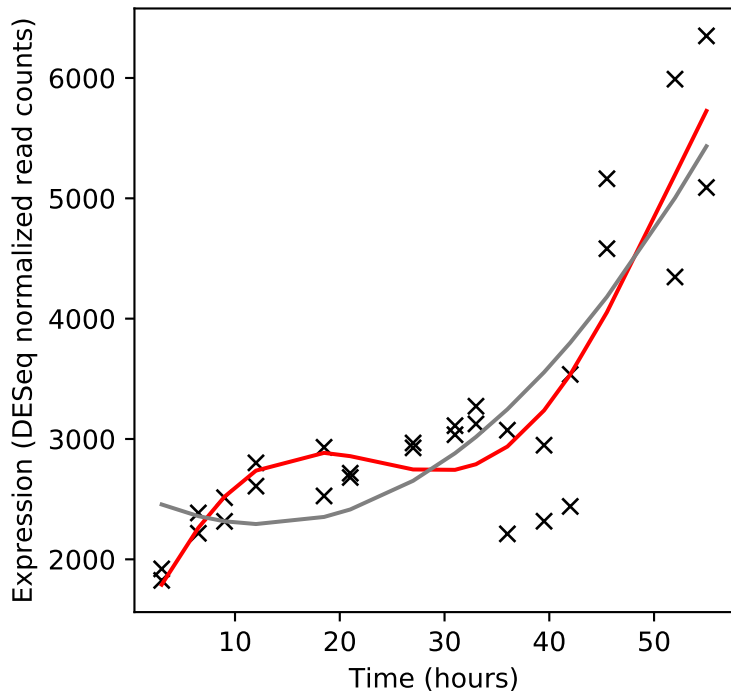

Rv2456c/-

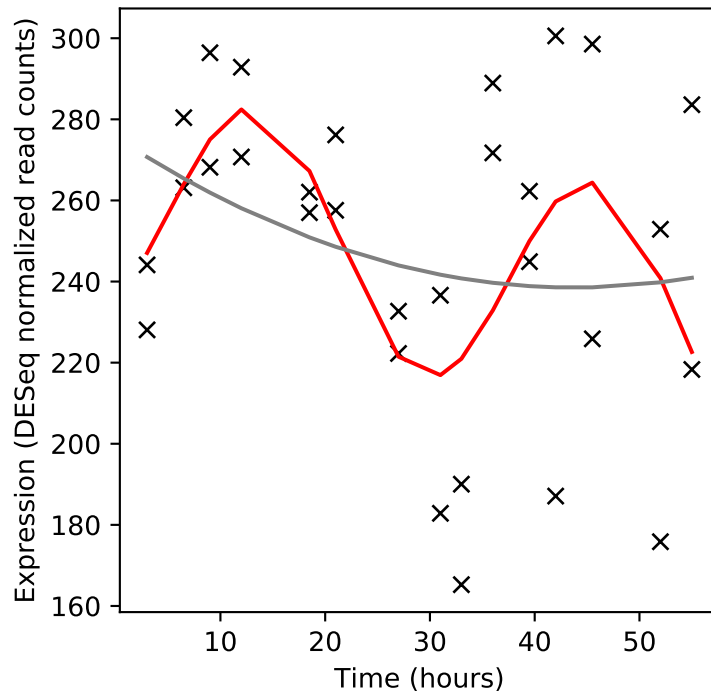

Rv2457c/clpX

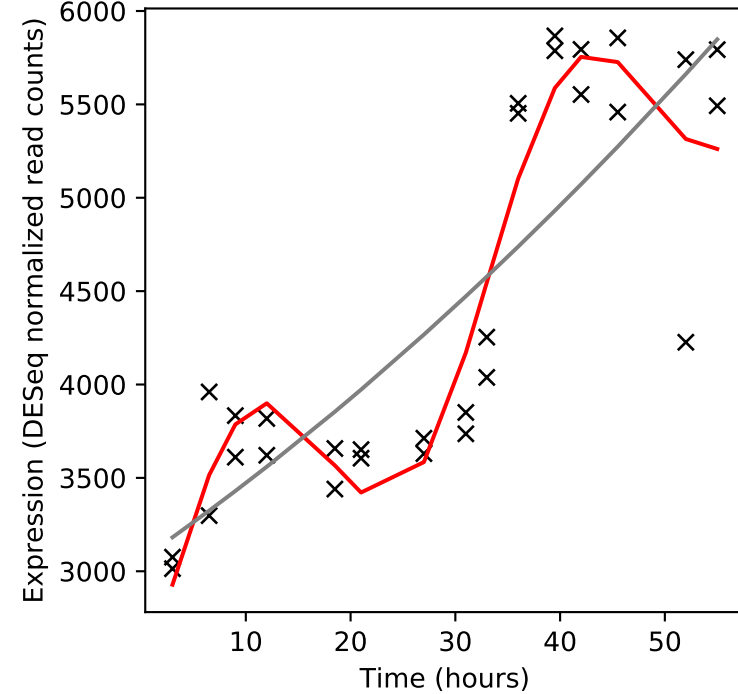

Rv2458/mmuM

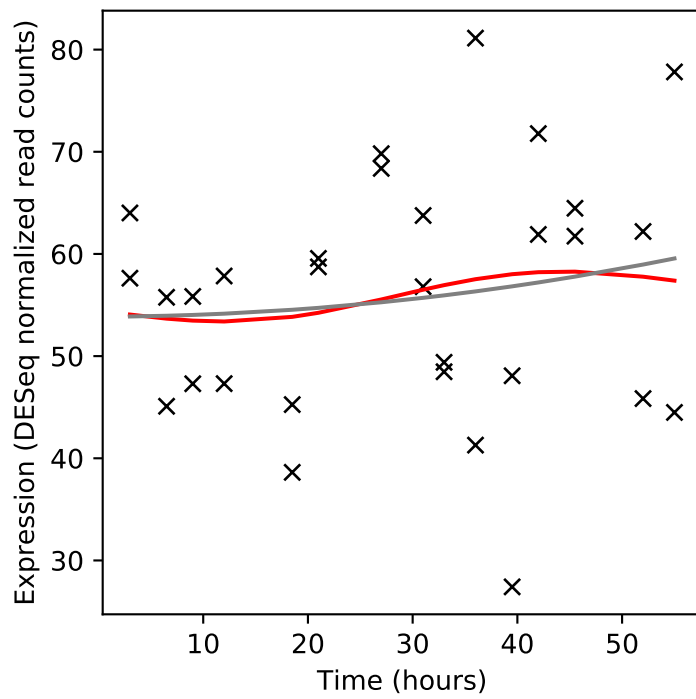

Rv2459/-

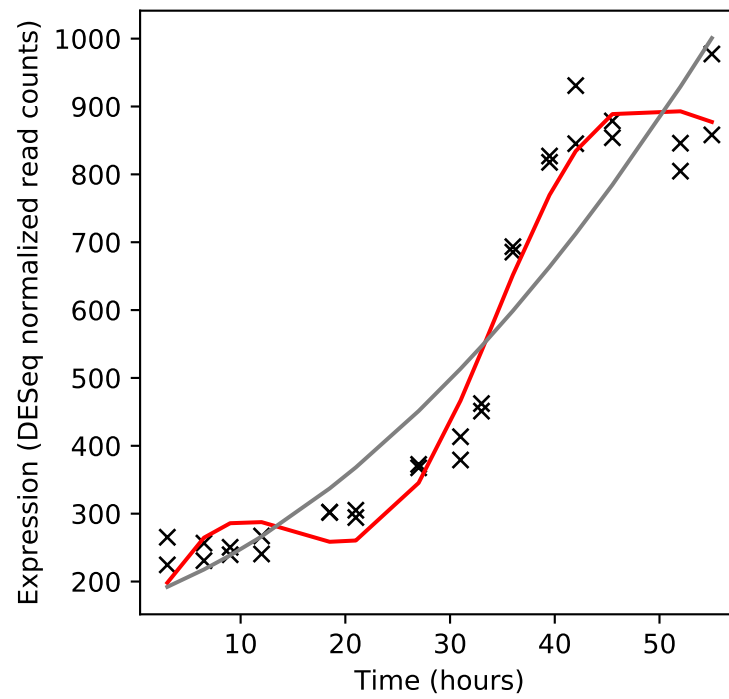

Rv2460c/clpP2

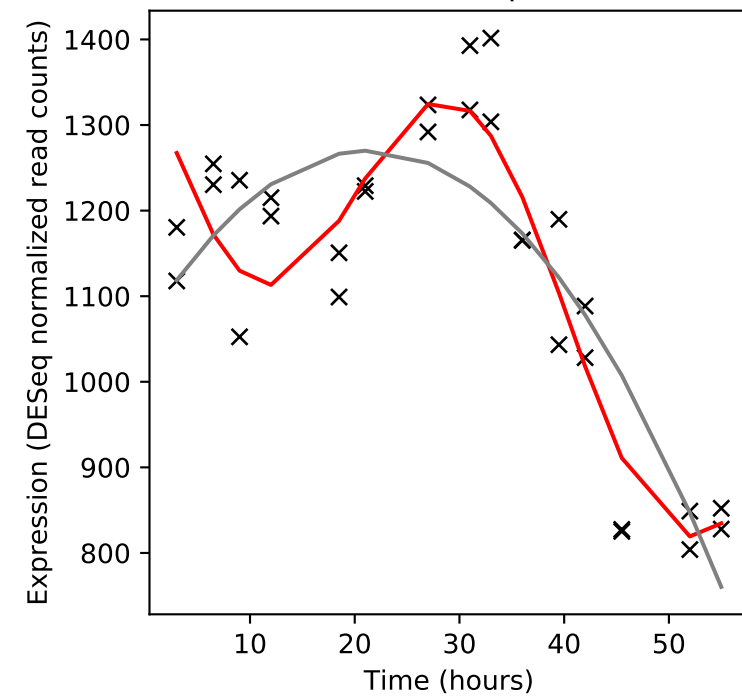

Rv2461c/clpP1

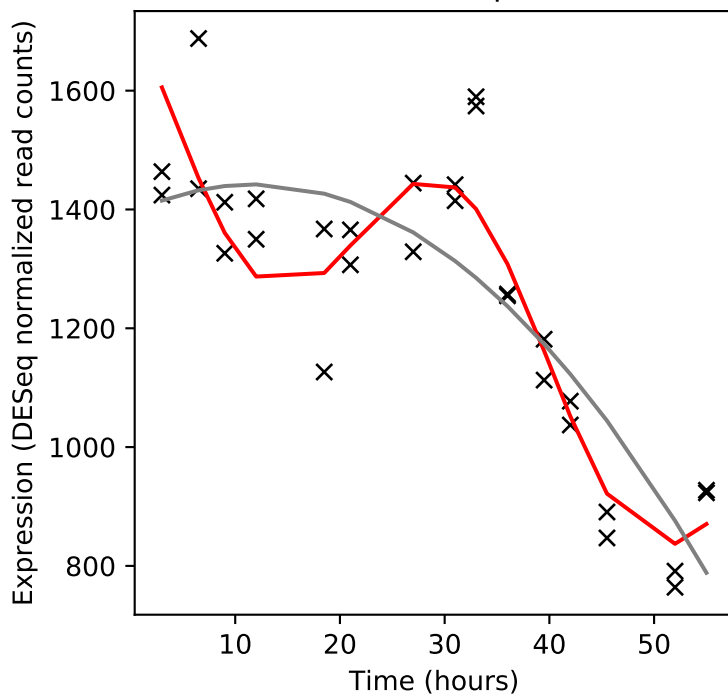

Rv2462c/tig

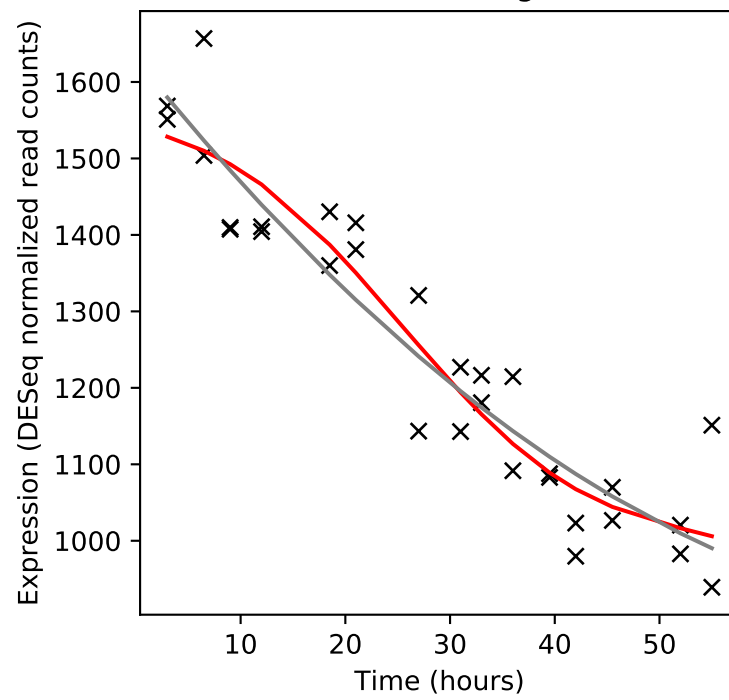

Rv2463/lipP

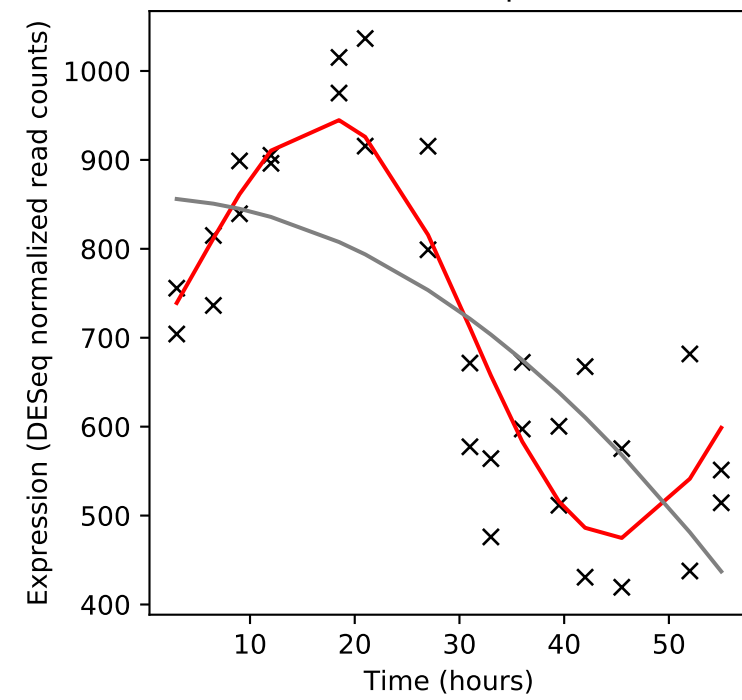

Rv2464c/-

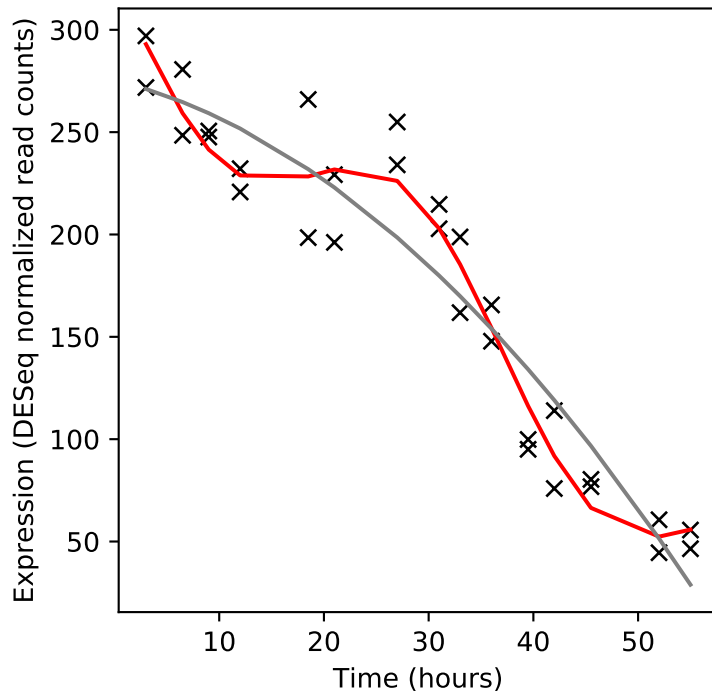

Rv2465c/rpiB

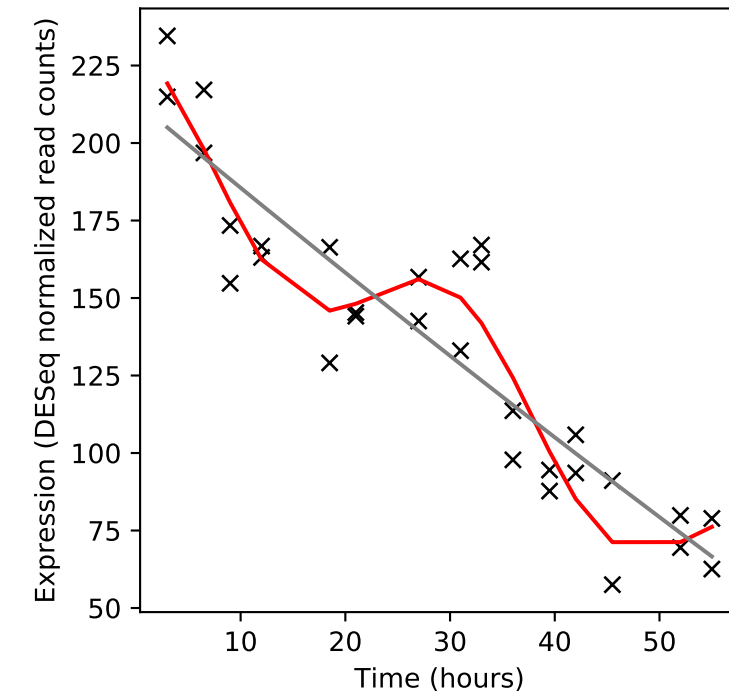

Rv2466c/-

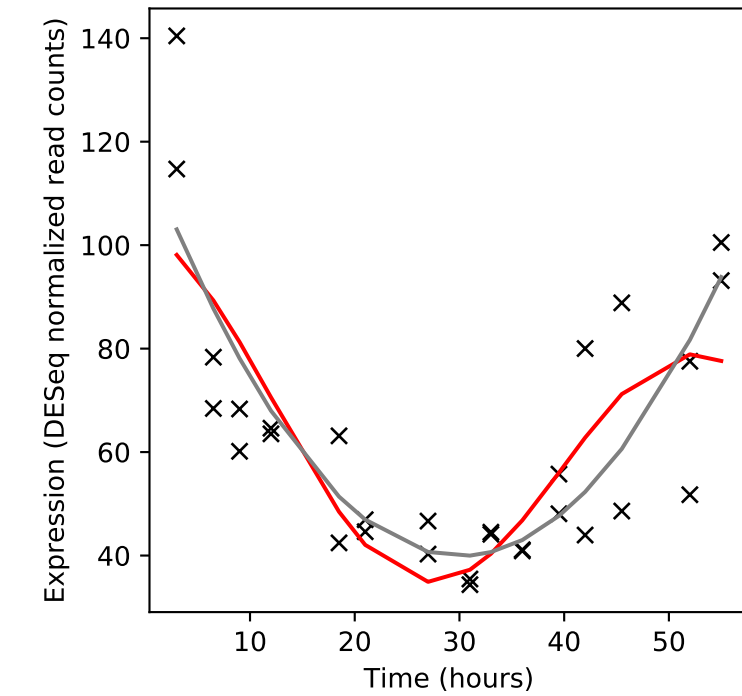

Rv2467/pepN

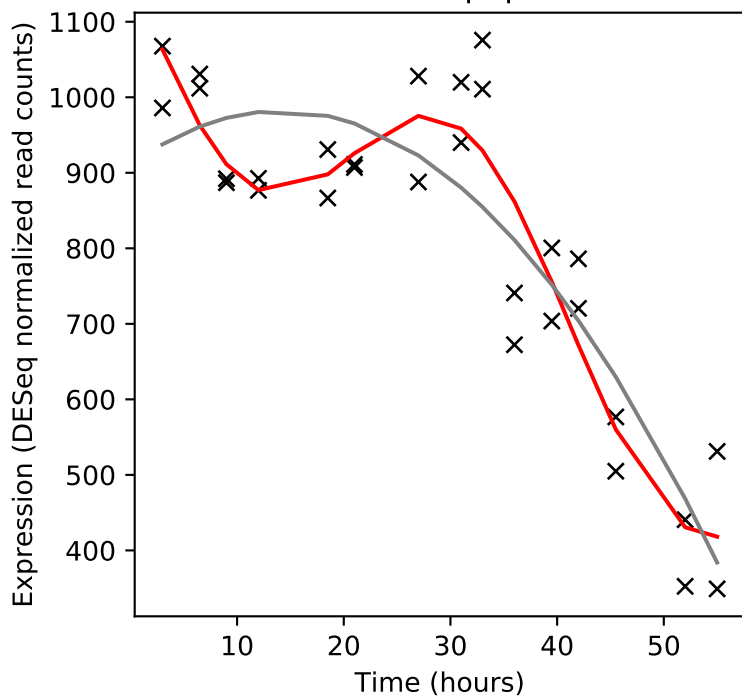

Rv2468c/-

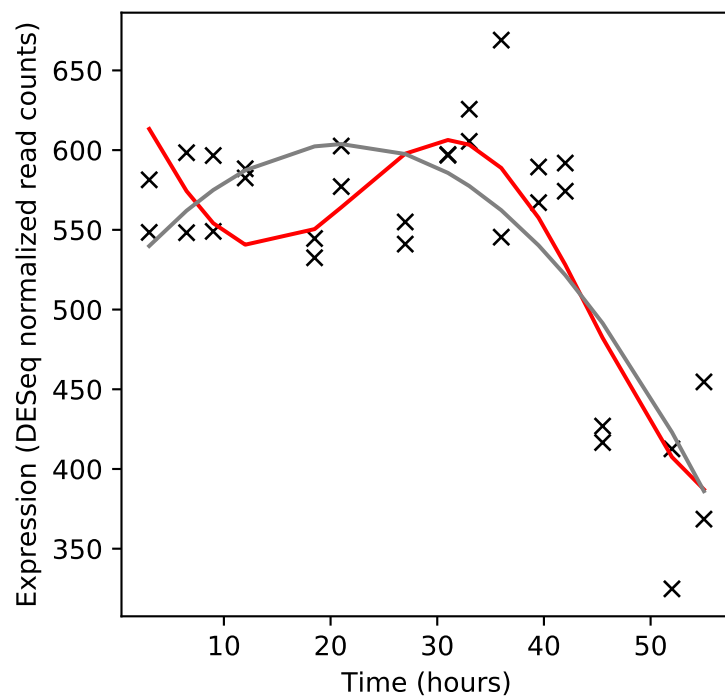

Rv2468A/-

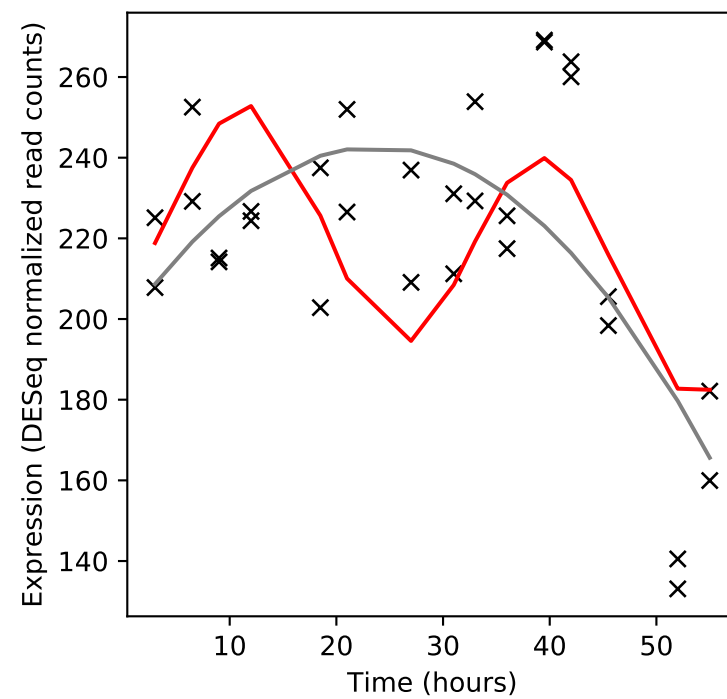

Rv2469c/-

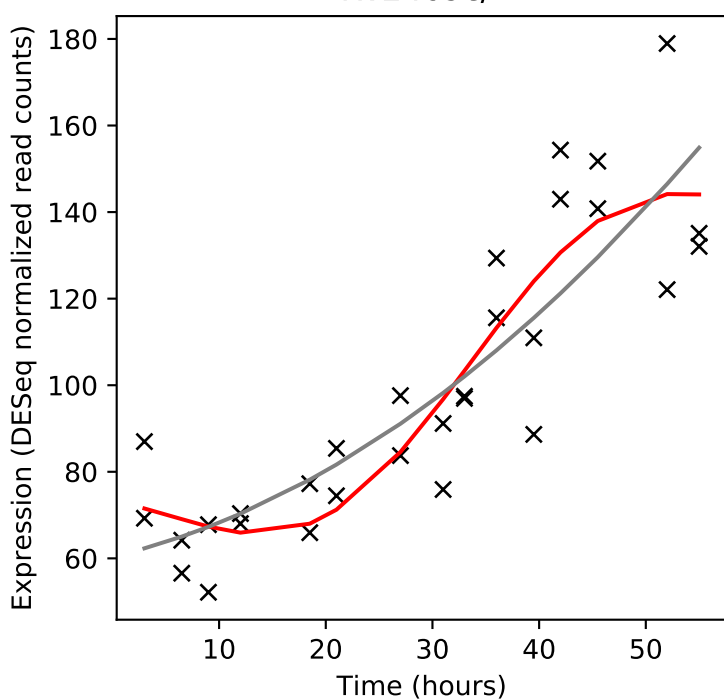

Rv2470/glbO

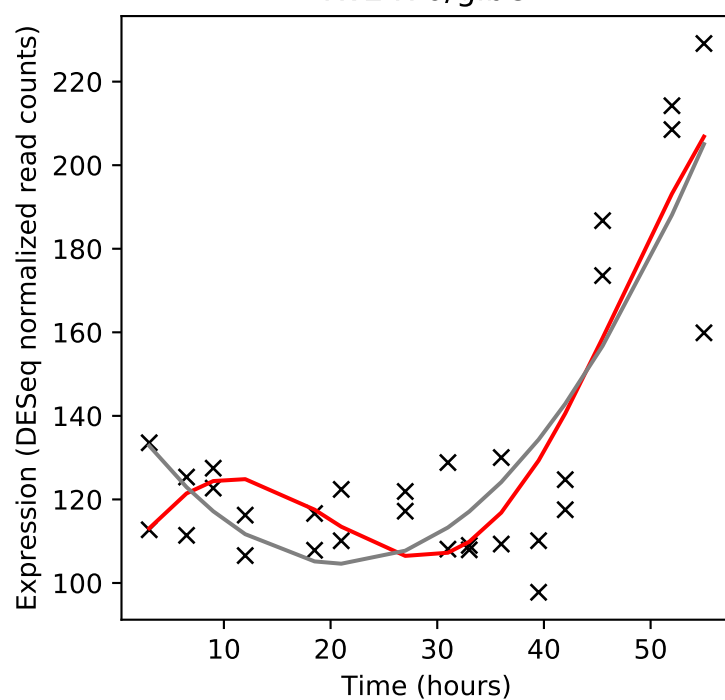

Rv2471/agIA

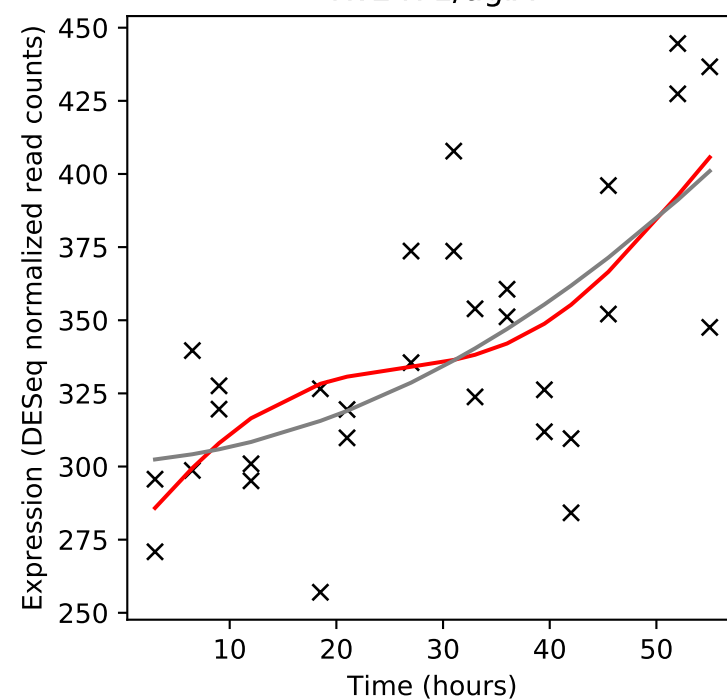

Rv2472/-

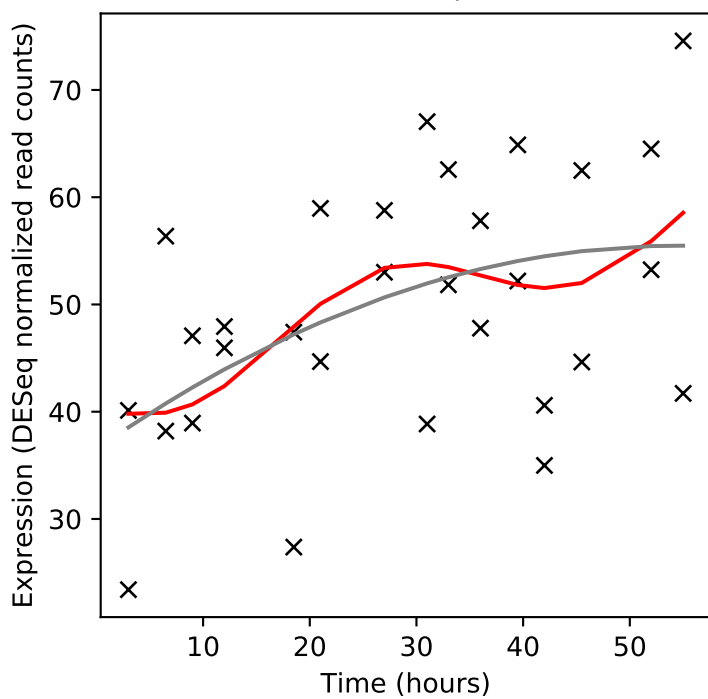

Rv2473/-

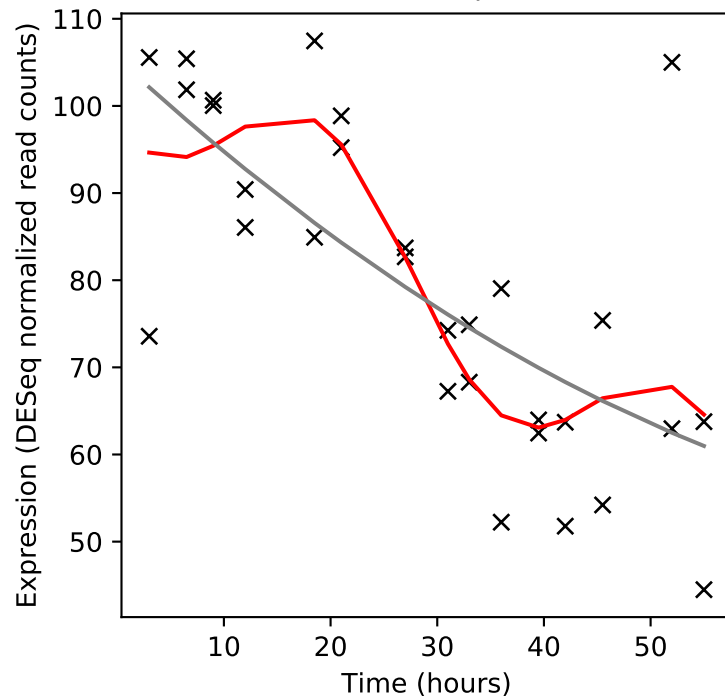

Rv2474c/-

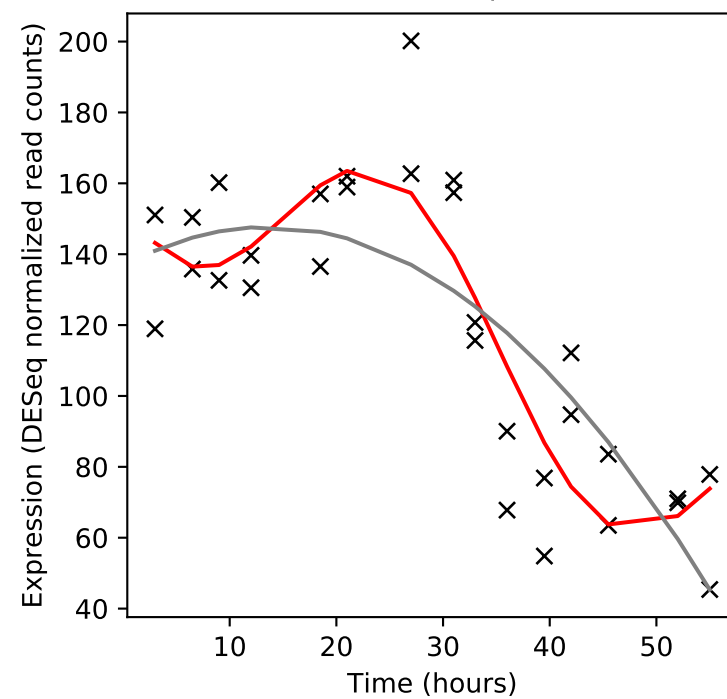



Rv2475c/-

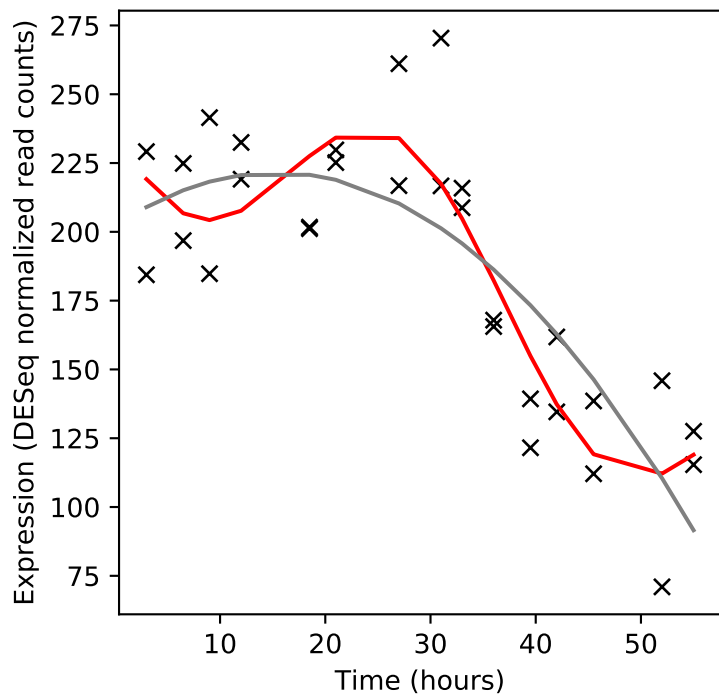

Rv2476c/gdh

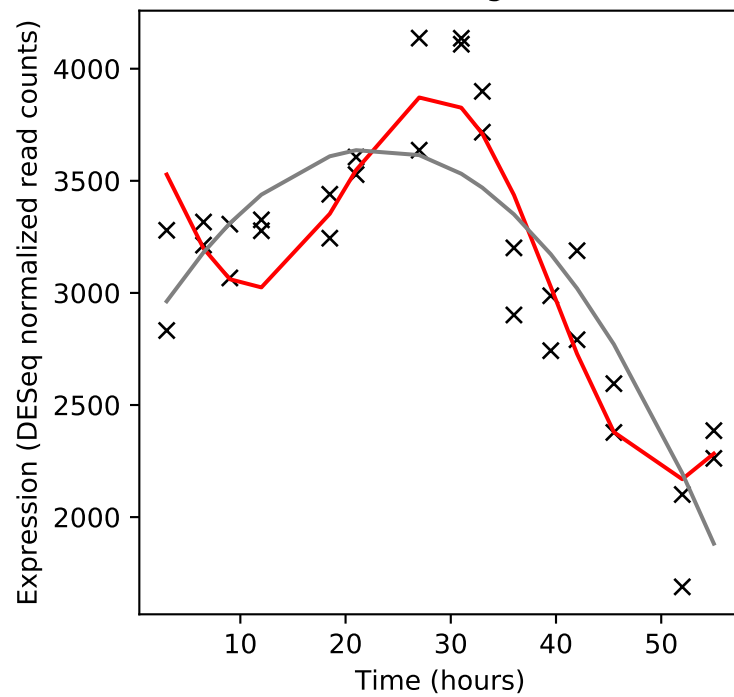

Rv2477c/-

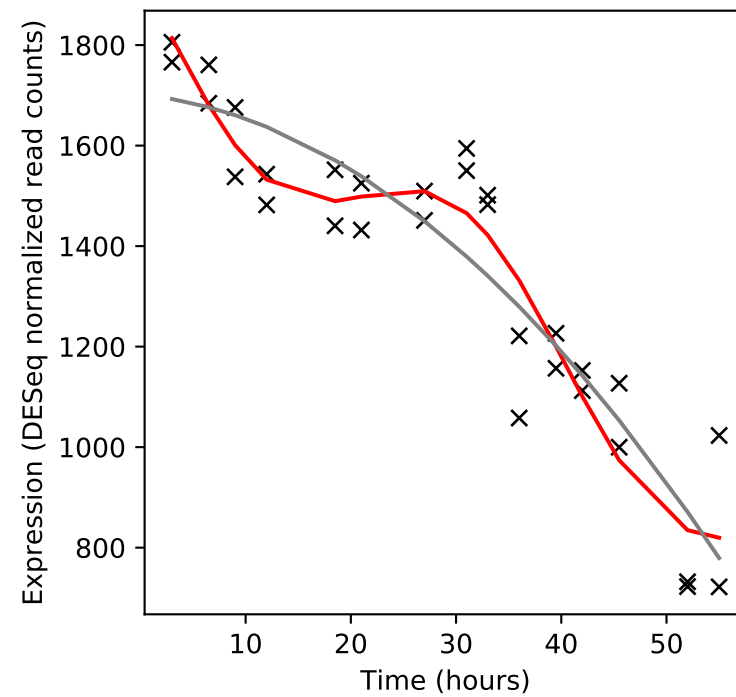

Rv2478c/-

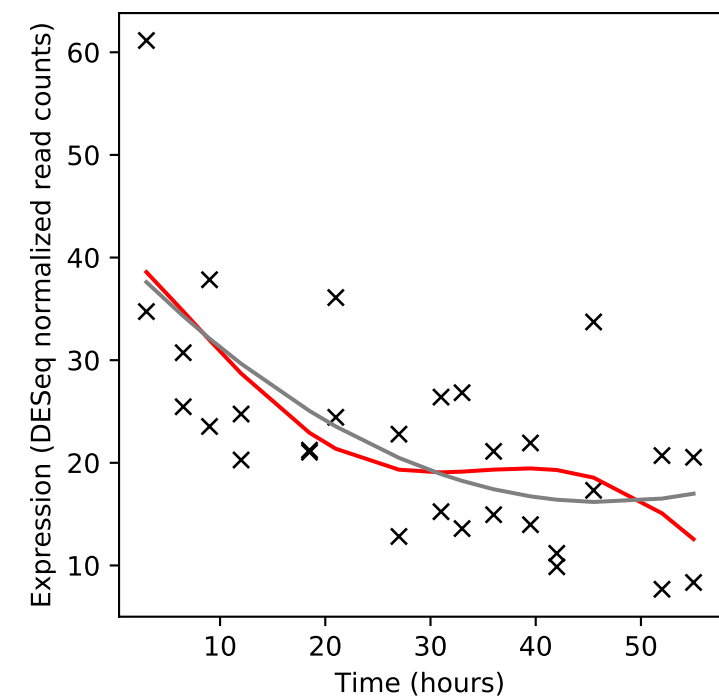

Rv2479c/-

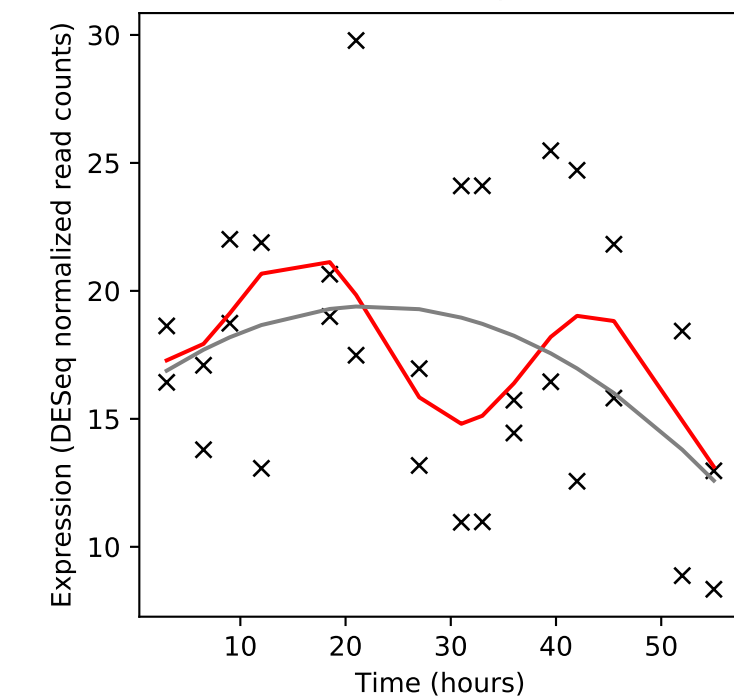

Rv2480c/-

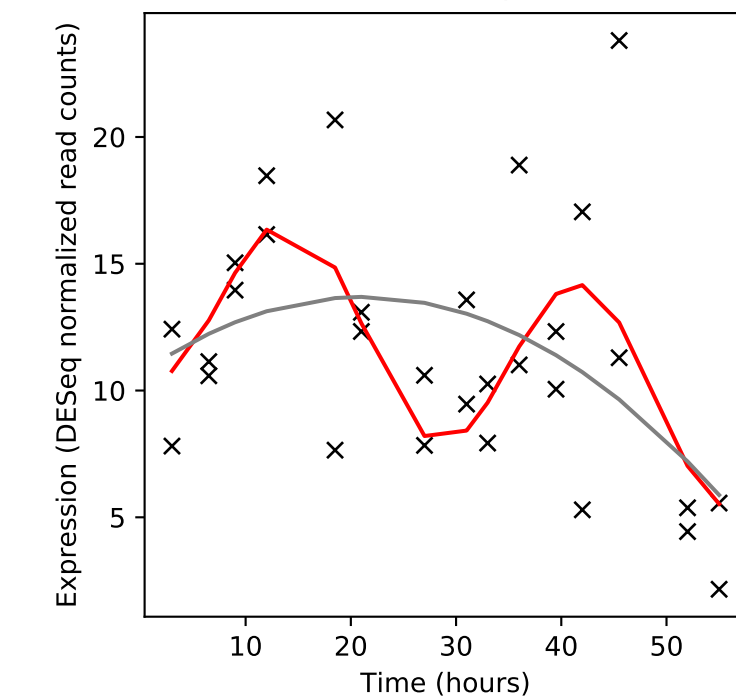

Rv2481c/-

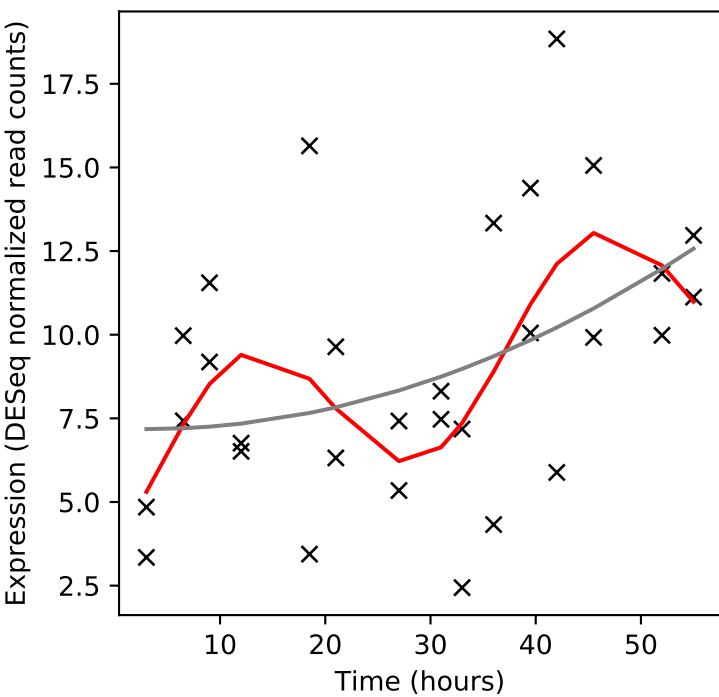

Rv2482c/plsB2

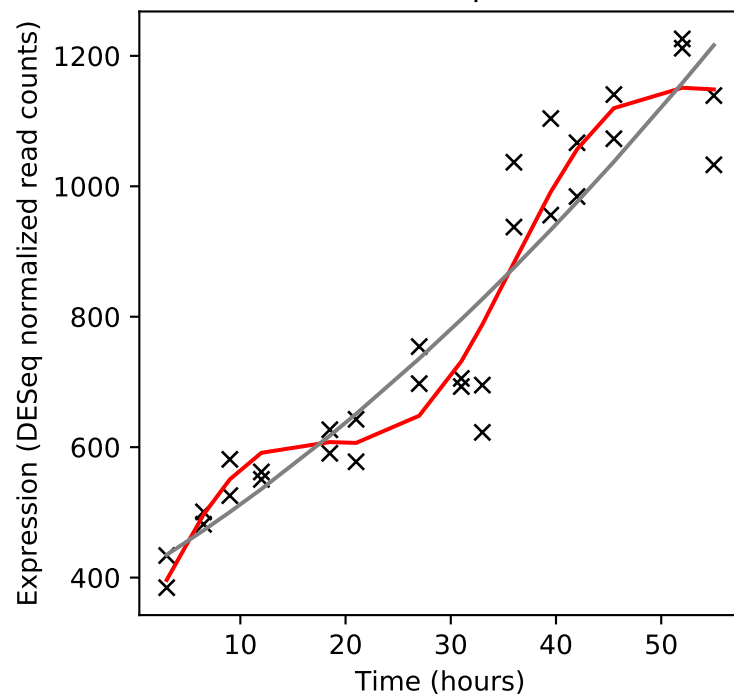

Rv2483c/plsC

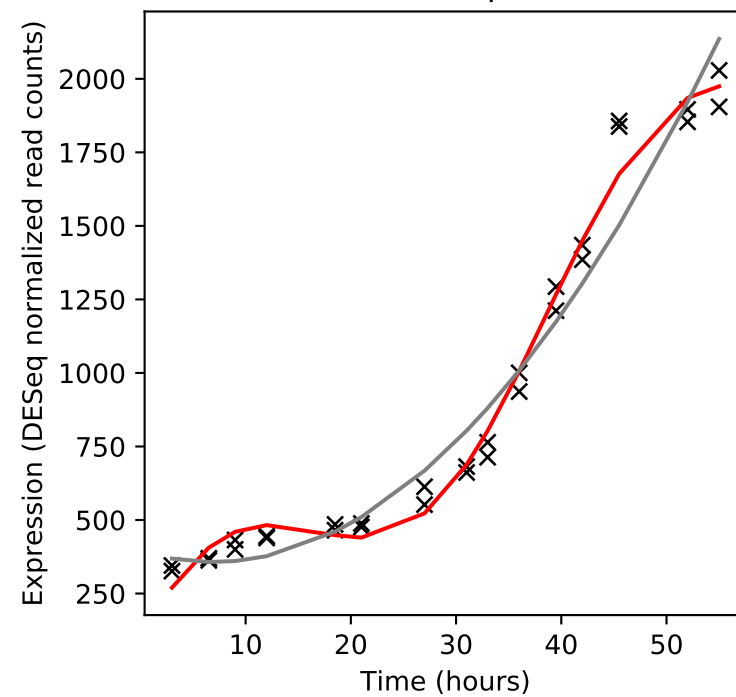

Rv2484c/-

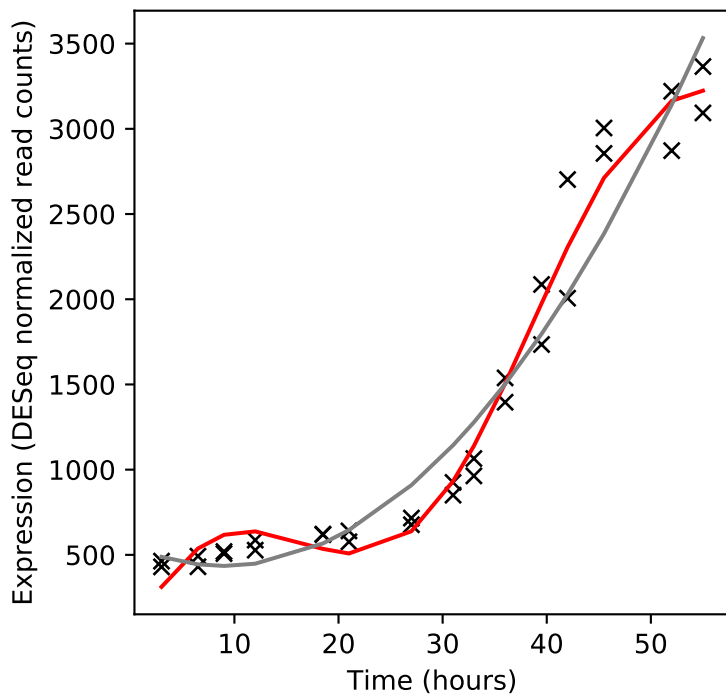

Rv2485c/lipQ

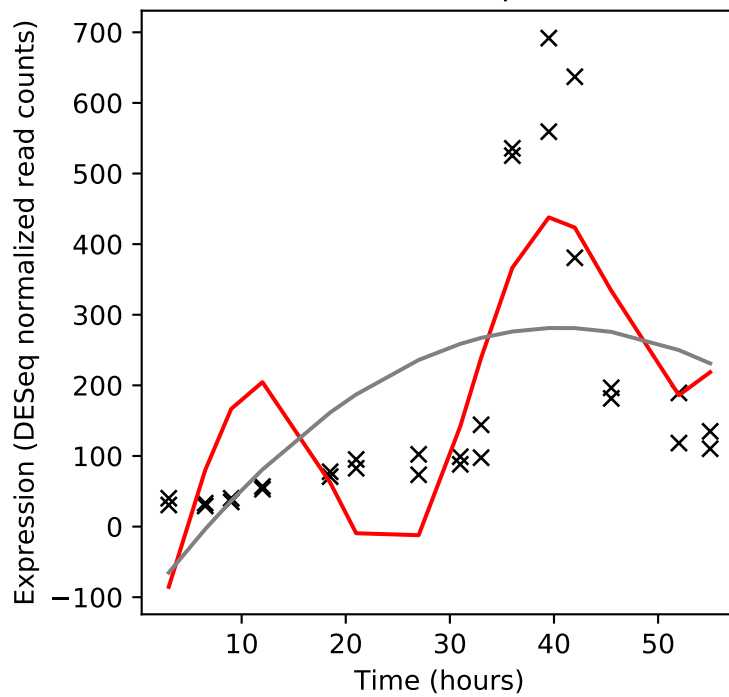

Rv2486/echA14

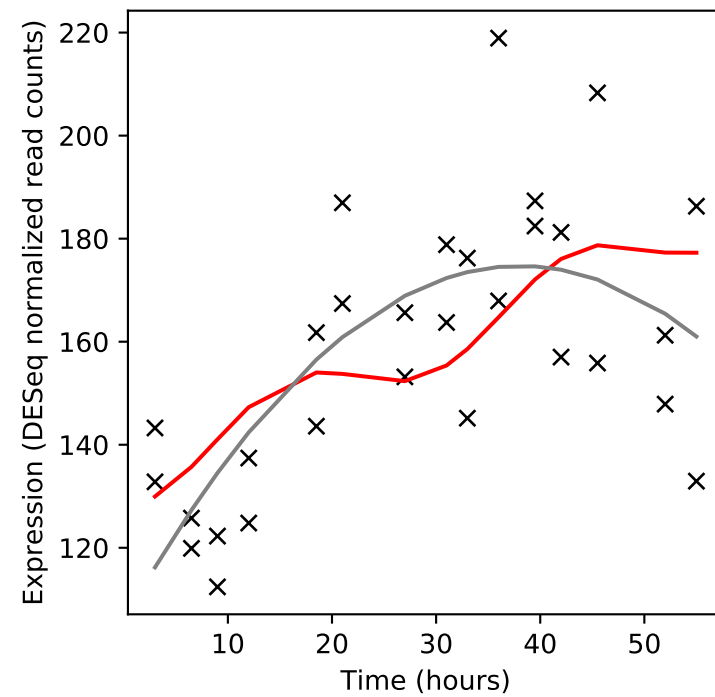

Rv2487c/PE\_PGRS42

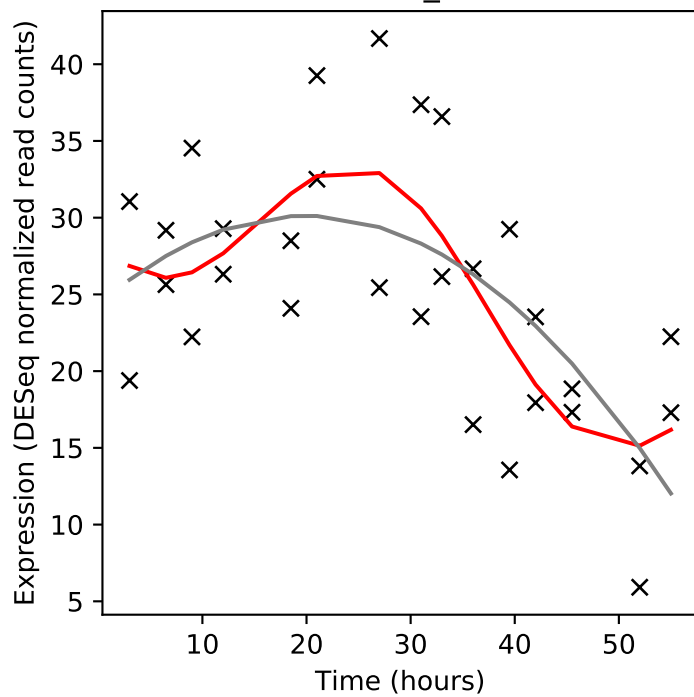

Rv2488c/-

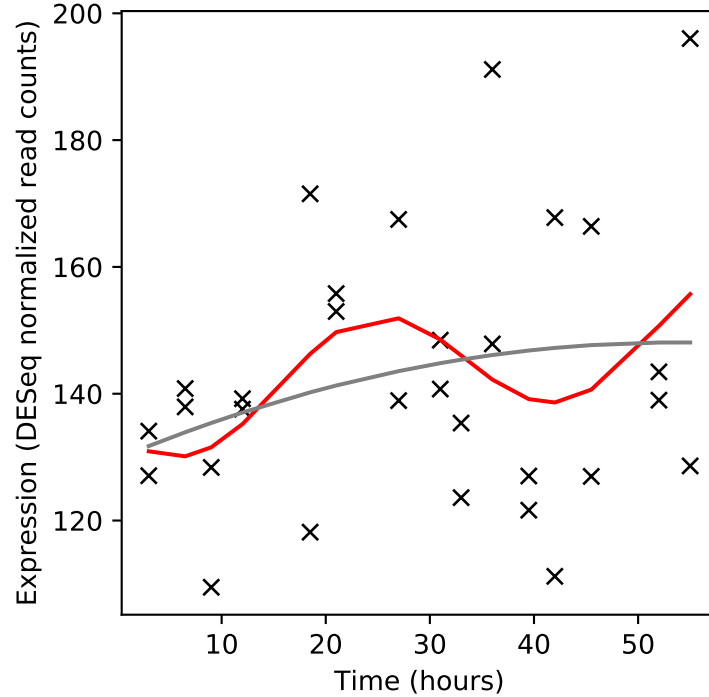

Rv2489c/-

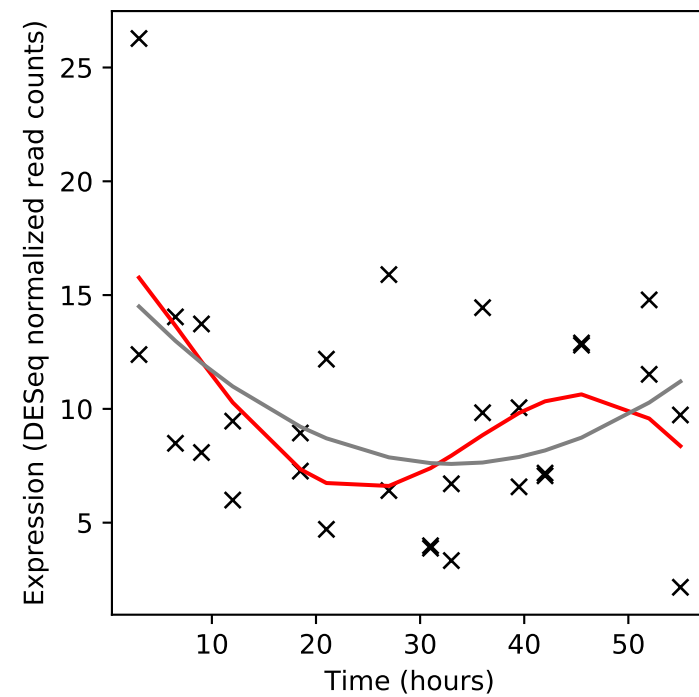

Rv2490c/PE\_PGRS43

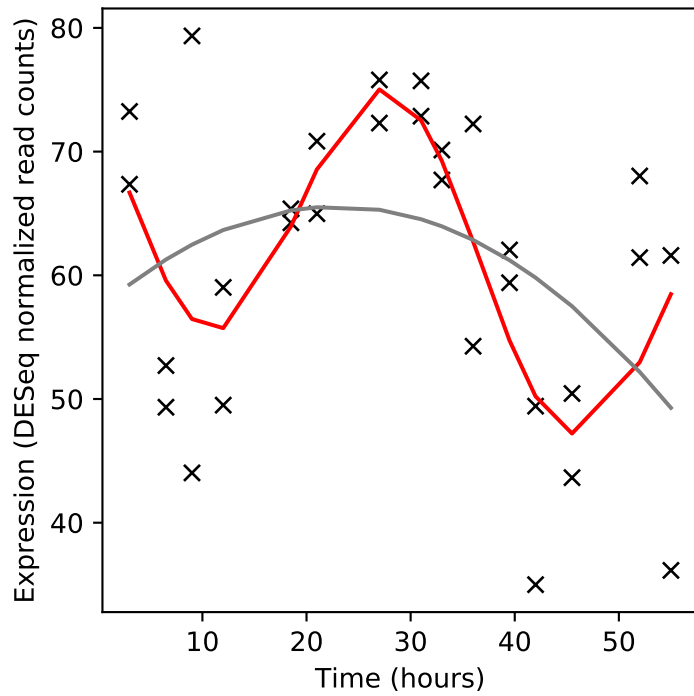

Rv2491/-

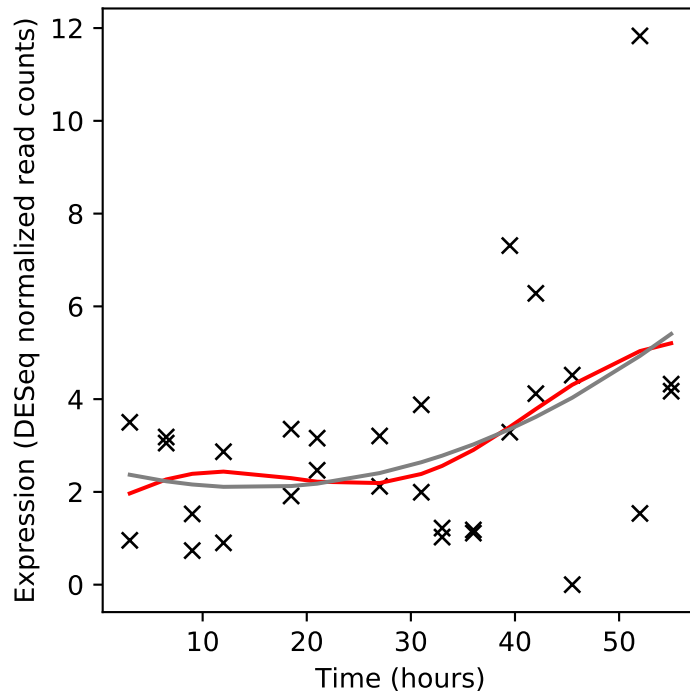

Rv2492/-

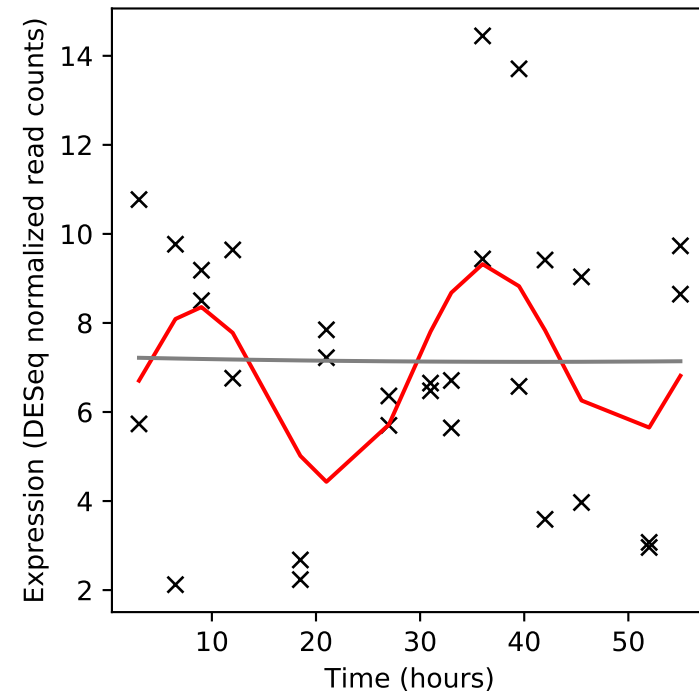

Rv2493/vapB38

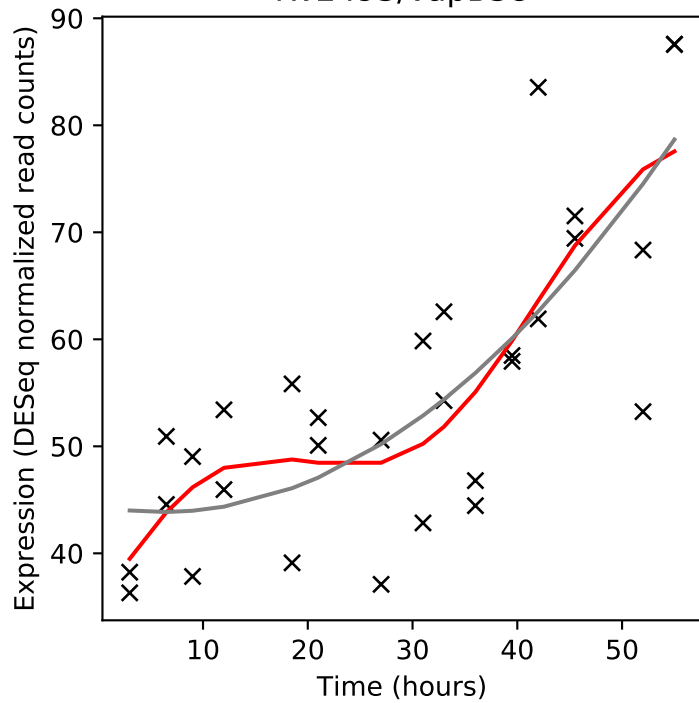

Rv2494/vapC38

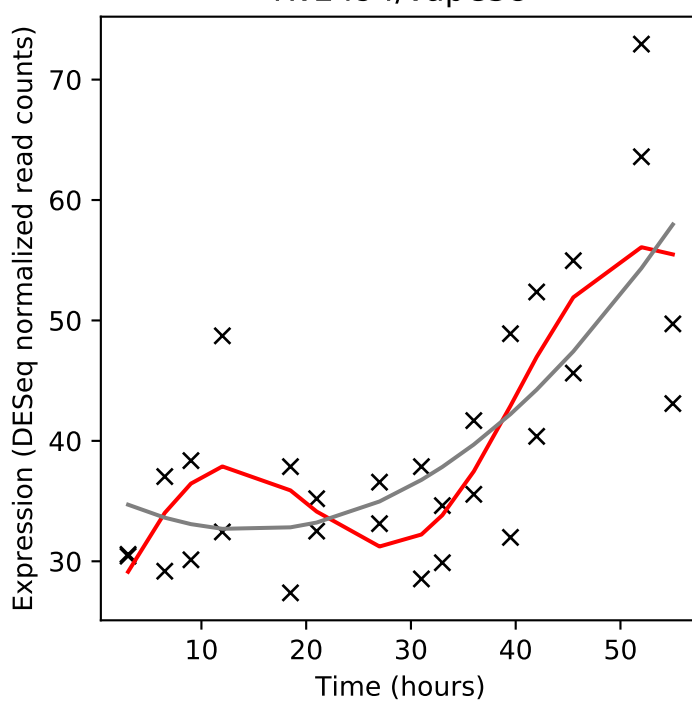

Rv2495c/bkdC

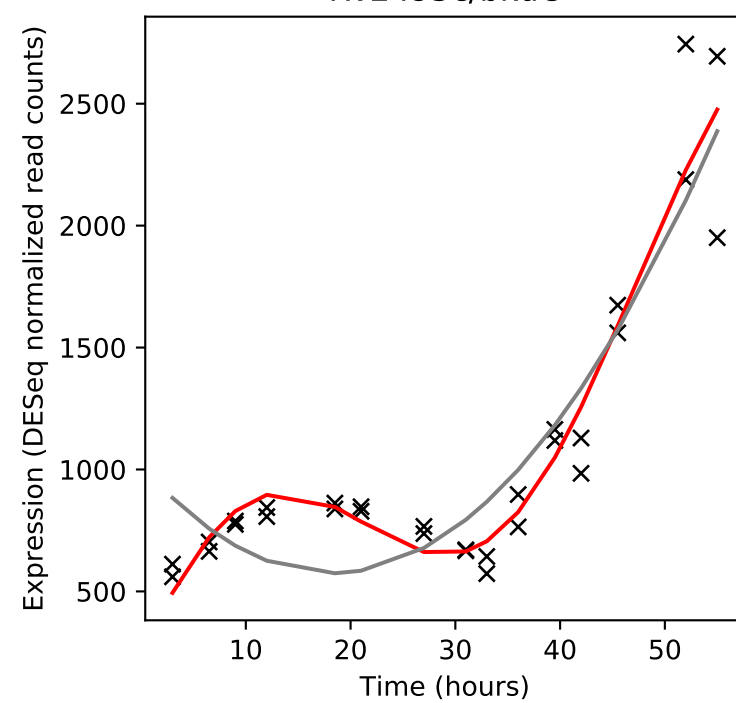

Rv2496c/bkdB

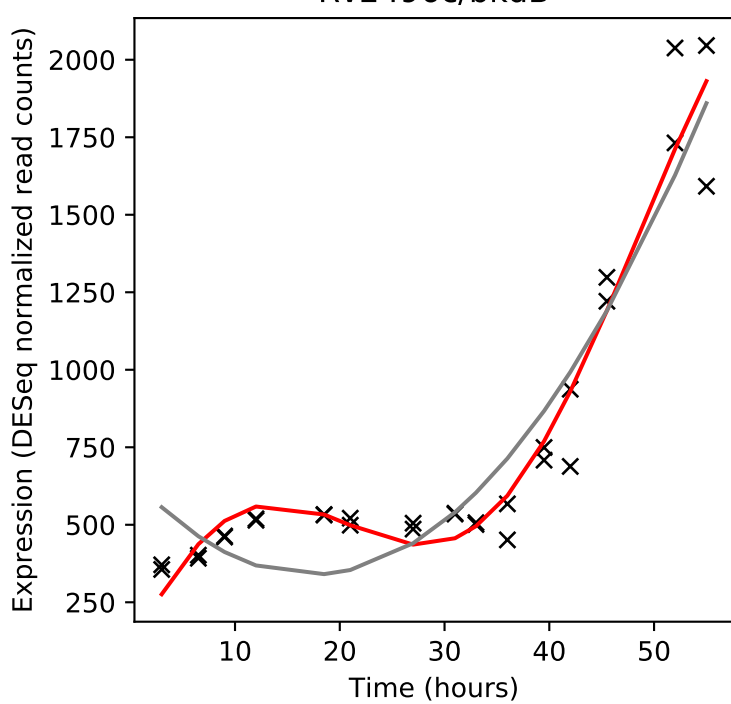

Rv2497c/bkdA

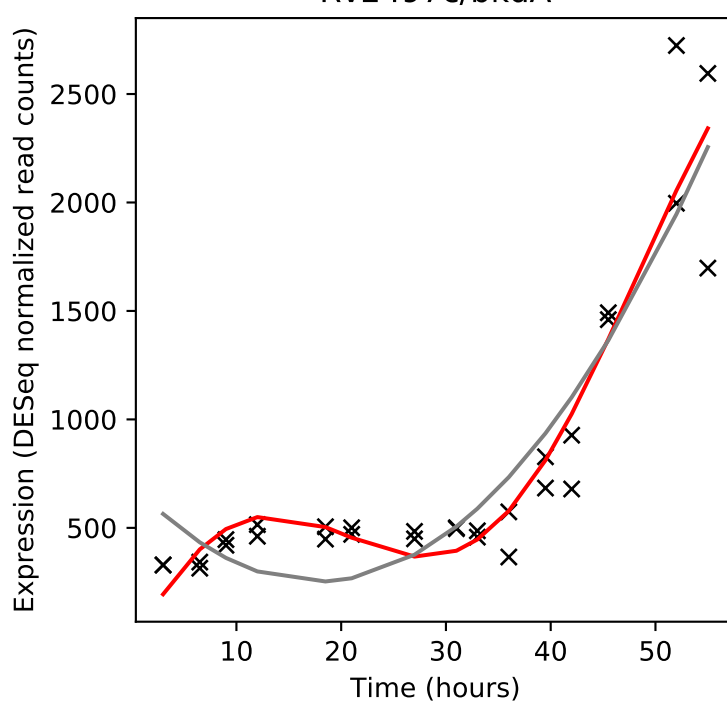

Rv2498c/citE

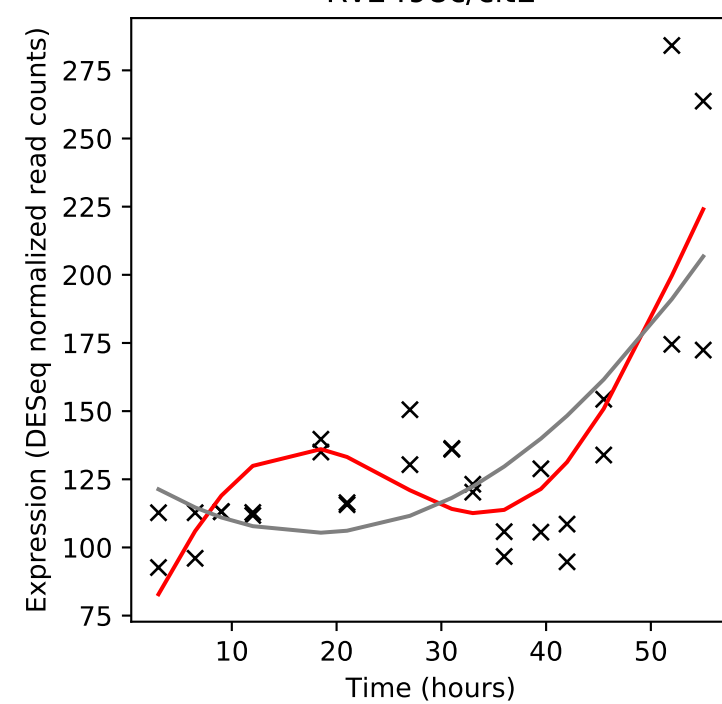

Rv2499c/-

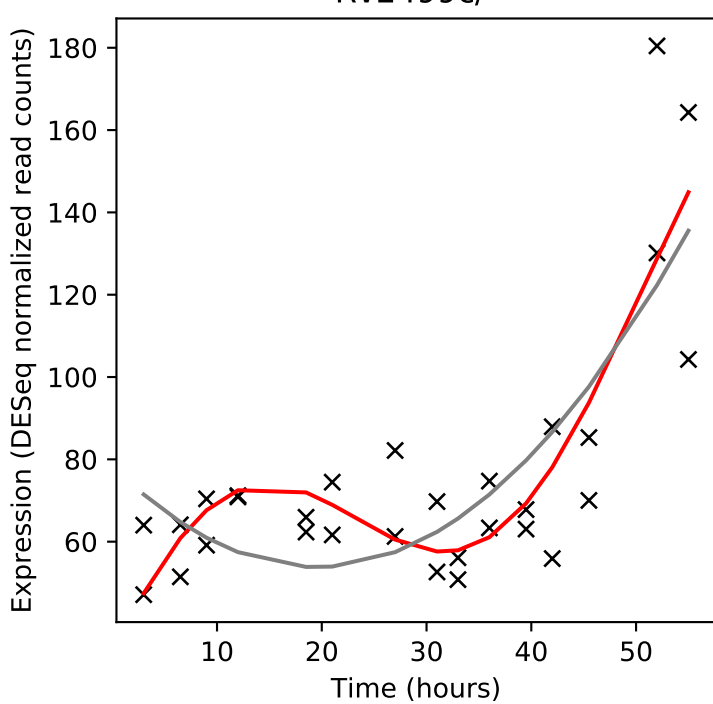

Rv2500c/fadE19

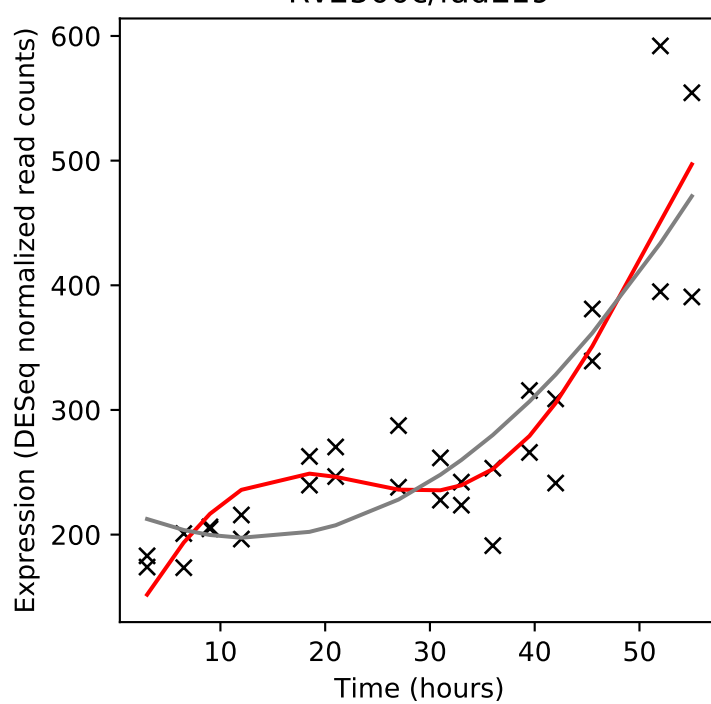

Rv2501c/accA1

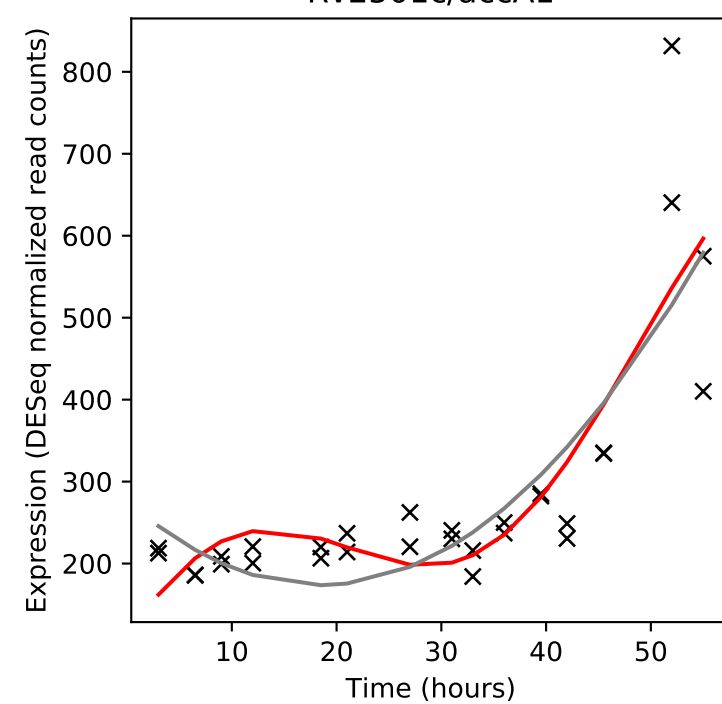

Rv2502c/accD1

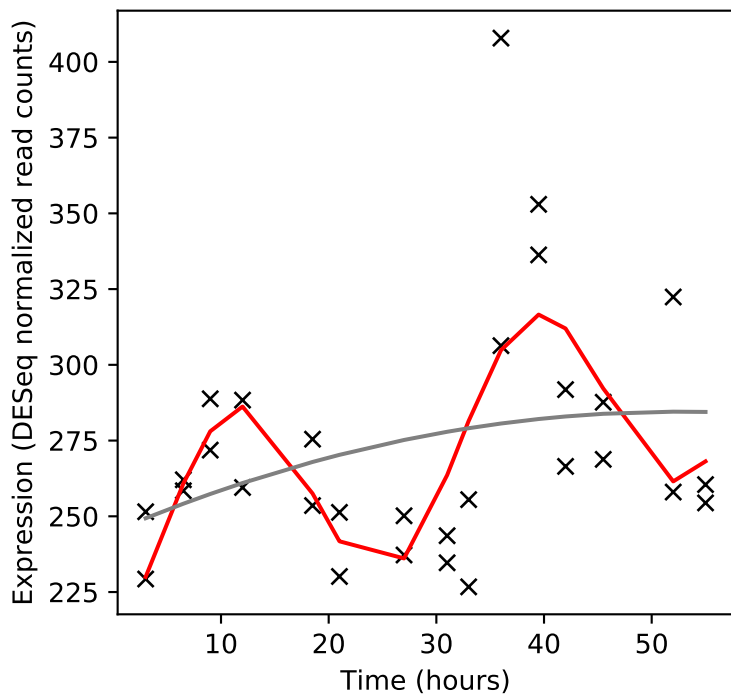

Rv2503c/scoB

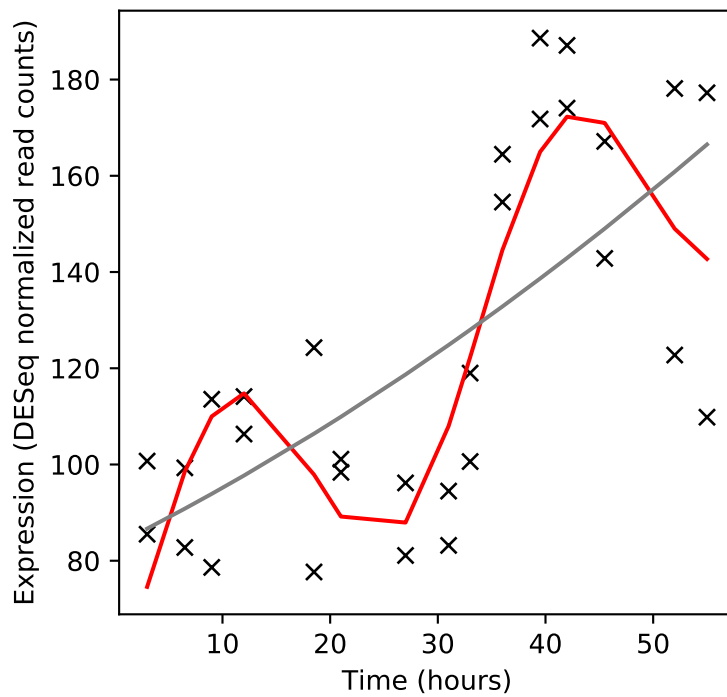

Rv2504c/scoA

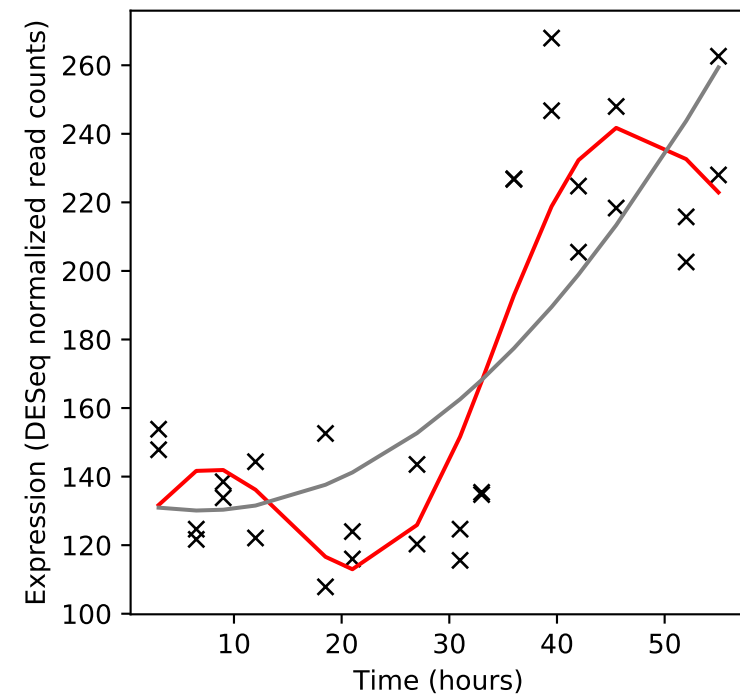

Rv2505c/fadD35

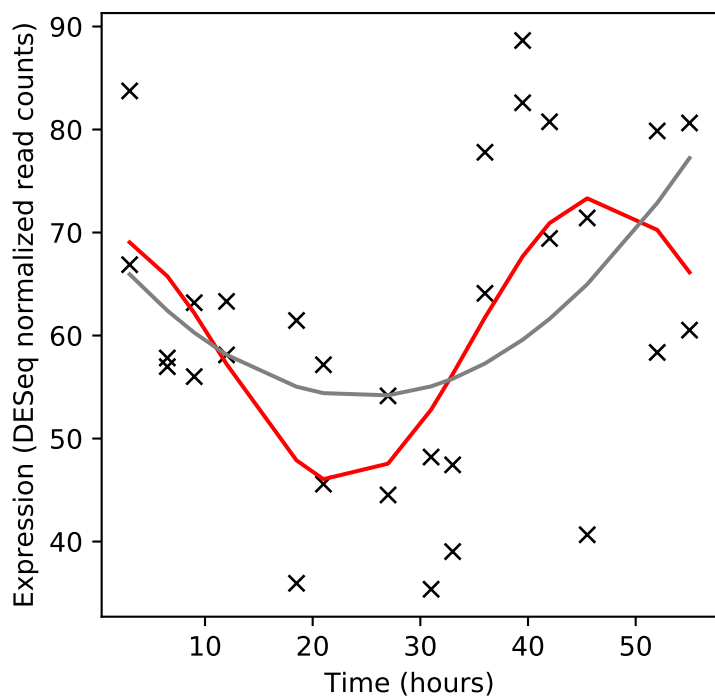

Rv2506/-

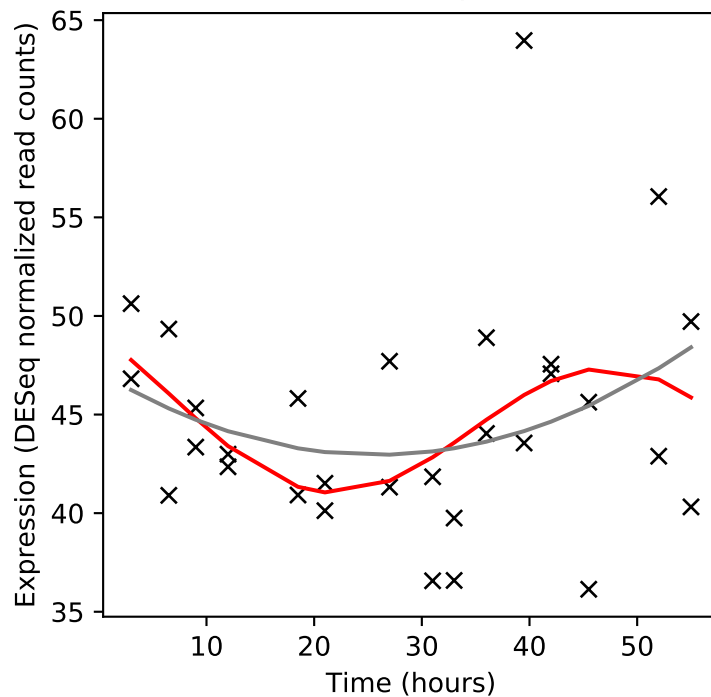

Rv2507/-

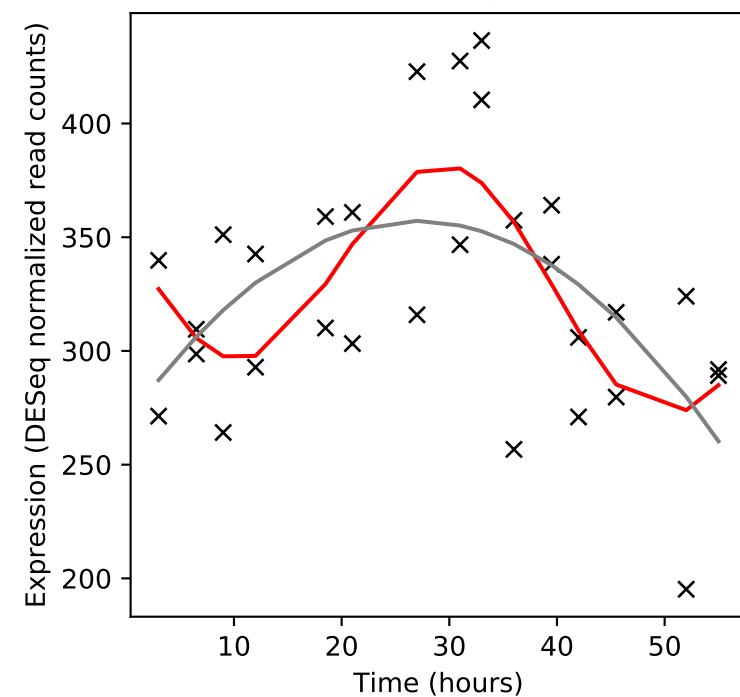

Rv2508c/-

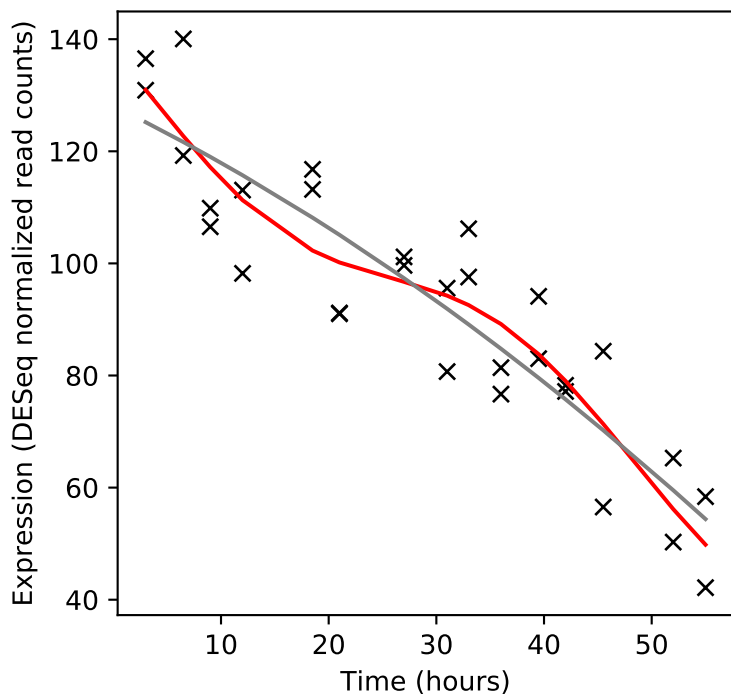

Rv2509/-

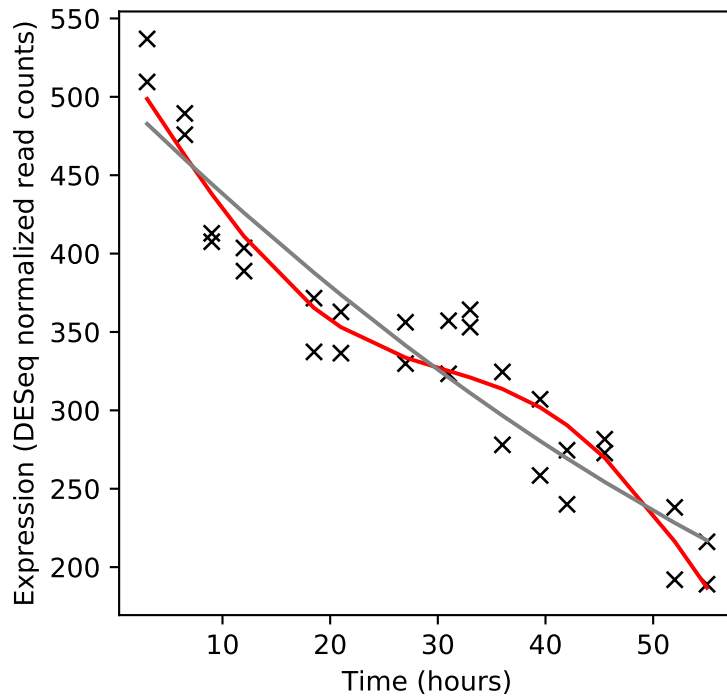

Rv2510c/-

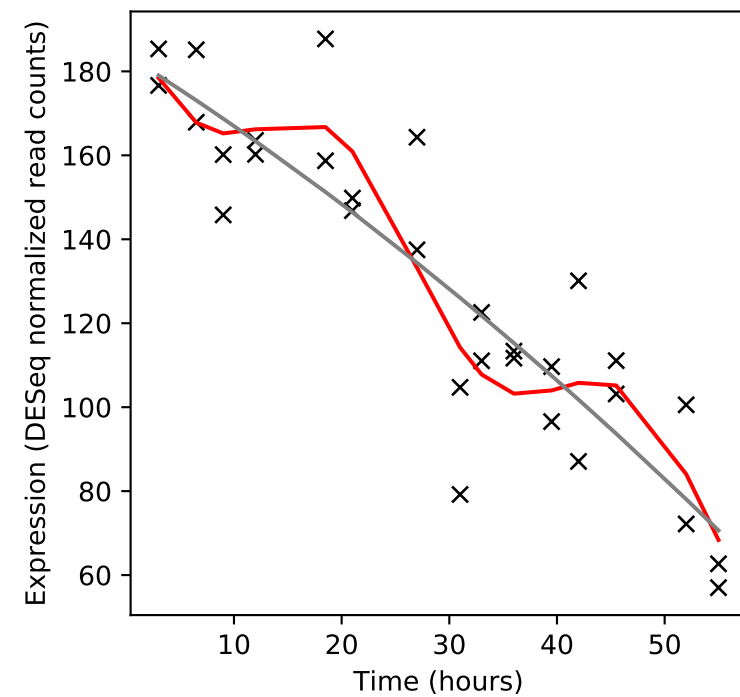

Rv2511/orn

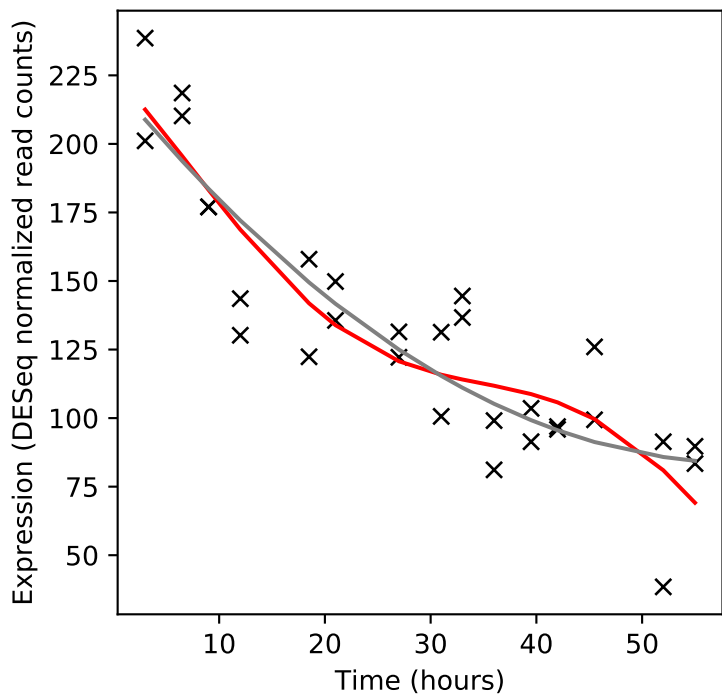

Rv2512c/-

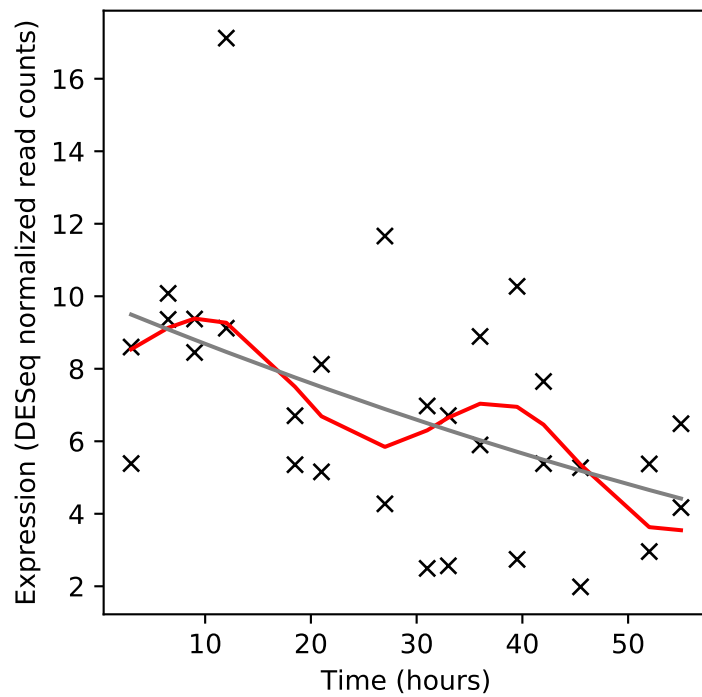

Rv2513/-

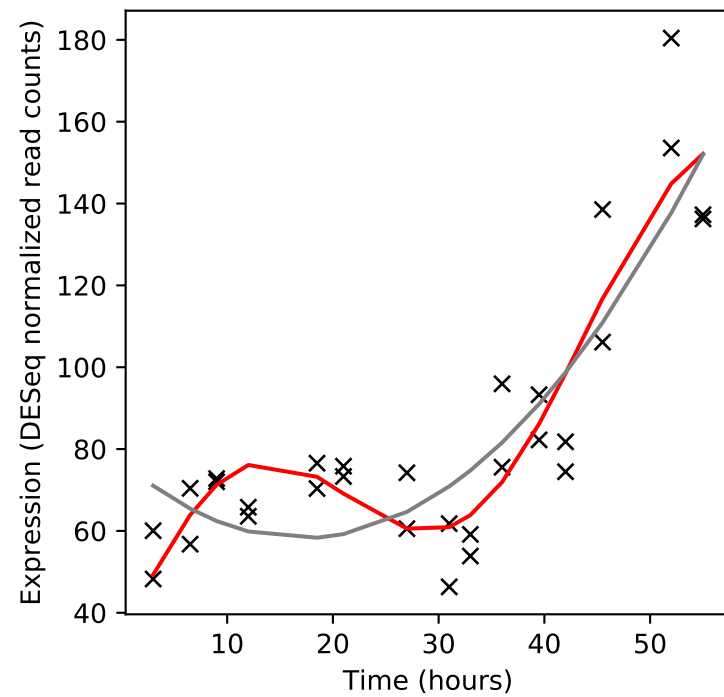

Rv2514c/-

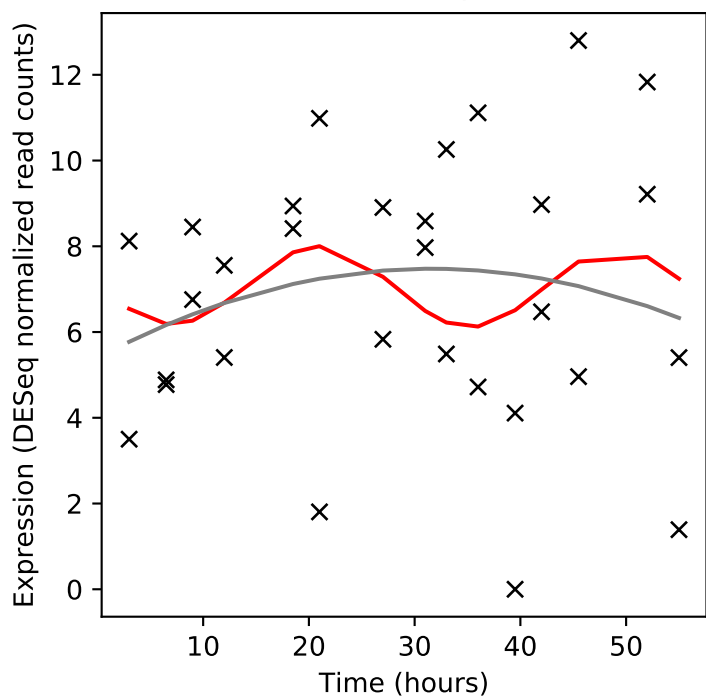

Rv2515c/-

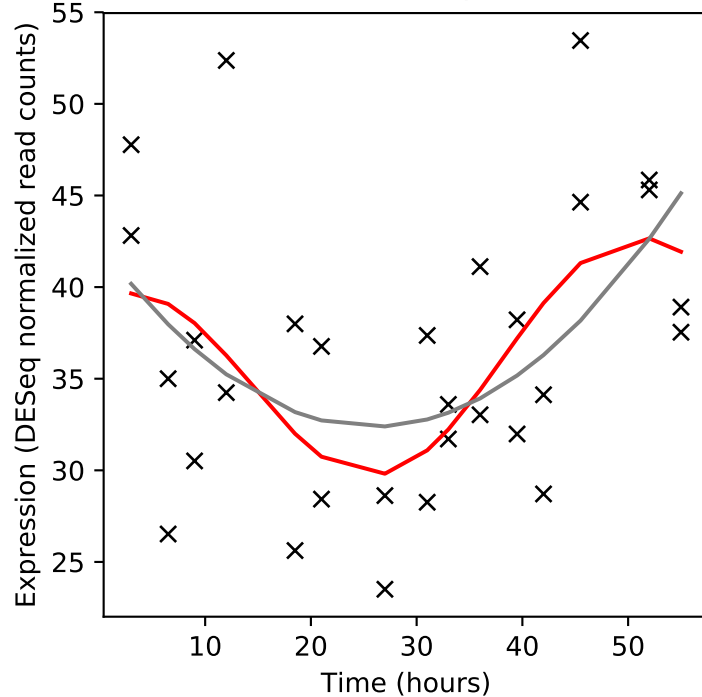

Rv2516c/-

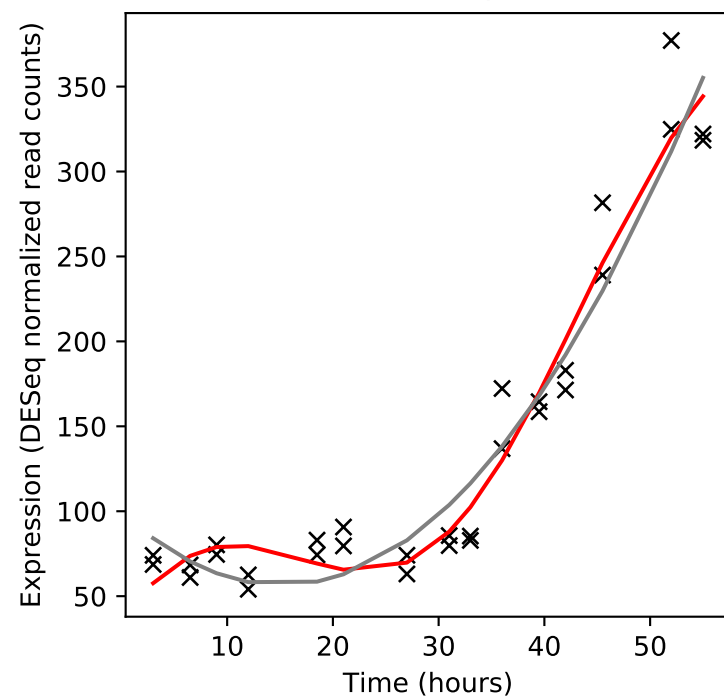

Rv2517c/-

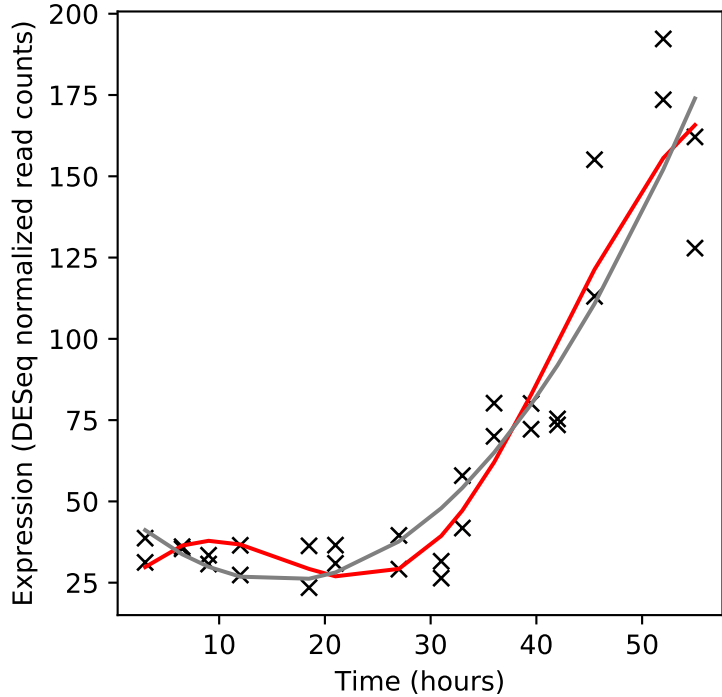

Rv2518c/ldtB

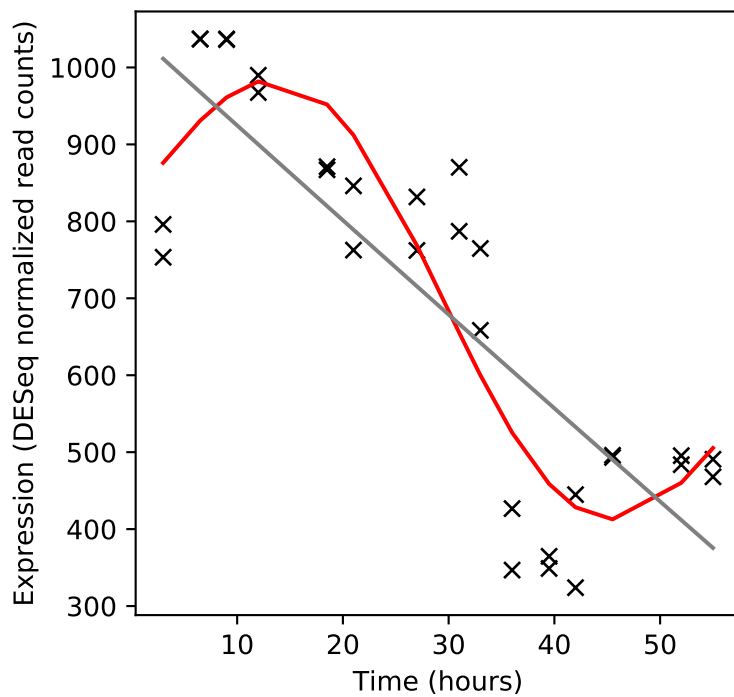

Rv2519/PE26

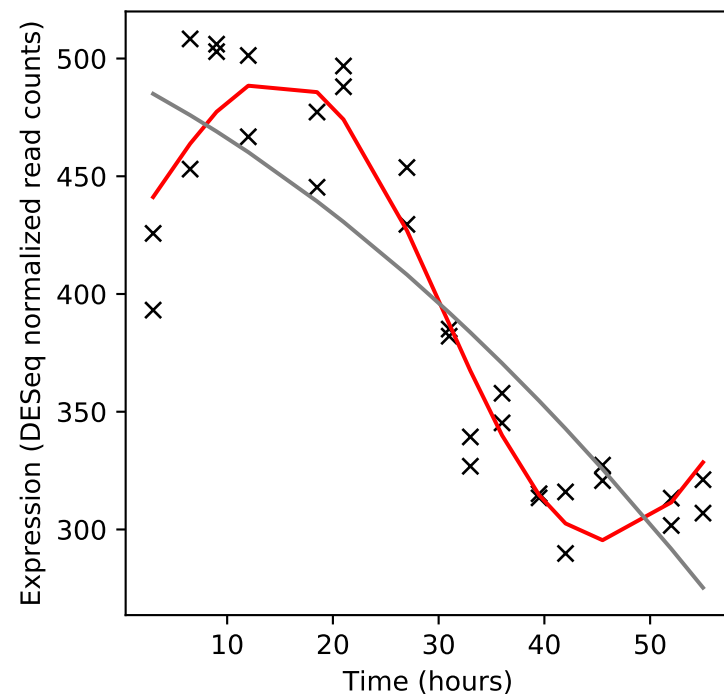

Rv2520c/-

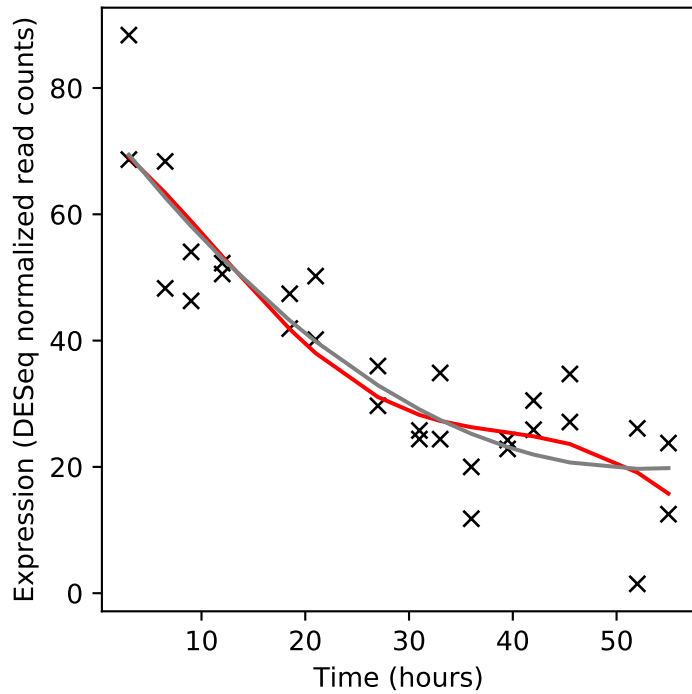

Rv2521/bcp

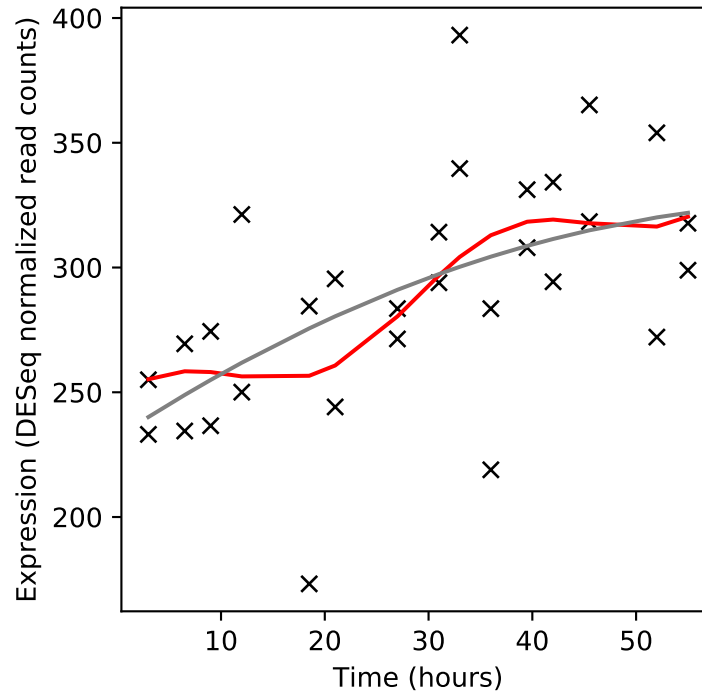

Rv2522c/-

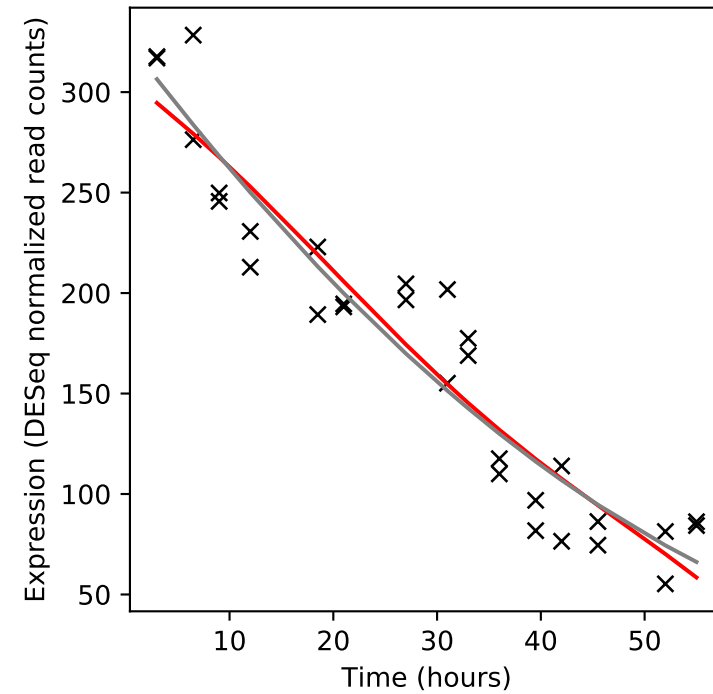

Rv2523c/acpS

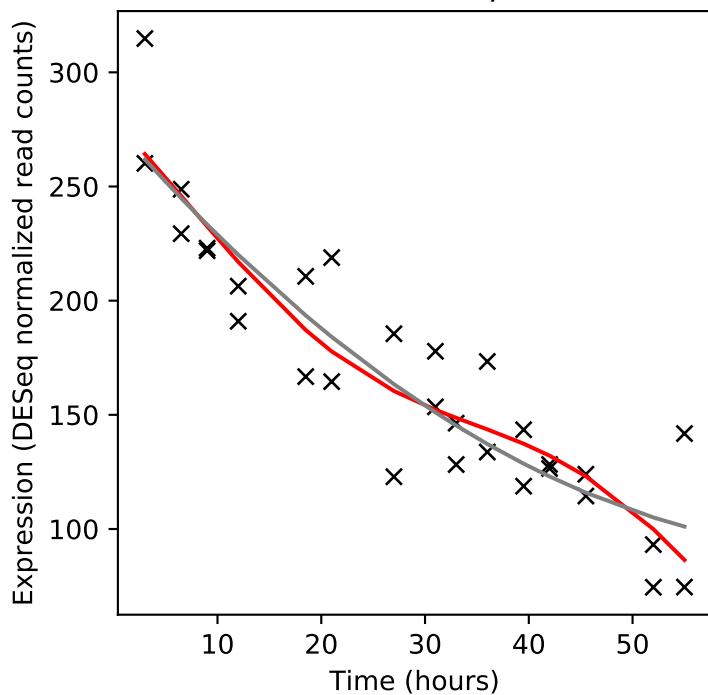

Rv2524c/fas

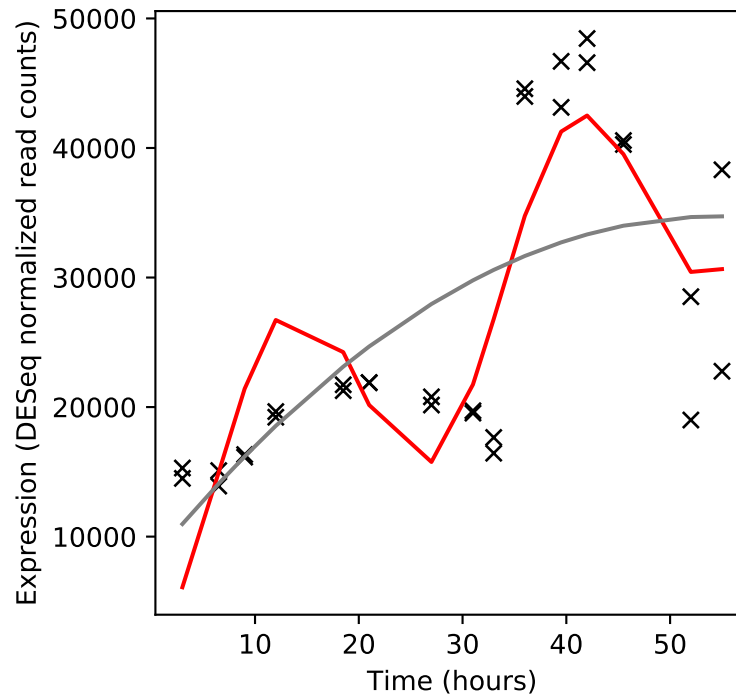

Rv2525c/-

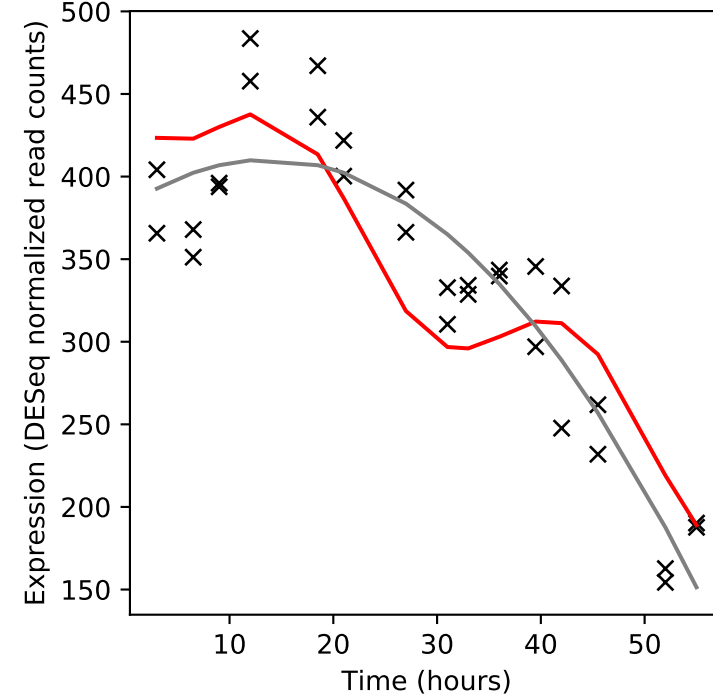

Rv2526/vapB17

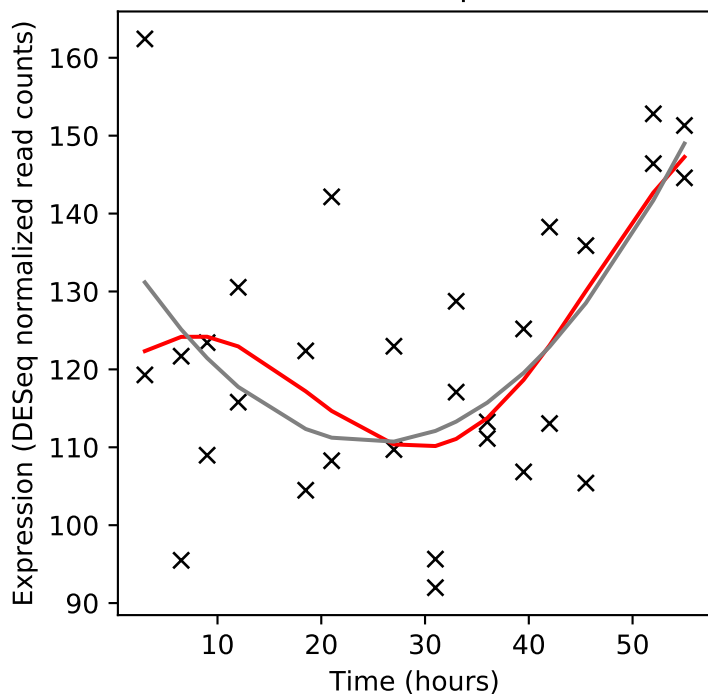

Rv2527/vapC17

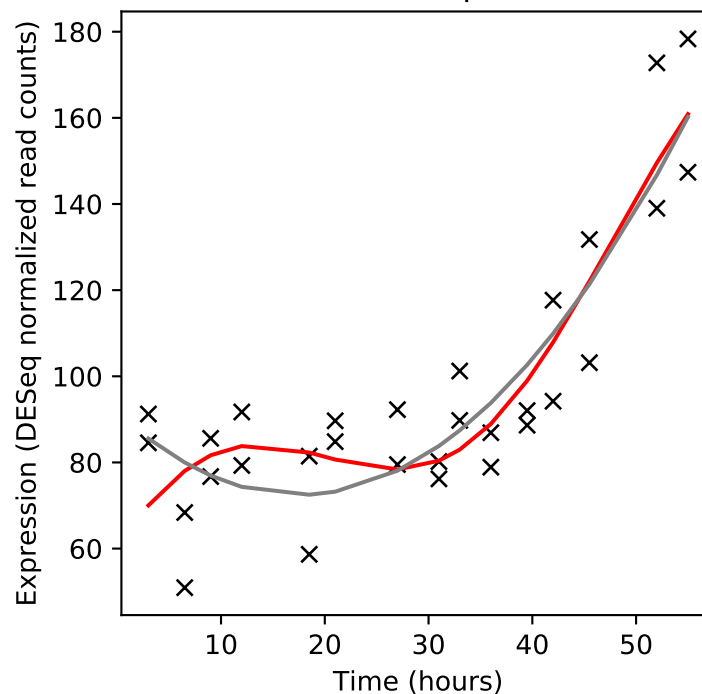

Rv2528c/mrr

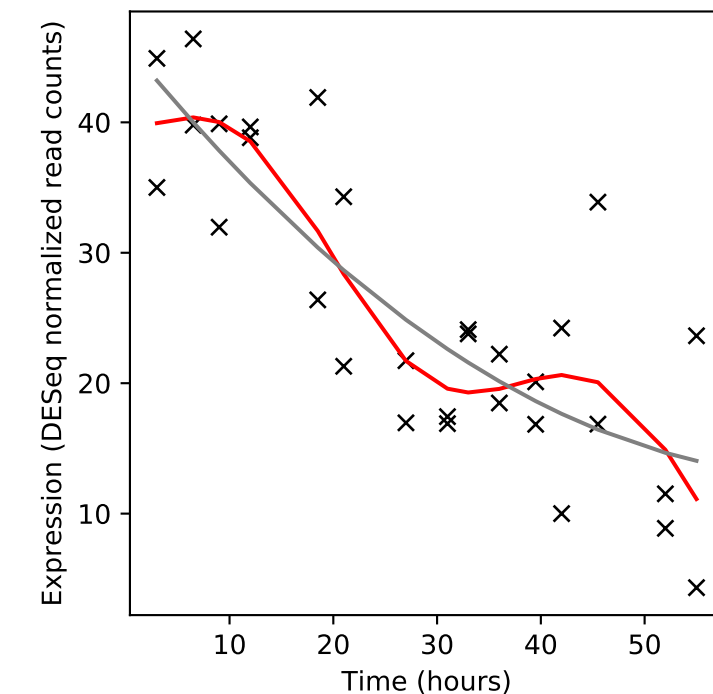

Rv2529/-

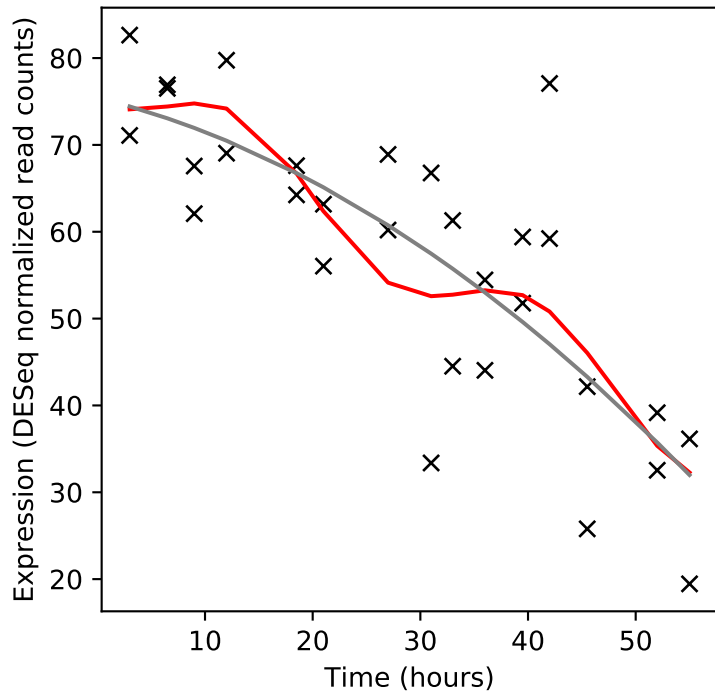

Rv2530c/vapC39

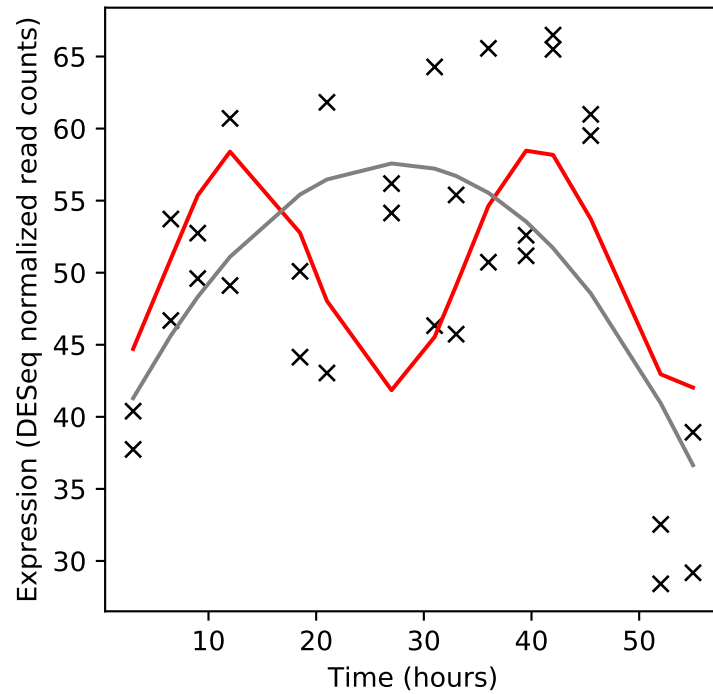

Rv2530A/vapB39

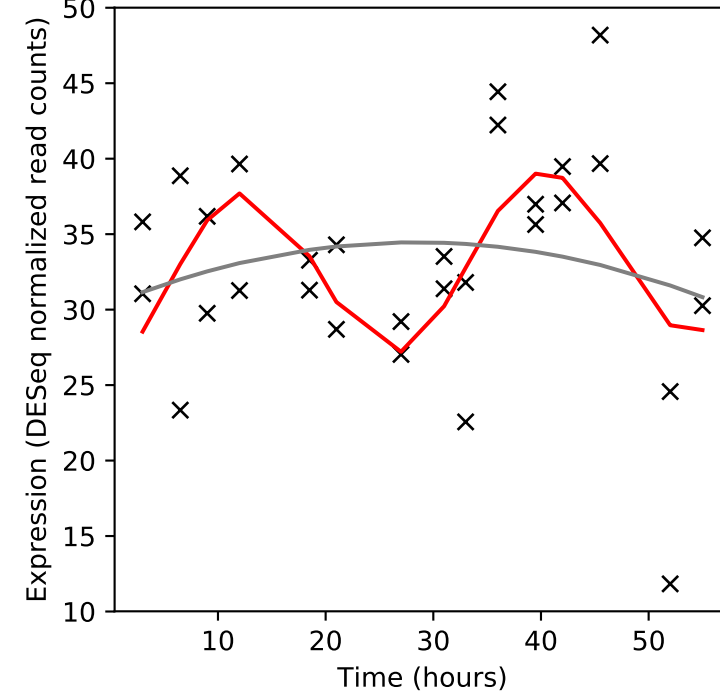

Rv2531c/-

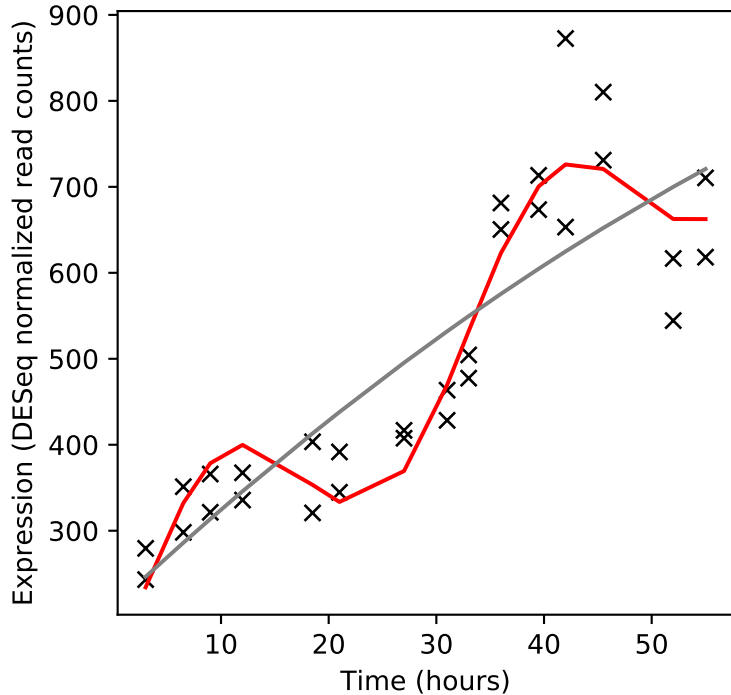

Rv2532c/-

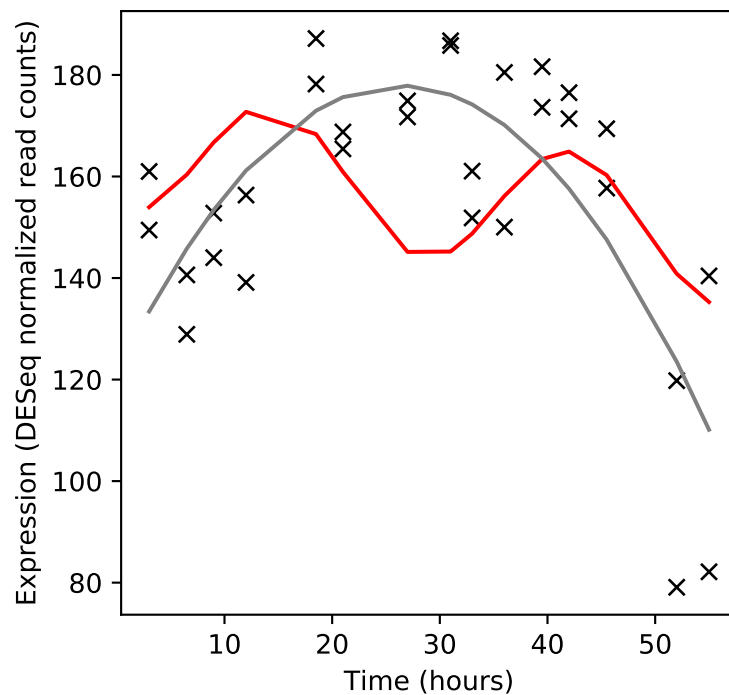

Rv2533c/nusB

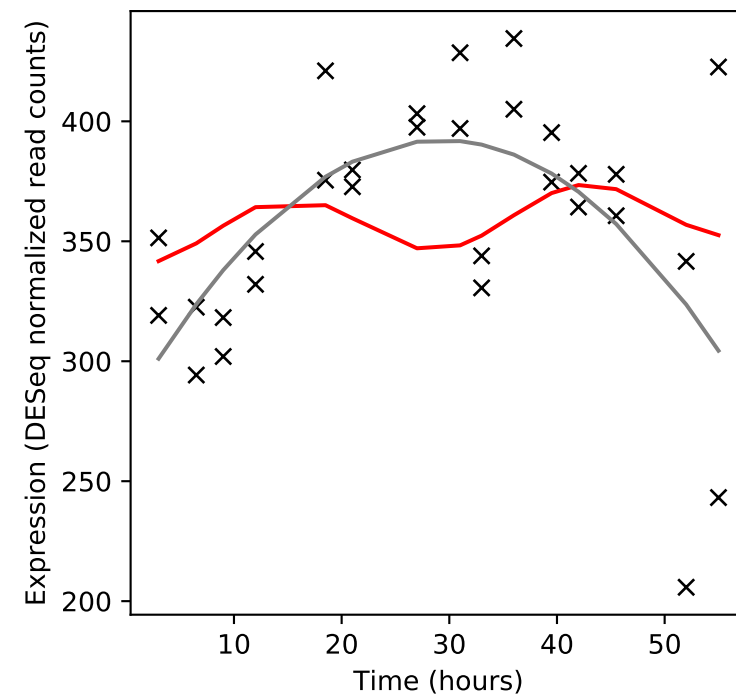

Rv2534c/efp

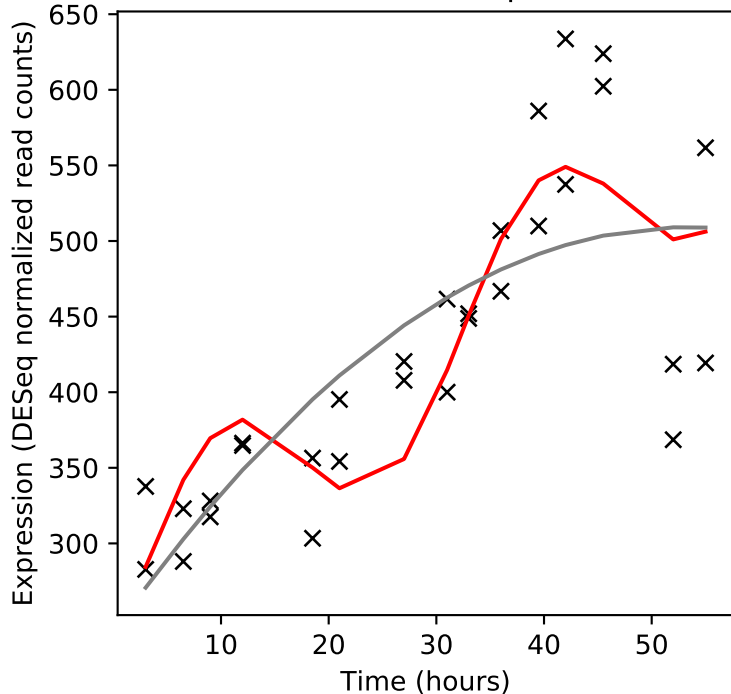

Rv2535c/pepQ

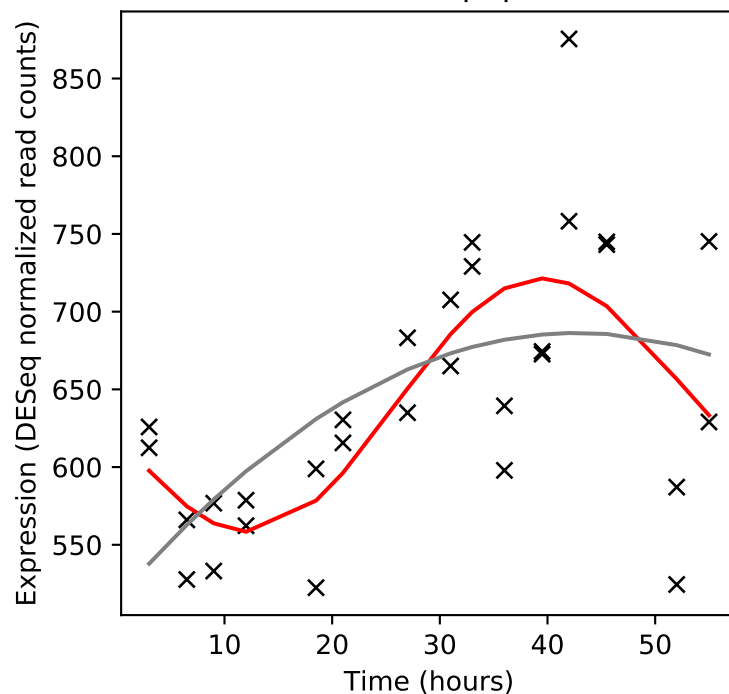

Rv2536/-

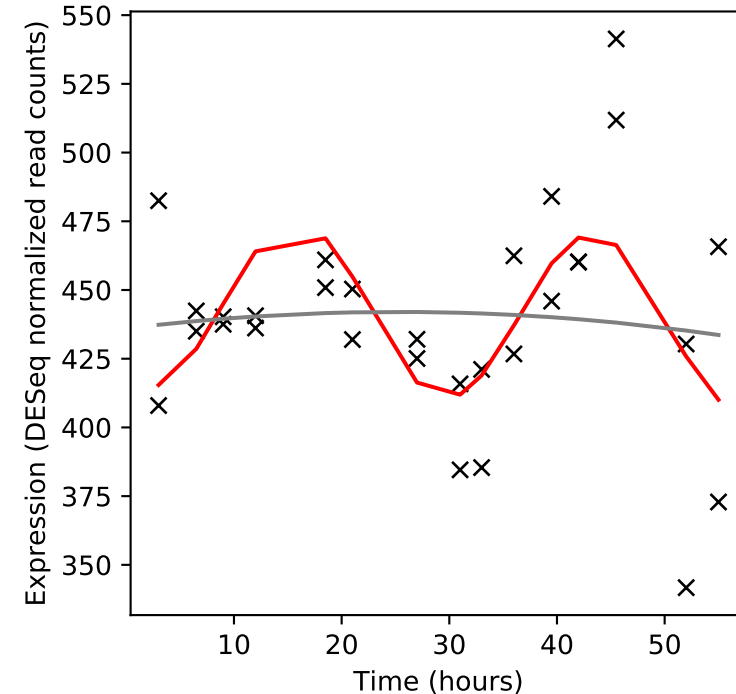



Rv2537c/aroD

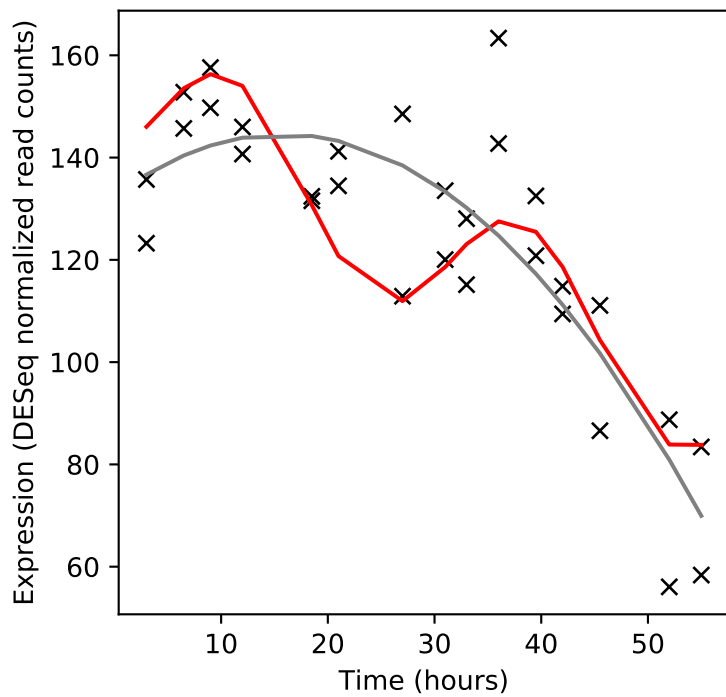

Rv2538c/aroB

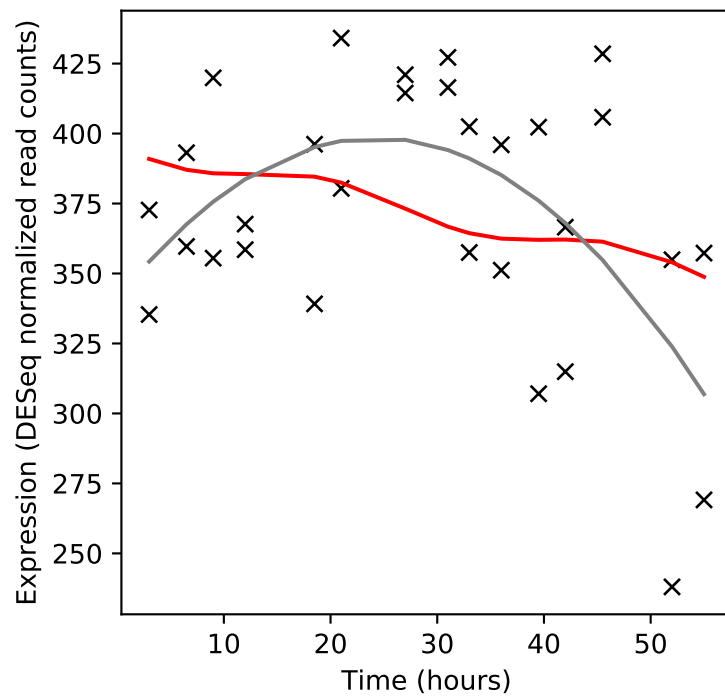

Rv2539c/aroK

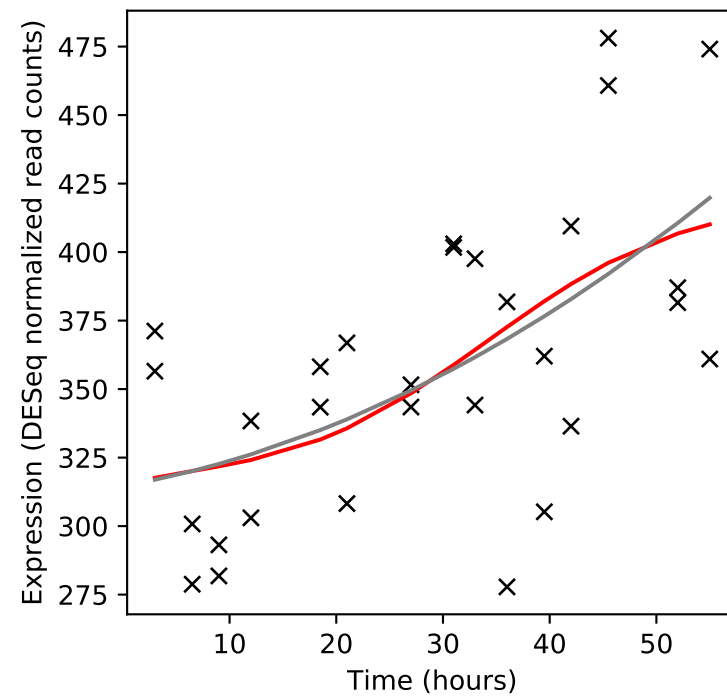

Rv2540c/aroF

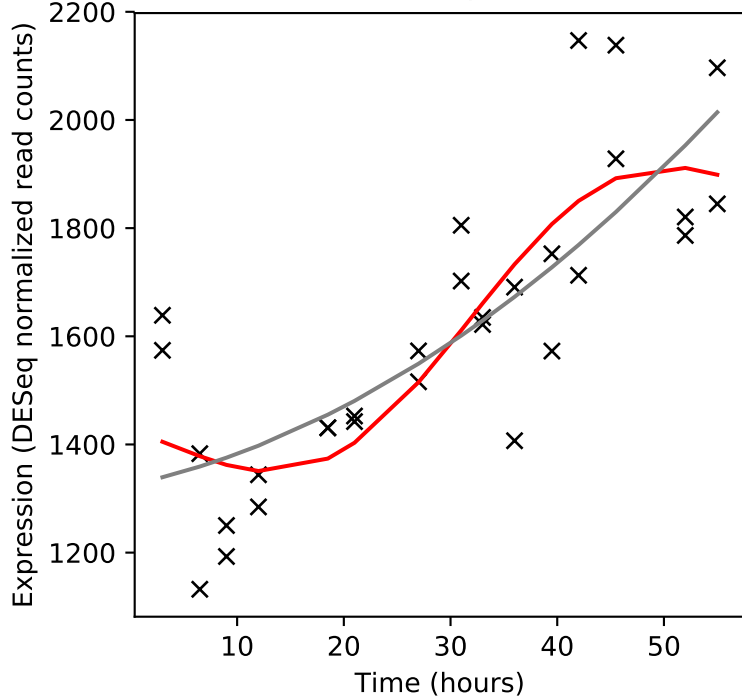

Rv2541/-

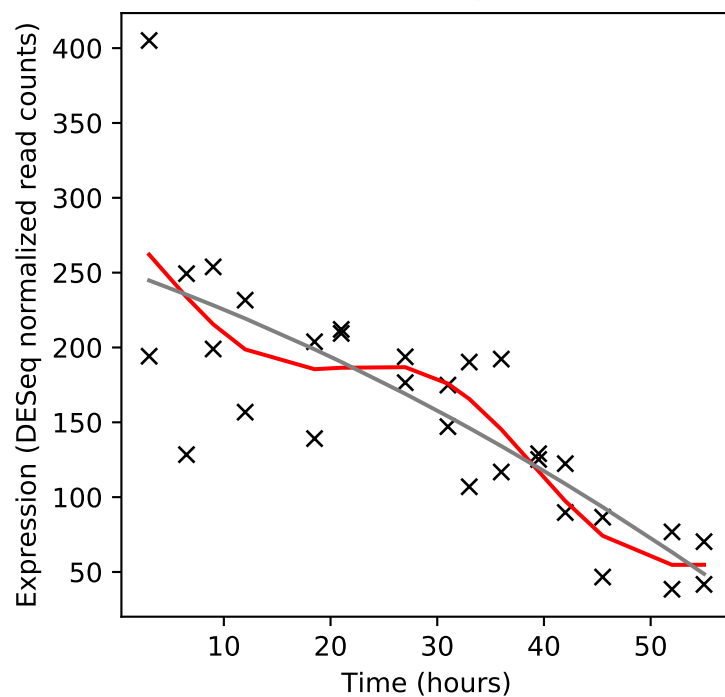

Rv2542/-

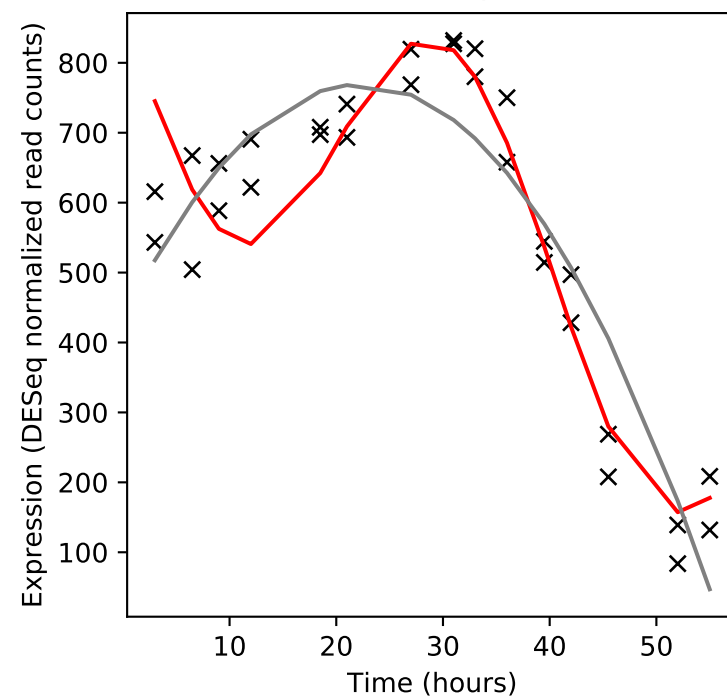

Rv2543/lppA

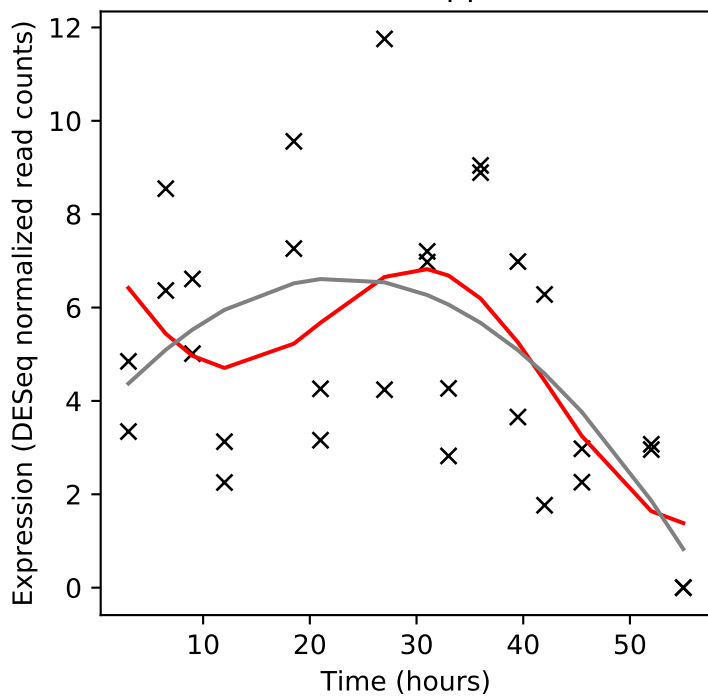

Rv2544/lppB

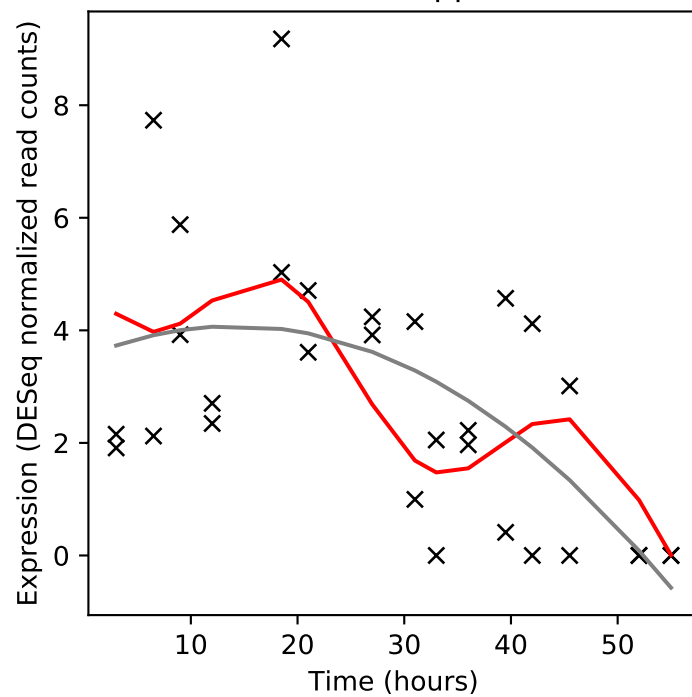

Rv2545/vapB18

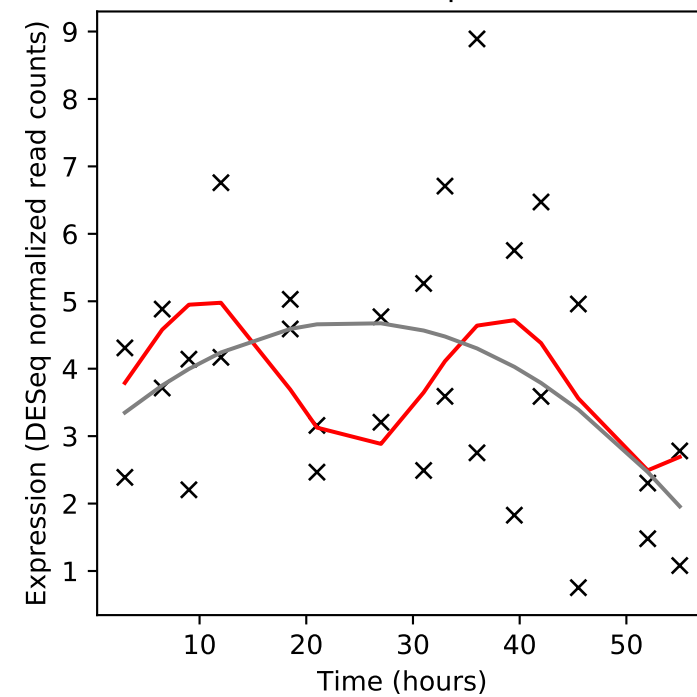

Rv2546/vapC18

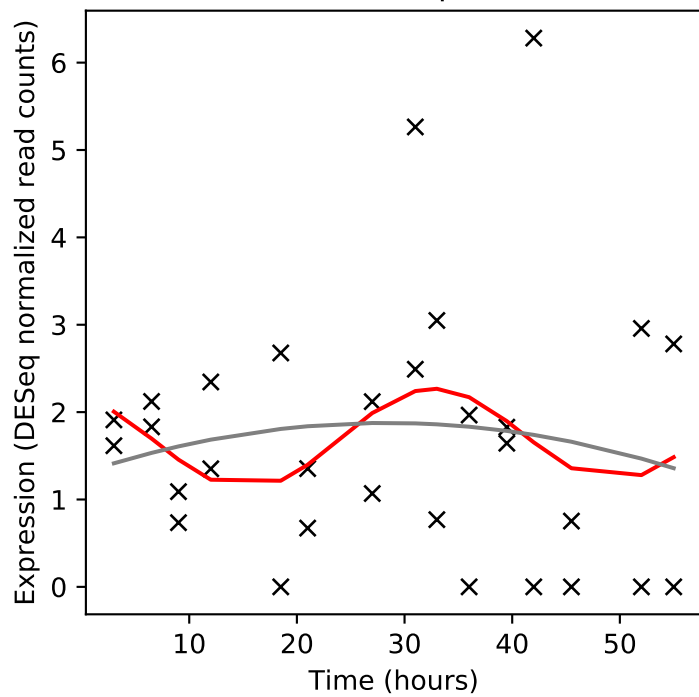

Rv2547/vapB19

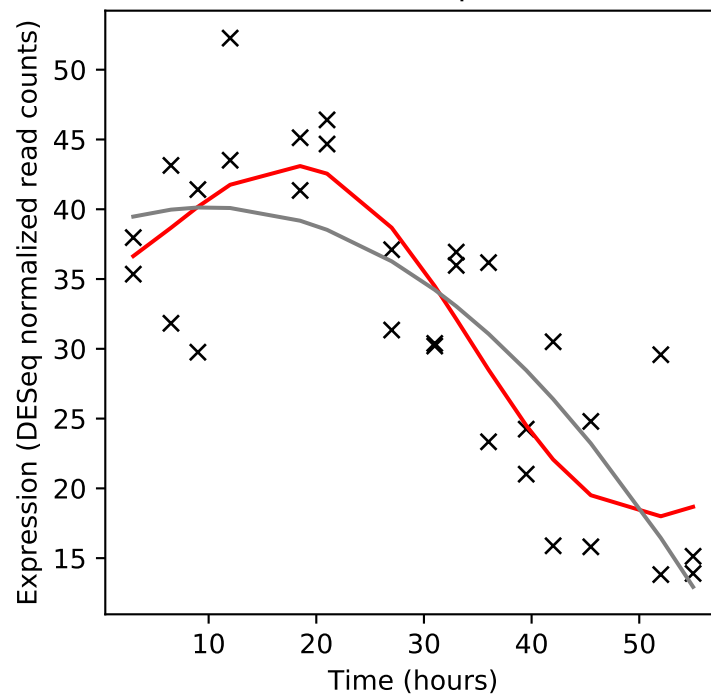

Rv2548/vapC19

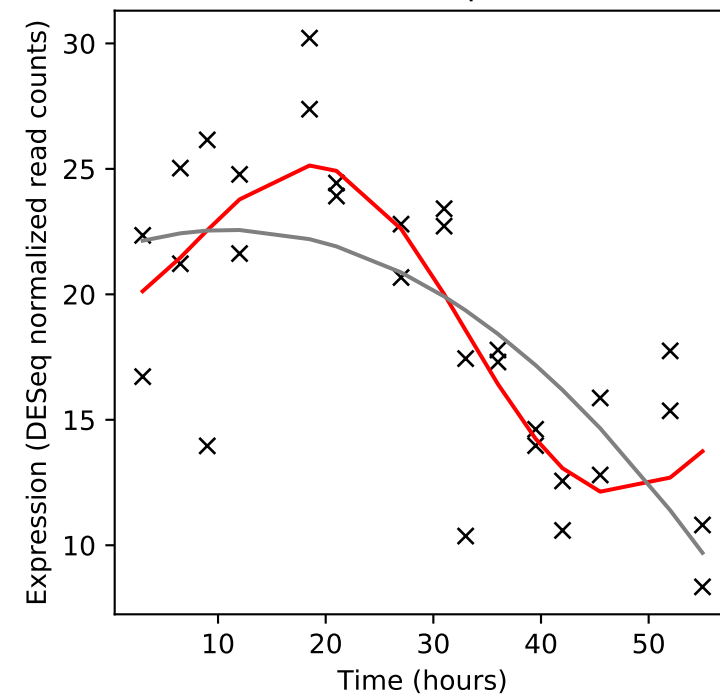

Rv2548A/-

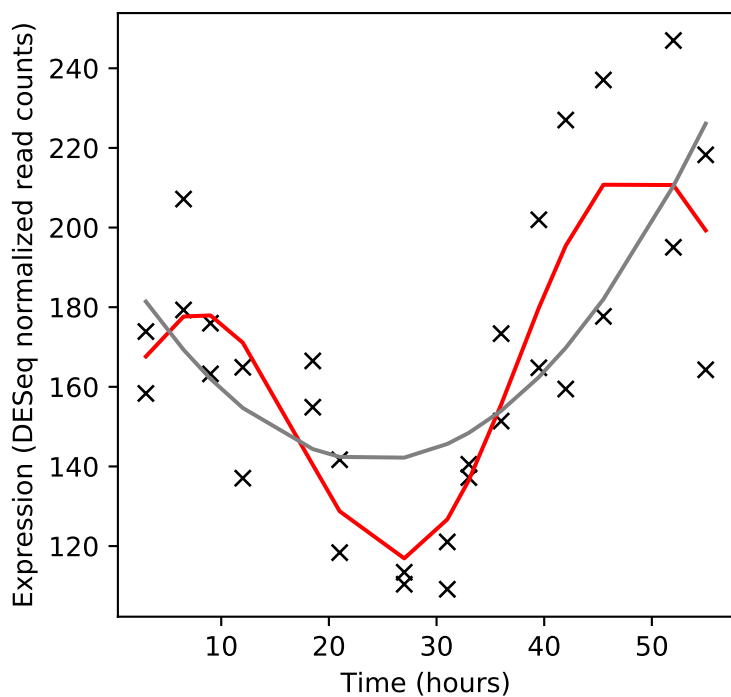

Rv2549c/vapC20

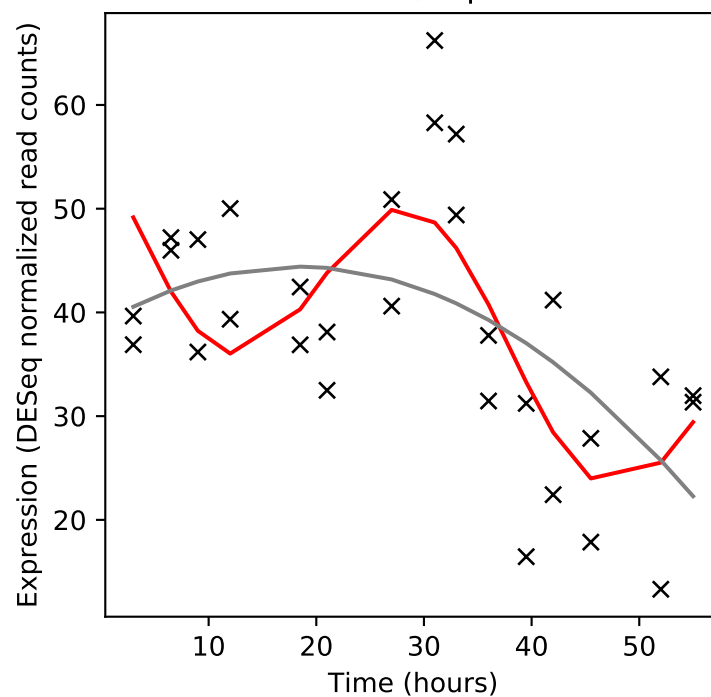

Rv2550c/vapB20

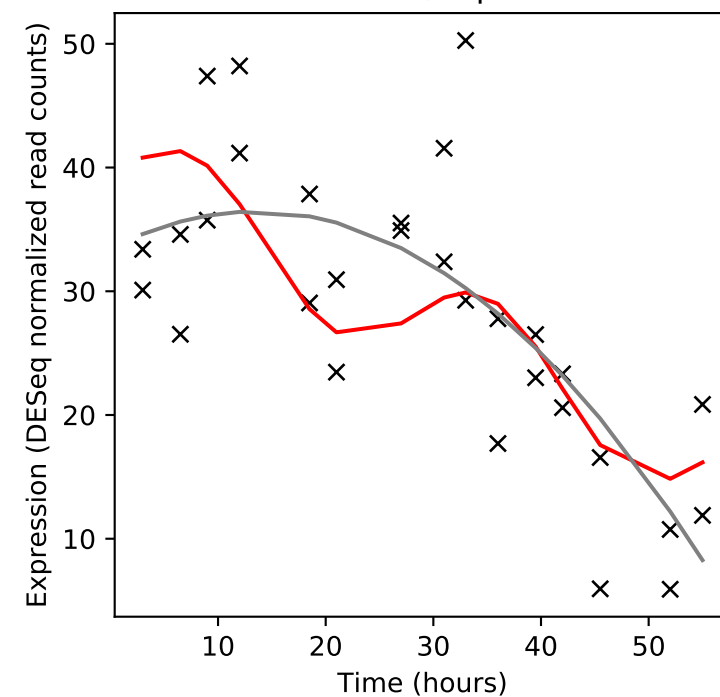

Rv2551c/-

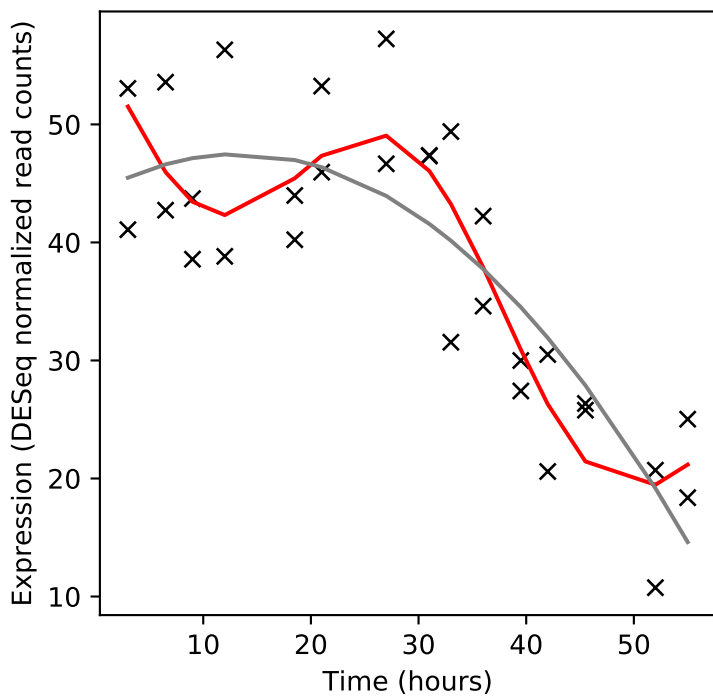

Rv2552c/aroE

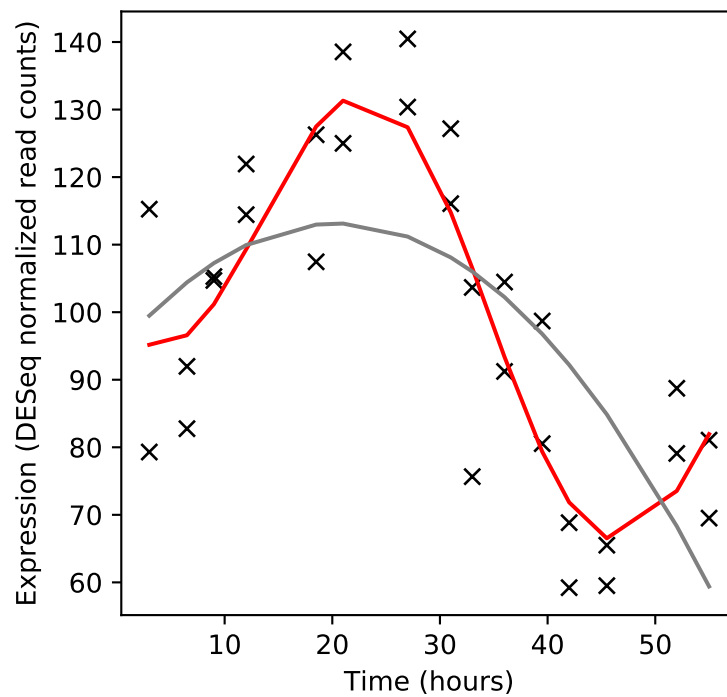

Rv2553c/-

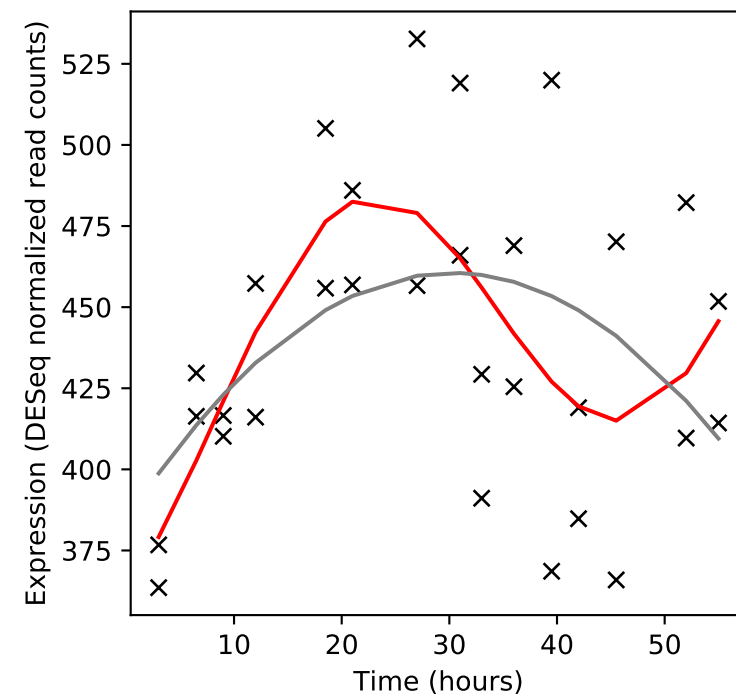

Rv2554c/-

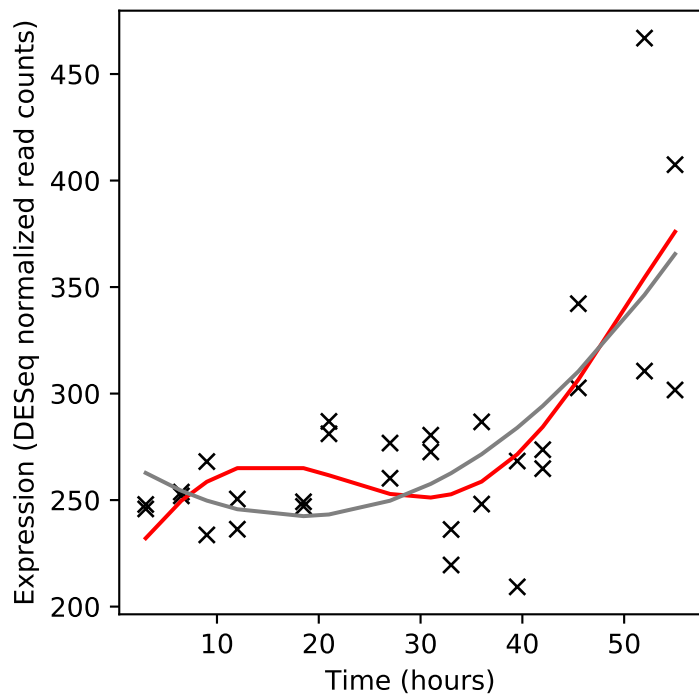

Rv2555c/alaS

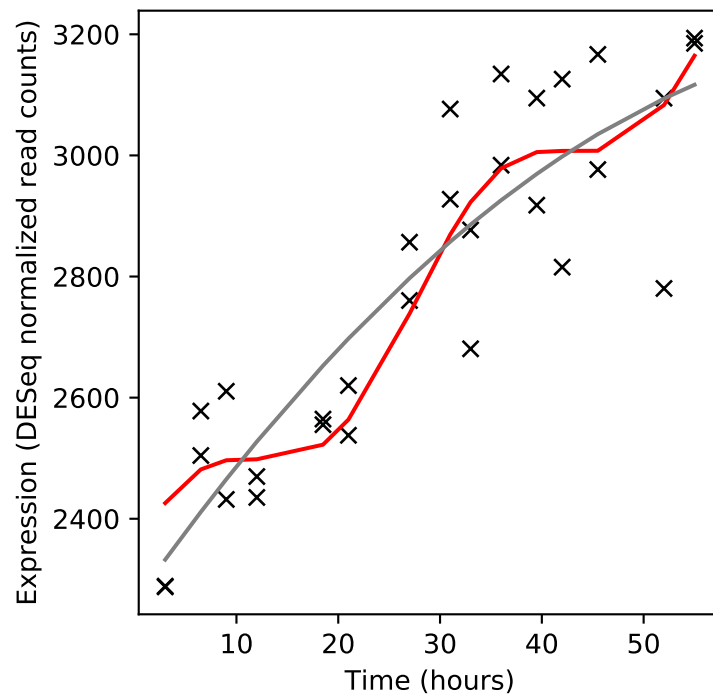

Rv2556c/-

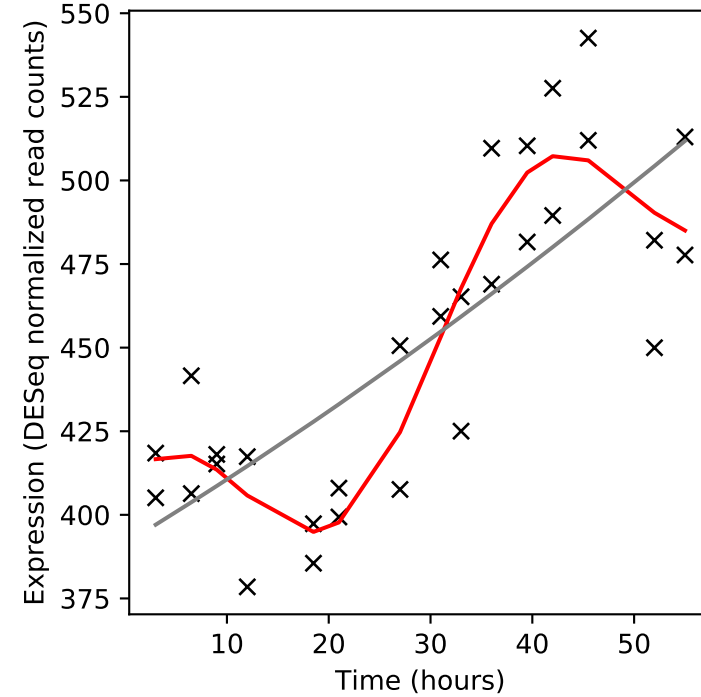

Rv2557/-

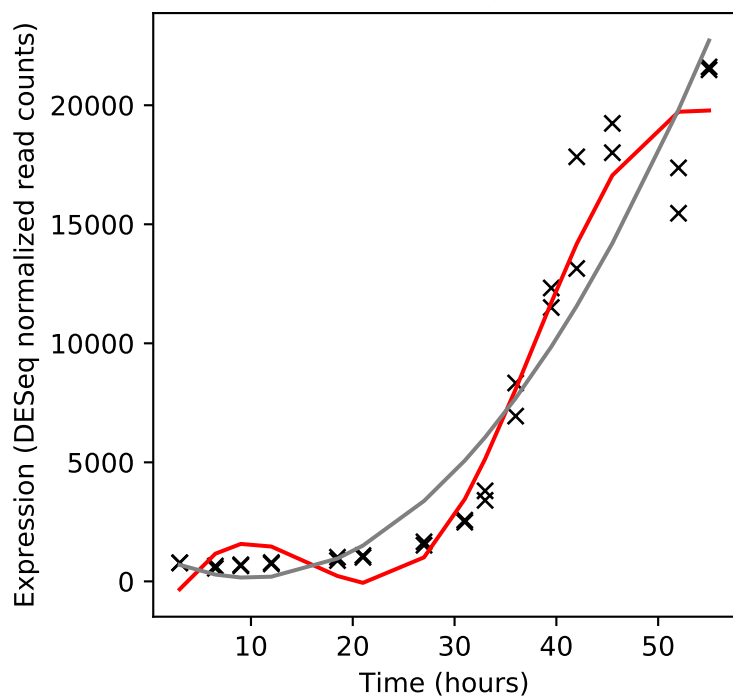

Rv2558/-

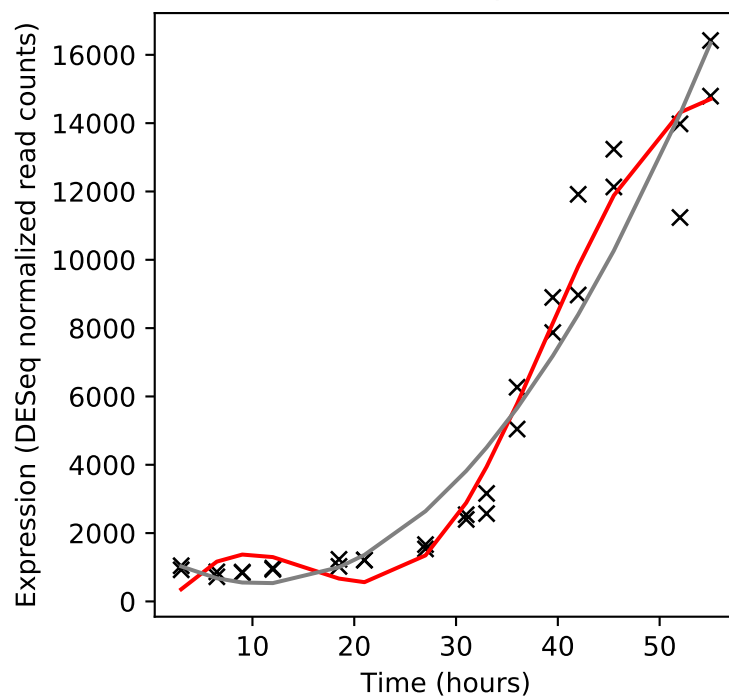

Rv2559c/-

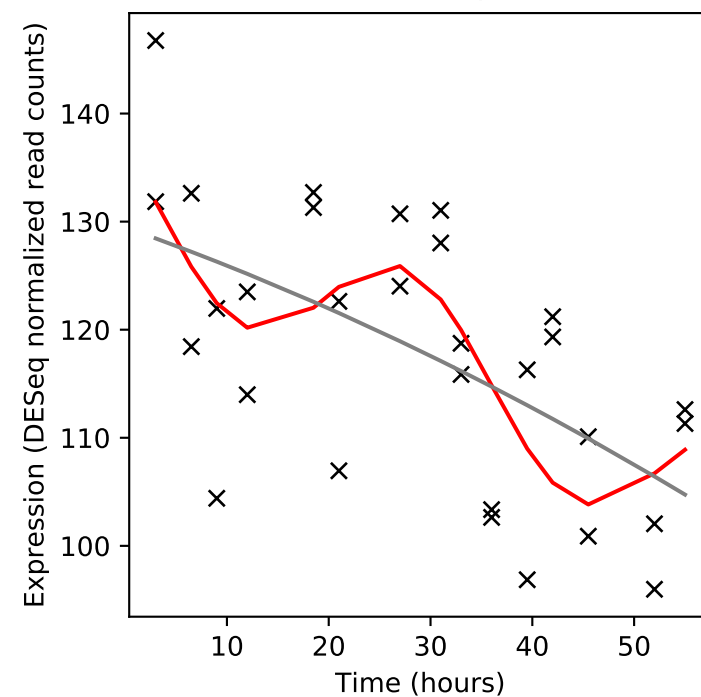

Rv2560/-

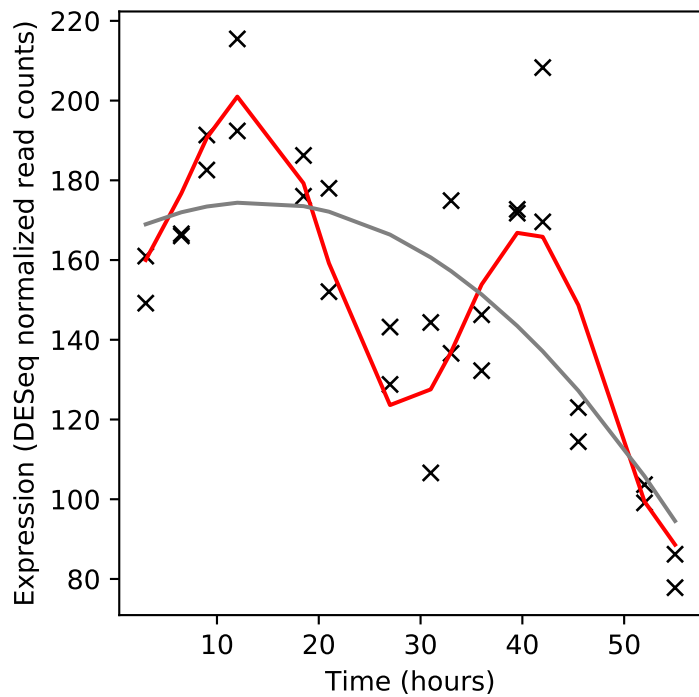

Rv2561/-

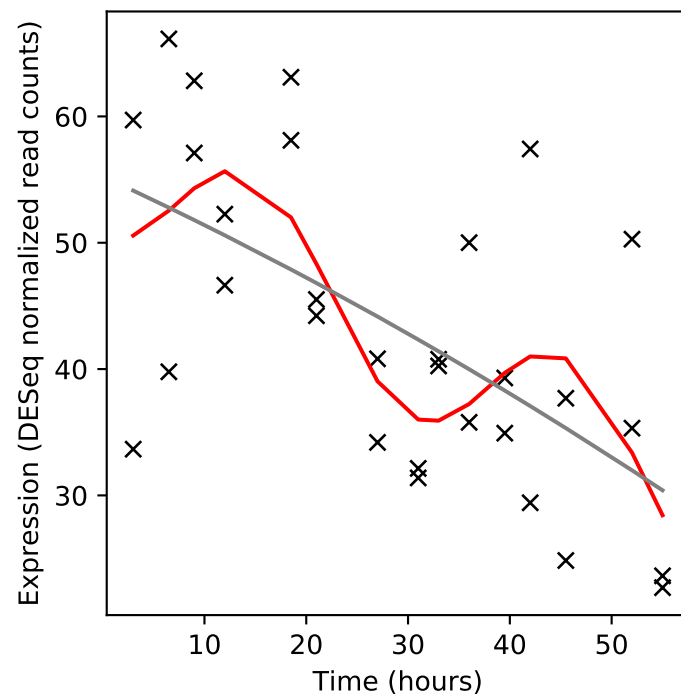

Rv2562/-

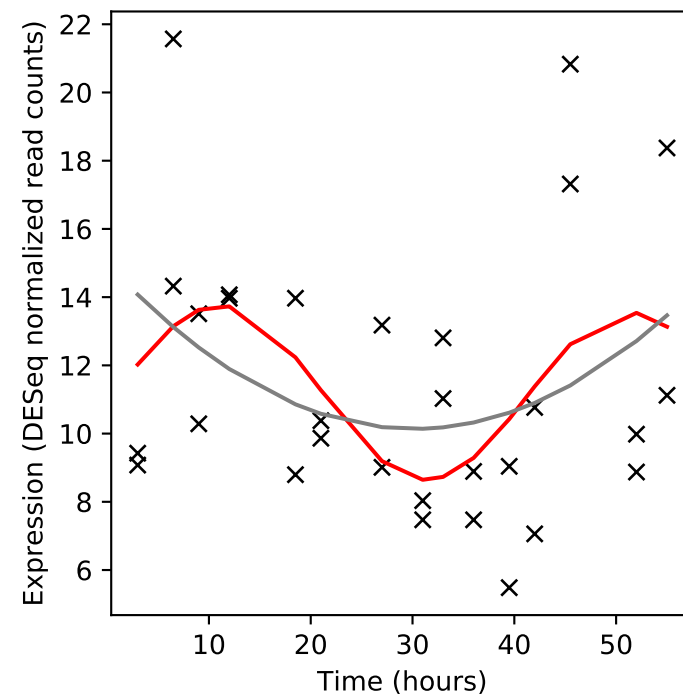

Rv2563/-

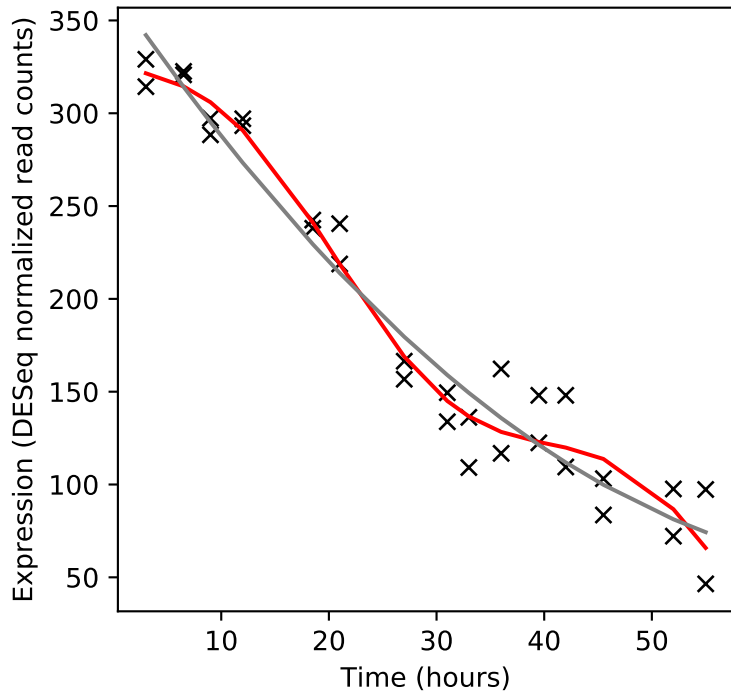

Rv2564/glnQ

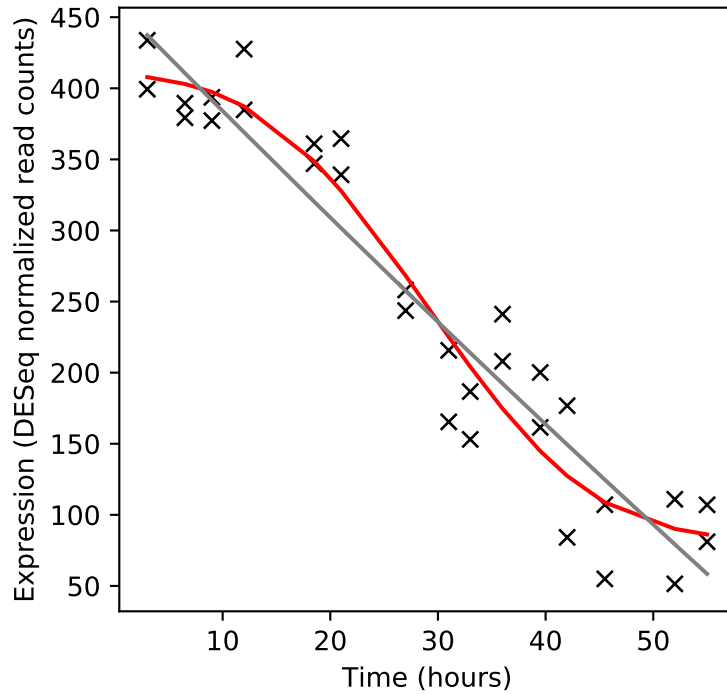

Rv2565/-

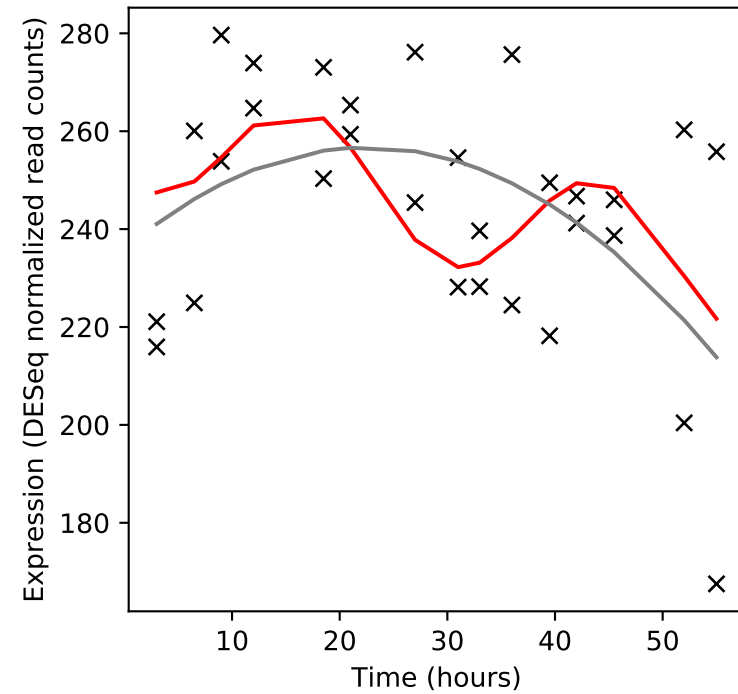

Rv2566/-

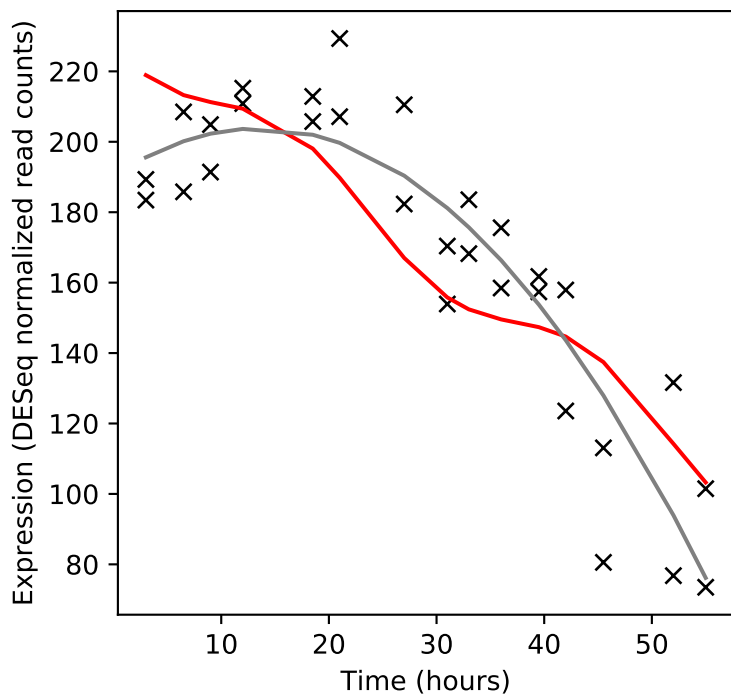

Rv2567/-

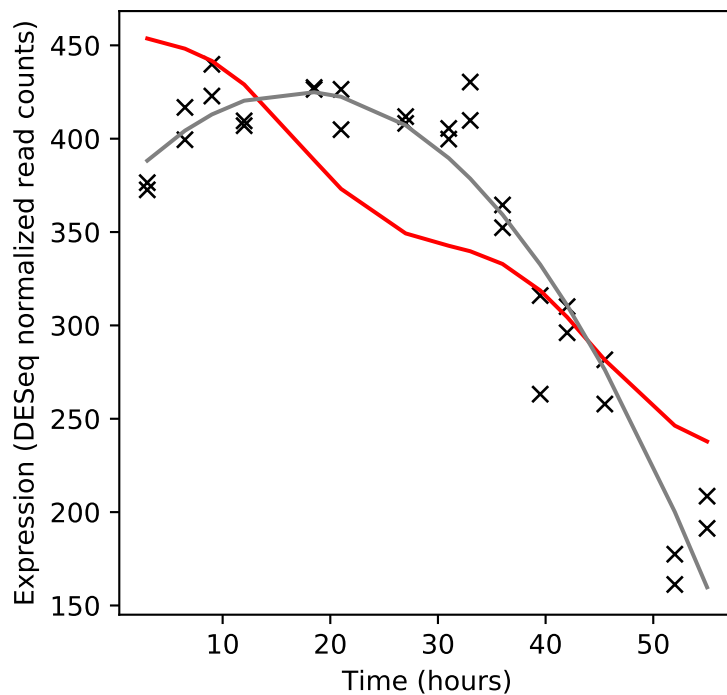

Rv2568c/-

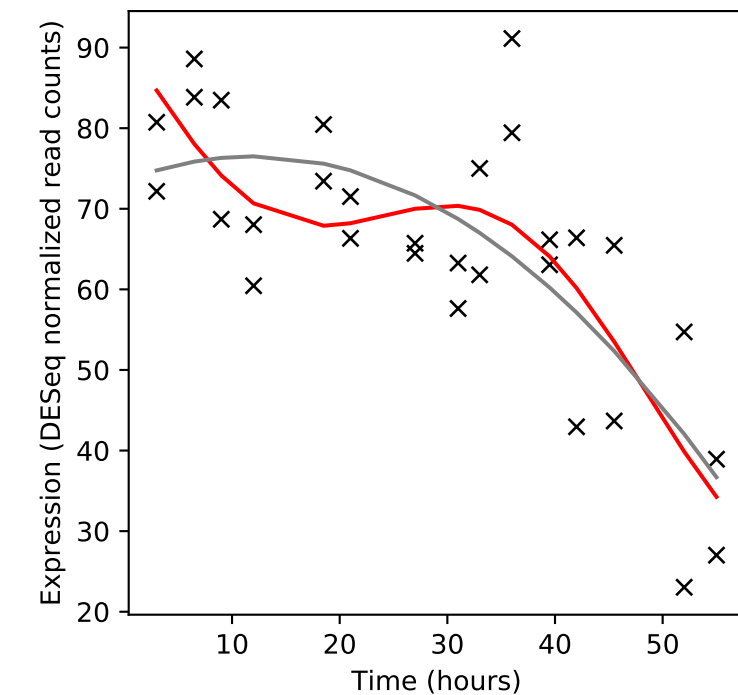

Rv2569c/-

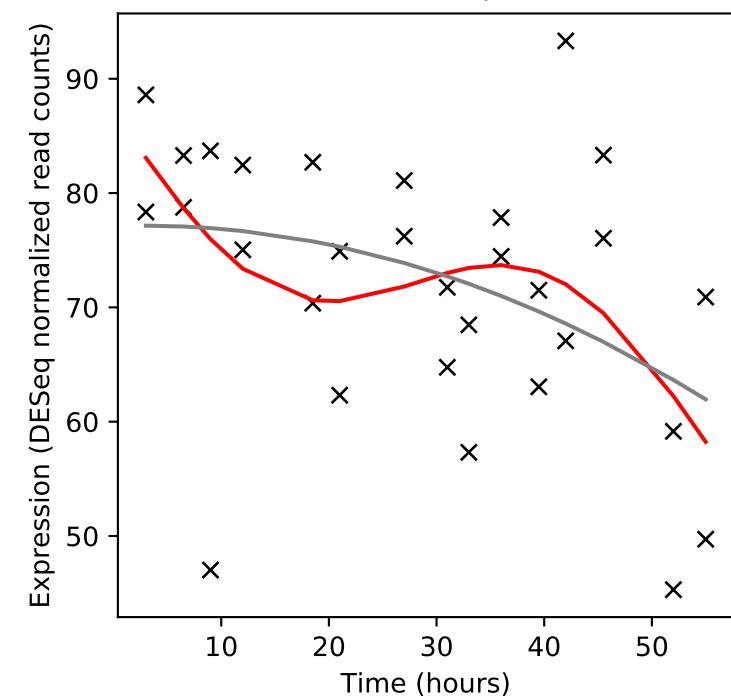

Rv2570/-

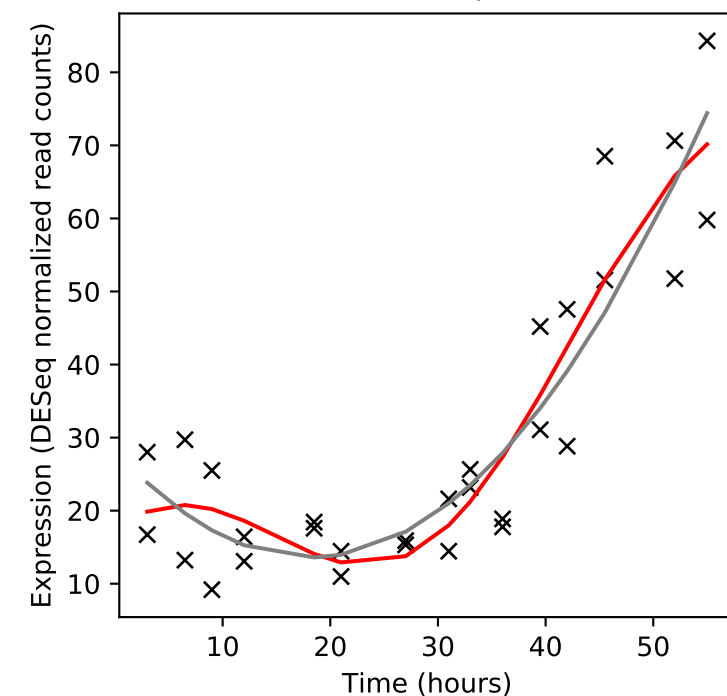

Rv2571c/-

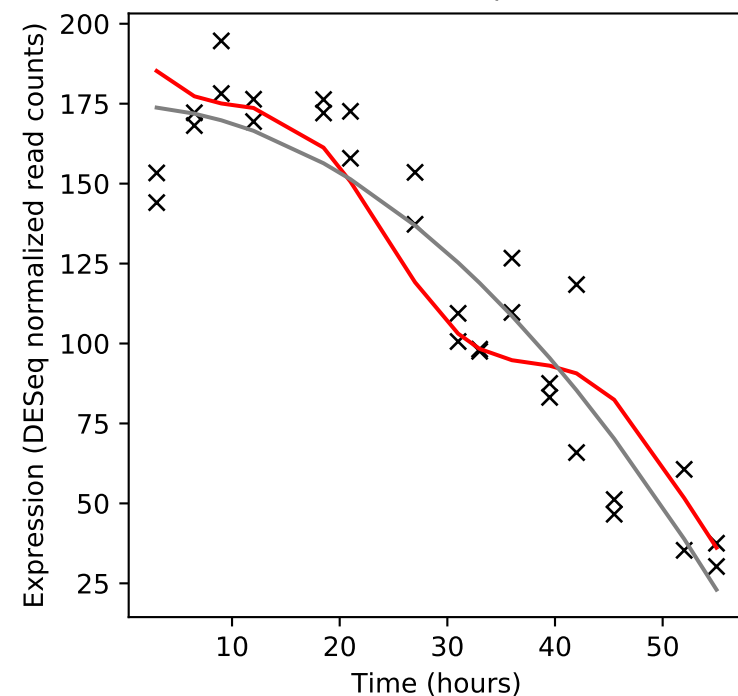

Rv2572c/aspS

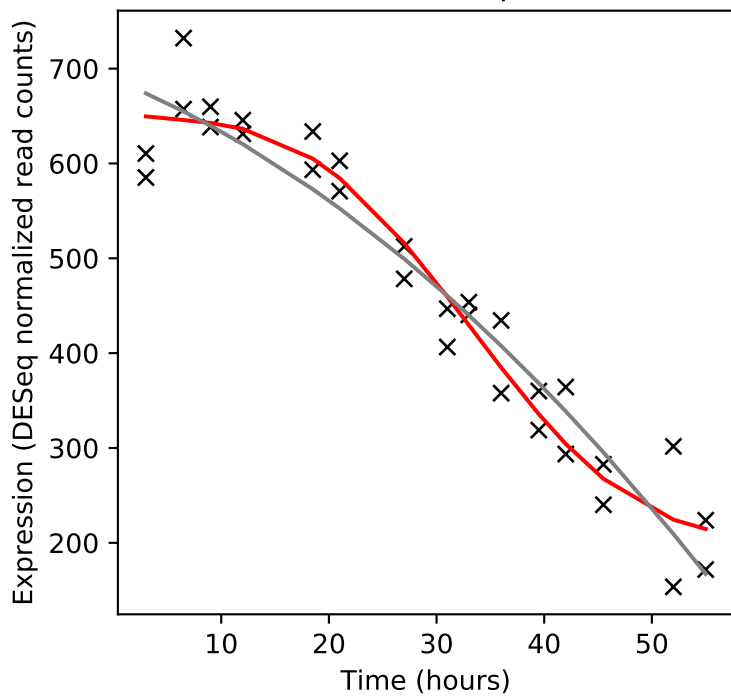

Rv2573/-

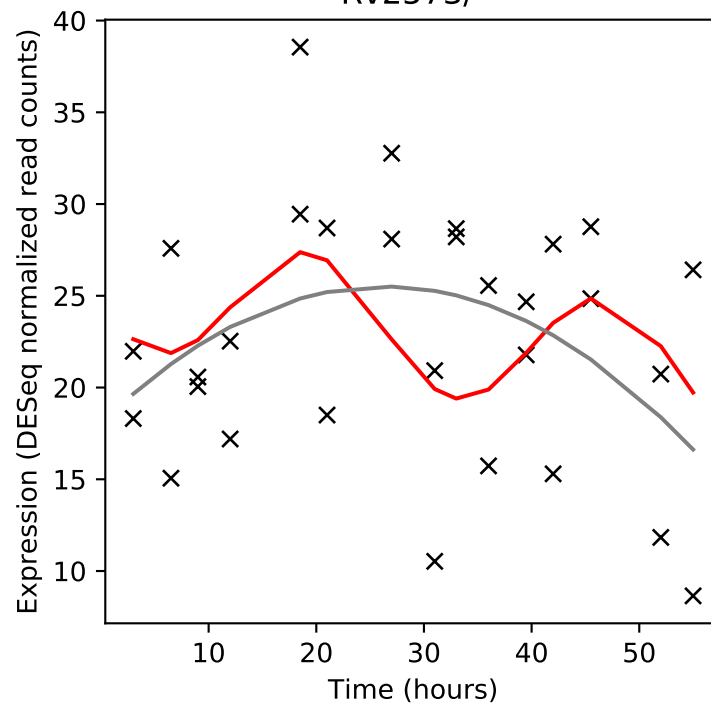

Rv2574/-

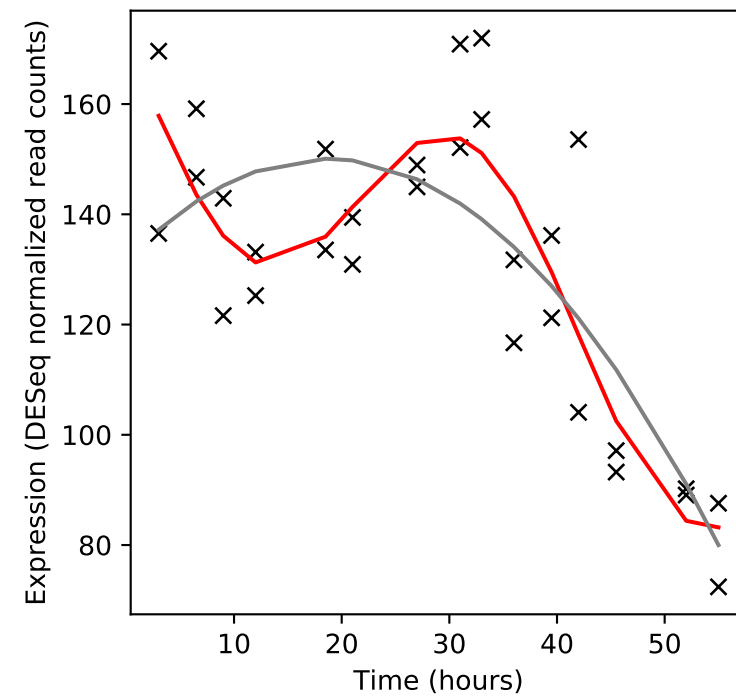

Rv2575/-

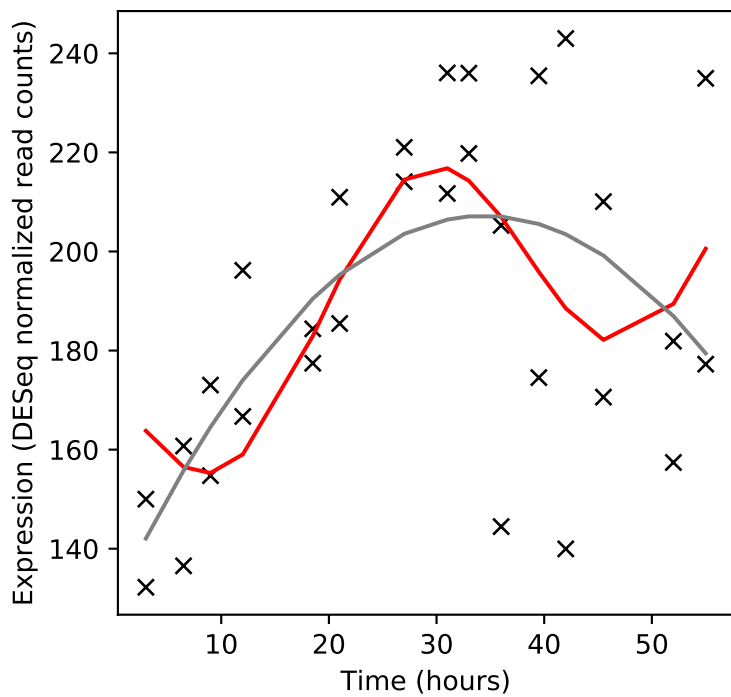

Rv2576c/-

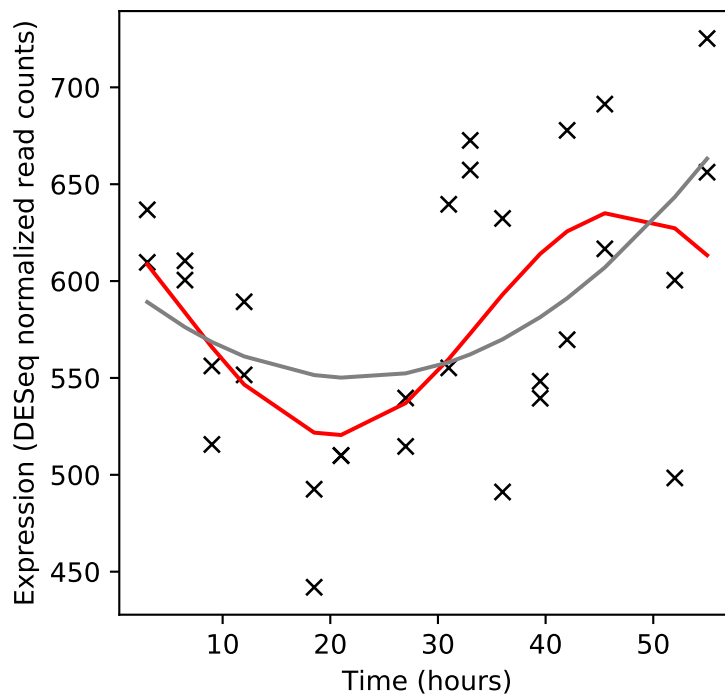

Rv2577/-

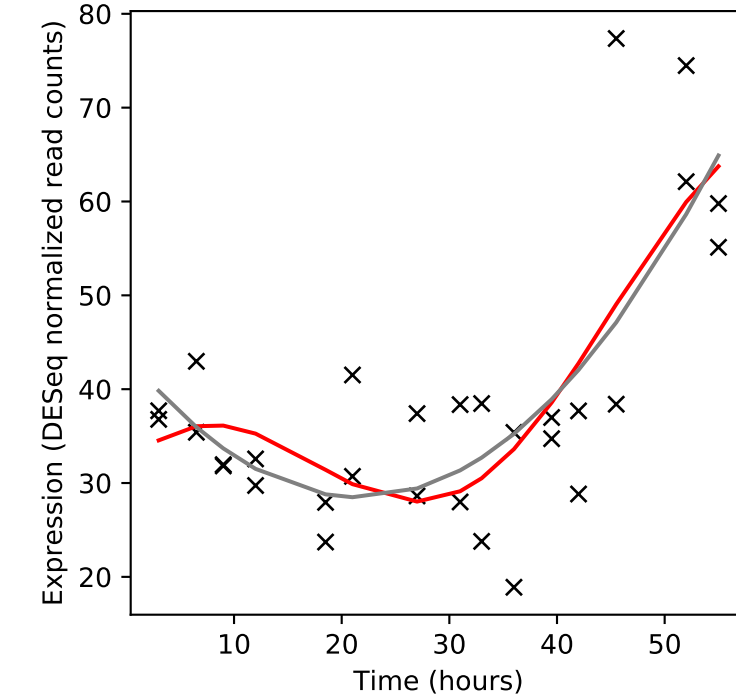

Rv2578c/-

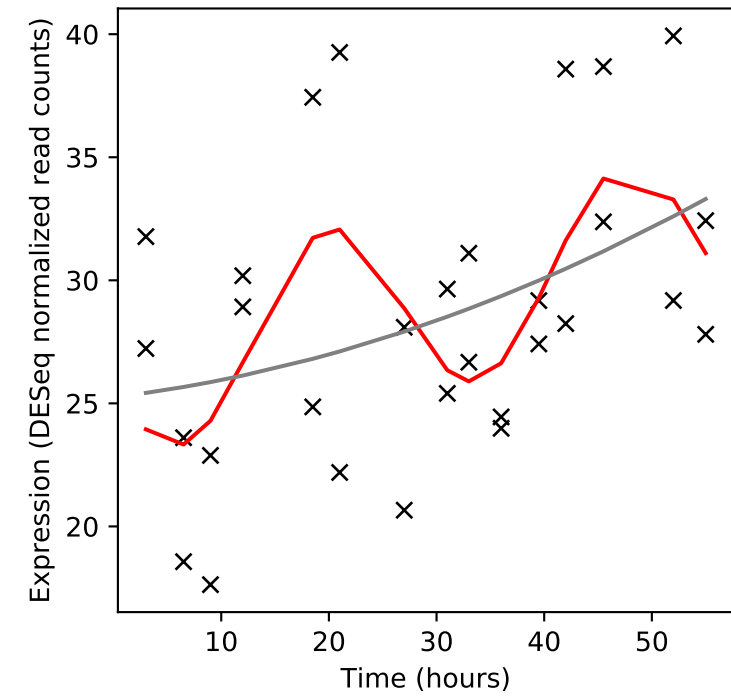

Rv2579/dhaA

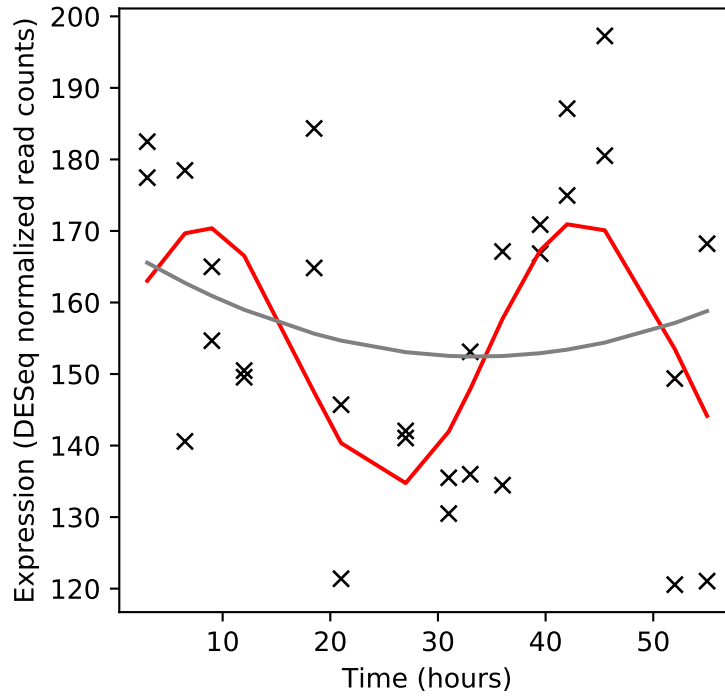

Rv2580c/hisS

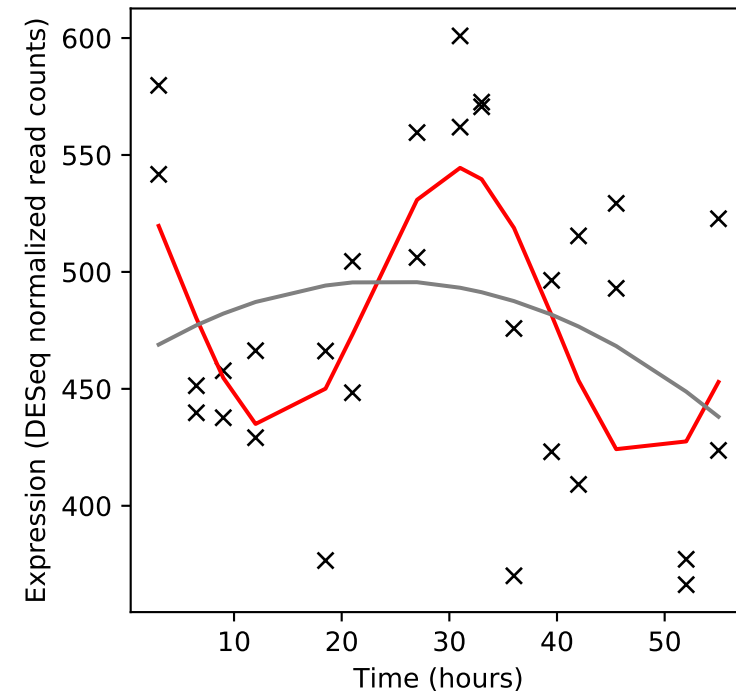

Rv2581c/-

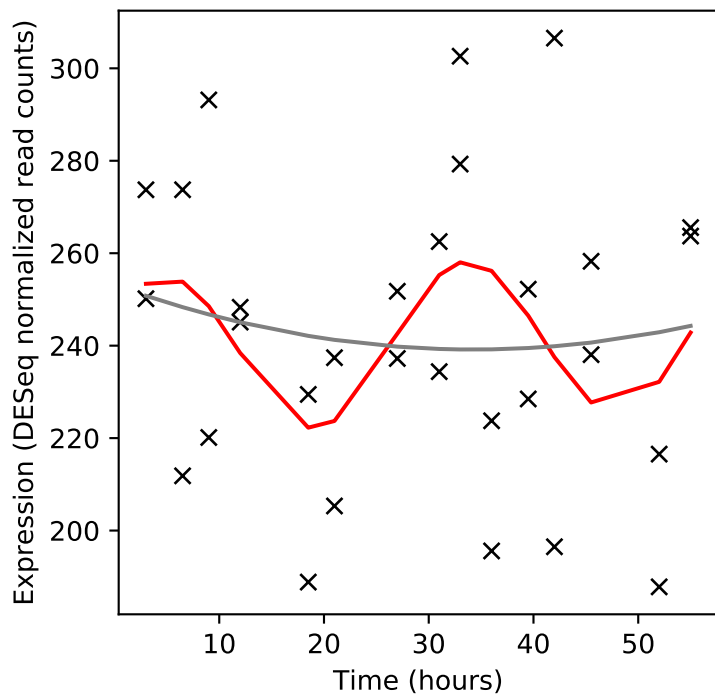

Rv2582/ppiB

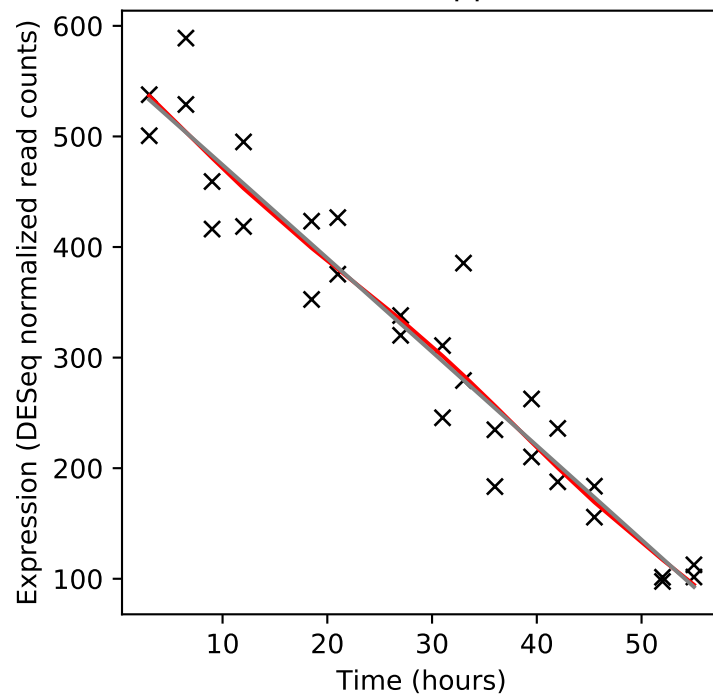

Rv2583c/relA

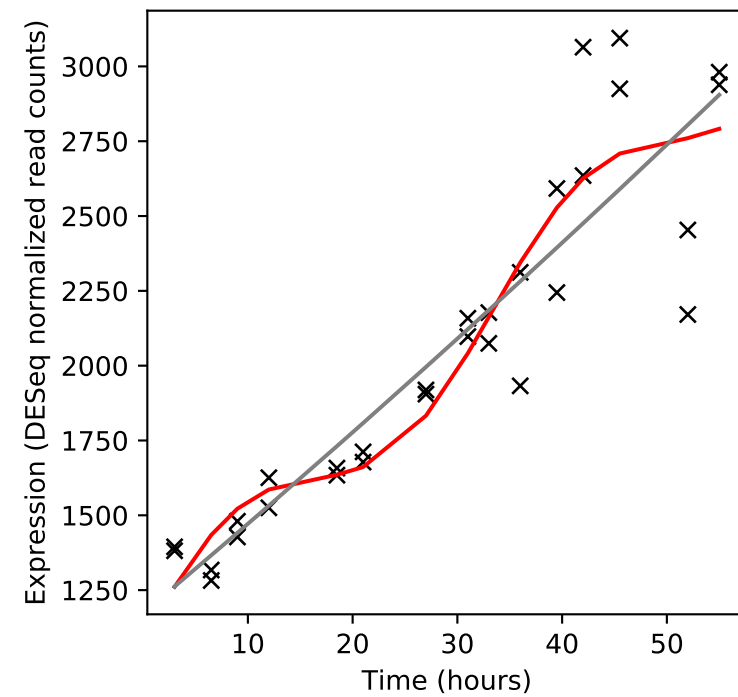

Rv2584c/apt

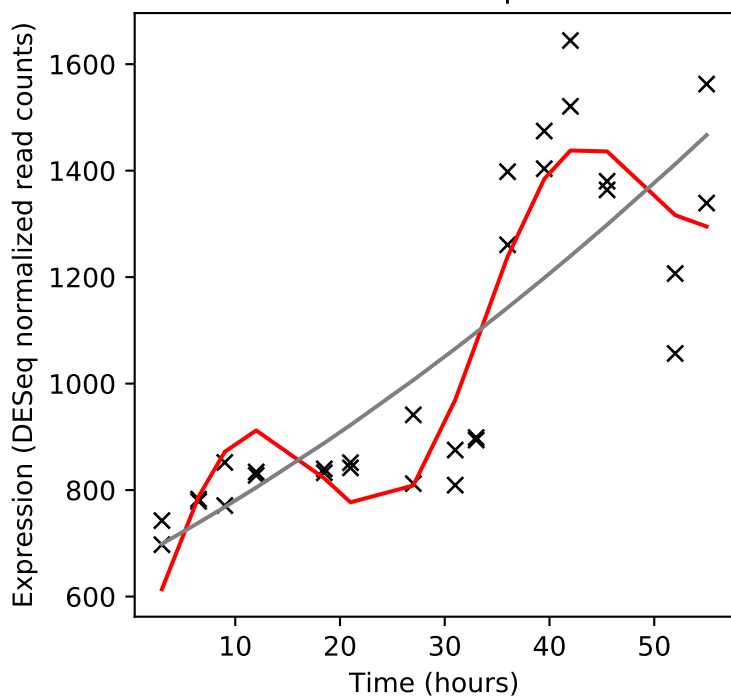

Rv2585c/-

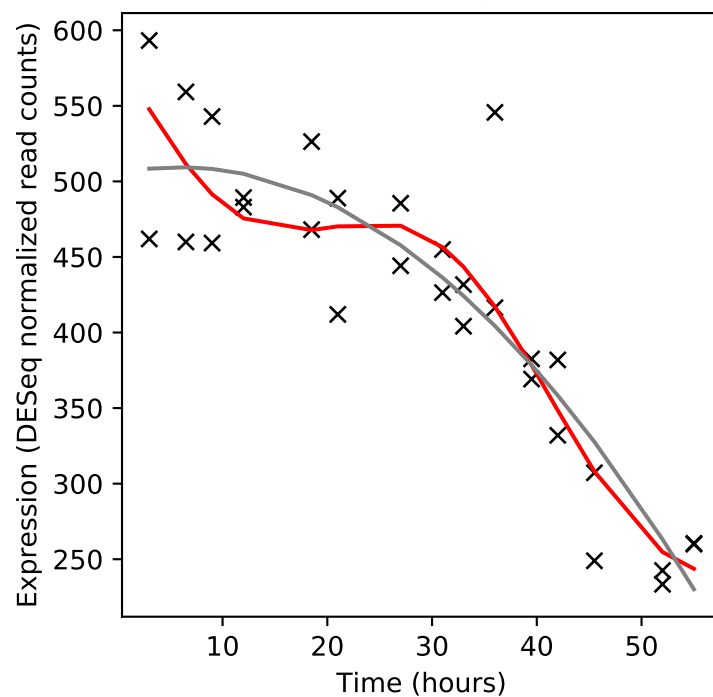

Rv2586c/secF

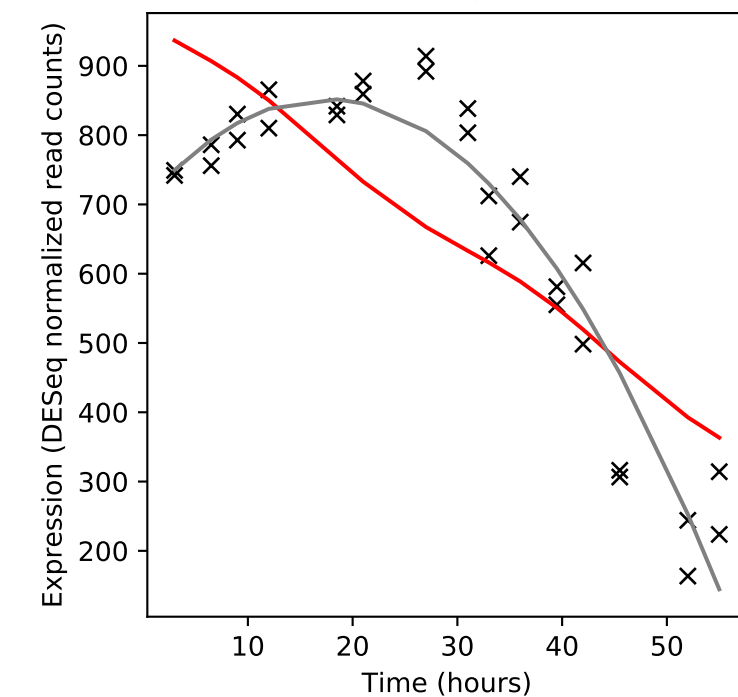

Rv2587c/secD

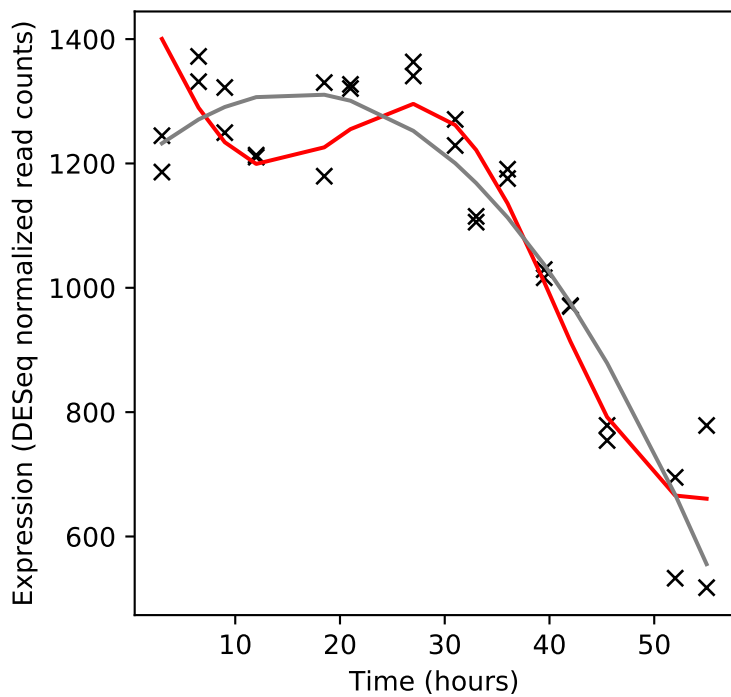

Rv2588c/yajC

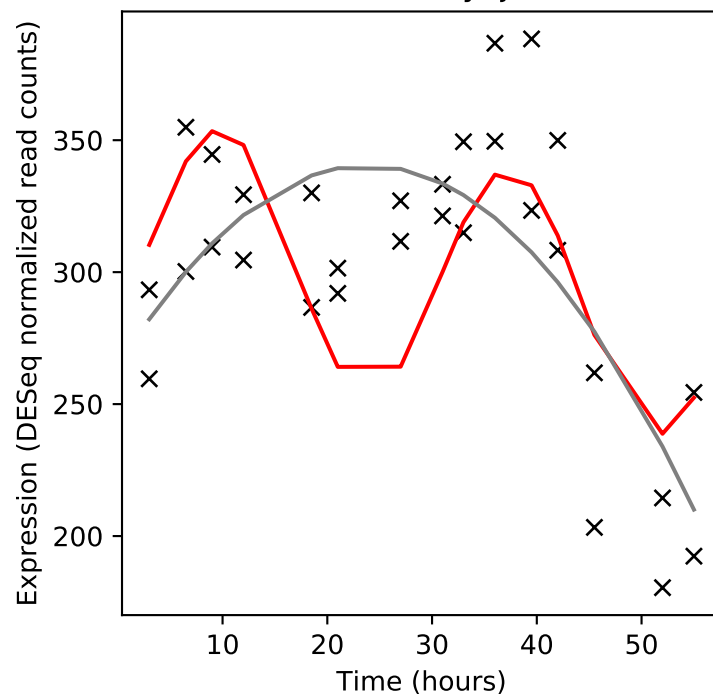

Rv2589/gabT

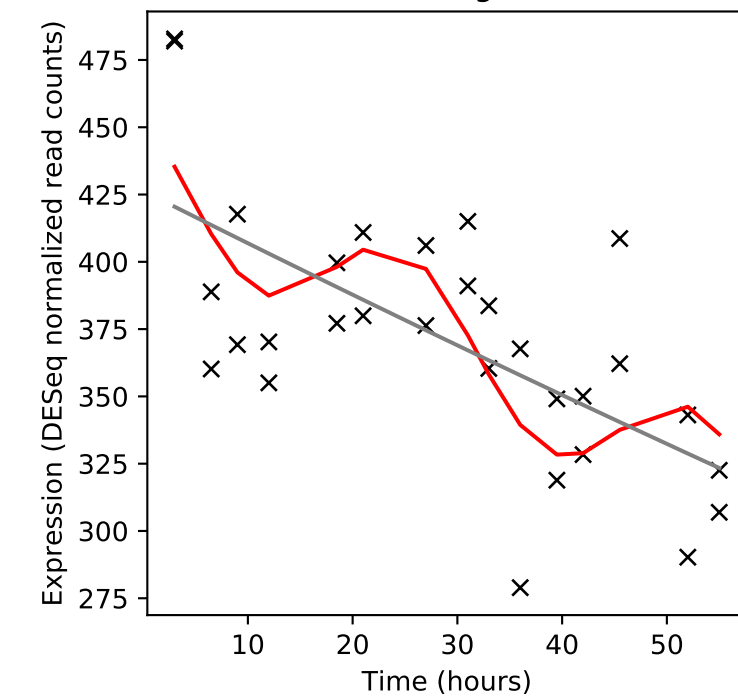

Rv2590/fadD9

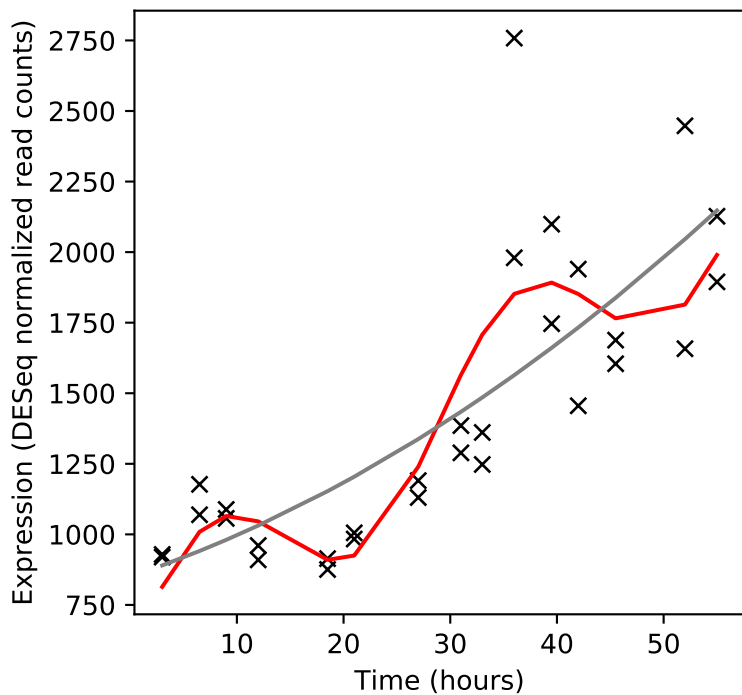

Rv2591/PE\_PGRS44

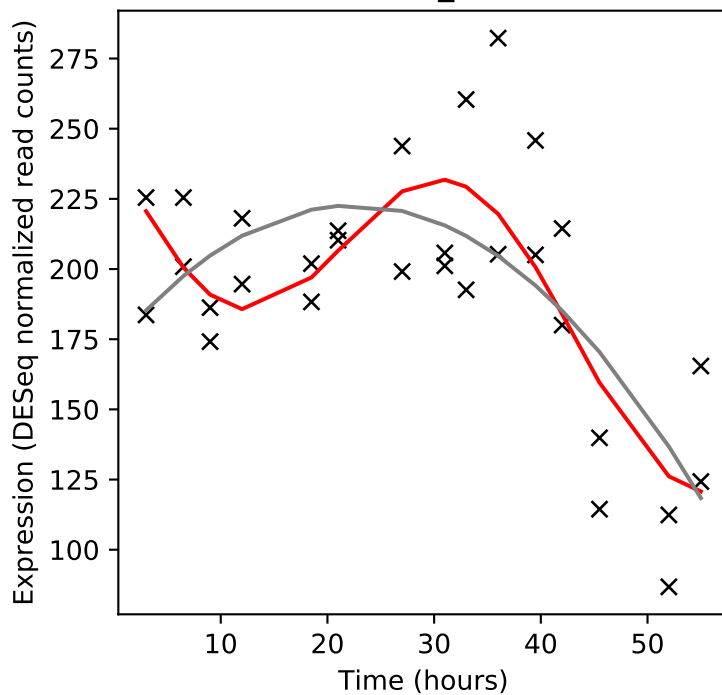

Rv2592c/ruvB

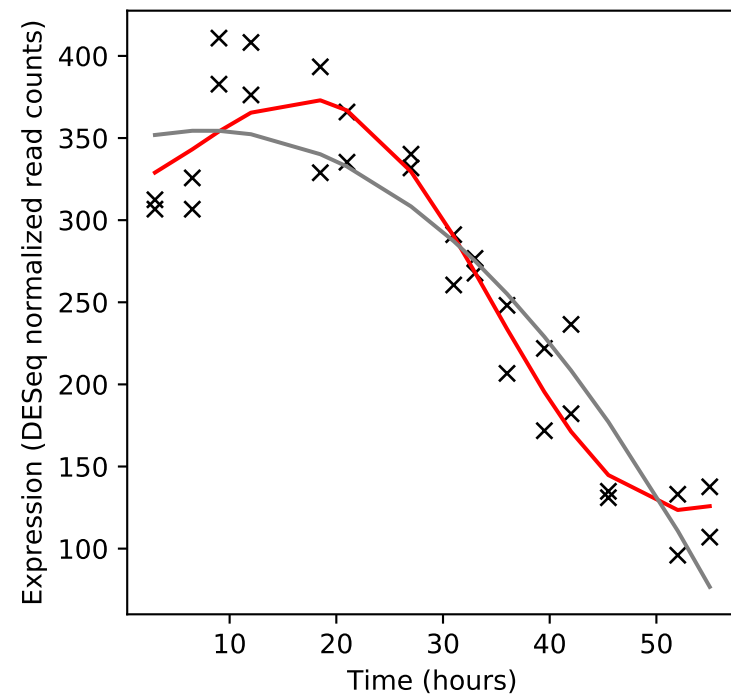

Rv2593c/ruvA

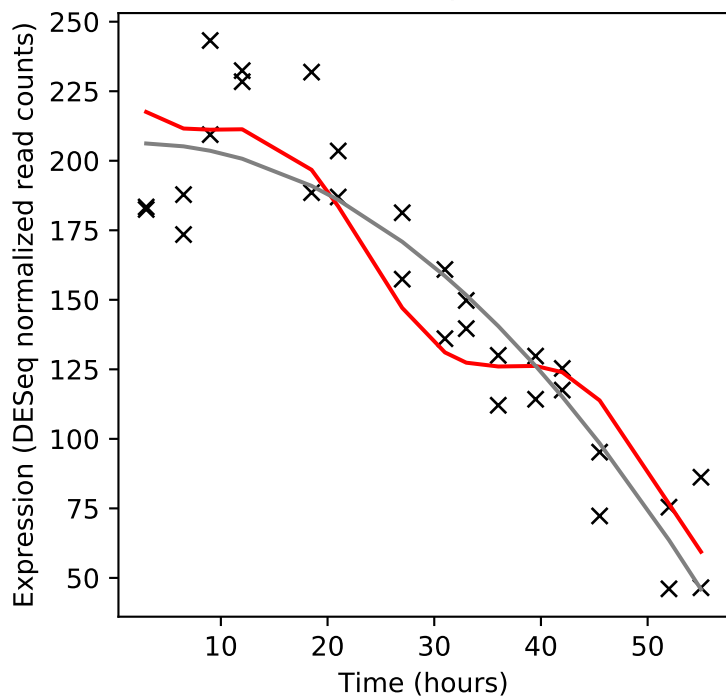

Rv2594c/ruvC

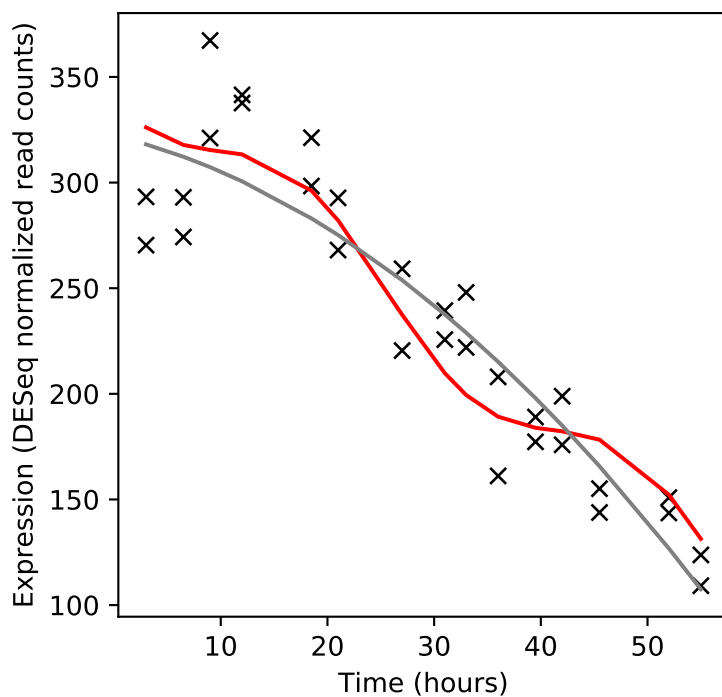

Rv2595/vapB40

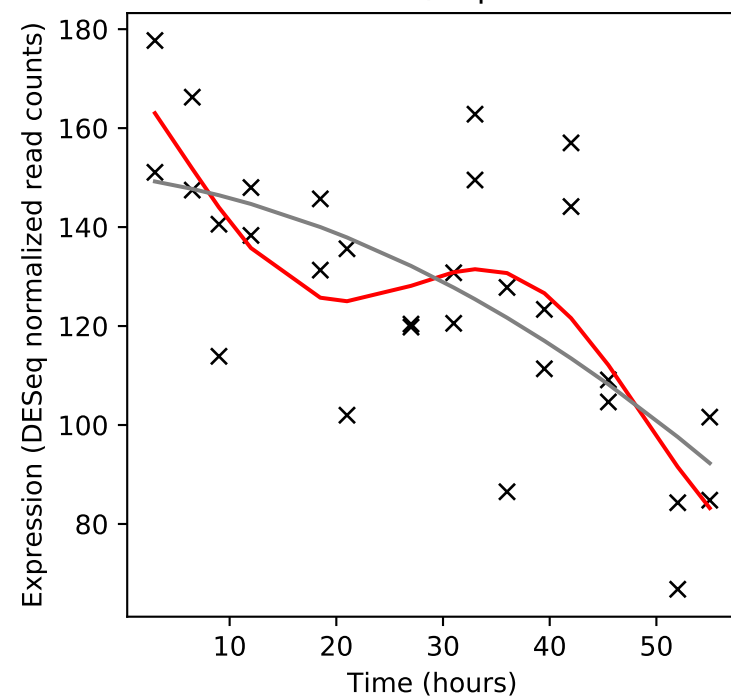

Rv2596/vapC40

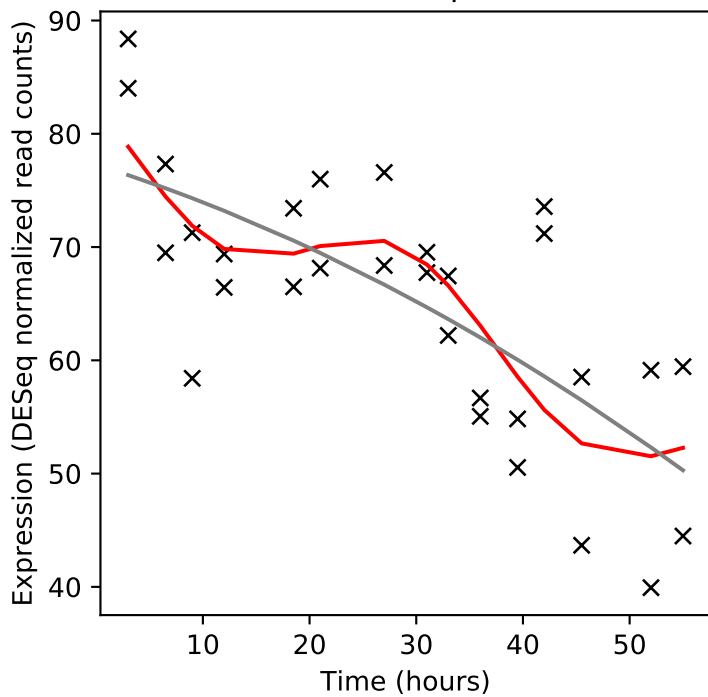

Rv2597/-

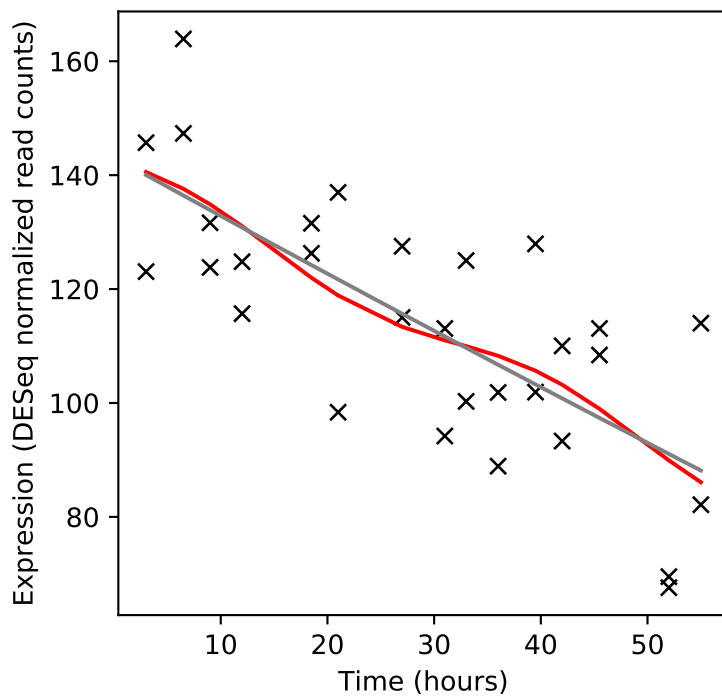

Rv2598/-

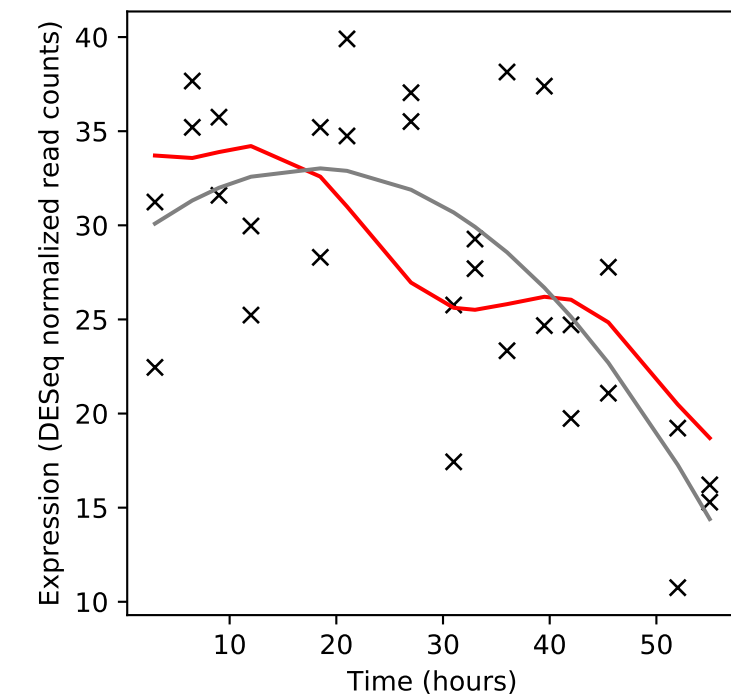



Rv2599/-

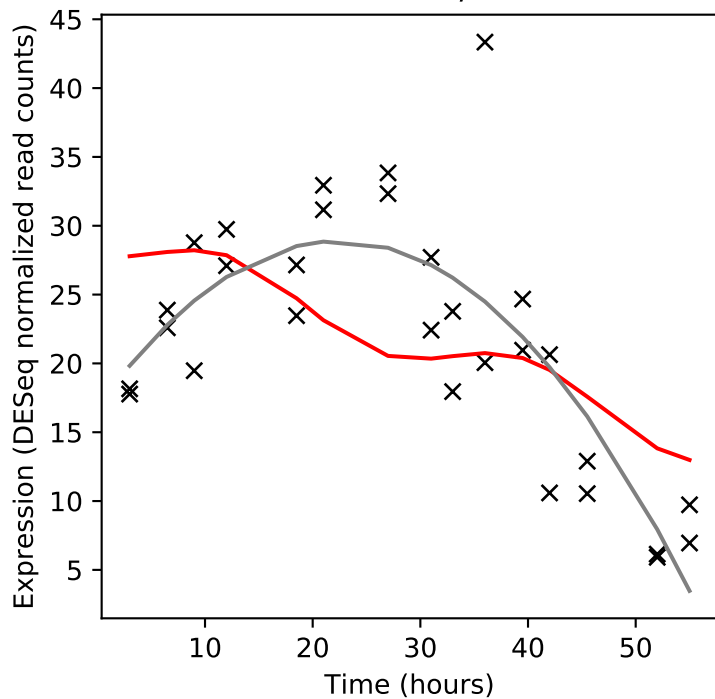

Rv2600/-

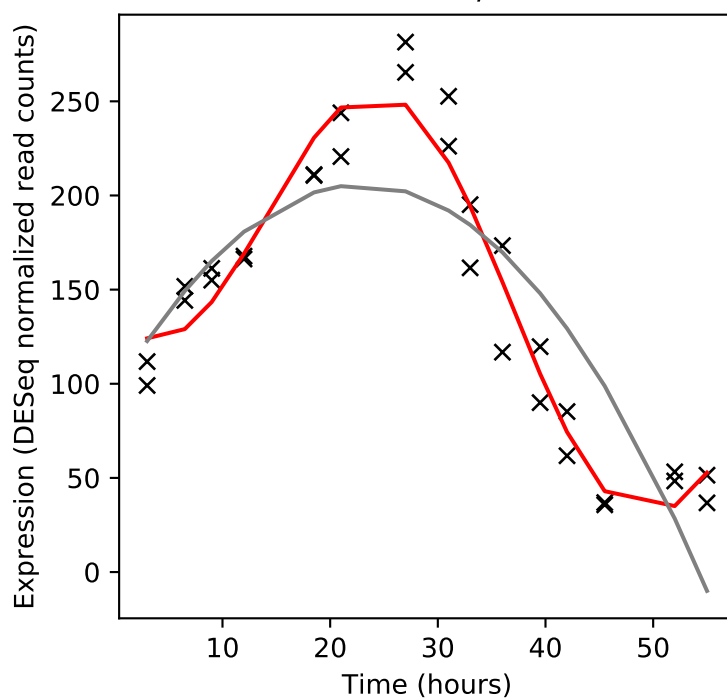

Rv2601/speE

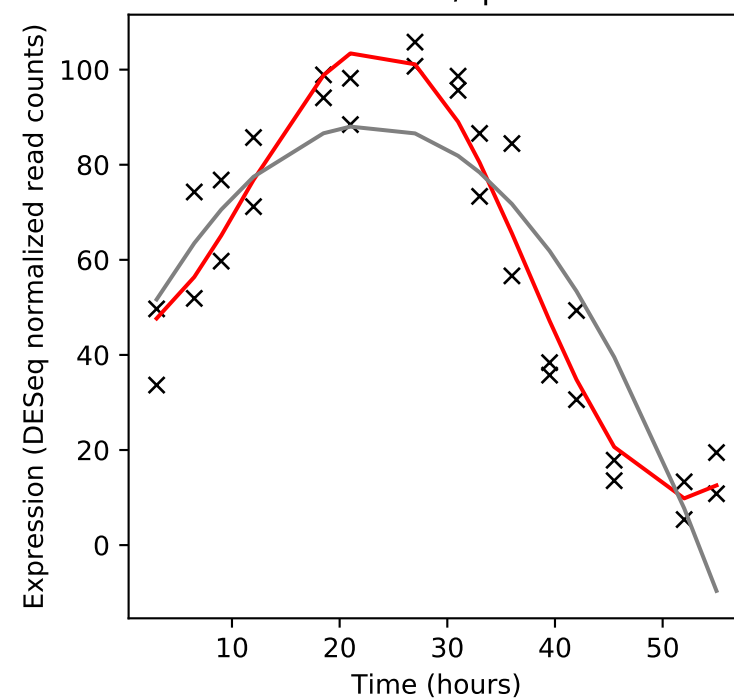

Rv2601A/vapB41

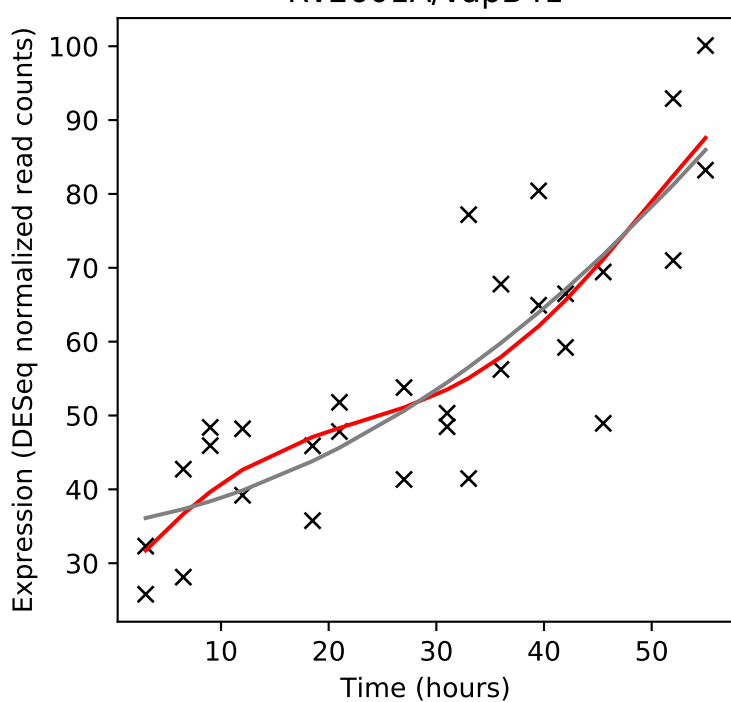

Rv2602/vapC41

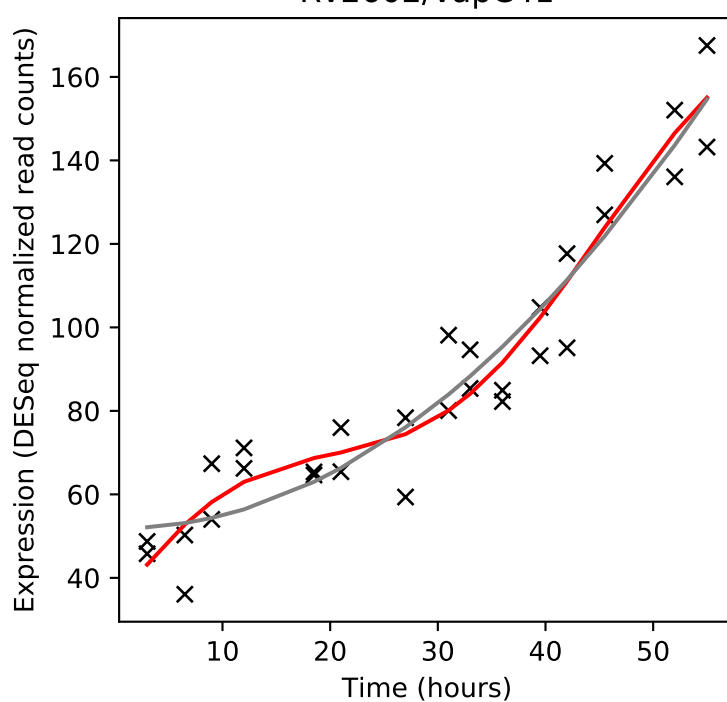

Rv2603c/-

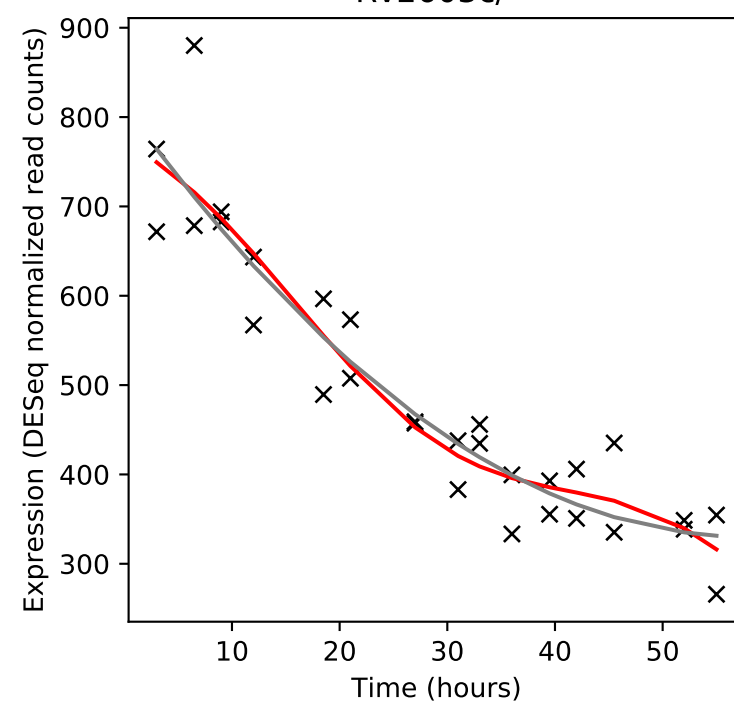

Rv2604c/snoP

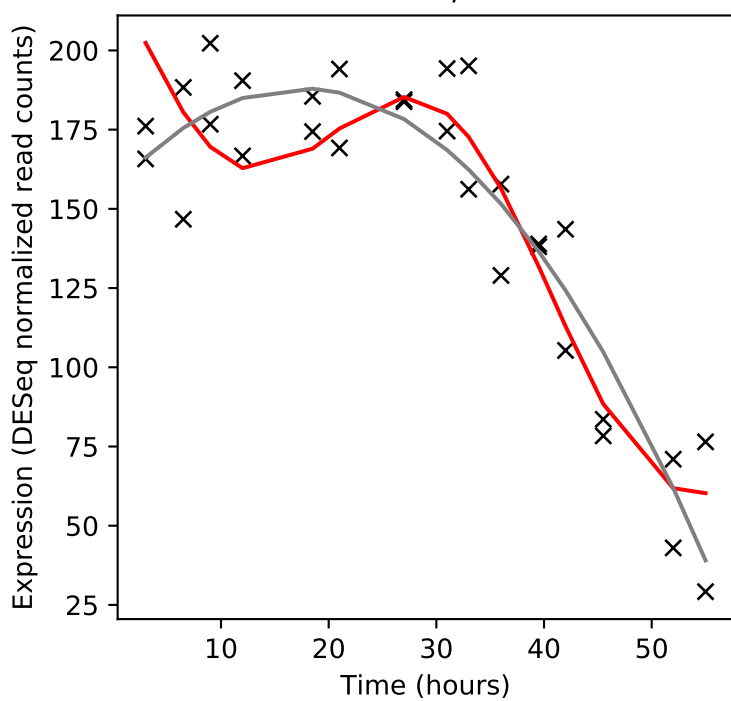

Rv2605c/tesB2

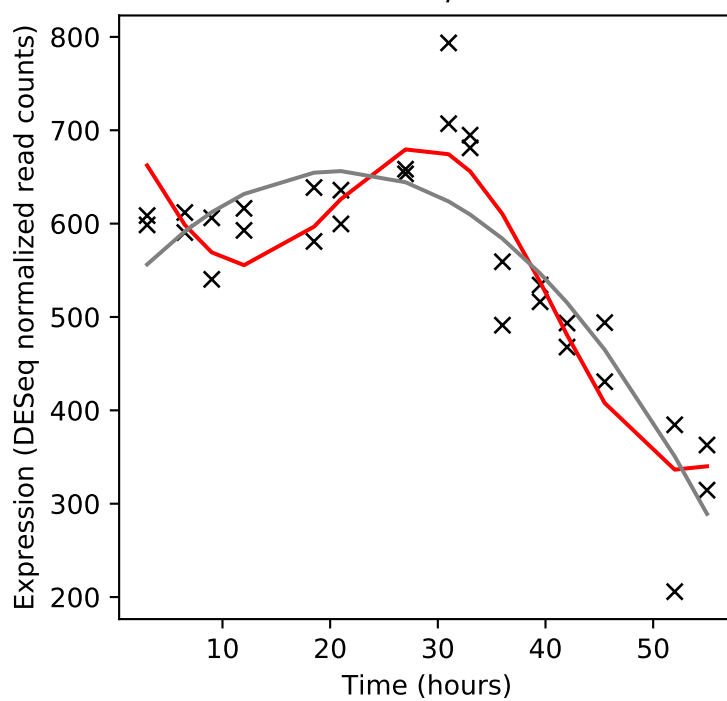

Rv2606c/snzP

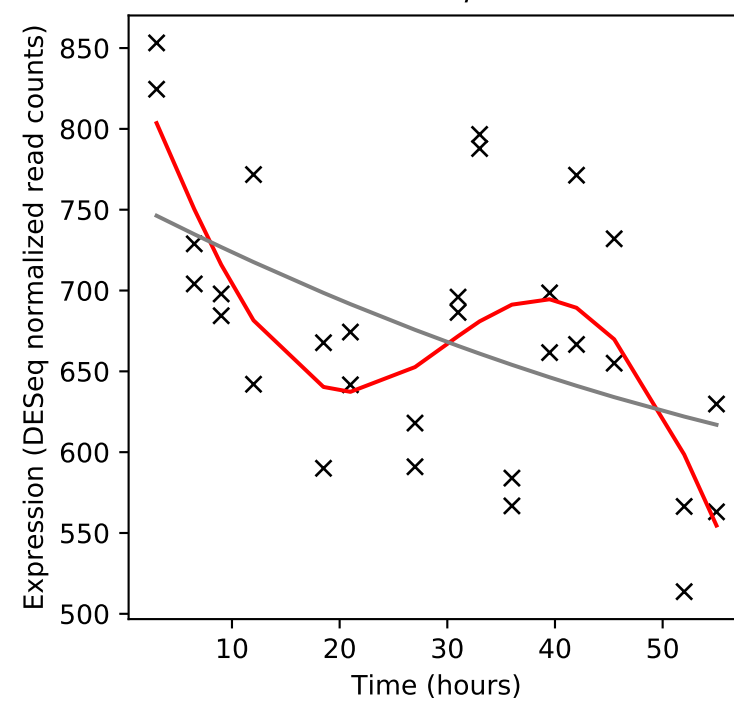

Rv2607/pdxH

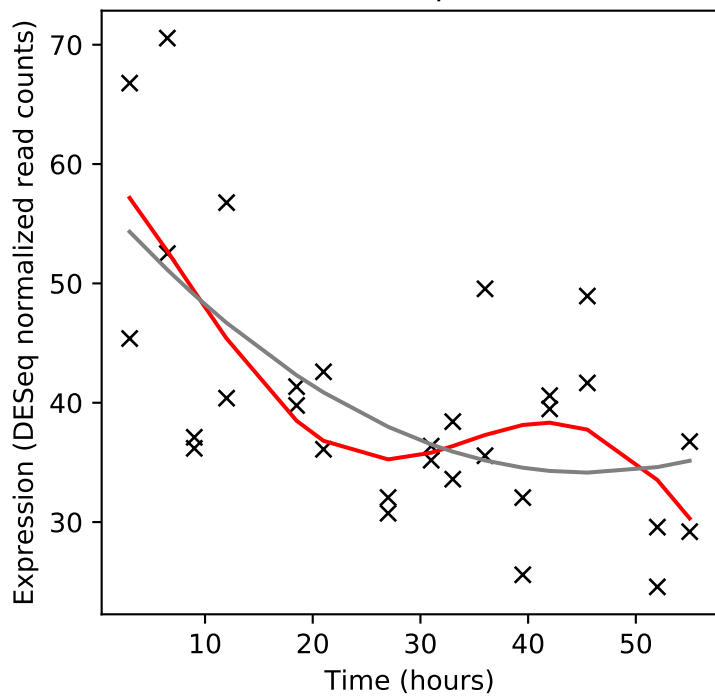

Rv2608/PPE42

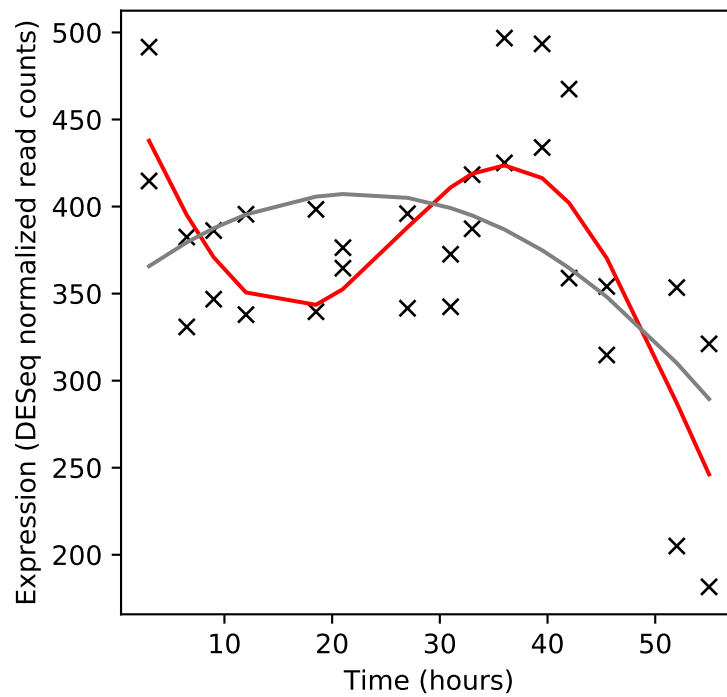

Rv2609c/-

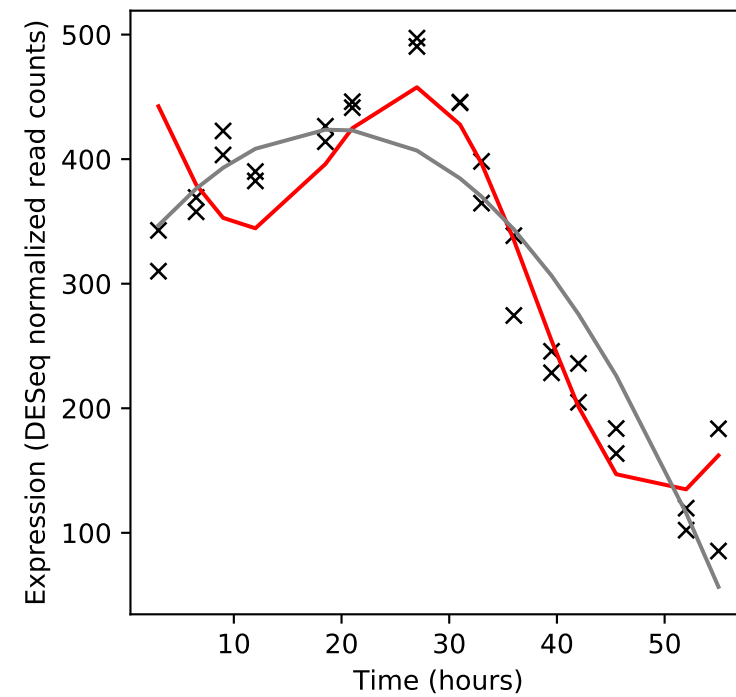

Rv2610c/pimA

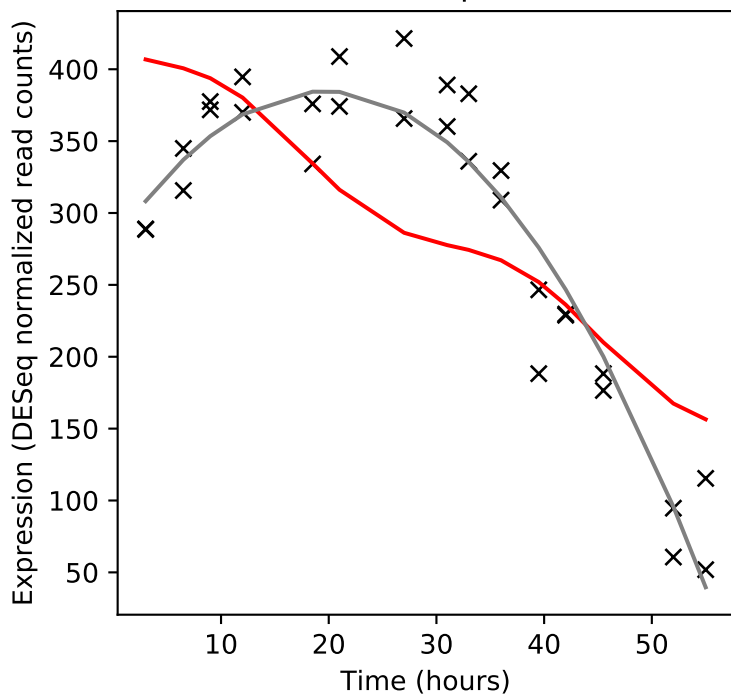

Rv2611c/-

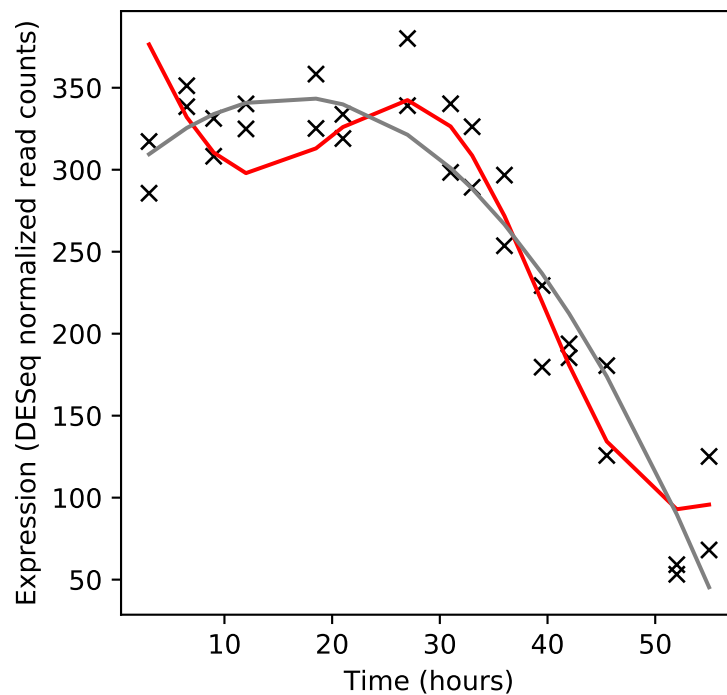

Rv2612c/pgsA1

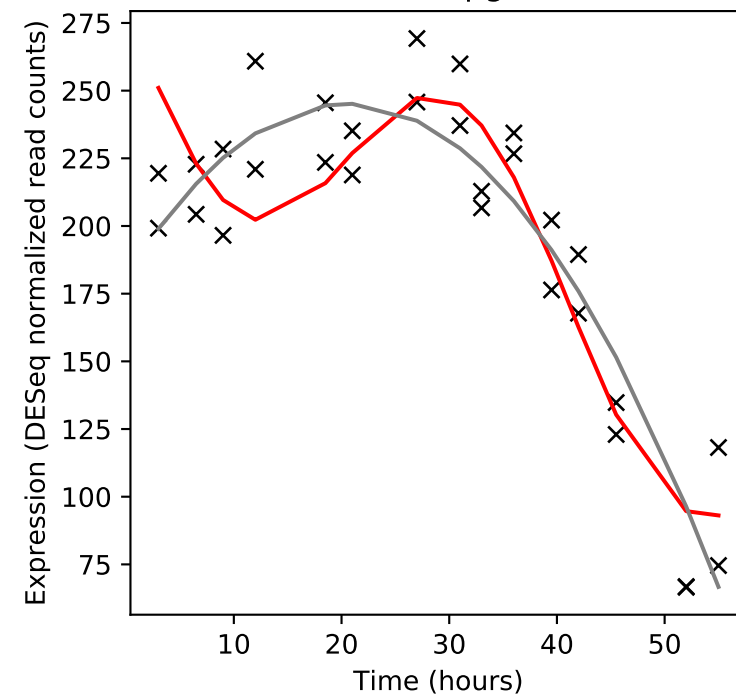

Rv2613c/-

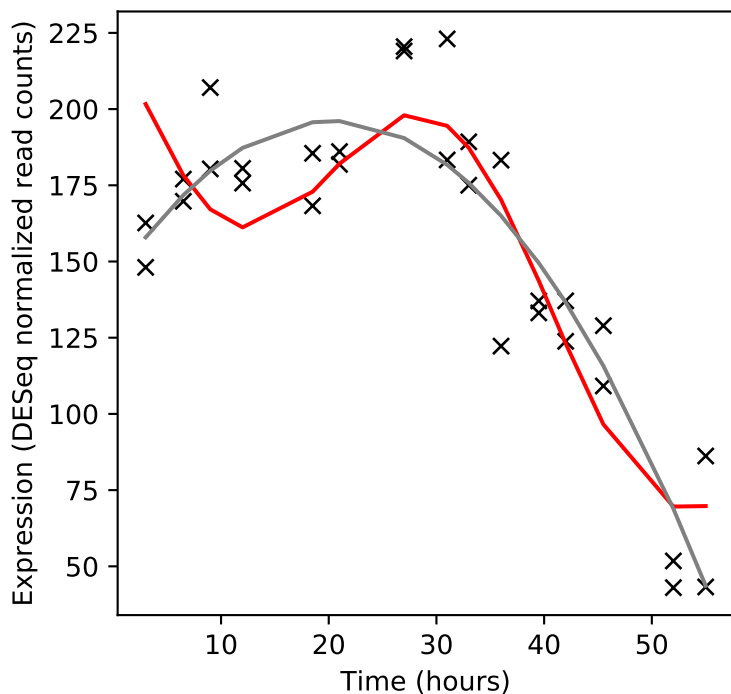

Rv2614c/thrS

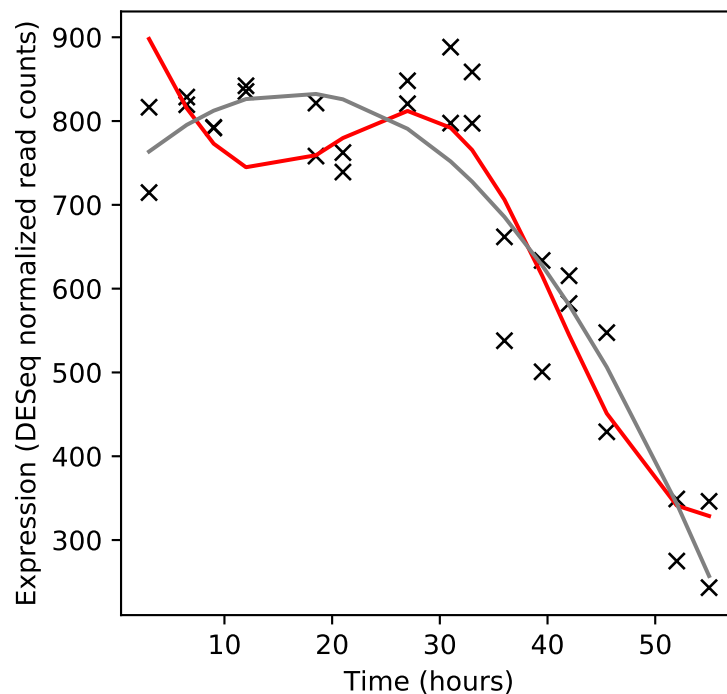

Rv2614A/-

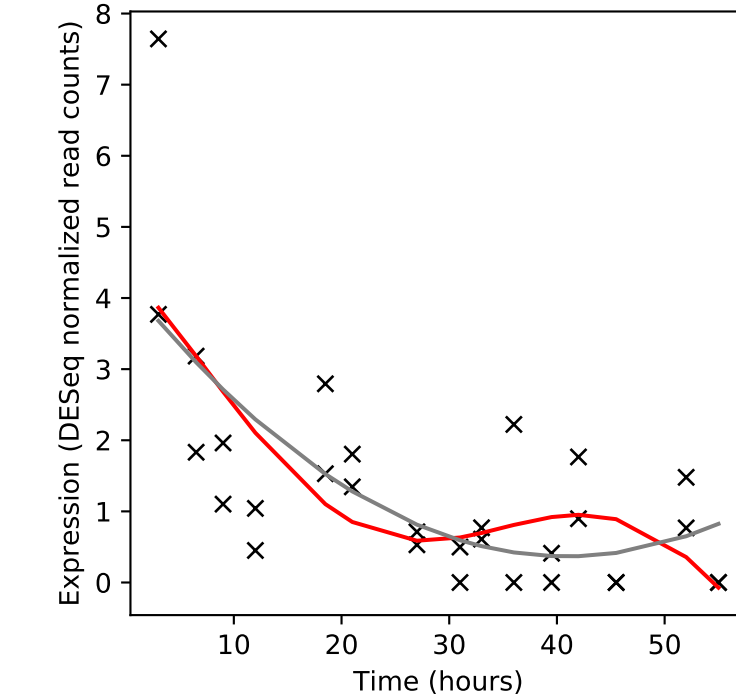

Rv2615c/PE\_PGRS45

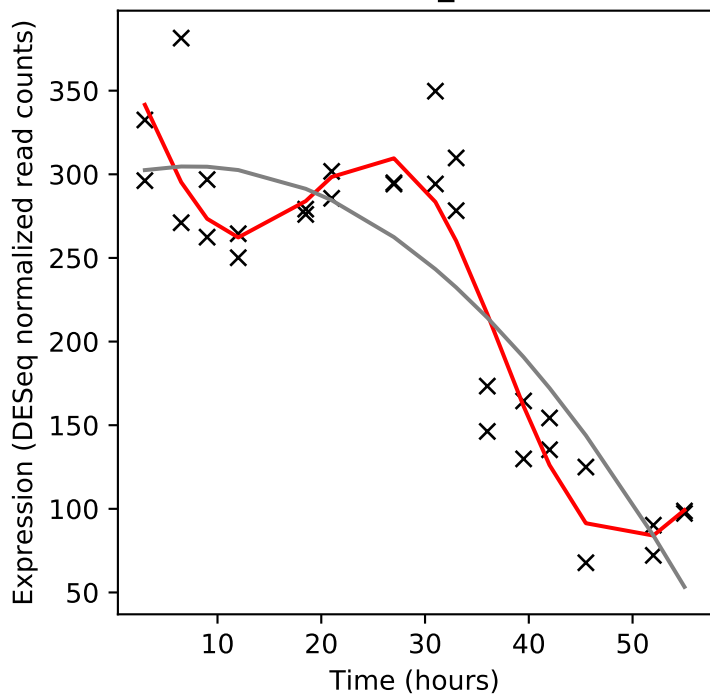

Rv2616/-

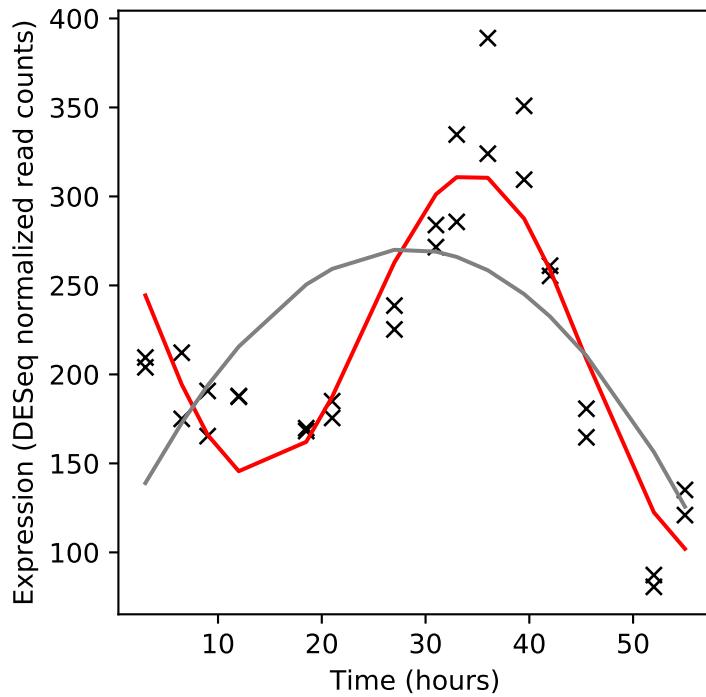

Rv2617c/-

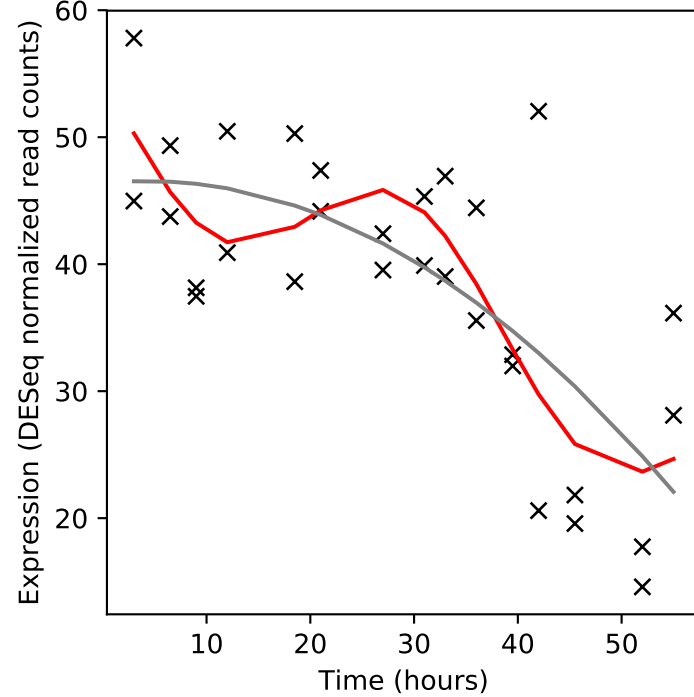

Rv2618/-

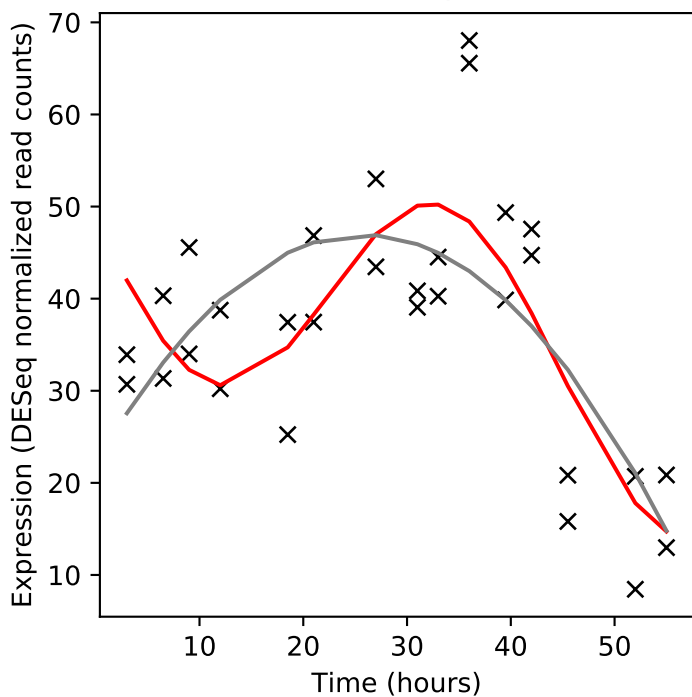

Rv2619c/-

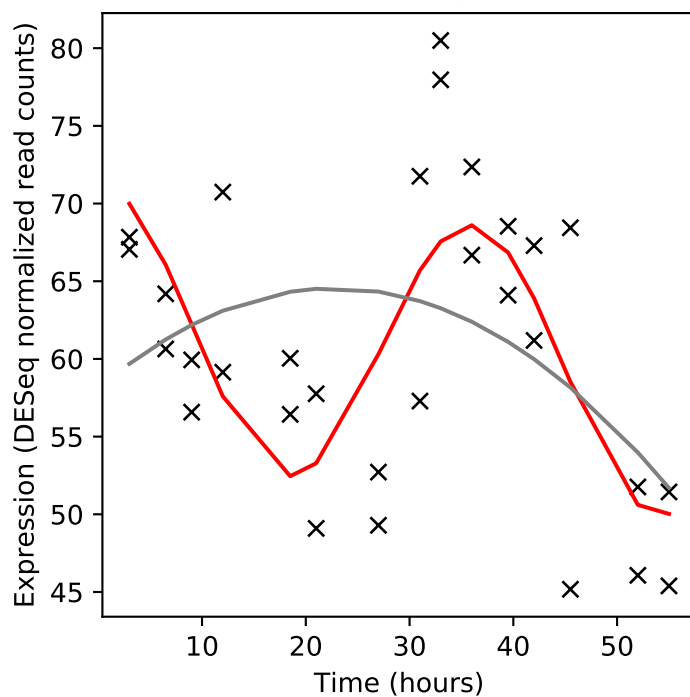

Rv2620c/-

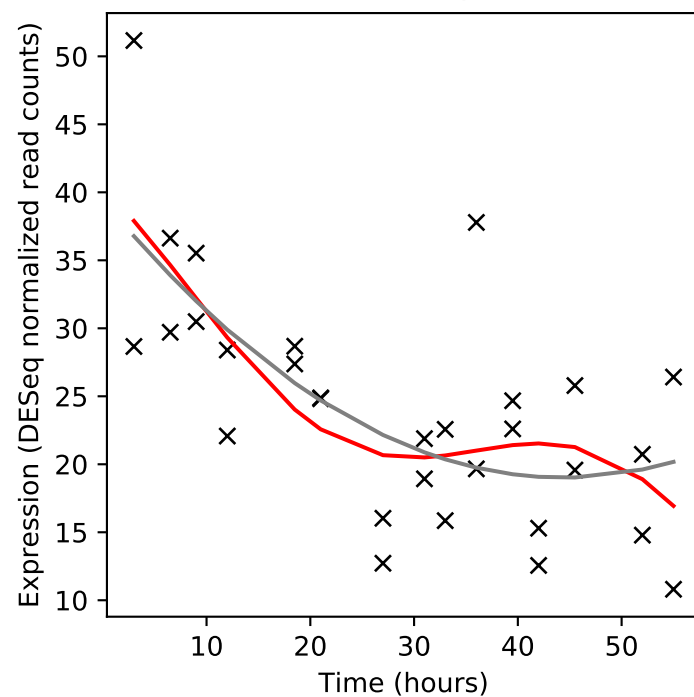

Rv2621c/-

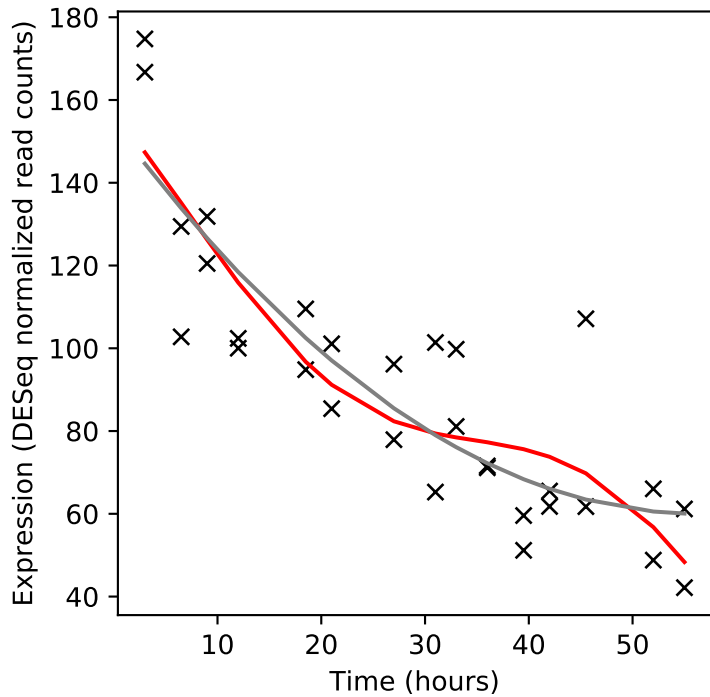

Rv2622/-

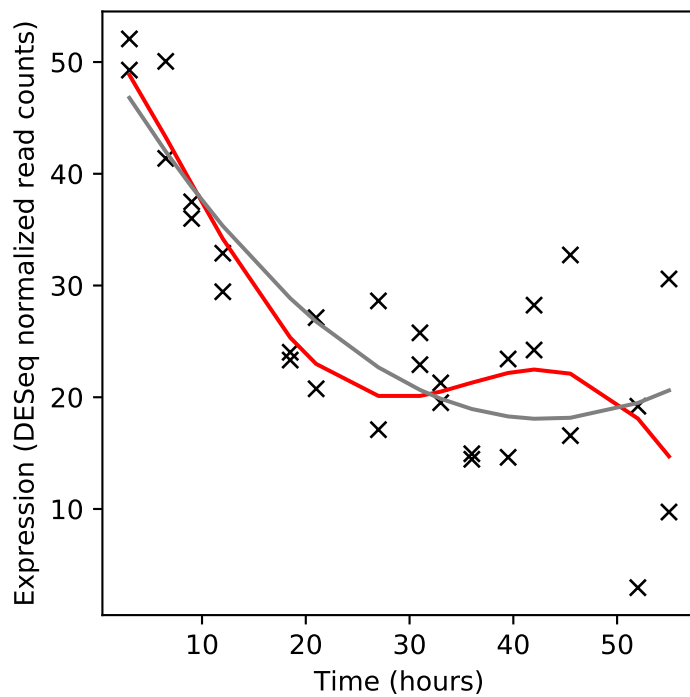

Rv2623/TB31.7

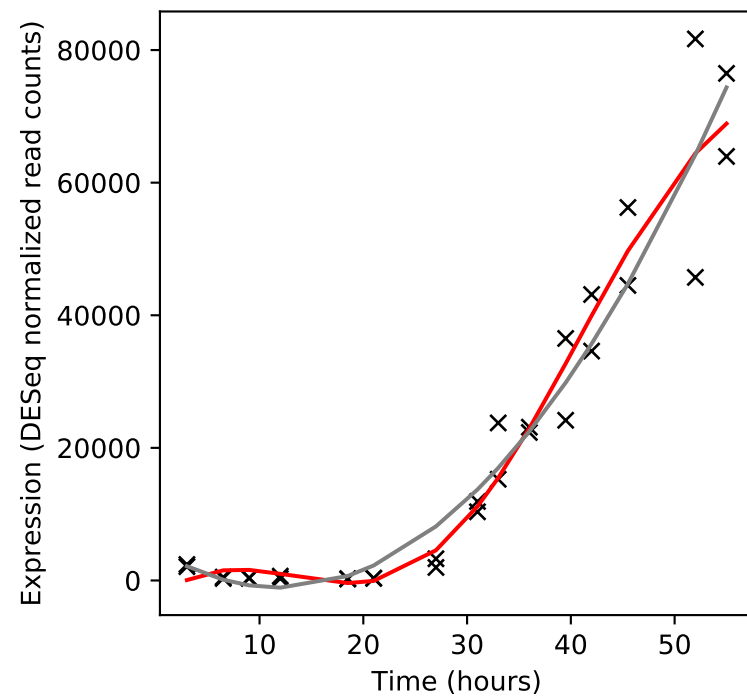

Rv2624c/-

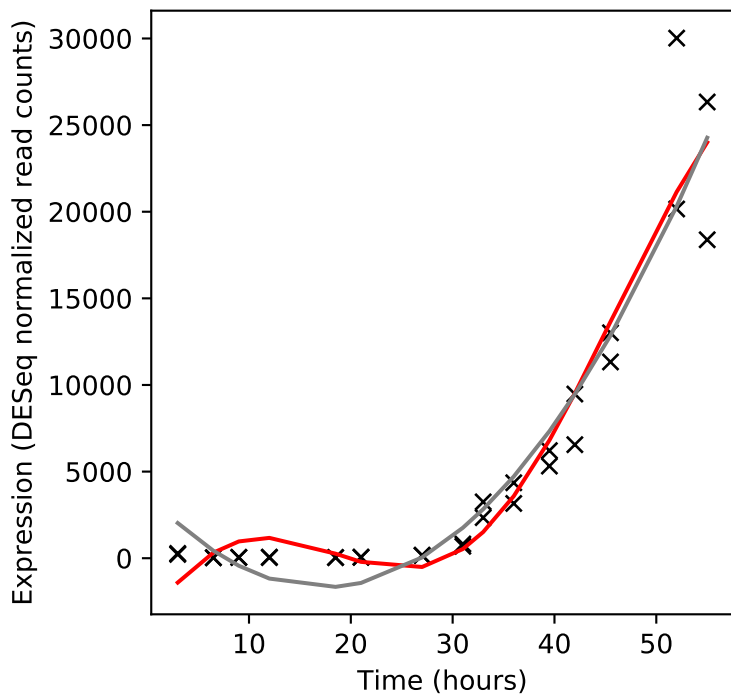

Rv2625c/-

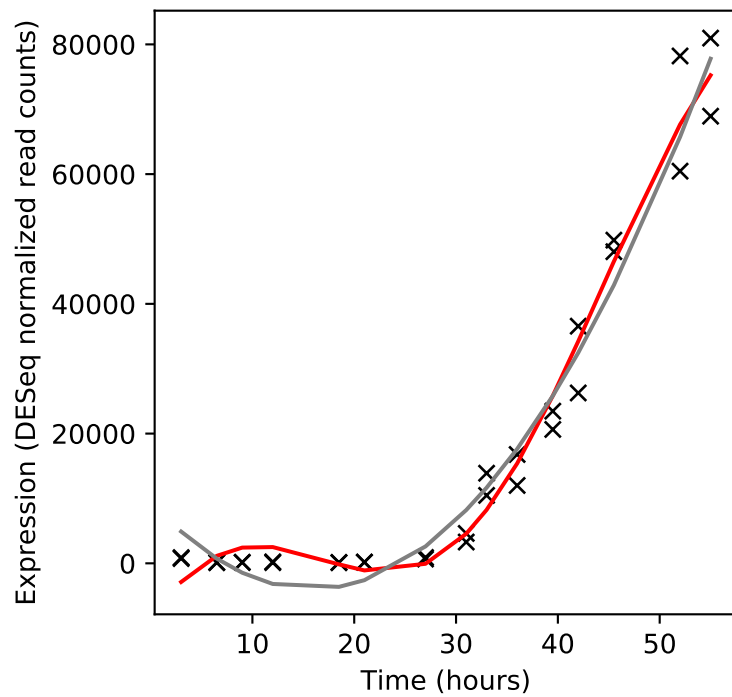

Rv2626c/hrp1

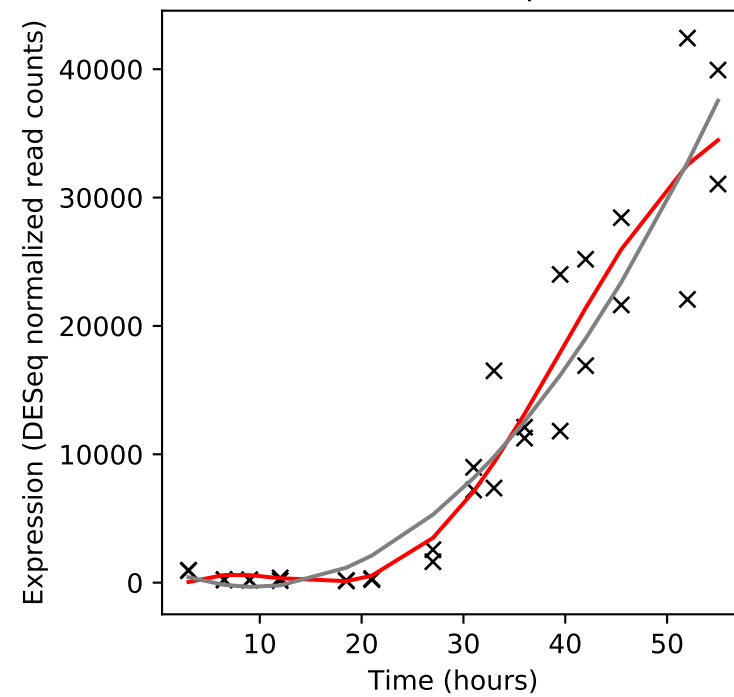

Rv2627c/-

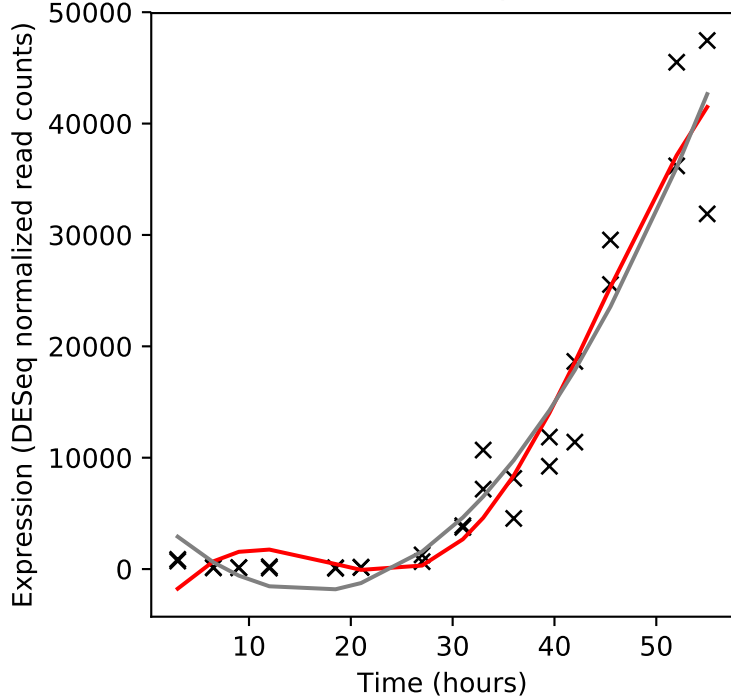

Rv2628/-

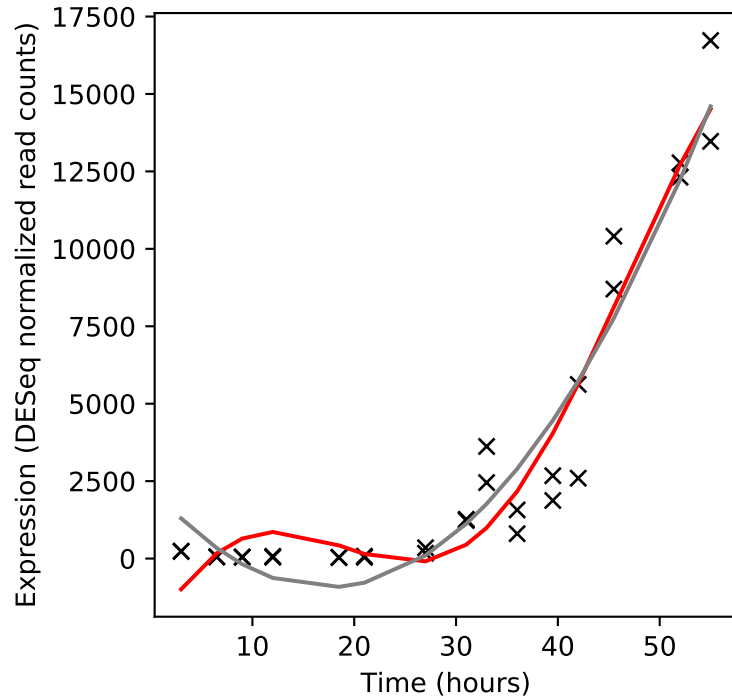

Rv2629/-

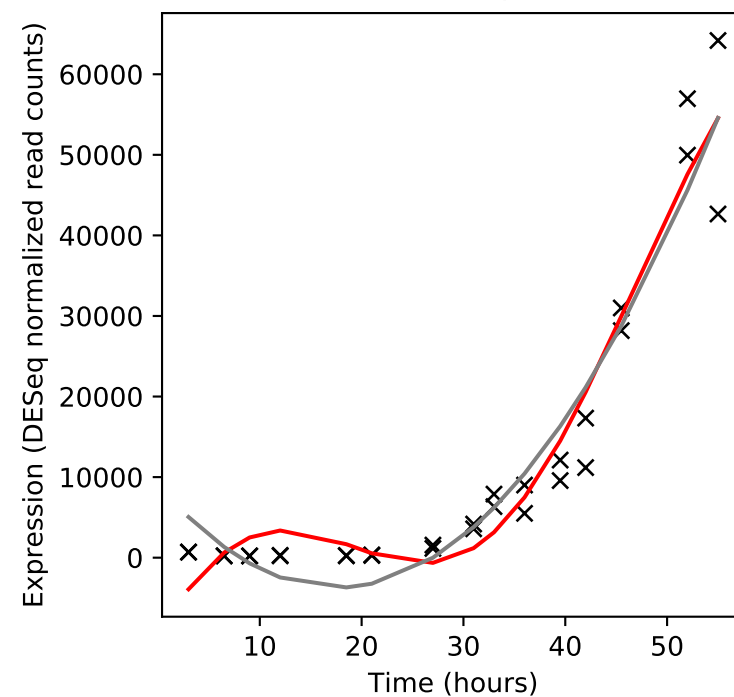

Rv2630/-

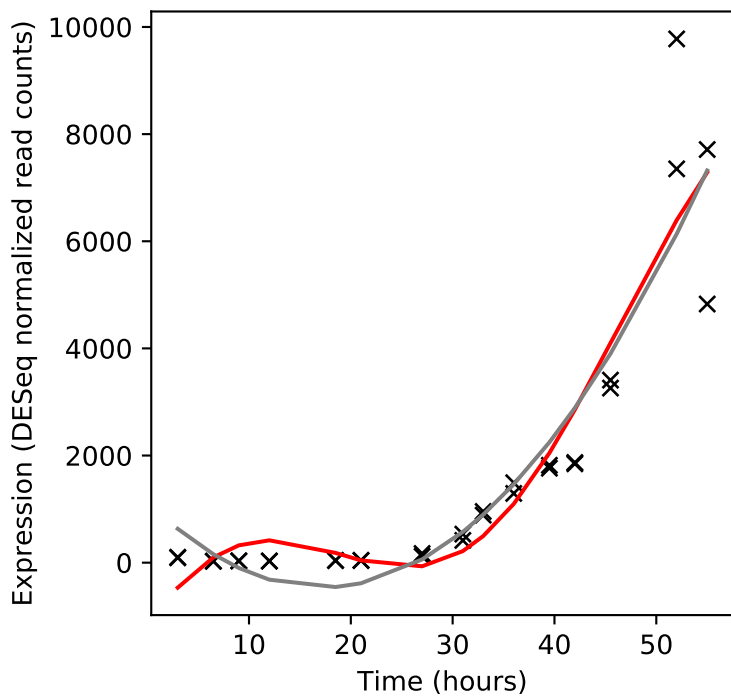

Rv2631/-

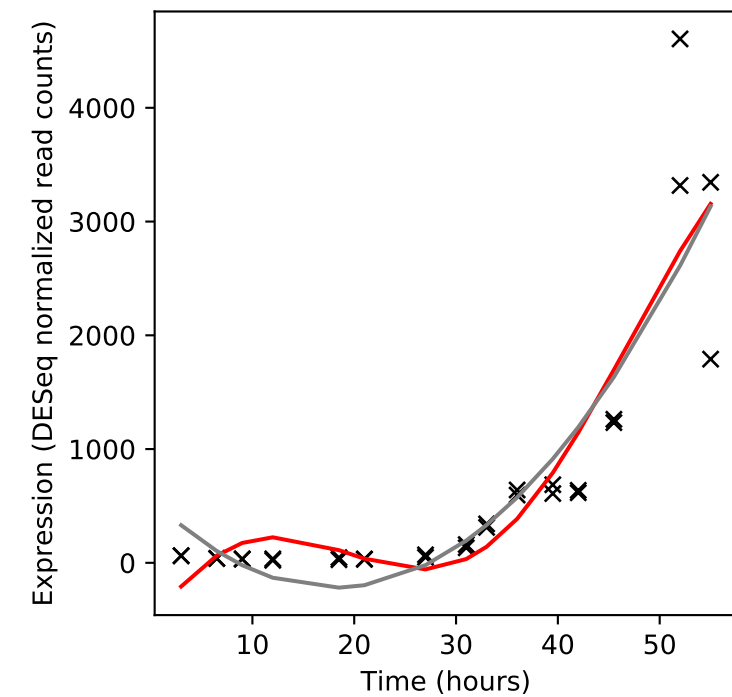

Rv2632c/-

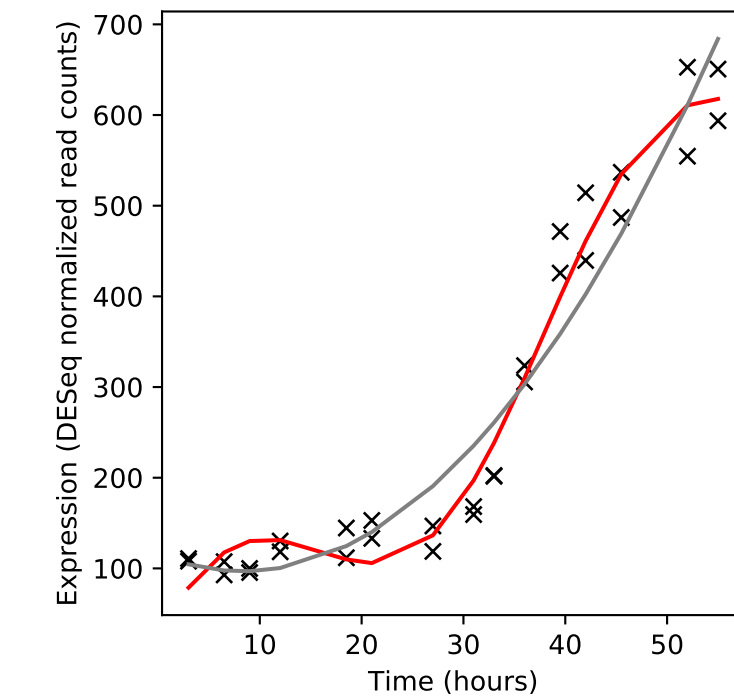

Rv2633c/-

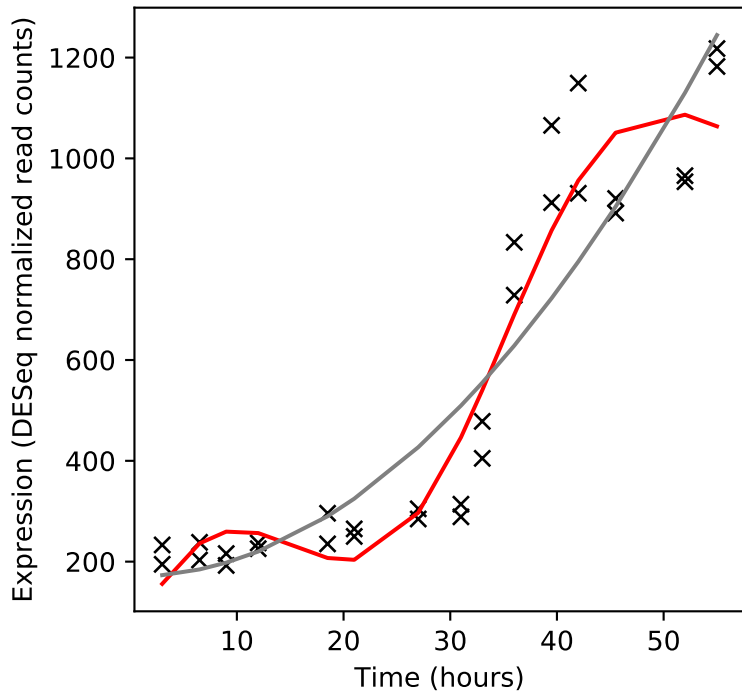

Rv2634c/PE\_PGRS46

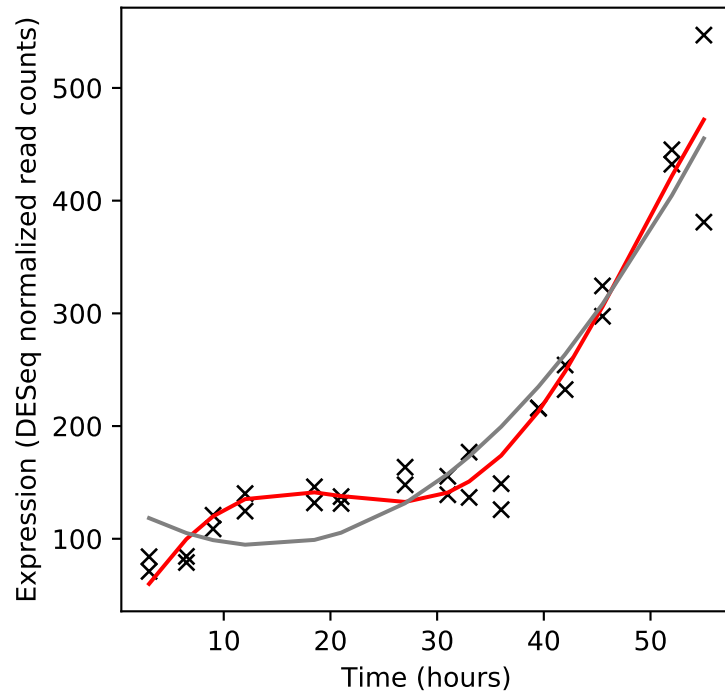

Rv2635/-

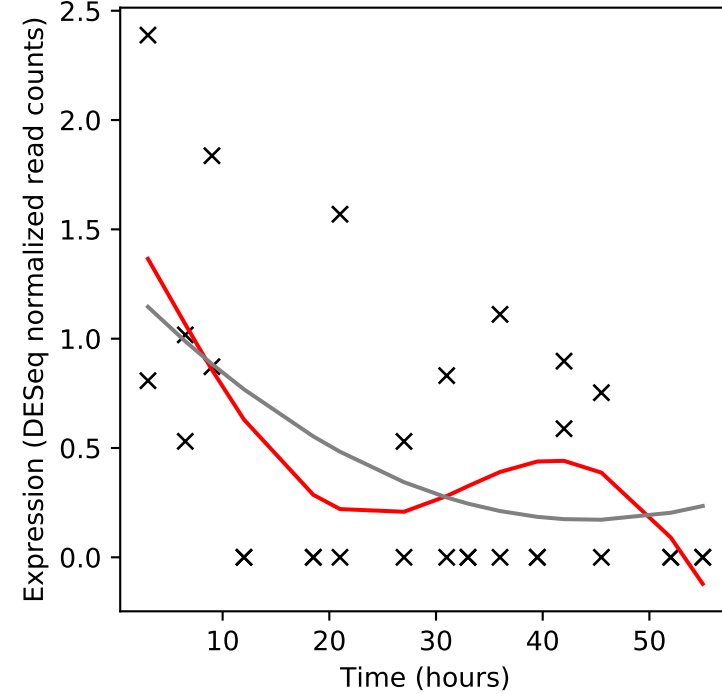

Rv2636/-

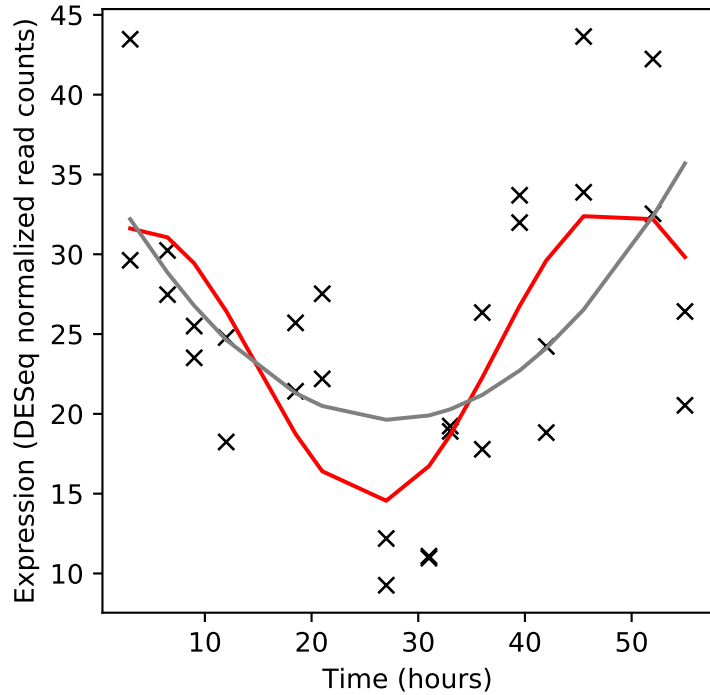

Rv2637/dedA

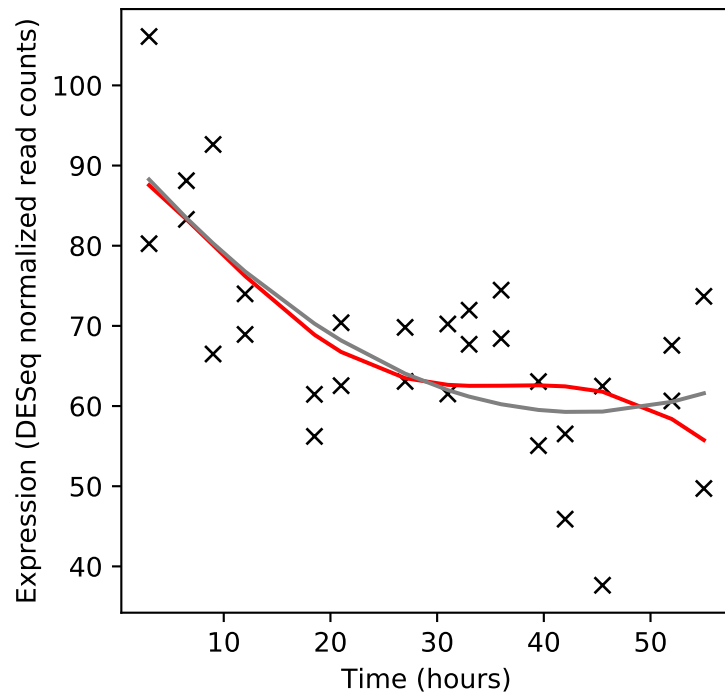

Rv2638/-

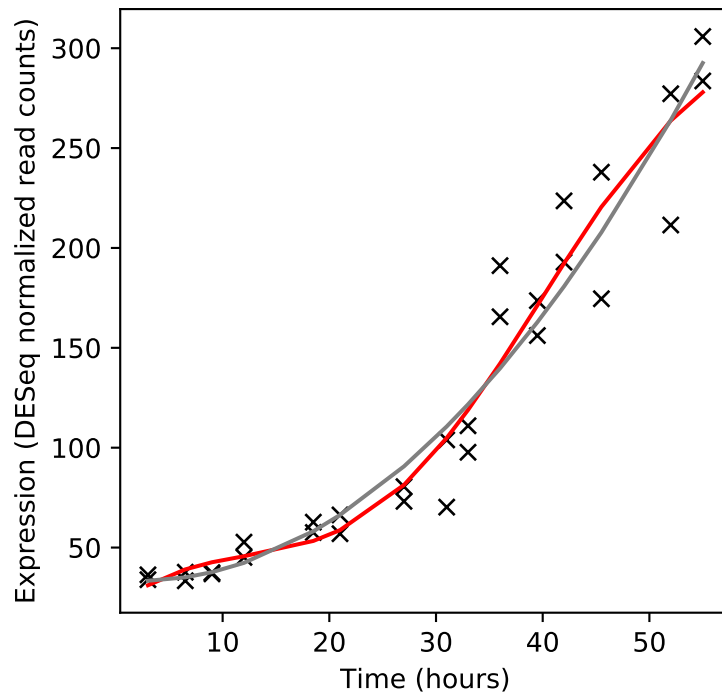

Rv2639c/-

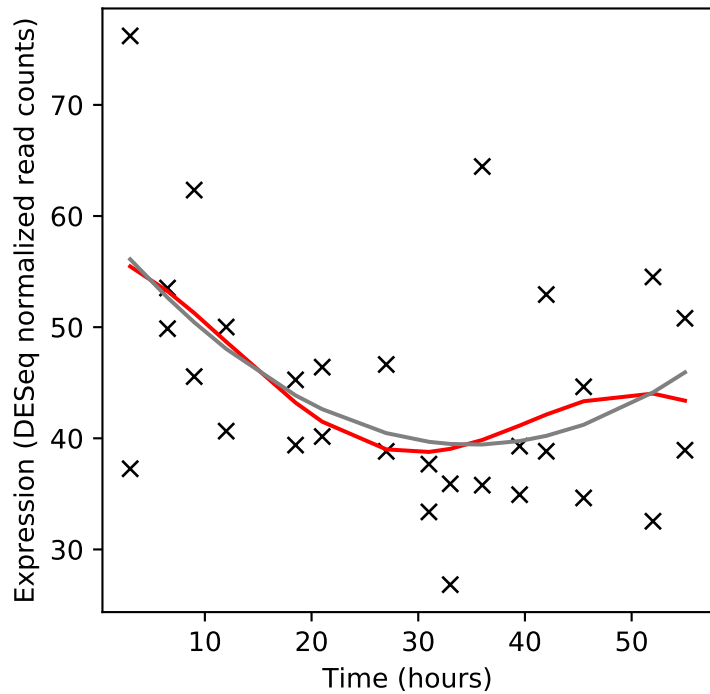

Rv2640c/-

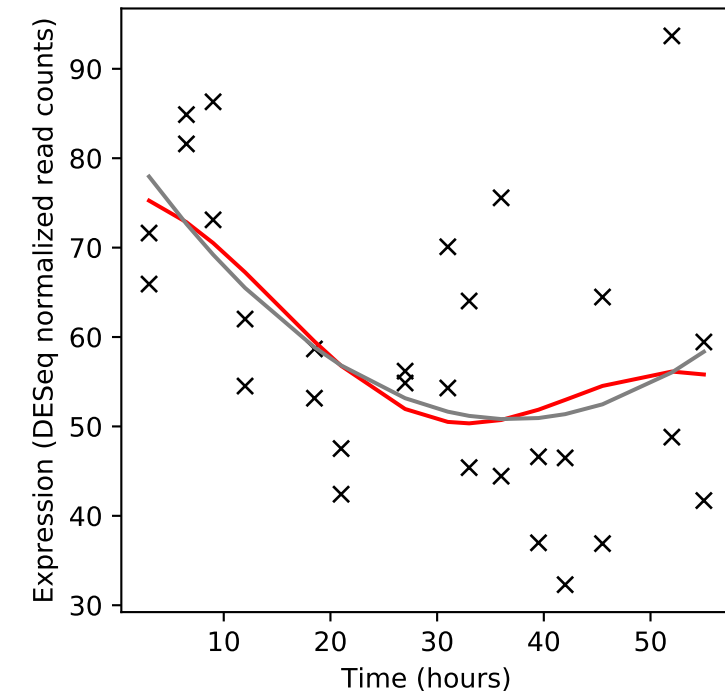

Rv2641/cadI

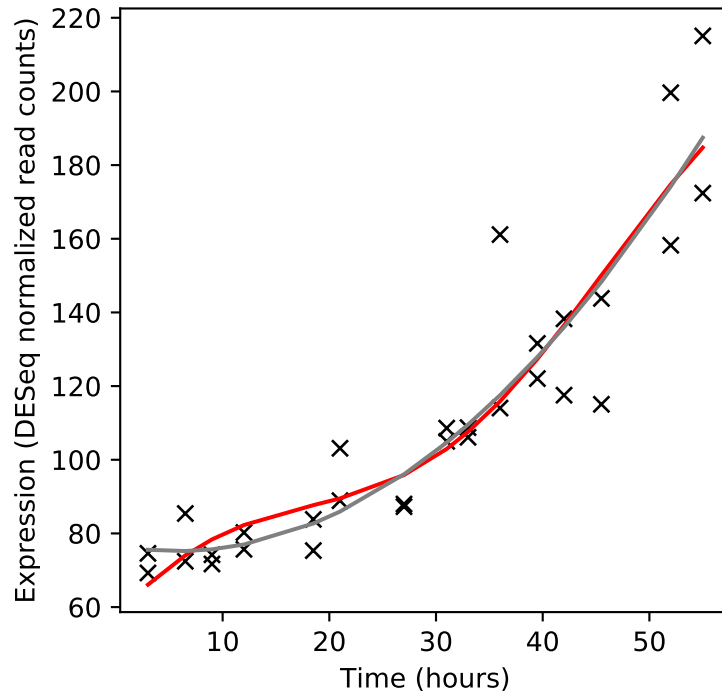

Rv2642/-

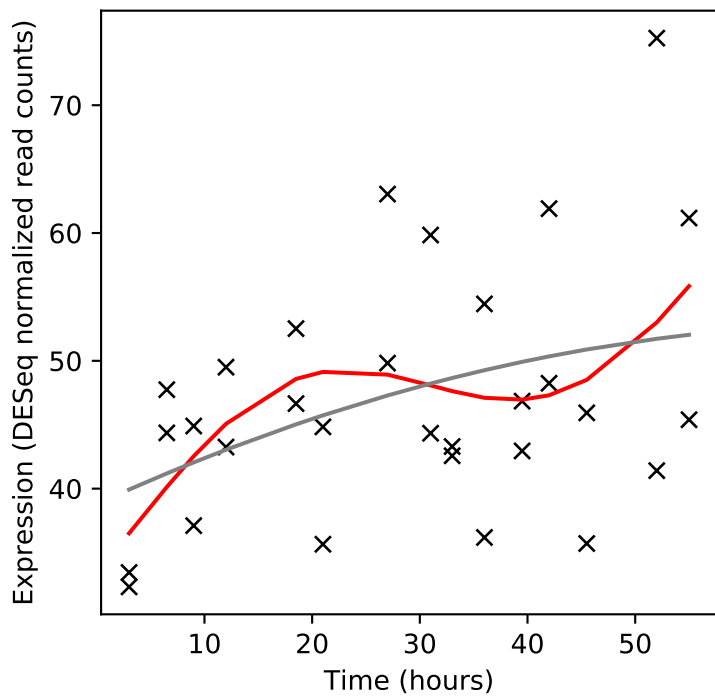

Rv2643/arsC

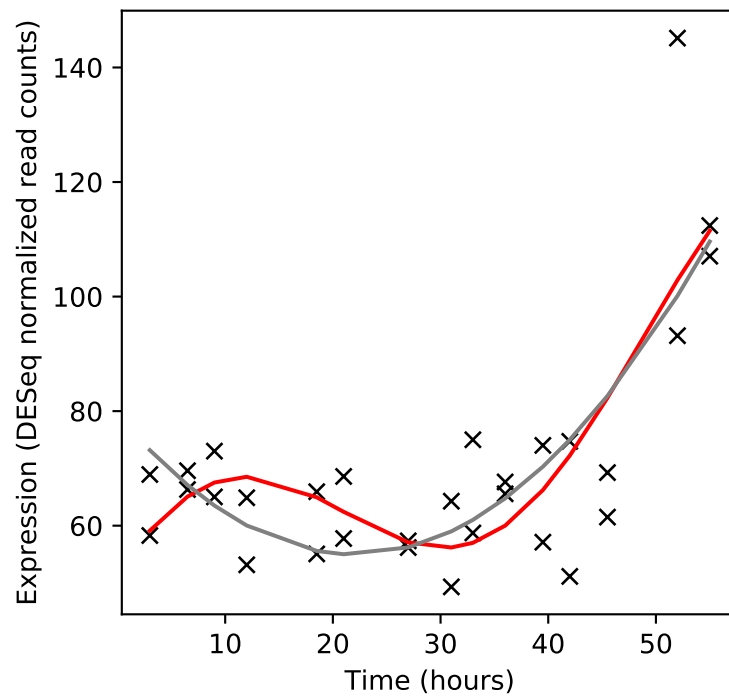

Rv2644c/-

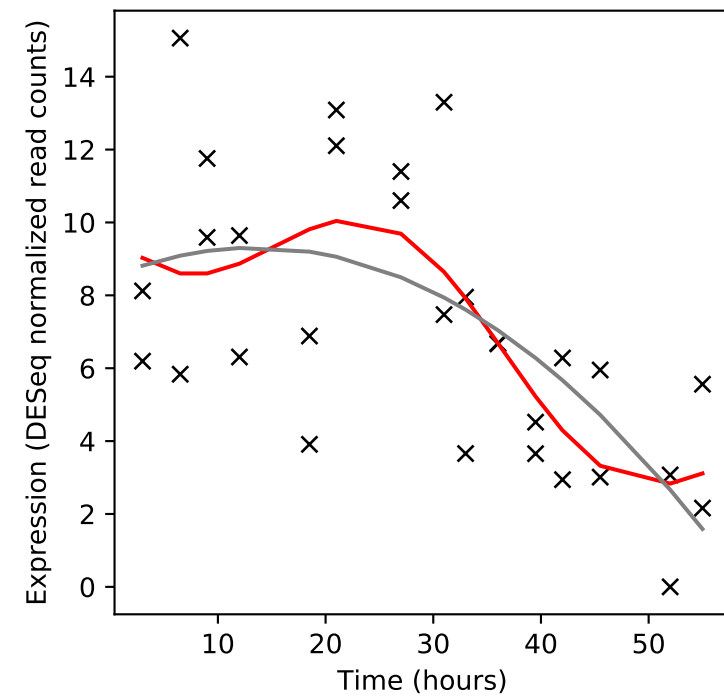

Rv2645/-

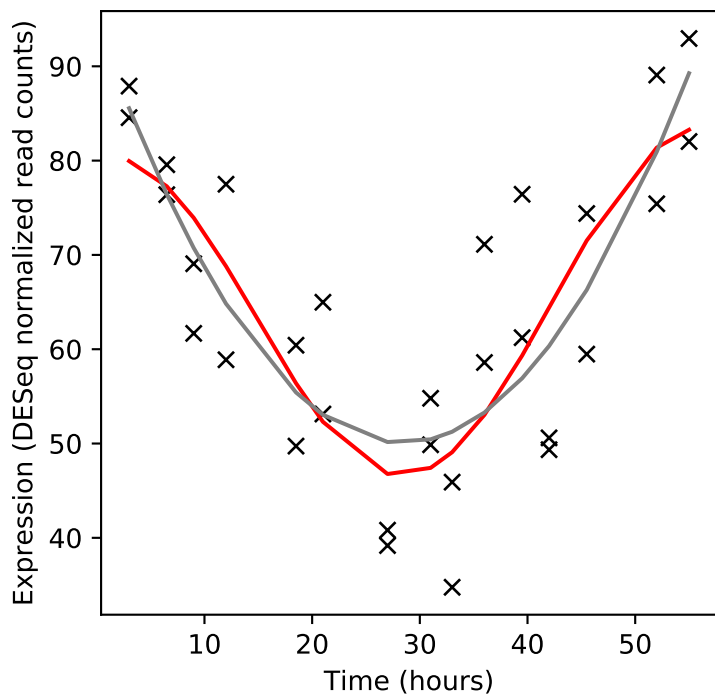

Rv2646/-

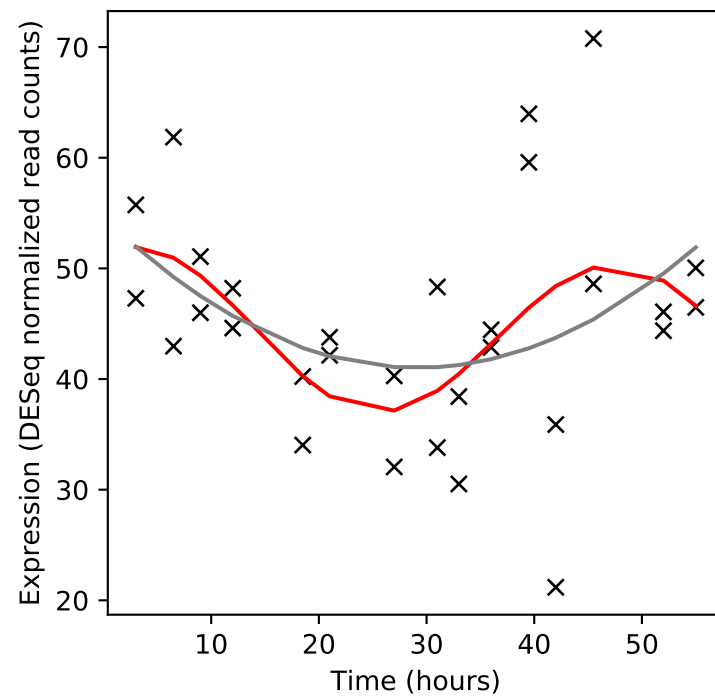

Rv2647/-

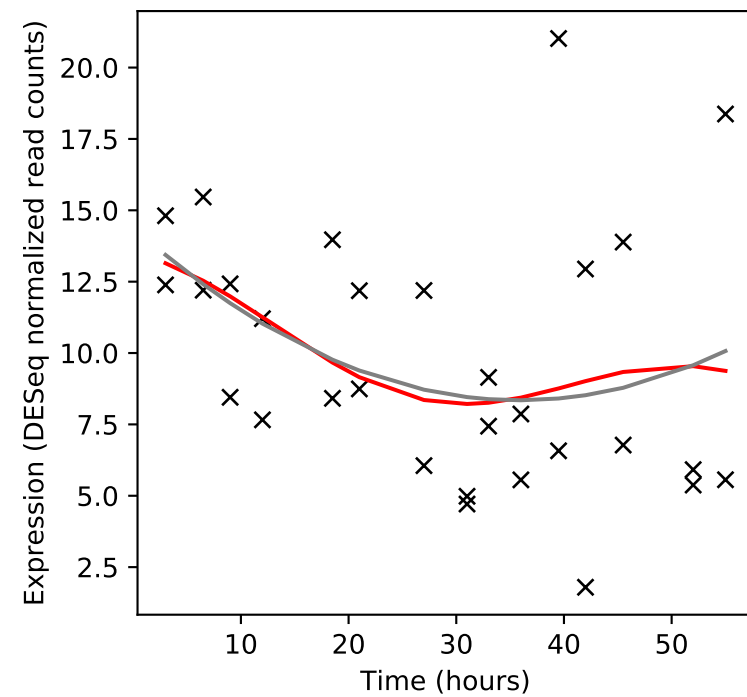

Rv2648/-

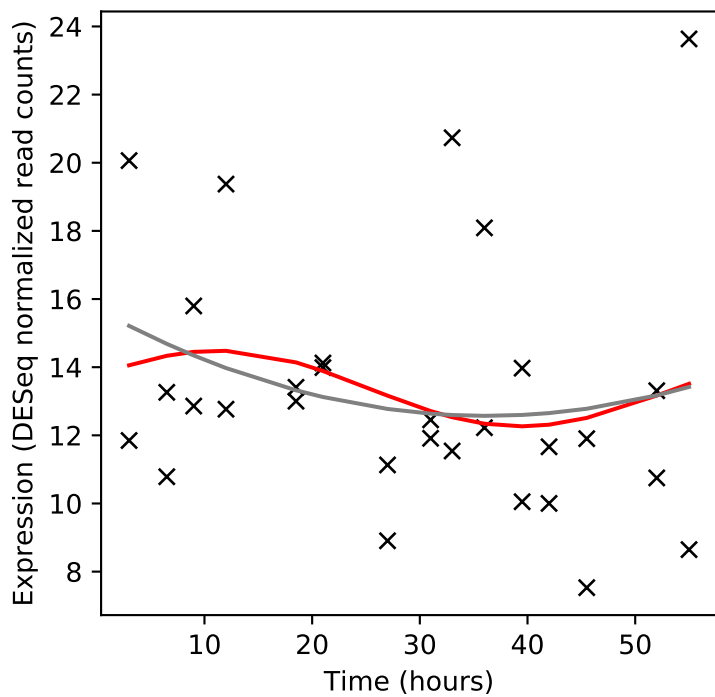

Rv2649/-

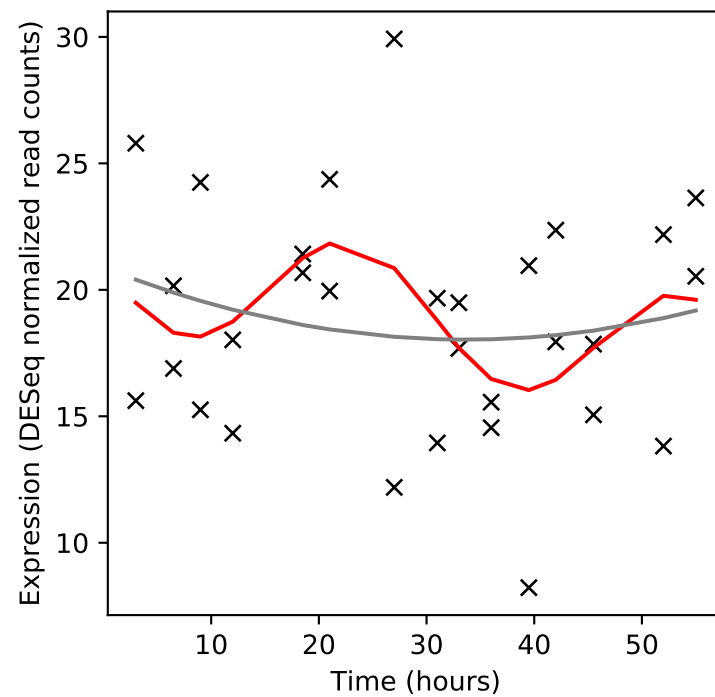

Rv2650c/-

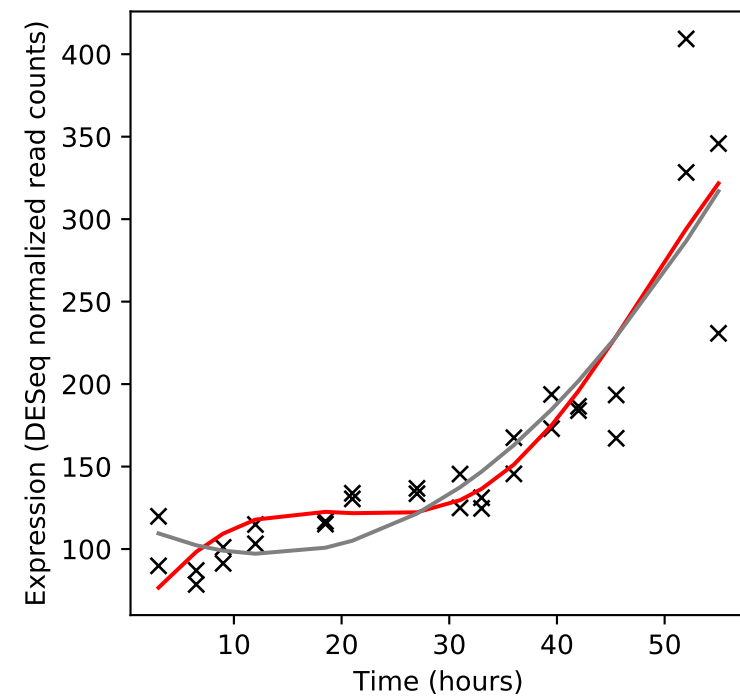

Rv2651c/-

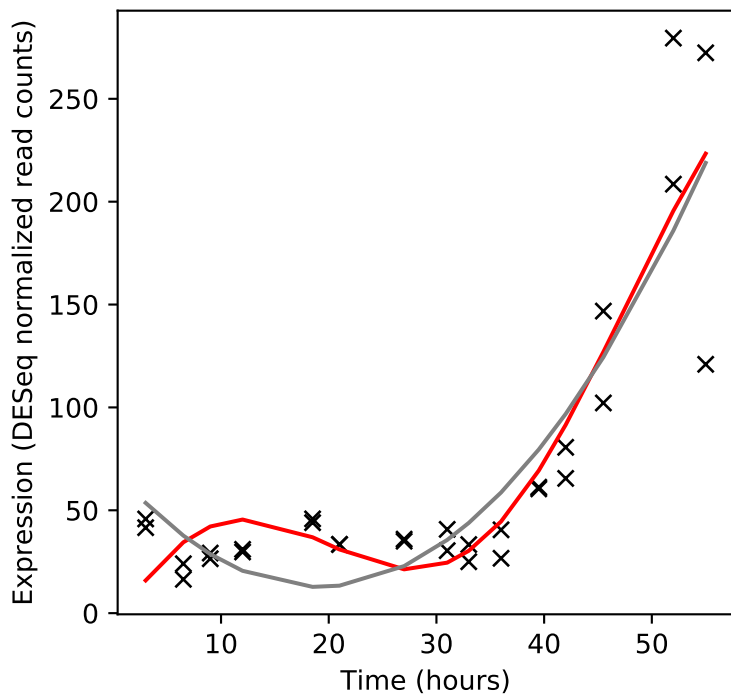

Rv2652c/-

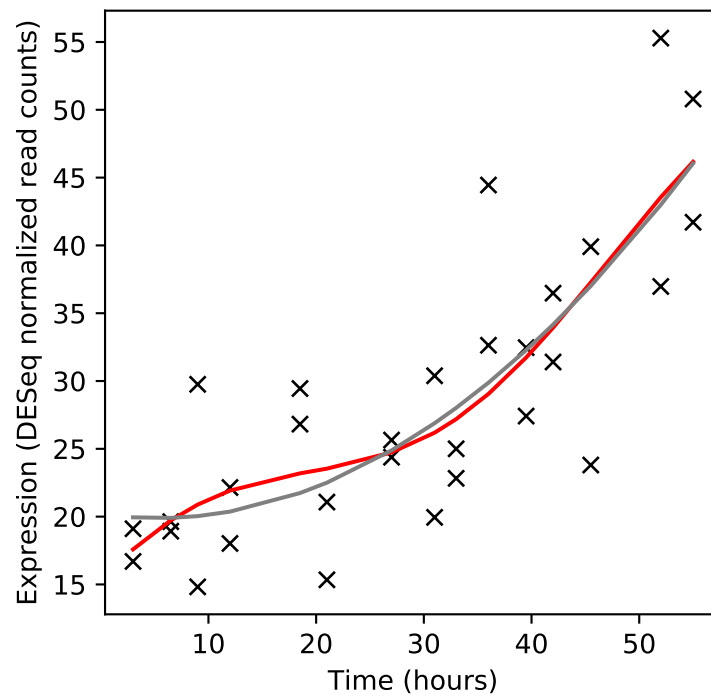

Rv2653c/-

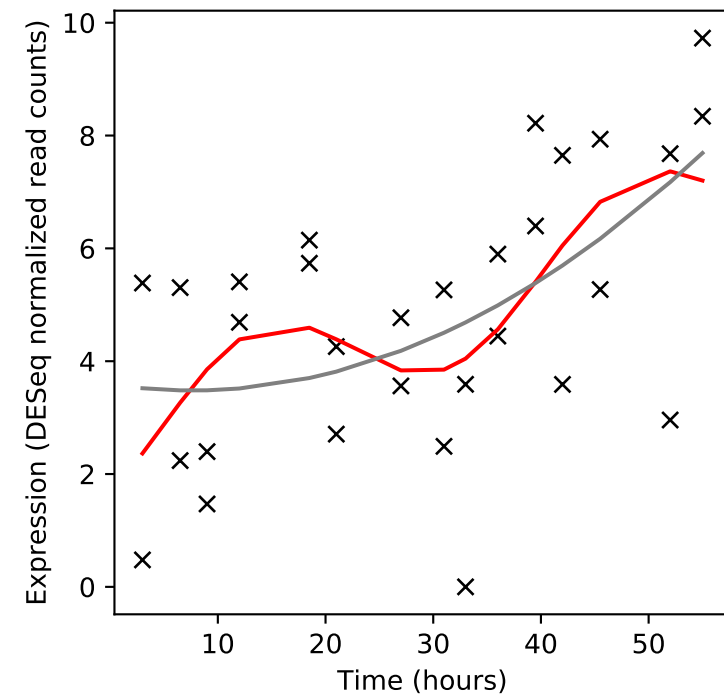

Rv2654c/-

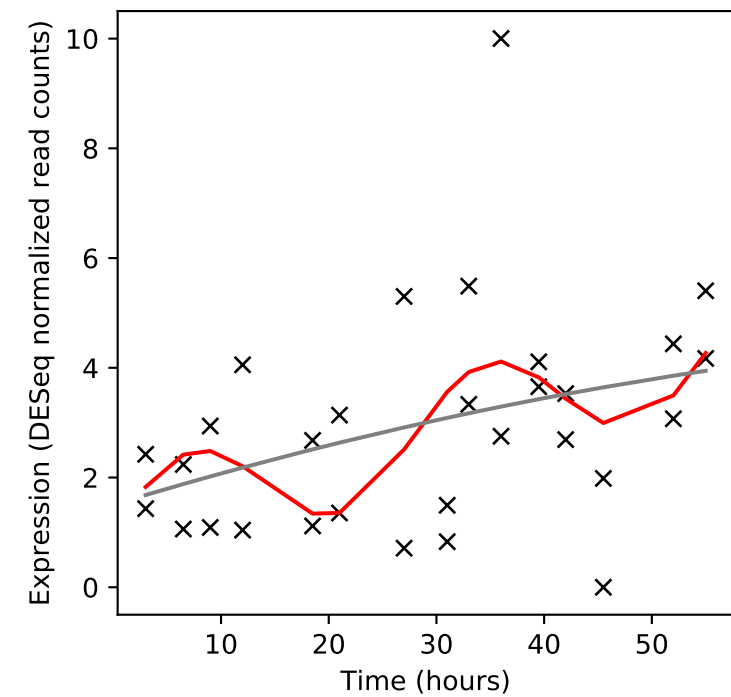

Rv2655c/-

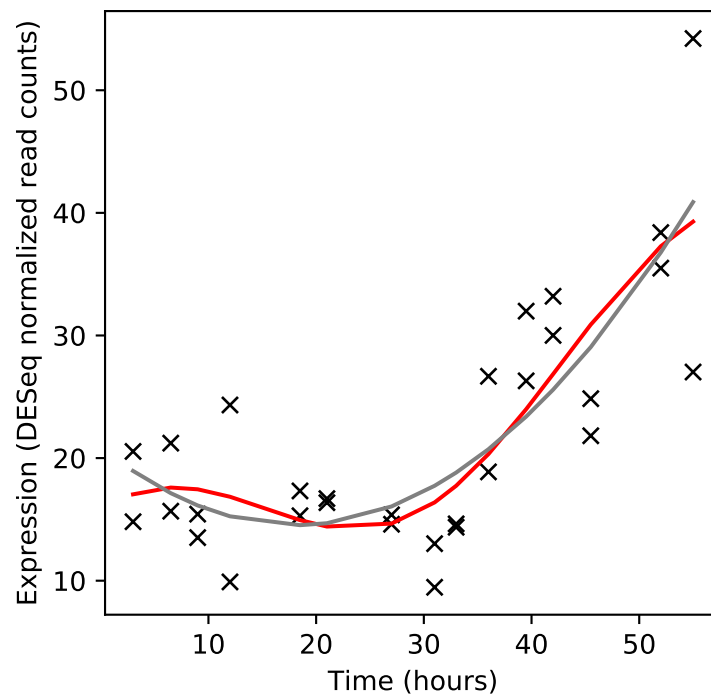

Rv2656c/-

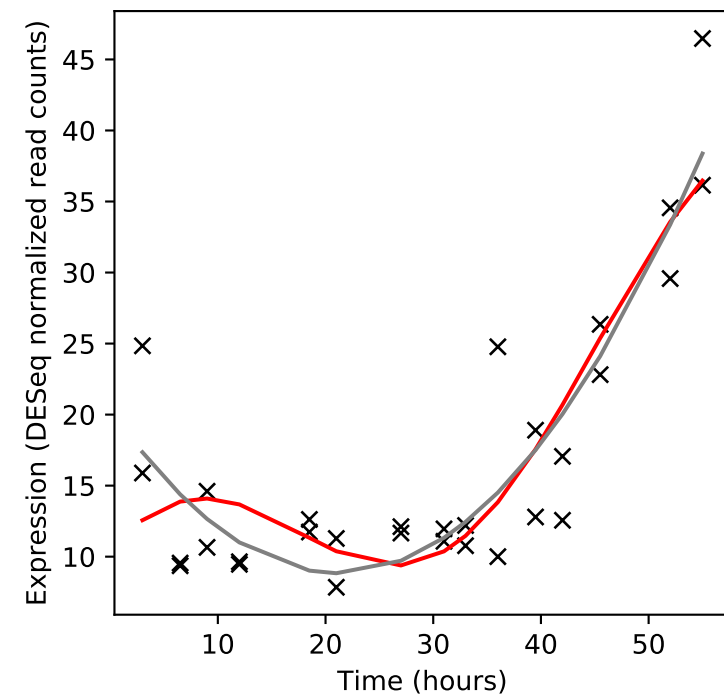

Rv2657c/-

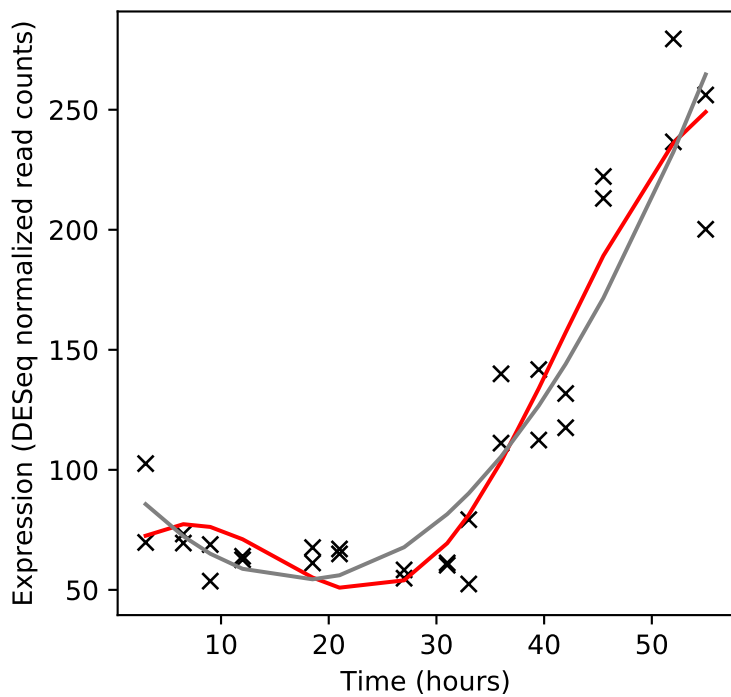

Rv2658c/-

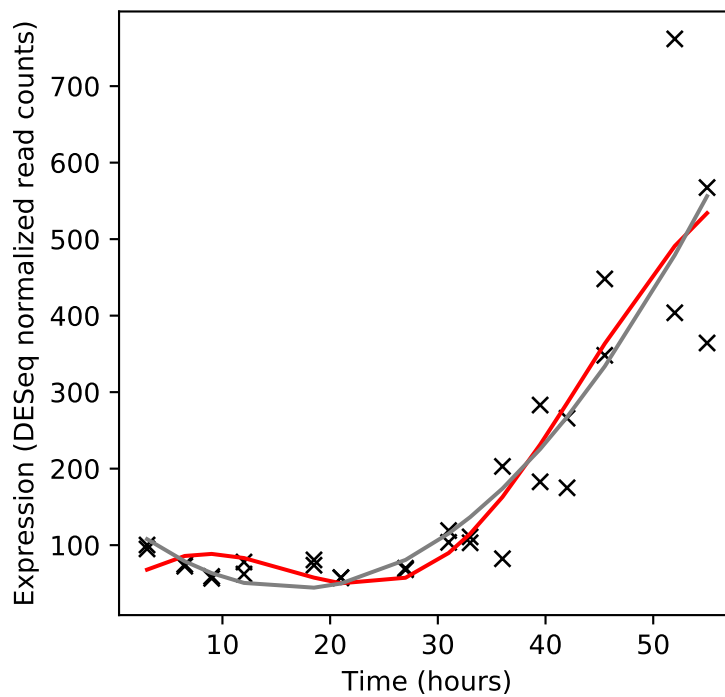

Rv2659c/-

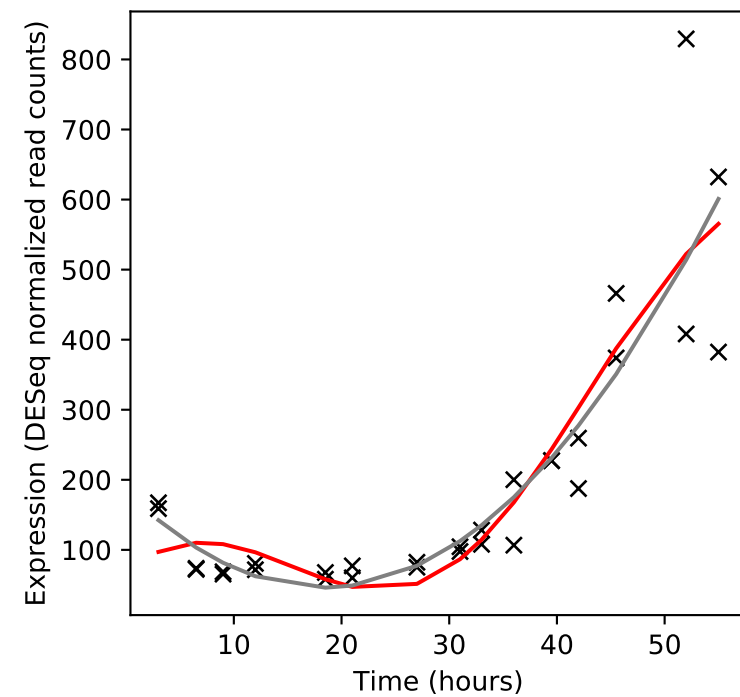



Rv2660c/-

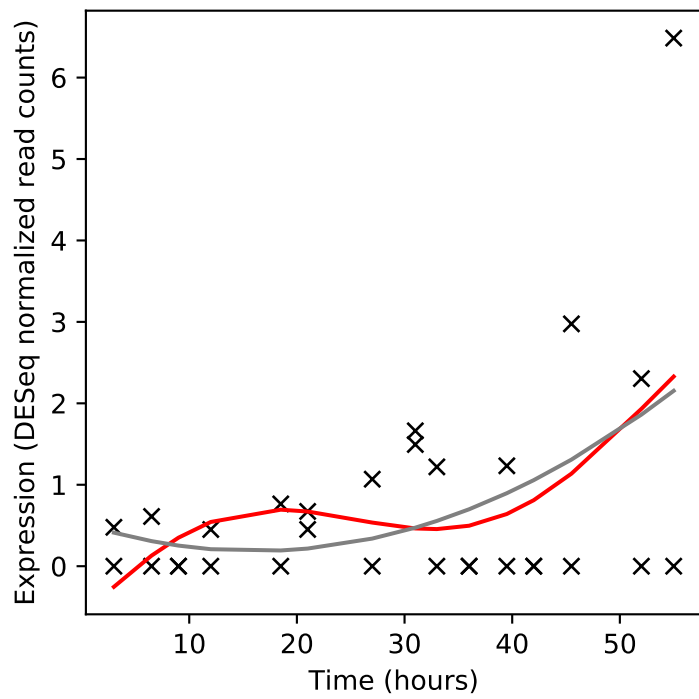

Rv2661c/-

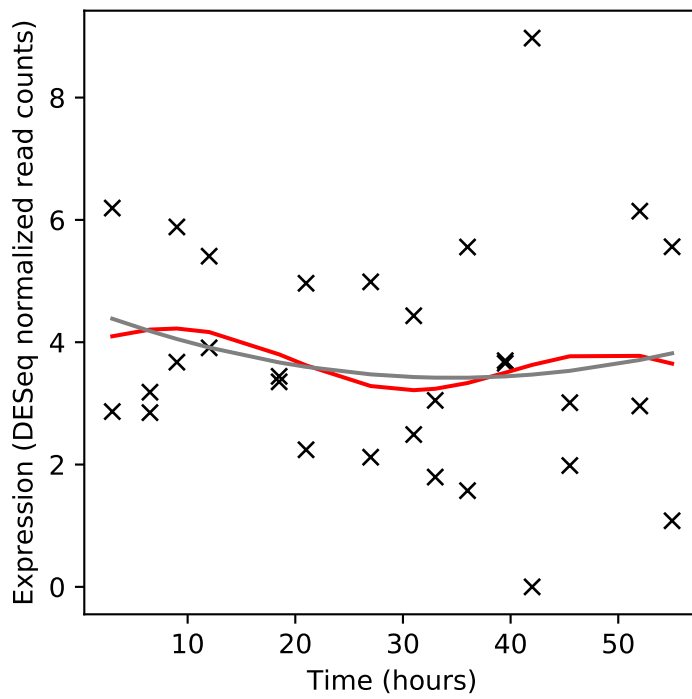

Rv2662/-

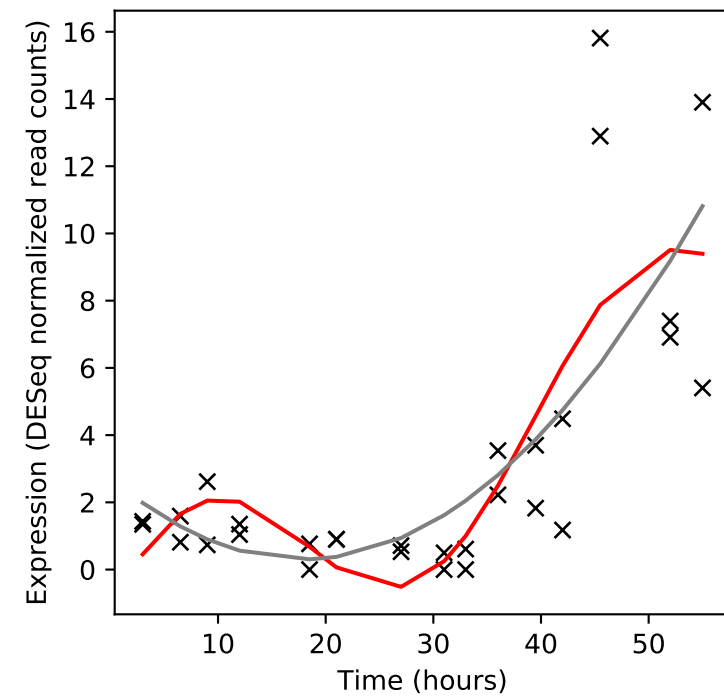

Rv2663/-

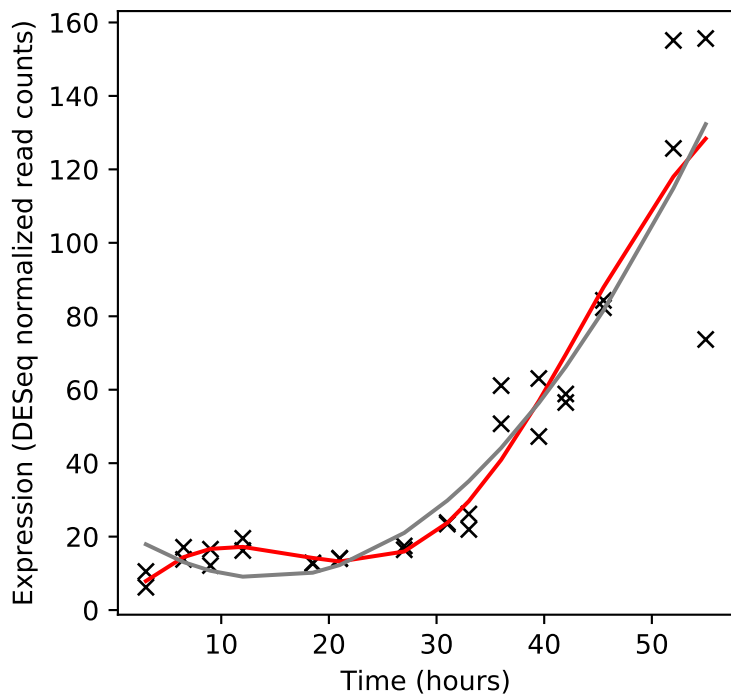

Rv2664/-

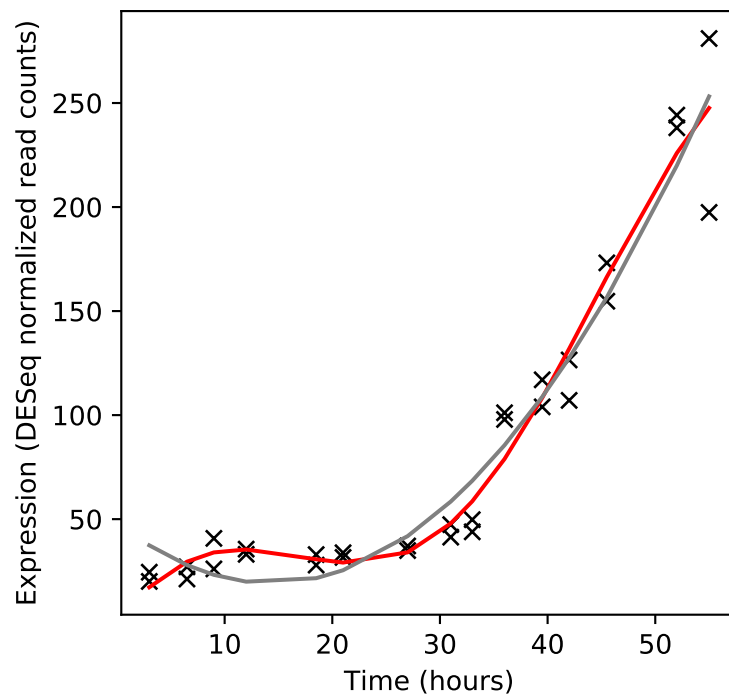

Rv2665/-

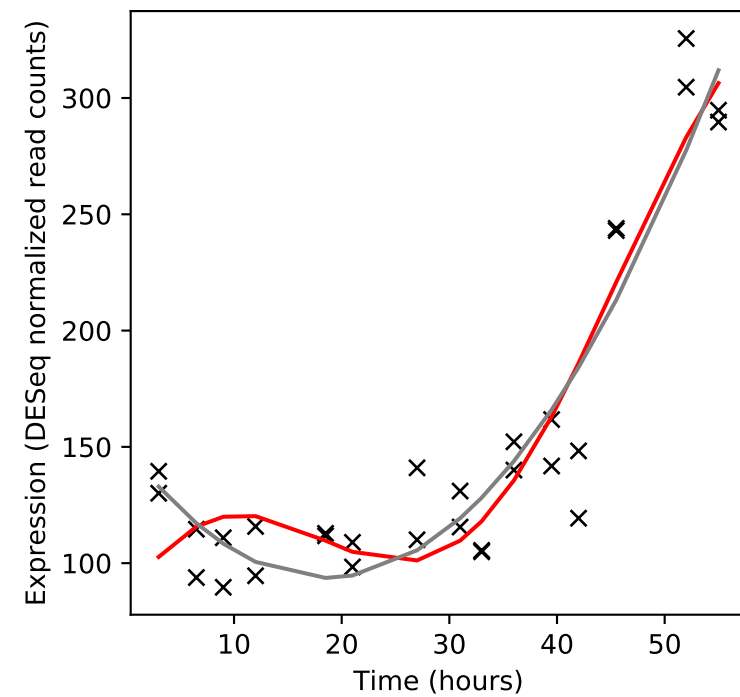

Rv2666/-

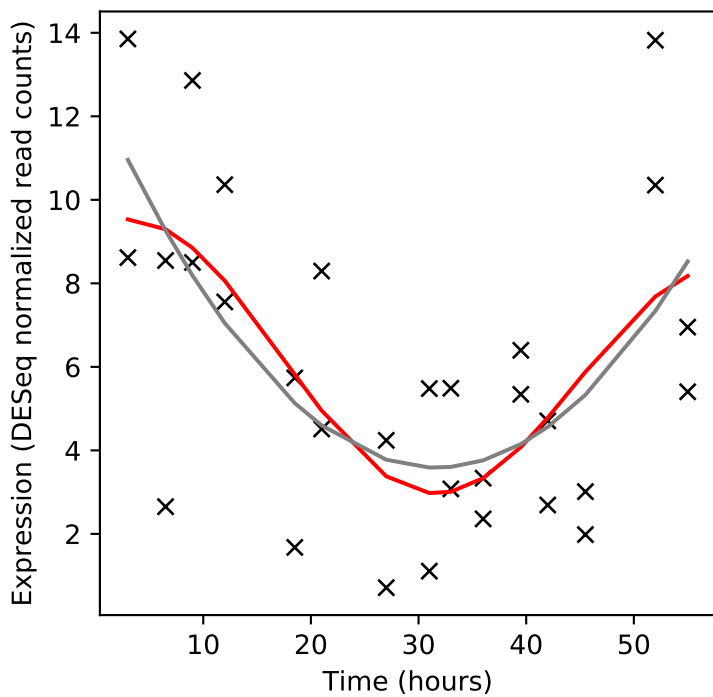

Rv2667/clpC2

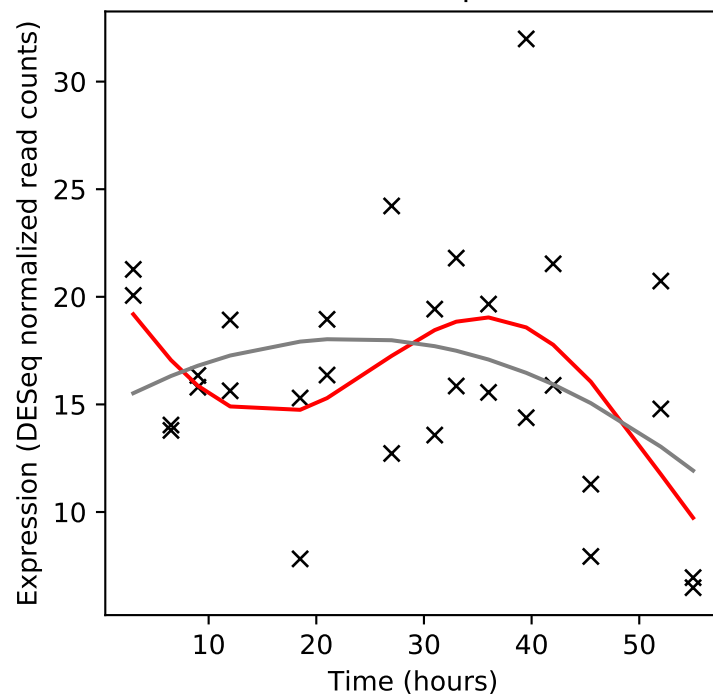

Rv2668/-

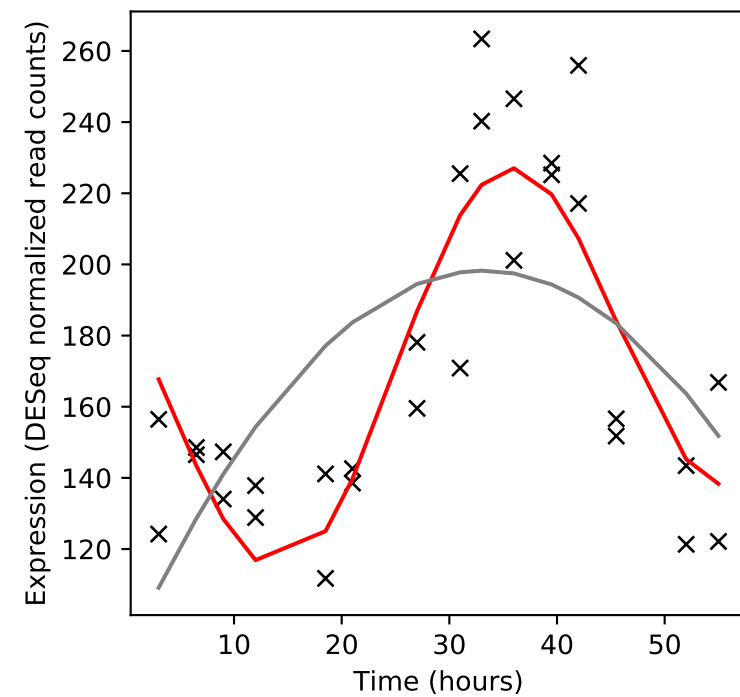

Rv2669/-

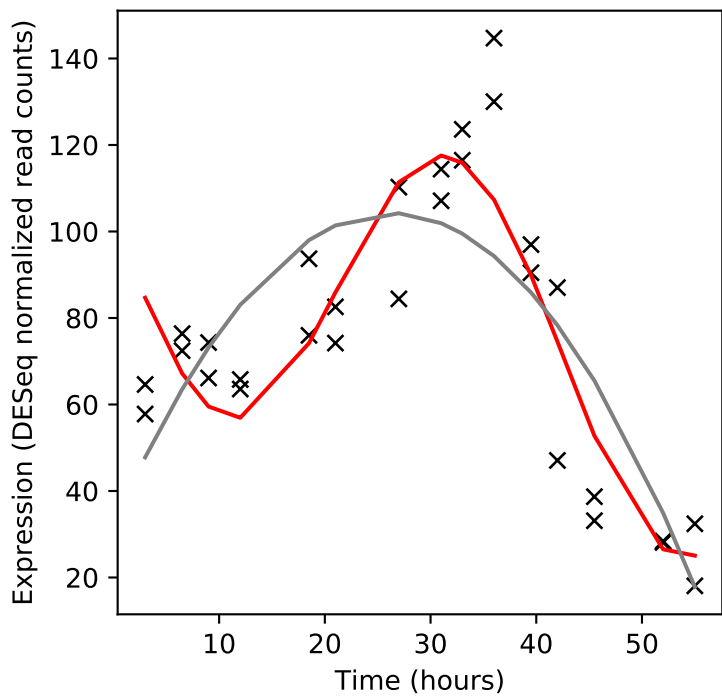

Rv2670c/-

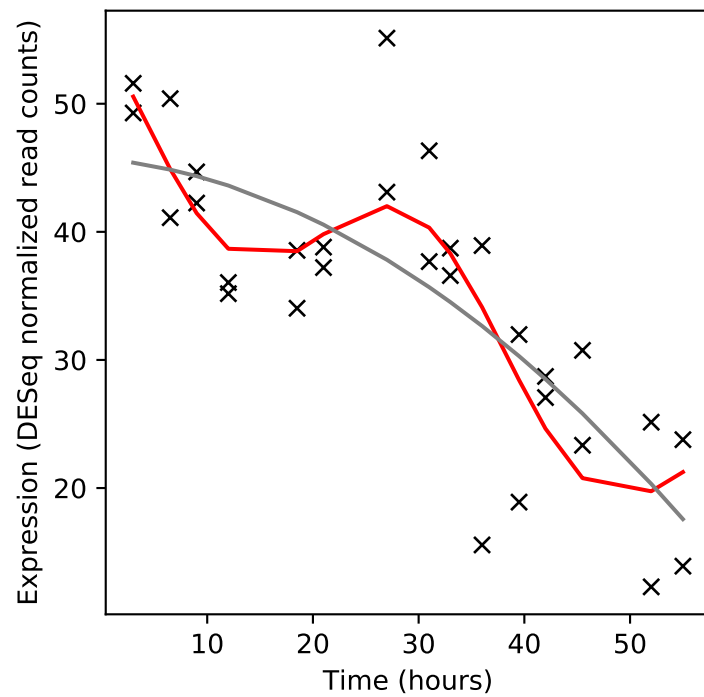

Rv2671/ribD

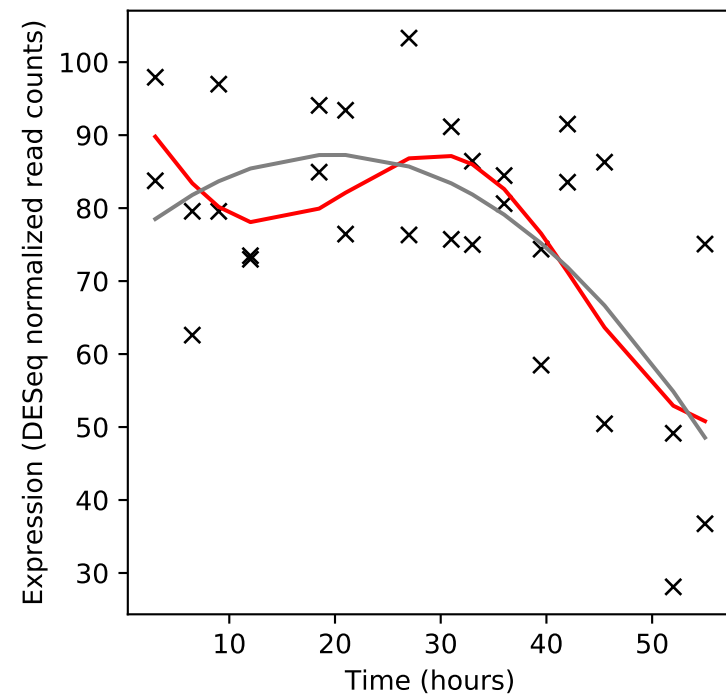

Rv2672/-

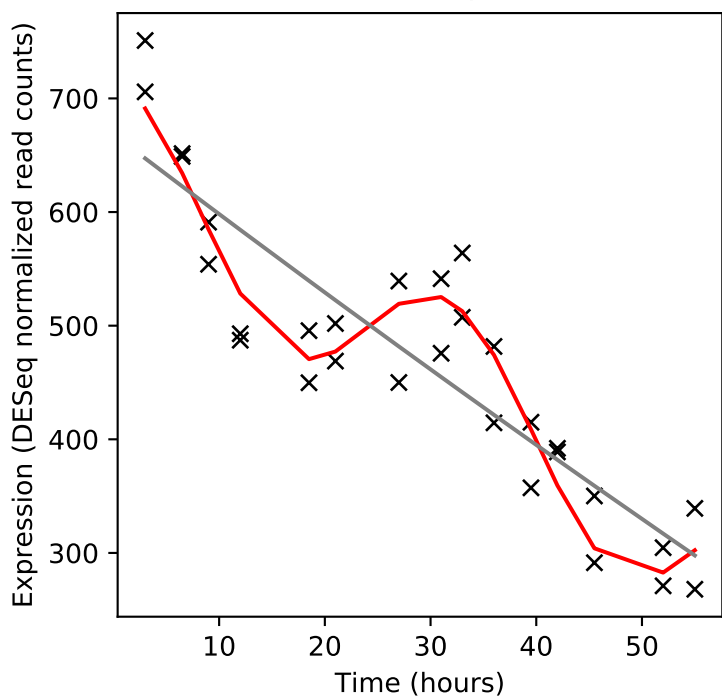

Rv2673/aftC

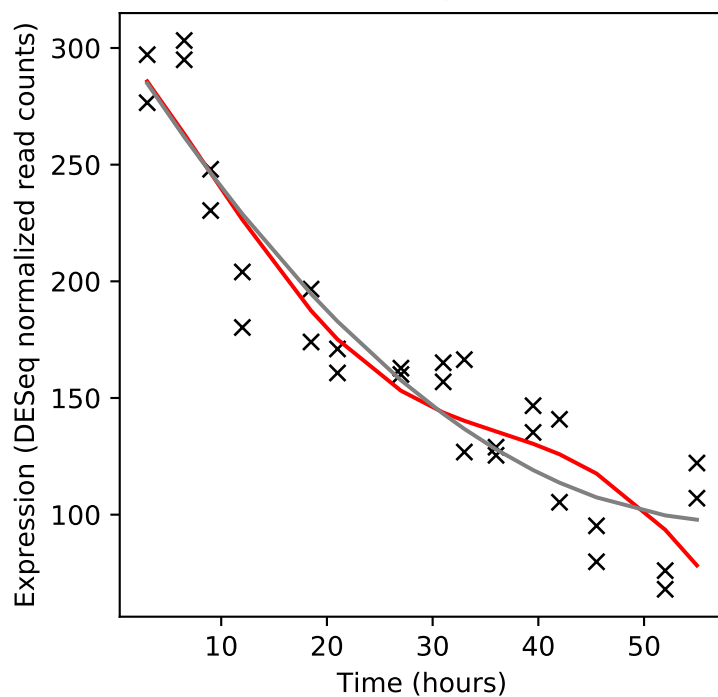

Rv2674/msrB

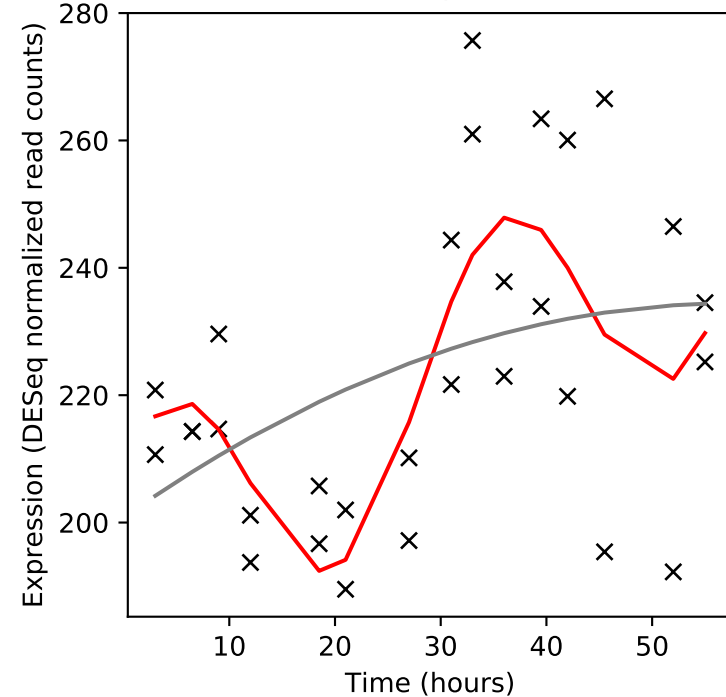

Rv2675c/-

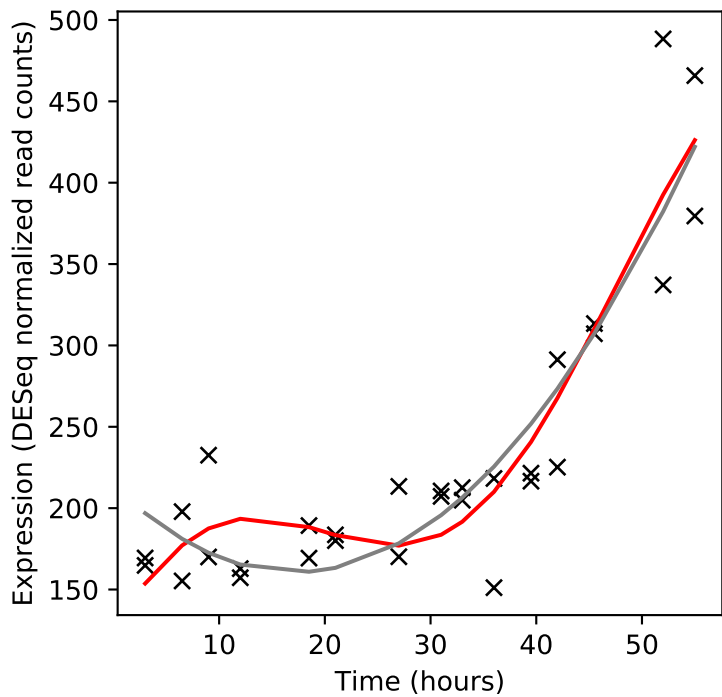

Rv2676c/-

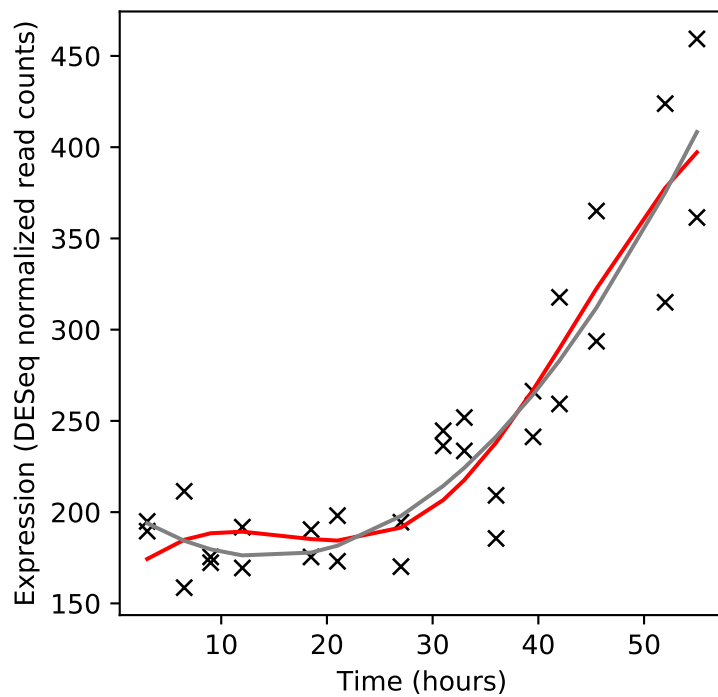

Rv2677c/hemY

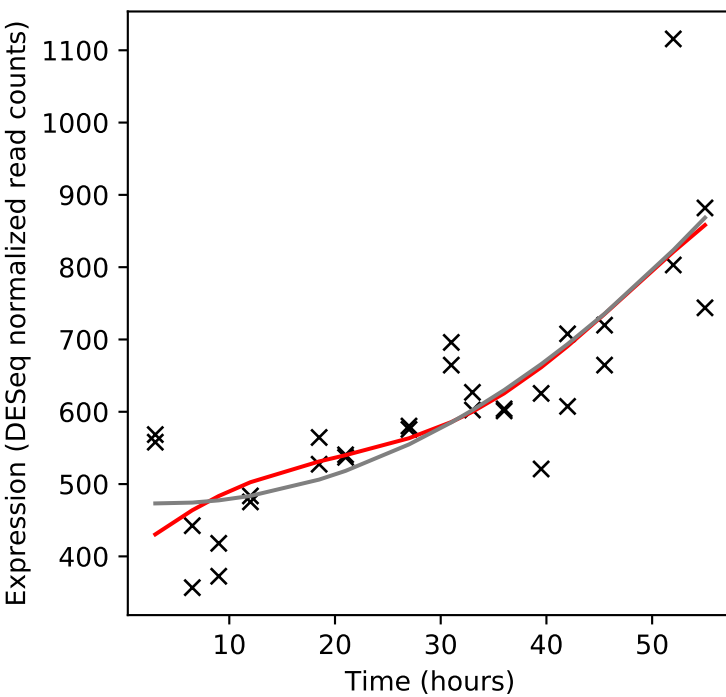

Rv2678c/hemE

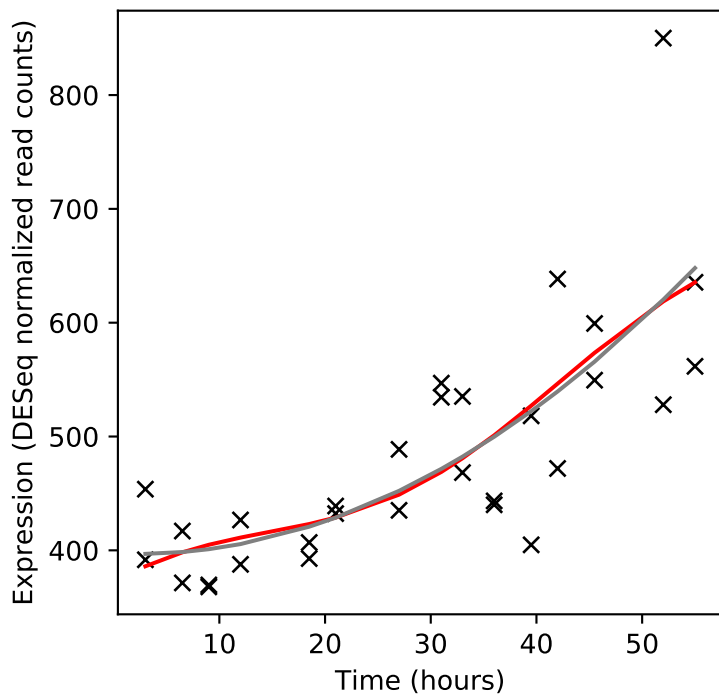

Rv2679/echA15

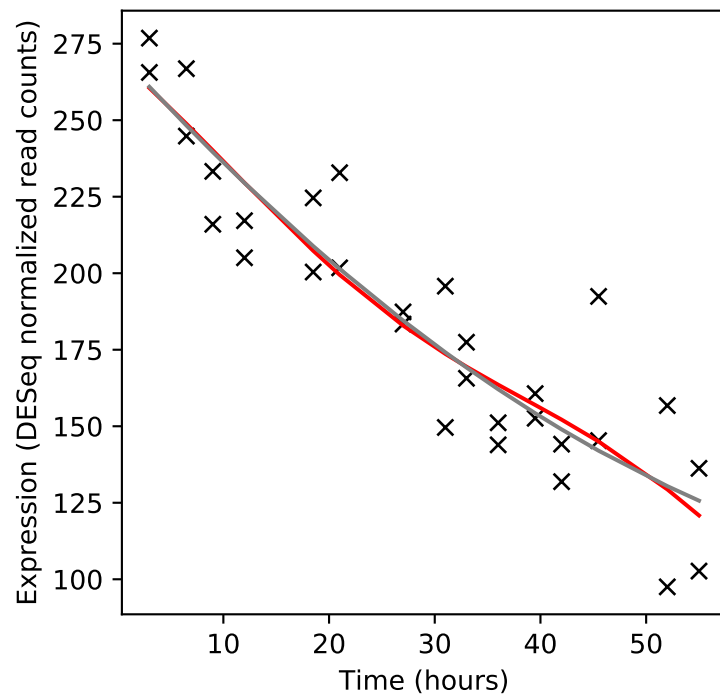

Rv2680/-

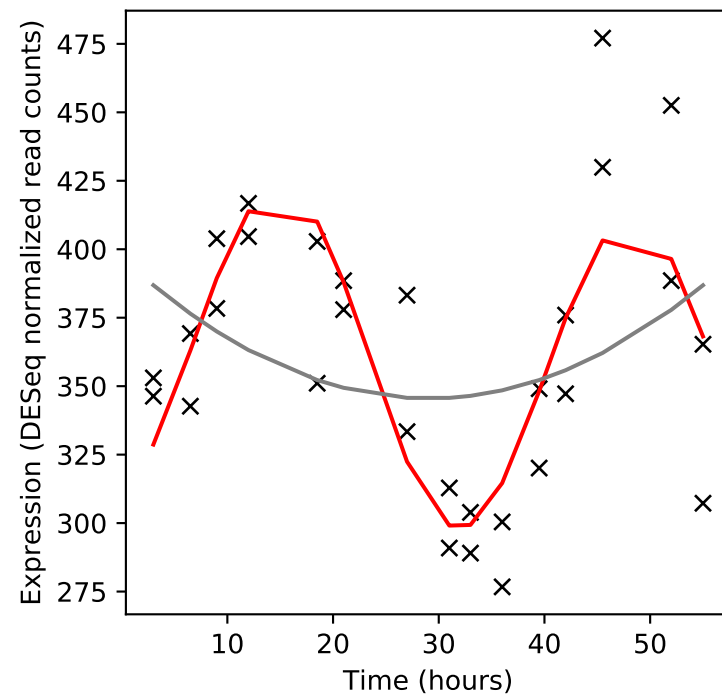

Rv2681/-

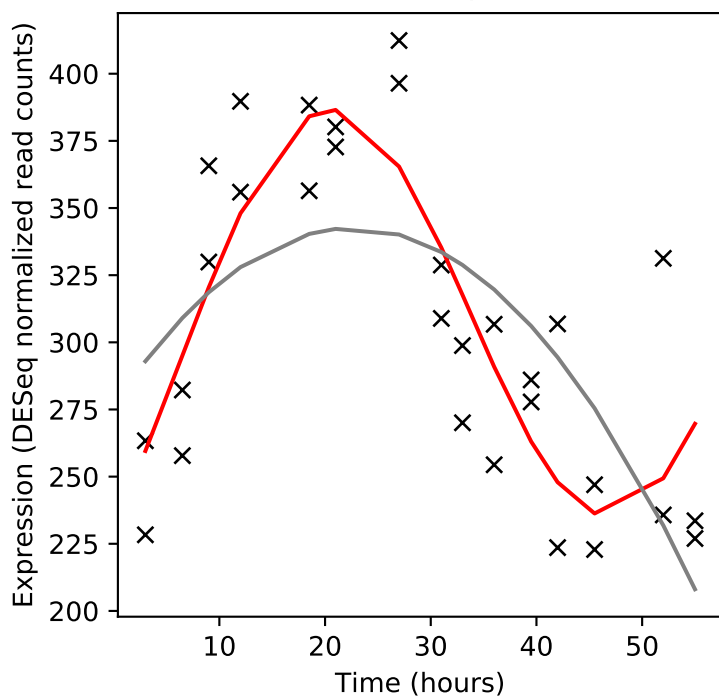

Rv2682c/dxs1

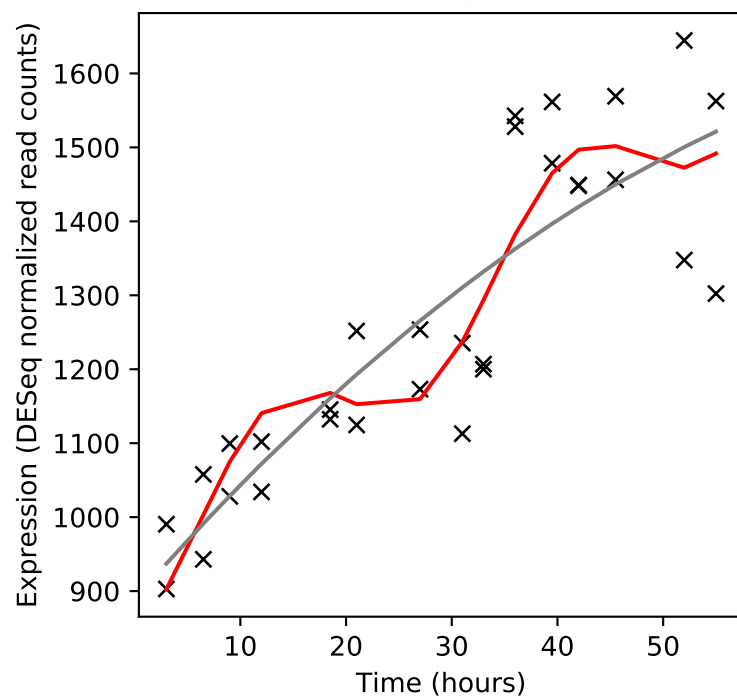

Rv2683/-

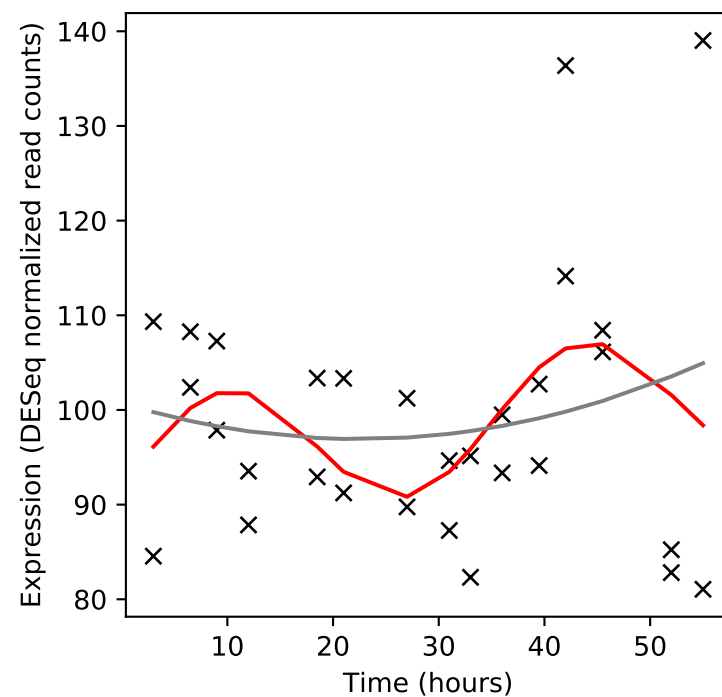

Rv2684/arsA

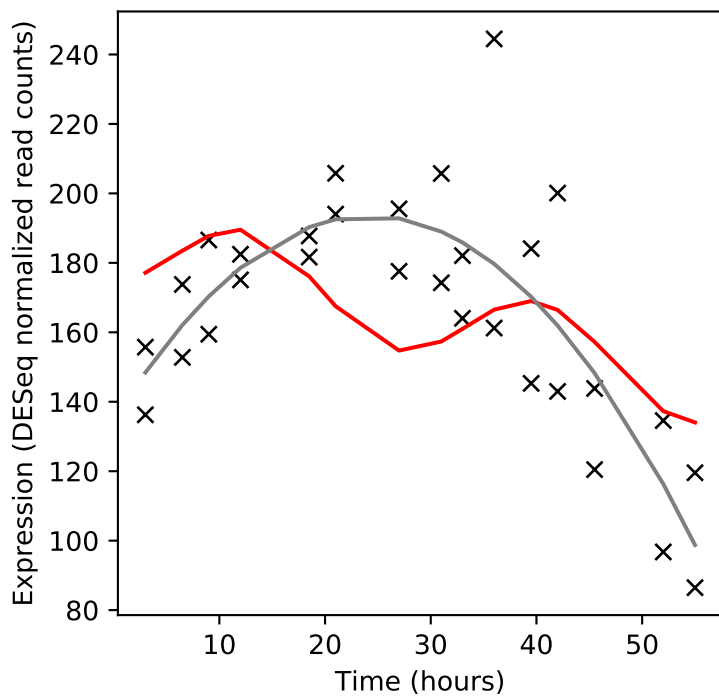

Rv2685/arsB1

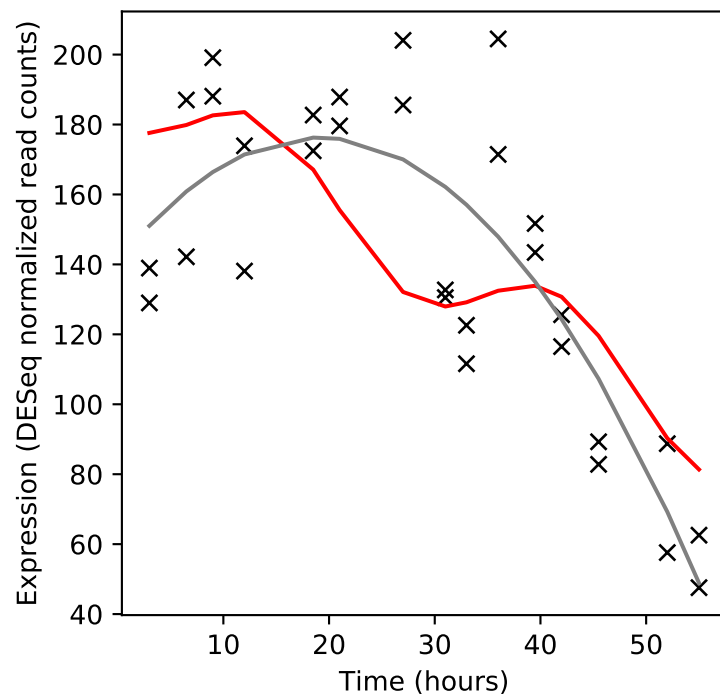

Rv2686c/-

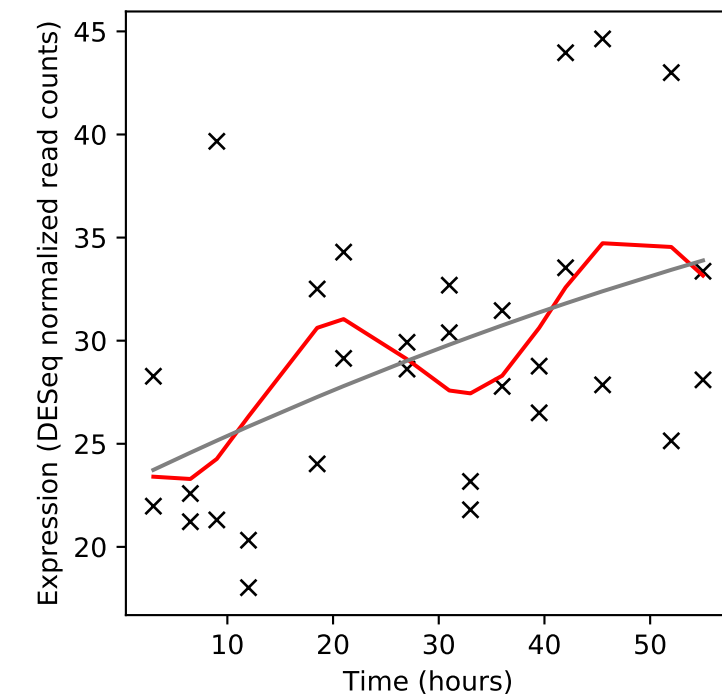

Rv2687c/-

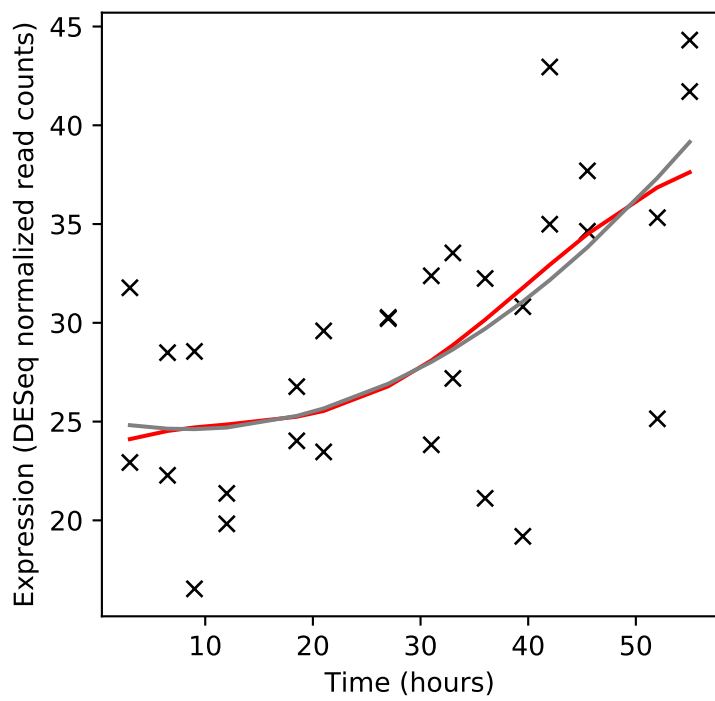

Rv2688c/-

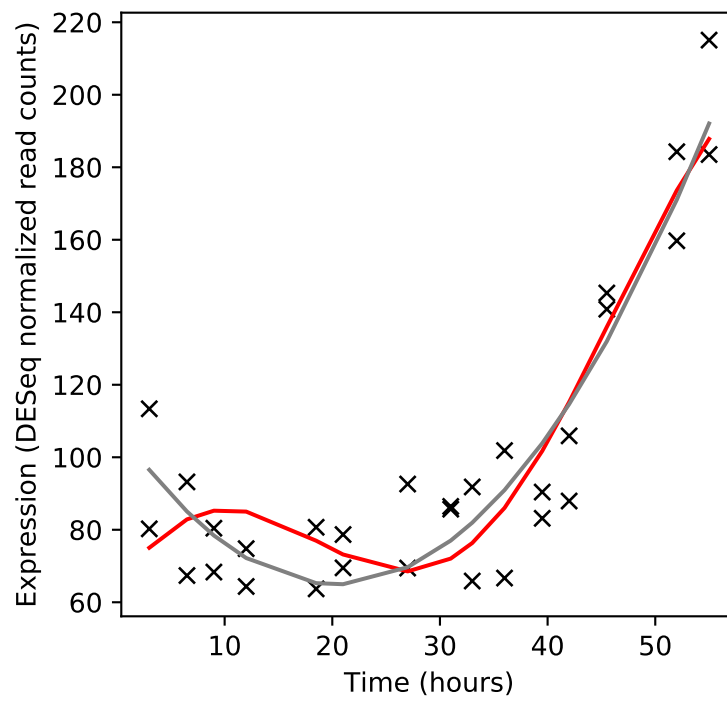

Rv2689c/-

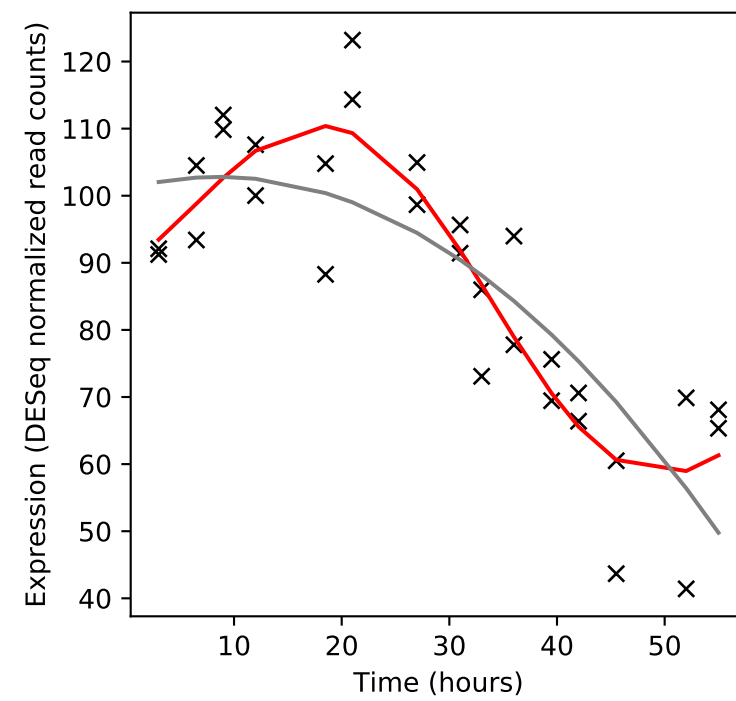

Rv2690c/-

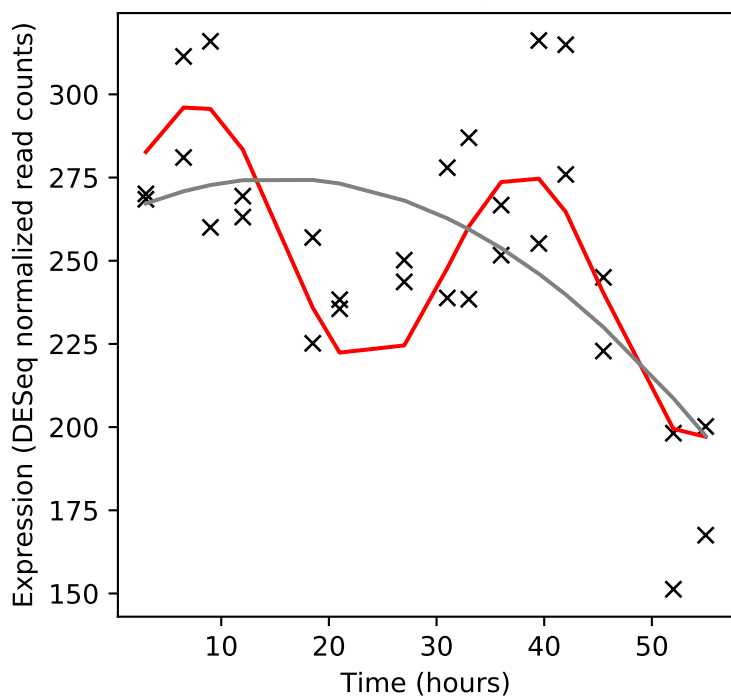

Rv2691/ceoB

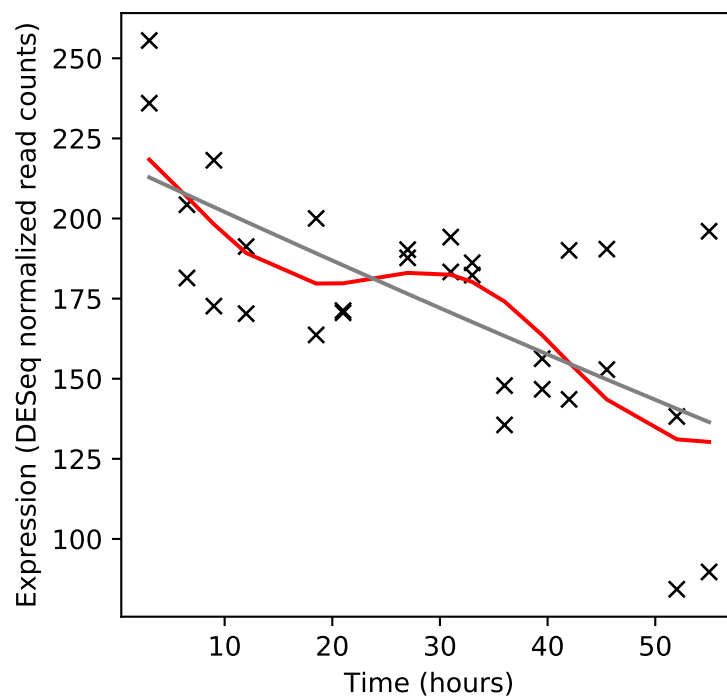

Rv2692/ceoC

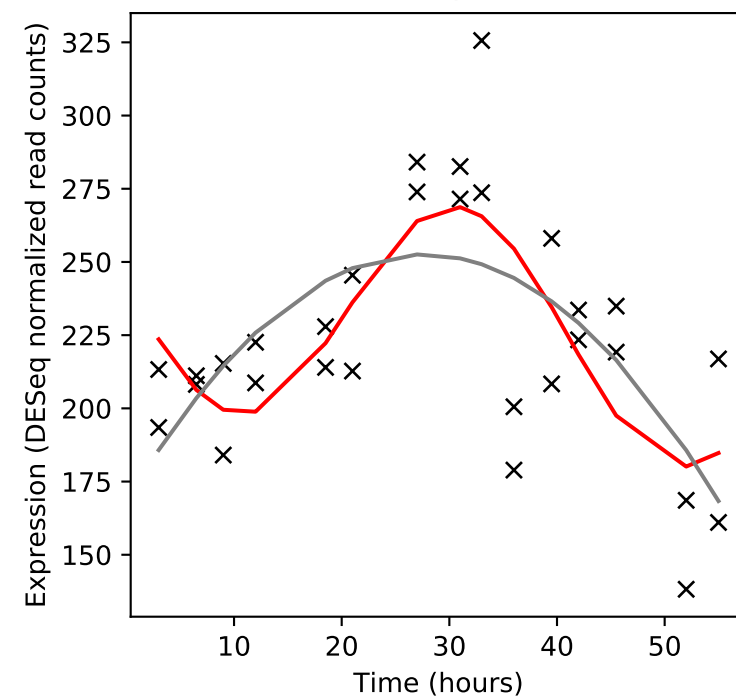

Rv2693c/-

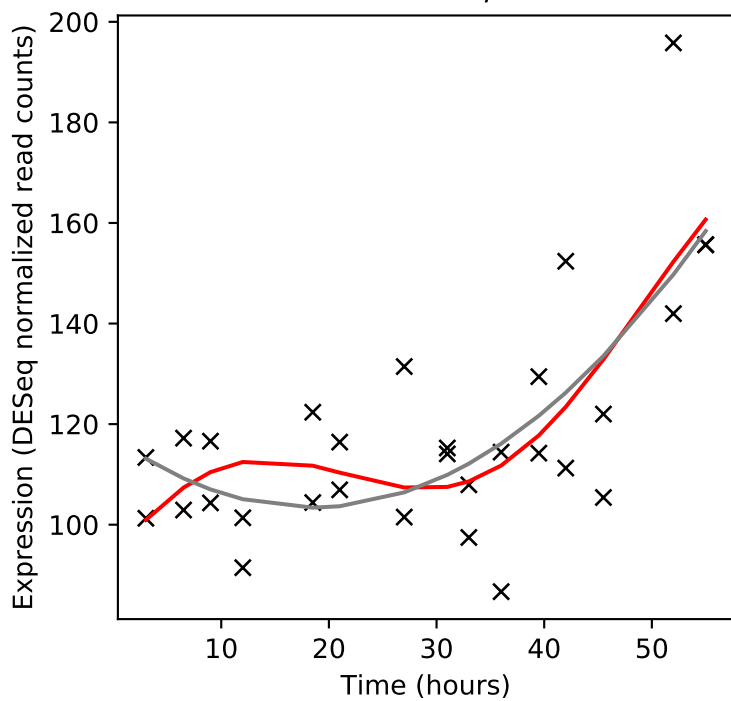

Rv2694c/-

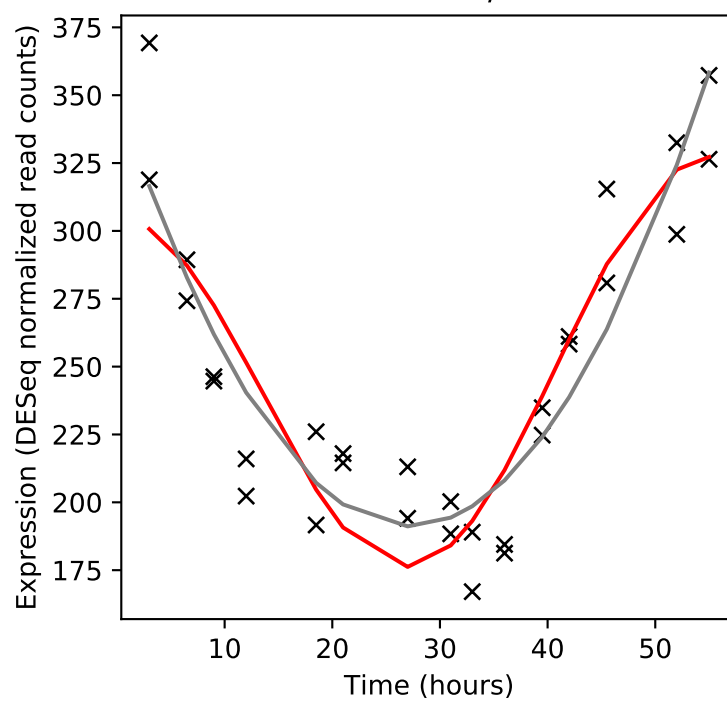

Rv2695/-

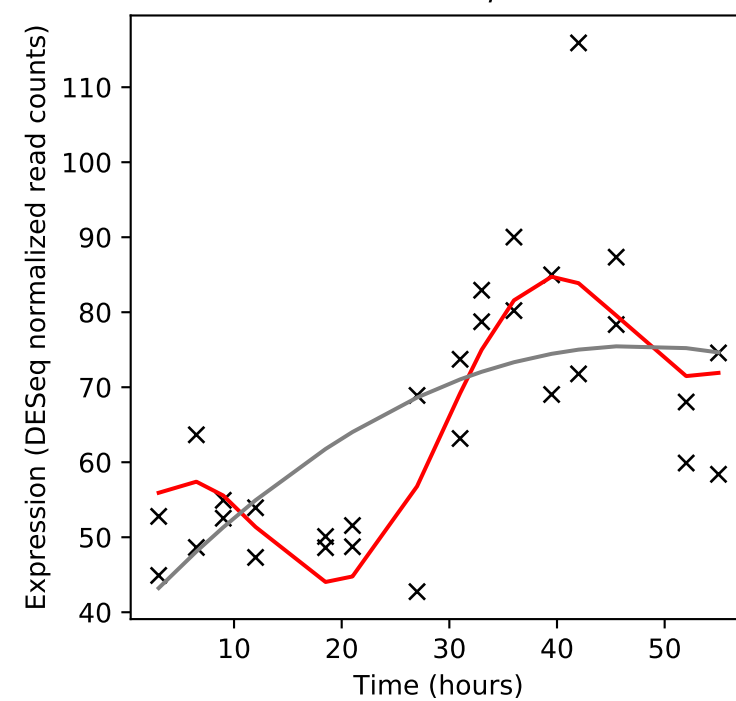

Rv2696c/-

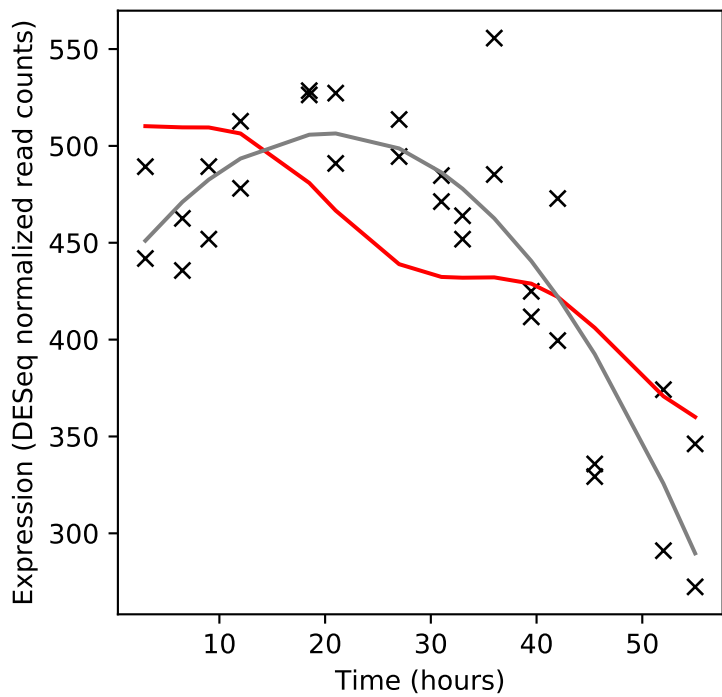

Rv2697c/dut

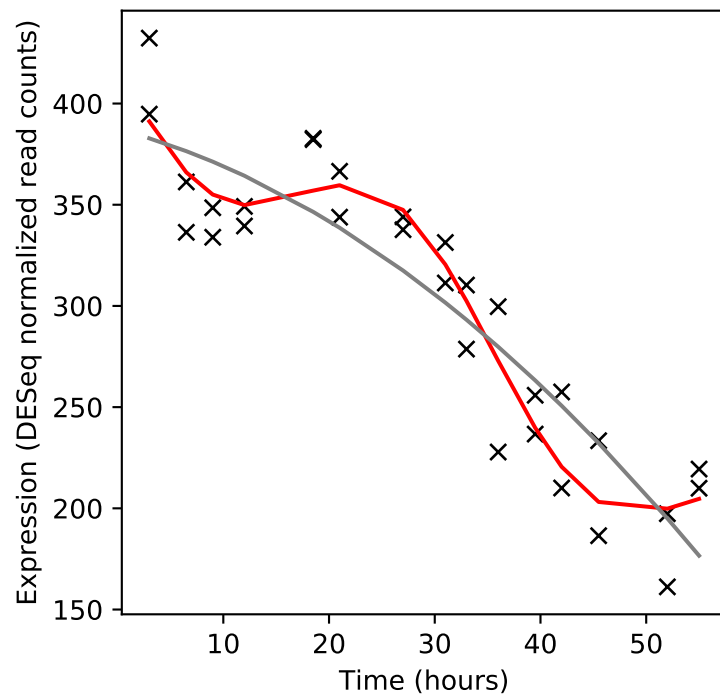

Rv2698/-

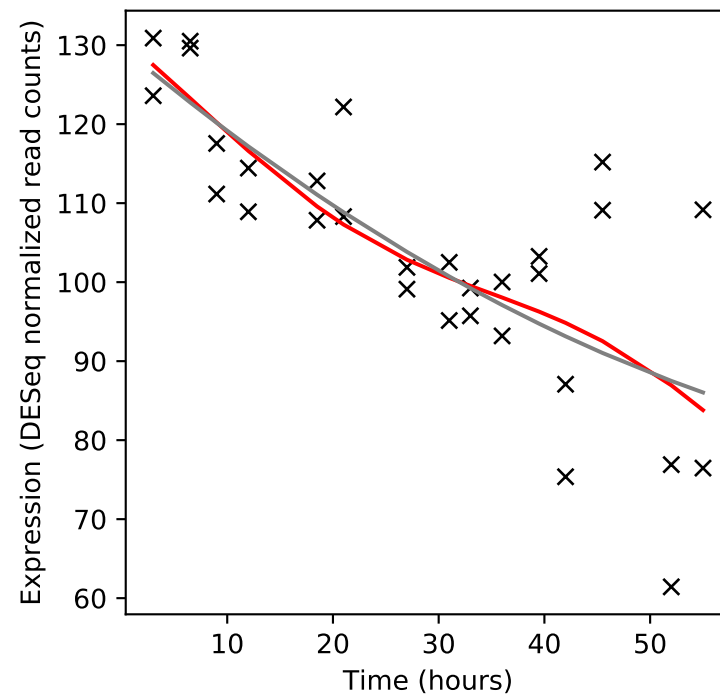

Rv2699c/-

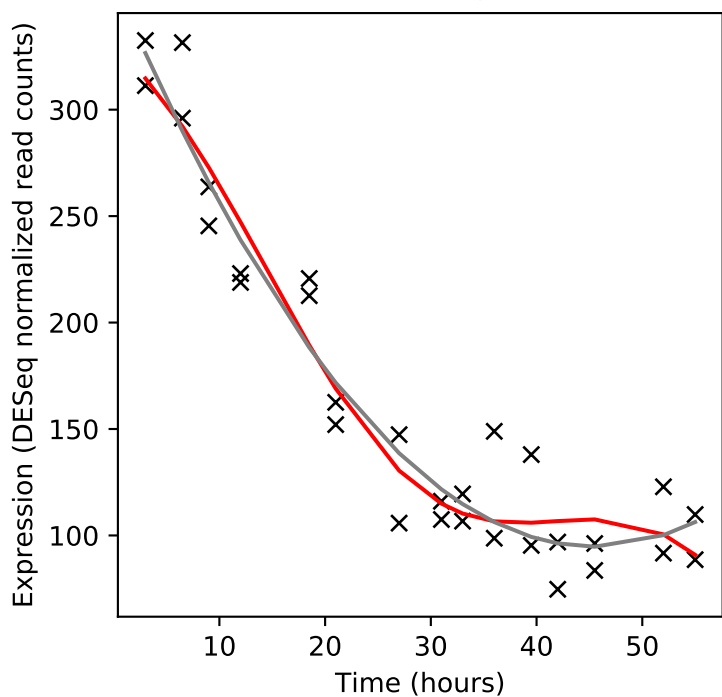

Rv2700/-

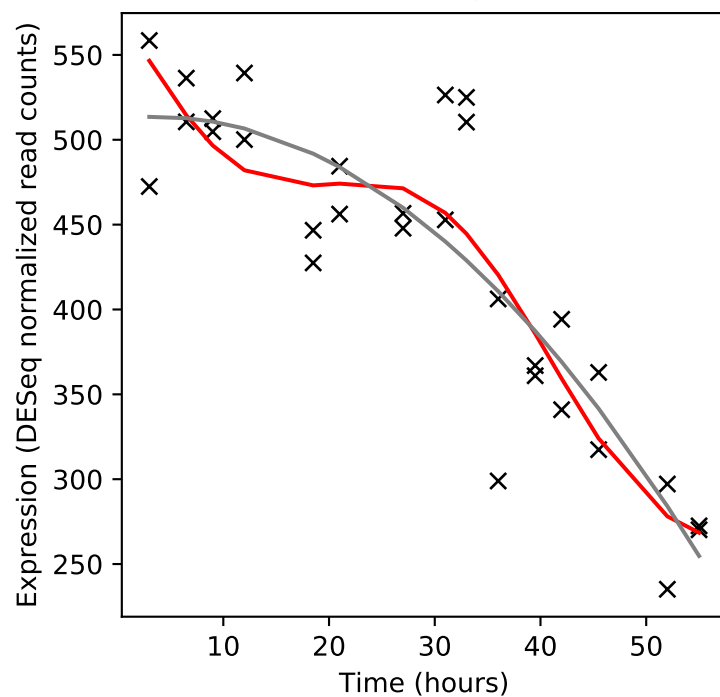

Rv2701c/suhB

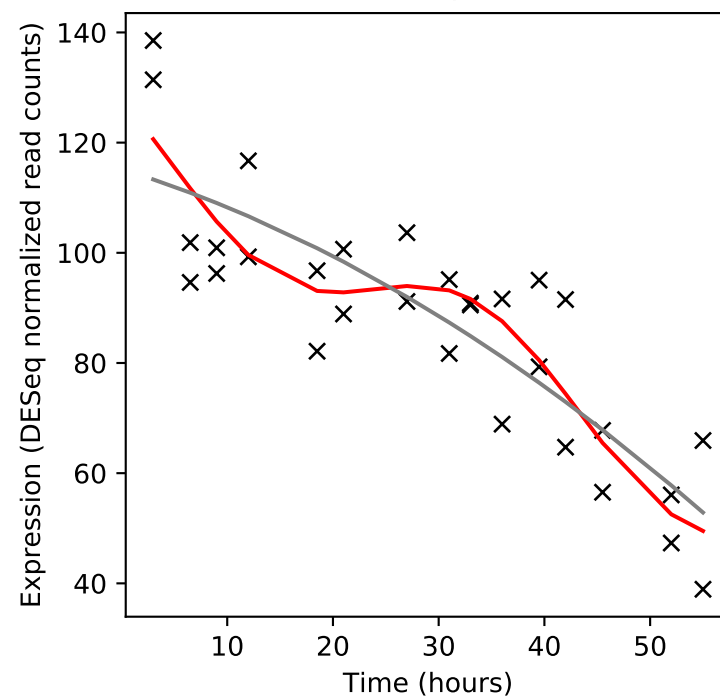

Rv2702/ppgK

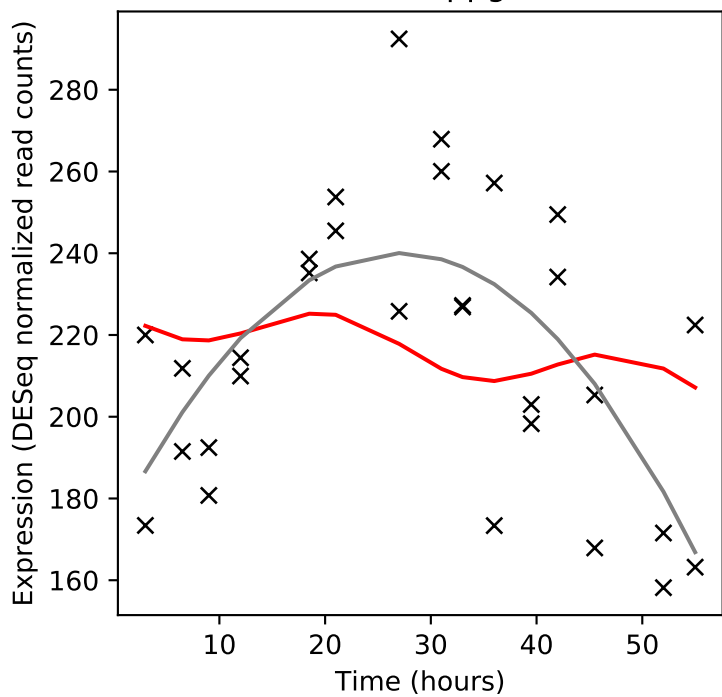

Rv2703/sigA

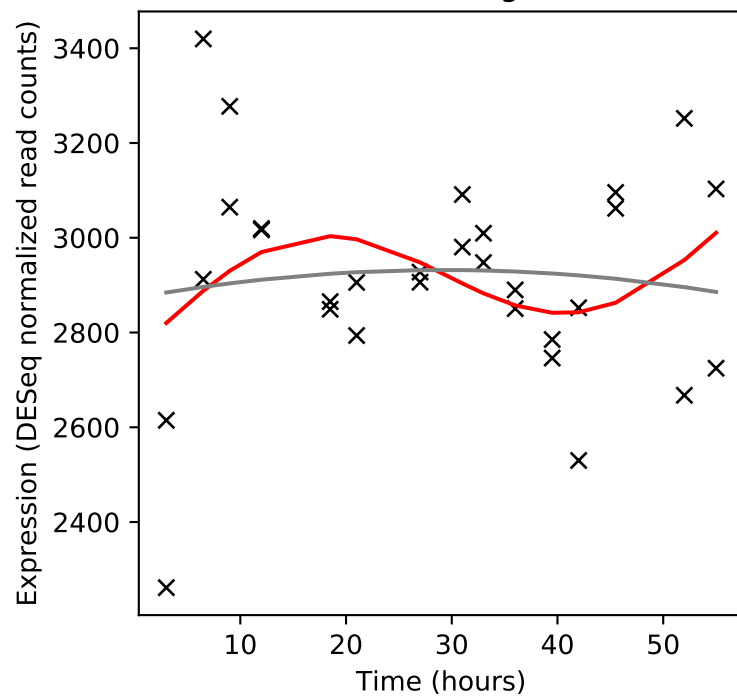

Rv2704/-

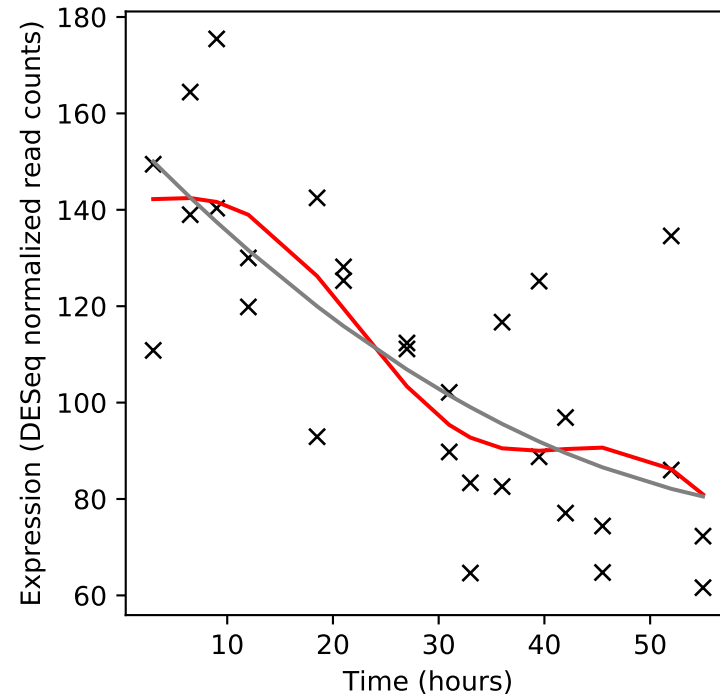

Rv2705c/-

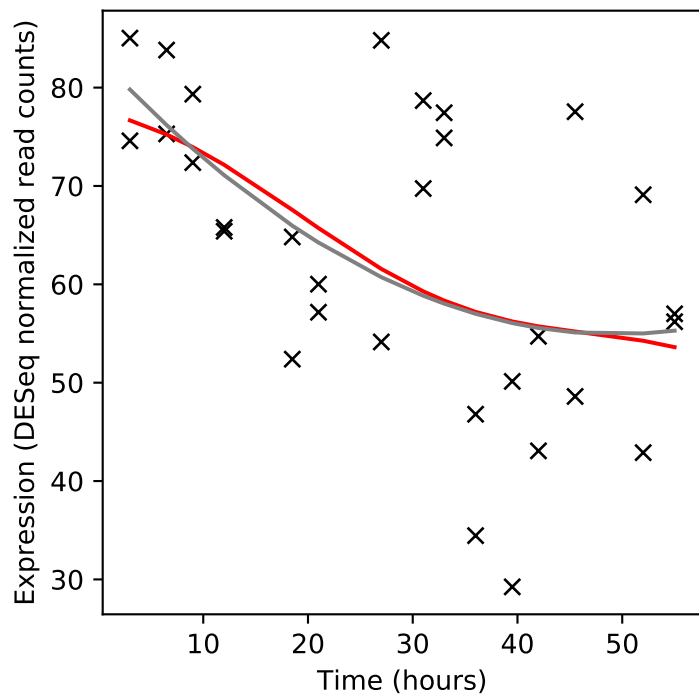

Rv2706c/-

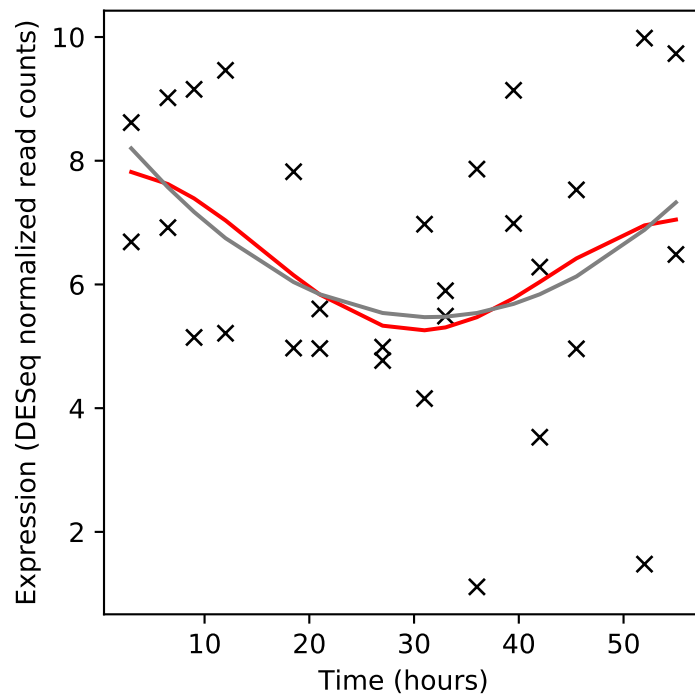

Rv2707/-

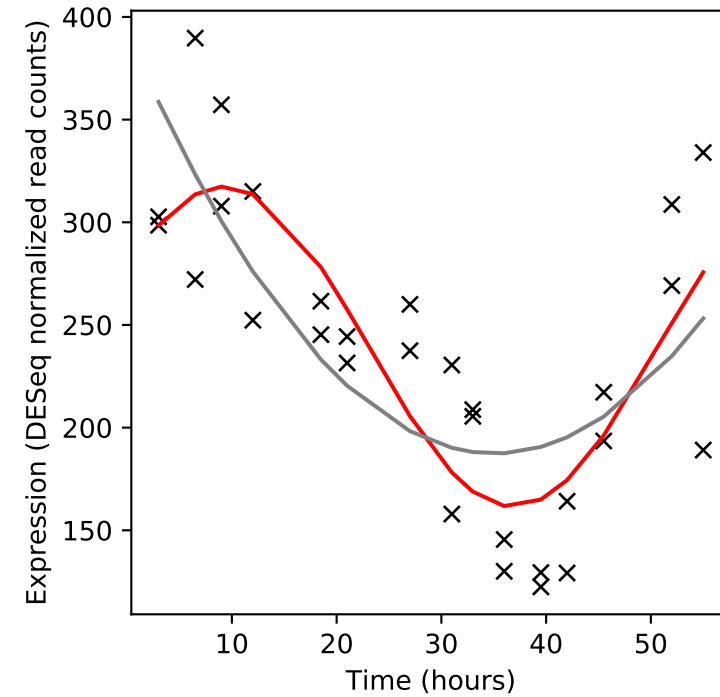

Rv2708c/-

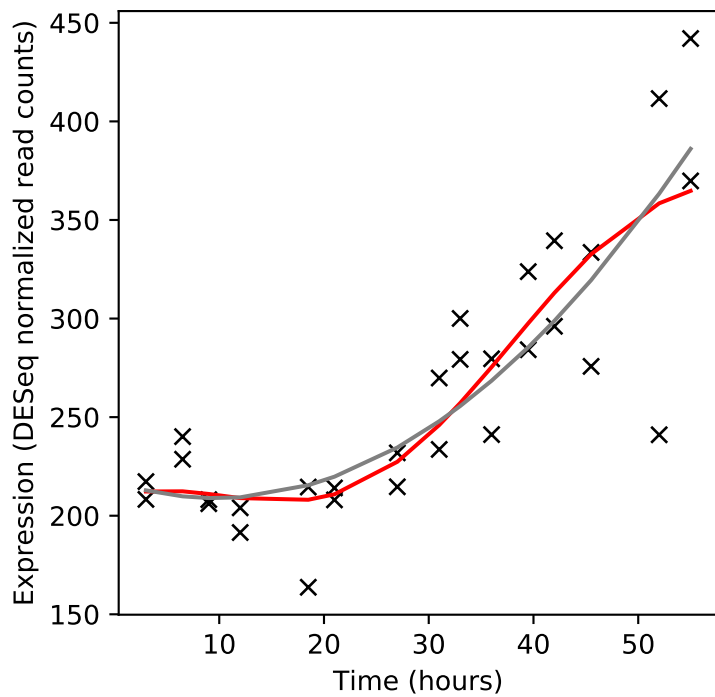

Rv2709/-

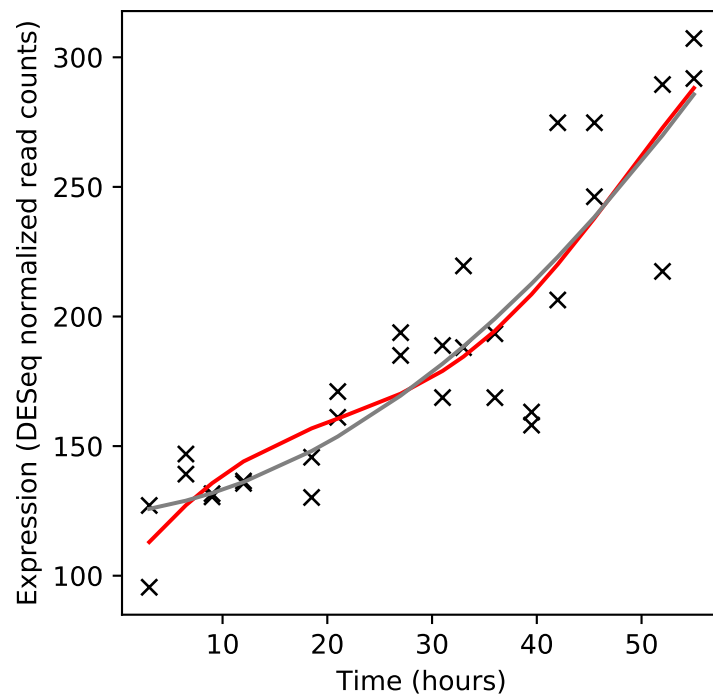

Rv2710/sigB

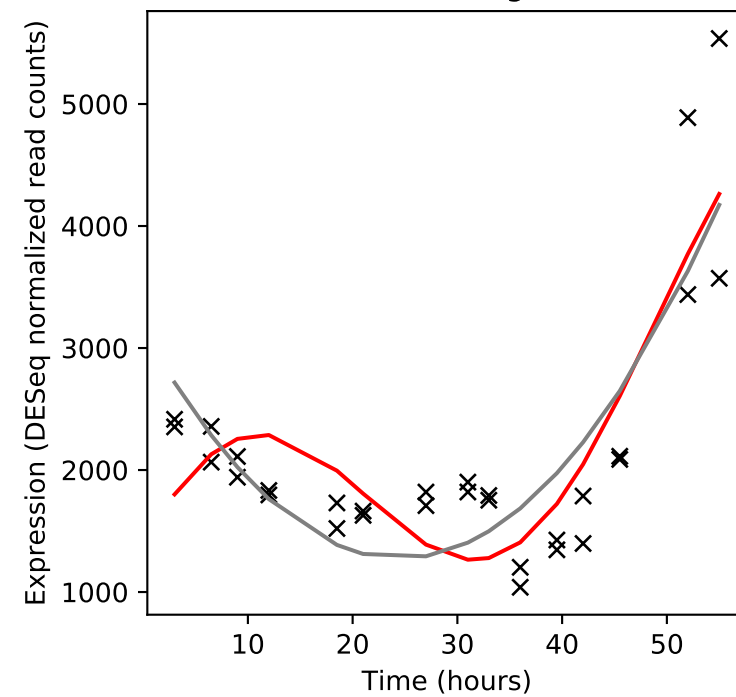

Rv2711/ideR

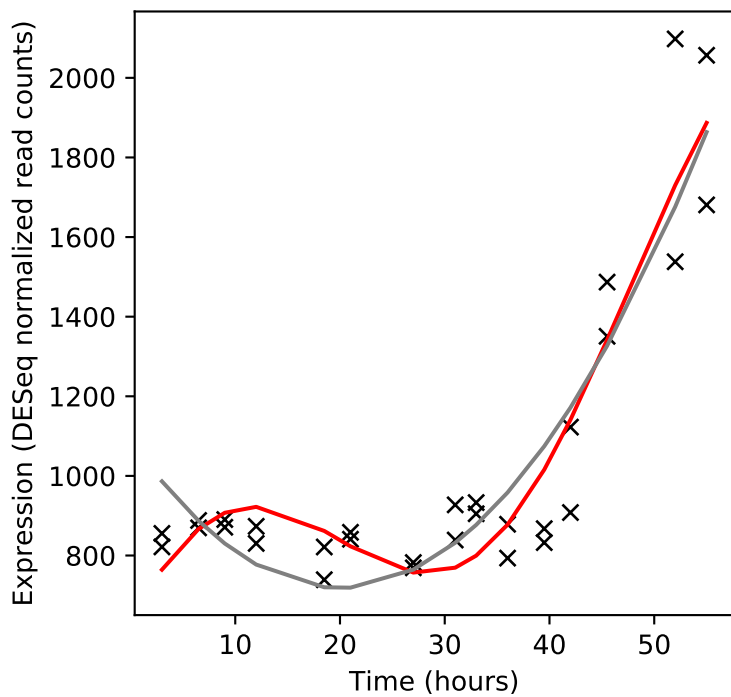

Rv2712c/-

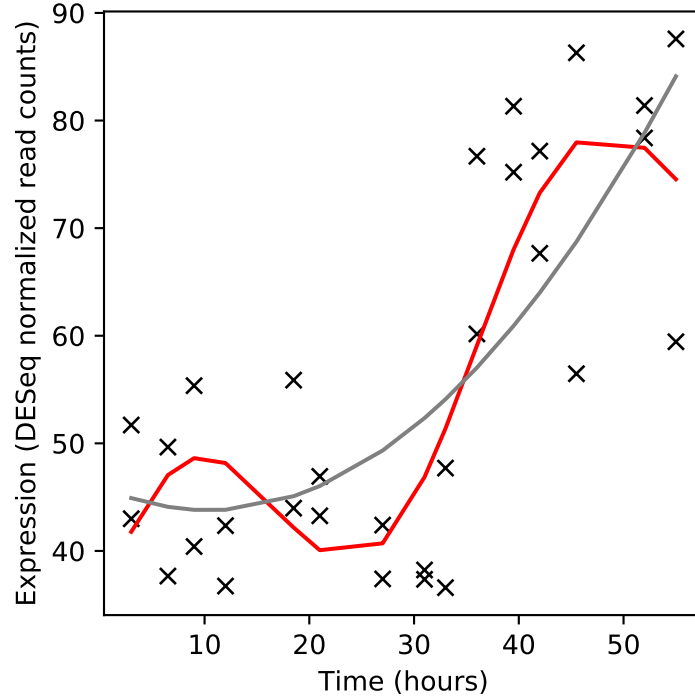

Rv2713/sthA

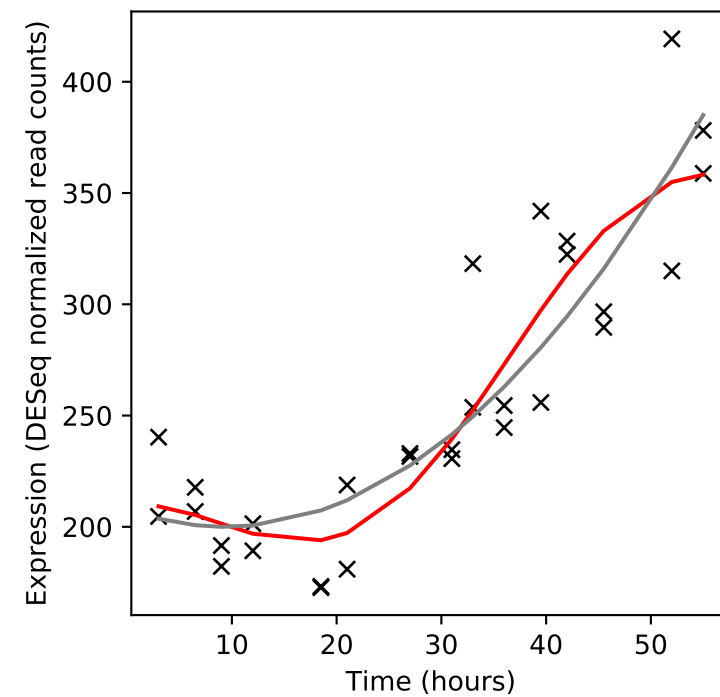

Rv2714/-

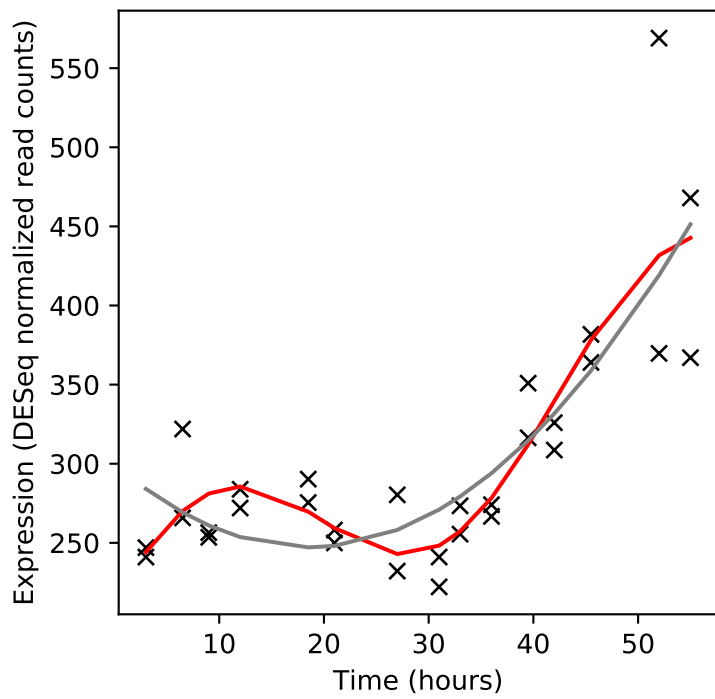

Rv2715/-

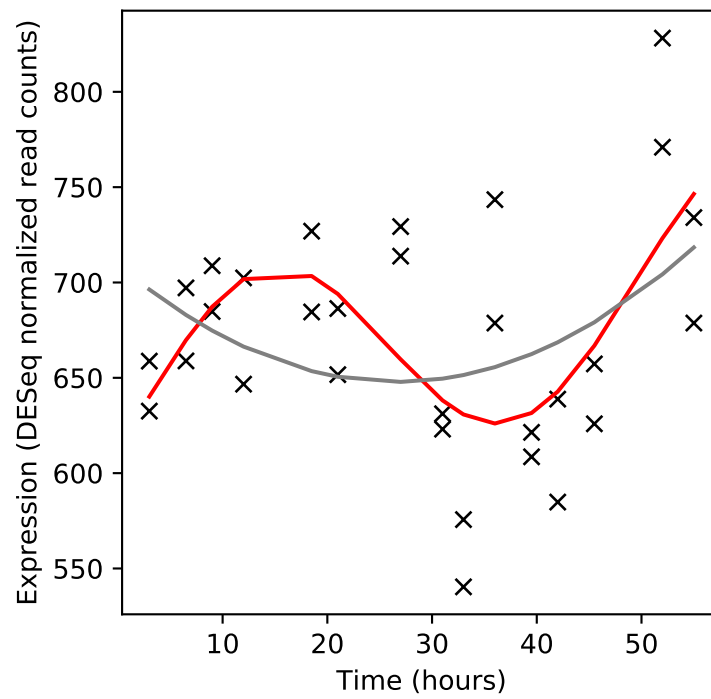

Rv2716/-

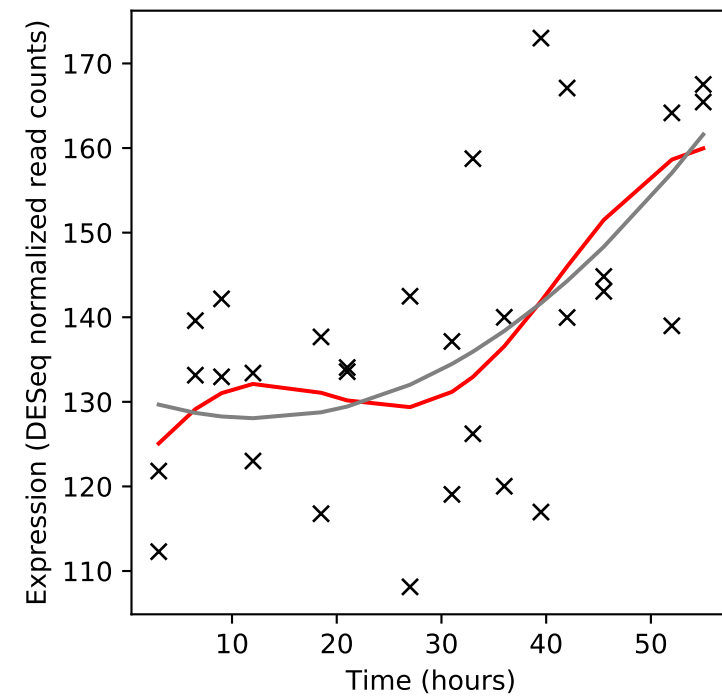

Rv2717c/-

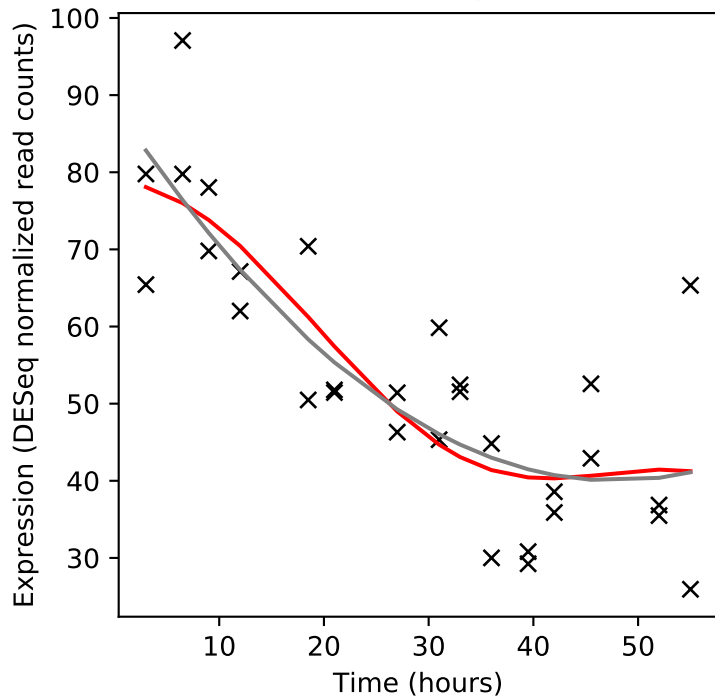

Rv2718c/nrdR

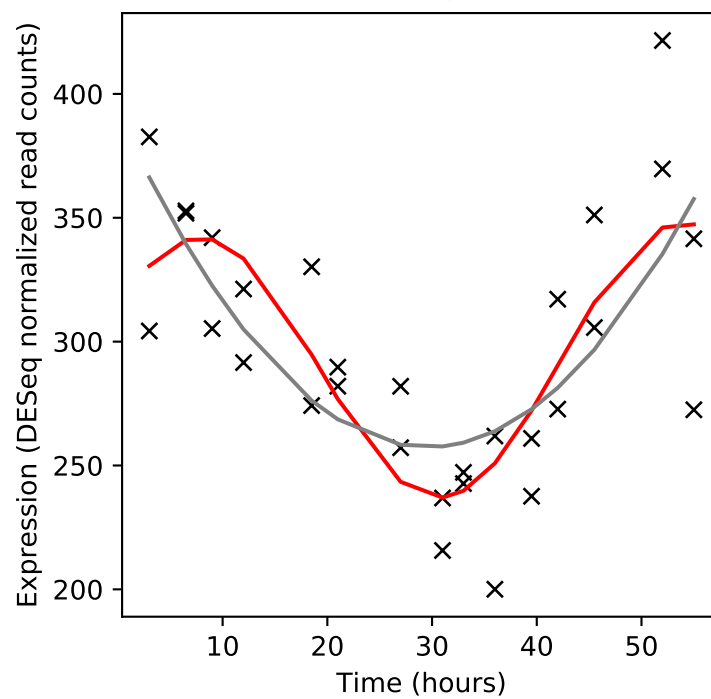

Rv2719c/-

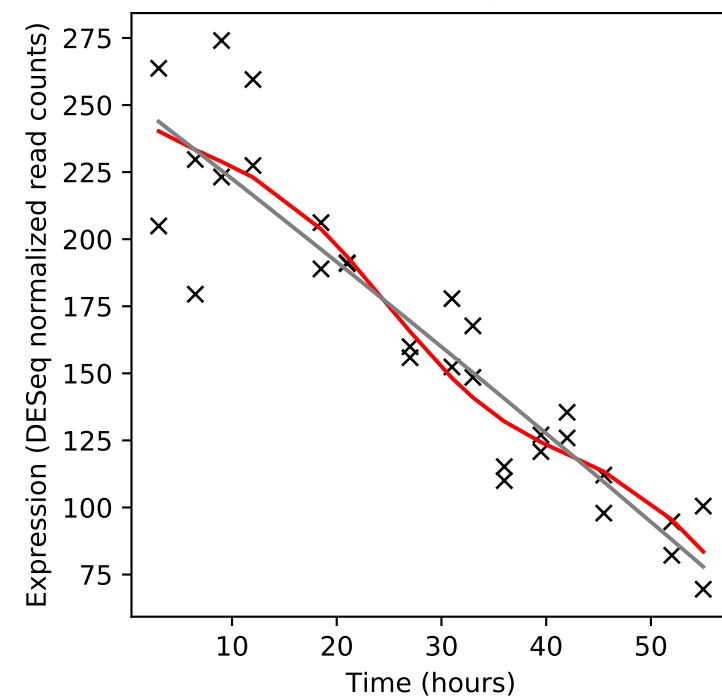

Rv2720/lexA

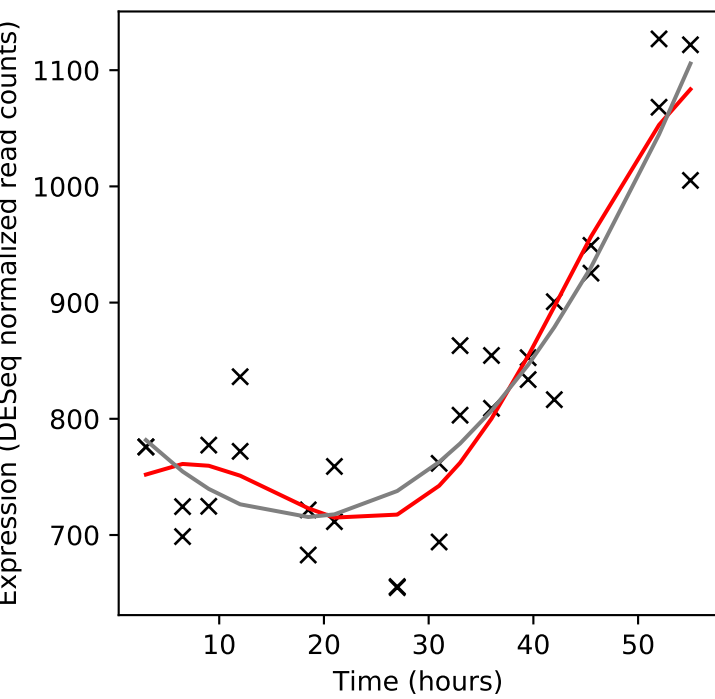

Rv2721c/-

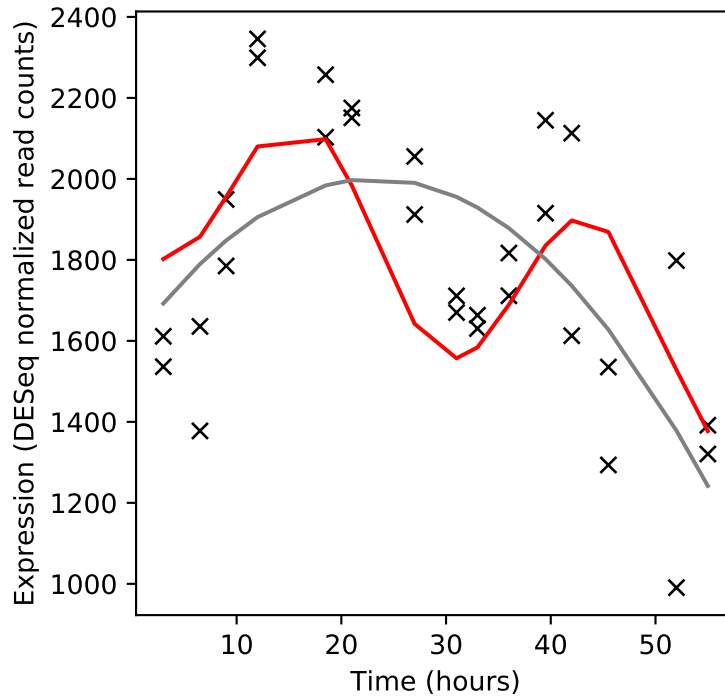

Rv2722/-

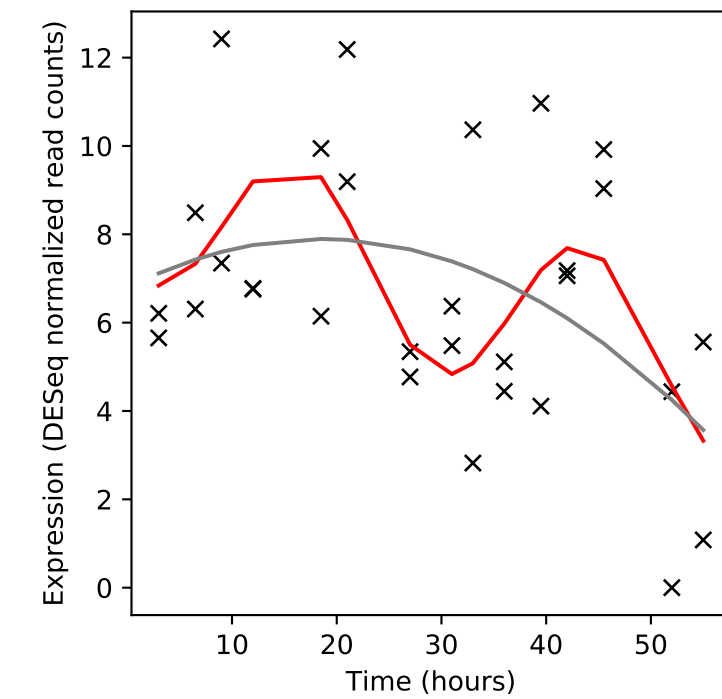



Rv2723/-

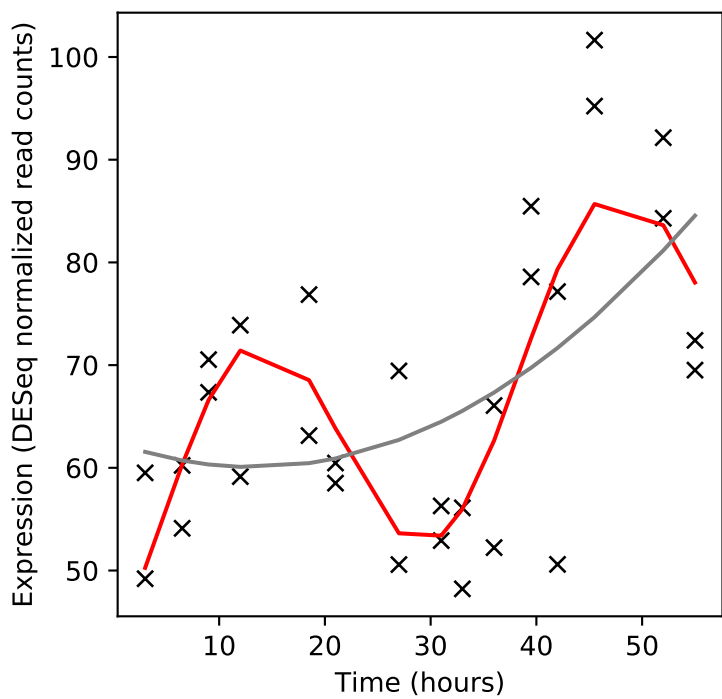

Rv2724c/fadE20

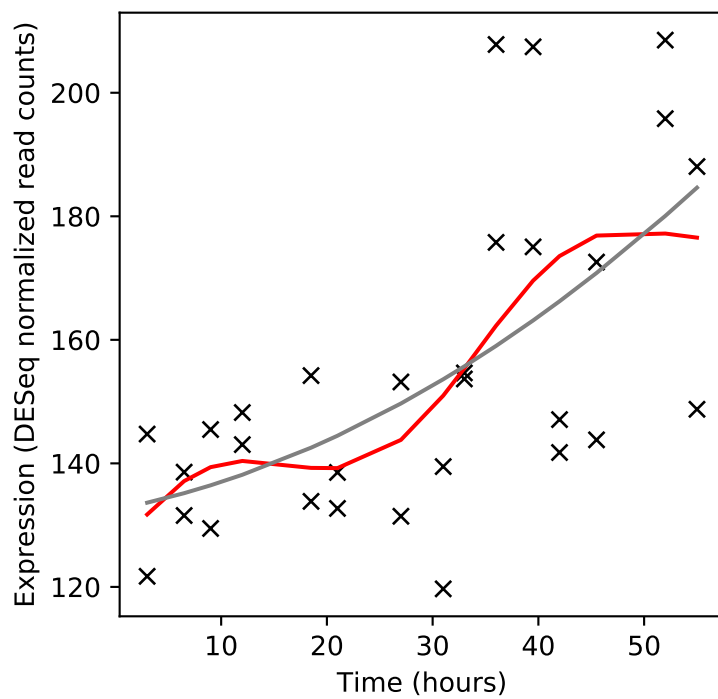

Rv2725c/hflX

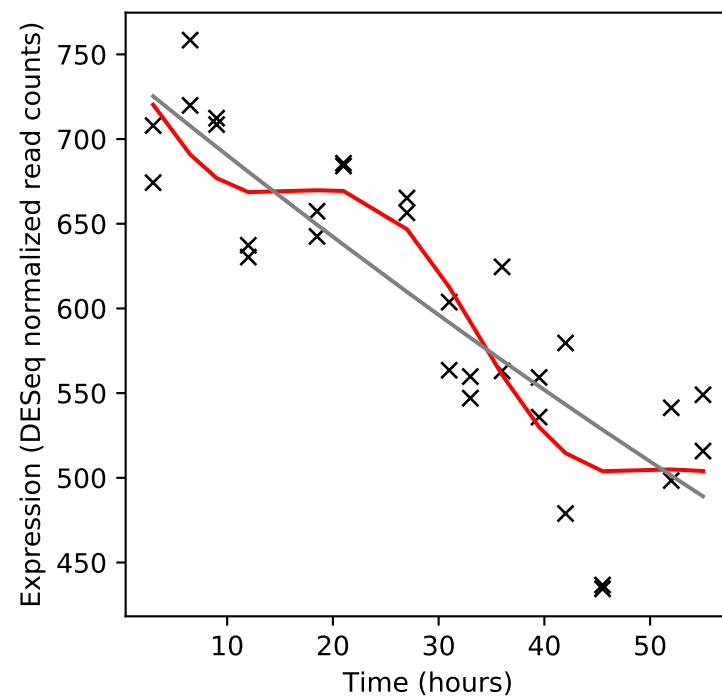

Rv2726c/dapF

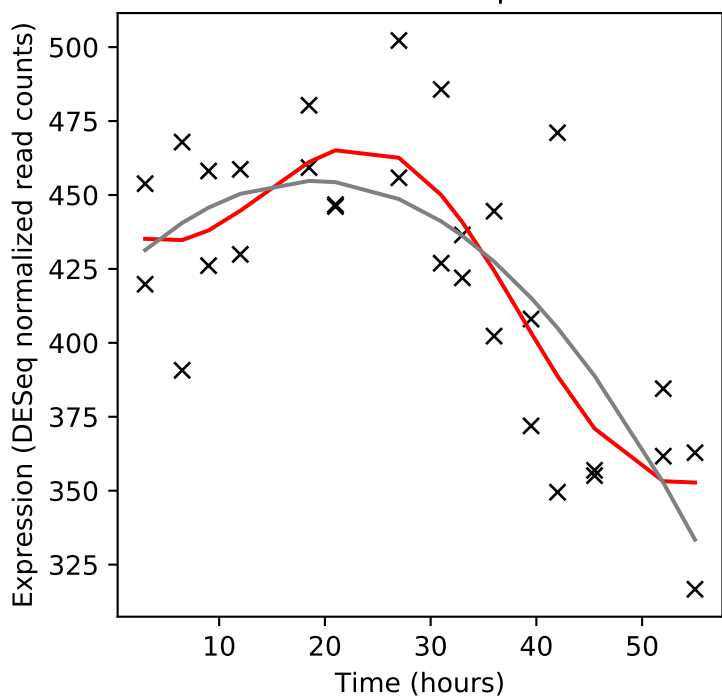

Rv2727c/miaA

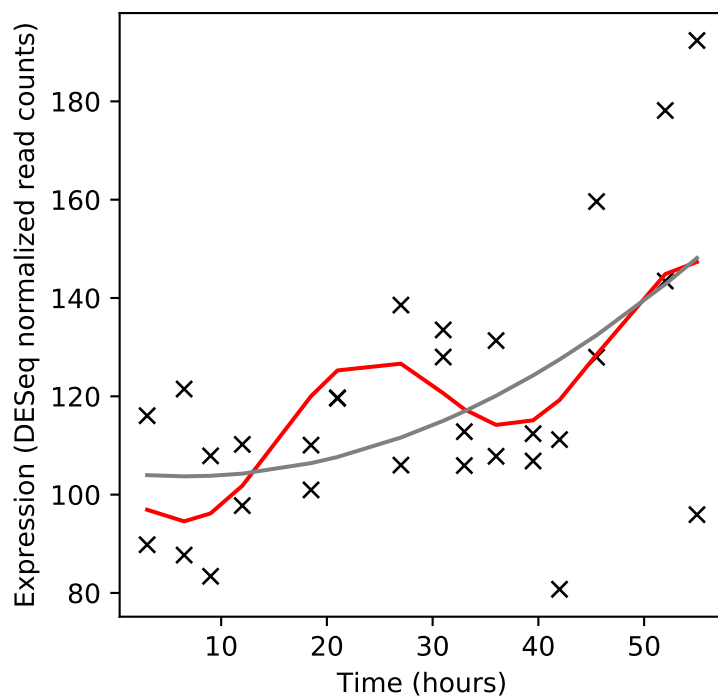

Rv2728c/-

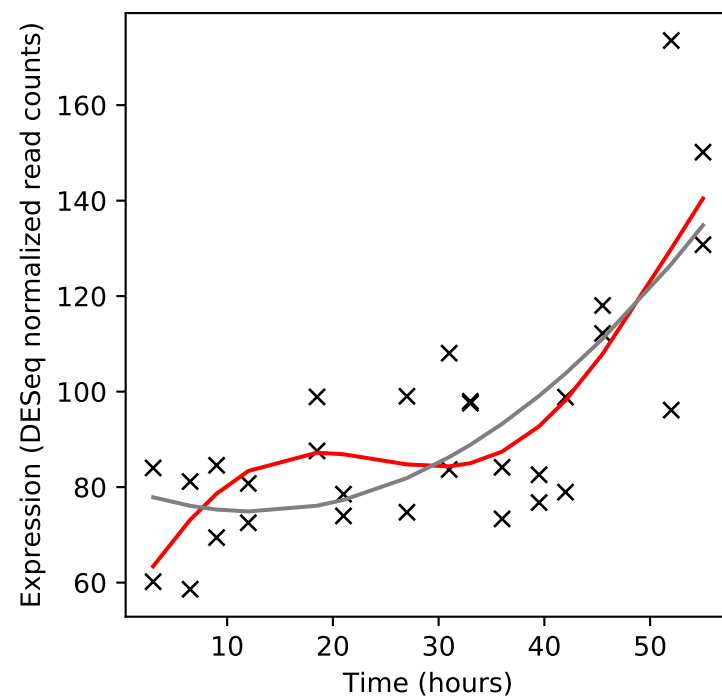

Rv2729c/-

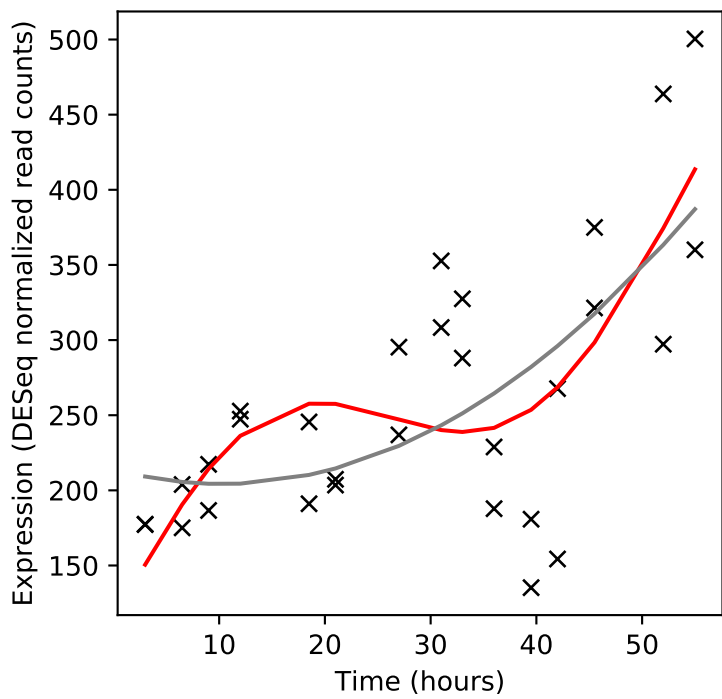

Rv2730/-

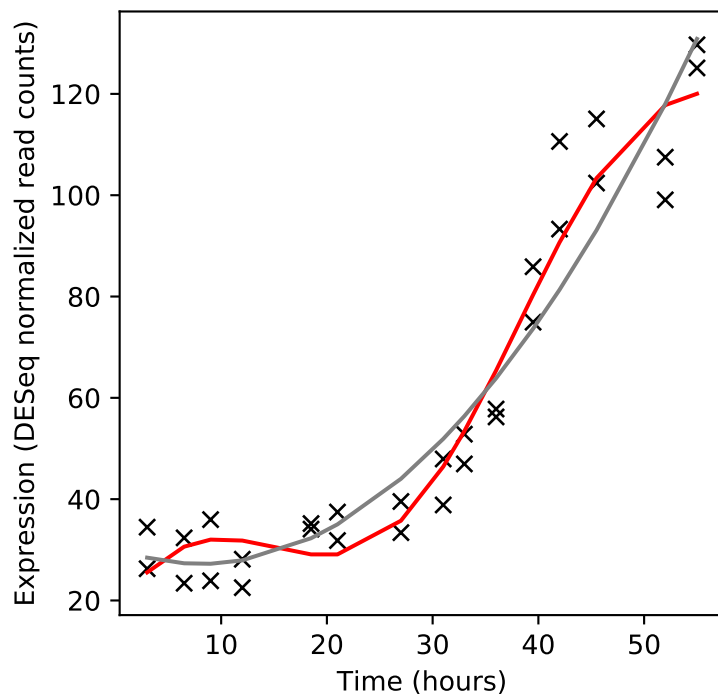

Rv2731/-

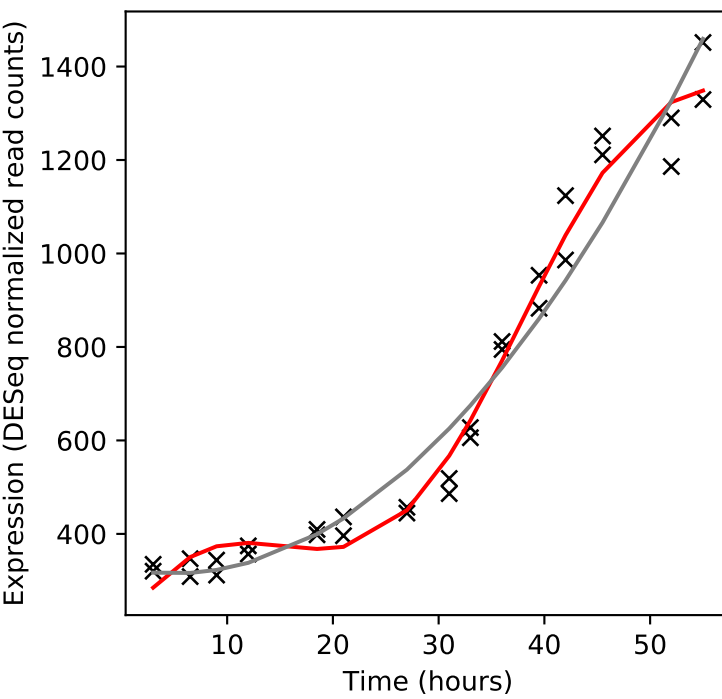

Rv2732c/-

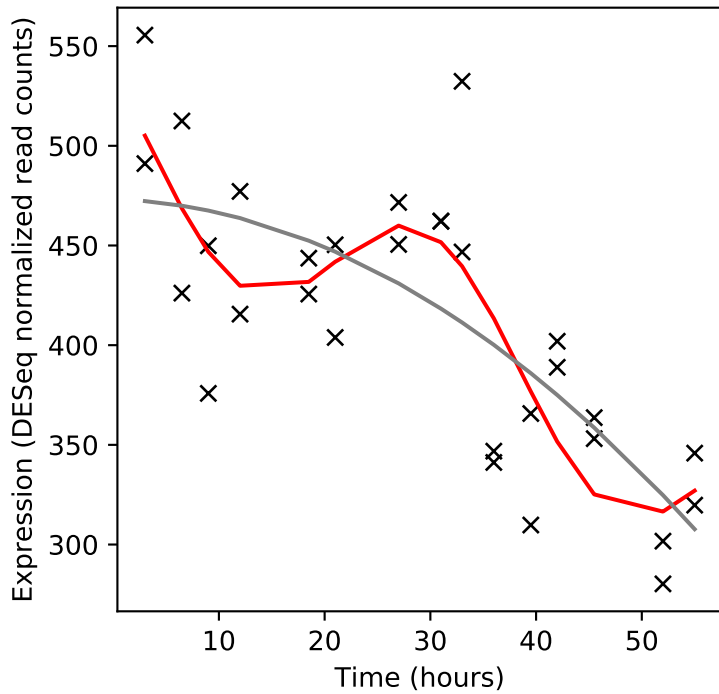

Rv2733c/-

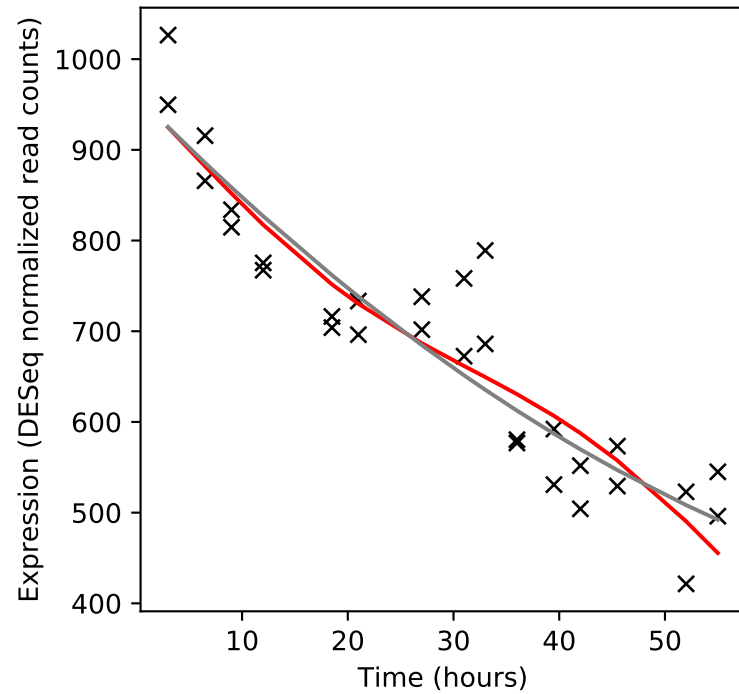

Rv2734c/-

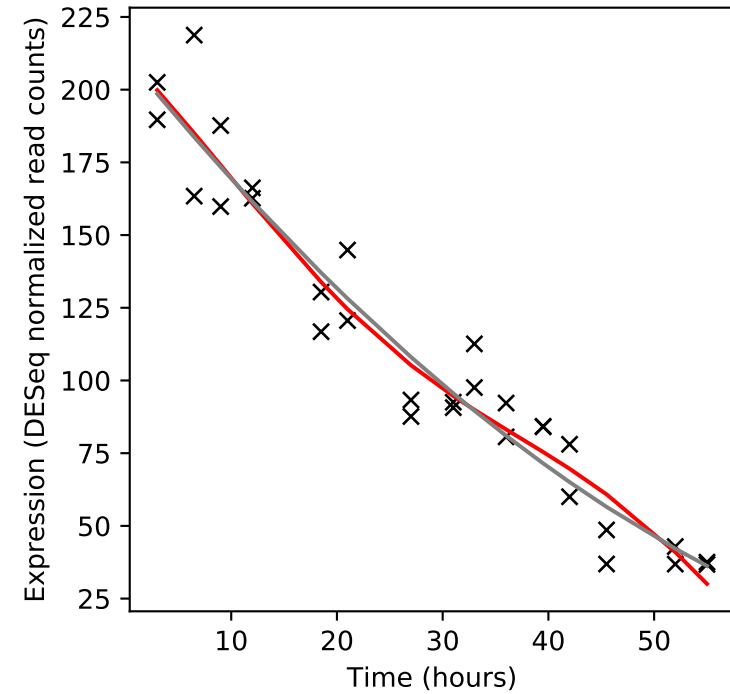

Rv2735c/-

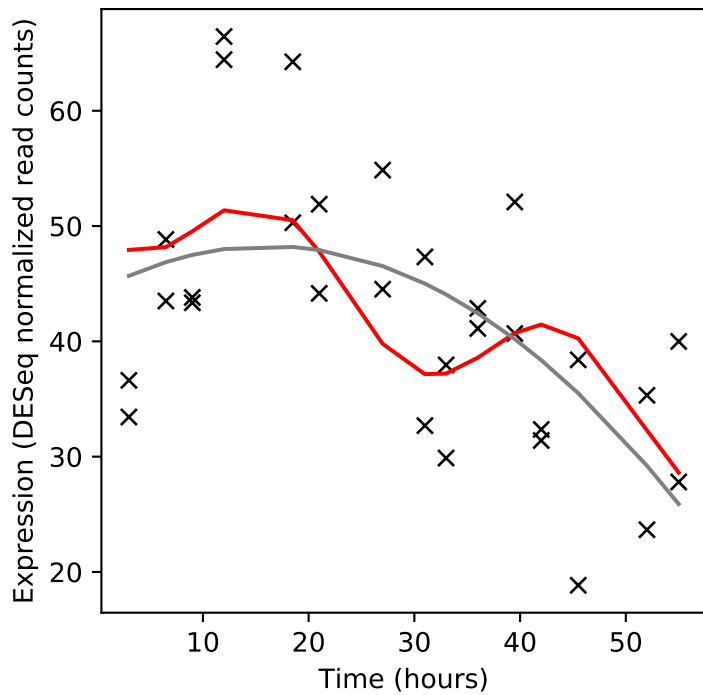

Rv2736c/recX

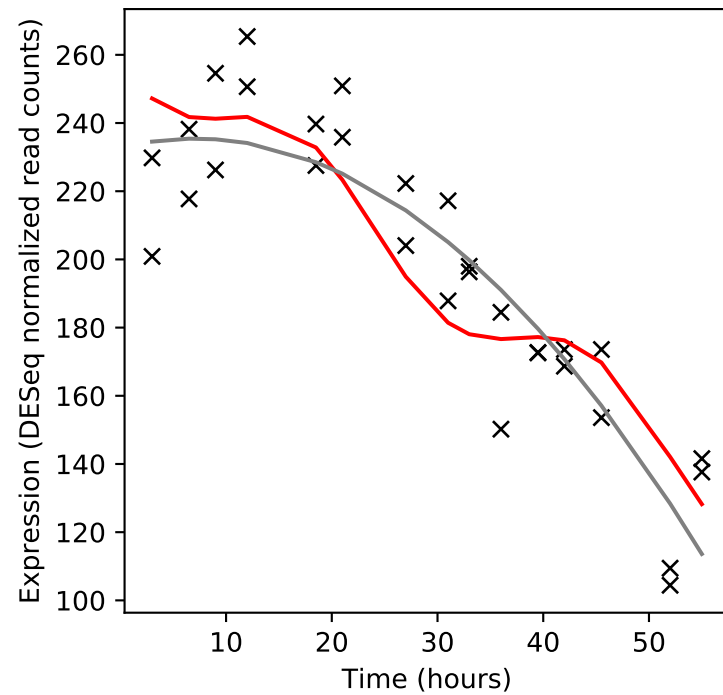

Rv2737c/recA

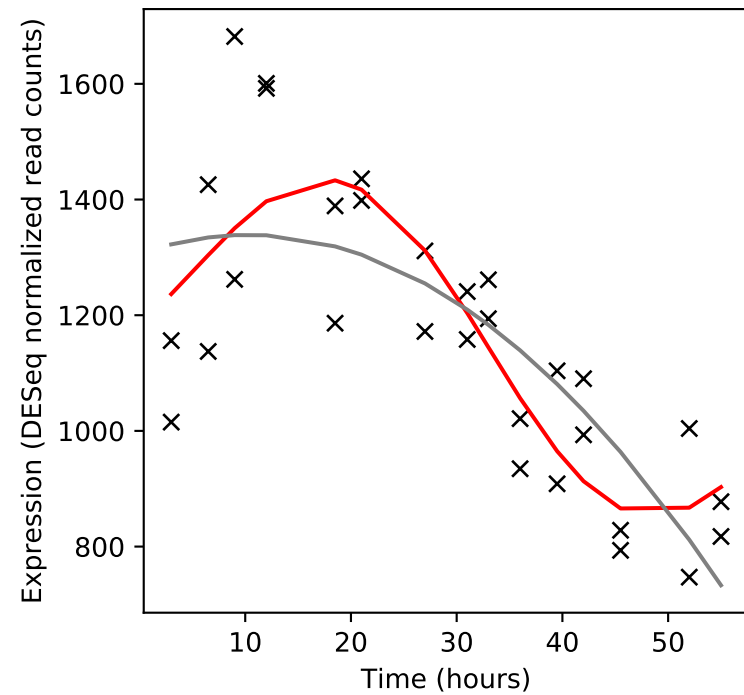

Rv2737A/-

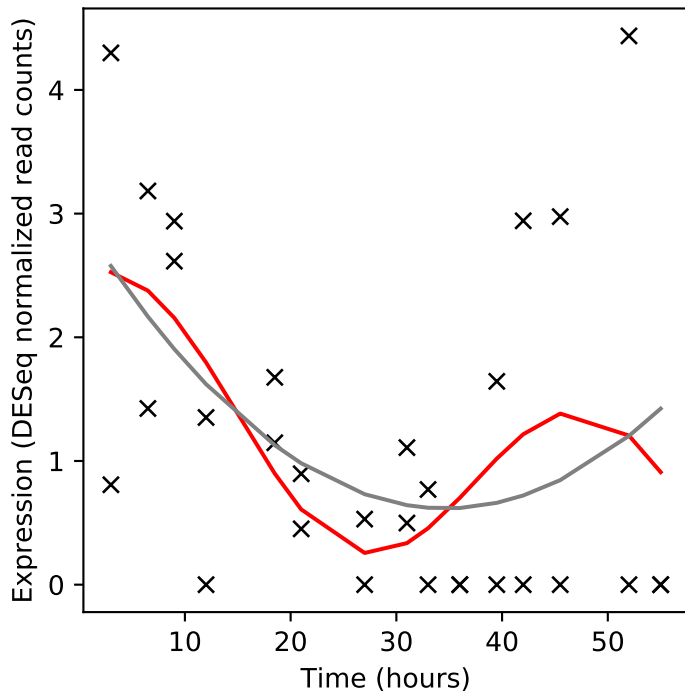

Rv2738c/-

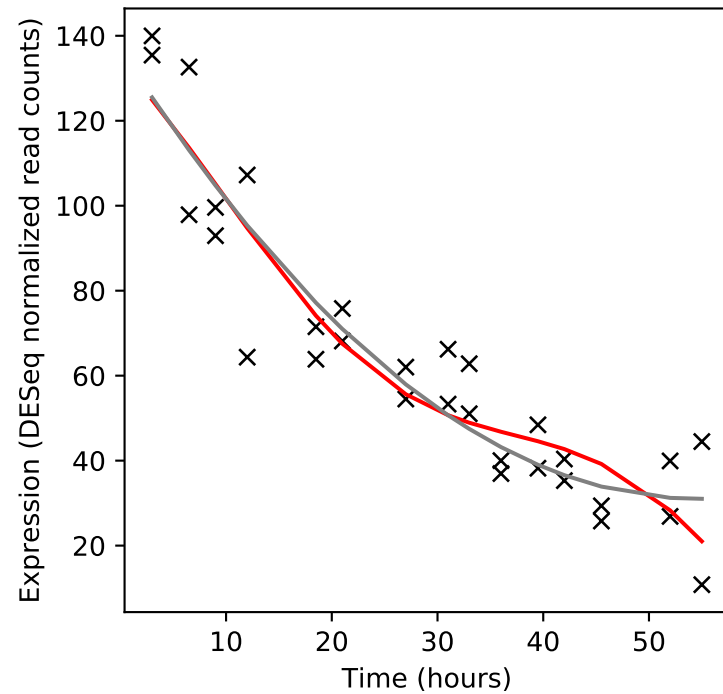

Rv2739c/-

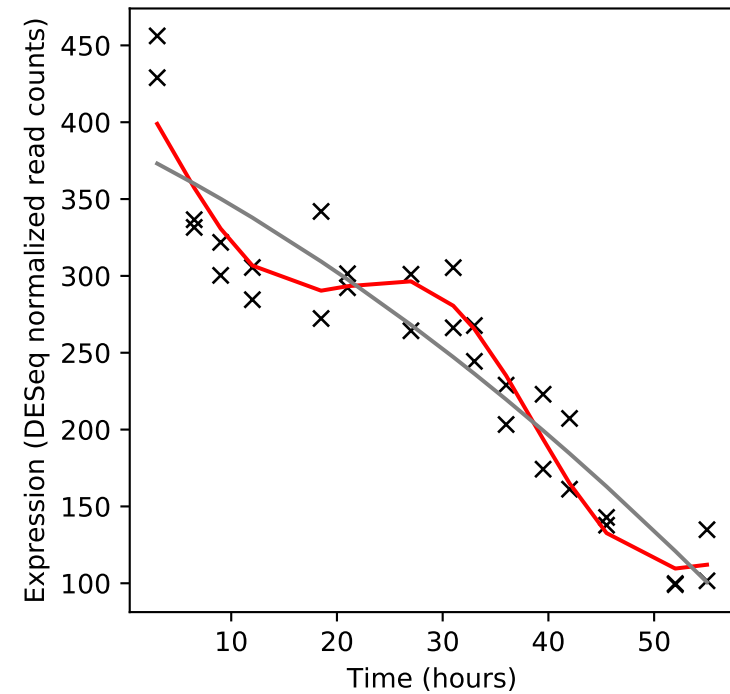

Rv2740/ephG

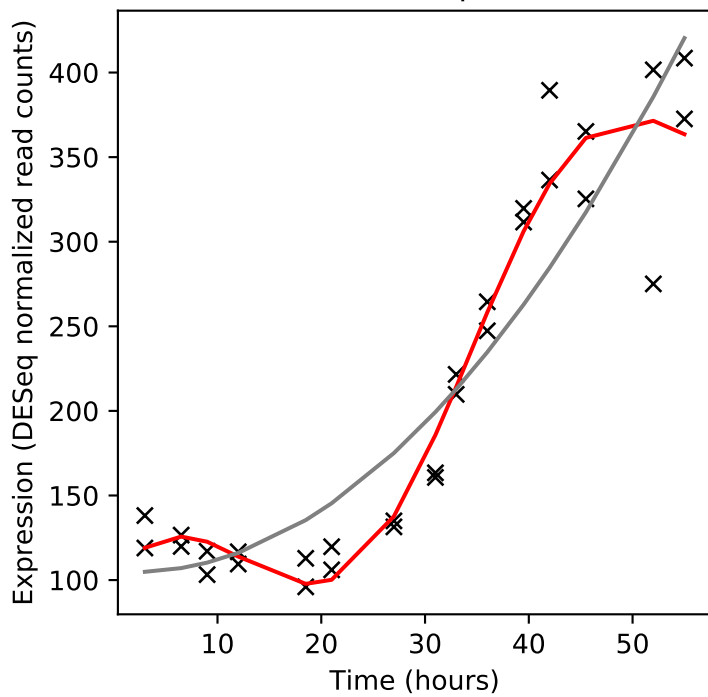

Rv2741/PE\_PGRS47

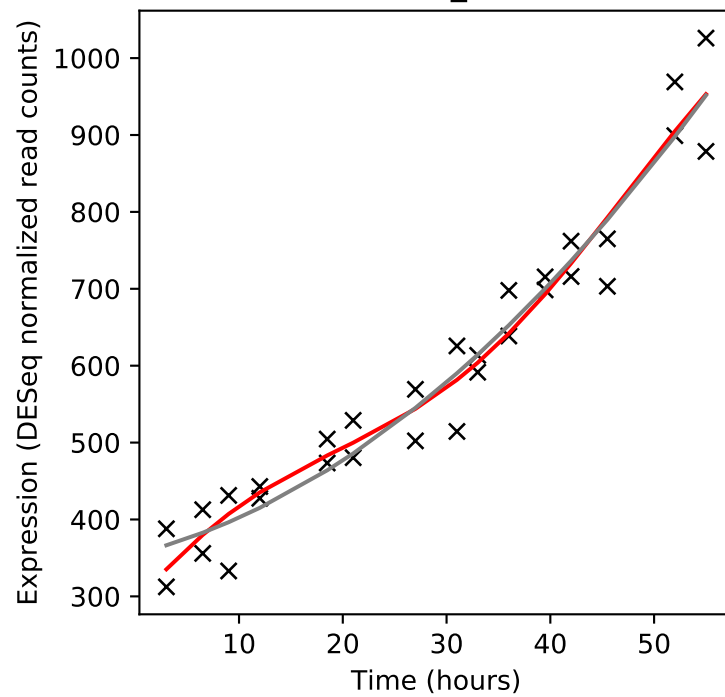

Rv2742c/-

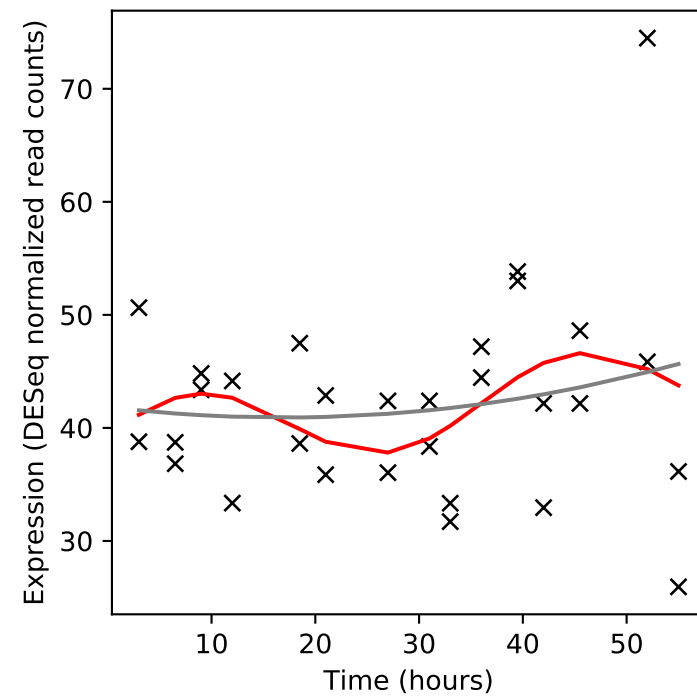

Rv2743c/-

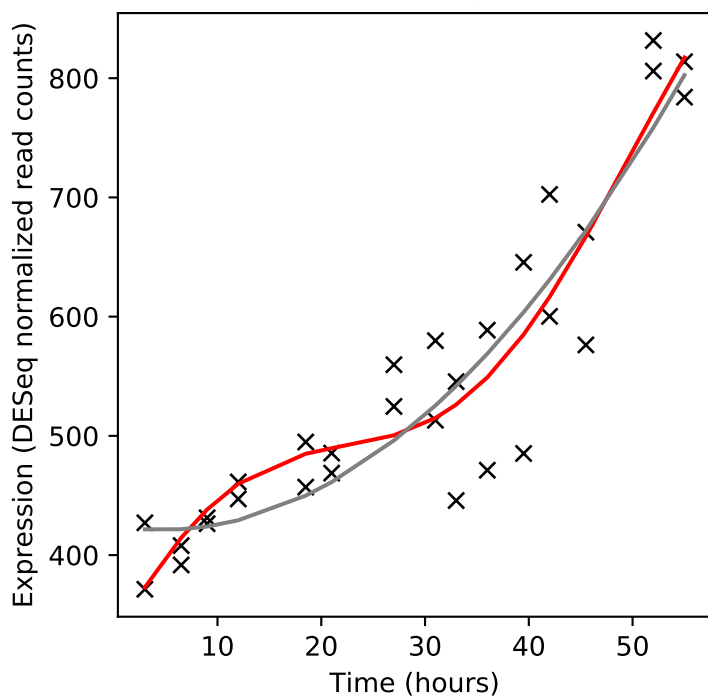

Rv2744c/35kd\_ag

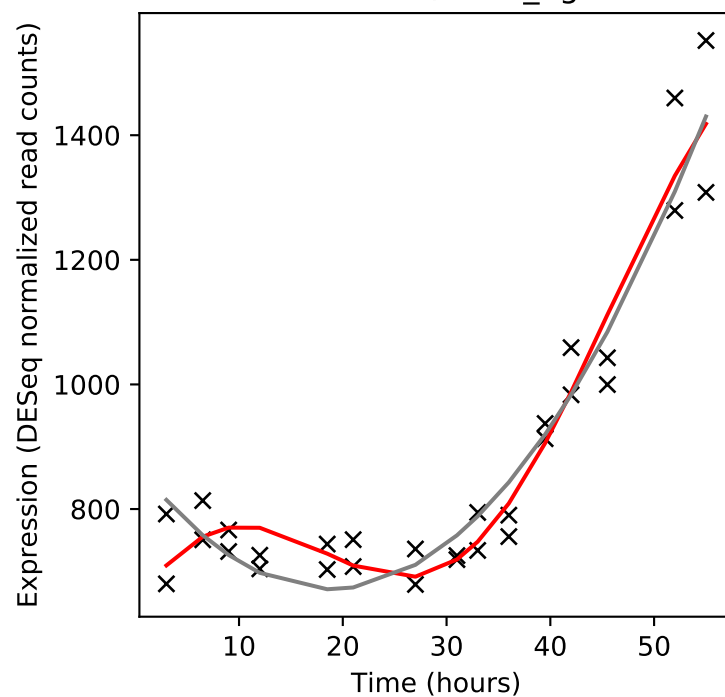

Rv2745c/clgR

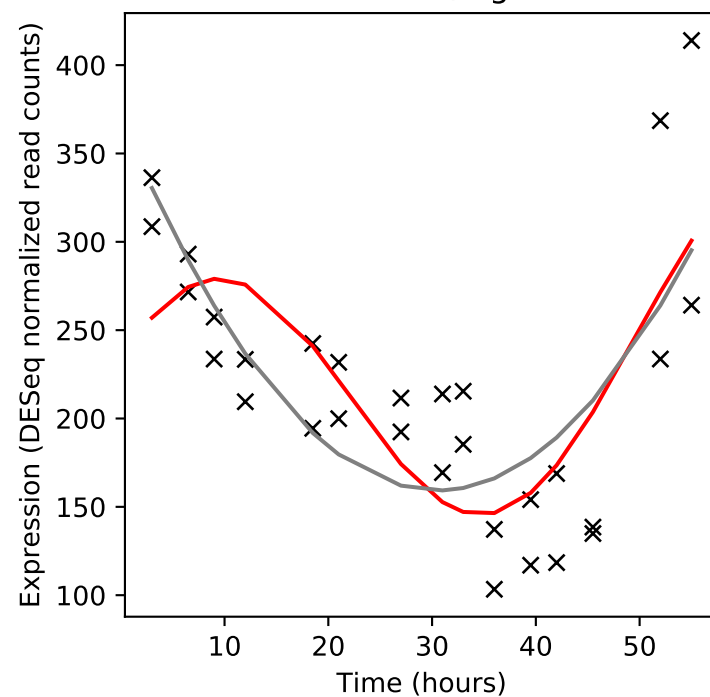

Rv2746c/pgsA3

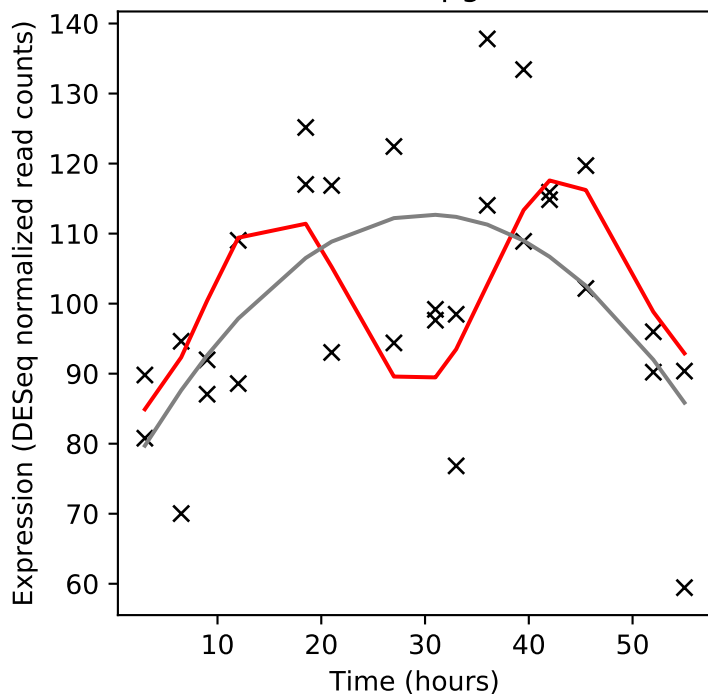

Rv2747/argA

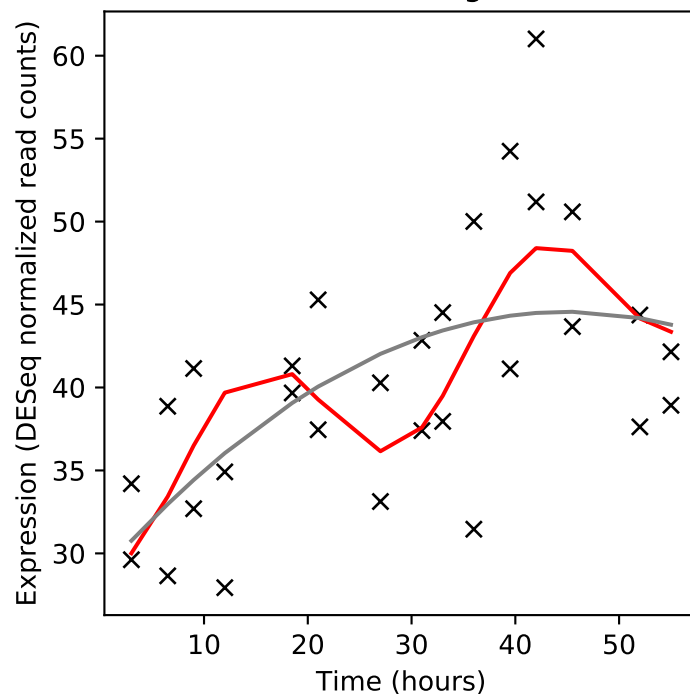

Rv2748c/ftsK

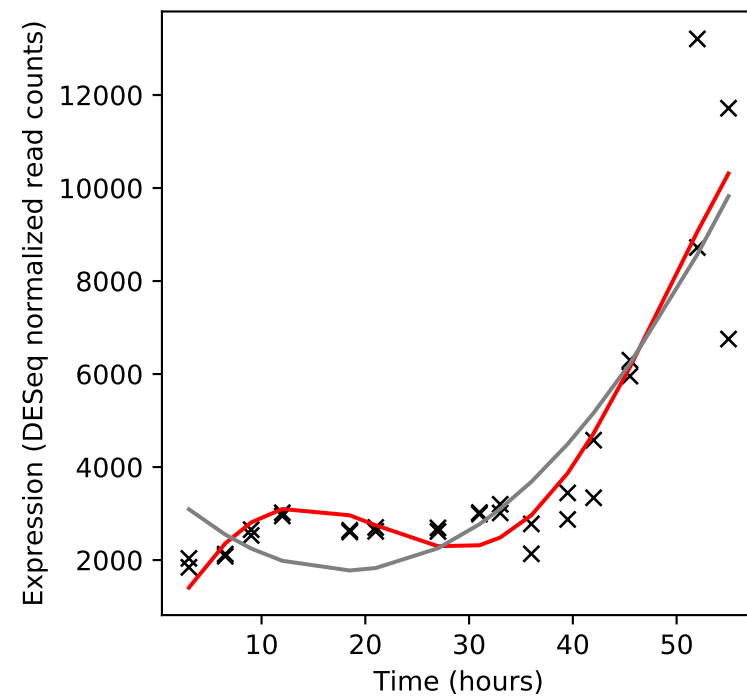

Rv2749/-

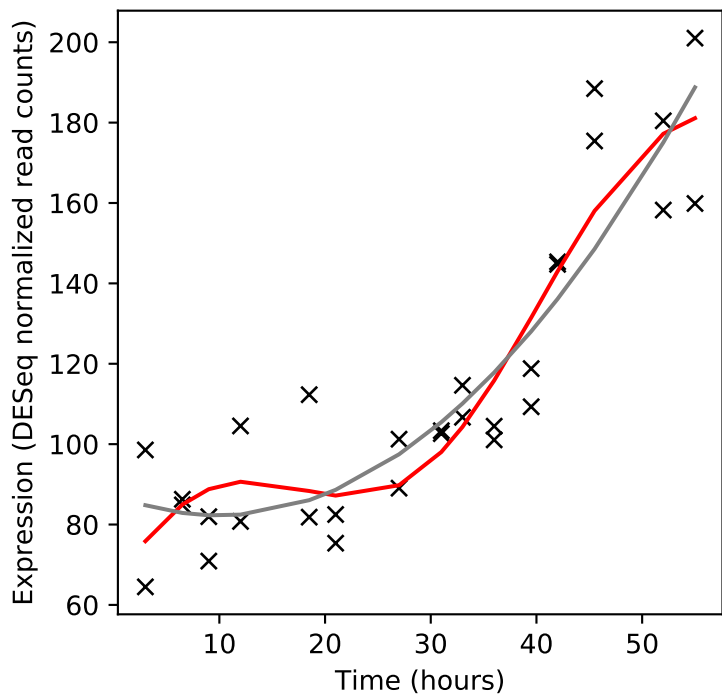

Rv2750/-

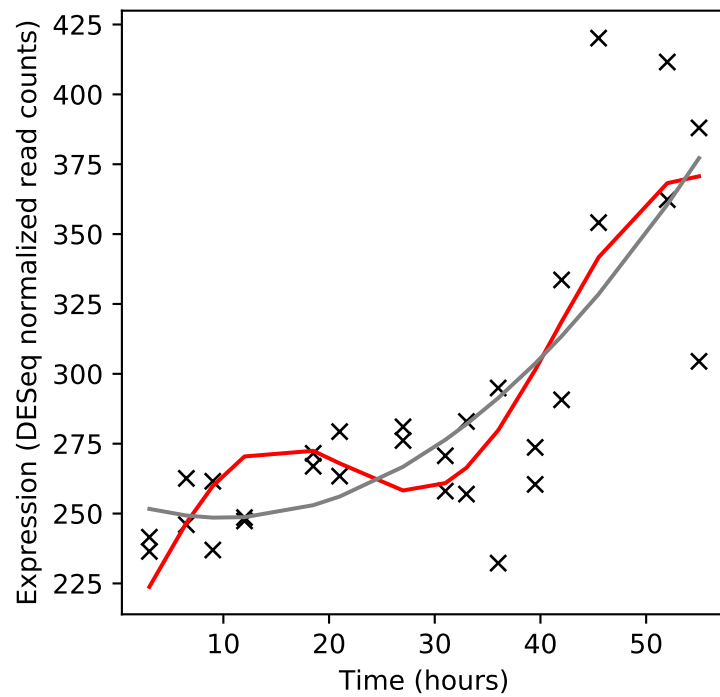

Rv2751/-

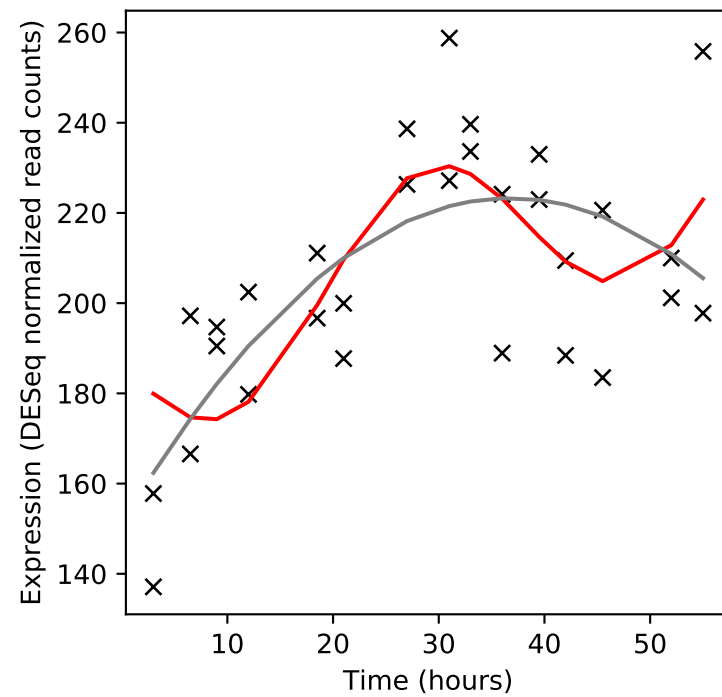

Rv2752c/-

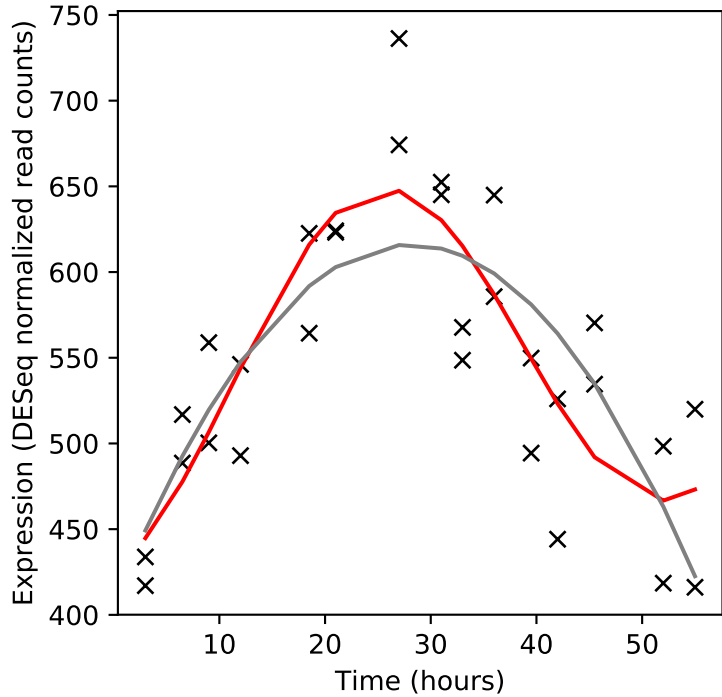

Rv2753c/dapA

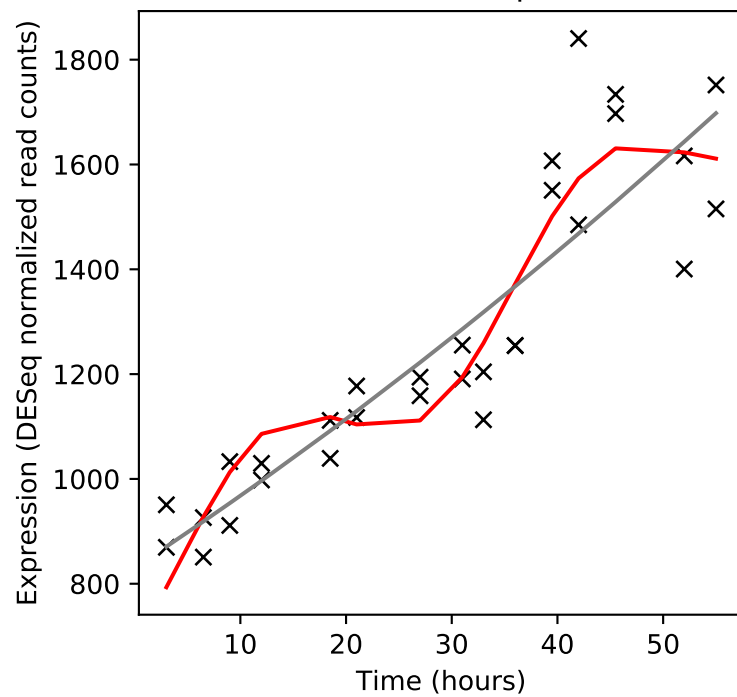

Rv2754c/thyX

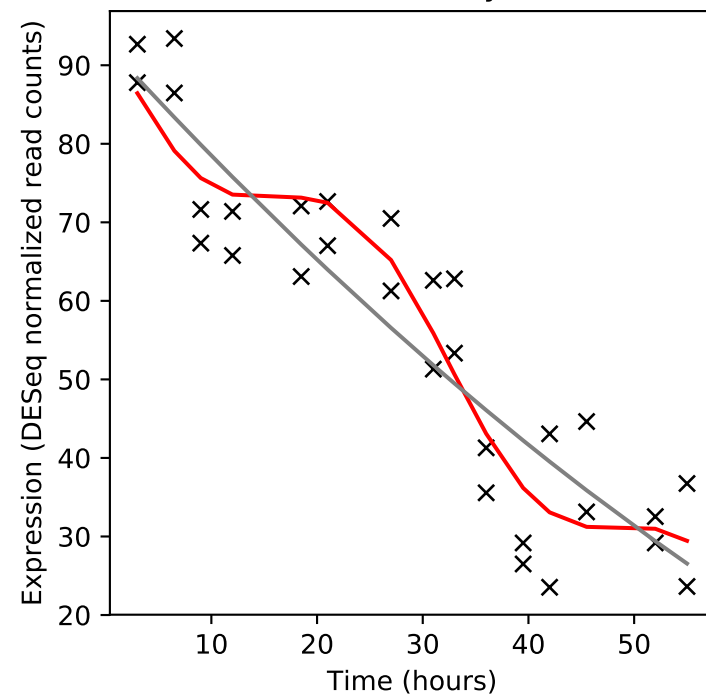

Rv2755c/hsdS.1

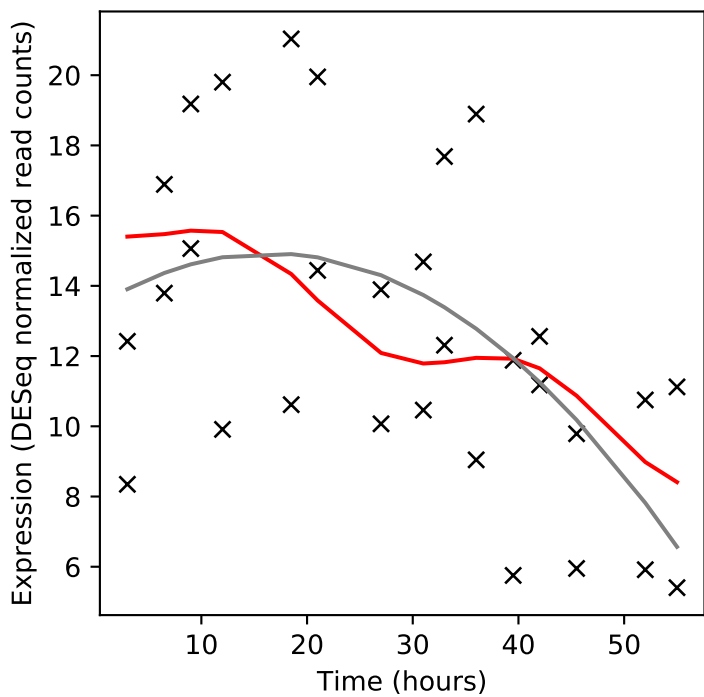

Rv2756c/hsdM

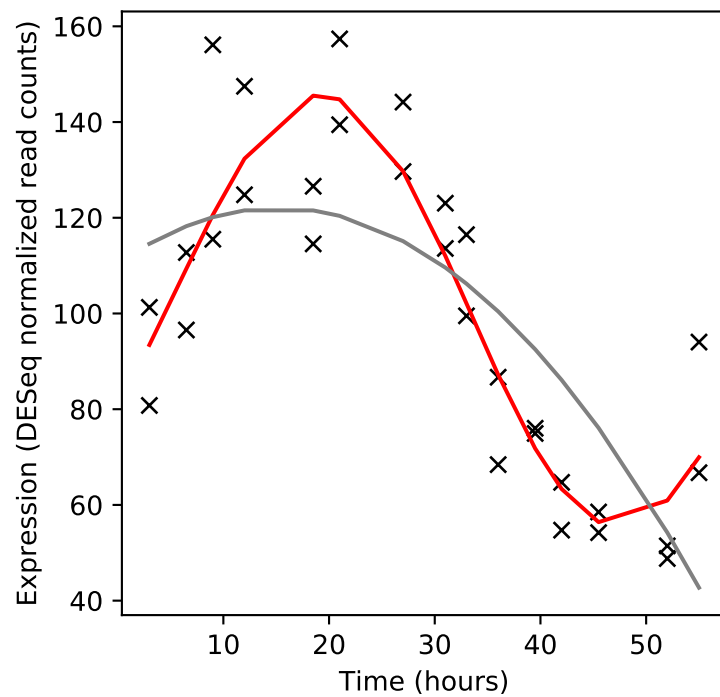

Rv2757c/vapC21

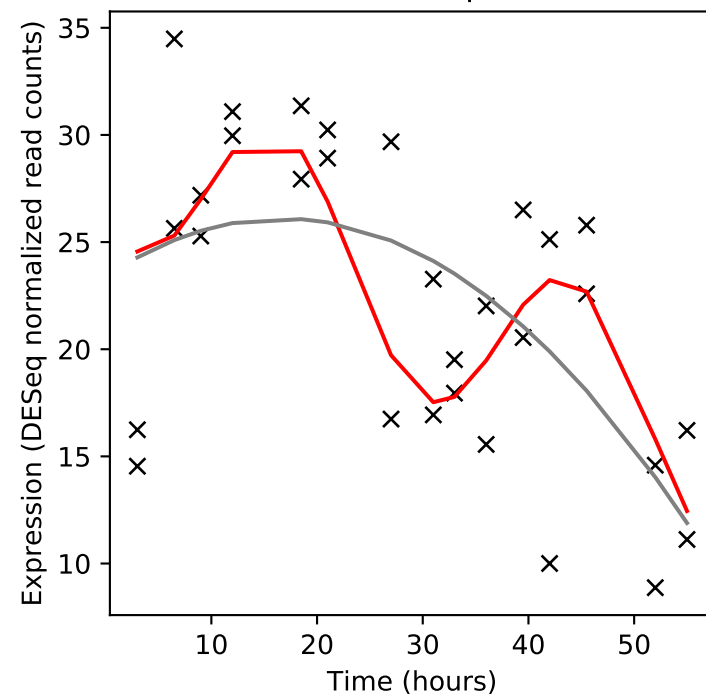

Rv2758c/vapB21

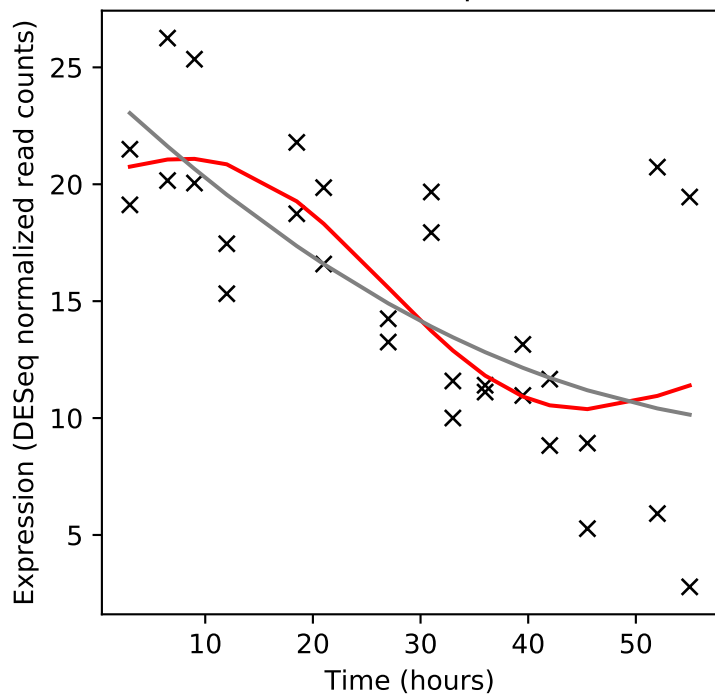

Rv2759c/vapC42

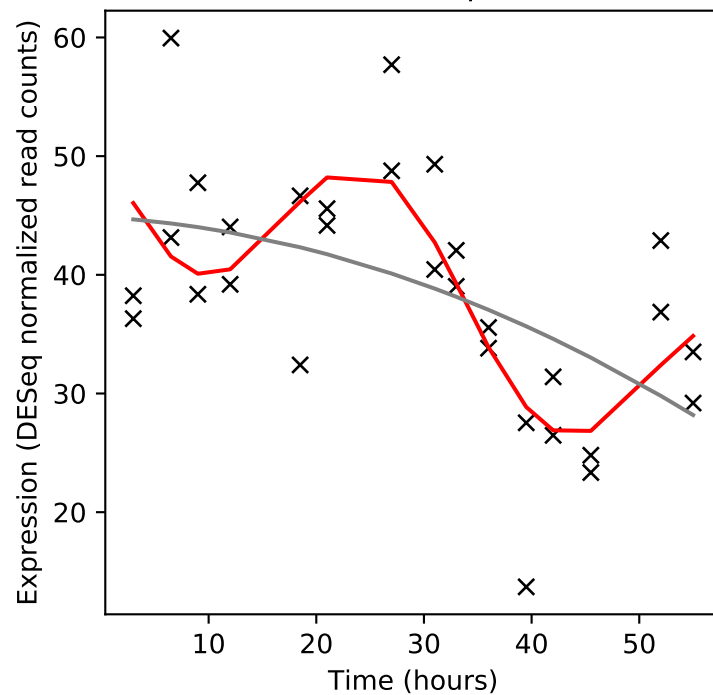

Rv2760c/vapB42

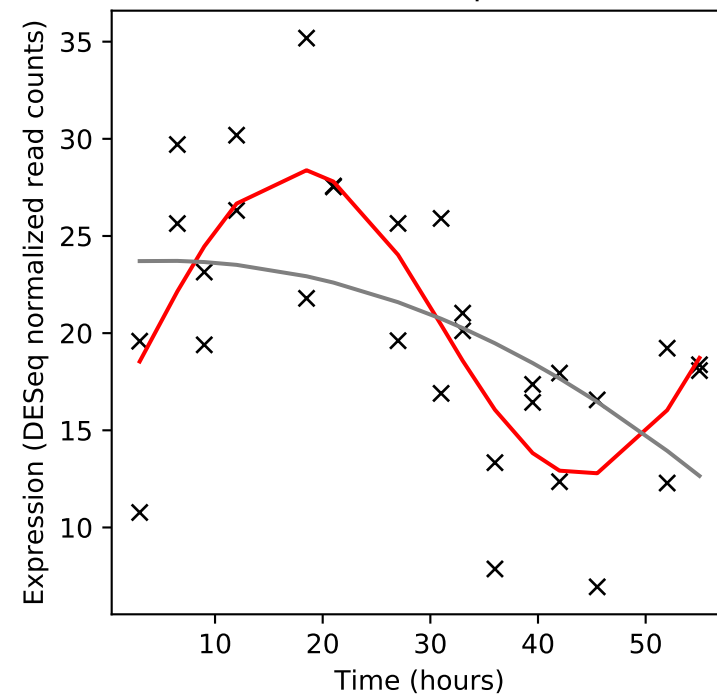

Rv2761c/hsdS

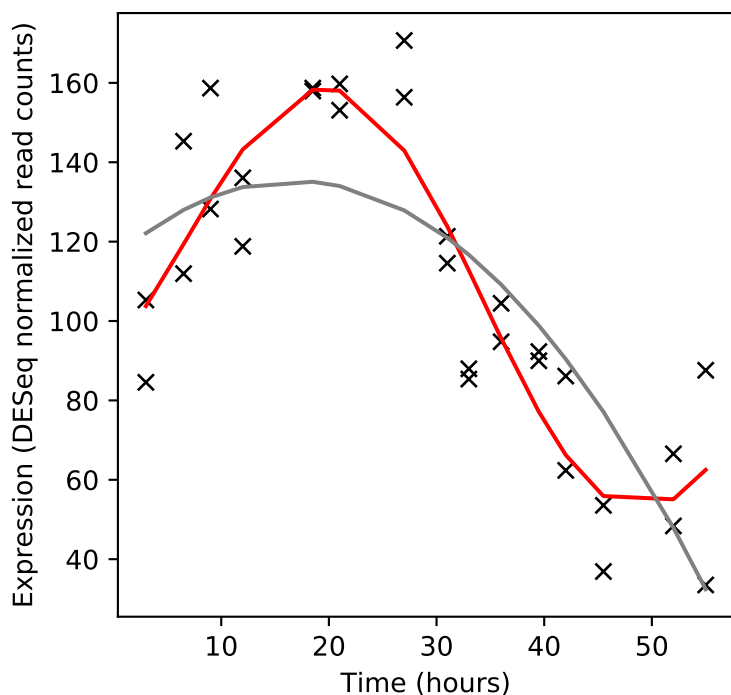

Rv2762c/-

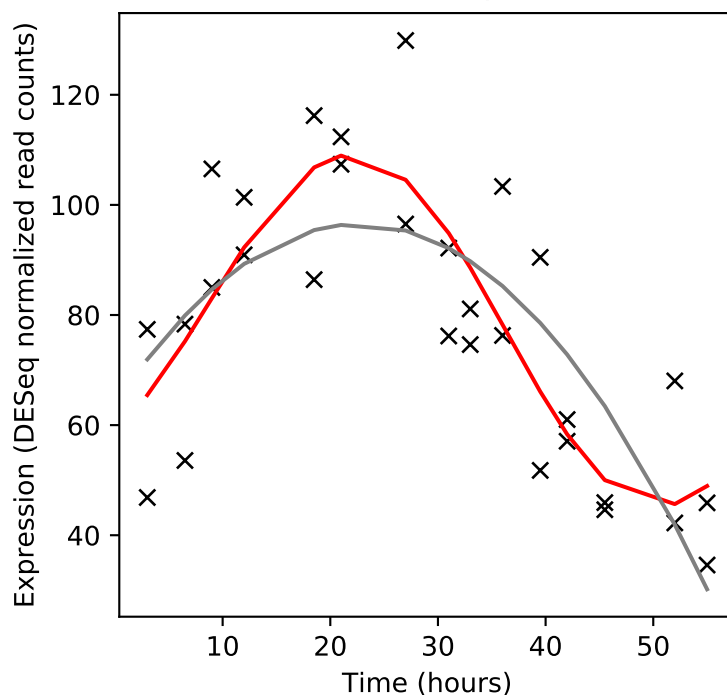

Rv2763c/dfrA

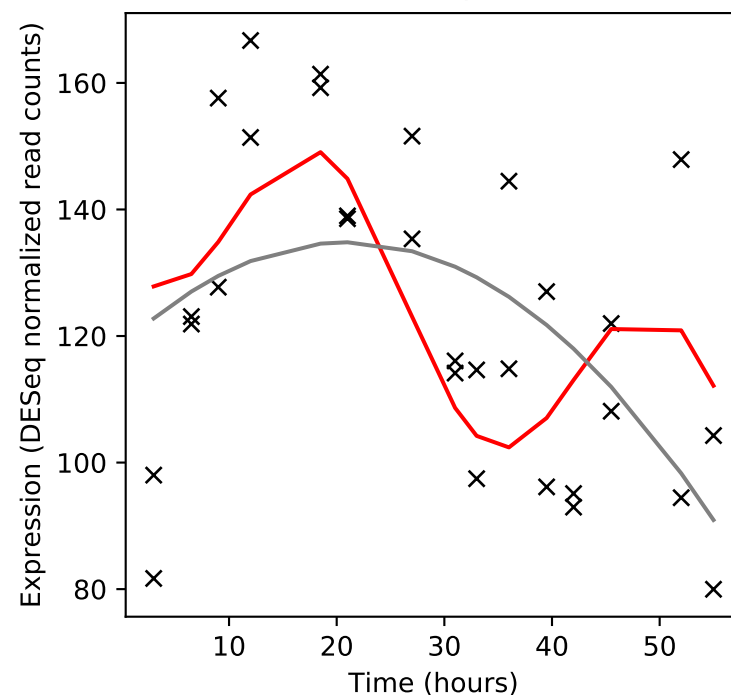

Rv2764c/thyA

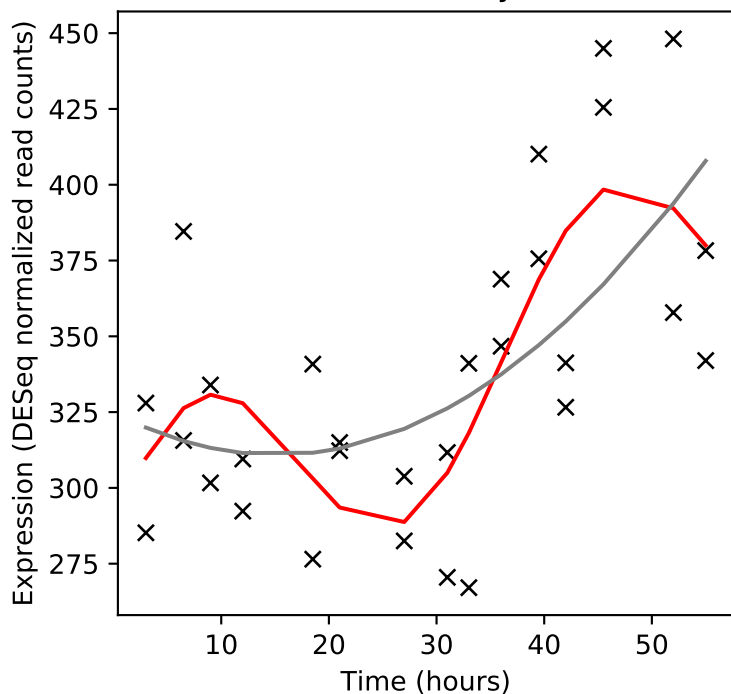

Rv2765c/-

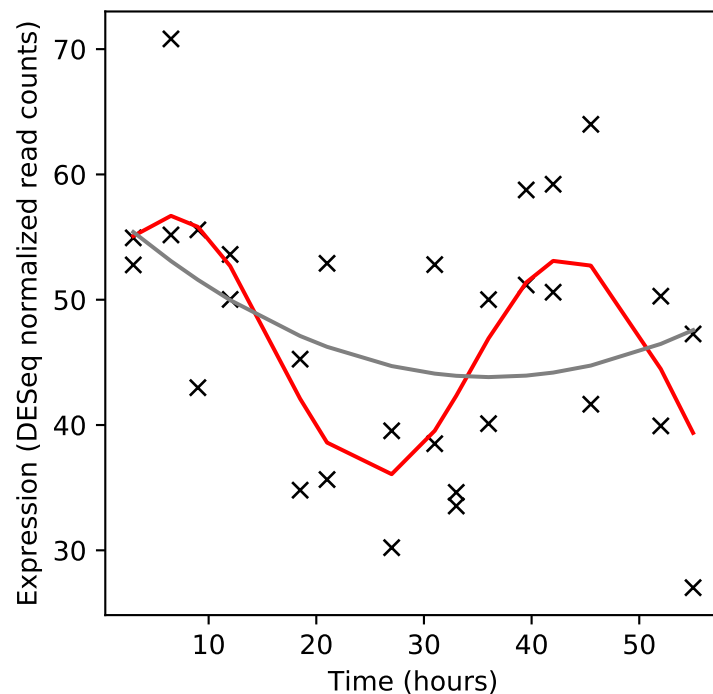

Rv2766c/-

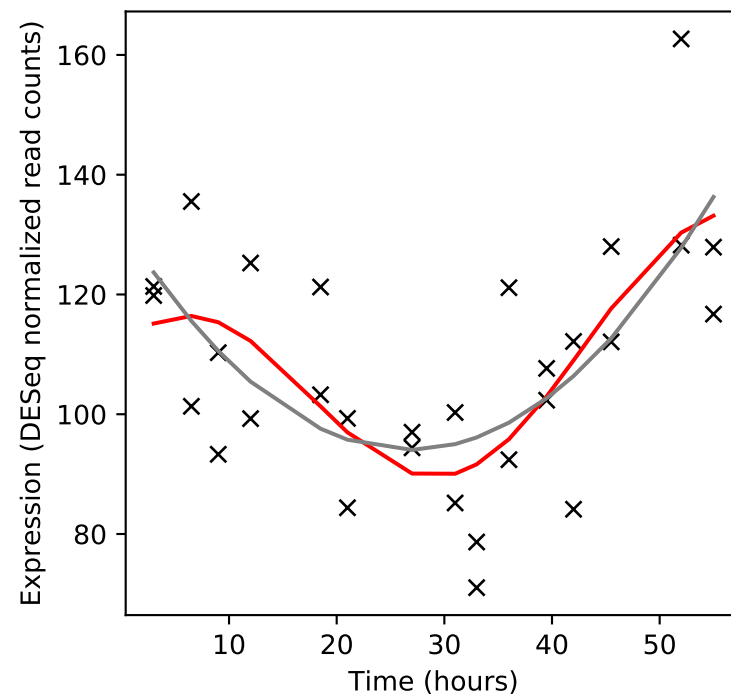

Rv2767c/-

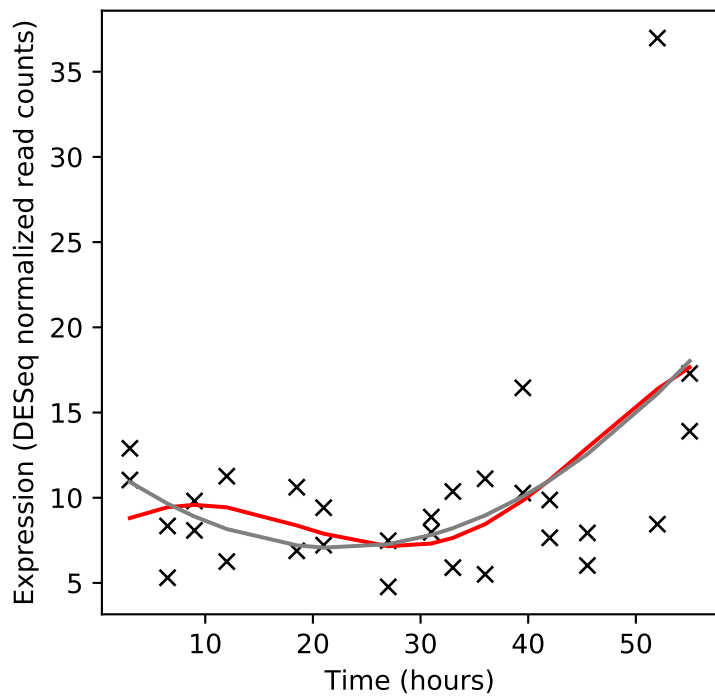

Rv2768c/PPE43

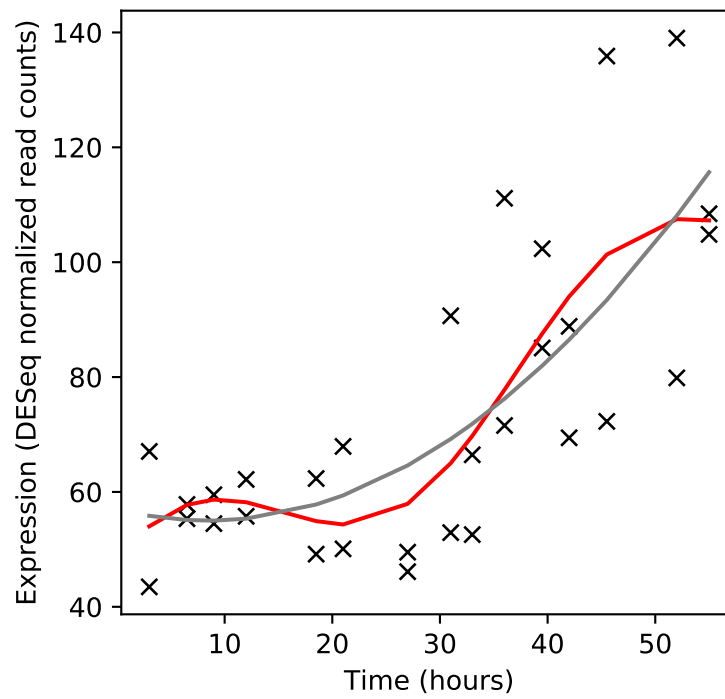

Rv2769c/PE27

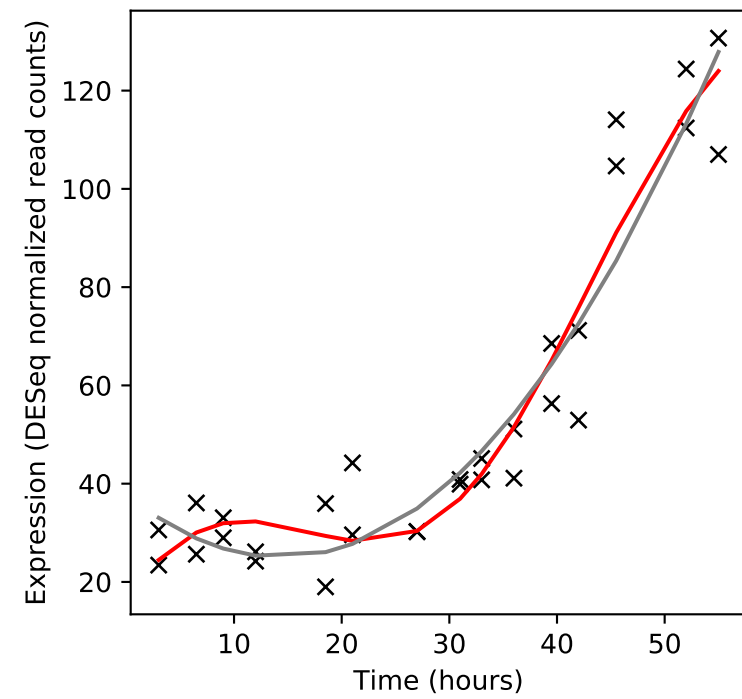

Rv2770c/PPE44

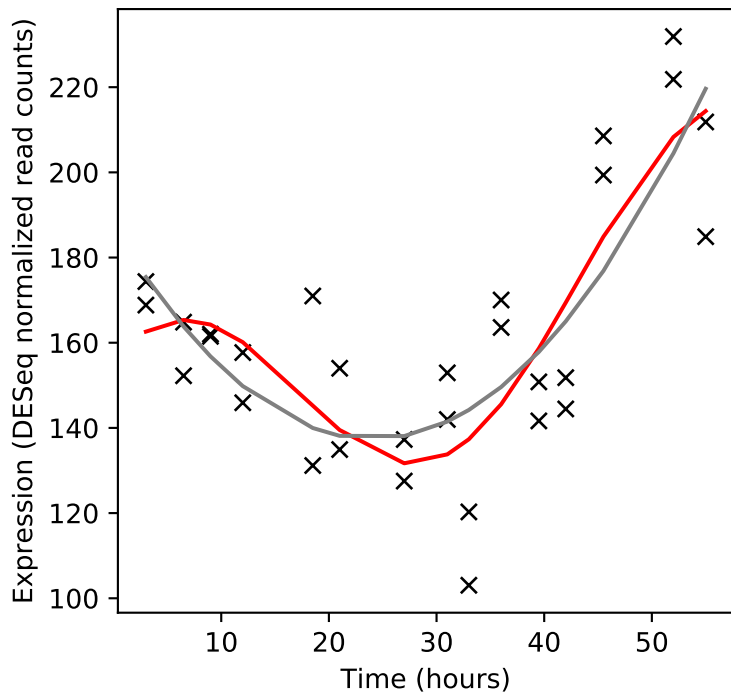

Rv2771c/-

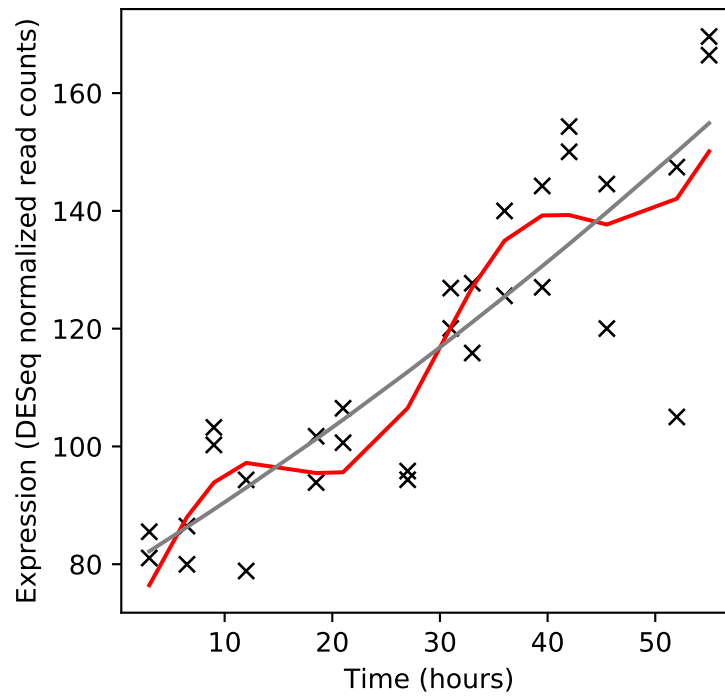

Rv2772c/-

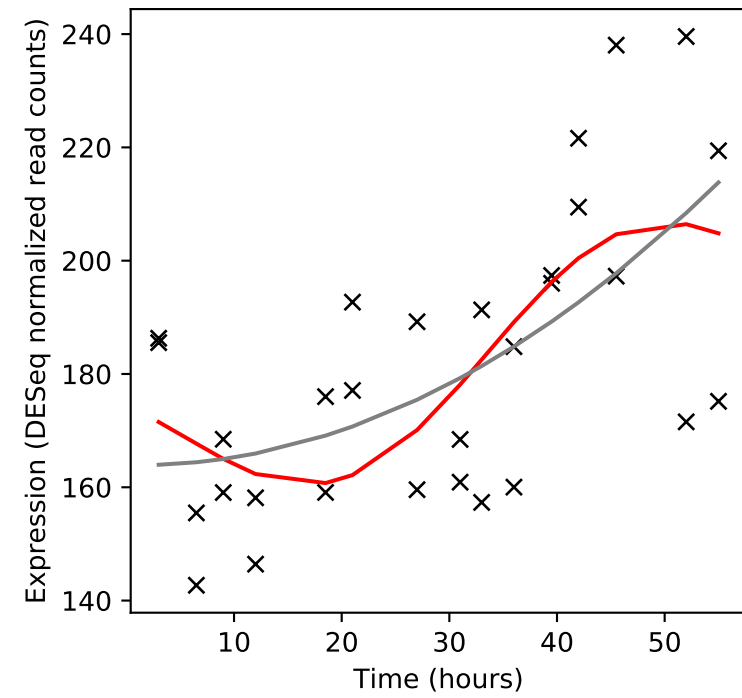

Rv2773c/dapB

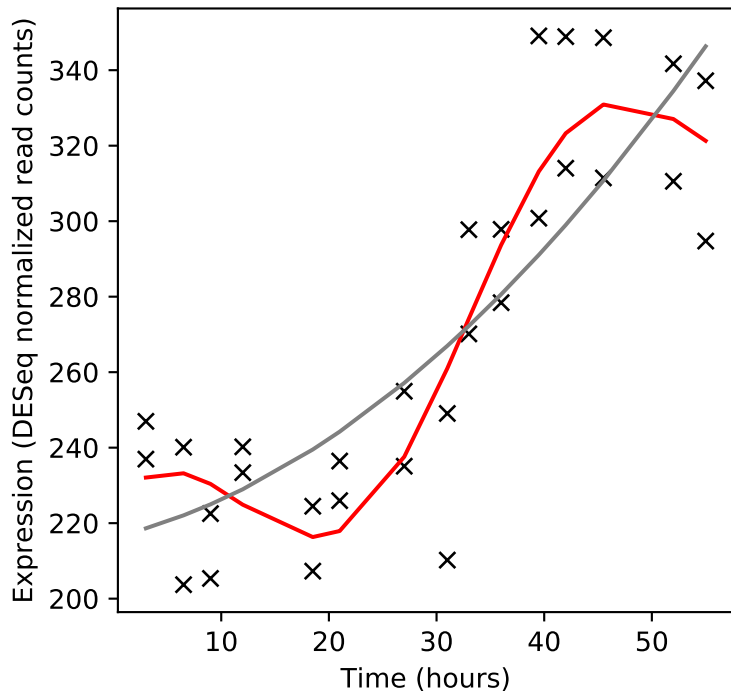

Rv2774c/-

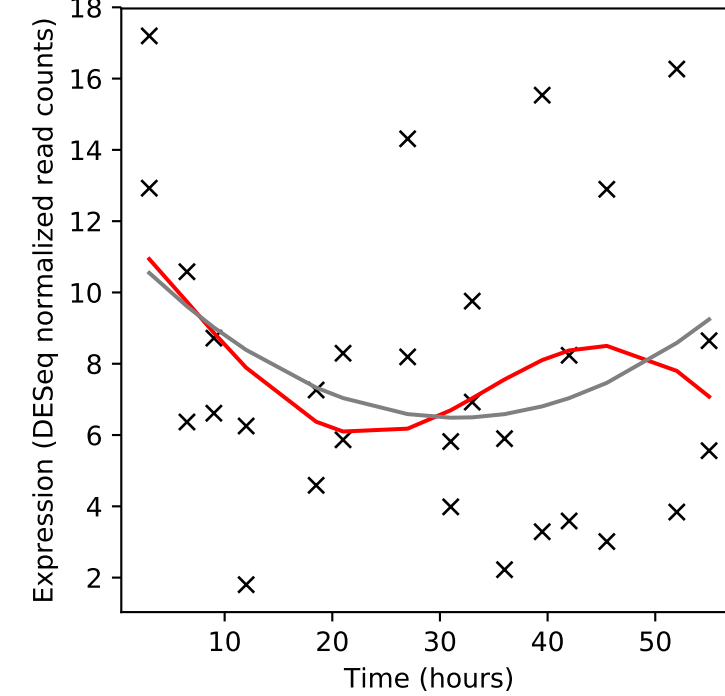

Rv2775c/-

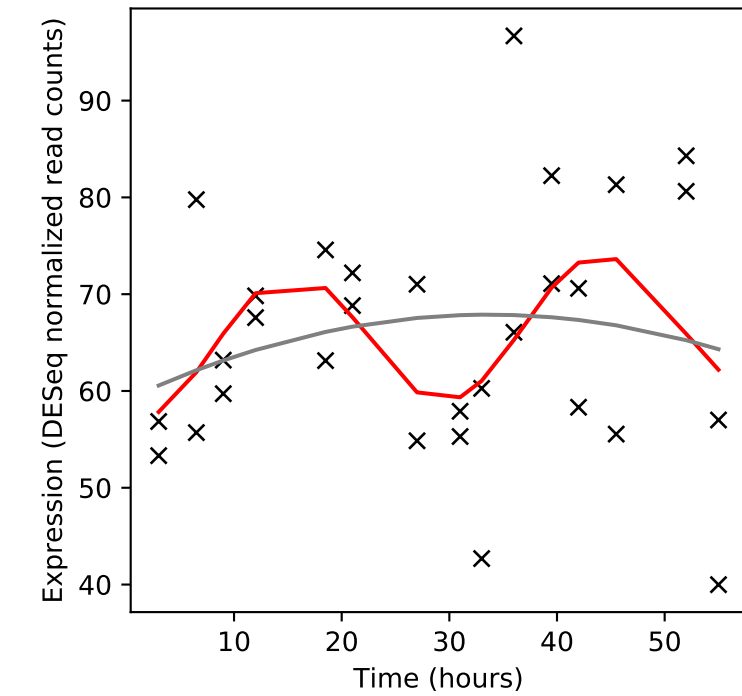

Rv2776c/-

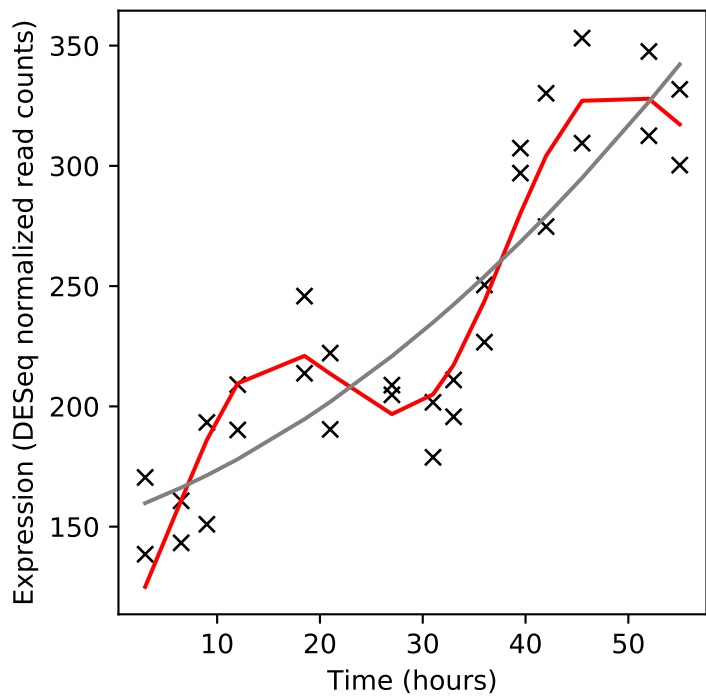

Rv2777c/-

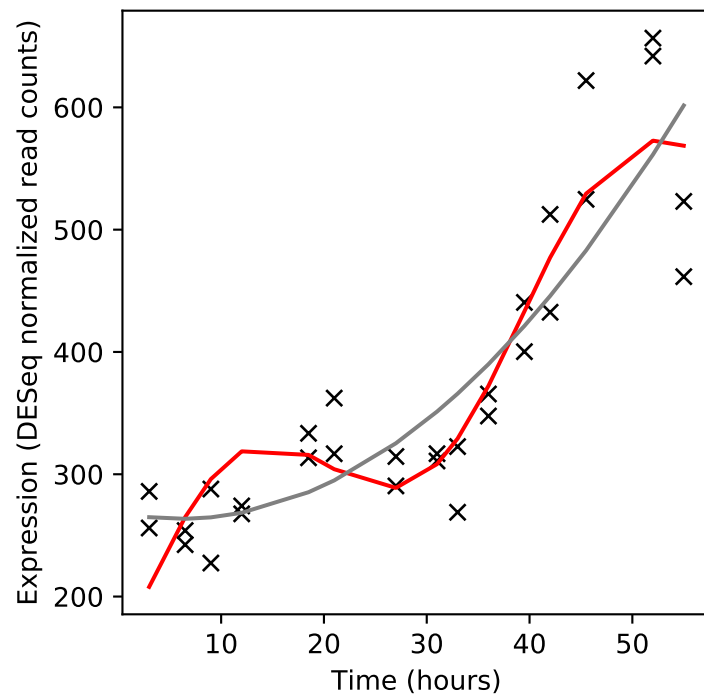

Rv2778c/-

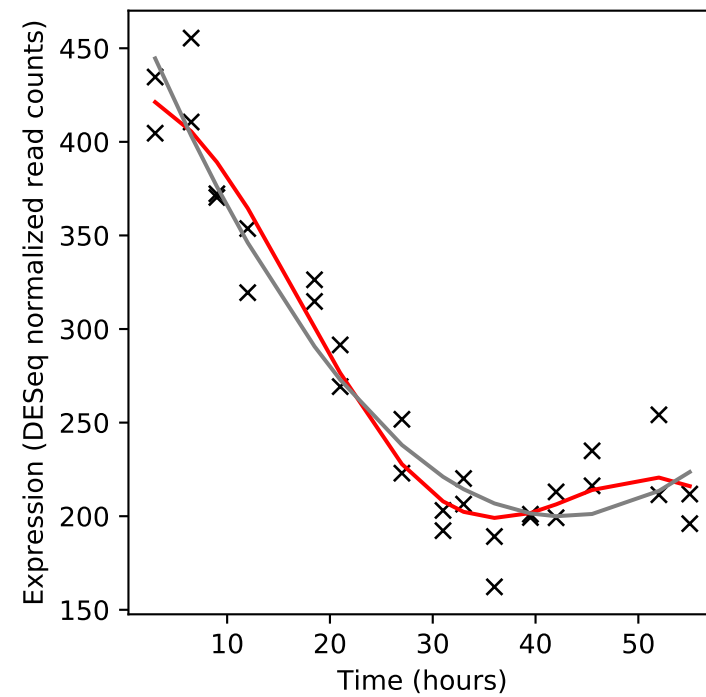

Rv2779c/-

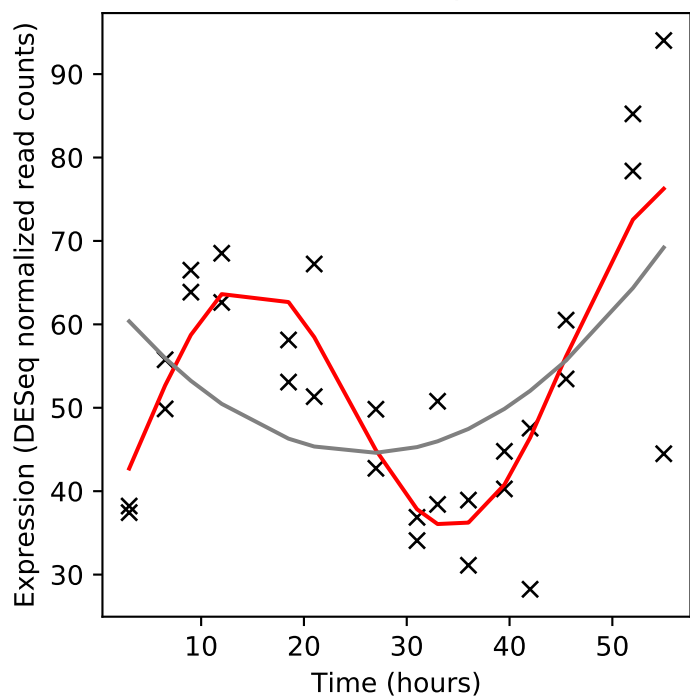

Rv2780/ald

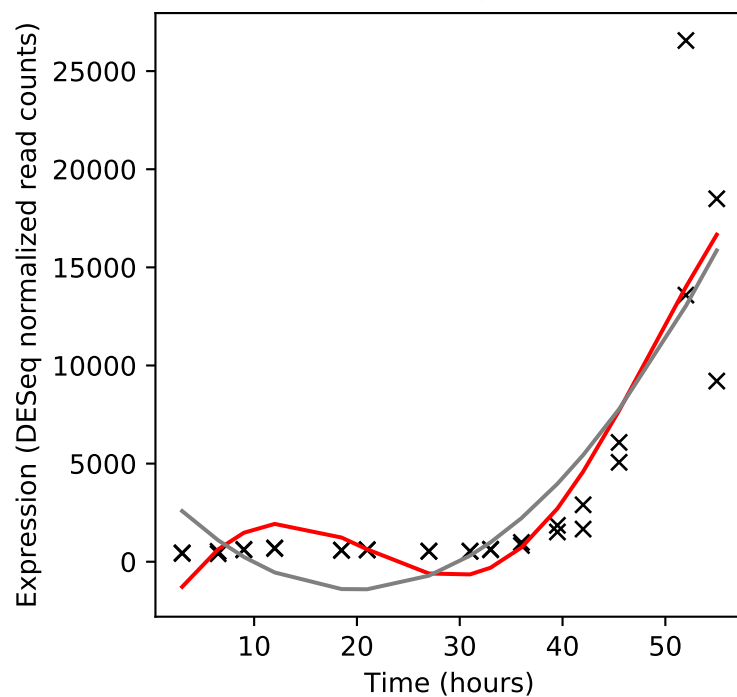

Rv2781c/-

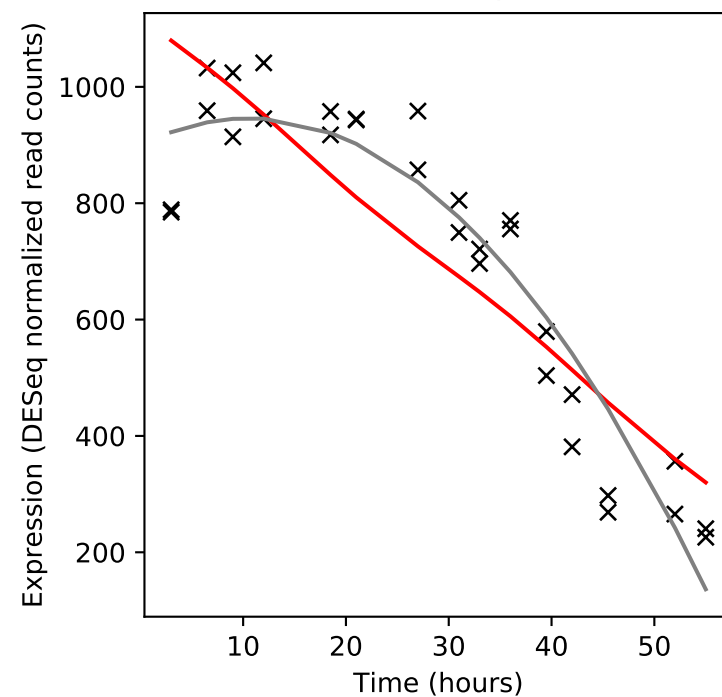

Rv2782c/pepR

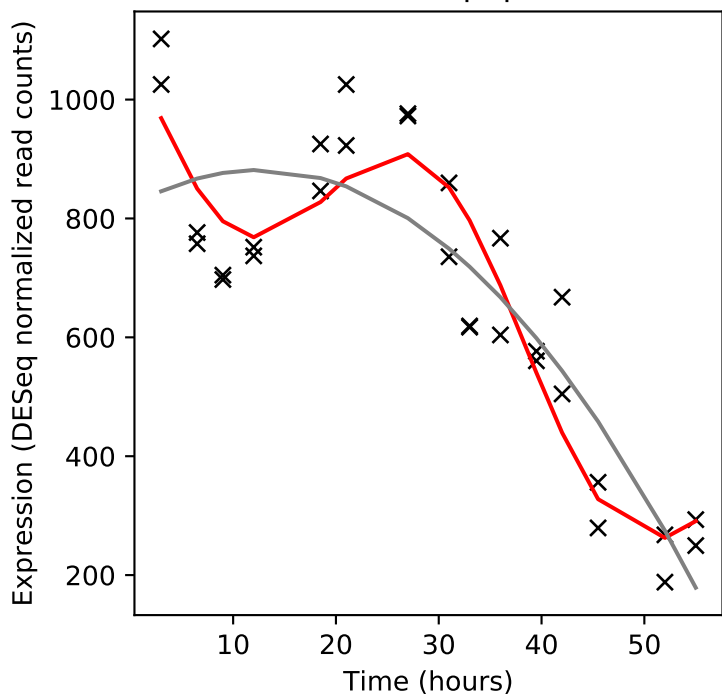

Rv2783c/gpsI

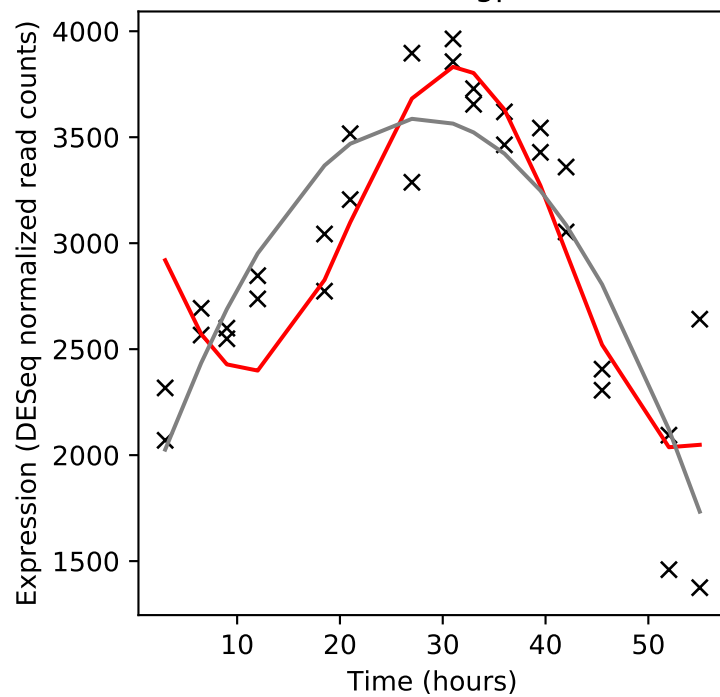

Rv2784c/lppU

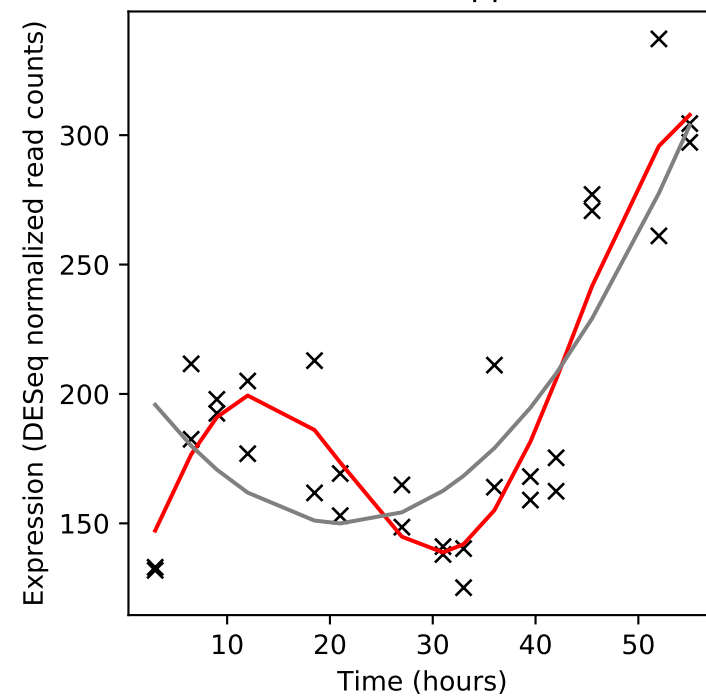



Rv2785c/rpsO

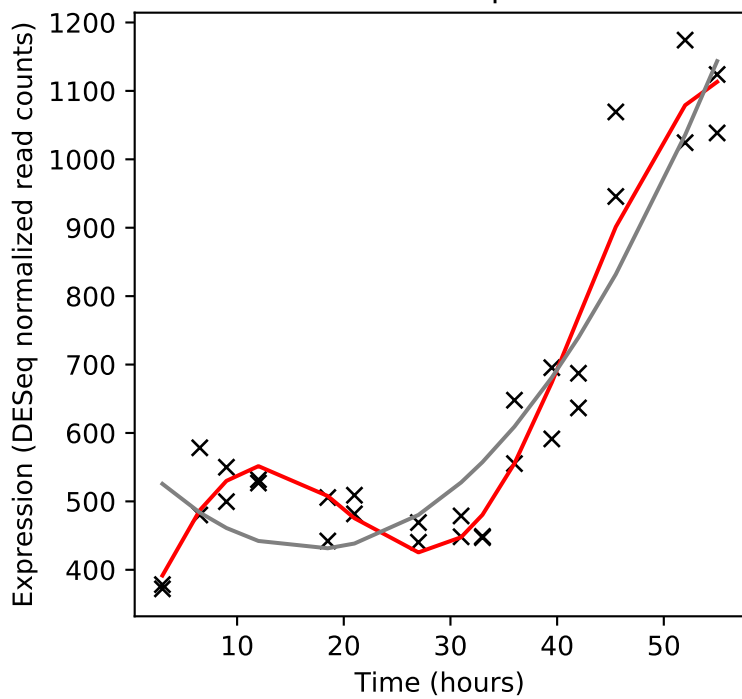

Rv2786c/ribF

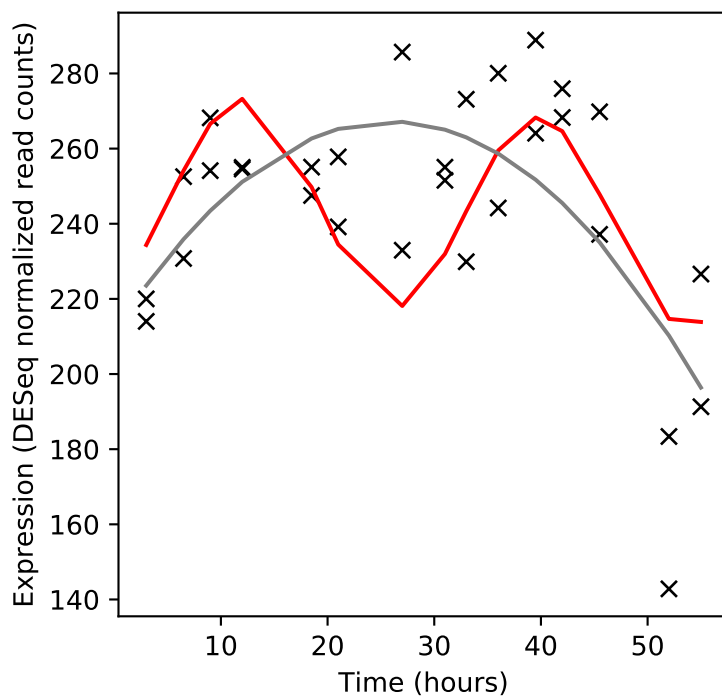

Rv2787/-

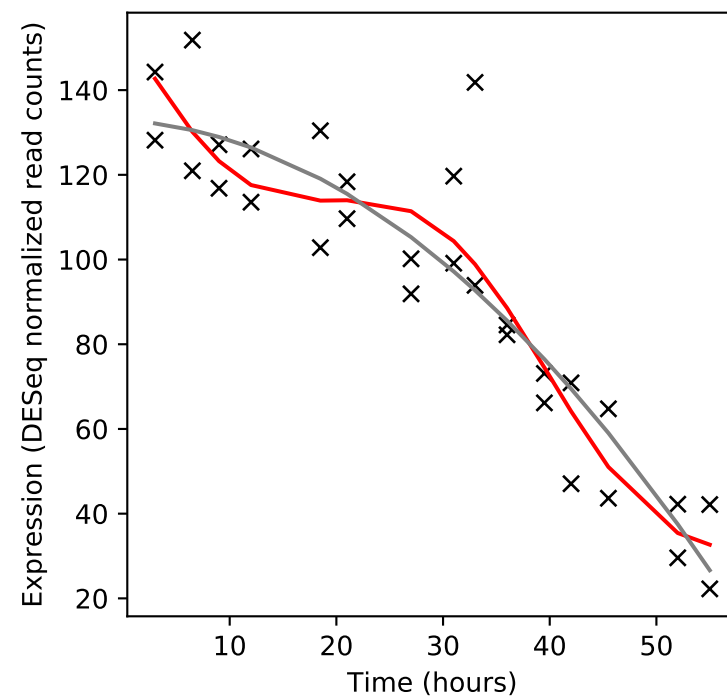

Rv2788/sirR

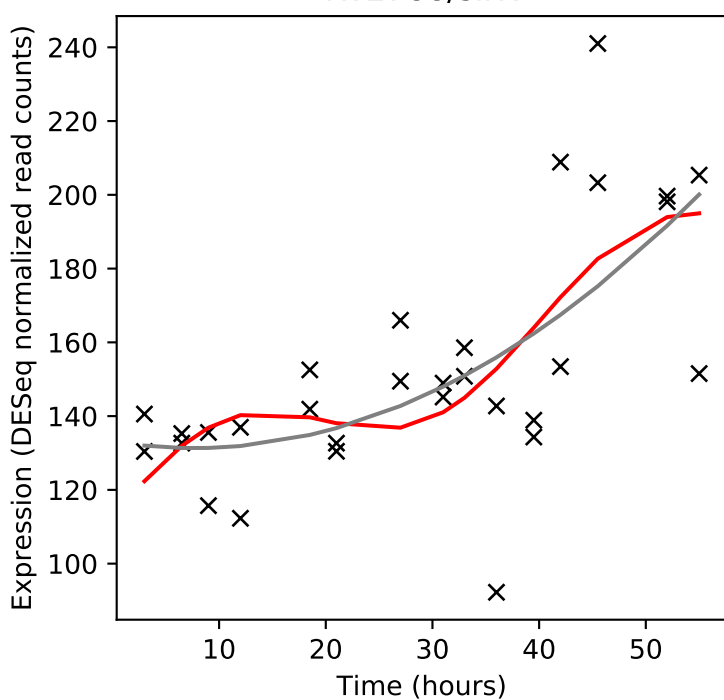

Rv2789c/fadE21

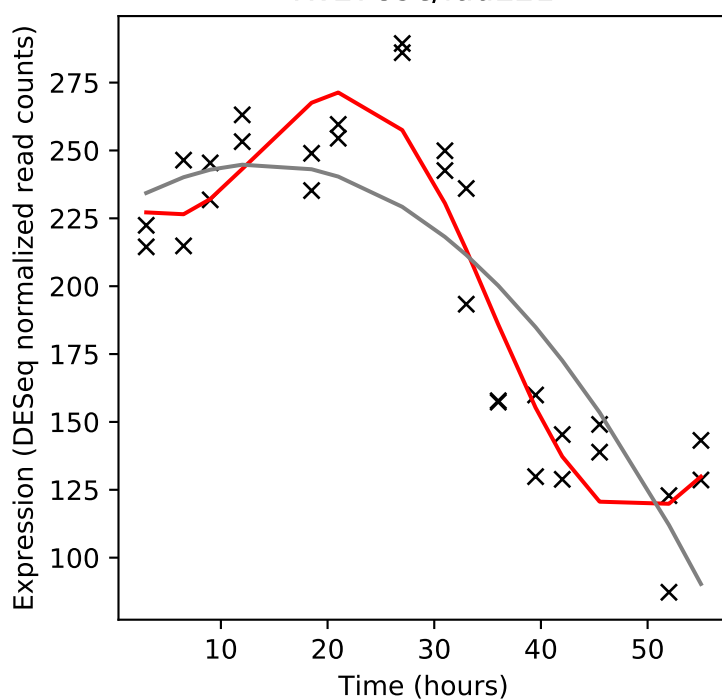

Rv2790c/ltp1

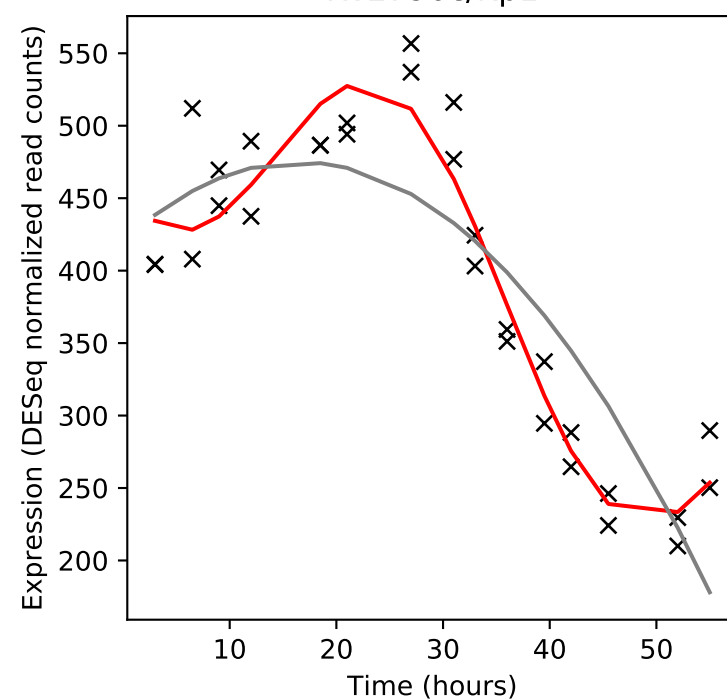

Rv2791c/-

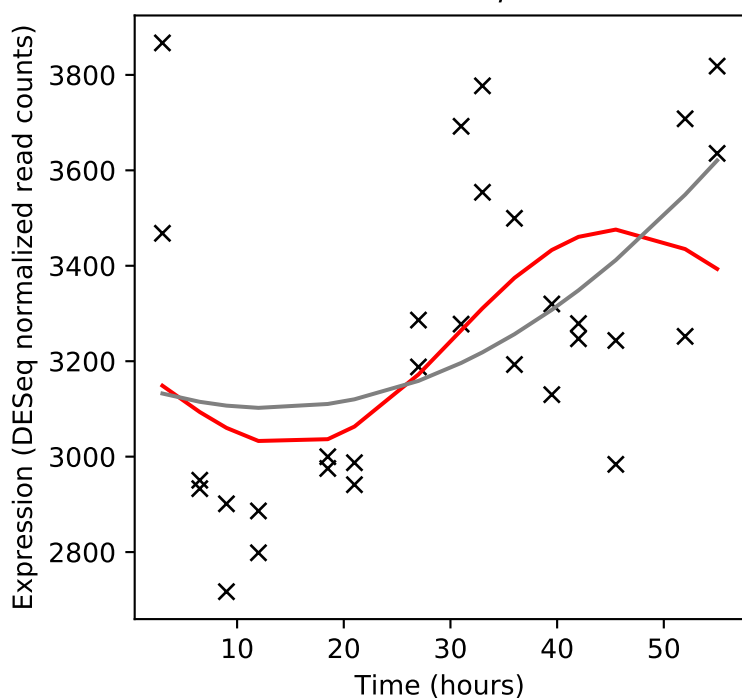

Rv2792c/-

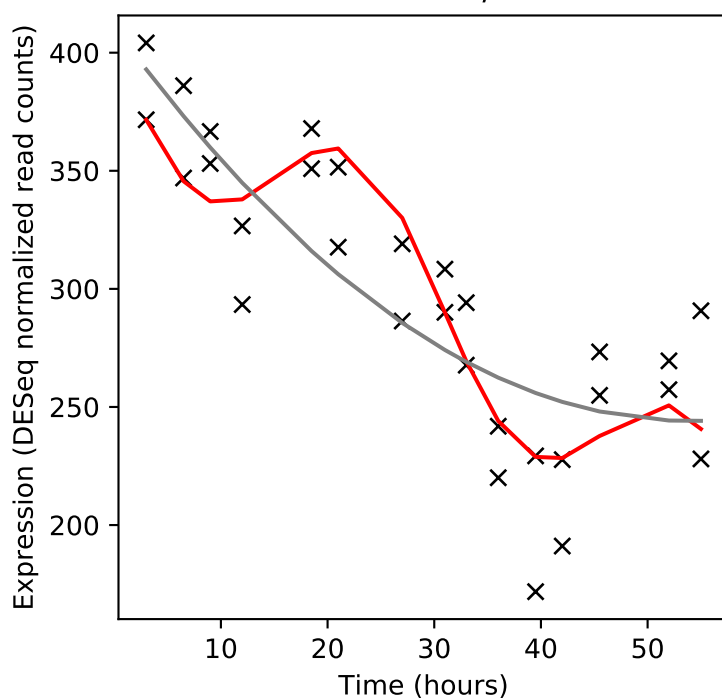

Rv2793c/truB

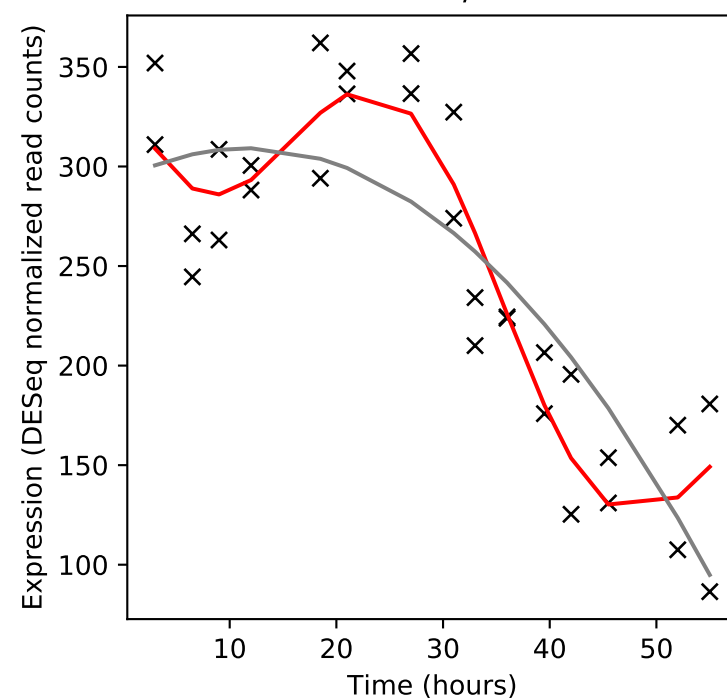

Rv2794c/pptT

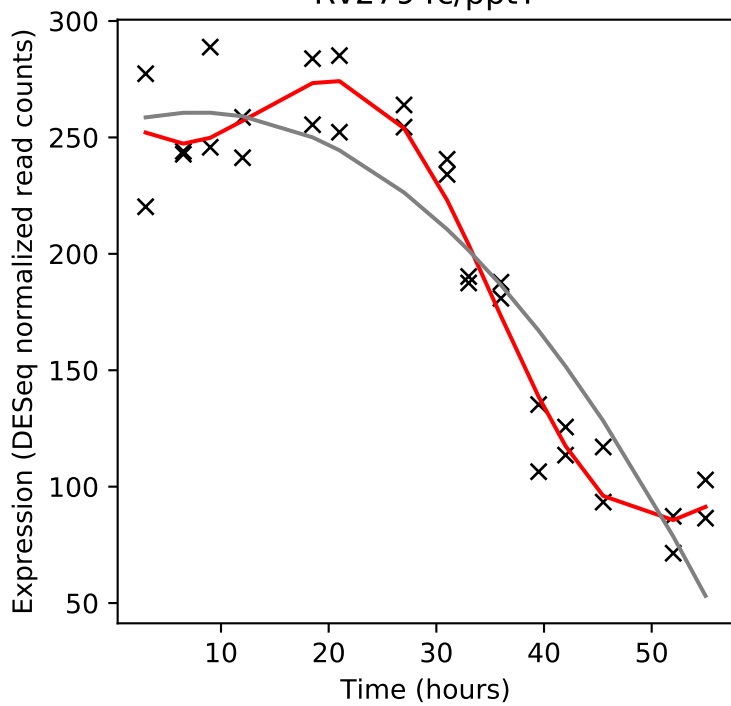

Rv2795c/-

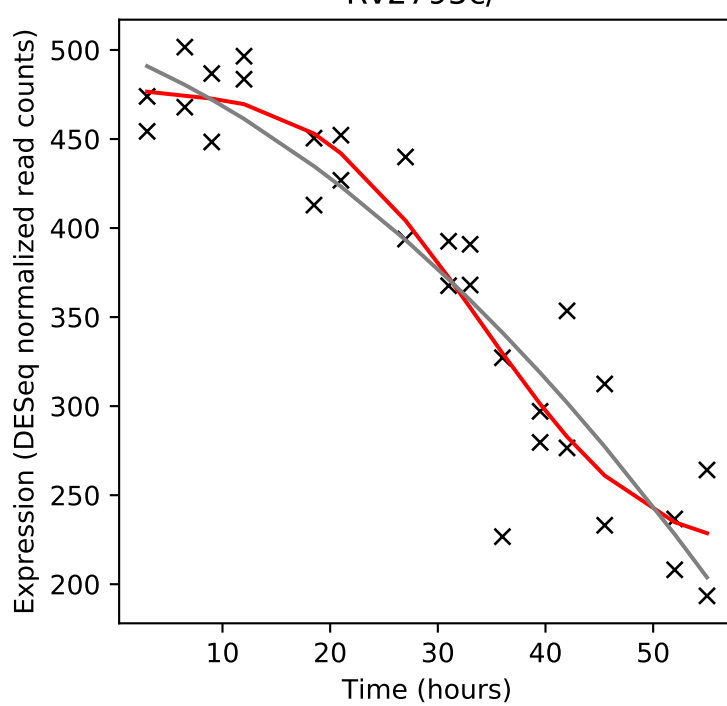

Rv2796c/lppV

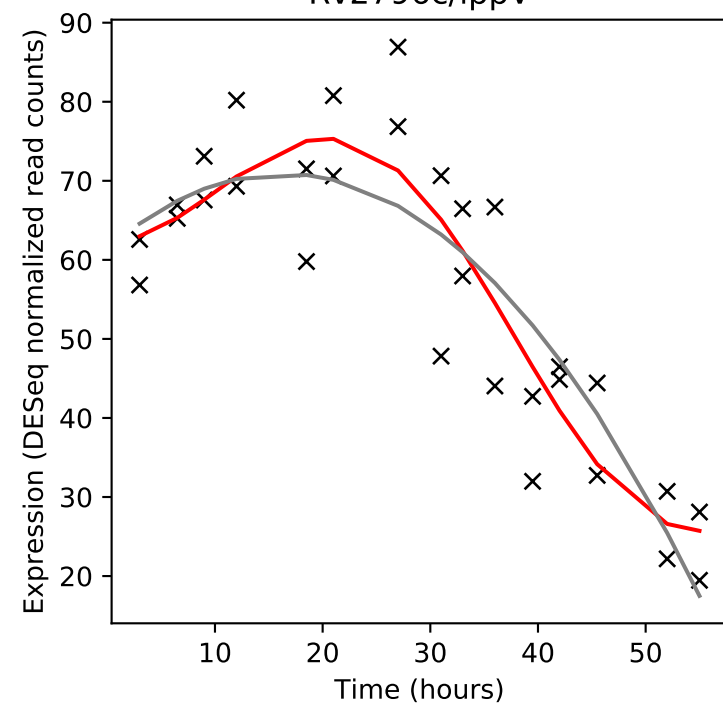

Rv2797c/-

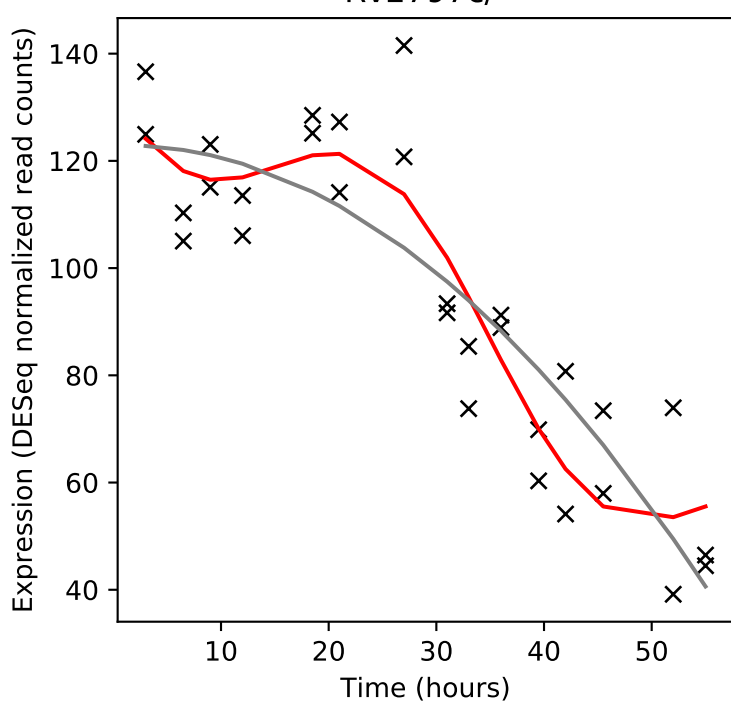

Rv2798c/-

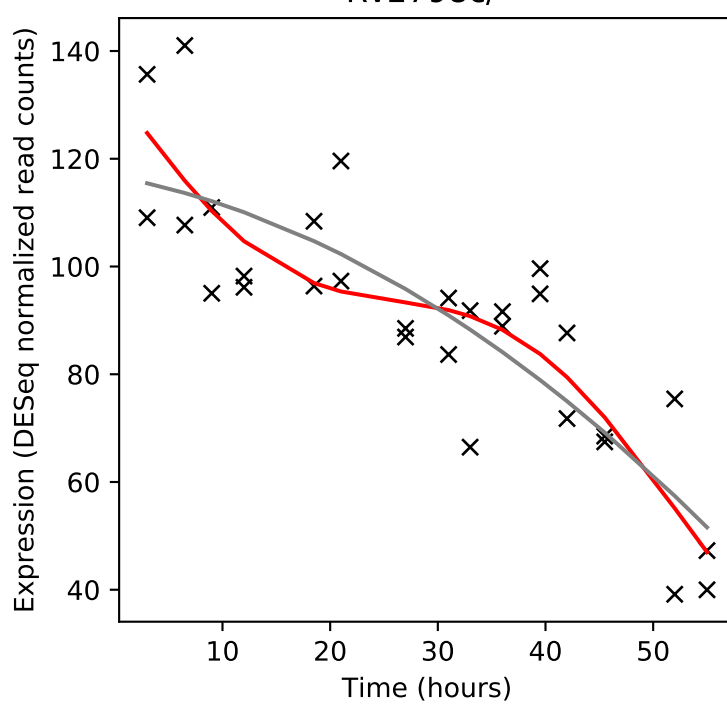

Rv2799/-

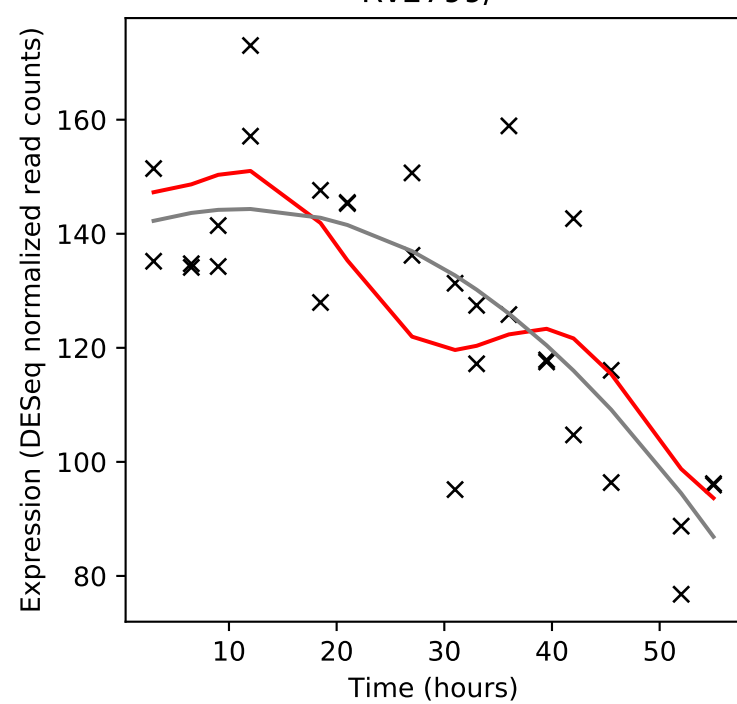

Rv2800/-

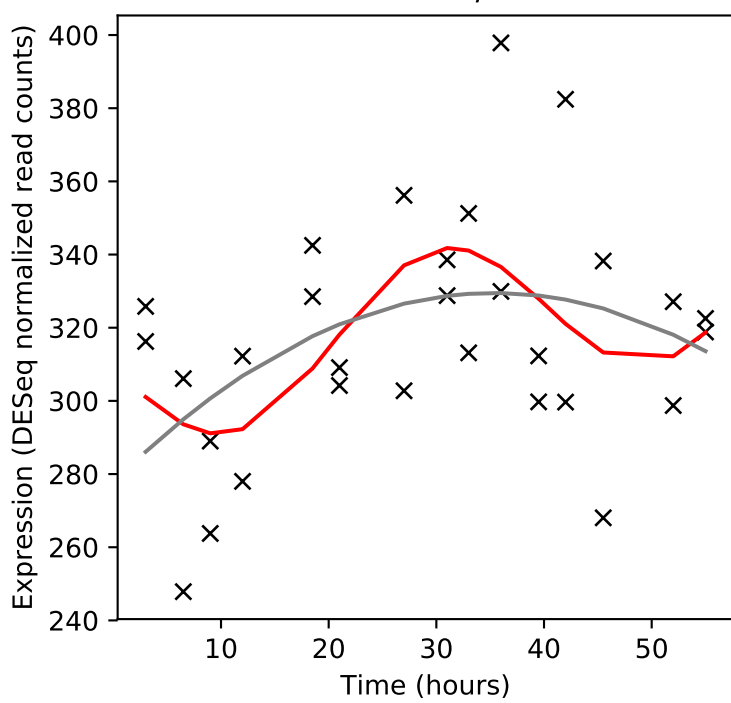

Rv2801c/mazF9

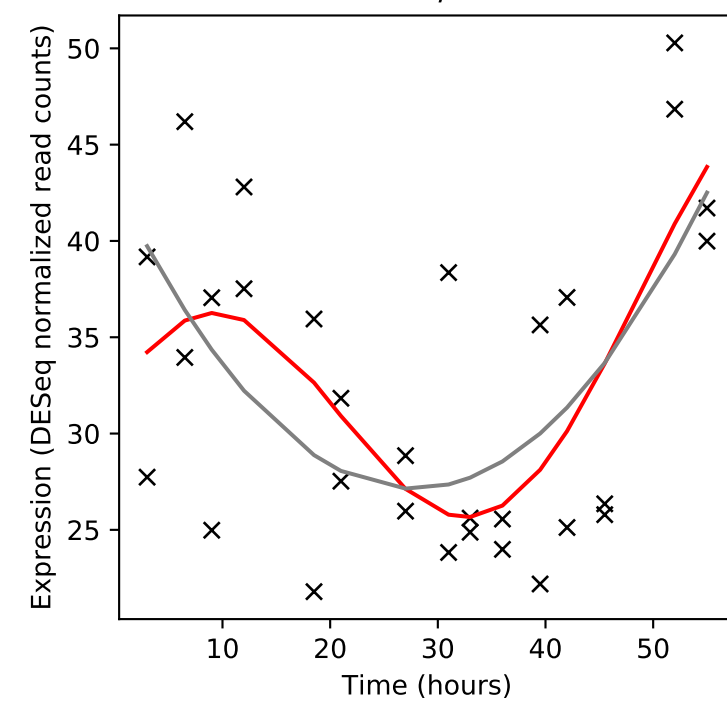

Rv2801A/mazE9

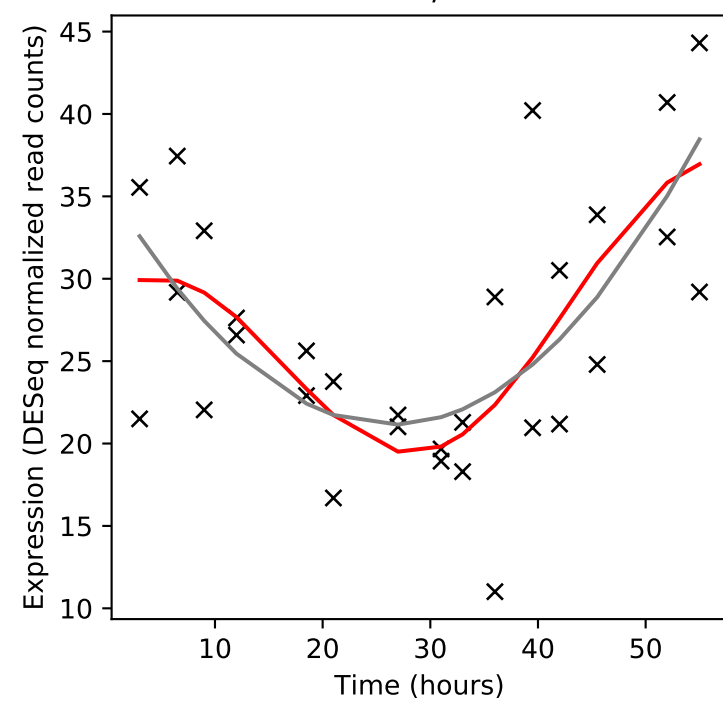

Rv2802c/-

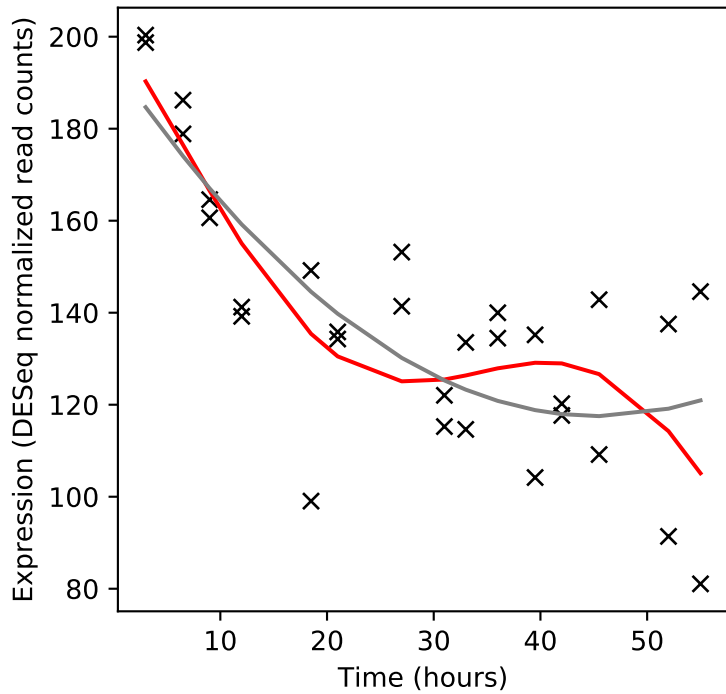

Rv2803/-

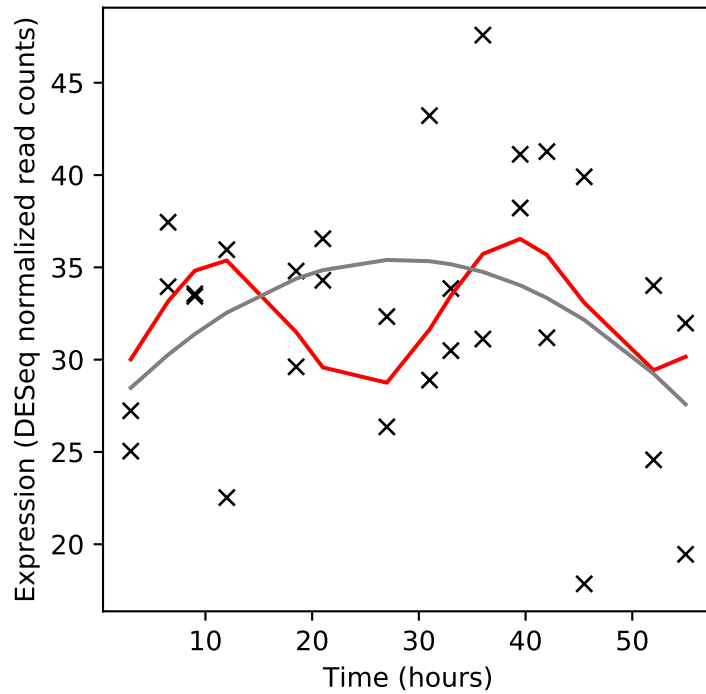

Rv2804c/-

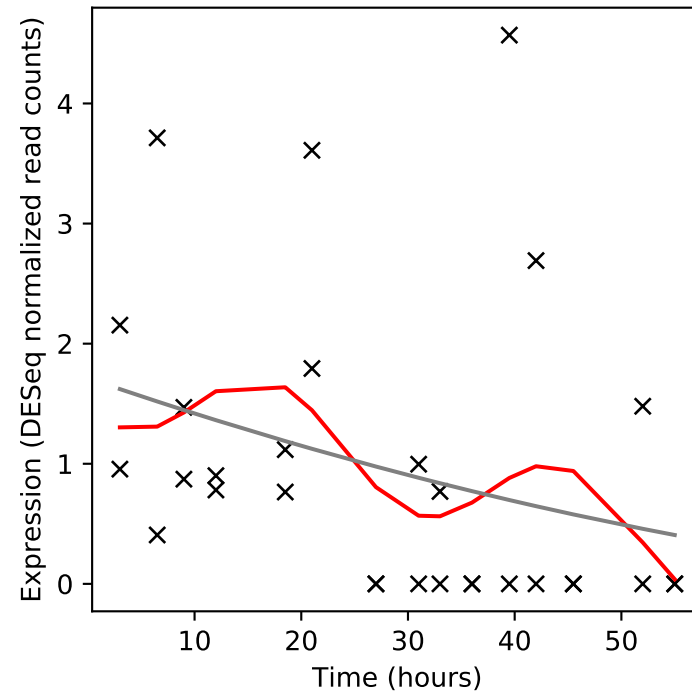

Rv2805/-

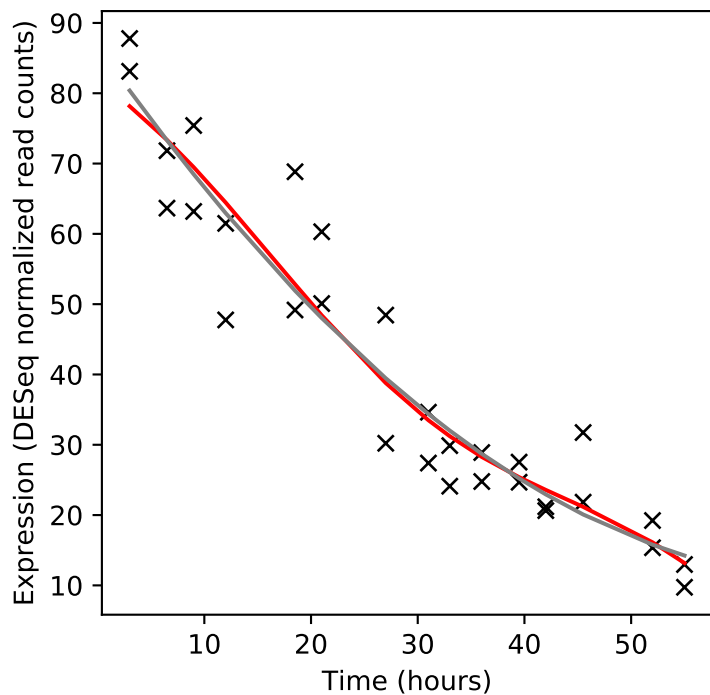

Rv2806/-

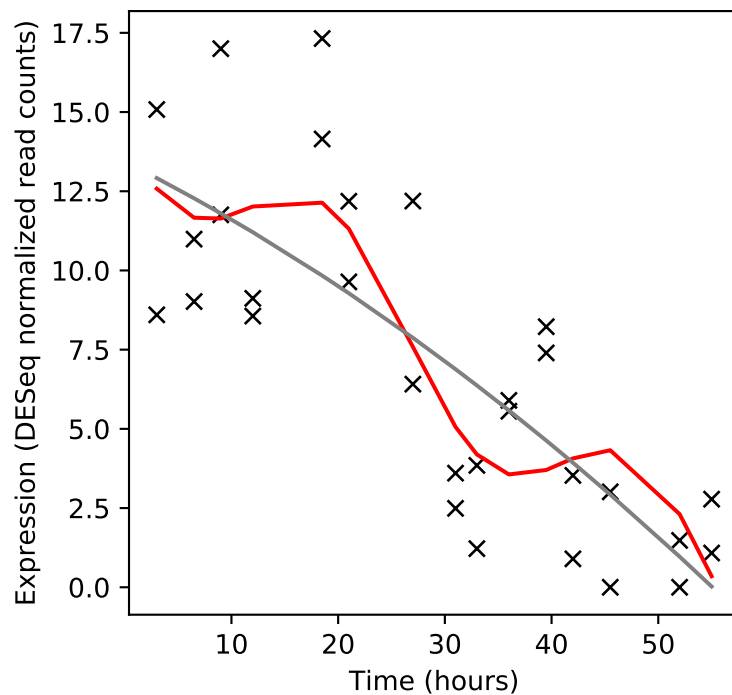

Rv2807/-

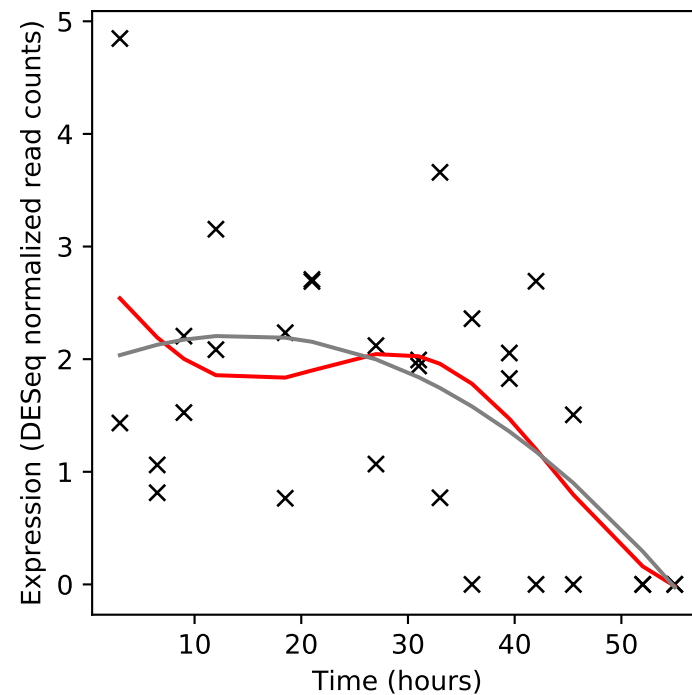

Rv2808/-

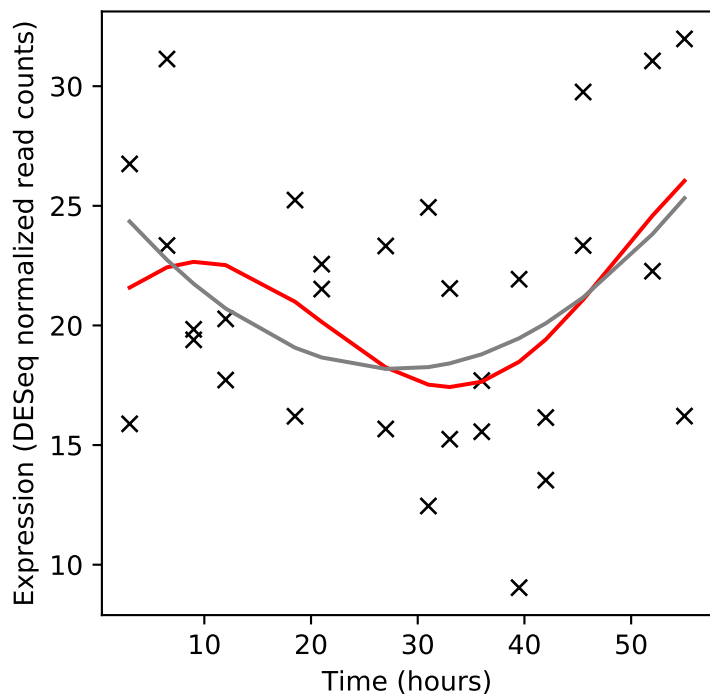

Rv2809/-

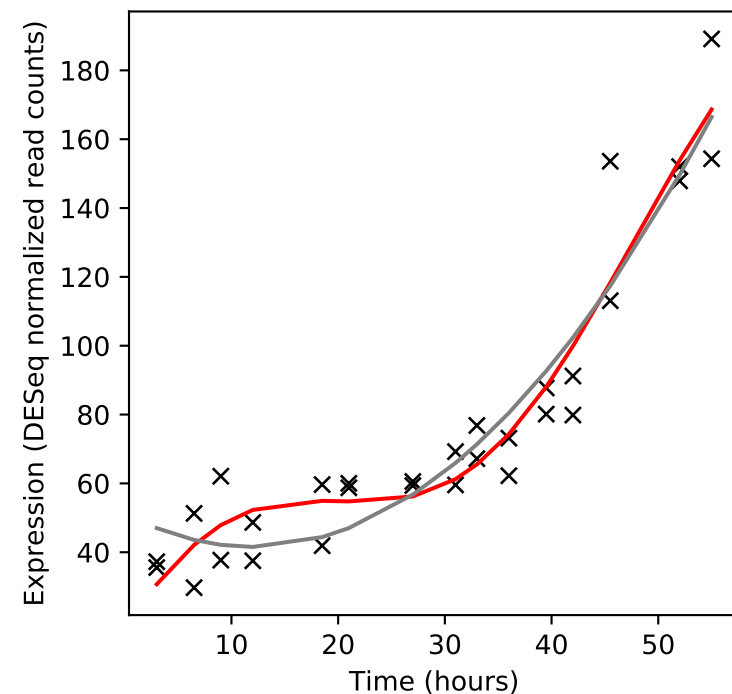

Rv2810c/-

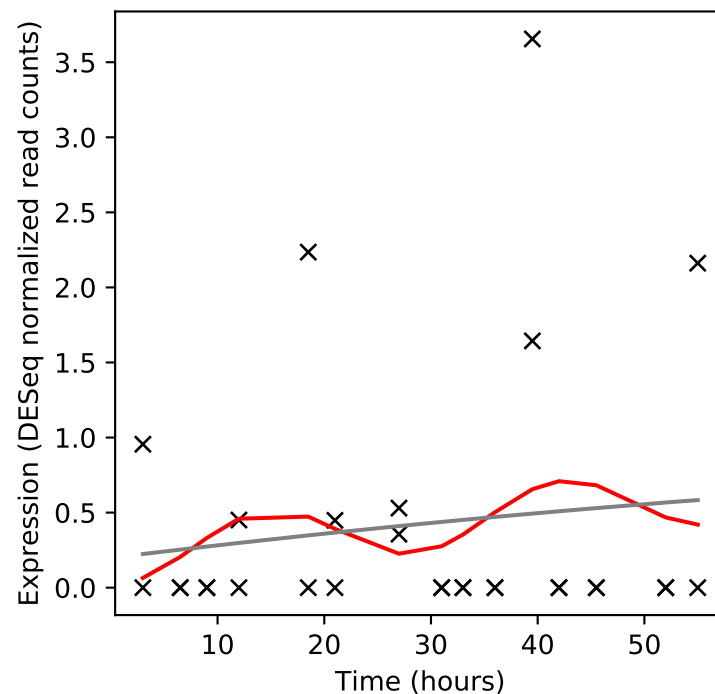

Rv2811c/-

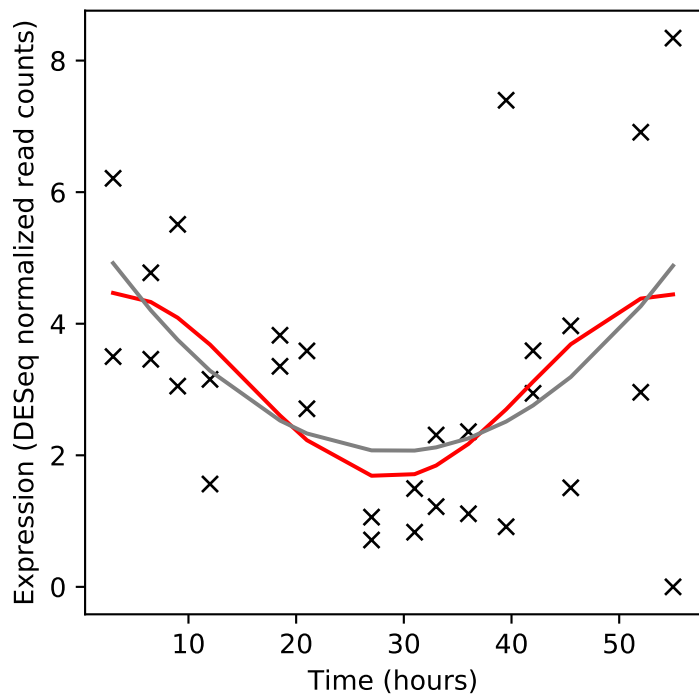

Rv2812c/-

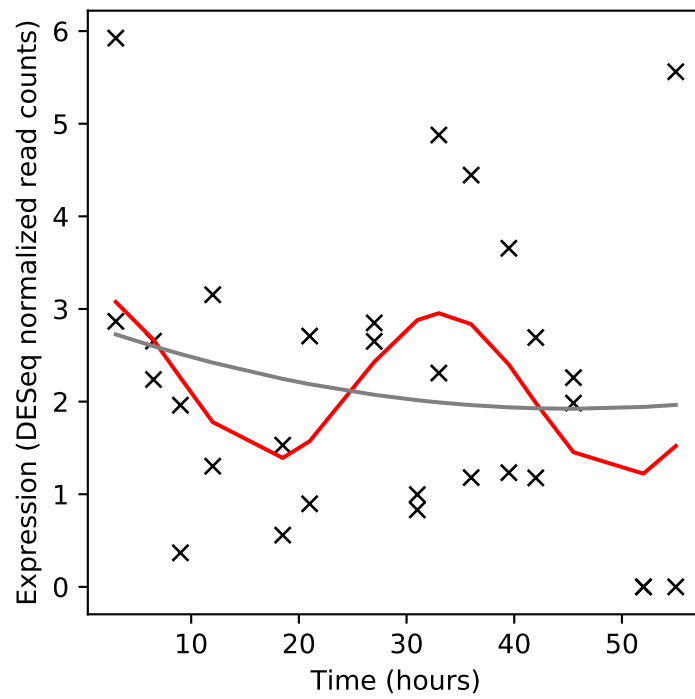

Rv2813c/-

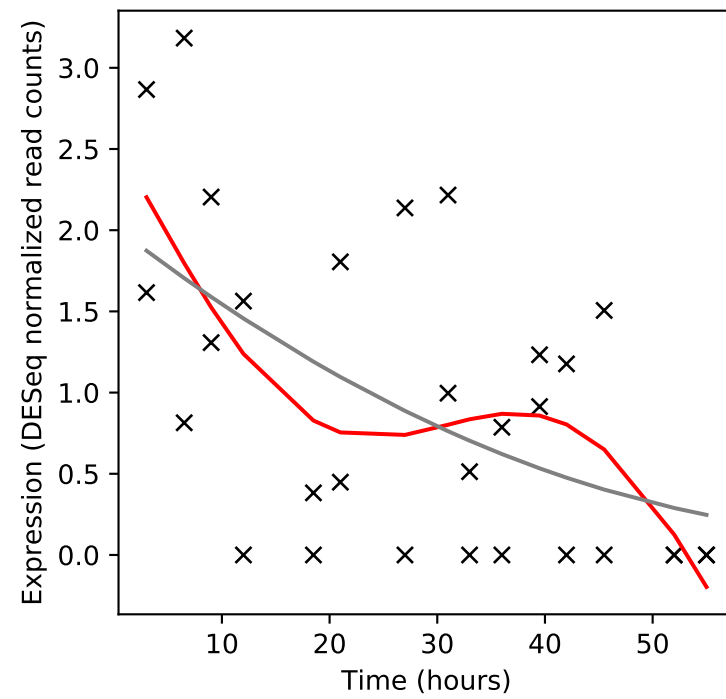

Rv2814c/-

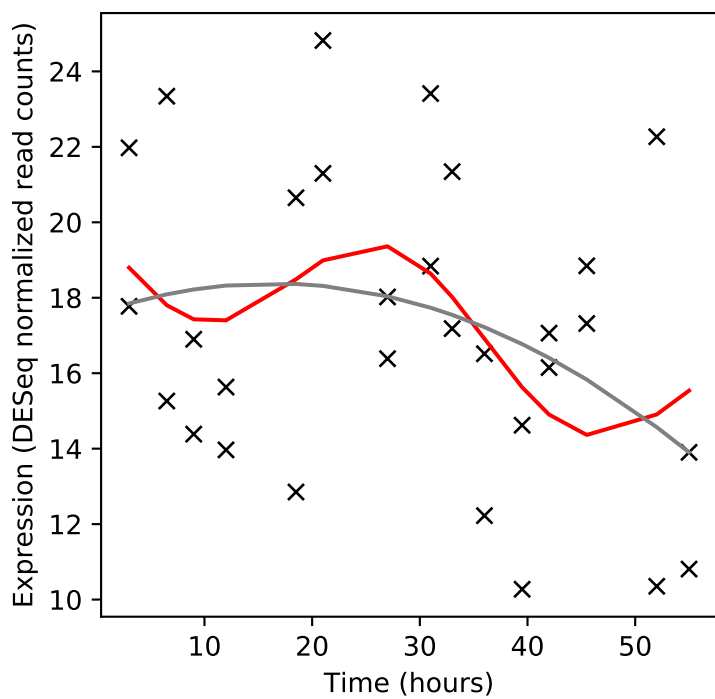

Rv2815c/-

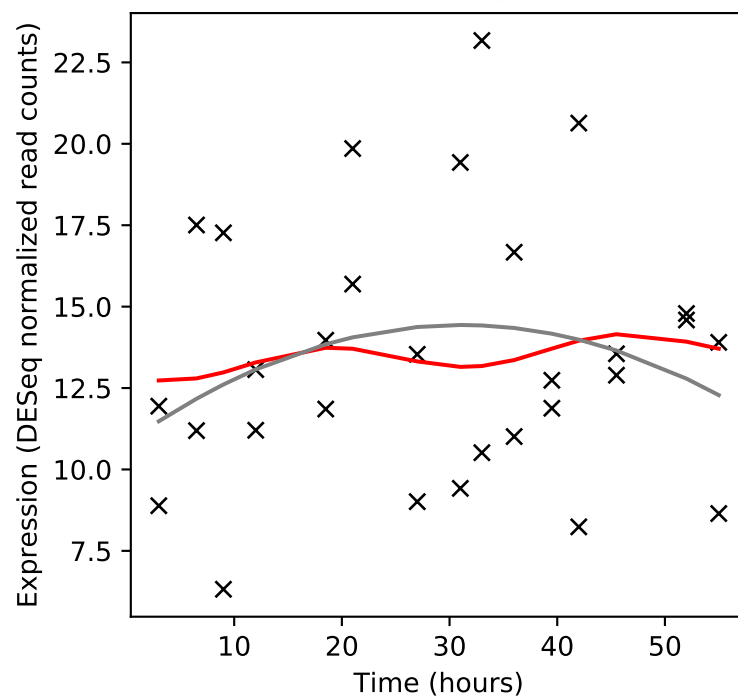

Rv2816c/-

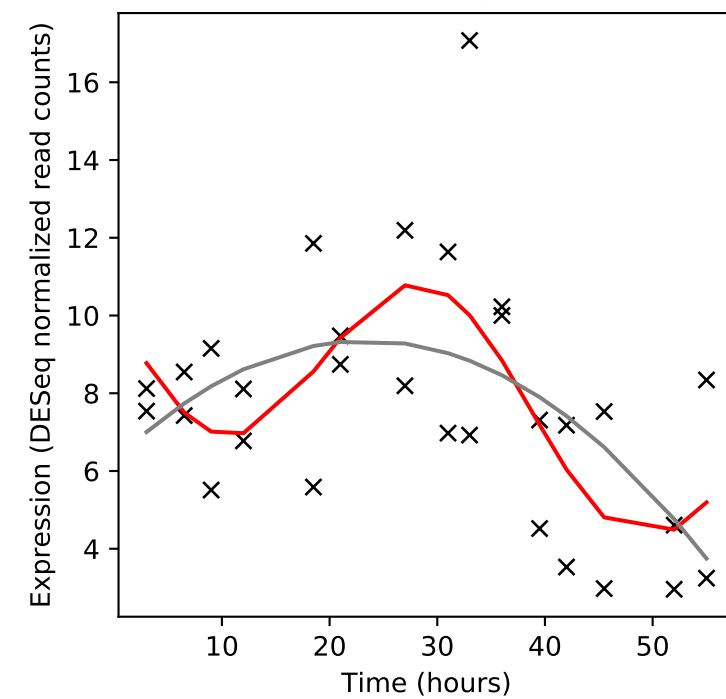

Rv2817c/-

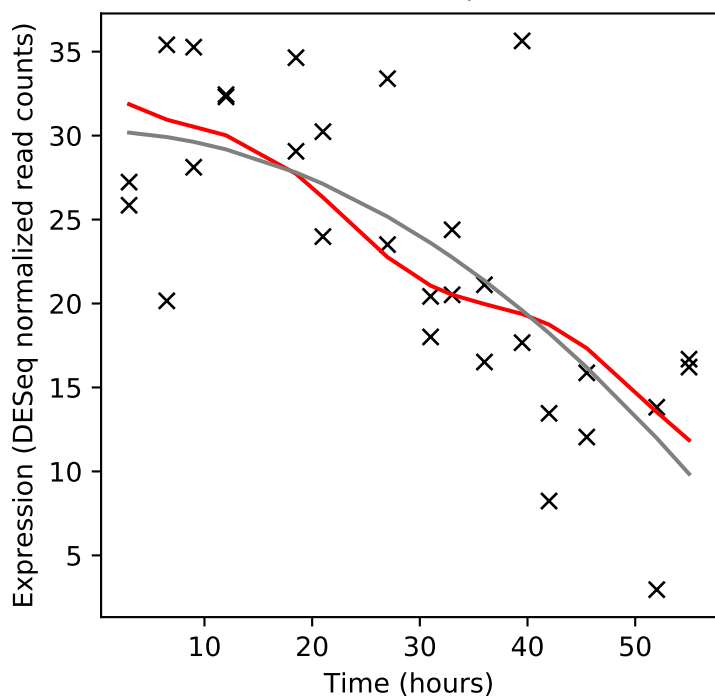

Rv2818c/-

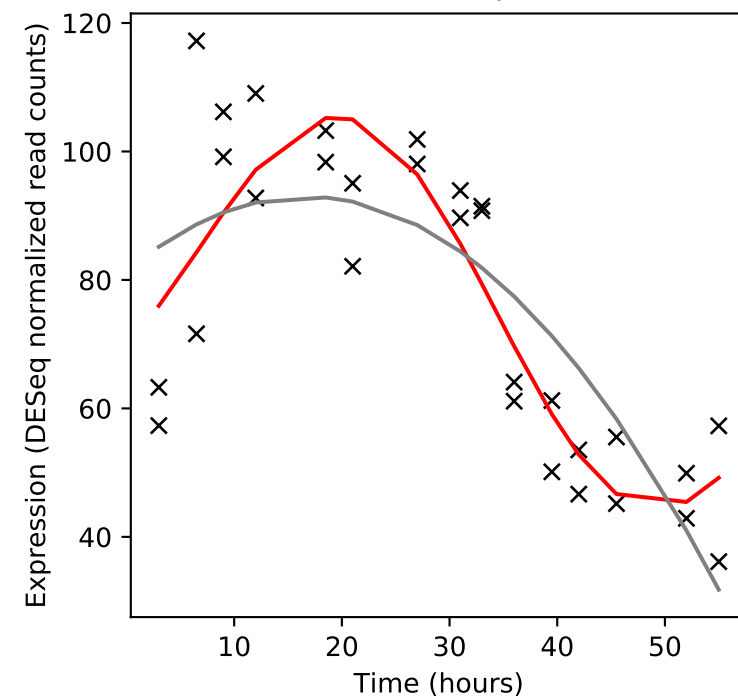

Rv2819c/-

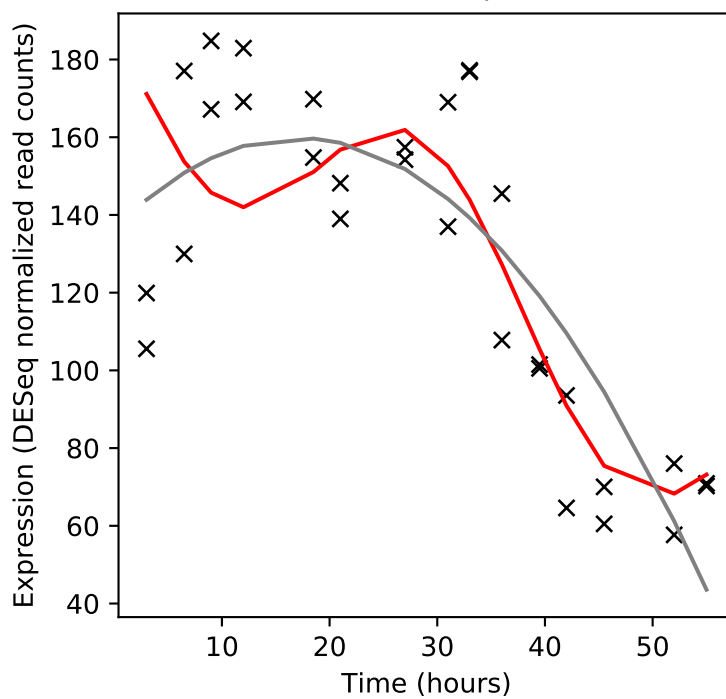

Rv2820c/-

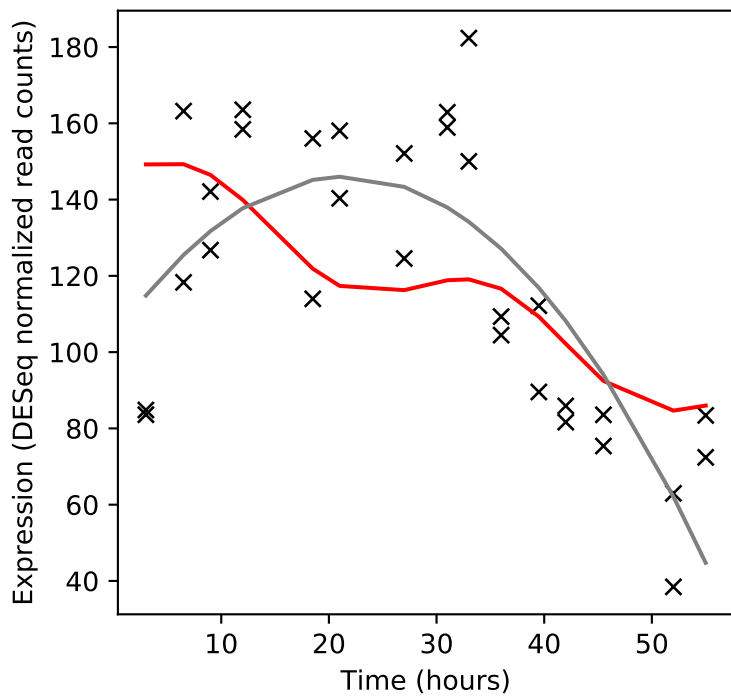

Rv2821c/-

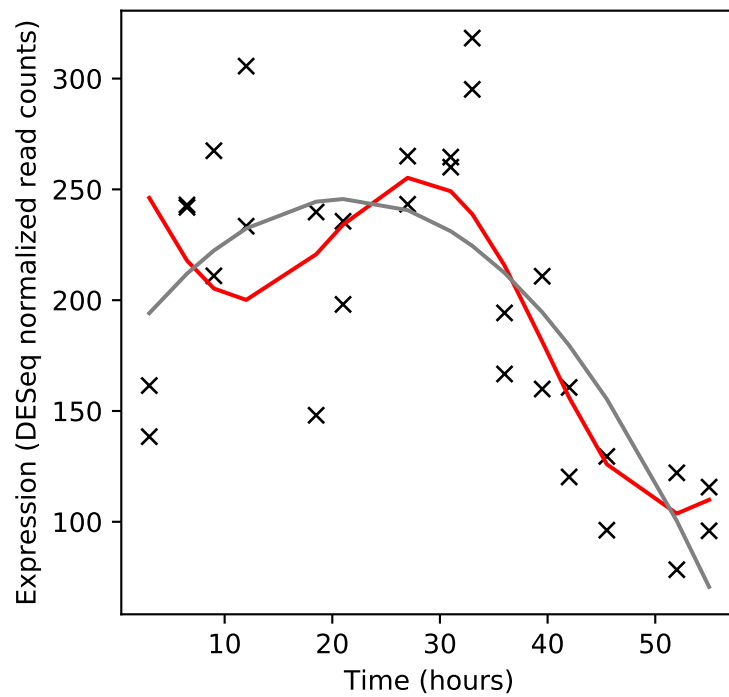

Rv2822c/-

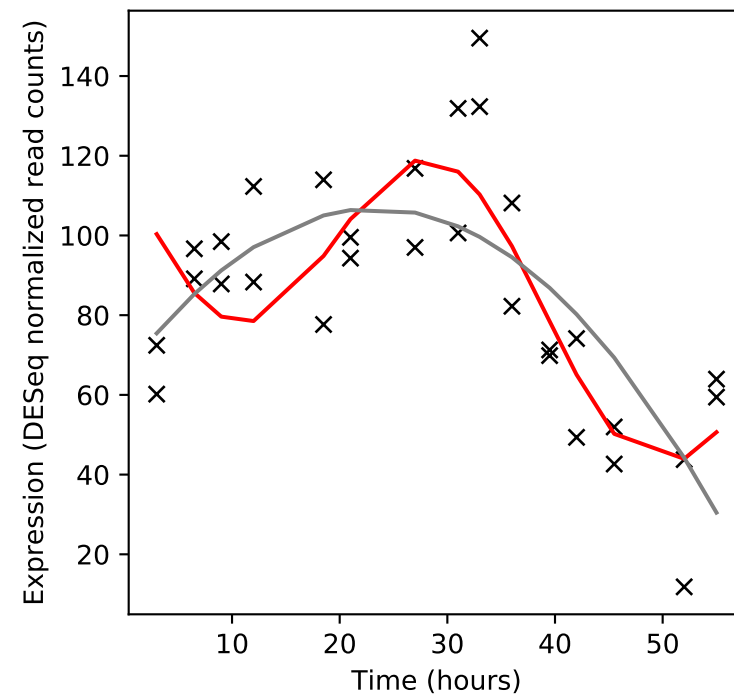

Rv2823c/-

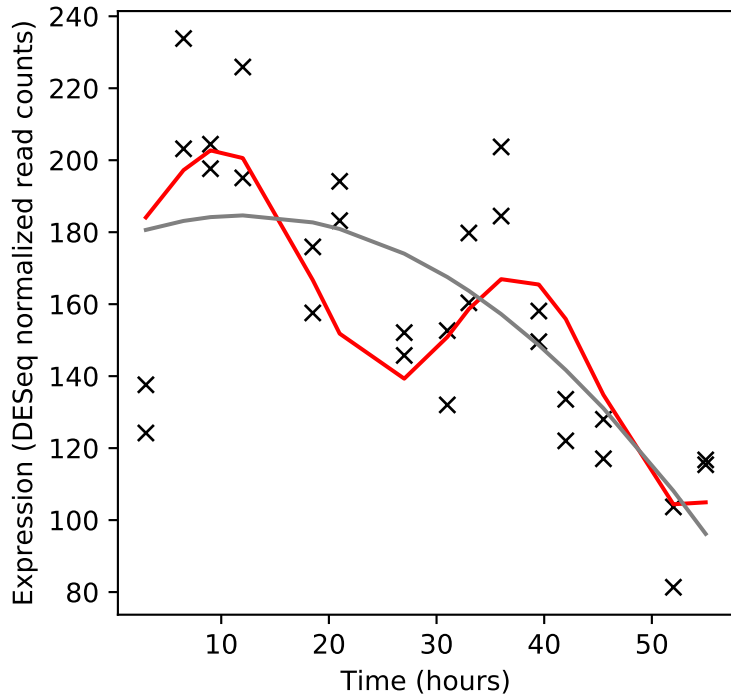

Rv2824c/-

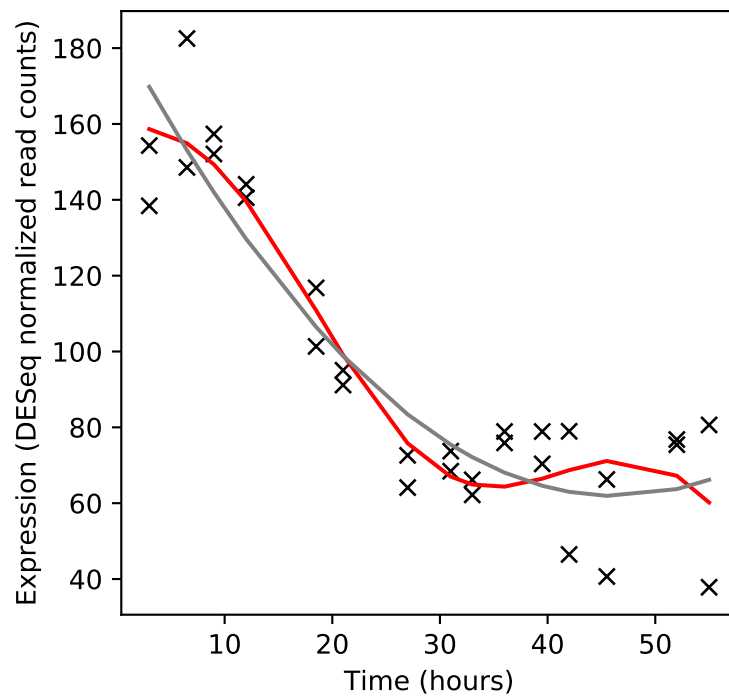

Rv2825c/-

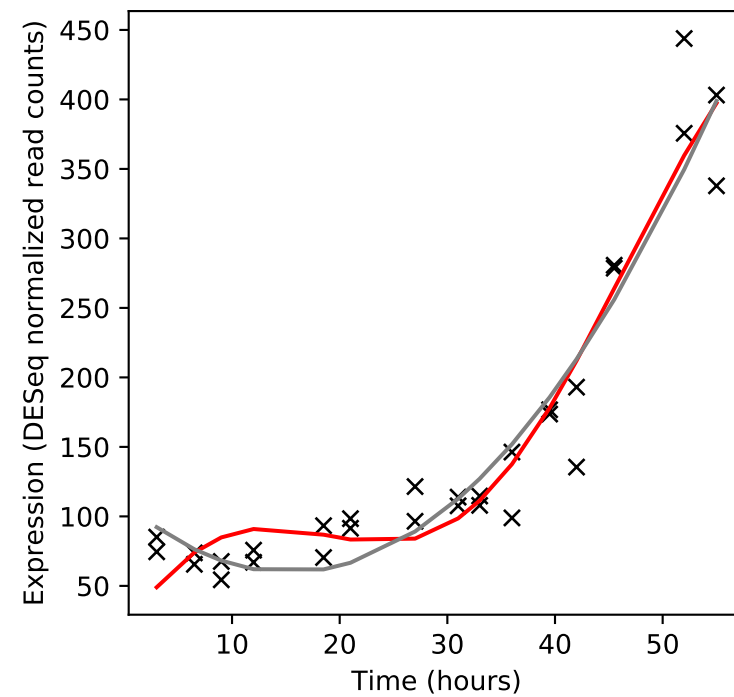

Rv2826c/-

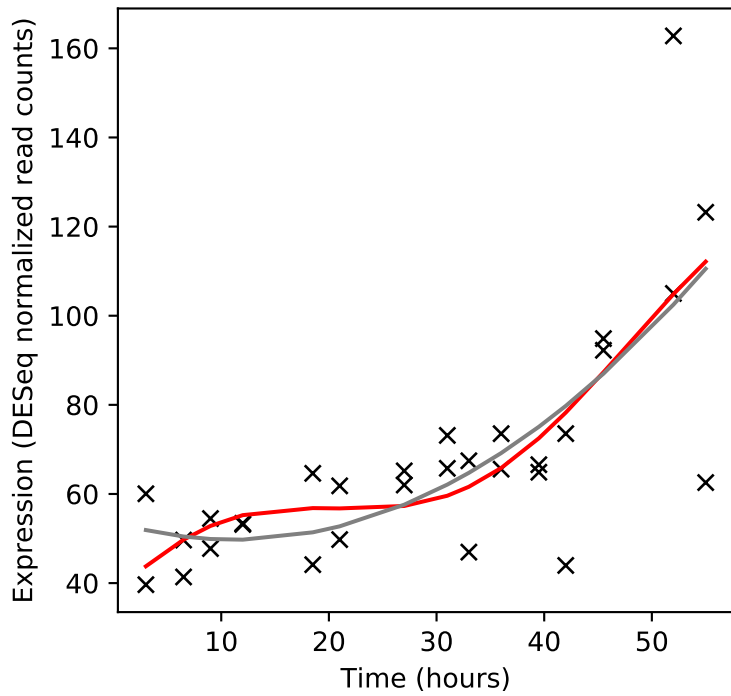

Rv2827c/-

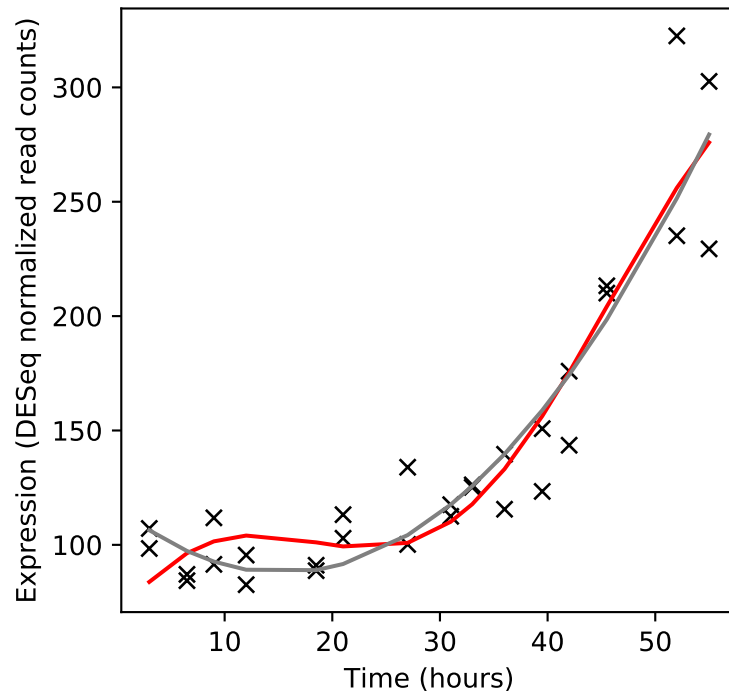

Rv2828c/-

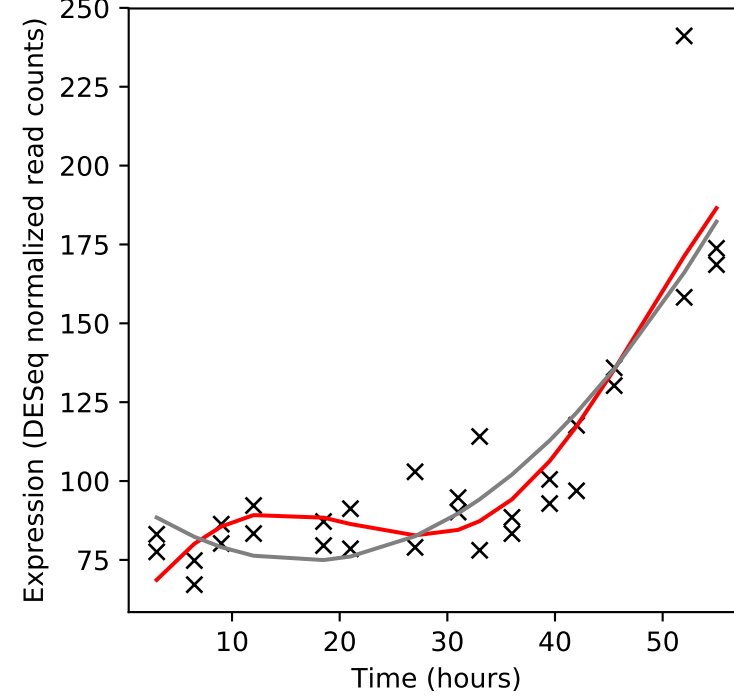

Rv2828A/-

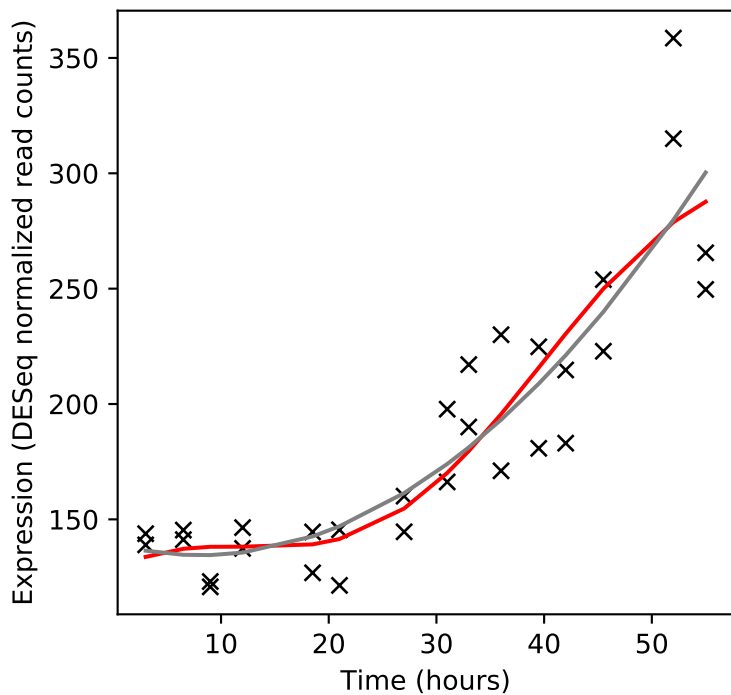

Rv2829c/vapC22

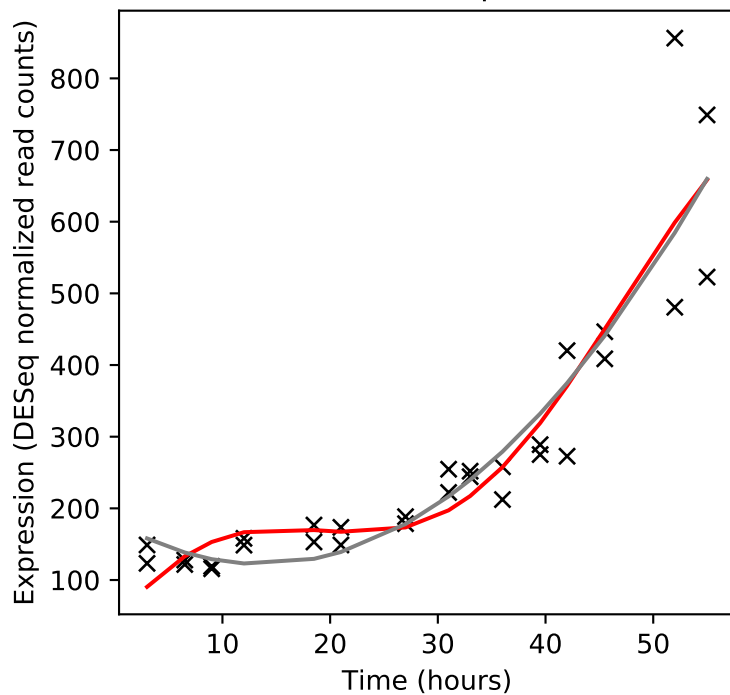

Rv2830c/vapB22

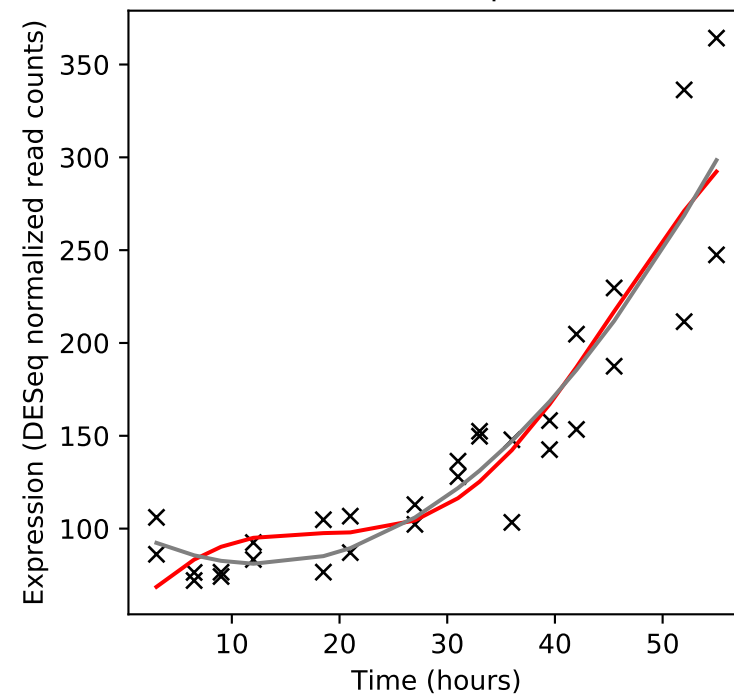

Rv2831/echA16

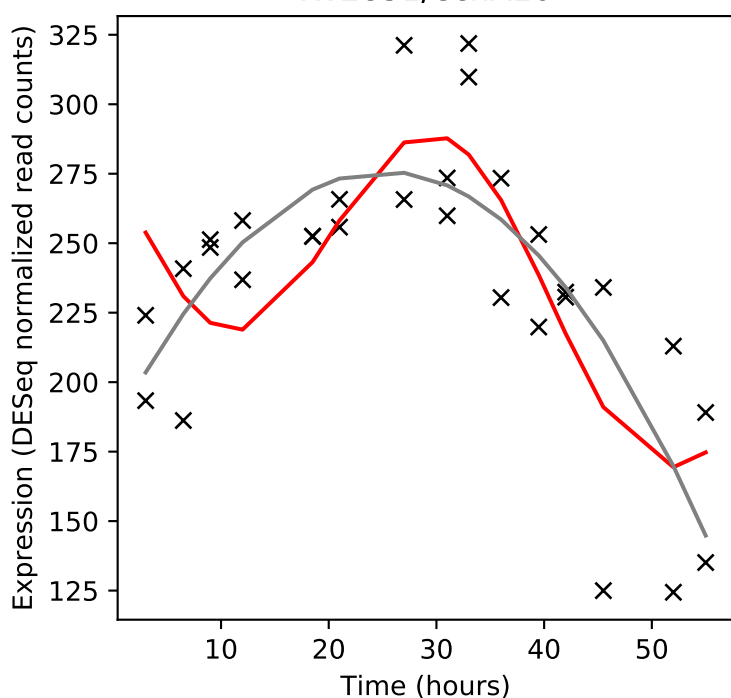

Rv2832c/ugpC

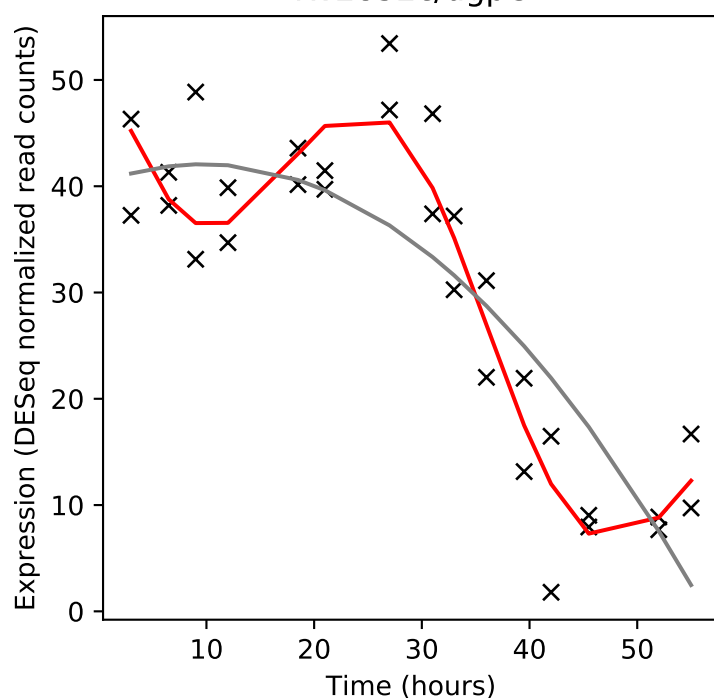

Rv2833c/ugpB

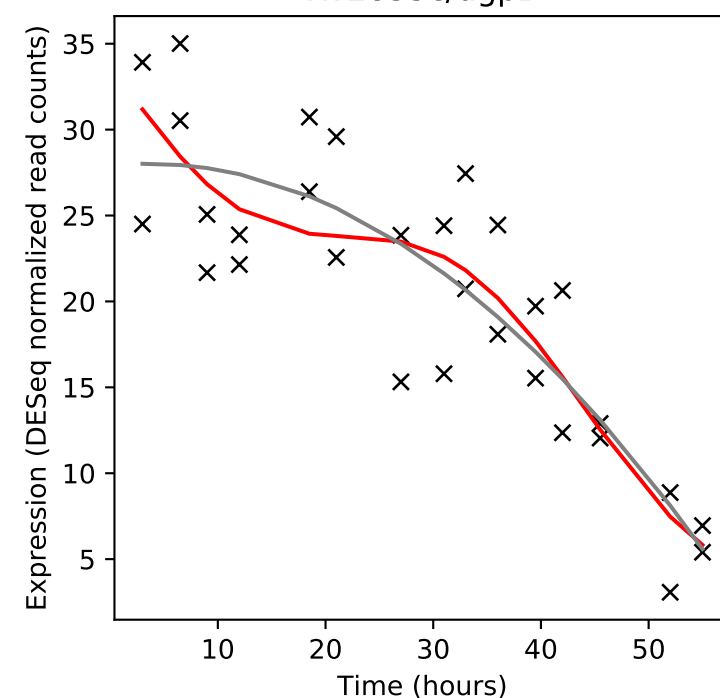

Rv2834c/ugpE

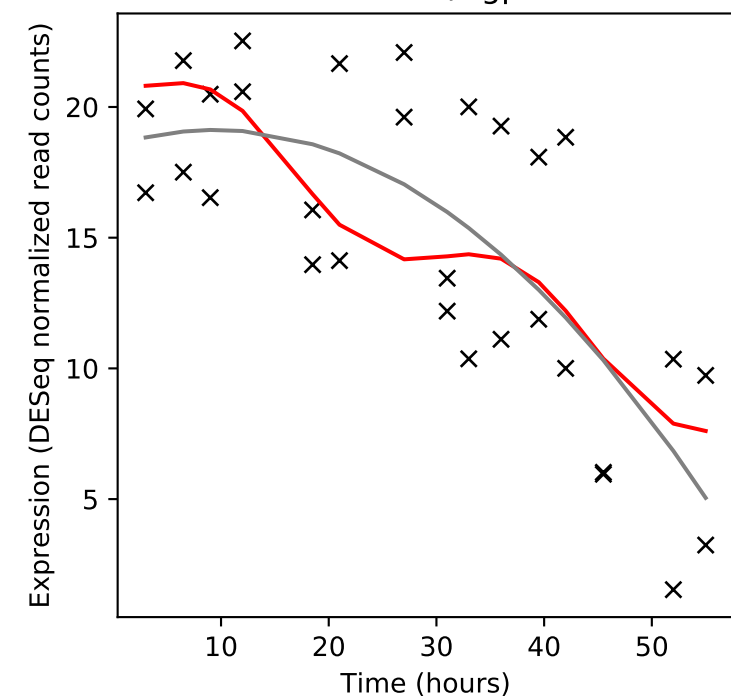

Rv2835c/ugpA

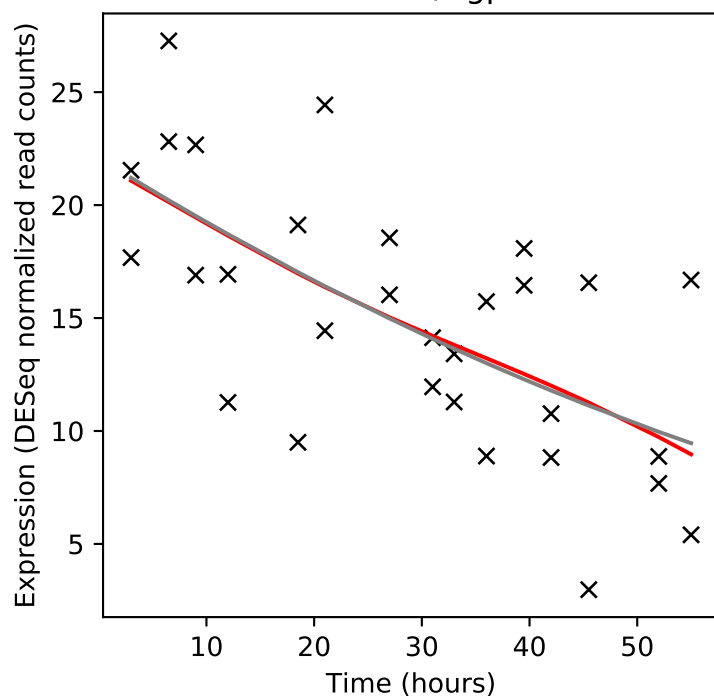

Rv2836c/dinF

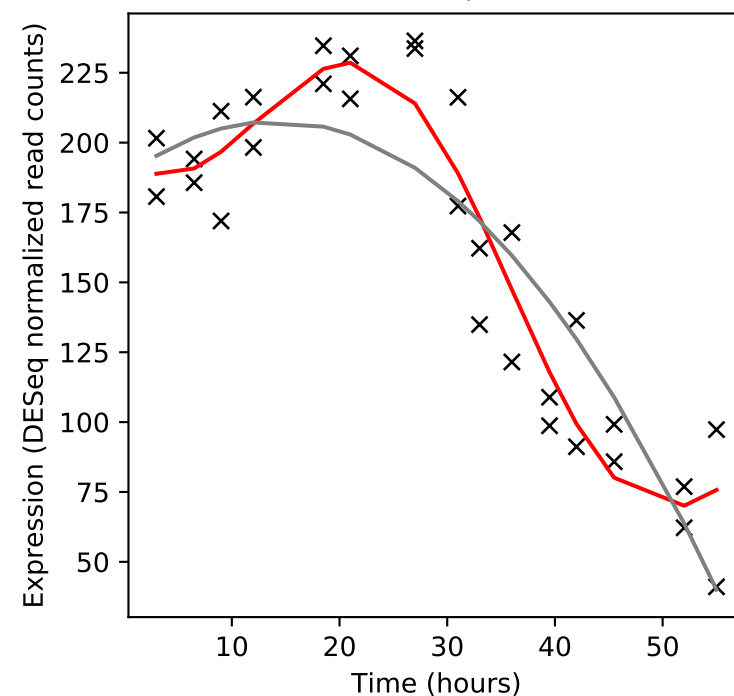

Rv2837c/-

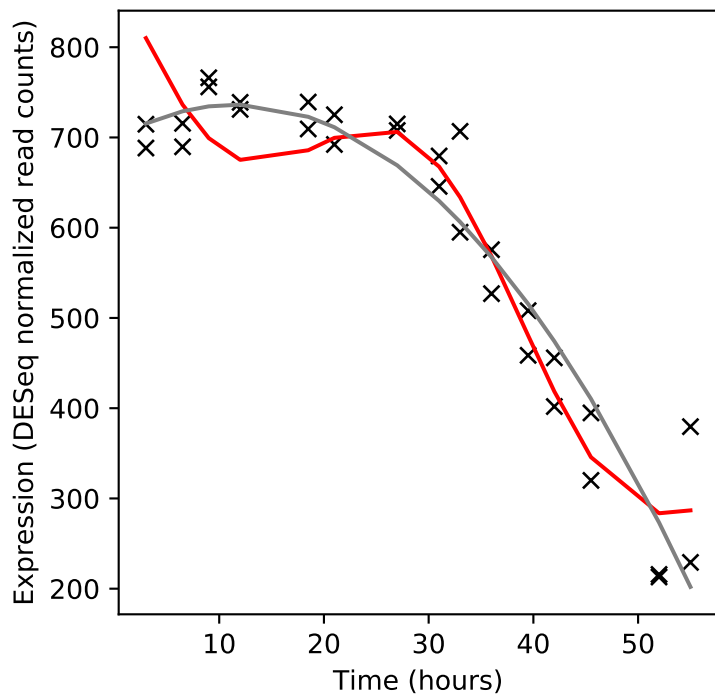

Rv2838c/rbfA

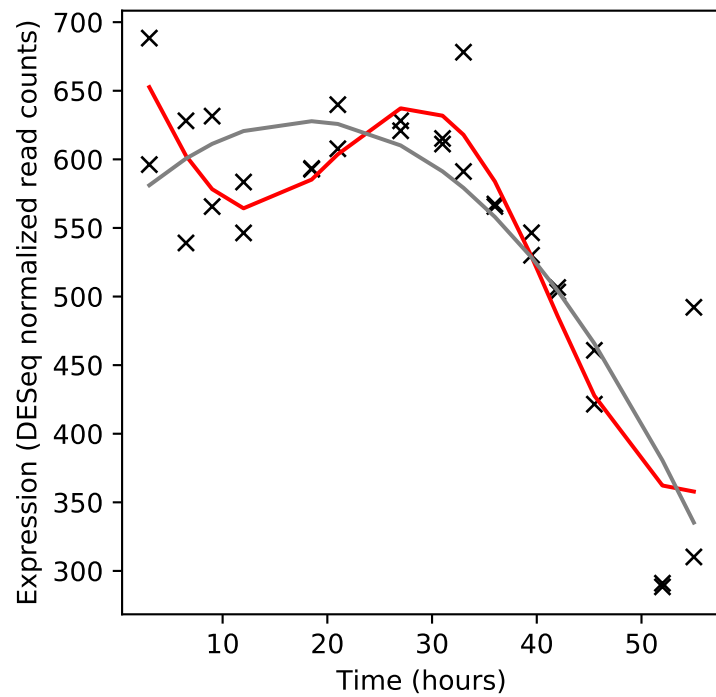

Rv2839c/infB

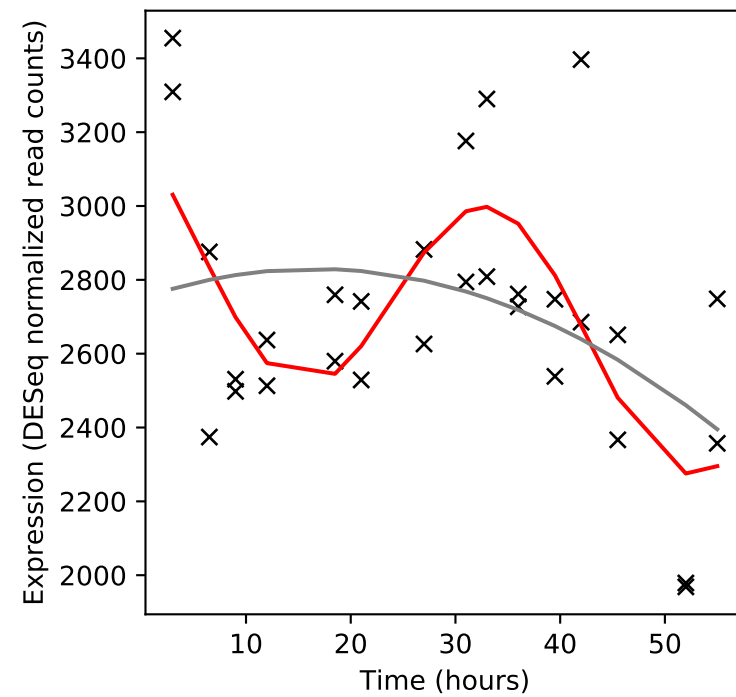

Rv2840c/-

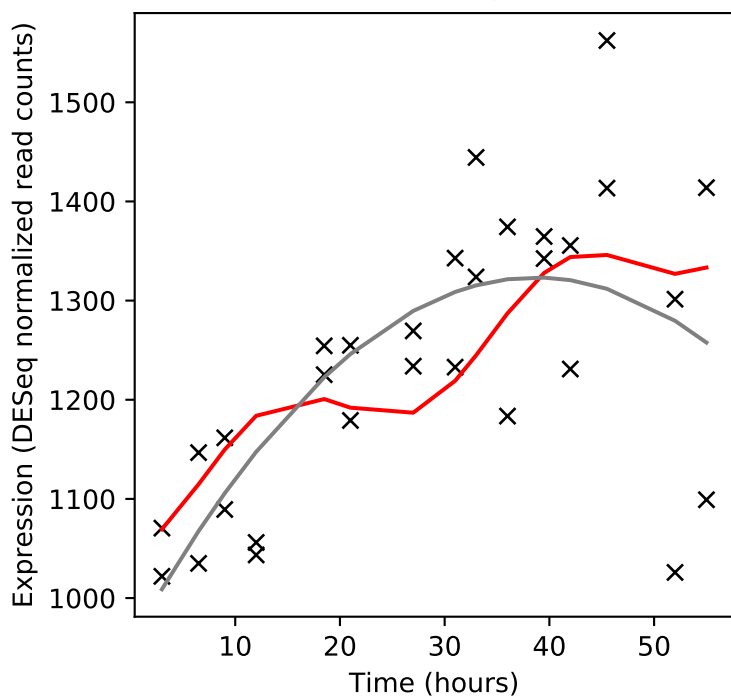

Rv2841c/nusA

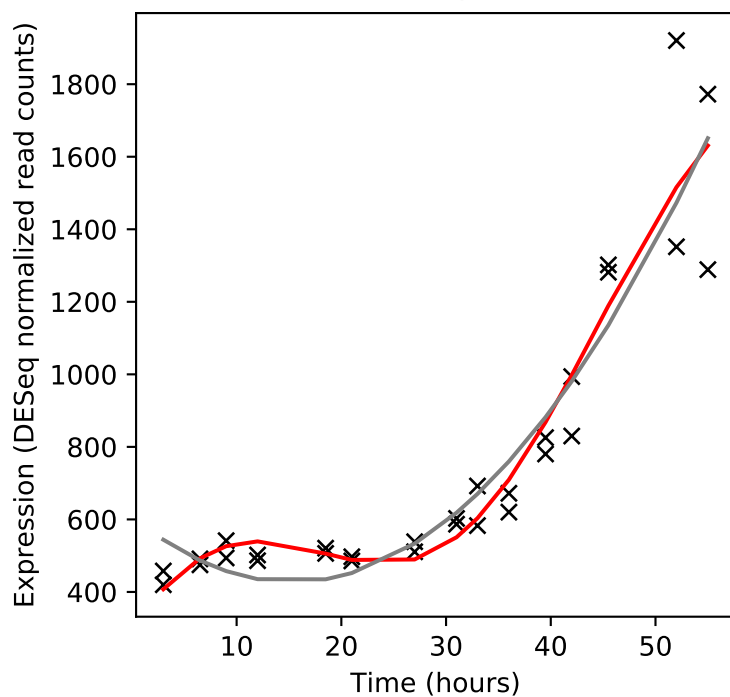

Rv2842c/-

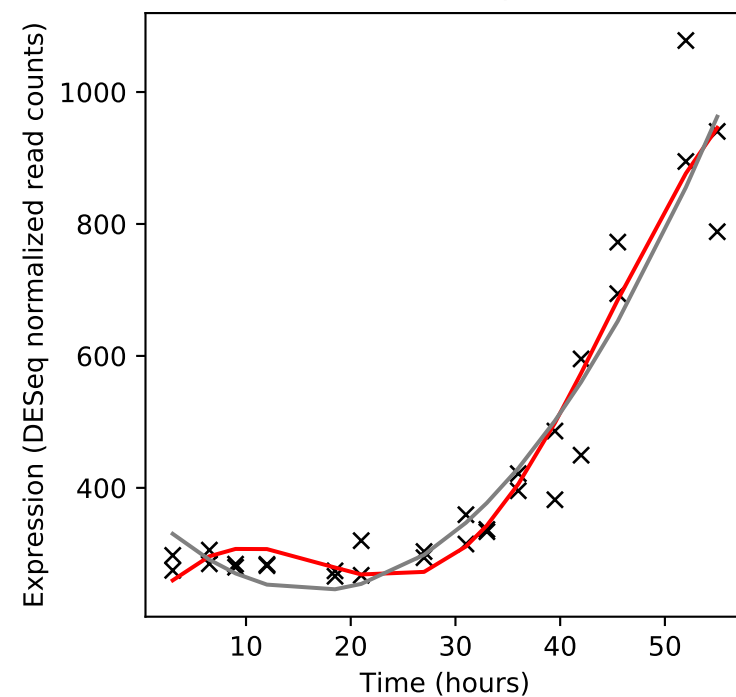

Rv2843/-

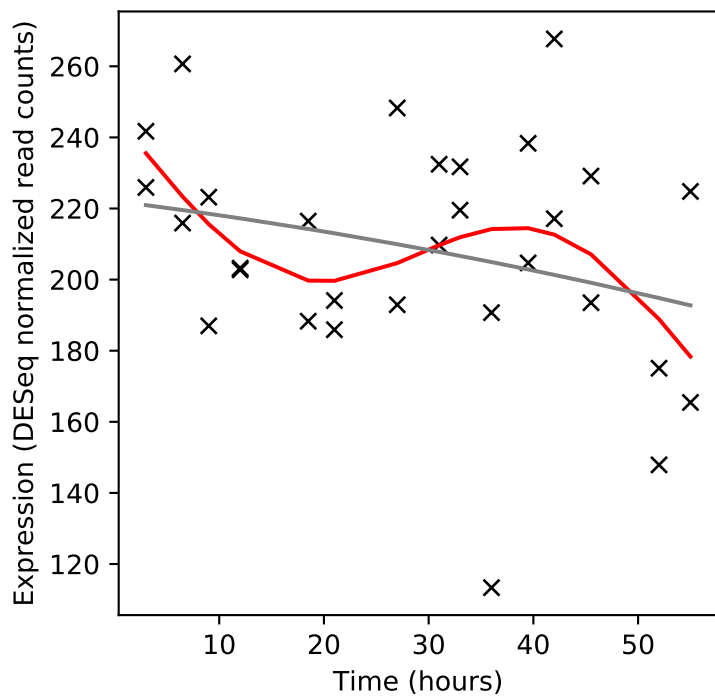

Rv2844/-

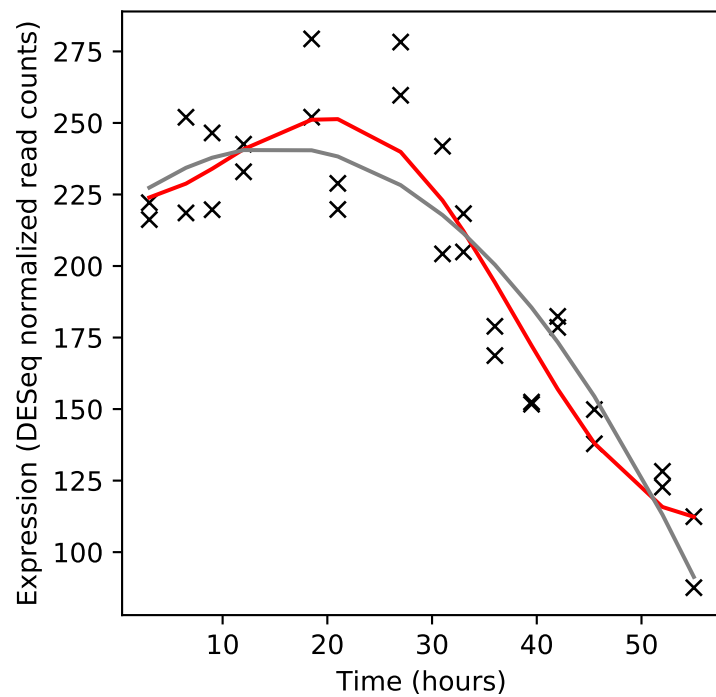

Rv2845c/proS

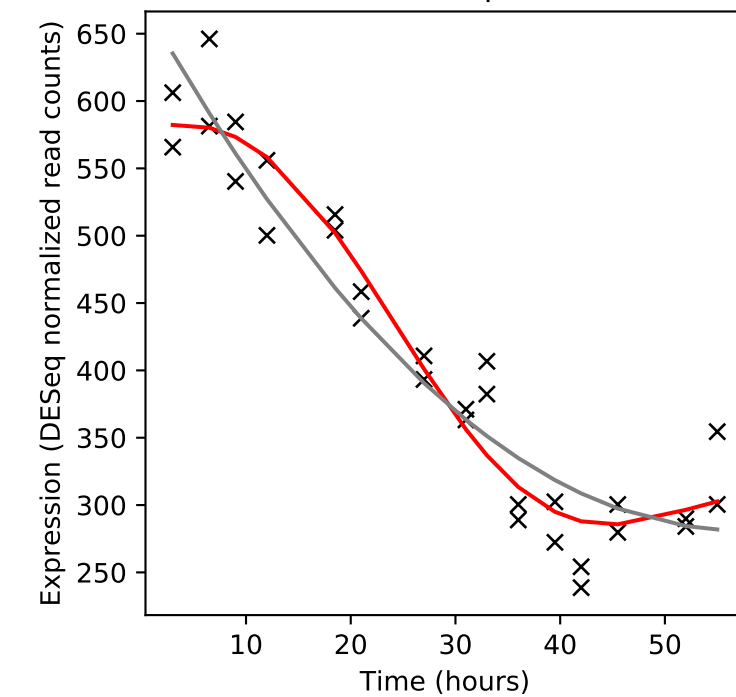



Rv2846c/efpA

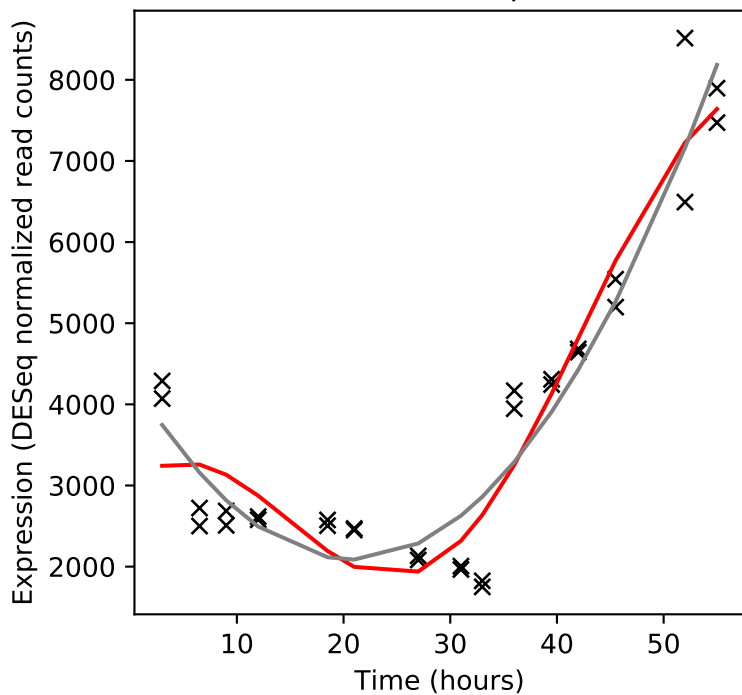

Rv2847c/cysG

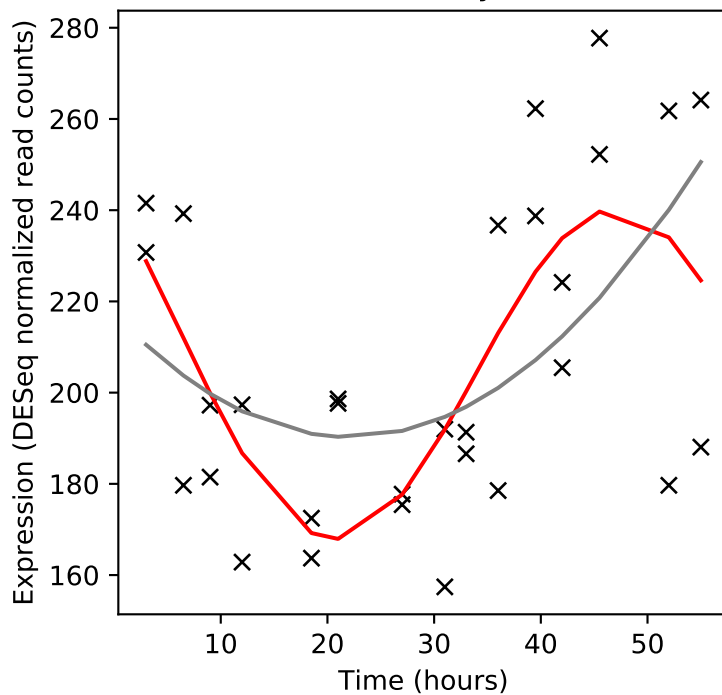

Rv2848c/cobB

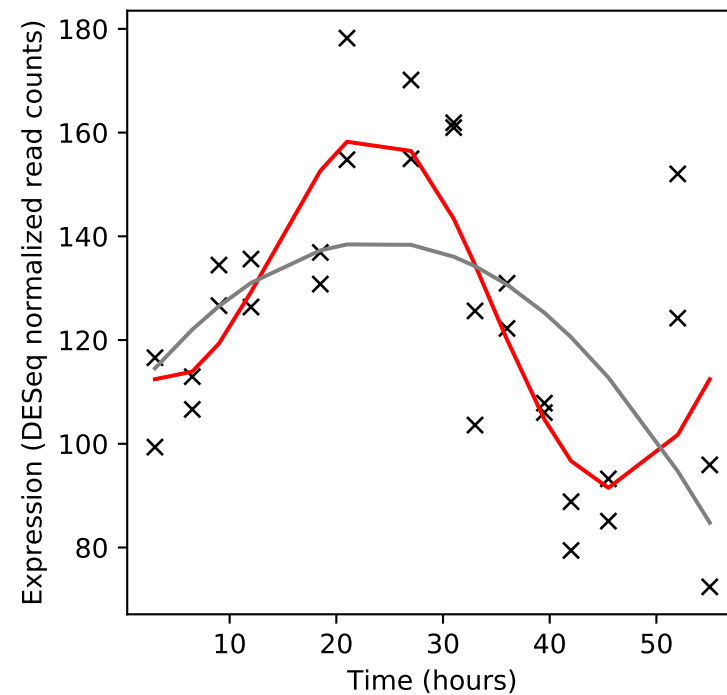

Rv2849c/cobO

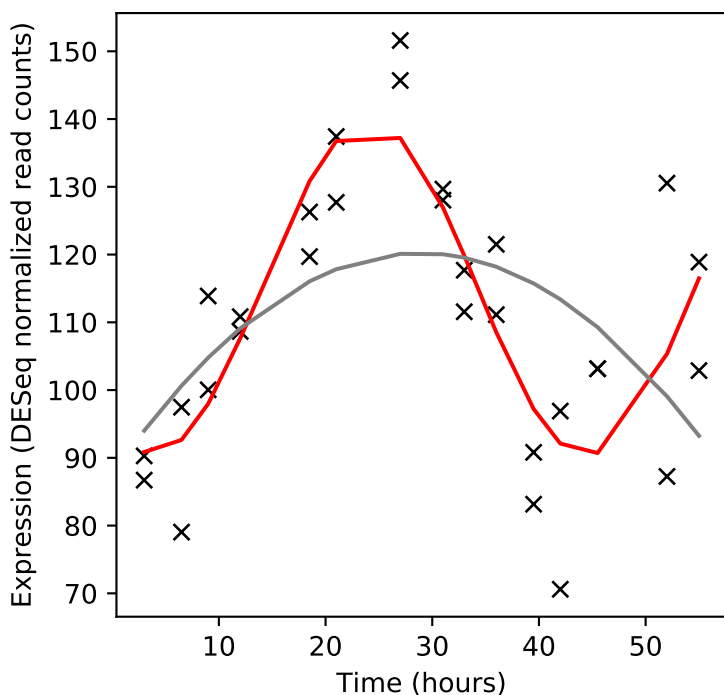

Rv2850c/-

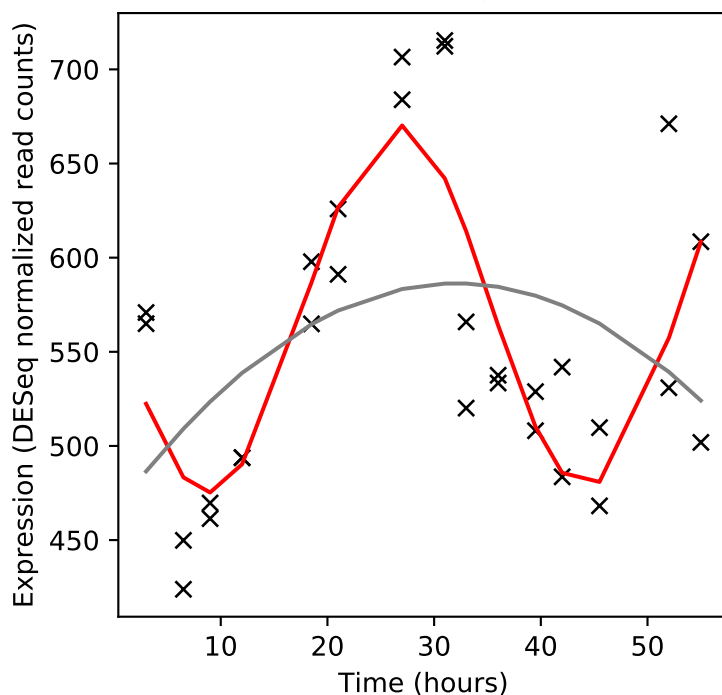

Rv2851c/-

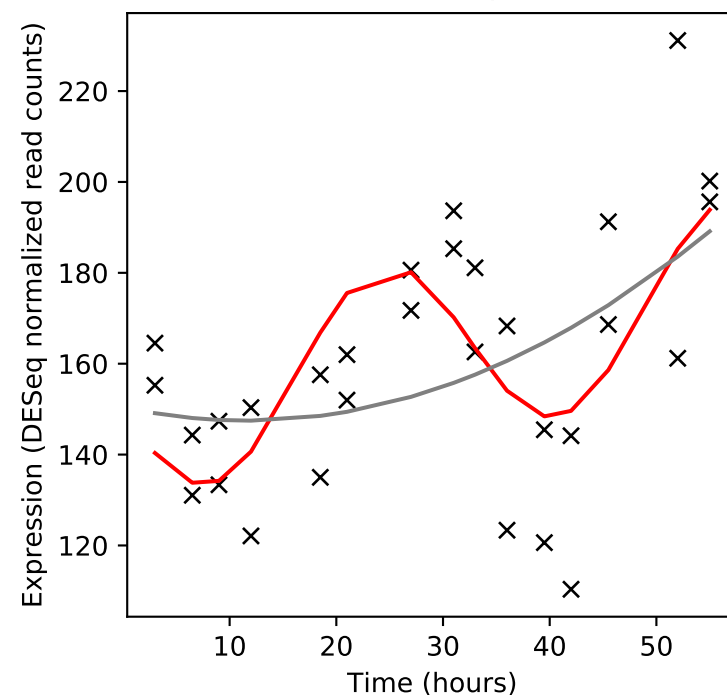

Rv2852c/mqo

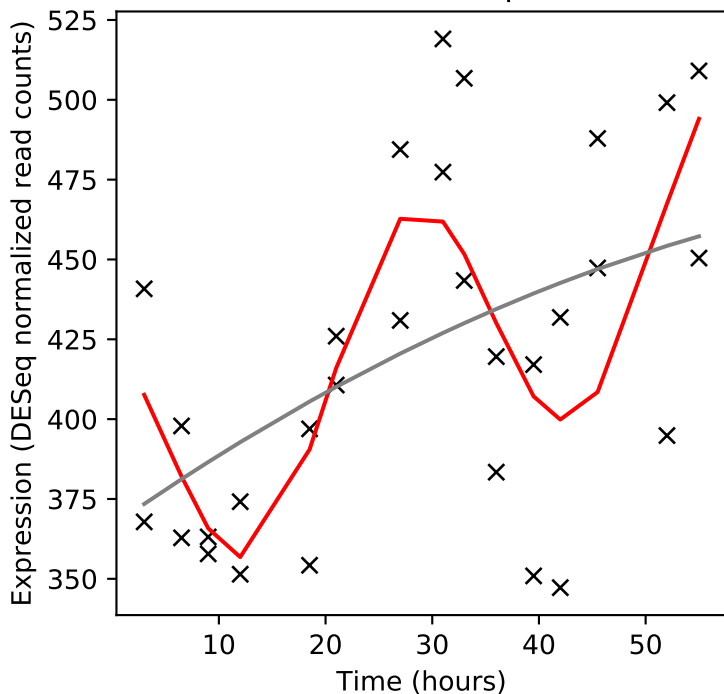

Rv2853/PE\_PGRS48

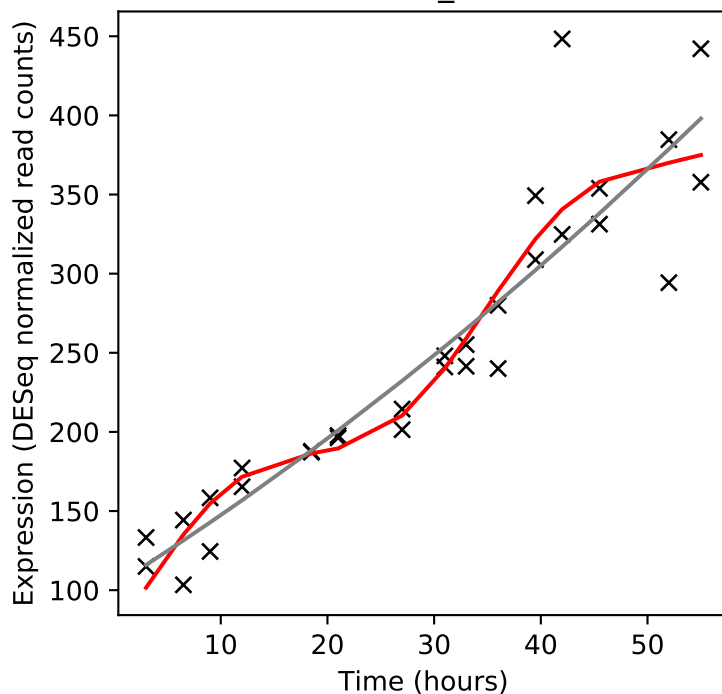

Rv2854c/-

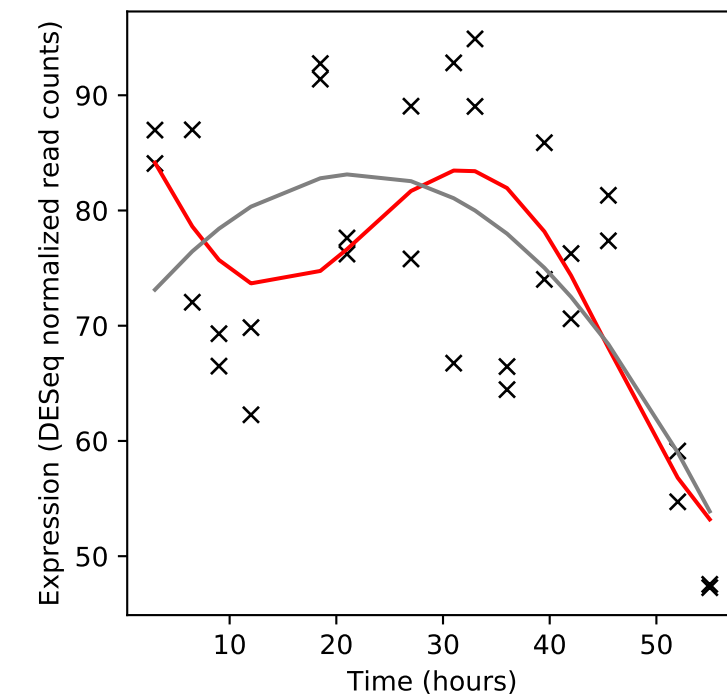

Rv2855/mtr

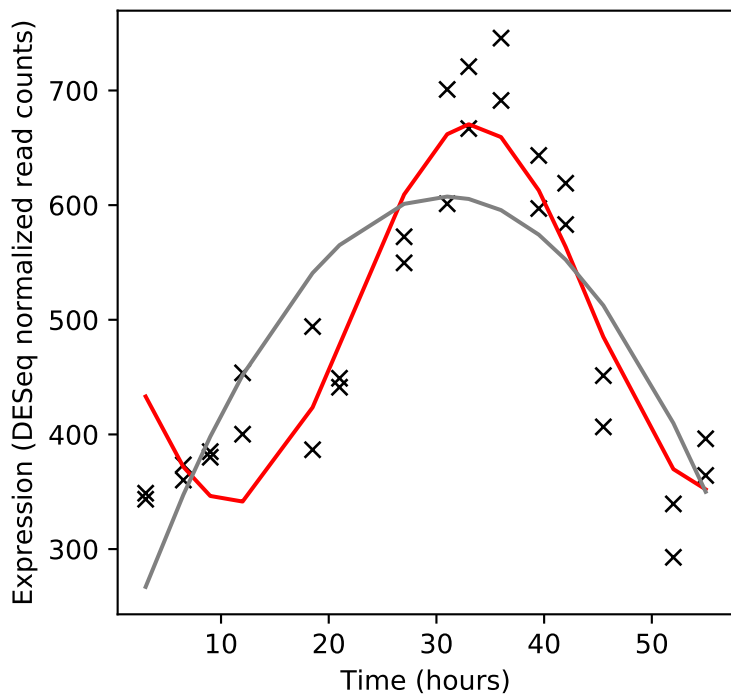

Rv2856/nicT

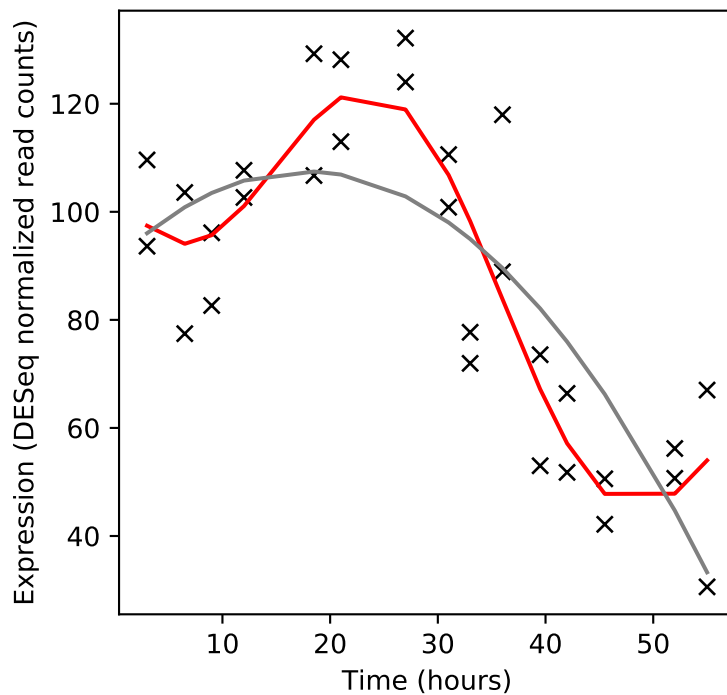

Rv2857c/-

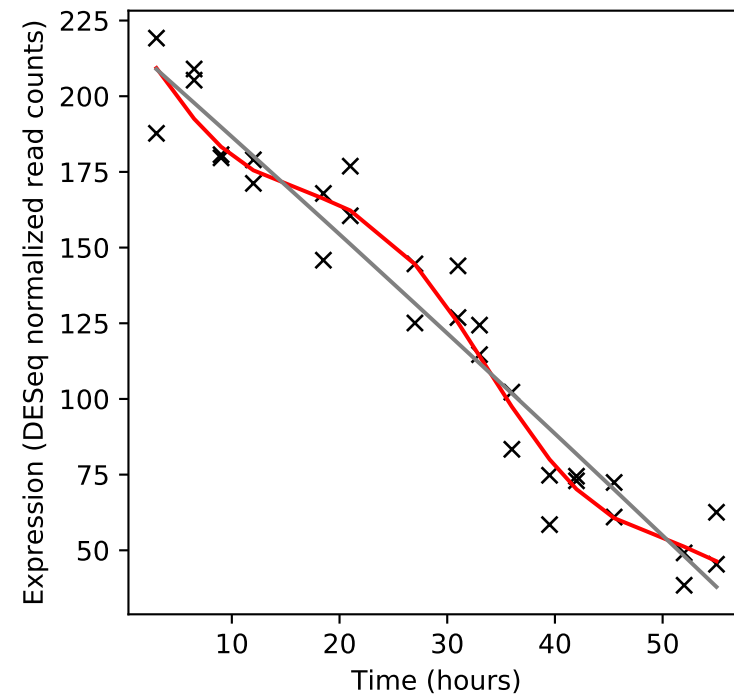

Rv2858c/aldC

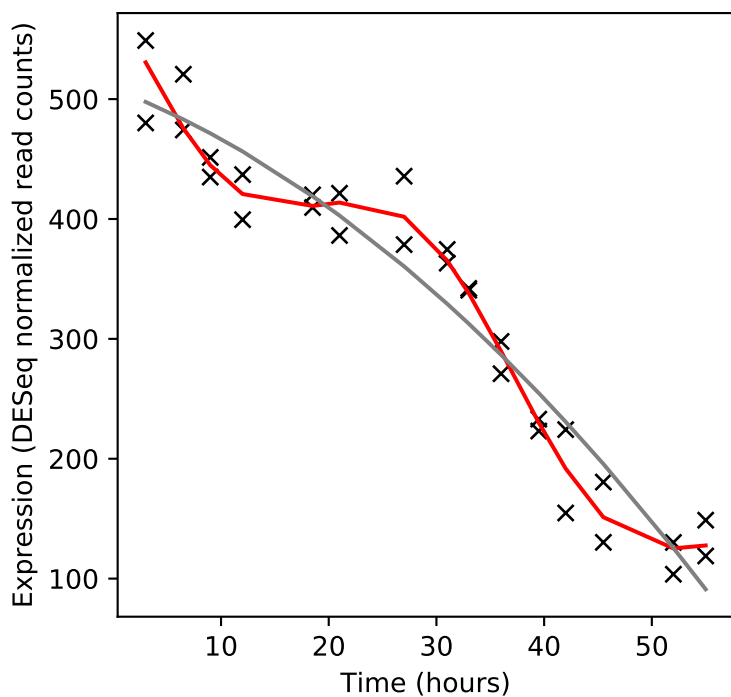

Rv2859c/-

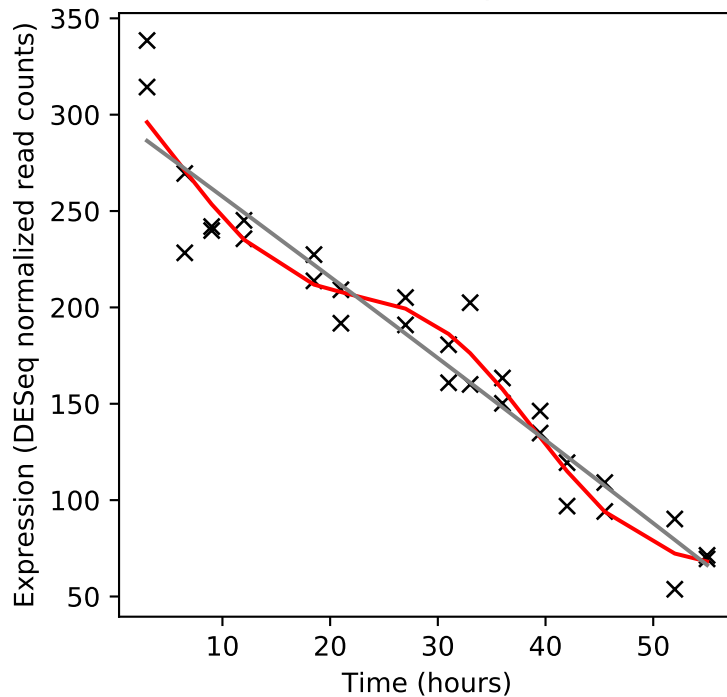

Rv2860c/glnA4

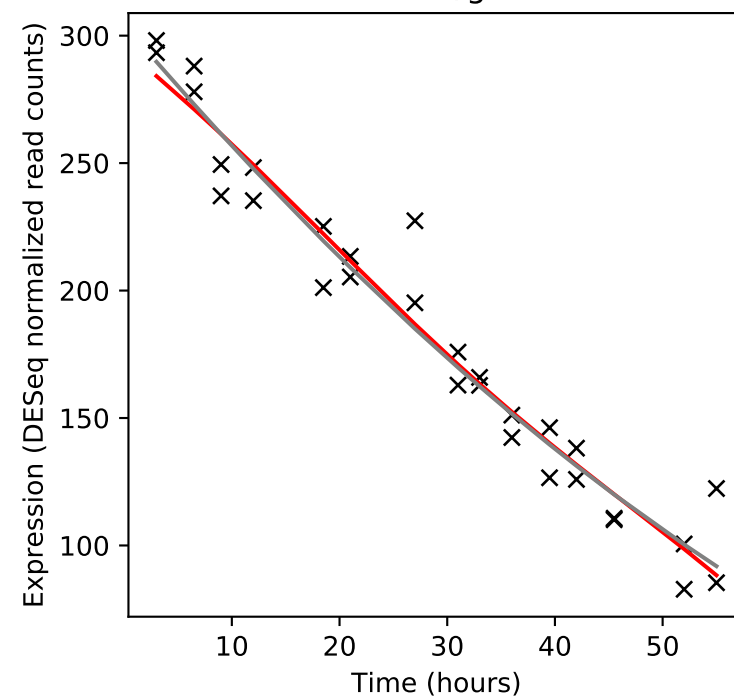

Rv2861c/mapB

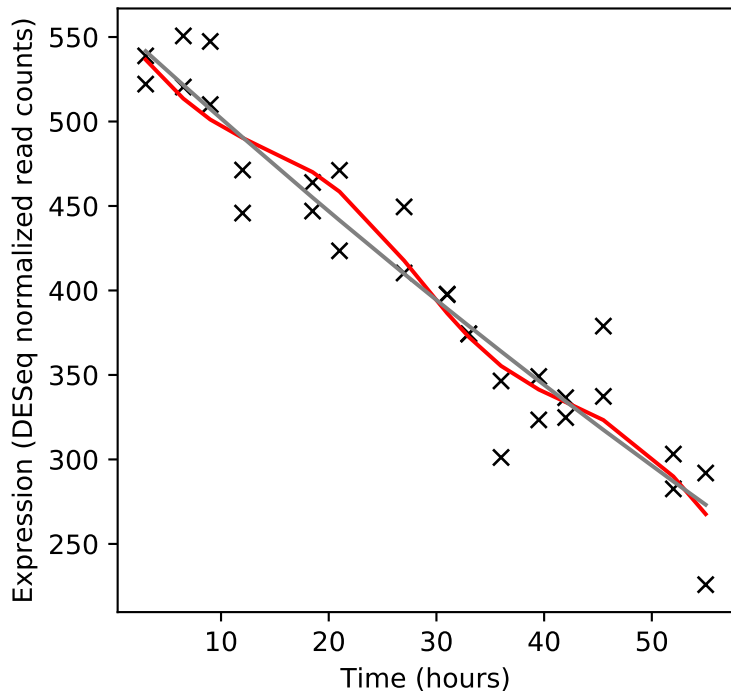

Rv2862c/-

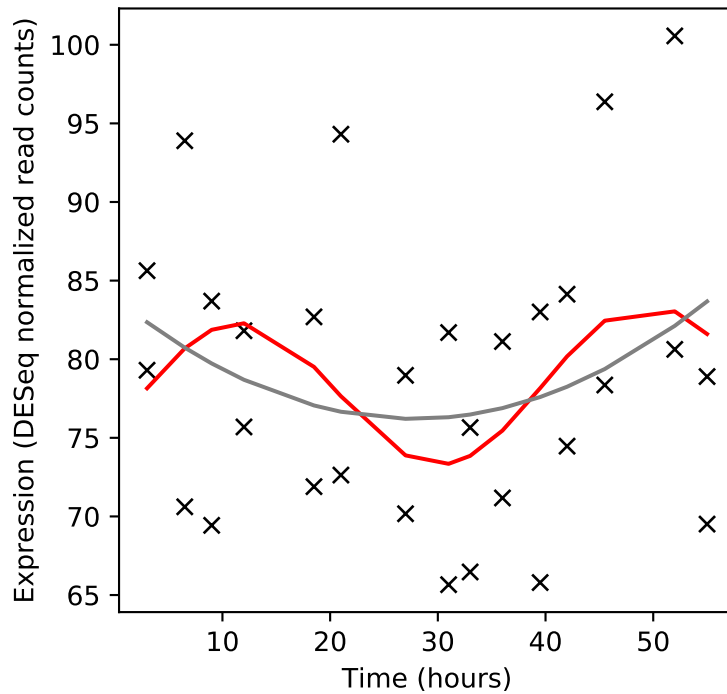

Rv2862A/vapB23

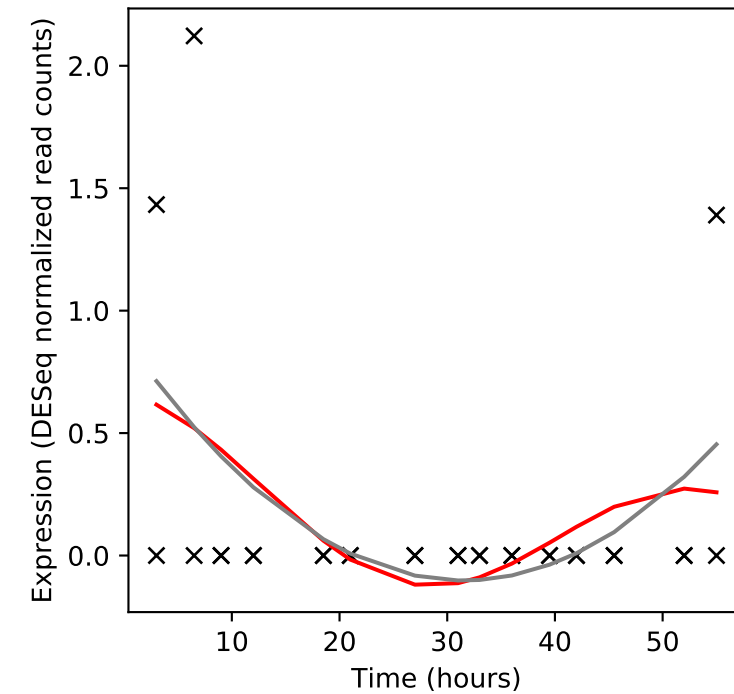

Rv2863/vapC23

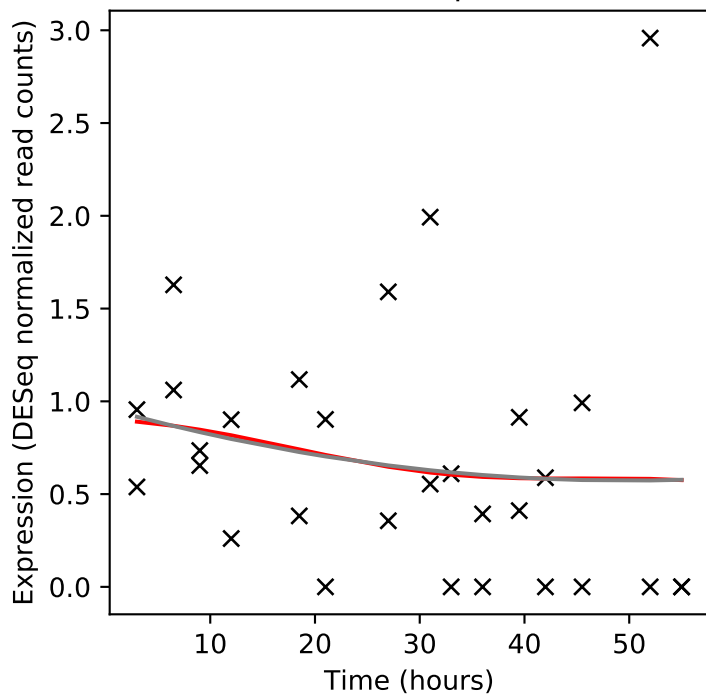

Rv2864c/-

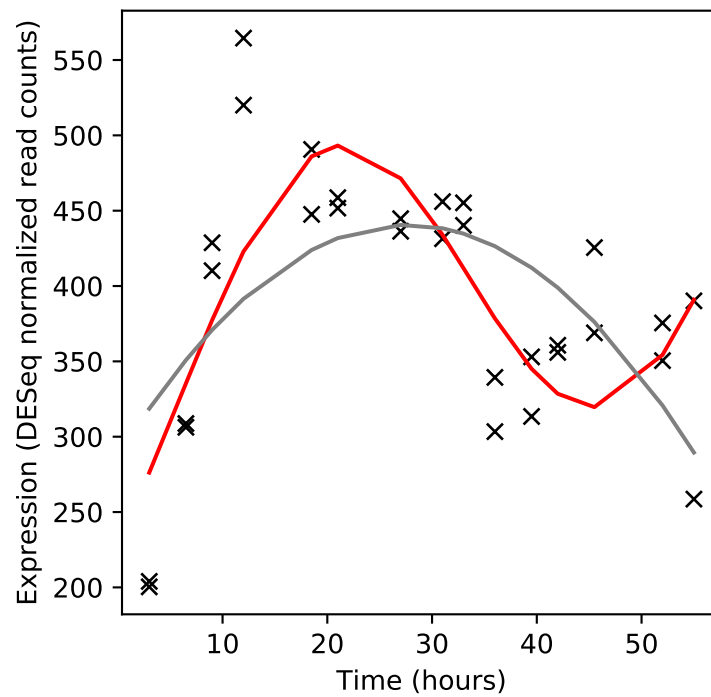

Rv2865/reIF

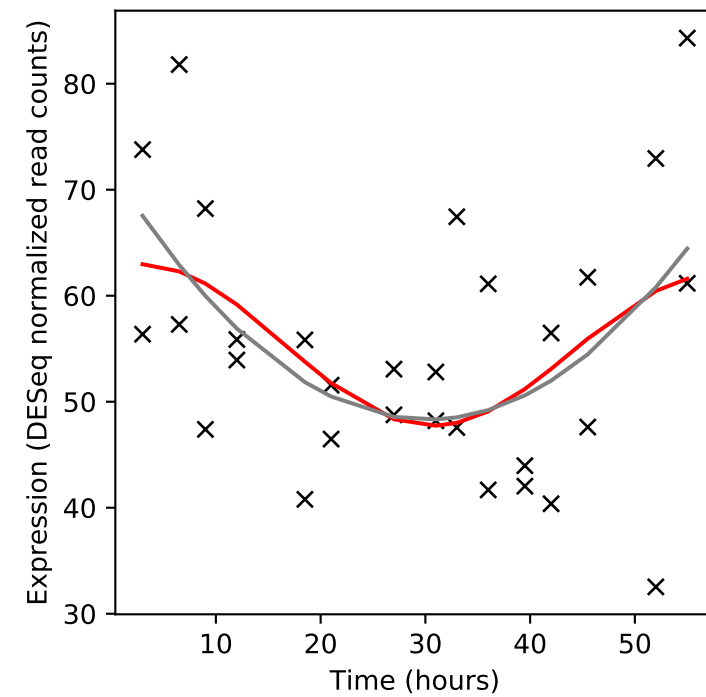

Rv2866/reIG

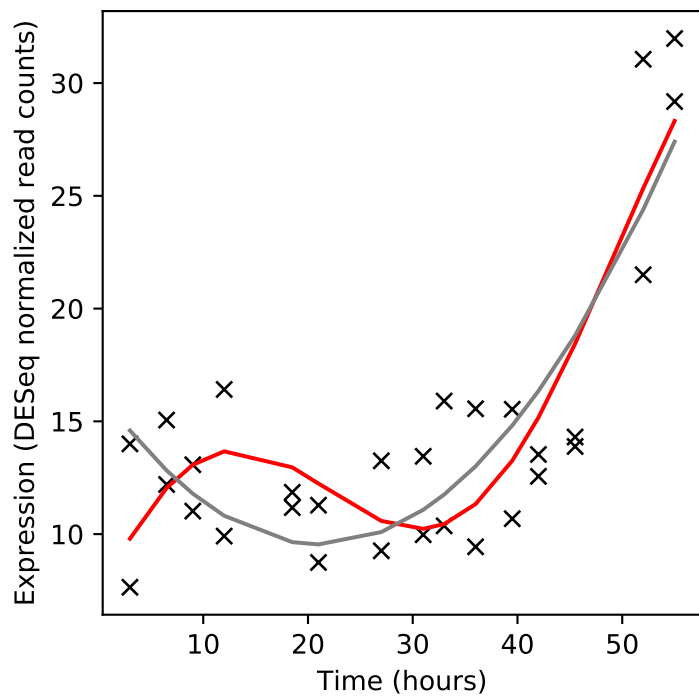

Rv2867c/-

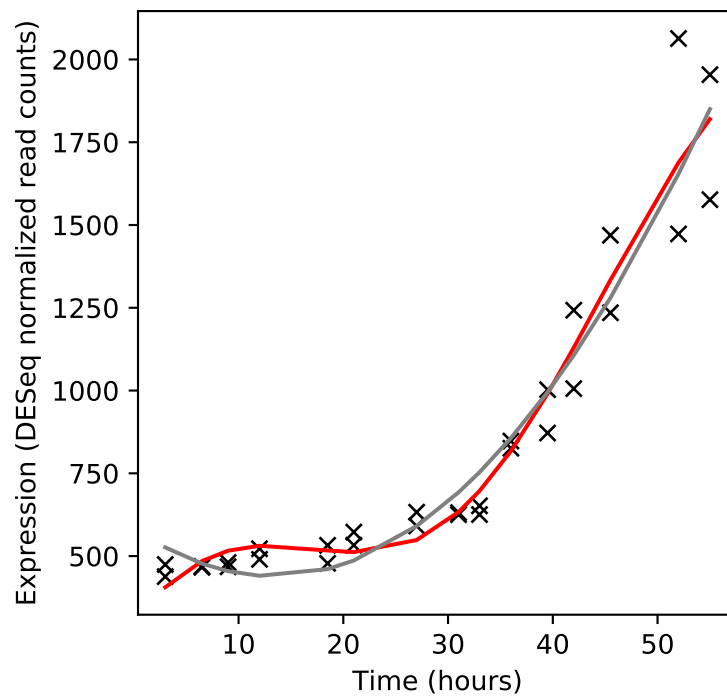

Rv2868c/gcpE

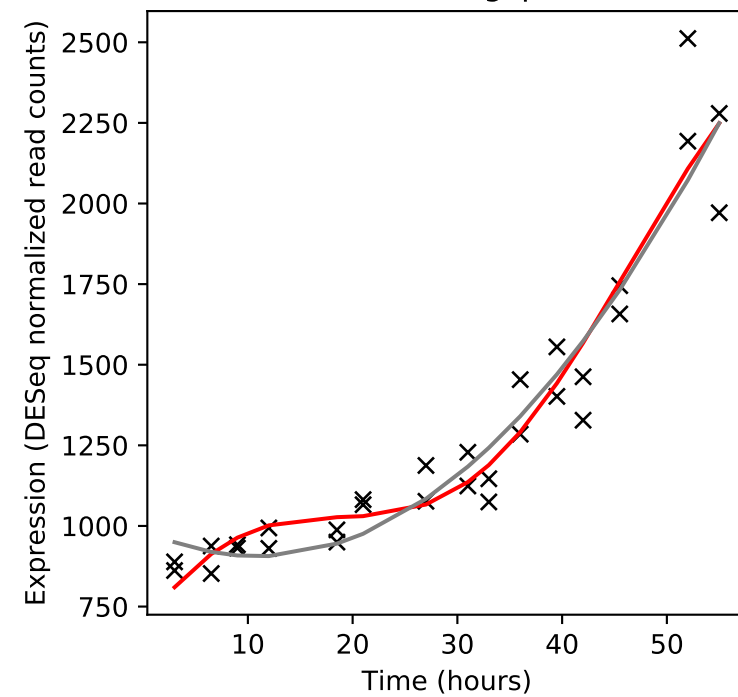

Rv2869c/rip

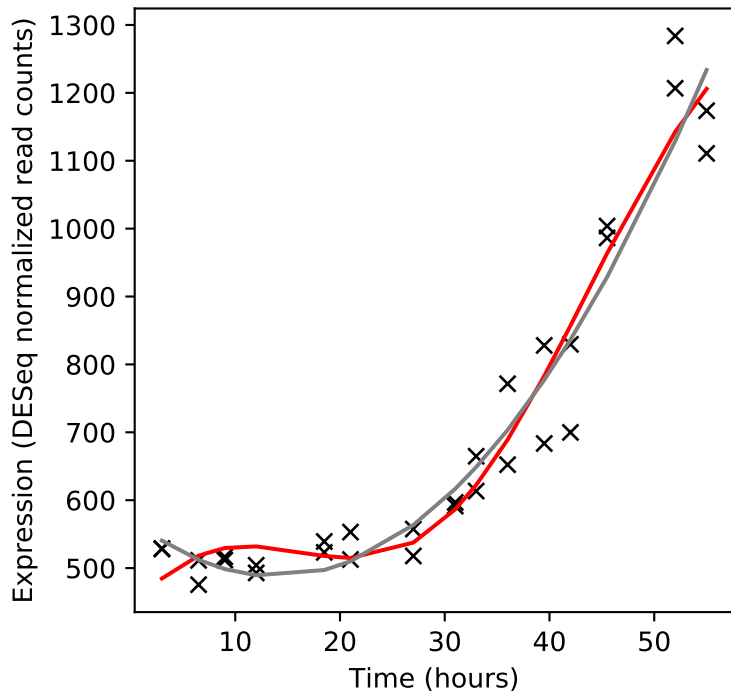

Rv2870c/dxr

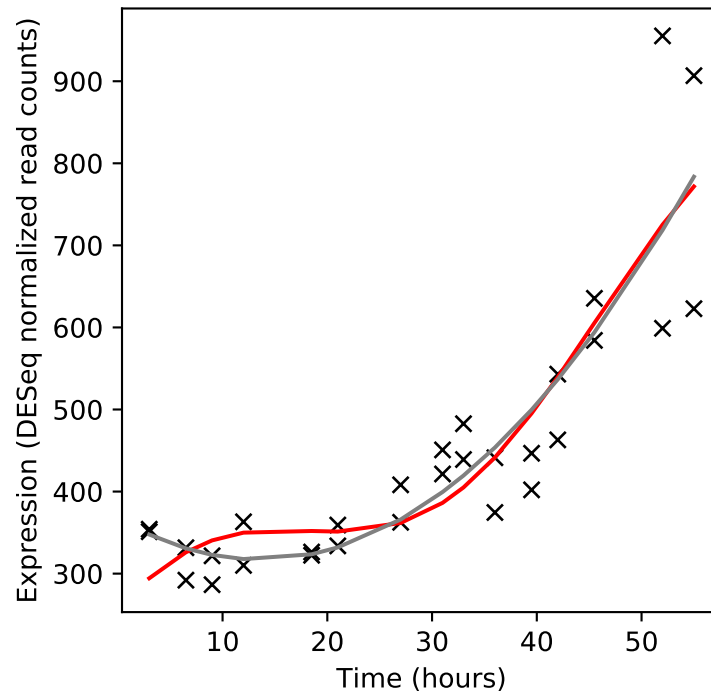

Rv2871/vapB43

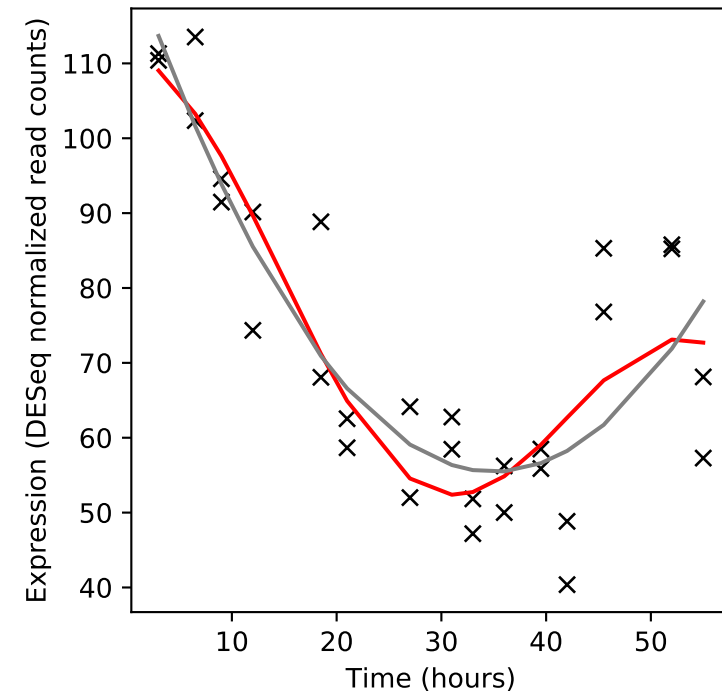

Rv2872/vapC43

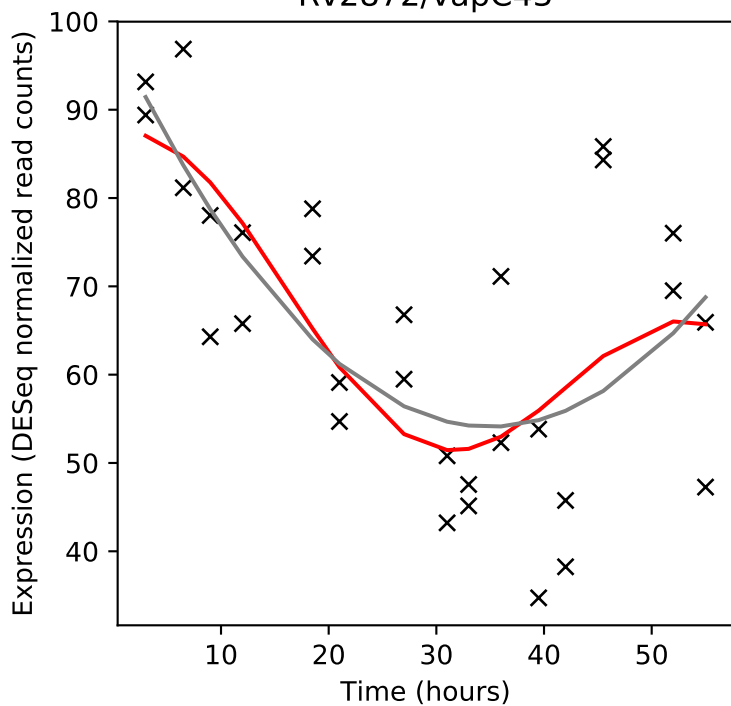

Rv2873/mpt83

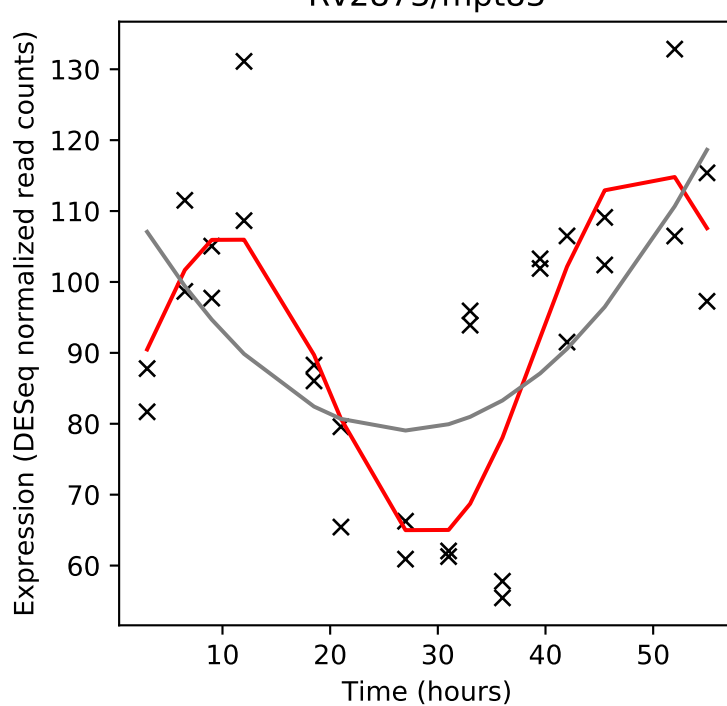

Rv2874/dipZ

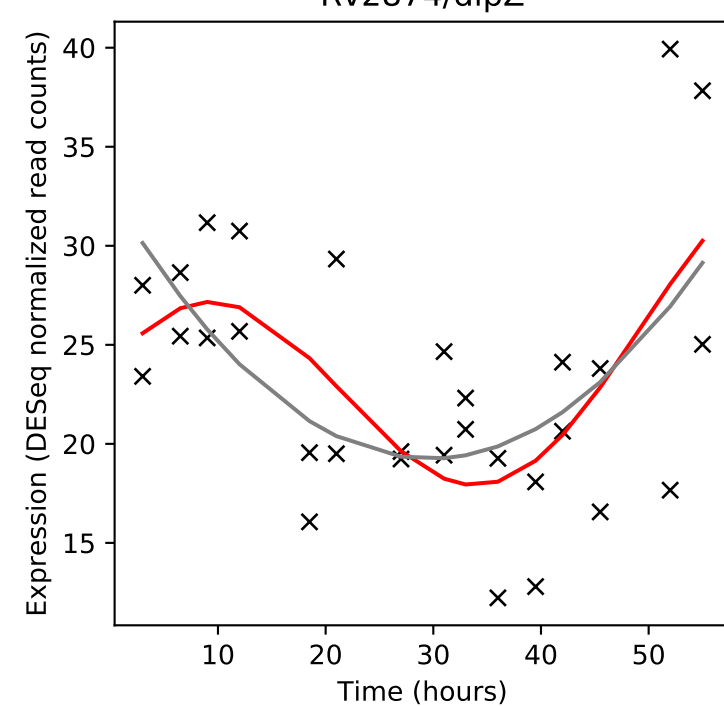

Rv2875/mpt70

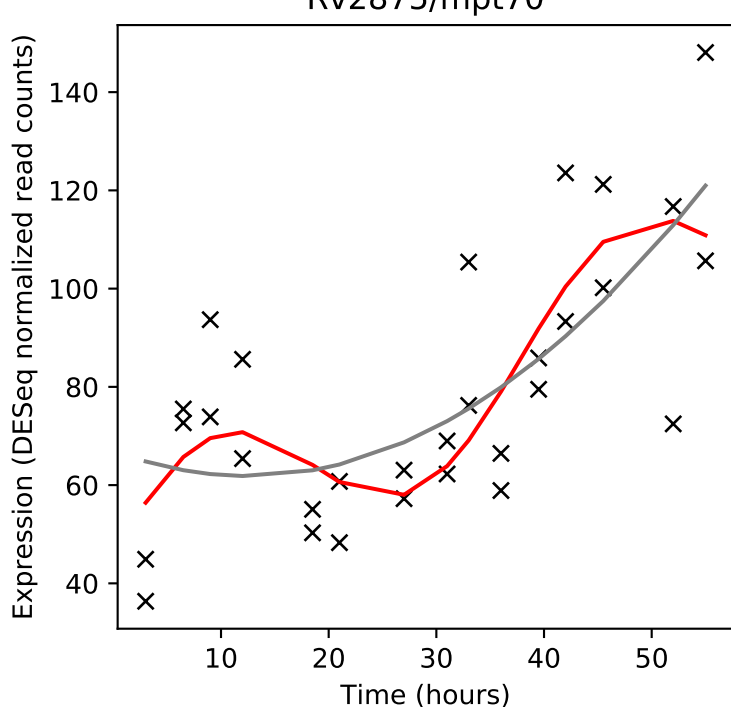

Rv2876/-

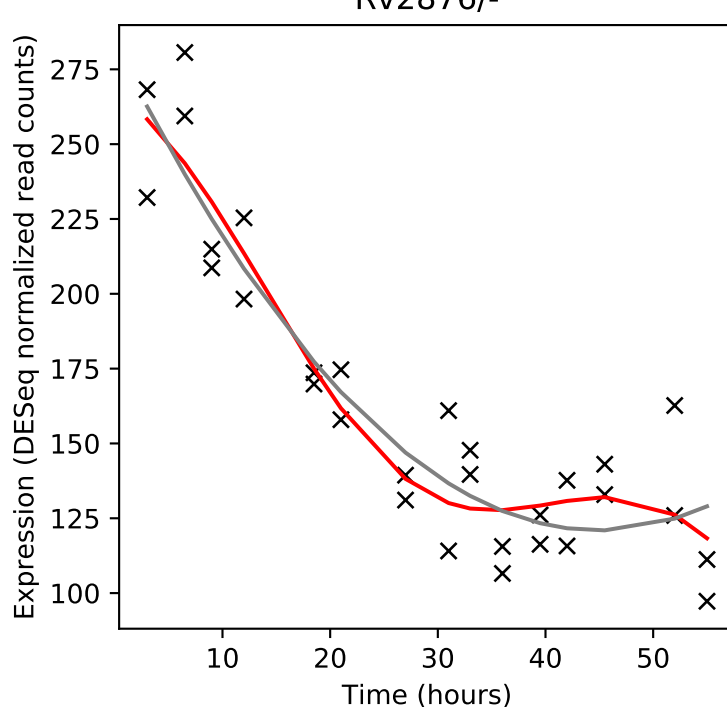

Rv2877c/-

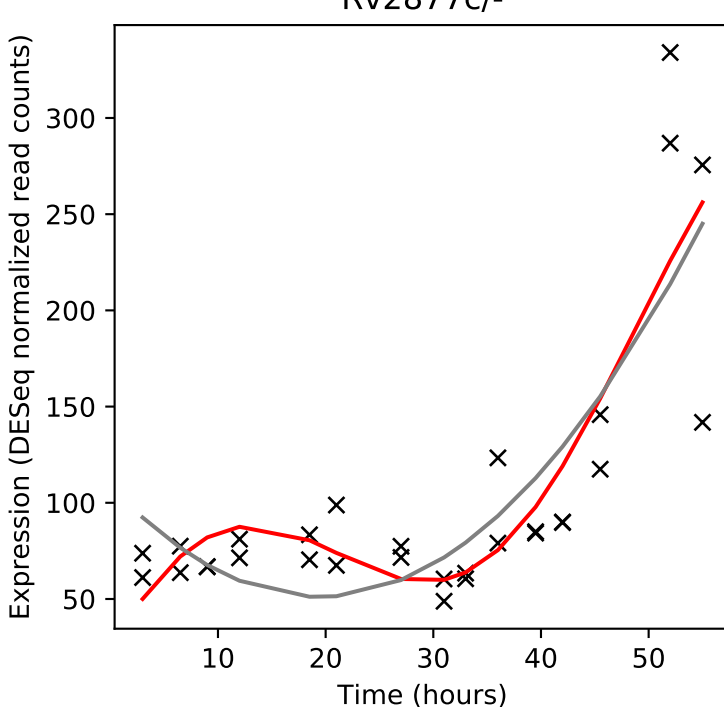

Rv2878c/mpt53

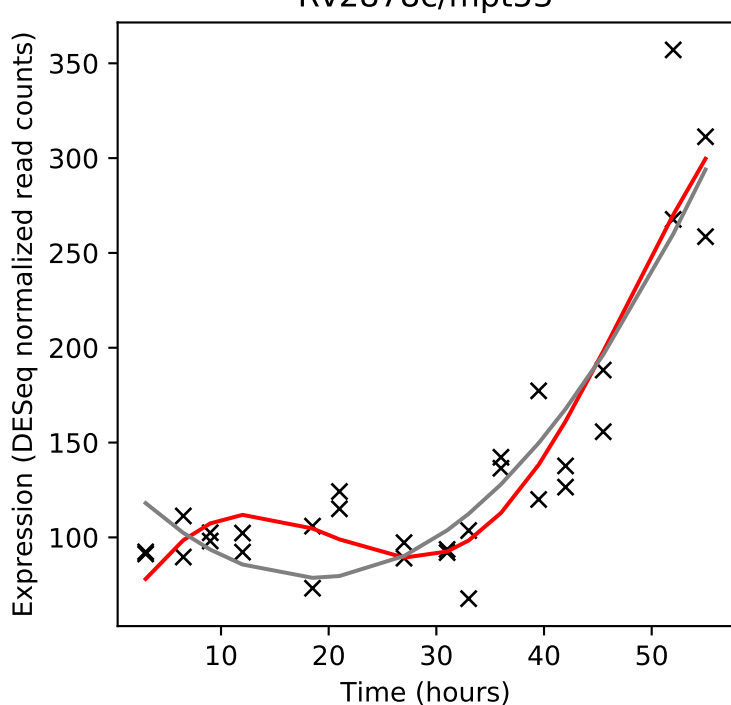

Rv2879c/-

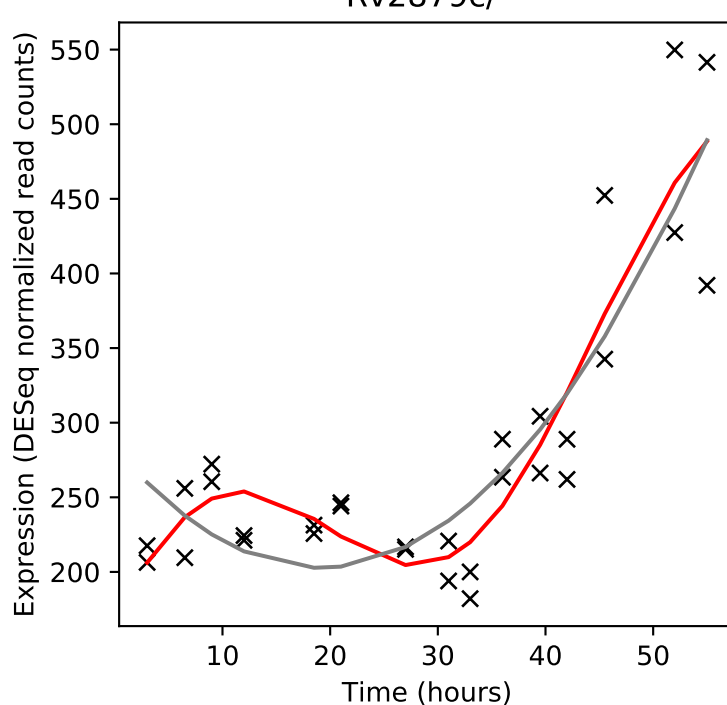

Rv2880c/-

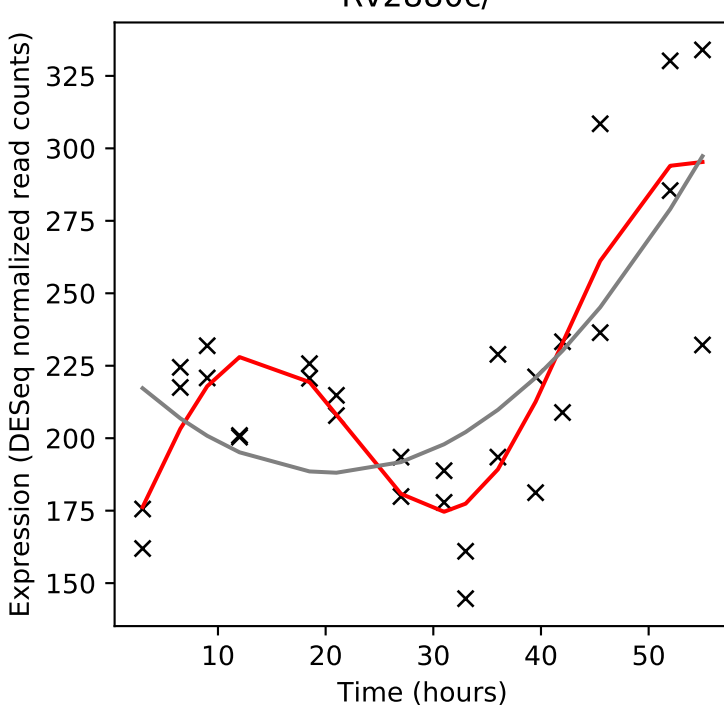

Rv2881c/cdsA

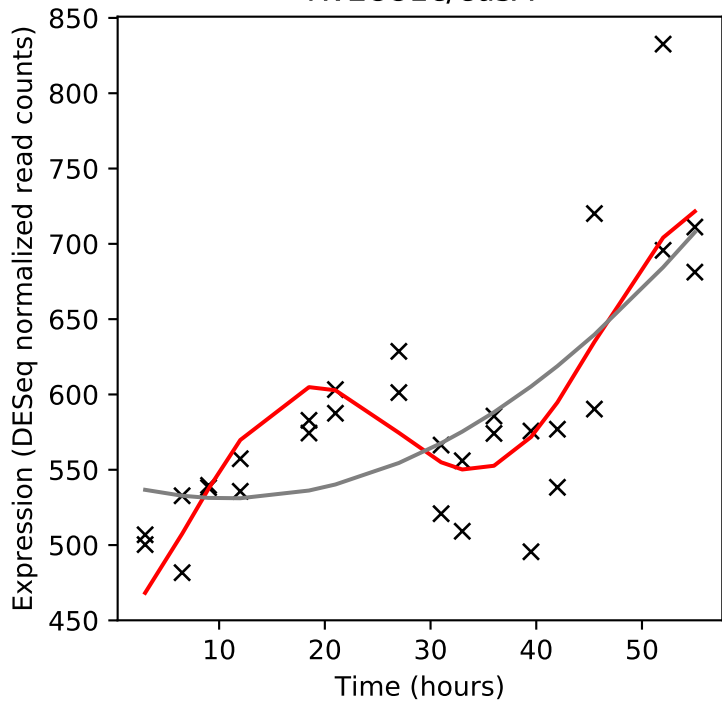

Rv2882c/frr

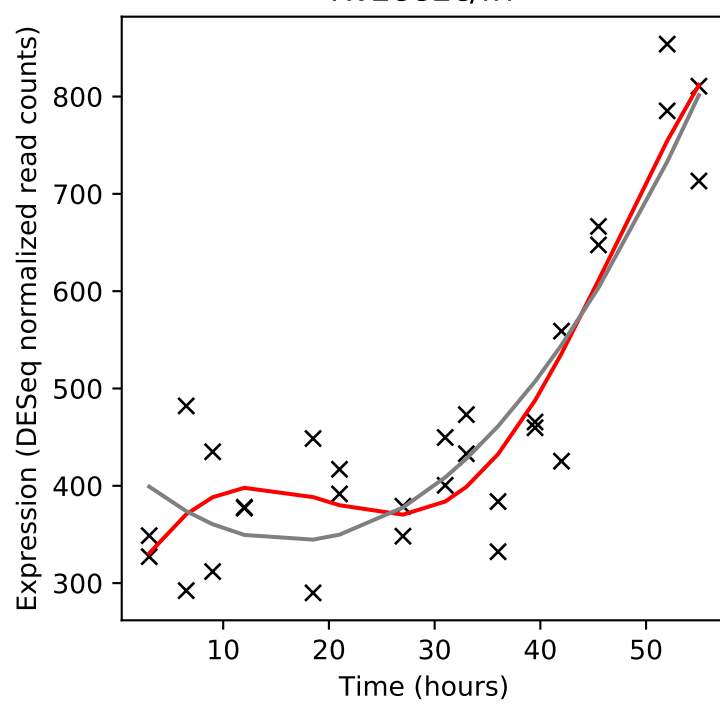

Rv2883c/pyrH

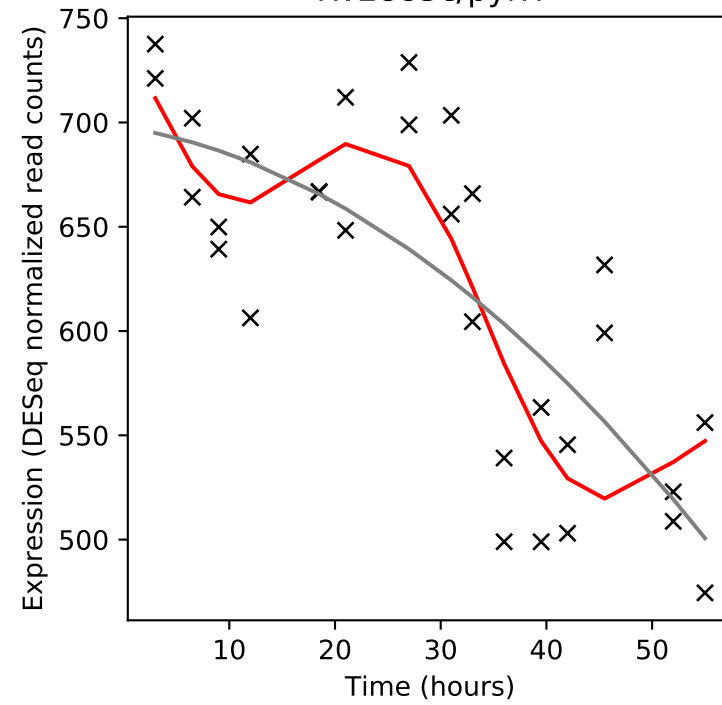

Rv2884c/-

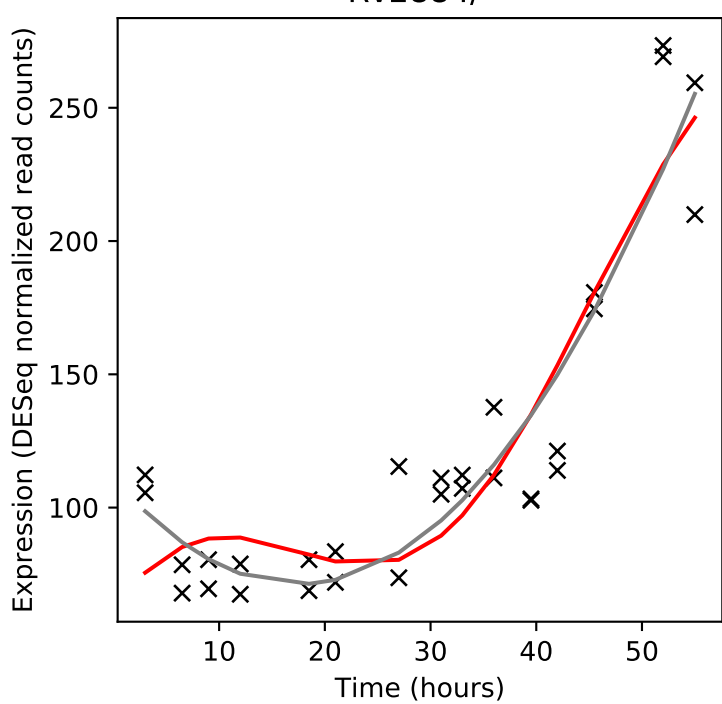

Rv2885c/-

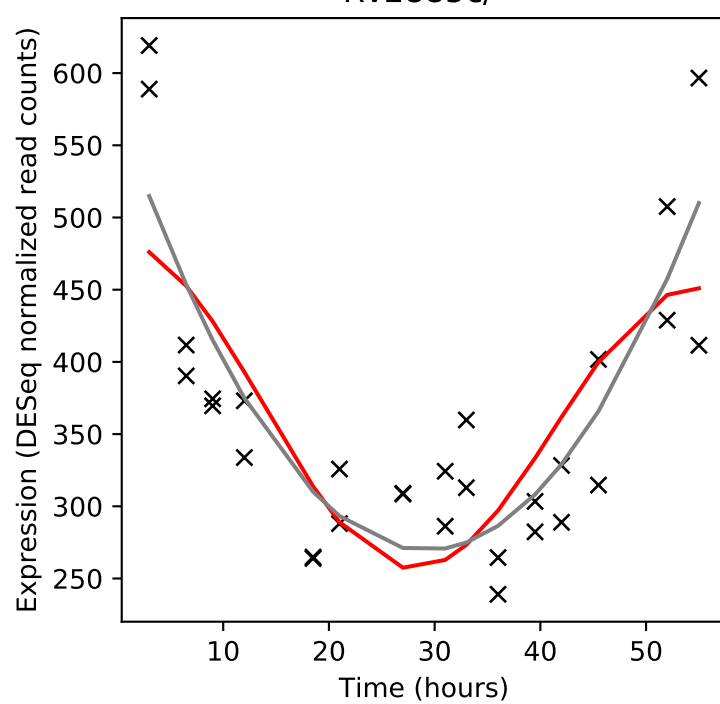

Rv2886c/-

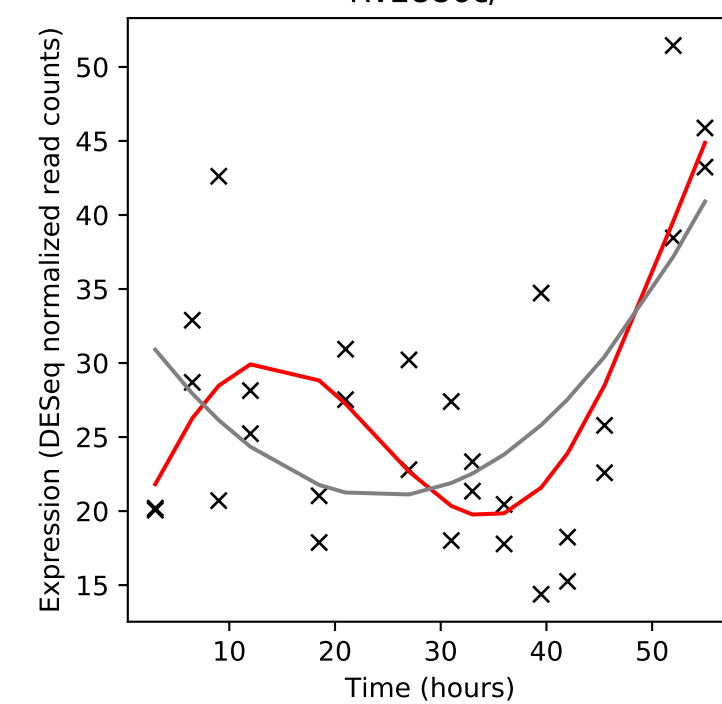

Rv2887c/-

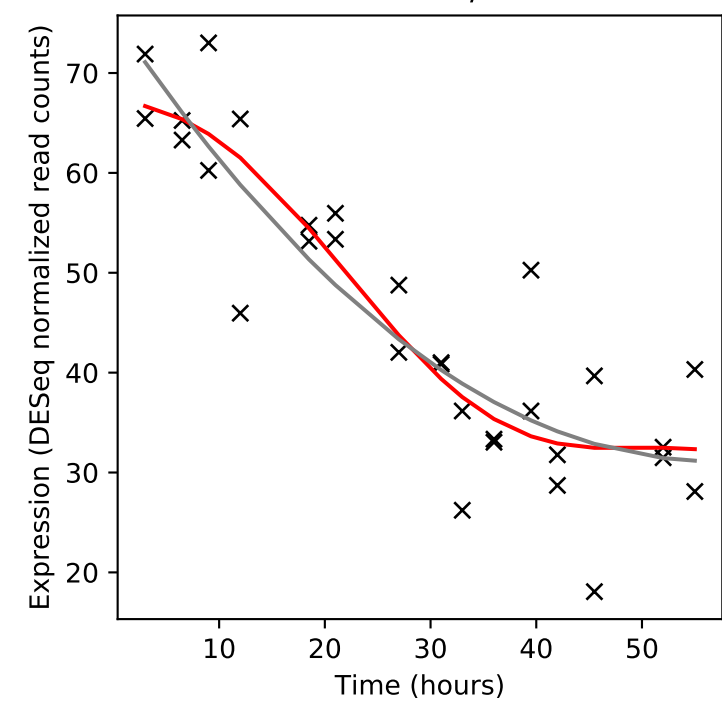

Rv2888c/amiC

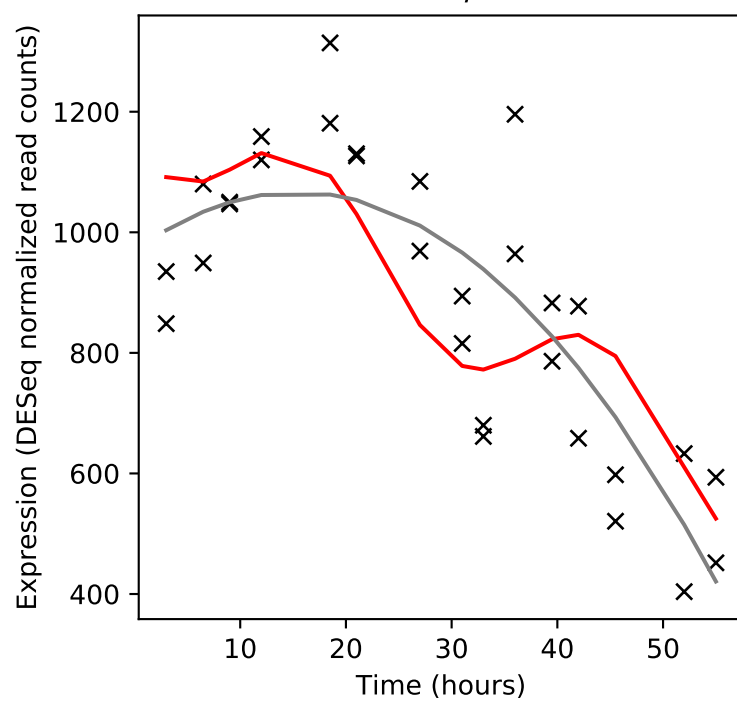

Rv2889c/tsf

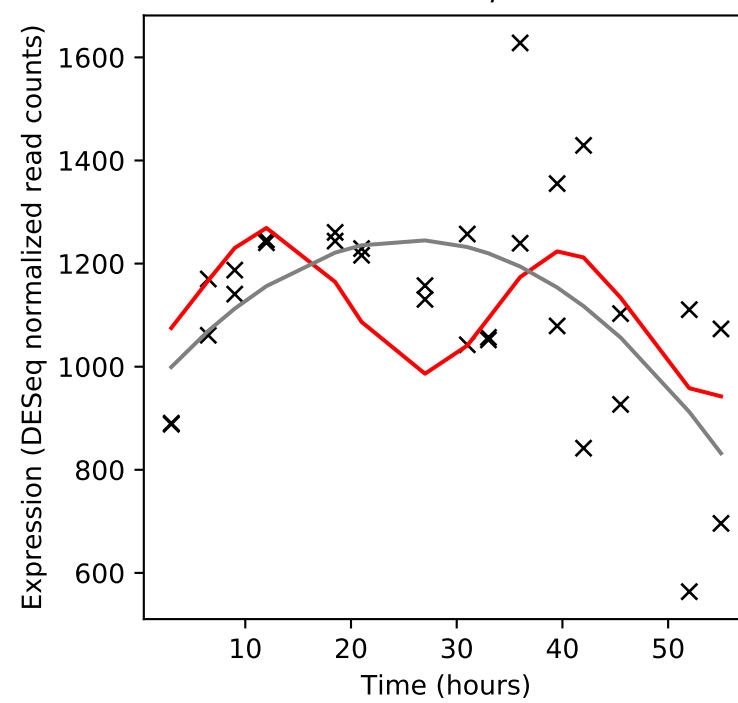

Rv2890c/rpsB

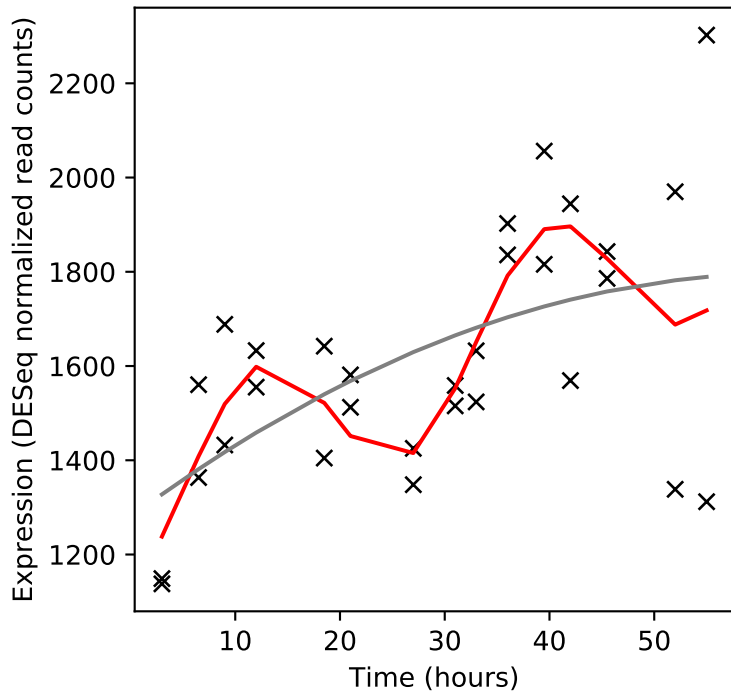

Rv2891/-

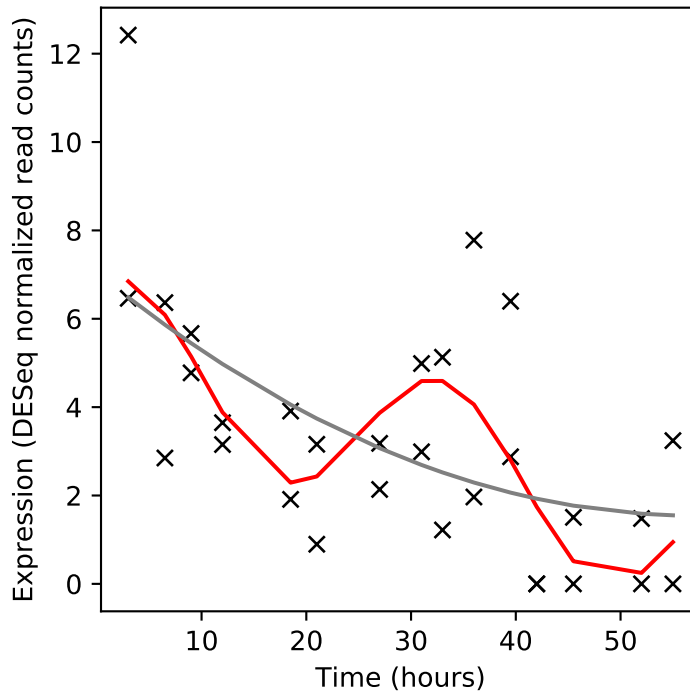

Rv2892c/PPE45

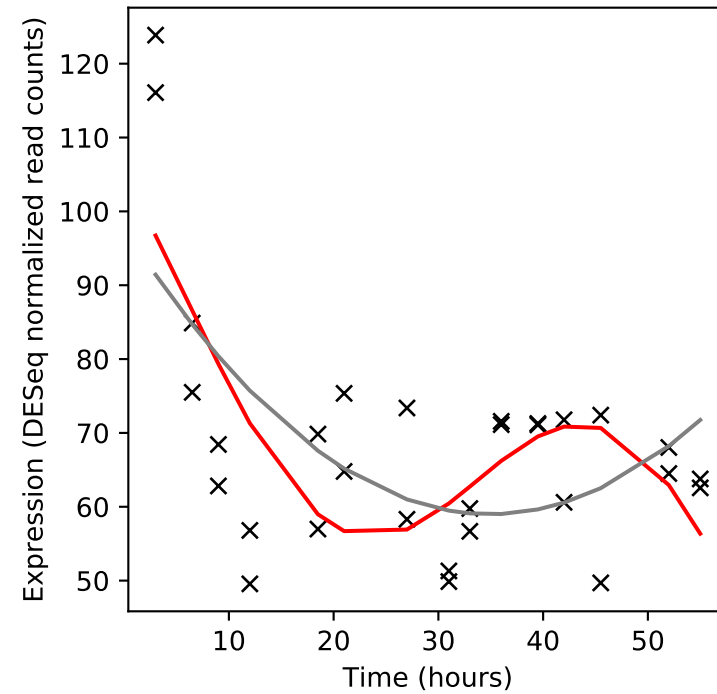

Rv2893/-

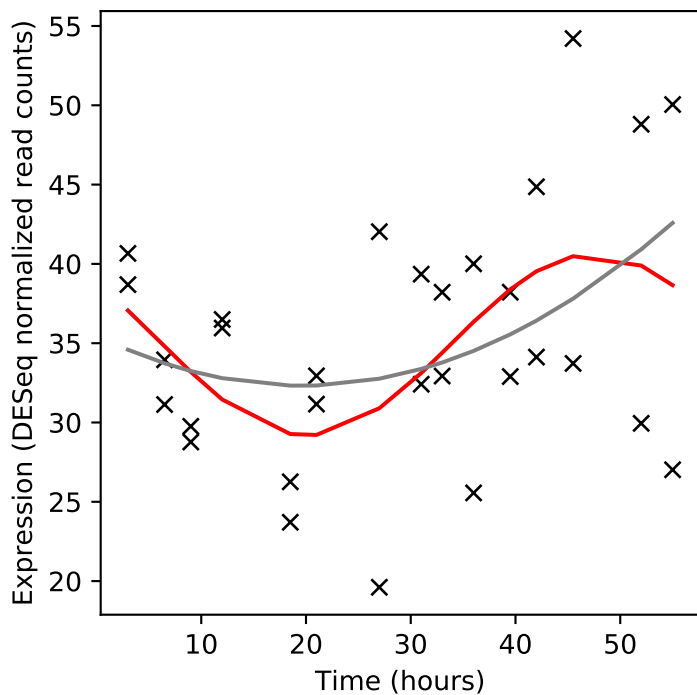

Rv2894c/xerC

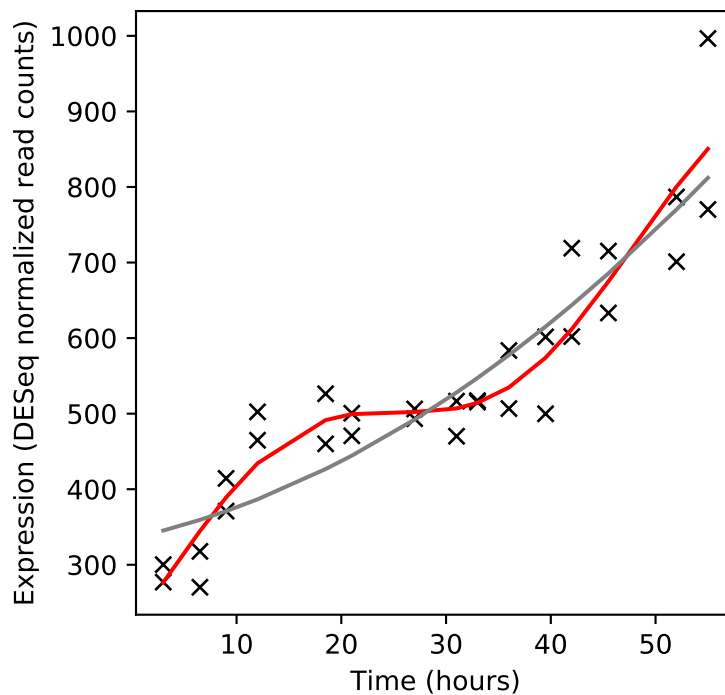

Rv2895c/viuB

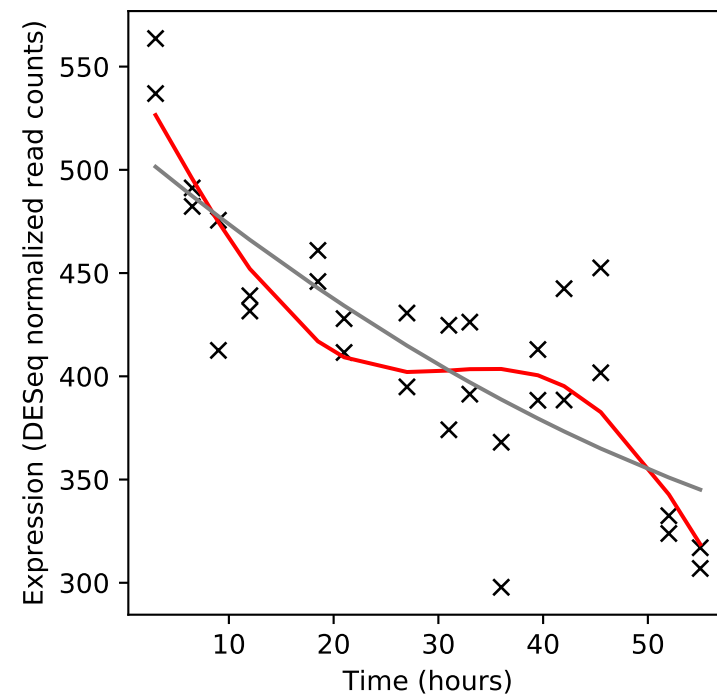

Rv2896c/-

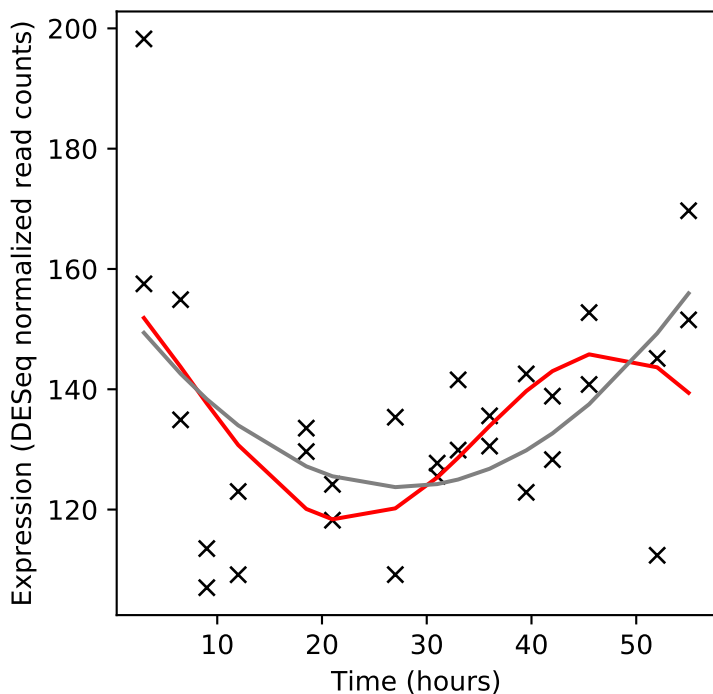

Rv2897c/-

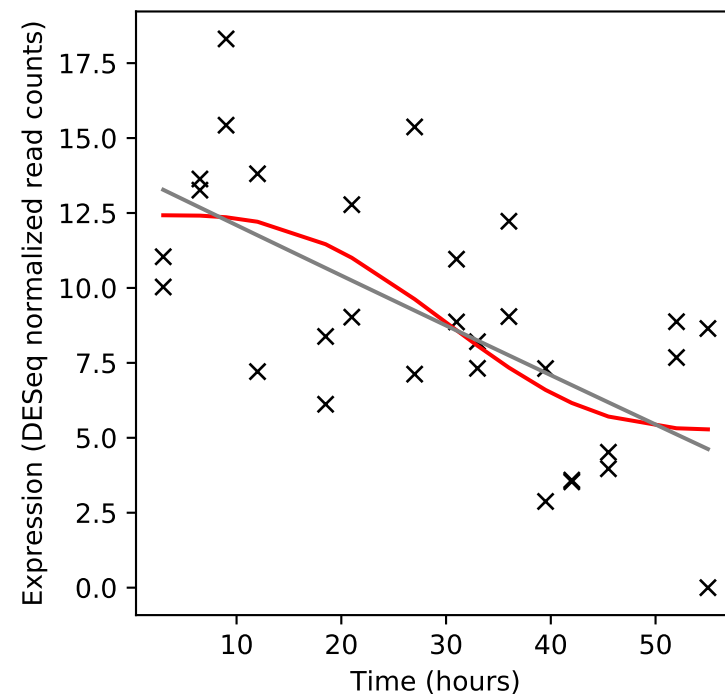

Rv2898c/-

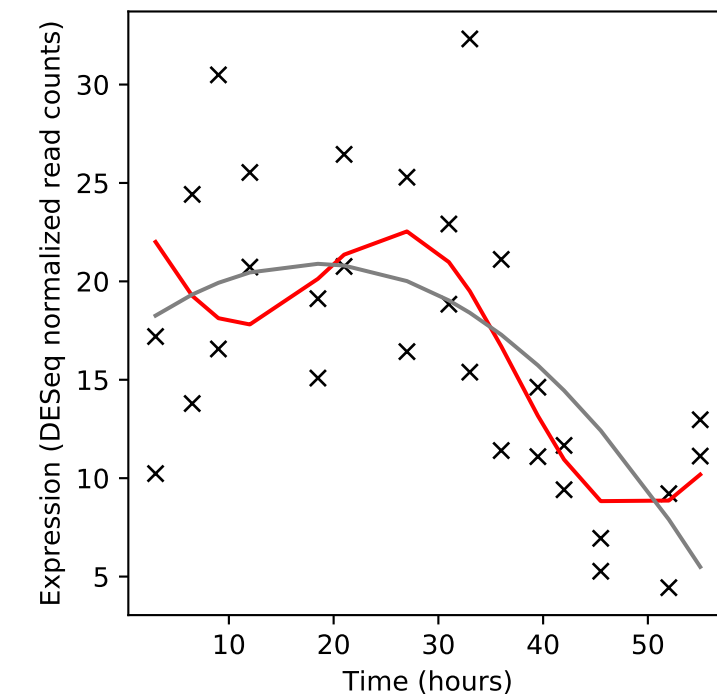

Rv2899c/fdhD

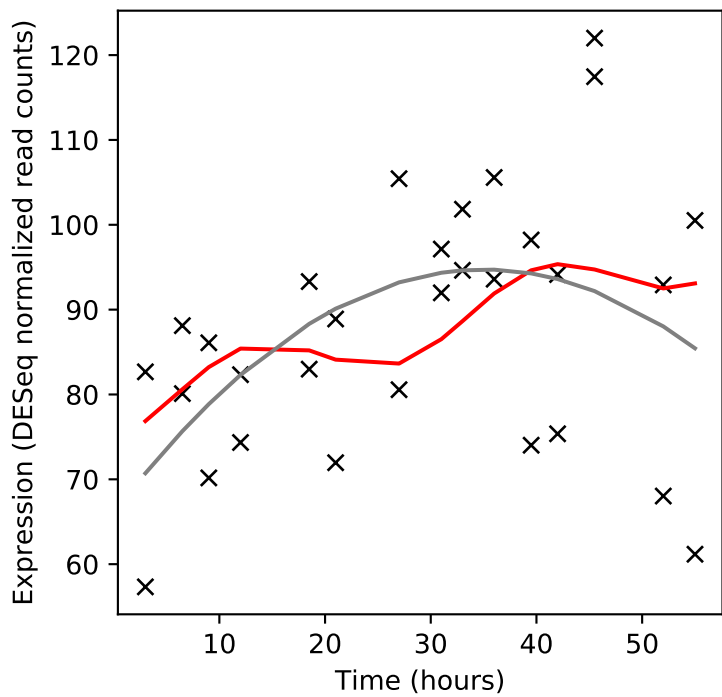

Rv2900c/fdhF

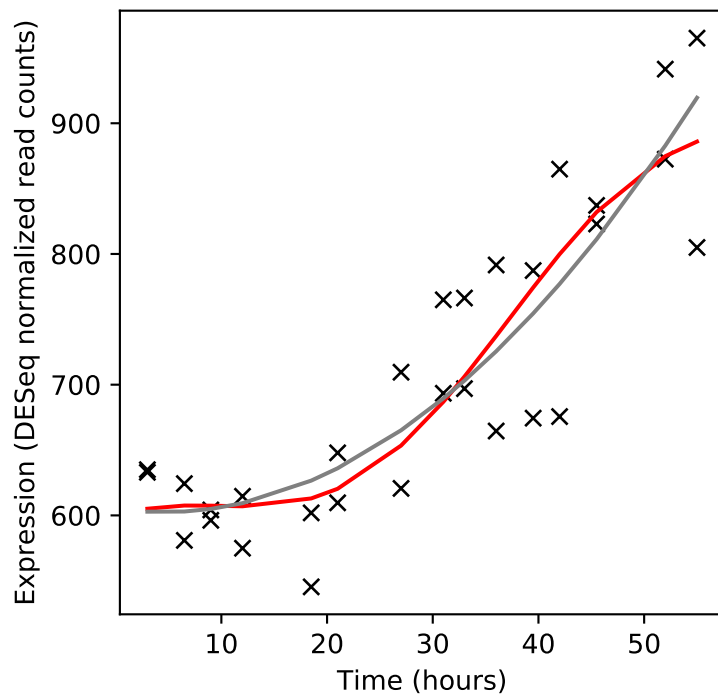

Rv2901c/-

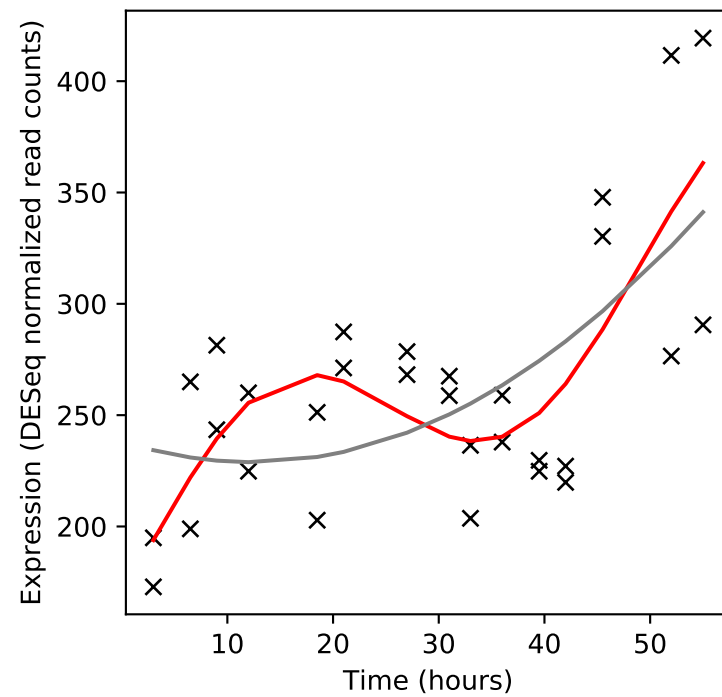

Rv2902c/rnhB

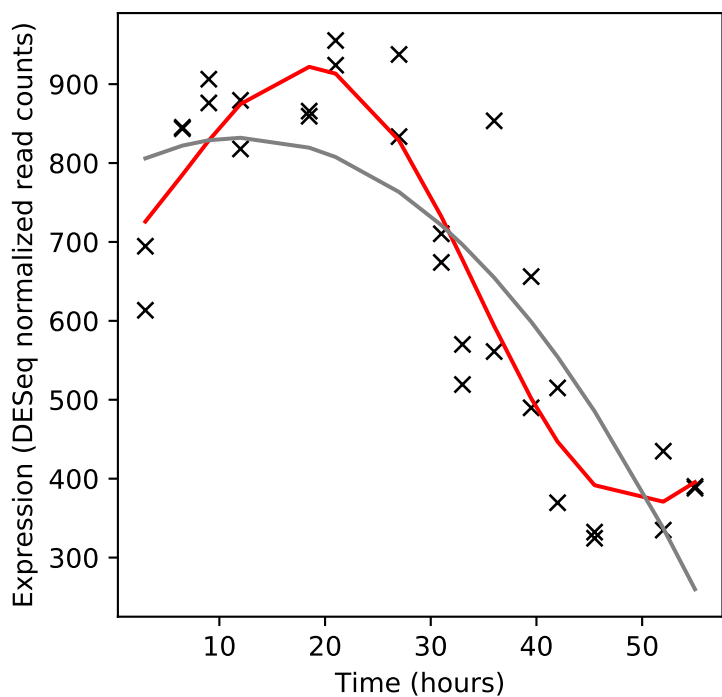

Rv2903c/lepB

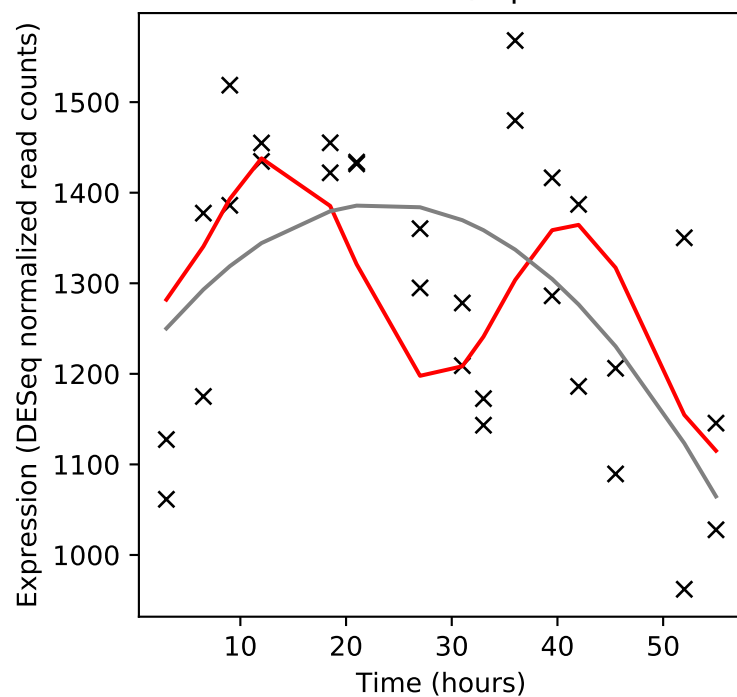

Rv2904c/rplS

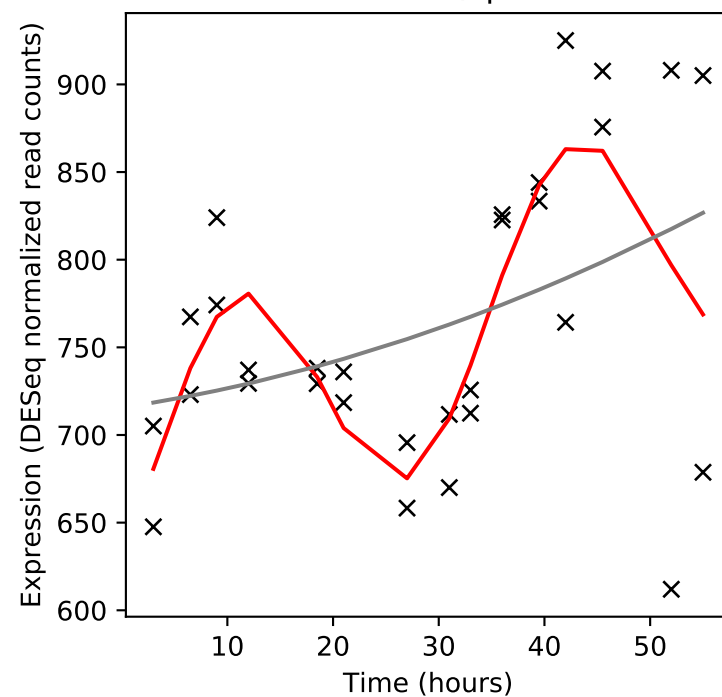

Rv2905/lppW

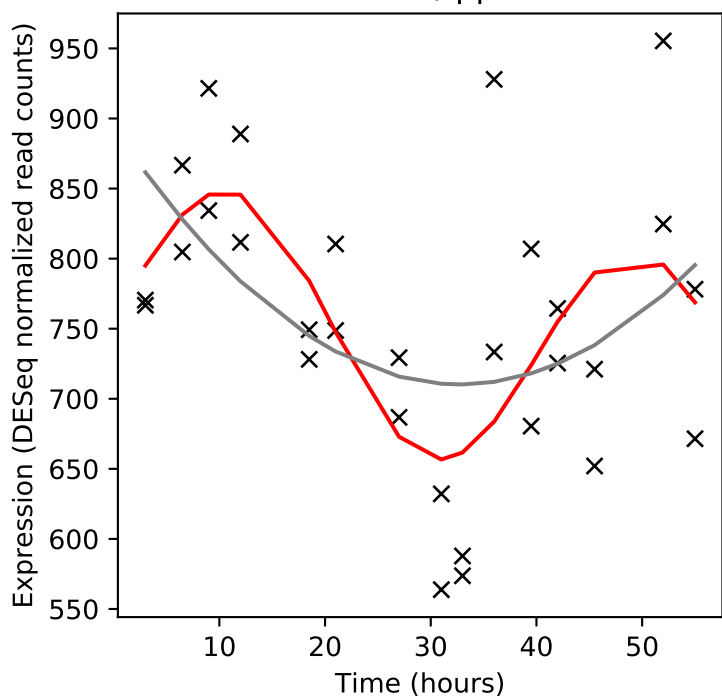

Rv2906c/trmD

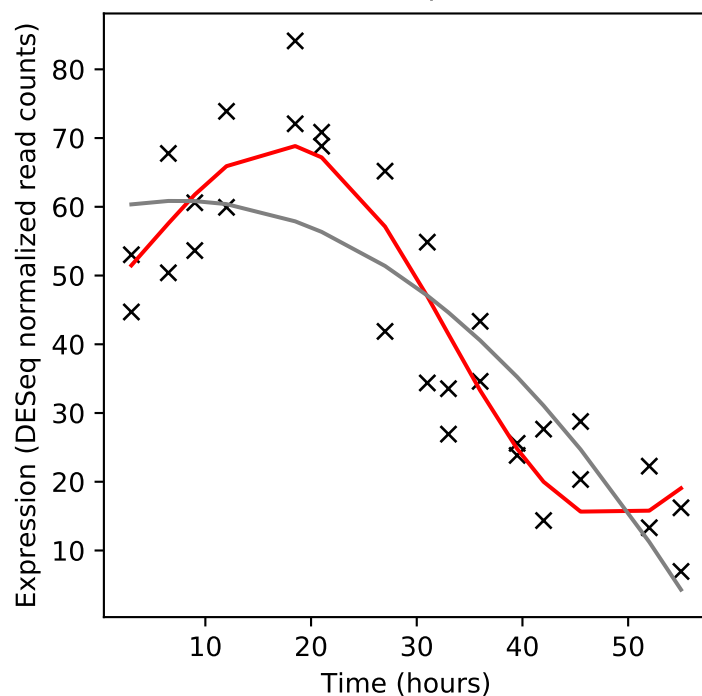

Rv2907c/rimM

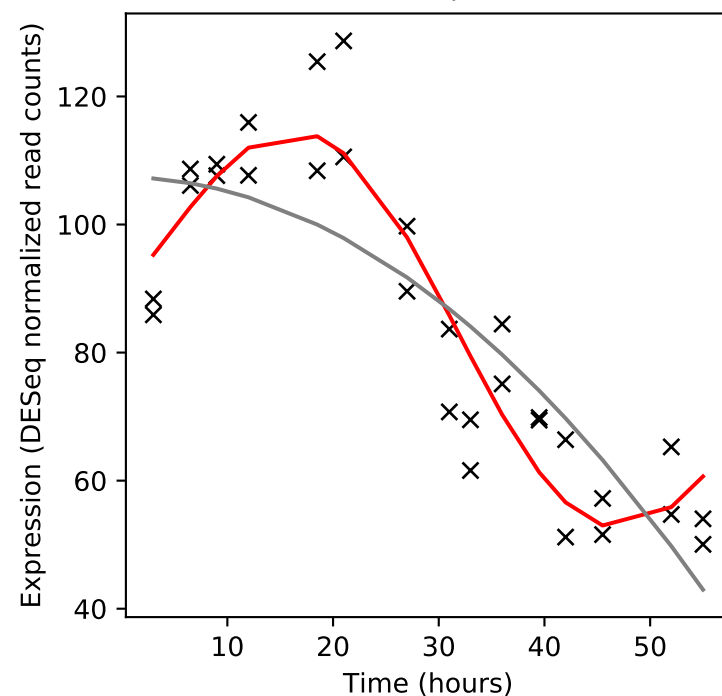



Rv2908c/-

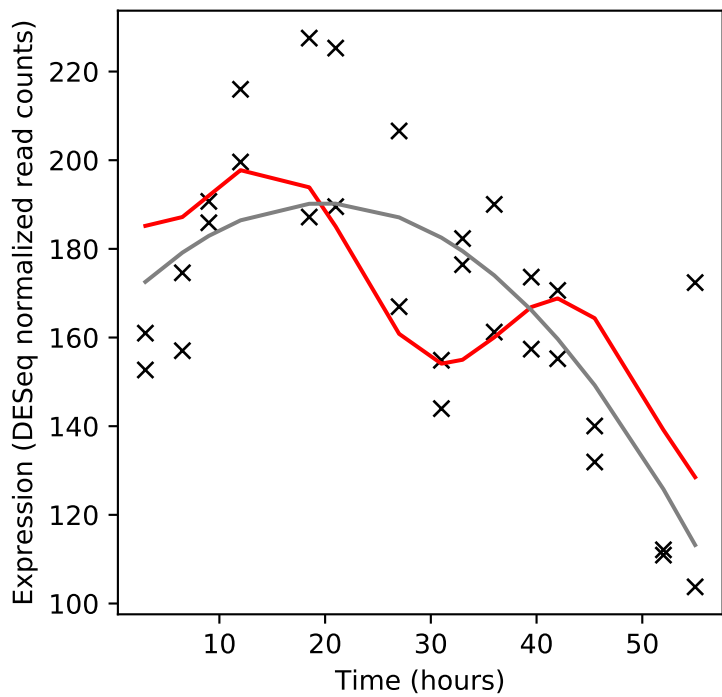

Rv2909c/rpsP

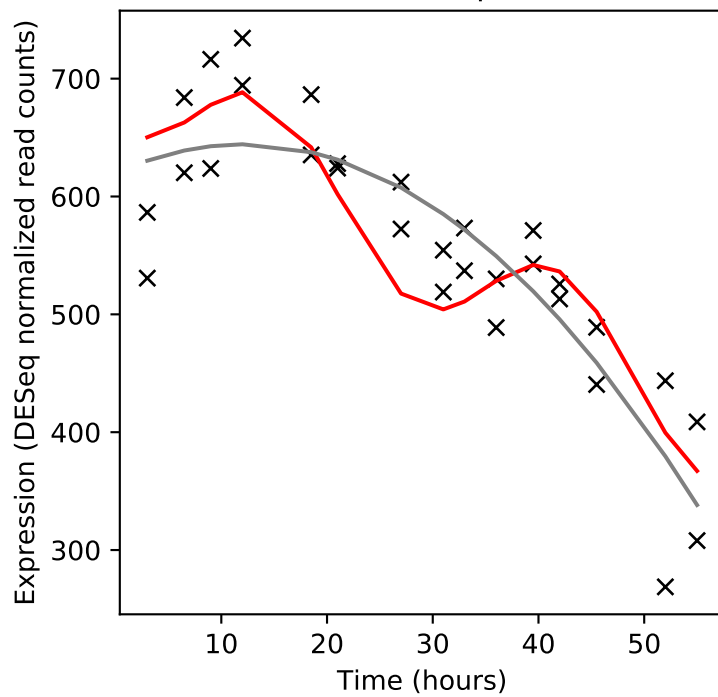

Rv2910c/-

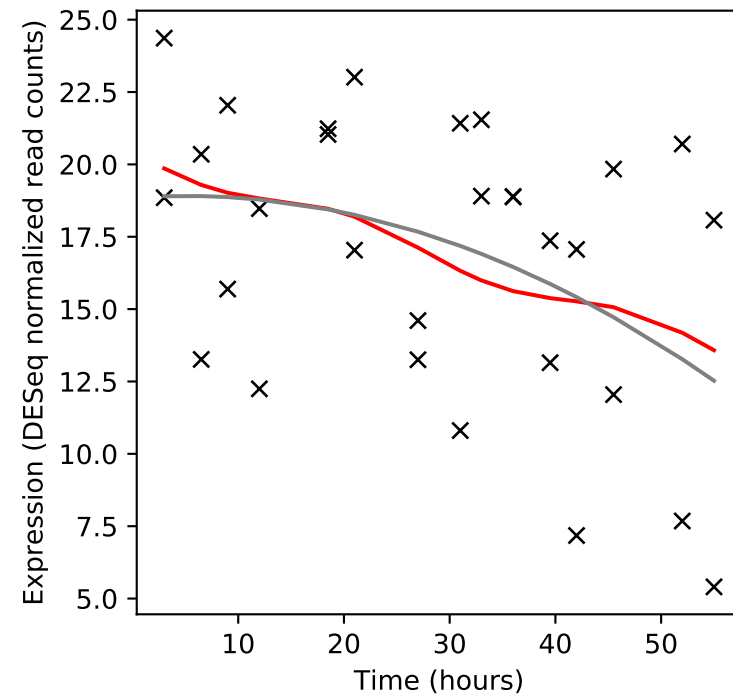

Rv2911/dacB2

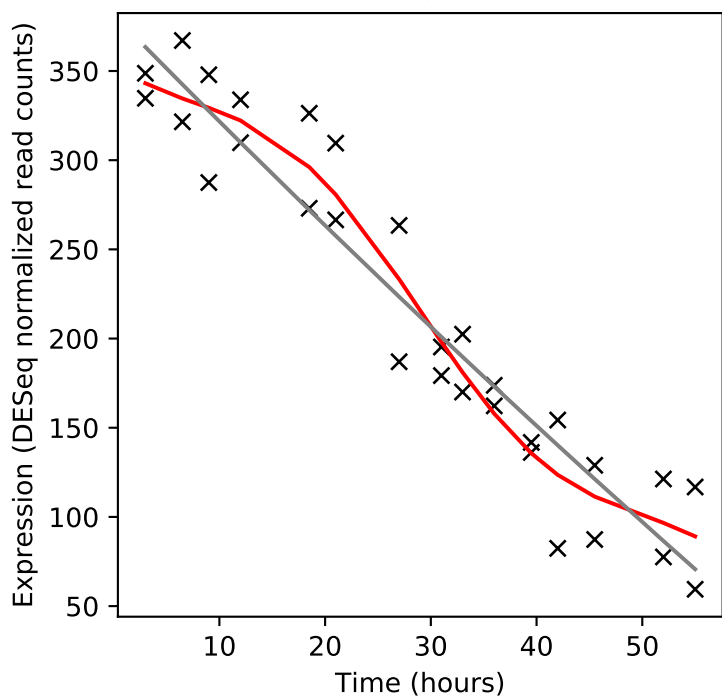

Rv2912c/-

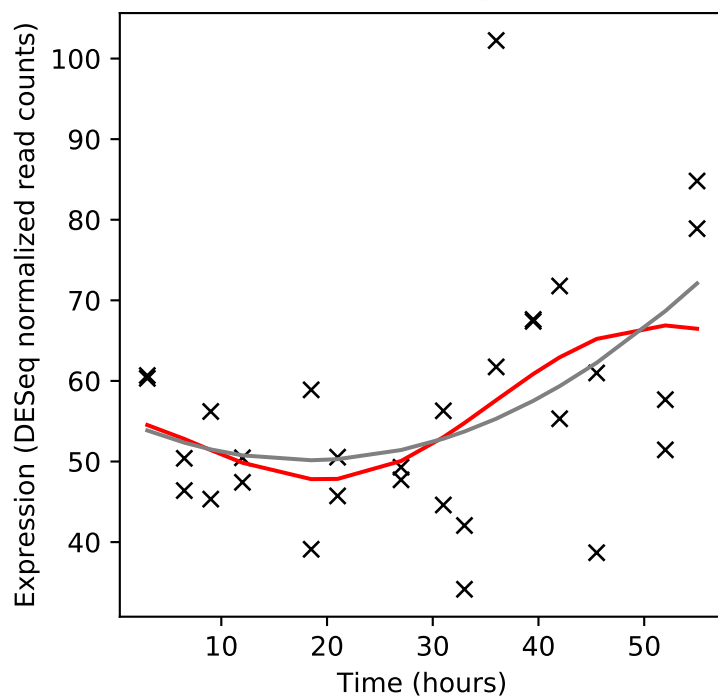

Rv2913c/-

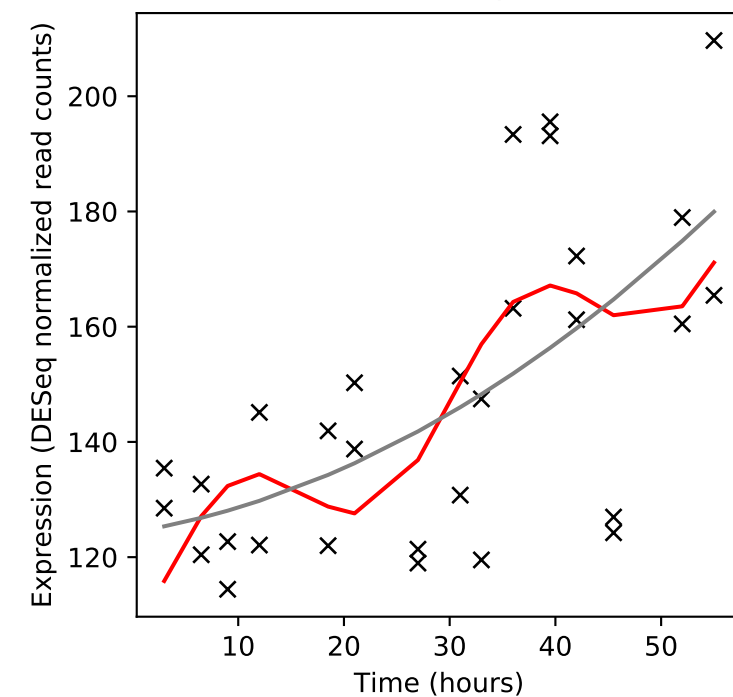

Rv2914c/pknl

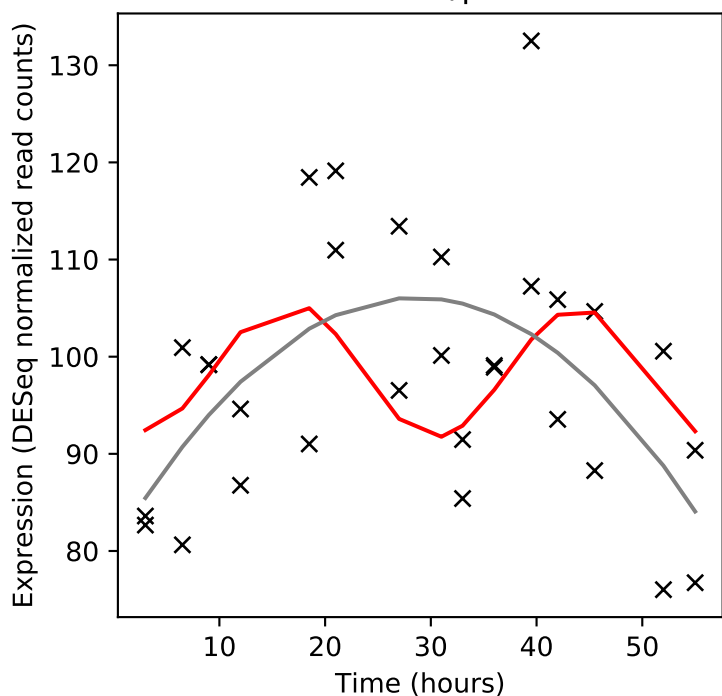

Rv2915c/-

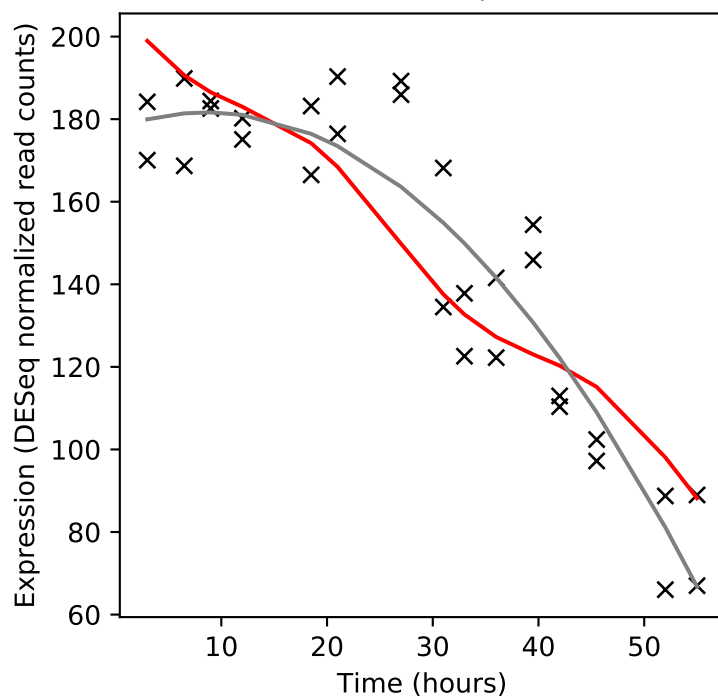

Rv2916c/ffh

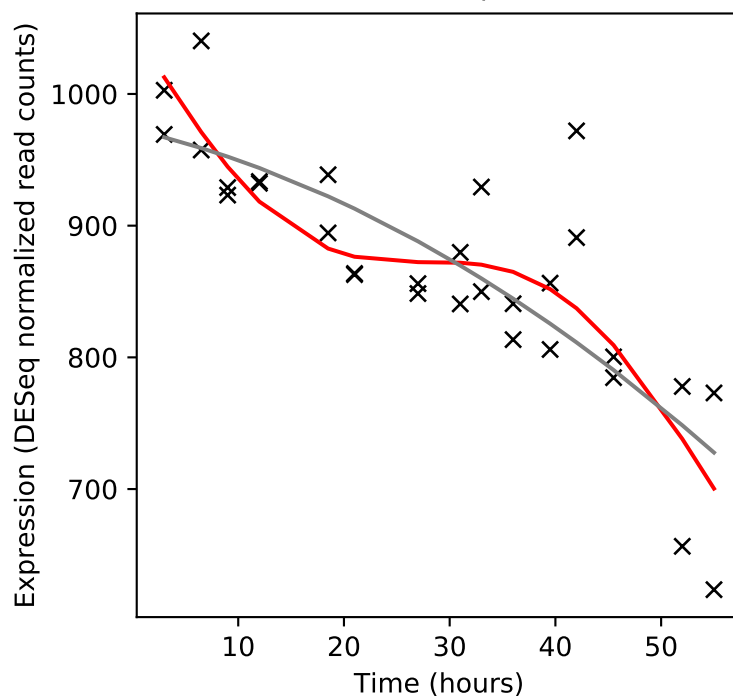

Rv2917/-

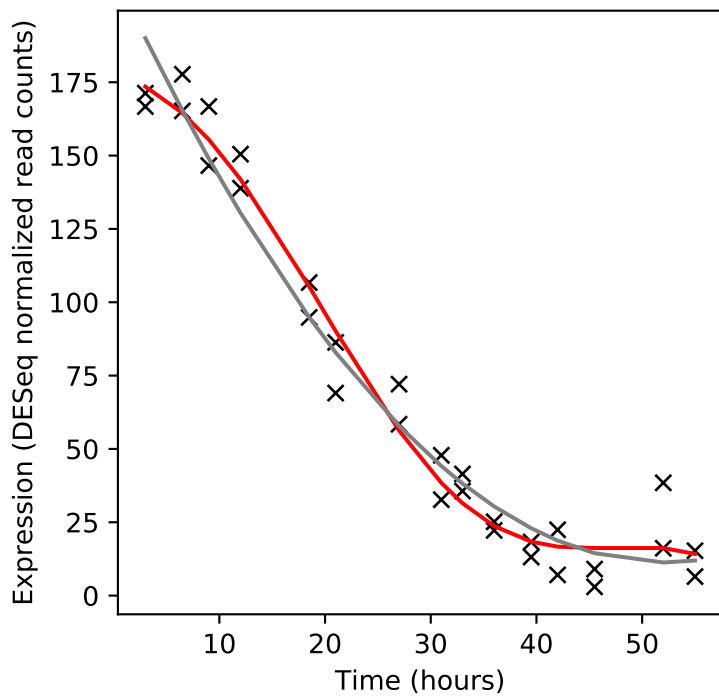

Rv2918c/glnD

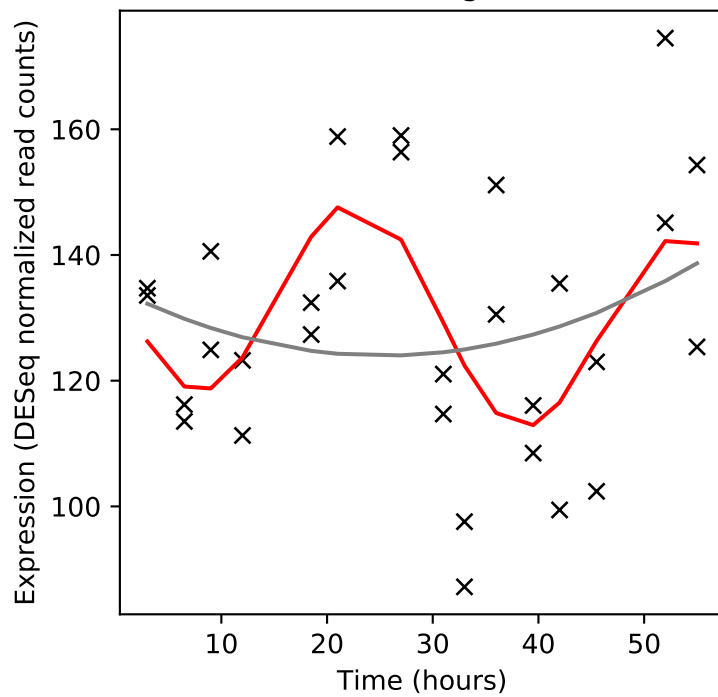

Rv2919c/glnB

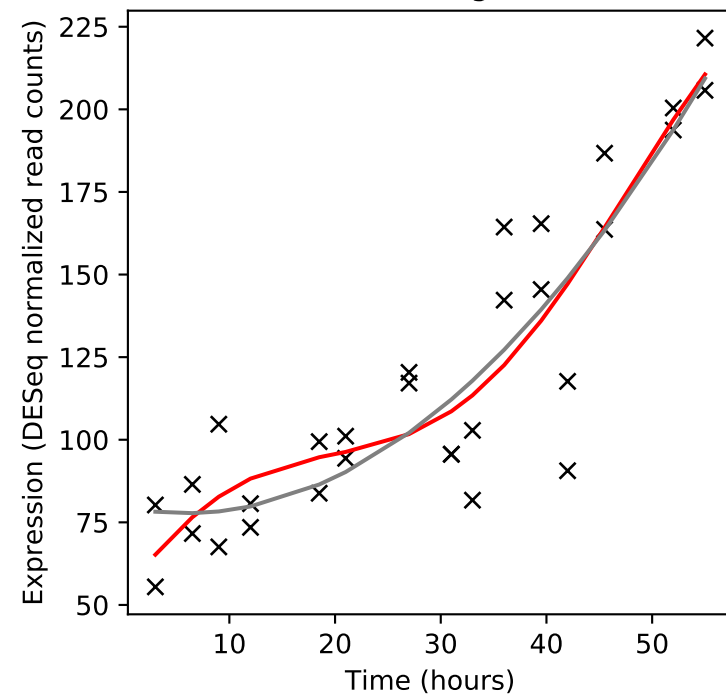

Rv2920c/amt

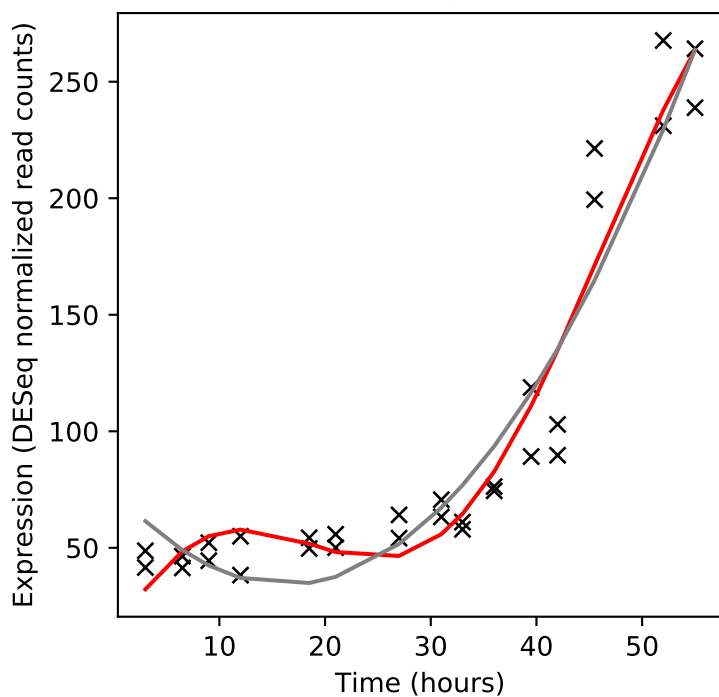

Rv2921c/ftsY

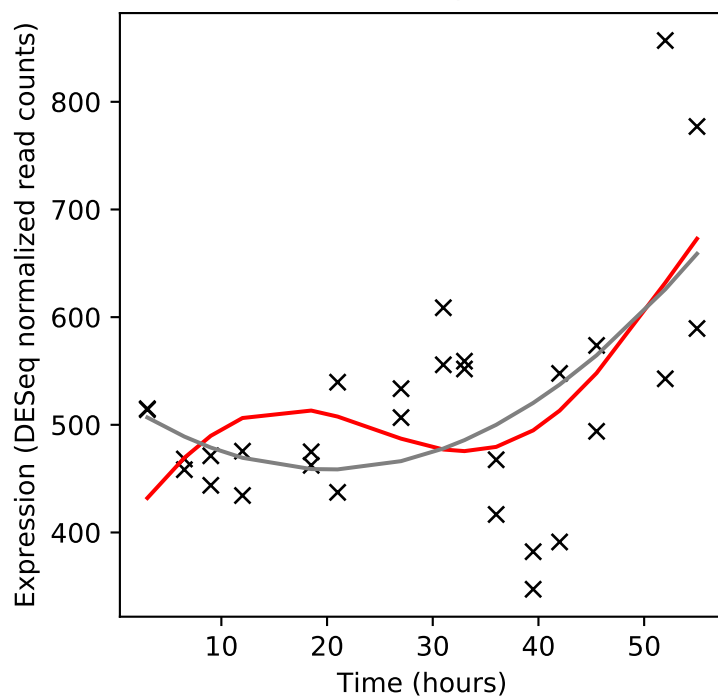

Rv2922c/smc

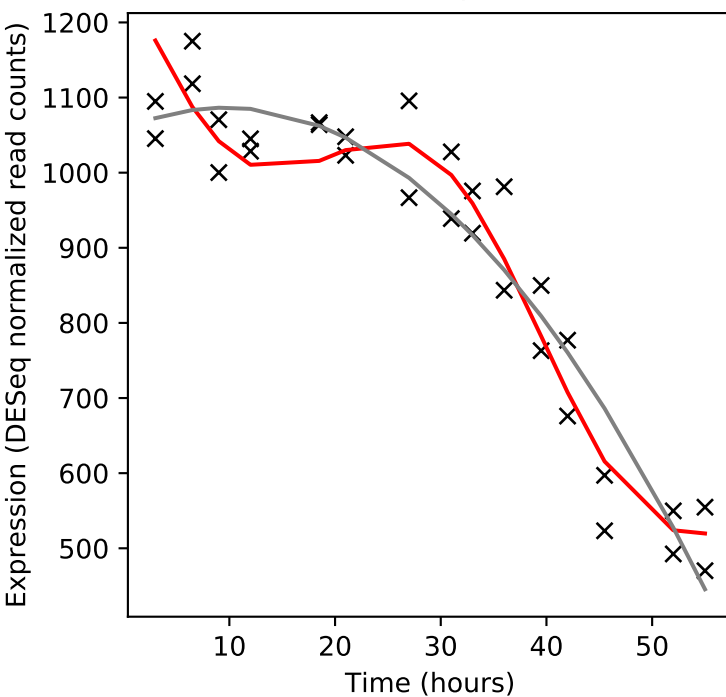

Rv2922A/acyP

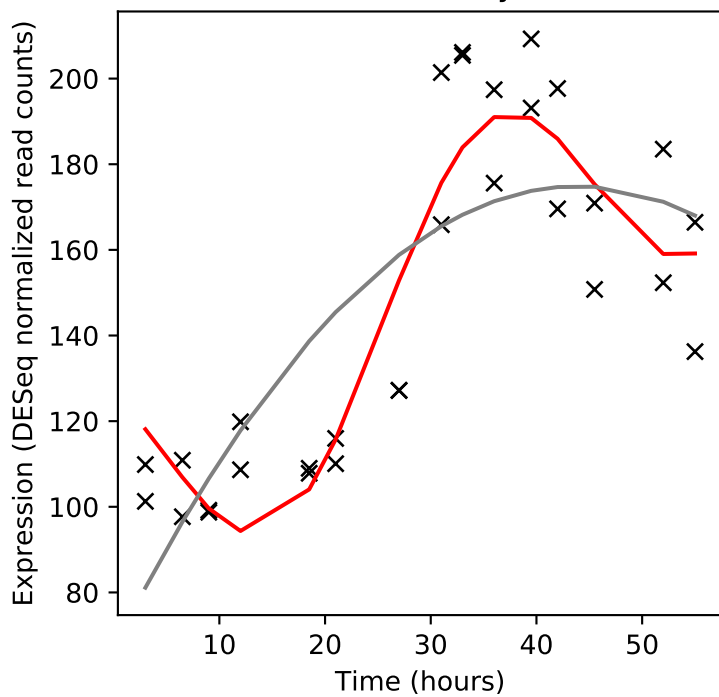

Rv2923c/-

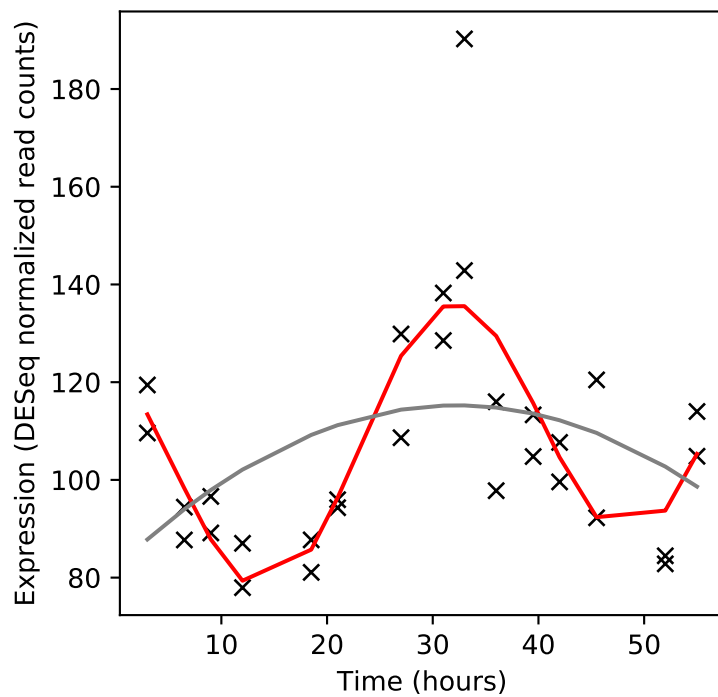

Rv2924c/fpg

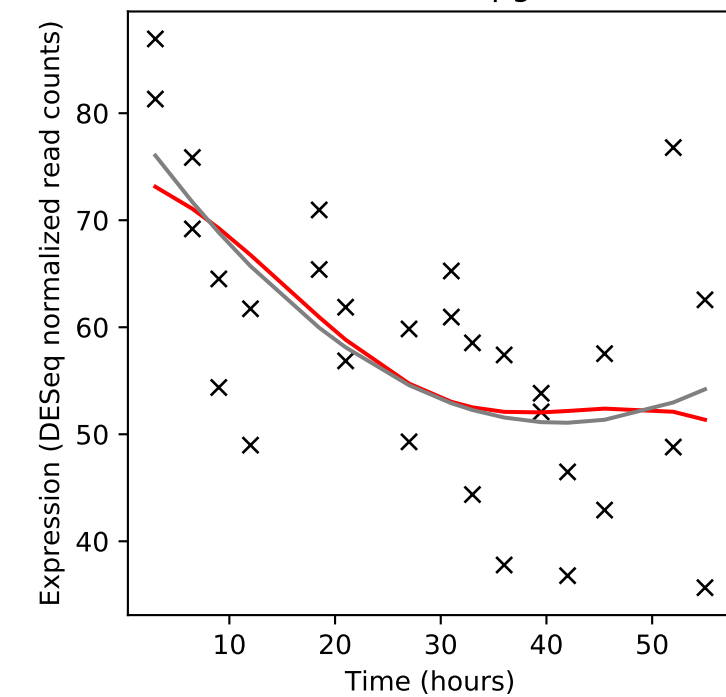

Rv2925c/rnc

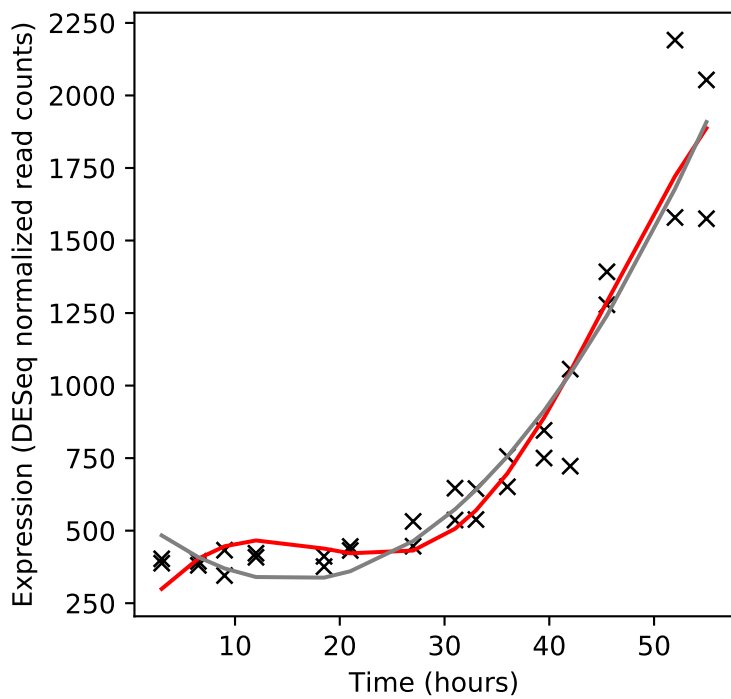

Rv2926c/-

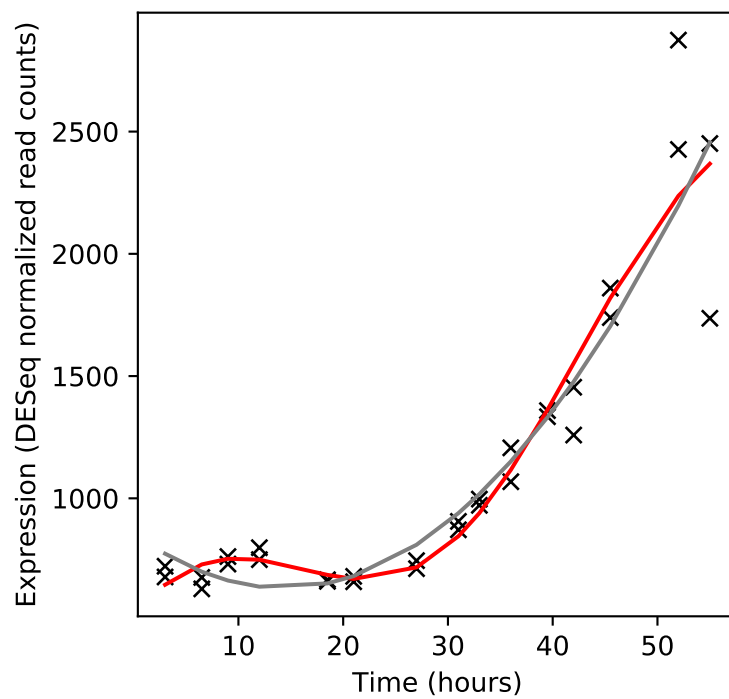

Rv2927c/-

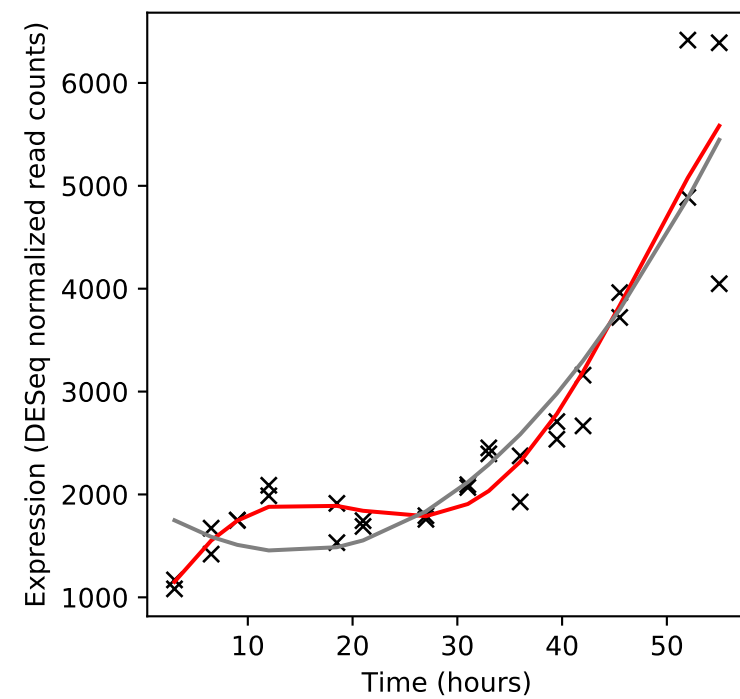

Rv2928/tesA

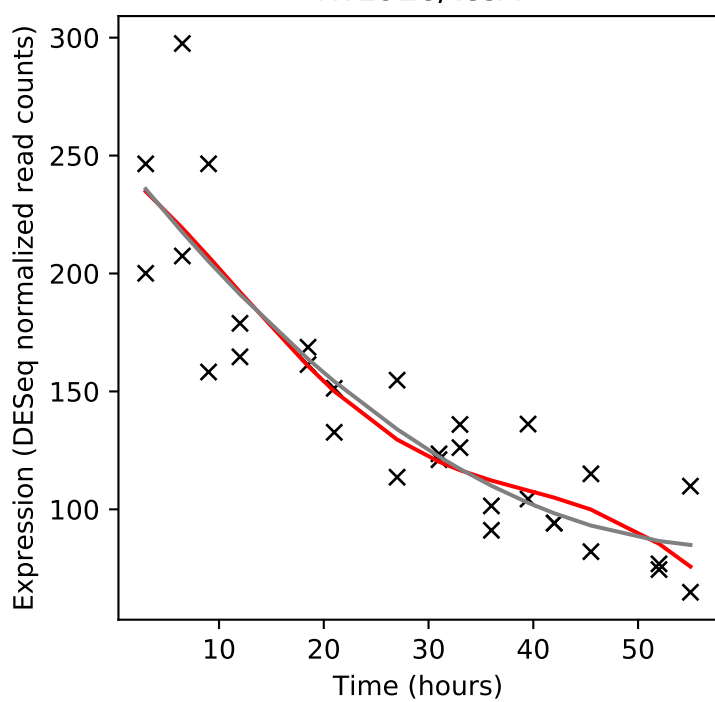

Rv2929/-

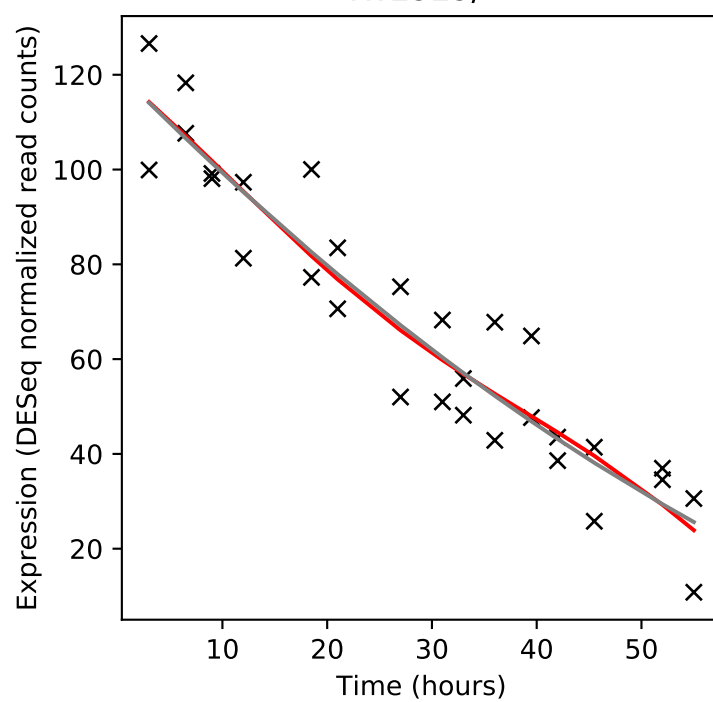

Rv2930/fadD26

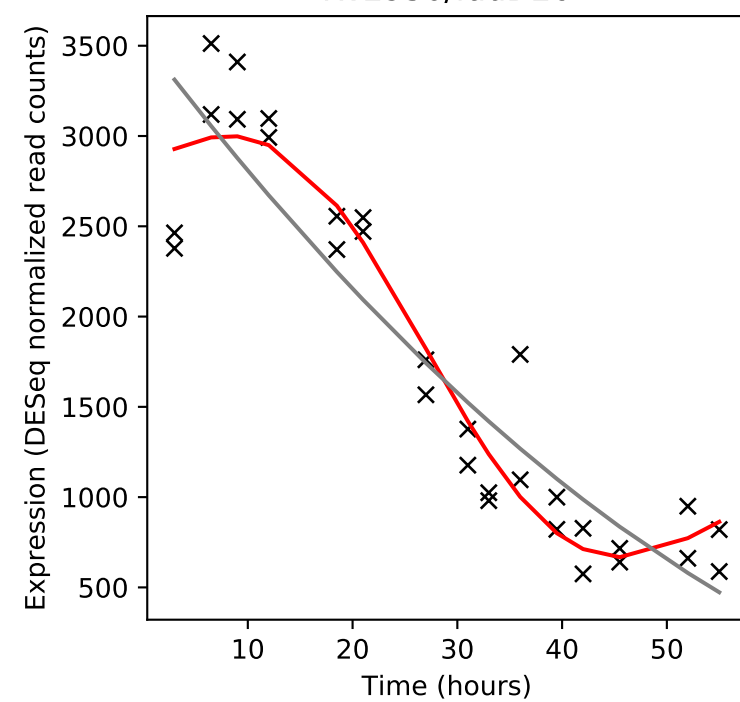

Rv2931/ppsA

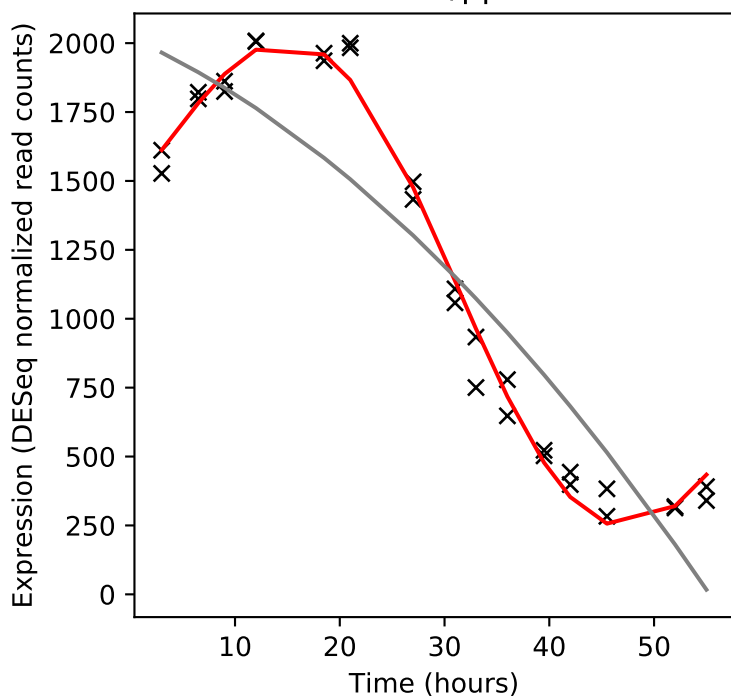

Rv2932/ppsB

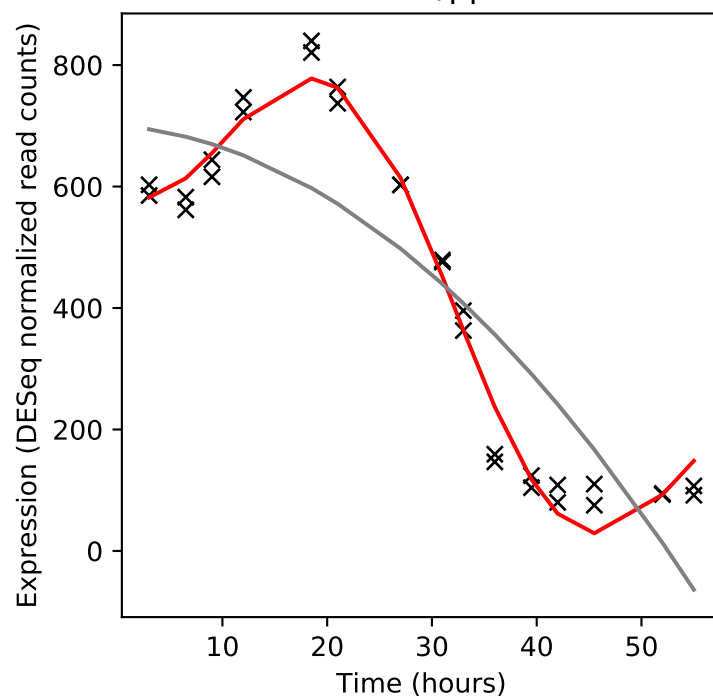

Rv2933/ppsC

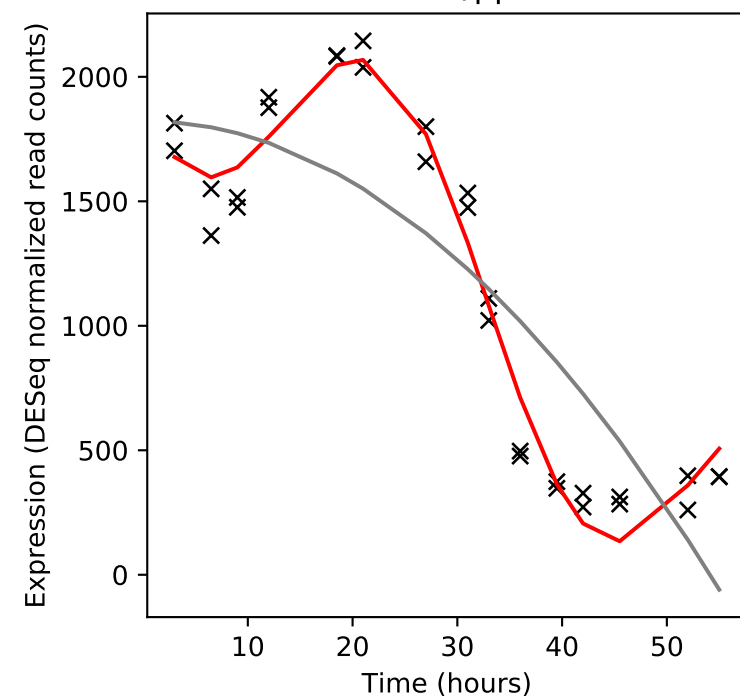

Rv2934/ppsD

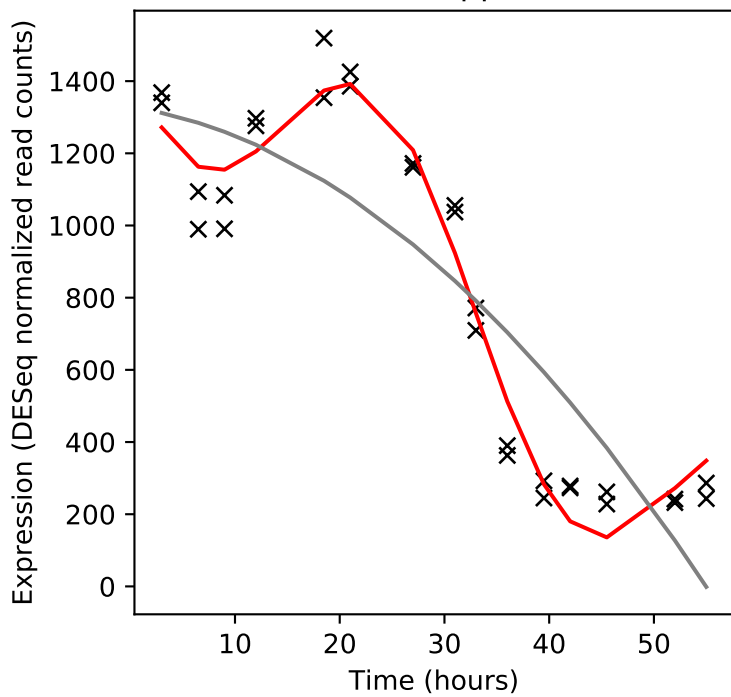

Rv2935/ppsE

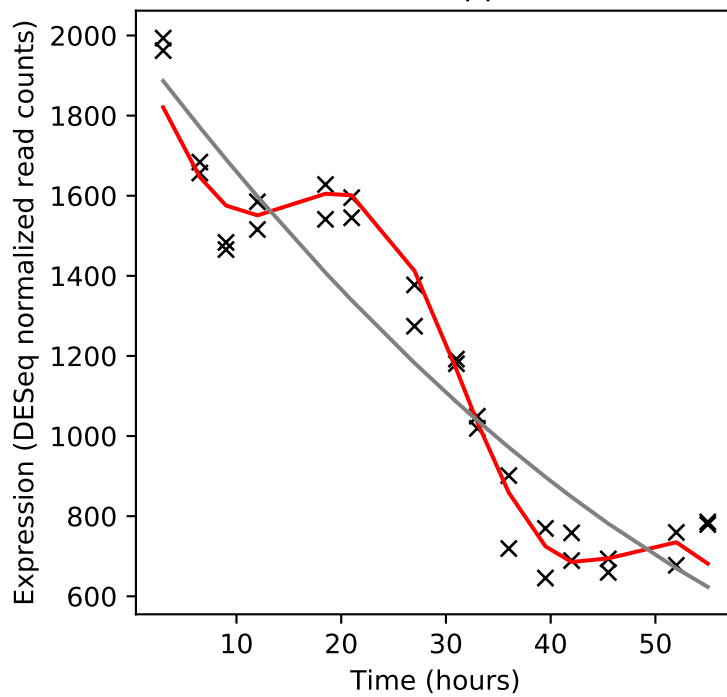

Rv2936/drrA

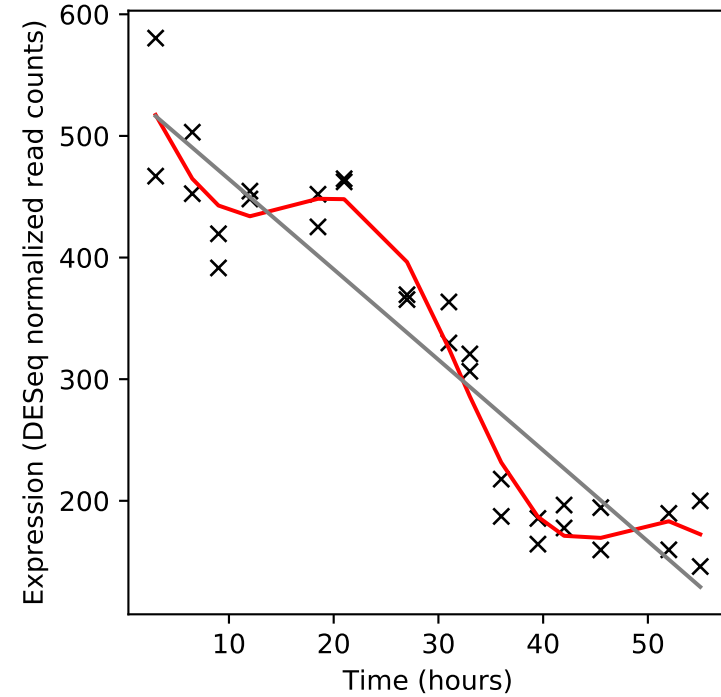

Rv2937/drrB

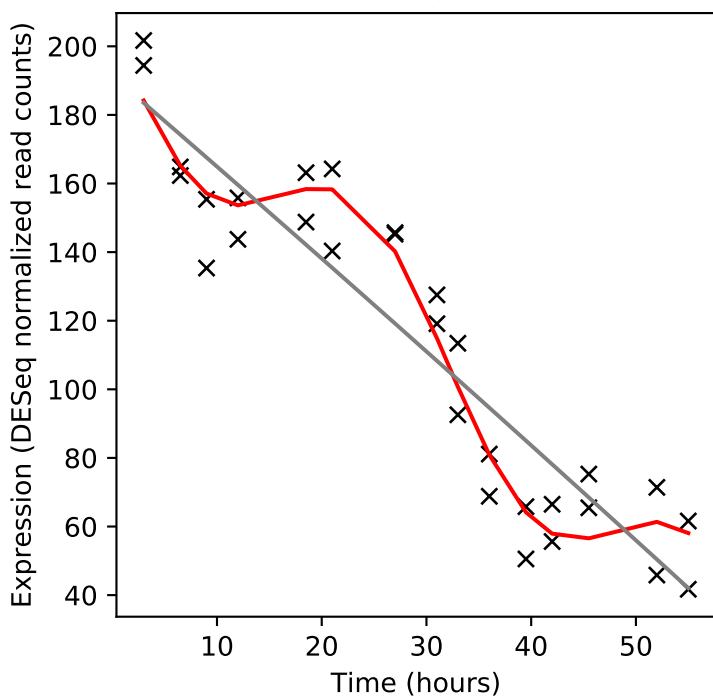

Rv2938/drrC

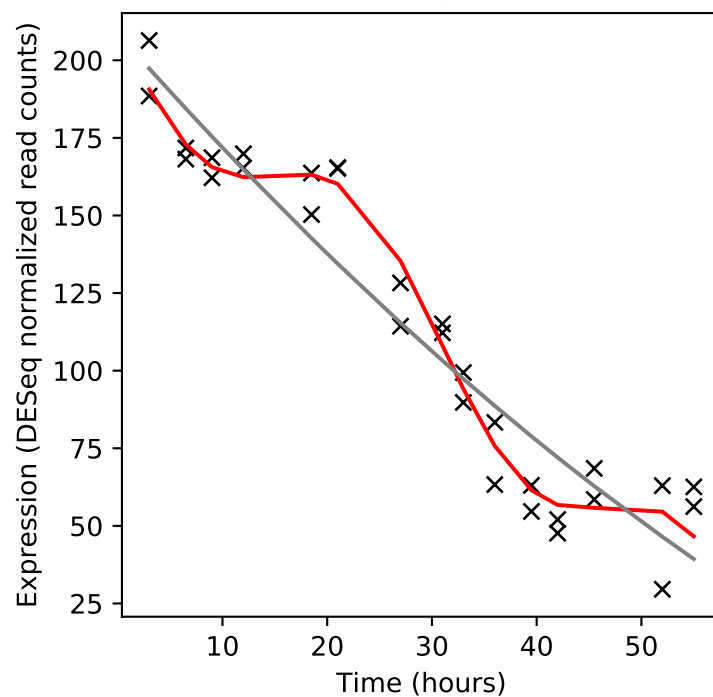

Rv2939/papA5

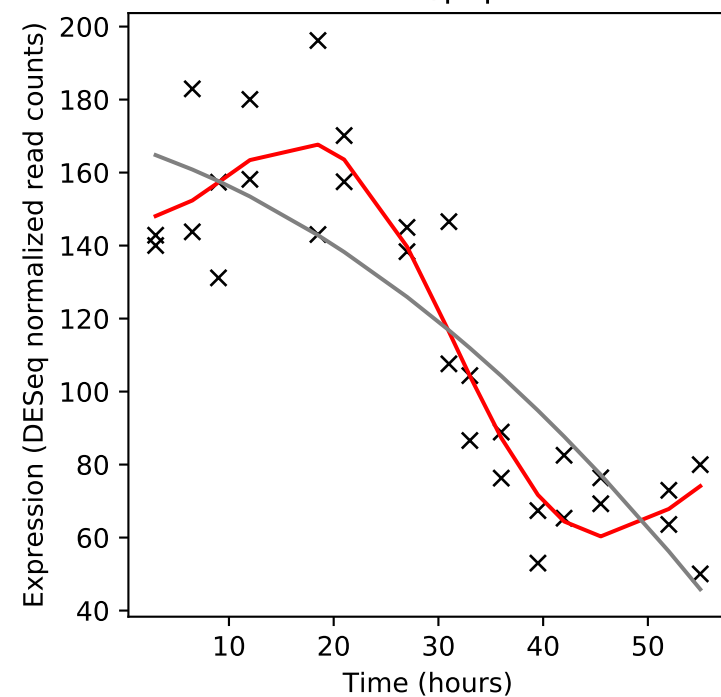

Rv2940c/mas

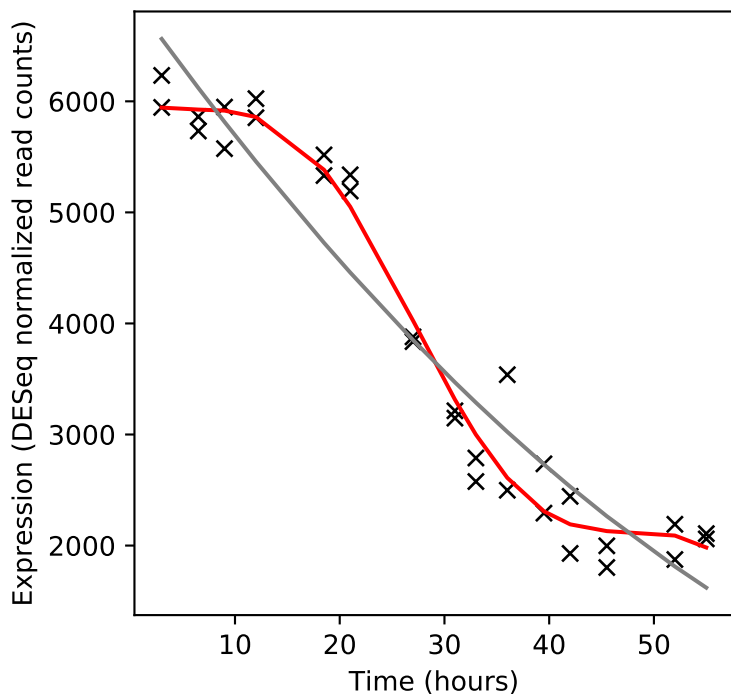

Rv2941/fadD28

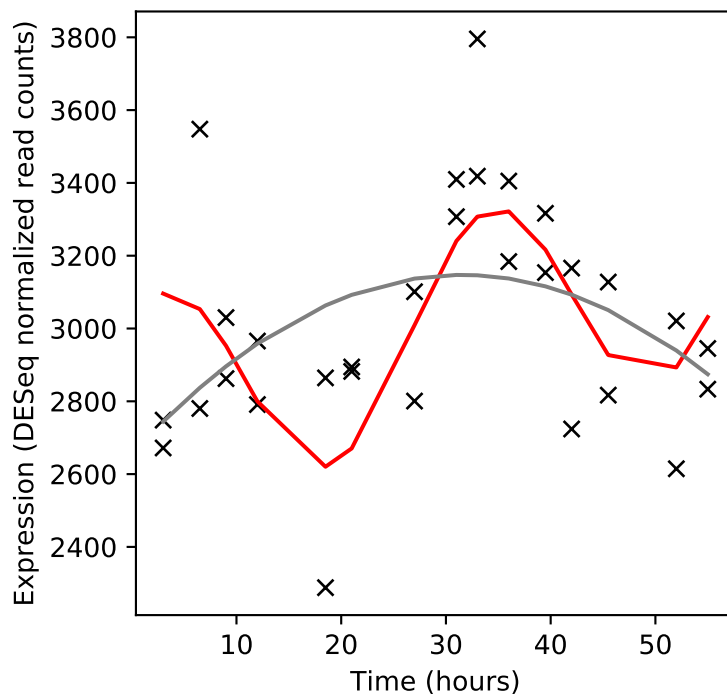

Rv2942/mmpL7

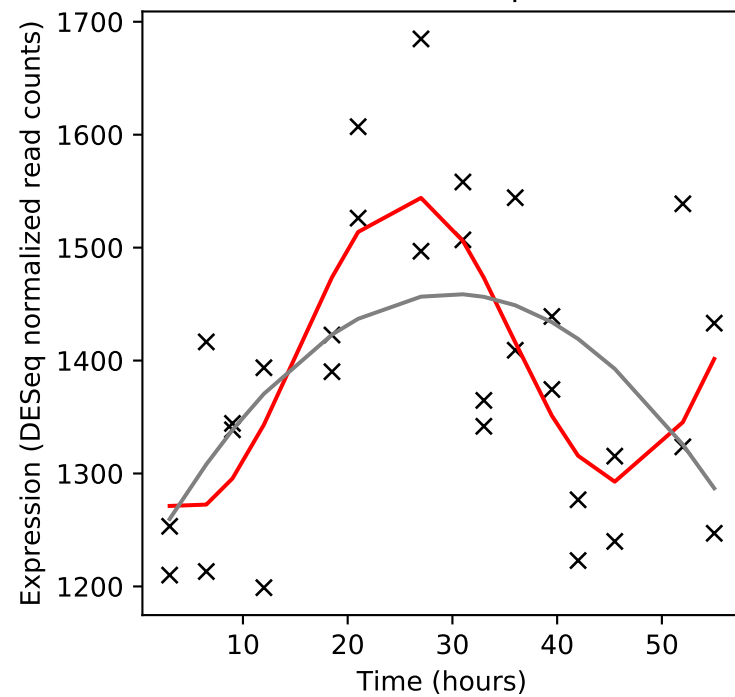

Rv2943/-

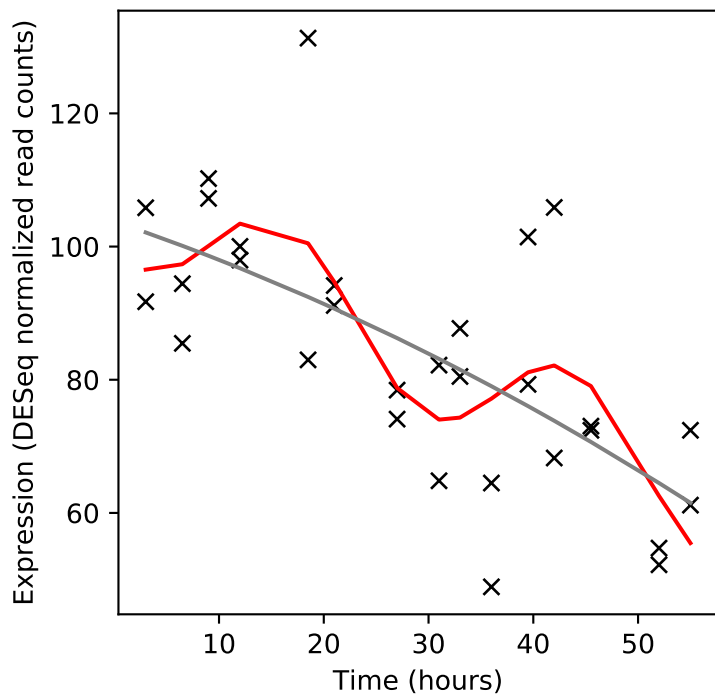

Rv2943A/-

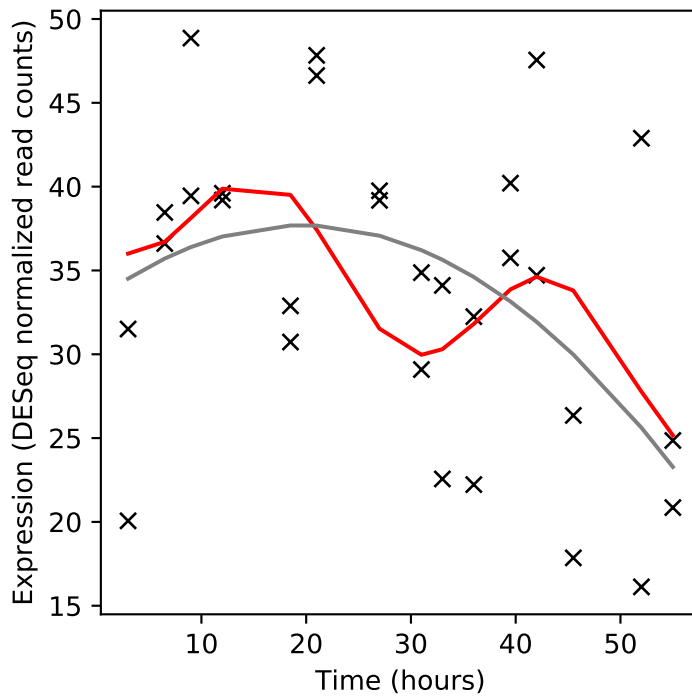

Rv2944/-

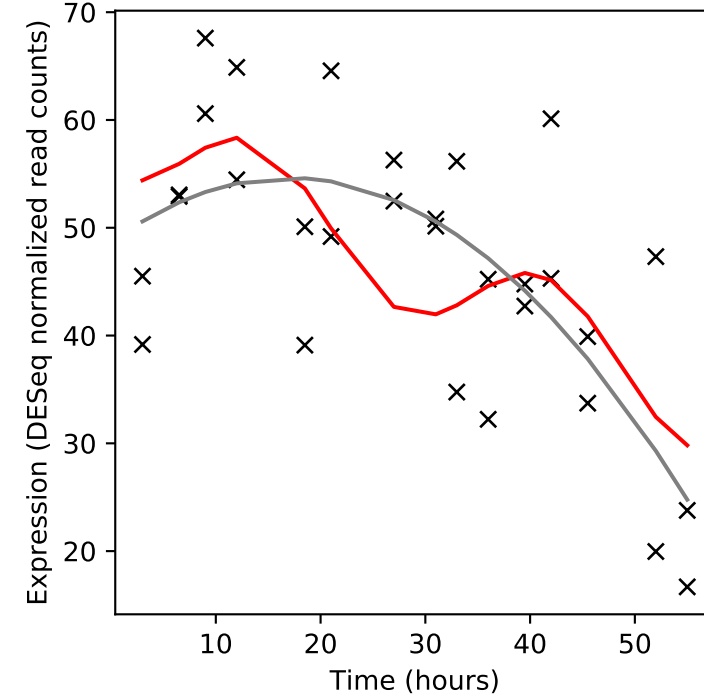

Rv2945c/lppX

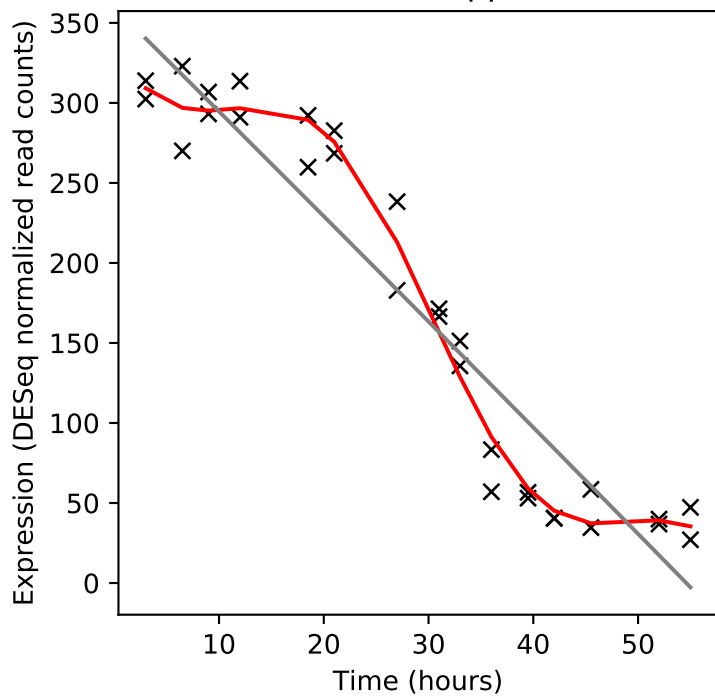

Rv2946c/pks1

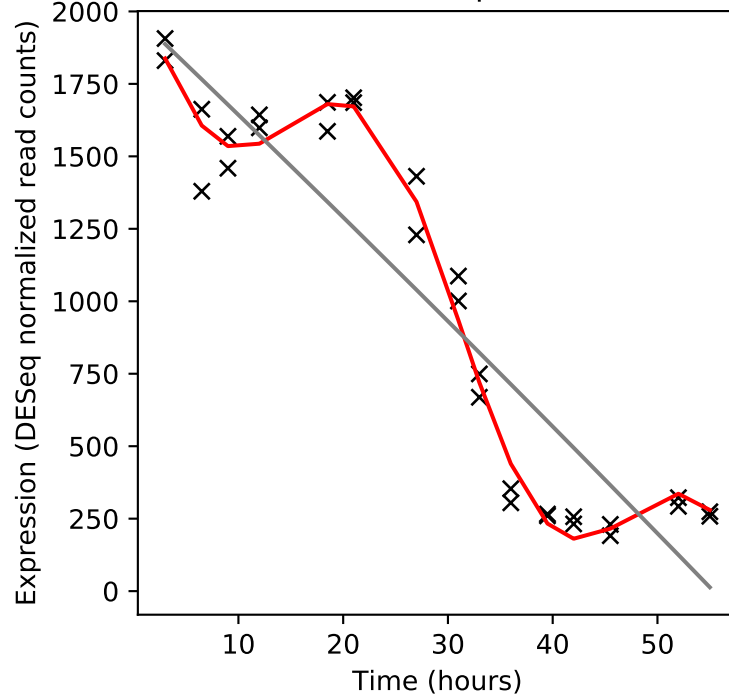

Rv2947c/pks15

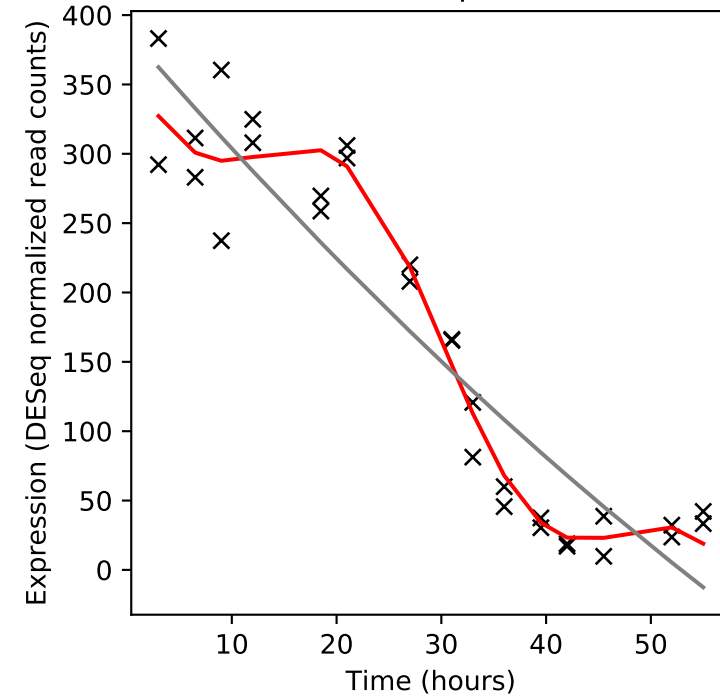

Rv2948c/fadD22

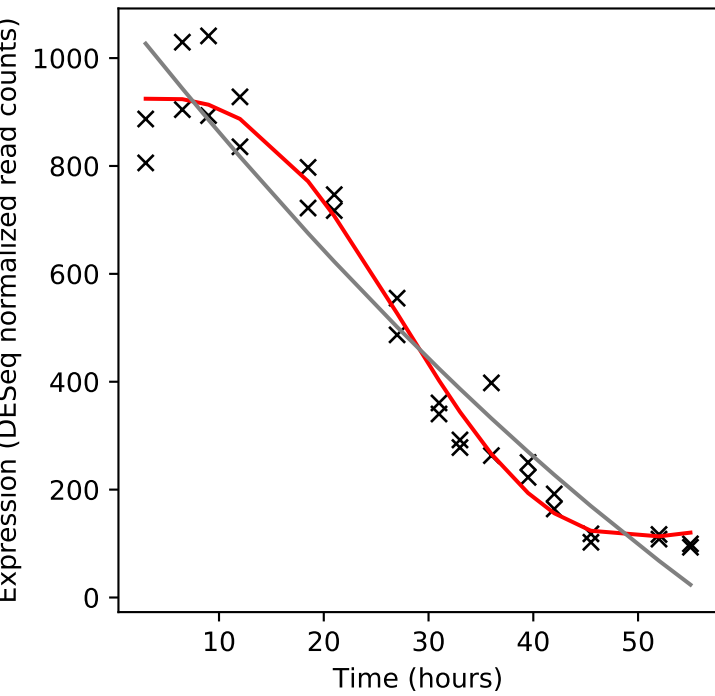

Rv2949c/-

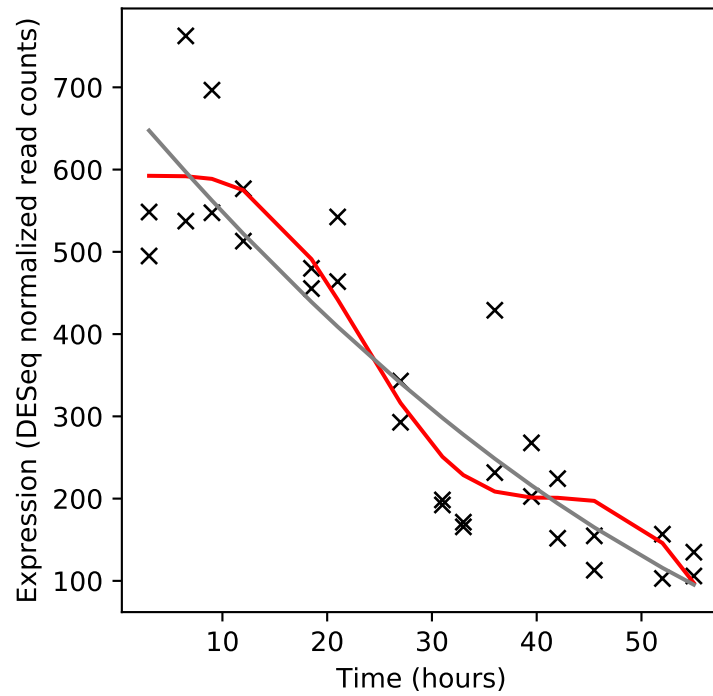

Rv2950c/fadD29

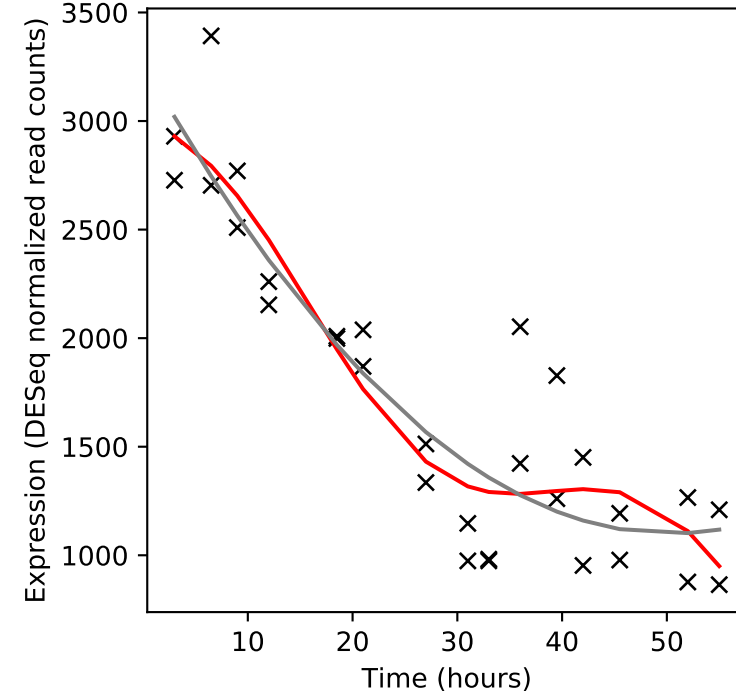

Rv2951c/-

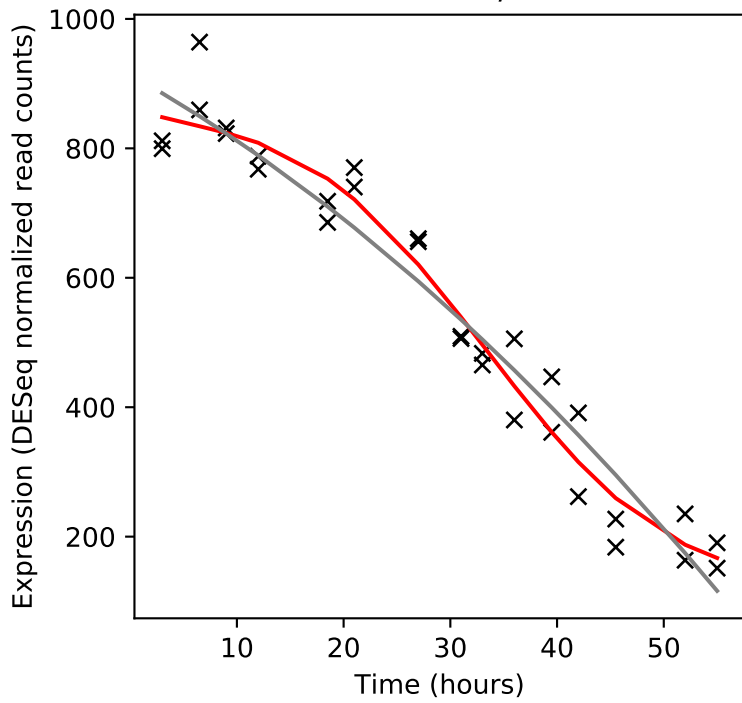

Rv2952/-

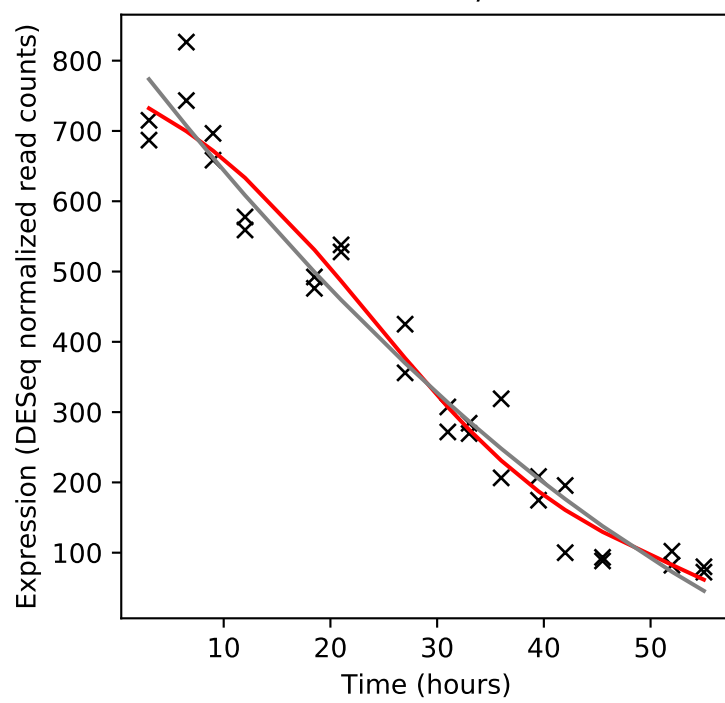

Rv2953/-

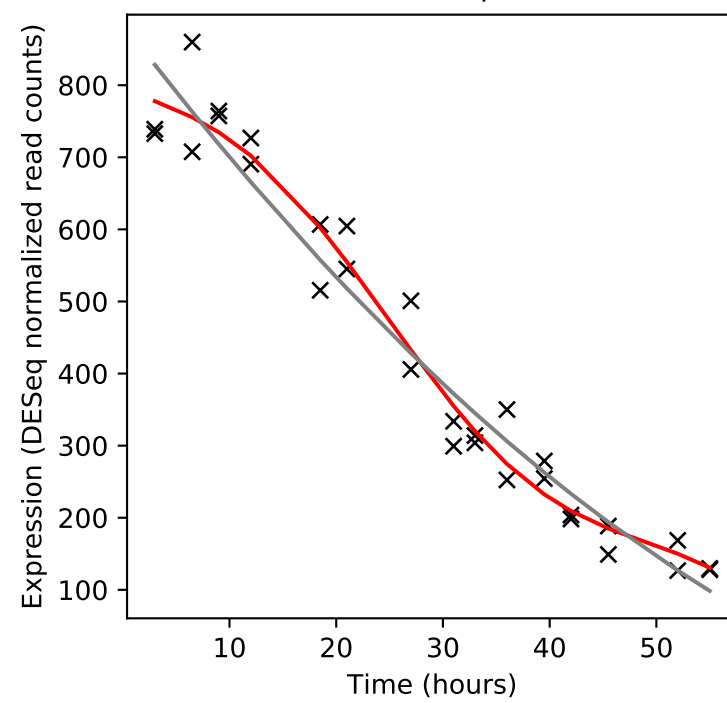

Rv2954c/-

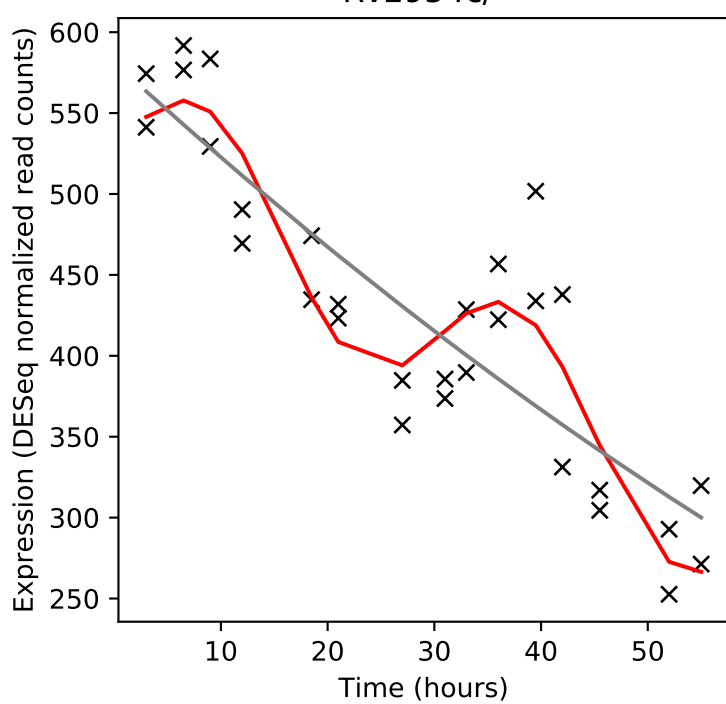

Rv2955c/-

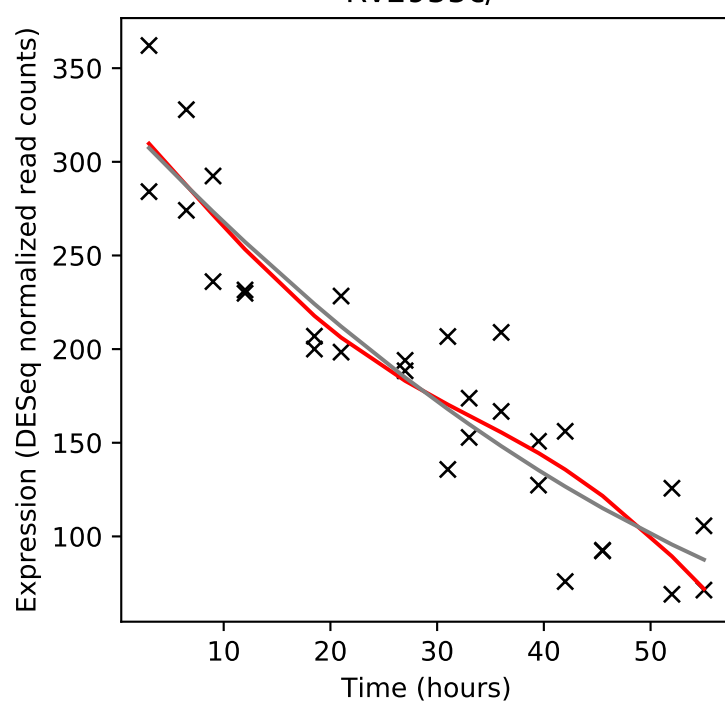

Rv2956/-

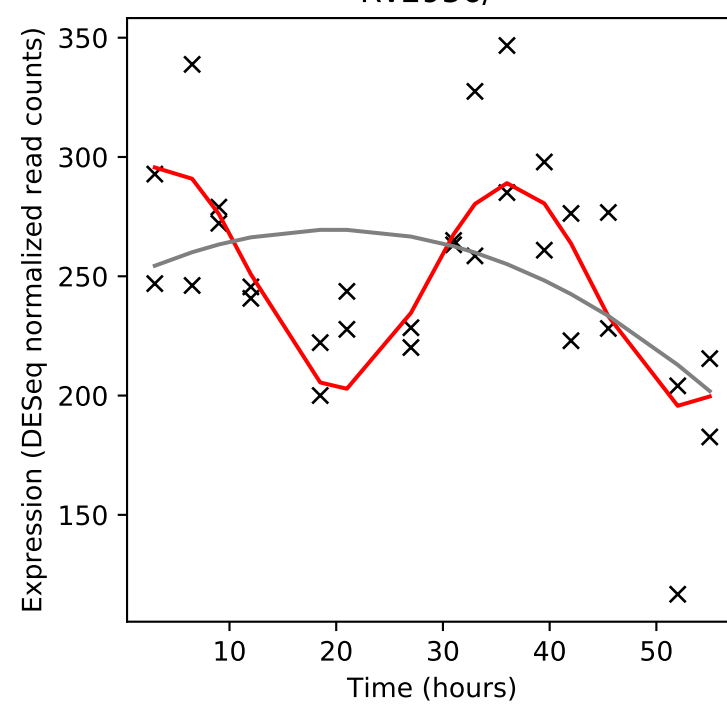

Rv2957/-

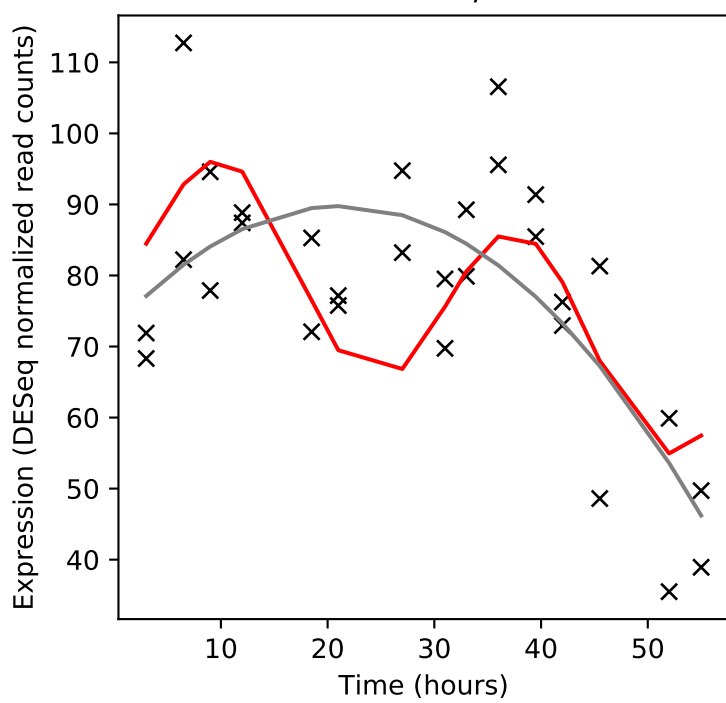

Rv2958c/-

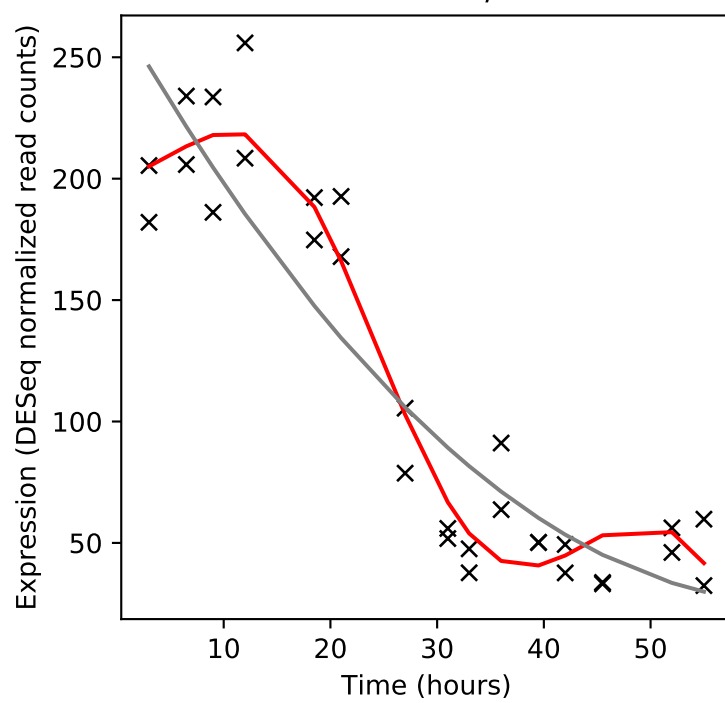

Rv2959c/-

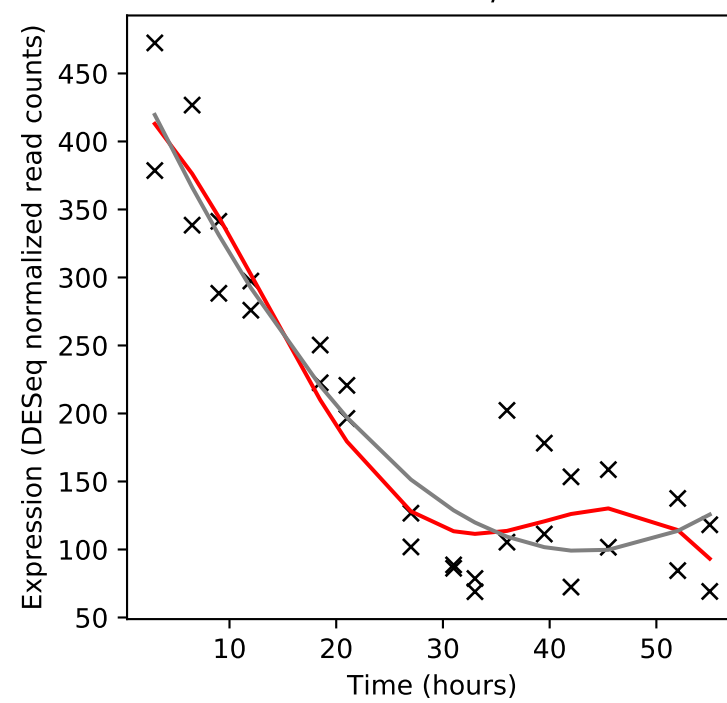

Rv2960c/-

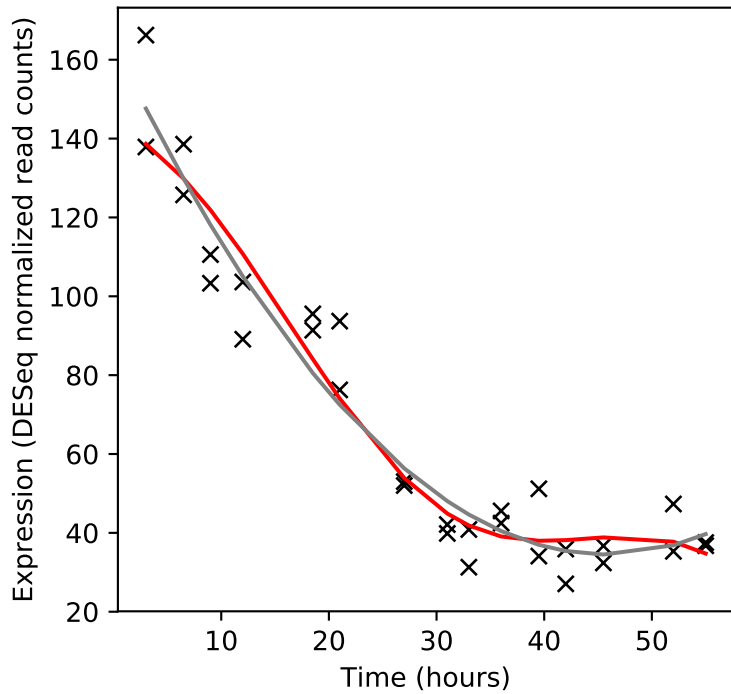

Rv2961/-

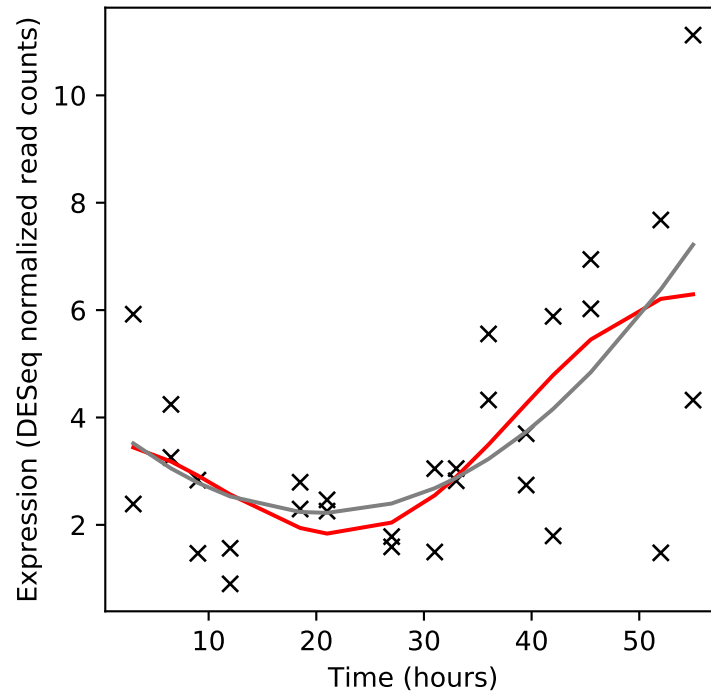

Rv2962c/-

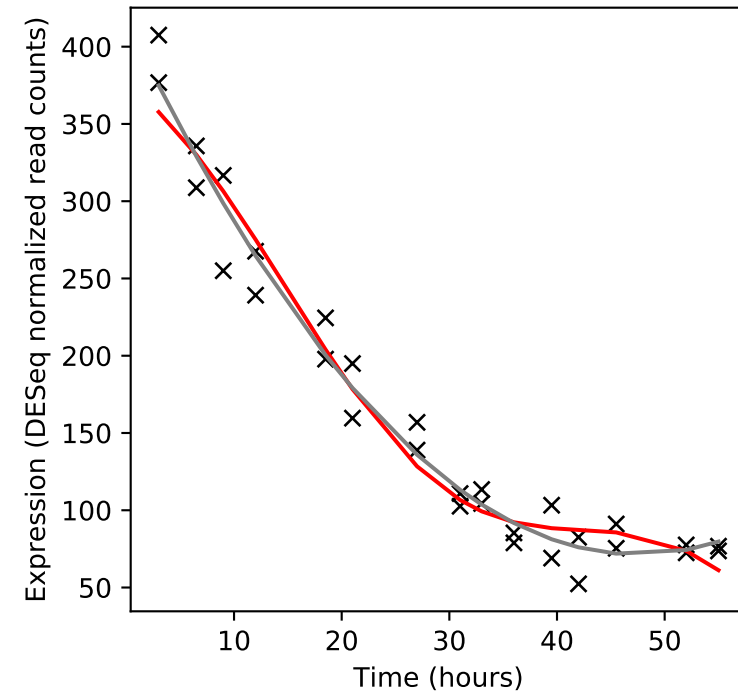

Rv2963/-

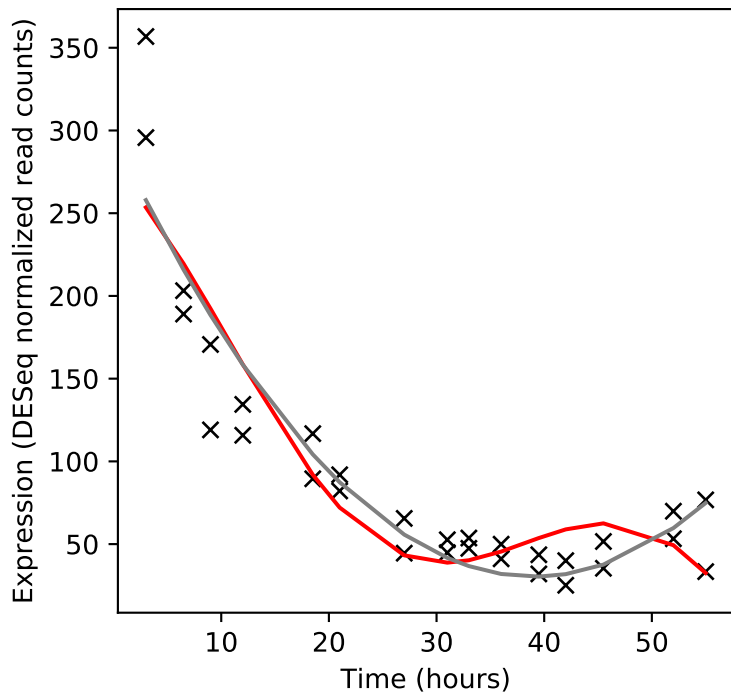

Rv2964/purU

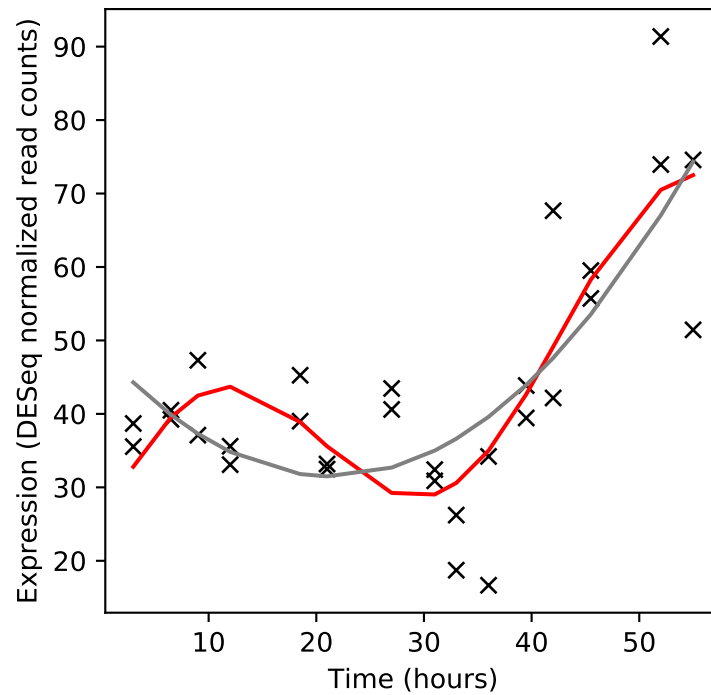

Rv2965c/kdtB

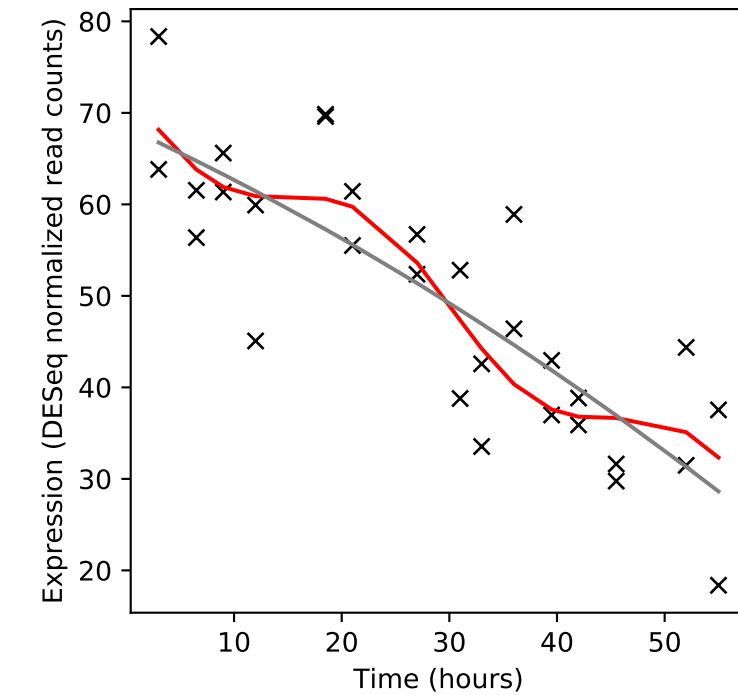

Rv2966c/-

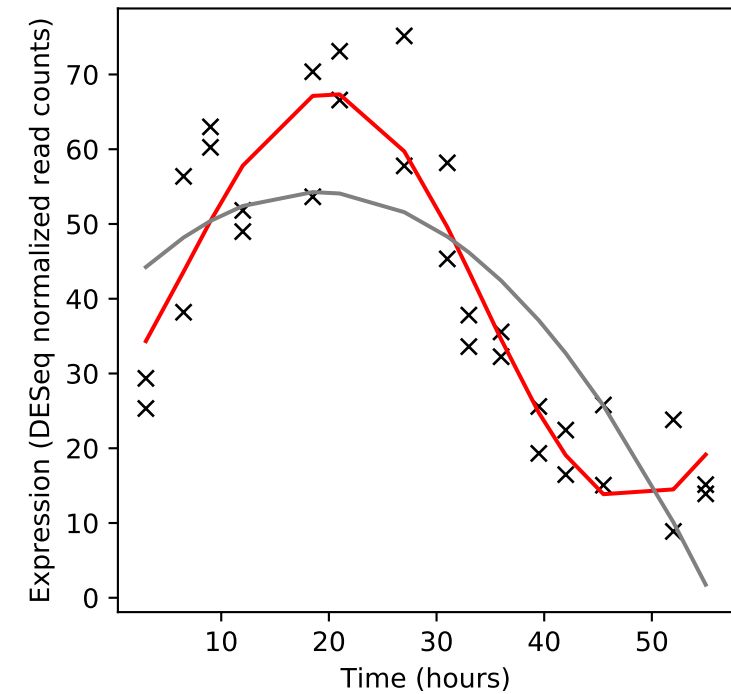

Rv2967c/pca

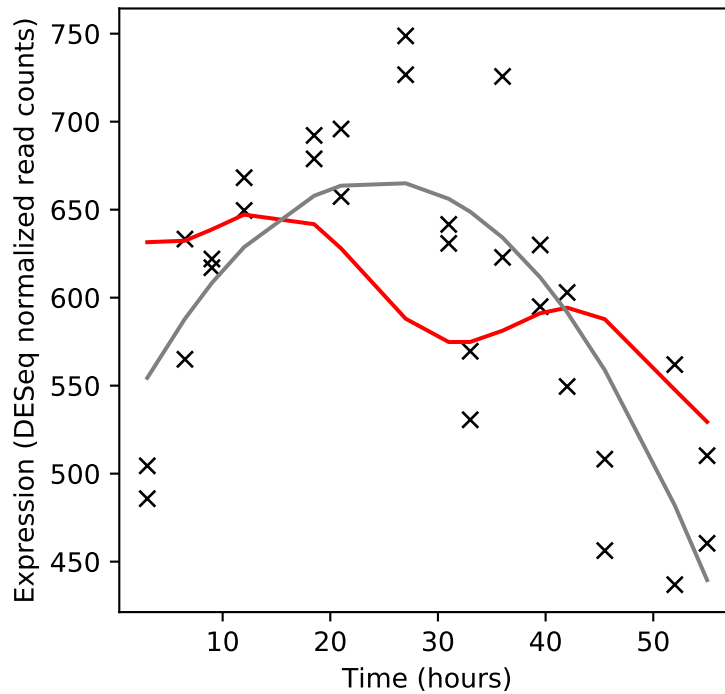

Rv2968c/-

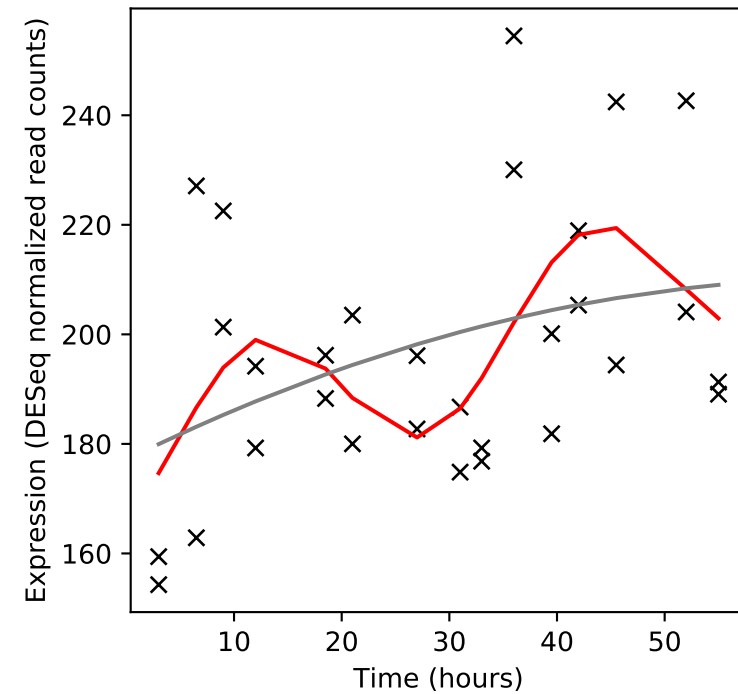



Rv2969c/-

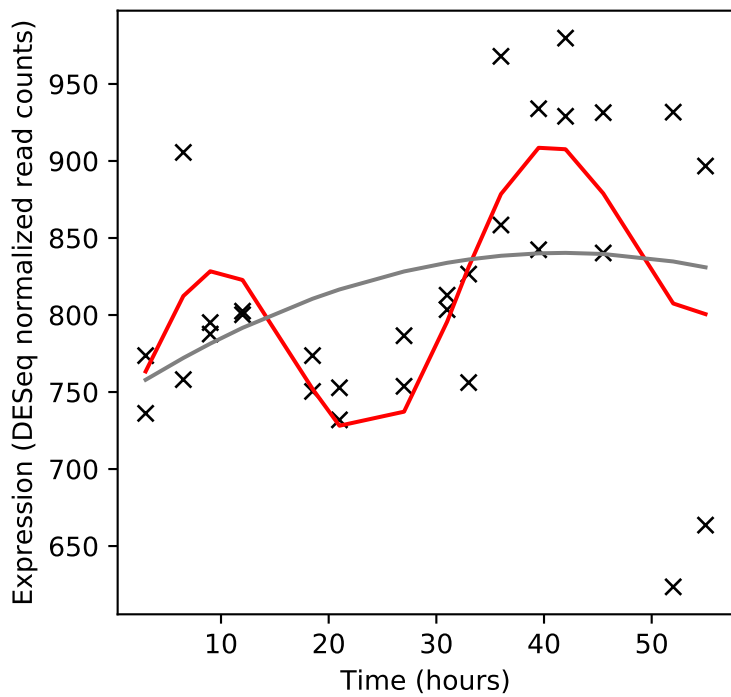

Rv2970c/lipN

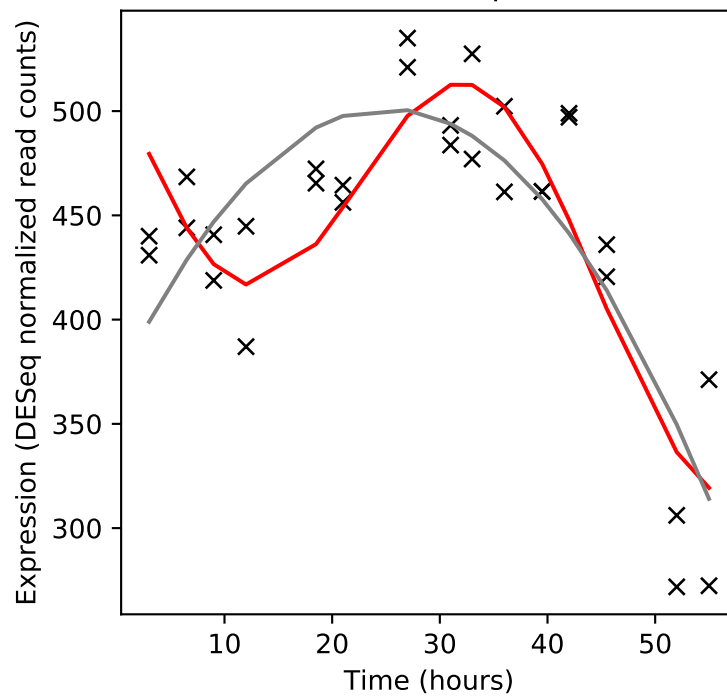

Rv2970A/-

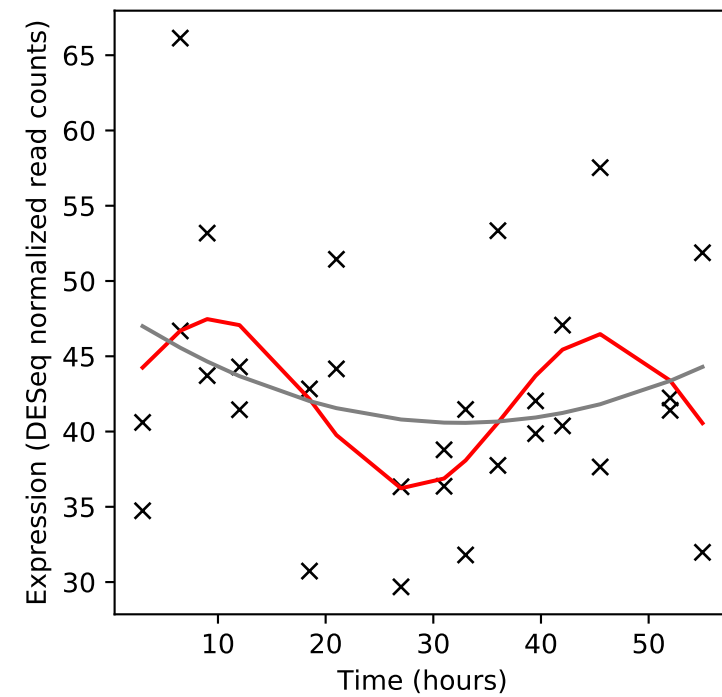

Rv2971/-

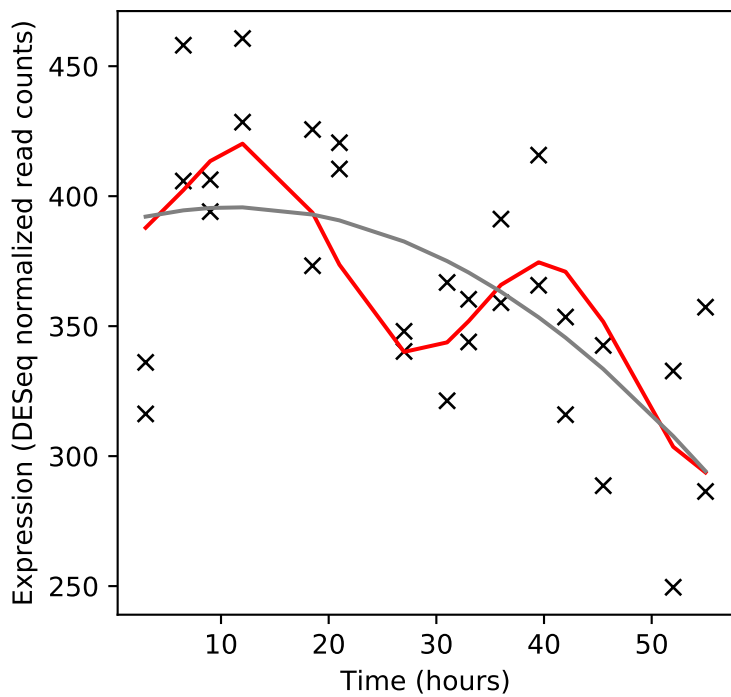

Rv2972c/-

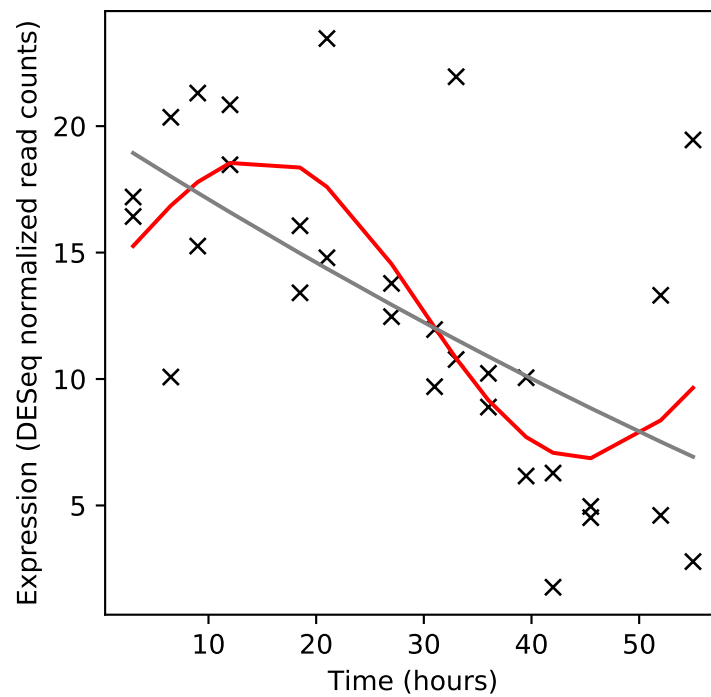

Rv2973c/recG

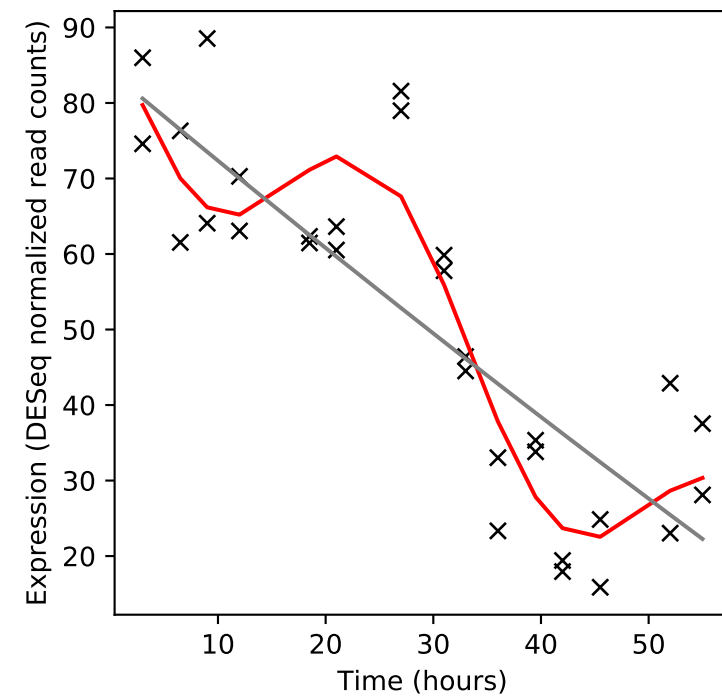

Rv2974c/-

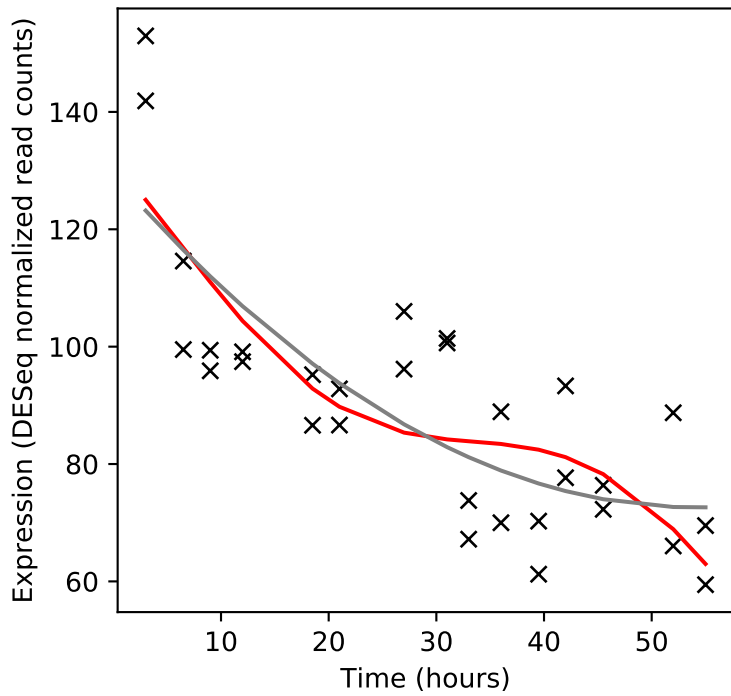

Rv2975c/-

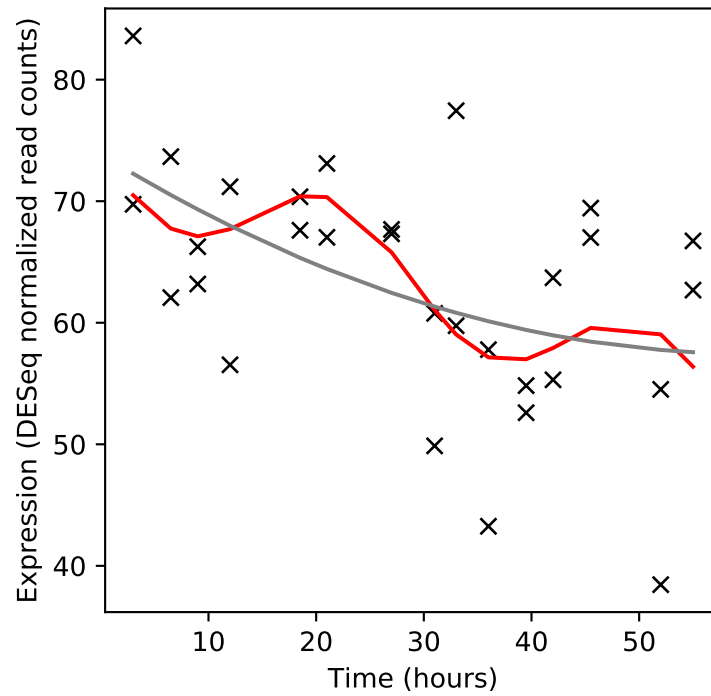

Rv2976c/ung

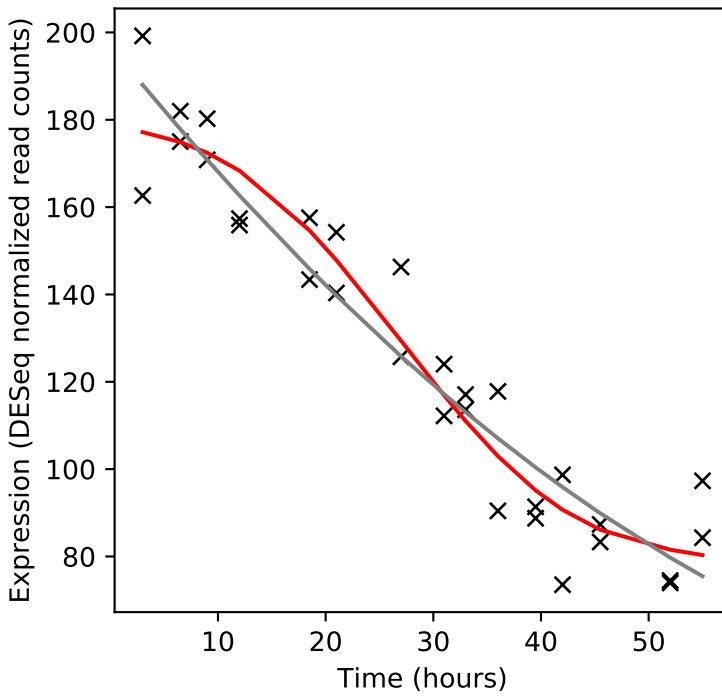

Rv2977c/thiL

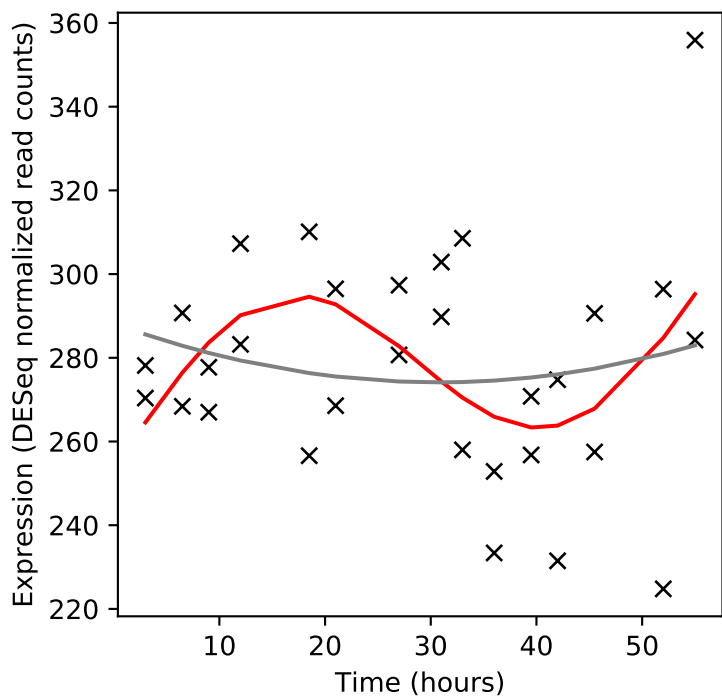

Rv2978c/-

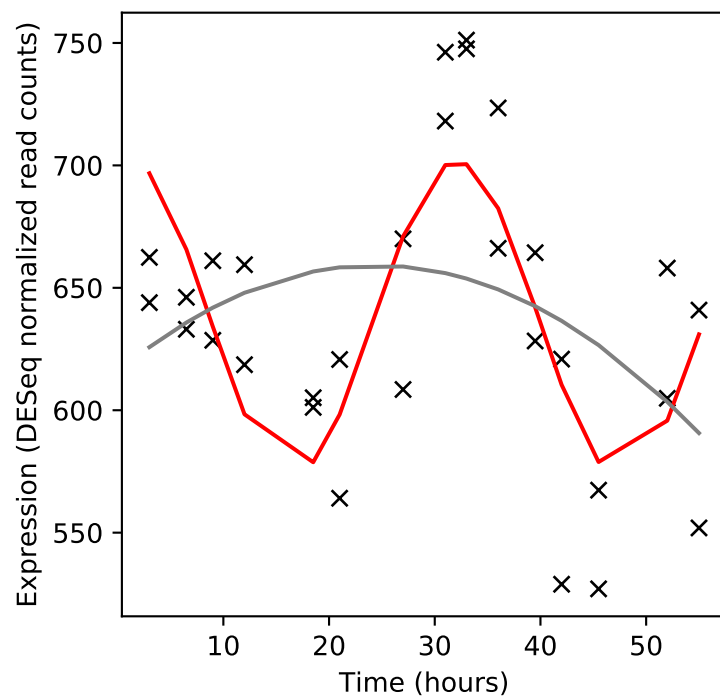

Rv2979c/-

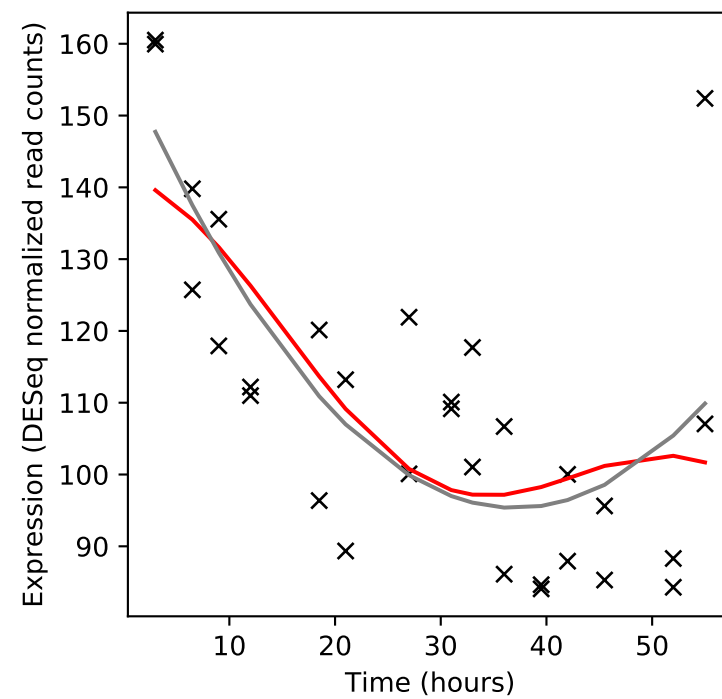

Rv2980/-

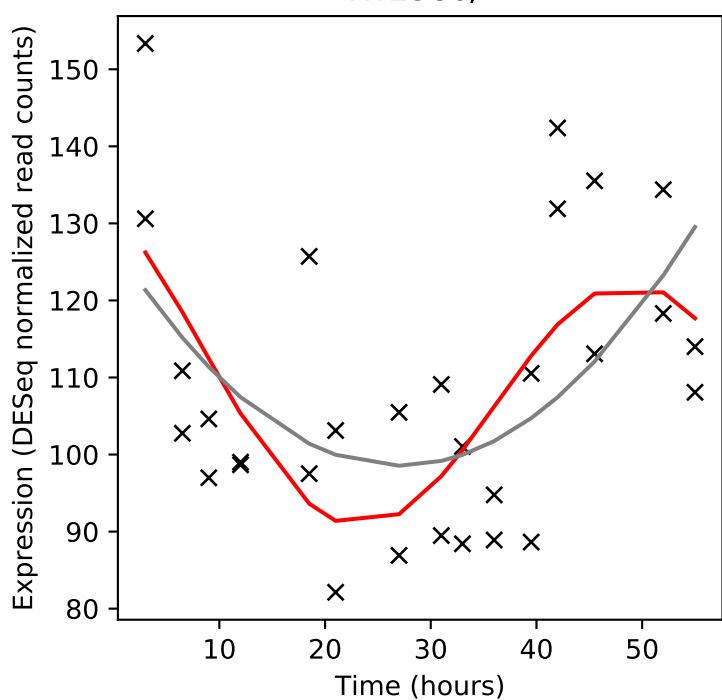

Rv2981c/ddIA

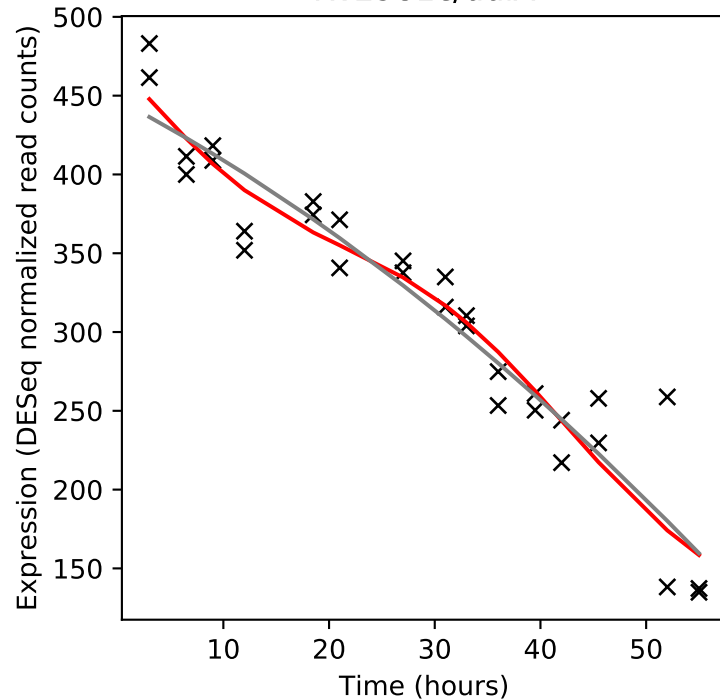

Rv2982c/gpdA2

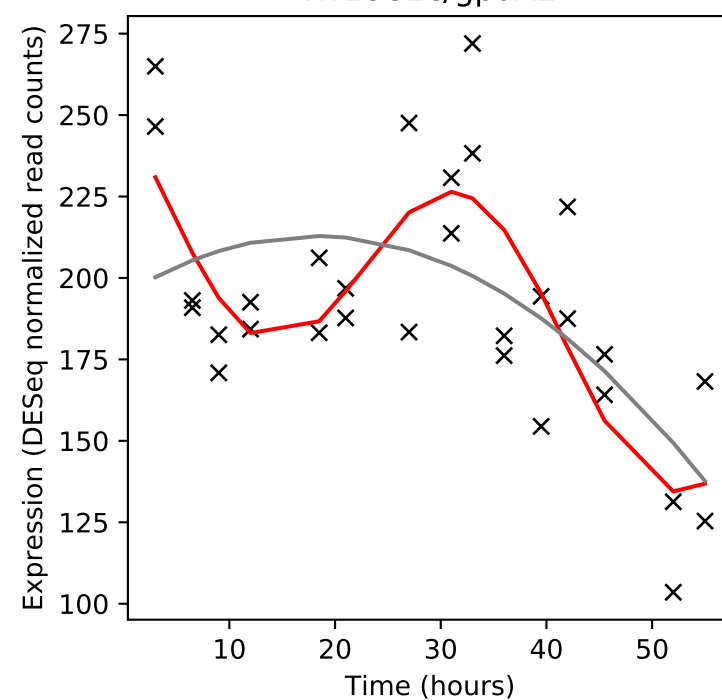

Rv2983/-

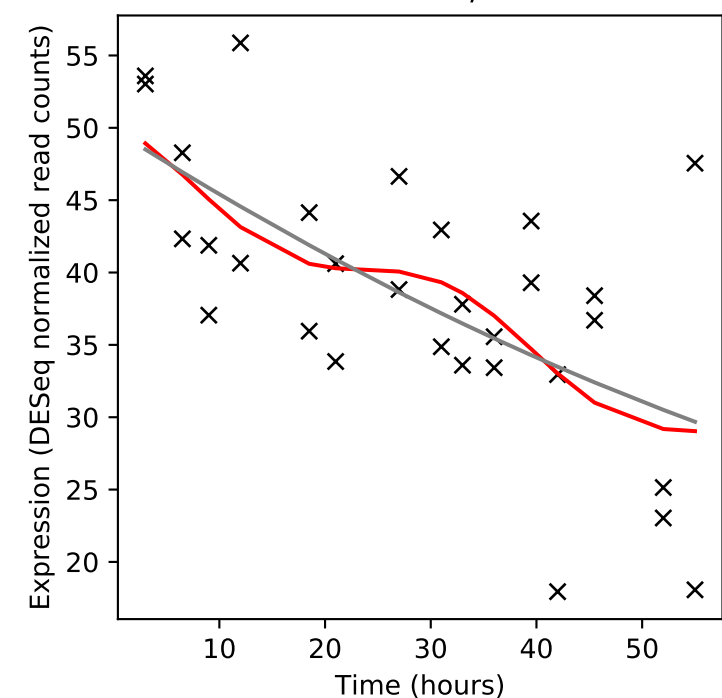

Rv2984/ppk1

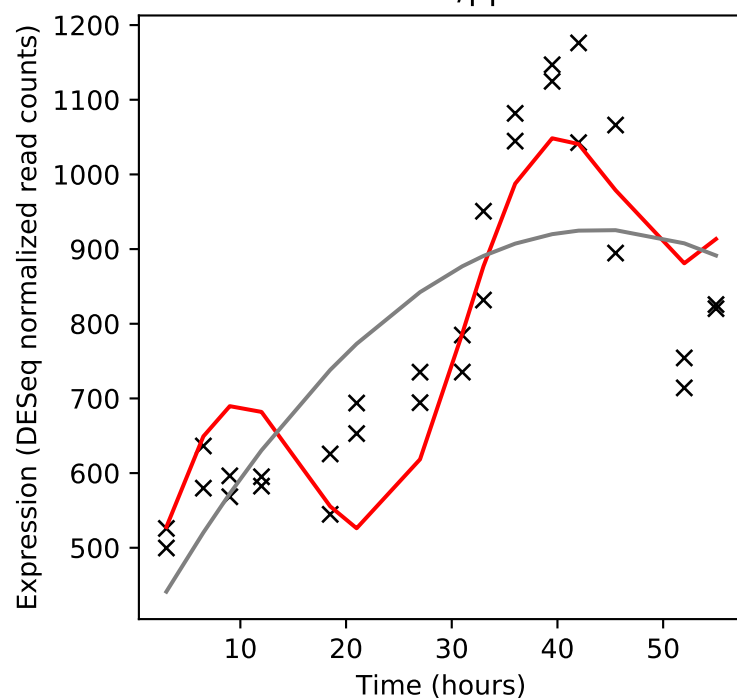

Rv2985/mutT1

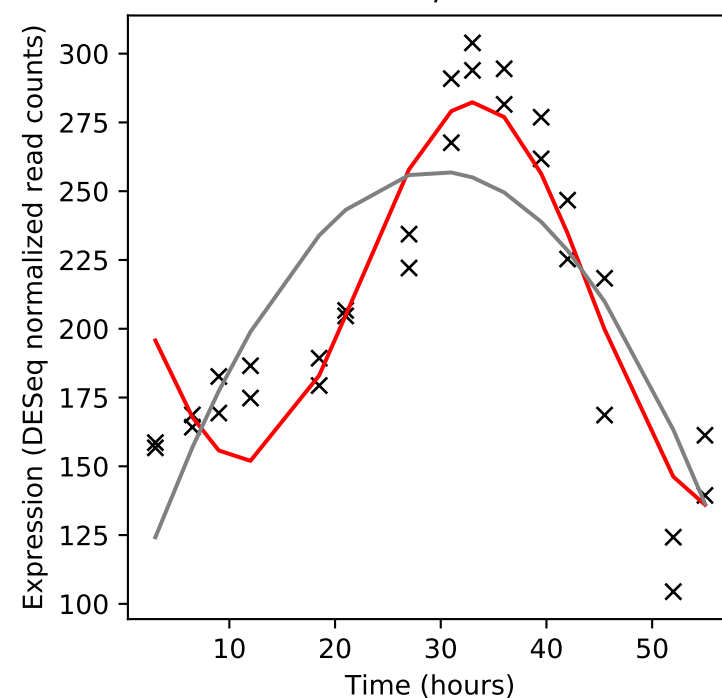

Rv2986c/hupB

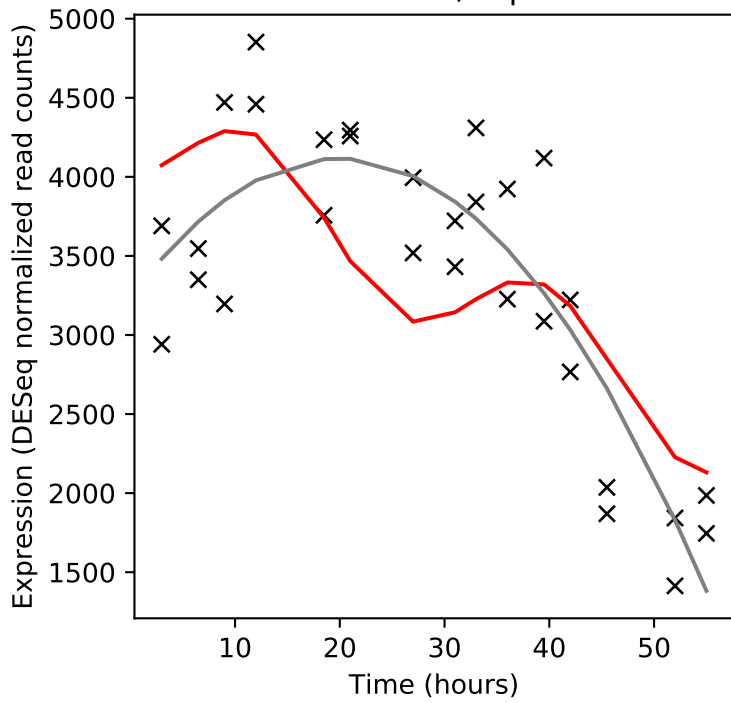

Rv2987c/leuD

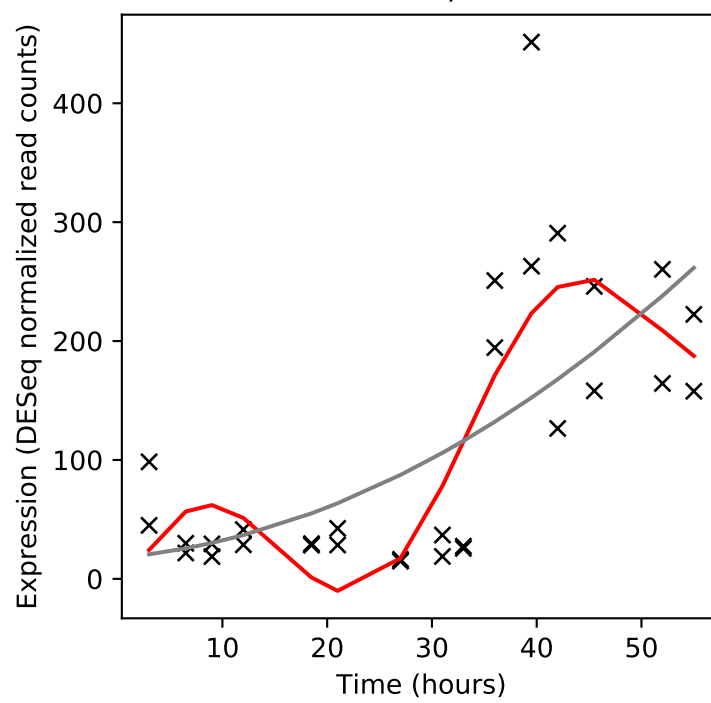

Rv2988c/leuC

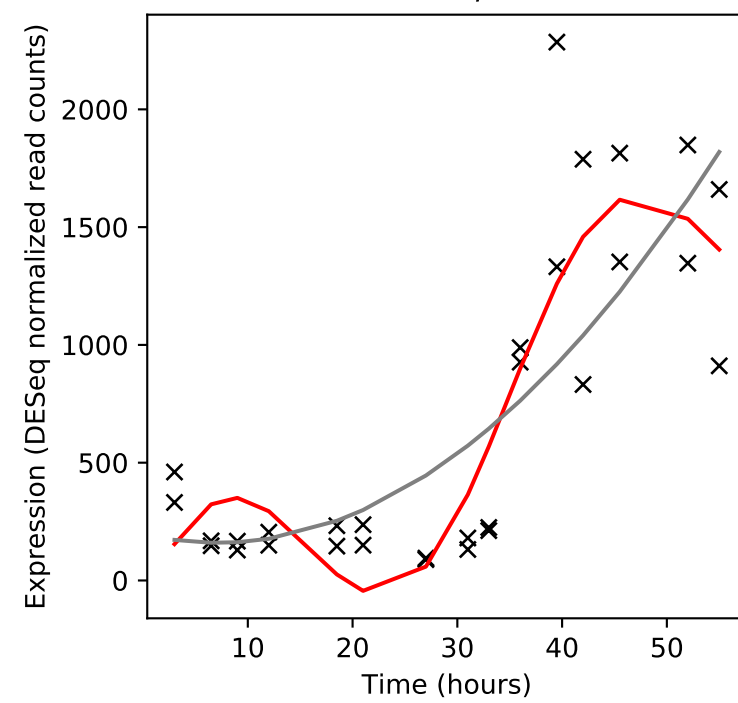

Rv2989/-

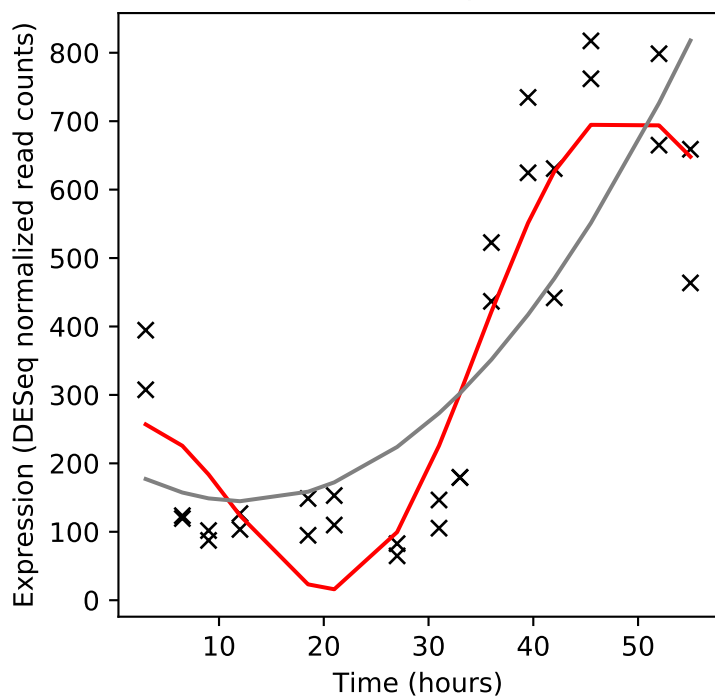

Rv2990c/-

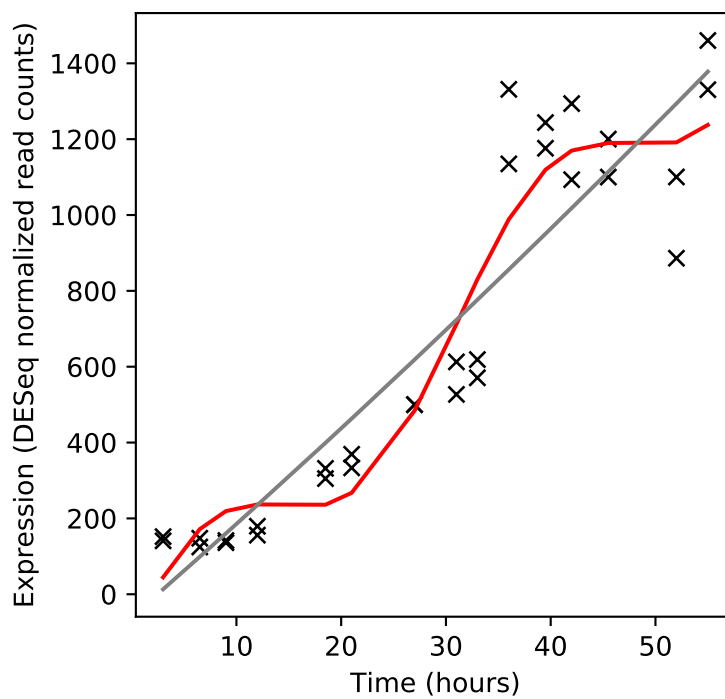

Rv2991/-

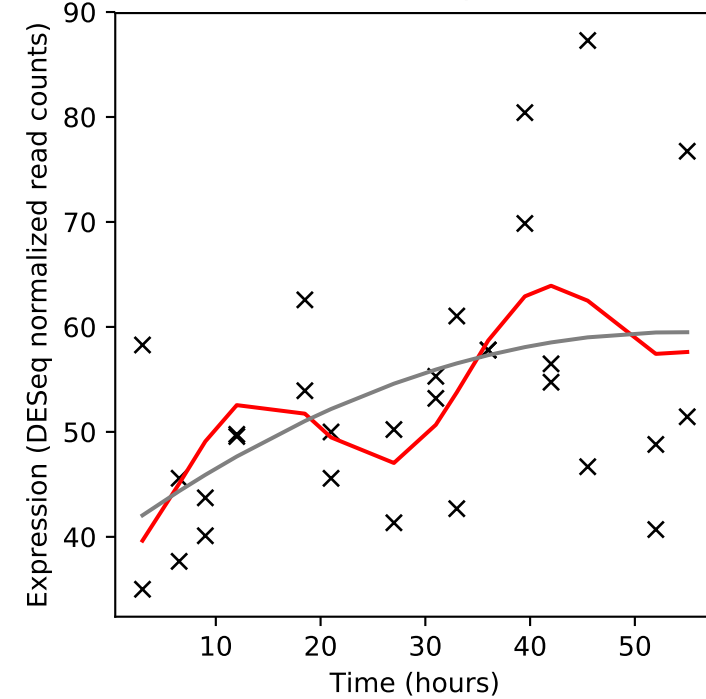

Rv2992c/gltS

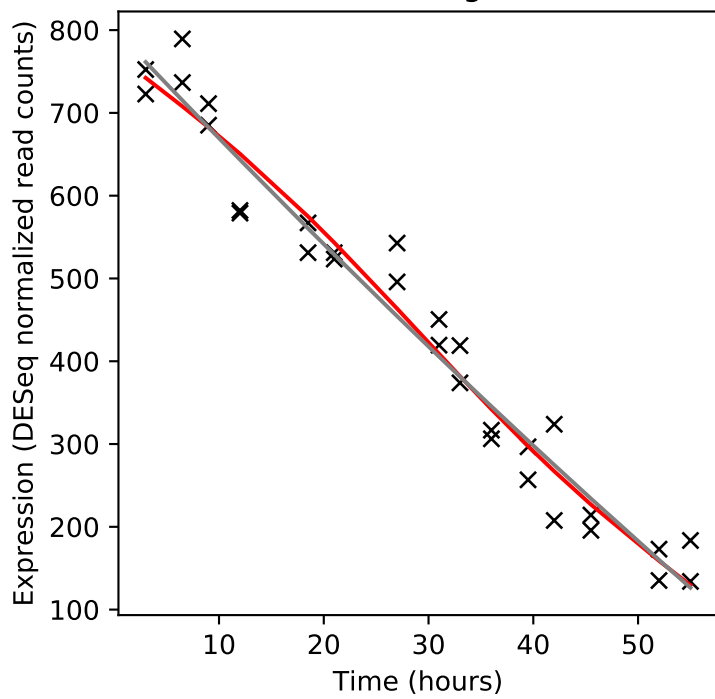

Rv2993c/-

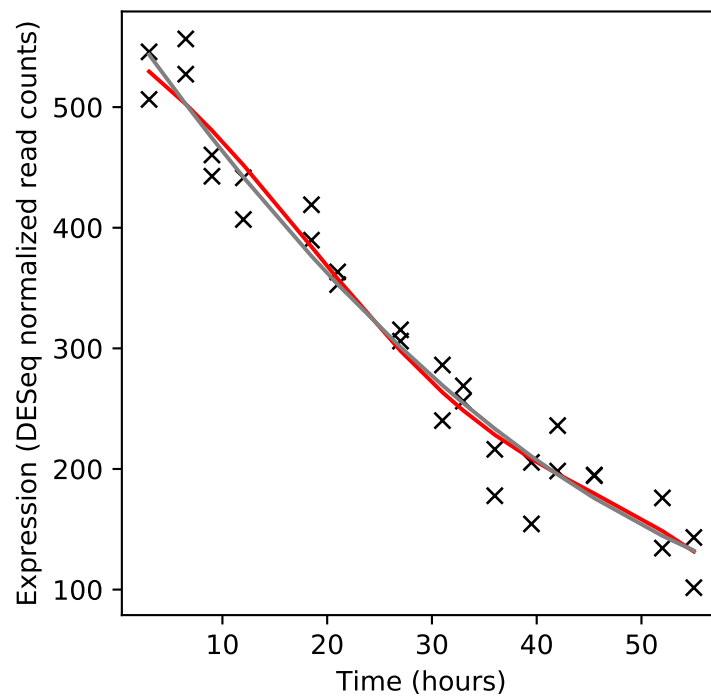

Rv2994/-

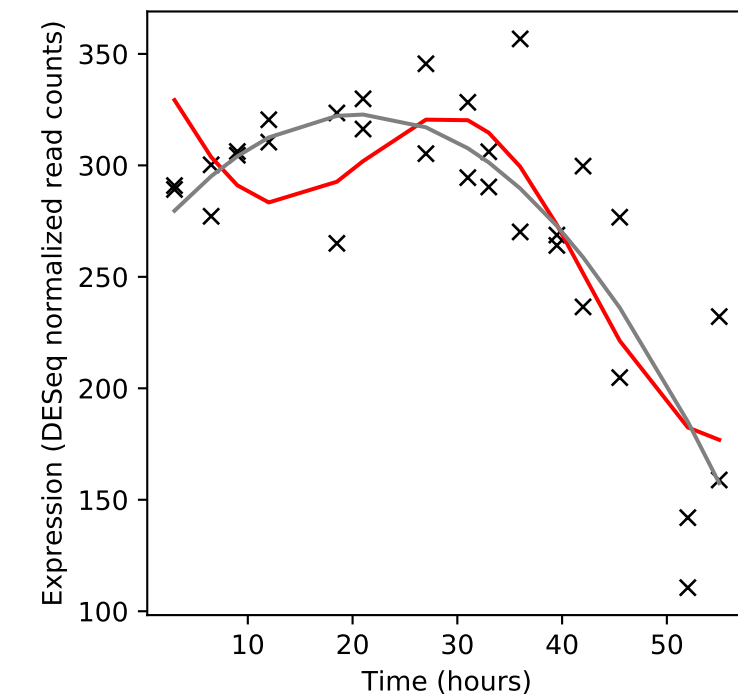

Rv2995c/leuB

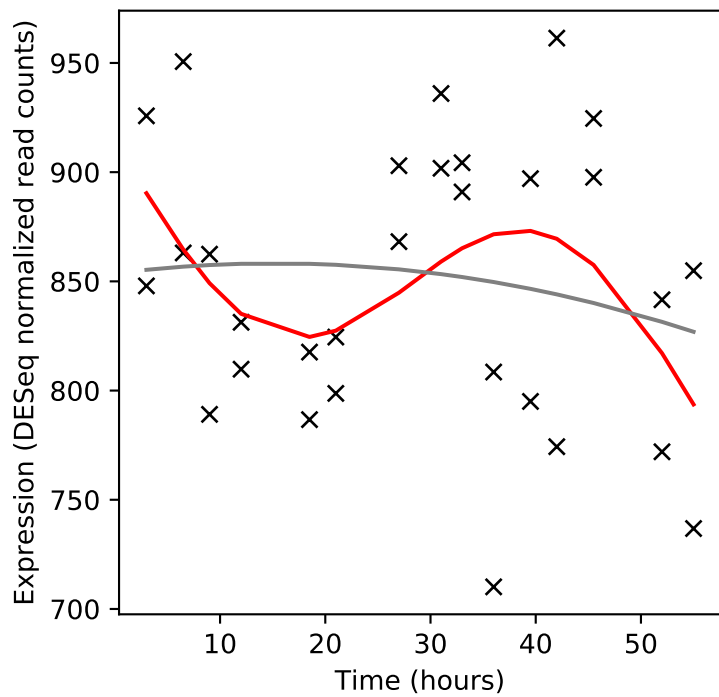

Rv2996c/serA1

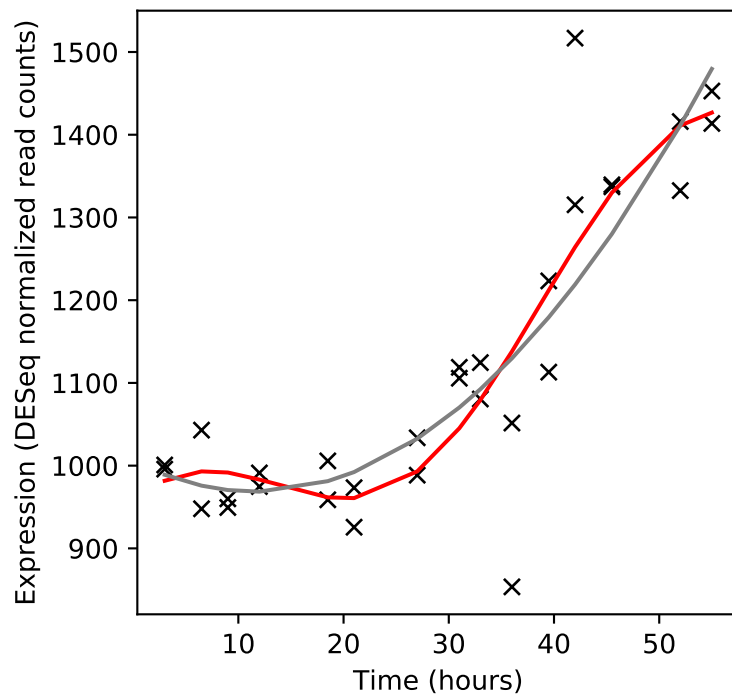

Rv2997/-

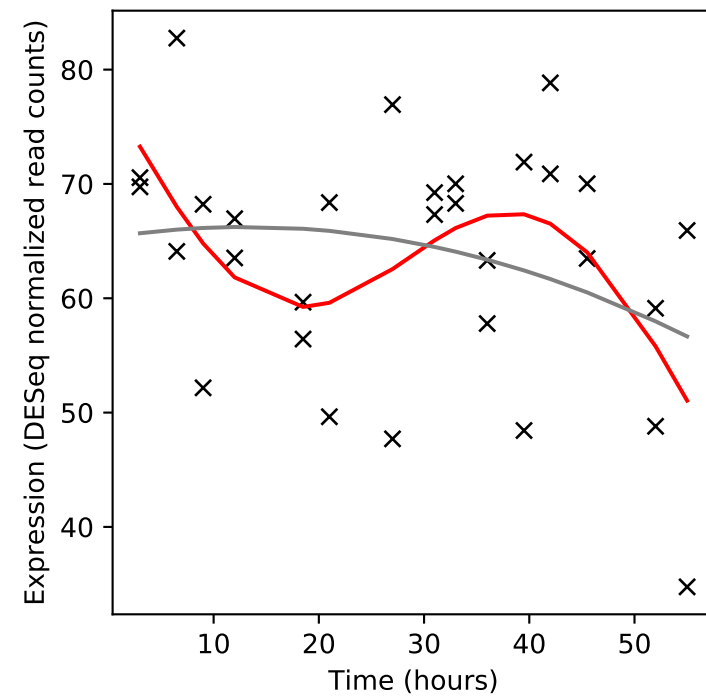

Rv2998/-

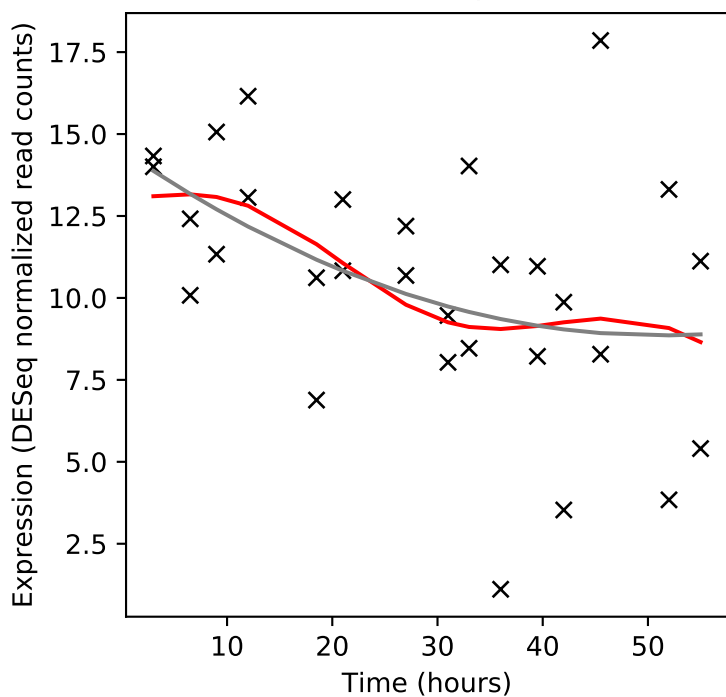

Rv2998A/-

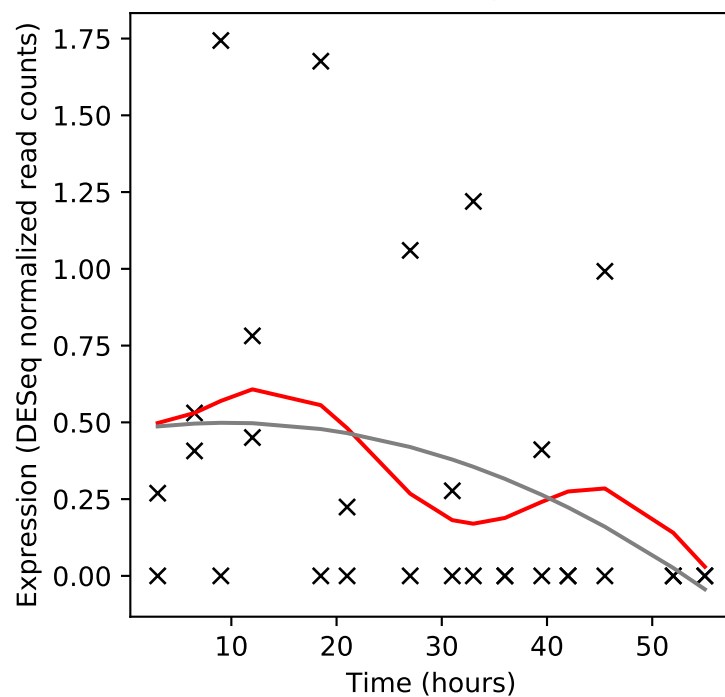

Rv2999/lppY

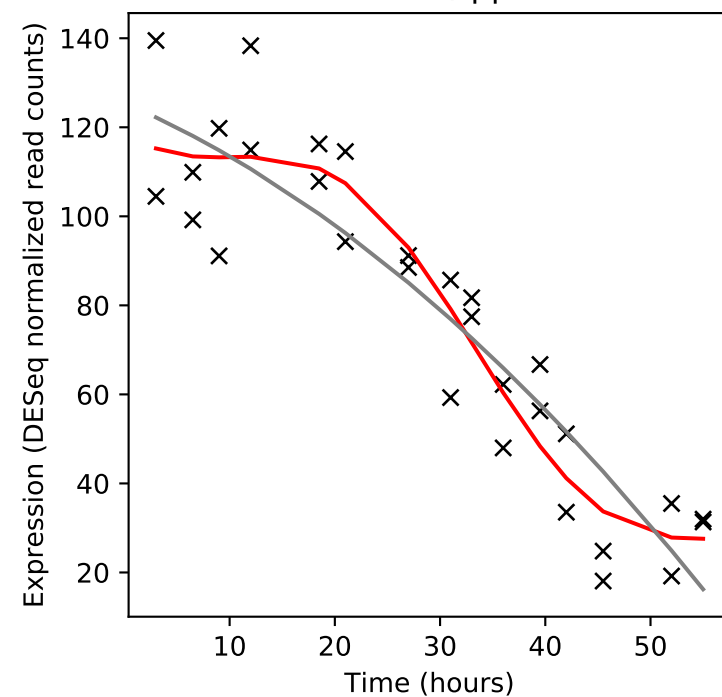

Rv3000/-

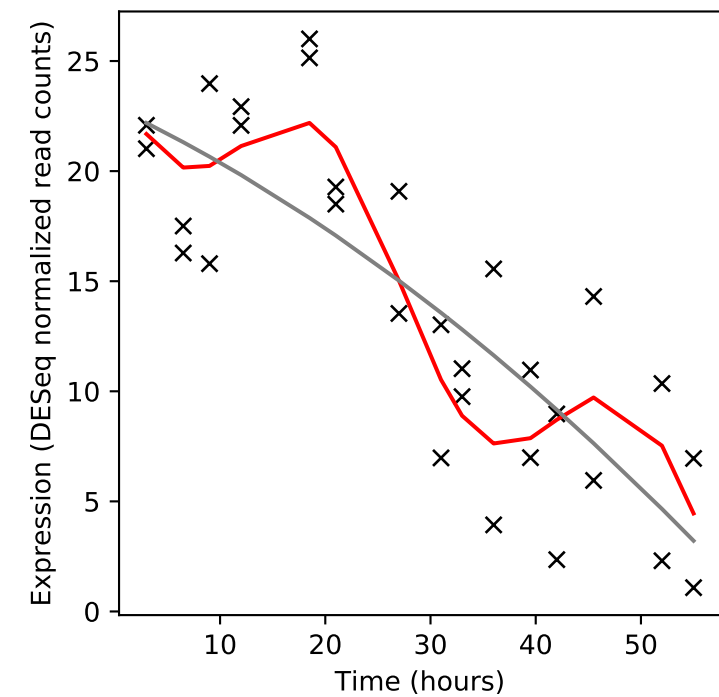

Rv3001c/ilvC

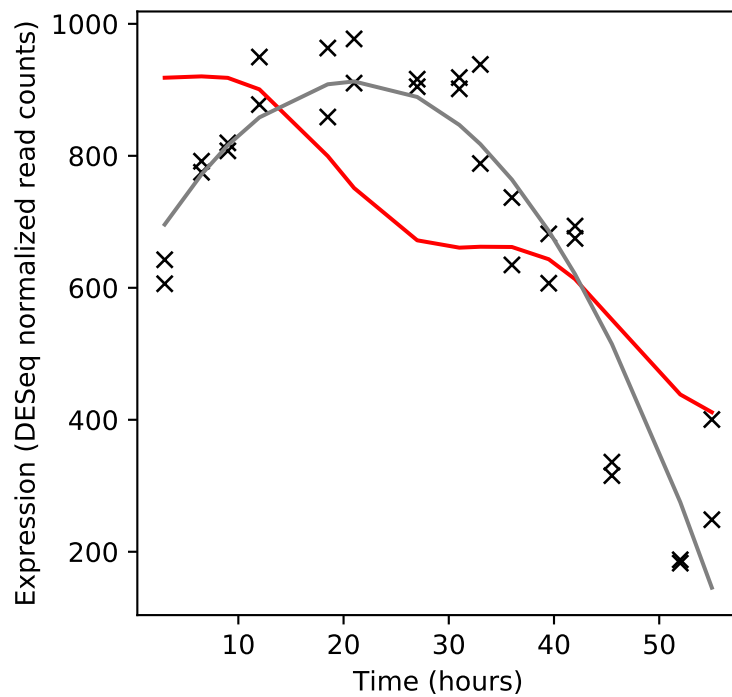

Rv3002c/ilvN

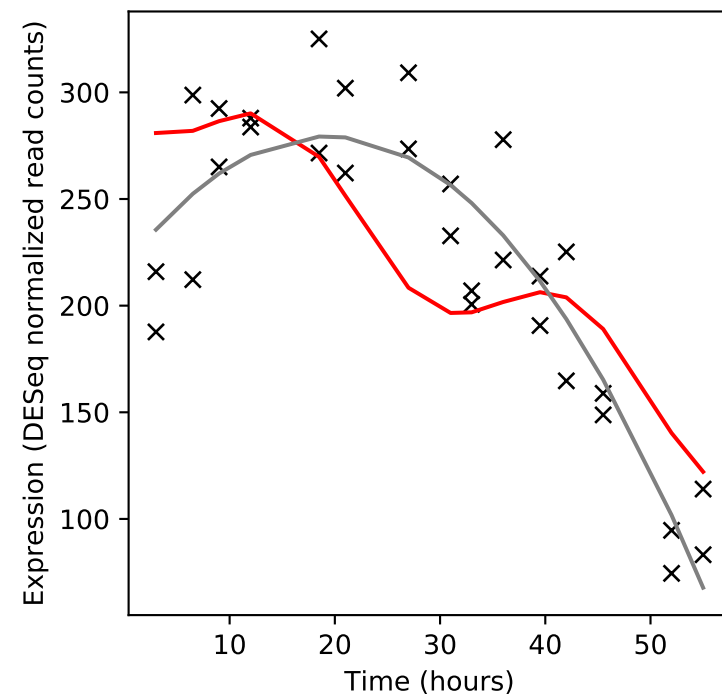

Rv3003c/ilvB1

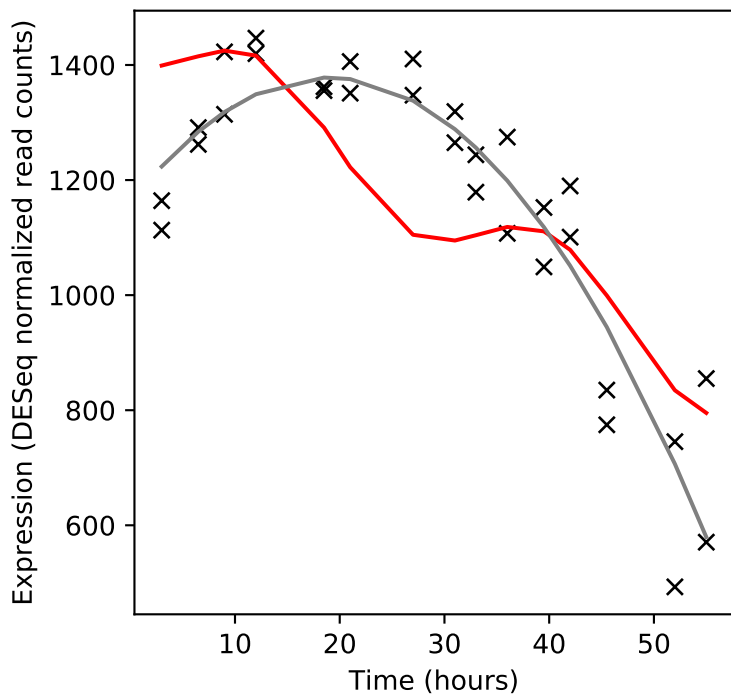

Rv3004c/cfp6

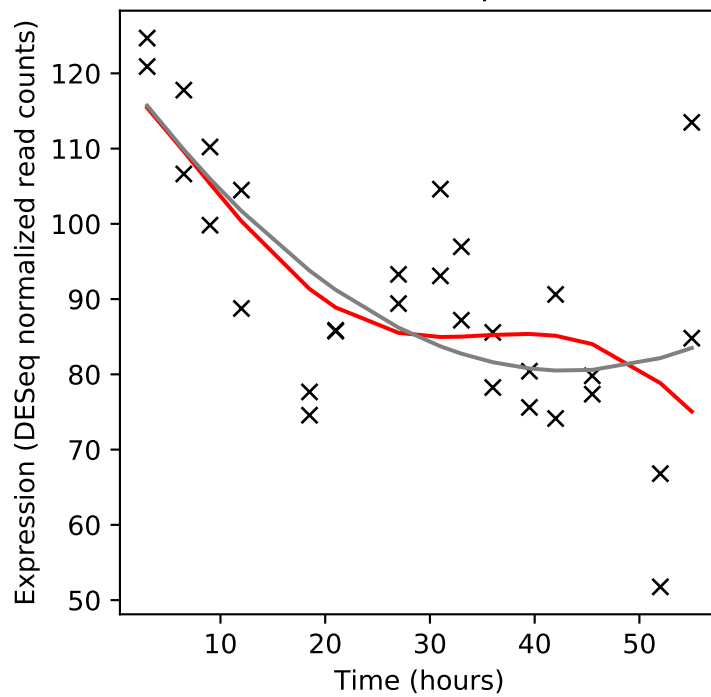

Rv3005c/-

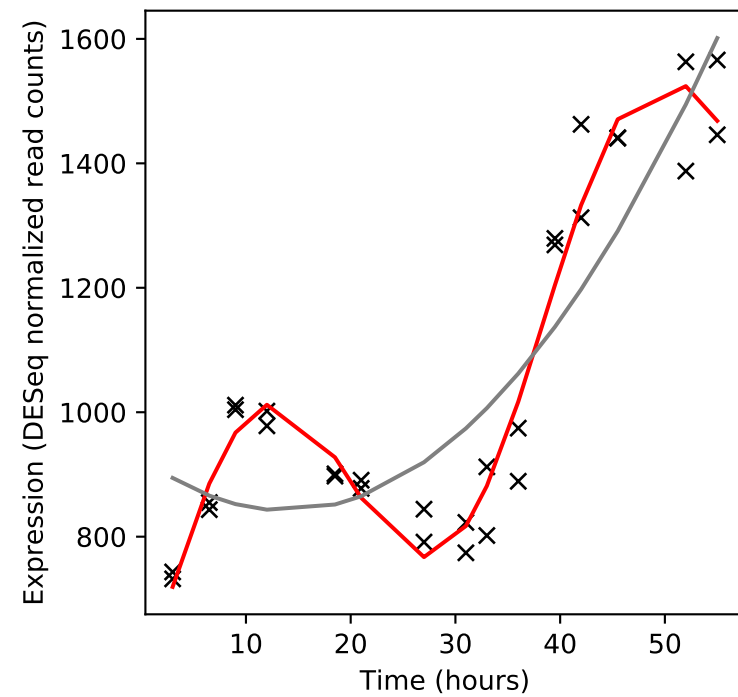

Rv3006c/lppZ

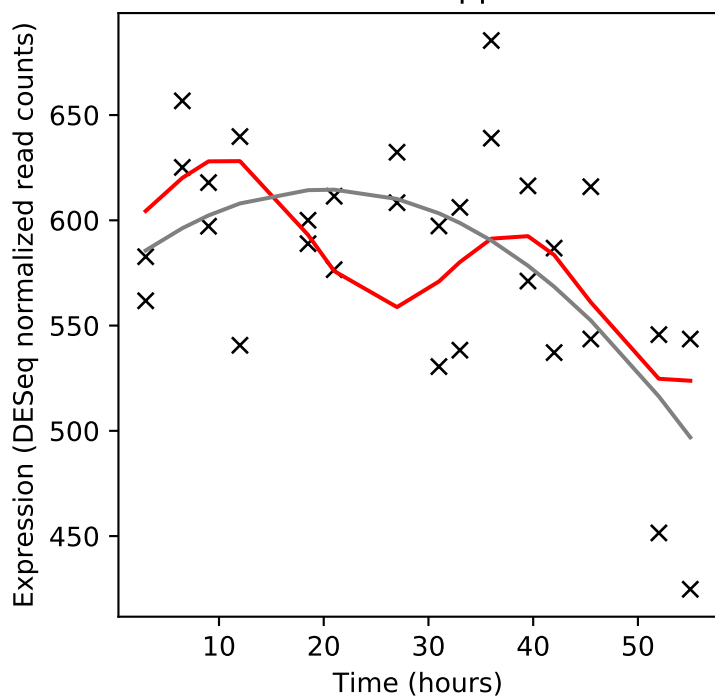

Rv3007c/-

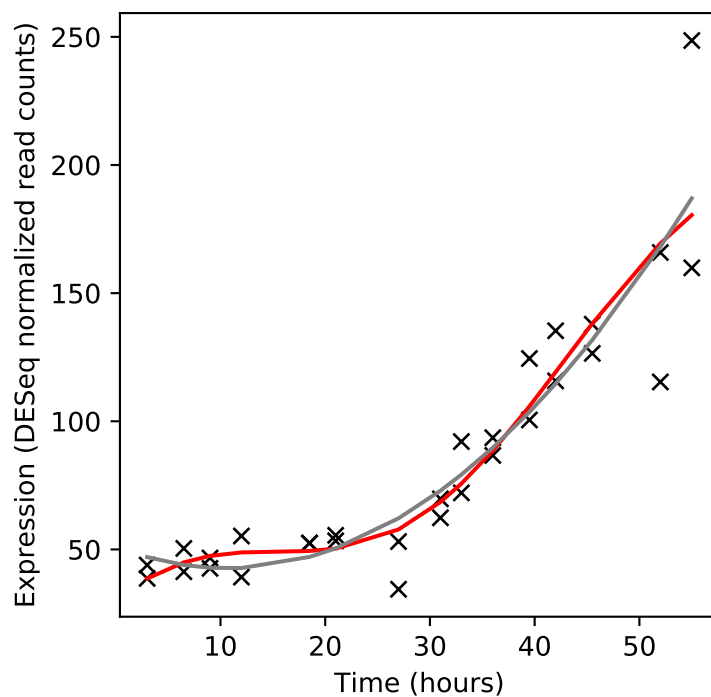

Rv3008c/-

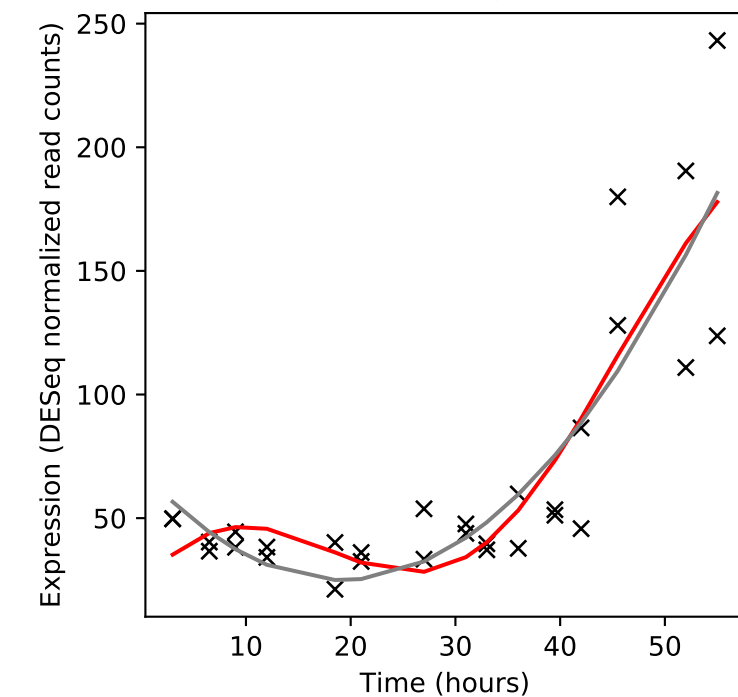

Rv3009c/gatB

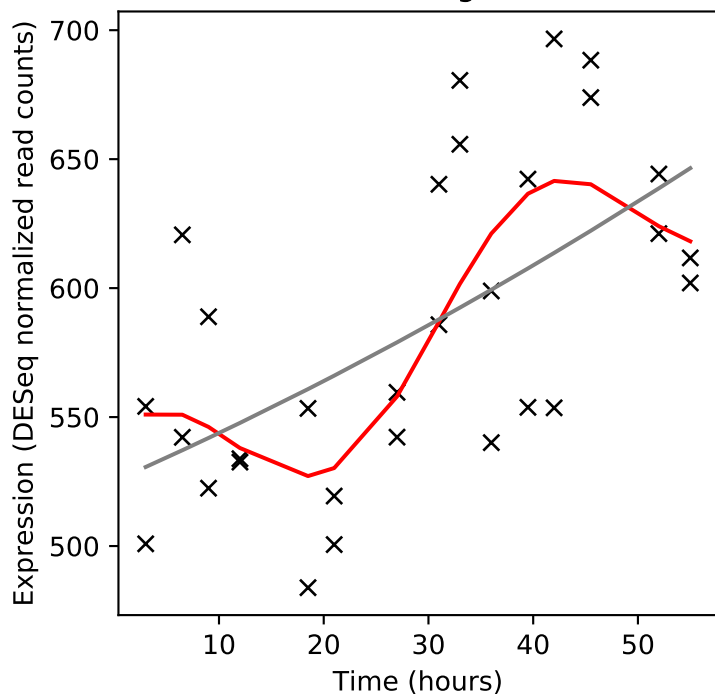

Rv3010c/pfkA

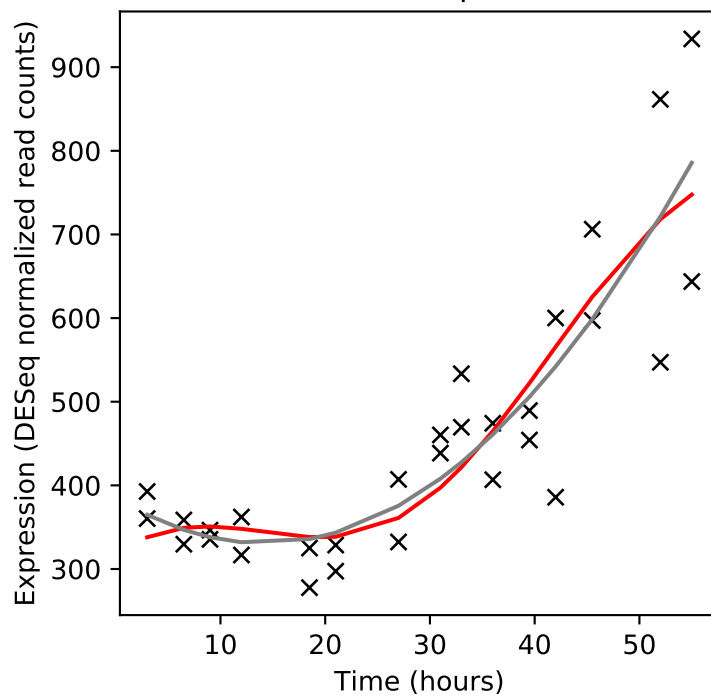

Rv3011c/gatA

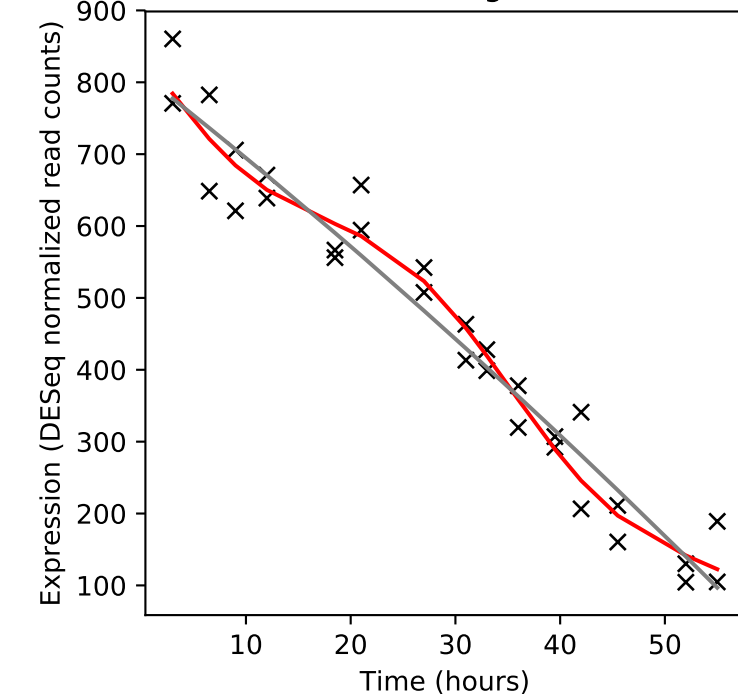

Rv3012c/gatC

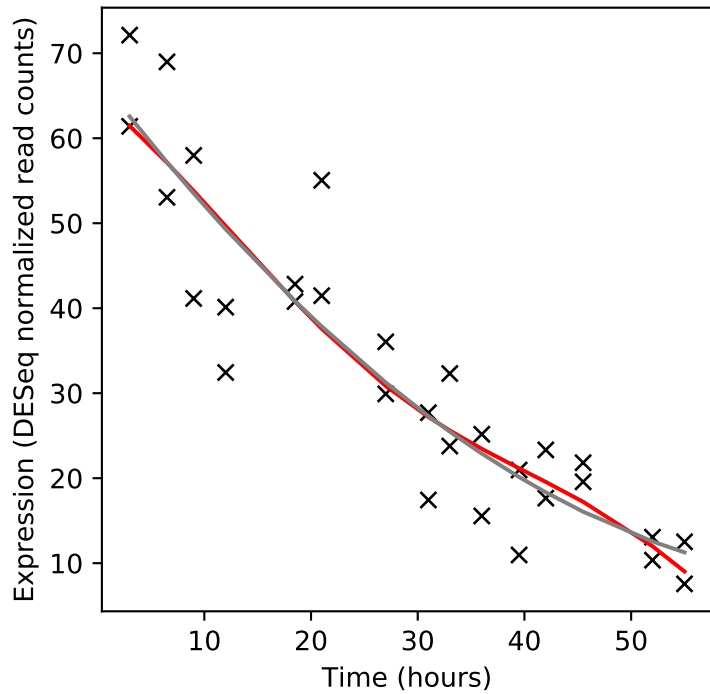

Rv3013/-

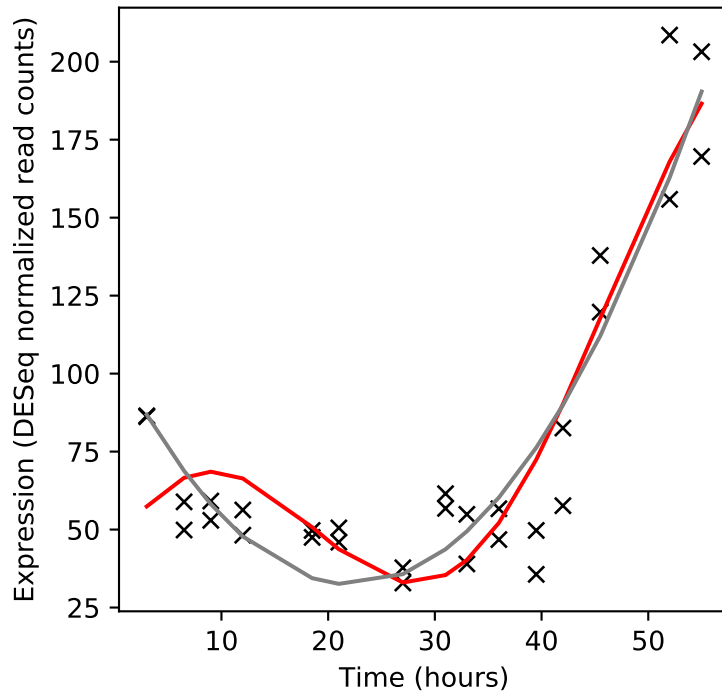

Rv3014c/ligA

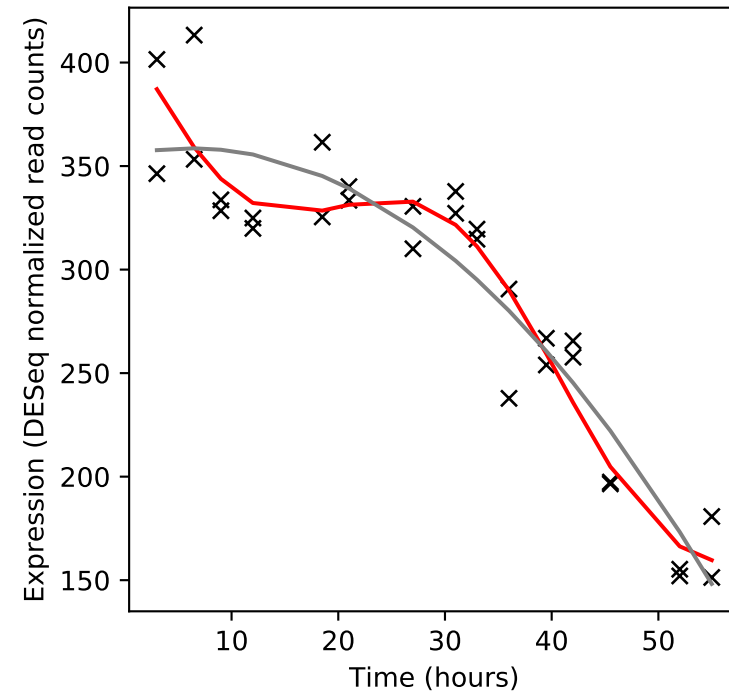

Rv3015c/-

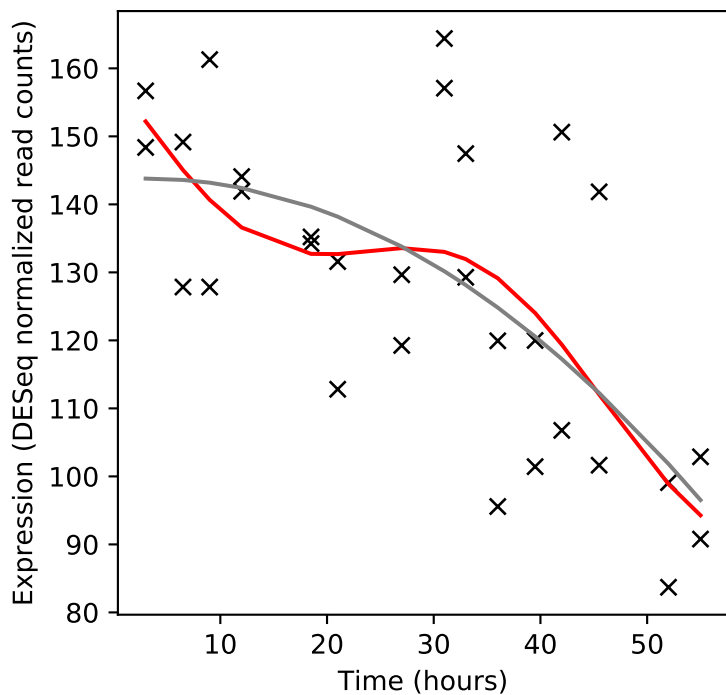

Rv3016/lpqA

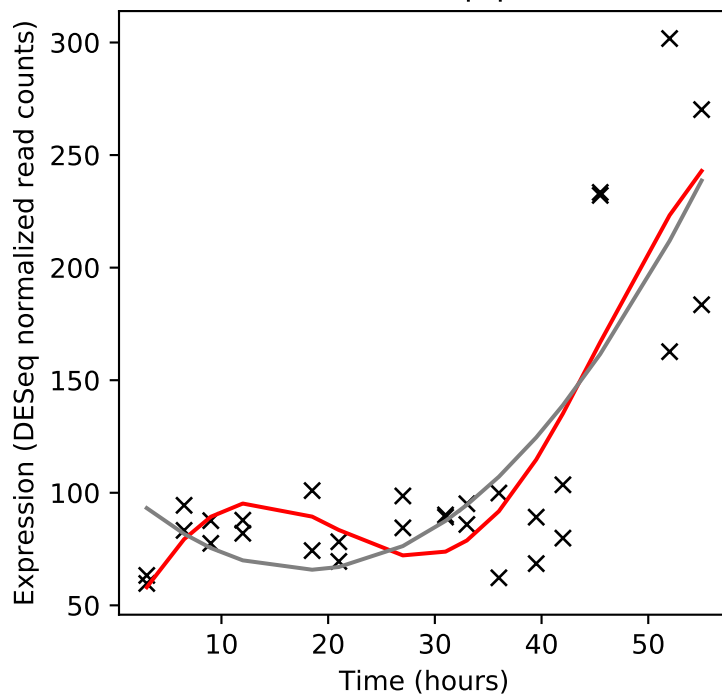

Rv3017c/esxQ

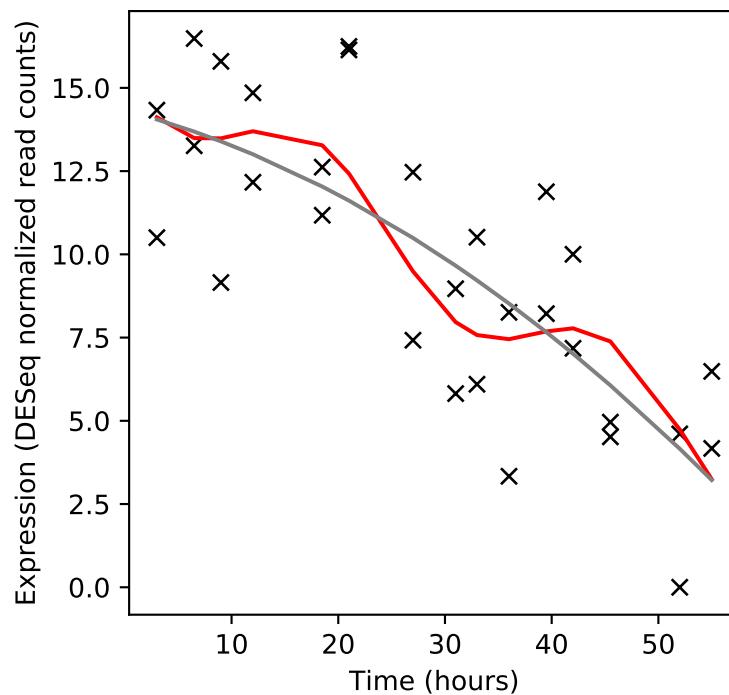

Rv3018c/PPE46

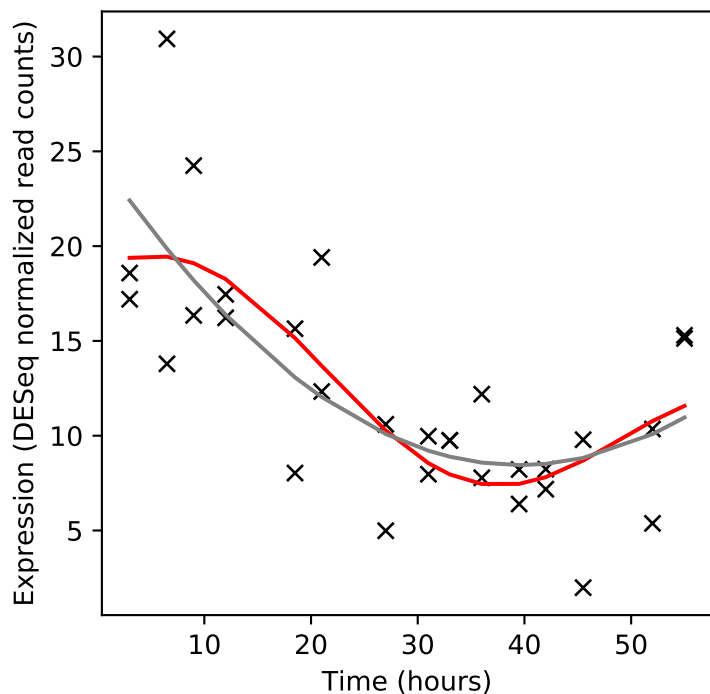

Rv3018A/PE27A

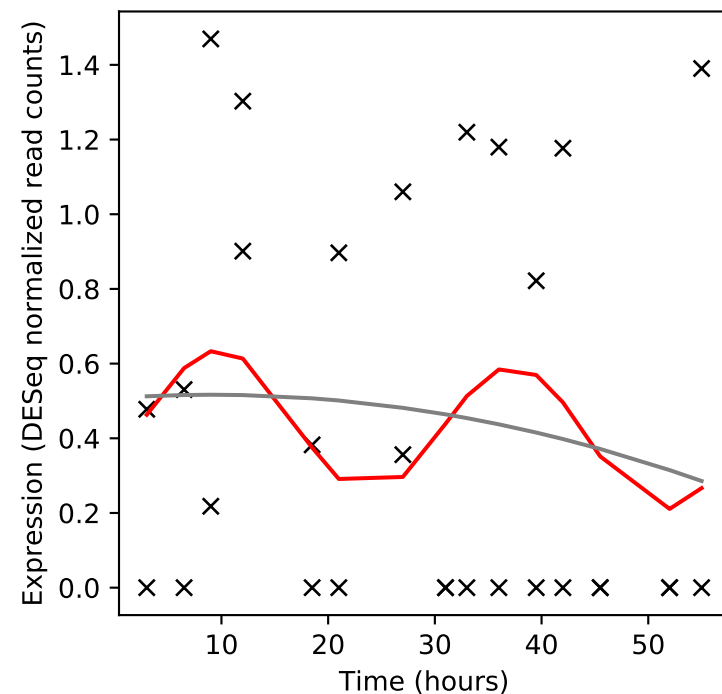

Rv3019c/esxR

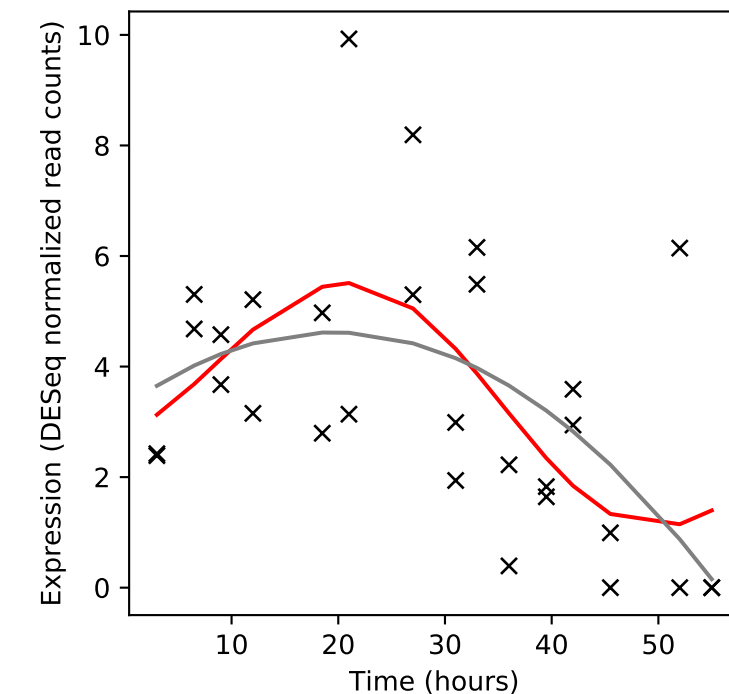

Rv3020c/esxS

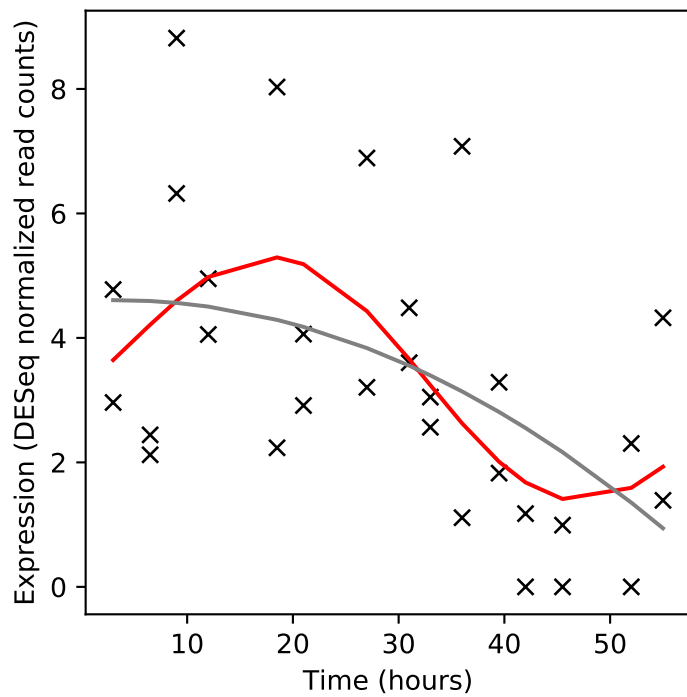

Rv3022A/PE29

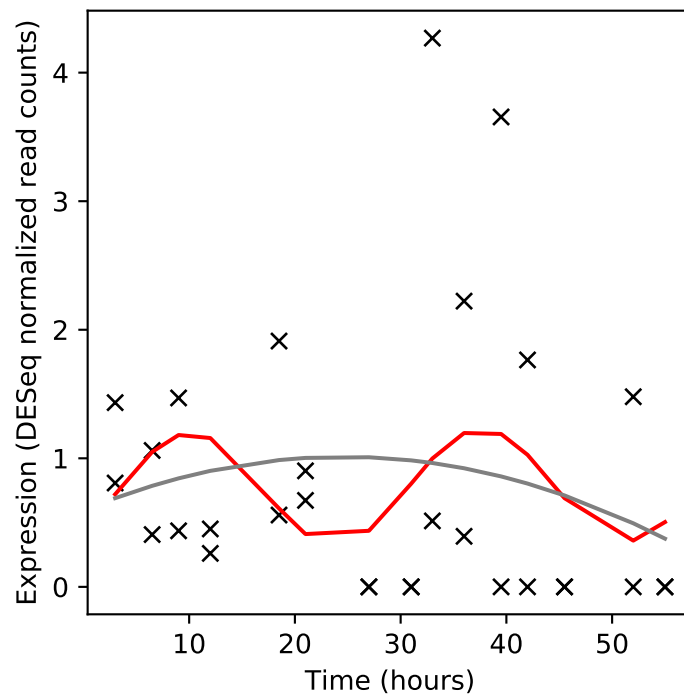

Rv3023c/-

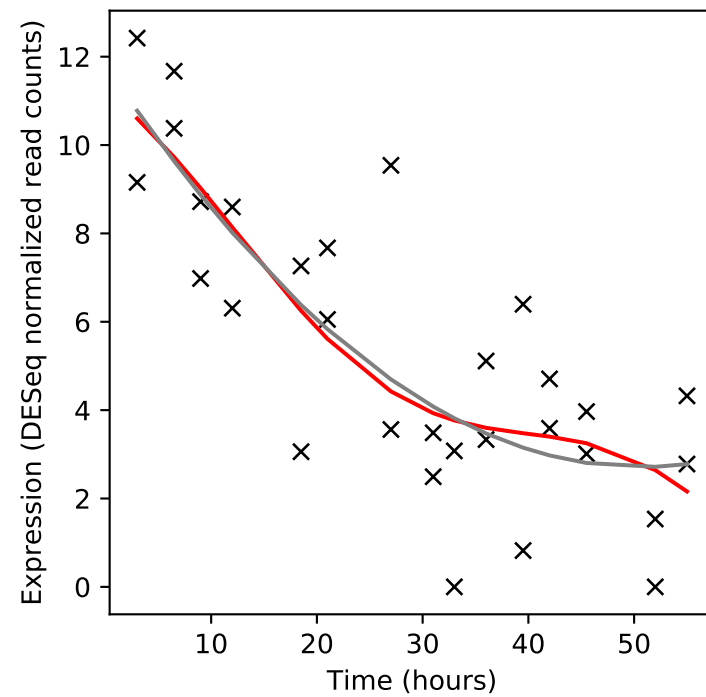

Rv3024c/trmU

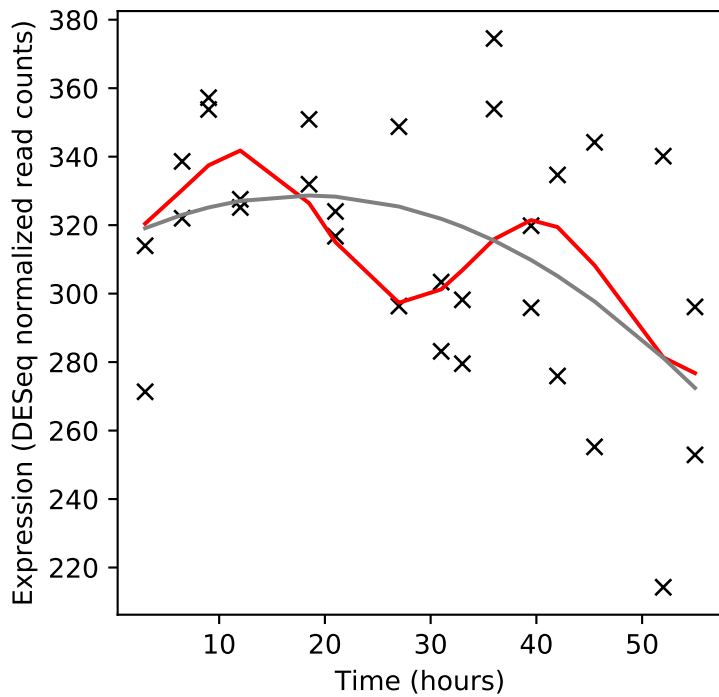

Rv3025c/iscS

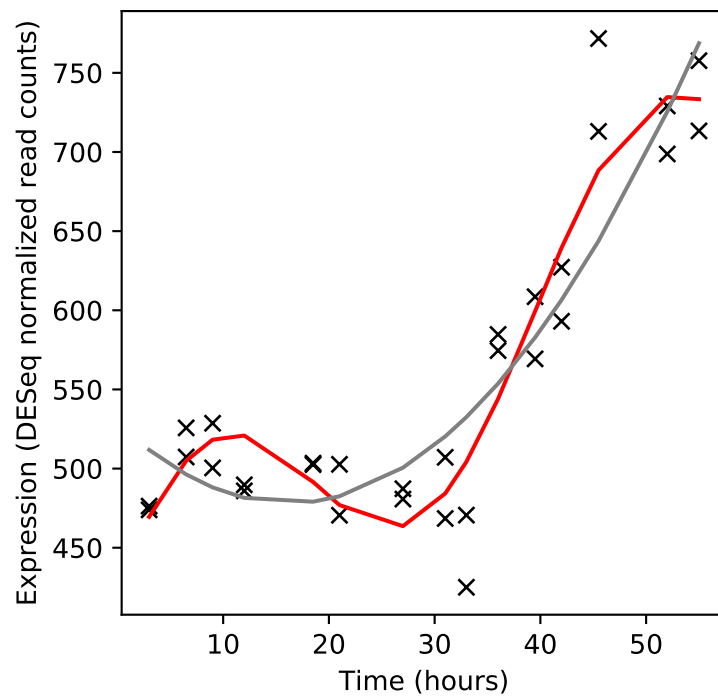

Rv3026c/-

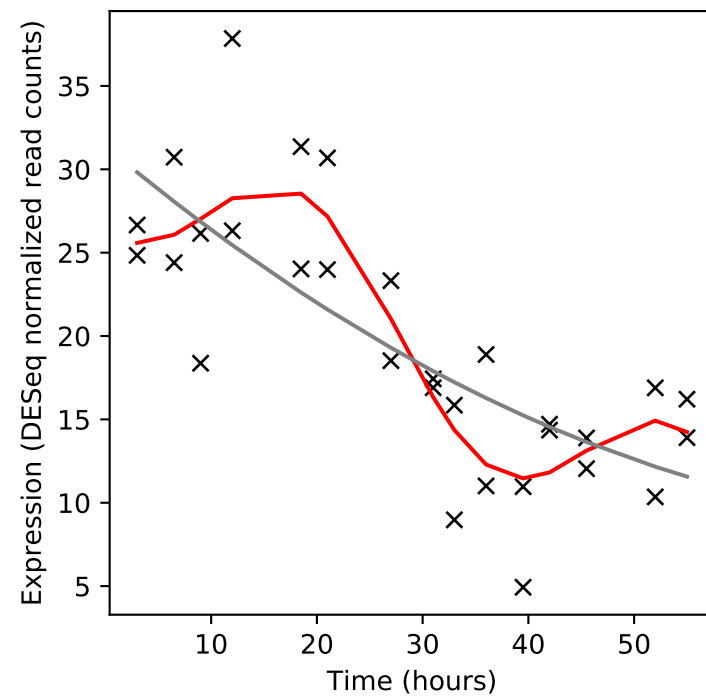

Rv3027c/-

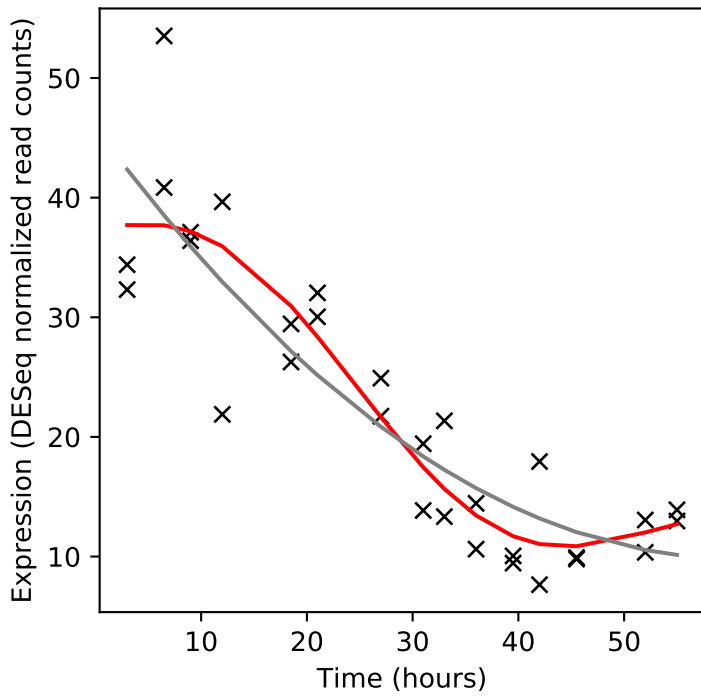

Rv3028c/fixB

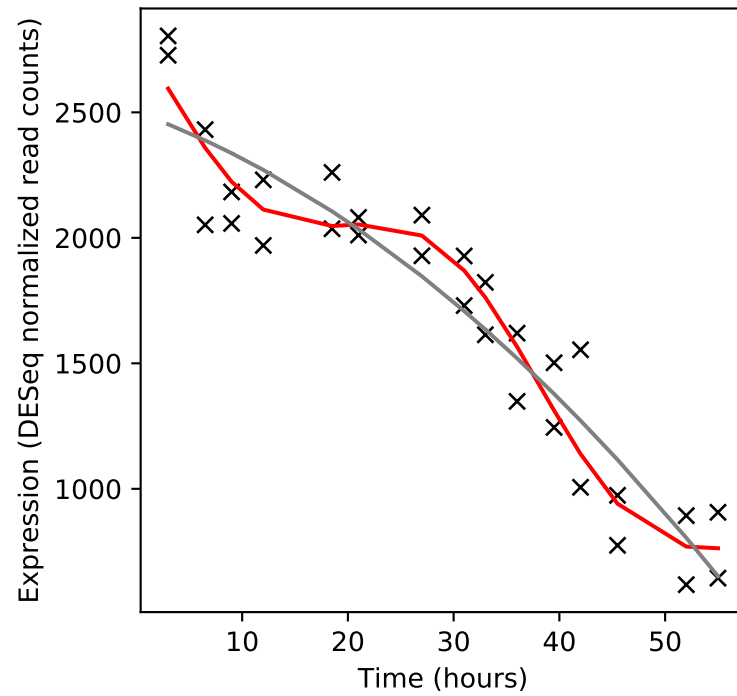

Rv3029c/fixA

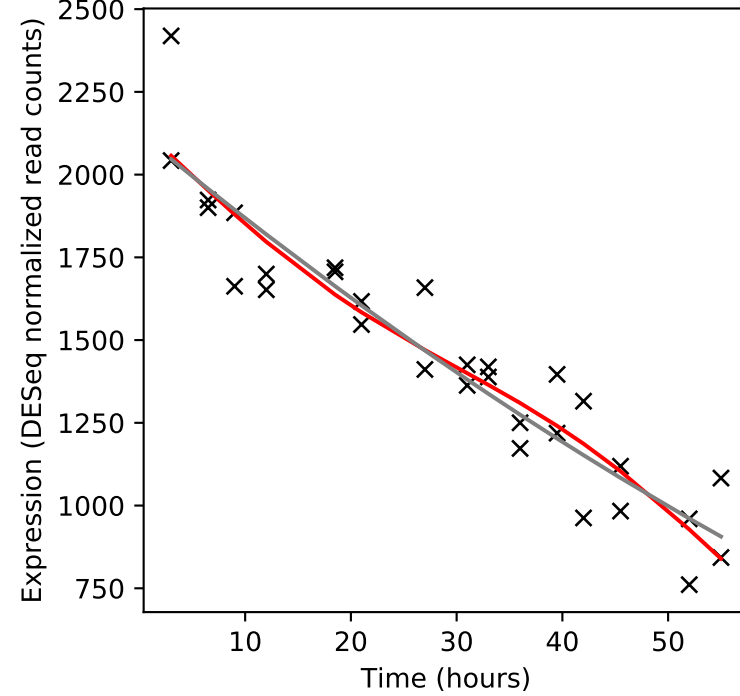



Rv3030/-

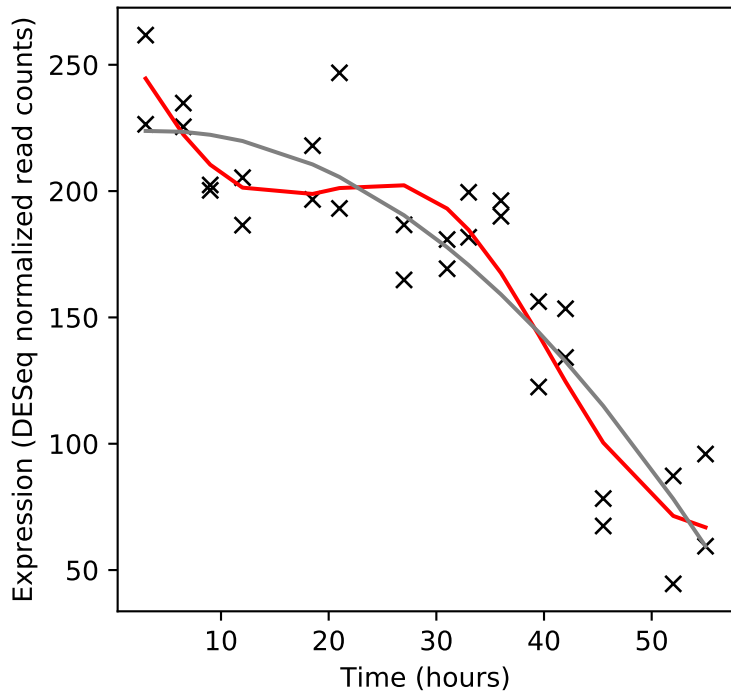

Rv3031/-

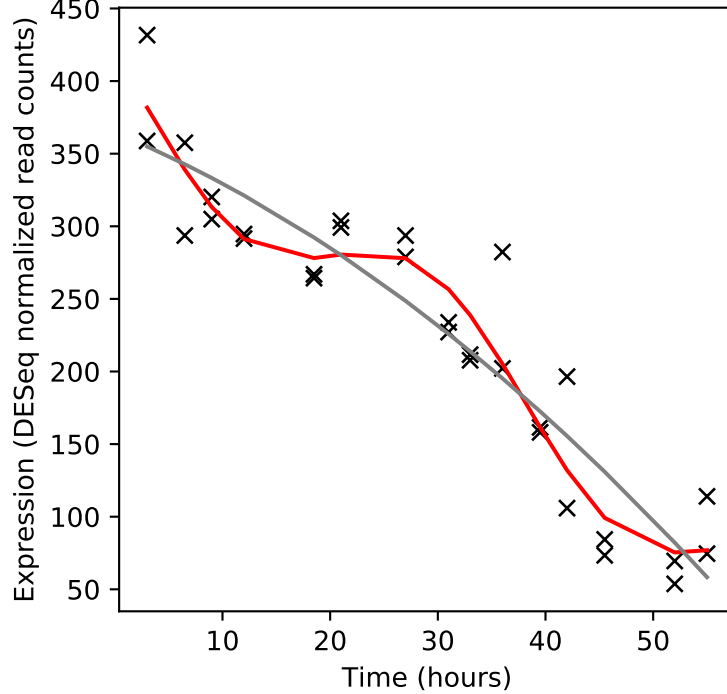

Rv3032/-

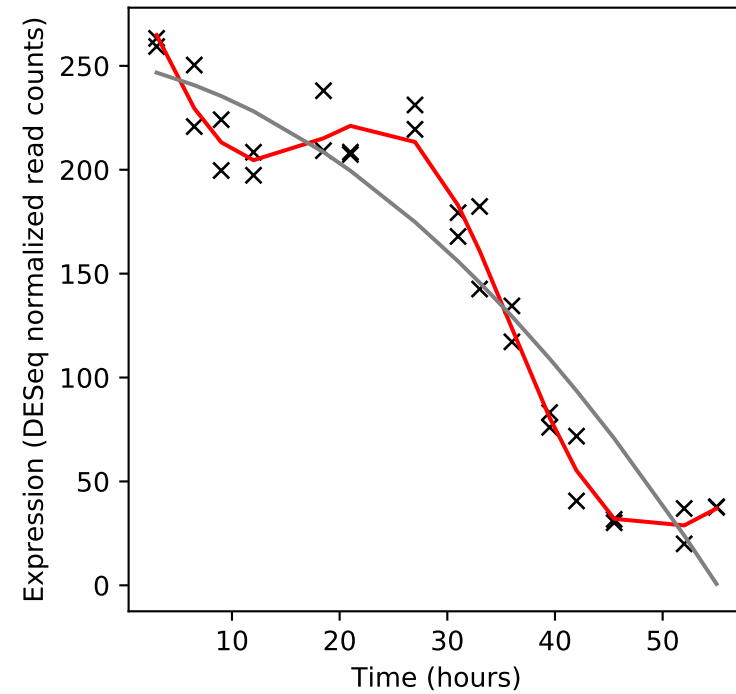

Rv3032A/-

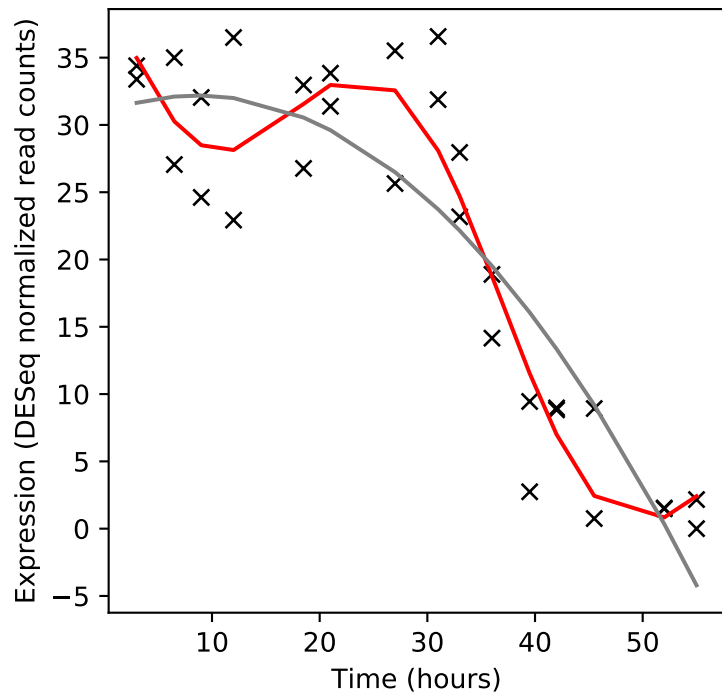

Rv3033/-

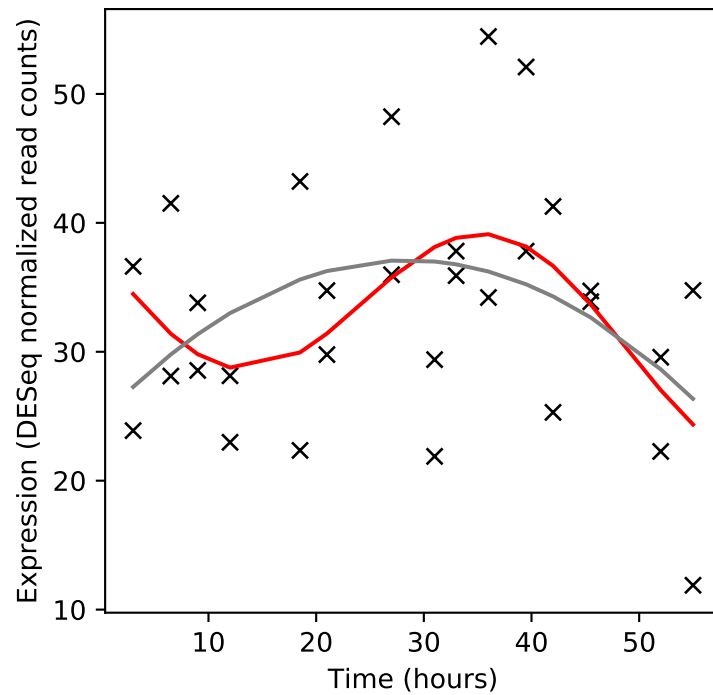

Rv3034c/-

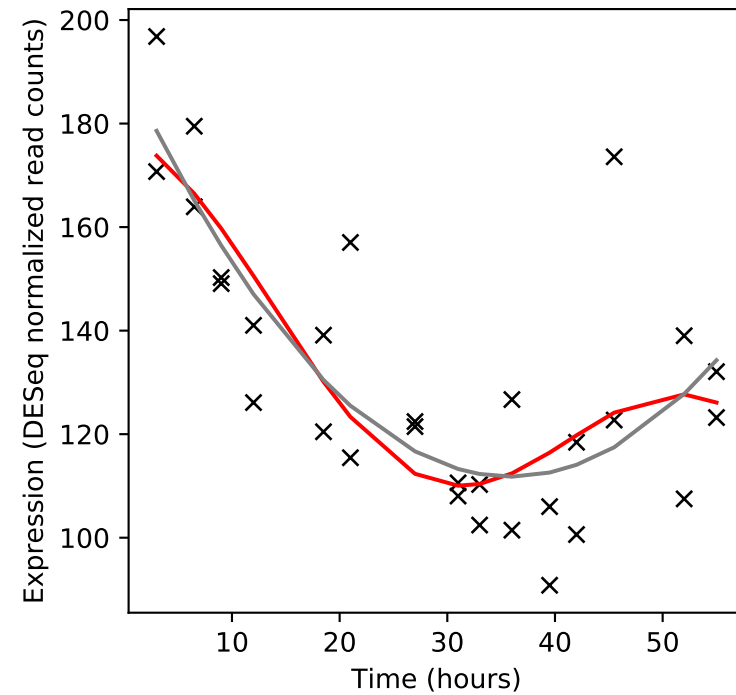

Rv3035/-

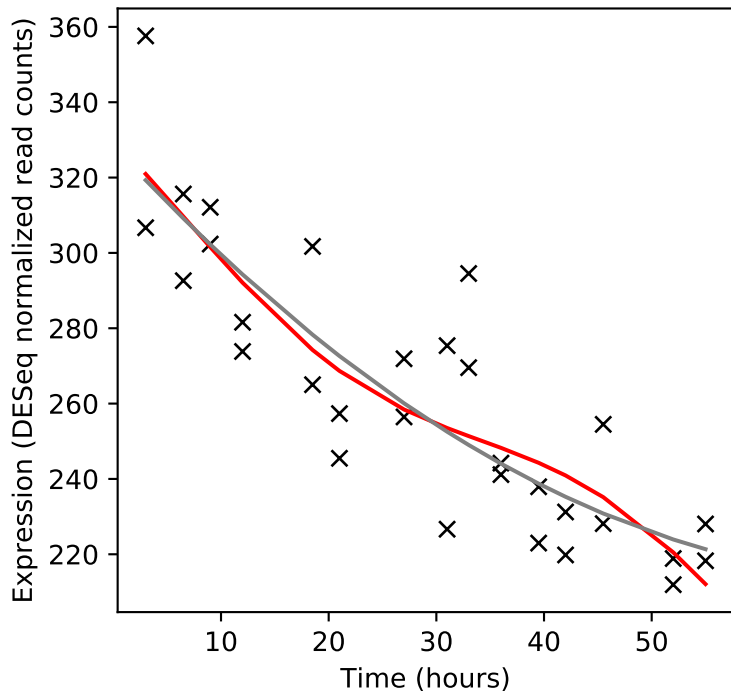

Rv3036c/TB22.2

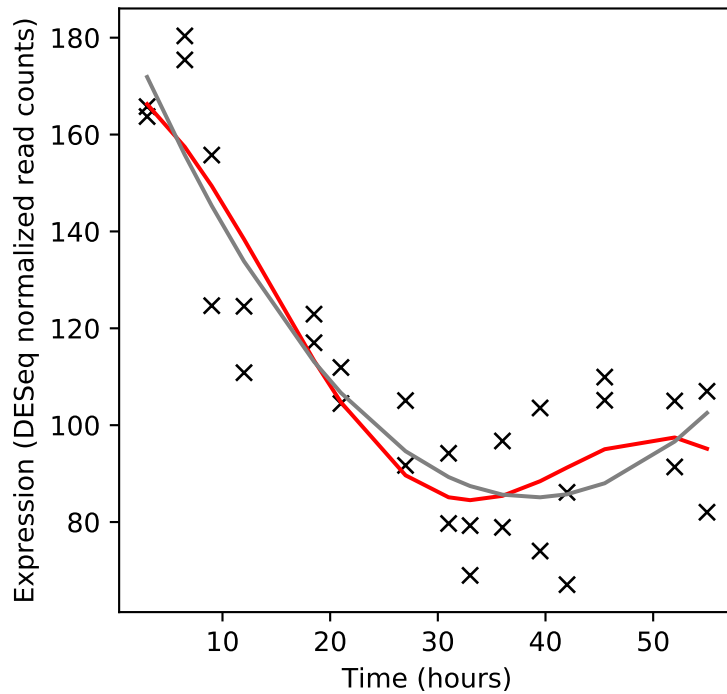

Rv3037c/-

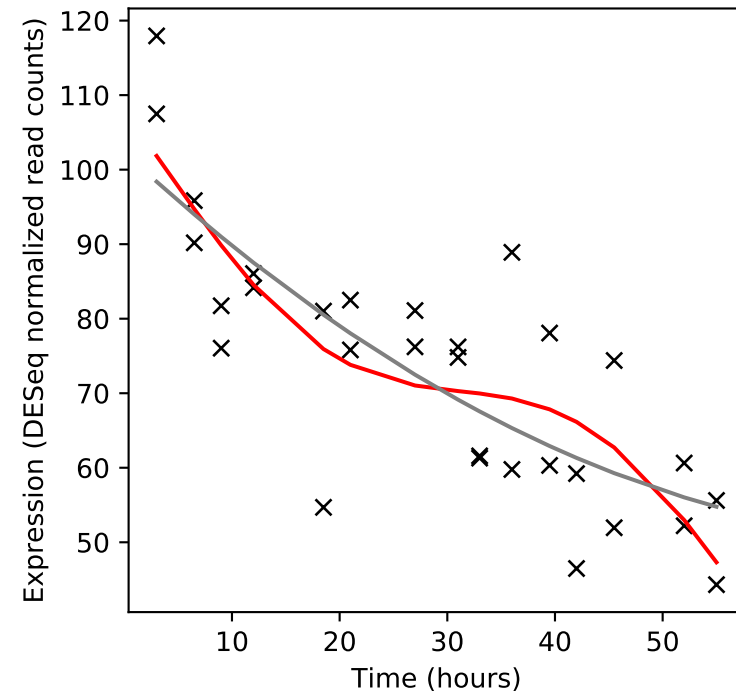

Rv3038c/-

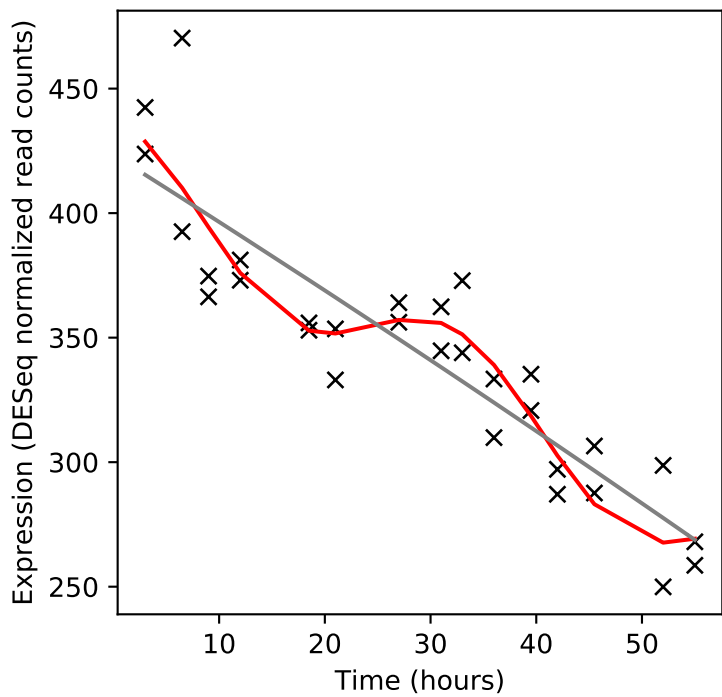

Rv3039c/echA17

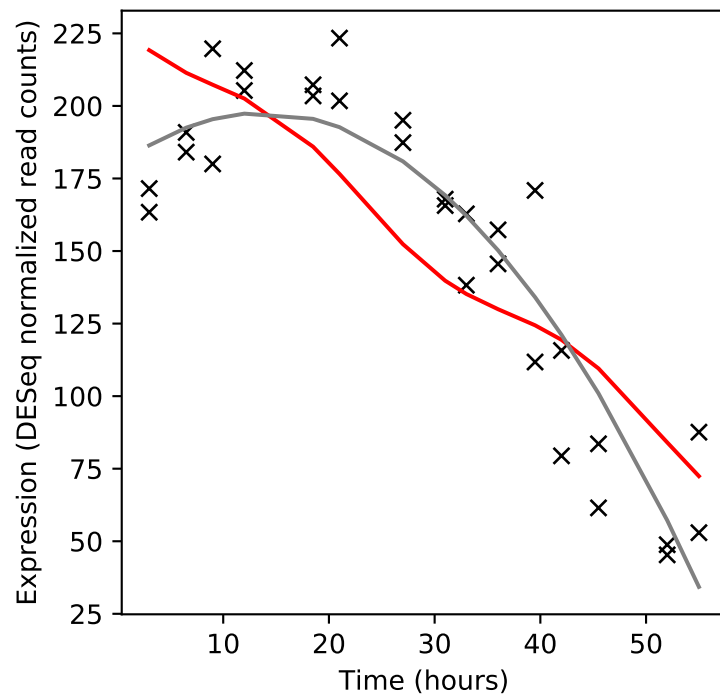

Rv3040c/-

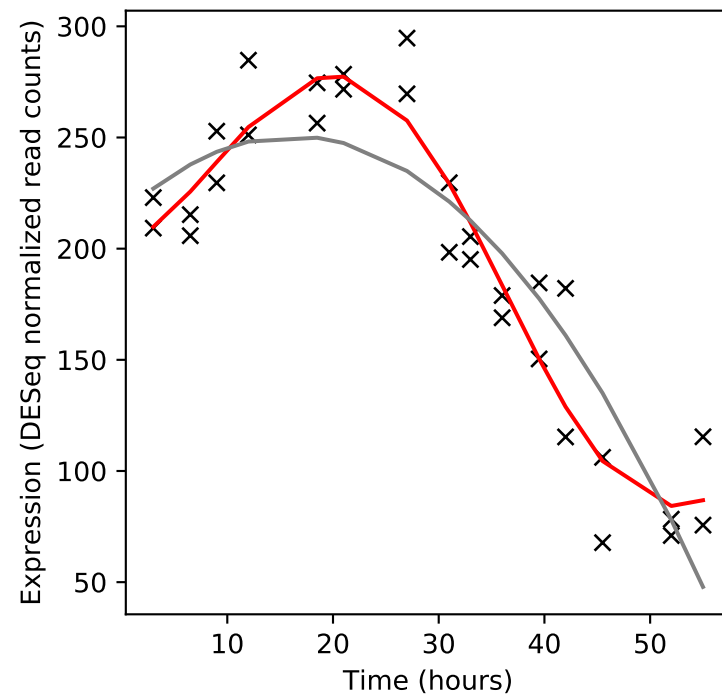

Rv3041c/-

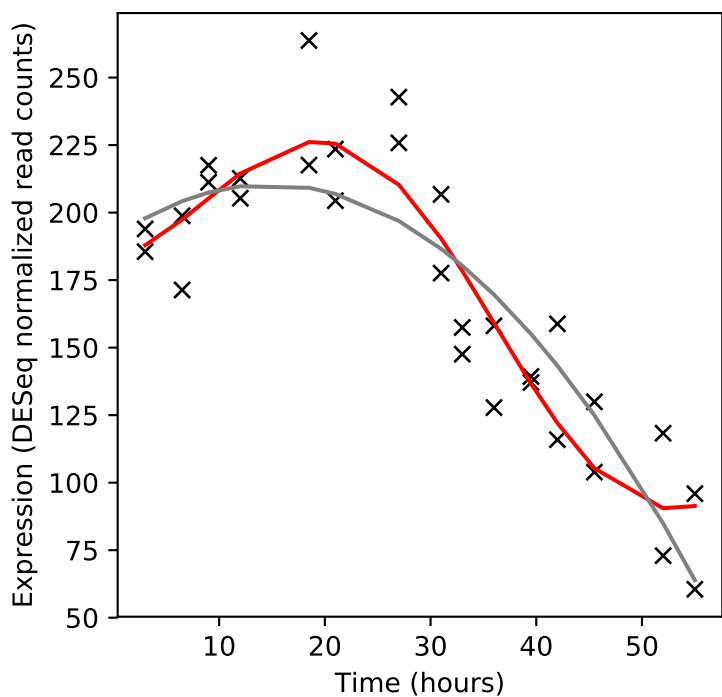

Rv3042c/serB2

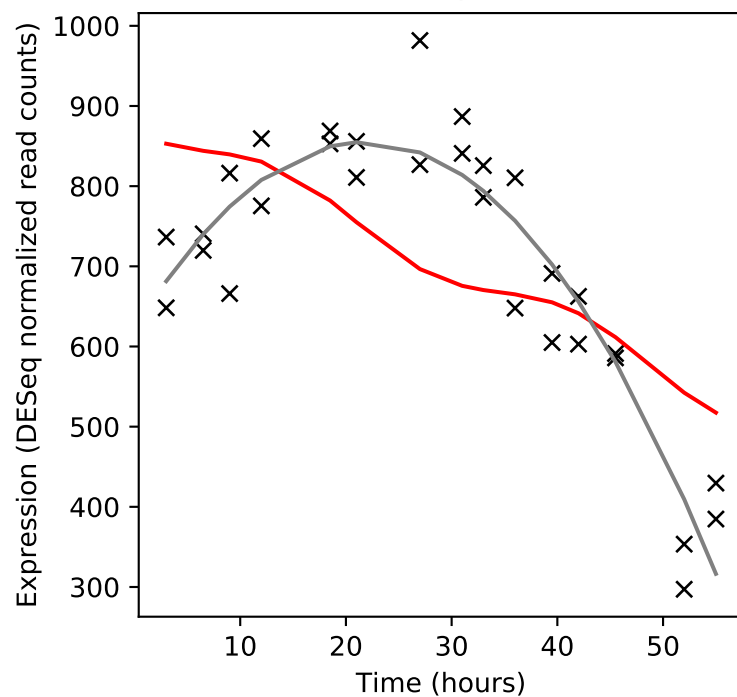

Rv3043c/ctaD

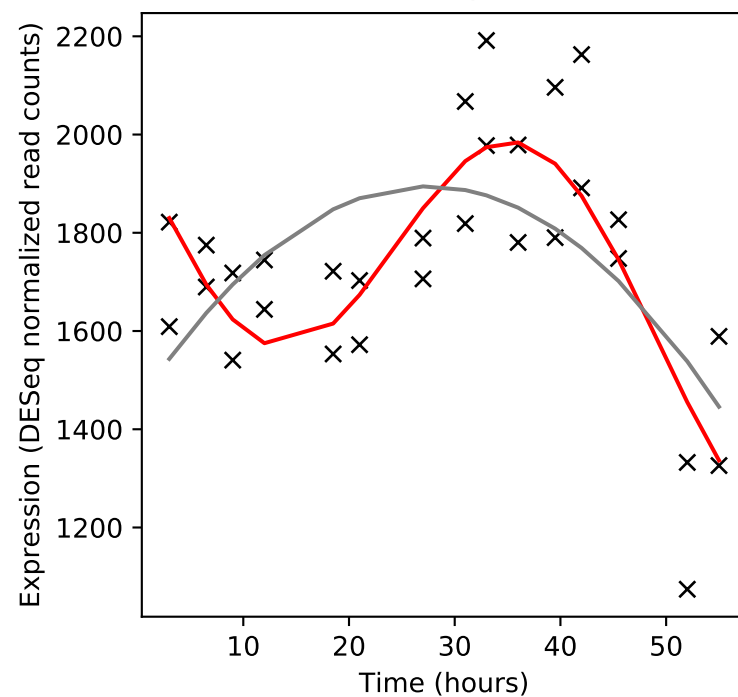

Rv3044/fecB

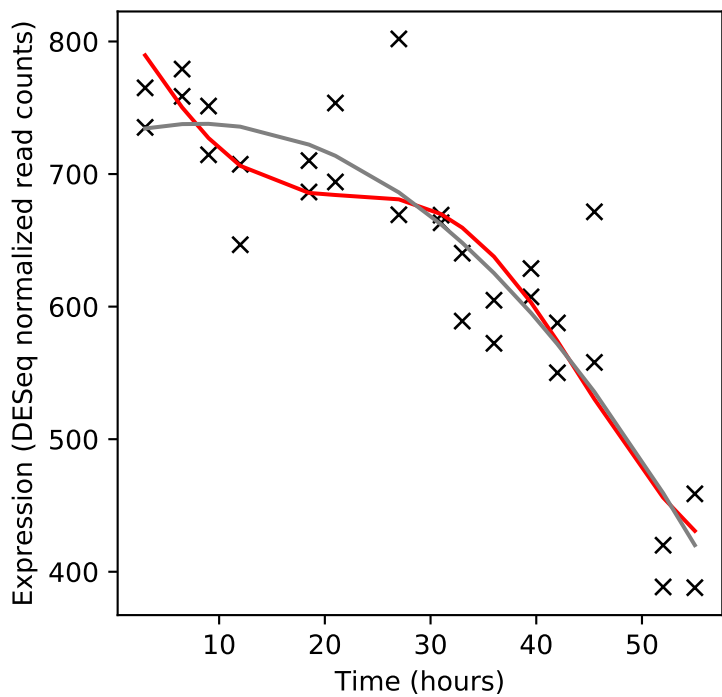

Rv3045/adhC

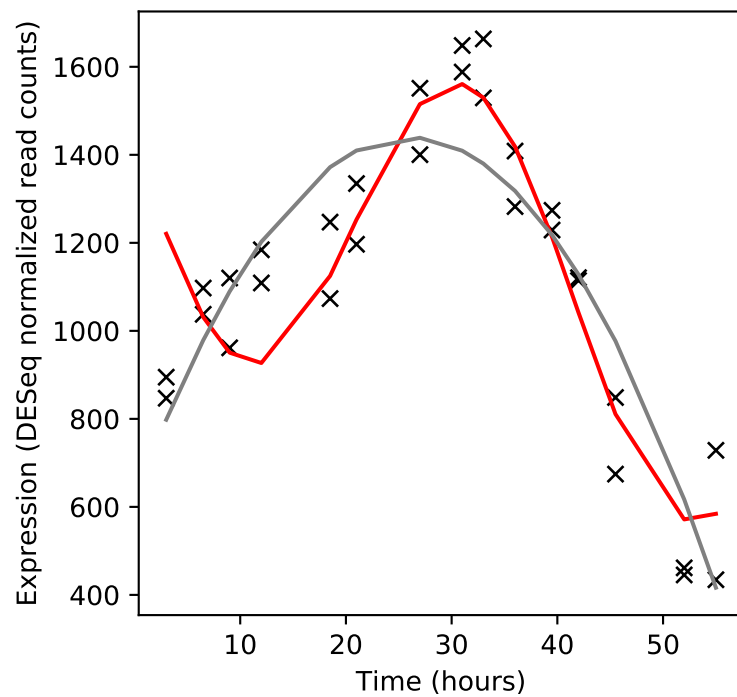

Rv3046c/-

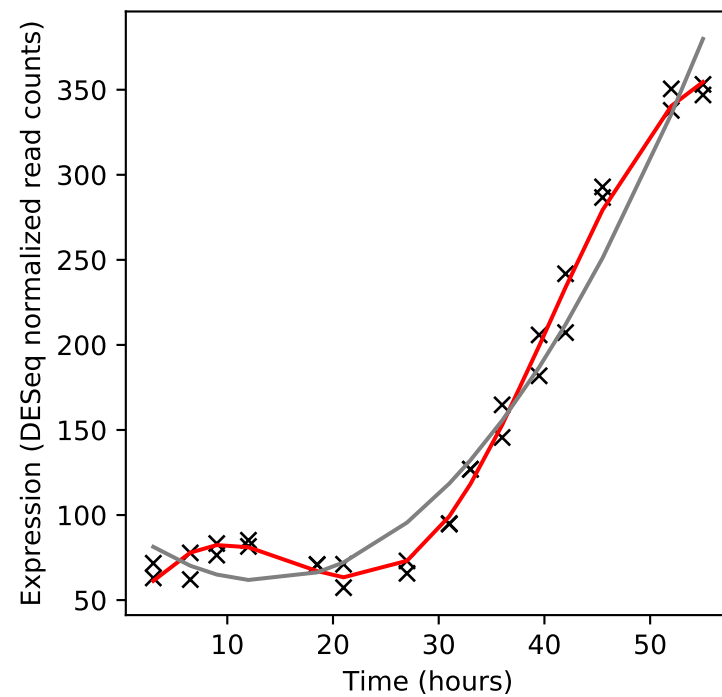

Rv3047c/-

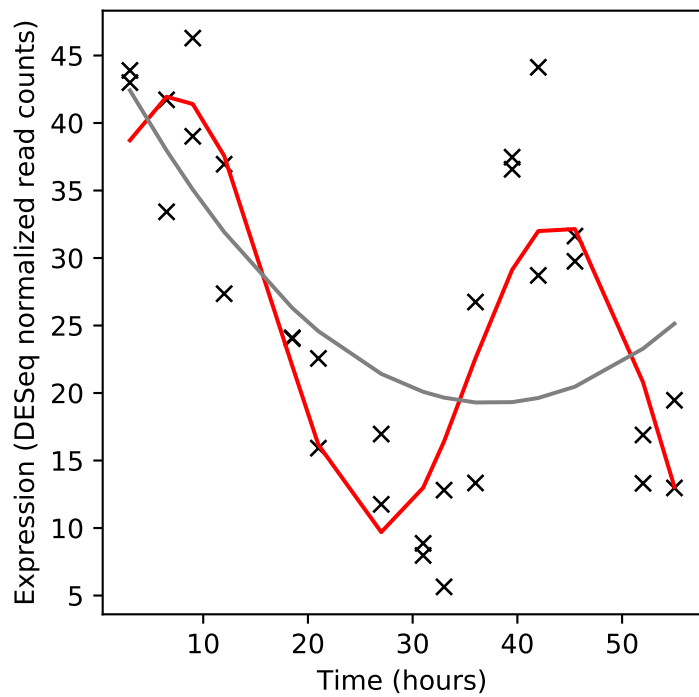

Rv3048c/nrdF2

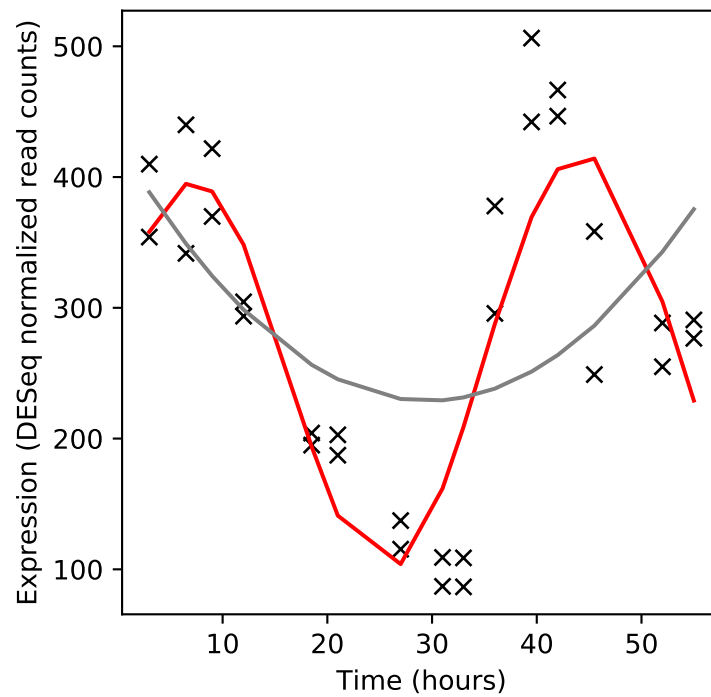

Rv3049c/-

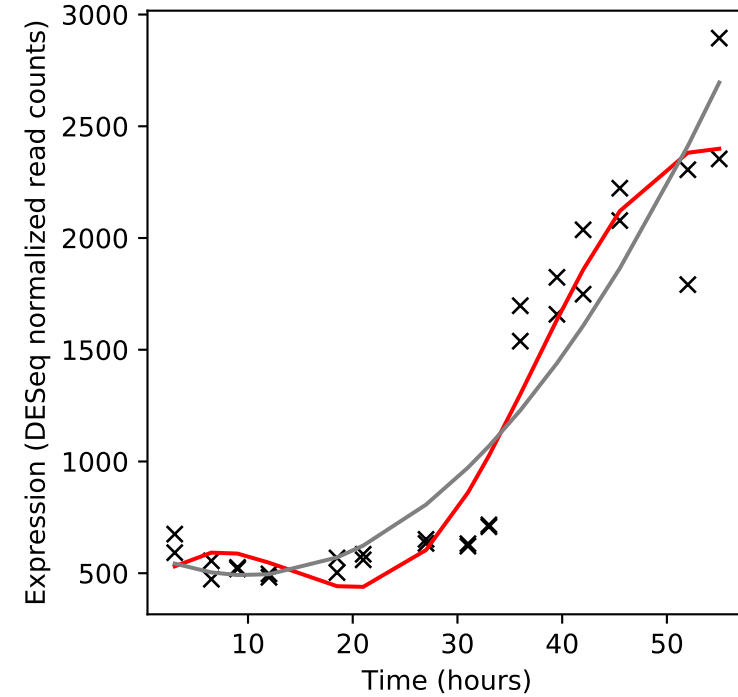

Rv3050c/-

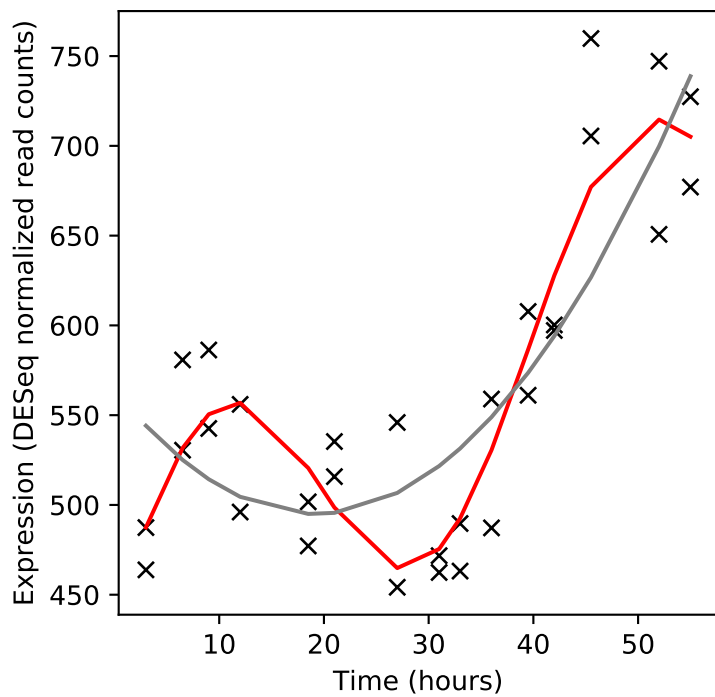

Rv3051c/nrdE

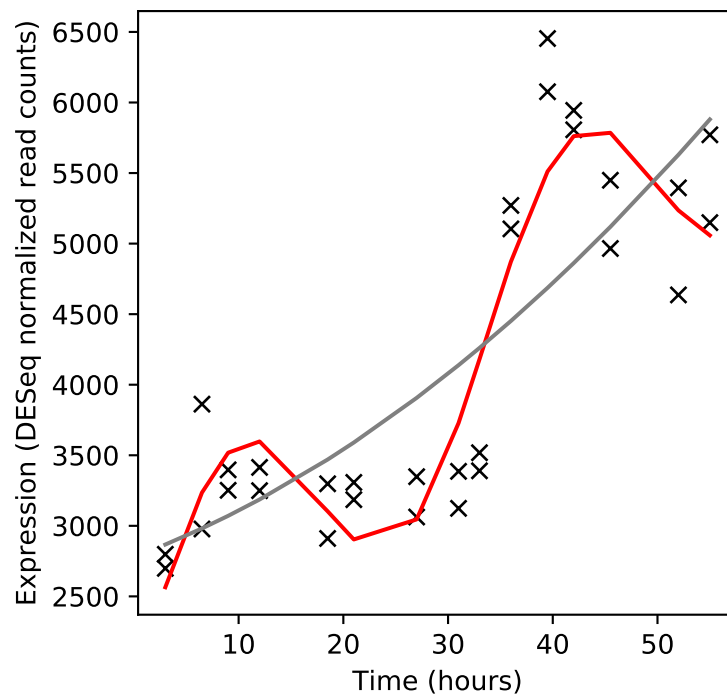

Rv3052c/nrdI

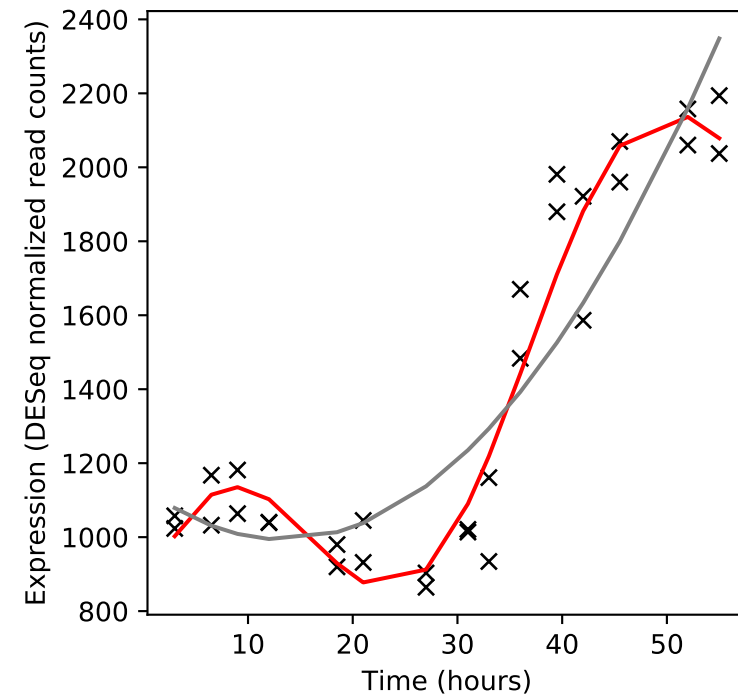

Rv3053c/nrdH

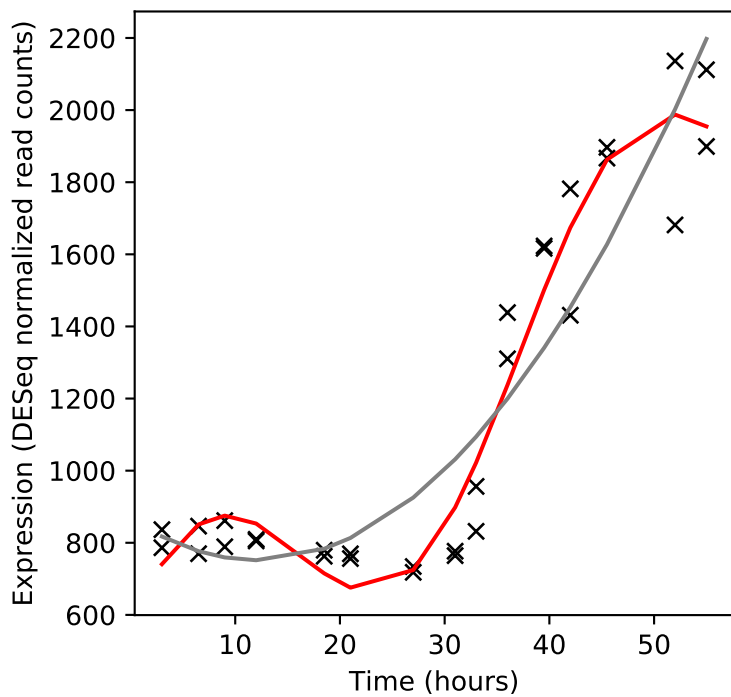

Rv3054c/-

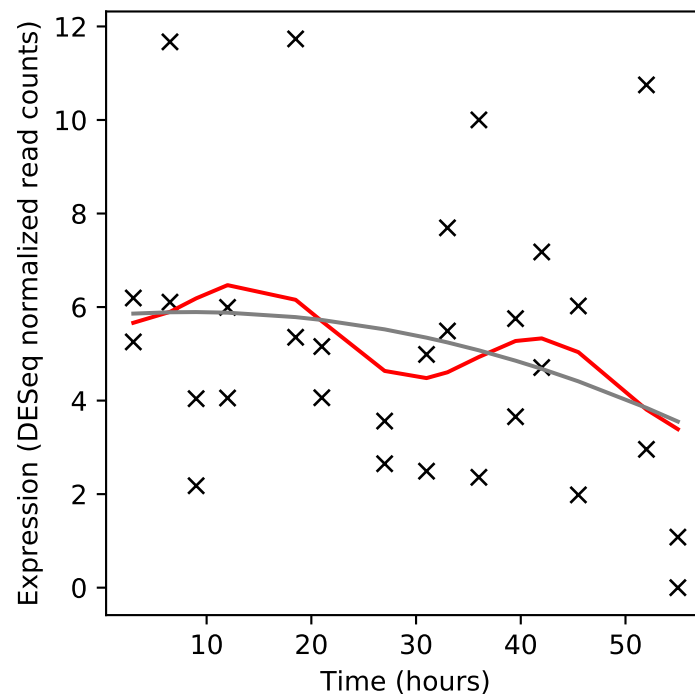

Rv3055/-

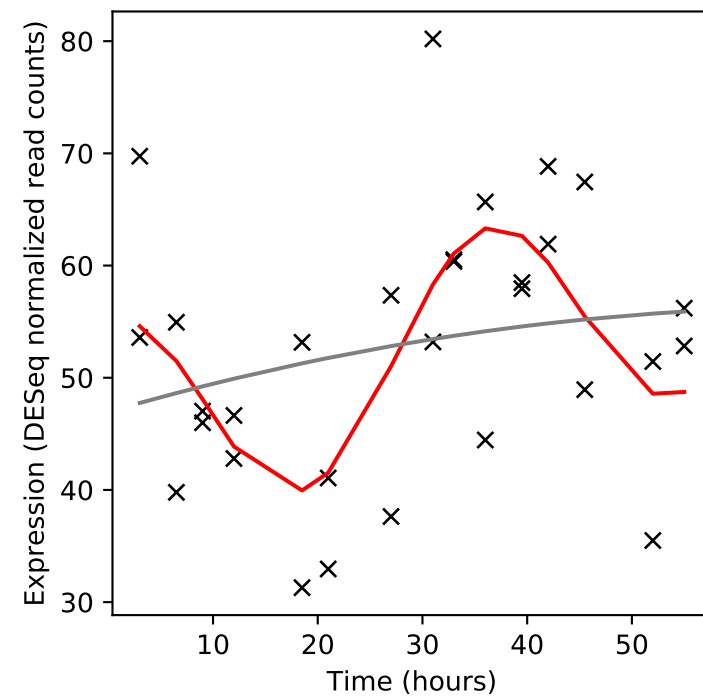

Rv3056/dinP

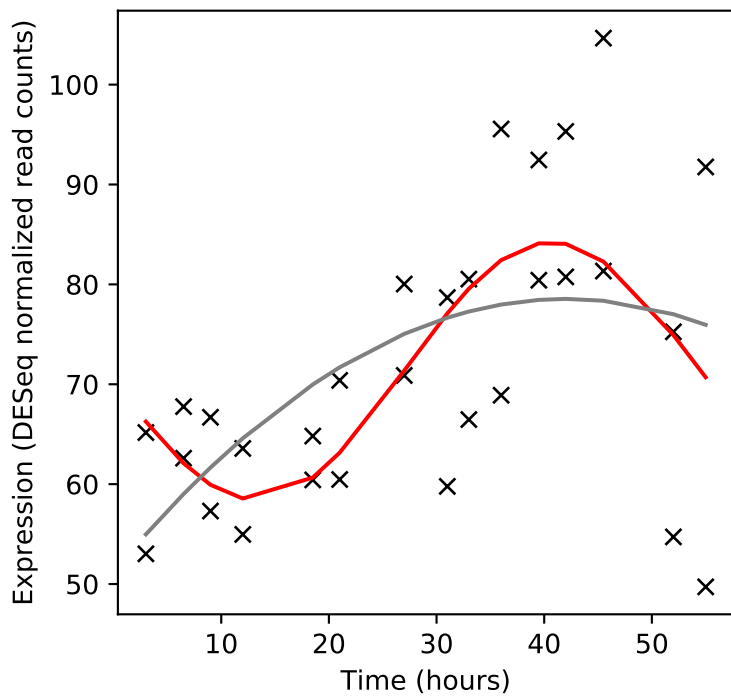

Rv3057c/-

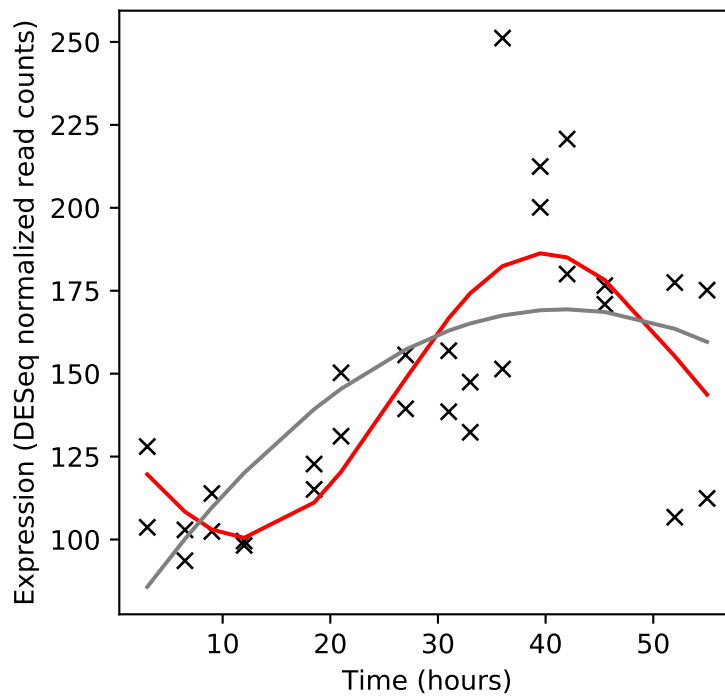

Rv3058c/-

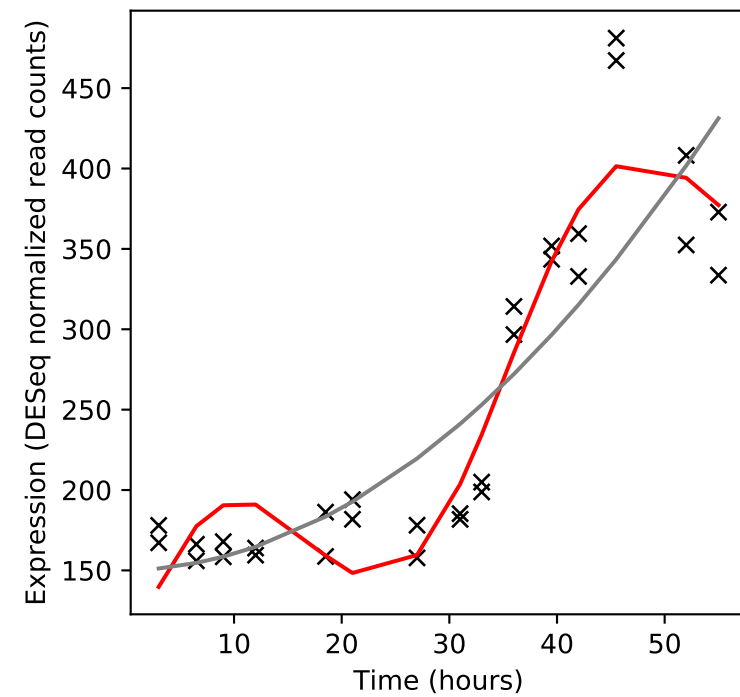

Rv3059/cyp136

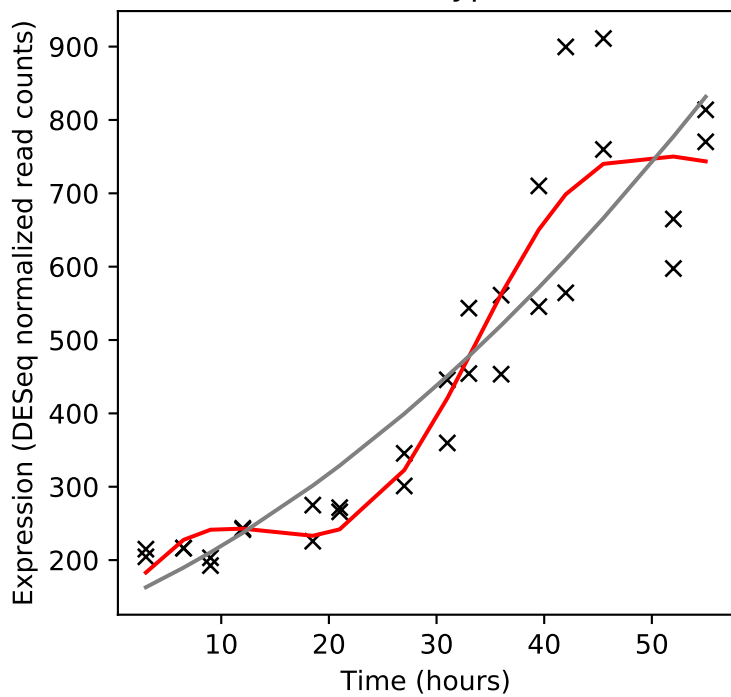

Rv3060c/-

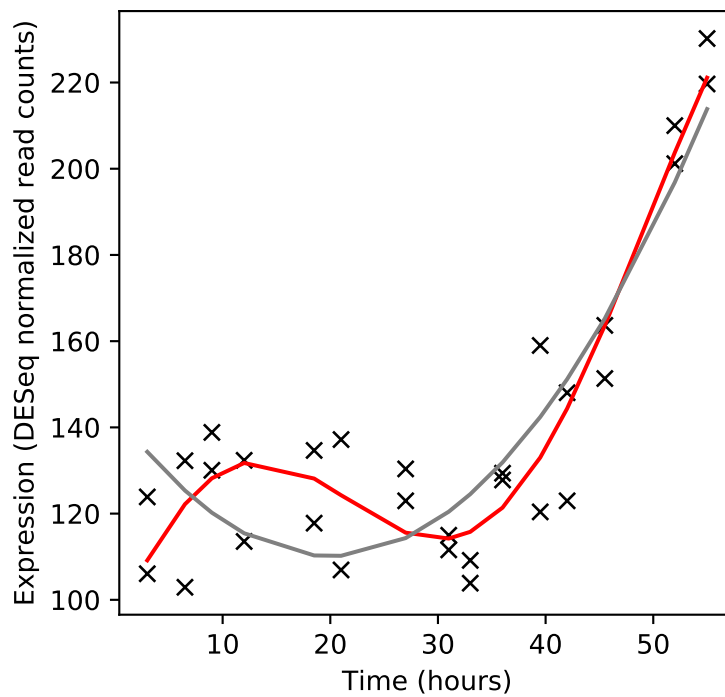

Rv3061c/fadE22

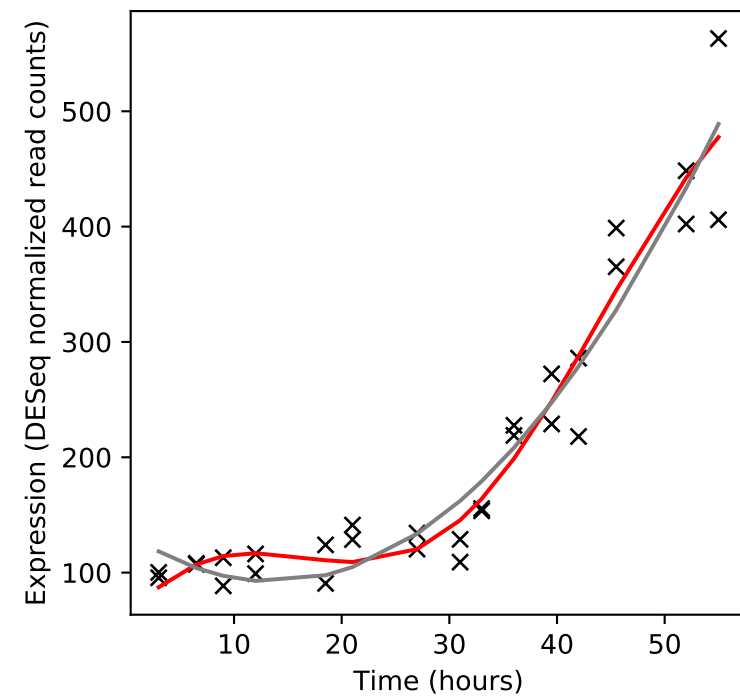

Rv3062/ligB

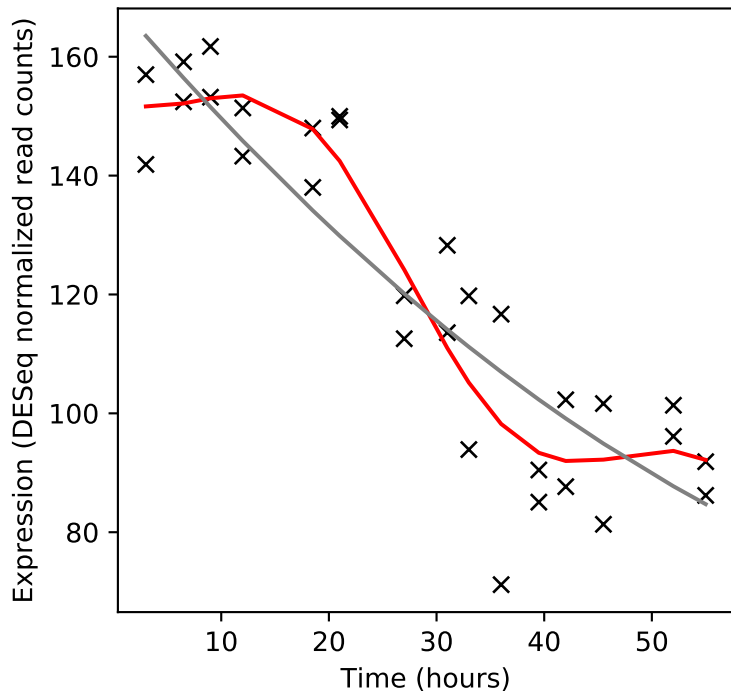

Rv3063/cstA

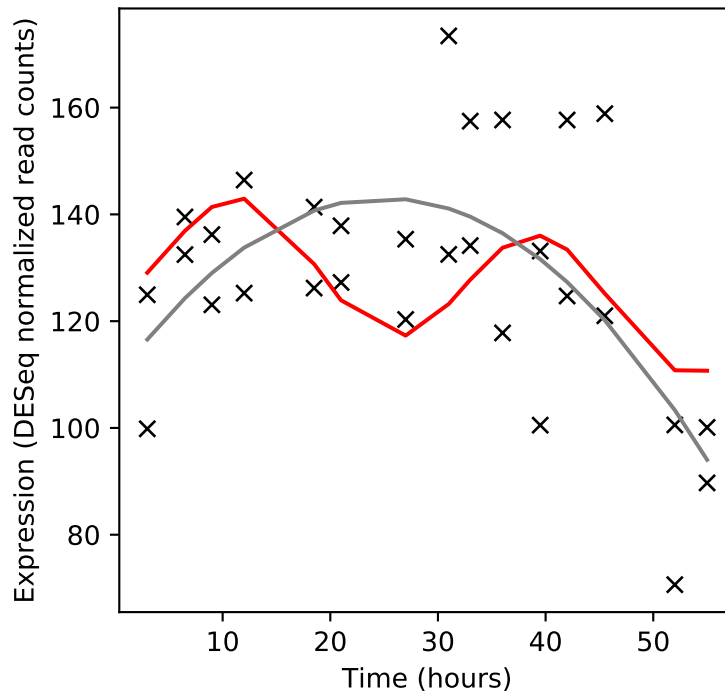

Rv3064c/-

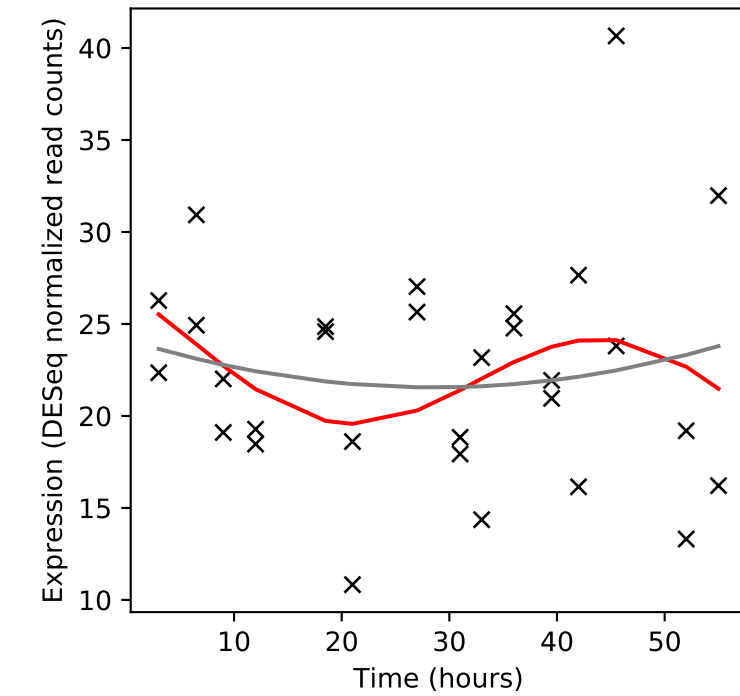

Rv3065/mmr

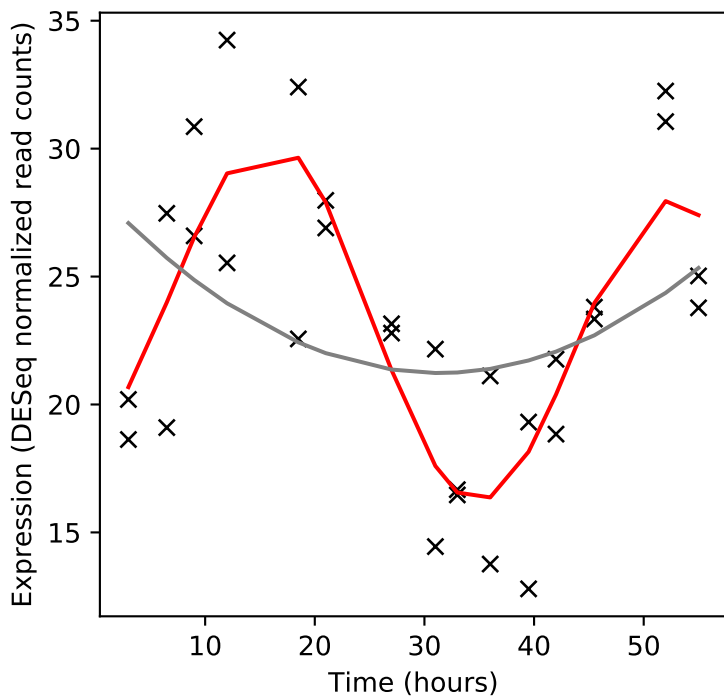

Rv3066/-

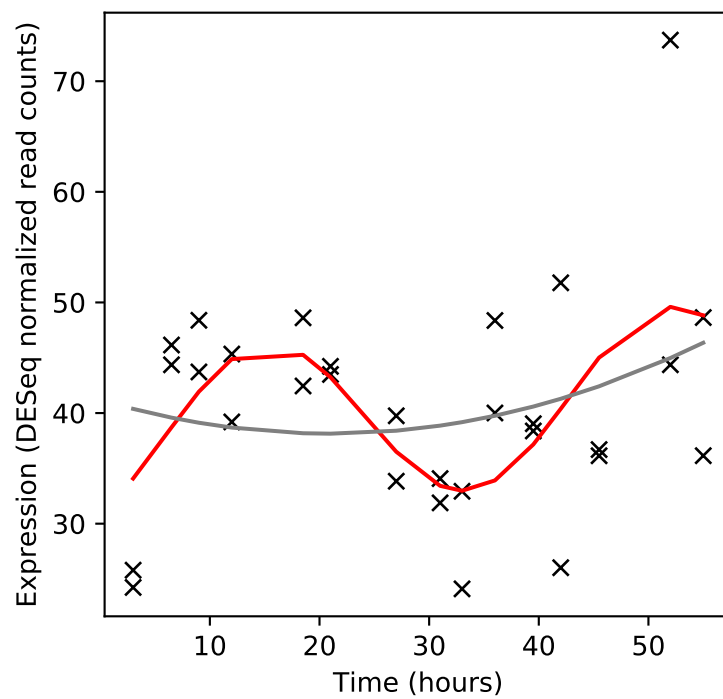

Rv3067/-

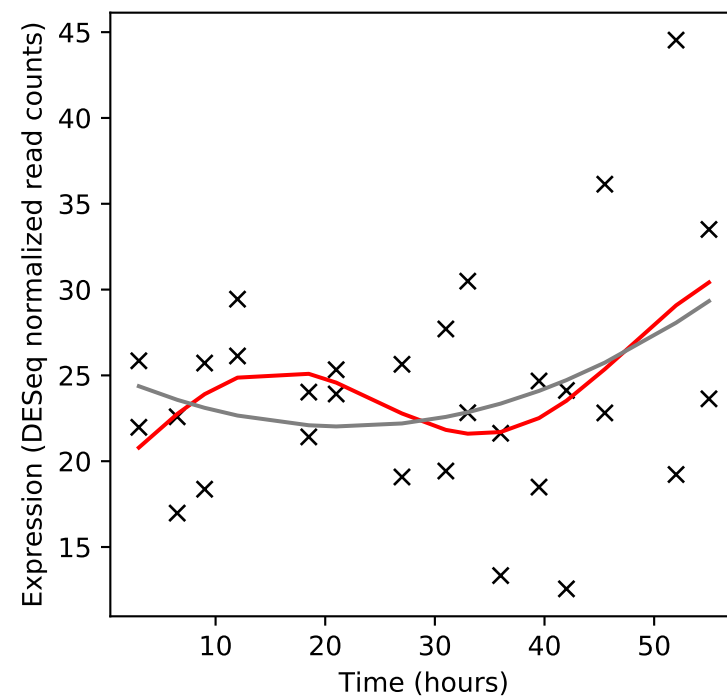

Rv3068c/pgmA

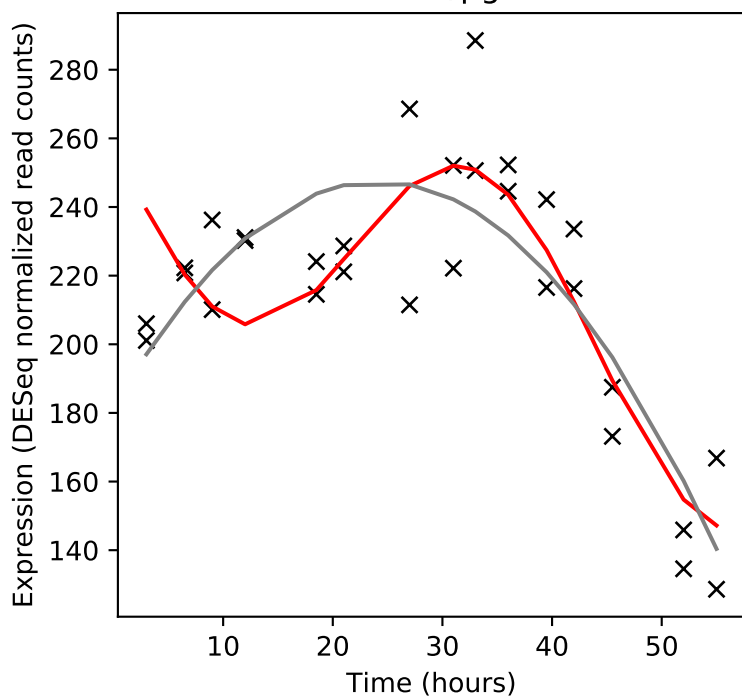

Rv3069/-

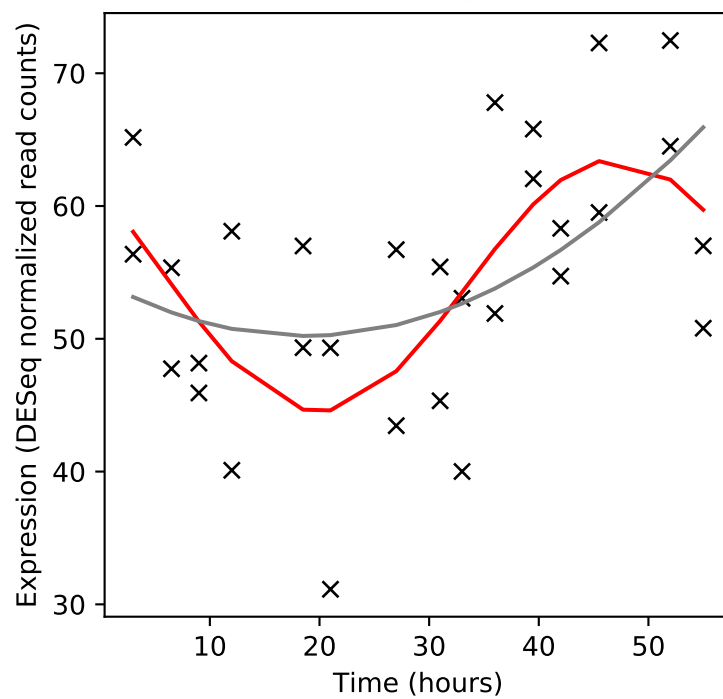

Rv3070/-

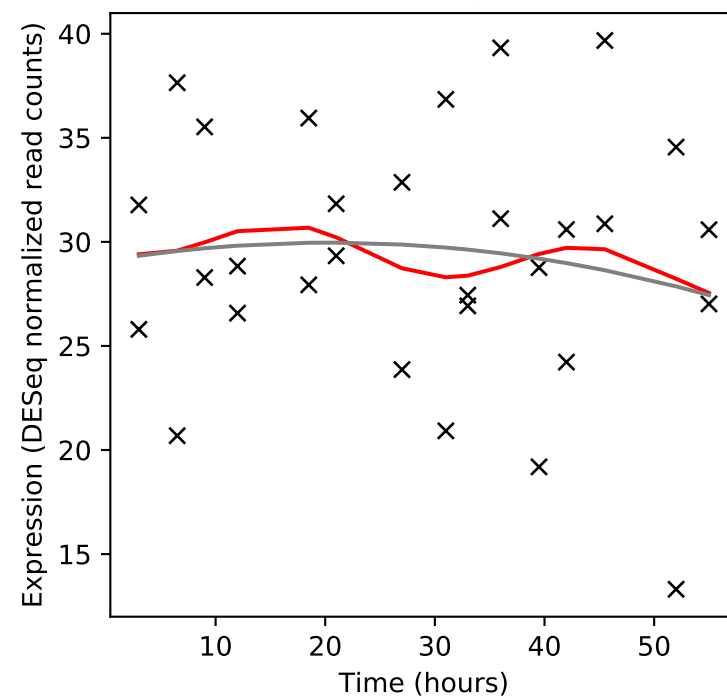

Rv3071/-

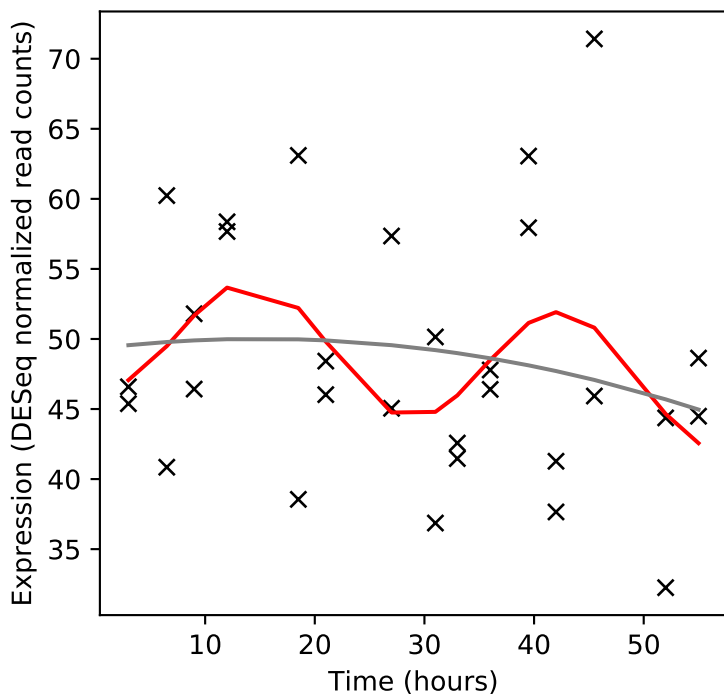

Rv3072c/-

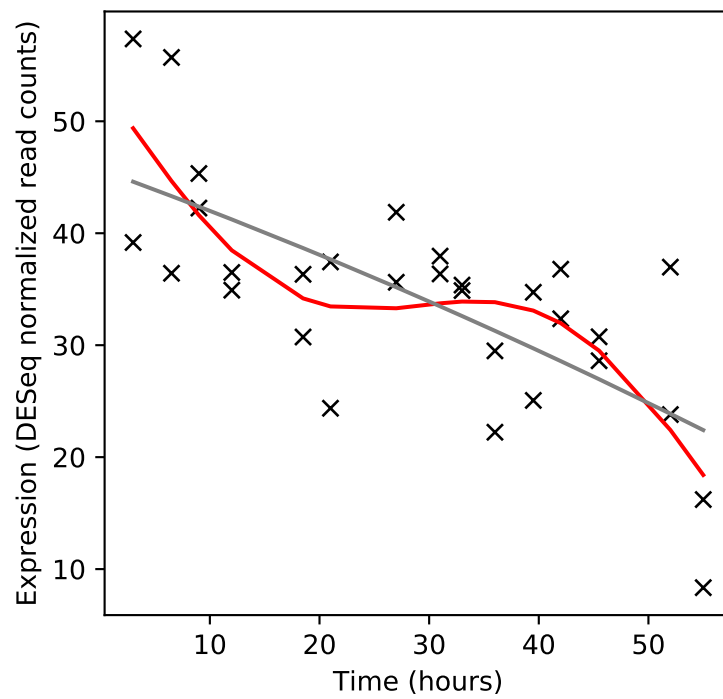

Rv3073c/-

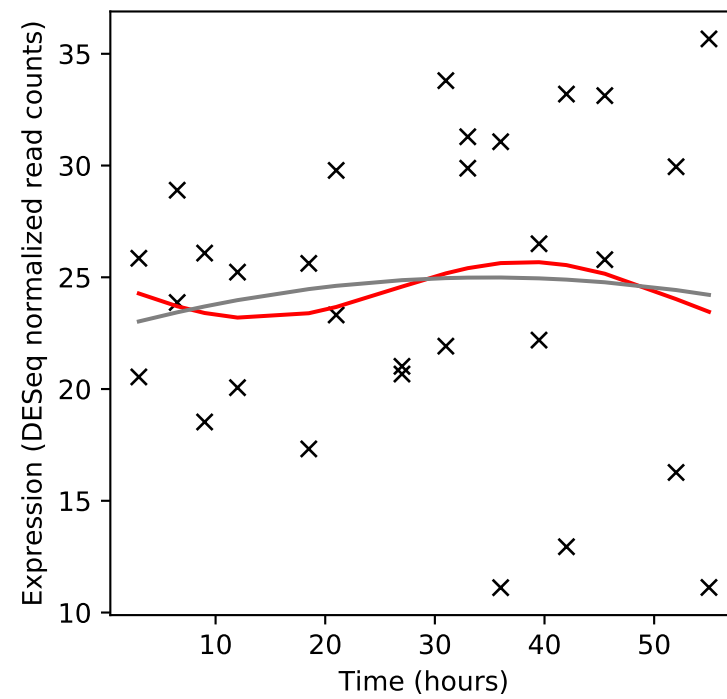

Rv3074/-

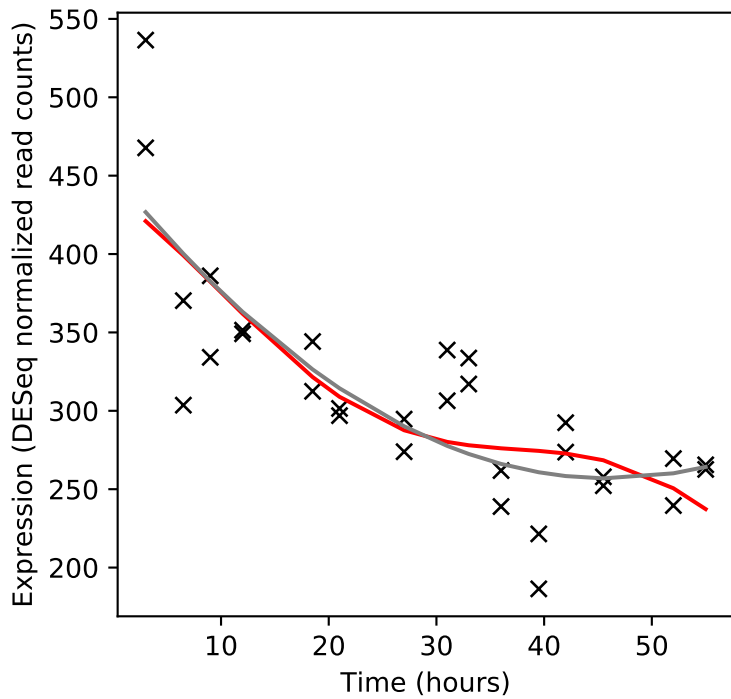

Rv3075c/-

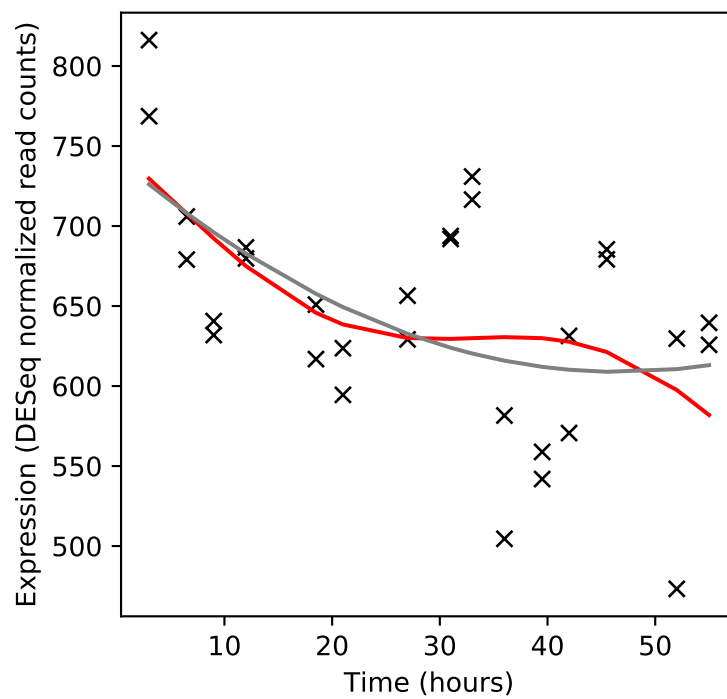

Rv3076/-

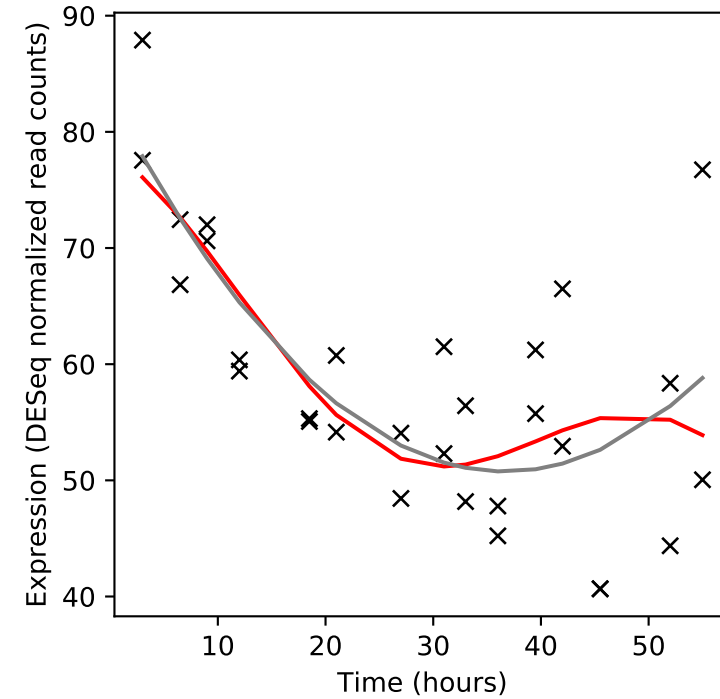

Rv3077/-

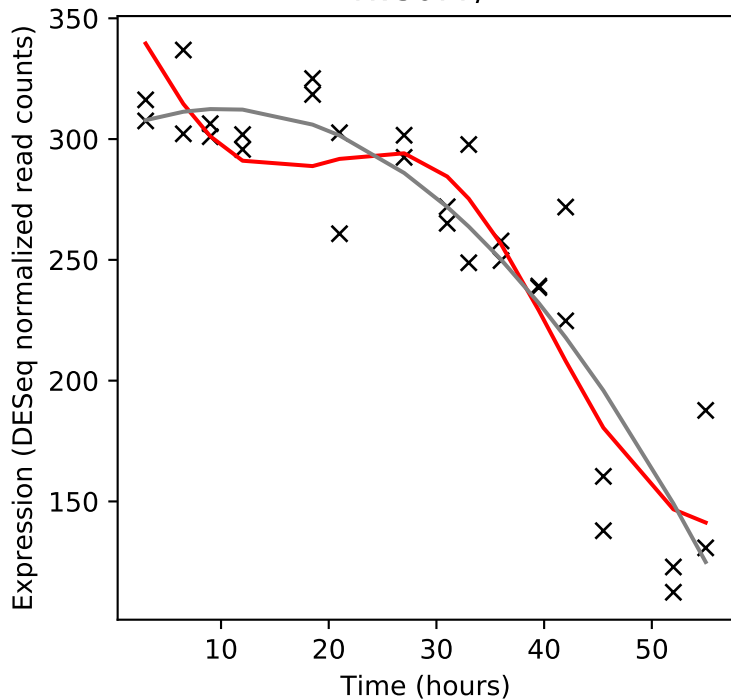

Rv3078/hab

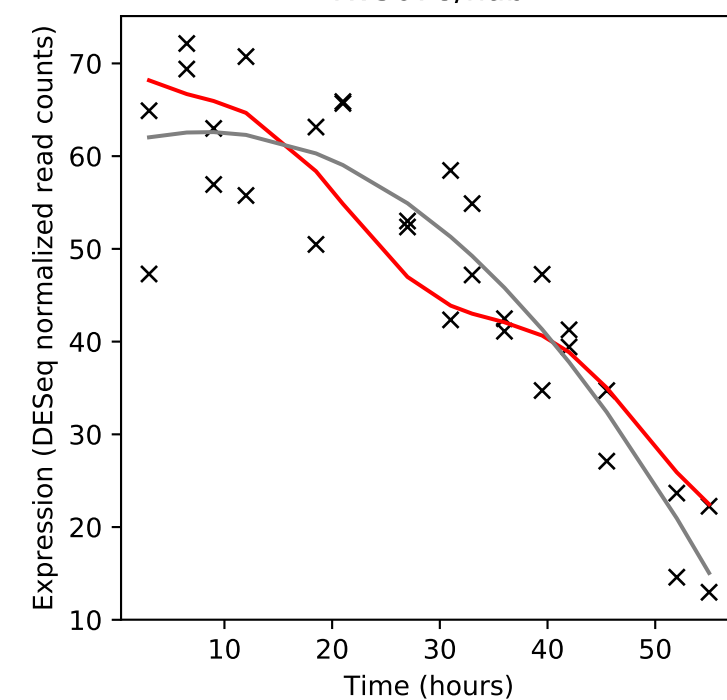

Rv3079c/-

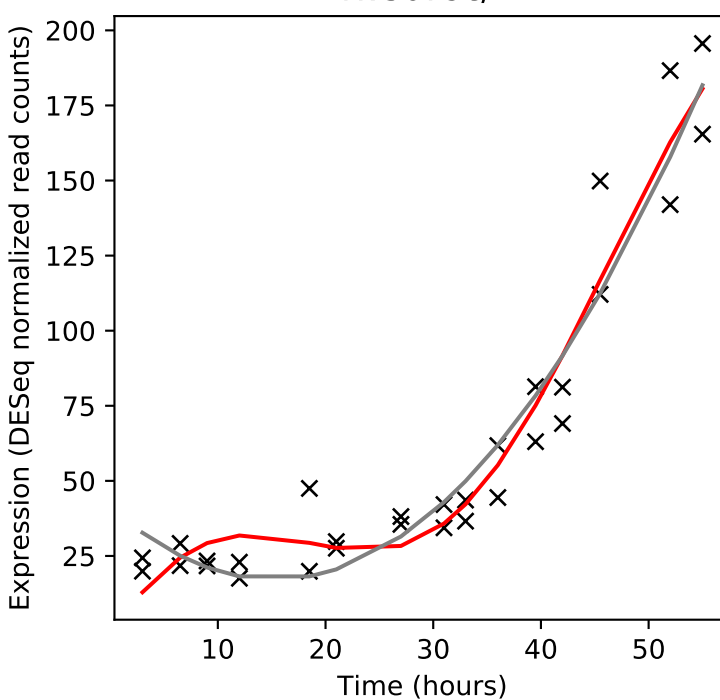

Rv3080c/pknK

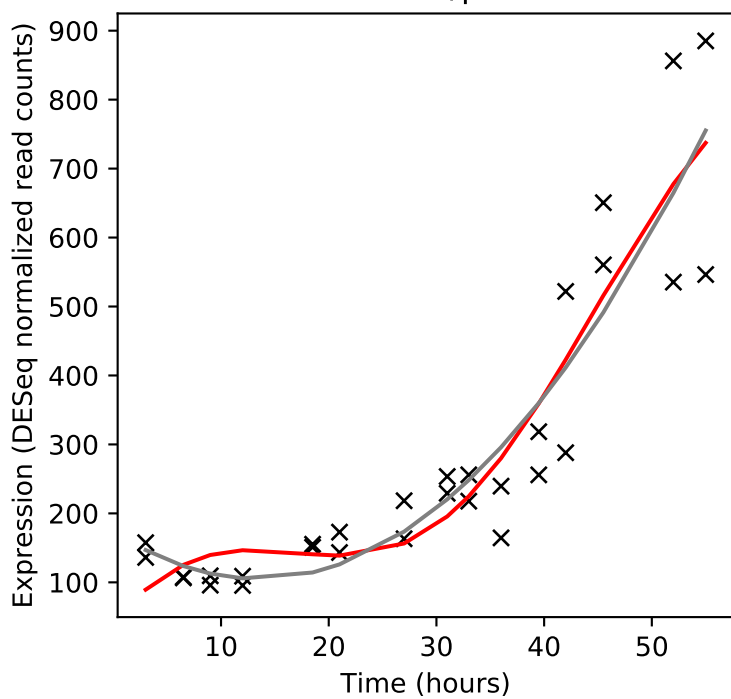

Rv3081/-

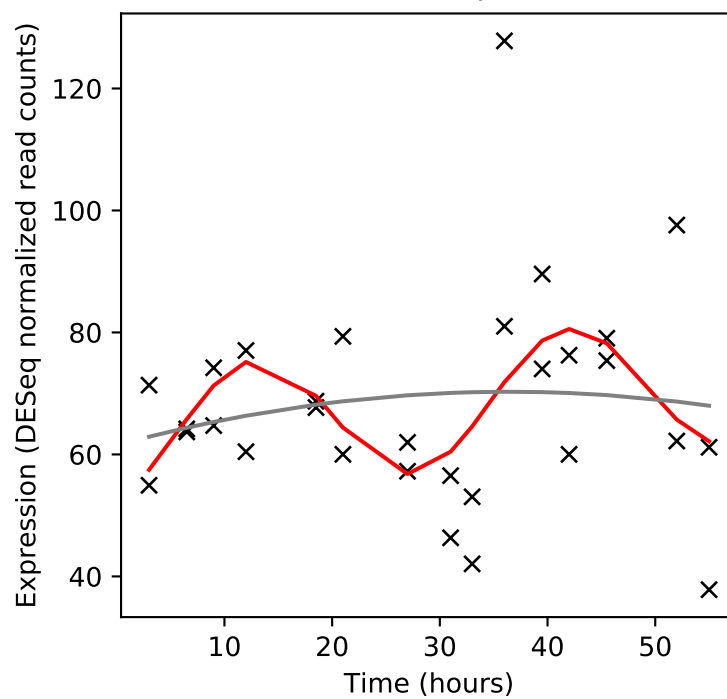

Rv3082c/virS

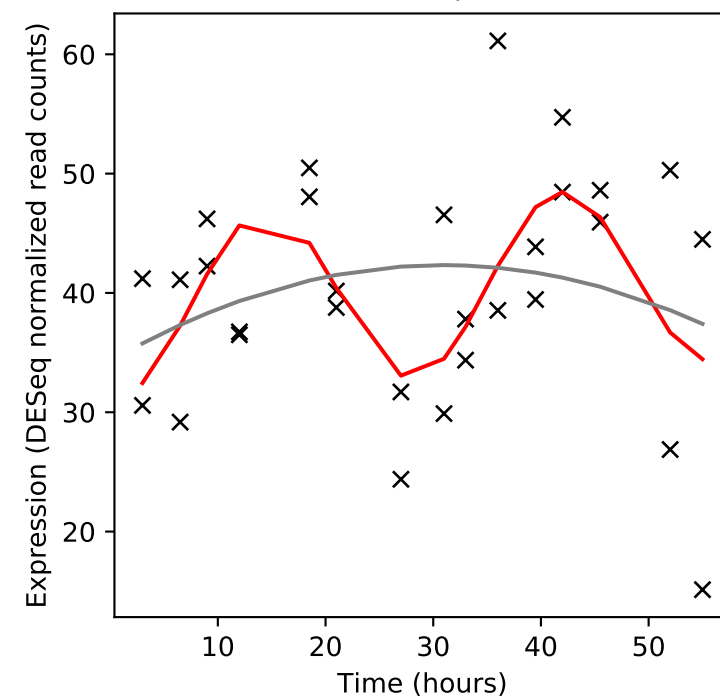

Rv3083/-

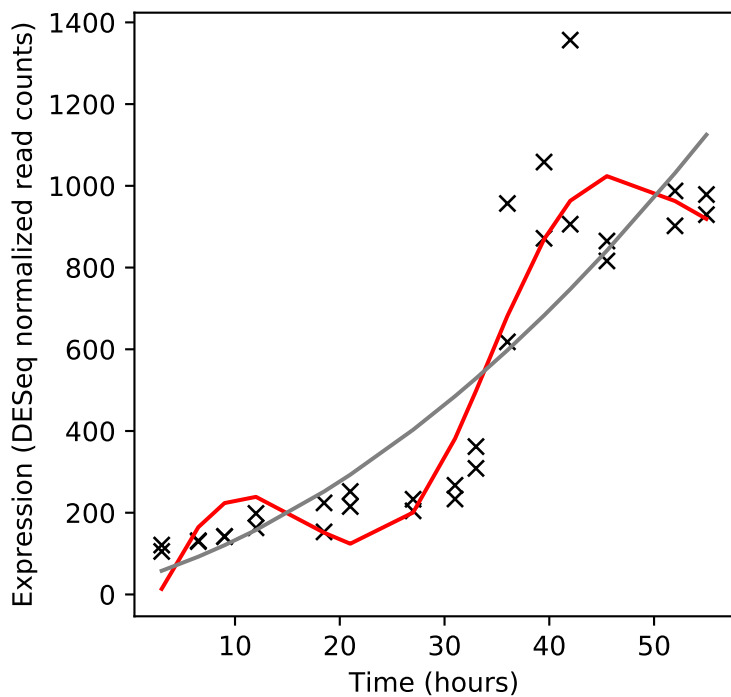

Rv3084/lipR

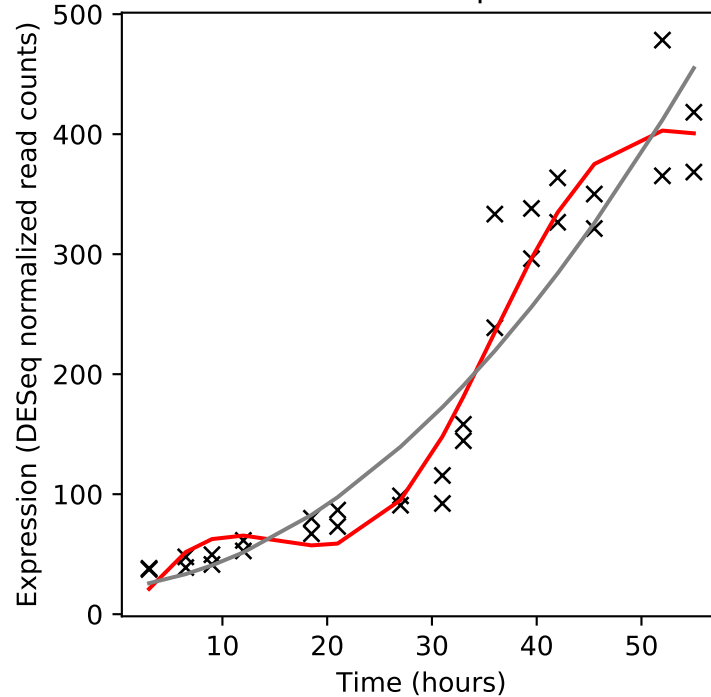

Rv3085/-

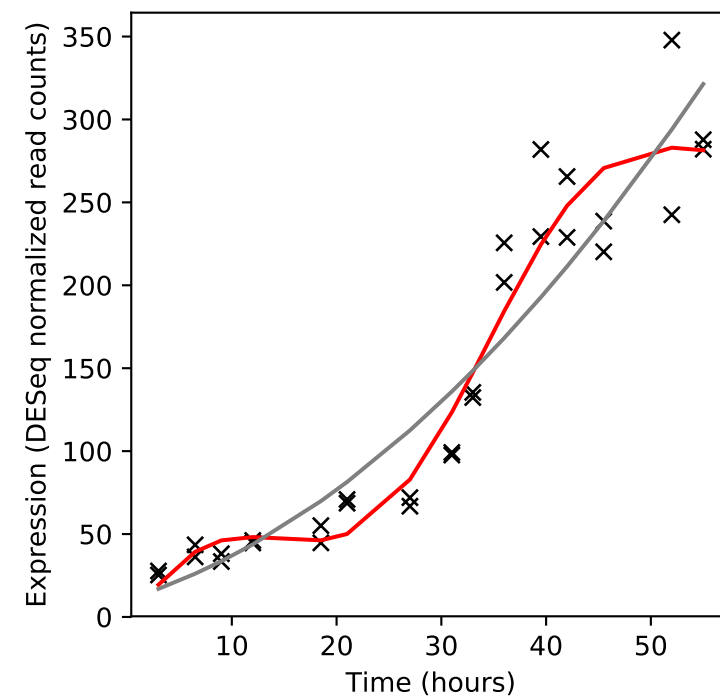

Rv3086/adhD

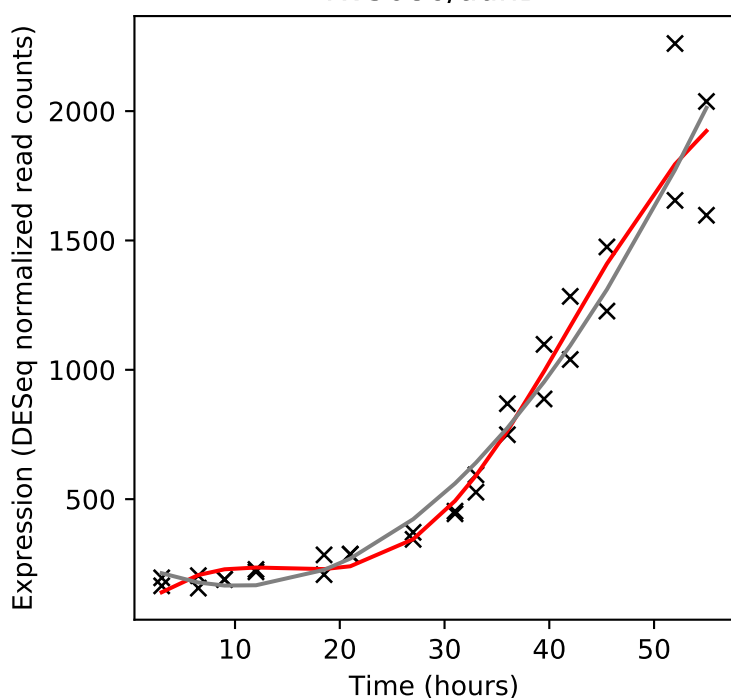

Rv3087/-

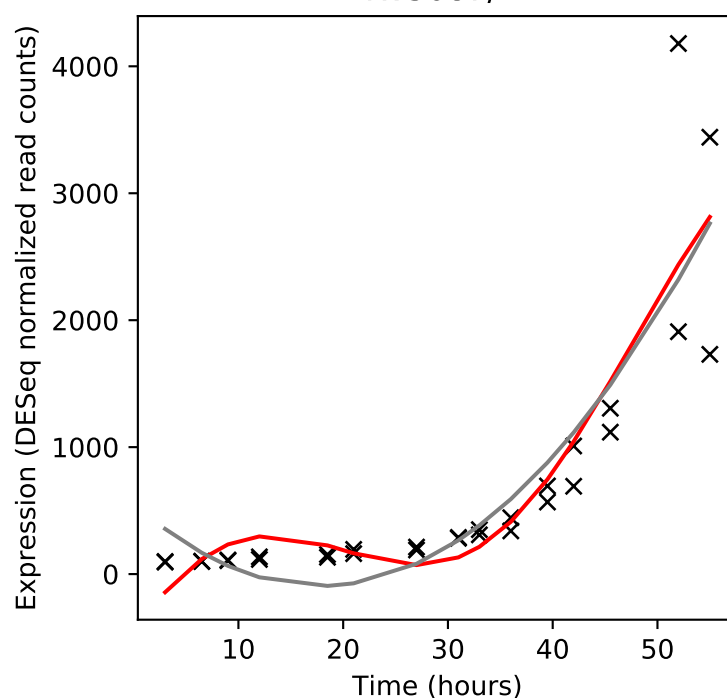

Rv3088/tgs4

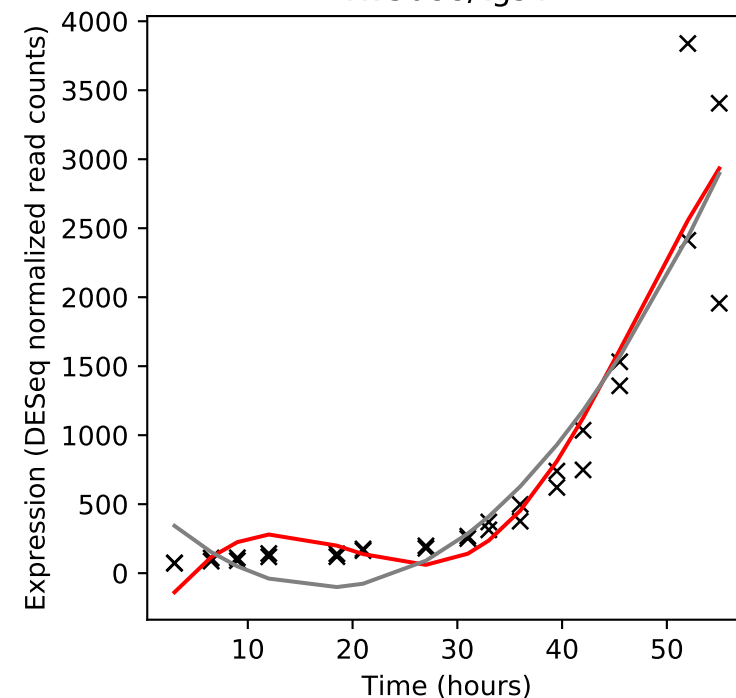

Rv3089/fadD13

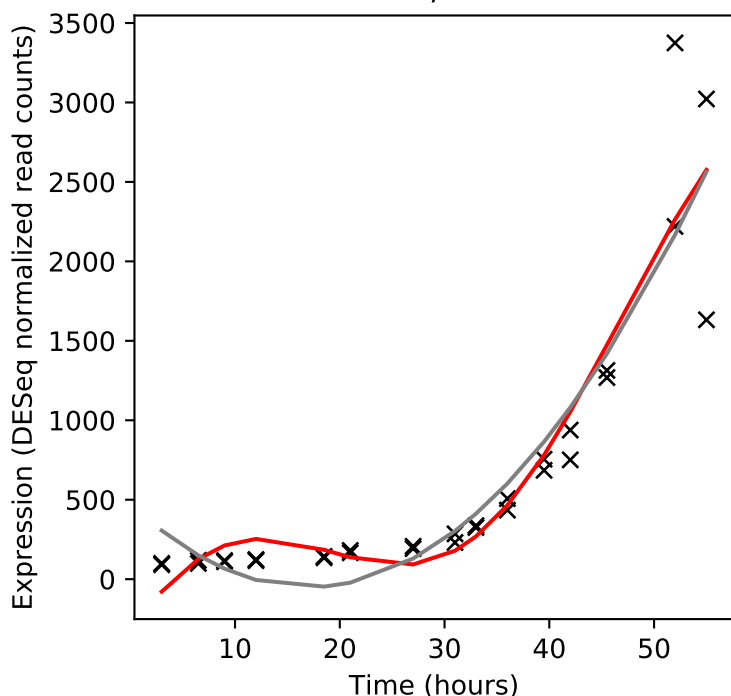

Rv3090/-

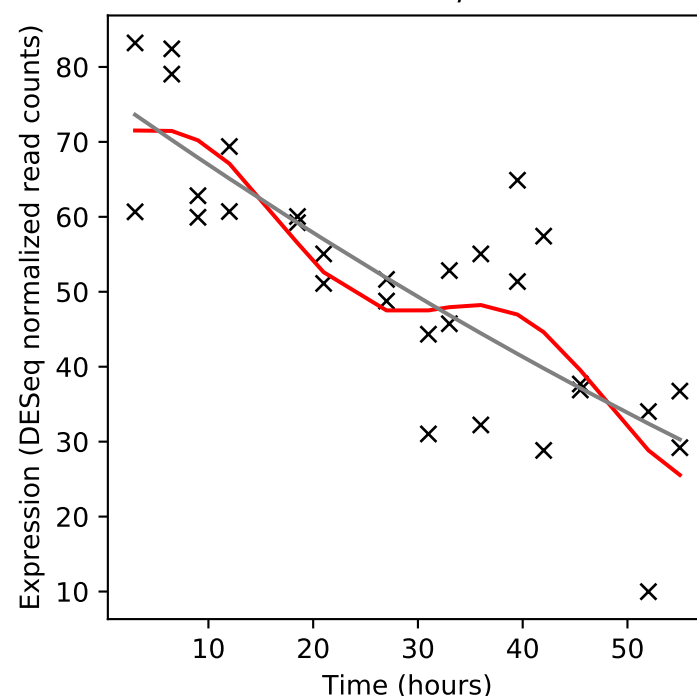

Rv3091/-

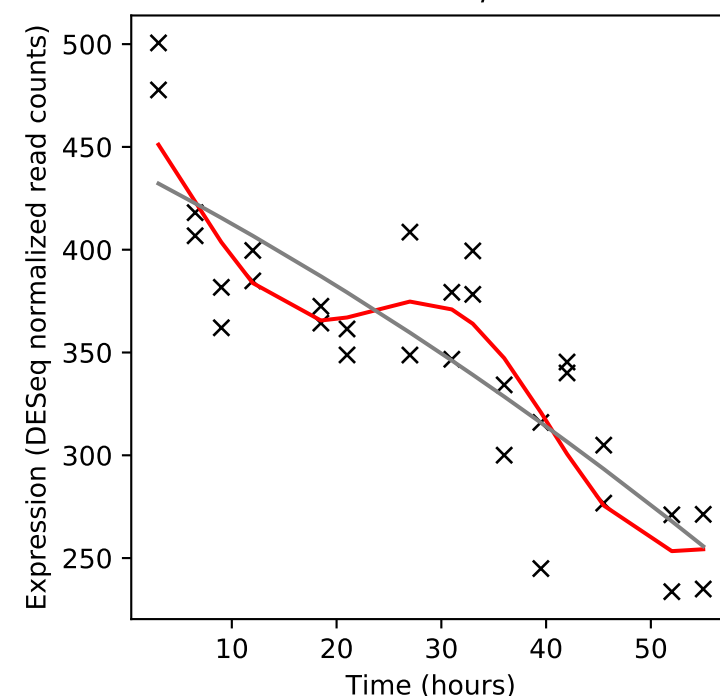



Rv3092c/-

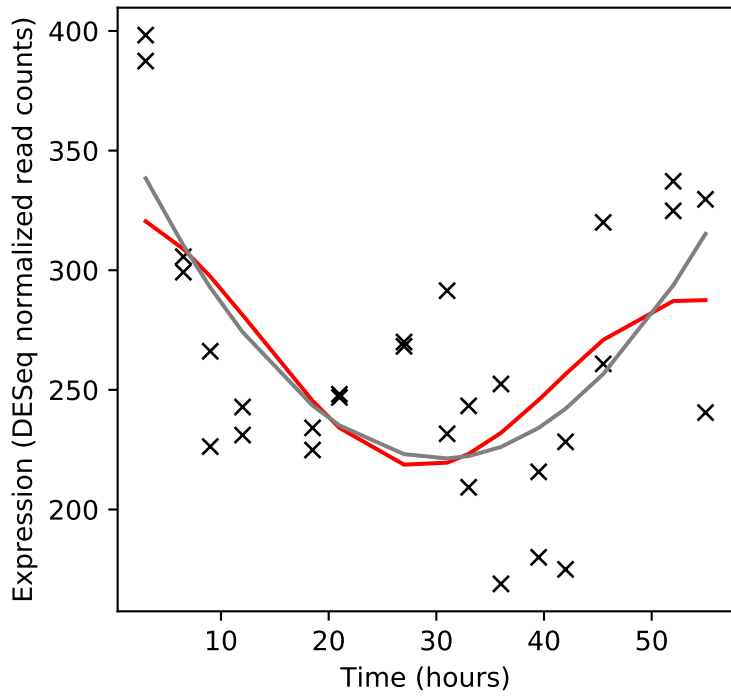

Rv3093c/-

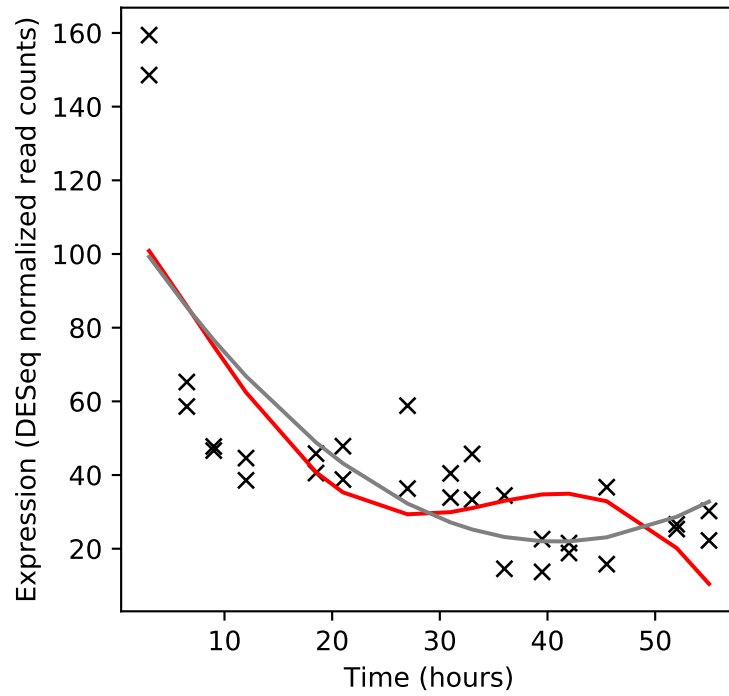

Rv3094c/-

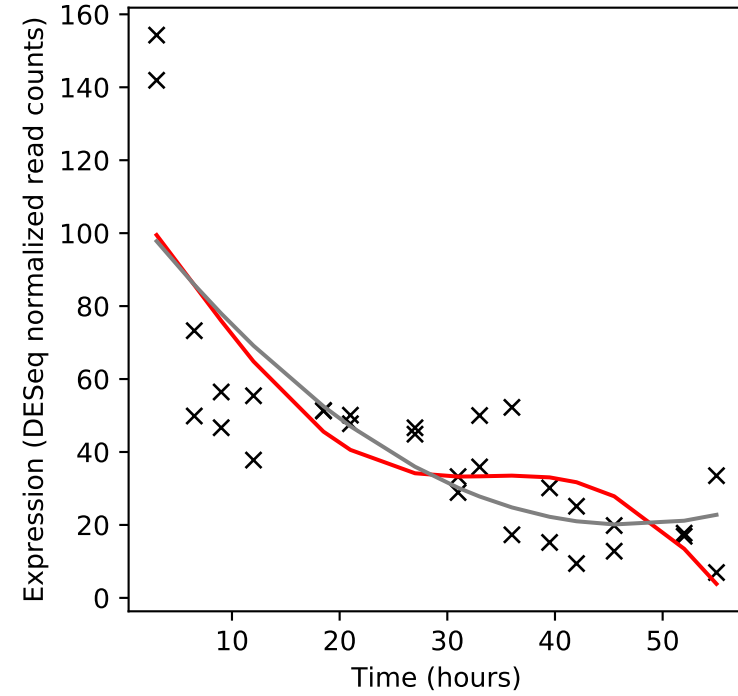

Rv3095/-

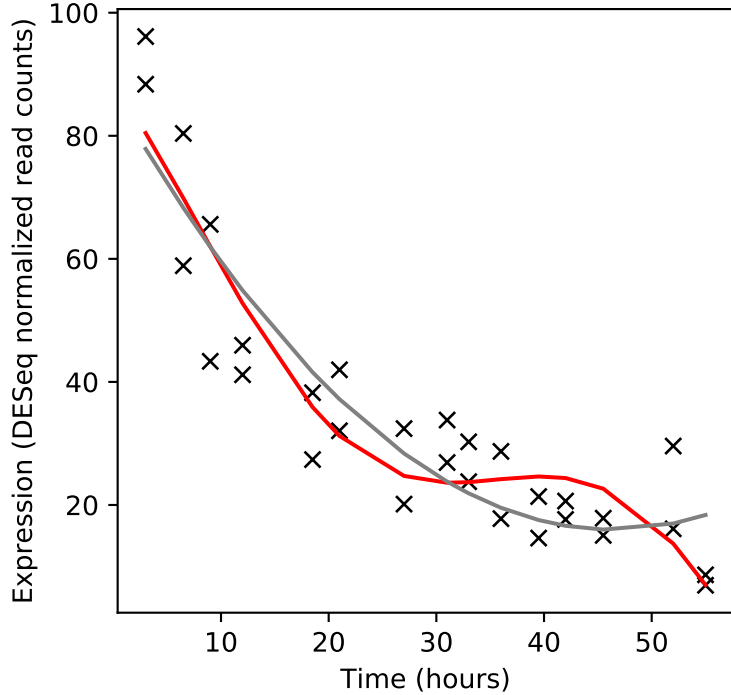

Rv3096/-

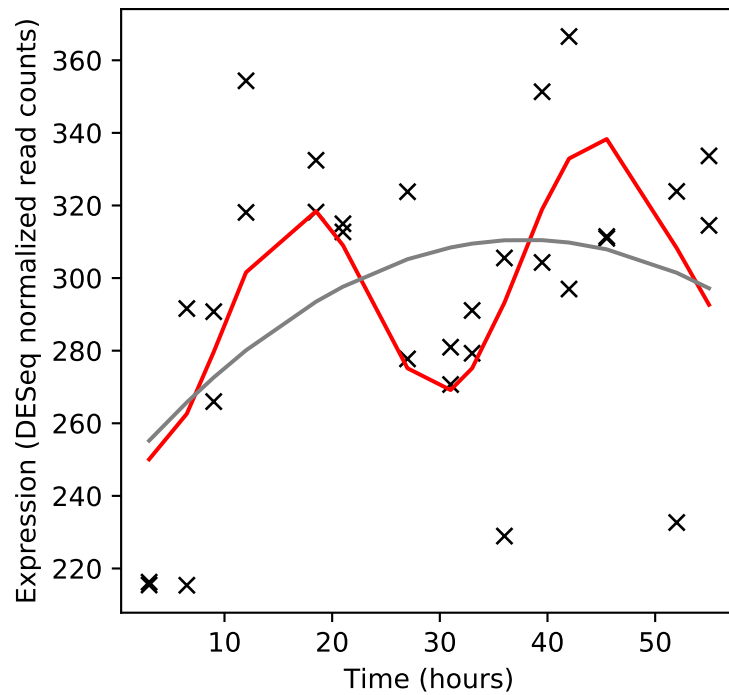

Rv3097c/lipY

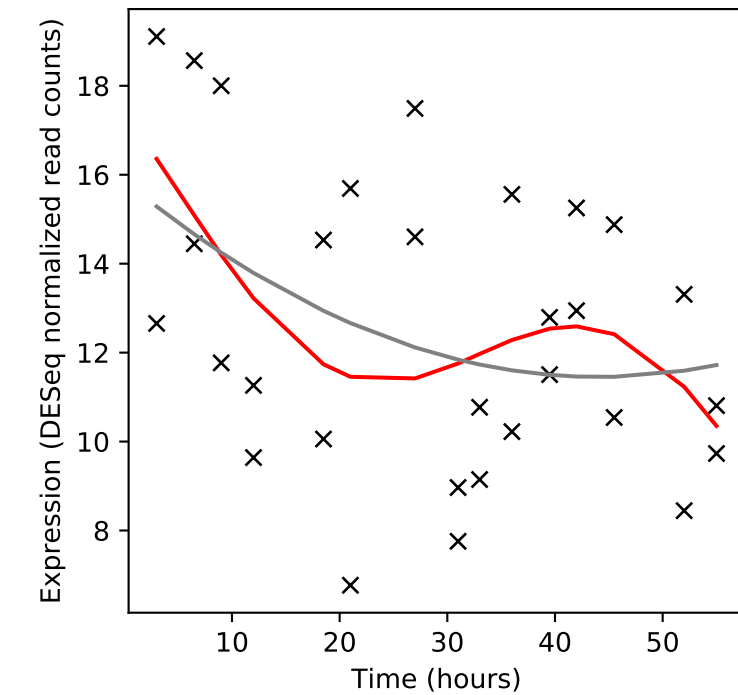

Rv3098c/-

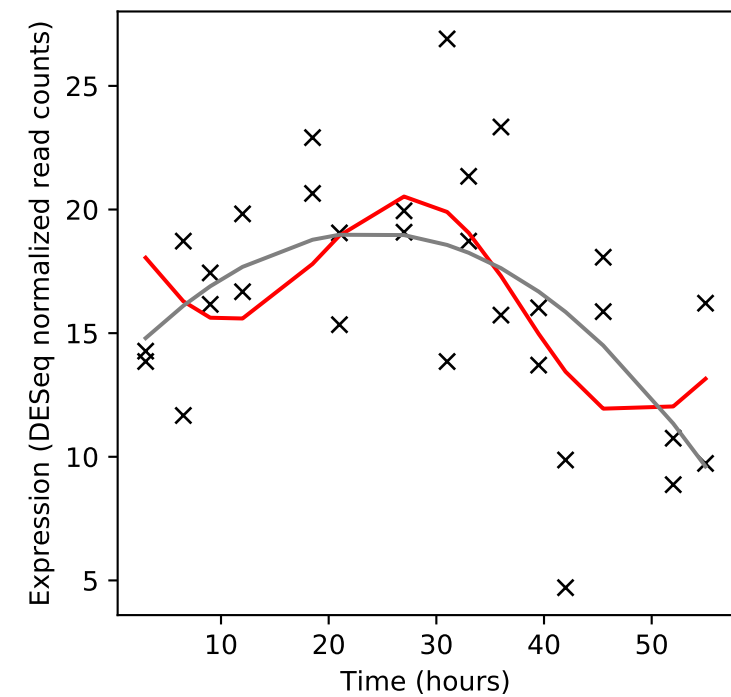

Rv3098A/-

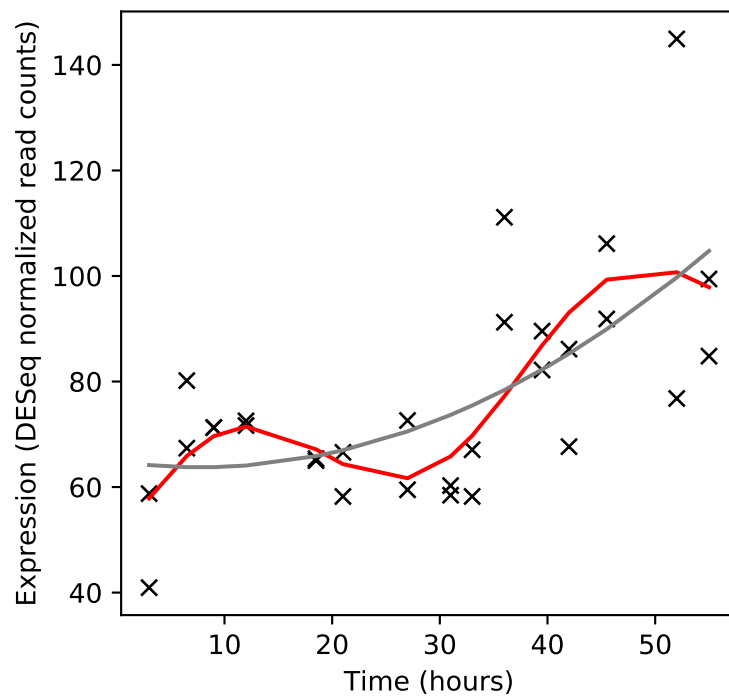

Rv3099c/-

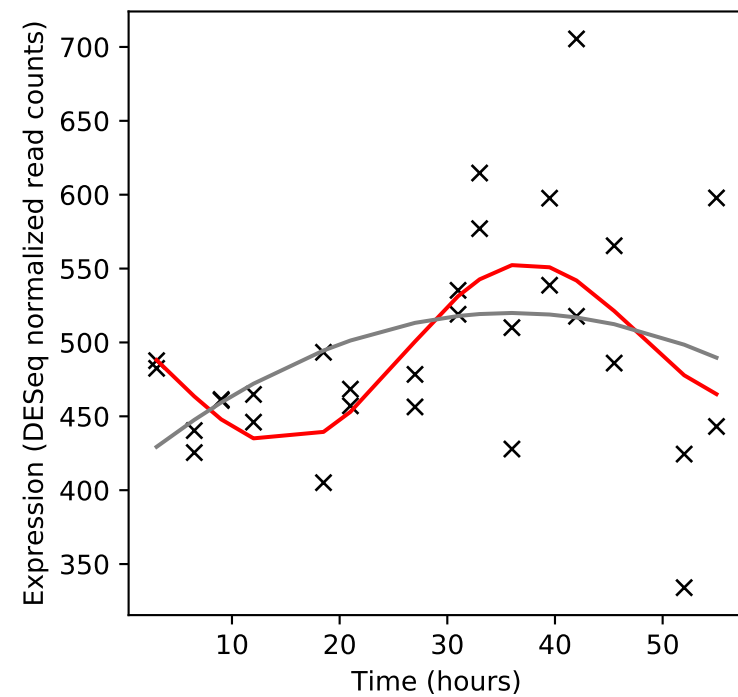

Rv3100c/smpB

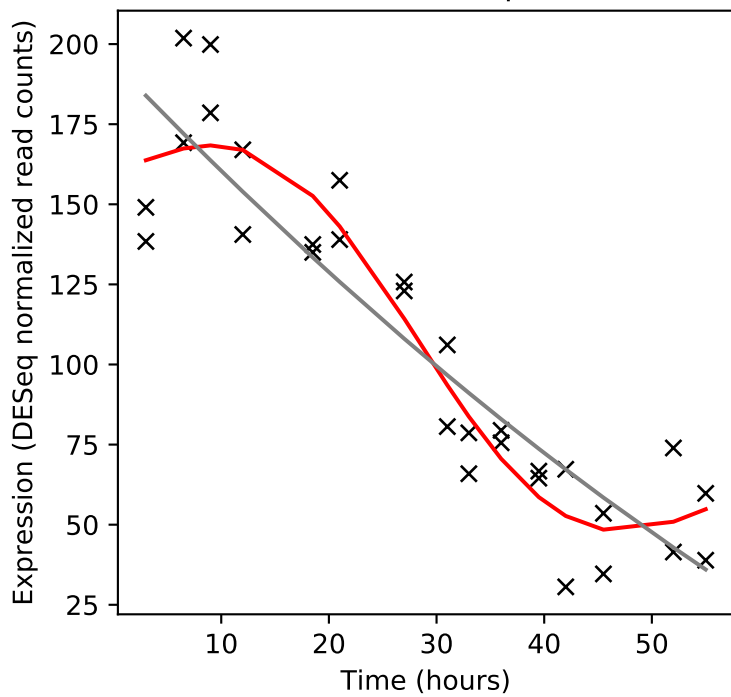

Rv3101c/ftsX

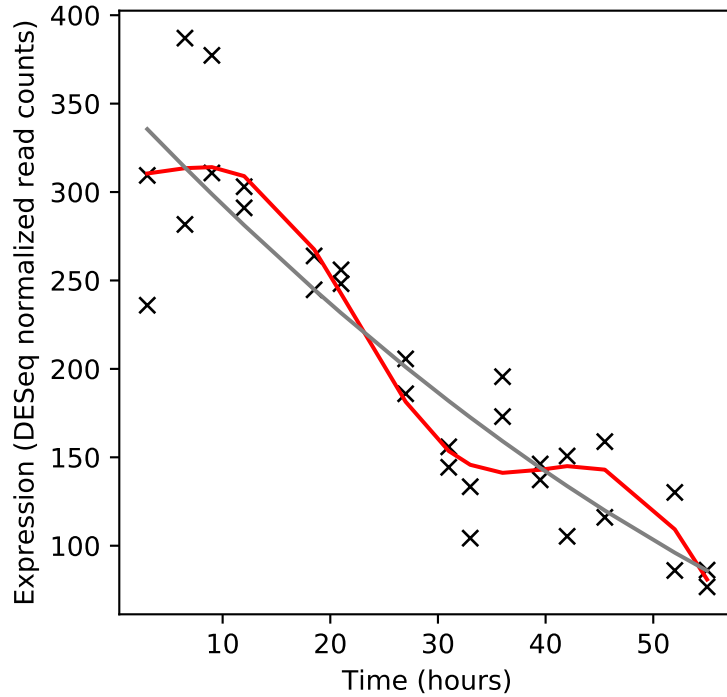

Rv3102c/ftsE

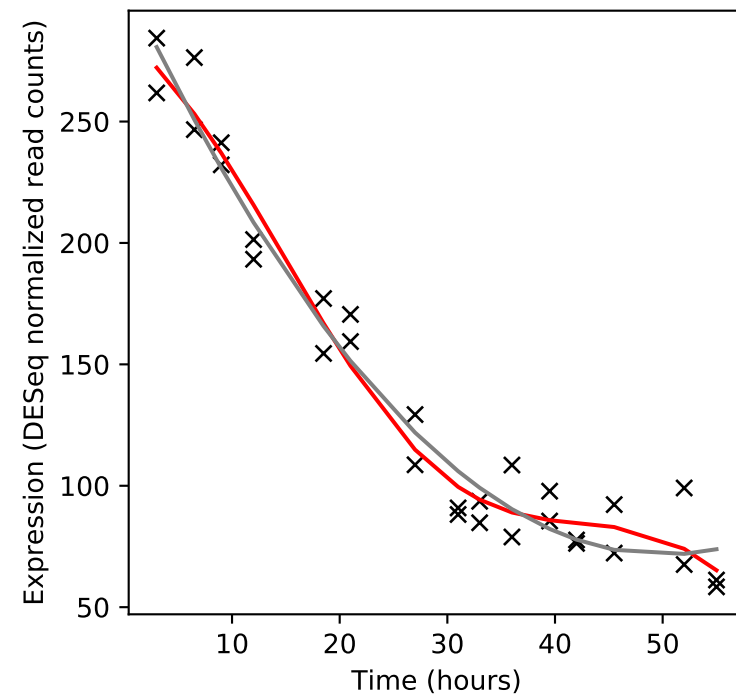

Rv3103c/-

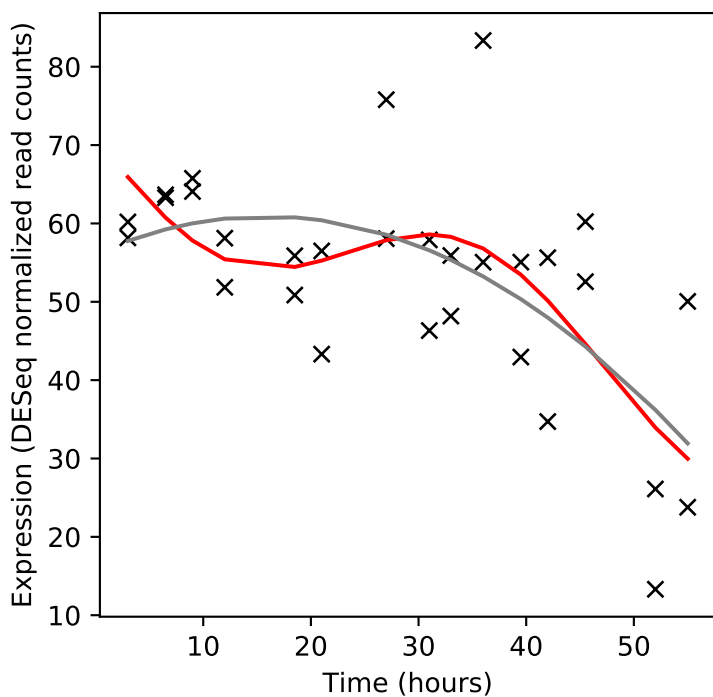

Rv3104c/-

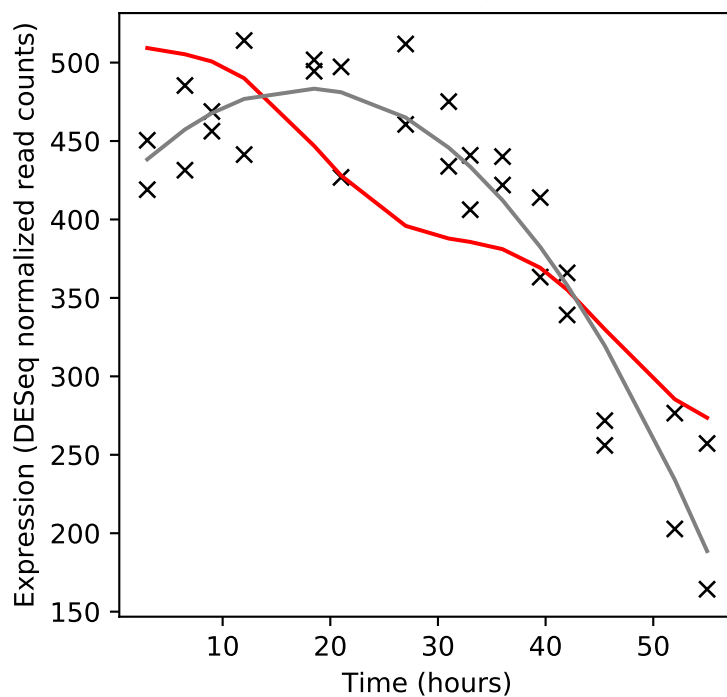

Rv3105c/prfB

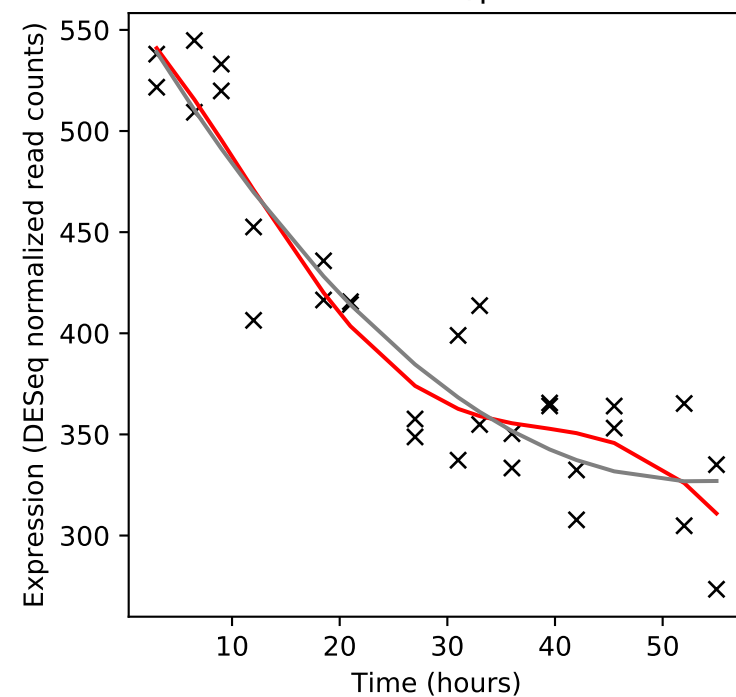

Rv3106c/fprA

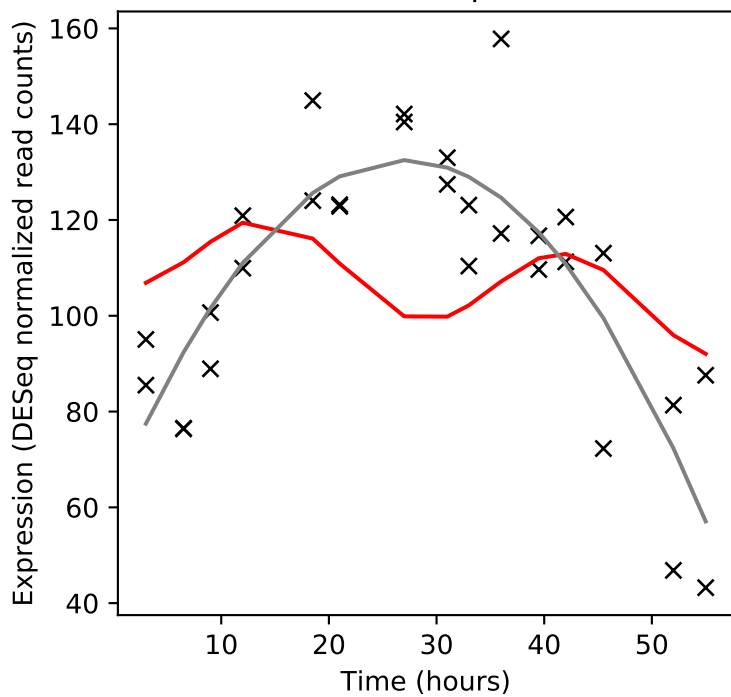

Rv3107c/agpS

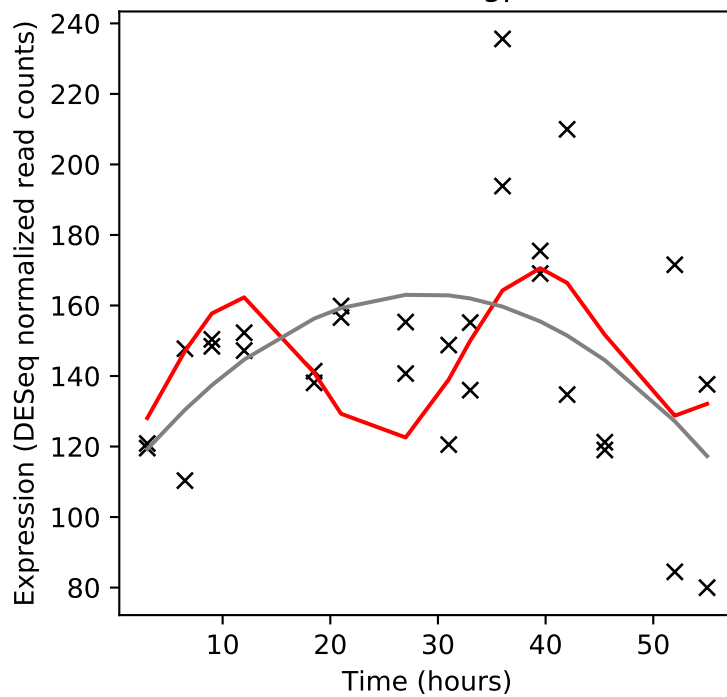

Rv3108c/-

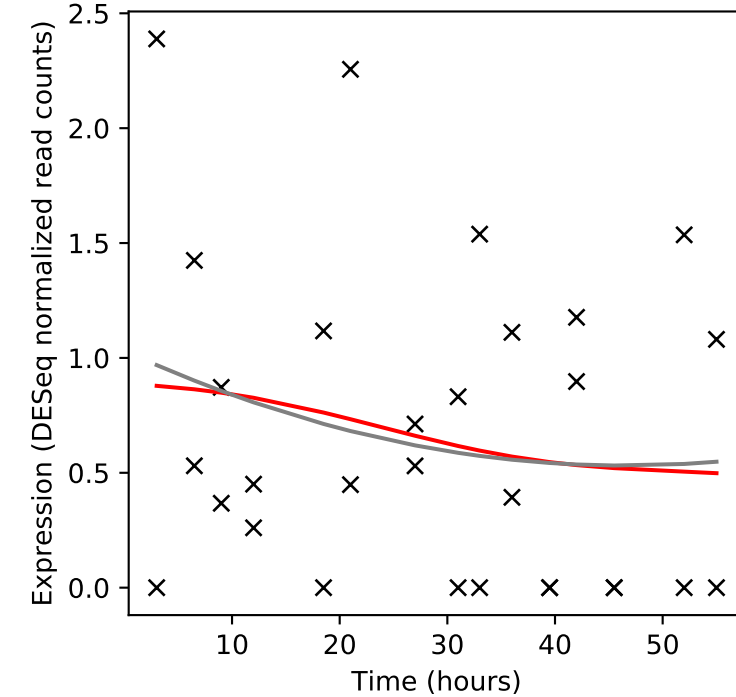

Rv3109/moaA1

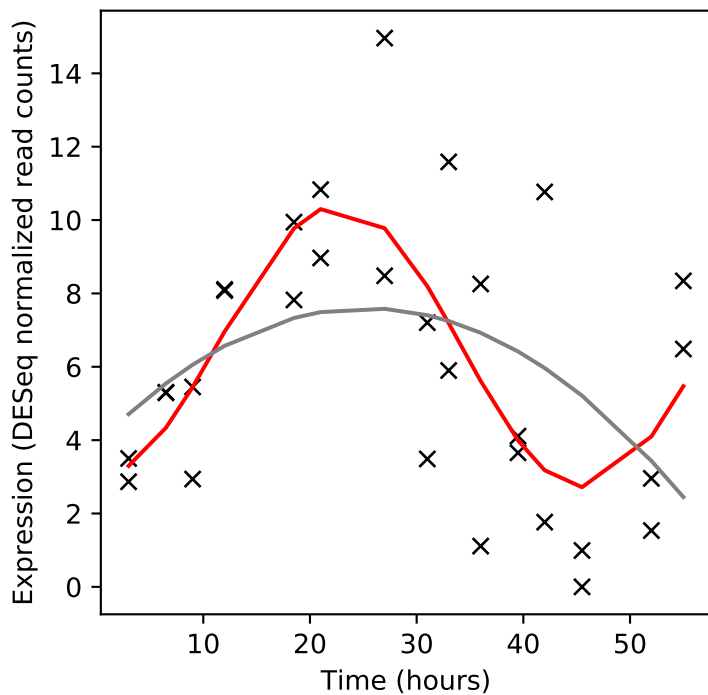

Rv3110/moaB1

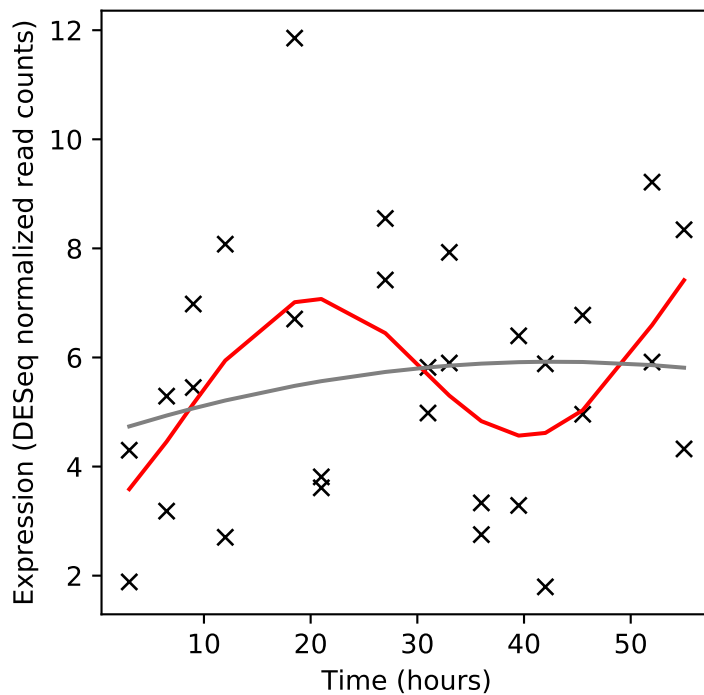

Rv3111/moaC1

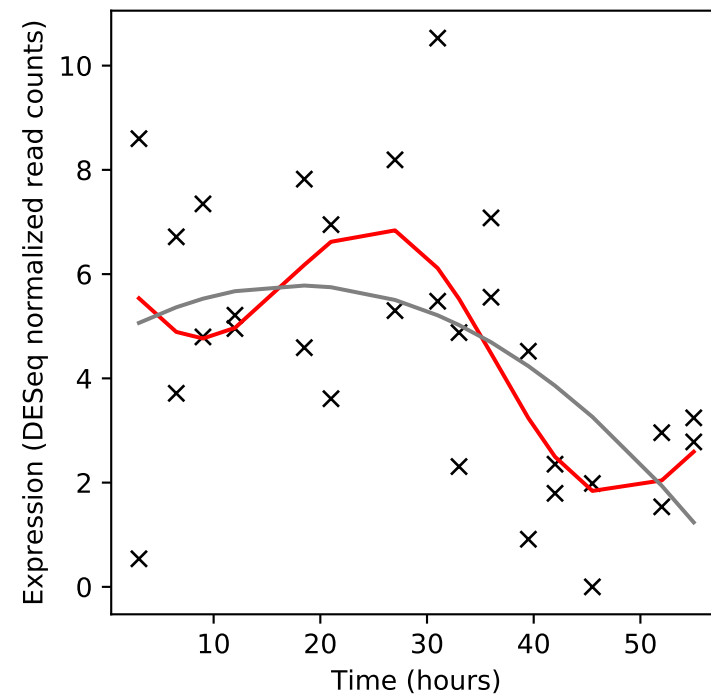

Rv3112/moaD1

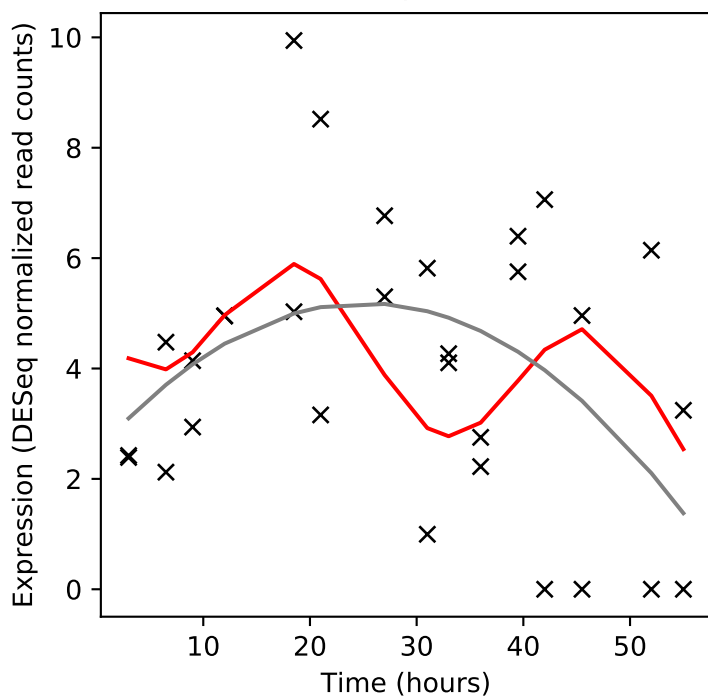

Rv3113/-

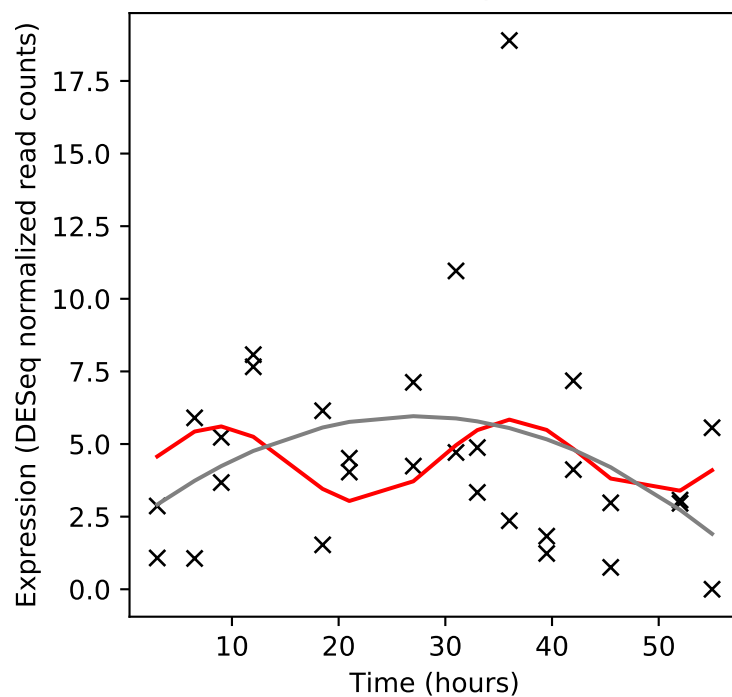

Rv3114/-

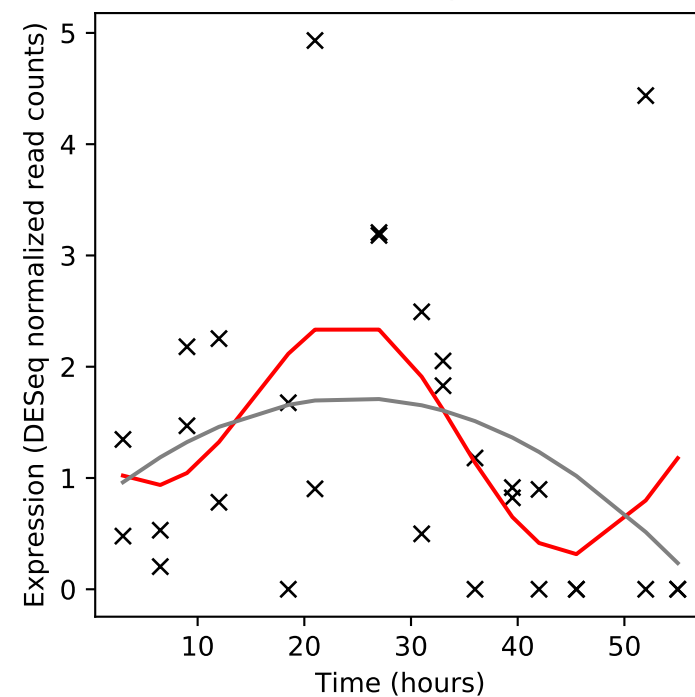

Rv3115/-

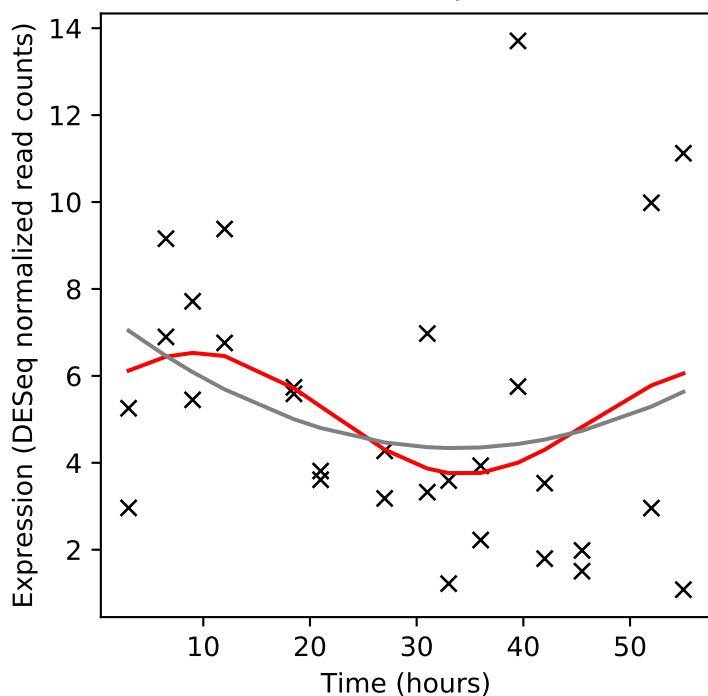

Rv3116/moeB2

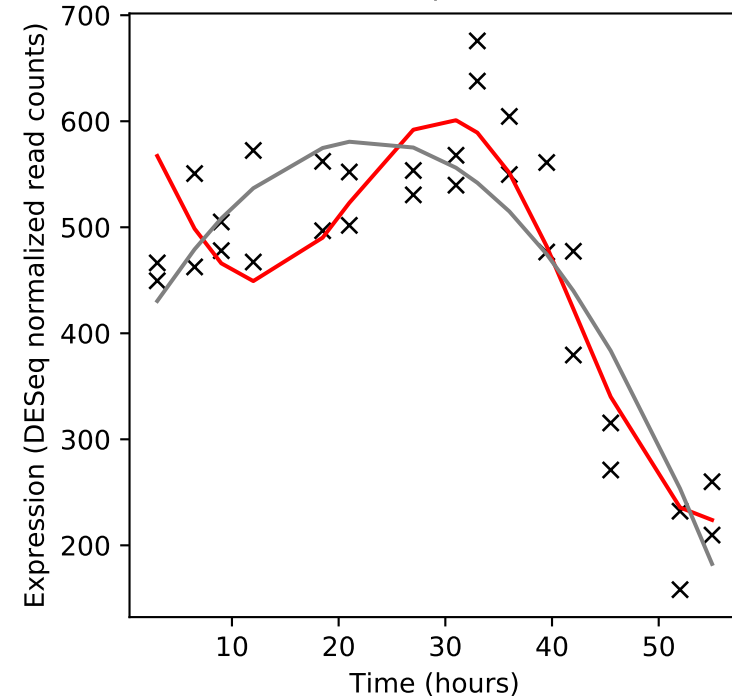

Rv3117/cysA3

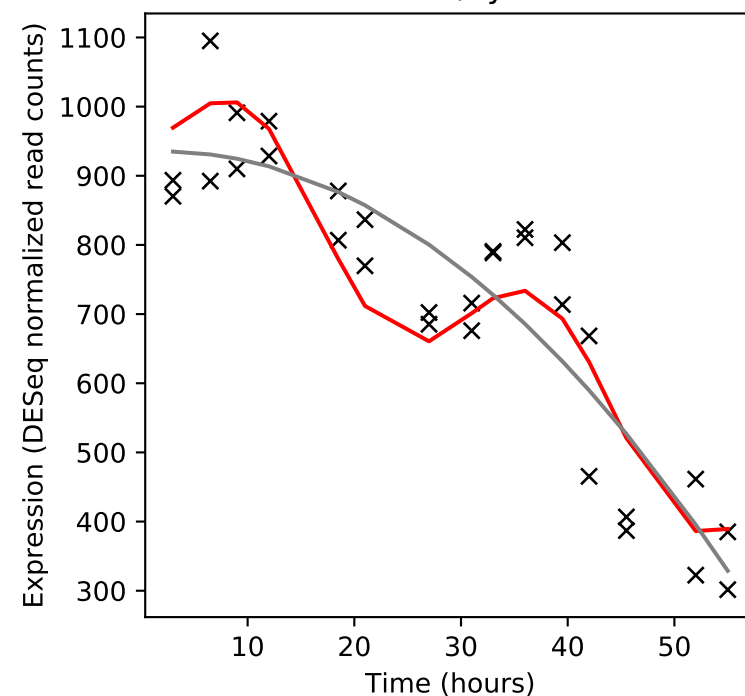

Rv3118/sseC1

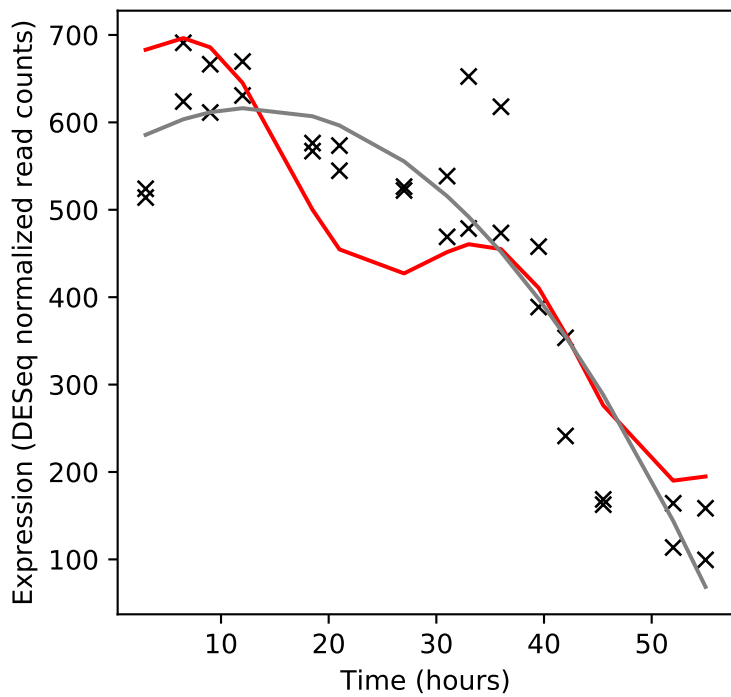

Rv3119/moaE1

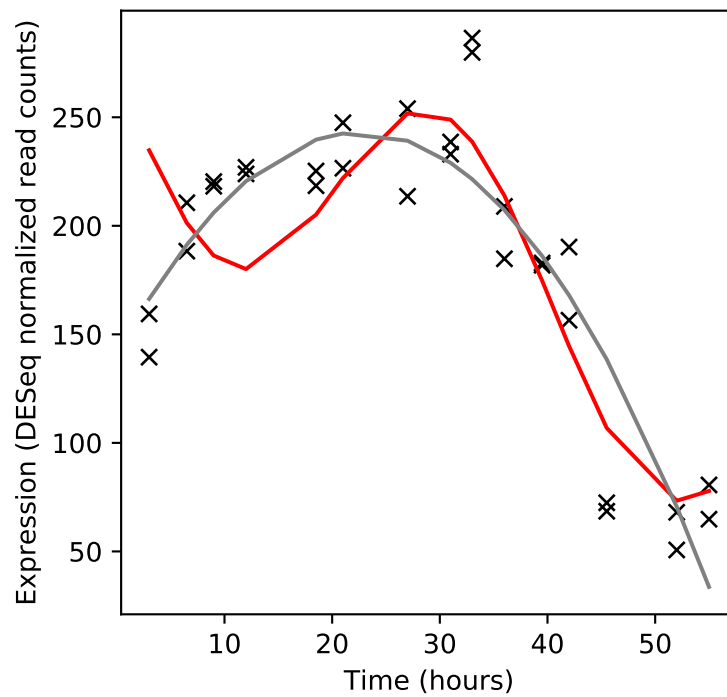

Rv3120/-

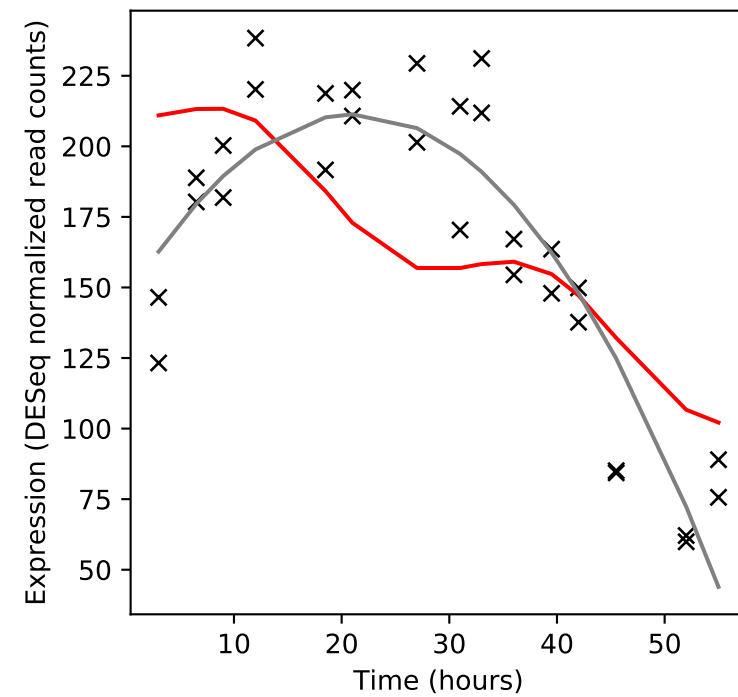

Rv3121/cyp141

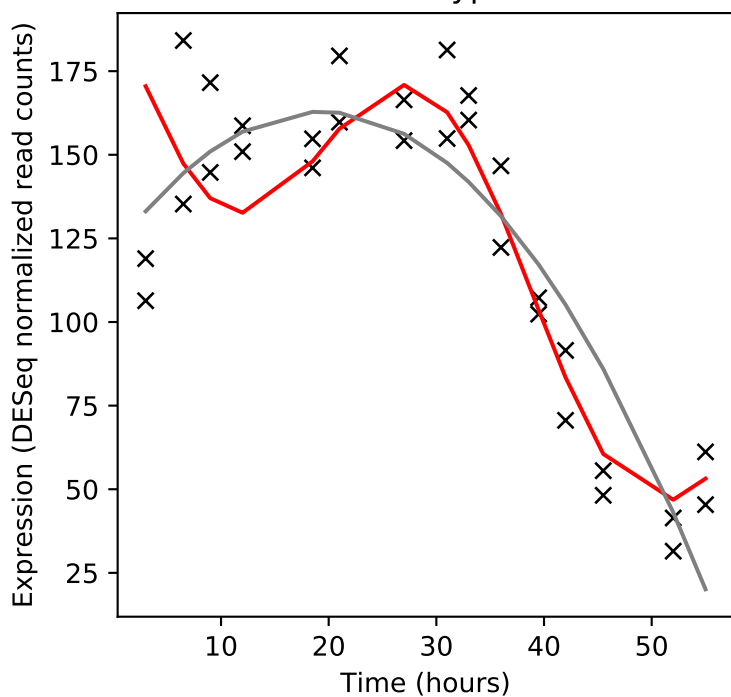

Rv3122/-

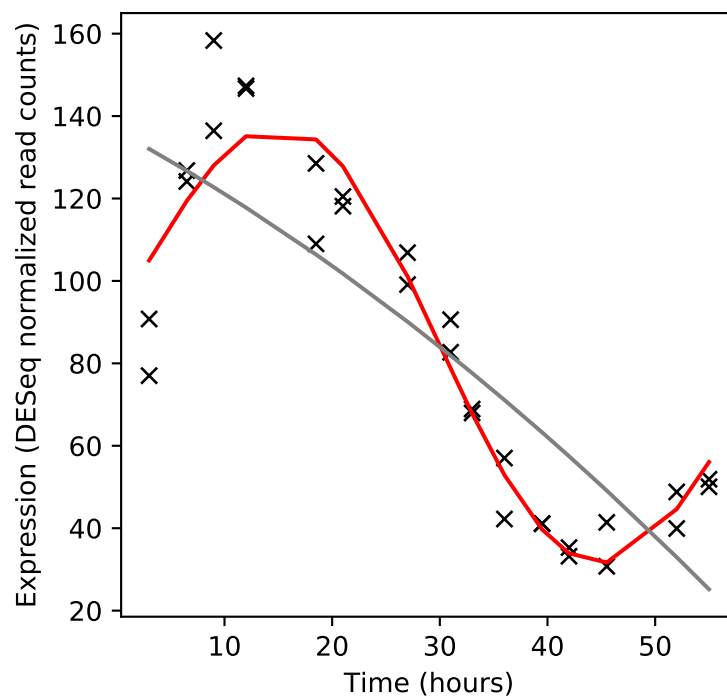

Rv3123/-

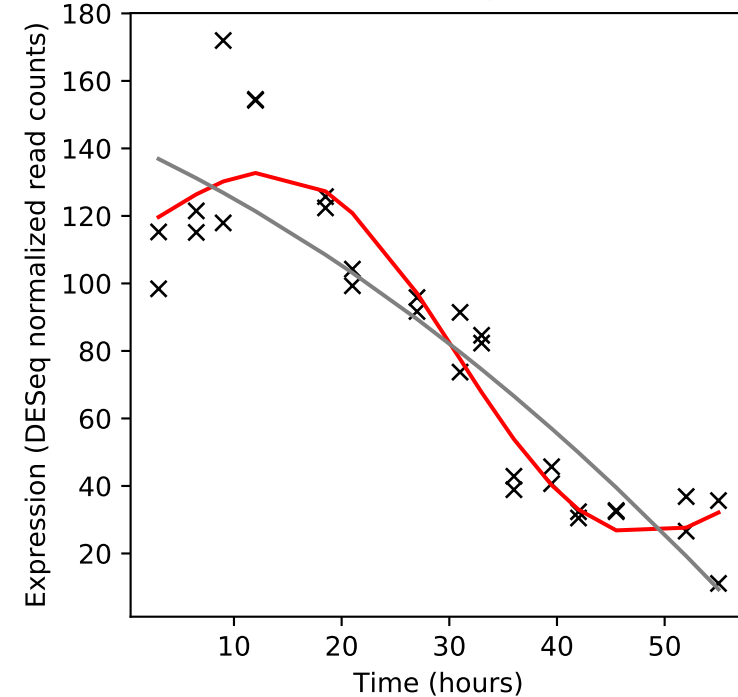

Rv3124/moaR1

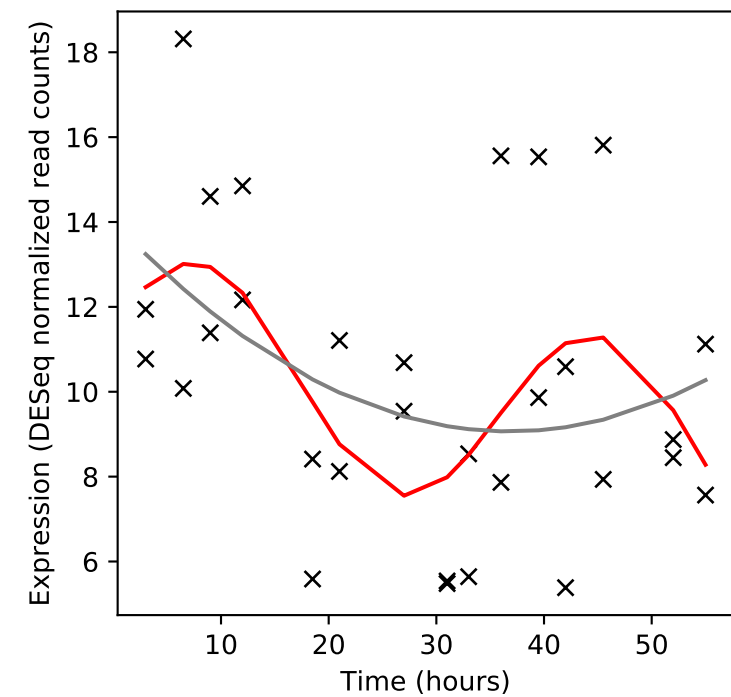

Rv3125c/PPE49

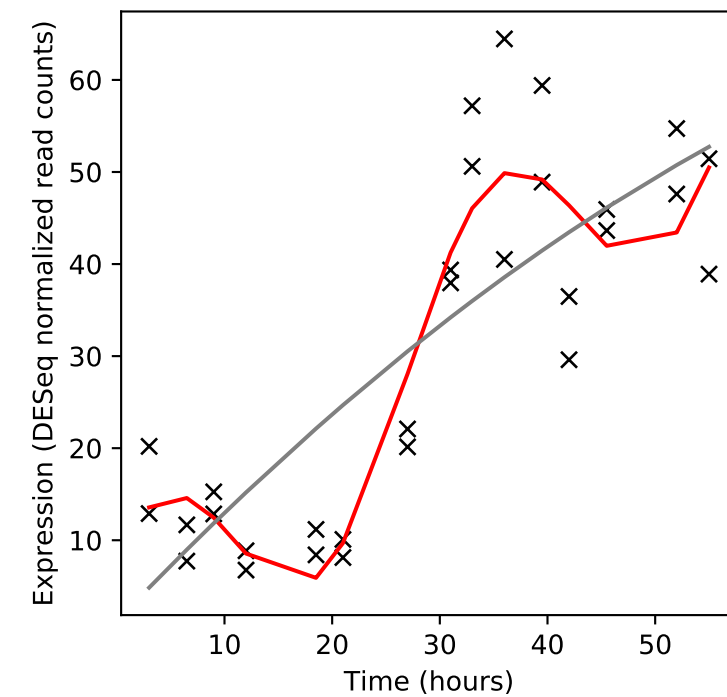

Rv3126c/-

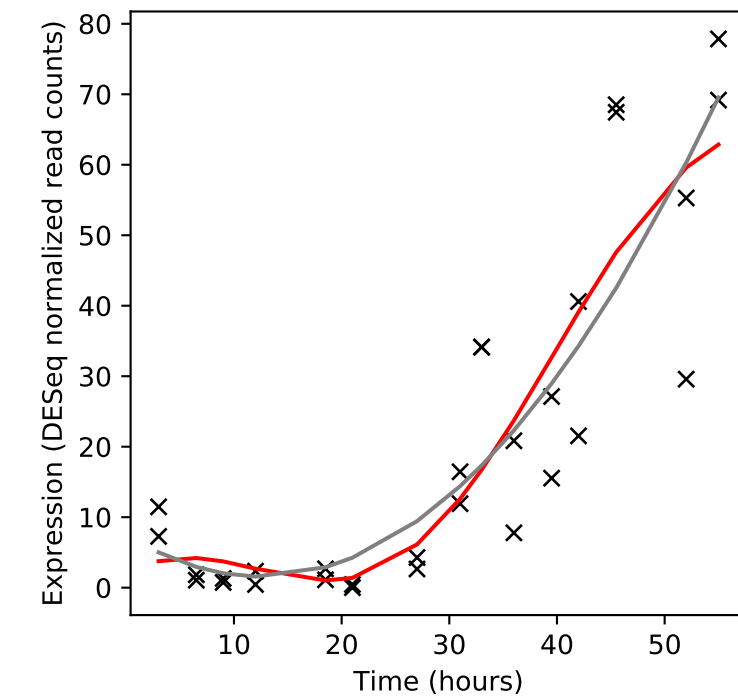

Rv3127/-

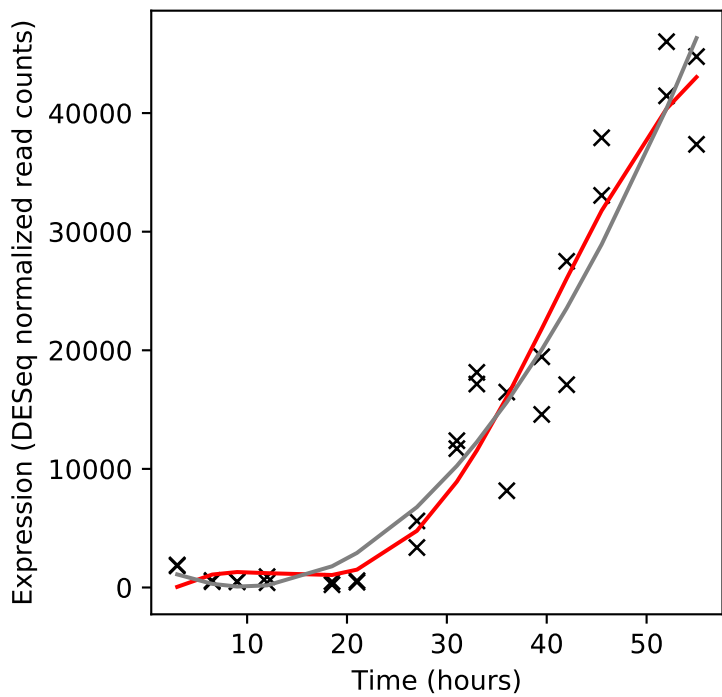

Rv3129/-

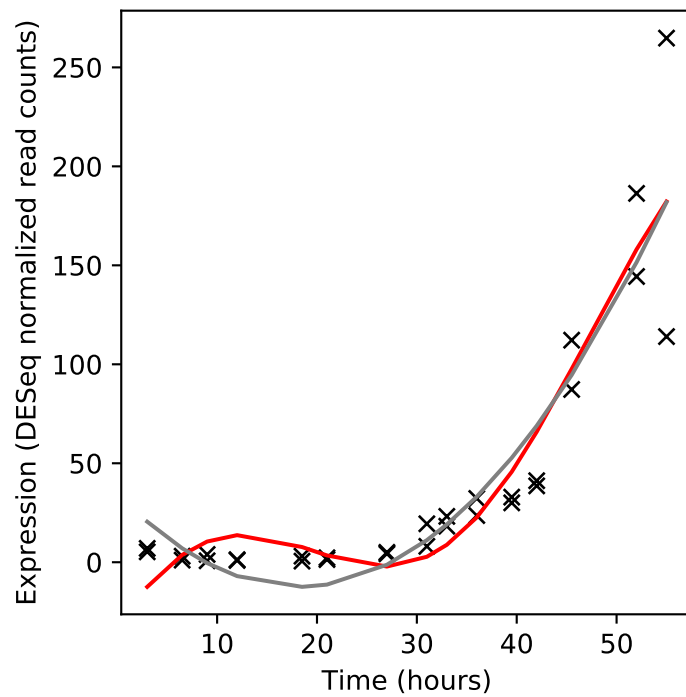

Rv3130c/tgs1

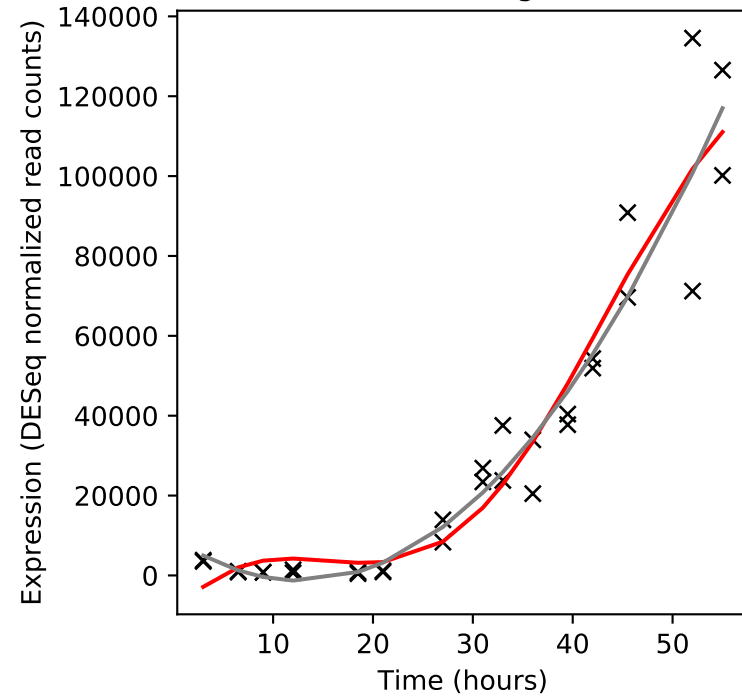

Rv3131/-

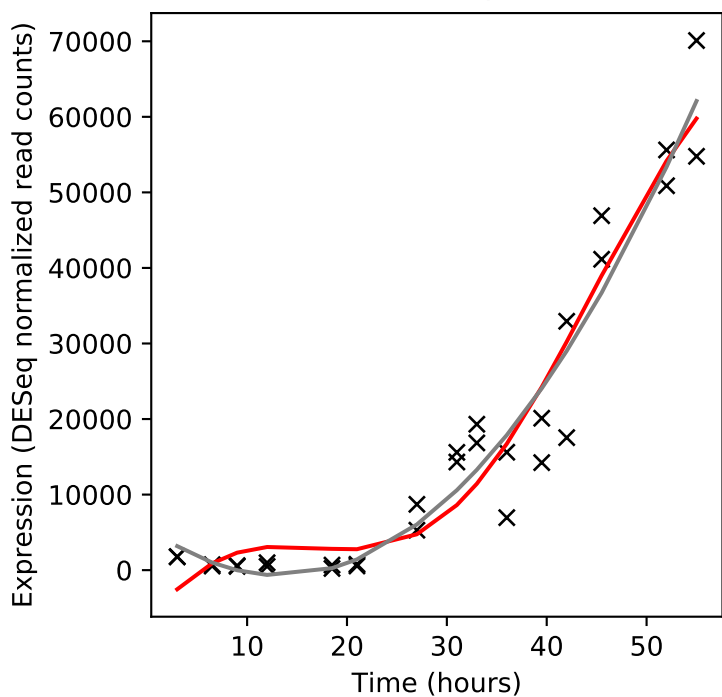

Rv3132c/devS

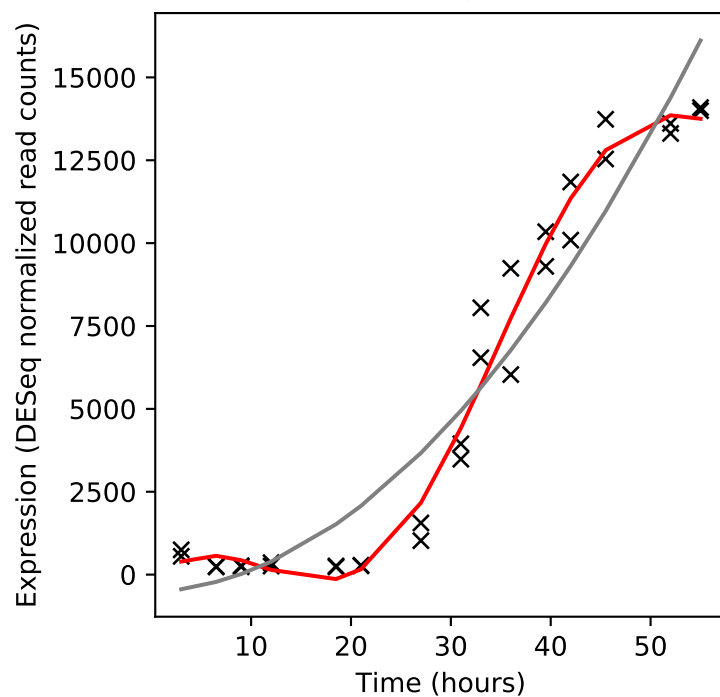

Rv3133c/devR

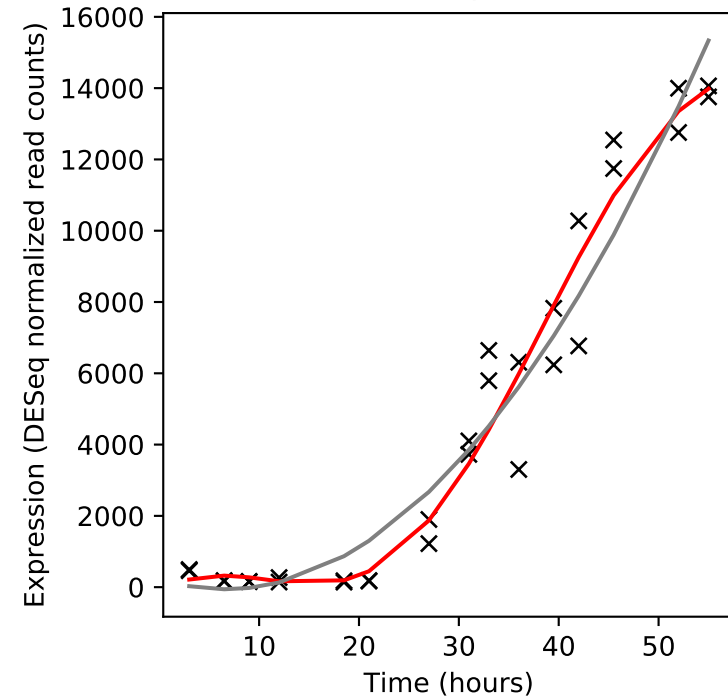

Rv3134c/-

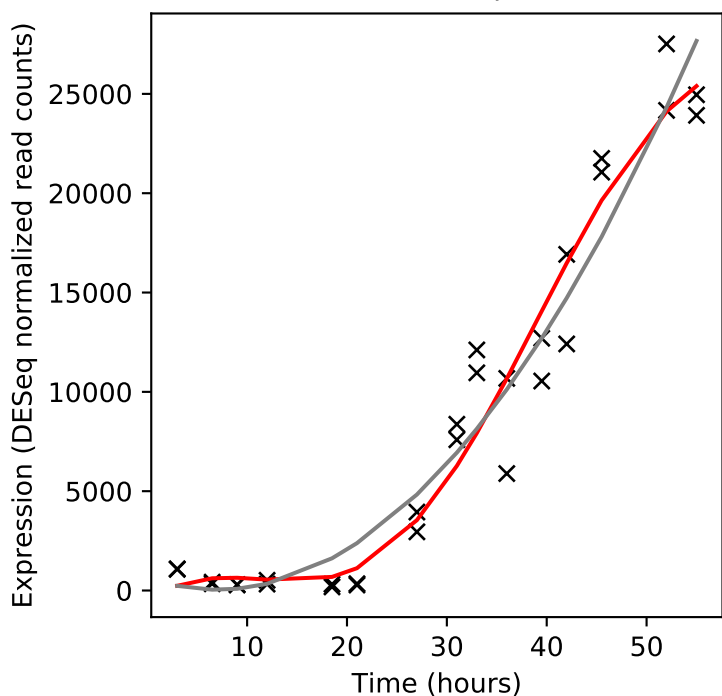

Rv3135/PPE50

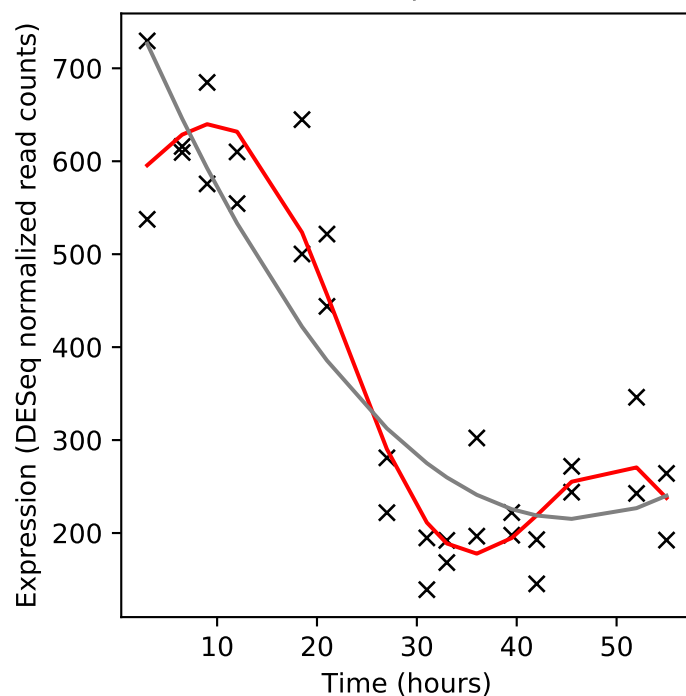

Rv3136/PPE51

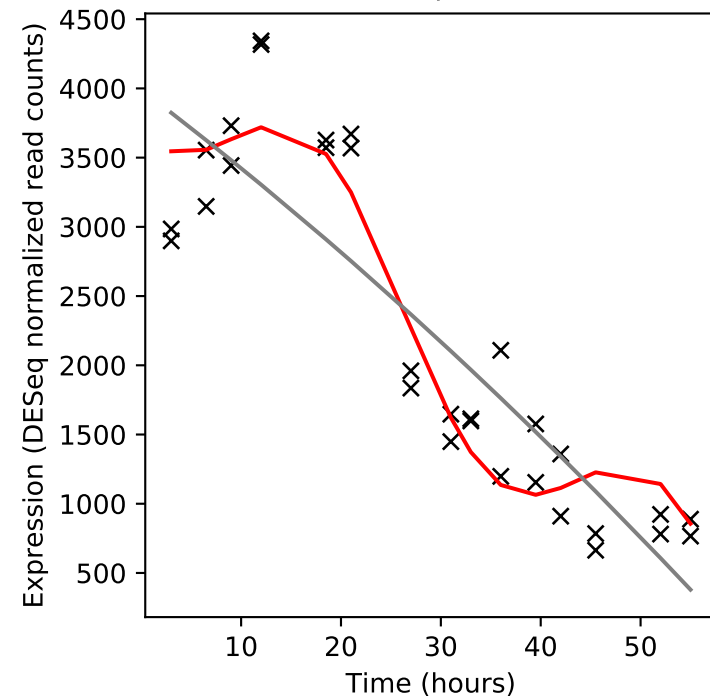

Rv3136A/-

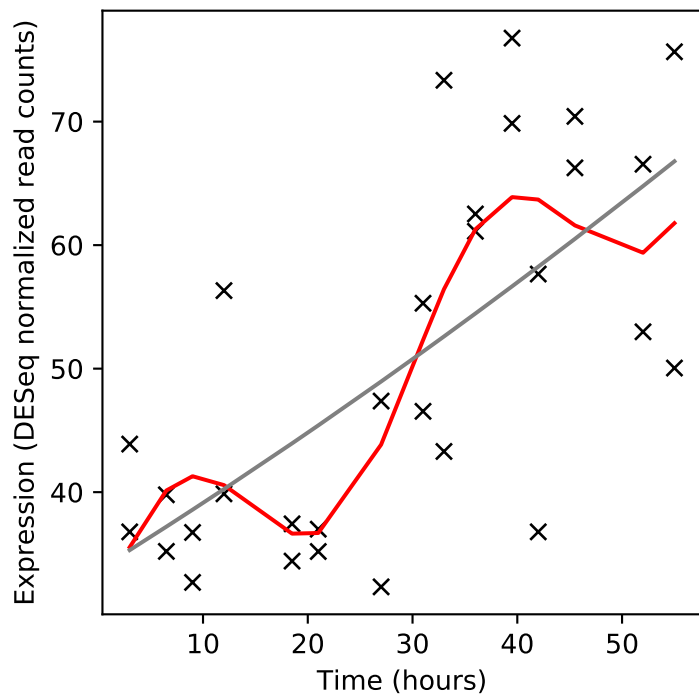

Rv3137/-

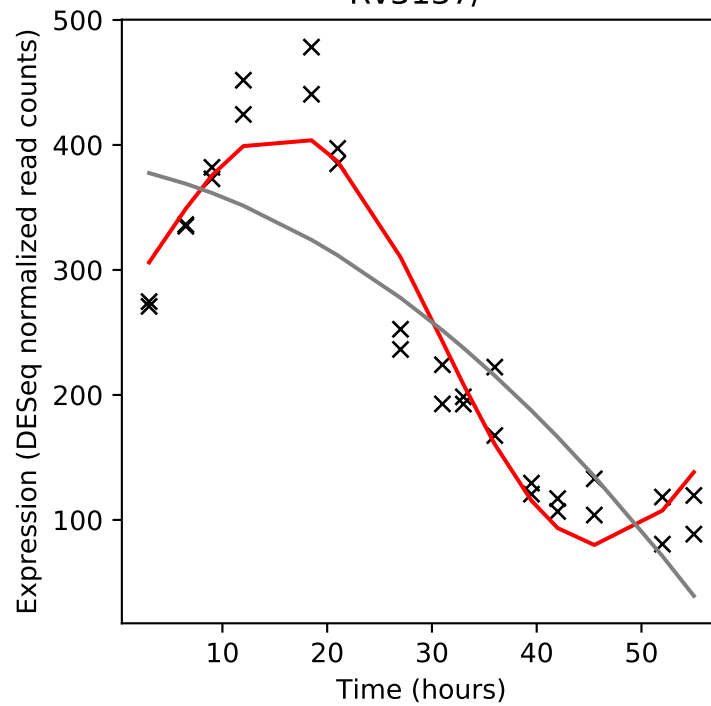

Rv3138/pflA

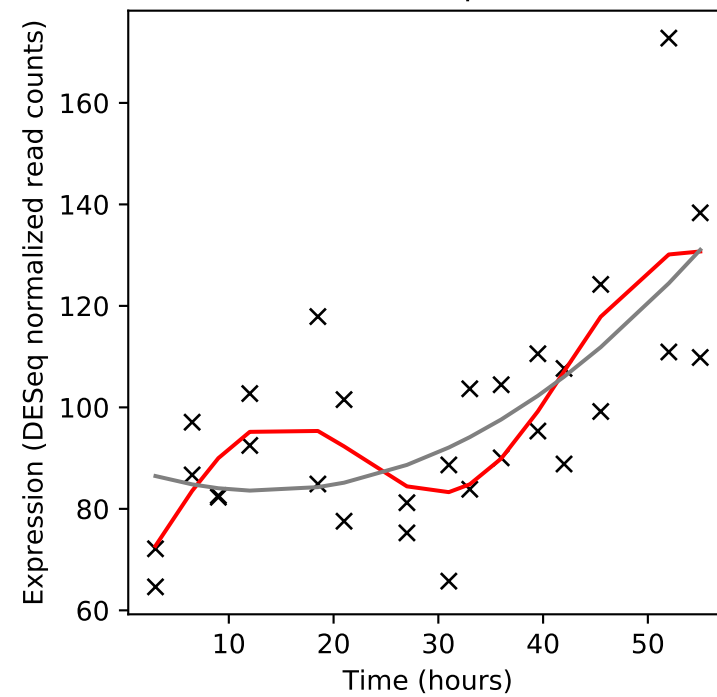

Rv3139/fadE24

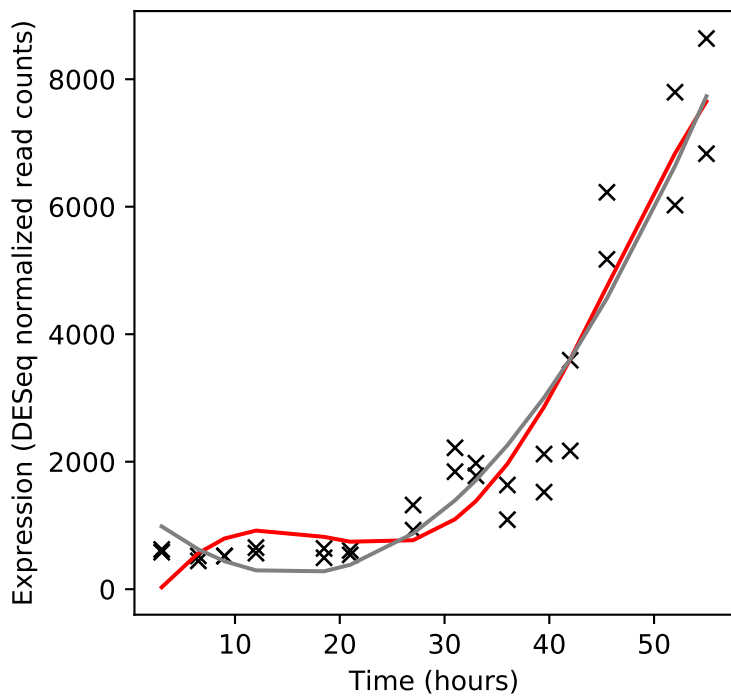

Rv3140/fadE23

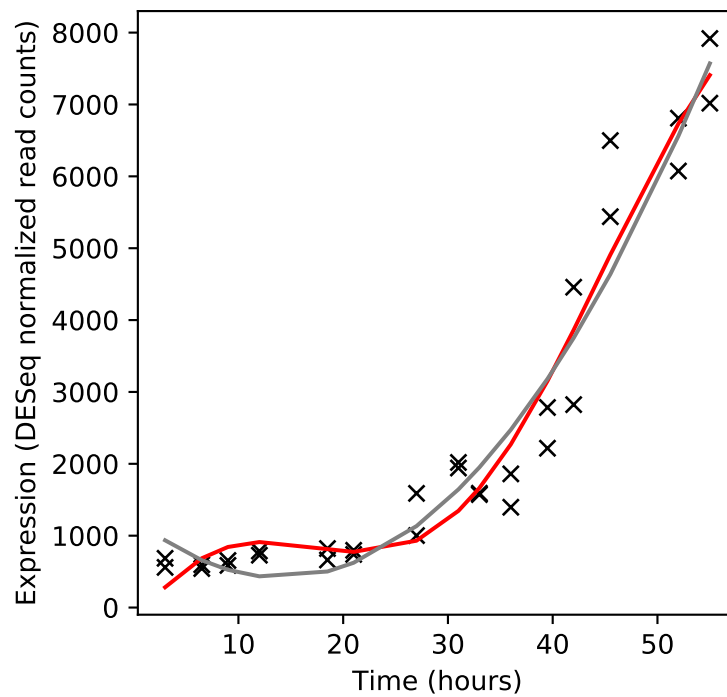

Rv3141/fadB4

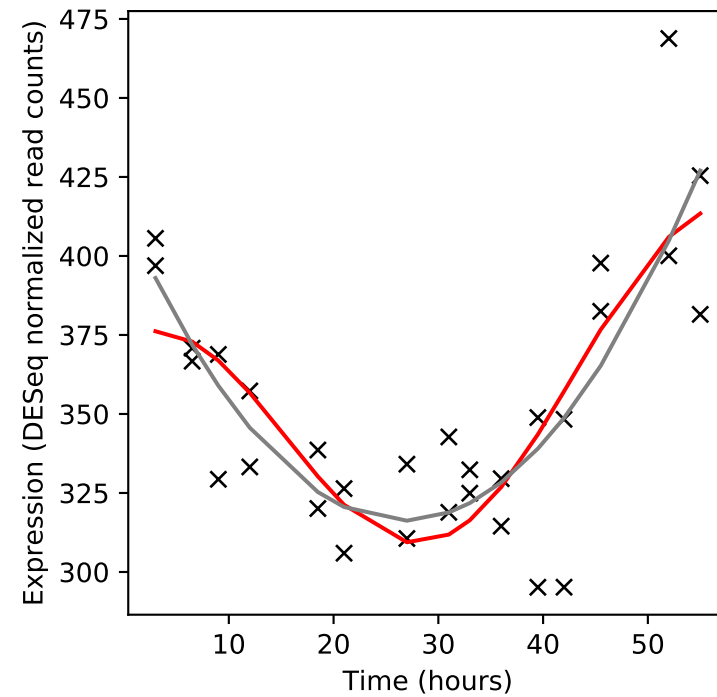

Rv3142c/-

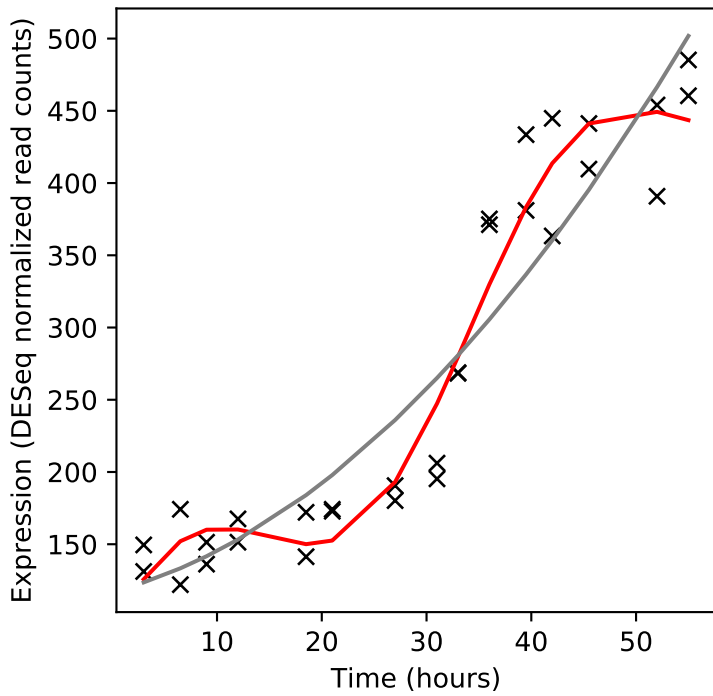

Rv3143/-

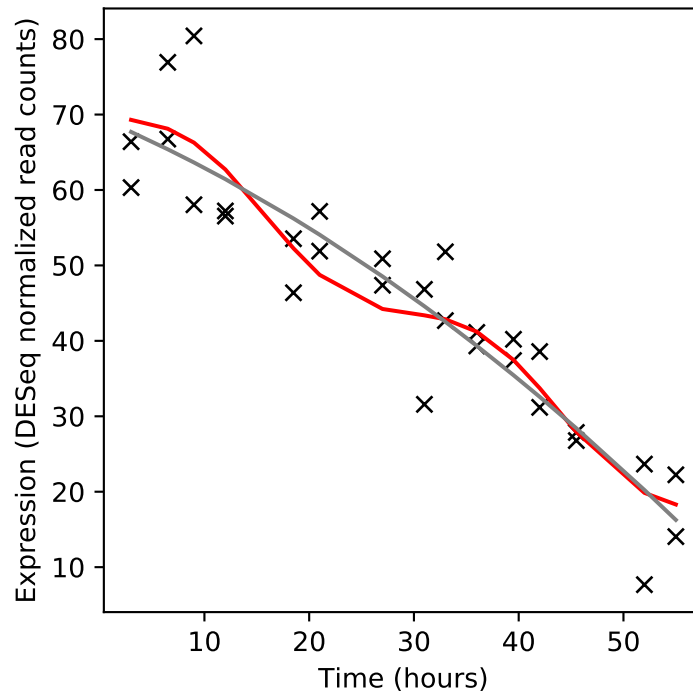

Rv3144c/PPE52

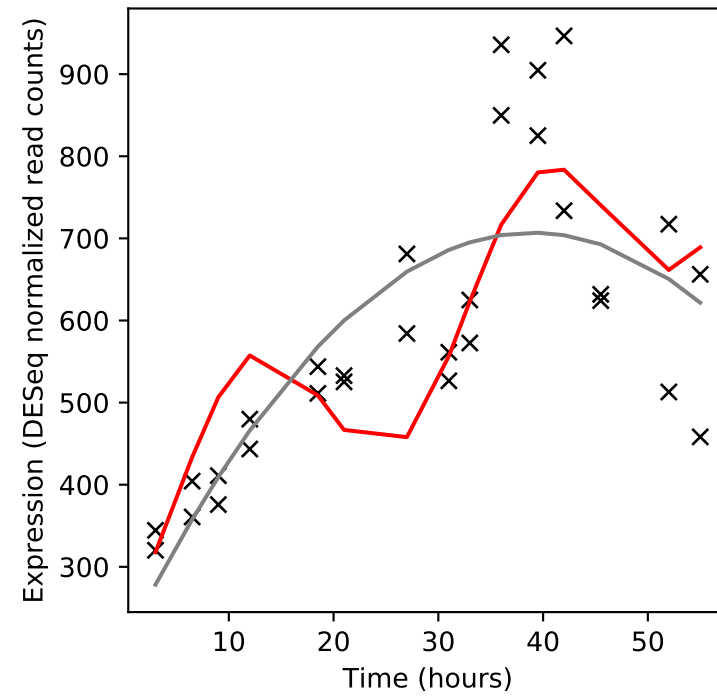

Rv3145/nuoA

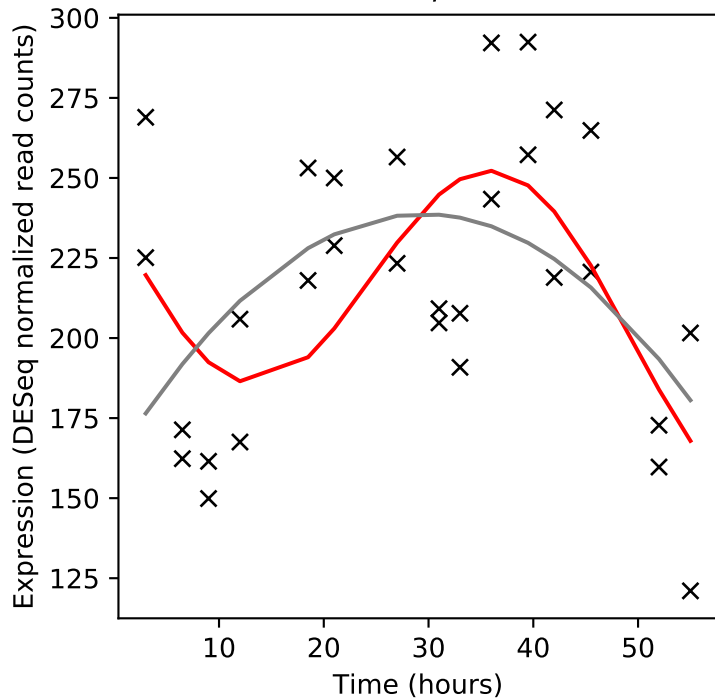

Rv3146/nuoB

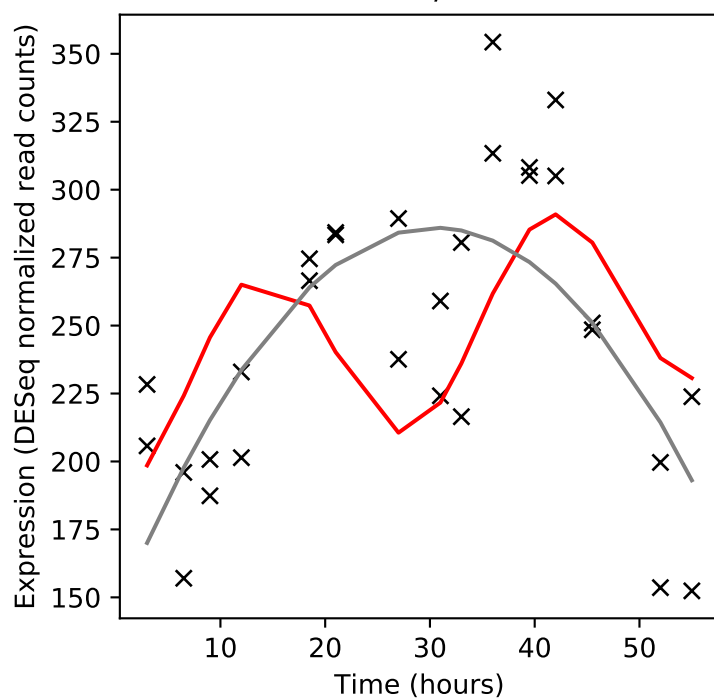

Rv3147/nuoC

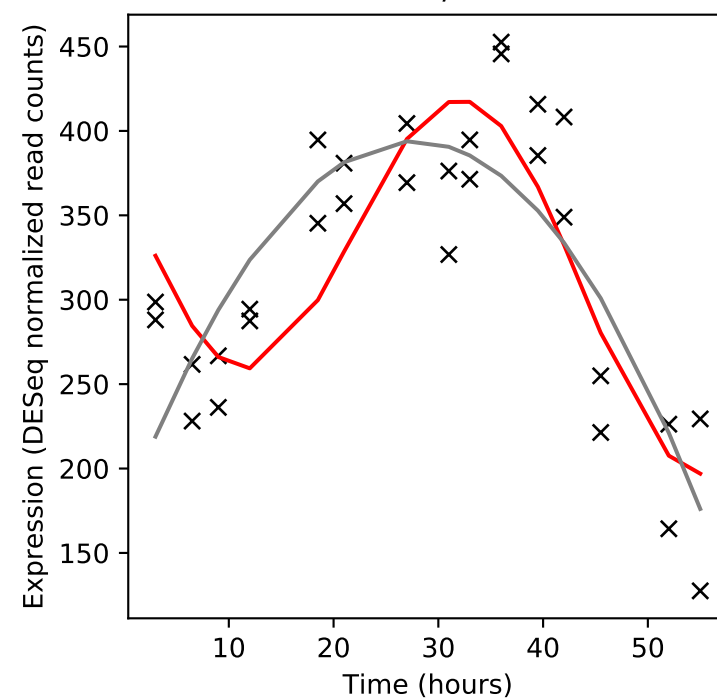

Rv3148/nuoD

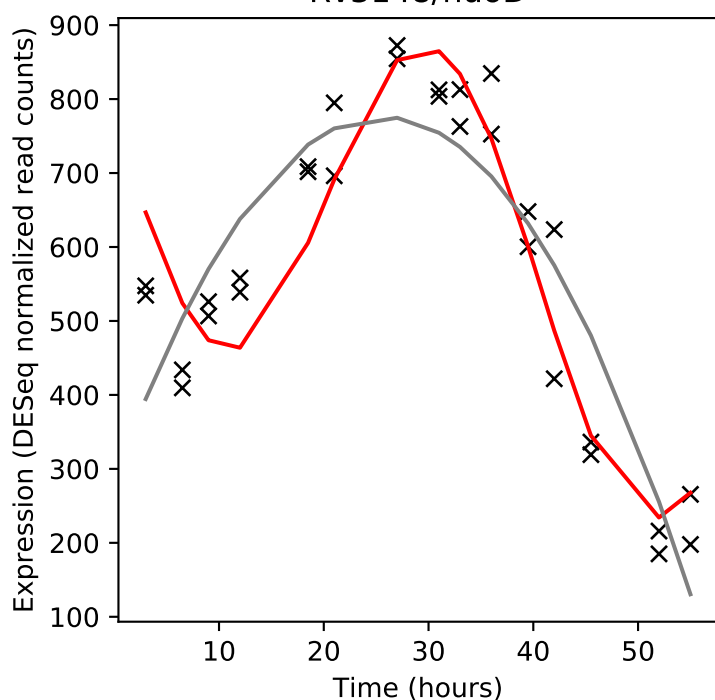

Rv3149/nuoE

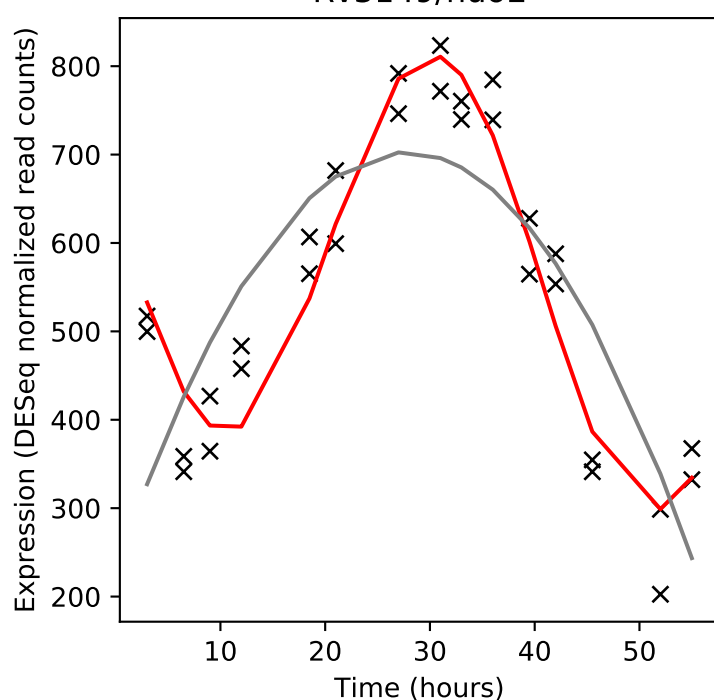

Rv3150/nuoF

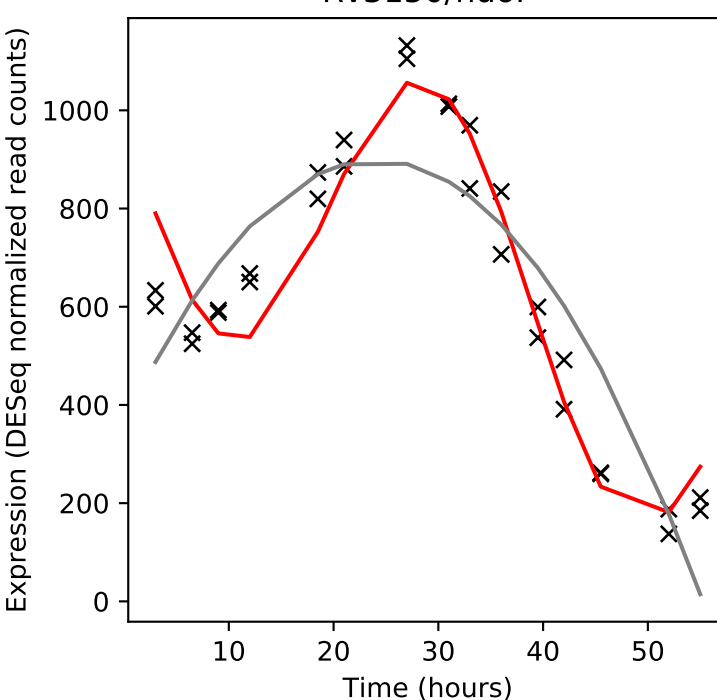

Rv3151/nuoG

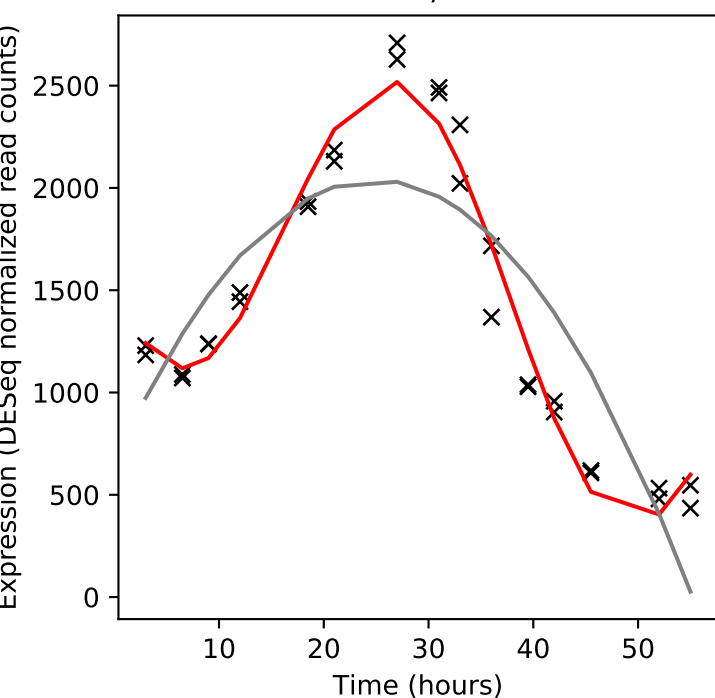

Rv3152/nuoH

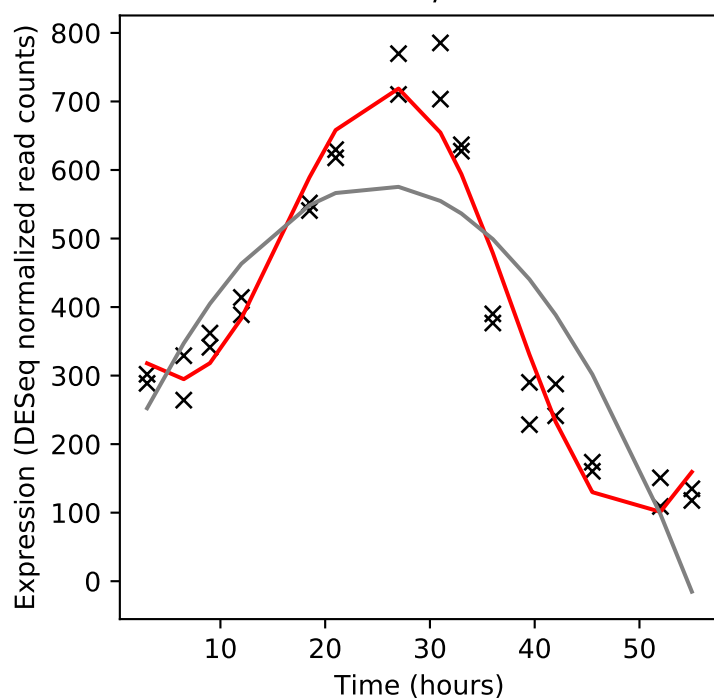

Rv3153/nuoI

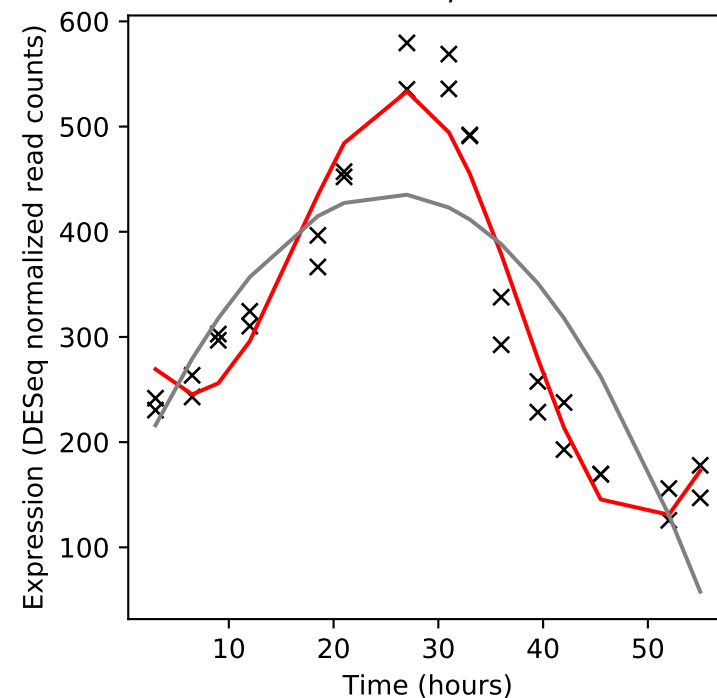



Rv3154/nuoJ

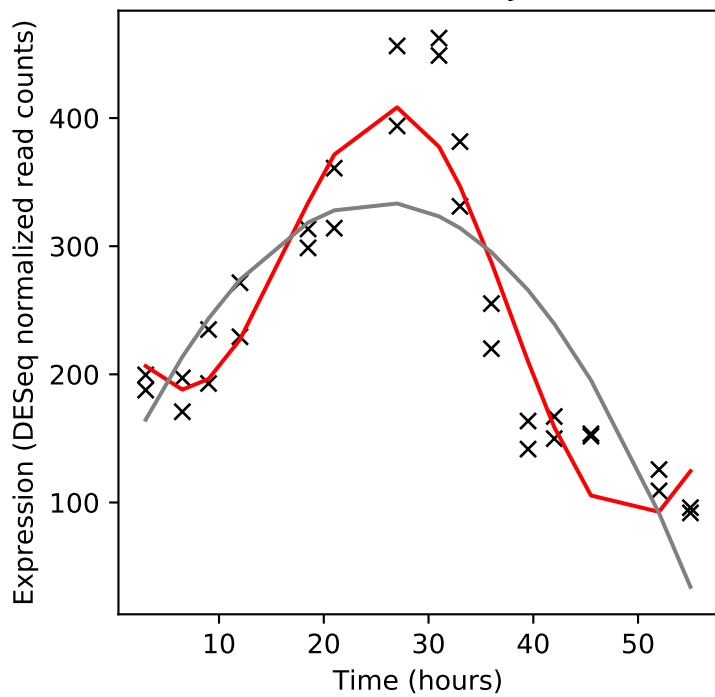

Rv3155/nuoK

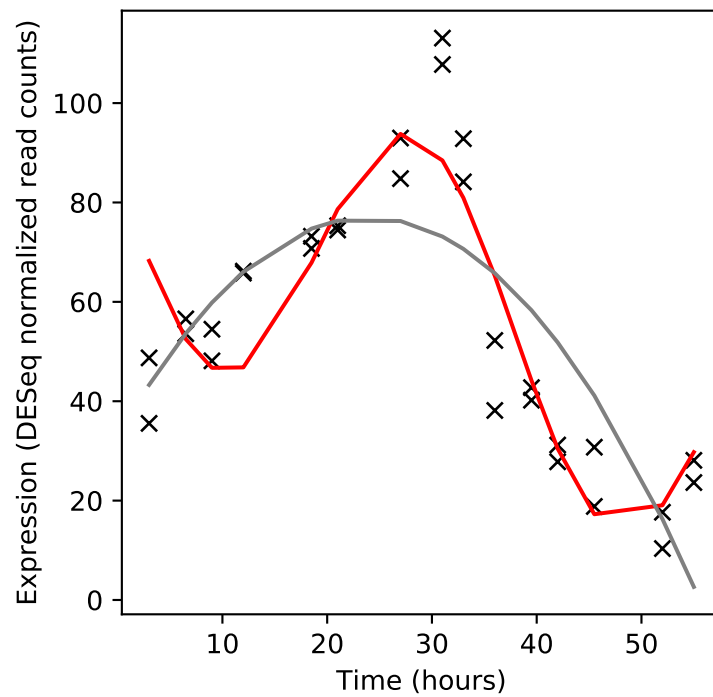

Rv3156/nuoL

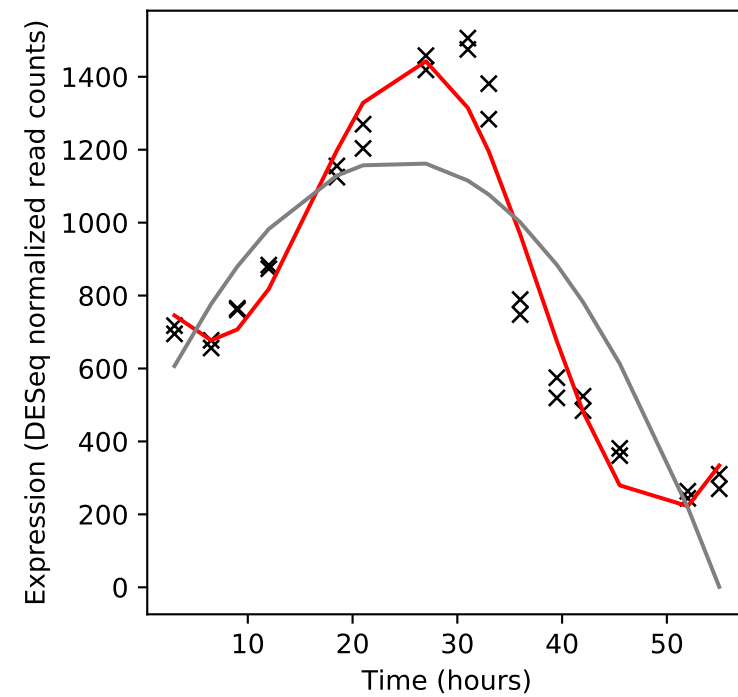

Rv3157/nuoM

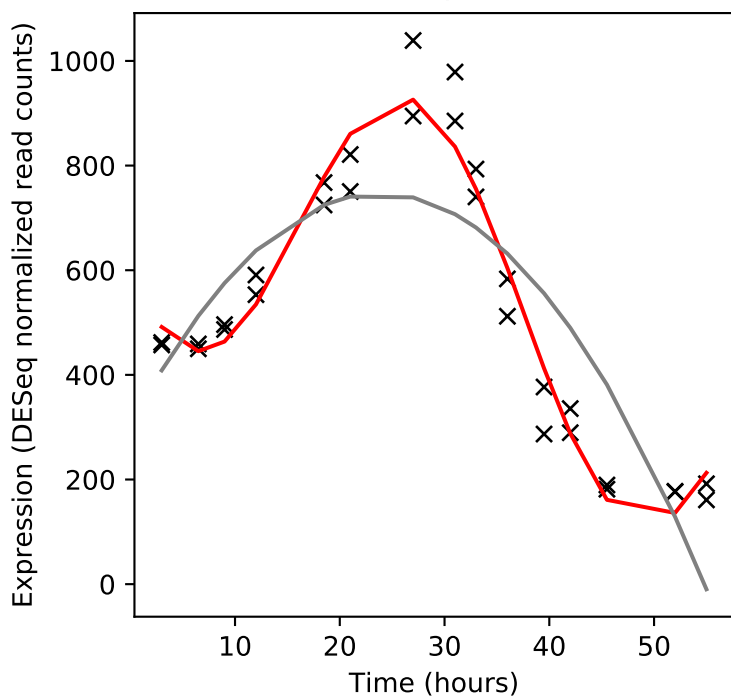

Rv3158/nuoN

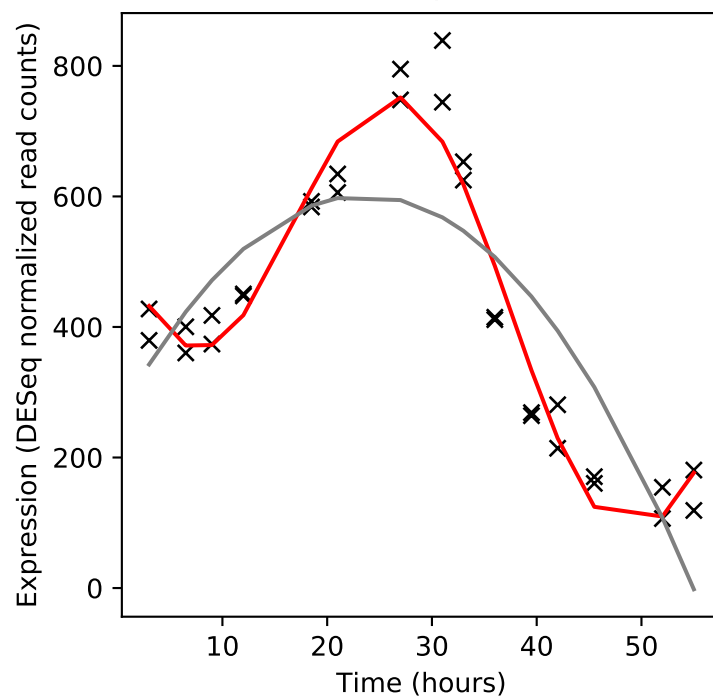

Rv3159c/PPE53

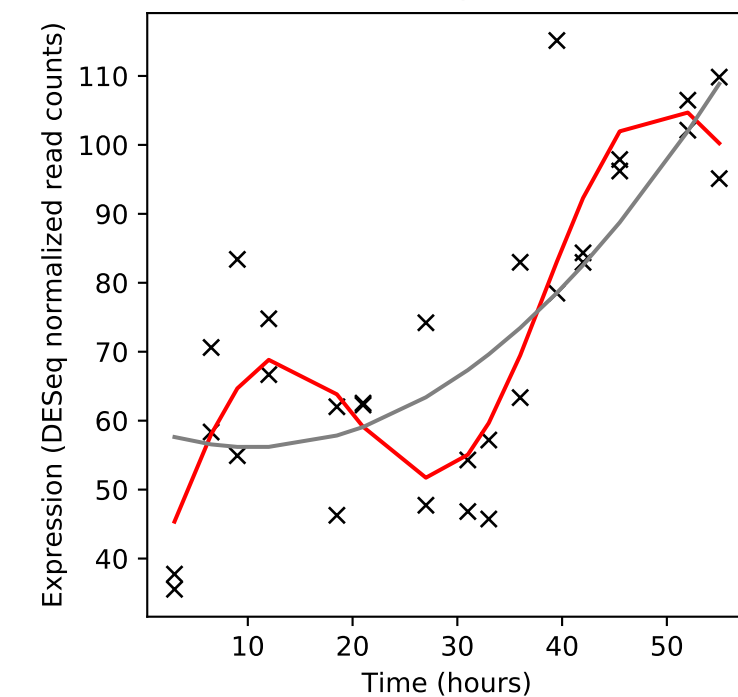

Rv3160c/-

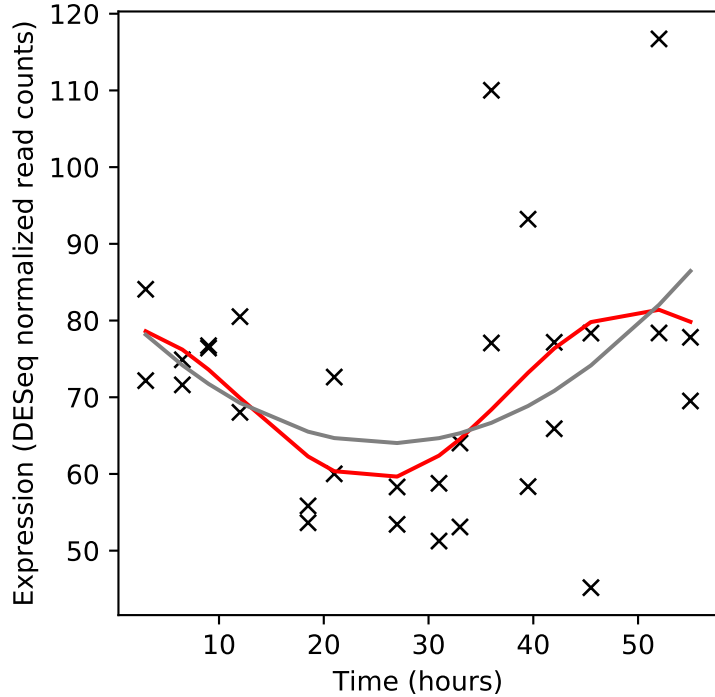

Rv3161c/-

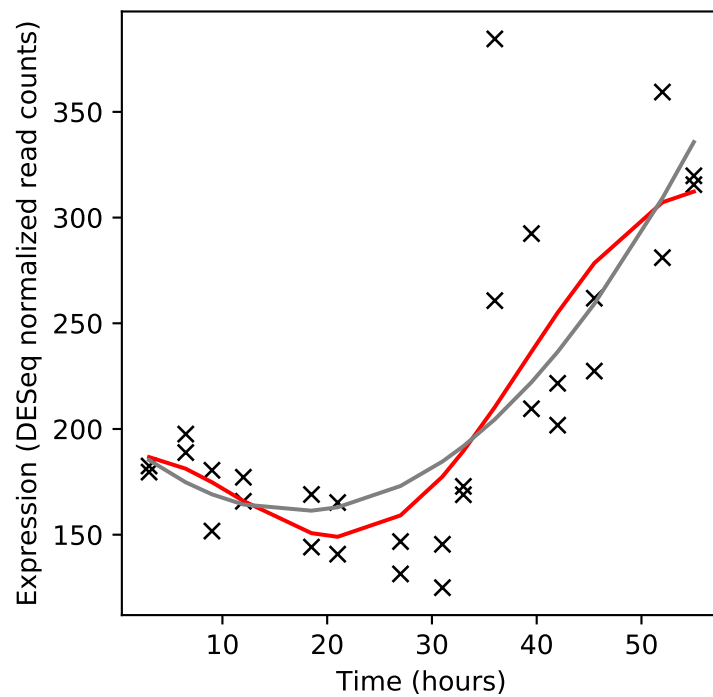

Rv3162c/-

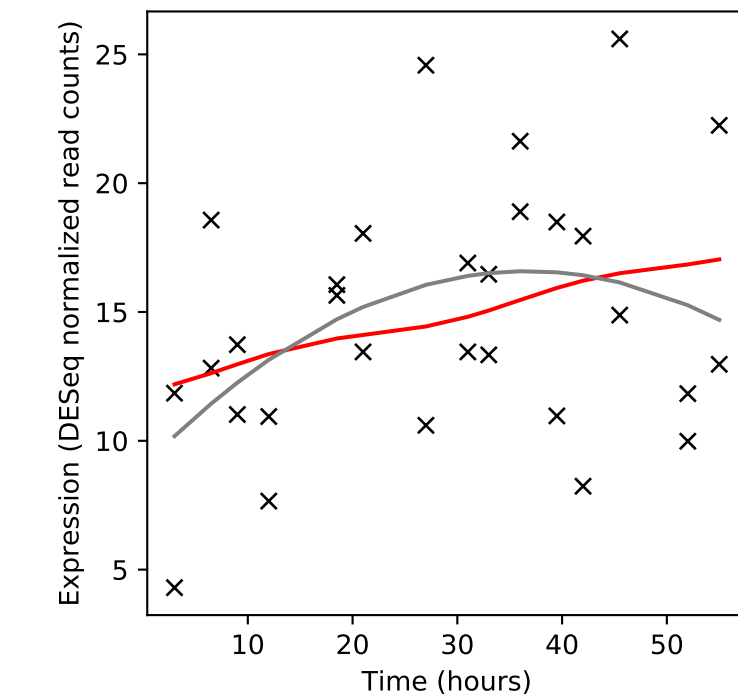

Rv3163c/-

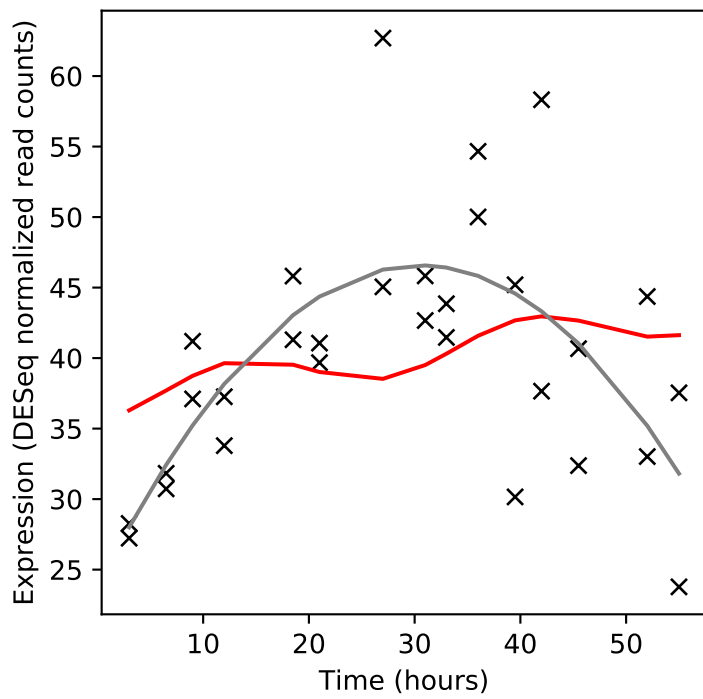

Rv3164c/moxR3

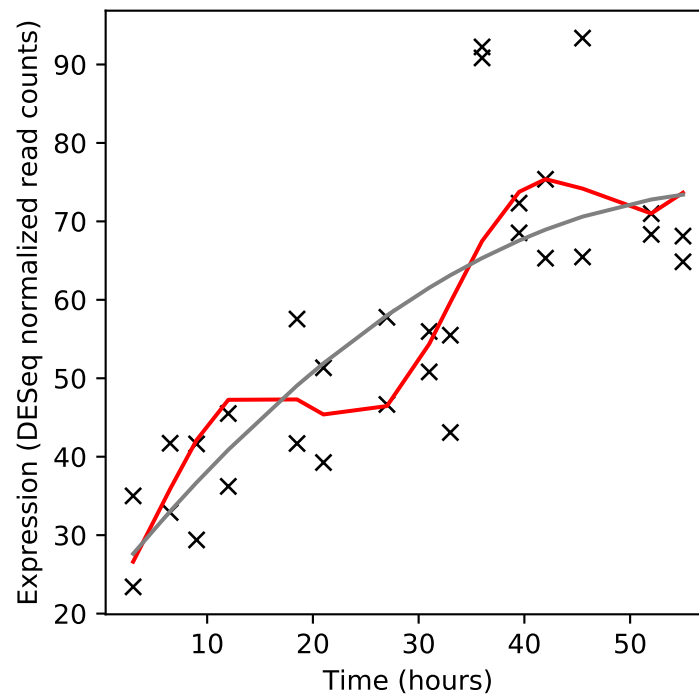

Rv3165c/-

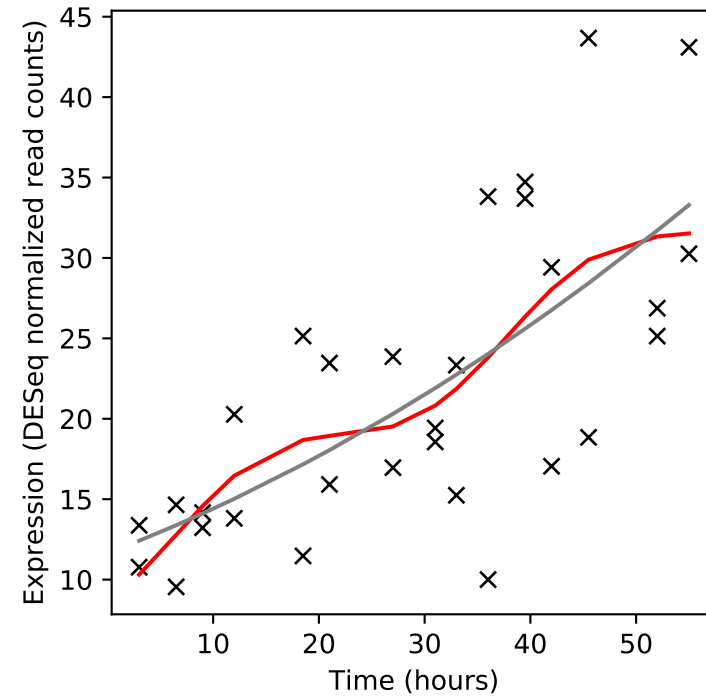

Rv3166c/-

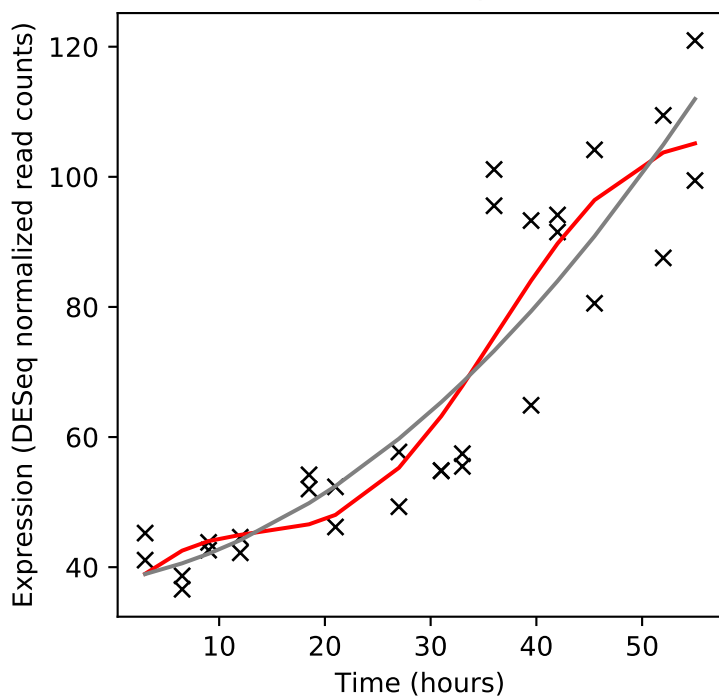

Rv3167c/-

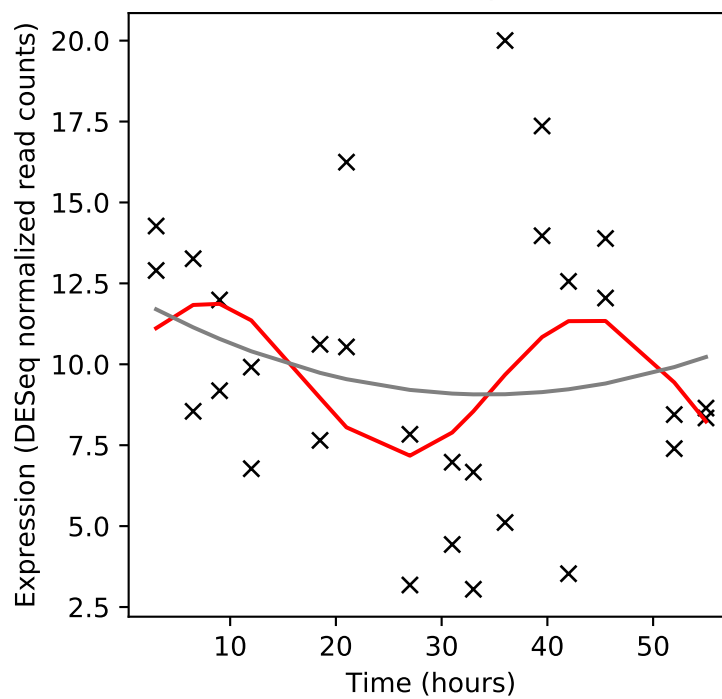

Rv3168/-

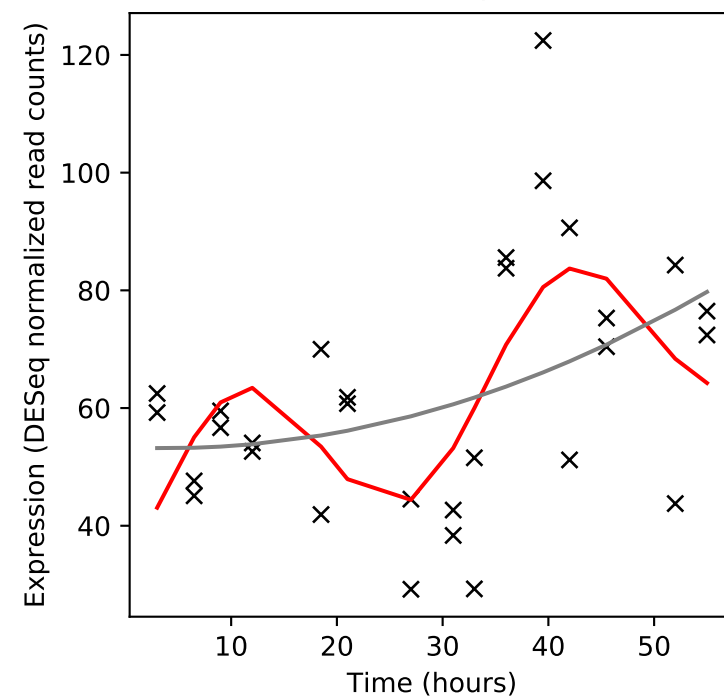

Rv3169/-

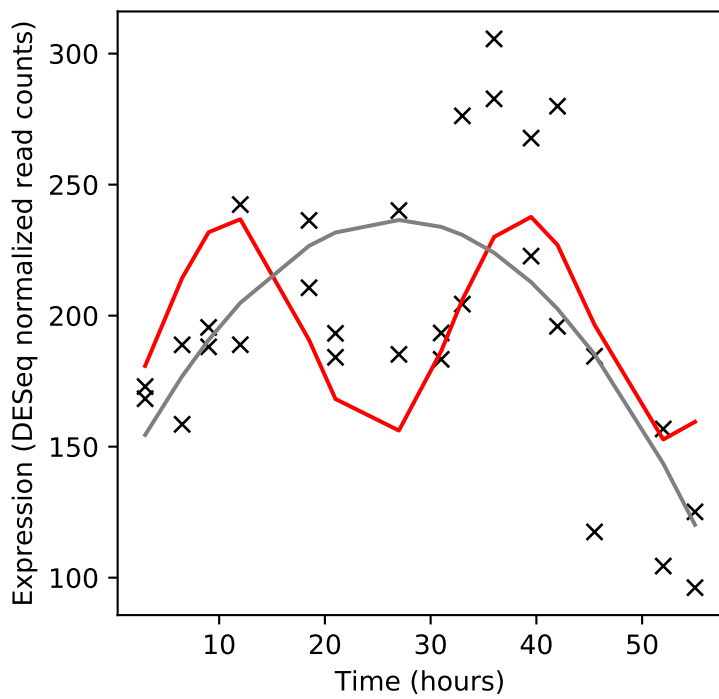

Rv3170/aofH

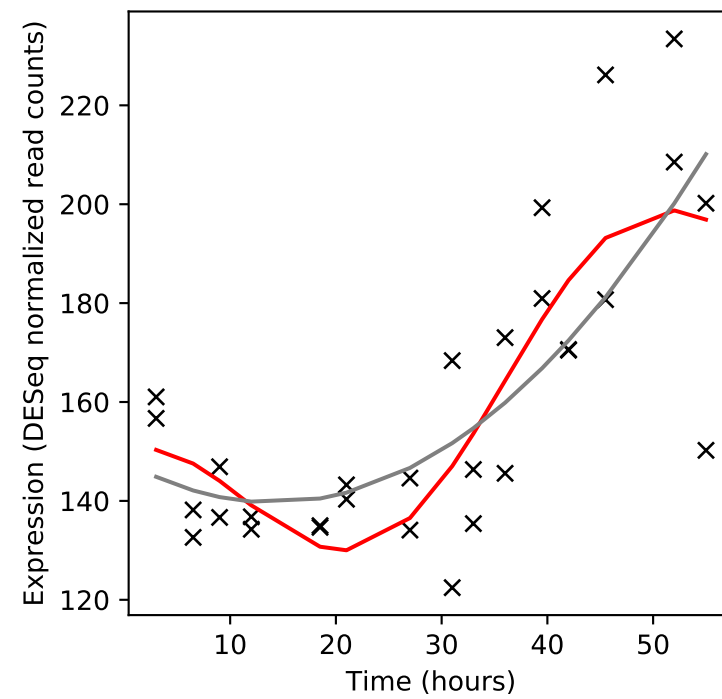

Rv3171c/hpx

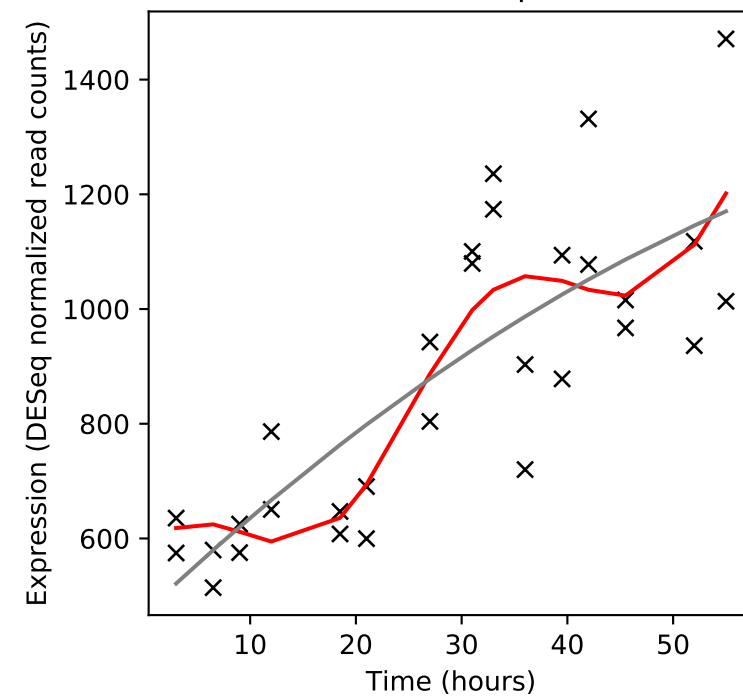

Rv3172c/-

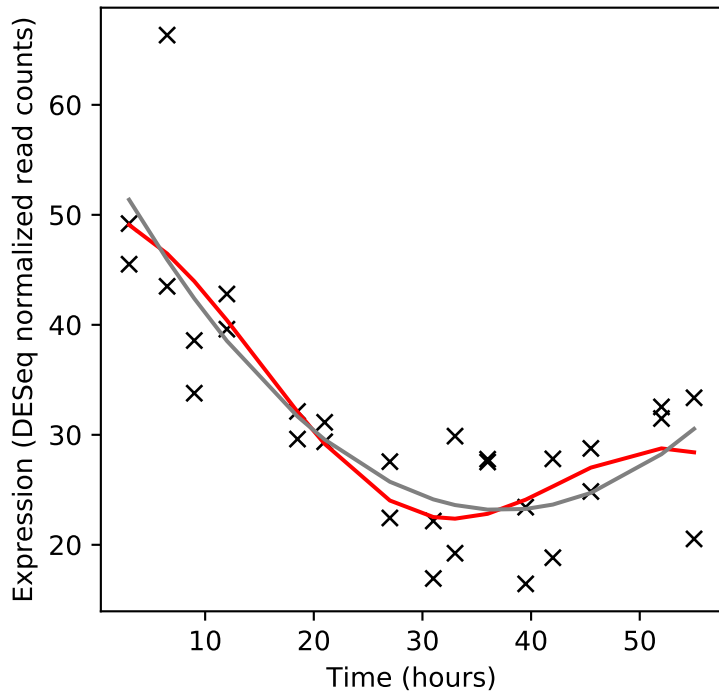

Rv3173c/-

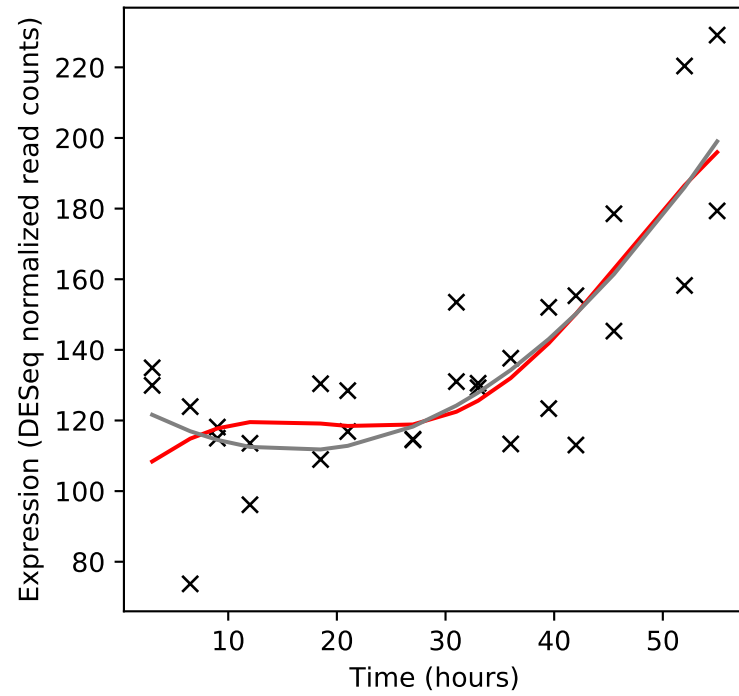

Rv3174/-

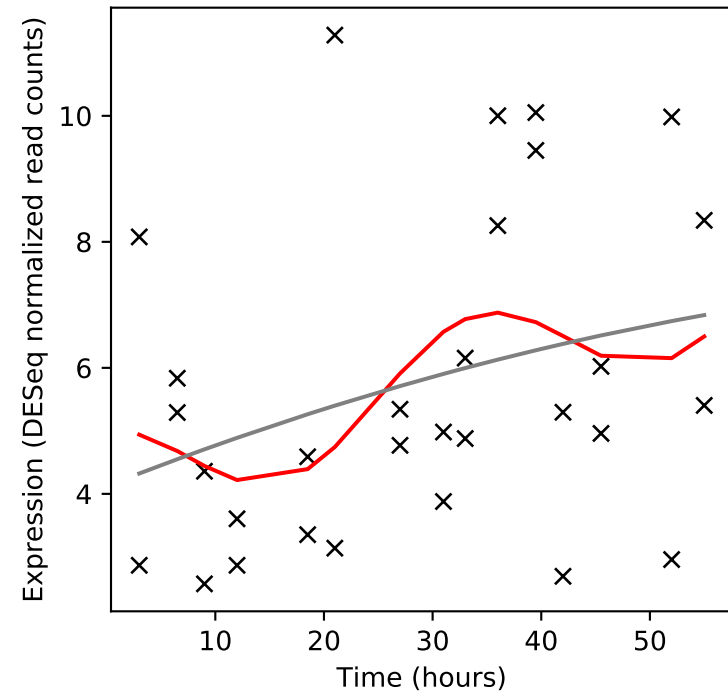

Rv3175/-

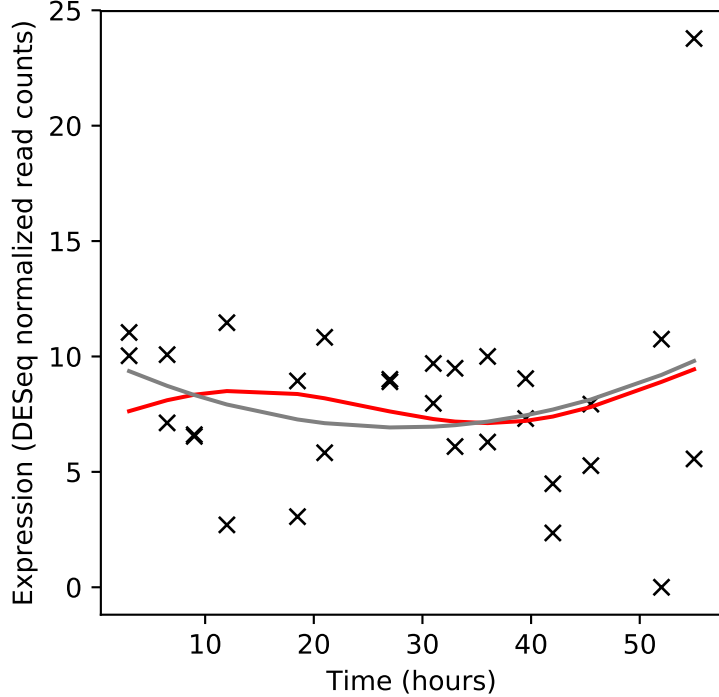

Rv3176c/mesT

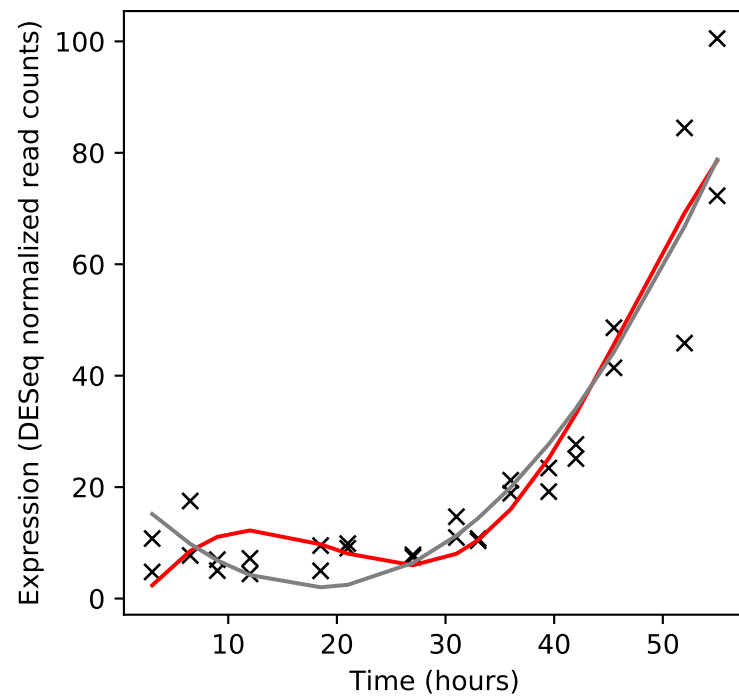

Rv3177/-

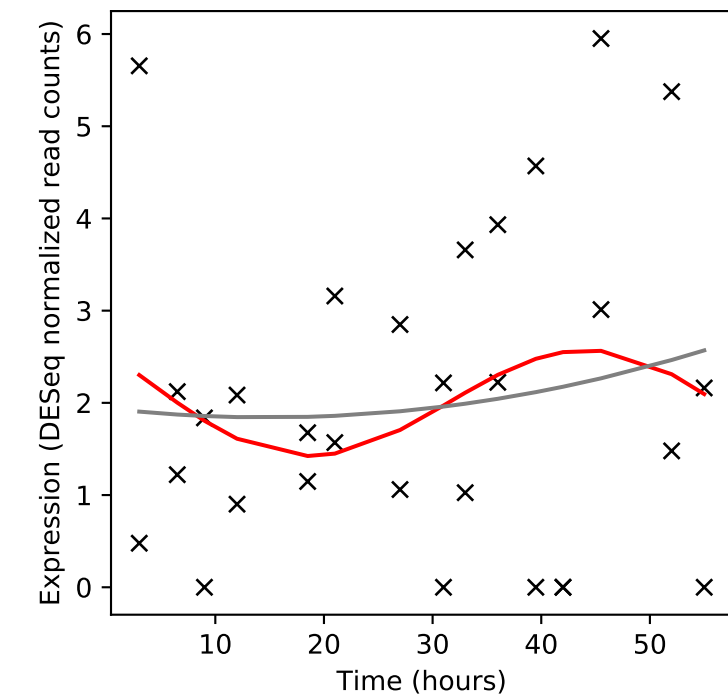

Rv3178/-

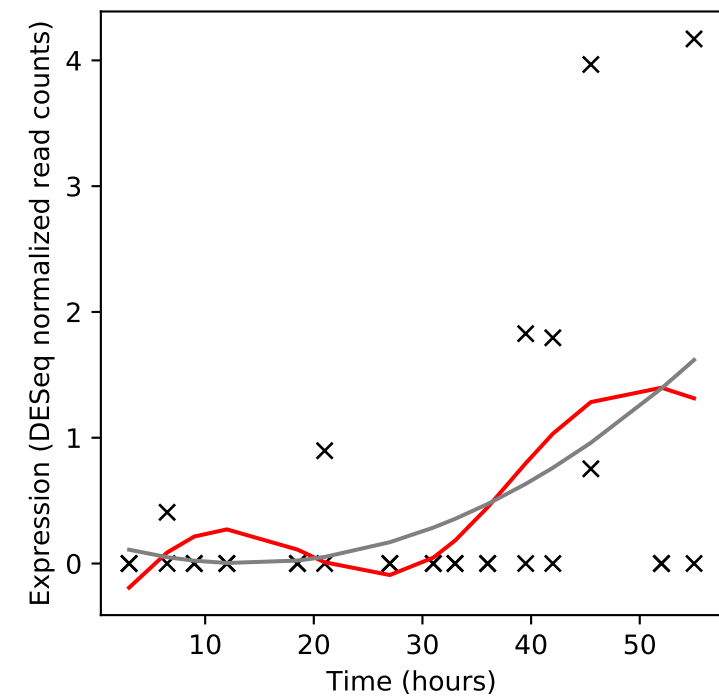

Rv3179/-

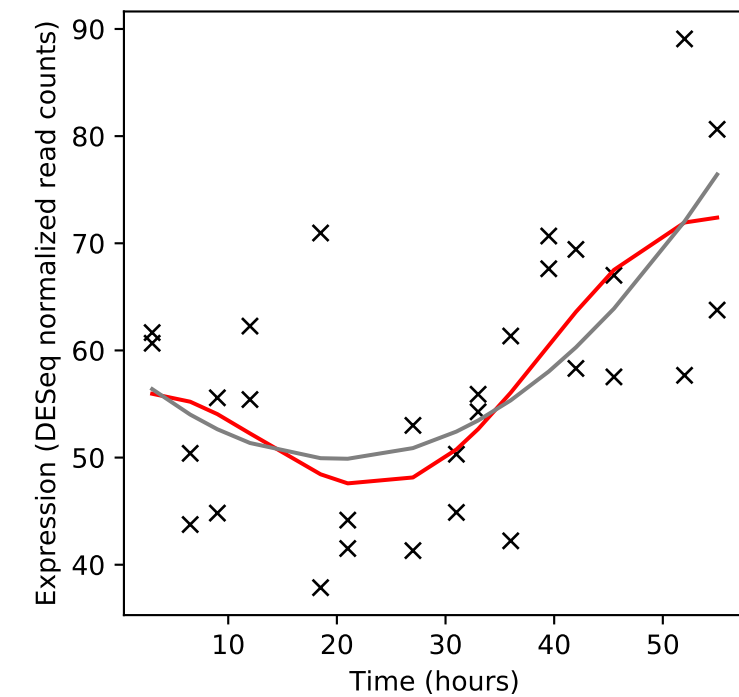

Rv3180c/-

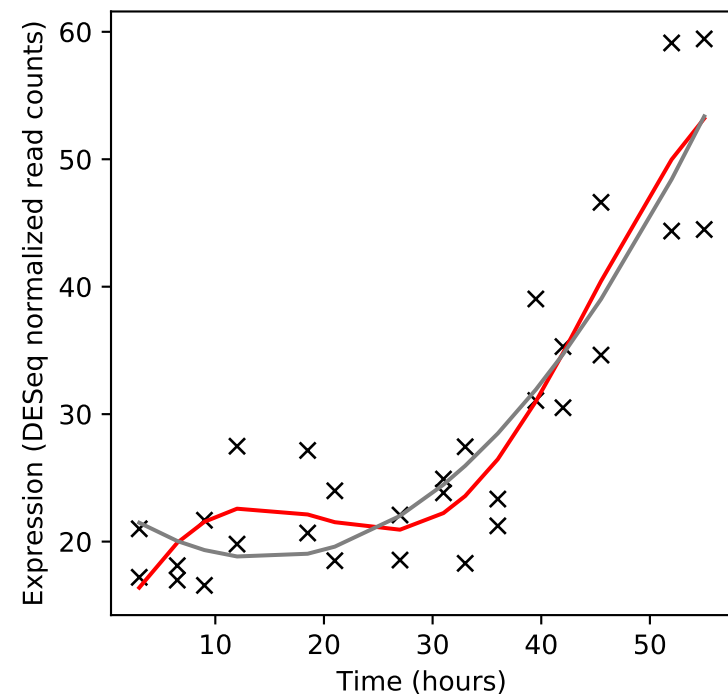

Rv3181c/-

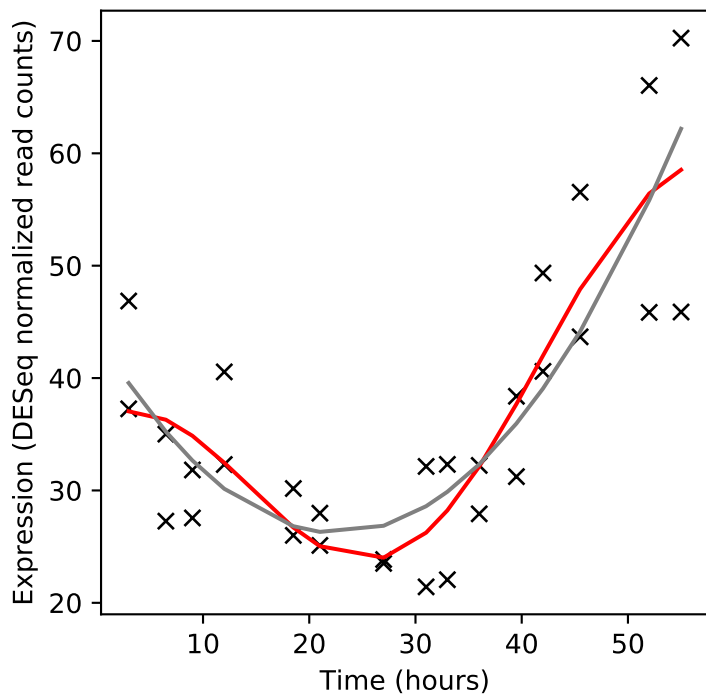

Rv3182/-

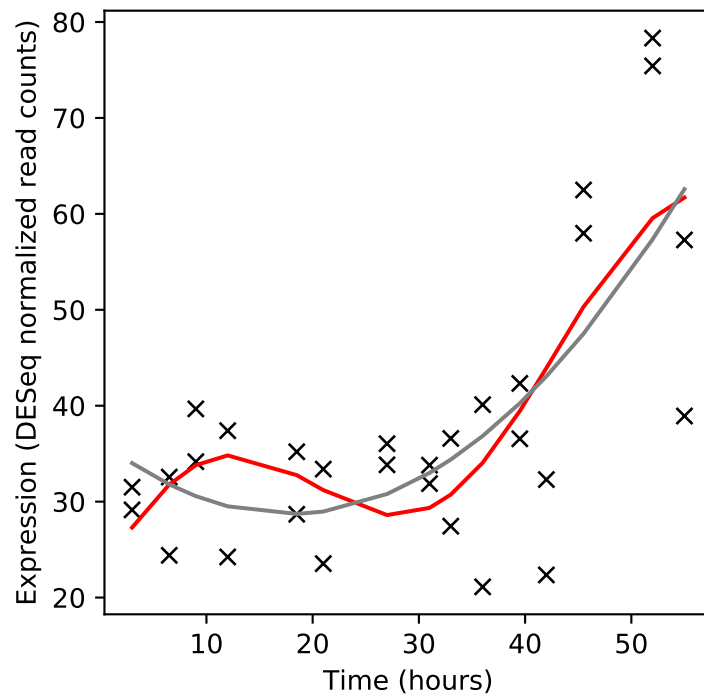

Rv3183/-

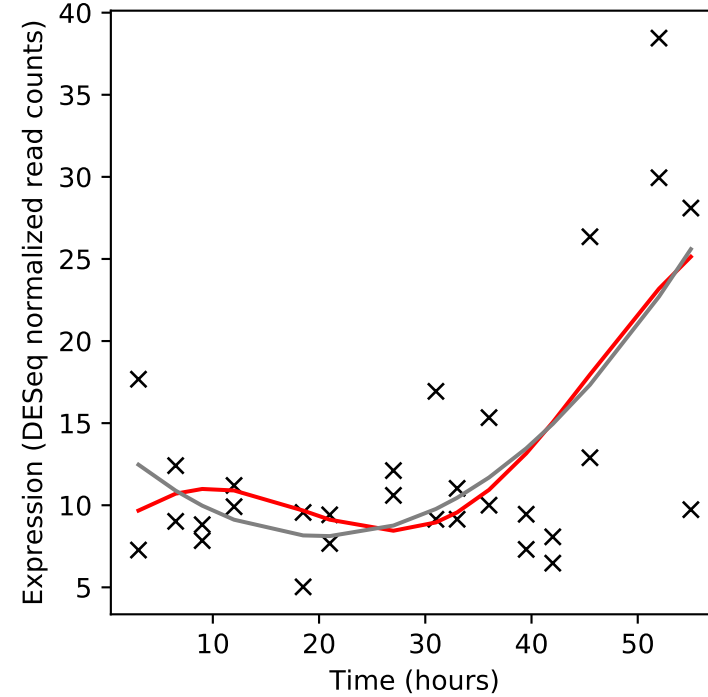

Rv3184/-

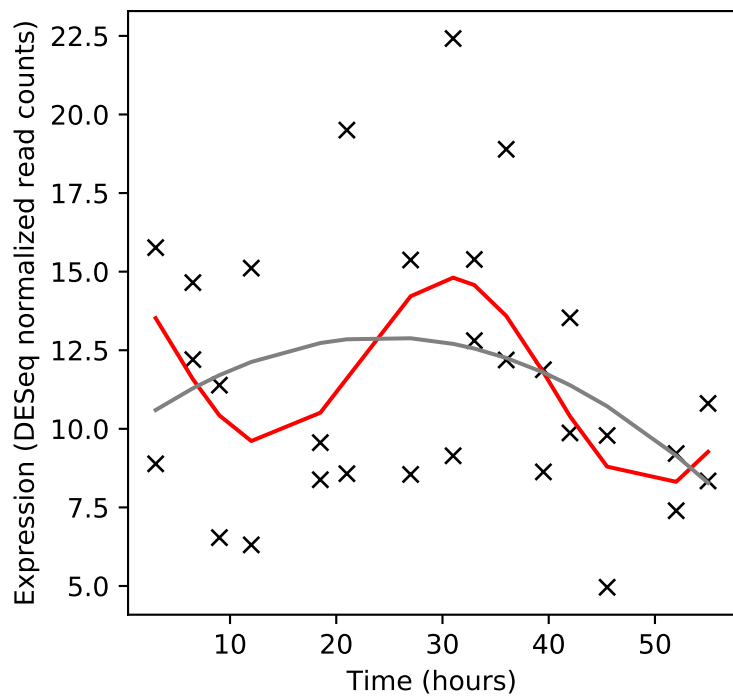

Rv3185/-

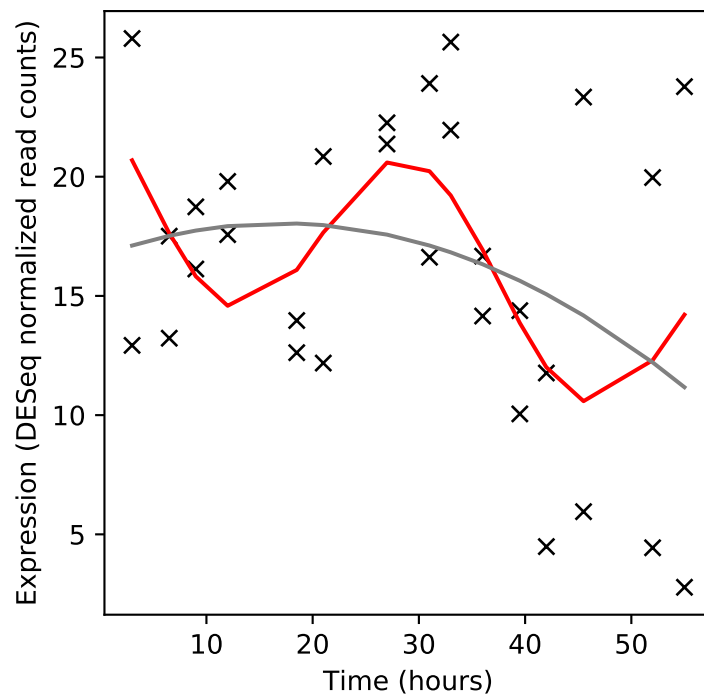

Rv3186/-

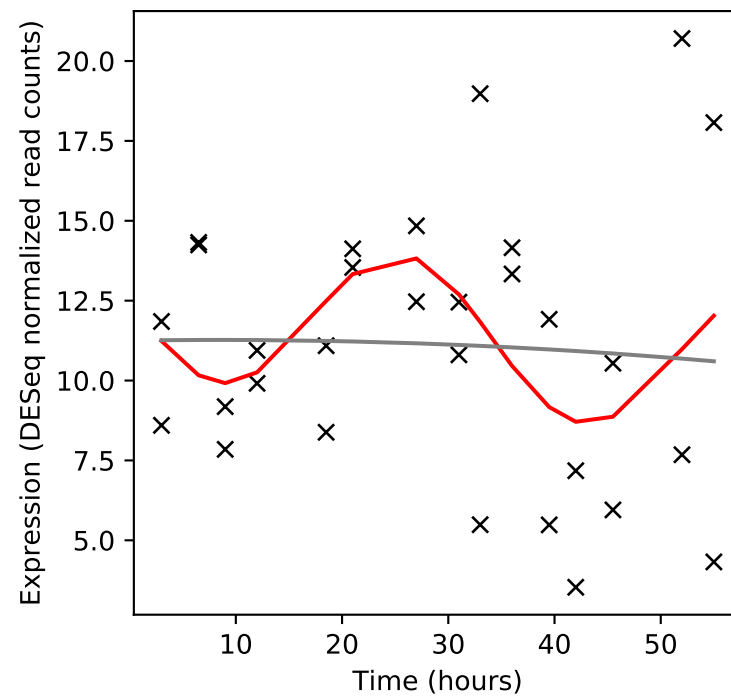

Rv3187/-

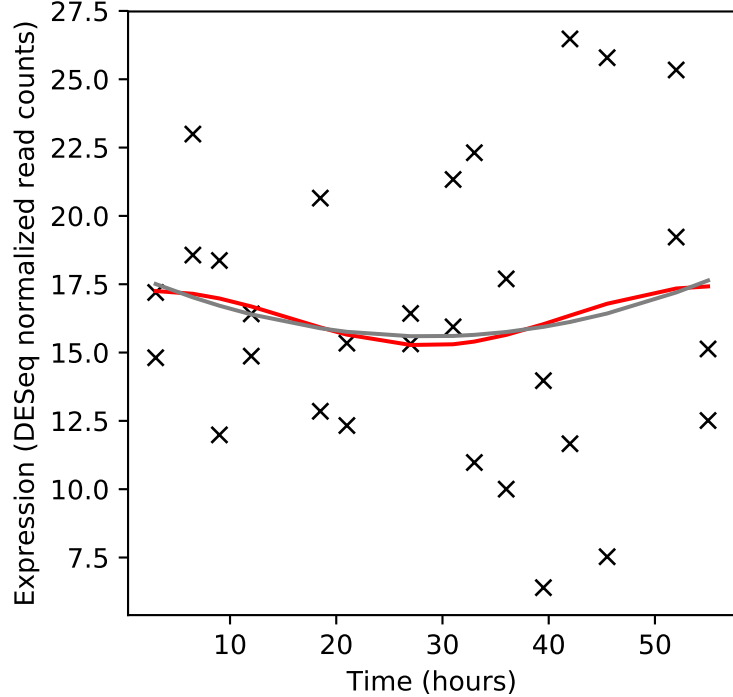

Rv3188/-

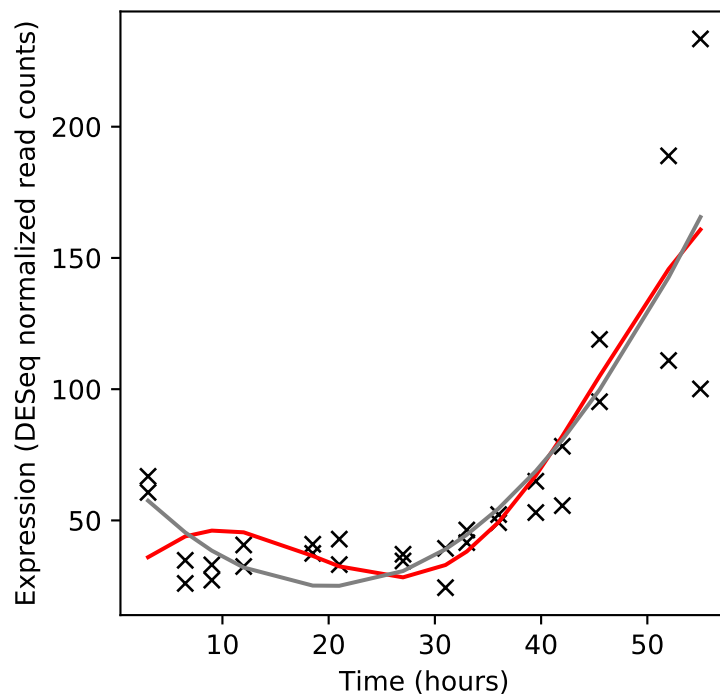

Rv3189/-

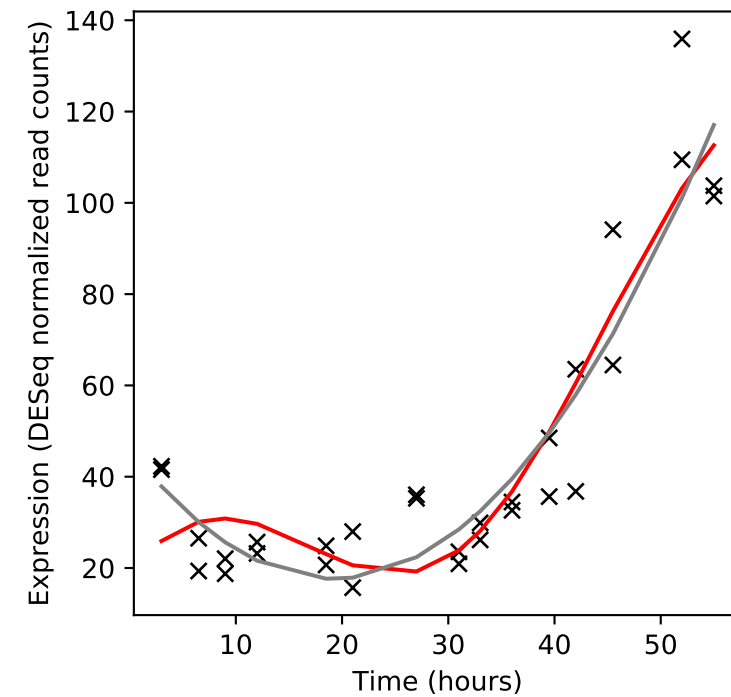

Rv3190c/-

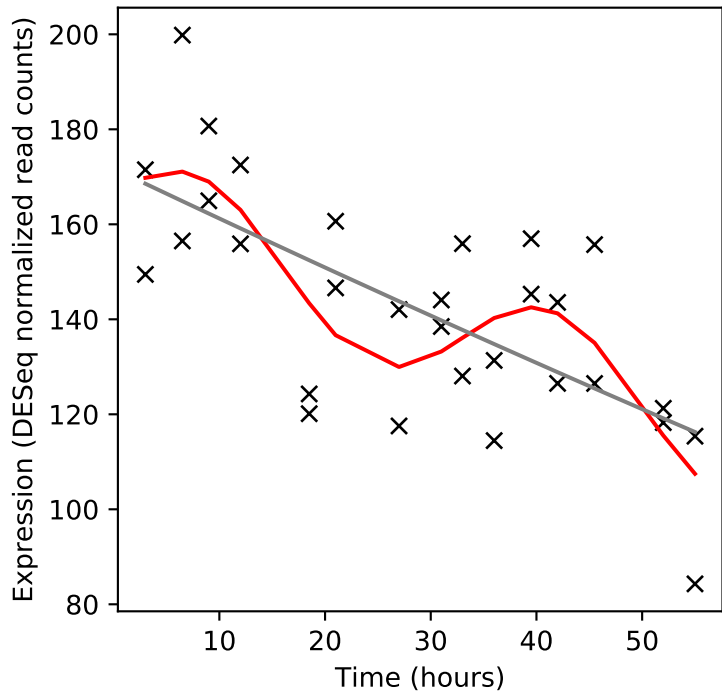

Rv3190A/-

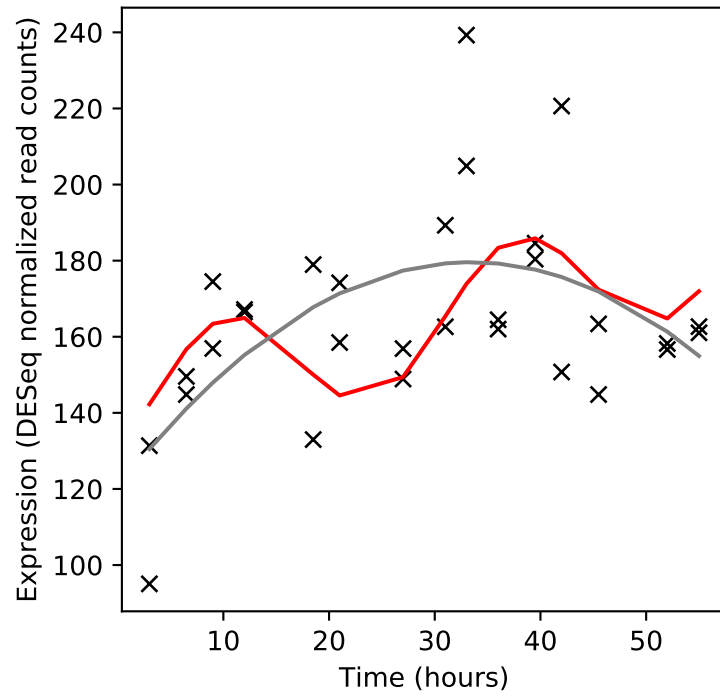

Rv3191c/-

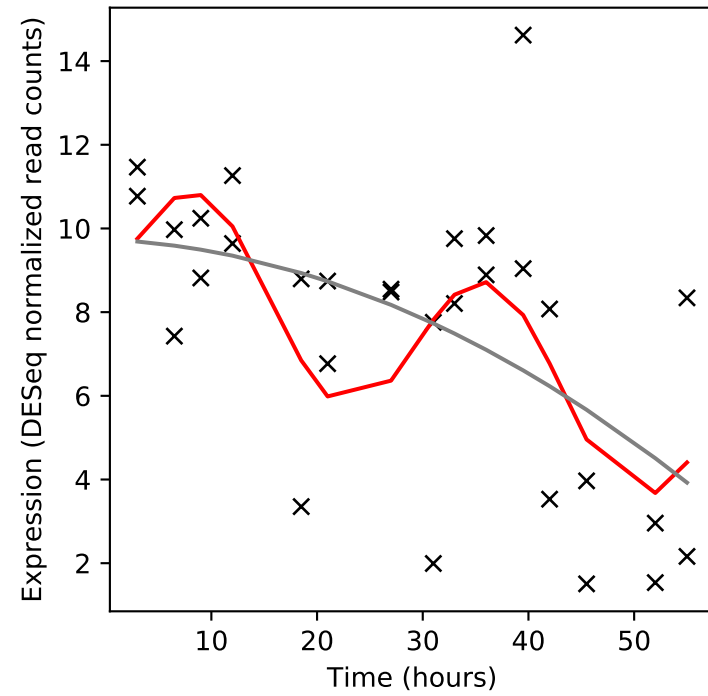

Rv3192/-

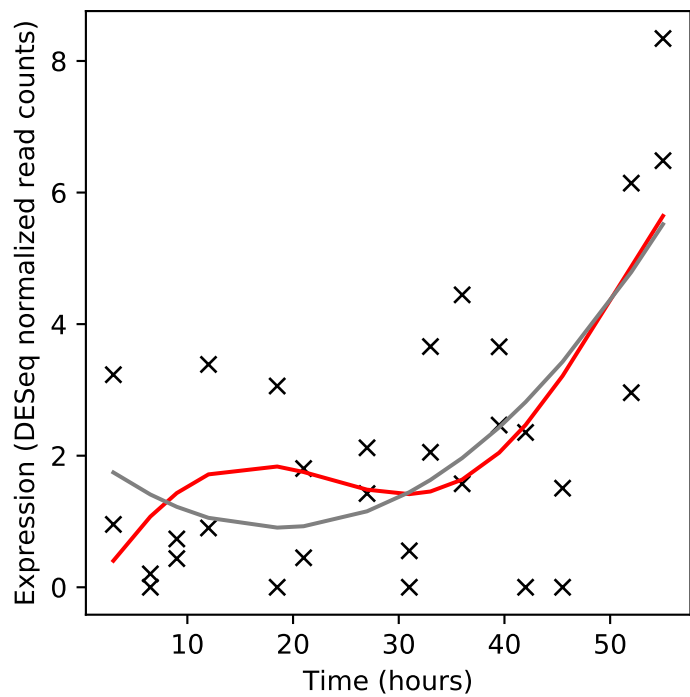

Rv3193c/-

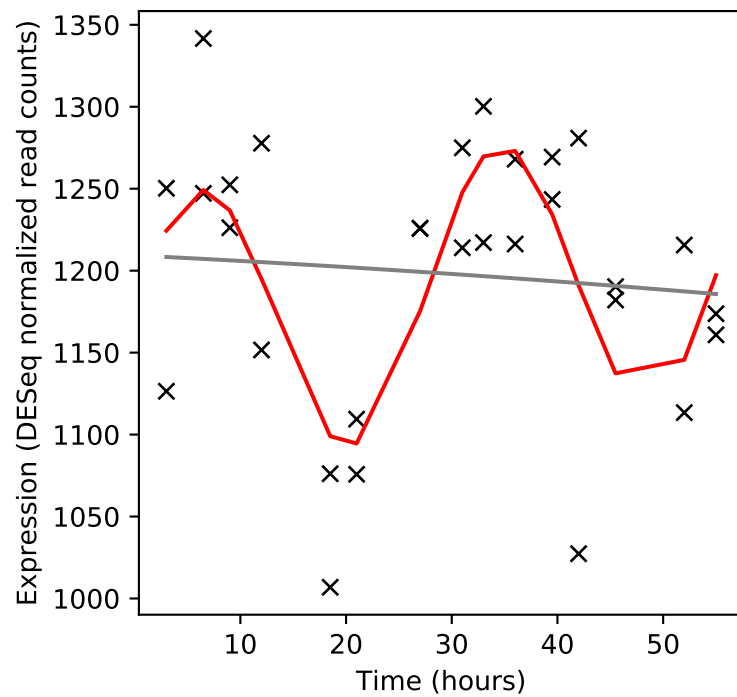

Rv3194c/-

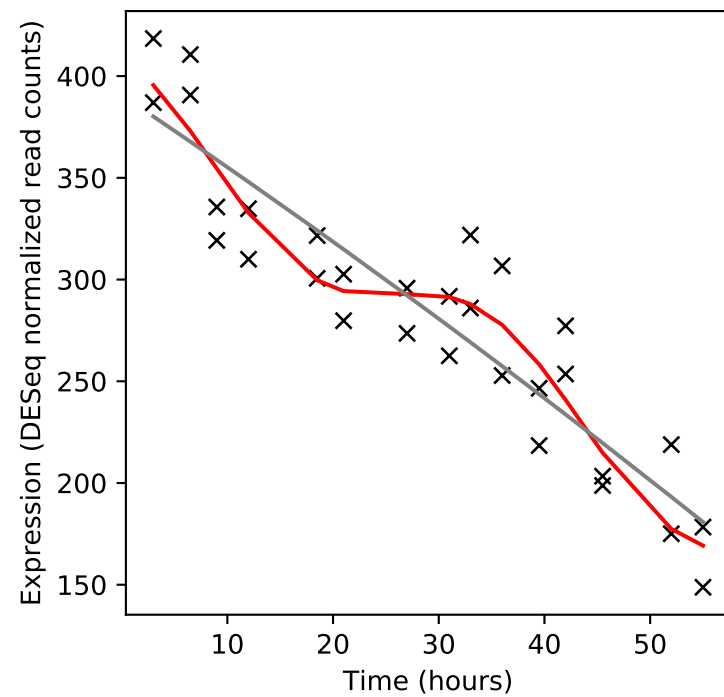

Rv3195/-

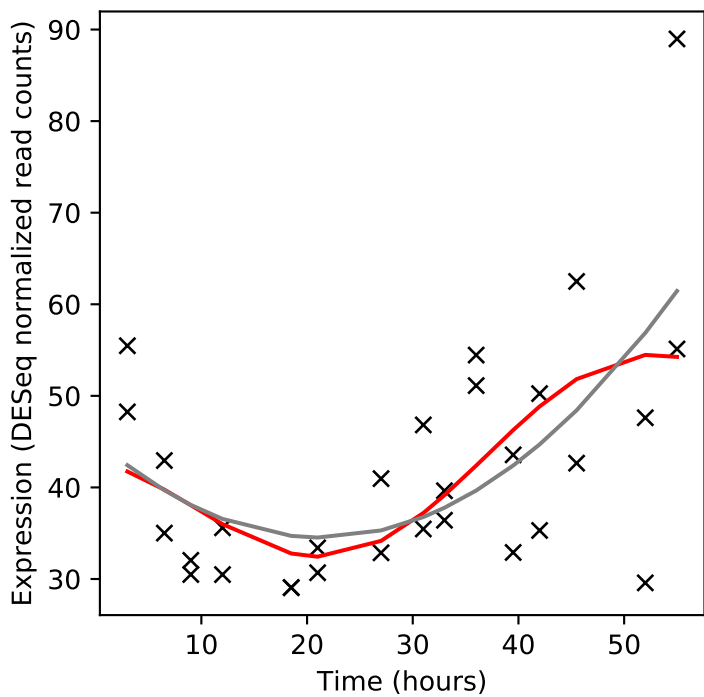

Rv3196/-

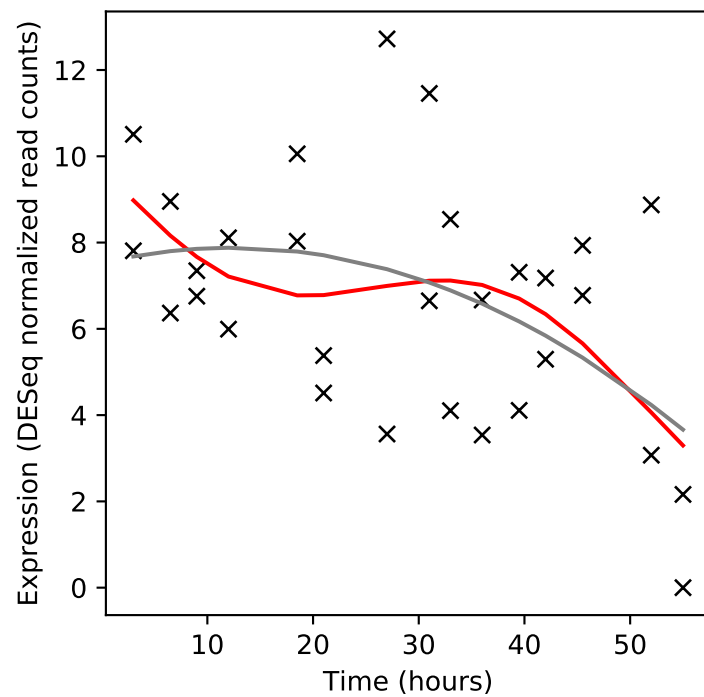

Rv3196A/-

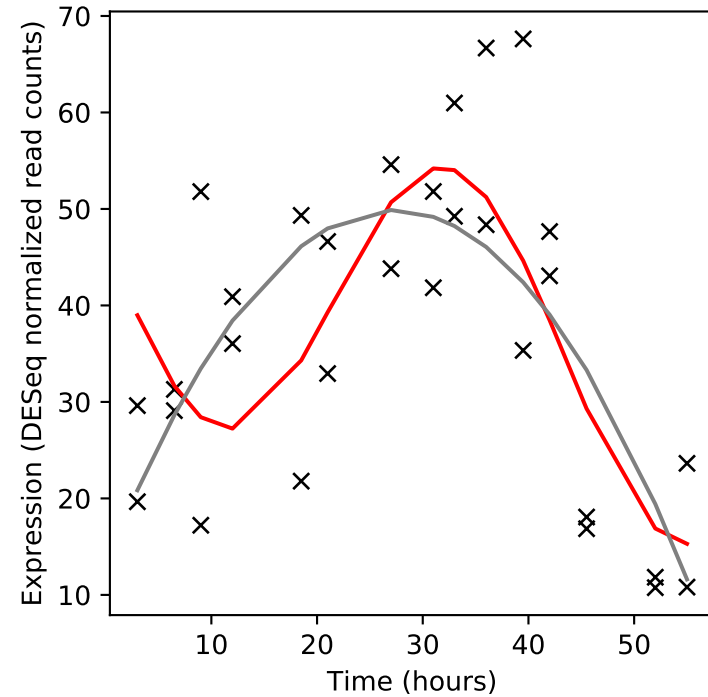

Rv3197/-

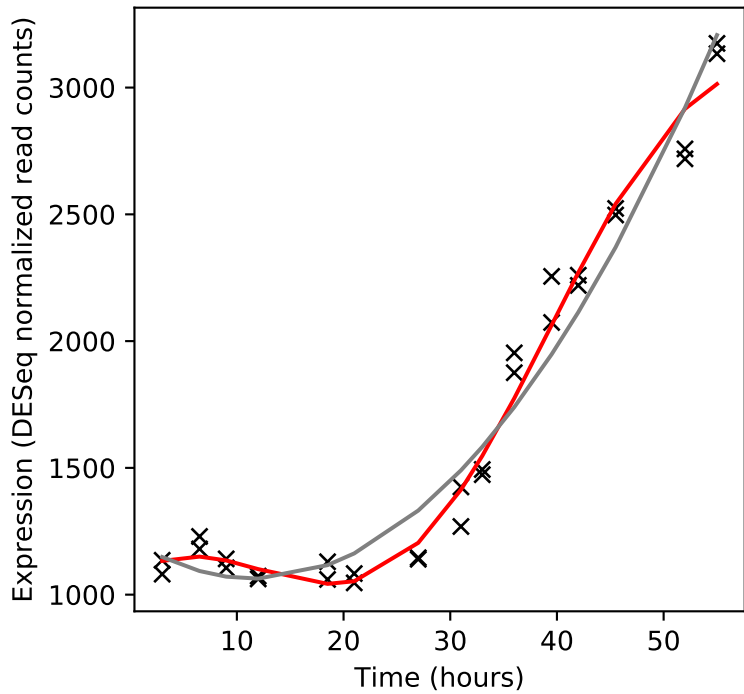

Rv3197A/whiB7

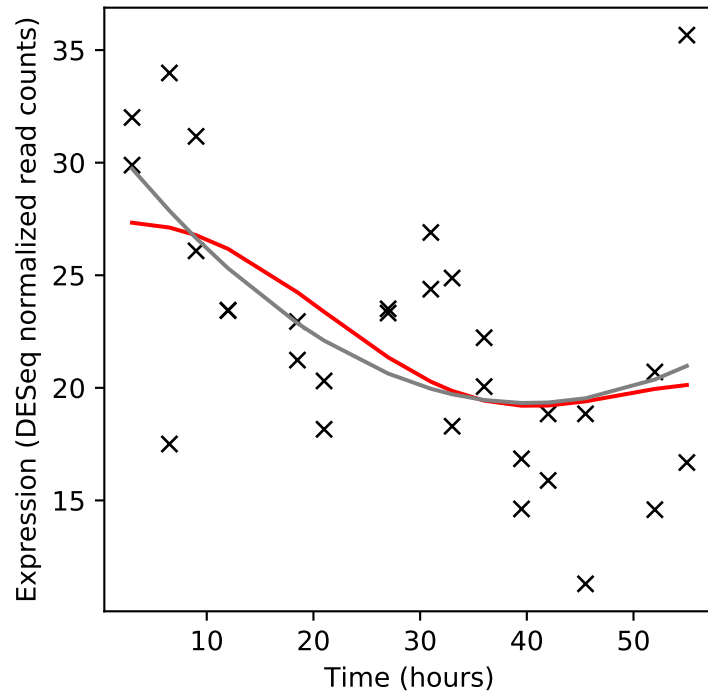

Rv3198c/uvrD2

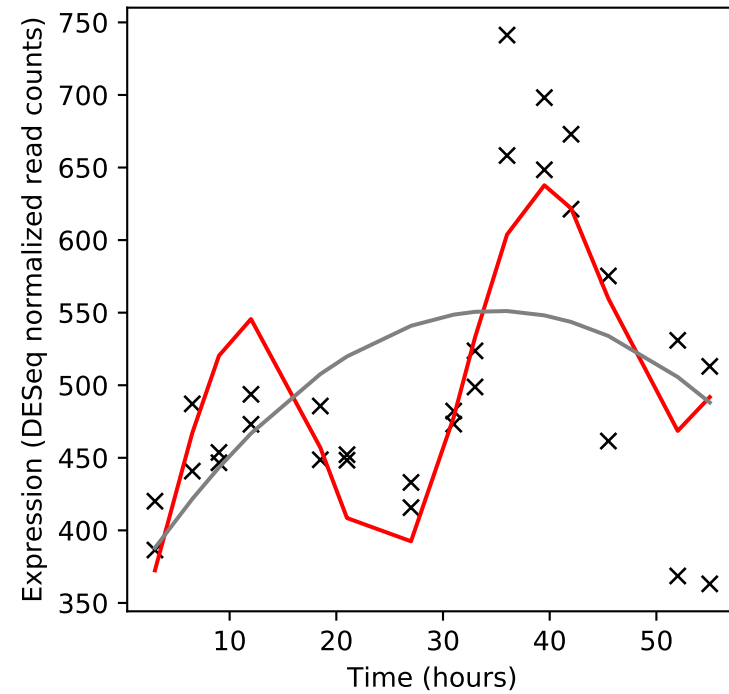

Rv3198A/-

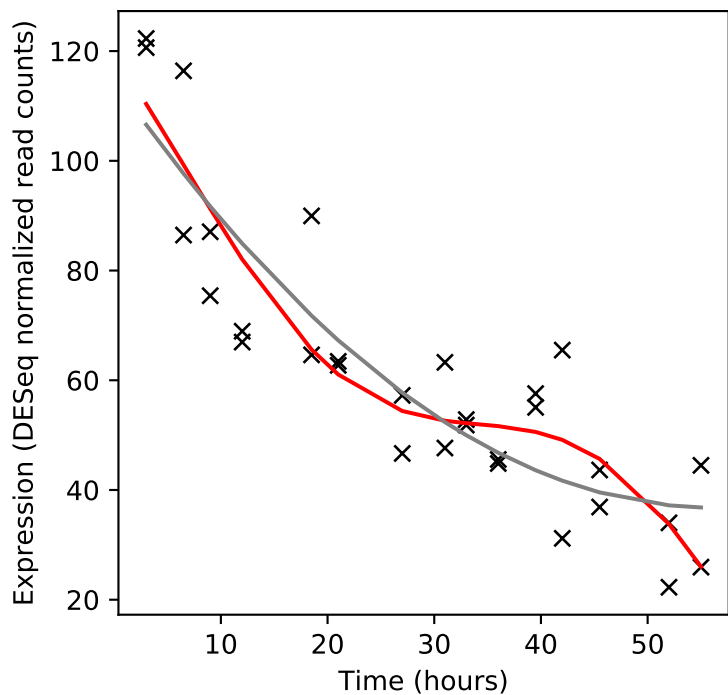

Rv3199c/nudC

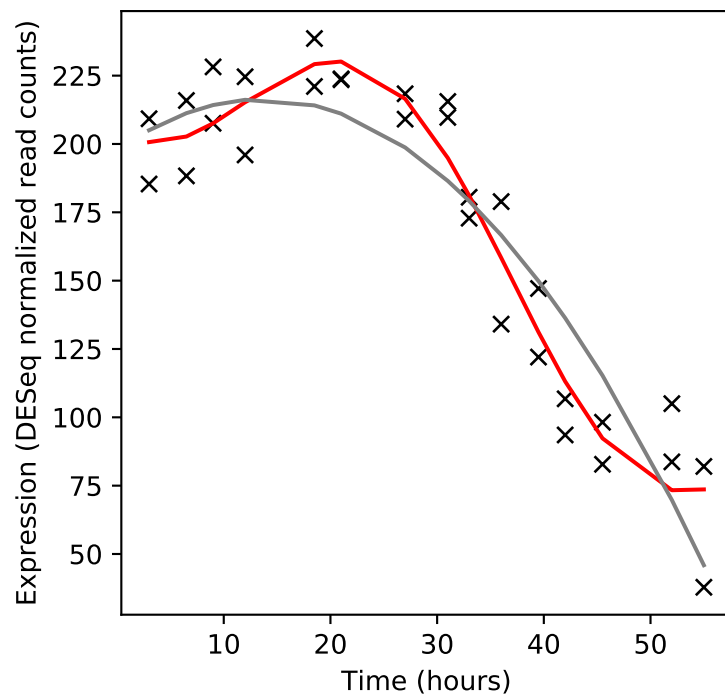

Rv3200c/-

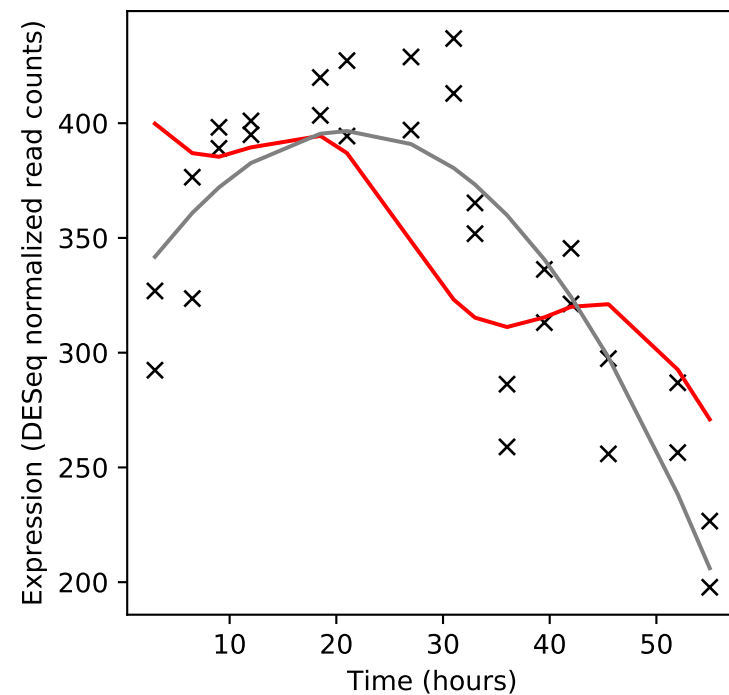

Rv3201c/-

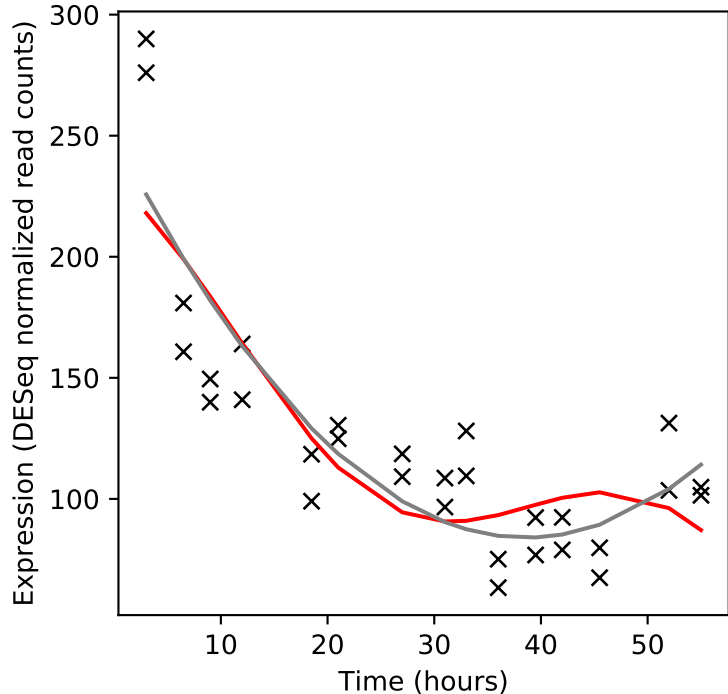

Rv3202c/-

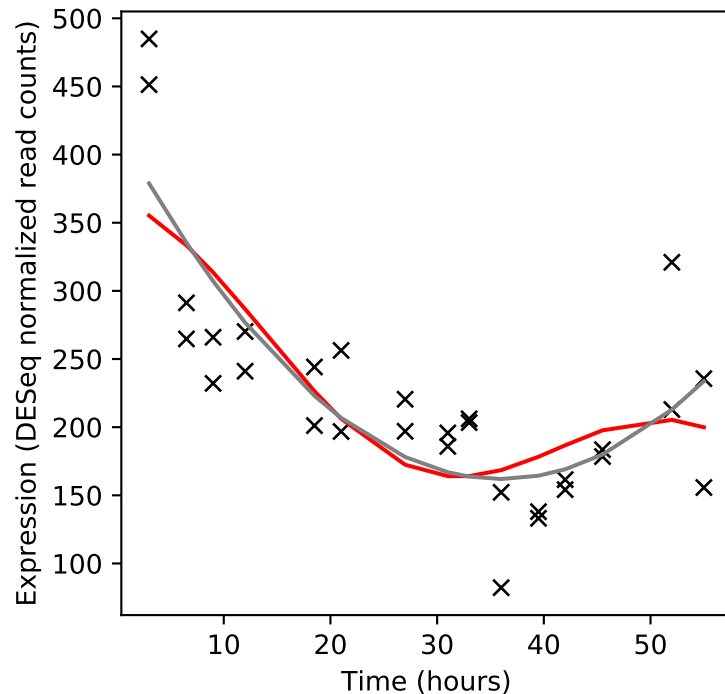

Rv3203/lipV

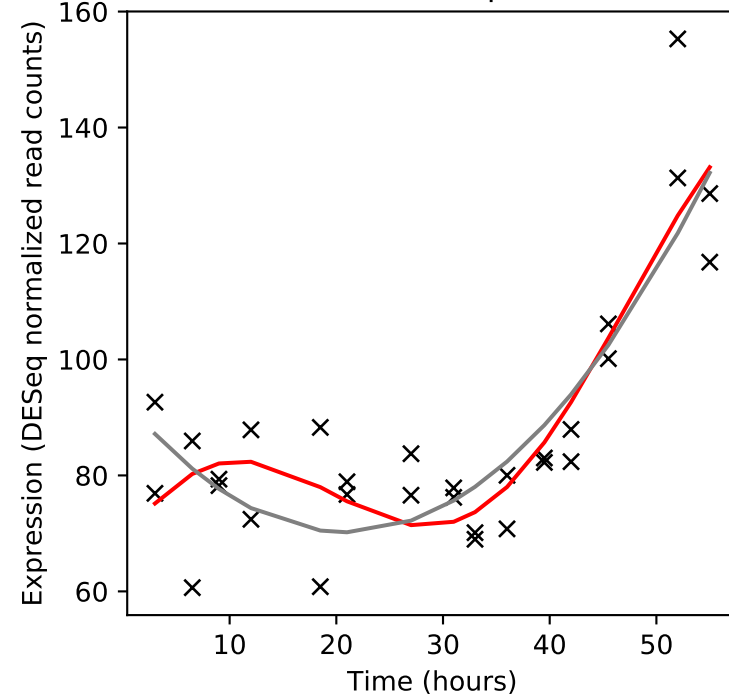

Rv3204/-

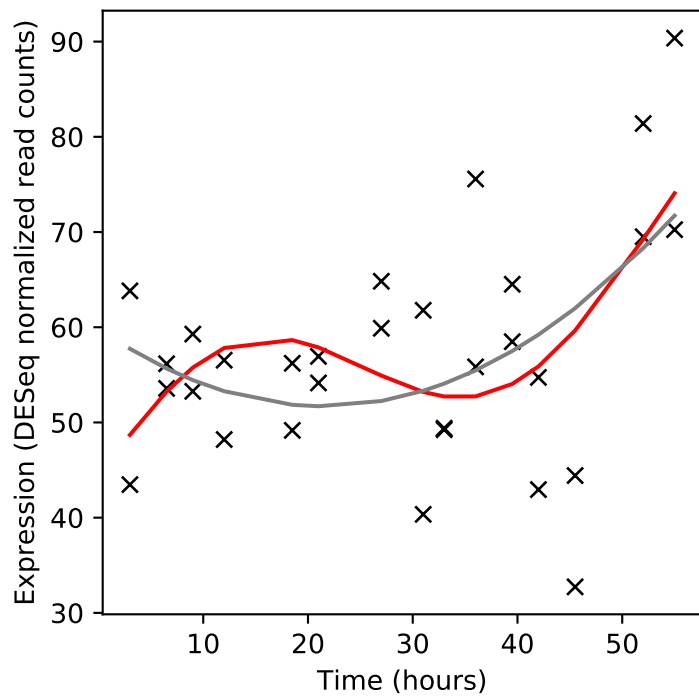

Rv3205c/-

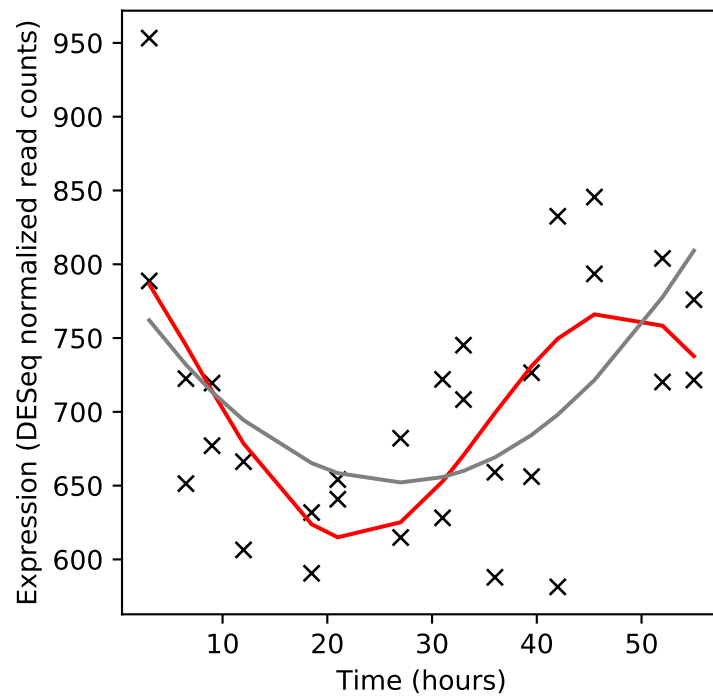

Rv3206c/moeB1

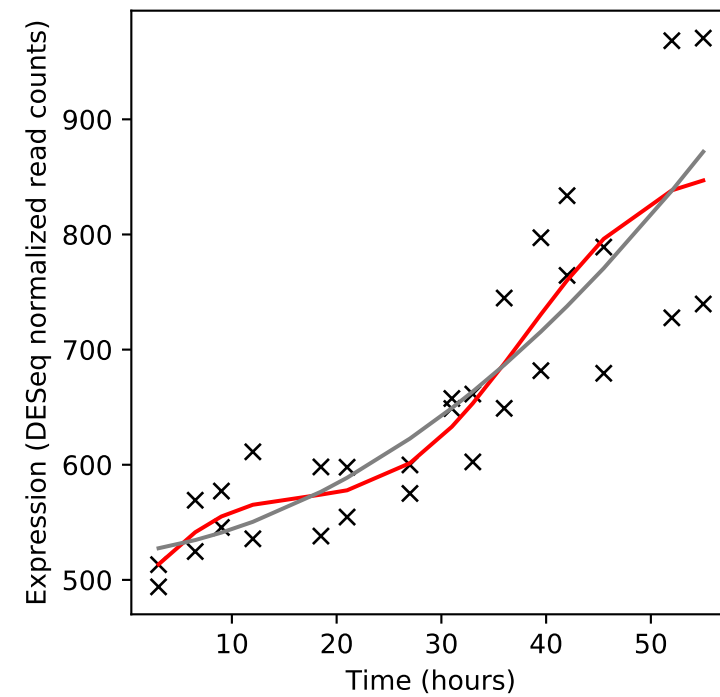

Rv3207c/-

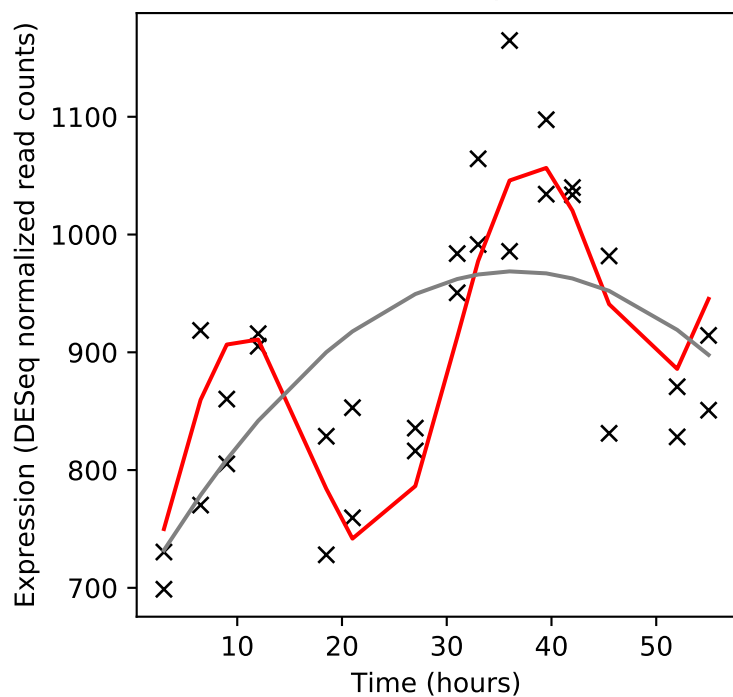

Rv3208/-

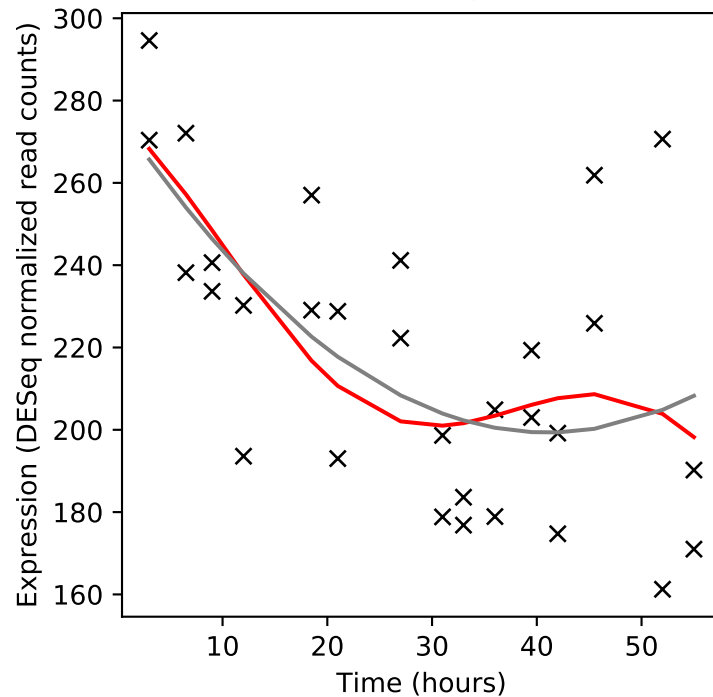

Rv3208A/TB9.4

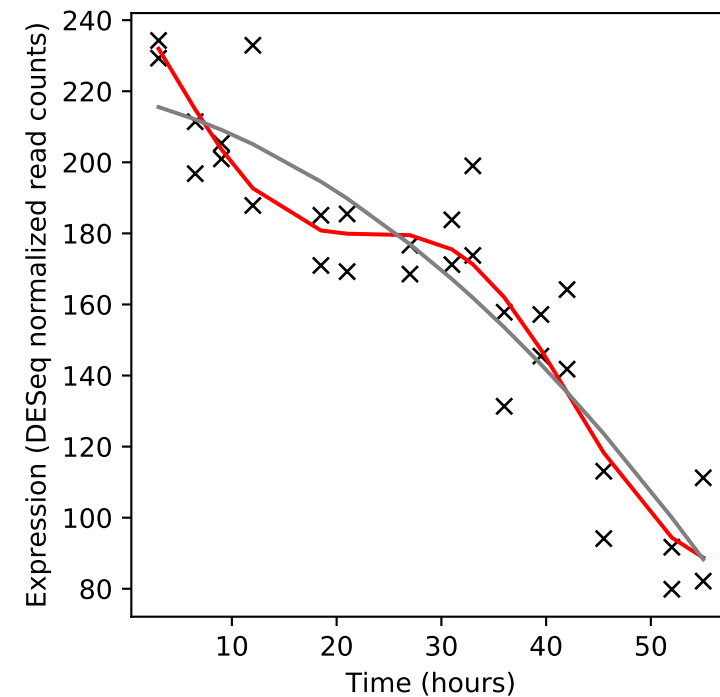

Rv3209/-

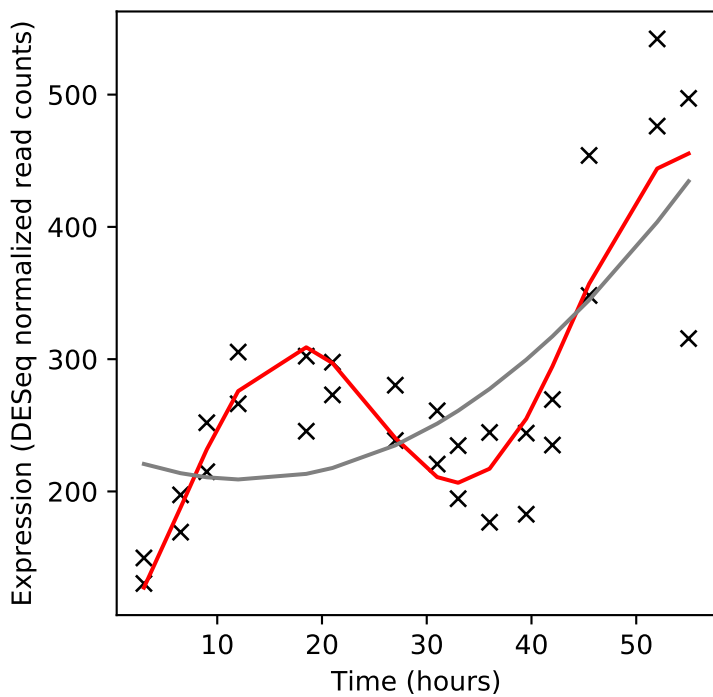

Rv3210c/-

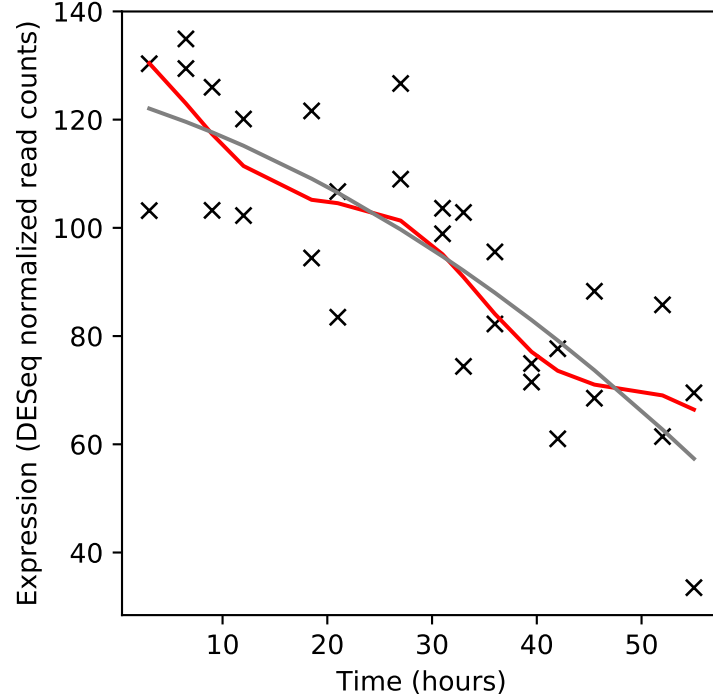

Rv3211/rhIE

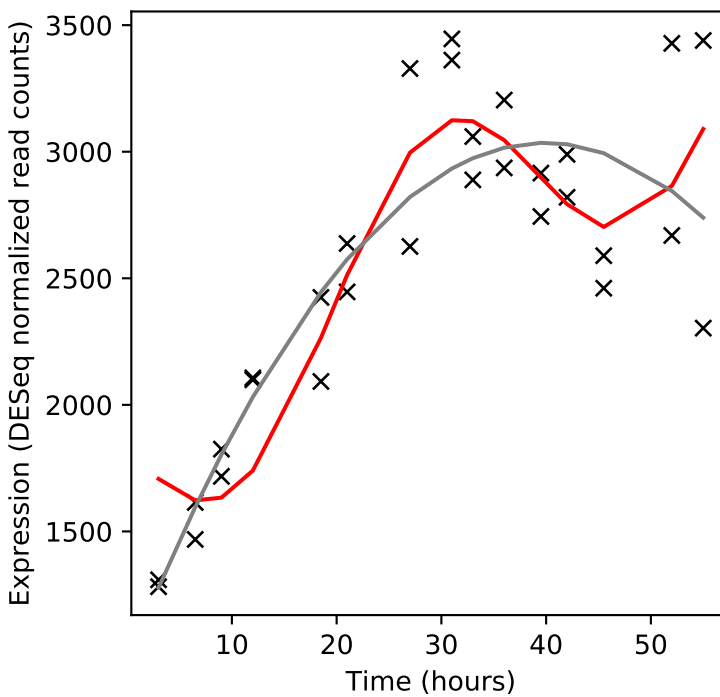



Rv3212/-

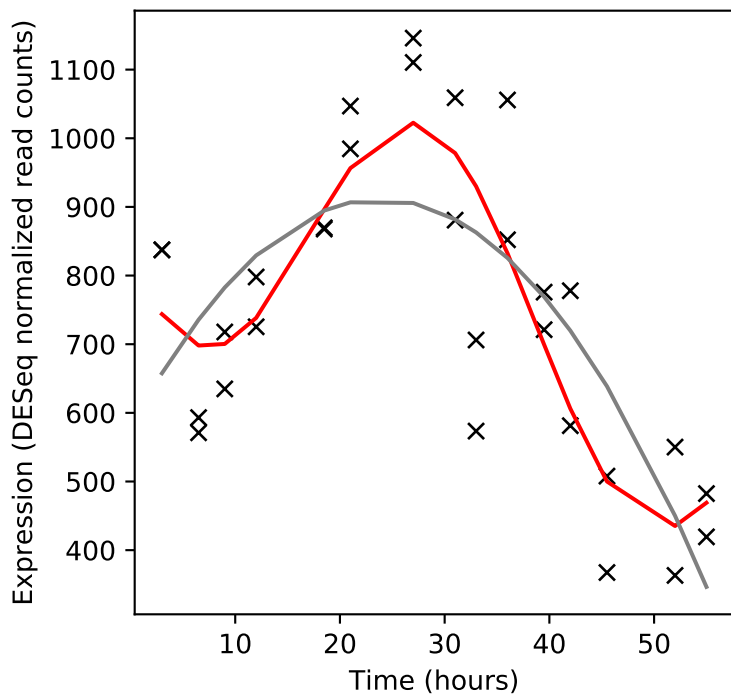

Rv3213c/-

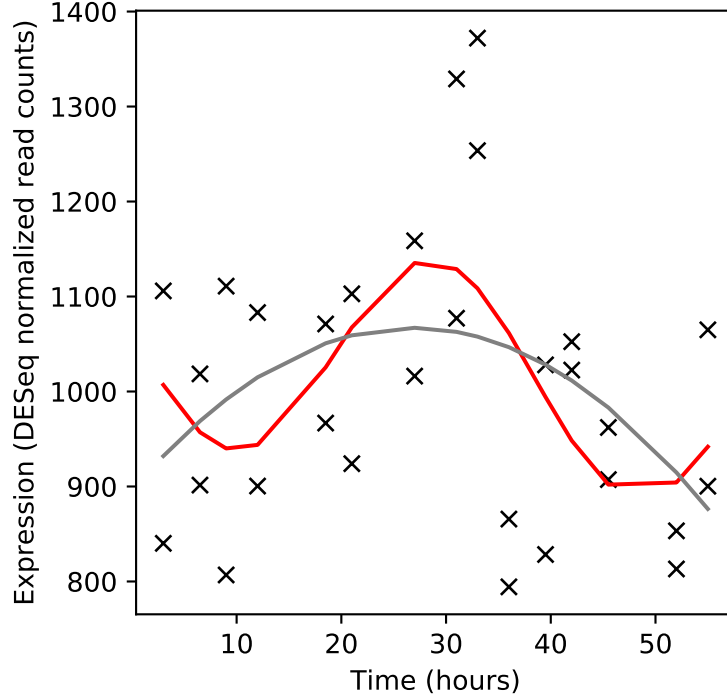

Rv3214/gpm2

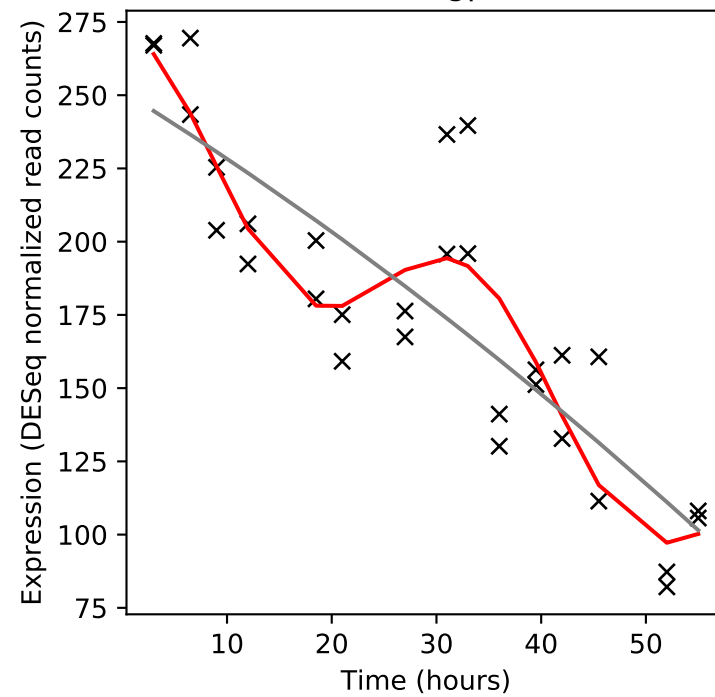

Rv3215/entC

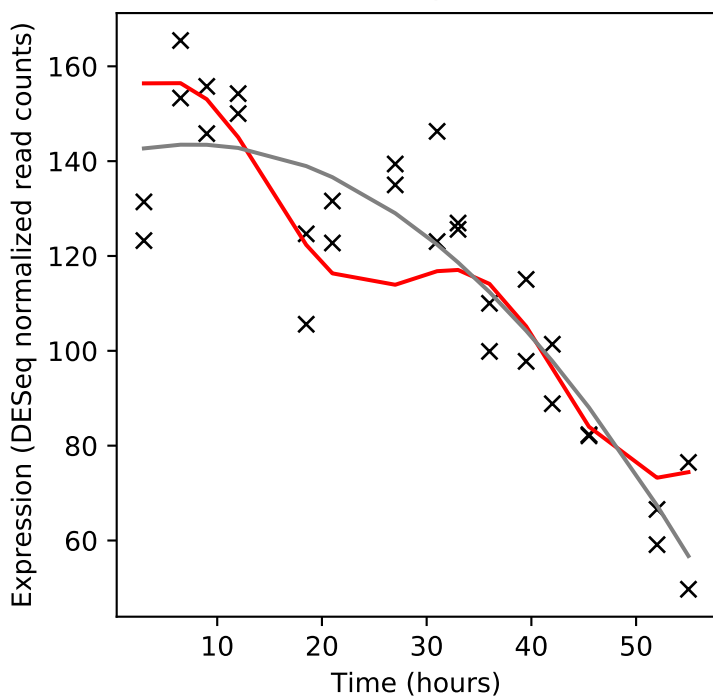

Rv3217c/-

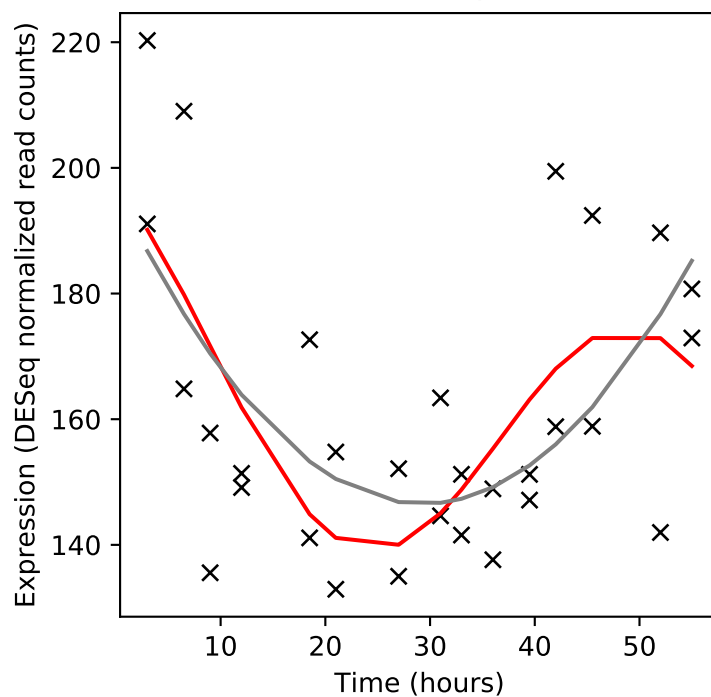

Rv3218/-

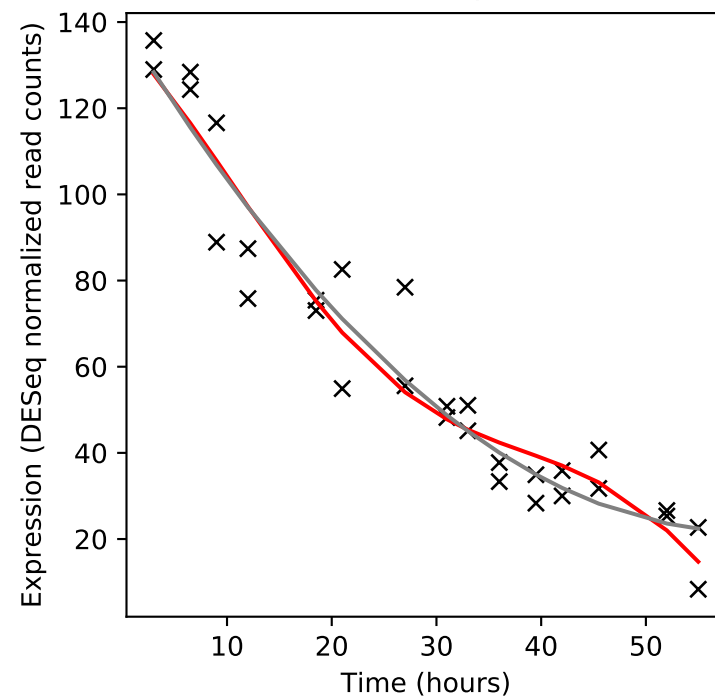

Rv3219/whiB1

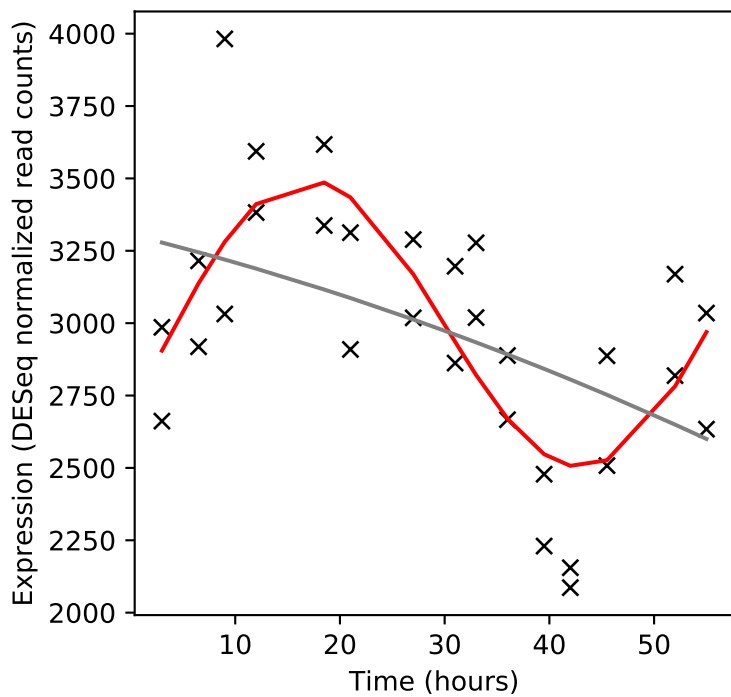

Rv3220c/-

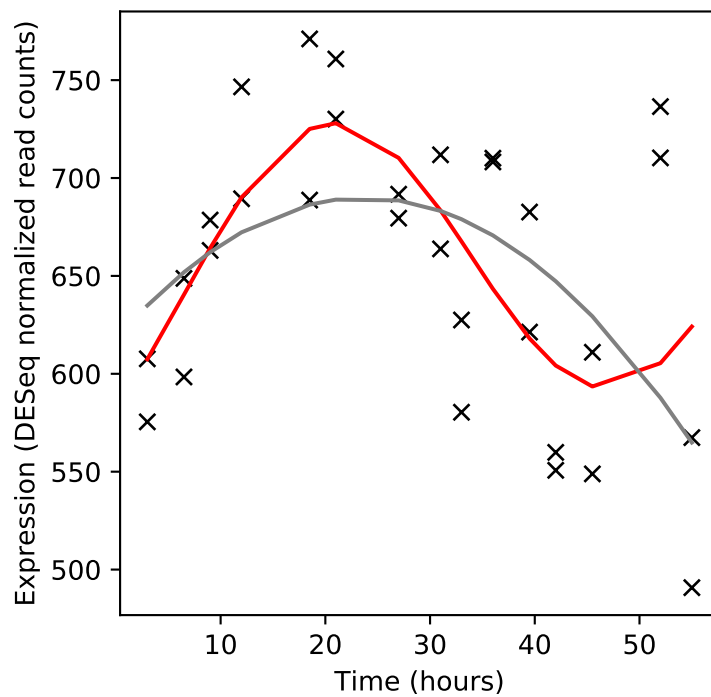

Rv3221c/TB7.3

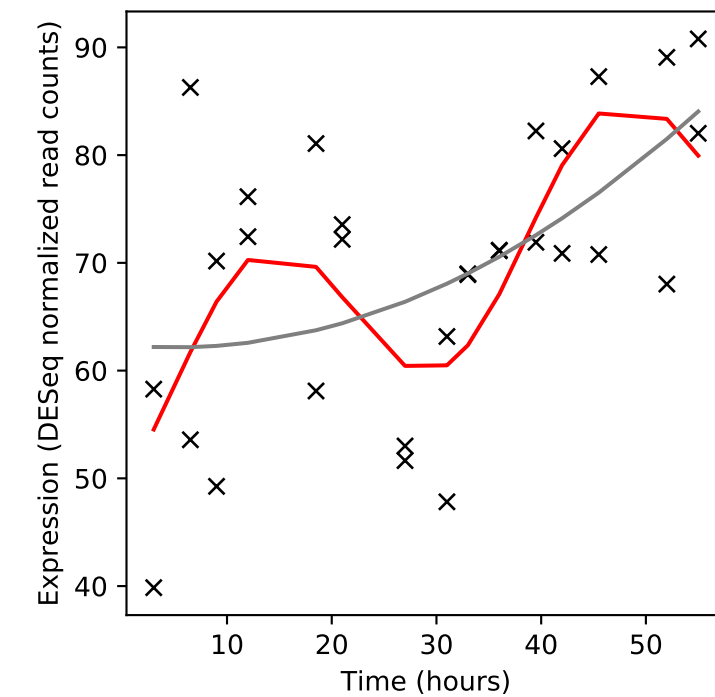

Rv3221A/rshA

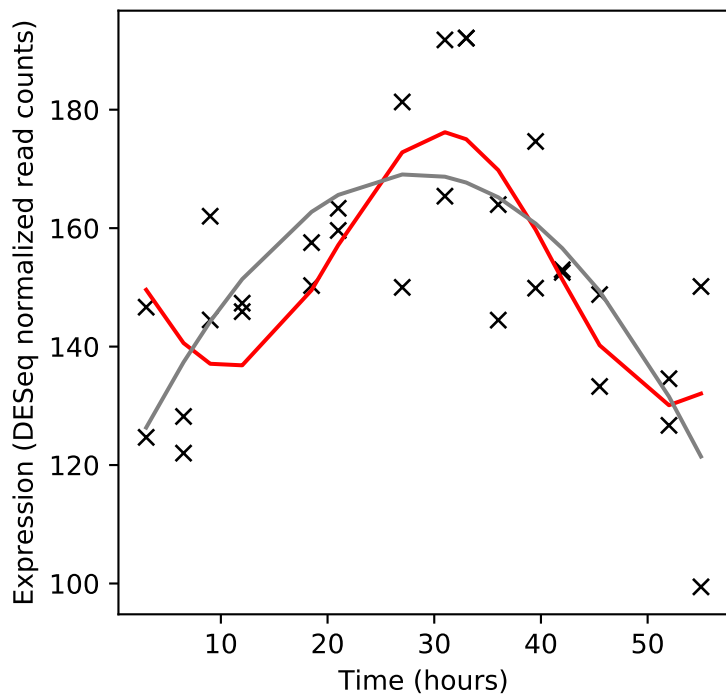

Rv3222c/-

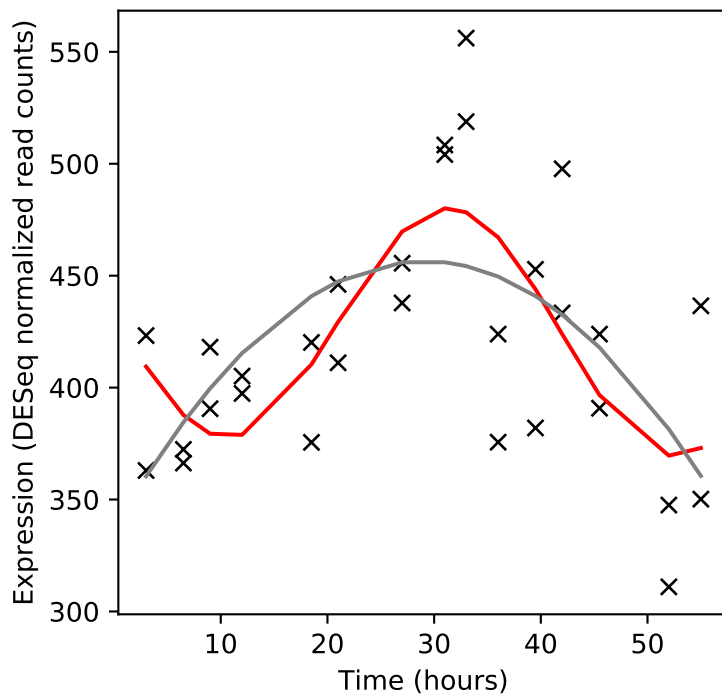

Rv3223c/sigH

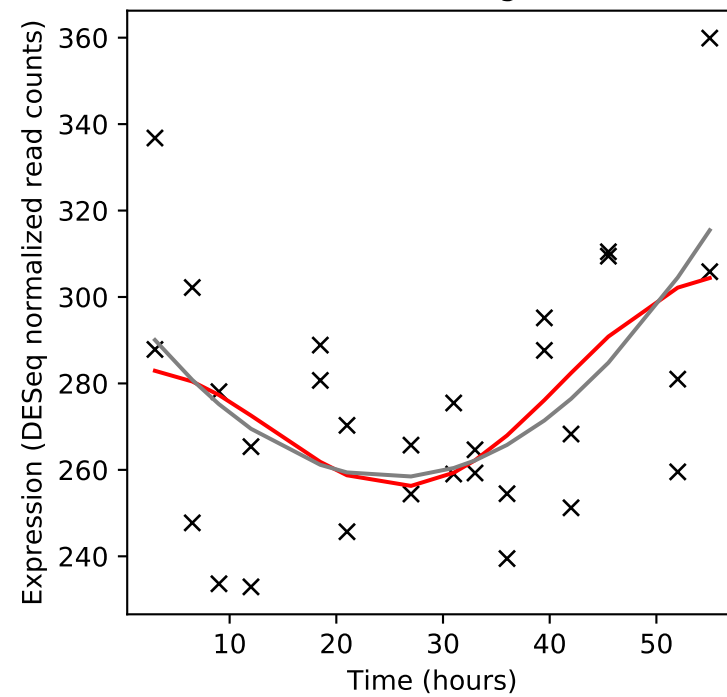

Rv3224/-

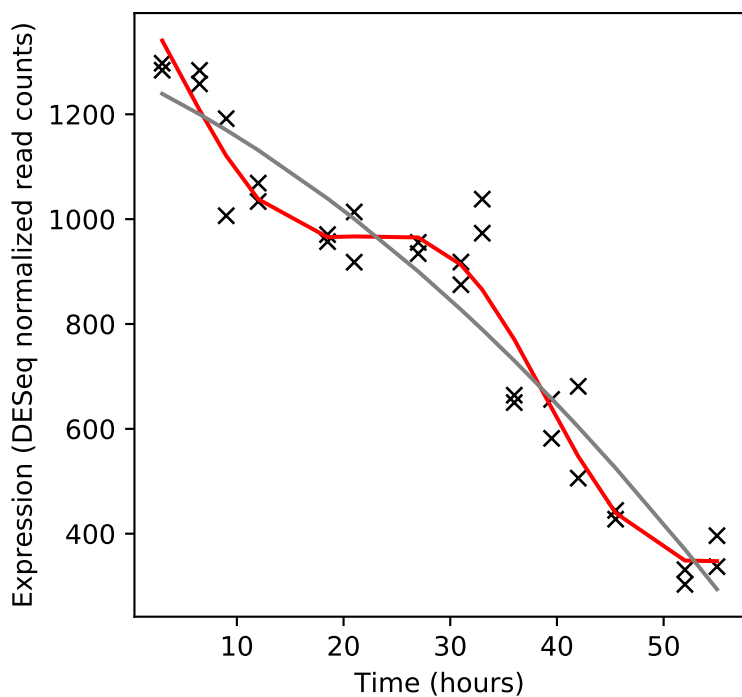

Rv3224A/-

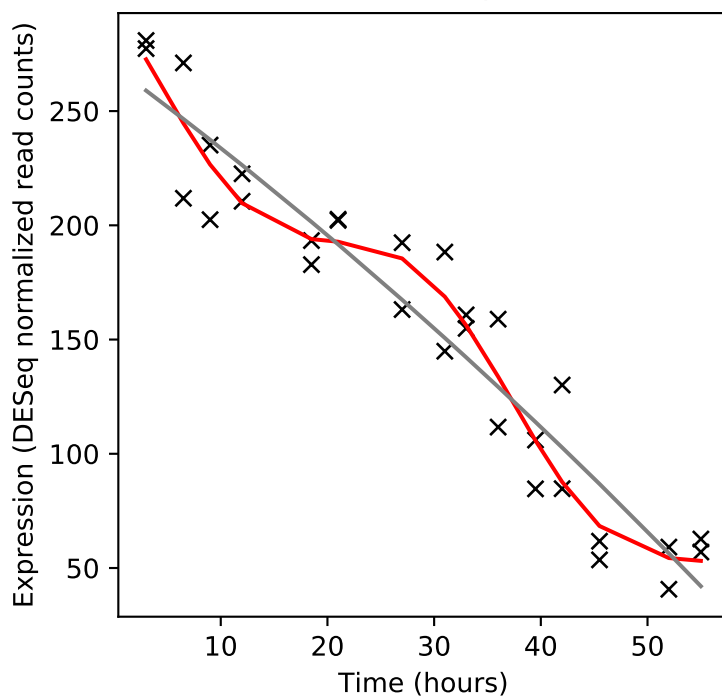

Rv3224B/-

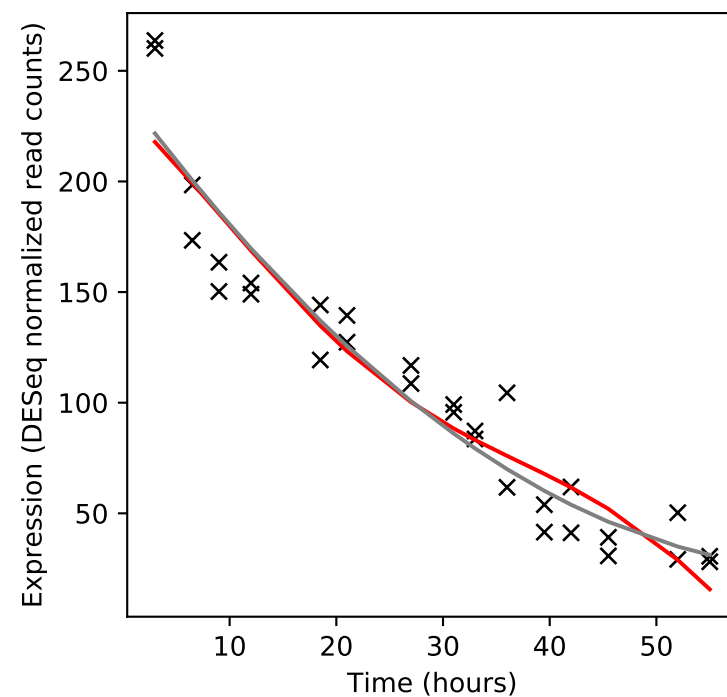

Rv3225c/-

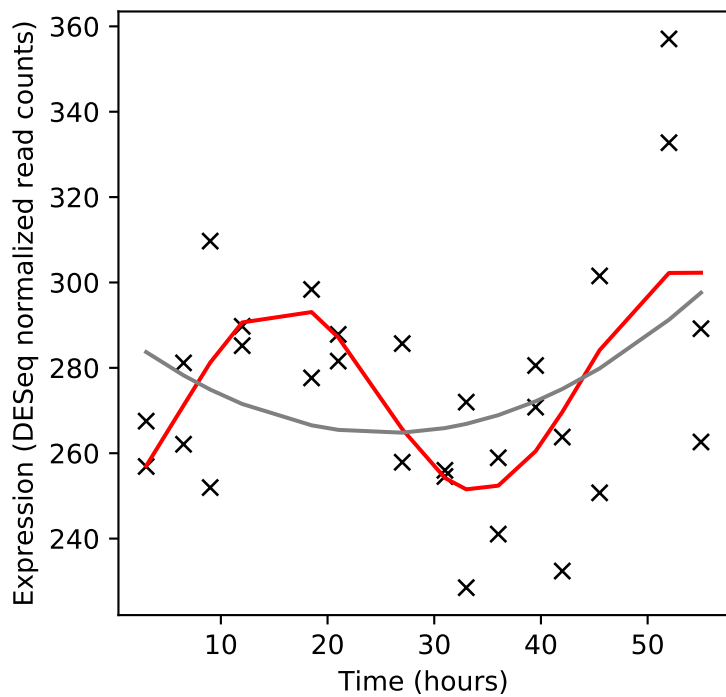

Rv3226c/-

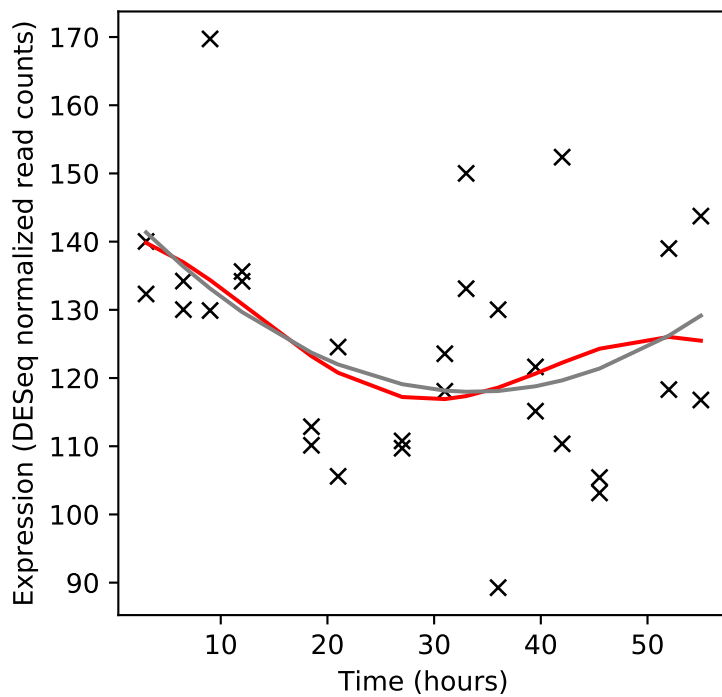

Rv3227/aroA

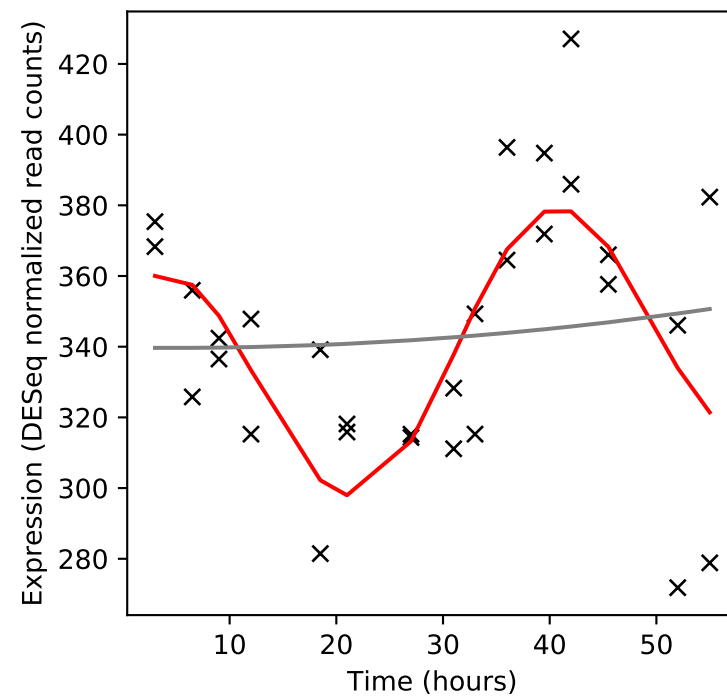

Rv3228/-

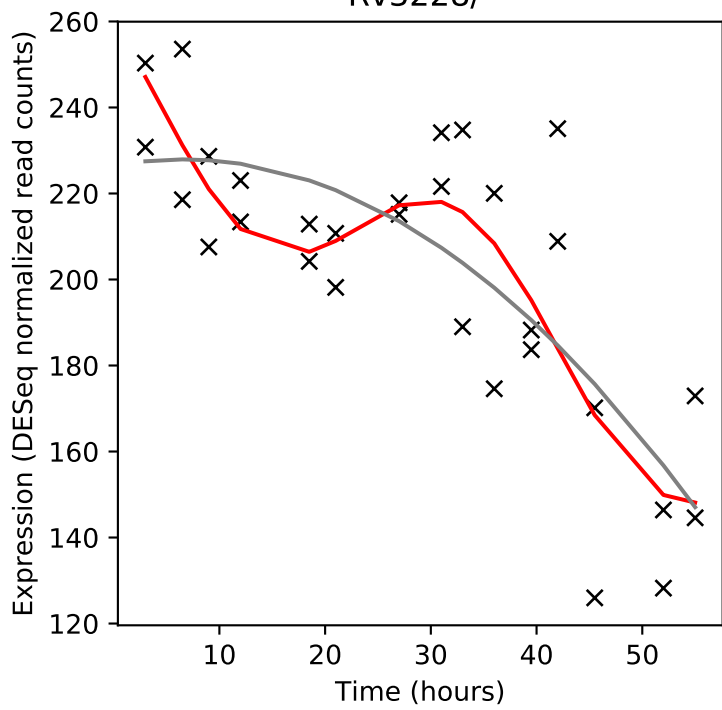

Rv3229c/desA3

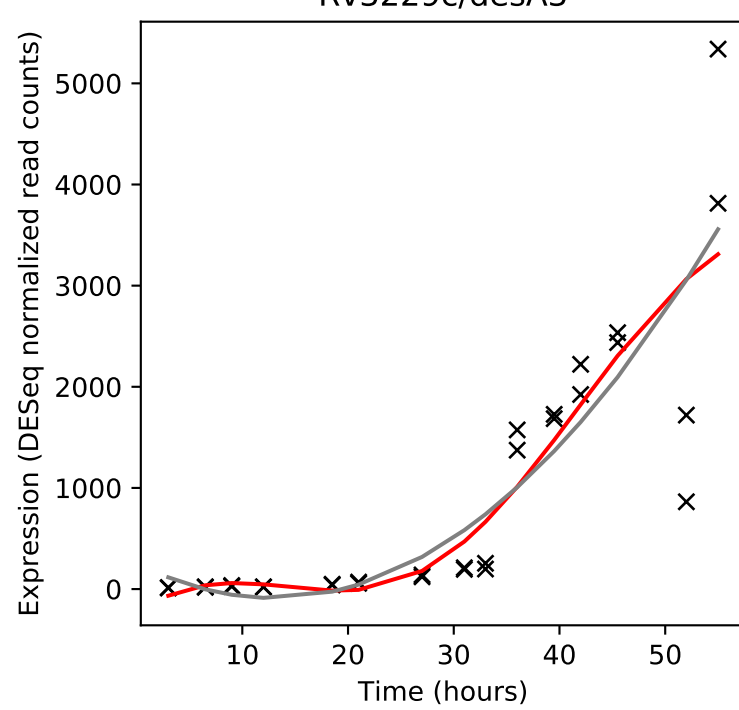

Rv3230c/-

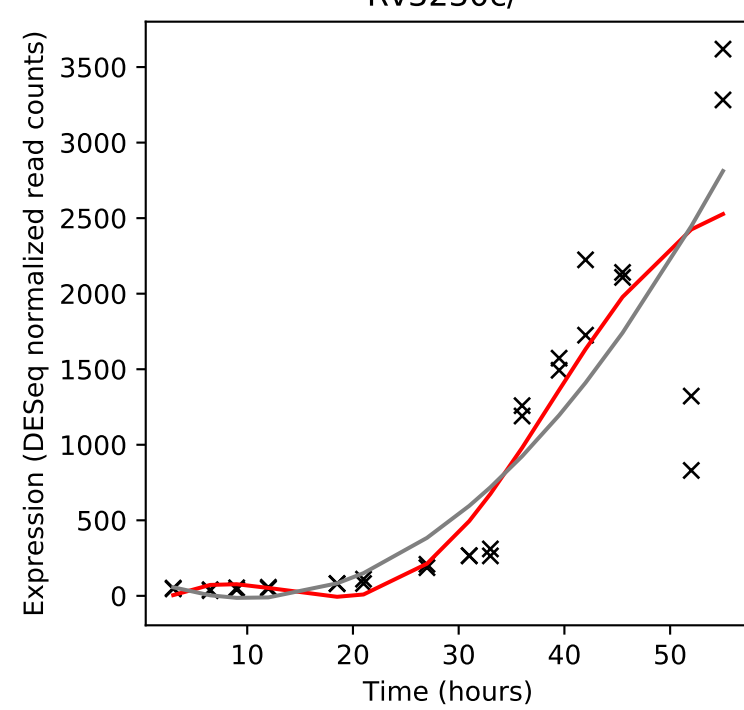

Rv3231c/-

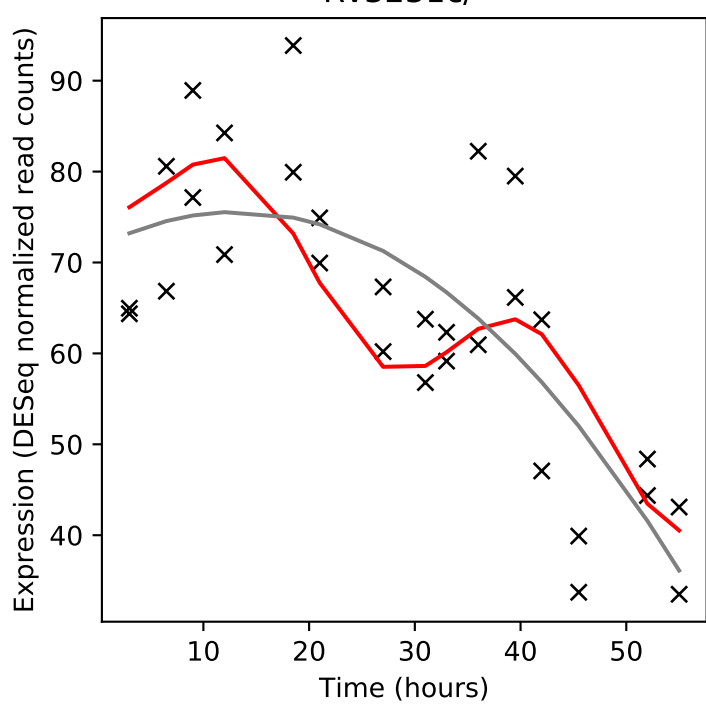

Rv3232c/ppk2

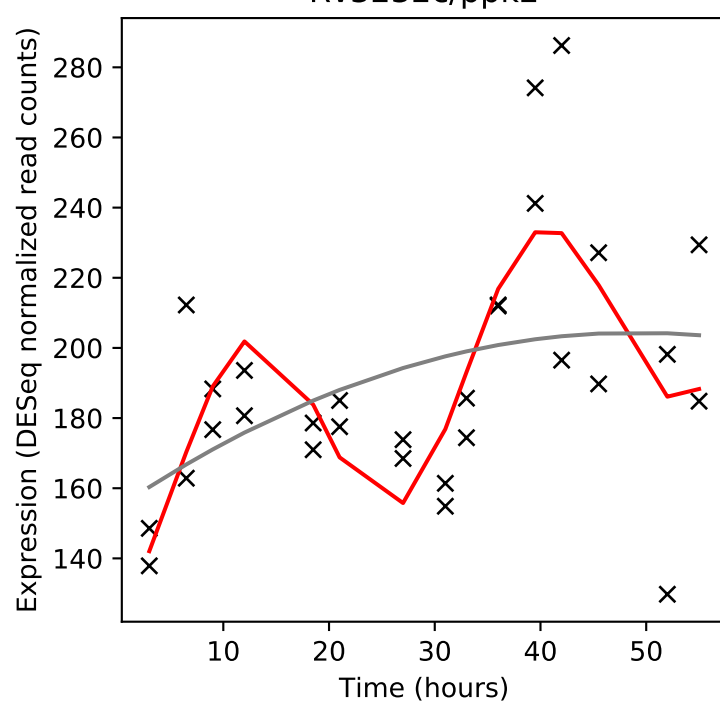

Rv3233c/-

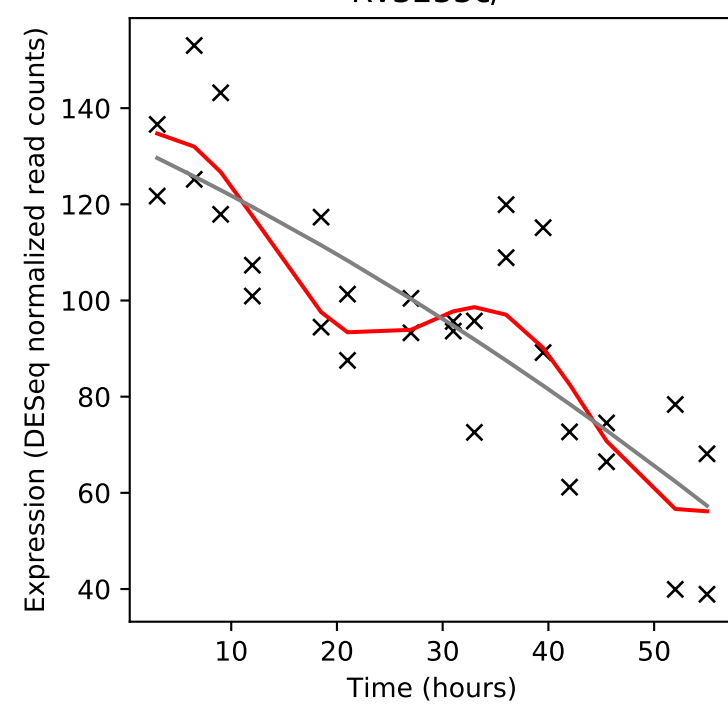

Rv3234c/tgs3

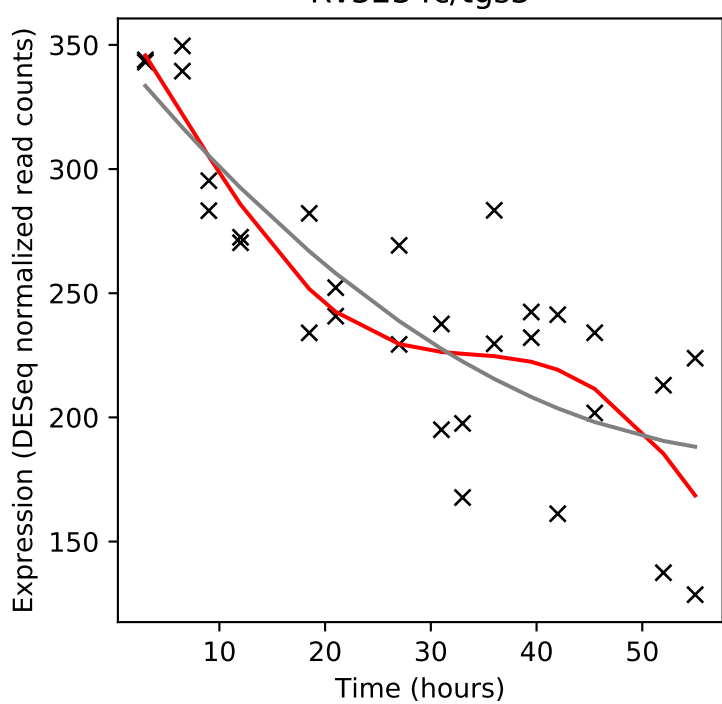

Rv3235/-

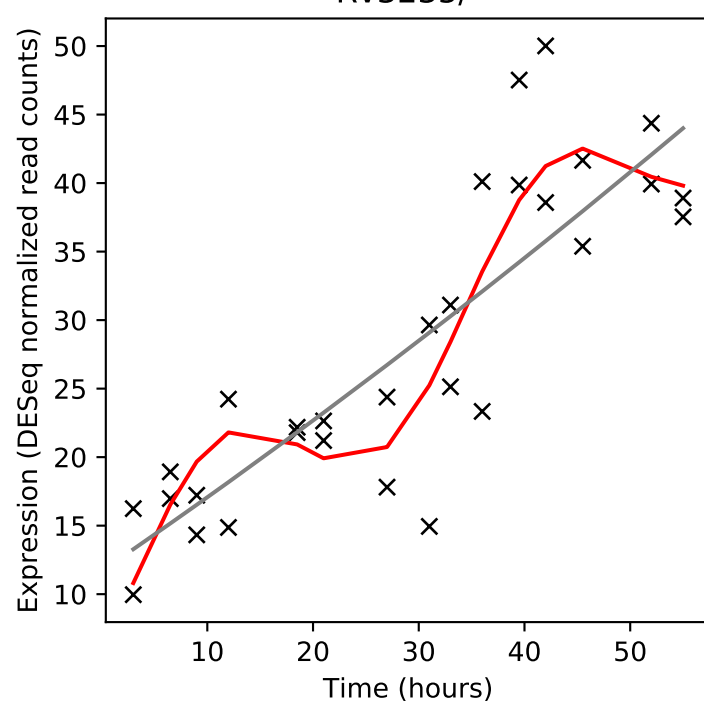

Rv3236c/-

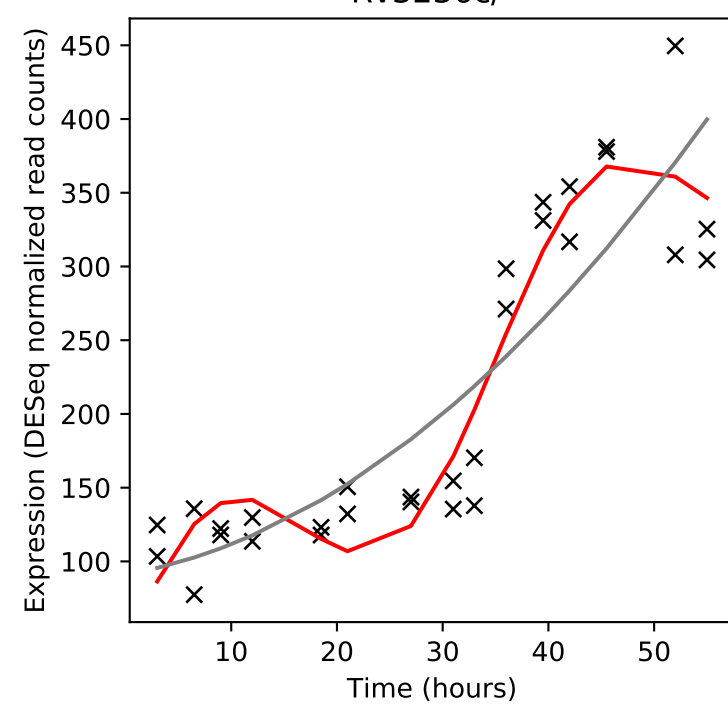

Rv3237c/-

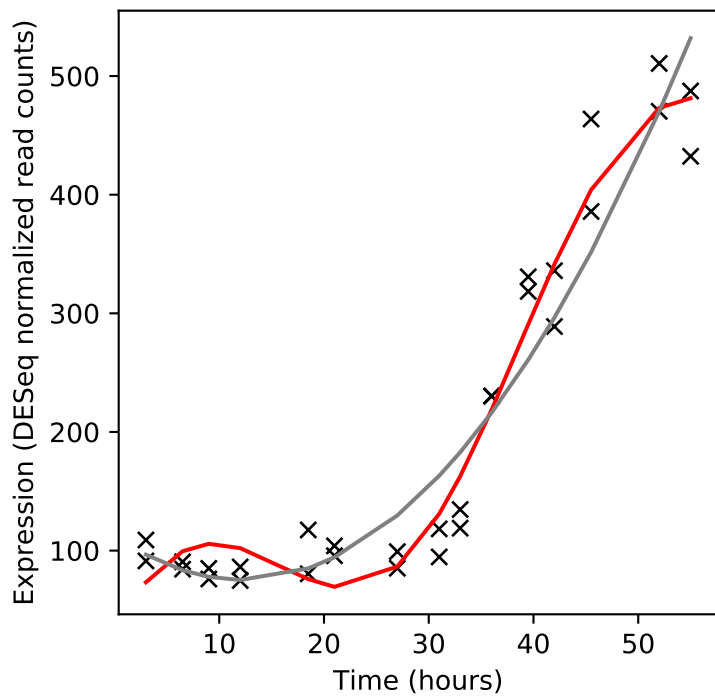

Rv3238c/-

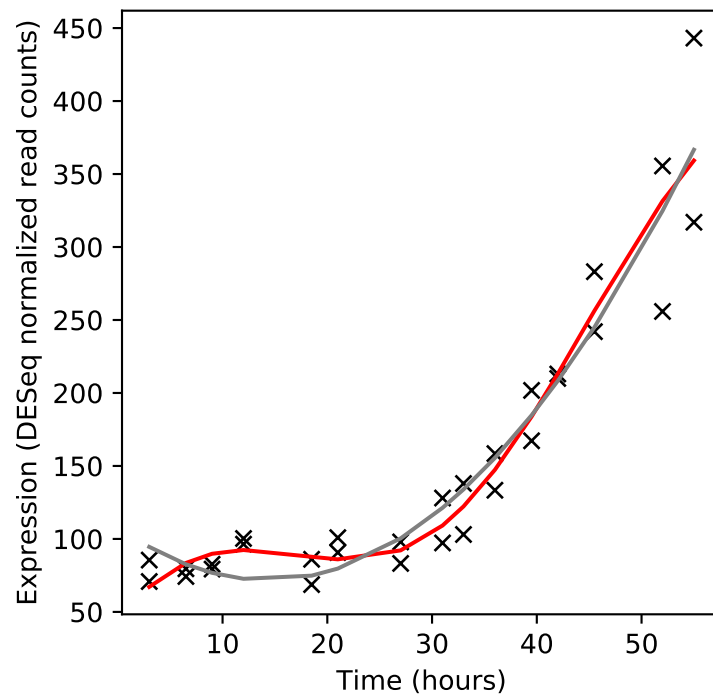

Rv3239c/-

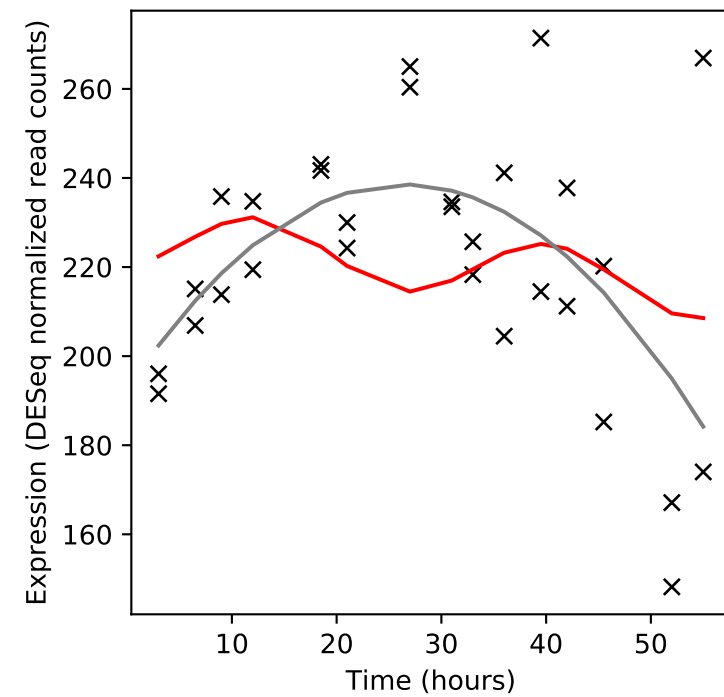

Rv3240c/secA1

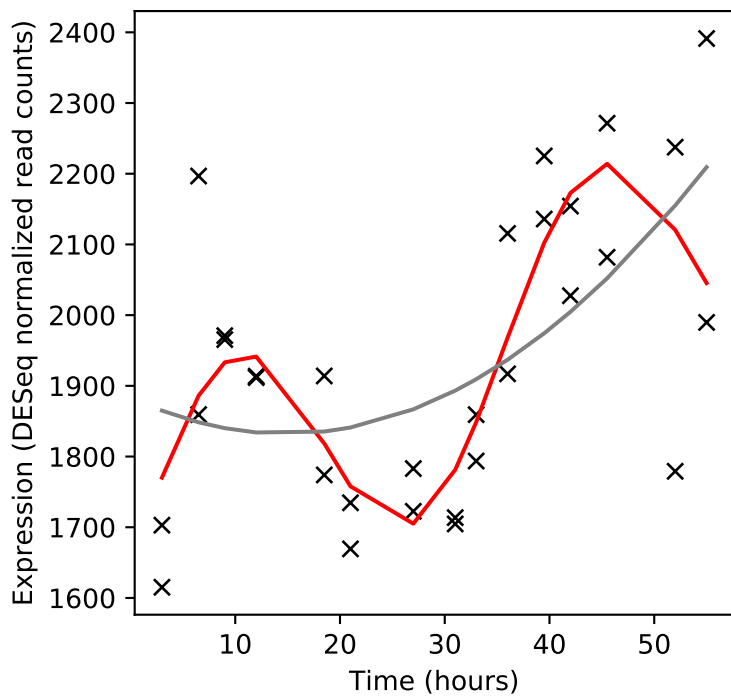

Rv3241c/-

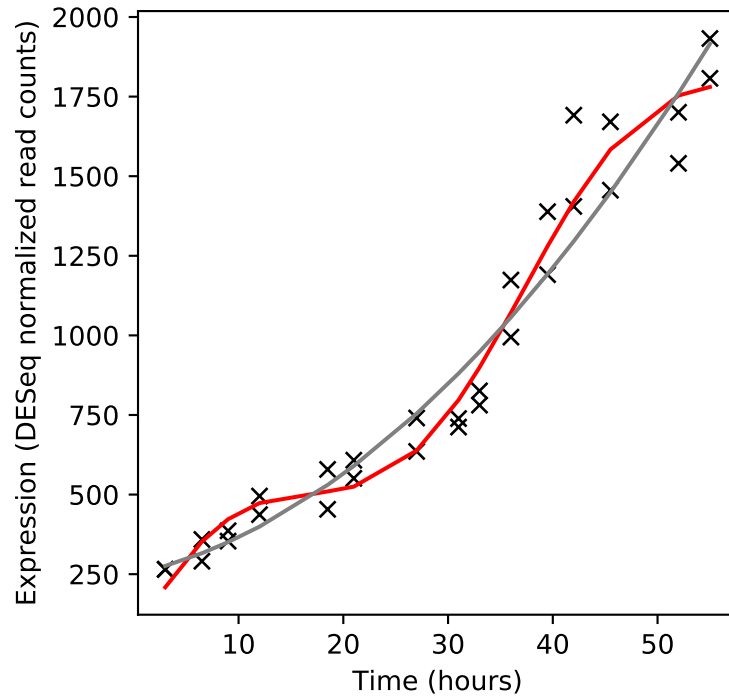

Rv3242c/-

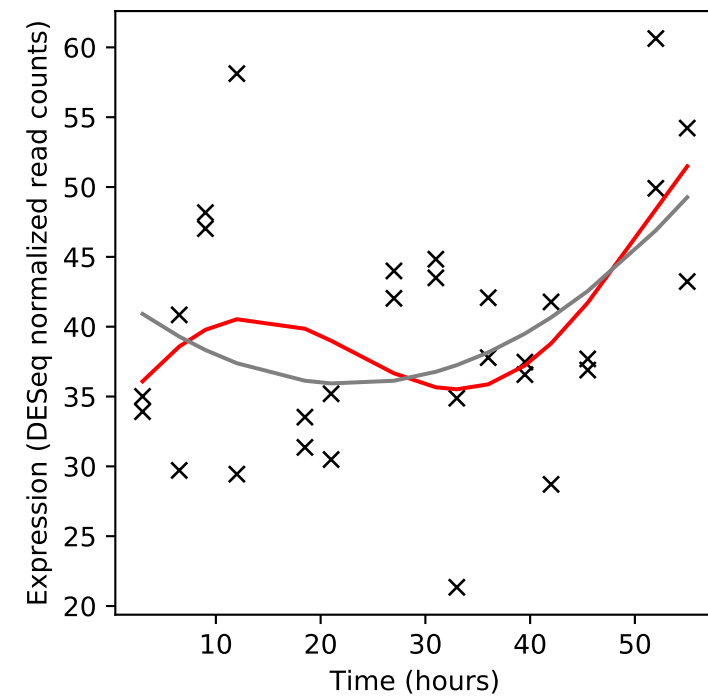

Rv3243c/-

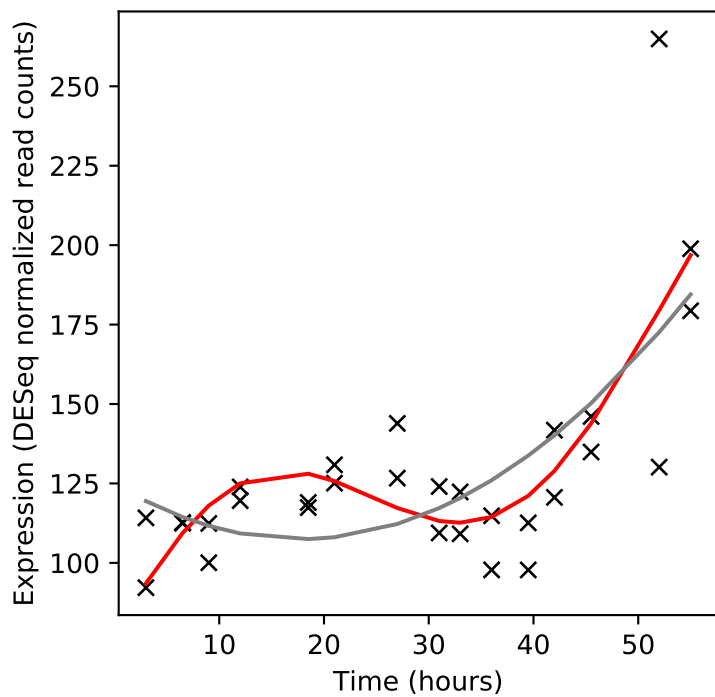

Rv3244c/lpqB

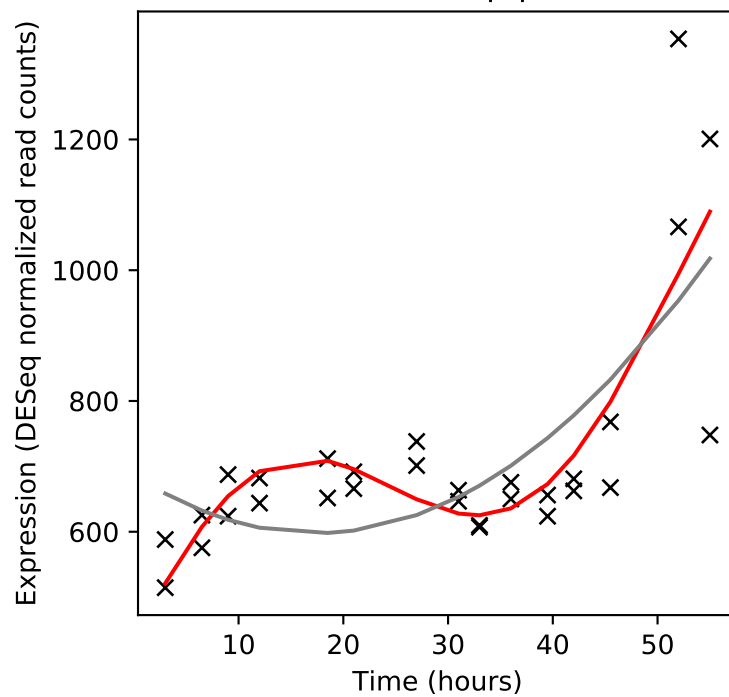

Rv3245c/mtrB

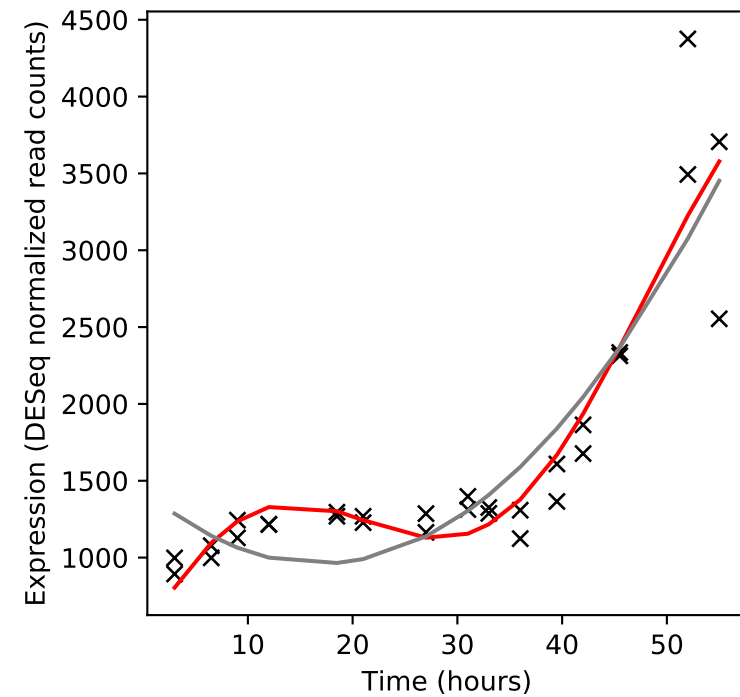

Rv3246c/mtrA

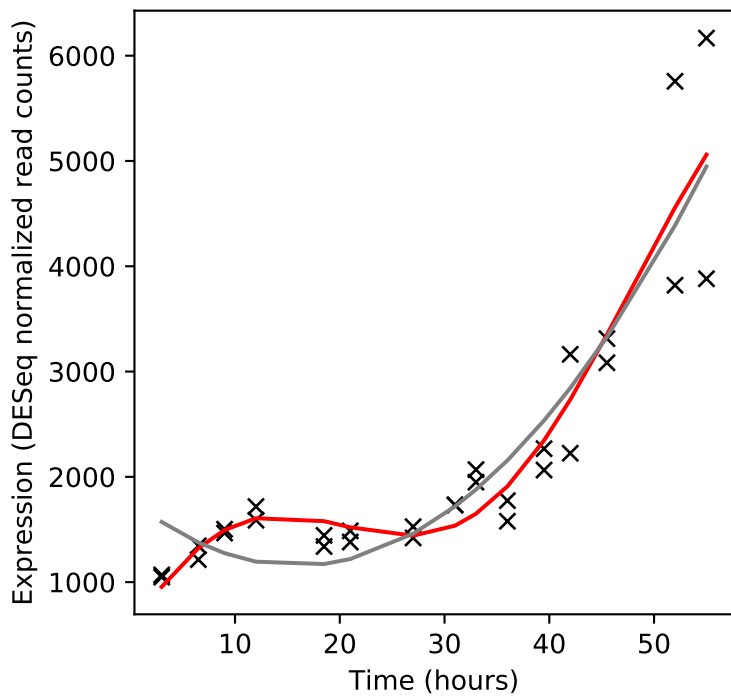

Rv3247c/tmk

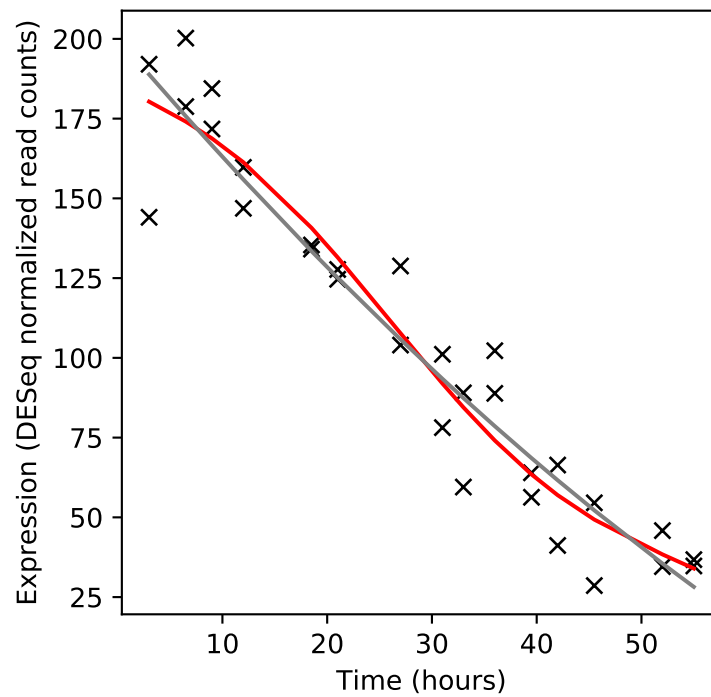

Rv3248c/sahH

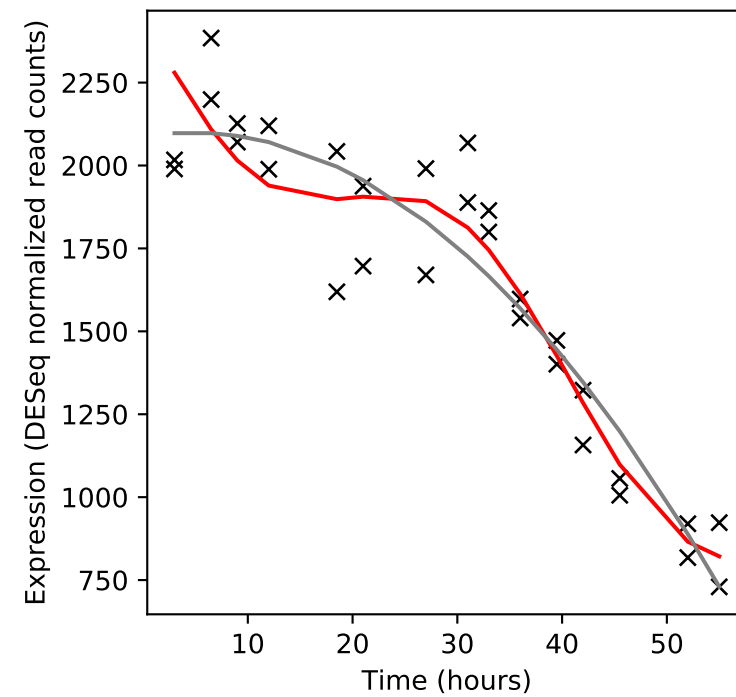

Rv3249c/-

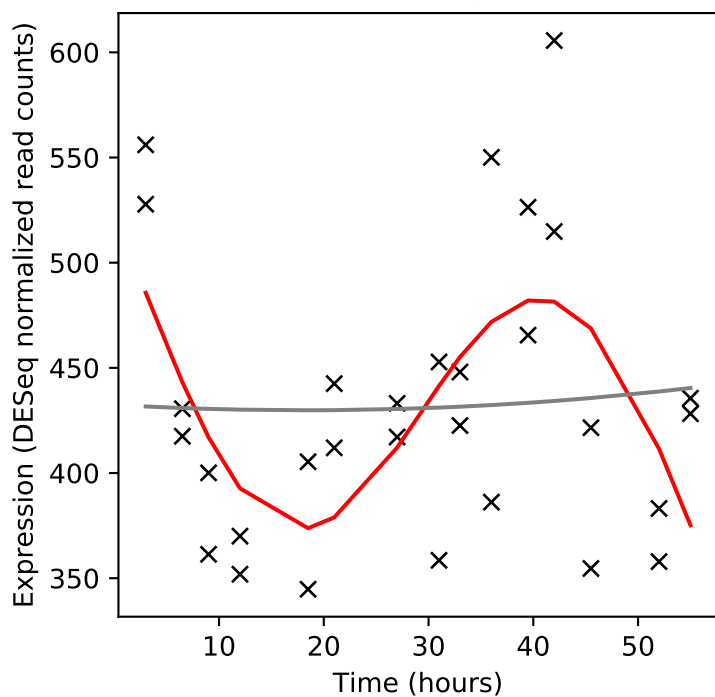

Rv3250c/rubB

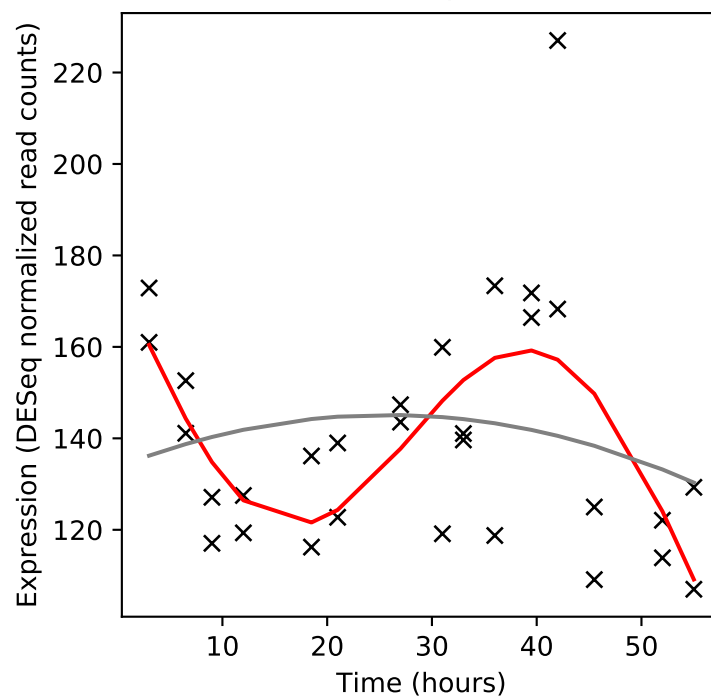

Rv3251c/rubA

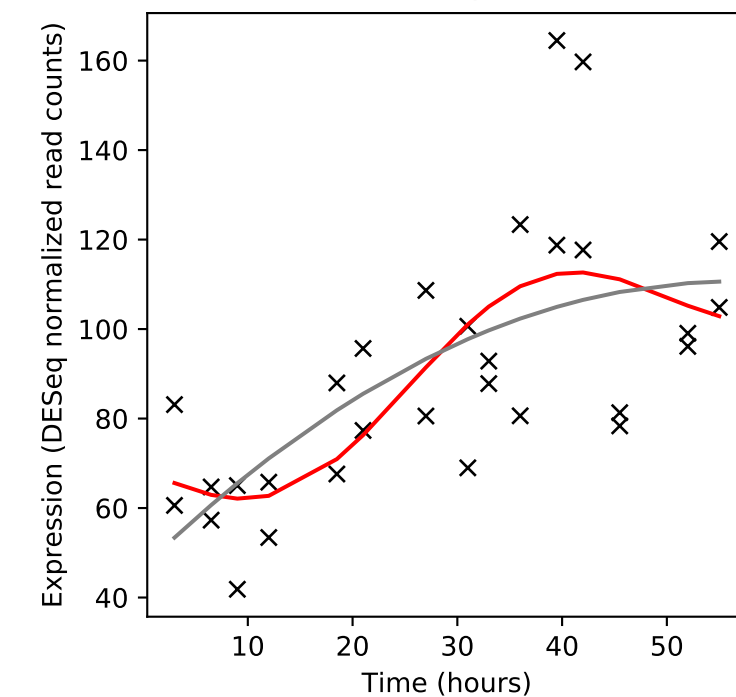

Rv3252c/alkB

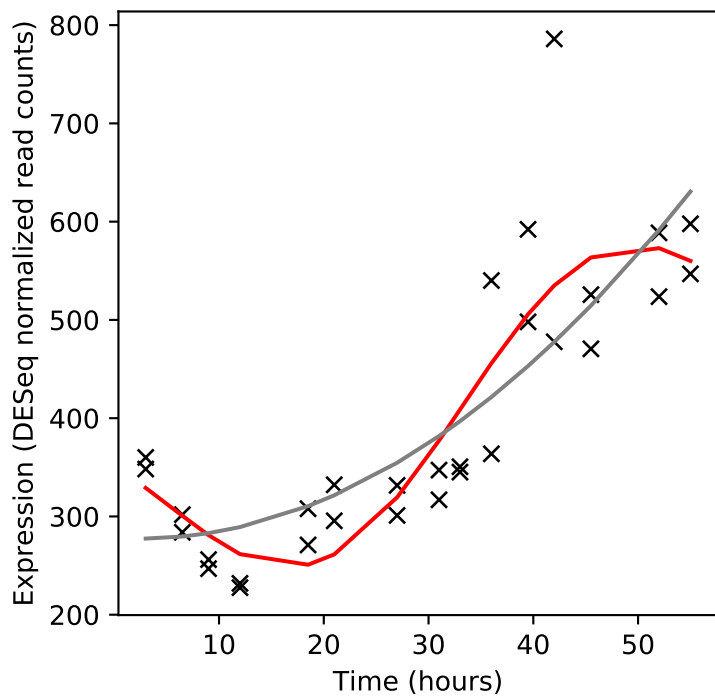

Rv3253c/-

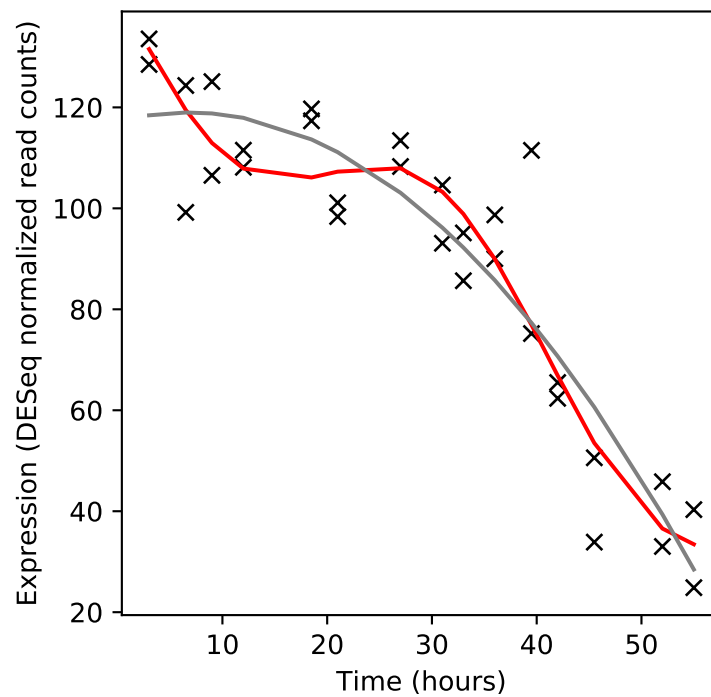

Rv3254c/-

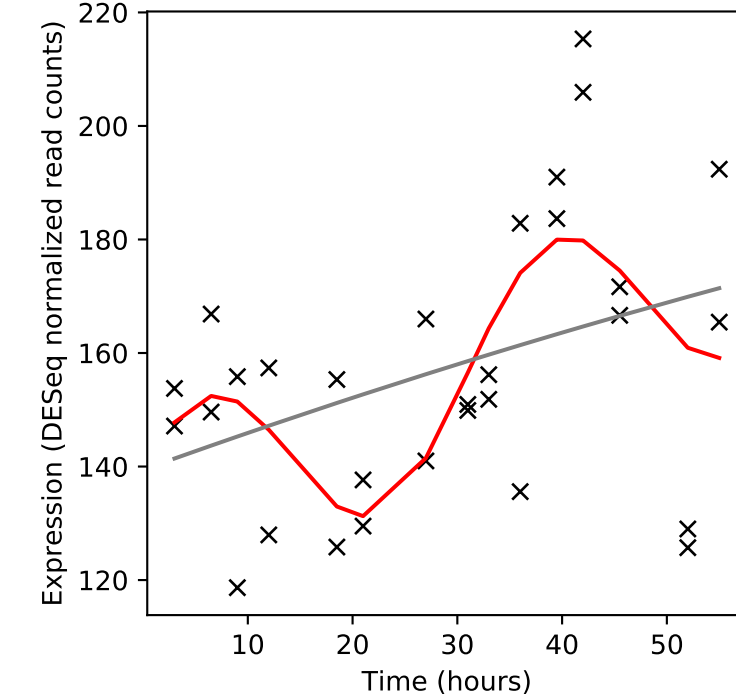

Rv3255c/maA

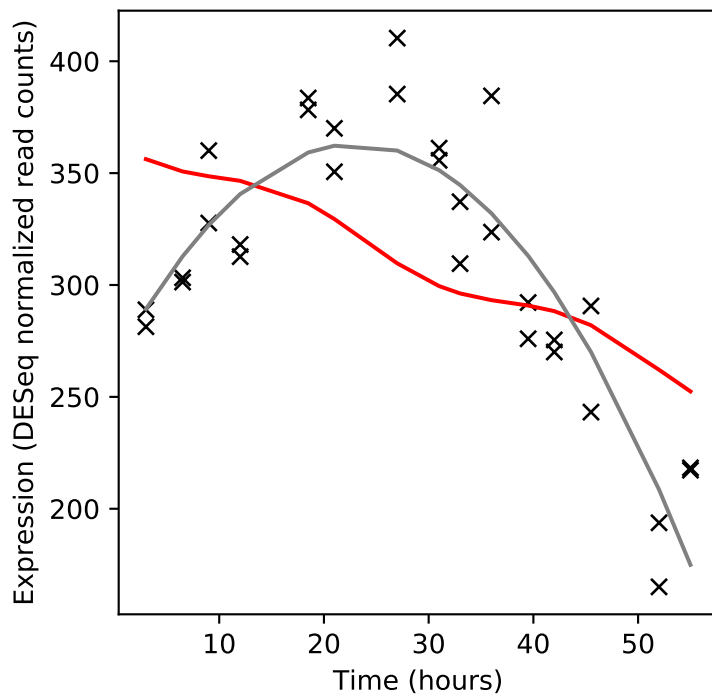

Rv3256c/-

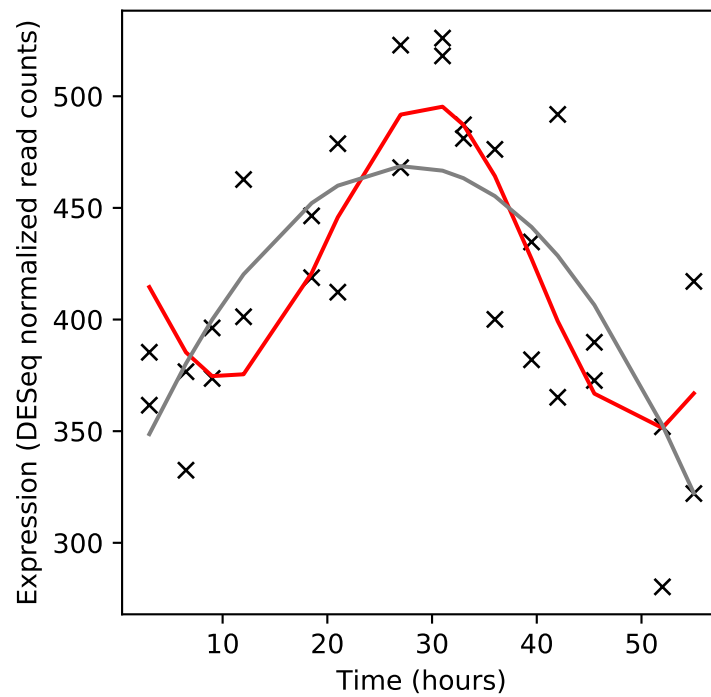

Rv3257c/pmmA

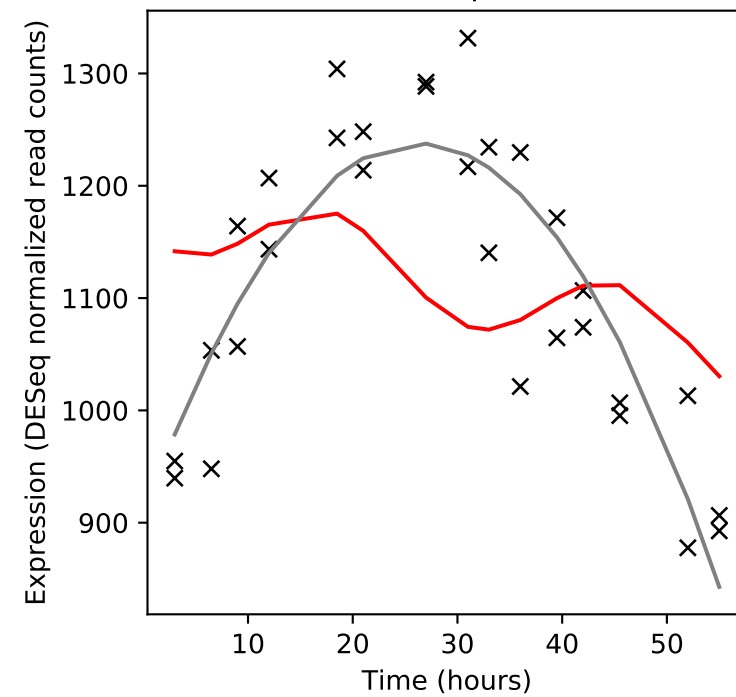

Rv3258c/-

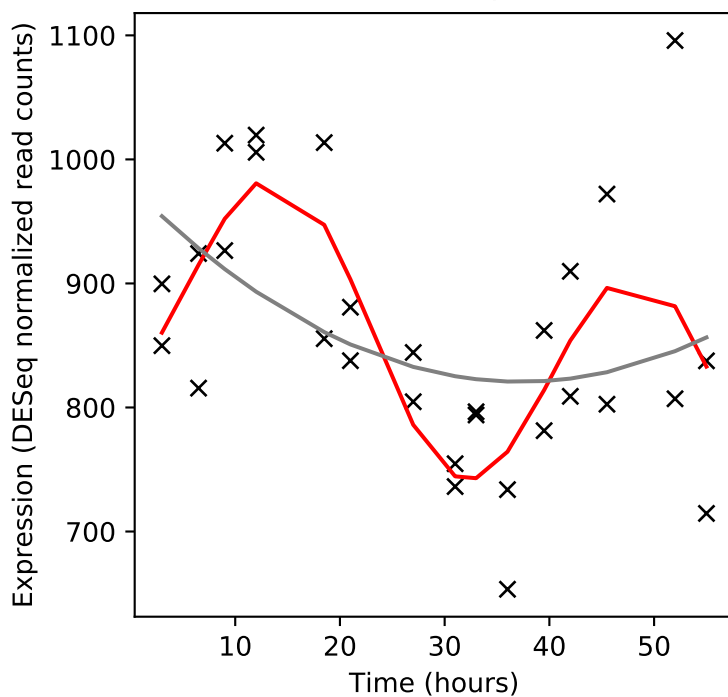

Rv3259c/-

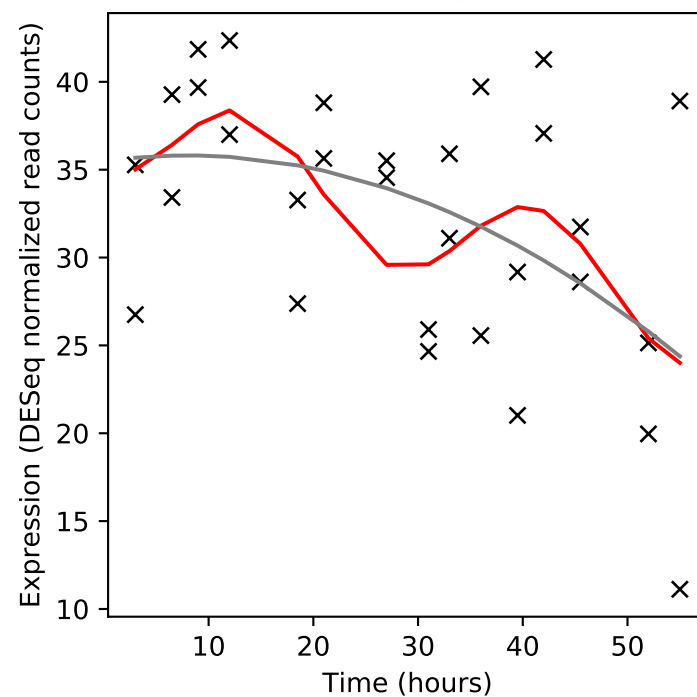

Rv3260c/whiB2

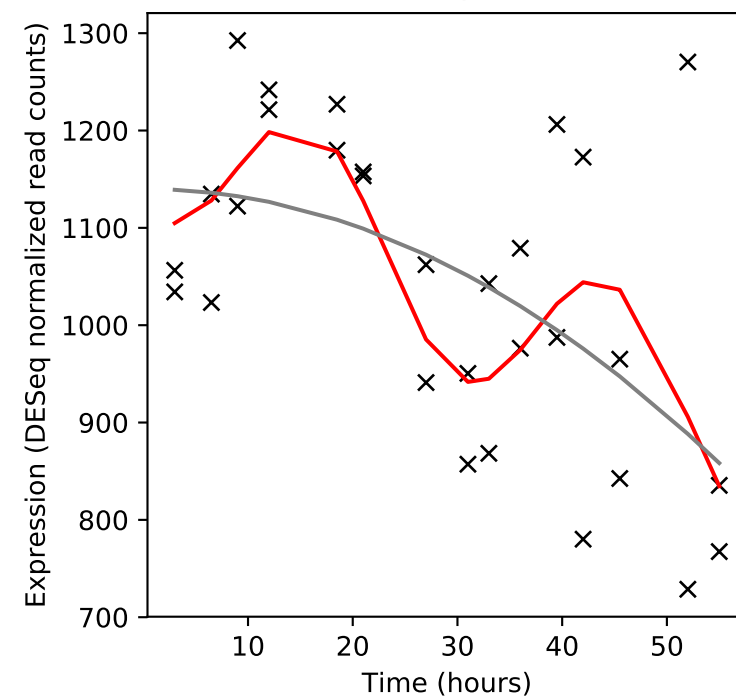

Rv3261c/fbiA

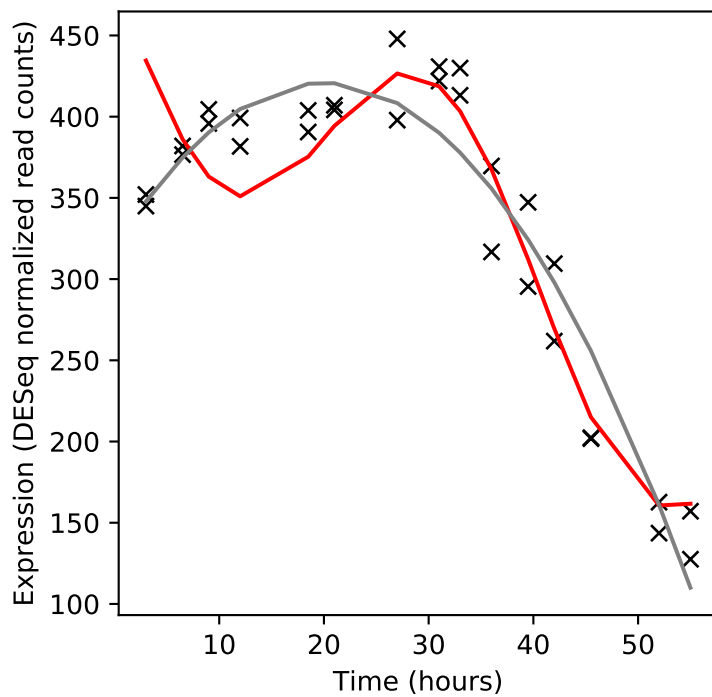

Rv3262c/fbiB

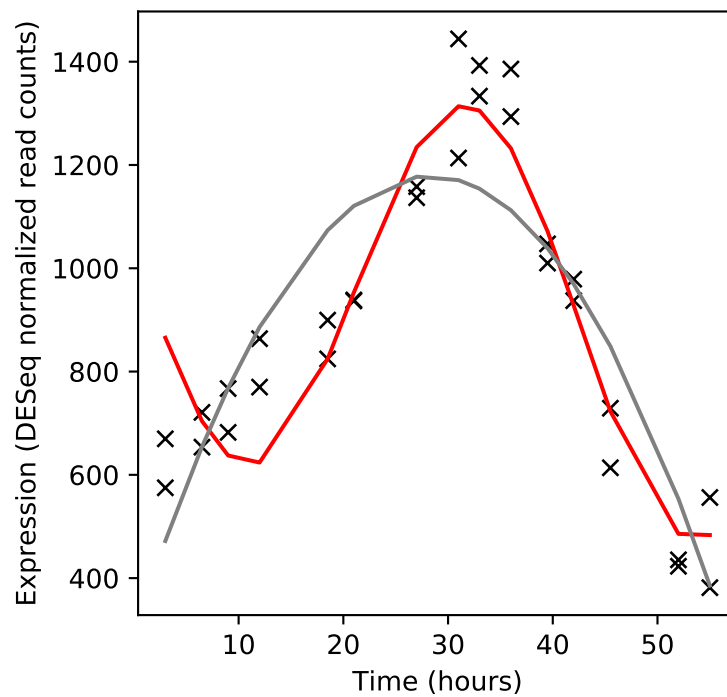

Rv3263c/-

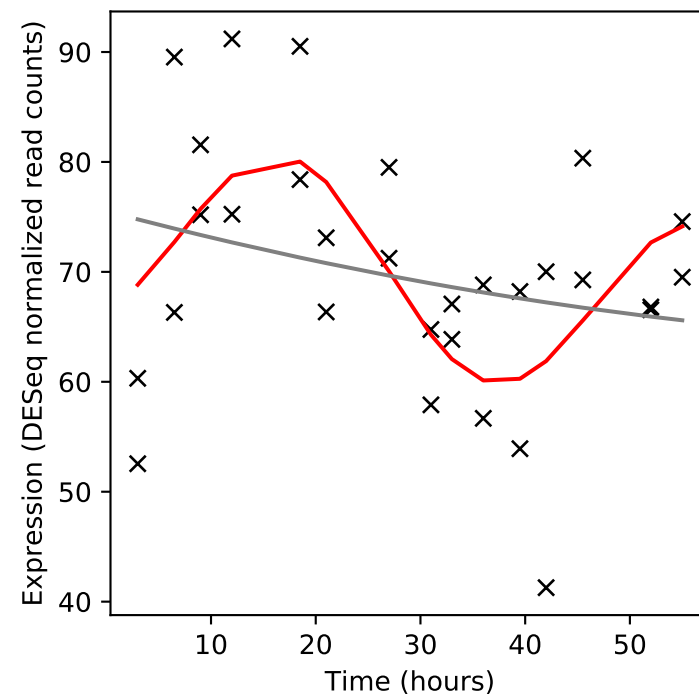

Rv3264c/manB

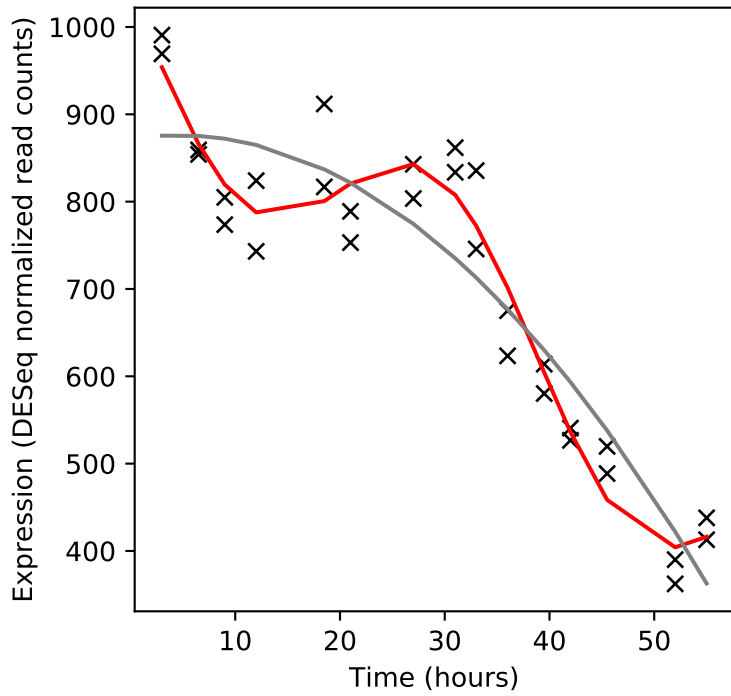

Rv3265c/wbbL1

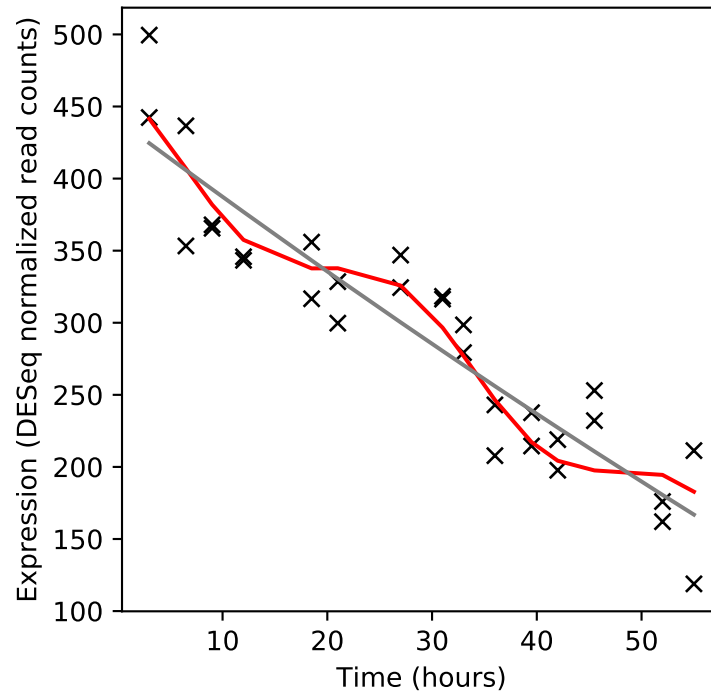

Rv3266c/rmlD

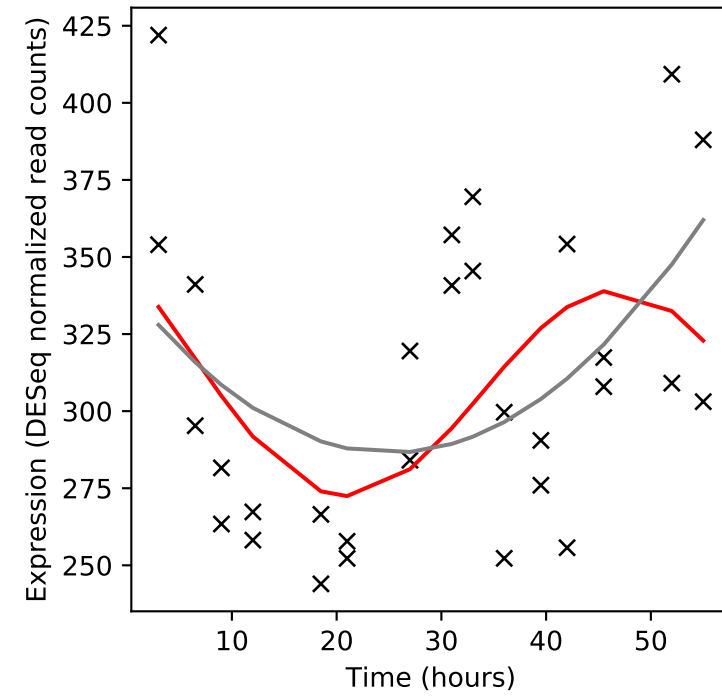

Rv3267/-

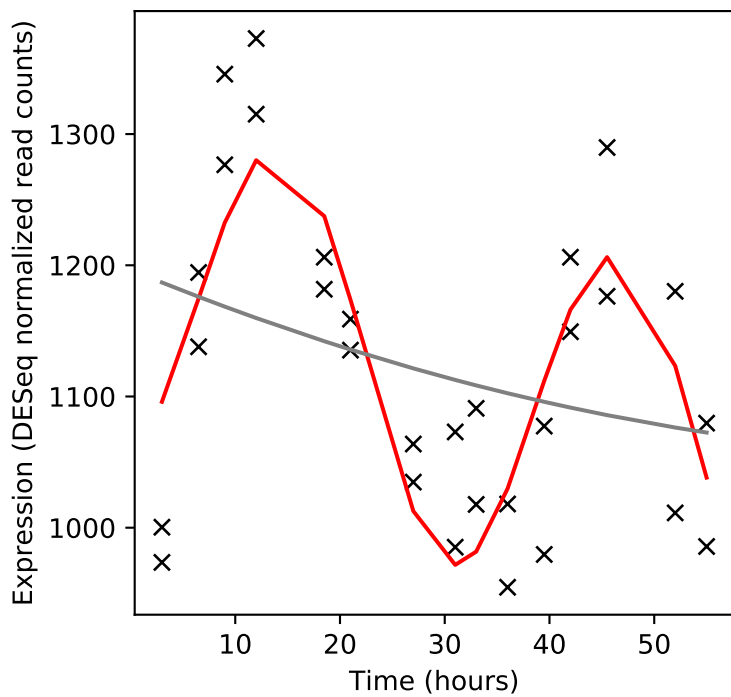

Rv3268/-

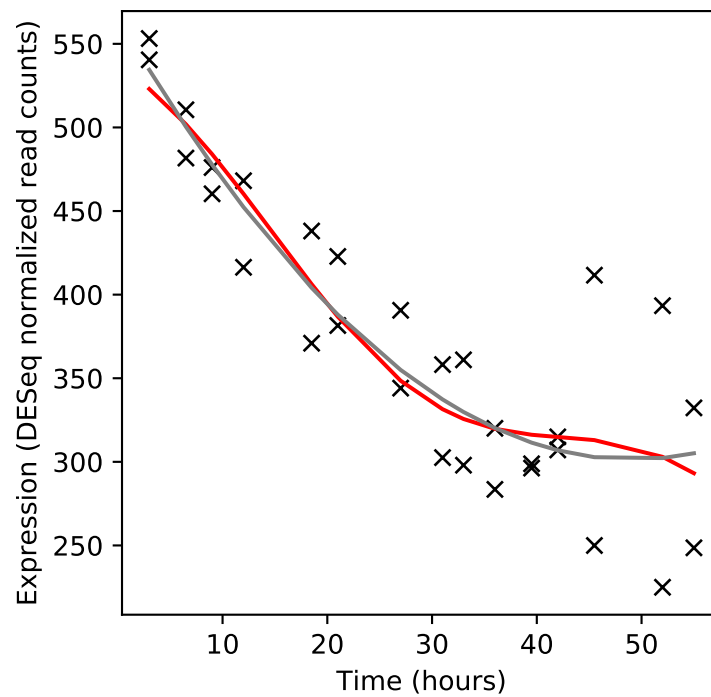

Rv3269/-

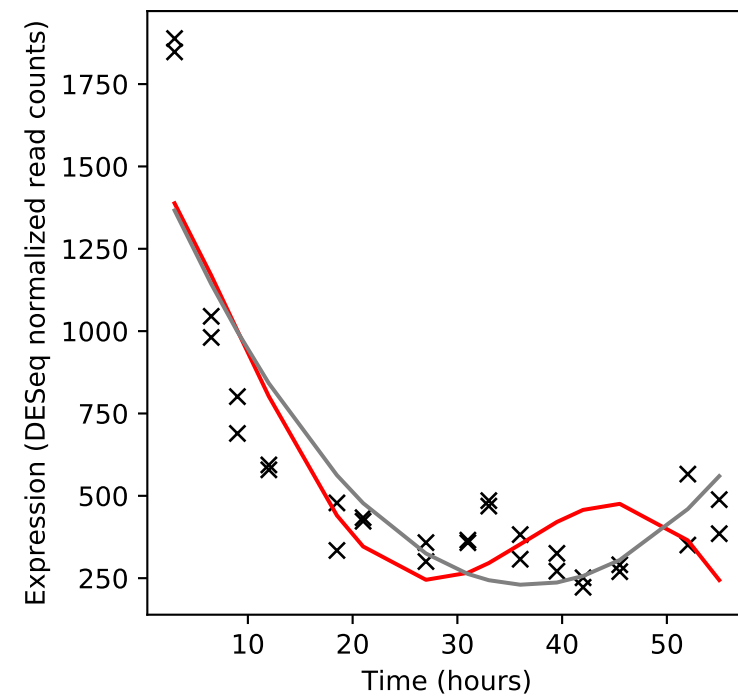

Rv3270/ctpC

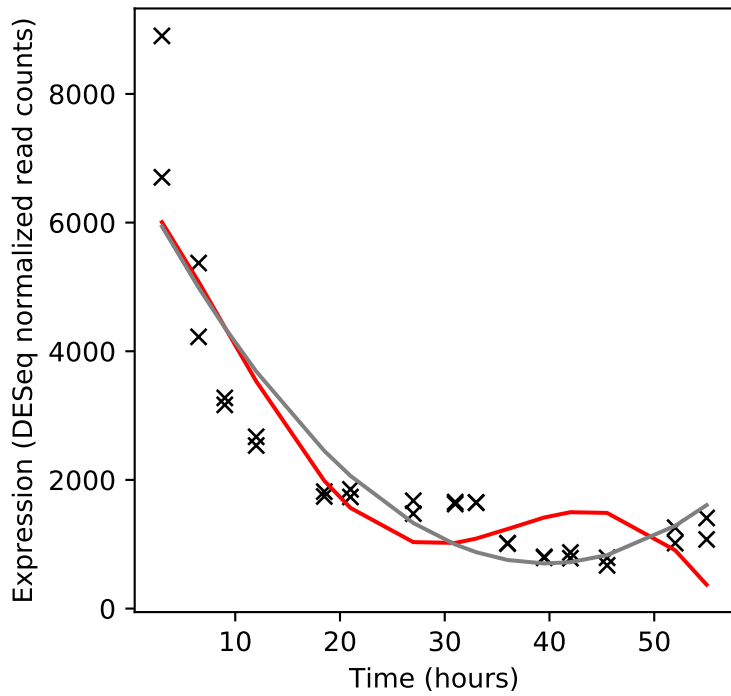

Rv3271c/-

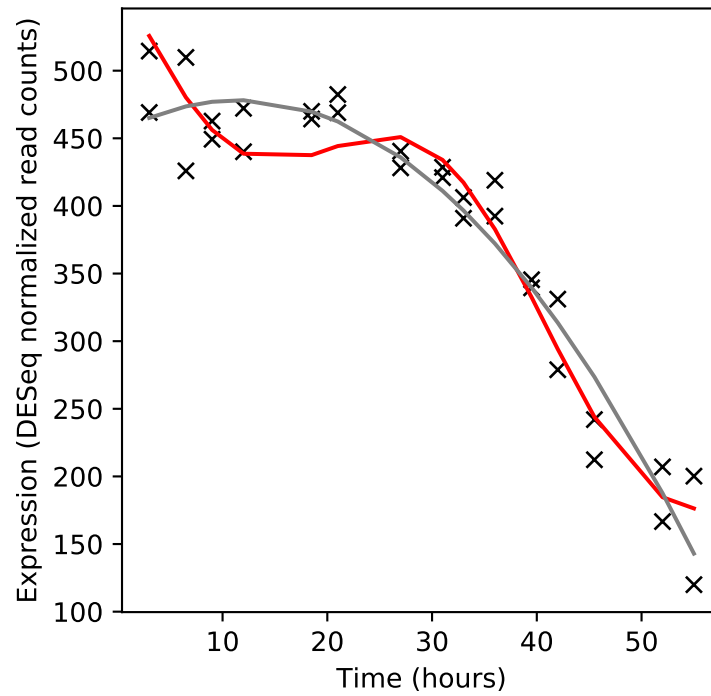

Rv3272/-

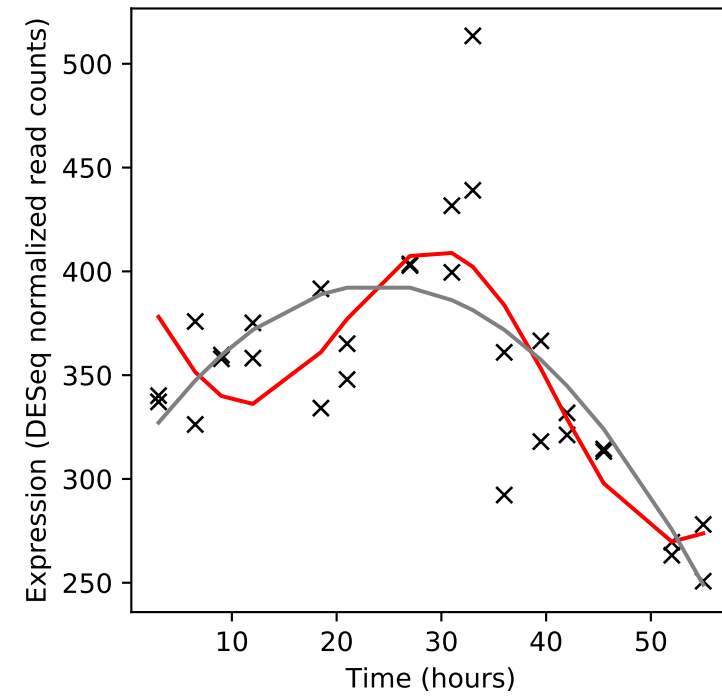



Rv3273/-

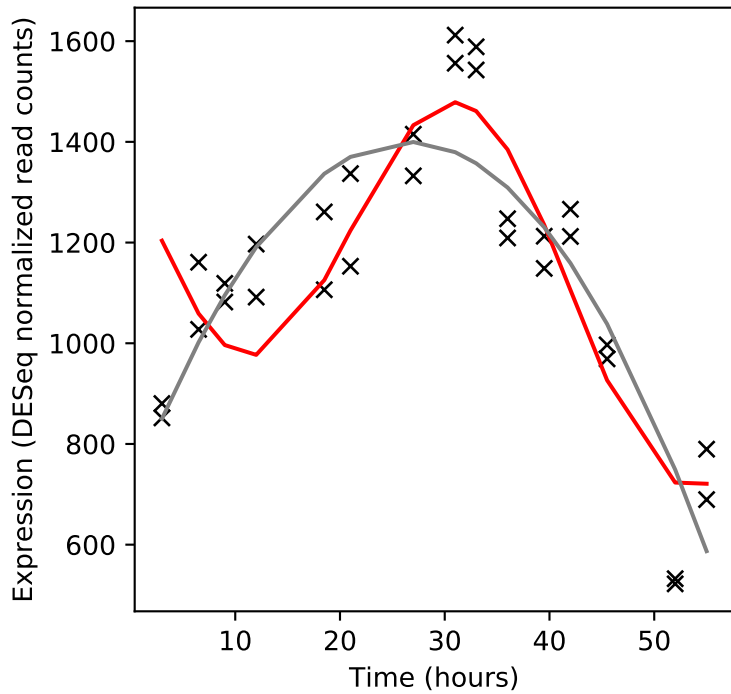

Rv3274c/fadE25

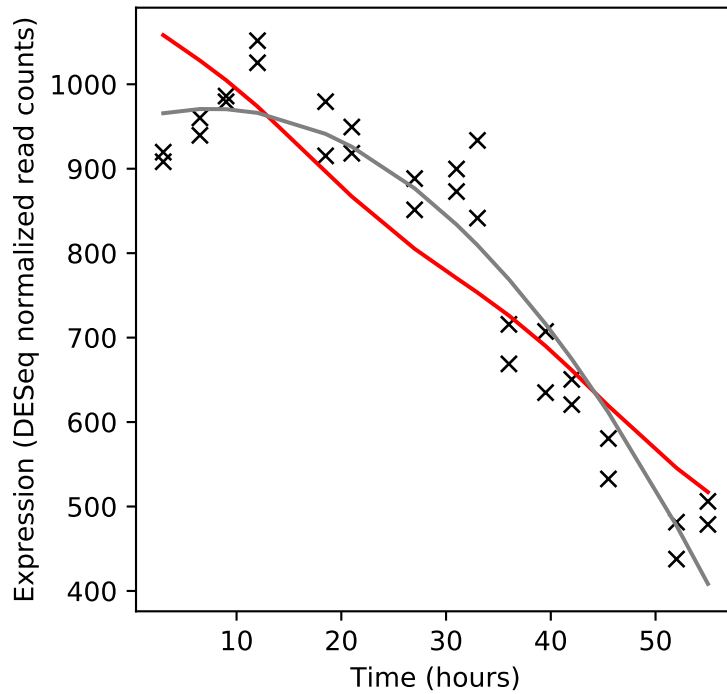

Rv3275c/purE

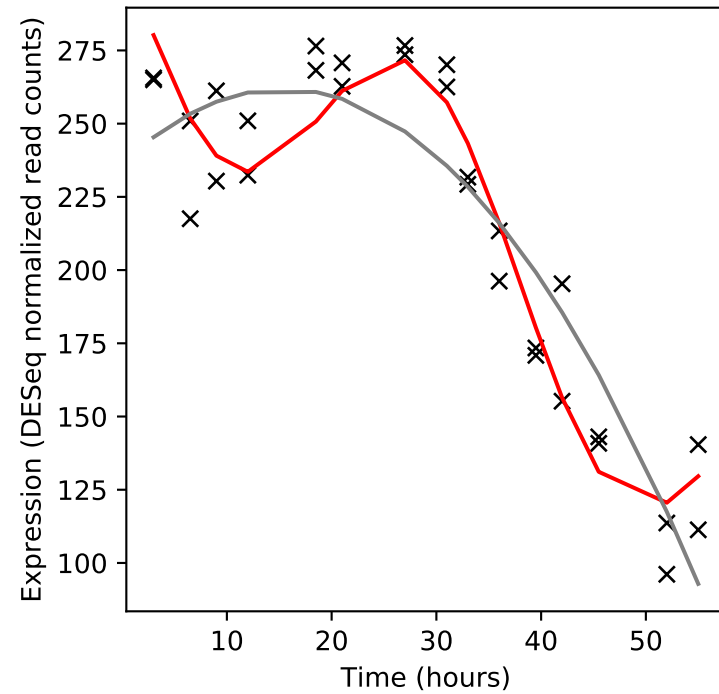

Rv3276c/purK

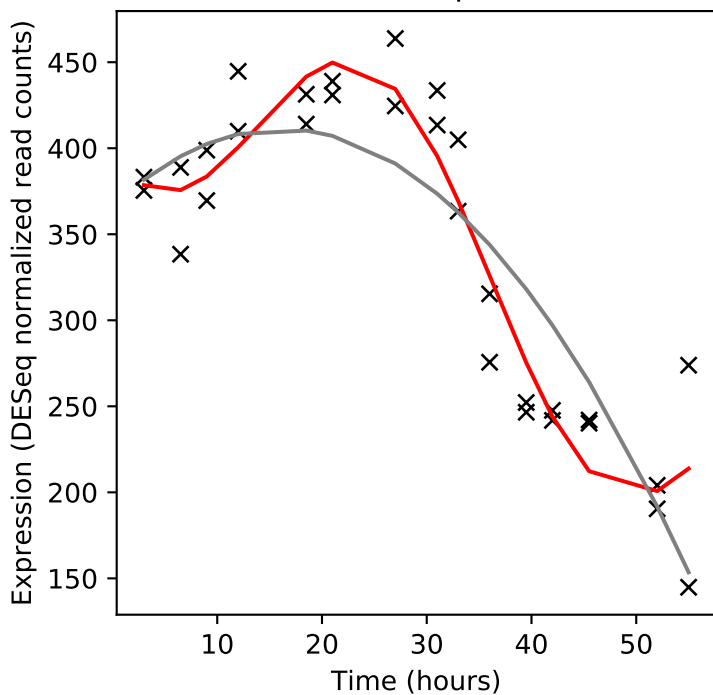

Rv3277/-

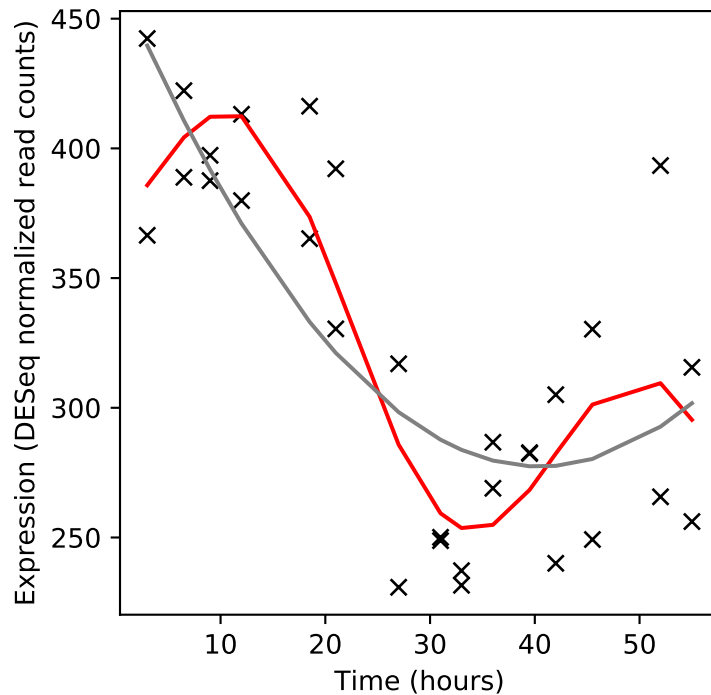

Rv3278c/-

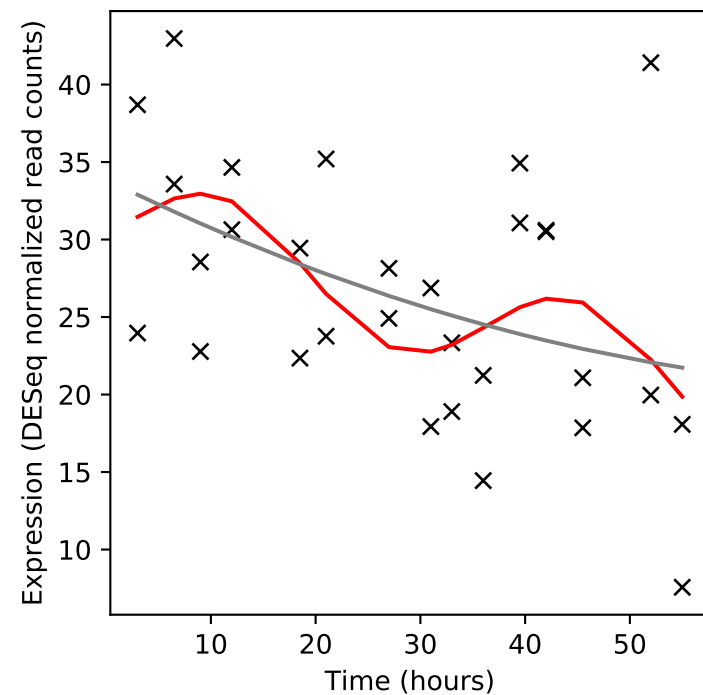

Rv3279c/birA

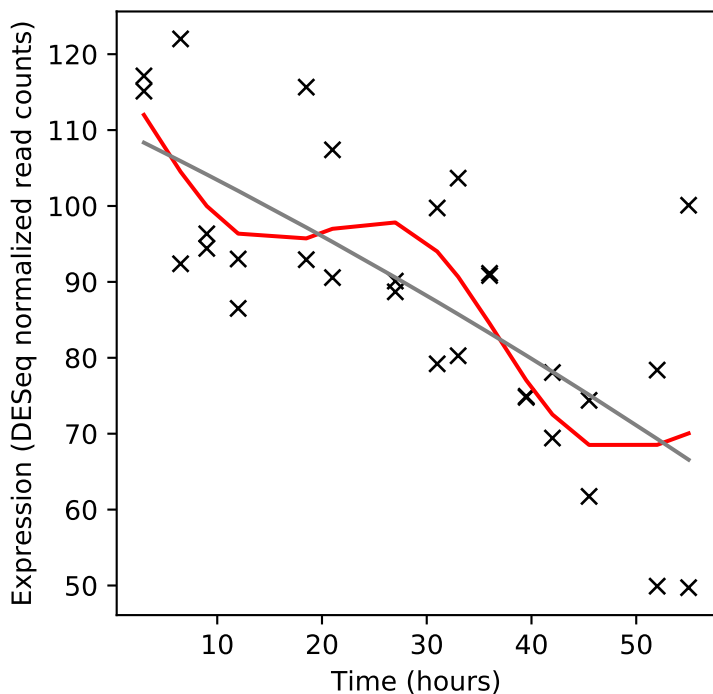

Rv3280/accD5

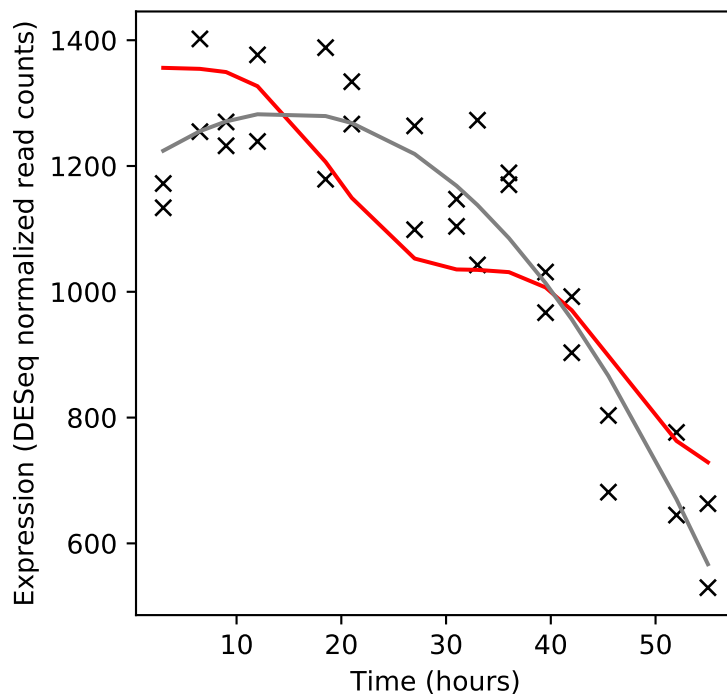

Rv3281/accE5

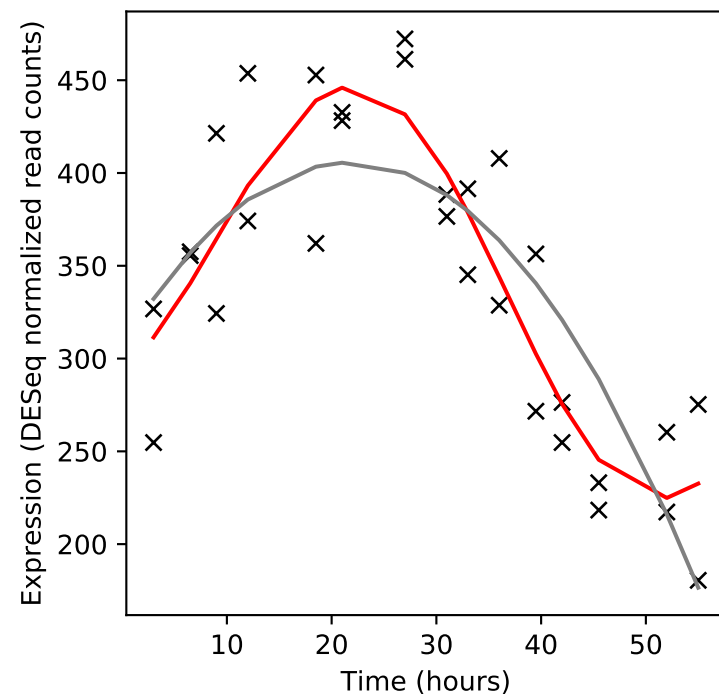

Rv3282/-

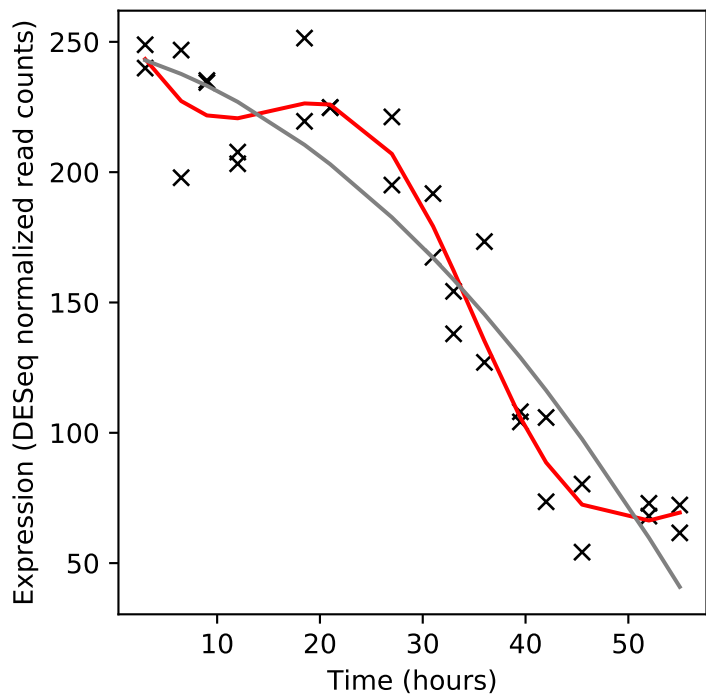

Rv3283/sseA

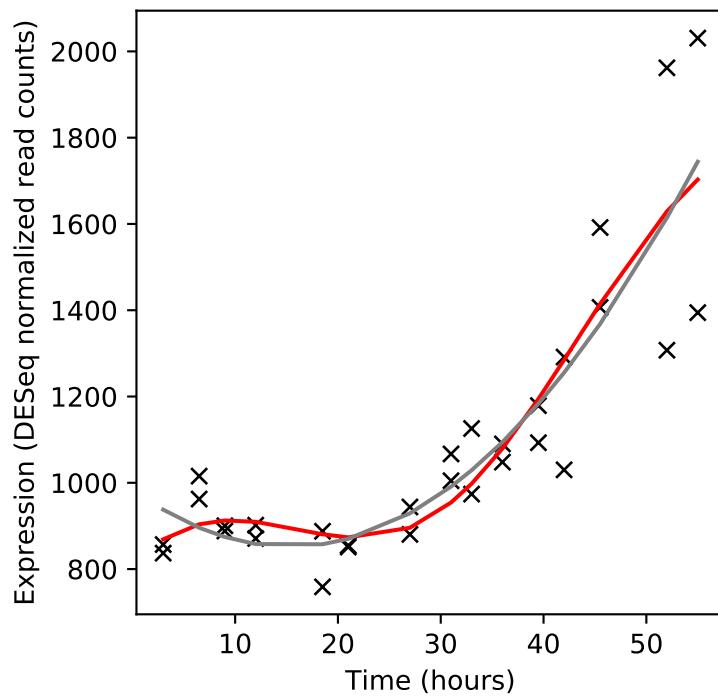

Rv3284/-

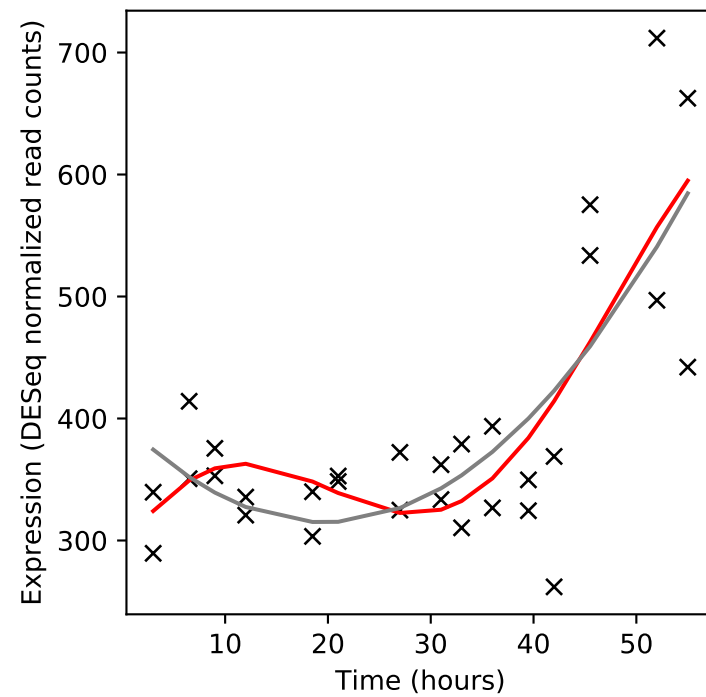

Rv3285/accA3

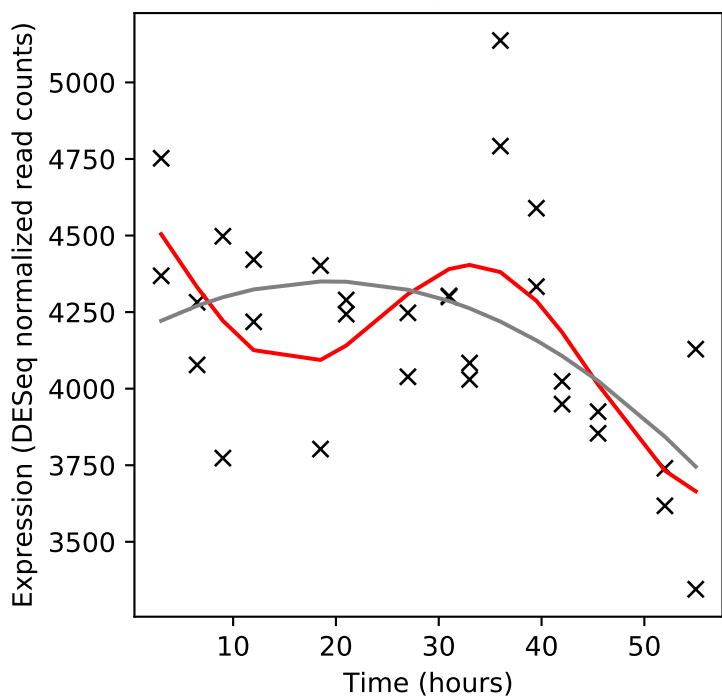

Rv3286c/sigF

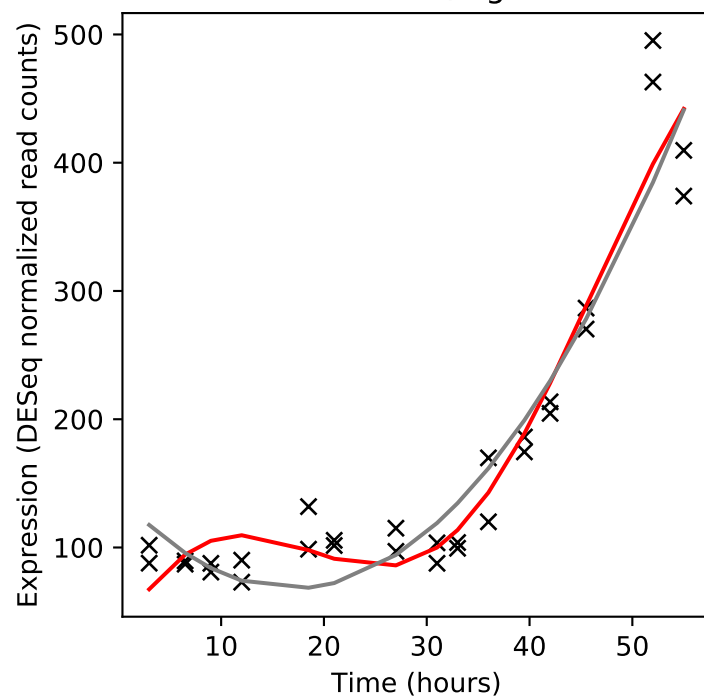

Rv3287c/rsbW

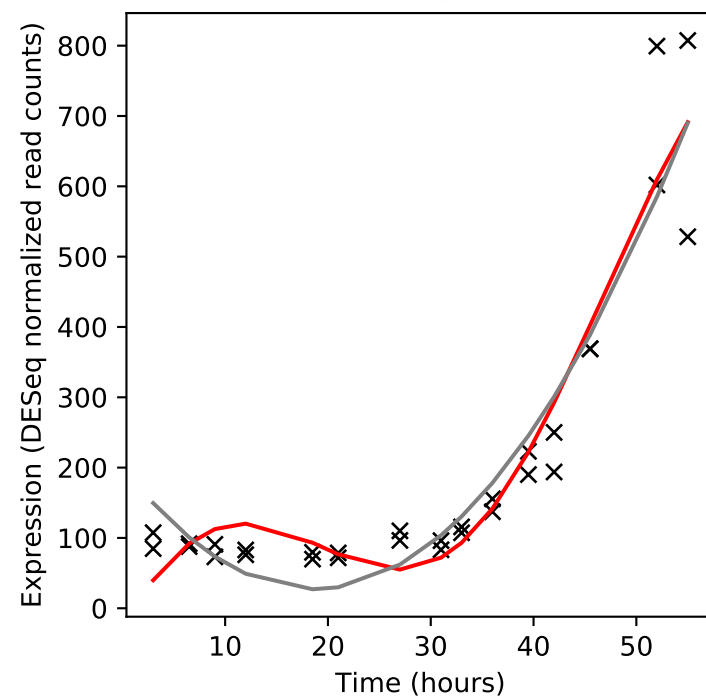

Rv3288c/usfY

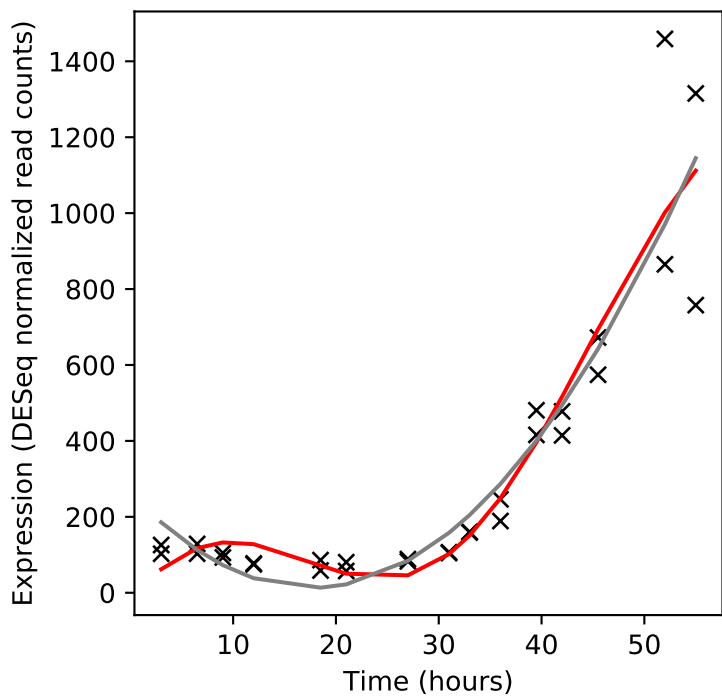

Rv3289c/-

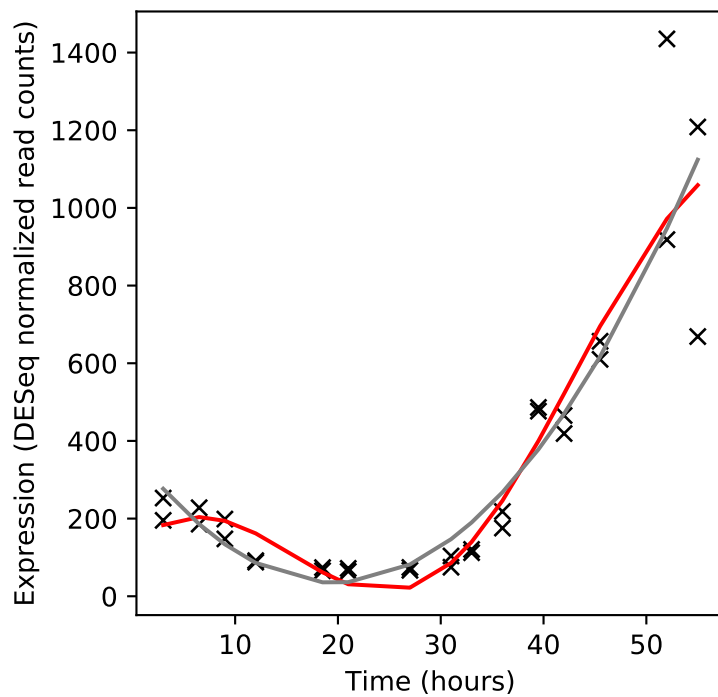

Rv3290c/lat

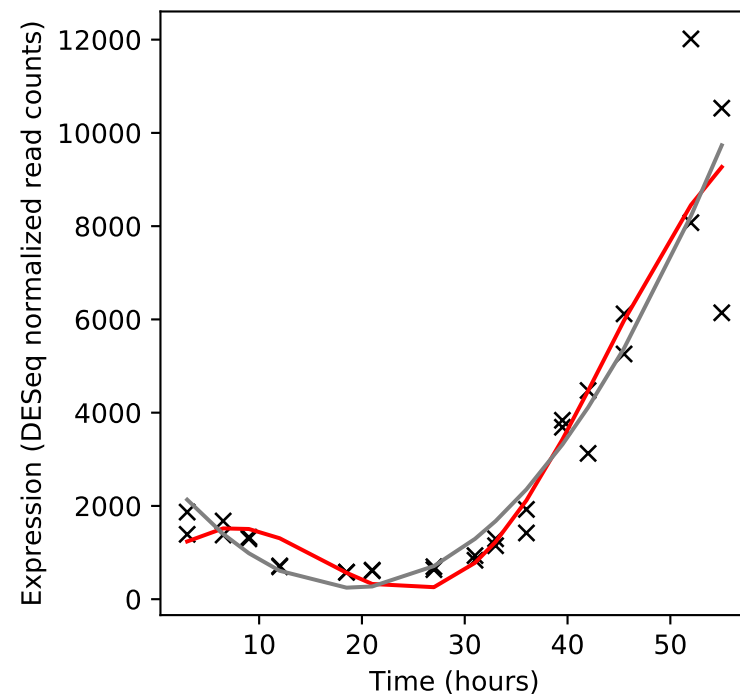

Rv3291c/lrpA

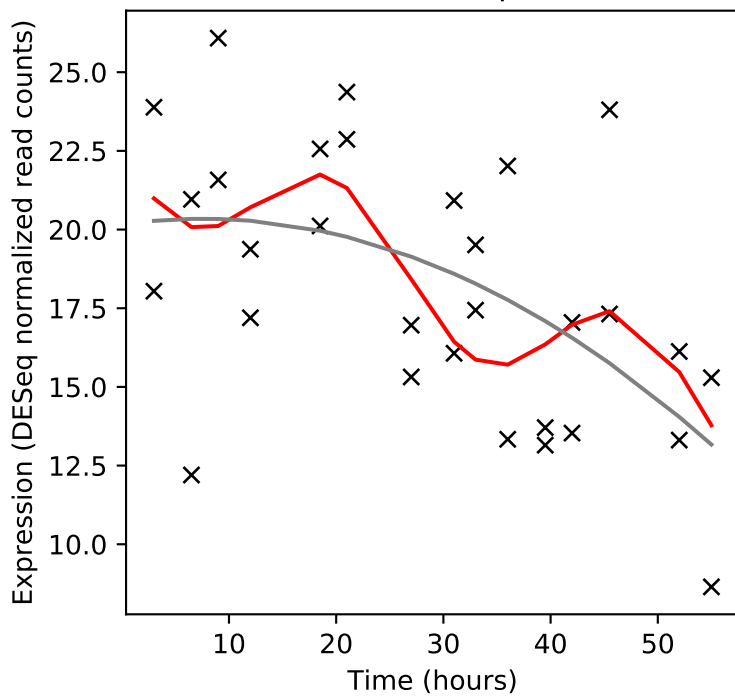

Rv3292/-

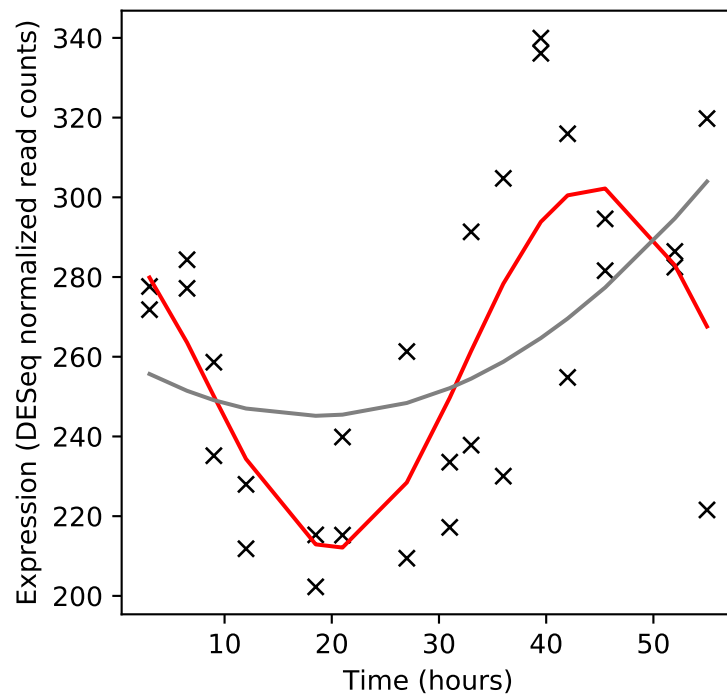

Rv3293/pcd

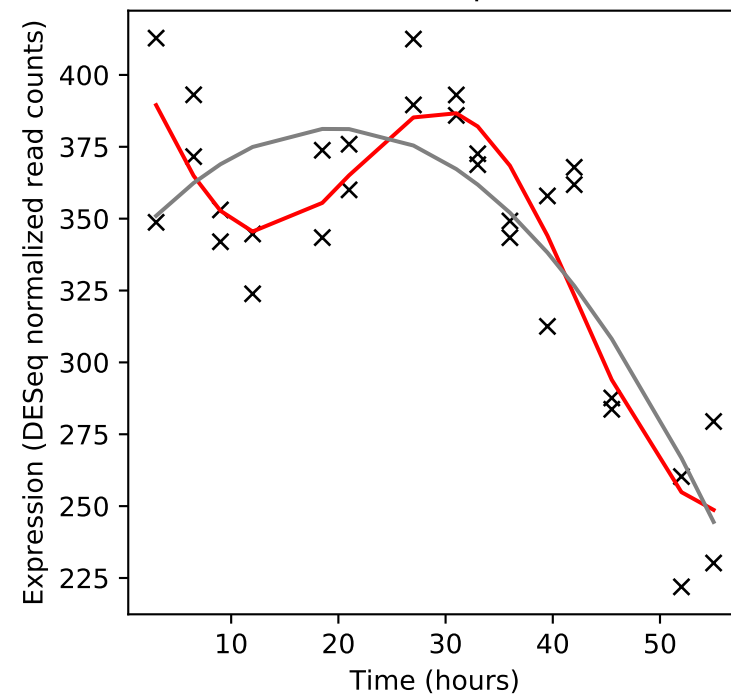

Rv3294c/-

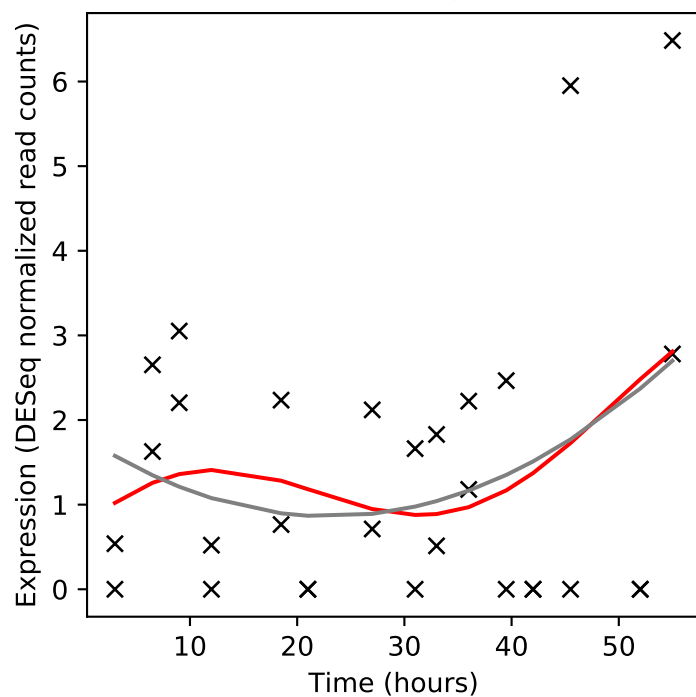

Rv3295/-

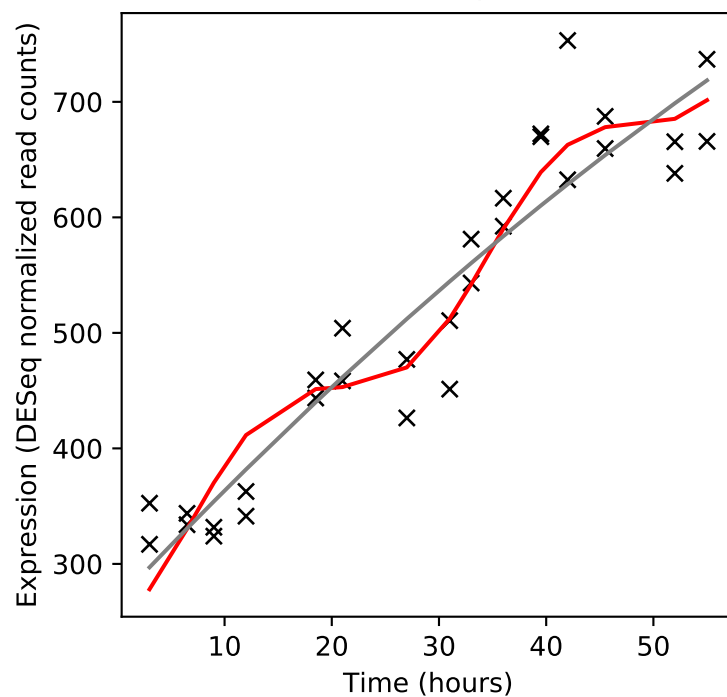

Rv3296/lhr

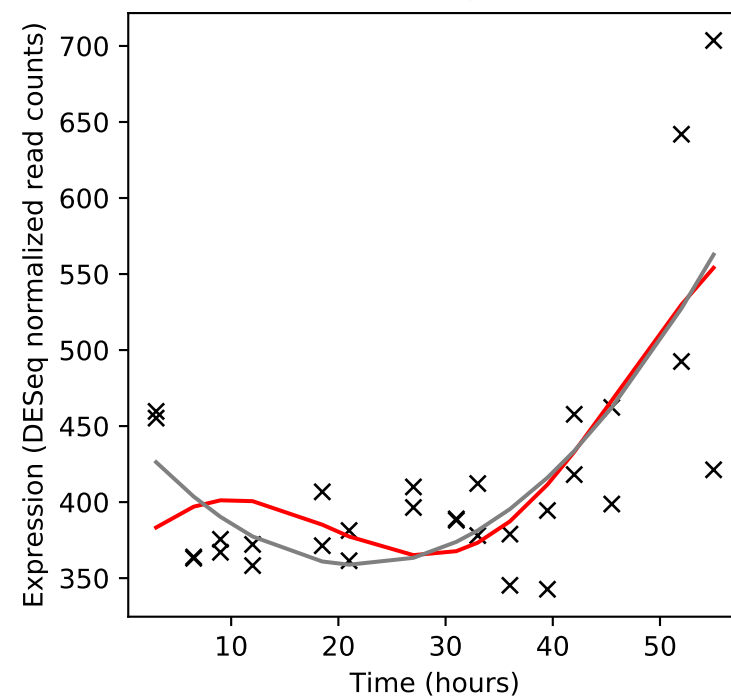

Rv3297/nei

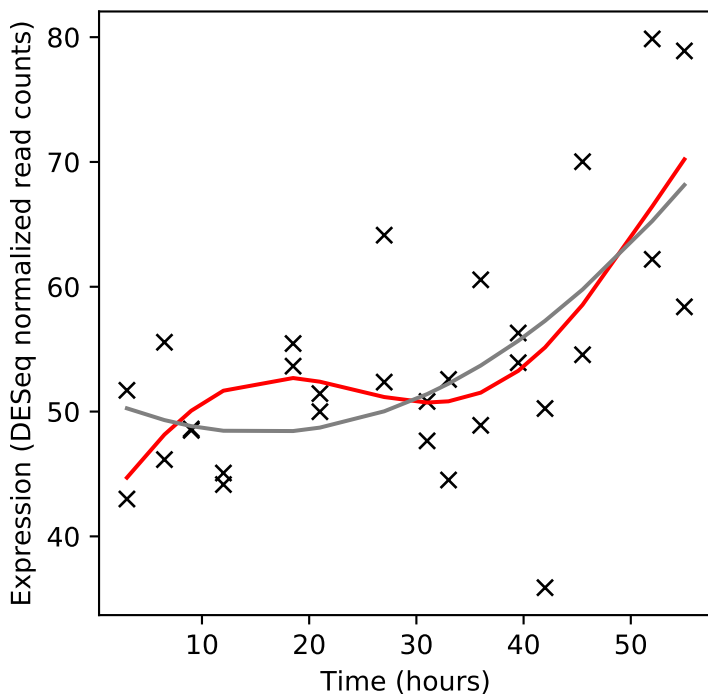

Rv3298c/lpqC

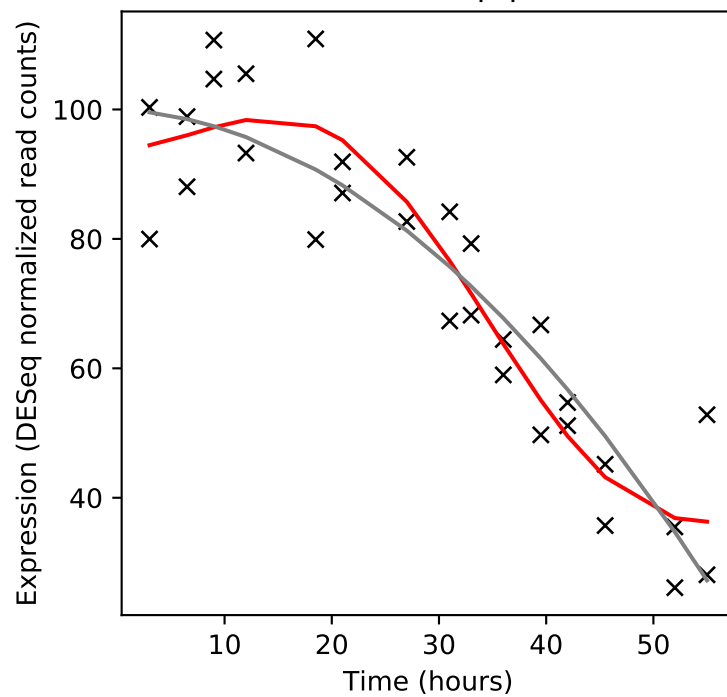

Rv3299c/atsB

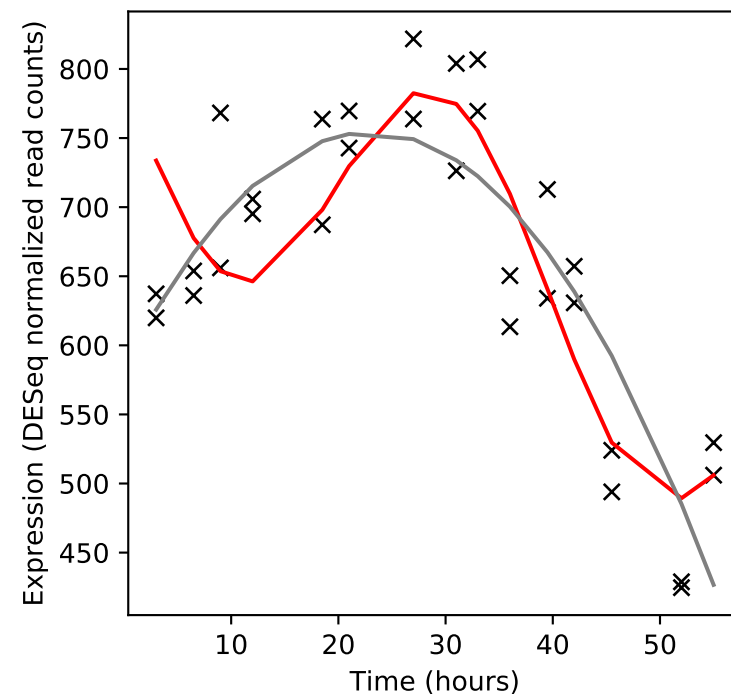

Rv3300c/-

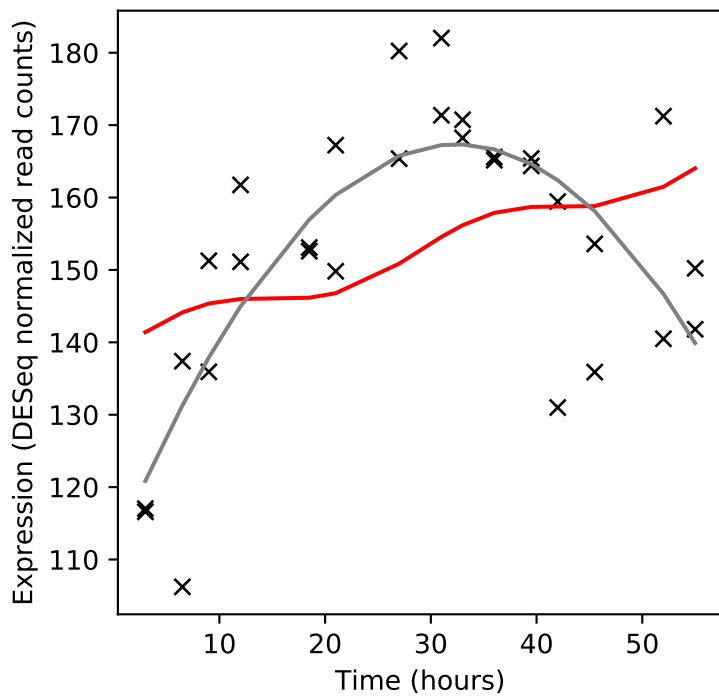

Rv3301c/phoY1

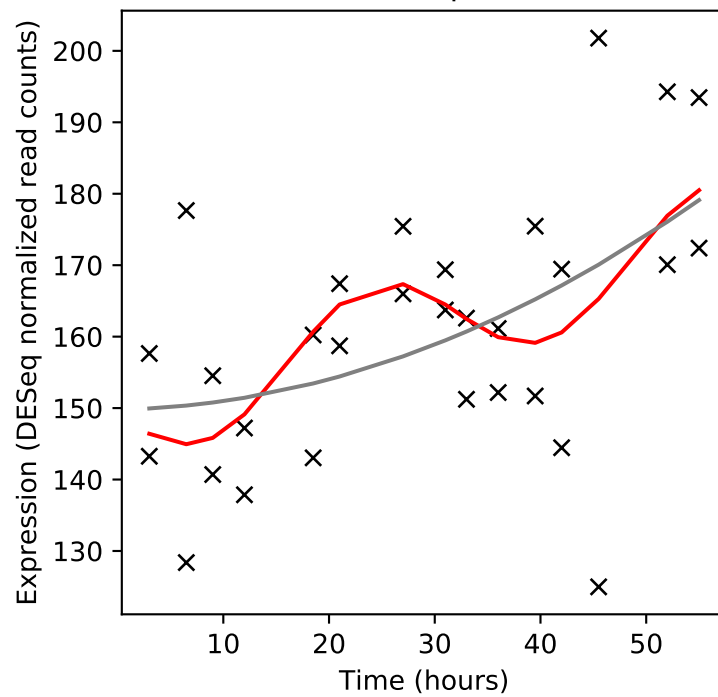

Rv3302c/glpD2

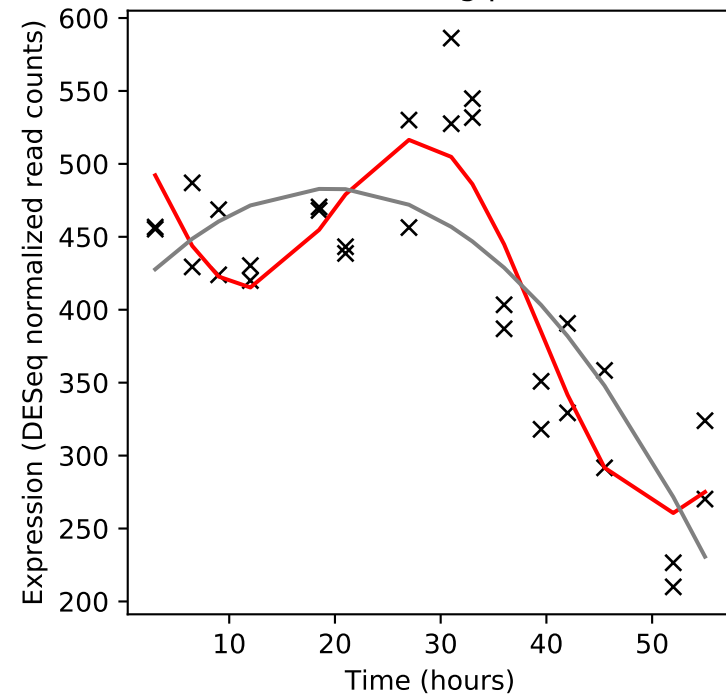

Rv3303c/lpdA

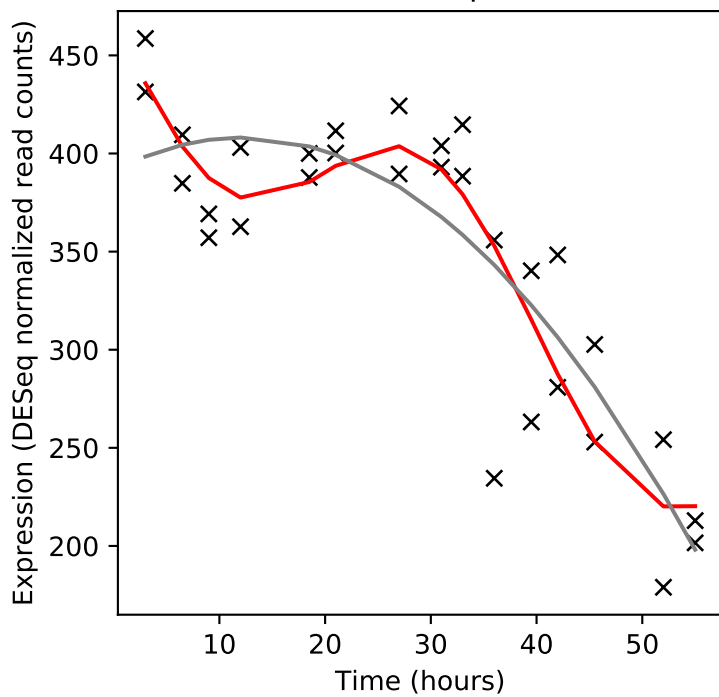

Rv3304/-

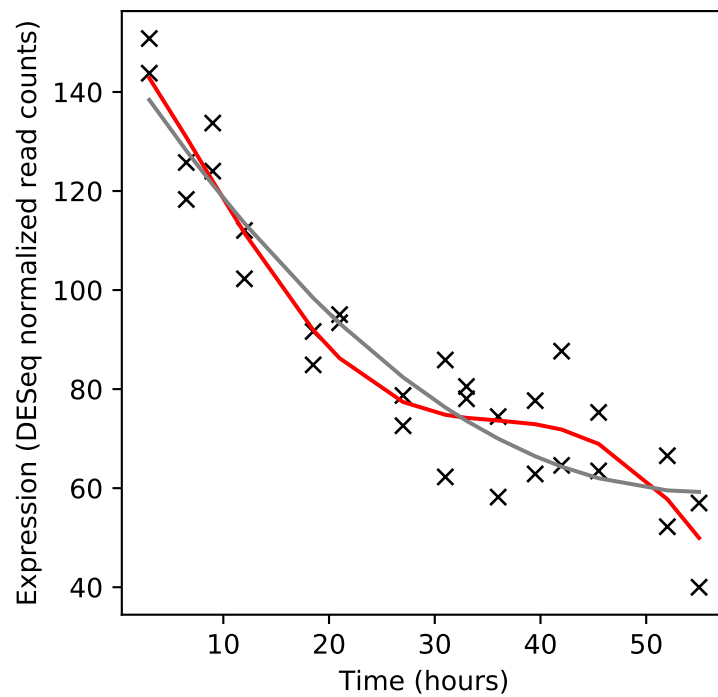

Rv3305c/amiA1

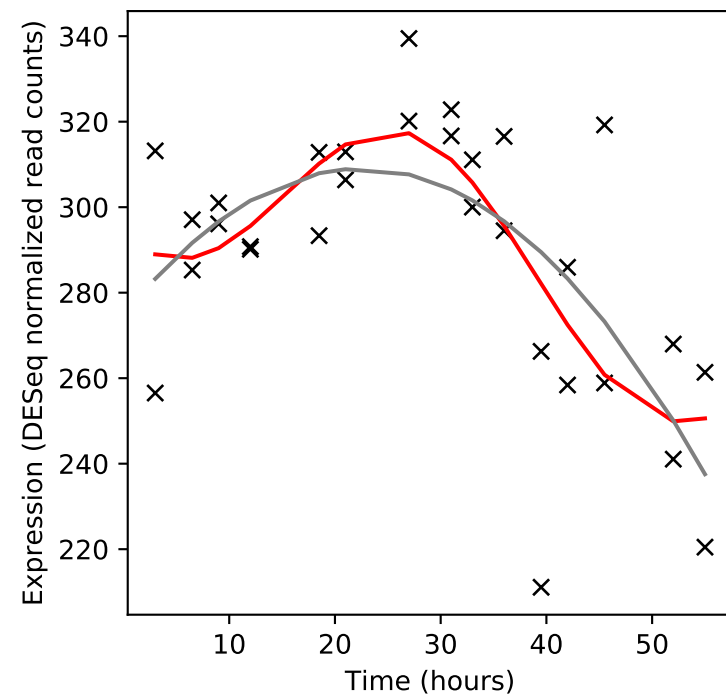

Rv3306c/amiB1

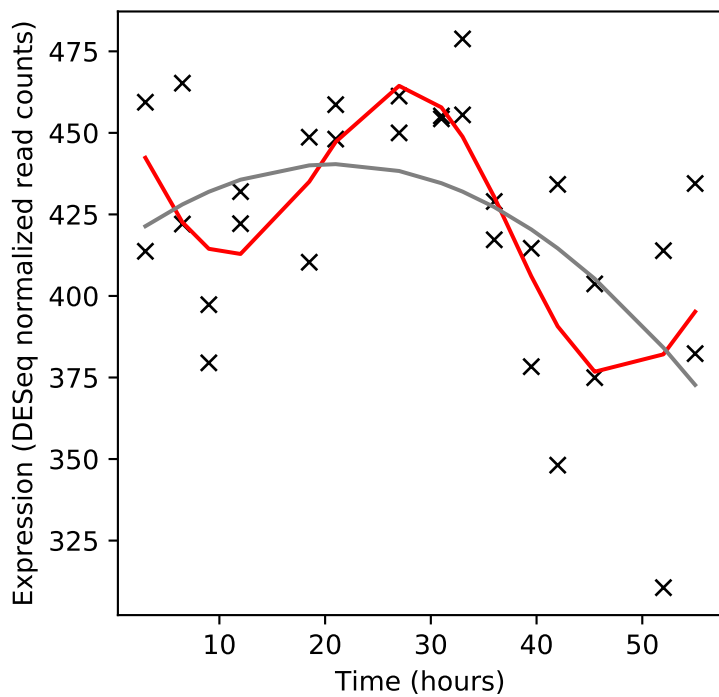

Rv3307/deoD

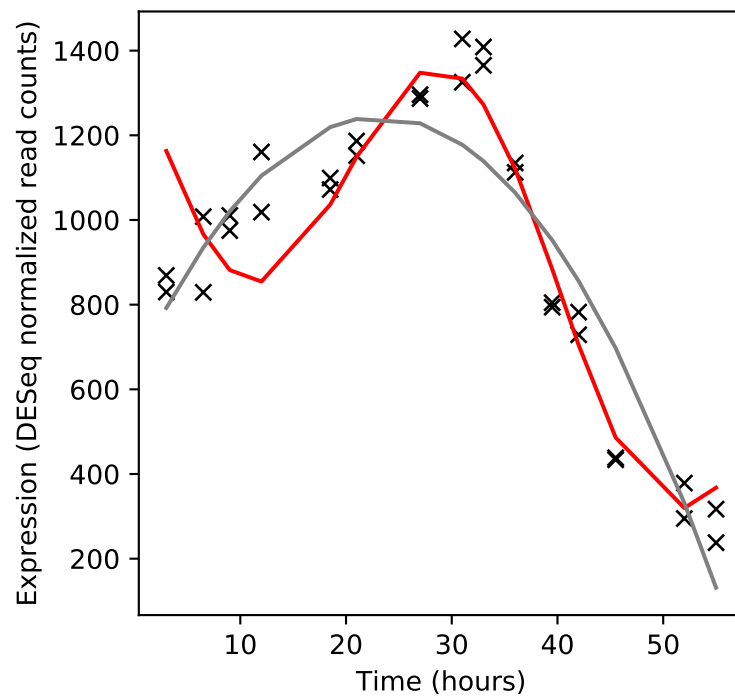

Rv3308/pmmB

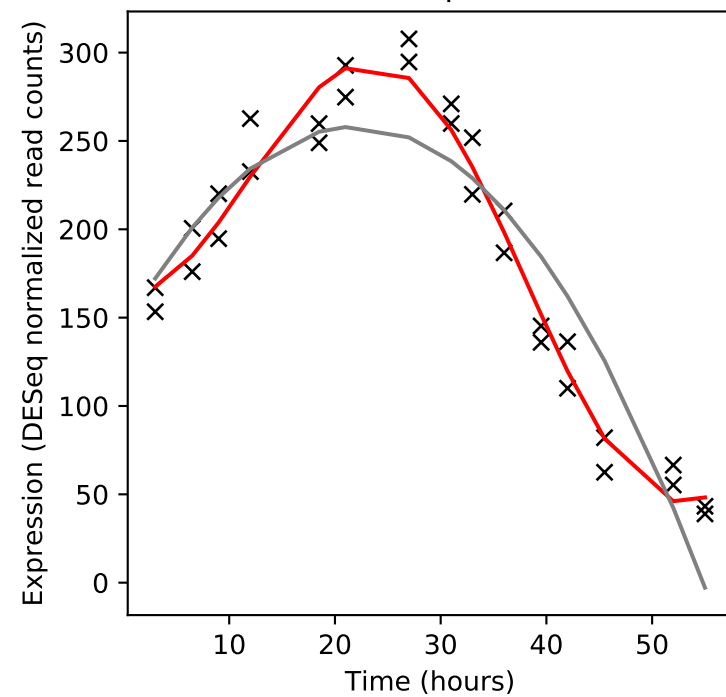

Rv3309c/upp

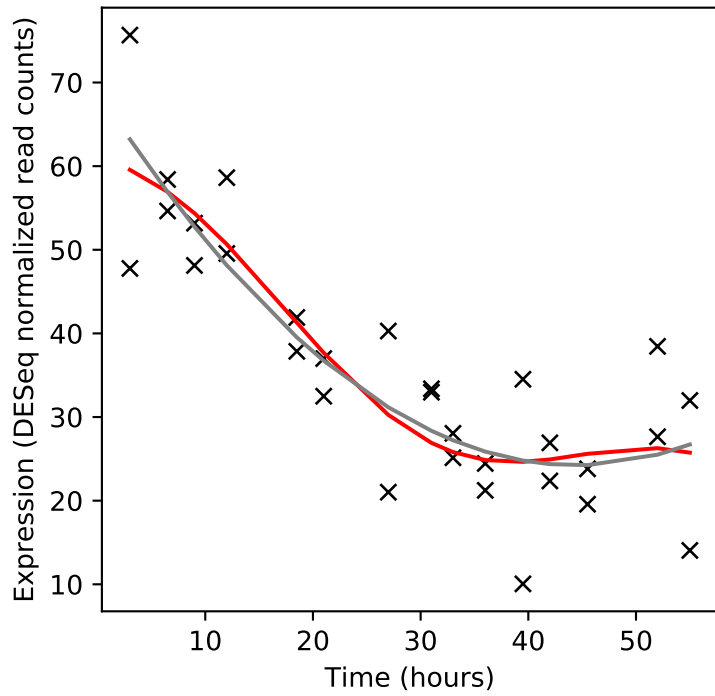

Rv3310/sapM

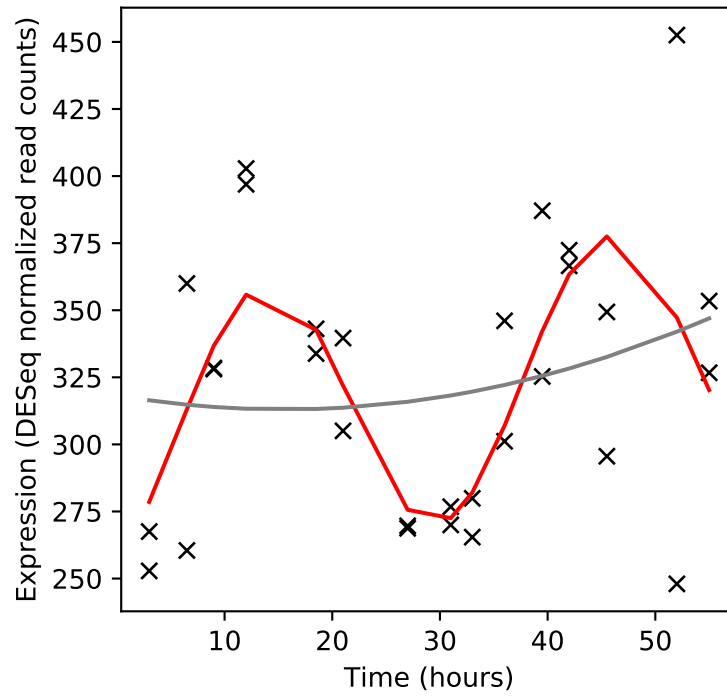

Rv3311/-

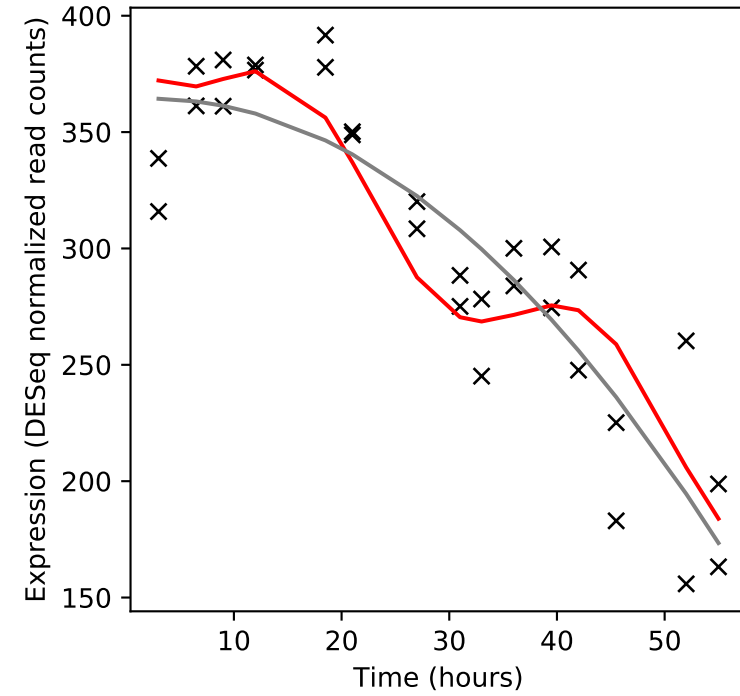

Rv3312c/-

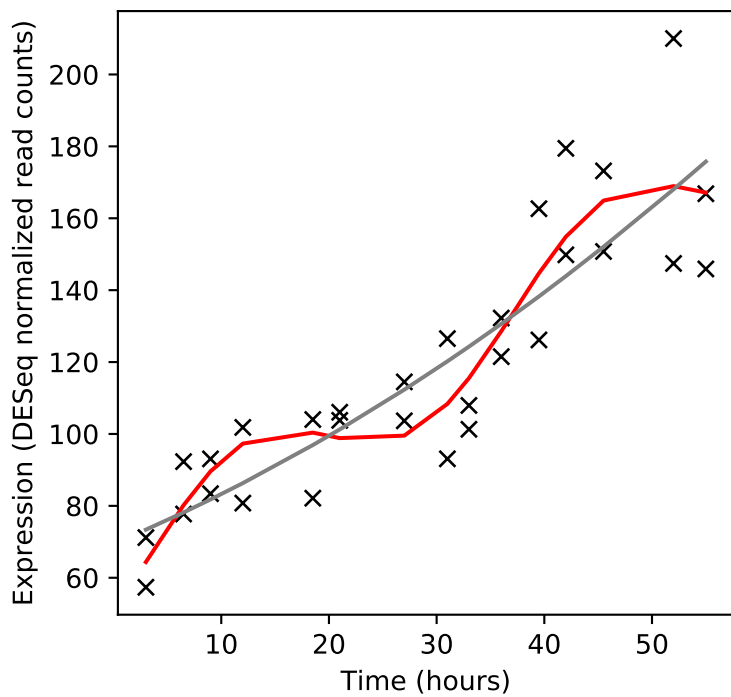

Rv3312A/-

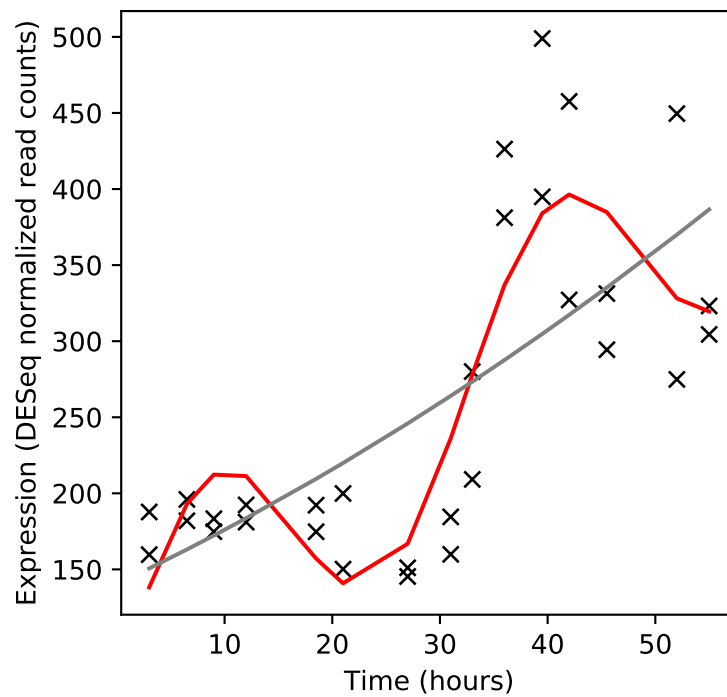

Rv3313c/add

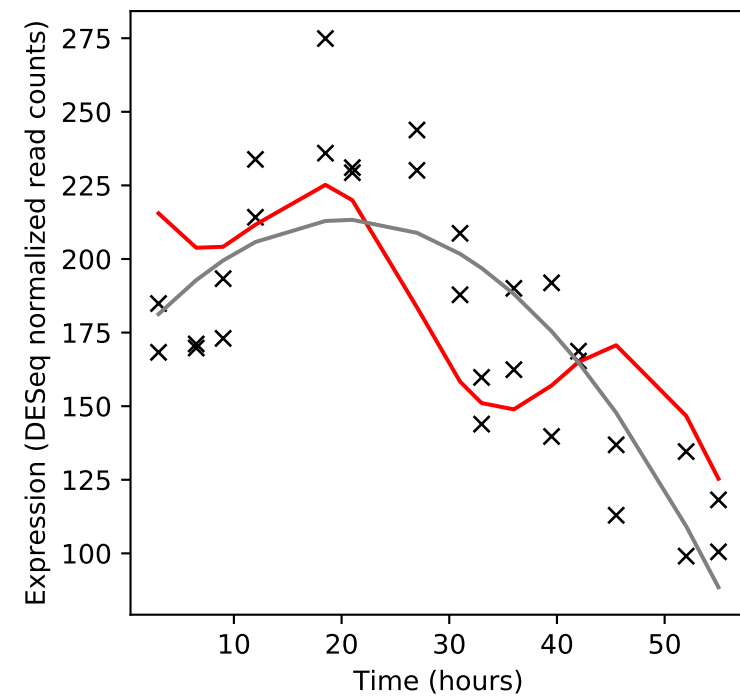

Rv3314c/deoA

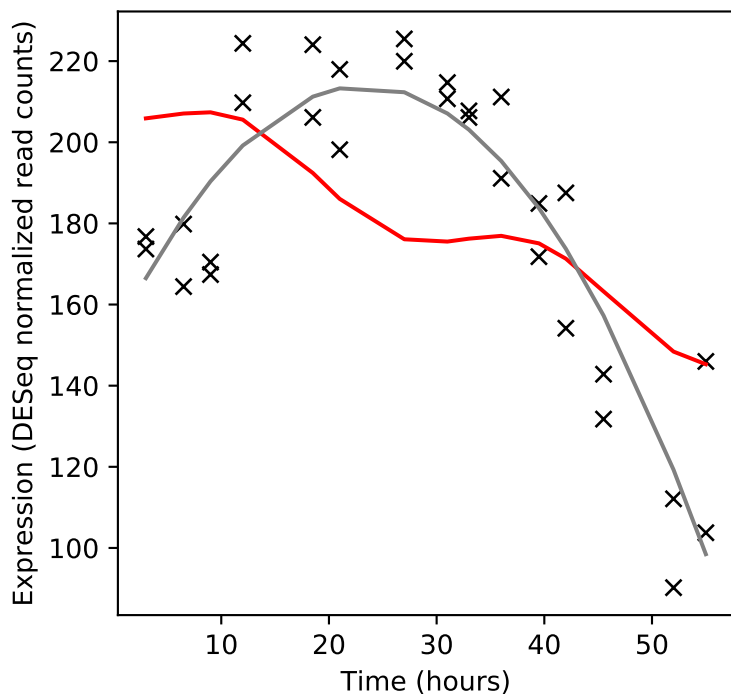

Rv3315c/cdd

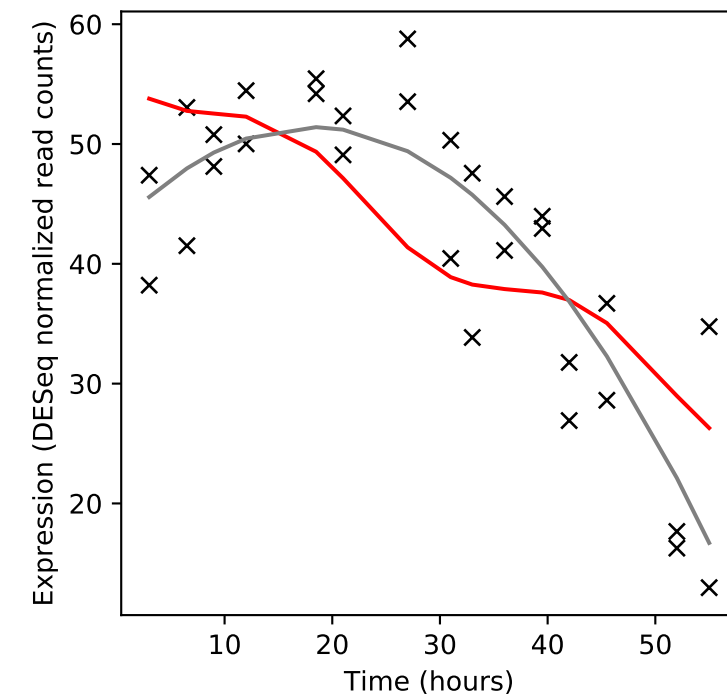

Rv3316/sdhC

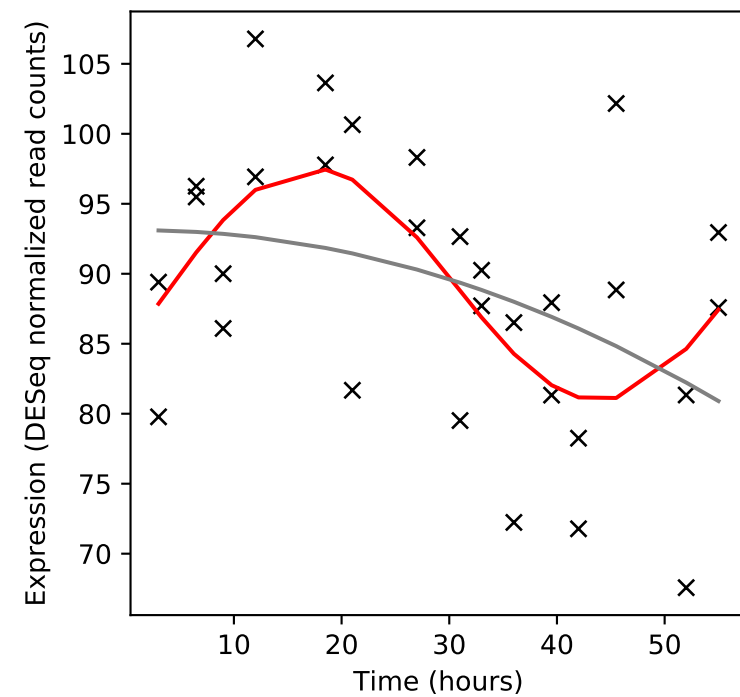

Rv3317/sdhD

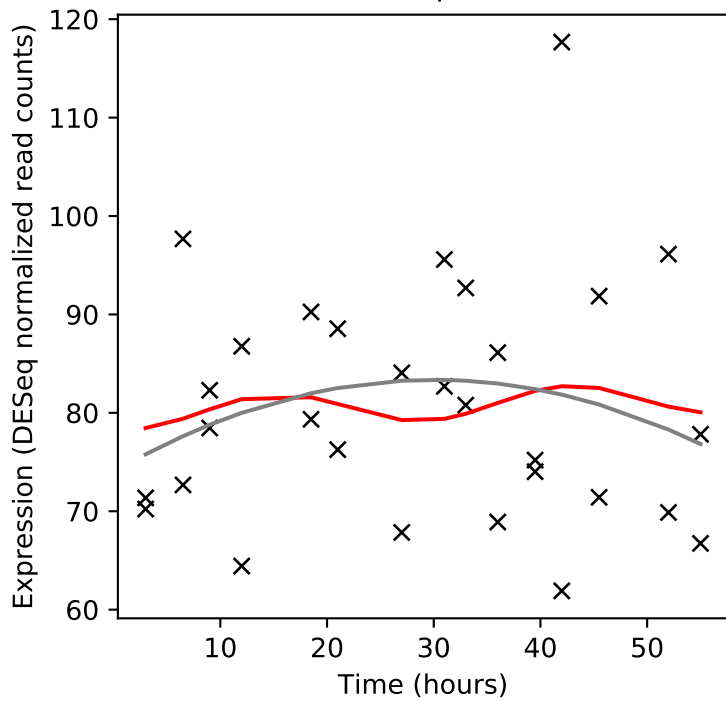

Rv3318/sdhA

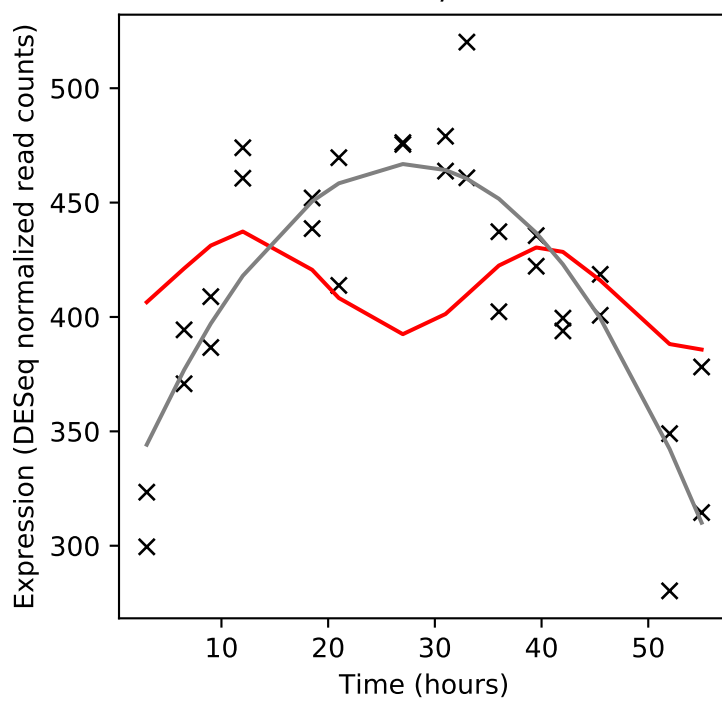

Rv3319/sdhB

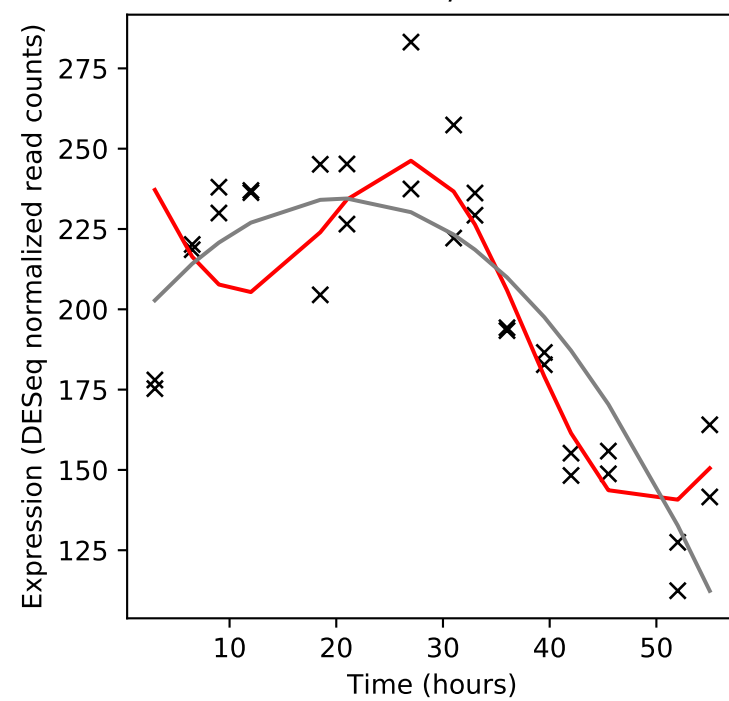

Rv3320c/vapC44

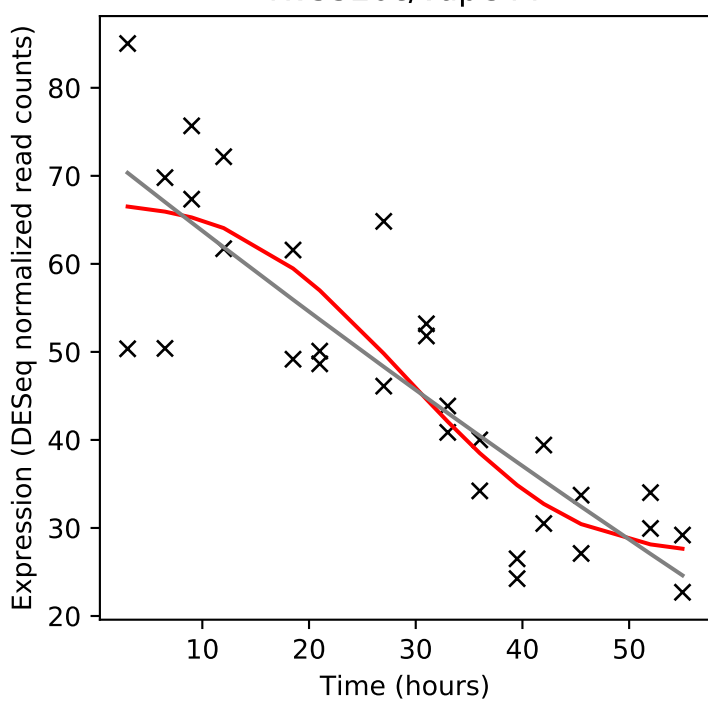

Rv3321c/vapB44

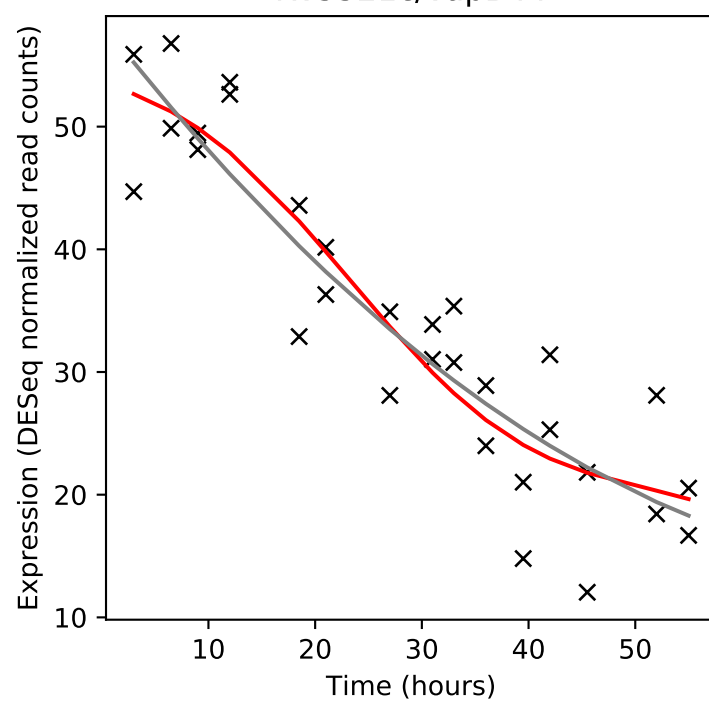

Rv3322c/-

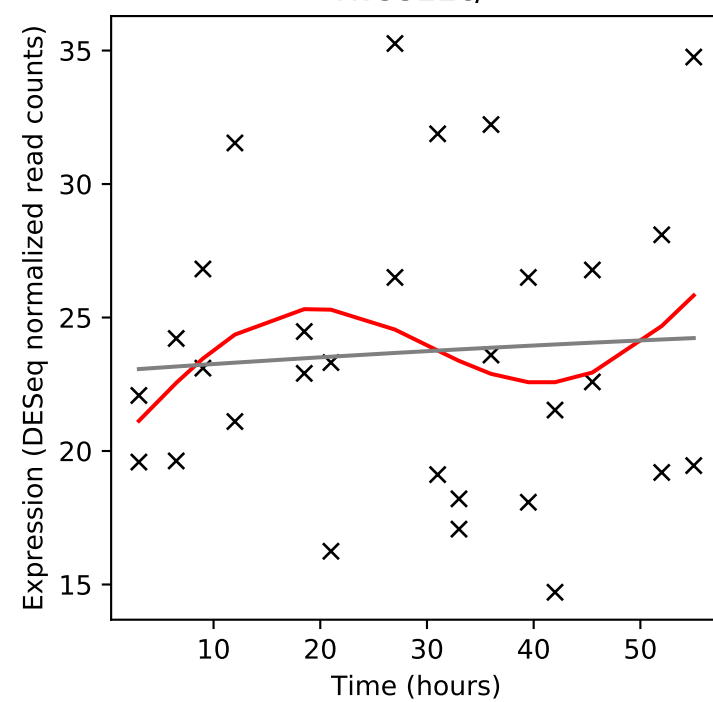

Rv3323c/moaX

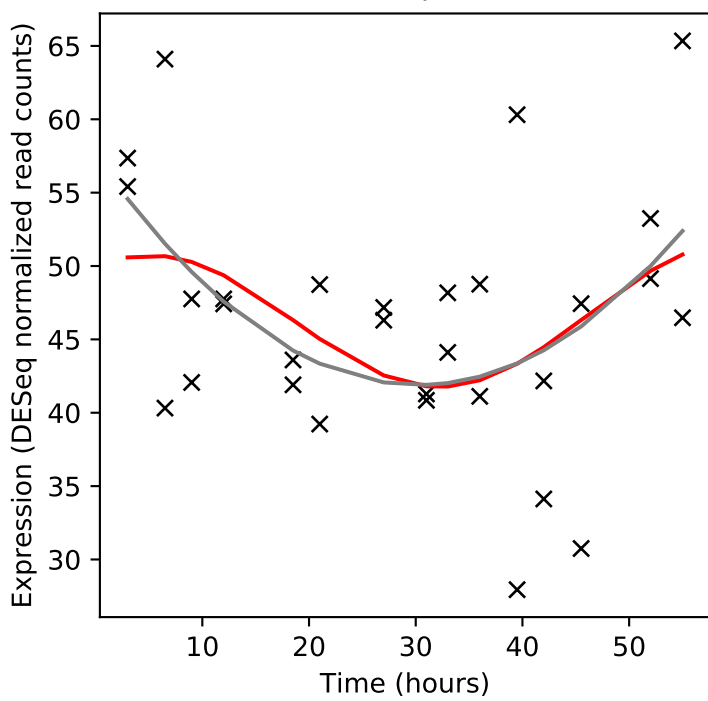

Rv3324c/moaC3

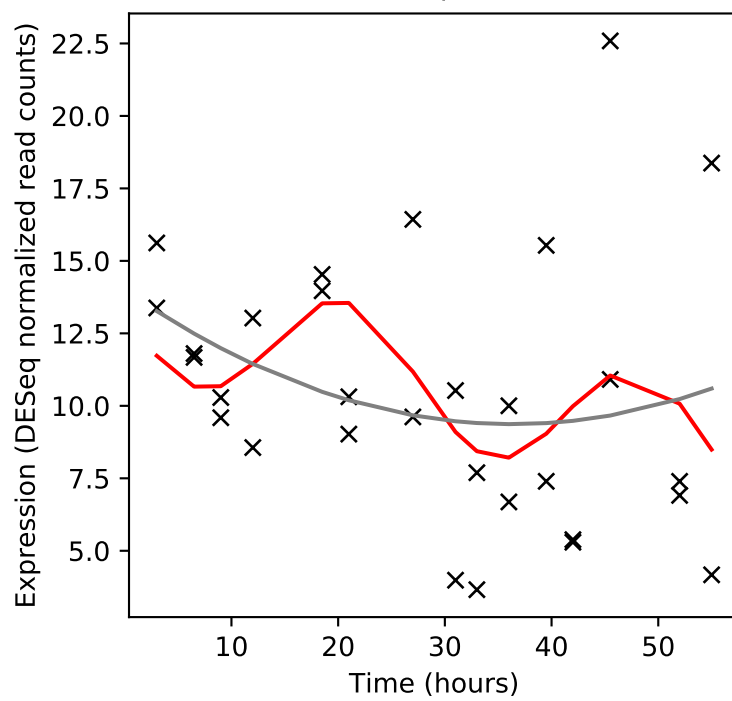

Rv3325/-

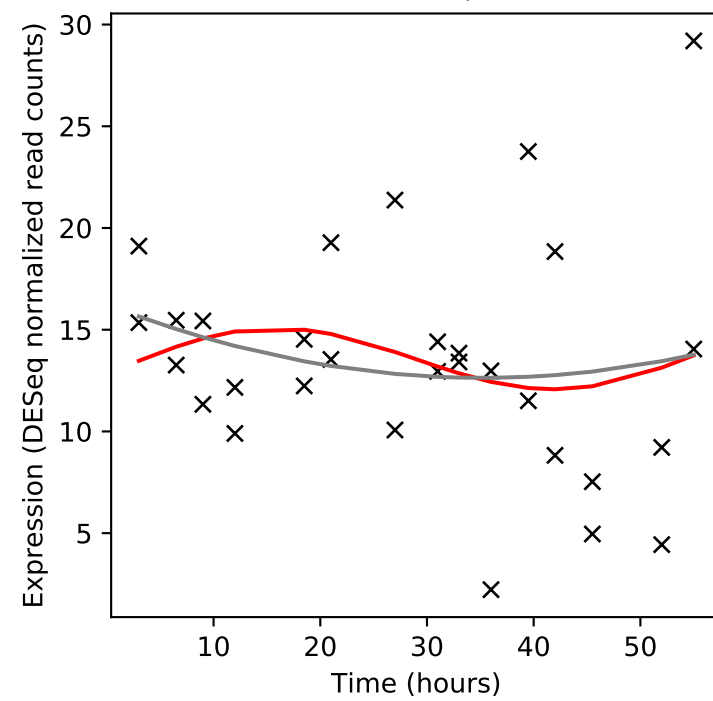

Rv3326/-

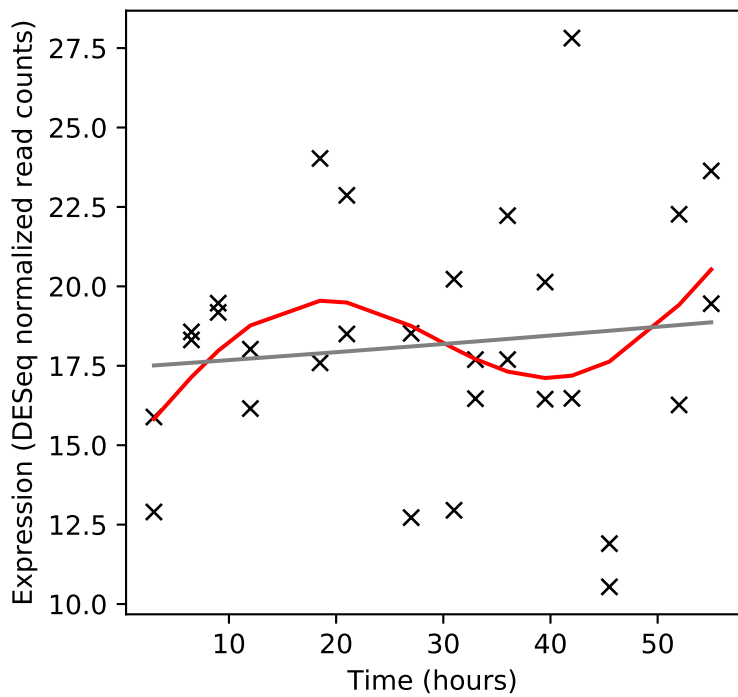

Rv3327/-

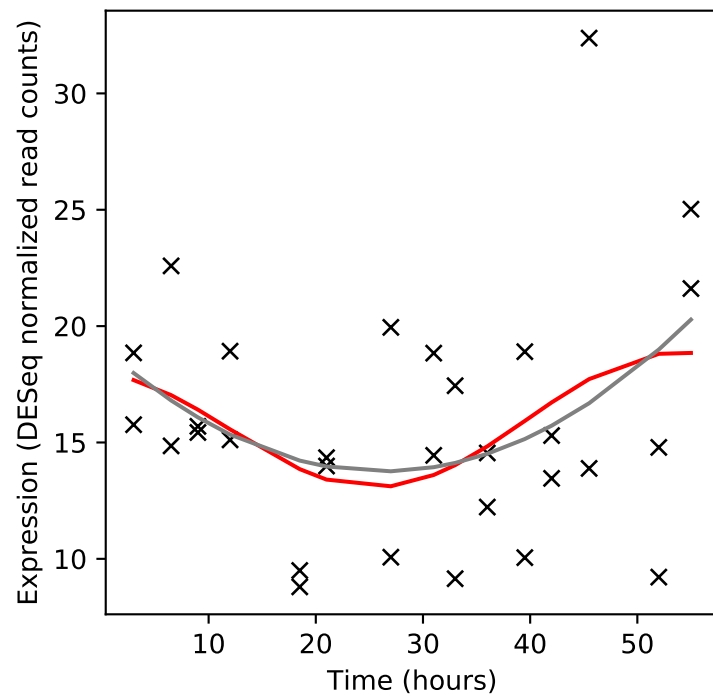

Rv3328c/sigJ

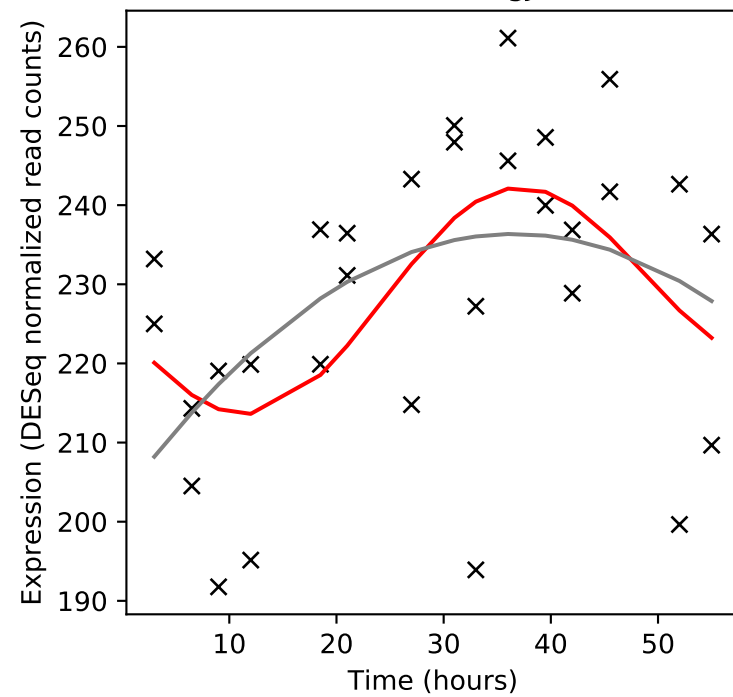

Rv3329/-

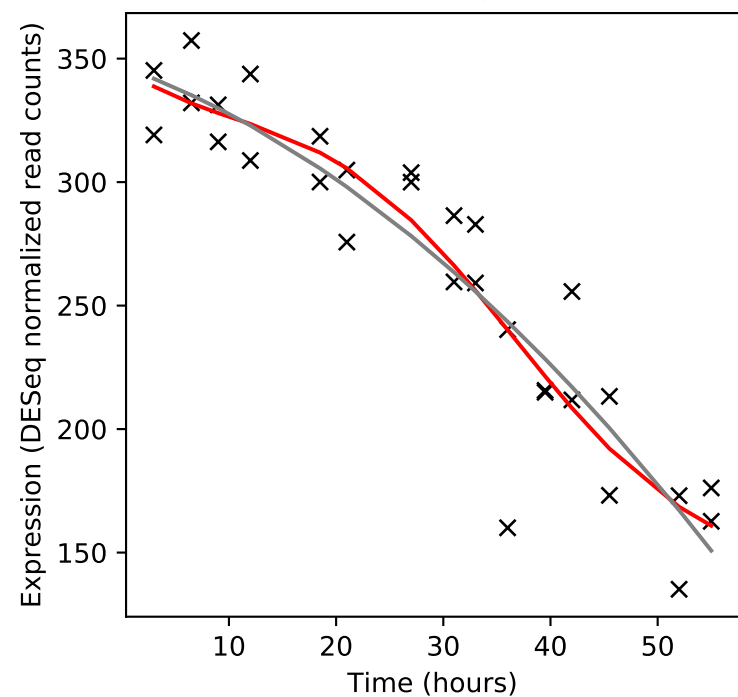

Rv3330/dacB1

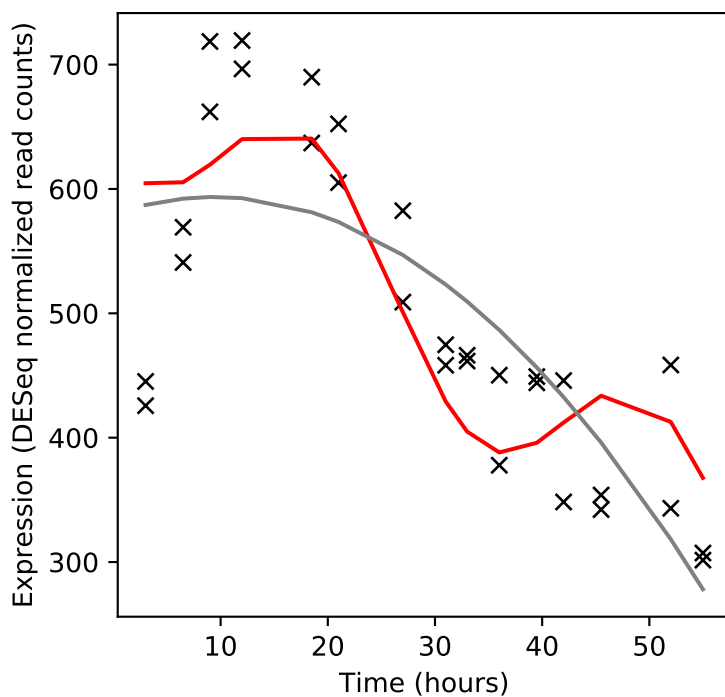

Rv3331/sugJ

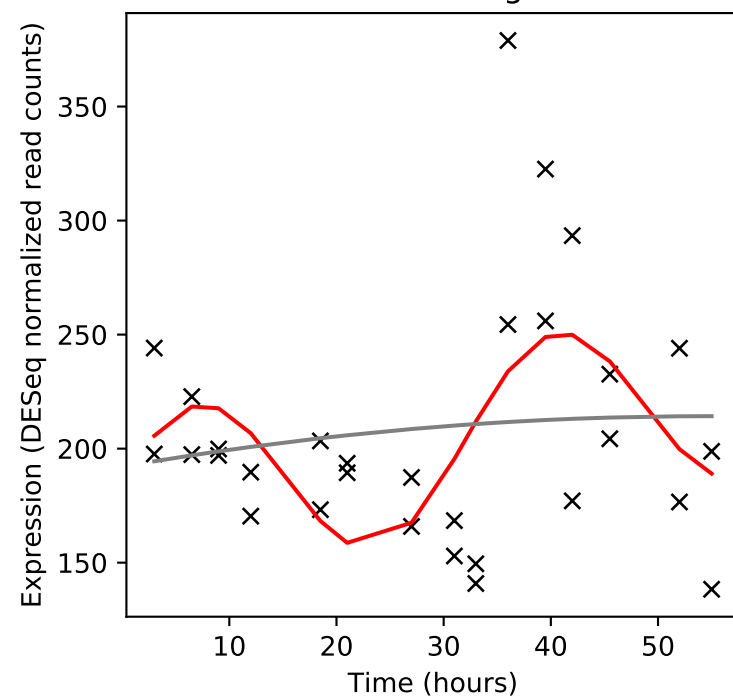

Rv3332/nagA

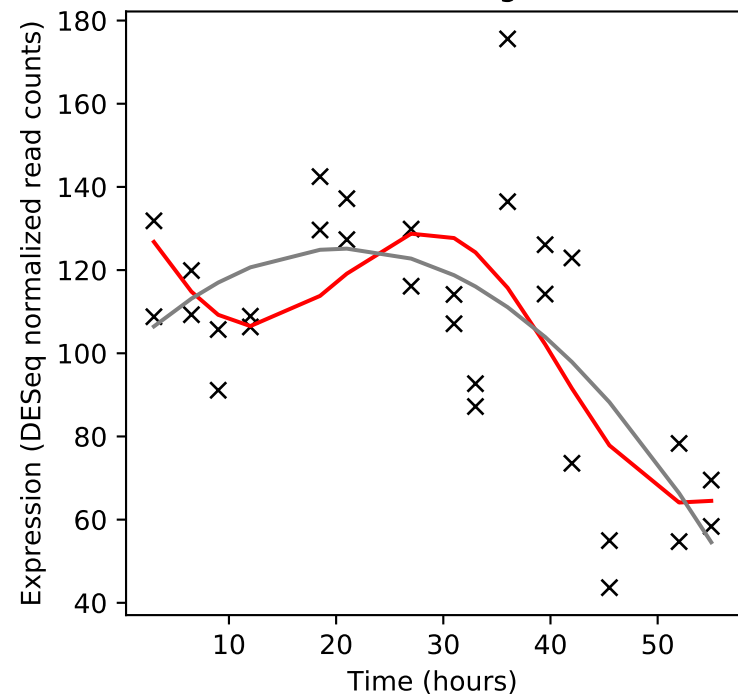

Rv3333c/-

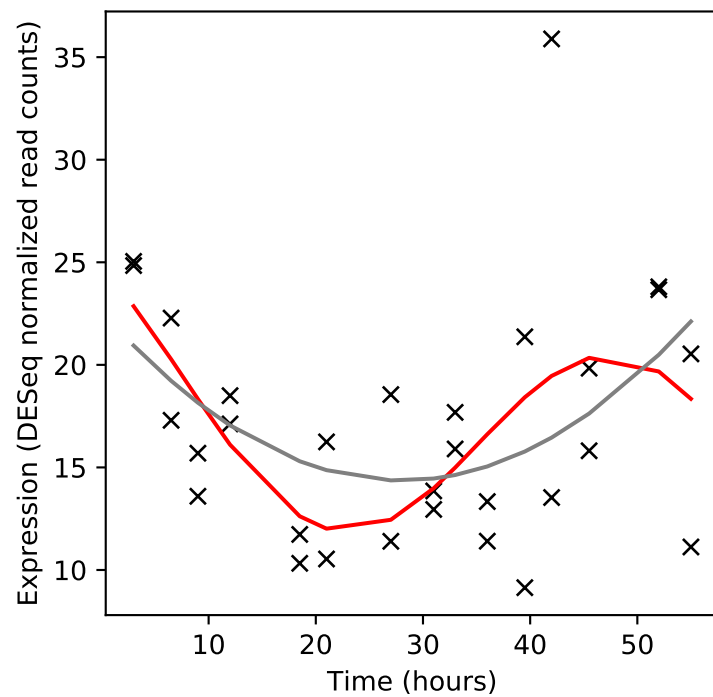

Rv3334/-

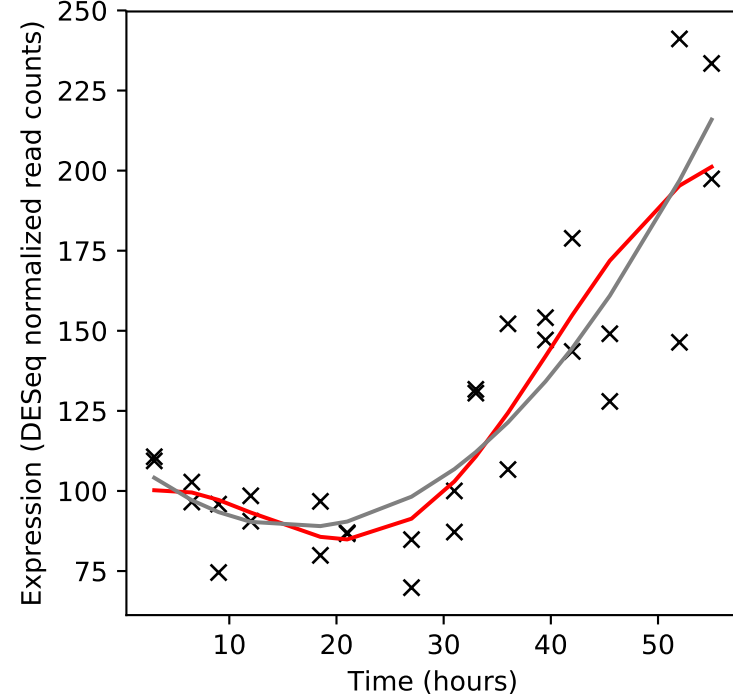



Rv3335c/-

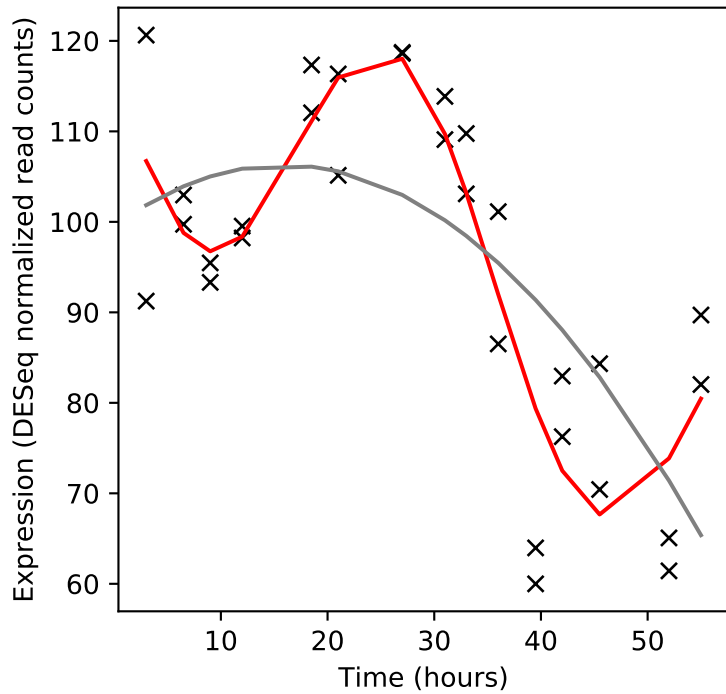

Rv3336c/trpS

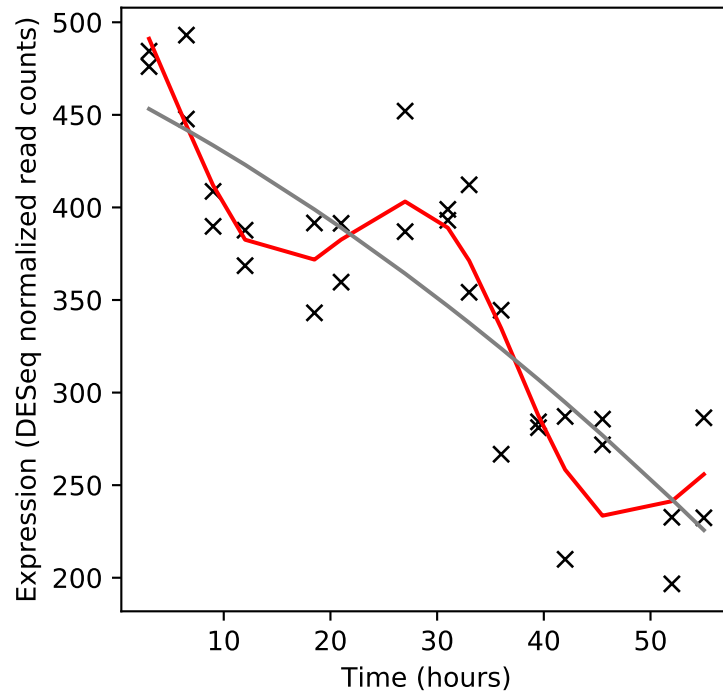

Rv3337/-

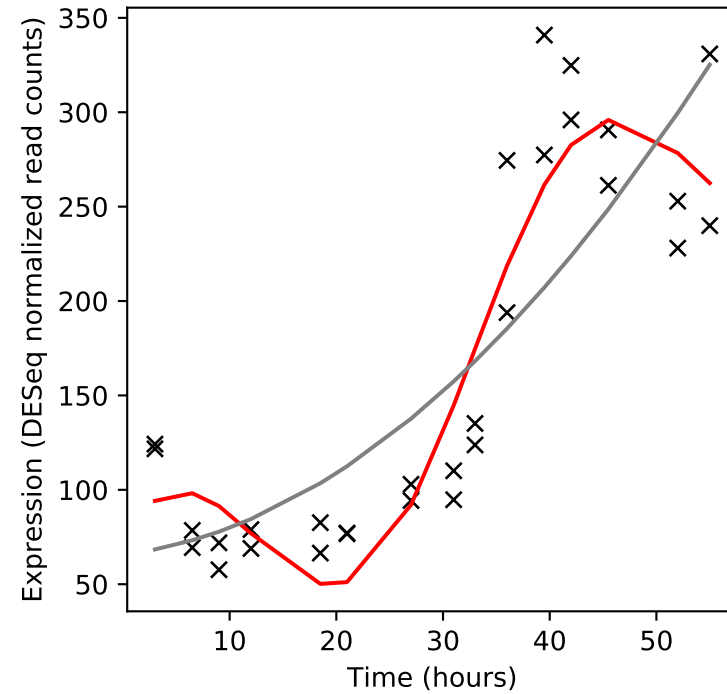

Rv3338/-

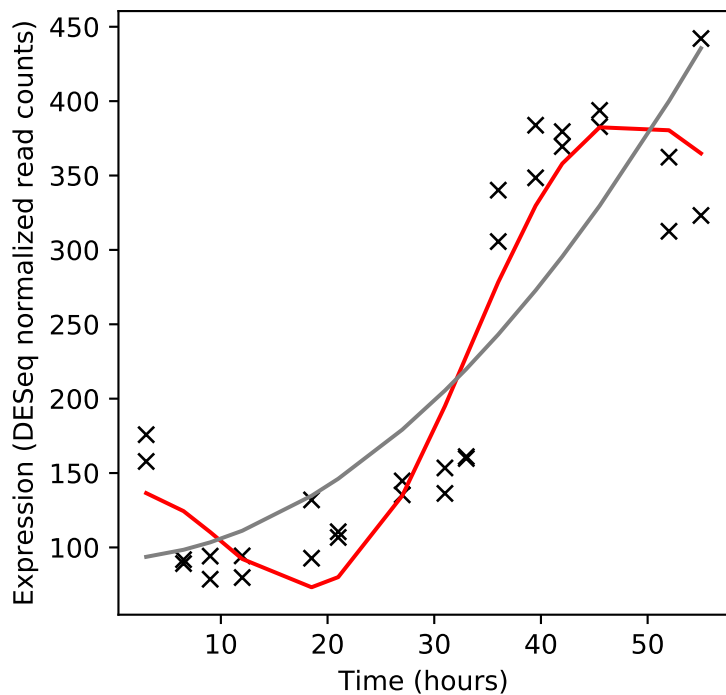

Rv3339c/icd1

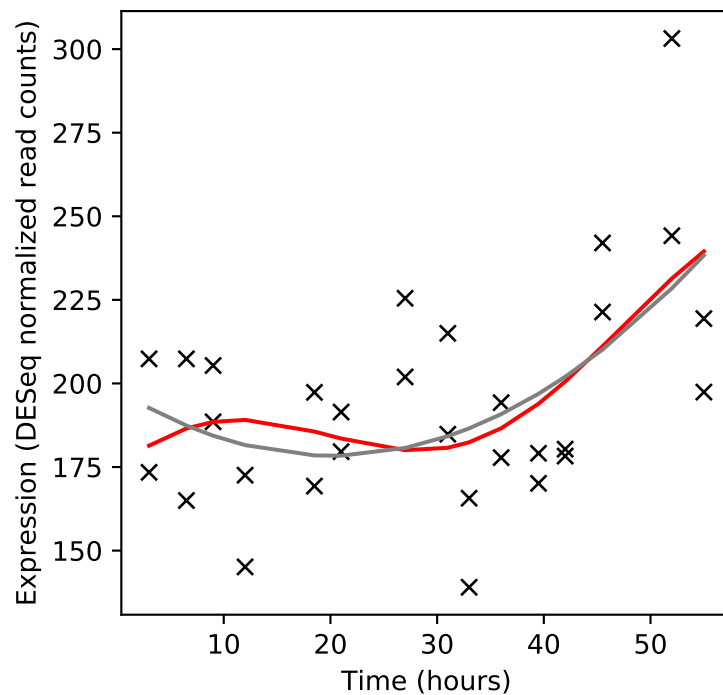

Rv3340/metC

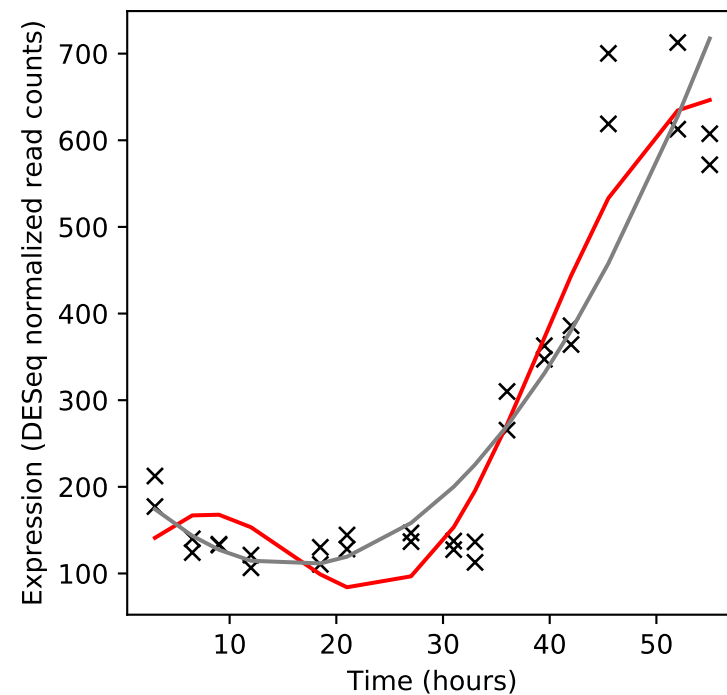

Rv3341/metA

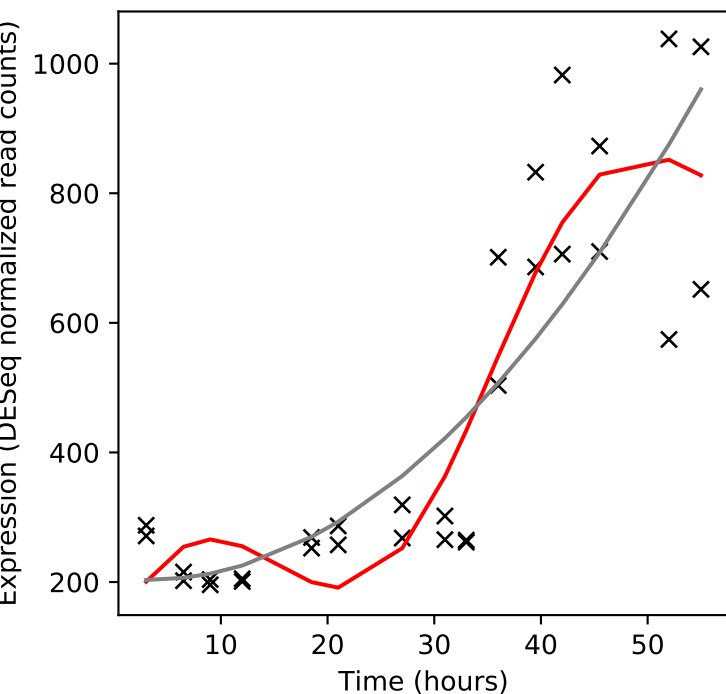

Rv3342/-

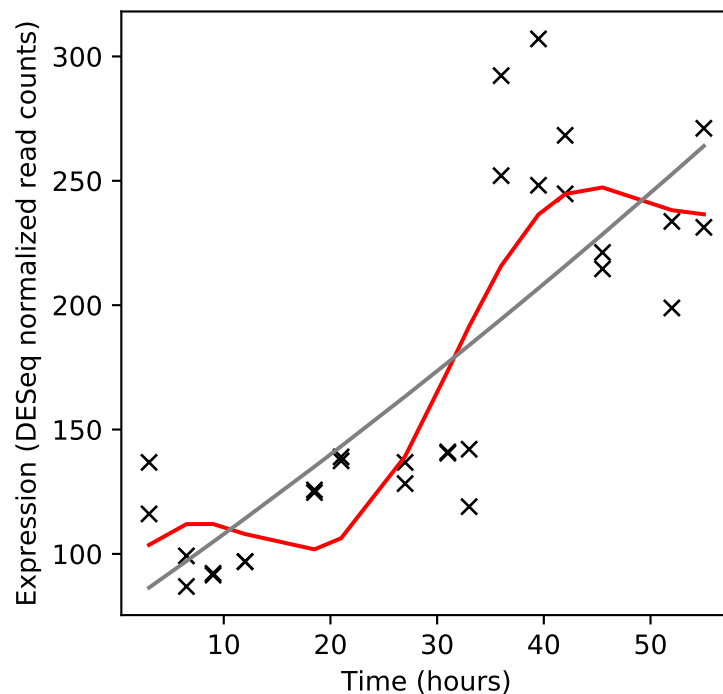

Rv3343c/PPE54

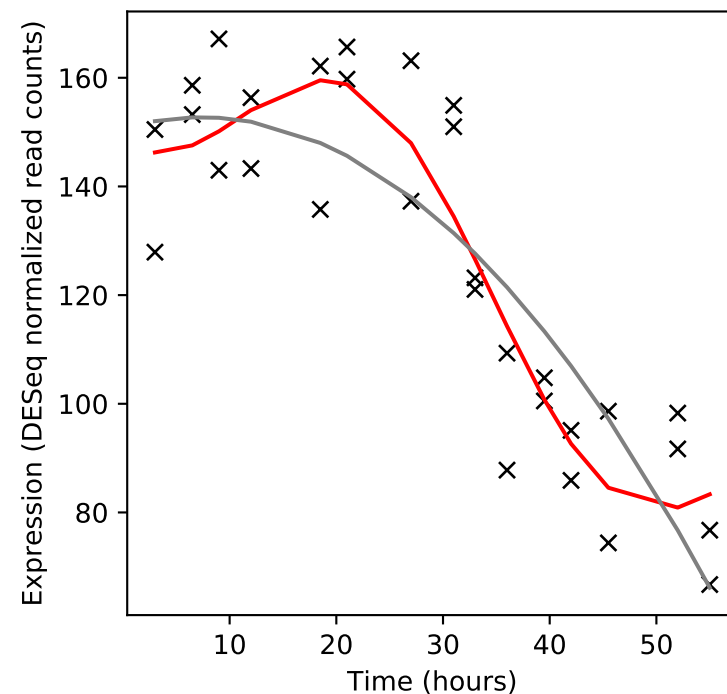

Rv3344c/PE\_PGRS49

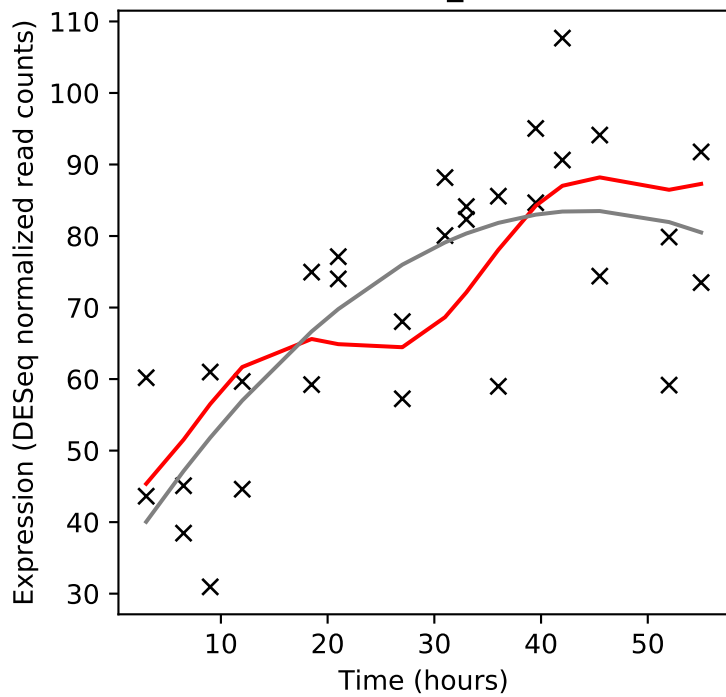

Rv3345c/PE\_PGRS50

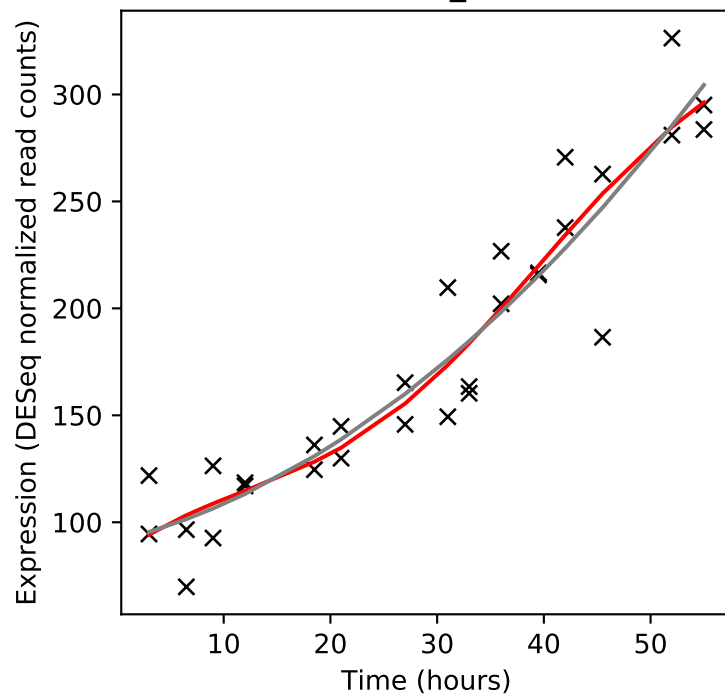

Rv3346c/-

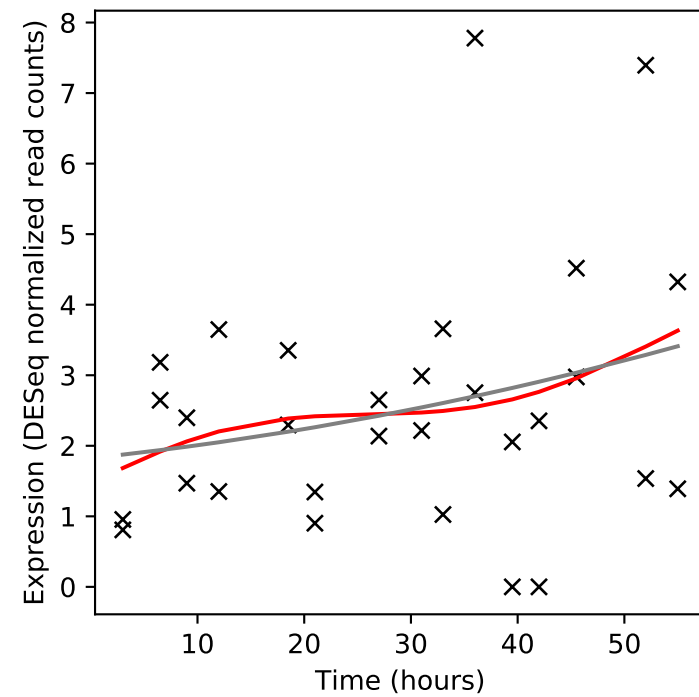

Rv3347c/PPE55

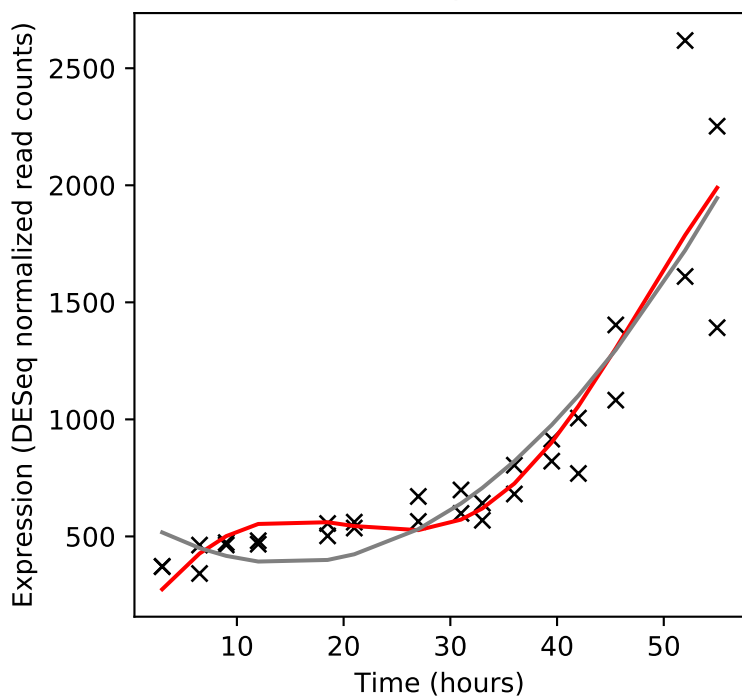

Rv3348c/-

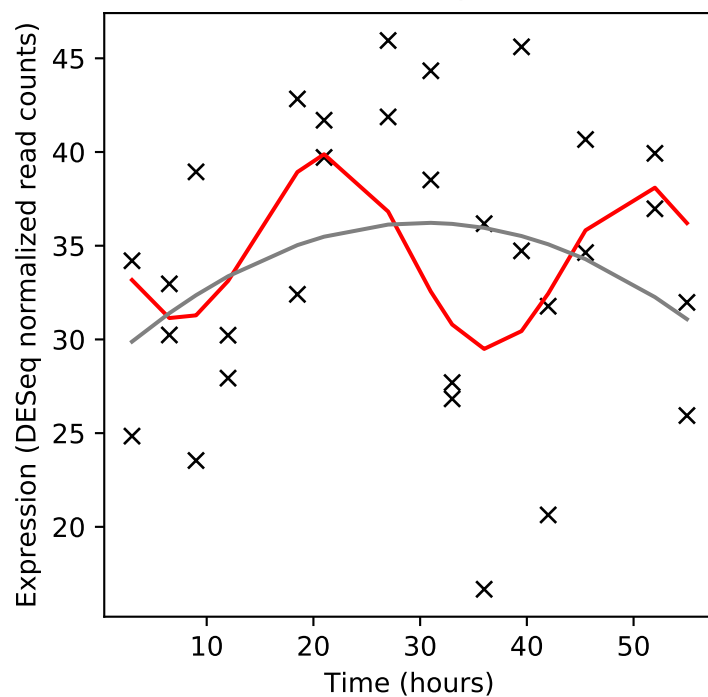

Rv3349c/-

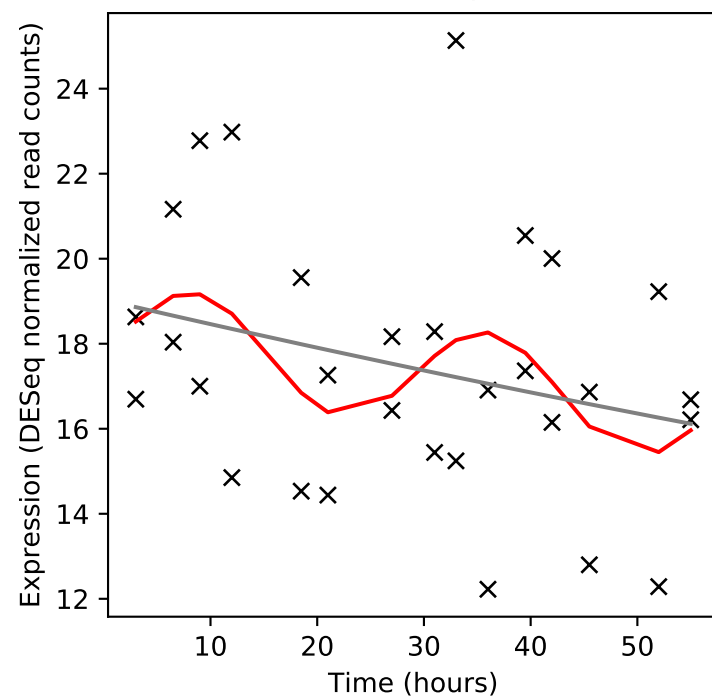

Rv3350c/PPE56

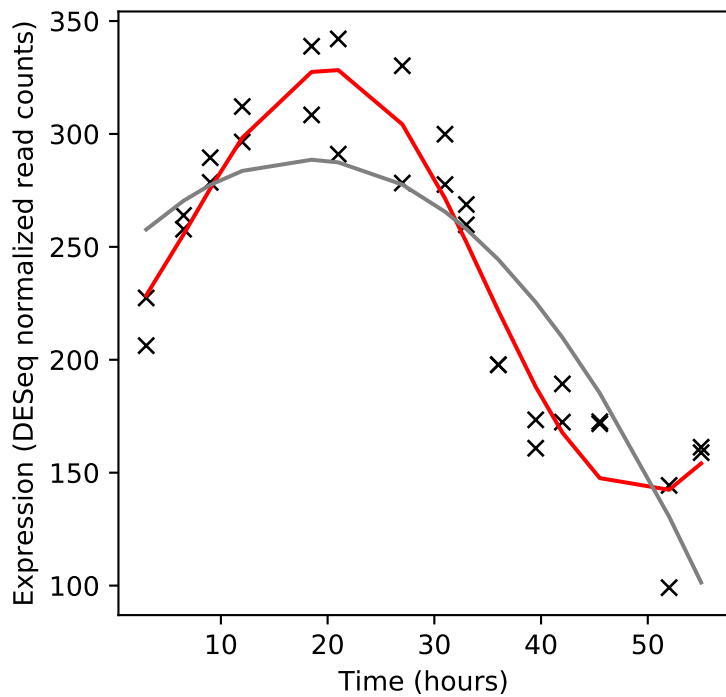

Rv3351c/-

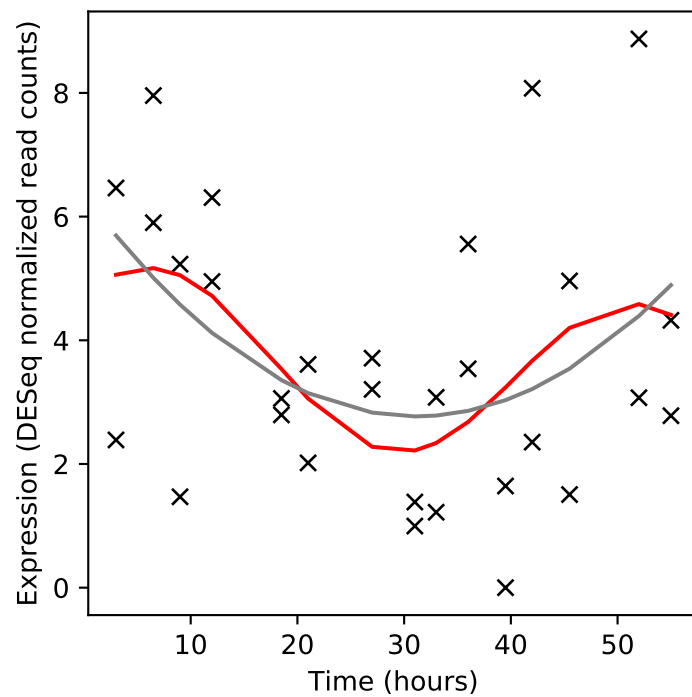

Rv3352c/-

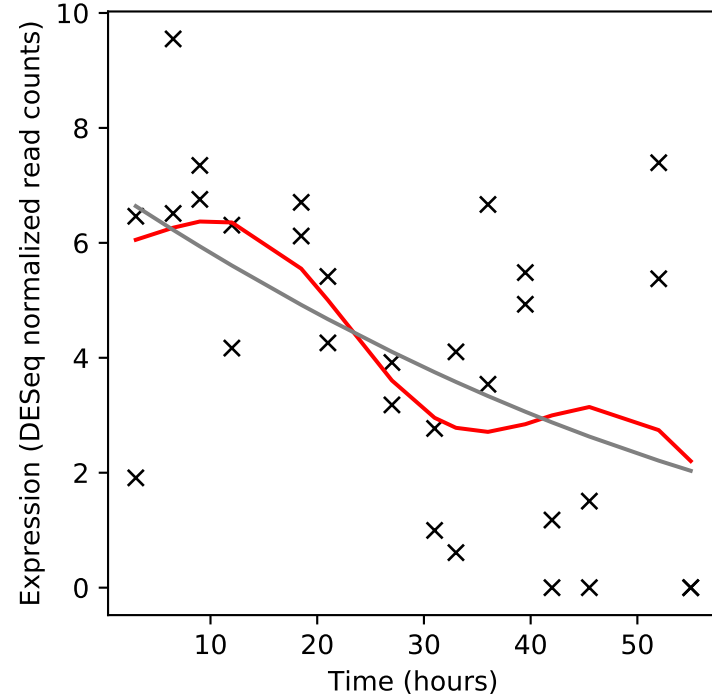

Rv3353c/-

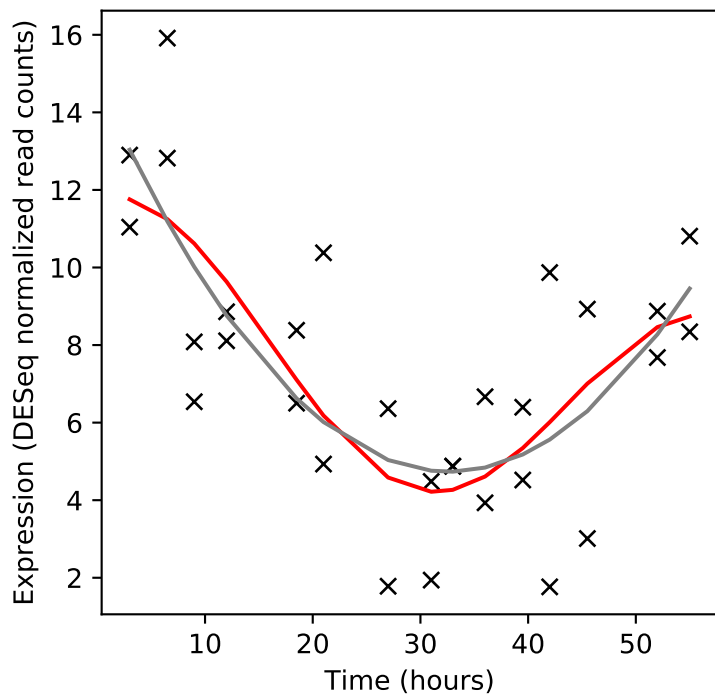

Rv3354/-

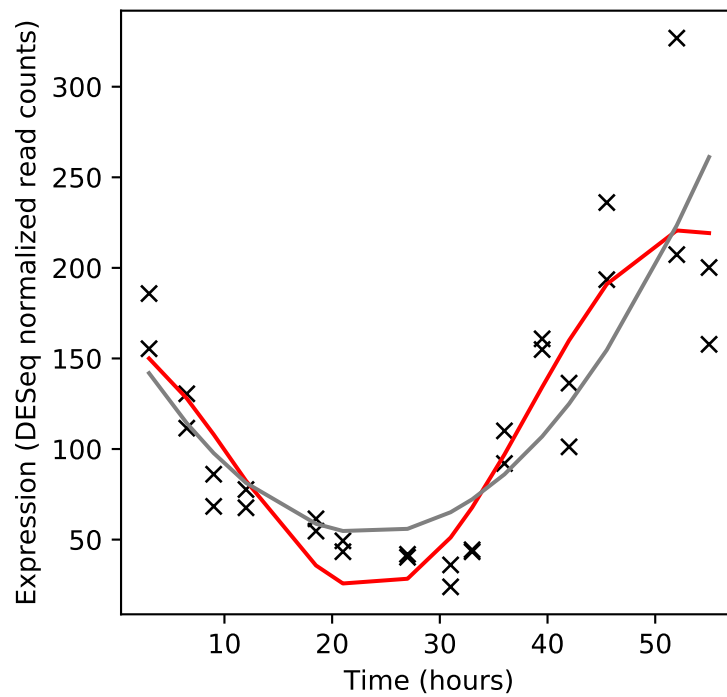

Rv3355c/-

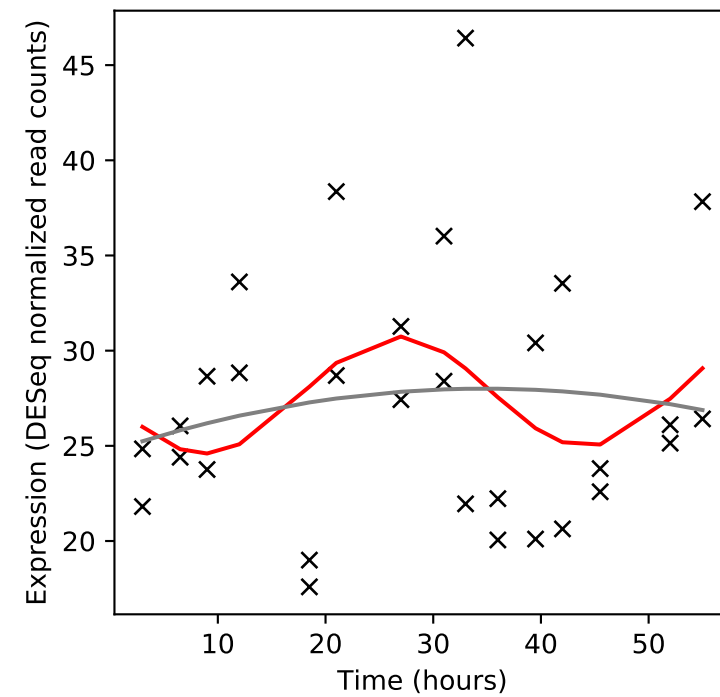

Rv3356c/fold

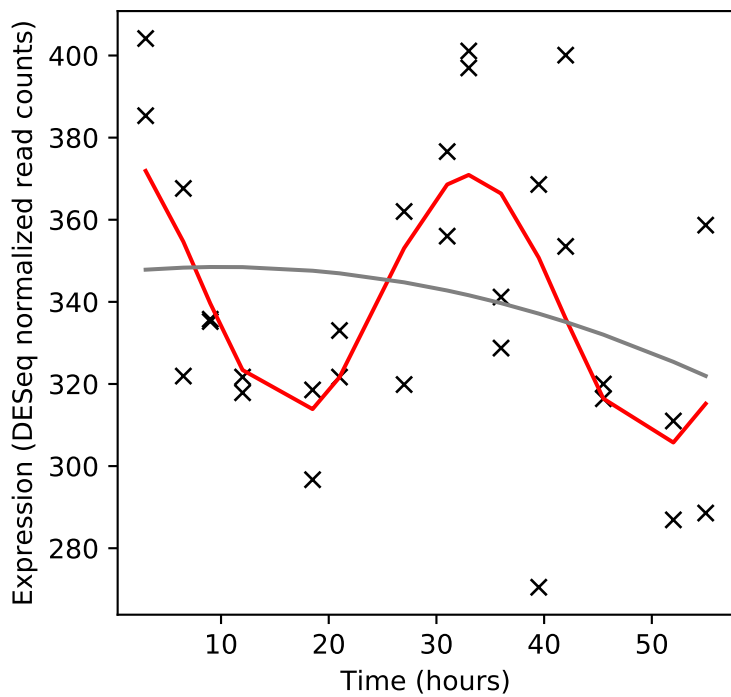

Rv3357/relJ

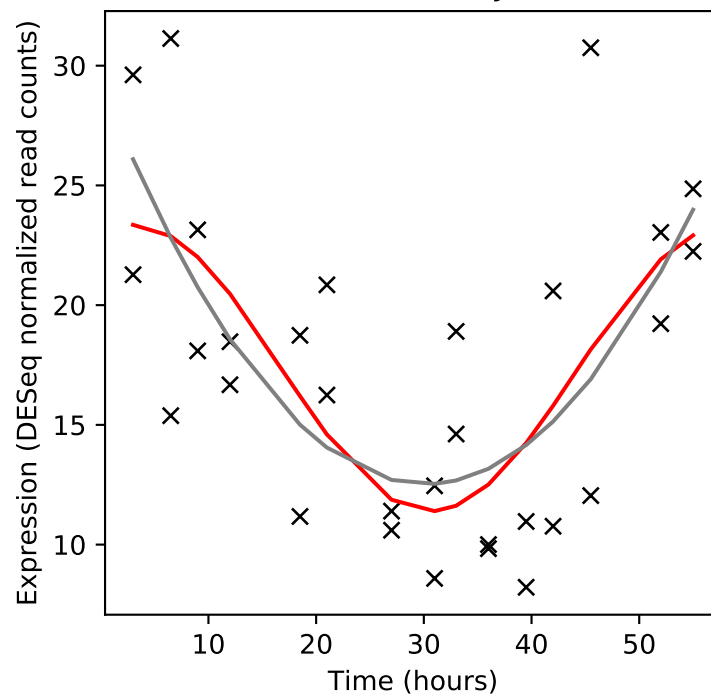

Rv3358/relK

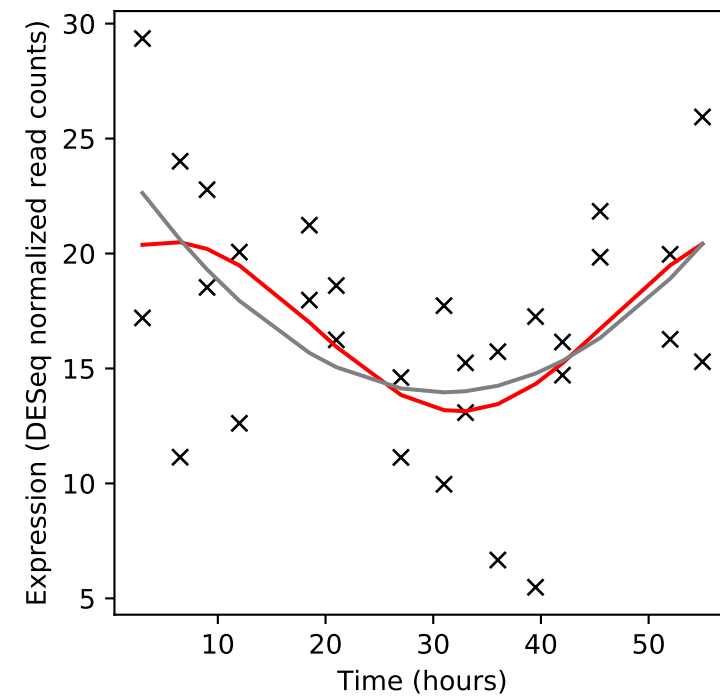

Rv3359/-

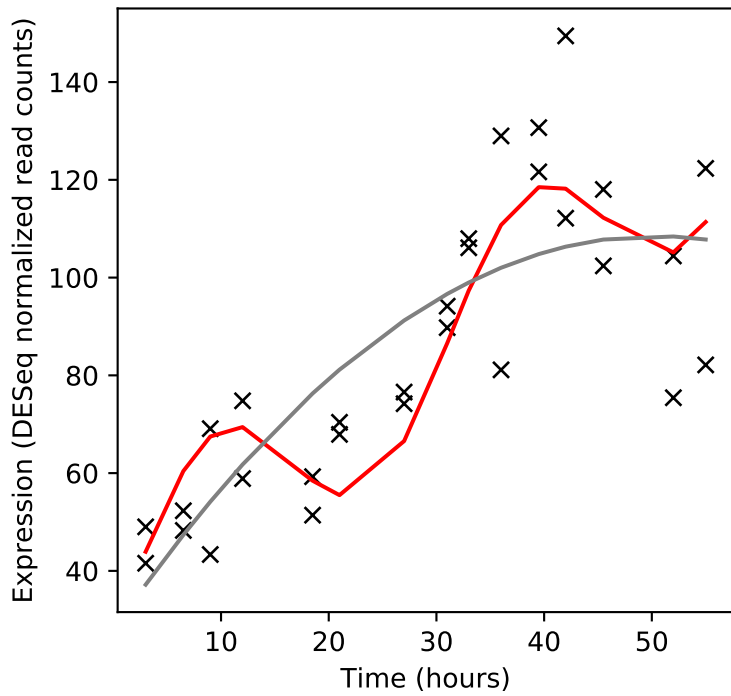

Rv3360/-

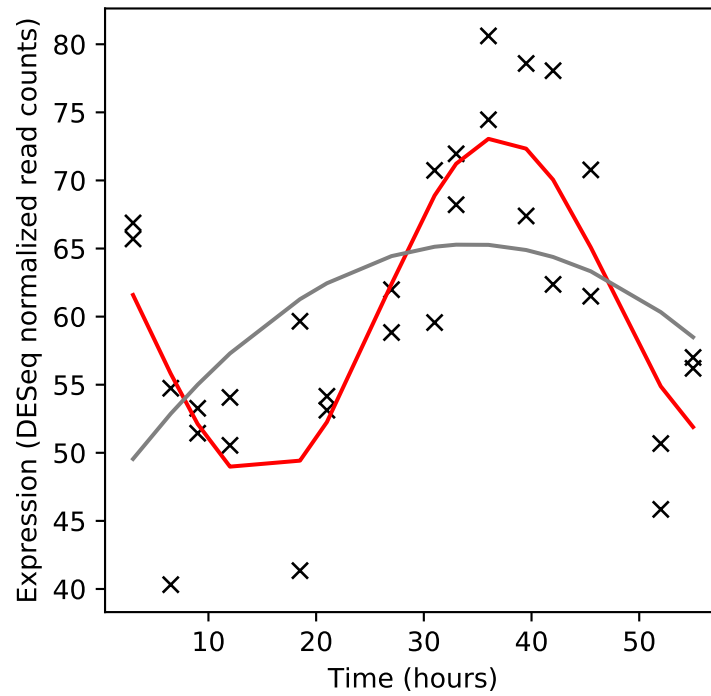

Rv3361c/-

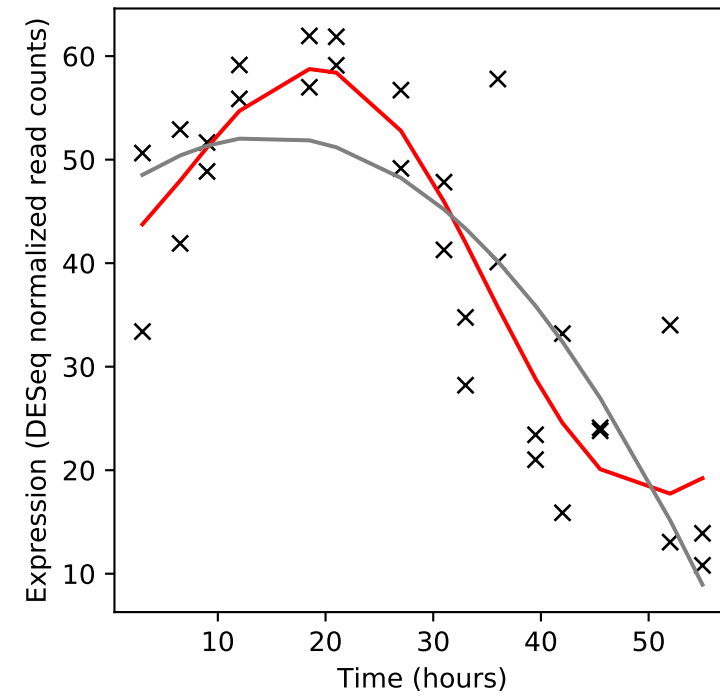

Rv3362c/-

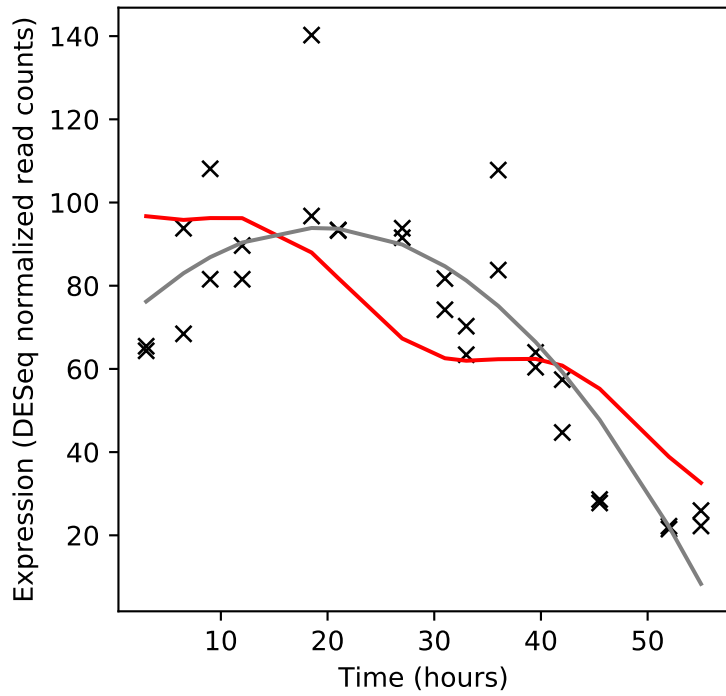

Rv3363c/-

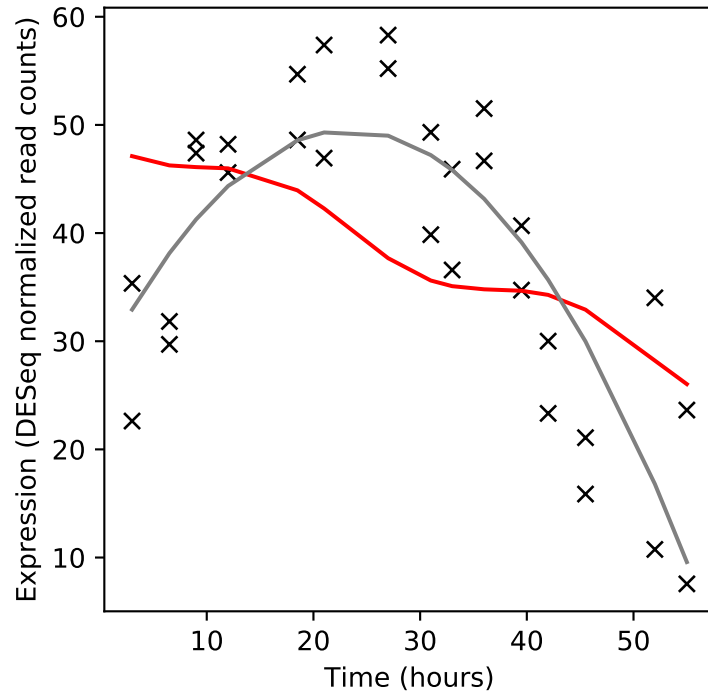

Rv3364c/-

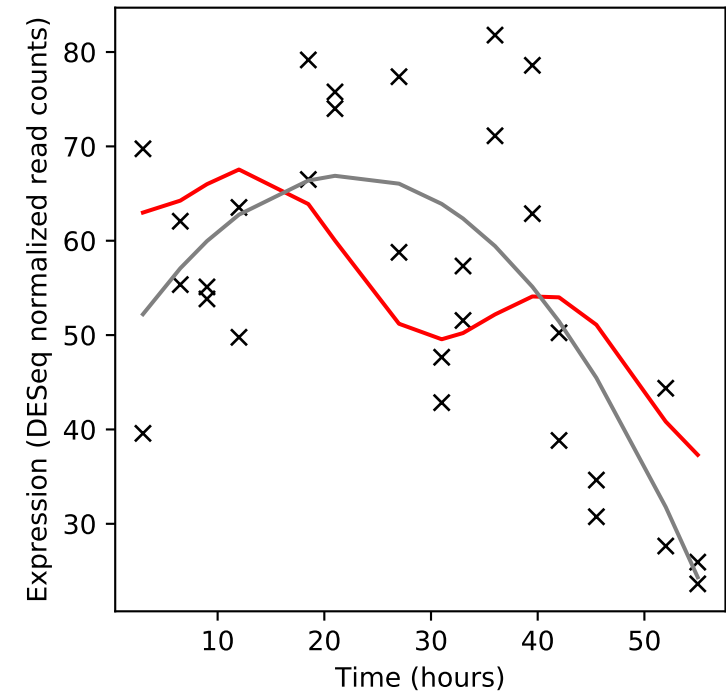

Rv3365c/-

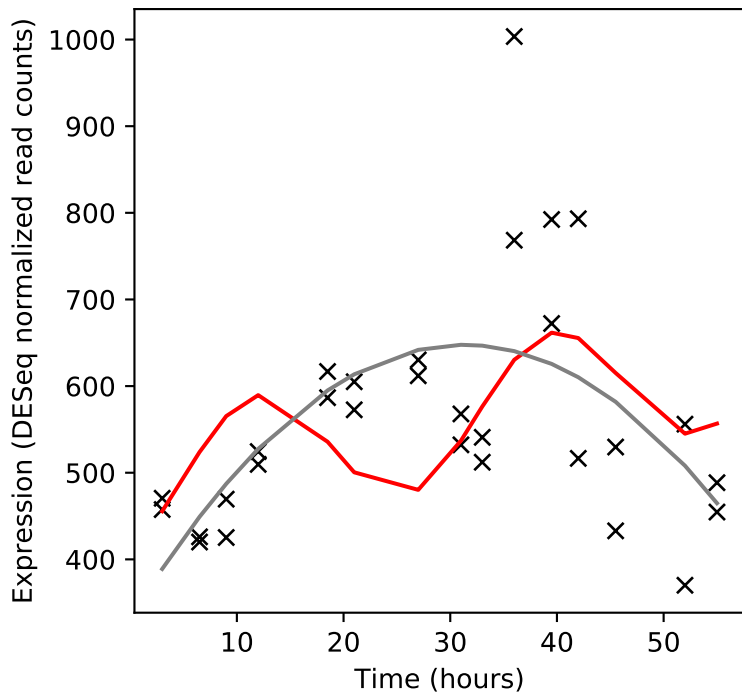

Rv3366/spoU

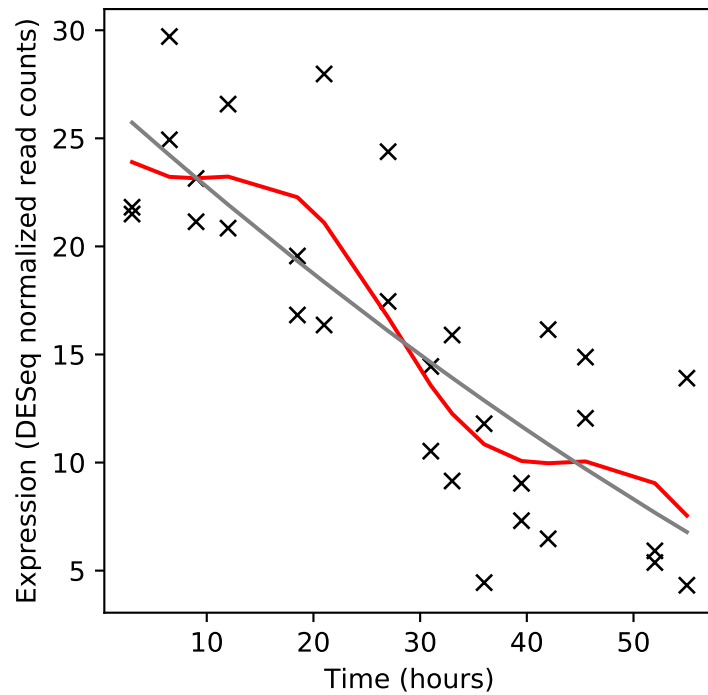

Rv3367/PE\_PGRS51

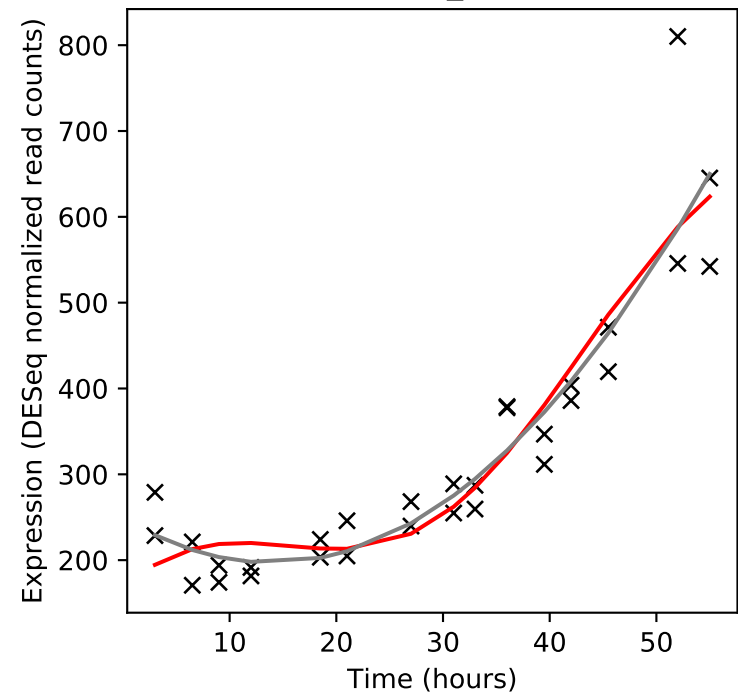

Rv3368c/-

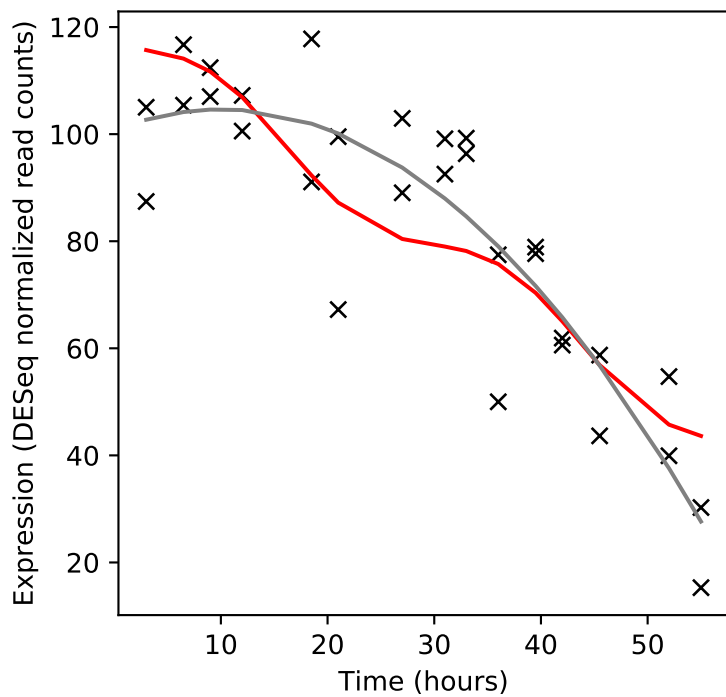

Rv3369/-

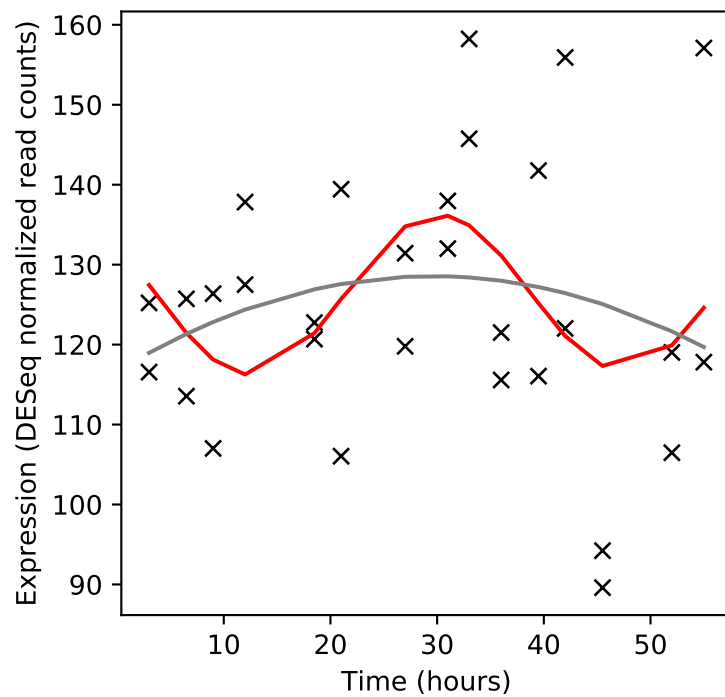

Rv3370c/dnaE2

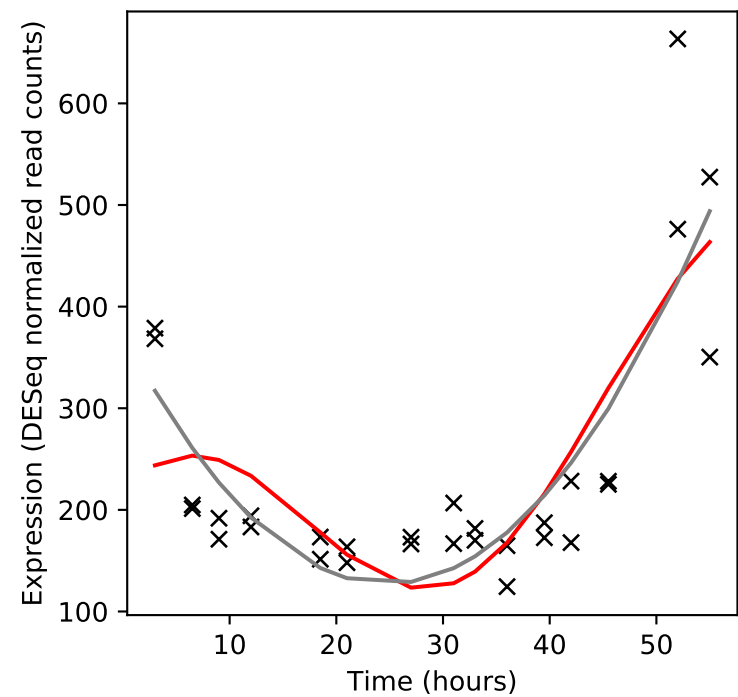

Rv3371/-

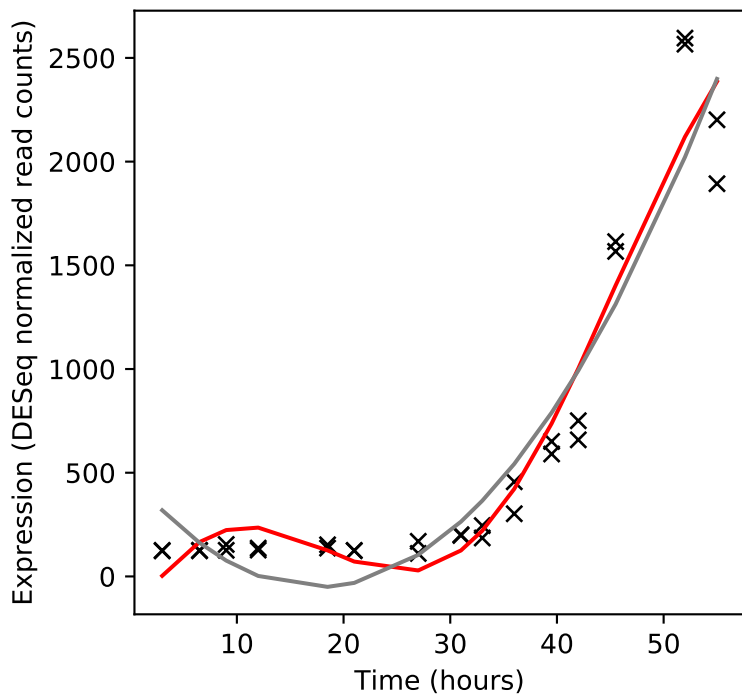

Rv3372/otsB2

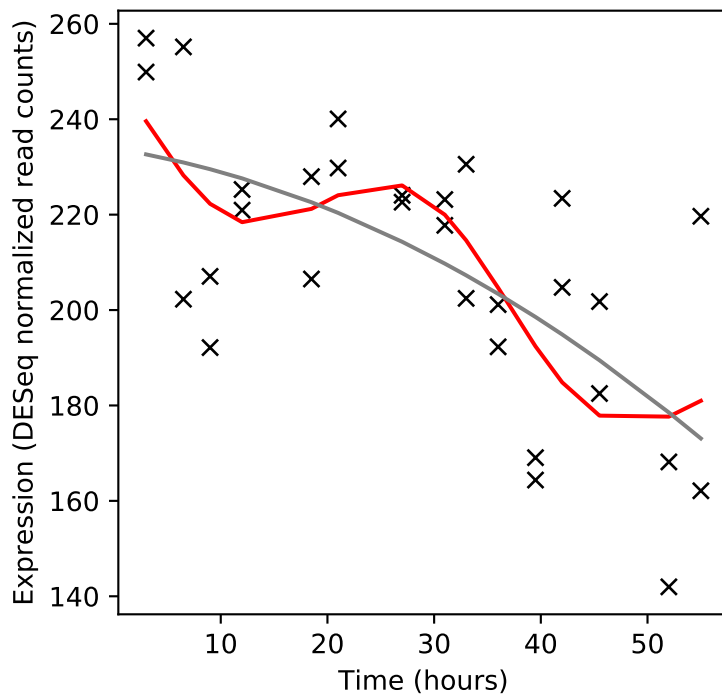

Rv3373/echA18

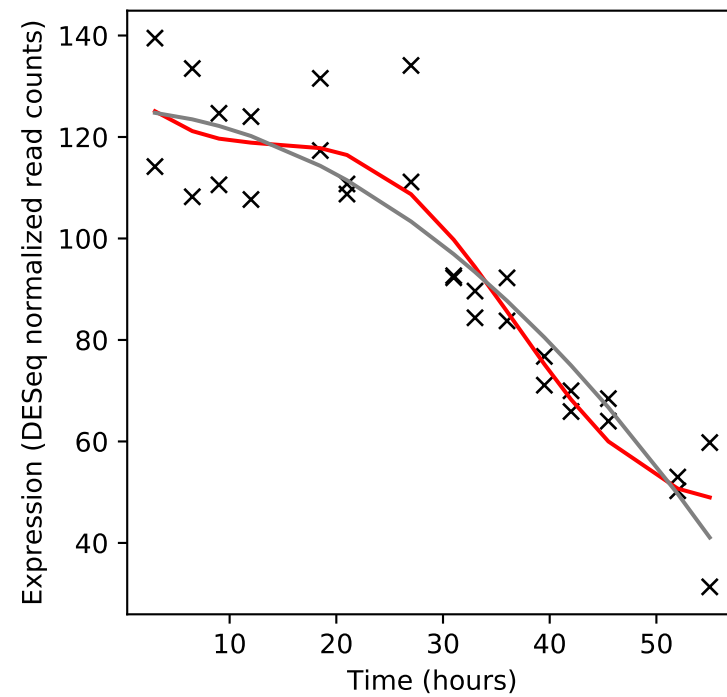

Rv3374/echA18.1

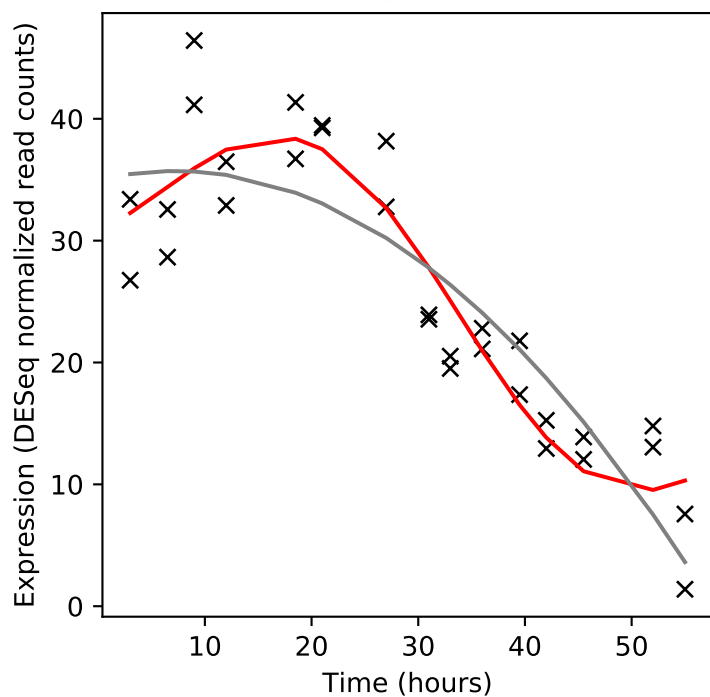

Rv3375/amiD

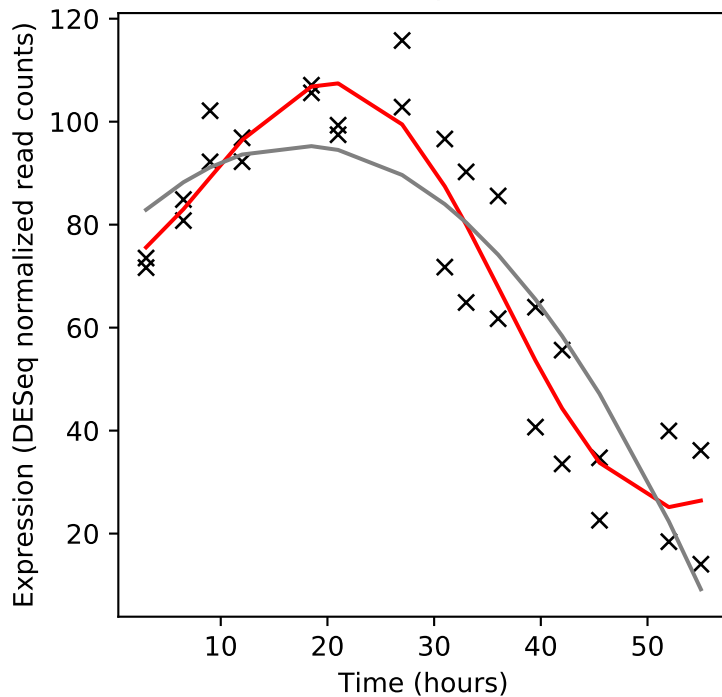

Rv3376/-

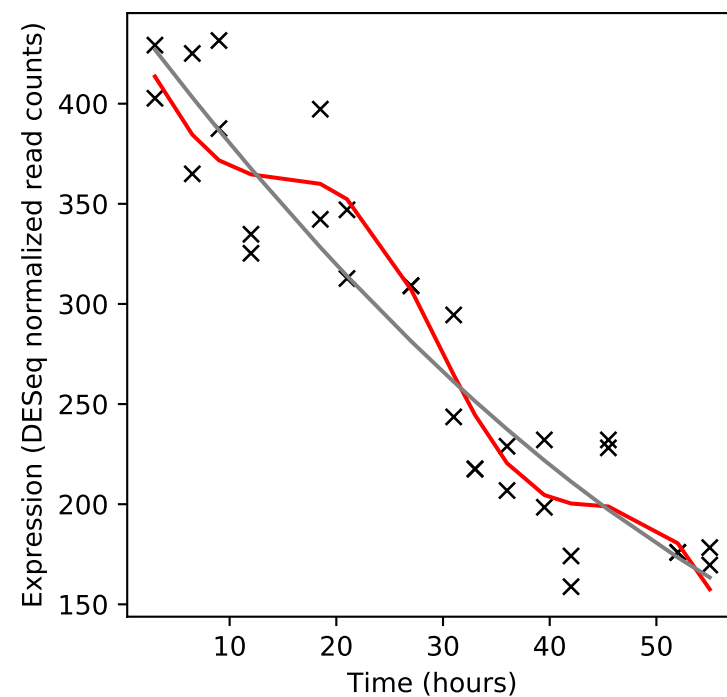

Rv3377c/-

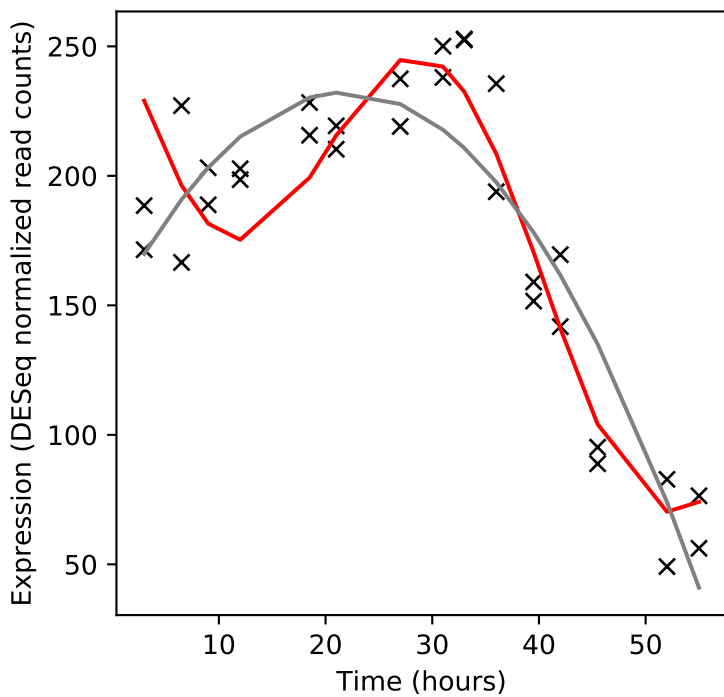

Rv3378c/-

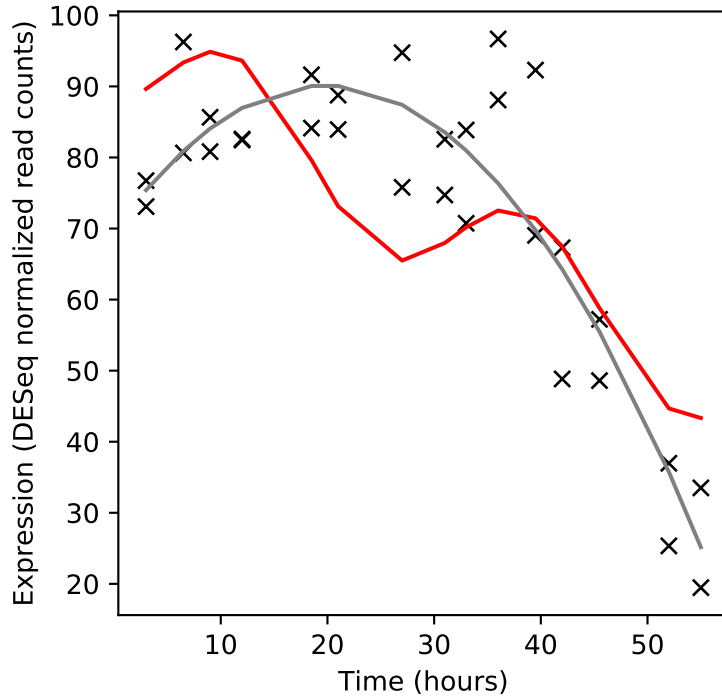

Rv3379c/dxs2

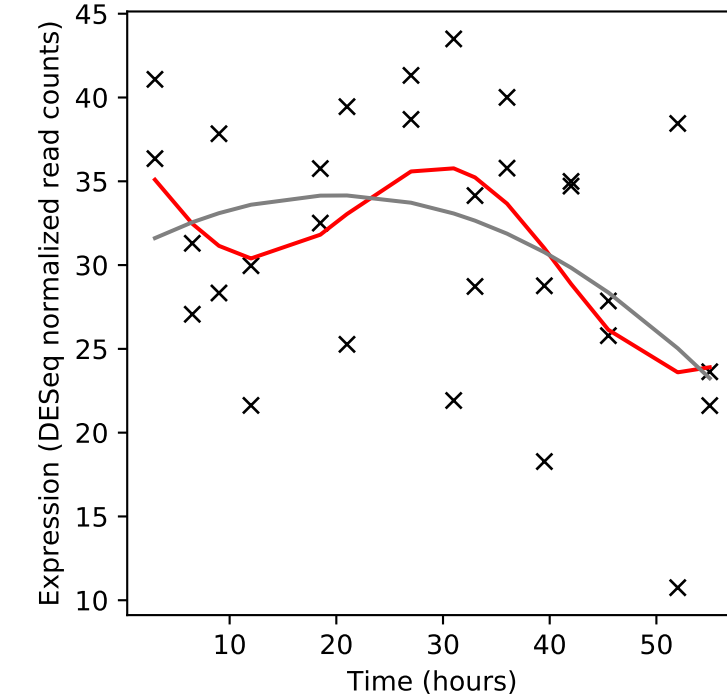

Rv3380c/-

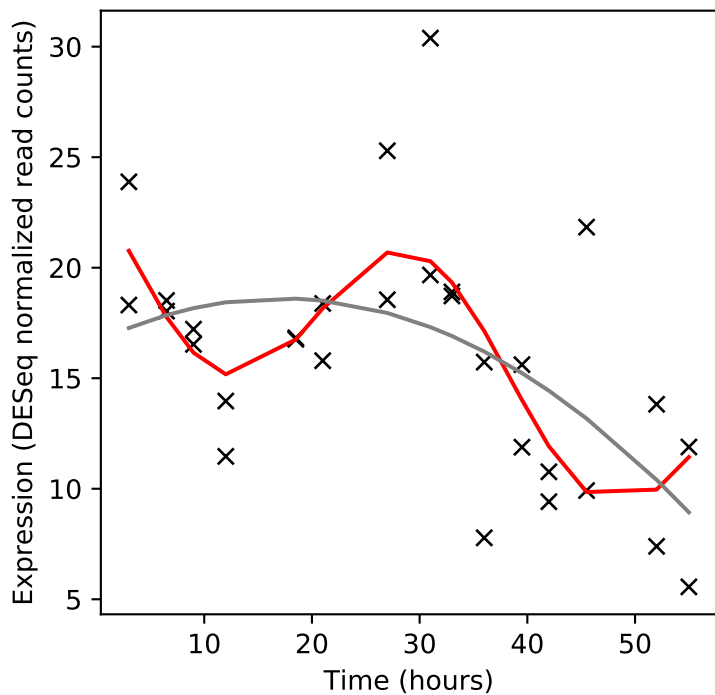

Rv3381c/-

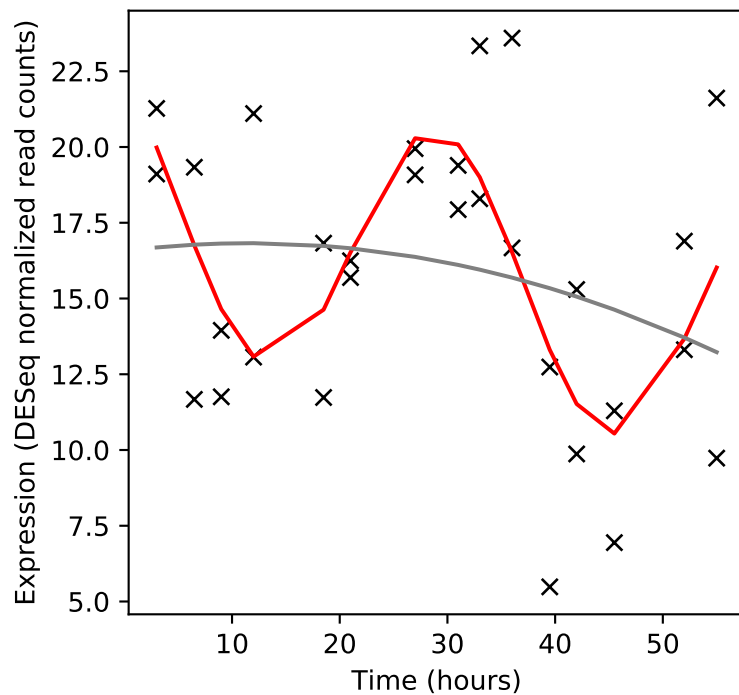

Rv3382c/lytB1

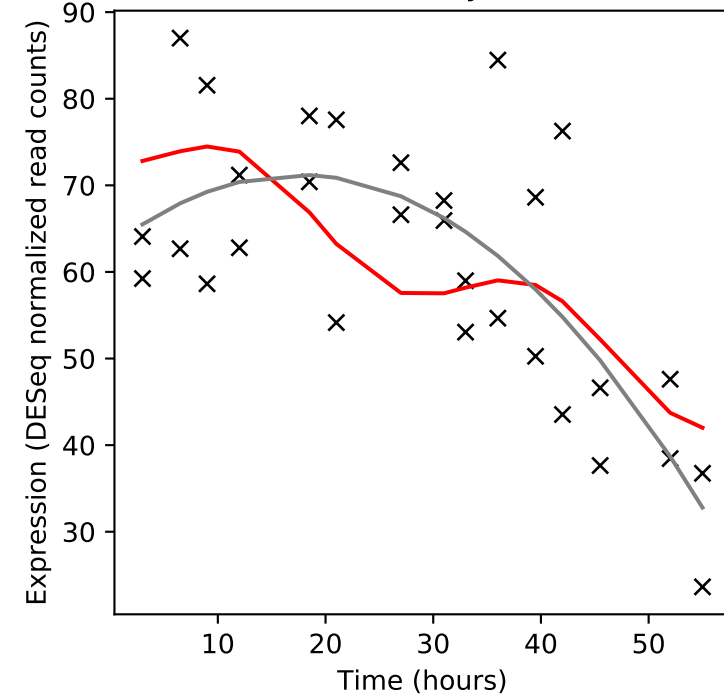

Rv3383c/idsB

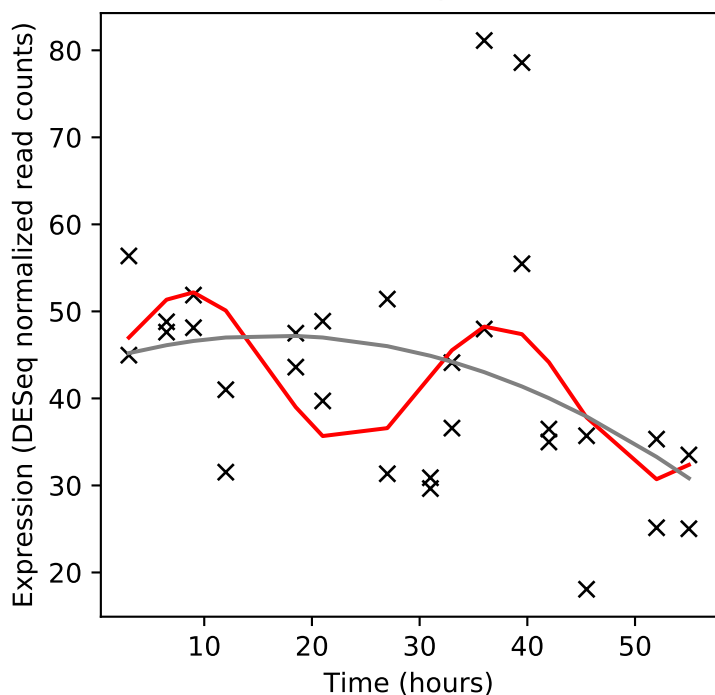

Rv3384c/vapC46

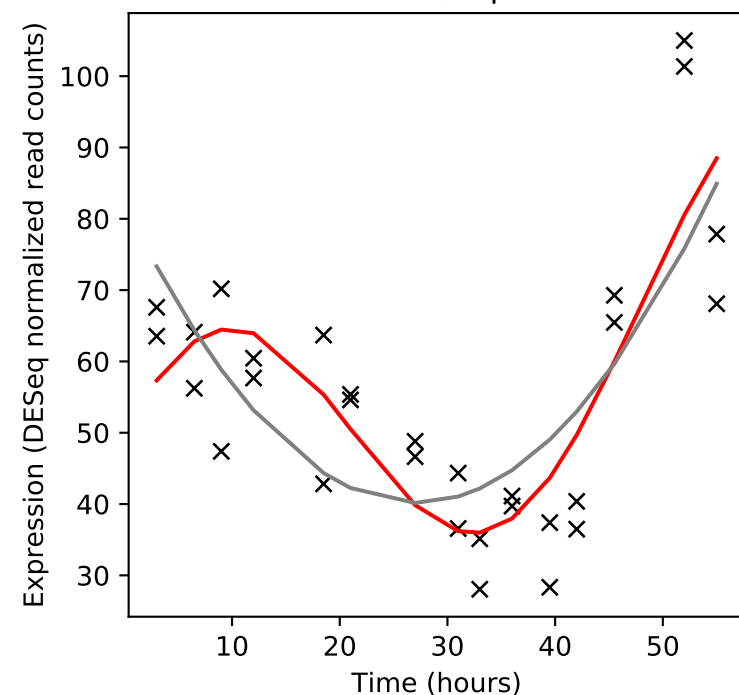

Rv3385c/vapB46

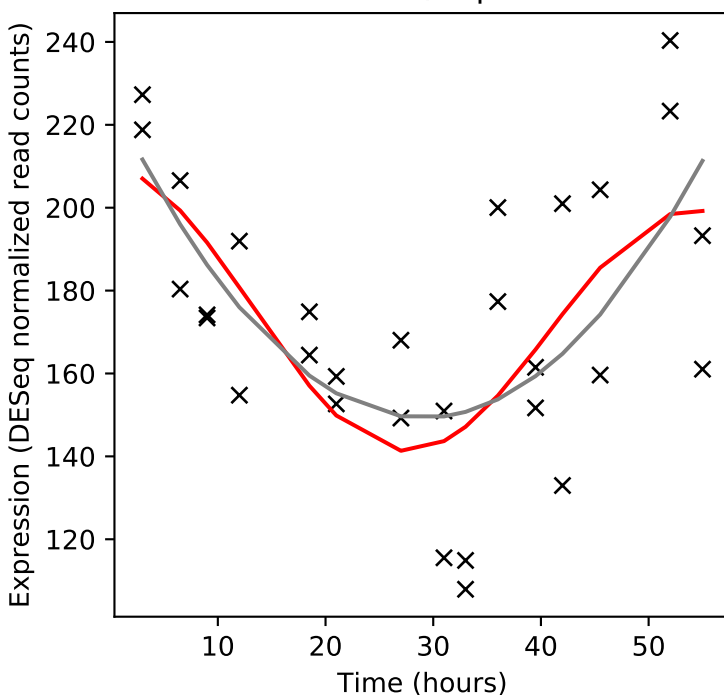

Rv3386/-

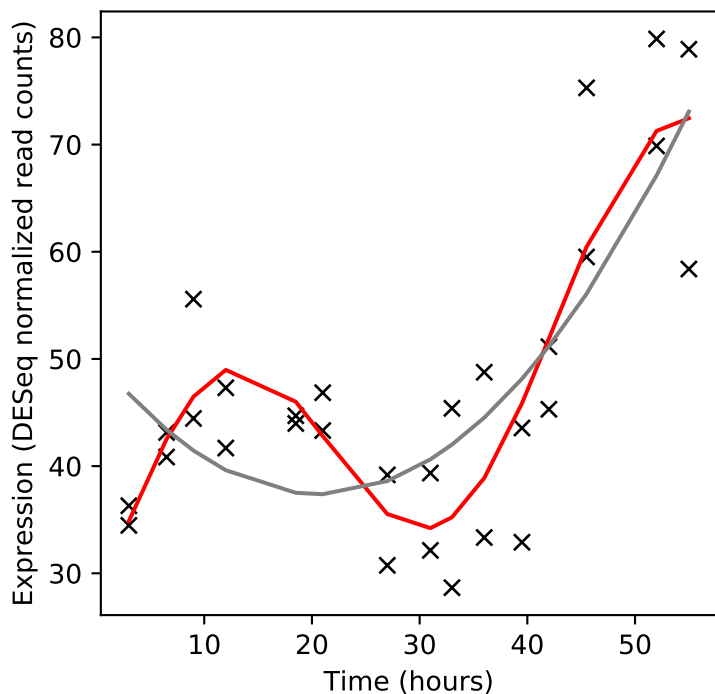

Rv3387/-

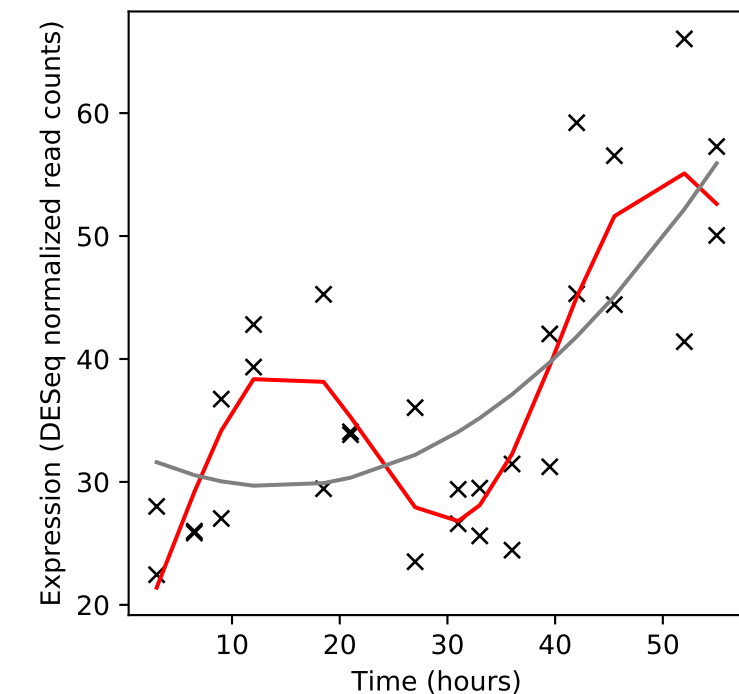

Rv3388/PE\_PGRS52

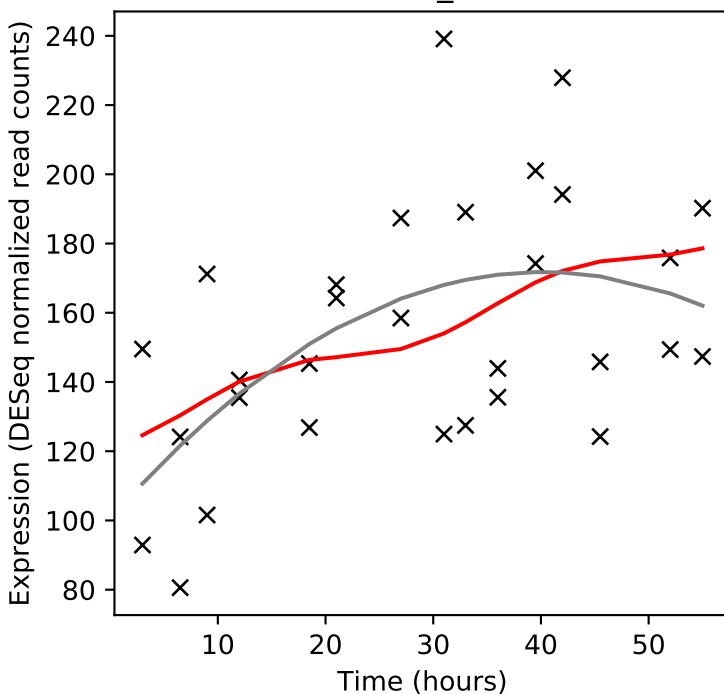

Rv3389c/htdY

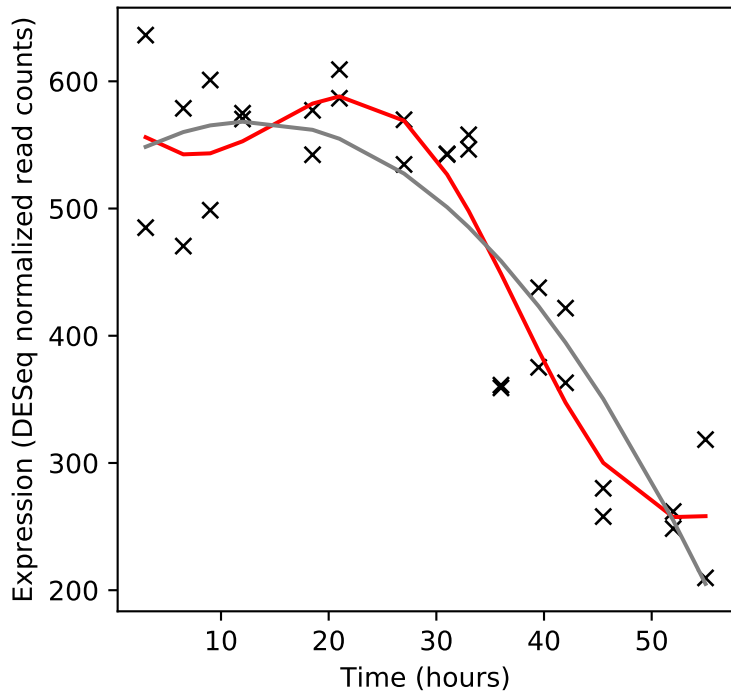

Rv3390/lpqD

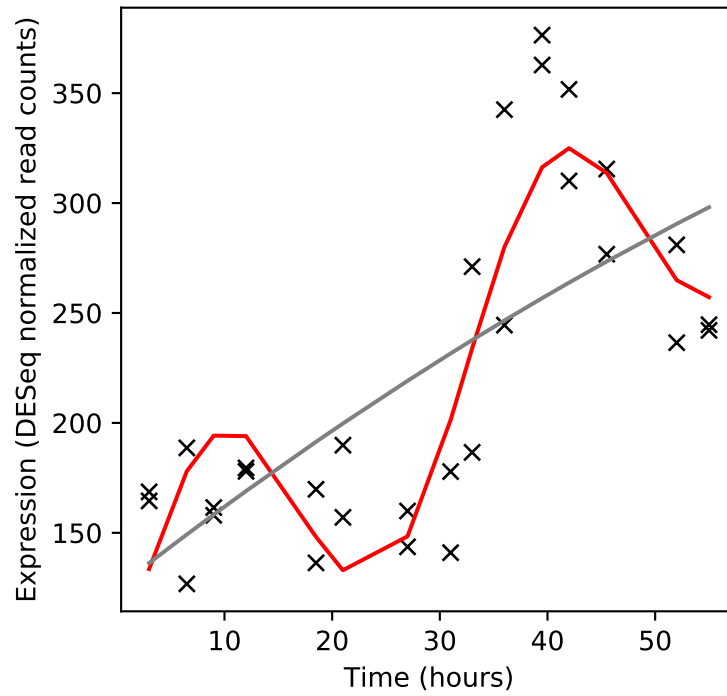

Rv3391/acrA1

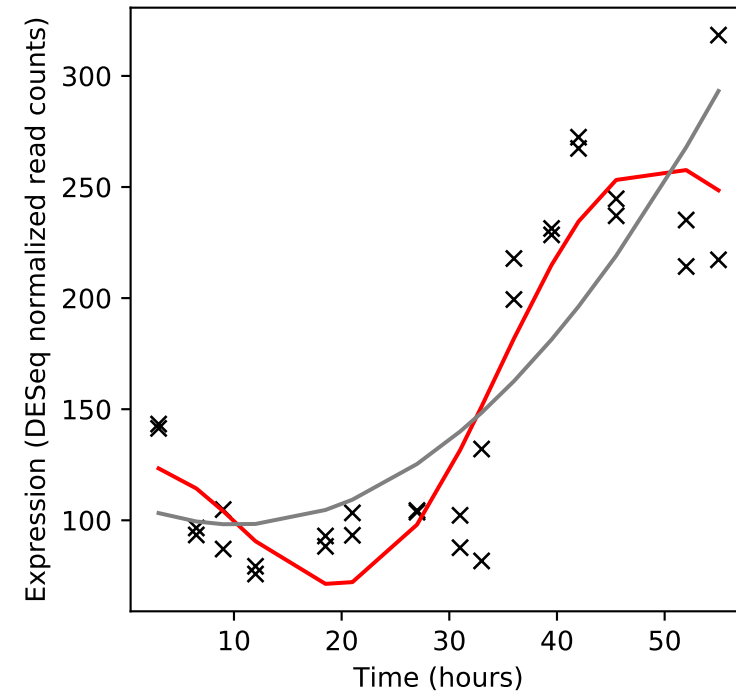

Rv3392c/cmaA1

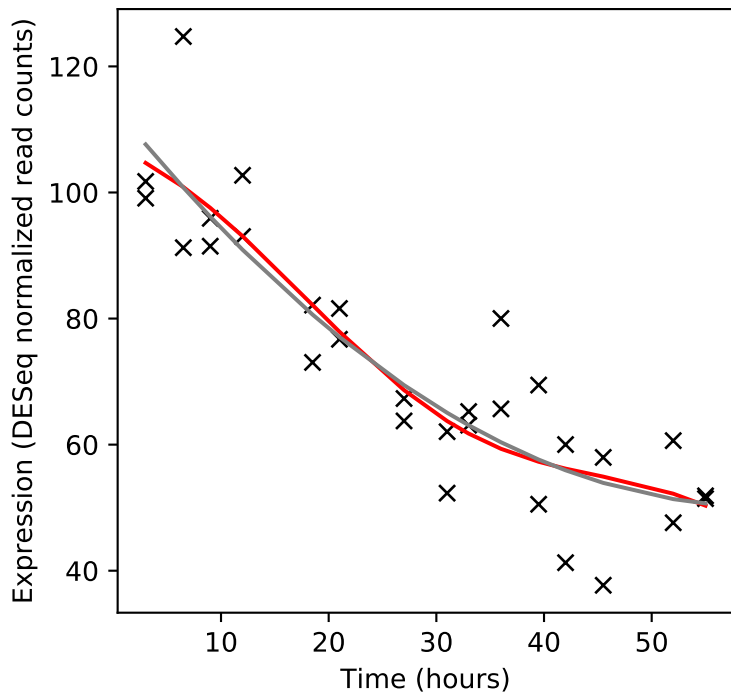

Rv3393/iunH

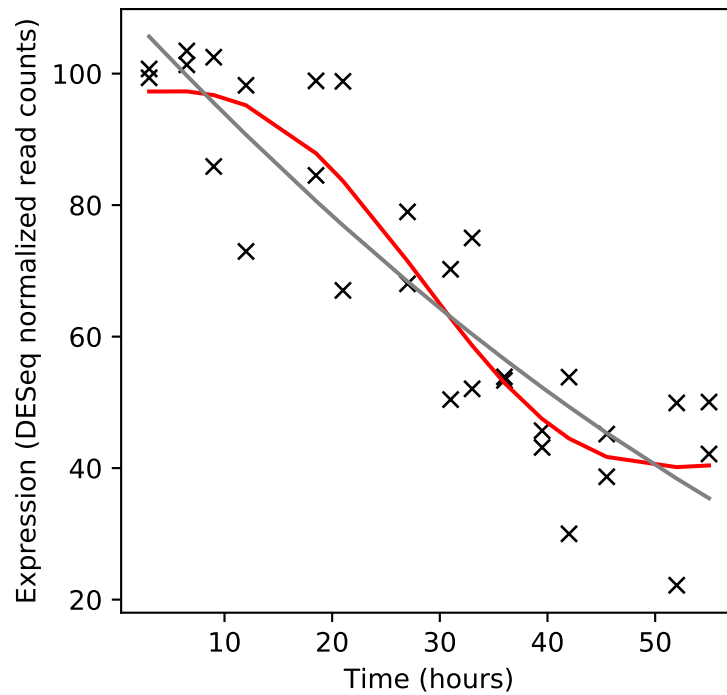

Rv3394c/-

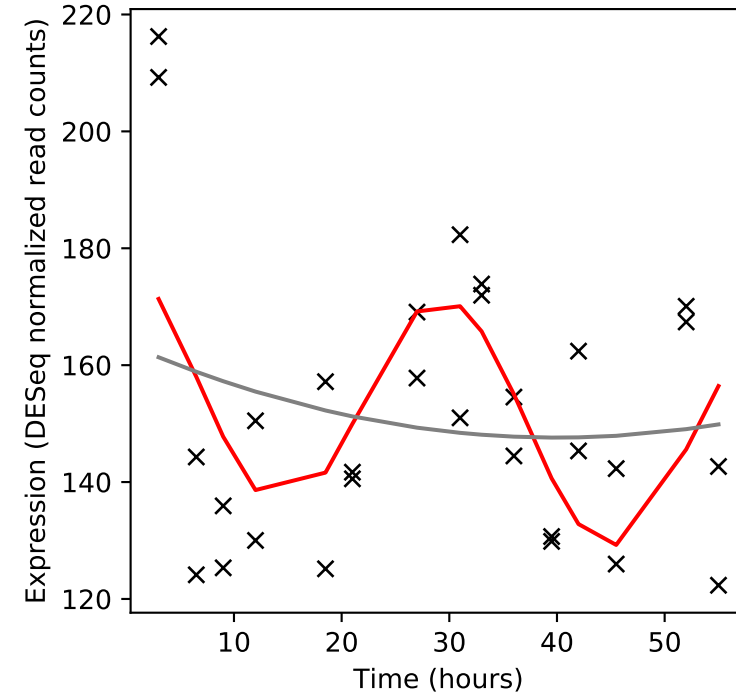

Rv3395c/-

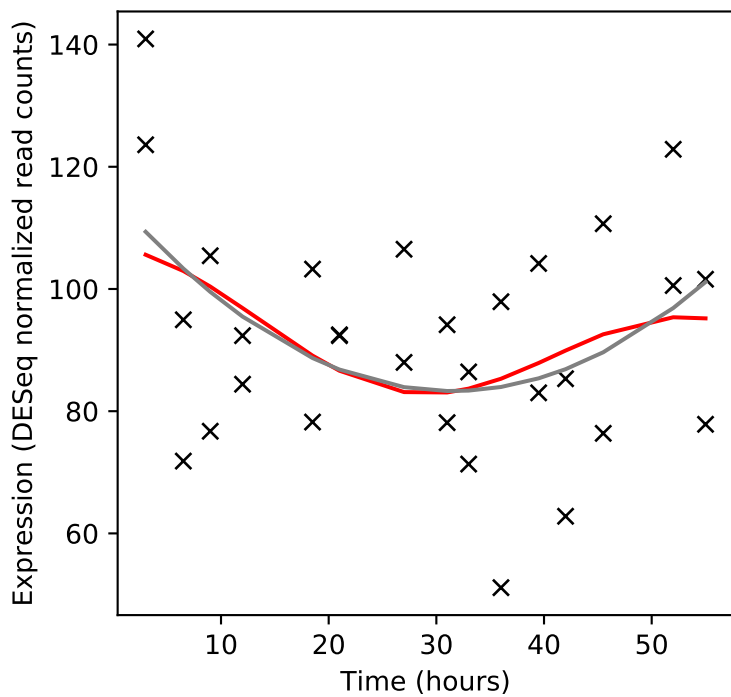

Rv3395A/-

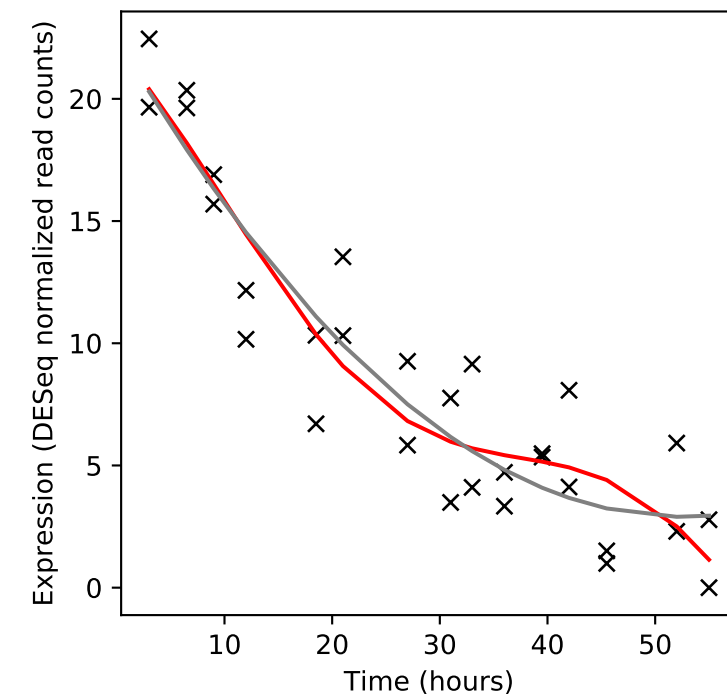

Rv3396c/guaA

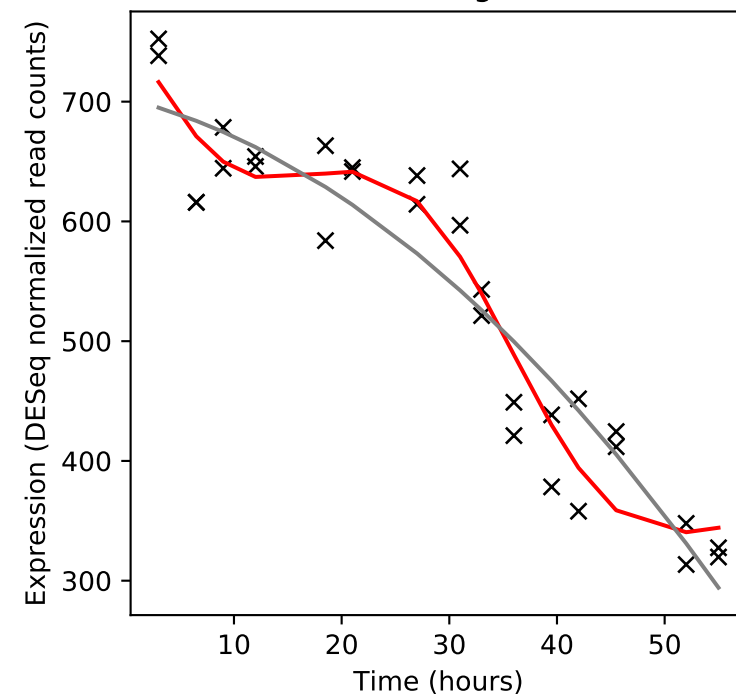



Rv3397c/phyA

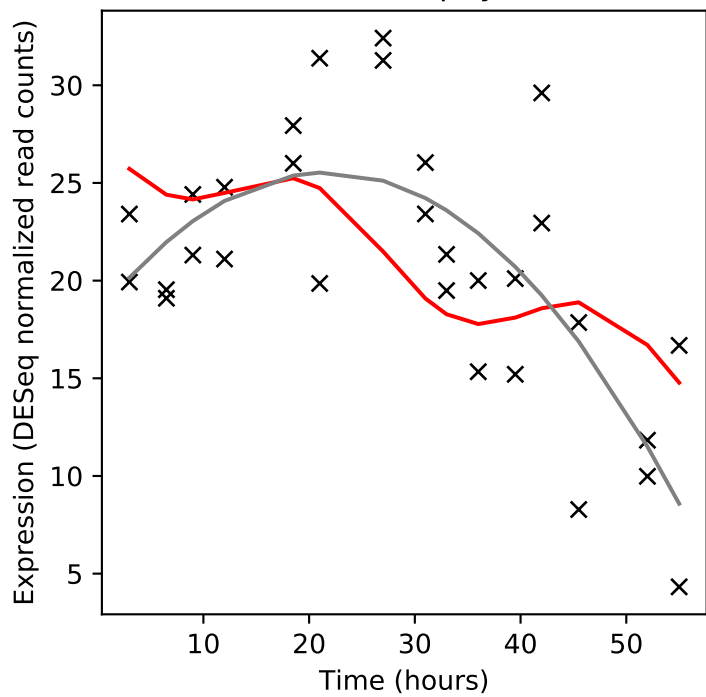

Rv3398c/idsA1

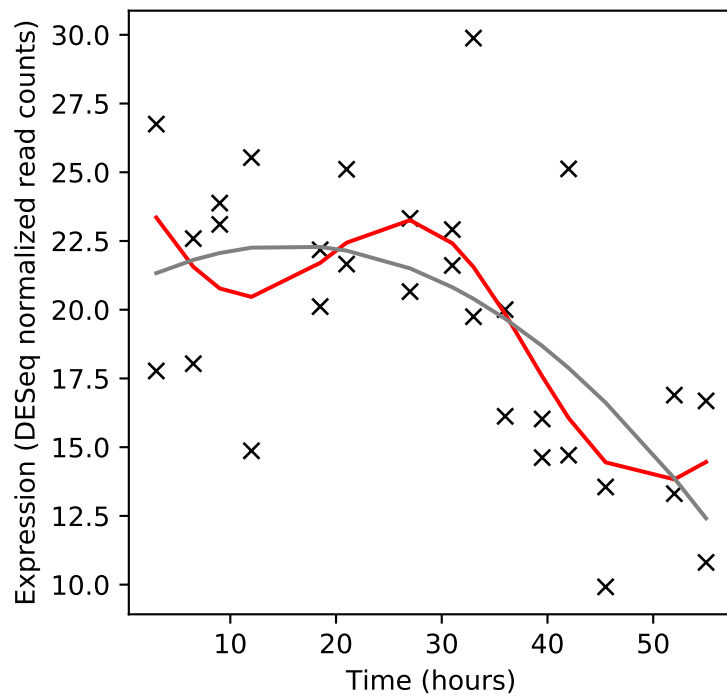

Rv3399c/-

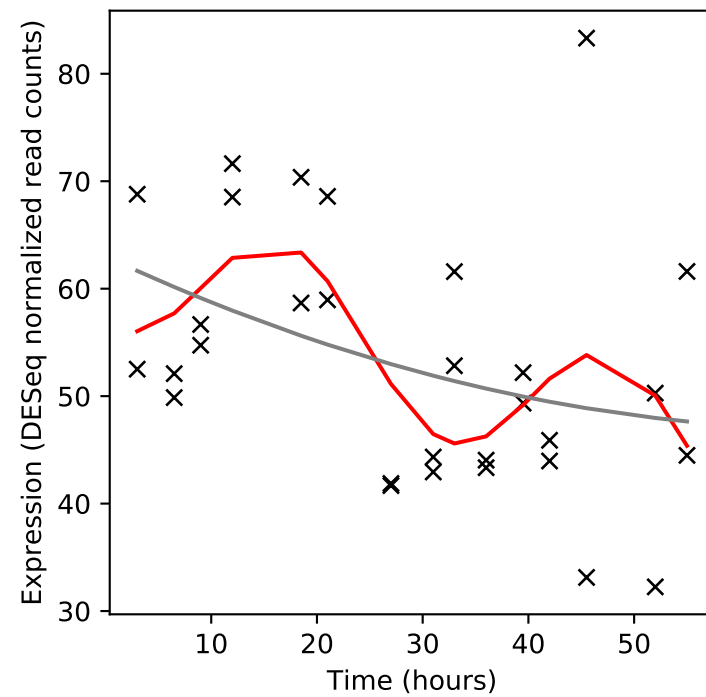

Rv3400c/-

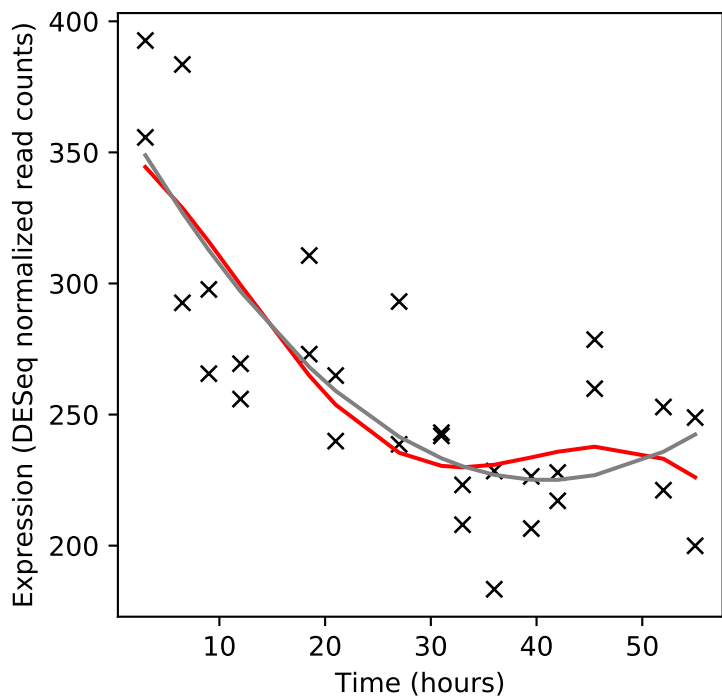

Rv3401c/-

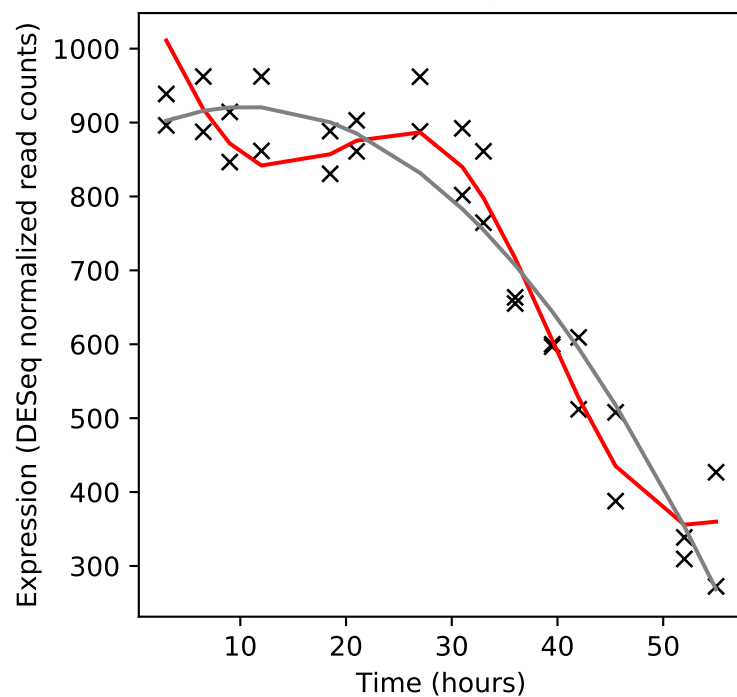

Rv3402c/-

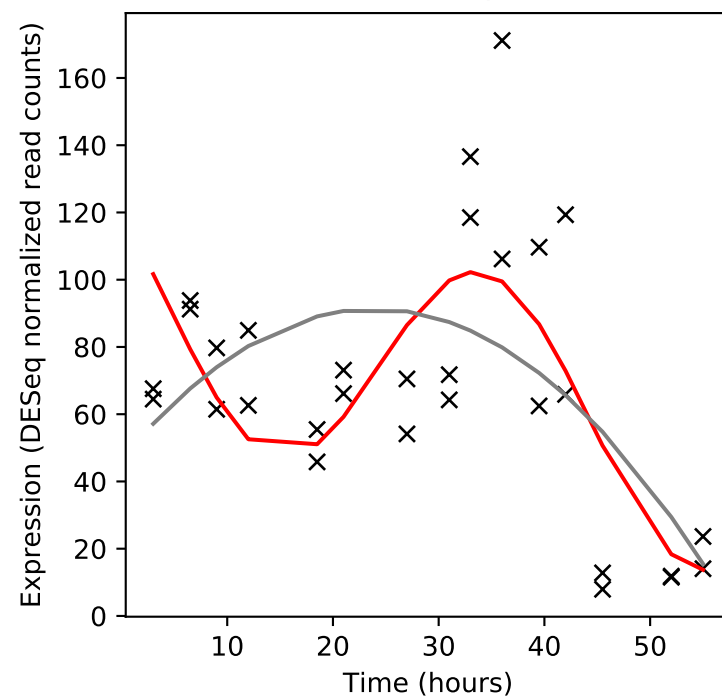

Rv3403c/-

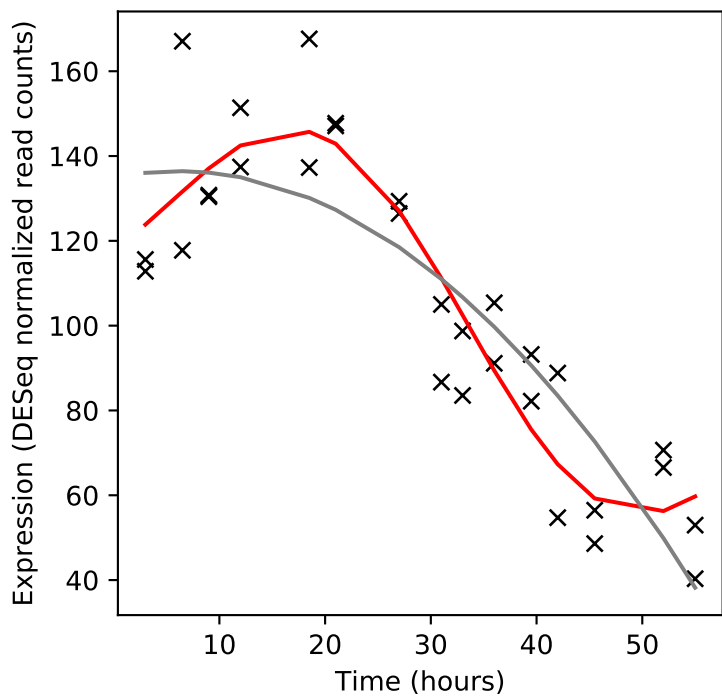

Rv3404c/-

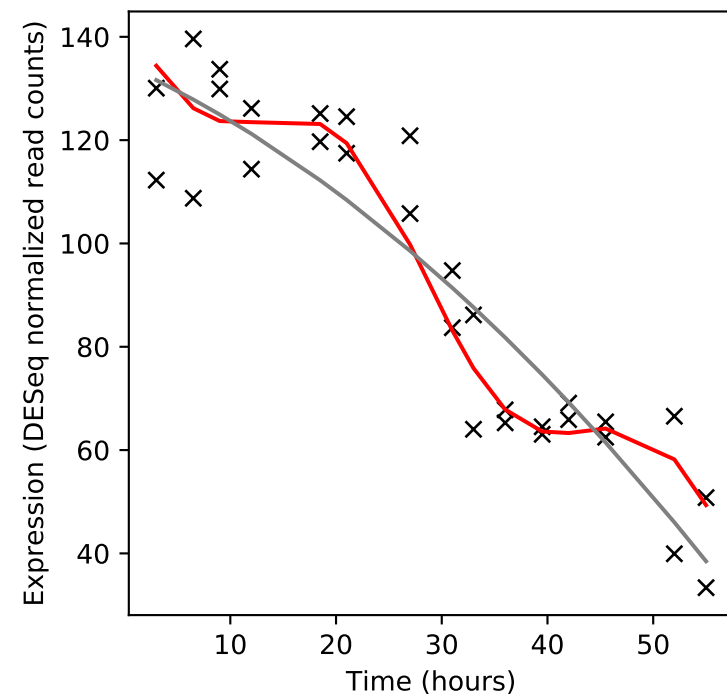

Rv3405c/-

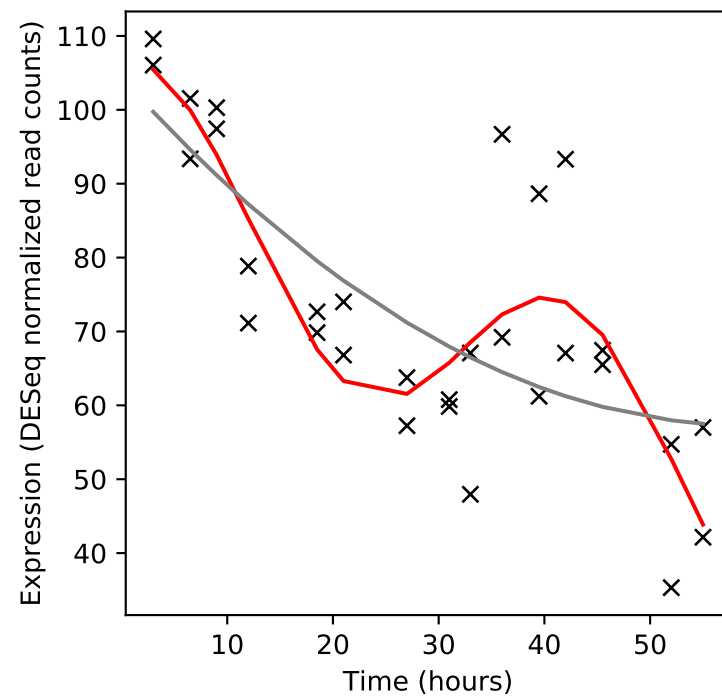

Rv3406/-

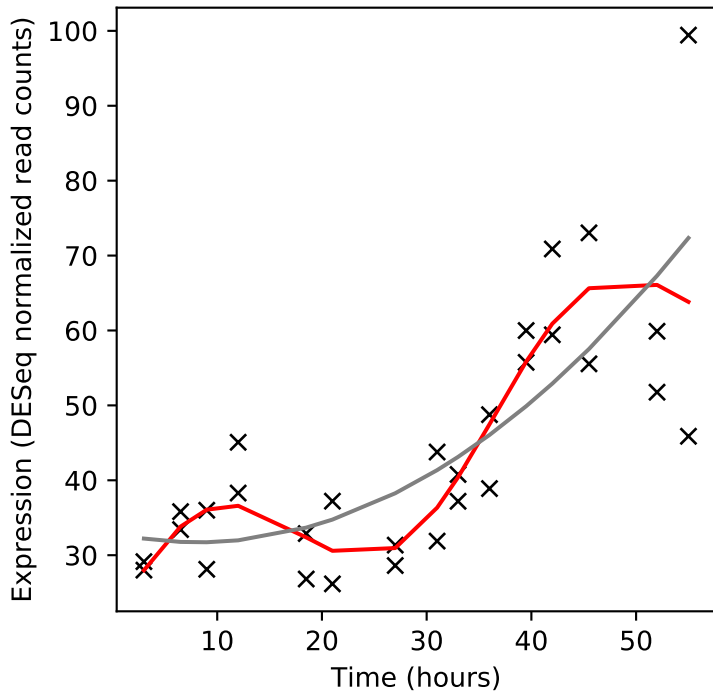

Rv3407/vapB47

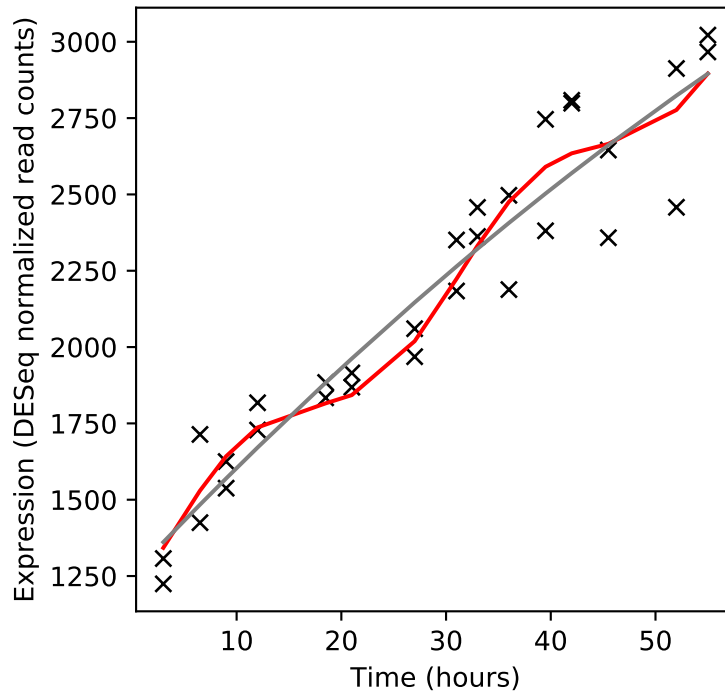

Rv3408/vapC47

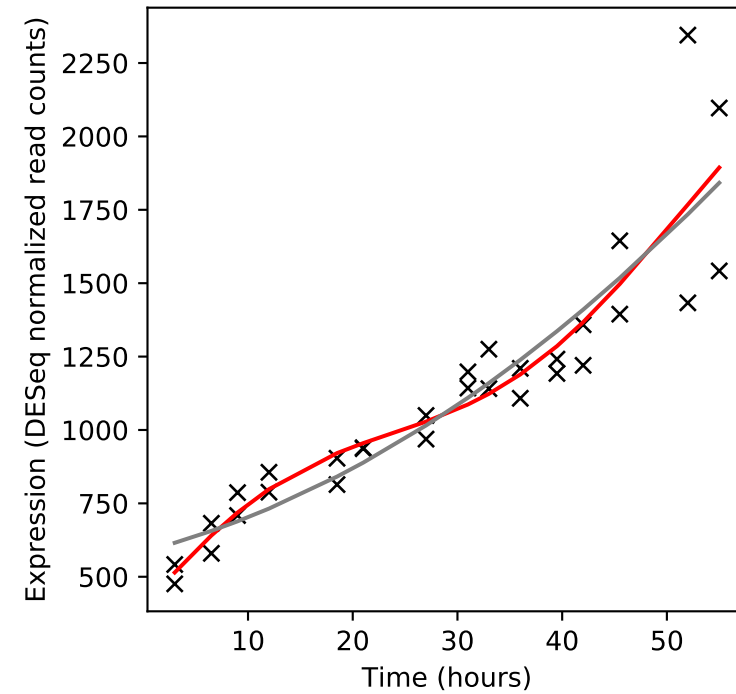

Rv3409c/choD

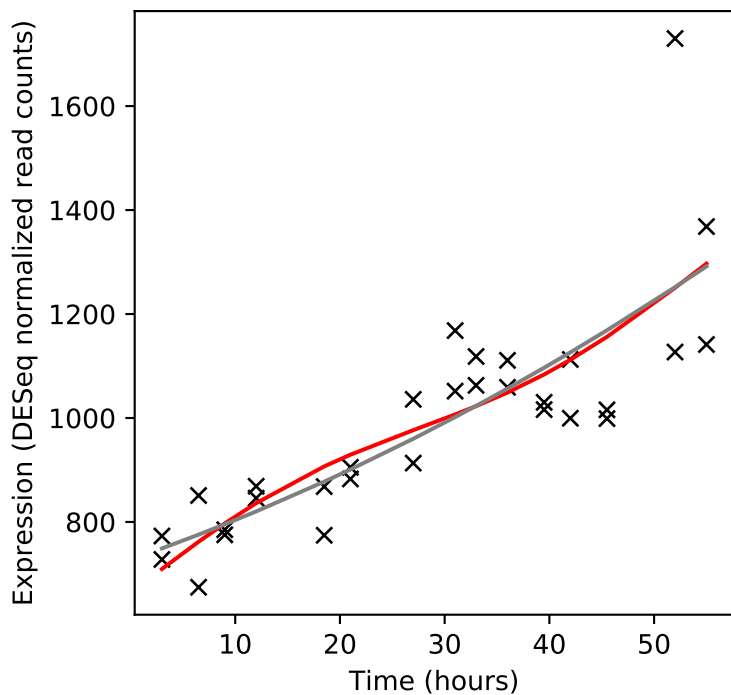

Rv3410c/guaB3

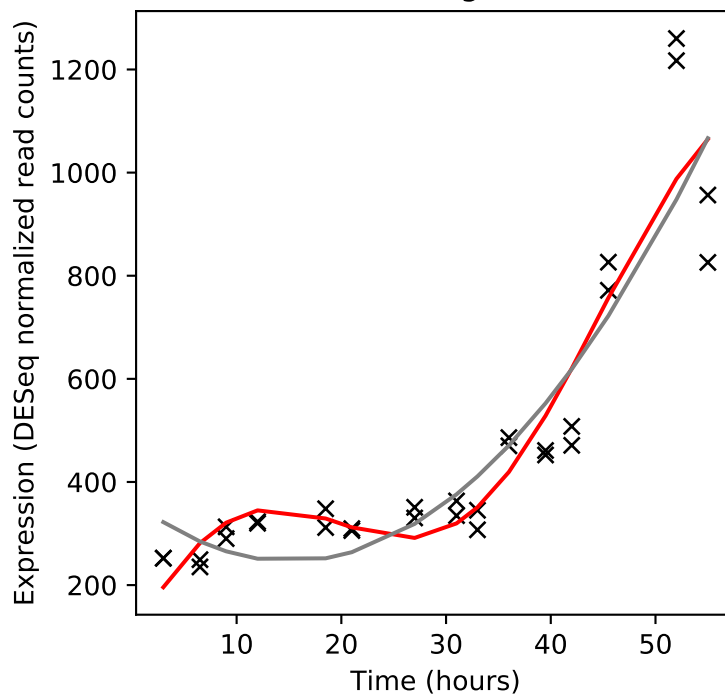

Rv3411c/guaB2

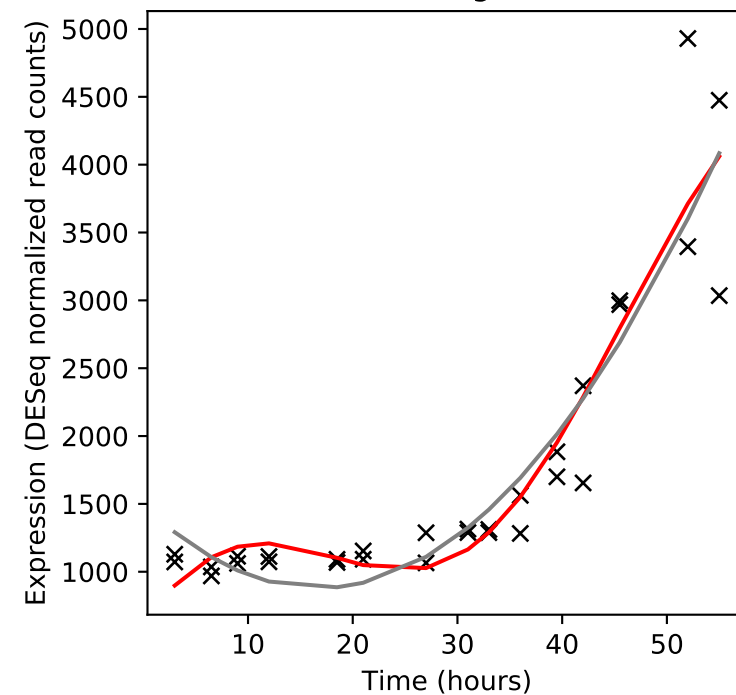

Rv3412/-

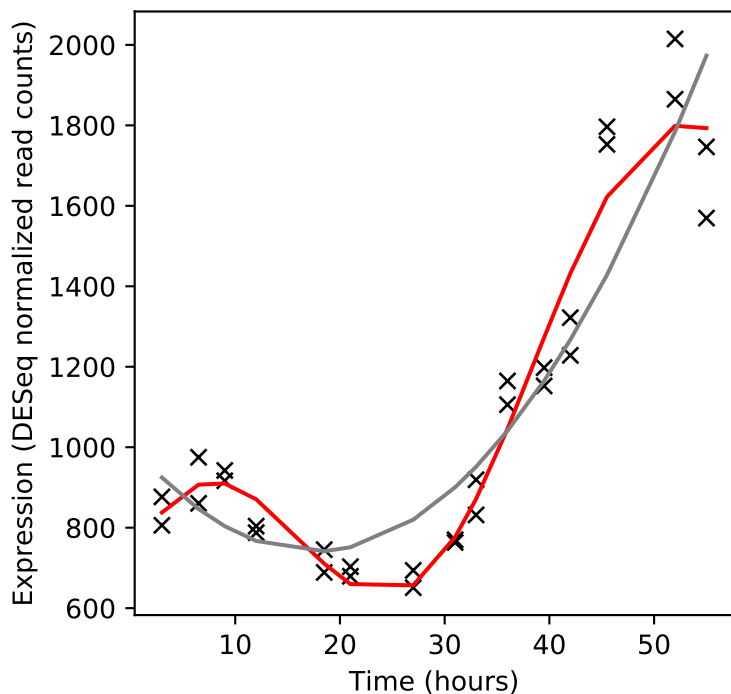

Rv3413c/-

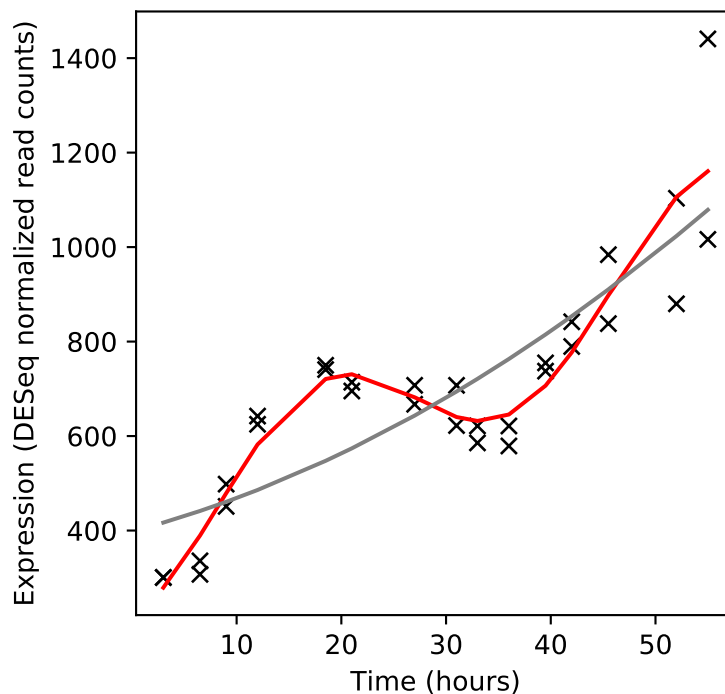

Rv3414c/sigD

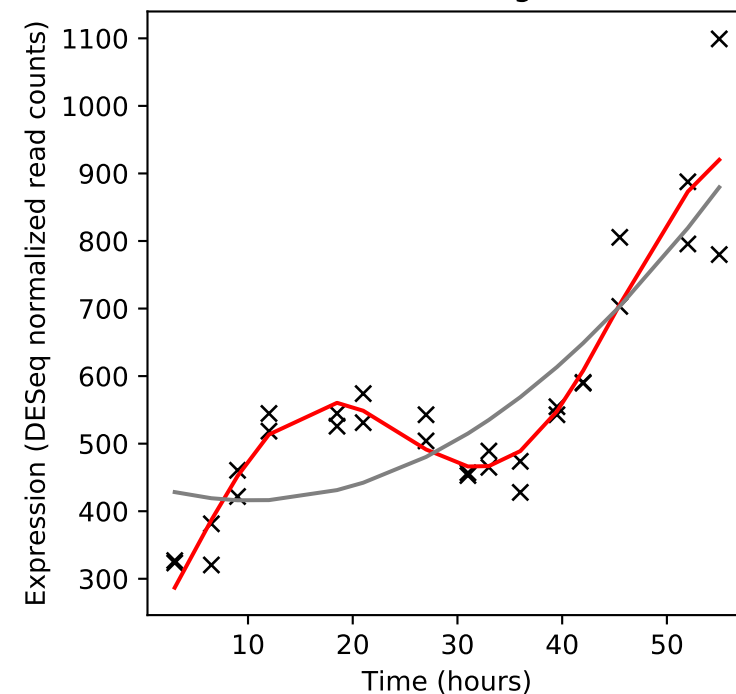

Rv3415c/-

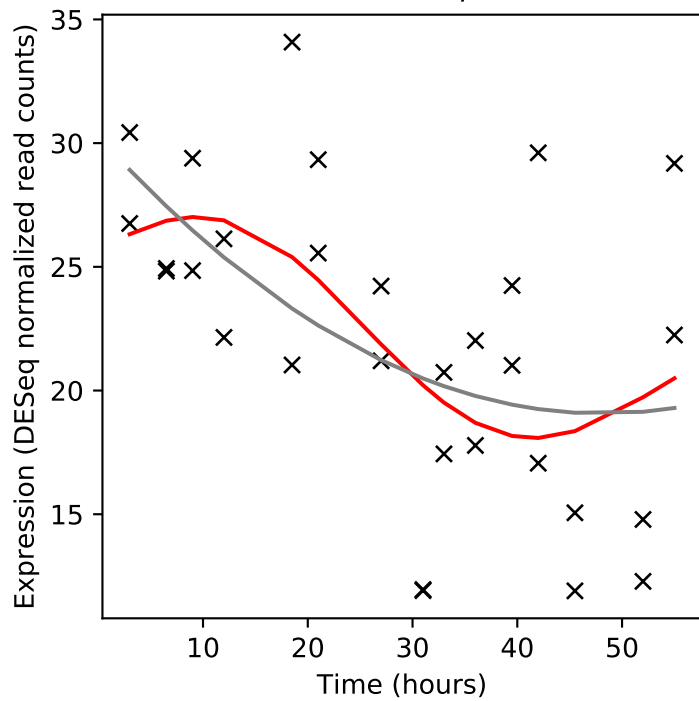

Rv3416/whiB3

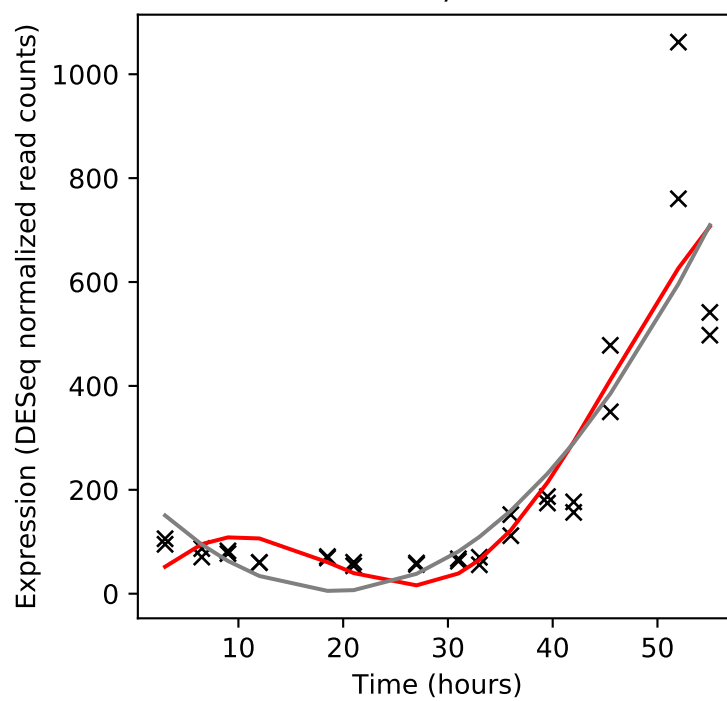

Rv3417c/groEL1

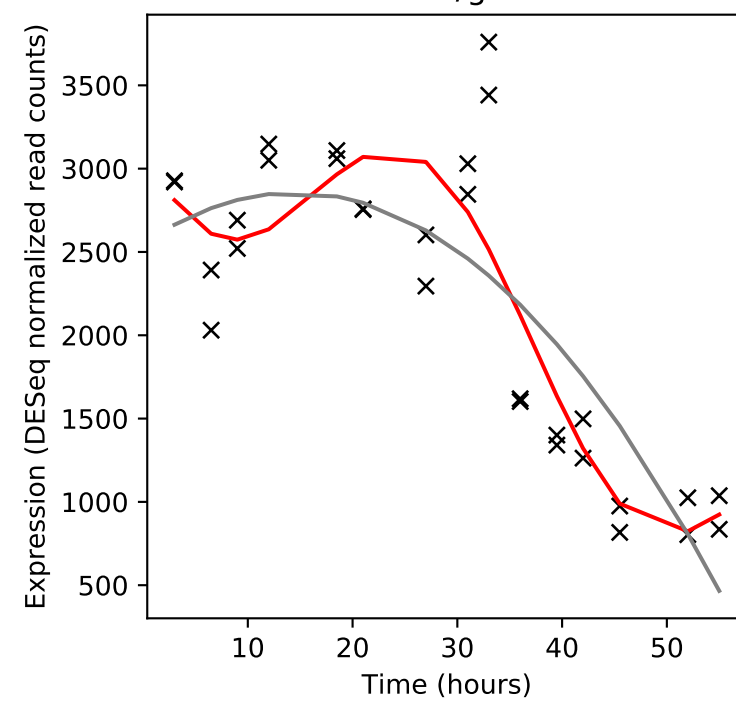

Rv3418c/groES

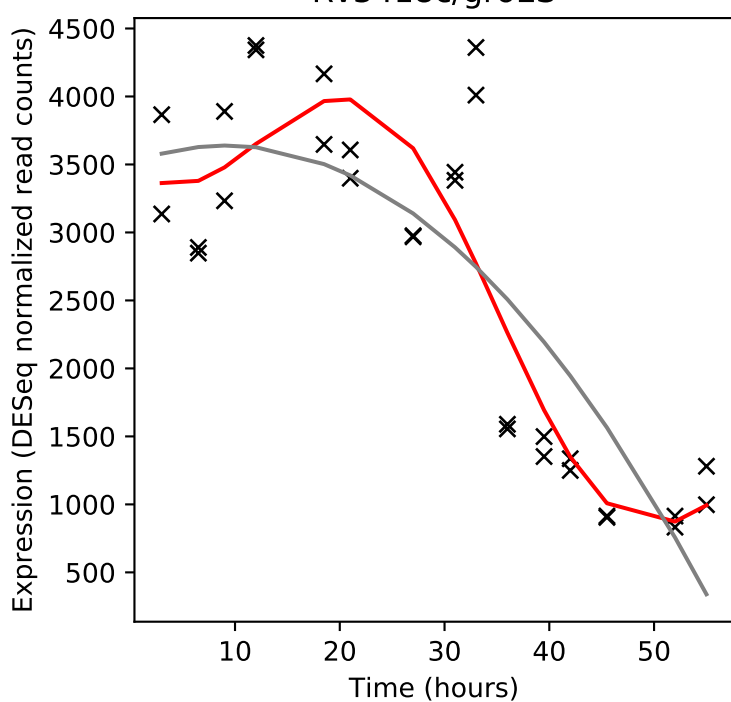

Rv3419c/gcp

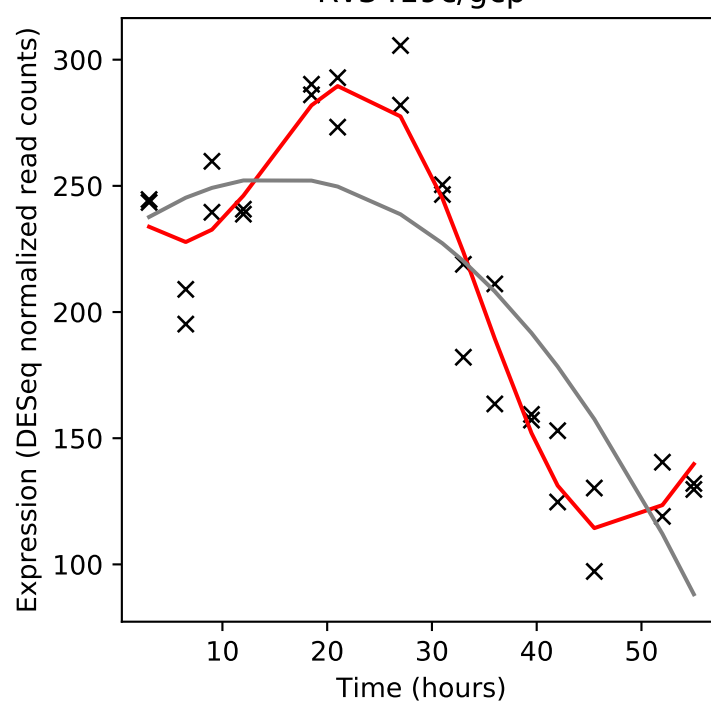

Rv3420c/rimI

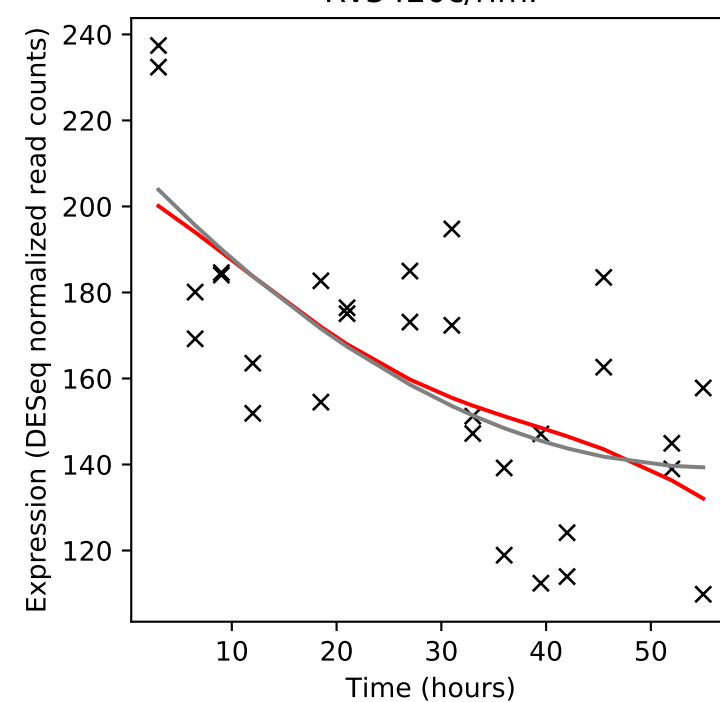

Rv3421c/-

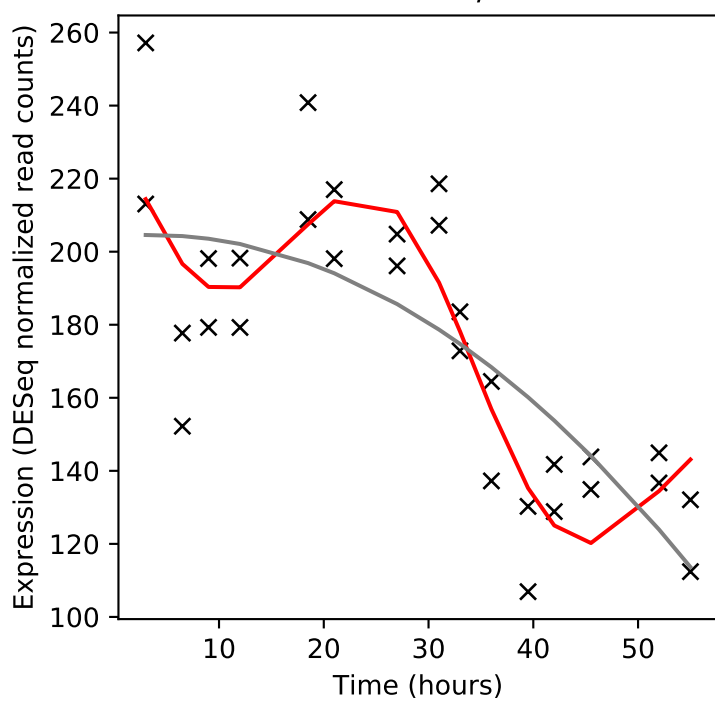

Rv3422c/-

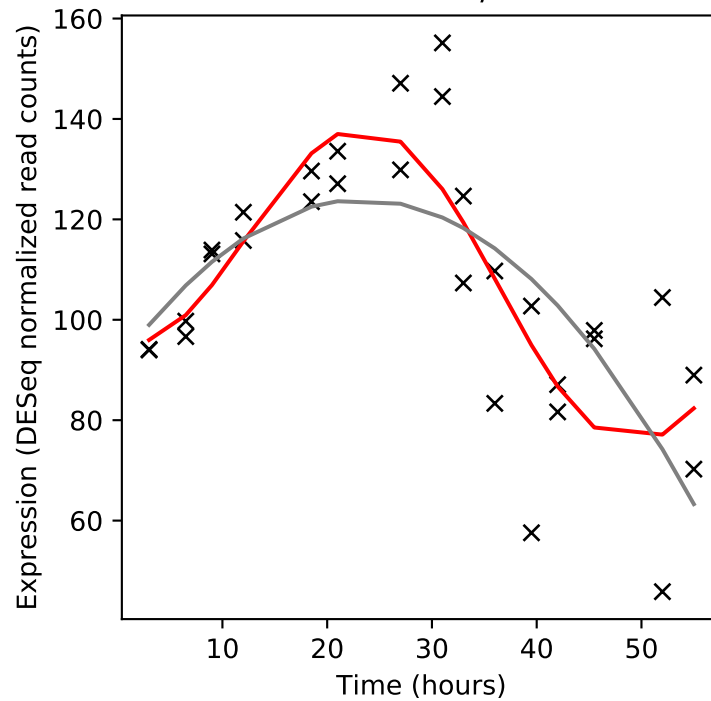

Rv3423c/alr

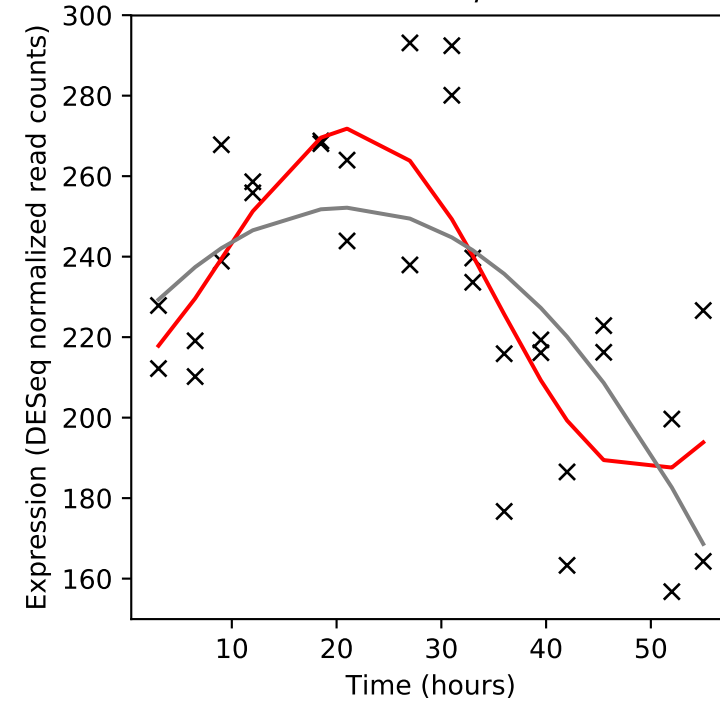

Rv3424c/-

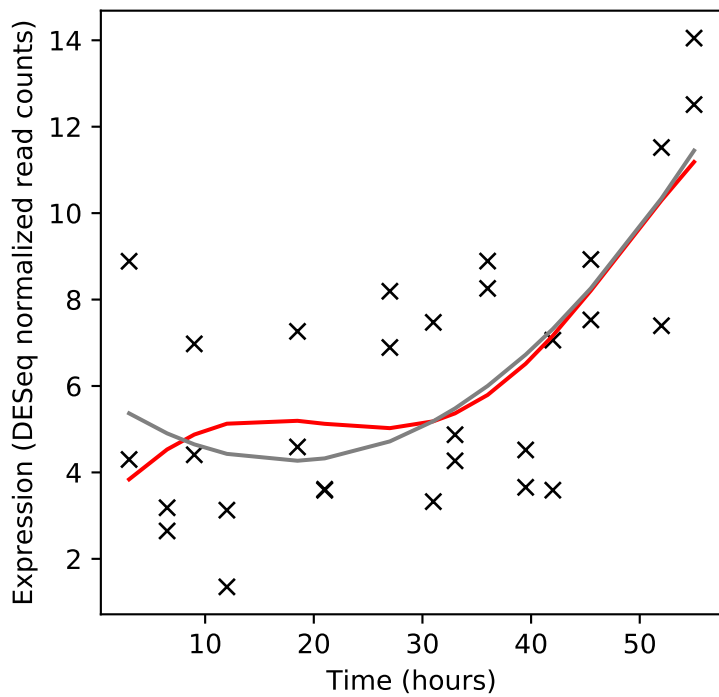

Rv3425/PPE57

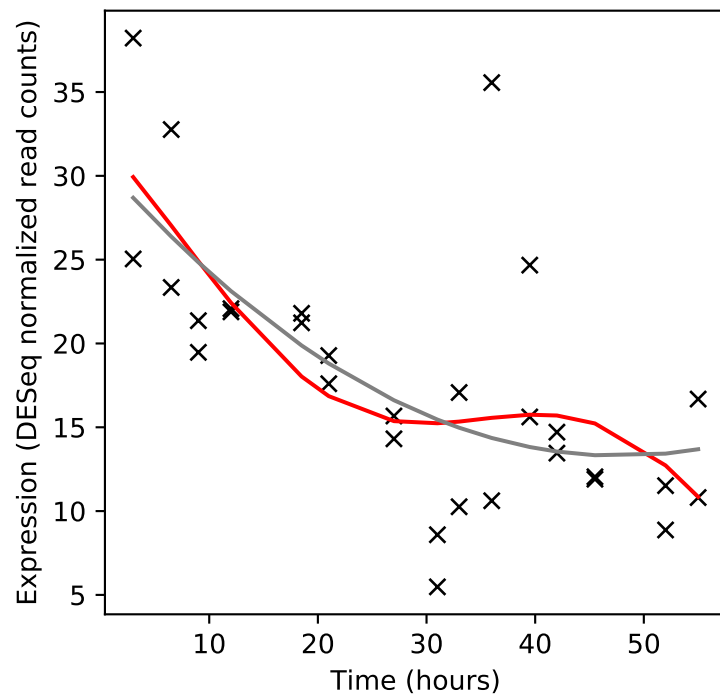

Rv3426/PPE58

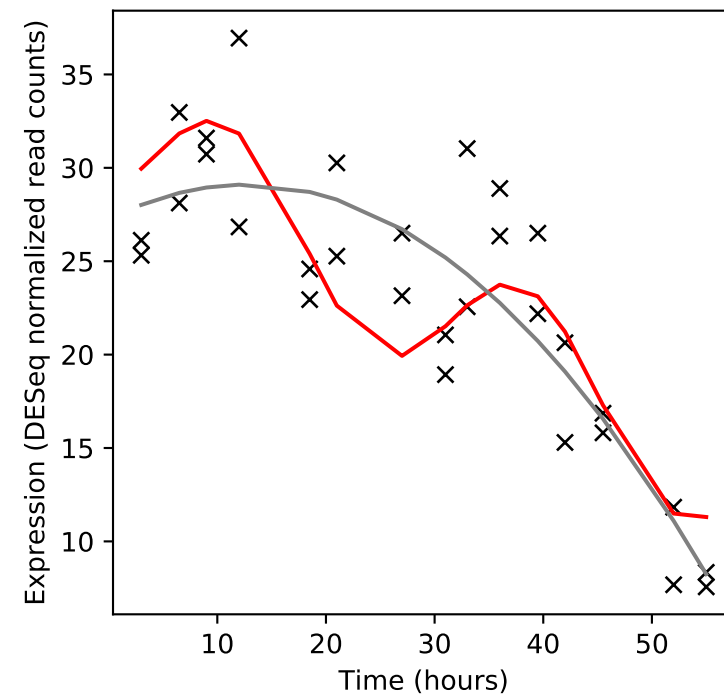

Rv3427c/-

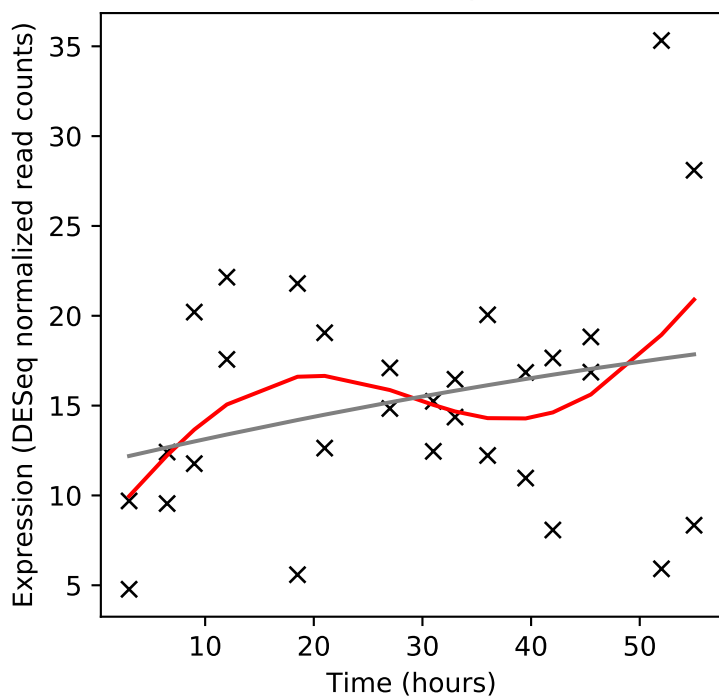

Rv3428c/-

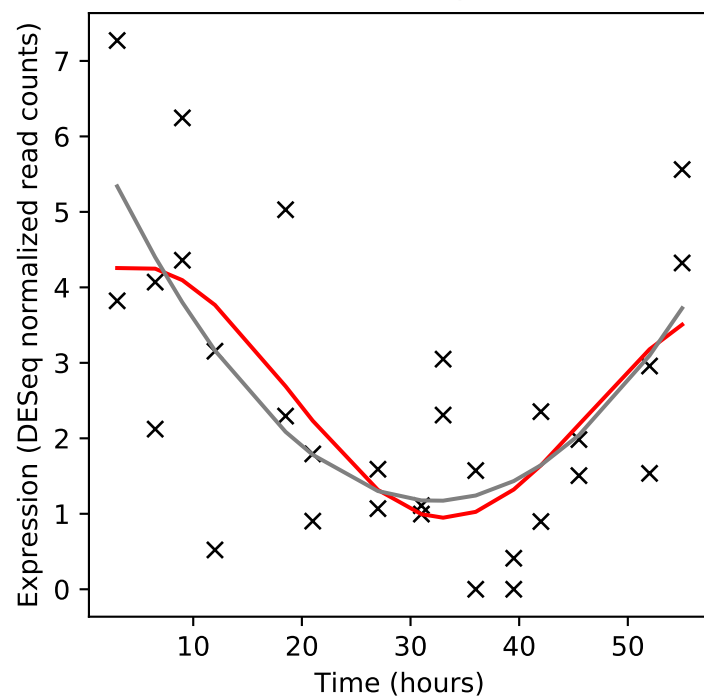

Rv3429/PPE59

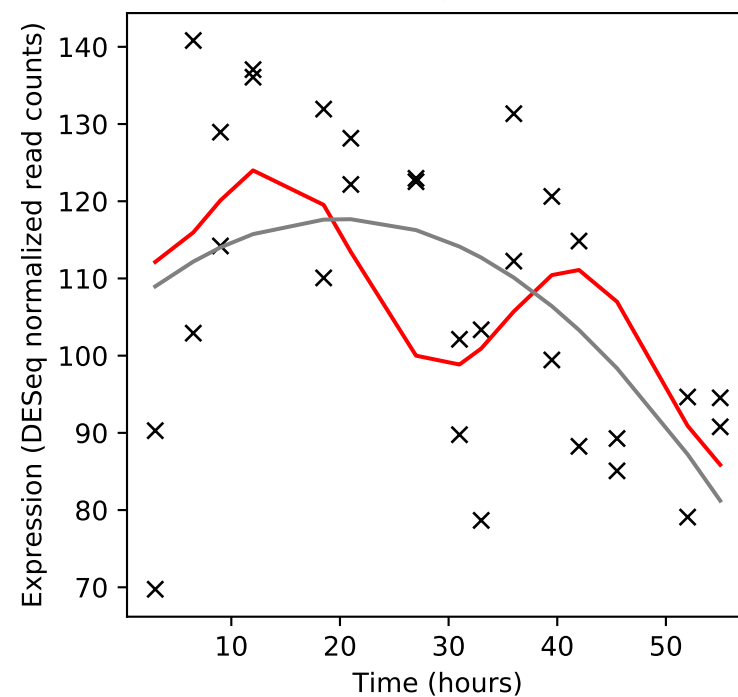

Rv3430c/-

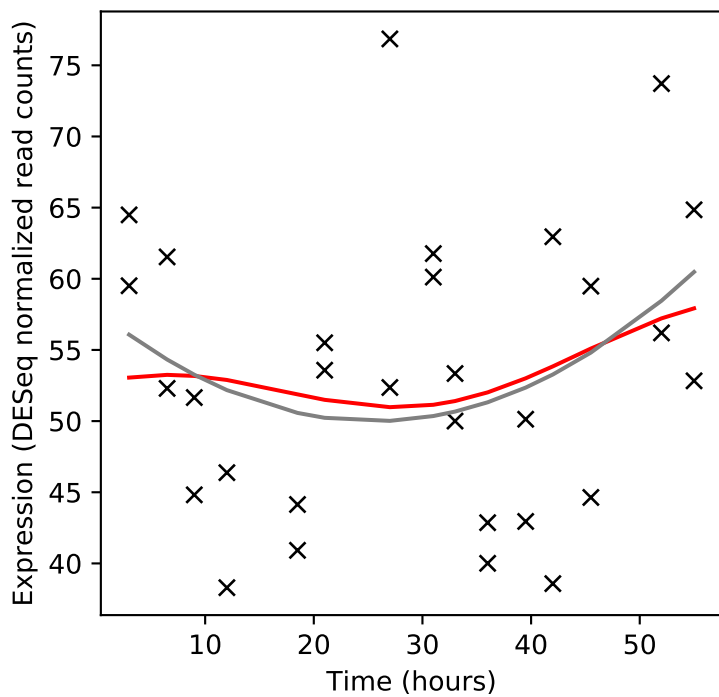

Rv3431c/-

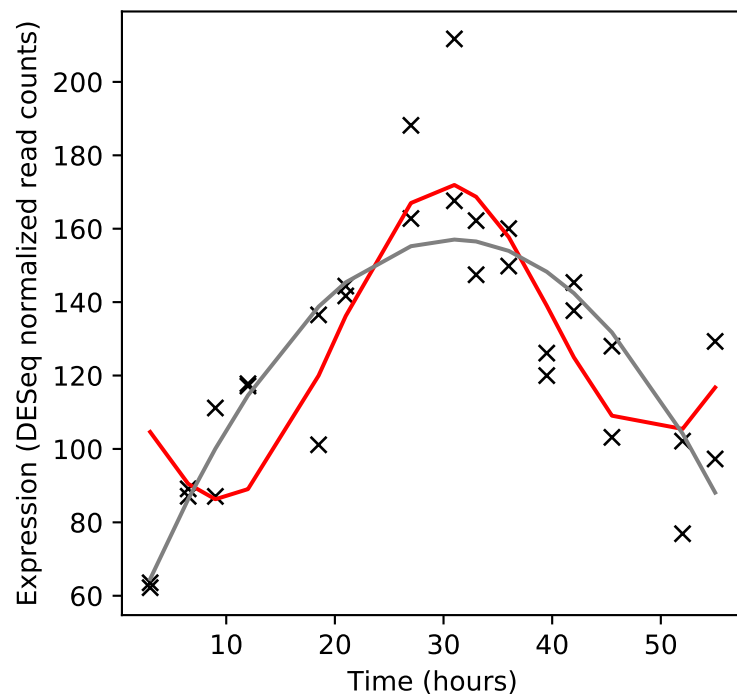

Rv3432c/gadB

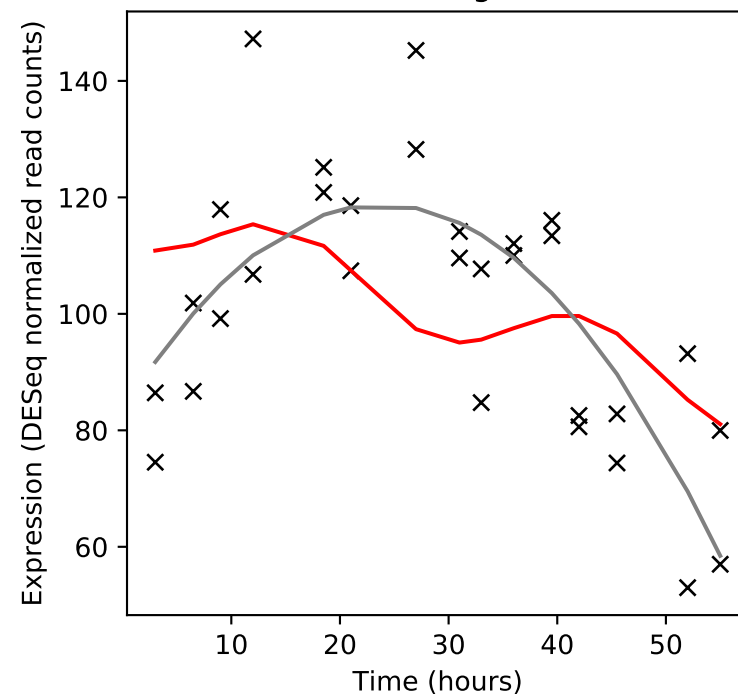

Rv3433c/-

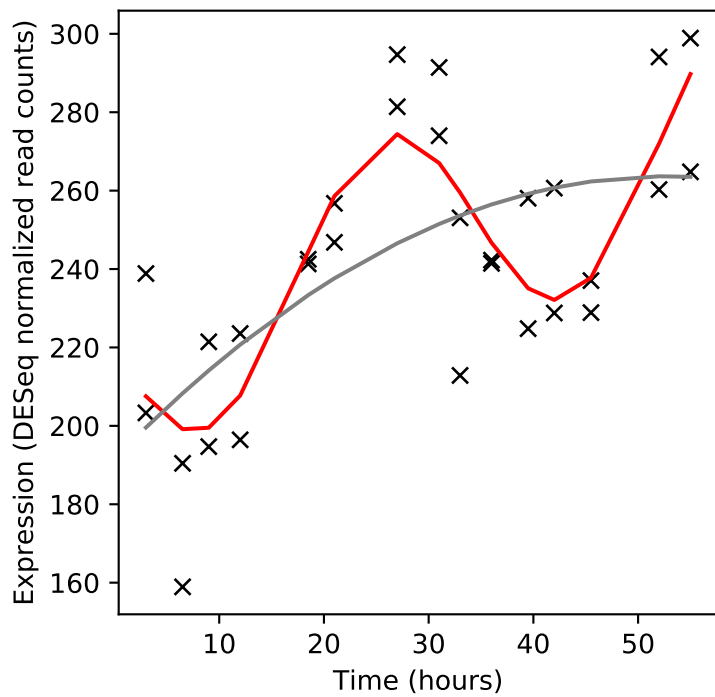

Rv3434c/-

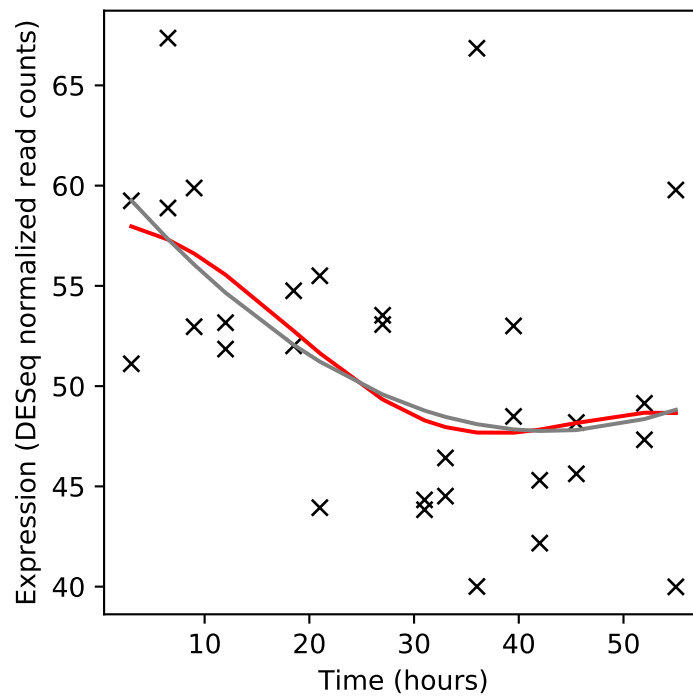

Rv3435c/-

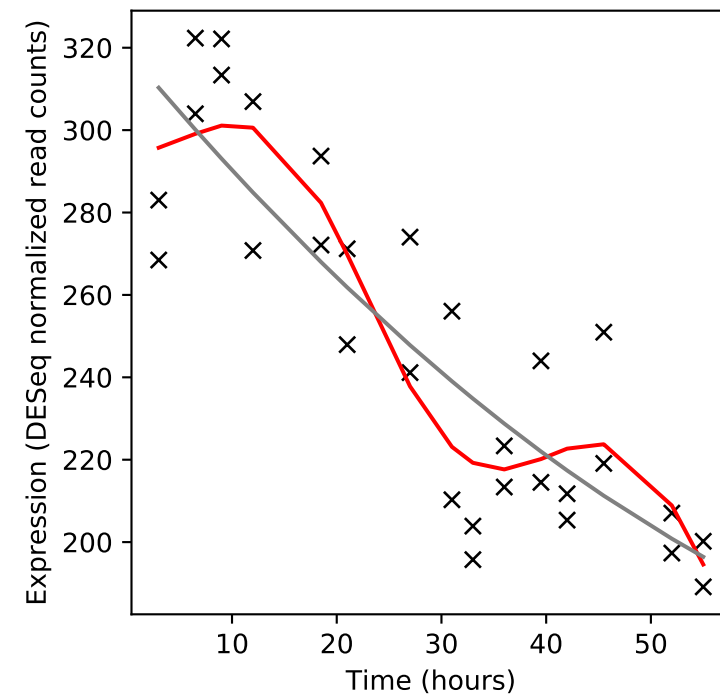

Rv3436c/glmS

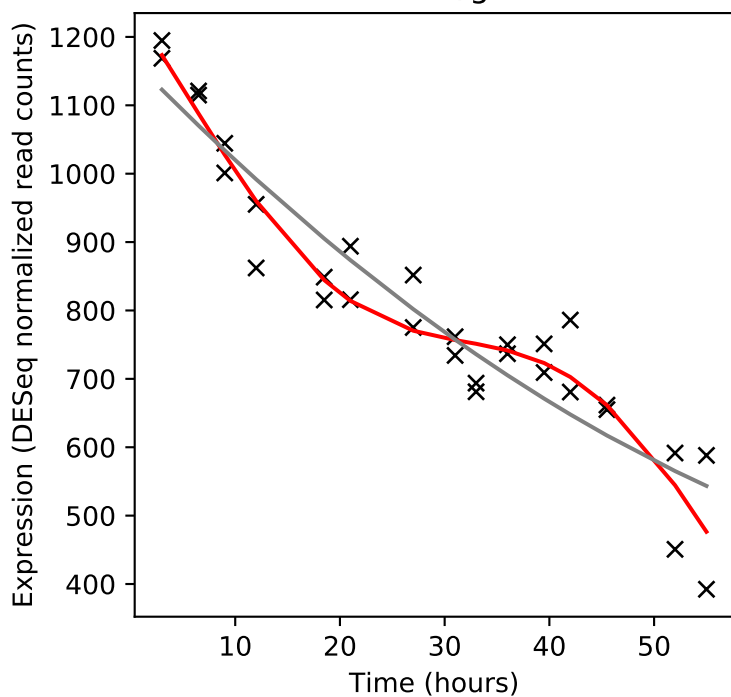

Rv3437/-

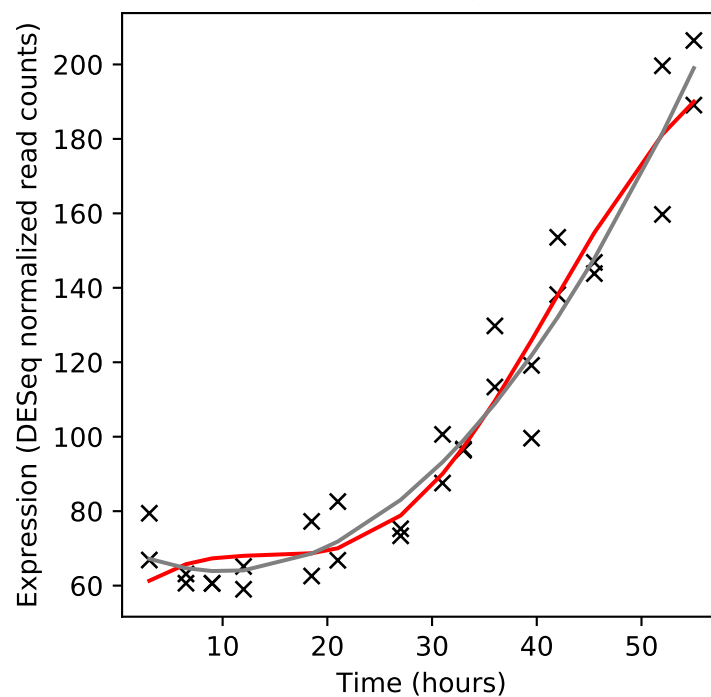

Rv3438/-

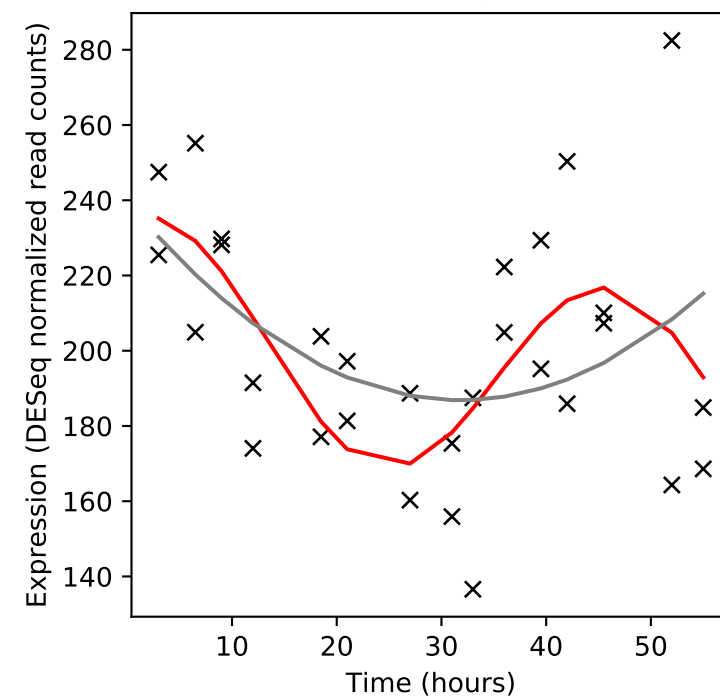

Rv3439c/-

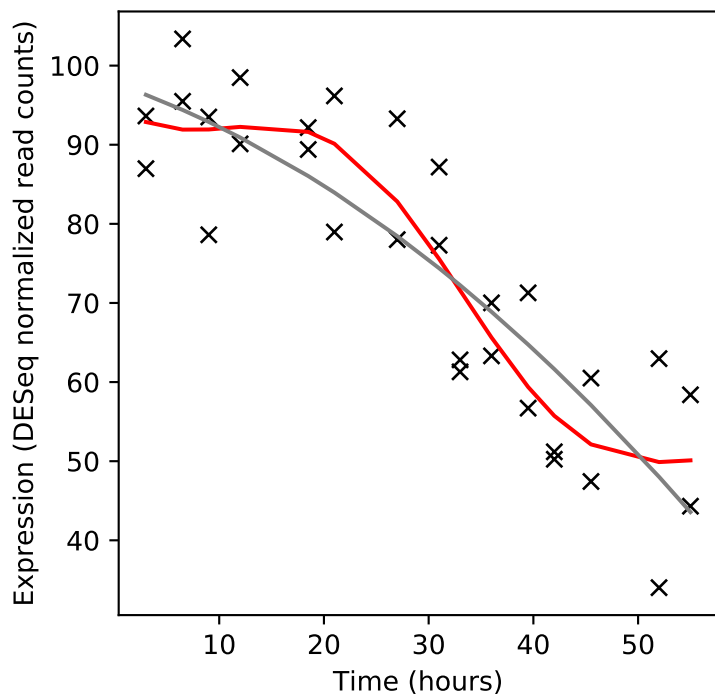

Rv3440c/-

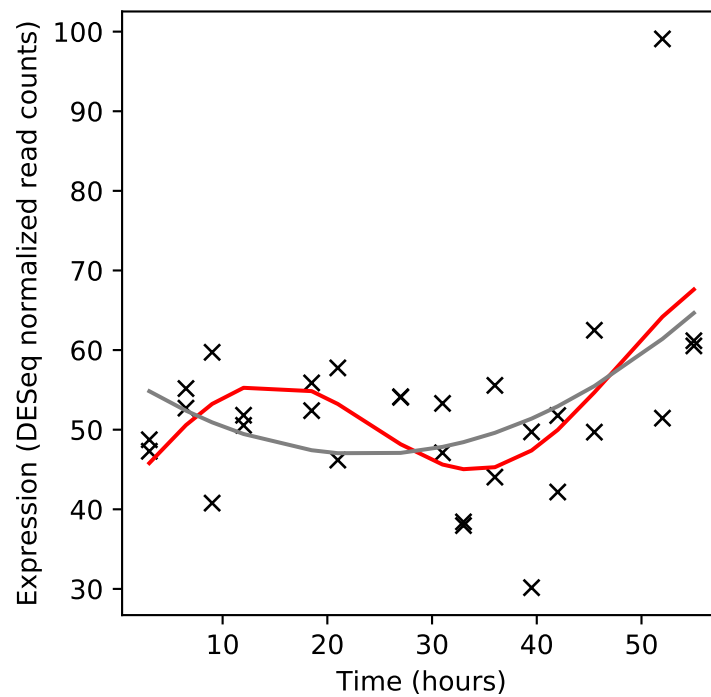

Rv3441c/mrsA

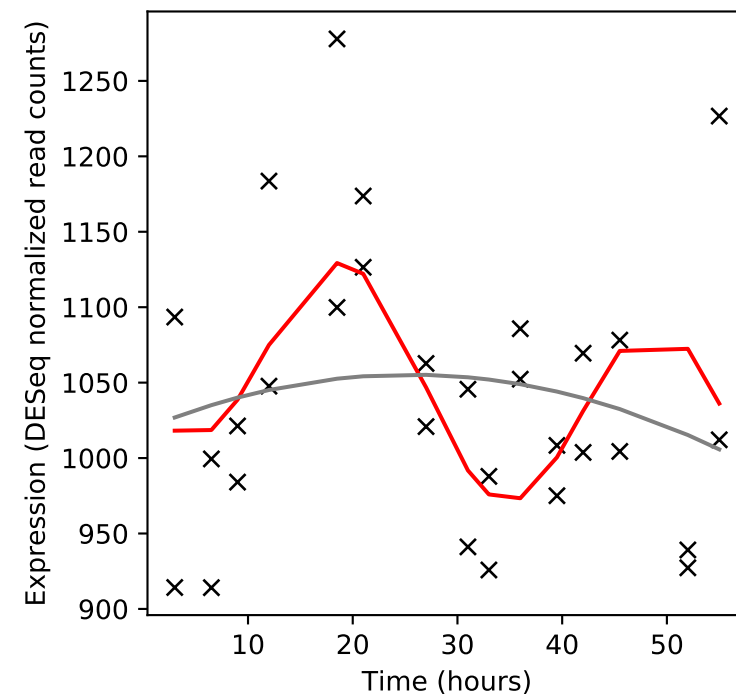

Rv3442c/rpsI

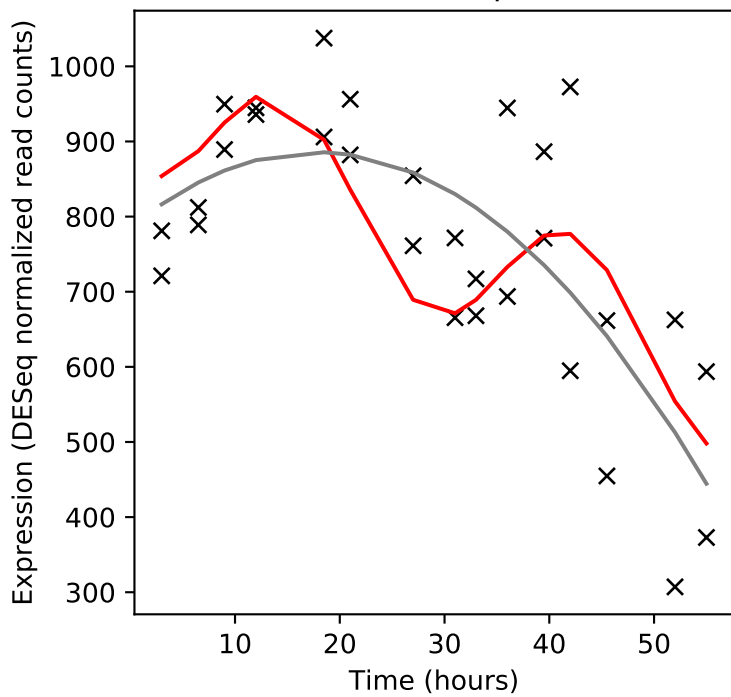

Rv3443c/rpIM

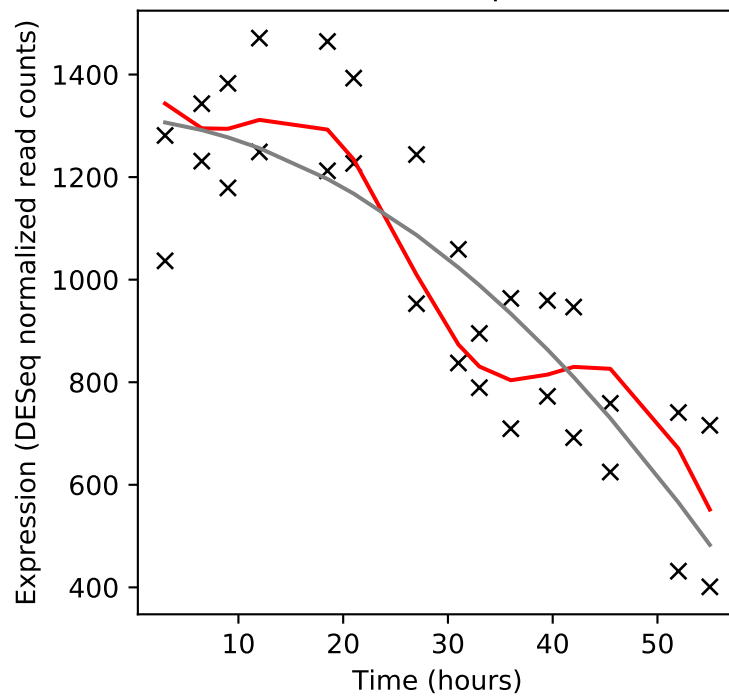

Rv3444c/esxT

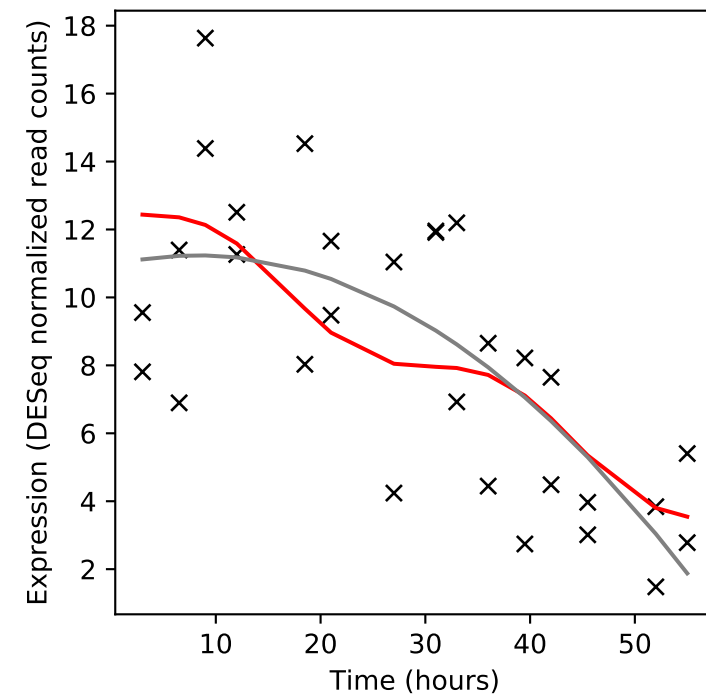

Rv3445c/esxU

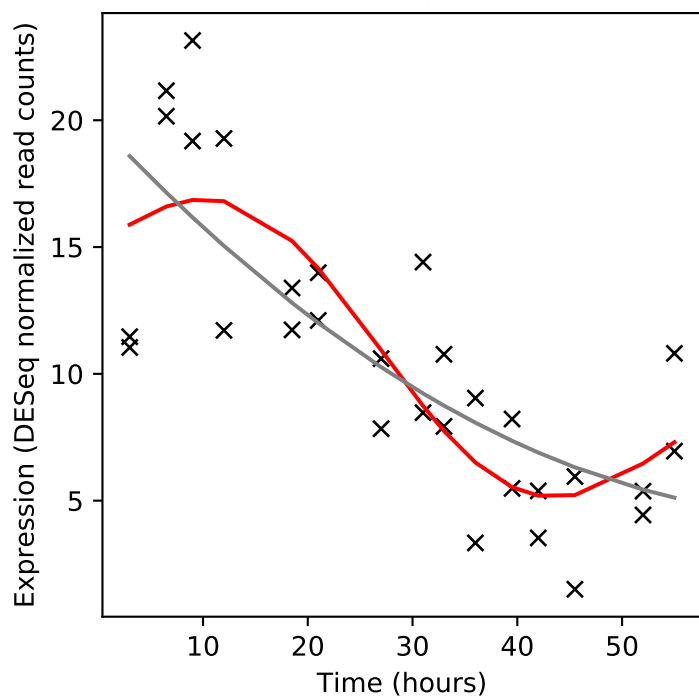

Rv3446c/-

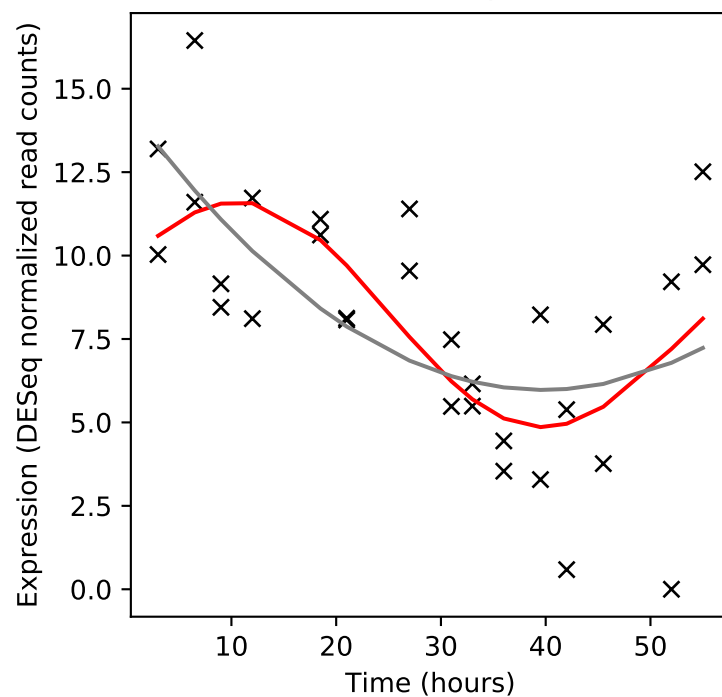

Rv3447c/eccC4

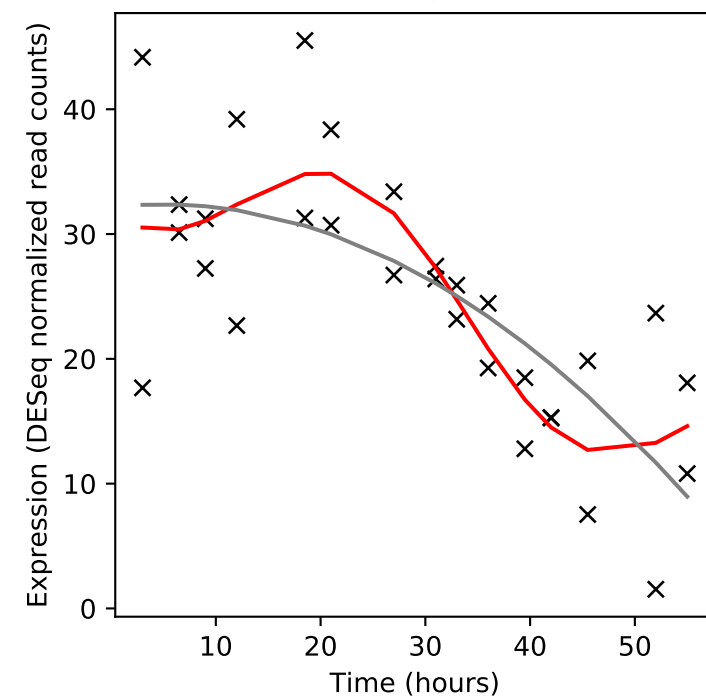

Rv3448/eccD4

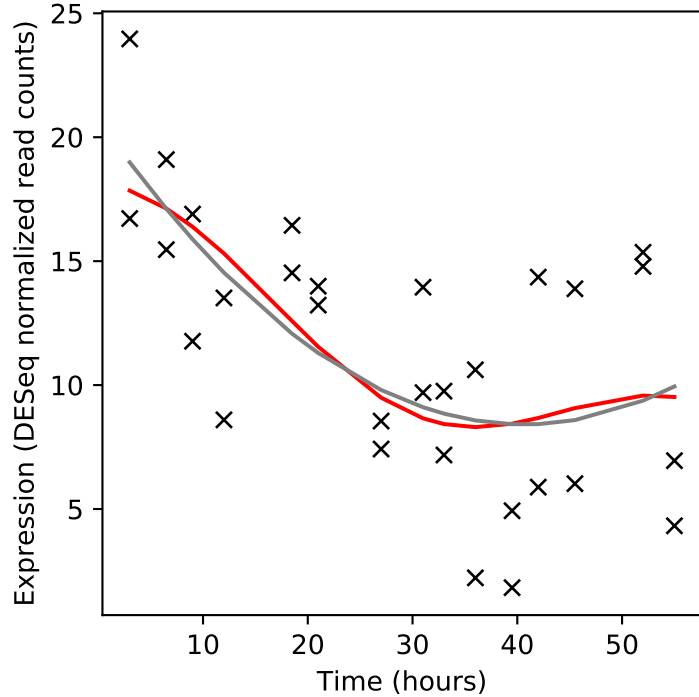

Rv3449/mycP4

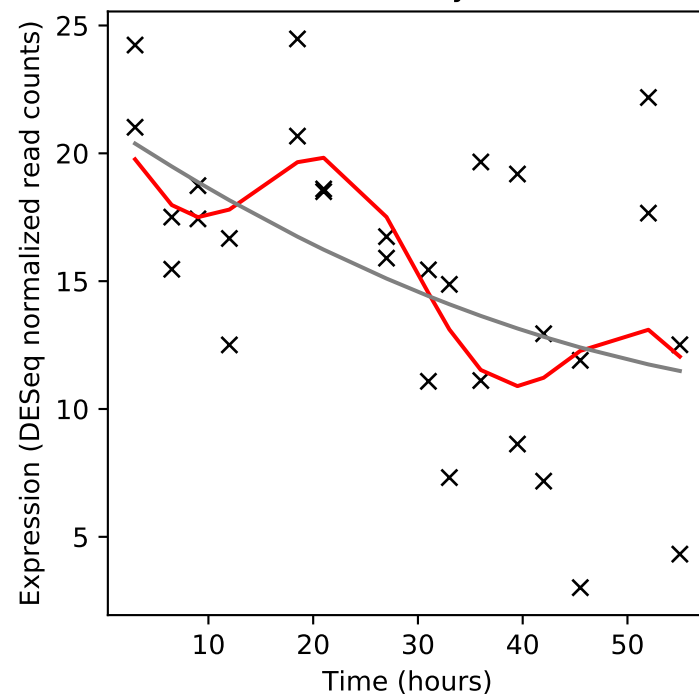

Rv3450c/eccB4

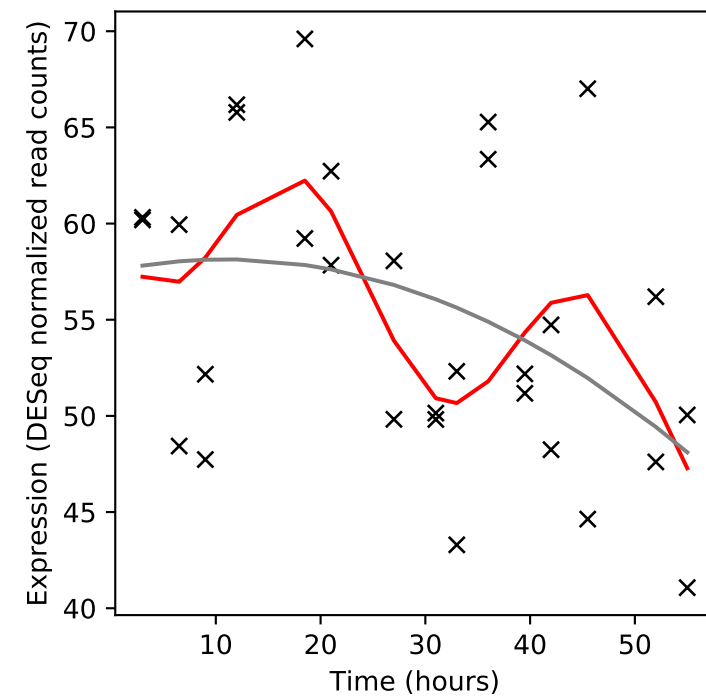

Rv3451/cut3

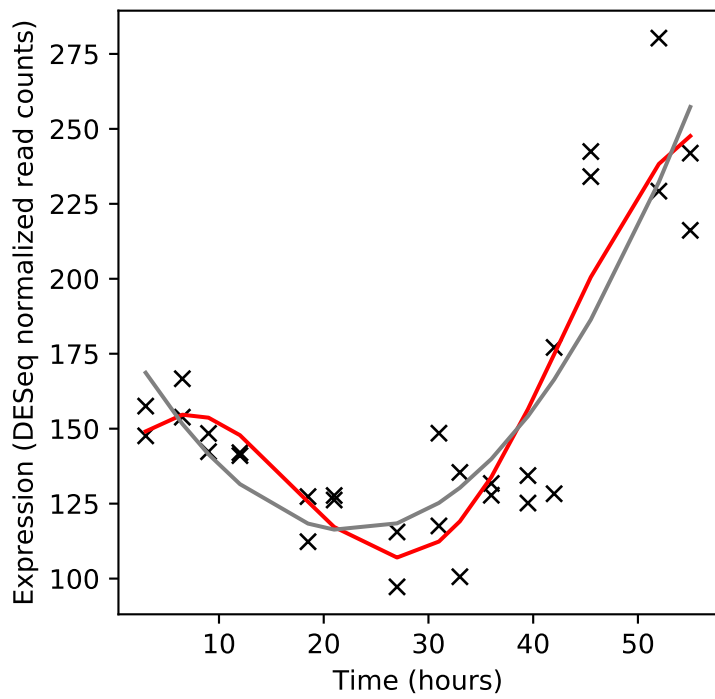

Rv3452/cut4

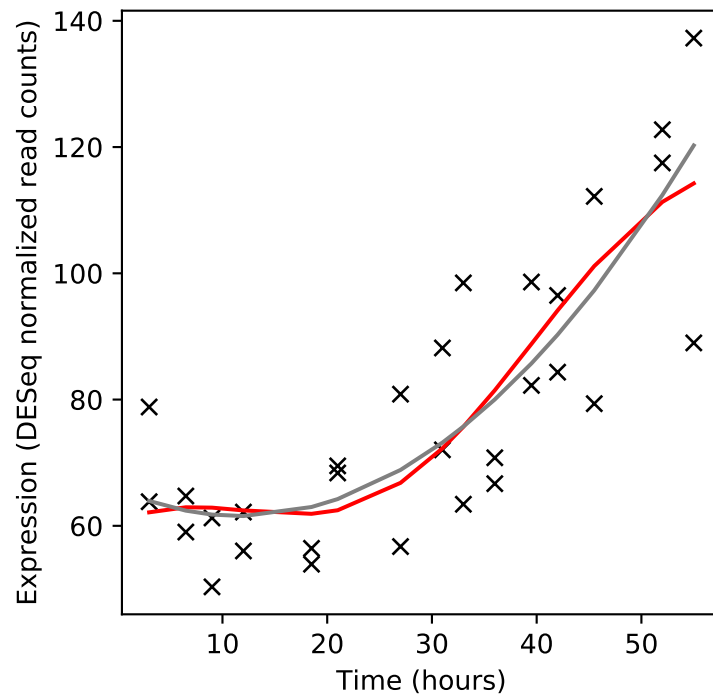

Rv3453/-

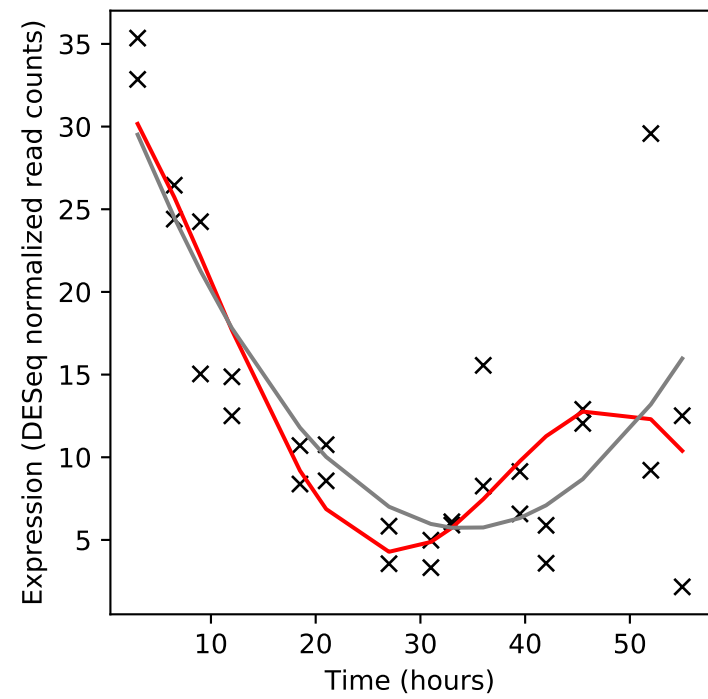

Rv3454/-

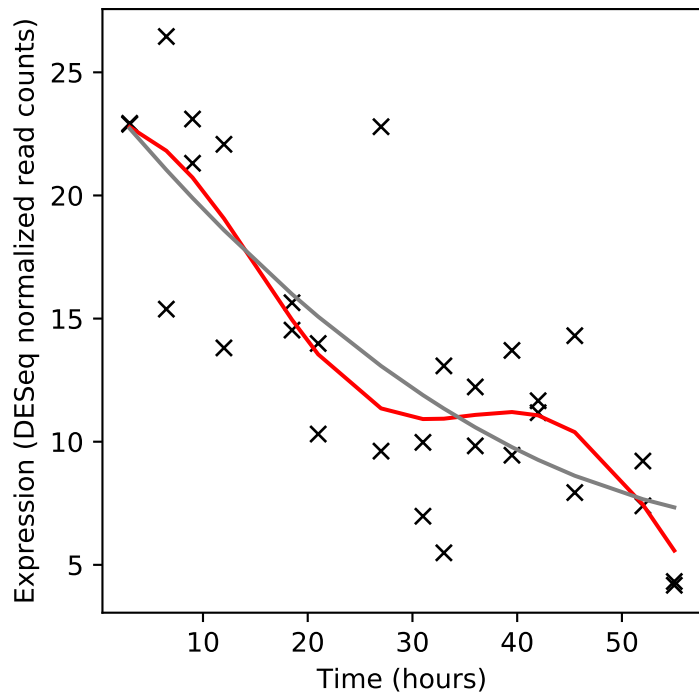

Rv3455c/truA

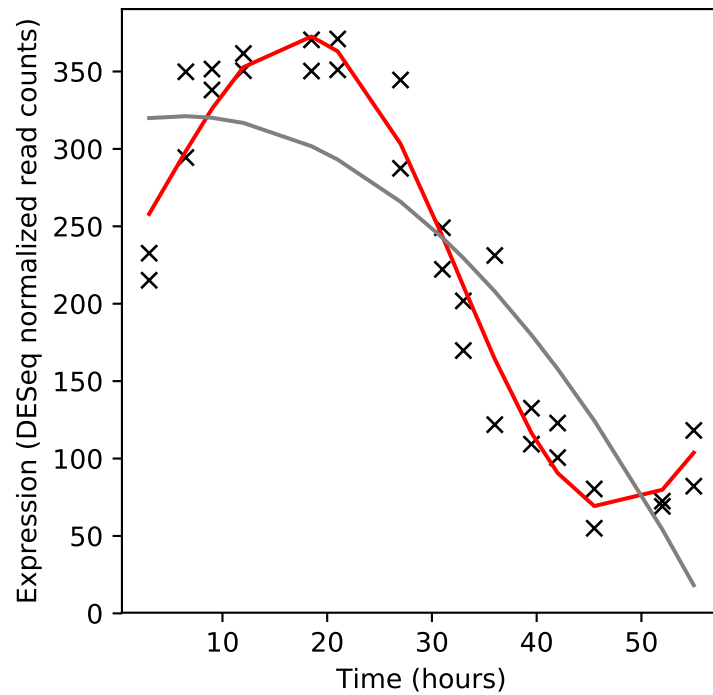

Rv3456c/rplQ

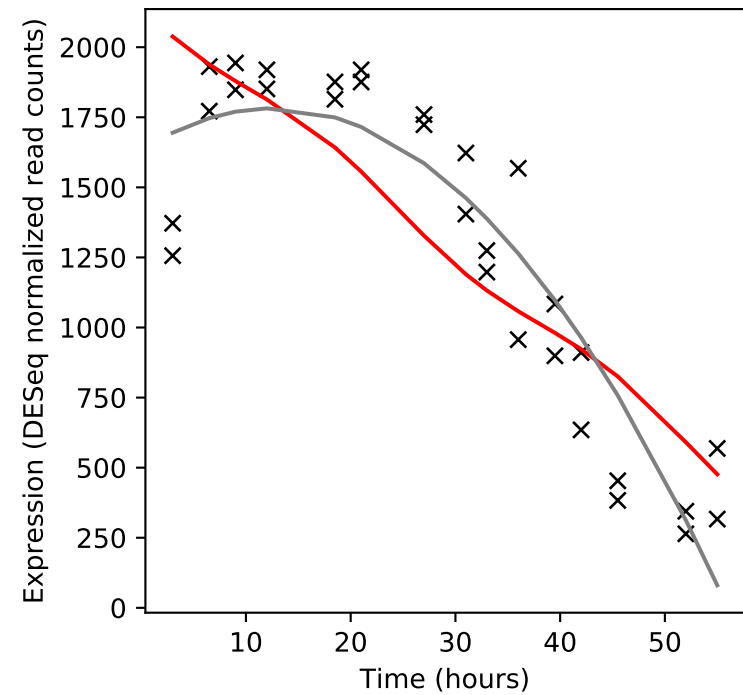

Rv3457c/rpoA

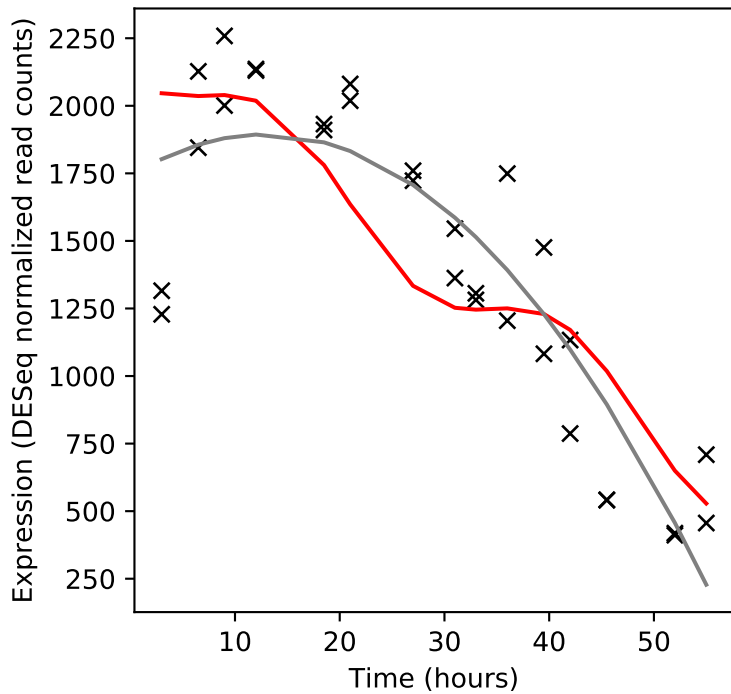

Rv3458c/rpsD

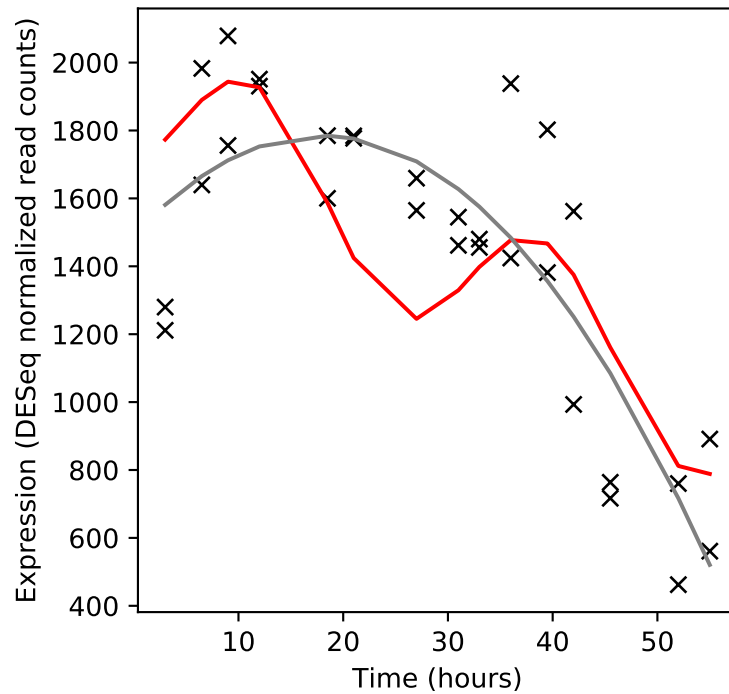

Rv3459c/rpsK

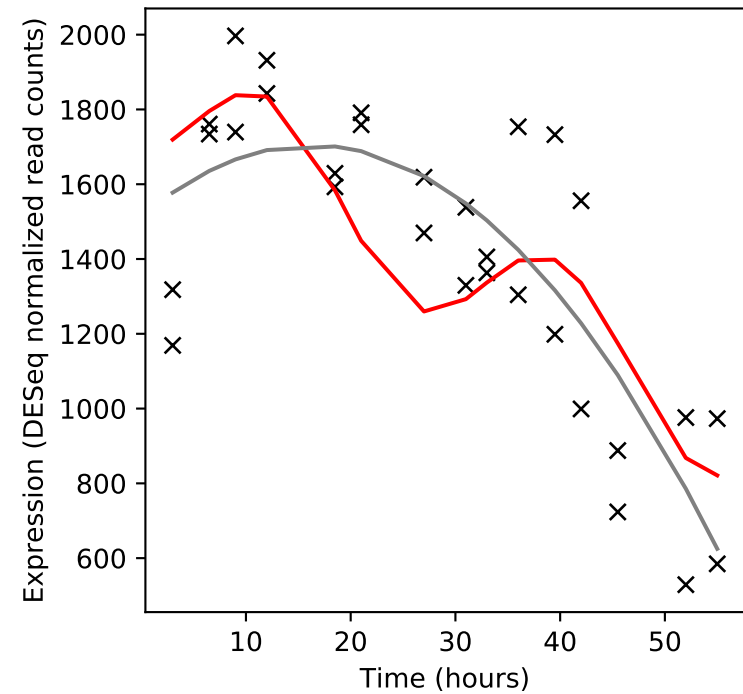



Rv3460c/rpsM

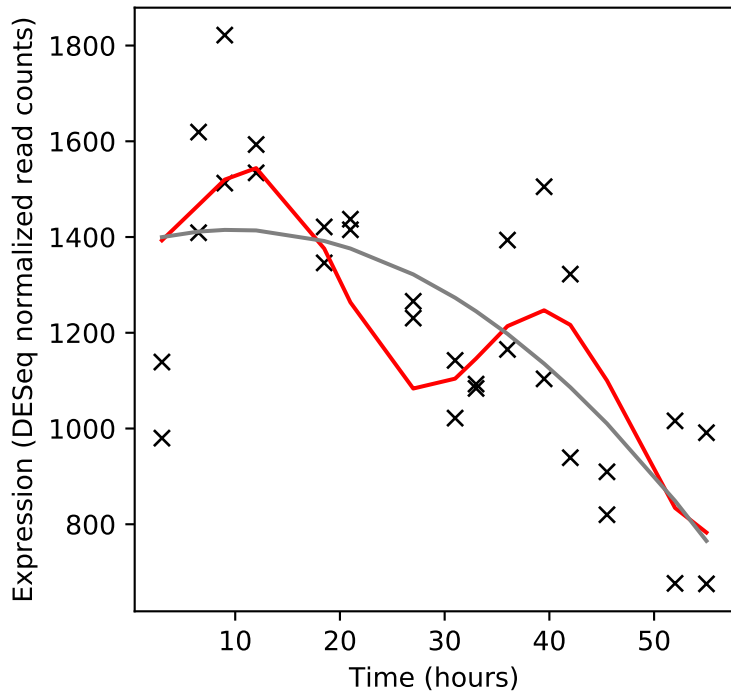

Rv3461c/rpmJ

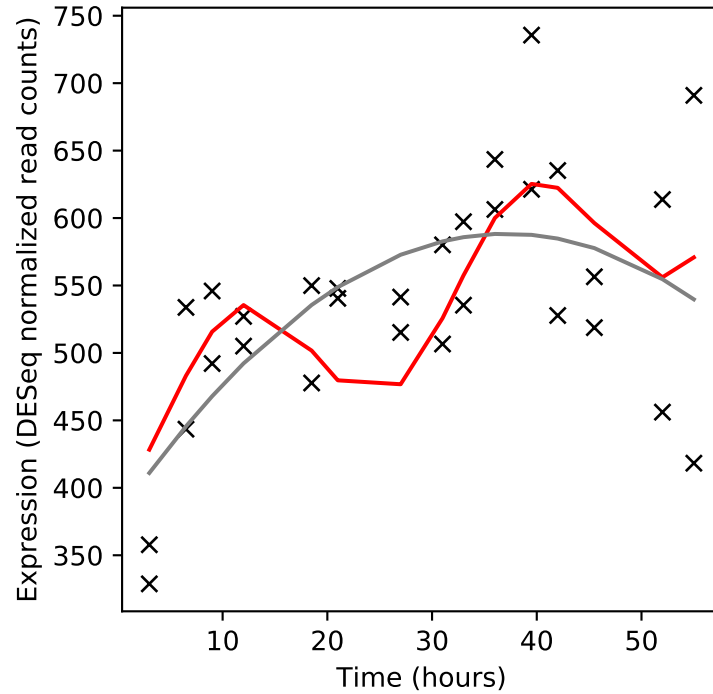

Rv3462c/infA

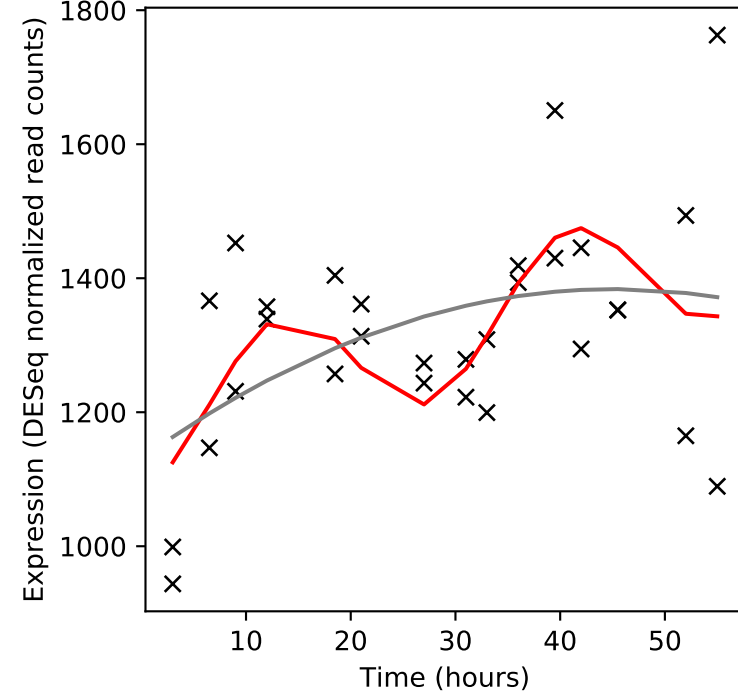

Rv3463/-

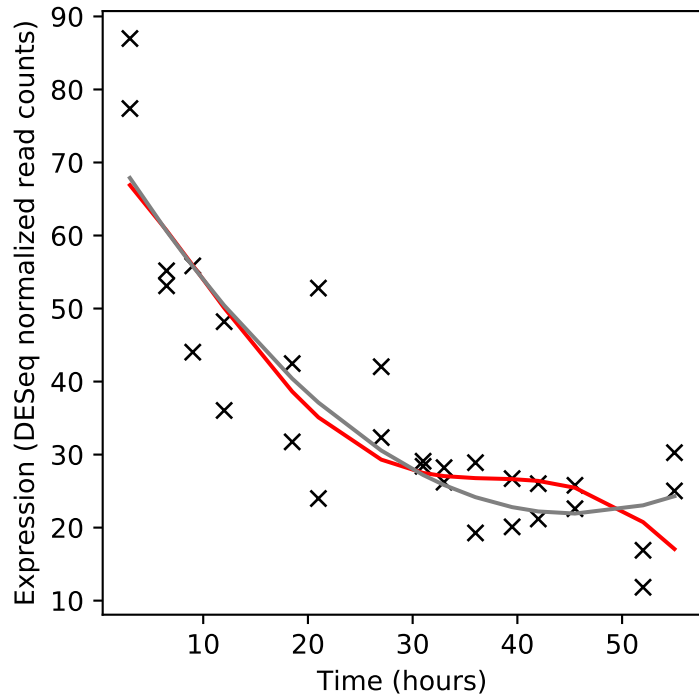

Rv3464/rmlB

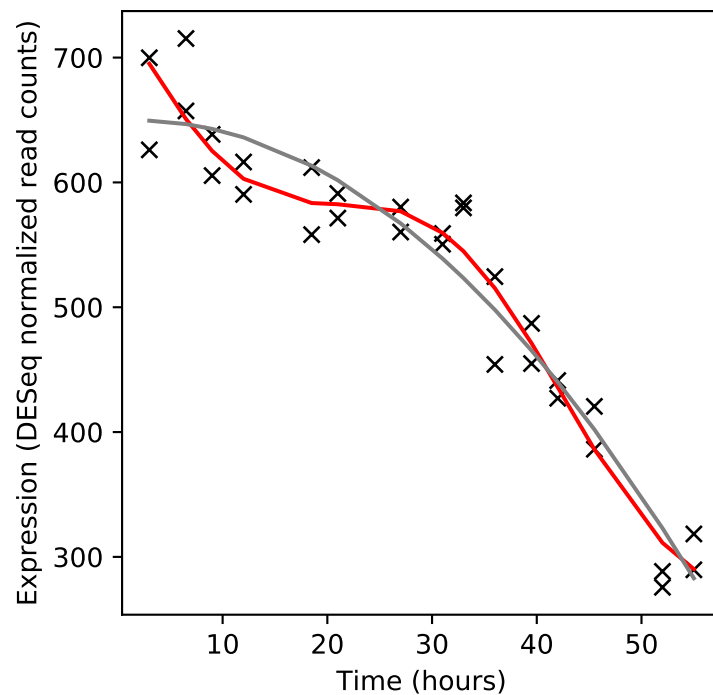

Rv3465/rmlC

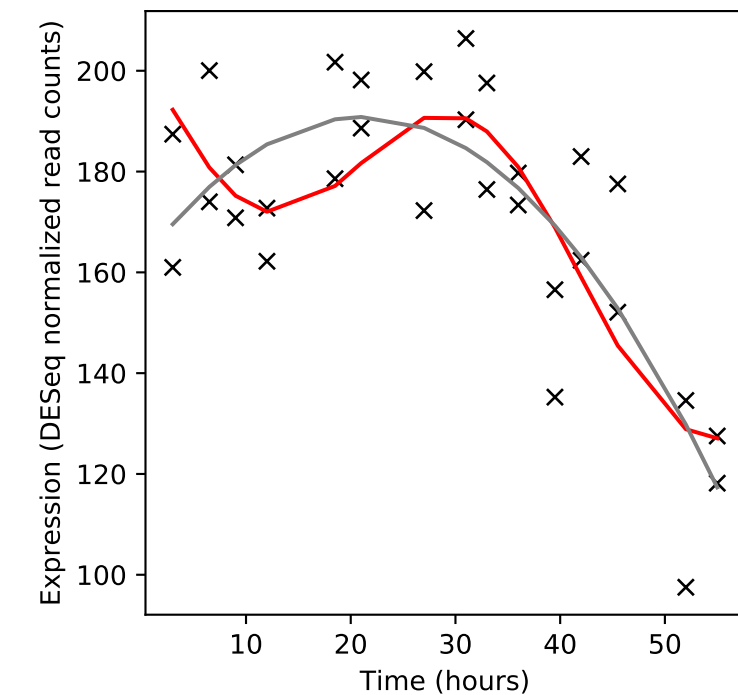

Rv3466/-

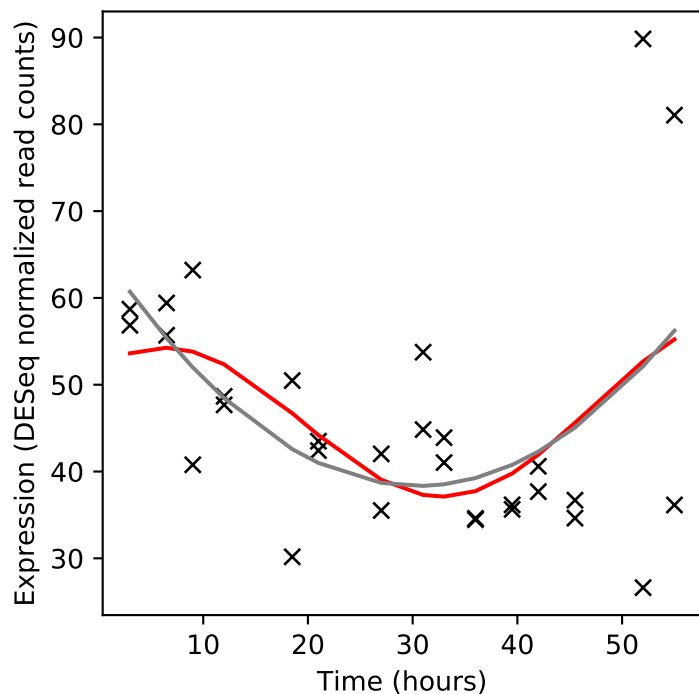

Rv3467/-

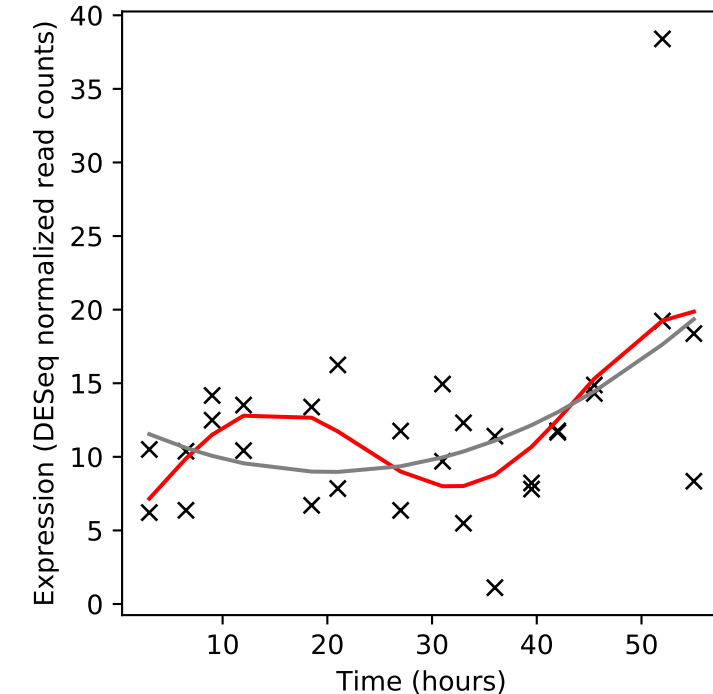

Rv3468c/-

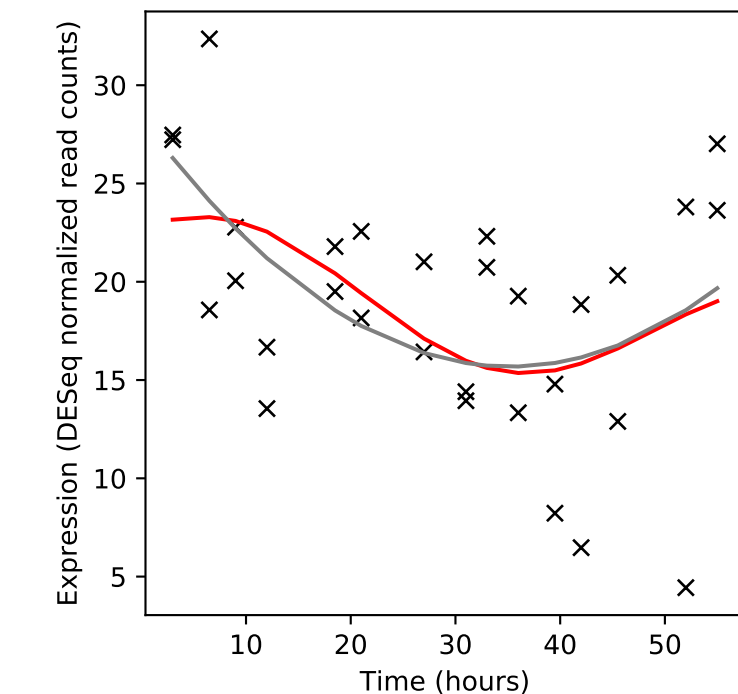

Rv3469c/mhpE

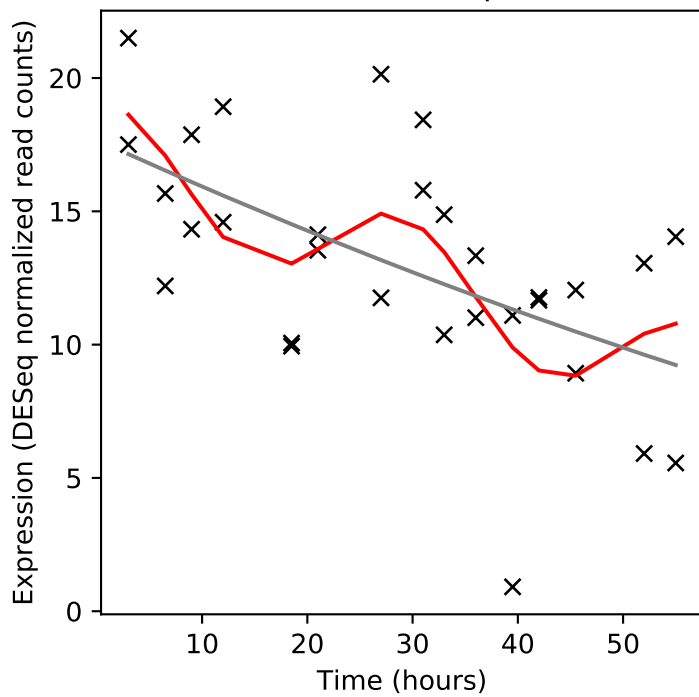

Rv3470c/ilvB2

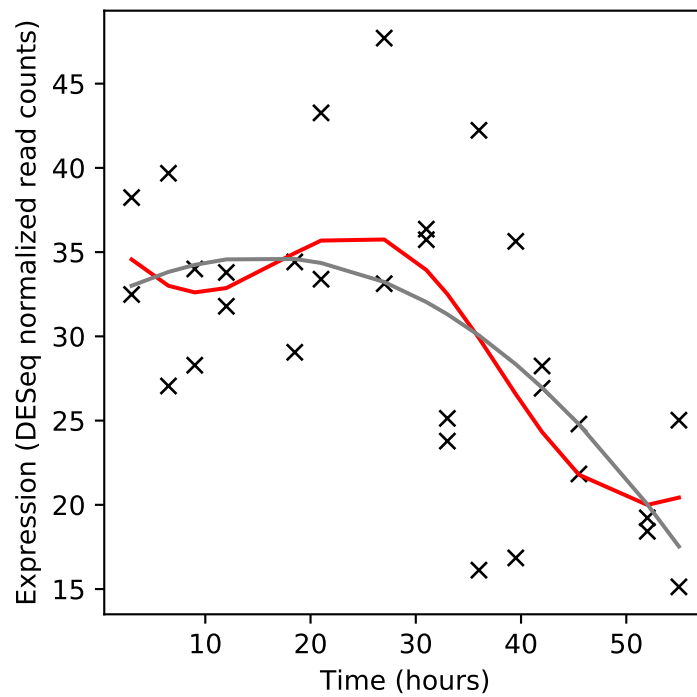

Rv3471c/-

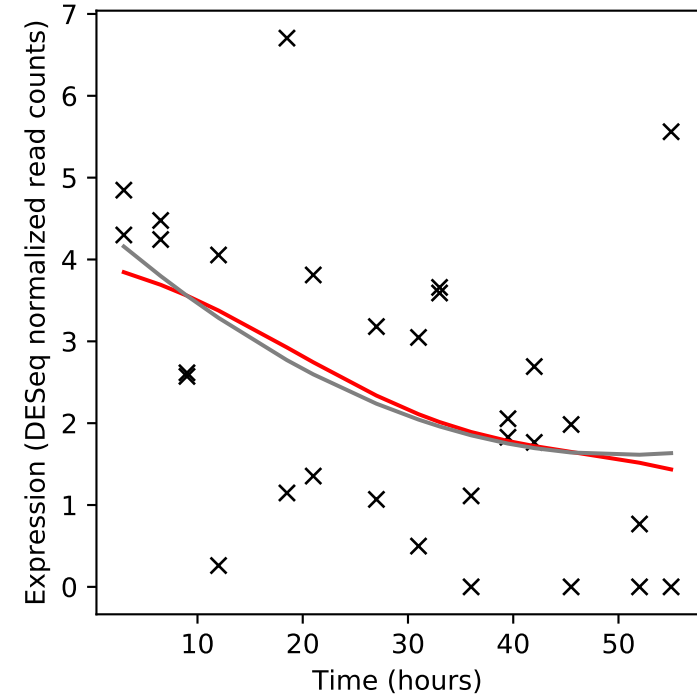

Rv3472c/-

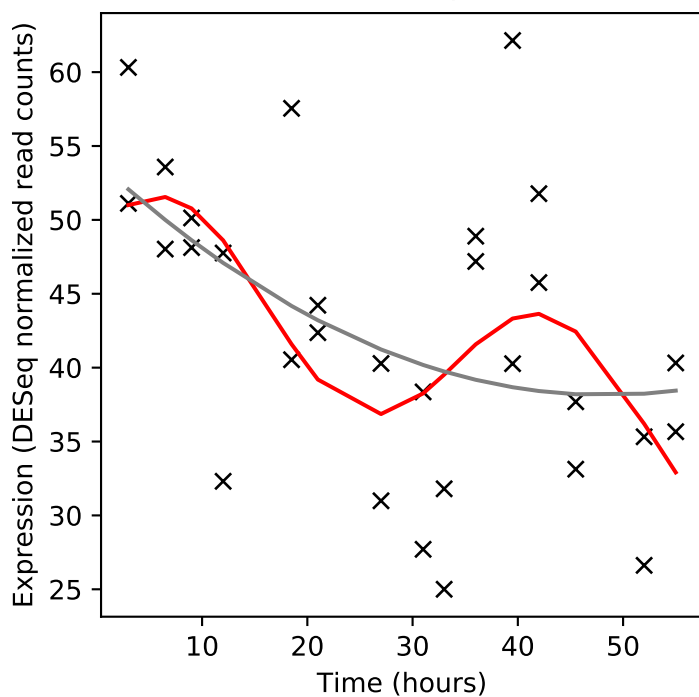

Rv3473c/bpoA

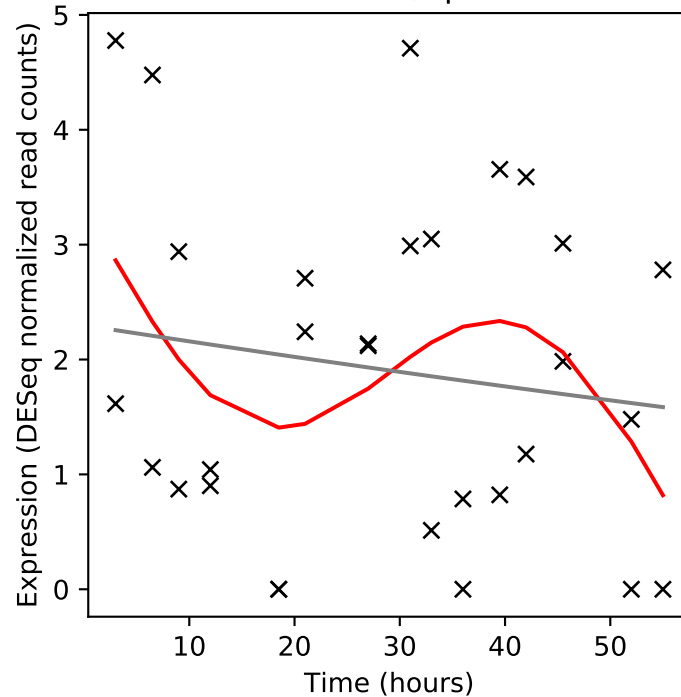

Rv3474c/-

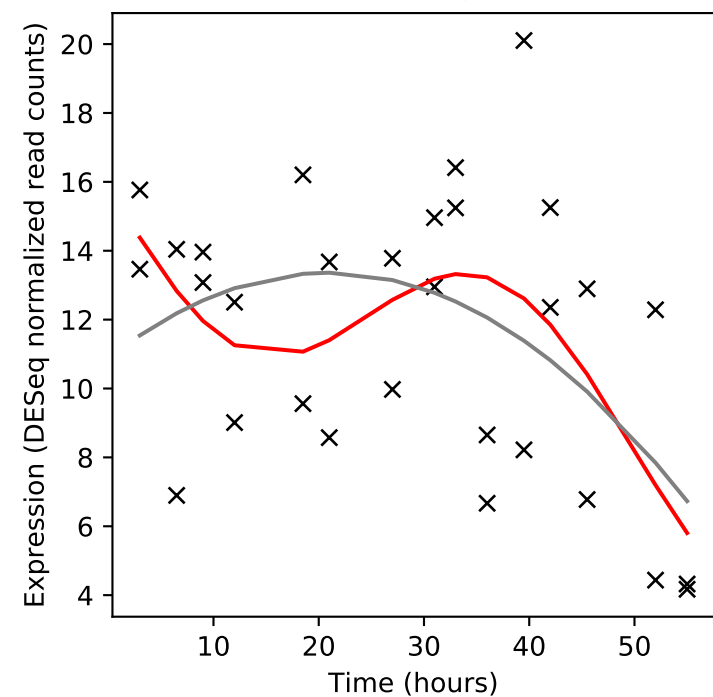

Rv3475c/-

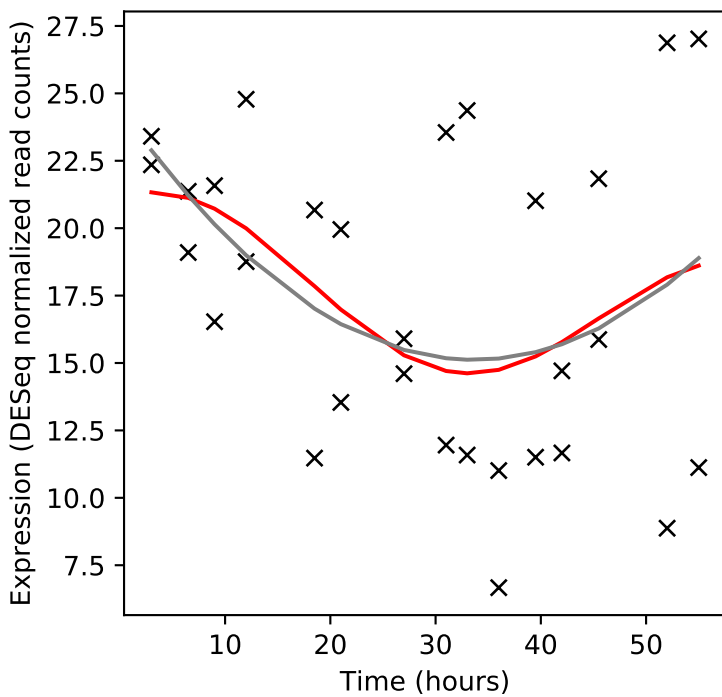

Rv3476c/kgtP

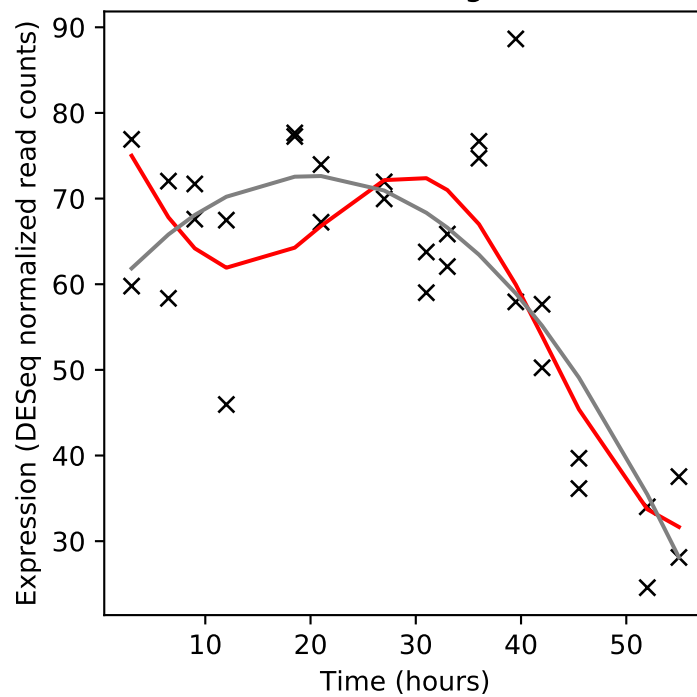

Rv3477c/PE31

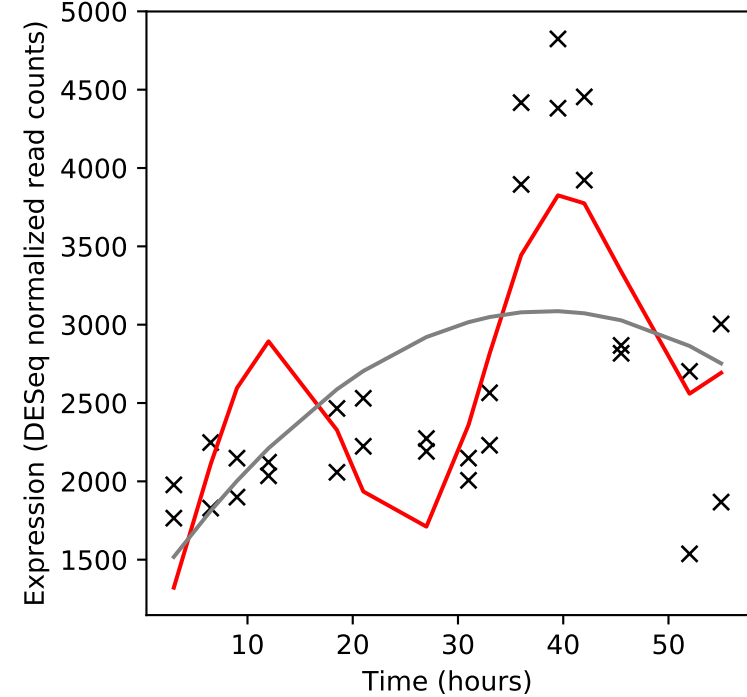

Rv3478/PPE60

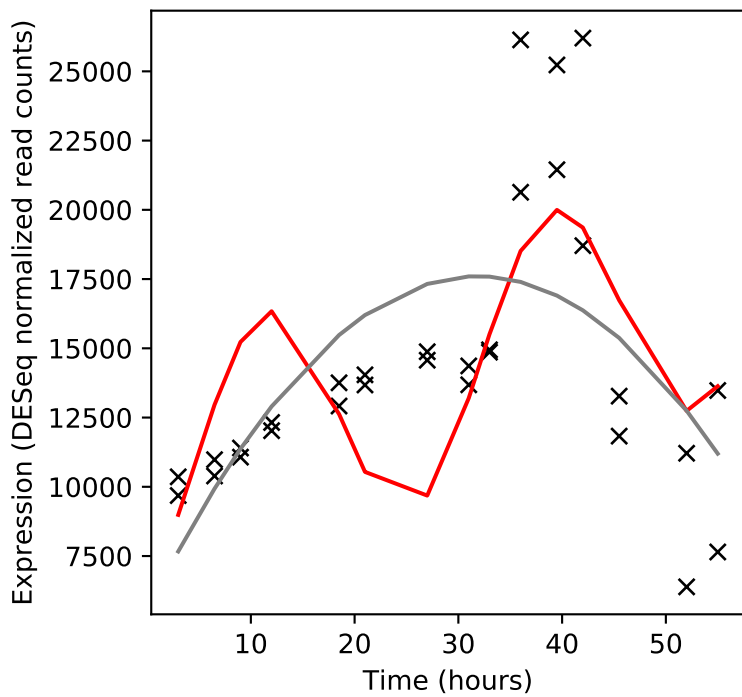

Rv3479/-

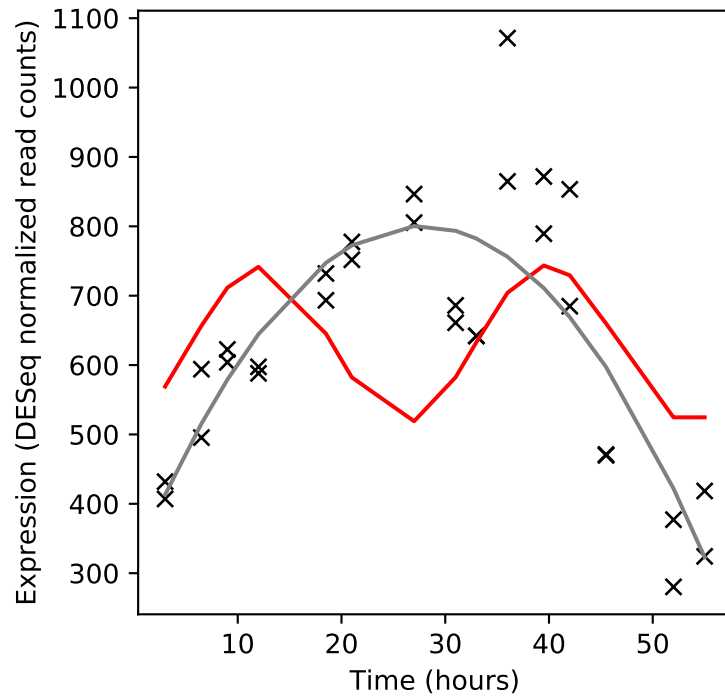

Rv3480c/-

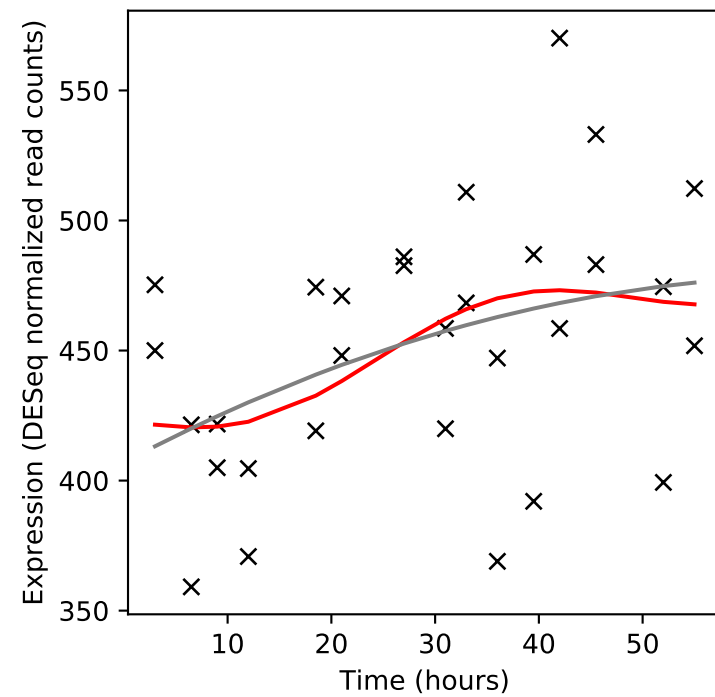

Rv3481c/-

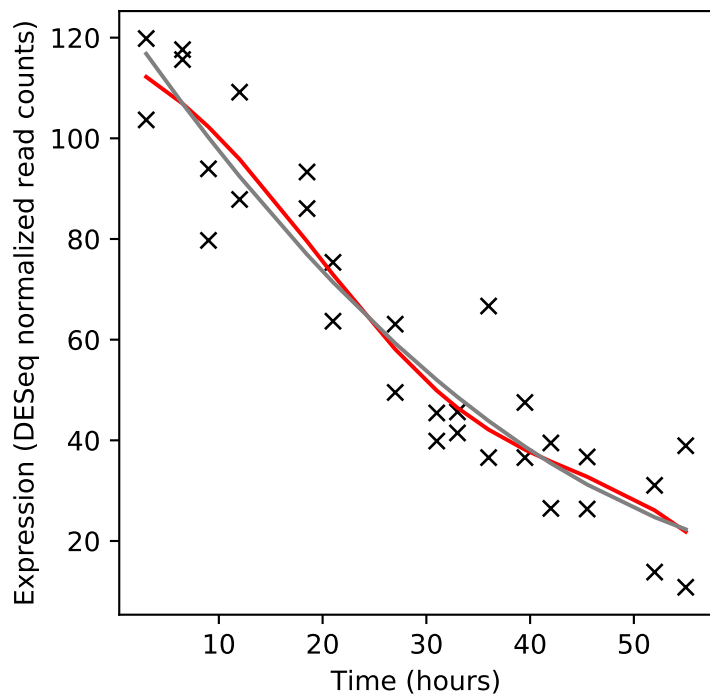

Rv3482c/-

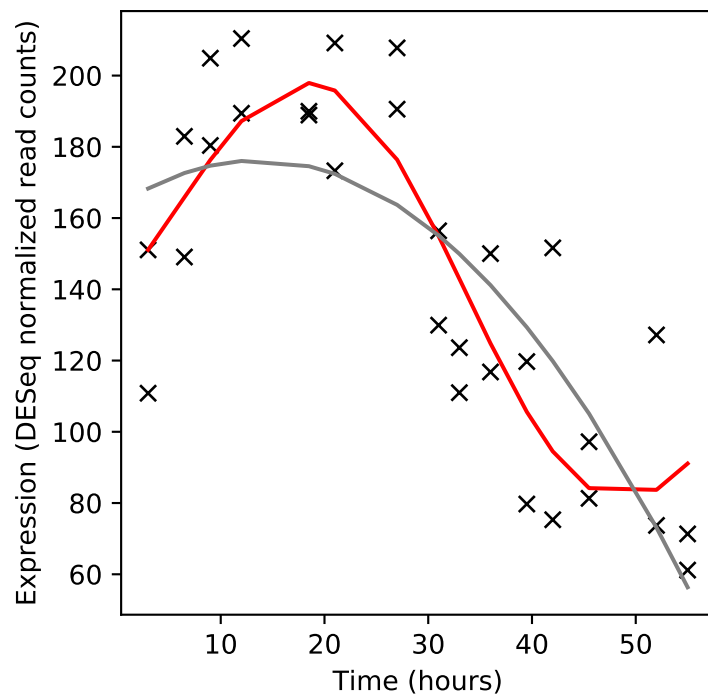

Rv3483c/-

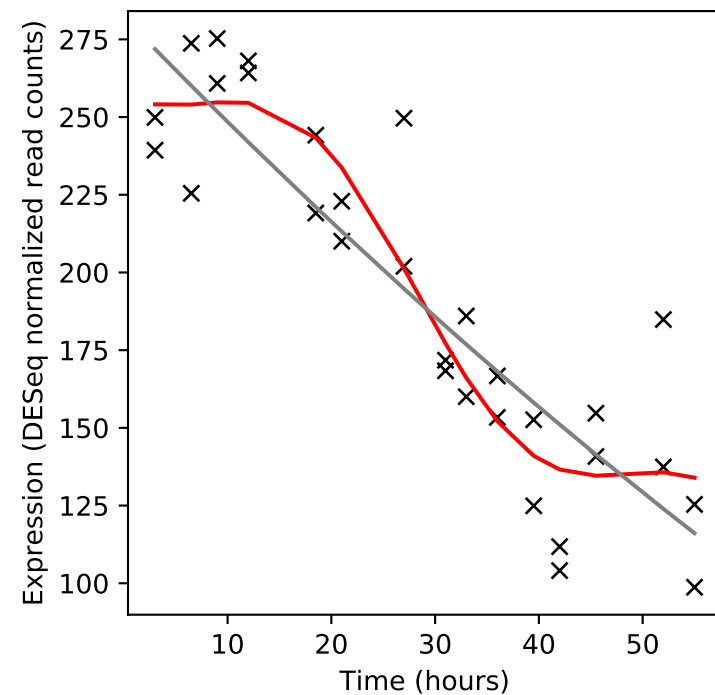

Rv3484/cpsA

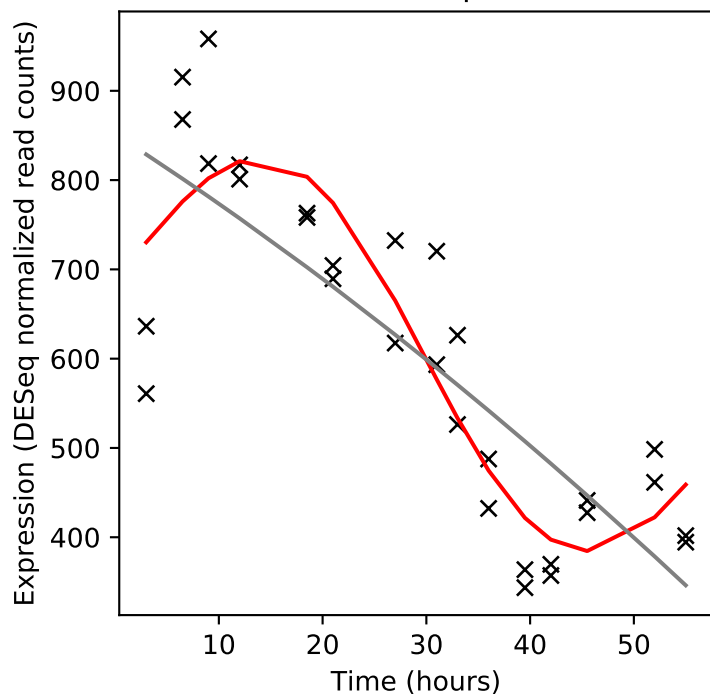

Rv3485c/-

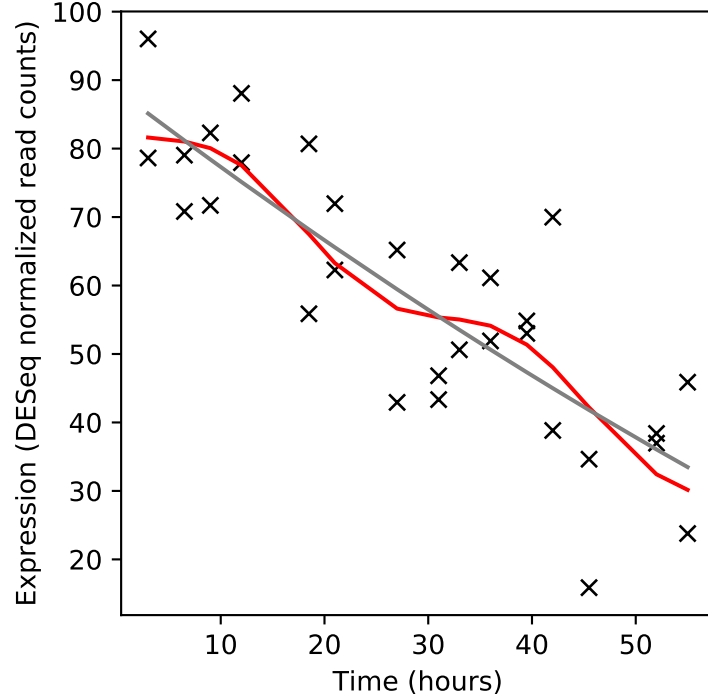

Rv3486/-

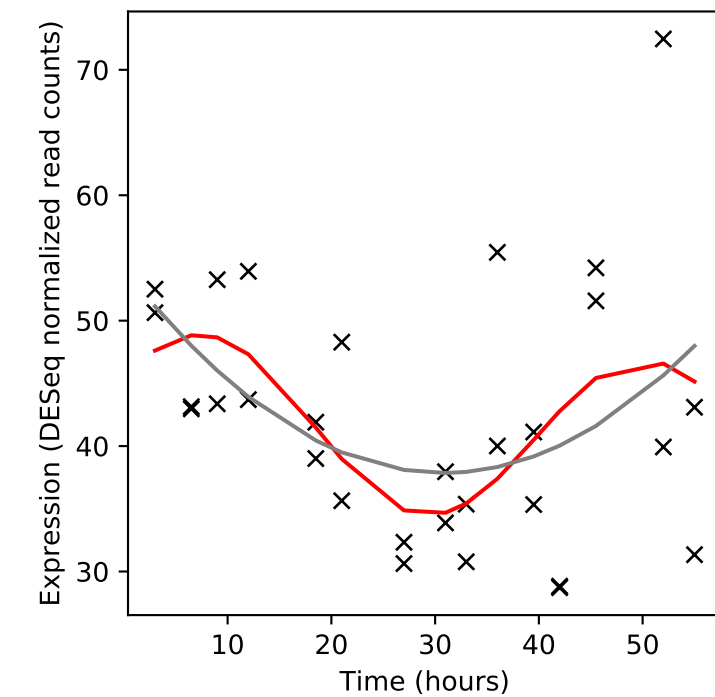

Rv3487c/lipF

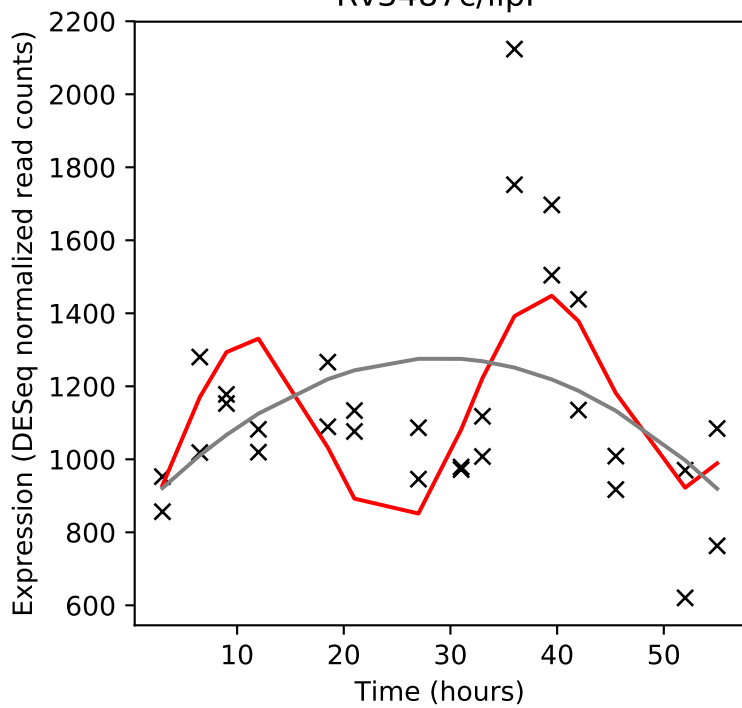

Rv3488/-

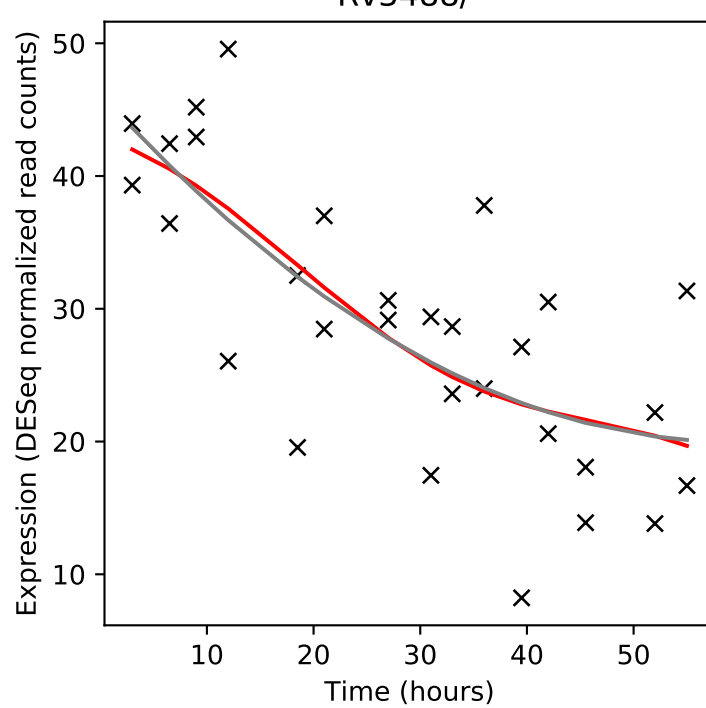

Rv3489/-

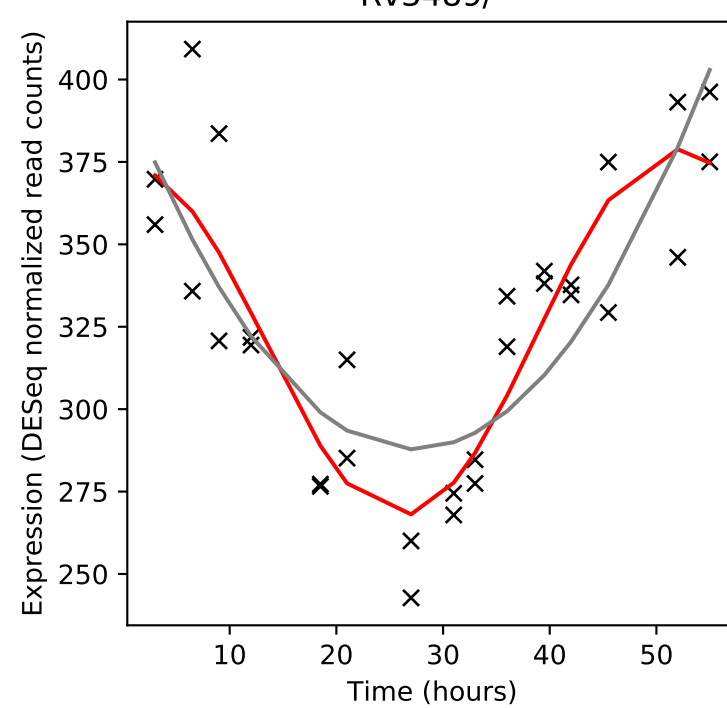

Rv3490/otsA

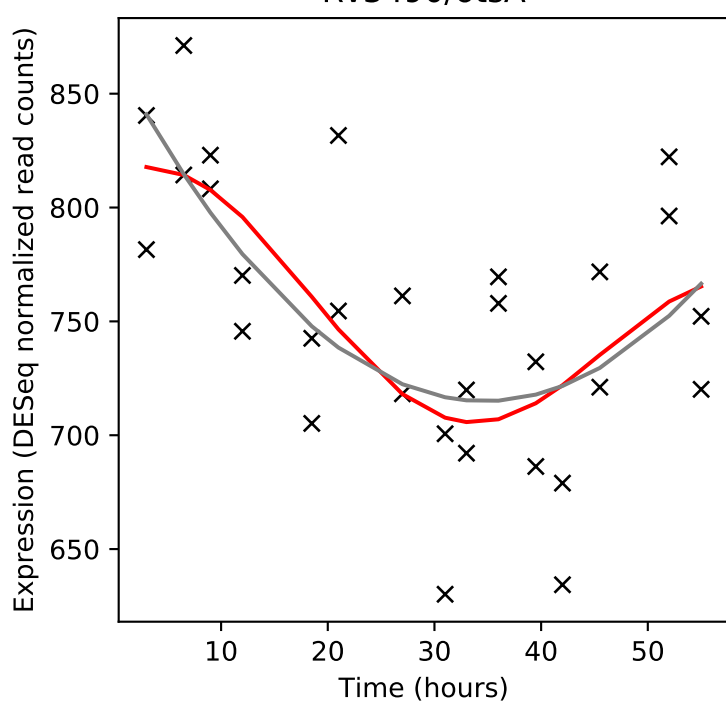

Rv3491/-

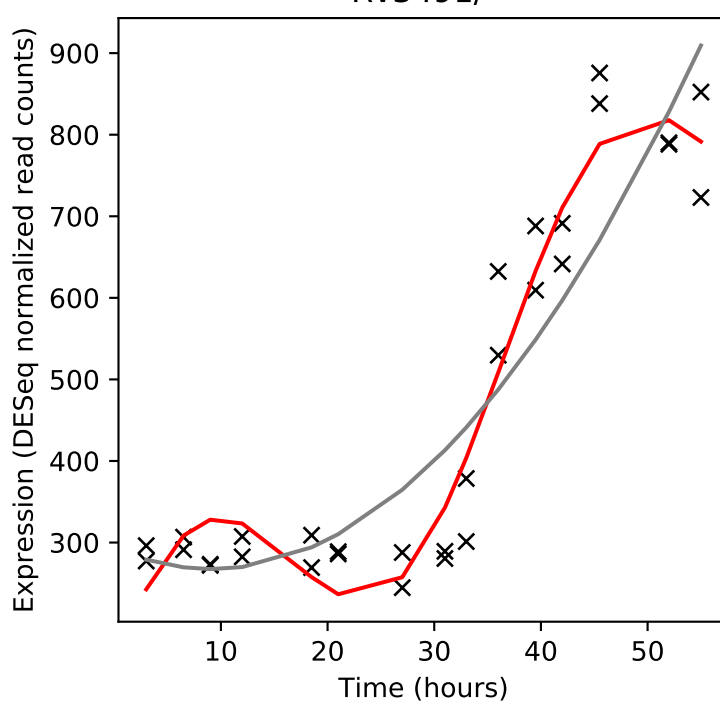

Rv3492c/-

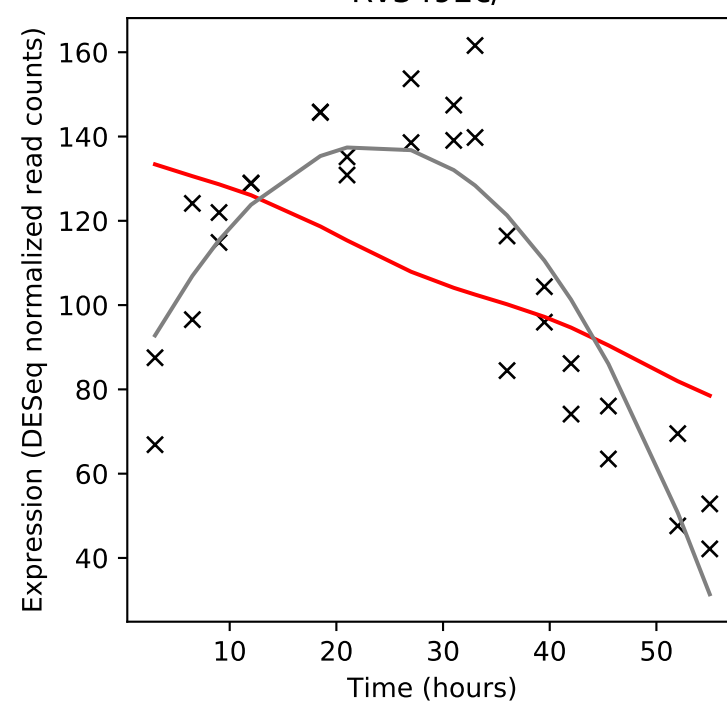

Rv3493c/-

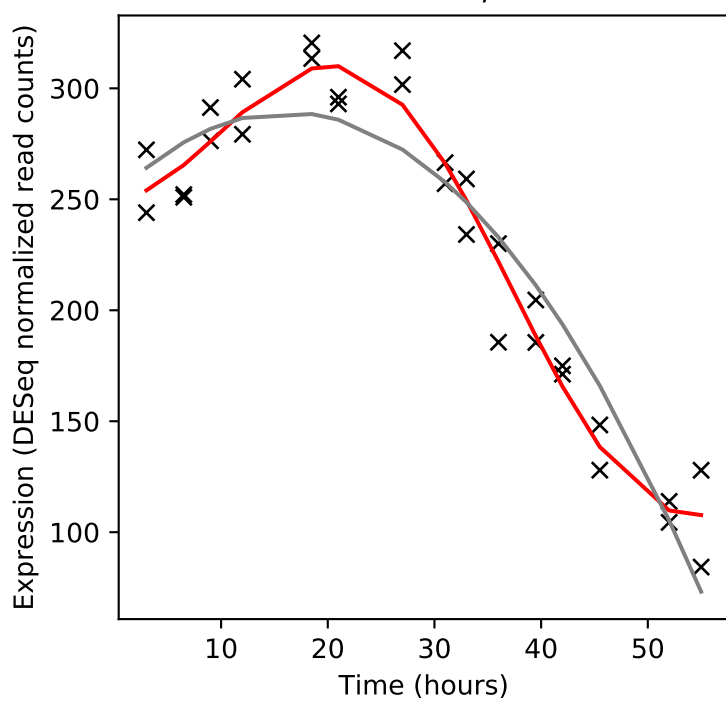

Rv3494c/mce4F

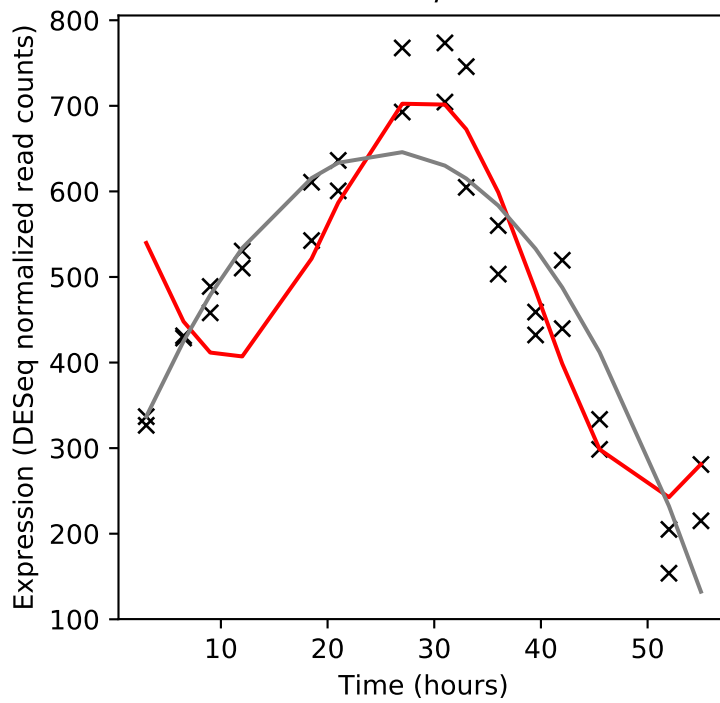

Rv3495c/lprN

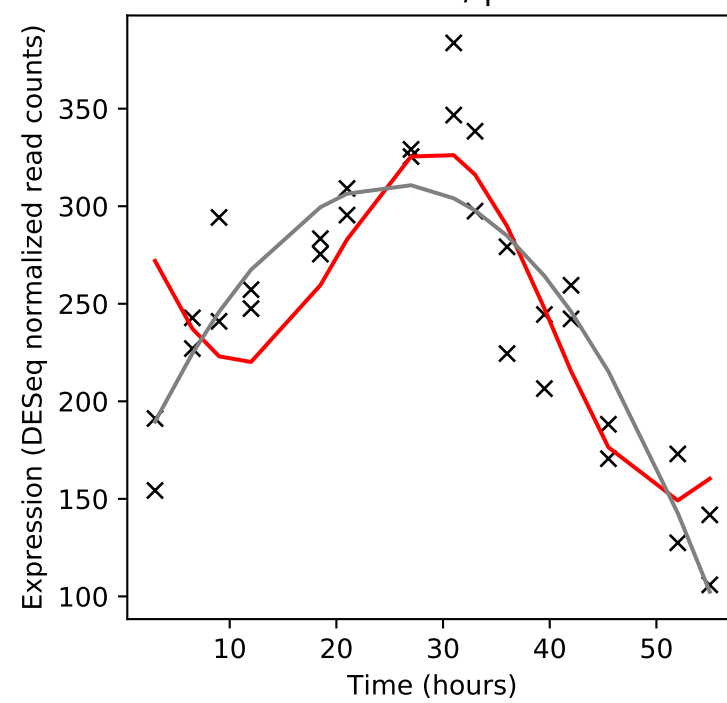

Rv3496c/mce4D

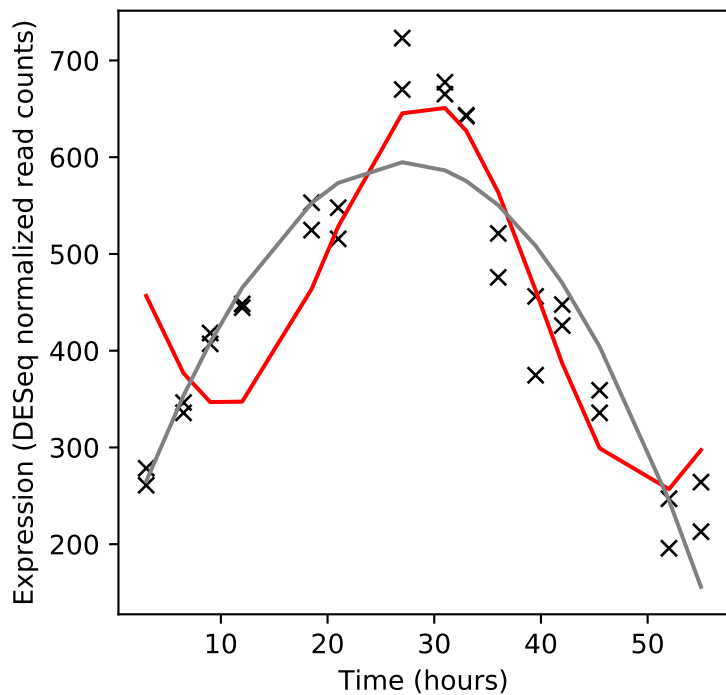

Rv3497c/mce4C

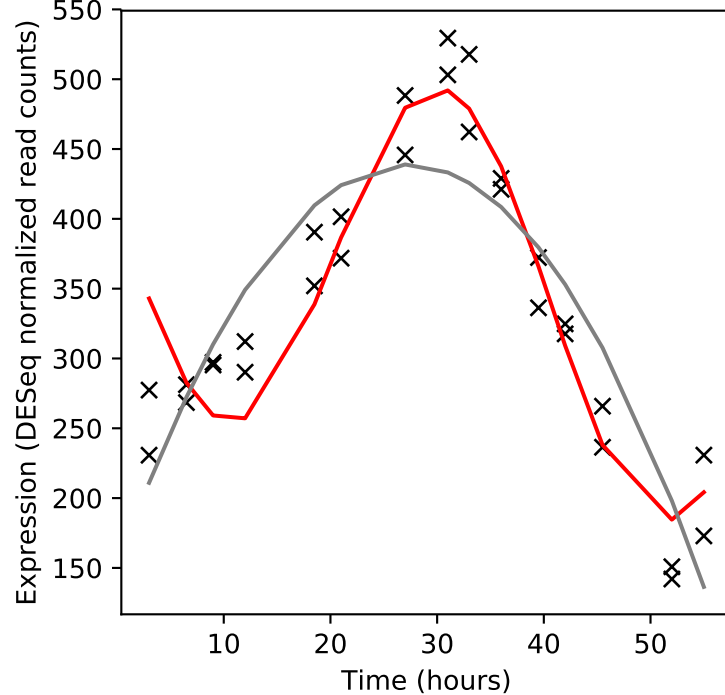

Rv3498c/mce4B

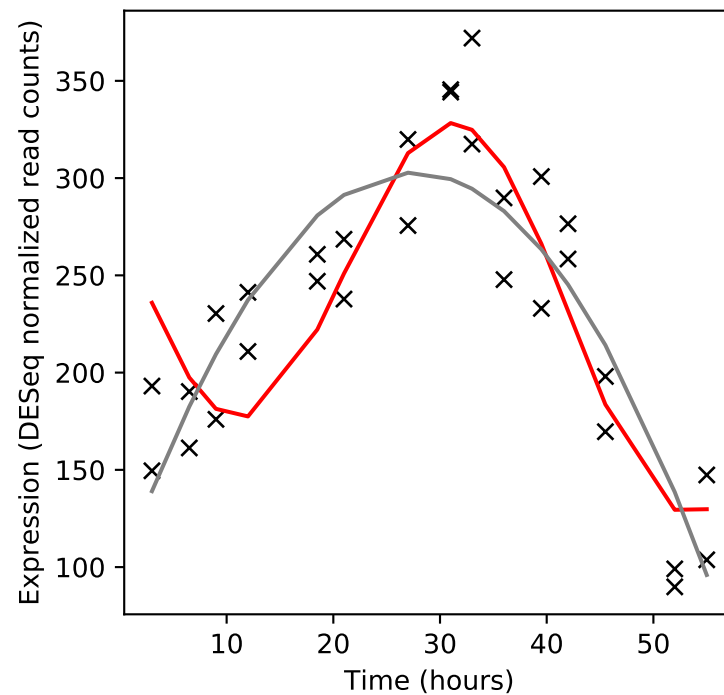

Rv3499c/mce4A

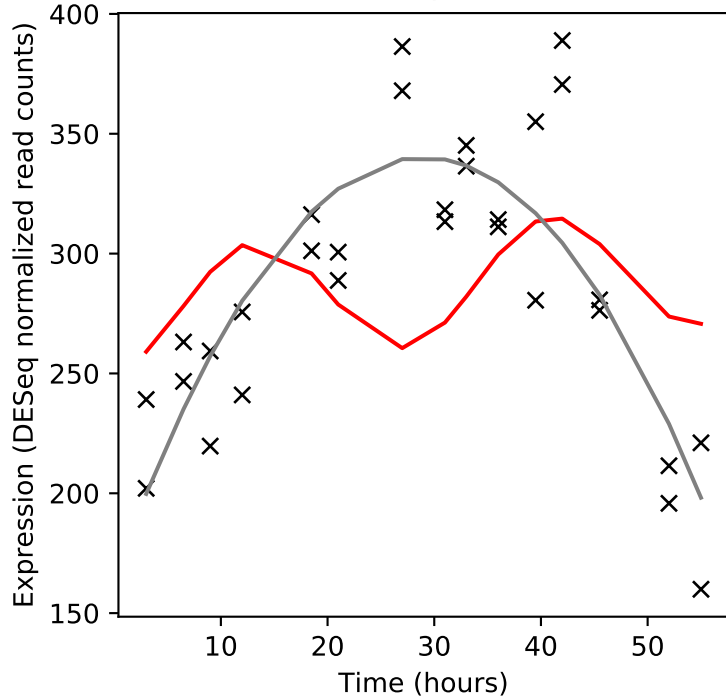

Rv3500c/yrbE4B

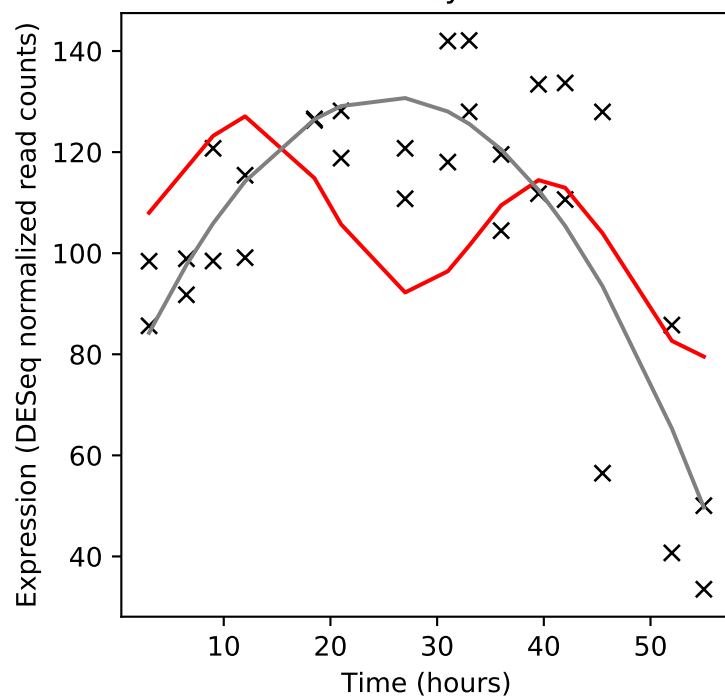

Rv3501c/yrbE4A

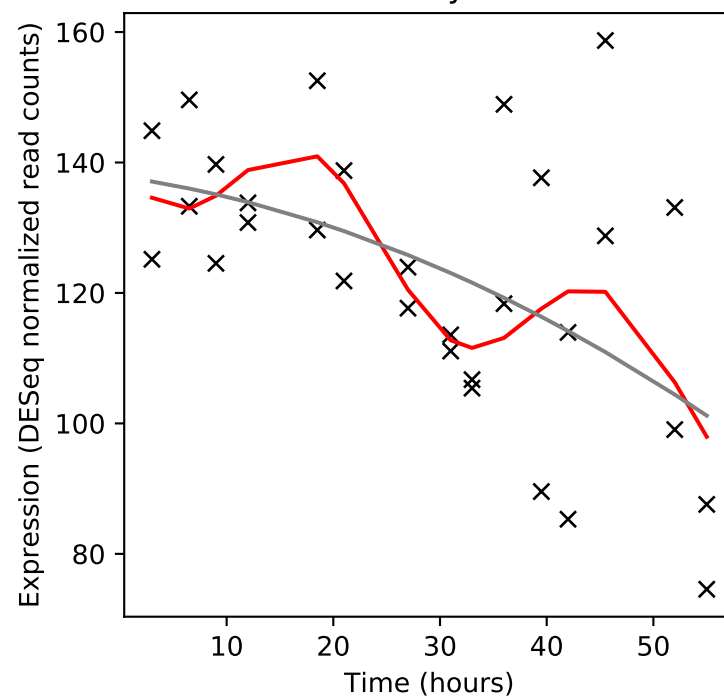

Rv3502c/-

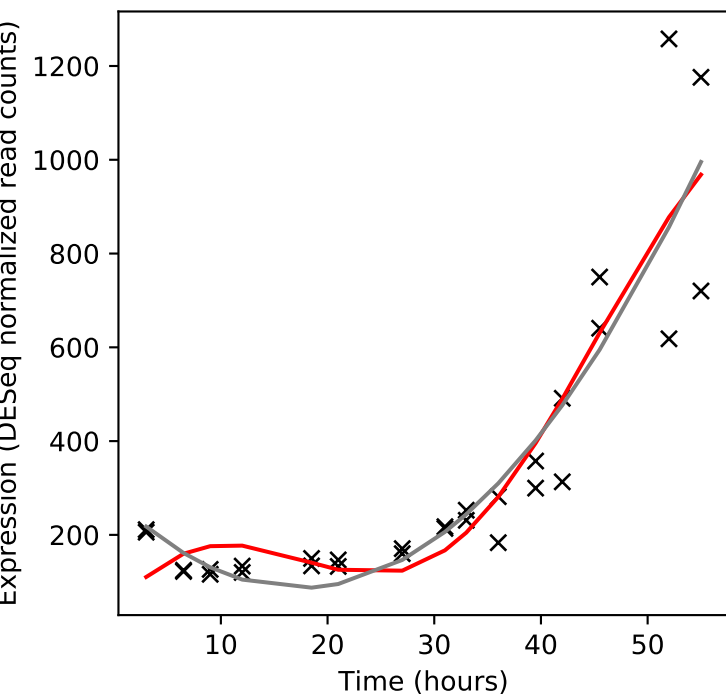

Rv3503c/fdxD

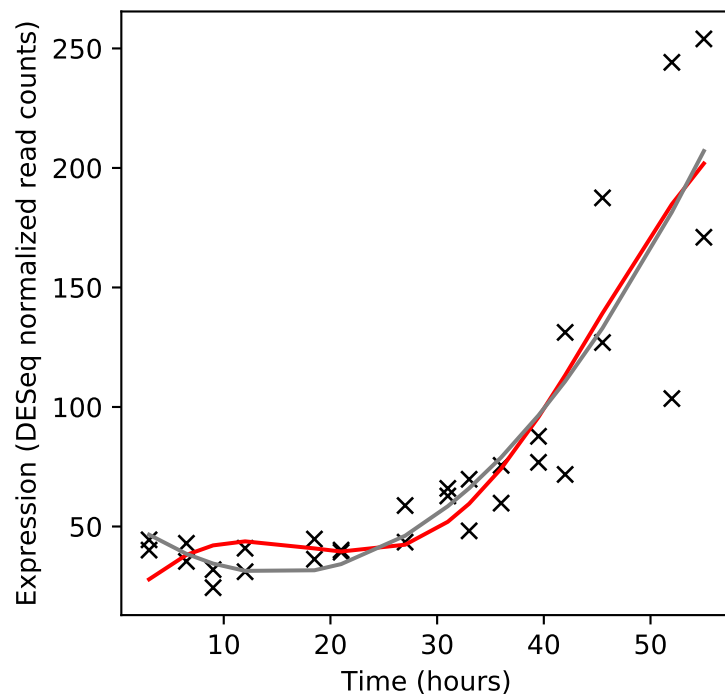

Rv3504/fadE26

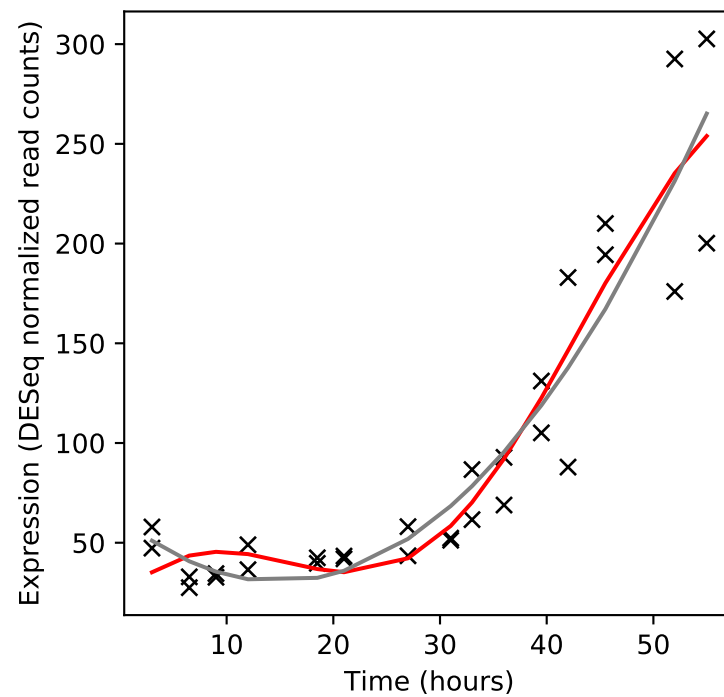

Rv3505/fadE27

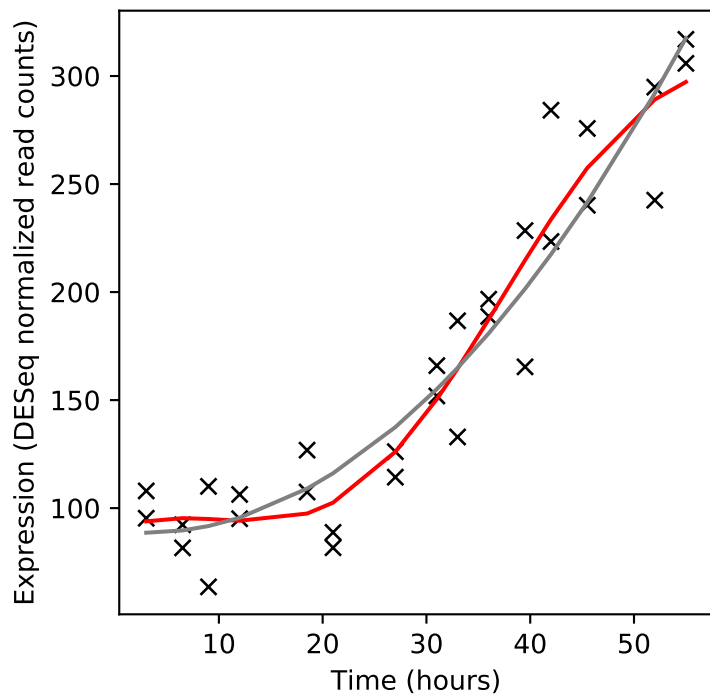

Rv3506/fadD17

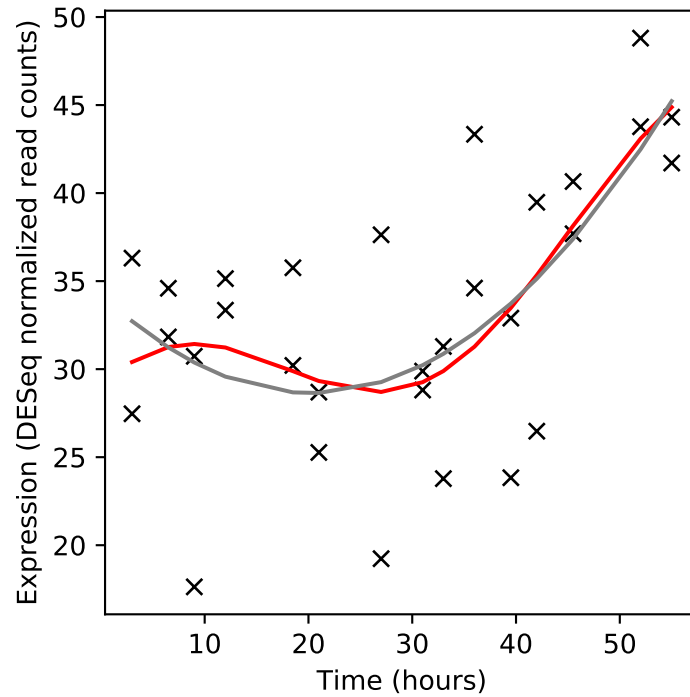

Rv3507/PE\_PGRS53

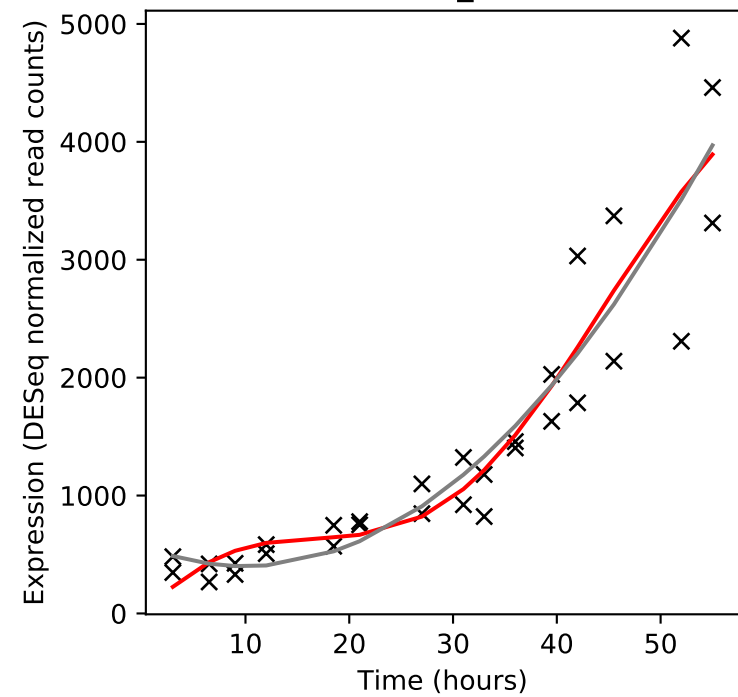

Rv3508/PE\_PGRS54

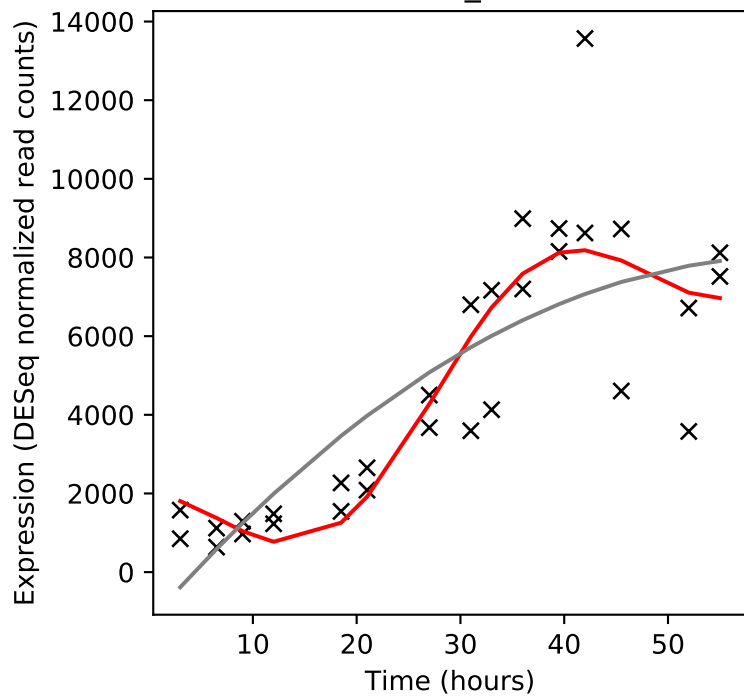

Rv3509c/ilvX

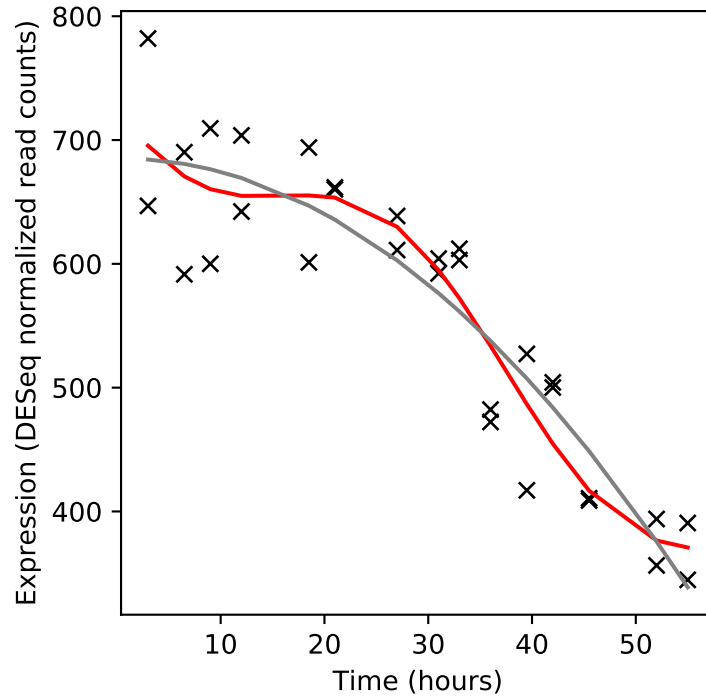

Rv3510c/-

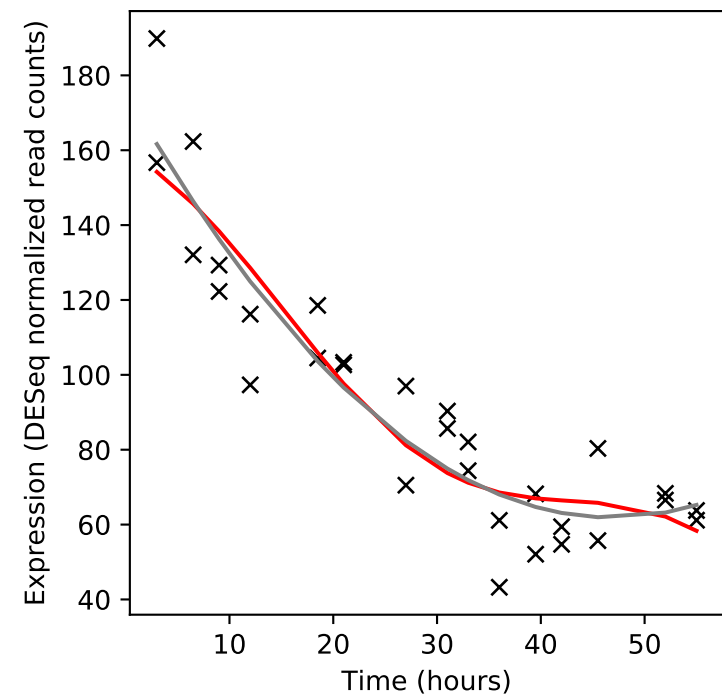

Rv3511/PE\_PGRS55

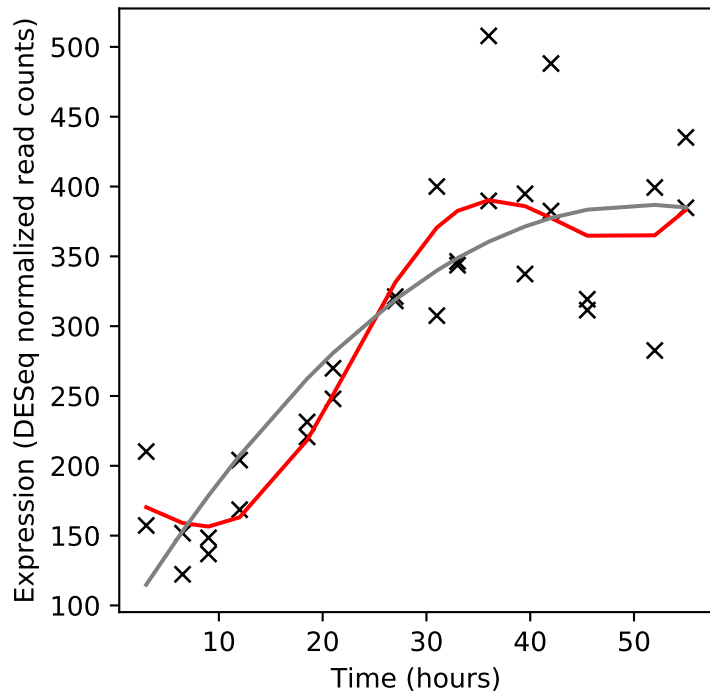

Rv3512/PE\_PGRS56

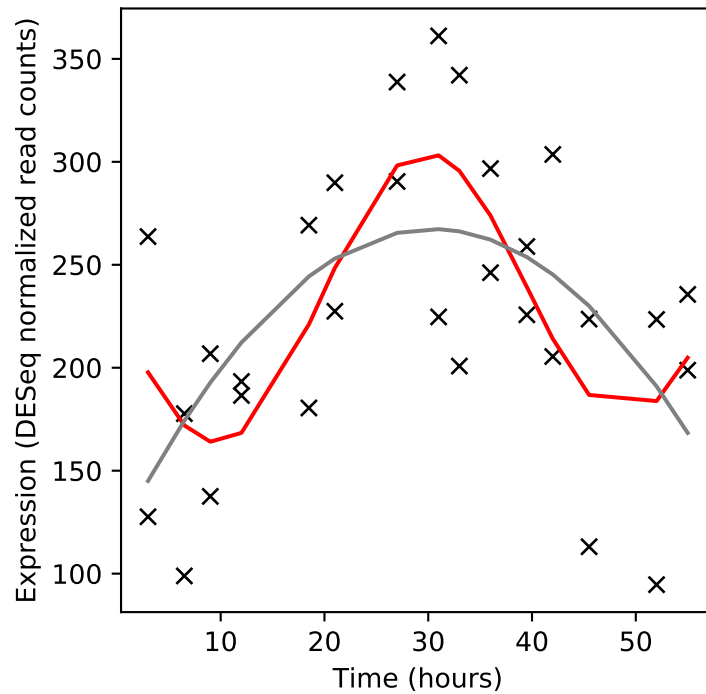

Rv3513c/fadD18

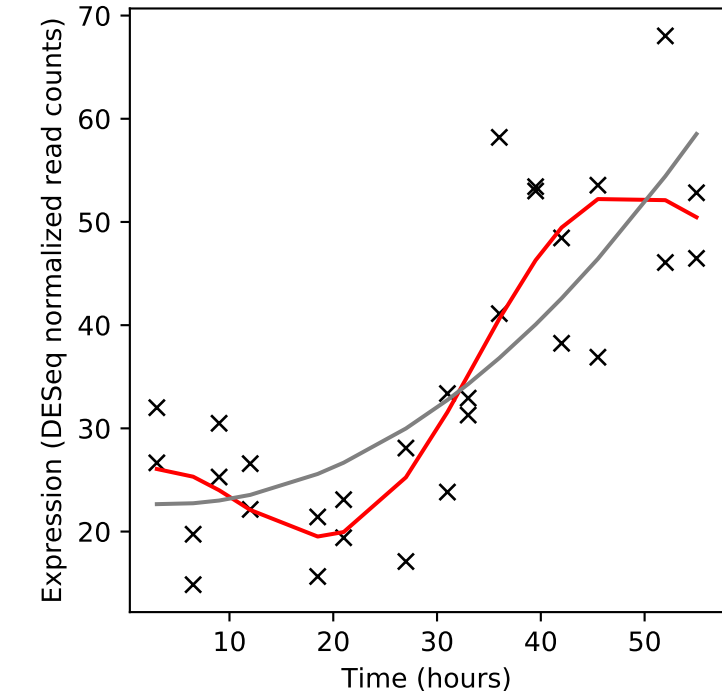

Rv3514/PE\_PGRS57

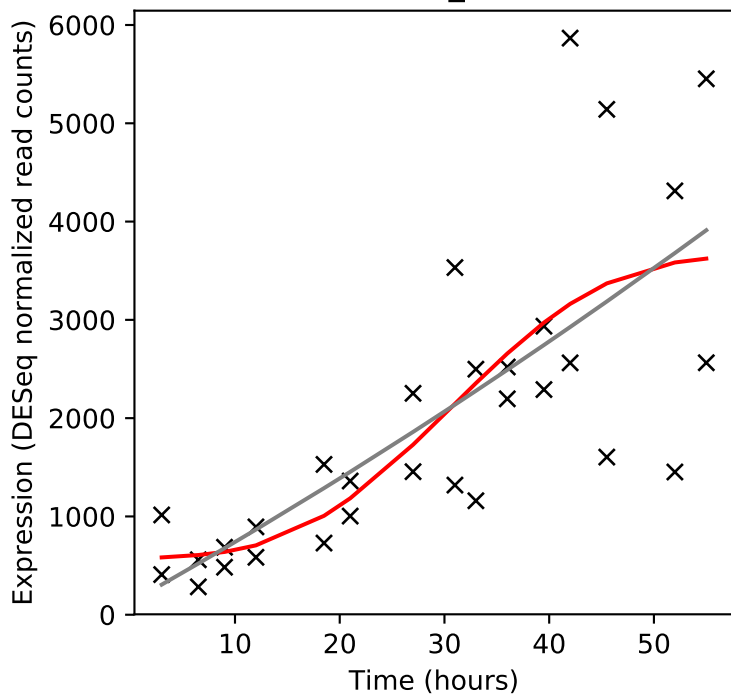

Rv3515c/fadD19

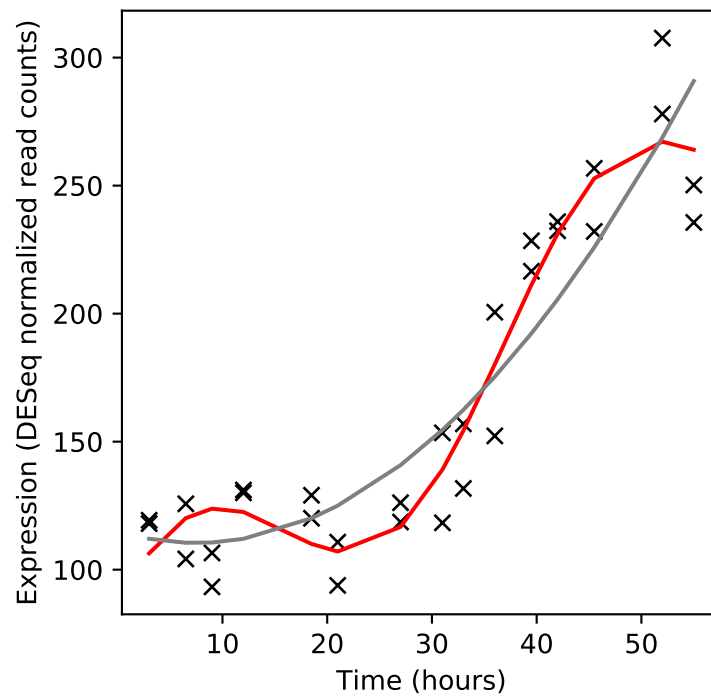

Rv3516/echA19

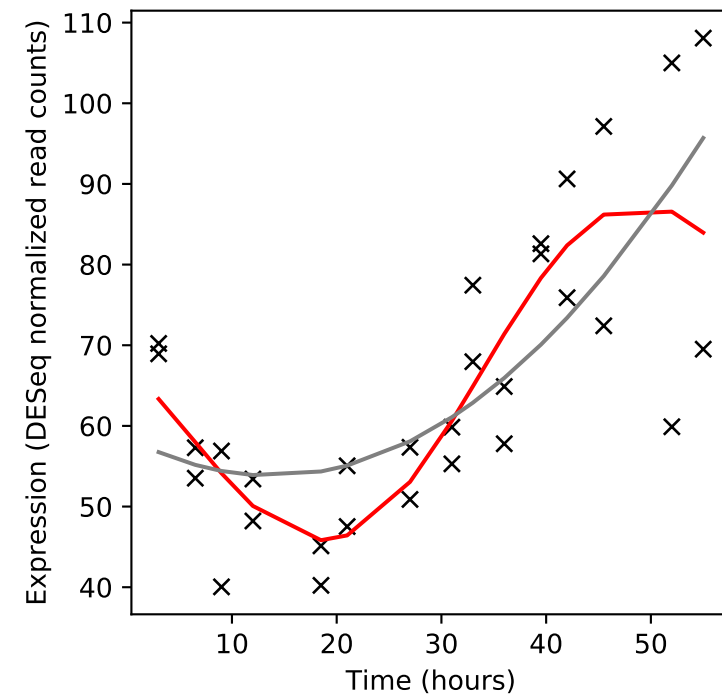

Rv3517/-

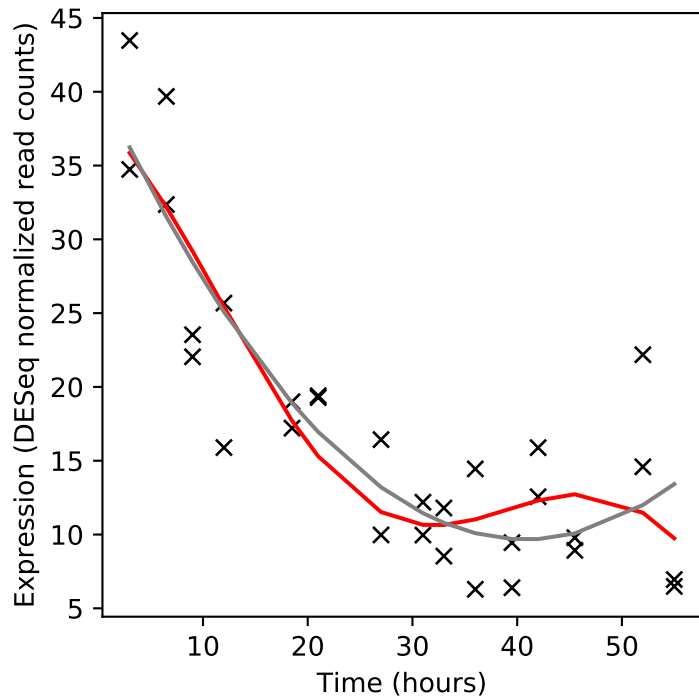

Rv3518c/cyp142

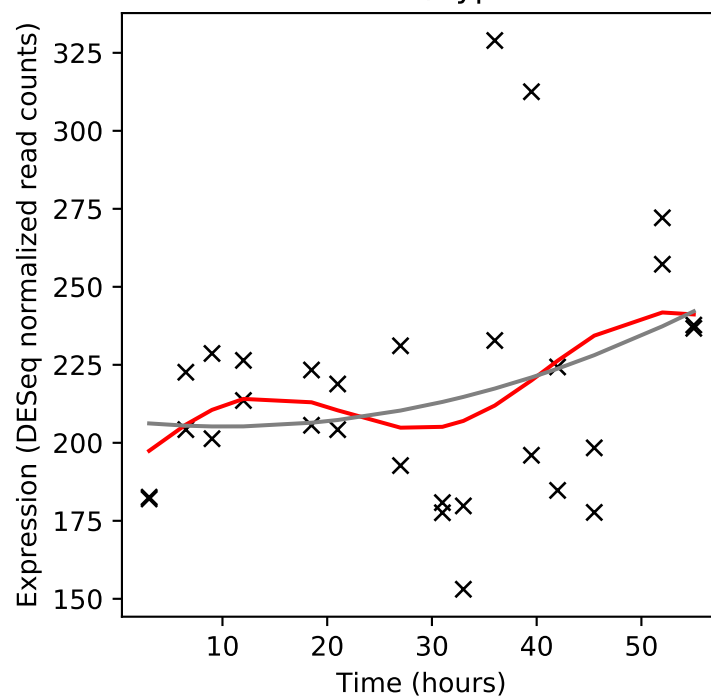

Rv3519/-

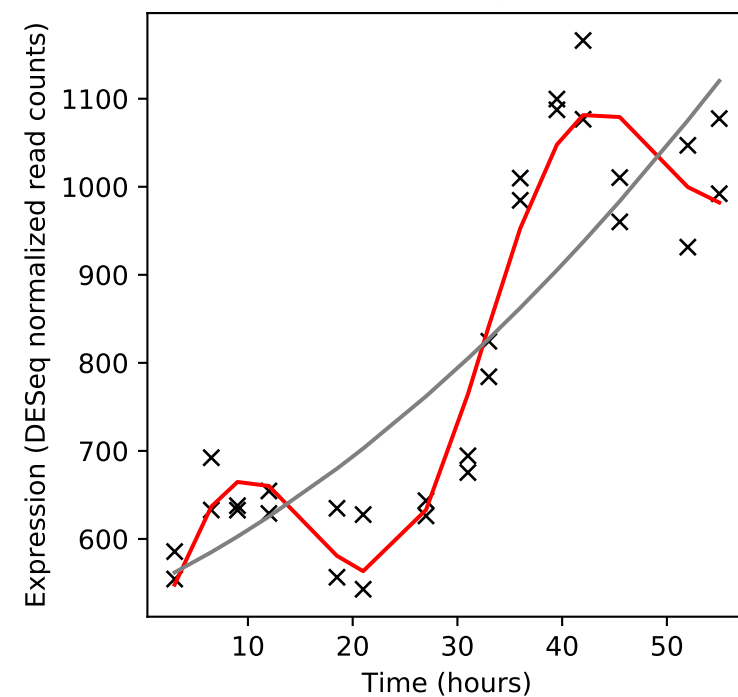

Rv3520c/-

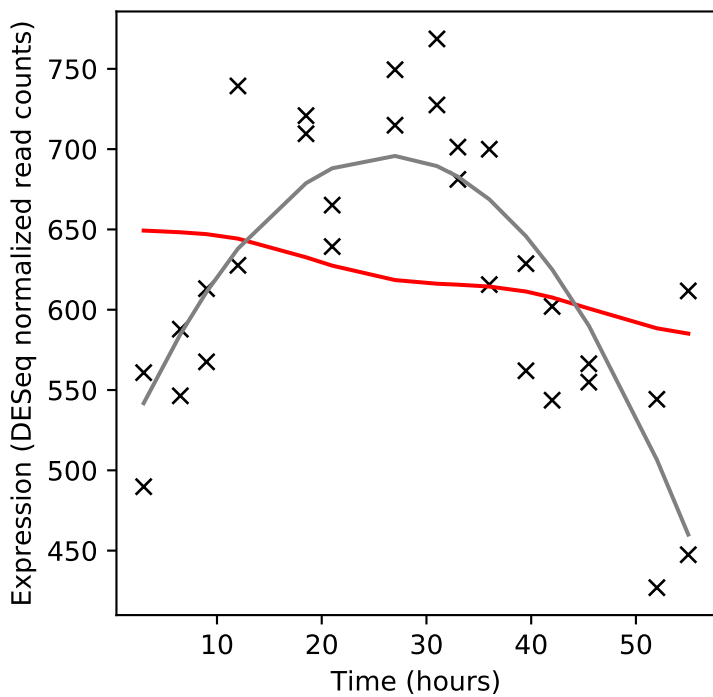

Rv3521/-

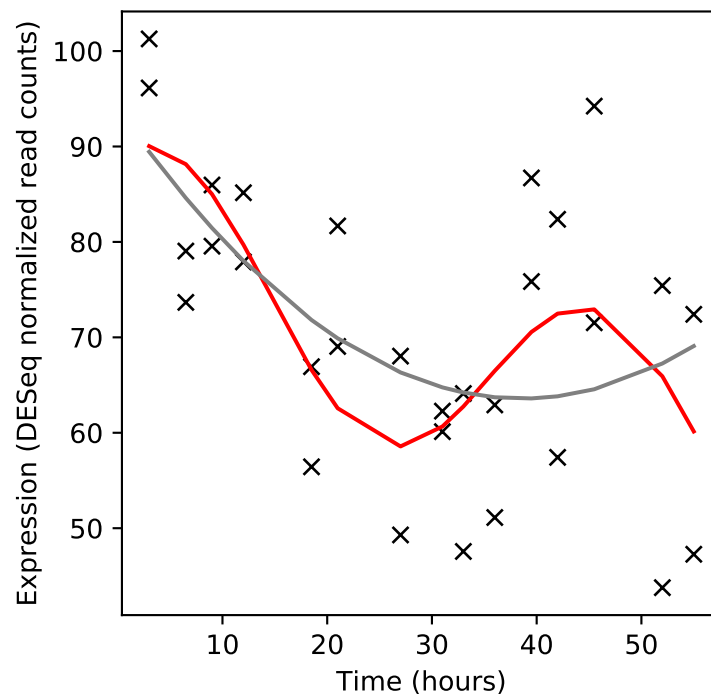

Rv3522/ltp4

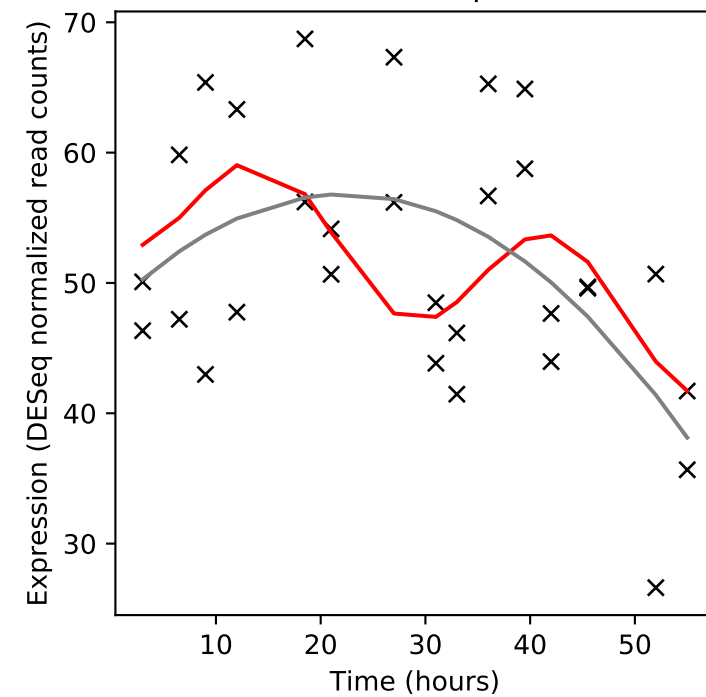



Rv3523/ltp3

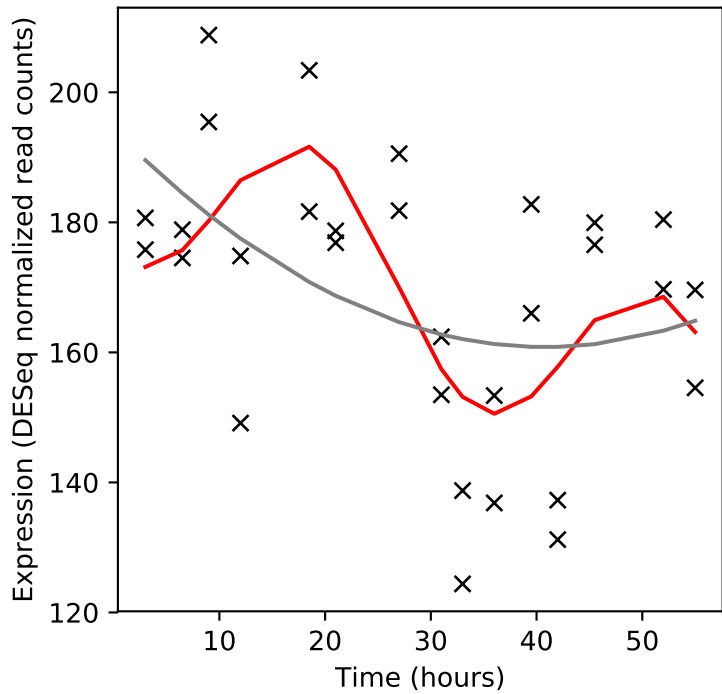

Rv3524/-

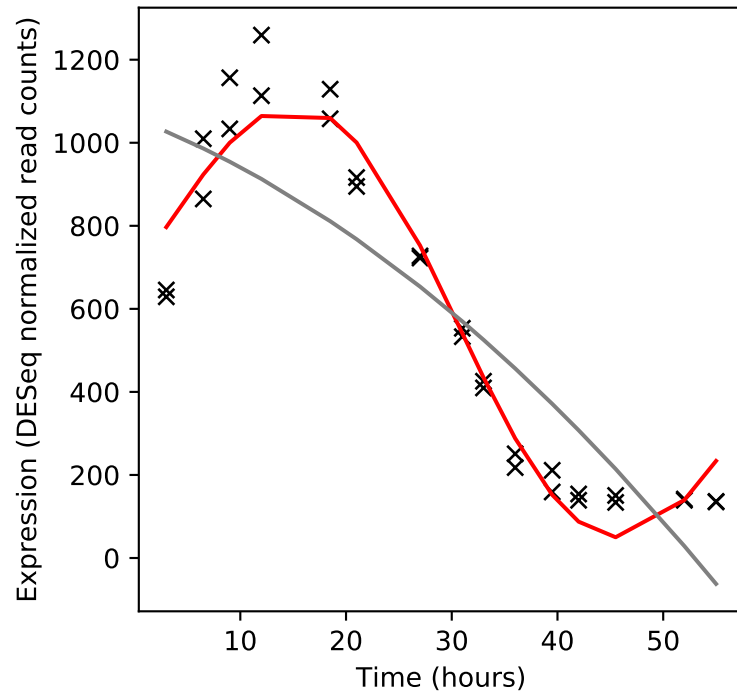

Rv3525c/-

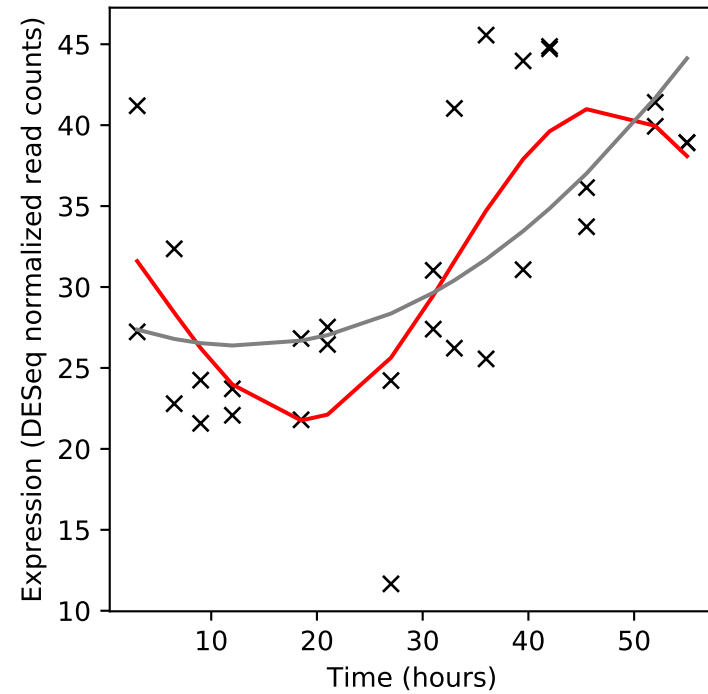

Rv3526/kshA

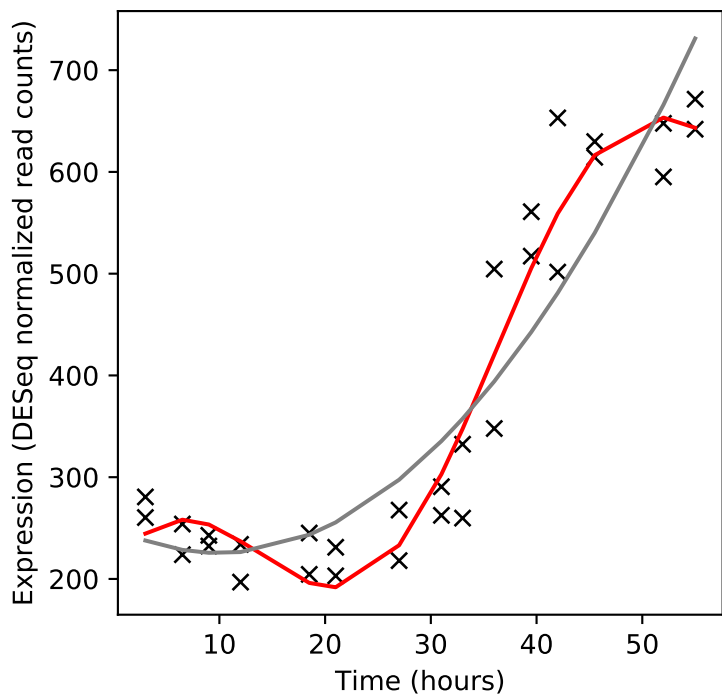

Rv3527/-

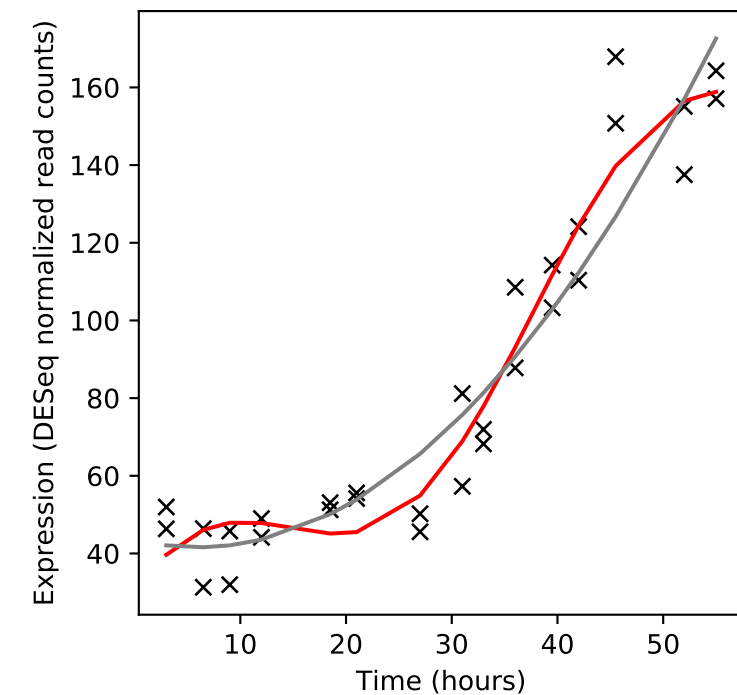

Rv3528c/-

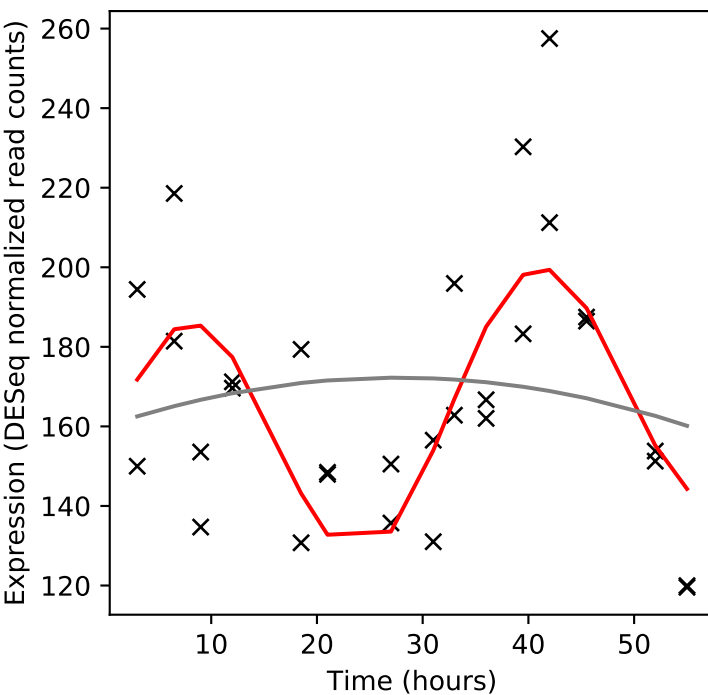

Rv3529c/-

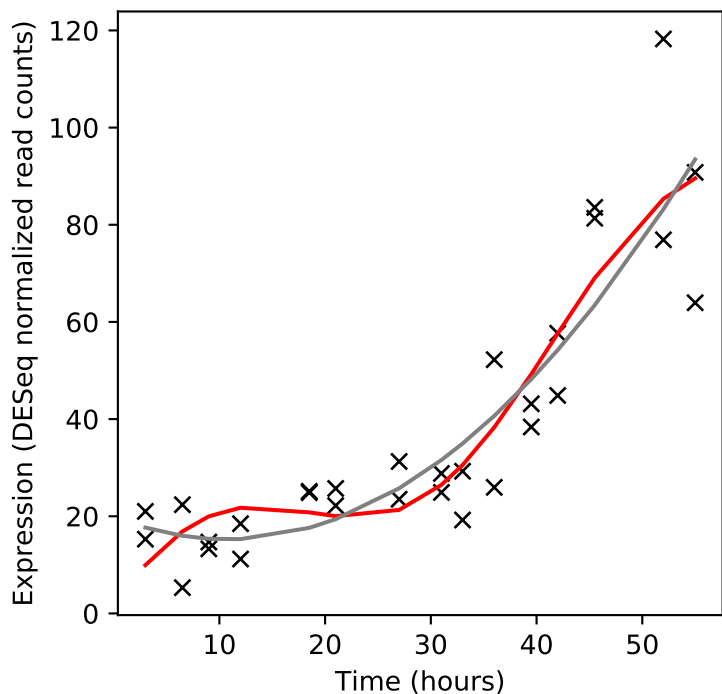

Rv3530c/-

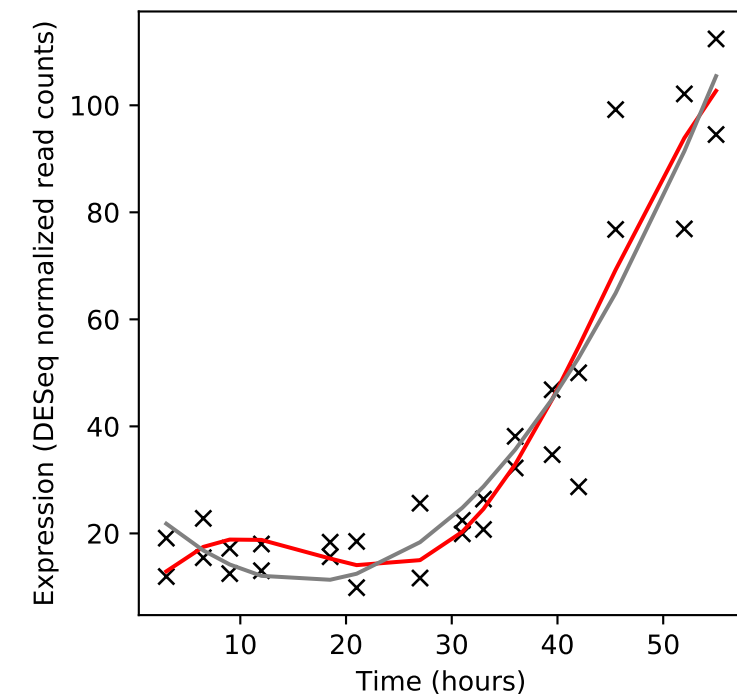

Rv3531c/-

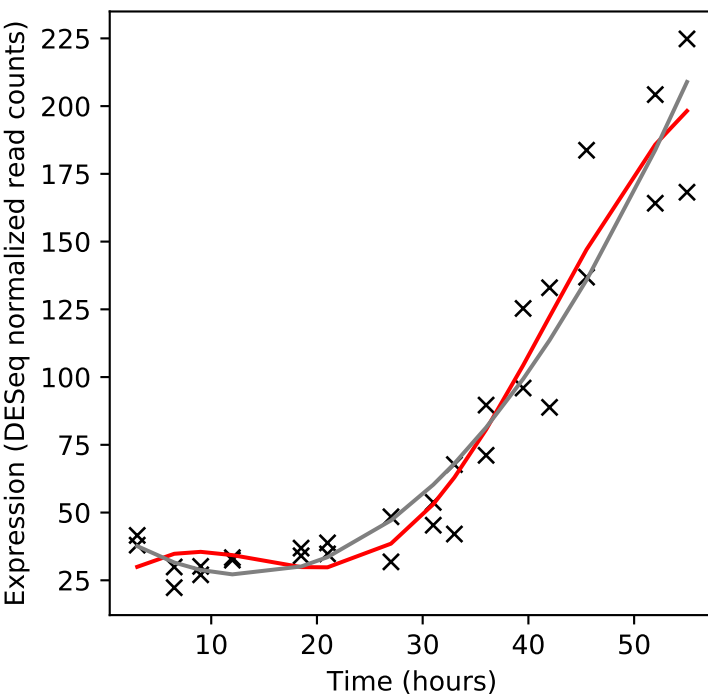

Rv3532/PPE61

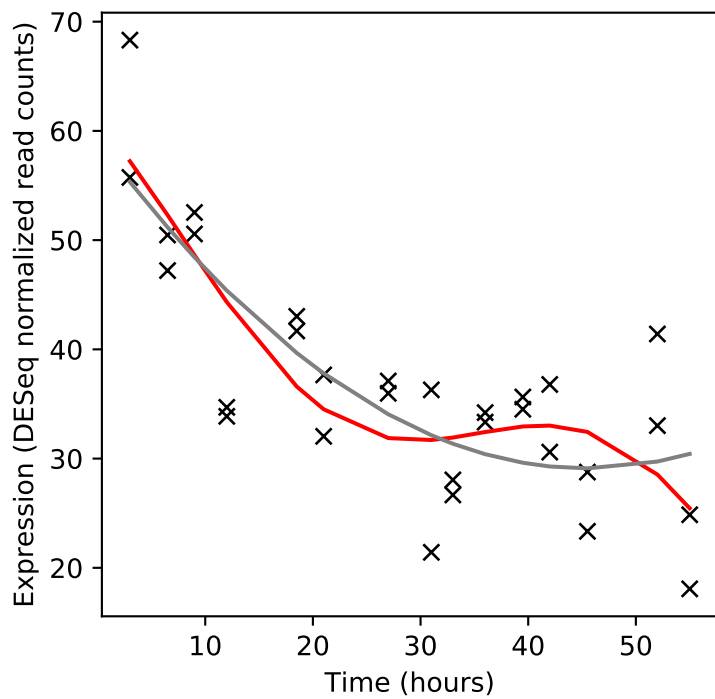

Rv3533c/PPE62

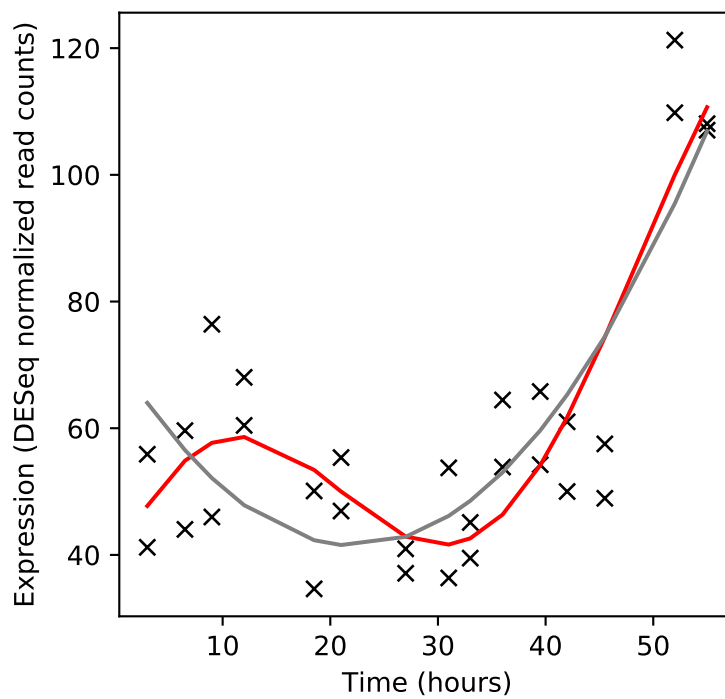

Rv3534c/hsaF

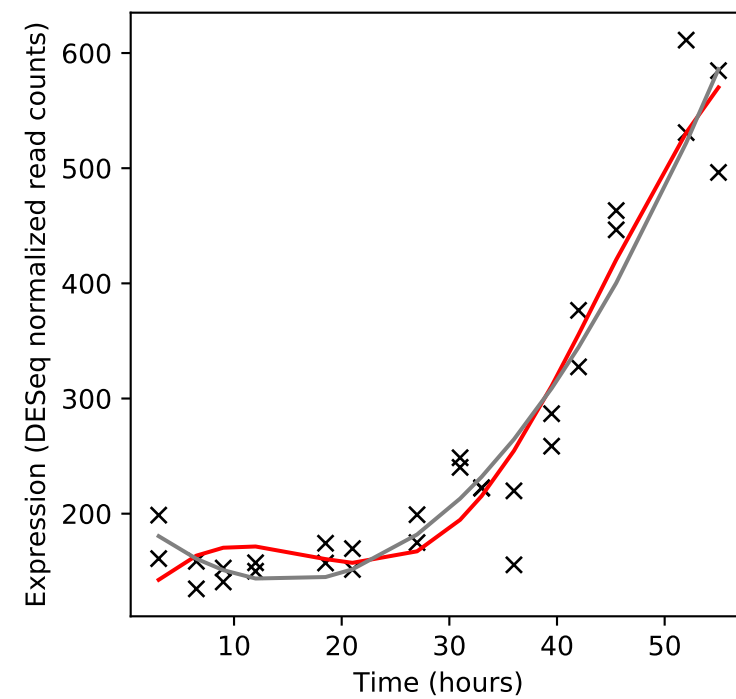

Rv3535c/hsaG

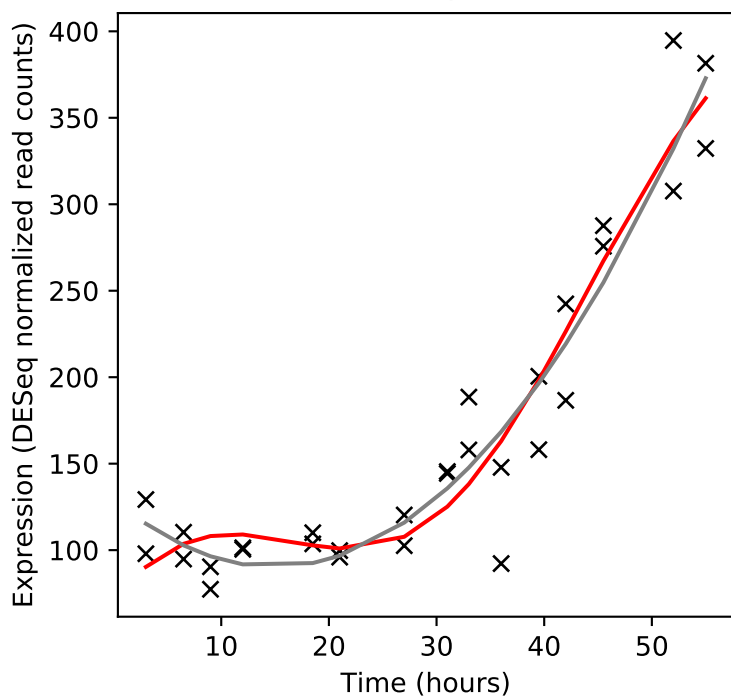

Rv3536c/hsaE

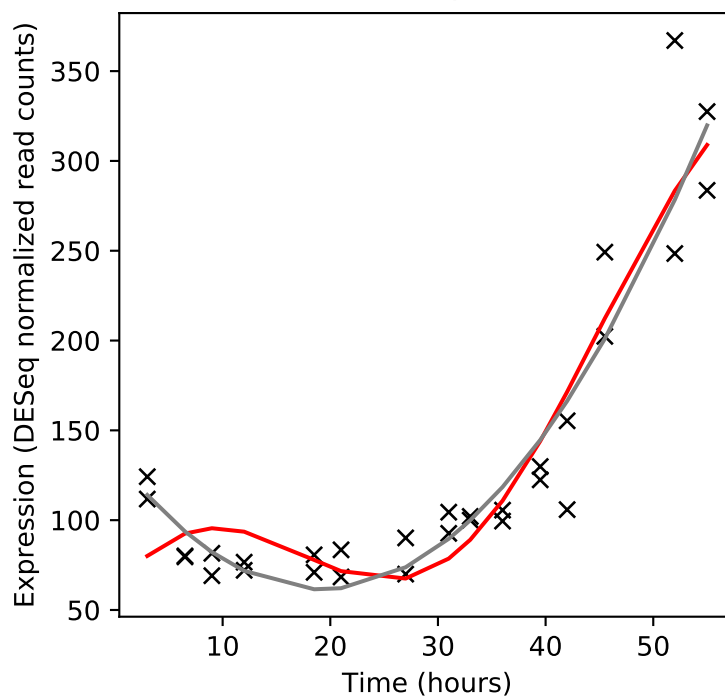

Rv3537/kstD

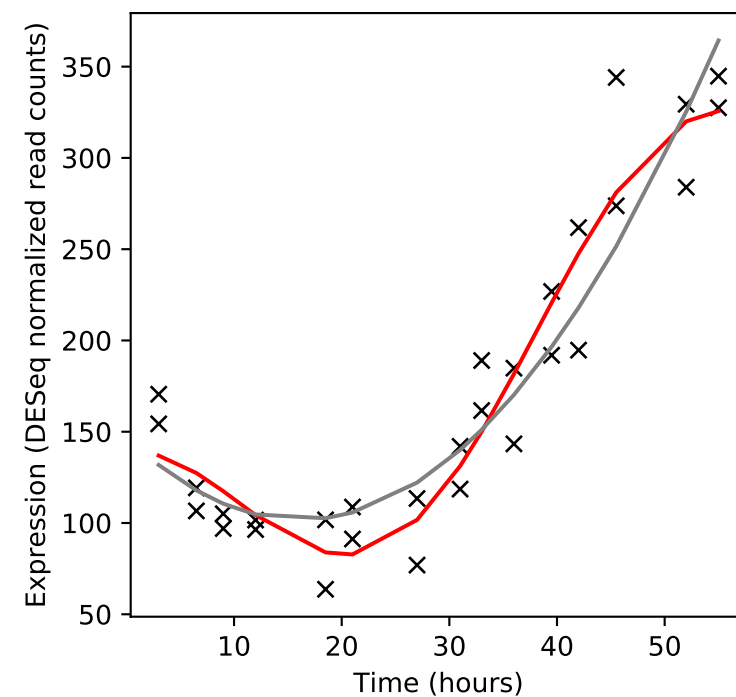

Rv3538/-

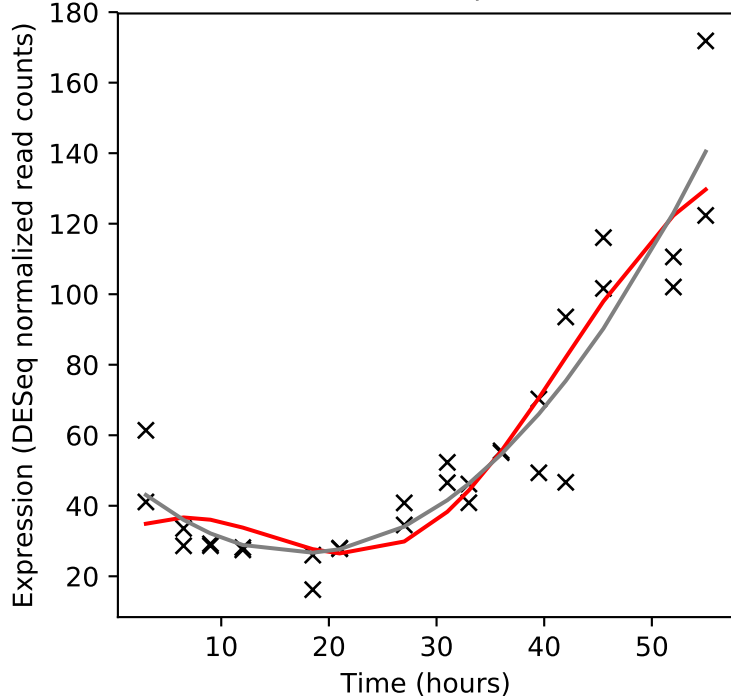

Rv3539/PPE63

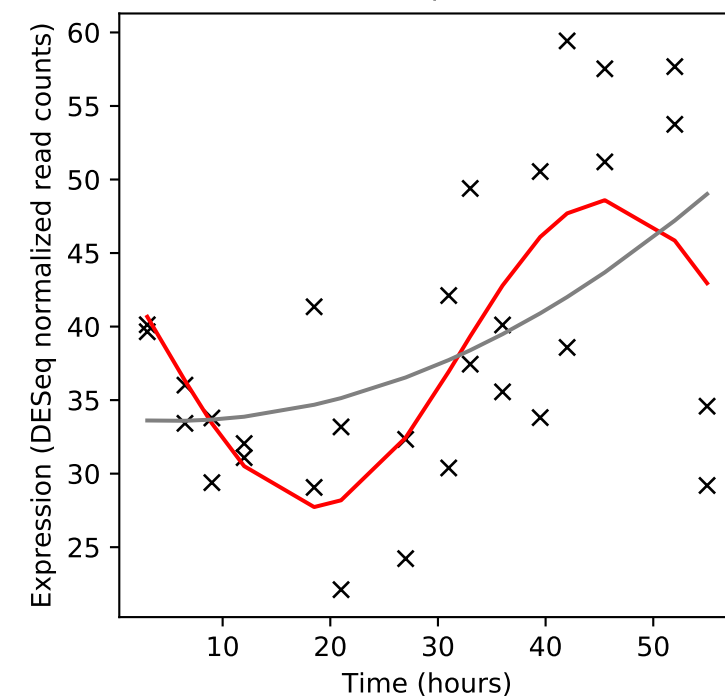

Rv3540c/Itp2

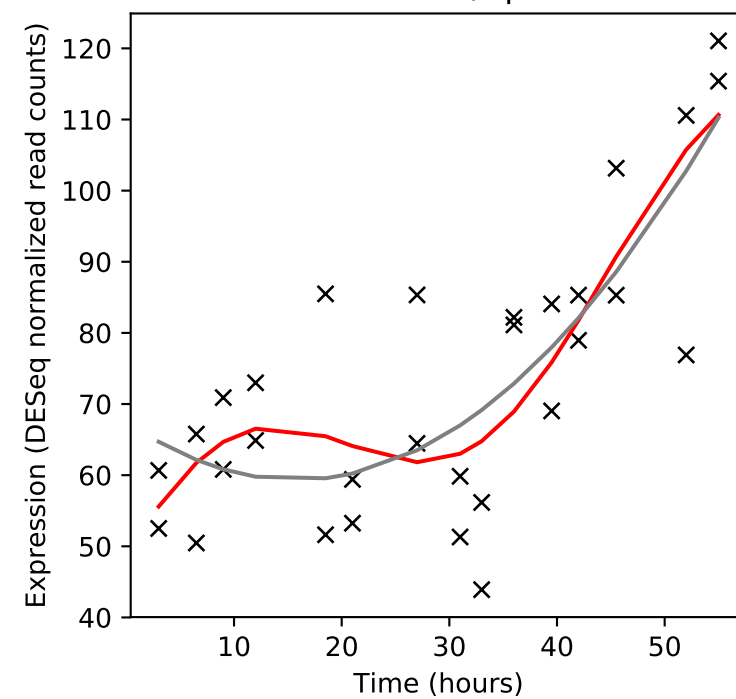

Rv3541c/-

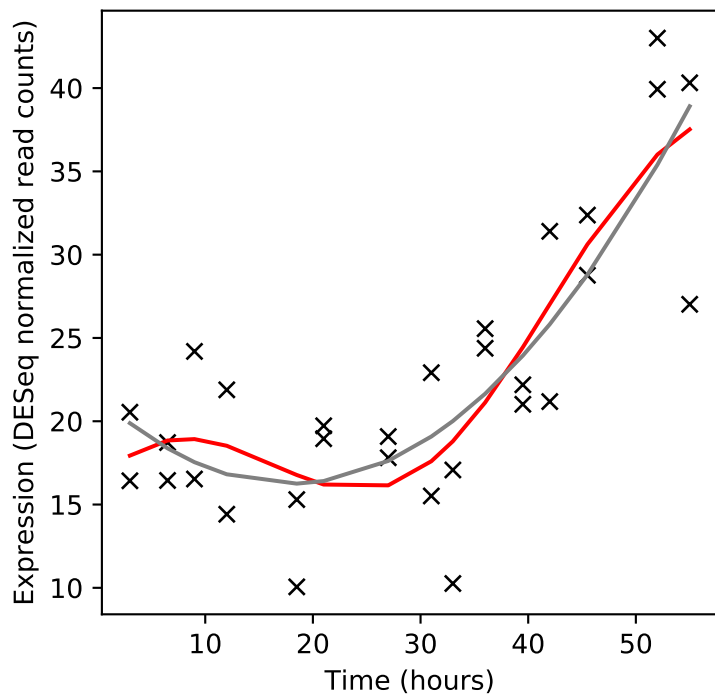

Rv3542c/-

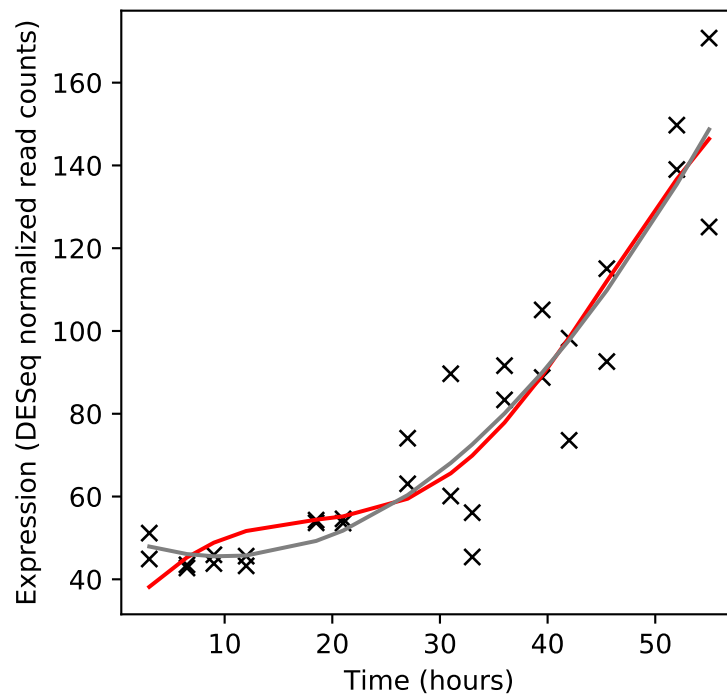

Rv3543c/fadE29

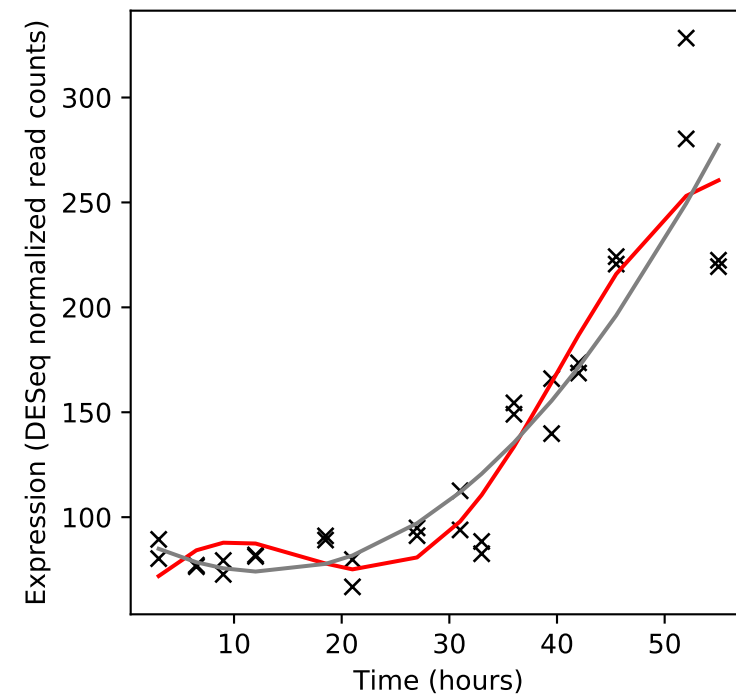

Rv3544c/fadE28

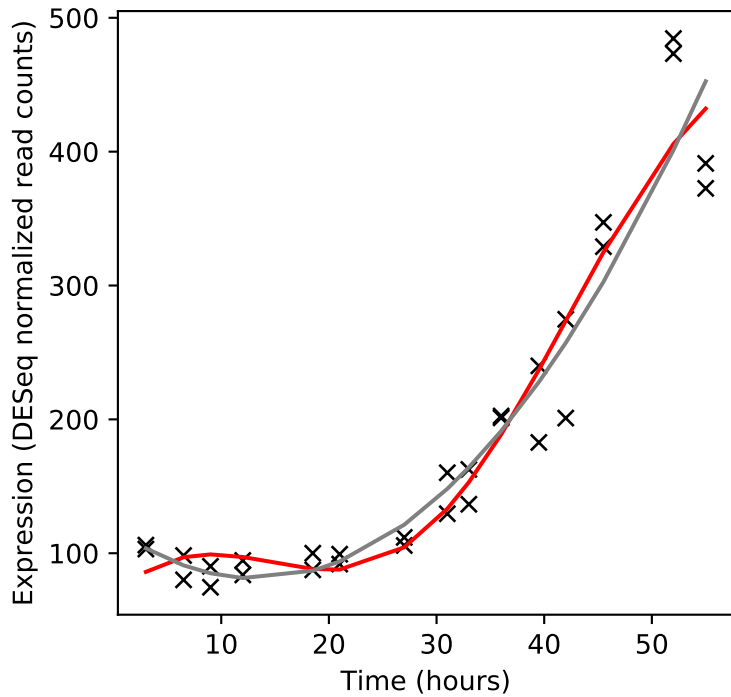

Rv3545c/cyp125

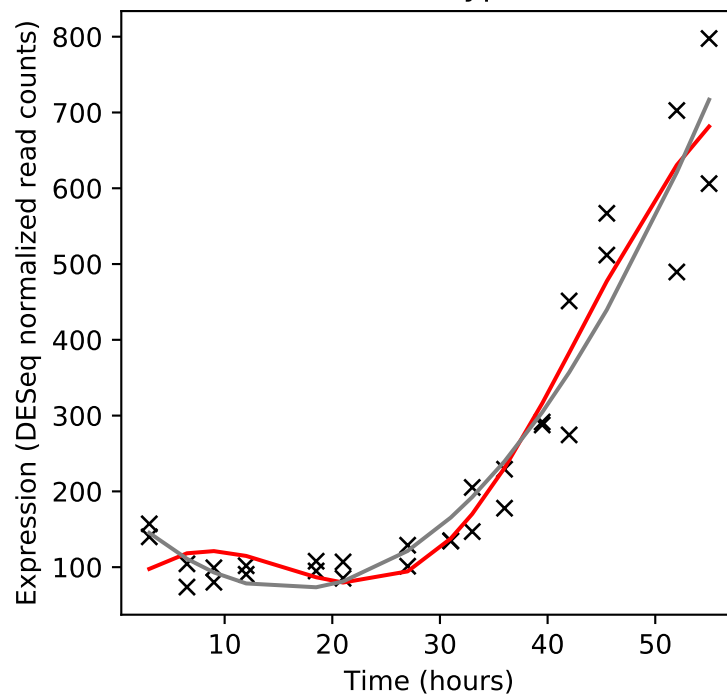

Rv3546/fadA5

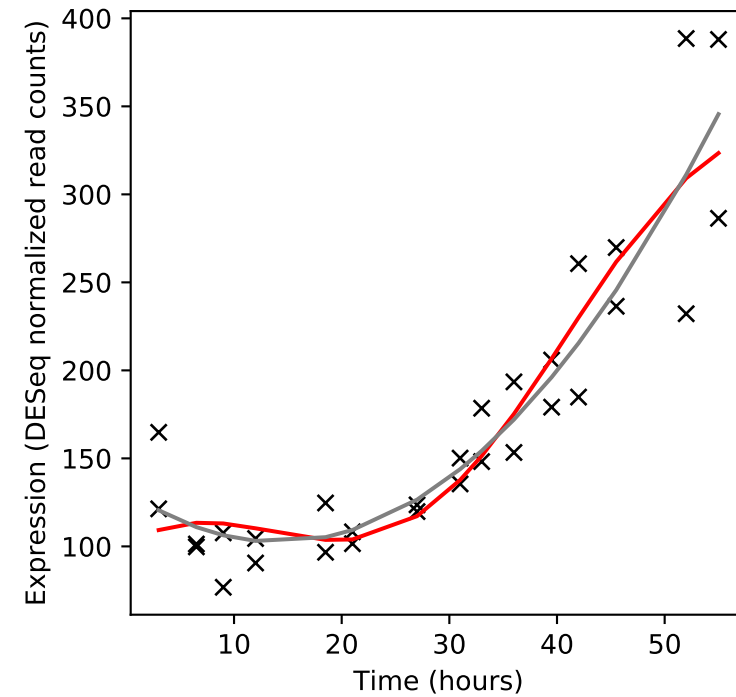

Rv3547/ddn

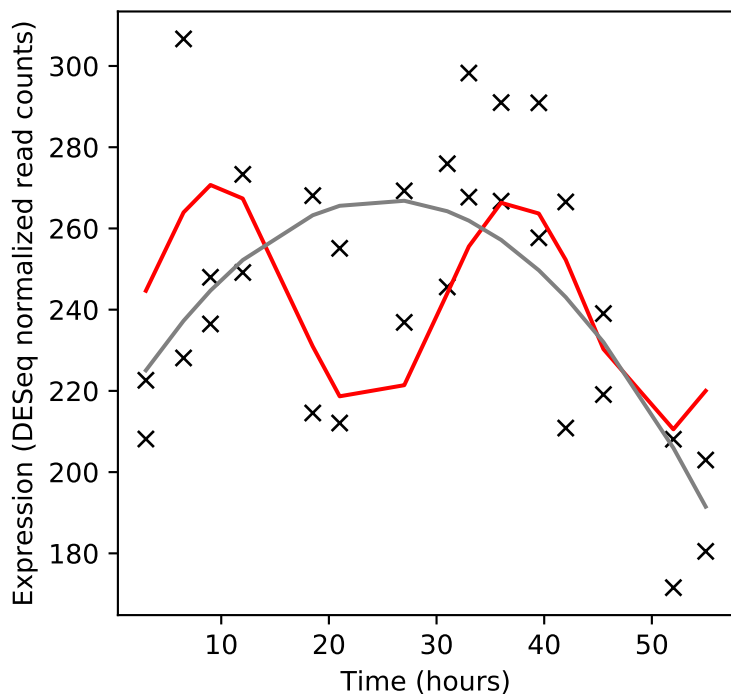

Rv3548c/-

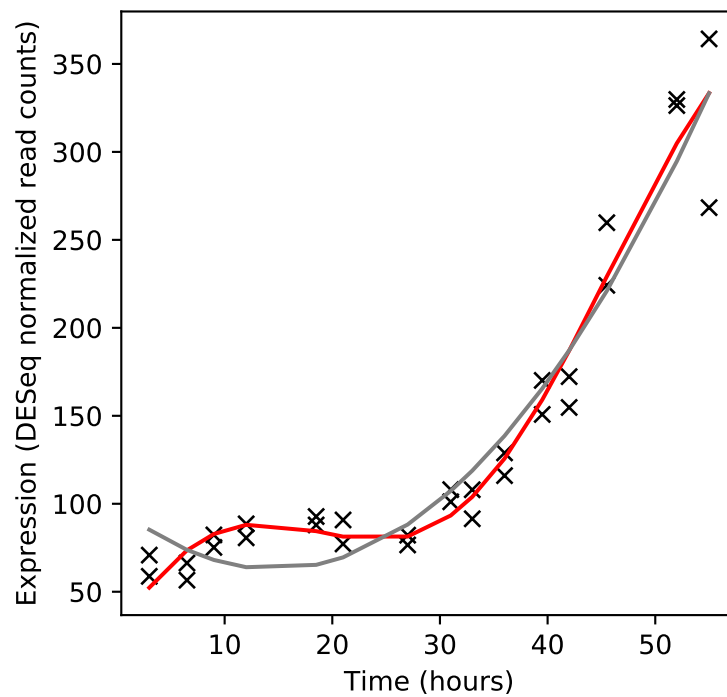

Rv3549c/-

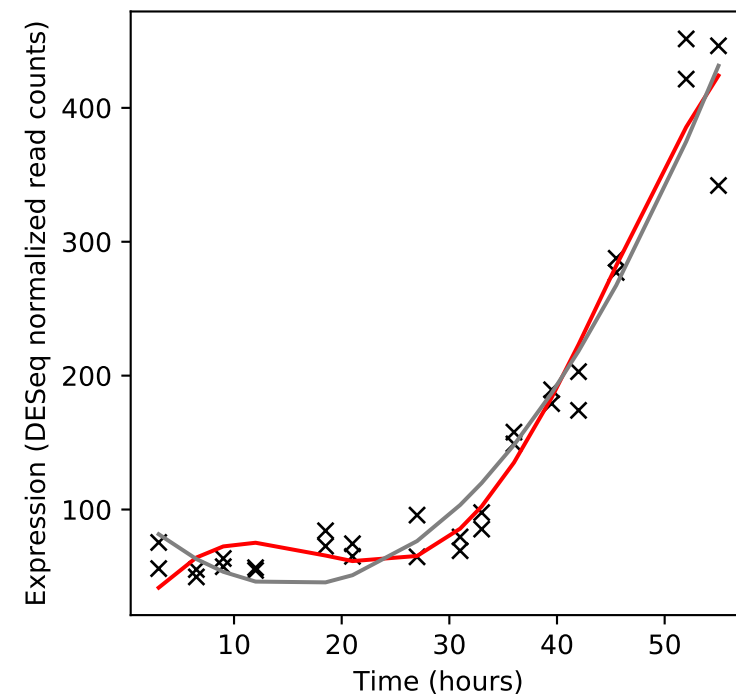

Rv3550/echA20

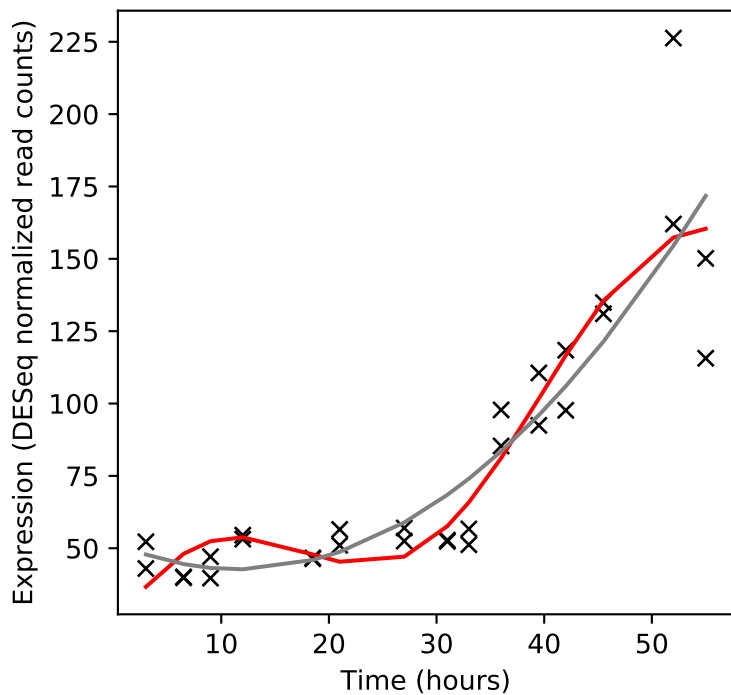

Rv3551/-

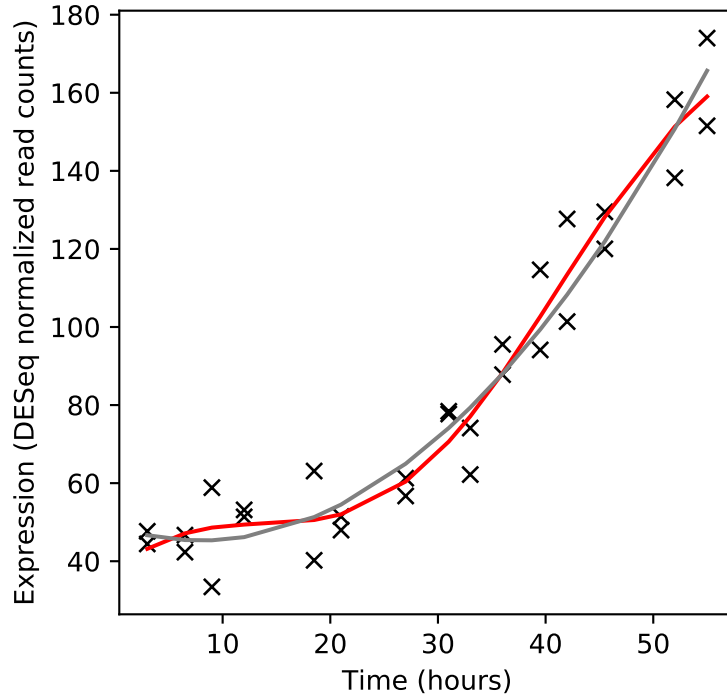

Rv3552/-

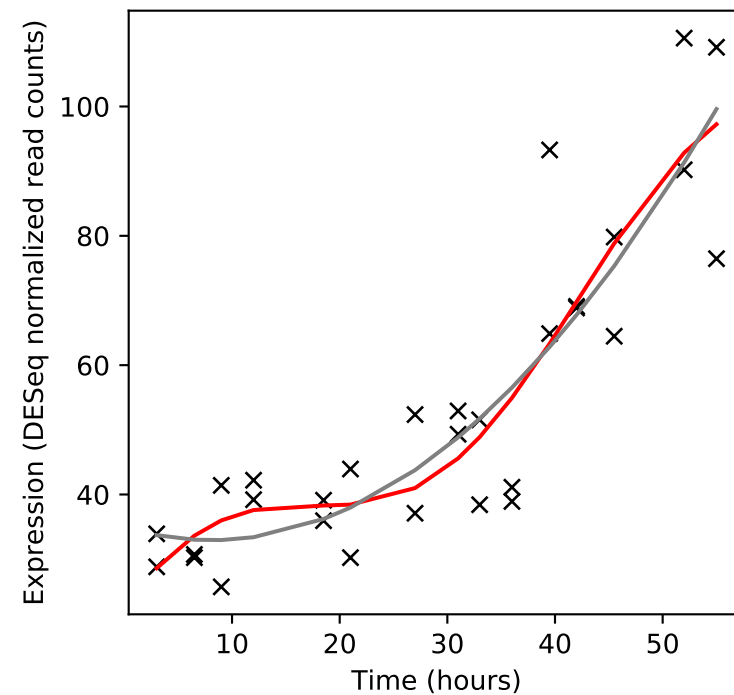

Rv3553/-

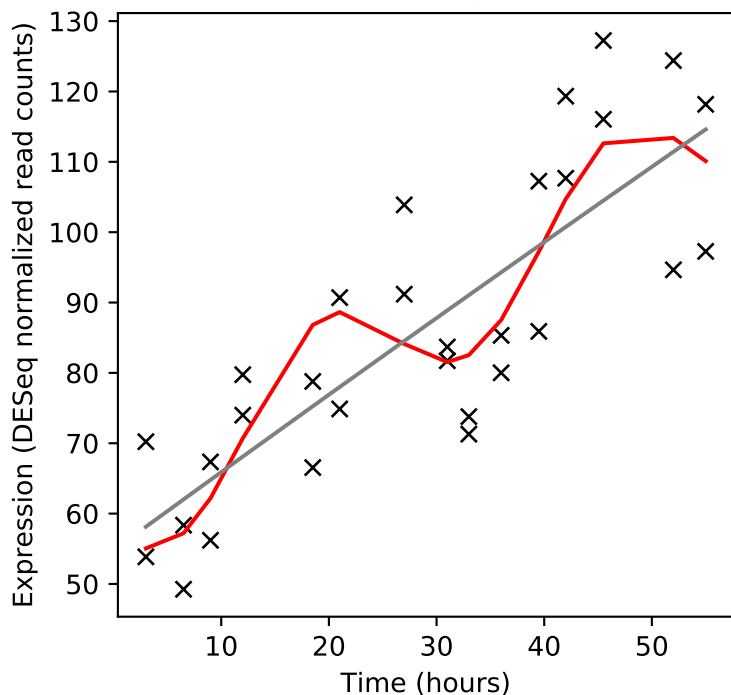

Rv3554/fdxB

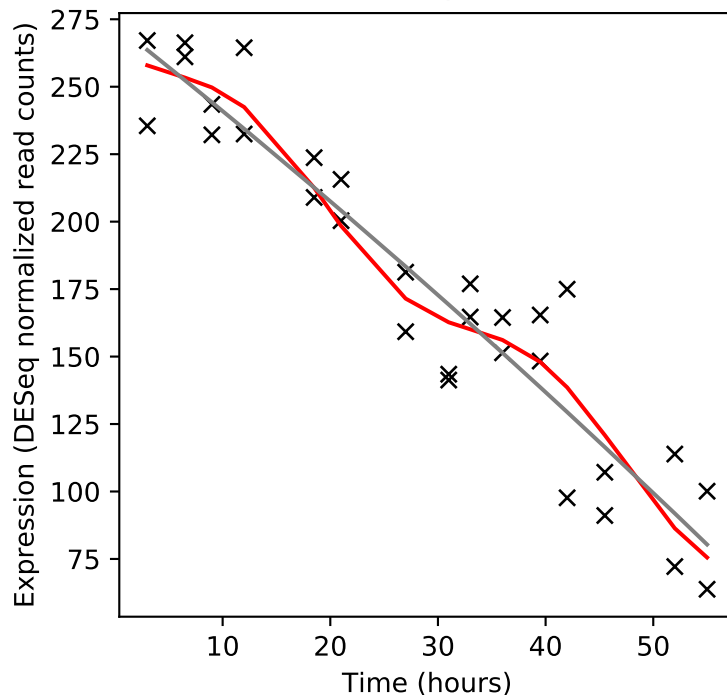

Rv3555c/-

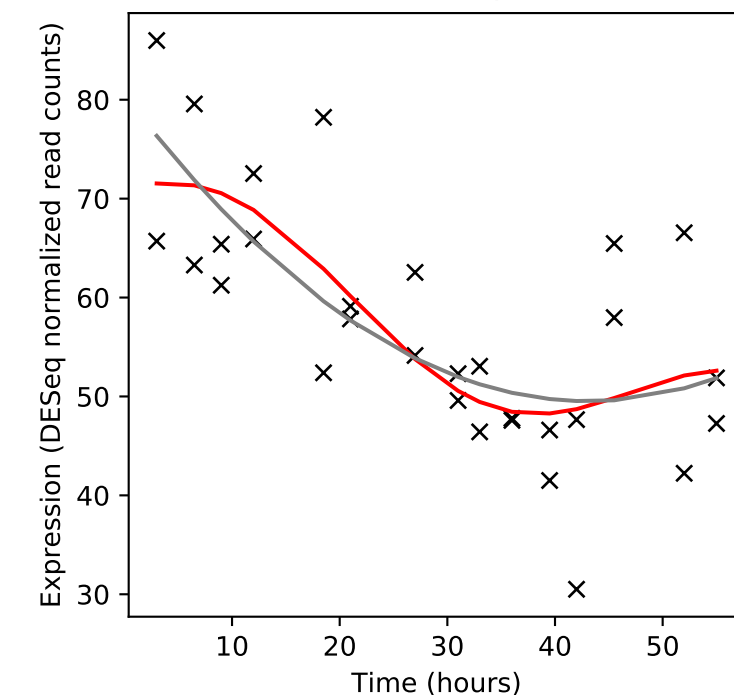

Rv3556c/fadA6

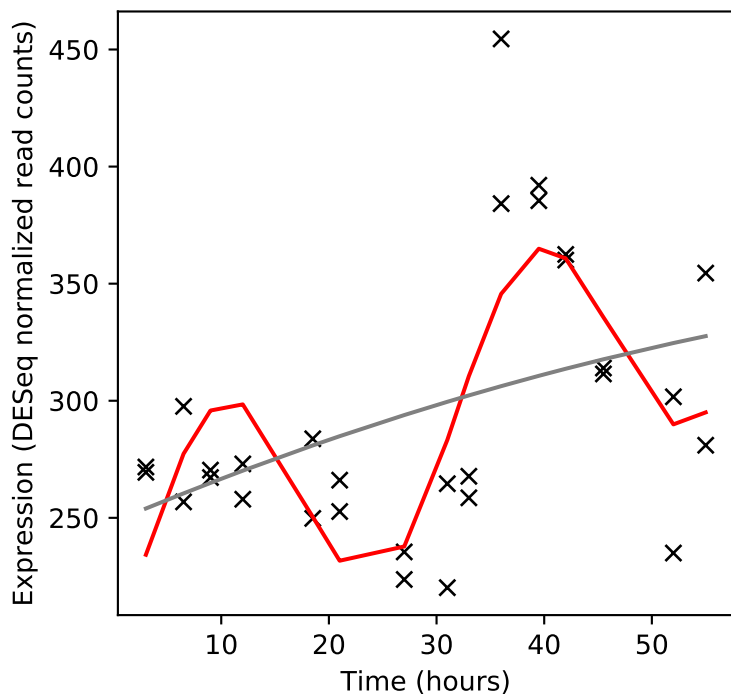

Rv3557c/-

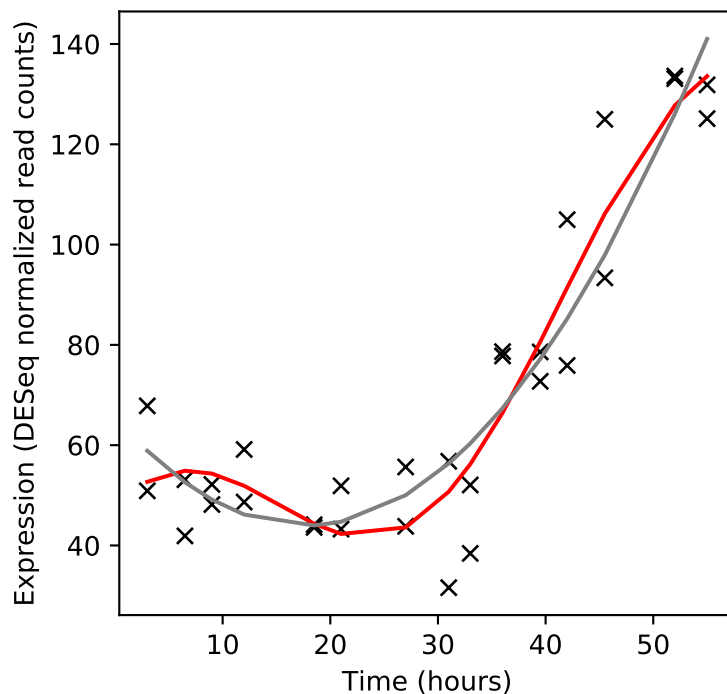

Rv3558/PPE64

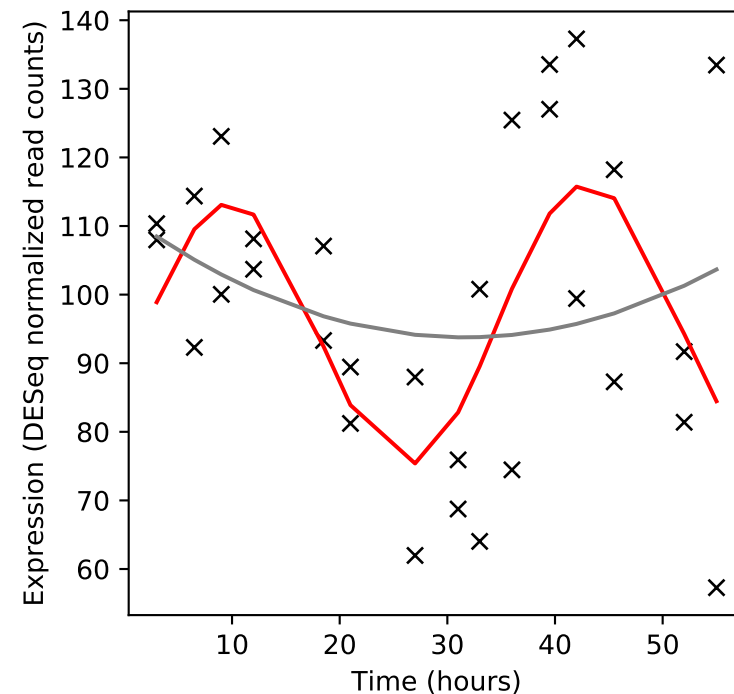

Rv3559c/-

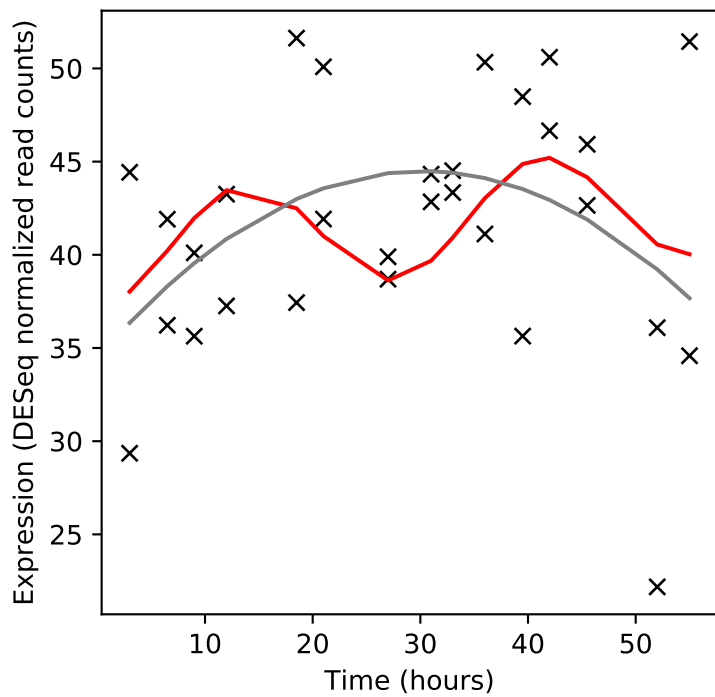

Rv3560c/fadE30

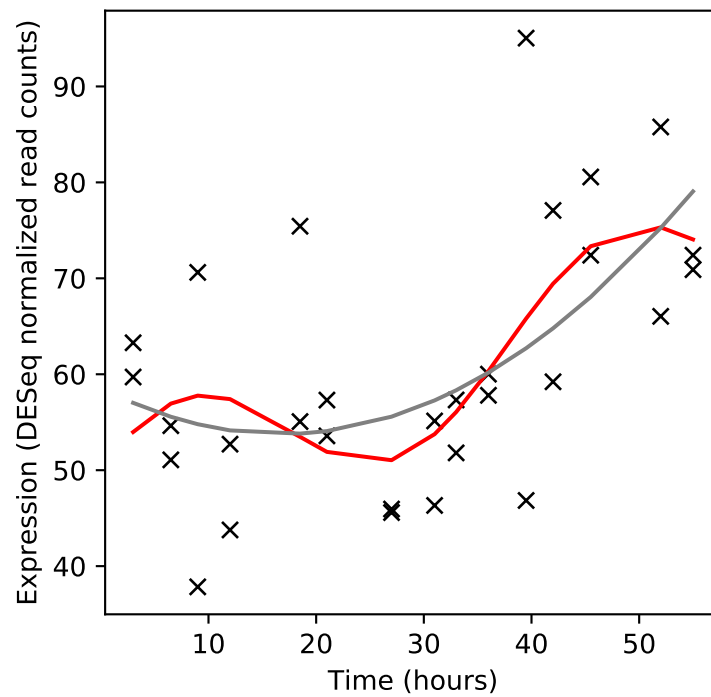

Rv3561/fadD3

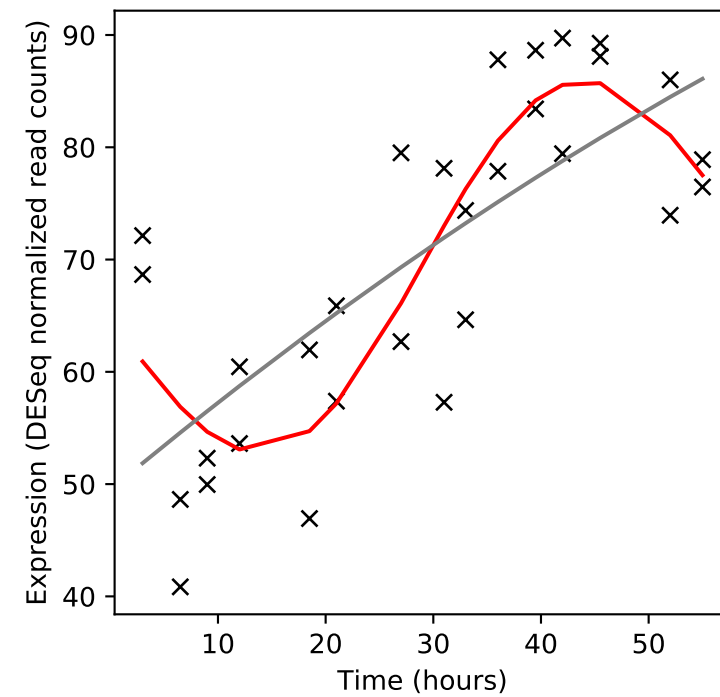

Rv3562/fadE31

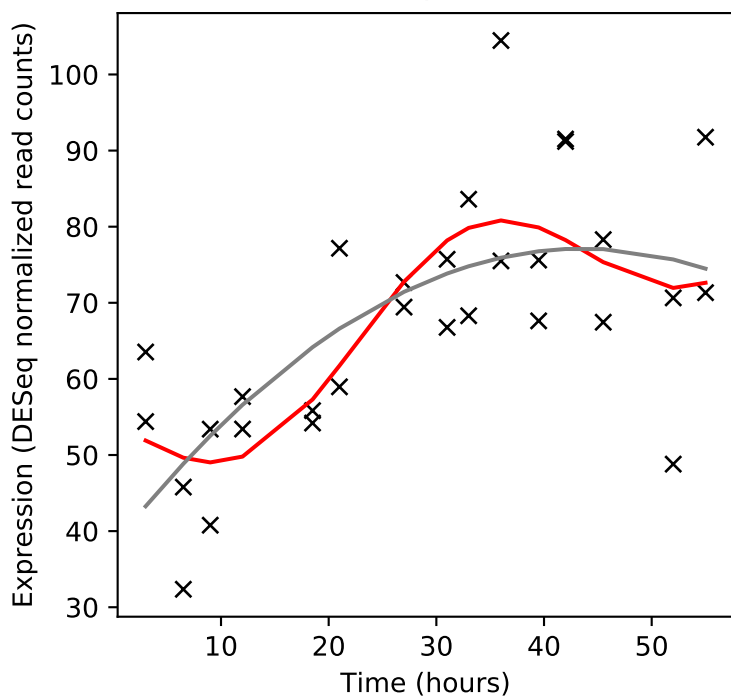

Rv3563/fadE32

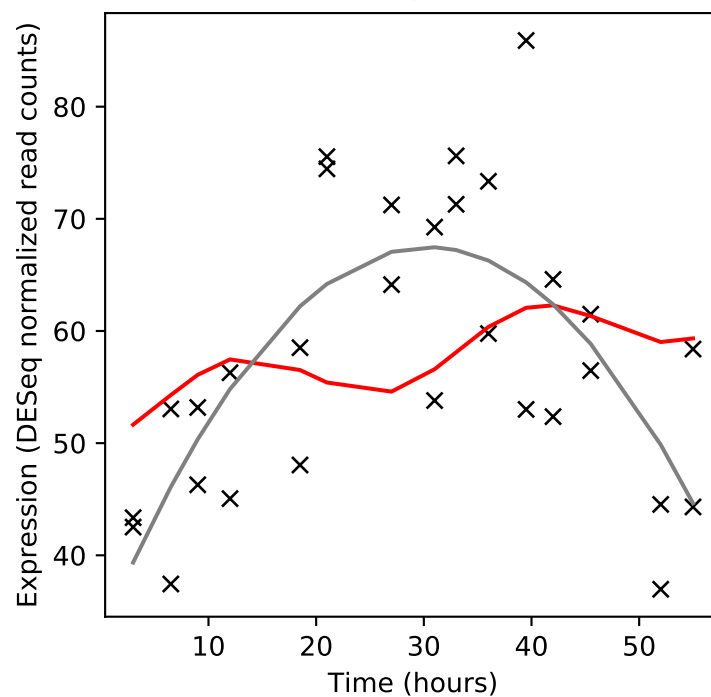

Rv3564/fadE33

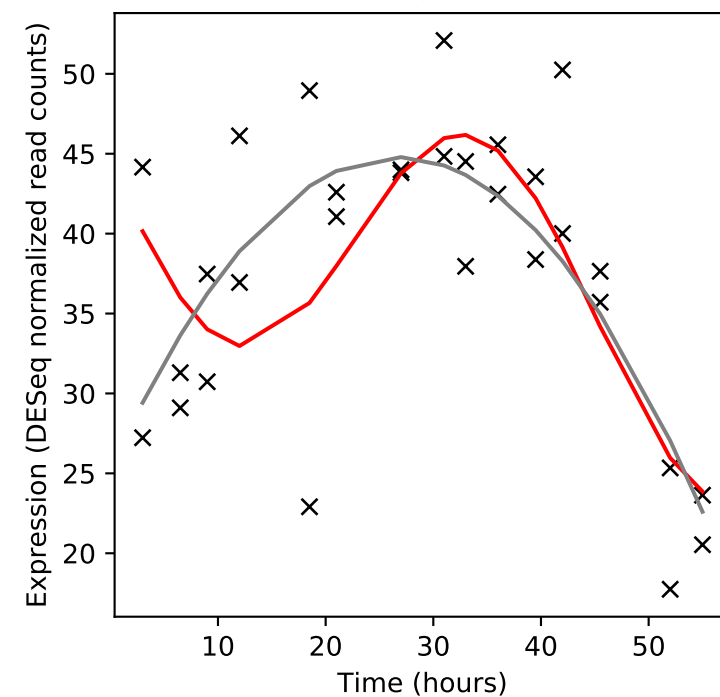

Rv3565/aspB

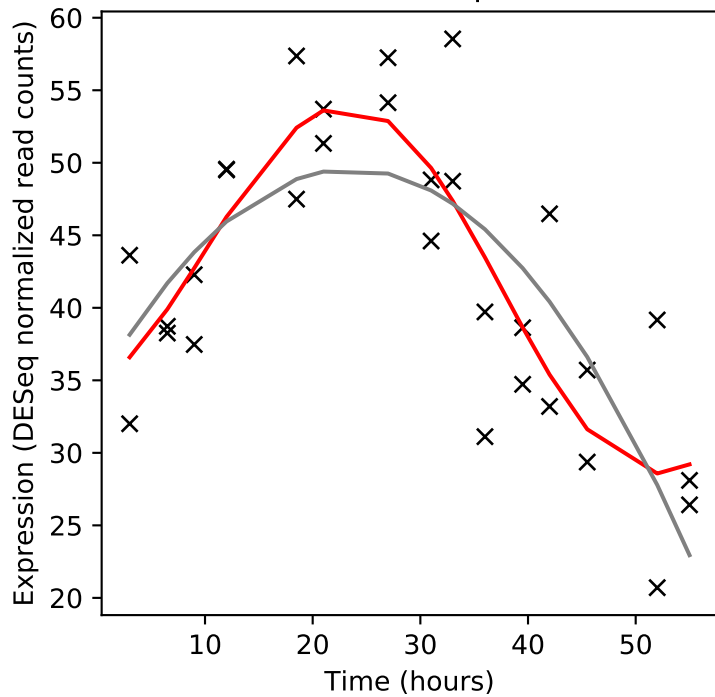

Rv3566c/nat

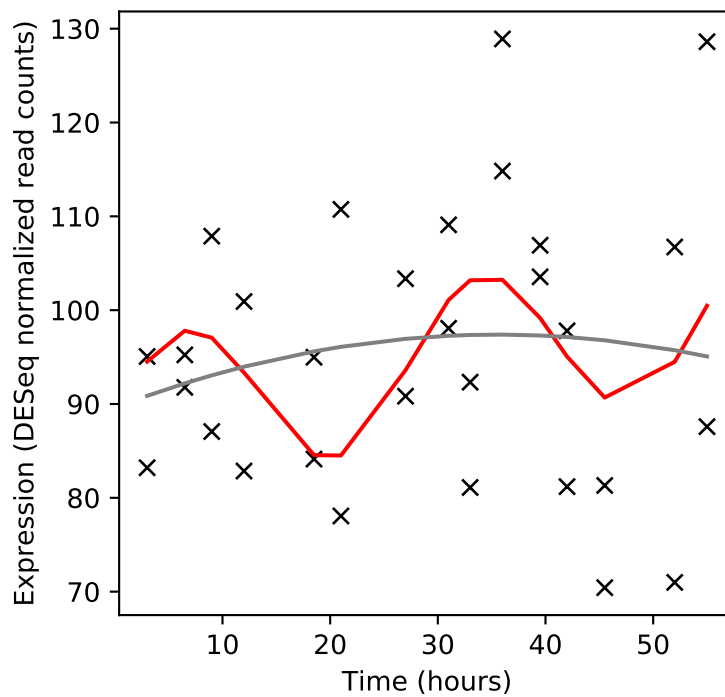

Rv3566A/-

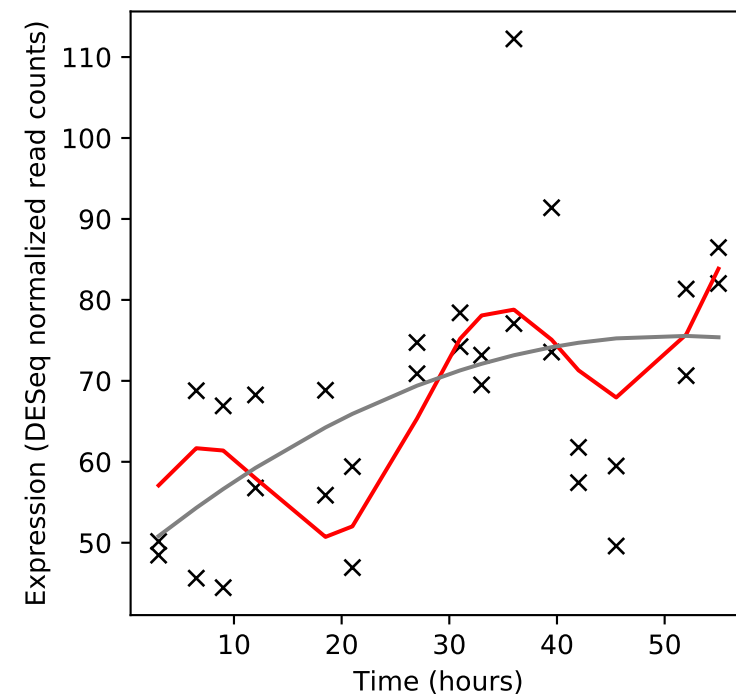

Rv3567c/hsaB

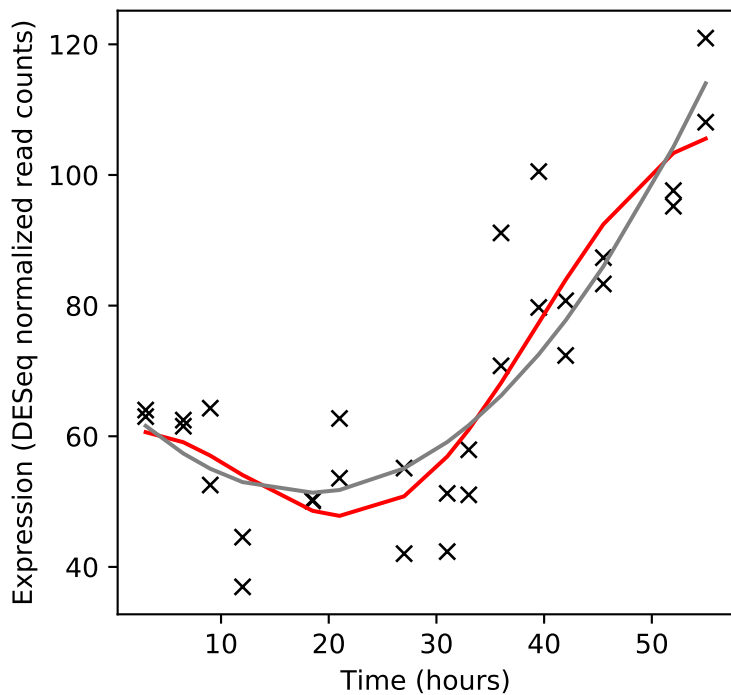

Rv3568c/hsaC

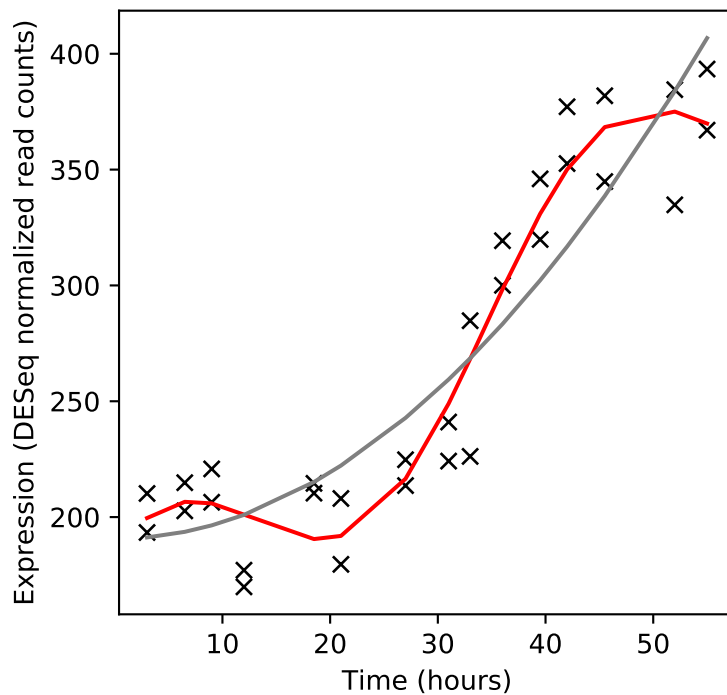

Rv3569c/hsaD

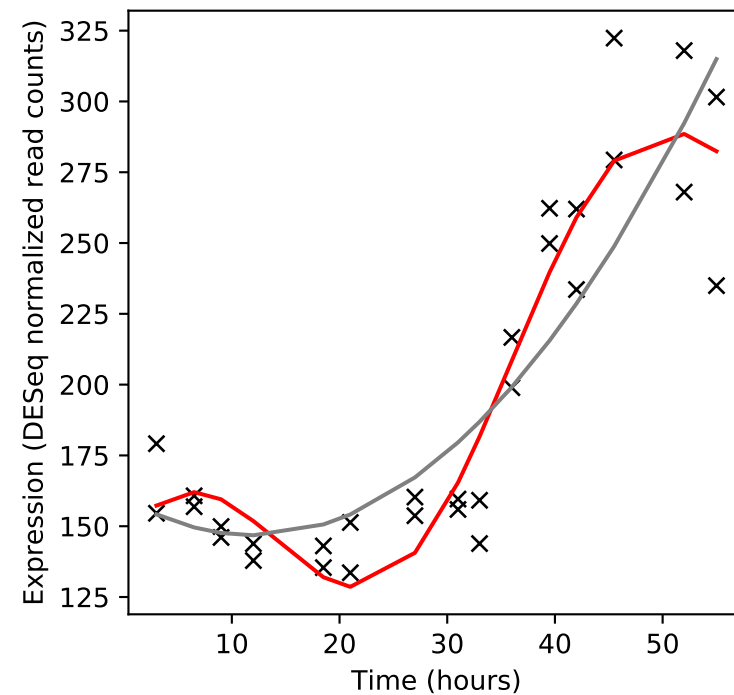

Rv3570c/hsaA

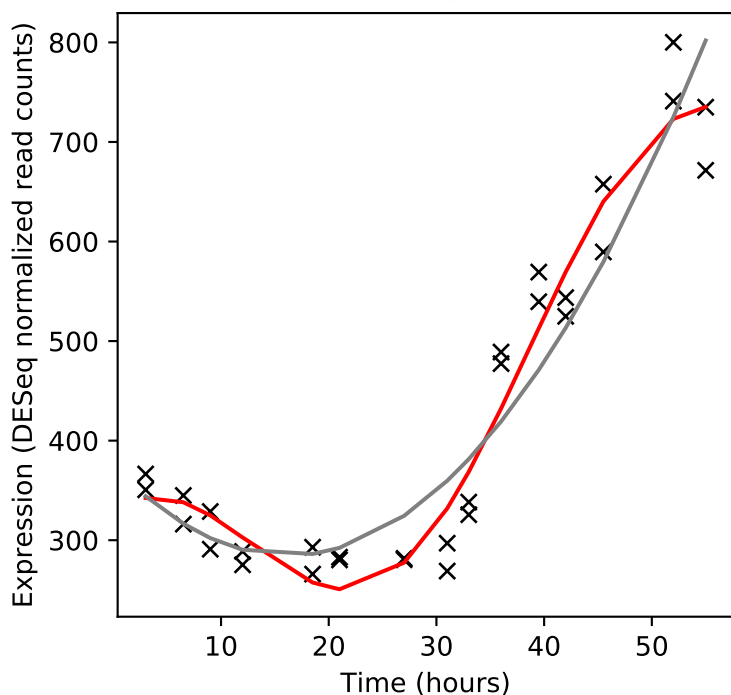

Rv3571/kshB

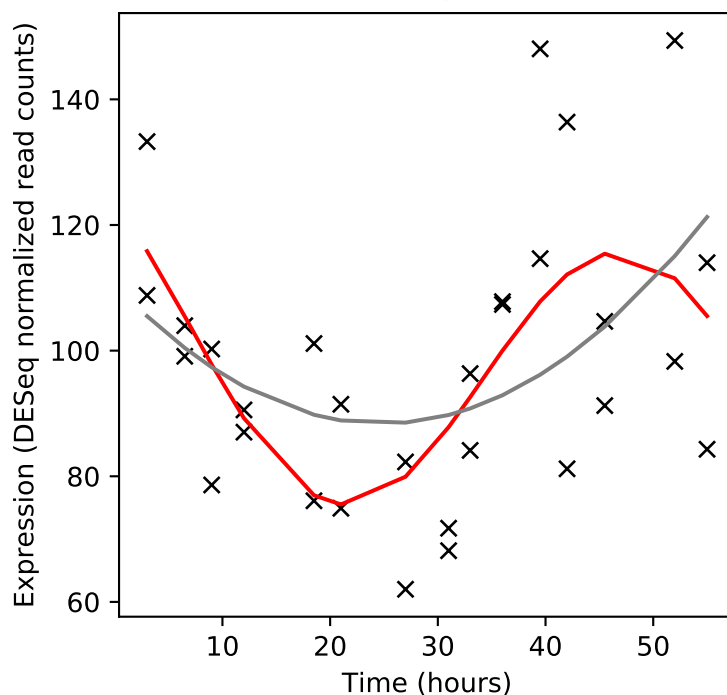

Rv3572/-

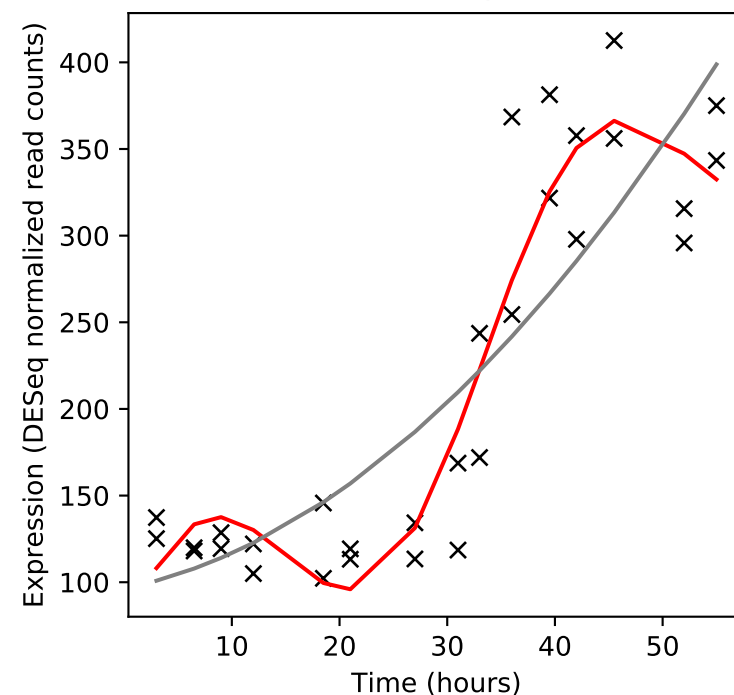

Rv3573c/fadE34

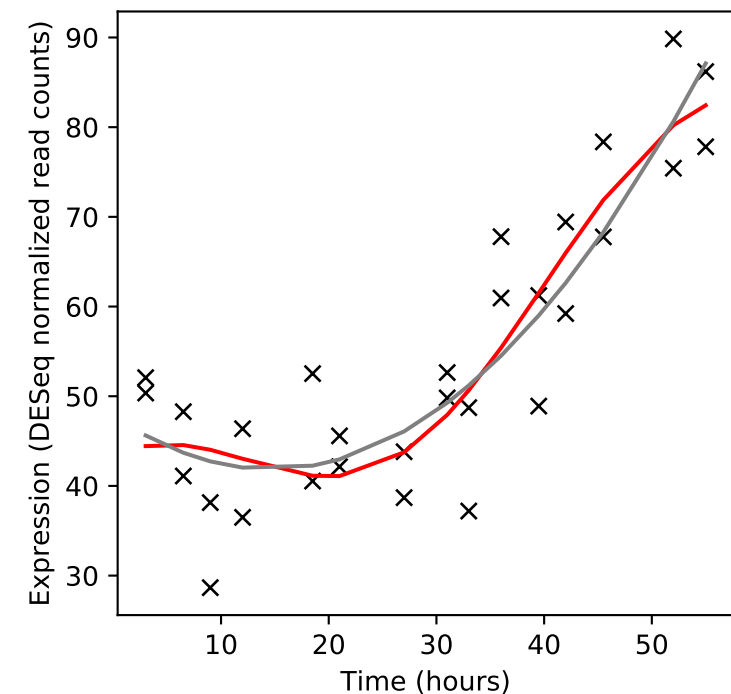

Rv3574/kstR

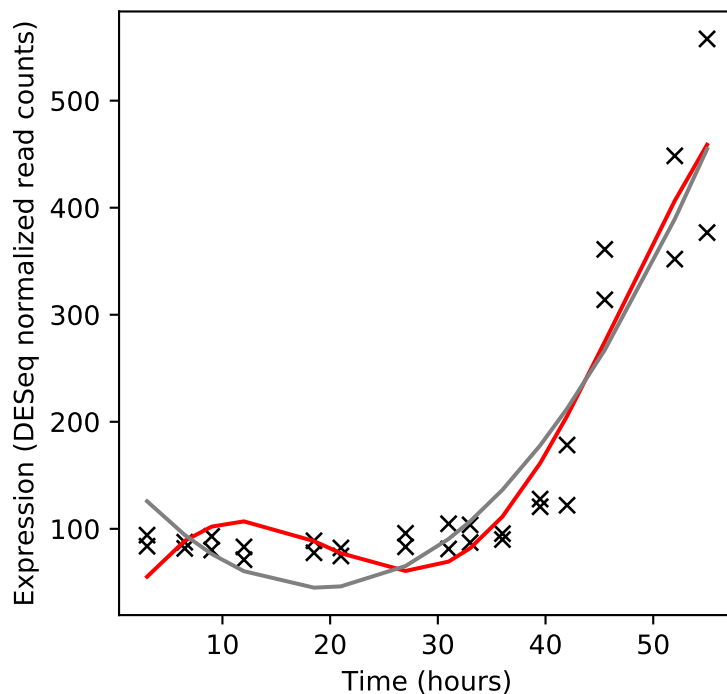

Rv3575c/-

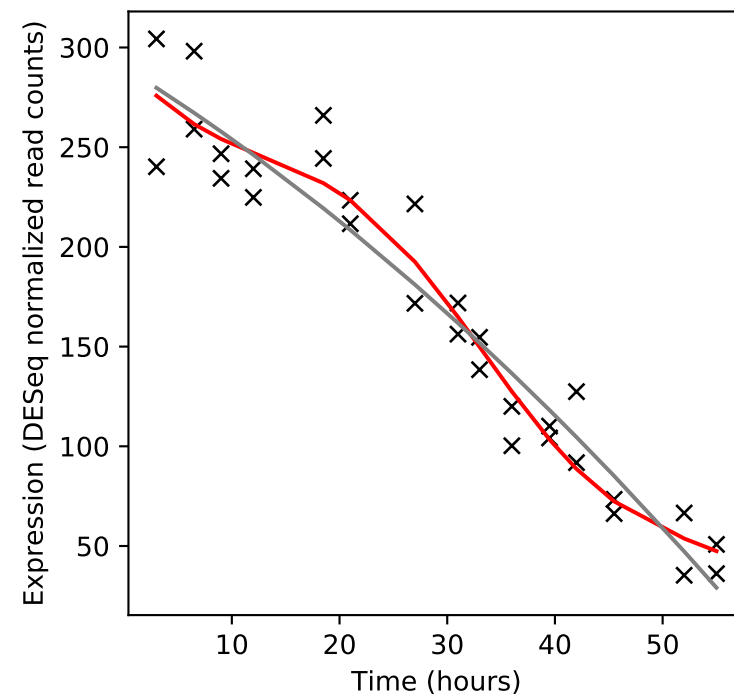

Rv3576/lppH

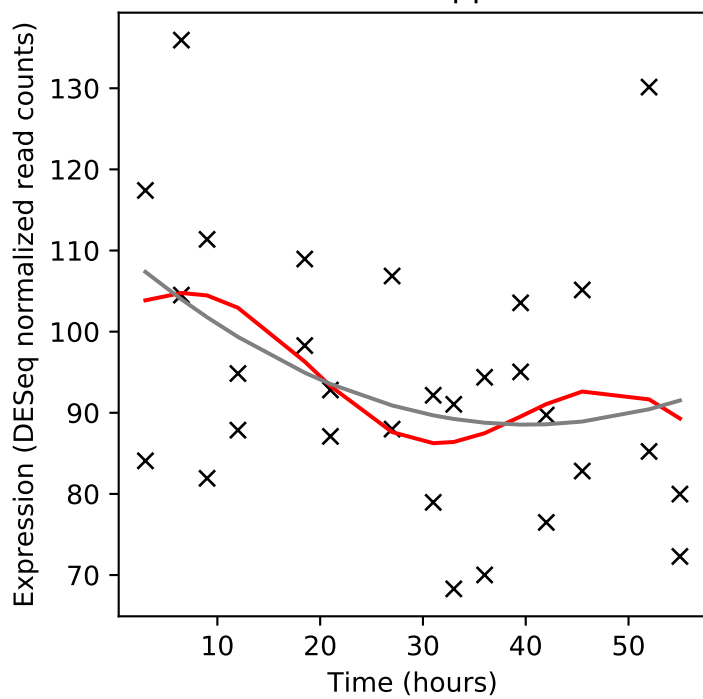

Rv3577/-

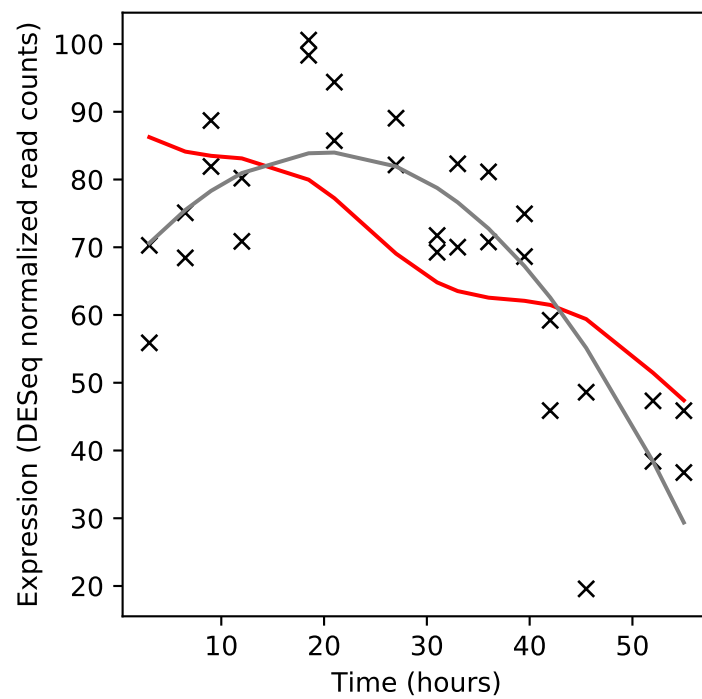

Rv3578/arsB2

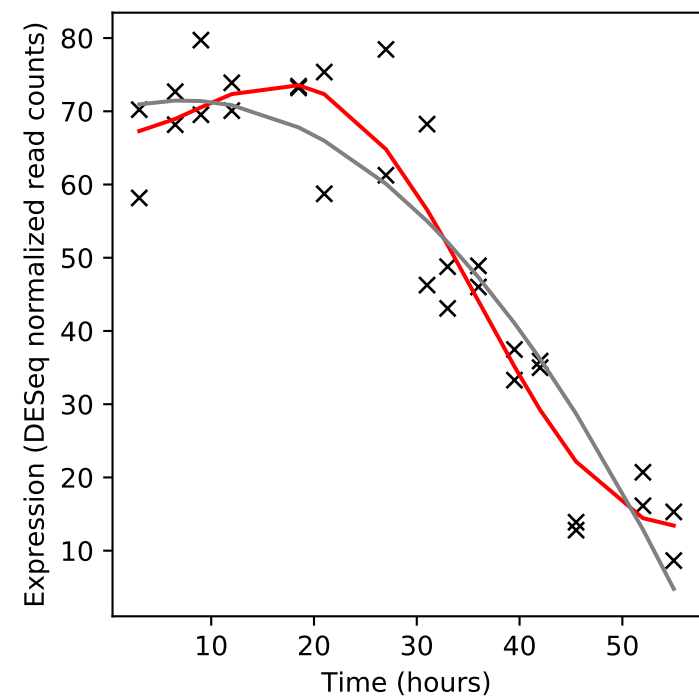

Rv3579c/-

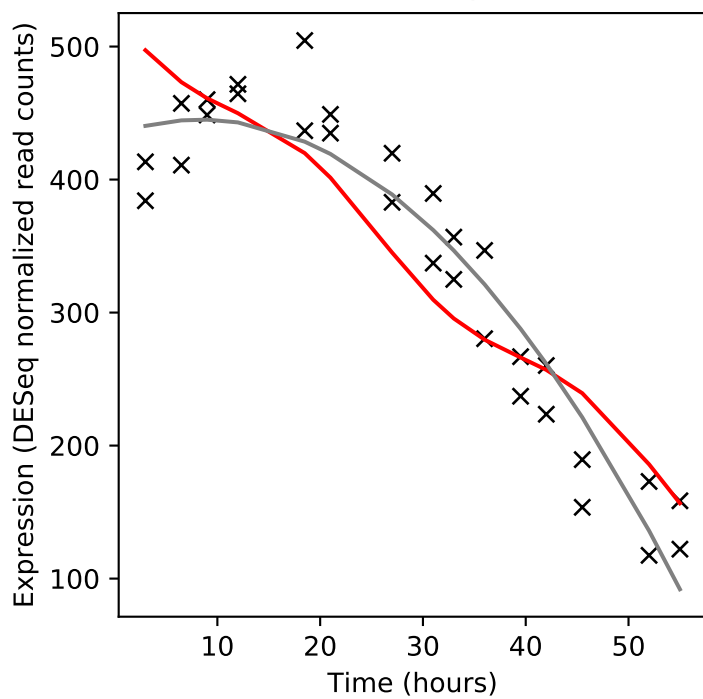

Rv3580c/cysS1

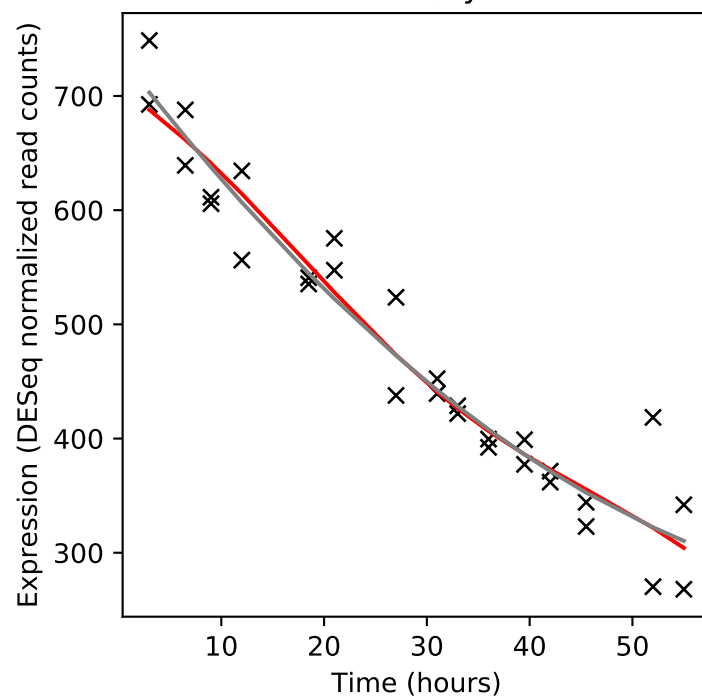

Rv3581c/ispF

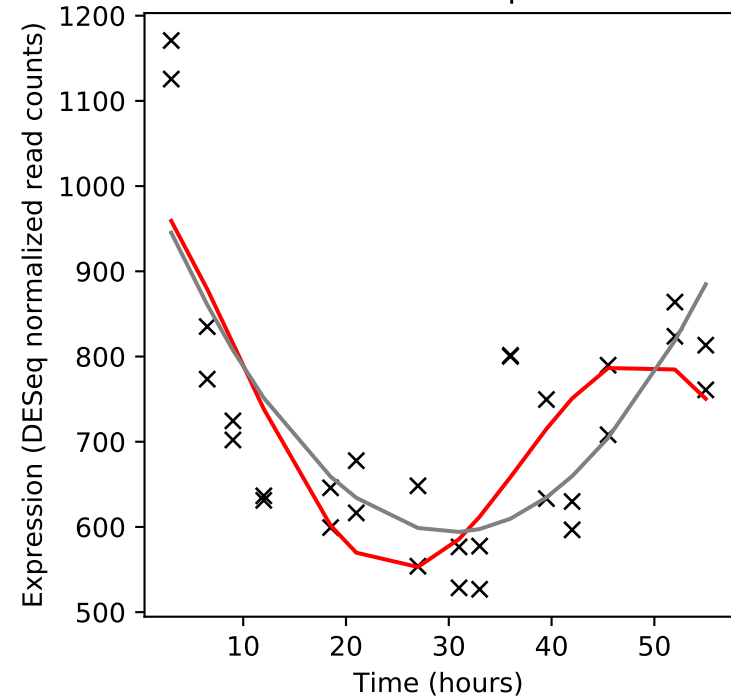

Rv3582c/ispD

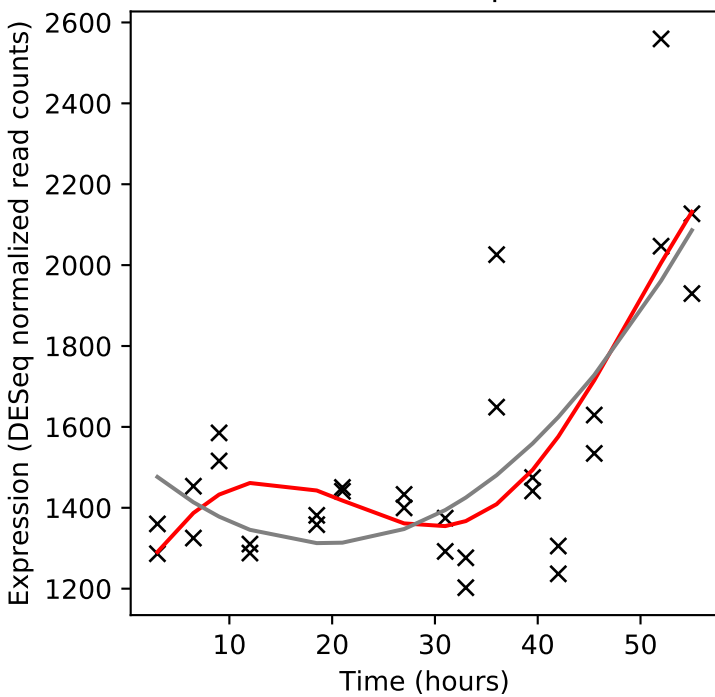

Rv3583c/-

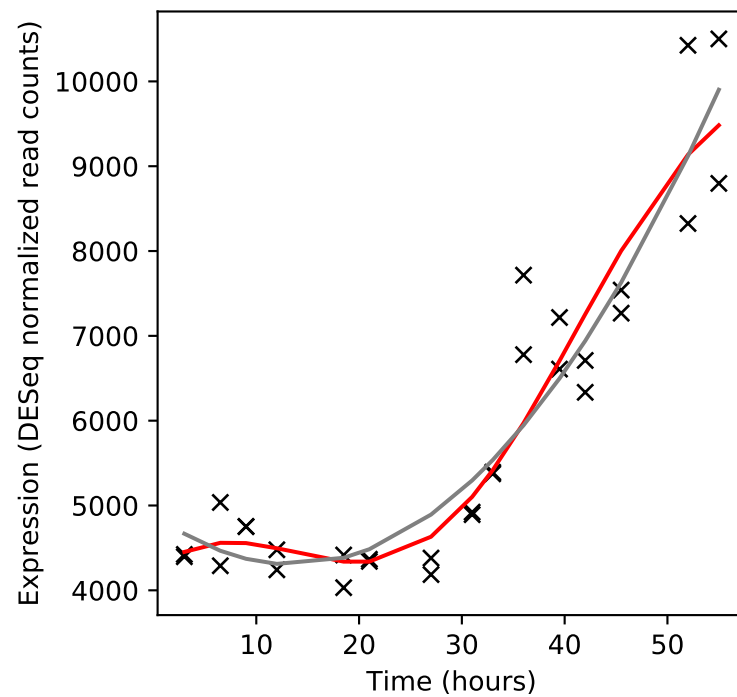

Rv3584/lpqE

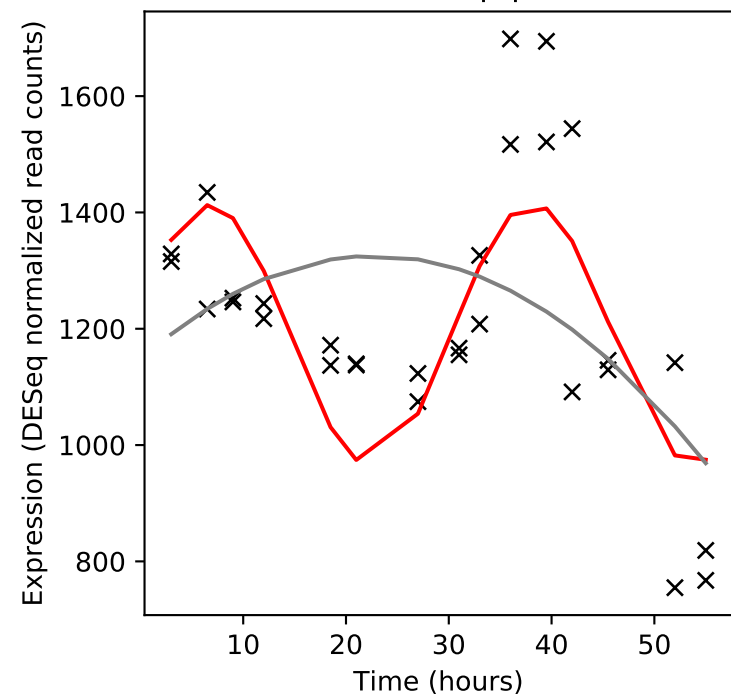



Rv3585/radA

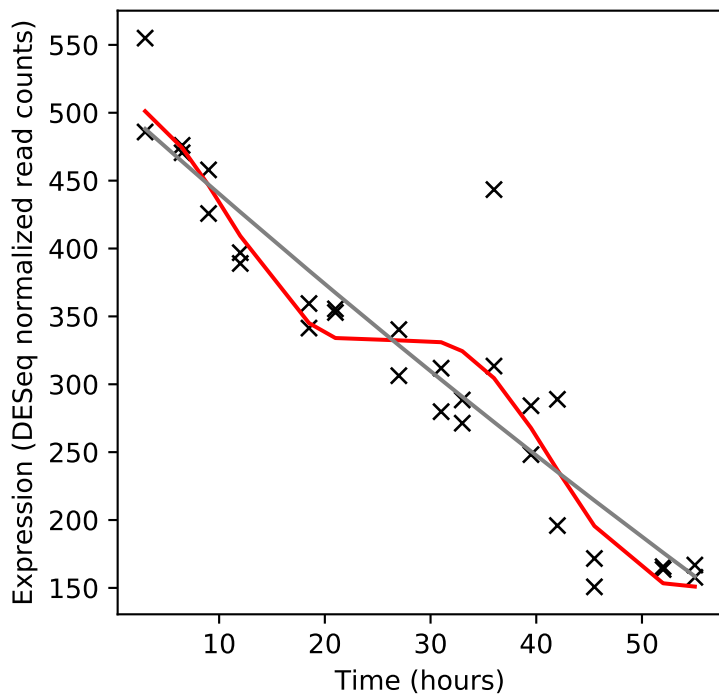

Rv3586/-

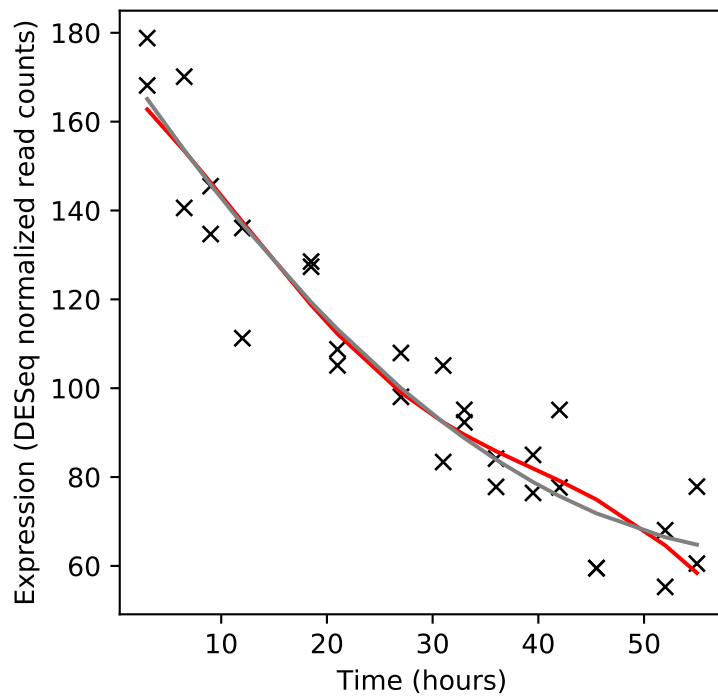

Rv3587c/-

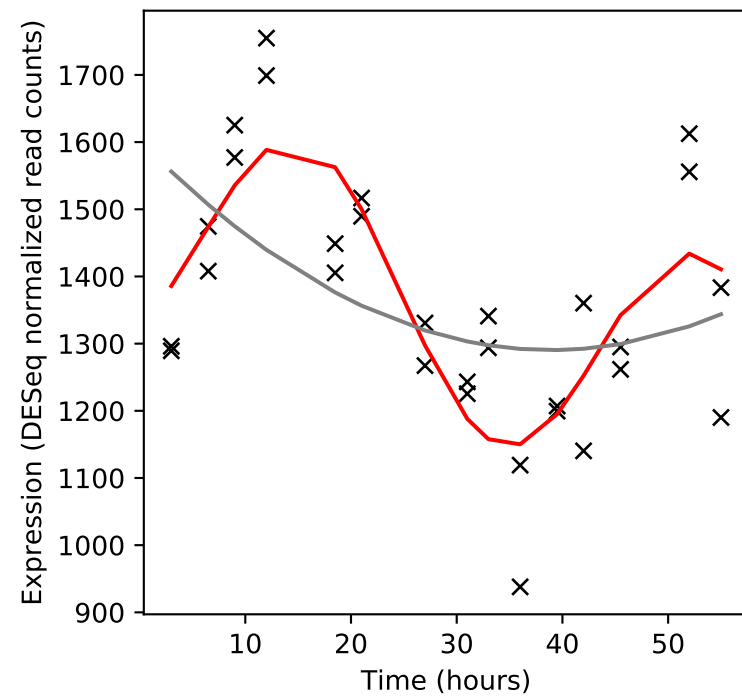

Rv3588c/canB

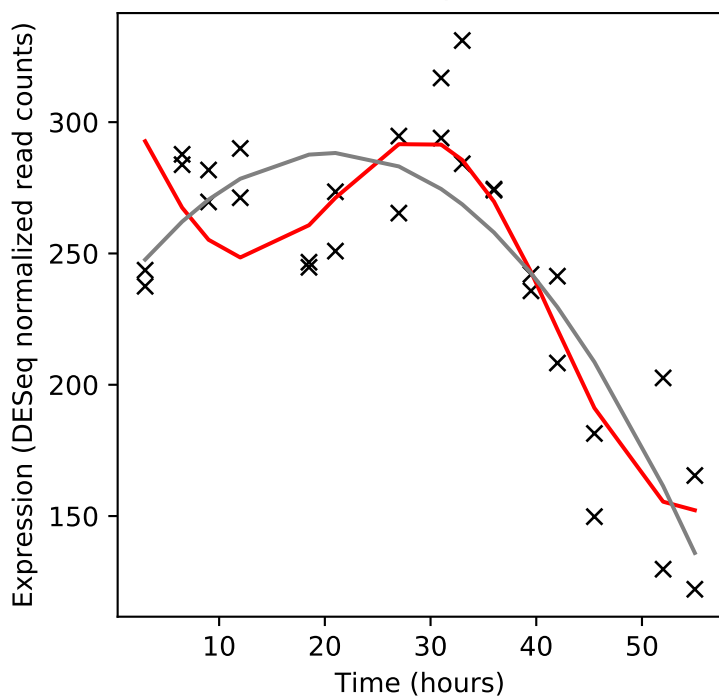

Rv3589/mutY

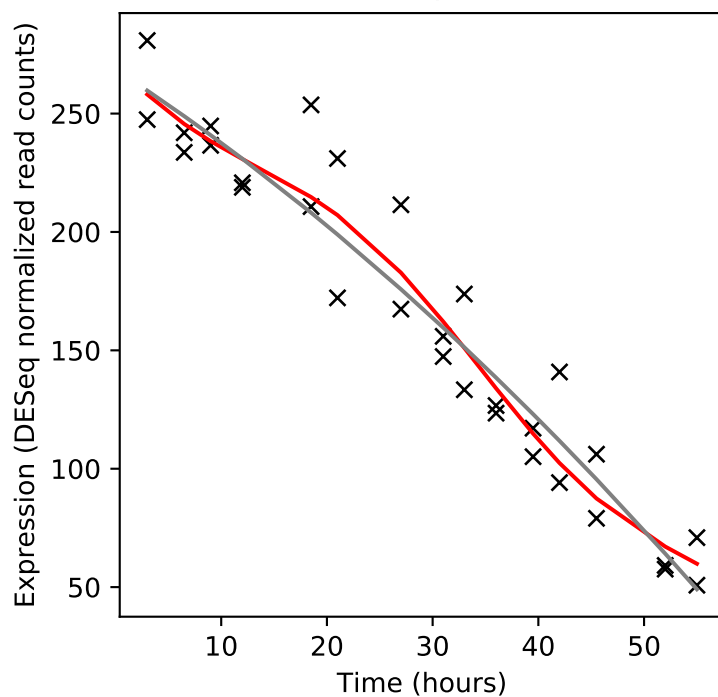

Rv3590c/PE\_PGRS58

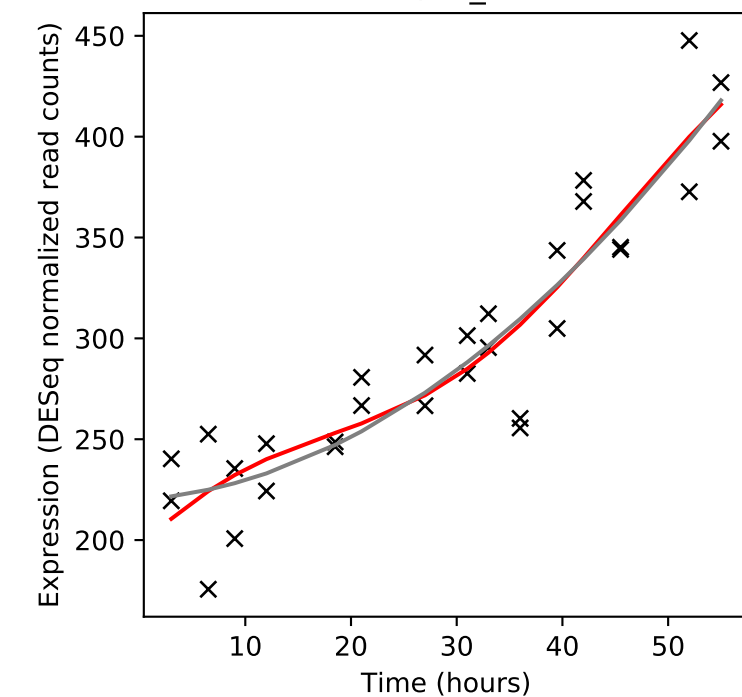

Rv3591c/-

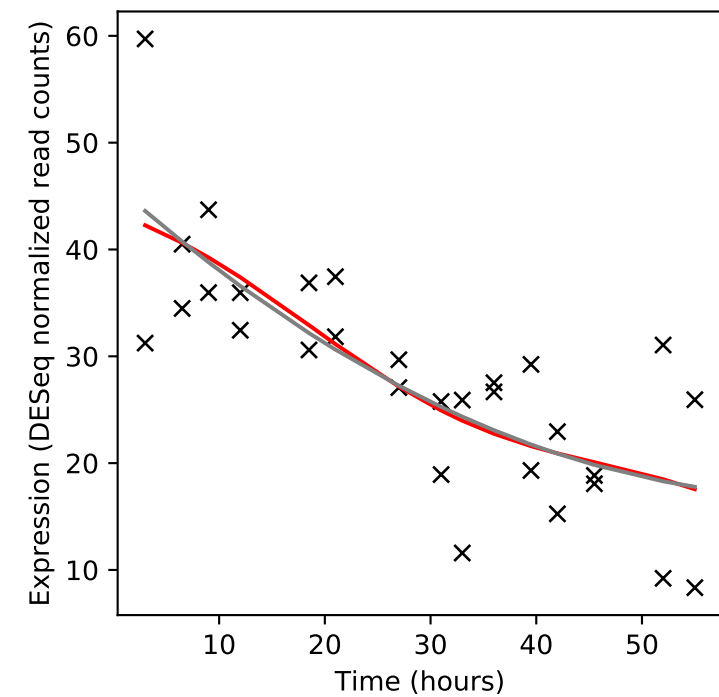

Rv3592/mhuD

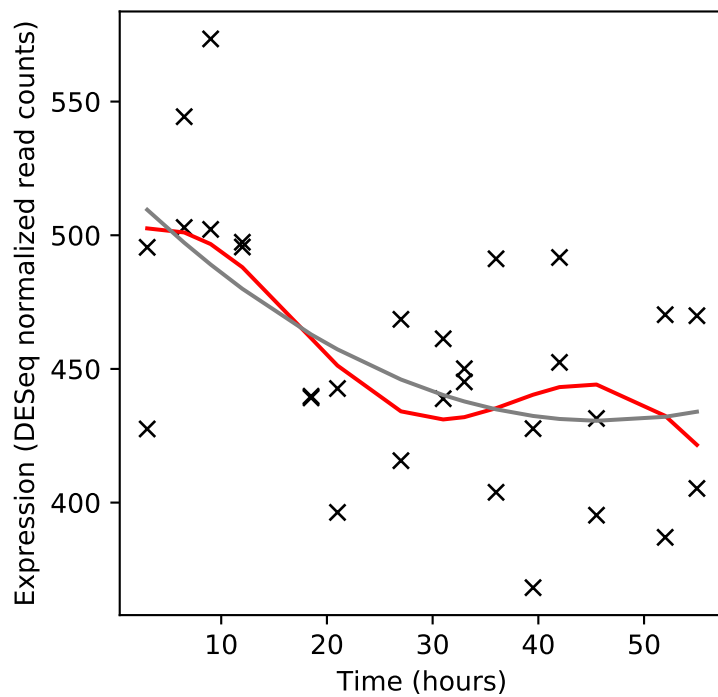

Rv3593/lpqF

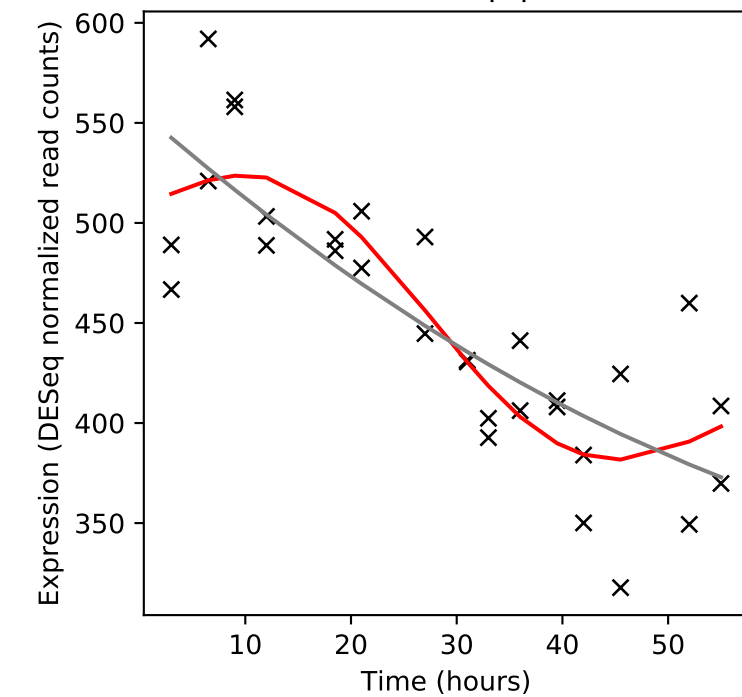

Rv3594/-

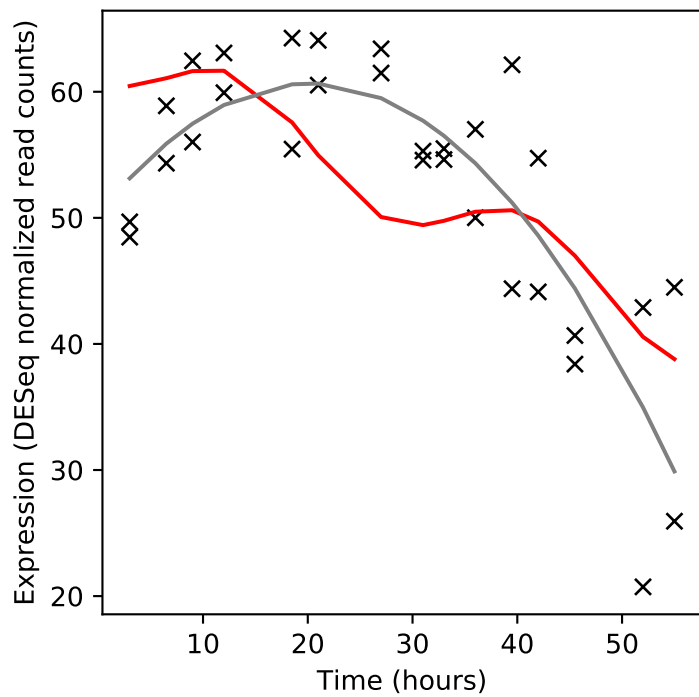

Rv3595c/PE\_PGRS59

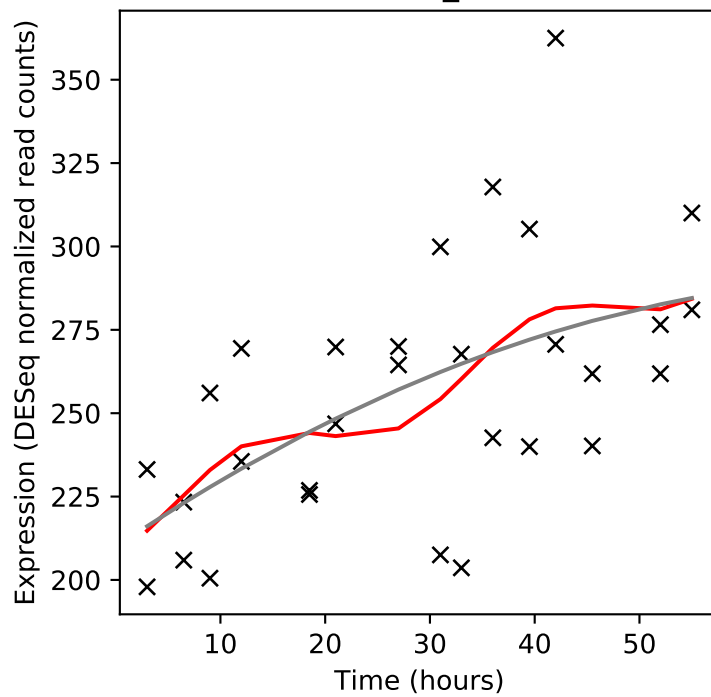

Rv3596c/clpC1

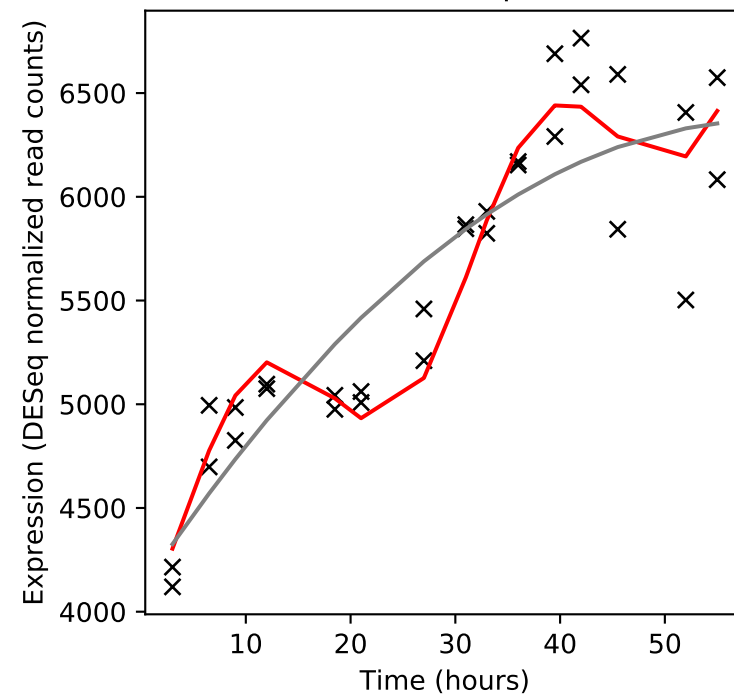

Rv3597c/lsr2

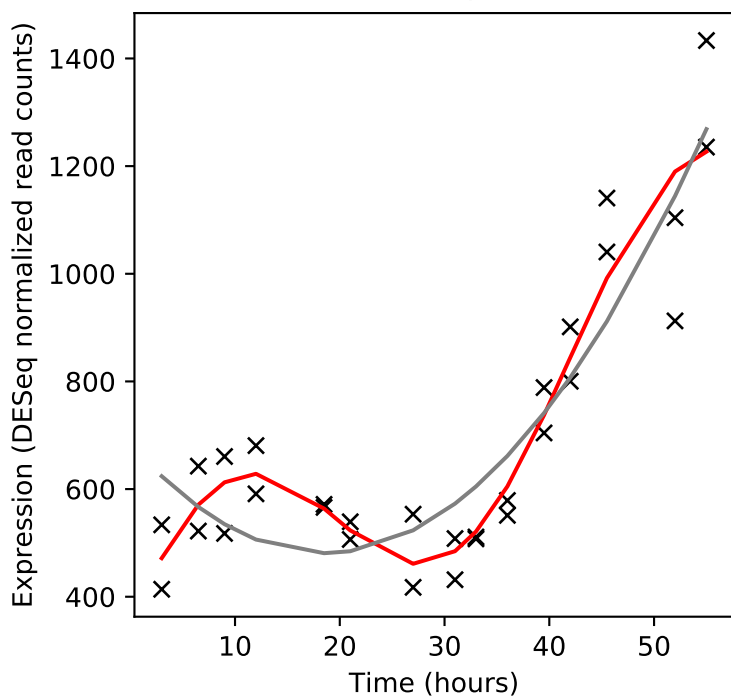

Rv3598c/lysS

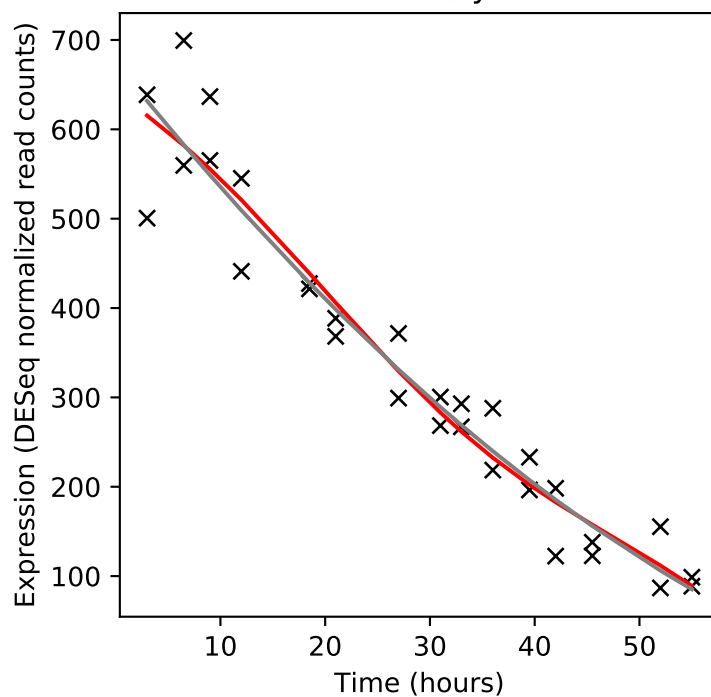

Rv3599c/-

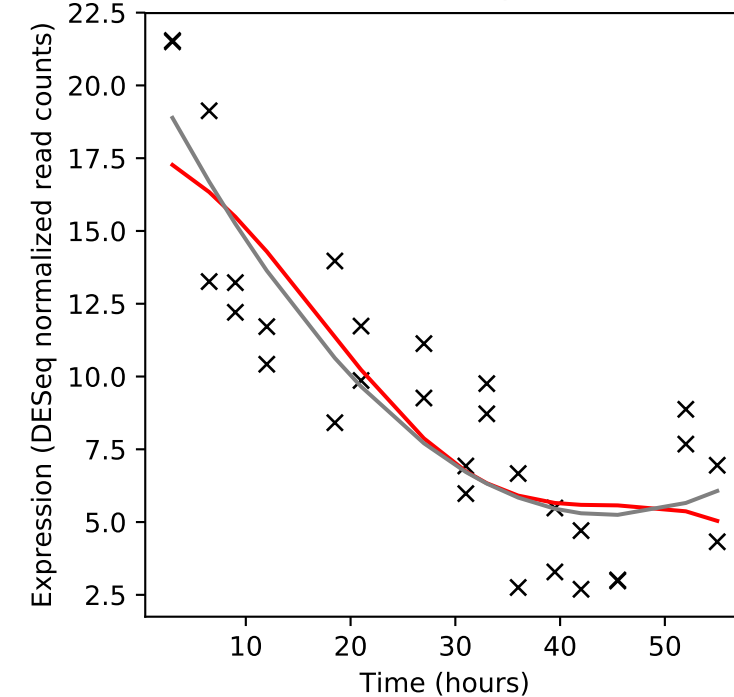

Rv3600c/-

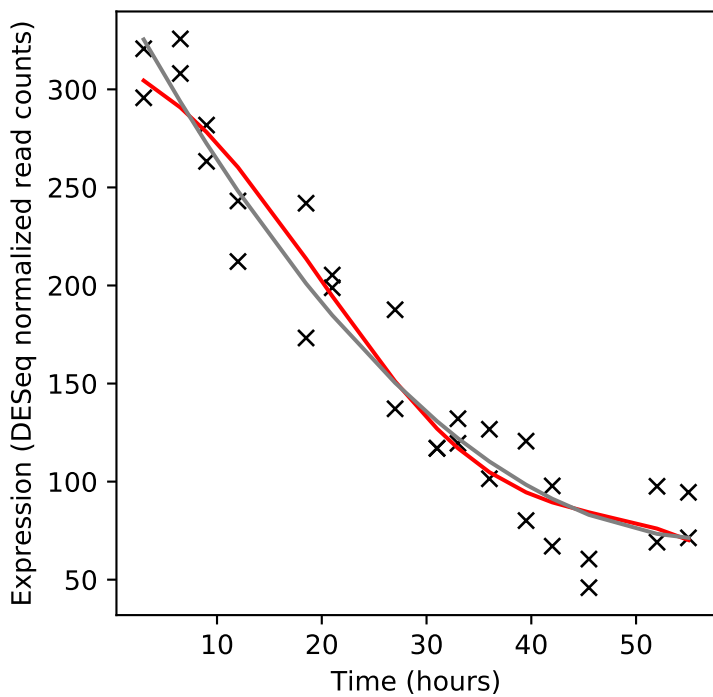

Rv3601c/panD

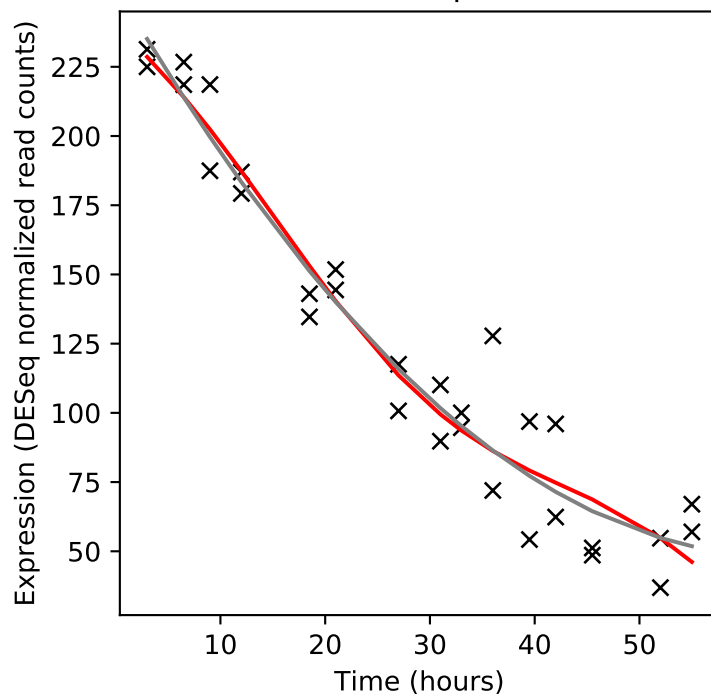

Rv3602c/panC

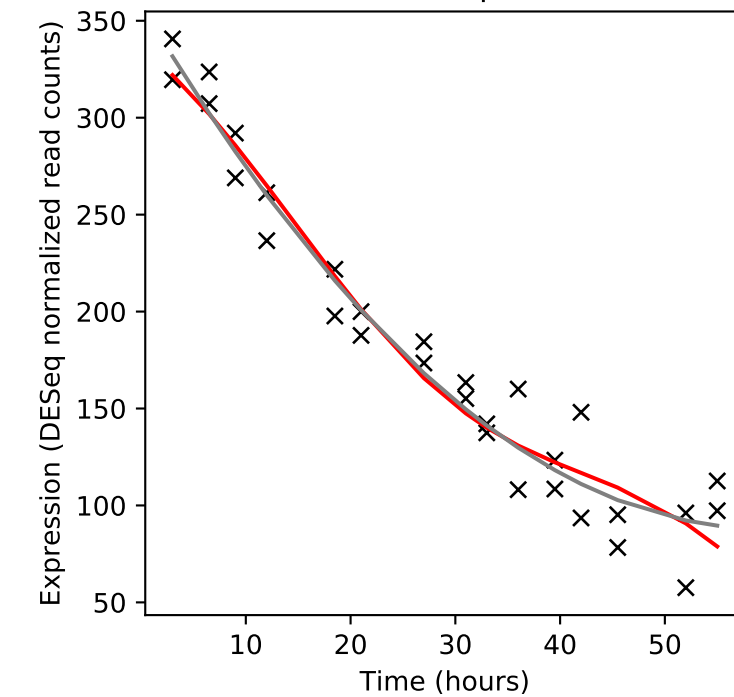

Rv3603c/-

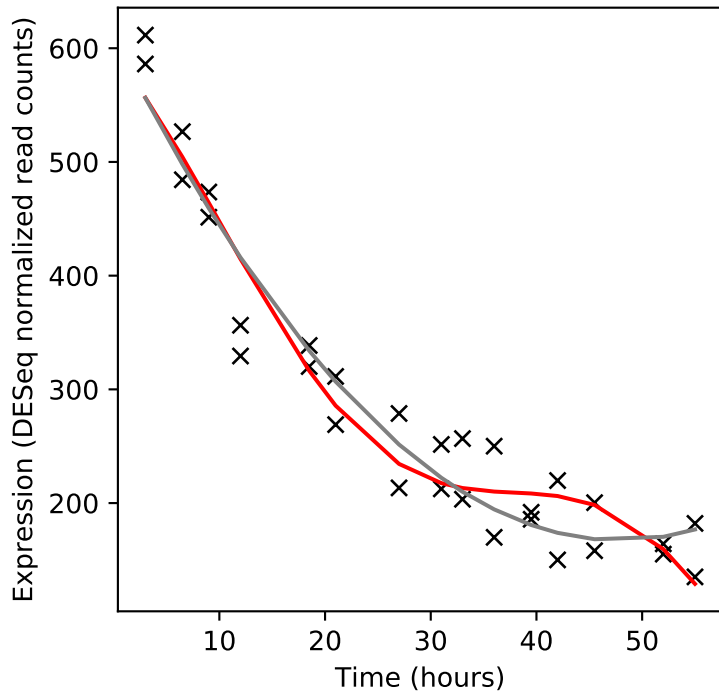

Rv3604c/-

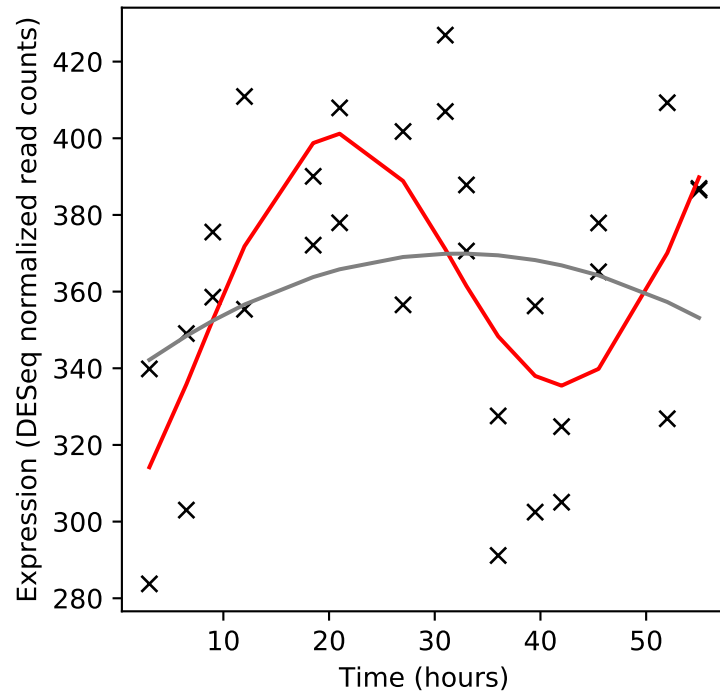

Rv3605c/-

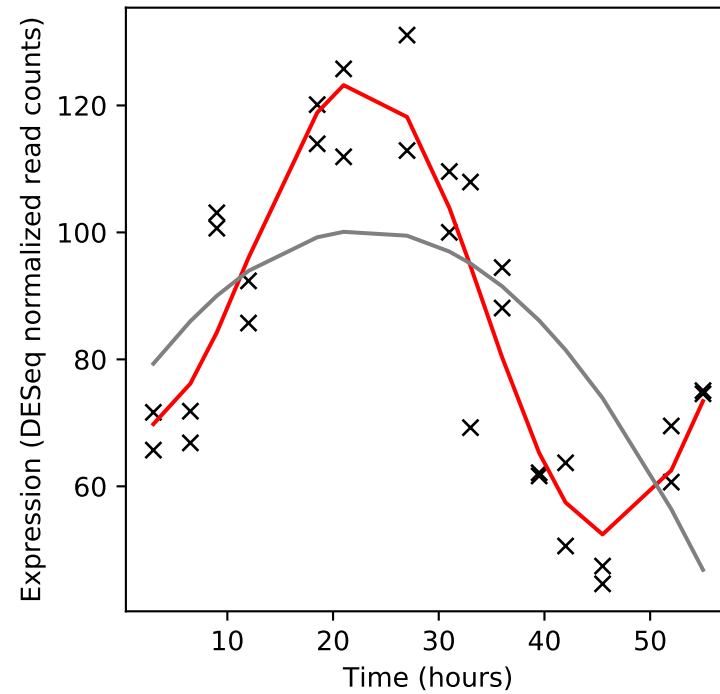

Rv3606c/folK

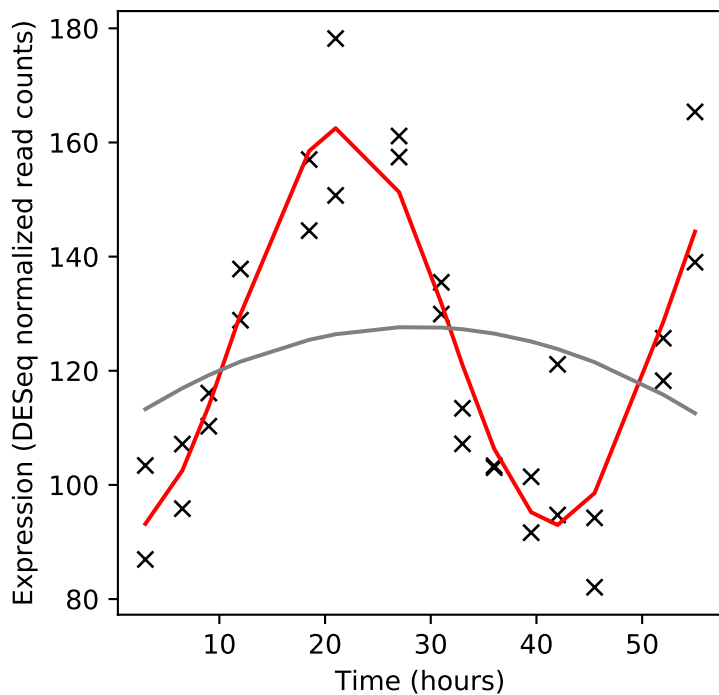

Rv3607c/folB

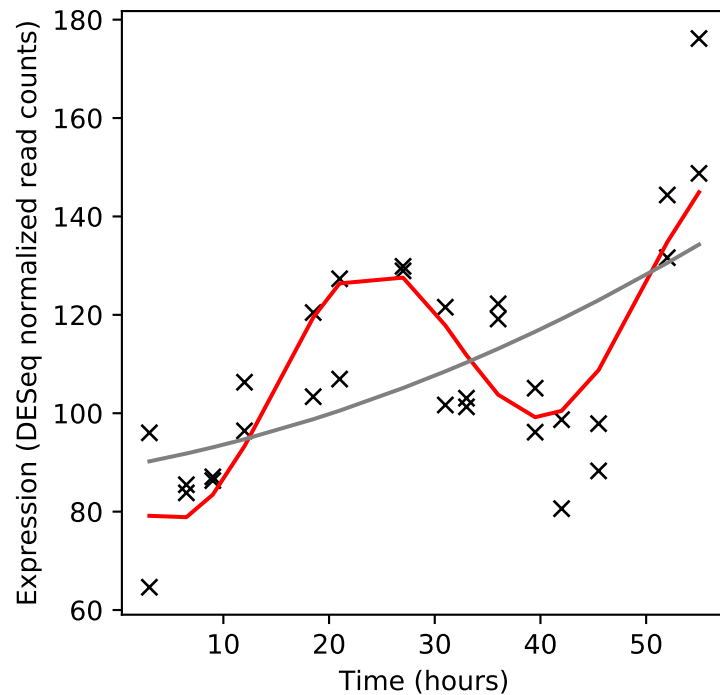

Rv3608c/folP1

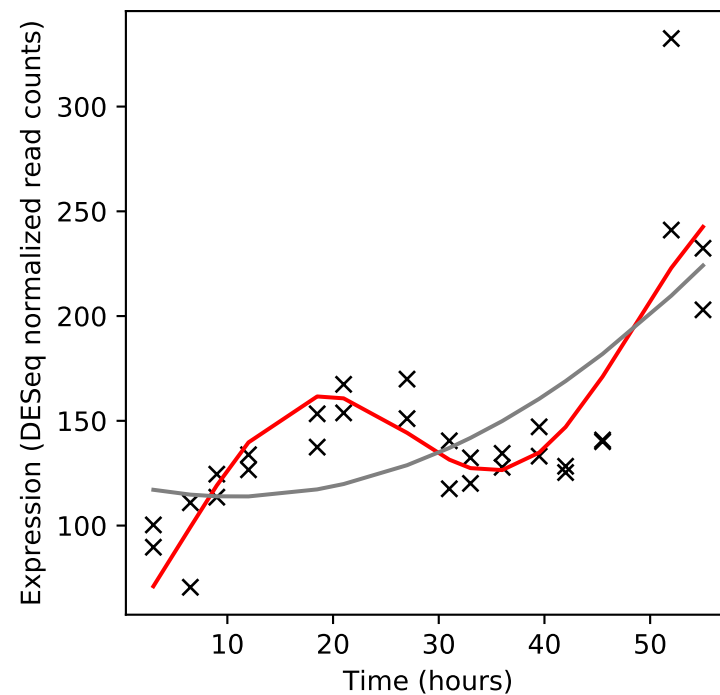

Rv3609c/folE

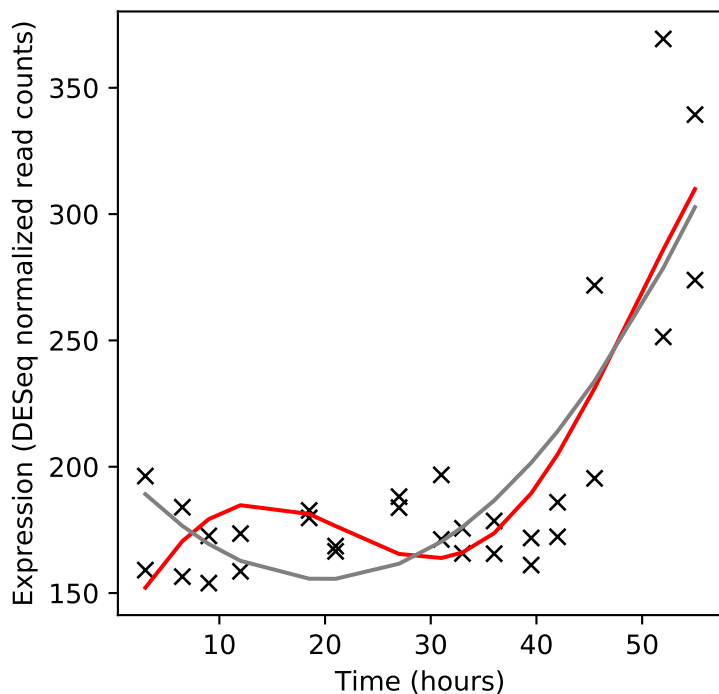

Rv3610c/ftsH

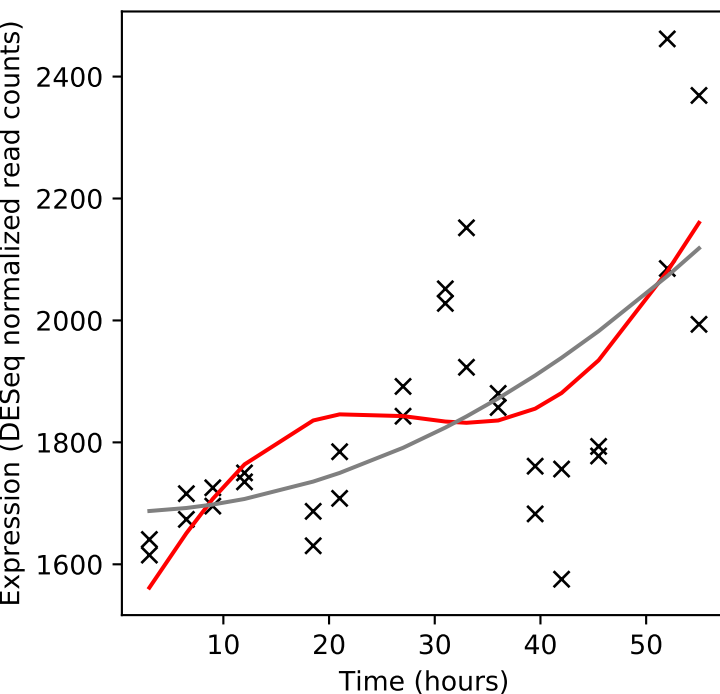

Rv3611/-

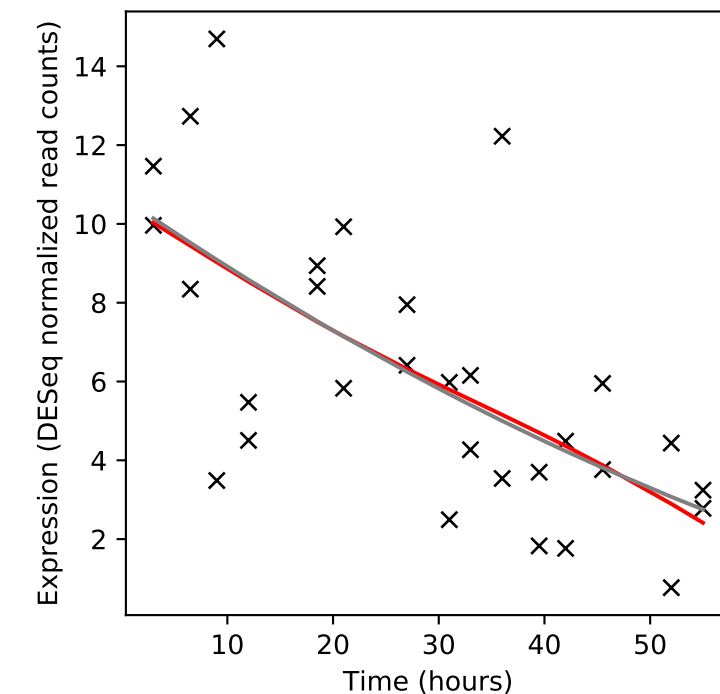

Rv3612c/-

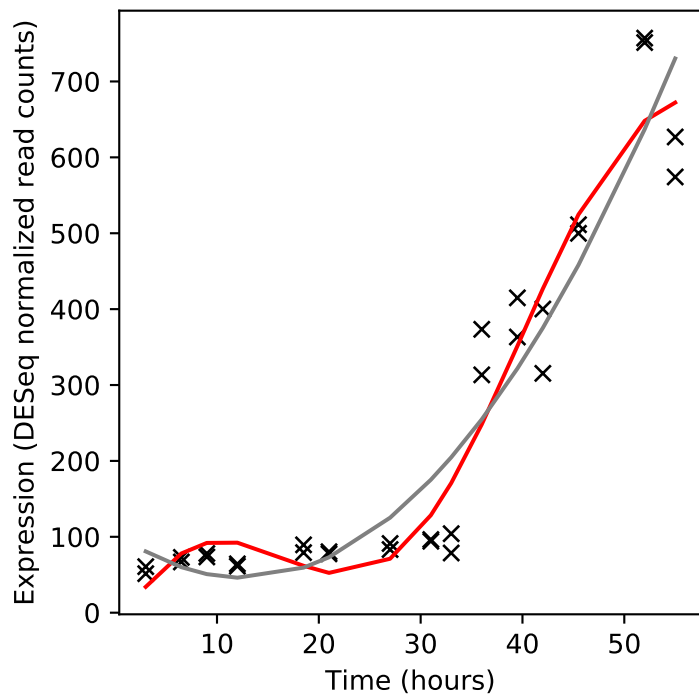

Rv3613c/-

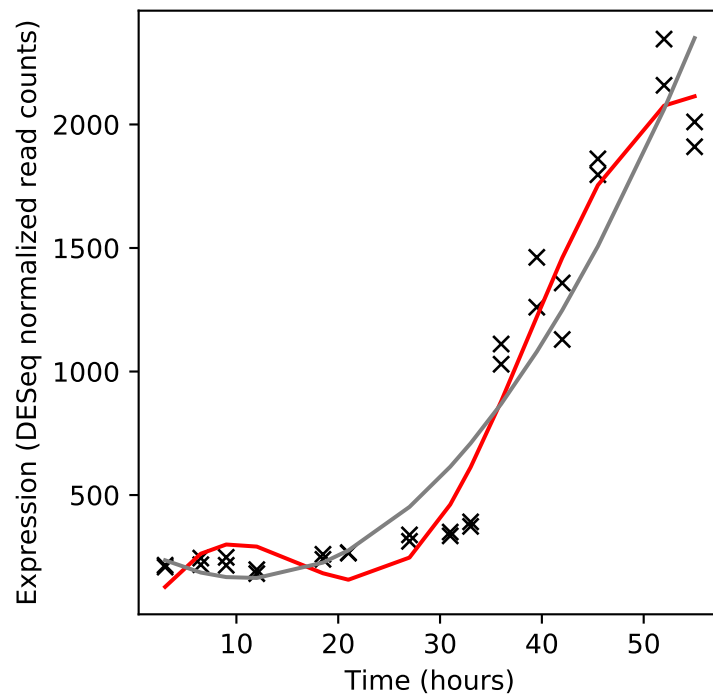

Rv3614c/espD

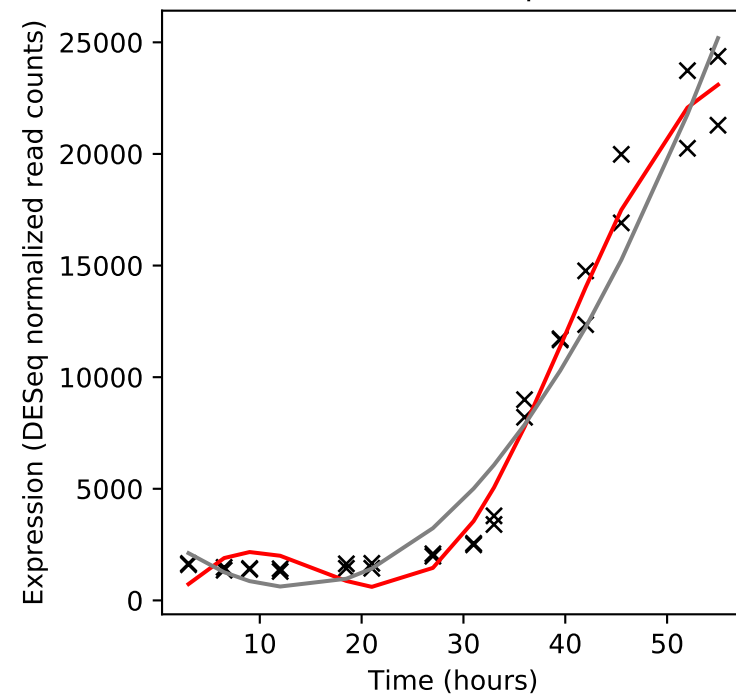

Rv3615c/espC

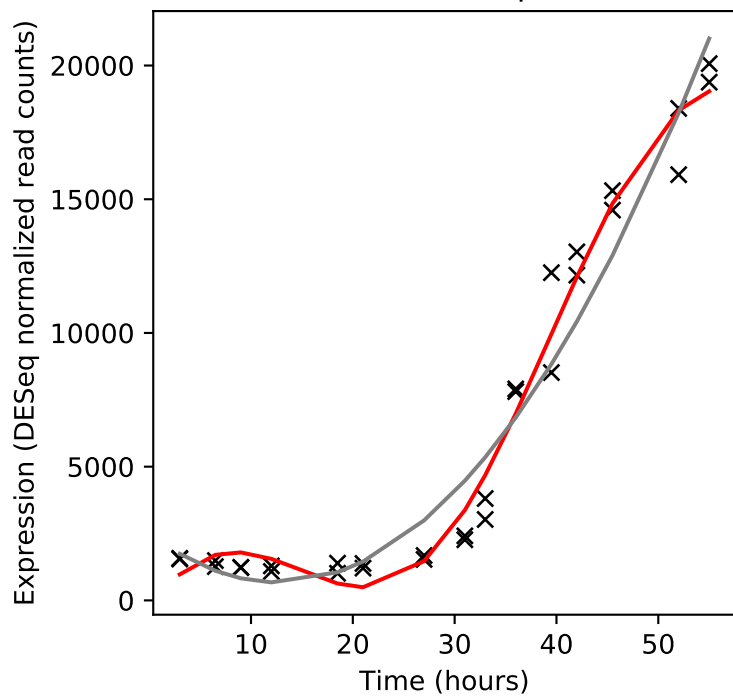

Rv3616c/espA

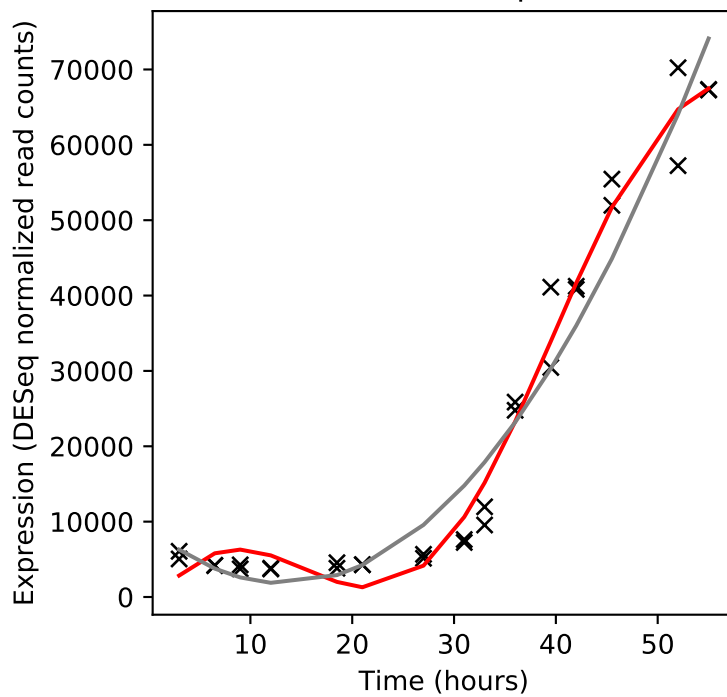

Rv3617/ephA

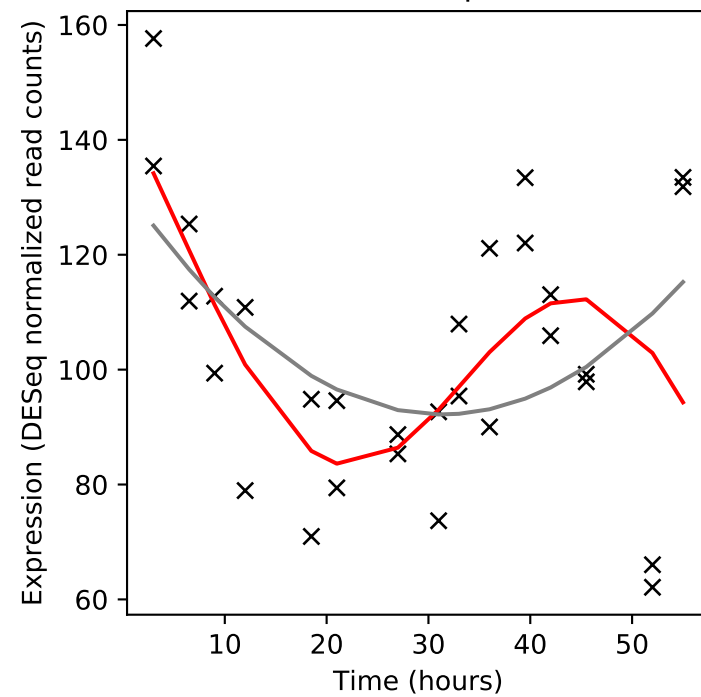

Rv3618/-

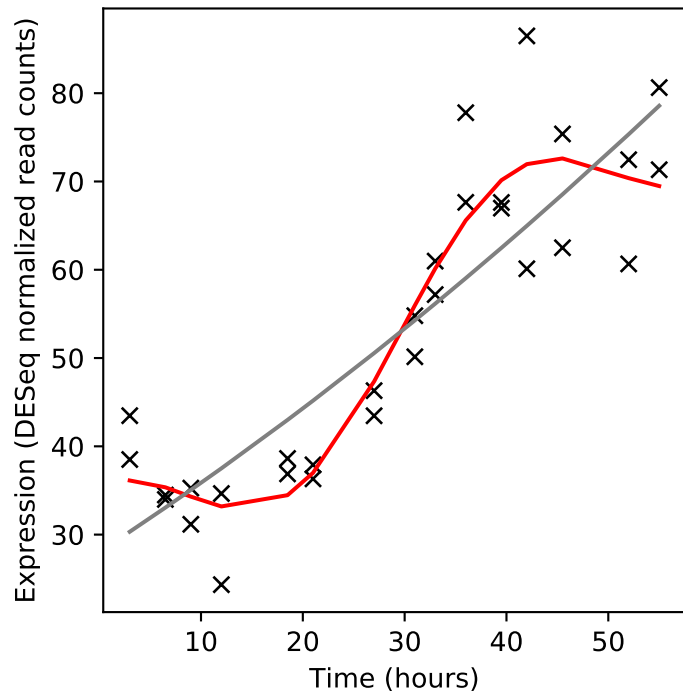

Rv3619c/esxV

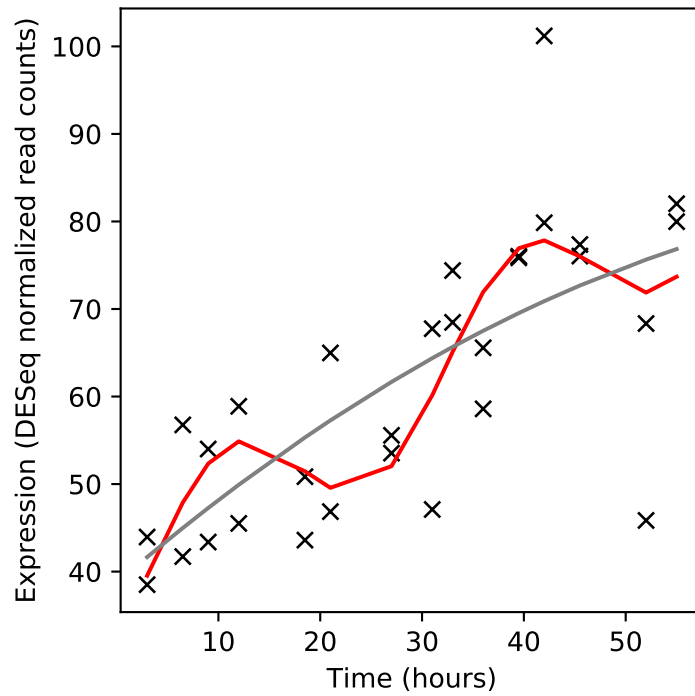

Rv3620c/esxW

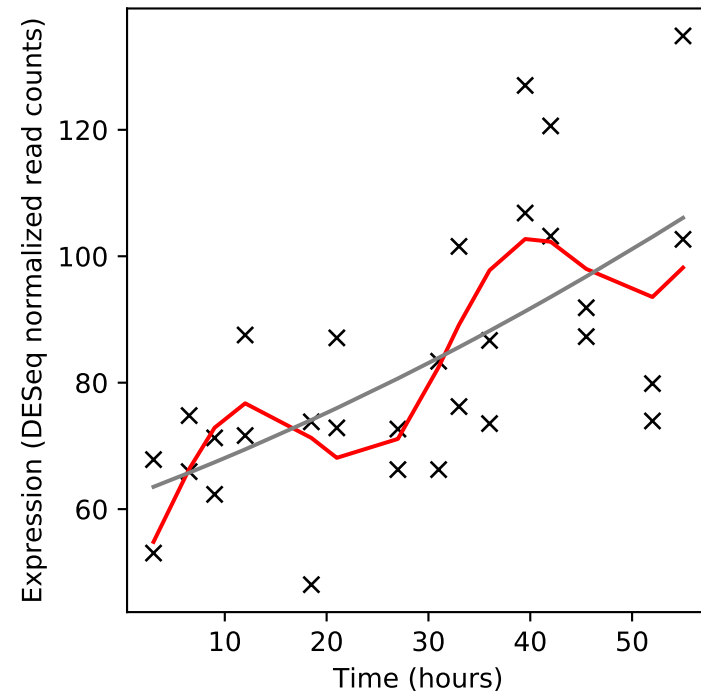

Rv3621c/PPE65

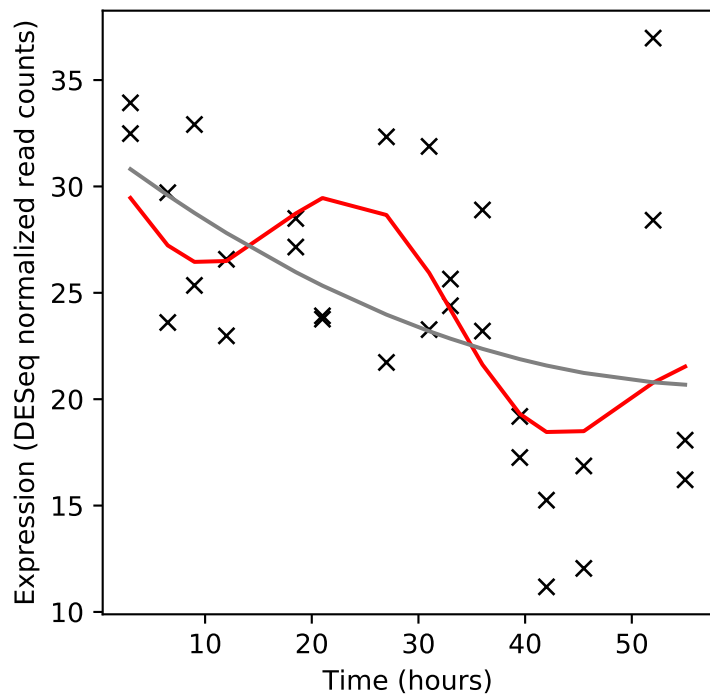

Rv3622c/PE32

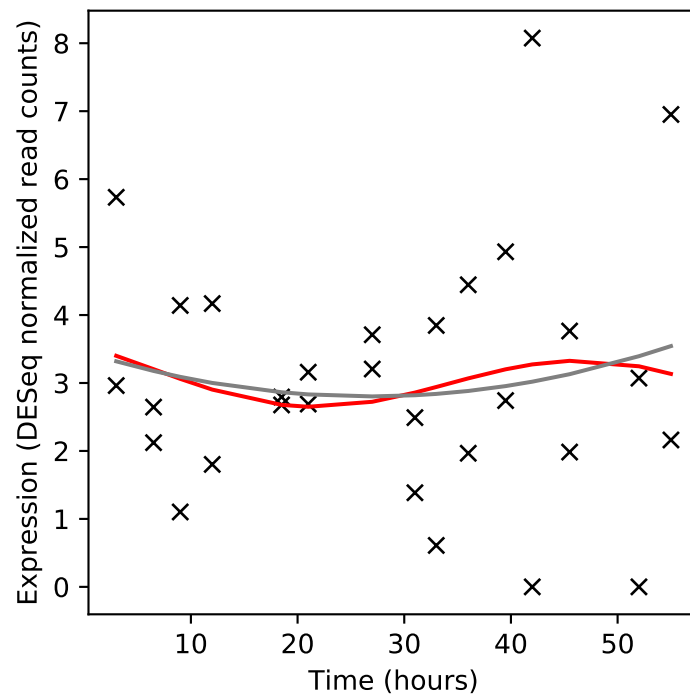

Rv3623/lpqG

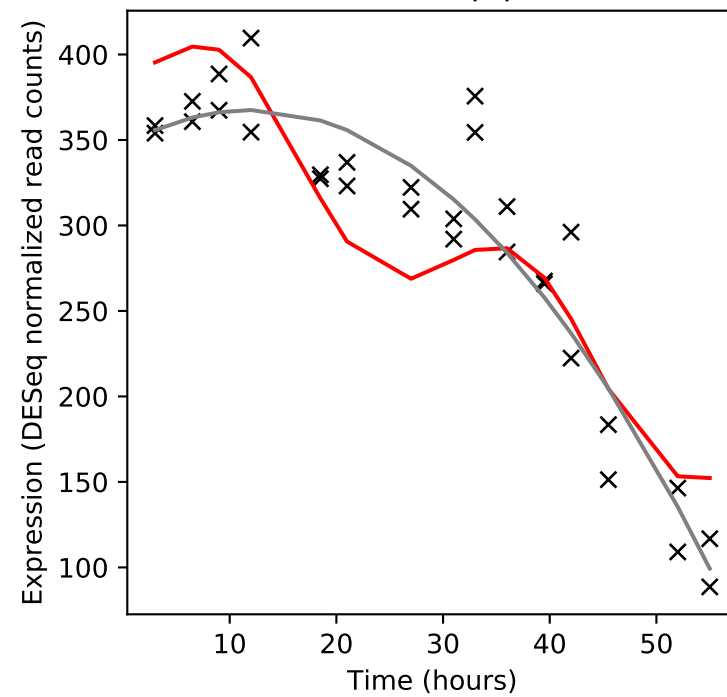

Rv3624c/hpt

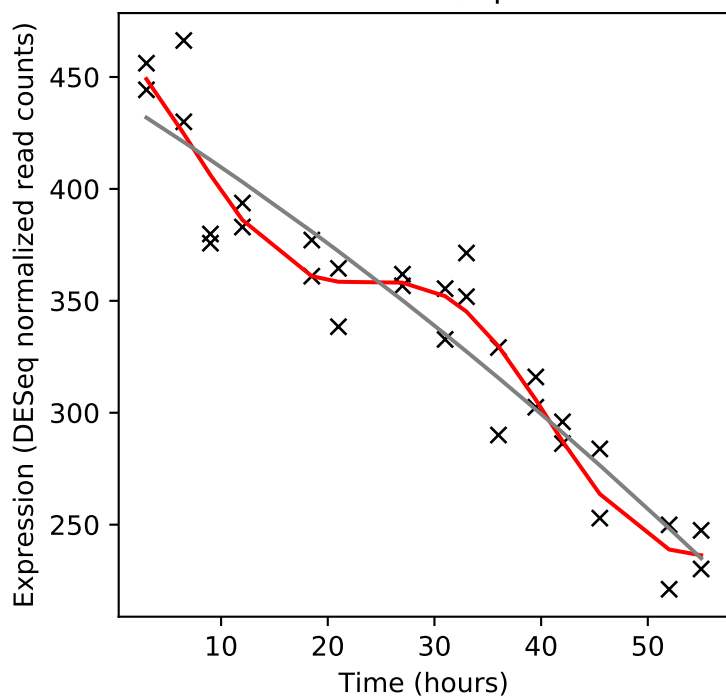

Rv3625c/mesJ

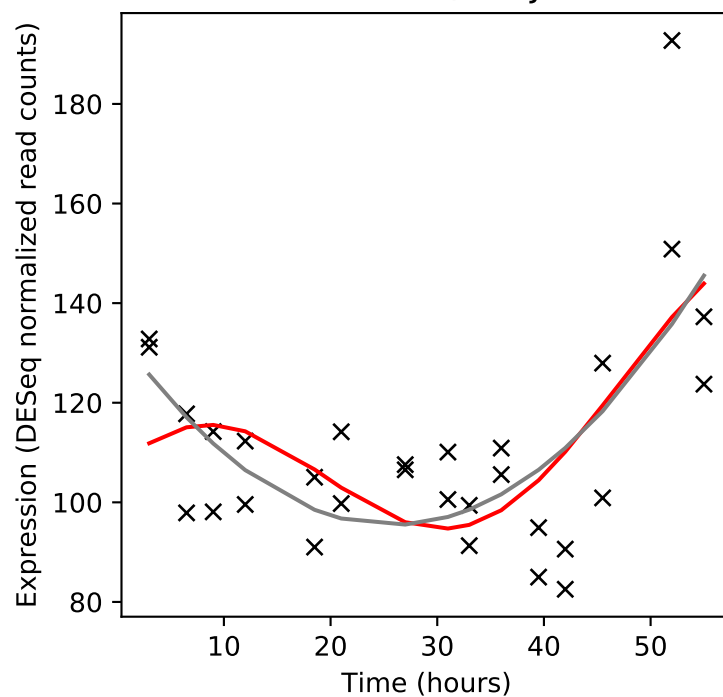

Rv3626c/-

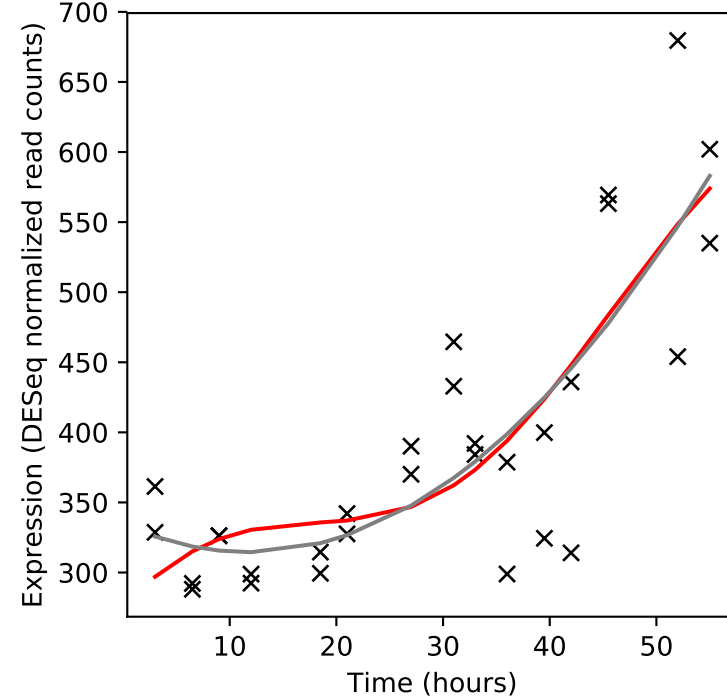

Rv3627c/-

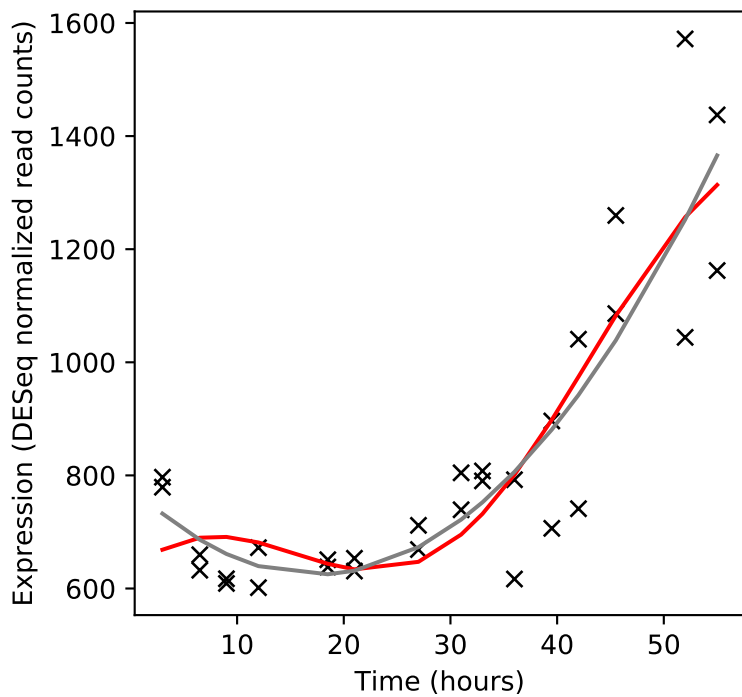

Rv3628/ppa

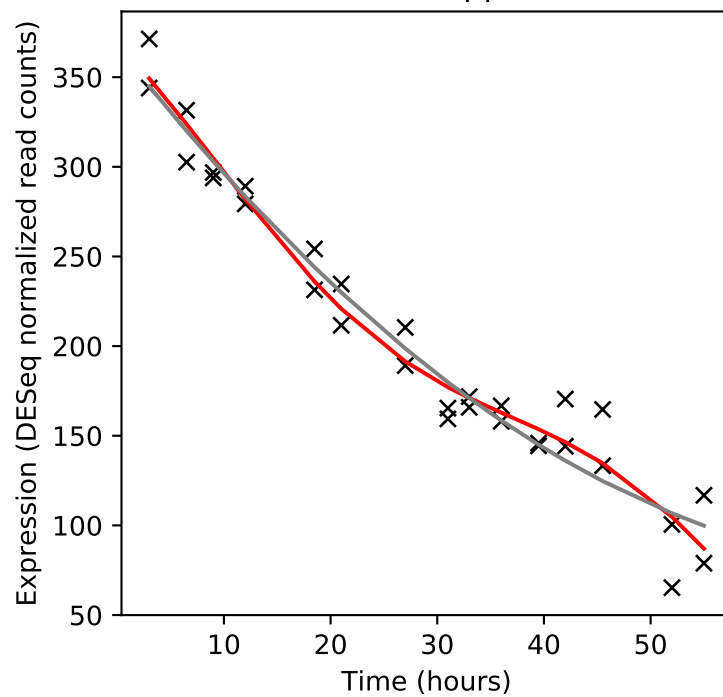

Rv3629c/-

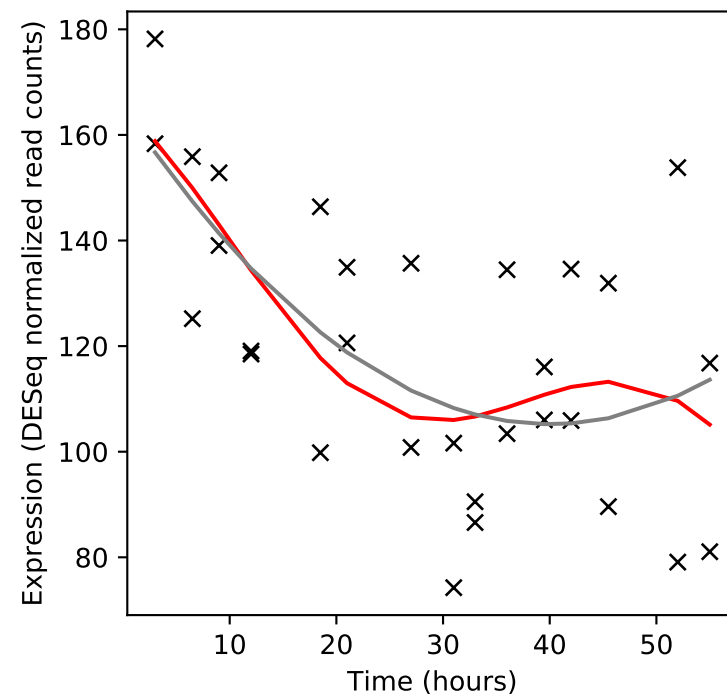

Rv3630/-

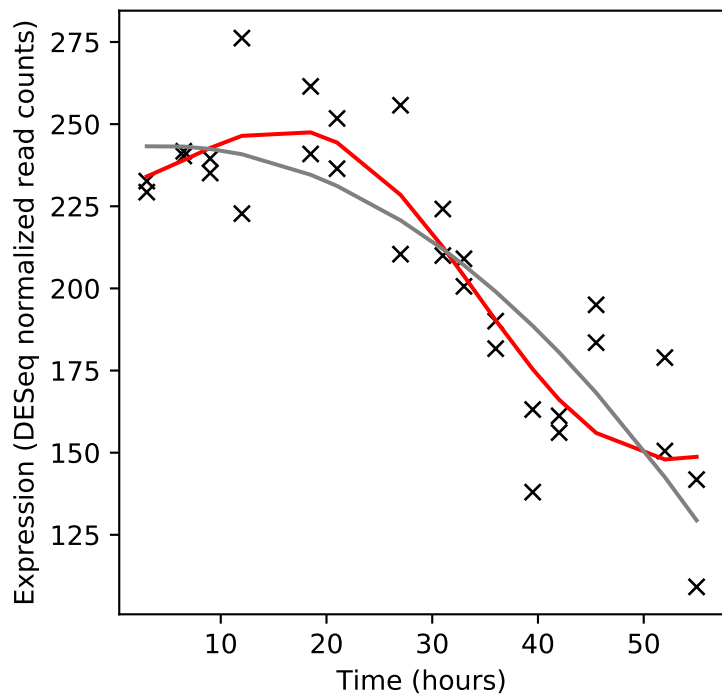

Rv3631/-

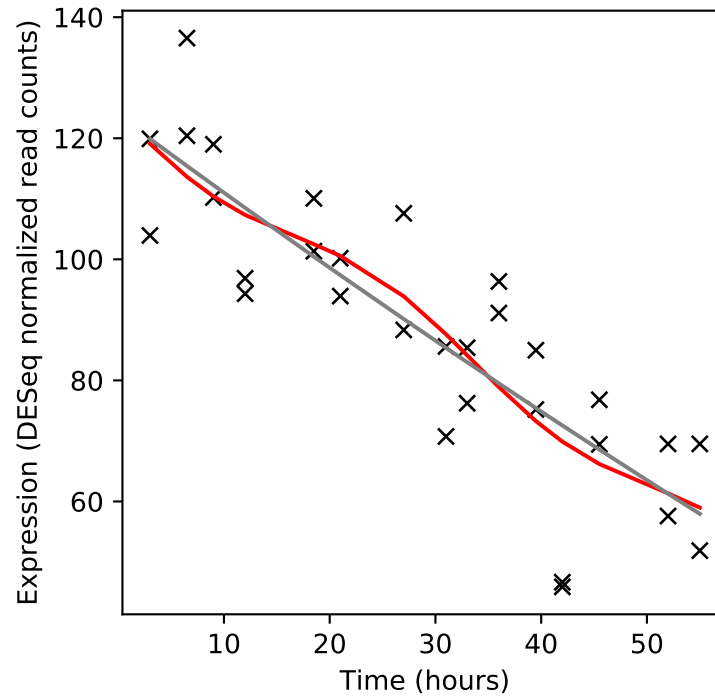

Rv3632/-

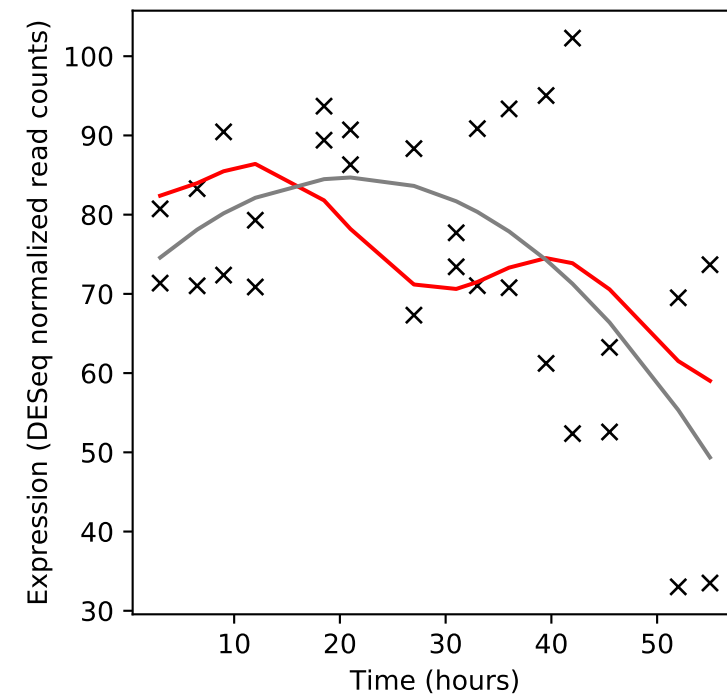

Rv3633/-

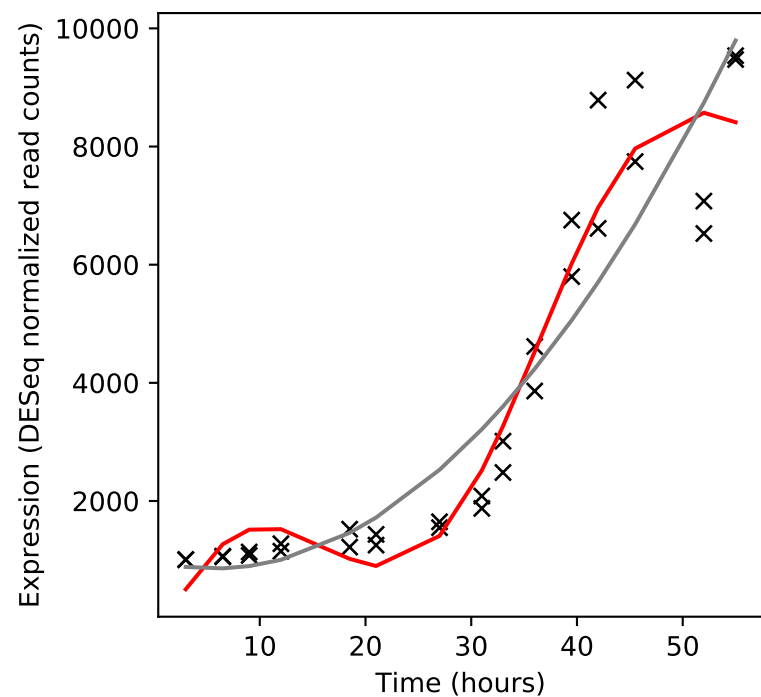

Rv3634c/galE1

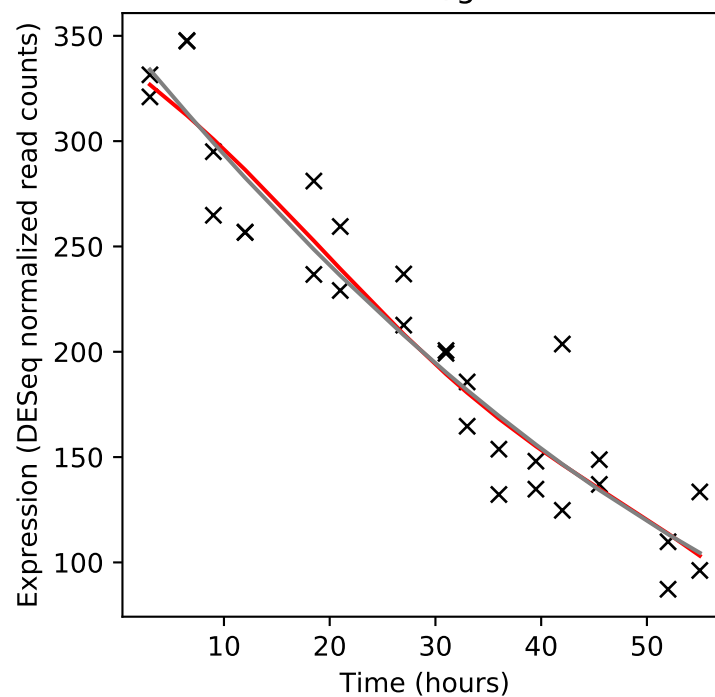

Rv3635/-

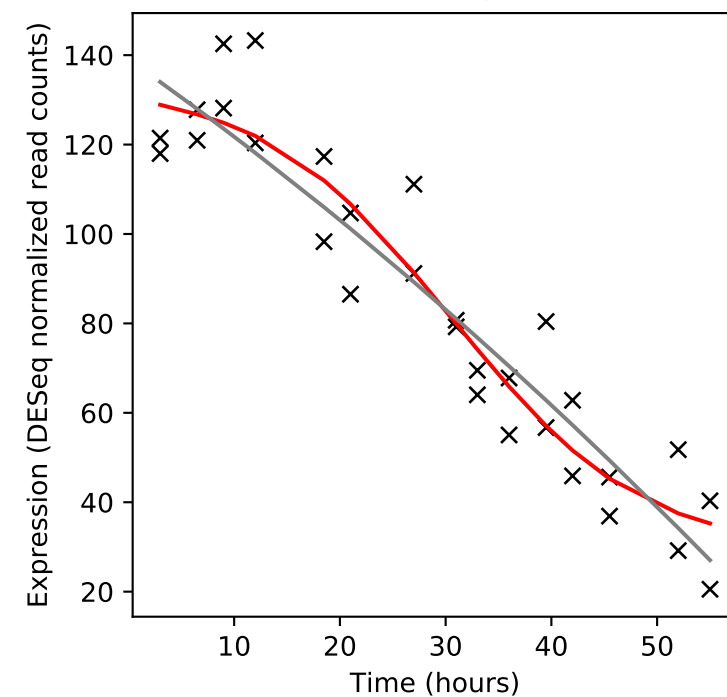

Rv3636/-

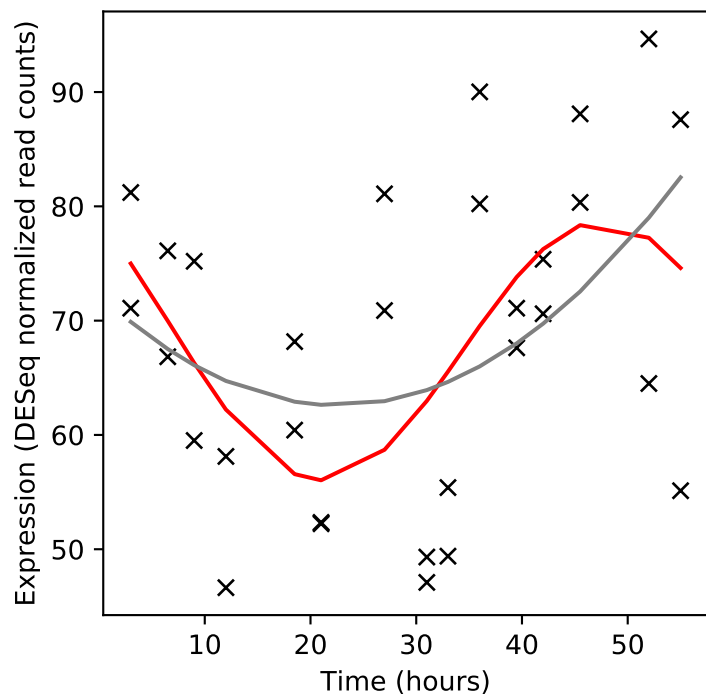

Rv3637/-

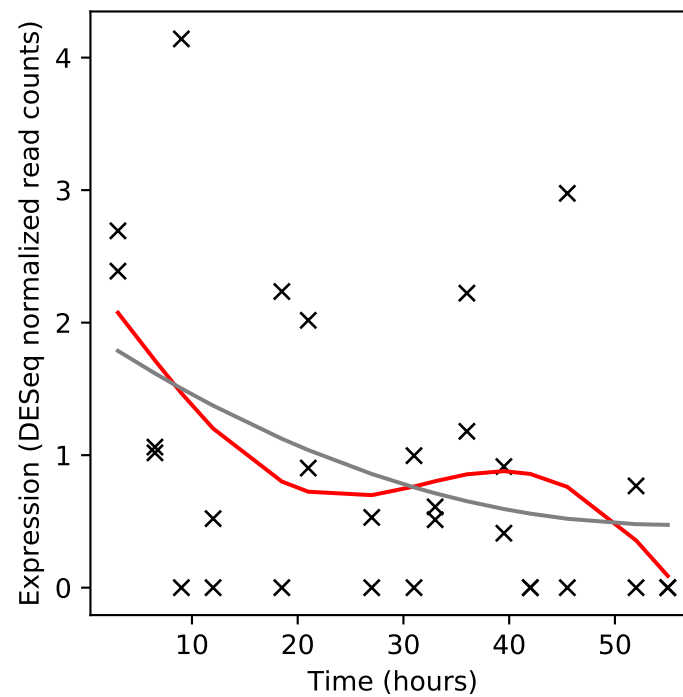

Rv3638/-

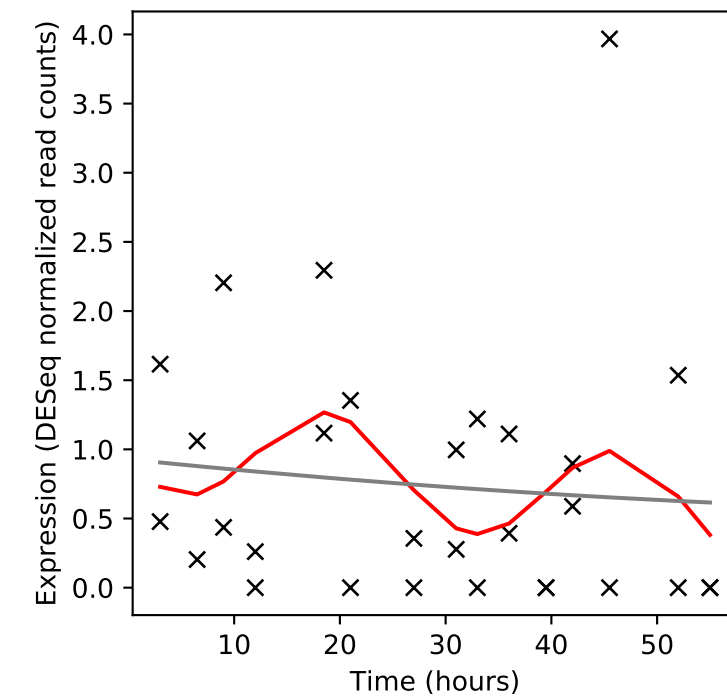

Rv3639c/-

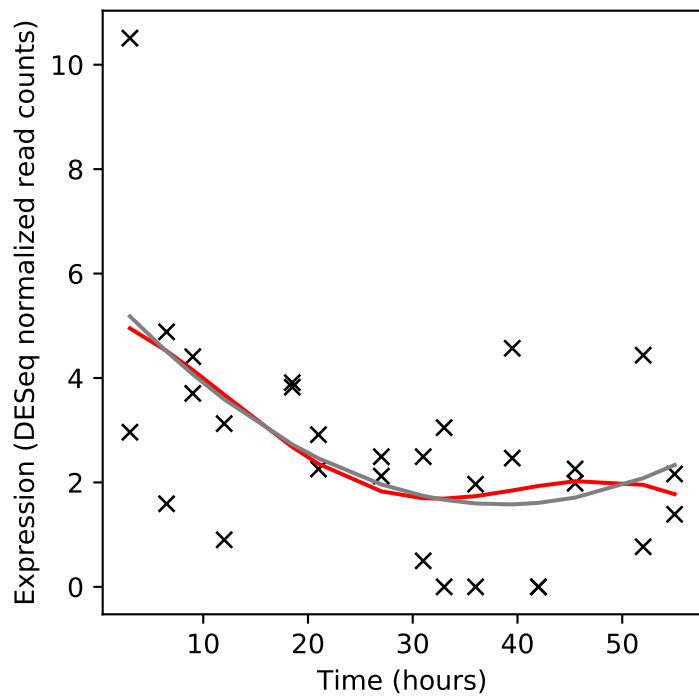

Rv3640c/-

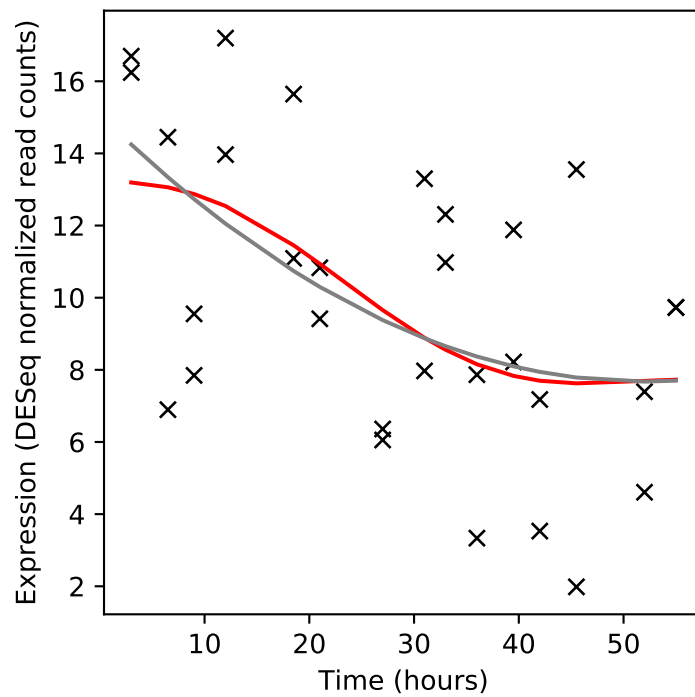

Rv3641c/fic

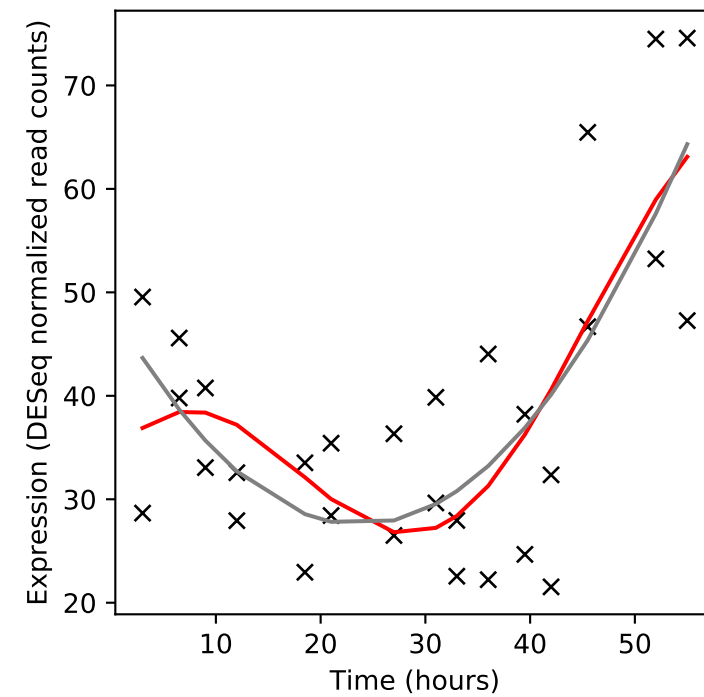

Rv3642c/-

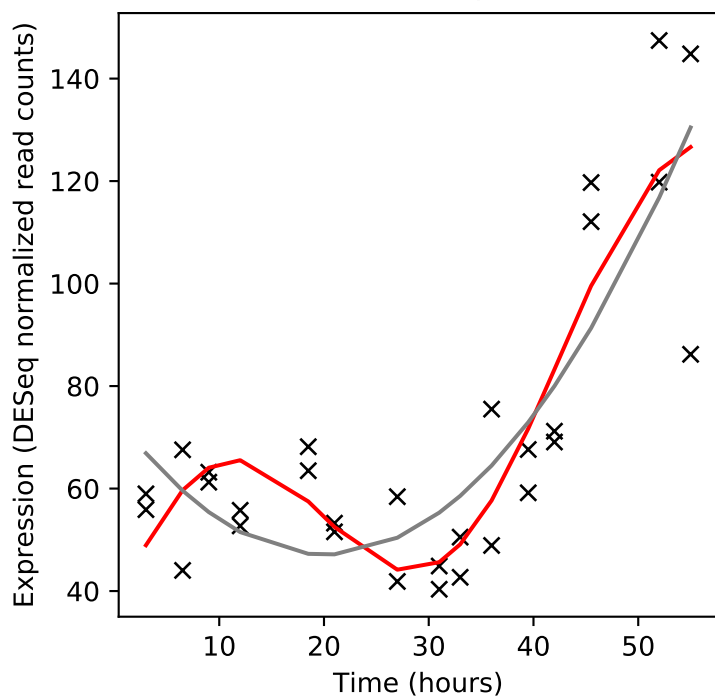

Rv3643/-

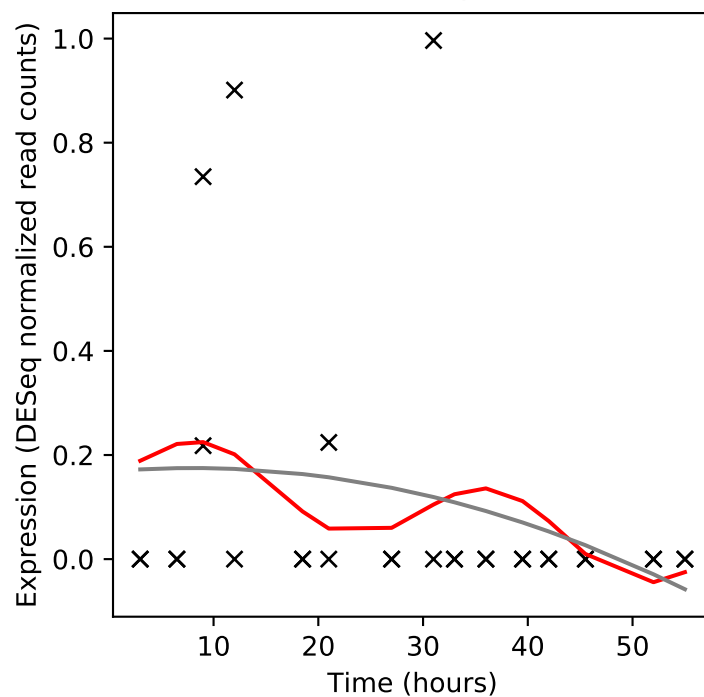

Rv3644c/-

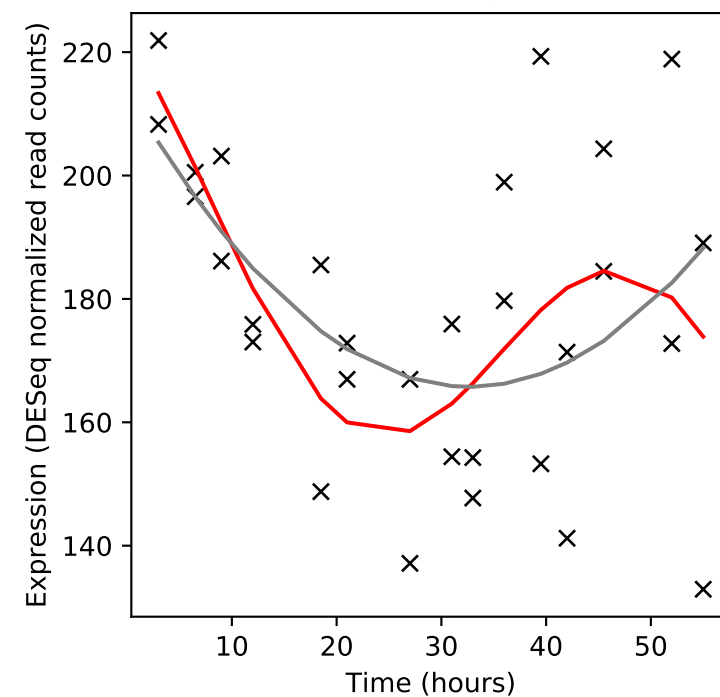

Rv3645/-

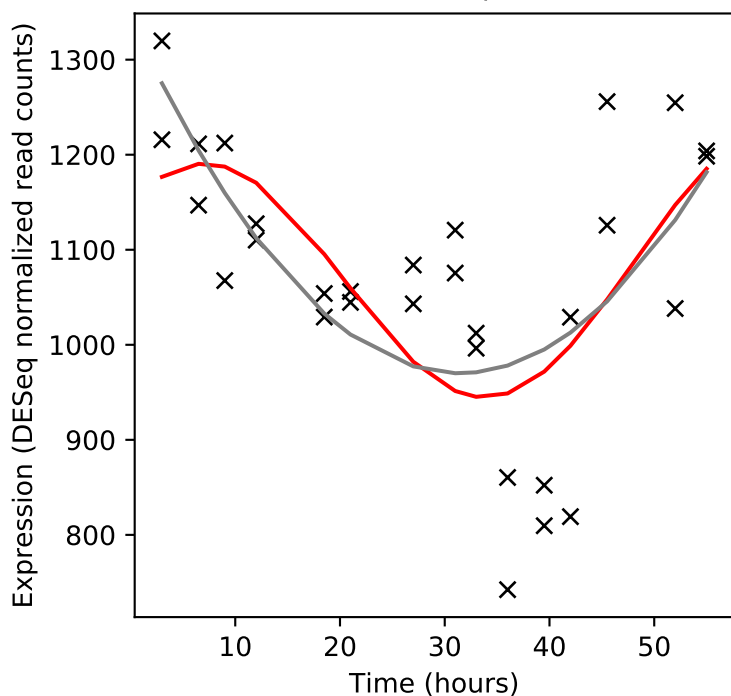

Rv3646c/topA

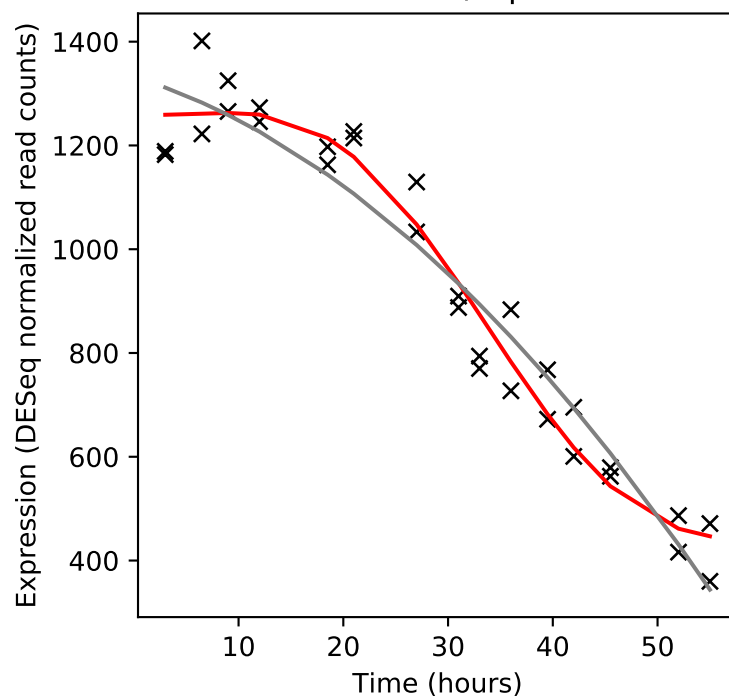

Rv3647c/-

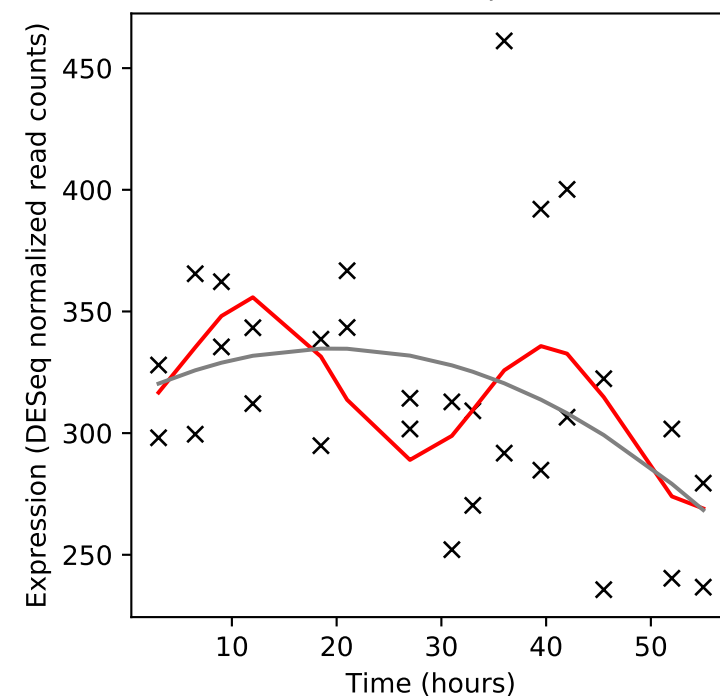



Rv3648c/cspA

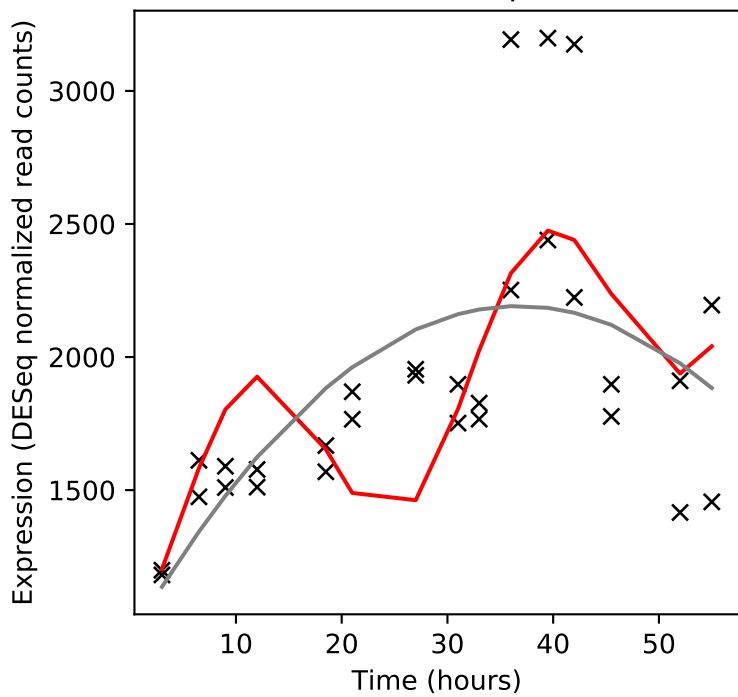

Rv3649/-

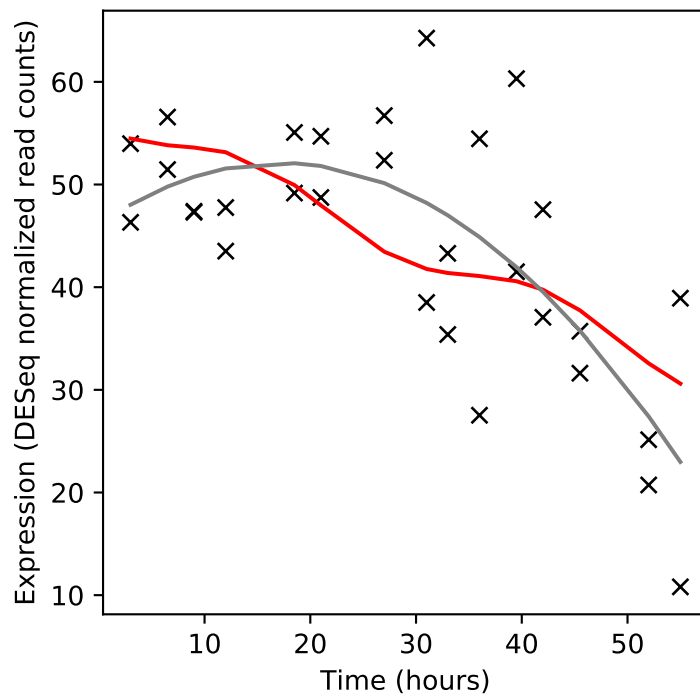

Rv3650/PE33

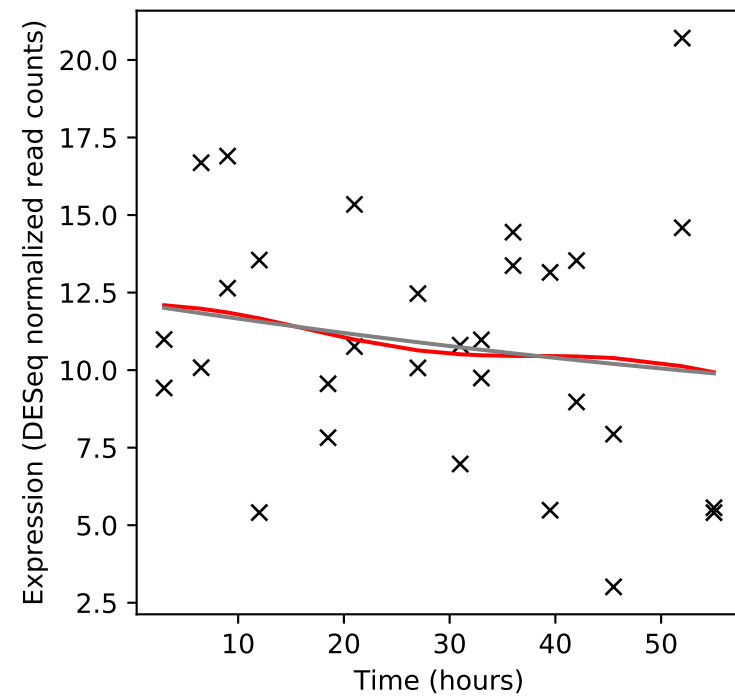

Rv3651/-

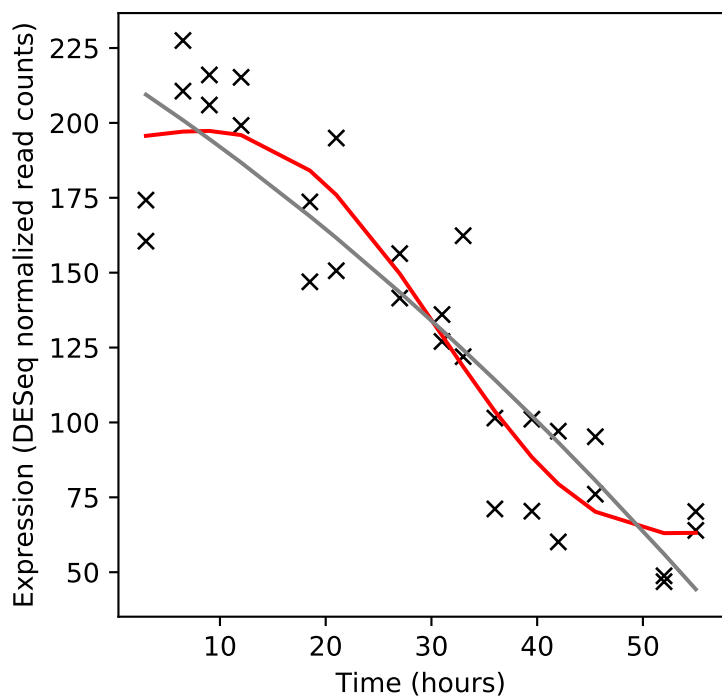

Rv3652/PE\_PGRS60

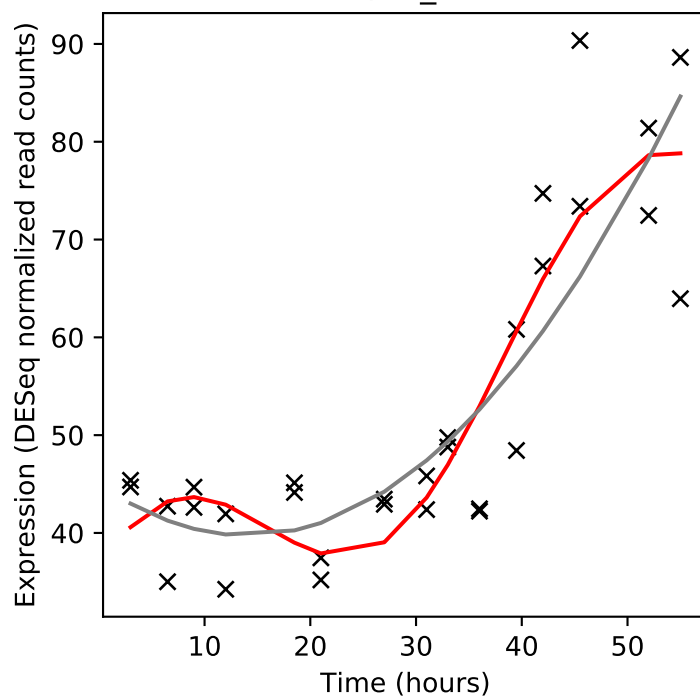

Rv3653/PE\_PGRS61

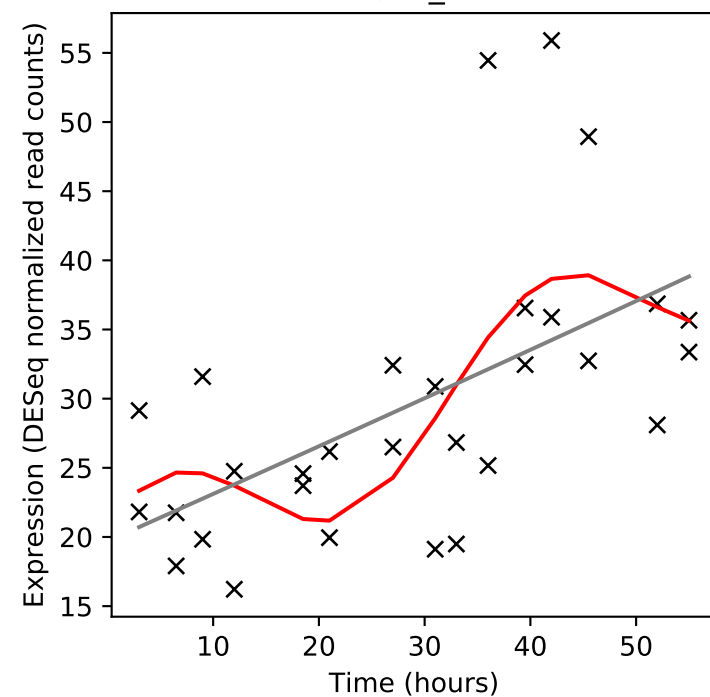

Rv3654c/-

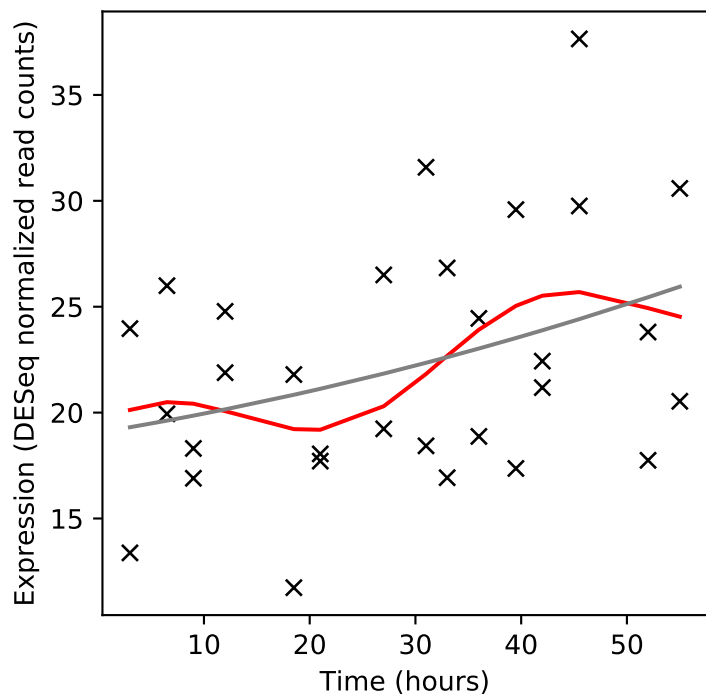

Rv3655c/-

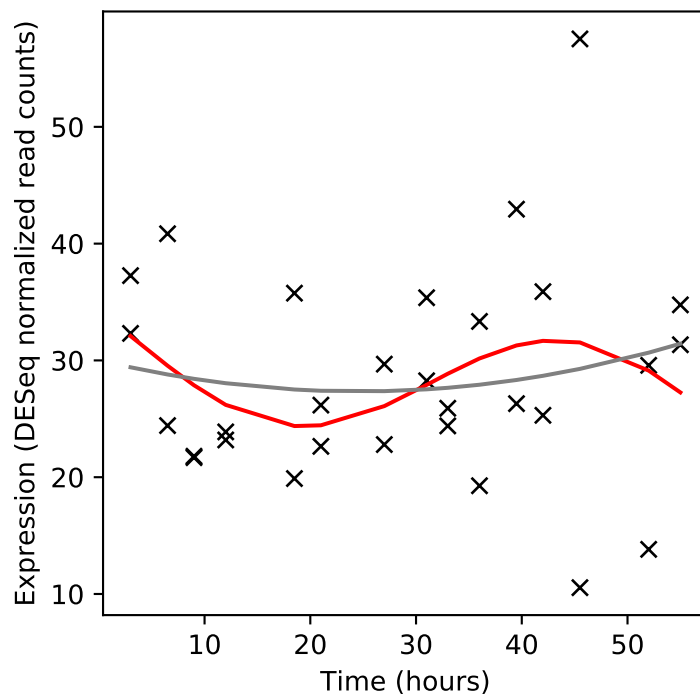

Rv3656c/-

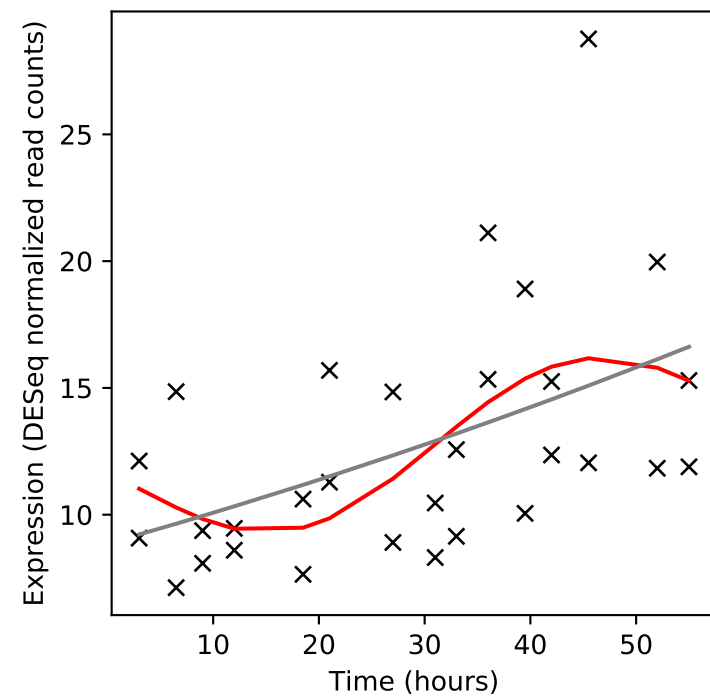

Rv3657c/-

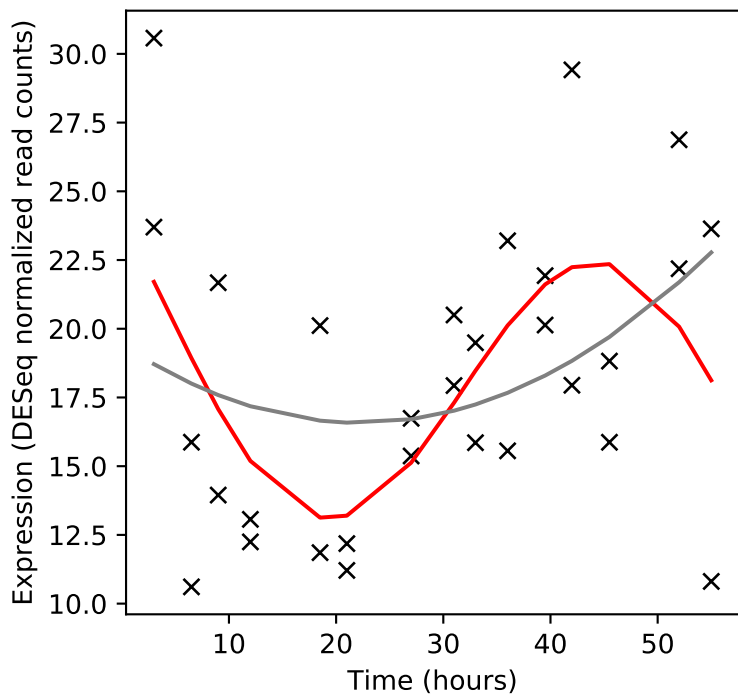

Rv3658c/-

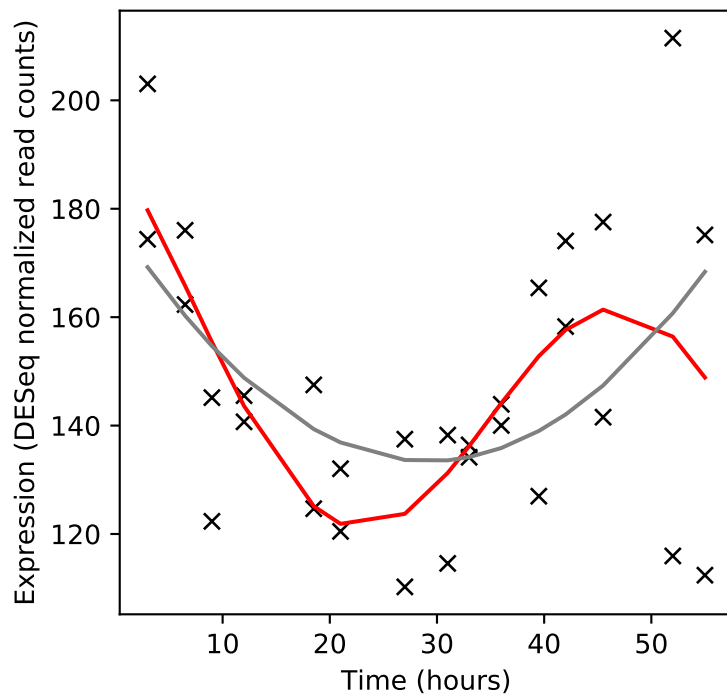

Rv3659c/-

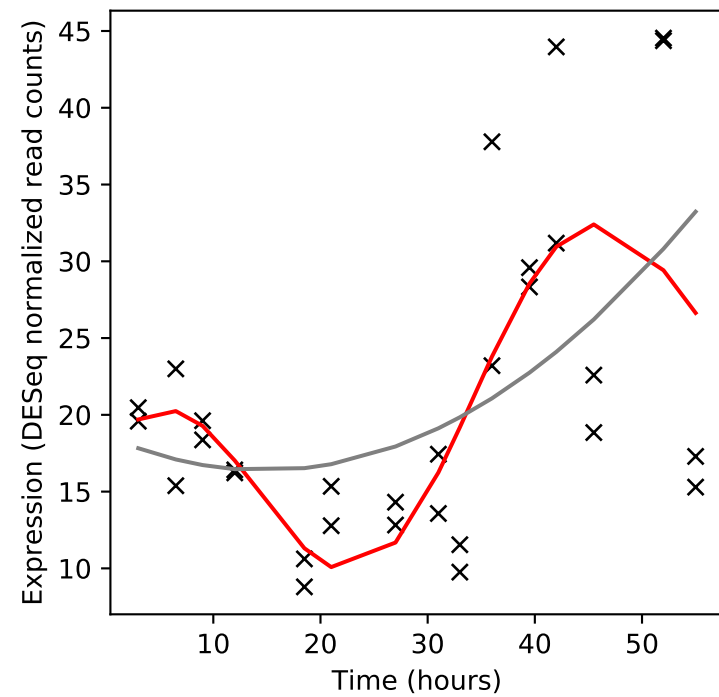

Rv3660c/-

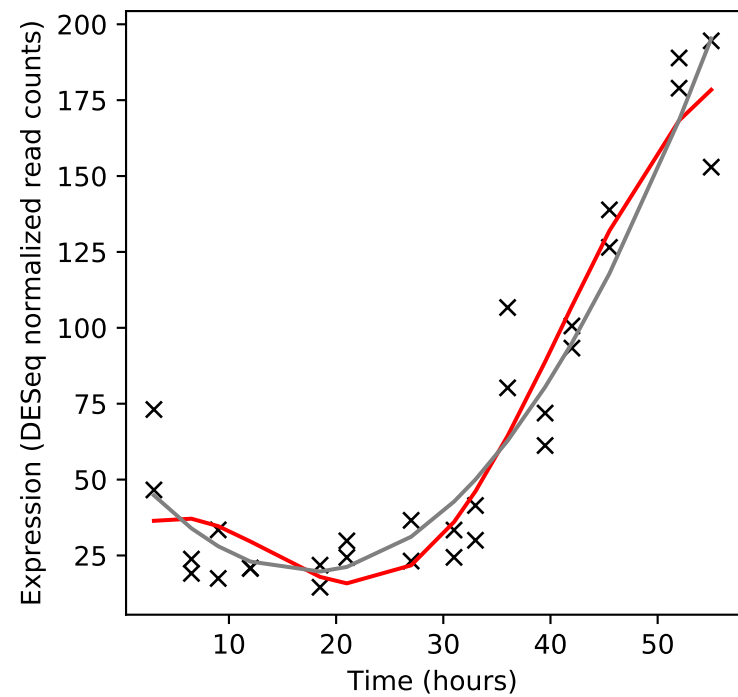

Rv3661/-

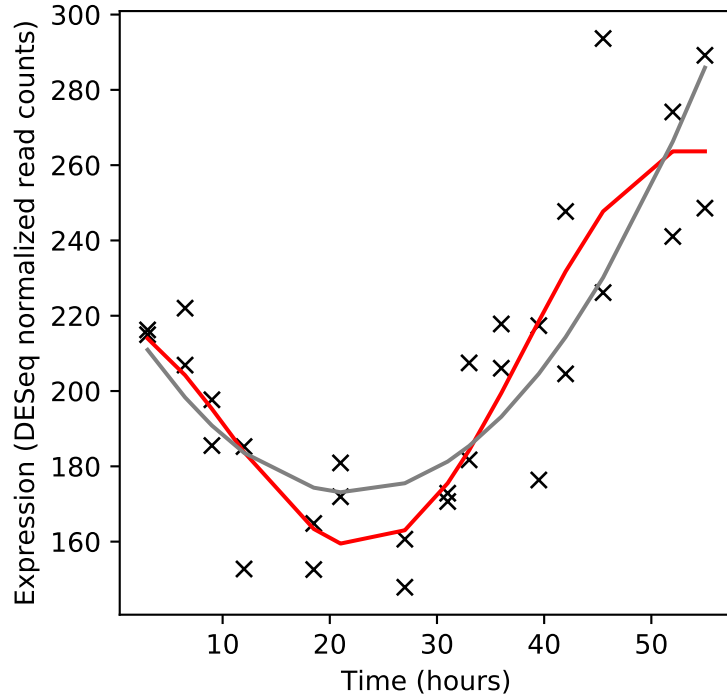

Rv3662c/-

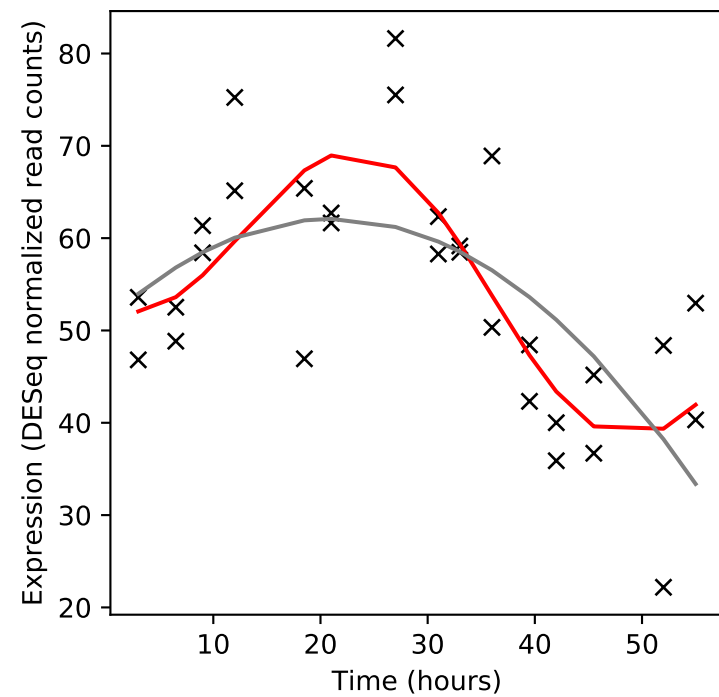

Rv3663c/dppD

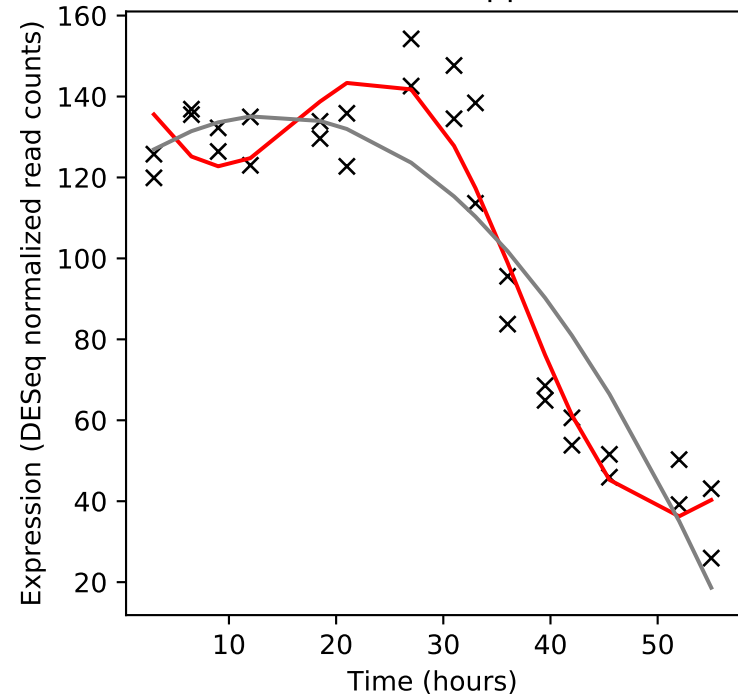

Rv3664c/dppC

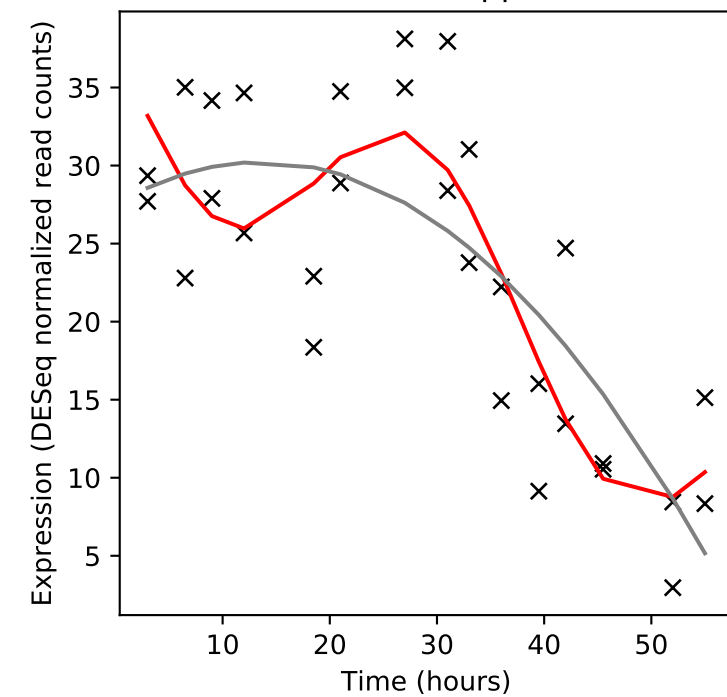

Rv3665c/dppB

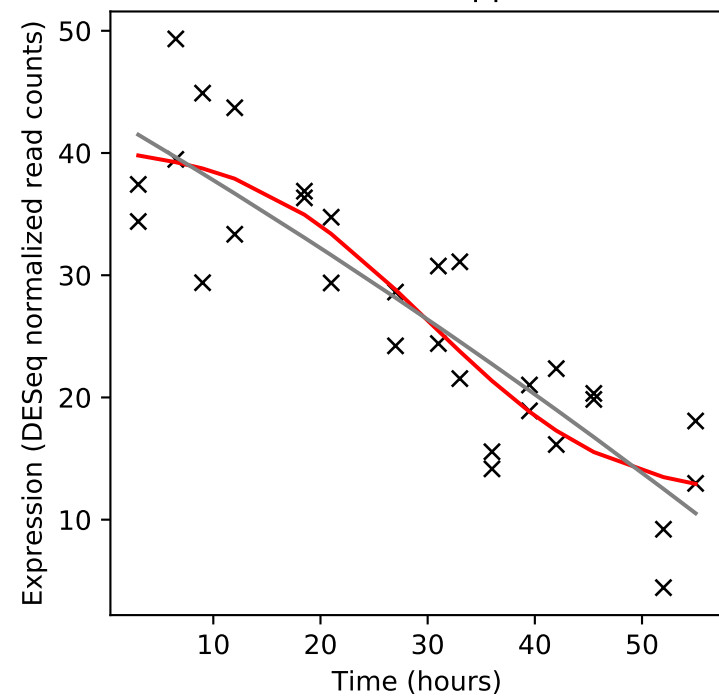

Rv3666c/dppA

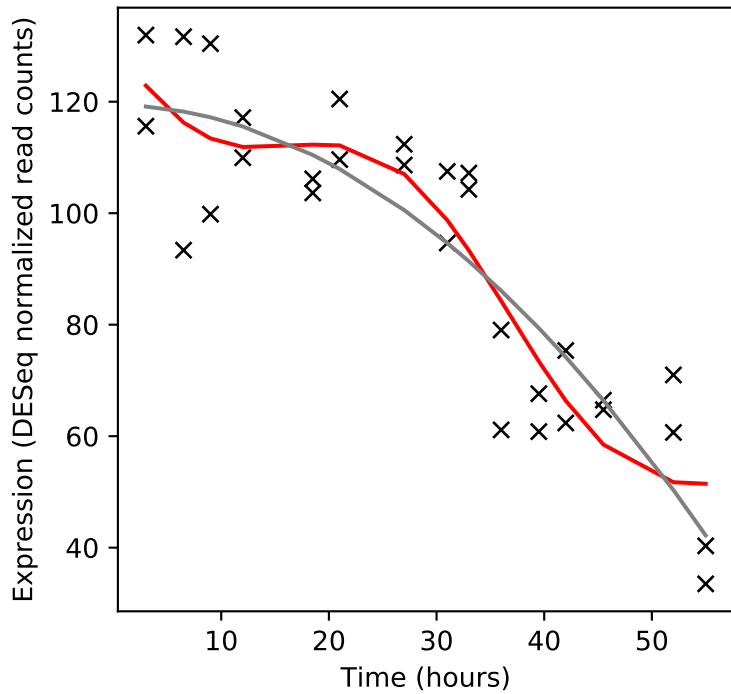

Rv3667/acs

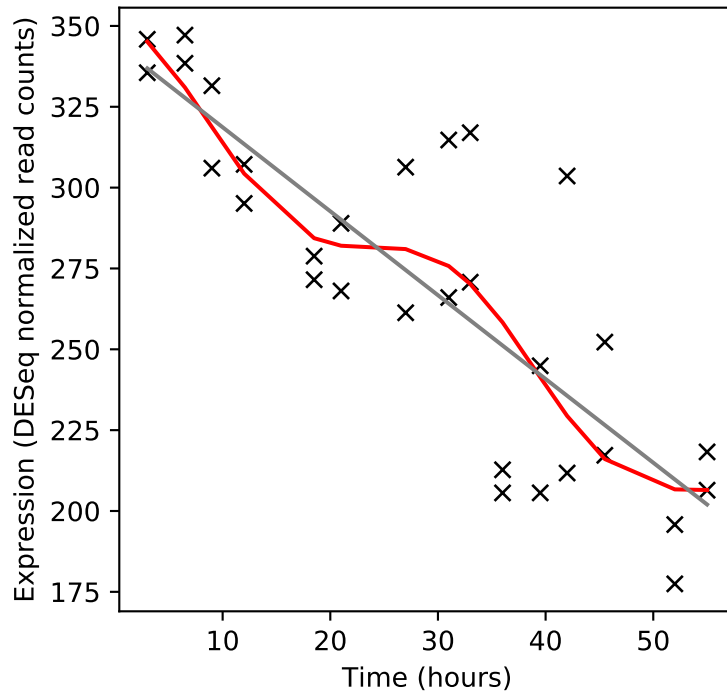

Rv3668c/-

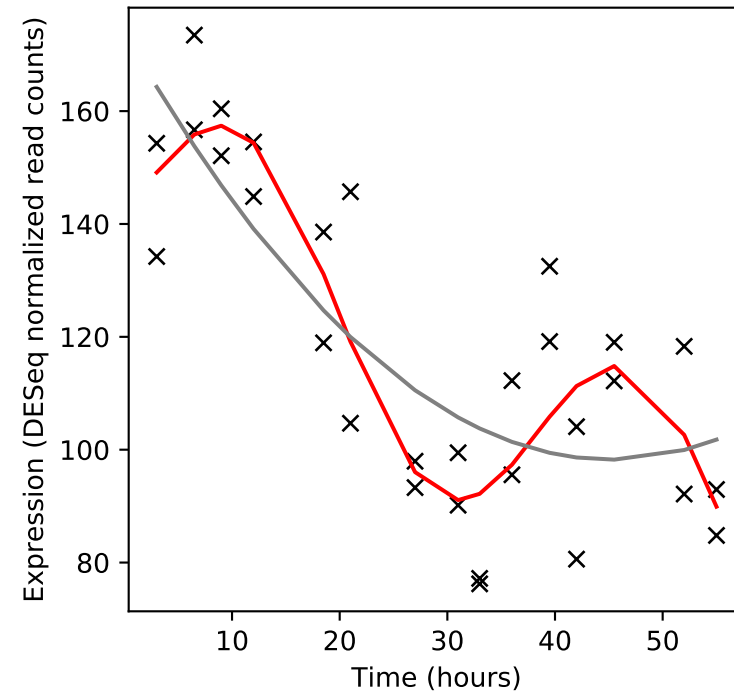

Rv3669/-

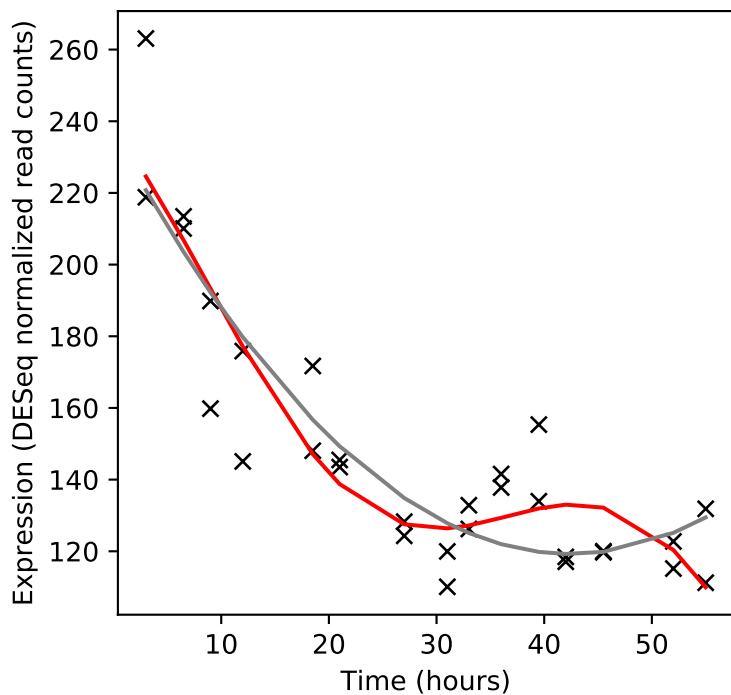

Rv3670/ephE

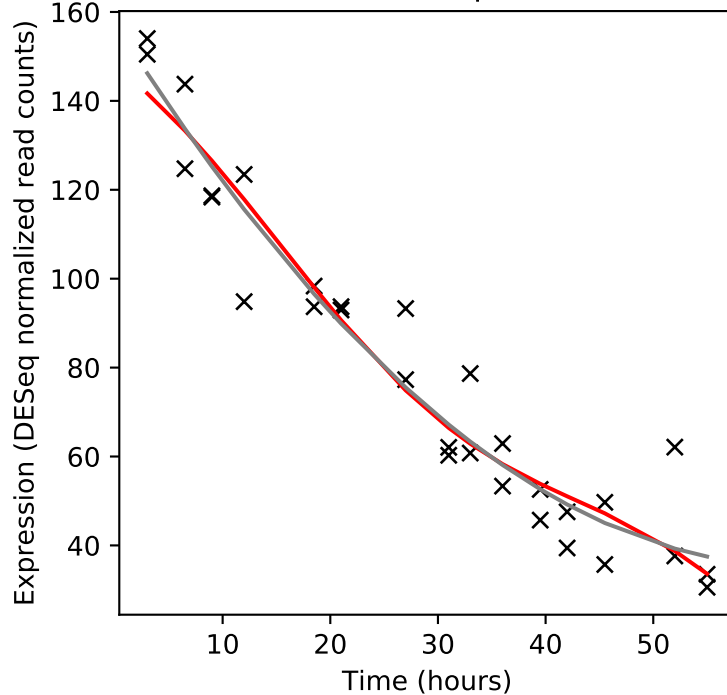

Rv3671c/-

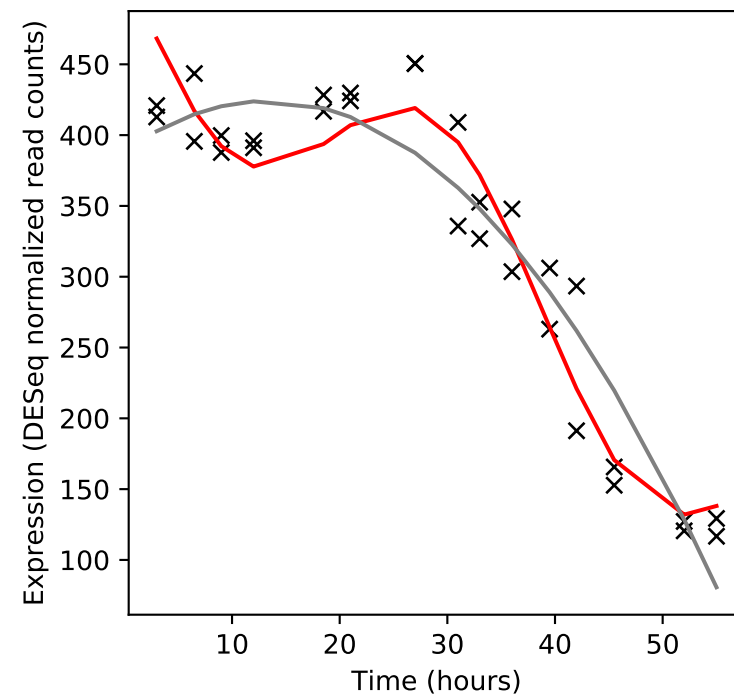

Rv3672c/-

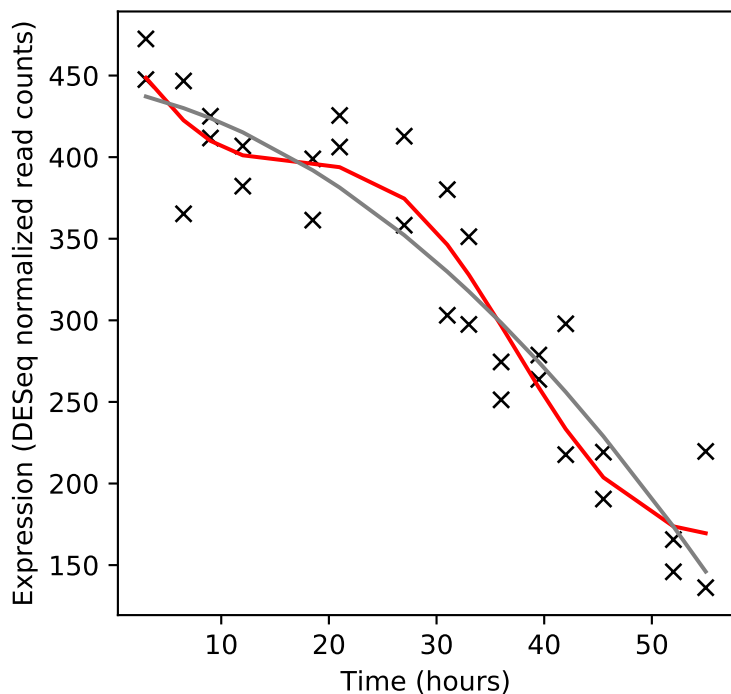

Rv3673c/-

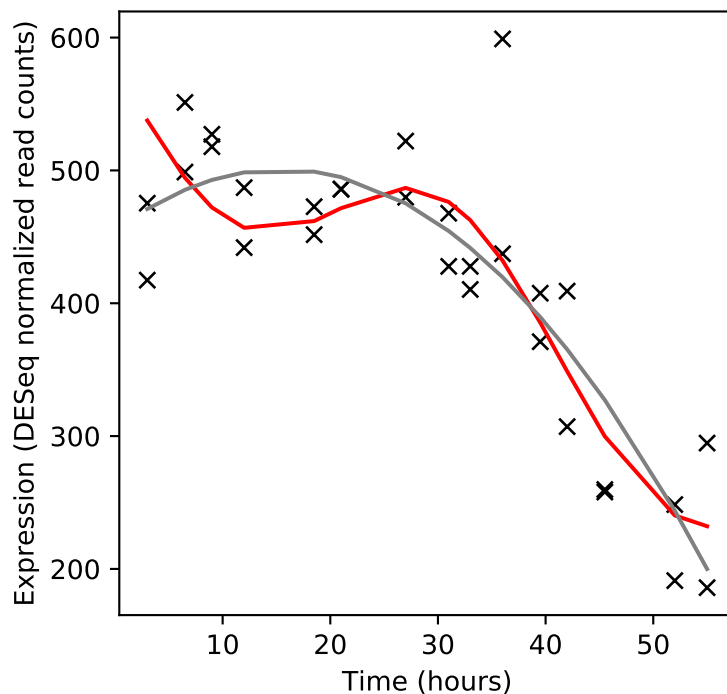

Rv3674c/nth

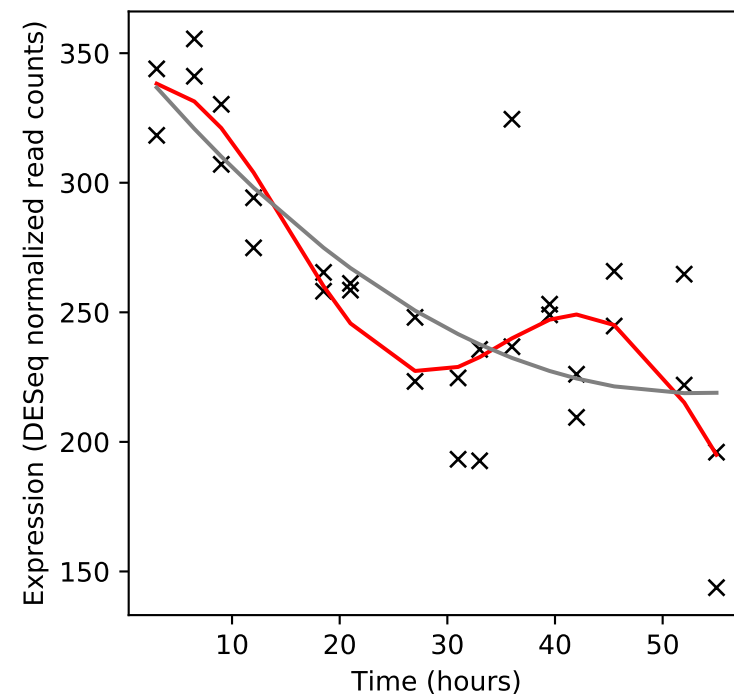

Rv3675/-

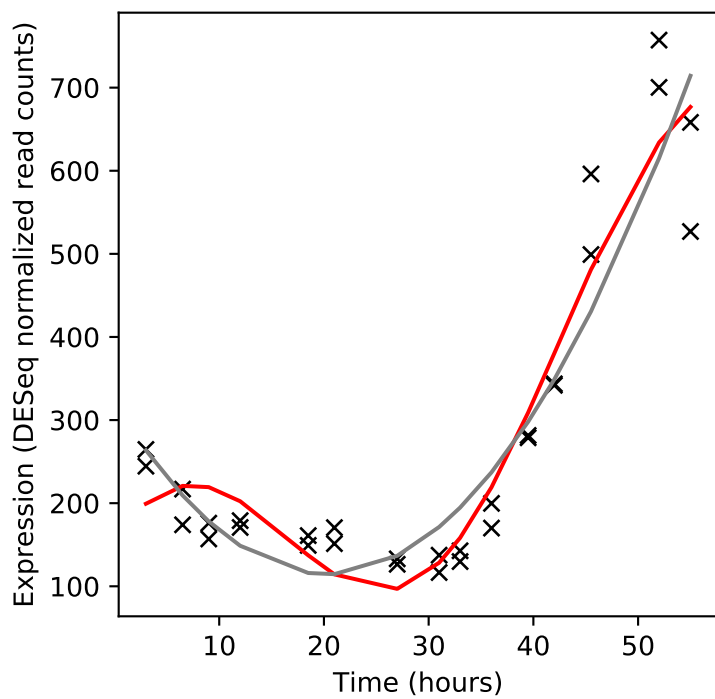

Rv3676/crp

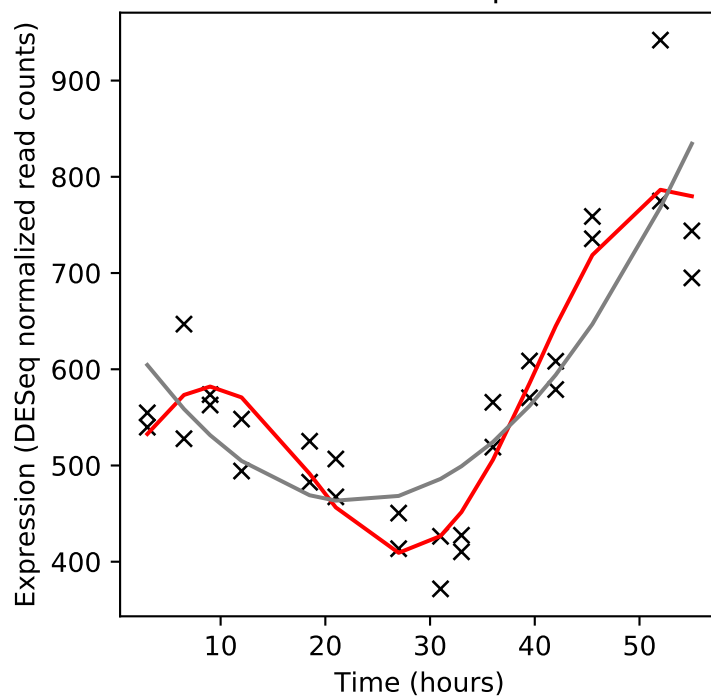

Rv3677c/-

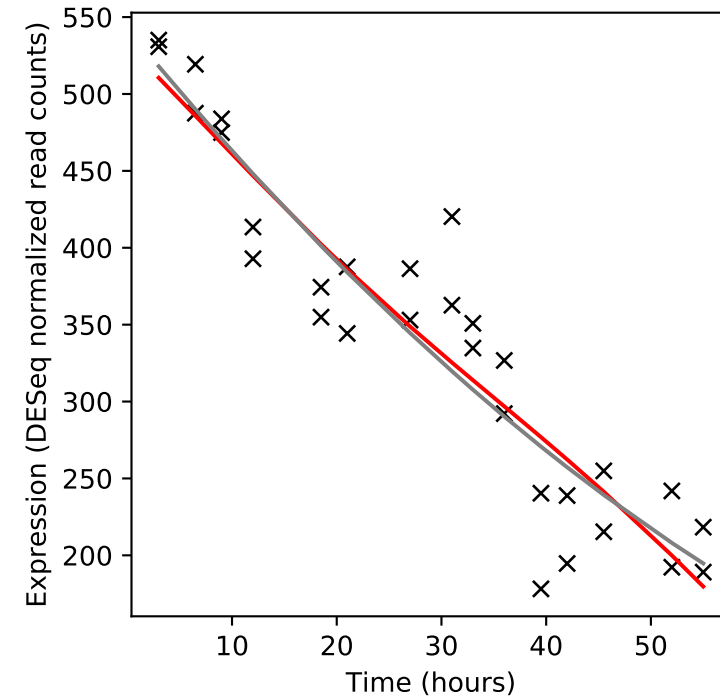

Rv3678c/-

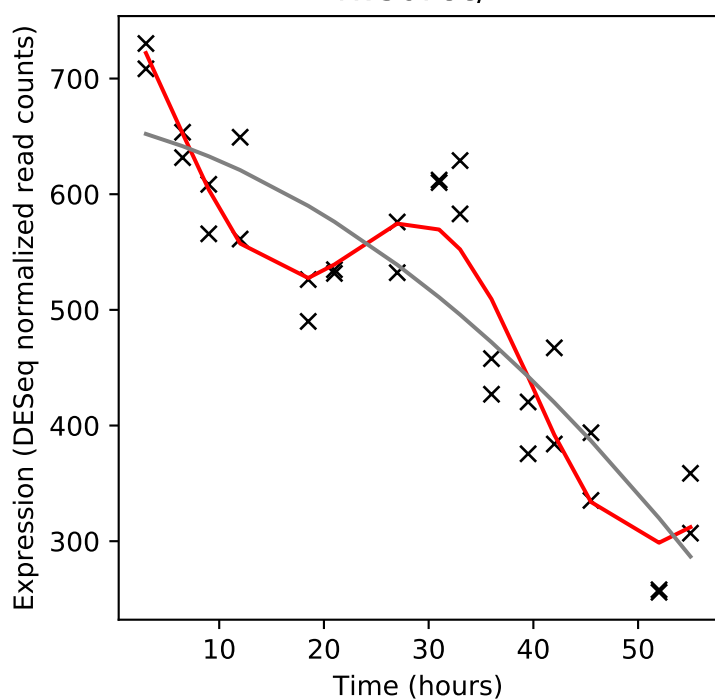

Rv3678A/-

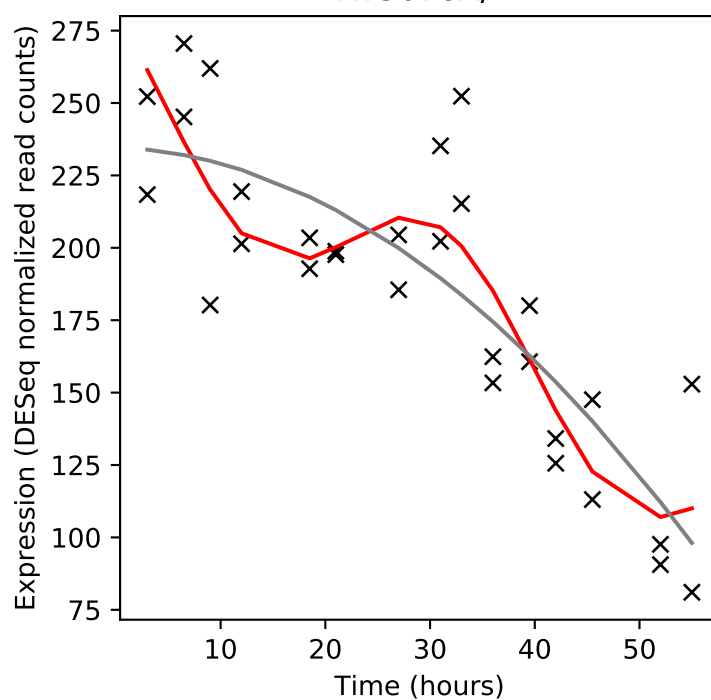

Rv3679/-

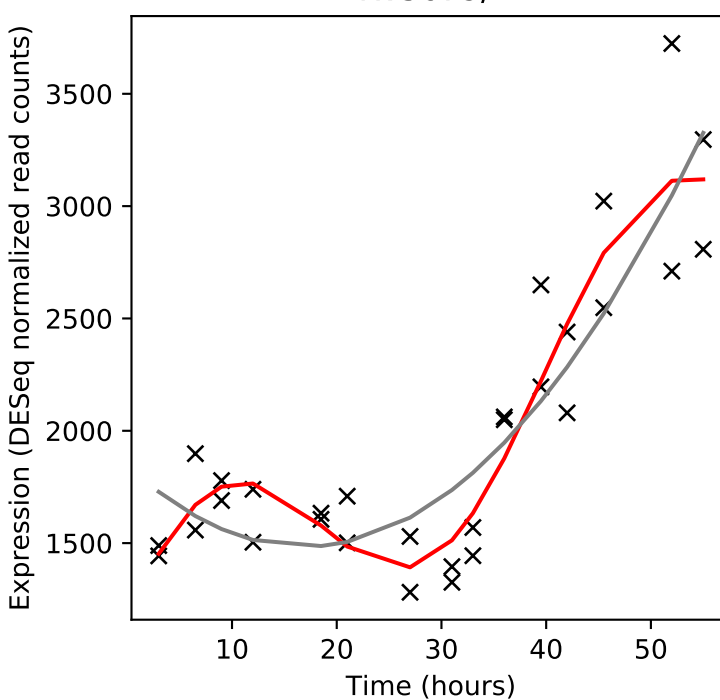

Rv3680/-

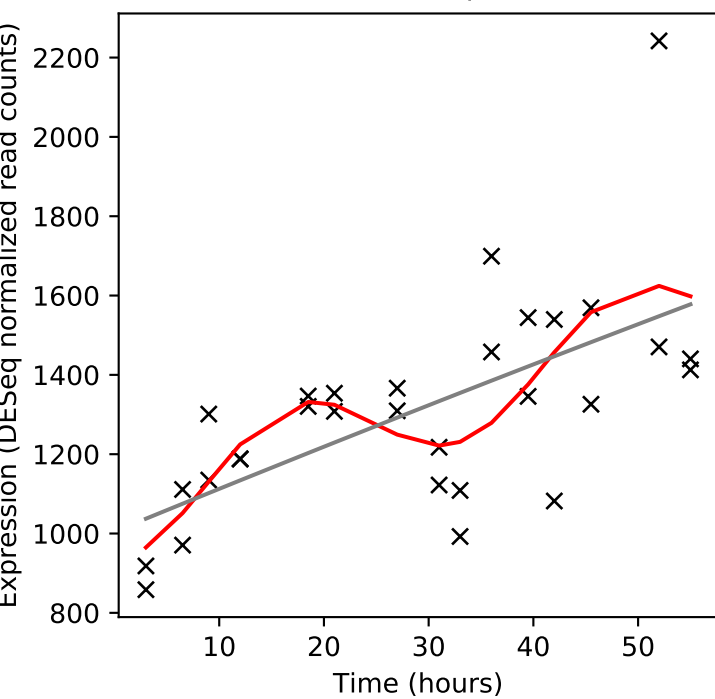

Rv3681c/whiB4

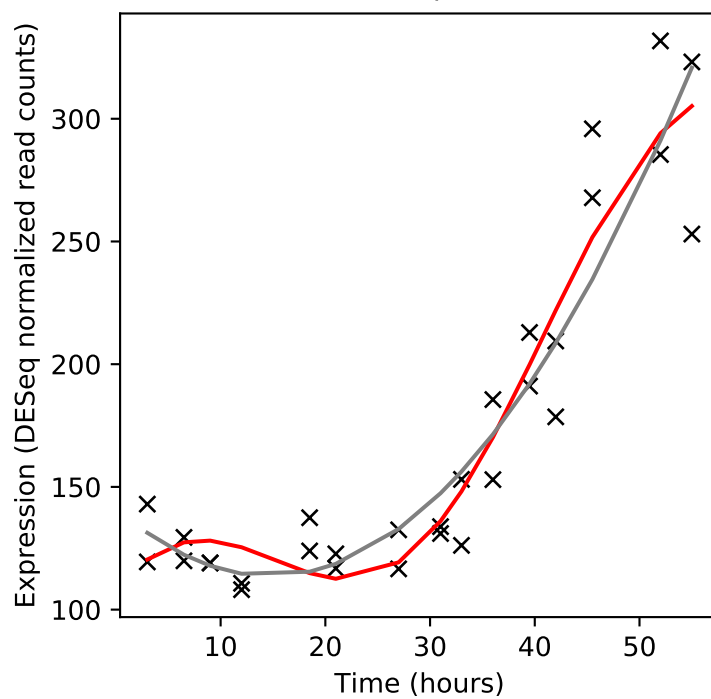

Rv3682/ponA2

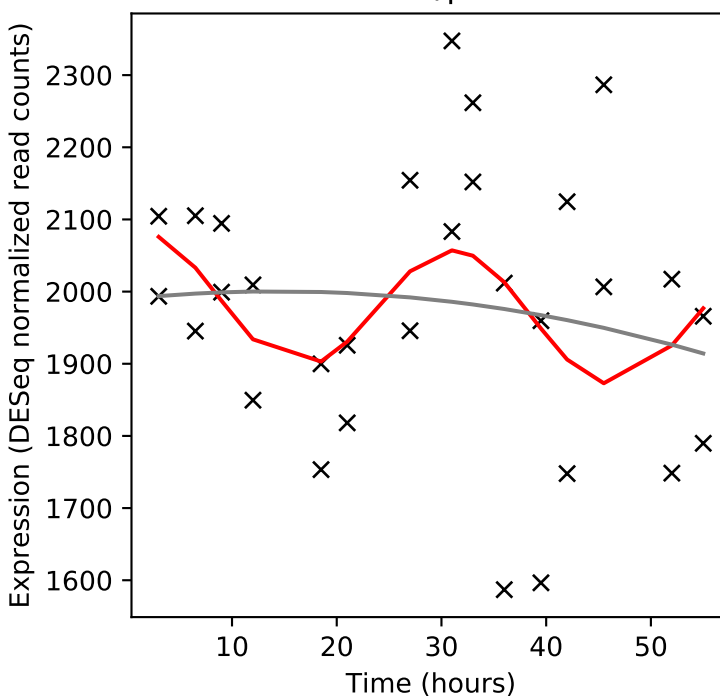

Rv3683/-

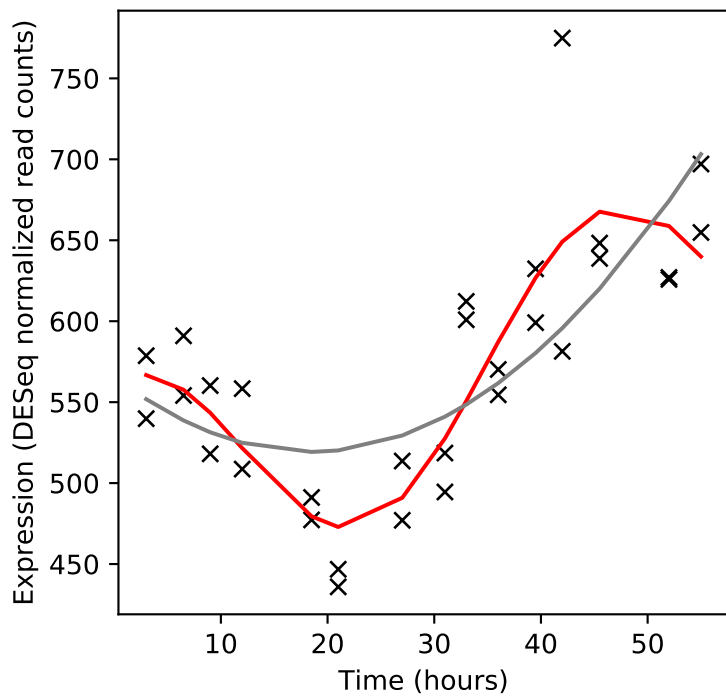

Rv3684/-

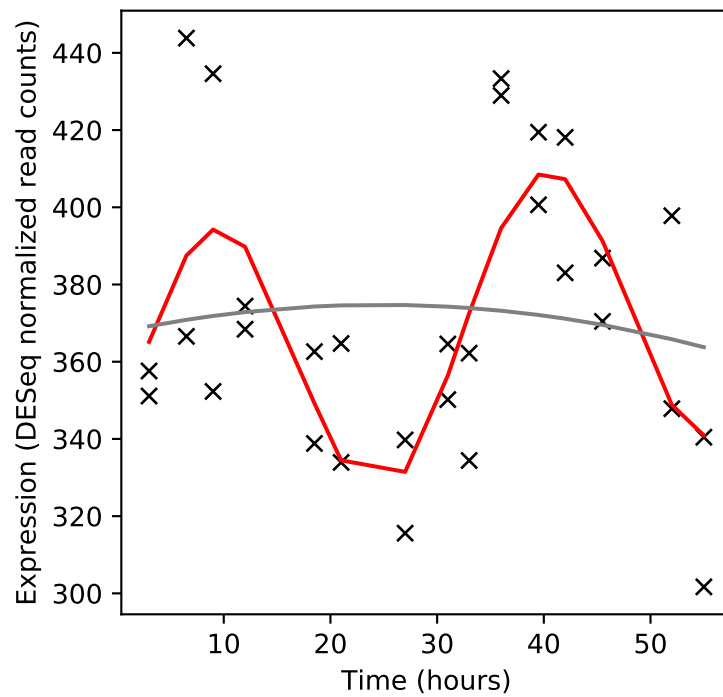

Rv3685c/cyp137

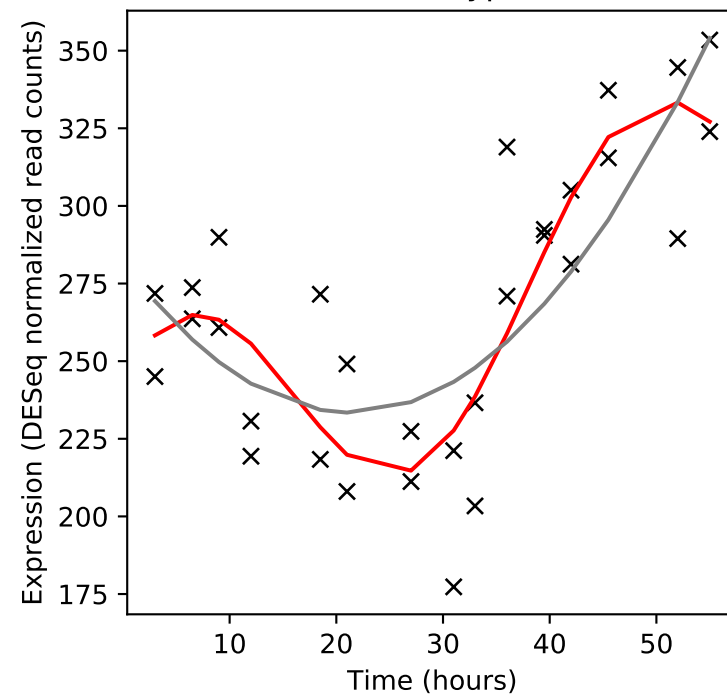

Rv3686c/-

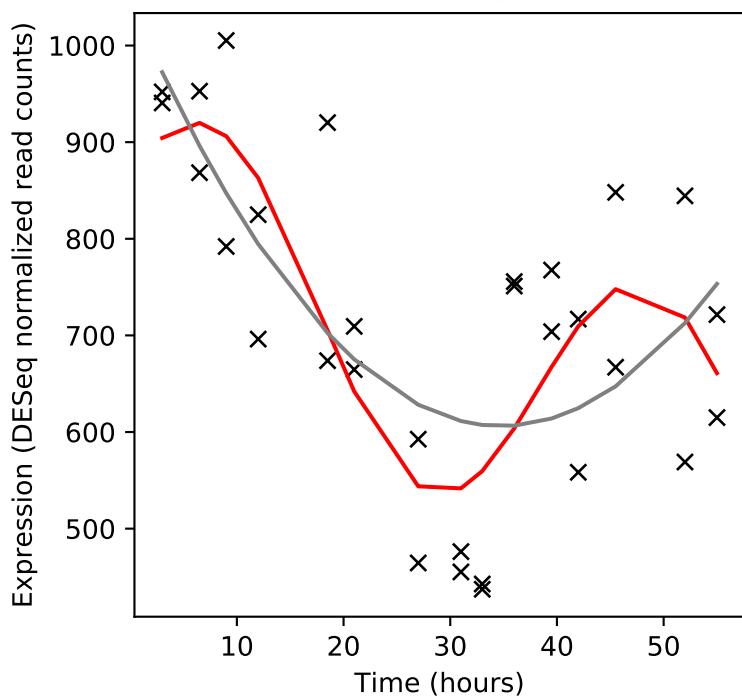

Rv3687c/rsfB

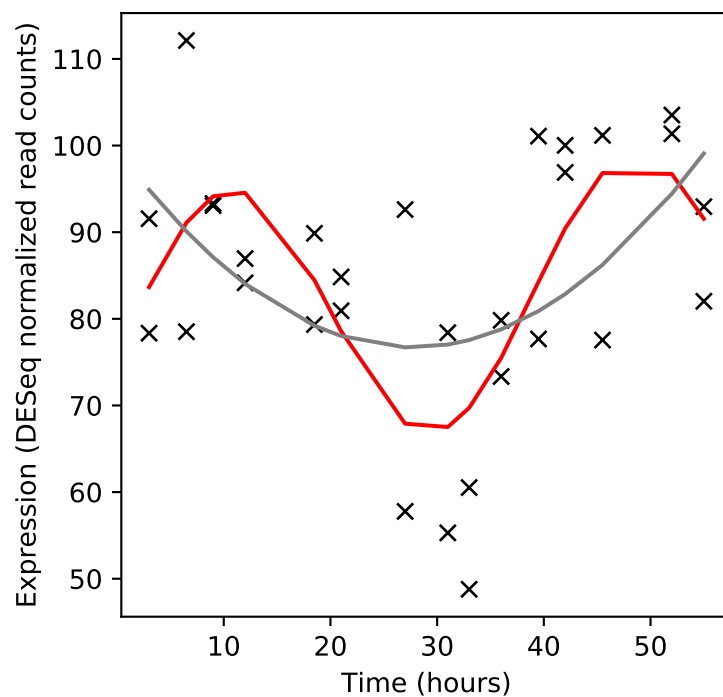

Rv3688c/-

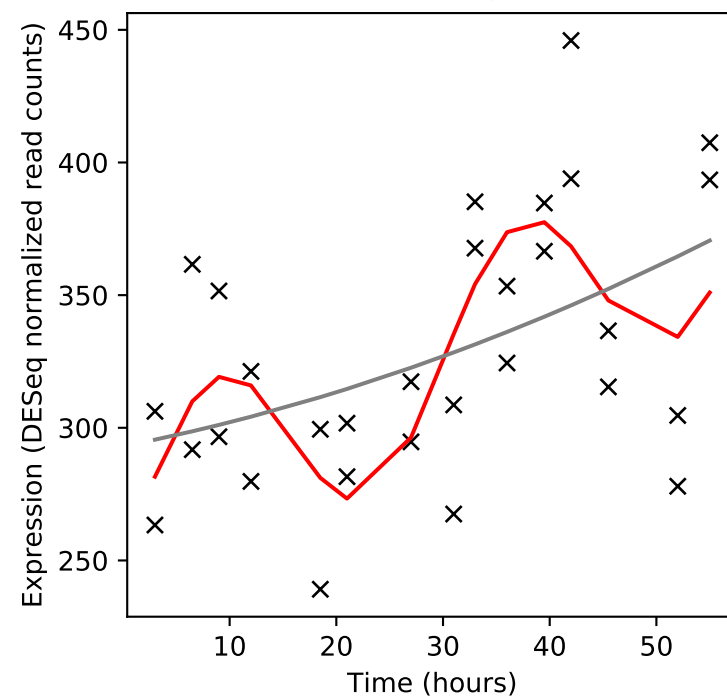

Rv3689/-

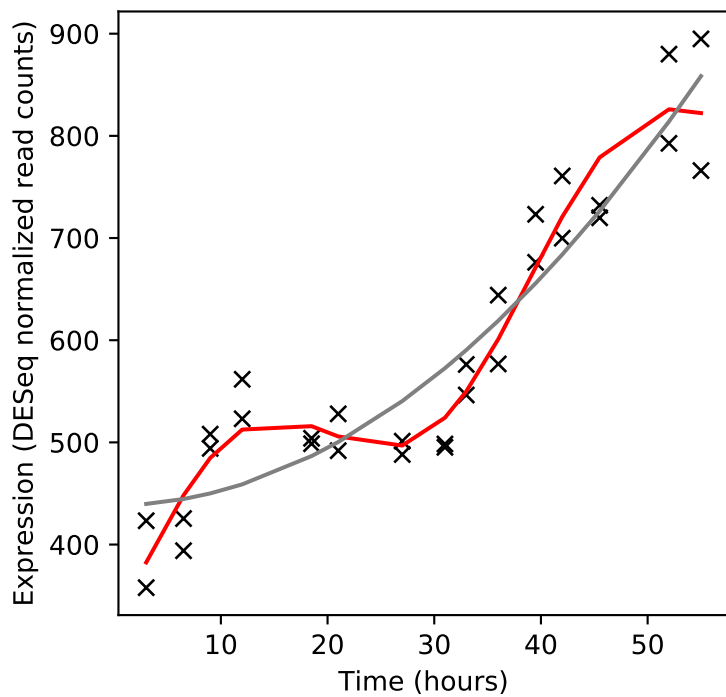

Rv3690/-

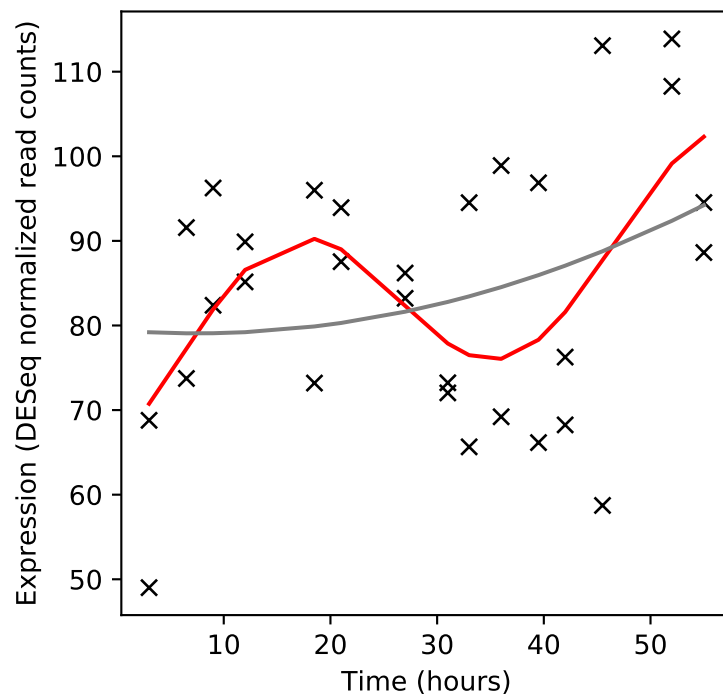

Rv3691/-

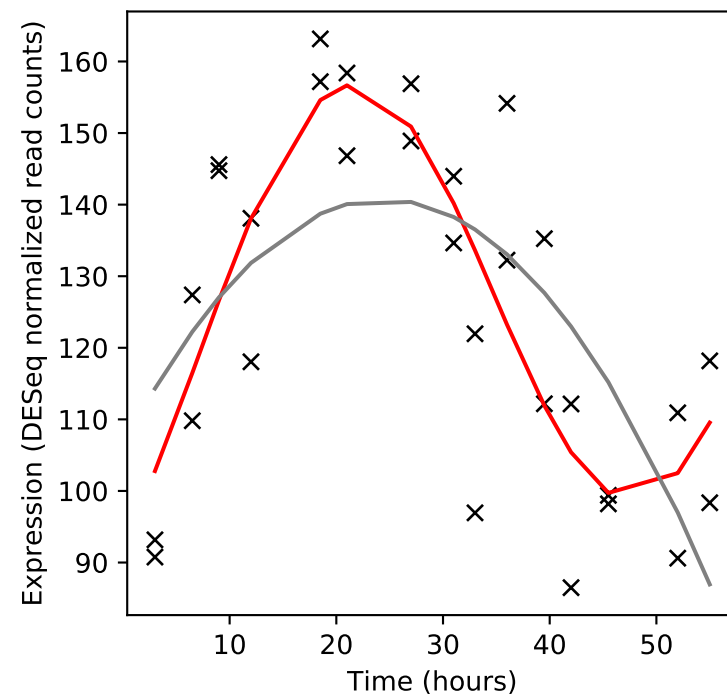

Rv3692/moxR2

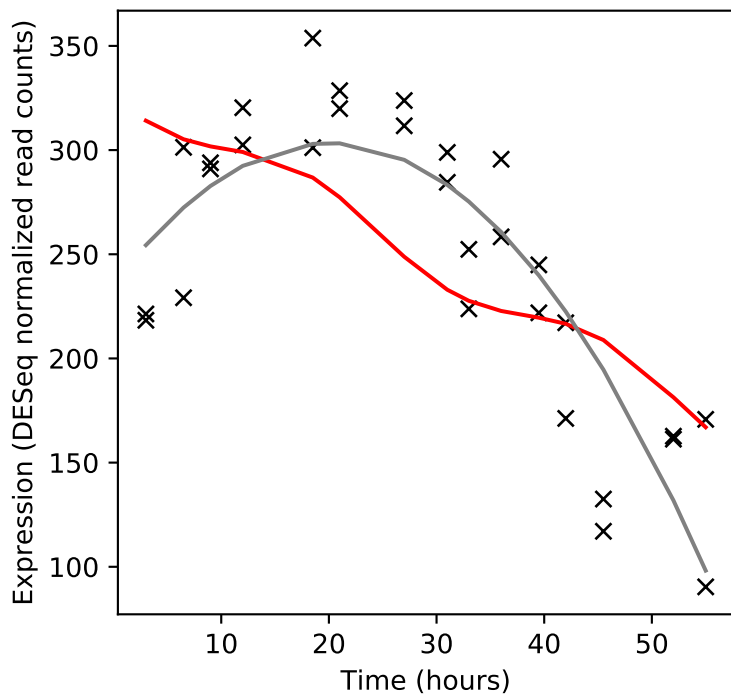

Rv3693/-

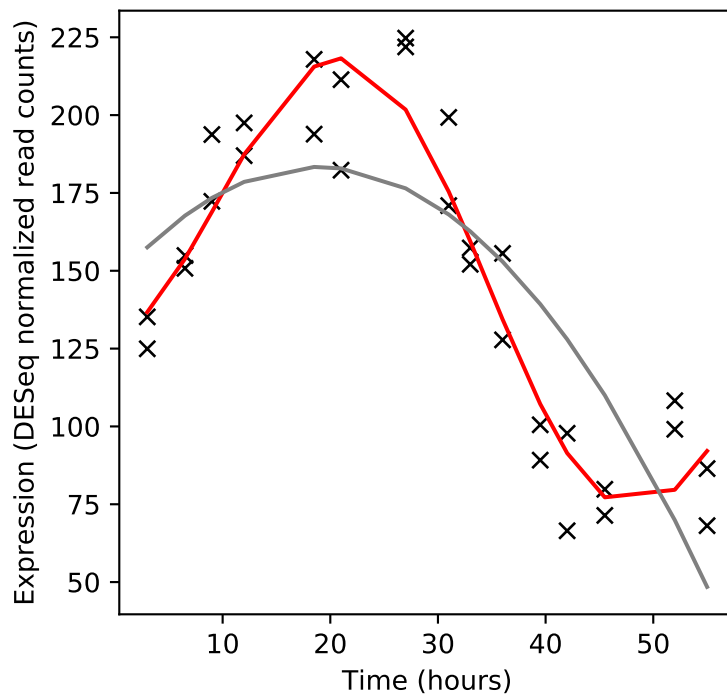

Rv3694c/-

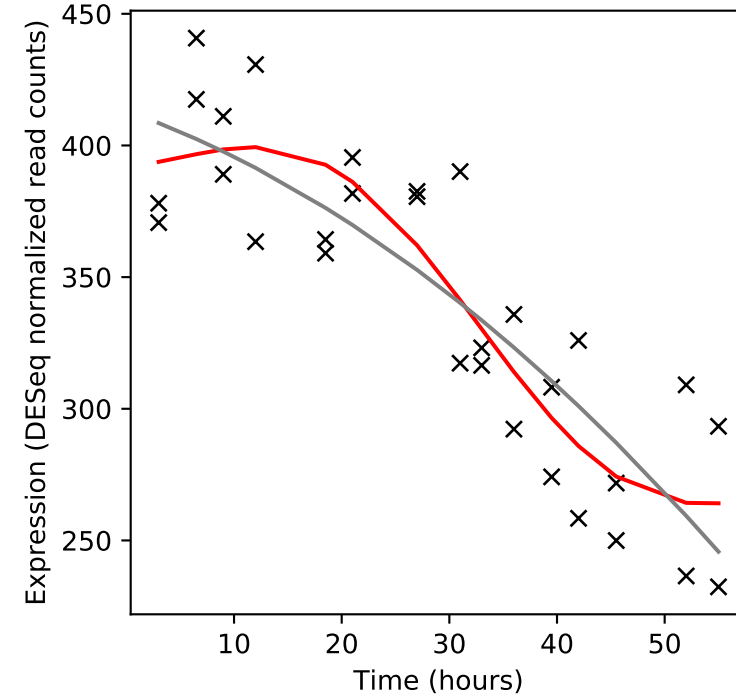

Rv3695/-

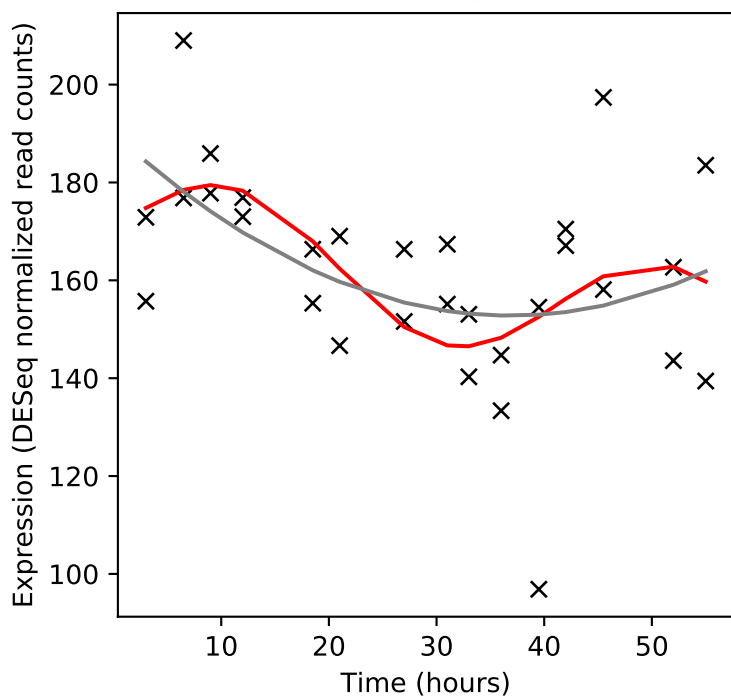

Rv3696c/glpK

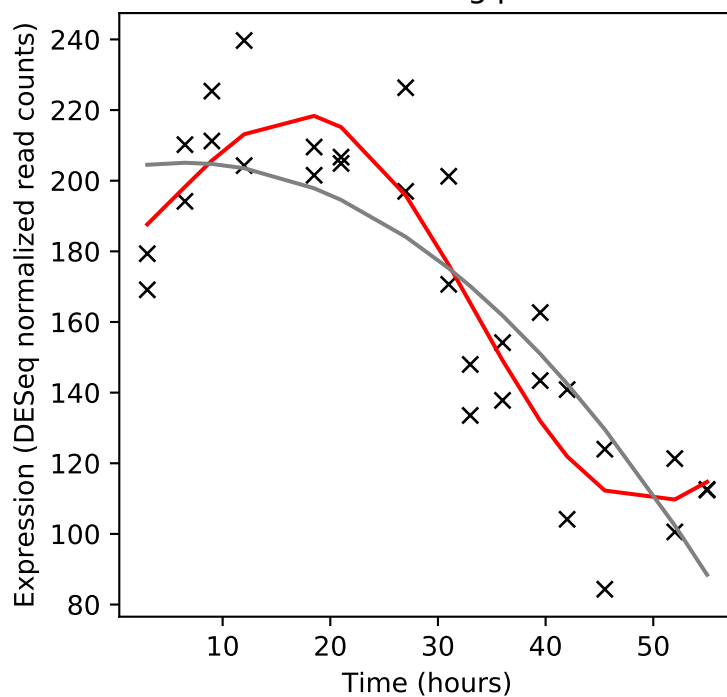

Rv3697c/vapC48

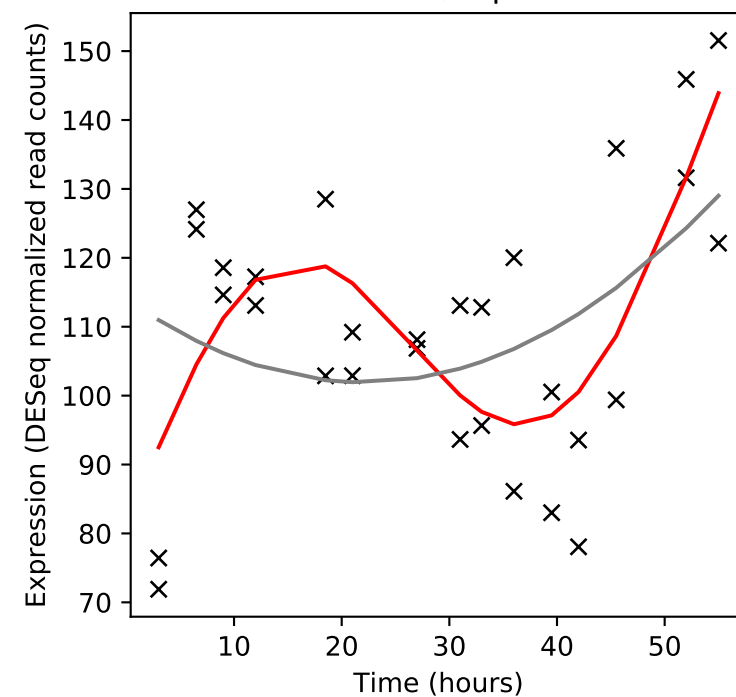

Rv3697A/vapB48

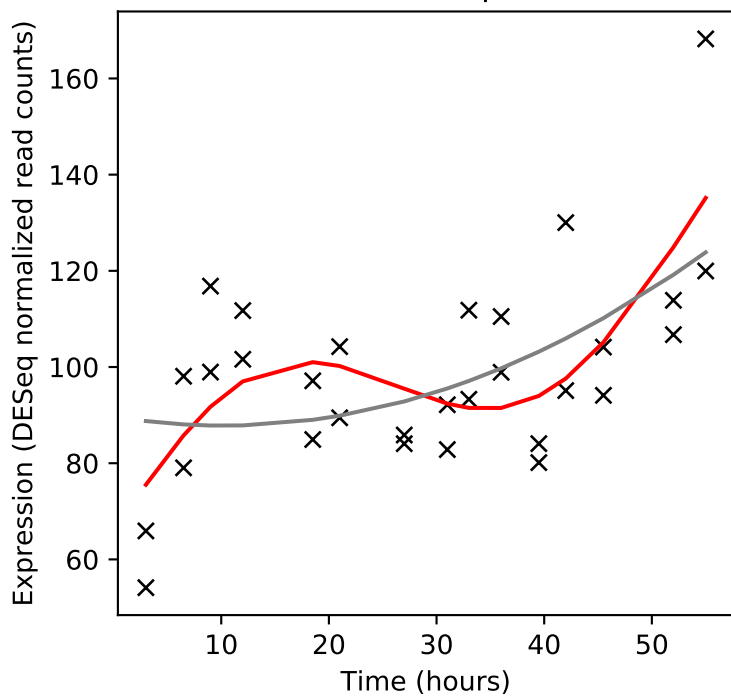

Rv3698/-

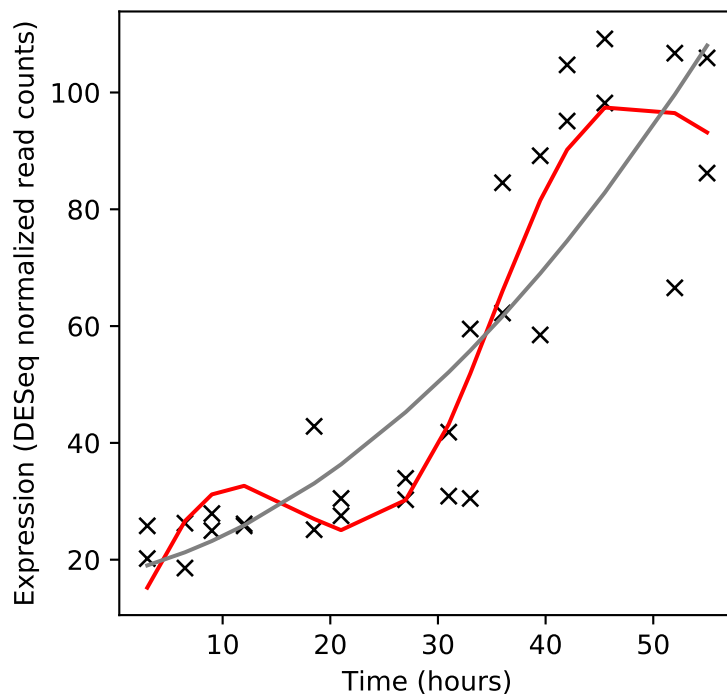

Rv3699/-

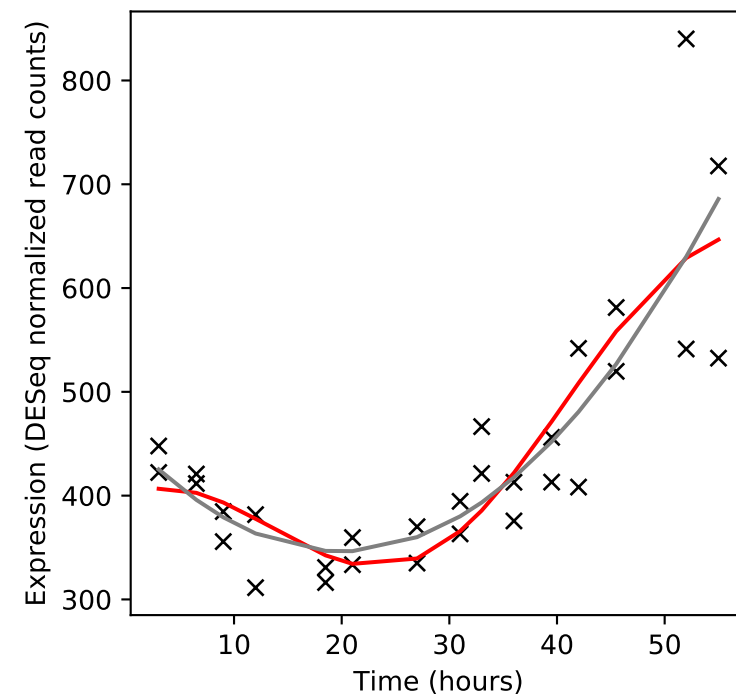

Rv3700c/-

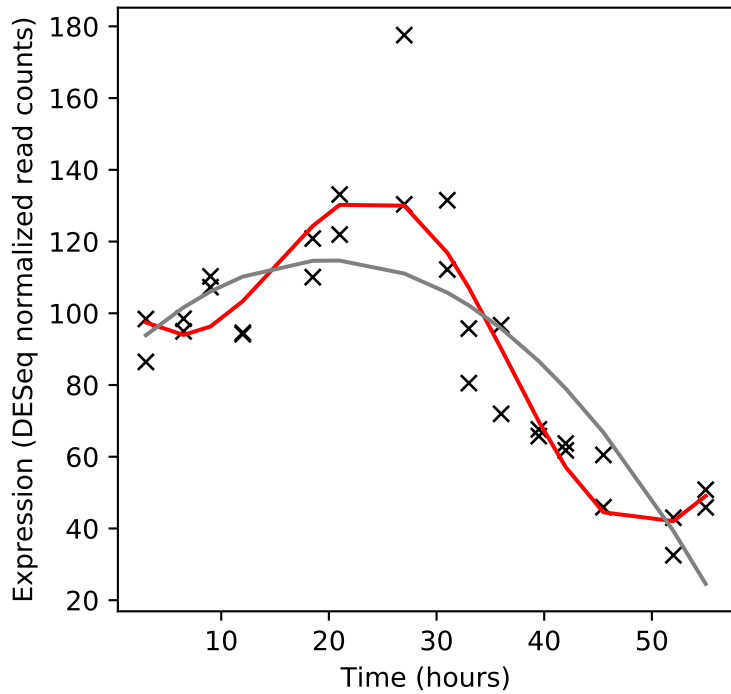

Rv3701c/-

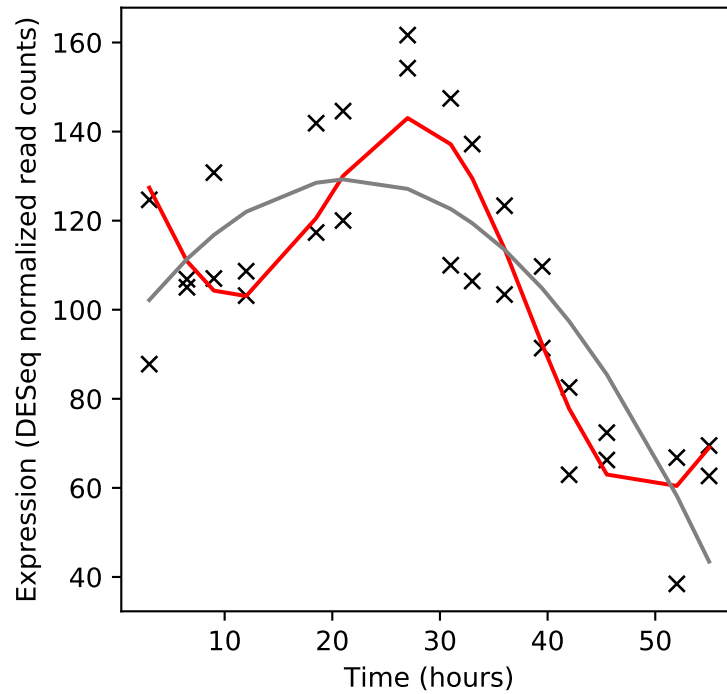

Rv3702c/-

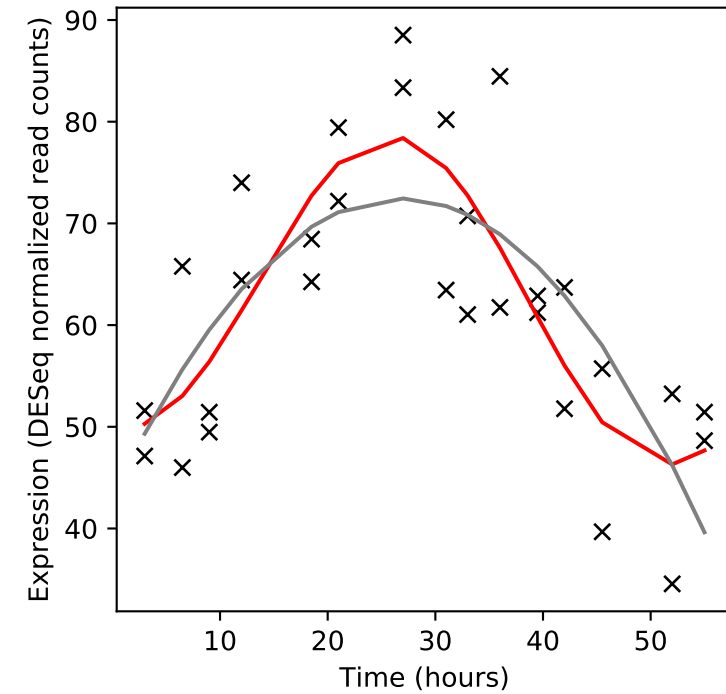

Rv3703c/-

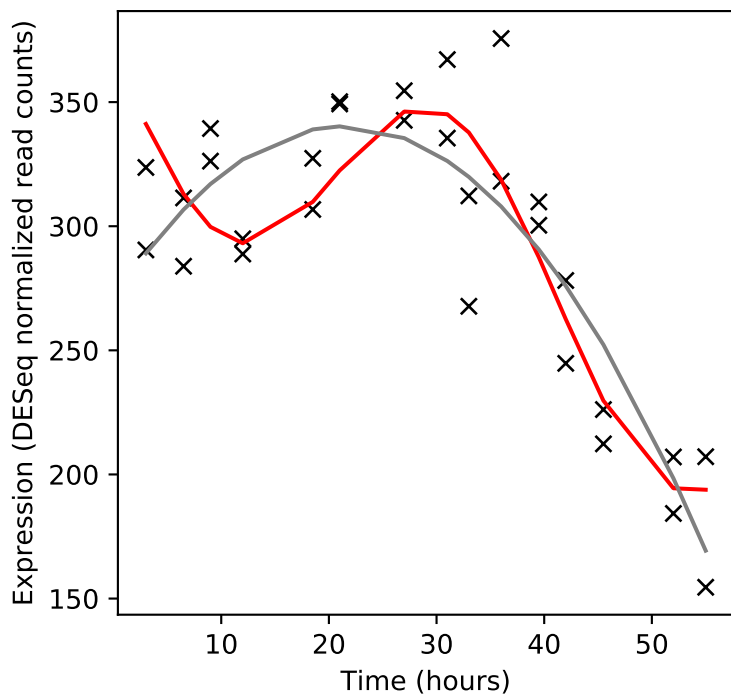

Rv3704c/gshA

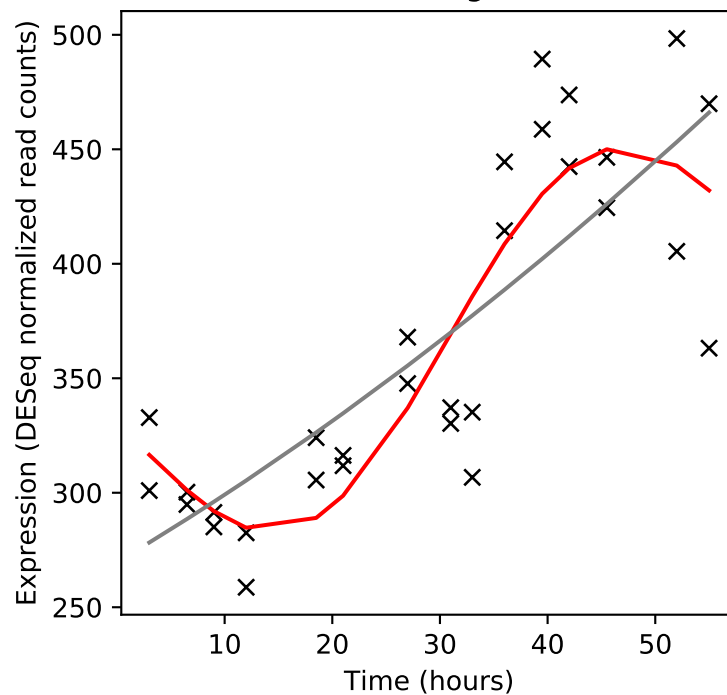

Rv3705c/-

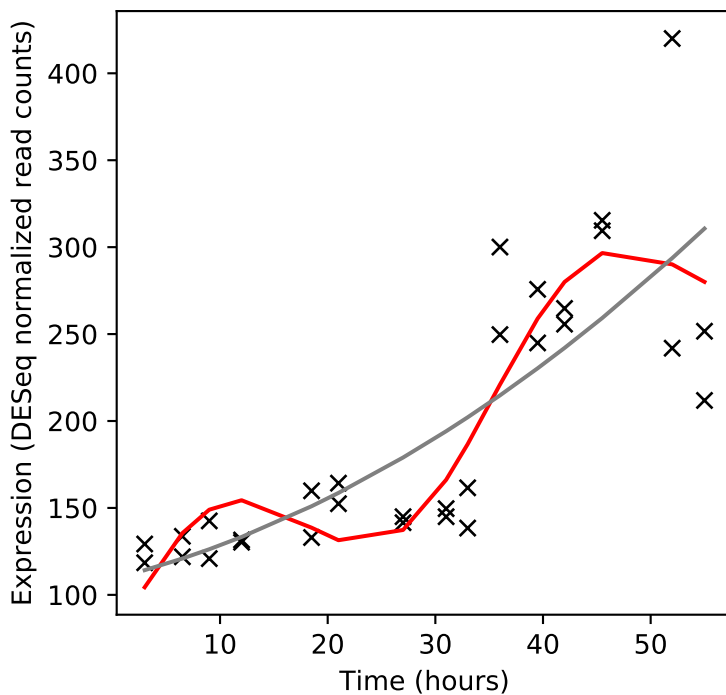

Rv3705A/-

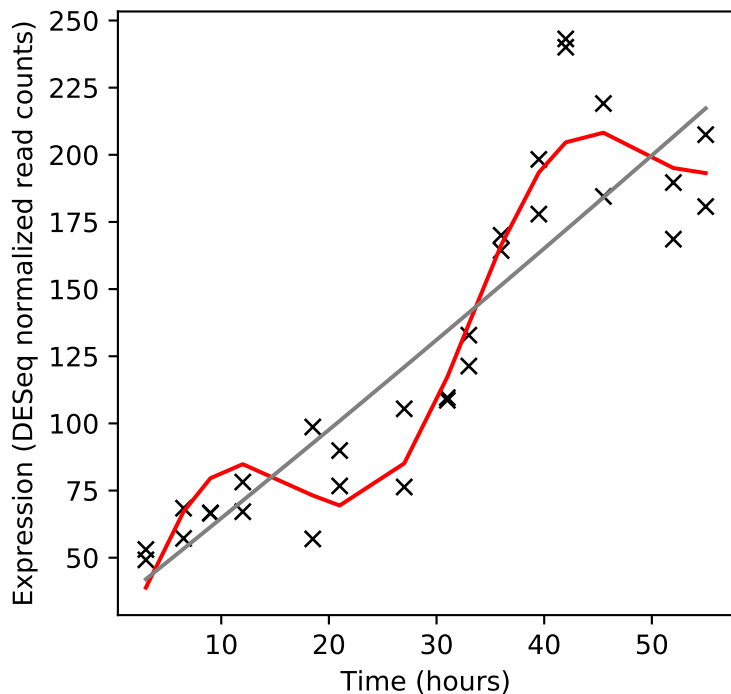

Rv3706c/-

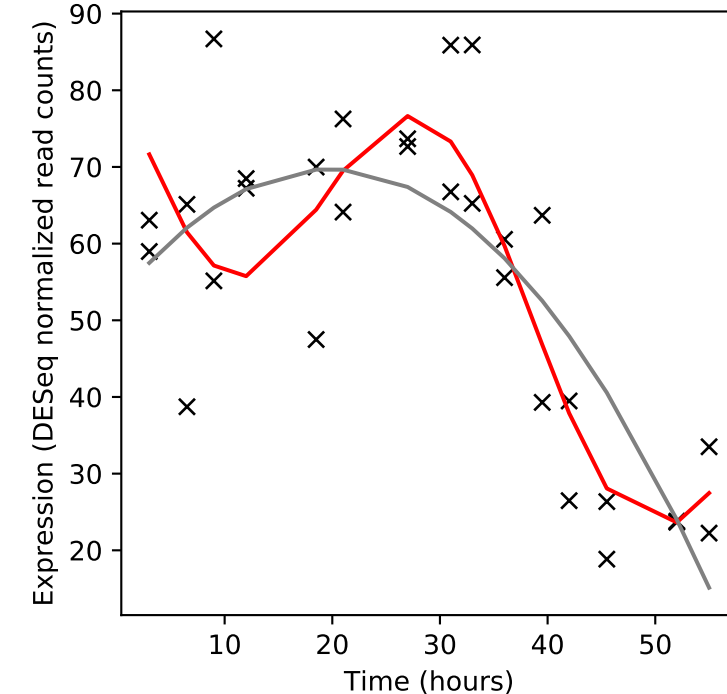

Rv3707c/-

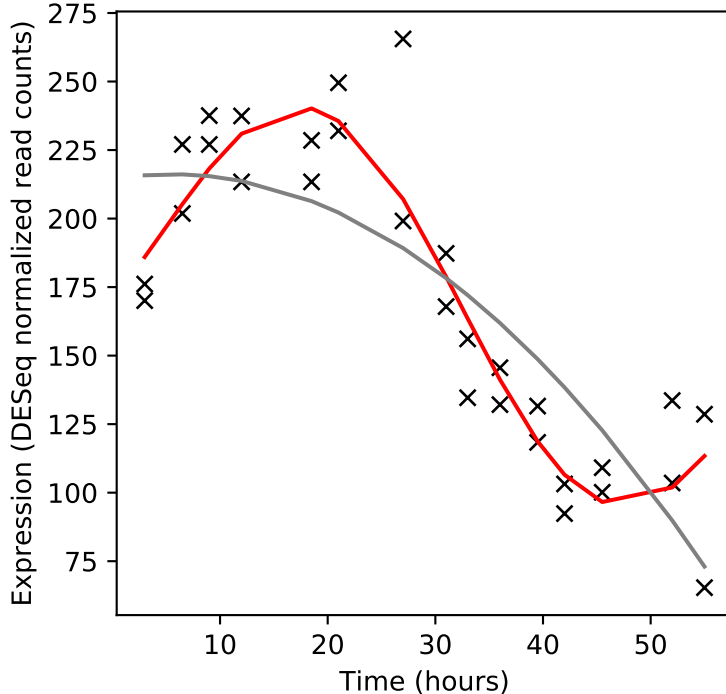



Rv3708c/asd

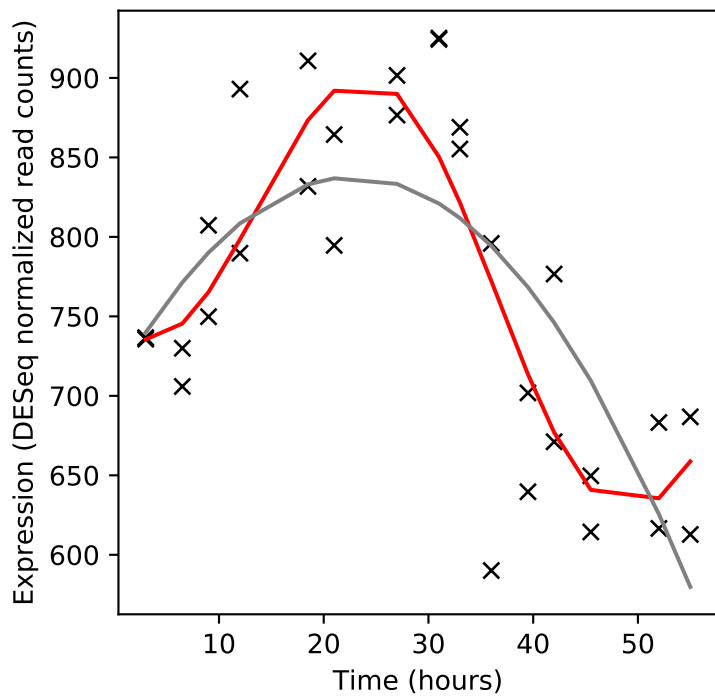

Rv3709c/ask

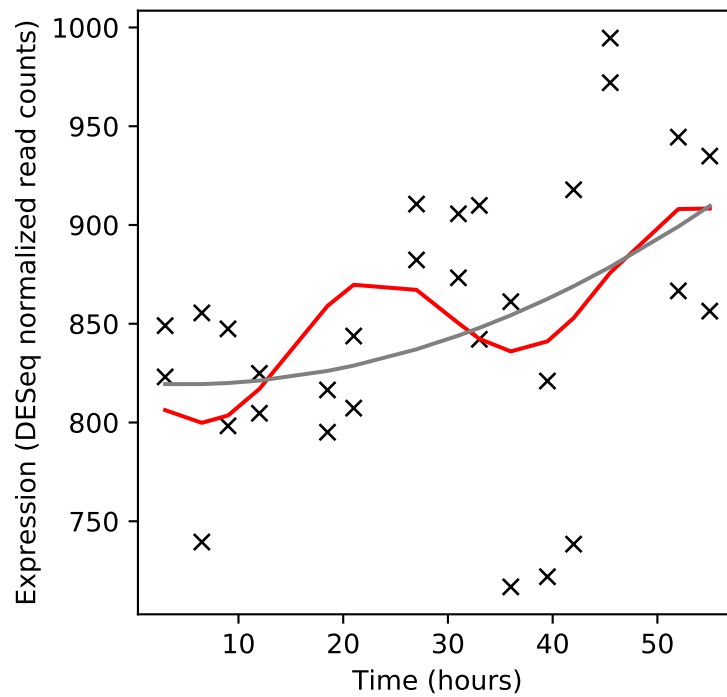

Rv3710/leuA

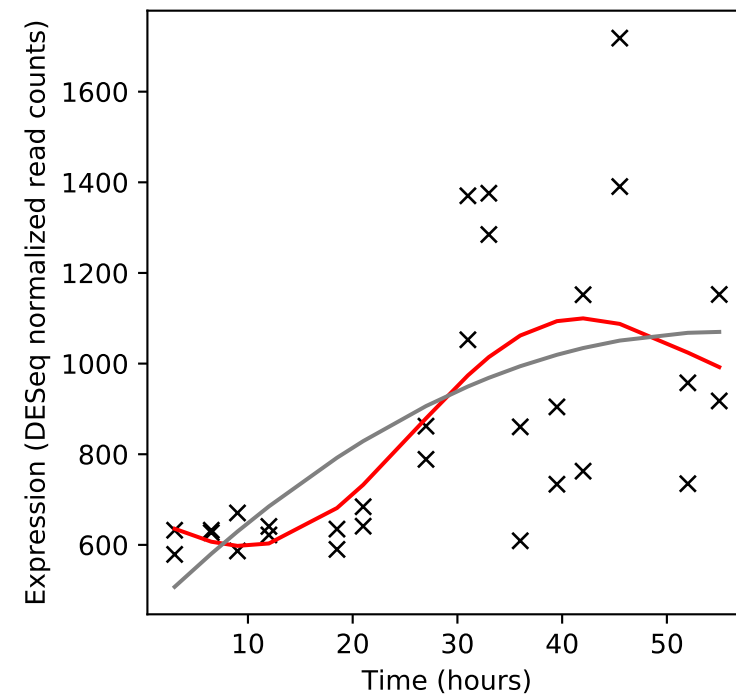

Rv3711c/dnaQ

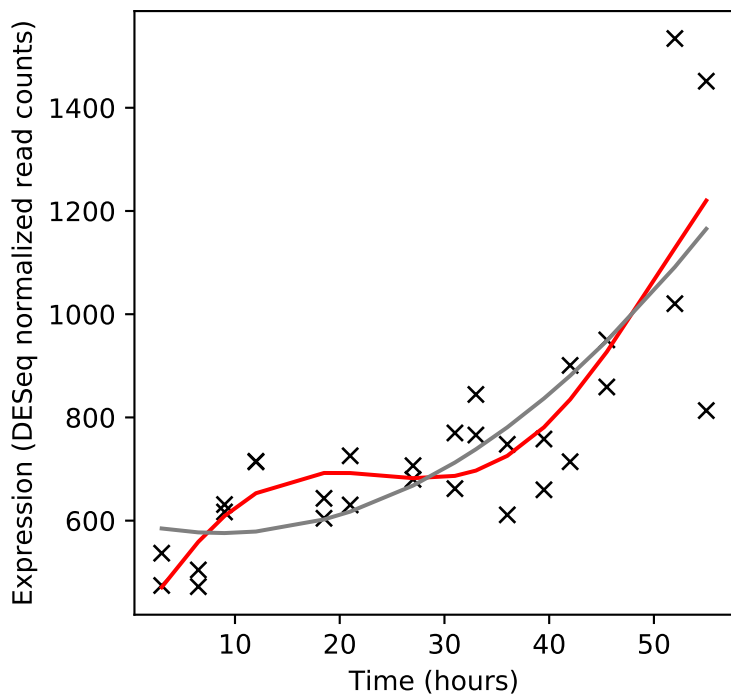

Rv3712/-

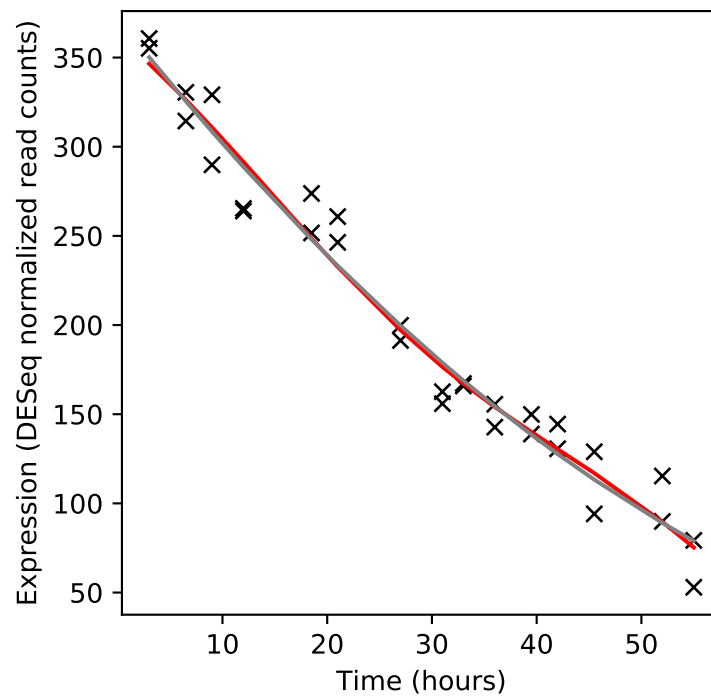

Rv3713/cobQ2

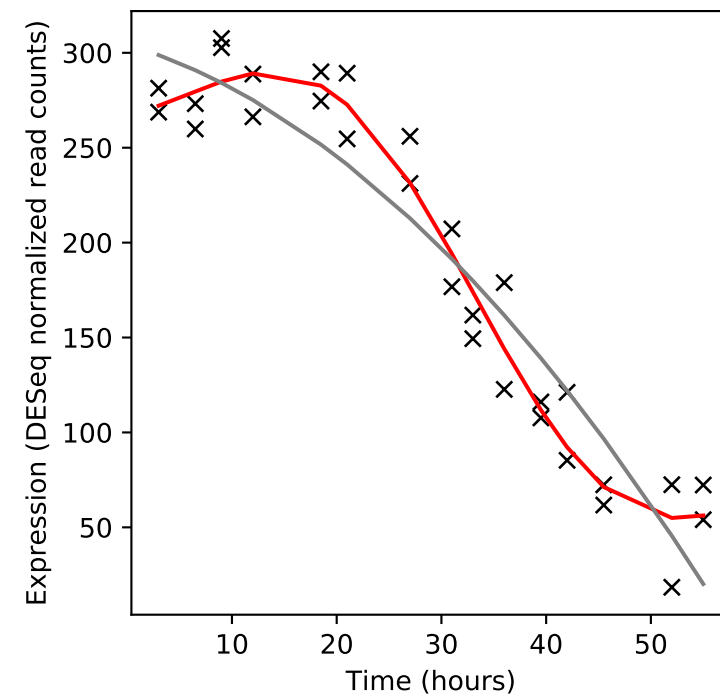

Rv3714c/-

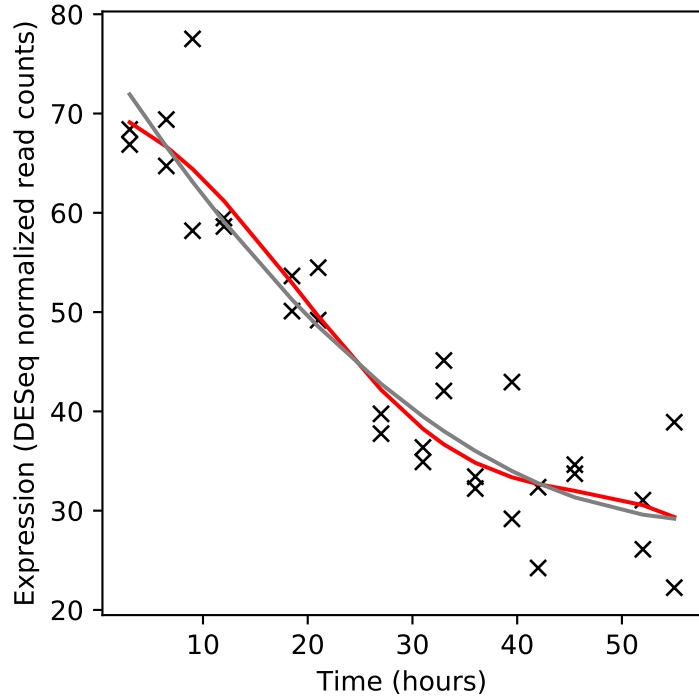

Rv3715c/recR

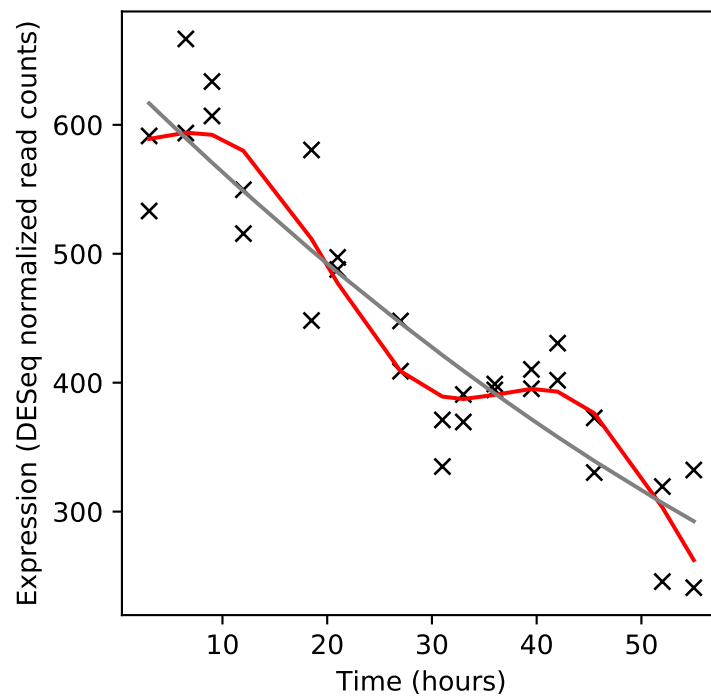

Rv3716c/-

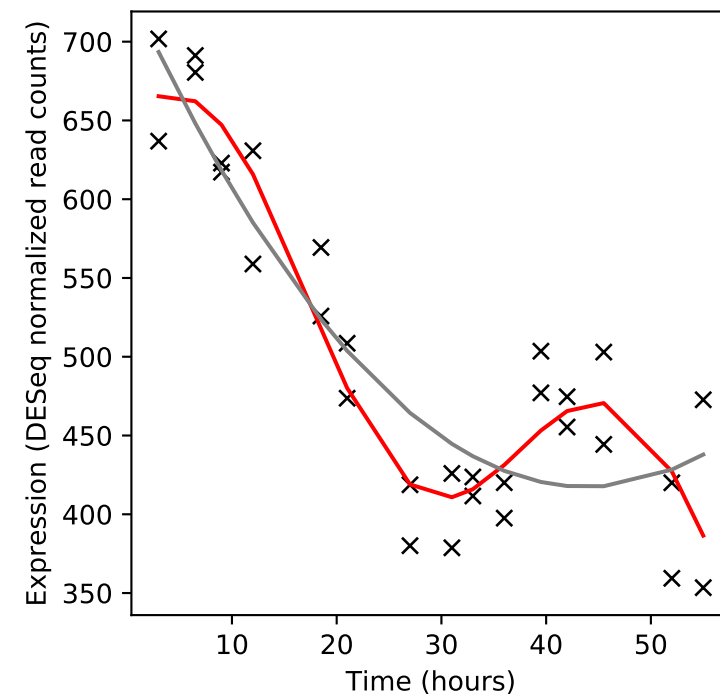

Rv3717/-

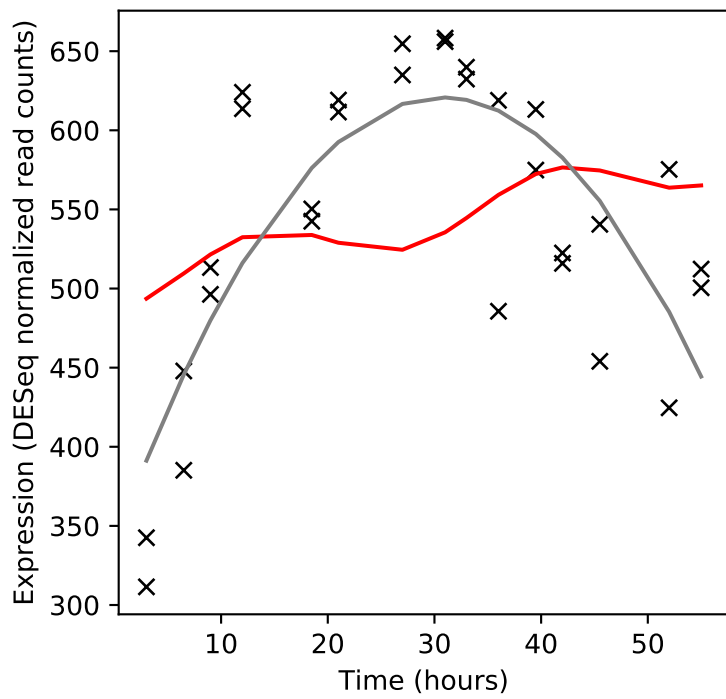

Rv3718c/-

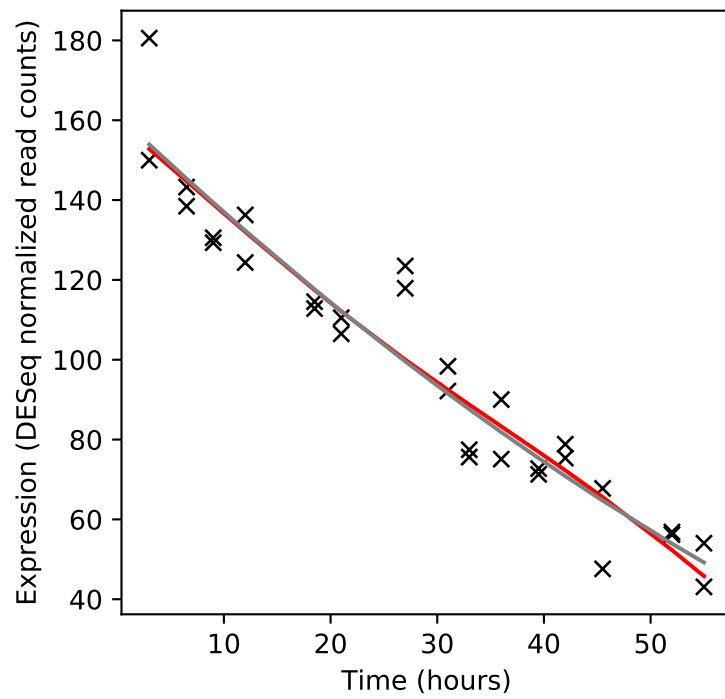

Rv3719/-

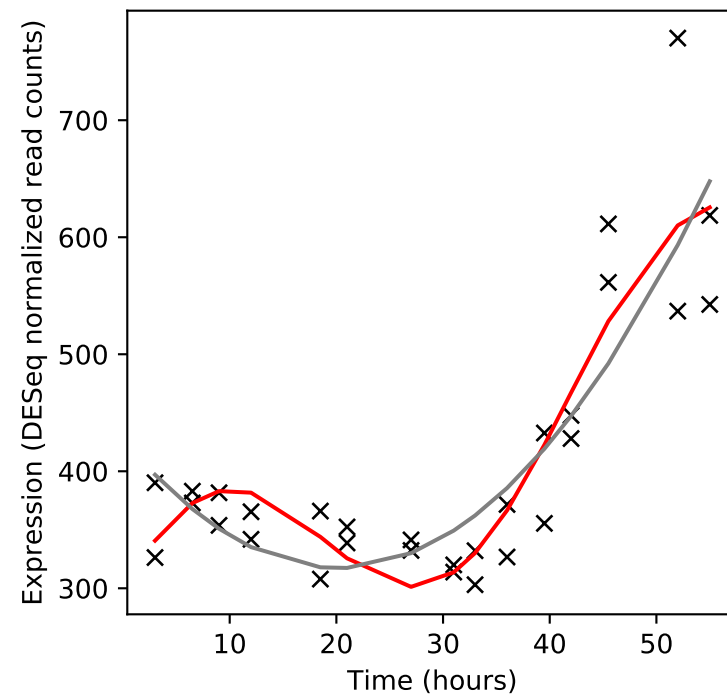

Rv3720/-

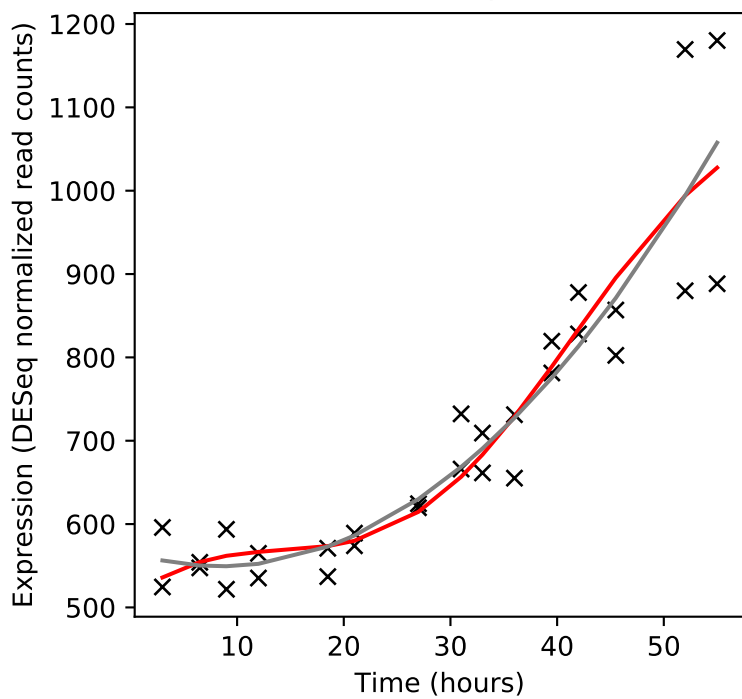

Rv3721c/dnaZX

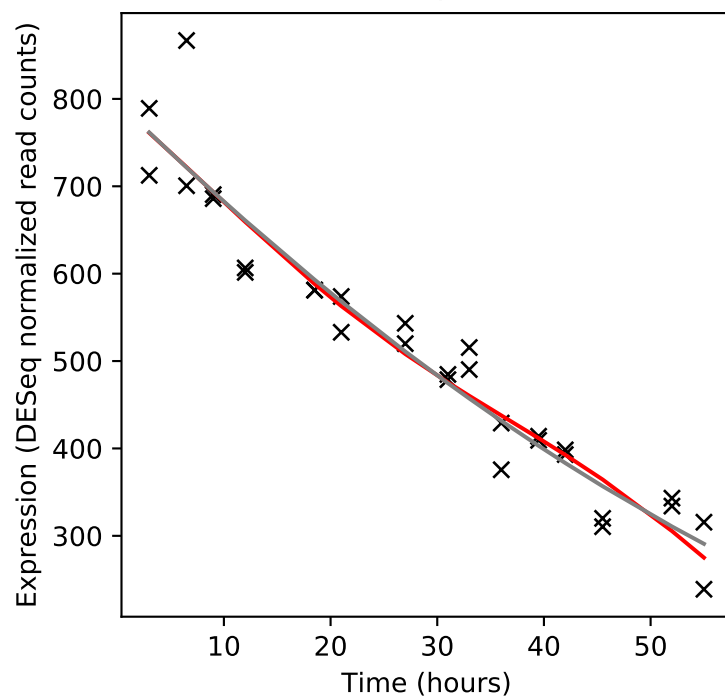

Rv3722c/-

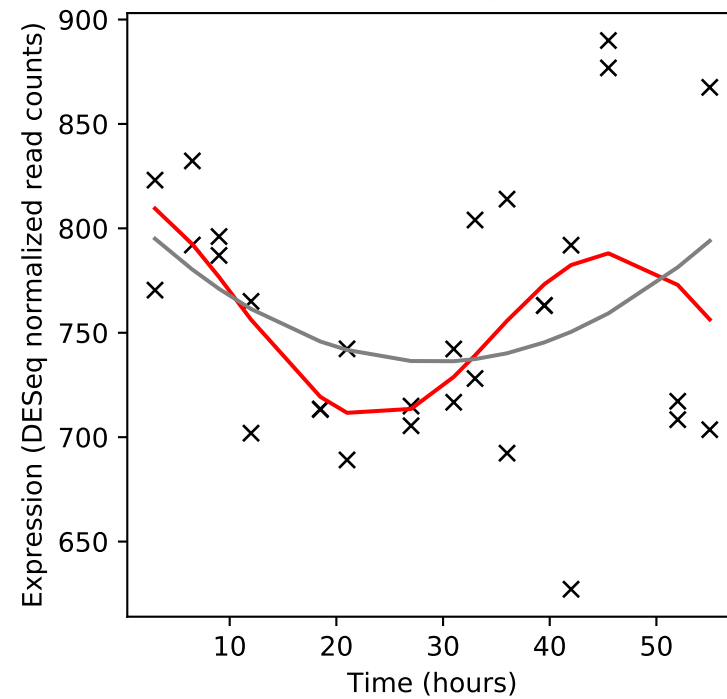

Rv3723/-

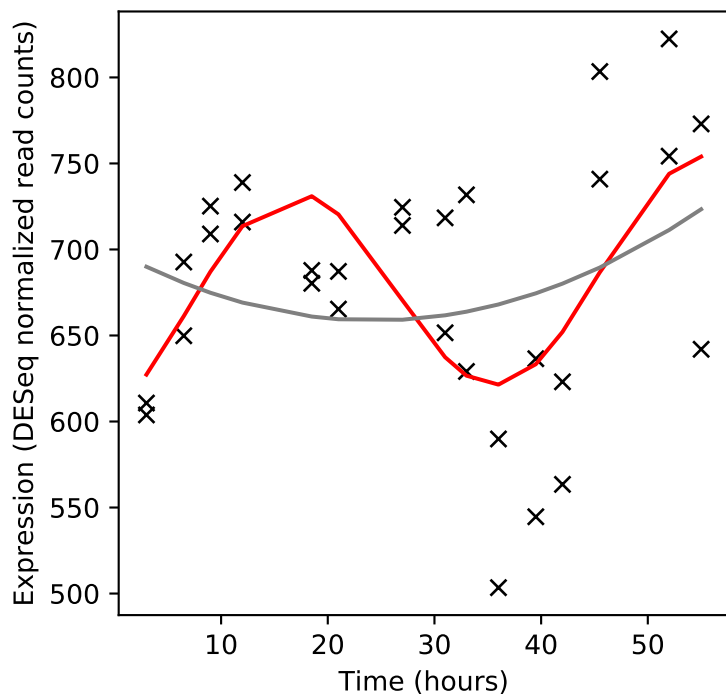

Rv3724A/cut5a

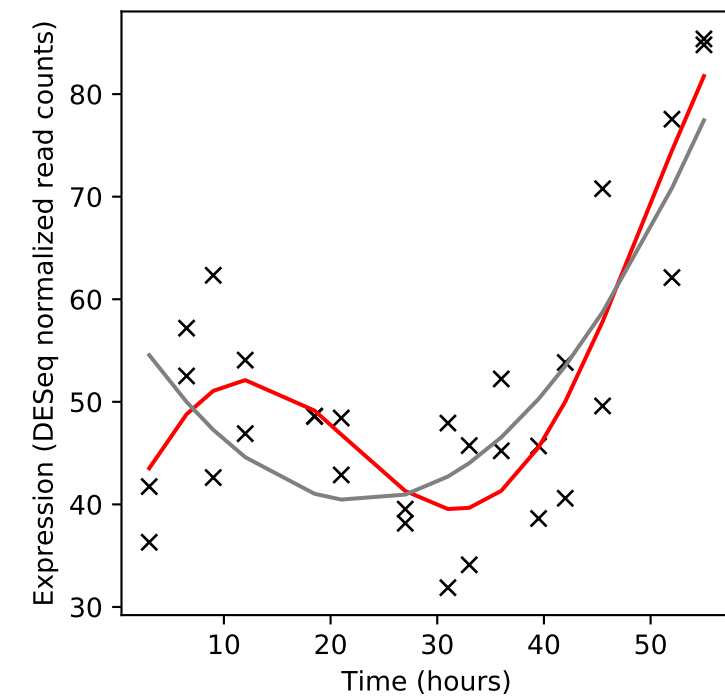

Rv3724B/cut5b

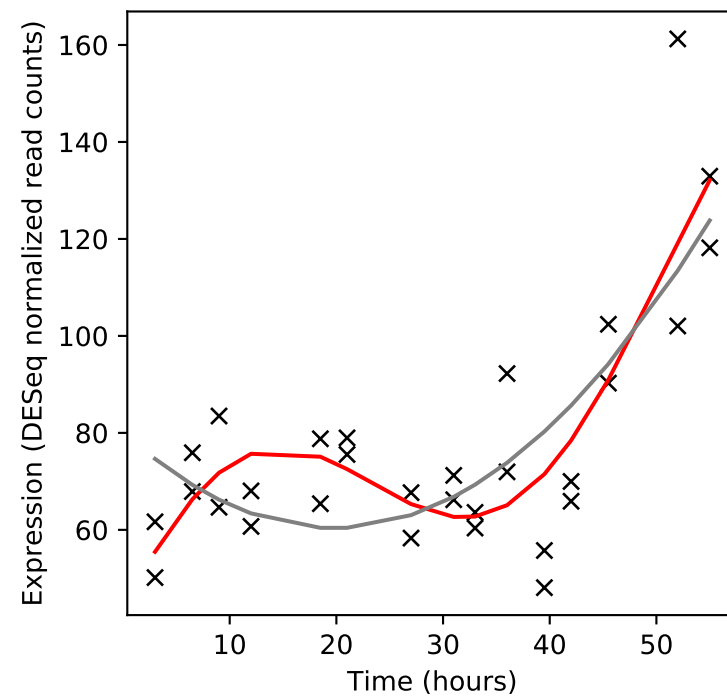

Rv3725/-

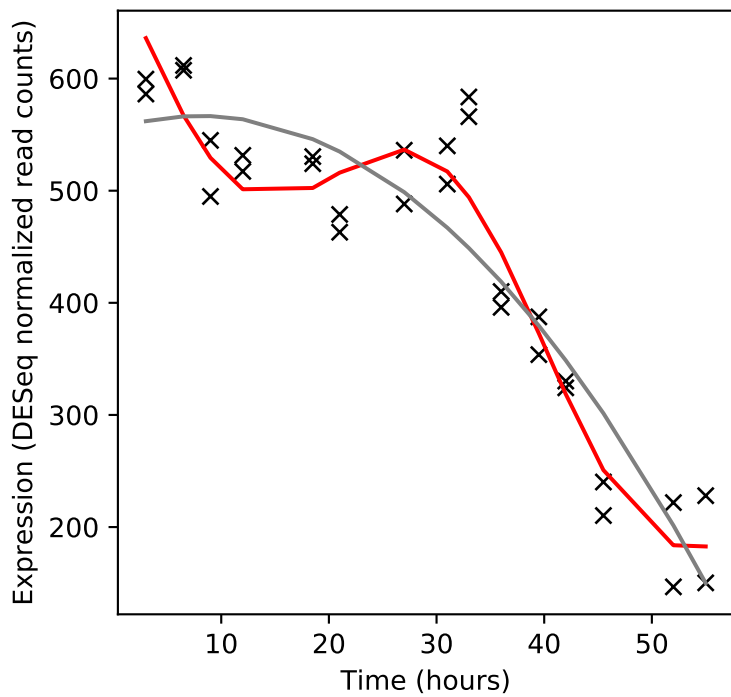

Rv3726/-

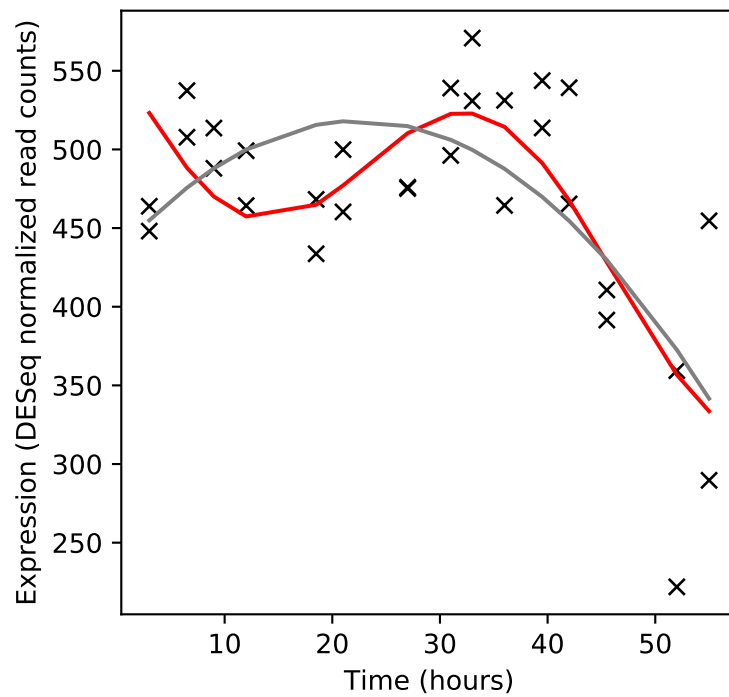

Rv3727/-

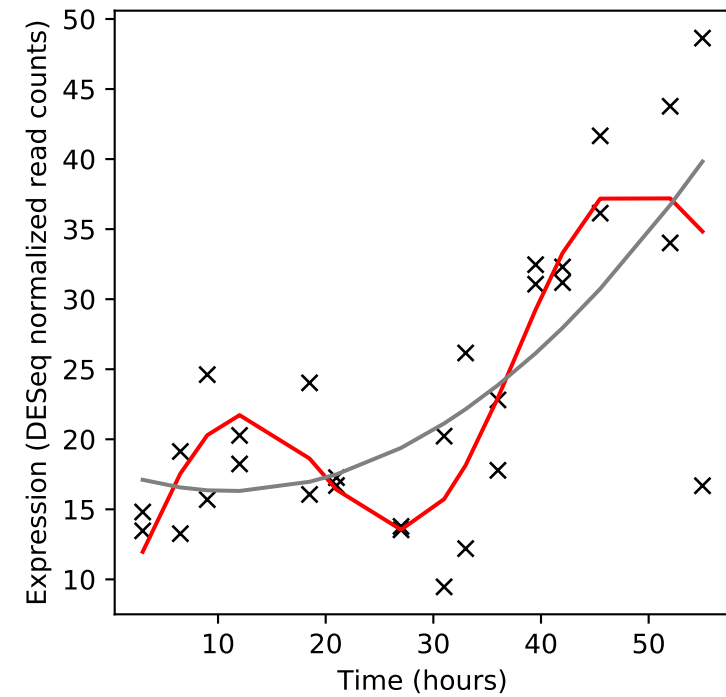

Rv3728/-

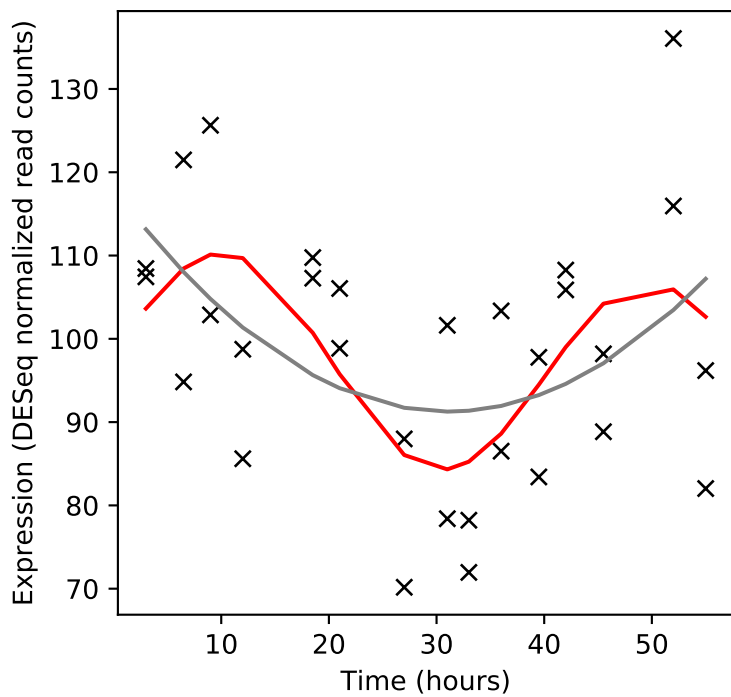

Rv3729/-

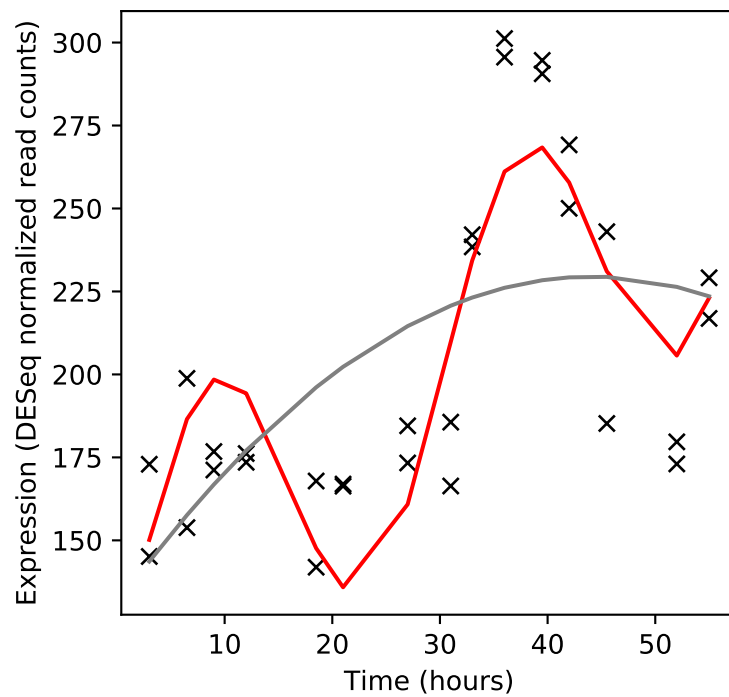

Rv3730c/-

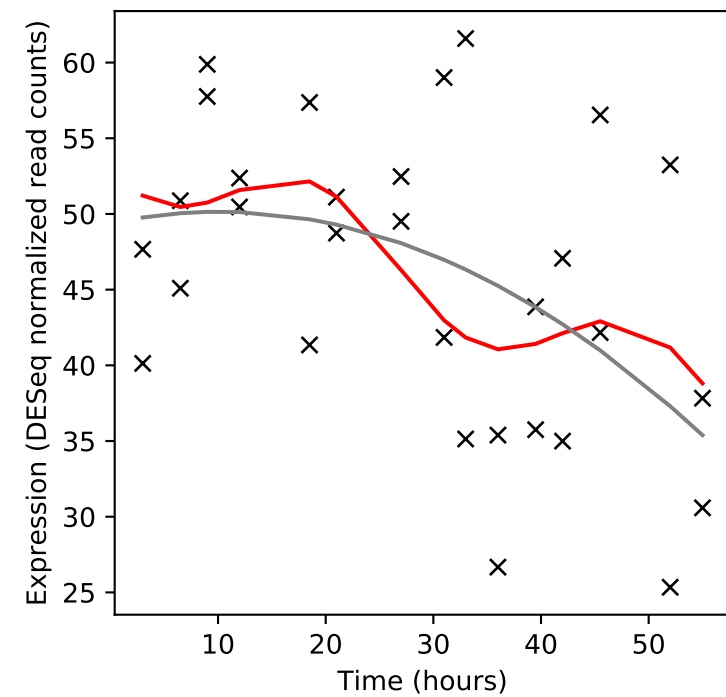

Rv3731/ligC

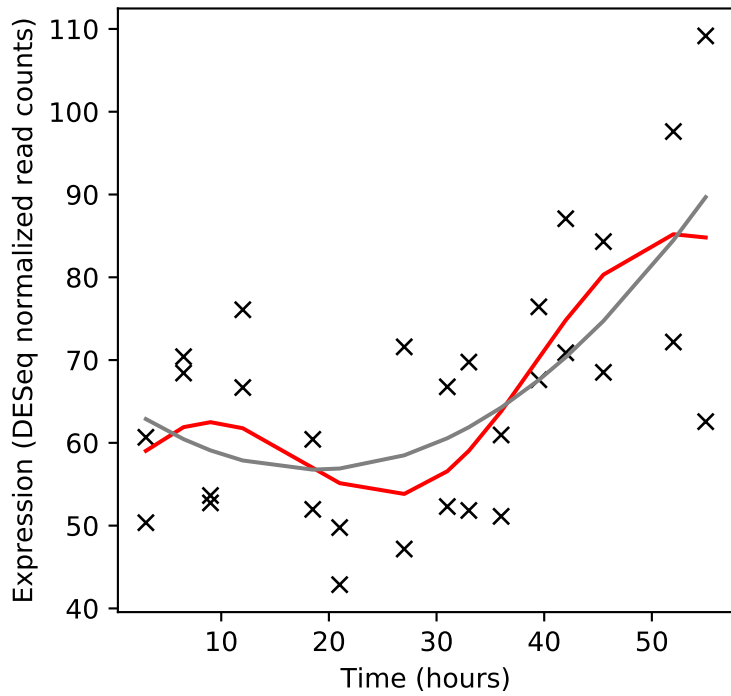

Rv3732/-

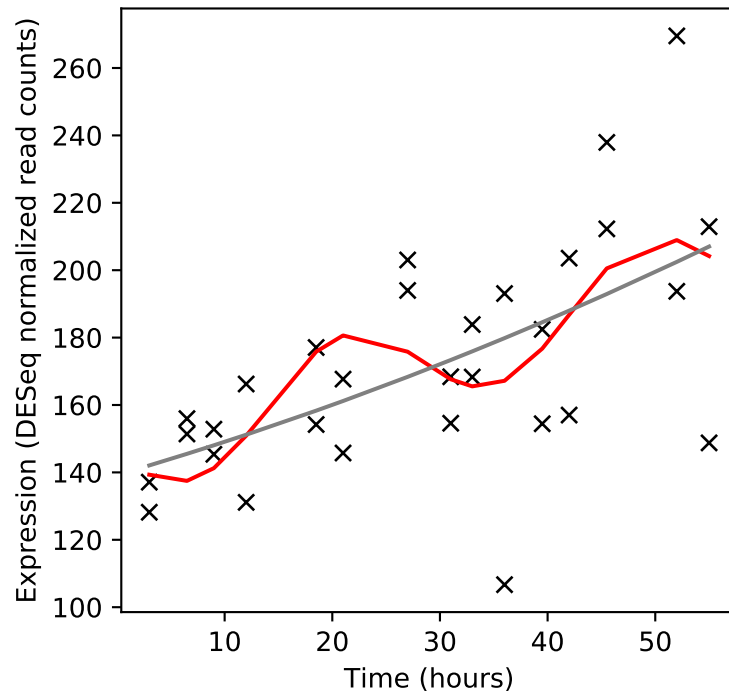

Rv3733c/-

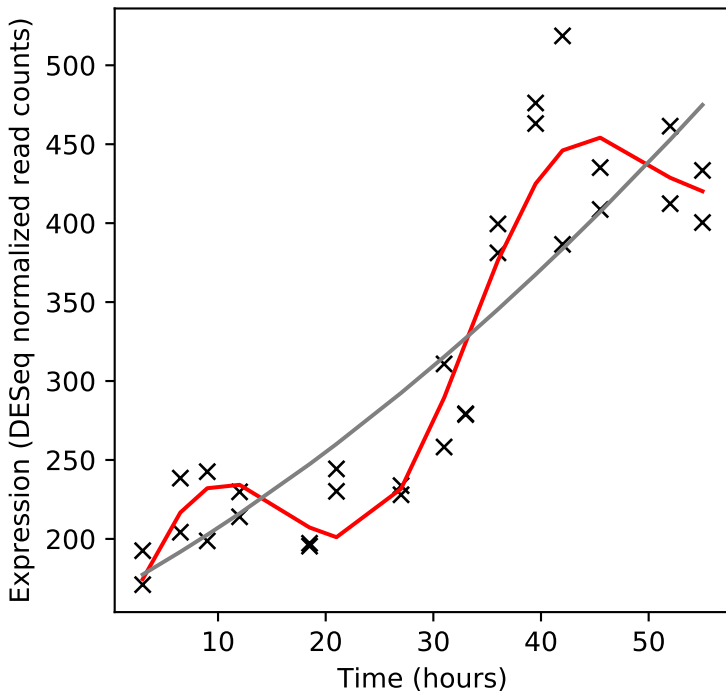

Rv3734c/tgs2

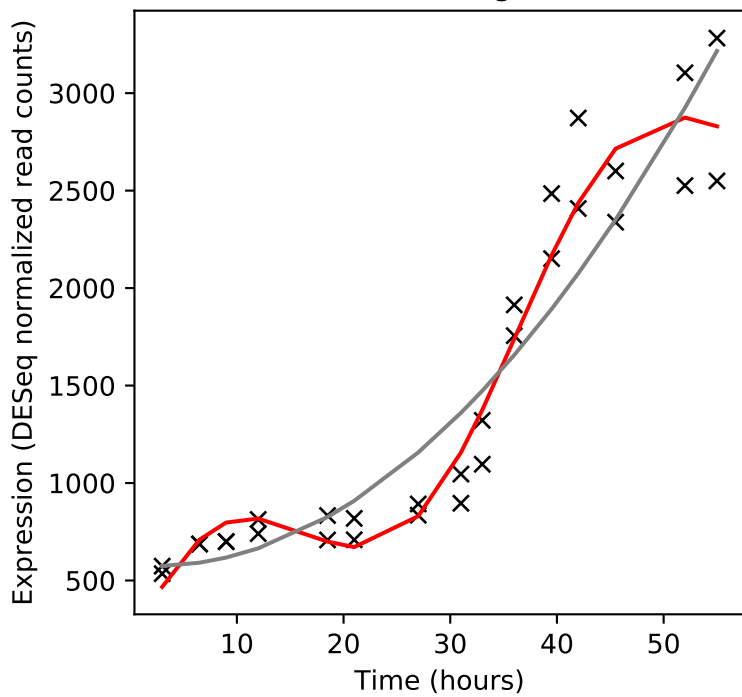

Rv3735/-

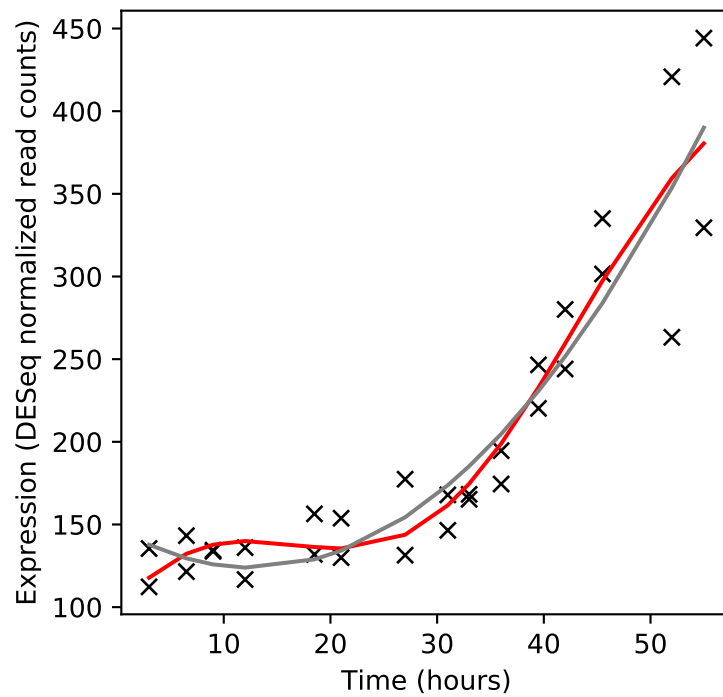

Rv3736/-

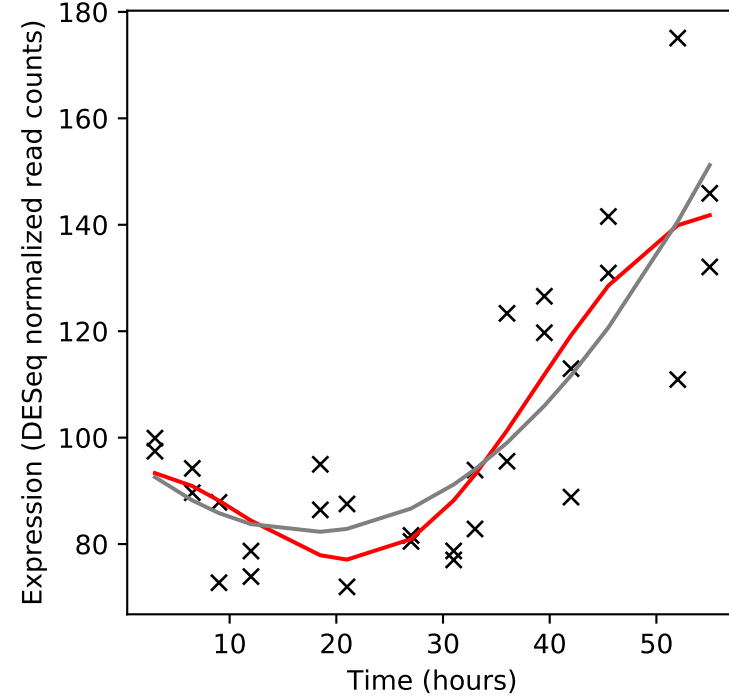

Rv3737/-

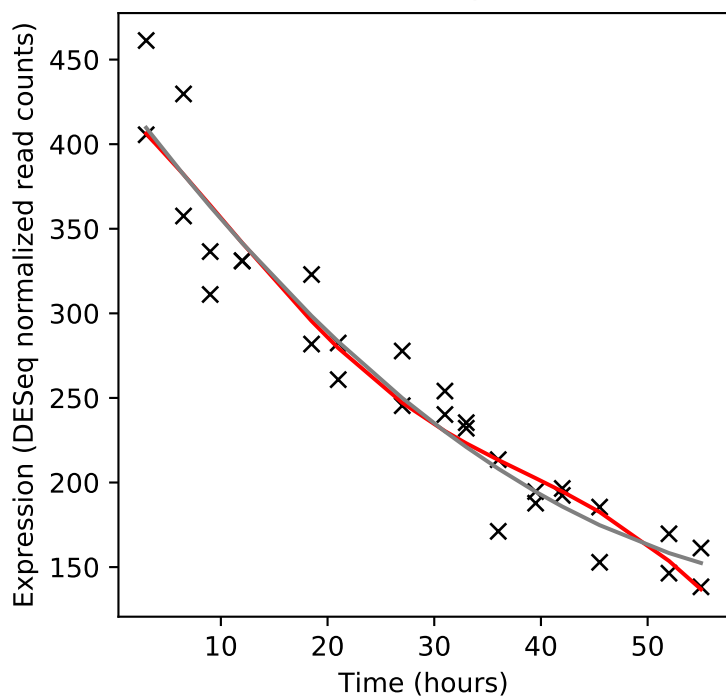

Rv3738c/PPE66

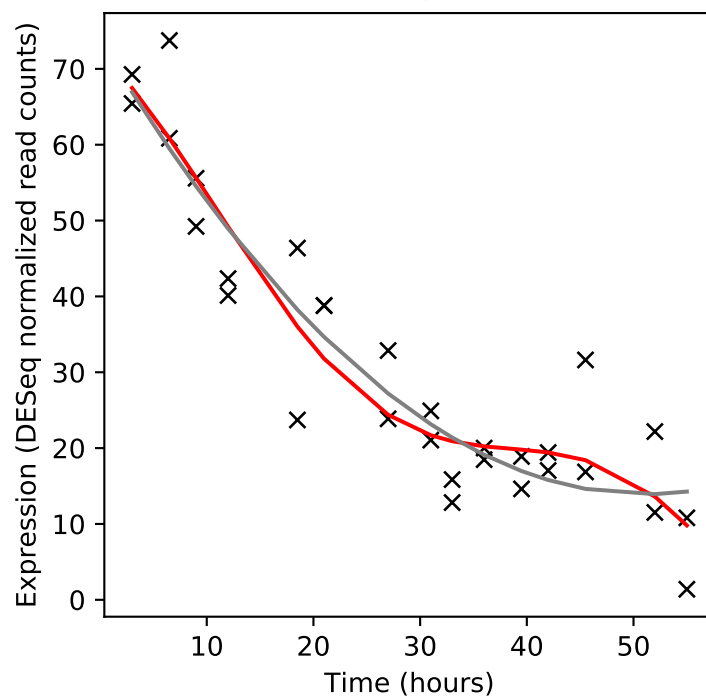

Rv3739c/PPE67

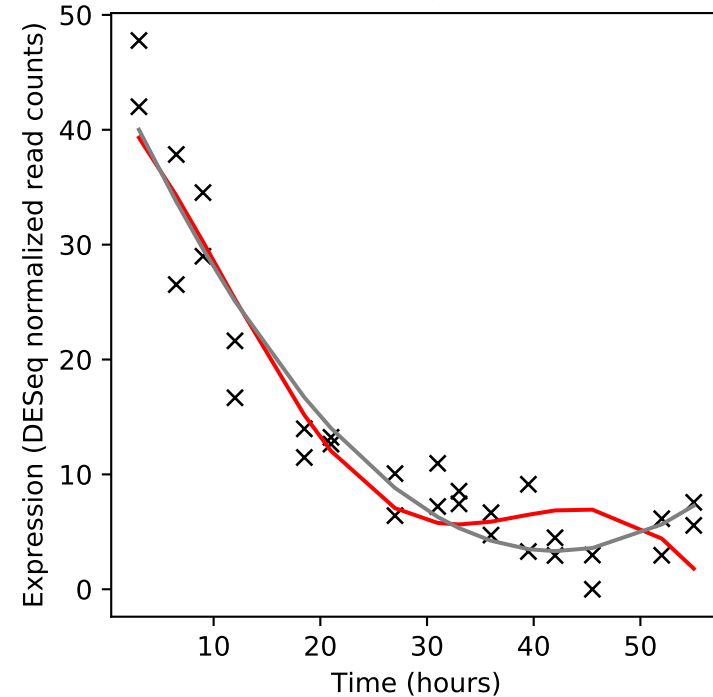

Rv3740c/-

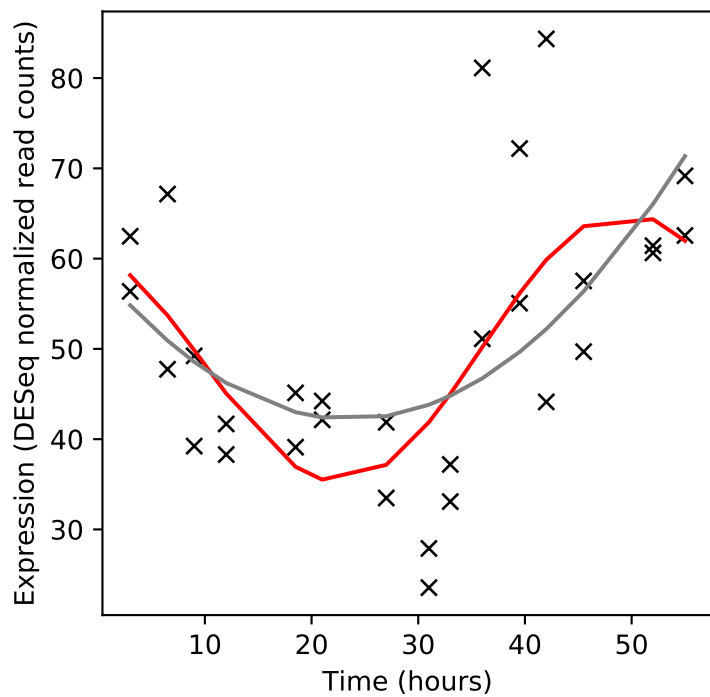

Rv3741c/-

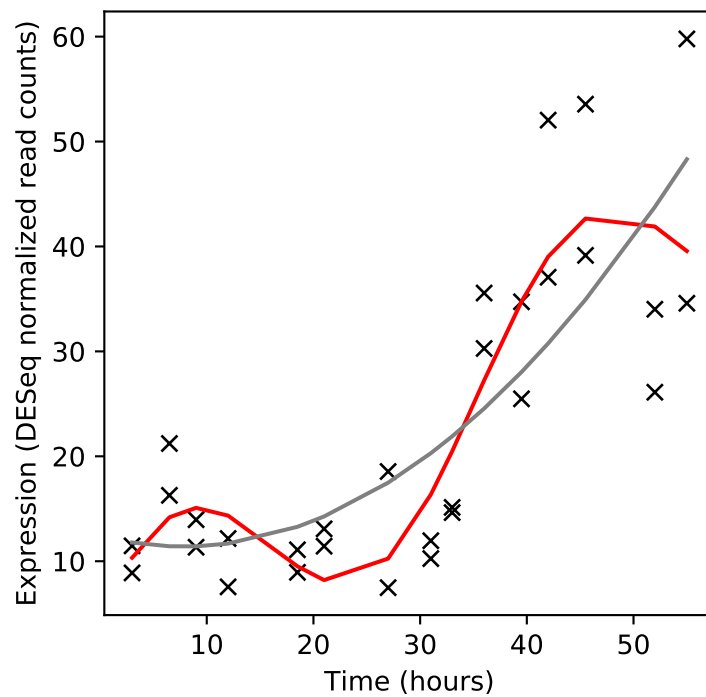

Rv3742c/-

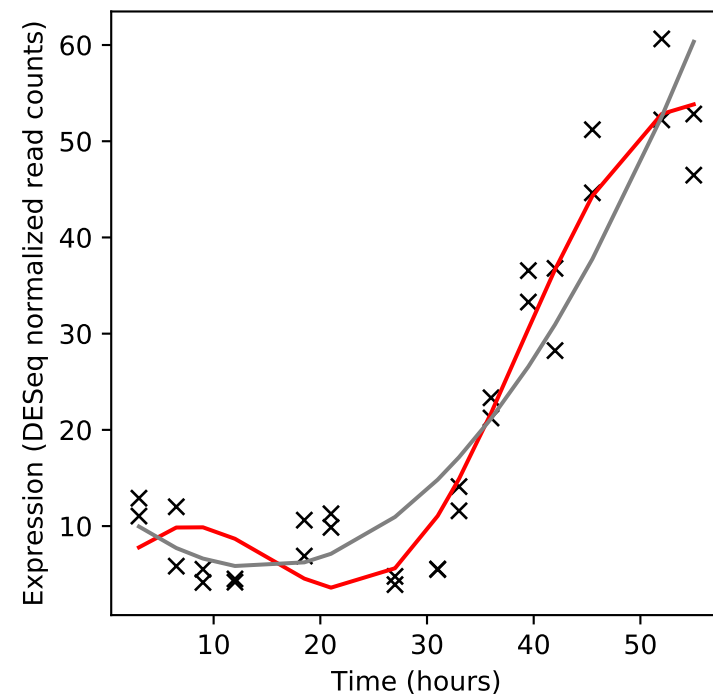

Rv3743c/ctpj

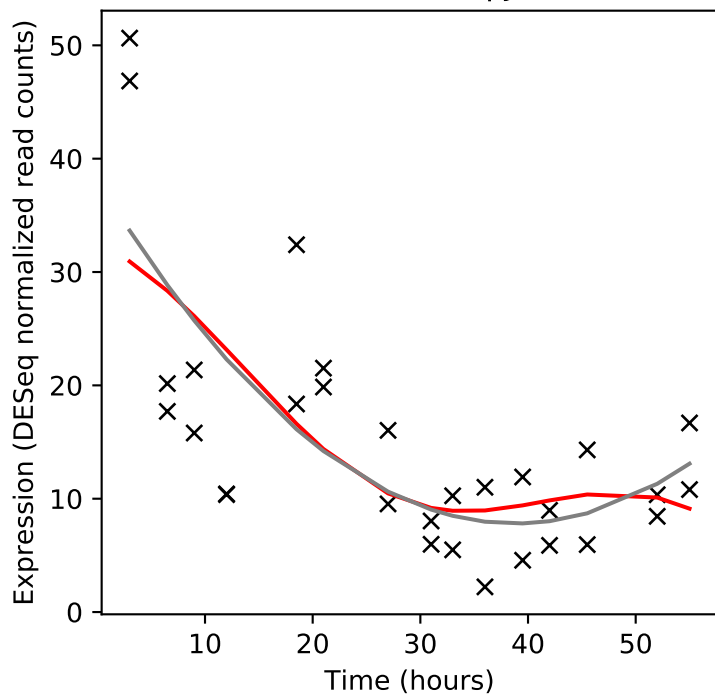

Rv3744/nmtR

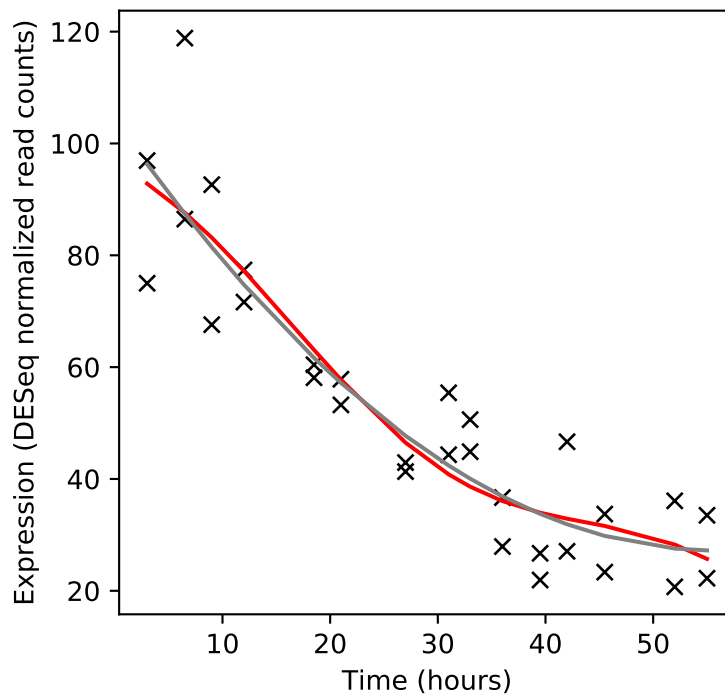

Rv3745c/-

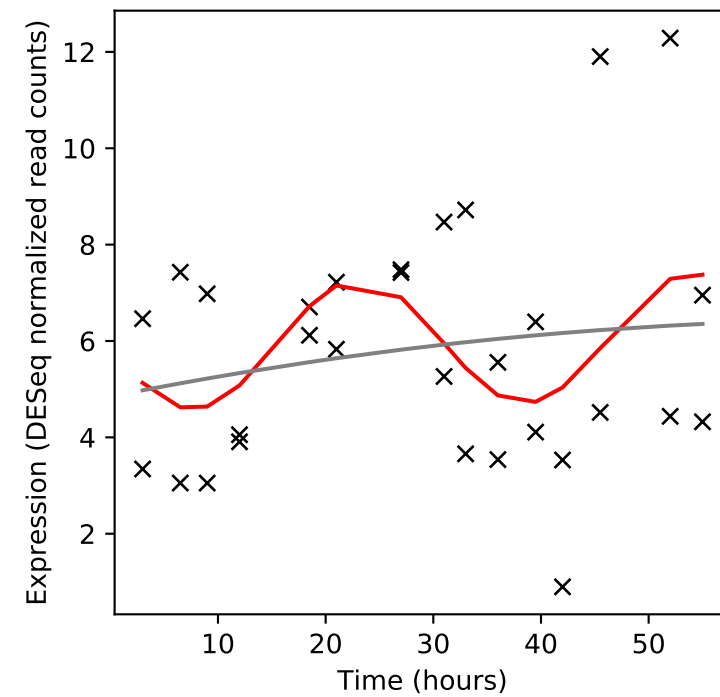

Rv3746c/PE34

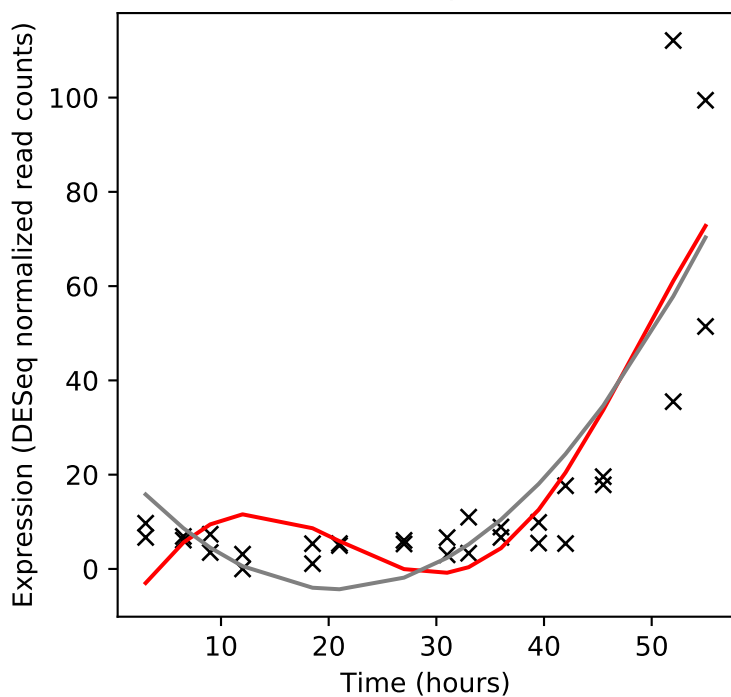

Rv3747/-

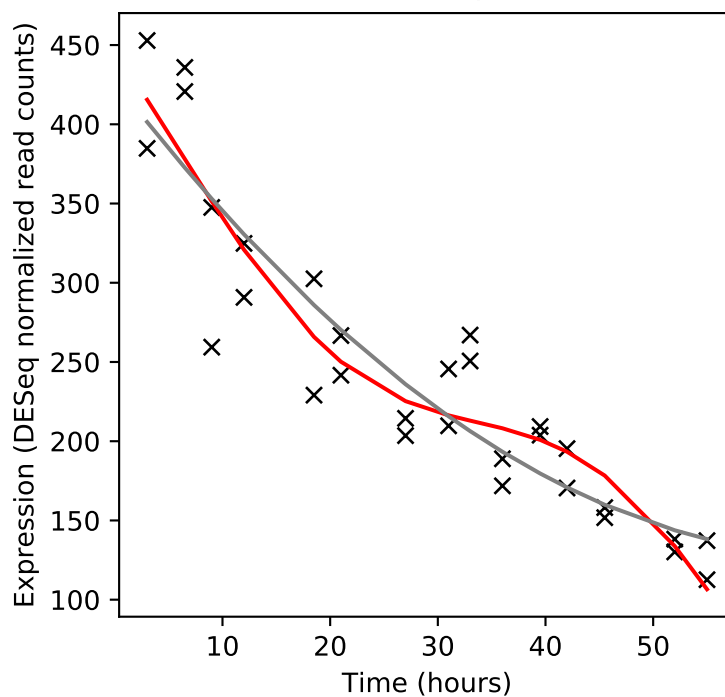

Rv3748/-

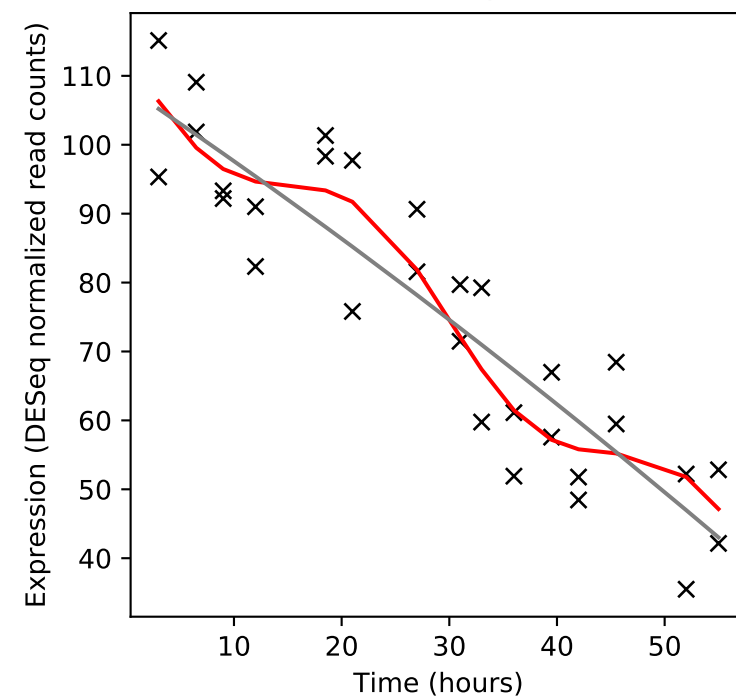

Rv3749c/-

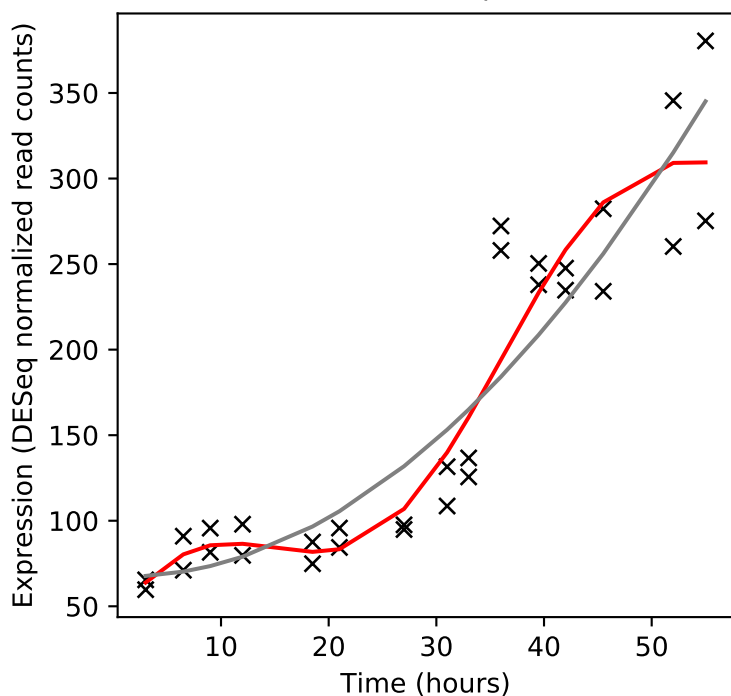

Rv3750c/-

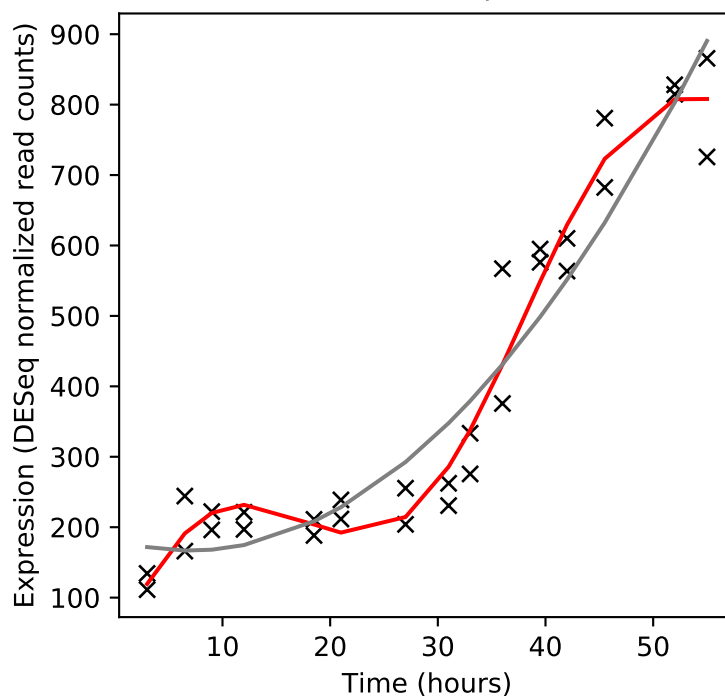

Rv3751/-

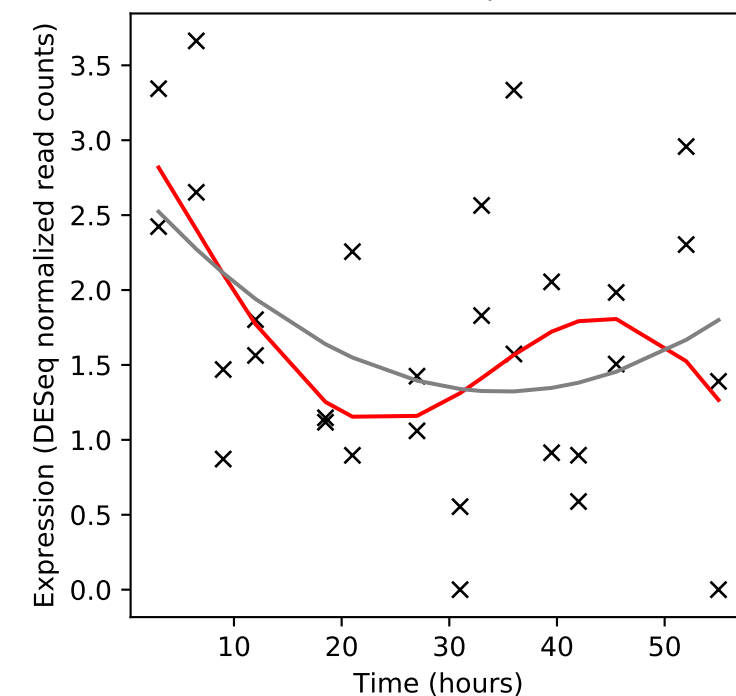

Rv3752c/-

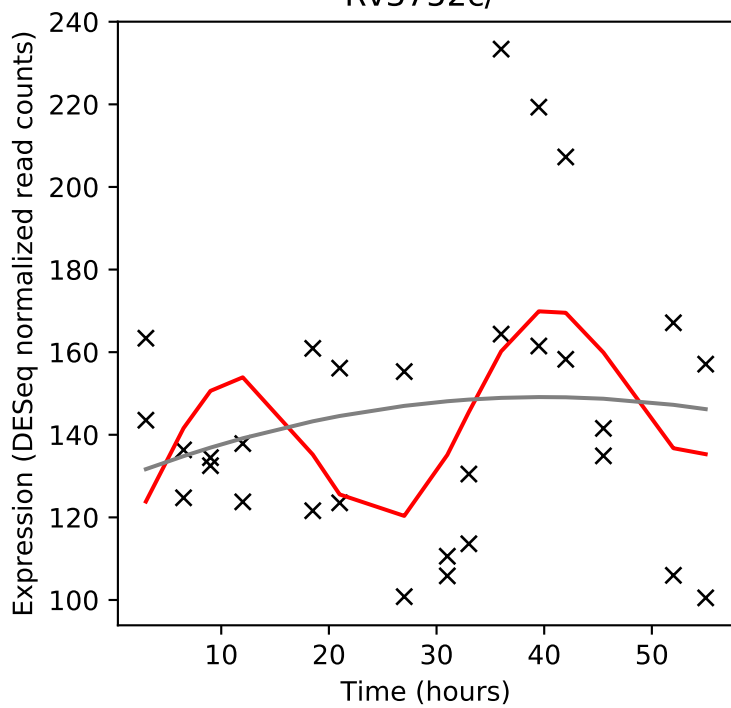

Rv3753c/-

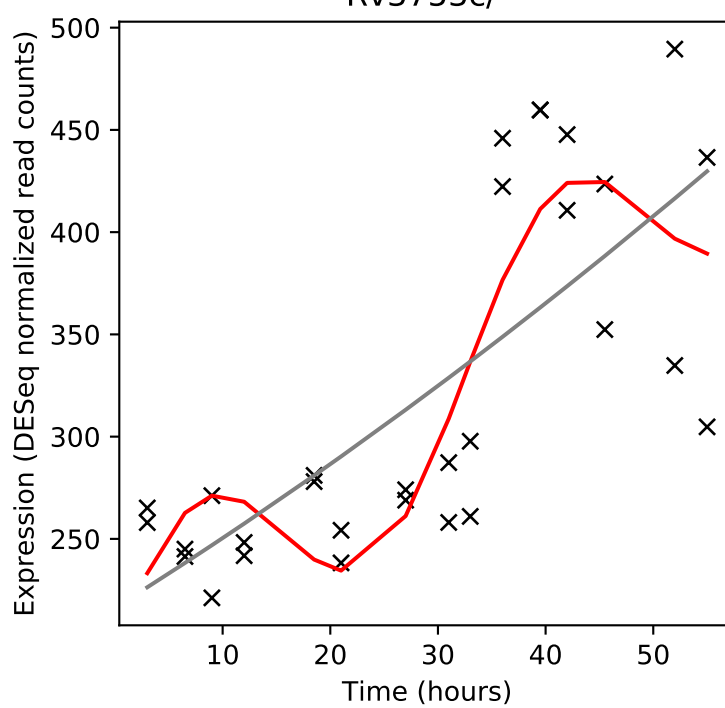

Rv3754/tyrA

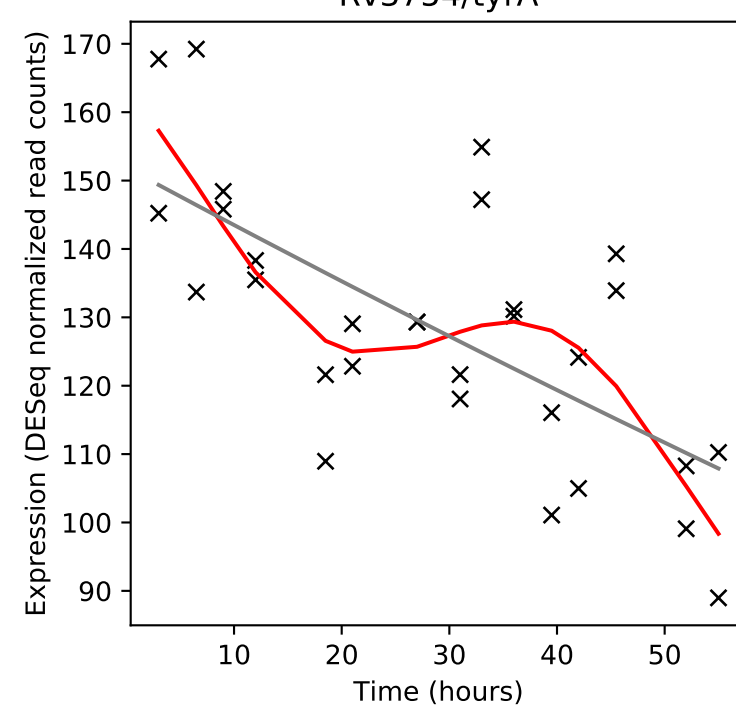

Rv3755c/-

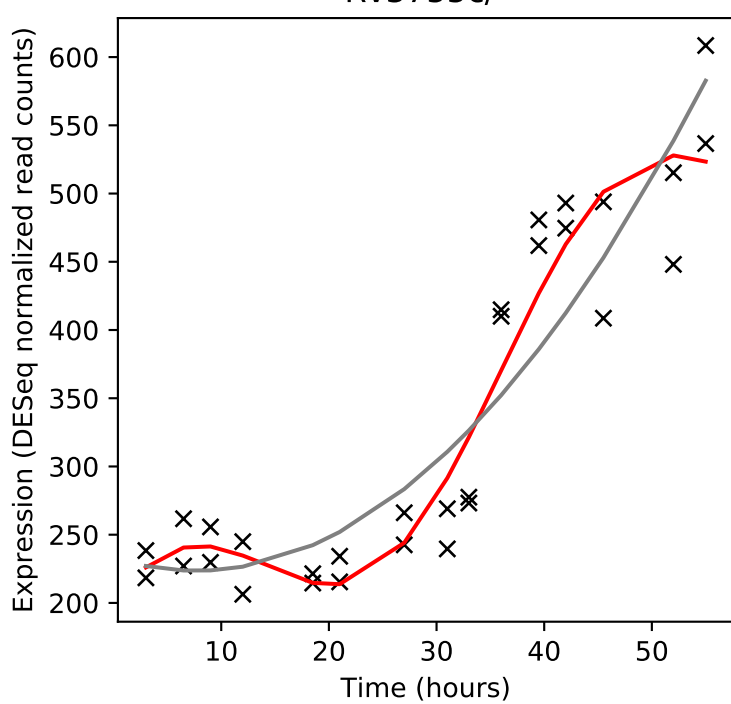

Rv3756c/proZ

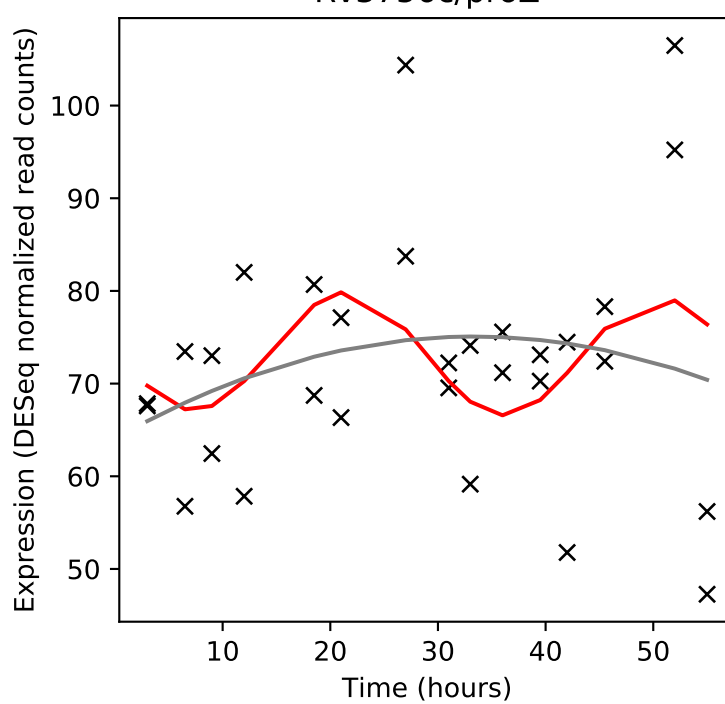

Rv3757c/proW

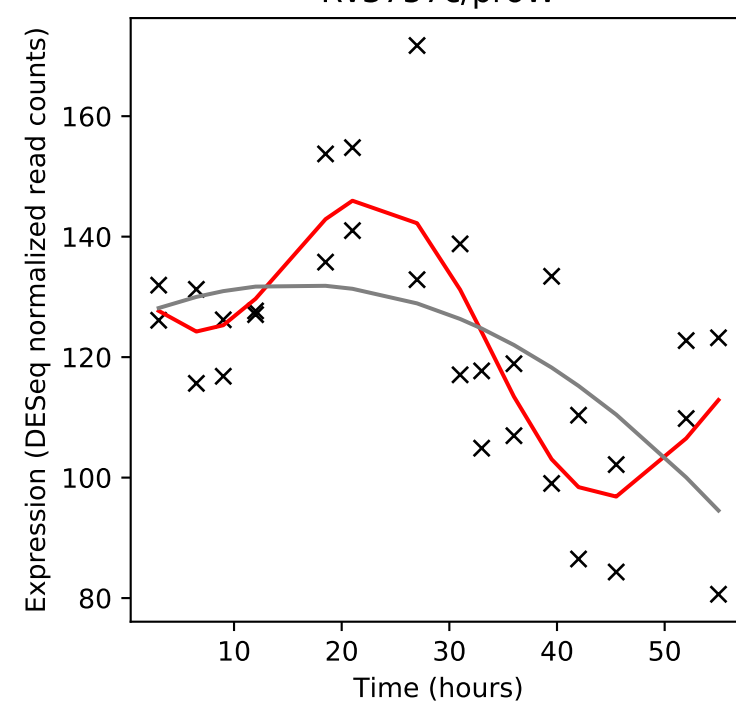

Rv3758c/proV

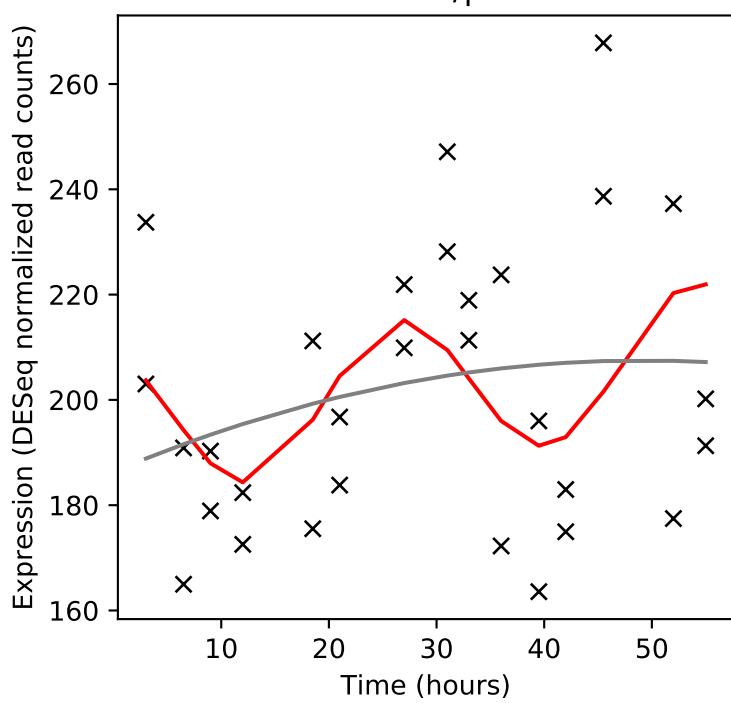

Rv3759c/proX

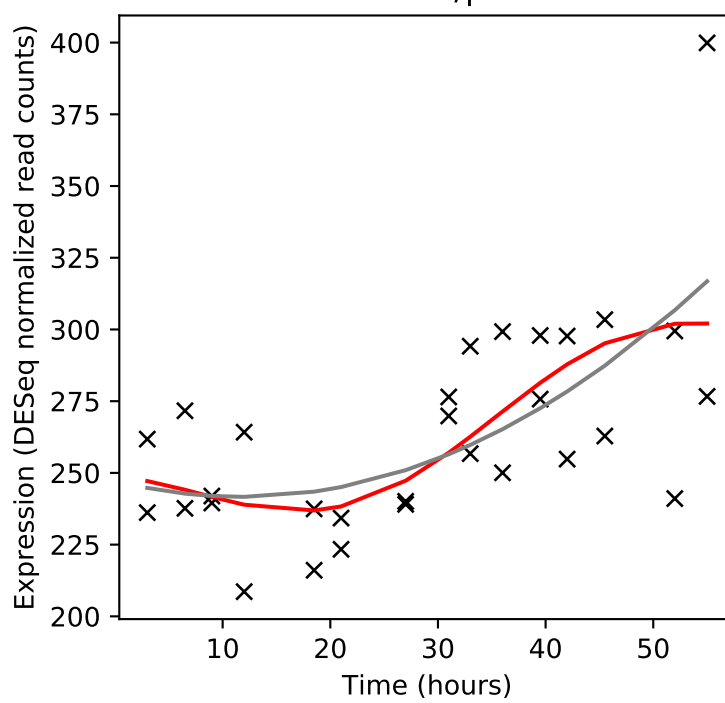

Rv3760/-

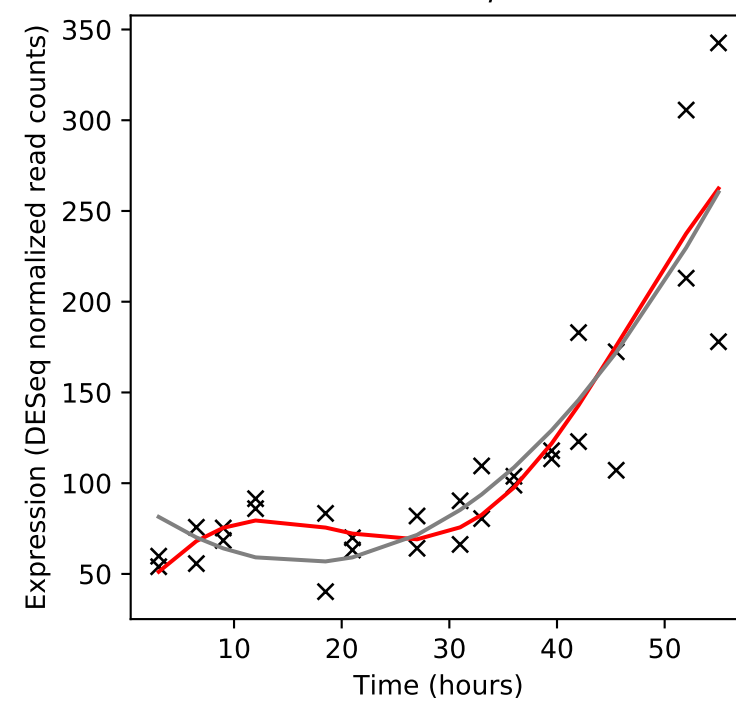

Rv3761c/fadE36

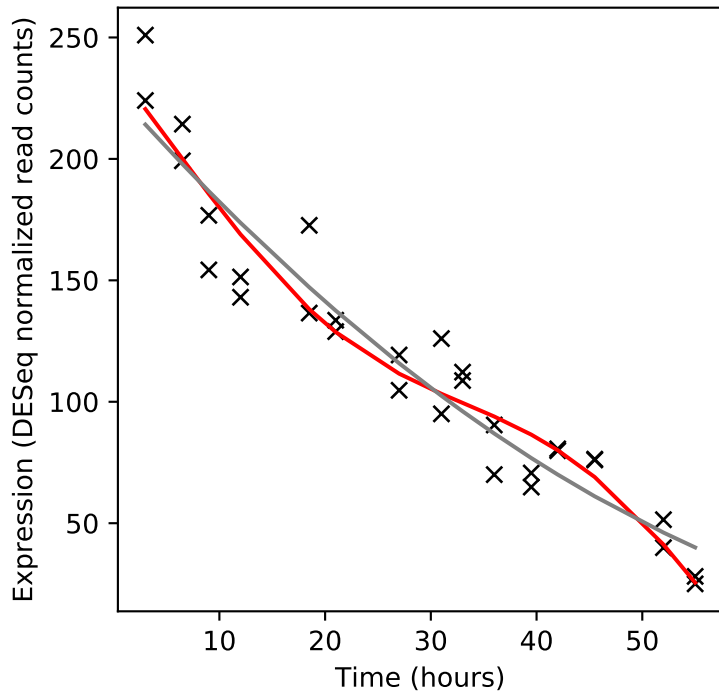

Rv3762c/-

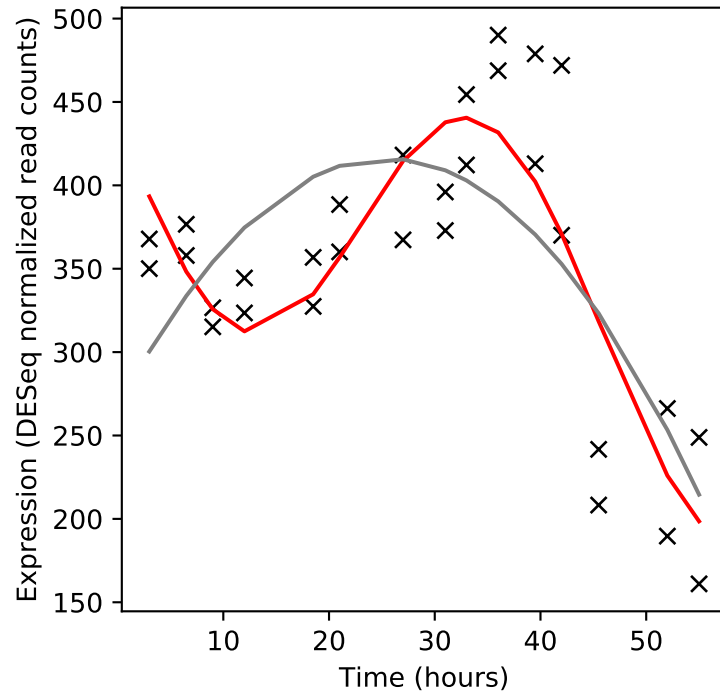

Rv3763/lpqH

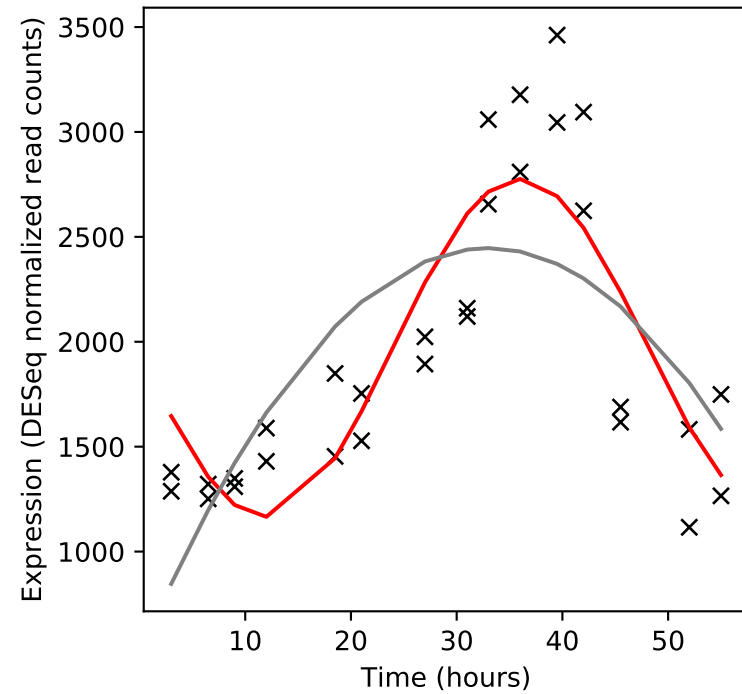

Rv3764c/tcrY

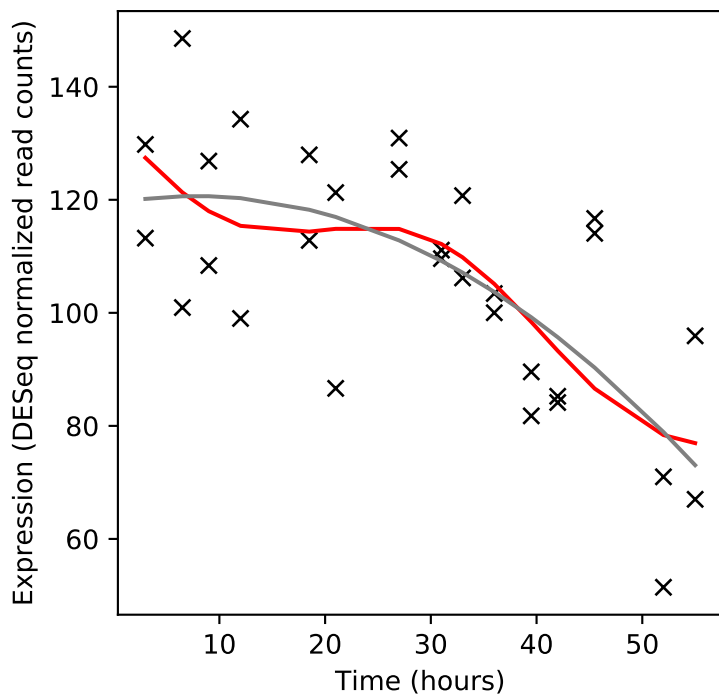

Rv3765c/tcrX

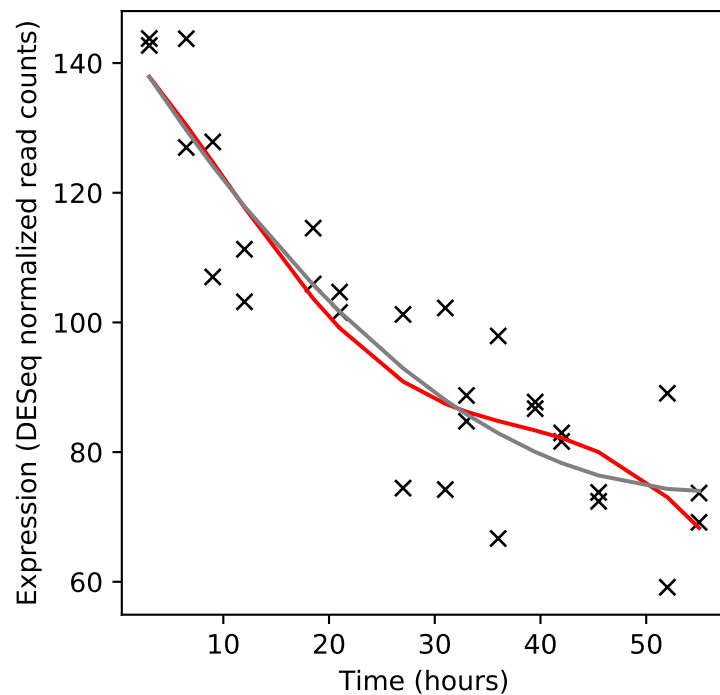

Rv3766/-

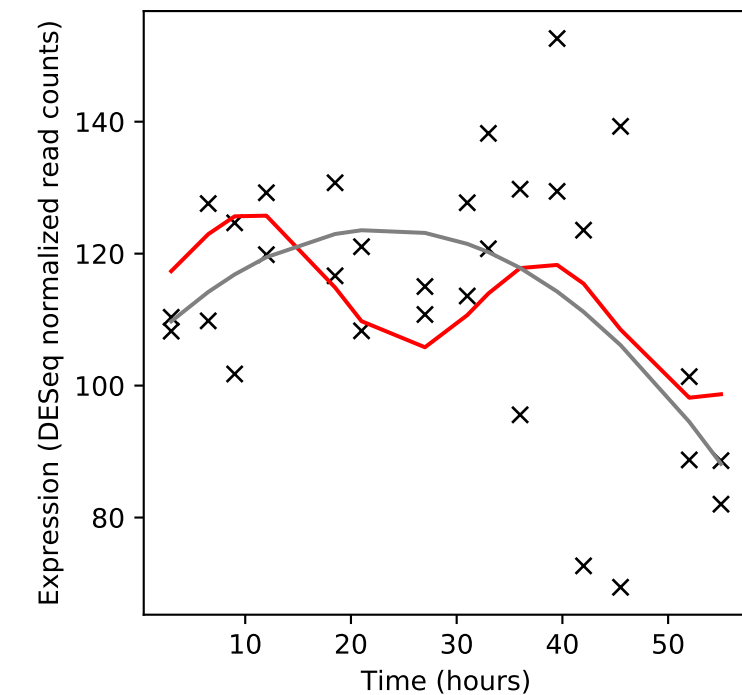

Rv3767c/-

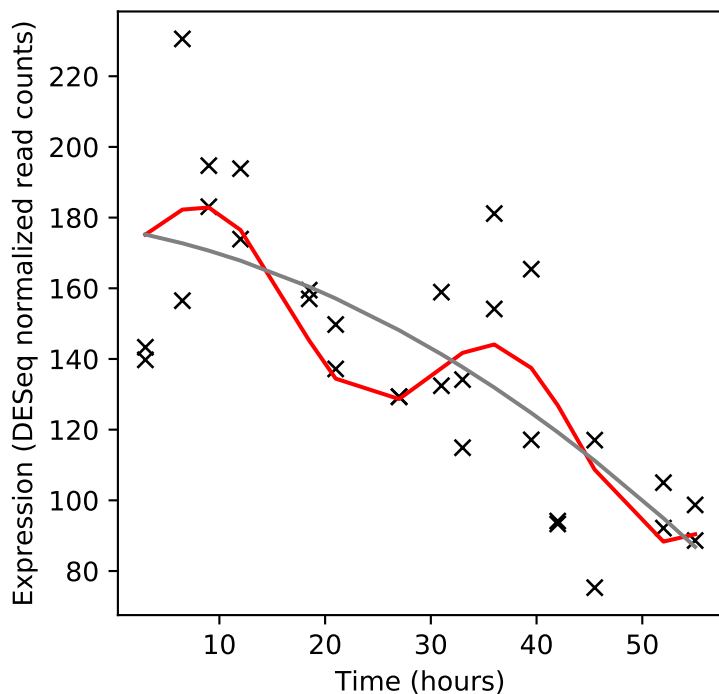

Rv3768/-

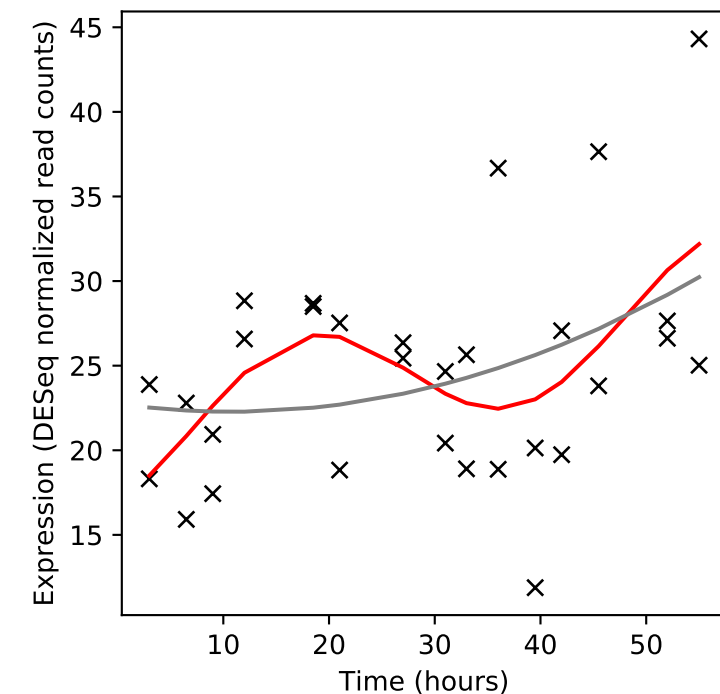

Rv3769/-

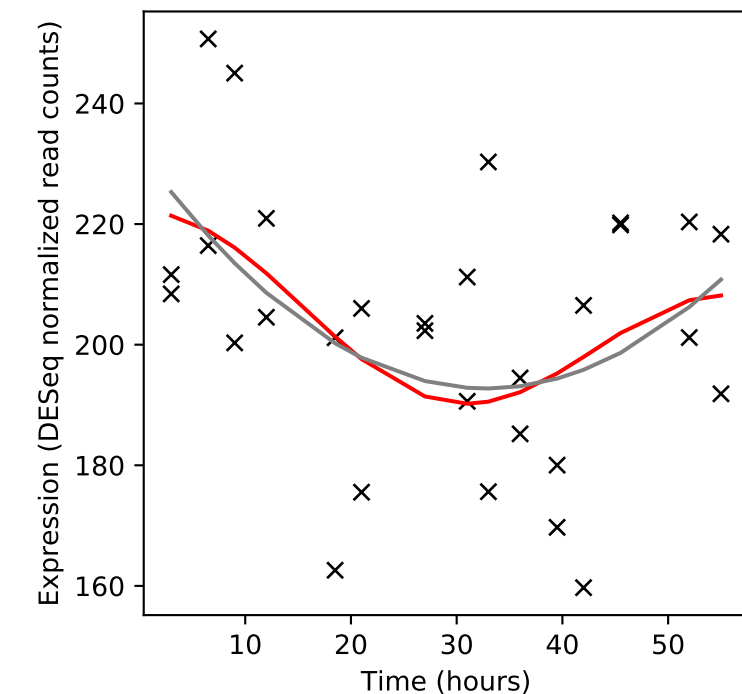



Rv3770c/-

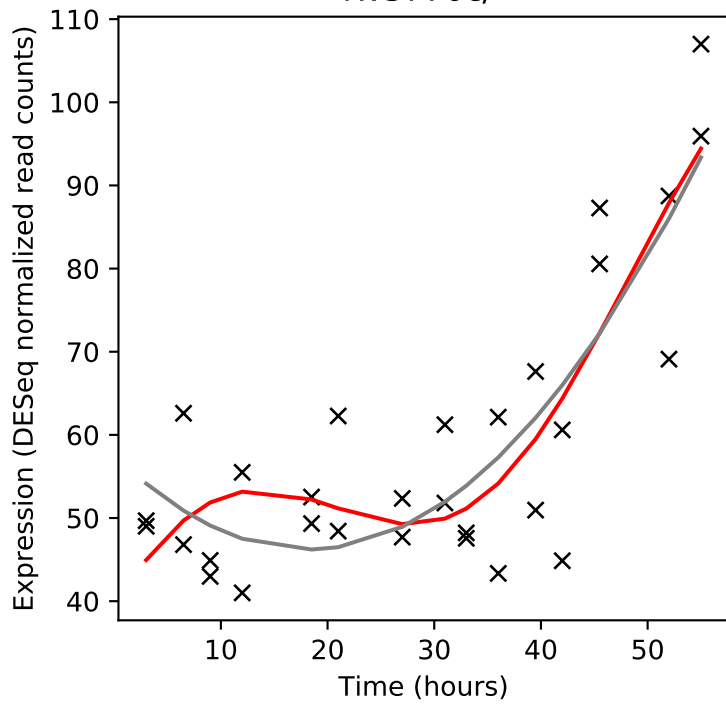

Rv3770A/-

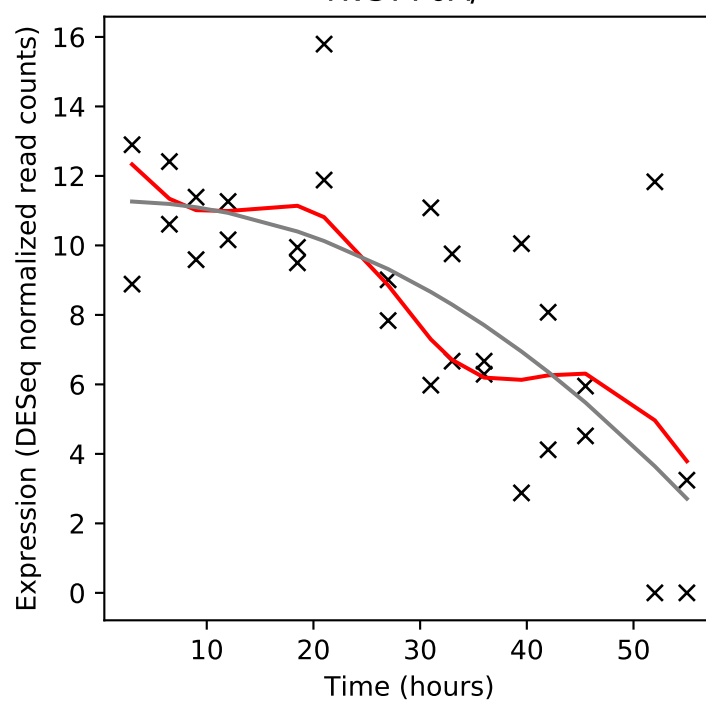

Rv3770B/-

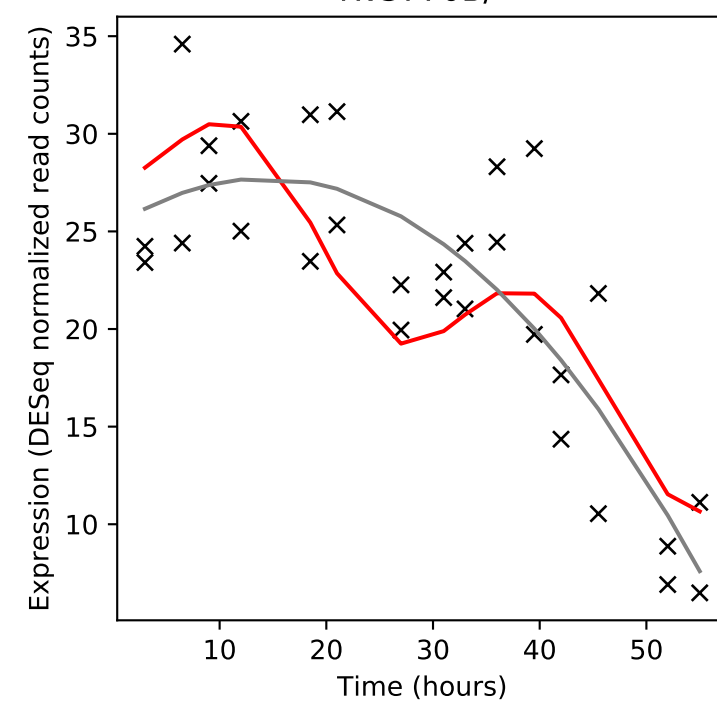

Rv3771c/-

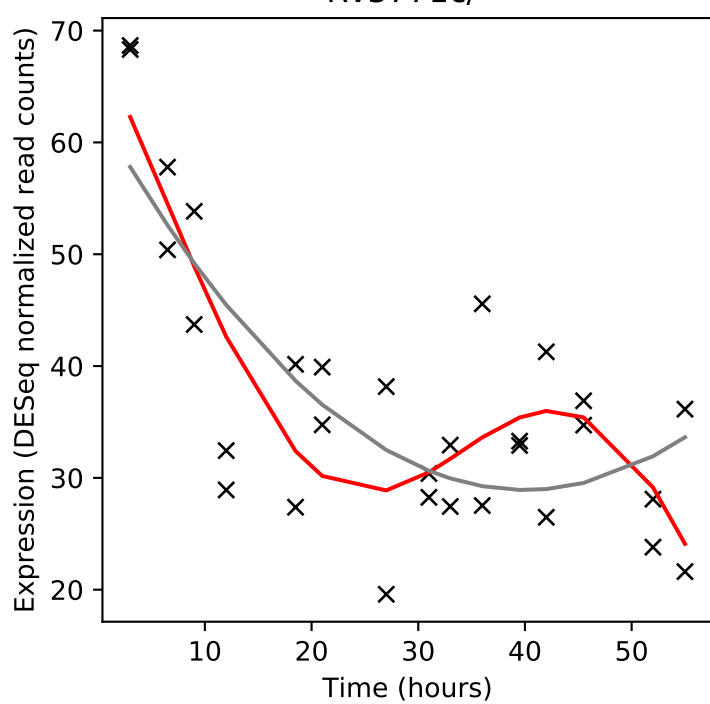

Rv3772/hisC2

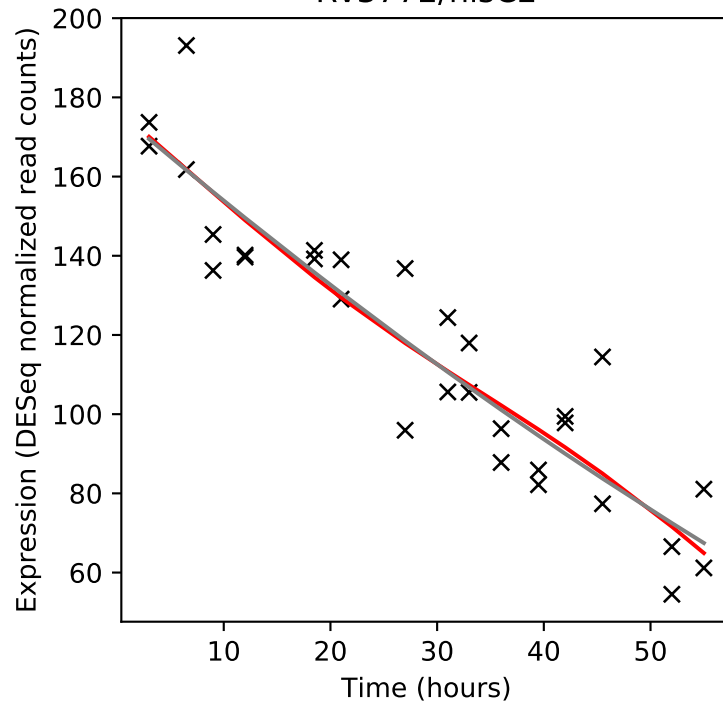

Rv3773c/-

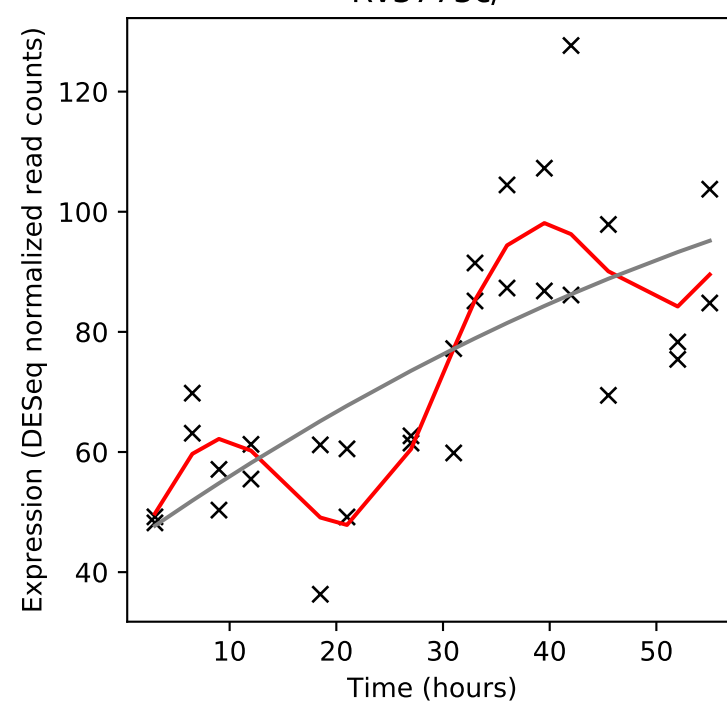

Rv3774/echA21

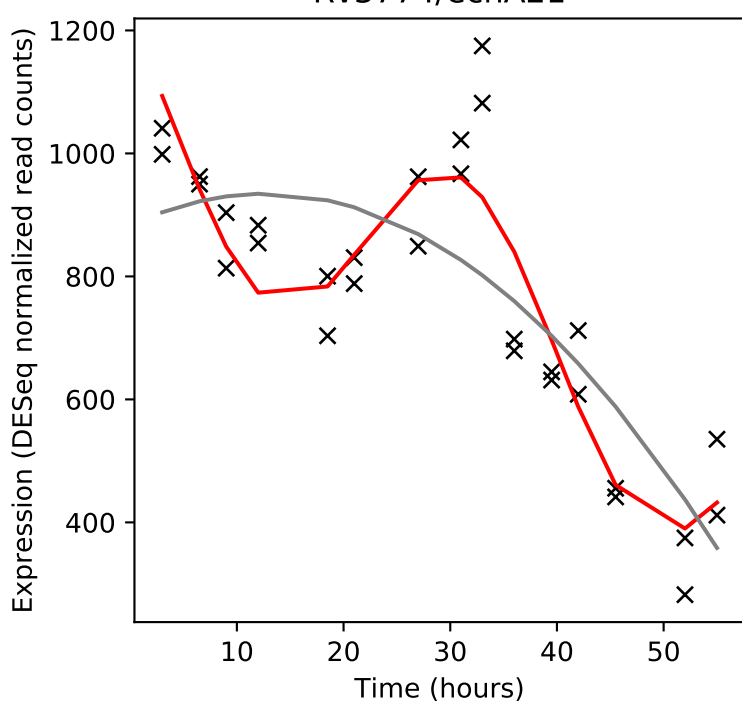

Rv3775/lipE

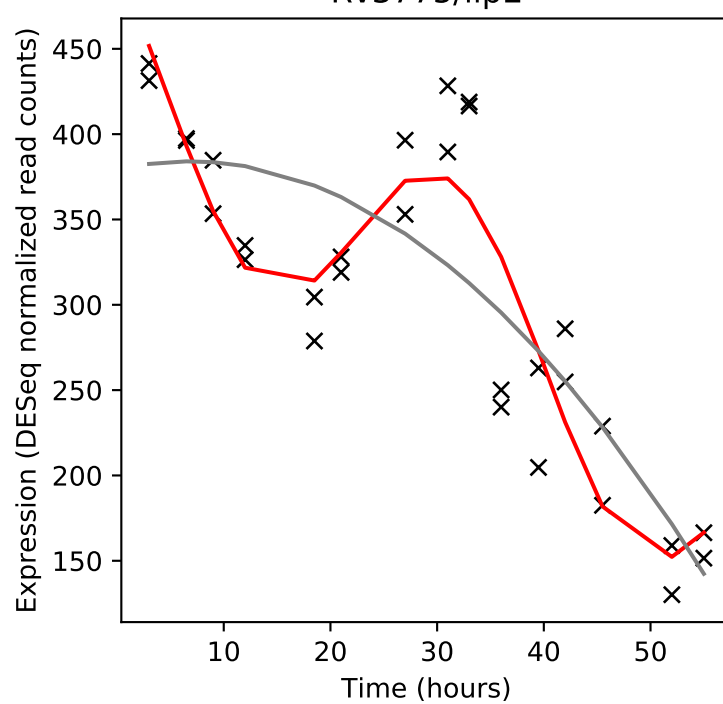

Rv3776/-

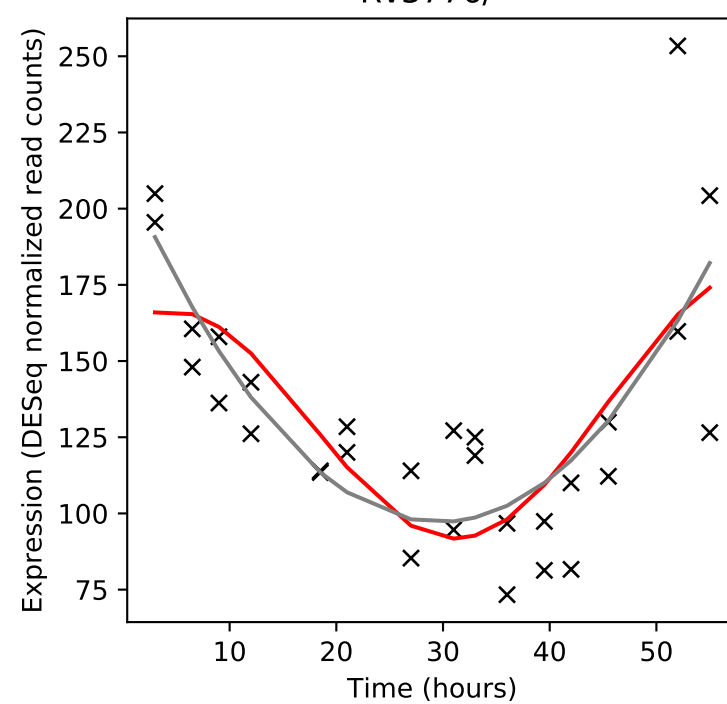

Rv3777/-

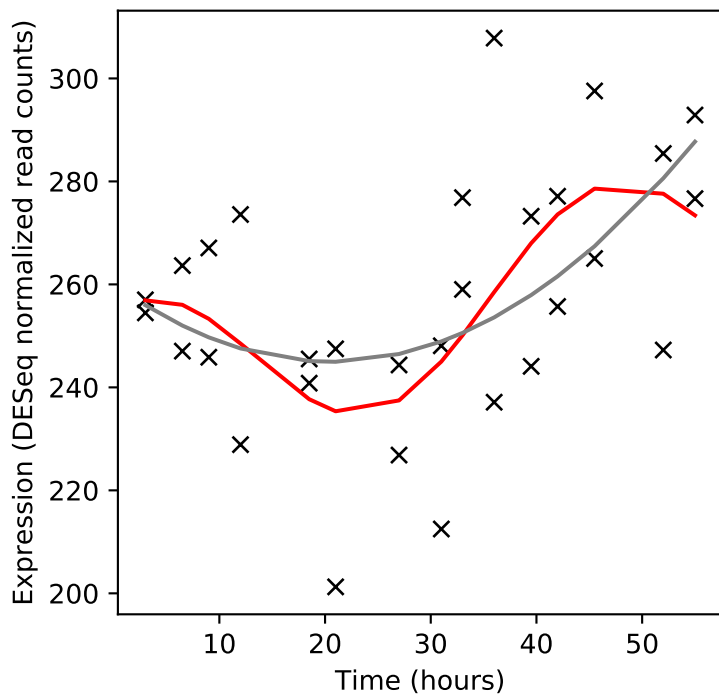

Rv3778c/-

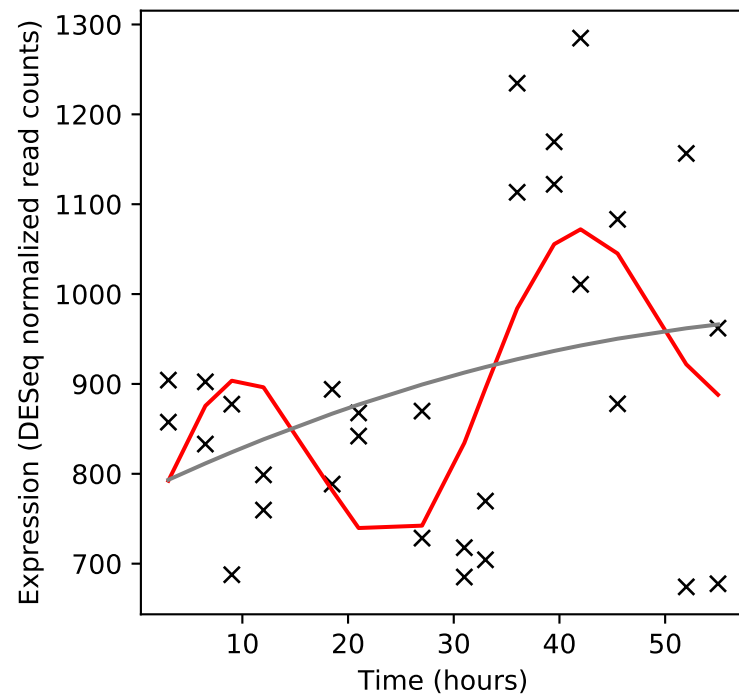

Rv3779/-

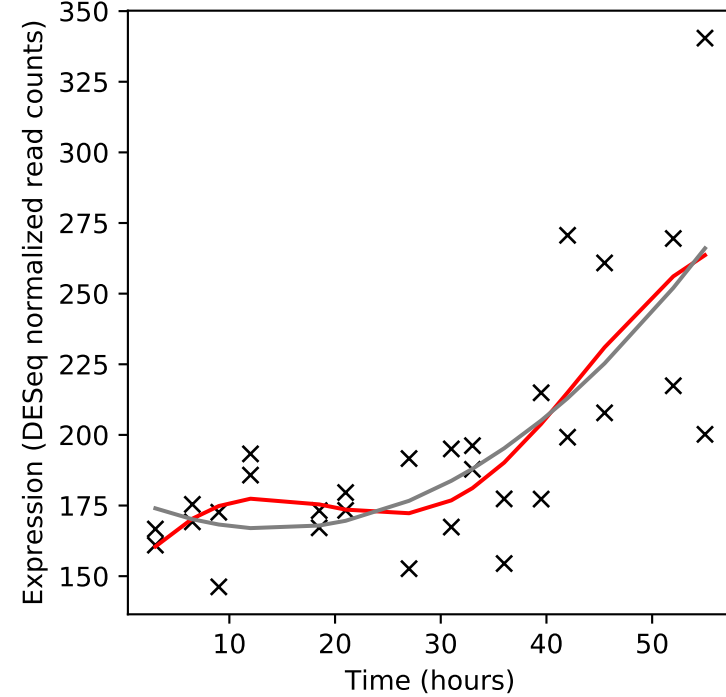

Rv3780/-

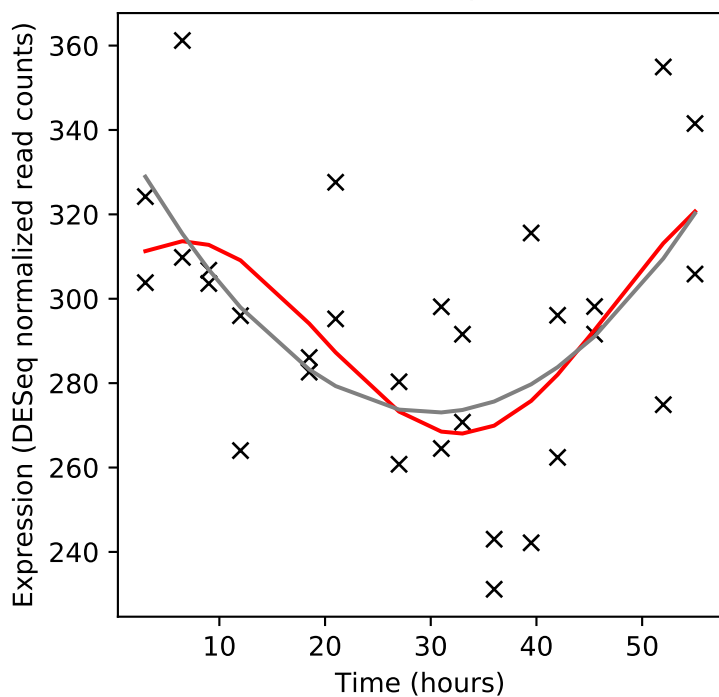

Rv3781/rfbE

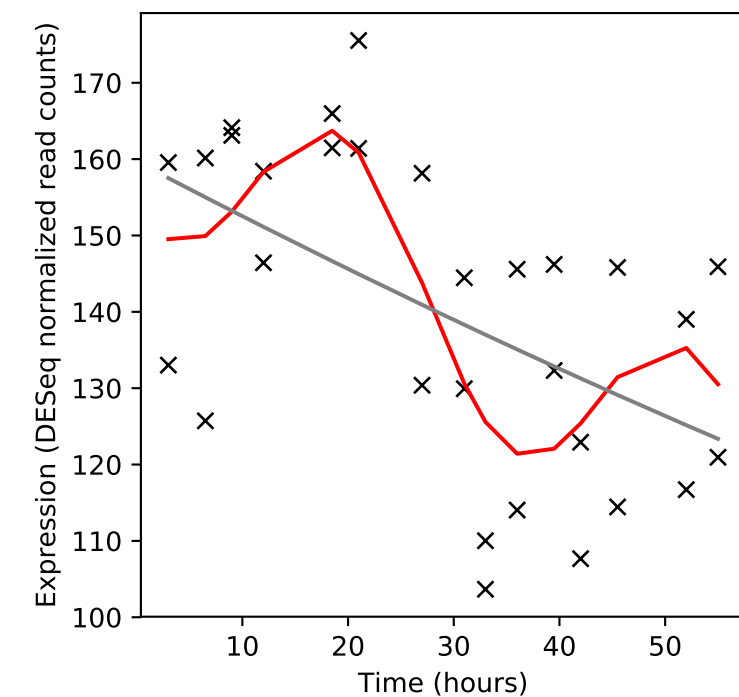

Rv3782/glfT1

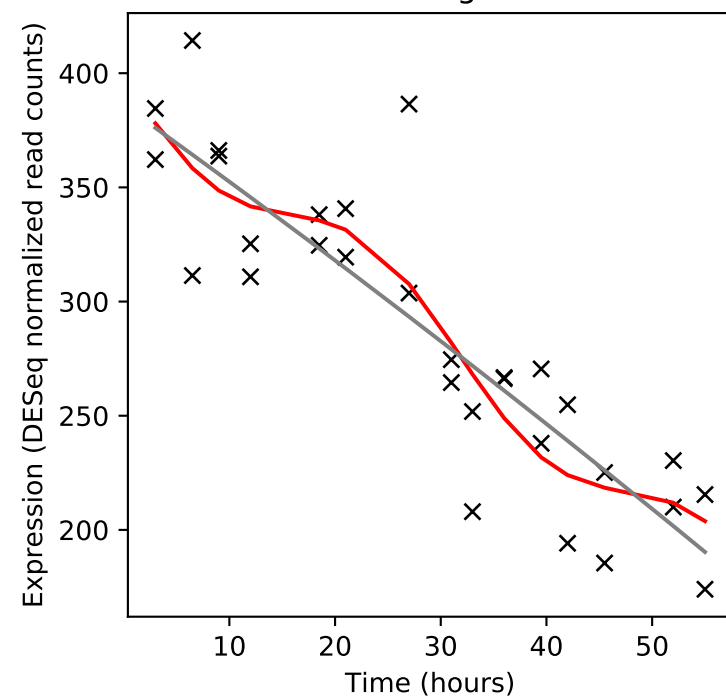

Rv3783/rfbD

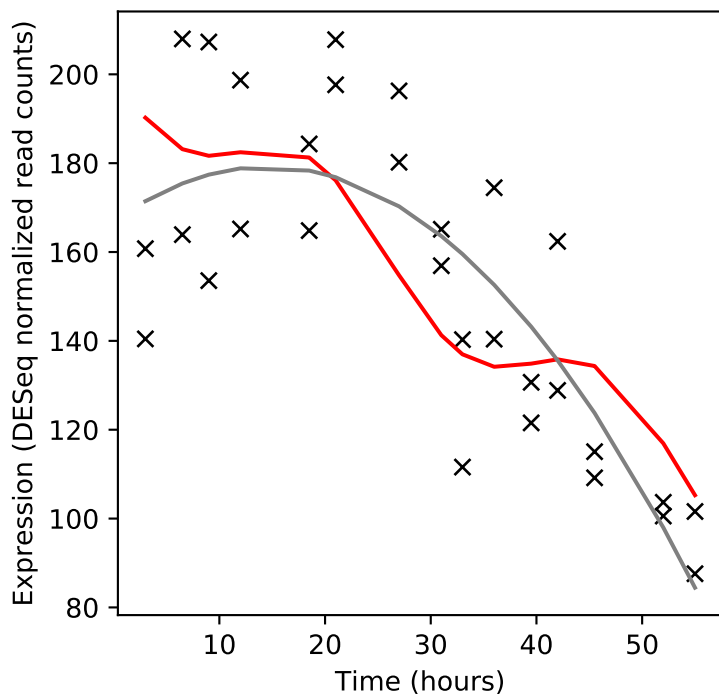

Rv3784/-

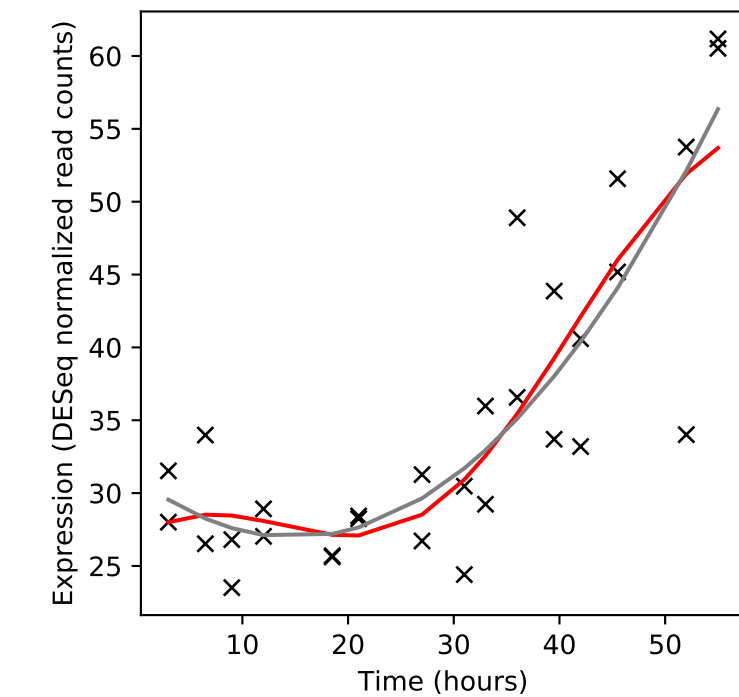

Rv3785/-

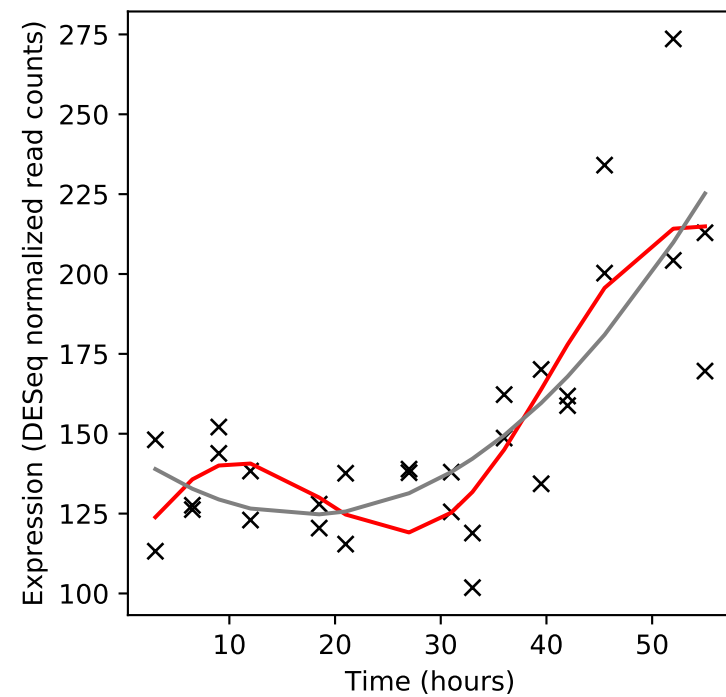

Rv3786c/-

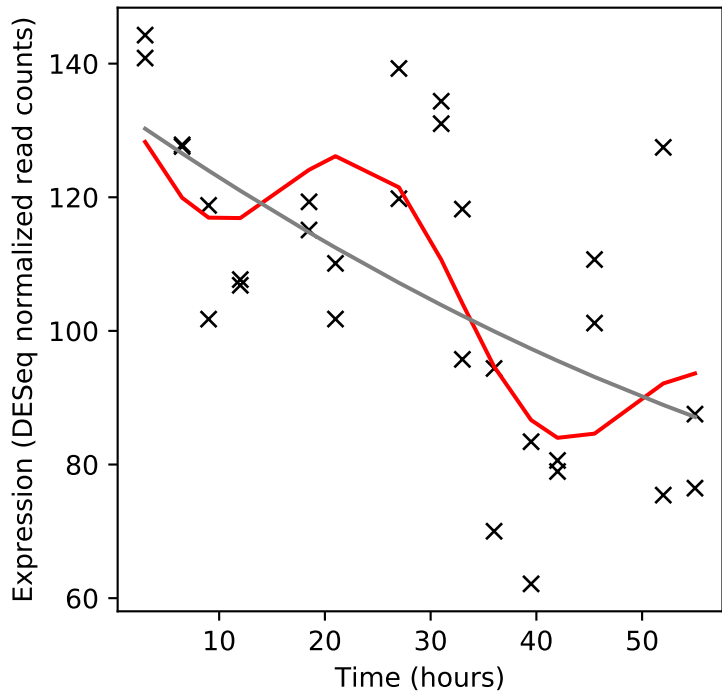

Rv3787c/-

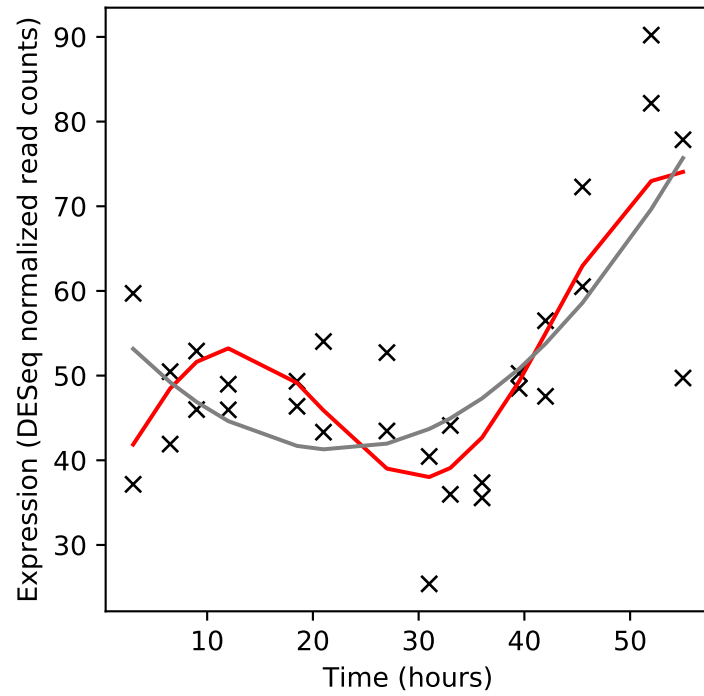

Rv3788/-

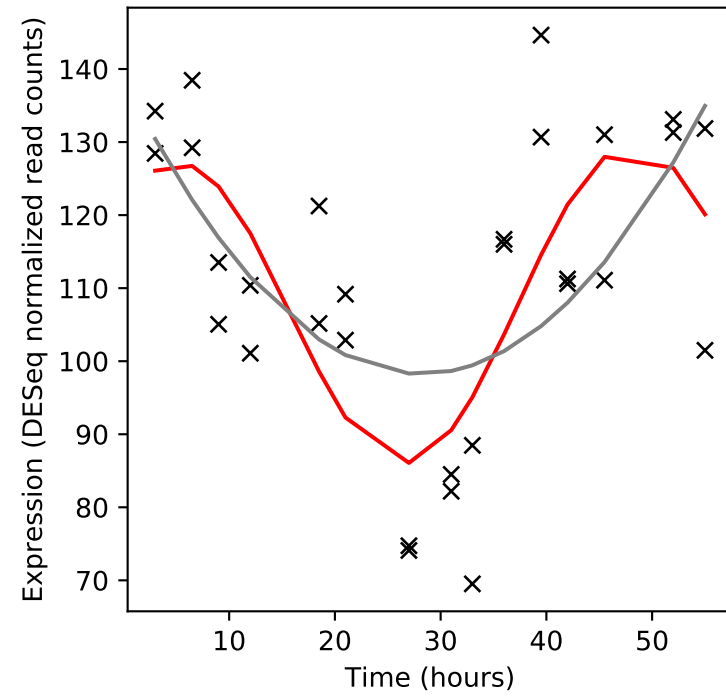

Rv3789/-

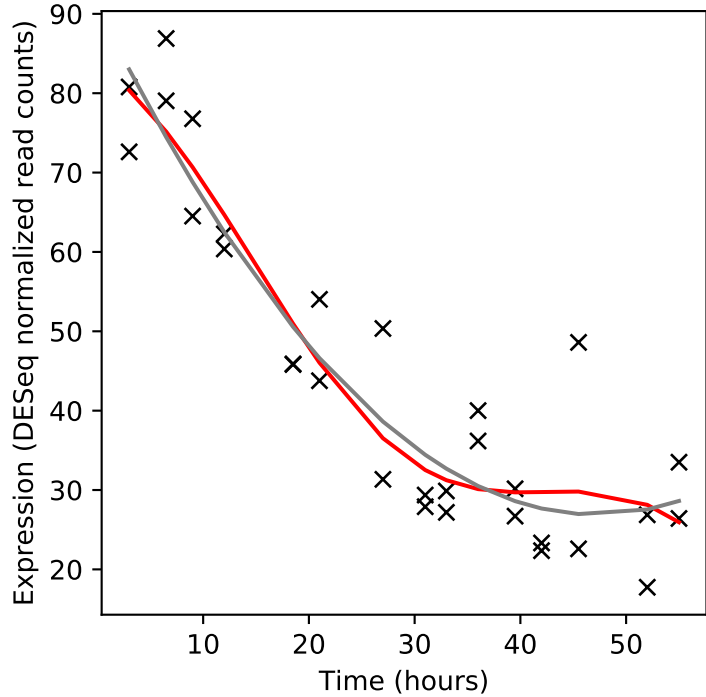

Rv3790/dprE1

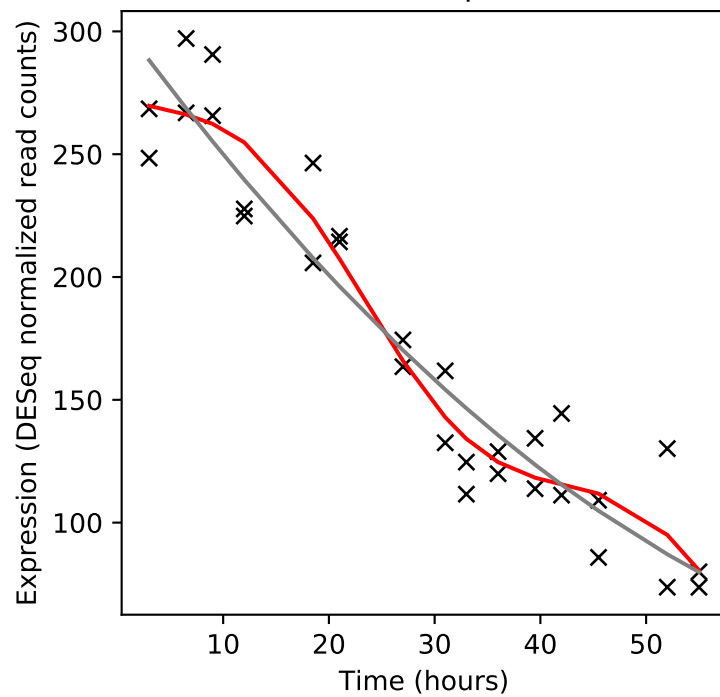

Rv3791/dprE2

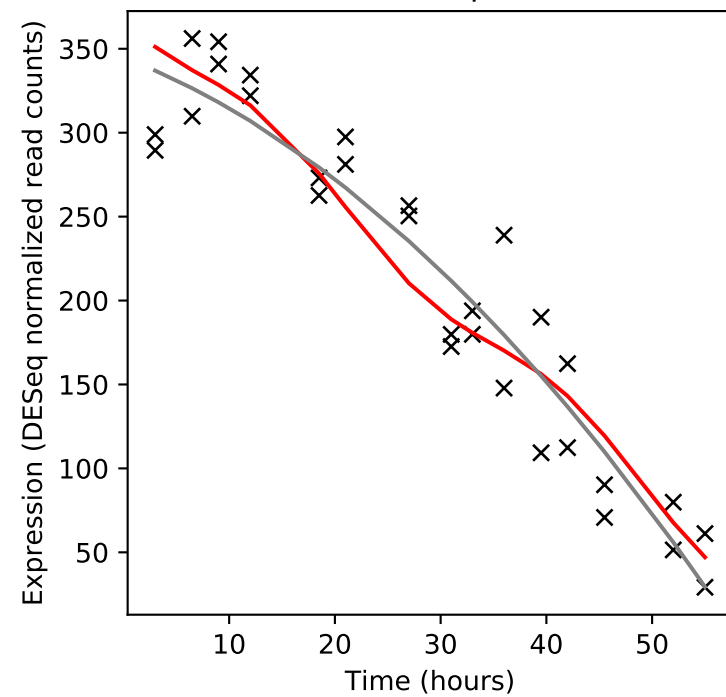

Rv3792/aftA

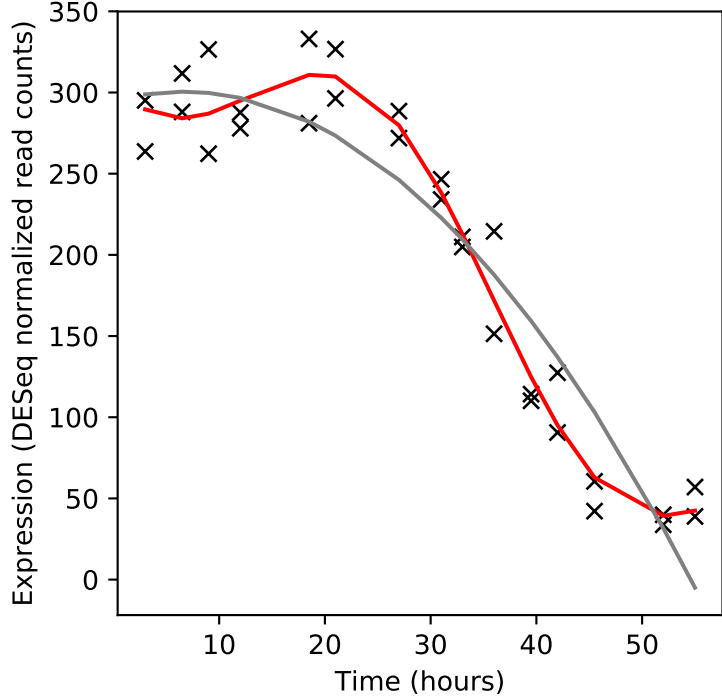

Rv3793/embC

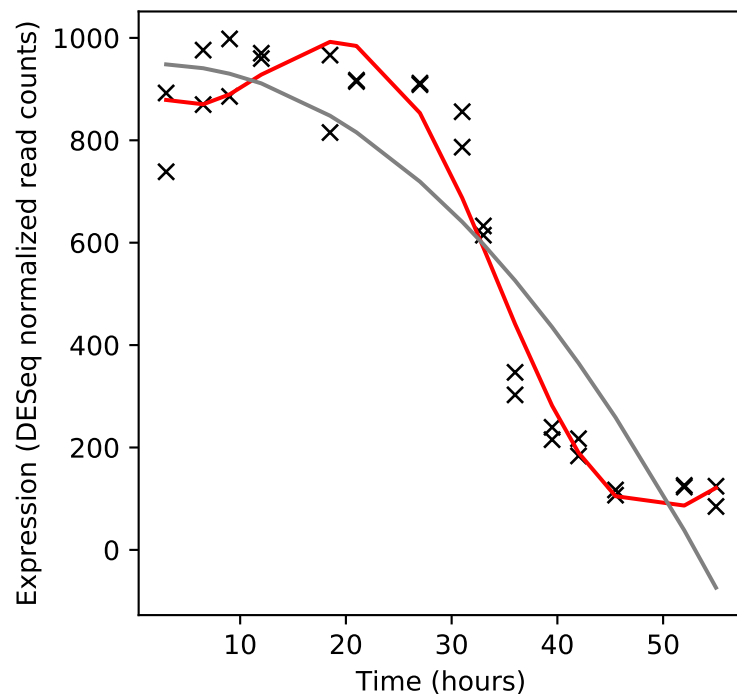

Rv3794/embA

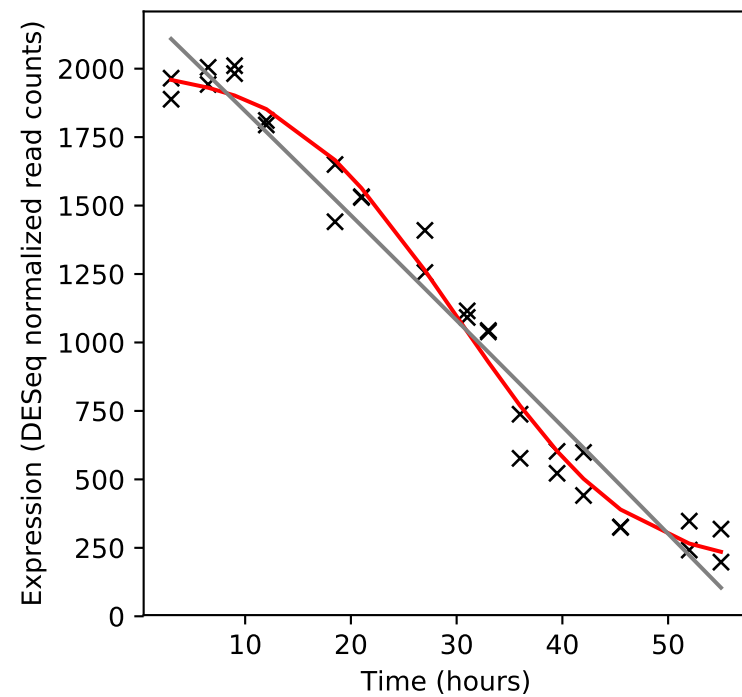

Rv3795/embB

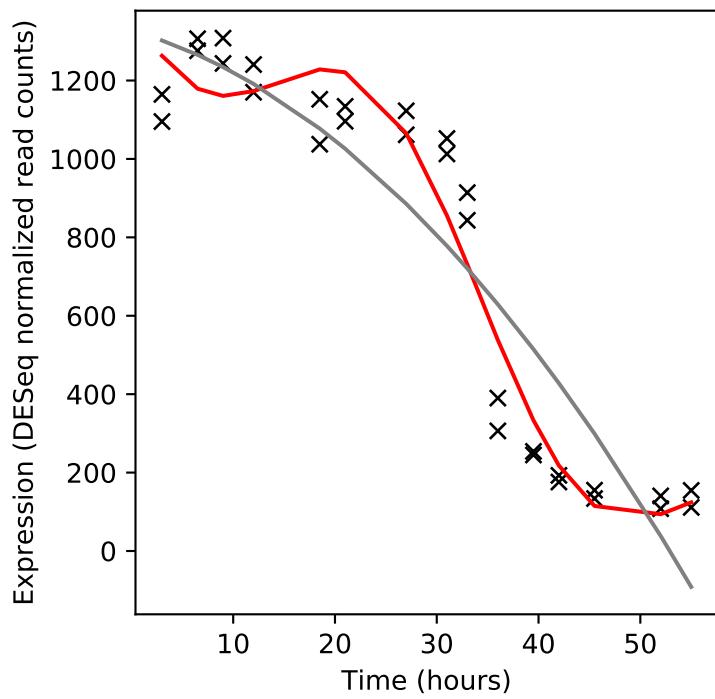

Rv3796/-

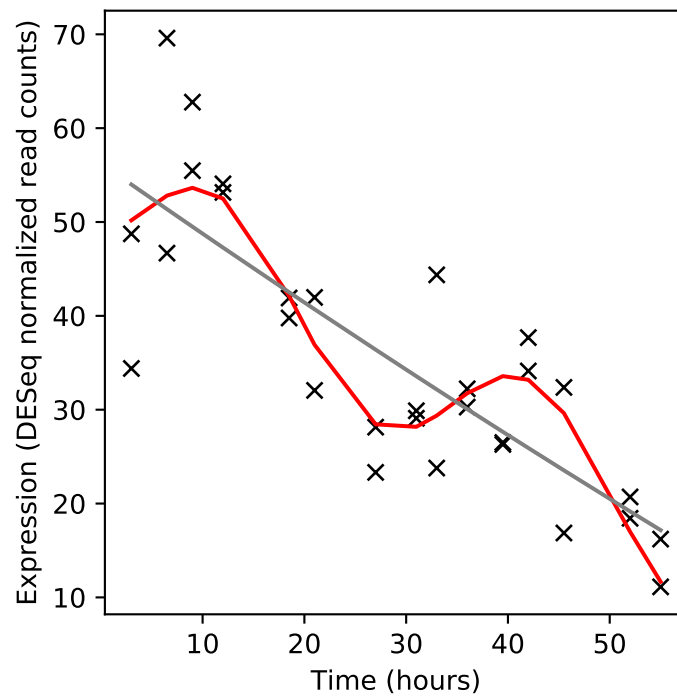

Rv3797/fadE35

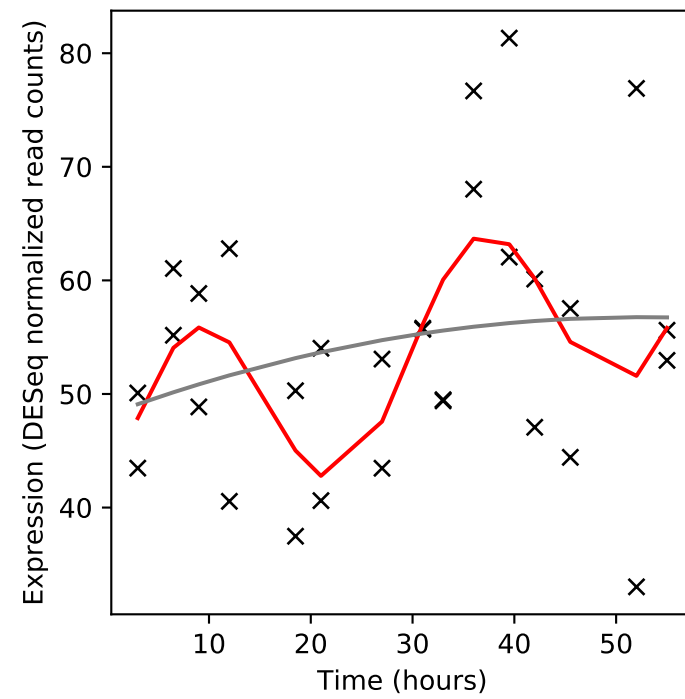

Rv3798/-

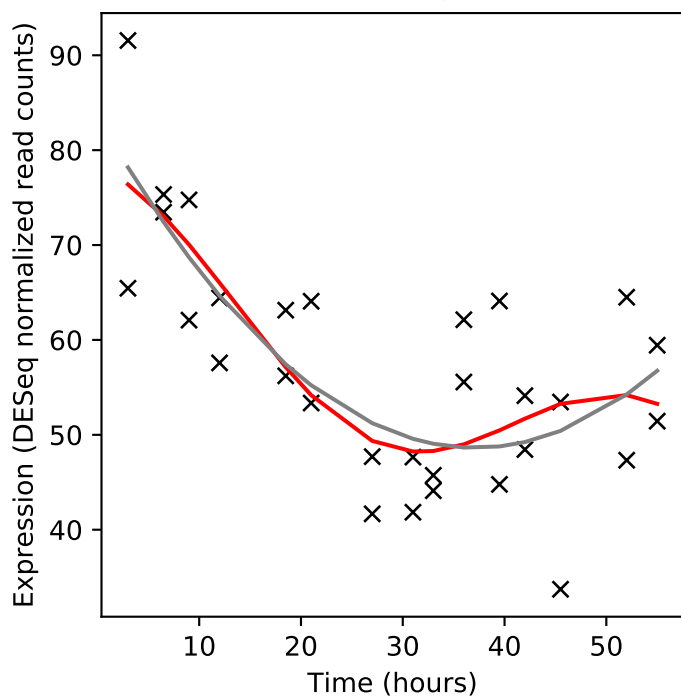

Rv3799c/accD4

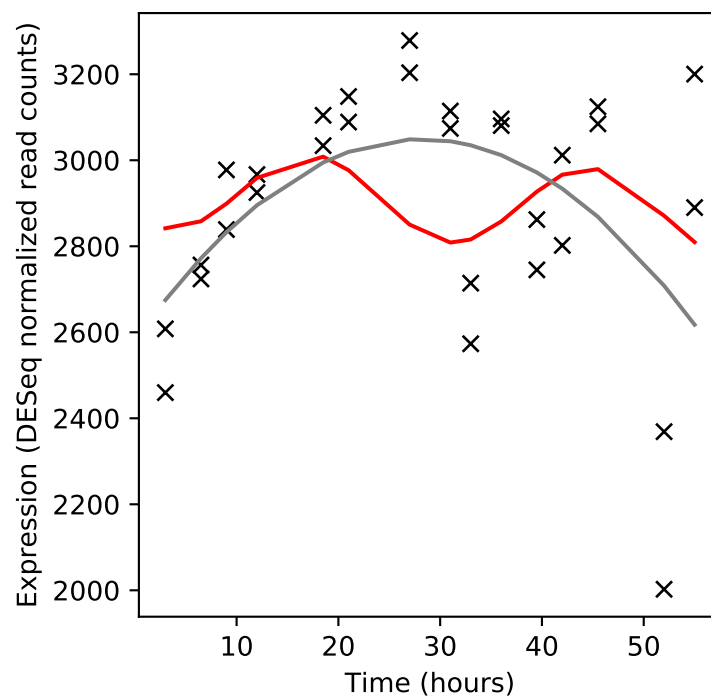

Rv3800c/pks13

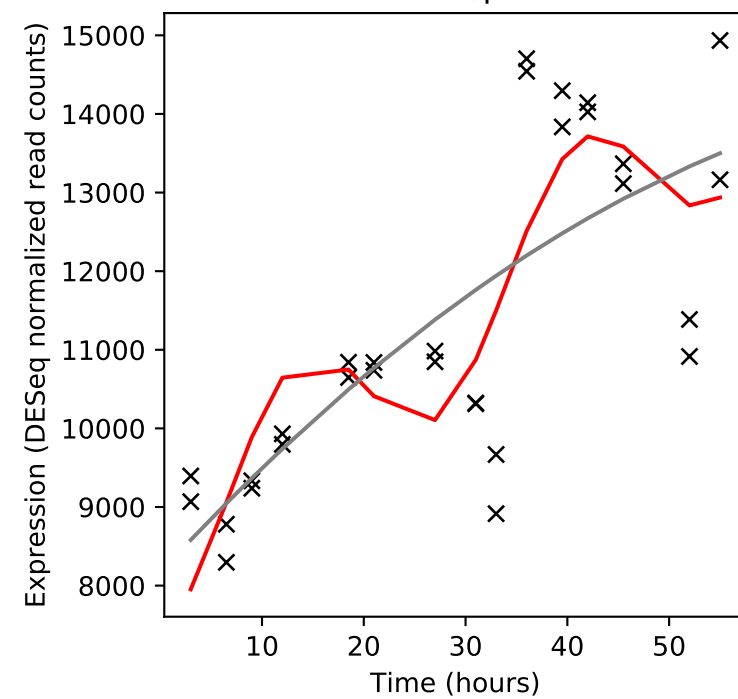

Rv3801c/fadD32

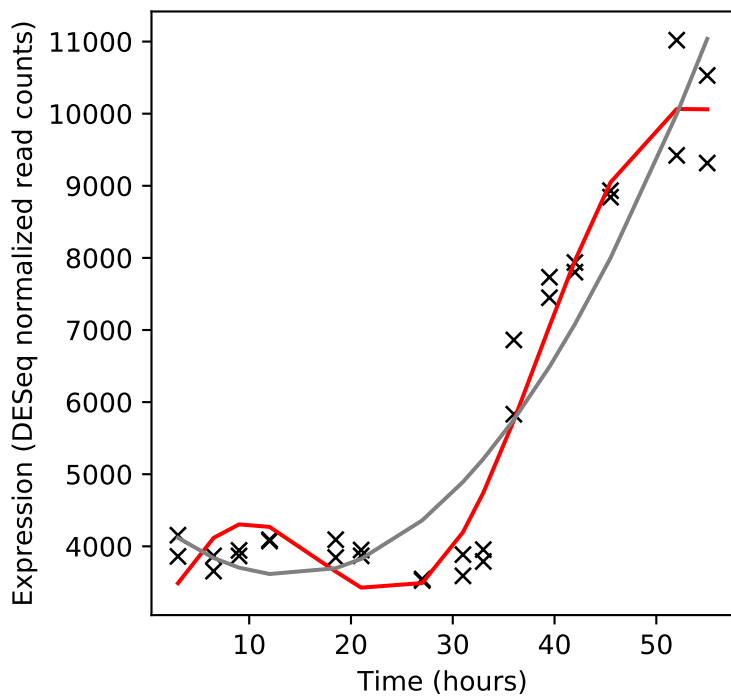

Rv3802c/-

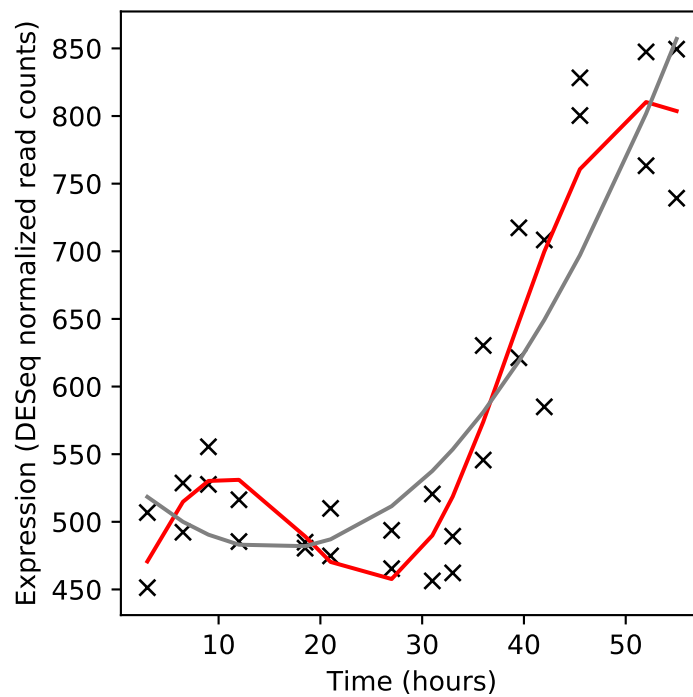

Rv3803c/fbpD

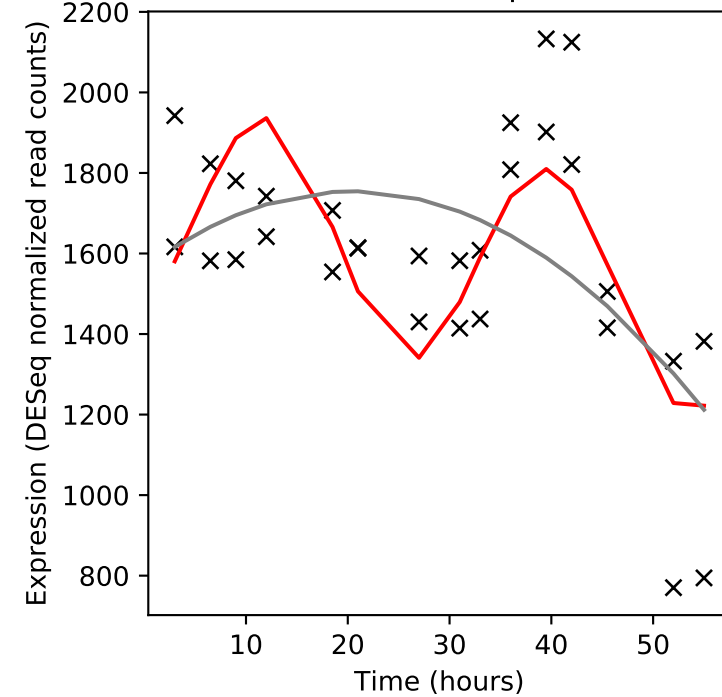

Rv3804c/fbpA

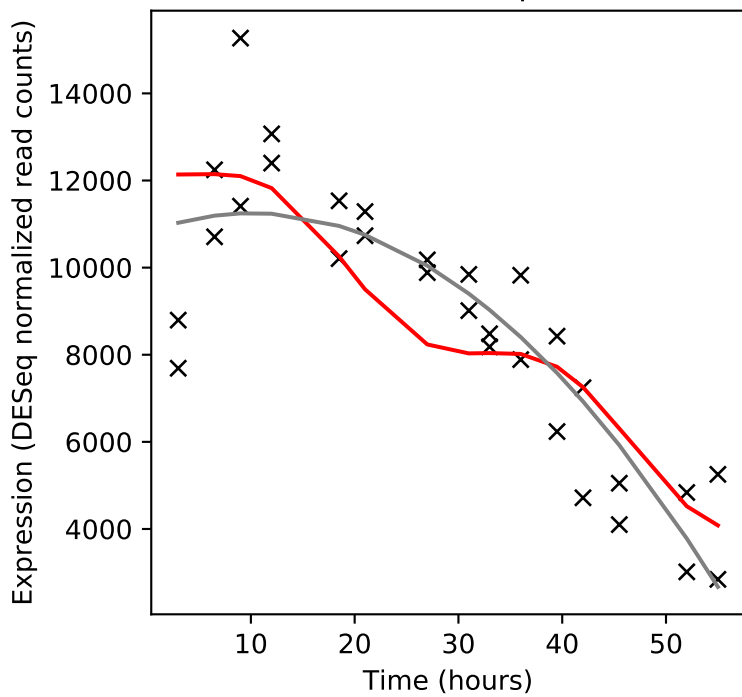

Rv3805c/aftB

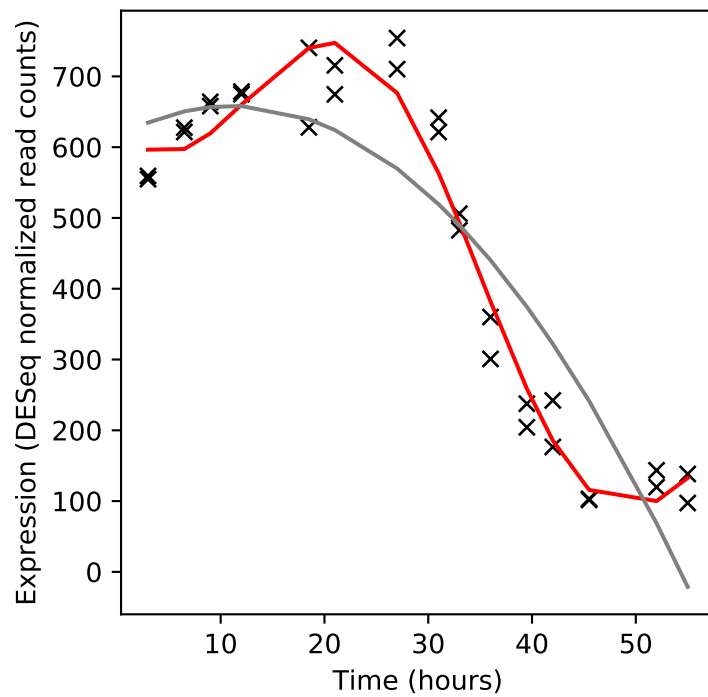

Rv3806c/ubiA

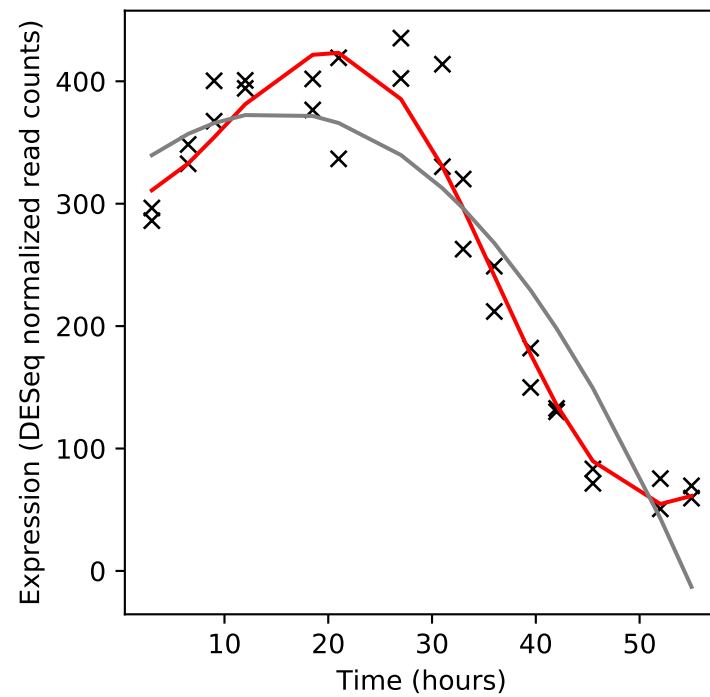

Rv3807c/-

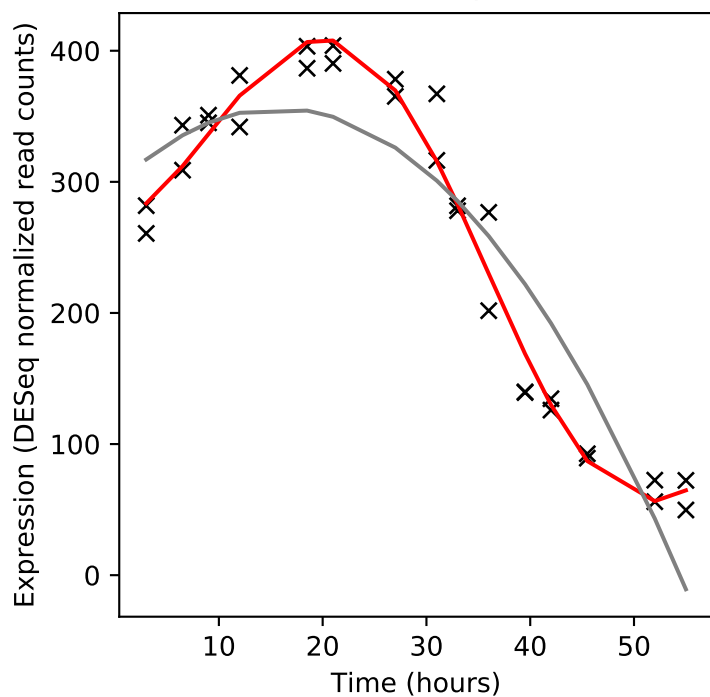

Rv3808c/glfT2

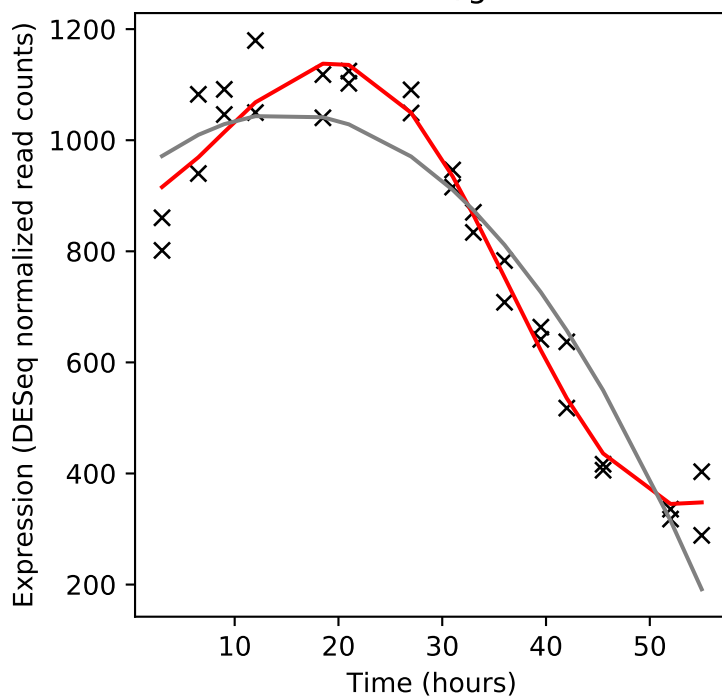

Rv3809c/glf

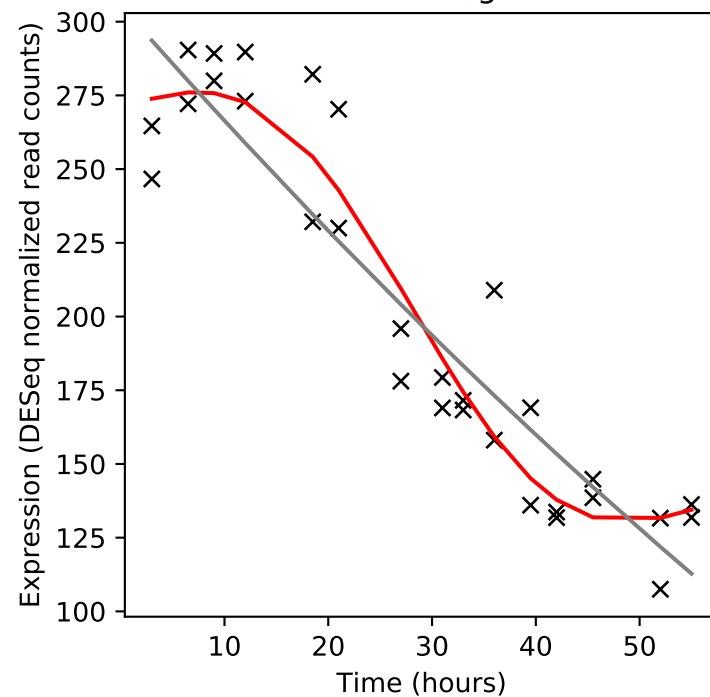

Rv3810/pirG

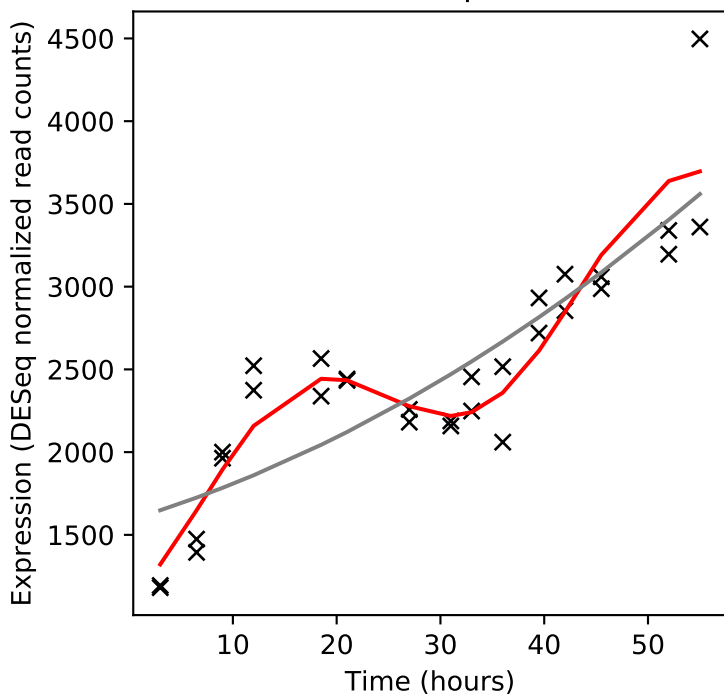

Rv3811/-

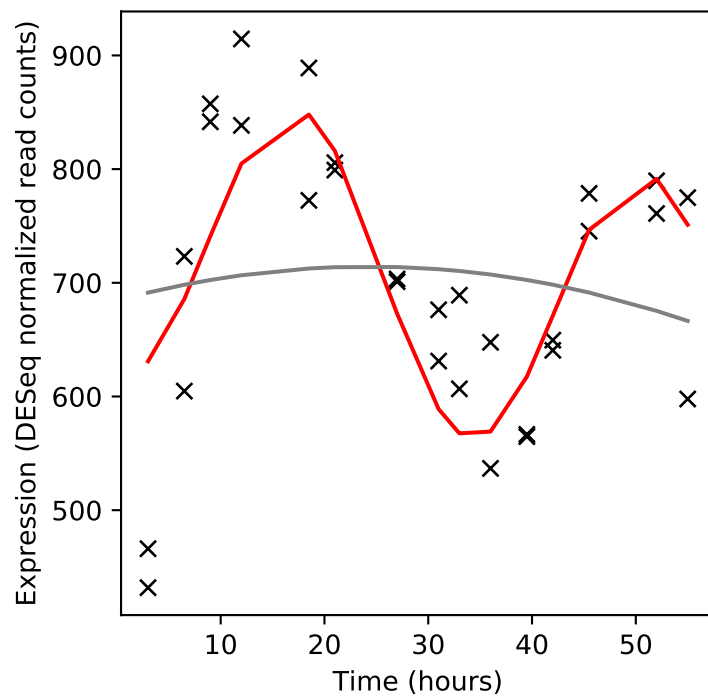

Rv3812/PE\_PGRS62

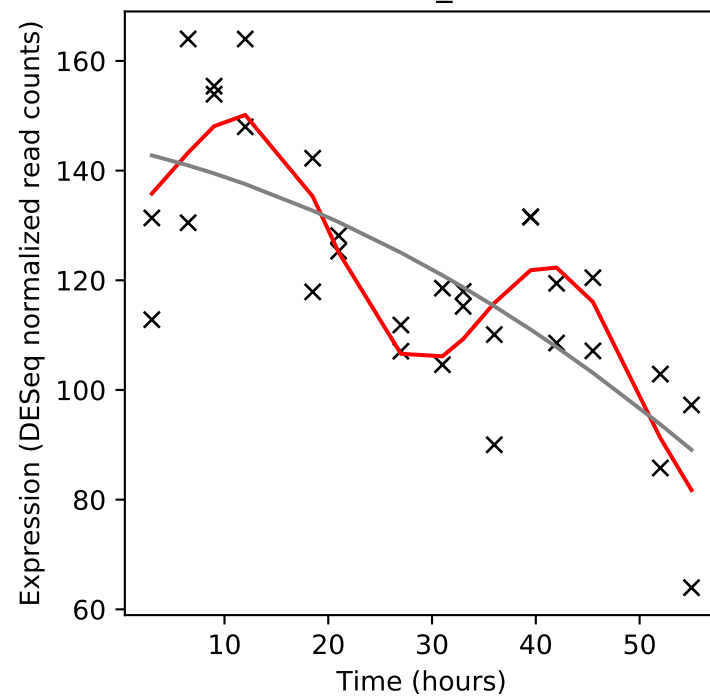

Rv3813c/-

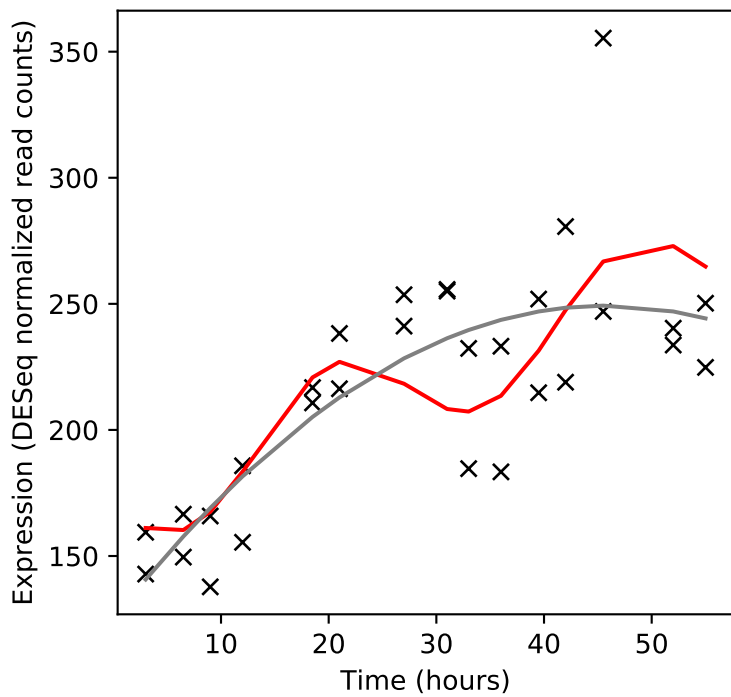

Rv3814c/-

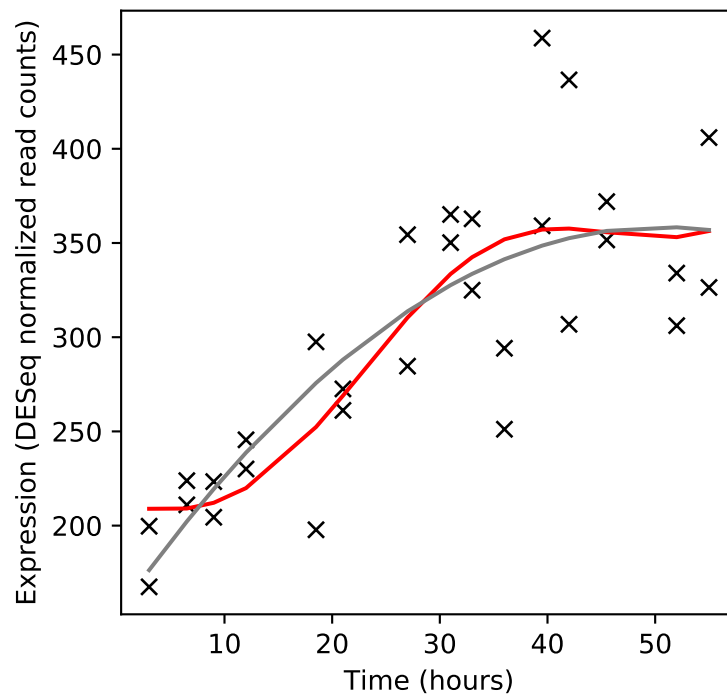

Rv3815c/-

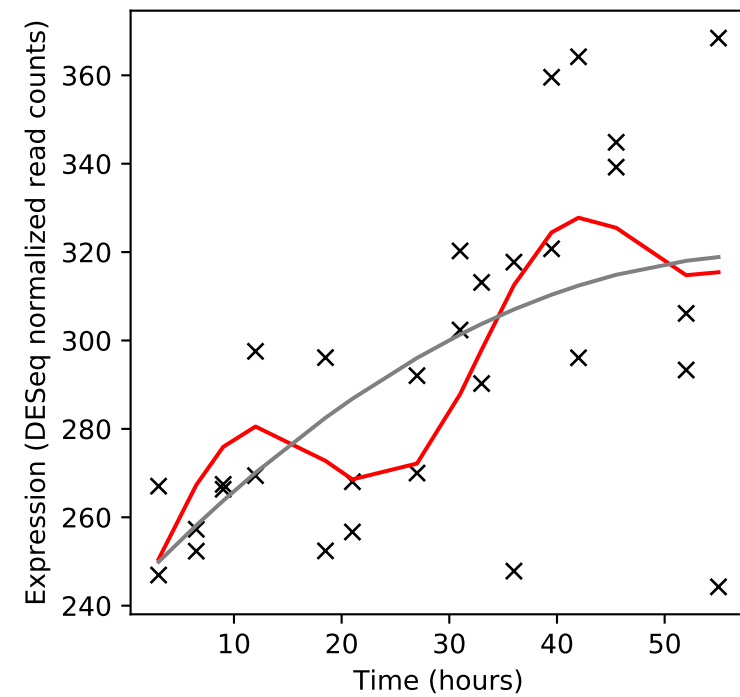

Rv3816c/-

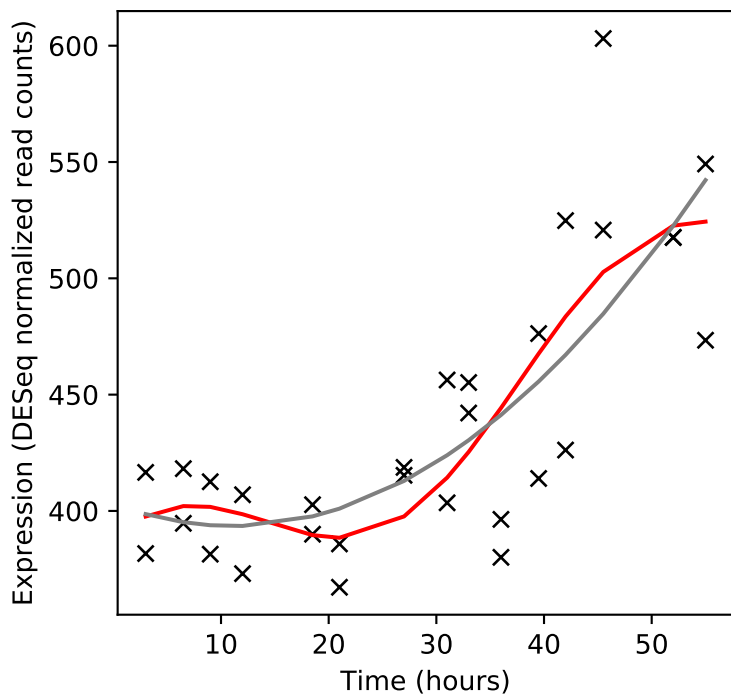

Rv3817/-

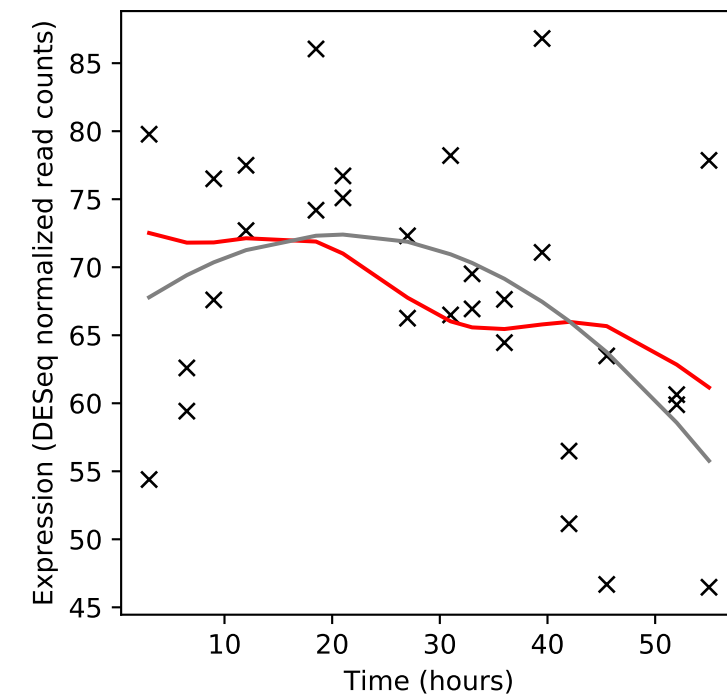

Rv3818/-

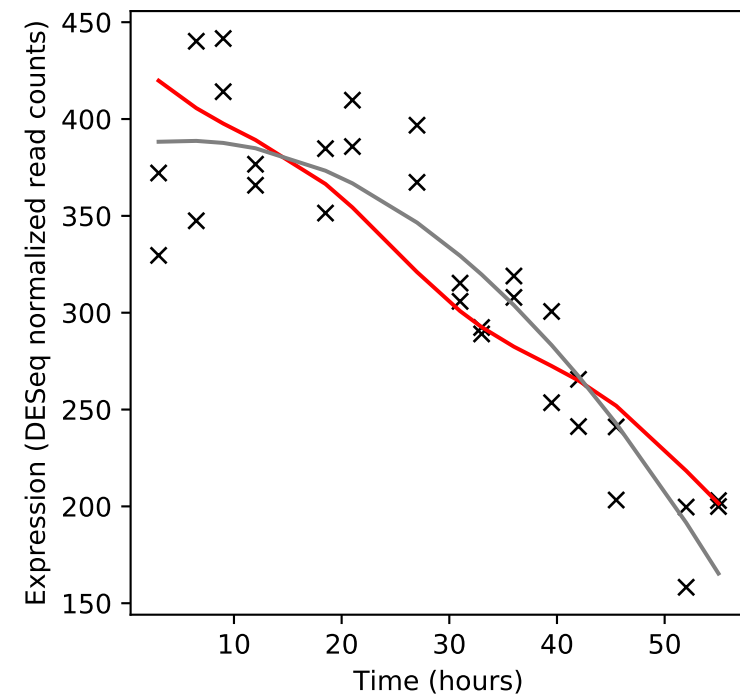

Rv3819/-

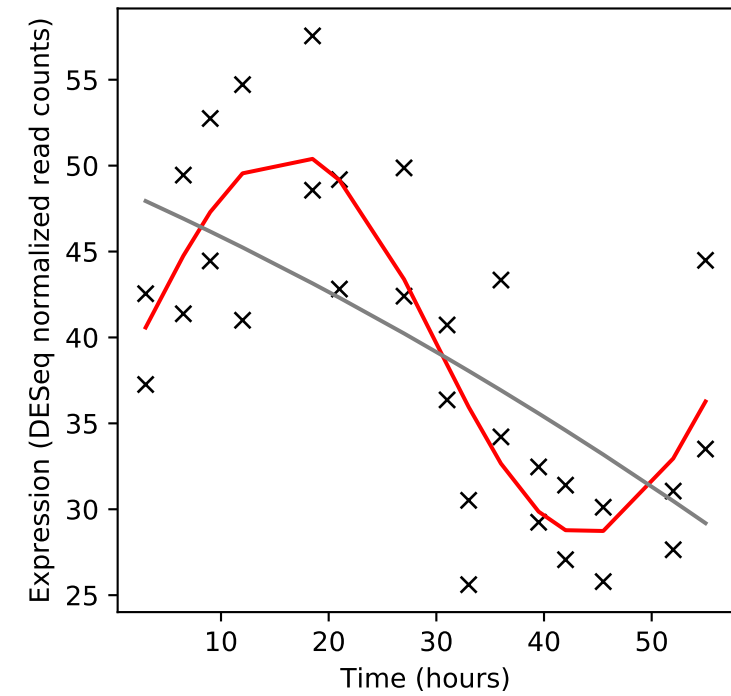

Rv3820c/papA2

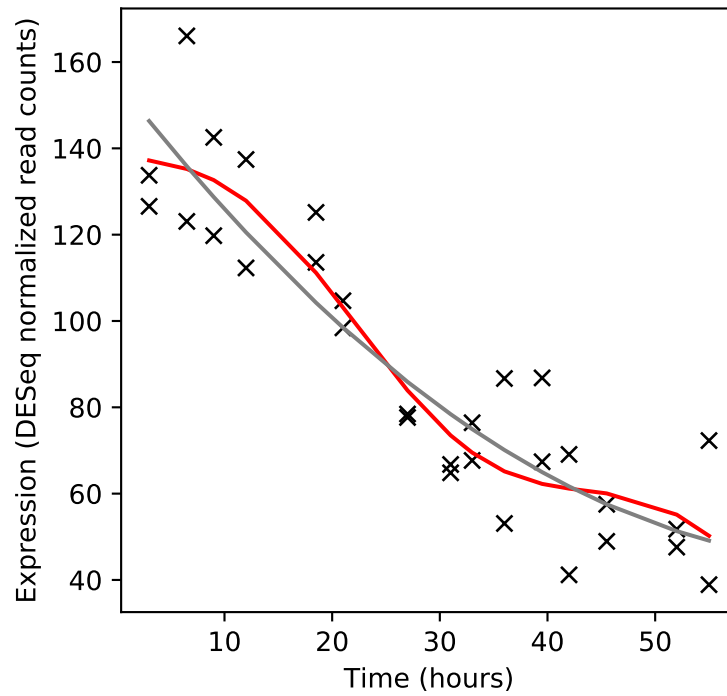

Rv3821/-

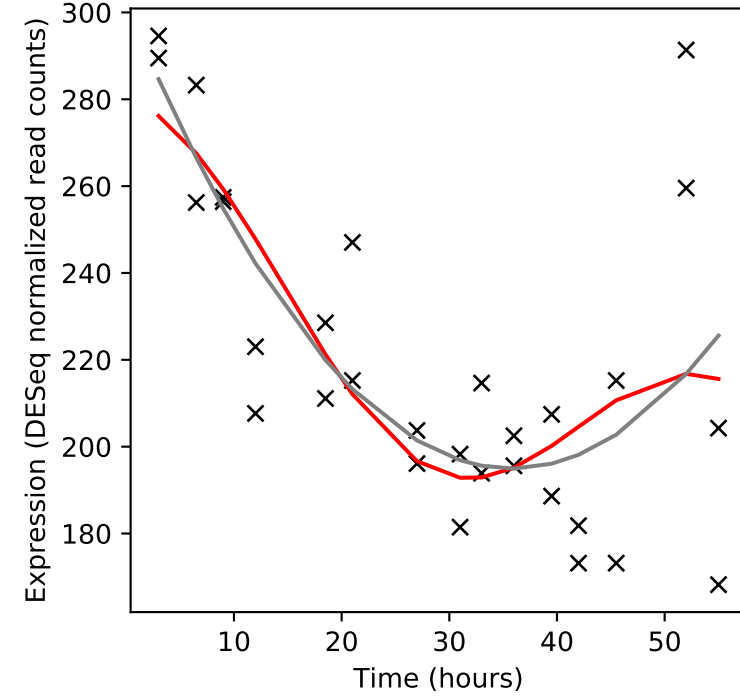

Rv3822c/-

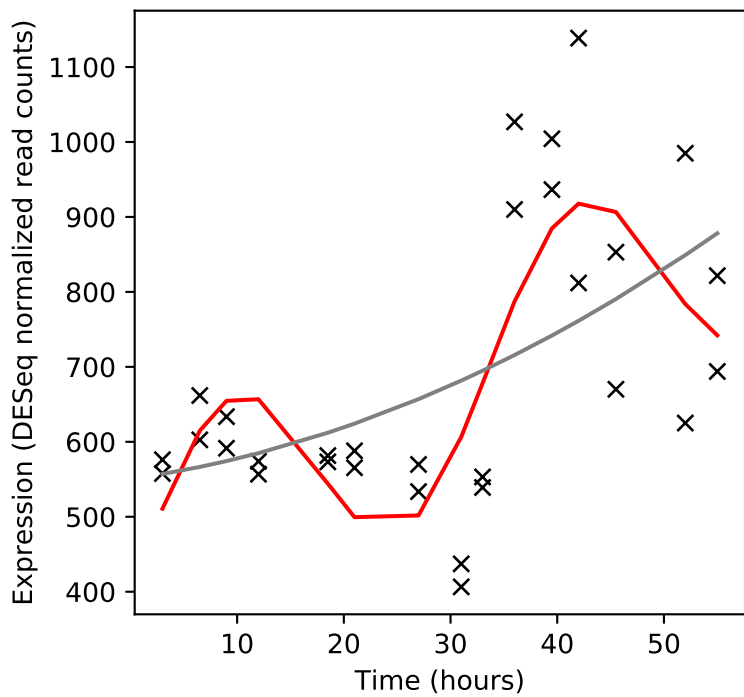

Rv3823c/mmpL8

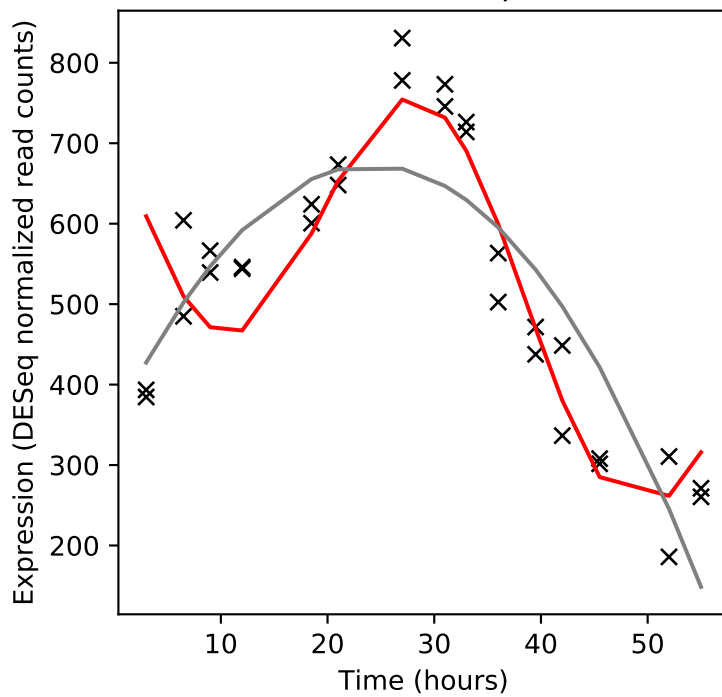

Rv3824c/papA1

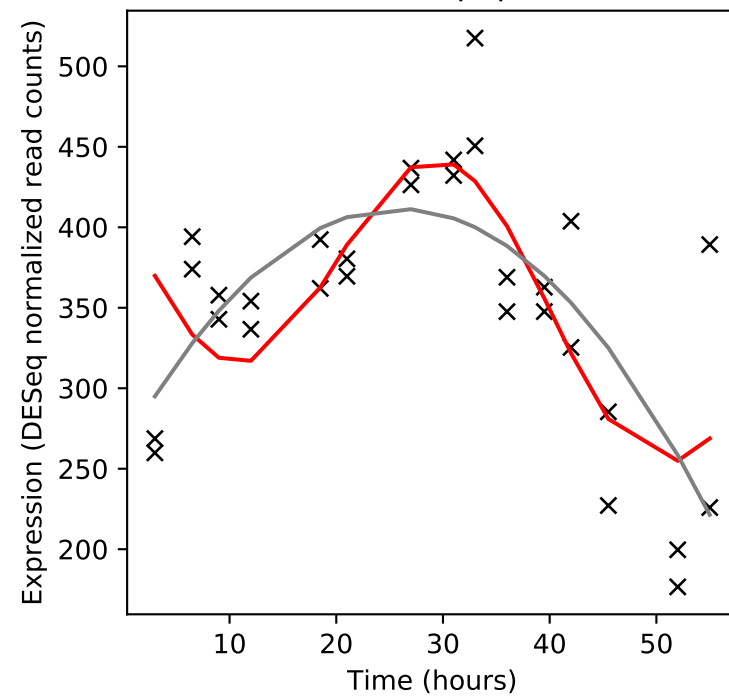

Rv3825c/pks2

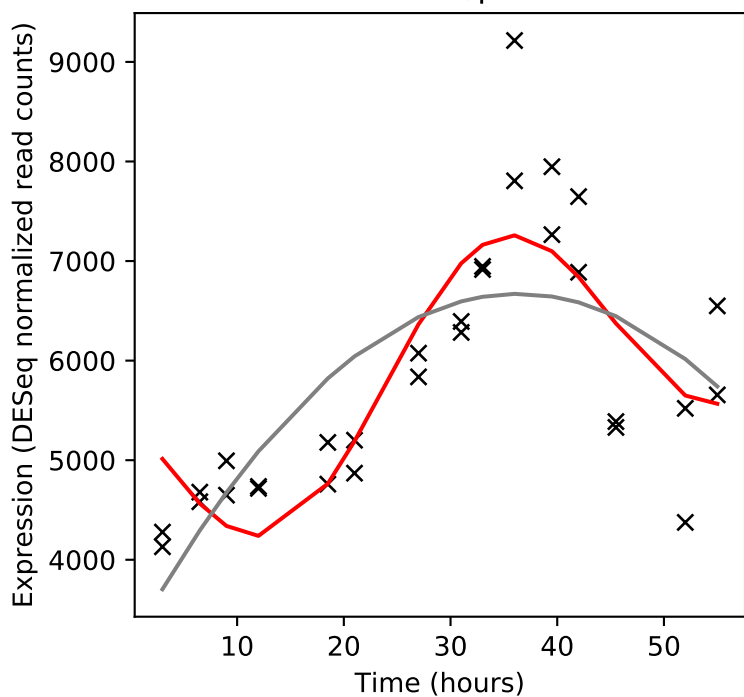

Rv3826c/fadD23

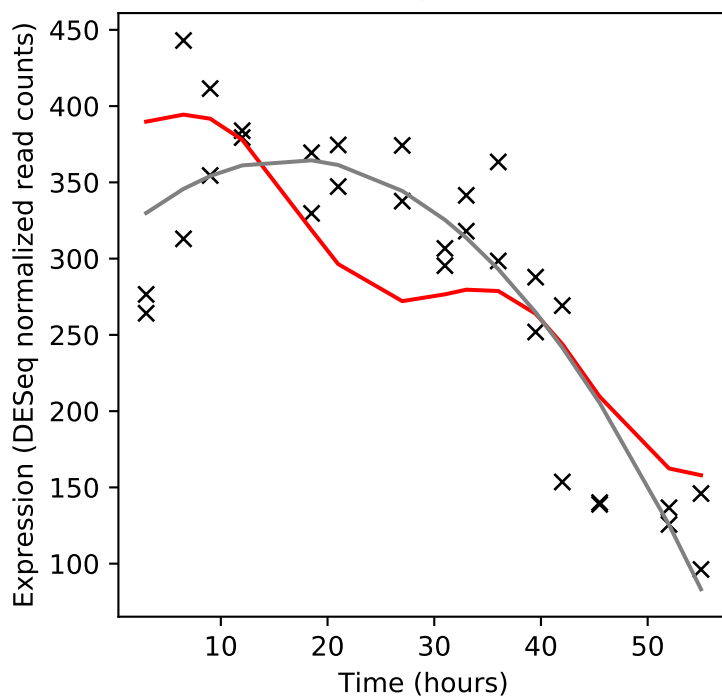

Rv3827c/-

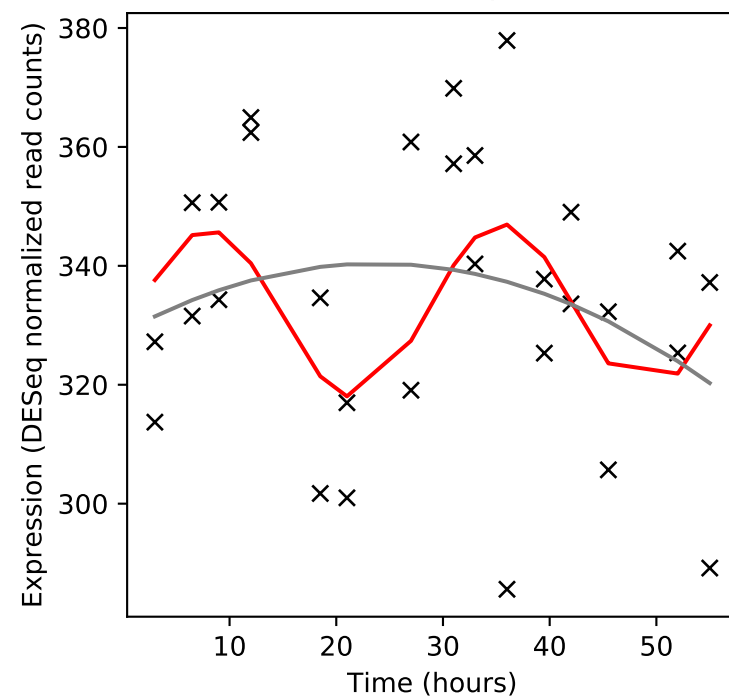

Rv3828c/-

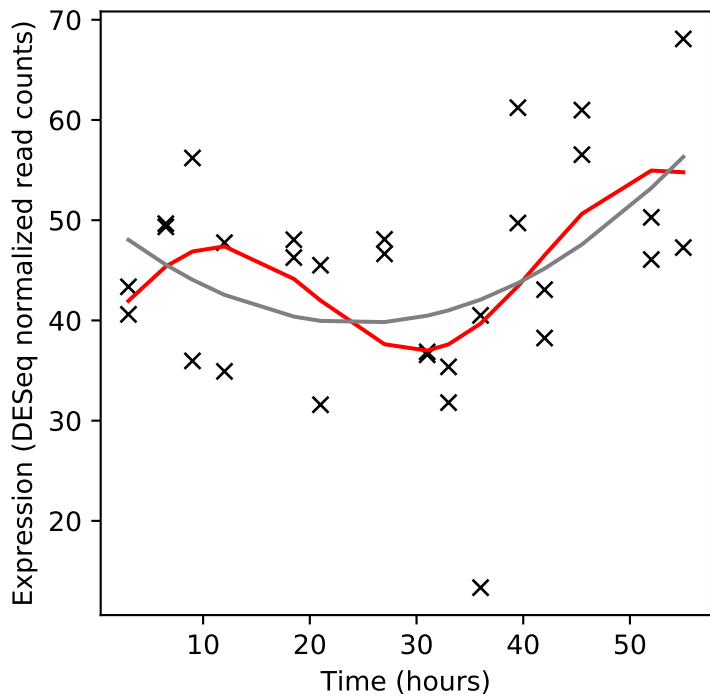

Rv3829c/-

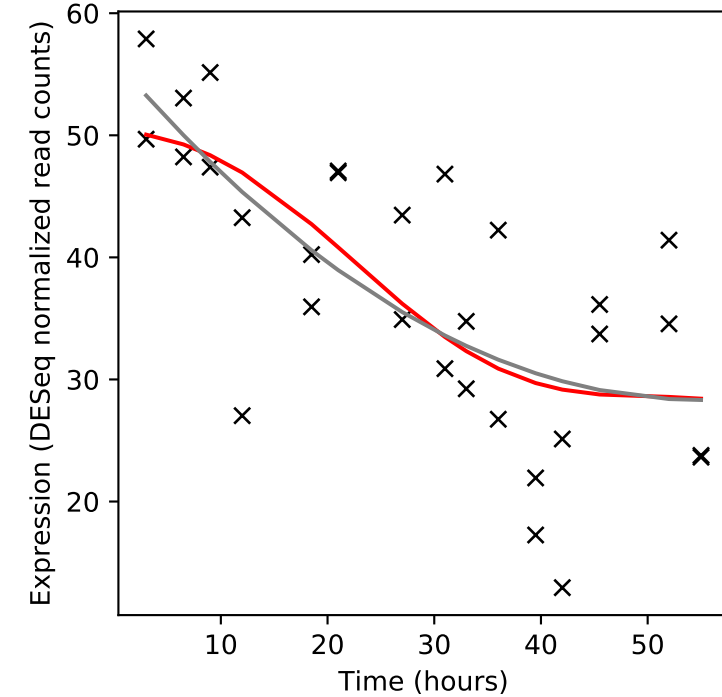

Rv3830c/-

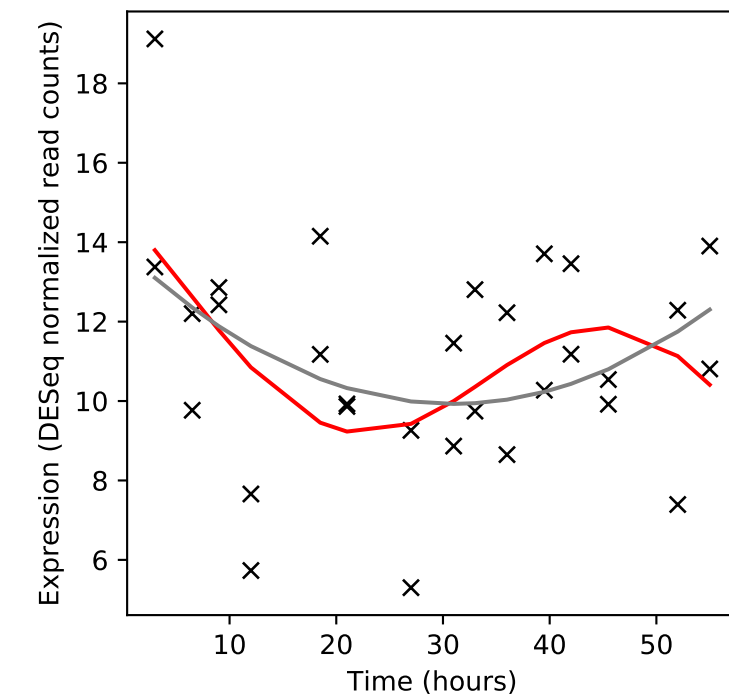



Rv3831/-

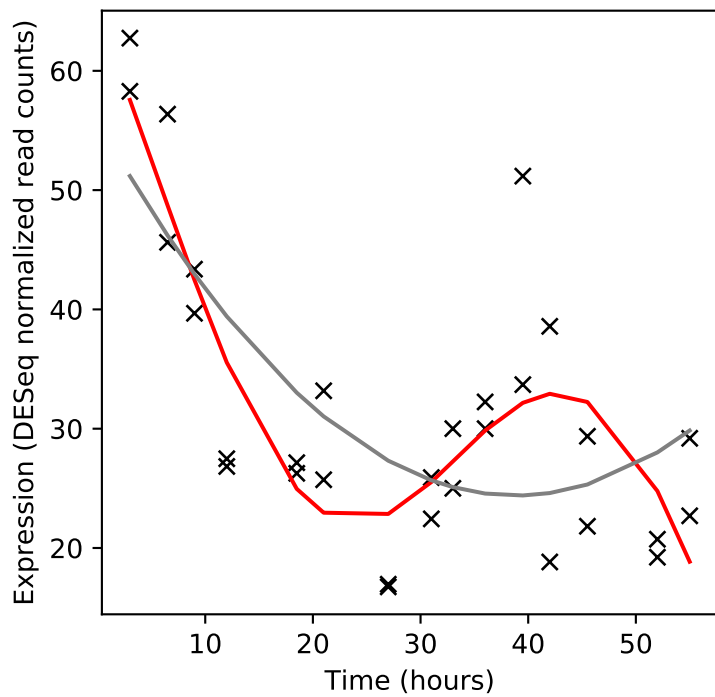

Rv3832c/-

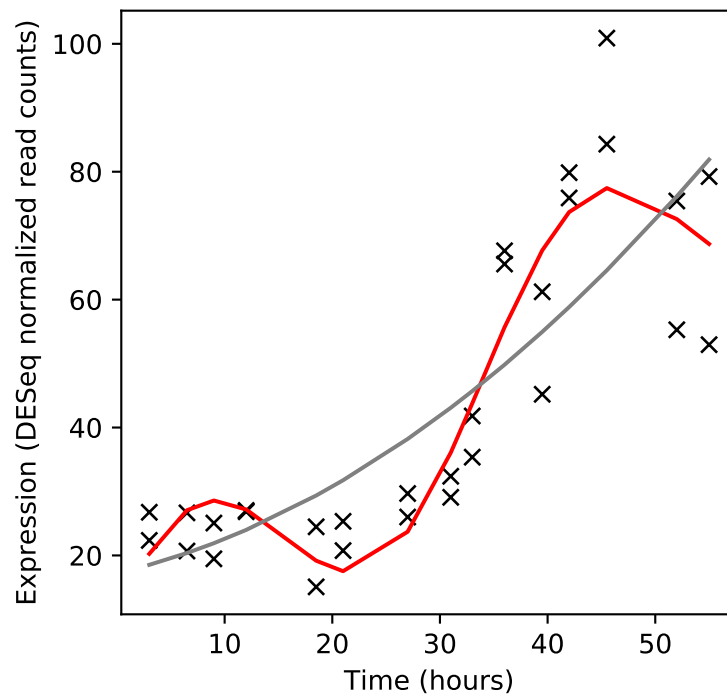

Rv3833/-

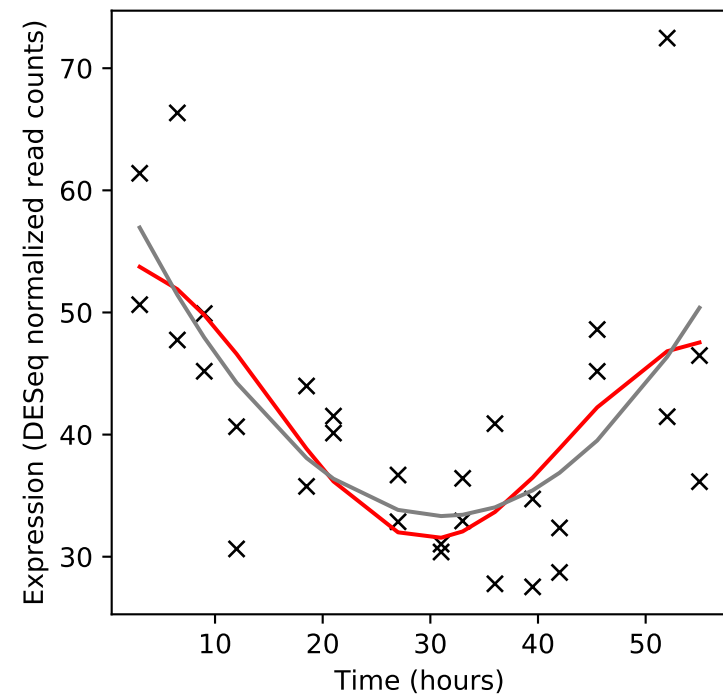

Rv3834c/serS

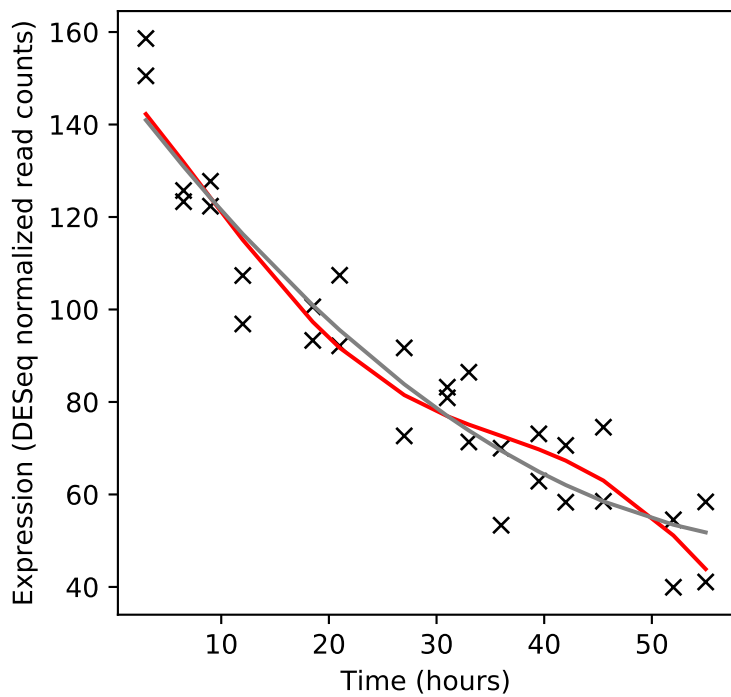

Rv3835/-

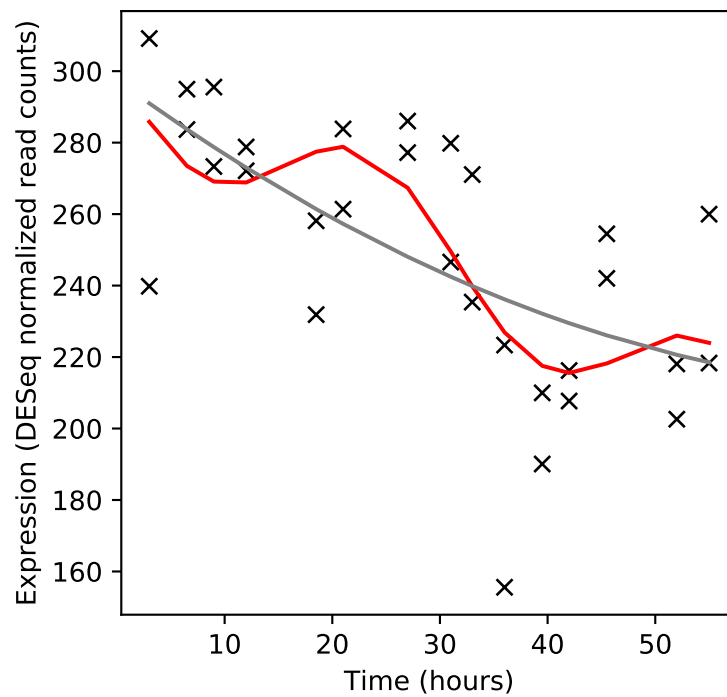

Rv3836/-

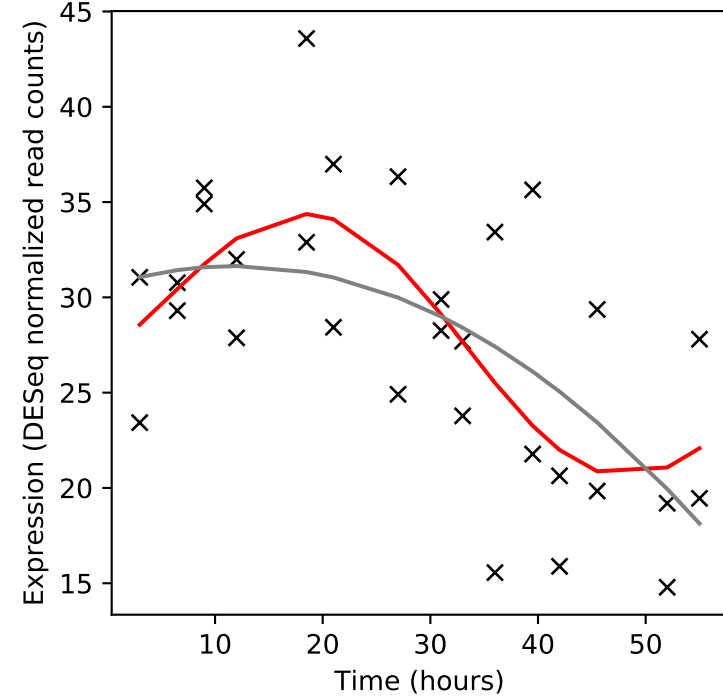

Rv3837c/-

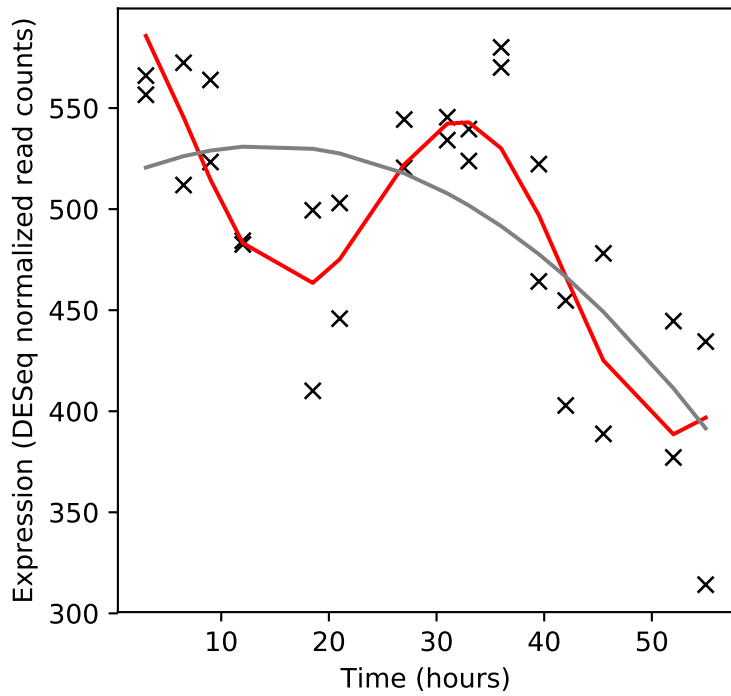

Rv3838c/pheA

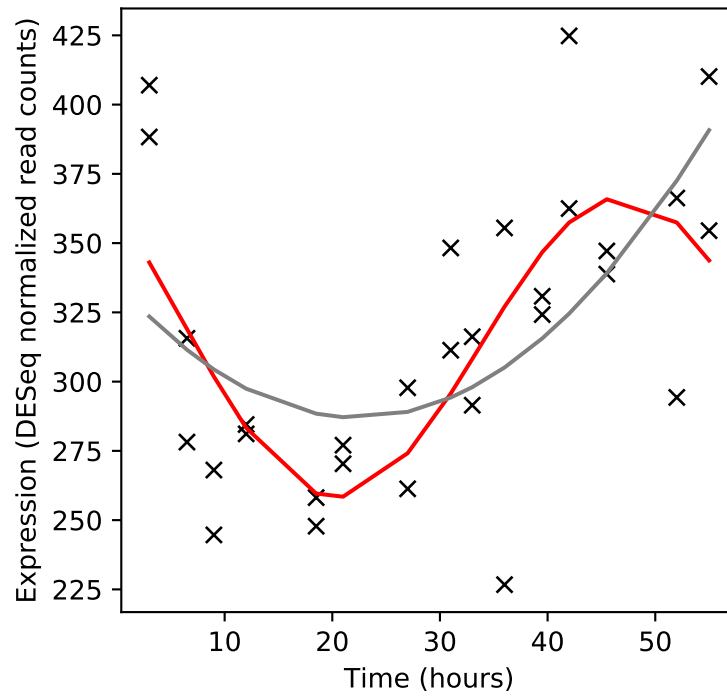

Rv3839/-

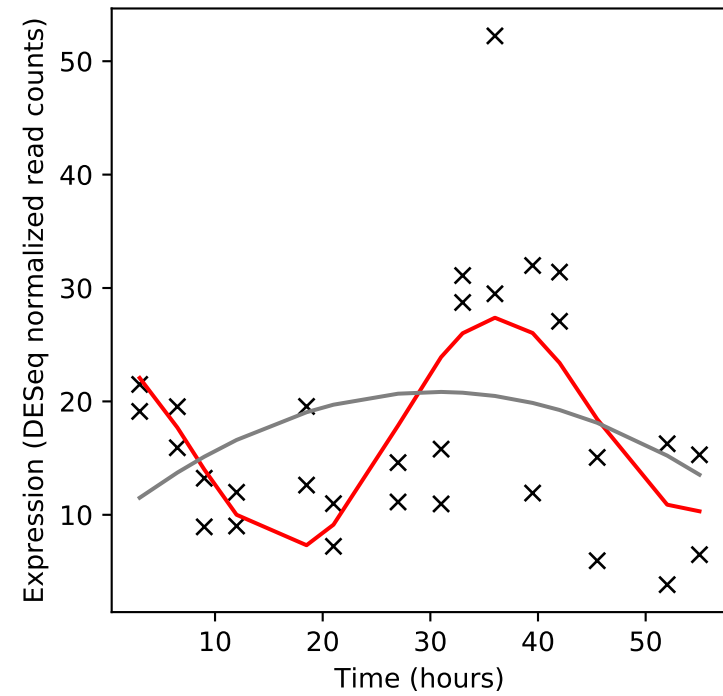

Rv3840/-

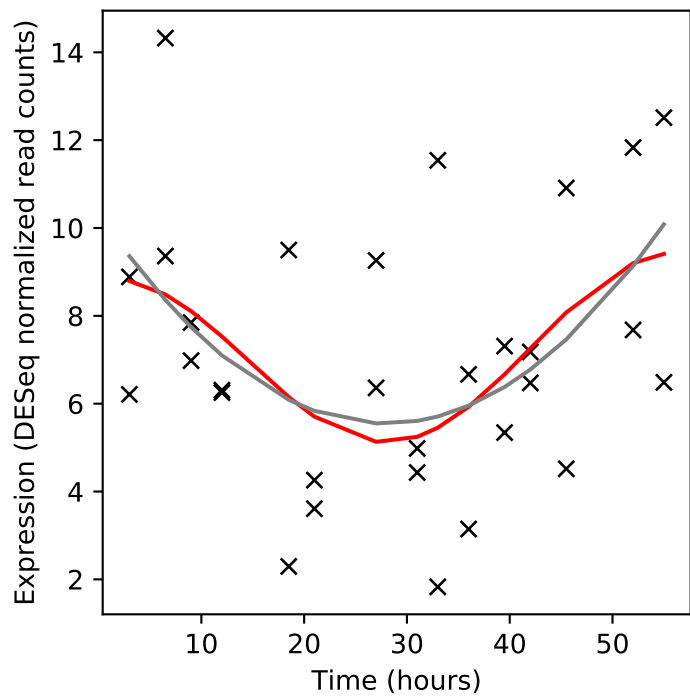

Rv3841/bfrB

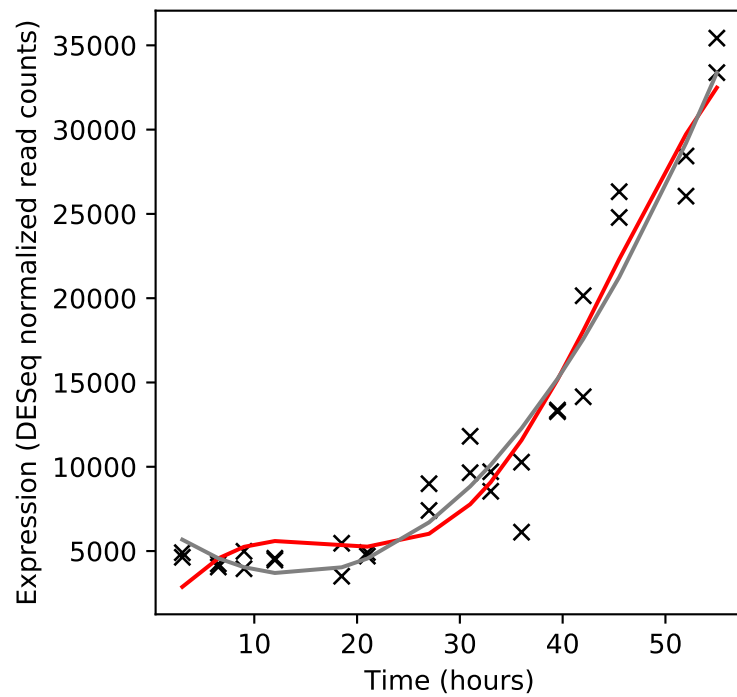

Rv3842c/glpQ1

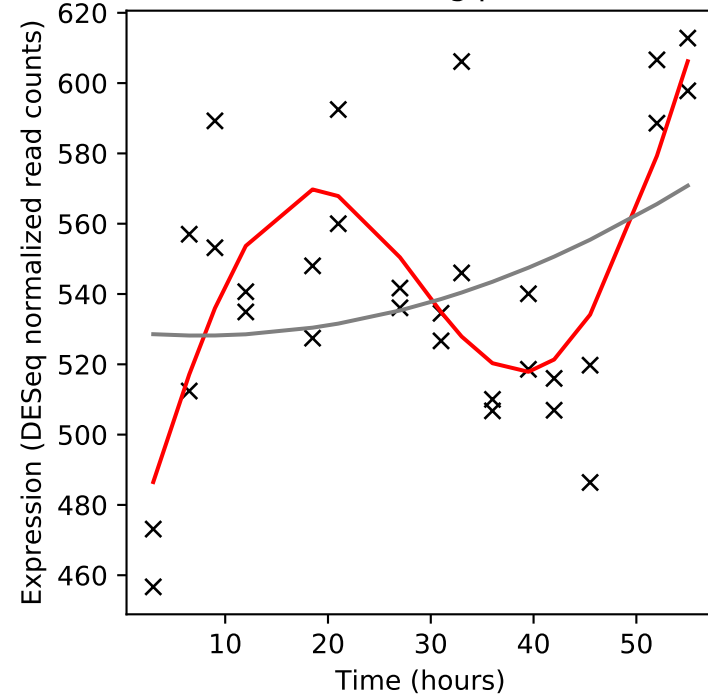

Rv3843c/-

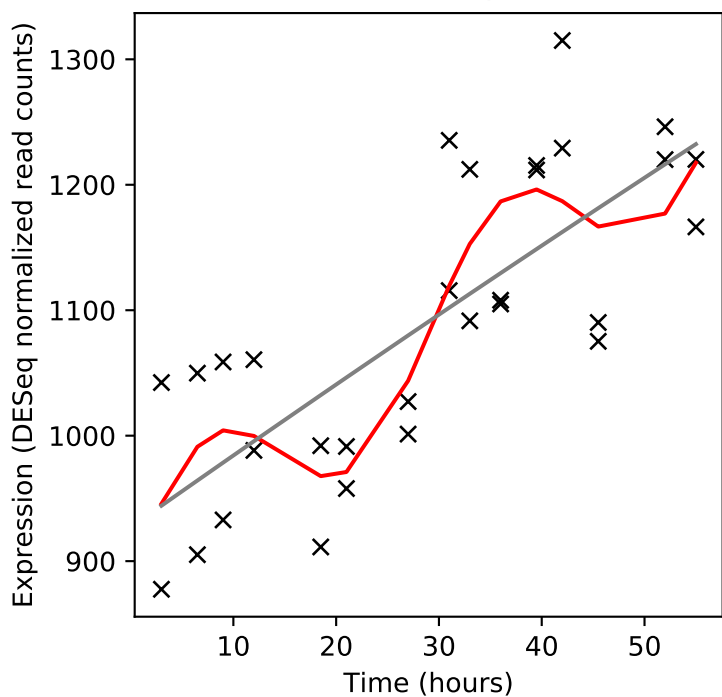

Rv3844/-

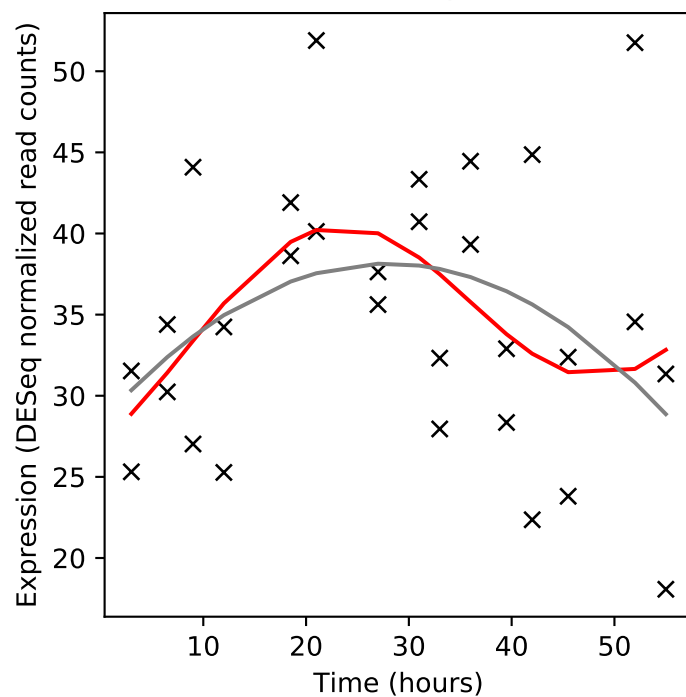

Rv3845/-

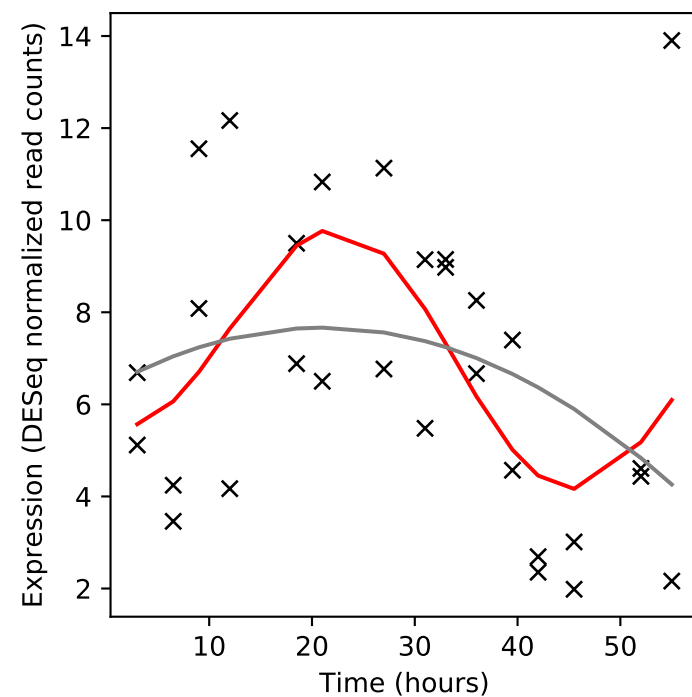

Rv3846/sodA

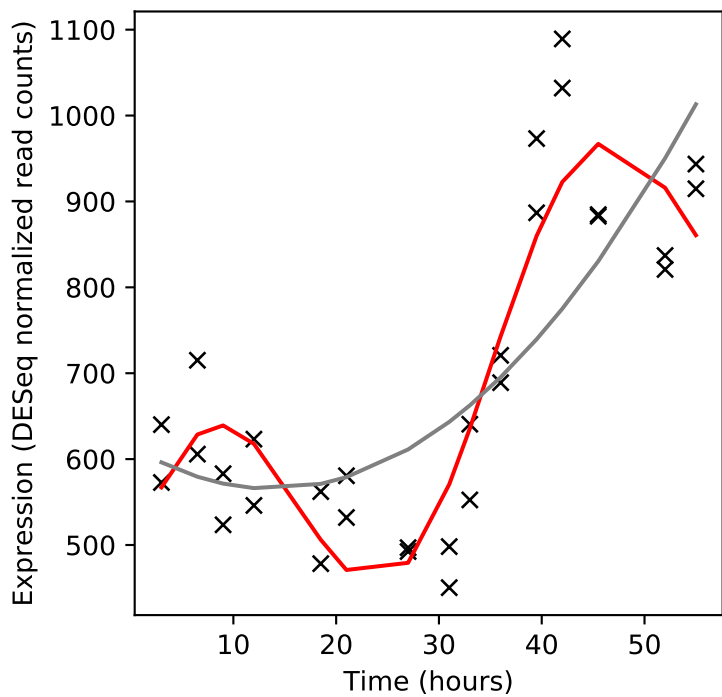

Rv3847/-

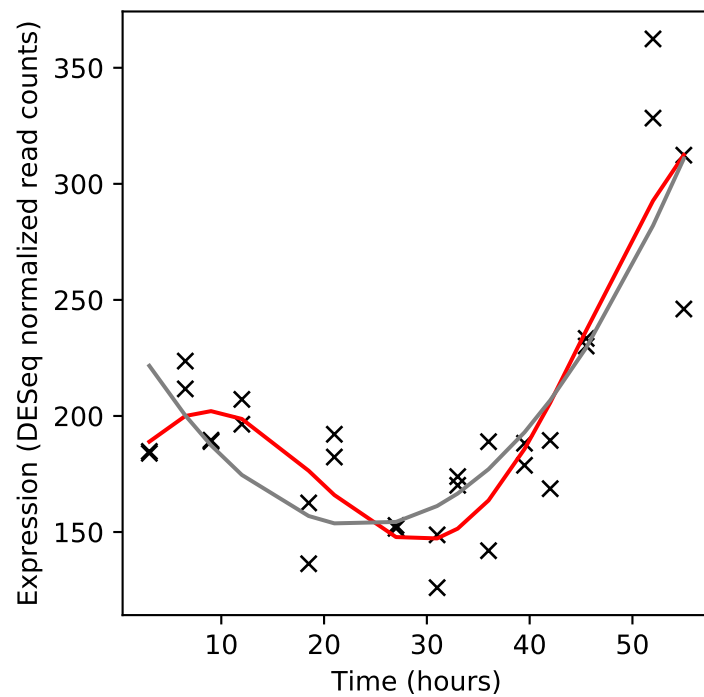

Rv3848/-

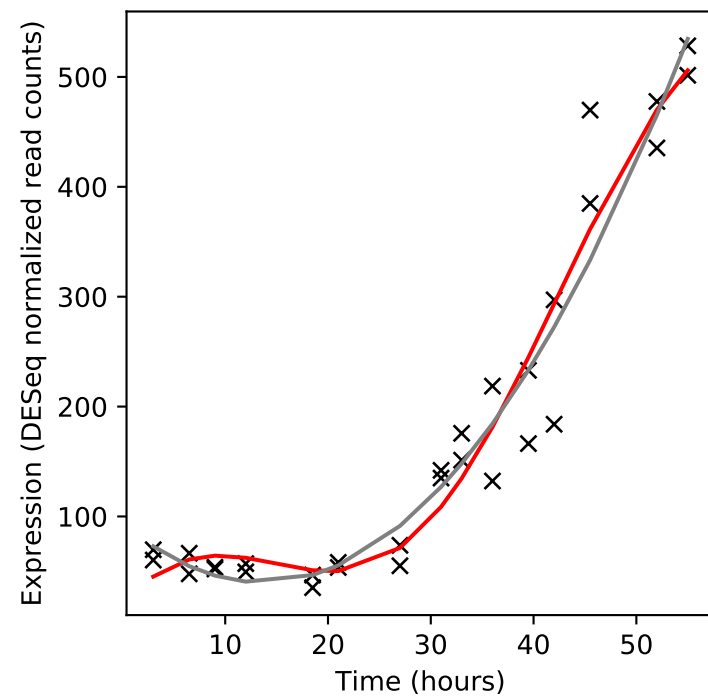

Rv3849/espR

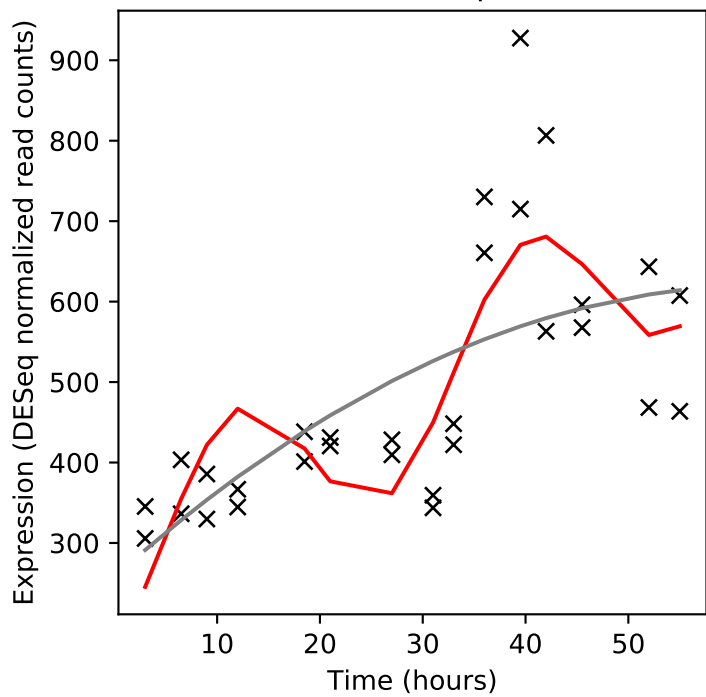

Rv3850/-

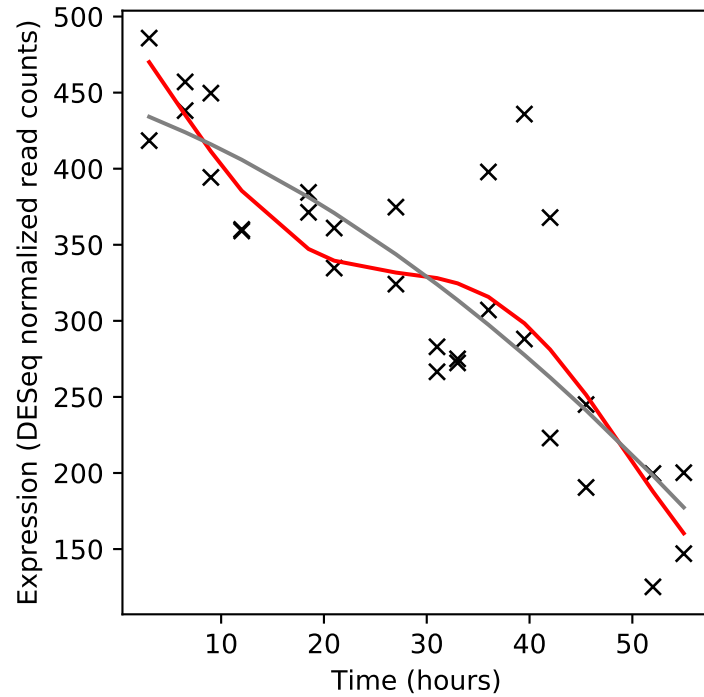

Rv3851/-

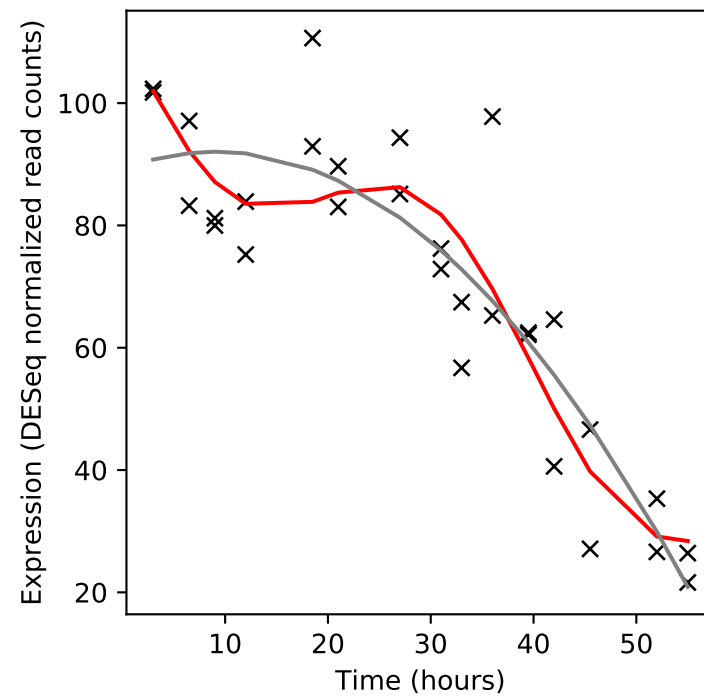

Rv3852/hns

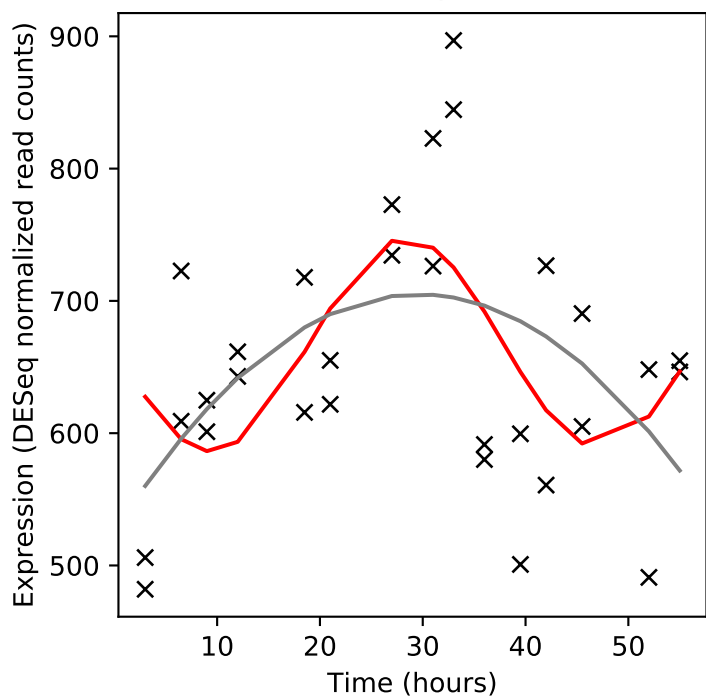

Rv3853/rraA

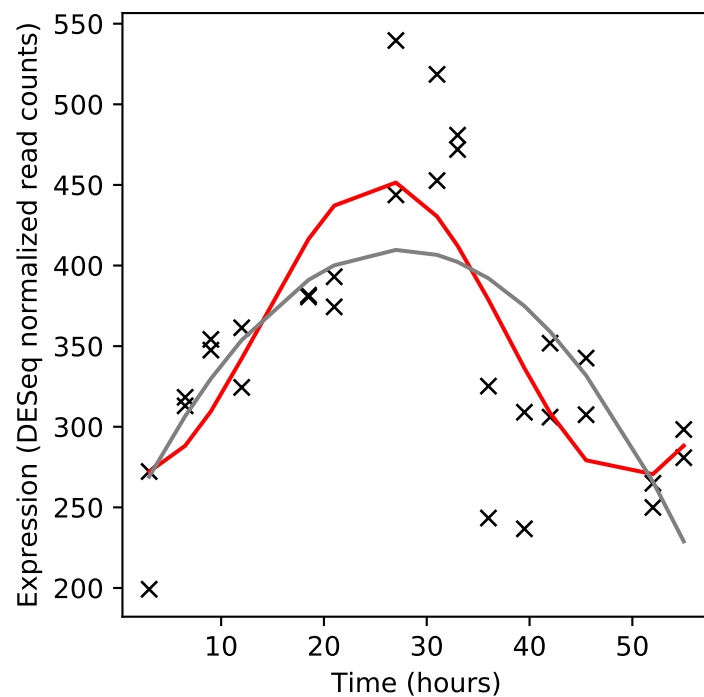

Rv3854c/ethA

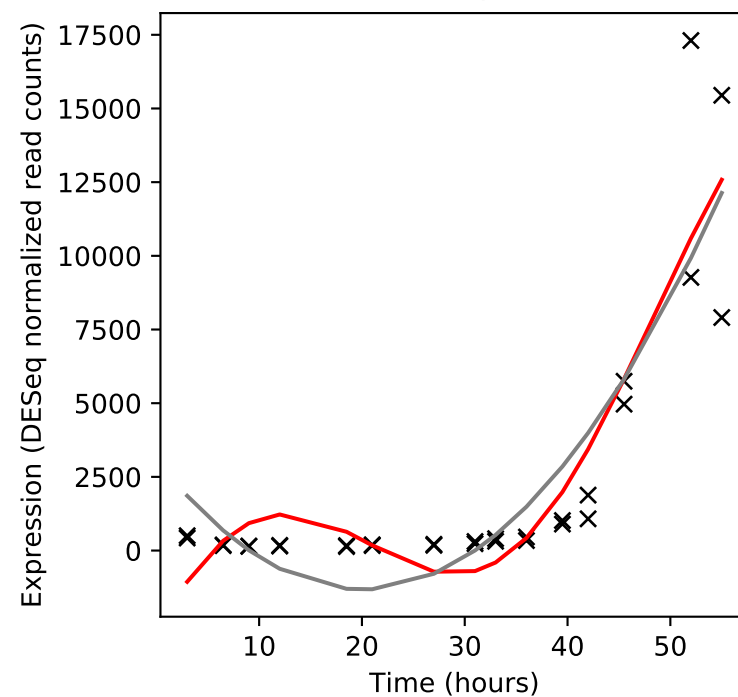

Rv3855/ethR

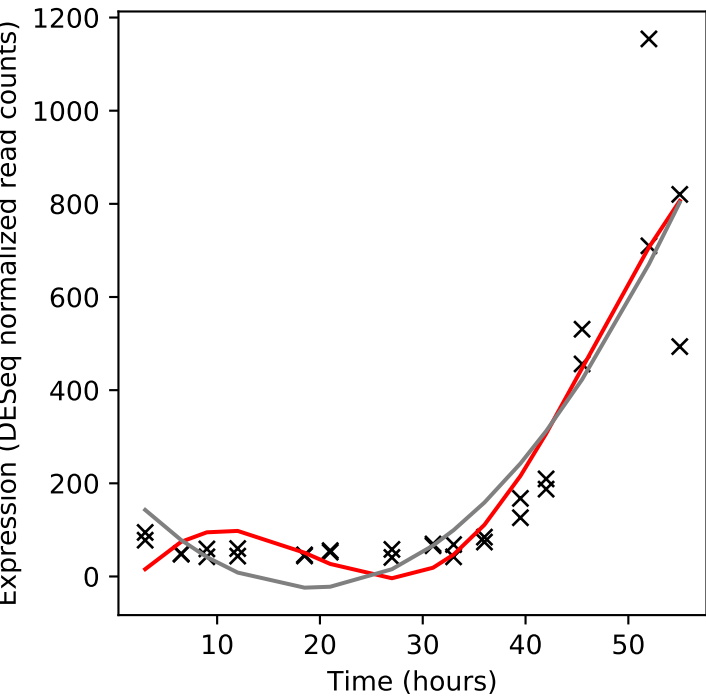

Rv3856c/-

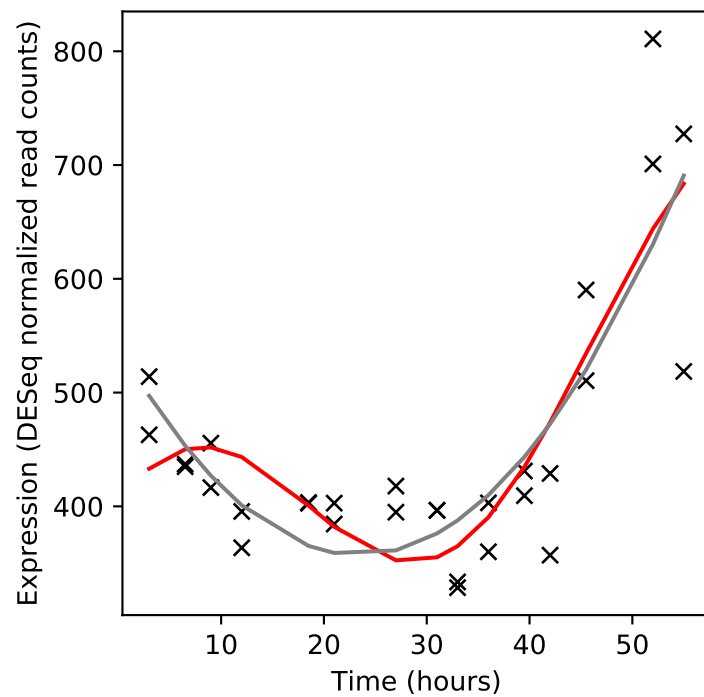

Rv3857c/-

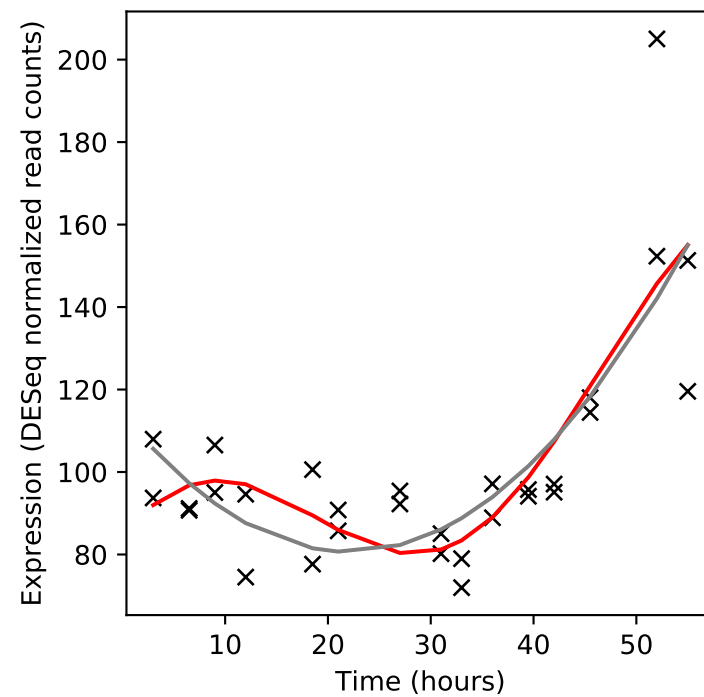

Rv3858c/gltD

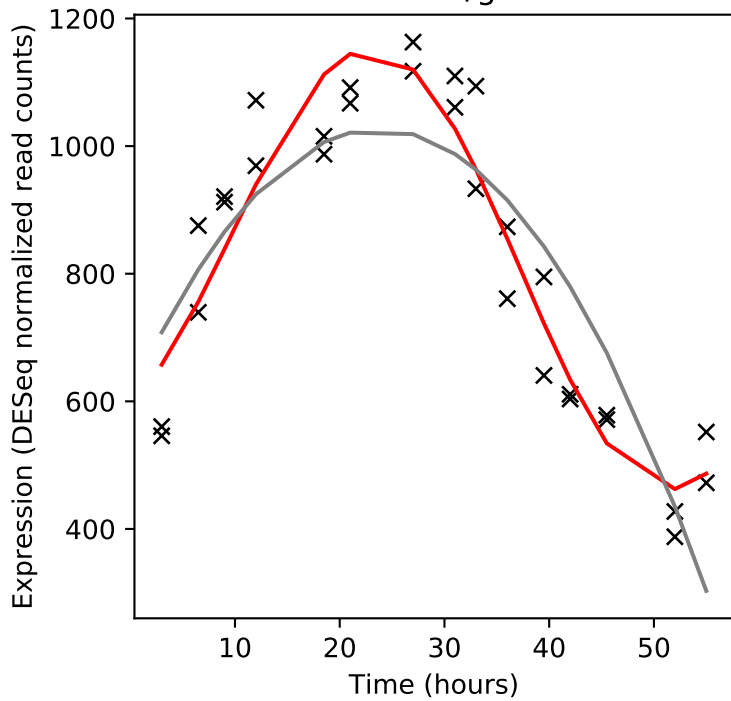

Rv3859c/gltB

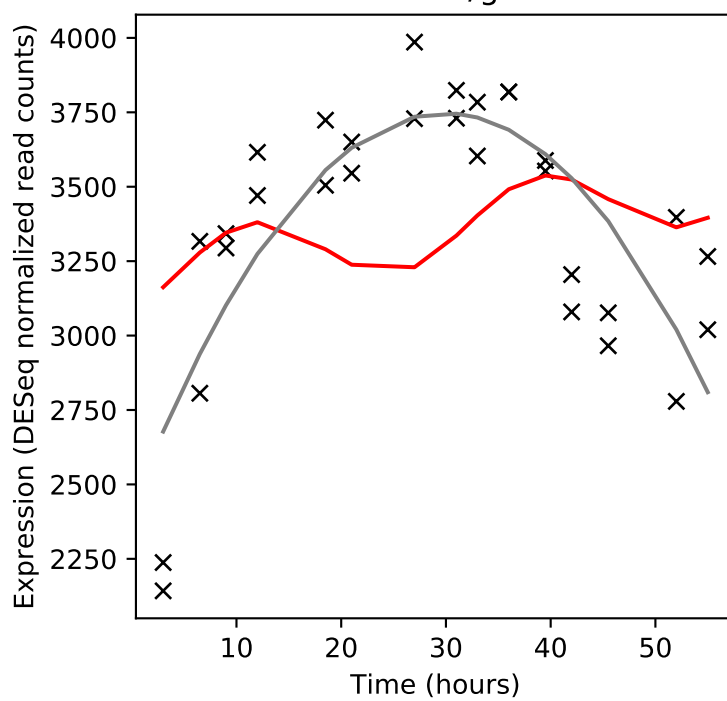

Rv3860/-

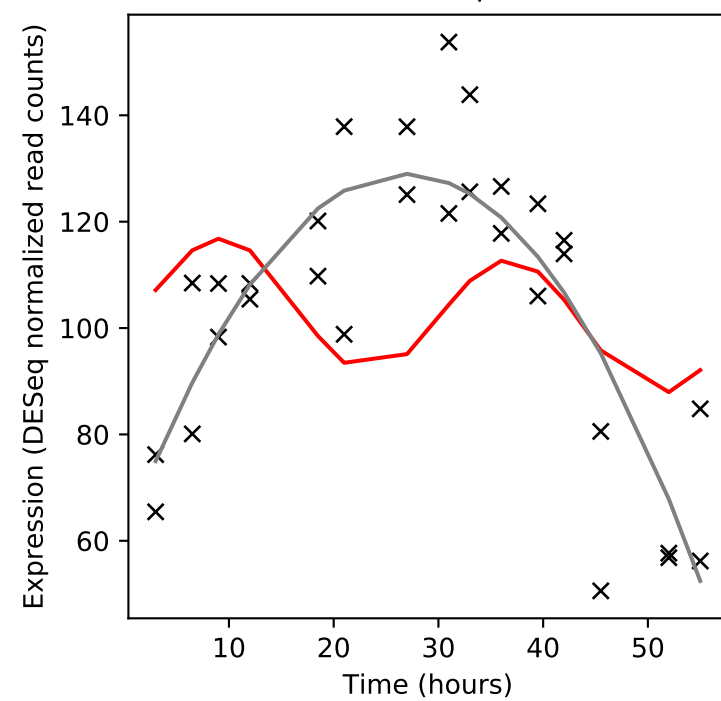

Rv3861/-

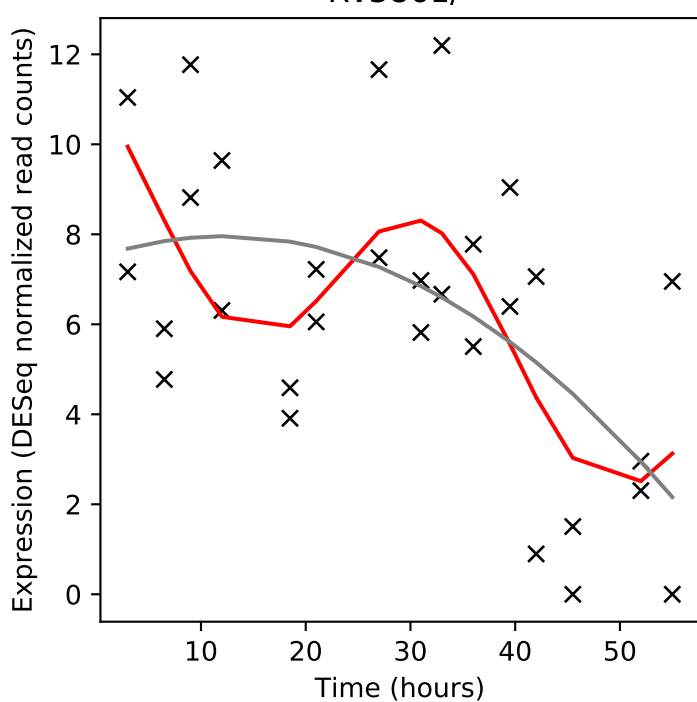

Rv3862c/whiB6

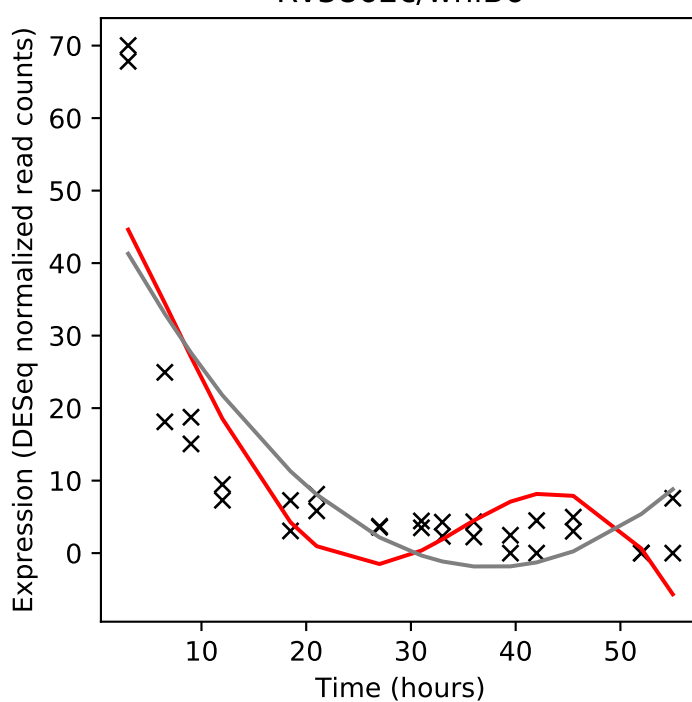

Rv3863/-

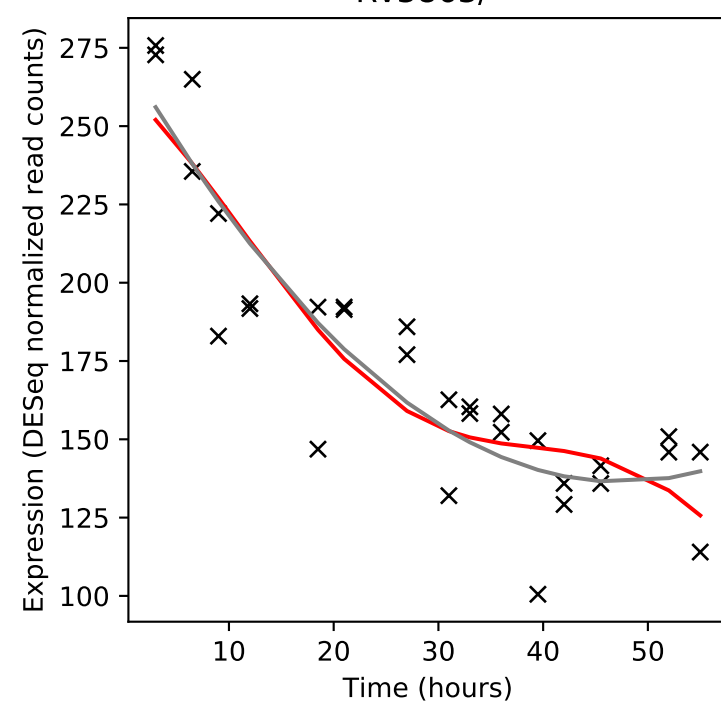

Rv3864/espE

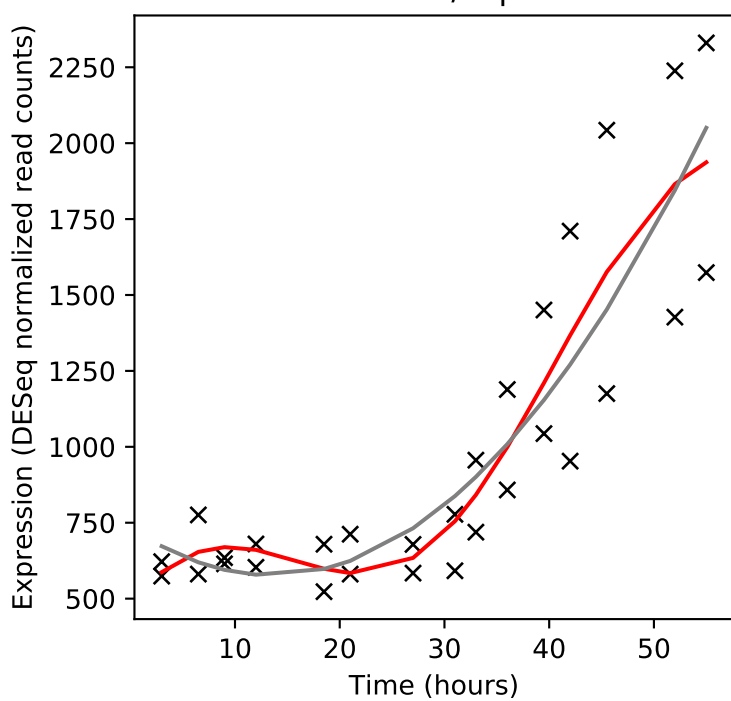

Rv3865/espF

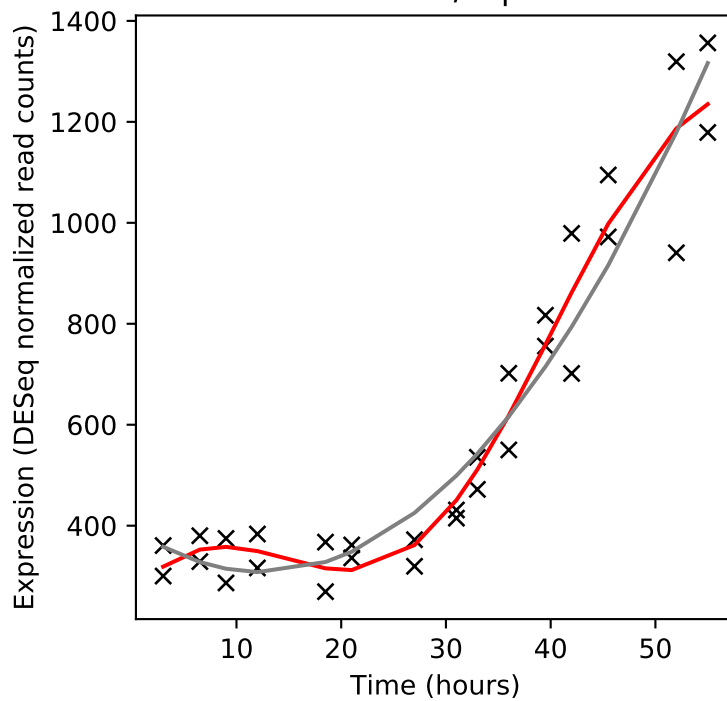

Rv3866/espG1

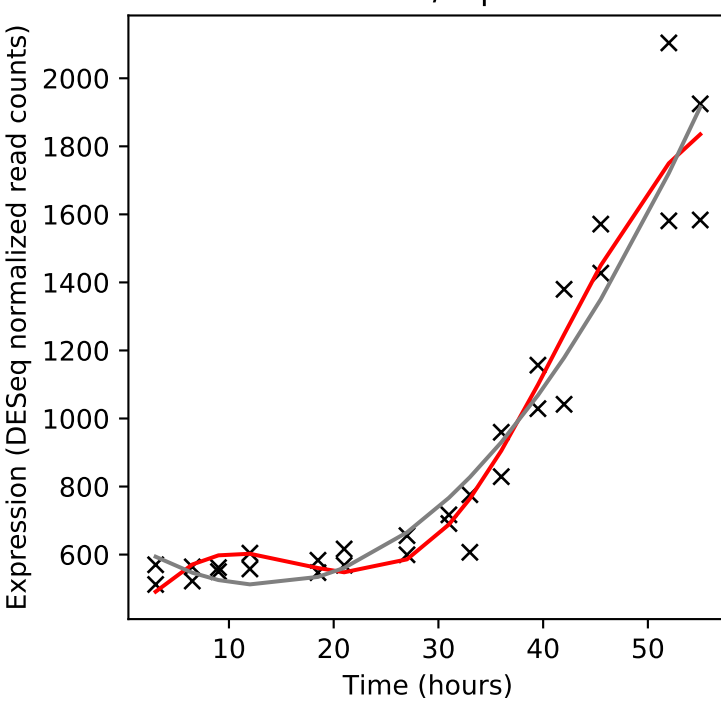

Rv3867/espH

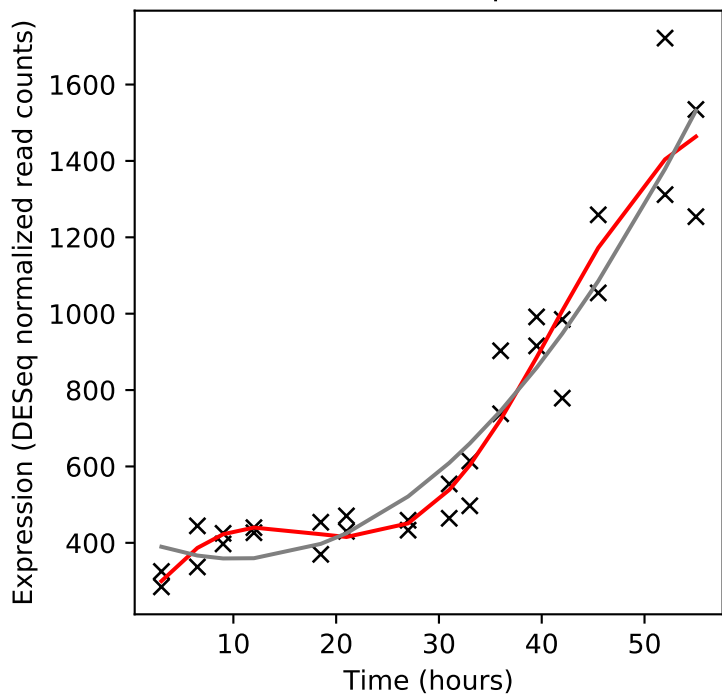

Rv3868/eccA1

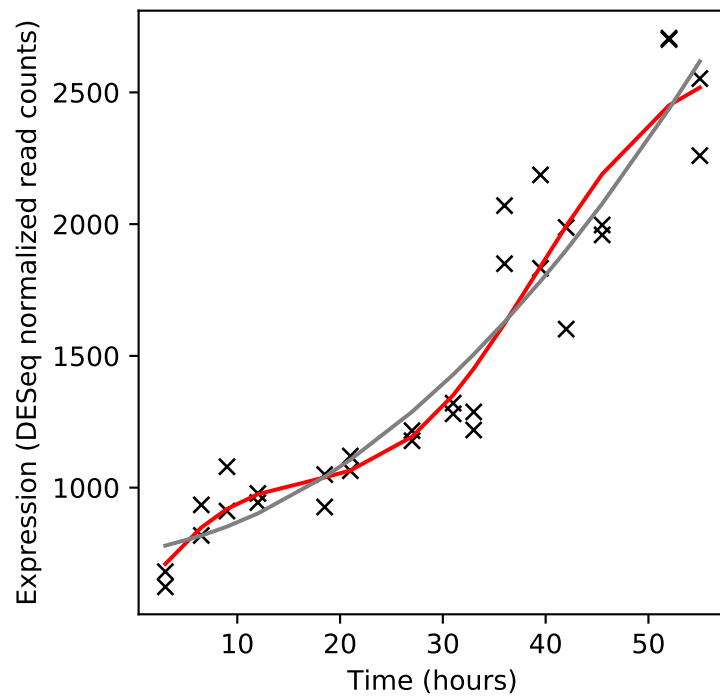

Rv3869/eccB1

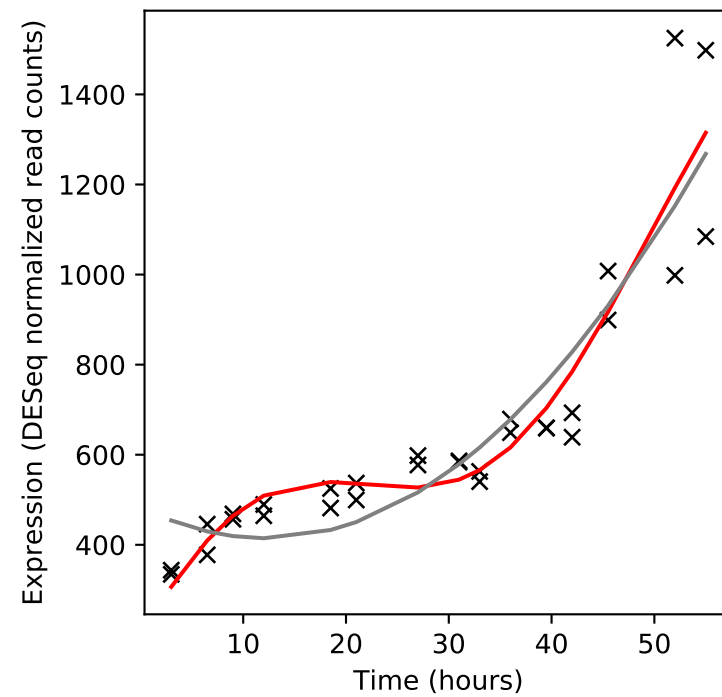

Rv3870/eccCa1

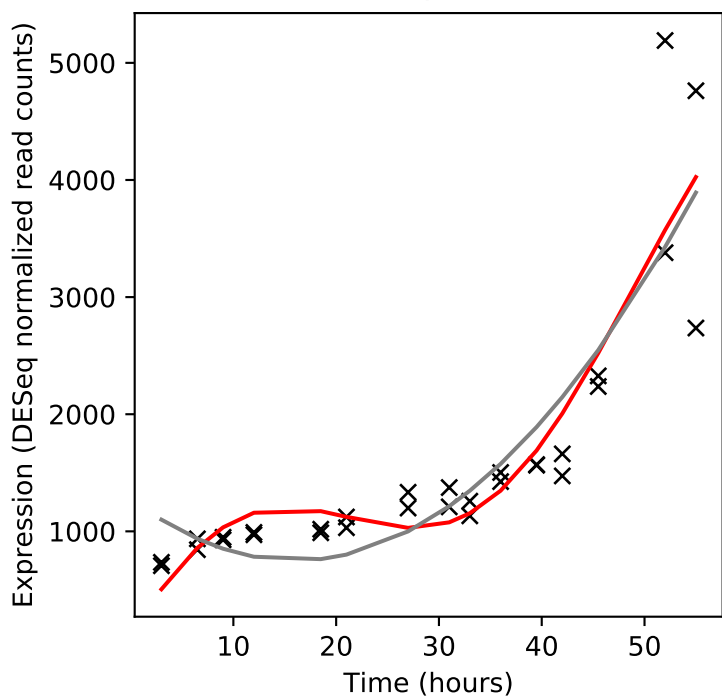

Rv3871/eccCb1

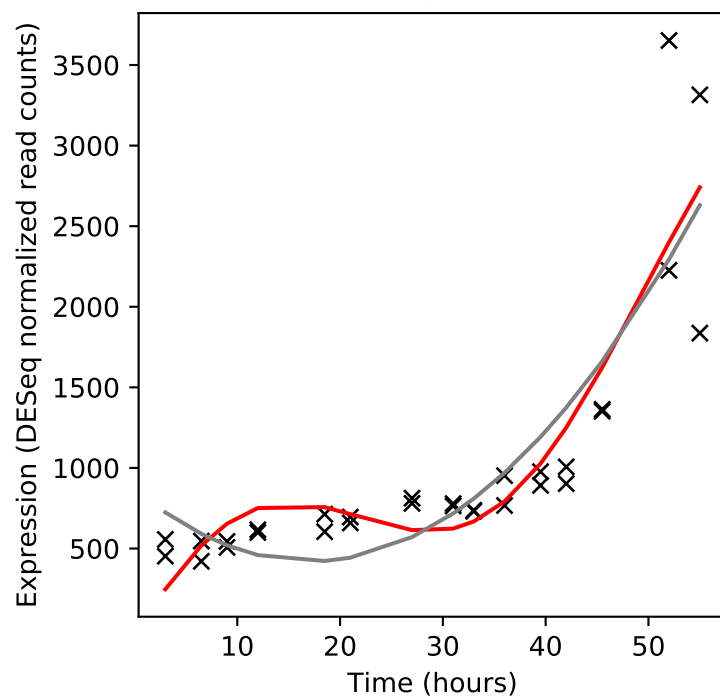

Rv3872/PE35

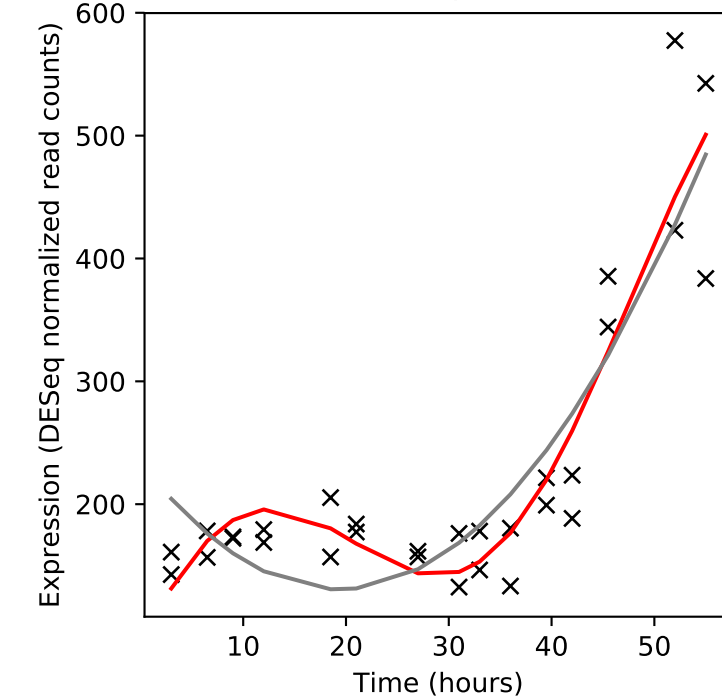

Rv3873/PPE68

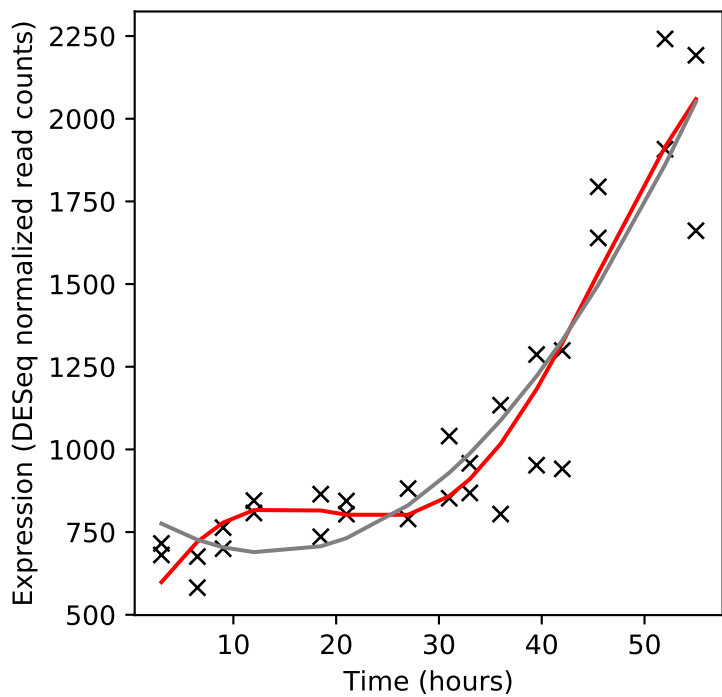

Rv3874/esxB

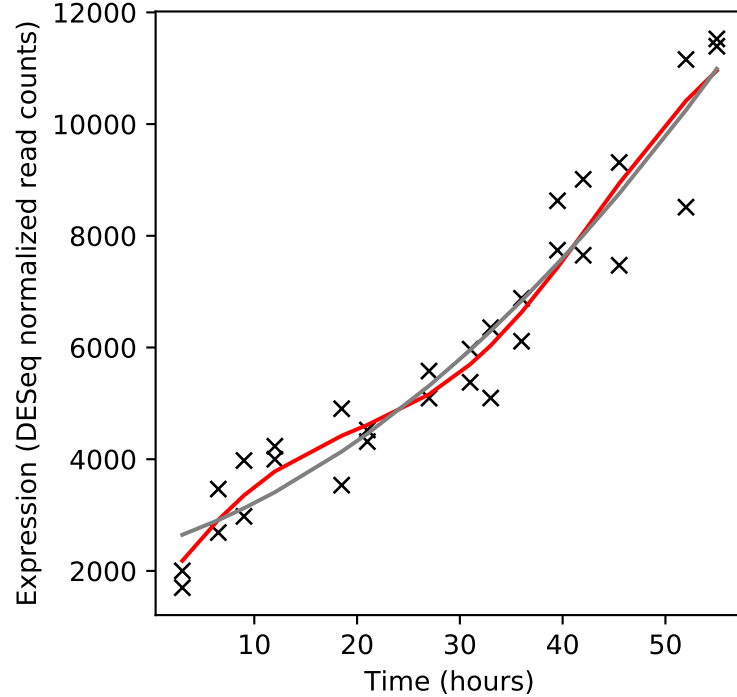

Rv3875/esxA

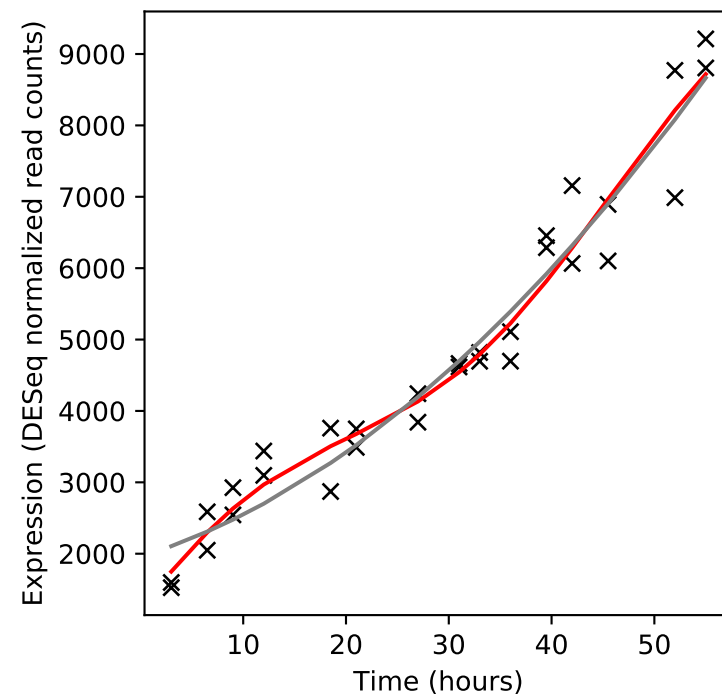

Rv3876/espl

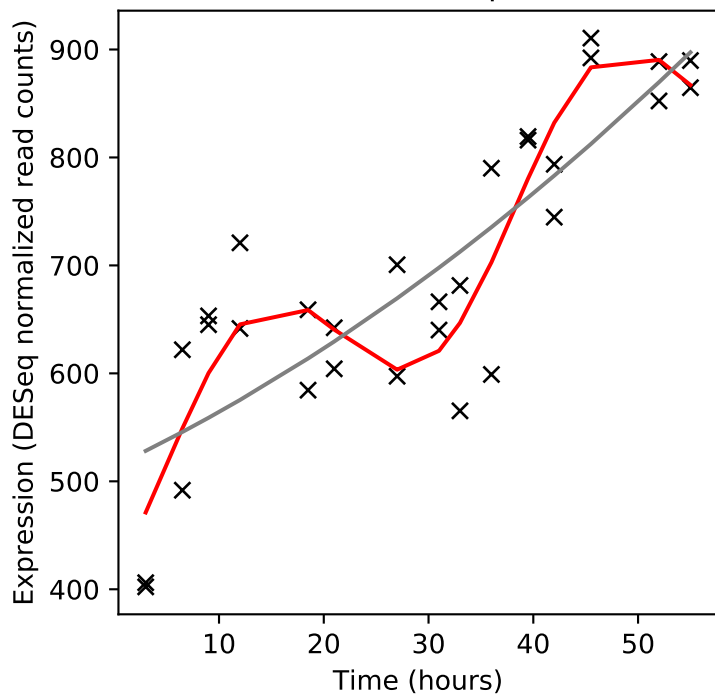

Rv3877/eccD1

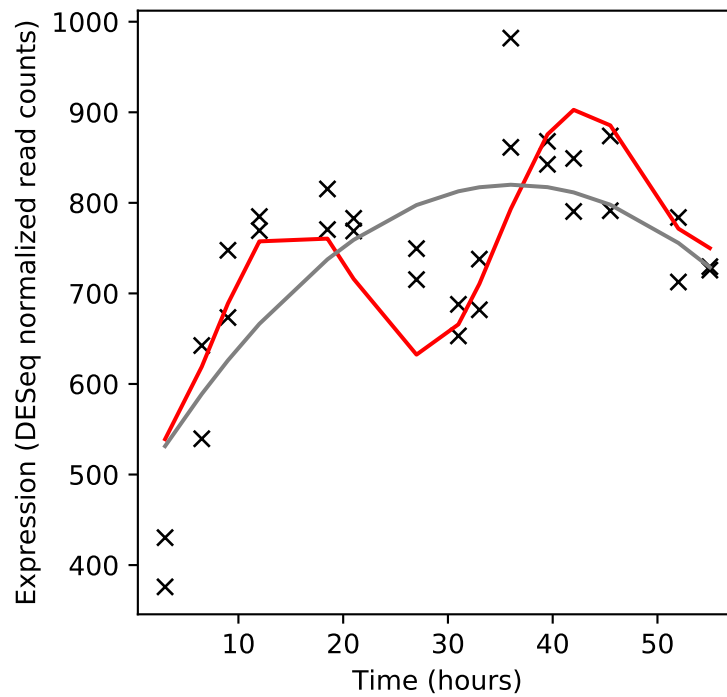

Rv3878/espj

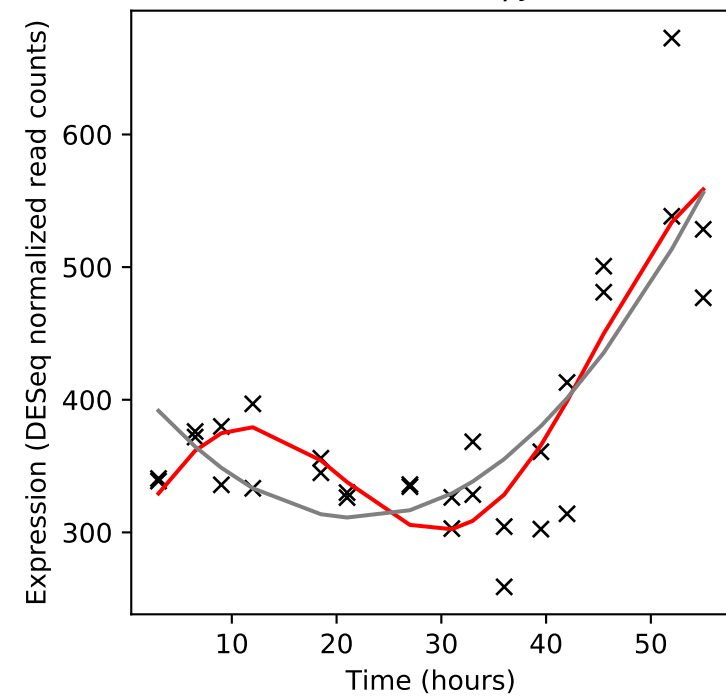

Rv3879c/espK

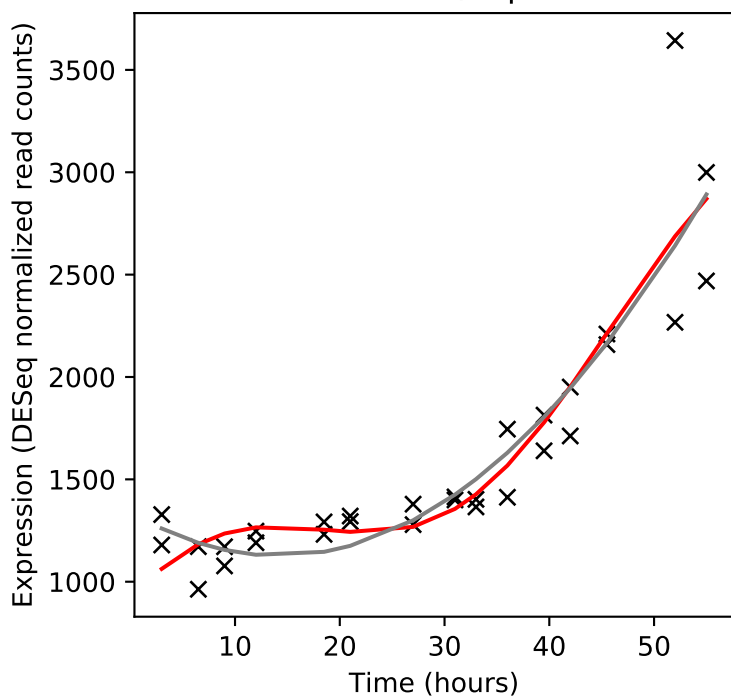

Rv3880c/espL

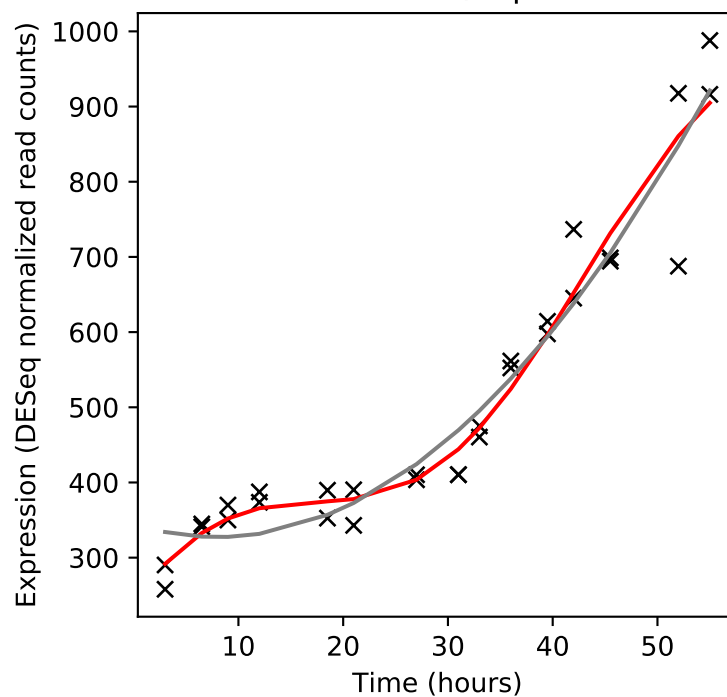

Rv3881c/espB

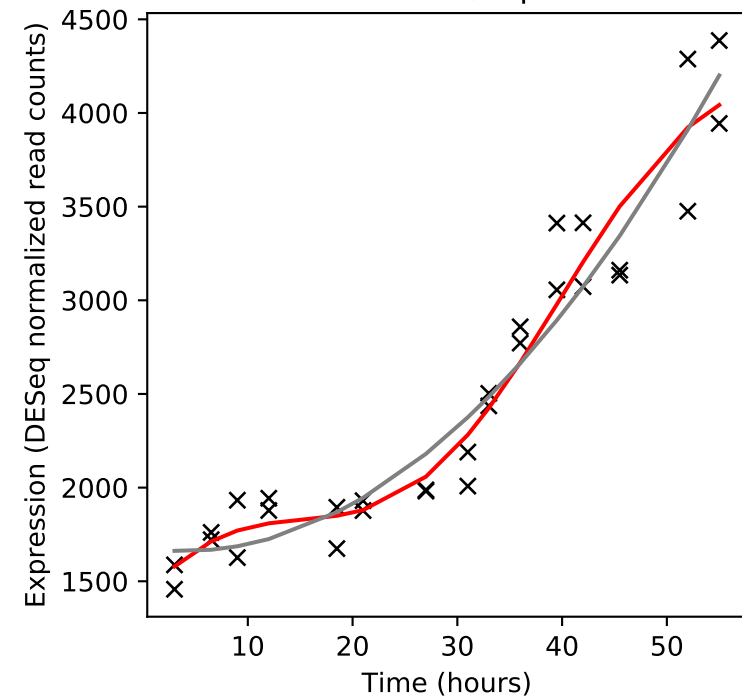

Rv3882c/eccE1

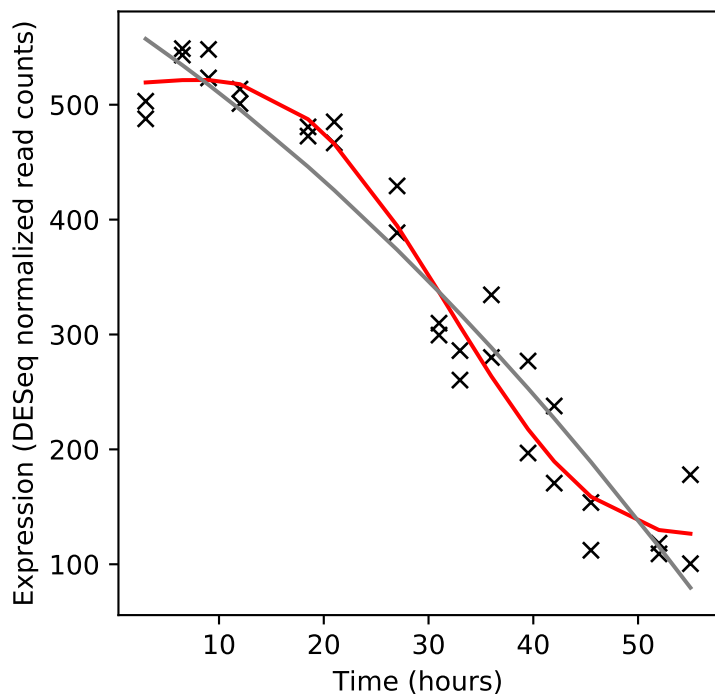

Rv3883c/mycP1

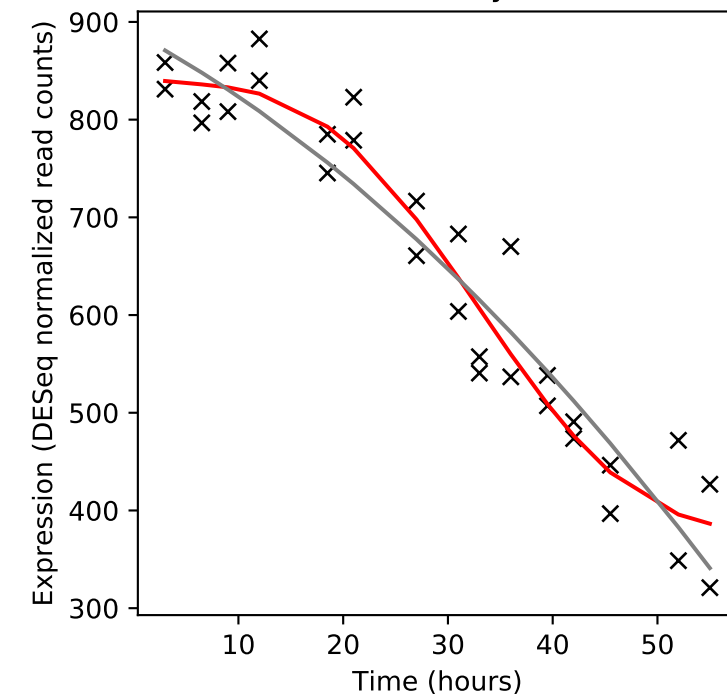

Rv3884c/eccA2

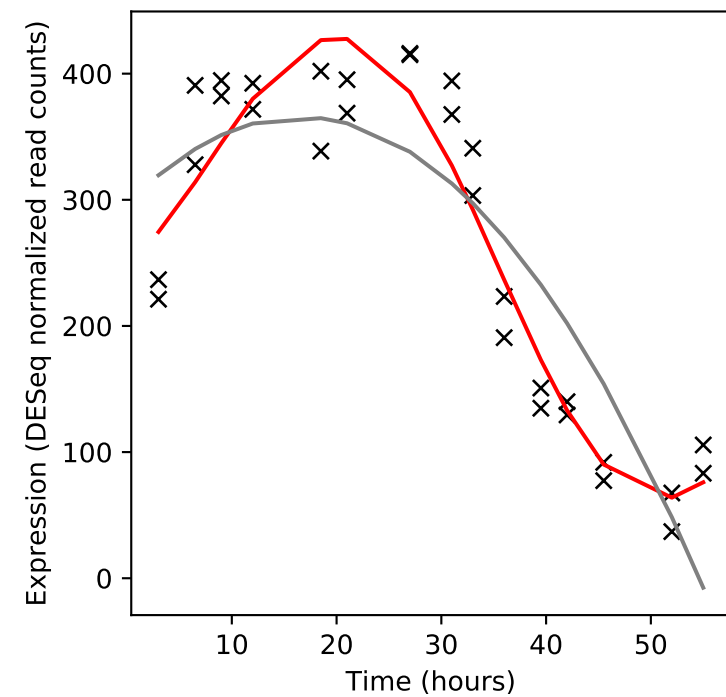

Rv3885c/eccE2

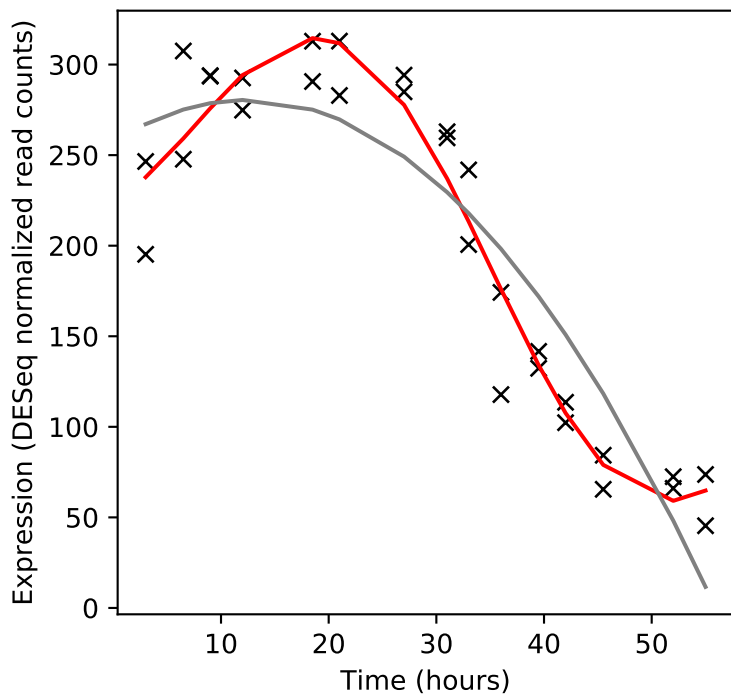

Rv3886c/mycP2

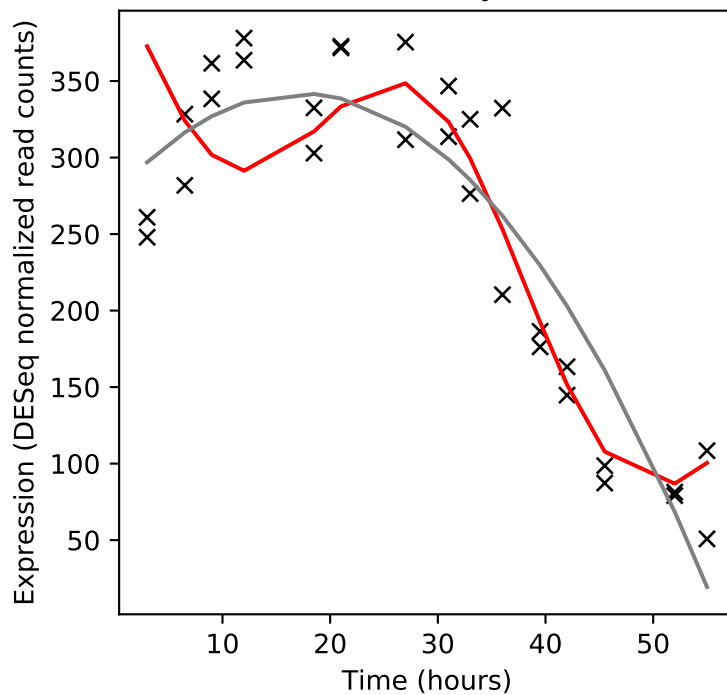

Rv3887c/eccD2

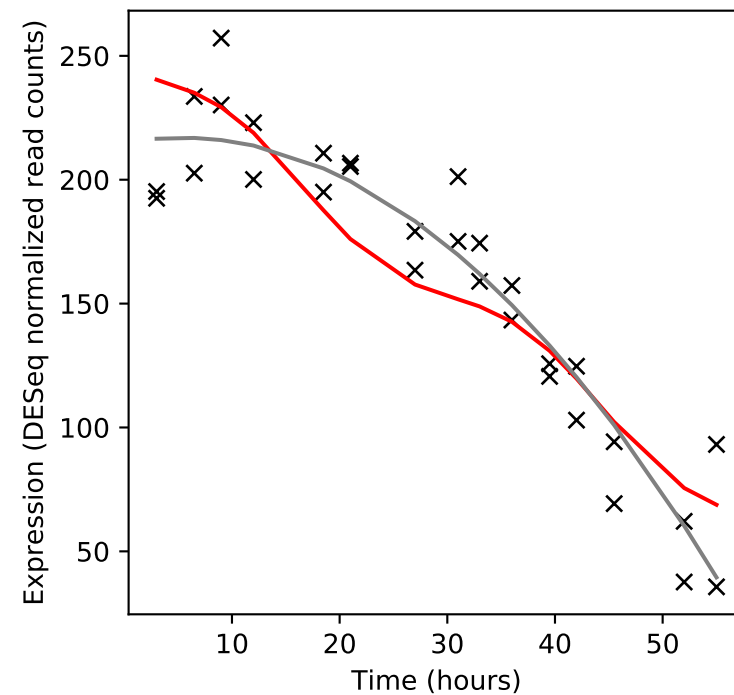

Rv3888c/-

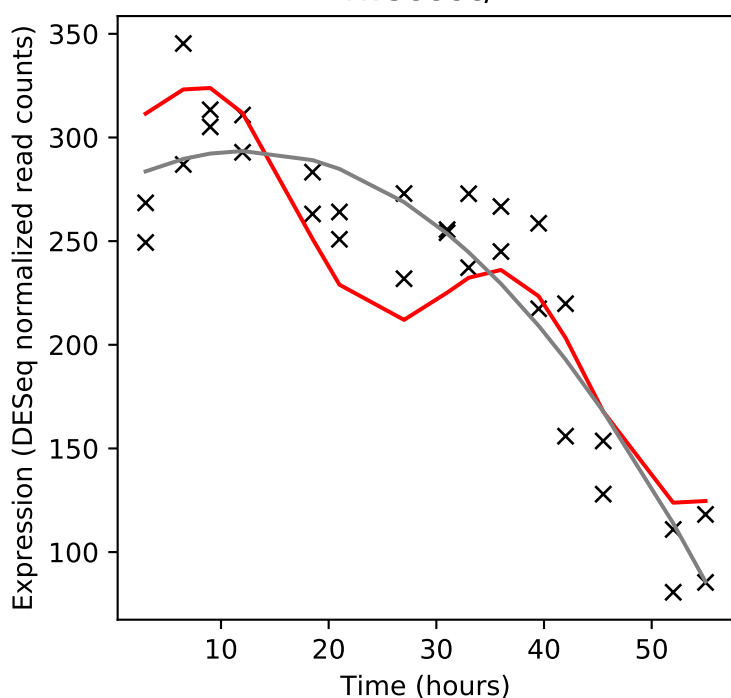

Rv3889c/espG2

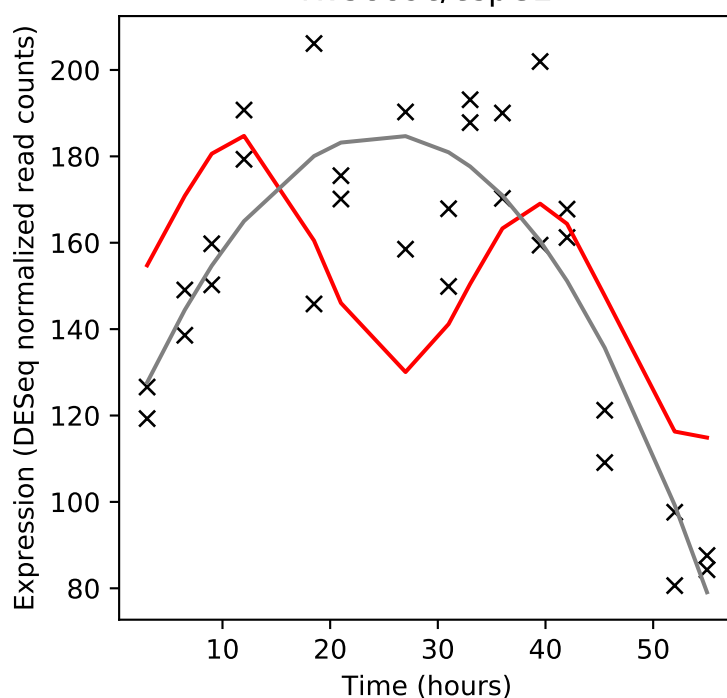

Rv3890c/esxC

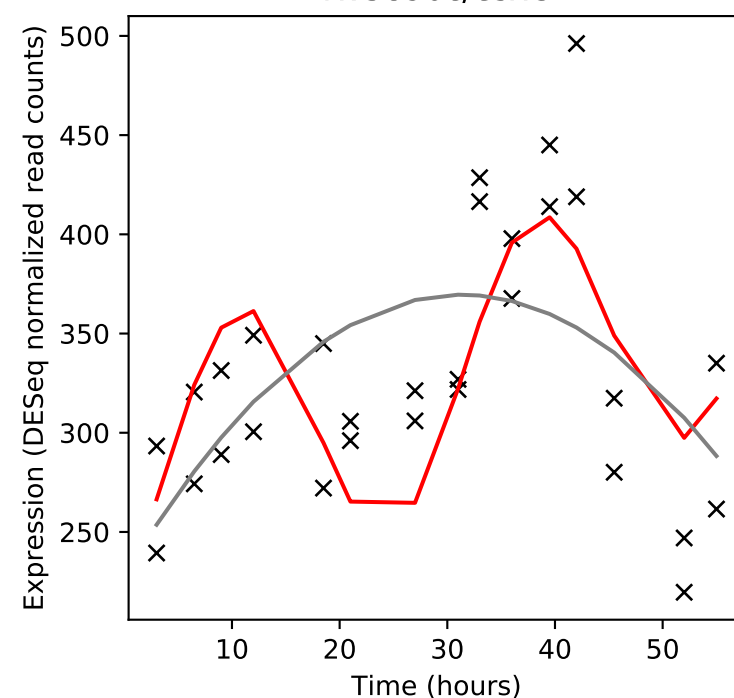

Rv3891c/esxD

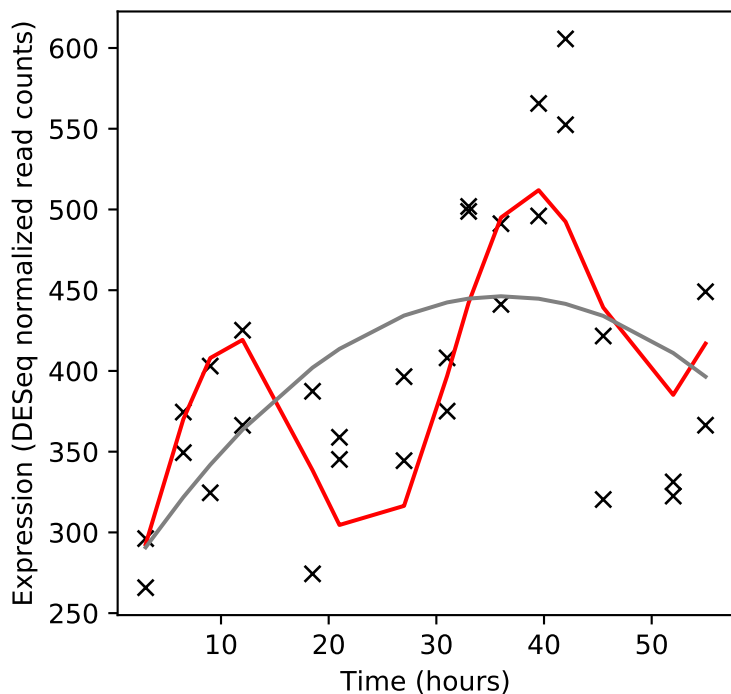

Rv3892c/PPE69

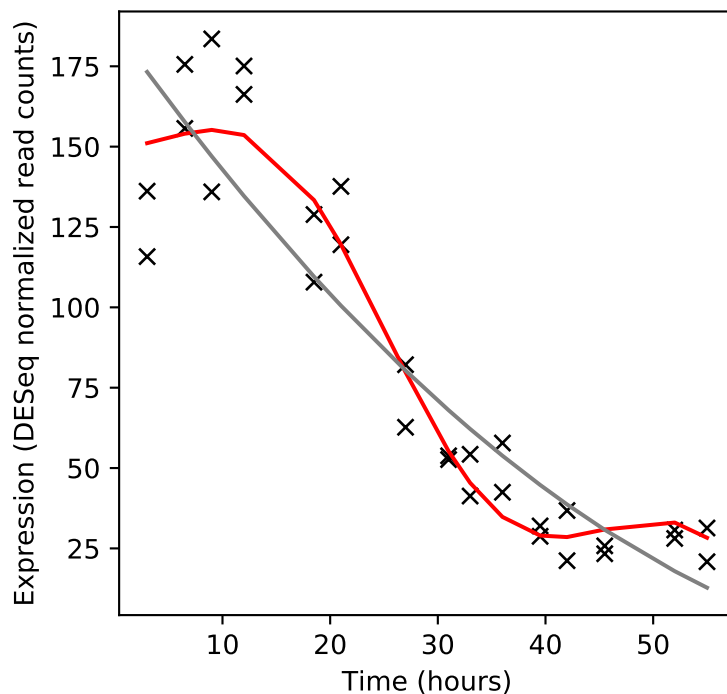

Rv3893c/PE36

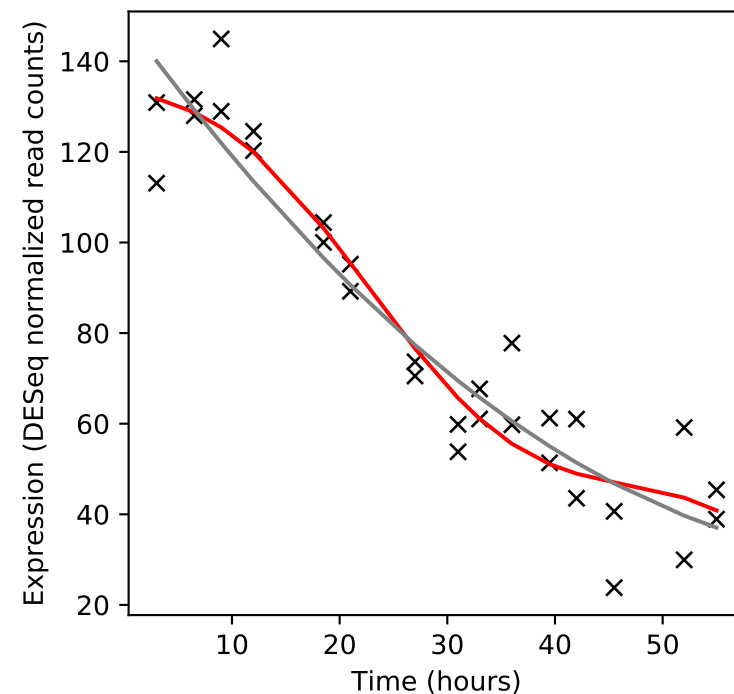



Rv3894c/eccC2

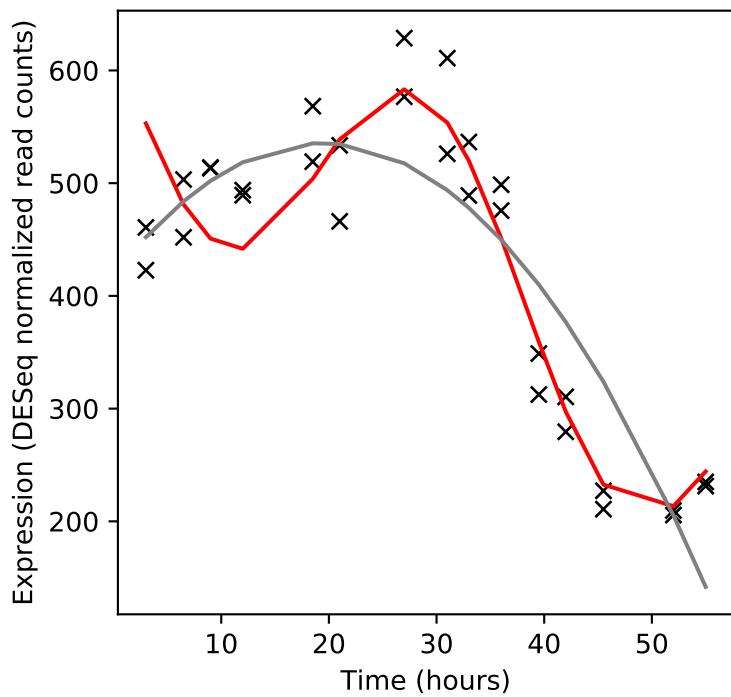

Rv3895c/eccB2

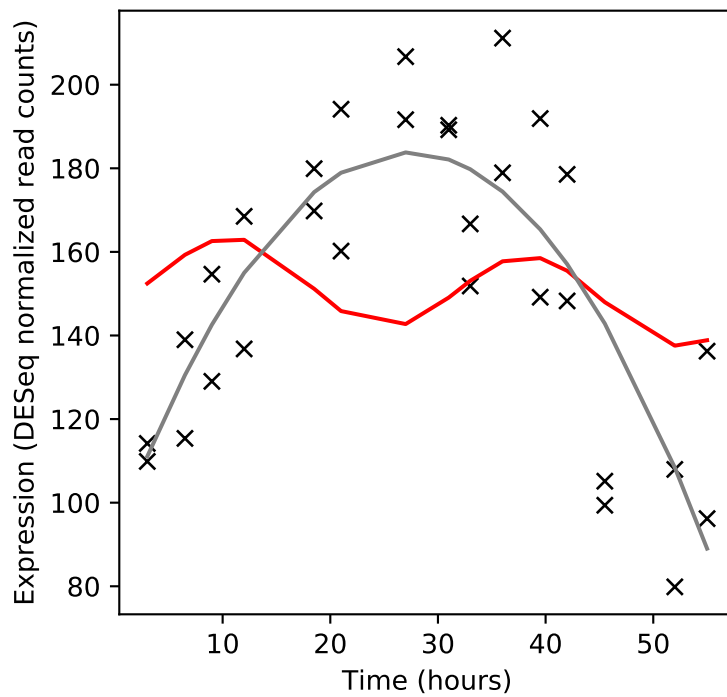

Rv3896c/-

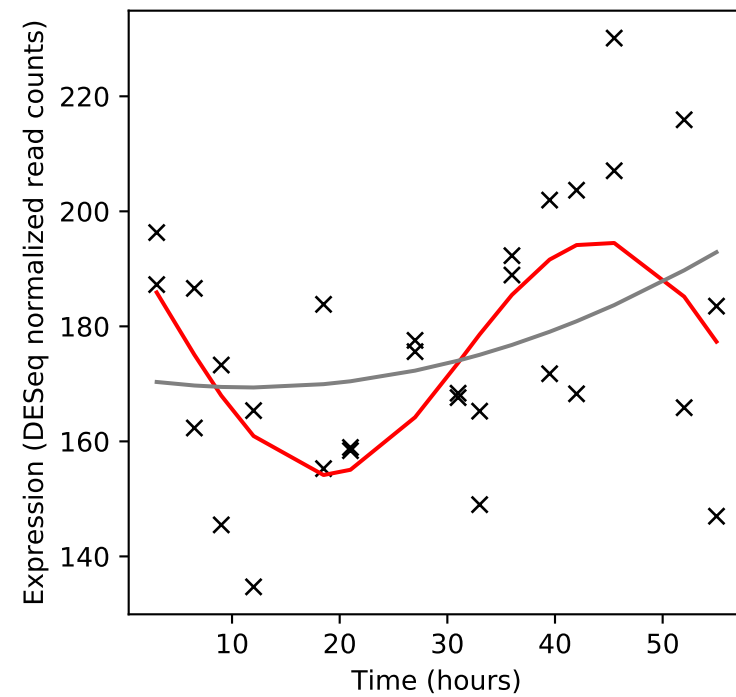

Rv3897c/-

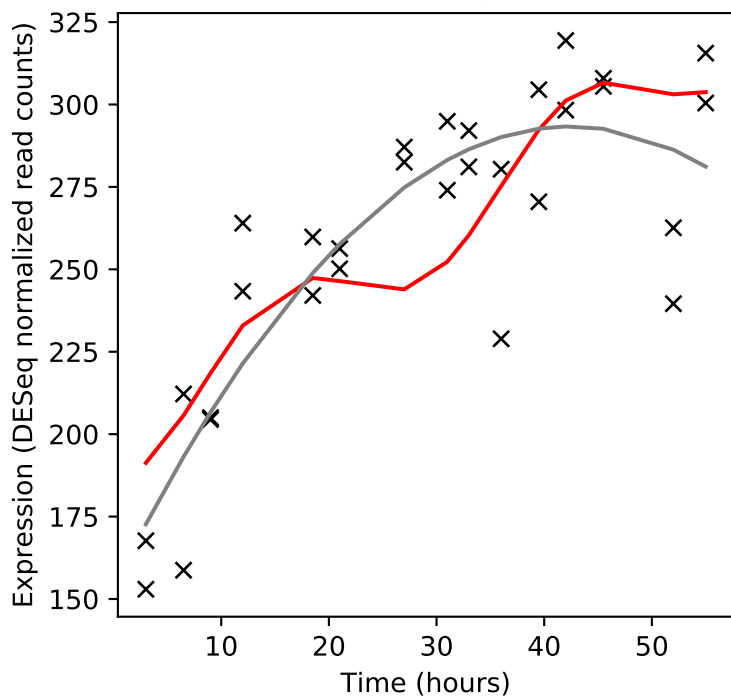

Rv3898c/-

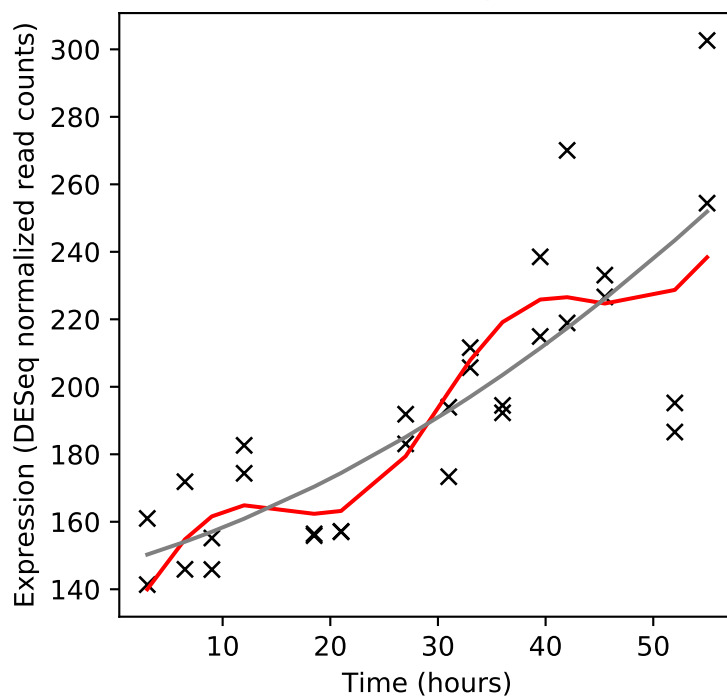

Rv3899c/-

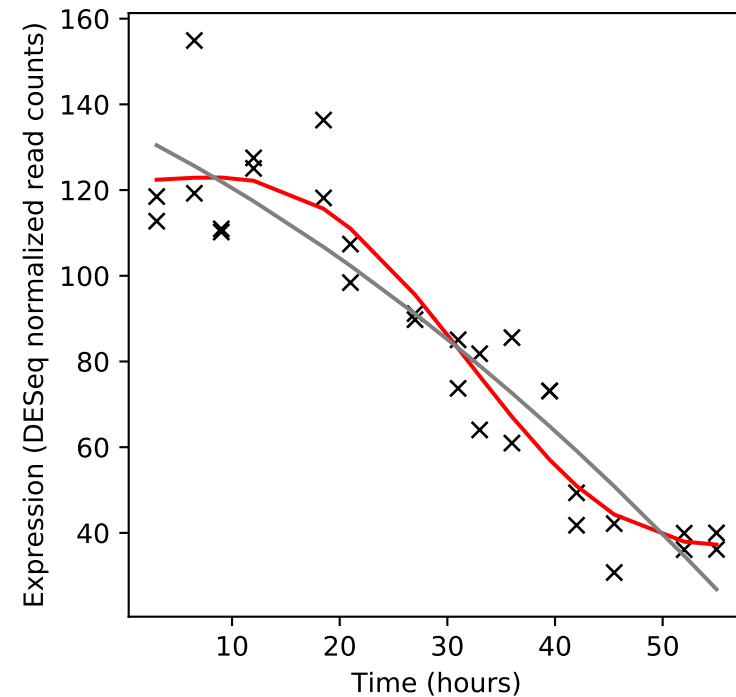

Rv3900c/-

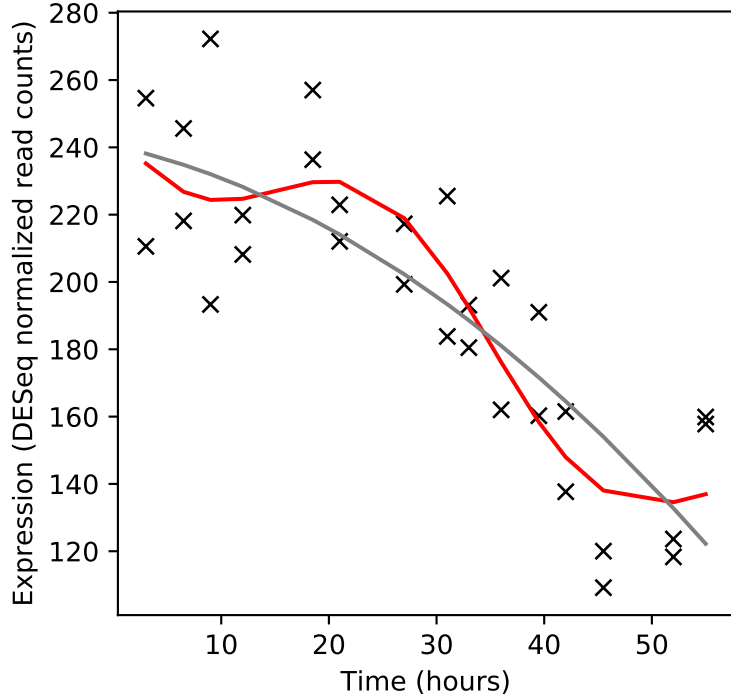

Rv3901c/-

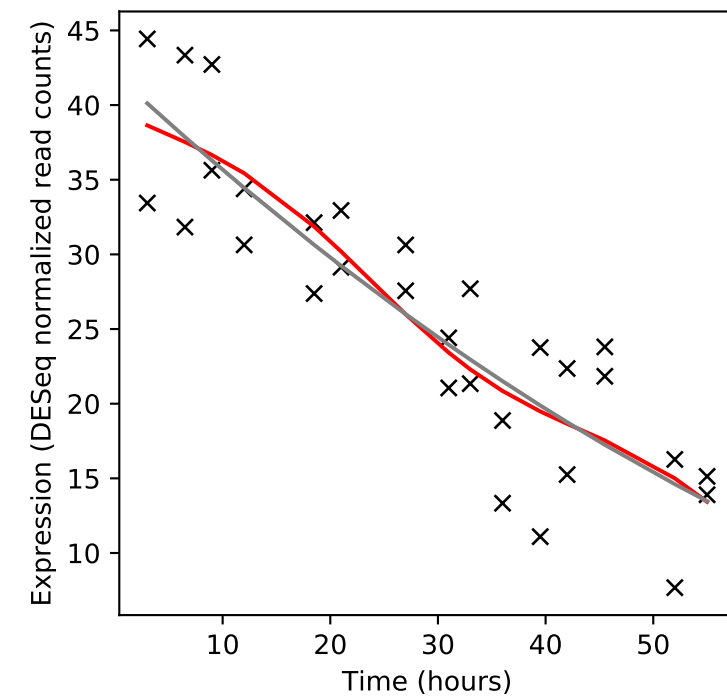

Rv3902c/-

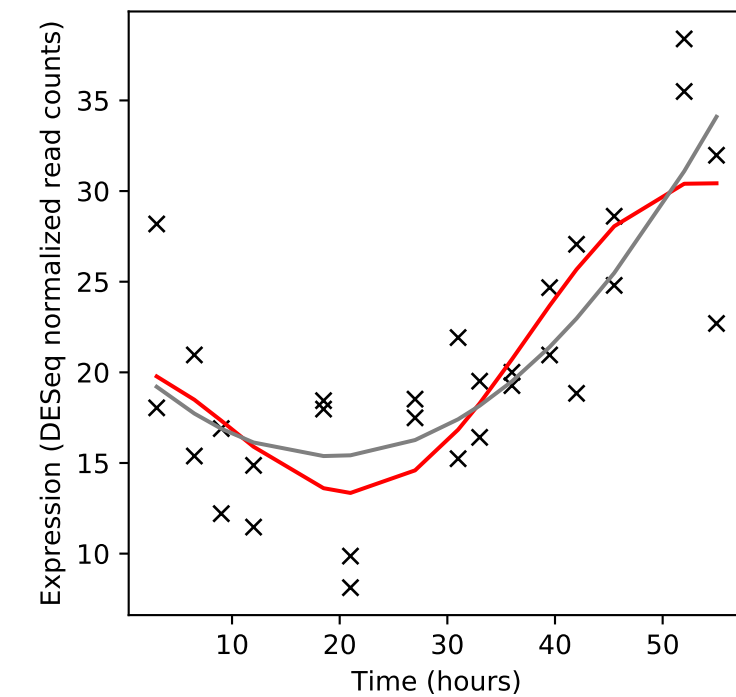

Rv3903c/-

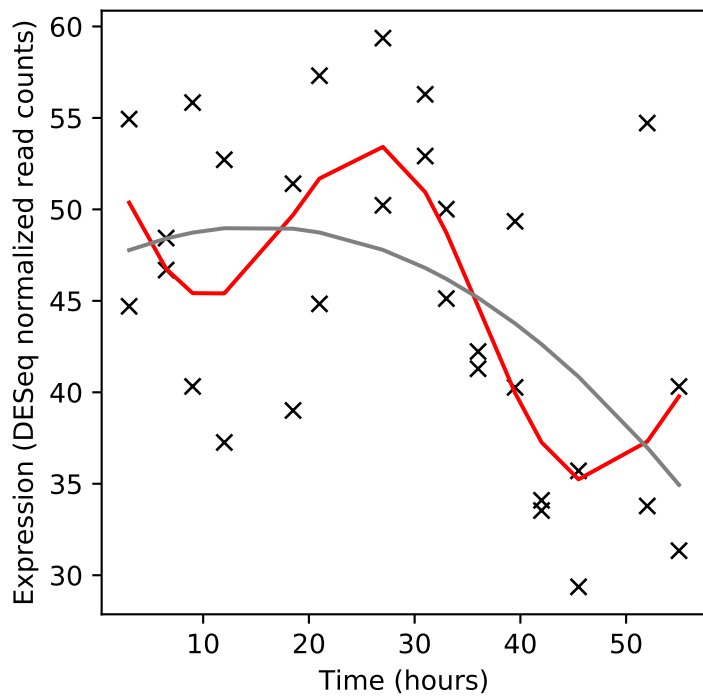

Rv3904c/esxE

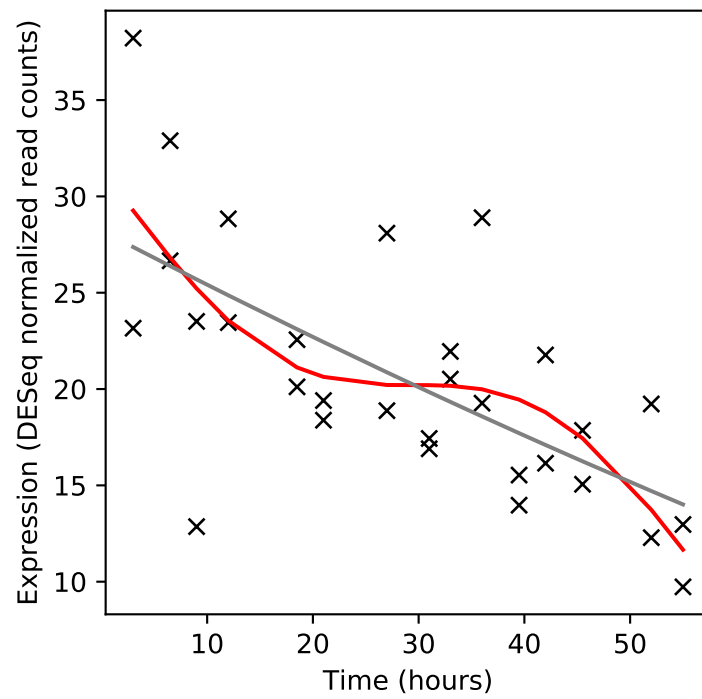

Rv3905c/esxF

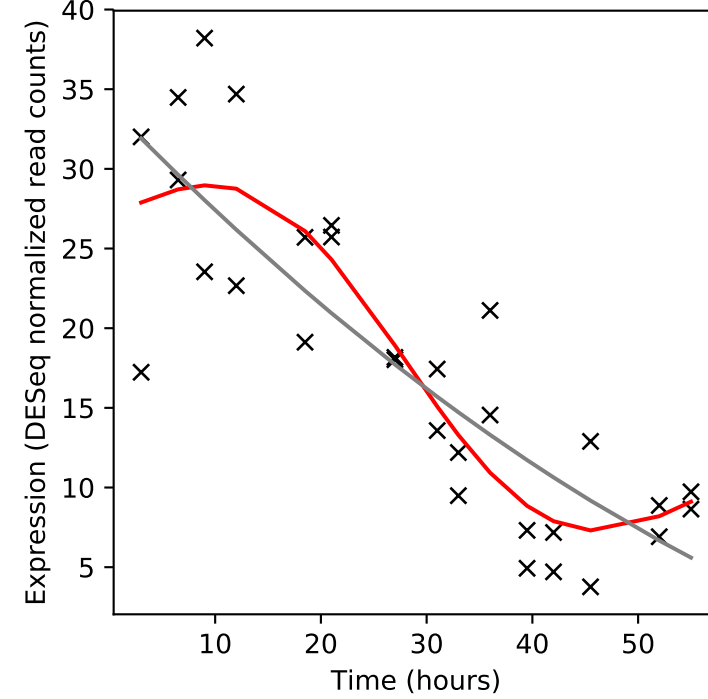

Rv3906c/-

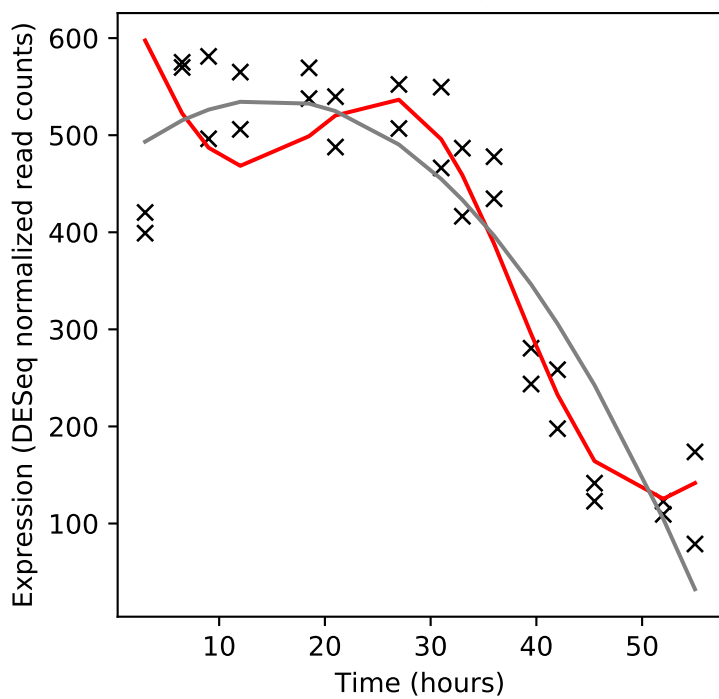

Rv3907c/pcnA

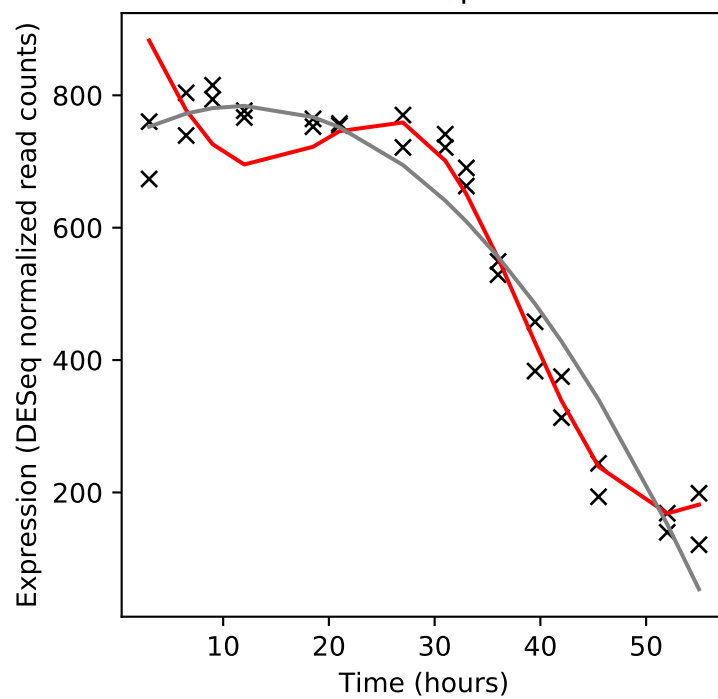

Rv3908/mutT4

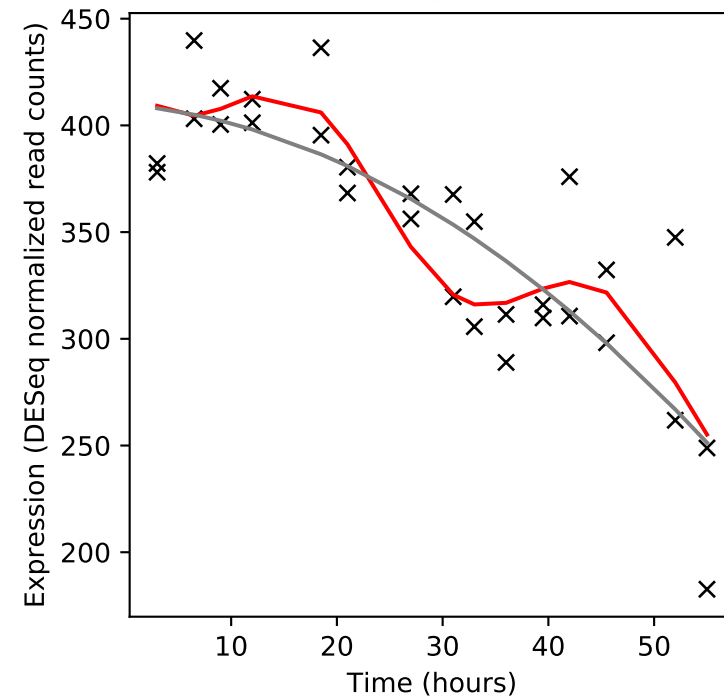

Rv3909/-

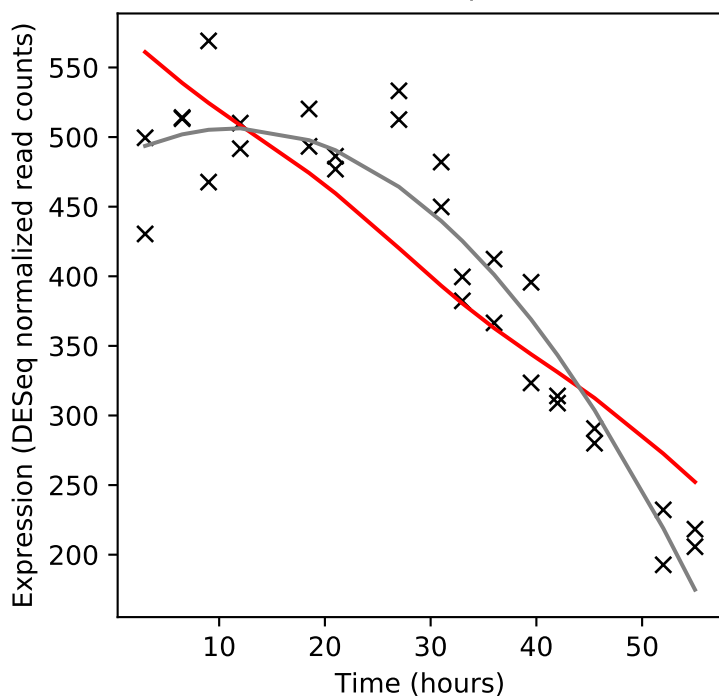

Rv3910/-

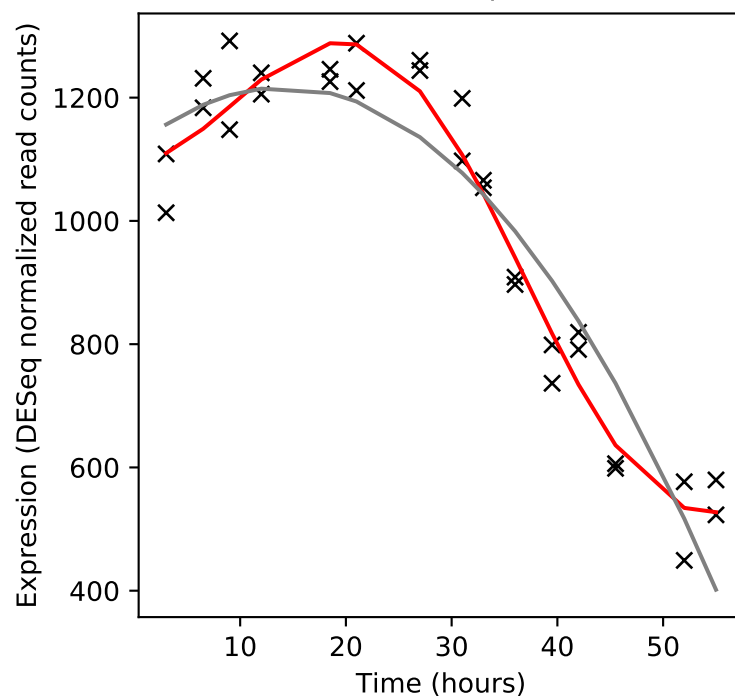

Rv3911/sigM

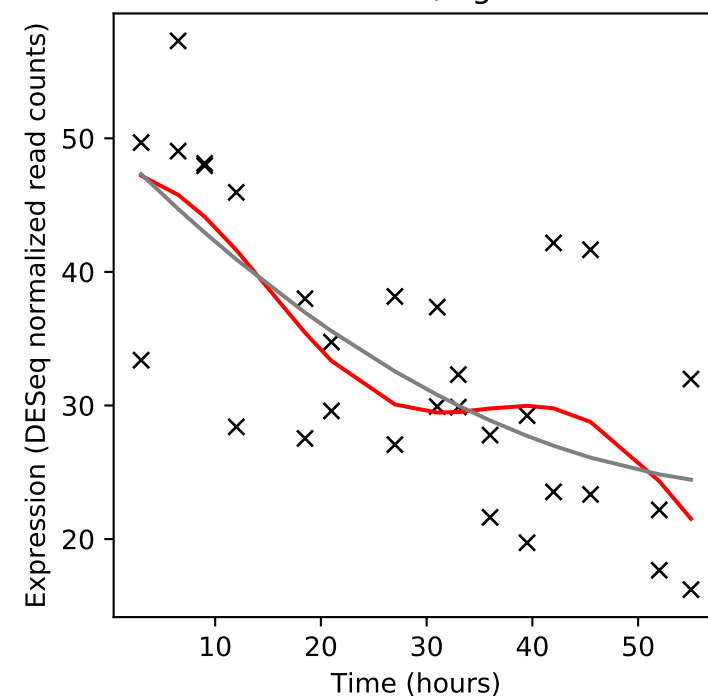

Rv3912/-

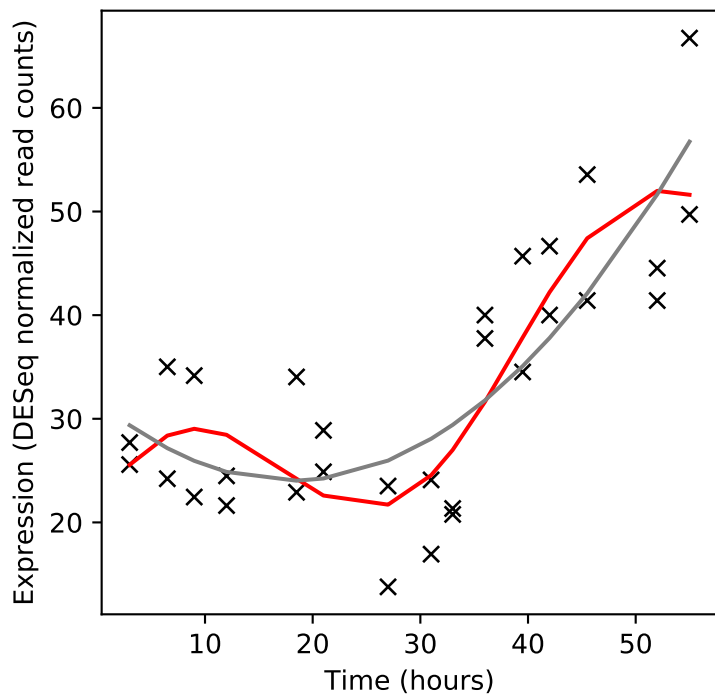

Rv3913/trxB2

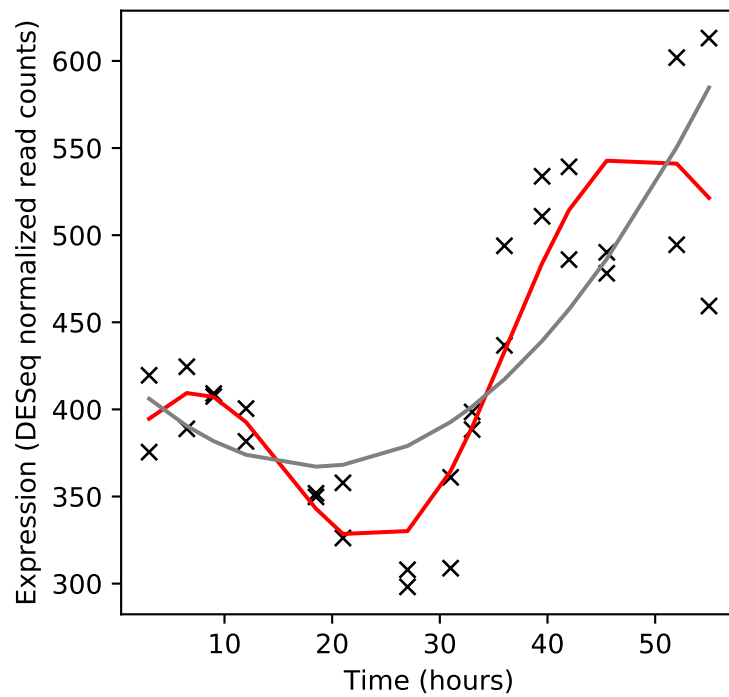

Rv3914/trxC

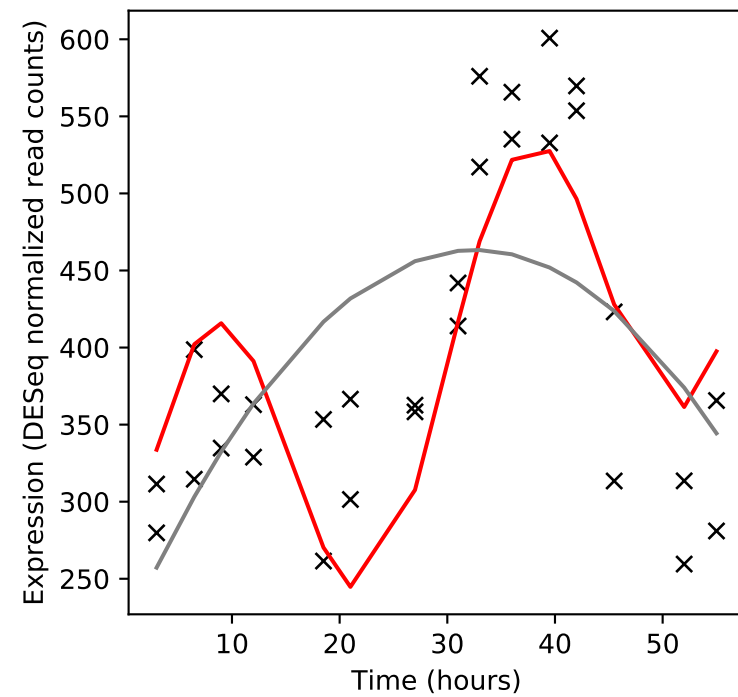

Rv3915/-

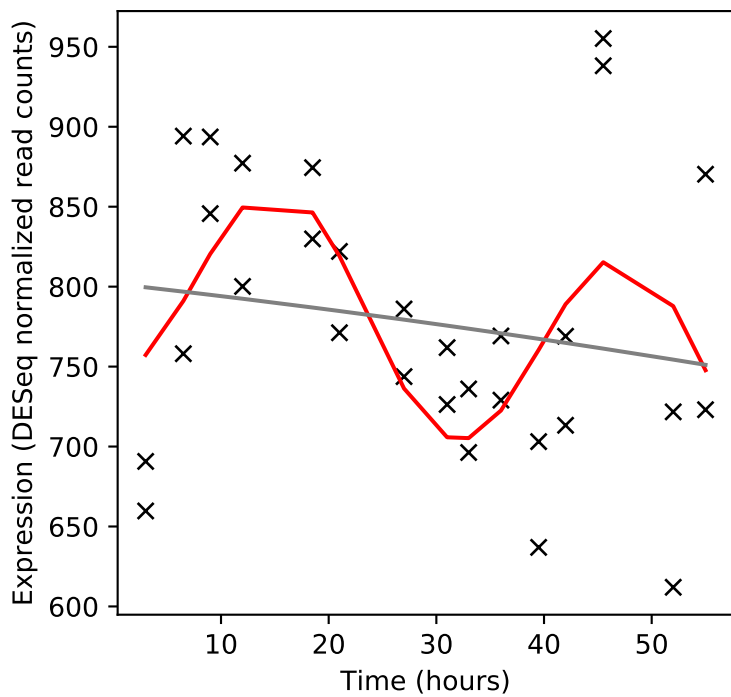

Rv3916c/-

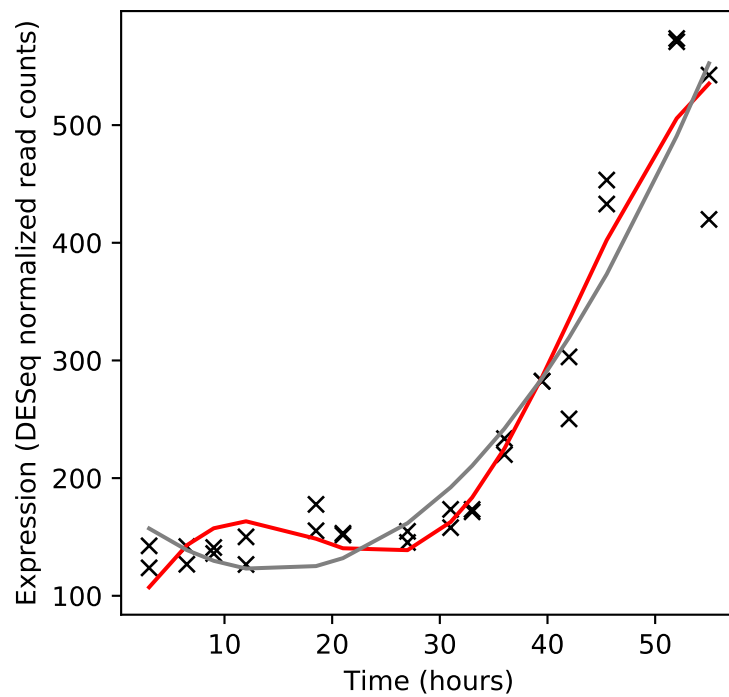

Rv3917c/parB

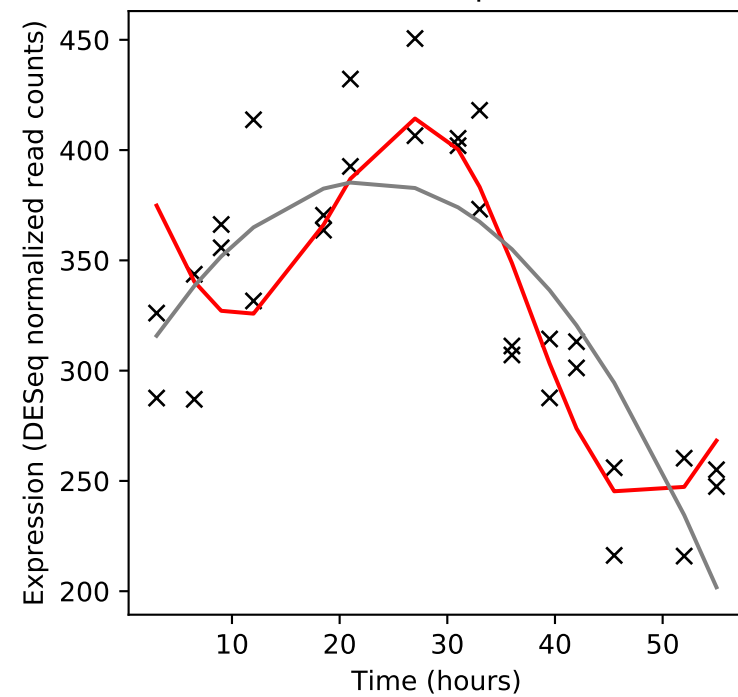

Rv3918c/parA

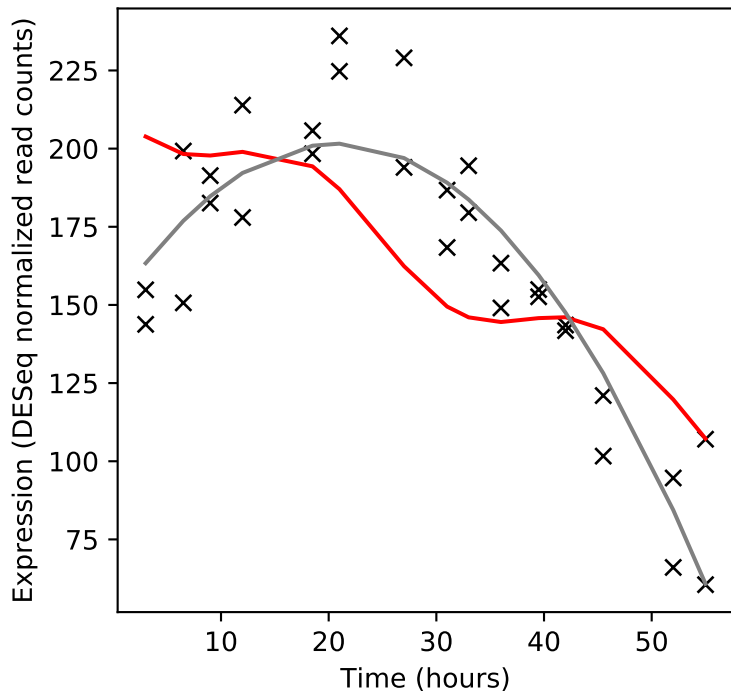

Rv3919c/gid

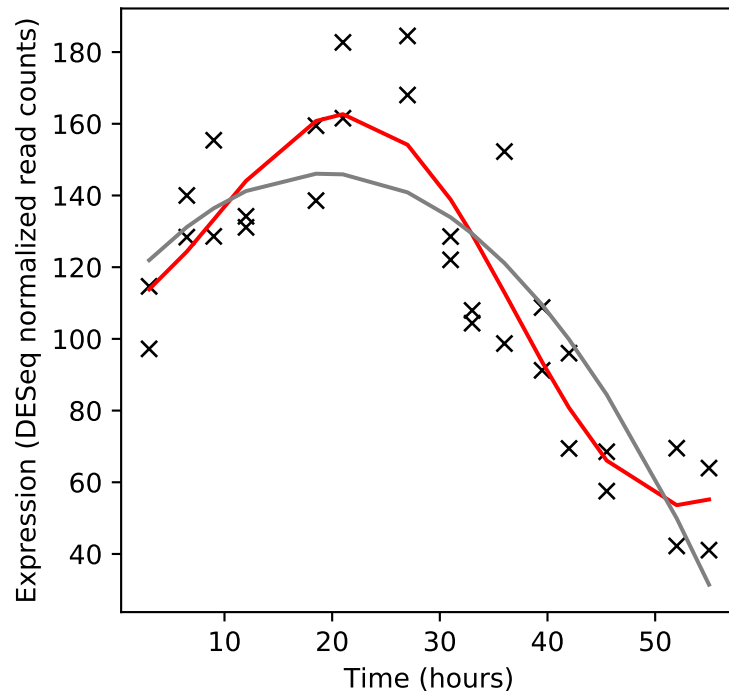

Rv3920c/-

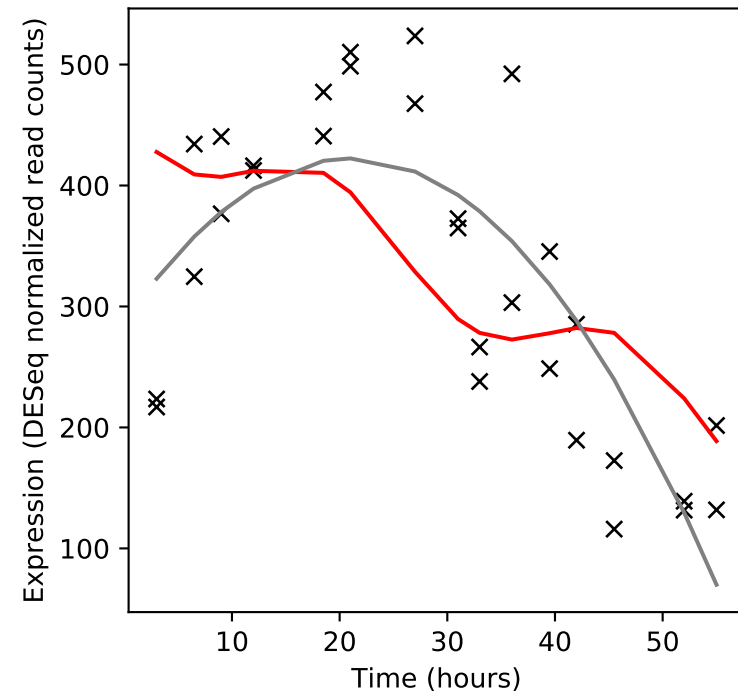

Rv3921c/-

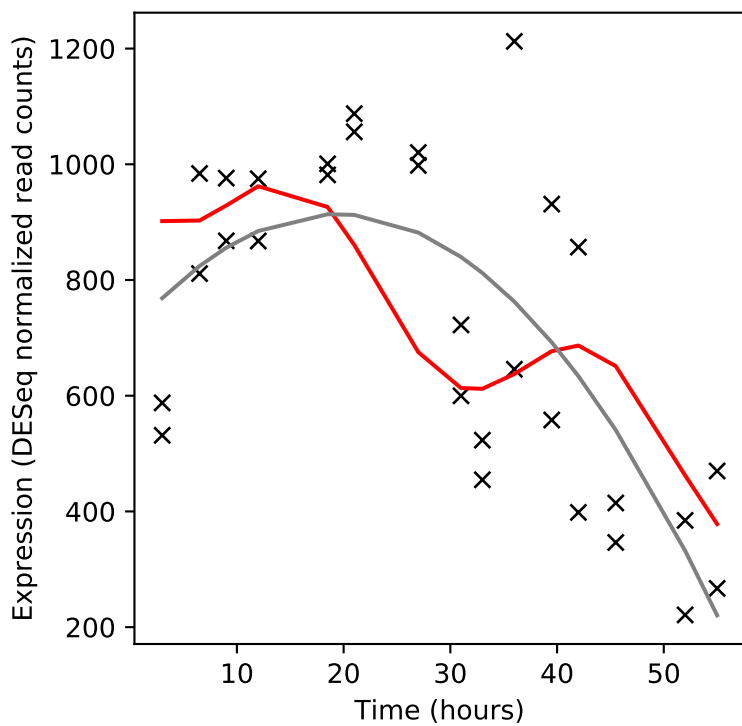

Rv3922c/-

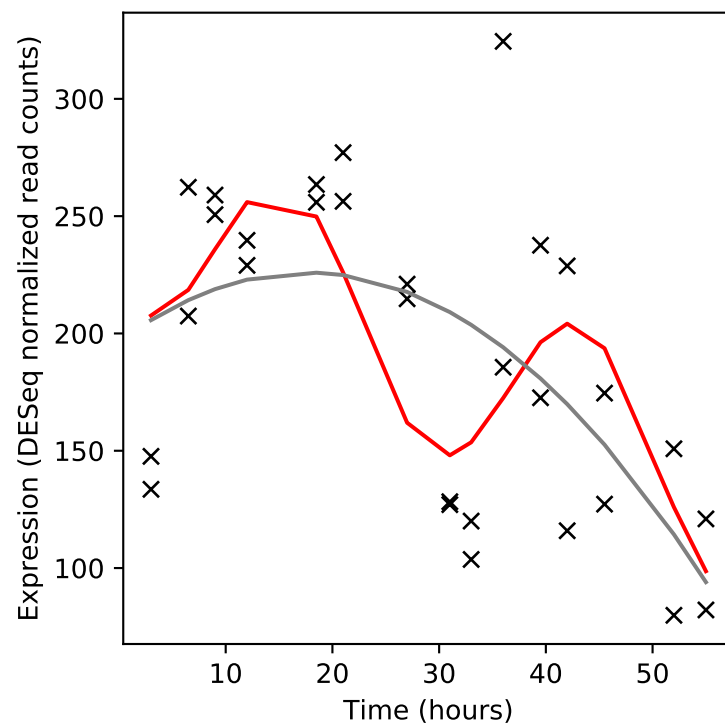

Rv3923c/rnpA

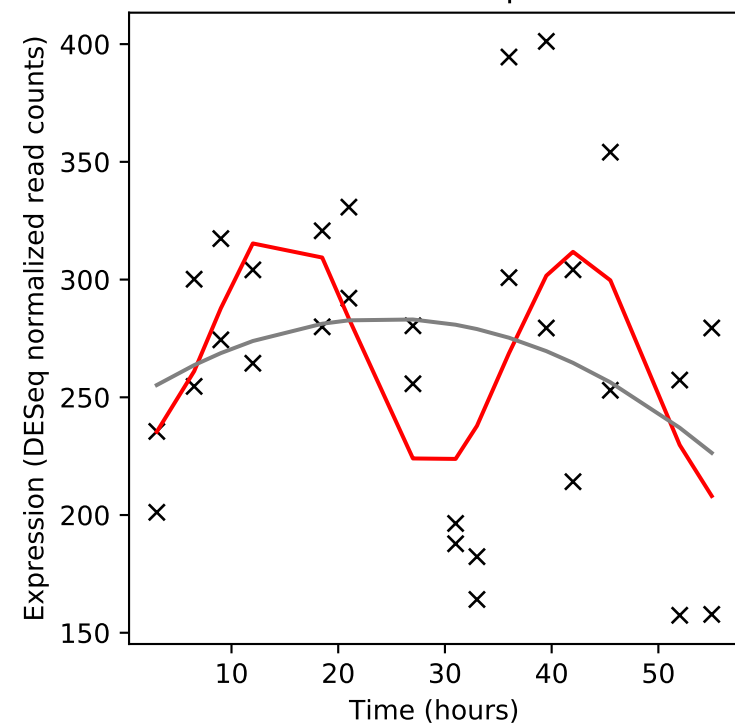

Rv3924c/rpmH

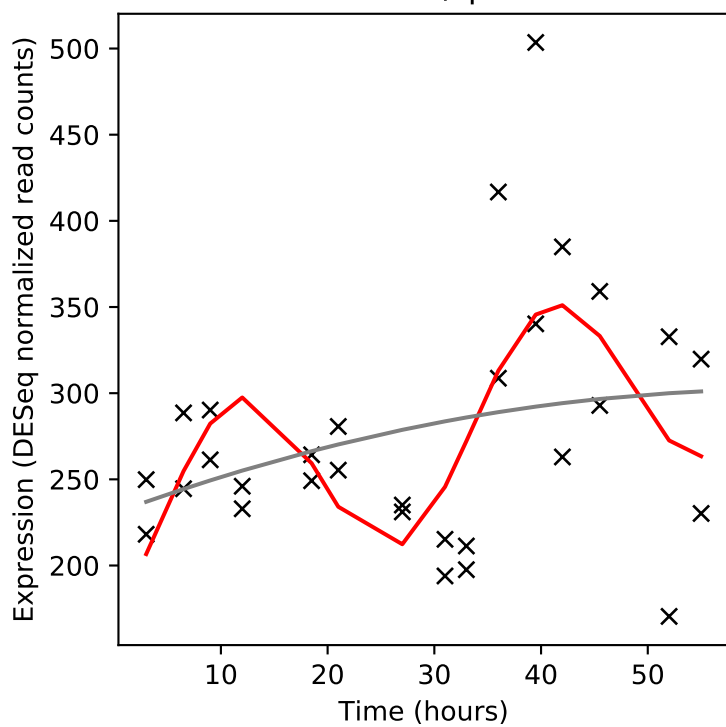

Supplement: NIHMS1617309-supplement-MMC4.pdf [file NIHMS1617309-supplement-MMC4.pdf]
